# Supplementary material for: Current status of proton pump inhibitor use in Japanese elderly patients with non-valvular atrial fibrillation: A subanalysis of the ANAFIE Registry
Source: PubMed Central journal article supplement (PMC7644054; doi:10.1371/journal.pone.0240859), 2020-11-05
Supplement: pone.0240859.s004.pdf [file pone.0240859.s004.pdf]

Data set specifications for analysis

ADCL Subject Criteria Subcohort Dataset

| Variable Name | Variable Label               | Variable Label (Japanese)                             | Type | Codelist | Details                                                           |
|---------------|------------------------------|-------------------------------------------------------|------|----------|-------------------------------------------------------------------|
| STUDYID       | Study Identifier             | Study Identifier                                      | C    | \$200    |                                                                   |
| USUBJID       | Unique Subject Identifier    | Subject number                                        | C    | \$200    |                                                                   |
| SITE_NO       | Study Site Number            | Facility No.                                          | C    | \$4      |                                                                   |
| SITE          | Study Site                   | Name of facility                                      | C    | \$200    |                                                                   |
| PID_SHORT     | Study Identifier for SRL     | Clintrial_Case number_SRL_Subject identification code | C    | \$10     |                                                                   |
| SUBA_F        | Participate Subcohort A Flag | SubA_Join Flag                                        | N    |          | Sub Cohort A join flag<br>"1" = subject cases, "0" = not subject  |
| SUBB_F        | Participate Subcohort B Flag | SubB_Join Flag                                        | N    |          | Sub Cohort B join flag<br>"1" = subject cases, "0" = not subject  |
| SUBC_F        | Participate Subcohort C Flag | SubC_Join Flag                                        | N    |          | Sub Cohort C join flag<br>"1" = subject cases, "0" = not subject  |
| SUBD_F        | Participate Subcohort D Flag | SubD_Join Flag                                        | N    |          | Sub Cohort D join flag<br>"1" = subject cases, "0" = not subject  |
| SUBE_F        | Participate Subcohort E Flag | SubE_join flag                                        | N    |          | Sub Cohort E join flag<br>"1" = subject cases, "0" = not subject  |
| SUBF_F        | Participate Subcohort F Flag | SubF_Join Flag                                        | N    |          | Sub Cohort F join flag<br>"1" = subject cases, "0" = not subject  |
| SUBG_F        | Participate Subcohort G Flag | SubG_Join Flag                                        | N    |          | Sub Cohort G join flag<br>"1" = subject cases, "0" = not subject  |
| STATUS_B      | Status at Baseline           | Baseline Status                                       | C    | \$20     |                                                                   |
| PT_FLAG       | Main Baseline Qualified      | Target case flag                                      | N    |          | Main-Baseline case flag<br>"1" = subject cases, "0" = not subject |

Sort by USUBJID

Data set specifications for analysis

ADAD Subject Inclusion/Exclusion Criteria Dataset

| Variable Name | Variable Label            | Variable Label (Japanese)          | Type | Codelist                  | Details                                                                                                                                                                                                                                                                                                                                                                       |
|---------------|---------------------------|------------------------------------|------|---------------------------|-------------------------------------------------------------------------------------------------------------------------------------------------------------------------------------------------------------------------------------------------------------------------------------------------------------------------------------------------------------------------------|
| STUDYID       | Study Identifier          | Study Identifier                   | C    | \$200                     |                                                                                                                                                                                                                                                                                                                                                                               |
| USUBJID       | Unique Subject Identifier | Subject number                     | C    | \$200                     |                                                                                                                                                                                                                                                                                                                                                                               |
| SITE_NO       | Study Site Number         | Facility No.                       | C    | 4                         |                                                                                                                                                                                                                                                                                                                                                                               |
| A1            | Inclusion Criteria 1      | Failure of selection criteria_A1   | N    | YN<br>[0="None", 1="Yes"] | Patients who were found to have not been definitively diagnosed with NVAf after obtaining informed consent<br>[Inclusion criteria nonconformity = 1, inclusion criteria conformity = 0]                                                                                                                                                                                       |
| A2            | Inclusion Criteria 2      | Failure of selection criteria_A2   | N    | YN<br>[0="None", 1="Yes"] | Patients who are unable to attend the hospital<br>[Inclusion criteria nonconformity = 1, inclusion criteria conformity = 0].                                                                                                                                                                                                                                                  |
| A3            | Inclusion Criteria 3      | Failure of selection criteria_A3   | N    | YN<br>[0="None", 1="Yes"] | Patients younger than 75 years at the time of informed consent<br>[Inclusion criteria nonconformity = 1, inclusion criteria conformity = 0].                                                                                                                                                                                                                                  |
| A4            | Inclusion Criteria 4      | Failure of selection criteria_A4   | N    | YN<br>[0="None", 1="Yes"] | Patients for whom written informed consent has not been obtained<br>[Inclusion criteria nonconformity = 1, inclusion criteria conformity = 0].                                                                                                                                                                                                                                |
| B1            | Exclusion Criteria 1      | To meet the exclusion criterion_B1 | N    | YN<br>[0="None", 1="Yes"] | Patients who were or were known to have participated in an intervention trial after obtaining informed consent<br>[Conflict with exclusion criteria = 1, non-conflict with exclusion criteria = 0].                                                                                                                                                                           |
| B2            | Exclusion Criteria 2      | To meet the exclusion criterion_B2 | N    | YN<br>[0="None", 1="Yes"] | Patients who were found to have a confirmed diagnosis of mitral stenosis after obtaining informed consent<br>[Conflict with exclusion criteria = 1, non-conflict with exclusion criteria = 0].                                                                                                                                                                                |
| B3            | Exclusion Criteria 3      | To meet the exclusion criterion_B3 | N    | YN<br>[0="None", 1="Yes"] | Patients who were confirmed to have a prosthetic valve (mechanical valve, bioprosthesis) in place before obtaining informed consent after obtaining informed consent<br>[Conflict with exclusion criteria = 1, non-conflict with exclusion criteria = 0].                                                                                                                     |
| B4            | Exclusion Criteria 4      | To meet the exclusion criterion_B4 | N    | YN<br>[0="None", 1="Yes"] | Patients who have experienced a cardiovascular event (stroke, myocardial infarction, cardiac intervention other than myocardial infarction, heart failure requiring hospitalization) or bleeding with hospitalization within 1 month before enrollment after obtaining informed consent.<br>[Conflict with exclusion criteria = 1, non-conflict with exclusion criteria = 0]. |
| B5            | Exclusion Criteria 5      | To meet the exclusion criterion_B5 | N    | YN<br>[0="None", 1="Yes"] | Patients who were confirmed to have been diagnosed within 1 year of life expectancy due to any disease before obtaining informed consent after obtaining informed consent<br>[Conflict with exclusion criteria = 1, non-conflict with exclusion criteria = 0].                                                                                                                |
| B6            | Exclusion Criteria 6      | To meet the exclusion criterion_B6 | N    | YN<br>[0="None", 1="Yes"] | Other patients who are deemed unsuitable to participate in the study by their physician<br>[Conflict with exclusion criteria = 1, non-conflict with exclusion criteria = 0].                                                                                                                                                                                                  |
| C1            | Other Criteria 1          | Others_C1                          | N    | YN<br>[0="None", 1="Yes"] | Cases in Facilities with Significant Contract Violations<br>[Conflict = 1, non-conflict = 0]                                                                                                                                                                                                                                                                                  |
| C2            | Other Criteria 2          | Others_C2                          | N    | YN<br>[0="None", 1="Yes"] | Patients who are known to be ineligible after registration<br>[Conflict = 1, non-conflict = 0]                                                                                                                                                                                                                                                                                |
| C3            | Other Criteria 3          | Other_C3                           | N    | YN<br>[0="None", 1="Yes"] | Data not available in cases where consent has been withdrawn<br>[Conflict = 1, non-conflict = 0]                                                                                                                                                                                                                                                                              |
| C4            | Other Criteria 4          | Others_C4                          | N    | YN<br>[0="None", 1="Yes"] | Cases that were incorrectly registered in the system, such as duplicate, etc.<br>[Conflict = 1, non-conflict = 0]                                                                                                                                                                                                                                                             |
| C5            | Other Criteria 5          | Others_C5                          | N    | YN<br>[0="None", 1="Yes"] | Case of baseline data not recalled (including during requesting review)<br>[Conflict = 1, non-conflict = 0]                                                                                                                                                                                                                                                                   |
| AD_FLAG       | Criteria Flag             | Case withdrawal flags              | N    | YN<br>[0="None", 1="Yes"] | =1 when either of the inclusion criteria is 1.<br>All 0 = 0                                                                                                                                                                                                                                                                                                                   |

Sort by USUBJID

Data set specifications for analysis

ADSL Subject-Level Analysis Dataset

| Variable Name | Variable Label                           | Variable Label (Japanese)                                                        | Type      | Codelist                                                                                                                                                                                                                                                                                                                          |
|---------------|------------------------------------------|----------------------------------------------------------------------------------|-----------|-----------------------------------------------------------------------------------------------------------------------------------------------------------------------------------------------------------------------------------------------------------------------------------------------------------------------------------|
| STUDYID       | Study Identifier                         |                                                                                  | C         | \$200                                                                                                                                                                                                                                                                                                                             |
| USUBJID       | Unique Subject Identifier                | Subject number                                                                   | C         | \$200                                                                                                                                                                                                                                                                                                                             |
| SITE          | Study Site                               | Name of facility                                                                 | C         | \$200                                                                                                                                                                                                                                                                                                                             |
| AGE           | Age at First Drug Intake                 | Age                                                                              | N         |                                                                                                                                                                                                                                                                                                                                   |
| AGEU          | Unit of Age                              | Units of age                                                                     | C         | \$200                                                                                                                                                                                                                                                                                                                             |
| AGEC          | Age Category                             | Age category                                                                     | N         | AGECT<br>[1 = "75 years of age or older and younger than 80 years of age",<br>2 = "80 years old or older and younger than 85 years old",<br>3 = "85 years old or older and younger than 90 years old",<br>4 = "90 years and older and younger than 95 years,"<br>5 = "aged 95 years and <100 years,"<br>6 = "100 years or older"] |
| SEX           | Sex                                      | Sex                                                                              | N         | SEXN<br>[0 = male, 1 = female].                                                                                                                                                                                                                                                                                                   |
| SEXN          | Sex (N)                                  | Gender (number)                                                                  | N         |                                                                                                                                                                                                                                                                                                                                   |
| ICDTC         | Date of Informed Consent                 | Date of consent                                                                  | YYMMDD10. |                                                                                                                                                                                                                                                                                                                                   |
| ENRFL         | Enrolled Population Flag                 | Registration confirmed case flag:<br>Flag of cases with date of informed consent | N         | 1                                                                                                                                                                                                                                                                                                                                 |
| INCFL         | Inclusion Flag                           | Selection criteria flag                                                          | N         | 1                                                                                                                                                                                                                                                                                                                                 |
| EXCFL         | Exclusion Flag                           | Exclusion criteria flag                                                          | N         | 1                                                                                                                                                                                                                                                                                                                                 |
| UQLFYD        | Unqualified after Enrollment             | Disqualification after Registration                                              | N         | 1                                                                                                                                                                                                                                                                                                                                 |
| FASFL         | Full Analysis Set Population Flag        | Flags for Efficacy Analysis                                                      | N         | 1                                                                                                                                                                                                                                                                                                                                 |
| NDGADENL      | Non-Drug Administration after Enrollment | Anticoagulant-naive patients after registration                                  | N         | 1                                                                                                                                                                                                                                                                                                                                 |
| TRSDT         | Date of First Exposure                   | Starting date of drug                                                            |           |                                                                                                                                                                                                                                                                                                                                   |
| TREDT         | Date of Last Exposure                    | Last day of drug administration                                                  |           |                                                                                                                                                                                                                                                                                                                                   |
| TRSDUR        | Duration of Drug Exposure                | Duration of drug use (days)                                                      | N         |                                                                                                                                                                                                                                                                                                                                   |
| HGT_BL        | Height at Informed Consent               | Height (cm) at baseline                                                          | N         |                                                                                                                                                                                                                                                                                                                                   |
| WGT_BL        | Weight at Informed Consent               | Baseline body weight (kg)                                                        | N         |                                                                                                                                                                                                                                                                                                                                   |
| WGTC_BL       | Weight Category at Informed Consent      | Baseline weight (kg) categories                                                  | N         | WGTC<br>[1 = "less than 60 kg" and 2 = "more than 60 kg"]                                                                                                                                                                                                                                                                         |
| BMI_BL        | BMI at Informed Consent                  | BMI (kg per m <sup>2</sup> ) at baseline.                                        | N         |                                                                                                                                                                                                                                                                                                                                   |
| BMIC_BL       | BMI Category at Informed Consent         | BMI(kg/m <sup>2</sup> ) categories at baseline.                                  | N         | BMIC<br>[1 = "<18.5kg/m2",<br>2 = "18.5kg/m2 or more and <25.0kg/m2",<br>3 = "25.0kg/m2 or more"]                                                                                                                                                                                                                                 |
| AFTYP         | Type of AF                               | Type of atrial fibrillation                                                      | N         | AFTYP<br>[1 = "paroxysmal",<br>2 = "persistent",<br>3 = "long-lasting",<br>4 = "Persistence"]                                                                                                                                                                                                                                     |
| AFTYP1        | Type of AF Alternate                     | Atrial fibrillation type 1                                                       | N         | AFTYPA: [1 = "paroxysmal",<br>2 = "persistent" and "long-lasting",<br>4 = "Persistence"]                                                                                                                                                                                                                                          |
| HISAF         | History of Major Surgery for non-AF      | History of major surgery other than AF                                           | N         | HISAF<br>[1 = "Major surgery within the last 3 months",<br>2="No major surgery within the                                                                                                                                                                                                                                         |
| HISBDYN       | History of Major Bleeding                | History of major bleeding                                                        | N         | YN<br>[0 = none, 1 = yes]                                                                                                                                                                                                                                                                                                         |
| HISBD1        | Intracranial Hemorrhage                  | Major hemorrhage: Intracranial hemorrhage                                        | N         | YN<br>[0 = none, 1 = yes]                                                                                                                                                                                                                                                                                                         |
| HISBD2        | Upper Gastrointestinal Bleeding          | Major bleeding: Upper gastrointestinal bleeding                                  | N         | YN<br>[0 = none, 1 = yes]                                                                                                                                                                                                                                                                                                         |
| HISBD3        | Lower Gastrointestinal Bleeding          | Major bleeding: Lower gastrointestinal bleeding                                  | N         | YN<br>[0 = none, 1 = yes]                                                                                                                                                                                                                                                                                                         |

Data set specifications for analysis

ADSL Subject-Level Analysis Dataset

| Variable Name | Variable Label                                   | Variable Label (Japanese)                                                     | Type      | Codelist                                                                                                                                                                 |
|---------------|--------------------------------------------------|-------------------------------------------------------------------------------|-----------|--------------------------------------------------------------------------------------------------------------------------------------------------------------------------|
| HISBD4        | Other Beeding                                    | Major bleeding: Other                                                         | N         | YN<br>[0 = none, 1 = yes]                                                                                                                                                |
| HISAL         | History of Drug Allergy                          | History of drug allergy                                                       | N         | YN<br>[0 = none, 1 = yes]                                                                                                                                                |
| SMK           | Smoking Status                                   | Smoking habit                                                                 | N         | SMK<br>[1 = "never smoked",<br>2 = "1 year or more after<br>stopping,"<br>3="Stopped within 1 year",<br>4="Smoking": 9="Unknown"]                                        |
| SMK1          | Smoking Status Part 1                            | Smoking habit 1                                                               | N         | SMKA<br>[1 = "never smoked",<br>2="stopped",<br>4="Smoking,"<br>9 = "unknown"]                                                                                           |
| DRK           | Drinking Habit                                   | Drinking habit                                                                | N         | DRK [1 = "drink on a daily basis,"<br>2="Sometimes I drink."<br>3 = "never drink",<br>9 = "unknown"]                                                                     |
| AFTHSPE       | Non-drug Therapy for AF                          | Prior nonpharmacologic therapy for AF                                         | N         | YN<br>[0 = none, 1 = yes]                                                                                                                                                |
| AFTHSPE1      | Catheter Ablation                                | Catheter ablation                                                             | N         | YN<br>[0 = none, 1 = yes]                                                                                                                                                |
| AFTHSPE2      | Cardioversion                                    | Electric defibrillation                                                       | N         | YN<br>[0 = none, 1 = yes]                                                                                                                                                |
| AFTHSPE3      | ICD                                              | ICD                                                                           | N         | YN<br>[0 = none, 1 = yes]                                                                                                                                                |
| AFTHSPE4      | Pacemaker Implantation                           | Pacemaker implantation                                                        | N         | YN<br>[0 = none, 1 = yes]                                                                                                                                                |
| AFTHSPE5      | Other Non-drug Therapy                           | Non-Pharmacotherapy: Other                                                    | N         | YN<br>[0 = none, 1 = yes]                                                                                                                                                |
| EXBLDTC       | Date of Examinations at Baseline                 | Baseline test date                                                            | YYMMDD10. |                                                                                                                                                                          |
| EXBLDUR       | Days from Examination and Informed Consent       | Period from the date of examination to the time of obtaining informed consent | N         |                                                                                                                                                                          |
| EXBLFL        | Examination Range Flag                           | Acceptable range adoption flag for test date                                  | N         | RNG<br>[1 = within acceptable limits]                                                                                                                                    |
| SBP_BL        | Systolic Blood Pressure at Informed Consent      | Baseline office BP:systolic (mmHg)                                            | N         |                                                                                                                                                                          |
| DBP_BL        | Diastolic Blood Pressure at Informed Consent     | Baseline office BP:diastolic (mmHg)                                           | N         |                                                                                                                                                                          |
| HGB_BL        | Hemoglobin at Baseline                           | Haemoglobin (g/dL) at baseline.                                               | N         |                                                                                                                                                                          |
| CRE_BL        | Serum Creatinine at Baseline                     | Serum creatinine (g/dL) at baseline.                                          | N         |                                                                                                                                                                          |
| CRC_BL        | Creatinine Clearance at Baseline                 | Baseline creatinine clearance (mL/min)                                        | N         |                                                                                                                                                                          |
| CRCC_BL       | Category of Creatinine Clearance at Baseline     | Creatinine clearance (mL/min) categories.                                     | N         | CRCT<br>[1 = "less than 15mL/min",<br>2 = "15mL/min or more and less than 30mL/min",<br>3 = "30mL/min or more and less than 50mL/min",<br>4 = "50mL/min or more and less |
| EGFR_BL       | Estimated Glomerular Filtration Rate at Baseline | eGFR (mL/min/1.73m <sup>2</sup> ) at baseline.                                | N         |                                                                                                                                                                          |

Data set specifications for analysis

ADSL Subject-Level Analysis Dataset

| Variable Name | Variable Label                                               | Variable Label (Japanese)                                                                                                                                                                                     | Type | Codelist                                                                                                                                                                                        |
|---------------|--------------------------------------------------------------|---------------------------------------------------------------------------------------------------------------------------------------------------------------------------------------------------------------|------|-------------------------------------------------------------------------------------------------------------------------------------------------------------------------------------------------|
| EGFRC_BL      | Category of Estimated Glomerular Filtration Rate at Baseline | eGFR (mL/min/1.73m <sup>2</sup> ) categories at baseline.                                                                                                                                                     | N    | EGFRCCT<br>[1="less than 15",<br>2 = "15 or more and less than 30",<br>3="30 to less than 45",<br>4 = "45 to less than 60",<br>5 = "60 to less than 90",<br>6="more than 90",<br>9 = "missing"] |
| HBA_BL        | Hemoglobin A1c at Baseline                                   | Baseline HbA 1 c(%)                                                                                                                                                                                           | N    |                                                                                                                                                                                                 |
| HBAC_BL       | Category of Hemoglobin A1c at Baseline                       | HbA1c (%) categories at baseline.                                                                                                                                                                             |      | HBACT<br>[1="less than 6.0%,"<br>2 = "6.0% or more but less than 7.0%,"<br>3="7.0% to 8.0%,"<br>4 = "8.0% or more",<br>9 = "missing"]                                                           |
| CHFDFL        | Congestive Heart Failure/LV Dysfunction Flag                 | C: Heart failure or left ventricular dysfunction flag                                                                                                                                                         | N    | YN<br>[0="None", 1="Yes"]                                                                                                                                                                       |
| HYPTFL        | Hypertension Flag                                            | H: Hypertension flag                                                                                                                                                                                          | N    | YN<br>[0="None", 1="Yes"]                                                                                                                                                                       |
| AGE75FL       | Age 75 Years or Older Flag                                   | A:75 Flag for age or older                                                                                                                                                                                    | N    | YN<br>[0="None", 1="Yes"]                                                                                                                                                                       |
| DIAMFL        | Diabetes Mellitus Flag                                       | D: Diabetes flag                                                                                                                                                                                              | N    | YN<br>[0="None", 1="Yes"]                                                                                                                                                                       |
| CERIFL        | Cerebral Infarction Flag                                     | S: Previous flag for cerebral infarction                                                                                                                                                                      | N    | Y2N<br>[0="None", 2="Yes"]                                                                                                                                                                      |
| CHADS2        | CHADS2 Score                                                 | CHADS2 Score                                                                                                                                                                                                  | N    |                                                                                                                                                                                                 |
| AGE75VFL      | Age 75 Years or Older Flag                                   | A2: Flag over 75                                                                                                                                                                                              | N    | Y2N<br>[0="None", 2="Yes"]                                                                                                                                                                      |
| TIATEFL       | Stroke/TIA/TE                                                | S2: Patients with a history of atherosclerotic, cardiogenic, lacunar, unclassified/unspecified cerebral infarction, TIA, pulmonary embolism, deep vein thrombosis, and other thromboembolic-related disorders | N    | Y2N<br>[0="None", 2="Yes"]                                                                                                                                                                      |
| VSDSFL        | Vascular disease                                             | V: Patients with a history of vascular disease (myocardial infarction, peripheral vascular disorder, internal carotid artery stenosis, arteriosclerosis obliterans or aortic plaque)                          | N    | YN<br>[0="None", 1="Yes"]                                                                                                                                                                       |
| AGE65FL       | Age 65 Years to Less Than 75 Years Old Flag                  | A: 65 years and older and younger than 75 years                                                                                                                                                               | N    | YN<br>[0="None", 1="Yes"]                                                                                                                                                                       |
| SEXFL         | Sex Flag                                                     | Sc: Female                                                                                                                                                                                                    | N    | YN<br>[0="None", 1="Yes"]                                                                                                                                                                       |
| CHA2DS2V      | CHA2DS2-VASc Score                                           | CHA 2 DS 2-VASc Score                                                                                                                                                                                         | N    |                                                                                                                                                                                                 |
| SBP160FL      | SBP at Baseline greater than 160 Flag                        | H: Hypertension (systolic blood pressure >=160mmHg)                                                                                                                                                           | N    | YN<br>[0="None", 1="Yes"]                                                                                                                                                                       |
| RNDFL         | Renal Dysfunction Flag                                       | A: Chronic kidney disease, severe renal impairment (chronic dialysis/kidney transplantation, serum creatinine 2.26 mg/dL)                                                                                     | N    | YN<br>[0="None", 1="Yes"]                                                                                                                                                                       |
| STRFL         | Stroke Flag                                                  | S: Stroke                                                                                                                                                                                                     | N    | YN<br>[0="None", 1="Yes"]                                                                                                                                                                       |
| BLDFL         | Bleed Flag                                                   | B: Bleeding (bleeding history, bleeding tendency (bleeding diathesis, anaemia, etc.))                                                                                                                         | N    | YN<br>[0="None", 1="Yes"]                                                                                                                                                                       |
| PTINRFL       | PT-INR Flag                                                  | L: Unstable International Normalized Ratio (INR) (INR unstable, high or TTR < 60%)                                                                                                                            | N    | YN<br>[0="None", 1="Yes"]                                                                                                                                                                       |
| AGE65EFL      | Age 65 Years or Older Flag                                   | E: Elderly (above age 65)                                                                                                                                                                                     | N    | YN<br>[0="None", 1="Yes"]                                                                                                                                                                       |
| DGALFL        | Drug or Alcohol                                              | D: Drugs, alcohol (antiplatelet drugs, combination NSAIDs, alcoholism)                                                                                                                                        | N    | YN<br>[0="None", 1="Yes"]                                                                                                                                                                       |
| HASBLED       | HAS-BLED Score                                               | HAS-BLED scoring                                                                                                                                                                                              | N    |                                                                                                                                                                                                 |

Sort by USUBJID

## Data set specifications for analysis

ADMH Medical History Analysis Dataset

| Variable Name | Variable Label                              | Variable Label (Japanese)                                                            | Type      | Codelist                        |
|---------------|---------------------------------------------|--------------------------------------------------------------------------------------|-----------|---------------------------------|
| STUDYID       | Study Identifier                            |                                                                                      | C         | \$200                           |
| USUBJID       | Unique Subject Identifier                   | Subject number                                                                       | C         | \$200                           |
| SITE          | Study Site                                  | Name of facility                                                                     | C         | \$200                           |
| AGE           | Age at First Drug Intake                    | Age                                                                                  | N         |                                 |
| AGEU          | Unit of Age                                 | Units of age                                                                         | C         | \$200                           |
| SEX           | Sex                                         | Sex                                                                                  | N         | SEXN<br>[0 = male, 1 = female]. |
| SEXN          | Sex (N)                                     | Gender (number)                                                                      | N         |                                 |
| ICDTC         | Date of Informed Consent                    | Date of consent                                                                      | YYMMDD10. |                                 |
| FASFL         | Full Analysis Set Population Flag           | Flags for Efficacy Analysis                                                          | N         | 1                               |
| TRSDT         | Date of First Exposure                      | Starting date of drug                                                                |           |                                 |
| TREDT         | Date of Last Exposure                       | Last day of drug administration                                                      |           |                                 |
| TRSDUR        | Duration of Drug Exposure                   | Duration of drug use (days)                                                          | N         |                                 |
| MHYN          | Medical History                             | Presence or absence of complications or medical history                              | N         | YN<br>[0="None", 1="Yes"]       |
| HBPN          | High Blood Pressure                         | Hypertension                                                                         | N         | YN<br>[0="None", 1="Yes"]       |
| DBYN          | Diabetes                                    | Diabetes mellitus                                                                    | N         | YN<br>[0="None", 1="Yes"]       |
| DB1YN         | Diabetic Retinopathy                        | Diabetes: Diabetic retinopathy                                                       | N         | YN<br>[0="None", 1="Yes"]       |
| DB2YN         | Diabetic Nephropathy                        | Diabetes: Diabetic nephropathy                                                       | N         | YN<br>[0="None", 1="Yes"]       |
| DB3YN         | Diabetic Neuropathy                         | Diabetes Mellitus: Diabetic Neuropathy                                               | N         | YN<br>[0="None", 1="Yes"]       |
| LMDYN         | Lipid metabolism disorders                  | Abnormality of lipid metabolism                                                      | N         | YN<br>[0="None", 1="Yes"]       |
| HYPURNYN      | Hyperuricemia                               | Hyperuricemia                                                                        | N         | YN<br>[0="None", 1="Yes"]       |
| KDDSYN        | Kidney Disease                              | Kidney disease                                                                       | N         | YN<br>[0="None", 1="Yes"]       |
| KDDS1YN       | Chronic Kidney Disease                      | Kidney Disease: Chronic Kidney Disease                                               | N         | YN<br>[0="None", 1="Yes"]       |
| KDDS2YN       | Advanced Renal Dysfunction without Dialysis | Kidney disease: Severe renal impairment (no dialysis)                                | N         | YN<br>[0="None", 1="Yes"]       |
| KDDS3YN       | Advanced Renal Dysfunction with Dialysis    | Kidney disease: Severe renal impairment (with dialysis)                              | N         | YN<br>[0="None", 1="Yes"]       |
| SLVDYN        | Severe Liver Dysfunction                    | Severe liver dysfunction                                                             | N         | YN<br>[0="None", 1="Yes"]       |
| RESDYN        | Respiratory Disease                         | Respiratory disease                                                                  | N         | YN<br>[0="None", 1="Yes"]       |
| HTDYN         | Heart Disease                               | Cardiac disorders                                                                    | N         | YN<br>[0="None", 1="Yes"]       |
| HTD1YN        | Myocardial Infarction                       | Cardiac Disease: Myocardial Infarction                                               | N         | YN<br>[0="None", 1="Yes"]       |
| HTD2YN        | Angina Pectoris                             | Heart Disease: Angina                                                                | N         | YN<br>[0="None", 1="Yes"]       |
| HTD3YN        | Heart Failure                               | Heart disease: Heart failure (including those without or with controlled congestion) | N         | YN<br>[0="None", 1="Yes"]       |
| HTD4YN        | Left Ventricular Systolic Dysfunction       | Heart Disease: Left Ventricular Systolic Dysfunction                                 | N         | YN<br>[0="None", 1="Yes"]       |
| HTD5YN        | Valvular Disease                            | Cardiac disease: Valvular disease (including postoperative)                          | N         | YN<br>[0="None", 1="Yes"]       |
| HTD6YN        | Cardiomyopathy                              | Cardiac Disease: Cardiomyopathy                                                      | N         | YN<br>[0="None", 1="Yes"]       |
| HTD7YN        | Hypertensive Heart Disease                  | Heart Disease: Hypertensive Heart Disease                                            | N         | YN<br>[0="None", 1="Yes"]       |
| HTD8YN        | Congenital Heart Disease                    | Heart Disease: Congenital Heart Disease                                              | N         | YN<br>[0="None", 1="Yes"]       |
| HTD9YN        | Other Heart Disease                         | Heart Diseases: Other                                                                | N         | YN<br>[0="None", 1="Yes"]       |
| CVACYN        | Cerebrovascular Accident                    | Cerebrovascular disorders                                                            | N         | YN<br>[0="None", 1="Yes"]       |
| CVAC1YN       | Atherosclerotic Cerebral Infarction         | Cerebrovascular disorders: atherosclerotics cerebral infarction                      | N         | YN<br>[0="None", 1="Yes"]       |
| CVAC2YN       | Cardiogenic Cerebral Infarction             | Cerebrovascular disorders: <u>Cardiogenic cerebral infarction</u>                    | N         | YN<br>[0="None", 1="Yes"]       |
| CVAC3YN       | Lacunar Cerebral Infarction                 | Cerebrovascular disorders: Lacunar <u>cerebral infarction</u>                        | N         | YN<br>[0="None", 1="Yes"]       |
| CVAC4YN       | Hemorrhagic Stroke                          | Cerebrovascular disorders: <u>Hemorrhagic stroke</u>                                 | N         | YN<br>[0="None", 1="Yes"]       |
| CVAC5YN       | Unclassified/Unknown Cerebral Infarction    | Cerebrovascular disorders: <u>Unclassified/unspecified cerebral infarction</u>       | N         | YN<br>[0="None", 1="Yes"]       |

Data set specifications for analysis

ADMH Medical History Analysis Dataset

| Variable Name | Variable Label                            | Variable Label (Japanese)                                       | Type | Codelist                                            |
|---------------|-------------------------------------------|-----------------------------------------------------------------|------|-----------------------------------------------------|
| CVAC6YN       | Transient Ischemic Attacks                | Cerebrovascular disorders; TIA                                  | N    | YN<br>[0="None", 1="Yes"]                           |
| CVAC7YN       | Other Cerebrovascular Accident            | Cerebrovascular disorders: Other                                | N    | YN<br>[0="None", 1="Yes"]                           |
| OTVDYN        | Other Vascular Disease                    | Other vascular diseases                                         | N    | YN<br>[0="None", 1="Yes"]                           |
| OTVD1YN       | Peripheral Vascular Disease               | Other vascular diseases: Peripheral vascular disorders          | N    | YN<br>[0="None", 1="Yes"]                           |
| OTVD2YN       | Aortic Plaque                             | Other Vascular Diseases: Aortic Plaque                          | N    | YN<br>[0="None", 1="Yes"]                           |
| OTVD3YN       | Other Vascular Disease: Other             | Other vascular diseases: Other                                  | N    | YN<br>[0="None", 1="Yes"]                           |
| TEDYN         | Thrombosis/Embolism-Related Disease       | Thrombotic and embolic disease                                  | N    | YN<br>[0="None", 1="Yes"]                           |
| TED1YN        | Pulmonary Embolism                        | Thromboembolic disease: Pulmonary embolism                      | N    | YN<br>[0="None", 1="Yes"]                           |
| TED2YN        | Deep Vein Thrombosis                      | Thrombosis/embolism-related disorders: Deep vein thrombosis     | N    | YN<br>[0="None", 1="Yes"]                           |
| TED3YN        | Internal Carotid Artery Stenosis          | Thromboembolic Disorders: Internal Carotid Artery Stenosis      | N    | YN<br>[0="None", 1="Yes"]                           |
| TED4YN        | Arteriosclerosis Obliterans               | Thromboembolism-related disease: arteriosclerosis obliterans    | N    | YN<br>[0="None", 1="Yes"]                           |
| TED5YN        | Other Thrombosis/Embolism-Related Disease | Thrombus and embolism-related diseases: Other                   | N    | YN<br>[0="None", 1="Yes"]                           |
| HTDMYN        | Hyperthyroidism                           | Hyperthyroidism                                                 | N    | YN<br>[0="None", 1="Yes"]                           |
| GASDYN        | Gastrointestinal Disease                  | Digestive disorder                                              | N    | YN<br>[0="None", 1="Yes"]                           |
| GASD1YN       | Upper Gastrointestinal Tract              | Gastrointestinal disease: Upper gastrointestinal tract resected | N    | YN<br>[0="None", 1="Yes"]                           |
| GASD2YN       | Lower Gastrointestinal Tract              | Gastrointestinal disease: Lower gastrointestinal tract resected | N    | YN<br>[0="None", 1="Yes"]                           |
| GASD3YN       | Reflux esophagitis                        | Gastrointestinal Diseases: Reflux Esophagitis                   | N    | YN<br>[0="None", 1="Yes"]                           |
| GASD4YN       | Other Gastrointestinal Disease            | Gastrointestinal Diseases: Other                                | N    | YN<br>[0="None", 1="Yes"]                           |
| MGTYN         | Malignant Tumor                           | Malignant tumor (tumor-bearing condition) Primary cancer only   | N    | YN<br>[0="None", 1="Yes"]                           |
| MGT1YN        | Gastric Cancer                            | Malignancy: Gastric cancer                                      | N    | YN<br>[0="None", 1="Yes"]                           |
| MGT2YN        | Colorectal Cancer                         | Malignancy: Colorectal Cancer                                   | N    | YN<br>[0="None", 1="Yes"]                           |
| MGT3YN        | Lung Cancer                               | Malignancy: Lung Cancer                                         | N    | YN<br>[0="None", 1="Yes"]                           |
| MGT4YN        | Brest Cancer                              | Malignancy: Breast Cancer                                       | N    | YN<br>[0="None", 1="Yes"]                           |
| MGT5YN        | Uterus/Ovarian Cancer                     | Malignancy: Uterine and ovarian cancer                          | N    | YN<br>[0="None", 1="Yes"]                           |
| MGT6YN        | Pancreatic Cancer                         | Malignancy: Pancreatic Cancer                                   | N    | YN<br>[0="None", 1="Yes"]                           |
| MGT7YN        | Other Malignant Tumor                     | Malignancy: Other                                               | N    | YN<br>[0="None", 1="Yes"]                           |
| ALZHYN        | Alzheimer                                 | Dementia                                                        | N    | YN<br>[0="None", 1="Yes"]                           |
| OHCPYN        | Other Complications                       | Other complications other than those listed above               | N    | YN<br>[0="None", 1="Yes"]                           |
| IMGYN         | Brain Imaging Test                        | Implementation of brain imaging                                 | N    | YNU<br>[0 = "none", "1 = "present", "9 = "unknown]] |
| FNDYN         | Brain Imaging Result                      | Abnormal brain imaging findings                                 | N    | YNU<br>[0="None" and 1="With", 9 = "unknown"]       |
| FALYN         | Fall Down within one year                 | Falls within 1 year                                             | N    | YNU<br>[0="None" and 1="With", 9 = "unknown"]       |

Sort by USUBJID

Data set specifications for analysis

| ADCM1         | Concomitant Drug Analysis Dataset                  | Concomitant Drug Analysis Dataset                   |           |                                                                                                                  |
|---------------|----------------------------------------------------|-----------------------------------------------------|-----------|------------------------------------------------------------------------------------------------------------------|
| Variable Name | Variable Label                                     | Variable Label (Japanese)                           | Type      | Codelist                                                                                                         |
| STUDYID       | Study Identifier                                   |                                                     | C         | \$200                                                                                                            |
| USUBJID       | Unique Subject Identifier                          | Subject number                                      | C         | \$200                                                                                                            |
| SITE          | Study Site                                         | Name of facility                                    | C         | \$200                                                                                                            |
| AGE           | Age at First Drug Intake                           | Age                                                 | N         |                                                                                                                  |
| AGEU          | Unit of Age                                        | Units of age                                        | C         | \$200                                                                                                            |
| SEX           | Sex                                                | Sex                                                 | N         | SEXN<br>[0 = male, 1 = female].                                                                                  |
| SEXN          | Sex (N)                                            | Gender (number)                                     | N         |                                                                                                                  |
| ICDTC         | Date of Informed Consent                           | Date of consent                                     | YYMMDD10. |                                                                                                                  |
| FASFL         | Full Analysis Set Population Flag                  | Flags for Efficacy Analysis                         | N         | 1                                                                                                                |
| TRSDT         | Date of First Exposure                             | Starting date of drug                               |           |                                                                                                                  |
| TREDT         | Date of Last Exposure                              | Last day of drug administration                     |           |                                                                                                                  |
| TRSDUR        | Duration of Drug Exposure                          | Duration of drug use (days)                         | N         |                                                                                                                  |
| VISITCT       | Visit                                              | Survey period                                       | N         | VISITN<br>[1="Baseline"<br>2="12 months"<br>3 = "after 24 months"]                                               |
| VISITCTN      | Visit (N)                                          | Survey Timing Categories                            | N         |                                                                                                                  |
| CMCNT1        | Number of Types of Internal Medicines              | Number of oral medications                          | N         |                                                                                                                  |
| CMCNT1NK      | Unknown Number of Types of Internal Medicines      | Oral medication type unknown                        | N         | NK<br>[1 = "unknown"]                                                                                            |
| CMCNT1CT      | Category for Number of Types of Internal Medicines | Several categories of oral medications              | N         | CMCT<br>[1 = "0 or more and 4 or less",<br>2="more than 5 and less than 9",<br>3="10 or more",<br>9 = "unknown"] |
| CMYN          | Administration of Concomitant Drug                 | Dose of concomitant drugs other than anticoagulants | N         | YNU<br>[0="None" and 1="With",<br>9 = "unknown"]                                                                 |
| ARTD          | Arrhythmic Drugs                                   | Arrhythmic drug                                     | N         | YN<br>[0 = none, 1 = yes]                                                                                        |
| ARTD1         | Rhythm Control                                     | Arrhythmia Drugs: Rhythm Control                    | N         | YN<br>[0 = none, 1 = yes]                                                                                        |
| ARTD2         | Rate Control                                       | Arrhythmia Drugs: Rate Control                      | N         | YN<br>[0 = none, 1 = yes]                                                                                        |
| APLD          | Anti-Platelet Drugs                                | Antiplatelet drugs                                  | N         | YN<br>[0 = none, 1 = yes]                                                                                        |
| APLD1         | ASA                                                | Antiplatelet agents; ASA:                           | N         | YN<br>[0 = none, 1 = yes]                                                                                        |
| APLD2         | P2Y12-I                                            | Antiplatelet drugs :P 2 Y 12-I                      | N         | YN<br>[0 = none, 1 = yes]                                                                                        |
| APLD3         | Other Anti-Platelet Drugs                          | Antiplatelet agents: Other                          | N         | YN<br>[0 = none, 1 = yes]                                                                                        |
| AHPD          | Antihypertensive Drugs                             | Antihypertensives                                   | N         | YN<br>[0 = none, 1 = yes]                                                                                        |
| LTD           | Lipid Therapy                                      | Lipid therapeutics                                  | N         | YN<br>[0 = none, 1 = yes]                                                                                        |
| LTD1          | Statins                                            | Lipid treatments: Statins                           | N         | YN<br>[0 = none, 1 = yes]                                                                                        |
| LTD2          | Other Than Statins                                 | Drugs for lipid treatment: Beyond statins           | N         | YN<br>[0 = none, 1 = yes]                                                                                        |
| DBTD          | Diabetes Drugs                                     | Diabetes pills                                      | N         | YN<br>[0 = none, 1 = yes]                                                                                        |
| DBTD1         | Sulfonylurea Drugs                                 | Diabetes Drugs: SU Agents                           | N         | YN<br>[0 = none, 1 = yes]                                                                                        |
| DBTD2         | $\alpha$ -Glucosidase Inhibitor                    | Diabetes pills : GI                                 | N         | YN<br>[0 = none, 1 = yes]                                                                                        |



Data set specifications for analysis

| Variable Name | Variable Label                                              | Variable Label (Japanese)                                                  | Type | Codelist                                                                                                           |
|---------------|-------------------------------------------------------------|----------------------------------------------------------------------------|------|--------------------------------------------------------------------------------------------------------------------|
| DBTD3         | Thiazolidine                                                | Diabetes: Thiazolidines                                                    | N    | YN<br>[0 = none, 1 = yes]                                                                                          |
| DBTD4         | DPP-4 Inhibitors                                            | Diabetes pills :DPP-4                                                      | N    | YN<br>[0 = none, 1 = yes]                                                                                          |
| DBTD5         | GLP-1 Inhibitors                                            | Diabetes pills :GLP-1                                                      | N    | YN<br>[0 = none, 1 = yes]                                                                                          |
| DBTD6         | SGLT2 Inhibitors                                            | Diabetes pills :SGLT2                                                      | N    | YN<br>[0 = none, 1 = yes]                                                                                          |
| DBTD7         | Insuline Related                                            | Diabetes Drugs: Insulin                                                    | N    | YN<br>[0 = none, 1 = yes]                                                                                          |
| DBTD8         | Other Diabetes Drugs                                        | Diabetes Drugs: Other                                                      | N    | YN<br>[0 = none, 1 = yes]                                                                                          |
| DMM           | Dementia Medications                                        | Drugs for dementia                                                         | N    | YN<br>[0 = none, 1 = yes]                                                                                          |
| ACNA          | Anti-Cancer Agent                                           | Anti-cancer drugs                                                          | N    | YN<br>[0 = none, 1 = yes]                                                                                          |
| COPD          | COPD                                                        | Drugs for chronic obstructive pulmonary disease (COPD)                     | N    | YN<br>[0 = none, 1 = yes]                                                                                          |
| PSYD          | Psychotropic Drugs                                          | Psychoactive drugs                                                         | N    | YN<br>[0 = none, 1 = yes]                                                                                          |
| PRPI          | Proton Pump Inhibitors                                      | Proton pump inhibitors                                                     | N    | YN<br>[0 = none, 1 = yes]                                                                                          |
| PGPI          | P-gp Inhibitors                                             | P-glycoprotein (P-gp) inhibitors                                           | N    | YN<br>[0 = none, 1 = yes]                                                                                          |
| TCMCNT        | Total Number of Drugs Including Anticoagulant               | Total number of drugs for use in combination with anticoagulants           | N    |                                                                                                                    |
| TCMCNTCT      | Category for Total Number of Drugs Other than Anticoagulant | Total number of concomitant medications other than anticoagulants category | N    | TCMCT<br>[1 = "0 or more and 4 or less",<br>2="more than 5 and less than 9",<br>3="10 or more"<br>999 = "unknown"] |

Sort by USUBJID VISITCTN

## Data set specifications for analysis

ADCM2 Administration Status of Anticoagulant Analysis Dataset

| Variable Name | Variable Label                       | Variable Label (Japanese)                             | Type      | Codelist                                                                                                                                                             |
|---------------|--------------------------------------|-------------------------------------------------------|-----------|----------------------------------------------------------------------------------------------------------------------------------------------------------------------|
| STUDYID       | Study Identifier                     |                                                       | C         | \$200                                                                                                                                                                |
| USUBJID       | Unique Subject Identifier            | Subject number                                        | C         | \$200                                                                                                                                                                |
| SITE          | Study Site                           | Name of facility                                      | C         | \$200                                                                                                                                                                |
| AGE           | Age at First Drug Intake             | Age                                                   | N         |                                                                                                                                                                      |
| AGEU          | Unit of Age                          | Units of age                                          | C         | \$200                                                                                                                                                                |
| SEX           | Sex                                  | Sex                                                   | N         | SEXN<br>[0 = male, 1 = female].                                                                                                                                      |
| SEXN          | Sex (N)                              | Gender (number)                                       | N         |                                                                                                                                                                      |
| ICDTC         | Date of Informed Consent             | Date of consent                                       | YYMMDD10. |                                                                                                                                                                      |
| FASFL         | Full Analysis Set Population Flag    | Flags for Efficacy Analysis                           | N         | 1                                                                                                                                                                    |
| TRSDT         | Date of First Exposure               | Starting date of drug                                 |           |                                                                                                                                                                      |
| TREDT         | Date of Last Exposure                | Last day of drug administration                       |           |                                                                                                                                                                      |
| TRSDUR        | Duration of Drug Exposure            | Duration of drug use (days)                           | N         |                                                                                                                                                                      |
| CM2NUM        | Administration Number                | Dose No.                                              | N         |                                                                                                                                                                      |
| VISITCT       | Visit                                | Survey period                                         | N         | VISITN<br>[1="Baseline"<br>2="12 months"<br>3 = "after 24 months"]                                                                                                   |
| VISITCTN      | Visit (N)                            | Survey Timing Categories                              | N         |                                                                                                                                                                      |
| ADYN          | Administration of Anticoagulant      | Presence of anticoagulants                            | N         | YN<br>[0="None", 1="Yes"]                                                                                                                                            |
| VISITAD       | Visit and Drug Administration        | Time of the start of administration                   | N         | VISITAD<br>[1 = "before 1 month",<br>2 = "within 1 month",<br>3 = "first dose",<br>9 = "unknown"]                                                                    |
| ACTYP         | Type of Anticoagulant                | Type of anticoagulant                                 | N         | ACTYP<br>[1 = "warfarin",<br>2="Dabigatran,"<br>3 = "rivaroxaban",<br>4 = "apixaban",<br>5 = "edoxaban",<br>6 = "parenteral anticoagulants",<br>7 = "edoxaban (OD)"] |
| DOSE          | Dose per day for DOAC only           | Daily dose (DOAC only)/(mg)                           | N         |                                                                                                                                                                      |
| DOSECNT       | Dose per 1time for DOAC only         | Number of daily doses (DOAC only)/(times)             | N         |                                                                                                                                                                      |
| STDTC         | Date of Start Administration         | Day of start of administration                        | YYMMDD10. |                                                                                                                                                                      |
| STADTC        | Around Date of Start Administration  | Approximately 1                                       | N         | AROUND<br>[1="Around"]                                                                                                                                               |
| STCNT         | Continuation at start                | Continue from previous Visit                          | N         | STCONT<br>[1 = "continued from the previous Visit"]                                                                                                                  |
| ENDTC         | Date of End Administration           | Completion of administration                          | YYMMDD10. |                                                                                                                                                                      |
| ENADTC        | Around Date of End Administration    | Approximately 2                                       | N         | AROUND<br>[1="Around"]                                                                                                                                               |
| ENCNT         | Continuation                         | Continuation                                          | N         | ENCONT<br>[1 = "continued"]                                                                                                                                          |
| DSRSN         | Reason for Discontinuation           | Change/discontinuation of administration              | N         | YN<br>[0="None",1="Yes"]                                                                                                                                             |
| DSRSN1        | Reason for Adverse Events            | Event/AE                                              | N         | YN<br>[0="None",1="Yes"]                                                                                                                                             |
| DSRSN2        | Reason for AF                        | Nonpharmacologic therapy for AF                       | N         | YN<br>[0="None",1="Yes"]                                                                                                                                             |
| DSRSN3        | Reason for Invasive Procedures       | Performing invasive procedures                        | N         | YN<br>[0="None",1="Yes"]                                                                                                                                             |
| DSRSN4        | Reason for Decreased Renal Function  | Poor kidney function                                  | N         | YN<br>[0="None",1="Yes"]                                                                                                                                             |
| DSRSN5        | Reason for Decreased Weight          | Weight loss                                           | N         | YN<br>[0="None",1="Yes"]                                                                                                                                             |
| DSRSN6        | Reason for P-glycoprotein Inhibitors | Combination of P-glycoprotein inhib                   | N         | YN<br>[0="None",1="Yes"]                                                                                                                                             |
| DSRSN7        | Reason for Fear of Bleeding          | Fear of bleeding without a definite cause of bleeding | N         | YN<br>[0="None",1="Yes"]                                                                                                                                             |

Data set specifications for analysis

ADCM2 Administration Status of Anticoagulant Analysis Dataset

| Variable Name | Variable Label                          | Variable Label (Japanese)     | Type | Codelist                 |
|---------------|-----------------------------------------|-------------------------------|------|--------------------------|
| DSRSN8        | Reason for Patient                      | Patient preferences           | N    | YN<br>[0="None",1="Yes"] |
| DSRSN9        | Reason for Patient Improved Convenience | Improving patient convenience | N    | YN<br>[0="None",1="Yes"] |
| DSRSN10       | Other Reason                            | Other                         | N    | YN<br>[0="None",1="Yes"] |

Sort by USUBJID VISITCTN CM2NUM

## Data set specifications for analysis

ADLB1 PI-INR Analysis Dataset

| Variable Name | Variable Label                            | Variable Label (Japanese)              | Type      | Codelist                                                           |
|---------------|-------------------------------------------|----------------------------------------|-----------|--------------------------------------------------------------------|
| STUDYID       | Study Identifier                          |                                        | C         | \$200                                                              |
| USUBJID       | Unique Subject Identifier                 | Subject number                         | C         | \$200                                                              |
| SITE          | Study Site                                | Name of facility                       | C         | \$200                                                              |
| AGE           | Age at First Drug Intake                  | Age                                    | N         |                                                                    |
| AGEU          | Unit of Age                               | Units of age                           | C         | \$200                                                              |
| SEX           | Sex                                       | Sex                                    | N         | SEXN<br>[0 = male, 1 = female].                                    |
| SEXN          | Sex (N)                                   | Gender (number)                        | N         |                                                                    |
| ICDTC         | Date of Informed Consent                  | Date of consent                        | YYMMDD10. |                                                                    |
| FASFL         | Full Analysis Set Population Flag         | Flags for Efficacy Analysis            | N         | 1                                                                  |
| TRSDT         | Date of First Exposure                    | Starting date of drug                  |           |                                                                    |
| TREDT         | Date of Last Exposure                     | Last day of drug administration        |           |                                                                    |
| TRSDUR        | Duration of Drug Exposure                 | Duration of drug use (days)            | N         |                                                                    |
| VISITCT       | Visit                                     | Survey period                          | N         | VISITN<br>[1="Baseline"<br>2="12 months"<br>3 = "after 24 months"] |
| VISITCTN      | Visit (N)                                 | Survey Timing Categories               | N         |                                                                    |
| LB1NO         | LB1 Number                                | Order of CRFs for PT-INR level         | N         |                                                                    |
| LBYN1         |                                           | Presence or absence of PT-INR readings | N         | YNU<br>[0="None" and 1="With",<br>9 = "unknown"]                   |
| POINT         | PT-INR Point                              | Sum of PTINR measured points           | N         |                                                                    |
| WFFG          | Warfarin Flag                             | Warfarin dosing flag                   | N         |                                                                    |
| PTINRFR       | PT-INR Flag Range                         | PT-INR range                           | N         |                                                                    |
| PTINRFGB      | PT-INR Flag of Baseline                   | PT-INR use flag at baseline            | N         |                                                                    |
| PTINR_DTC1    | Date/Time of Specimen Collection          | Date of PT-INR determination           | YYMMDD10. |                                                                    |
| PTINR_DTC0    | Date/Time of Previous Specimen Collection | Date of last PT-INR determination      | YYMMDD10. |                                                                    |
| PTINR_VAL1    | PT-INR Value                              | PT-INR level                           | N         |                                                                    |

Data set specifications for analysis

ADLB1 PI-INR Analysis Dataset

| Variable Name | Variable Label                                   | Variable Label (Japanese)                          | Type | Codelist                                                                          |
|---------------|--------------------------------------------------|----------------------------------------------------|------|-----------------------------------------------------------------------------------|
| PTINR_VAL0    | PT-INR Previous Value                            | Previous PT-INR                                    | N    |                                                                                   |
| PTINR_NKND    | PT-INR Unknown                                   | PT-INR not measured/unknown                        | N    | NK<br>[1 = "unknown"]                                                             |
| DSLDTC        | Days Since Last Date/Time of Specimen Collection | Number of days                                     | N    |                                                                                   |
| PTINRDIFF     | PT-INR Diff                                      | PT-INR difference                                  | N    |                                                                                   |
| PINRWR        | Previous PT-INR Within Range                     | Flags within and outside the previous PT-INR level | N    | RGCT<br>[0="less than 1.6",<br>1 = "1.6 to 2.6" or less,<br>2="greater than 2.6"] |
| CINRWR        | Current PT-INR Within Range                      | PT-INR Out-of-Range Flag                           | N    | RGCT<br>[0="less than 1.6",<br>1 = "1.6 to 2.6" or less,<br>2="greater than 2.6"] |
| SCENARIO      | Scenario                                         | TTR Calculation Flag                               | N    |                                                                                   |
| FIRFG1        | FIR Flag1                                        | FIR calculation flag 1                             | N    |                                                                                   |
| FIRFG2        | FIR Flag2                                        | FIR calculation flag 2                             | N    |                                                                                   |
| PINRDAR       | PT-INR Diff Above Range                          | Difference greater than the range                  | N    |                                                                                   |
| PINRDBR       | PT-INR Diff Below Range                          | Difference less than the range                     | N    |                                                                                   |
| PINRDWR       | PT-INR Diff Within Range                         | Differences within the range                       | N    |                                                                                   |

Data set specifications for analysis

ADLB1 PI-INR Analysis Dataset

| Variable Name | Variable Label                                                | Variable Label (Japanese)           | Type | Codelist |
|---------------|---------------------------------------------------------------|-------------------------------------|------|----------|
| DWRSLPER      | Days within Range since Last Date/Time of Specimen Collection | Percentage of days within the range | N    |          |
| DWRSL         | Days within Range since Last Date/Time of Specimen Collection | Days within the range               | N    |          |

Sort by USUBJID VISITCTN PTINR\_DTC1 LB1NO  
[Methods for calculating TTRs using Rosendaal method](#)

Data set specifications for analysis

Format

| FMTNAME | DESCRIPTION                           | TYPE | CODE | LABEL                                               |
|---------|---------------------------------------|------|------|-----------------------------------------------------|
| AGECT   | Age                                   | N    | 1    | 75 years and older and younger than 80 years        |
| AGECT   | Age                                   | N    | 2    | 80 years and older and younger than 85 years        |
| AGECT   | Age                                   | N    | 3    | 85 years old or older and younger than 90 years old |
| AGECT   | Age                                   | N    | 4    | 90 years and older and younger than 95 years        |
| AGECT   | Age                                   | N    | 5    | Age 95 and < 100 years                              |
| AGECT   | Age                                   | N    | 6    | 100 years or older                                  |
| SEXN    | Sex                                   | N    | 0    | Man                                                 |
| SEXN    | Sex                                   | N    | 1    | Woman                                               |
| WGTC    | Weight Category                       | N    | 1    | Less than 60 kg                                     |
| WGTC    | Weight Category                       | N    | 2    | 60 kg or more                                       |
| BMIC    | BMI Category                          | N    | 1    | Less than 18.5kg/m2                                 |
| BMIC    | BMI Category                          | N    | 2    | 18.5kg/m2 and less than 25.0kg/m2                   |
| BMIC    | BMI Category                          | N    | 3    | 25.0kg/m2 or more                                   |
| AFTYP   | Type of AF                            | N    | 1    | Paroxysmal                                          |
| AFTYP   | Type of AF                            | N    | 2    | Persistence                                         |
| AFTYP   | Type of AF                            | N    | 3    | Long-term persistence                               |
| AFTYP   | Type of AF                            | N    | 4    | Persistence                                         |
| HISAF   | History of Sugery for non-AF          | N    | 1    | Major surgery within the last 3 months              |
| HISAF   | History of Sugery for non-AF          | N    | 2    | No major surgery within the last 3 months           |
| HISAF   | History of Sugery for non-AF          | N    | 9    | Unknown                                             |
| SMK     | Smoking Status                        | N    | 1    | Have never smoked                                   |
| SMK     | Smoking Status                        | N    | 2    | More than a year after quitting                     |
| SMK     | Smoking Status                        | N    | 3    | Quit within a year                                  |
| SMK     | Smoking Status                        | N    | 4    | Be breathing                                        |
| SMK     | Smoking Status                        | N    | 9    | Unknown                                             |
| SMKA    | Smoking Status Part1                  | N    | 1    | Have never smoked                                   |
| SMKA    | Smoking Status Part1                  | N    | 2    | To discontinue                                      |
| SMKA    | Smoking Status Part1                  | N    | 4    | Be breathing                                        |
| SMKA    | Smoking Habit                         | N    | 9    | Unknown                                             |
| DRK     | Drinking Habit                        | N    | 1    | Drink routinely                                     |
| DRK     | Drinking Habit                        | N    | 2    | Occasional drinking                                 |
| DRK     | Drinking Habit                        | N    | 3    | Never drink                                         |
| DRK     | Drinking Habit                        | N    | 9    | Unknown                                             |
| RNG     | Range                                 | N    | 1    | Within acceptable limits                            |
| CRCCT   | Category of Creatinine Clearance      | N    | 1    | <15 mL/min                                          |
| CRCCT   | Category of Creatinine Clearance      | N    | 2    | 15 mL/min or more and less than 30mL/min            |
| CRCCT   | Category of Creatinine Clearance      | N    | 3    | 30 mL/min or more and less than 50mL/min            |
| CRCCT   | Category of Creatinine Clearance      | N    | 4    | 50 mL/min to less than 80mL/min                     |
| CRCCT   | Category of Creatinine Clearance      | N    | 5    | 80 mL/min or more                                   |
| CRCCT   | Category of Creatinine Clearance      | N    | 9    | Missing data                                        |
| EGFRCT  | Category of eGFR                      | N    | 1    | Less than 15                                        |
| EGFRCT  | Category of eGFR                      | N    | 2    | 15 to less than 30                                  |
| EGFRCT  | Category of eGFR                      | N    | 3    | 30 to less than 45                                  |
| EGFRCT  | Category of eGFR                      | N    | 4    | 45 to less than 60                                  |
| EGFRCT  | Category of eGFR                      | N    | 5    | 60 to less than 90                                  |
| EGFRCT  | Category of eGFR                      | N    | 6    | 90 or more                                          |
| EGFRCT  | Category of eGFR                      | N    | 9    | Missing data                                        |
| HBACT   | Category of Hemoglobin A1c            | N    | 1    | <6.0%                                               |
| HBACT   | Category of Hemoglobin A1c            | N    | 2    | 6.0% to less than 7.0%                              |
| HBACT   | Category of Hemoglobin A1c            | N    | 3    | Not less than 7.0% and not more than 8.0%.          |
| HBACT   | Category of Hemoglobin A1c            | N    | 4    | 8.0% or more                                        |
| HBACT   | Category of Hemoglobin A1c            | N    | 9    | Missing data                                        |
| YN      | Yes or No                             | N    | 0    | None                                                |
| YN      | Yes or No                             | N    | 1    | Present                                             |
| Y2N     | Yes or No                             | N    | 0    | None                                                |
| Y2N     | Yes or No                             | N    | 2    | Present                                             |
| YNU     | Yes or No                             | N    | 0    | None                                                |
| YNU     | Yes or No                             | N    | 1    | Present                                             |
| YNU     | Yes or No                             | N    | 9    | Unknown                                             |
| VISITN  | Category of VISIT                     | N    | 1    | Baseline                                            |
| VISITN  | Category of VISIT                     | N    | 2    | After 12 months                                     |
| VISITN  | Category of VISIT                     | N    | 3    | After 24 months                                     |
| VISITAD | Category for Timing of Administration | N    | 1    | Before 1 month                                      |
| VISITAD | Category for Timing of Administration | N    | 2    | Within 1 month                                      |
| VISITAD | Category for Timing of Administration | N    | 3    | First dose                                          |
| VISITAD | Category for Timing of Administration | N    | 9    | Unknown                                             |
| CMCT    | Category for Type of Concomitant Drug | N    | 1    | 0 to 4 or less                                      |
| CMCT    | Category for Type of Concomitant Drug | N    | 2    | 5 or more and 9 or less                             |

Data set specifications for analysis

Format

| FMTNAME | DESCRIPTION                                 | TYPE | CODE | LABEL                        |
|---------|---------------------------------------------|------|------|------------------------------|
| CMCT    | Category for Type of Concomitant Drug       | N    | 3    | 10 or more                   |
| CMCT    | Category for Type of Concomitant Drug       | N    | 9    | Unknown                      |
| NK      | Unknown                                     | N    | 1    | Unknown                      |
| TCMCT   | Total Category for Type of Concomitant Drug | N    | 1    | 0 to 4 or less               |
| TCMCT   | Total Category for Type of Concomitant Drug | N    | 2    | 5 or more and 9 or less      |
| TCMCT   | Total Category for Type of Concomitant Drug | N    | 3    | 10 or more                   |
| TCMCT   | Total Category for Type of Concomitant Drug | N    | 999  | Unknown                      |
| ACTYP   | Type of AC                                  | N    | 1    | Warfarin                     |
| ACTYP   | Type of AC                                  | N    | 2    | Dabigatran                   |
| ACTYP   | Type of AC                                  | N    | 3    | Rivaroxaban                  |
| ACTYP   | Type of AC                                  | N    | 4    | Apixaban                     |
| ACTYP   | Type of AC                                  | N    | 5    | Edoxaban                     |
| ACTYP   | Type of AC                                  | N    | 6    | Parenteral anticoagulants    |
| ACTYP   | Type of AC                                  | N    | 7    | Edoxaban (OD                 |
| STCONT  | Continuation at start                       | N    | 1    | Continue from previous Visit |
| ENCONT  | Continuation                                | N    | 1    | Continuation                 |
| RGCT    | Category of Range                           | N    | 0    | Less than 1.6                |
| RGCT    | Category of Range                           | N    | 1    | 1.6 – 2.6 or less            |
| RGCT    | Category of Range                           | N    | 2    | Greater than 2.6             |
| AROUND  | Around Date                                 | N    | 1    | Around                       |
