# Supplementary material for: Current status of proton pump inhibitor use in Japanese elderly patients with non-valvular atrial fibrillation: A subanalysis of the ANAFIE Registry
Source: PubMed Central journal article supplement (PMC7644054; doi:10.1371/journal.pone.0240859), 2020-11-05
Supplement: pone.0240859.s005.pdf [file pone.0240859.s005.pdf]

Laboratory tests at the time of obtaining Table 2-6 consent, according to the presence or absence of proton-pump inhibitors

Unique Subject Identifier=6298000000-0169

MEANS Procedure

Assay variable : PTINR\_VAL1 PT-INR Value

N Mean Standard Deviation Minimum Maximum

---

|   |           |           |           |           |
|---|-----------|-----------|-----------|-----------|
| 6 | 1.9033333 | 0.2122891 | 1.6400000 | 2.1500000 |
|---|-----------|-----------|-----------|-----------|

---

Unique Subject Identifier=6298000000-0170

Assay variable : PTINR\_VAL1 PT-INR Value

N Mean Standard Deviation Minimum Maximum

---

|   |           |           |           |           |
|---|-----------|-----------|-----------|-----------|
| 4 | 1.8300000 | 0.7481978 | 1.3300000 | 2.9400000 |
|---|-----------|-----------|-----------|-----------|

---

Unique Subject Identifier=6304000000-0005

Assay variable : PTINR\_VAL1 PT-INR Value

N Mean Standard Deviation Minimum Maximum

---

|   |           |           |           |           |
|---|-----------|-----------|-----------|-----------|
| 4 | 2.2475000 | 0.4780080 | 1.6400000 | 2.7200000 |
|---|-----------|-----------|-----------|-----------|

---

Unique Subject Identifier=6304000000-0011

Assay variable : PTINR\_VAL1 PT-INR Value

N Mean Standard Deviation Minimum Maximum

---

|   |           |  |           |           |
|---|-----------|--|-----------|-----------|
| 1 | 1.9600000 |  | 1.9600000 | 1.9600000 |
|---|-----------|--|-----------|-----------|

---

Laboratory tests at the time of obtaining Table 2-6 consent, according to the presence or absence of proton-pump inhibitors

Unique Subject Identifier=6304000000-0012

MEANS Procedure

Assay variable : PTINR\_VAL1 PT-INR Value

| N | Mean      | Standard Deviation | Minimum   | Maximum   |
|---|-----------|--------------------|-----------|-----------|
| 1 | 1.7000000 |                    | 1.7000000 | 1.7000000 |

Unique Subject Identifier=6304000000-0021

Assay variable : PTINR\_VAL1 PT-INR Value

| N | Mean      | Standard Deviation | Minimum   | Maximum   |
|---|-----------|--------------------|-----------|-----------|
| 3 | 1.7233333 | 0.4135618          | 1.4600000 | 2.2000000 |

Unique Subject Identifier=6304000000-0023

Assay variable : PTINR\_VAL1 PT-INR Value

| N | Mean      | Standard Deviation | Minimum   | Maximum   |
|---|-----------|--------------------|-----------|-----------|
| 2 | 2.1250000 | 0.3464823          | 1.8800000 | 2.3700000 |

Unique Subject Identifier=6304000000-0024

Assay variable : PTINR\_VAL1 PT-INR Value

N Mean Standard Deviation Minimum Maximum

---

|   |           |           |           |           |
|---|-----------|-----------|-----------|-----------|
| 3 | 1.7866667 | 0.1101514 | 1.6600000 | 1.8600000 |
|---|-----------|-----------|-----------|-----------|

---

Laboratory tests at the time of obtaining Table 2-6 consent, according to the presence or absence of proton-pump inhibitors

Unique Subject Identifier=6304000000-0025

MEANS Procedure

Assay variable : PTINR\_VAL1 PT-INR Value

N Mean Standard Deviation Minimum Maximum

---

|   |           |  |           |           |
|---|-----------|--|-----------|-----------|
| 1 | 2.5100000 |  | 2.5100000 | 2.5100000 |
|---|-----------|--|-----------|-----------|

---

Unique Subject Identifier=6309000000-0005

Assay variable : PTINR\_VAL1 PT-INR Value

N Mean Standard Deviation Minimum Maximum

---

|   |           |           |           |           |
|---|-----------|-----------|-----------|-----------|
| 3 | 2.7133333 | 0.0757188 | 2.6600000 | 2.8000000 |
|---|-----------|-----------|-----------|-----------|

---

Unique Subject Identifier=6309000000-0007

Assay variable : PTINR\_VAL1 PT-INR Value

N Mean Standard Deviation Minimum Maximum

---

|   |           |           |           |           |
|---|-----------|-----------|-----------|-----------|
| 2 | 2.8000000 | 0.0141421 | 2.7900000 | 2.8100000 |
|---|-----------|-----------|-----------|-----------|

---

Unique Subject Identifier=6309000000-0013

Assay variable : PTINR\_VAL1 PT-INR Value

N Mean Standard Deviation Minimum Maximum

---

|   |          |           |          |          |
|---|----------|-----------|----------|----------|
| 5 | 2.220000 | 0.3342155 | 1.690000 | 2.570000 |
|---|----------|-----------|----------|----------|

---

Laboratory tests at the time of obtaining Table 2-6 consent, according to the presence or absence of proton-pump inhibitors

Unique Subject Identifier=6309000000-0014

MEANS Procedure

Assay variable : PTINR\_VAL1 PT-INR Value

N Mean Standard Deviation Minimum Maximum

---

|   |           |           |           |           |
|---|-----------|-----------|-----------|-----------|
| 4 | 1.9350000 | 0.1100000 | 1.7900000 | 2.0300000 |
|---|-----------|-----------|-----------|-----------|

---

Unique Subject Identifier=6309000000-0017

Assay variable : PTINR\_VAL1 PT-INR Value

N Mean Standard Deviation Minimum Maximum

---

|   |           |           |           |           |
|---|-----------|-----------|-----------|-----------|
| 3 | 1.8566667 | 0.2532456 | 1.5700000 | 2.0500000 |
|---|-----------|-----------|-----------|-----------|

---

Unique Subject Identifier=6309000000-0018

Assay variable : PTINR\_VAL1 PT-INR Value

N Mean Standard Deviation Minimum Maximum

---

|   |           |           |           |           |
|---|-----------|-----------|-----------|-----------|
| 3 | 2.5700000 | 0.2426932 | 2.3700000 | 2.8400000 |
|---|-----------|-----------|-----------|-----------|

---

Unique Subject Identifier=6309000000-0030

Assay variable : PTINR\_VAL1 PT-INR Value

N Mean Standard Deviation Minimum Maximum

---

|   |          |           |          |          |
|---|----------|-----------|----------|----------|
| 2 | 2.500000 | 0.3959798 | 2.220000 | 2.780000 |
|---|----------|-----------|----------|----------|

---



Laboratory tests at the time of obtaining Table 2-6 consent, according to the presence or absence of proton-pump inhibitors

Unique Subject Identifier=6310000100-0001

MEANS Procedure

Assay variable : PTINR\_VAL1 PT-INR Value

| N | Mean      | Standard Deviation | Minimum   | Maximum   |
|---|-----------|--------------------|-----------|-----------|
| 5 | 1.8760000 | 0.1974335          | 1.6300000 | 2.1000000 |

Unique Subject Identifier=6310000100-0003

Assay variable : PTINR\_VAL1 PT-INR Value

| N | Mean      | Standard Deviation | Minimum   | Maximum   |
|---|-----------|--------------------|-----------|-----------|
| 6 | 2.0233333 | 0.2492923          | 1.6700000 | 2.2600000 |

Unique Subject Identifier=6310000100-0005

Assay variable : PTINR\_VAL1 PT-INR Value

| N | Mean      | Standard Deviation | Minimum   | Maximum   |
|---|-----------|--------------------|-----------|-----------|
| 6 | 2.0816667 | 0.4285518          | 1.6600000 | 2.7200000 |

Unique Subject Identifier=6310000100-0007

Assay variable : PTINR\_VAL1 PT-INR Value

N Mean Standard Deviation Minimum Maximum

---

|   |           |           |           |           |
|---|-----------|-----------|-----------|-----------|
| 5 | 2.3380000 | 0.5558507 | 1.6600000 | 2.8900000 |
|---|-----------|-----------|-----------|-----------|

---

Laboratory tests at the time of obtaining Table 2-6 consent, according to the presence or absence of proton-pump inhibitors

Unique Subject Identifier=6310000100-0008

MEANS Procedure

Assay variable : PTINR\_VAL1 PT-INR Value

N Mean Standard Deviation Minimum Maximum

---

|   |           |           |           |           |
|---|-----------|-----------|-----------|-----------|
| 5 | 2.4180000 | 0.5912867 | 1.7600000 | 3.3200000 |
|---|-----------|-----------|-----------|-----------|

---

Unique Subject Identifier=6310000100-0009

Assay variable : PTINR\_VAL1 PT-INR Value

N Mean Standard Deviation Minimum Maximum

---

|   |           |           |           |           |
|---|-----------|-----------|-----------|-----------|
| 5 | 1.9400000 | 0.4992494 | 1.4000000 | 2.7400000 |
|---|-----------|-----------|-----------|-----------|

---

Unique Subject Identifier=6310000100-0012

Assay variable : PTINR\_VAL1 PT-INR Value

N Mean Standard Deviation Minimum Maximum

---

|   |           |           |           |           |
|---|-----------|-----------|-----------|-----------|
| 6 | 2.3900000 | 0.6134493 | 1.5300000 | 3.2800000 |
|---|-----------|-----------|-----------|-----------|

---

Unique Subject Identifier=6310000100-0014

Assay variable : PTINR\_VAL1 PT-INR Value

N Mean Standard Deviation Minimum Maximum

---

|   |           |           |           |           |
|---|-----------|-----------|-----------|-----------|
| 5 | 2.3340000 | 0.8346436 | 1.5700000 | 3.7600000 |
|---|-----------|-----------|-----------|-----------|

---

Laboratory tests at the time of obtaining Table 2-6 consent, according to the presence or absence of proton-pump inhibitors

Unique Subject Identifier=6310000100-0016

MEANS Procedure

Assay variable : PTINR\_VAL1 PT-INR Value

N Mean Standard Deviation Minimum Maximum

---

|   |           |           |           |           |
|---|-----------|-----------|-----------|-----------|
| 5 | 1.9120000 | 0.4343040 | 1.1900000 | 2.3500000 |
|---|-----------|-----------|-----------|-----------|

---

Unique Subject Identifier=6310000100-0019

Assay variable : PTINR\_VAL1 PT-INR Value

N Mean Standard Deviation Minimum Maximum

---

|   |           |           |           |           |
|---|-----------|-----------|-----------|-----------|
| 5 | 2.3420000 | 0.4076395 | 1.6800000 | 2.6700000 |
|---|-----------|-----------|-----------|-----------|

---

Unique Subject Identifier=6310000100-0021

Assay variable : PTINR\_VAL1 PT-INR Value

N Mean Standard Deviation Minimum Maximum

---

|   |           |           |           |           |
|---|-----------|-----------|-----------|-----------|
| 6 | 2.2133333 | 0.6199892 | 1.5300000 | 3.1600000 |
|---|-----------|-----------|-----------|-----------|

---

Unique Subject Identifier=6310000100-0024

Assay variable : PTINR\_VAL1 PT-INR Value

N Mean Standard Deviation Minimum Maximum

---

|   |           |           |           |           |
|---|-----------|-----------|-----------|-----------|
| 5 | 2.0120000 | 0.5511533 | 1.3400000 | 2.8200000 |
|---|-----------|-----------|-----------|-----------|

---

Laboratory tests at the time of obtaining Table 2-6 consent, according to the presence or absence of proton-pump inhibitors

Unique Subject Identifier=6310000100-0026

MEANS Procedure

Assay variable : PTINR\_VAL1 PT-INR Value

N Mean Standard Deviation Minimum Maximum

---

|   |           |           |           |           |
|---|-----------|-----------|-----------|-----------|
| 4 | 1.9675000 | 0.4823812 | 1.4300000 | 2.5900000 |
|---|-----------|-----------|-----------|-----------|

---

Unique Subject Identifier=6310000100-0030

Assay variable : PTINR\_VAL1 PT-INR Value

N Mean Standard Deviation Minimum Maximum

---

|   |           |           |           |           |
|---|-----------|-----------|-----------|-----------|
| 6 | 1.8666667 | 0.1127239 | 1.7100000 | 1.9700000 |
|---|-----------|-----------|-----------|-----------|

---

Unique Subject Identifier=6310000100-0031

Assay variable : PTINR\_VAL1 PT-INR Value

N Mean Standard Deviation Minimum Maximum

---

|   |           |           |           |           |
|---|-----------|-----------|-----------|-----------|
| 5 | 2.4940000 | 0.2847455 | 2.0800000 | 2.8600000 |
|---|-----------|-----------|-----------|-----------|

---

Unique Subject Identifier=6310000100-0033

Assay variable : PTINR\_VAL1 PT-INR Value

N Mean Standard Deviation Minimum Maximum

---

|   |           |           |           |           |
|---|-----------|-----------|-----------|-----------|
| 5 | 1.9360000 | 0.5511170 | 1.3400000 | 2.6400000 |
|---|-----------|-----------|-----------|-----------|

---



Laboratory tests at the time of obtaining Table 2-6 consent, according to the presence or absence of proton-pump inhibitors

Unique Subject Identifier=6310000100-0035

MEANS Procedure

Assay variable : PTINR\_VAL1 PT-INR Value

| N | Mean      | Standard Deviation | Minimum   | Maximum   |
|---|-----------|--------------------|-----------|-----------|
| 5 | 1.8880000 | 0.3094673          | 1.5500000 | 2.2200000 |

Unique Subject Identifier=6310000100-0036

Assay variable : PTINR\_VAL1 PT-INR Value

| N | Mean      | Standard Deviation | Minimum   | Maximum   |
|---|-----------|--------------------|-----------|-----------|
| 6 | 2.1116667 | 0.3047239          | 1.7000000 | 2.5100000 |

Unique Subject Identifier=6333000000-0001

Assay variable : PTINR\_VAL1 PT-INR Value

| N | Mean      | Standard Deviation | Minimum   | Maximum   |
|---|-----------|--------------------|-----------|-----------|
| 4 | 2.4175000 | 0.7544258          | 1.4700000 | 3.2300000 |

Unique Subject Identifier=6340011000-0002

Assay variable : PTINR\_VAL1 PT-INR Value

N Mean Standard Deviation Minimum Maximum

---

|   |           |           |           |           |
|---|-----------|-----------|-----------|-----------|
| 6 | 1.7666667 | 0.1966384 | 1.6000000 | 2.1000000 |
|---|-----------|-----------|-----------|-----------|

---

Laboratory tests at the time of obtaining Table 2-6 consent, according to the presence or absence of proton-pump inhibitors

Unique Subject Identifier=6340011000-0008

MEANS Procedure

Assay variable : PTINR\_VAL1 PT-INR Value

N Mean Standard Deviation Minimum Maximum

---

|   |           |           |           |           |
|---|-----------|-----------|-----------|-----------|
| 3 | 1.5666667 | 0.0577350 | 1.5000000 | 1.6000000 |
|---|-----------|-----------|-----------|-----------|

---

Unique Subject Identifier=6340011000-0009

Assay variable : PTINR\_VAL1 PT-INR Value

N Mean Standard Deviation Minimum Maximum

---

|   |           |           |           |           |
|---|-----------|-----------|-----------|-----------|
| 5 | 1.8200000 | 0.1303840 | 1.7000000 | 2.0000000 |
|---|-----------|-----------|-----------|-----------|

---

Unique Subject Identifier=6340011000-0010

Assay variable : PTINR\_VAL1 PT-INR Value

N Mean Standard Deviation Minimum Maximum

---

|   |           |           |           |           |
|---|-----------|-----------|-----------|-----------|
| 4 | 1.9750000 | 0.3593976 | 1.5000000 | 2.3000000 |
|---|-----------|-----------|-----------|-----------|

---

Unique Subject Identifier=6366000000-0015

Assay variable : PTINR\_VAL1 PT-INR Value

N Mean Standard Deviation Minimum Maximum

---

|   |           |           |           |           |
|---|-----------|-----------|-----------|-----------|
| 6 | 2.2650000 | 0.2011716 | 1.9300000 | 2.5400000 |
|---|-----------|-----------|-----------|-----------|

---

Laboratory tests at the time of obtaining Table 2-6 consent, according to the presence or absence of proton-pump inhibitors

Unique Subject Identifier=642600000-0001

MEANS Procedure

Assay variable : PTINR\_VAL1 PT-INR Value

N Mean Standard Deviation Minimum Maximum

---

|   |           |           |           |           |
|---|-----------|-----------|-----------|-----------|
| 5 | 2.3820000 | 0.2289541 | 2.2200000 | 2.7800000 |
|---|-----------|-----------|-----------|-----------|

---

Unique Subject Identifier=642600000-0002

Assay variable : PTINR\_VAL1 PT-INR Value

N Mean Standard Deviation Minimum Maximum

---

|   |           |           |           |           |
|---|-----------|-----------|-----------|-----------|
| 6 | 1.8916667 | 0.5451024 | 1.2100000 | 2.4500000 |
|---|-----------|-----------|-----------|-----------|

---

Unique Subject Identifier=642600000-0006

Assay variable : PTINR\_VAL1 PT-INR Value

N Mean Standard Deviation Minimum Maximum

---

|   |           |           |           |           |
|---|-----------|-----------|-----------|-----------|
| 3 | 2.4766667 | 0.3066486 | 2.1400000 | 2.7400000 |
|---|-----------|-----------|-----------|-----------|

---

Unique Subject Identifier=642600000-0008

Assay variable : PTINR\_VAL1 PT-INR Value

N Mean Standard Deviation Minimum Maximum

---

|   |           |           |           |           |
|---|-----------|-----------|-----------|-----------|
| 6 | 1.7933333 | 0.3691973 | 1.4400000 | 2.4900000 |
|---|-----------|-----------|-----------|-----------|

---

Laboratory tests at the time of obtaining Table 2-6 consent, according to the presence or absence of proton-pump inhibitors

Unique Subject Identifier=642600000-0009

MEANS Procedure

Assay variable : PTINR\_VAL1 PT-INR Value

| N | Mean      | Standard Deviation | Minimum   | Maximum   |
|---|-----------|--------------------|-----------|-----------|
| 5 | 1.7180000 | 0.2357329          | 1.4800000 | 2.0600000 |

Unique Subject Identifier=642600000-0010

Assay variable : PTINR\_VAL1 PT-INR Value

| N | Mean      | Standard Deviation | Minimum   | Maximum   |
|---|-----------|--------------------|-----------|-----------|
| 5 | 1.5780000 | 0.0995992          | 1.4300000 | 1.6800000 |

Unique Subject Identifier=642600000-0014

Assay variable : PTINR\_VAL1 PT-INR Value

| N | Mean      | Standard Deviation | Minimum   | Maximum   |
|---|-----------|--------------------|-----------|-----------|
| 3 | 1.7433333 | 0.0808290          | 1.6700000 | 1.8300000 |

Unique Subject Identifier=642600000-0015

Assay variable : PTINR\_VAL1 PT-INR Value

N Mean Standard Deviation Minimum Maximum

---

|   |           |           |           |           |
|---|-----------|-----------|-----------|-----------|
| 5 | 1.9220000 | 0.0967988 | 1.8000000 | 2.0300000 |
|---|-----------|-----------|-----------|-----------|

---



Laboratory tests at the time of obtaining Table 2-6 consent, according to the presence or absence of proton-pump inhibitors

Unique Subject Identifier=642600000-0016

MEANS Procedure

Assay variable : PTINR\_VAL1 PT-INR Value

N Mean Standard Deviation Minimum Maximum

---

|   |           |           |           |           |
|---|-----------|-----------|-----------|-----------|
| 3 | 2.1966667 | 0.7054313 | 1.6400000 | 2.9900000 |
|---|-----------|-----------|-----------|-----------|

---

Unique Subject Identifier=642600000-0017

Assay variable : PTINR\_VAL1 PT-INR Value

N Mean Standard Deviation Minimum Maximum

---

|   |           |  |           |           |
|---|-----------|--|-----------|-----------|
| 1 | 1.0400000 |  | 1.0400000 | 1.0400000 |
|---|-----------|--|-----------|-----------|

---

Unique Subject Identifier=642600000-0019

Assay variable : PTINR\_VAL1 PT-INR Value

N Mean Standard Deviation Minimum Maximum

---

|   |           |           |           |           |
|---|-----------|-----------|-----------|-----------|
| 5 | 1.6720000 | 0.4934268 | 1.1700000 | 2.4900000 |
|---|-----------|-----------|-----------|-----------|

---

Unique Subject Identifier=642600000-0021

Assay variable : PTINR\_VAL1 PT-INR Value

N Mean Standard Deviation Minimum Maximum

---

|   |           |           |           |           |
|---|-----------|-----------|-----------|-----------|
| 4 | 2.3925000 | 0.3836991 | 1.8900000 | 2.8100000 |
|---|-----------|-----------|-----------|-----------|

---

Laboratory tests at the time of obtaining Table 2-6 consent, according to the presence or absence of proton-pump inhibitors

Unique Subject Identifier=642600000-0023

MEANS Procedure

Assay variable : PTINR\_VAL1 PT-INR Value

| N | Mean      | Standard Deviation | Minimum   | Maximum   |
|---|-----------|--------------------|-----------|-----------|
| 6 | 2.2016667 | 0.3270117          | 1.7600000 | 2.6600000 |

Unique Subject Identifier=6542010000-0005

Assay variable : PTINR\_VAL1 PT-INR Value

| N | Mean      | Standard Deviation | Minimum   | Maximum   |
|---|-----------|--------------------|-----------|-----------|
| 5 | 1.5580000 | 0.1697645          | 1.3000000 | 1.7500000 |

Unique Subject Identifier=6542010000-0009

Assay variable : PTINR\_VAL1 PT-INR Value

| N | Mean      | Standard Deviation | Minimum   | Maximum   |
|---|-----------|--------------------|-----------|-----------|
| 2 | 2.4000000 | 0.2828427          | 2.2000000 | 2.6000000 |

Unique Subject Identifier=6542010000-0010

Assay variable : PTINR\_VAL1 PT-INR Value

N Mean Standard Deviation Minimum Maximum

---

|   |          |           |          |          |
|---|----------|-----------|----------|----------|
| 5 | 1.840000 | 0.1516575 | 1.700000 | 2.100000 |
|---|----------|-----------|----------|----------|

---

Laboratory tests at the time of obtaining Table 2-6 consent, according to the presence or absence of proton-pump inhibitors

Unique Subject Identifier=6542010000-0011

MEANS Procedure

Assay variable : PTINR\_VAL1 PT-INR Value

N Mean Standard Deviation Minimum Maximum

---

|   |           |           |           |           |
|---|-----------|-----------|-----------|-----------|
| 5 | 1.8000000 | 0.3082207 | 1.5000000 | 2.2000000 |
|---|-----------|-----------|-----------|-----------|

---

Unique Subject Identifier=6542010000-0012

Assay variable : PTINR\_VAL1 PT-INR Value

N Mean Standard Deviation Minimum Maximum

---

|   |           |           |           |           |
|---|-----------|-----------|-----------|-----------|
| 6 | 1.4866667 | 0.1143095 | 1.4000000 | 1.7000000 |
|---|-----------|-----------|-----------|-----------|

---

Unique Subject Identifier=6542010000-0017

Assay variable : PTINR\_VAL1 PT-INR Value

N Mean Standard Deviation Minimum Maximum

---

|   |           |           |           |           |
|---|-----------|-----------|-----------|-----------|
| 6 | 2.2666667 | 0.5921711 | 1.6000000 | 3.0000000 |
|---|-----------|-----------|-----------|-----------|

---

Unique Subject Identifier=6542010000-0019

Assay variable : PTINR\_VAL1 PT-INR Value

N Mean Standard Deviation Minimum Maximum

---

|   |           |           |           |           |
|---|-----------|-----------|-----------|-----------|
| 5 | 1.8560000 | 0.3077012 | 1.6000000 | 2.2000000 |
|---|-----------|-----------|-----------|-----------|

---

Laboratory tests at the time of obtaining Table 2-6 consent, according to the presence or absence of proton-pump inhibitors

Unique Subject Identifier=6614001000-0004

MEANS Procedure

Assay variable : PTINR\_VAL1 PT-INR Value

N Mean Standard Deviation Minimum Maximum

---

|   |           |  |           |           |
|---|-----------|--|-----------|-----------|
| 1 | 2.7900000 |  | 2.7900000 | 2.7900000 |
|---|-----------|--|-----------|-----------|

---

Unique Subject Identifier=6614001000-0006

Assay variable : PTINR\_VAL1 PT-INR Value

N Mean Standard Deviation Minimum Maximum

---

|   |           |           |           |           |
|---|-----------|-----------|-----------|-----------|
| 3 | 2.1066667 | 0.4781562 | 1.7500000 | 2.6500000 |
|---|-----------|-----------|-----------|-----------|

---

Unique Subject Identifier=6614001000-0007

Assay variable : PTINR\_VAL1 PT-INR Value

N Mean Standard Deviation Minimum Maximum

---

|   |           |           |           |           |
|---|-----------|-----------|-----------|-----------|
| 5 | 2.0940000 | 0.1668233 | 1.8100000 | 2.2200000 |
|---|-----------|-----------|-----------|-----------|

---

Unique Subject Identifier=6614001000-0009

Assay variable : PTINR\_VAL1 PT-INR Value

N Mean Standard Deviation Minimum Maximum

---

|   |           |           |           |           |
|---|-----------|-----------|-----------|-----------|
| 2 | 1.6600000 | 0.4242641 | 1.3600000 | 1.9600000 |
|---|-----------|-----------|-----------|-----------|

---



Laboratory tests at the time of obtaining Table 2-6 consent, according to the presence or absence of proton-pump inhibitors

Unique Subject Identifier=6623000000-0003

MEANS Procedure

Assay variable : PTINR\_VAL1 PT-INR Value

N Mean Standard Deviation Minimum Maximum

---

|   |           |           |           |           |
|---|-----------|-----------|-----------|-----------|
| 6 | 1.8516667 | 0.1552310 | 1.6500000 | 2.1000000 |
|---|-----------|-----------|-----------|-----------|

---

Unique Subject Identifier=6623000000-0004

Assay variable : PTINR\_VAL1 PT-INR Value

N Mean Standard Deviation Minimum Maximum

---

|   |           |           |           |           |
|---|-----------|-----------|-----------|-----------|
| 4 | 2.1275000 | 0.1711481 | 2.0000000 | 2.3800000 |
|---|-----------|-----------|-----------|-----------|

---

Unique Subject Identifier=6623000000-0012

Assay variable : PTINR\_VAL1 PT-INR Value

N Mean Standard Deviation Minimum Maximum

---

|   |           |           |           |           |
|---|-----------|-----------|-----------|-----------|
| 3 | 1.2633333 | 0.0776745 | 1.2000000 | 1.3500000 |
|---|-----------|-----------|-----------|-----------|

---

Unique Subject Identifier=6623000000-0016

Assay variable : PTINR\_VAL1 PT-INR Value

N Mean Standard Deviation Minimum Maximum

---

|   |           |           |           |           |
|---|-----------|-----------|-----------|-----------|
| 5 | 1.7220000 | 0.3189357 | 1.2500000 | 2.0300000 |
|---|-----------|-----------|-----------|-----------|

---

Laboratory tests at the time of obtaining Table 2-6 consent, according to the presence or absence of proton-pump inhibitors

Unique Subject Identifier=6642010010-0003

MEANS Procedure

Assay variable : PTINR\_VAL1 PT-INR Value

N Mean Standard Deviation Minimum Maximum

---

|   |           |           |           |           |
|---|-----------|-----------|-----------|-----------|
| 6 | 1.8100000 | 0.1882551 | 1.5800000 | 2.1000000 |
|---|-----------|-----------|-----------|-----------|

---

Unique Subject Identifier=6642010010-0004

Assay variable : PTINR\_VAL1 PT-INR Value

N Mean Standard Deviation Minimum Maximum

---

|   |           |           |           |           |
|---|-----------|-----------|-----------|-----------|
| 6 | 1.7483333 | 0.1020621 | 1.6000000 | 1.8400000 |
|---|-----------|-----------|-----------|-----------|

---

Unique Subject Identifier=6642010010-0010

Assay variable : PTINR\_VAL1 PT-INR Value

N Mean Standard Deviation Minimum Maximum

---

|   |           |           |           |           |
|---|-----------|-----------|-----------|-----------|
| 5 | 2.2960000 | 0.5373360 | 1.8000000 | 3.0600000 |
|---|-----------|-----------|-----------|-----------|

---

Unique Subject Identifier=6642010010-0015

Assay variable : PTINR\_VAL1 PT-INR Value

N Mean Standard Deviation Minimum Maximum

---

|   |           |           |           |           |
|---|-----------|-----------|-----------|-----------|
| 6 | 1.6866667 | 0.2398889 | 1.4700000 | 2.0100000 |
|---|-----------|-----------|-----------|-----------|

---

Laboratory tests at the time of obtaining Table 2-6 consent, according to the presence or absence of proton-pump inhibitors

Unique Subject Identifier=674800000-0001

MEANS Procedure

Assay variable : PTINR\_VAL1 PT-INR Value

N Mean Standard Deviation Minimum Maximum

---

|   |           |           |           |           |
|---|-----------|-----------|-----------|-----------|
| 6 | 1.8666667 | 0.2338090 | 1.6000000 | 2.2000000 |
|---|-----------|-----------|-----------|-----------|

---

Unique Subject Identifier=674800000-0002

Assay variable : PTINR\_VAL1 PT-INR Value

N Mean Standard Deviation Minimum Maximum

---

|   |           |           |           |           |
|---|-----------|-----------|-----------|-----------|
| 5 | 2.1400000 | 0.2880972 | 1.7000000 | 2.5000000 |
|---|-----------|-----------|-----------|-----------|

---

Unique Subject Identifier=674800000-0004

Assay variable : PTINR\_VAL1 PT-INR Value

N Mean Standard Deviation Minimum Maximum

---

|   |           |           |           |           |
|---|-----------|-----------|-----------|-----------|
| 6 | 1.8833333 | 0.4308906 | 1.5000000 | 2.7000000 |
|---|-----------|-----------|-----------|-----------|

---

Unique Subject Identifier=7001010000-0004

Assay variable : PTINR\_VAL1 PT-INR Value

N Mean Standard Deviation Minimum Maximum

---

|   |           |           |           |           |
|---|-----------|-----------|-----------|-----------|
| 6 | 1.3983333 | 0.1105290 | 1.2700000 | 1.5600000 |
|---|-----------|-----------|-----------|-----------|

---

Laboratory tests at the time of obtaining Table 2-6 consent, according to the presence or absence of proton-pump inhibitors

Unique Subject Identifier=7001010000-0005

MEANS Procedure

Assay variable : PTINR\_VAL1 PT-INR Value

N Mean Standard Deviation Minimum Maximum

---

|   |           |           |           |           |
|---|-----------|-----------|-----------|-----------|
| 4 | 1.4525000 | 0.1034005 | 1.3300000 | 1.5800000 |
|---|-----------|-----------|-----------|-----------|

---

Unique Subject Identifier=7002000000-0004

Assay variable : PTINR\_VAL1 PT-INR Value

N Mean Standard Deviation Minimum Maximum

---

|   |           |           |           |           |
|---|-----------|-----------|-----------|-----------|
| 3 | 2.1266667 | 0.3200521 | 1.7600000 | 2.3500000 |
|---|-----------|-----------|-----------|-----------|

---

Unique Subject Identifier=7002000000-0011

Assay variable : PTINR\_VAL1 PT-INR Value

N Mean Standard Deviation Minimum Maximum

---

|   |           |           |           |           |
|---|-----------|-----------|-----------|-----------|
| 6 | 1.9516667 | 0.2183957 | 1.6700000 | 2.2000000 |
|---|-----------|-----------|-----------|-----------|

---

Unique Subject Identifier=7002000000-0013

Assay variable : PTINR\_VAL1 PT-INR Value

N Mean Standard Deviation Minimum Maximum

---

|   |           |           |           |           |
|---|-----------|-----------|-----------|-----------|
| 3 | 2.0033333 | 0.2441994 | 1.7300000 | 2.2000000 |
|---|-----------|-----------|-----------|-----------|

---



Laboratory tests at the time of obtaining Table 2-6 consent, according to the presence or absence of proton-pump inhibitors

Unique Subject Identifier=7002000000-0016

MEANS Procedure

Assay variable : PTINR\_VAL1 PT-INR Value

N Mean Standard Deviation Minimum Maximum

---

|   |           |           |           |           |
|---|-----------|-----------|-----------|-----------|
| 6 | 1.9100000 | 0.1604992 | 1.7600000 | 2.2000000 |
|---|-----------|-----------|-----------|-----------|

---

Unique Subject Identifier=7002000000-0017

Assay variable : PTINR\_VAL1 PT-INR Value

N Mean Standard Deviation Minimum Maximum

---

|   |           |           |           |           |
|---|-----------|-----------|-----------|-----------|
| 6 | 2.0300000 | 0.5932285 | 1.3200000 | 3.1000000 |
|---|-----------|-----------|-----------|-----------|

---

Unique Subject Identifier=7002000000-0018

Assay variable : PTINR\_VAL1 PT-INR Value

N Mean Standard Deviation Minimum Maximum

---

|   |           |           |           |           |
|---|-----------|-----------|-----------|-----------|
| 2 | 2.6450000 | 0.6858936 | 2.1600000 | 3.1300000 |
|---|-----------|-----------|-----------|-----------|

---

Unique Subject Identifier=7002000000-0020

Assay variable : PTINR\_VAL1 PT-INR Value

N Mean Standard Deviation Minimum Maximum

---

|   |           |           |           |           |
|---|-----------|-----------|-----------|-----------|
| 3 | 1.7266667 | 0.2631223 | 1.4900000 | 2.0100000 |
|---|-----------|-----------|-----------|-----------|

---

Laboratory tests at the time of obtaining Table 2-6 consent, according to the presence or absence of proton-pump inhibitors

Unique Subject Identifier=7002000000-0026

MEANS Procedure

Assay variable : PTINR\_VAL1 PT-INR Value

| N | Mean      | Standard Deviation | Minimum   | Maximum   |
|---|-----------|--------------------|-----------|-----------|
| 3 | 2.2900000 | 0.0754983          | 2.2200000 | 2.3700000 |

Unique Subject Identifier=7002000000-0032

Assay variable : PTINR\_VAL1 PT-INR Value

| N | Mean      | Standard Deviation | Minimum   | Maximum   |
|---|-----------|--------------------|-----------|-----------|
| 4 | 2.1050000 | 0.4320880          | 1.7400000 | 2.7300000 |

Unique Subject Identifier=7002000000-0038

Assay variable : PTINR\_VAL1 PT-INR Value

| N | Mean      | Standard Deviation | Minimum   | Maximum   |
|---|-----------|--------------------|-----------|-----------|
| 4 | 2.1075000 | 0.4912145          | 1.5400000 | 2.5800000 |

Unique Subject Identifier=7002000000-0039

Assay variable : PTINR\_VAL1 PT-INR Value

N Mean Standard Deviation Minimum Maximum

---

|   |           |           |           |           |
|---|-----------|-----------|-----------|-----------|
| 4 | 2.4050000 | 0.7684834 | 1.6700000 | 3.3800000 |
|---|-----------|-----------|-----------|-----------|

---

Laboratory tests at the time of obtaining Table 2-6 consent, according to the presence or absence of proton-pump inhibitors

Unique Subject Identifier=7002000000-0041

MEANS Procedure

Assay variable : PTINR\_VAL1 PT-INR Value

N Mean Standard Deviation Minimum Maximum

---

|   |           |           |           |           |
|---|-----------|-----------|-----------|-----------|
| 4 | 2.3250000 | 0.4141256 | 1.8700000 | 2.7100000 |
|---|-----------|-----------|-----------|-----------|

---

Unique Subject Identifier=7002000000-0042

Assay variable : PTINR\_VAL1 PT-INR Value

N Mean Standard Deviation Minimum Maximum

---

|   |           |           |           |           |
|---|-----------|-----------|-----------|-----------|
| 4 | 2.2700000 | 0.0734847 | 2.1700000 | 2.3300000 |
|---|-----------|-----------|-----------|-----------|

---

Unique Subject Identifier=7004000000-0002

Assay variable : PTINR\_VAL1 PT-INR Value

N Mean Standard Deviation Minimum Maximum

---

|   |           |           |           |           |
|---|-----------|-----------|-----------|-----------|
| 6 | 1.6400000 | 0.1906830 | 1.3200000 | 1.8100000 |
|---|-----------|-----------|-----------|-----------|

---

Unique Subject Identifier=7004000000-0008

Assay variable : PTINR\_VAL1 PT-INR Value

N Mean Standard Deviation Minimum Maximum

---

|   |           |           |           |           |
|---|-----------|-----------|-----------|-----------|
| 3 | 2.1933333 | 0.1305118 | 2.0900000 | 2.3400000 |
|---|-----------|-----------|-----------|-----------|

---

Laboratory tests at the time of obtaining Table 2-6 consent, according to the presence or absence of proton-pump inhibitors

Unique Subject Identifier=7004000000-0011

MEANS Procedure

Assay variable : PTINR\_VAL1 PT-INR Value

N Mean Standard Deviation Minimum Maximum

---

|   |           |           |           |           |
|---|-----------|-----------|-----------|-----------|
| 3 | 2.2066667 | 0.0971253 | 2.1000000 | 2.2900000 |
|---|-----------|-----------|-----------|-----------|

---

Unique Subject Identifier=7004000000-0018

Assay variable : PTINR\_VAL1 PT-INR Value

N Mean Standard Deviation Minimum Maximum

---

|   |           |           |           |           |
|---|-----------|-----------|-----------|-----------|
| 3 | 2.0600000 | 0.1400000 | 1.9000000 | 2.1600000 |
|---|-----------|-----------|-----------|-----------|

---

Unique Subject Identifier=7005000000-0001

Assay variable : PTINR\_VAL1 PT-INR Value

N Mean Standard Deviation Minimum Maximum

---

|   |           |           |           |           |
|---|-----------|-----------|-----------|-----------|
| 3 | 1.9966667 | 0.3552933 | 1.7300000 | 2.4000000 |
|---|-----------|-----------|-----------|-----------|

---

Unique Subject Identifier=7005000000-0002

Assay variable : PTINR\_VAL1 PT-INR Value

N Mean Standard Deviation Minimum Maximum

---

|   |           |           |           |           |
|---|-----------|-----------|-----------|-----------|
| 3 | 1.8633333 | 0.3758102 | 1.5500000 | 2.2800000 |
|---|-----------|-----------|-----------|-----------|

---



Laboratory tests at the time of obtaining Table 2-6 consent, according to the presence or absence of proton-pump inhibitors

Unique Subject Identifier=7005000000-0003

MEANS Procedure

Assay variable : PTINR\_VAL1 PT-INR Value

| N | Mean      | Standard Deviation | Minimum   | Maximum   |
|---|-----------|--------------------|-----------|-----------|
| 3 | 1.4366667 | 0.2177919          | 1.2600000 | 1.6800000 |

Unique Subject Identifier=7005000000-0006

Assay variable : PTINR\_VAL1 PT-INR Value

| N | Mean      | Standard Deviation | Minimum   | Maximum   |
|---|-----------|--------------------|-----------|-----------|
| 5 | 2.3880000 | 0.1505656          | 2.1400000 | 2.5200000 |

Unique Subject Identifier=7005000000-0007

Assay variable : PTINR\_VAL1 PT-INR Value

| N | Mean      | Standard Deviation | Minimum   | Maximum   |
|---|-----------|--------------------|-----------|-----------|
| 4 | 2.3500000 | 0.7673330          | 1.6300000 | 3.3900000 |

Unique Subject Identifier=7005000000-0008

Assay variable : PTINR\_VAL1 PT-INR Value

N Mean Standard Deviation Minimum Maximum

---

|   |          |           |          |          |
|---|----------|-----------|----------|----------|
| 4 | 1.560000 | 0.5383308 | 1.140000 | 2.310000 |
|---|----------|-----------|----------|----------|

---

Laboratory tests at the time of obtaining Table 2-6 consent, according to the presence or absence of proton-pump inhibitors

Unique Subject Identifier=7005000000-0009

MEANS Procedure

Assay variable : PTINR\_VAL1 PT-INR Value

N Mean Standard Deviation Minimum Maximum

---

|   |           |           |           |           |
|---|-----------|-----------|-----------|-----------|
| 6 | 2.0566667 | 0.1980572 | 1.8200000 | 2.2800000 |
|---|-----------|-----------|-----------|-----------|

---

Unique Subject Identifier=7005000000-0010

Assay variable : PTINR\_VAL1 PT-INR Value

N Mean Standard Deviation Minimum Maximum

---

|   |           |           |           |           |
|---|-----------|-----------|-----------|-----------|
| 3 | 1.8400000 | 0.2022375 | 1.6900000 | 2.0700000 |
|---|-----------|-----------|-----------|-----------|

---

Unique Subject Identifier=7005000000-0011

Assay variable : PTINR\_VAL1 PT-INR Value

N Mean Standard Deviation Minimum Maximum

---

|   |           |           |           |           |
|---|-----------|-----------|-----------|-----------|
| 3 | 1.7033333 | 0.8807005 | 1.0300000 | 2.7000000 |
|---|-----------|-----------|-----------|-----------|

---

Unique Subject Identifier=7005000000-0012

Assay variable : PTINR\_VAL1 PT-INR Value

N Mean Standard Deviation Minimum Maximum

---

|   |           |           |           |           |
|---|-----------|-----------|-----------|-----------|
| 3 | 2.1700000 | 0.6636264 | 1.4700000 | 2.7900000 |
|---|-----------|-----------|-----------|-----------|

---

Laboratory tests at the time of obtaining Table 2-6 consent, according to the presence or absence of proton-pump inhibitors

Unique Subject Identifier=7005000000-0013

MEANS Procedure

Assay variable : PTINR\_VAL1 PT-INR Value

N Mean Standard Deviation Minimum Maximum

---

|   |           |           |           |           |
|---|-----------|-----------|-----------|-----------|
| 4 | 1.5550000 | 0.1569501 | 1.4000000 | 1.7000000 |
|---|-----------|-----------|-----------|-----------|

---

Unique Subject Identifier=7005000000-0014

Assay variable : PTINR\_VAL1 PT-INR Value

N Mean Standard Deviation Minimum Maximum

---

|   |           |           |           |           |
|---|-----------|-----------|-----------|-----------|
| 3 | 1.8066667 | 0.1800926 | 1.6000000 | 1.9300000 |
|---|-----------|-----------|-----------|-----------|

---

Unique Subject Identifier=7005000000-0015

Assay variable : PTINR\_VAL1 PT-INR Value

N Mean Standard Deviation Minimum Maximum

---

|   |           |           |           |           |
|---|-----------|-----------|-----------|-----------|
| 5 | 2.4800000 | 0.4851288 | 1.8800000 | 3.1100000 |
|---|-----------|-----------|-----------|-----------|

---

Unique Subject Identifier=7005000000-0016

Assay variable : PTINR\_VAL1 PT-INR Value

N Mean Standard Deviation Minimum Maximum

---

|   |           |           |           |           |
|---|-----------|-----------|-----------|-----------|
| 3 | 2.0133333 | 0.1464013 | 1.8800000 | 2.1700000 |
|---|-----------|-----------|-----------|-----------|

---

Laboratory tests at the time of obtaining Table 2-6 consent, according to the presence or absence of proton-pump inhibitors

Unique Subject Identifier=7008000000-0005

MEANS Procedure

Assay variable : PTINR\_VAL1 PT-INR Value

N Mean Standard Deviation Minimum Maximum

---

|   |          |           |          |          |
|---|----------|-----------|----------|----------|
| 6 | 2.240000 | 0.3352014 | 1.800000 | 2.800000 |
|---|----------|-----------|----------|----------|

---

Unique Subject Identifier=7008000000-0007

Assay variable : PTINR\_VAL1 PT-INR Value

N Mean Standard Deviation Minimum Maximum

---

|   |          |           |          |          |
|---|----------|-----------|----------|----------|
| 6 | 1.685000 | 0.2126735 | 1.470000 | 2.040000 |
|---|----------|-----------|----------|----------|

---

Unique Subject Identifier=7008000000-0011

Assay variable : PTINR\_VAL1 PT-INR Value

N Mean Standard Deviation Minimum Maximum

---

|   |          |           |          |          |
|---|----------|-----------|----------|----------|
| 4 | 2.232500 | 0.3472151 | 1.920000 | 2.590000 |
|---|----------|-----------|----------|----------|

---

Unique Subject Identifier=7008000000-0013

Assay variable : PTINR\_VAL1 PT-INR Value

N Mean Standard Deviation Minimum Maximum

---

|   |           |           |           |           |
|---|-----------|-----------|-----------|-----------|
| 3 | 1.7566667 | 0.0907377 | 1.6900000 | 1.8600000 |
|---|-----------|-----------|-----------|-----------|

---



Laboratory tests at the time of obtaining Table 2-6 consent, according to the presence or absence of proton-pump inhibitors

Unique Subject Identifier=7008000000-0022

MEANS Procedure

Assay variable : PTINR\_VAL1 PT-INR Value

| N | Mean      | Standard Deviation | Minimum   | Maximum   |
|---|-----------|--------------------|-----------|-----------|
| 5 | 1.9140000 | 0.4508104          | 1.2900000 | 2.5100000 |

Unique Subject Identifier=7008000000-0023

Assay variable : PTINR\_VAL1 PT-INR Value

| N | Mean      | Standard Deviation | Minimum   | Maximum   |
|---|-----------|--------------------|-----------|-----------|
| 3 | 2.2800000 | 0.3551056          | 2.0700000 | 2.6900000 |

Unique Subject Identifier=7008000000-0027

Assay variable : PTINR\_VAL1 PT-INR Value

| N | Mean      | Standard Deviation | Minimum   | Maximum   |
|---|-----------|--------------------|-----------|-----------|
| 6 | 1.8600000 | 0.4904692          | 1.1700000 | 2.4500000 |

Unique Subject Identifier=7009010000-0003

Assay variable : PTINR\_VAL1 PT-INR Value

N Mean Standard Deviation Minimum Maximum

---

|   |          |           |          |          |
|---|----------|-----------|----------|----------|
| 3 | 2.150000 | 0.2457641 | 1.970000 | 2.430000 |
|---|----------|-----------|----------|----------|

---

Laboratory tests at the time of obtaining Table 2-6 consent, according to the presence or absence of proton-pump inhibitors

Unique Subject Identifier=7009010000-0004

MEANS Procedure

Assay variable : PTINR\_VAL1 PT-INR Value

N Mean Standard Deviation Minimum Maximum

---

|   |           |           |           |           |
|---|-----------|-----------|-----------|-----------|
| 6 | 2.4316667 | 0.5638587 | 1.5500000 | 3.2100000 |
|---|-----------|-----------|-----------|-----------|

---

Unique Subject Identifier=7009010000-0007

Assay variable : PTINR\_VAL1 PT-INR Value

N Mean Standard Deviation Minimum Maximum

---

|   |           |           |           |           |
|---|-----------|-----------|-----------|-----------|
| 4 | 1.7175000 | 0.2490482 | 1.5400000 | 2.0800000 |
|---|-----------|-----------|-----------|-----------|

---

Unique Subject Identifier=7009010000-0016

Assay variable : PTINR\_VAL1 PT-INR Value

N Mean Standard Deviation Minimum Maximum

---

|   |           |           |           |           |
|---|-----------|-----------|-----------|-----------|
| 3 | 2.6766667 | 0.1955335 | 2.4900000 | 2.8800000 |
|---|-----------|-----------|-----------|-----------|

---

Unique Subject Identifier=7014000000-0003

Assay variable : PTINR\_VAL1 PT-INR Value

N Mean Standard Deviation Minimum Maximum

---

|   |           |           |           |           |
|---|-----------|-----------|-----------|-----------|
| 6 | 2.2066667 | 0.1984607 | 1.9800000 | 2.5500000 |
|---|-----------|-----------|-----------|-----------|

---

Laboratory tests at the time of obtaining Table 2-6 consent, according to the presence or absence of proton-pump inhibitors

Unique Subject Identifier=7014000000-0005

MEANS Procedure

Assay variable : PTINR\_VAL1 PT-INR Value

N Mean Standard Deviation Minimum Maximum

---

|   |          |           |          |          |
|---|----------|-----------|----------|----------|
| 6 | 2.460000 | 0.5049752 | 1.730000 | 3.080000 |
|---|----------|-----------|----------|----------|

---

Unique Subject Identifier=7014000000-0007

Assay variable : PTINR\_VAL1 PT-INR Value

N Mean Standard Deviation Minimum Maximum

---

|   |          |           |          |          |
|---|----------|-----------|----------|----------|
| 5 | 2.222000 | 0.4557631 | 1.790000 | 2.930000 |
|---|----------|-----------|----------|----------|

---

Unique Subject Identifier=7014000000-0008

Assay variable : PTINR\_VAL1 PT-INR Value

N Mean Standard Deviation Minimum Maximum

---

|   |          |  |          |          |
|---|----------|--|----------|----------|
| 1 | 1.650000 |  | 1.650000 | 1.650000 |
|---|----------|--|----------|----------|

---

Unique Subject Identifier=7014000000-0010

Assay variable : PTINR\_VAL1 PT-INR Value

N Mean Standard Deviation Minimum Maximum

---

|   |           |           |           |           |
|---|-----------|-----------|-----------|-----------|
| 2 | 2.3950000 | 0.4879037 | 2.0500000 | 2.7400000 |
|---|-----------|-----------|-----------|-----------|

---

Laboratory tests at the time of obtaining Table 2-6 consent, according to the presence or absence of proton-pump inhibitors

Unique Subject Identifier=7026000000-0012

MEANS Procedure

Assay variable : PTINR\_VAL1 PT-INR Value

N Mean Standard Deviation Minimum Maximum

---

|   |           |           |           |           |
|---|-----------|-----------|-----------|-----------|
| 6 | 2.6666667 | 0.9492242 | 1.5000000 | 4.2800000 |
|---|-----------|-----------|-----------|-----------|

---

Unique Subject Identifier=7026000000-0013

Assay variable : PTINR\_VAL1 PT-INR Value

N Mean Standard Deviation Minimum Maximum

---

|   |           |           |           |           |
|---|-----------|-----------|-----------|-----------|
| 5 | 2.5980000 | 1.4820830 | 1.1000000 | 5.0000000 |
|---|-----------|-----------|-----------|-----------|

---

Unique Subject Identifier=7026000000-0020

Assay variable : PTINR\_VAL1 PT-INR Value

N Mean Standard Deviation Minimum Maximum

---

|   |           |           |           |           |
|---|-----------|-----------|-----------|-----------|
| 6 | 1.9583333 | 0.5064550 | 1.2000000 | 2.7400000 |
|---|-----------|-----------|-----------|-----------|

---

Unique Subject Identifier=7026000000-0021

Assay variable : PTINR\_VAL1 PT-INR Value

N Mean Standard Deviation Minimum Maximum

---

|   |           |           |           |           |
|---|-----------|-----------|-----------|-----------|
| 6 | 1.6650000 | 0.1202913 | 1.5200000 | 1.8000000 |
|---|-----------|-----------|-----------|-----------|

---



Laboratory tests at the time of obtaining Table 2-6 consent, according to the presence or absence of proton-pump inhibitors

Unique Subject Identifier=7026000000-0023

MEANS Procedure

Assay variable : PTINR\_VAL1 PT-INR Value

N Mean Standard Deviation Minimum Maximum

---

|   |           |           |           |           |
|---|-----------|-----------|-----------|-----------|
| 4 | 1.5375000 | 0.2137561 | 1.2600000 | 1.7500000 |
|---|-----------|-----------|-----------|-----------|

---

Unique Subject Identifier=7026000000-0025

Assay variable : PTINR\_VAL1 PT-INR Value

N Mean Standard Deviation Minimum Maximum

---

|   |           |           |           |           |
|---|-----------|-----------|-----------|-----------|
| 3 | 2.0766667 | 0.8183724 | 1.4100000 | 2.9900000 |
|---|-----------|-----------|-----------|-----------|

---

Unique Subject Identifier=7026000000-0026

Assay variable : PTINR\_VAL1 PT-INR Value

N Mean Standard Deviation Minimum Maximum

---

|   |           |           |           |           |
|---|-----------|-----------|-----------|-----------|
| 2 | 1.7650000 | 0.3181981 | 1.5400000 | 1.9900000 |
|---|-----------|-----------|-----------|-----------|

---

Unique Subject Identifier=7026000000-0029

Assay variable : PTINR\_VAL1 PT-INR Value

N Mean Standard Deviation Minimum Maximum

---

|   |          |           |          |          |
|---|----------|-----------|----------|----------|
| 4 | 2.250000 | 0.3271085 | 1.980000 | 2.720000 |
|---|----------|-----------|----------|----------|

---

Laboratory tests at the time of obtaining Table 2-6 consent, according to the presence or absence of proton-pump inhibitors

Unique Subject Identifier=7026000000-0034

MEANS Procedure

Assay variable : PTINR\_VAL1 PT-INR Value

N Mean Standard Deviation Minimum Maximum

---

|   |           |           |           |           |
|---|-----------|-----------|-----------|-----------|
| 4 | 1.7175000 | 0.1732772 | 1.5400000 | 1.8900000 |
|---|-----------|-----------|-----------|-----------|

---

Unique Subject Identifier=7026000000-0035

Assay variable : PTINR\_VAL1 PT-INR Value

N Mean Standard Deviation Minimum Maximum

---

|   |           |           |           |           |
|---|-----------|-----------|-----------|-----------|
| 5 | 1.4540000 | 0.1748714 | 1.2800000 | 1.7200000 |
|---|-----------|-----------|-----------|-----------|

---

Unique Subject Identifier=7026000000-0036

Assay variable : PTINR\_VAL1 PT-INR Value

N Mean Standard Deviation Minimum Maximum

---

|   |           |           |           |           |
|---|-----------|-----------|-----------|-----------|
| 2 | 1.8600000 | 0.5656854 | 1.4600000 | 2.2600000 |
|---|-----------|-----------|-----------|-----------|

---

Unique Subject Identifier=7026000000-0037

Assay variable : PTINR\_VAL1 PT-INR Value

N Mean Standard Deviation Minimum Maximum

---

|   |           |           |           |           |
|---|-----------|-----------|-----------|-----------|
| 2 | 1.7150000 | 0.0070711 | 1.7100000 | 1.7200000 |
|---|-----------|-----------|-----------|-----------|

---

Laboratory tests at the time of obtaining Table 2-6 consent, according to the presence or absence of proton-pump inhibitors

Unique Subject Identifier=7026000000-0040

MEANS Procedure

Assay variable : PTINR\_VAL1 PT-INR Value

N Mean Standard Deviation Minimum Maximum

---

|   |           |           |           |           |
|---|-----------|-----------|-----------|-----------|
| 3 | 1.8066667 | 0.2173323 | 1.5600000 | 1.9700000 |
|---|-----------|-----------|-----------|-----------|

---

Unique Subject Identifier=7030010000-0006

Assay variable : PTINR\_VAL1 PT-INR Value

N Mean Standard Deviation Minimum Maximum

---

|   |           |           |           |           |
|---|-----------|-----------|-----------|-----------|
| 5 | 2.5320000 | 0.6437934 | 1.9800000 | 3.6000000 |
|---|-----------|-----------|-----------|-----------|

---

Unique Subject Identifier=7030010000-0008

Assay variable : PTINR\_VAL1 PT-INR Value

N Mean Standard Deviation Minimum Maximum

---

|   |           |           |           |           |
|---|-----------|-----------|-----------|-----------|
| 4 | 1.8550000 | 0.3162805 | 1.4400000 | 2.1600000 |
|---|-----------|-----------|-----------|-----------|

---

Unique Subject Identifier=7030010000-0009

Assay variable : PTINR\_VAL1 PT-INR Value

N Mean Standard Deviation Minimum Maximum

---

|   |           |           |           |           |
|---|-----------|-----------|-----------|-----------|
| 5 | 2.1940000 | 0.4893669 | 1.6100000 | 2.6300000 |
|---|-----------|-----------|-----------|-----------|

---

Laboratory tests at the time of obtaining Table 2-6 consent, according to the presence or absence of proton-pump inhibitors

Unique Subject Identifier=7030010000-0013

MEANS Procedure

Assay variable : PTINR\_VAL1 PT-INR Value

| N | Mean      | Standard Deviation | Minimum   | Maximum   |
|---|-----------|--------------------|-----------|-----------|
| 5 | 2.1060000 | 0.1677200          | 1.9200000 | 2.3100000 |

Unique Subject Identifier=7030010000-0018

Assay variable : PTINR\_VAL1 PT-INR Value

| N | Mean      | Standard Deviation | Minimum   | Maximum   |
|---|-----------|--------------------|-----------|-----------|
| 4 | 2.1800000 | 0.1272792          | 2.0400000 | 2.3400000 |

Unique Subject Identifier=7030010000-0020

Assay variable : PTINR\_VAL1 PT-INR Value

| N | Mean      | Standard Deviation | Minimum   | Maximum   |
|---|-----------|--------------------|-----------|-----------|
| 5 | 1.5300000 | 0.1873499          | 1.2800000 | 1.8000000 |

Unique Subject Identifier=7030010000-0023

Assay variable : PTINR\_VAL1 PT-INR Value

N Mean Standard Deviation Minimum Maximum

---

|   |          |           |          |          |
|---|----------|-----------|----------|----------|
| 5 | 1.814000 | 0.1689083 | 1.550000 | 2.000000 |
|---|----------|-----------|----------|----------|

---



Laboratory tests at the time of obtaining Table 2-6 consent, according to the presence or absence of proton-pump inhibitors

Unique Subject Identifier=7030010000-0027

MEANS Procedure

Assay variable : PTINR\_VAL1 PT-INR Value

N Mean Standard Deviation Minimum Maximum

---

|   |           |           |           |           |
|---|-----------|-----------|-----------|-----------|
| 4 | 1.9275000 | 0.4454492 | 1.5900000 | 2.5700000 |
|---|-----------|-----------|-----------|-----------|

---

Unique Subject Identifier=7030010000-0028

Assay variable : PTINR\_VAL1 PT-INR Value

N Mean Standard Deviation Minimum Maximum

---

|   |           |           |           |           |
|---|-----------|-----------|-----------|-----------|
| 4 | 2.0875000 | 0.6229700 | 1.6400000 | 2.9800000 |
|---|-----------|-----------|-----------|-----------|

---

Unique Subject Identifier=7030010000-0031

Assay variable : PTINR\_VAL1 PT-INR Value

N Mean Standard Deviation Minimum Maximum

---

|   |           |           |           |           |
|---|-----------|-----------|-----------|-----------|
| 4 | 2.3525000 | 0.3063087 | 2.0600000 | 2.6600000 |
|---|-----------|-----------|-----------|-----------|

---

Unique Subject Identifier=7030010000-0032

Assay variable : PTINR\_VAL1 PT-INR Value

N Mean Standard Deviation Minimum Maximum

---

|   |           |           |           |           |
|---|-----------|-----------|-----------|-----------|
| 5 | 2.4060000 | 0.4752683 | 1.6900000 | 2.8700000 |
|---|-----------|-----------|-----------|-----------|

---

Laboratory tests at the time of obtaining Table 2-6 consent, according to the presence or absence of proton-pump inhibitors

Unique Subject Identifier=7030010000-0033

MEANS Procedure

Assay variable : PTINR\_VAL1 PT-INR Value

N Mean Standard Deviation Minimum Maximum

---

|   |           |           |           |           |
|---|-----------|-----------|-----------|-----------|
| 4 | 2.3750000 | 0.9238146 | 1.7700000 | 3.7500000 |
|---|-----------|-----------|-----------|-----------|

---

Unique Subject Identifier=7030010000-0034

Assay variable : PTINR\_VAL1 PT-INR Value

N Mean Standard Deviation Minimum Maximum

---

|   |           |           |           |           |
|---|-----------|-----------|-----------|-----------|
| 4 | 1.9250000 | 0.3516153 | 1.4800000 | 2.3400000 |
|---|-----------|-----------|-----------|-----------|

---

Unique Subject Identifier=7030010000-0039

Assay variable : PTINR\_VAL1 PT-INR Value

N Mean Standard Deviation Minimum Maximum

---

|   |           |           |           |           |
|---|-----------|-----------|-----------|-----------|
| 4 | 1.9325000 | 0.0917878 | 1.8400000 | 2.0300000 |
|---|-----------|-----------|-----------|-----------|

---

Unique Subject Identifier=7030010000-0040

Assay variable : PTINR\_VAL1 PT-INR Value

N Mean Standard Deviation Minimum Maximum

---

|   |           |           |           |           |
|---|-----------|-----------|-----------|-----------|
| 4 | 1.8700000 | 0.2855404 | 1.6500000 | 2.2700000 |
|---|-----------|-----------|-----------|-----------|

---

Laboratory tests at the time of obtaining Table 2-6 consent, according to the presence or absence of proton-pump inhibitors

Unique Subject Identifier=7030010000-0041

MEANS Procedure

Assay variable : PTINR\_VAL1 PT-INR Value

N Mean Standard Deviation Minimum Maximum

---

|   |           |           |           |           |
|---|-----------|-----------|-----------|-----------|
| 4 | 2.6000000 | 1.2533422 | 1.6500000 | 4.3400000 |
|---|-----------|-----------|-----------|-----------|

---

Unique Subject Identifier=7030010000-0042

Assay variable : PTINR\_VAL1 PT-INR Value

N Mean Standard Deviation Minimum Maximum

---

|   |           |           |           |           |
|---|-----------|-----------|-----------|-----------|
| 4 | 2.2000000 | 0.2679552 | 1.8700000 | 2.4600000 |
|---|-----------|-----------|-----------|-----------|

---

Unique Subject Identifier=7031011111-0006

Assay variable : PTINR\_VAL1 PT-INR Value

N Mean Standard Deviation Minimum Maximum

---

|   |           |           |           |           |
|---|-----------|-----------|-----------|-----------|
| 6 | 1.7516667 | 0.4393821 | 1.1700000 | 2.4100000 |
|---|-----------|-----------|-----------|-----------|

---

Unique Subject Identifier=7031011111-0008

Assay variable : PTINR\_VAL1 PT-INR Value

N Mean Standard Deviation Minimum Maximum

---

|   |           |           |           |           |
|---|-----------|-----------|-----------|-----------|
| 4 | 1.8225000 | 0.3039051 | 1.4300000 | 2.1700000 |
|---|-----------|-----------|-----------|-----------|

---

Laboratory tests at the time of obtaining Table 2-6 consent, according to the presence or absence of proton-pump inhibitors

Unique Subject Identifier=7031011111-0012

MEANS Procedure

Assay variable : PTINR\_VAL1 PT-INR Value

N Mean Standard Deviation Minimum Maximum

---

|   |           |           |           |           |
|---|-----------|-----------|-----------|-----------|
| 3 | 1.9900000 | 0.3862642 | 1.6500000 | 2.4100000 |
|---|-----------|-----------|-----------|-----------|

---

Unique Subject Identifier=7031011111-0013

Assay variable : PTINR\_VAL1 PT-INR Value

N Mean Standard Deviation Minimum Maximum

---

|   |           |           |           |           |
|---|-----------|-----------|-----------|-----------|
| 3 | 2.1766667 | 0.2983845 | 1.9800000 | 2.5200000 |
|---|-----------|-----------|-----------|-----------|

---

Unique Subject Identifier=7031011111-0015

Assay variable : PTINR\_VAL1 PT-INR Value

N Mean Standard Deviation Minimum Maximum

---

|   |           |           |           |           |
|---|-----------|-----------|-----------|-----------|
| 4 | 1.9800000 | 0.2738613 | 1.7000000 | 2.2200000 |
|---|-----------|-----------|-----------|-----------|

---

Unique Subject Identifier=7031011111-0019

Assay variable : PTINR\_VAL1 PT-INR Value

N Mean Standard Deviation Minimum Maximum

---

|   |          |           |          |          |
|---|----------|-----------|----------|----------|
| 5 | 2.120000 | 0.2667396 | 1.850000 | 2.530000 |
|---|----------|-----------|----------|----------|

---



Laboratory tests at the time of obtaining Table 2-6 consent, according to the presence or absence of proton-pump inhibitors

Unique Subject Identifier=7031011111-0022

MEANS Procedure

Assay variable : PTINR\_VAL1 PT-INR Value

N Mean Standard Deviation Minimum Maximum

---

|   |           |           |           |           |
|---|-----------|-----------|-----------|-----------|
| 4 | 1.7775000 | 0.2590206 | 1.4800000 | 2.1000000 |
|---|-----------|-----------|-----------|-----------|

---

Unique Subject Identifier=7031011111-0026

Assay variable : PTINR\_VAL1 PT-INR Value

N Mean Standard Deviation Minimum Maximum

---

|   |           |           |           |           |
|---|-----------|-----------|-----------|-----------|
| 6 | 2.6250000 | 0.1683746 | 2.4700000 | 2.9300000 |
|---|-----------|-----------|-----------|-----------|

---

Unique Subject Identifier=7031011111-0027

Assay variable : PTINR\_VAL1 PT-INR Value

N Mean Standard Deviation Minimum Maximum

---

|   |           |           |           |           |
|---|-----------|-----------|-----------|-----------|
| 3 | 2.2533333 | 0.4850086 | 1.7700000 | 2.7400000 |
|---|-----------|-----------|-----------|-----------|

---

Unique Subject Identifier=7031011111-0029

Assay variable : PTINR\_VAL1 PT-INR Value

N Mean Standard Deviation Minimum Maximum

---

|   |           |           |           |           |
|---|-----------|-----------|-----------|-----------|
| 4 | 2.3375000 | 0.2215664 | 2.0400000 | 2.5300000 |
|---|-----------|-----------|-----------|-----------|

---

Laboratory tests at the time of obtaining Table 2-6 consent, according to the presence or absence of proton-pump inhibitors

Unique Subject Identifier=7031011111-0030

MEANS Procedure

Assay variable : PTINR\_VAL1 PT-INR Value

N Mean Standard Deviation Minimum Maximum

---

|   |           |           |           |           |
|---|-----------|-----------|-----------|-----------|
| 5 | 1.8260000 | 0.2589981 | 1.5000000 | 2.1900000 |
|---|-----------|-----------|-----------|-----------|

---

Unique Subject Identifier=7031011111-0034

Assay variable : PTINR\_VAL1 PT-INR Value

N Mean Standard Deviation Minimum Maximum

---

|   |           |           |           |           |
|---|-----------|-----------|-----------|-----------|
| 4 | 2.1175000 | 0.6155418 | 1.4500000 | 2.9000000 |
|---|-----------|-----------|-----------|-----------|

---

Unique Subject Identifier=7031011111-0037

Assay variable : PTINR\_VAL1 PT-INR Value

N Mean Standard Deviation Minimum Maximum

---

|   |           |           |           |           |
|---|-----------|-----------|-----------|-----------|
| 4 | 1.7200000 | 0.1718527 | 1.5500000 | 1.9500000 |
|---|-----------|-----------|-----------|-----------|

---

Unique Subject Identifier=7031011111-0043

Assay variable : PTINR\_VAL1 PT-INR Value

N Mean Standard Deviation Minimum Maximum

---

|   |           |           |           |           |
|---|-----------|-----------|-----------|-----------|
| 4 | 2.7425000 | 0.2351418 | 2.4500000 | 3.0100000 |
|---|-----------|-----------|-----------|-----------|

---

Laboratory tests at the time of obtaining Table 2-6 consent, according to the presence or absence of proton-pump inhibitors

Unique Subject Identifier=7035000000-0009

MEANS Procedure

Assay variable : PTINR\_VAL1 PT-INR Value

| N | Mean      | Standard Deviation | Minimum   | Maximum   |
|---|-----------|--------------------|-----------|-----------|
| 3 | 2.8666667 | 0.2811287          | 2.6800000 | 3.1900000 |

Unique Subject Identifier=7035000000-0010

Assay variable : PTINR\_VAL1 PT-INR Value

| N | Mean      | Standard Deviation | Minimum   | Maximum   |
|---|-----------|--------------------|-----------|-----------|
| 3 | 1.9400000 | 0.2007486          | 1.7100000 | 2.0800000 |

Unique Subject Identifier=7035000000-0011

Assay variable : PTINR\_VAL1 PT-INR Value

| N | Mean      | Standard Deviation | Minimum   | Maximum   |
|---|-----------|--------------------|-----------|-----------|
| 6 | 1.7483333 | 0.3171382          | 1.3600000 | 2.1500000 |

Unique Subject Identifier=7035000000-0012

Assay variable : PTINR\_VAL1 PT-INR Value

N Mean Standard Deviation Minimum Maximum

---

|   |          |           |          |          |
|---|----------|-----------|----------|----------|
| 5 | 1.550000 | 0.0790569 | 1.470000 | 1.660000 |
|---|----------|-----------|----------|----------|

---

Laboratory tests at the time of obtaining Table 2-6 consent, according to the presence or absence of proton-pump inhibitors

Unique Subject Identifier=7035000000-0022

MEANS Procedure

Assay variable : PTINR\_VAL1 PT-INR Value

N Mean Standard Deviation Minimum Maximum

---

|   |           |           |           |           |
|---|-----------|-----------|-----------|-----------|
| 3 | 1.8900000 | 0.2688866 | 1.7200000 | 2.2000000 |
|---|-----------|-----------|-----------|-----------|

---

Unique Subject Identifier=7035000000-0026

Assay variable : PTINR\_VAL1 PT-INR Value

N Mean Standard Deviation Minimum Maximum

---

|   |           |           |           |           |
|---|-----------|-----------|-----------|-----------|
| 4 | 1.5450000 | 0.1337909 | 1.3900000 | 1.6800000 |
|---|-----------|-----------|-----------|-----------|

---

Unique Subject Identifier=7035000000-0027

Assay variable : PTINR\_VAL1 PT-INR Value

N Mean Standard Deviation Minimum Maximum

---

|   |           |           |           |           |
|---|-----------|-----------|-----------|-----------|
| 6 | 2.2966667 | 0.6932147 | 1.9700000 | 3.7100000 |
|---|-----------|-----------|-----------|-----------|

---

Unique Subject Identifier=7035000000-0028

Assay variable : PTINR\_VAL1 PT-INR Value

N Mean Standard Deviation Minimum Maximum

---

|   |           |           |           |           |
|---|-----------|-----------|-----------|-----------|
| 4 | 1.7625000 | 0.1931105 | 1.5900000 | 2.0300000 |
|---|-----------|-----------|-----------|-----------|

---



Laboratory tests at the time of obtaining Table 2-6 consent, according to the presence or absence of proton-pump inhibitors

Unique Subject Identifier=7035000000-0032

MEANS Procedure

Assay variable : PTINR\_VAL1 PT-INR Value

N Mean Standard Deviation Minimum Maximum

---

|   |           |           |           |           |
|---|-----------|-----------|-----------|-----------|
| 4 | 2.2075000 | 0.1721191 | 1.9900000 | 2.3600000 |
|---|-----------|-----------|-----------|-----------|

---

Unique Subject Identifier=7035000000-0038

Assay variable : PTINR\_VAL1 PT-INR Value

N Mean Standard Deviation Minimum Maximum

---

|   |           |           |           |           |
|---|-----------|-----------|-----------|-----------|
| 4 | 2.5200000 | 0.8057709 | 1.8400000 | 3.5400000 |
|---|-----------|-----------|-----------|-----------|

---

Unique Subject Identifier=7035000000-0039

Assay variable : PTINR\_VAL1 PT-INR Value

N Mean Standard Deviation Minimum Maximum

---

|   |           |           |           |           |
|---|-----------|-----------|-----------|-----------|
| 4 | 2.3600000 | 0.3371449 | 1.8800000 | 2.6000000 |
|---|-----------|-----------|-----------|-----------|

---

Unique Subject Identifier=7035000000-0041

Assay variable : PTINR\_VAL1 PT-INR Value

N Mean Standard Deviation Minimum Maximum

---

|   |           |           |           |           |
|---|-----------|-----------|-----------|-----------|
| 3 | 1.9266667 | 0.3431229 | 1.5600000 | 2.2400000 |
|---|-----------|-----------|-----------|-----------|

---

Laboratory tests at the time of obtaining Table 2-6 consent, according to the presence or absence of proton-pump inhibitors

Unique Subject Identifier=7035000000-0043

MEANS Procedure

Assay variable : PTINR\_VAL1 PT-INR Value

N Mean Standard Deviation Minimum Maximum

---

|   |           |           |           |           |
|---|-----------|-----------|-----------|-----------|
| 4 | 1.8850000 | 0.3070831 | 1.6300000 | 2.3300000 |
|---|-----------|-----------|-----------|-----------|

---

Unique Subject Identifier=7035000000-0050

Assay variable : PTINR\_VAL1 PT-INR Value

N Mean Standard Deviation Minimum Maximum

---

|   |           |           |           |           |
|---|-----------|-----------|-----------|-----------|
| 4 | 1.4325000 | 0.0518813 | 1.3600000 | 1.4700000 |
|---|-----------|-----------|-----------|-----------|

---

Unique Subject Identifier=7035000000-0052

Assay variable : PTINR\_VAL1 PT-INR Value

N Mean Standard Deviation Minimum Maximum

---

|   |           |           |           |           |
|---|-----------|-----------|-----------|-----------|
| 3 | 2.0600000 | 0.2351595 | 1.9000000 | 2.3300000 |
|---|-----------|-----------|-----------|-----------|

---

Unique Subject Identifier=7035000000-0054

Assay variable : PTINR\_VAL1 PT-INR Value

N Mean Standard Deviation Minimum Maximum

---

|   |           |           |           |           |
|---|-----------|-----------|-----------|-----------|
| 3 | 1.7533333 | 0.0503322 | 1.7000000 | 1.8000000 |
|---|-----------|-----------|-----------|-----------|

---

Laboratory tests at the time of obtaining Table 2-6 consent, according to the presence or absence of proton-pump inhibitors

Unique Subject Identifier=7035000000-0055

MEANS Procedure

Assay variable : PTINR\_VAL1 PT-INR Value

N Mean Standard Deviation Minimum Maximum

---

|   |           |           |           |           |
|---|-----------|-----------|-----------|-----------|
| 3 | 2.2566667 | 0.1877054 | 2.0400000 | 2.3700000 |
|---|-----------|-----------|-----------|-----------|

---

Unique Subject Identifier=7035000000-0057

Assay variable : PTINR\_VAL1 PT-INR Value

N Mean Standard Deviation Minimum Maximum

---

|   |           |  |           |           |
|---|-----------|--|-----------|-----------|
| 1 | 2.3200000 |  | 2.3200000 | 2.3200000 |
|---|-----------|--|-----------|-----------|

---

Unique Subject Identifier=7035000000-0061

Assay variable : PTINR\_VAL1 PT-INR Value

N Mean Standard Deviation Minimum Maximum

---

|   |           |           |           |           |
|---|-----------|-----------|-----------|-----------|
| 3 | 2.4400000 | 0.1609348 | 2.2700000 | 2.5900000 |
|---|-----------|-----------|-----------|-----------|

---

Unique Subject Identifier=7035000000-0062

Assay variable : PTINR\_VAL1 PT-INR Value

N Mean Standard Deviation Minimum Maximum

---

|   |           |           |           |           |
|---|-----------|-----------|-----------|-----------|
| 2 | 2.0050000 | 0.2474874 | 1.8300000 | 2.1800000 |
|---|-----------|-----------|-----------|-----------|

---

Laboratory tests at the time of obtaining Table 2-6 consent, according to the presence or absence of proton-pump inhibitors

Unique Subject Identifier=7035000000-0064

MEANS Procedure

Assay variable : PTINR\_VAL1 PT-INR Value

N Mean Standard Deviation Minimum Maximum

---

|   |           |           |           |           |
|---|-----------|-----------|-----------|-----------|
| 3 | 1.8733333 | 0.3552933 | 1.4700000 | 2.1400000 |
|---|-----------|-----------|-----------|-----------|

---

Unique Subject Identifier=7035000000-0066

Assay variable : PTINR\_VAL1 PT-INR Value

N Mean Standard Deviation Minimum Maximum

---

|   |           |           |           |           |
|---|-----------|-----------|-----------|-----------|
| 2 | 1.5500000 | 0.2121320 | 1.4000000 | 1.7000000 |
|---|-----------|-----------|-----------|-----------|

---

Unique Subject Identifier=7035000000-0068

Assay variable : PTINR\_VAL1 PT-INR Value

N Mean Standard Deviation Minimum Maximum

---

|   |           |           |           |           |
|---|-----------|-----------|-----------|-----------|
| 2 | 2.0100000 | 0.4101219 | 1.7200000 | 2.3000000 |
|---|-----------|-----------|-----------|-----------|

---

Unique Subject Identifier=7035000000-0071

Assay variable : PTINR\_VAL1 PT-INR Value

N Mean Standard Deviation Minimum Maximum

---

|   |          |           |          |          |
|---|----------|-----------|----------|----------|
| 3 | 2.080000 | 0.1228821 | 1.940000 | 2.170000 |
|---|----------|-----------|----------|----------|

---



Laboratory tests at the time of obtaining Table 2-6 consent, according to the presence or absence of proton-pump inhibitors

Unique Subject Identifier=7035000000-0072

MEANS Procedure

Assay variable : PTINR\_VAL1 PT-INR Value

N Mean Standard Deviation Minimum Maximum

---

|   |           |           |           |           |
|---|-----------|-----------|-----------|-----------|
| 4 | 1.9850000 | 0.4655105 | 1.5200000 | 2.4700000 |
|---|-----------|-----------|-----------|-----------|

---

Unique Subject Identifier=7035000000-0074

Assay variable : PTINR\_VAL1 PT-INR Value

N Mean Standard Deviation Minimum Maximum

---

|   |           |           |           |           |
|---|-----------|-----------|-----------|-----------|
| 3 | 1.6933333 | 0.0577350 | 1.6600000 | 1.7600000 |
|---|-----------|-----------|-----------|-----------|

---

Unique Subject Identifier=7035000000-0075

Assay variable : PTINR\_VAL1 PT-INR Value

N Mean Standard Deviation Minimum Maximum

---

|   |           |           |           |           |
|---|-----------|-----------|-----------|-----------|
| 2 | 2.4450000 | 0.5444722 | 2.0600000 | 2.8300000 |
|---|-----------|-----------|-----------|-----------|

---

Unique Subject Identifier=7035000000-0076

Assay variable : PTINR\_VAL1 PT-INR Value

N Mean Standard Deviation Minimum Maximum

---

|   |          |           |          |          |
|---|----------|-----------|----------|----------|
| 3 | 1.860000 | 0.4214262 | 1.420000 | 2.260000 |
|---|----------|-----------|----------|----------|

---

Laboratory tests at the time of obtaining Table 2-6 consent, according to the presence or absence of proton-pump inhibitors

Unique Subject Identifier=7035000000-0079

MEANS Procedure

Assay variable : PTINR\_VAL1 PT-INR Value

| N | Mean      | Standard Deviation | Minimum   | Maximum   |
|---|-----------|--------------------|-----------|-----------|
| 3 | 2.3800000 | 0.3961060          | 2.0300000 | 2.8100000 |

Unique Subject Identifier=7035000000-0084

Assay variable : PTINR\_VAL1 PT-INR Value

| N | Mean      | Standard Deviation | Minimum   | Maximum   |
|---|-----------|--------------------|-----------|-----------|
| 3 | 2.7966667 | 0.2750152          | 2.5200000 | 3.0700000 |

Unique Subject Identifier=7035000000-0086

Assay variable : PTINR\_VAL1 PT-INR Value

| N | Mean      | Standard Deviation | Minimum   | Maximum   |
|---|-----------|--------------------|-----------|-----------|
| 2 | 1.6950000 | 0.2050610          | 1.5500000 | 1.8400000 |

Unique Subject Identifier=7035000000-0088

Assay variable : PTINR\_VAL1 PT-INR Value

N Mean Standard Deviation Minimum Maximum

---

|   |           |           |           |           |
|---|-----------|-----------|-----------|-----------|
| 4 | 1.9900000 | 0.2070427 | 1.7500000 | 2.2200000 |
|---|-----------|-----------|-----------|-----------|

---

Laboratory tests at the time of obtaining Table 2-6 consent, according to the presence or absence of proton-pump inhibitors

Unique Subject Identifier=7035000000-0090

MEANS Procedure

Assay variable : PTINR\_VAL1 PT-INR Value

N Mean Standard Deviation Minimum Maximum

---

|   |           |           |           |           |
|---|-----------|-----------|-----------|-----------|
| 3 | 2.2766667 | 0.1858315 | 2.1500000 | 2.4900000 |
|---|-----------|-----------|-----------|-----------|

---

Unique Subject Identifier=7035000000-0095

Assay variable : PTINR\_VAL1 PT-INR Value

N Mean Standard Deviation Minimum Maximum

---

|   |           |           |           |           |
|---|-----------|-----------|-----------|-----------|
| 4 | 2.1625000 | 0.7162576 | 1.5900000 | 3.2100000 |
|---|-----------|-----------|-----------|-----------|

---

Unique Subject Identifier=7035000000-0097

Assay variable : PTINR\_VAL1 PT-INR Value

N Mean Standard Deviation Minimum Maximum

---

|   |           |  |           |           |
|---|-----------|--|-----------|-----------|
| 1 | 2.4600000 |  | 2.4600000 | 2.4600000 |
|---|-----------|--|-----------|-----------|

---

Unique Subject Identifier=7036000000-0003

Assay variable : PTINR\_VAL1 PT-INR Value

N Mean Standard Deviation Minimum Maximum

---

|   |          |           |          |          |
|---|----------|-----------|----------|----------|
| 5 | 2.280000 | 0.5263079 | 1.700000 | 3.100000 |
|---|----------|-----------|----------|----------|

---

Laboratory tests at the time of obtaining Table 2-6 consent, according to the presence or absence of proton-pump inhibitors

Unique Subject Identifier=7037000000-0012

MEANS Procedure

Assay variable : PTINR\_VAL1 PT-INR Value

N Mean Standard Deviation Minimum Maximum

---

|   |           |           |           |           |
|---|-----------|-----------|-----------|-----------|
| 6 | 2.1016667 | 0.5417164 | 1.7000000 | 3.1000000 |
|---|-----------|-----------|-----------|-----------|

---

Unique Subject Identifier=7040011000-0001

Assay variable : PTINR\_VAL1 PT-INR Value

N Mean Standard Deviation Minimum Maximum

---

|   |           |           |           |           |
|---|-----------|-----------|-----------|-----------|
| 6 | 2.3516667 | 0.5745752 | 1.3200000 | 2.9400000 |
|---|-----------|-----------|-----------|-----------|

---

Unique Subject Identifier=7040011000-0002

Assay variable : PTINR\_VAL1 PT-INR Value

N Mean Standard Deviation Minimum Maximum

---

|   |           |           |           |           |
|---|-----------|-----------|-----------|-----------|
| 5 | 2.5740000 | 0.3576031 | 2.0600000 | 2.9600000 |
|---|-----------|-----------|-----------|-----------|

---

Unique Subject Identifier=7042010110-0003

Assay variable : PTINR\_VAL1 PT-INR Value

N Mean Standard Deviation Minimum Maximum

---

|   |          |           |          |          |
|---|----------|-----------|----------|----------|
| 6 | 1.803333 | 0.6052988 | 1.370000 | 2.950000 |
|---|----------|-----------|----------|----------|

---



Laboratory tests at the time of obtaining Table 2-6 consent, according to the presence or absence of proton-pump inhibitors

Unique Subject Identifier=7042010110-0005

MEANS Procedure

Assay variable : PTINR\_VAL1 PT-INR Value

N Mean Standard Deviation Minimum Maximum

---

|   |           |           |           |           |
|---|-----------|-----------|-----------|-----------|
| 4 | 1.6250000 | 0.5434765 | 1.2300000 | 2.4200000 |
|---|-----------|-----------|-----------|-----------|

---

Unique Subject Identifier=7042010110-0006

Assay variable : PTINR\_VAL1 PT-INR Value

N Mean Standard Deviation Minimum Maximum

---

|   |           |           |           |           |
|---|-----------|-----------|-----------|-----------|
| 3 | 2.2100000 | 0.1100000 | 2.1000000 | 2.3200000 |
|---|-----------|-----------|-----------|-----------|

---

Unique Subject Identifier=7042010110-0010

Assay variable : PTINR\_VAL1 PT-INR Value

N Mean Standard Deviation Minimum Maximum

---

|   |           |           |           |           |
|---|-----------|-----------|-----------|-----------|
| 6 | 2.0633333 | 0.1961292 | 1.8600000 | 2.3900000 |
|---|-----------|-----------|-----------|-----------|

---

Unique Subject Identifier=7042010110-0011

Assay variable : PTINR\_VAL1 PT-INR Value

N Mean Standard Deviation Minimum Maximum

---

|   |          |           |          |          |
|---|----------|-----------|----------|----------|
| 3 | 1.920000 | 0.1252996 | 1.800000 | 2.050000 |
|---|----------|-----------|----------|----------|

---

Laboratory tests at the time of obtaining Table 2-6 consent, according to the presence or absence of proton-pump inhibitors

Unique Subject Identifier=7042010110-0013

MEANS Procedure

Assay variable : PTINR\_VAL1 PT-INR Value

N Mean Standard Deviation Minimum Maximum

---

|   |           |           |           |           |
|---|-----------|-----------|-----------|-----------|
| 6 | 2.2466667 | 0.2058802 | 1.8900000 | 2.4400000 |
|---|-----------|-----------|-----------|-----------|

---

Unique Subject Identifier=7042010110-0014

Assay variable : PTINR\_VAL1 PT-INR Value

N Mean Standard Deviation Minimum Maximum

---

|   |           |           |           |           |
|---|-----------|-----------|-----------|-----------|
| 6 | 1.3150000 | 0.2433721 | 1.0300000 | 1.7600000 |
|---|-----------|-----------|-----------|-----------|

---

Unique Subject Identifier=7042010110-0017

Assay variable : PTINR\_VAL1 PT-INR Value

N Mean Standard Deviation Minimum Maximum

---

|   |           |           |           |           |
|---|-----------|-----------|-----------|-----------|
| 6 | 2.1166667 | 1.2655697 | 1.4100000 | 4.6700000 |
|---|-----------|-----------|-----------|-----------|

---

Unique Subject Identifier=7042010110-0018

Assay variable : PTINR\_VAL1 PT-INR Value

N Mean Standard Deviation Minimum Maximum

---

|   |           |           |           |           |
|---|-----------|-----------|-----------|-----------|
| 6 | 1.4266667 | 0.0799166 | 1.3100000 | 1.5200000 |
|---|-----------|-----------|-----------|-----------|

---

Laboratory tests at the time of obtaining Table 2-6 consent, according to the presence or absence of proton-pump inhibitors

Unique Subject Identifier=7042010110-0021

MEANS Procedure

Assay variable : PTINR\_VAL1 PT-INR Value

| N | Mean      | Standard Deviation | Minimum   | Maximum   |
|---|-----------|--------------------|-----------|-----------|
| 3 | 2.2633333 | 0.0208167          | 2.2400000 | 2.2800000 |

Unique Subject Identifier=7042010110-0022

Assay variable : PTINR\_VAL1 PT-INR Value

| N | Mean      | Standard Deviation | Minimum   | Maximum   |
|---|-----------|--------------------|-----------|-----------|
| 5 | 1.5120000 | 0.1613072          | 1.2300000 | 1.6300000 |

Unique Subject Identifier=7042010110-0030

Assay variable : PTINR\_VAL1 PT-INR Value

| N | Mean      | Standard Deviation | Minimum   | Maximum   |
|---|-----------|--------------------|-----------|-----------|
| 3 | 1.3633333 | 0.1266228          | 1.2500000 | 1.5000000 |

Unique Subject Identifier=7042010110-0033

Assay variable : PTINR\_VAL1 PT-INR Value

N Mean Standard Deviation Minimum Maximum

---

|   |          |           |          |          |
|---|----------|-----------|----------|----------|
| 3 | 2.220000 | 0.3934463 | 1.800000 | 2.580000 |
|---|----------|-----------|----------|----------|

---

Laboratory tests at the time of obtaining Table 2-6 consent, according to the presence or absence of proton-pump inhibitors

Unique Subject Identifier=7042010110-0036

MEANS Procedure

Assay variable : PTINR\_VAL1 PT-INR Value

| N | Mean      | Standard Deviation | Minimum   | Maximum   |
|---|-----------|--------------------|-----------|-----------|
| 4 | 1.9200000 | 0.3194787          | 1.6200000 | 2.2700000 |

Unique Subject Identifier=7045000000-0001

Assay variable : PTINR\_VAL1 PT-INR Value

| N | Mean      | Standard Deviation | Minimum   | Maximum   |
|---|-----------|--------------------|-----------|-----------|
| 5 | 1.9640000 | 0.2596729          | 1.7400000 | 2.4000000 |

Unique Subject Identifier=7045000000-0002

Assay variable : PTINR\_VAL1 PT-INR Value

| N | Mean      | Standard Deviation | Minimum   | Maximum   |
|---|-----------|--------------------|-----------|-----------|
| 6 | 2.0250000 | 0.2338162          | 1.8300000 | 2.4900000 |

Unique Subject Identifier=7045000000-0009

Assay variable : PTINR\_VAL1 PT-INR Value

N Mean Standard Deviation Minimum Maximum

---

|   |           |           |           |           |
|---|-----------|-----------|-----------|-----------|
| 4 | 2.0150000 | 0.2143984 | 1.7300000 | 2.1900000 |
|---|-----------|-----------|-----------|-----------|

---



Laboratory tests at the time of obtaining Table 2-6 consent, according to the presence or absence of proton-pump inhibitors

Unique Subject Identifier=7045000000-0010

MEANS Procedure

Assay variable : PTINR\_VAL1 PT-INR Value

N Mean Standard Deviation Minimum Maximum

---

|   |           |           |           |           |
|---|-----------|-----------|-----------|-----------|
| 6 | 2.3050000 | 0.2608256 | 1.8900000 | 2.6200000 |
|---|-----------|-----------|-----------|-----------|

---

Unique Subject Identifier=7045000000-0011

Assay variable : PTINR\_VAL1 PT-INR Value

N Mean Standard Deviation Minimum Maximum

---

|   |           |           |           |           |
|---|-----------|-----------|-----------|-----------|
| 6 | 1.9750000 | 0.2833196 | 1.5400000 | 2.2500000 |
|---|-----------|-----------|-----------|-----------|

---

Unique Subject Identifier=7045000000-0012

Assay variable : PTINR\_VAL1 PT-INR Value

N Mean Standard Deviation Minimum Maximum

---

|   |           |           |           |           |
|---|-----------|-----------|-----------|-----------|
| 6 | 2.5050000 | 0.2514558 | 2.0500000 | 2.6800000 |
|---|-----------|-----------|-----------|-----------|

---

Unique Subject Identifier=7045000000-0013

Assay variable : PTINR\_VAL1 PT-INR Value

N Mean Standard Deviation Minimum Maximum

---

|   |           |           |           |           |
|---|-----------|-----------|-----------|-----------|
| 6 | 2.1566667 | 0.6226288 | 1.3300000 | 3.0500000 |
|---|-----------|-----------|-----------|-----------|

---

Laboratory tests at the time of obtaining Table 2-6 consent, according to the presence or absence of proton-pump inhibitors

Unique Subject Identifier=7045000000-0020

MEANS Procedure

Assay variable : PTINR\_VAL1 PT-INR Value

N Mean Standard Deviation Minimum Maximum

---

|   |           |           |           |           |
|---|-----------|-----------|-----------|-----------|
| 5 | 2.0620000 | 0.0849706 | 1.9600000 | 2.1400000 |
|---|-----------|-----------|-----------|-----------|

---

Unique Subject Identifier=7045000000-0021

Assay variable : PTINR\_VAL1 PT-INR Value

N Mean Standard Deviation Minimum Maximum

---

|   |           |           |           |           |
|---|-----------|-----------|-----------|-----------|
| 6 | 2.1316667 | 0.5024109 | 1.6700000 | 2.8300000 |
|---|-----------|-----------|-----------|-----------|

---

Unique Subject Identifier=7045000000-0023

Assay variable : PTINR\_VAL1 PT-INR Value

N Mean Standard Deviation Minimum Maximum

---

|   |           |           |           |           |
|---|-----------|-----------|-----------|-----------|
| 4 | 2.2825000 | 0.4265657 | 1.8300000 | 2.6900000 |
|---|-----------|-----------|-----------|-----------|

---

Unique Subject Identifier=7045000000-0024

Assay variable : PTINR\_VAL1 PT-INR Value

N Mean Standard Deviation Minimum Maximum

---

|   |          |           |          |          |
|---|----------|-----------|----------|----------|
| 5 | 2.150000 | 0.3277194 | 1.670000 | 2.590000 |
|---|----------|-----------|----------|----------|

---

Laboratory tests at the time of obtaining Table 2-6 consent, according to the presence or absence of proton-pump inhibitors

Unique Subject Identifier=7045000000-0026

MEANS Procedure

Assay variable : PTINR\_VAL1 PT-INR Value

N Mean Standard Deviation Minimum Maximum

---

|   |           |           |           |           |
|---|-----------|-----------|-----------|-----------|
| 4 | 1.7650000 | 0.1415392 | 1.5600000 | 1.8800000 |
|---|-----------|-----------|-----------|-----------|

---

Unique Subject Identifier=7045000000-0028

Assay variable : PTINR\_VAL1 PT-INR Value

N Mean Standard Deviation Minimum Maximum

---

|   |           |           |           |           |
|---|-----------|-----------|-----------|-----------|
| 6 | 2.1716667 | 0.4511060 | 1.4500000 | 2.6600000 |
|---|-----------|-----------|-----------|-----------|

---

Unique Subject Identifier=7045000000-0029

Assay variable : PTINR\_VAL1 PT-INR Value

N Mean Standard Deviation Minimum Maximum

---

|   |           |           |           |           |
|---|-----------|-----------|-----------|-----------|
| 4 | 2.0725000 | 0.1486327 | 1.9300000 | 2.2800000 |
|---|-----------|-----------|-----------|-----------|

---

Unique Subject Identifier=7045000000-0030

Assay variable : PTINR\_VAL1 PT-INR Value

N Mean Standard Deviation Minimum Maximum

---

|   |           |           |           |           |
|---|-----------|-----------|-----------|-----------|
| 4 | 2.0825000 | 0.3003748 | 1.6700000 | 2.3900000 |
|---|-----------|-----------|-----------|-----------|

---

Laboratory tests at the time of obtaining Table 2-6 consent, according to the presence or absence of proton-pump inhibitors

Unique Subject Identifier=7047000000-0001

MEANS Procedure

Assay variable : PTINR\_VAL1 PT-INR Value

N Mean Standard Deviation Minimum Maximum

---

|   |           |           |           |           |
|---|-----------|-----------|-----------|-----------|
| 6 | 1.6450000 | 0.5950714 | 1.2000000 | 2.6400000 |
|---|-----------|-----------|-----------|-----------|

---

Unique Subject Identifier=7047000000-0004

Assay variable : PTINR\_VAL1 PT-INR Value

N Mean Standard Deviation Minimum Maximum

---

|   |           |           |           |           |
|---|-----------|-----------|-----------|-----------|
| 6 | 1.6333333 | 0.2356834 | 1.4200000 | 2.0300000 |
|---|-----------|-----------|-----------|-----------|

---

Unique Subject Identifier=7047000000-0005

Assay variable : PTINR\_VAL1 PT-INR Value

N Mean Standard Deviation Minimum Maximum

---

|   |           |           |           |           |
|---|-----------|-----------|-----------|-----------|
| 5 | 1.4900000 | 0.1770593 | 1.2500000 | 1.7000000 |
|---|-----------|-----------|-----------|-----------|

---

Unique Subject Identifier=7047000000-0007

Assay variable : PTINR\_VAL1 PT-INR Value

N Mean Standard Deviation Minimum Maximum

---

|   |           |           |           |           |
|---|-----------|-----------|-----------|-----------|
| 2 | 1.4050000 | 0.0636396 | 1.3600000 | 1.4500000 |
|---|-----------|-----------|-----------|-----------|

---



Laboratory tests at the time of obtaining Table 2-6 consent, according to the presence or absence of proton-pump inhibitors

Unique Subject Identifier=7047000000-0008

MEANS Procedure

Assay variable : PTINR\_VAL1 PT-INR Value

| N | Mean      | Standard Deviation | Minimum   | Maximum   |
|---|-----------|--------------------|-----------|-----------|
| 2 | 1.5200000 | 0.3252691          | 1.2900000 | 1.7500000 |

Unique Subject Identifier=7047000000-0009

Assay variable : PTINR\_VAL1 PT-INR Value

| N | Mean      | Standard Deviation | Minimum   | Maximum   |
|---|-----------|--------------------|-----------|-----------|
| 3 | 1.7633333 | 0.3592121          | 1.4600000 | 2.1600000 |

Unique Subject Identifier=7055000000-0007

Assay variable : PTINR\_VAL1 PT-INR Value

| N | Mean      | Standard Deviation | Minimum   | Maximum   |
|---|-----------|--------------------|-----------|-----------|
| 6 | 2.0216667 | 0.1614208          | 1.8200000 | 2.2600000 |

Unique Subject Identifier=7061010010-0002

Assay variable : PTINR\_VAL1 PT-INR Value

N Mean Standard Deviation Minimum Maximum

---

|   |          |           |          |          |
|---|----------|-----------|----------|----------|
| 6 | 1.950000 | 0.2588436 | 1.700000 | 2.400000 |
|---|----------|-----------|----------|----------|

---

Laboratory tests at the time of obtaining Table 2-6 consent, according to the presence or absence of proton-pump inhibitors

Unique Subject Identifier=7061010010-0004

MEANS Procedure

Assay variable : PTINR\_VAL1 PT-INR Value

N Mean Standard Deviation Minimum Maximum

---

|   |           |           |           |           |
|---|-----------|-----------|-----------|-----------|
| 6 | 1.5500000 | 0.3563706 | 1.1000000 | 2.1000000 |
|---|-----------|-----------|-----------|-----------|

---

Unique Subject Identifier=7061010010-0007

Assay variable : PTINR\_VAL1 PT-INR Value

N Mean Standard Deviation Minimum Maximum

---

|   |           |           |           |           |
|---|-----------|-----------|-----------|-----------|
| 3 | 1.9666667 | 0.5033223 | 1.5000000 | 2.5000000 |
|---|-----------|-----------|-----------|-----------|

---

Unique Subject Identifier=7061010010-0009

Assay variable : PTINR\_VAL1 PT-INR Value

N Mean Standard Deviation Minimum Maximum

---

|   |           |           |           |           |
|---|-----------|-----------|-----------|-----------|
| 4 | 2.3250000 | 0.5737305 | 1.8000000 | 3.1000000 |
|---|-----------|-----------|-----------|-----------|

---

Unique Subject Identifier=7066000000-0002

Assay variable : PTINR\_VAL1 PT-INR Value

N Mean Standard Deviation Minimum Maximum

---

|   |           |           |           |           |
|---|-----------|-----------|-----------|-----------|
| 6 | 2.6683333 | 1.5619913 | 1.1900000 | 5.4500000 |
|---|-----------|-----------|-----------|-----------|

---

Laboratory tests at the time of obtaining Table 2-6 consent, according to the presence or absence of proton-pump inhibitors

Unique Subject Identifier=7066000000-0007

MEANS Procedure

Assay variable : PTINR\_VAL1 PT-INR Value

N Mean Standard Deviation Minimum Maximum

---

|   |           |           |           |           |
|---|-----------|-----------|-----------|-----------|
| 6 | 1.9766667 | 0.2334666 | 1.6000000 | 2.2900000 |
|---|-----------|-----------|-----------|-----------|

---

Unique Subject Identifier=7066000000-0008

Assay variable : PTINR\_VAL1 PT-INR Value

N Mean Standard Deviation Minimum Maximum

---

|   |           |           |           |           |
|---|-----------|-----------|-----------|-----------|
| 5 | 2.1600000 | 0.5041825 | 1.4600000 | 2.7900000 |
|---|-----------|-----------|-----------|-----------|

---

Unique Subject Identifier=7066000000-0013

Assay variable : PTINR\_VAL1 PT-INR Value

N Mean Standard Deviation Minimum Maximum

---

|   |           |           |           |           |
|---|-----------|-----------|-----------|-----------|
| 6 | 1.9066667 | 0.1186030 | 1.7200000 | 2.0300000 |
|---|-----------|-----------|-----------|-----------|

---

Unique Subject Identifier=7066000000-0021

Assay variable : PTINR\_VAL1 PT-INR Value

N Mean Standard Deviation Minimum Maximum

---

|   |           |           |           |           |
|---|-----------|-----------|-----------|-----------|
| 6 | 1.7133333 | 0.3478889 | 1.3200000 | 2.2000000 |
|---|-----------|-----------|-----------|-----------|

---

Laboratory tests at the time of obtaining Table 2-6 consent, according to the presence or absence of proton-pump inhibitors

Unique Subject Identifier=7066000000-0028

MEANS Procedure

Assay variable : PTINR\_VAL1 PT-INR Value

| N | Mean      | Standard Deviation | Minimum   | Maximum   |
|---|-----------|--------------------|-----------|-----------|
| 6 | 2.3533333 | 0.7609380          | 1.6100000 | 3.5400000 |

Unique Subject Identifier=7066000000-0029

Assay variable : PTINR\_VAL1 PT-INR Value

| N | Mean      | Standard Deviation | Minimum   | Maximum   |
|---|-----------|--------------------|-----------|-----------|
| 5 | 2.1020000 | 0.1020784          | 1.9600000 | 2.2200000 |

Unique Subject Identifier=7066000000-0030

Assay variable : PTINR\_VAL1 PT-INR Value

| N | Mean      | Standard Deviation | Minimum   | Maximum   |
|---|-----------|--------------------|-----------|-----------|
| 4 | 1.9500000 | 0.6216108          | 1.3900000 | 2.6100000 |

Unique Subject Identifier=7104010000-0010

Assay variable : PTINR\_VAL1 PT-INR Value

N Mean Standard Deviation Minimum Maximum

---

|   |           |           |           |           |
|---|-----------|-----------|-----------|-----------|
| 6 | 2.2700000 | 0.3199375 | 1.7500000 | 2.6700000 |
|---|-----------|-----------|-----------|-----------|

---



Laboratory tests at the time of obtaining Table 2-6 consent, according to the presence or absence of proton-pump inhibitors

Unique Subject Identifier=7104010000-0020

MEANS Procedure

Assay variable : PTINR\_VAL1 PT-INR Value

N Mean Standard Deviation Minimum Maximum

---

|   |           |           |           |           |
|---|-----------|-----------|-----------|-----------|
| 6 | 2.4650000 | 0.1415274 | 2.2900000 | 2.6500000 |
|---|-----------|-----------|-----------|-----------|

---

Unique Subject Identifier=7132010000-0011

Assay variable : PTINR\_VAL1 PT-INR Value

N Mean Standard Deviation Minimum Maximum

---

|   |           |           |           |           |
|---|-----------|-----------|-----------|-----------|
| 4 | 2.2025000 | 0.5558402 | 1.5000000 | 2.7100000 |
|---|-----------|-----------|-----------|-----------|

---

Unique Subject Identifier=7132010000-0017

Assay variable : PTINR\_VAL1 PT-INR Value

N Mean Standard Deviation Minimum Maximum

---

|   |           |           |           |           |
|---|-----------|-----------|-----------|-----------|
| 4 | 2.4975000 | 0.8896582 | 1.5000000 | 3.6100000 |
|---|-----------|-----------|-----------|-----------|

---

Unique Subject Identifier=7132010000-0018

Assay variable : PTINR\_VAL1 PT-INR Value

N Mean Standard Deviation Minimum Maximum

---

|   |           |           |           |           |
|---|-----------|-----------|-----------|-----------|
| 3 | 1.9233333 | 0.0650641 | 1.8600000 | 1.9900000 |
|---|-----------|-----------|-----------|-----------|

---

Laboratory tests at the time of obtaining Table 2-6 consent, according to the presence or absence of proton-pump inhibitors

Unique Subject Identifier=7132010000-0020

MEANS Procedure

Assay variable : PTINR\_VAL1 PT-INR Value

| N | Mean      | Standard Deviation | Minimum   | Maximum   |
|---|-----------|--------------------|-----------|-----------|
| 3 | 1.8400000 | 0.2260531          | 1.6900000 | 2.1000000 |

Unique Subject Identifier=7133000000-0001

Assay variable : PTINR\_VAL1 PT-INR Value

| N | Mean      | Standard Deviation | Minimum   | Maximum   |
|---|-----------|--------------------|-----------|-----------|
| 6 | 2.3316667 | 1.1864471          | 1.0700000 | 4.5200000 |

Unique Subject Identifier=7136000000-0002

Assay variable : PTINR\_VAL1 PT-INR Value

| N | Mean      | Standard Deviation | Minimum   | Maximum   |
|---|-----------|--------------------|-----------|-----------|
| 3 | 2.3066667 | 0.4752192          | 1.8400000 | 2.7900000 |

Unique Subject Identifier=7136000000-0003

Assay variable : PTINR\_VAL1 PT-INR Value

N Mean Standard Deviation Minimum Maximum

---

|   |          |           |          |          |
|---|----------|-----------|----------|----------|
| 4 | 2.320000 | 0.2786874 | 2.050000 | 2.710000 |
|---|----------|-----------|----------|----------|

---

Laboratory tests at the time of obtaining Table 2-6 consent, according to the presence or absence of proton-pump inhibitors

Unique Subject Identifier=713600000-0005

MEANS Procedure

Assay variable : PTINR\_VAL1 PT-INR Value

| N | Mean      | Standard Deviation | Minimum   | Maximum   |
|---|-----------|--------------------|-----------|-----------|
| 3 | 1.7033333 | 0.0814453          | 1.6100000 | 1.7600000 |

Unique Subject Identifier=713600000-0006

Assay variable : PTINR\_VAL1 PT-INR Value

| N | Mean      | Standard Deviation | Minimum   | Maximum   |
|---|-----------|--------------------|-----------|-----------|
| 4 | 1.5450000 | 0.2235322          | 1.2900000 | 1.7700000 |

Unique Subject Identifier=713600000-0007

Assay variable : PTINR\_VAL1 PT-INR Value

| N | Mean      | Standard Deviation | Minimum   | Maximum   |
|---|-----------|--------------------|-----------|-----------|
| 5 | 2.3600000 | 0.6914478          | 1.3700000 | 3.0000000 |

Unique Subject Identifier=713600000-0008

Assay variable : PTINR\_VAL1 PT-INR Value

N Mean Standard Deviation Minimum Maximum

---

|   |           |           |           |           |
|---|-----------|-----------|-----------|-----------|
| 6 | 1.6066667 | 0.7731666 | 1.1100000 | 3.1000000 |
|---|-----------|-----------|-----------|-----------|

---

Laboratory tests at the time of obtaining Table 2-6 consent, according to the presence or absence of proton-pump inhibitors

Unique Subject Identifier=713600000-0011

MEANS Procedure

Assay variable : PTINR\_VAL1 PT-INR Value

N Mean Standard Deviation Minimum Maximum

---

|   |           |           |           |           |
|---|-----------|-----------|-----------|-----------|
| 5 | 1.4300000 | 0.1609348 | 1.2200000 | 1.6200000 |
|---|-----------|-----------|-----------|-----------|

---

Unique Subject Identifier=713600000-0013

Assay variable : PTINR\_VAL1 PT-INR Value

N Mean Standard Deviation Minimum Maximum

---

|   |           |           |           |           |
|---|-----------|-----------|-----------|-----------|
| 4 | 2.0000000 | 0.1647220 | 1.7700000 | 2.1600000 |
|---|-----------|-----------|-----------|-----------|

---

Unique Subject Identifier=713600000-0014

Assay variable : PTINR\_VAL1 PT-INR Value

N Mean Standard Deviation Minimum Maximum

---

|   |           |           |           |           |
|---|-----------|-----------|-----------|-----------|
| 3 | 2.3633333 | 0.4532475 | 1.8400000 | 2.6300000 |
|---|-----------|-----------|-----------|-----------|

---

Unique Subject Identifier=713600000-0015

Assay variable : PTINR\_VAL1 PT-INR Value

N Mean Standard Deviation Minimum Maximum

---

|   |          |          |          |          |
|---|----------|----------|----------|----------|
| 4 | 2.280000 | 0.139044 | 2.150000 | 2.410000 |
|---|----------|----------|----------|----------|

---



Laboratory tests at the time of obtaining Table 2-6 consent, according to the presence or absence of proton-pump inhibitors

Unique Subject Identifier=713600000-0016

MEANS Procedure

Assay variable : PTINR\_VAL1 PT-INR Value

N Mean Standard Deviation Minimum Maximum

---

|   |          |           |          |          |
|---|----------|-----------|----------|----------|
| 3 | 1.910000 | 0.3477068 | 1.590000 | 2.280000 |
|---|----------|-----------|----------|----------|

---

Unique Subject Identifier=713600000-0017

Assay variable : PTINR\_VAL1 PT-INR Value

N Mean Standard Deviation Minimum Maximum

---

|   |           |           |          |          |
|---|-----------|-----------|----------|----------|
| 6 | 2.2816667 | 0.7896940 | 1.480000 | 3.550000 |
|---|-----------|-----------|----------|----------|

---

Unique Subject Identifier=713600000-0020

Assay variable : PTINR\_VAL1 PT-INR Value

N Mean Standard Deviation Minimum Maximum

---

|   |          |           |          |          |
|---|----------|-----------|----------|----------|
| 3 | 2.470000 | 0.3996248 | 2.040000 | 2.830000 |
|---|----------|-----------|----------|----------|

---

Unique Subject Identifier=713600000-0021

Assay variable : PTINR\_VAL1 PT-INR Value

N Mean Standard Deviation Minimum Maximum

---

|   |           |           |           |           |
|---|-----------|-----------|-----------|-----------|
| 6 | 2.1450000 | 0.4427528 | 1.6400000 | 2.7900000 |
|---|-----------|-----------|-----------|-----------|

---

Laboratory tests at the time of obtaining Table 2-6 consent, according to the presence or absence of proton-pump inhibitors

Unique Subject Identifier=713600000-0025

MEANS Procedure

Assay variable : PTINR\_VAL1 PT-INR Value

| N | Mean      | Standard Deviation | Minimum   | Maximum   |
|---|-----------|--------------------|-----------|-----------|
| 6 | 1.7150000 | 0.3321897          | 1.3700000 | 2.1200000 |

Unique Subject Identifier=713600000-0028

Assay variable : PTINR\_VAL1 PT-INR Value

| N | Mean      | Standard Deviation | Minimum   | Maximum   |
|---|-----------|--------------------|-----------|-----------|
| 4 | 1.9450000 | 0.4199603          | 1.5500000 | 2.4900000 |

Unique Subject Identifier=713600000-0029

Assay variable : PTINR\_VAL1 PT-INR Value

| N | Mean      | Standard Deviation | Minimum   | Maximum   |
|---|-----------|--------------------|-----------|-----------|
| 3 | 2.4300000 | 0.0871780          | 2.3700000 | 2.5300000 |

Unique Subject Identifier=713600000-0035

Assay variable : PTINR\_VAL1 PT-INR Value

N Mean Standard Deviation Minimum Maximum

---

|   |           |           |           |           |
|---|-----------|-----------|-----------|-----------|
| 4 | 2.4650000 | 0.2752575 | 2.1200000 | 2.7700000 |
|---|-----------|-----------|-----------|-----------|

---

Laboratory tests at the time of obtaining Table 2-6 consent, according to the presence or absence of proton-pump inhibitors

Unique Subject Identifier=713600000-0037

MEANS Procedure

Assay variable : PTINR\_VAL1 PT-INR Value

N Mean Standard Deviation Minimum Maximum

---

|   |          |          |          |          |
|---|----------|----------|----------|----------|
| 3 | 2.110000 | 0.130000 | 2.030000 | 2.260000 |
|---|----------|----------|----------|----------|

---

Unique Subject Identifier=713600000-0039

Assay variable : PTINR\_VAL1 PT-INR Value

N Mean Standard Deviation Minimum Maximum

---

|   |          |          |          |          |
|---|----------|----------|----------|----------|
| 3 | 2.203333 | 0.161658 | 2.110000 | 2.390000 |
|---|----------|----------|----------|----------|

---

Unique Subject Identifier=713600000-0040

Assay variable : PTINR\_VAL1 PT-INR Value

N Mean Standard Deviation Minimum Maximum

---

|   |          |          |          |          |
|---|----------|----------|----------|----------|
| 3 | 1.986667 | 0.156950 | 1.810000 | 2.110000 |
|---|----------|----------|----------|----------|

---

Unique Subject Identifier=713600000-0042

Assay variable : PTINR\_VAL1 PT-INR Value

N Mean Standard Deviation Minimum Maximum

---

|   |           |           |           |           |
|---|-----------|-----------|-----------|-----------|
| 4 | 1.7850000 | 0.3411256 | 1.3800000 | 2.2000000 |
|---|-----------|-----------|-----------|-----------|

---

Laboratory tests at the time of obtaining Table 2-6 consent, according to the presence or absence of proton-pump inhibitors

Unique Subject Identifier=713600000-0044

MEANS Procedure

Assay variable : PTINR\_VAL1 PT-INR Value

| N | Mean      | Standard Deviation | Minimum   | Maximum   |
|---|-----------|--------------------|-----------|-----------|
| 3 | 2.1866667 | 0.3338163          | 1.9600000 | 2.5700000 |

Unique Subject Identifier=713600000-0049

Assay variable : PTINR\_VAL1 PT-INR Value

| N | Mean      | Standard Deviation | Minimum   | Maximum   |
|---|-----------|--------------------|-----------|-----------|
| 3 | 2.3166667 | 0.3942503          | 1.9600000 | 2.7400000 |

Unique Subject Identifier=7137010000-0001

Assay variable : PTINR\_VAL1 PT-INR Value

| N | Mean      | Standard Deviation | Minimum   | Maximum   |
|---|-----------|--------------------|-----------|-----------|
| 5 | 1.5740000 | 0.2757354          | 1.1700000 | 1.8700000 |

Unique Subject Identifier=7154000000-0002

Assay variable : PTINR\_VAL1 PT-INR Value

N Mean Standard Deviation Minimum Maximum

---

|   |          |           |          |          |
|---|----------|-----------|----------|----------|
| 5 | 2.162000 | 0.6197338 | 1.550000 | 3.100000 |
|---|----------|-----------|----------|----------|

---



Laboratory tests at the time of obtaining Table 2-6 consent, according to the presence or absence of proton-pump inhibitors

Unique Subject Identifier=715400000-0009

MEANS Procedure

Assay variable : PTINR\_VAL1 PT-INR Value

N Mean Standard Deviation Minimum Maximum

---

|   |           |           |           |           |
|---|-----------|-----------|-----------|-----------|
| 5 | 2.2640000 | 0.3001333 | 1.9800000 | 2.7700000 |
|---|-----------|-----------|-----------|-----------|

---

Unique Subject Identifier=715400000-0012

Assay variable : PTINR\_VAL1 PT-INR Value

N Mean Standard Deviation Minimum Maximum

---

|   |           |           |           |           |
|---|-----------|-----------|-----------|-----------|
| 3 | 2.3266667 | 0.3888873 | 1.8800000 | 2.5900000 |
|---|-----------|-----------|-----------|-----------|

---

Unique Subject Identifier=715400000-0018

Assay variable : PTINR\_VAL1 PT-INR Value

N Mean Standard Deviation Minimum Maximum

---

|   |           |           |           |           |
|---|-----------|-----------|-----------|-----------|
| 5 | 1.9240000 | 0.2447039 | 1.6800000 | 2.3100000 |
|---|-----------|-----------|-----------|-----------|

---

Unique Subject Identifier=715400000-0024

Assay variable : PTINR\_VAL1 PT-INR Value

N Mean Standard Deviation Minimum Maximum

---

|   |           |           |           |           |
|---|-----------|-----------|-----------|-----------|
| 4 | 2.0525000 | 0.3732180 | 1.7000000 | 2.5300000 |
|---|-----------|-----------|-----------|-----------|

---

Laboratory tests at the time of obtaining Table 2-6 consent, according to the presence or absence of proton-pump inhibitors

Unique Subject Identifier=715400000-0025

MEANS Procedure

Assay variable : PTINR\_VAL1 PT-INR Value

N Mean Standard Deviation Minimum Maximum

---

|   |           |           |           |           |
|---|-----------|-----------|-----------|-----------|
| 4 | 2.2275000 | 0.0974252 | 2.1500000 | 2.3700000 |
|---|-----------|-----------|-----------|-----------|

---

Unique Subject Identifier=715400000-0028

Assay variable : PTINR\_VAL1 PT-INR Value

N Mean Standard Deviation Minimum Maximum

---

|   |           |           |           |           |
|---|-----------|-----------|-----------|-----------|
| 3 | 1.4433333 | 0.1001665 | 1.3400000 | 1.5400000 |
|---|-----------|-----------|-----------|-----------|

---

Unique Subject Identifier=715400000-0030

Assay variable : PTINR\_VAL1 PT-INR Value

N Mean Standard Deviation Minimum Maximum

---

|   |           |           |           |           |
|---|-----------|-----------|-----------|-----------|
| 3 | 2.0633333 | 0.5601190 | 1.5100000 | 2.6300000 |
|---|-----------|-----------|-----------|-----------|

---

Unique Subject Identifier=715400000-0031

Assay variable : PTINR\_VAL1 PT-INR Value

N Mean Standard Deviation Minimum Maximum

---

|   |           |           |           |           |
|---|-----------|-----------|-----------|-----------|
| 6 | 2.3266667 | 0.2047112 | 2.1100000 | 2.6100000 |
|---|-----------|-----------|-----------|-----------|

---

Laboratory tests at the time of obtaining Table 2-6 consent, according to the presence or absence of proton-pump inhibitors

Unique Subject Identifier=715500000-0004

MEANS Procedure

Assay variable : PTINR\_VAL1 PT-INR Value

N Mean Standard Deviation Minimum Maximum

---

|   |          |           |          |          |
|---|----------|-----------|----------|----------|
| 5 | 1.250000 | 0.0574456 | 1.160000 | 1.300000 |
|---|----------|-----------|----------|----------|

---

Unique Subject Identifier=715500000-0007

Assay variable : PTINR\_VAL1 PT-INR Value

N Mean Standard Deviation Minimum Maximum

---

|   |          |           |          |          |
|---|----------|-----------|----------|----------|
| 2 | 1.820000 | 0.4666905 | 1.490000 | 2.150000 |
|---|----------|-----------|----------|----------|

---

Unique Subject Identifier=715500000-0014

Assay variable : PTINR\_VAL1 PT-INR Value

N Mean Standard Deviation Minimum Maximum

---

|   |          |           |          |          |
|---|----------|-----------|----------|----------|
| 6 | 1.466667 | 0.3201041 | 1.110000 | 1.900000 |
|---|----------|-----------|----------|----------|

---

Unique Subject Identifier=715500000-0016

Assay variable : PTINR\_VAL1 PT-INR Value

N Mean Standard Deviation Minimum Maximum

---

|   |           |  |           |           |
|---|-----------|--|-----------|-----------|
| 1 | 1.0500000 |  | 1.0500000 | 1.0500000 |
|---|-----------|--|-----------|-----------|

---

Laboratory tests at the time of obtaining Table 2-6 consent, according to the presence or absence of proton-pump inhibitors

Unique Subject Identifier=7155000000-0020

MEANS Procedure

Assay variable : PTINR\_VAL1 PT-INR Value

N Mean Standard Deviation Minimum Maximum

---

|   |           |           |           |           |
|---|-----------|-----------|-----------|-----------|
| 4 | 2.0050000 | 0.1793507 | 1.8100000 | 2.2400000 |
|---|-----------|-----------|-----------|-----------|

---

Unique Subject Identifier=7155000000-0031

Assay variable : PTINR\_VAL1 PT-INR Value

N Mean Standard Deviation Minimum Maximum

---

|   |           |           |           |           |
|---|-----------|-----------|-----------|-----------|
| 3 | 1.6966667 | 0.1569501 | 1.5200000 | 1.8200000 |
|---|-----------|-----------|-----------|-----------|

---

Unique Subject Identifier=7155000000-0039

Assay variable : PTINR\_VAL1 PT-INR Value

N Mean Standard Deviation Minimum Maximum

---

|   |           |           |           |           |
|---|-----------|-----------|-----------|-----------|
| 4 | 2.3650000 | 0.4262628 | 1.8300000 | 2.7900000 |
|---|-----------|-----------|-----------|-----------|

---

Unique Subject Identifier=7167000000-0001

Assay variable : PTINR\_VAL1 PT-INR Value

N Mean Standard Deviation Minimum Maximum

---

|   |           |           |           |           |
|---|-----------|-----------|-----------|-----------|
| 6 | 1.1450000 | 0.1162325 | 0.9800000 | 1.2700000 |
|---|-----------|-----------|-----------|-----------|

---



Laboratory tests at the time of obtaining Table 2-6 consent, according to the presence or absence of proton-pump inhibitors

Unique Subject Identifier=7167000000-0003

MEANS Procedure

Assay variable : PTINR\_VAL1 PT-INR Value

N Mean Standard Deviation Minimum Maximum

---

|   |           |           |           |           |
|---|-----------|-----------|-----------|-----------|
| 3 | 2.1766667 | 0.2000833 | 1.9800000 | 2.3800000 |
|---|-----------|-----------|-----------|-----------|

---

Unique Subject Identifier=7171010000-0001

Assay variable : PTINR\_VAL1 PT-INR Value

N Mean Standard Deviation Minimum Maximum

---

|   |           |           |           |           |
|---|-----------|-----------|-----------|-----------|
| 6 | 1.9683333 | 0.3200260 | 1.6800000 | 2.5600000 |
|---|-----------|-----------|-----------|-----------|

---

Unique Subject Identifier=7171010000-0002

Assay variable : PTINR\_VAL1 PT-INR Value

N Mean Standard Deviation Minimum Maximum

---

|   |           |           |           |           |
|---|-----------|-----------|-----------|-----------|
| 6 | 1.7250000 | 0.1789693 | 1.4700000 | 1.9700000 |
|---|-----------|-----------|-----------|-----------|

---

Unique Subject Identifier=7171010000-0004

Assay variable : PTINR\_VAL1 PT-INR Value

N Mean Standard Deviation Minimum Maximum

---

|   |           |           |           |           |
|---|-----------|-----------|-----------|-----------|
| 5 | 1.7980000 | 0.1628496 | 1.6200000 | 2.0200000 |
|---|-----------|-----------|-----------|-----------|

---

Laboratory tests at the time of obtaining Table 2-6 consent, according to the presence or absence of proton-pump inhibitors

Unique Subject Identifier=7198010000-0001

MEANS Procedure

Assay variable : PTINR\_VAL1 PT-INR Value

| N | Mean      | Standard Deviation | Minimum   | Maximum   |
|---|-----------|--------------------|-----------|-----------|
| 3 | 1.5100000 | 0.1670329          | 1.3300000 | 1.6600000 |

Unique Subject Identifier=7198010000-0011

Assay variable : PTINR\_VAL1 PT-INR Value

| N | Mean      | Standard Deviation | Minimum   | Maximum   |
|---|-----------|--------------------|-----------|-----------|
| 6 | 1.8333333 | 0.1242041          | 1.6800000 | 2.0100000 |

Unique Subject Identifier=7198010000-0017

Assay variable : PTINR\_VAL1 PT-INR Value

| N | Mean      | Standard Deviation | Minimum   | Maximum   |
|---|-----------|--------------------|-----------|-----------|
| 6 | 2.1916667 | 0.4857743          | 1.5900000 | 3.0000000 |

Unique Subject Identifier=7198010000-0019

Assay variable : PTINR\_VAL1 PT-INR Value

N Mean Standard Deviation Minimum Maximum

---

|   |           |           |           |           |
|---|-----------|-----------|-----------|-----------|
| 4 | 1.6625000 | 0.1850000 | 1.4500000 | 1.9000000 |
|---|-----------|-----------|-----------|-----------|

---

Laboratory tests at the time of obtaining Table 2-6 consent, according to the presence or absence of proton-pump inhibitors

Unique Subject Identifier=7198010000-0031

MEANS Procedure

Assay variable : PTINR\_VAL1 PT-INR Value

N Mean Standard Deviation Minimum Maximum

---

|   |           |           |           |           |
|---|-----------|-----------|-----------|-----------|
| 5 | 1.8700000 | 0.3157531 | 1.6400000 | 2.4200000 |
|---|-----------|-----------|-----------|-----------|

---

Unique Subject Identifier=7198010000-0038

Assay variable : PTINR\_VAL1 PT-INR Value

N Mean Standard Deviation Minimum Maximum

---

|   |           |           |           |           |
|---|-----------|-----------|-----------|-----------|
| 6 | 1.9550000 | 0.4408968 | 1.3800000 | 2.5300000 |
|---|-----------|-----------|-----------|-----------|

---

Unique Subject Identifier=7198010000-0039

Assay variable : PTINR\_VAL1 PT-INR Value

N Mean Standard Deviation Minimum Maximum

---

|   |           |           |           |           |
|---|-----------|-----------|-----------|-----------|
| 4 | 2.3550000 | 0.0838650 | 2.2700000 | 2.4700000 |
|---|-----------|-----------|-----------|-----------|

---

Unique Subject Identifier=7198010000-0040

Assay variable : PTINR\_VAL1 PT-INR Value

N Mean Standard Deviation Minimum Maximum

---

|   |           |           |           |           |
|---|-----------|-----------|-----------|-----------|
| 4 | 1.9075000 | 0.1607016 | 1.7000000 | 2.0900000 |
|---|-----------|-----------|-----------|-----------|

---

Laboratory tests at the time of obtaining Table 2-6 consent, according to the presence or absence of proton-pump inhibitors

Unique Subject Identifier=7198010000-0044

MEANS Procedure

Assay variable : PTINR\_VAL1 PT-INR Value

| N | Mean      | Standard Deviation | Minimum   | Maximum   |
|---|-----------|--------------------|-----------|-----------|
| 2 | 1.9250000 | 0.1767767          | 1.8000000 | 2.0500000 |

Unique Subject Identifier=7198010000-0048

Assay variable : PTINR\_VAL1 PT-INR Value

| N | Mean      | Standard Deviation | Minimum   | Maximum   |
|---|-----------|--------------------|-----------|-----------|
| 1 | 1.5200000 |                    | 1.5200000 | 1.5200000 |

Unique Subject Identifier=7198010000-0051

Assay variable : PTINR\_VAL1 PT-INR Value

| N | Mean      | Standard Deviation | Minimum   | Maximum   |
|---|-----------|--------------------|-----------|-----------|
| 4 | 2.1575000 | 0.5864228          | 1.6400000 | 3.0000000 |

Unique Subject Identifier=7198010000-0053

Assay variable : PTINR\_VAL1 PT-INR Value

N Mean Standard Deviation Minimum Maximum

---

|   |          |           |          |          |
|---|----------|-----------|----------|----------|
| 6 | 1.960000 | 0.1584929 | 1.810000 | 2.220000 |
|---|----------|-----------|----------|----------|

---



Laboratory tests at the time of obtaining Table 2-6 consent, according to the presence or absence of proton-pump inhibitors

Unique Subject Identifier=7198010000-0057

MEANS Procedure

Assay variable : PTINR\_VAL1 PT-INR Value

N Mean Standard Deviation Minimum Maximum

---

|   |           |           |           |           |
|---|-----------|-----------|-----------|-----------|
| 5 | 2.1120000 | 0.2903791 | 1.7700000 | 2.4200000 |
|---|-----------|-----------|-----------|-----------|

---

Unique Subject Identifier=7198010000-0067

Assay variable : PTINR\_VAL1 PT-INR Value

N Mean Standard Deviation Minimum Maximum

---

|   |           |           |           |           |
|---|-----------|-----------|-----------|-----------|
| 3 | 2.3033333 | 0.5783886 | 1.6500000 | 2.7500000 |
|---|-----------|-----------|-----------|-----------|

---

Unique Subject Identifier=7198010000-0074

Assay variable : PTINR\_VAL1 PT-INR Value

N Mean Standard Deviation Minimum Maximum

---

|   |           |           |           |           |
|---|-----------|-----------|-----------|-----------|
| 6 | 1.7716667 | 0.4282250 | 1.4100000 | 2.3100000 |
|---|-----------|-----------|-----------|-----------|

---

Unique Subject Identifier=7198010000-0085

Assay variable : PTINR\_VAL1 PT-INR Value

N Mean Standard Deviation Minimum Maximum

---

|   |          |           |          |          |
|---|----------|-----------|----------|----------|
| 3 | 1.820000 | 0.4014972 | 1.440000 | 2.240000 |
|---|----------|-----------|----------|----------|

---

Laboratory tests at the time of obtaining Table 2-6 consent, according to the presence or absence of proton-pump inhibitors

Unique Subject Identifier=7198010000-0092

MEANS Procedure

Assay variable : PTINR\_VAL1 PT-INR Value

| N | Mean      | Standard Deviation | Minimum   | Maximum   |
|---|-----------|--------------------|-----------|-----------|
| 3 | 1.7466667 | 0.3002221          | 1.4400000 | 2.0400000 |

Unique Subject Identifier=7204000000-0002

Assay variable : PTINR\_VAL1 PT-INR Value

| N | Mean      | Standard Deviation | Minimum   | Maximum   |
|---|-----------|--------------------|-----------|-----------|
| 5 | 1.8680000 | 0.2940578          | 1.6000000 | 2.3500000 |

Unique Subject Identifier=7204000000-0010

Assay variable : PTINR\_VAL1 PT-INR Value

| N | Mean      | Standard Deviation | Minimum   | Maximum   |
|---|-----------|--------------------|-----------|-----------|
| 4 | 1.6300000 | 0.3236253          | 1.2800000 | 1.9200000 |

Unique Subject Identifier=7204000000-0017

Assay variable : PTINR\_VAL1 PT-INR Value

N Mean Standard Deviation Minimum Maximum

---

|   |           |           |           |           |
|---|-----------|-----------|-----------|-----------|
| 6 | 1.1933333 | 0.0588784 | 1.1100000 | 1.2800000 |
|---|-----------|-----------|-----------|-----------|

---

Laboratory tests at the time of obtaining Table 2-6 consent, according to the presence or absence of proton-pump inhibitors

Unique Subject Identifier=7204000000-0024

MEANS Procedure

Assay variable : PTINR\_VAL1 PT-INR Value

| N | Mean      | Standard Deviation | Minimum   | Maximum   |
|---|-----------|--------------------|-----------|-----------|
| 5 | 1.3140000 | 0.1689083          | 1.0900000 | 1.5600000 |

Unique Subject Identifier=7204000000-0026

Assay variable : PTINR\_VAL1 PT-INR Value

| N | Mean      | Standard Deviation | Minimum   | Maximum   |
|---|-----------|--------------------|-----------|-----------|
| 6 | 1.8383333 | 0.5723431          | 1.1400000 | 2.7900000 |

Unique Subject Identifier=7204000000-0028

Assay variable : PTINR\_VAL1 PT-INR Value

| N | Mean      | Standard Deviation | Minimum   | Maximum   |
|---|-----------|--------------------|-----------|-----------|
| 6 | 1.7533333 | 0.1148332          | 1.6400000 | 1.9100000 |

Unique Subject Identifier=7204000000-0030

Assay variable : PTINR\_VAL1 PT-INR Value

N Mean Standard Deviation Minimum Maximum

---

|   |           |           |           |           |
|---|-----------|-----------|-----------|-----------|
| 5 | 1.5080000 | 0.2537124 | 1.2800000 | 1.8900000 |
|---|-----------|-----------|-----------|-----------|

---

Laboratory tests at the time of obtaining Table 2-6 consent, according to the presence or absence of proton-pump inhibitors

Unique Subject Identifier=7204000000-0033

MEANS Procedure

Assay variable : PTINR\_VAL1 PT-INR Value

N Mean Standard Deviation Minimum Maximum

---

|   |           |           |           |           |
|---|-----------|-----------|-----------|-----------|
| 6 | 2.4266667 | 1.2527197 | 1.4600000 | 4.8300000 |
|---|-----------|-----------|-----------|-----------|

---

Unique Subject Identifier=7205000000-0001

Assay variable : PTINR\_VAL1 PT-INR Value

N Mean Standard Deviation Minimum Maximum

---

|   |           |           |           |           |
|---|-----------|-----------|-----------|-----------|
| 3 | 1.9266667 | 0.5118919 | 1.4700000 | 2.4800000 |
|---|-----------|-----------|-----------|-----------|

---

Unique Subject Identifier=7205000000-0027

Assay variable : PTINR\_VAL1 PT-INR Value

N Mean Standard Deviation Minimum Maximum

---

|   |           |           |           |           |
|---|-----------|-----------|-----------|-----------|
| 3 | 2.0700000 | 0.3593049 | 1.8100000 | 2.4800000 |
|---|-----------|-----------|-----------|-----------|

---

Unique Subject Identifier=7205000000-0061

Assay variable : PTINR\_VAL1 PT-INR Value

N Mean Standard Deviation Minimum Maximum

---

|   |           |           |           |           |
|---|-----------|-----------|-----------|-----------|
| 4 | 2.7075000 | 1.1173891 | 1.5500000 | 3.9700000 |
|---|-----------|-----------|-----------|-----------|

---



Laboratory tests at the time of obtaining Table 2-6 consent, according to the presence or absence of proton-pump inhibitors

Unique Subject Identifier=7205000000-0075

MEANS Procedure

Assay variable : PTINR\_VAL1 PT-INR Value

N Mean Standard Deviation Minimum Maximum

---

|   |           |           |           |           |
|---|-----------|-----------|-----------|-----------|
| 4 | 1.9125000 | 0.4852748 | 1.5700000 | 2.6300000 |
|---|-----------|-----------|-----------|-----------|

---

Unique Subject Identifier=7205000000-0080

Assay variable : PTINR\_VAL1 PT-INR Value

N Mean Standard Deviation Minimum Maximum

---

|   |           |           |           |           |
|---|-----------|-----------|-----------|-----------|
| 3 | 2.4900000 | 1.1468653 | 1.5300000 | 3.7600000 |
|---|-----------|-----------|-----------|-----------|

---

Unique Subject Identifier=7208011010-0005

Assay variable : PTINR\_VAL1 PT-INR Value

N Mean Standard Deviation Minimum Maximum

---

|   |           |           |           |           |
|---|-----------|-----------|-----------|-----------|
| 4 | 2.1100000 | 0.1925271 | 1.8700000 | 2.3100000 |
|---|-----------|-----------|-----------|-----------|

---

Unique Subject Identifier=7208011010-0007

Assay variable : PTINR\_VAL1 PT-INR Value

N Mean Standard Deviation Minimum Maximum

---

|   |           |           |           |           |
|---|-----------|-----------|-----------|-----------|
| 4 | 1.8925000 | 0.2736634 | 1.6600000 | 2.2600000 |
|---|-----------|-----------|-----------|-----------|

---

Laboratory tests at the time of obtaining Table 2-6 consent, according to the presence or absence of proton-pump inhibitors

Unique Subject Identifier=7208011010-0009

MEANS Procedure

Assay variable : PTINR\_VAL1 PT-INR Value

| N | Mean      | Standard Deviation | Minimum   | Maximum   |
|---|-----------|--------------------|-----------|-----------|
| 6 | 2.2666667 | 1.2165141          | 1.2300000 | 4.6400000 |

Unique Subject Identifier=7208011010-0011

Assay variable : PTINR\_VAL1 PT-INR Value

| N | Mean      | Standard Deviation | Minimum   | Maximum   |
|---|-----------|--------------------|-----------|-----------|
| 6 | 1.7300000 | 0.2324651          | 1.4900000 | 1.9900000 |

Unique Subject Identifier=7208011010-0012

Assay variable : PTINR\_VAL1 PT-INR Value

| N | Mean      | Standard Deviation | Minimum   | Maximum   |
|---|-----------|--------------------|-----------|-----------|
| 3 | 1.4966667 | 0.0503322          | 1.4500000 | 1.5500000 |

Unique Subject Identifier=7208011010-0013

Assay variable : PTINR\_VAL1 PT-INR Value

N Mean Standard Deviation Minimum Maximum

---

|   |          |  |          |          |
|---|----------|--|----------|----------|
| 1 | 2.310000 |  | 2.310000 | 2.310000 |
|---|----------|--|----------|----------|

---

Laboratory tests at the time of obtaining Table 2-6 consent, according to the presence or absence of proton-pump inhibitors

Unique Subject Identifier=7208011010-0015

MEANS Procedure

Assay variable : PTINR\_VAL1 PT-INR Value

N Mean Standard Deviation Minimum Maximum

---

|   |           |           |           |           |
|---|-----------|-----------|-----------|-----------|
| 3 | 1.5433333 | 0.4148895 | 1.1700000 | 1.9900000 |
|---|-----------|-----------|-----------|-----------|

---

Unique Subject Identifier=7209000000-0002

Assay variable : PTINR\_VAL1 PT-INR Value

N Mean Standard Deviation Minimum Maximum

---

|   |           |           |           |           |
|---|-----------|-----------|-----------|-----------|
| 3 | 2.1400000 | 0.2651415 | 1.8500000 | 2.3700000 |
|---|-----------|-----------|-----------|-----------|

---

Unique Subject Identifier=7209000000-0003

Assay variable : PTINR\_VAL1 PT-INR Value

N Mean Standard Deviation Minimum Maximum

---

|   |           |           |           |           |
|---|-----------|-----------|-----------|-----------|
| 3 | 2.3333333 | 0.1594783 | 2.1500000 | 2.4400000 |
|---|-----------|-----------|-----------|-----------|

---

Unique Subject Identifier=7209000000-0006

Assay variable : PTINR\_VAL1 PT-INR Value

N Mean Standard Deviation Minimum Maximum

---

|   |           |  |           |           |
|---|-----------|--|-----------|-----------|
| 1 | 1.5700000 |  | 1.5700000 | 1.5700000 |
|---|-----------|--|-----------|-----------|

---

Laboratory tests at the time of obtaining Table 2-6 consent, according to the presence or absence of proton-pump inhibitors

Unique Subject Identifier=7209000000-0007

MEANS Procedure

Assay variable : PTINR\_VAL1 PT-INR Value

N Mean Standard Deviation Minimum Maximum

---

|   |           |           |           |           |
|---|-----------|-----------|-----------|-----------|
| 4 | 1.1625000 | 0.0994569 | 1.0800000 | 1.2800000 |
|---|-----------|-----------|-----------|-----------|

---

Unique Subject Identifier=7209000000-0008

Assay variable : PTINR\_VAL1 PT-INR Value

N Mean Standard Deviation Minimum Maximum

---

|   |           |           |           |           |
|---|-----------|-----------|-----------|-----------|
| 4 | 1.9075000 | 0.2458150 | 1.7500000 | 2.2700000 |
|---|-----------|-----------|-----------|-----------|

---

Unique Subject Identifier=7209000000-0010

Assay variable : PTINR\_VAL1 PT-INR Value

N Mean Standard Deviation Minimum Maximum

---

|   |           |           |           |           |
|---|-----------|-----------|-----------|-----------|
| 4 | 1.8575000 | 0.3522665 | 1.5500000 | 2.3500000 |
|---|-----------|-----------|-----------|-----------|

---

Unique Subject Identifier=7209000000-0011

Assay variable : PTINR\_VAL1 PT-INR Value

N Mean Standard Deviation Minimum Maximum

---

|   |           |           |           |           |
|---|-----------|-----------|-----------|-----------|
| 4 | 1.9475000 | 0.1793274 | 1.6800000 | 2.0500000 |
|---|-----------|-----------|-----------|-----------|

---



Laboratory tests at the time of obtaining Table 2-6 consent, according to the presence or absence of proton-pump inhibitors

Unique Subject Identifier=7209000000-0014

MEANS Procedure

Assay variable : PTINR\_VAL1 PT-INR Value

N Mean Standard Deviation Minimum Maximum

---

|   |           |           |           |           |
|---|-----------|-----------|-----------|-----------|
| 4 | 2.0500000 | 0.3359563 | 1.5700000 | 2.3400000 |
|---|-----------|-----------|-----------|-----------|

---

Unique Subject Identifier=7209000000-0019

Assay variable : PTINR\_VAL1 PT-INR Value

N Mean Standard Deviation Minimum Maximum

---

|   |           |           |           |           |
|---|-----------|-----------|-----------|-----------|
| 4 | 2.2150000 | 0.1398809 | 2.0500000 | 2.3500000 |
|---|-----------|-----------|-----------|-----------|

---

Unique Subject Identifier=7209000000-0021

Assay variable : PTINR\_VAL1 PT-INR Value

N Mean Standard Deviation Minimum Maximum

---

|   |           |           |           |           |
|---|-----------|-----------|-----------|-----------|
| 3 | 1.9133333 | 0.3455913 | 1.5800000 | 2.2700000 |
|---|-----------|-----------|-----------|-----------|

---

Unique Subject Identifier=7209000000-0025

Assay variable : PTINR\_VAL1 PT-INR Value

N Mean Standard Deviation Minimum Maximum

---

|   |           |           |           |           |
|---|-----------|-----------|-----------|-----------|
| 3 | 1.8266667 | 0.2761038 | 1.5900000 | 2.1300000 |
|---|-----------|-----------|-----------|-----------|

---

Laboratory tests at the time of obtaining Table 2-6 consent, according to the presence or absence of proton-pump inhibitors

Unique Subject Identifier=7209000000-0026

MEANS Procedure

Assay variable : PTINR\_VAL1 PT-INR Value

| N | Mean      | Standard Deviation | Minimum   | Maximum   |
|---|-----------|--------------------|-----------|-----------|
| 2 | 1.5100000 | 0.0707107          | 1.4600000 | 1.5600000 |

Unique Subject Identifier=7209000000-0027

Assay variable : PTINR\_VAL1 PT-INR Value

| N | Mean      | Standard Deviation | Minimum   | Maximum   |
|---|-----------|--------------------|-----------|-----------|
| 4 | 1.8250000 | 0.4704962          | 1.2300000 | 2.3800000 |

Unique Subject Identifier=7209000000-0028

Assay variable : PTINR\_VAL1 PT-INR Value

| N | Mean      | Standard Deviation | Minimum   | Maximum   |
|---|-----------|--------------------|-----------|-----------|
| 4 | 2.2975000 | 0.0877021          | 2.2000000 | 2.3900000 |

Unique Subject Identifier=7209000000-0034

Assay variable : PTINR\_VAL1 PT-INR Value

N Mean Standard Deviation Minimum Maximum

---

|   |           |           |           |           |
|---|-----------|-----------|-----------|-----------|
| 4 | 1.8975000 | 0.0758837 | 1.8200000 | 2.0000000 |
|---|-----------|-----------|-----------|-----------|

---

Laboratory tests at the time of obtaining Table 2-6 consent, according to the presence or absence of proton-pump inhibitors

Unique Subject Identifier=7209000000-0036

MEANS Procedure

Assay variable : PTINR\_VAL1 PT-INR Value

N Mean Standard Deviation Minimum Maximum

---

|   |           |           |           |           |
|---|-----------|-----------|-----------|-----------|
| 4 | 1.8700000 | 0.4377975 | 1.4200000 | 2.2700000 |
|---|-----------|-----------|-----------|-----------|

---

Unique Subject Identifier=7209000000-0037

Assay variable : PTINR\_VAL1 PT-INR Value

N Mean Standard Deviation Minimum Maximum

---

|   |           |           |           |           |
|---|-----------|-----------|-----------|-----------|
| 4 | 2.0650000 | 0.1690168 | 1.8900000 | 2.2900000 |
|---|-----------|-----------|-----------|-----------|

---

Unique Subject Identifier=7209000000-0048

Assay variable : PTINR\_VAL1 PT-INR Value

N Mean Standard Deviation Minimum Maximum

---

|   |           |           |           |           |
|---|-----------|-----------|-----------|-----------|
| 3 | 1.6966667 | 0.1721434 | 1.5600000 | 1.8900000 |
|---|-----------|-----------|-----------|-----------|

---

Unique Subject Identifier=7209000000-0049

Assay variable : PTINR\_VAL1 PT-INR Value

N Mean Standard Deviation Minimum Maximum

---

|   |           |           |           |           |
|---|-----------|-----------|-----------|-----------|
| 6 | 2.9650000 | 0.6056979 | 2.1300000 | 3.9400000 |
|---|-----------|-----------|-----------|-----------|

---

Laboratory tests at the time of obtaining Table 2-6 consent, according to the presence or absence of proton-pump inhibitors

Unique Subject Identifier=7209000000-0050

MEANS Procedure

Assay variable : PTINR\_VAL1 PT-INR Value

| N | Mean      | Standard Deviation | Minimum   | Maximum   |
|---|-----------|--------------------|-----------|-----------|
| 3 | 1.2866667 | 0.3592121          | 0.9000000 | 1.6100000 |

Unique Subject Identifier=7209000000-0056

Assay variable : PTINR\_VAL1 PT-INR Value

| N | Mean      | Standard Deviation | Minimum   | Maximum   |
|---|-----------|--------------------|-----------|-----------|
| 6 | 1.5700000 | 0.1340149          | 1.3900000 | 1.7700000 |

Unique Subject Identifier=7209000000-0057

Assay variable : PTINR\_VAL1 PT-INR Value

| N | Mean      | Standard Deviation | Minimum   | Maximum   |
|---|-----------|--------------------|-----------|-----------|
| 6 | 1.8100000 | 0.3024566          | 1.4600000 | 2.2100000 |

Unique Subject Identifier=7209000000-0060

Assay variable : PTINR\_VAL1 PT-INR Value

N Mean Standard Deviation Minimum Maximum

---

|   |           |           |           |           |
|---|-----------|-----------|-----------|-----------|
| 4 | 2.0250000 | 0.1470827 | 1.8100000 | 2.1200000 |
|---|-----------|-----------|-----------|-----------|

---



Laboratory tests at the time of obtaining Table 2-6 consent, according to the presence or absence of proton-pump inhibitors

Unique Subject Identifier=7209000000-0061

MEANS Procedure

Assay variable : PTINR\_VAL1 PT-INR Value

N Mean Standard Deviation Minimum Maximum

---

|   |           |           |           |           |
|---|-----------|-----------|-----------|-----------|
| 4 | 1.8175000 | 0.4486554 | 1.2500000 | 2.3100000 |
|---|-----------|-----------|-----------|-----------|

---

Unique Subject Identifier=7209000000-0062

Assay variable : PTINR\_VAL1 PT-INR Value

N Mean Standard Deviation Minimum Maximum

---

|   |           |           |           |           |
|---|-----------|-----------|-----------|-----------|
| 4 | 2.8925000 | 0.0906918 | 2.8000000 | 2.9800000 |
|---|-----------|-----------|-----------|-----------|

---

Unique Subject Identifier=7209000000-0066

Assay variable : PTINR\_VAL1 PT-INR Value

N Mean Standard Deviation Minimum Maximum

---

|   |           |           |           |           |
|---|-----------|-----------|-----------|-----------|
| 4 | 1.6500000 | 0.3350622 | 1.3500000 | 2.1300000 |
|---|-----------|-----------|-----------|-----------|

---

Unique Subject Identifier=7209000000-0068

Assay variable : PTINR\_VAL1 PT-INR Value

N Mean Standard Deviation Minimum Maximum

---

|   |           |           |           |           |
|---|-----------|-----------|-----------|-----------|
| 4 | 2.3250000 | 0.2700000 | 2.1000000 | 2.7000000 |
|---|-----------|-----------|-----------|-----------|

---

Laboratory tests at the time of obtaining Table 2-6 consent, according to the presence or absence of proton-pump inhibitors

Unique Subject Identifier=7209000000-0072

MEANS Procedure

Assay variable : PTINR\_VAL1 PT-INR Value

N Mean Standard Deviation Minimum Maximum

---

|   |           |           |           |           |
|---|-----------|-----------|-----------|-----------|
| 4 | 2.4225000 | 0.2519755 | 2.1200000 | 2.6400000 |
|---|-----------|-----------|-----------|-----------|

---

Unique Subject Identifier=7209000000-0073

Assay variable : PTINR\_VAL1 PT-INR Value

N Mean Standard Deviation Minimum Maximum

---

|   |           |           |           |           |
|---|-----------|-----------|-----------|-----------|
| 2 | 1.8300000 | 0.8202439 | 1.2500000 | 2.4100000 |
|---|-----------|-----------|-----------|-----------|

---

Unique Subject Identifier=7209000000-0074

Assay variable : PTINR\_VAL1 PT-INR Value

N Mean Standard Deviation Minimum Maximum

---

|   |           |           |           |           |
|---|-----------|-----------|-----------|-----------|
| 4 | 1.9750000 | 0.8438602 | 1.2800000 | 3.0200000 |
|---|-----------|-----------|-----------|-----------|

---

Unique Subject Identifier=7209000000-0085

Assay variable : PTINR\_VAL1 PT-INR Value

N Mean Standard Deviation Minimum Maximum

---

|   |          |           |          |          |
|---|----------|-----------|----------|----------|
| 3 | 2.800000 | 0.2971532 | 2.460000 | 3.010000 |
|---|----------|-----------|----------|----------|

---

Laboratory tests at the time of obtaining Table 2-6 consent, according to the presence or absence of proton-pump inhibitors

Unique Subject Identifier=7209000000-0089

MEANS Procedure

Assay variable : PTINR\_VAL1 PT-INR Value

N Mean Standard Deviation Minimum Maximum

---

|   |           |           |           |           |
|---|-----------|-----------|-----------|-----------|
| 3 | 1.7333333 | 0.5928181 | 1.0500000 | 2.1100000 |
|---|-----------|-----------|-----------|-----------|

---

Unique Subject Identifier=7209000000-0090

Assay variable : PTINR\_VAL1 PT-INR Value

N Mean Standard Deviation Minimum Maximum

---

|   |           |           |           |           |
|---|-----------|-----------|-----------|-----------|
| 3 | 2.5233333 | 0.5186842 | 2.1800000 | 3.1200000 |
|---|-----------|-----------|-----------|-----------|

---

Unique Subject Identifier=7209000000-0093

Assay variable : PTINR\_VAL1 PT-INR Value

N Mean Standard Deviation Minimum Maximum

---

|   |           |           |           |           |
|---|-----------|-----------|-----------|-----------|
| 4 | 1.8825000 | 0.4947979 | 1.2900000 | 2.3200000 |
|---|-----------|-----------|-----------|-----------|

---

Unique Subject Identifier=7209000000-0094

Assay variable : PTINR\_VAL1 PT-INR Value

N Mean Standard Deviation Minimum Maximum

---

|   |          |           |          |          |
|---|----------|-----------|----------|----------|
| 3 | 2.083333 | 0.2569695 | 1.810000 | 2.320000 |
|---|----------|-----------|----------|----------|

---

Laboratory tests at the time of obtaining Table 2-6 consent, according to the presence or absence of proton-pump inhibitors

Unique Subject Identifier=7209000000-0095

MEANS Procedure

Assay variable : PTINR\_VAL1 PT-INR Value

| N | Mean      | Standard Deviation | Minimum   | Maximum   |
|---|-----------|--------------------|-----------|-----------|
| 1 | 1.8800000 |                    | 1.8800000 | 1.8800000 |

Unique Subject Identifier=7209000000-0097

Assay variable : PTINR\_VAL1 PT-INR Value

| N | Mean      | Standard Deviation | Minimum   | Maximum   |
|---|-----------|--------------------|-----------|-----------|
| 2 | 2.3950000 | 1.3364318          | 1.4500000 | 3.3400000 |

Unique Subject Identifier=7209000000-0098

Assay variable : PTINR\_VAL1 PT-INR Value

| N | Mean      | Standard Deviation | Minimum   | Maximum   |
|---|-----------|--------------------|-----------|-----------|
| 3 | 2.5200000 | 0.1345362          | 2.3700000 | 2.6300000 |

Unique Subject Identifier=7209000000-0099

Assay variable : PTINR\_VAL1 PT-INR Value

N Mean Standard Deviation Minimum Maximum

---

|   |           |           |           |           |
|---|-----------|-----------|-----------|-----------|
| 4 | 1.9275000 | 0.1412740 | 1.7200000 | 2.0300000 |
|---|-----------|-----------|-----------|-----------|

---



Laboratory tests at the time of obtaining Table 2-6 consent, according to the presence or absence of proton-pump inhibitors

Unique Subject Identifier=7209000000-0110

MEANS Procedure

Assay variable : PTINR\_VAL1 PT-INR Value

N Mean Standard Deviation Minimum Maximum

---

|   |           |  |           |           |
|---|-----------|--|-----------|-----------|
| 1 | 2.8100000 |  | 2.8100000 | 2.8100000 |
|---|-----------|--|-----------|-----------|

---

Unique Subject Identifier=7209000000-0111

Assay variable : PTINR\_VAL1 PT-INR Value

N Mean Standard Deviation Minimum Maximum

---

|   |           |  |           |           |
|---|-----------|--|-----------|-----------|
| 1 | 1.5700000 |  | 1.5700000 | 1.5700000 |
|---|-----------|--|-----------|-----------|

---

Unique Subject Identifier=7209000000-0112

Assay variable : PTINR\_VAL1 PT-INR Value

N Mean Standard Deviation Minimum Maximum

---

|   |           |  |           |           |
|---|-----------|--|-----------|-----------|
| 1 | 1.6600000 |  | 1.6600000 | 1.6600000 |
|---|-----------|--|-----------|-----------|

---

Unique Subject Identifier=7209000000-0114

Assay variable : PTINR\_VAL1 PT-INR Value

N Mean Standard Deviation Minimum Maximum

---

|   |           |           |           |           |
|---|-----------|-----------|-----------|-----------|
| 4 | 2.2475000 | 0.5292999 | 1.6200000 | 2.8900000 |
|---|-----------|-----------|-----------|-----------|

---

Laboratory tests at the time of obtaining Table 2-6 consent, according to the presence or absence of proton-pump inhibitors

Unique Subject Identifier=7209000000-0116

MEANS Procedure

Assay variable : PTINR\_VAL1 PT-INR Value

N Mean Standard Deviation Minimum Maximum

---

|   |           |           |           |           |
|---|-----------|-----------|-----------|-----------|
| 3 | 1.6533333 | 0.1715615 | 1.4700000 | 1.8100000 |
|---|-----------|-----------|-----------|-----------|

---

Unique Subject Identifier=7209000000-0136

Assay variable : PTINR\_VAL1 PT-INR Value

N Mean Standard Deviation Minimum Maximum

---

|   |           |           |           |           |
|---|-----------|-----------|-----------|-----------|
| 3 | 1.9733333 | 0.1436431 | 1.8100000 | 2.0800000 |
|---|-----------|-----------|-----------|-----------|

---

Unique Subject Identifier=7209000000-0148

Assay variable : PTINR\_VAL1 PT-INR Value

N Mean Standard Deviation Minimum Maximum

---

|   |           |           |           |           |
|---|-----------|-----------|-----------|-----------|
| 4 | 1.7325000 | 0.0623832 | 1.6500000 | 1.8000000 |
|---|-----------|-----------|-----------|-----------|

---

Unique Subject Identifier=7209000000-0149

Assay variable : PTINR\_VAL1 PT-INR Value

N Mean Standard Deviation Minimum Maximum

---

|   |           |           |           |           |
|---|-----------|-----------|-----------|-----------|
| 3 | 1.9566667 | 0.4895236 | 1.5800000 | 2.5100000 |
|---|-----------|-----------|-----------|-----------|

---

Laboratory tests at the time of obtaining Table 2-6 consent, according to the presence or absence of proton-pump inhibitors

Unique Subject Identifier=7221000000-0003

MEANS Procedure

Assay variable : PTINR\_VAL1 PT-INR Value

N Mean Standard Deviation Minimum Maximum

---

|   |           |           |           |           |
|---|-----------|-----------|-----------|-----------|
| 5 | 1.9000000 | 0.3807887 | 1.4000000 | 2.4000000 |
|---|-----------|-----------|-----------|-----------|

---

Unique Subject Identifier=7221000000-0008

Assay variable : PTINR\_VAL1 PT-INR Value

N Mean Standard Deviation Minimum Maximum

---

|   |           |           |           |           |
|---|-----------|-----------|-----------|-----------|
| 5 | 1.7600000 | 0.2073644 | 1.4000000 | 1.9000000 |
|---|-----------|-----------|-----------|-----------|

---

Unique Subject Identifier=7221000000-0016

Assay variable : PTINR\_VAL1 PT-INR Value

N Mean Standard Deviation Minimum Maximum

---

|   |           |           |           |           |
|---|-----------|-----------|-----------|-----------|
| 5 | 2.3400000 | 0.3435113 | 2.0000000 | 2.8000000 |
|---|-----------|-----------|-----------|-----------|

---

Unique Subject Identifier=7221000000-0020

Assay variable : PTINR\_VAL1 PT-INR Value

N Mean Standard Deviation Minimum Maximum

---

|   |          |           |          |          |
|---|----------|-----------|----------|----------|
| 5 | 2.180000 | 0.1923538 | 1.900000 | 2.400000 |
|---|----------|-----------|----------|----------|

---

Laboratory tests at the time of obtaining Table 2-6 consent, according to the presence or absence of proton-pump inhibitors

Unique Subject Identifier=7224011010-0002

MEANS Procedure

Assay variable : PTINR\_VAL1 PT-INR Value

N Mean Standard Deviation Minimum Maximum

---

|   |           |  |           |           |
|---|-----------|--|-----------|-----------|
| 1 | 2.3800000 |  | 2.3800000 | 2.3800000 |
|---|-----------|--|-----------|-----------|

---

Unique Subject Identifier=7224011010-0004

Assay variable : PTINR\_VAL1 PT-INR Value

N Mean Standard Deviation Minimum Maximum

---

|   |           |  |           |           |
|---|-----------|--|-----------|-----------|
| 1 | 2.0300000 |  | 2.0300000 | 2.0300000 |
|---|-----------|--|-----------|-----------|

---

Unique Subject Identifier=7224011010-0006

Assay variable : PTINR\_VAL1 PT-INR Value

N Mean Standard Deviation Minimum Maximum

---

|   |           |  |           |           |
|---|-----------|--|-----------|-----------|
| 1 | 1.9000000 |  | 1.9000000 | 1.9000000 |
|---|-----------|--|-----------|-----------|

---

Unique Subject Identifier=7224011010-0009

Assay variable : PTINR\_VAL1 PT-INR Value

N Mean Standard Deviation Minimum Maximum

---

|   |          |           |          |          |
|---|----------|-----------|----------|----------|
| 5 | 1.750000 | 0.2431049 | 1.520000 | 2.140000 |
|---|----------|-----------|----------|----------|

---



Laboratory tests at the time of obtaining Table 2-6 consent, according to the presence or absence of proton-pump inhibitors

Unique Subject Identifier=7224011010-0011

MEANS Procedure

Assay variable : PTINR\_VAL1 PT-INR Value

N Mean Standard Deviation Minimum Maximum

---

|   |           |           |           |           |
|---|-----------|-----------|-----------|-----------|
| 3 | 1.4700000 | 0.2389561 | 1.2600000 | 1.7300000 |
|---|-----------|-----------|-----------|-----------|

---

Unique Subject Identifier=7226000000-0001

Assay variable : PTINR\_VAL1 PT-INR Value

N Mean Standard Deviation Minimum Maximum

---

|   |           |           |           |           |
|---|-----------|-----------|-----------|-----------|
| 3 | 1.4700000 | 0.1587451 | 1.2900000 | 1.5900000 |
|---|-----------|-----------|-----------|-----------|

---

Unique Subject Identifier=7226000000-0005

Assay variable : PTINR\_VAL1 PT-INR Value

N Mean Standard Deviation Minimum Maximum

---

|   |           |           |           |           |
|---|-----------|-----------|-----------|-----------|
| 4 | 1.7500000 | 0.2714160 | 1.4200000 | 2.0100000 |
|---|-----------|-----------|-----------|-----------|

---

Unique Subject Identifier=7226000000-0006

Assay variable : PTINR\_VAL1 PT-INR Value

N Mean Standard Deviation Minimum Maximum

---

|   |          |           |          |          |
|---|----------|-----------|----------|----------|
| 4 | 2.290000 | 1.0512532 | 1.440000 | 3.710000 |
|---|----------|-----------|----------|----------|

---

Laboratory tests at the time of obtaining Table 2-6 consent, according to the presence or absence of proton-pump inhibitors

Unique Subject Identifier=722600000-0012

MEANS Procedure

Assay variable : PTINR\_VAL1 PT-INR Value

| N | Mean      | Standard Deviation | Minimum   | Maximum   |
|---|-----------|--------------------|-----------|-----------|
| 3 | 2.3866667 | 0.3066486          | 2.1900000 | 2.7400000 |

Unique Subject Identifier=722600000-0013

Assay variable : PTINR\_VAL1 PT-INR Value

| N | Mean      | Standard Deviation | Minimum   | Maximum   |
|---|-----------|--------------------|-----------|-----------|
| 4 | 2.2375000 | 0.3244868          | 1.9300000 | 2.6900000 |

Unique Subject Identifier=722600000-0017

Assay variable : PTINR\_VAL1 PT-INR Value

| N | Mean      | Standard Deviation | Minimum   | Maximum   |
|---|-----------|--------------------|-----------|-----------|
| 5 | 1.8540000 | 0.3089984          | 1.4200000 | 2.2900000 |

Unique Subject Identifier=722600000-0019

Assay variable : PTINR\_VAL1 PT-INR Value

N Mean Standard Deviation Minimum Maximum

---

|   |           |           |           |           |
|---|-----------|-----------|-----------|-----------|
| 3 | 1.9366667 | 0.4315476 | 1.5900000 | 2.4200000 |
|---|-----------|-----------|-----------|-----------|

---

Laboratory tests at the time of obtaining Table 2-6 consent, according to the presence or absence of proton-pump inhibitors

Unique Subject Identifier=722600000-0020

MEANS Procedure

Assay variable : PTINR\_VAL1 PT-INR Value

N Mean Standard Deviation Minimum Maximum

---

|   |           |           |           |           |
|---|-----------|-----------|-----------|-----------|
| 3 | 1.8766667 | 0.5612783 | 1.3700000 | 2.4800000 |
|---|-----------|-----------|-----------|-----------|

---

Unique Subject Identifier=722600000-0022

Assay variable : PTINR\_VAL1 PT-INR Value

N Mean Standard Deviation Minimum Maximum

---

|   |           |           |           |           |
|---|-----------|-----------|-----------|-----------|
| 3 | 2.0766667 | 0.6251666 | 1.4600000 | 2.7100000 |
|---|-----------|-----------|-----------|-----------|

---

Unique Subject Identifier=722600000-0024

Assay variable : PTINR\_VAL1 PT-INR Value

N Mean Standard Deviation Minimum Maximum

---

|   |           |           |           |           |
|---|-----------|-----------|-----------|-----------|
| 5 | 1.6380000 | 0.4292086 | 1.2000000 | 2.3500000 |
|---|-----------|-----------|-----------|-----------|

---

Unique Subject Identifier=722600000-0026

Assay variable : PTINR\_VAL1 PT-INR Value

N Mean Standard Deviation Minimum Maximum

---

|   |           |           |           |           |
|---|-----------|-----------|-----------|-----------|
| 3 | 1.9100000 | 0.6080296 | 1.3400000 | 2.5500000 |
|---|-----------|-----------|-----------|-----------|

---

Laboratory tests at the time of obtaining Table 2-6 consent, according to the presence or absence of proton-pump inhibitors

Unique Subject Identifier=7226000000-0029

MEANS Procedure

Assay variable : PTINR\_VAL1 PT-INR Value

| N | Mean      | Standard Deviation | Minimum   | Maximum   |
|---|-----------|--------------------|-----------|-----------|
| 3 | 1.6866667 | 0.3027100          | 1.4100000 | 2.0100000 |

Unique Subject Identifier=7233000000-0007

Assay variable : PTINR\_VAL1 PT-INR Value

| N | Mean      | Standard Deviation | Minimum   | Maximum   |
|---|-----------|--------------------|-----------|-----------|
| 4 | 2.2800000 | 0.1663330          | 2.0900000 | 2.4600000 |

Unique Subject Identifier=7235000000-0002

Assay variable : PTINR\_VAL1 PT-INR Value

| N | Mean      | Standard Deviation | Minimum   | Maximum   |
|---|-----------|--------------------|-----------|-----------|
| 1 | 2.9300000 |                    | 2.9300000 | 2.9300000 |

Unique Subject Identifier=7235000000-0003

Assay variable : PTINR\_VAL1 PT-INR Value

N Mean Standard Deviation Minimum Maximum

---

|   |           |  |           |           |
|---|-----------|--|-----------|-----------|
| 1 | 2.2700000 |  | 2.2700000 | 2.2700000 |
|---|-----------|--|-----------|-----------|

---



Laboratory tests at the time of obtaining Table 2-6 consent, according to the presence or absence of proton-pump inhibitors

Unique Subject Identifier=723500000-0011

MEANS Procedure

Assay variable : PTINR\_VAL1 PT-INR Value

N Mean Standard Deviation Minimum Maximum

---

|   |           |           |           |           |
|---|-----------|-----------|-----------|-----------|
| 2 | 2.1850000 | 0.2616295 | 2.0000000 | 2.3700000 |
|---|-----------|-----------|-----------|-----------|

---

Unique Subject Identifier=723500000-0012

Assay variable : PTINR\_VAL1 PT-INR Value

N Mean Standard Deviation Minimum Maximum

---

|   |           |  |           |           |
|---|-----------|--|-----------|-----------|
| 1 | 3.0300000 |  | 3.0300000 | 3.0300000 |
|---|-----------|--|-----------|-----------|

---

Unique Subject Identifier=723500000-0013

Assay variable : PTINR\_VAL1 PT-INR Value

N Mean Standard Deviation Minimum Maximum

---

|   |           |           |           |           |
|---|-----------|-----------|-----------|-----------|
| 2 | 1.7250000 | 0.5161880 | 1.3600000 | 2.0900000 |
|---|-----------|-----------|-----------|-----------|

---

Unique Subject Identifier=723500000-0015

Assay variable : PTINR\_VAL1 PT-INR Value

N Mean Standard Deviation Minimum Maximum

---

|   |          |  |          |          |
|---|----------|--|----------|----------|
| 1 | 2.280000 |  | 2.280000 | 2.280000 |
|---|----------|--|----------|----------|

---

Laboratory tests at the time of obtaining Table 2-6 consent, according to the presence or absence of proton-pump inhibitors

Unique Subject Identifier=723500000-0018

MEANS Procedure

Assay variable : PTINR\_VAL1 PT-INR Value

N Mean Standard Deviation Minimum Maximum

---

|   |           |  |           |           |
|---|-----------|--|-----------|-----------|
| 1 | 1.4900000 |  | 1.4900000 | 1.4900000 |
|---|-----------|--|-----------|-----------|

---

Unique Subject Identifier=7237010000-0001

Assay variable : PTINR\_VAL1 PT-INR Value

N Mean Standard Deviation Minimum Maximum

---

|   |           |           |           |           |
|---|-----------|-----------|-----------|-----------|
| 3 | 1.5800000 | 0.0346410 | 1.5400000 | 1.6000000 |
|---|-----------|-----------|-----------|-----------|

---

Unique Subject Identifier=7237010000-0002

Assay variable : PTINR\_VAL1 PT-INR Value

N Mean Standard Deviation Minimum Maximum

---

|   |           |           |           |           |
|---|-----------|-----------|-----------|-----------|
| 3 | 1.8833333 | 0.4650090 | 1.4200000 | 2.3500000 |
|---|-----------|-----------|-----------|-----------|

---

Unique Subject Identifier=7237010000-0003

Assay variable : PTINR\_VAL1 PT-INR Value

N Mean Standard Deviation Minimum Maximum

---

|   |          |           |          |          |
|---|----------|-----------|----------|----------|
| 3 | 1.400000 | 0.3143247 | 1.040000 | 1.620000 |
|---|----------|-----------|----------|----------|

---

Laboratory tests at the time of obtaining Table 2-6 consent, according to the presence or absence of proton-pump inhibitors

Unique Subject Identifier=7242010000-0001

MEANS Procedure

Assay variable : PTINR\_VAL1 PT-INR Value

N Mean Standard Deviation Minimum Maximum

---

|   |           |           |           |           |
|---|-----------|-----------|-----------|-----------|
| 2 | 1.3250000 | 0.2050610 | 1.1800000 | 1.4700000 |
|---|-----------|-----------|-----------|-----------|

---

Unique Subject Identifier=7242010000-0003

Assay variable : PTINR\_VAL1 PT-INR Value

N Mean Standard Deviation Minimum Maximum

---

|   |           |           |           |           |
|---|-----------|-----------|-----------|-----------|
| 2 | 2.2050000 | 0.1060660 | 2.1300000 | 2.2800000 |
|---|-----------|-----------|-----------|-----------|

---

Unique Subject Identifier=7242010000-0008

Assay variable : PTINR\_VAL1 PT-INR Value

N Mean Standard Deviation Minimum Maximum

---

|   |           |           |           |           |
|---|-----------|-----------|-----------|-----------|
| 2 | 1.6850000 | 0.0070711 | 1.6800000 | 1.6900000 |
|---|-----------|-----------|-----------|-----------|

---

Unique Subject Identifier=7242010000-0009

Assay variable : PTINR\_VAL1 PT-INR Value

N Mean Standard Deviation Minimum Maximum

---

|   |          |           |          |          |
|---|----------|-----------|----------|----------|
| 2 | 2.310000 | 0.4101219 | 2.020000 | 2.600000 |
|---|----------|-----------|----------|----------|

---

Laboratory tests at the time of obtaining Table 2-6 consent, according to the presence or absence of proton-pump inhibitors

Unique Subject Identifier=7242010000-0012

MEANS Procedure

Assay variable : PTINR\_VAL1 PT-INR Value

| N | Mean      | Standard Deviation | Minimum   | Maximum   |
|---|-----------|--------------------|-----------|-----------|
| 2 | 1.9250000 | 0.4737615          | 1.5900000 | 2.2600000 |

Unique Subject Identifier=7314000000-0009

Assay variable : PTINR\_VAL1 PT-INR Value

| N | Mean      | Standard Deviation | Minimum   | Maximum   |
|---|-----------|--------------------|-----------|-----------|
| 4 | 1.7750000 | 0.2362908          | 1.6000000 | 2.1000000 |

Unique Subject Identifier=7314000000-0016

Assay variable : PTINR\_VAL1 PT-INR Value

| N | Mean      | Standard Deviation | Minimum   | Maximum   |
|---|-----------|--------------------|-----------|-----------|
| 5 | 1.5800000 | 0.0836660          | 1.5000000 | 1.7000000 |

Unique Subject Identifier=7314000000-0020

Assay variable : PTINR\_VAL1 PT-INR Value

N Mean Standard Deviation Minimum Maximum

---

|   |           |           |           |           |
|---|-----------|-----------|-----------|-----------|
| 6 | 1.7666667 | 0.1632993 | 1.6000000 | 2.0000000 |
|---|-----------|-----------|-----------|-----------|

---



Laboratory tests at the time of obtaining Table 2-6 consent, according to the presence or absence of proton-pump inhibitors

Unique Subject Identifier=732600000-0001

MEANS Procedure

Assay variable : PTINR\_VAL1 PT-INR Value

| N | Mean     | Standard Deviation | Minimum  | Maximum  |
|---|----------|--------------------|----------|----------|
| 5 | 1.610000 | 0.3037269          | 1.280000 | 2.050000 |

Unique Subject Identifier=732600000-0004

Assay variable : PTINR\_VAL1 PT-INR Value

| N | Mean     | Standard Deviation | Minimum  | Maximum  |
|---|----------|--------------------|----------|----------|
| 3 | 2.156667 | 0.2074448          | 1.970000 | 2.380000 |

Unique Subject Identifier=732600000-0005

Assay variable : PTINR\_VAL1 PT-INR Value

| N | Mean     | Standard Deviation | Minimum  | Maximum  |
|---|----------|--------------------|----------|----------|
| 5 | 2.466000 | 0.3561320          | 1.940000 | 2.910000 |

Unique Subject Identifier=732600000-0006

Assay variable : PTINR\_VAL1 PT-INR Value

N Mean Standard Deviation Minimum Maximum

---

|   |          |           |          |          |
|---|----------|-----------|----------|----------|
| 5 | 1.940000 | 0.2518928 | 1.610000 | 2.260000 |
|---|----------|-----------|----------|----------|

---

Laboratory tests at the time of obtaining Table 2-6 consent, according to the presence or absence of proton-pump inhibitors

Unique Subject Identifier=732600000-0007

MEANS Procedure

Assay variable : PTINR\_VAL1 PT-INR Value

| N | Mean      | Standard Deviation | Minimum   | Maximum   |
|---|-----------|--------------------|-----------|-----------|
| 4 | 1.8825000 | 0.2154646          | 1.5800000 | 2.0600000 |

Unique Subject Identifier=7332010000-0002

Assay variable : PTINR\_VAL1 PT-INR Value

| N | Mean      | Standard Deviation | Minimum   | Maximum   |
|---|-----------|--------------------|-----------|-----------|
| 5 | 2.1080000 | 1.0816977          | 1.3600000 | 3.9600000 |

Unique Subject Identifier=7332010000-0004

Assay variable : PTINR\_VAL1 PT-INR Value

| N | Mean      | Standard Deviation | Minimum   | Maximum   |
|---|-----------|--------------------|-----------|-----------|
| 4 | 1.8125000 | 0.2139120          | 1.5300000 | 2.0500000 |

Unique Subject Identifier=7332010000-0005

Assay variable : PTINR\_VAL1 PT-INR Value

N Mean Standard Deviation Minimum Maximum

---

|   |           |           |           |           |
|---|-----------|-----------|-----------|-----------|
| 4 | 2.2150000 | 0.1815673 | 2.0400000 | 2.4500000 |
|---|-----------|-----------|-----------|-----------|

---

Laboratory tests at the time of obtaining Table 2-6 consent, according to the presence or absence of proton-pump inhibitors

Unique Subject Identifier=7332010000-0006

MEANS Procedure

Assay variable : PTINR\_VAL1 PT-INR Value

N Mean Standard Deviation Minimum Maximum

---

|   |           |           |           |           |
|---|-----------|-----------|-----------|-----------|
| 6 | 1.8366667 | 0.2407211 | 1.5800000 | 2.2400000 |
|---|-----------|-----------|-----------|-----------|

---

Unique Subject Identifier=7332010000-0007

Assay variable : PTINR\_VAL1 PT-INR Value

N Mean Standard Deviation Minimum Maximum

---

|   |           |           |           |           |
|---|-----------|-----------|-----------|-----------|
| 6 | 2.3350000 | 0.3577569 | 1.9900000 | 2.9900000 |
|---|-----------|-----------|-----------|-----------|

---

Unique Subject Identifier=7332010000-0008

Assay variable : PTINR\_VAL1 PT-INR Value

N Mean Standard Deviation Minimum Maximum

---

|   |           |           |           |           |
|---|-----------|-----------|-----------|-----------|
| 5 | 1.6520000 | 0.0990959 | 1.5300000 | 1.7900000 |
|---|-----------|-----------|-----------|-----------|

---

Unique Subject Identifier=7332010000-0014

Assay variable : PTINR\_VAL1 PT-INR Value

N Mean Standard Deviation Minimum Maximum

---

|   |          |           |          |          |
|---|----------|-----------|----------|----------|
| 3 | 1.833333 | 0.1021437 | 1.760000 | 1.950000 |
|---|----------|-----------|----------|----------|

---

Laboratory tests at the time of obtaining Table 2-6 consent, according to the presence or absence of proton-pump inhibitors

Unique Subject Identifier=7332010000-0016

MEANS Procedure

Assay variable : PTINR\_VAL1 PT-INR Value

N Mean Standard Deviation Minimum Maximum

---

|   |           |           |           |           |
|---|-----------|-----------|-----------|-----------|
| 3 | 1.8733333 | 0.1674316 | 1.6800000 | 1.9700000 |
|---|-----------|-----------|-----------|-----------|

---

Unique Subject Identifier=7332010000-0017

Assay variable : PTINR\_VAL1 PT-INR Value

N Mean Standard Deviation Minimum Maximum

---

|   |           |           |           |           |
|---|-----------|-----------|-----------|-----------|
| 3 | 2.2433333 | 0.5253887 | 1.9400000 | 2.8500000 |
|---|-----------|-----------|-----------|-----------|

---

Unique Subject Identifier=7332010000-0018

Assay variable : PTINR\_VAL1 PT-INR Value

N Mean Standard Deviation Minimum Maximum

---

|   |           |           |           |           |
|---|-----------|-----------|-----------|-----------|
| 3 | 2.0533333 | 0.3925982 | 1.6000000 | 2.2800000 |
|---|-----------|-----------|-----------|-----------|

---

Unique Subject Identifier=7332010000-0023

Assay variable : PTINR\_VAL1 PT-INR Value

N Mean Standard Deviation Minimum Maximum

---

|   |           |           |           |           |
|---|-----------|-----------|-----------|-----------|
| 4 | 2.0575000 | 0.3232517 | 1.7500000 | 2.4500000 |
|---|-----------|-----------|-----------|-----------|

---



Laboratory tests at the time of obtaining Table 2-6 consent, according to the presence or absence of proton-pump inhibitors

Unique Subject Identifier=7332010000-0026

MEANS Procedure

Assay variable : PTINR\_VAL1 PT-INR Value

N Mean Standard Deviation Minimum Maximum

---

|   |           |           |           |           |
|---|-----------|-----------|-----------|-----------|
| 4 | 2.0350000 | 0.4239890 | 1.6600000 | 2.5400000 |
|---|-----------|-----------|-----------|-----------|

---

Unique Subject Identifier=7332010000-0029

Assay variable : PTINR\_VAL1 PT-INR Value

N Mean Standard Deviation Minimum Maximum

---

|   |           |           |           |           |
|---|-----------|-----------|-----------|-----------|
| 3 | 1.9233333 | 0.2400694 | 1.6600000 | 2.1300000 |
|---|-----------|-----------|-----------|-----------|

---

Unique Subject Identifier=7332010000-0032

Assay variable : PTINR\_VAL1 PT-INR Value

N Mean Standard Deviation Minimum Maximum

---

|   |           |           |           |           |
|---|-----------|-----------|-----------|-----------|
| 3 | 1.7233333 | 0.1446836 | 1.6300000 | 1.8900000 |
|---|-----------|-----------|-----------|-----------|

---

Unique Subject Identifier=7340011000-0001

Assay variable : PTINR\_VAL1 PT-INR Value

N Mean Standard Deviation Minimum Maximum

---

|   |          |           |          |          |
|---|----------|-----------|----------|----------|
| 6 | 2.033333 | 0.0816497 | 1.900000 | 2.100000 |
|---|----------|-----------|----------|----------|

---

Laboratory tests at the time of obtaining Table 2-6 consent, according to the presence or absence of proton-pump inhibitors

Unique Subject Identifier=7345000010-0004

MEANS Procedure

Assay variable : PTINR\_VAL1 PT-INR Value

N Mean Standard Deviation Minimum Maximum

---

|   |           |           |           |           |
|---|-----------|-----------|-----------|-----------|
| 6 | 2.0566667 | 0.4411651 | 1.6700000 | 2.9000000 |
|---|-----------|-----------|-----------|-----------|

---

Unique Subject Identifier=7345000010-0005

Assay variable : PTINR\_VAL1 PT-INR Value

N Mean Standard Deviation Minimum Maximum

---

|   |           |           |           |           |
|---|-----------|-----------|-----------|-----------|
| 4 | 1.8300000 | 0.3754997 | 1.3200000 | 2.2000000 |
|---|-----------|-----------|-----------|-----------|

---

Unique Subject Identifier=7345000010-0008

Assay variable : PTINR\_VAL1 PT-INR Value

N Mean Standard Deviation Minimum Maximum

---

|   |           |           |           |           |
|---|-----------|-----------|-----------|-----------|
| 6 | 2.2266667 | 0.4322345 | 1.5300000 | 2.6900000 |
|---|-----------|-----------|-----------|-----------|

---

Unique Subject Identifier=7345000010-0009

Assay variable : PTINR\_VAL1 PT-INR Value

N Mean Standard Deviation Minimum Maximum

---

|   |           |           |           |           |
|---|-----------|-----------|-----------|-----------|
| 6 | 2.1466667 | 0.4553973 | 1.6800000 | 2.8100000 |
|---|-----------|-----------|-----------|-----------|

---

Laboratory tests at the time of obtaining Table 2-6 consent, according to the presence or absence of proton-pump inhibitors

Unique Subject Identifier=7345000010-0011

MEANS Procedure

Assay variable : PTINR\_VAL1 PT-INR Value

N Mean Standard Deviation Minimum Maximum

---

|   |           |           |           |           |
|---|-----------|-----------|-----------|-----------|
| 6 | 2.0033333 | 0.2483277 | 1.7300000 | 2.4300000 |
|---|-----------|-----------|-----------|-----------|

---

Unique Subject Identifier=7345000010-0012

Assay variable : PTINR\_VAL1 PT-INR Value

N Mean Standard Deviation Minimum Maximum

---

|   |           |           |           |           |
|---|-----------|-----------|-----------|-----------|
| 6 | 1.7850000 | 0.4234973 | 1.2100000 | 2.1900000 |
|---|-----------|-----------|-----------|-----------|

---

Unique Subject Identifier=7345000010-0014

Assay variable : PTINR\_VAL1 PT-INR Value

N Mean Standard Deviation Minimum Maximum

---

|   |           |           |           |           |
|---|-----------|-----------|-----------|-----------|
| 4 | 2.2275000 | 0.6051102 | 1.4200000 | 2.8700000 |
|---|-----------|-----------|-----------|-----------|

---

Unique Subject Identifier=7345000010-0015

Assay variable : PTINR\_VAL1 PT-INR Value

N Mean Standard Deviation Minimum Maximum

---

|   |           |           |           |           |
|---|-----------|-----------|-----------|-----------|
| 5 | 1.8660000 | 0.1965452 | 1.5900000 | 2.1400000 |
|---|-----------|-----------|-----------|-----------|

---

Laboratory tests at the time of obtaining Table 2-6 consent, according to the presence or absence of proton-pump inhibitors

Unique Subject Identifier=7345000010-0017

MEANS Procedure

Assay variable : PTINR\_VAL1 PT-INR Value

N Mean Standard Deviation Minimum Maximum

---

|   |          |           |          |          |
|---|----------|-----------|----------|----------|
| 6 | 1.500000 | 0.5067544 | 1.110000 | 2.410000 |
|---|----------|-----------|----------|----------|

---

Unique Subject Identifier=7345000010-0020

Assay variable : PTINR\_VAL1 PT-INR Value

N Mean Standard Deviation Minimum Maximum

---

|   |          |           |          |          |
|---|----------|-----------|----------|----------|
| 6 | 2.160000 | 0.3951202 | 1.700000 | 2.720000 |
|---|----------|-----------|----------|----------|

---

Unique Subject Identifier=7345000010-0023

Assay variable : PTINR\_VAL1 PT-INR Value

N Mean Standard Deviation Minimum Maximum

---

|   |           |           |          |          |
|---|-----------|-----------|----------|----------|
| 6 | 1.9916667 | 0.3581852 | 1.540000 | 2.410000 |
|---|-----------|-----------|----------|----------|

---

Unique Subject Identifier=7345000010-0024

Assay variable : PTINR\_VAL1 PT-INR Value

N Mean Standard Deviation Minimum Maximum

---

|   |           |           |           |           |
|---|-----------|-----------|-----------|-----------|
| 5 | 2.0580000 | 0.2605187 | 1.8100000 | 2.4600000 |
|---|-----------|-----------|-----------|-----------|

---



Laboratory tests at the time of obtaining Table 2-6 consent, according to the presence or absence of proton-pump inhibitors

Unique Subject Identifier=7345000010-0025

MEANS Procedure

Assay variable : PTINR\_VAL1 PT-INR Value

| N | Mean      | Standard Deviation | Minimum   | Maximum   |
|---|-----------|--------------------|-----------|-----------|
| 6 | 1.7316667 | 0.3022196          | 1.3400000 | 2.0900000 |

Unique Subject Identifier=7345000010-0026

Assay variable : PTINR\_VAL1 PT-INR Value

| N | Mean      | Standard Deviation | Minimum   | Maximum   |
|---|-----------|--------------------|-----------|-----------|
| 3 | 2.2166667 | 0.2746513          | 1.9100000 | 2.4400000 |

Unique Subject Identifier=7345000010-0027

Assay variable : PTINR\_VAL1 PT-INR Value

| N | Mean      | Standard Deviation | Minimum   | Maximum   |
|---|-----------|--------------------|-----------|-----------|
| 6 | 2.2650000 | 0.3276431          | 1.9300000 | 2.7700000 |

Unique Subject Identifier=7345000010-0029

Assay variable : PTINR\_VAL1 PT-INR Value

N Mean Standard Deviation Minimum Maximum

---

|   |           |           |           |           |
|---|-----------|-----------|-----------|-----------|
| 4 | 1.6425000 | 0.2725650 | 1.3000000 | 1.9200000 |
|---|-----------|-----------|-----------|-----------|

---

Laboratory tests at the time of obtaining Table 2-6 consent, according to the presence or absence of proton-pump inhibitors

Unique Subject Identifier=7345000010-0039

MEANS Procedure

Assay variable : PTINR\_VAL1 PT-INR Value

N Mean Standard Deviation Minimum Maximum

---

|   |           |           |           |           |
|---|-----------|-----------|-----------|-----------|
| 3 | 1.4266667 | 0.0723418 | 1.3800000 | 1.5100000 |
|---|-----------|-----------|-----------|-----------|

---

Unique Subject Identifier=7345000010-0040

Assay variable : PTINR\_VAL1 PT-INR Value

N Mean Standard Deviation Minimum Maximum

---

|   |           |           |           |           |
|---|-----------|-----------|-----------|-----------|
| 6 | 1.7333333 | 0.2383834 | 1.3900000 | 1.9200000 |
|---|-----------|-----------|-----------|-----------|

---

Unique Subject Identifier=7345000010-0044

Assay variable : PTINR\_VAL1 PT-INR Value

N Mean Standard Deviation Minimum Maximum

---

|   |           |           |           |           |
|---|-----------|-----------|-----------|-----------|
| 3 | 1.9400000 | 0.0888819 | 1.8400000 | 2.0100000 |
|---|-----------|-----------|-----------|-----------|

---

Unique Subject Identifier=7366011100-0002

Assay variable : PTINR\_VAL1 PT-INR Value

N Mean Standard Deviation Minimum Maximum

---

|   |           |           |           |           |
|---|-----------|-----------|-----------|-----------|
| 6 | 1.7066667 | 0.3946982 | 1.2400000 | 2.3800000 |
|---|-----------|-----------|-----------|-----------|

---

Laboratory tests at the time of obtaining Table 2-6 consent, according to the presence or absence of proton-pump inhibitors

Unique Subject Identifier=7366011100-0006

MEANS Procedure

Assay variable : PTINR\_VAL1 PT-INR Value

N Mean Standard Deviation Minimum Maximum

---

|   |           |           |           |           |
|---|-----------|-----------|-----------|-----------|
| 6 | 1.9866667 | 0.1116542 | 1.8400000 | 2.1100000 |
|---|-----------|-----------|-----------|-----------|

---

Unique Subject Identifier=7366011100-0009

Assay variable : PTINR\_VAL1 PT-INR Value

N Mean Standard Deviation Minimum Maximum

---

|   |           |           |           |           |
|---|-----------|-----------|-----------|-----------|
| 6 | 1.8883333 | 0.3343900 | 1.4900000 | 2.4700000 |
|---|-----------|-----------|-----------|-----------|

---

Unique Subject Identifier=7366011100-0010

Assay variable : PTINR\_VAL1 PT-INR Value

N Mean Standard Deviation Minimum Maximum

---

|   |           |           |           |           |
|---|-----------|-----------|-----------|-----------|
| 4 | 2.4100000 | 0.3554340 | 1.8800000 | 2.6400000 |
|---|-----------|-----------|-----------|-----------|

---

Unique Subject Identifier=7366011100-0013

Assay variable : PTINR\_VAL1 PT-INR Value

N Mean Standard Deviation Minimum Maximum

---

|   |           |           |           |           |
|---|-----------|-----------|-----------|-----------|
| 5 | 2.0740000 | 0.2734593 | 1.7400000 | 2.3200000 |
|---|-----------|-----------|-----------|-----------|

---

Laboratory tests at the time of obtaining Table 2-6 consent, according to the presence or absence of proton-pump inhibitors

Unique Subject Identifier=7366011100-0016

MEANS Procedure

Assay variable : PTINR\_VAL1 PT-INR Value

N Mean Standard Deviation Minimum Maximum

---

|   |           |           |           |           |
|---|-----------|-----------|-----------|-----------|
| 6 | 2.1350000 | 0.4511652 | 1.7400000 | 3.0100000 |
|---|-----------|-----------|-----------|-----------|

---

Unique Subject Identifier=7414010000-0001

Assay variable : PTINR\_VAL1 PT-INR Value

N Mean Standard Deviation Minimum Maximum

---

|   |           |           |           |           |
|---|-----------|-----------|-----------|-----------|
| 6 | 1.7383333 | 0.2650597 | 1.3300000 | 2.1000000 |
|---|-----------|-----------|-----------|-----------|

---

Unique Subject Identifier=7414010000-0004

Assay variable : PTINR\_VAL1 PT-INR Value

N Mean Standard Deviation Minimum Maximum

---

|   |           |           |           |           |
|---|-----------|-----------|-----------|-----------|
| 6 | 1.8016667 | 0.4156160 | 1.3900000 | 2.5300000 |
|---|-----------|-----------|-----------|-----------|

---

Unique Subject Identifier=7414010000-0014

Assay variable : PTINR\_VAL1 PT-INR Value

N Mean Standard Deviation Minimum Maximum

---

|   |           |           |           |           |
|---|-----------|-----------|-----------|-----------|
| 4 | 2.3650000 | 0.1204159 | 2.2100000 | 2.4700000 |
|---|-----------|-----------|-----------|-----------|

---



Laboratory tests at the time of obtaining Table 2-6 consent, according to the presence or absence of proton-pump inhibitors

Unique Subject Identifier=7414010000-0016

MEANS Procedure

Assay variable : PTINR\_VAL1 PT-INR Value

| N | Mean      | Standard Deviation | Minimum   | Maximum   |
|---|-----------|--------------------|-----------|-----------|
| 5 | 2.1760000 | 0.1050238          | 2.0800000 | 2.3500000 |

Unique Subject Identifier=7414010000-0019

Assay variable : PTINR\_VAL1 PT-INR Value

| N | Mean      | Standard Deviation | Minimum   | Maximum   |
|---|-----------|--------------------|-----------|-----------|
| 5 | 2.1620000 | 0.6068113          | 1.3700000 | 2.6800000 |

Unique Subject Identifier=7414010000-0020

Assay variable : PTINR\_VAL1 PT-INR Value

| N | Mean      | Standard Deviation | Minimum   | Maximum   |
|---|-----------|--------------------|-----------|-----------|
| 5 | 1.9640000 | 0.6578982          | 1.4600000 | 2.9700000 |

Unique Subject Identifier=7414010000-0021

Assay variable : PTINR\_VAL1 PT-INR Value

N Mean Standard Deviation Minimum Maximum

---

|   |           |           |           |           |
|---|-----------|-----------|-----------|-----------|
| 4 | 1.6950000 | 0.4900680 | 1.2800000 | 2.3400000 |
|---|-----------|-----------|-----------|-----------|

---

Laboratory tests at the time of obtaining Table 2-6 consent, according to the presence or absence of proton-pump inhibitors

Unique Subject Identifier=7414010000-0025

MEANS Procedure

Assay variable : PTINR\_VAL1 PT-INR Value

N Mean Standard Deviation Minimum Maximum

---

|   |           |           |           |           |
|---|-----------|-----------|-----------|-----------|
| 6 | 1.7083333 | 0.4653780 | 1.3200000 | 2.5600000 |
|---|-----------|-----------|-----------|-----------|

---

Unique Subject Identifier=7414010000-0028

Assay variable : PTINR\_VAL1 PT-INR Value

N Mean Standard Deviation Minimum Maximum

---

|   |           |           |           |           |
|---|-----------|-----------|-----------|-----------|
| 4 | 1.3650000 | 0.0519615 | 1.3100000 | 1.4300000 |
|---|-----------|-----------|-----------|-----------|

---

Unique Subject Identifier=7414010000-0033

Assay variable : PTINR\_VAL1 PT-INR Value

N Mean Standard Deviation Minimum Maximum

---

|   |           |           |           |           |
|---|-----------|-----------|-----------|-----------|
| 6 | 1.9616667 | 0.1038107 | 1.8300000 | 2.1000000 |
|---|-----------|-----------|-----------|-----------|

---

Unique Subject Identifier=7414010000-0034

Assay variable : PTINR\_VAL1 PT-INR Value

N Mean Standard Deviation Minimum Maximum

---

|   |          |           |          |          |
|---|----------|-----------|----------|----------|
| 6 | 1.610000 | 0.1550484 | 1.420000 | 1.870000 |
|---|----------|-----------|----------|----------|

---

Laboratory tests at the time of obtaining Table 2-6 consent, according to the presence or absence of proton-pump inhibitors

Unique Subject Identifier=7414010000-0035

MEANS Procedure

Assay variable : PTINR\_VAL1 PT-INR Value

| N | Mean     | Standard Deviation | Minimum  | Maximum  |
|---|----------|--------------------|----------|----------|
| 3 | 2.100000 | 0.2451530          | 1.860000 | 2.350000 |

Unique Subject Identifier=7414010000-0038

Assay variable : PTINR\_VAL1 PT-INR Value

| N | Mean      | Standard Deviation | Minimum  | Maximum  |
|---|-----------|--------------------|----------|----------|
| 6 | 1.7816667 | 0.1220519          | 1.620000 | 1.960000 |

Unique Subject Identifier=7414010000-0041

Assay variable : PTINR\_VAL1 PT-INR Value

| N | Mean     | Standard Deviation | Minimum  | Maximum  |
|---|----------|--------------------|----------|----------|
| 4 | 2.142500 | 0.2148449          | 1.920000 | 2.400000 |

Unique Subject Identifier=7414010000-0044

Assay variable : PTINR\_VAL1 PT-INR Value

N Mean Standard Deviation Minimum Maximum

---

|   |           |           |           |           |
|---|-----------|-----------|-----------|-----------|
| 6 | 2.0483333 | 0.1449713 | 1.8800000 | 2.2900000 |
|---|-----------|-----------|-----------|-----------|

---

Laboratory tests at the time of obtaining Table 2-6 consent, according to the presence or absence of proton-pump inhibitors

Unique Subject Identifier=7414010000-0045

MEANS Procedure

Assay variable : PTINR\_VAL1 PT-INR Value

| N | Mean      | Standard Deviation | Minimum   | Maximum   |
|---|-----------|--------------------|-----------|-----------|
| 6 | 1.3216667 | 0.1364429          | 1.2200000 | 1.5700000 |

Unique Subject Identifier=7414010000-0054

Assay variable : PTINR\_VAL1 PT-INR Value

| N | Mean      | Standard Deviation | Minimum   | Maximum   |
|---|-----------|--------------------|-----------|-----------|
| 5 | 1.2300000 | 0.0479583          | 1.1900000 | 1.3000000 |

Unique Subject Identifier=7423000000-0003

Assay variable : PTINR\_VAL1 PT-INR Value

| N | Mean      | Standard Deviation | Minimum   | Maximum   |
|---|-----------|--------------------|-----------|-----------|
| 4 | 1.7500000 | 0.1264911          | 1.5900000 | 1.8700000 |

Unique Subject Identifier=7423000000-0005

Assay variable : PTINR\_VAL1 PT-INR Value

N Mean Standard Deviation Minimum Maximum

---

|   |           |           |           |           |
|---|-----------|-----------|-----------|-----------|
| 6 | 1.8283333 | 0.4879105 | 1.3300000 | 2.4600000 |
|---|-----------|-----------|-----------|-----------|

---



Laboratory tests at the time of obtaining Table 2-6 consent, according to the presence or absence of proton-pump inhibitors

Unique Subject Identifier=7423000000-0006

MEANS Procedure

Assay variable : PTINR\_VAL1 PT-INR Value

N Mean Standard Deviation Minimum Maximum

---

|   |           |           |           |           |
|---|-----------|-----------|-----------|-----------|
| 4 | 1.6550000 | 0.1668333 | 1.5400000 | 1.9000000 |
|---|-----------|-----------|-----------|-----------|

---

Unique Subject Identifier=7423000000-0007

Assay variable : PTINR\_VAL1 PT-INR Value

N Mean Standard Deviation Minimum Maximum

---

|   |           |  |           |           |
|---|-----------|--|-----------|-----------|
| 1 | 2.0500000 |  | 2.0500000 | 2.0500000 |
|---|-----------|--|-----------|-----------|

---

Unique Subject Identifier=7423000000-0012

Assay variable : PTINR\_VAL1 PT-INR Value

N Mean Standard Deviation Minimum Maximum

---

|   |           |           |           |           |
|---|-----------|-----------|-----------|-----------|
| 3 | 1.9333333 | 0.3265476 | 1.7300000 | 2.3100000 |
|---|-----------|-----------|-----------|-----------|

---

Unique Subject Identifier=7423000000-0014

Assay variable : PTINR\_VAL1 PT-INR Value

N Mean Standard Deviation Minimum Maximum

---

|   |           |           |           |           |
|---|-----------|-----------|-----------|-----------|
| 3 | 2.2466667 | 0.3239341 | 2.0400000 | 2.6200000 |
|---|-----------|-----------|-----------|-----------|

---

Laboratory tests at the time of obtaining Table 2-6 consent, according to the presence or absence of proton-pump inhibitors

Unique Subject Identifier=7423000000-0017

MEANS Procedure

Assay variable : PTINR\_VAL1 PT-INR Value

N Mean Standard Deviation Minimum Maximum

---

|   |           |           |           |           |
|---|-----------|-----------|-----------|-----------|
| 4 | 1.4725000 | 0.1138347 | 1.3500000 | 1.6200000 |
|---|-----------|-----------|-----------|-----------|

---

Unique Subject Identifier=7423000000-0020

Assay variable : PTINR\_VAL1 PT-INR Value

N Mean Standard Deviation Minimum Maximum

---

|   |           |           |           |           |
|---|-----------|-----------|-----------|-----------|
| 2 | 1.2050000 | 0.0636396 | 1.1600000 | 1.2500000 |
|---|-----------|-----------|-----------|-----------|

---

Unique Subject Identifier=7423000000-0025

Assay variable : PTINR\_VAL1 PT-INR Value

N Mean Standard Deviation Minimum Maximum

---

|   |           |           |           |           |
|---|-----------|-----------|-----------|-----------|
| 5 | 1.5060000 | 0.0770065 | 1.4400000 | 1.6200000 |
|---|-----------|-----------|-----------|-----------|

---

Unique Subject Identifier=7423000000-0026

Assay variable : PTINR\_VAL1 PT-INR Value

N Mean Standard Deviation Minimum Maximum

---

|   |           |           |           |           |
|---|-----------|-----------|-----------|-----------|
| 4 | 2.5350000 | 0.8121781 | 1.5200000 | 3.4300000 |
|---|-----------|-----------|-----------|-----------|

---

Laboratory tests at the time of obtaining Table 2-6 consent, according to the presence or absence of proton-pump inhibitors

Unique Subject Identifier=7423000000-0028

MEANS Procedure

Assay variable : PTINR\_VAL1 PT-INR Value

| N | Mean      | Standard Deviation | Minimum   | Maximum   |
|---|-----------|--------------------|-----------|-----------|
| 2 | 1.8000000 | 0.4101219          | 1.5100000 | 2.0900000 |

Unique Subject Identifier=7423000000-0029

Assay variable : PTINR\_VAL1 PT-INR Value

| N | Mean      | Standard Deviation | Minimum   | Maximum   |
|---|-----------|--------------------|-----------|-----------|
| 5 | 1.6200000 | 0.1680774          | 1.4900000 | 1.8800000 |

Unique Subject Identifier=7423000000-0030

Assay variable : PTINR\_VAL1 PT-INR Value

| N | Mean      | Standard Deviation | Minimum   | Maximum   |
|---|-----------|--------------------|-----------|-----------|
| 5 | 1.8160000 | 0.3728002          | 1.3200000 | 2.1100000 |

Unique Subject Identifier=7423000000-0038

Assay variable : PTINR\_VAL1 PT-INR Value

N Mean Standard Deviation Minimum Maximum

---

|   |           |           |           |           |
|---|-----------|-----------|-----------|-----------|
| 2 | 1.7950000 | 0.0353553 | 1.7700000 | 1.8200000 |
|---|-----------|-----------|-----------|-----------|

---

Laboratory tests at the time of obtaining Table 2-6 consent, according to the presence or absence of proton-pump inhibitors

Unique Subject Identifier=7423000000-0039

MEANS Procedure

Assay variable : PTINR\_VAL1 PT-INR Value

N Mean Standard Deviation Minimum Maximum

---

|   |           |           |           |           |
|---|-----------|-----------|-----------|-----------|
| 6 | 1.7416667 | 0.5770760 | 1.1300000 | 2.4800000 |
|---|-----------|-----------|-----------|-----------|

---

Unique Subject Identifier=7423000000-0040

Assay variable : PTINR\_VAL1 PT-INR Value

N Mean Standard Deviation Minimum Maximum

---

|   |           |           |           |           |
|---|-----------|-----------|-----------|-----------|
| 2 | 2.4000000 | 0.0989949 | 2.3300000 | 2.4700000 |
|---|-----------|-----------|-----------|-----------|

---

Unique Subject Identifier=7423000000-0043

Assay variable : PTINR\_VAL1 PT-INR Value

N Mean Standard Deviation Minimum Maximum

---

|   |           |           |           |           |
|---|-----------|-----------|-----------|-----------|
| 3 | 2.8633333 | 0.7456764 | 2.3600000 | 3.7200000 |
|---|-----------|-----------|-----------|-----------|

---

Unique Subject Identifier=7423000000-0044

Assay variable : PTINR\_VAL1 PT-INR Value

N Mean Standard Deviation Minimum Maximum

---

|   |          |           |          |          |
|---|----------|-----------|----------|----------|
| 5 | 1.650000 | 0.2155226 | 1.420000 | 1.920000 |
|---|----------|-----------|----------|----------|

---



Laboratory tests at the time of obtaining Table 2-6 consent, according to the presence or absence of proton-pump inhibitors

Unique Subject Identifier=7423000000-0052

MEANS Procedure

Assay variable : PTINR\_VAL1 PT-INR Value

N Mean Standard Deviation Minimum Maximum

---

|   |           |           |           |           |
|---|-----------|-----------|-----------|-----------|
| 4 | 2.3200000 | 0.2422120 | 2.0800000 | 2.6400000 |
|---|-----------|-----------|-----------|-----------|

---

Unique Subject Identifier=7423000000-0053

Assay variable : PTINR\_VAL1 PT-INR Value

N Mean Standard Deviation Minimum Maximum

---

|   |           |           |           |           |
|---|-----------|-----------|-----------|-----------|
| 6 | 2.0233333 | 0.2628815 | 1.7500000 | 2.4100000 |
|---|-----------|-----------|-----------|-----------|

---

Unique Subject Identifier=7423000000-0058

Assay variable : PTINR\_VAL1 PT-INR Value

N Mean Standard Deviation Minimum Maximum

---

|   |           |           |           |           |
|---|-----------|-----------|-----------|-----------|
| 2 | 1.8750000 | 0.3606245 | 1.6200000 | 2.1300000 |
|---|-----------|-----------|-----------|-----------|

---

Unique Subject Identifier=7423000000-0060

Assay variable : PTINR\_VAL1 PT-INR Value

N Mean Standard Deviation Minimum Maximum

---

|   |           |           |           |           |
|---|-----------|-----------|-----------|-----------|
| 2 | 1.7700000 | 0.4242641 | 1.4700000 | 2.0700000 |
|---|-----------|-----------|-----------|-----------|

---

Laboratory tests at the time of obtaining Table 2-6 consent, according to the presence or absence of proton-pump inhibitors

Unique Subject Identifier=7423000000-0061

MEANS Procedure

Assay variable : PTINR\_VAL1 PT-INR Value

| N | Mean      | Standard Deviation | Minimum   | Maximum   |
|---|-----------|--------------------|-----------|-----------|
| 5 | 1.7380000 | 0.1310343          | 1.5800000 | 1.8900000 |

Unique Subject Identifier=7423000000-0062

Assay variable : PTINR\_VAL1 PT-INR Value

| N | Mean      | Standard Deviation | Minimum   | Maximum   |
|---|-----------|--------------------|-----------|-----------|
| 5 | 1.7300000 | 0.1811077          | 1.4800000 | 1.9400000 |

Unique Subject Identifier=7423000000-0063

Assay variable : PTINR\_VAL1 PT-INR Value

| N | Mean      | Standard Deviation | Minimum   | Maximum   |
|---|-----------|--------------------|-----------|-----------|
| 6 | 1.6400000 | 0.2395830          | 1.3500000 | 2.0000000 |

Unique Subject Identifier=7423000000-0064

Assay variable : PTINR\_VAL1 PT-INR Value

N Mean Standard Deviation Minimum Maximum

---

|   |           |           |           |           |
|---|-----------|-----------|-----------|-----------|
| 4 | 1.8525000 | 0.1408013 | 1.6600000 | 1.9800000 |
|---|-----------|-----------|-----------|-----------|

---

Laboratory tests at the time of obtaining Table 2-6 consent, according to the presence or absence of proton-pump inhibitors

Unique Subject Identifier=7423000000-0065

MEANS Procedure

Assay variable : PTINR\_VAL1 PT-INR Value

N Mean Standard Deviation Minimum Maximum

---

|   |           |           |           |           |
|---|-----------|-----------|-----------|-----------|
| 2 | 1.9850000 | 0.2474874 | 1.8100000 | 2.1600000 |
|---|-----------|-----------|-----------|-----------|

---

Unique Subject Identifier=7423000000-0066

Assay variable : PTINR\_VAL1 PT-INR Value

N Mean Standard Deviation Minimum Maximum

---

|   |           |           |           |           |
|---|-----------|-----------|-----------|-----------|
| 2 | 2.2600000 | 0.0707107 | 2.2100000 | 2.3100000 |
|---|-----------|-----------|-----------|-----------|

---

Unique Subject Identifier=7423000000-0070

Assay variable : PTINR\_VAL1 PT-INR Value

N Mean Standard Deviation Minimum Maximum

---

|   |           |           |           |           |
|---|-----------|-----------|-----------|-----------|
| 3 | 1.7100000 | 0.0556776 | 1.6500000 | 1.7600000 |
|---|-----------|-----------|-----------|-----------|

---

Unique Subject Identifier=7423000000-0071

Assay variable : PTINR\_VAL1 PT-INR Value

N Mean Standard Deviation Minimum Maximum

---

|   |           |  |           |           |
|---|-----------|--|-----------|-----------|
| 1 | 1.5600000 |  | 1.5600000 | 1.5600000 |
|---|-----------|--|-----------|-----------|

---

Laboratory tests at the time of obtaining Table 2-6 consent, according to the presence or absence of proton-pump inhibitors

Unique Subject Identifier=7423000000-0072

MEANS Procedure

Assay variable : PTINR\_VAL1 PT-INR Value

| N | Mean      | Standard Deviation | Minimum   | Maximum   |
|---|-----------|--------------------|-----------|-----------|
| 4 | 1.6525000 | 0.2732978          | 1.3500000 | 1.9900000 |

Unique Subject Identifier=7423000000-0074

Assay variable : PTINR\_VAL1 PT-INR Value

| N | Mean      | Standard Deviation | Minimum   | Maximum   |
|---|-----------|--------------------|-----------|-----------|
| 2 | 1.9250000 | 0.0070711          | 1.9200000 | 1.9300000 |

Unique Subject Identifier=7423000000-0075

Assay variable : PTINR\_VAL1 PT-INR Value

| N | Mean      | Standard Deviation | Minimum   | Maximum   |
|---|-----------|--------------------|-----------|-----------|
| 2 | 1.5850000 | 0.0494975          | 1.5500000 | 1.6200000 |

Unique Subject Identifier=7423000000-0076

Assay variable : PTINR\_VAL1 PT-INR Value

N Mean Standard Deviation Minimum Maximum

---

|   |          |           |          |          |
|---|----------|-----------|----------|----------|
| 3 | 2.280000 | 0.3604164 | 1.910000 | 2.630000 |
|---|----------|-----------|----------|----------|

---



Laboratory tests at the time of obtaining Table 2-6 consent, according to the presence or absence of proton-pump inhibitors

Unique Subject Identifier=7423000000-0080

MEANS Procedure

Assay variable : PTINR\_VAL1 PT-INR Value

| N | Mean      | Standard Deviation | Minimum   | Maximum   |
|---|-----------|--------------------|-----------|-----------|
| 3 | 1.7333333 | 0.0378594          | 1.6900000 | 1.7600000 |

Unique Subject Identifier=7423000000-0081

Assay variable : PTINR\_VAL1 PT-INR Value

| N | Mean      | Standard Deviation | Minimum   | Maximum   |
|---|-----------|--------------------|-----------|-----------|
| 1 | 1.5700000 |                    | 1.5700000 | 1.5700000 |

Unique Subject Identifier=7423000000-0086

Assay variable : PTINR\_VAL1 PT-INR Value

| N | Mean      | Standard Deviation | Minimum   | Maximum   |
|---|-----------|--------------------|-----------|-----------|
| 3 | 2.2666667 | 0.0404145          | 2.2200000 | 2.2900000 |

Unique Subject Identifier=7423000000-0087

Assay variable : PTINR\_VAL1 PT-INR Value

N Mean Standard Deviation Minimum Maximum

---

|   |          |           |          |          |
|---|----------|-----------|----------|----------|
| 2 | 1.960000 | 0.0989949 | 1.890000 | 2.030000 |
|---|----------|-----------|----------|----------|

---

Laboratory tests at the time of obtaining Table 2-6 consent, according to the presence or absence of proton-pump inhibitors

Unique Subject Identifier=7423000000-0088

MEANS Procedure

Assay variable : PTINR\_VAL1 PT-INR Value

| N | Mean      | Standard Deviation | Minimum   | Maximum   |
|---|-----------|--------------------|-----------|-----------|
| 3 | 1.8633333 | 0.3108590          | 1.6500000 | 2.2200000 |

Unique Subject Identifier=7423000000-0090

Assay variable : PTINR\_VAL1 PT-INR Value

| N | Mean      | Standard Deviation | Minimum   | Maximum   |
|---|-----------|--------------------|-----------|-----------|
| 5 | 1.6720000 | 0.6956795          | 1.0500000 | 2.6600000 |

Unique Subject Identifier=7423000000-0095

Assay variable : PTINR\_VAL1 PT-INR Value

| N | Mean      | Standard Deviation | Minimum   | Maximum   |
|---|-----------|--------------------|-----------|-----------|
| 3 | 1.7266667 | 0.0680686          | 1.6500000 | 1.7800000 |

Unique Subject Identifier=7423000000-0097

Assay variable : PTINR\_VAL1 PT-INR Value

N Mean Standard Deviation Minimum Maximum

---

|   |           |           |           |           |
|---|-----------|-----------|-----------|-----------|
| 4 | 1.7925000 | 0.1867931 | 1.6200000 | 2.0000000 |
|---|-----------|-----------|-----------|-----------|

---

Laboratory tests at the time of obtaining Table 2-6 consent, according to the presence or absence of proton-pump inhibitors

Unique Subject Identifier=7423000000-0099

MEANS Procedure

Assay variable : PTINR\_VAL1 PT-INR Value

| N | Mean      | Standard Deviation | Minimum   | Maximum   |
|---|-----------|--------------------|-----------|-----------|
| 3 | 1.6133333 | 0.0152753          | 1.6000000 | 1.6300000 |

Unique Subject Identifier=7542000000-0003

Assay variable : PTINR\_VAL1 PT-INR Value

| N | Mean      | Standard Deviation | Minimum   | Maximum   |
|---|-----------|--------------------|-----------|-----------|
| 6 | 2.0333333 | 0.6377042          | 1.6000000 | 3.3000000 |

Unique Subject Identifier=7542000000-0005

Assay variable : PTINR\_VAL1 PT-INR Value

| N | Mean      | Standard Deviation | Minimum   | Maximum   |
|---|-----------|--------------------|-----------|-----------|
| 6 | 2.5833333 | 1.2416387          | 1.5000000 | 4.5000000 |

Unique Subject Identifier=7542000000-0006

Assay variable : PTINR\_VAL1 PT-INR Value

N Mean Standard Deviation Minimum Maximum

---

|   |          |           |          |          |
|---|----------|-----------|----------|----------|
| 5 | 1.420000 | 0.2167948 | 1.300000 | 1.800000 |
|---|----------|-----------|----------|----------|

---

Laboratory tests at the time of obtaining Table 2-6 consent, according to the presence or absence of proton-pump inhibitors

Unique Subject Identifier=7542000000-0007

MEANS Procedure

Assay variable : PTINR\_VAL1 PT-INR Value

N Mean Standard Deviation Minimum Maximum

---

|   |           |           |           |           |
|---|-----------|-----------|-----------|-----------|
| 6 | 2.5066667 | 1.1654641 | 1.4600000 | 4.3000000 |
|---|-----------|-----------|-----------|-----------|

---

Unique Subject Identifier=7542000000-0008

Assay variable : PTINR\_VAL1 PT-INR Value

N Mean Standard Deviation Minimum Maximum

---

|   |           |           |           |           |
|---|-----------|-----------|-----------|-----------|
| 6 | 2.2666667 | 0.5391351 | 1.4000000 | 2.9000000 |
|---|-----------|-----------|-----------|-----------|

---

Unique Subject Identifier=7542000000-0009

Assay variable : PTINR\_VAL1 PT-INR Value

N Mean Standard Deviation Minimum Maximum

---

|   |           |           |           |           |
|---|-----------|-----------|-----------|-----------|
| 6 | 2.2166667 | 0.1602082 | 1.9000000 | 2.3000000 |
|---|-----------|-----------|-----------|-----------|

---

Unique Subject Identifier=7542000000-0015

Assay variable : PTINR\_VAL1 PT-INR Value

N Mean Standard Deviation Minimum Maximum

---

|   |          |           |          |          |
|---|----------|-----------|----------|----------|
| 6 | 2.190000 | 0.2202726 | 1.990000 | 2.580000 |
|---|----------|-----------|----------|----------|

---



Laboratory tests at the time of obtaining Table 2-6 consent, according to the presence or absence of proton-pump inhibitors

Unique Subject Identifier=7542000000-0017

MEANS Procedure

Assay variable : PTINR\_VAL1 PT-INR Value

N Mean Standard Deviation Minimum Maximum

---

|   |           |           |           |           |
|---|-----------|-----------|-----------|-----------|
| 6 | 2.3833333 | 0.9368387 | 1.5000000 | 3.9000000 |
|---|-----------|-----------|-----------|-----------|

---

Unique Subject Identifier=7542000000-0021

Assay variable : PTINR\_VAL1 PT-INR Value

N Mean Standard Deviation Minimum Maximum

---

|   |           |           |           |           |
|---|-----------|-----------|-----------|-----------|
| 6 | 1.9666667 | 0.2804758 | 1.7000000 | 2.5000000 |
|---|-----------|-----------|-----------|-----------|

---

Unique Subject Identifier=7542000000-0023

Assay variable : PTINR\_VAL1 PT-INR Value

N Mean Standard Deviation Minimum Maximum

---

|   |           |           |           |           |
|---|-----------|-----------|-----------|-----------|
| 6 | 2.1333333 | 0.1632993 | 1.9000000 | 2.3000000 |
|---|-----------|-----------|-----------|-----------|

---

Unique Subject Identifier=7542000000-0025

Assay variable : PTINR\_VAL1 PT-INR Value

N Mean Standard Deviation Minimum Maximum

---

|   |          |           |          |          |
|---|----------|-----------|----------|----------|
| 5 | 2.140000 | 0.2073644 | 1.900000 | 2.400000 |
|---|----------|-----------|----------|----------|

---

Laboratory tests at the time of obtaining Table 2-6 consent, according to the presence or absence of proton-pump inhibitors

Unique Subject Identifier=7542000000-0026

MEANS Procedure

Assay variable : PTINR\_VAL1 PT-INR Value

N Mean Standard Deviation Minimum Maximum

---

|   |           |           |           |           |
|---|-----------|-----------|-----------|-----------|
| 6 | 1.7833333 | 0.1329160 | 1.6000000 | 2.0000000 |
|---|-----------|-----------|-----------|-----------|

---

Unique Subject Identifier=7542000000-0029

Assay variable : PTINR\_VAL1 PT-INR Value

N Mean Standard Deviation Minimum Maximum

---

|   |           |           |           |           |
|---|-----------|-----------|-----------|-----------|
| 6 | 2.3000000 | 0.7014271 | 1.4000000 | 3.3000000 |
|---|-----------|-----------|-----------|-----------|

---

Unique Subject Identifier=7542000000-0030

Assay variable : PTINR\_VAL1 PT-INR Value

N Mean Standard Deviation Minimum Maximum

---

|   |           |           |           |           |
|---|-----------|-----------|-----------|-----------|
| 2 | 2.1500000 | 0.3535534 | 1.9000000 | 2.4000000 |
|---|-----------|-----------|-----------|-----------|

---

Unique Subject Identifier=7542000000-0031

Assay variable : PTINR\_VAL1 PT-INR Value

N Mean Standard Deviation Minimum Maximum

---

|   |           |           |           |           |
|---|-----------|-----------|-----------|-----------|
| 3 | 1.6666667 | 0.4041452 | 1.3000000 | 2.1000000 |
|---|-----------|-----------|-----------|-----------|

---

Laboratory tests at the time of obtaining Table 2-6 consent, according to the presence or absence of proton-pump inhibitors

Unique Subject Identifier=7542000000-0032

MEANS Procedure

Assay variable : PTINR\_VAL1 PT-INR Value

N Mean Standard Deviation Minimum Maximum

---

|   |           |           |           |           |
|---|-----------|-----------|-----------|-----------|
| 6 | 1.5666667 | 0.2804758 | 1.3000000 | 2.0000000 |
|---|-----------|-----------|-----------|-----------|

---

Unique Subject Identifier=7542000000-0037

Assay variable : PTINR\_VAL1 PT-INR Value

N Mean Standard Deviation Minimum Maximum

---

|   |           |           |           |           |
|---|-----------|-----------|-----------|-----------|
| 5 | 1.9200000 | 0.2167948 | 1.7000000 | 2.2000000 |
|---|-----------|-----------|-----------|-----------|

---

Unique Subject Identifier=7642010000-0001

Assay variable : PTINR\_VAL1 PT-INR Value

N Mean Standard Deviation Minimum Maximum

---

|   |           |           |           |           |
|---|-----------|-----------|-----------|-----------|
| 3 | 2.2033333 | 0.4838733 | 1.8300000 | 2.7500000 |
|---|-----------|-----------|-----------|-----------|

---

Unique Subject Identifier=7642010000-0002

Assay variable : PTINR\_VAL1 PT-INR Value

N Mean Standard Deviation Minimum Maximum

---

|   |           |           |           |           |
|---|-----------|-----------|-----------|-----------|
| 3 | 2.3966667 | 0.0737111 | 2.3400000 | 2.4800000 |
|---|-----------|-----------|-----------|-----------|

---

Laboratory tests at the time of obtaining Table 2-6 consent, according to the presence or absence of proton-pump inhibitors

Unique Subject Identifier=7642010000-0003

MEANS Procedure

Assay variable : PTINR\_VAL1 PT-INR Value

N Mean Standard Deviation Minimum Maximum

---

|   |           |           |           |           |
|---|-----------|-----------|-----------|-----------|
| 4 | 2.1725000 | 0.4658594 | 1.7000000 | 2.8000000 |
|---|-----------|-----------|-----------|-----------|

---

Unique Subject Identifier=8005000000-0001

Assay variable : PTINR\_VAL1 PT-INR Value

N Mean Standard Deviation Minimum Maximum

---

|   |           |           |           |           |
|---|-----------|-----------|-----------|-----------|
| 6 | 1.6983333 | 0.2394508 | 1.3400000 | 1.9300000 |
|---|-----------|-----------|-----------|-----------|

---

Unique Subject Identifier=8005000000-0002

Assay variable : PTINR\_VAL1 PT-INR Value

N Mean Standard Deviation Minimum Maximum

---

|   |           |           |           |           |
|---|-----------|-----------|-----------|-----------|
| 6 | 2.0000000 | 0.1436663 | 1.8400000 | 2.2500000 |
|---|-----------|-----------|-----------|-----------|

---

Unique Subject Identifier=8005000000-0006

Assay variable : PTINR\_VAL1 PT-INR Value

N Mean Standard Deviation Minimum Maximum

---

|   |          |           |          |          |
|---|----------|-----------|----------|----------|
| 5 | 2.232000 | 0.2921815 | 1.960000 | 2.640000 |
|---|----------|-----------|----------|----------|

---



Laboratory tests at the time of obtaining Table 2-6 consent, according to the presence or absence of proton-pump inhibitors

Unique Subject Identifier=8005000000-0007

MEANS Procedure

Assay variable : PTINR\_VAL1 PT-INR Value

N Mean Standard Deviation Minimum Maximum

---

|   |           |           |           |           |
|---|-----------|-----------|-----------|-----------|
| 4 | 1.8350000 | 0.5570458 | 1.2300000 | 2.4600000 |
|---|-----------|-----------|-----------|-----------|

---

Unique Subject Identifier=8005000000-0010

Assay variable : PTINR\_VAL1 PT-INR Value

N Mean Standard Deviation Minimum Maximum

---

|   |           |           |           |           |
|---|-----------|-----------|-----------|-----------|
| 5 | 1.9360000 | 0.4195593 | 1.4700000 | 2.5200000 |
|---|-----------|-----------|-----------|-----------|

---

Unique Subject Identifier=8005000000-0011

Assay variable : PTINR\_VAL1 PT-INR Value

N Mean Standard Deviation Minimum Maximum

---

|   |           |           |           |           |
|---|-----------|-----------|-----------|-----------|
| 5 | 1.7220000 | 0.2052316 | 1.5300000 | 2.0500000 |
|---|-----------|-----------|-----------|-----------|

---

Unique Subject Identifier=8009000000-0001

Assay variable : PTINR\_VAL1 PT-INR Value

N Mean Standard Deviation Minimum Maximum

---

|   |           |           |           |           |
|---|-----------|-----------|-----------|-----------|
| 6 | 1.7416667 | 0.4793085 | 1.1800000 | 2.5100000 |
|---|-----------|-----------|-----------|-----------|

---

Laboratory tests at the time of obtaining Table 2-6 consent, according to the presence or absence of proton-pump inhibitors

Unique Subject Identifier=8009000000-0002

MEANS Procedure

Assay variable : PTINR\_VAL1 PT-INR Value

N Mean Standard Deviation Minimum Maximum

---

|   |           |           |           |           |
|---|-----------|-----------|-----------|-----------|
| 5 | 2.2660000 | 0.5860717 | 1.8800000 | 3.3000000 |
|---|-----------|-----------|-----------|-----------|

---

Unique Subject Identifier=8009000000-0003

Assay variable : PTINR\_VAL1 PT-INR Value

N Mean Standard Deviation Minimum Maximum

---

|   |           |           |           |           |
|---|-----------|-----------|-----------|-----------|
| 4 | 2.1725000 | 0.4624842 | 1.5800000 | 2.5500000 |
|---|-----------|-----------|-----------|-----------|

---

Unique Subject Identifier=8009000000-0005

Assay variable : PTINR\_VAL1 PT-INR Value

N Mean Standard Deviation Minimum Maximum

---

|   |           |           |           |           |
|---|-----------|-----------|-----------|-----------|
| 4 | 1.6425000 | 0.0939415 | 1.5200000 | 1.7300000 |
|---|-----------|-----------|-----------|-----------|

---

Unique Subject Identifier=8009000000-0014

Assay variable : PTINR\_VAL1 PT-INR Value

N Mean Standard Deviation Minimum Maximum

---

|   |           |           |           |           |
|---|-----------|-----------|-----------|-----------|
| 4 | 2.3925000 | 0.2822971 | 2.0400000 | 2.7300000 |
|---|-----------|-----------|-----------|-----------|

---

Laboratory tests at the time of obtaining Table 2-6 consent, according to the presence or absence of proton-pump inhibitors

Unique Subject Identifier=8009000000-0016

MEANS Procedure

Assay variable : PTINR\_VAL1 PT-INR Value

N Mean Standard Deviation Minimum Maximum

---

|   |           |           |           |           |
|---|-----------|-----------|-----------|-----------|
| 4 | 2.2550000 | 1.0195914 | 1.3800000 | 3.6200000 |
|---|-----------|-----------|-----------|-----------|

---

Unique Subject Identifier=8009000000-0023

Assay variable : PTINR\_VAL1 PT-INR Value

N Mean Standard Deviation Minimum Maximum

---

|   |           |           |           |           |
|---|-----------|-----------|-----------|-----------|
| 5 | 2.1700000 | 1.0790042 | 0.9600000 | 3.6500000 |
|---|-----------|-----------|-----------|-----------|

---

Unique Subject Identifier=8009000000-0029

Assay variable : PTINR\_VAL1 PT-INR Value

N Mean Standard Deviation Minimum Maximum

---

|   |           |           |           |           |
|---|-----------|-----------|-----------|-----------|
| 5 | 1.9920000 | 0.2108791 | 1.7200000 | 2.2500000 |
|---|-----------|-----------|-----------|-----------|

---

Unique Subject Identifier=8009000000-0030

Assay variable : PTINR\_VAL1 PT-INR Value

N Mean Standard Deviation Minimum Maximum

---

|   |           |           |           |           |
|---|-----------|-----------|-----------|-----------|
| 4 | 1.5125000 | 0.1631717 | 1.3600000 | 1.7300000 |
|---|-----------|-----------|-----------|-----------|

---

Laboratory tests at the time of obtaining Table 2-6 consent, according to the presence or absence of proton-pump inhibitors

Unique Subject Identifier=8010000100-0007

MEANS Procedure

Assay variable : PTINR\_VAL1 PT-INR Value

| N | Mean      | Standard Deviation | Minimum   | Maximum   |
|---|-----------|--------------------|-----------|-----------|
| 3 | 1.4333333 | 0.1305118          | 1.3300000 | 1.5800000 |

Unique Subject Identifier=8010000100-0012

Assay variable : PTINR\_VAL1 PT-INR Value

| N | Mean      | Standard Deviation | Minimum   | Maximum   |
|---|-----------|--------------------|-----------|-----------|
| 6 | 2.0383333 | 0.2545912          | 1.5800000 | 2.3100000 |

Unique Subject Identifier=8010000100-0016

Assay variable : PTINR\_VAL1 PT-INR Value

| N | Mean      | Standard Deviation | Minimum   | Maximum   |
|---|-----------|--------------------|-----------|-----------|
| 5 | 2.3700000 | 0.5013482          | 1.7600000 | 3.1300000 |

Unique Subject Identifier=8010000100-0022

Assay variable : PTINR\_VAL1 PT-INR Value

N Mean Standard Deviation Minimum Maximum

---

|   |           |           |           |           |
|---|-----------|-----------|-----------|-----------|
| 6 | 1.5650000 | 0.3614831 | 1.1400000 | 1.9600000 |
|---|-----------|-----------|-----------|-----------|

---



Laboratory tests at the time of obtaining Table 2-6 consent, according to the presence or absence of proton-pump inhibitors

Unique Subject Identifier=8010000100-0029

MEANS Procedure

Assay variable : PTINR\_VAL1 PT-INR Value

N Mean Standard Deviation Minimum Maximum

---

|   |           |           |           |           |
|---|-----------|-----------|-----------|-----------|
| 5 | 2.0400000 | 0.7243273 | 1.2900000 | 3.1100000 |
|---|-----------|-----------|-----------|-----------|

---

Unique Subject Identifier=8010000100-0030

Assay variable : PTINR\_VAL1 PT-INR Value

N Mean Standard Deviation Minimum Maximum

---

|   |           |           |           |           |
|---|-----------|-----------|-----------|-----------|
| 3 | 2.5700000 | 0.1212436 | 2.4300000 | 2.6400000 |
|---|-----------|-----------|-----------|-----------|

---

Unique Subject Identifier=8010000100-0060

Assay variable : PTINR\_VAL1 PT-INR Value

N Mean Standard Deviation Minimum Maximum

---

|   |           |           |           |           |
|---|-----------|-----------|-----------|-----------|
| 3 | 2.1866667 | 0.2967041 | 1.9100000 | 2.5000000 |
|---|-----------|-----------|-----------|-----------|

---

Unique Subject Identifier=8014000000-0001

Assay variable : PTINR\_VAL1 PT-INR Value

N Mean Standard Deviation Minimum Maximum

---

|   |           |           |           |           |
|---|-----------|-----------|-----------|-----------|
| 2 | 2.7150000 | 0.0636396 | 2.6700000 | 2.7600000 |
|---|-----------|-----------|-----------|-----------|

---

Laboratory tests at the time of obtaining Table 2-6 consent, according to the presence or absence of proton-pump inhibitors

Unique Subject Identifier=8017000000-0001

MEANS Procedure

Assay variable : PTINR\_VAL1 PT-INR Value

N Mean Standard Deviation Minimum Maximum

---

|   |           |           |           |           |
|---|-----------|-----------|-----------|-----------|
| 3 | 1.9800000 | 0.3386739 | 1.6000000 | 2.2500000 |
|---|-----------|-----------|-----------|-----------|

---

Unique Subject Identifier=8020011000-0002

Assay variable : PTINR\_VAL1 PT-INR Value

N Mean Standard Deviation Minimum Maximum

---

|   |           |  |           |           |
|---|-----------|--|-----------|-----------|
| 1 | 2.3500000 |  | 2.3500000 | 2.3500000 |
|---|-----------|--|-----------|-----------|

---

Unique Subject Identifier=8020011000-0007

Assay variable : PTINR\_VAL1 PT-INR Value

N Mean Standard Deviation Minimum Maximum

---

|   |           |  |           |           |
|---|-----------|--|-----------|-----------|
| 1 | 1.8400000 |  | 1.8400000 | 1.8400000 |
|---|-----------|--|-----------|-----------|

---

Unique Subject Identifier=8020011000-0029

Assay variable : PTINR\_VAL1 PT-INR Value

N Mean Standard Deviation Minimum Maximum

---

|   |          |  |          |          |
|---|----------|--|----------|----------|
| 1 | 2.360000 |  | 2.360000 | 2.360000 |
|---|----------|--|----------|----------|

---

Laboratory tests at the time of obtaining Table 2-6 consent, according to the presence or absence of proton-pump inhibitors

Unique Subject Identifier=8020011000-0032

MEANS Procedure

Assay variable : PTINR\_VAL1 PT-INR Value

| N | Mean      | Standard Deviation | Minimum   | Maximum   |
|---|-----------|--------------------|-----------|-----------|
| 1 | 1.3700000 |                    | 1.3700000 | 1.3700000 |

Unique Subject Identifier=8020011000-0040

Assay variable : PTINR\_VAL1 PT-INR Value

| N | Mean      | Standard Deviation | Minimum   | Maximum   |
|---|-----------|--------------------|-----------|-----------|
| 2 | 1.8000000 | 0.5798276          | 1.3900000 | 2.2100000 |

Unique Subject Identifier=8020011000-0042

Assay variable : PTINR\_VAL1 PT-INR Value

| N | Mean      | Standard Deviation | Minimum   | Maximum   |
|---|-----------|--------------------|-----------|-----------|
| 1 | 2.9400000 |                    | 2.9400000 | 2.9400000 |

Unique Subject Identifier=8020011000-0043

Assay variable : PTINR\_VAL1 PT-INR Value

N Mean Standard Deviation Minimum Maximum

---

|   |           |           |           |           |
|---|-----------|-----------|-----------|-----------|
| 2 | 1.5300000 | 0.1838478 | 1.4000000 | 1.6600000 |
|---|-----------|-----------|-----------|-----------|

---

Laboratory tests at the time of obtaining Table 2-6 consent, according to the presence or absence of proton-pump inhibitors

Unique Subject Identifier=8020011000-0046

MEANS Procedure

Assay variable : PTINR\_VAL1 PT-INR Value

N Mean Standard Deviation Minimum Maximum

---

|   |           |  |           |           |
|---|-----------|--|-----------|-----------|
| 1 | 1.3200000 |  | 1.3200000 | 1.3200000 |
|---|-----------|--|-----------|-----------|

---

Unique Subject Identifier=8023000000-0003

Assay variable : PTINR\_VAL1 PT-INR Value

N Mean Standard Deviation Minimum Maximum

---

|   |           |           |           |           |
|---|-----------|-----------|-----------|-----------|
| 2 | 2.1800000 | 0.2404163 | 2.0100000 | 2.3500000 |
|---|-----------|-----------|-----------|-----------|

---

Unique Subject Identifier=8023000000-0008

Assay variable : PTINR\_VAL1 PT-INR Value

N Mean Standard Deviation Minimum Maximum

---

|   |           |  |           |           |
|---|-----------|--|-----------|-----------|
| 1 | 2.0100000 |  | 2.0100000 | 2.0100000 |
|---|-----------|--|-----------|-----------|

---

Unique Subject Identifier=8023000000-0010

Assay variable : PTINR\_VAL1 PT-INR Value

N Mean Standard Deviation Minimum Maximum

---

|   |           |           |           |           |
|---|-----------|-----------|-----------|-----------|
| 4 | 1.9550000 | 0.6821779 | 1.5200000 | 2.9700000 |
|---|-----------|-----------|-----------|-----------|

---



Laboratory tests at the time of obtaining Table 2-6 consent, according to the presence or absence of proton-pump inhibitors

Unique Subject Identifier=8023000000-0011

MEANS Procedure

Assay variable : PTINR\_VAL1 PT-INR Value

N Mean Standard Deviation Minimum Maximum

---

|   |           |           |           |           |
|---|-----------|-----------|-----------|-----------|
| 6 | 1.4300000 | 0.1912067 | 1.2400000 | 1.8000000 |
|---|-----------|-----------|-----------|-----------|

---

Unique Subject Identifier=8023000000-0012

Assay variable : PTINR\_VAL1 PT-INR Value

N Mean Standard Deviation Minimum Maximum

---

|   |           |           |           |           |
|---|-----------|-----------|-----------|-----------|
| 3 | 2.0833333 | 0.2829016 | 1.9200000 | 2.4100000 |
|---|-----------|-----------|-----------|-----------|

---

Unique Subject Identifier=8023000000-0013

Assay variable : PTINR\_VAL1 PT-INR Value

N Mean Standard Deviation Minimum Maximum

---

|   |           |           |           |           |
|---|-----------|-----------|-----------|-----------|
| 3 | 2.0533333 | 0.1258306 | 1.9200000 | 2.1700000 |
|---|-----------|-----------|-----------|-----------|

---

Unique Subject Identifier=8023000000-0016

Assay variable : PTINR\_VAL1 PT-INR Value

N Mean Standard Deviation Minimum Maximum

---

|   |           |           |           |           |
|---|-----------|-----------|-----------|-----------|
| 3 | 2.0233333 | 0.2557994 | 1.7800000 | 2.2900000 |
|---|-----------|-----------|-----------|-----------|

---

Laboratory tests at the time of obtaining Table 2-6 consent, according to the presence or absence of proton-pump inhibitors

Unique Subject Identifier=8023000000-0018

MEANS Procedure

Assay variable : PTINR\_VAL1 PT-INR Value

N Mean Standard Deviation Minimum Maximum

---

|   |           |           |           |           |
|---|-----------|-----------|-----------|-----------|
| 3 | 2.0666667 | 0.2950141 | 1.7700000 | 2.3600000 |
|---|-----------|-----------|-----------|-----------|

---

Unique Subject Identifier=8023000000-0019

Assay variable : PTINR\_VAL1 PT-INR Value

N Mean Standard Deviation Minimum Maximum

---

|   |           |           |           |           |
|---|-----------|-----------|-----------|-----------|
| 3 | 1.4900000 | 0.0556776 | 1.4300000 | 1.5400000 |
|---|-----------|-----------|-----------|-----------|

---

Unique Subject Identifier=8023000000-0020

Assay variable : PTINR\_VAL1 PT-INR Value

N Mean Standard Deviation Minimum Maximum

---

|   |           |           |           |           |
|---|-----------|-----------|-----------|-----------|
| 3 | 1.9100000 | 0.1802776 | 1.7600000 | 2.1100000 |
|---|-----------|-----------|-----------|-----------|

---

Unique Subject Identifier=8023000000-0021

Assay variable : PTINR\_VAL1 PT-INR Value

N Mean Standard Deviation Minimum Maximum

---

|   |           |           |           |           |
|---|-----------|-----------|-----------|-----------|
| 3 | 2.0333333 | 0.1550269 | 1.9200000 | 2.2100000 |
|---|-----------|-----------|-----------|-----------|

---

Laboratory tests at the time of obtaining Table 2-6 consent, according to the presence or absence of proton-pump inhibitors

Unique Subject Identifier=8023000000-0025

MEANS Procedure

Assay variable : PTINR\_VAL1 PT-INR Value

N Mean Standard Deviation Minimum Maximum

---

|   |           |           |           |           |
|---|-----------|-----------|-----------|-----------|
| 3 | 2.1266667 | 0.1115049 | 2.0000000 | 2.2100000 |
|---|-----------|-----------|-----------|-----------|

---

Unique Subject Identifier=8023000000-0033

Assay variable : PTINR\_VAL1 PT-INR Value

N Mean Standard Deviation Minimum Maximum

---

|   |           |           |           |           |
|---|-----------|-----------|-----------|-----------|
| 3 | 1.4900000 | 0.3051229 | 1.1400000 | 1.7000000 |
|---|-----------|-----------|-----------|-----------|

---

Unique Subject Identifier=8023000000-0034

Assay variable : PTINR\_VAL1 PT-INR Value

N Mean Standard Deviation Minimum Maximum

---

|   |           |           |           |           |
|---|-----------|-----------|-----------|-----------|
| 3 | 2.5033333 | 0.1266228 | 2.3600000 | 2.6000000 |
|---|-----------|-----------|-----------|-----------|

---

Unique Subject Identifier=8023000000-0036

Assay variable : PTINR\_VAL1 PT-INR Value

N Mean Standard Deviation Minimum Maximum

---

|   |           |           |           |           |
|---|-----------|-----------|-----------|-----------|
| 3 | 1.8033333 | 0.1250333 | 1.6600000 | 1.8900000 |
|---|-----------|-----------|-----------|-----------|

---

Laboratory tests at the time of obtaining Table 2-6 consent, according to the presence or absence of proton-pump inhibitors

Unique Subject Identifier=8023000000-0037

MEANS Procedure

Assay variable : PTINR\_VAL1 PT-INR Value

| N | Mean      | Standard Deviation | Minimum   | Maximum   |
|---|-----------|--------------------|-----------|-----------|
| 4 | 1.6125000 | 0.2650000          | 1.2800000 | 1.8800000 |

Unique Subject Identifier=8023000000-0041

Assay variable : PTINR\_VAL1 PT-INR Value

| N | Mean      | Standard Deviation | Minimum   | Maximum   |
|---|-----------|--------------------|-----------|-----------|
| 2 | 1.9000000 | 0.2828427          | 1.7000000 | 2.1000000 |

Unique Subject Identifier=8023000000-0042

Assay variable : PTINR\_VAL1 PT-INR Value

| N | Mean      | Standard Deviation | Minimum   | Maximum   |
|---|-----------|--------------------|-----------|-----------|
| 2 | 2.3350000 | 0.4454773          | 2.0200000 | 2.6500000 |

Unique Subject Identifier=8023000000-0043

Assay variable : PTINR\_VAL1 PT-INR Value

N Mean Standard Deviation Minimum Maximum

---

|   |           |  |           |           |
|---|-----------|--|-----------|-----------|
| 1 | 1.7700000 |  | 1.7700000 | 1.7700000 |
|---|-----------|--|-----------|-----------|

---



Laboratory tests at the time of obtaining Table 2-6 consent, according to the presence or absence of proton-pump inhibitors

Unique Subject Identifier=8023000000-0045

MEANS Procedure

Assay variable : PTINR\_VAL1 PT-INR Value

N Mean Standard Deviation Minimum Maximum

---

|   |           |           |           |           |
|---|-----------|-----------|-----------|-----------|
| 3 | 1.6966667 | 0.4239497 | 1.3100000 | 2.1500000 |
|---|-----------|-----------|-----------|-----------|

---

Unique Subject Identifier=8023000000-0048

Assay variable : PTINR\_VAL1 PT-INR Value

N Mean Standard Deviation Minimum Maximum

---

|   |           |  |           |           |
|---|-----------|--|-----------|-----------|
| 1 | 2.3200000 |  | 2.3200000 | 2.3200000 |
|---|-----------|--|-----------|-----------|

---

Unique Subject Identifier=8023000000-0049

Assay variable : PTINR\_VAL1 PT-INR Value

N Mean Standard Deviation Minimum Maximum

---

|   |           |   |           |           |
|---|-----------|---|-----------|-----------|
| 2 | 1.7100000 | 0 | 1.7100000 | 1.7100000 |
|---|-----------|---|-----------|-----------|

---

Unique Subject Identifier=8024000000-0003

Assay variable : PTINR\_VAL1 PT-INR Value

N Mean Standard Deviation Minimum Maximum

---

|   |           |           |           |           |
|---|-----------|-----------|-----------|-----------|
| 5 | 1.6740000 | 0.0901665 | 1.5800000 | 1.7700000 |
|---|-----------|-----------|-----------|-----------|

---

Laboratory tests at the time of obtaining Table 2-6 consent, according to the presence or absence of proton-pump inhibitors

Unique Subject Identifier=8026000000-0002

MEANS Procedure

Assay variable : PTINR\_VAL1 PT-INR Value

N Mean Standard Deviation Minimum Maximum

---

|   |           |           |           |           |
|---|-----------|-----------|-----------|-----------|
| 4 | 2.1300000 | 0.5430776 | 1.4300000 | 2.7500000 |
|---|-----------|-----------|-----------|-----------|

---

Unique Subject Identifier=8026000000-0003

Assay variable : PTINR\_VAL1 PT-INR Value

N Mean Standard Deviation Minimum Maximum

---

|   |           |           |           |           |
|---|-----------|-----------|-----------|-----------|
| 3 | 2.2133333 | 0.2136196 | 1.9700000 | 2.3700000 |
|---|-----------|-----------|-----------|-----------|

---

Unique Subject Identifier=8026000000-0004

Assay variable : PTINR\_VAL1 PT-INR Value

N Mean Standard Deviation Minimum Maximum

---

|   |           |           |           |           |
|---|-----------|-----------|-----------|-----------|
| 3 | 1.9600000 | 1.0142485 | 1.3300000 | 3.1300000 |
|---|-----------|-----------|-----------|-----------|

---

Unique Subject Identifier=8026000000-0007

Assay variable : PTINR\_VAL1 PT-INR Value

N Mean Standard Deviation Minimum Maximum

---

|   |           |           |           |           |
|---|-----------|-----------|-----------|-----------|
| 2 | 1.8300000 | 0.4384062 | 1.5200000 | 2.1400000 |
|---|-----------|-----------|-----------|-----------|

---

Laboratory tests at the time of obtaining Table 2-6 consent, according to the presence or absence of proton-pump inhibitors

Unique Subject Identifier=8026000000-0008

MEANS Procedure

Assay variable : PTINR\_VAL1 PT-INR Value

| N | Mean      | Standard Deviation | Minimum   | Maximum   |
|---|-----------|--------------------|-----------|-----------|
| 2 | 1.1350000 | 0.0636396          | 1.0900000 | 1.1800000 |

Unique Subject Identifier=8026000000-0012

Assay variable : PTINR\_VAL1 PT-INR Value

| N | Mean      | Standard Deviation | Minimum   | Maximum   |
|---|-----------|--------------------|-----------|-----------|
| 3 | 1.9900000 | 0.4513314          | 1.5200000 | 2.4200000 |

Unique Subject Identifier=8026000000-0018

Assay variable : PTINR\_VAL1 PT-INR Value

| N | Mean      | Standard Deviation | Minimum   | Maximum   |
|---|-----------|--------------------|-----------|-----------|
| 3 | 1.6266667 | 0.0945163          | 1.5200000 | 1.7000000 |

Unique Subject Identifier=8026000000-0026

Assay variable : PTINR\_VAL1 PT-INR Value

N Mean Standard Deviation Minimum Maximum

---

|   |          |           |          |          |
|---|----------|-----------|----------|----------|
| 3 | 2.340000 | 0.8098765 | 1.670000 | 3.240000 |
|---|----------|-----------|----------|----------|

---

Laboratory tests at the time of obtaining Table 2-6 consent, according to the presence or absence of proton-pump inhibitors

Unique Subject Identifier=802600000-0027

MEANS Procedure

Assay variable : PTINR\_VAL1 PT-INR Value

N Mean Standard Deviation Minimum Maximum

---

|   |           |           |           |           |
|---|-----------|-----------|-----------|-----------|
| 2 | 2.2950000 | 0.3606245 | 2.0400000 | 2.5500000 |
|---|-----------|-----------|-----------|-----------|

---

Unique Subject Identifier=802600000-0028

Assay variable : PTINR\_VAL1 PT-INR Value

N Mean Standard Deviation Minimum Maximum

---

|   |           |           |           |           |
|---|-----------|-----------|-----------|-----------|
| 2 | 1.8650000 | 0.2474874 | 1.6900000 | 2.0400000 |
|---|-----------|-----------|-----------|-----------|

---

Unique Subject Identifier=802600000-0029

Assay variable : PTINR\_VAL1 PT-INR Value

N Mean Standard Deviation Minimum Maximum

---

|   |           |           |           |           |
|---|-----------|-----------|-----------|-----------|
| 3 | 2.2333333 | 0.1209683 | 2.1400000 | 2.3700000 |
|---|-----------|-----------|-----------|-----------|

---

Unique Subject Identifier=802600000-0030

Assay variable : PTINR\_VAL1 PT-INR Value

N Mean Standard Deviation Minimum Maximum

---

|   |          |           |          |          |
|---|----------|-----------|----------|----------|
| 3 | 1.920000 | 0.2402082 | 1.730000 | 2.190000 |
|---|----------|-----------|----------|----------|

---



Laboratory tests at the time of obtaining Table 2-6 consent, according to the presence or absence of proton-pump inhibitors

Unique Subject Identifier=8030011000-0001

MEANS Procedure

Assay variable : PTINR\_VAL1 PT-INR Value

N Mean Standard Deviation Minimum Maximum

---

|   |           |           |           |           |
|---|-----------|-----------|-----------|-----------|
| 4 | 1.8025000 | 0.3365883 | 1.4100000 | 2.2300000 |
|---|-----------|-----------|-----------|-----------|

---

Unique Subject Identifier=8030011000-0002

Assay variable : PTINR\_VAL1 PT-INR Value

N Mean Standard Deviation Minimum Maximum

---

|   |           |           |           |           |
|---|-----------|-----------|-----------|-----------|
| 6 | 1.9350000 | 0.2510578 | 1.7200000 | 2.4200000 |
|---|-----------|-----------|-----------|-----------|

---

Unique Subject Identifier=8030011000-0007

Assay variable : PTINR\_VAL1 PT-INR Value

N Mean Standard Deviation Minimum Maximum

---

|   |           |           |           |           |
|---|-----------|-----------|-----------|-----------|
| 6 | 2.5100000 | 0.6117189 | 1.9100000 | 3.6600000 |
|---|-----------|-----------|-----------|-----------|

---

Unique Subject Identifier=8030011000-0008

Assay variable : PTINR\_VAL1 PT-INR Value

N Mean Standard Deviation Minimum Maximum

---

|   |          |           |          |          |
|---|----------|-----------|----------|----------|
| 4 | 2.360000 | 0.4857297 | 1.750000 | 2.880000 |
|---|----------|-----------|----------|----------|

---

Laboratory tests at the time of obtaining Table 2-6 consent, according to the presence or absence of proton-pump inhibitors

Unique Subject Identifier=8030011000-0018

MEANS Procedure

Assay variable : PTINR\_VAL1 PT-INR Value

N Mean Standard Deviation Minimum Maximum

---

|   |           |           |           |           |
|---|-----------|-----------|-----------|-----------|
| 4 | 1.5875000 | 0.2430878 | 1.2700000 | 1.8500000 |
|---|-----------|-----------|-----------|-----------|

---

Unique Subject Identifier=8030011000-0021

Assay variable : PTINR\_VAL1 PT-INR Value

N Mean Standard Deviation Minimum Maximum

---

|   |           |           |           |           |
|---|-----------|-----------|-----------|-----------|
| 6 | 2.3433333 | 0.1875811 | 2.1000000 | 2.5500000 |
|---|-----------|-----------|-----------|-----------|

---

Unique Subject Identifier=8030011000-0026

Assay variable : PTINR\_VAL1 PT-INR Value

N Mean Standard Deviation Minimum Maximum

---

|   |           |           |           |           |
|---|-----------|-----------|-----------|-----------|
| 4 | 2.3300000 | 0.2210581 | 2.1400000 | 2.6300000 |
|---|-----------|-----------|-----------|-----------|

---

Unique Subject Identifier=8030011000-0027

Assay variable : PTINR\_VAL1 PT-INR Value

N Mean Standard Deviation Minimum Maximum

---

|   |           |           |           |           |
|---|-----------|-----------|-----------|-----------|
| 6 | 2.1783333 | 0.2555321 | 1.8500000 | 2.5100000 |
|---|-----------|-----------|-----------|-----------|

---

Laboratory tests at the time of obtaining Table 2-6 consent, according to the presence or absence of proton-pump inhibitors

Unique Subject Identifier=8030011000-0029

MEANS Procedure

Assay variable : PTINR\_VAL1 PT-INR Value

| N | Mean      | Standard Deviation | Minimum   | Maximum   |
|---|-----------|--------------------|-----------|-----------|
| 5 | 1.9740000 | 0.1647119          | 1.7500000 | 2.1900000 |

Unique Subject Identifier=8031000000-0005

Assay variable : PTINR\_VAL1 PT-INR Value

| N | Mean      | Standard Deviation | Minimum   | Maximum   |
|---|-----------|--------------------|-----------|-----------|
| 4 | 1.9000000 | 0.1016530          | 1.7700000 | 2.0100000 |

Unique Subject Identifier=8031000000-0009

Assay variable : PTINR\_VAL1 PT-INR Value

| N | Mean      | Standard Deviation | Minimum   | Maximum   |
|---|-----------|--------------------|-----------|-----------|
| 4 | 1.9700000 | 0.8517824          | 1.2300000 | 2.9800000 |

Unique Subject Identifier=8031000000-0014

Assay variable : PTINR\_VAL1 PT-INR Value

N Mean Standard Deviation Minimum Maximum

---

|   |           |           |           |           |
|---|-----------|-----------|-----------|-----------|
| 5 | 1.8780000 | 0.1722498 | 1.6200000 | 2.0500000 |
|---|-----------|-----------|-----------|-----------|

---

Laboratory tests at the time of obtaining Table 2-6 consent, according to the presence or absence of proton-pump inhibitors

Unique Subject Identifier=8031000000-0023

MEANS Procedure

Assay variable : PTINR\_VAL1 PT-INR Value

| N | Mean      | Standard Deviation | Minimum   | Maximum   |
|---|-----------|--------------------|-----------|-----------|
| 5 | 1.9620000 | 0.4747315          | 1.3400000 | 2.4400000 |

Unique Subject Identifier=8031000000-0028

Assay variable : PTINR\_VAL1 PT-INR Value

| N | Mean      | Standard Deviation | Minimum   | Maximum   |
|---|-----------|--------------------|-----------|-----------|
| 2 | 1.9250000 | 0.0636396          | 1.8800000 | 1.9700000 |

Unique Subject Identifier=8031000000-0040

Assay variable : PTINR\_VAL1 PT-INR Value

| N | Mean      | Standard Deviation | Minimum   | Maximum   |
|---|-----------|--------------------|-----------|-----------|
| 6 | 2.5016667 | 1.3092962          | 1.1200000 | 4.3600000 |

Unique Subject Identifier=8031000000-0046

Assay variable : PTINR\_VAL1 PT-INR Value

N Mean Standard Deviation Minimum Maximum

---

|   |           |           |           |           |
|---|-----------|-----------|-----------|-----------|
| 4 | 2.0850000 | 0.4438093 | 1.7500000 | 2.7000000 |
|---|-----------|-----------|-----------|-----------|

---



Laboratory tests at the time of obtaining Table 2-6 consent, according to the presence or absence of proton-pump inhibitors

Unique Subject Identifier=8031000000-0048

MEANS Procedure

Assay variable : PTINR\_VAL1 PT-INR Value

N Mean Standard Deviation Minimum Maximum

---

|   |           |           |           |           |
|---|-----------|-----------|-----------|-----------|
| 6 | 1.6966667 | 0.1569289 | 1.4000000 | 1.8600000 |
|---|-----------|-----------|-----------|-----------|

---

Unique Subject Identifier=8031000000-0049

Assay variable : PTINR\_VAL1 PT-INR Value

N Mean Standard Deviation Minimum Maximum

---

|   |           |           |           |           |
|---|-----------|-----------|-----------|-----------|
| 5 | 2.3820000 | 0.7620171 | 1.7900000 | 3.4100000 |
|---|-----------|-----------|-----------|-----------|

---

Unique Subject Identifier=8031000000-0050

Assay variable : PTINR\_VAL1 PT-INR Value

N Mean Standard Deviation Minimum Maximum

---

|   |           |           |           |           |
|---|-----------|-----------|-----------|-----------|
| 6 | 1.9216667 | 0.2844234 | 1.6600000 | 2.4000000 |
|---|-----------|-----------|-----------|-----------|

---

Unique Subject Identifier=8033000000-0003

Assay variable : PTINR\_VAL1 PT-INR Value

N Mean Standard Deviation Minimum Maximum

---

|   |           |           |           |           |
|---|-----------|-----------|-----------|-----------|
| 6 | 1.6350000 | 1.0143323 | 0.9200000 | 3.6300000 |
|---|-----------|-----------|-----------|-----------|

---

Laboratory tests at the time of obtaining Table 2-6 consent, according to the presence or absence of proton-pump inhibitors

Unique Subject Identifier=8035000000-0005

MEANS Procedure

Assay variable : PTINR\_VAL1 PT-INR Value

N Mean Standard Deviation Minimum Maximum

---

|   |           |           |           |           |
|---|-----------|-----------|-----------|-----------|
| 2 | 1.9000000 | 0.1414214 | 1.8000000 | 2.0000000 |
|---|-----------|-----------|-----------|-----------|

---

Unique Subject Identifier=8035000000-0010

Assay variable : PTINR\_VAL1 PT-INR Value

N Mean Standard Deviation Minimum Maximum

---

|   |           |           |           |           |
|---|-----------|-----------|-----------|-----------|
| 3 | 2.1333333 | 0.2386071 | 1.9400000 | 2.4000000 |
|---|-----------|-----------|-----------|-----------|

---

Unique Subject Identifier=8035000000-0014

Assay variable : PTINR\_VAL1 PT-INR Value

N Mean Standard Deviation Minimum Maximum

---

|   |           |           |           |           |
|---|-----------|-----------|-----------|-----------|
| 3 | 1.8766667 | 0.1436431 | 1.7700000 | 2.0400000 |
|---|-----------|-----------|-----------|-----------|

---

Unique Subject Identifier=8035000000-0015

Assay variable : PTINR\_VAL1 PT-INR Value

N Mean Standard Deviation Minimum Maximum

---

|   |           |           |           |           |
|---|-----------|-----------|-----------|-----------|
| 3 | 2.0900000 | 0.2475884 | 1.9000000 | 2.3700000 |
|---|-----------|-----------|-----------|-----------|

---

Laboratory tests at the time of obtaining Table 2-6 consent, according to the presence or absence of proton-pump inhibitors

Unique Subject Identifier=8035000000-0016

MEANS Procedure

Assay variable : PTINR\_VAL1 PT-INR Value

N Mean Standard Deviation Minimum Maximum

---

|   |           |  |           |           |
|---|-----------|--|-----------|-----------|
| 1 | 2.5900000 |  | 2.5900000 | 2.5900000 |
|---|-----------|--|-----------|-----------|

---

Unique Subject Identifier=8036000000-0001

Assay variable : PTINR\_VAL1 PT-INR Value

N Mean Standard Deviation Minimum Maximum

---

|   |           |           |           |           |
|---|-----------|-----------|-----------|-----------|
| 4 | 2.1950000 | 0.8135724 | 1.4600000 | 3.3100000 |
|---|-----------|-----------|-----------|-----------|

---

Unique Subject Identifier=8036000000-0007

Assay variable : PTINR\_VAL1 PT-INR Value

N Mean Standard Deviation Minimum Maximum

---

|   |           |           |           |           |
|---|-----------|-----------|-----------|-----------|
| 6 | 1.7033333 | 0.1907529 | 1.4600000 | 1.9500000 |
|---|-----------|-----------|-----------|-----------|

---

Unique Subject Identifier=8040011000-0007

Assay variable : PTINR\_VAL1 PT-INR Value

N Mean Standard Deviation Minimum Maximum

---

|   |           |           |           |           |
|---|-----------|-----------|-----------|-----------|
| 6 | 2.1116667 | 0.2406173 | 1.8700000 | 2.4400000 |
|---|-----------|-----------|-----------|-----------|

---

Laboratory tests at the time of obtaining Table 2-6 consent, according to the presence or absence of proton-pump inhibitors

Unique Subject Identifier=8047000000-0015

MEANS Procedure

Assay variable : PTINR\_VAL1 PT-INR Value

| N | Mean      | Standard Deviation | Minimum   | Maximum   |
|---|-----------|--------------------|-----------|-----------|
| 3 | 1.8966667 | 0.7503555          | 1.3400000 | 2.7500000 |

Unique Subject Identifier=8047000000-0016

Assay variable : PTINR\_VAL1 PT-INR Value

| N | Mean      | Standard Deviation | Minimum   | Maximum   |
|---|-----------|--------------------|-----------|-----------|
| 5 | 1.3080000 | 0.1616168          | 1.1300000 | 1.5300000 |

Unique Subject Identifier=8047000000-0025

Assay variable : PTINR\_VAL1 PT-INR Value

| N | Mean      | Standard Deviation | Minimum   | Maximum   |
|---|-----------|--------------------|-----------|-----------|
| 3 | 1.9100000 | 0.1113553          | 1.7900000 | 2.0100000 |

Unique Subject Identifier=8047000000-0028

Assay variable : PTINR\_VAL1 PT-INR Value

N Mean Standard Deviation Minimum Maximum

---

|   |           |           |           |           |
|---|-----------|-----------|-----------|-----------|
| 3 | 1.5933333 | 0.0472582 | 1.5400000 | 1.6300000 |
|---|-----------|-----------|-----------|-----------|

---



Laboratory tests at the time of obtaining Table 2-6 consent, according to the presence or absence of proton-pump inhibitors

Unique Subject Identifier=8047000000-0029

MEANS Procedure

Assay variable : PTINR\_VAL1 PT-INR Value

| N | Mean      | Standard Deviation | Minimum   | Maximum   |
|---|-----------|--------------------|-----------|-----------|
| 3 | 1.6866667 | 0.2311565          | 1.4700000 | 1.9300000 |

Unique Subject Identifier=8048010011-0002

Assay variable : PTINR\_VAL1 PT-INR Value

| N | Mean      | Standard Deviation | Minimum   | Maximum   |
|---|-----------|--------------------|-----------|-----------|
| 2 | 1.3900000 | 0.0565685          | 1.3500000 | 1.4300000 |

Unique Subject Identifier=8048010011-0007

Assay variable : PTINR\_VAL1 PT-INR Value

| N | Mean      | Standard Deviation | Minimum   | Maximum   |
|---|-----------|--------------------|-----------|-----------|
| 3 | 1.9533333 | 0.4188476          | 1.6100000 | 2.4200000 |

Unique Subject Identifier=8048010011-0028

Assay variable : PTINR\_VAL1 PT-INR Value

N Mean Standard Deviation Minimum Maximum

---

|   |           |           |           |           |
|---|-----------|-----------|-----------|-----------|
| 6 | 2.0916667 | 0.1070358 | 1.9700000 | 2.2800000 |
|---|-----------|-----------|-----------|-----------|

---

Laboratory tests at the time of obtaining Table 2-6 consent, according to the presence or absence of proton-pump inhibitors

Unique Subject Identifier=8048010011-0034

MEANS Procedure

Assay variable : PTINR\_VAL1 PT-INR Value

N Mean Standard Deviation Minimum Maximum

---

|   |          |           |          |          |
|---|----------|-----------|----------|----------|
| 2 | 1.640000 | 0.6363961 | 1.190000 | 2.090000 |
|---|----------|-----------|----------|----------|

---

Unique Subject Identifier=8054010000-0001

Assay variable : PTINR\_VAL1 PT-INR Value

N Mean Standard Deviation Minimum Maximum

---

|   |          |           |          |          |
|---|----------|-----------|----------|----------|
| 4 | 2.547500 | 0.5144819 | 1.910000 | 3.120000 |
|---|----------|-----------|----------|----------|

---

Unique Subject Identifier=8055000000-0004

Assay variable : PTINR\_VAL1 PT-INR Value

N Mean Standard Deviation Minimum Maximum

---

|   |          |           |          |          |
|---|----------|-----------|----------|----------|
| 4 | 1.837500 | 0.0997914 | 1.730000 | 1.960000 |
|---|----------|-----------|----------|----------|

---

Unique Subject Identifier=8055000000-0006

Assay variable : PTINR\_VAL1 PT-INR Value

N Mean Standard Deviation Minimum Maximum

---

|   |          |           |          |          |
|---|----------|-----------|----------|----------|
| 4 | 2.190000 | 0.6639779 | 1.720000 | 3.170000 |
|---|----------|-----------|----------|----------|

---

Laboratory tests at the time of obtaining Table 2-6 consent, according to the presence or absence of proton-pump inhibitors

Unique Subject Identifier=8057011000-0001

MEANS Procedure

Assay variable : PTINR\_VAL1 PT-INR Value

N Mean Standard Deviation Minimum Maximum

---

|   |           |  |           |           |
|---|-----------|--|-----------|-----------|
| 1 | 1.3800000 |  | 1.3800000 | 1.3800000 |
|---|-----------|--|-----------|-----------|

---

Unique Subject Identifier=8057011000-0012

Assay variable : PTINR\_VAL1 PT-INR Value

N Mean Standard Deviation Minimum Maximum

---

|   |           |           |           |           |
|---|-----------|-----------|-----------|-----------|
| 6 | 1.7183333 | 0.3896879 | 1.3100000 | 2.2200000 |
|---|-----------|-----------|-----------|-----------|

---

Unique Subject Identifier=8057011000-0014

Assay variable : PTINR\_VAL1 PT-INR Value

N Mean Standard Deviation Minimum Maximum

---

|   |           |           |           |           |
|---|-----------|-----------|-----------|-----------|
| 3 | 2.2566667 | 0.3689625 | 1.8500000 | 2.5700000 |
|---|-----------|-----------|-----------|-----------|

---

Unique Subject Identifier=8057011000-0015

Assay variable : PTINR\_VAL1 PT-INR Value

N Mean Standard Deviation Minimum Maximum

---

|   |           |           |           |           |
|---|-----------|-----------|-----------|-----------|
| 6 | 2.1483333 | 0.6102923 | 1.4900000 | 3.1000000 |
|---|-----------|-----------|-----------|-----------|

---

Laboratory tests at the time of obtaining Table 2-6 consent, according to the presence or absence of proton-pump inhibitors

Unique Subject Identifier=8060011000-0001

MEANS Procedure

Assay variable : PTINR\_VAL1 PT-INR Value

N Mean Standard Deviation Minimum Maximum

---

|   |           |           |           |           |
|---|-----------|-----------|-----------|-----------|
| 6 | 2.3666667 | 0.4273952 | 1.9000000 | 3.1000000 |
|---|-----------|-----------|-----------|-----------|

---

Unique Subject Identifier=8060011000-0002

Assay variable : PTINR\_VAL1 PT-INR Value

N Mean Standard Deviation Minimum Maximum

---

|   |           |           |           |           |
|---|-----------|-----------|-----------|-----------|
| 3 | 2.7333333 | 1.0066446 | 1.8000000 | 3.8000000 |
|---|-----------|-----------|-----------|-----------|

---

Unique Subject Identifier=8060011000-0003

Assay variable : PTINR\_VAL1 PT-INR Value

N Mean Standard Deviation Minimum Maximum

---

|   |           |           |           |           |
|---|-----------|-----------|-----------|-----------|
| 3 | 2.6000000 | 0.4582576 | 2.1000000 | 3.0000000 |
|---|-----------|-----------|-----------|-----------|

---

Unique Subject Identifier=8060011000-0004

Assay variable : PTINR\_VAL1 PT-INR Value

N Mean Standard Deviation Minimum Maximum

---

|   |          |  |          |          |
|---|----------|--|----------|----------|
| 1 | 1.800000 |  | 1.800000 | 1.800000 |
|---|----------|--|----------|----------|

---



Laboratory tests at the time of obtaining Table 2-6 consent, according to the presence or absence of proton-pump inhibitors

Unique Subject Identifier=8060011000-0008

MEANS Procedure

Assay variable : PTINR\_VAL1 PT-INR Value

N Mean Standard Deviation Minimum Maximum

---

|   |           |           |           |           |
|---|-----------|-----------|-----------|-----------|
| 6 | 2.1166667 | 0.7305249 | 1.4000000 | 3.0000000 |
|---|-----------|-----------|-----------|-----------|

---

Unique Subject Identifier=8060011000-0009

Assay variable : PTINR\_VAL1 PT-INR Value

N Mean Standard Deviation Minimum Maximum

---

|   |           |           |           |           |
|---|-----------|-----------|-----------|-----------|
| 6 | 2.4000000 | 0.0894427 | 2.3000000 | 2.5000000 |
|---|-----------|-----------|-----------|-----------|

---

Unique Subject Identifier=8060011000-0011

Assay variable : PTINR\_VAL1 PT-INR Value

N Mean Standard Deviation Minimum Maximum

---

|   |           |           |           |           |
|---|-----------|-----------|-----------|-----------|
| 2 | 1.9500000 | 0.4949747 | 1.6000000 | 2.3000000 |
|---|-----------|-----------|-----------|-----------|

---

Unique Subject Identifier=8060011000-0012

Assay variable : PTINR\_VAL1 PT-INR Value

N Mean Standard Deviation Minimum Maximum

---

|   |           |           |           |           |
|---|-----------|-----------|-----------|-----------|
| 5 | 1.9200000 | 0.4438468 | 1.5000000 | 2.4000000 |
|---|-----------|-----------|-----------|-----------|

---

Laboratory tests at the time of obtaining Table 2-6 consent, according to the presence or absence of proton-pump inhibitors

Unique Subject Identifier=8060011000-0013

MEANS Procedure

Assay variable : PTINR\_VAL1 PT-INR Value

N Mean Standard Deviation Minimum Maximum

---

|   |           |           |           |           |
|---|-----------|-----------|-----------|-----------|
| 6 | 1.9333333 | 0.3932768 | 1.5000000 | 2.5000000 |
|---|-----------|-----------|-----------|-----------|

---

Unique Subject Identifier=8060011000-0017

Assay variable : PTINR\_VAL1 PT-INR Value

N Mean Standard Deviation Minimum Maximum

---

|   |           |           |           |           |
|---|-----------|-----------|-----------|-----------|
| 3 | 2.2333333 | 0.1527525 | 2.1000000 | 2.4000000 |
|---|-----------|-----------|-----------|-----------|

---

Unique Subject Identifier=8060011000-0020

Assay variable : PTINR\_VAL1 PT-INR Value

N Mean Standard Deviation Minimum Maximum

---

|   |           |           |           |           |
|---|-----------|-----------|-----------|-----------|
| 6 | 2.3166667 | 0.3125167 | 1.9000000 | 2.8000000 |
|---|-----------|-----------|-----------|-----------|

---

Unique Subject Identifier=8060011000-0021

Assay variable : PTINR\_VAL1 PT-INR Value

N Mean Standard Deviation Minimum Maximum

---

|   |           |           |           |           |
|---|-----------|-----------|-----------|-----------|
| 6 | 1.9666667 | 0.1632993 | 1.7000000 | 2.2000000 |
|---|-----------|-----------|-----------|-----------|

---

Laboratory tests at the time of obtaining Table 2-6 consent, according to the presence or absence of proton-pump inhibitors

Unique Subject Identifier=8060011000-0022

MEANS Procedure

Assay variable : PTINR\_VAL1 PT-INR Value

| N | Mean      | Standard Deviation | Minimum   | Maximum   |
|---|-----------|--------------------|-----------|-----------|
| 3 | 2.0666667 | 0.1527525          | 1.9000000 | 2.2000000 |

Unique Subject Identifier=8060011000-0023

Assay variable : PTINR\_VAL1 PT-INR Value

| N | Mean      | Standard Deviation | Minimum   | Maximum   |
|---|-----------|--------------------|-----------|-----------|
| 6 | 1.9833333 | 0.3311596          | 1.7000000 | 2.6000000 |

Unique Subject Identifier=8060011000-0026

Assay variable : PTINR\_VAL1 PT-INR Value

| N | Mean      | Standard Deviation | Minimum   | Maximum   |
|---|-----------|--------------------|-----------|-----------|
| 4 | 2.3000000 | 0.2449490          | 2.0000000 | 2.6000000 |

Unique Subject Identifier=8060011000-0029

Assay variable : PTINR\_VAL1 PT-INR Value

N Mean Standard Deviation Minimum Maximum

---

|   |          |           |          |          |
|---|----------|-----------|----------|----------|
| 2 | 2.450000 | 0.0707107 | 2.400000 | 2.500000 |
|---|----------|-----------|----------|----------|

---

Laboratory tests at the time of obtaining Table 2-6 consent, according to the presence or absence of proton-pump inhibitors

Unique Subject Identifier=8060011000-0030

MEANS Procedure

Assay variable : PTINR\_VAL1 PT-INR Value

| N | Mean      | Standard Deviation | Minimum   | Maximum   |
|---|-----------|--------------------|-----------|-----------|
| 3 | 1.9000000 | 0.2645751          | 1.6000000 | 2.1000000 |

Unique Subject Identifier=8061010010-0002

Assay variable : PTINR\_VAL1 PT-INR Value

| N | Mean      | Standard Deviation | Minimum   | Maximum   |
|---|-----------|--------------------|-----------|-----------|
| 4 | 1.7425000 | 0.4847938          | 1.0900000 | 2.2500000 |

Unique Subject Identifier=8067000000-0001

Assay variable : PTINR\_VAL1 PT-INR Value

| N | Mean      | Standard Deviation | Minimum   | Maximum   |
|---|-----------|--------------------|-----------|-----------|
| 6 | 2.0366667 | 0.2960856          | 1.7900000 | 2.4900000 |

Unique Subject Identifier=8100000000-0002

Assay variable : PTINR\_VAL1 PT-INR Value

N Mean Standard Deviation Minimum Maximum

---

|   |           |           |           |           |
|---|-----------|-----------|-----------|-----------|
| 5 | 2.1960000 | 0.2891021 | 1.8900000 | 2.5300000 |
|---|-----------|-----------|-----------|-----------|

---



Laboratory tests at the time of obtaining Table 2-6 consent, according to the presence or absence of proton-pump inhibitors

Unique Subject Identifier=810000000-0005

MEANS Procedure

Assay variable : PTINR\_VAL1 PT-INR Value

N Mean Standard Deviation Minimum Maximum

---

|   |           |           |           |           |
|---|-----------|-----------|-----------|-----------|
| 4 | 1.8875000 | 0.2543456 | 1.5400000 | 2.1500000 |
|---|-----------|-----------|-----------|-----------|

---

Unique Subject Identifier=810400000-0001

Assay variable : PTINR\_VAL1 PT-INR Value

N Mean Standard Deviation Minimum Maximum

---

|   |           |           |           |           |
|---|-----------|-----------|-----------|-----------|
| 2 | 1.8600000 | 0.0141421 | 1.8500000 | 1.8700000 |
|---|-----------|-----------|-----------|-----------|

---

Unique Subject Identifier=810400000-0002

Assay variable : PTINR\_VAL1 PT-INR Value

N Mean Standard Deviation Minimum Maximum

---

|   |           |           |           |           |
|---|-----------|-----------|-----------|-----------|
| 2 | 2.8700000 | 0.6081118 | 2.4400000 | 3.3000000 |
|---|-----------|-----------|-----------|-----------|

---

Unique Subject Identifier=810400000-0003

Assay variable : PTINR\_VAL1 PT-INR Value

N Mean Standard Deviation Minimum Maximum

---

|   |          |           |          |          |
|---|----------|-----------|----------|----------|
| 2 | 1.350000 | 0.0707107 | 1.300000 | 1.400000 |
|---|----------|-----------|----------|----------|

---

Laboratory tests at the time of obtaining Table 2-6 consent, according to the presence or absence of proton-pump inhibitors

Unique Subject Identifier=810400000-0005

MEANS Procedure

Assay variable : PTINR\_VAL1 PT-INR Value

N Mean Standard Deviation Minimum Maximum

---

|   |          |           |          |          |
|---|----------|-----------|----------|----------|
| 4 | 2.390000 | 0.1764464 | 2.160000 | 2.590000 |
|---|----------|-----------|----------|----------|

---

Unique Subject Identifier=810400000-0007

Assay variable : PTINR\_VAL1 PT-INR Value

N Mean Standard Deviation Minimum Maximum

---

|   |          |           |          |          |
|---|----------|-----------|----------|----------|
| 4 | 1.535000 | 0.1473092 | 1.390000 | 1.690000 |
|---|----------|-----------|----------|----------|

---

Unique Subject Identifier=810400000-0008

Assay variable : PTINR\_VAL1 PT-INR Value

N Mean Standard Deviation Minimum Maximum

---

|   |          |           |          |          |
|---|----------|-----------|----------|----------|
| 4 | 1.835000 | 0.2037155 | 1.600000 | 2.020000 |
|---|----------|-----------|----------|----------|

---

Unique Subject Identifier=810400000-0018

Assay variable : PTINR\_VAL1 PT-INR Value

N Mean Standard Deviation Minimum Maximum

---

|   |           |           |           |           |
|---|-----------|-----------|-----------|-----------|
| 6 | 2.0150000 | 0.2504196 | 1.6900000 | 2.4400000 |
|---|-----------|-----------|-----------|-----------|

---

Laboratory tests at the time of obtaining Table 2-6 consent, according to the presence or absence of proton-pump inhibitors

Unique Subject Identifier=810400000-0021

MEANS Procedure

Assay variable : PTINR\_VAL1 PT-INR Value

N Mean Standard Deviation Minimum Maximum

---

|   |           |           |           |           |
|---|-----------|-----------|-----------|-----------|
| 3 | 1.6700000 | 0.4063250 | 1.3300000 | 2.1200000 |
|---|-----------|-----------|-----------|-----------|

---

Unique Subject Identifier=810400000-0027

Assay variable : PTINR\_VAL1 PT-INR Value

N Mean Standard Deviation Minimum Maximum

---

|   |           |           |           |           |
|---|-----------|-----------|-----------|-----------|
| 3 | 1.9133333 | 0.5225259 | 1.3100000 | 2.2200000 |
|---|-----------|-----------|-----------|-----------|

---

Unique Subject Identifier=8108111100-0026

Assay variable : PTINR\_VAL1 PT-INR Value

N Mean Standard Deviation Minimum Maximum

---

|   |           |  |           |           |
|---|-----------|--|-----------|-----------|
| 1 | 2.2600000 |  | 2.2600000 | 2.2600000 |
|---|-----------|--|-----------|-----------|

---

Unique Subject Identifier=8110000100-0001

Assay variable : PTINR\_VAL1 PT-INR Value

N Mean Standard Deviation Minimum Maximum

---

|   |           |           |           |           |
|---|-----------|-----------|-----------|-----------|
| 3 | 1.6433333 | 0.1755942 | 1.4600000 | 1.8100000 |
|---|-----------|-----------|-----------|-----------|

---

Laboratory tests at the time of obtaining Table 2-6 consent, according to the presence or absence of proton-pump inhibitors

Unique Subject Identifier=8110000100-0002

MEANS Procedure

Assay variable : PTINR\_VAL1 PT-INR Value

N Mean Standard Deviation Minimum Maximum

---

|   |           |           |           |           |
|---|-----------|-----------|-----------|-----------|
| 3 | 2.1833333 | 0.1167619 | 2.0800000 | 2.3100000 |
|---|-----------|-----------|-----------|-----------|

---

Unique Subject Identifier=8110000100-0003

Assay variable : PTINR\_VAL1 PT-INR Value

N Mean Standard Deviation Minimum Maximum

---

|   |           |           |           |           |
|---|-----------|-----------|-----------|-----------|
| 5 | 2.2760000 | 0.3549366 | 1.9500000 | 2.7100000 |
|---|-----------|-----------|-----------|-----------|

---

Unique Subject Identifier=8110000100-0004

Assay variable : PTINR\_VAL1 PT-INR Value

N Mean Standard Deviation Minimum Maximum

---

|   |           |           |           |           |
|---|-----------|-----------|-----------|-----------|
| 3 | 2.2466667 | 0.4954123 | 1.8200000 | 2.7900000 |
|---|-----------|-----------|-----------|-----------|

---

Unique Subject Identifier=8110000100-0006

Assay variable : PTINR\_VAL1 PT-INR Value

N Mean Standard Deviation Minimum Maximum

---

|   |           |           |           |           |
|---|-----------|-----------|-----------|-----------|
| 5 | 2.0980000 | 0.1888650 | 1.8400000 | 2.2900000 |
|---|-----------|-----------|-----------|-----------|

---



Laboratory tests at the time of obtaining Table 2-6 consent, according to the presence or absence of proton-pump inhibitors

Unique Subject Identifier=811400000-0002

MEANS Procedure

Assay variable : PTINR\_VAL1 PT-INR Value

N Mean Standard Deviation Minimum Maximum

---

|   |           |           |           |           |
|---|-----------|-----------|-----------|-----------|
| 4 | 1.7950000 | 0.3923859 | 1.5600000 | 2.3800000 |
|---|-----------|-----------|-----------|-----------|

---

Unique Subject Identifier=811400000-0006

Assay variable : PTINR\_VAL1 PT-INR Value

N Mean Standard Deviation Minimum Maximum

---

|   |           |           |           |           |
|---|-----------|-----------|-----------|-----------|
| 3 | 1.4600000 | 0.1374773 | 1.3400000 | 1.6100000 |
|---|-----------|-----------|-----------|-----------|

---

Unique Subject Identifier=811400000-0008

Assay variable : PTINR\_VAL1 PT-INR Value

N Mean Standard Deviation Minimum Maximum

---

|   |           |           |           |           |
|---|-----------|-----------|-----------|-----------|
| 6 | 1.7950000 | 0.2055967 | 1.4900000 | 2.0900000 |
|---|-----------|-----------|-----------|-----------|

---

Unique Subject Identifier=811400000-0009

Assay variable : PTINR\_VAL1 PT-INR Value

N Mean Standard Deviation Minimum Maximum

---

|   |           |           |           |           |
|---|-----------|-----------|-----------|-----------|
| 4 | 1.4150000 | 0.3961902 | 1.0400000 | 1.9500000 |
|---|-----------|-----------|-----------|-----------|

---

Laboratory tests at the time of obtaining Table 2-6 consent, according to the presence or absence of proton-pump inhibitors

Unique Subject Identifier=8117011010-0002

MEANS Procedure

Assay variable : PTINR\_VAL1 PT-INR Value

N Mean Standard Deviation Minimum Maximum

---

|   |           |           |           |           |
|---|-----------|-----------|-----------|-----------|
| 3 | 1.6833333 | 0.4539089 | 1.1600000 | 1.9700000 |
|---|-----------|-----------|-----------|-----------|

---

Unique Subject Identifier=8117011010-0004

Assay variable : PTINR\_VAL1 PT-INR Value

N Mean Standard Deviation Minimum Maximum

---

|   |           |  |           |           |
|---|-----------|--|-----------|-----------|
| 1 | 2.0900000 |  | 2.0900000 | 2.0900000 |
|---|-----------|--|-----------|-----------|

---

Unique Subject Identifier=8117011010-0005

Assay variable : PTINR\_VAL1 PT-INR Value

N Mean Standard Deviation Minimum Maximum

---

|   |           |           |           |           |
|---|-----------|-----------|-----------|-----------|
| 2 | 1.7700000 | 0.2121320 | 1.6200000 | 1.9200000 |
|---|-----------|-----------|-----------|-----------|

---

Unique Subject Identifier=8117011010-0009

Assay variable : PTINR\_VAL1 PT-INR Value

N Mean Standard Deviation Minimum Maximum

---

|   |           |           |           |           |
|---|-----------|-----------|-----------|-----------|
| 5 | 1.9260000 | 0.1119375 | 1.7700000 | 2.0400000 |
|---|-----------|-----------|-----------|-----------|

---

Laboratory tests at the time of obtaining Table 2-6 consent, according to the presence or absence of proton-pump inhibitors

Unique Subject Identifier=8117011010-0010

MEANS Procedure

Assay variable : PTINR\_VAL1 PT-INR Value

N Mean Standard Deviation Minimum Maximum

---

|   |           |           |           |           |
|---|-----------|-----------|-----------|-----------|
| 6 | 1.7433333 | 0.2410532 | 1.4200000 | 2.1300000 |
|---|-----------|-----------|-----------|-----------|

---

Unique Subject Identifier=8117011010-0016

Assay variable : PTINR\_VAL1 PT-INR Value

N Mean Standard Deviation Minimum Maximum

---

|   |           |           |           |           |
|---|-----------|-----------|-----------|-----------|
| 3 | 1.7100000 | 0.1708801 | 1.5500000 | 1.8900000 |
|---|-----------|-----------|-----------|-----------|

---

Unique Subject Identifier=8117011010-0024

Assay variable : PTINR\_VAL1 PT-INR Value

N Mean Standard Deviation Minimum Maximum

---

|   |           |           |           |           |
|---|-----------|-----------|-----------|-----------|
| 2 | 2.3050000 | 0.0777817 | 2.2500000 | 2.3600000 |
|---|-----------|-----------|-----------|-----------|

---

Unique Subject Identifier=8117011010-0025

Assay variable : PTINR\_VAL1 PT-INR Value

N Mean Standard Deviation Minimum Maximum

---

|   |           |           |           |           |
|---|-----------|-----------|-----------|-----------|
| 5 | 2.0960000 | 0.2261194 | 1.8200000 | 2.3200000 |
|---|-----------|-----------|-----------|-----------|

---

Laboratory tests at the time of obtaining Table 2-6 consent, according to the presence or absence of proton-pump inhibitors

Unique Subject Identifier=8117011010-0028

MEANS Procedure

Assay variable : PTINR\_VAL1 PT-INR Value

N Mean Standard Deviation Minimum Maximum

---

|   |           |           |           |           |
|---|-----------|-----------|-----------|-----------|
| 6 | 1.9283333 | 0.3702117 | 1.3900000 | 2.3500000 |
|---|-----------|-----------|-----------|-----------|

---

Unique Subject Identifier=8123000000-0002

Assay variable : PTINR\_VAL1 PT-INR Value

N Mean Standard Deviation Minimum Maximum

---

|   |           |           |           |           |
|---|-----------|-----------|-----------|-----------|
| 6 | 1.9000000 | 0.2909983 | 1.5900000 | 2.3800000 |
|---|-----------|-----------|-----------|-----------|

---

Unique Subject Identifier=8123000000-0004

Assay variable : PTINR\_VAL1 PT-INR Value

N Mean Standard Deviation Minimum Maximum

---

|   |           |           |           |           |
|---|-----------|-----------|-----------|-----------|
| 6 | 1.8983333 | 0.2920559 | 1.4500000 | 2.2300000 |
|---|-----------|-----------|-----------|-----------|

---

Unique Subject Identifier=8123000000-0005

Assay variable : PTINR\_VAL1 PT-INR Value

N Mean Standard Deviation Minimum Maximum

---

|   |           |           |           |           |
|---|-----------|-----------|-----------|-----------|
| 3 | 2.0866667 | 0.2542309 | 1.8100000 | 2.3100000 |
|---|-----------|-----------|-----------|-----------|

---



Laboratory tests at the time of obtaining Table 2-6 consent, according to the presence or absence of proton-pump inhibitors

Unique Subject Identifier=8123000000-0010

MEANS Procedure

Assay variable : PTINR\_VAL1 PT-INR Value

N Mean Standard Deviation Minimum Maximum

---

|   |           |           |           |           |
|---|-----------|-----------|-----------|-----------|
| 5 | 1.9240000 | 0.3630840 | 1.4900000 | 2.4600000 |
|---|-----------|-----------|-----------|-----------|

---

Unique Subject Identifier=8123000000-0011

Assay variable : PTINR\_VAL1 PT-INR Value

N Mean Standard Deviation Minimum Maximum

---

|   |           |           |           |           |
|---|-----------|-----------|-----------|-----------|
| 4 | 1.8825000 | 0.2151550 | 1.6800000 | 2.1500000 |
|---|-----------|-----------|-----------|-----------|

---

Unique Subject Identifier=8123000000-0012

Assay variable : PTINR\_VAL1 PT-INR Value

N Mean Standard Deviation Minimum Maximum

---

|   |           |           |           |           |
|---|-----------|-----------|-----------|-----------|
| 4 | 1.9625000 | 0.1668083 | 1.7300000 | 2.1100000 |
|---|-----------|-----------|-----------|-----------|

---

Unique Subject Identifier=8123000000-0013

Assay variable : PTINR\_VAL1 PT-INR Value

N Mean Standard Deviation Minimum Maximum

---

|   |          |           |          |          |
|---|----------|-----------|----------|----------|
| 5 | 2.116000 | 0.1350185 | 1.950000 | 2.300000 |
|---|----------|-----------|----------|----------|

---

Laboratory tests at the time of obtaining Table 2-6 consent, according to the presence or absence of proton-pump inhibitors

Unique Subject Identifier=8123000000-0018

MEANS Procedure

Assay variable : PTINR\_VAL1 PT-INR Value

N Mean Standard Deviation Minimum Maximum

---

|   |           |           |           |           |
|---|-----------|-----------|-----------|-----------|
| 6 | 1.8600000 | 0.3850714 | 1.5200000 | 2.5700000 |
|---|-----------|-----------|-----------|-----------|

---

Unique Subject Identifier=8124000000-0001

Assay variable : PTINR\_VAL1 PT-INR Value

N Mean Standard Deviation Minimum Maximum

---

|   |           |  |           |           |
|---|-----------|--|-----------|-----------|
| 1 | 3.6500000 |  | 3.6500000 | 3.6500000 |
|---|-----------|--|-----------|-----------|

---

Unique Subject Identifier=8133000000-0001

Assay variable : PTINR\_VAL1 PT-INR Value

N Mean Standard Deviation Minimum Maximum

---

|   |           |  |           |           |
|---|-----------|--|-----------|-----------|
| 1 | 2.3400000 |  | 2.3400000 | 2.3400000 |
|---|-----------|--|-----------|-----------|

---

Unique Subject Identifier=8135000000-0002

Assay variable : PTINR\_VAL1 PT-INR Value

N Mean Standard Deviation Minimum Maximum

---

|   |           |  |           |           |
|---|-----------|--|-----------|-----------|
| 1 | 1.8500000 |  | 1.8500000 | 1.8500000 |
|---|-----------|--|-----------|-----------|

---

Laboratory tests at the time of obtaining Table 2-6 consent, according to the presence or absence of proton-pump inhibitors

Unique Subject Identifier=813500000-0004

MEANS Procedure

Assay variable : PTINR\_VAL1 PT-INR Value

| N | Mean      | Standard Deviation | Minimum   | Maximum   |
|---|-----------|--------------------|-----------|-----------|
| 2 | 1.4900000 | 0.1555635          | 1.3800000 | 1.6000000 |

Unique Subject Identifier=813500000-0006

Assay variable : PTINR\_VAL1 PT-INR Value

| N | Mean      | Standard Deviation | Minimum   | Maximum   |
|---|-----------|--------------------|-----------|-----------|
| 2 | 1.5700000 | 0.0282843          | 1.5500000 | 1.5900000 |

Unique Subject Identifier=813500000-0007

Assay variable : PTINR\_VAL1 PT-INR Value

| N | Mean      | Standard Deviation | Minimum   | Maximum   |
|---|-----------|--------------------|-----------|-----------|
| 3 | 2.0833333 | 0.2635021          | 1.7900000 | 2.3000000 |

Unique Subject Identifier=813500000-0009

Assay variable : PTINR\_VAL1 PT-INR Value

N Mean Standard Deviation Minimum Maximum

---

|   |          |           |          |          |
|---|----------|-----------|----------|----------|
| 3 | 2.120000 | 0.3815757 | 1.680000 | 2.360000 |
|---|----------|-----------|----------|----------|

---

Laboratory tests at the time of obtaining Table 2-6 consent, according to the presence or absence of proton-pump inhibitors

Unique Subject Identifier=813500000-0013

MEANS Procedure

Assay variable : PTINR\_VAL1 PT-INR Value

| N | Mean     | Standard Deviation | Minimum  | Maximum  |
|---|----------|--------------------|----------|----------|
| 3 | 2.100000 | 0.5543465          | 1.770000 | 2.740000 |

Unique Subject Identifier=813500000-0014

Assay variable : PTINR\_VAL1 PT-INR Value

| N | Mean     | Standard Deviation | Minimum  | Maximum  |
|---|----------|--------------------|----------|----------|
| 3 | 1.750000 | 0.5369358          | 1.440000 | 2.370000 |

Unique Subject Identifier=813600000-0002

Assay variable : PTINR\_VAL1 PT-INR Value

| N | Mean     | Standard Deviation | Minimum  | Maximum  |
|---|----------|--------------------|----------|----------|
| 6 | 1.823333 | 0.2530349          | 1.400000 | 2.130000 |

Unique Subject Identifier=813600000-0010

Assay variable : PTINR\_VAL1 PT-INR Value

N Mean Standard Deviation Minimum Maximum

---

|   |          |           |          |          |
|---|----------|-----------|----------|----------|
| 4 | 1.840000 | 0.0294392 | 1.810000 | 1.880000 |
|---|----------|-----------|----------|----------|

---



Laboratory tests at the time of obtaining Table 2-6 consent, according to the presence or absence of proton-pump inhibitors

Unique Subject Identifier=813600000-0015

MEANS Procedure

Assay variable : PTINR\_VAL1 PT-INR Value

N Mean Standard Deviation Minimum Maximum

---

|   |           |           |           |           |
|---|-----------|-----------|-----------|-----------|
| 4 | 2.1425000 | 0.8701485 | 1.5400000 | 3.4300000 |
|---|-----------|-----------|-----------|-----------|

---

Unique Subject Identifier=813600000-0022

Assay variable : PTINR\_VAL1 PT-INR Value

N Mean Standard Deviation Minimum Maximum

---

|   |           |           |           |           |
|---|-----------|-----------|-----------|-----------|
| 4 | 2.0050000 | 0.6165225 | 1.5300000 | 2.9100000 |
|---|-----------|-----------|-----------|-----------|

---

Unique Subject Identifier=8137010000-0002

Assay variable : PTINR\_VAL1 PT-INR Value

N Mean Standard Deviation Minimum Maximum

---

|   |           |           |           |           |
|---|-----------|-----------|-----------|-----------|
| 3 | 2.3833333 | 0.7011657 | 1.8600000 | 3.1800000 |
|---|-----------|-----------|-----------|-----------|

---

Unique Subject Identifier=8137010000-0004

Assay variable : PTINR\_VAL1 PT-INR Value

N Mean Standard Deviation Minimum Maximum

---

|   |           |           |           |           |
|---|-----------|-----------|-----------|-----------|
| 3 | 1.8800000 | 0.1705872 | 1.6900000 | 2.0200000 |
|---|-----------|-----------|-----------|-----------|

---

Laboratory tests at the time of obtaining Table 2-6 consent, according to the presence or absence of proton-pump inhibitors

Unique Subject Identifier=8137010000-0007

MEANS Procedure

Assay variable : PTINR\_VAL1 PT-INR Value

| N | Mean      | Standard Deviation | Minimum   | Maximum   |
|---|-----------|--------------------|-----------|-----------|
| 5 | 1.9260000 | 0.2608256          | 1.5500000 | 2.2100000 |

Unique Subject Identifier=8137010000-0013

Assay variable : PTINR\_VAL1 PT-INR Value

| N | Mean      | Standard Deviation | Minimum   | Maximum   |
|---|-----------|--------------------|-----------|-----------|
| 2 | 1.8400000 | 0.4242641          | 1.5400000 | 2.1400000 |

Unique Subject Identifier=8137010000-0015

Assay variable : PTINR\_VAL1 PT-INR Value

| N | Mean      | Standard Deviation | Minimum   | Maximum   |
|---|-----------|--------------------|-----------|-----------|
| 2 | 1.9550000 | 0.2757716          | 1.7600000 | 2.1500000 |

Unique Subject Identifier=8137010000-0019

Assay variable : PTINR\_VAL1 PT-INR Value

N Mean Standard Deviation Minimum Maximum

---

|   |           |           |           |           |
|---|-----------|-----------|-----------|-----------|
| 3 | 1.6933333 | 0.0709460 | 1.6300000 | 1.7700000 |
|---|-----------|-----------|-----------|-----------|

---

Laboratory tests at the time of obtaining Table 2-6 consent, according to the presence or absence of proton-pump inhibitors

Unique Subject Identifier=8148010111-0001

MEANS Procedure

Assay variable : PTINR\_VAL1 PT-INR Value

N Mean Standard Deviation Minimum Maximum

---

|   |           |           |           |           |
|---|-----------|-----------|-----------|-----------|
| 6 | 2.5416667 | 0.6447144 | 1.7300000 | 3.3800000 |
|---|-----------|-----------|-----------|-----------|

---

Unique Subject Identifier=8148010111-0002

Assay variable : PTINR\_VAL1 PT-INR Value

N Mean Standard Deviation Minimum Maximum

---

|   |           |           |           |           |
|---|-----------|-----------|-----------|-----------|
| 3 | 1.7133333 | 0.1650253 | 1.5500000 | 1.8800000 |
|---|-----------|-----------|-----------|-----------|

---

Unique Subject Identifier=8148010111-0015

Assay variable : PTINR\_VAL1 PT-INR Value

N Mean Standard Deviation Minimum Maximum

---

|   |           |           |           |           |
|---|-----------|-----------|-----------|-----------|
| 5 | 1.9880000 | 0.3409839 | 1.6400000 | 2.4500000 |
|---|-----------|-----------|-----------|-----------|

---

Unique Subject Identifier=8154011000-0003

Assay variable : PTINR\_VAL1 PT-INR Value

N Mean Standard Deviation Minimum Maximum

---

|   |           |           |           |           |
|---|-----------|-----------|-----------|-----------|
| 3 | 1.4433333 | 0.1715615 | 1.2600000 | 1.6000000 |
|---|-----------|-----------|-----------|-----------|

---

Laboratory tests at the time of obtaining Table 2-6 consent, according to the presence or absence of proton-pump inhibitors

Unique Subject Identifier=8154011000-0020

MEANS Procedure

Assay variable : PTINR\_VAL1 PT-INR Value

N Mean Standard Deviation Minimum Maximum

---

|   |           |           |           |           |
|---|-----------|-----------|-----------|-----------|
| 6 | 2.1566667 | 0.4464378 | 1.8000000 | 3.0400000 |
|---|-----------|-----------|-----------|-----------|

---

Unique Subject Identifier=8154011000-0021

Assay variable : PTINR\_VAL1 PT-INR Value

N Mean Standard Deviation Minimum Maximum

---

|   |           |           |           |           |
|---|-----------|-----------|-----------|-----------|
| 5 | 2.1940000 | 0.2634008 | 1.9800000 | 2.6500000 |
|---|-----------|-----------|-----------|-----------|

---

Unique Subject Identifier=8154011000-0027

Assay variable : PTINR\_VAL1 PT-INR Value

N Mean Standard Deviation Minimum Maximum

---

|   |           |           |           |           |
|---|-----------|-----------|-----------|-----------|
| 4 | 1.8125000 | 0.2051625 | 1.6000000 | 2.0300000 |
|---|-----------|-----------|-----------|-----------|

---

Unique Subject Identifier=8160000000-0003

Assay variable : PTINR\_VAL1 PT-INR Value

N Mean Standard Deviation Minimum Maximum

---

|   |           |           |           |           |
|---|-----------|-----------|-----------|-----------|
| 6 | 1.8100000 | 0.2372341 | 1.6000000 | 2.2000000 |
|---|-----------|-----------|-----------|-----------|

---



Laboratory tests at the time of obtaining Table 2-6 consent, according to the presence or absence of proton-pump inhibitors

Unique Subject Identifier=816000000-0004

MEANS Procedure

Assay variable : PTINR\_VAL1 PT-INR Value

N Mean Standard Deviation Minimum Maximum

---

|   |           |           |           |           |
|---|-----------|-----------|-----------|-----------|
| 6 | 1.9666667 | 0.1751190 | 1.7000000 | 2.2000000 |
|---|-----------|-----------|-----------|-----------|

---

Unique Subject Identifier=816000000-0006

Assay variable : PTINR\_VAL1 PT-INR Value

N Mean Standard Deviation Minimum Maximum

---

|   |           |           |           |           |
|---|-----------|-----------|-----------|-----------|
| 6 | 1.7850000 | 0.3574213 | 1.4000000 | 2.3000000 |
|---|-----------|-----------|-----------|-----------|

---

Unique Subject Identifier=816000000-0007

Assay variable : PTINR\_VAL1 PT-INR Value

N Mean Standard Deviation Minimum Maximum

---

|   |           |           |           |           |
|---|-----------|-----------|-----------|-----------|
| 5 | 1.9880000 | 0.1475466 | 1.7700000 | 2.1000000 |
|---|-----------|-----------|-----------|-----------|

---

Unique Subject Identifier=816000000-0008

Assay variable : PTINR\_VAL1 PT-INR Value

N Mean Standard Deviation Minimum Maximum

---

|   |           |           |           |           |
|---|-----------|-----------|-----------|-----------|
| 6 | 2.1683333 | 0.4108731 | 1.7100000 | 2.8000000 |
|---|-----------|-----------|-----------|-----------|

---

Laboratory tests at the time of obtaining Table 2-6 consent, according to the presence or absence of proton-pump inhibitors

Unique Subject Identifier=816000000-0009

MEANS Procedure

Assay variable : PTINR\_VAL1 PT-INR Value

N Mean Standard Deviation Minimum Maximum

---

|   |          |           |          |          |
|---|----------|-----------|----------|----------|
| 6 | 1.560000 | 0.1019804 | 1.400000 | 1.700000 |
|---|----------|-----------|----------|----------|

---

Unique Subject Identifier=816000000-0010

Assay variable : PTINR\_VAL1 PT-INR Value

N Mean Standard Deviation Minimum Maximum

---

|   |           |           |          |          |
|---|-----------|-----------|----------|----------|
| 6 | 1.8516667 | 0.2371005 | 1.630000 | 2.300000 |
|---|-----------|-----------|----------|----------|

---

Unique Subject Identifier=816000000-0011

Assay variable : PTINR\_VAL1 PT-INR Value

N Mean Standard Deviation Minimum Maximum

---

|   |          |           |          |          |
|---|----------|-----------|----------|----------|
| 5 | 1.580000 | 0.2774887 | 1.300000 | 2.000000 |
|---|----------|-----------|----------|----------|

---

Unique Subject Identifier=816000000-0013

Assay variable : PTINR\_VAL1 PT-INR Value

N Mean Standard Deviation Minimum Maximum

---

|   |           |           |           |           |
|---|-----------|-----------|-----------|-----------|
| 6 | 2.0950000 | 0.4871858 | 1.5000000 | 2.9700000 |
|---|-----------|-----------|-----------|-----------|

---

Laboratory tests at the time of obtaining Table 2-6 consent, according to the presence or absence of proton-pump inhibitors

Unique Subject Identifier=816000000-0017

MEANS Procedure

Assay variable : PTINR\_VAL1 PT-INR Value

N Mean Standard Deviation Minimum Maximum

---

|   |           |           |           |           |
|---|-----------|-----------|-----------|-----------|
| 6 | 1.8283333 | 0.1000833 | 1.7000000 | 2.0000000 |
|---|-----------|-----------|-----------|-----------|

---

Unique Subject Identifier=816000000-0018

Assay variable : PTINR\_VAL1 PT-INR Value

N Mean Standard Deviation Minimum Maximum

---

|   |           |           |           |           |
|---|-----------|-----------|-----------|-----------|
| 6 | 1.6333333 | 0.2111556 | 1.4000000 | 2.0000000 |
|---|-----------|-----------|-----------|-----------|

---

Unique Subject Identifier=816000000-0022

Assay variable : PTINR\_VAL1 PT-INR Value

N Mean Standard Deviation Minimum Maximum

---

|   |           |           |           |           |
|---|-----------|-----------|-----------|-----------|
| 6 | 1.7250000 | 0.2403123 | 1.5000000 | 2.0000000 |
|---|-----------|-----------|-----------|-----------|

---

Unique Subject Identifier=816000000-0025

Assay variable : PTINR\_VAL1 PT-INR Value

N Mean Standard Deviation Minimum Maximum

---

|   |           |           |           |           |
|---|-----------|-----------|-----------|-----------|
| 6 | 1.7800000 | 0.1707630 | 1.5000000 | 2.0000000 |
|---|-----------|-----------|-----------|-----------|

---

Laboratory tests at the time of obtaining Table 2-6 consent, according to the presence or absence of proton-pump inhibitors

Unique Subject Identifier=816000000-0026

MEANS Procedure

Assay variable : PTINR\_VAL1 PT-INR Value

| N | Mean      | Standard Deviation | Minimum   | Maximum   |
|---|-----------|--------------------|-----------|-----------|
| 6 | 1.6266667 | 0.1751190          | 1.3600000 | 1.9000000 |

Unique Subject Identifier=8161010010-0002

Assay variable : PTINR\_VAL1 PT-INR Value

| N | Mean      | Standard Deviation | Minimum   | Maximum   |
|---|-----------|--------------------|-----------|-----------|
| 4 | 1.9625000 | 0.3406244          | 1.5400000 | 2.3600000 |

Unique Subject Identifier=8161010010-0003

Assay variable : PTINR\_VAL1 PT-INR Value

| N | Mean      | Standard Deviation | Minimum   | Maximum   |
|---|-----------|--------------------|-----------|-----------|
| 3 | 2.6700000 | 0.3439477          | 2.3000000 | 2.9800000 |

Unique Subject Identifier=8161010010-0006

Assay variable : PTINR\_VAL1 PT-INR Value

N Mean Standard Deviation Minimum Maximum

---

|   |           |           |           |           |
|---|-----------|-----------|-----------|-----------|
| 2 | 1.8250000 | 0.2333452 | 1.6600000 | 1.9900000 |
|---|-----------|-----------|-----------|-----------|

---



Laboratory tests at the time of obtaining Table 2-6 consent, according to the presence or absence of proton-pump inhibitors

Unique Subject Identifier=8161010010-0008

MEANS Procedure

Assay variable : PTINR\_VAL1 PT-INR Value

N Mean Standard Deviation Minimum Maximum

---

|   |           |           |           |           |
|---|-----------|-----------|-----------|-----------|
| 2 | 1.6500000 | 0.1555635 | 1.5400000 | 1.7600000 |
|---|-----------|-----------|-----------|-----------|

---

Unique Subject Identifier=8161010010-0010

Assay variable : PTINR\_VAL1 PT-INR Value

N Mean Standard Deviation Minimum Maximum

---

|   |           |           |           |           |
|---|-----------|-----------|-----------|-----------|
| 3 | 1.3700000 | 0.2260531 | 1.1200000 | 1.5600000 |
|---|-----------|-----------|-----------|-----------|

---

Unique Subject Identifier=8161010010-0011

Assay variable : PTINR\_VAL1 PT-INR Value

N Mean Standard Deviation Minimum Maximum

---

|   |           |           |           |           |
|---|-----------|-----------|-----------|-----------|
| 5 | 1.7800000 | 0.1607794 | 1.6000000 | 1.9800000 |
|---|-----------|-----------|-----------|-----------|

---

Unique Subject Identifier=8161010010-0016

Assay variable : PTINR\_VAL1 PT-INR Value

N Mean Standard Deviation Minimum Maximum

---

|   |          |           |          |          |
|---|----------|-----------|----------|----------|
| 4 | 2.300000 | 0.5686827 | 1.790000 | 2.990000 |
|---|----------|-----------|----------|----------|

---

Laboratory tests at the time of obtaining Table 2-6 consent, according to the presence or absence of proton-pump inhibitors

Unique Subject Identifier=8161010010-0018

MEANS Procedure

Assay variable : PTINR\_VAL1 PT-INR Value

N Mean Standard Deviation Minimum Maximum

---

|   |           |           |           |           |
|---|-----------|-----------|-----------|-----------|
| 5 | 1.5080000 | 0.2834078 | 1.2900000 | 1.9900000 |
|---|-----------|-----------|-----------|-----------|

---

Unique Subject Identifier=8161010010-0022

Assay variable : PTINR\_VAL1 PT-INR Value

N Mean Standard Deviation Minimum Maximum

---

|   |           |           |           |           |
|---|-----------|-----------|-----------|-----------|
| 3 | 2.8366667 | 0.3043572 | 2.6000000 | 3.1800000 |
|---|-----------|-----------|-----------|-----------|

---

Unique Subject Identifier=8161010010-0023

Assay variable : PTINR\_VAL1 PT-INR Value

N Mean Standard Deviation Minimum Maximum

---

|   |           |           |           |           |
|---|-----------|-----------|-----------|-----------|
| 3 | 2.5333333 | 0.4272392 | 2.2200000 | 3.0200000 |
|---|-----------|-----------|-----------|-----------|

---

Unique Subject Identifier=8161010010-0024

Assay variable : PTINR\_VAL1 PT-INR Value

N Mean Standard Deviation Minimum Maximum

---

|   |          |          |          |          |
|---|----------|----------|----------|----------|
| 5 | 2.114000 | 0.602976 | 1.660000 | 3.160000 |
|---|----------|----------|----------|----------|

---

Laboratory tests at the time of obtaining Table 2-6 consent, according to the presence or absence of proton-pump inhibitors

Unique Subject Identifier=8161010010-0025

MEANS Procedure

Assay variable : PTINR\_VAL1 PT-INR Value

N Mean Standard Deviation Minimum Maximum

---

|   |          |           |          |          |
|---|----------|-----------|----------|----------|
| 4 | 2.410000 | 0.2201515 | 2.230000 | 2.730000 |
|---|----------|-----------|----------|----------|

---

Unique Subject Identifier=8164000000-0001

Assay variable : PTINR\_VAL1 PT-INR Value

N Mean Standard Deviation Minimum Maximum

---

|   |          |           |          |          |
|---|----------|-----------|----------|----------|
| 6 | 2.136667 | 0.1568014 | 1.980000 | 2.330000 |
|---|----------|-----------|----------|----------|

---

Unique Subject Identifier=8164000000-0003

Assay variable : PTINR\_VAL1 PT-INR Value

N Mean Standard Deviation Minimum Maximum

---

|   |          |           |          |          |
|---|----------|-----------|----------|----------|
| 5 | 2.132000 | 0.2025339 | 1.870000 | 2.340000 |
|---|----------|-----------|----------|----------|

---

Unique Subject Identifier=8164000000-0004

Assay variable : PTINR\_VAL1 PT-INR Value

N Mean Standard Deviation Minimum Maximum

---

|   |           |           |           |           |
|---|-----------|-----------|-----------|-----------|
| 3 | 1.5166667 | 0.2302897 | 1.3200000 | 1.7700000 |
|---|-----------|-----------|-----------|-----------|

---

Laboratory tests at the time of obtaining Table 2-6 consent, according to the presence or absence of proton-pump inhibitors

Unique Subject Identifier=8171010100-0002

MEANS Procedure

Assay variable : PTINR\_VAL1 PT-INR Value

N Mean Standard Deviation Minimum Maximum

---

|   |           |           |           |           |
|---|-----------|-----------|-----------|-----------|
| 4 | 1.7700000 | 0.5373391 | 1.1600000 | 2.4700000 |
|---|-----------|-----------|-----------|-----------|

---

Unique Subject Identifier=8171010100-0003

Assay variable : PTINR\_VAL1 PT-INR Value

N Mean Standard Deviation Minimum Maximum

---

|   |           |           |           |           |
|---|-----------|-----------|-----------|-----------|
| 2 | 1.7250000 | 0.1626346 | 1.6100000 | 1.8400000 |
|---|-----------|-----------|-----------|-----------|

---

Unique Subject Identifier=8171010100-0004

Assay variable : PTINR\_VAL1 PT-INR Value

N Mean Standard Deviation Minimum Maximum

---

|   |           |           |           |           |
|---|-----------|-----------|-----------|-----------|
| 2 | 2.0500000 | 0.1838478 | 1.9200000 | 2.1800000 |
|---|-----------|-----------|-----------|-----------|

---

Unique Subject Identifier=8171010100-0006

Assay variable : PTINR\_VAL1 PT-INR Value

N Mean Standard Deviation Minimum Maximum

---

|   |           |           |           |           |
|---|-----------|-----------|-----------|-----------|
| 4 | 2.0450000 | 0.1247664 | 1.8800000 | 2.1600000 |
|---|-----------|-----------|-----------|-----------|

---



Laboratory tests at the time of obtaining Table 2-6 consent, according to the presence or absence of proton-pump inhibitors

Unique Subject Identifier=8171010100-0007

MEANS Procedure

Assay variable : PTINR\_VAL1 PT-INR Value

N Mean Standard Deviation Minimum Maximum

---

|   |           |           |           |           |
|---|-----------|-----------|-----------|-----------|
| 3 | 1.8766667 | 0.3955165 | 1.4700000 | 2.2600000 |
|---|-----------|-----------|-----------|-----------|

---

Unique Subject Identifier=8171010100-0008

Assay variable : PTINR\_VAL1 PT-INR Value

N Mean Standard Deviation Minimum Maximum

---

|   |           |           |           |           |
|---|-----------|-----------|-----------|-----------|
| 3 | 1.9600000 | 0.1835756 | 1.8300000 | 2.1700000 |
|---|-----------|-----------|-----------|-----------|

---

Unique Subject Identifier=8198010000-0036

Assay variable : PTINR\_VAL1 PT-INR Value

N Mean Standard Deviation Minimum Maximum

---

|   |           |           |           |           |
|---|-----------|-----------|-----------|-----------|
| 6 | 2.2000000 | 0.4560702 | 1.8000000 | 3.1000000 |
|---|-----------|-----------|-----------|-----------|

---

Unique Subject Identifier=8198010000-0039

Assay variable : PTINR\_VAL1 PT-INR Value

N Mean Standard Deviation Minimum Maximum

---

|   |          |           |          |          |
|---|----------|-----------|----------|----------|
| 4 | 2.150000 | 0.3696846 | 1.700000 | 2.600000 |
|---|----------|-----------|----------|----------|

---

Laboratory tests at the time of obtaining Table 2-6 consent, according to the presence or absence of proton-pump inhibitors

Unique Subject Identifier=8198010000-0045

MEANS Procedure

Assay variable : PTINR\_VAL1 PT-INR Value

N Mean Standard Deviation Minimum Maximum

---

|   |           |           |           |           |
|---|-----------|-----------|-----------|-----------|
| 5 | 1.9200000 | 0.1095445 | 1.8000000 | 2.1000000 |
|---|-----------|-----------|-----------|-----------|

---

Unique Subject Identifier=8198010000-0047

Assay variable : PTINR\_VAL1 PT-INR Value

N Mean Standard Deviation Minimum Maximum

---

|   |           |           |           |           |
|---|-----------|-----------|-----------|-----------|
| 6 | 1.6833333 | 0.3060501 | 1.4000000 | 2.2000000 |
|---|-----------|-----------|-----------|-----------|

---

Unique Subject Identifier=8204000000-0002

Assay variable : PTINR\_VAL1 PT-INR Value

N Mean Standard Deviation Minimum Maximum

---

|   |           |           |           |           |
|---|-----------|-----------|-----------|-----------|
| 3 | 1.9800000 | 0.2095233 | 1.7500000 | 2.1600000 |
|---|-----------|-----------|-----------|-----------|

---

Unique Subject Identifier=8204000000-0010

Assay variable : PTINR\_VAL1 PT-INR Value

N Mean Standard Deviation Minimum Maximum

---

|   |           |           |           |           |
|---|-----------|-----------|-----------|-----------|
| 5 | 1.8460000 | 0.6179239 | 1.1200000 | 2.7900000 |
|---|-----------|-----------|-----------|-----------|

---

Laboratory tests at the time of obtaining Table 2-6 consent, according to the presence or absence of proton-pump inhibitors

Unique Subject Identifier=8204000000-0014

MEANS Procedure

Assay variable : PTINR\_VAL1 PT-INR Value

| N | Mean      | Standard Deviation | Minimum   | Maximum   |
|---|-----------|--------------------|-----------|-----------|
| 3 | 1.6766667 | 0.1123981          | 1.5800000 | 1.8000000 |

Unique Subject Identifier=8204000000-0015

Assay variable : PTINR\_VAL1 PT-INR Value

| N | Mean      | Standard Deviation | Minimum   | Maximum   |
|---|-----------|--------------------|-----------|-----------|
| 3 | 2.0000000 | 0.6939741          | 1.4000000 | 2.7600000 |

Unique Subject Identifier=8204000000-0019

Assay variable : PTINR\_VAL1 PT-INR Value

| N | Mean      | Standard Deviation | Minimum   | Maximum   |
|---|-----------|--------------------|-----------|-----------|
| 5 | 2.0960000 | 0.4102804          | 1.7200000 | 2.6600000 |

Unique Subject Identifier=8205000000-0001

Assay variable : PTINR\_VAL1 PT-INR Value

N Mean Standard Deviation Minimum Maximum

---

|   |           |           |           |           |
|---|-----------|-----------|-----------|-----------|
| 4 | 1.6725000 | 0.1225765 | 1.5000000 | 1.7900000 |
|---|-----------|-----------|-----------|-----------|

---

Laboratory tests at the time of obtaining Table 2-6 consent, according to the presence or absence of proton-pump inhibitors

Unique Subject Identifier=8205000000-0008

MEANS Procedure

Assay variable : PTINR\_VAL1 PT-INR Value

N Mean Standard Deviation Minimum Maximum

---

|   |           |           |           |           |
|---|-----------|-----------|-----------|-----------|
| 3 | 2.4466667 | 0.2569695 | 2.2100000 | 2.7200000 |
|---|-----------|-----------|-----------|-----------|

---

Unique Subject Identifier=8205000000-0020

Assay variable : PTINR\_VAL1 PT-INR Value

N Mean Standard Deviation Minimum Maximum

---

|   |           |           |           |           |
|---|-----------|-----------|-----------|-----------|
| 3 | 2.6433333 | 0.1877054 | 2.5300000 | 2.8600000 |
|---|-----------|-----------|-----------|-----------|

---

Unique Subject Identifier=8205000000-0027

Assay variable : PTINR\_VAL1 PT-INR Value

N Mean Standard Deviation Minimum Maximum

---

|   |           |           |           |           |
|---|-----------|-----------|-----------|-----------|
| 4 | 2.0325000 | 0.2025463 | 1.8800000 | 2.3300000 |
|---|-----------|-----------|-----------|-----------|

---

Unique Subject Identifier=8205000000-0028

Assay variable : PTINR\_VAL1 PT-INR Value

N Mean Standard Deviation Minimum Maximum

---

|   |          |           |          |          |
|---|----------|-----------|----------|----------|
| 3 | 1.820000 | 0.2463737 | 1.590000 | 2.080000 |
|---|----------|-----------|----------|----------|

---



Laboratory tests at the time of obtaining Table 2-6 consent, according to the presence or absence of proton-pump inhibitors

Unique Subject Identifier=8205000000-0036

MEANS Procedure

Assay variable : PTINR\_VAL1 PT-INR Value

N Mean Standard Deviation Minimum Maximum

---

|   |           |           |           |           |
|---|-----------|-----------|-----------|-----------|
| 4 | 2.2500000 | 0.2450850 | 2.0400000 | 2.5800000 |
|---|-----------|-----------|-----------|-----------|

---

Unique Subject Identifier=8205000000-0042

Assay variable : PTINR\_VAL1 PT-INR Value

N Mean Standard Deviation Minimum Maximum

---

|   |           |           |           |           |
|---|-----------|-----------|-----------|-----------|
| 4 | 1.8975000 | 0.3986122 | 1.6300000 | 2.4800000 |
|---|-----------|-----------|-----------|-----------|

---

Unique Subject Identifier=8209000000-0003

Assay variable : PTINR\_VAL1 PT-INR Value

N Mean Standard Deviation Minimum Maximum

---

|   |           |           |           |           |
|---|-----------|-----------|-----------|-----------|
| 6 | 2.2900000 | 0.3209984 | 1.9000000 | 2.6400000 |
|---|-----------|-----------|-----------|-----------|

---

Unique Subject Identifier=8209000000-0004

Assay variable : PTINR\_VAL1 PT-INR Value

N Mean Standard Deviation Minimum Maximum

---

|   |           |           |           |           |
|---|-----------|-----------|-----------|-----------|
| 6 | 2.2233333 | 0.7048593 | 1.6500000 | 3.2500000 |
|---|-----------|-----------|-----------|-----------|

---

Laboratory tests at the time of obtaining Table 2-6 consent, according to the presence or absence of proton-pump inhibitors

Unique Subject Identifier=8209000000-0005

MEANS Procedure

Assay variable : PTINR\_VAL1 PT-INR Value

N Mean Standard Deviation Minimum Maximum

---

|   |           |           |           |           |
|---|-----------|-----------|-----------|-----------|
| 6 | 2.3283333 | 0.4630515 | 1.7800000 | 2.9800000 |
|---|-----------|-----------|-----------|-----------|

---

Unique Subject Identifier=8209000000-0007

Assay variable : PTINR\_VAL1 PT-INR Value

N Mean Standard Deviation Minimum Maximum

---

|   |           |           |           |           |
|---|-----------|-----------|-----------|-----------|
| 5 | 1.6820000 | 0.2108791 | 1.3700000 | 1.9200000 |
|---|-----------|-----------|-----------|-----------|

---

Unique Subject Identifier=8209000000-0008

Assay variable : PTINR\_VAL1 PT-INR Value

N Mean Standard Deviation Minimum Maximum

---

|   |           |           |           |           |
|---|-----------|-----------|-----------|-----------|
| 6 | 2.0366667 | 0.4864018 | 1.5400000 | 2.8300000 |
|---|-----------|-----------|-----------|-----------|

---

Unique Subject Identifier=8209000000-0010

Assay variable : PTINR\_VAL1 PT-INR Value

N Mean Standard Deviation Minimum Maximum

---

|   |           |           |           |           |
|---|-----------|-----------|-----------|-----------|
| 4 | 2.2750000 | 0.3152248 | 1.9200000 | 2.6500000 |
|---|-----------|-----------|-----------|-----------|

---

Laboratory tests at the time of obtaining Table 2-6 consent, according to the presence or absence of proton-pump inhibitors

Unique Subject Identifier=8209000000-0014

MEANS Procedure

Assay variable : PTINR\_VAL1 PT-INR Value

N Mean Standard Deviation Minimum Maximum

---

|   |           |           |           |           |
|---|-----------|-----------|-----------|-----------|
| 6 | 2.3583333 | 0.3791262 | 1.8000000 | 2.8700000 |
|---|-----------|-----------|-----------|-----------|

---

Unique Subject Identifier=8209000000-0017

Assay variable : PTINR\_VAL1 PT-INR Value

N Mean Standard Deviation Minimum Maximum

---

|   |           |           |           |           |
|---|-----------|-----------|-----------|-----------|
| 4 | 2.0750000 | 0.2619796 | 1.7800000 | 2.4000000 |
|---|-----------|-----------|-----------|-----------|

---

Unique Subject Identifier=8209000000-0019

Assay variable : PTINR\_VAL1 PT-INR Value

N Mean Standard Deviation Minimum Maximum

---

|   |           |           |           |           |
|---|-----------|-----------|-----------|-----------|
| 3 | 2.2633333 | 0.1154701 | 2.1300000 | 2.3300000 |
|---|-----------|-----------|-----------|-----------|

---

Unique Subject Identifier=8209000000-0023

Assay variable : PTINR\_VAL1 PT-INR Value

N Mean Standard Deviation Minimum Maximum

---

|   |           |           |           |           |
|---|-----------|-----------|-----------|-----------|
| 6 | 1.8800000 | 0.3602222 | 1.5000000 | 2.5700000 |
|---|-----------|-----------|-----------|-----------|

---

Laboratory tests at the time of obtaining Table 2-6 consent, according to the presence or absence of proton-pump inhibitors

Unique Subject Identifier=8209000000-0024

MEANS Procedure

Assay variable : PTINR\_VAL1 PT-INR Value

N Mean Standard Deviation Minimum Maximum

---

|   |           |           |           |           |
|---|-----------|-----------|-----------|-----------|
| 4 | 1.7000000 | 0.3987480 | 1.2600000 | 2.2200000 |
|---|-----------|-----------|-----------|-----------|

---

Unique Subject Identifier=8209000000-0026

Assay variable : PTINR\_VAL1 PT-INR Value

N Mean Standard Deviation Minimum Maximum

---

|   |           |           |           |           |
|---|-----------|-----------|-----------|-----------|
| 4 | 1.9675000 | 0.5758689 | 1.3100000 | 2.5400000 |
|---|-----------|-----------|-----------|-----------|

---

Unique Subject Identifier=8209000000-0027

Assay variable : PTINR\_VAL1 PT-INR Value

N Mean Standard Deviation Minimum Maximum

---

|   |           |           |           |           |
|---|-----------|-----------|-----------|-----------|
| 6 | 2.4133333 | 0.2027478 | 2.1700000 | 2.7200000 |
|---|-----------|-----------|-----------|-----------|

---

Unique Subject Identifier=8209000000-0028

Assay variable : PTINR\_VAL1 PT-INR Value

N Mean Standard Deviation Minimum Maximum

---

|   |           |           |           |           |
|---|-----------|-----------|-----------|-----------|
| 6 | 2.2266667 | 0.2068494 | 1.9600000 | 2.5000000 |
|---|-----------|-----------|-----------|-----------|

---



Laboratory tests at the time of obtaining Table 2-6 consent, according to the presence or absence of proton-pump inhibitors

Unique Subject Identifier=8210000100-0002

MEANS Procedure

Assay variable : PTINR\_VAL1 PT-INR Value

N Mean Standard Deviation Minimum Maximum

---

|   |           |  |           |           |
|---|-----------|--|-----------|-----------|
| 1 | 1.0800000 |  | 1.0800000 | 1.0800000 |
|---|-----------|--|-----------|-----------|

---

Unique Subject Identifier=8223000000-0004

Assay variable : PTINR\_VAL1 PT-INR Value

N Mean Standard Deviation Minimum Maximum

---

|   |           |           |           |           |
|---|-----------|-----------|-----------|-----------|
| 3 | 1.8933333 | 0.3043572 | 1.6700000 | 2.2400000 |
|---|-----------|-----------|-----------|-----------|

---

Unique Subject Identifier=8223000000-0016

Assay variable : PTINR\_VAL1 PT-INR Value

N Mean Standard Deviation Minimum Maximum

---

|   |           |           |           |           |
|---|-----------|-----------|-----------|-----------|
| 6 | 1.8766667 | 0.8429630 | 1.3900000 | 3.5600000 |
|---|-----------|-----------|-----------|-----------|

---

Unique Subject Identifier=8223000000-0022

Assay variable : PTINR\_VAL1 PT-INR Value

N Mean Standard Deviation Minimum Maximum

---

|   |          |           |          |          |
|---|----------|-----------|----------|----------|
| 3 | 2.020000 | 0.3835362 | 1.670000 | 2.430000 |
|---|----------|-----------|----------|----------|

---

Laboratory tests at the time of obtaining Table 2-6 consent, according to the presence or absence of proton-pump inhibitors

Unique Subject Identifier=8223000000-0023

MEANS Procedure

Assay variable : PTINR\_VAL1 PT-INR Value

| N | Mean      | Standard Deviation | Minimum   | Maximum   |
|---|-----------|--------------------|-----------|-----------|
| 3 | 1.8933333 | 0.4461315          | 1.3900000 | 2.2400000 |

Unique Subject Identifier=8223000000-0024

Assay variable : PTINR\_VAL1 PT-INR Value

| N | Mean      | Standard Deviation | Minimum   | Maximum   |
|---|-----------|--------------------|-----------|-----------|
| 5 | 1.8820000 | 0.5756040          | 1.2900000 | 2.5300000 |

Unique Subject Identifier=8223000000-0025

Assay variable : PTINR\_VAL1 PT-INR Value

| N | Mean      | Standard Deviation | Minimum   | Maximum   |
|---|-----------|--------------------|-----------|-----------|
| 1 | 2.1500000 |                    | 2.1500000 | 2.1500000 |

Unique Subject Identifier=8233000000-0006

Assay variable : PTINR\_VAL1 PT-INR Value

N Mean Standard Deviation Minimum Maximum

---

|   |           |           |           |           |
|---|-----------|-----------|-----------|-----------|
| 5 | 1.6120000 | 0.1308434 | 1.4000000 | 1.7600000 |
|---|-----------|-----------|-----------|-----------|

---

Laboratory tests at the time of obtaining Table 2-6 consent, according to the presence or absence of proton-pump inhibitors

Unique Subject Identifier=8233000000-0018

MEANS Procedure

Assay variable : PTINR\_VAL1 PT-INR Value

| N | Mean      | Standard Deviation | Minimum   | Maximum   |
|---|-----------|--------------------|-----------|-----------|
| 2 | 1.3900000 | 0.2687006          | 1.2000000 | 1.5800000 |

Unique Subject Identifier=8233000000-0019

Assay variable : PTINR\_VAL1 PT-INR Value

| N | Mean      | Standard Deviation | Minimum   | Maximum   |
|---|-----------|--------------------|-----------|-----------|
| 2 | 2.6950000 | 0.1909188          | 2.5600000 | 2.8300000 |

Unique Subject Identifier=8237011000-0002

Assay variable : PTINR\_VAL1 PT-INR Value

| N | Mean      | Standard Deviation | Minimum   | Maximum   |
|---|-----------|--------------------|-----------|-----------|
| 2 | 1.8500000 | 0.0707107          | 1.8000000 | 1.9000000 |

Unique Subject Identifier=8237011000-0003

Assay variable : PTINR\_VAL1 PT-INR Value

N Mean Standard Deviation Minimum Maximum

---

|   |           |           |           |           |
|---|-----------|-----------|-----------|-----------|
| 3 | 2.2333333 | 0.2886751 | 1.9000000 | 2.4000000 |
|---|-----------|-----------|-----------|-----------|

---

Laboratory tests at the time of obtaining Table 2-6 consent, according to the presence or absence of proton-pump inhibitors

Unique Subject Identifier=8237011000-0005

MEANS Procedure

Assay variable : PTINR\_VAL1 PT-INR Value

N Mean Standard Deviation Minimum Maximum

---

|   |           |           |           |           |
|---|-----------|-----------|-----------|-----------|
| 2 | 2.3000000 | 0.1414214 | 2.2000000 | 2.4000000 |
|---|-----------|-----------|-----------|-----------|

---

Unique Subject Identifier=8237011000-0006

Assay variable : PTINR\_VAL1 PT-INR Value

N Mean Standard Deviation Minimum Maximum

---

|   |           |           |           |           |
|---|-----------|-----------|-----------|-----------|
| 2 | 1.8000000 | 0.2828427 | 1.6000000 | 2.0000000 |
|---|-----------|-----------|-----------|-----------|

---

Unique Subject Identifier=8237011000-0008

Assay variable : PTINR\_VAL1 PT-INR Value

N Mean Standard Deviation Minimum Maximum

---

|   |           |           |           |           |
|---|-----------|-----------|-----------|-----------|
| 3 | 1.9666667 | 0.2081666 | 1.8000000 | 2.2000000 |
|---|-----------|-----------|-----------|-----------|

---

Unique Subject Identifier=8237011000-0011

Assay variable : PTINR\_VAL1 PT-INR Value

N Mean Standard Deviation Minimum Maximum

---

|   |          |           |          |          |
|---|----------|-----------|----------|----------|
| 3 | 2.100000 | 0.1732051 | 1.900000 | 2.200000 |
|---|----------|-----------|----------|----------|

---



Laboratory tests at the time of obtaining Table 2-6 consent, according to the presence or absence of proton-pump inhibitors

Unique Subject Identifier=8237011000-0014

MEANS Procedure

Assay variable : PTINR\_VAL1 PT-INR Value

N Mean Standard Deviation Minimum Maximum

---

|   |           |           |           |           |
|---|-----------|-----------|-----------|-----------|
| 6 | 2.1166667 | 0.6675827 | 1.4000000 | 3.1000000 |
|---|-----------|-----------|-----------|-----------|

---

Unique Subject Identifier=8237011000-0015

Assay variable : PTINR\_VAL1 PT-INR Value

N Mean Standard Deviation Minimum Maximum

---

|   |           |           |           |           |
|---|-----------|-----------|-----------|-----------|
| 2 | 2.5000000 | 0.9899495 | 1.8000000 | 3.2000000 |
|---|-----------|-----------|-----------|-----------|

---

Unique Subject Identifier=8237011000-0017

Assay variable : PTINR\_VAL1 PT-INR Value

N Mean Standard Deviation Minimum Maximum

---

|   |           |           |           |           |
|---|-----------|-----------|-----------|-----------|
| 2 | 1.4000000 | 0.1414214 | 1.3000000 | 1.5000000 |
|---|-----------|-----------|-----------|-----------|

---

Unique Subject Identifier=8237011000-0018

Assay variable : PTINR\_VAL1 PT-INR Value

N Mean Standard Deviation Minimum Maximum

---

|   |           |           |           |           |
|---|-----------|-----------|-----------|-----------|
| 4 | 2.0500000 | 0.1732051 | 1.9000000 | 2.3000000 |
|---|-----------|-----------|-----------|-----------|

---

Laboratory tests at the time of obtaining Table 2-6 consent, according to the presence or absence of proton-pump inhibitors

Unique Subject Identifier=8237011000-0023

MEANS Procedure

Assay variable : PTINR\_VAL1 PT-INR Value

N Mean Standard Deviation Minimum Maximum

---

|   |           |           |           |           |
|---|-----------|-----------|-----------|-----------|
| 3 | 2.5666667 | 0.3214550 | 2.2000000 | 2.8000000 |
|---|-----------|-----------|-----------|-----------|

---

Unique Subject Identifier=8237011000-0025

Assay variable : PTINR\_VAL1 PT-INR Value

N Mean Standard Deviation Minimum Maximum

---

|   |           |           |           |           |
|---|-----------|-----------|-----------|-----------|
| 3 | 2.4000000 | 0.2000000 | 2.2000000 | 2.6000000 |
|---|-----------|-----------|-----------|-----------|

---

Unique Subject Identifier=8237011000-0028

Assay variable : PTINR\_VAL1 PT-INR Value

N Mean Standard Deviation Minimum Maximum

---

|   |           |  |           |           |
|---|-----------|--|-----------|-----------|
| 1 | 2.4000000 |  | 2.4000000 | 2.4000000 |
|---|-----------|--|-----------|-----------|

---

Unique Subject Identifier=8237011000-0029

Assay variable : PTINR\_VAL1 PT-INR Value

N Mean Standard Deviation Minimum Maximum

---

|   |           |           |           |           |
|---|-----------|-----------|-----------|-----------|
| 6 | 1.7166667 | 0.4400758 | 1.3000000 | 2.5000000 |
|---|-----------|-----------|-----------|-----------|

---

Laboratory tests at the time of obtaining Table 2-6 consent, according to the presence or absence of proton-pump inhibitors

Unique Subject Identifier=8240011000-0004

MEANS Procedure

Assay variable : PTINR\_VAL1 PT-INR Value

N Mean Standard Deviation Minimum Maximum

---

|   |           |           |           |           |
|---|-----------|-----------|-----------|-----------|
| 4 | 2.3950000 | 0.3850974 | 1.8500000 | 2.7200000 |
|---|-----------|-----------|-----------|-----------|

---

Unique Subject Identifier=8240011000-0006

Assay variable : PTINR\_VAL1 PT-INR Value

N Mean Standard Deviation Minimum Maximum

---

|   |           |           |           |           |
|---|-----------|-----------|-----------|-----------|
| 6 | 2.1900000 | 0.3000667 | 1.7700000 | 2.5500000 |
|---|-----------|-----------|-----------|-----------|

---

Unique Subject Identifier=8240011000-0007

Assay variable : PTINR\_VAL1 PT-INR Value

N Mean Standard Deviation Minimum Maximum

---

|   |           |           |           |           |
|---|-----------|-----------|-----------|-----------|
| 6 | 2.3183333 | 0.5312030 | 1.8300000 | 3.2400000 |
|---|-----------|-----------|-----------|-----------|

---

Unique Subject Identifier=8240011000-0008

Assay variable : PTINR\_VAL1 PT-INR Value

N Mean Standard Deviation Minimum Maximum

---

|   |           |           |           |           |
|---|-----------|-----------|-----------|-----------|
| 6 | 2.2466667 | 0.2787592 | 1.9700000 | 2.6700000 |
|---|-----------|-----------|-----------|-----------|

---

Laboratory tests at the time of obtaining Table 2-6 consent, according to the presence or absence of proton-pump inhibitors

Unique Subject Identifier=8240011000-0009

MEANS Procedure

Assay variable : PTINR\_VAL1 PT-INR Value

N Mean Standard Deviation Minimum Maximum

---

|   |           |           |           |           |
|---|-----------|-----------|-----------|-----------|
| 6 | 2.0766667 | 0.1127239 | 1.9200000 | 2.2100000 |
|---|-----------|-----------|-----------|-----------|

---

Unique Subject Identifier=8240011000-0020

Assay variable : PTINR\_VAL1 PT-INR Value

N Mean Standard Deviation Minimum Maximum

---

|   |           |           |           |           |
|---|-----------|-----------|-----------|-----------|
| 6 | 1.8100000 | 0.3050246 | 1.5200000 | 2.3700000 |
|---|-----------|-----------|-----------|-----------|

---

Unique Subject Identifier=8240011000-0021

Assay variable : PTINR\_VAL1 PT-INR Value

N Mean Standard Deviation Minimum Maximum

---

|   |           |           |           |           |
|---|-----------|-----------|-----------|-----------|
| 5 | 1.8580000 | 0.2609023 | 1.5700000 | 2.2700000 |
|---|-----------|-----------|-----------|-----------|

---

Unique Subject Identifier=8240011000-0025

Assay variable : PTINR\_VAL1 PT-INR Value

N Mean Standard Deviation Minimum Maximum

---

|   |           |           |           |           |
|---|-----------|-----------|-----------|-----------|
| 6 | 1.6516667 | 0.1531557 | 1.4100000 | 1.7700000 |
|---|-----------|-----------|-----------|-----------|

---



Laboratory tests at the time of obtaining Table 2-6 consent, according to the presence or absence of proton-pump inhibitors

Unique Subject Identifier=8240011000-0035

MEANS Procedure

Assay variable : PTINR\_VAL1 PT-INR Value

N Mean Standard Deviation Minimum Maximum

---

|   |           |           |           |           |
|---|-----------|-----------|-----------|-----------|
| 6 | 1.8183333 | 0.3077282 | 1.4000000 | 2.1500000 |
|---|-----------|-----------|-----------|-----------|

---

Unique Subject Identifier=8240011000-0042

Assay variable : PTINR\_VAL1 PT-INR Value

N Mean Standard Deviation Minimum Maximum

---

|   |           |           |           |           |
|---|-----------|-----------|-----------|-----------|
| 5 | 2.2280000 | 0.4447696 | 1.5800000 | 2.6500000 |
|---|-----------|-----------|-----------|-----------|

---

Unique Subject Identifier=8240011000-0043

Assay variable : PTINR\_VAL1 PT-INR Value

N Mean Standard Deviation Minimum Maximum

---

|   |           |           |           |           |
|---|-----------|-----------|-----------|-----------|
| 6 | 1.8783333 | 0.2213971 | 1.6400000 | 2.2500000 |
|---|-----------|-----------|-----------|-----------|

---

Unique Subject Identifier=8240011000-0044

Assay variable : PTINR\_VAL1 PT-INR Value

N Mean Standard Deviation Minimum Maximum

---

|   |           |           |           |           |
|---|-----------|-----------|-----------|-----------|
| 6 | 2.5533333 | 0.4300543 | 2.1700000 | 3.3200000 |
|---|-----------|-----------|-----------|-----------|

---

Laboratory tests at the time of obtaining Table 2-6 consent, according to the presence or absence of proton-pump inhibitors

Unique Subject Identifier=8241000000-0001

MEANS Procedure

Assay variable : PTINR\_VAL1 PT-INR Value

N Mean Standard Deviation Minimum Maximum

---

|   |           |           |           |           |
|---|-----------|-----------|-----------|-----------|
| 2 | 2.3550000 | 0.1767767 | 2.2300000 | 2.4800000 |
|---|-----------|-----------|-----------|-----------|

---

Unique Subject Identifier=8241000000-0010

Assay variable : PTINR\_VAL1 PT-INR Value

N Mean Standard Deviation Minimum Maximum

---

|   |           |           |           |           |
|---|-----------|-----------|-----------|-----------|
| 4 | 2.0475000 | 0.3894761 | 1.7500000 | 2.6000000 |
|---|-----------|-----------|-----------|-----------|

---

Unique Subject Identifier=8241000000-0014

Assay variable : PTINR\_VAL1 PT-INR Value

N Mean Standard Deviation Minimum Maximum

---

|   |           |  |           |           |
|---|-----------|--|-----------|-----------|
| 1 | 1.8500000 |  | 1.8500000 | 1.8500000 |
|---|-----------|--|-----------|-----------|

---

Unique Subject Identifier=8241000000-0018

Assay variable : PTINR\_VAL1 PT-INR Value

N Mean Standard Deviation Minimum Maximum

---

|   |           |           |           |           |
|---|-----------|-----------|-----------|-----------|
| 5 | 1.5240000 | 0.1637987 | 1.3200000 | 1.7500000 |
|---|-----------|-----------|-----------|-----------|

---

Laboratory tests at the time of obtaining Table 2-6 consent, according to the presence or absence of proton-pump inhibitors

Unique Subject Identifier=8241000000-0021

MEANS Procedure

Assay variable : PTINR\_VAL1 PT-INR Value

N Mean Standard Deviation Minimum Maximum

---

|   |           |           |           |           |
|---|-----------|-----------|-----------|-----------|
| 6 | 1.8233333 | 0.1009290 | 1.6800000 | 1.9600000 |
|---|-----------|-----------|-----------|-----------|

---

Unique Subject Identifier=8241000000-0023

Assay variable : PTINR\_VAL1 PT-INR Value

N Mean Standard Deviation Minimum Maximum

---

|   |           |           |           |           |
|---|-----------|-----------|-----------|-----------|
| 4 | 1.7300000 | 0.3918333 | 1.2400000 | 2.1900000 |
|---|-----------|-----------|-----------|-----------|

---

Unique Subject Identifier=8241000000-0024

Assay variable : PTINR\_VAL1 PT-INR Value

N Mean Standard Deviation Minimum Maximum

---

|   |           |           |           |           |
|---|-----------|-----------|-----------|-----------|
| 4 | 1.9350000 | 0.1491085 | 1.7500000 | 2.1100000 |
|---|-----------|-----------|-----------|-----------|

---

Unique Subject Identifier=8241000000-0027

Assay variable : PTINR\_VAL1 PT-INR Value

N Mean Standard Deviation Minimum Maximum

---

|   |          |           |          |          |
|---|----------|-----------|----------|----------|
| 4 | 1.840000 | 0.4162531 | 1.310000 | 2.310000 |
|---|----------|-----------|----------|----------|

---

Laboratory tests at the time of obtaining Table 2-6 consent, according to the presence or absence of proton-pump inhibitors

Unique Subject Identifier=8241000000-0028

MEANS Procedure

Assay variable : PTINR\_VAL1 PT-INR Value

N Mean Standard Deviation Minimum Maximum

---

|   |           |           |           |           |
|---|-----------|-----------|-----------|-----------|
| 4 | 2.4300000 | 0.2320919 | 2.2500000 | 2.7700000 |
|---|-----------|-----------|-----------|-----------|

---

Unique Subject Identifier=8241000000-0029

Assay variable : PTINR\_VAL1 PT-INR Value

N Mean Standard Deviation Minimum Maximum

---

|   |           |           |           |           |
|---|-----------|-----------|-----------|-----------|
| 3 | 2.0566667 | 0.2107922 | 1.9300000 | 2.3000000 |
|---|-----------|-----------|-----------|-----------|

---

Unique Subject Identifier=8241000000-0030

Assay variable : PTINR\_VAL1 PT-INR Value

N Mean Standard Deviation Minimum Maximum

---

|   |           |           |           |           |
|---|-----------|-----------|-----------|-----------|
| 4 | 2.2750000 | 0.5987487 | 1.8400000 | 3.1200000 |
|---|-----------|-----------|-----------|-----------|

---

Unique Subject Identifier=8245000000-0003

Assay variable : PTINR\_VAL1 PT-INR Value

N Mean Standard Deviation Minimum Maximum

---

|   |           |           |           |           |
|---|-----------|-----------|-----------|-----------|
| 3 | 2.8333333 | 0.1365040 | 2.7100000 | 2.9800000 |
|---|-----------|-----------|-----------|-----------|

---



Laboratory tests at the time of obtaining Table 2-6 consent, according to the presence or absence of proton-pump inhibitors

Unique Subject Identifier=8245000000-0004

MEANS Procedure

Assay variable : PTINR\_VAL1 PT-INR Value

N Mean Standard Deviation Minimum Maximum

---

|   |           |           |           |           |
|---|-----------|-----------|-----------|-----------|
| 4 | 1.7650000 | 0.2053452 | 1.5600000 | 2.0000000 |
|---|-----------|-----------|-----------|-----------|

---

Unique Subject Identifier=8245000000-0005

Assay variable : PTINR\_VAL1 PT-INR Value

N Mean Standard Deviation Minimum Maximum

---

|   |           |           |           |           |
|---|-----------|-----------|-----------|-----------|
| 2 | 2.0600000 | 0.1838478 | 1.9300000 | 2.1900000 |
|---|-----------|-----------|-----------|-----------|

---

Unique Subject Identifier=8245000000-0006

Assay variable : PTINR\_VAL1 PT-INR Value

N Mean Standard Deviation Minimum Maximum

---

|   |           |           |           |           |
|---|-----------|-----------|-----------|-----------|
| 2 | 1.9400000 | 0.0565685 | 1.9000000 | 1.9800000 |
|---|-----------|-----------|-----------|-----------|

---

Unique Subject Identifier=8245000000-0007

Assay variable : PTINR\_VAL1 PT-INR Value

N Mean Standard Deviation Minimum Maximum

---

|   |           |           |           |           |
|---|-----------|-----------|-----------|-----------|
| 2 | 1.7900000 | 0.0989949 | 1.7200000 | 1.8600000 |
|---|-----------|-----------|-----------|-----------|

---

Laboratory tests at the time of obtaining Table 2-6 consent, according to the presence or absence of proton-pump inhibitors

Unique Subject Identifier=824500000-0008

MEANS Procedure

Assay variable : PTINR\_VAL1 PT-INR Value

N Mean Standard Deviation Minimum Maximum

---

|   |           |           |           |           |
|---|-----------|-----------|-----------|-----------|
| 2 | 2.5000000 | 1.0889444 | 1.7300000 | 3.2700000 |
|---|-----------|-----------|-----------|-----------|

---

Unique Subject Identifier=824500000-0009

Assay variable : PTINR\_VAL1 PT-INR Value

N Mean Standard Deviation Minimum Maximum

---

|   |           |  |           |           |
|---|-----------|--|-----------|-----------|
| 1 | 2.5000000 |  | 2.5000000 | 2.5000000 |
|---|-----------|--|-----------|-----------|

---

Unique Subject Identifier=824500000-0010

Assay variable : PTINR\_VAL1 PT-INR Value

N Mean Standard Deviation Minimum Maximum

---

|   |           |           |           |           |
|---|-----------|-----------|-----------|-----------|
| 2 | 2.0550000 | 0.2192031 | 1.9000000 | 2.2100000 |
|---|-----------|-----------|-----------|-----------|

---

Unique Subject Identifier=824500000-0012

Assay variable : PTINR\_VAL1 PT-INR Value

N Mean Standard Deviation Minimum Maximum

---

|   |           |           |           |           |
|---|-----------|-----------|-----------|-----------|
| 2 | 2.5850000 | 0.8131728 | 2.0100000 | 3.1600000 |
|---|-----------|-----------|-----------|-----------|

---

Laboratory tests at the time of obtaining Table 2-6 consent, according to the presence or absence of proton-pump inhibitors

Unique Subject Identifier=824500000-0013

MEANS Procedure

Assay variable : PTINR\_VAL1 PT-INR Value

N Mean Standard Deviation Minimum Maximum

---

|   |           |           |           |           |
|---|-----------|-----------|-----------|-----------|
| 3 | 2.0166667 | 0.1761628 | 1.8200000 | 2.1600000 |
|---|-----------|-----------|-----------|-----------|

---

Unique Subject Identifier=824500000-0016

Assay variable : PTINR\_VAL1 PT-INR Value

N Mean Standard Deviation Minimum Maximum

---

|   |           |           |           |           |
|---|-----------|-----------|-----------|-----------|
| 3 | 1.8500000 | 0.2029778 | 1.6300000 | 2.0300000 |
|---|-----------|-----------|-----------|-----------|

---

Unique Subject Identifier=824500000-0019

Assay variable : PTINR\_VAL1 PT-INR Value

N Mean Standard Deviation Minimum Maximum

---

|   |           |           |           |           |
|---|-----------|-----------|-----------|-----------|
| 2 | 1.9850000 | 0.2899138 | 1.7800000 | 2.1900000 |
|---|-----------|-----------|-----------|-----------|

---

Unique Subject Identifier=824500000-0025

Assay variable : PTINR\_VAL1 PT-INR Value

N Mean Standard Deviation Minimum Maximum

---

|   |          |           |          |          |
|---|----------|-----------|----------|----------|
| 2 | 2.620000 | 0.3818377 | 2.350000 | 2.890000 |
|---|----------|-----------|----------|----------|

---

Laboratory tests at the time of obtaining Table 2-6 consent, according to the presence or absence of proton-pump inhibitors

Unique Subject Identifier=8245000000-0027

MEANS Procedure

Assay variable : PTINR\_VAL1 PT-INR Value

N Mean Standard Deviation Minimum Maximum

---

|   |           |           |           |           |
|---|-----------|-----------|-----------|-----------|
| 3 | 2.3433333 | 0.2650157 | 2.0800000 | 2.6100000 |
|---|-----------|-----------|-----------|-----------|

---

Unique Subject Identifier=8245000000-0028

Assay variable : PTINR\_VAL1 PT-INR Value

N Mean Standard Deviation Minimum Maximum

---

|   |           |           |           |           |
|---|-----------|-----------|-----------|-----------|
| 4 | 1.9225000 | 0.2891799 | 1.5900000 | 2.2200000 |
|---|-----------|-----------|-----------|-----------|

---

Unique Subject Identifier=8257010001-0002

Assay variable : PTINR\_VAL1 PT-INR Value

N Mean Standard Deviation Minimum Maximum

---

|   |           |           |           |           |
|---|-----------|-----------|-----------|-----------|
| 6 | 1.5250000 | 0.4353734 | 1.1300000 | 2.3600000 |
|---|-----------|-----------|-----------|-----------|

---

Unique Subject Identifier=8257010001-0003

Assay variable : PTINR\_VAL1 PT-INR Value

N Mean Standard Deviation Minimum Maximum

---

|   |           |           |           |           |
|---|-----------|-----------|-----------|-----------|
| 4 | 2.2125000 | 0.7436117 | 1.3100000 | 3.0400000 |
|---|-----------|-----------|-----------|-----------|

---



Laboratory tests at the time of obtaining Table 2-6 consent, according to the presence or absence of proton-pump inhibitors

Unique Subject Identifier=8257010001-0004

MEANS Procedure

Assay variable : PTINR\_VAL1 PT-INR Value

N Mean Standard Deviation Minimum Maximum

---

|   |           |           |           |           |
|---|-----------|-----------|-----------|-----------|
| 6 | 1.9466667 | 0.0480278 | 1.9100000 | 2.0400000 |
|---|-----------|-----------|-----------|-----------|

---

Unique Subject Identifier=8257010001-0006

Assay variable : PTINR\_VAL1 PT-INR Value

N Mean Standard Deviation Minimum Maximum

---

|   |           |           |           |           |
|---|-----------|-----------|-----------|-----------|
| 3 | 2.4566667 | 0.8939985 | 1.4400000 | 3.1200000 |
|---|-----------|-----------|-----------|-----------|

---

Unique Subject Identifier=8257010001-0010

Assay variable : PTINR\_VAL1 PT-INR Value

N Mean Standard Deviation Minimum Maximum

---

|   |           |           |           |           |
|---|-----------|-----------|-----------|-----------|
| 2 | 1.2300000 | 0.1838478 | 1.1000000 | 1.3600000 |
|---|-----------|-----------|-----------|-----------|

---

Unique Subject Identifier=8257010001-0011

Assay variable : PTINR\_VAL1 PT-INR Value

N Mean Standard Deviation Minimum Maximum

---

|   |           |           |           |           |
|---|-----------|-----------|-----------|-----------|
| 6 | 2.1350000 | 0.2946693 | 1.7500000 | 2.6500000 |
|---|-----------|-----------|-----------|-----------|

---

Laboratory tests at the time of obtaining Table 2-6 consent, according to the presence or absence of proton-pump inhibitors

Unique Subject Identifier=8257010001-0012

MEANS Procedure

Assay variable : PTINR\_VAL1 PT-INR Value

N Mean Standard Deviation Minimum Maximum

---

|   |           |           |           |           |
|---|-----------|-----------|-----------|-----------|
| 6 | 1.5666667 | 0.4684300 | 1.1700000 | 2.4900000 |
|---|-----------|-----------|-----------|-----------|

---

Unique Subject Identifier=8257010001-0015

Assay variable : PTINR\_VAL1 PT-INR Value

N Mean Standard Deviation Minimum Maximum

---

|   |           |           |           |           |
|---|-----------|-----------|-----------|-----------|
| 3 | 1.4633333 | 0.2557994 | 1.2200000 | 1.7300000 |
|---|-----------|-----------|-----------|-----------|

---

Unique Subject Identifier=8257010001-0016

Assay variable : PTINR\_VAL1 PT-INR Value

N Mean Standard Deviation Minimum Maximum

---

|   |           |           |           |           |
|---|-----------|-----------|-----------|-----------|
| 3 | 2.2433333 | 0.3477547 | 1.8500000 | 2.5100000 |
|---|-----------|-----------|-----------|-----------|

---

Unique Subject Identifier=8257010001-0024

Assay variable : PTINR\_VAL1 PT-INR Value

N Mean Standard Deviation Minimum Maximum

---

|   |           |           |           |           |
|---|-----------|-----------|-----------|-----------|
| 2 | 1.7650000 | 0.4171930 | 1.4700000 | 2.0600000 |
|---|-----------|-----------|-----------|-----------|

---

Laboratory tests at the time of obtaining Table 2-6 consent, according to the presence or absence of proton-pump inhibitors

Unique Subject Identifier=8257010001-0029

MEANS Procedure

Assay variable : PTINR\_VAL1 PT-INR Value

N Mean Standard Deviation Minimum Maximum

---

|   |           |           |           |           |
|---|-----------|-----------|-----------|-----------|
| 3 | 1.7733333 | 0.3181719 | 1.5700000 | 2.1400000 |
|---|-----------|-----------|-----------|-----------|

---

Unique Subject Identifier=8257010001-0030

Assay variable : PTINR\_VAL1 PT-INR Value

N Mean Standard Deviation Minimum Maximum

---

|   |           |           |           |           |
|---|-----------|-----------|-----------|-----------|
| 4 | 2.1250000 | 0.7816436 | 1.1700000 | 3.0100000 |
|---|-----------|-----------|-----------|-----------|

---

Unique Subject Identifier=8266000000-0017

Assay variable : PTINR\_VAL1 PT-INR Value

N Mean Standard Deviation Minimum Maximum

---

|   |           |           |           |           |
|---|-----------|-----------|-----------|-----------|
| 3 | 2.4100000 | 0.2389561 | 2.2000000 | 2.6700000 |
|---|-----------|-----------|-----------|-----------|

---

Unique Subject Identifier=8266000000-0020

Assay variable : PTINR\_VAL1 PT-INR Value

N Mean Standard Deviation Minimum Maximum

---

|   |           |           |           |           |
|---|-----------|-----------|-----------|-----------|
| 6 | 2.5250000 | 0.3613170 | 2.0700000 | 3.1400000 |
|---|-----------|-----------|-----------|-----------|

---

Laboratory tests at the time of obtaining Table 2-6 consent, according to the presence or absence of proton-pump inhibitors

Unique Subject Identifier=826600000-0026

MEANS Procedure

Assay variable : PTINR\_VAL1 PT-INR Value

N Mean Standard Deviation Minimum Maximum

---

|   |           |           |           |           |
|---|-----------|-----------|-----------|-----------|
| 4 | 2.7025000 | 0.4548535 | 2.2100000 | 3.2400000 |
|---|-----------|-----------|-----------|-----------|

---

Unique Subject Identifier=826600000-0027

Assay variable : PTINR\_VAL1 PT-INR Value

N Mean Standard Deviation Minimum Maximum

---

|   |           |           |           |           |
|---|-----------|-----------|-----------|-----------|
| 6 | 2.6733333 | 0.5607733 | 2.1000000 | 3.4200000 |
|---|-----------|-----------|-----------|-----------|

---

Unique Subject Identifier=8301010000-0004

Assay variable : PTINR\_VAL1 PT-INR Value

N Mean Standard Deviation Minimum Maximum

---

|   |           |           |           |           |
|---|-----------|-----------|-----------|-----------|
| 6 | 1.7666667 | 0.3141125 | 1.2000000 | 2.1000000 |
|---|-----------|-----------|-----------|-----------|

---

Unique Subject Identifier=8326000000-0003

Assay variable : PTINR\_VAL1 PT-INR Value

N Mean Standard Deviation Minimum Maximum

---

|   |          |           |          |          |
|---|----------|-----------|----------|----------|
| 3 | 1.663333 | 0.2281082 | 1.400000 | 1.800000 |
|---|----------|-----------|----------|----------|

---



Laboratory tests at the time of obtaining Table 2-6 consent, according to the presence or absence of proton-pump inhibitors

Unique Subject Identifier=832600000-0006

MEANS Procedure

Assay variable : PTINR\_VAL1 PT-INR Value

N Mean Standard Deviation Minimum Maximum

---

|   |           |           |           |           |
|---|-----------|-----------|-----------|-----------|
| 4 | 2.2975000 | 1.4179886 | 1.3000000 | 4.4000000 |
|---|-----------|-----------|-----------|-----------|

---

Unique Subject Identifier=832600000-0009

Assay variable : PTINR\_VAL1 PT-INR Value

N Mean Standard Deviation Minimum Maximum

---

|   |           |           |           |           |
|---|-----------|-----------|-----------|-----------|
| 4 | 2.4150000 | 0.3139533 | 2.1000000 | 2.8500000 |
|---|-----------|-----------|-----------|-----------|

---

Unique Subject Identifier=832600000-0012

Assay variable : PTINR\_VAL1 PT-INR Value

N Mean Standard Deviation Minimum Maximum

---

|   |           |           |           |           |
|---|-----------|-----------|-----------|-----------|
| 4 | 2.3250000 | 0.2564501 | 1.9500000 | 2.5200000 |
|---|-----------|-----------|-----------|-----------|

---

Unique Subject Identifier=832600000-0013

Assay variable : PTINR\_VAL1 PT-INR Value

N Mean Standard Deviation Minimum Maximum

---

|   |          |           |          |          |
|---|----------|-----------|----------|----------|
| 6 | 2.000000 | 1.3607057 | 1.110000 | 4.710000 |
|---|----------|-----------|----------|----------|

---

Laboratory tests at the time of obtaining Table 2-6 consent, according to the presence or absence of proton-pump inhibitors

Unique Subject Identifier=832600000-0014

MEANS Procedure

Assay variable : PTINR\_VAL1 PT-INR Value

N Mean Standard Deviation Minimum Maximum

---

|   |          |           |          |          |
|---|----------|-----------|----------|----------|
| 6 | 2.160000 | 0.2707767 | 1.820000 | 2.500000 |
|---|----------|-----------|----------|----------|

---

Unique Subject Identifier=832600000-0020

Assay variable : PTINR\_VAL1 PT-INR Value

N Mean Standard Deviation Minimum Maximum

---

|   |          |           |          |          |
|---|----------|-----------|----------|----------|
| 5 | 2.062000 | 0.4699149 | 1.590000 | 2.780000 |
|---|----------|-----------|----------|----------|

---

Unique Subject Identifier=832600000-0021

Assay variable : PTINR\_VAL1 PT-INR Value

N Mean Standard Deviation Minimum Maximum

---

|   |          |           |          |          |
|---|----------|-----------|----------|----------|
| 2 | 2.335000 | 0.2474874 | 2.160000 | 2.510000 |
|---|----------|-----------|----------|----------|

---

Unique Subject Identifier=832600000-0023

Assay variable : PTINR\_VAL1 PT-INR Value

N Mean Standard Deviation Minimum Maximum

---

|   |           |           |           |           |
|---|-----------|-----------|-----------|-----------|
| 4 | 2.1175000 | 0.1120640 | 2.0000000 | 2.2700000 |
|---|-----------|-----------|-----------|-----------|

---

Laboratory tests at the time of obtaining Table 2-6 consent, according to the presence or absence of proton-pump inhibitors

Unique Subject Identifier=832600000-0024

MEANS Procedure

Assay variable : PTINR\_VAL1 PT-INR Value

| N | Mean     | Standard Deviation | Minimum  | Maximum  |
|---|----------|--------------------|----------|----------|
| 3 | 1.750000 | 0.3148015          | 1.490000 | 2.100000 |

Unique Subject Identifier=832600000-0026

Assay variable : PTINR\_VAL1 PT-INR Value

| N | Mean     | Standard Deviation | Minimum  | Maximum  |
|---|----------|--------------------|----------|----------|
| 5 | 2.162000 | 0.2448877          | 1.900000 | 2.530000 |

Unique Subject Identifier=832600000-0028

Assay variable : PTINR\_VAL1 PT-INR Value

| N | Mean     | Standard Deviation | Minimum  | Maximum  |
|---|----------|--------------------|----------|----------|
| 3 | 2.360000 | 0.2286919          | 2.100000 | 2.530000 |

Unique Subject Identifier=832600000-0029

Assay variable : PTINR\_VAL1 PT-INR Value

N Mean Standard Deviation Minimum Maximum

---

|   |          |           |          |          |
|---|----------|-----------|----------|----------|
| 3 | 2.440000 | 0.6109828 | 1.850000 | 3.070000 |
|---|----------|-----------|----------|----------|

---

Laboratory tests at the time of obtaining Table 2-6 consent, according to the presence or absence of proton-pump inhibitors

Unique Subject Identifier=832600000-0031

MEANS Procedure

Assay variable : PTINR\_VAL1 PT-INR Value

N Mean Standard Deviation Minimum Maximum

---

|   |          |           |          |          |
|---|----------|-----------|----------|----------|
| 5 | 1.840000 | 0.2701851 | 1.400000 | 2.100000 |
|---|----------|-----------|----------|----------|

---

Unique Subject Identifier=832600000-0033

Assay variable : PTINR\_VAL1 PT-INR Value

N Mean Standard Deviation Minimum Maximum

---

|   |          |           |          |          |
|---|----------|-----------|----------|----------|
| 6 | 1.898333 | 0.4345304 | 1.500000 | 2.500000 |
|---|----------|-----------|----------|----------|

---

Unique Subject Identifier=832600000-0035

Assay variable : PTINR\_VAL1 PT-INR Value

N Mean Standard Deviation Minimum Maximum

---

|   |          |           |          |          |
|---|----------|-----------|----------|----------|
| 5 | 1.798000 | 0.1549839 | 1.600000 | 1.990000 |
|---|----------|-----------|----------|----------|

---

Unique Subject Identifier=832600000-0036

Assay variable : PTINR\_VAL1 PT-INR Value

N Mean Standard Deviation Minimum Maximum

---

|   |          |           |          |          |
|---|----------|-----------|----------|----------|
| 6 | 1.640000 | 0.1035374 | 1.490000 | 1.760000 |
|---|----------|-----------|----------|----------|

---



Laboratory tests at the time of obtaining Table 2-6 consent, according to the presence or absence of proton-pump inhibitors

Unique Subject Identifier=8326000000-0038

MEANS Procedure

Assay variable : PTINR\_VAL1 PT-INR Value

N Mean Standard Deviation Minimum Maximum

---

|   |           |           |           |           |
|---|-----------|-----------|-----------|-----------|
| 6 | 1.4966667 | 0.0941630 | 1.3800000 | 1.6000000 |
|---|-----------|-----------|-----------|-----------|

---

Unique Subject Identifier=8326000000-0040

Assay variable : PTINR\_VAL1 PT-INR Value

N Mean Standard Deviation Minimum Maximum

---

|   |           |           |           |           |
|---|-----------|-----------|-----------|-----------|
| 3 | 2.0766667 | 0.2916048 | 1.7400000 | 2.2500000 |
|---|-----------|-----------|-----------|-----------|

---

Unique Subject Identifier=8332010000-0005

Assay variable : PTINR\_VAL1 PT-INR Value

N Mean Standard Deviation Minimum Maximum

---

|   |           |           |           |           |
|---|-----------|-----------|-----------|-----------|
| 5 | 1.7620000 | 0.3076849 | 1.5100000 | 2.2200000 |
|---|-----------|-----------|-----------|-----------|

---

Unique Subject Identifier=8332010000-0008

Assay variable : PTINR\_VAL1 PT-INR Value

N Mean Standard Deviation Minimum Maximum

---

|   |           |           |           |           |
|---|-----------|-----------|-----------|-----------|
| 4 | 2.1475000 | 0.1114675 | 2.0000000 | 2.2700000 |
|---|-----------|-----------|-----------|-----------|

---

Laboratory tests at the time of obtaining Table 2-6 consent, according to the presence or absence of proton-pump inhibitors

Unique Subject Identifier=8332010000-0009

MEANS Procedure

Assay variable : PTINR\_VAL1 PT-INR Value

| N | Mean      | Standard Deviation | Minimum   | Maximum   |
|---|-----------|--------------------|-----------|-----------|
| 5 | 2.6960000 | 0.3958282          | 2.1100000 | 3.1800000 |

Unique Subject Identifier=8332010000-0015

Assay variable : PTINR\_VAL1 PT-INR Value

| N | Mean      | Standard Deviation | Minimum   | Maximum   |
|---|-----------|--------------------|-----------|-----------|
| 6 | 2.4466667 | 0.6553981          | 1.7400000 | 3.3300000 |

Unique Subject Identifier=8332010000-0017

Assay variable : PTINR\_VAL1 PT-INR Value

| N | Mean      | Standard Deviation | Minimum   | Maximum   |
|---|-----------|--------------------|-----------|-----------|
| 4 | 2.1225000 | 0.2233644          | 1.8100000 | 2.3400000 |

Unique Subject Identifier=8332010000-0020

Assay variable : PTINR\_VAL1 PT-INR Value

N Mean Standard Deviation Minimum Maximum

---

|   |          |           |          |          |
|---|----------|-----------|----------|----------|
| 6 | 2.625000 | 0.7922563 | 1.970000 | 4.110000 |
|---|----------|-----------|----------|----------|

---

Laboratory tests at the time of obtaining Table 2-6 consent, according to the presence or absence of proton-pump inhibitors

Unique Subject Identifier=8332010000-0028

MEANS Procedure

Assay variable : PTINR\_VAL1 PT-INR Value

N Mean Standard Deviation Minimum Maximum

---

|   |           |           |           |           |
|---|-----------|-----------|-----------|-----------|
| 6 | 2.7833333 | 0.3792976 | 2.1700000 | 3.2100000 |
|---|-----------|-----------|-----------|-----------|

---

Unique Subject Identifier=8332010000-0043

Assay variable : PTINR\_VAL1 PT-INR Value

N Mean Standard Deviation Minimum Maximum

---

|   |           |           |           |           |
|---|-----------|-----------|-----------|-----------|
| 4 | 1.5925000 | 0.0689807 | 1.4900000 | 1.6400000 |
|---|-----------|-----------|-----------|-----------|

---

Unique Subject Identifier=8332010000-0046

Assay variable : PTINR\_VAL1 PT-INR Value

N Mean Standard Deviation Minimum Maximum

---

|   |           |           |           |           |
|---|-----------|-----------|-----------|-----------|
| 3 | 2.1833333 | 0.3803069 | 1.8800000 | 2.6100000 |
|---|-----------|-----------|-----------|-----------|

---

Unique Subject Identifier=8332010000-0052

Assay variable : PTINR\_VAL1 PT-INR Value

N Mean Standard Deviation Minimum Maximum

---

|   |           |           |           |           |
|---|-----------|-----------|-----------|-----------|
| 6 | 2.0950000 | 0.3677907 | 1.7000000 | 2.6000000 |
|---|-----------|-----------|-----------|-----------|

---

Laboratory tests at the time of obtaining Table 2-6 consent, according to the presence or absence of proton-pump inhibitors

Unique Subject Identifier=8332010000-0055

MEANS Procedure

Assay variable : PTINR\_VAL1 PT-INR Value

N Mean Standard Deviation Minimum Maximum

---

|   |           |           |           |           |
|---|-----------|-----------|-----------|-----------|
| 6 | 1.9950000 | 0.5670185 | 1.5500000 | 3.0300000 |
|---|-----------|-----------|-----------|-----------|

---

Unique Subject Identifier=8332010000-0056

Assay variable : PTINR\_VAL1 PT-INR Value

N Mean Standard Deviation Minimum Maximum

---

|   |           |           |           |           |
|---|-----------|-----------|-----------|-----------|
| 6 | 2.2566667 | 0.4317715 | 1.6200000 | 2.7300000 |
|---|-----------|-----------|-----------|-----------|

---

Unique Subject Identifier=8332010000-0068

Assay variable : PTINR\_VAL1 PT-INR Value

N Mean Standard Deviation Minimum Maximum

---

|   |           |           |           |           |
|---|-----------|-----------|-----------|-----------|
| 5 | 1.9500000 | 0.3262668 | 1.5800000 | 2.2300000 |
|---|-----------|-----------|-----------|-----------|

---

Unique Subject Identifier=8332010000-0072

Assay variable : PTINR\_VAL1 PT-INR Value

N Mean Standard Deviation Minimum Maximum

---

|   |          |           |          |          |
|---|----------|-----------|----------|----------|
| 5 | 2.820000 | 0.2271563 | 2.610000 | 3.200000 |
|---|----------|-----------|----------|----------|

---



Laboratory tests at the time of obtaining Table 2-6 consent, according to the presence or absence of proton-pump inhibitors

Unique Subject Identifier=8332010000-0093

MEANS Procedure

Assay variable : PTINR\_VAL1 PT-INR Value

N Mean Standard Deviation Minimum Maximum

---

|   |           |  |           |           |
|---|-----------|--|-----------|-----------|
| 1 | 2.0300000 |  | 2.0300000 | 2.0300000 |
|---|-----------|--|-----------|-----------|

---

Unique Subject Identifier=8332010000-0095

Assay variable : PTINR\_VAL1 PT-INR Value

N Mean Standard Deviation Minimum Maximum

---

|   |           |  |           |           |
|---|-----------|--|-----------|-----------|
| 1 | 1.6800000 |  | 1.6800000 | 1.6800000 |
|---|-----------|--|-----------|-----------|

---

Unique Subject Identifier=8332010000-0101

Assay variable : PTINR\_VAL1 PT-INR Value

N Mean Standard Deviation Minimum Maximum

---

|   |           |           |           |           |
|---|-----------|-----------|-----------|-----------|
| 2 | 1.9700000 | 0.0424264 | 1.9400000 | 2.0000000 |
|---|-----------|-----------|-----------|-----------|

---

Unique Subject Identifier=8332010000-0121

Assay variable : PTINR\_VAL1 PT-INR Value

N Mean Standard Deviation Minimum Maximum

---

|   |           |           |           |           |
|---|-----------|-----------|-----------|-----------|
| 2 | 1.7250000 | 0.2333452 | 1.5600000 | 1.8900000 |
|---|-----------|-----------|-----------|-----------|

---

Laboratory tests at the time of obtaining Table 2-6 consent, according to the presence or absence of proton-pump inhibitors

Unique Subject Identifier=8332010000-0141

MEANS Procedure

Assay variable : PTINR\_VAL1 PT-INR Value

N Mean Standard Deviation Minimum Maximum

---

|   |           |           |           |           |
|---|-----------|-----------|-----------|-----------|
| 3 | 2.0033333 | 0.0416333 | 1.9700000 | 2.0500000 |
|---|-----------|-----------|-----------|-----------|

---

Unique Subject Identifier=8332010000-0142

Assay variable : PTINR\_VAL1 PT-INR Value

N Mean Standard Deviation Minimum Maximum

---

|   |           |           |           |           |
|---|-----------|-----------|-----------|-----------|
| 4 | 2.3750000 | 0.1707825 | 2.2000000 | 2.6000000 |
|---|-----------|-----------|-----------|-----------|

---

Unique Subject Identifier=8332010000-0145

Assay variable : PTINR\_VAL1 PT-INR Value

N Mean Standard Deviation Minimum Maximum

---

|   |           |  |           |           |
|---|-----------|--|-----------|-----------|
| 1 | 1.8200000 |  | 1.8200000 | 1.8200000 |
|---|-----------|--|-----------|-----------|

---

Unique Subject Identifier=8332010000-0151

Assay variable : PTINR\_VAL1 PT-INR Value

N Mean Standard Deviation Minimum Maximum

---

|   |          |           |          |          |
|---|----------|-----------|----------|----------|
| 6 | 2.110000 | 0.2538503 | 1.720000 | 2.330000 |
|---|----------|-----------|----------|----------|

---

Laboratory tests at the time of obtaining Table 2-6 consent, according to the presence or absence of proton-pump inhibitors

Unique Subject Identifier=8332010000-0180

MEANS Procedure

Assay variable : PTINR\_VAL1 PT-INR Value

N Mean Standard Deviation Minimum Maximum

---

|   |           |           |           |           |
|---|-----------|-----------|-----------|-----------|
| 4 | 1.8625000 | 0.1791415 | 1.7000000 | 2.1100000 |
|---|-----------|-----------|-----------|-----------|

---

Unique Subject Identifier=8332010000-0192

Assay variable : PTINR\_VAL1 PT-INR Value

N Mean Standard Deviation Minimum Maximum

---

|   |           |  |           |           |
|---|-----------|--|-----------|-----------|
| 1 | 1.9600000 |  | 1.9600000 | 1.9600000 |
|---|-----------|--|-----------|-----------|

---

Unique Subject Identifier=8332010000-0194

Assay variable : PTINR\_VAL1 PT-INR Value

N Mean Standard Deviation Minimum Maximum

---

|   |           |           |           |           |
|---|-----------|-----------|-----------|-----------|
| 4 | 1.3850000 | 0.1550269 | 1.2400000 | 1.5600000 |
|---|-----------|-----------|-----------|-----------|

---

Unique Subject Identifier=8340011000-0013

Assay variable : PTINR\_VAL1 PT-INR Value

N Mean Standard Deviation Minimum Maximum

---

|   |           |           |           |           |
|---|-----------|-----------|-----------|-----------|
| 4 | 1.7675000 | 0.2636127 | 1.5300000 | 2.0200000 |
|---|-----------|-----------|-----------|-----------|

---

Laboratory tests at the time of obtaining Table 2-6 consent, according to the presence or absence of proton-pump inhibitors

Unique Subject Identifier=8340011000-0022

MEANS Procedure

Assay variable : PTINR\_VAL1 PT-INR Value

N Mean Standard Deviation Minimum Maximum

---

|   |           |           |           |           |
|---|-----------|-----------|-----------|-----------|
| 4 | 2.1000000 | 0.3261901 | 1.7600000 | 2.5400000 |
|---|-----------|-----------|-----------|-----------|

---

Unique Subject Identifier=8340011000-0025

Assay variable : PTINR\_VAL1 PT-INR Value

N Mean Standard Deviation Minimum Maximum

---

|   |           |           |           |           |
|---|-----------|-----------|-----------|-----------|
| 5 | 2.1240000 | 0.4209869 | 1.5300000 | 2.6200000 |
|---|-----------|-----------|-----------|-----------|

---

Unique Subject Identifier=8345000000-0006

Assay variable : PTINR\_VAL1 PT-INR Value

N Mean Standard Deviation Minimum Maximum

---

|   |           |           |           |           |
|---|-----------|-----------|-----------|-----------|
| 6 | 1.4600000 | 0.0876356 | 1.3400000 | 1.5700000 |
|---|-----------|-----------|-----------|-----------|

---

Unique Subject Identifier=8345000000-0007

Assay variable : PTINR\_VAL1 PT-INR Value

N Mean Standard Deviation Minimum Maximum

---

|   |          |           |          |          |
|---|----------|-----------|----------|----------|
| 3 | 2.510000 | 0.4132796 | 2.070000 | 2.890000 |
|---|----------|-----------|----------|----------|

---



Laboratory tests at the time of obtaining Table 2-6 consent, according to the presence or absence of proton-pump inhibitors

Unique Subject Identifier=8345000000-0009

MEANS Procedure

Assay variable : PTINR\_VAL1 PT-INR Value

N Mean Standard Deviation Minimum Maximum

---

|   |           |           |           |           |
|---|-----------|-----------|-----------|-----------|
| 6 | 2.0716667 | 0.4374205 | 1.5300000 | 2.8300000 |
|---|-----------|-----------|-----------|-----------|

---

Unique Subject Identifier=8345000000-0020

Assay variable : PTINR\_VAL1 PT-INR Value

N Mean Standard Deviation Minimum Maximum

---

|   |           |           |           |           |
|---|-----------|-----------|-----------|-----------|
| 3 | 2.1166667 | 0.1985783 | 1.8900000 | 2.2600000 |
|---|-----------|-----------|-----------|-----------|

---

Unique Subject Identifier=8345000000-0023

Assay variable : PTINR\_VAL1 PT-INR Value

N Mean Standard Deviation Minimum Maximum

---

|   |           |           |           |           |
|---|-----------|-----------|-----------|-----------|
| 3 | 2.2200000 | 0.3380828 | 2.0100000 | 2.6100000 |
|---|-----------|-----------|-----------|-----------|

---

Unique Subject Identifier=8345000000-0025

Assay variable : PTINR\_VAL1 PT-INR Value

N Mean Standard Deviation Minimum Maximum

---

|   |           |  |           |           |
|---|-----------|--|-----------|-----------|
| 1 | 1.6600000 |  | 1.6600000 | 1.6600000 |
|---|-----------|--|-----------|-----------|

---

Laboratory tests at the time of obtaining Table 2-6 consent, according to the presence or absence of proton-pump inhibitors

Unique Subject Identifier=8417010011-0004

MEANS Procedure

Assay variable : PTINR\_VAL1 PT-INR Value

N Mean Standard Deviation Minimum Maximum

---

|   |           |           |           |           |
|---|-----------|-----------|-----------|-----------|
| 6 | 2.2533333 | 0.2838779 | 1.9400000 | 2.6300000 |
|---|-----------|-----------|-----------|-----------|

---

Unique Subject Identifier=8442010000-0002

Assay variable : PTINR\_VAL1 PT-INR Value

N Mean Standard Deviation Minimum Maximum

---

|   |           |           |           |           |
|---|-----------|-----------|-----------|-----------|
| 3 | 1.7133333 | 0.2074448 | 1.4900000 | 1.9000000 |
|---|-----------|-----------|-----------|-----------|

---

Unique Subject Identifier=8442010000-0005

Assay variable : PTINR\_VAL1 PT-INR Value

N Mean Standard Deviation Minimum Maximum

---

|   |           |           |           |           |
|---|-----------|-----------|-----------|-----------|
| 4 | 2.2075000 | 0.5354982 | 1.4600000 | 2.6100000 |
|---|-----------|-----------|-----------|-----------|

---

Unique Subject Identifier=8442010000-0008

Assay variable : PTINR\_VAL1 PT-INR Value

N Mean Standard Deviation Minimum Maximum

---

|   |           |           |           |           |
|---|-----------|-----------|-----------|-----------|
| 3 | 1.6866667 | 0.2514624 | 1.4900000 | 1.9700000 |
|---|-----------|-----------|-----------|-----------|

---

Laboratory tests at the time of obtaining Table 2-6 consent, according to the presence or absence of proton-pump inhibitors

Unique Subject Identifier=8442010000-0010

MEANS Procedure

Assay variable : PTINR\_VAL1 PT-INR Value

| N | Mean      | Standard Deviation | Minimum   | Maximum   |
|---|-----------|--------------------|-----------|-----------|
| 3 | 2.1933333 | 0.2502665          | 1.9500000 | 2.4500000 |

Unique Subject Identifier=8442010000-0017

Assay variable : PTINR\_VAL1 PT-INR Value

| N | Mean      | Standard Deviation | Minimum   | Maximum   |
|---|-----------|--------------------|-----------|-----------|
| 2 | 1.7450000 | 0.0919239          | 1.6800000 | 1.8100000 |

Unique Subject Identifier=8442010000-0021

Assay variable : PTINR\_VAL1 PT-INR Value

| N | Mean      | Standard Deviation | Minimum   | Maximum   |
|---|-----------|--------------------|-----------|-----------|
| 3 | 1.6566667 | 0.1877054          | 1.4900000 | 1.8600000 |

Unique Subject Identifier=8514000000-0001

Assay variable : PTINR\_VAL1 PT-INR Value

N Mean Standard Deviation Minimum Maximum

---

|   |           |           |           |           |
|---|-----------|-----------|-----------|-----------|
| 5 | 1.8760000 | 0.5155386 | 1.0700000 | 2.4900000 |
|---|-----------|-----------|-----------|-----------|

---

Laboratory tests at the time of obtaining Table 2-6 consent, according to the presence or absence of proton-pump inhibitors

Unique Subject Identifier=8514000000-0004

MEANS Procedure

Assay variable : PTINR\_VAL1 PT-INR Value

N Mean Standard Deviation Minimum Maximum

---

|   |           |           |           |           |
|---|-----------|-----------|-----------|-----------|
| 6 | 2.0583333 | 0.1905168 | 1.7900000 | 2.3600000 |
|---|-----------|-----------|-----------|-----------|

---

Unique Subject Identifier=8623000000-0001

Assay variable : PTINR\_VAL1 PT-INR Value

N Mean Standard Deviation Minimum Maximum

---

|   |           |           |           |           |
|---|-----------|-----------|-----------|-----------|
| 4 | 2.0100000 | 0.0787401 | 1.9200000 | 2.0900000 |
|---|-----------|-----------|-----------|-----------|

---

Unique Subject Identifier=8623000000-0004

Assay variable : PTINR\_VAL1 PT-INR Value

N Mean Standard Deviation Minimum Maximum

---

|   |           |           |           |           |
|---|-----------|-----------|-----------|-----------|
| 4 | 2.1550000 | 0.5980803 | 1.4900000 | 2.9300000 |
|---|-----------|-----------|-----------|-----------|

---

Unique Subject Identifier=8623000000-0005

Assay variable : PTINR\_VAL1 PT-INR Value

N Mean Standard Deviation Minimum Maximum

---

|   |           |           |           |           |
|---|-----------|-----------|-----------|-----------|
| 2 | 1.8250000 | 0.1060660 | 1.7500000 | 1.9000000 |
|---|-----------|-----------|-----------|-----------|

---



Laboratory tests at the time of obtaining Table 2-6 consent, according to the presence or absence of proton-pump inhibitors

Unique Subject Identifier=8623000000-0009

MEANS Procedure

Assay variable : PTINR\_VAL1 PT-INR Value

N Mean Standard Deviation Minimum Maximum

---

|   |           |           |           |           |
|---|-----------|-----------|-----------|-----------|
| 2 | 1.9350000 | 0.0494975 | 1.9000000 | 1.9700000 |
|---|-----------|-----------|-----------|-----------|

---

Unique Subject Identifier=8623000000-0010

Assay variable : PTINR\_VAL1 PT-INR Value

N Mean Standard Deviation Minimum Maximum

---

|   |           |  |           |           |
|---|-----------|--|-----------|-----------|
| 1 | 1.7200000 |  | 1.7200000 | 1.7200000 |
|---|-----------|--|-----------|-----------|

---

Unique Subject Identifier=8623000000-0011

Assay variable : PTINR\_VAL1 PT-INR Value

N Mean Standard Deviation Minimum Maximum

---

|   |           |           |           |           |
|---|-----------|-----------|-----------|-----------|
| 3 | 2.4300000 | 0.2662705 | 2.1800000 | 2.7100000 |
|---|-----------|-----------|-----------|-----------|

---

Unique Subject Identifier=8623000000-0016

Assay variable : PTINR\_VAL1 PT-INR Value

N Mean Standard Deviation Minimum Maximum

---

|   |           |           |           |           |
|---|-----------|-----------|-----------|-----------|
| 6 | 2.1816667 | 0.2010390 | 1.9700000 | 2.4500000 |
|---|-----------|-----------|-----------|-----------|

---

Laboratory tests at the time of obtaining Table 2-6 consent, according to the presence or absence of proton-pump inhibitors

Unique Subject Identifier=8623000000-0025

MEANS Procedure

Assay variable : PTINR\_VAL1 PT-INR Value

N Mean Standard Deviation Minimum Maximum

---

|   |           |           |           |           |
|---|-----------|-----------|-----------|-----------|
| 3 | 2.6033333 | 1.0813109 | 1.9200000 | 3.8500000 |
|---|-----------|-----------|-----------|-----------|

---

Unique Subject Identifier=8623000000-0026

Assay variable : PTINR\_VAL1 PT-INR Value

N Mean Standard Deviation Minimum Maximum

---

|   |           |           |           |           |
|---|-----------|-----------|-----------|-----------|
| 4 | 1.9875000 | 0.5948319 | 1.4900000 | 2.8400000 |
|---|-----------|-----------|-----------|-----------|

---

Unique Subject Identifier=8623000000-0027

Assay variable : PTINR\_VAL1 PT-INR Value

N Mean Standard Deviation Minimum Maximum

---

|   |           |           |           |           |
|---|-----------|-----------|-----------|-----------|
| 5 | 1.5660000 | 0.0808084 | 1.4900000 | 1.6800000 |
|---|-----------|-----------|-----------|-----------|

---

Unique Subject Identifier=8623000000-0029

Assay variable : PTINR\_VAL1 PT-INR Value

N Mean Standard Deviation Minimum Maximum

---

|   |           |           |           |           |
|---|-----------|-----------|-----------|-----------|
| 4 | 1.4850000 | 0.1933046 | 1.2500000 | 1.6800000 |
|---|-----------|-----------|-----------|-----------|

---

Laboratory tests at the time of obtaining Table 2-6 consent, according to the presence or absence of proton-pump inhibitors

Unique Subject Identifier=8623000000-0030

MEANS Procedure

Assay variable : PTINR\_VAL1 PT-INR Value

N Mean Standard Deviation Minimum Maximum

---

|   |           |           |           |           |
|---|-----------|-----------|-----------|-----------|
| 2 | 2.0000000 | 1.2727922 | 1.1000000 | 2.9000000 |
|---|-----------|-----------|-----------|-----------|

---

Unique Subject Identifier=8748000000-0003

Assay variable : PTINR\_VAL1 PT-INR Value

N Mean Standard Deviation Minimum Maximum

---

|   |           |  |           |           |
|---|-----------|--|-----------|-----------|
| 1 | 1.4300000 |  | 1.4300000 | 1.4300000 |
|---|-----------|--|-----------|-----------|

---

Unique Subject Identifier=9001010000-0009

Assay variable : PTINR\_VAL1 PT-INR Value

N Mean Standard Deviation Minimum Maximum

---

|   |           |           |           |           |
|---|-----------|-----------|-----------|-----------|
| 6 | 1.8500000 | 0.3271085 | 1.4000000 | 2.2000000 |
|---|-----------|-----------|-----------|-----------|

---

Unique Subject Identifier=9001010000-0010

Assay variable : PTINR\_VAL1 PT-INR Value

N Mean Standard Deviation Minimum Maximum

---

|   |           |           |           |           |
|---|-----------|-----------|-----------|-----------|
| 6 | 2.1833333 | 0.3311596 | 1.8000000 | 2.7000000 |
|---|-----------|-----------|-----------|-----------|

---

Laboratory tests at the time of obtaining Table 2-6 consent, according to the presence or absence of proton-pump inhibitors

Unique Subject Identifier=9002010000-0051

MEANS Procedure

Assay variable : PTINR\_VAL1 PT-INR Value

N Mean Standard Deviation Minimum Maximum

---

|   |           |           |           |           |
|---|-----------|-----------|-----------|-----------|
| 5 | 2.0380000 | 0.3810118 | 1.5400000 | 2.5500000 |
|---|-----------|-----------|-----------|-----------|

---

Unique Subject Identifier=9002010000-0057

Assay variable : PTINR\_VAL1 PT-INR Value

N Mean Standard Deviation Minimum Maximum

---

|   |           |           |           |           |
|---|-----------|-----------|-----------|-----------|
| 4 | 1.6625000 | 0.1725060 | 1.4400000 | 1.8600000 |
|---|-----------|-----------|-----------|-----------|

---

Unique Subject Identifier=9002010000-0067

Assay variable : PTINR\_VAL1 PT-INR Value

N Mean Standard Deviation Minimum Maximum

---

|   |           |           |           |           |
|---|-----------|-----------|-----------|-----------|
| 5 | 1.8720000 | 0.1495660 | 1.6300000 | 2.0200000 |
|---|-----------|-----------|-----------|-----------|

---

Unique Subject Identifier=9002010000-0069

Assay variable : PTINR\_VAL1 PT-INR Value

N Mean Standard Deviation Minimum Maximum

---

|   |           |           |           |           |
|---|-----------|-----------|-----------|-----------|
| 6 | 1.9333333 | 0.3015073 | 1.5700000 | 2.3700000 |
|---|-----------|-----------|-----------|-----------|

---



Laboratory tests at the time of obtaining Table 2-6 consent, according to the presence or absence of proton-pump inhibitors

Unique Subject Identifier=9002010000-0079

MEANS Procedure

Assay variable : PTINR\_VAL1 PT-INR Value

N Mean Standard Deviation Minimum Maximum

---

|   |           |           |           |           |
|---|-----------|-----------|-----------|-----------|
| 4 | 2.0350000 | 1.1125197 | 1.0500000 | 3.6300000 |
|---|-----------|-----------|-----------|-----------|

---

Unique Subject Identifier=9002010000-0088

Assay variable : PTINR\_VAL1 PT-INR Value

N Mean Standard Deviation Minimum Maximum

---

|   |           |           |           |           |
|---|-----------|-----------|-----------|-----------|
| 4 | 1.5800000 | 0.2423496 | 1.3800000 | 1.9300000 |
|---|-----------|-----------|-----------|-----------|

---

Unique Subject Identifier=9002010000-0139

Assay variable : PTINR\_VAL1 PT-INR Value

N Mean Standard Deviation Minimum Maximum

---

|   |           |           |           |           |
|---|-----------|-----------|-----------|-----------|
| 4 | 2.1200000 | 0.4318179 | 1.6100000 | 2.6000000 |
|---|-----------|-----------|-----------|-----------|

---

Unique Subject Identifier=9002010000-0164

Assay variable : PTINR\_VAL1 PT-INR Value

N Mean Standard Deviation Minimum Maximum

---

|   |           |           |           |           |
|---|-----------|-----------|-----------|-----------|
| 6 | 2.1116667 | 0.3227021 | 1.8600000 | 2.7100000 |
|---|-----------|-----------|-----------|-----------|

---

Laboratory tests at the time of obtaining Table 2-6 consent, according to the presence or absence of proton-pump inhibitors

Unique Subject Identifier=9002010000-0223

MEANS Procedure

Assay variable : PTINR\_VAL1 PT-INR Value

N Mean Standard Deviation Minimum Maximum

---

|   |           |           |           |           |
|---|-----------|-----------|-----------|-----------|
| 6 | 1.7866667 | 0.2677810 | 1.5100000 | 2.2500000 |
|---|-----------|-----------|-----------|-----------|

---

Unique Subject Identifier=9005000000-0004

Assay variable : PTINR\_VAL1 PT-INR Value

N Mean Standard Deviation Minimum Maximum

---

|   |           |           |           |           |
|---|-----------|-----------|-----------|-----------|
| 3 | 1.7166667 | 0.2285461 | 1.5700000 | 1.9800000 |
|---|-----------|-----------|-----------|-----------|

---

Unique Subject Identifier=9005000000-0005

Assay variable : PTINR\_VAL1 PT-INR Value

N Mean Standard Deviation Minimum Maximum

---

|   |           |           |           |           |
|---|-----------|-----------|-----------|-----------|
| 3 | 1.7833333 | 0.2150194 | 1.6000000 | 2.0200000 |
|---|-----------|-----------|-----------|-----------|

---

Unique Subject Identifier=9005000000-0007

Assay variable : PTINR\_VAL1 PT-INR Value

N Mean Standard Deviation Minimum Maximum

---

|   |          |           |          |          |
|---|----------|-----------|----------|----------|
| 3 | 1.500000 | 0.1442221 | 1.380000 | 1.660000 |
|---|----------|-----------|----------|----------|

---

Laboratory tests at the time of obtaining Table 2-6 consent, according to the presence or absence of proton-pump inhibitors

Unique Subject Identifier=9005000000-0009

MEANS Procedure

Assay variable : PTINR\_VAL1 PT-INR Value

N Mean Standard Deviation Minimum Maximum

---

|   |           |           |           |           |
|---|-----------|-----------|-----------|-----------|
| 6 | 2.4033333 | 0.3593698 | 1.9600000 | 3.0200000 |
|---|-----------|-----------|-----------|-----------|

---

Unique Subject Identifier=9005000000-0015

Assay variable : PTINR\_VAL1 PT-INR Value

N Mean Standard Deviation Minimum Maximum

---

|   |           |           |           |           |
|---|-----------|-----------|-----------|-----------|
| 3 | 1.9733333 | 0.1357694 | 1.8300000 | 2.1000000 |
|---|-----------|-----------|-----------|-----------|

---

Unique Subject Identifier=9005000000-0023

Assay variable : PTINR\_VAL1 PT-INR Value

N Mean Standard Deviation Minimum Maximum

---

|   |           |           |           |           |
|---|-----------|-----------|-----------|-----------|
| 3 | 1.4833333 | 0.0923760 | 1.4300000 | 1.5900000 |
|---|-----------|-----------|-----------|-----------|

---

Unique Subject Identifier=9005000000-0033

Assay variable : PTINR\_VAL1 PT-INR Value

N Mean Standard Deviation Minimum Maximum

---

|   |           |           |           |           |
|---|-----------|-----------|-----------|-----------|
| 3 | 1.8233333 | 0.2218859 | 1.6200000 | 2.0600000 |
|---|-----------|-----------|-----------|-----------|

---

Laboratory tests at the time of obtaining Table 2-6 consent, according to the presence or absence of proton-pump inhibitors

Unique Subject Identifier=9008010000-0006

MEANS Procedure

Assay variable : PTINR\_VAL1 PT-INR Value

N Mean Standard Deviation Minimum Maximum

---

|   |           |           |           |           |
|---|-----------|-----------|-----------|-----------|
| 3 | 1.9466667 | 0.1858315 | 1.7400000 | 2.1000000 |
|---|-----------|-----------|-----------|-----------|

---

Unique Subject Identifier=9008010000-0012

Assay variable : PTINR\_VAL1 PT-INR Value

N Mean Standard Deviation Minimum Maximum

---

|   |           |           |           |           |
|---|-----------|-----------|-----------|-----------|
| 3 | 2.3766667 | 0.2554082 | 2.0900000 | 2.5800000 |
|---|-----------|-----------|-----------|-----------|

---

Unique Subject Identifier=9008010000-0017

Assay variable : PTINR\_VAL1 PT-INR Value

N Mean Standard Deviation Minimum Maximum

---

|   |           |           |           |           |
|---|-----------|-----------|-----------|-----------|
| 2 | 1.8100000 | 0.1414214 | 1.7100000 | 1.9100000 |
|---|-----------|-----------|-----------|-----------|

---

Unique Subject Identifier=9008010000-0021

Assay variable : PTINR\_VAL1 PT-INR Value

N Mean Standard Deviation Minimum Maximum

---

|   |           |           |           |           |
|---|-----------|-----------|-----------|-----------|
| 4 | 1.8275000 | 0.2637391 | 1.5600000 | 2.1300000 |
|---|-----------|-----------|-----------|-----------|

---



Laboratory tests at the time of obtaining Table 2-6 consent, according to the presence or absence of proton-pump inhibitors

Unique Subject Identifier=9008010000-0027

MEANS Procedure

Assay variable : PTINR\_VAL1 PT-INR Value

N Mean Standard Deviation Minimum Maximum

---

|   |           |           |           |           |
|---|-----------|-----------|-----------|-----------|
| 4 | 1.3375000 | 0.2895255 | 1.0500000 | 1.7100000 |
|---|-----------|-----------|-----------|-----------|

---

Unique Subject Identifier=9009010000-0001

Assay variable : PTINR\_VAL1 PT-INR Value

N Mean Standard Deviation Minimum Maximum

---

|   |           |           |           |           |
|---|-----------|-----------|-----------|-----------|
| 6 | 1.7666667 | 0.1512173 | 1.6000000 | 2.0100000 |
|---|-----------|-----------|-----------|-----------|

---

Unique Subject Identifier=9009010000-0003

Assay variable : PTINR\_VAL1 PT-INR Value

N Mean Standard Deviation Minimum Maximum

---

|   |           |           |           |           |
|---|-----------|-----------|-----------|-----------|
| 4 | 1.7750000 | 0.1660321 | 1.5900000 | 1.9900000 |
|---|-----------|-----------|-----------|-----------|

---

Unique Subject Identifier=9009010000-0013

Assay variable : PTINR\_VAL1 PT-INR Value

N Mean Standard Deviation Minimum Maximum

---

|   |           |           |           |           |
|---|-----------|-----------|-----------|-----------|
| 4 | 1.3275000 | 0.0419325 | 1.2700000 | 1.3700000 |
|---|-----------|-----------|-----------|-----------|

---

Laboratory tests at the time of obtaining Table 2-6 consent, according to the presence or absence of proton-pump inhibitors

Unique Subject Identifier=9009010000-0015

MEANS Procedure

Assay variable : PTINR\_VAL1 PT-INR Value

N Mean Standard Deviation Minimum Maximum

---

|   |           |           |           |           |
|---|-----------|-----------|-----------|-----------|
| 6 | 2.2666667 | 0.3688722 | 1.8900000 | 2.9200000 |
|---|-----------|-----------|-----------|-----------|

---

Unique Subject Identifier=9009010000-0017

Assay variable : PTINR\_VAL1 PT-INR Value

N Mean Standard Deviation Minimum Maximum

---

|   |           |           |           |           |
|---|-----------|-----------|-----------|-----------|
| 4 | 1.6525000 | 0.2736634 | 1.4200000 | 2.0400000 |
|---|-----------|-----------|-----------|-----------|

---

Unique Subject Identifier=9009010000-0022

Assay variable : PTINR\_VAL1 PT-INR Value

N Mean Standard Deviation Minimum Maximum

---

|   |           |           |           |           |
|---|-----------|-----------|-----------|-----------|
| 3 | 1.4166667 | 0.0665833 | 1.3600000 | 1.4900000 |
|---|-----------|-----------|-----------|-----------|

---

Unique Subject Identifier=9009010000-0030

Assay variable : PTINR\_VAL1 PT-INR Value

N Mean Standard Deviation Minimum Maximum

---

|   |           |           |           |           |
|---|-----------|-----------|-----------|-----------|
| 4 | 1.6875000 | 0.1787689 | 1.5200000 | 1.9400000 |
|---|-----------|-----------|-----------|-----------|

---

Laboratory tests at the time of obtaining Table 2-6 consent, according to the presence or absence of proton-pump inhibitors

Unique Subject Identifier=9014000000-0002

MEANS Procedure

Assay variable : PTINR\_VAL1 PT-INR Value

N Mean Standard Deviation Minimum Maximum

---

|   |           |           |           |           |
|---|-----------|-----------|-----------|-----------|
| 5 | 1.8480000 | 0.1758408 | 1.7000000 | 2.1400000 |
|---|-----------|-----------|-----------|-----------|

---

Unique Subject Identifier=9014000000-0003

Assay variable : PTINR\_VAL1 PT-INR Value

N Mean Standard Deviation Minimum Maximum

---

|   |           |           |           |           |
|---|-----------|-----------|-----------|-----------|
| 4 | 2.1700000 | 0.1529706 | 2.0300000 | 2.3800000 |
|---|-----------|-----------|-----------|-----------|

---

Unique Subject Identifier=9014000000-0004

Assay variable : PTINR\_VAL1 PT-INR Value

N Mean Standard Deviation Minimum Maximum

---

|   |           |           |           |           |
|---|-----------|-----------|-----------|-----------|
| 5 | 2.2540000 | 0.2352233 | 2.0200000 | 2.6400000 |
|---|-----------|-----------|-----------|-----------|

---

Unique Subject Identifier=9014000000-0007

Assay variable : PTINR\_VAL1 PT-INR Value

N Mean Standard Deviation Minimum Maximum

---

|   |          |           |          |          |
|---|----------|-----------|----------|----------|
| 3 | 2.313333 | 0.1569501 | 2.190000 | 2.490000 |
|---|----------|-----------|----------|----------|

---

Laboratory tests at the time of obtaining Table 2-6 consent, according to the presence or absence of proton-pump inhibitors

Unique Subject Identifier=9014000000-0008

MEANS Procedure

Assay variable : PTINR\_VAL1 PT-INR Value

| N | Mean      | Standard Deviation | Minimum   | Maximum   |
|---|-----------|--------------------|-----------|-----------|
| 4 | 1.9625000 | 0.1302242          | 1.8600000 | 2.1400000 |

Unique Subject Identifier=9014000000-0010

Assay variable : PTINR\_VAL1 PT-INR Value

| N | Mean      | Standard Deviation | Minimum   | Maximum   |
|---|-----------|--------------------|-----------|-----------|
| 3 | 2.0033333 | 0.3700450          | 1.7700000 | 2.4300000 |

Unique Subject Identifier=9014000000-0013

Assay variable : PTINR\_VAL1 PT-INR Value

| N | Mean      | Standard Deviation | Minimum   | Maximum   |
|---|-----------|--------------------|-----------|-----------|
| 6 | 2.0133333 | 0.2587405          | 1.7200000 | 2.4800000 |

Unique Subject Identifier=9014000000-0019

Assay variable : PTINR\_VAL1 PT-INR Value

N Mean Standard Deviation Minimum Maximum

---

|   |           |           |           |           |
|---|-----------|-----------|-----------|-----------|
| 5 | 2.3220000 | 0.7481110 | 1.5400000 | 3.1100000 |
|---|-----------|-----------|-----------|-----------|

---



Laboratory tests at the time of obtaining Table 2-6 consent, according to the presence or absence of proton-pump inhibitors

Unique Subject Identifier=9014000000-0021

MEANS Procedure

Assay variable : PTINR\_VAL1 PT-INR Value

N Mean Standard Deviation Minimum Maximum

---

|   |           |           |           |           |
|---|-----------|-----------|-----------|-----------|
| 5 | 2.3020000 | 0.6430941 | 1.5200000 | 3.0900000 |
|---|-----------|-----------|-----------|-----------|

---

Unique Subject Identifier=9014000000-0022

Assay variable : PTINR\_VAL1 PT-INR Value

N Mean Standard Deviation Minimum Maximum

---

|   |           |           |           |           |
|---|-----------|-----------|-----------|-----------|
| 6 | 1.7750000 | 0.3111752 | 1.3500000 | 2.2400000 |
|---|-----------|-----------|-----------|-----------|

---

Unique Subject Identifier=9014000000-0023

Assay variable : PTINR\_VAL1 PT-INR Value

N Mean Standard Deviation Minimum Maximum

---

|   |           |           |           |           |
|---|-----------|-----------|-----------|-----------|
| 4 | 2.0475000 | 0.0981071 | 1.9500000 | 2.1700000 |
|---|-----------|-----------|-----------|-----------|

---

Unique Subject Identifier=9014000000-0025

Assay variable : PTINR\_VAL1 PT-INR Value

N Mean Standard Deviation Minimum Maximum

---

|   |           |           |           |           |
|---|-----------|-----------|-----------|-----------|
| 4 | 1.9575000 | 0.2604323 | 1.6400000 | 2.2700000 |
|---|-----------|-----------|-----------|-----------|

---

Laboratory tests at the time of obtaining Table 2-6 consent, according to the presence or absence of proton-pump inhibitors

Unique Subject Identifier=9014000000-0027

MEANS Procedure

Assay variable : PTINR\_VAL1 PT-INR Value

N Mean Standard Deviation Minimum Maximum

---

|   |           |           |           |           |
|---|-----------|-----------|-----------|-----------|
| 3 | 1.8500000 | 0.0692820 | 1.8100000 | 1.9300000 |
|---|-----------|-----------|-----------|-----------|

---

Unique Subject Identifier=9014000000-0028

Assay variable : PTINR\_VAL1 PT-INR Value

N Mean Standard Deviation Minimum Maximum

---

|   |           |           |           |           |
|---|-----------|-----------|-----------|-----------|
| 5 | 2.5640000 | 0.8219976 | 1.8500000 | 3.8300000 |
|---|-----------|-----------|-----------|-----------|

---

Unique Subject Identifier=9014000000-0029

Assay variable : PTINR\_VAL1 PT-INR Value

N Mean Standard Deviation Minimum Maximum

---

|   |           |           |           |           |
|---|-----------|-----------|-----------|-----------|
| 5 | 2.6740000 | 0.6759290 | 1.9800000 | 3.4800000 |
|---|-----------|-----------|-----------|-----------|

---

Unique Subject Identifier=9014000000-0030

Assay variable : PTINR\_VAL1 PT-INR Value

N Mean Standard Deviation Minimum Maximum

---

|   |          |           |          |          |
|---|----------|-----------|----------|----------|
| 5 | 1.800000 | 0.0751665 | 1.720000 | 1.880000 |
|---|----------|-----------|----------|----------|

---

Laboratory tests at the time of obtaining Table 2-6 consent, according to the presence or absence of proton-pump inhibitors

Unique Subject Identifier=9020011000-0001

MEANS Procedure

Assay variable : PTINR\_VAL1 PT-INR Value

N Mean Standard Deviation Minimum Maximum

---

|   |           |           |           |           |
|---|-----------|-----------|-----------|-----------|
| 5 | 2.2440000 | 0.3773990 | 1.6800000 | 2.7000000 |
|---|-----------|-----------|-----------|-----------|

---

Unique Subject Identifier=9020011000-0005

Assay variable : PTINR\_VAL1 PT-INR Value

N Mean Standard Deviation Minimum Maximum

---

|   |           |           |           |           |
|---|-----------|-----------|-----------|-----------|
| 3 | 1.5033333 | 0.1850225 | 1.2900000 | 1.6200000 |
|---|-----------|-----------|-----------|-----------|

---

Unique Subject Identifier=9020011000-0010

Assay variable : PTINR\_VAL1 PT-INR Value

N Mean Standard Deviation Minimum Maximum

---

|   |           |           |           |           |
|---|-----------|-----------|-----------|-----------|
| 3 | 1.4700000 | 0.1126943 | 1.4000000 | 1.6000000 |
|---|-----------|-----------|-----------|-----------|

---

Unique Subject Identifier=9020011000-0028

Assay variable : PTINR\_VAL1 PT-INR Value

N Mean Standard Deviation Minimum Maximum

---

|   |           |           |           |           |
|---|-----------|-----------|-----------|-----------|
| 3 | 1.8933333 | 0.2294196 | 1.6300000 | 2.0500000 |
|---|-----------|-----------|-----------|-----------|

---

Laboratory tests at the time of obtaining Table 2-6 consent, according to the presence or absence of proton-pump inhibitors

Unique Subject Identifier=9024000000-0002

MEANS Procedure

Assay variable : PTINR\_VAL1 PT-INR Value

N Mean Standard Deviation Minimum Maximum

---

|   |           |           |           |           |
|---|-----------|-----------|-----------|-----------|
| 6 | 2.2916667 | 0.2705858 | 1.9500000 | 2.5700000 |
|---|-----------|-----------|-----------|-----------|

---

Unique Subject Identifier=9024000000-0005

Assay variable : PTINR\_VAL1 PT-INR Value

N Mean Standard Deviation Minimum Maximum

---

|   |           |           |           |           |
|---|-----------|-----------|-----------|-----------|
| 6 | 1.6800000 | 0.4543567 | 1.1000000 | 2.2200000 |
|---|-----------|-----------|-----------|-----------|

---

Unique Subject Identifier=9024000000-0007

Assay variable : PTINR\_VAL1 PT-INR Value

N Mean Standard Deviation Minimum Maximum

---

|   |           |           |           |           |
|---|-----------|-----------|-----------|-----------|
| 3 | 2.5966667 | 0.2138535 | 2.4100000 | 2.8300000 |
|---|-----------|-----------|-----------|-----------|

---

Unique Subject Identifier=9031010000-0016

Assay variable : PTINR\_VAL1 PT-INR Value

N Mean Standard Deviation Minimum Maximum

---

|   |          |           |          |          |
|---|----------|-----------|----------|----------|
| 3 | 2.060000 | 0.2981610 | 1.810000 | 2.390000 |
|---|----------|-----------|----------|----------|

---



Laboratory tests at the time of obtaining Table 2-6 consent, according to the presence or absence of proton-pump inhibitors

Unique Subject Identifier=9032011000-0005

MEANS Procedure

Assay variable : PTINR\_VAL1 PT-INR Value

N Mean Standard Deviation Minimum Maximum

---

|   |           |           |           |           |
|---|-----------|-----------|-----------|-----------|
| 4 | 2.1000000 | 0.2160247 | 1.8000000 | 2.3000000 |
|---|-----------|-----------|-----------|-----------|

---

Unique Subject Identifier=9032011000-0008

Assay variable : PTINR\_VAL1 PT-INR Value

N Mean Standard Deviation Minimum Maximum

---

|   |           |           |           |           |
|---|-----------|-----------|-----------|-----------|
| 4 | 1.8500000 | 0.6608076 | 1.4000000 | 2.8000000 |
|---|-----------|-----------|-----------|-----------|

---

Unique Subject Identifier=9032011000-0009

Assay variable : PTINR\_VAL1 PT-INR Value

N Mean Standard Deviation Minimum Maximum

---

|   |           |           |           |           |
|---|-----------|-----------|-----------|-----------|
| 4 | 2.0000000 | 0.3162278 | 1.6000000 | 2.3000000 |
|---|-----------|-----------|-----------|-----------|

---

Unique Subject Identifier=9035000000-0005

Assay variable : PTINR\_VAL1 PT-INR Value

N Mean Standard Deviation Minimum Maximum

---

|   |          |          |          |          |
|---|----------|----------|----------|----------|
| 3 | 2.350000 | 0.130000 | 2.200000 | 2.430000 |
|---|----------|----------|----------|----------|

---

Laboratory tests at the time of obtaining Table 2-6 consent, according to the presence or absence of proton-pump inhibitors

Unique Subject Identifier=9035000000-0045

MEANS Procedure

Assay variable : PTINR\_VAL1 PT-INR Value

N Mean Standard Deviation Minimum Maximum

---

|   |           |           |           |           |
|---|-----------|-----------|-----------|-----------|
| 2 | 2.0350000 | 0.0212132 | 2.0200000 | 2.0500000 |
|---|-----------|-----------|-----------|-----------|

---

Unique Subject Identifier=9035000000-0058

Assay variable : PTINR\_VAL1 PT-INR Value

N Mean Standard Deviation Minimum Maximum

---

|   |           |           |           |           |
|---|-----------|-----------|-----------|-----------|
| 4 | 2.0100000 | 0.5874805 | 1.2400000 | 2.6600000 |
|---|-----------|-----------|-----------|-----------|

---

Unique Subject Identifier=9035000000-0061

Assay variable : PTINR\_VAL1 PT-INR Value

N Mean Standard Deviation Minimum Maximum

---

|   |           |           |           |           |
|---|-----------|-----------|-----------|-----------|
| 5 | 1.7380000 | 0.2872629 | 1.5100000 | 2.1700000 |
|---|-----------|-----------|-----------|-----------|

---

Unique Subject Identifier=9035000000-0062

Assay variable : PTINR\_VAL1 PT-INR Value

N Mean Standard Deviation Minimum Maximum

---

|   |           |           |           |           |
|---|-----------|-----------|-----------|-----------|
| 3 | 1.8933333 | 0.3875994 | 1.5900000 | 2.3300000 |
|---|-----------|-----------|-----------|-----------|

---

Laboratory tests at the time of obtaining Table 2-6 consent, according to the presence or absence of proton-pump inhibitors

Unique Subject Identifier=9035000000-0069

MEANS Procedure

Assay variable : PTINR\_VAL1 PT-INR Value

| N | Mean      | Standard Deviation | Minimum   | Maximum   |
|---|-----------|--------------------|-----------|-----------|
| 3 | 1.8800000 | 0.1915724          | 1.7500000 | 2.1000000 |

Unique Subject Identifier=9035000000-0078

Assay variable : PTINR\_VAL1 PT-INR Value

| N | Mean      | Standard Deviation | Minimum   | Maximum   |
|---|-----------|--------------------|-----------|-----------|
| 3 | 1.7866667 | 0.3807011          | 1.4200000 | 2.1800000 |

Unique Subject Identifier=9035000000-0081

Assay variable : PTINR\_VAL1 PT-INR Value

| N | Mean      | Standard Deviation | Minimum   | Maximum   |
|---|-----------|--------------------|-----------|-----------|
| 6 | 1.6900000 | 0.2090933          | 1.3500000 | 1.9500000 |

Unique Subject Identifier=9035000000-0084

Assay variable : PTINR\_VAL1 PT-INR Value

N Mean Standard Deviation Minimum Maximum

---

|   |          |           |          |          |
|---|----------|-----------|----------|----------|
| 3 | 1.403333 | 0.1871719 | 1.190000 | 1.540000 |
|---|----------|-----------|----------|----------|

---

Laboratory tests at the time of obtaining Table 2-6 consent, according to the presence or absence of proton-pump inhibitors

Unique Subject Identifier=9035000000-0094

MEANS Procedure

Assay variable : PTINR\_VAL1 PT-INR Value

N Mean Standard Deviation Minimum Maximum

---

|   |           |           |           |           |
|---|-----------|-----------|-----------|-----------|
| 3 | 1.6166667 | 0.2956913 | 1.3600000 | 1.9400000 |
|---|-----------|-----------|-----------|-----------|

---

Unique Subject Identifier=9035000000-0095

Assay variable : PTINR\_VAL1 PT-INR Value

N Mean Standard Deviation Minimum Maximum

---

|   |           |           |           |           |
|---|-----------|-----------|-----------|-----------|
| 3 | 1.9266667 | 0.0650641 | 1.8600000 | 1.9900000 |
|---|-----------|-----------|-----------|-----------|

---

Unique Subject Identifier=9035000000-0100

Assay variable : PTINR\_VAL1 PT-INR Value

N Mean Standard Deviation Minimum Maximum

---

|   |           |           |           |           |
|---|-----------|-----------|-----------|-----------|
| 4 | 1.7525000 | 0.6388205 | 0.9800000 | 2.4400000 |
|---|-----------|-----------|-----------|-----------|

---

Unique Subject Identifier=9036000000-0015

Assay variable : PTINR\_VAL1 PT-INR Value

N Mean Standard Deviation Minimum Maximum

---

|   |           |           |           |           |
|---|-----------|-----------|-----------|-----------|
| 3 | 1.9733333 | 0.0503322 | 1.9200000 | 2.0200000 |
|---|-----------|-----------|-----------|-----------|

---



Laboratory tests at the time of obtaining Table 2-6 consent, according to the presence or absence of proton-pump inhibitors

Unique Subject Identifier=9037000010-0003

MEANS Procedure

Assay variable : PTINR\_VAL1 PT-INR Value

| N | Mean      | Standard Deviation | Minimum   | Maximum   |
|---|-----------|--------------------|-----------|-----------|
| 5 | 2.2560000 | 1.0411676          | 1.5800000 | 4.0700000 |

Unique Subject Identifier=9037000010-0006

Assay variable : PTINR\_VAL1 PT-INR Value

| N | Mean      | Standard Deviation | Minimum   | Maximum   |
|---|-----------|--------------------|-----------|-----------|
| 2 | 1.8450000 | 0.3606245          | 1.5900000 | 2.1000000 |

Unique Subject Identifier=9037000010-0007

Assay variable : PTINR\_VAL1 PT-INR Value

| N | Mean      | Standard Deviation | Minimum   | Maximum   |
|---|-----------|--------------------|-----------|-----------|
| 2 | 2.0700000 | 0.0424264          | 2.0400000 | 2.1000000 |

Unique Subject Identifier=9037000010-0009

Assay variable : PTINR\_VAL1 PT-INR Value

N Mean Standard Deviation Minimum Maximum

---

|   |           |           |           |           |
|---|-----------|-----------|-----------|-----------|
| 3 | 2.1466667 | 0.8800189 | 1.1400000 | 2.7700000 |
|---|-----------|-----------|-----------|-----------|

---

Laboratory tests at the time of obtaining Table 2-6 consent, according to the presence or absence of proton-pump inhibitors

Unique Subject Identifier=9037000010-0010

MEANS Procedure

Assay variable : PTINR\_VAL1 PT-INR Value

| N | Mean      | Standard Deviation | Minimum   | Maximum   |
|---|-----------|--------------------|-----------|-----------|
| 5 | 1.7520000 | 0.4846855          | 1.3200000 | 2.5800000 |

Unique Subject Identifier=9040011000-0003

Assay variable : PTINR\_VAL1 PT-INR Value

| N | Mean      | Standard Deviation | Minimum   | Maximum   |
|---|-----------|--------------------|-----------|-----------|
| 4 | 1.8200000 | 0.0336650          | 1.7800000 | 1.8600000 |

Unique Subject Identifier=9047000000-0011

Assay variable : PTINR\_VAL1 PT-INR Value

| N | Mean      | Standard Deviation | Minimum   | Maximum   |
|---|-----------|--------------------|-----------|-----------|
| 3 | 1.1000000 | 0.1153256          | 1.0100000 | 1.2300000 |

Unique Subject Identifier=9047000000-0012

Assay variable : PTINR\_VAL1 PT-INR Value

N Mean Standard Deviation Minimum Maximum

---

|   |           |           |           |           |
|---|-----------|-----------|-----------|-----------|
| 4 | 1.5700000 | 0.2437212 | 1.4200000 | 1.9300000 |
|---|-----------|-----------|-----------|-----------|

---

Laboratory tests at the time of obtaining Table 2-6 consent, according to the presence or absence of proton-pump inhibitors

Unique Subject Identifier=9047000000-0013

MEANS Procedure

Assay variable : PTINR\_VAL1 PT-INR Value

N Mean Standard Deviation Minimum Maximum

---

|   |           |           |           |           |
|---|-----------|-----------|-----------|-----------|
| 3 | 1.7666667 | 0.1361372 | 1.6600000 | 1.9200000 |
|---|-----------|-----------|-----------|-----------|

---

Unique Subject Identifier=9047000000-0014

Assay variable : PTINR\_VAL1 PT-INR Value

N Mean Standard Deviation Minimum Maximum

---

|   |           |           |           |           |
|---|-----------|-----------|-----------|-----------|
| 4 | 2.3525000 | 0.5212405 | 1.6800000 | 2.8900000 |
|---|-----------|-----------|-----------|-----------|

---

Unique Subject Identifier=9047000000-0015

Assay variable : PTINR\_VAL1 PT-INR Value

N Mean Standard Deviation Minimum Maximum

---

|   |           |           |           |           |
|---|-----------|-----------|-----------|-----------|
| 2 | 1.7500000 | 0.2404163 | 1.5800000 | 1.9200000 |
|---|-----------|-----------|-----------|-----------|

---

Unique Subject Identifier=9047000000-0017

Assay variable : PTINR\_VAL1 PT-INR Value

N Mean Standard Deviation Minimum Maximum

---

|   |           |           |           |           |
|---|-----------|-----------|-----------|-----------|
| 5 | 1.8880000 | 0.1759830 | 1.6800000 | 2.0700000 |
|---|-----------|-----------|-----------|-----------|

---

Laboratory tests at the time of obtaining Table 2-6 consent, according to the presence or absence of proton-pump inhibitors

Unique Subject Identifier=9047000000-0019

MEANS Procedure

Assay variable : PTINR\_VAL1 PT-INR Value

N Mean Standard Deviation Minimum Maximum

---

|   |           |           |           |           |
|---|-----------|-----------|-----------|-----------|
| 4 | 1.6550000 | 0.4173328 | 1.1100000 | 2.0200000 |
|---|-----------|-----------|-----------|-----------|

---

Unique Subject Identifier=9055000000-0001

Assay variable : PTINR\_VAL1 PT-INR Value

N Mean Standard Deviation Minimum Maximum

---

|   |           |           |           |           |
|---|-----------|-----------|-----------|-----------|
| 4 | 1.6950000 | 0.2852484 | 1.4300000 | 2.1000000 |
|---|-----------|-----------|-----------|-----------|

---

Unique Subject Identifier=9055000000-0002

Assay variable : PTINR\_VAL1 PT-INR Value

N Mean Standard Deviation Minimum Maximum

---

|   |           |           |           |           |
|---|-----------|-----------|-----------|-----------|
| 4 | 1.6700000 | 0.1842100 | 1.5000000 | 1.9300000 |
|---|-----------|-----------|-----------|-----------|

---

Unique Subject Identifier=9057000000-0006

Assay variable : PTINR\_VAL1 PT-INR Value

N Mean Standard Deviation Minimum Maximum

---

|   |          |          |          |          |
|---|----------|----------|----------|----------|
| 3 | 2.080000 | 0.060000 | 2.020000 | 2.140000 |
|---|----------|----------|----------|----------|

---



Laboratory tests at the time of obtaining Table 2-6 consent, according to the presence or absence of proton-pump inhibitors

Unique Subject Identifier=9057000000-0007

MEANS Procedure

Assay variable : PTINR\_VAL1 PT-INR Value

| N | Mean      | Standard Deviation | Minimum   | Maximum   |
|---|-----------|--------------------|-----------|-----------|
| 5 | 1.7260000 | 0.1522498          | 1.5600000 | 1.9500000 |

Unique Subject Identifier=9057000000-0010

Assay variable : PTINR\_VAL1 PT-INR Value

| N | Mean      | Standard Deviation | Minimum   | Maximum   |
|---|-----------|--------------------|-----------|-----------|
| 3 | 1.8133333 | 0.2470493          | 1.5500000 | 2.0400000 |

Unique Subject Identifier=9057000000-0011

Assay variable : PTINR\_VAL1 PT-INR Value

| N | Mean      | Standard Deviation | Minimum   | Maximum   |
|---|-----------|--------------------|-----------|-----------|
| 5 | 1.8460000 | 0.3114964          | 1.5000000 | 2.3300000 |

Unique Subject Identifier=9057000000-0014

Assay variable : PTINR\_VAL1 PT-INR Value

N Mean Standard Deviation Minimum Maximum

---

|   |          |           |          |          |
|---|----------|-----------|----------|----------|
| 5 | 2.050000 | 0.2982449 | 1.780000 | 2.510000 |
|---|----------|-----------|----------|----------|

---

Laboratory tests at the time of obtaining Table 2-6 consent, according to the presence or absence of proton-pump inhibitors

Unique Subject Identifier=9057000000-0015

MEANS Procedure

Assay variable : PTINR\_VAL1 PT-INR Value

N Mean Standard Deviation Minimum Maximum

---

|   |           |           |           |           |
|---|-----------|-----------|-----------|-----------|
| 4 | 2.1025000 | 0.4014453 | 1.8500000 | 2.7000000 |
|---|-----------|-----------|-----------|-----------|

---

Unique Subject Identifier=9071010000-0003

Assay variable : PTINR\_VAL1 PT-INR Value

N Mean Standard Deviation Minimum Maximum

---

|   |           |           |           |           |
|---|-----------|-----------|-----------|-----------|
| 5 | 1.8520000 | 0.3769217 | 1.5400000 | 2.4300000 |
|---|-----------|-----------|-----------|-----------|

---

Unique Subject Identifier=9071010000-0004

Assay variable : PTINR\_VAL1 PT-INR Value

N Mean Standard Deviation Minimum Maximum

---

|   |           |  |           |           |
|---|-----------|--|-----------|-----------|
| 1 | 2.4800000 |  | 2.4800000 | 2.4800000 |
|---|-----------|--|-----------|-----------|

---

Unique Subject Identifier=9100001000-0004

Assay variable : PTINR\_VAL1 PT-INR Value

N Mean Standard Deviation Minimum Maximum

---

|   |           |           |           |           |
|---|-----------|-----------|-----------|-----------|
| 3 | 2.2366667 | 0.1761628 | 2.0400000 | 2.3800000 |
|---|-----------|-----------|-----------|-----------|

---

Laboratory tests at the time of obtaining Table 2-6 consent, according to the presence or absence of proton-pump inhibitors

Unique Subject Identifier=9100001000-0005

MEANS Procedure

Assay variable : PTINR\_VAL1 PT-INR Value

| N | Mean      | Standard Deviation | Minimum   | Maximum   |
|---|-----------|--------------------|-----------|-----------|
| 5 | 1.8000000 | 0.3383046          | 1.4400000 | 2.2900000 |

Unique Subject Identifier=9100001000-0006

Assay variable : PTINR\_VAL1 PT-INR Value

| N | Mean      | Standard Deviation | Minimum   | Maximum   |
|---|-----------|--------------------|-----------|-----------|
| 3 | 1.9733333 | 0.0986577          | 1.8600000 | 2.0400000 |

Unique Subject Identifier=9100001000-0010

Assay variable : PTINR\_VAL1 PT-INR Value

| N | Mean      | Standard Deviation | Minimum   | Maximum   |
|---|-----------|--------------------|-----------|-----------|
| 4 | 1.8100000 | 0.8195934          | 1.0700000 | 2.7300000 |

Unique Subject Identifier=9100001000-0011

Assay variable : PTINR\_VAL1 PT-INR Value

N Mean Standard Deviation Minimum Maximum

---

|   |           |           |           |           |
|---|-----------|-----------|-----------|-----------|
| 4 | 1.8975000 | 0.0754431 | 1.7900000 | 1.9500000 |
|---|-----------|-----------|-----------|-----------|

---

Laboratory tests at the time of obtaining Table 2-6 consent, according to the presence or absence of proton-pump inhibitors

Unique Subject Identifier=9100001000-0012

MEANS Procedure

Assay variable : PTINR\_VAL1 PT-INR Value

N Mean Standard Deviation Minimum Maximum

---

|   |           |           |           |           |
|---|-----------|-----------|-----------|-----------|
| 4 | 1.4100000 | 0.1902630 | 1.2100000 | 1.6300000 |
|---|-----------|-----------|-----------|-----------|

---

Unique Subject Identifier=9100001000-0013

Assay variable : PTINR\_VAL1 PT-INR Value

N Mean Standard Deviation Minimum Maximum

---

|   |           |           |           |           |
|---|-----------|-----------|-----------|-----------|
| 3 | 1.9266667 | 0.3707200 | 1.5100000 | 2.2200000 |
|---|-----------|-----------|-----------|-----------|

---

Unique Subject Identifier=9100001000-0014

Assay variable : PTINR\_VAL1 PT-INR Value

N Mean Standard Deviation Minimum Maximum

---

|   |           |           |           |           |
|---|-----------|-----------|-----------|-----------|
| 5 | 2.4900000 | 0.4428882 | 1.7600000 | 2.8500000 |
|---|-----------|-----------|-----------|-----------|

---

Unique Subject Identifier=9100001000-0015

Assay variable : PTINR\_VAL1 PT-INR Value

N Mean Standard Deviation Minimum Maximum

---

|   |          |           |          |          |
|---|----------|-----------|----------|----------|
| 3 | 1.833333 | 0.7793801 | 1.190000 | 2.700000 |
|---|----------|-----------|----------|----------|

---



Laboratory tests at the time of obtaining Table 2-6 consent, according to the presence or absence of proton-pump inhibitors

Unique Subject Identifier=9100001000-0016

MEANS Procedure

Assay variable : PTINR\_VAL1 PT-INR Value

N Mean Standard Deviation Minimum Maximum

---

|   |           |           |           |           |
|---|-----------|-----------|-----------|-----------|
| 4 | 1.8700000 | 0.4128761 | 1.4600000 | 2.3500000 |
|---|-----------|-----------|-----------|-----------|

---

Unique Subject Identifier=9100001000-0019

Assay variable : PTINR\_VAL1 PT-INR Value

N Mean Standard Deviation Minimum Maximum

---

|   |           |           |           |           |
|---|-----------|-----------|-----------|-----------|
| 3 | 1.5066667 | 0.2318045 | 1.2600000 | 1.7200000 |
|---|-----------|-----------|-----------|-----------|

---

Unique Subject Identifier=9100001000-0021

Assay variable : PTINR\_VAL1 PT-INR Value

N Mean Standard Deviation Minimum Maximum

---

|   |           |           |           |           |
|---|-----------|-----------|-----------|-----------|
| 2 | 1.7300000 | 0.0848528 | 1.6700000 | 1.7900000 |
|---|-----------|-----------|-----------|-----------|

---

Unique Subject Identifier=9100001000-0024

Assay variable : PTINR\_VAL1 PT-INR Value

N Mean Standard Deviation Minimum Maximum

---

|   |          |           |          |          |
|---|----------|-----------|----------|----------|
| 3 | 2.010000 | 0.1873499 | 1.860000 | 2.220000 |
|---|----------|-----------|----------|----------|

---

Laboratory tests at the time of obtaining Table 2-6 consent, according to the presence or absence of proton-pump inhibitors

Unique Subject Identifier=9100001000-0026

MEANS Procedure

Assay variable : PTINR\_VAL1 PT-INR Value

N Mean Standard Deviation Minimum Maximum

---

|   |           |           |           |           |
|---|-----------|-----------|-----------|-----------|
| 4 | 2.3650000 | 0.7005474 | 1.6800000 | 3.2600000 |
|---|-----------|-----------|-----------|-----------|

---

Unique Subject Identifier=9100001000-0027

Assay variable : PTINR\_VAL1 PT-INR Value

N Mean Standard Deviation Minimum Maximum

---

|   |           |           |           |           |
|---|-----------|-----------|-----------|-----------|
| 4 | 2.6375000 | 2.0399244 | 1.4300000 | 5.6900000 |
|---|-----------|-----------|-----------|-----------|

---

Unique Subject Identifier=9100001000-0030

Assay variable : PTINR\_VAL1 PT-INR Value

N Mean Standard Deviation Minimum Maximum

---

|   |           |           |           |           |
|---|-----------|-----------|-----------|-----------|
| 4 | 1.8500000 | 0.2499333 | 1.6100000 | 2.0900000 |
|---|-----------|-----------|-----------|-----------|

---

Unique Subject Identifier=9101010000-0001

Assay variable : PTINR\_VAL1 PT-INR Value

N Mean Standard Deviation Minimum Maximum

---

|   |          |          |          |          |
|---|----------|----------|----------|----------|
| 3 | 2.000000 | 0.360551 | 1.700000 | 2.400000 |
|---|----------|----------|----------|----------|

---

Laboratory tests at the time of obtaining Table 2-6 consent, according to the presence or absence of proton-pump inhibitors

Unique Subject Identifier=9101010000-0002

MEANS Procedure

Assay variable : PTINR\_VAL1 PT-INR Value

N Mean Standard Deviation Minimum Maximum

---

|   |           |           |           |           |
|---|-----------|-----------|-----------|-----------|
| 4 | 2.8000000 | 0.8602325 | 1.9000000 | 3.9000000 |
|---|-----------|-----------|-----------|-----------|

---

Unique Subject Identifier=9101010000-0003

Assay variable : PTINR\_VAL1 PT-INR Value

N Mean Standard Deviation Minimum Maximum

---

|   |           |           |           |           |
|---|-----------|-----------|-----------|-----------|
| 2 | 1.2500000 | 0.0707107 | 1.2000000 | 1.3000000 |
|---|-----------|-----------|-----------|-----------|

---

Unique Subject Identifier=9101010000-0004

Assay variable : PTINR\_VAL1 PT-INR Value

N Mean Standard Deviation Minimum Maximum

---

|   |           |           |           |           |
|---|-----------|-----------|-----------|-----------|
| 5 | 2.1400000 | 0.2190890 | 1.8000000 | 2.4000000 |
|---|-----------|-----------|-----------|-----------|

---

Unique Subject Identifier=9101010000-0007

Assay variable : PTINR\_VAL1 PT-INR Value

N Mean Standard Deviation Minimum Maximum

---

|   |          |           |          |          |
|---|----------|-----------|----------|----------|
| 2 | 1.600000 | 0.1414214 | 1.500000 | 1.700000 |
|---|----------|-----------|----------|----------|

---

Laboratory tests at the time of obtaining Table 2-6 consent, according to the presence or absence of proton-pump inhibitors

Unique Subject Identifier=9101010000-0008

MEANS Procedure

Assay variable : PTINR\_VAL1 PT-INR Value

| N | Mean      | Standard Deviation | Minimum   | Maximum   |
|---|-----------|--------------------|-----------|-----------|
| 2 | 1.7000000 | 0.1414214          | 1.6000000 | 1.8000000 |

Unique Subject Identifier=9101010000-0010

Assay variable : PTINR\_VAL1 PT-INR Value

| N | Mean      | Standard Deviation | Minimum   | Maximum   |
|---|-----------|--------------------|-----------|-----------|
| 3 | 1.5666667 | 0.1154701          | 1.5000000 | 1.7000000 |

Unique Subject Identifier=9101010000-0011

Assay variable : PTINR\_VAL1 PT-INR Value

| N | Mean      | Standard Deviation | Minimum   | Maximum   |
|---|-----------|--------------------|-----------|-----------|
| 3 | 1.5333333 | 0.1154701          | 1.4000000 | 1.6000000 |

Unique Subject Identifier=9101010000-0013

Assay variable : PTINR\_VAL1 PT-INR Value

N Mean Standard Deviation Minimum Maximum

---

|   |          |           |          |          |
|---|----------|-----------|----------|----------|
| 4 | 2.125000 | 1.3400871 | 1.200000 | 4.100000 |
|---|----------|-----------|----------|----------|

---



Laboratory tests at the time of obtaining Table 2-6 consent, according to the presence or absence of proton-pump inhibitors

Unique Subject Identifier=9101010000-0018

MEANS Procedure

Assay variable : PTINR\_VAL1 PT-INR Value

N Mean Standard Deviation Minimum Maximum

---

|   |           |           |           |           |
|---|-----------|-----------|-----------|-----------|
| 3 | 2.0000000 | 0.2000000 | 1.8000000 | 2.2000000 |
|---|-----------|-----------|-----------|-----------|

---

Unique Subject Identifier=9101010000-0021

Assay variable : PTINR\_VAL1 PT-INR Value

N Mean Standard Deviation Minimum Maximum

---

|   |           |           |           |           |
|---|-----------|-----------|-----------|-----------|
| 3 | 1.3666667 | 0.1154701 | 1.3000000 | 1.5000000 |
|---|-----------|-----------|-----------|-----------|

---

Unique Subject Identifier=9101010000-0022

Assay variable : PTINR\_VAL1 PT-INR Value

N Mean Standard Deviation Minimum Maximum

---

|   |           |           |           |           |
|---|-----------|-----------|-----------|-----------|
| 3 | 2.8000000 | 1.5000000 | 1.3000000 | 4.3000000 |
|---|-----------|-----------|-----------|-----------|

---

Unique Subject Identifier=9101010000-0025

Assay variable : PTINR\_VAL1 PT-INR Value

N Mean Standard Deviation Minimum Maximum

---

|   |          |          |          |          |
|---|----------|----------|----------|----------|
| 3 | 2.133333 | 0.802086 | 1.300000 | 2.900000 |
|---|----------|----------|----------|----------|

---

Laboratory tests at the time of obtaining Table 2-6 consent, according to the presence or absence of proton-pump inhibitors

Unique Subject Identifier=9101010000-0028

MEANS Procedure

Assay variable : PTINR\_VAL1 PT-INR Value

| N | Mean      | Standard Deviation | Minimum   | Maximum   |
|---|-----------|--------------------|-----------|-----------|
| 2 | 1.3000000 | 0.1414214          | 1.2000000 | 1.4000000 |

Unique Subject Identifier=9101010000-0029

Assay variable : PTINR\_VAL1 PT-INR Value

| N | Mean      | Standard Deviation | Minimum   | Maximum   |
|---|-----------|--------------------|-----------|-----------|
| 3 | 1.6666667 | 0.1154701          | 1.6000000 | 1.8000000 |

Unique Subject Identifier=9101010000-0031

Assay variable : PTINR\_VAL1 PT-INR Value

| N | Mean      | Standard Deviation | Minimum   | Maximum   |
|---|-----------|--------------------|-----------|-----------|
| 3 | 2.0666667 | 0.1527525          | 1.9000000 | 2.2000000 |

Unique Subject Identifier=9101010000-0032

Assay variable : PTINR\_VAL1 PT-INR Value

N Mean Standard Deviation Minimum Maximum

---

|   |          |           |          |          |
|---|----------|-----------|----------|----------|
| 3 | 2.100000 | 0.2645751 | 1.800000 | 2.300000 |
|---|----------|-----------|----------|----------|

---

Laboratory tests at the time of obtaining Table 2-6 consent, according to the presence or absence of proton-pump inhibitors

Unique Subject Identifier=9101010000-0033

MEANS Procedure

Assay variable : PTINR\_VAL1 PT-INR Value

N Mean Standard Deviation Minimum Maximum

---

|   |           |           |           |           |
|---|-----------|-----------|-----------|-----------|
| 4 | 1.4250000 | 0.0957427 | 1.3000000 | 1.5000000 |
|---|-----------|-----------|-----------|-----------|

---

Unique Subject Identifier=9101010000-0037

Assay variable : PTINR\_VAL1 PT-INR Value

N Mean Standard Deviation Minimum Maximum

---

|   |           |           |           |           |
|---|-----------|-----------|-----------|-----------|
| 3 | 1.2666667 | 0.2886751 | 1.1000000 | 1.6000000 |
|---|-----------|-----------|-----------|-----------|

---

Unique Subject Identifier=9101010000-0038

Assay variable : PTINR\_VAL1 PT-INR Value

N Mean Standard Deviation Minimum Maximum

---

|   |           |           |           |           |
|---|-----------|-----------|-----------|-----------|
| 6 | 2.4000000 | 0.3687818 | 2.1000000 | 3.0000000 |
|---|-----------|-----------|-----------|-----------|

---

Unique Subject Identifier=9101010000-0039

Assay variable : PTINR\_VAL1 PT-INR Value

N Mean Standard Deviation Minimum Maximum

---

|   |           |           |           |           |
|---|-----------|-----------|-----------|-----------|
| 2 | 1.9000000 | 0.1414214 | 1.8000000 | 2.0000000 |
|---|-----------|-----------|-----------|-----------|

---

Laboratory tests at the time of obtaining Table 2-6 consent, according to the presence or absence of proton-pump inhibitors

Unique Subject Identifier=9101010000-0040

MEANS Procedure

Assay variable : PTINR\_VAL1 PT-INR Value

N Mean Standard Deviation Minimum Maximum

---

|   |           |           |           |           |
|---|-----------|-----------|-----------|-----------|
| 4 | 1.4750000 | 0.2629956 | 1.2000000 | 1.7000000 |
|---|-----------|-----------|-----------|-----------|

---

Unique Subject Identifier=9101010000-0045

Assay variable : PTINR\_VAL1 PT-INR Value

N Mean Standard Deviation Minimum Maximum

---

|   |           |           |           |           |
|---|-----------|-----------|-----------|-----------|
| 3 | 1.0666667 | 0.0577350 | 1.0000000 | 1.1000000 |
|---|-----------|-----------|-----------|-----------|

---

Unique Subject Identifier=9101010000-0048

Assay variable : PTINR\_VAL1 PT-INR Value

N Mean Standard Deviation Minimum Maximum

---

|   |           |           |           |           |
|---|-----------|-----------|-----------|-----------|
| 2 | 1.2500000 | 0.0707107 | 1.2000000 | 1.3000000 |
|---|-----------|-----------|-----------|-----------|

---

Unique Subject Identifier=9104000000-0002

Assay variable : PTINR\_VAL1 PT-INR Value

N Mean Standard Deviation Minimum Maximum

---

|   |           |           |           |           |
|---|-----------|-----------|-----------|-----------|
| 4 | 2.2725000 | 0.3339037 | 2.0700000 | 2.7700000 |
|---|-----------|-----------|-----------|-----------|

---



Laboratory tests at the time of obtaining Table 2-6 consent, according to the presence or absence of proton-pump inhibitors

Unique Subject Identifier=9105000000-0011

MEANS Procedure

Assay variable : PTINR\_VAL1 PT-INR Value

N Mean Standard Deviation Minimum Maximum

---

|   |           |           |           |           |
|---|-----------|-----------|-----------|-----------|
| 4 | 2.0950000 | 0.2757414 | 1.7000000 | 2.3300000 |
|---|-----------|-----------|-----------|-----------|

---

Unique Subject Identifier=9105000000-0016

Assay variable : PTINR\_VAL1 PT-INR Value

N Mean Standard Deviation Minimum Maximum

---

|   |           |           |           |           |
|---|-----------|-----------|-----------|-----------|
| 2 | 2.4500000 | 0.2545584 | 2.2700000 | 2.6300000 |
|---|-----------|-----------|-----------|-----------|

---

Unique Subject Identifier=9105000000-0017

Assay variable : PTINR\_VAL1 PT-INR Value

N Mean Standard Deviation Minimum Maximum

---

|   |           |           |           |           |
|---|-----------|-----------|-----------|-----------|
| 5 | 1.9320000 | 0.5714630 | 1.2000000 | 2.7800000 |
|---|-----------|-----------|-----------|-----------|

---

Unique Subject Identifier=9105000000-0023

Assay variable : PTINR\_VAL1 PT-INR Value

N Mean Standard Deviation Minimum Maximum

---

|   |           |           |           |           |
|---|-----------|-----------|-----------|-----------|
| 3 | 1.8933333 | 0.2514624 | 1.7100000 | 2.1800000 |
|---|-----------|-----------|-----------|-----------|

---

Laboratory tests at the time of obtaining Table 2-6 consent, according to the presence or absence of proton-pump inhibitors

Unique Subject Identifier=9108011111-0005

MEANS Procedure

Assay variable : PTINR\_VAL1 PT-INR Value

N Mean Standard Deviation Minimum Maximum

---

|   |           |           |           |           |
|---|-----------|-----------|-----------|-----------|
| 6 | 2.2700000 | 0.2148488 | 1.9700000 | 2.5000000 |
|---|-----------|-----------|-----------|-----------|

---

Unique Subject Identifier=9108011111-0007

Assay variable : PTINR\_VAL1 PT-INR Value

N Mean Standard Deviation Minimum Maximum

---

|   |           |           |           |           |
|---|-----------|-----------|-----------|-----------|
| 3 | 1.9500000 | 0.4334743 | 1.6800000 | 2.4500000 |
|---|-----------|-----------|-----------|-----------|

---

Unique Subject Identifier=9124000000-0001

Assay variable : PTINR\_VAL1 PT-INR Value

N Mean Standard Deviation Minimum Maximum

---

|   |           |           |           |           |
|---|-----------|-----------|-----------|-----------|
| 3 | 2.2400000 | 0.2357965 | 2.0400000 | 2.5000000 |
|---|-----------|-----------|-----------|-----------|

---

Unique Subject Identifier=9127000000-0003

Assay variable : PTINR\_VAL1 PT-INR Value

N Mean Standard Deviation Minimum Maximum

---

|   |           |  |           |           |
|---|-----------|--|-----------|-----------|
| 1 | 1.9300000 |  | 1.9300000 | 1.9300000 |
|---|-----------|--|-----------|-----------|

---

Laboratory tests at the time of obtaining Table 2-6 consent, according to the presence or absence of proton-pump inhibitors

Unique Subject Identifier=9127000000-0010

MEANS Procedure

Assay variable : PTINR\_VAL1 PT-INR Value

N Mean Standard Deviation Minimum Maximum

---

|   |           |           |           |           |
|---|-----------|-----------|-----------|-----------|
| 5 | 2.1300000 | 0.1070047 | 1.9700000 | 2.2200000 |
|---|-----------|-----------|-----------|-----------|

---

Unique Subject Identifier=9127000000-0011

Assay variable : PTINR\_VAL1 PT-INR Value

N Mean Standard Deviation Minimum Maximum

---

|   |           |           |           |           |
|---|-----------|-----------|-----------|-----------|
| 5 | 2.0780000 | 0.3126020 | 1.7800000 | 2.5200000 |
|---|-----------|-----------|-----------|-----------|

---

Unique Subject Identifier=9127000000-0012

Assay variable : PTINR\_VAL1 PT-INR Value

N Mean Standard Deviation Minimum Maximum

---

|   |           |           |           |           |
|---|-----------|-----------|-----------|-----------|
| 3 | 2.4033333 | 0.1001665 | 2.2900000 | 2.4800000 |
|---|-----------|-----------|-----------|-----------|

---

Unique Subject Identifier=9135000000-0008

Assay variable : PTINR\_VAL1 PT-INR Value

N Mean Standard Deviation Minimum Maximum

---

|   |           |  |           |           |
|---|-----------|--|-----------|-----------|
| 1 | 2.3900000 |  | 2.3900000 | 2.3900000 |
|---|-----------|--|-----------|-----------|

---

Laboratory tests at the time of obtaining Table 2-6 consent, according to the presence or absence of proton-pump inhibitors

Unique Subject Identifier=9136010000-0003

MEANS Procedure

Assay variable : PTINR\_VAL1 PT-INR Value

| N | Mean      | Standard Deviation | Minimum   | Maximum   |
|---|-----------|--------------------|-----------|-----------|
| 3 | 2.0733333 | 0.2050203          | 1.9500000 | 2.3100000 |

Unique Subject Identifier=9136010000-0005

Assay variable : PTINR\_VAL1 PT-INR Value

| N | Mean      | Standard Deviation | Minimum   | Maximum   |
|---|-----------|--------------------|-----------|-----------|
| 4 | 1.8575000 | 0.3407223          | 1.5800000 | 2.3100000 |

Unique Subject Identifier=9136010000-0006

Assay variable : PTINR\_VAL1 PT-INR Value

| N | Mean      | Standard Deviation | Minimum   | Maximum   |
|---|-----------|--------------------|-----------|-----------|
| 3 | 2.1933333 | 0.3382800          | 1.8100000 | 2.4500000 |

Unique Subject Identifier=9136010000-0008

Assay variable : PTINR\_VAL1 PT-INR Value

N Mean Standard Deviation Minimum Maximum

---

|   |           |           |           |           |
|---|-----------|-----------|-----------|-----------|
| 3 | 1.4733333 | 0.2055075 | 1.3400000 | 1.7100000 |
|---|-----------|-----------|-----------|-----------|

---



Laboratory tests at the time of obtaining Table 2-6 consent, according to the presence or absence of proton-pump inhibitors

Unique Subject Identifier=9136010000-0009

MEANS Procedure

Assay variable : PTINR\_VAL1 PT-INR Value

N Mean Standard Deviation Minimum Maximum

---

|   |           |           |           |           |
|---|-----------|-----------|-----------|-----------|
| 3 | 2.0366667 | 0.3555747 | 1.6700000 | 2.3800000 |
|---|-----------|-----------|-----------|-----------|

---

Unique Subject Identifier=9136010000-0010

Assay variable : PTINR\_VAL1 PT-INR Value

N Mean Standard Deviation Minimum Maximum

---

|   |           |           |           |           |
|---|-----------|-----------|-----------|-----------|
| 3 | 1.8500000 | 0.2858321 | 1.5300000 | 2.0800000 |
|---|-----------|-----------|-----------|-----------|

---

Unique Subject Identifier=9136010000-0012

Assay variable : PTINR\_VAL1 PT-INR Value

N Mean Standard Deviation Minimum Maximum

---

|   |           |           |           |           |
|---|-----------|-----------|-----------|-----------|
| 4 | 2.1550000 | 0.1791647 | 1.9600000 | 2.3600000 |
|---|-----------|-----------|-----------|-----------|

---

Unique Subject Identifier=9136010000-0014

Assay variable : PTINR\_VAL1 PT-INR Value

N Mean Standard Deviation Minimum Maximum

---

|   |           |           |           |           |
|---|-----------|-----------|-----------|-----------|
| 5 | 1.7640000 | 0.1040673 | 1.6700000 | 1.9200000 |
|---|-----------|-----------|-----------|-----------|

---

Laboratory tests at the time of obtaining Table 2-6 consent, according to the presence or absence of proton-pump inhibitors

Unique Subject Identifier=9136010000-0015

MEANS Procedure

Assay variable : PTINR\_VAL1 PT-INR Value

N Mean Standard Deviation Minimum Maximum

---

|   |           |           |           |           |
|---|-----------|-----------|-----------|-----------|
| 3 | 2.5133333 | 0.4801389 | 2.1000000 | 3.0400000 |
|---|-----------|-----------|-----------|-----------|

---

Unique Subject Identifier=9136010000-0018

Assay variable : PTINR\_VAL1 PT-INR Value

N Mean Standard Deviation Minimum Maximum

---

|   |           |           |           |           |
|---|-----------|-----------|-----------|-----------|
| 3 | 2.4366667 | 0.4005413 | 2.0800000 | 2.8700000 |
|---|-----------|-----------|-----------|-----------|

---

Unique Subject Identifier=9136010000-0019

Assay variable : PTINR\_VAL1 PT-INR Value

N Mean Standard Deviation Minimum Maximum

---

|   |           |           |           |           |
|---|-----------|-----------|-----------|-----------|
| 3 | 1.8533333 | 0.1662328 | 1.7000000 | 2.0300000 |
|---|-----------|-----------|-----------|-----------|

---

Unique Subject Identifier=9136010000-0025

Assay variable : PTINR\_VAL1 PT-INR Value

N Mean Standard Deviation Minimum Maximum

---

|   |           |           |           |           |
|---|-----------|-----------|-----------|-----------|
| 3 | 2.5166667 | 0.1913984 | 2.3600000 | 2.7300000 |
|---|-----------|-----------|-----------|-----------|

---

Laboratory tests at the time of obtaining Table 2-6 consent, according to the presence or absence of proton-pump inhibitors

Unique Subject Identifier=9136010000-0035

MEANS Procedure

Assay variable : PTINR\_VAL1 PT-INR Value

| N | Mean      | Standard Deviation | Minimum   | Maximum   |
|---|-----------|--------------------|-----------|-----------|
| 3 | 1.7700000 | 0.2264950          | 1.5600000 | 2.0100000 |

Unique Subject Identifier=9136010000-0036

Assay variable : PTINR\_VAL1 PT-INR Value

| N | Mean      | Standard Deviation | Minimum   | Maximum   |
|---|-----------|--------------------|-----------|-----------|
| 4 | 2.2800000 | 0.2290560          | 2.0400000 | 2.5900000 |

Unique Subject Identifier=9136010000-0040

Assay variable : PTINR\_VAL1 PT-INR Value

| N | Mean      | Standard Deviation | Minimum   | Maximum   |
|---|-----------|--------------------|-----------|-----------|
| 3 | 1.4800000 | 0.3364521          | 1.2200000 | 1.8600000 |

Unique Subject Identifier=9137010000-0001

Assay variable : PTINR\_VAL1 PT-INR Value

N Mean Standard Deviation Minimum Maximum

---

|   |           |           |           |           |
|---|-----------|-----------|-----------|-----------|
| 4 | 1.8950000 | 0.5202884 | 1.1200000 | 2.2300000 |
|---|-----------|-----------|-----------|-----------|

---

Laboratory tests at the time of obtaining Table 2-6 consent, according to the presence or absence of proton-pump inhibitors

Unique Subject Identifier=9141000000-0001

MEANS Procedure

Assay variable : PTINR\_VAL1 PT-INR Value

N Mean Standard Deviation Minimum Maximum

---

|   |           |           |           |           |
|---|-----------|-----------|-----------|-----------|
| 4 | 2.0550000 | 0.1330413 | 1.8600000 | 2.1600000 |
|---|-----------|-----------|-----------|-----------|

---

Unique Subject Identifier=9141000000-0002

Assay variable : PTINR\_VAL1 PT-INR Value

N Mean Standard Deviation Minimum Maximum

---

|   |           |           |           |           |
|---|-----------|-----------|-----------|-----------|
| 5 | 1.9540000 | 0.2758260 | 1.5100000 | 2.1600000 |
|---|-----------|-----------|-----------|-----------|

---

Unique Subject Identifier=9141000000-0003

Assay variable : PTINR\_VAL1 PT-INR Value

N Mean Standard Deviation Minimum Maximum

---

|   |           |           |           |           |
|---|-----------|-----------|-----------|-----------|
| 5 | 2.1600000 | 0.3426368 | 1.5700000 | 2.4600000 |
|---|-----------|-----------|-----------|-----------|

---

Unique Subject Identifier=9141000000-0004

Assay variable : PTINR\_VAL1 PT-INR Value

N Mean Standard Deviation Minimum Maximum

---

|   |           |           |           |           |
|---|-----------|-----------|-----------|-----------|
| 3 | 1.9000000 | 0.1833030 | 1.7000000 | 2.0600000 |
|---|-----------|-----------|-----------|-----------|

---



Laboratory tests at the time of obtaining Table 2-6 consent, according to the presence or absence of proton-pump inhibitors

Unique Subject Identifier=9141000000-0005

MEANS Procedure

Assay variable : PTINR\_VAL1 PT-INR Value

N Mean Standard Deviation Minimum Maximum

---

|   |           |           |           |           |
|---|-----------|-----------|-----------|-----------|
| 5 | 2.0400000 | 0.2370654 | 1.7200000 | 2.3800000 |
|---|-----------|-----------|-----------|-----------|

---

Unique Subject Identifier=9141000000-0006

Assay variable : PTINR\_VAL1 PT-INR Value

N Mean Standard Deviation Minimum Maximum

---

|   |           |           |           |           |
|---|-----------|-----------|-----------|-----------|
| 4 | 1.6450000 | 0.1408309 | 1.4600000 | 1.8000000 |
|---|-----------|-----------|-----------|-----------|

---

Unique Subject Identifier=9141000000-0007

Assay variable : PTINR\_VAL1 PT-INR Value

N Mean Standard Deviation Minimum Maximum

---

|   |           |           |           |           |
|---|-----------|-----------|-----------|-----------|
| 6 | 1.9016667 | 0.2760012 | 1.5000000 | 2.1600000 |
|---|-----------|-----------|-----------|-----------|

---

Unique Subject Identifier=9142010000-0005

Assay variable : PTINR\_VAL1 PT-INR Value

N Mean Standard Deviation Minimum Maximum

---

|   |           |           |           |           |
|---|-----------|-----------|-----------|-----------|
| 3 | 1.7000000 | 0.2879236 | 1.5000000 | 2.0300000 |
|---|-----------|-----------|-----------|-----------|

---

Laboratory tests at the time of obtaining Table 2-6 consent, according to the presence or absence of proton-pump inhibitors

Unique Subject Identifier=9142010000-0009

MEANS Procedure

Assay variable : PTINR\_VAL1 PT-INR Value

N Mean Standard Deviation Minimum Maximum

---

|   |           |           |           |           |
|---|-----------|-----------|-----------|-----------|
| 3 | 1.3900000 | 0.0818535 | 1.3200000 | 1.4800000 |
|---|-----------|-----------|-----------|-----------|

---

Unique Subject Identifier=9142010000-0013

Assay variable : PTINR\_VAL1 PT-INR Value

N Mean Standard Deviation Minimum Maximum

---

|   |           |           |           |           |
|---|-----------|-----------|-----------|-----------|
| 2 | 1.7500000 | 0.3252691 | 1.5200000 | 1.9800000 |
|---|-----------|-----------|-----------|-----------|

---

Unique Subject Identifier=9142010000-0014

Assay variable : PTINR\_VAL1 PT-INR Value

N Mean Standard Deviation Minimum Maximum

---

|   |           |  |           |           |
|---|-----------|--|-----------|-----------|
| 1 | 1.6200000 |  | 1.6200000 | 1.6200000 |
|---|-----------|--|-----------|-----------|

---

Unique Subject Identifier=9142010000-0017

Assay variable : PTINR\_VAL1 PT-INR Value

N Mean Standard Deviation Minimum Maximum

---

|   |           |  |           |           |
|---|-----------|--|-----------|-----------|
| 1 | 2.0800000 |  | 2.0800000 | 2.0800000 |
|---|-----------|--|-----------|-----------|

---

Laboratory tests at the time of obtaining Table 2-6 consent, according to the presence or absence of proton-pump inhibitors

Unique Subject Identifier=9142010000-0026

MEANS Procedure

Assay variable : PTINR\_VAL1 PT-INR Value

N Mean Standard Deviation Minimum Maximum

---

|   |           |           |           |           |
|---|-----------|-----------|-----------|-----------|
| 3 | 2.2733333 | 0.0351188 | 2.2400000 | 2.3100000 |
|---|-----------|-----------|-----------|-----------|

---

Unique Subject Identifier=9142010000-0027

Assay variable : PTINR\_VAL1 PT-INR Value

N Mean Standard Deviation Minimum Maximum

---

|   |           |           |           |           |
|---|-----------|-----------|-----------|-----------|
| 2 | 2.4250000 | 0.4313351 | 2.1200000 | 2.7300000 |
|---|-----------|-----------|-----------|-----------|

---

Unique Subject Identifier=9142010000-0029

Assay variable : PTINR\_VAL1 PT-INR Value

N Mean Standard Deviation Minimum Maximum

---

|   |           |           |           |           |
|---|-----------|-----------|-----------|-----------|
| 3 | 1.8100000 | 0.0556776 | 1.7600000 | 1.8700000 |
|---|-----------|-----------|-----------|-----------|

---

Unique Subject Identifier=9142010000-0034

Assay variable : PTINR\_VAL1 PT-INR Value

N Mean Standard Deviation Minimum Maximum

---

|   |           |  |           |           |
|---|-----------|--|-----------|-----------|
| 1 | 1.3500000 |  | 1.3500000 | 1.3500000 |
|---|-----------|--|-----------|-----------|

---

Laboratory tests at the time of obtaining Table 2-6 consent, according to the presence or absence of proton-pump inhibitors

Unique Subject Identifier=9142010000-0036

MEANS Procedure

Assay variable : PTINR\_VAL1 PT-INR Value

| N | Mean      | Standard Deviation | Minimum   | Maximum   |
|---|-----------|--------------------|-----------|-----------|
| 3 | 1.5100000 | 0.1646208          | 1.3200000 | 1.6100000 |

Unique Subject Identifier=9142010000-0037

Assay variable : PTINR\_VAL1 PT-INR Value

| N | Mean      | Standard Deviation | Minimum   | Maximum   |
|---|-----------|--------------------|-----------|-----------|
| 3 | 2.0333333 | 0.4867580          | 1.6000000 | 2.5600000 |

Unique Subject Identifier=9148000000-0006

Assay variable : PTINR\_VAL1 PT-INR Value

| N | Mean      | Standard Deviation | Minimum   | Maximum   |
|---|-----------|--------------------|-----------|-----------|
| 6 | 2.4450000 | 0.6390853          | 1.5200000 | 3.4200000 |

Unique Subject Identifier=9148000000-0007

Assay variable : PTINR\_VAL1 PT-INR Value

N Mean Standard Deviation Minimum Maximum

---

|   |          |           |          |          |
|---|----------|-----------|----------|----------|
| 5 | 1.910000 | 0.3306055 | 1.440000 | 2.300000 |
|---|----------|-----------|----------|----------|

---



Laboratory tests at the time of obtaining Table 2-6 consent, according to the presence or absence of proton-pump inhibitors

Unique Subject Identifier=914800000-0010

MEANS Procedure

Assay variable : PTINR\_VAL1 PT-INR Value

N Mean Standard Deviation Minimum Maximum

---

|   |           |           |           |           |
|---|-----------|-----------|-----------|-----------|
| 2 | 2.1450000 | 0.3323402 | 1.9100000 | 2.3800000 |
|---|-----------|-----------|-----------|-----------|

---

Unique Subject Identifier=914800000-0013

Assay variable : PTINR\_VAL1 PT-INR Value

N Mean Standard Deviation Minimum Maximum

---

|   |           |           |           |           |
|---|-----------|-----------|-----------|-----------|
| 4 | 1.6500000 | 0.0860233 | 1.5500000 | 1.7600000 |
|---|-----------|-----------|-----------|-----------|

---

Unique Subject Identifier=9154010000-0001

Assay variable : PTINR\_VAL1 PT-INR Value

N Mean Standard Deviation Minimum Maximum

---

|   |           |           |           |           |
|---|-----------|-----------|-----------|-----------|
| 4 | 1.7475000 | 0.1175798 | 1.5800000 | 1.8500000 |
|---|-----------|-----------|-----------|-----------|

---

Unique Subject Identifier=9154010000-0005

Assay variable : PTINR\_VAL1 PT-INR Value

N Mean Standard Deviation Minimum Maximum

---

|   |          |           |          |          |
|---|----------|-----------|----------|----------|
| 4 | 2.400000 | 0.1449138 | 2.230000 | 2.560000 |
|---|----------|-----------|----------|----------|

---

Laboratory tests at the time of obtaining Table 2-6 consent, according to the presence or absence of proton-pump inhibitors

Unique Subject Identifier=9154010000-0009

MEANS Procedure

Assay variable : PTINR\_VAL1 PT-INR Value

| N | Mean      | Standard Deviation | Minimum   | Maximum   |
|---|-----------|--------------------|-----------|-----------|
| 5 | 1.9180000 | 0.6155648          | 1.4200000 | 2.9800000 |

Unique Subject Identifier=9154010000-0011

Assay variable : PTINR\_VAL1 PT-INR Value

| N | Mean      | Standard Deviation | Minimum   | Maximum   |
|---|-----------|--------------------|-----------|-----------|
| 4 | 2.0875000 | 0.3872445          | 1.5300000 | 2.3600000 |

Unique Subject Identifier=9154010000-0012

Assay variable : PTINR\_VAL1 PT-INR Value

| N | Mean      | Standard Deviation | Minimum   | Maximum   |
|---|-----------|--------------------|-----------|-----------|
| 4 | 2.4750000 | 0.9984488          | 1.6500000 | 3.7900000 |

Unique Subject Identifier=9154010000-0014

Assay variable : PTINR\_VAL1 PT-INR Value

N Mean Standard Deviation Minimum Maximum

---

|   |           |           |           |           |
|---|-----------|-----------|-----------|-----------|
| 4 | 2.0575000 | 0.1883923 | 1.8400000 | 2.3000000 |
|---|-----------|-----------|-----------|-----------|

---

Laboratory tests at the time of obtaining Table 2-6 consent, according to the presence or absence of proton-pump inhibitors

Unique Subject Identifier=9154010000-0015

MEANS Procedure

Assay variable : PTINR\_VAL1 PT-INR Value

N Mean Standard Deviation Minimum Maximum

---

|   |           |           |           |           |
|---|-----------|-----------|-----------|-----------|
| 4 | 2.3175000 | 0.1291962 | 2.1800000 | 2.4900000 |
|---|-----------|-----------|-----------|-----------|

---

Unique Subject Identifier=9154010000-0019

Assay variable : PTINR\_VAL1 PT-INR Value

N Mean Standard Deviation Minimum Maximum

---

|   |           |           |           |           |
|---|-----------|-----------|-----------|-----------|
| 6 | 1.9866667 | 0.4823553 | 1.2700000 | 2.6300000 |
|---|-----------|-----------|-----------|-----------|

---

Unique Subject Identifier=9154010000-0027

Assay variable : PTINR\_VAL1 PT-INR Value

N Mean Standard Deviation Minimum Maximum

---

|   |           |           |           |           |
|---|-----------|-----------|-----------|-----------|
| 4 | 2.6075000 | 0.2267708 | 2.3500000 | 2.8600000 |
|---|-----------|-----------|-----------|-----------|

---

Unique Subject Identifier=9154010000-0028

Assay variable : PTINR\_VAL1 PT-INR Value

N Mean Standard Deviation Minimum Maximum

---

|   |           |           |           |           |
|---|-----------|-----------|-----------|-----------|
| 6 | 1.2216667 | 0.0861201 | 1.1400000 | 1.3900000 |
|---|-----------|-----------|-----------|-----------|

---

Laboratory tests at the time of obtaining Table 2-6 consent, according to the presence or absence of proton-pump inhibitors

Unique Subject Identifier=9154010000-0029

MEANS Procedure

Assay variable : PTINR\_VAL1 PT-INR Value

N Mean Standard Deviation Minimum Maximum

---

|   |           |           |           |           |
|---|-----------|-----------|-----------|-----------|
| 5 | 1.5140000 | 0.3269251 | 1.1900000 | 2.0000000 |
|---|-----------|-----------|-----------|-----------|

---

Unique Subject Identifier=9154010000-0030

Assay variable : PTINR\_VAL1 PT-INR Value

N Mean Standard Deviation Minimum Maximum

---

|   |           |           |           |           |
|---|-----------|-----------|-----------|-----------|
| 4 | 2.2300000 | 0.0559762 | 2.1500000 | 2.2800000 |
|---|-----------|-----------|-----------|-----------|

---

Unique Subject Identifier=9164000000-0002

Assay variable : PTINR\_VAL1 PT-INR Value

N Mean Standard Deviation Minimum Maximum

---

|   |           |           |           |           |
|---|-----------|-----------|-----------|-----------|
| 6 | 2.3750000 | 0.1931580 | 2.0500000 | 2.6100000 |
|---|-----------|-----------|-----------|-----------|

---

Unique Subject Identifier=9164000000-0003

Assay variable : PTINR\_VAL1 PT-INR Value

N Mean Standard Deviation Minimum Maximum

---

|   |          |           |          |          |
|---|----------|-----------|----------|----------|
| 6 | 2.113333 | 0.5858214 | 1.270000 | 2.740000 |
|---|----------|-----------|----------|----------|

---



Laboratory tests at the time of obtaining Table 2-6 consent, according to the presence or absence of proton-pump inhibitors

Unique Subject Identifier=916400000-0005

MEANS Procedure

Assay variable : PTINR\_VAL1 PT-INR Value

N Mean Standard Deviation Minimum Maximum

---

|   |           |           |           |           |
|---|-----------|-----------|-----------|-----------|
| 6 | 1.9916667 | 0.2276327 | 1.6500000 | 2.3600000 |
|---|-----------|-----------|-----------|-----------|

---

Unique Subject Identifier=916400000-0006

Assay variable : PTINR\_VAL1 PT-INR Value

N Mean Standard Deviation Minimum Maximum

---

|   |           |           |           |           |
|---|-----------|-----------|-----------|-----------|
| 3 | 2.4333333 | 0.6278800 | 1.9800000 | 3.1500000 |
|---|-----------|-----------|-----------|-----------|

---

Unique Subject Identifier=916400000-0012

Assay variable : PTINR\_VAL1 PT-INR Value

N Mean Standard Deviation Minimum Maximum

---

|   |           |           |           |           |
|---|-----------|-----------|-----------|-----------|
| 3 | 2.0300000 | 0.1212436 | 1.9000000 | 2.1400000 |
|---|-----------|-----------|-----------|-----------|

---

Unique Subject Identifier=916400000-0013

Assay variable : PTINR\_VAL1 PT-INR Value

N Mean Standard Deviation Minimum Maximum

---

|   |           |  |           |           |
|---|-----------|--|-----------|-----------|
| 1 | 1.8300000 |  | 1.8300000 | 1.8300000 |
|---|-----------|--|-----------|-----------|

---

Laboratory tests at the time of obtaining Table 2-6 consent, according to the presence or absence of proton-pump inhibitors

Unique Subject Identifier=916600000-0005

MEANS Procedure

Assay variable : PTINR\_VAL1 PT-INR Value

| N | Mean      | Standard Deviation | Minimum   | Maximum   |
|---|-----------|--------------------|-----------|-----------|
| 3 | 1.7233333 | 0.1890326          | 1.5100000 | 1.8700000 |

Unique Subject Identifier=916600000-0008

Assay variable : PTINR\_VAL1 PT-INR Value

| N | Mean      | Standard Deviation | Minimum   | Maximum   |
|---|-----------|--------------------|-----------|-----------|
| 3 | 1.8900000 | 0.4396590          | 1.5300000 | 2.3800000 |

Unique Subject Identifier=916600000-0009

Assay variable : PTINR\_VAL1 PT-INR Value

| N | Mean      | Standard Deviation | Minimum   | Maximum   |
|---|-----------|--------------------|-----------|-----------|
| 5 | 2.1800000 | 0.1788854          | 2.0000000 | 2.4100000 |

Unique Subject Identifier=9210000100-0007

Assay variable : PTINR\_VAL1 PT-INR Value

N Mean Standard Deviation Minimum Maximum

---

|   |           |           |           |           |
|---|-----------|-----------|-----------|-----------|
| 5 | 2.2660000 | 0.4350057 | 1.7700000 | 2.7200000 |
|---|-----------|-----------|-----------|-----------|

---

Laboratory tests at the time of obtaining Table 2-6 consent, according to the presence or absence of proton-pump inhibitors

Unique Subject Identifier=9210000100-0017

MEANS Procedure

Assay variable : PTINR\_VAL1 PT-INR Value

| N | Mean      | Standard Deviation | Minimum   | Maximum   |
|---|-----------|--------------------|-----------|-----------|
| 4 | 2.0425000 | 0.5600818          | 1.3900000 | 2.7300000 |

Unique Subject Identifier=9210000100-0027

Assay variable : PTINR\_VAL1 PT-INR Value

| N | Mean      | Standard Deviation | Minimum   | Maximum   |
|---|-----------|--------------------|-----------|-----------|
| 5 | 1.7020000 | 0.1355360          | 1.6100000 | 1.9400000 |

Unique Subject Identifier=9210000100-0030

Assay variable : PTINR\_VAL1 PT-INR Value

| N | Mean      | Standard Deviation | Minimum   | Maximum   |
|---|-----------|--------------------|-----------|-----------|
| 6 | 1.5966667 | 0.2411362          | 1.3400000 | 1.9800000 |

Unique Subject Identifier=9214000000-0002

Assay variable : PTINR\_VAL1 PT-INR Value

N Mean Standard Deviation Minimum Maximum

---

|   |           |  |           |           |
|---|-----------|--|-----------|-----------|
| 1 | 1.7300000 |  | 1.7300000 | 1.7300000 |
|---|-----------|--|-----------|-----------|

---

Laboratory tests at the time of obtaining Table 2-6 consent, according to the presence or absence of proton-pump inhibitors

Unique Subject Identifier=9214000000-0022

MEANS Procedure

Assay variable : PTINR\_VAL1 PT-INR Value

N Mean Standard Deviation Minimum Maximum

---

|   |           |           |           |           |
|---|-----------|-----------|-----------|-----------|
| 4 | 1.5850000 | 0.3219213 | 1.2000000 | 1.9700000 |
|---|-----------|-----------|-----------|-----------|

---

Unique Subject Identifier=9235000000-0002

Assay variable : PTINR\_VAL1 PT-INR Value

N Mean Standard Deviation Minimum Maximum

---

|   |           |           |           |           |
|---|-----------|-----------|-----------|-----------|
| 3 | 1.7000000 | 0.1000000 | 1.6000000 | 1.8000000 |
|---|-----------|-----------|-----------|-----------|

---

Unique Subject Identifier=9235000000-0008

Assay variable : PTINR\_VAL1 PT-INR Value

N Mean Standard Deviation Minimum Maximum

---

|   |           |           |           |           |
|---|-----------|-----------|-----------|-----------|
| 2 | 1.7250000 | 0.3889087 | 1.4500000 | 2.0000000 |
|---|-----------|-----------|-----------|-----------|

---

Unique Subject Identifier=9235000000-0009

Assay variable : PTINR\_VAL1 PT-INR Value

N Mean Standard Deviation Minimum Maximum

---

|   |          |          |          |          |
|---|----------|----------|----------|----------|
| 3 | 1.500000 | 0.100000 | 1.400000 | 1.600000 |
|---|----------|----------|----------|----------|

---



Laboratory tests at the time of obtaining Table 2-6 consent, according to the presence or absence of proton-pump inhibitors

Unique Subject Identifier=923500000-0012

MEANS Procedure

Assay variable : PTINR\_VAL1 PT-INR Value

N Mean Standard Deviation Minimum Maximum

---

|   |           |           |           |           |
|---|-----------|-----------|-----------|-----------|
| 3 | 1.9000000 | 0.2000000 | 1.7000000 | 2.1000000 |
|---|-----------|-----------|-----------|-----------|

---

Unique Subject Identifier=923500000-0019

Assay variable : PTINR\_VAL1 PT-INR Value

N Mean Standard Deviation Minimum Maximum

---

|   |           |           |           |           |
|---|-----------|-----------|-----------|-----------|
| 2 | 2.1500000 | 0.0707107 | 2.1000000 | 2.2000000 |
|---|-----------|-----------|-----------|-----------|

---

Unique Subject Identifier=924100000-0003

Assay variable : PTINR\_VAL1 PT-INR Value

N Mean Standard Deviation Minimum Maximum

---

|   |           |           |           |           |
|---|-----------|-----------|-----------|-----------|
| 3 | 2.2033333 | 0.3728717 | 1.8600000 | 2.6000000 |
|---|-----------|-----------|-----------|-----------|

---

Unique Subject Identifier=924100000-0005

Assay variable : PTINR\_VAL1 PT-INR Value

N Mean Standard Deviation Minimum Maximum

---

|   |           |           |           |           |
|---|-----------|-----------|-----------|-----------|
| 3 | 1.5566667 | 0.0709460 | 1.4800000 | 1.6200000 |
|---|-----------|-----------|-----------|-----------|

---

Laboratory tests at the time of obtaining Table 2-6 consent, according to the presence or absence of proton-pump inhibitors

Unique Subject Identifier=9241000000-0007

MEANS Procedure

Assay variable : PTINR\_VAL1 PT-INR Value

N Mean Standard Deviation Minimum Maximum

---

|   |          |           |          |          |
|---|----------|-----------|----------|----------|
| 3 | 2.100000 | 0.1587451 | 1.920000 | 2.220000 |
|---|----------|-----------|----------|----------|

---

Unique Subject Identifier=9241000000-0011

Assay variable : PTINR\_VAL1 PT-INR Value

N Mean Standard Deviation Minimum Maximum

---

|   |          |           |          |          |
|---|----------|-----------|----------|----------|
| 3 | 1.453333 | 0.2223361 | 1.320000 | 1.710000 |
|---|----------|-----------|----------|----------|

---

Unique Subject Identifier=9241000000-0012

Assay variable : PTINR\_VAL1 PT-INR Value

N Mean Standard Deviation Minimum Maximum

---

|   |          |           |          |          |
|---|----------|-----------|----------|----------|
| 3 | 1.813333 | 0.2557994 | 1.520000 | 1.990000 |
|---|----------|-----------|----------|----------|

---

Unique Subject Identifier=9241000000-0015

Assay variable : PTINR\_VAL1 PT-INR Value

N Mean Standard Deviation Minimum Maximum

---

|   |           |           |           |           |
|---|-----------|-----------|-----------|-----------|
| 3 | 2.1733333 | 0.3837100 | 1.8900000 | 2.6100000 |
|---|-----------|-----------|-----------|-----------|

---

Laboratory tests at the time of obtaining Table 2-6 consent, according to the presence or absence of proton-pump inhibitors

Unique Subject Identifier=9241000000-0017

MEANS Procedure

Assay variable : PTINR\_VAL1 PT-INR Value

N Mean Standard Deviation Minimum Maximum

---

|   |           |           |           |           |
|---|-----------|-----------|-----------|-----------|
| 3 | 1.1666667 | 0.2478575 | 0.9900000 | 1.4500000 |
|---|-----------|-----------|-----------|-----------|

---

Unique Subject Identifier=9242011011-0003

Assay variable : PTINR\_VAL1 PT-INR Value

N Mean Standard Deviation Minimum Maximum

---

|   |           |           |           |           |
|---|-----------|-----------|-----------|-----------|
| 6 | 1.1233333 | 0.0571548 | 1.0500000 | 1.2000000 |
|---|-----------|-----------|-----------|-----------|

---

Unique Subject Identifier=9257010000-0001

Assay variable : PTINR\_VAL1 PT-INR Value

N Mean Standard Deviation Minimum Maximum

---

|   |           |           |           |           |
|---|-----------|-----------|-----------|-----------|
| 3 | 1.3333333 | 0.0305505 | 1.3000000 | 1.3600000 |
|---|-----------|-----------|-----------|-----------|

---

Unique Subject Identifier=9257010000-0002

Assay variable : PTINR\_VAL1 PT-INR Value

N Mean Standard Deviation Minimum Maximum

---

|   |           |           |           |           |
|---|-----------|-----------|-----------|-----------|
| 3 | 1.1666667 | 0.1050397 | 1.0600000 | 1.2700000 |
|---|-----------|-----------|-----------|-----------|

---

Laboratory tests at the time of obtaining Table 2-6 consent, according to the presence or absence of proton-pump inhibitors

Unique Subject Identifier=9257010000-0003

MEANS Procedure

Assay variable : PTINR\_VAL1 PT-INR Value

| N | Mean     | Standard Deviation | Minimum  | Maximum  |
|---|----------|--------------------|----------|----------|
| 5 | 1.960000 | 0.7876865          | 1.070000 | 3.060000 |

Unique Subject Identifier=9257010000-0004

Assay variable : PTINR\_VAL1 PT-INR Value

| N | Mean     | Standard Deviation | Minimum  | Maximum  |
|---|----------|--------------------|----------|----------|
| 3 | 1.986667 | 0.1096966          | 1.860000 | 2.050000 |

Unique Subject Identifier=9257010000-0005

Assay variable : PTINR\_VAL1 PT-INR Value

| N | Mean     | Standard Deviation | Minimum  | Maximum  |
|---|----------|--------------------|----------|----------|
| 5 | 1.514000 | 0.0971082          | 1.400000 | 1.630000 |

Unique Subject Identifier=9257010000-0006

Assay variable : PTINR\_VAL1 PT-INR Value

N Mean Standard Deviation Minimum Maximum

---

|   |           |           |           |           |
|---|-----------|-----------|-----------|-----------|
| 3 | 1.5133333 | 0.2610236 | 1.2200000 | 1.7200000 |
|---|-----------|-----------|-----------|-----------|

---



Laboratory tests at the time of obtaining Table 2-6 consent, according to the presence or absence of proton-pump inhibitors

Unique Subject Identifier=9257010000-0007

MEANS Procedure

Assay variable : PTINR\_VAL1 PT-INR Value

N Mean Standard Deviation Minimum Maximum

---

|   |           |           |           |           |
|---|-----------|-----------|-----------|-----------|
| 4 | 1.4750000 | 0.1464013 | 1.2700000 | 1.5900000 |
|---|-----------|-----------|-----------|-----------|

---

Unique Subject Identifier=9257010000-0008

Assay variable : PTINR\_VAL1 PT-INR Value

N Mean Standard Deviation Minimum Maximum

---

|   |           |           |           |           |
|---|-----------|-----------|-----------|-----------|
| 4 | 1.4725000 | 0.1961929 | 1.2300000 | 1.6600000 |
|---|-----------|-----------|-----------|-----------|

---

Unique Subject Identifier=9257010000-0009

Assay variable : PTINR\_VAL1 PT-INR Value

N Mean Standard Deviation Minimum Maximum

---

|   |           |           |           |           |
|---|-----------|-----------|-----------|-----------|
| 6 | 2.0683333 | 1.0299013 | 1.4400000 | 4.1400000 |
|---|-----------|-----------|-----------|-----------|

---

Unique Subject Identifier=9257010000-0010

Assay variable : PTINR\_VAL1 PT-INR Value

N Mean Standard Deviation Minimum Maximum

---

|   |           |           |           |           |
|---|-----------|-----------|-----------|-----------|
| 2 | 2.2350000 | 0.3889087 | 1.9600000 | 2.5100000 |
|---|-----------|-----------|-----------|-----------|

---

Laboratory tests at the time of obtaining Table 2-6 consent, according to the presence or absence of proton-pump inhibitors

Unique Subject Identifier=9257010000-0012

MEANS Procedure

Assay variable : PTINR\_VAL1 PT-INR Value

N Mean Standard Deviation Minimum Maximum

---

|   |          |           |          |          |
|---|----------|-----------|----------|----------|
| 3 | 1.400000 | 0.0435890 | 1.370000 | 1.450000 |
|---|----------|-----------|----------|----------|

---

Unique Subject Identifier=9257010000-0013

Assay variable : PTINR\_VAL1 PT-INR Value

N Mean Standard Deviation Minimum Maximum

---

|   |           |           |          |          |
|---|-----------|-----------|----------|----------|
| 3 | 1.5366667 | 0.1703917 | 1.340000 | 1.640000 |
|---|-----------|-----------|----------|----------|

---

Unique Subject Identifier=9257010000-0014

Assay variable : PTINR\_VAL1 PT-INR Value

N Mean Standard Deviation Minimum Maximum

---

|   |          |          |          |          |
|---|----------|----------|----------|----------|
| 3 | 1.210000 | 0.100000 | 1.110000 | 1.310000 |
|---|----------|----------|----------|----------|

---

Unique Subject Identifier=9257010000-0019

Assay variable : PTINR\_VAL1 PT-INR Value

N Mean Standard Deviation Minimum Maximum

---

|   |           |           |           |           |
|---|-----------|-----------|-----------|-----------|
| 5 | 1.4320000 | 0.2583989 | 1.1800000 | 1.8200000 |
|---|-----------|-----------|-----------|-----------|

---

Laboratory tests at the time of obtaining Table 2-6 consent, according to the presence or absence of proton-pump inhibitors

Unique Subject Identifier=9257010000-0020

MEANS Procedure

Assay variable : PTINR\_VAL1 PT-INR Value

N Mean Standard Deviation Minimum Maximum

---

|   |           |           |           |           |
|---|-----------|-----------|-----------|-----------|
| 3 | 1.2266667 | 0.0057735 | 1.2200000 | 1.2300000 |
|---|-----------|-----------|-----------|-----------|

---

Unique Subject Identifier=9257010000-0021

Assay variable : PTINR\_VAL1 PT-INR Value

N Mean Standard Deviation Minimum Maximum

---

|   |           |           |           |           |
|---|-----------|-----------|-----------|-----------|
| 4 | 1.5275000 | 0.1359841 | 1.4000000 | 1.7000000 |
|---|-----------|-----------|-----------|-----------|

---

Unique Subject Identifier=9257010000-0023

Assay variable : PTINR\_VAL1 PT-INR Value

N Mean Standard Deviation Minimum Maximum

---

|   |           |           |           |           |
|---|-----------|-----------|-----------|-----------|
| 3 | 2.3233333 | 0.6915442 | 1.6600000 | 3.0400000 |
|---|-----------|-----------|-----------|-----------|

---

Unique Subject Identifier=9257010000-0025

Assay variable : PTINR\_VAL1 PT-INR Value

N Mean Standard Deviation Minimum Maximum

---

|   |           |           |           |           |
|---|-----------|-----------|-----------|-----------|
| 6 | 1.4900000 | 0.5108424 | 0.9700000 | 2.3000000 |
|---|-----------|-----------|-----------|-----------|

---

Laboratory tests at the time of obtaining Table 2-6 consent, according to the presence or absence of proton-pump inhibitors

Unique Subject Identifier=9326000000-0004

MEANS Procedure

Assay variable : PTINR\_VAL1 PT-INR Value

| N | Mean      | Standard Deviation | Minimum   | Maximum   |
|---|-----------|--------------------|-----------|-----------|
| 6 | 1.9966667 | 0.1367723          | 1.8500000 | 2.1600000 |

Unique Subject Identifier=9342010000-0002

Assay variable : PTINR\_VAL1 PT-INR Value

| N | Mean      | Standard Deviation | Minimum   | Maximum   |
|---|-----------|--------------------|-----------|-----------|
| 6 | 1.6016667 | 0.1135635          | 1.5100000 | 1.7700000 |

Unique Subject Identifier=9345000010-0006

Assay variable : PTINR\_VAL1 PT-INR Value

| N | Mean      | Standard Deviation | Minimum   | Maximum   |
|---|-----------|--------------------|-----------|-----------|
| 3 | 2.4233333 | 0.2084067          | 2.2400000 | 2.6500000 |

Unique Subject Identifier=9345000010-0007

Assay variable : PTINR\_VAL1 PT-INR Value

N Mean Standard Deviation Minimum Maximum

---

|   |          |  |          |          |
|---|----------|--|----------|----------|
| 1 | 2.130000 |  | 2.130000 | 2.130000 |
|---|----------|--|----------|----------|

---



Laboratory tests at the time of obtaining Table 2-6 consent, according to the presence or absence of proton-pump inhibitors

Unique Subject Identifier=9348010000-0001

MEANS Procedure

Assay variable : PTINR\_VAL1 PT-INR Value

N Mean Standard Deviation Minimum Maximum

---

|   |           |           |           |           |
|---|-----------|-----------|-----------|-----------|
| 4 | 2.4325000 | 0.5248730 | 1.9600000 | 3.1700000 |
|---|-----------|-----------|-----------|-----------|

---

Unique Subject Identifier=9348010000-0002

Assay variable : PTINR\_VAL1 PT-INR Value

N Mean Standard Deviation Minimum Maximum

---

|   |           |           |           |           |
|---|-----------|-----------|-----------|-----------|
| 2 | 1.8700000 | 0.1272792 | 1.7800000 | 1.9600000 |
|---|-----------|-----------|-----------|-----------|

---

Unique Subject Identifier=9348010000-0004

Assay variable : PTINR\_VAL1 PT-INR Value

N Mean Standard Deviation Minimum Maximum

---

|   |           |           |           |           |
|---|-----------|-----------|-----------|-----------|
| 6 | 1.8600000 | 0.2059126 | 1.6200000 | 2.2300000 |
|---|-----------|-----------|-----------|-----------|

---

Unique Subject Identifier=9348010000-0005

Assay variable : PTINR\_VAL1 PT-INR Value

N Mean Standard Deviation Minimum Maximum

---

|   |           |           |           |           |
|---|-----------|-----------|-----------|-----------|
| 3 | 1.7166667 | 0.1101514 | 1.6100000 | 1.8300000 |
|---|-----------|-----------|-----------|-----------|

---

Laboratory tests at the time of obtaining Table 2-6 consent, according to the presence or absence of proton-pump inhibitors

Unique Subject Identifier=9348010000-0007

MEANS Procedure

Assay variable : PTINR\_VAL1 PT-INR Value

N Mean Standard Deviation Minimum Maximum

---

|   |           |           |           |           |
|---|-----------|-----------|-----------|-----------|
| 6 | 2.1533333 | 0.6930993 | 1.5300000 | 3.3200000 |
|---|-----------|-----------|-----------|-----------|

---

Unique Subject Identifier=9348010000-0010

Assay variable : PTINR\_VAL1 PT-INR Value

N Mean Standard Deviation Minimum Maximum

---

|   |           |           |           |           |
|---|-----------|-----------|-----------|-----------|
| 3 | 2.4533333 | 0.2354428 | 2.2100000 | 2.6800000 |
|---|-----------|-----------|-----------|-----------|

---

Unique Subject Identifier=9348010000-0020

Assay variable : PTINR\_VAL1 PT-INR Value

N Mean Standard Deviation Minimum Maximum

---

|   |           |           |           |           |
|---|-----------|-----------|-----------|-----------|
| 3 | 1.8866667 | 0.2367136 | 1.7500000 | 2.1600000 |
|---|-----------|-----------|-----------|-----------|

---

Unique Subject Identifier=9348010000-0028

Assay variable : PTINR\_VAL1 PT-INR Value

N Mean Standard Deviation Minimum Maximum

---

|   |           |           |           |           |
|---|-----------|-----------|-----------|-----------|
| 2 | 1.7800000 | 0.2545584 | 1.6000000 | 1.9600000 |
|---|-----------|-----------|-----------|-----------|

---

Laboratory tests at the time of obtaining Table 2-6 consent, according to the presence or absence of proton-pump inhibitors

Unique Subject Identifier=9348010000-0029

MEANS Procedure

Assay variable : PTINR\_VAL1 PT-INR Value

N Mean Standard Deviation Minimum Maximum

---

|   |           |           |           |           |
|---|-----------|-----------|-----------|-----------|
| 6 | 1.4150000 | 0.2147324 | 1.2000000 | 1.7300000 |
|---|-----------|-----------|-----------|-----------|

---

Unique Subject Identifier=9348010000-0033

Assay variable : PTINR\_VAL1 PT-INR Value

N Mean Standard Deviation Minimum Maximum

---

|   |           |           |           |           |
|---|-----------|-----------|-----------|-----------|
| 3 | 1.9400000 | 0.2193171 | 1.7800000 | 2.1900000 |
|---|-----------|-----------|-----------|-----------|

---

Unique Subject Identifier=9348010000-0039

Assay variable : PTINR\_VAL1 PT-INR Value

N Mean Standard Deviation Minimum Maximum

---

|   |           |           |           |           |
|---|-----------|-----------|-----------|-----------|
| 5 | 1.6740000 | 0.2322283 | 1.2700000 | 1.8500000 |
|---|-----------|-----------|-----------|-----------|

---

Unique Subject Identifier=9348010000-0040

Assay variable : PTINR\_VAL1 PT-INR Value

N Mean Standard Deviation Minimum Maximum

---

|   |           |           |           |           |
|---|-----------|-----------|-----------|-----------|
| 4 | 2.0700000 | 0.5057008 | 1.4300000 | 2.5900000 |
|---|-----------|-----------|-----------|-----------|

---

Laboratory tests at the time of obtaining Table 2-6 consent, according to the presence or absence of proton-pump inhibitors

Unique Subject Identifier=9348010000-0046

MEANS Procedure

Assay variable : PTINR\_VAL1 PT-INR Value

N Mean Standard Deviation Minimum Maximum

---

|   |           |           |           |           |
|---|-----------|-----------|-----------|-----------|
| 6 | 2.0550000 | 0.8034613 | 1.1700000 | 3.4400000 |
|---|-----------|-----------|-----------|-----------|

---

Unique Subject Identifier=9348010000-0055

Assay variable : PTINR\_VAL1 PT-INR Value

N Mean Standard Deviation Minimum Maximum

---

|   |           |           |           |           |
|---|-----------|-----------|-----------|-----------|
| 3 | 2.1500000 | 0.1216553 | 2.0100000 | 2.2300000 |
|---|-----------|-----------|-----------|-----------|

---

Unique Subject Identifier=9348010000-0058

Assay variable : PTINR\_VAL1 PT-INR Value

N Mean Standard Deviation Minimum Maximum

---

|   |           |           |           |           |
|---|-----------|-----------|-----------|-----------|
| 6 | 2.3483333 | 0.5566836 | 1.5900000 | 3.2400000 |
|---|-----------|-----------|-----------|-----------|

---

Unique Subject Identifier=9348010000-0063

Assay variable : PTINR\_VAL1 PT-INR Value

N Mean Standard Deviation Minimum Maximum

---

|   |           |           |           |           |
|---|-----------|-----------|-----------|-----------|
| 2 | 1.9800000 | 0.2545584 | 1.8000000 | 2.1600000 |
|---|-----------|-----------|-----------|-----------|

---



Laboratory tests at the time of obtaining Table 2-6 consent, according to the presence or absence of proton-pump inhibitors

Unique Subject Identifier=9348010000-0065

MEANS Procedure

Assay variable : PTINR\_VAL1 PT-INR Value

N Mean Standard Deviation Minimum Maximum

---

|   |           |           |           |           |
|---|-----------|-----------|-----------|-----------|
| 3 | 1.9866667 | 0.2112660 | 1.7900000 | 2.2100000 |
|---|-----------|-----------|-----------|-----------|

---

Unique Subject Identifier=9348010000-0072

Assay variable : PTINR\_VAL1 PT-INR Value

N Mean Standard Deviation Minimum Maximum

---

|   |           |           |           |           |
|---|-----------|-----------|-----------|-----------|
| 3 | 2.6566667 | 0.1650253 | 2.4900000 | 2.8200000 |
|---|-----------|-----------|-----------|-----------|

---

Unique Subject Identifier=9348010000-0083

Assay variable : PTINR\_VAL1 PT-INR Value

N Mean Standard Deviation Minimum Maximum

---

|   |           |           |           |           |
|---|-----------|-----------|-----------|-----------|
| 3 | 2.6333333 | 0.3501904 | 2.2900000 | 2.9900000 |
|---|-----------|-----------|-----------|-----------|

---

Unique Subject Identifier=9348010000-0088

Assay variable : PTINR\_VAL1 PT-INR Value

N Mean Standard Deviation Minimum Maximum

---

|   |          |           |          |          |
|---|----------|-----------|----------|----------|
| 3 | 2.280000 | 0.2051828 | 2.070000 | 2.480000 |
|---|----------|-----------|----------|----------|

---

Laboratory tests at the time of obtaining Table 2-6 consent, according to the presence or absence of proton-pump inhibitors

Unique Subject Identifier=9348010000-0093

MEANS Procedure

Assay variable : PTINR\_VAL1 PT-INR Value

N Mean Standard Deviation Minimum Maximum

---

|   |           |           |           |           |
|---|-----------|-----------|-----------|-----------|
| 4 | 1.7250000 | 0.2547548 | 1.3900000 | 1.9900000 |
|---|-----------|-----------|-----------|-----------|

---

Unique Subject Identifier=9348010000-0094

Assay variable : PTINR\_VAL1 PT-INR Value

N Mean Standard Deviation Minimum Maximum

---

|   |           |           |           |           |
|---|-----------|-----------|-----------|-----------|
| 3 | 2.0833333 | 0.8114391 | 1.5000000 | 3.0100000 |
|---|-----------|-----------|-----------|-----------|

---

Unique Subject Identifier=9348010000-0095

Assay variable : PTINR\_VAL1 PT-INR Value

N Mean Standard Deviation Minimum Maximum

---

|   |           |  |           |           |
|---|-----------|--|-----------|-----------|
| 1 | 1.9300000 |  | 1.9300000 | 1.9300000 |
|---|-----------|--|-----------|-----------|

---

Unique Subject Identifier=9348010000-0096

Assay variable : PTINR\_VAL1 PT-INR Value

N Mean Standard Deviation Minimum Maximum

---

|   |           |           |           |           |
|---|-----------|-----------|-----------|-----------|
| 4 | 2.4150000 | 0.6133243 | 1.8600000 | 3.1300000 |
|---|-----------|-----------|-----------|-----------|

---

Laboratory tests at the time of obtaining Table 2-6 consent, according to the presence or absence of proton-pump inhibitors

Unique Subject Identifier=9348010000-0097

MEANS Procedure

Assay variable : PTINR\_VAL1 PT-INR Value

N Mean Standard Deviation Minimum Maximum

---

|   |           |           |           |           |
|---|-----------|-----------|-----------|-----------|
| 3 | 2.6066667 | 0.3995414 | 2.1600000 | 2.9300000 |
|---|-----------|-----------|-----------|-----------|

---

Unique Subject Identifier=9348010000-0098

Assay variable : PTINR\_VAL1 PT-INR Value

N Mean Standard Deviation Minimum Maximum

---

|   |           |           |           |           |
|---|-----------|-----------|-----------|-----------|
| 4 | 2.4000000 | 0.9819369 | 1.6200000 | 3.6900000 |
|---|-----------|-----------|-----------|-----------|

---

Unique Subject Identifier=9348010000-0105

Assay variable : PTINR\_VAL1 PT-INR Value

N Mean Standard Deviation Minimum Maximum

---

|   |           |           |           |           |
|---|-----------|-----------|-----------|-----------|
| 4 | 2.0250000 | 0.2706166 | 1.7900000 | 2.3800000 |
|---|-----------|-----------|-----------|-----------|

---

Unique Subject Identifier=9348010000-0114

Assay variable : PTINR\_VAL1 PT-INR Value

N Mean Standard Deviation Minimum Maximum

---

|   |           |           |           |           |
|---|-----------|-----------|-----------|-----------|
| 5 | 1.7580000 | 0.2359449 | 1.4200000 | 2.0100000 |
|---|-----------|-----------|-----------|-----------|

---

Laboratory tests at the time of obtaining Table 2-6 consent, according to the presence or absence of proton-pump inhibitors

Unique Subject Identifier=9348010000-0115

MEANS Procedure

Assay variable : PTINR\_VAL1 PT-INR Value

N Mean Standard Deviation Minimum Maximum

---

|   |           |           |           |           |
|---|-----------|-----------|-----------|-----------|
| 4 | 2.3700000 | 0.3962323 | 2.1300000 | 2.9600000 |
|---|-----------|-----------|-----------|-----------|

---

Unique Subject Identifier=9348010000-0117

Assay variable : PTINR\_VAL1 PT-INR Value

N Mean Standard Deviation Minimum Maximum

---

|   |           |           |           |           |
|---|-----------|-----------|-----------|-----------|
| 3 | 1.5300000 | 0.3803945 | 1.1400000 | 1.9000000 |
|---|-----------|-----------|-----------|-----------|

---

Unique Subject Identifier=9348010000-0127

Assay variable : PTINR\_VAL1 PT-INR Value

N Mean Standard Deviation Minimum Maximum

---

|   |           |           |           |           |
|---|-----------|-----------|-----------|-----------|
| 2 | 2.1100000 | 0.7495332 | 1.5800000 | 2.6400000 |
|---|-----------|-----------|-----------|-----------|

---

Unique Subject Identifier=9348010000-0131

Assay variable : PTINR\_VAL1 PT-INR Value

N Mean Standard Deviation Minimum Maximum

---

|   |          |           |          |          |
|---|----------|-----------|----------|----------|
| 3 | 1.120000 | 0.0458258 | 1.070000 | 1.160000 |
|---|----------|-----------|----------|----------|

---



Laboratory tests at the time of obtaining Table 2-6 consent, according to the presence or absence of proton-pump inhibitors

Unique Subject Identifier=9348010000-0132

MEANS Procedure

Assay variable : PTINR\_VAL1 PT-INR Value

| N | Mean      | Standard Deviation | Minimum   | Maximum   |
|---|-----------|--------------------|-----------|-----------|
| 3 | 1.5533333 | 0.4306197          | 1.1100000 | 1.9700000 |

Unique Subject Identifier=9366000000-0001

Assay variable : PTINR\_VAL1 PT-INR Value

| N | Mean      | Standard Deviation | Minimum   | Maximum   |
|---|-----------|--------------------|-----------|-----------|
| 6 | 2.3066667 | 0.4933829          | 1.6900000 | 2.9500000 |

Unique Subject Identifier=9366000000-0002

Assay variable : PTINR\_VAL1 PT-INR Value

| N | Mean      | Standard Deviation | Minimum   | Maximum   |
|---|-----------|--------------------|-----------|-----------|
| 6 | 2.7283333 | 0.6265275          | 1.6400000 | 3.4200000 |

Unique Subject Identifier=9366000000-0003

Assay variable : PTINR\_VAL1 PT-INR Value

N Mean Standard Deviation Minimum Maximum

---

|   |           |           |           |           |
|---|-----------|-----------|-----------|-----------|
| 6 | 2.2566667 | 0.7819378 | 1.5100000 | 3.7200000 |
|---|-----------|-----------|-----------|-----------|

---

Laboratory tests at the time of obtaining Table 2-6 consent, according to the presence or absence of proton-pump inhibitors

Unique Subject Identifier=936600000-0004

MEANS Procedure

Assay variable : PTINR\_VAL1 PT-INR Value

N Mean Standard Deviation Minimum Maximum

---

|   |           |           |           |           |
|---|-----------|-----------|-----------|-----------|
| 6 | 2.6233333 | 0.1745470 | 2.3500000 | 2.8300000 |
|---|-----------|-----------|-----------|-----------|

---

Unique Subject Identifier=936600000-0006

Assay variable : PTINR\_VAL1 PT-INR Value

N Mean Standard Deviation Minimum Maximum

---

|   |           |           |           |           |
|---|-----------|-----------|-----------|-----------|
| 6 | 1.8183333 | 0.8000854 | 1.1300000 | 3.2400000 |
|---|-----------|-----------|-----------|-----------|

---

Unique Subject Identifier=951400000-0002

Assay variable : PTINR\_VAL1 PT-INR Value

N Mean Standard Deviation Minimum Maximum

---

|   |           |           |           |           |
|---|-----------|-----------|-----------|-----------|
| 3 | 2.3766667 | 1.0442860 | 1.6300000 | 3.5700000 |
|---|-----------|-----------|-----------|-----------|

---

Unique Subject Identifier=951400000-0006

Assay variable : PTINR\_VAL1 PT-INR Value

N Mean Standard Deviation Minimum Maximum

---

|   |           |           |           |           |
|---|-----------|-----------|-----------|-----------|
| 3 | 1.7633333 | 0.3178574 | 1.5100000 | 2.1200000 |
|---|-----------|-----------|-----------|-----------|

---

Laboratory tests at the time of obtaining Table 2-6 consent, according to the presence or absence of proton-pump inhibitors

Unique Subject Identifier=951400000-0007

MEANS Procedure

Assay variable : PTINR\_VAL1 PT-INR Value

N Mean Standard Deviation Minimum Maximum

---

|   |           |           |           |           |
|---|-----------|-----------|-----------|-----------|
| 5 | 1.6980000 | 0.1586506 | 1.5200000 | 1.8900000 |
|---|-----------|-----------|-----------|-----------|

---

Unique Subject Identifier=951400000-0009

Assay variable : PTINR\_VAL1 PT-INR Value

N Mean Standard Deviation Minimum Maximum

---

|   |           |           |           |           |
|---|-----------|-----------|-----------|-----------|
| 4 | 1.5000000 | 0.0883176 | 1.4400000 | 1.6300000 |
|---|-----------|-----------|-----------|-----------|

---

Unique Subject Identifier=951400000-0011

Assay variable : PTINR\_VAL1 PT-INR Value

N Mean Standard Deviation Minimum Maximum

---

|   |           |           |           |           |
|---|-----------|-----------|-----------|-----------|
| 4 | 1.7575000 | 0.2359908 | 1.5100000 | 2.0600000 |
|---|-----------|-----------|-----------|-----------|

---

Unique Subject Identifier=951400000-0016

Assay variable : PTINR\_VAL1 PT-INR Value

N Mean Standard Deviation Minimum Maximum

---

|   |           |           |           |           |
|---|-----------|-----------|-----------|-----------|
| 4 | 1.6700000 | 0.3421501 | 1.3900000 | 2.1300000 |
|---|-----------|-----------|-----------|-----------|

---

Laboratory tests at the time of obtaining Table 2-6 consent, according to the presence or absence of proton-pump inhibitors

Unique Subject Identifier=951400000-0018

MEANS Procedure

Assay variable : PTINR\_VAL1 PT-INR Value

N Mean Standard Deviation Minimum Maximum

---

|   |           |           |           |           |
|---|-----------|-----------|-----------|-----------|
| 4 | 2.1200000 | 0.3594440 | 1.6700000 | 2.4100000 |
|---|-----------|-----------|-----------|-----------|

---

Unique Subject Identifier=951400000-0021

Assay variable : PTINR\_VAL1 PT-INR Value

N Mean Standard Deviation Minimum Maximum

---

|   |           |           |           |           |
|---|-----------|-----------|-----------|-----------|
| 4 | 2.0400000 | 0.1831211 | 1.7900000 | 2.2300000 |
|---|-----------|-----------|-----------|-----------|

---

Unique Subject Identifier=951400000-0022

Assay variable : PTINR\_VAL1 PT-INR Value

N Mean Standard Deviation Minimum Maximum

---

|   |           |           |           |           |
|---|-----------|-----------|-----------|-----------|
| 4 | 1.5775000 | 0.0590903 | 1.5300000 | 1.6600000 |
|---|-----------|-----------|-----------|-----------|

---

Unique Subject Identifier=951400000-0023

Assay variable : PTINR\_VAL1 PT-INR Value

N Mean Standard Deviation Minimum Maximum

---

|   |           |           |           |           |
|---|-----------|-----------|-----------|-----------|
| 4 | 1.5075000 | 0.1209339 | 1.4000000 | 1.6800000 |
|---|-----------|-----------|-----------|-----------|

---



Laboratory tests at the time of obtaining Table 2-6 consent, according to the presence or absence of proton-pump inhibitors

Unique Subject Identifier=951400000-0026

MEANS Procedure

Assay variable : PTINR\_VAL1 PT-INR Value

N Mean Standard Deviation Minimum Maximum

---

|   |           |           |           |           |
|---|-----------|-----------|-----------|-----------|
| 4 | 2.3200000 | 0.0979796 | 2.2000000 | 2.4400000 |
|---|-----------|-----------|-----------|-----------|

---

Unique Subject Identifier=951400000-0034

Assay variable : PTINR\_VAL1 PT-INR Value

N Mean Standard Deviation Minimum Maximum

---

|   |           |           |           |           |
|---|-----------|-----------|-----------|-----------|
| 4 | 2.1250000 | 0.1417745 | 2.0000000 | 2.3000000 |
|---|-----------|-----------|-----------|-----------|

---

Unique Subject Identifier=954800000-0002

Assay variable : PTINR\_VAL1 PT-INR Value

N Mean Standard Deviation Minimum Maximum

---

|   |           |           |           |           |
|---|-----------|-----------|-----------|-----------|
| 2 | 1.2150000 | 0.0212132 | 1.2000000 | 1.2300000 |
|---|-----------|-----------|-----------|-----------|

---

Unique Subject Identifier=962310000-0003

Assay variable : PTINR\_VAL1 PT-INR Value

N Mean Standard Deviation Minimum Maximum

---

|   |           |           |           |           |
|---|-----------|-----------|-----------|-----------|
| 2 | 1.3450000 | 0.1060660 | 1.2700000 | 1.4200000 |
|---|-----------|-----------|-----------|-----------|

---

Laboratory tests at the time of obtaining Table 2-6 consent, according to the presence or absence of proton-pump inhibitors

Unique Subject Identifier=9623100000-0004

MEANS Procedure

Assay variable : PTINR\_VAL1 PT-INR Value

| N | Mean      | Standard Deviation | Minimum   | Maximum   |
|---|-----------|--------------------|-----------|-----------|
| 2 | 1.7900000 | 0.2687006          | 1.6000000 | 1.9800000 |

Unique Subject Identifier=9623100000-0005

Assay variable : PTINR\_VAL1 PT-INR Value

| N | Mean      | Standard Deviation | Minimum   | Maximum   |
|---|-----------|--------------------|-----------|-----------|
| 3 | 1.4600000 | 0.1732051          | 1.2600000 | 1.5600000 |

Unique Subject Identifier=9623100000-0007

Assay variable : PTINR\_VAL1 PT-INR Value

| N | Mean      | Standard Deviation | Minimum   | Maximum   |
|---|-----------|--------------------|-----------|-----------|
| 5 | 1.6000000 | 0.1528071          | 1.4400000 | 1.8200000 |

Unique Subject Identifier=9648000000-0006

Assay variable : PTINR\_VAL1 PT-INR Value

N Mean Standard Deviation Minimum Maximum

---

|   |           |           |           |           |
|---|-----------|-----------|-----------|-----------|
| 3 | 2.6066667 | 1.1305898 | 1.8900000 | 3.9100000 |
|---|-----------|-----------|-----------|-----------|

---

Laboratory tests at the time of obtaining Table 2-6 consent, according to the presence or absence of proton-pump inhibitors

Unique Subject Identifier=964800000-0012

MEANS Procedure

Assay variable : PTINR\_VAL1 PT-INR Value

| N | Mean      | Standard Deviation | Minimum   | Maximum   |
|---|-----------|--------------------|-----------|-----------|
| 2 | 2.6800000 | 0.0141421          | 2.6700000 | 2.6900000 |

Unique Subject Identifier=964800000-0014

Assay variable : PTINR\_VAL1 PT-INR Value

| N | Mean      | Standard Deviation | Minimum   | Maximum   |
|---|-----------|--------------------|-----------|-----------|
| 2 | 1.7100000 | 0.0989949          | 1.6400000 | 1.7800000 |

Unique Subject Identifier=964800000-0021

Assay variable : PTINR\_VAL1 PT-INR Value

| N | Mean      | Standard Deviation | Minimum   | Maximum   |
|---|-----------|--------------------|-----------|-----------|
| 3 | 2.4466667 | 0.3758102          | 2.2100000 | 2.8800000 |

Unique Subject Identifier=964800000-0023

Assay variable : PTINR\_VAL1 PT-INR Value

N Mean Standard Deviation Minimum Maximum

---

|   |           |  |           |           |
|---|-----------|--|-----------|-----------|
| 1 | 1.7800000 |  | 1.7800000 | 1.7800000 |
|---|-----------|--|-----------|-----------|

---

Laboratory tests at the time of obtaining Table 2-6 consent, according to the presence or absence of proton-pump inhibitors

FREQ Procedure

Table : ALL \* \_PTINRCT

ALL \_PTINRCT

Power |

Percent |

Percent of rows

Percentage of columns | 1| 2| 3| 4| 9| Total

|       |        |        |        |        |        |        |   |  |   |  |   |
|-------|--------|--------|--------|--------|--------|--------|---|--|---|--|---|
|       | +      |        | +      |        | +      |        | + |  | + |  | + |
| 1     | 1074   | 3266   | 3316   | 324    | 315    | 8295   |   |  |   |  |   |
|       | 12.95  | 39.37  | 39.98  | 3.91   | 3.80   | 100.00 |   |  |   |  |   |
|       | 12.95  | 39.37  | 39.98  | 3.91   | 3.80   |        |   |  |   |  |   |
|       | 100.00 | 100.00 | 100.00 | 100.00 | 100.00 |        |   |  |   |  |   |
|       | +      |        | +      |        | +      |        | + |  | + |  | + |
| Total | 1074   | 3266   | 3316   | 324    | 315    | 8295   |   |  |   |  |   |
|       | 12.95  | 39.37  | 39.98  | 3.91   | 3.80   | 100.00 |   |  |   |  |   |

Laboratory tests at the time of obtaining Table 2-6 consent, according to the presence or absence of proton-pump inhibitors

FREQ Procedure

Table : ALL \* \_PTINRCT

ALL \_PTINRCT

Power |

Percent |

Percent of rows

Percentage of columns | 1| 2| 3| 4| 9| Total

|       |        |        |        |        |        |        |   |  |   |  |   |
|-------|--------|--------|--------|--------|--------|--------|---|--|---|--|---|
|       | +      |        | +      |        | +      |        | + |  | + |  | + |
| 1     | 1074   | 3266   | 3316   | 324    | 315    | 8295   |   |  |   |  |   |
|       | 12.95  | 39.37  | 39.98  | 3.91   | 3.80   | 100.00 |   |  |   |  |   |
|       | 12.95  | 39.37  | 39.98  | 3.91   | 3.80   |        |   |  |   |  |   |
|       | 100.00 | 100.00 | 100.00 | 100.00 | 100.00 |        |   |  |   |  |   |
|       | +      |        | +      |        | +      |        | + |  | + |  | + |
| Total | 1074   | 3266   | 3316   | 324    | 315    | 8295   |   |  |   |  |   |
|       | 12.95  | 39.37  | 39.98  | 3.91   | 3.80   | 100.00 |   |  |   |  |   |



Laboratory tests at the time of obtaining Table 2-6 consent, according to the presence or absence of proton-pump inhibitors

FREQ Procedure

Table : ALL \* \_PTINRCT

ALL \_PTINRCT

Power |

Percent |

Percent of rows

Percentage of columns | 1| 2| 3| 4| 9| Total

|       |        |        |        |        |        |        |   |  |   |  |   |
|-------|--------|--------|--------|--------|--------|--------|---|--|---|--|---|
|       | +      |        | +      |        | +      |        | + |  | + |  | + |
| 1     | 1074   | 3266   | 3316   | 324    | 315    | 8295   |   |  |   |  |   |
|       | 12.95  | 39.37  | 39.98  | 3.91   | 3.80   | 100.00 |   |  |   |  |   |
|       | 12.95  | 39.37  | 39.98  | 3.91   | 3.80   |        |   |  |   |  |   |
|       | 100.00 | 100.00 | 100.00 | 100.00 | 100.00 |        |   |  |   |  |   |
|       | +      |        | +      |        | +      |        | + |  | + |  | + |
| Total | 1074   | 3266   | 3316   | 324    | 315    | 8295   |   |  |   |  |   |
|       | 12.95  | 39.37  | 39.98  | 3.91   | 3.80   | 100.00 |   |  |   |  |   |

Laboratory tests at the time of obtaining Table 2-6 consent, according to the presence or absence of proton-pump inhibitors

FREQ Procedure

Table : ALL \* \_PTINRCT

ALL \_PTINRCT

Power |

Percent |

Percent of rows

Percentage of columns | 1| 2| 3| 4| 9| Total

|       |        |        |        |        |        |        |   |
|-------|--------|--------|--------|--------|--------|--------|---|
|       | +      | +      | +      | +      | +      | +      | + |
| 1     | 1074   | 3266   | 3316   | 324    | 315    | 8295   |   |
|       | 12.95  | 39.37  | 39.98  | 3.91   | 3.80   | 100.00 |   |
|       | 12.95  | 39.37  | 39.98  | 3.91   | 3.80   |        |   |
|       | 100.00 | 100.00 | 100.00 | 100.00 | 100.00 |        |   |
|       | +      | +      | +      | +      | +      | +      | + |
| Total | 1074   | 3266   | 3316   | 324    | 315    | 8295   |   |
|       | 12.95  | 39.37  | 39.98  | 3.91   | 3.80   | 100.00 |   |

Laboratory tests at the time of obtaining Table 2-6 consent, according to the presence or absence of proton-pump inhibitors

FREQ Procedure

Table : ALL \* \_PTINRCT

ALL \_PTINRCT

Power |

Percent |

Percent of rows

Percentage of columns | 1| 2| 3| 4| 9| Total

|       |        |        |        |        |        |        |   |
|-------|--------|--------|--------|--------|--------|--------|---|
|       | +      | +      | +      | +      | +      | +      | + |
| 1     | 1074   | 3266   | 3316   | 324    | 315    | 8295   |   |
|       | 12.95  | 39.37  | 39.98  | 3.91   | 3.80   | 100.00 |   |
|       | 12.95  | 39.37  | 39.98  | 3.91   | 3.80   |        |   |
|       | 100.00 | 100.00 | 100.00 | 100.00 | 100.00 |        |   |
|       | +      | +      | +      | +      | +      | +      | + |
| Total | 1074   | 3266   | 3316   | 324    | 315    | 8295   |   |
|       | 12.95  | 39.37  | 39.98  | 3.91   | 3.80   | 100.00 |   |

Laboratory tests at the time of obtaining Table 2-6 consent, according to the presence or absence of proton-pump inhibitors

FREQ Procedure

Table : ALL \* \_TTRCT

ALL \_TTRCT

Power |

Percent |

Percent of rows

Percentage of columns | 1| 2| 3| 4| 9| Total

|       |        |        |        |        |        |        |   |  |   |  |   |
|-------|--------|--------|--------|--------|--------|--------|---|--|---|--|---|
|       | +      |        | +      |        | +      |        | + |  | + |  | + |
| 1     | 1043   | 736    | 1166   | 4003   | 1347   | 8295   |   |  |   |  |   |
|       | 12.57  | 8.87   | 14.06  | 48.26  | 16.24  | 100.00 |   |  |   |  |   |
|       | 12.57  | 8.87   | 14.06  | 48.26  | 16.24  |        |   |  |   |  |   |
|       | 100.00 | 100.00 | 100.00 | 100.00 | 100.00 |        |   |  |   |  |   |
|       | +      |        | +      |        | +      |        | + |  | + |  | + |
| Total | 1043   | 736    | 1166   | 4003   | 1347   | 8295   |   |  |   |  |   |
|       | 12.57  | 8.87   | 14.06  | 48.26  | 16.24  | 100.00 |   |  |   |  |   |

Laboratory tests at the time of obtaining Table 2-6 consent, according to the presence or absence of proton-pump inhibitors

FREQ Procedure

Table : ALL \* \_TTRCT

ALL \_TTRCT

Power |

Percent |

Percent of rows

Percentage of columns | 1| 2| 3| 4| 9| Total

|       |        |        |        |        |        |        |   |
|-------|--------|--------|--------|--------|--------|--------|---|
|       | +      | +      | +      | +      | +      | +      | + |
| 1     | 1043   | 736    | 1166   | 4003   | 1347   | 8295   |   |
|       | 12.57  | 8.87   | 14.06  | 48.26  | 16.24  | 100.00 |   |
|       | 12.57  | 8.87   | 14.06  | 48.26  | 16.24  |        |   |
|       | 100.00 | 100.00 | 100.00 | 100.00 | 100.00 |        |   |
|       | +      | +      | +      | +      | +      | +      | + |
| Total | 1043   | 736    | 1166   | 4003   | 1347   | 8295   |   |
|       | 12.57  | 8.87   | 14.06  | 48.26  | 16.24  | 100.00 |   |

Laboratory tests at the time of obtaining Table 2-6 consent, according to the presence or absence of proton-pump inhibitors

FREQ Procedure

Table : ALL \* \_TTRCT

ALL \_TTRCT

Power |

Percent |

Percent of rows

Percentage of columns | 1| 2| 3| 4| 9| Total

|       |        |        |        |        |        |        |   |  |   |  |   |
|-------|--------|--------|--------|--------|--------|--------|---|--|---|--|---|
|       | +      |        | +      |        | +      |        | + |  | + |  | + |
| 1     | 1043   | 736    | 1166   | 4003   | 1347   | 8295   |   |  |   |  |   |
|       | 12.57  | 8.87   | 14.06  | 48.26  | 16.24  | 100.00 |   |  |   |  |   |
|       | 12.57  | 8.87   | 14.06  | 48.26  | 16.24  |        |   |  |   |  |   |
|       | 100.00 | 100.00 | 100.00 | 100.00 | 100.00 |        |   |  |   |  |   |
|       | +      |        | +      |        | +      |        | + |  | + |  | + |
| Total | 1043   | 736    | 1166   | 4003   | 1347   | 8295   |   |  |   |  |   |
|       | 12.57  | 8.87   | 14.06  | 48.26  | 16.24  | 100.00 |   |  |   |  |   |

Laboratory tests at the time of obtaining Table 2-6 consent, according to the presence or absence of proton-pump inhibitors

FREQ Procedure

Table : ALL \* \_TTRCT

ALL \_TTRCT

Power |

Percent |

Percent of rows

Percentage of columns | 1| 2| 3| 4| 9| Total

|       |        |        |        |        |        |        |   |
|-------|--------|--------|--------|--------|--------|--------|---|
|       | +      | +      | +      | +      | +      | +      | + |
| 1     | 1043   | 736    | 1166   | 4003   | 1347   | 8295   |   |
|       | 12.57  | 8.87   | 14.06  | 48.26  | 16.24  | 100.00 |   |
|       | 12.57  | 8.87   | 14.06  | 48.26  | 16.24  |        |   |
|       | 100.00 | 100.00 | 100.00 | 100.00 | 100.00 |        |   |
|       | +      | +      | +      | +      | +      | +      | + |
| Total | 1043   | 736    | 1166   | 4003   | 1347   | 8295   |   |
|       | 12.57  | 8.87   | 14.06  | 48.26  | 16.24  | 100.00 |   |

Laboratory tests at the time of obtaining Table 2-6 consent, according to the presence or absence of proton-pump inhibitors

FREQ Procedure

Table : ALL \* \_TTRCT

ALL \_TTRCT

Power |

Percent |

Percent of rows

Percentage of columns | 1| 2| 3| 4| 9| Total

|       |        |        |        |        |        |        |   |  |   |  |   |
|-------|--------|--------|--------|--------|--------|--------|---|--|---|--|---|
|       | +      |        | +      |        | +      |        | + |  | + |  | + |
| 1     | 1043   | 736    | 1166   | 4003   | 1347   | 8295   |   |  |   |  |   |
|       | 12.57  | 8.87   | 14.06  | 48.26  | 16.24  | 100.00 |   |  |   |  |   |
|       | 12.57  | 8.87   | 14.06  | 48.26  | 16.24  |        |   |  |   |  |   |
|       | 100.00 | 100.00 | 100.00 | 100.00 | 100.00 |        |   |  |   |  |   |
|       | +      |        | +      |        | +      |        | + |  | + |  | + |
| Total | 1043   | 736    | 1166   | 4003   | 1347   | 8295   |   |  |   |  |   |
|       | 12.57  | 8.87   | 14.06  | 48.26  | 16.24  | 100.00 |   |  |   |  |   |



Laboratory tests at the time of obtaining Table 2-6 consent, according to the presence or absence of proton-pump inhibitors

FREQ Procedure

Table : ALL \* \_FIRCT

ALL \_FIRCT

Power |

Percent |

Percent of rows

Percentage of columns | 1| 2| 3| 4| 9| Total

|       |        |        |        |        |        |        |   |
|-------|--------|--------|--------|--------|--------|--------|---|
|       | +      | +      | +      | +      | +      | +      | + |
| 1     | 1033   | 823    | 1621   | 3517   | 1301   | 8295   |   |
|       | 12.45  | 9.92   | 19.54  | 42.40  | 15.68  | 100.00 |   |
|       | 12.45  | 9.92   | 19.54  | 42.40  | 15.68  |        |   |
|       | 100.00 | 100.00 | 100.00 | 100.00 | 100.00 |        |   |
|       | +      | +      | +      | +      | +      | +      | + |
| Total | 1033   | 823    | 1621   | 3517   | 1301   | 8295   |   |
|       | 12.45  | 9.92   | 19.54  | 42.40  | 15.68  | 100.00 |   |

Laboratory tests at the time of obtaining Table 2-6 consent, according to the presence or absence of proton-pump inhibitors

FREQ Procedure

Table : ALL \* \_FIRCT

ALL \_FIRCT

Power |

Percent |

Percent of rows

Percentage of columns | 1| 2| 3| 4| 9| Total

|       |        |        |        |        |        |        |   |
|-------|--------|--------|--------|--------|--------|--------|---|
|       | +      | +      | +      | +      | +      | +      | + |
| 1     | 1033   | 823    | 1621   | 3517   | 1301   | 8295   |   |
|       | 12.45  | 9.92   | 19.54  | 42.40  | 15.68  | 100.00 |   |
|       | 12.45  | 9.92   | 19.54  | 42.40  | 15.68  |        |   |
|       | 100.00 | 100.00 | 100.00 | 100.00 | 100.00 |        |   |
|       | +      | +      | +      | +      | +      | +      | + |
| Total | 1033   | 823    | 1621   | 3517   | 1301   | 8295   |   |
|       | 12.45  | 9.92   | 19.54  | 42.40  | 15.68  | 100.00 |   |

Laboratory tests at the time of obtaining Table 2-6 consent, according to the presence or absence of proton-pump inhibitors

FREQ Procedure

Table : ALL \* \_FIRCT

ALL \_FIRCT

Power |

Percent |

Percent of rows

Percentage of columns | 1| 2| 3| 4| 9| Total

|       |        |        |        |        |        |        |   |
|-------|--------|--------|--------|--------|--------|--------|---|
|       | +      | +      | +      | +      | +      | +      | + |
| 1     | 1033   | 823    | 1621   | 3517   | 1301   | 8295   |   |
|       | 12.45  | 9.92   | 19.54  | 42.40  | 15.68  | 100.00 |   |
|       | 12.45  | 9.92   | 19.54  | 42.40  | 15.68  |        |   |
|       | 100.00 | 100.00 | 100.00 | 100.00 | 100.00 |        |   |
|       | +      | +      | +      | +      | +      | +      | + |
| Total | 1033   | 823    | 1621   | 3517   | 1301   | 8295   |   |
|       | 12.45  | 9.92   | 19.54  | 42.40  | 15.68  | 100.00 |   |

Laboratory tests at the time of obtaining Table 2-6 consent, according to the presence or absence of proton-pump inhibitors

FREQ Procedure

Table : ALL \* \_FIRCT

ALL \_FIRCT

Power |

Percent |

Percent of rows

Percentage of columns | 1| 2| 3| 4| 9| Total

|       |        |        |        |        |        |        |   |
|-------|--------|--------|--------|--------|--------|--------|---|
|       | +      | +      | +      | +      | +      | +      | + |
| 1     | 1033   | 823    | 1621   | 3517   | 1301   | 8295   |   |
|       | 12.45  | 9.92   | 19.54  | 42.40  | 15.68  | 100.00 |   |
|       | 12.45  | 9.92   | 19.54  | 42.40  | 15.68  |        |   |
|       | 100.00 | 100.00 | 100.00 | 100.00 | 100.00 |        |   |
|       | +      | +      | +      | +      | +      | +      | + |
| Total | 1033   | 823    | 1621   | 3517   | 1301   | 8295   |   |
|       | 12.45  | 9.92   | 19.54  | 42.40  | 15.68  | 100.00 |   |

Laboratory tests at the time of obtaining Table 2-6 consent, according to the presence or absence of proton-pump inhibitors

FREQ Procedure

Table : ALL \* \_FIRCT

ALL \_FIRCT

Power |

Percent |

Percent of rows

Percentage of columns | 1| 2| 3| 4| 9| Total

|       |        |        |        |        |        |        |   |
|-------|--------|--------|--------|--------|--------|--------|---|
|       | +      | +      | +      | +      | +      | +      | + |
| 1     | 1033   | 823    | 1621   | 3517   | 1301   | 8295   |   |
|       | 12.45  | 9.92   | 19.54  | 42.40  | 15.68  | 100.00 |   |
|       | 12.45  | 9.92   | 19.54  | 42.40  | 15.68  |        |   |
|       | 100.00 | 100.00 | 100.00 | 100.00 | 100.00 |        |   |
|       | +      | +      | +      | +      | +      | +      | + |
| Total | 1033   | 823    | 1621   | 3517   | 1301   | 8295   |   |
|       | 12.45  | 9.92   | 19.54  | 42.40  | 15.68  | 100.00 |   |

Laboratory tests at the time of obtaining Table 2-6 consent, according to the presence or absence of proton-pump inhibitors

FREQ Procedure

Table : ALL \* t\_CRCC1

ALL t\_CRCC1

Power |

Percent |

Percent of rows

Percentage of columns | 1| 2| 3| 4| 5| Total

|       | 1      | 2      | 3      | 4      | 5      | Total  |
|-------|--------|--------|--------|--------|--------|--------|
| 1     | 423    | 3506   | 10833  | 10525  | 1117   | 26404  |
|       | 1.60   | 13.28  | 41.03  | 39.86  | 4.23   | 100.00 |
|       | 1.60   | 13.28  | 41.03  | 39.86  | 4.23   |        |
|       | 100.00 | 100.00 | 100.00 | 100.00 | 100.00 |        |
| Total | 423    | 3506   | 10833  | 10525  | 1117   | 26404  |
|       | 1.60   | 13.28  | 41.03  | 39.86  | 4.23   | 100.00 |

Degree of missing values = 6086

Laboratory tests at the time of obtaining Table 2-6 consent, according to the presence or absence of proton-pump inhibitors

FREQ Procedure

Table : ALL \* t\_CRCC1

ALL t\_CRCC1

Power |

Percent |

Percent of rows

Percentage of columns | 1| 2| 3| 4| 5| Total

|       | 1      | 2      | 3      | 4      | 5      | Total  |
|-------|--------|--------|--------|--------|--------|--------|
| 1     | 423    | 3506   | 10833  | 10525  | 1117   | 26404  |
|       | 1.60   | 13.28  | 41.03  | 39.86  | 4.23   | 100.00 |
|       | 1.60   | 13.28  | 41.03  | 39.86  | 4.23   |        |
|       | 100.00 | 100.00 | 100.00 | 100.00 | 100.00 |        |
| Total | 423    | 3506   | 10833  | 10525  | 1117   | 26404  |
|       | 1.60   | 13.28  | 41.03  | 39.86  | 4.23   | 100.00 |

Degree of missing values = 6086

Laboratory tests at the time of obtaining Table 2-6 consent, according to the presence or absence of proton-pump inhibitors

FREQ Procedure

Table : ALL \* t\_CRCC1

ALL t\_CRCC1

Power |

Percent |

Percent of rows

Percentage of columns | 1| 2| 3| 4| 5| Total

|       | 1      | 2      | 3      | 4      | 5      | Total  |
|-------|--------|--------|--------|--------|--------|--------|
| 1     | 423    | 3506   | 10833  | 10525  | 1117   | 26404  |
|       | 1.60   | 13.28  | 41.03  | 39.86  | 4.23   | 100.00 |
|       | 1.60   | 13.28  | 41.03  | 39.86  | 4.23   |        |
|       | 100.00 | 100.00 | 100.00 | 100.00 | 100.00 |        |
| Total | 423    | 3506   | 10833  | 10525  | 1117   | 26404  |
|       | 1.60   | 13.28  | 41.03  | 39.86  | 4.23   | 100.00 |

Degree of missing values = 6086



Laboratory tests at the time of obtaining Table 2-6 consent, according to the presence or absence of proton-pump inhibitors

FREQ Procedure

Table : ALL \* t\_CRCC1

ALL t\_CRCC1

Power |

Percent |

Percent of rows

Percentage of columns | 1| 2| 3| 4| 5| Total

|       | 1      | 2      | 3      | 4      | 5      | Total  |
|-------|--------|--------|--------|--------|--------|--------|
| 1     | 423    | 3506   | 10833  | 10525  | 1117   | 26404  |
|       | 1.60   | 13.28  | 41.03  | 39.86  | 4.23   | 100.00 |
|       | 1.60   | 13.28  | 41.03  | 39.86  | 4.23   |        |
|       | 100.00 | 100.00 | 100.00 | 100.00 | 100.00 |        |
| Total | 423    | 3506   | 10833  | 10525  | 1117   | 26404  |
|       | 1.60   | 13.28  | 41.03  | 39.86  | 4.23   | 100.00 |

Degree of missing values = 6086

Laboratory tests at the time of obtaining Table 2-6 consent, according to the presence or absence of proton-pump inhibitors

FREQ Procedure

Table : ALL \* t\_CRCC1

ALL t\_CRCC1

Power |

Percent |

Percent of rows

Percentage of columns | 1| 2| 3| 4| 5| Total

|       | 1      | 2      | 3      | 4      | 5      | Total  |
|-------|--------|--------|--------|--------|--------|--------|
| 1     | 423    | 3506   | 10833  | 10525  | 1117   | 26404  |
|       | 1.60   | 13.28  | 41.03  | 39.86  | 4.23   | 100.00 |
|       | 1.60   | 13.28  | 41.03  | 39.86  | 4.23   |        |
|       | 100.00 | 100.00 | 100.00 | 100.00 | 100.00 |        |
| Total | 423    | 3506   | 10833  | 10525  | 1117   | 26404  |
|       | 1.60   | 13.28  | 41.03  | 39.86  | 4.23   | 100.00 |

Degree of missing values = 6086

Laboratory tests at the time of obtaining Table 2-6 consent, according to the presence or absence of proton-pump inhibitors

FREQ Procedure

Table : ALL \* non\_CRCC1

ALL non\_CRCC1

Power |

Percent |

Percent of rows

Percent of columns | 1 | Total

|        |        |        |  |
|--------|--------|--------|--|
| _____+ |        | _____+ |  |
| 1      | 6086   | 6086   |  |
|        | 100.00 | 100.00 |  |
|        | 100.00 |        |  |
|        | 100.00 |        |  |
| _____+ |        | _____+ |  |
| Total  | 6086   | 6086   |  |
|        | 100.00 | 100.00 |  |

Degree of missing values = 26404

Laboratory tests at the time of obtaining Table 2-6 consent, according to the presence or absence of proton-pump inhibitors

FREQ Procedure

Table : ALL \* t\_EGFR1

ALL t\_EGFR1

Power |

Percent |

Percent of rows

Percentage of columns | 1| 2| 3| 4| 5| 6| Total

|       | 1      | 2      | 3      | 4      | 5      | 6      | Total  |
|-------|--------|--------|--------|--------|--------|--------|--------|
| 1     | 276    | 1923   | 6383   | 10204  | 9237   | 575    | 28598  |
|       | 0.97   | 6.72   | 22.32  | 35.68  | 32.30  | 2.01   | 100.00 |
|       | 0.97   | 6.72   | 22.32  | 35.68  | 32.30  | 2.01   |        |
|       | 100.00 | 100.00 | 100.00 | 100.00 | 100.00 | 100.00 |        |
| Total | 276    | 1923   | 6383   | 10204  | 9237   | 575    | 28598  |
|       | 0.97   | 6.72   | 22.32  | 35.68  | 32.30  | 2.01   | 100.00 |

Degree of missing values = 3892

Laboratory tests at the time of obtaining Table 2-6 consent, according to the presence or absence of proton-pump inhibitors

FREQ Procedure

Table : ALL \* t\_EGFR1

ALL t\_EGFR1

Power |

Percent |

Percent of rows

Percentage of columns | 1| 2| 3| 4| 5| 6| Total

|       | 1      | 2      | 3      | 4      | 5      | 6      | Total  |
|-------|--------|--------|--------|--------|--------|--------|--------|
| 1     | 276    | 1923   | 6383   | 10204  | 9237   | 575    | 28598  |
|       | 0.97   | 6.72   | 22.32  | 35.68  | 32.30  | 2.01   | 100.00 |
|       | 0.97   | 6.72   | 22.32  | 35.68  | 32.30  | 2.01   |        |
|       | 100.00 | 100.00 | 100.00 | 100.00 | 100.00 | 100.00 |        |
| Total | 276    | 1923   | 6383   | 10204  | 9237   | 575    | 28598  |
|       | 0.97   | 6.72   | 22.32  | 35.68  | 32.30  | 2.01   | 100.00 |

Degree of missing values = 3892

Laboratory tests at the time of obtaining Table 2-6 consent, according to the presence or absence of proton-pump inhibitors

FREQ Procedure

Table : ALL \* t\_EGFR1

ALL t\_EGFR1

Power |

Percent |

Percent of rows

Percentage of columns | 1| 2| 3| 4| 5| 6| Total

|       | 1      | 2      | 3      | 4      | 5      | 6      | Total  |
|-------|--------|--------|--------|--------|--------|--------|--------|
| 1     | 276    | 1923   | 6383   | 10204  | 9237   | 575    | 28598  |
|       | 0.97   | 6.72   | 22.32  | 35.68  | 32.30  | 2.01   | 100.00 |
|       | 0.97   | 6.72   | 22.32  | 35.68  | 32.30  | 2.01   |        |
|       | 100.00 | 100.00 | 100.00 | 100.00 | 100.00 | 100.00 |        |
| Total | 276    | 1923   | 6383   | 10204  | 9237   | 575    | 28598  |
|       | 0.97   | 6.72   | 22.32  | 35.68  | 32.30  | 2.01   | 100.00 |

Degree of missing values = 3892

Laboratory tests at the time of obtaining Table 2-6 consent, according to the presence or absence of proton-pump inhibitors

FREQ Procedure

Table : ALL \* t\_EGFR1

ALL t\_EGFR1

Power |

Percent |

Percent of rows

Percentage of columns | 1| 2| 3| 4| 5| 6| Total

|       | 1      | 2      | 3      | 4      | 5      | 6      | Total  |
|-------|--------|--------|--------|--------|--------|--------|--------|
| 1     | 276    | 1923   | 6383   | 10204  | 9237   | 575    | 28598  |
|       | 0.97   | 6.72   | 22.32  | 35.68  | 32.30  | 2.01   | 100.00 |
|       | 0.97   | 6.72   | 22.32  | 35.68  | 32.30  | 2.01   |        |
|       | 100.00 | 100.00 | 100.00 | 100.00 | 100.00 | 100.00 |        |
| Total | 276    | 1923   | 6383   | 10204  | 9237   | 575    | 28598  |
|       | 0.97   | 6.72   | 22.32  | 35.68  | 32.30  | 2.01   | 100.00 |

Degree of missing values = 3892

Laboratory tests at the time of obtaining Table 2-6 consent, according to the presence or absence of proton-pump inhibitors

FREQ Procedure

Table : ALL \* t\_EGFR1

ALL t\_EGFR1

Power |

Percent |

Percent of rows

Percentage of columns | 1| 2| 3| 4| 5| 6| Total

|       | 1      | 2      | 3      | 4      | 5      | 6      | Total  |
|-------|--------|--------|--------|--------|--------|--------|--------|
| 1     | 276    | 1923   | 6383   | 10204  | 9237   | 575    | 28598  |
|       | 0.97   | 6.72   | 22.32  | 35.68  | 32.30  | 2.01   | 100.00 |
|       | 0.97   | 6.72   | 22.32  | 35.68  | 32.30  | 2.01   |        |
|       | 100.00 | 100.00 | 100.00 | 100.00 | 100.00 | 100.00 |        |
| Total | 276    | 1923   | 6383   | 10204  | 9237   | 575    | 28598  |
|       | 0.97   | 6.72   | 22.32  | 35.68  | 32.30  | 2.01   | 100.00 |

Degree of missing values = 3892



Laboratory tests at the time of obtaining Table 2-6 consent, according to the presence or absence of proton-pump inhibitors

FREQ Procedure

Table : ALL \* t\_EGFR1

ALL t\_EGFR1

Power |

Percent |

Percent of rows

Percentage of columns | 1| 2| 3| 4| 5| 6| Total

|       | 1      | 2      | 3      | 4      | 5      | 6      | Total  |
|-------|--------|--------|--------|--------|--------|--------|--------|
| 1     | 276    | 1923   | 6383   | 10204  | 9237   | 575    | 28598  |
|       | 0.97   | 6.72   | 22.32  | 35.68  | 32.30  | 2.01   | 100.00 |
|       | 0.97   | 6.72   | 22.32  | 35.68  | 32.30  | 2.01   |        |
|       | 100.00 | 100.00 | 100.00 | 100.00 | 100.00 | 100.00 |        |
| Total | 276    | 1923   | 6383   | 10204  | 9237   | 575    | 28598  |
|       | 0.97   | 6.72   | 22.32  | 35.68  | 32.30  | 2.01   | 100.00 |

Degree of missing values = 3892

Laboratory tests at the time of obtaining Table 2-6 consent, according to the presence or absence of proton-pump inhibitors

FREQ Procedure

Table : ALL \* non\_EGFR1

ALL non\_EGFR1

Power |

Percent |

Percent of rows

Percent of columns | 1 | Total

|        |        |        |  |
|--------|--------|--------|--|
| _____+ |        | _____+ |  |
| 1      | 3892   | 3892   |  |
|        | 100.00 | 100.00 |  |
|        | 100.00 |        |  |
|        | 100.00 |        |  |
| _____+ |        | _____+ |  |
| Total  | 3892   | 3892   |  |
|        | 100.00 | 100.00 |  |

Frequency of missing values = 28598

Laboratory tests at the time of obtaining Table 2-6 consent, according to the presence or absence of proton-pump inhibitors

FREQ Procedure

Table : ALL \* HBAC\_BL

ALL HBAC\_BL(Category of Hemoglobin A1c at Baseline)

Power |

Percent |

Percent of rows

Column Percent|<6.0%|6.0%|More than |7.0%|More than |8.0%|Missing|Total

|| < 7.0%| < 8.0%| ||

|       | < 7.0% | < 8.0% |        |        |        |        |  |
|-------|--------|--------|--------|--------|--------|--------|--|
| 1     | 8796   | 6754   | 1565   | 556    | 14819  | 32490  |  |
|       | 27.07  | 20.79  | 4.82   | 1.71   | 45.61  | 100.00 |  |
|       | 27.07  | 20.79  | 4.82   | 1.71   | 45.61  |        |  |
|       | 100.00 | 100.00 | 100.00 | 100.00 | 100.00 |        |  |
| Total | 8796   | 6754   | 1565   | 556    | 14819  | 32490  |  |
|       | 27.07  | 20.79  | 4.82   | 1.71   | 45.61  | 100.00 |  |

Laboratory tests at the time of obtaining Table 2-6 consent, according to the presence or absence of proton-pump inhibitors

FREQ Procedure

Table : ALL \* HBAC\_BL

ALL HBAC\_BL(Category of Hemoglobin A1c at Baseline)

Power |

Percent |

Percent of rows

Column Percent|<6.0%|6.0%|More than |7.0%|More than |8.0%|Missing|Total

|| < 7.0%| < 8.0%| ||

|       | < 7.0% | < 8.0% |        |        |        |        |  |
|-------|--------|--------|--------|--------|--------|--------|--|
| 1     | 8796   | 6754   | 1565   | 556    | 14819  | 32490  |  |
|       | 27.07  | 20.79  | 4.82   | 1.71   | 45.61  | 100.00 |  |
|       | 27.07  | 20.79  | 4.82   | 1.71   | 45.61  |        |  |
|       | 100.00 | 100.00 | 100.00 | 100.00 | 100.00 |        |  |
| Total | 8796   | 6754   | 1565   | 556    | 14819  | 32490  |  |
|       | 27.07  | 20.79  | 4.82   | 1.71   | 45.61  | 100.00 |  |

Laboratory tests at the time of obtaining Table 2-6 consent, according to the presence or absence of proton-pump inhibitors

FREQ Procedure

Table : ALL \* HBAC\_BL

ALL HBAC\_BL(Category of Hemoglobin A1c at Baseline)

Power |

Percent |

Percent of rows

Column Percent|<6.0%|6.0%|More than |7.0%|More than |8.0%|Missing|Total

|| < 7.0%| < 8.0%| ||

|       | < 7.0% | < 8.0% |        |        |        |        |  |
|-------|--------|--------|--------|--------|--------|--------|--|
| 1     | 8796   | 6754   | 1565   | 556    | 14819  | 32490  |  |
|       | 27.07  | 20.79  | 4.82   | 1.71   | 45.61  | 100.00 |  |
|       | 27.07  | 20.79  | 4.82   | 1.71   | 45.61  |        |  |
|       | 100.00 | 100.00 | 100.00 | 100.00 | 100.00 |        |  |
| Total | 8796   | 6754   | 1565   | 556    | 14819  | 32490  |  |
|       | 27.07  | 20.79  | 4.82   | 1.71   | 45.61  | 100.00 |  |

Laboratory tests at the time of obtaining Table 2-6 consent, according to the presence or absence of proton-pump inhibitors

FREQ Procedure

Table : ALL \* HBAC\_BL

ALL HBAC\_BL(Category of Hemoglobin A1c at Baseline)

Power |

Percent |

Percent of rows

Column Percent|<6.0%|6.0%|More than |7.0%|More than |8.0%|Missing|Total

|| < 7.0%| < 8.0%| ||

|       | < 7.0% | < 8.0% |        |        |        |        |  |
|-------|--------|--------|--------|--------|--------|--------|--|
| 1     | 8796   | 6754   | 1565   | 556    | 14819  | 32490  |  |
|       | 27.07  | 20.79  | 4.82   | 1.71   | 45.61  | 100.00 |  |
|       | 27.07  | 20.79  | 4.82   | 1.71   | 45.61  |        |  |
|       | 100.00 | 100.00 | 100.00 | 100.00 | 100.00 |        |  |
| Total | 8796   | 6754   | 1565   | 556    | 14819  | 32490  |  |
|       | 27.07  | 20.79  | 4.82   | 1.71   | 45.61  | 100.00 |  |

Laboratory tests at the time of obtaining Table 2-6 consent, according to the presence or absence of proton-pump inhibitors

FREQ Procedure

Table : ALL \* HBAC\_BL

ALL HBAC\_BL(Category of Hemoglobin A1c at Baseline)

Power |

Percent |

Percent of rows

Column Percent|<6.0%|6.0%|More than |7.0%|More than |8.0%|Missing|Total

|| < 7.0%| < 8.0%| ||

|       | < 7.0% | < 8.0% |        |        |        |        |  |
|-------|--------|--------|--------|--------|--------|--------|--|
| 1     | 8796   | 6754   | 1565   | 556    | 14819  | 32490  |  |
|       | 27.07  | 20.79  | 4.82   | 1.71   | 45.61  | 100.00 |  |
|       | 27.07  | 20.79  | 4.82   | 1.71   | 45.61  |        |  |
|       | 100.00 | 100.00 | 100.00 | 100.00 | 100.00 |        |  |
| Total | 8796   | 6754   | 1565   | 556    | 14819  | 32490  |  |
|       | 27.07  | 20.79  | 4.82   | 1.71   | 45.61  | 100.00 |  |

Laboratory tests at the time of obtaining Table 2-6 consent, according to the presence or absence of proton-pump inhibitors

FREQ Procedure

|   |                      |                  | Cumulative |        |
|---|----------------------|------------------|------------|--------|
|   | Percent of ALL power | Percent of power |            |        |
| 1 | 11981                | 100.00           | 11981      | 100.00 |



Laboratory tests at the time of obtaining Table 2-6 consent, according to the presence or absence of proton-pump inhibitors

FREQ Procedure

Tables: ALL\* ACTYP

ALL

ACTYP(Type of AF)

Power |

Percent |

Percent of rows

Percent of column|Warfa| Total

|Phosphate|

| |

+ +

1 | 2955 | 2955

| 100.00 | 100.00

| 100.00 |

| 100.00 |

+ +

Total 2955 2955

100.00 100.00

Laboratory tests at the time of obtaining Table 2-6 consent, according to the presence or absence of proton-pump inhibitors

Unique Subject Identifier=0001110010-0003

MEANS Procedure

Assay variable : PTINR\_VAL1 PT-INR Value

| N | Mean      | Standard Deviation | Minimum   | Maximum   |
|---|-----------|--------------------|-----------|-----------|
| 3 | 2.0366667 | 0.2542309          | 1.7600000 | 2.2600000 |

Unique Subject Identifier=0001110010-0004

Assay variable : PTINR\_VAL1 PT-INR Value

| N | Mean      | Standard Deviation | Minimum   | Maximum   |
|---|-----------|--------------------|-----------|-----------|
| 4 | 2.7500000 | 0.3389199          | 2.3000000 | 3.0700000 |

Unique Subject Identifier=0001110010-0015

Assay variable : PTINR\_VAL1 PT-INR Value

| N | Mean      | Standard Deviation | Minimum   | Maximum   |
|---|-----------|--------------------|-----------|-----------|
| 3 | 2.0866667 | 0.1006645          | 1.9800000 | 2.1800000 |

Unique Subject Identifier=0001110010-0032

Assay variable : PTINR\_VAL1 PT-INR Value

N Mean Standard Deviation Minimum Maximum

---

|   |           |           |           |           |
|---|-----------|-----------|-----------|-----------|
| 4 | 2.3300000 | 0.4302712 | 1.8600000 | 2.7700000 |
|---|-----------|-----------|-----------|-----------|

---

Laboratory tests at the time of obtaining Table 2-6 consent, according to the presence or absence of proton-pump inhibitors

Unique Subject Identifier=0004110010-0010

MEANS Procedure

Assay variable : PTINR\_VAL1 PT-INR Value

N Mean Standard Deviation Minimum Maximum

---

|   |           |           |           |           |
|---|-----------|-----------|-----------|-----------|
| 6 | 1.8166667 | 0.2108712 | 1.5500000 | 2.0100000 |
|---|-----------|-----------|-----------|-----------|

---

Unique Subject Identifier=0004110010-0026

Assay variable : PTINR\_VAL1 PT-INR Value

N Mean Standard Deviation Minimum Maximum

---

|   |           |           |           |           |
|---|-----------|-----------|-----------|-----------|
| 6 | 1.8650000 | 0.2438647 | 1.4900000 | 2.1800000 |
|---|-----------|-----------|-----------|-----------|

---

Unique Subject Identifier=0004110010-0031

Assay variable : PTINR\_VAL1 PT-INR Value

N Mean Standard Deviation Minimum Maximum

---

|   |           |           |           |           |
|---|-----------|-----------|-----------|-----------|
| 4 | 2.1100000 | 0.1602082 | 1.9300000 | 2.3000000 |
|---|-----------|-----------|-----------|-----------|

---

Unique Subject Identifier=0004110010-0042

Assay variable : PTINR\_VAL1 PT-INR Value

N Mean Standard Deviation Minimum Maximum

---

|   |           |           |           |           |
|---|-----------|-----------|-----------|-----------|
| 4 | 1.7100000 | 0.1927001 | 1.4800000 | 1.9100000 |
|---|-----------|-----------|-----------|-----------|

---

Laboratory tests at the time of obtaining Table 2-6 consent, according to the presence or absence of proton-pump inhibitors

Unique Subject Identifier=0004110010-0047

MEANS Procedure

Assay variable : PTINR\_VAL1 PT-INR Value

N Mean Standard Deviation Minimum Maximum

---

|   |           |           |           |           |
|---|-----------|-----------|-----------|-----------|
| 3 | 1.8500000 | 0.3874274 | 1.4900000 | 2.2600000 |
|---|-----------|-----------|-----------|-----------|

---

Unique Subject Identifier=0005010000-0003

Assay variable : PTINR\_VAL1 PT-INR Value

N Mean Standard Deviation Minimum Maximum

---

|   |           |           |           |           |
|---|-----------|-----------|-----------|-----------|
| 6 | 1.9066667 | 0.4583739 | 1.3500000 | 2.6800000 |
|---|-----------|-----------|-----------|-----------|

---

Unique Subject Identifier=0005010000-0007

Assay variable : PTINR\_VAL1 PT-INR Value

N Mean Standard Deviation Minimum Maximum

---

|   |           |           |           |           |
|---|-----------|-----------|-----------|-----------|
| 3 | 1.9800000 | 0.4900000 | 1.4900000 | 2.4700000 |
|---|-----------|-----------|-----------|-----------|

---

Unique Subject Identifier=0005010000-0020

Assay variable : PTINR\_VAL1 PT-INR Value

N Mean Standard Deviation Minimum Maximum

---

|   |          |           |          |          |
|---|----------|-----------|----------|----------|
| 3 | 1.840000 | 0.1216553 | 1.700000 | 1.920000 |
|---|----------|-----------|----------|----------|

---

Laboratory tests at the time of obtaining Table 2-6 consent, according to the presence or absence of proton-pump inhibitors

Unique Subject Identifier=0005010000-0022

MEANS Procedure

Assay variable : PTINR\_VAL1 PT-INR Value

N Mean Standard Deviation Minimum Maximum

---

|   |           |           |           |           |
|---|-----------|-----------|-----------|-----------|
| 6 | 2.2233333 | 0.7559012 | 1.6600000 | 3.6100000 |
|---|-----------|-----------|-----------|-----------|

---

Unique Subject Identifier=0005010000-0034

Assay variable : PTINR\_VAL1 PT-INR Value

N Mean Standard Deviation Minimum Maximum

---

|   |           |           |           |           |
|---|-----------|-----------|-----------|-----------|
| 6 | 1.2433333 | 0.0997330 | 1.1400000 | 1.4000000 |
|---|-----------|-----------|-----------|-----------|

---

Unique Subject Identifier=0005010000-0050

Assay variable : PTINR\_VAL1 PT-INR Value

N Mean Standard Deviation Minimum Maximum

---

|   |           |           |           |           |
|---|-----------|-----------|-----------|-----------|
| 6 | 1.7866667 | 0.2182353 | 1.5600000 | 2.1200000 |
|---|-----------|-----------|-----------|-----------|

---

Unique Subject Identifier=0005010000-0052



Assay variable : PTINR\_VAL1 PT-INR Value

N Mean Standard Deviation Minimum Maximum

---

|   |           |           |           |           |
|---|-----------|-----------|-----------|-----------|
| 2 | 1.0900000 | 0.0707107 | 1.0400000 | 1.1400000 |
|---|-----------|-----------|-----------|-----------|

---

Laboratory tests at the time of obtaining Table 2-6 consent, according to the presence or absence of proton-pump inhibitors

Unique Subject Identifier=0005010000-0053

MEANS Procedure

Assay variable : PTINR\_VAL1 PT-INR Value

N Mean Standard Deviation Minimum Maximum

---

|   |           |           |           |           |
|---|-----------|-----------|-----------|-----------|
| 6 | 1.9983333 | 0.3748822 | 1.4700000 | 2.5400000 |
|---|-----------|-----------|-----------|-----------|

---

Unique Subject Identifier=0005010000-0058

Assay variable : PTINR\_VAL1 PT-INR Value

N Mean Standard Deviation Minimum Maximum

---

|   |           |           |           |           |
|---|-----------|-----------|-----------|-----------|
| 2 | 1.6950000 | 0.1484924 | 1.5900000 | 1.8000000 |
|---|-----------|-----------|-----------|-----------|

---

Unique Subject Identifier=0006100000-0006

Assay variable : PTINR\_VAL1 PT-INR Value

N Mean Standard Deviation Minimum Maximum

---

|   |           |           |           |           |
|---|-----------|-----------|-----------|-----------|
| 3 | 2.3633333 | 0.2098412 | 2.2000000 | 2.6000000 |
|---|-----------|-----------|-----------|-----------|

---

Unique Subject Identifier=0006100000-0016

Assay variable : PTINR\_VAL1 PT-INR Value

N Mean Standard Deviation Minimum Maximum

---

|   |           |           |           |           |
|---|-----------|-----------|-----------|-----------|
| 3 | 1.9400000 | 1.0544667 | 1.0900000 | 3.1200000 |
|---|-----------|-----------|-----------|-----------|

---

Laboratory tests at the time of obtaining Table 2-6 consent, according to the presence or absence of proton-pump inhibitors

Unique Subject Identifier=0006100000-0054

MEANS Procedure

Assay variable : PTINR\_VAL1 PT-INR Value

N Mean Standard Deviation Minimum Maximum

---

|   |           |           |           |           |
|---|-----------|-----------|-----------|-----------|
| 5 | 1.7740000 | 0.1986957 | 1.5800000 | 2.0200000 |
|---|-----------|-----------|-----------|-----------|

---

Unique Subject Identifier=0006100000-0056

Assay variable : PTINR\_VAL1 PT-INR Value

N Mean Standard Deviation Minimum Maximum

---

|   |           |           |           |           |
|---|-----------|-----------|-----------|-----------|
| 3 | 1.7166667 | 0.0986577 | 1.6500000 | 1.8300000 |
|---|-----------|-----------|-----------|-----------|

---

Unique Subject Identifier=0006100000-0062

Assay variable : PTINR\_VAL1 PT-INR Value

N Mean Standard Deviation Minimum Maximum

---

|   |           |           |           |           |
|---|-----------|-----------|-----------|-----------|
| 6 | 1.9066667 | 0.3507516 | 1.7100000 | 2.6200000 |
|---|-----------|-----------|-----------|-----------|

---

Unique Subject Identifier=0006100000-0064

Assay variable : PTINR\_VAL1 PT-INR Value

N Mean Standard Deviation Minimum Maximum

---

|   |           |           |           |           |
|---|-----------|-----------|-----------|-----------|
| 4 | 1.7800000 | 0.1888562 | 1.5600000 | 1.9700000 |
|---|-----------|-----------|-----------|-----------|

---

Laboratory tests at the time of obtaining Table 2-6 consent, according to the presence or absence of proton-pump inhibitors

Unique Subject Identifier=0006100000-0065

MEANS Procedure

Assay variable : PTINR\_VAL1 PT-INR Value

N Mean Standard Deviation Minimum Maximum

---

|   |           |           |           |           |
|---|-----------|-----------|-----------|-----------|
| 6 | 1.8983333 | 1.0817470 | 1.2700000 | 4.0900000 |
|---|-----------|-----------|-----------|-----------|

---

Unique Subject Identifier=0006100000-0068

Assay variable : PTINR\_VAL1 PT-INR Value

N Mean Standard Deviation Minimum Maximum

---

|   |           |  |           |           |
|---|-----------|--|-----------|-----------|
| 1 | 1.7700000 |  | 1.7700000 | 1.7700000 |
|---|-----------|--|-----------|-----------|

---

Unique Subject Identifier=0006100000-0069

Assay variable : PTINR\_VAL1 PT-INR Value

N Mean Standard Deviation Minimum Maximum

---

|   |           |           |           |           |
|---|-----------|-----------|-----------|-----------|
| 4 | 2.0075000 | 0.4908751 | 1.7100000 | 2.7400000 |
|---|-----------|-----------|-----------|-----------|

---

Unique Subject Identifier=0007011000-0001

Assay variable : PTINR\_VAL1 PT-INR Value

N Mean Standard Deviation Minimum Maximum

---

|   |           |           |           |           |
|---|-----------|-----------|-----------|-----------|
| 3 | 1.8966667 | 0.2950141 | 1.6000000 | 2.1900000 |
|---|-----------|-----------|-----------|-----------|

---

Laboratory tests at the time of obtaining Table 2-6 consent, according to the presence or absence of proton-pump inhibitors

Unique Subject Identifier=0007011000-0002

MEANS Procedure

Assay variable : PTINR\_VAL1 PT-INR Value

N Mean Standard Deviation Minimum Maximum

---

|   |           |           |           |           |
|---|-----------|-----------|-----------|-----------|
| 3 | 1.9133333 | 0.8891194 | 1.4000000 | 2.9400000 |
|---|-----------|-----------|-----------|-----------|

---

Unique Subject Identifier=0007011000-0005

Assay variable : PTINR\_VAL1 PT-INR Value

N Mean Standard Deviation Minimum Maximum

---

|   |           |           |           |           |
|---|-----------|-----------|-----------|-----------|
| 5 | 2.0900000 | 0.3537655 | 1.7300000 | 2.4700000 |
|---|-----------|-----------|-----------|-----------|

---

Unique Subject Identifier=0007011000-0022

Assay variable : PTINR\_VAL1 PT-INR Value

N Mean Standard Deviation Minimum Maximum

---

|   |           |           |           |           |
|---|-----------|-----------|-----------|-----------|
| 6 | 2.0483333 | 0.5314665 | 1.3000000 | 2.8300000 |
|---|-----------|-----------|-----------|-----------|

---

Unique Subject Identifier=0007011000-0043



Assay variable : PTINR\_VAL1 PT-INR Value

N Mean Standard Deviation Minimum Maximum

---

|   |          |           |          |          |
|---|----------|-----------|----------|----------|
| 3 | 1.610000 | 0.1014889 | 1.500000 | 1.700000 |
|---|----------|-----------|----------|----------|

---

Laboratory tests at the time of obtaining Table 2-6 consent, according to the presence or absence of proton-pump inhibitors

Unique Subject Identifier=0007011000-0078

MEANS Procedure

Assay variable : PTINR\_VAL1 PT-INR Value

N Mean Standard Deviation Minimum Maximum

---

|   |           |           |           |           |
|---|-----------|-----------|-----------|-----------|
| 4 | 1.7925000 | 0.1004573 | 1.7000000 | 1.9300000 |
|---|-----------|-----------|-----------|-----------|

---

Unique Subject Identifier=0007011000-0095

Assay variable : PTINR\_VAL1 PT-INR Value

N Mean Standard Deviation Minimum Maximum

---

|   |           |           |           |           |
|---|-----------|-----------|-----------|-----------|
| 5 | 1.1160000 | 0.0545894 | 1.0500000 | 1.1800000 |
|---|-----------|-----------|-----------|-----------|

---

Unique Subject Identifier=0007011000-0097

Assay variable : PTINR\_VAL1 PT-INR Value

N Mean Standard Deviation Minimum Maximum

---

|   |           |           |           |           |
|---|-----------|-----------|-----------|-----------|
| 6 | 1.6150000 | 0.1943965 | 1.3700000 | 1.9600000 |
|---|-----------|-----------|-----------|-----------|

---

Unique Subject Identifier=0007011000-0102

Assay variable : PTINR\_VAL1 PT-INR Value

N Mean Standard Deviation Minimum Maximum

---

|   |           |  |           |           |
|---|-----------|--|-----------|-----------|
| 1 | 1.6600000 |  | 1.6600000 | 1.6600000 |
|---|-----------|--|-----------|-----------|

---

Laboratory tests at the time of obtaining Table 2-6 consent, according to the presence or absence of proton-pump inhibitors

Unique Subject Identifier=0007011000-0112

MEANS Procedure

Assay variable : PTINR\_VAL1 PT-INR Value

N Mean Standard Deviation Minimum Maximum

---

|   |           |           |           |           |
|---|-----------|-----------|-----------|-----------|
| 3 | 2.1133333 | 0.5084617 | 1.8000000 | 2.7000000 |
|---|-----------|-----------|-----------|-----------|

---

Unique Subject Identifier=0007011000-0118

Assay variable : PTINR\_VAL1 PT-INR Value

N Mean Standard Deviation Minimum Maximum

---

|   |           |           |           |           |
|---|-----------|-----------|-----------|-----------|
| 3 | 1.5900000 | 0.3000000 | 1.2900000 | 1.8900000 |
|---|-----------|-----------|-----------|-----------|

---

Unique Subject Identifier=0007011000-0120

Assay variable : PTINR\_VAL1 PT-INR Value

N Mean Standard Deviation Minimum Maximum

---

|   |           |           |           |           |
|---|-----------|-----------|-----------|-----------|
| 3 | 1.9666667 | 0.1527525 | 1.8000000 | 2.1000000 |
|---|-----------|-----------|-----------|-----------|

---

Unique Subject Identifier=0007011000-0122

Assay variable : PTINR\_VAL1 PT-INR Value

N Mean Standard Deviation Minimum Maximum

---

|   |           |           |           |           |
|---|-----------|-----------|-----------|-----------|
| 6 | 1.7816667 | 0.3644402 | 1.2000000 | 2.2000000 |
|---|-----------|-----------|-----------|-----------|

---

Laboratory tests at the time of obtaining Table 2-6 consent, according to the presence or absence of proton-pump inhibitors

Unique Subject Identifier=0007011000-0135

MEANS Procedure

Assay variable : PTINR\_VAL1 PT-INR Value

N Mean Standard Deviation Minimum Maximum

---

|   |           |           |           |           |
|---|-----------|-----------|-----------|-----------|
| 5 | 2.1000000 | 0.4484417 | 1.5700000 | 2.8100000 |
|---|-----------|-----------|-----------|-----------|

---

Unique Subject Identifier=0007011000-0137

Assay variable : PTINR\_VAL1 PT-INR Value

N Mean Standard Deviation Minimum Maximum

---

|   |           |           |           |           |
|---|-----------|-----------|-----------|-----------|
| 3 | 1.3900000 | 0.0781025 | 1.3400000 | 1.4800000 |
|---|-----------|-----------|-----------|-----------|

---

Unique Subject Identifier=0008000110-0001

Assay variable : PTINR\_VAL1 PT-INR Value

N Mean Standard Deviation Minimum Maximum

---

|   |           |  |           |           |
|---|-----------|--|-----------|-----------|
| 1 | 2.2800000 |  | 2.2800000 | 2.2800000 |
|---|-----------|--|-----------|-----------|

---

Unique Subject Identifier=0009010000-0013

Assay variable : PTINR\_VAL1 PT-INR Value

N Mean Standard Deviation Minimum Maximum

---

|   |           |           |           |           |
|---|-----------|-----------|-----------|-----------|
| 3 | 2.4933333 | 0.3326159 | 2.2400000 | 2.8700000 |
|---|-----------|-----------|-----------|-----------|

---

Laboratory tests at the time of obtaining Table 2-6 consent, according to the presence or absence of proton-pump inhibitors

Unique Subject Identifier=0009010000-0041

MEANS Procedure

Assay variable : PTINR\_VAL1 PT-INR Value

| N | Mean      | Standard Deviation | Minimum   | Maximum   |
|---|-----------|--------------------|-----------|-----------|
| 3 | 1.5933333 | 0.0723418          | 1.5100000 | 1.6400000 |

Unique Subject Identifier=0009010000-0043

Assay variable : PTINR\_VAL1 PT-INR Value

| N | Mean      | Standard Deviation | Minimum   | Maximum   |
|---|-----------|--------------------|-----------|-----------|
| 2 | 2.5200000 | 0.4525483          | 2.2000000 | 2.8400000 |

Unique Subject Identifier=0009010000-0044

Assay variable : PTINR\_VAL1 PT-INR Value

| N | Mean      | Standard Deviation | Minimum   | Maximum   |
|---|-----------|--------------------|-----------|-----------|
| 2 | 2.7550000 | 0.4737615          | 2.4200000 | 3.0900000 |

Unique Subject Identifier=0009010000-0072



Assay variable : PTINR\_VAL1 PT-INR Value

N Mean Standard Deviation Minimum Maximum

---

|   |           |           |           |           |
|---|-----------|-----------|-----------|-----------|
| 6 | 2.0783333 | 0.4169612 | 1.6500000 | 2.8700000 |
|---|-----------|-----------|-----------|-----------|

---

Laboratory tests at the time of obtaining Table 2-6 consent, according to the presence or absence of proton-pump inhibitors

Unique Subject Identifier=0009010000-0085

MEANS Procedure

Assay variable : PTINR\_VAL1 PT-INR Value

| N | Mean      | Standard Deviation | Minimum   | Maximum   |
|---|-----------|--------------------|-----------|-----------|
| 3 | 2.0700000 | 0.2946184          | 1.8100000 | 2.3900000 |

Unique Subject Identifier=0009010000-0087

Assay variable : PTINR\_VAL1 PT-INR Value

| N | Mean      | Standard Deviation | Minimum   | Maximum   |
|---|-----------|--------------------|-----------|-----------|
| 5 | 1.4800000 | 0.0930054          | 1.3800000 | 1.6100000 |

Unique Subject Identifier=0009010000-0090

Assay variable : PTINR\_VAL1 PT-INR Value

| N | Mean      | Standard Deviation | Minimum   | Maximum   |
|---|-----------|--------------------|-----------|-----------|
| 5 | 1.8860000 | 0.4982269          | 1.2900000 | 2.5700000 |

Unique Subject Identifier=0009010000-0112

Assay variable : PTINR\_VAL1 PT-INR Value

N Mean Standard Deviation Minimum Maximum

---

|   |           |           |           |           |
|---|-----------|-----------|-----------|-----------|
| 3 | 1.8366667 | 0.5005330 | 1.3500000 | 2.3500000 |
|---|-----------|-----------|-----------|-----------|

---

Laboratory tests at the time of obtaining Table 2-6 consent, according to the presence or absence of proton-pump inhibitors

Unique Subject Identifier=0009010000-0114

MEANS Procedure

Assay variable : PTINR\_VAL1 PT-INR Value

N Mean Standard Deviation Minimum Maximum

---

|   |           |           |           |           |
|---|-----------|-----------|-----------|-----------|
| 3 | 2.2966667 | 0.6668083 | 1.6600000 | 2.9900000 |
|---|-----------|-----------|-----------|-----------|

---

Unique Subject Identifier=0009010000-0130

Assay variable : PTINR\_VAL1 PT-INR Value

N Mean Standard Deviation Minimum Maximum

---

|   |           |           |           |           |
|---|-----------|-----------|-----------|-----------|
| 4 | 1.2725000 | 0.2150000 | 1.0400000 | 1.5600000 |
|---|-----------|-----------|-----------|-----------|

---

Unique Subject Identifier=0009010000-0137

Assay variable : PTINR\_VAL1 PT-INR Value

N Mean Standard Deviation Minimum Maximum

---

|   |           |           |           |           |
|---|-----------|-----------|-----------|-----------|
| 5 | 1.6860000 | 0.3005495 | 1.2200000 | 1.9700000 |
|---|-----------|-----------|-----------|-----------|

---

Unique Subject Identifier=0009010000-0149

Assay variable : PTINR\_VAL1 PT-INR Value

N Mean Standard Deviation Minimum Maximum

---

|   |           |           |           |           |
|---|-----------|-----------|-----------|-----------|
| 4 | 2.3825000 | 0.2696139 | 2.0200000 | 2.6600000 |
|---|-----------|-----------|-----------|-----------|

---

Laboratory tests at the time of obtaining Table 2-6 consent, according to the presence or absence of proton-pump inhibitors

Unique Subject Identifier=0009010000-0178

MEANS Procedure

Assay variable : PTINR\_VAL1 PT-INR Value

| N | Mean      | Standard Deviation | Minimum   | Maximum   |
|---|-----------|--------------------|-----------|-----------|
| 2 | 1.9800000 | 0.3959798          | 1.7000000 | 2.2600000 |

Unique Subject Identifier=0009010000-0223

Assay variable : PTINR\_VAL1 PT-INR Value

| N | Mean      | Standard Deviation | Minimum   | Maximum   |
|---|-----------|--------------------|-----------|-----------|
| 6 | 2.1433333 | 0.2331237          | 1.8100000 | 2.4600000 |

Unique Subject Identifier=0009010000-0239

Assay variable : PTINR\_VAL1 PT-INR Value

| N | Mean      | Standard Deviation | Minimum   | Maximum   |
|---|-----------|--------------------|-----------|-----------|
| 3 | 1.6366667 | 0.0493288          | 1.5800000 | 1.6700000 |

Unique Subject Identifier=0009010000-0246

Assay variable : PTINR\_VAL1 PT-INR Value

N Mean Standard Deviation Minimum Maximum

---

|   |           |           |           |           |
|---|-----------|-----------|-----------|-----------|
| 4 | 2.5500000 | 0.3987480 | 1.9700000 | 2.8800000 |
|---|-----------|-----------|-----------|-----------|

---

Laboratory tests at the time of obtaining Table 2-6 consent, according to the presence or absence of proton-pump inhibitors

Unique Subject Identifier=0009010000-0254

MEANS Procedure

Assay variable : PTINR\_VAL1 PT-INR Value

N Mean Standard Deviation Minimum Maximum

---

|   |          |           |          |          |
|---|----------|-----------|----------|----------|
| 2 | 1.340000 | 0.1131371 | 1.260000 | 1.420000 |
|---|----------|-----------|----------|----------|

---

Unique Subject Identifier=0016011100-0001

Assay variable : PTINR\_VAL1 PT-INR Value

N Mean Standard Deviation Minimum Maximum

---

|   |          |           |          |          |
|---|----------|-----------|----------|----------|
| 2 | 2.255000 | 0.0070711 | 2.250000 | 2.260000 |
|---|----------|-----------|----------|----------|

---

Unique Subject Identifier=0017010000-0003

Assay variable : PTINR\_VAL1 PT-INR Value

N Mean Standard Deviation Minimum Maximum

---

|   |          |          |          |          |
|---|----------|----------|----------|----------|
| 4 | 2.177500 | 0.135000 | 1.990000 | 2.290000 |
|---|----------|----------|----------|----------|

---

Unique Subject Identifier=0017010000-0015



Assay variable : PTINR\_VAL1 PT-INR Value

N Mean Standard Deviation Minimum Maximum

---

|   |           |           |           |           |
|---|-----------|-----------|-----------|-----------|
| 4 | 2.0900000 | 0.2738613 | 1.8500000 | 2.4600000 |
|---|-----------|-----------|-----------|-----------|

---

Laboratory tests at the time of obtaining Table 2-6 consent, according to the presence or absence of proton-pump inhibitors

Unique Subject Identifier=0017010000-0028

MEANS Procedure

Assay variable : PTINR\_VAL1 PT-INR Value

N Mean Standard Deviation Minimum Maximum

---

|   |           |           |           |           |
|---|-----------|-----------|-----------|-----------|
| 4 | 2.5500000 | 0.5575542 | 1.7700000 | 3.0400000 |
|---|-----------|-----------|-----------|-----------|

---

Unique Subject Identifier=0017010000-0038

Assay variable : PTINR\_VAL1 PT-INR Value

N Mean Standard Deviation Minimum Maximum

---

|   |           |           |           |           |
|---|-----------|-----------|-----------|-----------|
| 3 | 2.1200000 | 0.1228821 | 1.9800000 | 2.2100000 |
|---|-----------|-----------|-----------|-----------|

---

Unique Subject Identifier=0017010000-0071

Assay variable : PTINR\_VAL1 PT-INR Value

N Mean Standard Deviation Minimum Maximum

---

|   |           |           |           |           |
|---|-----------|-----------|-----------|-----------|
| 3 | 1.9066667 | 0.0472582 | 1.8700000 | 1.9600000 |
|---|-----------|-----------|-----------|-----------|

---

Unique Subject Identifier=0017010000-0082

Assay variable : PTINR\_VAL1 PT-INR Value

N Mean Standard Deviation Minimum Maximum

---

|   |          |           |          |          |
|---|----------|-----------|----------|----------|
| 3 | 2.380000 | 0.7171471 | 1.770000 | 3.170000 |
|---|----------|-----------|----------|----------|

---

Laboratory tests at the time of obtaining Table 2-6 consent, according to the presence or absence of proton-pump inhibitors

Unique Subject Identifier=0019010000-0026

MEANS Procedure

Assay variable : PTINR\_VAL1 PT-INR Value

N Mean Standard Deviation Minimum Maximum

---

|   |           |           |           |           |
|---|-----------|-----------|-----------|-----------|
| 4 | 1.8475000 | 0.2385197 | 1.5600000 | 2.1400000 |
|---|-----------|-----------|-----------|-----------|

---

Unique Subject Identifier=0019010000-0031

Assay variable : PTINR\_VAL1 PT-INR Value

N Mean Standard Deviation Minimum Maximum

---

|   |           |           |           |           |
|---|-----------|-----------|-----------|-----------|
| 2 | 1.6300000 | 0.0989949 | 1.5600000 | 1.7000000 |
|---|-----------|-----------|-----------|-----------|

---

Unique Subject Identifier=0019010000-0041

Assay variable : PTINR\_VAL1 PT-INR Value

N Mean Standard Deviation Minimum Maximum

---

|   |           |           |           |           |
|---|-----------|-----------|-----------|-----------|
| 3 | 2.2533333 | 0.2742870 | 1.9400000 | 2.4500000 |
|---|-----------|-----------|-----------|-----------|

---

Unique Subject Identifier=0019010000-0043

Assay variable : PTINR\_VAL1 PT-INR Value

N Mean Standard Deviation Minimum Maximum

---

|   |           |           |           |           |
|---|-----------|-----------|-----------|-----------|
| 2 | 2.2850000 | 0.0636396 | 2.2400000 | 2.3300000 |
|---|-----------|-----------|-----------|-----------|

---

Laboratory tests at the time of obtaining Table 2-6 consent, according to the presence or absence of proton-pump inhibitors

Unique Subject Identifier=0019010000-0057

MEANS Procedure

Assay variable : PTINR\_VAL1 PT-INR Value

N Mean Standard Deviation Minimum Maximum

---

|   |           |           |           |           |
|---|-----------|-----------|-----------|-----------|
| 3 | 1.8700000 | 0.0173205 | 1.8600000 | 1.8900000 |
|---|-----------|-----------|-----------|-----------|

---

Unique Subject Identifier=0019010000-0086

Assay variable : PTINR\_VAL1 PT-INR Value

N Mean Standard Deviation Minimum Maximum

---

|   |           |           |           |           |
|---|-----------|-----------|-----------|-----------|
| 3 | 2.5833333 | 0.4772141 | 2.0500000 | 2.9700000 |
|---|-----------|-----------|-----------|-----------|

---

Unique Subject Identifier=0019010000-0097

Assay variable : PTINR\_VAL1 PT-INR Value

N Mean Standard Deviation Minimum Maximum

---

|   |           |           |           |           |
|---|-----------|-----------|-----------|-----------|
| 3 | 2.3900000 | 0.0888819 | 2.3200000 | 2.4900000 |
|---|-----------|-----------|-----------|-----------|

---

Unique Subject Identifier=0019010000-0112

Assay variable : PTINR\_VAL1 PT-INR Value

N Mean Standard Deviation Minimum Maximum

---

|   |          |           |          |          |
|---|----------|-----------|----------|----------|
| 3 | 2.933333 | 1.3891124 | 1.410000 | 4.130000 |
|---|----------|-----------|----------|----------|

---

Laboratory tests at the time of obtaining Table 2-6 consent, according to the presence or absence of proton-pump inhibitors

Unique Subject Identifier=0021000000-0009

MEANS Procedure

Assay variable : PTINR\_VAL1 PT-INR Value

N Mean Standard Deviation Minimum Maximum

---

|   |           |           |           |           |
|---|-----------|-----------|-----------|-----------|
| 6 | 2.1216667 | 0.1859480 | 1.9100000 | 2.3800000 |
|---|-----------|-----------|-----------|-----------|

---

Unique Subject Identifier=0021000000-0012

Assay variable : PTINR\_VAL1 PT-INR Value

N Mean Standard Deviation Minimum Maximum

---

|   |           |           |           |           |
|---|-----------|-----------|-----------|-----------|
| 3 | 1.7833333 | 0.1365040 | 1.6900000 | 1.9400000 |
|---|-----------|-----------|-----------|-----------|

---

Unique Subject Identifier=0021000000-0017

Assay variable : PTINR\_VAL1 PT-INR Value

N Mean Standard Deviation Minimum Maximum

---

|   |           |           |           |           |
|---|-----------|-----------|-----------|-----------|
| 6 | 1.6866667 | 0.1303329 | 1.6000000 | 1.9500000 |
|---|-----------|-----------|-----------|-----------|

---

Unique Subject Identifier=0021000000-0027



Assay variable : PTINR\_VAL1 PT-INR Value

N Mean Standard Deviation Minimum Maximum

---

|   |          |           |          |          |
|---|----------|-----------|----------|----------|
| 5 | 2.230000 | 0.2109502 | 1.920000 | 2.460000 |
|---|----------|-----------|----------|----------|

---

Laboratory tests at the time of obtaining Table 2-6 consent, according to the presence or absence of proton-pump inhibitors

Unique Subject Identifier=0027000000-0022

MEANS Procedure

Assay variable : PTINR\_VAL1 PT-INR Value

N Mean Standard Deviation Minimum Maximum

---

|   |           |           |           |           |
|---|-----------|-----------|-----------|-----------|
| 3 | 1.9033333 | 0.1656301 | 1.7300000 | 2.0600000 |
|---|-----------|-----------|-----------|-----------|

---

Unique Subject Identifier=0030010010-0012

Assay variable : PTINR\_VAL1 PT-INR Value

N Mean Standard Deviation Minimum Maximum

---

|   |           |           |           |           |
|---|-----------|-----------|-----------|-----------|
| 6 | 1.7750000 | 0.1925357 | 1.4900000 | 2.0500000 |
|---|-----------|-----------|-----------|-----------|

---

Unique Subject Identifier=0031110001-0007

Assay variable : PTINR\_VAL1 PT-INR Value

N Mean Standard Deviation Minimum Maximum

---

|   |           |           |           |           |
|---|-----------|-----------|-----------|-----------|
| 3 | 2.6366667 | 0.3496188 | 2.4200000 | 3.0400000 |
|---|-----------|-----------|-----------|-----------|

---

Unique Subject Identifier=0031110001-0023

Assay variable : PTINR\_VAL1 PT-INR Value

N Mean Standard Deviation Minimum Maximum

---

|   |          |           |          |          |
|---|----------|-----------|----------|----------|
| 3 | 2.160000 | 0.0781025 | 2.070000 | 2.210000 |
|---|----------|-----------|----------|----------|

---

Laboratory tests at the time of obtaining Table 2-6 consent, according to the presence or absence of proton-pump inhibitors

Unique Subject Identifier=0031110001-0025

MEANS Procedure

Assay variable : PTINR\_VAL1 PT-INR Value

N Mean Standard Deviation Minimum Maximum

---

|   |           |           |           |           |
|---|-----------|-----------|-----------|-----------|
| 3 | 2.2066667 | 0.2615977 | 1.9300000 | 2.4500000 |
|---|-----------|-----------|-----------|-----------|

---

Unique Subject Identifier=0032110000-0008

Assay variable : PTINR\_VAL1 PT-INR Value

N Mean Standard Deviation Minimum Maximum

---

|   |           |           |           |           |
|---|-----------|-----------|-----------|-----------|
| 6 | 1.3133333 | 0.1148332 | 1.1300000 | 1.4200000 |
|---|-----------|-----------|-----------|-----------|

---

Unique Subject Identifier=0038111111-0011

Assay variable : PTINR\_VAL1 PT-INR Value

N Mean Standard Deviation Minimum Maximum

---

|   |           |           |           |           |
|---|-----------|-----------|-----------|-----------|
| 6 | 1.5683333 | 0.1190658 | 1.4300000 | 1.7500000 |
|---|-----------|-----------|-----------|-----------|

---

Unique Subject Identifier=0038111111-0019

Assay variable : PTINR\_VAL1 PT-INR Value

N Mean Standard Deviation Minimum Maximum

---

|   |           |           |           |           |
|---|-----------|-----------|-----------|-----------|
| 5 | 2.0840000 | 0.3230015 | 1.7300000 | 2.4800000 |
|---|-----------|-----------|-----------|-----------|

---

Laboratory tests at the time of obtaining Table 2-6 consent, according to the presence or absence of proton-pump inhibitors

Unique Subject Identifier=0038111111-0022

MEANS Procedure

Assay variable : PTINR\_VAL1 PT-INR Value

N Mean Standard Deviation Minimum Maximum

---

|   |           |           |           |           |
|---|-----------|-----------|-----------|-----------|
| 6 | 2.3133333 | 0.6361027 | 1.2200000 | 3.1000000 |
|---|-----------|-----------|-----------|-----------|

---

Unique Subject Identifier=0041110000-0011

Assay variable : PTINR\_VAL1 PT-INR Value

N Mean Standard Deviation Minimum Maximum

---

|   |           |           |           |           |
|---|-----------|-----------|-----------|-----------|
| 2 | 1.9750000 | 0.3889087 | 1.7000000 | 2.2500000 |
|---|-----------|-----------|-----------|-----------|

---

Unique Subject Identifier=0042100010-0003

Assay variable : PTINR\_VAL1 PT-INR Value

N Mean Standard Deviation Minimum Maximum

---

|   |           |           |           |           |
|---|-----------|-----------|-----------|-----------|
| 5 | 1.8320000 | 0.2375289 | 1.5900000 | 2.1300000 |
|---|-----------|-----------|-----------|-----------|

---

Unique Subject Identifier=0042100010-0006

Assay variable : PTINR\_VAL1 PT-INR Value

N Mean Standard Deviation Minimum Maximum

---

|   |           |           |           |           |
|---|-----------|-----------|-----------|-----------|
| 6 | 2.2916667 | 0.3726884 | 1.9300000 | 2.8300000 |
|---|-----------|-----------|-----------|-----------|

---

Laboratory tests at the time of obtaining Table 2-6 consent, according to the presence or absence of proton-pump inhibitors

Unique Subject Identifier=0043010010-0001

MEANS Procedure

Assay variable : PTINR\_VAL1 PT-INR Value

N Mean Standard Deviation Minimum Maximum

---

|   |           |           |           |           |
|---|-----------|-----------|-----------|-----------|
| 4 | 1.8025000 | 0.2833578 | 1.4100000 | 2.0200000 |
|---|-----------|-----------|-----------|-----------|

---

Unique Subject Identifier=0043010010-0003

Assay variable : PTINR\_VAL1 PT-INR Value

N Mean Standard Deviation Minimum Maximum

---

|   |           |           |           |           |
|---|-----------|-----------|-----------|-----------|
| 2 | 1.4700000 | 0.0565685 | 1.4300000 | 1.5100000 |
|---|-----------|-----------|-----------|-----------|

---

Unique Subject Identifier=0043010010-0007

Assay variable : PTINR\_VAL1 PT-INR Value

N Mean Standard Deviation Minimum Maximum

---

|   |           |           |           |           |
|---|-----------|-----------|-----------|-----------|
| 5 | 2.0780000 | 0.7081102 | 1.4600000 | 3.2300000 |
|---|-----------|-----------|-----------|-----------|

---

Unique Subject Identifier=0046100001-0002



Assay variable : PTINR\_VAL1 PT-INR Value

N Mean Standard Deviation Minimum Maximum

---

|   |           |           |           |           |
|---|-----------|-----------|-----------|-----------|
| 6 | 2.2733333 | 0.2268627 | 2.0200000 | 2.6100000 |
|---|-----------|-----------|-----------|-----------|

---

Laboratory tests at the time of obtaining Table 2-6 consent, according to the presence or absence of proton-pump inhibitors

Unique Subject Identifier=0046100001-0003

MEANS Procedure

Assay variable : PTINR\_VAL1 PT-INR Value

N Mean Standard Deviation Minimum Maximum

---

|   |           |           |           |           |
|---|-----------|-----------|-----------|-----------|
| 4 | 2.0625000 | 0.3096638 | 1.7700000 | 2.3400000 |
|---|-----------|-----------|-----------|-----------|

---

Unique Subject Identifier=0046100001-0011

Assay variable : PTINR\_VAL1 PT-INR Value

N Mean Standard Deviation Minimum Maximum

---

|   |           |           |           |           |
|---|-----------|-----------|-----------|-----------|
| 6 | 1.7933333 | 0.5809877 | 1.1400000 | 2.7400000 |
|---|-----------|-----------|-----------|-----------|

---

Unique Subject Identifier=0046100001-0022

Assay variable : PTINR\_VAL1 PT-INR Value

N Mean Standard Deviation Minimum Maximum

---

|   |           |           |           |           |
|---|-----------|-----------|-----------|-----------|
| 6 | 3.1633333 | 1.9392335 | 1.1800000 | 6.4300000 |
|---|-----------|-----------|-----------|-----------|

---

Unique Subject Identifier=0046100001-0027

Assay variable : PTINR\_VAL1 PT-INR Value

N Mean Standard Deviation Minimum Maximum

---

|   |           |           |           |           |
|---|-----------|-----------|-----------|-----------|
| 6 | 1.8350000 | 0.4404884 | 1.3100000 | 2.4700000 |
|---|-----------|-----------|-----------|-----------|

---

Laboratory tests at the time of obtaining Table 2-6 consent, according to the presence or absence of proton-pump inhibitors

Unique Subject Identifier=0046100001-0047

MEANS Procedure

Assay variable : PTINR\_VAL1 PT-INR Value

| N | Mean      | Standard Deviation | Minimum   | Maximum   |
|---|-----------|--------------------|-----------|-----------|
| 3 | 1.6033333 | 0.1365040          | 1.4800000 | 1.7500000 |

Unique Subject Identifier=0046100001-0049

Assay variable : PTINR\_VAL1 PT-INR Value

| N | Mean      | Standard Deviation | Minimum   | Maximum   |
|---|-----------|--------------------|-----------|-----------|
| 3 | 1.7633333 | 0.3695042          | 1.5500000 | 2.1900000 |

Unique Subject Identifier=0046100001-0066

Assay variable : PTINR\_VAL1 PT-INR Value

| N | Mean      | Standard Deviation | Minimum   | Maximum   |
|---|-----------|--------------------|-----------|-----------|
| 2 | 2.2950000 | 0.4879037          | 1.9500000 | 2.6400000 |

Unique Subject Identifier=0046100001-0073

Assay variable : PTINR\_VAL1 PT-INR Value

N Mean Standard Deviation Minimum Maximum

---

|   |           |           |           |           |
|---|-----------|-----------|-----------|-----------|
| 4 | 1.2925000 | 0.0750000 | 1.2300000 | 1.3800000 |
|---|-----------|-----------|-----------|-----------|

---

Laboratory tests at the time of obtaining Table 2-6 consent, according to the presence or absence of proton-pump inhibitors

Unique Subject Identifier=0046100001-0082

MEANS Procedure

Assay variable : PTINR\_VAL1 PT-INR Value

N Mean Standard Deviation Minimum Maximum

---

|   |           |  |           |           |
|---|-----------|--|-----------|-----------|
| 1 | 2.3100000 |  | 2.3100000 | 2.3100000 |
|---|-----------|--|-----------|-----------|

---

Unique Subject Identifier=0048000010-0003

Assay variable : PTINR\_VAL1 PT-INR Value

N Mean Standard Deviation Minimum Maximum

---

|   |           |           |           |           |
|---|-----------|-----------|-----------|-----------|
| 3 | 1.6566667 | 0.2050203 | 1.4500000 | 1.8600000 |
|---|-----------|-----------|-----------|-----------|

---

Unique Subject Identifier=0049000010-0005

Assay variable : PTINR\_VAL1 PT-INR Value

N Mean Standard Deviation Minimum Maximum

---

|   |           |           |           |           |
|---|-----------|-----------|-----------|-----------|
| 6 | 2.2850000 | 0.2167718 | 2.0400000 | 2.5900000 |
|---|-----------|-----------|-----------|-----------|

---

Unique Subject Identifier=0049000010-0006

Assay variable : PTINR\_VAL1 PT-INR Value

N Mean Standard Deviation Minimum Maximum

---

|   |           |           |           |           |
|---|-----------|-----------|-----------|-----------|
| 5 | 1.9750000 | 0.6737025 | 1.3400000 | 3.1000000 |
|---|-----------|-----------|-----------|-----------|

---

Laboratory tests at the time of obtaining Table 2-6 consent, according to the presence or absence of proton-pump inhibitors

Unique Subject Identifier=0049000010-0008

MEANS Procedure

Assay variable : PTINR\_VAL1 PT-INR Value

N Mean Standard Deviation Minimum Maximum

---

|   |           |           |           |           |
|---|-----------|-----------|-----------|-----------|
| 5 | 1.9020000 | 0.0957601 | 1.7700000 | 2.0200000 |
|---|-----------|-----------|-----------|-----------|

---

Unique Subject Identifier=0049000010-0011

Assay variable : PTINR\_VAL1 PT-INR Value

N Mean Standard Deviation Minimum Maximum

---

|   |           |           |           |           |
|---|-----------|-----------|-----------|-----------|
| 4 | 1.8350000 | 0.2335951 | 1.6200000 | 2.1200000 |
|---|-----------|-----------|-----------|-----------|

---

Unique Subject Identifier=0049000010-0015

Assay variable : PTINR\_VAL1 PT-INR Value

N Mean Standard Deviation Minimum Maximum

---

|   |           |           |           |           |
|---|-----------|-----------|-----------|-----------|
| 6 | 1.8416667 | 0.4710166 | 1.4100000 | 2.7300000 |
|---|-----------|-----------|-----------|-----------|

---

Unique Subject Identifier=0054010000-0020



Assay variable : PTINR\_VAL1 PT-INR Value

N Mean Standard Deviation Minimum Maximum

---

|   |           |  |           |           |
|---|-----------|--|-----------|-----------|
| 1 | 2.2300000 |  | 2.2300000 | 2.2300000 |
|---|-----------|--|-----------|-----------|

---

Laboratory tests at the time of obtaining Table 2-6 consent, according to the presence or absence of proton-pump inhibitors

Unique Subject Identifier=0054010000-0027

MEANS Procedure

Assay variable : PTINR\_VAL1 PT-INR Value

N Mean Standard Deviation Minimum Maximum

---

|   |           |           |           |           |
|---|-----------|-----------|-----------|-----------|
| 3 | 1.7700000 | 0.1646208 | 1.6700000 | 1.9600000 |
|---|-----------|-----------|-----------|-----------|

---

Unique Subject Identifier=0055100000-0001

Assay variable : PTINR\_VAL1 PT-INR Value

N Mean Standard Deviation Minimum Maximum

---

|   |           |           |           |           |
|---|-----------|-----------|-----------|-----------|
| 4 | 1.8175000 | 0.0754431 | 1.7700000 | 1.9300000 |
|---|-----------|-----------|-----------|-----------|

---

Unique Subject Identifier=0059100000-0003

Assay variable : PTINR\_VAL1 PT-INR Value

N Mean Standard Deviation Minimum Maximum

---

|   |           |           |           |           |
|---|-----------|-----------|-----------|-----------|
| 6 | 1.7716667 | 0.1251266 | 1.6400000 | 1.9700000 |
|---|-----------|-----------|-----------|-----------|

---

Unique Subject Identifier=0059100000-0005

Assay variable : PTINR\_VAL1 PT-INR Value

N Mean Standard Deviation Minimum Maximum

---

|   |           |           |           |           |
|---|-----------|-----------|-----------|-----------|
| 5 | 1.5380000 | 0.2161481 | 1.3400000 | 1.8400000 |
|---|-----------|-----------|-----------|-----------|

---

Laboratory tests at the time of obtaining Table 2-6 consent, according to the presence or absence of proton-pump inhibitors

Unique Subject Identifier=0061000000-0005

MEANS Procedure

Assay variable : PTINR\_VAL1 PT-INR Value

N Mean Standard Deviation Minimum Maximum

---

|   |           |           |           |           |
|---|-----------|-----------|-----------|-----------|
| 3 | 2.1266667 | 0.4099187 | 1.8900000 | 2.6000000 |
|---|-----------|-----------|-----------|-----------|

---

Unique Subject Identifier=0061000000-0018

Assay variable : PTINR\_VAL1 PT-INR Value

N Mean Standard Deviation Minimum Maximum

---

|   |           |  |           |           |
|---|-----------|--|-----------|-----------|
| 1 | 1.0800000 |  | 1.0800000 | 1.0800000 |
|---|-----------|--|-----------|-----------|

---

Unique Subject Identifier=0061000000-0019

Assay variable : PTINR\_VAL1 PT-INR Value

N Mean Standard Deviation Minimum Maximum

---

|   |           |           |           |           |
|---|-----------|-----------|-----------|-----------|
| 2 | 2.4500000 | 0.9616652 | 1.7700000 | 3.1300000 |
|---|-----------|-----------|-----------|-----------|

---

Unique Subject Identifier=0063010000-0029

Assay variable : PTINR\_VAL1 PT-INR Value

N Mean Standard Deviation Minimum Maximum

---

|   |           |           |           |           |
|---|-----------|-----------|-----------|-----------|
| 3 | 1.9566667 | 0.2571640 | 1.7700000 | 2.2500000 |
|---|-----------|-----------|-----------|-----------|

---

Laboratory tests at the time of obtaining Table 2-6 consent, according to the presence or absence of proton-pump inhibitors

Unique Subject Identifier=0063010000-0041

MEANS Procedure

Assay variable : PTINR\_VAL1 PT-INR Value

N Mean Standard Deviation Minimum Maximum

---

|   |           |           |           |           |
|---|-----------|-----------|-----------|-----------|
| 2 | 1.7050000 | 0.5586144 | 1.3100000 | 2.1000000 |
|---|-----------|-----------|-----------|-----------|

---

Unique Subject Identifier=0063010000-0044

Assay variable : PTINR\_VAL1 PT-INR Value

N Mean Standard Deviation Minimum Maximum

---

|   |           |           |           |           |
|---|-----------|-----------|-----------|-----------|
| 3 | 2.4366667 | 0.3066486 | 2.1900000 | 2.7800000 |
|---|-----------|-----------|-----------|-----------|

---

Unique Subject Identifier=0063110000-0004

Assay variable : PTINR\_VAL1 PT-INR Value

N Mean Standard Deviation Minimum Maximum

---

|   |           |           |           |           |
|---|-----------|-----------|-----------|-----------|
| 6 | 1.8750000 | 0.0531977 | 1.8300000 | 1.9800000 |
|---|-----------|-----------|-----------|-----------|

---

Unique Subject Identifier=0063110000-0005

Assay variable : PTINR\_VAL1 PT-INR Value

N Mean Standard Deviation Minimum Maximum

---

|   |           |           |           |           |
|---|-----------|-----------|-----------|-----------|
| 5 | 2.7820000 | 0.5848248 | 1.9100000 | 3.3800000 |
|---|-----------|-----------|-----------|-----------|

---

Laboratory tests at the time of obtaining Table 2-6 consent, according to the presence or absence of proton-pump inhibitors

Unique Subject Identifier=0063110000-0007

MEANS Procedure

Assay variable : PTINR\_VAL1 PT-INR Value

N Mean Standard Deviation Minimum Maximum

---

|   |           |           |           |           |
|---|-----------|-----------|-----------|-----------|
| 2 | 1.8050000 | 0.0919239 | 1.7400000 | 1.8700000 |
|---|-----------|-----------|-----------|-----------|

---

Unique Subject Identifier=0063110000-0012

Assay variable : PTINR\_VAL1 PT-INR Value

N Mean Standard Deviation Minimum Maximum

---

|   |           |           |           |           |
|---|-----------|-----------|-----------|-----------|
| 5 | 1.9900000 | 0.9109336 | 1.2200000 | 3.5600000 |
|---|-----------|-----------|-----------|-----------|

---

Unique Subject Identifier=0063110000-0015

Assay variable : PTINR\_VAL1 PT-INR Value

N Mean Standard Deviation Minimum Maximum

---

|   |           |           |           |           |
|---|-----------|-----------|-----------|-----------|
| 4 | 2.0775000 | 1.0203717 | 1.3600000 | 3.5900000 |
|---|-----------|-----------|-----------|-----------|

---

Unique Subject Identifier=0064010110-0011



Assay variable : PTINR\_VAL1 PT-INR Value

N Mean Standard Deviation Minimum Maximum

---

|   |           |           |           |           |
|---|-----------|-----------|-----------|-----------|
| 6 | 1.7750000 | 0.1013410 | 1.6100000 | 1.9100000 |
|---|-----------|-----------|-----------|-----------|

---

Laboratory tests at the time of obtaining Table 2-6 consent, according to the presence or absence of proton-pump inhibitors

Unique Subject Identifier=0069000000-0003

MEANS Procedure

Assay variable : PTINR\_VAL1 PT-INR Value

N Mean Standard Deviation Minimum Maximum

---

|   |           |           |           |           |
|---|-----------|-----------|-----------|-----------|
| 6 | 1.8816667 | 0.5136698 | 1.5700000 | 2.9000000 |
|---|-----------|-----------|-----------|-----------|

---

Unique Subject Identifier=0069000000-0014

Assay variable : PTINR\_VAL1 PT-INR Value

N Mean Standard Deviation Minimum Maximum

---

|   |           |           |           |           |
|---|-----------|-----------|-----------|-----------|
| 6 | 3.1800000 | 2.1056116 | 1.4200000 | 6.8400000 |
|---|-----------|-----------|-----------|-----------|

---

Unique Subject Identifier=0070000000-0013

Assay variable : PTINR\_VAL1 PT-INR Value

N Mean Standard Deviation Minimum Maximum

---

|   |           |           |           |           |
|---|-----------|-----------|-----------|-----------|
| 3 | 2.1933333 | 0.2554082 | 1.9900000 | 2.4800000 |
|---|-----------|-----------|-----------|-----------|

---

Unique Subject Identifier=0070000000-0026

Assay variable : PTINR\_VAL1 PT-INR Value

N Mean Standard Deviation Minimum Maximum

---

|   |           |           |           |           |
|---|-----------|-----------|-----------|-----------|
| 6 | 2.6550000 | 0.1619568 | 2.4700000 | 2.8500000 |
|---|-----------|-----------|-----------|-----------|

---

Laboratory tests at the time of obtaining Table 2-6 consent, according to the presence or absence of proton-pump inhibitors

Unique Subject Identifier=0070000000-0028

MEANS Procedure

Assay variable : PTINR\_VAL1 PT-INR Value

N Mean Standard Deviation Minimum Maximum

---

|   |           |           |           |           |
|---|-----------|-----------|-----------|-----------|
| 3 | 1.8166667 | 0.2800595 | 1.6500000 | 2.1400000 |
|---|-----------|-----------|-----------|-----------|

---

Unique Subject Identifier=0070000000-0029

Assay variable : PTINR\_VAL1 PT-INR Value

N Mean Standard Deviation Minimum Maximum

---

|   |           |           |           |           |
|---|-----------|-----------|-----------|-----------|
| 4 | 2.5775000 | 0.5146763 | 2.1100000 | 3.2100000 |
|---|-----------|-----------|-----------|-----------|

---

Unique Subject Identifier=0070000000-0031

Assay variable : PTINR\_VAL1 PT-INR Value

N Mean Standard Deviation Minimum Maximum

---

|   |           |           |           |           |
|---|-----------|-----------|-----------|-----------|
| 3 | 1.7400000 | 0.1967232 | 1.5300000 | 1.9200000 |
|---|-----------|-----------|-----------|-----------|

---

Unique Subject Identifier=0070000000-0033

Assay variable : PTINR\_VAL1 PT-INR Value

N Mean Standard Deviation Minimum Maximum

---

|   |          |           |          |          |
|---|----------|-----------|----------|----------|
| 3 | 1.810000 | 0.0655744 | 1.750000 | 1.880000 |
|---|----------|-----------|----------|----------|

---

Laboratory tests at the time of obtaining Table 2-6 consent, according to the presence or absence of proton-pump inhibitors

Unique Subject Identifier=0070000000-0043

MEANS Procedure

Assay variable : PTINR\_VAL1 PT-INR Value

N Mean Standard Deviation Minimum Maximum

---

|   |           |           |           |           |
|---|-----------|-----------|-----------|-----------|
| 4 | 1.7825000 | 0.1664081 | 1.5700000 | 1.9700000 |
|---|-----------|-----------|-----------|-----------|

---

Unique Subject Identifier=0070000000-0050

Assay variable : PTINR\_VAL1 PT-INR Value

N Mean Standard Deviation Minimum Maximum

---

|   |           |           |           |           |
|---|-----------|-----------|-----------|-----------|
| 6 | 2.2550000 | 1.2352935 | 1.4300000 | 4.7300000 |
|---|-----------|-----------|-----------|-----------|

---

Unique Subject Identifier=0070000000-0054

Assay variable : PTINR\_VAL1 PT-INR Value

N Mean Standard Deviation Minimum Maximum

---

|   |           |           |           |           |
|---|-----------|-----------|-----------|-----------|
| 5 | 2.2600000 | 0.3611094 | 1.8900000 | 2.6900000 |
|---|-----------|-----------|-----------|-----------|

---

Unique Subject Identifier=0070000000-0058

Assay variable : PTINR\_VAL1 PT-INR Value

N Mean Standard Deviation Minimum Maximum

---

|   |          |           |          |          |
|---|----------|-----------|----------|----------|
| 3 | 2.250000 | 0.3811824 | 2.020000 | 2.690000 |
|---|----------|-----------|----------|----------|

---

Laboratory tests at the time of obtaining Table 2-6 consent, according to the presence or absence of proton-pump inhibitors

Unique Subject Identifier=0070000000-0067

MEANS Procedure

Assay variable : PTINR\_VAL1 PT-INR Value

N Mean Standard Deviation Minimum Maximum

---

|   |          |           |          |          |
|---|----------|-----------|----------|----------|
| 4 | 2.340000 | 0.0496655 | 2.290000 | 2.400000 |
|---|----------|-----------|----------|----------|

---

Unique Subject Identifier=0071000000-0002

Assay variable : PTINR\_VAL1 PT-INR Value

N Mean Standard Deviation Minimum Maximum

---

|   |          |  |          |          |
|---|----------|--|----------|----------|
| 1 | 2.130000 |  | 2.130000 | 2.130000 |
|---|----------|--|----------|----------|

---

Unique Subject Identifier=0071000000-0005

Assay variable : PTINR\_VAL1 PT-INR Value

N Mean Standard Deviation Minimum Maximum

---

|   |          |           |          |          |
|---|----------|-----------|----------|----------|
| 6 | 1.908333 | 0.1915637 | 1.720000 | 2.200000 |
|---|----------|-----------|----------|----------|

---

Unique Subject Identifier=0071000000-0008



Assay variable : PTINR\_VAL1 PT-INR Value

N Mean Standard Deviation Minimum Maximum

---

|   |           |           |           |           |
|---|-----------|-----------|-----------|-----------|
| 3 | 1.7433333 | 0.1556706 | 1.5800000 | 1.8900000 |
|---|-----------|-----------|-----------|-----------|

---

Laboratory tests at the time of obtaining Table 2-6 consent, according to the presence or absence of proton-pump inhibitors

Unique Subject Identifier=0071000000-0010

MEANS Procedure

Assay variable : PTINR\_VAL1 PT-INR Value

N Mean Standard Deviation Minimum Maximum

---

|   |           |           |           |           |
|---|-----------|-----------|-----------|-----------|
| 4 | 1.8125000 | 0.2233644 | 1.5500000 | 2.0700000 |
|---|-----------|-----------|-----------|-----------|

---

Unique Subject Identifier=0071000000-0016

Assay variable : PTINR\_VAL1 PT-INR Value

N Mean Standard Deviation Minimum Maximum

---

|   |           |  |           |           |
|---|-----------|--|-----------|-----------|
| 1 | 2.0500000 |  | 2.0500000 | 2.0500000 |
|---|-----------|--|-----------|-----------|

---

Unique Subject Identifier=0071000000-0019

Assay variable : PTINR\_VAL1 PT-INR Value

N Mean Standard Deviation Minimum Maximum

---

|   |           |           |           |           |
|---|-----------|-----------|-----------|-----------|
| 5 | 1.9220000 | 0.0683374 | 1.8700000 | 2.0400000 |
|---|-----------|-----------|-----------|-----------|

---

Unique Subject Identifier=0071000000-0020

Assay variable : PTINR\_VAL1 PT-INR Value

N Mean Standard Deviation Minimum Maximum

---

|   |           |           |           |           |
|---|-----------|-----------|-----------|-----------|
| 4 | 2.4150000 | 0.4956813 | 2.0700000 | 3.1500000 |
|---|-----------|-----------|-----------|-----------|

---

Laboratory tests at the time of obtaining Table 2-6 consent, according to the presence or absence of proton-pump inhibitors

Unique Subject Identifier=0071000000-0027

MEANS Procedure

Assay variable : PTINR\_VAL1 PT-INR Value

N Mean Standard Deviation Minimum Maximum

---

|   |           |           |           |           |
|---|-----------|-----------|-----------|-----------|
| 4 | 1.5950000 | 0.3139533 | 1.2600000 | 1.9100000 |
|---|-----------|-----------|-----------|-----------|

---

Unique Subject Identifier=0072000000-0004

Assay variable : PTINR\_VAL1 PT-INR Value

N Mean Standard Deviation Minimum Maximum

---

|   |           |           |           |           |
|---|-----------|-----------|-----------|-----------|
| 6 | 1.8583333 | 0.3816499 | 1.4300000 | 2.2900000 |
|---|-----------|-----------|-----------|-----------|

---

Unique Subject Identifier=0072000000-0011

Assay variable : PTINR\_VAL1 PT-INR Value

N Mean Standard Deviation Minimum Maximum

---

|   |           |           |           |           |
|---|-----------|-----------|-----------|-----------|
| 6 | 1.6583333 | 0.2003414 | 1.4000000 | 2.0200000 |
|---|-----------|-----------|-----------|-----------|

---

Unique Subject Identifier=0076011000-0005

Assay variable : PTINR\_VAL1 PT-INR Value

N Mean Standard Deviation Minimum Maximum

---

|   |           |           |           |           |
|---|-----------|-----------|-----------|-----------|
| 5 | 1.8240000 | 1.0294319 | 1.0100000 | 3.5100000 |
|---|-----------|-----------|-----------|-----------|

---

Laboratory tests at the time of obtaining Table 2-6 consent, according to the presence or absence of proton-pump inhibitors

Unique Subject Identifier=0076011000-0015

MEANS Procedure

Assay variable : PTINR\_VAL1 PT-INR Value

N Mean Standard Deviation Minimum Maximum

---

|   |           |           |           |           |
|---|-----------|-----------|-----------|-----------|
| 2 | 1.8200000 | 0.1131371 | 1.7400000 | 1.9000000 |
|---|-----------|-----------|-----------|-----------|

---

Unique Subject Identifier=0076011000-0017

Assay variable : PTINR\_VAL1 PT-INR Value

N Mean Standard Deviation Minimum Maximum

---

|   |           |           |           |           |
|---|-----------|-----------|-----------|-----------|
| 4 | 1.2225000 | 0.0330404 | 1.2000000 | 1.2700000 |
|---|-----------|-----------|-----------|-----------|

---

Unique Subject Identifier=0077000000-0004

Assay variable : PTINR\_VAL1 PT-INR Value

N Mean Standard Deviation Minimum Maximum

---

|   |           |           |           |           |
|---|-----------|-----------|-----------|-----------|
| 4 | 2.1100000 | 1.0274564 | 1.0300000 | 3.4900000 |
|---|-----------|-----------|-----------|-----------|

---

Unique Subject Identifier=0078001000-0005

Assay variable : PTINR\_VAL1 PT-INR Value

N Mean Standard Deviation Minimum Maximum

---

|   |          |           |           |           |
|---|----------|-----------|-----------|-----------|
| 3 | 2.113333 | 0.2804164 | 1.8700000 | 2.4200000 |
|---|----------|-----------|-----------|-----------|

---

Laboratory tests at the time of obtaining Table 2-6 consent, according to the presence or absence of proton-pump inhibitors

Unique Subject Identifier=0078001000-0016

MEANS Procedure

Assay variable : PTINR\_VAL1 PT-INR Value

N Mean Standard Deviation Minimum Maximum

---

|   |           |           |           |           |
|---|-----------|-----------|-----------|-----------|
| 4 | 2.2425000 | 1.1359101 | 1.5000000 | 3.9200000 |
|---|-----------|-----------|-----------|-----------|

---

Unique Subject Identifier=0079000000-0002

Assay variable : PTINR\_VAL1 PT-INR Value

N Mean Standard Deviation Minimum Maximum

---

|   |           |           |           |           |
|---|-----------|-----------|-----------|-----------|
| 3 | 1.9466667 | 0.2103172 | 1.7300000 | 2.1500000 |
|---|-----------|-----------|-----------|-----------|

---

Unique Subject Identifier=0079000000-0009

Assay variable : PTINR\_VAL1 PT-INR Value

N Mean Standard Deviation Minimum Maximum

---

|   |           |           |           |           |
|---|-----------|-----------|-----------|-----------|
| 3 | 1.7866667 | 0.0850490 | 1.6900000 | 1.8500000 |
|---|-----------|-----------|-----------|-----------|

---

Unique Subject Identifier=0079000000-0020



Assay variable : PTINR\_VAL1 PT-INR Value

N Mean Standard Deviation Minimum Maximum

---

|   |           |           |           |           |
|---|-----------|-----------|-----------|-----------|
| 4 | 1.8125000 | 0.2628529 | 1.4700000 | 2.0600000 |
|---|-----------|-----------|-----------|-----------|

---

Laboratory tests at the time of obtaining Table 2-6 consent, according to the presence or absence of proton-pump inhibitors

Unique Subject Identifier=0079000000-0029

MEANS Procedure

Assay variable : PTINR\_VAL1 PT-INR Value

| N | Mean      | Standard Deviation | Minimum   | Maximum   |
|---|-----------|--------------------|-----------|-----------|
| 3 | 1.9366667 | 0.5179125          | 1.3400000 | 2.2700000 |

Unique Subject Identifier=0081000000-0005

Assay variable : PTINR\_VAL1 PT-INR Value

| N | Mean      | Standard Deviation | Minimum   | Maximum   |
|---|-----------|--------------------|-----------|-----------|
| 4 | 1.6250000 | 0.2651415          | 1.3800000 | 2.0000000 |

Unique Subject Identifier=0081000000-0006

Assay variable : PTINR\_VAL1 PT-INR Value

| N | Mean      | Standard Deviation | Minimum   | Maximum   |
|---|-----------|--------------------|-----------|-----------|
| 3 | 1.6066667 | 0.2400694          | 1.4300000 | 1.8800000 |

Unique Subject Identifier=0081000000-0010

Assay variable : PTINR\_VAL1 PT-INR Value

N Mean Standard Deviation Minimum Maximum

---

|   |           |           |           |           |
|---|-----------|-----------|-----------|-----------|
| 4 | 2.0850000 | 0.1552417 | 1.8900000 | 2.2700000 |
|---|-----------|-----------|-----------|-----------|

---

Laboratory tests at the time of obtaining Table 2-6 consent, according to the presence or absence of proton-pump inhibitors

Unique Subject Identifier=0081000000-0011

MEANS Procedure

Assay variable : PTINR\_VAL1 PT-INR Value

N Mean Standard Deviation Minimum Maximum

---

|   |           |           |           |           |
|---|-----------|-----------|-----------|-----------|
| 6 | 2.3900000 | 0.7361522 | 1.3800000 | 3.6200000 |
|---|-----------|-----------|-----------|-----------|

---

Unique Subject Identifier=0085000000-0007

Assay variable : PTINR\_VAL1 PT-INR Value

N Mean Standard Deviation Minimum Maximum

---

|   |           |           |           |           |
|---|-----------|-----------|-----------|-----------|
| 6 | 1.8800000 | 0.5933633 | 1.2700000 | 2.9200000 |
|---|-----------|-----------|-----------|-----------|

---

Unique Subject Identifier=0086100000-0010

Assay variable : PTINR\_VAL1 PT-INR Value

N Mean Standard Deviation Minimum Maximum

---

|   |           |  |           |           |
|---|-----------|--|-----------|-----------|
| 1 | 2.5800000 |  | 2.5800000 | 2.5800000 |
|---|-----------|--|-----------|-----------|

---

Unique Subject Identifier=0086100000-0019

Assay variable : PTINR\_VAL1 PT-INR Value

N Mean Standard Deviation Minimum Maximum

---

|   |           |           |           |           |
|---|-----------|-----------|-----------|-----------|
| 4 | 1.6750000 | 0.2030599 | 1.4400000 | 1.8900000 |
|---|-----------|-----------|-----------|-----------|

---

Laboratory tests at the time of obtaining Table 2-6 consent, according to the presence or absence of proton-pump inhibitors

Unique Subject Identifier=0094001000-0016

MEANS Procedure

Assay variable : PTINR\_VAL1 PT-INR Value

N Mean Standard Deviation Minimum Maximum

---

|   |           |           |           |           |
|---|-----------|-----------|-----------|-----------|
| 4 | 1.5175000 | 0.2064582 | 1.2500000 | 1.6900000 |
|---|-----------|-----------|-----------|-----------|

---

Unique Subject Identifier=0094001000-0018

Assay variable : PTINR\_VAL1 PT-INR Value

N Mean Standard Deviation Minimum Maximum

---

|   |           |           |           |           |
|---|-----------|-----------|-----------|-----------|
| 3 | 2.0966667 | 0.1850225 | 1.9800000 | 2.3100000 |
|---|-----------|-----------|-----------|-----------|

---

Unique Subject Identifier=0094001000-0023

Assay variable : PTINR\_VAL1 PT-INR Value

N Mean Standard Deviation Minimum Maximum

---

|   |           |           |           |           |
|---|-----------|-----------|-----------|-----------|
| 3 | 1.9300000 | 0.0818535 | 1.8600000 | 2.0200000 |
|---|-----------|-----------|-----------|-----------|

---

Unique Subject Identifier=0094001000-0049

Assay variable : PTINR\_VAL1 PT-INR Value

N Mean Standard Deviation Minimum Maximum

---

|   |           |           |           |           |
|---|-----------|-----------|-----------|-----------|
| 4 | 1.9250000 | 0.4018706 | 1.4100000 | 2.3400000 |
|---|-----------|-----------|-----------|-----------|

---

Laboratory tests at the time of obtaining Table 2-6 consent, according to the presence or absence of proton-pump inhibitors

Unique Subject Identifier=0098000000-0002

MEANS Procedure

Assay variable : PTINR\_VAL1 PT-INR Value

N Mean Standard Deviation Minimum Maximum

---

|   |           |           |           |           |
|---|-----------|-----------|-----------|-----------|
| 6 | 1.9750000 | 0.3007158 | 1.5600000 | 2.4900000 |
|---|-----------|-----------|-----------|-----------|

---

Unique Subject Identifier=0098000000-0007

Assay variable : PTINR\_VAL1 PT-INR Value

N Mean Standard Deviation Minimum Maximum

---

|   |           |           |           |           |
|---|-----------|-----------|-----------|-----------|
| 5 | 1.9360000 | 0.3231563 | 1.5900000 | 2.4600000 |
|---|-----------|-----------|-----------|-----------|

---

Unique Subject Identifier=0098000000-0012

Assay variable : PTINR\_VAL1 PT-INR Value

N Mean Standard Deviation Minimum Maximum

---

|   |           |           |           |           |
|---|-----------|-----------|-----------|-----------|
| 6 | 2.0800000 | 0.2728369 | 1.8000000 | 2.4900000 |
|---|-----------|-----------|-----------|-----------|

---

Unique Subject Identifier=0098000000-0013



Assay variable : PTINR\_VAL1 PT-INR Value

N Mean Standard Deviation Minimum Maximum

---

|   |           |           |           |           |
|---|-----------|-----------|-----------|-----------|
| 6 | 1.4966667 | 0.3375599 | 1.2000000 | 1.9700000 |
|---|-----------|-----------|-----------|-----------|

---

Laboratory tests at the time of obtaining Table 2-6 consent, according to the presence or absence of proton-pump inhibitors

Unique Subject Identifier=0098000000-0016

MEANS Procedure

Assay variable : PTINR\_VAL1 PT-INR Value

N Mean Standard Deviation Minimum Maximum

---

|   |           |           |           |           |
|---|-----------|-----------|-----------|-----------|
| 6 | 2.1116667 | 0.4949108 | 1.5200000 | 2.9500000 |
|---|-----------|-----------|-----------|-----------|

---

Unique Subject Identifier=0098000000-0017

Assay variable : PTINR\_VAL1 PT-INR Value

N Mean Standard Deviation Minimum Maximum

---

|   |           |           |           |           |
|---|-----------|-----------|-----------|-----------|
| 6 | 1.5916667 | 0.2320704 | 1.1500000 | 1.8100000 |
|---|-----------|-----------|-----------|-----------|

---

Unique Subject Identifier=0102000000-0002

Assay variable : PTINR\_VAL1 PT-INR Value

N Mean Standard Deviation Minimum Maximum

---

|   |           |           |           |           |
|---|-----------|-----------|-----------|-----------|
| 6 | 1.5333333 | 0.1966384 | 1.2000000 | 1.7000000 |
|---|-----------|-----------|-----------|-----------|

---

Unique Subject Identifier=0102000000-0008

Assay variable : PTINR\_VAL1 PT-INR Value

N Mean Standard Deviation Minimum Maximum

---

|   |           |           |           |           |
|---|-----------|-----------|-----------|-----------|
| 6 | 1.8833333 | 0.8035339 | 1.2000000 | 3.2000000 |
|---|-----------|-----------|-----------|-----------|

---

Laboratory tests at the time of obtaining Table 2-6 consent, according to the presence or absence of proton-pump inhibitors

Unique Subject Identifier=0102000000-0009

MEANS Procedure

Assay variable : PTINR\_VAL1 PT-INR Value

N Mean Standard Deviation Minimum Maximum

---

|   |           |           |           |           |
|---|-----------|-----------|-----------|-----------|
| 6 | 1.7166667 | 0.3188521 | 1.4000000 | 2.3000000 |
|---|-----------|-----------|-----------|-----------|

---

Unique Subject Identifier=0103000000-0009

Assay variable : PTINR\_VAL1 PT-INR Value

N Mean Standard Deviation Minimum Maximum

---

|   |           |           |           |           |
|---|-----------|-----------|-----------|-----------|
| 6 | 1.8450000 | 0.2712748 | 1.5500000 | 2.3300000 |
|---|-----------|-----------|-----------|-----------|

---

Unique Subject Identifier=0103000000-0015

Assay variable : PTINR\_VAL1 PT-INR Value

N Mean Standard Deviation Minimum Maximum

---

|   |           |           |           |           |
|---|-----------|-----------|-----------|-----------|
| 6 | 1.8083333 | 0.1024532 | 1.6900000 | 1.9800000 |
|---|-----------|-----------|-----------|-----------|

---

Unique Subject Identifier=0103000000-0017

Assay variable : PTINR\_VAL1 PT-INR Value

N Mean Standard Deviation Minimum Maximum

---

|   |           |           |           |           |
|---|-----------|-----------|-----------|-----------|
| 4 | 2.3025000 | 0.2242580 | 1.9800000 | 2.5000000 |
|---|-----------|-----------|-----------|-----------|

---

Laboratory tests at the time of obtaining Table 2-6 consent, according to the presence or absence of proton-pump inhibitors

Unique Subject Identifier=0120000000-0003

MEANS Procedure

Assay variable : PTINR\_VAL1 PT-INR Value

N Mean Standard Deviation Minimum Maximum

---

|   |           |           |           |           |
|---|-----------|-----------|-----------|-----------|
| 2 | 2.0250000 | 0.3323402 | 1.7900000 | 2.2600000 |
|---|-----------|-----------|-----------|-----------|

---

Unique Subject Identifier=0120000000-0004

Assay variable : PTINR\_VAL1 PT-INR Value

N Mean Standard Deviation Minimum Maximum

---

|   |           |           |           |           |
|---|-----------|-----------|-----------|-----------|
| 3 | 1.7433333 | 0.2494661 | 1.4600000 | 1.9300000 |
|---|-----------|-----------|-----------|-----------|

---

Unique Subject Identifier=0121010000-0005

Assay variable : PTINR\_VAL1 PT-INR Value

N Mean Standard Deviation Minimum Maximum

---

|   |           |           |           |           |
|---|-----------|-----------|-----------|-----------|
| 6 | 1.9666667 | 0.2250926 | 1.6000000 | 2.3000000 |
|---|-----------|-----------|-----------|-----------|

---

Unique Subject Identifier=0121010000-0012

Assay variable : PTINR\_VAL1 PT-INR Value

N Mean Standard Deviation Minimum Maximum

---

|   |           |           |           |           |
|---|-----------|-----------|-----------|-----------|
| 6 | 2.2166667 | 0.2857738 | 1.8000000 | 2.6000000 |
|---|-----------|-----------|-----------|-----------|

---

Laboratory tests at the time of obtaining Table 2-6 consent, according to the presence or absence of proton-pump inhibitors

Unique Subject Identifier=0121010000-0014

MEANS Procedure

Assay variable : PTINR\_VAL1 PT-INR Value

N Mean Standard Deviation Minimum Maximum

---

|   |          |           |          |          |
|---|----------|-----------|----------|----------|
| 6 | 2.150000 | 0.1048809 | 2.000000 | 2.300000 |
|---|----------|-----------|----------|----------|

---

Unique Subject Identifier=0121010000-0023

Assay variable : PTINR\_VAL1 PT-INR Value

N Mean Standard Deviation Minimum Maximum

---

|   |          |           |          |          |
|---|----------|-----------|----------|----------|
| 6 | 2.150000 | 0.6379655 | 1.600000 | 3.400000 |
|---|----------|-----------|----------|----------|

---

Unique Subject Identifier=0132000000-0003

Assay variable : PTINR\_VAL1 PT-INR Value

N Mean Standard Deviation Minimum Maximum

---

|   |          |           |          |          |
|---|----------|-----------|----------|----------|
| 2 | 2.495000 | 0.1909188 | 2.360000 | 2.630000 |
|---|----------|-----------|----------|----------|

---

Unique Subject Identifier=0132000000-0009



Assay variable : PTINR\_VAL1 PT-INR Value

N Mean Standard Deviation Minimum Maximum

---

|   |           |           |           |           |
|---|-----------|-----------|-----------|-----------|
| 4 | 1.6600000 | 0.3465064 | 1.1700000 | 1.9100000 |
|---|-----------|-----------|-----------|-----------|

---

Laboratory tests at the time of obtaining Table 2-6 consent, according to the presence or absence of proton-pump inhibitors

Unique Subject Identifier=0132000000-0012

MEANS Procedure

Assay variable : PTINR\_VAL1 PT-INR Value

| N | Mean      | Standard Deviation | Minimum   | Maximum   |
|---|-----------|--------------------|-----------|-----------|
| 3 | 1.5266667 | 0.3661056          | 1.1200000 | 1.8300000 |

Unique Subject Identifier=0133000000-0001

Assay variable : PTINR\_VAL1 PT-INR Value

| N | Mean      | Standard Deviation | Minimum   | Maximum   |
|---|-----------|--------------------|-----------|-----------|
| 4 | 1.3675000 | 0.2090255          | 1.0800000 | 1.5800000 |

Unique Subject Identifier=0133000000-0005

Assay variable : PTINR\_VAL1 PT-INR Value

| N | Mean      | Standard Deviation | Minimum   | Maximum   |
|---|-----------|--------------------|-----------|-----------|
| 3 | 1.8500000 | 0.0556776          | 1.7900000 | 1.9000000 |

Unique Subject Identifier=0133000000-0010

Assay variable : PTINR\_VAL1 PT-INR Value

N Mean Standard Deviation Minimum Maximum

---

|   |           |           |           |           |
|---|-----------|-----------|-----------|-----------|
| 3 | 2.2966667 | 0.6230837 | 1.7600000 | 2.9800000 |
|---|-----------|-----------|-----------|-----------|

---

Laboratory tests at the time of obtaining Table 2-6 consent, according to the presence or absence of proton-pump inhibitors

Unique Subject Identifier=0133000000-0011

MEANS Procedure

Assay variable : PTINR\_VAL1 PT-INR Value

| N | Mean      | Standard Deviation | Minimum   | Maximum   |
|---|-----------|--------------------|-----------|-----------|
| 5 | 1.7120000 | 0.1485598          | 1.5300000 | 1.9300000 |

Unique Subject Identifier=0133000000-0012

Assay variable : PTINR\_VAL1 PT-INR Value

| N | Mean      | Standard Deviation | Minimum   | Maximum   |
|---|-----------|--------------------|-----------|-----------|
| 3 | 1.5366667 | 0.0288675          | 1.5200000 | 1.5700000 |

Unique Subject Identifier=0133000000-0013

Assay variable : PTINR\_VAL1 PT-INR Value

| N | Mean      | Standard Deviation | Minimum   | Maximum   |
|---|-----------|--------------------|-----------|-----------|
| 2 | 1.4750000 | 0.0494975          | 1.4400000 | 1.5100000 |

Unique Subject Identifier=0133000000-0015

Assay variable : PTINR\_VAL1 PT-INR Value

N Mean Standard Deviation Minimum Maximum

---

|   |           |  |           |           |
|---|-----------|--|-----------|-----------|
| 1 | 2.0400000 |  | 2.0400000 | 2.0400000 |
|---|-----------|--|-----------|-----------|

---

Laboratory tests at the time of obtaining Table 2-6 consent, according to the presence or absence of proton-pump inhibitors

Unique Subject Identifier=0133000000-0045

MEANS Procedure

Assay variable : PTINR\_VAL1 PT-INR Value

| N | Mean      | Standard Deviation | Minimum   | Maximum   |
|---|-----------|--------------------|-----------|-----------|
| 3 | 2.2766667 | 0.7092484          | 1.5000000 | 2.8900000 |

Unique Subject Identifier=0133000000-0052

Assay variable : PTINR\_VAL1 PT-INR Value

| N | Mean      | Standard Deviation | Minimum   | Maximum   |
|---|-----------|--------------------|-----------|-----------|
| 4 | 1.6150000 | 0.0974679          | 1.5200000 | 1.7500000 |

Unique Subject Identifier=0133000000-0061

Assay variable : PTINR\_VAL1 PT-INR Value

| N | Mean      | Standard Deviation | Minimum   | Maximum   |
|---|-----------|--------------------|-----------|-----------|
| 3 | 1.8633333 | 0.3716629          | 1.4500000 | 2.1700000 |

Unique Subject Identifier=0133000000-0068

Assay variable : PTINR\_VAL1 PT-INR Value

N Mean Standard Deviation Minimum Maximum

---

|   |           |           |           |           |
|---|-----------|-----------|-----------|-----------|
| 3 | 1.7433333 | 0.3837100 | 1.4600000 | 2.1800000 |
|---|-----------|-----------|-----------|-----------|

---

Laboratory tests at the time of obtaining Table 2-6 consent, according to the presence or absence of proton-pump inhibitors

Unique Subject Identifier=0135000000-0002

MEANS Procedure

Assay variable : PTINR\_VAL1 PT-INR Value

N Mean Standard Deviation Minimum Maximum

---

|   |           |           |           |           |
|---|-----------|-----------|-----------|-----------|
| 3 | 1.7400000 | 0.1571623 | 1.6000000 | 1.9100000 |
|---|-----------|-----------|-----------|-----------|

---

Unique Subject Identifier=0135000000-0010

Assay variable : PTINR\_VAL1 PT-INR Value

N Mean Standard Deviation Minimum Maximum

---

|   |           |           |           |           |
|---|-----------|-----------|-----------|-----------|
| 3 | 1.6866667 | 0.0378594 | 1.6600000 | 1.7300000 |
|---|-----------|-----------|-----------|-----------|

---

Unique Subject Identifier=0135000000-0020

Assay variable : PTINR\_VAL1 PT-INR Value

N Mean Standard Deviation Minimum Maximum

---

|   |           |           |           |           |
|---|-----------|-----------|-----------|-----------|
| 3 | 1.7466667 | 0.1101514 | 1.6400000 | 1.8600000 |
|---|-----------|-----------|-----------|-----------|

---

Unique Subject Identifier=0135000000-0026



Assay variable : PTINR\_VAL1 PT-INR Value

N Mean Standard Deviation Minimum Maximum

---

|   |           |           |           |           |
|---|-----------|-----------|-----------|-----------|
| 3 | 1.6366667 | 0.1436431 | 1.5300000 | 1.8000000 |
|---|-----------|-----------|-----------|-----------|

---

Laboratory tests at the time of obtaining Table 2-6 consent, according to the presence or absence of proton-pump inhibitors

Unique Subject Identifier=0135000000-0028

MEANS Procedure

Assay variable : PTINR\_VAL1 PT-INR Value

N Mean Standard Deviation Minimum Maximum

---

|   |           |           |           |           |
|---|-----------|-----------|-----------|-----------|
| 4 | 2.0575000 | 0.2653771 | 1.7000000 | 2.3000000 |
|---|-----------|-----------|-----------|-----------|

---

Unique Subject Identifier=0136000010-0003

Assay variable : PTINR\_VAL1 PT-INR Value

N Mean Standard Deviation Minimum Maximum

---

|   |           |           |           |           |
|---|-----------|-----------|-----------|-----------|
| 6 | 2.1200000 | 0.4215211 | 1.3000000 | 2.4500000 |
|---|-----------|-----------|-----------|-----------|

---

Unique Subject Identifier=0138000010-0001

Assay variable : PTINR\_VAL1 PT-INR Value

N Mean Standard Deviation Minimum Maximum

---

|   |           |           |           |           |
|---|-----------|-----------|-----------|-----------|
| 6 | 1.6950000 | 0.2682350 | 1.4500000 | 2.0600000 |
|---|-----------|-----------|-----------|-----------|

---

Unique Subject Identifier=0138000010-0002

Assay variable : PTINR\_VAL1 PT-INR Value

N Mean Standard Deviation Minimum Maximum

---

|   |           |           |           |           |
|---|-----------|-----------|-----------|-----------|
| 6 | 1.7716667 | 0.3066214 | 1.3300000 | 2.1600000 |
|---|-----------|-----------|-----------|-----------|

---

Laboratory tests at the time of obtaining Table 2-6 consent, according to the presence or absence of proton-pump inhibitors

Unique Subject Identifier=0138000010-0003

MEANS Procedure

Assay variable : PTINR\_VAL1 PT-INR Value

| N | Mean      | Standard Deviation | Minimum   | Maximum   |
|---|-----------|--------------------|-----------|-----------|
| 3 | 1.9933333 | 0.4215843          | 1.6400000 | 2.4600000 |

Unique Subject Identifier=0138000010-0004

Assay variable : PTINR\_VAL1 PT-INR Value

| N | Mean      | Standard Deviation | Minimum   | Maximum   |
|---|-----------|--------------------|-----------|-----------|
| 3 | 1.8566667 | 0.1096966          | 1.7300000 | 1.9200000 |

Unique Subject Identifier=0138000010-0014

Assay variable : PTINR\_VAL1 PT-INR Value

| N | Mean      | Standard Deviation | Minimum   | Maximum   |
|---|-----------|--------------------|-----------|-----------|
| 4 | 1.8300000 | 0.4009988          | 1.3500000 | 2.1900000 |

Unique Subject Identifier=0138000010-0015

Assay variable : PTINR\_VAL1 PT-INR Value

N Mean Standard Deviation Minimum Maximum

---

|   |          |           |          |          |
|---|----------|-----------|----------|----------|
| 3 | 2.130000 | 0.0953939 | 2.040000 | 2.230000 |
|---|----------|-----------|----------|----------|

---

Laboratory tests at the time of obtaining Table 2-6 consent, according to the presence or absence of proton-pump inhibitors

Unique Subject Identifier=0138000010-0016

MEANS Procedure

Assay variable : PTINR\_VAL1 PT-INR Value

| N | Mean      | Standard Deviation | Minimum   | Maximum   |
|---|-----------|--------------------|-----------|-----------|
| 3 | 1.2733333 | 0.0288675          | 1.2400000 | 1.2900000 |

Unique Subject Identifier=0138000010-0022

Assay variable : PTINR\_VAL1 PT-INR Value

| N | Mean      | Standard Deviation | Minimum   | Maximum   |
|---|-----------|--------------------|-----------|-----------|
| 2 | 1.7550000 | 0.1202082          | 1.6700000 | 1.8400000 |

Unique Subject Identifier=0138000010-0031

Assay variable : PTINR\_VAL1 PT-INR Value

| N | Mean      | Standard Deviation | Minimum   | Maximum   |
|---|-----------|--------------------|-----------|-----------|
| 3 | 1.5700000 | 0.1500000          | 1.4200000 | 1.7200000 |

Unique Subject Identifier=0138000010-0033

Assay variable : PTINR\_VAL1 PT-INR Value

N Mean Standard Deviation Minimum Maximum

---

|   |           |           |           |           |
|---|-----------|-----------|-----------|-----------|
| 3 | 1.9066667 | 0.2657693 | 1.6300000 | 2.1600000 |
|---|-----------|-----------|-----------|-----------|

---

Laboratory tests at the time of obtaining Table 2-6 consent, according to the presence or absence of proton-pump inhibitors

Unique Subject Identifier=0138000010-0035

MEANS Procedure

Assay variable : PTINR\_VAL1 PT-INR Value

N Mean Standard Deviation Minimum Maximum

---

|   |           |           |           |           |
|---|-----------|-----------|-----------|-----------|
| 2 | 1.5750000 | 0.2192031 | 1.4200000 | 1.7300000 |
|---|-----------|-----------|-----------|-----------|

---

Unique Subject Identifier=0138000010-0036

Assay variable : PTINR\_VAL1 PT-INR Value

N Mean Standard Deviation Minimum Maximum

---

|   |           |           |           |           |
|---|-----------|-----------|-----------|-----------|
| 3 | 1.8566667 | 0.1501111 | 1.7700000 | 2.0300000 |
|---|-----------|-----------|-----------|-----------|

---

Unique Subject Identifier=0138000010-0037

Assay variable : PTINR\_VAL1 PT-INR Value

N Mean Standard Deviation Minimum Maximum

---

|   |           |           |           |           |
|---|-----------|-----------|-----------|-----------|
| 3 | 1.8733333 | 0.1285820 | 1.7800000 | 2.0200000 |
|---|-----------|-----------|-----------|-----------|

---

Unique Subject Identifier=0139000010-0017



Assay variable : PTINR\_VAL1 PT-INR Value

N Mean Standard Deviation Minimum Maximum

---

|   |           |           |           |           |
|---|-----------|-----------|-----------|-----------|
| 2 | 1.4250000 | 0.5020458 | 1.0700000 | 1.7800000 |
|---|-----------|-----------|-----------|-----------|

---

Laboratory tests at the time of obtaining Table 2-6 consent, according to the presence or absence of proton-pump inhibitors

Unique Subject Identifier=0140000010-0002

MEANS Procedure

Assay variable : PTINR\_VAL1 PT-INR Value

N Mean Standard Deviation Minimum Maximum

---

|   |          |          |          |          |
|---|----------|----------|----------|----------|
| 6 | 2.240000 | 0.541593 | 1.340000 | 2.850000 |
|---|----------|----------|----------|----------|

---

Unique Subject Identifier=0140000010-0008

Assay variable : PTINR\_VAL1 PT-INR Value

N Mean Standard Deviation Minimum Maximum

---

|   |          |          |          |          |
|---|----------|----------|----------|----------|
| 4 | 2.367500 | 0.283593 | 2.010000 | 2.610000 |
|---|----------|----------|----------|----------|

---

Unique Subject Identifier=0140000010-0016

Assay variable : PTINR\_VAL1 PT-INR Value

N Mean Standard Deviation Minimum Maximum

---

|   |          |          |          |          |
|---|----------|----------|----------|----------|
| 4 | 1.772500 | 0.611578 | 1.310000 | 2.600000 |
|---|----------|----------|----------|----------|

---

Unique Subject Identifier=0140000010-0017

Assay variable : PTINR\_VAL1 PT-INR Value

N Mean Standard Deviation Minimum Maximum

---

|   |          |          |          |          |
|---|----------|----------|----------|----------|
| 6 | 1.860000 | 0.762608 | 1.420000 | 3.400000 |
|---|----------|----------|----------|----------|

---

Laboratory tests at the time of obtaining Table 2-6 consent, according to the presence or absence of proton-pump inhibitors

Unique Subject Identifier=014000010-0025

MEANS Procedure

Assay variable : PTINR\_VAL1 PT-INR Value

N Mean Standard Deviation Minimum Maximum

---

|   |          |          |          |          |
|---|----------|----------|----------|----------|
| 3 | 1.490000 | 0.062450 | 1.420000 | 1.540000 |
|---|----------|----------|----------|----------|

---

Unique Subject Identifier=0143010000-0003

Assay variable : PTINR\_VAL1 PT-INR Value

N Mean Standard Deviation Minimum Maximum

---

|   |          |           |          |          |
|---|----------|-----------|----------|----------|
| 6 | 2.115000 | 0.3043518 | 1.850000 | 2.510000 |
|---|----------|-----------|----------|----------|

---

Unique Subject Identifier=0143010000-0011

Assay variable : PTINR\_VAL1 PT-INR Value

N Mean Standard Deviation Minimum Maximum

---

|   |          |           |          |          |
|---|----------|-----------|----------|----------|
| 5 | 2.366000 | 0.6961537 | 1.570000 | 3.450000 |
|---|----------|-----------|----------|----------|

---

Unique Subject Identifier=0143010000-0012

Assay variable : PTINR\_VAL1 PT-INR Value

N Mean Standard Deviation Minimum Maximum

---

|   |           |           |           |           |
|---|-----------|-----------|-----------|-----------|
| 6 | 1.6550000 | 0.1595932 | 1.5100000 | 1.9200000 |
|---|-----------|-----------|-----------|-----------|

---

Laboratory tests at the time of obtaining Table 2-6 consent, according to the presence or absence of proton-pump inhibitors

Unique Subject Identifier=0143010000-0031

MEANS Procedure

Assay variable : PTINR\_VAL1 PT-INR Value

N Mean Standard Deviation Minimum Maximum

---

|   |           |           |           |           |
|---|-----------|-----------|-----------|-----------|
| 6 | 2.4433333 | 0.3251256 | 1.8200000 | 2.7800000 |
|---|-----------|-----------|-----------|-----------|

---

Unique Subject Identifier=0143010000-0036

Assay variable : PTINR\_VAL1 PT-INR Value

N Mean Standard Deviation Minimum Maximum

---

|   |           |           |           |           |
|---|-----------|-----------|-----------|-----------|
| 6 | 1.8383333 | 0.1904118 | 1.5600000 | 2.0500000 |
|---|-----------|-----------|-----------|-----------|

---

Unique Subject Identifier=0143010000-0043

Assay variable : PTINR\_VAL1 PT-INR Value

N Mean Standard Deviation Minimum Maximum

---

|   |           |           |           |           |
|---|-----------|-----------|-----------|-----------|
| 6 | 1.7733333 | 0.3512074 | 1.4200000 | 2.2500000 |
|---|-----------|-----------|-----------|-----------|

---

Unique Subject Identifier=0143010000-0044

Assay variable : PTINR\_VAL1 PT-INR Value

N Mean Standard Deviation Minimum Maximum

---

|   |           |           |           |           |
|---|-----------|-----------|-----------|-----------|
| 6 | 1.7583333 | 0.2982225 | 1.3700000 | 1.9800000 |
|---|-----------|-----------|-----------|-----------|

---

Laboratory tests at the time of obtaining Table 2-6 consent, according to the presence or absence of proton-pump inhibitors

Unique Subject Identifier=0143010000-0056

MEANS Procedure

Assay variable : PTINR\_VAL1 PT-INR Value

N Mean Standard Deviation Minimum Maximum

---

|   |           |           |           |           |
|---|-----------|-----------|-----------|-----------|
| 4 | 2.0625000 | 0.3895617 | 1.7200000 | 2.6200000 |
|---|-----------|-----------|-----------|-----------|

---

Unique Subject Identifier=0143010000-0064

Assay variable : PTINR\_VAL1 PT-INR Value

N Mean Standard Deviation Minimum Maximum

---

|   |           |           |           |           |
|---|-----------|-----------|-----------|-----------|
| 6 | 2.2883333 | 0.3831144 | 1.9200000 | 2.8400000 |
|---|-----------|-----------|-----------|-----------|

---

Unique Subject Identifier=0143010000-0072

Assay variable : PTINR\_VAL1 PT-INR Value

N Mean Standard Deviation Minimum Maximum

---

|   |           |           |           |           |
|---|-----------|-----------|-----------|-----------|
| 6 | 2.1366667 | 0.6937915 | 1.4600000 | 3.3900000 |
|---|-----------|-----------|-----------|-----------|

---

Unique Subject Identifier=0143010000-0073



Assay variable : PTINR\_VAL1 PT-INR Value

N Mean Standard Deviation Minimum Maximum

---

|   |           |           |           |           |
|---|-----------|-----------|-----------|-----------|
| 6 | 2.0133333 | 0.2307957 | 1.7300000 | 2.2800000 |
|---|-----------|-----------|-----------|-----------|

---

Laboratory tests at the time of obtaining Table 2-6 consent, according to the presence or absence of proton-pump inhibitors

Unique Subject Identifier=0143010000-0075

MEANS Procedure

Assay variable : PTINR\_VAL1 PT-INR Value

N Mean Standard Deviation Minimum Maximum

---

|   |           |           |           |           |
|---|-----------|-----------|-----------|-----------|
| 6 | 2.1666667 | 0.2559427 | 1.8800000 | 2.6100000 |
|---|-----------|-----------|-----------|-----------|

---

Unique Subject Identifier=0143010000-0076

Assay variable : PTINR\_VAL1 PT-INR Value

N Mean Standard Deviation Minimum Maximum

---

|   |           |           |           |           |
|---|-----------|-----------|-----------|-----------|
| 6 | 1.9283333 | 0.3119241 | 1.5600000 | 2.4000000 |
|---|-----------|-----------|-----------|-----------|

---

Unique Subject Identifier=0143010000-0079

Assay variable : PTINR\_VAL1 PT-INR Value

N Mean Standard Deviation Minimum Maximum

---

|   |           |           |           |           |
|---|-----------|-----------|-----------|-----------|
| 3 | 2.4166667 | 0.2302897 | 2.1800000 | 2.6400000 |
|---|-----------|-----------|-----------|-----------|

---

Unique Subject Identifier=0143010000-0093

Assay variable : PTINR\_VAL1 PT-INR Value

N Mean Standard Deviation Minimum Maximum

---

|   |           |           |           |           |
|---|-----------|-----------|-----------|-----------|
| 5 | 2.0500000 | 0.4650269 | 1.6700000 | 2.6900000 |
|---|-----------|-----------|-----------|-----------|

---

Laboratory tests at the time of obtaining Table 2-6 consent, according to the presence or absence of proton-pump inhibitors

Unique Subject Identifier=0143010000-0099

MEANS Procedure

Assay variable : PTINR\_VAL1 PT-INR Value

N Mean Standard Deviation Minimum Maximum

---

|   |           |           |           |           |
|---|-----------|-----------|-----------|-----------|
| 6 | 2.2566667 | 0.2694934 | 1.8800000 | 2.6700000 |
|---|-----------|-----------|-----------|-----------|

---

Unique Subject Identifier=0143010000-0100

Assay variable : PTINR\_VAL1 PT-INR Value

N Mean Standard Deviation Minimum Maximum

---

|   |           |           |           |           |
|---|-----------|-----------|-----------|-----------|
| 6 | 2.0233333 | 0.5109468 | 1.2100000 | 2.6900000 |
|---|-----------|-----------|-----------|-----------|

---

Unique Subject Identifier=0143010000-0108

Assay variable : PTINR\_VAL1 PT-INR Value

N Mean Standard Deviation Minimum Maximum

---

|   |           |           |           |           |
|---|-----------|-----------|-----------|-----------|
| 6 | 2.1850000 | 0.6755664 | 1.8200000 | 3.5600000 |
|---|-----------|-----------|-----------|-----------|

---

Unique Subject Identifier=0143010000-0111

Assay variable : PTINR\_VAL1 PT-INR Value

N Mean Standard Deviation Minimum Maximum

---

|   |           |           |           |           |
|---|-----------|-----------|-----------|-----------|
| 5 | 1.7480000 | 0.1564289 | 1.5800000 | 1.9800000 |
|---|-----------|-----------|-----------|-----------|

---

Laboratory tests at the time of obtaining Table 2-6 consent, according to the presence or absence of proton-pump inhibitors

Unique Subject Identifier=0143010000-0112

MEANS Procedure

Assay variable : PTINR\_VAL1 PT-INR Value

N Mean Standard Deviation Minimum Maximum

---

|   |           |           |           |           |
|---|-----------|-----------|-----------|-----------|
| 6 | 1.8850000 | 0.1078425 | 1.7700000 | 2.0600000 |
|---|-----------|-----------|-----------|-----------|

---

Unique Subject Identifier=0143010000-0118

Assay variable : PTINR\_VAL1 PT-INR Value

N Mean Standard Deviation Minimum Maximum

---

|   |           |           |           |           |
|---|-----------|-----------|-----------|-----------|
| 6 | 1.7116667 | 0.3252332 | 1.4400000 | 2.3400000 |
|---|-----------|-----------|-----------|-----------|

---

Unique Subject Identifier=0143010000-0129

Assay variable : PTINR\_VAL1 PT-INR Value

N Mean Standard Deviation Minimum Maximum

---

|   |           |           |           |           |
|---|-----------|-----------|-----------|-----------|
| 4 | 2.1300000 | 0.1134313 | 1.9800000 | 2.2500000 |
|---|-----------|-----------|-----------|-----------|

---

Unique Subject Identifier=0143010000-0132

Assay variable : PTINR\_VAL1 PT-INR Value

N Mean Standard Deviation Minimum Maximum

---

|   |          |           |          |          |
|---|----------|-----------|----------|----------|
| 4 | 1.360000 | 0.5643285 | 1.000000 | 2.200000 |
|---|----------|-----------|----------|----------|

---

Laboratory tests at the time of obtaining Table 2-6 consent, according to the presence or absence of proton-pump inhibitors

Unique Subject Identifier=0143010000-0141

MEANS Procedure

Assay variable : PTINR\_VAL1 PT-INR Value

N Mean Standard Deviation Minimum Maximum

---

|   |           |           |           |           |
|---|-----------|-----------|-----------|-----------|
| 4 | 2.1150000 | 0.1844813 | 2.0000000 | 2.3900000 |
|---|-----------|-----------|-----------|-----------|

---

Unique Subject Identifier=0143010000-0153

Assay variable : PTINR\_VAL1 PT-INR Value

N Mean Standard Deviation Minimum Maximum

---

|   |           |           |           |           |
|---|-----------|-----------|-----------|-----------|
| 6 | 1.9733333 | 0.4101544 | 1.4300000 | 2.5900000 |
|---|-----------|-----------|-----------|-----------|

---

Unique Subject Identifier=0143010000-0154

Assay variable : PTINR\_VAL1 PT-INR Value

N Mean Standard Deviation Minimum Maximum

---

|   |           |           |           |           |
|---|-----------|-----------|-----------|-----------|
| 6 | 2.0316667 | 0.6977798 | 1.1400000 | 2.8200000 |
|---|-----------|-----------|-----------|-----------|

---

Unique Subject Identifier=0143010000-0155



Assay variable : PTINR\_VAL1 PT-INR Value

N Mean Standard Deviation Minimum Maximum

---

|   |           |           |           |           |
|---|-----------|-----------|-----------|-----------|
| 6 | 2.3250000 | 0.2429609 | 1.9500000 | 2.6100000 |
|---|-----------|-----------|-----------|-----------|

---

Laboratory tests at the time of obtaining Table 2-6 consent, according to the presence or absence of proton-pump inhibitors

Unique Subject Identifier=0143010000-0163

MEANS Procedure

Assay variable : PTINR\_VAL1 PT-INR Value

N Mean Standard Deviation Minimum Maximum

---

|   |           |           |           |           |
|---|-----------|-----------|-----------|-----------|
| 5 | 1.9640000 | 0.1141490 | 1.7900000 | 2.0800000 |
|---|-----------|-----------|-----------|-----------|

---

Unique Subject Identifier=0143010000-0164

Assay variable : PTINR\_VAL1 PT-INR Value

N Mean Standard Deviation Minimum Maximum

---

|   |           |           |           |           |
|---|-----------|-----------|-----------|-----------|
| 6 | 2.4100000 | 0.2503597 | 2.0900000 | 2.7800000 |
|---|-----------|-----------|-----------|-----------|

---

Unique Subject Identifier=0143010000-0173

Assay variable : PTINR\_VAL1 PT-INR Value

N Mean Standard Deviation Minimum Maximum

---

|   |           |           |           |           |
|---|-----------|-----------|-----------|-----------|
| 6 | 2.3616667 | 0.3055105 | 1.8700000 | 2.8200000 |
|---|-----------|-----------|-----------|-----------|

---

Unique Subject Identifier=0143010000-0175

Assay variable : PTINR\_VAL1 PT-INR Value

N Mean Standard Deviation Minimum Maximum

---

|   |           |           |           |           |
|---|-----------|-----------|-----------|-----------|
| 2 | 1.8800000 | 0.2828427 | 1.6800000 | 2.0800000 |
|---|-----------|-----------|-----------|-----------|

---

Laboratory tests at the time of obtaining Table 2-6 consent, according to the presence or absence of proton-pump inhibitors

Unique Subject Identifier=0143010000-0182

MEANS Procedure

Assay variable : PTINR\_VAL1 PT-INR Value

N Mean Standard Deviation Minimum Maximum

---

|   |           |           |           |           |
|---|-----------|-----------|-----------|-----------|
| 6 | 2.0133333 | 0.7044336 | 1.6300000 | 3.4200000 |
|---|-----------|-----------|-----------|-----------|

---

Unique Subject Identifier=0143010000-0188

Assay variable : PTINR\_VAL1 PT-INR Value

N Mean Standard Deviation Minimum Maximum

---

|   |           |  |           |           |
|---|-----------|--|-----------|-----------|
| 1 | 1.6400000 |  | 1.6400000 | 1.6400000 |
|---|-----------|--|-----------|-----------|

---

Unique Subject Identifier=0143010000-0196

Assay variable : PTINR\_VAL1 PT-INR Value

N Mean Standard Deviation Minimum Maximum

---

|   |           |           |           |           |
|---|-----------|-----------|-----------|-----------|
| 2 | 1.8900000 | 0.0141421 | 1.8800000 | 1.9000000 |
|---|-----------|-----------|-----------|-----------|

---

Unique Subject Identifier=0144000000-0006

Assay variable : PTINR\_VAL1 PT-INR Value

N Mean Standard Deviation Minimum Maximum

---

|   |           |           |           |           |
|---|-----------|-----------|-----------|-----------|
| 6 | 1.9683333 | 0.2527779 | 1.6300000 | 2.4100000 |
|---|-----------|-----------|-----------|-----------|

---

Laboratory tests at the time of obtaining Table 2-6 consent, according to the presence or absence of proton-pump inhibitors

Unique Subject Identifier=0144000000-0014

MEANS Procedure

Assay variable : PTINR\_VAL1 PT-INR Value

N Mean Standard Deviation Minimum Maximum

---

|   |           |           |           |           |
|---|-----------|-----------|-----------|-----------|
| 2 | 1.2000000 | 0.1555635 | 1.0900000 | 1.3100000 |
|---|-----------|-----------|-----------|-----------|

---

Unique Subject Identifier=0145000000-0005

Assay variable : PTINR\_VAL1 PT-INR Value

N Mean Standard Deviation Minimum Maximum

---

|   |           |           |           |           |
|---|-----------|-----------|-----------|-----------|
| 4 | 2.6175000 | 0.3463500 | 2.2700000 | 3.0100000 |
|---|-----------|-----------|-----------|-----------|

---

Unique Subject Identifier=0145000000-0008

Assay variable : PTINR\_VAL1 PT-INR Value

N Mean Standard Deviation Minimum Maximum

---

|   |           |           |           |           |
|---|-----------|-----------|-----------|-----------|
| 2 | 2.4200000 | 0.5232590 | 2.0500000 | 2.7900000 |
|---|-----------|-----------|-----------|-----------|

---

Unique Subject Identifier=0145000000-0014

Assay variable : PTINR\_VAL1 PT-INR Value

N Mean Standard Deviation Minimum Maximum

---

|   |          |           |          |          |
|---|----------|-----------|----------|----------|
| 3 | 2.210000 | 0.2861818 | 2.030000 | 2.540000 |
|---|----------|-----------|----------|----------|

---

Laboratory tests at the time of obtaining Table 2-6 consent, according to the presence or absence of proton-pump inhibitors

Unique Subject Identifier=0145000000-0015

MEANS Procedure

Assay variable : PTINR\_VAL1 PT-INR Value

N Mean Standard Deviation Minimum Maximum

---

|   |           |           |           |           |
|---|-----------|-----------|-----------|-----------|
| 4 | 1.7450000 | 0.0974679 | 1.6100000 | 1.8300000 |
|---|-----------|-----------|-----------|-----------|

---

Unique Subject Identifier=0146000000-0007

Assay variable : PTINR\_VAL1 PT-INR Value

N Mean Standard Deviation Minimum Maximum

---

|   |           |           |           |           |
|---|-----------|-----------|-----------|-----------|
| 3 | 2.2566667 | 0.2608320 | 1.9600000 | 2.4500000 |
|---|-----------|-----------|-----------|-----------|

---

Unique Subject Identifier=0146000000-0009

Assay variable : PTINR\_VAL1 PT-INR Value

N Mean Standard Deviation Minimum Maximum

---

|   |           |           |           |           |
|---|-----------|-----------|-----------|-----------|
| 3 | 1.8233333 | 0.1700980 | 1.6300000 | 1.9500000 |
|---|-----------|-----------|-----------|-----------|

---

Unique Subject Identifier=0146000000-0015



Assay variable : PTINR\_VAL1 PT-INR Value

N Mean Standard Deviation Minimum Maximum

---

|   |           |           |           |           |
|---|-----------|-----------|-----------|-----------|
| 4 | 2.3250000 | 0.3706301 | 1.8300000 | 2.7200000 |
|---|-----------|-----------|-----------|-----------|

---

Laboratory tests at the time of obtaining Table 2-6 consent, according to the presence or absence of proton-pump inhibitors

Unique Subject Identifier=014600000-0021

MEANS Procedure

Assay variable : PTINR\_VAL1 PT-INR Value

N Mean Standard Deviation Minimum Maximum

---

|   |           |           |           |           |
|---|-----------|-----------|-----------|-----------|
| 2 | 2.1050000 | 0.0212132 | 2.0900000 | 2.1200000 |
|---|-----------|-----------|-----------|-----------|

---

Unique Subject Identifier=014700000-0009

Assay variable : PTINR\_VAL1 PT-INR Value

N Mean Standard Deviation Minimum Maximum

---

|   |           |           |           |           |
|---|-----------|-----------|-----------|-----------|
| 3 | 1.8133333 | 0.0152753 | 1.8000000 | 1.8300000 |
|---|-----------|-----------|-----------|-----------|

---

Unique Subject Identifier=014700000-0013

Assay variable : PTINR\_VAL1 PT-INR Value

N Mean Standard Deviation Minimum Maximum

---

|   |           |           |           |           |
|---|-----------|-----------|-----------|-----------|
| 4 | 1.9850000 | 0.5911853 | 1.6500000 | 2.8700000 |
|---|-----------|-----------|-----------|-----------|

---

Unique Subject Identifier=015501000-0004

Assay variable : PTINR\_VAL1 PT-INR Value

N Mean Standard Deviation Minimum Maximum

---

|   |           |           |           |           |
|---|-----------|-----------|-----------|-----------|
| 3 | 2.1666667 | 0.1154701 | 2.1000000 | 2.3000000 |
|---|-----------|-----------|-----------|-----------|

---

Laboratory tests at the time of obtaining Table 2-6 consent, according to the presence or absence of proton-pump inhibitors

Unique Subject Identifier=0155010000-0006

MEANS Procedure

Assay variable : PTINR\_VAL1 PT-INR Value

N Mean Standard Deviation Minimum Maximum

---

|   |           |           |           |           |
|---|-----------|-----------|-----------|-----------|
| 4 | 2.1250000 | 0.2872281 | 1.7000000 | 2.3000000 |
|---|-----------|-----------|-----------|-----------|

---

Unique Subject Identifier=0155010000-0007

Assay variable : PTINR\_VAL1 PT-INR Value

N Mean Standard Deviation Minimum Maximum

---

|   |           |           |           |           |
|---|-----------|-----------|-----------|-----------|
| 3 | 1.9333333 | 0.1154701 | 1.8000000 | 2.0000000 |
|---|-----------|-----------|-----------|-----------|

---

Unique Subject Identifier=0155010000-0008

Assay variable : PTINR\_VAL1 PT-INR Value

N Mean Standard Deviation Minimum Maximum

---

|   |           |           |           |           |
|---|-----------|-----------|-----------|-----------|
| 4 | 2.7000000 | 0.4760952 | 2.2000000 | 3.2000000 |
|---|-----------|-----------|-----------|-----------|

---

Unique Subject Identifier=0155010000-0009

Assay variable : PTINR\_VAL1 PT-INR Value

N Mean Standard Deviation Minimum Maximum

---

|   |           |           |           |           |
|---|-----------|-----------|-----------|-----------|
| 4 | 1.7750000 | 0.1500000 | 1.6000000 | 1.9000000 |
|---|-----------|-----------|-----------|-----------|

---

Laboratory tests at the time of obtaining Table 2-6 consent, according to the presence or absence of proton-pump inhibitors

Unique Subject Identifier=0155010000-0010

MEANS Procedure

Assay variable : PTINR\_VAL1 PT-INR Value

N Mean Standard Deviation Minimum Maximum

---

|   |           |           |           |           |
|---|-----------|-----------|-----------|-----------|
| 4 | 2.2000000 | 0.2943920 | 1.9000000 | 2.5000000 |
|---|-----------|-----------|-----------|-----------|

---

Unique Subject Identifier=0161000000-0011

Assay variable : PTINR\_VAL1 PT-INR Value

N Mean Standard Deviation Minimum Maximum

---

|   |           |           |           |           |
|---|-----------|-----------|-----------|-----------|
| 6 | 2.0733333 | 0.3310992 | 1.5700000 | 2.5900000 |
|---|-----------|-----------|-----------|-----------|

---

Unique Subject Identifier=0161000000-0017

Assay variable : PTINR\_VAL1 PT-INR Value

N Mean Standard Deviation Minimum Maximum

---

|   |           |           |           |           |
|---|-----------|-----------|-----------|-----------|
| 6 | 1.8400000 | 0.3245921 | 1.3300000 | 2.2500000 |
|---|-----------|-----------|-----------|-----------|

---

Unique Subject Identifier=0165000000-0013

Assay variable : PTINR\_VAL1 PT-INR Value

N Mean Standard Deviation Minimum Maximum

---

|   |          |           |          |          |
|---|----------|-----------|----------|----------|
| 5 | 2.262000 | 0.5316672 | 1.680000 | 3.130000 |
|---|----------|-----------|----------|----------|

---

Laboratory tests at the time of obtaining Table 2-6 consent, according to the presence or absence of proton-pump inhibitors

Unique Subject Identifier=0165000000-0017

MEANS Procedure

Assay variable : PTINR\_VAL1 PT-INR Value

N Mean Standard Deviation Minimum Maximum

---

|   |           |           |           |           |
|---|-----------|-----------|-----------|-----------|
| 6 | 1.7750000 | 0.1590912 | 1.5600000 | 2.0400000 |
|---|-----------|-----------|-----------|-----------|

---

Unique Subject Identifier=0166000000-0009

Assay variable : PTINR\_VAL1 PT-INR Value

N Mean Standard Deviation Minimum Maximum

---

|   |           |           |           |           |
|---|-----------|-----------|-----------|-----------|
| 2 | 2.1050000 | 0.1060660 | 2.0300000 | 2.1800000 |
|---|-----------|-----------|-----------|-----------|

---

Unique Subject Identifier=0166000000-0017

Assay variable : PTINR\_VAL1 PT-INR Value

N Mean Standard Deviation Minimum Maximum

---

|   |           |           |           |           |
|---|-----------|-----------|-----------|-----------|
| 6 | 1.1783333 | 0.1292156 | 1.0700000 | 1.4300000 |
|---|-----------|-----------|-----------|-----------|

---

Unique Subject Identifier=0166000000-0021



Assay variable : PTINR\_VAL1 PT-INR Value

N Mean Standard Deviation Minimum Maximum

---

|   |          |           |          |          |
|---|----------|-----------|----------|----------|
| 2 | 2.640000 | 0.3394113 | 2.400000 | 2.880000 |
|---|----------|-----------|----------|----------|

---

Laboratory tests at the time of obtaining Table 2-6 consent, according to the presence or absence of proton-pump inhibitors

Unique Subject Identifier=016600000-0023

MEANS Procedure

Assay variable : PTINR\_VAL1 PT-INR Value

N Mean Standard Deviation Minimum Maximum

---

|   |           |  |           |           |
|---|-----------|--|-----------|-----------|
| 1 | 1.6900000 |  | 1.6900000 | 1.6900000 |
|---|-----------|--|-----------|-----------|

---

Unique Subject Identifier=016600000-0039

Assay variable : PTINR\_VAL1 PT-INR Value

N Mean Standard Deviation Minimum Maximum

---

|   |           |           |           |           |
|---|-----------|-----------|-----------|-----------|
| 3 | 2.1466667 | 0.1357694 | 1.9900000 | 2.2300000 |
|---|-----------|-----------|-----------|-----------|

---

Unique Subject Identifier=016600000-0040

Assay variable : PTINR\_VAL1 PT-INR Value

N Mean Standard Deviation Minimum Maximum

---

|   |           |           |           |           |
|---|-----------|-----------|-----------|-----------|
| 3 | 2.2566667 | 0.2030599 | 2.1200000 | 2.4900000 |
|---|-----------|-----------|-----------|-----------|

---

Unique Subject Identifier=016600000-0047

Assay variable : PTINR\_VAL1 PT-INR Value

N Mean Standard Deviation Minimum Maximum

---

|   |           |           |           |           |
|---|-----------|-----------|-----------|-----------|
| 2 | 2.1550000 | 0.0212132 | 2.1400000 | 2.1700000 |
|---|-----------|-----------|-----------|-----------|

---

Laboratory tests at the time of obtaining Table 2-6 consent, according to the presence or absence of proton-pump inhibitors

Unique Subject Identifier=0166000000-0054

MEANS Procedure

Assay variable : PTINR\_VAL1 PT-INR Value

N Mean Standard Deviation Minimum Maximum

---

|   |           |           |           |           |
|---|-----------|-----------|-----------|-----------|
| 2 | 1.8250000 | 0.0353553 | 1.8000000 | 1.8500000 |
|---|-----------|-----------|-----------|-----------|

---

Unique Subject Identifier=0166000000-0062

Assay variable : PTINR\_VAL1 PT-INR Value

N Mean Standard Deviation Minimum Maximum

---

|   |           |           |           |           |
|---|-----------|-----------|-----------|-----------|
| 2 | 2.0200000 | 0.2969848 | 1.8100000 | 2.2300000 |
|---|-----------|-----------|-----------|-----------|

---

Unique Subject Identifier=0170000000-0008

Assay variable : PTINR\_VAL1 PT-INR Value

N Mean Standard Deviation Minimum Maximum

---

|   |           |           |           |           |
|---|-----------|-----------|-----------|-----------|
| 4 | 1.6825000 | 0.2304163 | 1.4600000 | 1.9600000 |
|---|-----------|-----------|-----------|-----------|

---

Unique Subject Identifier=0170000000-0013

Assay variable : PTINR\_VAL1 PT-INR Value

N Mean Standard Deviation Minimum Maximum

---

|   |           |           |           |           |
|---|-----------|-----------|-----------|-----------|
| 3 | 1.7366667 | 0.0986577 | 1.6700000 | 1.8500000 |
|---|-----------|-----------|-----------|-----------|

---

Laboratory tests at the time of obtaining Table 2-6 consent, according to the presence or absence of proton-pump inhibitors

Unique Subject Identifier=0173000000-0001

MEANS Procedure

Assay variable : PTINR\_VAL1 PT-INR Value

N Mean Standard Deviation Minimum Maximum

---

|   |           |           |           |           |
|---|-----------|-----------|-----------|-----------|
| 4 | 1.6525000 | 0.1883923 | 1.4300000 | 1.8900000 |
|---|-----------|-----------|-----------|-----------|

---

Unique Subject Identifier=0177100000-0007

Assay variable : PTINR\_VAL1 PT-INR Value

N Mean Standard Deviation Minimum Maximum

---

|   |           |           |           |           |
|---|-----------|-----------|-----------|-----------|
| 5 | 1.8680000 | 0.4621904 | 1.5500000 | 2.6700000 |
|---|-----------|-----------|-----------|-----------|

---

Unique Subject Identifier=0177100000-0065

Assay variable : PTINR\_VAL1 PT-INR Value

N Mean Standard Deviation Minimum Maximum

---

|   |           |           |           |           |
|---|-----------|-----------|-----------|-----------|
| 4 | 2.3825000 | 0.4011130 | 1.9700000 | 2.8500000 |
|---|-----------|-----------|-----------|-----------|

---

Unique Subject Identifier=0178100000-0004

Assay variable : PTINR\_VAL1 PT-INR Value

N Mean Standard Deviation Minimum Maximum

---

|   |           |           |           |           |
|---|-----------|-----------|-----------|-----------|
| 4 | 2.2875000 | 0.1978846 | 2.1200000 | 2.5400000 |
|---|-----------|-----------|-----------|-----------|

---

Laboratory tests at the time of obtaining Table 2-6 consent, according to the presence or absence of proton-pump inhibitors

Unique Subject Identifier=0178100000-0007

MEANS Procedure

Assay variable : PTINR\_VAL1 PT-INR Value

| N | Mean      | Standard Deviation | Minimum   | Maximum   |
|---|-----------|--------------------|-----------|-----------|
| 5 | 2.1760000 | 0.5141790          | 1.7100000 | 2.9900000 |

Unique Subject Identifier=0178100000-0011

Assay variable : PTINR\_VAL1 PT-INR Value

| N | Mean      | Standard Deviation | Minimum   | Maximum   |
|---|-----------|--------------------|-----------|-----------|
| 5 | 1.6000000 | 0.1048809          | 1.4400000 | 1.7200000 |

Unique Subject Identifier=0178100000-0013

Assay variable : PTINR\_VAL1 PT-INR Value

| N | Mean      | Standard Deviation | Minimum   | Maximum   |
|---|-----------|--------------------|-----------|-----------|
| 4 | 2.2000000 | 0.0898146          | 2.1100000 | 2.3200000 |

Unique Subject Identifier=0178100000-0017



Assay variable : PTINR\_VAL1 PT-INR Value

N Mean Standard Deviation Minimum Maximum

---

|   |          |          |          |          |
|---|----------|----------|----------|----------|
| 6 | 2.033333 | 0.259281 | 1.580000 | 2.260000 |
|---|----------|----------|----------|----------|

---

Laboratory tests at the time of obtaining Table 2-6 consent, according to the presence or absence of proton-pump inhibitors

Unique Subject Identifier=0178100000-0041

MEANS Procedure

Assay variable : PTINR\_VAL1 PT-INR Value

N Mean Standard Deviation Minimum Maximum

---

|   |           |           |           |           |
|---|-----------|-----------|-----------|-----------|
| 3 | 1.9866667 | 0.2354428 | 1.7600000 | 2.2300000 |
|---|-----------|-----------|-----------|-----------|

---

Unique Subject Identifier=0178100000-0042

Assay variable : PTINR\_VAL1 PT-INR Value

N Mean Standard Deviation Minimum Maximum

---

|   |           |           |           |           |
|---|-----------|-----------|-----------|-----------|
| 4 | 1.9625000 | 0.1602862 | 1.8500000 | 2.1900000 |
|---|-----------|-----------|-----------|-----------|

---

Unique Subject Identifier=0178100000-0053

Assay variable : PTINR\_VAL1 PT-INR Value

N Mean Standard Deviation Minimum Maximum

---

|   |           |           |           |           |
|---|-----------|-----------|-----------|-----------|
| 6 | 1.8166667 | 0.3120684 | 1.5200000 | 2.4000000 |
|---|-----------|-----------|-----------|-----------|

---

Unique Subject Identifier=0178100000-0058

Assay variable : PTINR\_VAL1 PT-INR Value

N Mean Standard Deviation Minimum Maximum

---

|   |           |           |           |           |
|---|-----------|-----------|-----------|-----------|
| 4 | 2.0675000 | 0.3244868 | 1.7600000 | 2.5200000 |
|---|-----------|-----------|-----------|-----------|

---

Laboratory tests at the time of obtaining Table 2-6 consent, according to the presence or absence of proton-pump inhibitors

Unique Subject Identifier=0178100000-0065

MEANS Procedure

Assay variable : PTINR\_VAL1 PT-INR Value

| N | Mean      | Standard Deviation | Minimum   | Maximum   |
|---|-----------|--------------------|-----------|-----------|
| 4 | 2.3025000 | 0.7097124          | 1.5900000 | 3.2800000 |

Unique Subject Identifier=0180000000-0001

Assay variable : PTINR\_VAL1 PT-INR Value

| N | Mean      | Standard Deviation | Minimum   | Maximum   |
|---|-----------|--------------------|-----------|-----------|
| 5 | 1.7280000 | 0.2413918          | 1.4800000 | 1.9900000 |

Unique Subject Identifier=0180000000-0004

Assay variable : PTINR\_VAL1 PT-INR Value

| N | Mean      | Standard Deviation | Minimum   | Maximum   |
|---|-----------|--------------------|-----------|-----------|
| 6 | 2.2966667 | 0.1778389          | 2.1000000 | 2.5200000 |

Unique Subject Identifier=0180000000-0024

Assay variable : PTINR\_VAL1 PT-INR Value

N Mean Standard Deviation Minimum Maximum

---

|   |           |           |           |           |
|---|-----------|-----------|-----------|-----------|
| 2 | 1.8900000 | 0.0282843 | 1.8700000 | 1.9100000 |
|---|-----------|-----------|-----------|-----------|

---

Laboratory tests at the time of obtaining Table 2-6 consent, according to the presence or absence of proton-pump inhibitors

Unique Subject Identifier=018000000-0026

MEANS Procedure

Assay variable : PTINR\_VAL1 PT-INR Value

N Mean Standard Deviation Minimum Maximum

---

|   |           |           |           |           |
|---|-----------|-----------|-----------|-----------|
| 6 | 2.2150000 | 0.4043637 | 1.7900000 | 2.9400000 |
|---|-----------|-----------|-----------|-----------|

---

Unique Subject Identifier=018900000-0020

Assay variable : PTINR\_VAL1 PT-INR Value

N Mean Standard Deviation Minimum Maximum

---

|   |           |           |           |           |
|---|-----------|-----------|-----------|-----------|
| 3 | 2.4733333 | 0.6214767 | 1.9100000 | 3.1400000 |
|---|-----------|-----------|-----------|-----------|

---

Unique Subject Identifier=018900000-0030

Assay variable : PTINR\_VAL1 PT-INR Value

N Mean Standard Deviation Minimum Maximum

---

|   |           |           |           |           |
|---|-----------|-----------|-----------|-----------|
| 4 | 1.8200000 | 0.0743864 | 1.7100000 | 1.8700000 |
|---|-----------|-----------|-----------|-----------|

---

Unique Subject Identifier=018900000-0033

Assay variable : PTINR\_VAL1 PT-INR Value

N Mean Standard Deviation Minimum Maximum

---

|   |           |           |           |           |
|---|-----------|-----------|-----------|-----------|
| 3 | 1.9033333 | 0.2003331 | 1.7100000 | 2.1100000 |
|---|-----------|-----------|-----------|-----------|

---

Laboratory tests at the time of obtaining Table 2-6 consent, according to the presence or absence of proton-pump inhibitors

Unique Subject Identifier=0195011000-0016

MEANS Procedure

Assay variable : PTINR\_VAL1 PT-INR Value

N Mean Standard Deviation Minimum Maximum

---

|   |           |           |           |           |
|---|-----------|-----------|-----------|-----------|
| 3 | 1.7366667 | 0.1305118 | 1.6000000 | 1.8600000 |
|---|-----------|-----------|-----------|-----------|

---

Unique Subject Identifier=0201000000-0006

Assay variable : PTINR\_VAL1 PT-INR Value

N Mean Standard Deviation Minimum Maximum

---

|   |           |           |           |           |
|---|-----------|-----------|-----------|-----------|
| 3 | 2.2900000 | 0.5406478 | 1.8700000 | 2.9000000 |
|---|-----------|-----------|-----------|-----------|

---

Unique Subject Identifier=0207100000-0002

Assay variable : PTINR\_VAL1 PT-INR Value

N Mean Standard Deviation Minimum Maximum

---

|   |           |           |           |           |
|---|-----------|-----------|-----------|-----------|
| 6 | 1.9150000 | 0.3571414 | 1.6400000 | 2.6100000 |
|---|-----------|-----------|-----------|-----------|

---

Unique Subject Identifier=0207100000-0008



Assay variable : PTINR\_VAL1 PT-INR Value

N Mean Standard Deviation Minimum Maximum

---

|   |           |  |           |           |
|---|-----------|--|-----------|-----------|
| 1 | 1.6500000 |  | 1.6500000 | 1.6500000 |
|---|-----------|--|-----------|-----------|

---

Laboratory tests at the time of obtaining Table 2-6 consent, according to the presence or absence of proton-pump inhibitors

Unique Subject Identifier=0207100000-0013

MEANS Procedure

Assay variable : PTINR\_VAL1 PT-INR Value

| N | Mean      | Standard Deviation | Minimum   | Maximum   |
|---|-----------|--------------------|-----------|-----------|
| 3 | 1.7533333 | 0.1193035          | 1.6700000 | 1.8900000 |

Unique Subject Identifier=0207100000-0015

Assay variable : PTINR\_VAL1 PT-INR Value

| N | Mean      | Standard Deviation | Minimum   | Maximum   |
|---|-----------|--------------------|-----------|-----------|
| 2 | 3.0850000 | 0.1060660          | 3.0100000 | 3.1600000 |

Unique Subject Identifier=0207100000-0017

Assay variable : PTINR\_VAL1 PT-INR Value

| N | Mean      | Standard Deviation | Minimum   | Maximum   |
|---|-----------|--------------------|-----------|-----------|
| 3 | 2.2733333 | 0.4908496          | 1.9800000 | 2.8400000 |

Unique Subject Identifier=0210000000-0003

Assay variable : PTINR\_VAL1 PT-INR Value

N Mean Standard Deviation Minimum Maximum

---

|   |           |           |           |           |
|---|-----------|-----------|-----------|-----------|
| 6 | 2.4666667 | 0.5715476 | 1.7000000 | 3.3000000 |
|---|-----------|-----------|-----------|-----------|

---

Laboratory tests at the time of obtaining Table 2-6 consent, according to the presence or absence of proton-pump inhibitors

Unique Subject Identifier=021000000-0017

MEANS Procedure

Assay variable : PTINR\_VAL1 PT-INR Value

N Mean Standard Deviation Minimum Maximum

---

|   |          |           |          |          |
|---|----------|-----------|----------|----------|
| 5 | 1.760000 | 0.1140175 | 1.600000 | 1.900000 |
|---|----------|-----------|----------|----------|

---

Unique Subject Identifier=021300000-0001

Assay variable : PTINR\_VAL1 PT-INR Value

N Mean Standard Deviation Minimum Maximum

---

|   |          |           |          |          |
|---|----------|-----------|----------|----------|
| 6 | 2.135000 | 0.1533297 | 1.910000 | 2.370000 |
|---|----------|-----------|----------|----------|

---

Unique Subject Identifier=021700000-0004

Assay variable : PTINR\_VAL1 PT-INR Value

N Mean Standard Deviation Minimum Maximum

---

|   |          |           |          |          |
|---|----------|-----------|----------|----------|
| 6 | 1.775000 | 0.2757354 | 1.500000 | 2.220000 |
|---|----------|-----------|----------|----------|

---

Unique Subject Identifier=021700000-0006

Assay variable : PTINR\_VAL1 PT-INR Value

N Mean Standard Deviation Minimum Maximum

---

|   |           |  |           |           |
|---|-----------|--|-----------|-----------|
| 1 | 1.6500000 |  | 1.6500000 | 1.6500000 |
|---|-----------|--|-----------|-----------|

---

Laboratory tests at the time of obtaining Table 2-6 consent, according to the presence or absence of proton-pump inhibitors

Unique Subject Identifier=0220000000-0004

MEANS Procedure

Assay variable : PTINR\_VAL1 PT-INR Value

N Mean Standard Deviation Minimum Maximum

---

|   |           |           |           |           |
|---|-----------|-----------|-----------|-----------|
| 5 | 2.3160000 | 0.4197976 | 1.9700000 | 2.9400000 |
|---|-----------|-----------|-----------|-----------|

---

Unique Subject Identifier=0220000000-0005

Assay variable : PTINR\_VAL1 PT-INR Value

N Mean Standard Deviation Minimum Maximum

---

|   |           |           |           |           |
|---|-----------|-----------|-----------|-----------|
| 5 | 2.5600000 | 0.7336212 | 1.8100000 | 3.7900000 |
|---|-----------|-----------|-----------|-----------|

---

Unique Subject Identifier=0220000000-0007

Assay variable : PTINR\_VAL1 PT-INR Value

N Mean Standard Deviation Minimum Maximum

---

|   |           |           |           |           |
|---|-----------|-----------|-----------|-----------|
| 6 | 1.9116667 | 0.0919601 | 1.8000000 | 2.0800000 |
|---|-----------|-----------|-----------|-----------|

---

Unique Subject Identifier=0220000000-0008

Assay variable : PTINR\_VAL1 PT-INR Value

N Mean Standard Deviation Minimum Maximum

---

|   |          |           |          |          |
|---|----------|-----------|----------|----------|
| 4 | 2.210000 | 0.4927474 | 1.780000 | 2.920000 |
|---|----------|-----------|----------|----------|

---

Laboratory tests at the time of obtaining Table 2-6 consent, according to the presence or absence of proton-pump inhibitors

Unique Subject Identifier=0220000000-0010

MEANS Procedure

Assay variable : PTINR\_VAL1 PT-INR Value

N Mean Standard Deviation Minimum Maximum

---

|   |           |           |           |           |
|---|-----------|-----------|-----------|-----------|
| 4 | 2.0350000 | 0.1047219 | 1.9300000 | 2.1700000 |
|---|-----------|-----------|-----------|-----------|

---

Unique Subject Identifier=0220000000-0013

Assay variable : PTINR\_VAL1 PT-INR Value

N Mean Standard Deviation Minimum Maximum

---

|   |           |           |           |           |
|---|-----------|-----------|-----------|-----------|
| 6 | 2.1783333 | 0.2587212 | 1.9100000 | 2.4800000 |
|---|-----------|-----------|-----------|-----------|

---

Unique Subject Identifier=0220000000-0015

Assay variable : PTINR\_VAL1 PT-INR Value

N Mean Standard Deviation Minimum Maximum

---

|   |           |           |           |           |
|---|-----------|-----------|-----------|-----------|
| 4 | 1.6975000 | 0.4239792 | 1.1300000 | 2.0600000 |
|---|-----------|-----------|-----------|-----------|

---

Unique Subject Identifier=0220000000-0016



Assay variable : PTINR\_VAL1 PT-INR Value

N Mean Standard Deviation Minimum Maximum

---

|   |          |           |          |          |
|---|----------|-----------|----------|----------|
| 5 | 2.160000 | 0.4509989 | 1.640000 | 2.660000 |
|---|----------|-----------|----------|----------|

---

Laboratory tests at the time of obtaining Table 2-6 consent, according to the presence or absence of proton-pump inhibitors

Unique Subject Identifier=0220000000-0020

MEANS Procedure

Assay variable : PTINR\_VAL1 PT-INR Value

N Mean Standard Deviation Minimum Maximum

---

|   |           |           |           |           |
|---|-----------|-----------|-----------|-----------|
| 4 | 1.9100000 | 0.2201515 | 1.7300000 | 2.2300000 |
|---|-----------|-----------|-----------|-----------|

---

Unique Subject Identifier=0220000000-0025

Assay variable : PTINR\_VAL1 PT-INR Value

N Mean Standard Deviation Minimum Maximum

---

|   |           |           |           |           |
|---|-----------|-----------|-----------|-----------|
| 4 | 2.1150000 | 0.4969574 | 1.6500000 | 2.6600000 |
|---|-----------|-----------|-----------|-----------|

---

Unique Subject Identifier=0220000000-0032

Assay variable : PTINR\_VAL1 PT-INR Value

N Mean Standard Deviation Minimum Maximum

---

|   |           |           |           |           |
|---|-----------|-----------|-----------|-----------|
| 3 | 2.6033333 | 0.2802380 | 2.3300000 | 2.8900000 |
|---|-----------|-----------|-----------|-----------|

---

Unique Subject Identifier=0222011000-0001

Assay variable : PTINR\_VAL1 PT-INR Value

N Mean Standard Deviation Minimum Maximum

---

|   |           |           |           |           |
|---|-----------|-----------|-----------|-----------|
| 6 | 1.9800000 | 0.3700811 | 1.5700000 | 2.3900000 |
|---|-----------|-----------|-----------|-----------|

---

Laboratory tests at the time of obtaining Table 2-6 consent, according to the presence or absence of proton-pump inhibitors

Unique Subject Identifier=0222011000-0005

MEANS Procedure

Assay variable : PTINR\_VAL1 PT-INR Value

N Mean Standard Deviation Minimum Maximum

---

|   |           |           |           |           |
|---|-----------|-----------|-----------|-----------|
| 5 | 2.0880000 | 0.2135884 | 1.8900000 | 2.4000000 |
|---|-----------|-----------|-----------|-----------|

---

Unique Subject Identifier=0222011000-0009

Assay variable : PTINR\_VAL1 PT-INR Value

N Mean Standard Deviation Minimum Maximum

---

|   |           |           |           |           |
|---|-----------|-----------|-----------|-----------|
| 4 | 2.0425000 | 0.2069420 | 1.8600000 | 2.3400000 |
|---|-----------|-----------|-----------|-----------|

---

Unique Subject Identifier=0222011000-0010

Assay variable : PTINR\_VAL1 PT-INR Value

N Mean Standard Deviation Minimum Maximum

---

|   |           |           |           |           |
|---|-----------|-----------|-----------|-----------|
| 5 | 2.4220000 | 0.7858562 | 1.8800000 | 3.8100000 |
|---|-----------|-----------|-----------|-----------|

---

Unique Subject Identifier=0222011000-0013

Assay variable : PTINR\_VAL1 PT-INR Value

N Mean Standard Deviation Minimum Maximum

---

|   |           |           |           |           |
|---|-----------|-----------|-----------|-----------|
| 5 | 2.3140000 | 0.1659217 | 2.0500000 | 2.4600000 |
|---|-----------|-----------|-----------|-----------|

---

Laboratory tests at the time of obtaining Table 2-6 consent, according to the presence or absence of proton-pump inhibitors

Unique Subject Identifier=0228100000-0012

MEANS Procedure

Assay variable : PTINR\_VAL1 PT-INR Value

N Mean Standard Deviation Minimum Maximum

---

|   |           |           |           |           |
|---|-----------|-----------|-----------|-----------|
| 6 | 1.3550000 | 0.1380942 | 1.1200000 | 1.5100000 |
|---|-----------|-----------|-----------|-----------|

---

Unique Subject Identifier=0228100000-0014

Assay variable : PTINR\_VAL1 PT-INR Value

N Mean Standard Deviation Minimum Maximum

---

|   |           |           |           |           |
|---|-----------|-----------|-----------|-----------|
| 6 | 2.0833333 | 0.2852134 | 1.8300000 | 2.6200000 |
|---|-----------|-----------|-----------|-----------|

---

Unique Subject Identifier=0228100000-0052

Assay variable : PTINR\_VAL1 PT-INR Value

N Mean Standard Deviation Minimum Maximum

---

|   |           |  |           |           |
|---|-----------|--|-----------|-----------|
| 1 | 1.8000000 |  | 1.8000000 | 1.8000000 |
|---|-----------|--|-----------|-----------|

---

Unique Subject Identifier=0229100000-0001

Assay variable : PTINR\_VAL1 PT-INR Value

N Mean Standard Deviation Minimum Maximum

---

|   |           |           |           |           |
|---|-----------|-----------|-----------|-----------|
| 4 | 1.7550000 | 0.1178983 | 1.6400000 | 1.8800000 |
|---|-----------|-----------|-----------|-----------|

---

Laboratory tests at the time of obtaining Table 2-6 consent, according to the presence or absence of proton-pump inhibitors

Unique Subject Identifier=0229100000-0004

MEANS Procedure

Assay variable : PTINR\_VAL1 PT-INR Value

N Mean Standard Deviation Minimum Maximum

---

|   |           |           |           |           |
|---|-----------|-----------|-----------|-----------|
| 6 | 1.5983333 | 0.4860213 | 1.1700000 | 2.4600000 |
|---|-----------|-----------|-----------|-----------|

---

Unique Subject Identifier=0229100000-0018

Assay variable : PTINR\_VAL1 PT-INR Value

N Mean Standard Deviation Minimum Maximum

---

|   |           |           |           |           |
|---|-----------|-----------|-----------|-----------|
| 6 | 1.9466667 | 0.1880071 | 1.7800000 | 2.2800000 |
|---|-----------|-----------|-----------|-----------|

---

Unique Subject Identifier=0229100000-0029

Assay variable : PTINR\_VAL1 PT-INR Value

N Mean Standard Deviation Minimum Maximum

---

|   |           |           |           |           |
|---|-----------|-----------|-----------|-----------|
| 6 | 2.1550000 | 0.2954827 | 1.7900000 | 2.5900000 |
|---|-----------|-----------|-----------|-----------|

---

Unique Subject Identifier=0229100000-0030



Assay variable : PTINR\_VAL1 PT-INR Value

N Mean Standard Deviation Minimum Maximum

---

|   |           |           |           |           |
|---|-----------|-----------|-----------|-----------|
| 4 | 2.0775000 | 0.1252664 | 1.9500000 | 2.1900000 |
|---|-----------|-----------|-----------|-----------|

---

Laboratory tests at the time of obtaining Table 2-6 consent, according to the presence or absence of proton-pump inhibitors

Unique Subject Identifier=0230100000-0004

MEANS Procedure

Assay variable : PTINR\_VAL1 PT-INR Value

N Mean Standard Deviation Minimum Maximum

---

|   |           |           |           |           |
|---|-----------|-----------|-----------|-----------|
| 5 | 2.4640000 | 0.3543021 | 2.0000000 | 2.8100000 |
|---|-----------|-----------|-----------|-----------|

---

Unique Subject Identifier=0231100000-0008

Assay variable : PTINR\_VAL1 PT-INR Value

N Mean Standard Deviation Minimum Maximum

---

|   |           |           |           |           |
|---|-----------|-----------|-----------|-----------|
| 5 | 1.7260000 | 0.2921986 | 1.2700000 | 2.0600000 |
|---|-----------|-----------|-----------|-----------|

---

Unique Subject Identifier=0231100000-0013

Assay variable : PTINR\_VAL1 PT-INR Value

N Mean Standard Deviation Minimum Maximum

---

|   |           |           |           |           |
|---|-----------|-----------|-----------|-----------|
| 4 | 1.8125000 | 0.2224672 | 1.4900000 | 1.9700000 |
|---|-----------|-----------|-----------|-----------|

---

Unique Subject Identifier=0231100000-0017

Assay variable : PTINR\_VAL1 PT-INR Value

N Mean Standard Deviation Minimum Maximum

---

|   |           |           |           |           |
|---|-----------|-----------|-----------|-----------|
| 2 | 1.3900000 | 0.0282843 | 1.3700000 | 1.4100000 |
|---|-----------|-----------|-----------|-----------|

---

Laboratory tests at the time of obtaining Table 2-6 consent, according to the presence or absence of proton-pump inhibitors

Unique Subject Identifier=0231100000-0019

MEANS Procedure

Assay variable : PTINR\_VAL1 PT-INR Value

N Mean Standard Deviation Minimum Maximum

---

|   |           |           |           |           |
|---|-----------|-----------|-----------|-----------|
| 5 | 1.7680000 | 0.3922627 | 1.4200000 | 2.3500000 |
|---|-----------|-----------|-----------|-----------|

---

Unique Subject Identifier=0231100000-0038

Assay variable : PTINR\_VAL1 PT-INR Value

N Mean Standard Deviation Minimum Maximum

---

|   |           |           |           |           |
|---|-----------|-----------|-----------|-----------|
| 4 | 2.0575000 | 0.2807579 | 1.7800000 | 2.3800000 |
|---|-----------|-----------|-----------|-----------|

---

Unique Subject Identifier=0231100000-0046

Assay variable : PTINR\_VAL1 PT-INR Value

N Mean Standard Deviation Minimum Maximum

---

|   |           |           |           |           |
|---|-----------|-----------|-----------|-----------|
| 6 | 2.1883333 | 0.1718623 | 1.8800000 | 2.4000000 |
|---|-----------|-----------|-----------|-----------|

---

Unique Subject Identifier=1003000000-0010

Assay variable : PTINR\_VAL1 PT-INR Value

N Mean Standard Deviation Minimum Maximum

---

|   |          |           |          |          |
|---|----------|-----------|----------|----------|
| 5 | 2.202000 | 0.2882187 | 1.840000 | 2.590000 |
|---|----------|-----------|----------|----------|

---

Laboratory tests at the time of obtaining Table 2-6 consent, according to the presence or absence of proton-pump inhibitors

Unique Subject Identifier=1005000000-0010

MEANS Procedure

Assay variable : PTINR\_VAL1 PT-INR Value

N Mean Standard Deviation Minimum Maximum

---

|   |           |           |           |           |
|---|-----------|-----------|-----------|-----------|
| 6 | 1.5200000 | 0.0850882 | 1.4200000 | 1.6700000 |
|---|-----------|-----------|-----------|-----------|

---

Unique Subject Identifier=1009010010-0007

Assay variable : PTINR\_VAL1 PT-INR Value

N Mean Standard Deviation Minimum Maximum

---

|   |           |           |           |           |
|---|-----------|-----------|-----------|-----------|
| 3 | 2.3333333 | 0.2309401 | 2.2000000 | 2.6000000 |
|---|-----------|-----------|-----------|-----------|

---

Unique Subject Identifier=1009010010-0013

Assay variable : PTINR\_VAL1 PT-INR Value

N Mean Standard Deviation Minimum Maximum

---

|   |           |           |           |           |
|---|-----------|-----------|-----------|-----------|
| 6 | 2.5333333 | 0.1966384 | 2.3000000 | 2.8000000 |
|---|-----------|-----------|-----------|-----------|

---

Unique Subject Identifier=1009010010-0014

Assay variable : PTINR\_VAL1 PT-INR Value

N Mean Standard Deviation Minimum Maximum

---

|   |          |           |          |          |
|---|----------|-----------|----------|----------|
| 6 | 2.383333 | 0.6080022 | 1.900000 | 3.500000 |
|---|----------|-----------|----------|----------|

---

Laboratory tests at the time of obtaining Table 2-6 consent, according to the presence or absence of proton-pump inhibitors

Unique Subject Identifier=1009010010-0027

MEANS Procedure

Assay variable : PTINR\_VAL1 PT-INR Value

N Mean Standard Deviation Minimum Maximum

---

|   |           |           |           |           |
|---|-----------|-----------|-----------|-----------|
| 6 | 2.1166667 | 0.7250287 | 1.6000000 | 3.5000000 |
|---|-----------|-----------|-----------|-----------|

---

Unique Subject Identifier=1010010000-0003

Assay variable : PTINR\_VAL1 PT-INR Value

N Mean Standard Deviation Minimum Maximum

---

|   |           |           |           |           |
|---|-----------|-----------|-----------|-----------|
| 6 | 1.7833333 | 0.1329160 | 1.6000000 | 2.0000000 |
|---|-----------|-----------|-----------|-----------|

---

Unique Subject Identifier=1010010000-0005

Assay variable : PTINR\_VAL1 PT-INR Value

N Mean Standard Deviation Minimum Maximum

---

|   |           |  |           |           |
|---|-----------|--|-----------|-----------|
| 1 | 2.0000000 |  | 2.0000000 | 2.0000000 |
|---|-----------|--|-----------|-----------|

---

Unique Subject Identifier=1013010110-0006



Assay variable : PTINR\_VAL1 PT-INR Value

N Mean Standard Deviation Minimum Maximum

---

|   |           |           |           |           |
|---|-----------|-----------|-----------|-----------|
| 6 | 1.9666667 | 0.2160247 | 1.6000000 | 2.2000000 |
|---|-----------|-----------|-----------|-----------|

---

Laboratory tests at the time of obtaining Table 2-6 consent, according to the presence or absence of proton-pump inhibitors

Unique Subject Identifier=1019010100-0009

MEANS Procedure

Assay variable : PTINR\_VAL1 PT-INR Value

N Mean Standard Deviation Minimum Maximum

---

|   |           |           |           |           |
|---|-----------|-----------|-----------|-----------|
| 6 | 3.2066667 | 1.1550180 | 1.7200000 | 4.9100000 |
|---|-----------|-----------|-----------|-----------|

---

Unique Subject Identifier=1019010100-0013

Assay variable : PTINR\_VAL1 PT-INR Value

N Mean Standard Deviation Minimum Maximum

---

|   |           |           |           |           |
|---|-----------|-----------|-----------|-----------|
| 5 | 1.6940000 | 0.3864324 | 1.2700000 | 2.1700000 |
|---|-----------|-----------|-----------|-----------|

---

Unique Subject Identifier=1028000000-0019

Assay variable : PTINR\_VAL1 PT-INR Value

N Mean Standard Deviation Minimum Maximum

---

|   |           |           |           |           |
|---|-----------|-----------|-----------|-----------|
| 2 | 1.9950000 | 0.0212132 | 1.9800000 | 2.0100000 |
|---|-----------|-----------|-----------|-----------|

---

Unique Subject Identifier=1031010000-0111

Assay variable : PTINR\_VAL1 PT-INR Value

N Mean Standard Deviation Minimum Maximum

---

|   |           |           |           |           |
|---|-----------|-----------|-----------|-----------|
| 6 | 1.7900000 | 0.2429815 | 1.5900000 | 2.2300000 |
|---|-----------|-----------|-----------|-----------|

---

Laboratory tests at the time of obtaining Table 2-6 consent, according to the presence or absence of proton-pump inhibitors

Unique Subject Identifier=1031010000-0120

MEANS Procedure

Assay variable : PTINR\_VAL1 PT-INR Value

| N | Mean      | Standard Deviation | Minimum   | Maximum   |
|---|-----------|--------------------|-----------|-----------|
| 2 | 1.7400000 | 0.3535534          | 1.4900000 | 1.9900000 |

Unique Subject Identifier=1032000000-0001

Assay variable : PTINR\_VAL1 PT-INR Value

| N | Mean      | Standard Deviation | Minimum   | Maximum   |
|---|-----------|--------------------|-----------|-----------|
| 3 | 1.6900000 | 0.0300000          | 1.6600000 | 1.7200000 |

Unique Subject Identifier=1032000000-0004

Assay variable : PTINR\_VAL1 PT-INR Value

| N | Mean      | Standard Deviation | Minimum   | Maximum   |
|---|-----------|--------------------|-----------|-----------|
| 3 | 2.0666667 | 0.5291818          | 1.4900000 | 2.5300000 |

Unique Subject Identifier=1032000000-0006

Assay variable : PTINR\_VAL1 PT-INR Value

N Mean Standard Deviation Minimum Maximum

---

|   |           |           |           |           |
|---|-----------|-----------|-----------|-----------|
| 6 | 1.7933333 | 0.4071200 | 1.4600000 | 2.5000000 |
|---|-----------|-----------|-----------|-----------|

---

Laboratory tests at the time of obtaining Table 2-6 consent, according to the presence or absence of proton-pump inhibitors

Unique Subject Identifier=1032000000-0007

MEANS Procedure

Assay variable : PTINR\_VAL1 PT-INR Value

N Mean Standard Deviation Minimum Maximum

---

|   |           |           |           |           |
|---|-----------|-----------|-----------|-----------|
| 6 | 2.4366667 | 0.6166252 | 1.6900000 | 3.1000000 |
|---|-----------|-----------|-----------|-----------|

---

Unique Subject Identifier=1032000000-0008

Assay variable : PTINR\_VAL1 PT-INR Value

N Mean Standard Deviation Minimum Maximum

---

|   |           |           |           |           |
|---|-----------|-----------|-----------|-----------|
| 6 | 1.6883333 | 0.5840348 | 1.2900000 | 2.5600000 |
|---|-----------|-----------|-----------|-----------|

---

Unique Subject Identifier=1032000000-0010

Assay variable : PTINR\_VAL1 PT-INR Value

N Mean Standard Deviation Minimum Maximum

---

|   |           |           |           |           |
|---|-----------|-----------|-----------|-----------|
| 6 | 2.2250000 | 0.2714959 | 1.8800000 | 2.6200000 |
|---|-----------|-----------|-----------|-----------|

---

Unique Subject Identifier=1032000000-0011

Assay variable : PTINR\_VAL1 PT-INR Value

N Mean Standard Deviation Minimum Maximum

---

|   |          |           |          |          |
|---|----------|-----------|----------|----------|
| 6 | 2.160000 | 0.1288410 | 1.920000 | 2.290000 |
|---|----------|-----------|----------|----------|

---

Laboratory tests at the time of obtaining Table 2-6 consent, according to the presence or absence of proton-pump inhibitors

Unique Subject Identifier=1032000000-0013

MEANS Procedure

Assay variable : PTINR\_VAL1 PT-INR Value

N Mean Standard Deviation Minimum Maximum

---

|   |           |           |           |           |
|---|-----------|-----------|-----------|-----------|
| 6 | 1.9833333 | 0.4921653 | 1.6500000 | 2.9300000 |
|---|-----------|-----------|-----------|-----------|

---

Unique Subject Identifier=1032000000-0017

Assay variable : PTINR\_VAL1 PT-INR Value

N Mean Standard Deviation Minimum Maximum

---

|   |           |           |           |           |
|---|-----------|-----------|-----------|-----------|
| 6 | 2.1833333 | 0.3101398 | 1.7600000 | 2.7000000 |
|---|-----------|-----------|-----------|-----------|

---

Unique Subject Identifier=1032000000-0018

Assay variable : PTINR\_VAL1 PT-INR Value

N Mean Standard Deviation Minimum Maximum

---

|   |           |           |           |           |
|---|-----------|-----------|-----------|-----------|
| 6 | 1.9116667 | 0.3806529 | 1.4900000 | 2.5500000 |
|---|-----------|-----------|-----------|-----------|

---

Unique Subject Identifier=1032000000-0021



Assay variable : PTINR\_VAL1 PT-INR Value

N Mean Standard Deviation Minimum Maximum

---

|   |           |           |           |           |
|---|-----------|-----------|-----------|-----------|
| 6 | 1.8950000 | 0.1712016 | 1.6500000 | 2.0500000 |
|---|-----------|-----------|-----------|-----------|

---

Laboratory tests at the time of obtaining Table 2-6 consent, according to the presence or absence of proton-pump inhibitors

Unique Subject Identifier=1032000000-0025

MEANS Procedure

Assay variable : PTINR\_VAL1 PT-INR Value

N Mean Standard Deviation Minimum Maximum

---

|   |           |           |           |           |
|---|-----------|-----------|-----------|-----------|
| 6 | 1.5883333 | 0.3950907 | 1.2800000 | 2.3500000 |
|---|-----------|-----------|-----------|-----------|

---

Unique Subject Identifier=1032000000-0028

Assay variable : PTINR\_VAL1 PT-INR Value

N Mean Standard Deviation Minimum Maximum

---

|   |           |           |           |           |
|---|-----------|-----------|-----------|-----------|
| 6 | 2.3250000 | 0.2562616 | 1.9800000 | 2.7200000 |
|---|-----------|-----------|-----------|-----------|

---

Unique Subject Identifier=1032000000-0030

Assay variable : PTINR\_VAL1 PT-INR Value

N Mean Standard Deviation Minimum Maximum

---

|   |           |           |           |           |
|---|-----------|-----------|-----------|-----------|
| 6 | 1.7050000 | 0.0939681 | 1.5900000 | 1.8300000 |
|---|-----------|-----------|-----------|-----------|

---

Unique Subject Identifier=1034000000-0009

Assay variable : PTINR\_VAL1 PT-INR Value

N Mean Standard Deviation Minimum Maximum

---

|   |          |  |          |          |
|---|----------|--|----------|----------|
| 1 | 1.200000 |  | 1.200000 | 1.200000 |
|---|----------|--|----------|----------|

---

Laboratory tests at the time of obtaining Table 2-6 consent, according to the presence or absence of proton-pump inhibitors

Unique Subject Identifier=1035000000-0013

MEANS Procedure

Assay variable : PTINR\_VAL1 PT-INR Value

N Mean Standard Deviation Minimum Maximum

---

|   |           |           |           |           |
|---|-----------|-----------|-----------|-----------|
| 5 | 2.0740000 | 0.1984439 | 1.8000000 | 2.3300000 |
|---|-----------|-----------|-----------|-----------|

---

Unique Subject Identifier=1038000000-0004

Assay variable : PTINR\_VAL1 PT-INR Value

N Mean Standard Deviation Minimum Maximum

---

|   |           |           |           |           |
|---|-----------|-----------|-----------|-----------|
| 6 | 2.0833333 | 0.1722401 | 1.9000000 | 2.3000000 |
|---|-----------|-----------|-----------|-----------|

---

Unique Subject Identifier=1041011110-0033

Assay variable : PTINR\_VAL1 PT-INR Value

N Mean Standard Deviation Minimum Maximum

---

|   |           |           |           |           |
|---|-----------|-----------|-----------|-----------|
| 6 | 1.9833333 | 0.1471960 | 1.8000000 | 2.2000000 |
|---|-----------|-----------|-----------|-----------|

---

Unique Subject Identifier=1041011110-0036

Assay variable : PTINR\_VAL1 PT-INR Value

N Mean Standard Deviation Minimum Maximum

---

|   |           |           |           |           |
|---|-----------|-----------|-----------|-----------|
| 6 | 2.2666667 | 0.6186006 | 1.2000000 | 2.9000000 |
|---|-----------|-----------|-----------|-----------|

---

Laboratory tests at the time of obtaining Table 2-6 consent, according to the presence or absence of proton-pump inhibitors

Unique Subject Identifier=1041011110-0043

MEANS Procedure

Assay variable : PTINR\_VAL1 PT-INR Value

N Mean Standard Deviation Minimum Maximum

---

|   |           |           |           |           |
|---|-----------|-----------|-----------|-----------|
| 5 | 1.7200000 | 0.1303840 | 1.6000000 | 1.9000000 |
|---|-----------|-----------|-----------|-----------|

---

Unique Subject Identifier=1052000000-0003

Assay variable : PTINR\_VAL1 PT-INR Value

N Mean Standard Deviation Minimum Maximum

---

|   |           |           |           |           |
|---|-----------|-----------|-----------|-----------|
| 5 | 1.7960000 | 0.1668233 | 1.6300000 | 2.0000000 |
|---|-----------|-----------|-----------|-----------|

---

Unique Subject Identifier=1060000000-0010

Assay variable : PTINR\_VAL1 PT-INR Value

N Mean Standard Deviation Minimum Maximum

---

|   |           |           |           |           |
|---|-----------|-----------|-----------|-----------|
| 6 | 1.9666667 | 0.2771041 | 1.6800000 | 2.3600000 |
|---|-----------|-----------|-----------|-----------|

---

Unique Subject Identifier=1060000000-0022

Assay variable : PTINR\_VAL1 PT-INR Value

N Mean Standard Deviation Minimum Maximum

---

|   |           |           |           |           |
|---|-----------|-----------|-----------|-----------|
| 4 | 1.8100000 | 0.1570563 | 1.6200000 | 2.0000000 |
|---|-----------|-----------|-----------|-----------|

---

Laboratory tests at the time of obtaining Table 2-6 consent, according to the presence or absence of proton-pump inhibitors

Unique Subject Identifier=1060000000-0043

MEANS Procedure

Assay variable : PTINR\_VAL1 PT-INR Value

| N | Mean      | Standard Deviation | Minimum   | Maximum   |
|---|-----------|--------------------|-----------|-----------|
| 2 | 1.8950000 | 0.2899138          | 1.6900000 | 2.1000000 |

Unique Subject Identifier=1065010011-0008

Assay variable : PTINR\_VAL1 PT-INR Value

| N | Mean      | Standard Deviation | Minimum   | Maximum   |
|---|-----------|--------------------|-----------|-----------|
| 6 | 2.4666667 | 0.5163978          | 1.6000000 | 3.0000000 |

Unique Subject Identifier=1065010011-0012

Assay variable : PTINR\_VAL1 PT-INR Value

| N | Mean      | Standard Deviation | Minimum   | Maximum   |
|---|-----------|--------------------|-----------|-----------|
| 6 | 2.2333333 | 0.7580677          | 1.5000000 | 3.4000000 |

Unique Subject Identifier=1068010111-0006



Assay variable : PTINR\_VAL1 PT-INR Value

N Mean Standard Deviation Minimum Maximum

---

|   |           |           |           |           |
|---|-----------|-----------|-----------|-----------|
| 3 | 1.9266667 | 0.1331666 | 1.7800000 | 2.0400000 |
|---|-----------|-----------|-----------|-----------|

---

Laboratory tests at the time of obtaining Table 2-6 consent, according to the presence or absence of proton-pump inhibitors

Unique Subject Identifier=1068010111-0026

MEANS Procedure

Assay variable : PTINR\_VAL1 PT-INR Value

N Mean Standard Deviation Minimum Maximum

---

|   |           |           |           |           |
|---|-----------|-----------|-----------|-----------|
| 5 | 2.1220000 | 0.7623451 | 1.4100000 | 3.2600000 |
|---|-----------|-----------|-----------|-----------|

---

Unique Subject Identifier=1072000000-0022

Assay variable : PTINR\_VAL1 PT-INR Value

N Mean Standard Deviation Minimum Maximum

---

|   |           |           |           |           |
|---|-----------|-----------|-----------|-----------|
| 6 | 1.7950000 | 0.1415274 | 1.6500000 | 2.0600000 |
|---|-----------|-----------|-----------|-----------|

---

Unique Subject Identifier=1072000000-0034

Assay variable : PTINR\_VAL1 PT-INR Value

N Mean Standard Deviation Minimum Maximum

---

|   |           |           |           |           |
|---|-----------|-----------|-----------|-----------|
| 6 | 1.9483333 | 0.1212298 | 1.7300000 | 2.0400000 |
|---|-----------|-----------|-----------|-----------|

---

Unique Subject Identifier=1074011010-0002

Assay variable : PTINR\_VAL1 PT-INR Value

N Mean Standard Deviation Minimum Maximum

---

|   |           |           |           |           |
|---|-----------|-----------|-----------|-----------|
| 5 | 2.3260000 | 0.6975529 | 1.7600000 | 3.5000000 |
|---|-----------|-----------|-----------|-----------|

---

Laboratory tests at the time of obtaining Table 2-6 consent, according to the presence or absence of proton-pump inhibitors

Unique Subject Identifier=1074011010-0010

MEANS Procedure

Assay variable : PTINR\_VAL1 PT-INR Value

N Mean Standard Deviation Minimum Maximum

---

|   |          |           |          |          |
|---|----------|-----------|----------|----------|
| 5 | 1.760000 | 0.2302173 | 1.510000 | 2.100000 |
|---|----------|-----------|----------|----------|

---

Unique Subject Identifier=1080000000-0001

Assay variable : PTINR\_VAL1 PT-INR Value

N Mean Standard Deviation Minimum Maximum

---

|   |           |           |          |          |
|---|-----------|-----------|----------|----------|
| 6 | 2.1783333 | 0.2145150 | 1.960000 | 2.440000 |
|---|-----------|-----------|----------|----------|

---

Unique Subject Identifier=1080000000-0007

Assay variable : PTINR\_VAL1 PT-INR Value

N Mean Standard Deviation Minimum Maximum

---

|   |          |           |          |          |
|---|----------|-----------|----------|----------|
| 6 | 2.535000 | 0.1775106 | 2.270000 | 2.730000 |
|---|----------|-----------|----------|----------|

---

Unique Subject Identifier=1087000000-0004

Assay variable : PTINR\_VAL1 PT-INR Value

N Mean Standard Deviation Minimum Maximum

---

|   |           |           |           |           |
|---|-----------|-----------|-----------|-----------|
| 6 | 1.9983333 | 0.4471875 | 1.5400000 | 2.5400000 |
|---|-----------|-----------|-----------|-----------|

---

Laboratory tests at the time of obtaining Table 2-6 consent, according to the presence or absence of proton-pump inhibitors

Unique Subject Identifier=1090001110-0011

MEANS Procedure

Assay variable : PTINR\_VAL1 PT-INR Value

N Mean Standard Deviation Minimum Maximum

---

|   |          |           |          |          |
|---|----------|-----------|----------|----------|
| 6 | 2.400000 | 0.3098387 | 1.900000 | 2.800000 |
|---|----------|-----------|----------|----------|

---

Unique Subject Identifier=1090001110-0012

Assay variable : PTINR\_VAL1 PT-INR Value

N Mean Standard Deviation Minimum Maximum

---

|   |          |           |          |          |
|---|----------|-----------|----------|----------|
| 6 | 1.866667 | 0.2732520 | 1.500000 | 2.300000 |
|---|----------|-----------|----------|----------|

---

Unique Subject Identifier=1091010000-0007

Assay variable : PTINR\_VAL1 PT-INR Value

N Mean Standard Deviation Minimum Maximum

---

|   |          |           |          |          |
|---|----------|-----------|----------|----------|
| 6 | 2.366667 | 0.5046451 | 1.600000 | 3.100000 |
|---|----------|-----------|----------|----------|

---

Unique Subject Identifier=1091010000-0010

Assay variable : PTINR\_VAL1 PT-INR Value

N Mean Standard Deviation Minimum Maximum

---

|   |          |           |          |          |
|---|----------|-----------|----------|----------|
| 6 | 2.050000 | 0.2073644 | 1.800000 | 2.400000 |
|---|----------|-----------|----------|----------|

---

Laboratory tests at the time of obtaining Table 2-6 consent, according to the presence or absence of proton-pump inhibitors

Unique Subject Identifier=1091010000-0028

MEANS Procedure

Assay variable : PTINR\_VAL1 PT-INR Value

N Mean Standard Deviation Minimum Maximum

---

|   |           |           |           |           |
|---|-----------|-----------|-----------|-----------|
| 5 | 2.1800000 | 0.8043631 | 1.4000000 | 3.3000000 |
|---|-----------|-----------|-----------|-----------|

---

Unique Subject Identifier=1091010000-0030

Assay variable : PTINR\_VAL1 PT-INR Value

N Mean Standard Deviation Minimum Maximum

---

|   |           |           |           |           |
|---|-----------|-----------|-----------|-----------|
| 6 | 1.7000000 | 0.2000000 | 1.5000000 | 2.0000000 |
|---|-----------|-----------|-----------|-----------|

---

Unique Subject Identifier=1091010000-0038

Assay variable : PTINR\_VAL1 PT-INR Value

N Mean Standard Deviation Minimum Maximum

---

|   |           |           |           |           |
|---|-----------|-----------|-----------|-----------|
| 6 | 1.8666667 | 0.2065591 | 1.7000000 | 2.2000000 |
|---|-----------|-----------|-----------|-----------|

---

Unique Subject Identifier=1091010000-0042



Assay variable : PTINR\_VAL1 PT-INR Value

N Mean Standard Deviation Minimum Maximum

---

|   |           |           |           |           |
|---|-----------|-----------|-----------|-----------|
| 6 | 1.8833333 | 0.2401388 | 1.6000000 | 2.3000000 |
|---|-----------|-----------|-----------|-----------|

---

Laboratory tests at the time of obtaining Table 2-6 consent, according to the presence or absence of proton-pump inhibitors

Unique Subject Identifier=1094000000-0003

MEANS Procedure

Assay variable : PTINR\_VAL1 PT-INR Value

N Mean Standard Deviation Minimum Maximum

---

|   |           |           |           |           |
|---|-----------|-----------|-----------|-----------|
| 6 | 1.5350000 | 0.0736885 | 1.4400000 | 1.6300000 |
|---|-----------|-----------|-----------|-----------|

---

Unique Subject Identifier=1094000000-0005

Assay variable : PTINR\_VAL1 PT-INR Value

N Mean Standard Deviation Minimum Maximum

---

|   |           |           |           |           |
|---|-----------|-----------|-----------|-----------|
| 5 | 2.5000000 | 0.4803644 | 2.1200000 | 3.3000000 |
|---|-----------|-----------|-----------|-----------|

---

Unique Subject Identifier=1095000000-0025

Assay variable : PTINR\_VAL1 PT-INR Value

N Mean Standard Deviation Minimum Maximum

---

|   |           |           |           |           |
|---|-----------|-----------|-----------|-----------|
| 6 | 2.0666667 | 0.3204164 | 1.8000000 | 2.6000000 |
|---|-----------|-----------|-----------|-----------|

---

Unique Subject Identifier=1096000000-0001

Assay variable : PTINR\_VAL1 PT-INR Value

N Mean Standard Deviation Minimum Maximum

---

|   |          |  |          |          |
|---|----------|--|----------|----------|
| 1 | 2.060000 |  | 2.060000 | 2.060000 |
|---|----------|--|----------|----------|

---

Laboratory tests at the time of obtaining Table 2-6 consent, according to the presence or absence of proton-pump inhibitors

Unique Subject Identifier=1096000000-0018

MEANS Procedure

Assay variable : PTINR\_VAL1 PT-INR Value

N Mean Standard Deviation Minimum Maximum

---

|   |           |           |           |           |
|---|-----------|-----------|-----------|-----------|
| 3 | 1.5666667 | 0.2516611 | 1.3000000 | 1.8000000 |
|---|-----------|-----------|-----------|-----------|

---

Unique Subject Identifier=1099000000-0002

Assay variable : PTINR\_VAL1 PT-INR Value

N Mean Standard Deviation Minimum Maximum

---

|   |           |           |           |           |
|---|-----------|-----------|-----------|-----------|
| 3 | 1.4300000 | 0.1300000 | 1.3500000 | 1.5800000 |
|---|-----------|-----------|-----------|-----------|

---

Unique Subject Identifier=1099000000-0004

Assay variable : PTINR\_VAL1 PT-INR Value

N Mean Standard Deviation Minimum Maximum

---

|   |           |  |           |           |
|---|-----------|--|-----------|-----------|
| 1 | 1.6400000 |  | 1.6400000 | 1.6400000 |
|---|-----------|--|-----------|-----------|

---

Unique Subject Identifier=1102000000-0008

Assay variable : PTINR\_VAL1 PT-INR Value

N Mean Standard Deviation Minimum Maximum

---

|   |           |           |           |           |
|---|-----------|-----------|-----------|-----------|
| 2 | 1.5700000 | 0.1131371 | 1.4900000 | 1.6500000 |
|---|-----------|-----------|-----------|-----------|

---

Laboratory tests at the time of obtaining Table 2-6 consent, according to the presence or absence of proton-pump inhibitors

Unique Subject Identifier=1102000000-0021

MEANS Procedure

Assay variable : PTINR\_VAL1 PT-INR Value

N Mean Standard Deviation Minimum Maximum

---

|   |           |           |           |           |
|---|-----------|-----------|-----------|-----------|
| 2 | 1.7950000 | 0.0353553 | 1.7700000 | 1.8200000 |
|---|-----------|-----------|-----------|-----------|

---

Unique Subject Identifier=1102000000-0022

Assay variable : PTINR\_VAL1 PT-INR Value

N Mean Standard Deviation Minimum Maximum

---

|   |           |           |           |           |
|---|-----------|-----------|-----------|-----------|
| 3 | 2.0666667 | 0.4441096 | 1.5800000 | 2.4500000 |
|---|-----------|-----------|-----------|-----------|

---

Unique Subject Identifier=1110000000-0002

Assay variable : PTINR\_VAL1 PT-INR Value

N Mean Standard Deviation Minimum Maximum

---

|   |           |           |           |           |
|---|-----------|-----------|-----------|-----------|
| 5 | 2.1000000 | 0.1581139 | 1.9000000 | 2.3000000 |
|---|-----------|-----------|-----------|-----------|

---

Unique Subject Identifier=1111000000-0005

Assay variable : PTINR\_VAL1 PT-INR Value

N Mean Standard Deviation Minimum Maximum

---

|   |          |           |          |          |
|---|----------|-----------|----------|----------|
| 6 | 1.560000 | 0.1181524 | 1.480000 | 1.780000 |
|---|----------|-----------|----------|----------|

---

Laboratory tests at the time of obtaining Table 2-6 consent, according to the presence or absence of proton-pump inhibitors

Unique Subject Identifier=1111000000-0012

MEANS Procedure

Assay variable : PTINR\_VAL1 PT-INR Value

N Mean Standard Deviation Minimum Maximum

---

|   |           |           |           |           |
|---|-----------|-----------|-----------|-----------|
| 2 | 2.1050000 | 0.1484924 | 2.0000000 | 2.2100000 |
|---|-----------|-----------|-----------|-----------|

---

Unique Subject Identifier=1112000000-0002

Assay variable : PTINR\_VAL1 PT-INR Value

N Mean Standard Deviation Minimum Maximum

---

|   |           |           |           |           |
|---|-----------|-----------|-----------|-----------|
| 6 | 1.8966667 | 0.5702865 | 1.3100000 | 2.7600000 |
|---|-----------|-----------|-----------|-----------|

---

Unique Subject Identifier=1112000000-0015

Assay variable : PTINR\_VAL1 PT-INR Value

N Mean Standard Deviation Minimum Maximum

---

|   |           |           |           |           |
|---|-----------|-----------|-----------|-----------|
| 6 | 2.1833333 | 0.6064212 | 1.5500000 | 3.1900000 |
|---|-----------|-----------|-----------|-----------|

---

Unique Subject Identifier=1118011000-0002



Assay variable : PTINR\_VAL1 PT-INR Value

N Mean Standard Deviation Minimum Maximum

---

|   |          |           |          |          |
|---|----------|-----------|----------|----------|
| 5 | 2.100000 | 0.2549510 | 1.800000 | 2.400000 |
|---|----------|-----------|----------|----------|

---

Laboratory tests at the time of obtaining Table 2-6 consent, according to the presence or absence of proton-pump inhibitors

Unique Subject Identifier=1118011000-0006

MEANS Procedure

Assay variable : PTINR\_VAL1 PT-INR Value

N Mean Standard Deviation Minimum Maximum

---

|   |           |           |           |           |
|---|-----------|-----------|-----------|-----------|
| 6 | 2.1833333 | 0.5307228 | 1.6000000 | 3.0000000 |
|---|-----------|-----------|-----------|-----------|

---

Unique Subject Identifier=1118011000-0009

Assay variable : PTINR\_VAL1 PT-INR Value

N Mean Standard Deviation Minimum Maximum

---

|   |           |           |           |           |
|---|-----------|-----------|-----------|-----------|
| 6 | 1.9666667 | 0.2503331 | 1.7000000 | 2.3000000 |
|---|-----------|-----------|-----------|-----------|

---

Unique Subject Identifier=1118011000-0021

Assay variable : PTINR\_VAL1 PT-INR Value

N Mean Standard Deviation Minimum Maximum

---

|   |           |           |           |           |
|---|-----------|-----------|-----------|-----------|
| 5 | 1.5600000 | 0.1140175 | 1.4000000 | 1.7000000 |
|---|-----------|-----------|-----------|-----------|

---

Unique Subject Identifier=1118011000-0023

Assay variable : PTINR\_VAL1 PT-INR Value

N Mean Standard Deviation Minimum Maximum

---

|   |          |          |          |          |
|---|----------|----------|----------|----------|
| 6 | 2.000000 | 0.551362 | 1.500000 | 2.800000 |
|---|----------|----------|----------|----------|

---

Laboratory tests at the time of obtaining Table 2-6 consent, according to the presence or absence of proton-pump inhibitors

Unique Subject Identifier=1118011000-0027

MEANS Procedure

Assay variable : PTINR\_VAL1 PT-INR Value

N Mean Standard Deviation Minimum Maximum

---

|   |           |           |           |           |
|---|-----------|-----------|-----------|-----------|
| 5 | 2.0800000 | 0.4549725 | 1.6000000 | 2.8000000 |
|---|-----------|-----------|-----------|-----------|

---

Unique Subject Identifier=1118011000-0045

Assay variable : PTINR\_VAL1 PT-INR Value

N Mean Standard Deviation Minimum Maximum

---

|   |           |           |           |           |
|---|-----------|-----------|-----------|-----------|
| 6 | 1.8833333 | 0.1169045 | 1.7000000 | 2.0000000 |
|---|-----------|-----------|-----------|-----------|

---

Unique Subject Identifier=1118011000-0083

Assay variable : PTINR\_VAL1 PT-INR Value

N Mean Standard Deviation Minimum Maximum

---

|   |           |           |           |           |
|---|-----------|-----------|-----------|-----------|
| 6 | 2.2833333 | 0.4792355 | 1.9000000 | 2.9000000 |
|---|-----------|-----------|-----------|-----------|

---

Unique Subject Identifier=1118011000-0087

Assay variable : PTINR\_VAL1 PT-INR Value

N Mean Standard Deviation Minimum Maximum

---

|   |          |          |          |          |
|---|----------|----------|----------|----------|
| 5 | 1.800000 | 0.300000 | 1.500000 | 2.100000 |
|---|----------|----------|----------|----------|

---

Laboratory tests at the time of obtaining Table 2-6 consent, according to the presence or absence of proton-pump inhibitors

Unique Subject Identifier=1118011000-0090

MEANS Procedure

Assay variable : PTINR\_VAL1 PT-INR Value

N Mean Standard Deviation Minimum Maximum

---

|   |           |           |           |           |
|---|-----------|-----------|-----------|-----------|
| 6 | 2.5833333 | 0.2483277 | 2.3000000 | 2.9000000 |
|---|-----------|-----------|-----------|-----------|

---

Unique Subject Identifier=1118011000-0102

Assay variable : PTINR\_VAL1 PT-INR Value

N Mean Standard Deviation Minimum Maximum

---

|   |           |           |           |           |
|---|-----------|-----------|-----------|-----------|
| 6 | 1.9000000 | 0.3521363 | 1.7000000 | 2.6000000 |
|---|-----------|-----------|-----------|-----------|

---

Unique Subject Identifier=1118011000-0109

Assay variable : PTINR\_VAL1 PT-INR Value

N Mean Standard Deviation Minimum Maximum

---

|   |           |           |           |           |
|---|-----------|-----------|-----------|-----------|
| 5 | 2.2200000 | 0.2774887 | 1.8000000 | 2.5000000 |
|---|-----------|-----------|-----------|-----------|

---

Unique Subject Identifier=1118011000-0120

Assay variable : PTINR\_VAL1 PT-INR Value

N Mean Standard Deviation Minimum Maximum

---

|   |           |           |           |           |
|---|-----------|-----------|-----------|-----------|
| 6 | 1.8166667 | 0.2136976 | 1.6000000 | 2.2000000 |
|---|-----------|-----------|-----------|-----------|

---

Laboratory tests at the time of obtaining Table 2-6 consent, according to the presence or absence of proton-pump inhibitors

Unique Subject Identifier=1119000000-0005

MEANS Procedure

Assay variable : PTINR\_VAL1 PT-INR Value

N Mean Standard Deviation Minimum Maximum

---

|   |           |  |           |           |
|---|-----------|--|-----------|-----------|
| 1 | 1.6300000 |  | 1.6300000 | 1.6300000 |
|---|-----------|--|-----------|-----------|

---

Unique Subject Identifier=1119000000-0016

Assay variable : PTINR\_VAL1 PT-INR Value

N Mean Standard Deviation Minimum Maximum

---

|   |           |           |           |           |
|---|-----------|-----------|-----------|-----------|
| 2 | 1.9800000 | 0.0282843 | 1.9600000 | 2.0000000 |
|---|-----------|-----------|-----------|-----------|

---

Unique Subject Identifier=1119000000-0019

Assay variable : PTINR\_VAL1 PT-INR Value

N Mean Standard Deviation Minimum Maximum

---

|   |           |           |           |           |
|---|-----------|-----------|-----------|-----------|
| 6 | 2.1466667 | 0.3225937 | 1.9000000 | 2.7400000 |
|---|-----------|-----------|-----------|-----------|

---

Unique Subject Identifier=1119000000-0044



Assay variable : PTINR\_VAL1 PT-INR Value

N Mean Standard Deviation Minimum Maximum

---

|   |          |           |          |          |
|---|----------|-----------|----------|----------|
| 5 | 1.840000 | 0.2966479 | 1.500000 | 2.300000 |
|---|----------|-----------|----------|----------|

---

Laboratory tests at the time of obtaining Table 2-6 consent, according to the presence or absence of proton-pump inhibitors

Unique Subject Identifier=1122001010-0018

MEANS Procedure

Assay variable : PTINR\_VAL1 PT-INR Value

| N | Mean      | Standard Deviation | Minimum   | Maximum   |
|---|-----------|--------------------|-----------|-----------|
| 1 | 1.6400000 |                    | 1.6400000 | 1.6400000 |

Unique Subject Identifier=1122001010-0031

Assay variable : PTINR\_VAL1 PT-INR Value

| N | Mean      | Standard Deviation | Minimum   | Maximum   |
|---|-----------|--------------------|-----------|-----------|
| 6 | 2.4833333 | 0.4684727          | 1.7500000 | 2.9500000 |

Unique Subject Identifier=1122001010-0038

Assay variable : PTINR\_VAL1 PT-INR Value

| N | Mean      | Standard Deviation | Minimum   | Maximum   |
|---|-----------|--------------------|-----------|-----------|
| 6 | 2.0683333 | 0.1979310          | 1.8600000 | 2.3300000 |

Unique Subject Identifier=1122001010-0052

Assay variable : PTINR\_VAL1 PT-INR Value

N Mean Standard Deviation Minimum Maximum

---

|   |           |           |           |           |
|---|-----------|-----------|-----------|-----------|
| 6 | 1.9266667 | 0.1954141 | 1.6200000 | 2.1300000 |
|---|-----------|-----------|-----------|-----------|

---

Laboratory tests at the time of obtaining Table 2-6 consent, according to the presence or absence of proton-pump inhibitors

Unique Subject Identifier=1122001010-0055

MEANS Procedure

Assay variable : PTINR\_VAL1 PT-INR Value

N Mean Standard Deviation Minimum Maximum

---

|   |           |           |           |           |
|---|-----------|-----------|-----------|-----------|
| 6 | 1.7900000 | 0.1943193 | 1.6000000 | 2.1300000 |
|---|-----------|-----------|-----------|-----------|

---

Unique Subject Identifier=1122001010-0056

Assay variable : PTINR\_VAL1 PT-INR Value

N Mean Standard Deviation Minimum Maximum

---

|   |           |           |           |           |
|---|-----------|-----------|-----------|-----------|
| 5 | 2.4940000 | 0.3922754 | 2.1100000 | 2.9300000 |
|---|-----------|-----------|-----------|-----------|

---

Unique Subject Identifier=1122001010-0060

Assay variable : PTINR\_VAL1 PT-INR Value

N Mean Standard Deviation Minimum Maximum

---

|   |           |           |           |           |
|---|-----------|-----------|-----------|-----------|
| 6 | 1.7200000 | 0.7457882 | 1.1800000 | 3.1800000 |
|---|-----------|-----------|-----------|-----------|

---

Unique Subject Identifier=1122001010-0061

Assay variable : PTINR\_VAL1 PT-INR Value

N Mean Standard Deviation Minimum Maximum

---

|   |           |           |           |           |
|---|-----------|-----------|-----------|-----------|
| 6 | 2.4133333 | 0.2000667 | 2.1300000 | 2.7100000 |
|---|-----------|-----------|-----------|-----------|

---

Laboratory tests at the time of obtaining Table 2-6 consent, according to the presence or absence of proton-pump inhibitors

Unique Subject Identifier=1122001010-0063

MEANS Procedure

Assay variable : PTINR\_VAL1 PT-INR Value

N Mean Standard Deviation Minimum Maximum

---

|   |           |           |           |           |
|---|-----------|-----------|-----------|-----------|
| 6 | 2.2633333 | 0.2497732 | 1.8100000 | 2.5600000 |
|---|-----------|-----------|-----------|-----------|

---

Unique Subject Identifier=1122001010-0066

Assay variable : PTINR\_VAL1 PT-INR Value

N Mean Standard Deviation Minimum Maximum

---

|   |           |           |           |           |
|---|-----------|-----------|-----------|-----------|
| 6 | 2.0233333 | 0.2823945 | 1.6200000 | 2.3800000 |
|---|-----------|-----------|-----------|-----------|

---

Unique Subject Identifier=1122001010-0072

Assay variable : PTINR\_VAL1 PT-INR Value

N Mean Standard Deviation Minimum Maximum

---

|   |           |           |           |           |
|---|-----------|-----------|-----------|-----------|
| 3 | 1.6566667 | 0.4454586 | 1.2000000 | 2.0900000 |
|---|-----------|-----------|-----------|-----------|

---

Unique Subject Identifier=1122001010-0073

Assay variable : PTINR\_VAL1 PT-INR Value

N Mean Standard Deviation Minimum Maximum

---

|   |           |           |           |           |
|---|-----------|-----------|-----------|-----------|
| 6 | 1.7566667 | 0.2808321 | 1.4700000 | 2.2500000 |
|---|-----------|-----------|-----------|-----------|

---

Laboratory tests at the time of obtaining Table 2-6 consent, according to the presence or absence of proton-pump inhibitors

Unique Subject Identifier=1127010000-0001

MEANS Procedure

Assay variable : PTINR\_VAL1 PT-INR Value

N Mean Standard Deviation Minimum Maximum

---

|   |           |           |           |           |
|---|-----------|-----------|-----------|-----------|
| 6 | 1.6833333 | 0.1834848 | 1.4000000 | 1.9000000 |
|---|-----------|-----------|-----------|-----------|

---

Unique Subject Identifier=1154000000-0006

Assay variable : PTINR\_VAL1 PT-INR Value

N Mean Standard Deviation Minimum Maximum

---

|   |           |           |           |           |
|---|-----------|-----------|-----------|-----------|
| 5 | 1.5900000 | 0.1168332 | 1.4500000 | 1.7200000 |
|---|-----------|-----------|-----------|-----------|

---

Unique Subject Identifier=1156000000-0003

Assay variable : PTINR\_VAL1 PT-INR Value

N Mean Standard Deviation Minimum Maximum

---

|   |           |           |           |           |
|---|-----------|-----------|-----------|-----------|
| 6 | 1.1816667 | 0.2081746 | 0.9600000 | 1.4500000 |
|---|-----------|-----------|-----------|-----------|

---

Unique Subject Identifier=1156000000-0006



Assay variable : PTINR\_VAL1 PT-INR Value

N Mean Standard Deviation Minimum Maximum

---

|   |          |           |          |          |
|---|----------|-----------|----------|----------|
| 5 | 2.602000 | 0.5514708 | 2.050000 | 3.470000 |
|---|----------|-----------|----------|----------|

---

Laboratory tests at the time of obtaining Table 2-6 consent, according to the presence or absence of proton-pump inhibitors

Unique Subject Identifier=115600000-0007

MEANS Procedure

Assay variable : PTINR\_VAL1 PT-INR Value

N Mean Standard Deviation Minimum Maximum

---

|   |           |           |           |           |
|---|-----------|-----------|-----------|-----------|
| 5 | 3.6280000 | 2.4042400 | 1.6800000 | 7.8100000 |
|---|-----------|-----------|-----------|-----------|

---

Unique Subject Identifier=115600000-0008

Assay variable : PTINR\_VAL1 PT-INR Value

N Mean Standard Deviation Minimum Maximum

---

|   |           |           |           |           |
|---|-----------|-----------|-----------|-----------|
| 6 | 2.1600000 | 0.5060040 | 1.7400000 | 3.1300000 |
|---|-----------|-----------|-----------|-----------|

---

Unique Subject Identifier=115600000-0010

Assay variable : PTINR\_VAL1 PT-INR Value

N Mean Standard Deviation Minimum Maximum

---

|   |           |           |           |           |
|---|-----------|-----------|-----------|-----------|
| 6 | 1.6116667 | 0.2249815 | 1.3200000 | 1.8600000 |
|---|-----------|-----------|-----------|-----------|

---

Unique Subject Identifier=115600000-0011

Assay variable : PTINR\_VAL1 PT-INR Value

N Mean Standard Deviation Minimum Maximum

---

|   |           |           |           |           |
|---|-----------|-----------|-----------|-----------|
| 4 | 2.6725000 | 0.2568235 | 2.4200000 | 3.0300000 |
|---|-----------|-----------|-----------|-----------|

---

Laboratory tests at the time of obtaining Table 2-6 consent, according to the presence or absence of proton-pump inhibitors

Unique Subject Identifier=1156000000-0012

MEANS Procedure

Assay variable : PTINR\_VAL1 PT-INR Value

N Mean Standard Deviation Minimum Maximum

---

|   |           |           |           |           |
|---|-----------|-----------|-----------|-----------|
| 5 | 1.4780000 | 0.2141728 | 1.3100000 | 1.8400000 |
|---|-----------|-----------|-----------|-----------|

---

Unique Subject Identifier=1156000000-0021

Assay variable : PTINR\_VAL1 PT-INR Value

N Mean Standard Deviation Minimum Maximum

---

|   |           |           |           |           |
|---|-----------|-----------|-----------|-----------|
| 2 | 1.2700000 | 0.3394113 | 1.0300000 | 1.5100000 |
|---|-----------|-----------|-----------|-----------|

---

Unique Subject Identifier=1156000000-0059

Assay variable : PTINR\_VAL1 PT-INR Value

N Mean Standard Deviation Minimum Maximum

---

|   |           |           |           |           |
|---|-----------|-----------|-----------|-----------|
| 6 | 1.6850000 | 0.2930358 | 1.2700000 | 1.9800000 |
|---|-----------|-----------|-----------|-----------|

---

Unique Subject Identifier=1157000000-0014

Assay variable : PTINR\_VAL1 PT-INR Value

N Mean Standard Deviation Minimum Maximum

---

|   |           |           |           |           |
|---|-----------|-----------|-----------|-----------|
| 6 | 2.2783333 | 0.4660651 | 1.8000000 | 3.0000000 |
|---|-----------|-----------|-----------|-----------|

---

Laboratory tests at the time of obtaining Table 2-6 consent, according to the presence or absence of proton-pump inhibitors

Unique Subject Identifier=1157000000-0028

MEANS Procedure

Assay variable : PTINR\_VAL1 PT-INR Value

N Mean Standard Deviation Minimum Maximum

---

|   |           |           |           |           |
|---|-----------|-----------|-----------|-----------|
| 6 | 1.6500000 | 0.2509980 | 1.5000000 | 2.1000000 |
|---|-----------|-----------|-----------|-----------|

---

Unique Subject Identifier=1157000000-0029

Assay variable : PTINR\_VAL1 PT-INR Value

N Mean Standard Deviation Minimum Maximum

---

|   |           |           |           |           |
|---|-----------|-----------|-----------|-----------|
| 6 | 2.1000000 | 0.4560702 | 1.5000000 | 2.8000000 |
|---|-----------|-----------|-----------|-----------|

---

Unique Subject Identifier=1158010000-0010

Assay variable : PTINR\_VAL1 PT-INR Value

N Mean Standard Deviation Minimum Maximum

---

|   |           |           |           |           |
|---|-----------|-----------|-----------|-----------|
| 6 | 2.1350000 | 0.4554887 | 1.6400000 | 2.9800000 |
|---|-----------|-----------|-----------|-----------|

---

Unique Subject Identifier=1158010000-0015

Assay variable : PTINR\_VAL1 PT-INR Value

N Mean Standard Deviation Minimum Maximum

---

|   |          |           |          |          |
|---|----------|-----------|----------|----------|
| 6 | 2.480000 | 0.4456905 | 1.880000 | 2.870000 |
|---|----------|-----------|----------|----------|

---

Laboratory tests at the time of obtaining Table 2-6 consent, according to the presence or absence of proton-pump inhibitors

Unique Subject Identifier=1158010000-0026

MEANS Procedure

Assay variable : PTINR\_VAL1 PT-INR Value

N Mean Standard Deviation Minimum Maximum

---

|   |           |           |           |           |
|---|-----------|-----------|-----------|-----------|
| 6 | 2.0000000 | 0.3034469 | 1.4700000 | 2.3300000 |
|---|-----------|-----------|-----------|-----------|

---

Unique Subject Identifier=1158010000-0031

Assay variable : PTINR\_VAL1 PT-INR Value

N Mean Standard Deviation Minimum Maximum

---

|   |           |           |           |           |
|---|-----------|-----------|-----------|-----------|
| 6 | 2.3666667 | 0.3695763 | 1.9000000 | 3.0100000 |
|---|-----------|-----------|-----------|-----------|

---

Unique Subject Identifier=1158010000-0043

Assay variable : PTINR\_VAL1 PT-INR Value

N Mean Standard Deviation Minimum Maximum

---

|   |           |           |           |           |
|---|-----------|-----------|-----------|-----------|
| 6 | 2.3216667 | 0.2634704 | 1.8300000 | 2.6300000 |
|---|-----------|-----------|-----------|-----------|

---

Unique Subject Identifier=1158010000-0058



Assay variable : PTINR\_VAL1 PT-INR Value

N Mean Standard Deviation Minimum Maximum

---

|   |           |           |           |           |
|---|-----------|-----------|-----------|-----------|
| 6 | 1.9850000 | 0.1488288 | 1.8800000 | 2.2800000 |
|---|-----------|-----------|-----------|-----------|

---

Laboratory tests at the time of obtaining Table 2-6 consent, according to the presence or absence of proton-pump inhibitors

Unique Subject Identifier=1158010000-0067

MEANS Procedure

Assay variable : PTINR\_VAL1 PT-INR Value

N Mean Standard Deviation Minimum Maximum

---

|   |           |           |           |           |
|---|-----------|-----------|-----------|-----------|
| 6 | 2.2433333 | 0.6172412 | 1.4900000 | 3.2600000 |
|---|-----------|-----------|-----------|-----------|

---

Unique Subject Identifier=1158010000-0071

Assay variable : PTINR\_VAL1 PT-INR Value

N Mean Standard Deviation Minimum Maximum

---

|   |           |           |           |           |
|---|-----------|-----------|-----------|-----------|
| 6 | 2.4450000 | 0.6404295 | 1.4800000 | 3.2000000 |
|---|-----------|-----------|-----------|-----------|

---

Unique Subject Identifier=1158010000-0076

Assay variable : PTINR\_VAL1 PT-INR Value

N Mean Standard Deviation Minimum Maximum

---

|   |           |           |           |           |
|---|-----------|-----------|-----------|-----------|
| 6 | 2.0983333 | 0.4266810 | 1.6000000 | 2.6300000 |
|---|-----------|-----------|-----------|-----------|

---

Unique Subject Identifier=1158010000-0093

Assay variable : PTINR\_VAL1 PT-INR Value

N Mean Standard Deviation Minimum Maximum

---

|   |           |           |           |           |
|---|-----------|-----------|-----------|-----------|
| 6 | 2.0983333 | 0.4264935 | 1.5700000 | 2.8400000 |
|---|-----------|-----------|-----------|-----------|

---

Laboratory tests at the time of obtaining Table 2-6 consent, according to the presence or absence of proton-pump inhibitors

Unique Subject Identifier=1158010000-0095

MEANS Procedure

Assay variable : PTINR\_VAL1 PT-INR Value

N Mean Standard Deviation Minimum Maximum

---

|   |           |           |           |           |
|---|-----------|-----------|-----------|-----------|
| 6 | 2.2450000 | 0.2022622 | 1.9700000 | 2.4800000 |
|---|-----------|-----------|-----------|-----------|

---

Unique Subject Identifier=1158010000-0105

Assay variable : PTINR\_VAL1 PT-INR Value

N Mean Standard Deviation Minimum Maximum

---

|   |           |           |           |           |
|---|-----------|-----------|-----------|-----------|
| 6 | 2.0800000 | 0.3533836 | 1.5500000 | 2.5300000 |
|---|-----------|-----------|-----------|-----------|

---

Unique Subject Identifier=1158010000-0114

Assay variable : PTINR\_VAL1 PT-INR Value

N Mean Standard Deviation Minimum Maximum

---

|   |           |           |           |           |
|---|-----------|-----------|-----------|-----------|
| 6 | 2.3900000 | 0.3985975 | 1.7700000 | 2.9800000 |
|---|-----------|-----------|-----------|-----------|

---

Unique Subject Identifier=1158010000-0124

Assay variable : PTINR\_VAL1 PT-INR Value

N Mean Standard Deviation Minimum Maximum

---

|   |           |           |           |           |
|---|-----------|-----------|-----------|-----------|
| 6 | 1.9900000 | 0.7699610 | 1.1200000 | 3.2900000 |
|---|-----------|-----------|-----------|-----------|

---

Laboratory tests at the time of obtaining Table 2-6 consent, according to the presence or absence of proton-pump inhibitors

Unique Subject Identifier=1158010000-0125

MEANS Procedure

Assay variable : PTINR\_VAL1 PT-INR Value

N Mean Standard Deviation Minimum Maximum

---

|   |           |           |           |           |
|---|-----------|-----------|-----------|-----------|
| 6 | 2.2600000 | 0.9979780 | 1.6400000 | 4.2600000 |
|---|-----------|-----------|-----------|-----------|

---

Unique Subject Identifier=1159000000-0001

Assay variable : PTINR\_VAL1 PT-INR Value

N Mean Standard Deviation Minimum Maximum

---

|   |           |           |           |           |
|---|-----------|-----------|-----------|-----------|
| 6 | 2.1000000 | 0.1897367 | 1.8000000 | 2.3000000 |
|---|-----------|-----------|-----------|-----------|

---

Unique Subject Identifier=1159000000-0007

Assay variable : PTINR\_VAL1 PT-INR Value

N Mean Standard Deviation Minimum Maximum

---

|   |           |           |           |           |
|---|-----------|-----------|-----------|-----------|
| 6 | 2.3000000 | 0.5549775 | 1.8000000 | 3.1000000 |
|---|-----------|-----------|-----------|-----------|

---

Unique Subject Identifier=1161010100-0025

Assay variable : PTINR\_VAL1 PT-INR Value

N Mean Standard Deviation Minimum Maximum

---

|   |           |           |           |           |
|---|-----------|-----------|-----------|-----------|
| 2 | 2.3350000 | 0.8980256 | 1.7000000 | 2.9700000 |
|---|-----------|-----------|-----------|-----------|

---

Laboratory tests at the time of obtaining Table 2-6 consent, according to the presence or absence of proton-pump inhibitors

Unique Subject Identifier=1168011000-0006

MEANS Procedure

Assay variable : PTINR\_VAL1 PT-INR Value

N Mean Standard Deviation Minimum Maximum

---

|   |           |           |           |           |
|---|-----------|-----------|-----------|-----------|
| 3 | 2.3966667 | 0.1674316 | 2.3000000 | 2.5900000 |
|---|-----------|-----------|-----------|-----------|

---

Unique Subject Identifier=1168011000-0011

Assay variable : PTINR\_VAL1 PT-INR Value

N Mean Standard Deviation Minimum Maximum

---

|   |           |           |           |           |
|---|-----------|-----------|-----------|-----------|
| 3 | 2.1066667 | 0.1934770 | 1.9900000 | 2.3300000 |
|---|-----------|-----------|-----------|-----------|

---

Unique Subject Identifier=1168011000-0021

Assay variable : PTINR\_VAL1 PT-INR Value

N Mean Standard Deviation Minimum Maximum

---

|   |           |           |           |           |
|---|-----------|-----------|-----------|-----------|
| 2 | 2.2450000 | 0.0777817 | 2.1900000 | 2.3000000 |
|---|-----------|-----------|-----------|-----------|

---

Unique Subject Identifier=1171000000-0004



Assay variable : PTINR\_VAL1 PT-INR Value

N Mean Standard Deviation Minimum Maximum

---

|   |           |           |           |           |
|---|-----------|-----------|-----------|-----------|
| 6 | 1.3383333 | 0.0617792 | 1.2900000 | 1.4400000 |
|---|-----------|-----------|-----------|-----------|

---

Laboratory tests at the time of obtaining Table 2-6 consent, according to the presence or absence of proton-pump inhibitors

Unique Subject Identifier=1172011000-0007

MEANS Procedure

Assay variable : PTINR\_VAL1 PT-INR Value

N Mean Standard Deviation Minimum Maximum

---

|   |           |           |           |           |
|---|-----------|-----------|-----------|-----------|
| 6 | 1.6833333 | 0.1329160 | 1.5000000 | 1.9000000 |
|---|-----------|-----------|-----------|-----------|

---

Unique Subject Identifier=1173011100-0002

Assay variable : PTINR\_VAL1 PT-INR Value

N Mean Standard Deviation Minimum Maximum

---

|   |           |           |           |           |
|---|-----------|-----------|-----------|-----------|
| 6 | 1.7833333 | 0.1329160 | 1.6000000 | 2.0000000 |
|---|-----------|-----------|-----------|-----------|

---

Unique Subject Identifier=1173011100-0027

Assay variable : PTINR\_VAL1 PT-INR Value

N Mean Standard Deviation Minimum Maximum

---

|   |           |           |           |           |
|---|-----------|-----------|-----------|-----------|
| 6 | 2.1666667 | 0.7174027 | 1.6000000 | 3.6000000 |
|---|-----------|-----------|-----------|-----------|

---

Unique Subject Identifier=1173011100-0041

Assay variable : PTINR\_VAL1 PT-INR Value

N Mean Standard Deviation Minimum Maximum

---

|   |           |           |           |           |
|---|-----------|-----------|-----------|-----------|
| 5 | 1.6800000 | 0.3346640 | 1.4000000 | 2.2000000 |
|---|-----------|-----------|-----------|-----------|

---

Laboratory tests at the time of obtaining Table 2-6 consent, according to the presence or absence of proton-pump inhibitors

Unique Subject Identifier=1175011000-0002

MEANS Procedure

Assay variable : PTINR\_VAL1 PT-INR Value

N Mean Standard Deviation Minimum Maximum

---

|   |           |           |           |           |
|---|-----------|-----------|-----------|-----------|
| 6 | 1.7333333 | 0.0516398 | 1.7000000 | 1.8000000 |
|---|-----------|-----------|-----------|-----------|

---

Unique Subject Identifier=1175011000-0008

Assay variable : PTINR\_VAL1 PT-INR Value

N Mean Standard Deviation Minimum Maximum

---

|   |           |           |           |           |
|---|-----------|-----------|-----------|-----------|
| 6 | 2.0166667 | 0.2041241 | 1.7000000 | 2.3000000 |
|---|-----------|-----------|-----------|-----------|

---

Unique Subject Identifier=1175011000-0011

Assay variable : PTINR\_VAL1 PT-INR Value

N Mean Standard Deviation Minimum Maximum

---

|   |           |           |           |           |
|---|-----------|-----------|-----------|-----------|
| 6 | 2.0666667 | 0.4885352 | 1.6000000 | 3.0000000 |
|---|-----------|-----------|-----------|-----------|

---

Unique Subject Identifier=1175011000-0018

Assay variable : PTINR\_VAL1 PT-INR Value

N Mean Standard Deviation Minimum Maximum

---

|   |          |           |          |          |
|---|----------|-----------|----------|----------|
| 6 | 2.350000 | 0.6090977 | 1.500000 | 3.300000 |
|---|----------|-----------|----------|----------|

---

Laboratory tests at the time of obtaining Table 2-6 consent, according to the presence or absence of proton-pump inhibitors

Unique Subject Identifier=1179000000-0001

MEANS Procedure

Assay variable : PTINR\_VAL1 PT-INR Value

N Mean Standard Deviation Minimum Maximum

---

|   |           |           |           |           |
|---|-----------|-----------|-----------|-----------|
| 6 | 1.7000000 | 0.2280351 | 1.3000000 | 1.9000000 |
|---|-----------|-----------|-----------|-----------|

---

Unique Subject Identifier=1181000000-0011

Assay variable : PTINR\_VAL1 PT-INR Value

N Mean Standard Deviation Minimum Maximum

---

|   |           |           |           |           |
|---|-----------|-----------|-----------|-----------|
| 2 | 1.3500000 | 0.0282843 | 1.3300000 | 1.3700000 |
|---|-----------|-----------|-----------|-----------|

---

Unique Subject Identifier=1181000000-0014

Assay variable : PTINR\_VAL1 PT-INR Value

N Mean Standard Deviation Minimum Maximum

---

|   |           |           |           |           |
|---|-----------|-----------|-----------|-----------|
| 3 | 2.1600000 | 0.4396590 | 1.8000000 | 2.6500000 |
|---|-----------|-----------|-----------|-----------|

---

Unique Subject Identifier=1194000000-0008

Assay variable : PTINR\_VAL1 PT-INR Value

N Mean Standard Deviation Minimum Maximum

---

|   |           |           |           |           |
|---|-----------|-----------|-----------|-----------|
| 3 | 2.3300000 | 0.4942671 | 1.9000000 | 2.8700000 |
|---|-----------|-----------|-----------|-----------|

---

Laboratory tests at the time of obtaining Table 2-6 consent, according to the presence or absence of proton-pump inhibitors

Unique Subject Identifier=1203010000-0001

MEANS Procedure

Assay variable : PTINR\_VAL1 PT-INR Value

N Mean Standard Deviation Minimum Maximum

---

|   |           |           |           |           |
|---|-----------|-----------|-----------|-----------|
| 5 | 2.3280000 | 0.3598194 | 2.0300000 | 2.9400000 |
|---|-----------|-----------|-----------|-----------|

---

Unique Subject Identifier=1203010000-0007

Assay variable : PTINR\_VAL1 PT-INR Value

N Mean Standard Deviation Minimum Maximum

---

|   |           |           |           |           |
|---|-----------|-----------|-----------|-----------|
| 6 | 2.6633333 | 0.5982530 | 2.0900000 | 3.7300000 |
|---|-----------|-----------|-----------|-----------|

---

Unique Subject Identifier=1203010000-0012

Assay variable : PTINR\_VAL1 PT-INR Value

N Mean Standard Deviation Minimum Maximum

---

|   |           |           |           |           |
|---|-----------|-----------|-----------|-----------|
| 6 | 2.4400000 | 1.1452161 | 1.0100000 | 4.1600000 |
|---|-----------|-----------|-----------|-----------|

---

Unique Subject Identifier=1203010000-0016



Assay variable : PTINR\_VAL1 PT-INR Value

N Mean Standard Deviation Minimum Maximum

---

|   |          |           |          |          |
|---|----------|-----------|----------|----------|
| 6 | 2.340000 | 0.4595215 | 1.640000 | 3.060000 |
|---|----------|-----------|----------|----------|

---

Laboratory tests at the time of obtaining Table 2-6 consent, according to the presence or absence of proton-pump inhibitors

Unique Subject Identifier=1203010000-0024

MEANS Procedure

Assay variable : PTINR\_VAL1 PT-INR Value

N Mean Standard Deviation Minimum Maximum

---

|   |           |           |           |           |
|---|-----------|-----------|-----------|-----------|
| 6 | 2.2000000 | 0.0822192 | 2.0600000 | 2.3000000 |
|---|-----------|-----------|-----------|-----------|

---

Unique Subject Identifier=1211000000-0028

Assay variable : PTINR\_VAL1 PT-INR Value

N Mean Standard Deviation Minimum Maximum

---

|   |           |           |           |           |
|---|-----------|-----------|-----------|-----------|
| 5 | 2.1600000 | 0.3847077 | 1.7000000 | 2.5000000 |
|---|-----------|-----------|-----------|-----------|

---

Unique Subject Identifier=1211000000-0036

Assay variable : PTINR\_VAL1 PT-INR Value

N Mean Standard Deviation Minimum Maximum

---

|   |           |           |           |           |
|---|-----------|-----------|-----------|-----------|
| 5 | 1.5200000 | 0.1303840 | 1.4000000 | 1.7000000 |
|---|-----------|-----------|-----------|-----------|

---

Unique Subject Identifier=1212000000-0003

Assay variable : PTINR\_VAL1 PT-INR Value

N Mean Standard Deviation Minimum Maximum

---

|   |           |           |           |           |
|---|-----------|-----------|-----------|-----------|
| 6 | 2.2216667 | 0.3413747 | 1.9000000 | 2.6500000 |
|---|-----------|-----------|-----------|-----------|

---

Laboratory tests at the time of obtaining Table 2-6 consent, according to the presence or absence of proton-pump inhibitors

Unique Subject Identifier=1212000000-0005

MEANS Procedure

Assay variable : PTINR\_VAL1 PT-INR Value

N Mean Standard Deviation Minimum Maximum

---

|   |           |           |           |           |
|---|-----------|-----------|-----------|-----------|
| 6 | 1.9483333 | 0.2242692 | 1.7200000 | 2.3500000 |
|---|-----------|-----------|-----------|-----------|

---

Unique Subject Identifier=1212000000-0011

Assay variable : PTINR\_VAL1 PT-INR Value

N Mean Standard Deviation Minimum Maximum

---

|   |           |           |           |           |
|---|-----------|-----------|-----------|-----------|
| 6 | 1.7366667 | 0.2789743 | 1.3100000 | 2.1300000 |
|---|-----------|-----------|-----------|-----------|

---

Unique Subject Identifier=1212000000-0013

Assay variable : PTINR\_VAL1 PT-INR Value

N Mean Standard Deviation Minimum Maximum

---

|   |           |           |           |           |
|---|-----------|-----------|-----------|-----------|
| 6 | 1.8283333 | 0.2626341 | 1.4700000 | 2.0900000 |
|---|-----------|-----------|-----------|-----------|

---

Unique Subject Identifier=1212000000-0017

Assay variable : PTINR\_VAL1 PT-INR Value

N Mean Standard Deviation Minimum Maximum

---

|   |           |           |           |           |
|---|-----------|-----------|-----------|-----------|
| 5 | 2.4480000 | 0.3210452 | 2.1600000 | 2.9800000 |
|---|-----------|-----------|-----------|-----------|

---

Laboratory tests at the time of obtaining Table 2-6 consent, according to the presence or absence of proton-pump inhibitors

Unique Subject Identifier=1216000000-0003

MEANS Procedure

Assay variable : PTINR\_VAL1 PT-INR Value

N Mean Standard Deviation Minimum Maximum

---

|   |           |           |           |           |
|---|-----------|-----------|-----------|-----------|
| 5 | 1.7820000 | 0.6529701 | 1.2300000 | 2.6000000 |
|---|-----------|-----------|-----------|-----------|

---

Unique Subject Identifier=1219000000-0002

Assay variable : PTINR\_VAL1 PT-INR Value

N Mean Standard Deviation Minimum Maximum

---

|   |           |           |           |           |
|---|-----------|-----------|-----------|-----------|
| 4 | 2.3425000 | 0.6785954 | 1.7700000 | 3.2500000 |
|---|-----------|-----------|-----------|-----------|

---

Unique Subject Identifier=1219000000-0004

Assay variable : PTINR\_VAL1 PT-INR Value

N Mean Standard Deviation Minimum Maximum

---

|   |           |           |           |           |
|---|-----------|-----------|-----------|-----------|
| 3 | 2.2533333 | 0.1289703 | 2.1100000 | 2.3600000 |
|---|-----------|-----------|-----------|-----------|

---

Unique Subject Identifier=1219000000-0007

Assay variable : PTINR\_VAL1 PT-INR Value

N Mean Standard Deviation Minimum Maximum

---

|   |           |   |           |           |
|---|-----------|---|-----------|-----------|
| 2 | 2.1700000 | 0 | 2.1700000 | 2.1700000 |
|---|-----------|---|-----------|-----------|

---

Laboratory tests at the time of obtaining Table 2-6 consent, according to the presence or absence of proton-pump inhibitors

Unique Subject Identifier=1219000000-0010

MEANS Procedure

Assay variable : PTINR\_VAL1 PT-INR Value

| N | Mean      | Standard Deviation | Minimum   | Maximum   |
|---|-----------|--------------------|-----------|-----------|
| 3 | 1.2733333 | 0.1700980          | 1.0800000 | 1.4000000 |

Unique Subject Identifier=1219000000-0028

Assay variable : PTINR\_VAL1 PT-INR Value

| N | Mean      | Standard Deviation | Minimum   | Maximum   |
|---|-----------|--------------------|-----------|-----------|
| 4 | 2.2550000 | 0.4258717          | 1.6700000 | 2.6300000 |

Unique Subject Identifier=1219000000-0037

Assay variable : PTINR\_VAL1 PT-INR Value

| N | Mean      | Standard Deviation | Minimum   | Maximum   |
|---|-----------|--------------------|-----------|-----------|
| 4 | 2.3400000 | 0.2230097          | 2.0900000 | 2.6300000 |

Unique Subject Identifier=1221000000-0003



Assay variable : PTINR\_VAL1 PT-INR Value

N Mean Standard Deviation Minimum Maximum

---

|   |          |           |          |          |
|---|----------|-----------|----------|----------|
| 5 | 1.920000 | 0.3271085 | 1.700000 | 2.500000 |
|---|----------|-----------|----------|----------|

---

Laboratory tests at the time of obtaining Table 2-6 consent, according to the presence or absence of proton-pump inhibitors

Unique Subject Identifier=1222000000-0003

MEANS Procedure

Assay variable : PTINR\_VAL1 PT-INR Value

N Mean Standard Deviation Minimum Maximum

---

|   |           |           |           |           |
|---|-----------|-----------|-----------|-----------|
| 5 | 2.3000000 | 0.1224745 | 2.1000000 | 2.4000000 |
|---|-----------|-----------|-----------|-----------|

---

Unique Subject Identifier=1222000000-0007

Assay variable : PTINR\_VAL1 PT-INR Value

N Mean Standard Deviation Minimum Maximum

---

|   |           |           |           |           |
|---|-----------|-----------|-----------|-----------|
| 4 | 2.0750000 | 0.0957427 | 2.0000000 | 2.2000000 |
|---|-----------|-----------|-----------|-----------|

---

Unique Subject Identifier=1222000000-0008

Assay variable : PTINR\_VAL1 PT-INR Value

N Mean Standard Deviation Minimum Maximum

---

|   |           |           |           |           |
|---|-----------|-----------|-----------|-----------|
| 5 | 1.8200000 | 0.0836660 | 1.7000000 | 1.9000000 |
|---|-----------|-----------|-----------|-----------|

---

Unique Subject Identifier=1222000000-0011

Assay variable : PTINR\_VAL1 PT-INR Value

N Mean Standard Deviation Minimum Maximum

---

|   |           |           |           |           |
|---|-----------|-----------|-----------|-----------|
| 5 | 1.6800000 | 0.1788854 | 1.5000000 | 1.9000000 |
|---|-----------|-----------|-----------|-----------|

---

Laboratory tests at the time of obtaining Table 2-6 consent, according to the presence or absence of proton-pump inhibitors

Unique Subject Identifier=1223010000-0007

MEANS Procedure

Assay variable : PTINR\_VAL1 PT-INR Value

N Mean Standard Deviation Minimum Maximum

---

|   |           |           |           |           |
|---|-----------|-----------|-----------|-----------|
| 6 | 1.8666667 | 0.3932768 | 1.1000000 | 2.2000000 |
|---|-----------|-----------|-----------|-----------|

---

Unique Subject Identifier=1223010000-0013

Assay variable : PTINR\_VAL1 PT-INR Value

N Mean Standard Deviation Minimum Maximum

---

|   |           |           |           |           |
|---|-----------|-----------|-----------|-----------|
| 5 | 1.7800000 | 0.1303840 | 1.6000000 | 1.9000000 |
|---|-----------|-----------|-----------|-----------|

---

Unique Subject Identifier=1223010000-0018

Assay variable : PTINR\_VAL1 PT-INR Value

N Mean Standard Deviation Minimum Maximum

---

|   |           |           |           |           |
|---|-----------|-----------|-----------|-----------|
| 5 | 2.0200000 | 0.5761944 | 1.5000000 | 2.9000000 |
|---|-----------|-----------|-----------|-----------|

---

Unique Subject Identifier=1223010000-0021

Assay variable : PTINR\_VAL1 PT-INR Value

N Mean Standard Deviation Minimum Maximum

---

|   |           |           |           |           |
|---|-----------|-----------|-----------|-----------|
| 6 | 1.8666667 | 0.1632993 | 1.7000000 | 2.1000000 |
|---|-----------|-----------|-----------|-----------|

---

Laboratory tests at the time of obtaining Table 2-6 consent, according to the presence or absence of proton-pump inhibitors

Unique Subject Identifier=1223010000-0038

MEANS Procedure

Assay variable : PTINR\_VAL1 PT-INR Value

N Mean Standard Deviation Minimum Maximum

---

|   |           |           |           |           |
|---|-----------|-----------|-----------|-----------|
| 4 | 2.1500000 | 0.7937254 | 1.0000000 | 2.8000000 |
|---|-----------|-----------|-----------|-----------|

---

Unique Subject Identifier=1226000000-0007

Assay variable : PTINR\_VAL1 PT-INR Value

N Mean Standard Deviation Minimum Maximum

---

|   |           |           |           |           |
|---|-----------|-----------|-----------|-----------|
| 3 | 1.7700000 | 0.2137756 | 1.6000000 | 2.0100000 |
|---|-----------|-----------|-----------|-----------|

---

Unique Subject Identifier=1226000000-0013

Assay variable : PTINR\_VAL1 PT-INR Value

N Mean Standard Deviation Minimum Maximum

---

|   |           |           |           |           |
|---|-----------|-----------|-----------|-----------|
| 4 | 1.7850000 | 0.1103026 | 1.6400000 | 1.9000000 |
|---|-----------|-----------|-----------|-----------|

---

Unique Subject Identifier=1226000000-0030

Assay variable : PTINR\_VAL1 PT-INR Value

N Mean Standard Deviation Minimum Maximum

---

|   |           |           |           |           |
|---|-----------|-----------|-----------|-----------|
| 4 | 2.1225000 | 0.4256270 | 1.6100000 | 2.6500000 |
|---|-----------|-----------|-----------|-----------|

---

Laboratory tests at the time of obtaining Table 2-6 consent, according to the presence or absence of proton-pump inhibitors

Unique Subject Identifier=1227000000-0028

MEANS Procedure

Assay variable : PTINR\_VAL1 PT-INR Value

| N | Mean      | Standard Deviation | Minimum   | Maximum   |
|---|-----------|--------------------|-----------|-----------|
| 6 | 2.3833333 | 0.2228602          | 2.1000000 | 2.7000000 |

Unique Subject Identifier=1227000000-0034

Assay variable : PTINR\_VAL1 PT-INR Value

| N | Mean      | Standard Deviation | Minimum   | Maximum   |
|---|-----------|--------------------|-----------|-----------|
| 5 | 2.2200000 | 0.5263079          | 1.4000000 | 2.8000000 |

Unique Subject Identifier=1227000000-0078

Assay variable : PTINR\_VAL1 PT-INR Value

| N | Mean      | Standard Deviation | Minimum   | Maximum   |
|---|-----------|--------------------|-----------|-----------|
| 5 | 1.8600000 | 0.0894427          | 1.8000000 | 2.0000000 |

Unique Subject Identifier=1229000000-0016



Assay variable : PTINR\_VAL1 PT-INR Value

N Mean Standard Deviation Minimum Maximum

---

|   |           |           |           |           |
|---|-----------|-----------|-----------|-----------|
| 6 | 2.1666667 | 0.2732520 | 1.8000000 | 2.5000000 |
|---|-----------|-----------|-----------|-----------|

---

Laboratory tests at the time of obtaining Table 2-6 consent, according to the presence or absence of proton-pump inhibitors

Unique Subject Identifier=1232000000-0005

MEANS Procedure

Assay variable : PTINR\_VAL1 PT-INR Value

N Mean Standard Deviation Minimum Maximum

---

|   |           |           |           |           |
|---|-----------|-----------|-----------|-----------|
| 6 | 2.0833333 | 0.3920034 | 1.6000000 | 2.6000000 |
|---|-----------|-----------|-----------|-----------|

---

Unique Subject Identifier=1232000000-0008

Assay variable : PTINR\_VAL1 PT-INR Value

N Mean Standard Deviation Minimum Maximum

---

|   |           |           |           |           |
|---|-----------|-----------|-----------|-----------|
| 5 | 2.0400000 | 0.2073644 | 1.7000000 | 2.2000000 |
|---|-----------|-----------|-----------|-----------|

---

Unique Subject Identifier=1234001000-0006

Assay variable : PTINR\_VAL1 PT-INR Value

N Mean Standard Deviation Minimum Maximum

---

|   |           |  |           |           |
|---|-----------|--|-----------|-----------|
| 1 | 1.0300000 |  | 1.0300000 | 1.0300000 |
|---|-----------|--|-----------|-----------|

---

Unique Subject Identifier=1235000000-0006

Assay variable : PTINR\_VAL1 PT-INR Value

N Mean Standard Deviation Minimum Maximum

---

|   |           |           |           |           |
|---|-----------|-----------|-----------|-----------|
| 3 | 1.4233333 | 0.1234234 | 1.3200000 | 1.5600000 |
|---|-----------|-----------|-----------|-----------|

---

Laboratory tests at the time of obtaining Table 2-6 consent, according to the presence or absence of proton-pump inhibitors

Unique Subject Identifier=1235000000-0009

MEANS Procedure

Assay variable : PTINR\_VAL1 PT-INR Value

N Mean Standard Deviation Minimum Maximum

---

|   |           |           |           |           |
|---|-----------|-----------|-----------|-----------|
| 3 | 1.6466667 | 0.1616581 | 1.5000000 | 1.8200000 |
|---|-----------|-----------|-----------|-----------|

---

Unique Subject Identifier=1235000000-0010

Assay variable : PTINR\_VAL1 PT-INR Value

N Mean Standard Deviation Minimum Maximum

---

|   |           |           |           |           |
|---|-----------|-----------|-----------|-----------|
| 6 | 1.6300000 | 0.2368122 | 1.2000000 | 1.8800000 |
|---|-----------|-----------|-----------|-----------|

---

Unique Subject Identifier=1235000000-0013

Assay variable : PTINR\_VAL1 PT-INR Value

N Mean Standard Deviation Minimum Maximum

---

|   |           |           |           |           |
|---|-----------|-----------|-----------|-----------|
| 6 | 1.4433333 | 0.0871015 | 1.3600000 | 1.5500000 |
|---|-----------|-----------|-----------|-----------|

---

Unique Subject Identifier=1235000000-0017

Assay variable : PTINR\_VAL1 PT-INR Value

N Mean Standard Deviation Minimum Maximum

---

|   |           |           |           |           |
|---|-----------|-----------|-----------|-----------|
| 5 | 1.5700000 | 0.1234909 | 1.4200000 | 1.7300000 |
|---|-----------|-----------|-----------|-----------|

---

Laboratory tests at the time of obtaining Table 2-6 consent, according to the presence or absence of proton-pump inhibitors

Unique Subject Identifier=1235000000-0021

MEANS Procedure

Assay variable : PTINR\_VAL1 PT-INR Value

N Mean Standard Deviation Minimum Maximum

---

|   |           |           |           |           |
|---|-----------|-----------|-----------|-----------|
| 6 | 1.2966667 | 0.0920145 | 1.2100000 | 1.4100000 |
|---|-----------|-----------|-----------|-----------|

---

Unique Subject Identifier=1235000000-0024

Assay variable : PTINR\_VAL1 PT-INR Value

N Mean Standard Deviation Minimum Maximum

---

|   |           |           |           |           |
|---|-----------|-----------|-----------|-----------|
| 6 | 1.3716667 | 0.0793515 | 1.2700000 | 1.5000000 |
|---|-----------|-----------|-----------|-----------|

---

Unique Subject Identifier=1235000000-0027

Assay variable : PTINR\_VAL1 PT-INR Value

N Mean Standard Deviation Minimum Maximum

---

|   |           |           |           |           |
|---|-----------|-----------|-----------|-----------|
| 2 | 2.0100000 | 0.1131371 | 1.9300000 | 2.0900000 |
|---|-----------|-----------|-----------|-----------|

---

Unique Subject Identifier=1235000000-0034

Assay variable : PTINR\_VAL1 PT-INR Value

N Mean Standard Deviation Minimum Maximum

---

|   |           |           |           |           |
|---|-----------|-----------|-----------|-----------|
| 6 | 1.6650000 | 0.3907301 | 1.3300000 | 2.3500000 |
|---|-----------|-----------|-----------|-----------|

---

Laboratory tests at the time of obtaining Table 2-6 consent, according to the presence or absence of proton-pump inhibitors

Unique Subject Identifier=1235000000-0042

MEANS Procedure

Assay variable : PTINR\_VAL1 PT-INR Value

N Mean Standard Deviation Minimum Maximum

---

|   |           |           |           |           |
|---|-----------|-----------|-----------|-----------|
| 6 | 1.7666667 | 0.6168198 | 1.2600000 | 2.9900000 |
|---|-----------|-----------|-----------|-----------|

---

Unique Subject Identifier=1237000000-0011

Assay variable : PTINR\_VAL1 PT-INR Value

N Mean Standard Deviation Minimum Maximum

---

|   |           |           |           |           |
|---|-----------|-----------|-----------|-----------|
| 3 | 2.0000000 | 0.1732051 | 1.9000000 | 2.2000000 |
|---|-----------|-----------|-----------|-----------|

---

Unique Subject Identifier=1237000000-0012

Assay variable : PTINR\_VAL1 PT-INR Value

N Mean Standard Deviation Minimum Maximum

---

|   |           |           |           |           |
|---|-----------|-----------|-----------|-----------|
| 3 | 1.5333333 | 0.1527525 | 1.4000000 | 1.7000000 |
|---|-----------|-----------|-----------|-----------|

---

Unique Subject Identifier=1241000000-0005



Assay variable : PTINR\_VAL1 PT-INR Value

N Mean Standard Deviation Minimum Maximum

---

|   |           |  |           |           |
|---|-----------|--|-----------|-----------|
| 1 | 2.7900000 |  | 2.7900000 | 2.7900000 |
|---|-----------|--|-----------|-----------|

---

Laboratory tests at the time of obtaining Table 2-6 consent, according to the presence or absence of proton-pump inhibitors

Unique Subject Identifier=1241000000-0006

MEANS Procedure

Assay variable : PTINR\_VAL1 PT-INR Value

N Mean Standard Deviation Minimum Maximum

---

|   |           |           |           |           |
|---|-----------|-----------|-----------|-----------|
| 5 | 2.8220000 | 0.7436868 | 1.5500000 | 3.4700000 |
|---|-----------|-----------|-----------|-----------|

---

Unique Subject Identifier=1248000000-0001

Assay variable : PTINR\_VAL1 PT-INR Value

N Mean Standard Deviation Minimum Maximum

---

|   |           |           |           |           |
|---|-----------|-----------|-----------|-----------|
| 2 | 2.4450000 | 0.3323402 | 2.2100000 | 2.6800000 |
|---|-----------|-----------|-----------|-----------|

---

Unique Subject Identifier=1255011110-0002

Assay variable : PTINR\_VAL1 PT-INR Value

N Mean Standard Deviation Minimum Maximum

---

|   |           |           |           |           |
|---|-----------|-----------|-----------|-----------|
| 2 | 2.4200000 | 0.3535534 | 2.1700000 | 2.6700000 |
|---|-----------|-----------|-----------|-----------|

---

Unique Subject Identifier=1255011110-0004

Assay variable : PTINR\_VAL1 PT-INR Value

N Mean Standard Deviation Minimum Maximum

---

|   |           |  |           |           |
|---|-----------|--|-----------|-----------|
| 1 | 2.3000000 |  | 2.3000000 | 2.3000000 |
|---|-----------|--|-----------|-----------|

---

Laboratory tests at the time of obtaining Table 2-6 consent, according to the presence or absence of proton-pump inhibitors

Unique Subject Identifier=1258000000-0005

MEANS Procedure

Assay variable : PTINR\_VAL1 PT-INR Value

| N | Mean      | Standard Deviation | Minimum   | Maximum   |
|---|-----------|--------------------|-----------|-----------|
| 6 | 2.0050000 | 0.3219161          | 1.8500000 | 2.6600000 |

Unique Subject Identifier=1262000000-0016

Assay variable : PTINR\_VAL1 PT-INR Value

| N | Mean      | Standard Deviation | Minimum   | Maximum   |
|---|-----------|--------------------|-----------|-----------|
| 2 | 1.5000000 | 0                  | 1.5000000 | 1.5000000 |

Unique Subject Identifier=1262000000-0020

Assay variable : PTINR\_VAL1 PT-INR Value

| N | Mean      | Standard Deviation | Minimum   | Maximum   |
|---|-----------|--------------------|-----------|-----------|
| 2 | 1.6000000 | 0.1414214          | 1.5000000 | 1.7000000 |

Unique Subject Identifier=1262000000-0023

Assay variable : PTINR\_VAL1 PT-INR Value

N Mean Standard Deviation Minimum Maximum

---

|   |           |  |           |           |
|---|-----------|--|-----------|-----------|
| 1 | 1.7000000 |  | 1.7000000 | 1.7000000 |
|---|-----------|--|-----------|-----------|

---

Laboratory tests at the time of obtaining Table 2-6 consent, according to the presence or absence of proton-pump inhibitors

Unique Subject Identifier=1262000000-0027

MEANS Procedure

Assay variable : PTINR\_VAL1 PT-INR Value

| N | Mean      | Standard Deviation | Minimum   | Maximum   |
|---|-----------|--------------------|-----------|-----------|
| 2 | 1.9500000 | 0.6363961          | 1.5000000 | 2.4000000 |

Unique Subject Identifier=1262000000-0058

Assay variable : PTINR\_VAL1 PT-INR Value

| N | Mean      | Standard Deviation | Minimum   | Maximum   |
|---|-----------|--------------------|-----------|-----------|
| 1 | 1.3000000 |                    | 1.3000000 | 1.3000000 |

Unique Subject Identifier=1262000000-0064

Assay variable : PTINR\_VAL1 PT-INR Value

| N | Mean      | Standard Deviation | Minimum   | Maximum   |
|---|-----------|--------------------|-----------|-----------|
| 2 | 1.9000000 | 0.2828427          | 1.7000000 | 2.1000000 |

Unique Subject Identifier=1262000000-0075

Assay variable : PTINR\_VAL1 PT-INR Value

N Mean Standard Deviation Minimum Maximum

---

|   |          |          |          |          |
|---|----------|----------|----------|----------|
| 2 | 1.450000 | 0.212132 | 1.300000 | 1.600000 |
|---|----------|----------|----------|----------|

---

Laboratory tests at the time of obtaining Table 2-6 consent, according to the presence or absence of proton-pump inhibitors

Unique Subject Identifier=1262000000-0079

MEANS Procedure

Assay variable : PTINR\_VAL1 PT-INR Value

N Mean Standard Deviation Minimum Maximum

---

|   |           |           |           |           |
|---|-----------|-----------|-----------|-----------|
| 2 | 2.2500000 | 0.3535534 | 2.0000000 | 2.5000000 |
|---|-----------|-----------|-----------|-----------|

---

Unique Subject Identifier=1263011000-0004

Assay variable : PTINR\_VAL1 PT-INR Value

N Mean Standard Deviation Minimum Maximum

---

|   |           |           |           |           |
|---|-----------|-----------|-----------|-----------|
| 6 | 2.3133333 | 0.2189673 | 2.0900000 | 2.5800000 |
|---|-----------|-----------|-----------|-----------|

---

Unique Subject Identifier=1263011000-0007

Assay variable : PTINR\_VAL1 PT-INR Value

N Mean Standard Deviation Minimum Maximum

---

|   |           |           |           |           |
|---|-----------|-----------|-----------|-----------|
| 4 | 2.5700000 | 0.9076343 | 1.6000000 | 3.6700000 |
|---|-----------|-----------|-----------|-----------|

---

Unique Subject Identifier=1263011000-0018



Assay variable : PTINR\_VAL1 PT-INR Value

N Mean Standard Deviation Minimum Maximum

---

|   |           |           |           |           |
|---|-----------|-----------|-----------|-----------|
| 6 | 2.3416667 | 0.2632426 | 1.9700000 | 2.6100000 |
|---|-----------|-----------|-----------|-----------|

---

Laboratory tests at the time of obtaining Table 2-6 consent, according to the presence or absence of proton-pump inhibitors

Unique Subject Identifier=1264001000-0007

MEANS Procedure

Assay variable : PTINR\_VAL1 PT-INR Value

N Mean Standard Deviation Minimum Maximum

---

|   |           |           |           |           |
|---|-----------|-----------|-----------|-----------|
| 6 | 2.1166667 | 0.6080022 | 1.4000000 | 2.8000000 |
|---|-----------|-----------|-----------|-----------|

---

Unique Subject Identifier=1266000000-0001

Assay variable : PTINR\_VAL1 PT-INR Value

N Mean Standard Deviation Minimum Maximum

---

|   |           |           |           |           |
|---|-----------|-----------|-----------|-----------|
| 6 | 2.0283333 | 0.3773283 | 1.4000000 | 2.4500000 |
|---|-----------|-----------|-----------|-----------|

---

Unique Subject Identifier=1266000000-0020

Assay variable : PTINR\_VAL1 PT-INR Value

N Mean Standard Deviation Minimum Maximum

---

|   |           |           |           |           |
|---|-----------|-----------|-----------|-----------|
| 6 | 1.4316667 | 0.1837843 | 1.2000000 | 1.7000000 |
|---|-----------|-----------|-----------|-----------|

---

Unique Subject Identifier=1266000000-0021

Assay variable : PTINR\_VAL1 PT-INR Value

N Mean Standard Deviation Minimum Maximum

---

|   |           |           |           |           |
|---|-----------|-----------|-----------|-----------|
| 6 | 2.1716667 | 0.3237540 | 1.8000000 | 2.7000000 |
|---|-----------|-----------|-----------|-----------|

---

Laboratory tests at the time of obtaining Table 2-6 consent, according to the presence or absence of proton-pump inhibitors

Unique Subject Identifier=1266000000-0029

MEANS Procedure

Assay variable : PTINR\_VAL1 PT-INR Value

N Mean Standard Deviation Minimum Maximum

---

|   |           |           |           |           |
|---|-----------|-----------|-----------|-----------|
| 6 | 1.9283333 | 0.2204011 | 1.6400000 | 2.2800000 |
|---|-----------|-----------|-----------|-----------|

---

Unique Subject Identifier=1266000000-0038

Assay variable : PTINR\_VAL1 PT-INR Value

N Mean Standard Deviation Minimum Maximum

---

|   |           |           |           |           |
|---|-----------|-----------|-----------|-----------|
| 6 | 2.1250000 | 0.1740977 | 1.9000000 | 2.4000000 |
|---|-----------|-----------|-----------|-----------|

---

Unique Subject Identifier=1266000000-0047

Assay variable : PTINR\_VAL1 PT-INR Value

N Mean Standard Deviation Minimum Maximum

---

|   |           |           |           |           |
|---|-----------|-----------|-----------|-----------|
| 6 | 1.4850000 | 0.2843062 | 1.1900000 | 1.8700000 |
|---|-----------|-----------|-----------|-----------|

---

Unique Subject Identifier=1266000000-0049

Assay variable : PTINR\_VAL1 PT-INR Value

N Mean Standard Deviation Minimum Maximum

---

|   |           |           |           |           |
|---|-----------|-----------|-----------|-----------|
| 6 | 2.5066667 | 1.1082719 | 1.5000000 | 4.6000000 |
|---|-----------|-----------|-----------|-----------|

---

Laboratory tests at the time of obtaining Table 2-6 consent, according to the presence or absence of proton-pump inhibitors

Unique Subject Identifier=1266000000-0051

MEANS Procedure

Assay variable : PTINR\_VAL1 PT-INR Value

N Mean Standard Deviation Minimum Maximum

---

|   |           |           |           |           |
|---|-----------|-----------|-----------|-----------|
| 5 | 2.0340000 | 0.3240062 | 1.6100000 | 2.5000000 |
|---|-----------|-----------|-----------|-----------|

---

Unique Subject Identifier=1266000000-0053

Assay variable : PTINR\_VAL1 PT-INR Value

N Mean Standard Deviation Minimum Maximum

---

|   |           |           |           |           |
|---|-----------|-----------|-----------|-----------|
| 6 | 2.4983333 | 0.1980320 | 2.2000000 | 2.8000000 |
|---|-----------|-----------|-----------|-----------|

---

Unique Subject Identifier=1266000000-0055

Assay variable : PTINR\_VAL1 PT-INR Value

N Mean Standard Deviation Minimum Maximum

---

|   |           |           |           |           |
|---|-----------|-----------|-----------|-----------|
| 6 | 2.1800000 | 0.2497999 | 1.8000000 | 2.5800000 |
|---|-----------|-----------|-----------|-----------|

---

Unique Subject Identifier=1266000000-0059

Assay variable : PTINR\_VAL1 PT-INR Value

N Mean Standard Deviation Minimum Maximum

---

|   |          |           |          |          |
|---|----------|-----------|----------|----------|
| 6 | 2.290000 | 0.4923007 | 1.900000 | 3.200000 |
|---|----------|-----------|----------|----------|

---

Laboratory tests at the time of obtaining Table 2-6 consent, according to the presence or absence of proton-pump inhibitors

Unique Subject Identifier=1266000000-0063

MEANS Procedure

Assay variable : PTINR\_VAL1 PT-INR Value

N Mean Standard Deviation Minimum Maximum

---

|   |           |           |           |           |
|---|-----------|-----------|-----------|-----------|
| 6 | 2.3433333 | 0.5746883 | 1.6000000 | 2.9000000 |
|---|-----------|-----------|-----------|-----------|

---

Unique Subject Identifier=1266000000-0068

Assay variable : PTINR\_VAL1 PT-INR Value

N Mean Standard Deviation Minimum Maximum

---

|   |           |           |           |           |
|---|-----------|-----------|-----------|-----------|
| 6 | 1.8616667 | 0.1397736 | 1.7000000 | 2.1000000 |
|---|-----------|-----------|-----------|-----------|

---

Unique Subject Identifier=1269000000-0002

Assay variable : PTINR\_VAL1 PT-INR Value

N Mean Standard Deviation Minimum Maximum

---

|   |           |           |           |           |
|---|-----------|-----------|-----------|-----------|
| 6 | 1.6083333 | 0.4269153 | 1.0500000 | 2.2500000 |
|---|-----------|-----------|-----------|-----------|

---

Unique Subject Identifier=1269000000-0007



Assay variable : PTINR\_VAL1 PT-INR Value

N Mean Standard Deviation Minimum Maximum

---

|   |           |           |           |           |
|---|-----------|-----------|-----------|-----------|
| 4 | 1.8625000 | 0.1990603 | 1.6400000 | 2.1200000 |
|---|-----------|-----------|-----------|-----------|

---

Laboratory tests at the time of obtaining Table 2-6 consent, according to the presence or absence of proton-pump inhibitors

Unique Subject Identifier=1269000000-0009

MEANS Procedure

Assay variable : PTINR\_VAL1 PT-INR Value

N Mean Standard Deviation Minimum Maximum

---

|   |           |           |           |           |
|---|-----------|-----------|-----------|-----------|
| 6 | 1.8533333 | 0.3991324 | 1.1900000 | 2.1600000 |
|---|-----------|-----------|-----------|-----------|

---

Unique Subject Identifier=1269000000-0010

Assay variable : PTINR\_VAL1 PT-INR Value

N Mean Standard Deviation Minimum Maximum

---

|   |           |           |           |           |
|---|-----------|-----------|-----------|-----------|
| 5 | 1.8400000 | 0.2164486 | 1.5600000 | 2.0500000 |
|---|-----------|-----------|-----------|-----------|

---

Unique Subject Identifier=1269000000-0012

Assay variable : PTINR\_VAL1 PT-INR Value

N Mean Standard Deviation Minimum Maximum

---

|   |           |           |           |           |
|---|-----------|-----------|-----------|-----------|
| 6 | 1.8933333 | 0.1742029 | 1.7200000 | 2.1600000 |
|---|-----------|-----------|-----------|-----------|

---

Unique Subject Identifier=1269000000-0020

Assay variable : PTINR\_VAL1 PT-INR Value

N Mean Standard Deviation Minimum Maximum

---

|   |           |           |           |           |
|---|-----------|-----------|-----------|-----------|
| 6 | 1.5016667 | 0.1826928 | 1.2100000 | 1.7000000 |
|---|-----------|-----------|-----------|-----------|

---

Laboratory tests at the time of obtaining Table 2-6 consent, according to the presence or absence of proton-pump inhibitors

Unique Subject Identifier=1270000000-0002

MEANS Procedure

Assay variable : PTINR\_VAL1 PT-INR Value

| N | Mean      | Standard Deviation | Minimum   | Maximum   |
|---|-----------|--------------------|-----------|-----------|
| 3 | 2.0933333 | 0.0404145          | 2.0500000 | 2.1300000 |

Unique Subject Identifier=1270000000-0004

Assay variable : PTINR\_VAL1 PT-INR Value

| N | Mean      | Standard Deviation | Minimum   | Maximum   |
|---|-----------|--------------------|-----------|-----------|
| 2 | 1.9000000 | 0.1414214          | 1.8000000 | 2.0000000 |

Unique Subject Identifier=1276000000-0004

Assay variable : PTINR\_VAL1 PT-INR Value

| N | Mean      | Standard Deviation | Minimum   | Maximum   |
|---|-----------|--------------------|-----------|-----------|
| 4 | 1.7250000 | 0.2747726          | 1.4300000 | 2.0600000 |

Unique Subject Identifier=1276000000-0005

Assay variable : PTINR\_VAL1 PT-INR Value

N Mean Standard Deviation Minimum Maximum

---

|   |          |           |          |          |
|---|----------|-----------|----------|----------|
| 3 | 2.100000 | 0.2951271 | 1.800000 | 2.390000 |
|---|----------|-----------|----------|----------|

---

Laboratory tests at the time of obtaining Table 2-6 consent, according to the presence or absence of proton-pump inhibitors

Unique Subject Identifier=1276000000-0008

MEANS Procedure

Assay variable : PTINR\_VAL1 PT-INR Value

N Mean Standard Deviation Minimum Maximum

---

|   |           |           |           |           |
|---|-----------|-----------|-----------|-----------|
| 3 | 1.8633333 | 0.0665833 | 1.8200000 | 1.9400000 |
|---|-----------|-----------|-----------|-----------|

---

Unique Subject Identifier=1278011100-0013

Assay variable : PTINR\_VAL1 PT-INR Value

N Mean Standard Deviation Minimum Maximum

---

|   |           |           |           |           |
|---|-----------|-----------|-----------|-----------|
| 2 | 1.6900000 | 0.0141421 | 1.6800000 | 1.7000000 |
|---|-----------|-----------|-----------|-----------|

---

Unique Subject Identifier=1286000000-0026

Assay variable : PTINR\_VAL1 PT-INR Value

N Mean Standard Deviation Minimum Maximum

---

|   |           |           |           |           |
|---|-----------|-----------|-----------|-----------|
| 6 | 2.2833333 | 0.9453394 | 1.4000000 | 4.0000000 |
|---|-----------|-----------|-----------|-----------|

---

Unique Subject Identifier=1286000000-0027

Assay variable : PTINR\_VAL1 PT-INR Value

N Mean Standard Deviation Minimum Maximum

---

|   |           |           |           |           |
|---|-----------|-----------|-----------|-----------|
| 6 | 2.1166667 | 0.1602082 | 2.0000000 | 2.4000000 |
|---|-----------|-----------|-----------|-----------|

---

Laboratory tests at the time of obtaining Table 2-6 consent, according to the presence or absence of proton-pump inhibitors

Unique Subject Identifier=1286000000-0028

MEANS Procedure

Assay variable : PTINR\_VAL1 PT-INR Value

N Mean Standard Deviation Minimum Maximum

---

|   |           |           |           |           |
|---|-----------|-----------|-----------|-----------|
| 6 | 1.9333333 | 0.7501111 | 1.3000000 | 3.4000000 |
|---|-----------|-----------|-----------|-----------|

---

Unique Subject Identifier=1289000000-0006

Assay variable : PTINR\_VAL1 PT-INR Value

N Mean Standard Deviation Minimum Maximum

---

|   |           |           |           |           |
|---|-----------|-----------|-----------|-----------|
| 3 | 1.6366667 | 0.1833939 | 1.4300000 | 1.7800000 |
|---|-----------|-----------|-----------|-----------|

---

Unique Subject Identifier=1289000000-0009

Assay variable : PTINR\_VAL1 PT-INR Value

N Mean Standard Deviation Minimum Maximum

---

|   |           |           |           |           |
|---|-----------|-----------|-----------|-----------|
| 3 | 2.1033333 | 0.4000417 | 1.7000000 | 2.5000000 |
|---|-----------|-----------|-----------|-----------|

---

Unique Subject Identifier=1290011000-0004



Assay variable : PTINR\_VAL1 PT-INR Value

N Mean Standard Deviation Minimum Maximum

---

|   |           |           |           |           |
|---|-----------|-----------|-----------|-----------|
| 3 | 1.5233333 | 0.0680686 | 1.4700000 | 1.6000000 |
|---|-----------|-----------|-----------|-----------|

---

Laboratory tests at the time of obtaining Table 2-6 consent, according to the presence or absence of proton-pump inhibitors

Unique Subject Identifier=1290011000-0005

MEANS Procedure

Assay variable : PTINR\_VAL1 PT-INR Value

| N | Mean      | Standard Deviation | Minimum   | Maximum   |
|---|-----------|--------------------|-----------|-----------|
| 2 | 1.7150000 | 0.2333452          | 1.5500000 | 1.8800000 |

Unique Subject Identifier=1290011000-0011

Assay variable : PTINR\_VAL1 PT-INR Value

| N | Mean      | Standard Deviation | Minimum   | Maximum   |
|---|-----------|--------------------|-----------|-----------|
| 2 | 1.7600000 | 0.6929646          | 1.2700000 | 2.2500000 |

Unique Subject Identifier=1291000000-0001

Assay variable : PTINR\_VAL1 PT-INR Value

| N | Mean      | Standard Deviation | Minimum   | Maximum   |
|---|-----------|--------------------|-----------|-----------|
| 4 | 2.0500000 | 0.4509250          | 1.7000000 | 2.7000000 |

Unique Subject Identifier=1291000000-0006

Assay variable : PTINR\_VAL1 PT-INR Value

N Mean Standard Deviation Minimum Maximum

---

|   |          |           |          |          |
|---|----------|-----------|----------|----------|
| 5 | 2.140000 | 0.5727128 | 1.400000 | 2.800000 |
|---|----------|-----------|----------|----------|

---

Laboratory tests at the time of obtaining Table 2-6 consent, according to the presence or absence of proton-pump inhibitors

Unique Subject Identifier=1291000000-0007

MEANS Procedure

Assay variable : PTINR\_VAL1 PT-INR Value

N Mean Standard Deviation Minimum Maximum

---

|   |           |           |           |           |
|---|-----------|-----------|-----------|-----------|
| 4 | 2.5500000 | 0.6557439 | 2.0000000 | 3.5000000 |
|---|-----------|-----------|-----------|-----------|

---

Unique Subject Identifier=1291000000-0008

Assay variable : PTINR\_VAL1 PT-INR Value

N Mean Standard Deviation Minimum Maximum

---

|   |           |           |           |           |
|---|-----------|-----------|-----------|-----------|
| 3 | 2.1333333 | 0.3511885 | 1.8000000 | 2.5000000 |
|---|-----------|-----------|-----------|-----------|

---

Unique Subject Identifier=1291000000-0010

Assay variable : PTINR\_VAL1 PT-INR Value

N Mean Standard Deviation Minimum Maximum

---

|   |           |           |           |           |
|---|-----------|-----------|-----------|-----------|
| 4 | 1.8500000 | 0.1732051 | 1.6000000 | 2.0000000 |
|---|-----------|-----------|-----------|-----------|

---

Unique Subject Identifier=1291000000-0013

Assay variable : PTINR\_VAL1 PT-INR Value

N Mean Standard Deviation Minimum Maximum

---

|   |           |           |           |           |
|---|-----------|-----------|-----------|-----------|
| 6 | 1.9166667 | 0.6013873 | 1.2000000 | 3.0000000 |
|---|-----------|-----------|-----------|-----------|

---

Laboratory tests at the time of obtaining Table 2-6 consent, according to the presence or absence of proton-pump inhibitors

Unique Subject Identifier=1291000000-0017

MEANS Procedure

Assay variable : PTINR\_VAL1 PT-INR Value

N Mean Standard Deviation Minimum Maximum

---

|   |           |           |           |           |
|---|-----------|-----------|-----------|-----------|
| 6 | 1.5333333 | 0.2732520 | 1.1000000 | 1.9000000 |
|---|-----------|-----------|-----------|-----------|

---

Unique Subject Identifier=1293000000-0006

Assay variable : PTINR\_VAL1 PT-INR Value

N Mean Standard Deviation Minimum Maximum

---

|   |           |           |           |           |
|---|-----------|-----------|-----------|-----------|
| 3 | 1.3333333 | 0.4163332 | 1.0000000 | 1.8000000 |
|---|-----------|-----------|-----------|-----------|

---

Unique Subject Identifier=1293000000-0022

Assay variable : PTINR\_VAL1 PT-INR Value

N Mean Standard Deviation Minimum Maximum

---

|   |           |           |           |           |
|---|-----------|-----------|-----------|-----------|
| 5 | 1.3000000 | 0.1000000 | 1.2000000 | 1.4000000 |
|---|-----------|-----------|-----------|-----------|

---

Unique Subject Identifier=1293000000-0030

Assay variable : PTINR\_VAL1 PT-INR Value

N Mean Standard Deviation Minimum Maximum

---

|   |          |           |          |          |
|---|----------|-----------|----------|----------|
| 6 | 1.333333 | 0.1751190 | 1.000000 | 1.500000 |
|---|----------|-----------|----------|----------|

---

Laboratory tests at the time of obtaining Table 2-6 consent, according to the presence or absence of proton-pump inhibitors

Unique Subject Identifier=1294011001-0009

MEANS Procedure

Assay variable : PTINR\_VAL1 PT-INR Value

N Mean Standard Deviation Minimum Maximum

---

|   |           |           |           |           |
|---|-----------|-----------|-----------|-----------|
| 6 | 2.4700000 | 0.3459480 | 1.9100000 | 2.9000000 |
|---|-----------|-----------|-----------|-----------|

---

Unique Subject Identifier=1298011000-0006

Assay variable : PTINR\_VAL1 PT-INR Value

N Mean Standard Deviation Minimum Maximum

---

|   |           |           |           |           |
|---|-----------|-----------|-----------|-----------|
| 6 | 2.2666667 | 0.3723797 | 1.9000000 | 2.9000000 |
|---|-----------|-----------|-----------|-----------|

---

Unique Subject Identifier=1298011000-0025

Assay variable : PTINR\_VAL1 PT-INR Value

N Mean Standard Deviation Minimum Maximum

---

|   |           |           |           |           |
|---|-----------|-----------|-----------|-----------|
| 5 | 1.5800000 | 0.2774887 | 1.2000000 | 1.9000000 |
|---|-----------|-----------|-----------|-----------|

---

Unique Subject Identifier=1298011000-0027



Assay variable : PTINR\_VAL1 PT-INR Value

N Mean Standard Deviation Minimum Maximum

---

|   |           |           |           |           |
|---|-----------|-----------|-----------|-----------|
| 6 | 2.4666667 | 0.2943920 | 2.1000000 | 2.8000000 |
|---|-----------|-----------|-----------|-----------|

---

Laboratory tests at the time of obtaining Table 2-6 consent, according to the presence or absence of proton-pump inhibitors

Unique Subject Identifier=1303000000-0001

MEANS Procedure

Assay variable : PTINR\_VAL1 PT-INR Value

| N | Mean     | Standard Deviation | Minimum  | Maximum  |
|---|----------|--------------------|----------|----------|
| 5 | 1.860000 | 0.4159327          | 1.400000 | 2.500000 |

Unique Subject Identifier=1303000000-0004

Assay variable : PTINR\_VAL1 PT-INR Value

| N | Mean     | Standard Deviation | Minimum  | Maximum  |
|---|----------|--------------------|----------|----------|
| 5 | 2.180000 | 0.2774887          | 1.800000 | 2.500000 |

Unique Subject Identifier=1303000000-0012

Assay variable : PTINR\_VAL1 PT-INR Value

| N | Mean     | Standard Deviation | Minimum  | Maximum  |
|---|----------|--------------------|----------|----------|
| 5 | 1.980000 | 0.5848077          | 1.600000 | 3.000000 |

Unique Subject Identifier=1303000000-0013

Assay variable : PTINR\_VAL1 PT-INR Value

N Mean Standard Deviation Minimum Maximum

---

|   |           |           |           |           |
|---|-----------|-----------|-----------|-----------|
| 6 | 1.8500000 | 0.2073644 | 1.5000000 | 2.1000000 |
|---|-----------|-----------|-----------|-----------|

---

Laboratory tests at the time of obtaining Table 2-6 consent, according to the presence or absence of proton-pump inhibitors

Unique Subject Identifier=1303000000-0026

MEANS Procedure

Assay variable : PTINR\_VAL1 PT-INR Value

N Mean Standard Deviation Minimum Maximum

---

|   |           |           |           |           |
|---|-----------|-----------|-----------|-----------|
| 5 | 1.9200000 | 0.3271085 | 1.5000000 | 2.3000000 |
|---|-----------|-----------|-----------|-----------|

---

Unique Subject Identifier=1303000000-0027

Assay variable : PTINR\_VAL1 PT-INR Value

N Mean Standard Deviation Minimum Maximum

---

|   |           |           |           |           |
|---|-----------|-----------|-----------|-----------|
| 5 | 1.7400000 | 0.3577709 | 1.4000000 | 2.2000000 |
|---|-----------|-----------|-----------|-----------|

---

Unique Subject Identifier=1308000000-0003

Assay variable : PTINR\_VAL1 PT-INR Value

N Mean Standard Deviation Minimum Maximum

---

|   |           |           |           |           |
|---|-----------|-----------|-----------|-----------|
| 6 | 1.9550000 | 0.3385705 | 1.4200000 | 2.4200000 |
|---|-----------|-----------|-----------|-----------|

---

Unique Subject Identifier=1313000000-0014

Assay variable : PTINR\_VAL1 PT-INR Value

N Mean Standard Deviation Minimum Maximum

---

|   |           |  |           |           |
|---|-----------|--|-----------|-----------|
| 1 | 1.5100000 |  | 1.5100000 | 1.5100000 |
|---|-----------|--|-----------|-----------|

---

Laboratory tests at the time of obtaining Table 2-6 consent, according to the presence or absence of proton-pump inhibitors

Unique Subject Identifier=1314010000-0007

MEANS Procedure

Assay variable : PTINR\_VAL1 PT-INR Value

N Mean Standard Deviation Minimum Maximum

---

|   |           |  |           |           |
|---|-----------|--|-----------|-----------|
| 1 | 1.5000000 |  | 1.5000000 | 1.5000000 |
|---|-----------|--|-----------|-----------|

---

Unique Subject Identifier=1319000000-0009

Assay variable : PTINR\_VAL1 PT-INR Value

N Mean Standard Deviation Minimum Maximum

---

|   |           |           |           |           |
|---|-----------|-----------|-----------|-----------|
| 5 | 1.9000000 | 0.3464102 | 1.4000000 | 2.2000000 |
|---|-----------|-----------|-----------|-----------|

---

Unique Subject Identifier=1319000000-0019

Assay variable : PTINR\_VAL1 PT-INR Value

N Mean Standard Deviation Minimum Maximum

---

|   |           |           |           |           |
|---|-----------|-----------|-----------|-----------|
| 6 | 2.5166667 | 1.0068101 | 1.7000000 | 4.4000000 |
|---|-----------|-----------|-----------|-----------|

---

Unique Subject Identifier=1320000000-0006

Assay variable : PTINR\_VAL1 PT-INR Value

N Mean Standard Deviation Minimum Maximum

---

|   |           |           |           |           |
|---|-----------|-----------|-----------|-----------|
| 4 | 1.9150000 | 0.3267517 | 1.4400000 | 2.1400000 |
|---|-----------|-----------|-----------|-----------|

---

Laboratory tests at the time of obtaining Table 2-6 consent, according to the presence or absence of proton-pump inhibitors

Unique Subject Identifier=1320000000-0008

MEANS Procedure

Assay variable : PTINR\_VAL1 PT-INR Value

| N | Mean      | Standard Deviation | Minimum   | Maximum   |
|---|-----------|--------------------|-----------|-----------|
| 5 | 2.0800000 | 0.2589401          | 1.7800000 | 2.3200000 |

Unique Subject Identifier=1320000000-0012

Assay variable : PTINR\_VAL1 PT-INR Value

| N | Mean      | Standard Deviation | Minimum   | Maximum   |
|---|-----------|--------------------|-----------|-----------|
| 6 | 1.7816667 | 0.0879583          | 1.6700000 | 1.9000000 |

Unique Subject Identifier=1320000000-0016

Assay variable : PTINR\_VAL1 PT-INR Value

| N | Mean      | Standard Deviation | Minimum   | Maximum   |
|---|-----------|--------------------|-----------|-----------|
| 6 | 2.5616667 | 0.6723218          | 1.6800000 | 3.2600000 |

Unique Subject Identifier=1320000000-0018



Assay variable : PTINR\_VAL1 PT-INR Value

N Mean Standard Deviation Minimum Maximum

---

|   |           |           |           |           |
|---|-----------|-----------|-----------|-----------|
| 5 | 1.9200000 | 0.3896794 | 1.3300000 | 2.2700000 |
|---|-----------|-----------|-----------|-----------|

---

Laboratory tests at the time of obtaining Table 2-6 consent, according to the presence or absence of proton-pump inhibitors

Unique Subject Identifier=1320000000-0028

MEANS Procedure

Assay variable : PTINR\_VAL1 PT-INR Value

N Mean Standard Deviation Minimum Maximum

---

|   |           |           |           |           |
|---|-----------|-----------|-----------|-----------|
| 6 | 1.9716667 | 0.1146153 | 1.8000000 | 2.1000000 |
|---|-----------|-----------|-----------|-----------|

---

Unique Subject Identifier=1320000000-0030

Assay variable : PTINR\_VAL1 PT-INR Value

N Mean Standard Deviation Minimum Maximum

---

|   |           |           |           |           |
|---|-----------|-----------|-----------|-----------|
| 6 | 1.9950000 | 0.1315675 | 1.7700000 | 2.1500000 |
|---|-----------|-----------|-----------|-----------|

---

Unique Subject Identifier=1321011110-0025

Assay variable : PTINR\_VAL1 PT-INR Value

N Mean Standard Deviation Minimum Maximum

---

|   |           |           |           |           |
|---|-----------|-----------|-----------|-----------|
| 6 | 2.9550000 | 0.5216416 | 2.4000000 | 3.7400000 |
|---|-----------|-----------|-----------|-----------|

---

Unique Subject Identifier=1324111000-0004

Assay variable : PTINR\_VAL1 PT-INR Value

N Mean Standard Deviation Minimum Maximum

---

|   |          |           |          |          |
|---|----------|-----------|----------|----------|
| 6 | 2.033333 | 0.6501282 | 1.200000 | 3.100000 |
|---|----------|-----------|----------|----------|

---

Laboratory tests at the time of obtaining Table 2-6 consent, according to the presence or absence of proton-pump inhibitors

Unique Subject Identifier=1324111000-0013

MEANS Procedure

Assay variable : PTINR\_VAL1 PT-INR Value

N Mean Standard Deviation Minimum Maximum

---

|   |           |           |           |           |
|---|-----------|-----------|-----------|-----------|
| 6 | 1.6500000 | 0.2428992 | 1.4000000 | 2.0000000 |
|---|-----------|-----------|-----------|-----------|

---

Unique Subject Identifier=1324111000-0015

Assay variable : PTINR\_VAL1 PT-INR Value

N Mean Standard Deviation Minimum Maximum

---

|   |           |           |           |           |
|---|-----------|-----------|-----------|-----------|
| 5 | 2.0800000 | 0.3962323 | 1.6000000 | 2.6000000 |
|---|-----------|-----------|-----------|-----------|

---

Unique Subject Identifier=1324111000-0019

Assay variable : PTINR\_VAL1 PT-INR Value

N Mean Standard Deviation Minimum Maximum

---

|   |           |           |           |           |
|---|-----------|-----------|-----------|-----------|
| 6 | 1.2333333 | 0.0516398 | 1.2000000 | 1.3000000 |
|---|-----------|-----------|-----------|-----------|

---

Unique Subject Identifier=1326000000-0005

Assay variable : PTINR\_VAL1 PT-INR Value

N Mean Standard Deviation Minimum Maximum

---

|   |           |  |   |           |           |
|---|-----------|--|---|-----------|-----------|
| 5 | 0.9000000 |  | 0 | 0.9000000 | 0.9000000 |
|---|-----------|--|---|-----------|-----------|

---

Laboratory tests at the time of obtaining Table 2-6 consent, according to the presence or absence of proton-pump inhibitors

Unique Subject Identifier=1326000000-0008

MEANS Procedure

Assay variable : PTINR\_VAL1 PT-INR Value

N Mean Standard Deviation Minimum Maximum

---

|   |           |           |           |           |
|---|-----------|-----------|-----------|-----------|
| 6 | 1.3500000 | 0.0836660 | 1.3000000 | 1.5000000 |
|---|-----------|-----------|-----------|-----------|

---

Unique Subject Identifier=1326000000-0009

Assay variable : PTINR\_VAL1 PT-INR Value

N Mean Standard Deviation Minimum Maximum

---

|   |           |   |           |           |
|---|-----------|---|-----------|-----------|
| 6 | 1.0000000 | 0 | 1.0000000 | 1.0000000 |
|---|-----------|---|-----------|-----------|

---

Unique Subject Identifier=1326000000-0010

Assay variable : PTINR\_VAL1 PT-INR Value

N Mean Standard Deviation Minimum Maximum

---

|   |           |           |           |           |
|---|-----------|-----------|-----------|-----------|
| 6 | 1.1000000 | 0.0632456 | 1.0000000 | 1.2000000 |
|---|-----------|-----------|-----------|-----------|

---

Unique Subject Identifier=1328011111-0043

Assay variable : PTINR\_VAL1 PT-INR Value

N Mean Standard Deviation Minimum Maximum

---

|   |           |           |           |           |
|---|-----------|-----------|-----------|-----------|
| 6 | 1.8166667 | 0.2701604 | 1.4700000 | 2.2800000 |
|---|-----------|-----------|-----------|-----------|

---

Laboratory tests at the time of obtaining Table 2-6 consent, according to the presence or absence of proton-pump inhibitors

Unique Subject Identifier=1328011111-0050

MEANS Procedure

Assay variable : PTINR\_VAL1 PT-INR Value

N Mean Standard Deviation Minimum Maximum

---

|   |           |           |           |           |
|---|-----------|-----------|-----------|-----------|
| 6 | 1.7950000 | 0.0926823 | 1.6300000 | 1.9000000 |
|---|-----------|-----------|-----------|-----------|

---

Unique Subject Identifier=1328011111-0060

Assay variable : PTINR\_VAL1 PT-INR Value

N Mean Standard Deviation Minimum Maximum

---

|   |           |           |           |           |
|---|-----------|-----------|-----------|-----------|
| 2 | 1.2050000 | 0.2333452 | 1.0400000 | 1.3700000 |
|---|-----------|-----------|-----------|-----------|

---

Unique Subject Identifier=1328011111-0075

Assay variable : PTINR\_VAL1 PT-INR Value

N Mean Standard Deviation Minimum Maximum

---

|   |           |  |           |           |
|---|-----------|--|-----------|-----------|
| 1 | 1.9500000 |  | 1.9500000 | 1.9500000 |
|---|-----------|--|-----------|-----------|

---

Unique Subject Identifier=1328011111-0086



Assay variable : PTINR\_VAL1 PT-INR Value

N Mean Standard Deviation Minimum Maximum

---

|   |           |           |           |           |
|---|-----------|-----------|-----------|-----------|
| 6 | 1.6766667 | 0.2522433 | 1.3700000 | 2.0900000 |
|---|-----------|-----------|-----------|-----------|

---

Laboratory tests at the time of obtaining Table 2-6 consent, according to the presence or absence of proton-pump inhibitors

Unique Subject Identifier=1341011111-0008

MEANS Procedure

Assay variable : PTINR\_VAL1 PT-INR Value

| N | Mean      | Standard Deviation | Minimum   | Maximum   |
|---|-----------|--------------------|-----------|-----------|
| 5 | 1.9160000 | 0.1283745          | 1.7000000 | 2.0400000 |

Unique Subject Identifier=1351010111-0003

Assay variable : PTINR\_VAL1 PT-INR Value

| N | Mean      | Standard Deviation | Minimum   | Maximum   |
|---|-----------|--------------------|-----------|-----------|
| 6 | 2.1666667 | 0.3386247          | 1.9000000 | 2.8000000 |

Unique Subject Identifier=1351010111-0018

Assay variable : PTINR\_VAL1 PT-INR Value

| N | Mean      | Standard Deviation | Minimum   | Maximum   |
|---|-----------|--------------------|-----------|-----------|
| 6 | 2.1166667 | 0.2994439          | 1.7000000 | 2.5000000 |

Unique Subject Identifier=1353000000-0050

Assay variable : PTINR\_VAL1 PT-INR Value

N Mean Standard Deviation Minimum Maximum

---

|   |          |  |          |          |
|---|----------|--|----------|----------|
| 1 | 1.200000 |  | 1.200000 | 1.200000 |
|---|----------|--|----------|----------|

---

Laboratory tests at the time of obtaining Table 2-6 consent, according to the presence or absence of proton-pump inhibitors

Unique Subject Identifier=1354010000-0012

MEANS Procedure

Assay variable : PTINR\_VAL1 PT-INR Value

| N | Mean     | Standard Deviation | Minimum  | Maximum  |
|---|----------|--------------------|----------|----------|
| 6 | 1.810000 | 0.1186592          | 1.640000 | 1.970000 |

Unique Subject Identifier=1354010000-0013

Assay variable : PTINR\_VAL1 PT-INR Value

| N | Mean     | Standard Deviation | Minimum  | Maximum  |
|---|----------|--------------------|----------|----------|
| 5 | 1.938000 | 0.4510211          | 1.600000 | 2.700000 |

Unique Subject Identifier=1354010000-0016

Assay variable : PTINR\_VAL1 PT-INR Value

| N | Mean     | Standard Deviation | Minimum  | Maximum  |
|---|----------|--------------------|----------|----------|
| 3 | 1.923333 | 0.2315887          | 1.730000 | 2.180000 |

Unique Subject Identifier=1354010000-0034

Assay variable : PTINR\_VAL1 PT-INR Value

N Mean Standard Deviation Minimum Maximum

---

|   |           |           |           |           |
|---|-----------|-----------|-----------|-----------|
| 6 | 1.8083333 | 0.1801573 | 1.5800000 | 2.0800000 |
|---|-----------|-----------|-----------|-----------|

---

Laboratory tests at the time of obtaining Table 2-6 consent, according to the presence or absence of proton-pump inhibitors

Unique Subject Identifier=1354010000-0037

MEANS Procedure

Assay variable : PTINR\_VAL1 PT-INR Value

N Mean Standard Deviation Minimum Maximum

---

|   |           |           |           |           |
|---|-----------|-----------|-----------|-----------|
| 6 | 1.4383333 | 0.1360025 | 1.3000000 | 1.6500000 |
|---|-----------|-----------|-----------|-----------|

---

Unique Subject Identifier=1354010000-0045

Assay variable : PTINR\_VAL1 PT-INR Value

N Mean Standard Deviation Minimum Maximum

---

|   |           |           |           |           |
|---|-----------|-----------|-----------|-----------|
| 6 | 1.8366667 | 0.3957609 | 1.3400000 | 2.5100000 |
|---|-----------|-----------|-----------|-----------|

---

Unique Subject Identifier=1354010000-0052

Assay variable : PTINR\_VAL1 PT-INR Value

N Mean Standard Deviation Minimum Maximum

---

|   |           |           |           |           |
|---|-----------|-----------|-----------|-----------|
| 6 | 2.2083333 | 1.4976838 | 1.1600000 | 5.1000000 |
|---|-----------|-----------|-----------|-----------|

---

Unique Subject Identifier=1354010000-0056

Assay variable : PTINR\_VAL1 PT-INR Value

N Mean Standard Deviation Minimum Maximum

---

|   |           |           |           |           |
|---|-----------|-----------|-----------|-----------|
| 6 | 1.7100000 | 0.1572260 | 1.5300000 | 1.9800000 |
|---|-----------|-----------|-----------|-----------|

---

Laboratory tests at the time of obtaining Table 2-6 consent, according to the presence or absence of proton-pump inhibitors

Unique Subject Identifier=1365010000-0002

MEANS Procedure

Assay variable : PTINR\_VAL1 PT-INR Value

N Mean Standard Deviation Minimum Maximum

---

|   |           |           |           |           |
|---|-----------|-----------|-----------|-----------|
| 4 | 2.0400000 | 0.2174090 | 1.7600000 | 2.2900000 |
|---|-----------|-----------|-----------|-----------|

---

Unique Subject Identifier=1365010000-0007

Assay variable : PTINR\_VAL1 PT-INR Value

N Mean Standard Deviation Minimum Maximum

---

|   |           |           |           |           |
|---|-----------|-----------|-----------|-----------|
| 6 | 2.0833333 | 0.4950421 | 1.5000000 | 2.7000000 |
|---|-----------|-----------|-----------|-----------|

---

Unique Subject Identifier=1365010000-0008

Assay variable : PTINR\_VAL1 PT-INR Value

N Mean Standard Deviation Minimum Maximum

---

|   |           |           |           |           |
|---|-----------|-----------|-----------|-----------|
| 5 | 1.8940000 | 0.3383489 | 1.6100000 | 2.3200000 |
|---|-----------|-----------|-----------|-----------|

---

Unique Subject Identifier=1365010000-0019



Assay variable : PTINR\_VAL1 PT-INR Value

N Mean Standard Deviation Minimum Maximum

---

|   |           |           |           |           |
|---|-----------|-----------|-----------|-----------|
| 3 | 1.7700000 | 0.2000000 | 1.5700000 | 1.9700000 |
|---|-----------|-----------|-----------|-----------|

---

Laboratory tests at the time of obtaining Table 2-6 consent, according to the presence or absence of proton-pump inhibitors

Unique Subject Identifier=1370010000-0012

MEANS Procedure

Assay variable : PTINR\_VAL1 PT-INR Value

N Mean Standard Deviation Minimum Maximum

---

|   |           |  |           |           |
|---|-----------|--|-----------|-----------|
| 1 | 2.1800000 |  | 2.1800000 | 2.1800000 |
|---|-----------|--|-----------|-----------|

---

Unique Subject Identifier=1371000000-0011

Assay variable : PTINR\_VAL1 PT-INR Value

N Mean Standard Deviation Minimum Maximum

---

|   |           |           |           |           |
|---|-----------|-----------|-----------|-----------|
| 5 | 1.8440000 | 0.2234502 | 1.4800000 | 2.0200000 |
|---|-----------|-----------|-----------|-----------|

---

Unique Subject Identifier=1373000000-0002

Assay variable : PTINR\_VAL1 PT-INR Value

N Mean Standard Deviation Minimum Maximum

---

|   |           |           |           |           |
|---|-----------|-----------|-----------|-----------|
| 5 | 1.4800000 | 0.2774887 | 1.2000000 | 1.9000000 |
|---|-----------|-----------|-----------|-----------|

---

Unique Subject Identifier=1377011000-0003

Assay variable : PTINR\_VAL1 PT-INR Value

N Mean Standard Deviation Minimum Maximum

---

|   |           |           |           |           |
|---|-----------|-----------|-----------|-----------|
| 4 | 1.5925000 | 0.0780491 | 1.4900000 | 1.6800000 |
|---|-----------|-----------|-----------|-----------|

---

Laboratory tests at the time of obtaining Table 2-6 consent, according to the presence or absence of proton-pump inhibitors

Unique Subject Identifier=1377011000-0011

MEANS Procedure

Assay variable : PTINR\_VAL1 PT-INR Value

N Mean Standard Deviation Minimum Maximum

---

|   |           |           |           |           |
|---|-----------|-----------|-----------|-----------|
| 6 | 2.2766667 | 0.4296821 | 1.7900000 | 2.8700000 |
|---|-----------|-----------|-----------|-----------|

---

Unique Subject Identifier=1380000110-0008

Assay variable : PTINR\_VAL1 PT-INR Value

N Mean Standard Deviation Minimum Maximum

---

|   |           |           |           |           |
|---|-----------|-----------|-----------|-----------|
| 6 | 1.8500000 | 0.5576737 | 1.4000000 | 2.8000000 |
|---|-----------|-----------|-----------|-----------|

---

Unique Subject Identifier=1380000110-0011

Assay variable : PTINR\_VAL1 PT-INR Value

N Mean Standard Deviation Minimum Maximum

---

|   |           |           |           |           |
|---|-----------|-----------|-----------|-----------|
| 6 | 2.0000000 | 0.2366432 | 1.6000000 | 2.3000000 |
|---|-----------|-----------|-----------|-----------|

---

Unique Subject Identifier=1380000110-0022

Assay variable : PTINR\_VAL1 PT-INR Value

N Mean Standard Deviation Minimum Maximum

---

|   |           |           |           |           |
|---|-----------|-----------|-----------|-----------|
| 6 | 2.0666667 | 0.3444803 | 1.6000000 | 2.5000000 |
|---|-----------|-----------|-----------|-----------|

---

Laboratory tests at the time of obtaining Table 2-6 consent, according to the presence or absence of proton-pump inhibitors

Unique Subject Identifier=1380000110-0024

MEANS Procedure

Assay variable : PTINR\_VAL1 PT-INR Value

N Mean Standard Deviation Minimum Maximum

---

|   |           |           |           |           |
|---|-----------|-----------|-----------|-----------|
| 6 | 1.8666667 | 0.2875181 | 1.4000000 | 2.2000000 |
|---|-----------|-----------|-----------|-----------|

---

Unique Subject Identifier=1385011000-0011

Assay variable : PTINR\_VAL1 PT-INR Value

N Mean Standard Deviation Minimum Maximum

---

|   |           |           |           |           |
|---|-----------|-----------|-----------|-----------|
| 5 | 2.0820000 | 0.2811050 | 1.7200000 | 2.4100000 |
|---|-----------|-----------|-----------|-----------|

---

Unique Subject Identifier=1385011000-0014

Assay variable : PTINR\_VAL1 PT-INR Value

N Mean Standard Deviation Minimum Maximum

---

|   |           |           |           |           |
|---|-----------|-----------|-----------|-----------|
| 3 | 2.4733333 | 0.7379928 | 1.7000000 | 3.1700000 |
|---|-----------|-----------|-----------|-----------|

---

Unique Subject Identifier=1385011000-0016

Assay variable : PTINR\_VAL1 PT-INR Value

N Mean Standard Deviation Minimum Maximum

---

|   |          |           |          |          |
|---|----------|-----------|----------|----------|
| 3 | 2.150000 | 0.0888819 | 2.080000 | 2.250000 |
|---|----------|-----------|----------|----------|

---

Laboratory tests at the time of obtaining Table 2-6 consent, according to the presence or absence of proton-pump inhibitors

Unique Subject Identifier=1385011000-0027

MEANS Procedure

Assay variable : PTINR\_VAL1 PT-INR Value

N Mean Standard Deviation Minimum Maximum

---

|   |           |           |           |           |
|---|-----------|-----------|-----------|-----------|
| 2 | 2.1200000 | 0.0282843 | 2.1000000 | 2.1400000 |
|---|-----------|-----------|-----------|-----------|

---

Unique Subject Identifier=1385011000-0028

Assay variable : PTINR\_VAL1 PT-INR Value

N Mean Standard Deviation Minimum Maximum

---

|   |           |           |           |           |
|---|-----------|-----------|-----------|-----------|
| 3 | 2.2933333 | 0.0450925 | 2.2500000 | 2.3400000 |
|---|-----------|-----------|-----------|-----------|

---

Unique Subject Identifier=1385011000-0044

Assay variable : PTINR\_VAL1 PT-INR Value

N Mean Standard Deviation Minimum Maximum

---

|   |           |           |           |           |
|---|-----------|-----------|-----------|-----------|
| 3 | 2.1200000 | 0.6100000 | 1.5100000 | 2.7300000 |
|---|-----------|-----------|-----------|-----------|

---

Unique Subject Identifier=1385011000-0059



Assay variable : PTINR\_VAL1 PT-INR Value

N Mean Standard Deviation Minimum Maximum

---

|   |          |           |          |          |
|---|----------|-----------|----------|----------|
| 4 | 1.620000 | 0.1346601 | 1.420000 | 1.700000 |
|---|----------|-----------|----------|----------|

---

Laboratory tests at the time of obtaining Table 2-6 consent, according to the presence or absence of proton-pump inhibitors

Unique Subject Identifier=1385011000-0061

MEANS Procedure

Assay variable : PTINR\_VAL1 PT-INR Value

N Mean Standard Deviation Minimum Maximum

---

|   |           |           |           |           |
|---|-----------|-----------|-----------|-----------|
| 3 | 2.2866667 | 0.0152753 | 2.2700000 | 2.3000000 |
|---|-----------|-----------|-----------|-----------|

---

Unique Subject Identifier=1385011000-0065

Assay variable : PTINR\_VAL1 PT-INR Value

N Mean Standard Deviation Minimum Maximum

---

|   |           |           |           |           |
|---|-----------|-----------|-----------|-----------|
| 3 | 2.2500000 | 0.0600000 | 2.1900000 | 2.3100000 |
|---|-----------|-----------|-----------|-----------|

---

Unique Subject Identifier=1386000000-0017

Assay variable : PTINR\_VAL1 PT-INR Value

N Mean Standard Deviation Minimum Maximum

---

|   |           |           |           |           |
|---|-----------|-----------|-----------|-----------|
| 2 | 1.8150000 | 0.5444722 | 1.4300000 | 2.2000000 |
|---|-----------|-----------|-----------|-----------|

---

Unique Subject Identifier=1386000000-0018

Assay variable : PTINR\_VAL1 PT-INR Value

N Mean Standard Deviation Minimum Maximum

---

|   |           |           |           |           |
|---|-----------|-----------|-----------|-----------|
| 4 | 1.9650000 | 0.3481858 | 1.6000000 | 2.3900000 |
|---|-----------|-----------|-----------|-----------|

---

Laboratory tests at the time of obtaining Table 2-6 consent, according to the presence or absence of proton-pump inhibitors

Unique Subject Identifier=1392011110-0003

MEANS Procedure

Assay variable : PTINR\_VAL1 PT-INR Value

N Mean Standard Deviation Minimum Maximum

---

|   |           |           |           |           |
|---|-----------|-----------|-----------|-----------|
| 6 | 1.6166667 | 0.2483277 | 1.3000000 | 2.0000000 |
|---|-----------|-----------|-----------|-----------|

---

Unique Subject Identifier=1392011110-0006

Assay variable : PTINR\_VAL1 PT-INR Value

N Mean Standard Deviation Minimum Maximum

---

|   |           |           |           |           |
|---|-----------|-----------|-----------|-----------|
| 6 | 2.0833333 | 0.4020779 | 1.6000000 | 2.6000000 |
|---|-----------|-----------|-----------|-----------|

---

Unique Subject Identifier=1392011110-0011

Assay variable : PTINR\_VAL1 PT-INR Value

N Mean Standard Deviation Minimum Maximum

---

|   |           |           |           |           |
|---|-----------|-----------|-----------|-----------|
| 6 | 1.8166667 | 0.1602082 | 1.6000000 | 2.0000000 |
|---|-----------|-----------|-----------|-----------|

---

Unique Subject Identifier=1394011010-0004

Assay variable : PTINR\_VAL1 PT-INR Value

N Mean Standard Deviation Minimum Maximum

---

|   |           |           |           |           |
|---|-----------|-----------|-----------|-----------|
| 3 | 1.9666667 | 1.0016653 | 1.2000000 | 3.1000000 |
|---|-----------|-----------|-----------|-----------|

---

Laboratory tests at the time of obtaining Table 2-6 consent, according to the presence or absence of proton-pump inhibitors

Unique Subject Identifier=1395000000-0007

MEANS Procedure

Assay variable : PTINR\_VAL1 PT-INR Value

N Mean Standard Deviation Minimum Maximum

---

|   |           |           |           |           |
|---|-----------|-----------|-----------|-----------|
| 5 | 2.3880000 | 0.4996699 | 1.9000000 | 3.2300000 |
|---|-----------|-----------|-----------|-----------|

---

Unique Subject Identifier=1396000000-0006

Assay variable : PTINR\_VAL1 PT-INR Value

N Mean Standard Deviation Minimum Maximum

---

|   |           |  |           |           |
|---|-----------|--|-----------|-----------|
| 1 | 1.5000000 |  | 1.5000000 | 1.5000000 |
|---|-----------|--|-----------|-----------|

---

Unique Subject Identifier=1396000000-0007

Assay variable : PTINR\_VAL1 PT-INR Value

N Mean Standard Deviation Minimum Maximum

---

|   |           |  |           |           |
|---|-----------|--|-----------|-----------|
| 1 | 2.0000000 |  | 2.0000000 | 2.0000000 |
|---|-----------|--|-----------|-----------|

---

Unique Subject Identifier=1398010000-0022

Assay variable : PTINR\_VAL1 PT-INR Value

N Mean Standard Deviation Minimum Maximum

---

|   |          |           |          |          |
|---|----------|-----------|----------|----------|
| 5 | 2.200000 | 0.3082207 | 1.900000 | 2.600000 |
|---|----------|-----------|----------|----------|

---

Laboratory tests at the time of obtaining Table 2-6 consent, according to the presence or absence of proton-pump inhibitors

Unique Subject Identifier=1400000000-0007

MEANS Procedure

Assay variable : PTINR\_VAL1 PT-INR Value

N Mean Standard Deviation Minimum Maximum

---

|   |           |           |           |           |
|---|-----------|-----------|-----------|-----------|
| 3 | 1.7200000 | 0.0781025 | 1.6300000 | 1.7700000 |
|---|-----------|-----------|-----------|-----------|

---

Unique Subject Identifier=1405000000-0003

Assay variable : PTINR\_VAL1 PT-INR Value

N Mean Standard Deviation Minimum Maximum

---

|   |           |           |           |           |
|---|-----------|-----------|-----------|-----------|
| 6 | 2.2500000 | 0.3674235 | 1.9000000 | 2.8000000 |
|---|-----------|-----------|-----------|-----------|

---

Unique Subject Identifier=1405000000-0009

Assay variable : PTINR\_VAL1 PT-INR Value

N Mean Standard Deviation Minimum Maximum

---

|   |           |           |           |           |
|---|-----------|-----------|-----------|-----------|
| 6 | 2.2166667 | 0.6306082 | 1.7000000 | 3.4000000 |
|---|-----------|-----------|-----------|-----------|

---

Unique Subject Identifier=1405000000-0013



Assay variable : PTINR\_VAL1 PT-INR Value

N Mean Standard Deviation Minimum Maximum

---

|   |          |           |          |          |
|---|----------|-----------|----------|----------|
| 6 | 2.033333 | 0.1366260 | 1.900000 | 2.300000 |
|---|----------|-----------|----------|----------|

---

Laboratory tests at the time of obtaining Table 2-6 consent, according to the presence or absence of proton-pump inhibitors

Unique Subject Identifier=1405000000-0016

MEANS Procedure

Assay variable : PTINR\_VAL1 PT-INR Value

N Mean Standard Deviation Minimum Maximum

---

|   |           |           |           |           |
|---|-----------|-----------|-----------|-----------|
| 6 | 2.4233333 | 0.4233989 | 1.8000000 | 2.8000000 |
|---|-----------|-----------|-----------|-----------|

---

Unique Subject Identifier=1405000000-0019

Assay variable : PTINR\_VAL1 PT-INR Value

N Mean Standard Deviation Minimum Maximum

---

|   |           |           |           |           |
|---|-----------|-----------|-----------|-----------|
| 6 | 2.4666667 | 0.6742897 | 1.7000000 | 3.6000000 |
|---|-----------|-----------|-----------|-----------|

---

Unique Subject Identifier=1405000000-0020

Assay variable : PTINR\_VAL1 PT-INR Value

N Mean Standard Deviation Minimum Maximum

---

|   |           |           |           |           |
|---|-----------|-----------|-----------|-----------|
| 6 | 2.0500000 | 0.3271085 | 1.7000000 | 2.5000000 |
|---|-----------|-----------|-----------|-----------|

---

Unique Subject Identifier=1405000000-0022

Assay variable : PTINR\_VAL1 PT-INR Value

N Mean Standard Deviation Minimum Maximum

---

|   |           |           |           |           |
|---|-----------|-----------|-----------|-----------|
| 6 | 2.0166667 | 0.4996666 | 1.6000000 | 3.0000000 |
|---|-----------|-----------|-----------|-----------|

---

Laboratory tests at the time of obtaining Table 2-6 consent, according to the presence or absence of proton-pump inhibitors

Unique Subject Identifier=1405000000-0027

MEANS Procedure

Assay variable : PTINR\_VAL1 PT-INR Value

N Mean Standard Deviation Minimum Maximum

---

|   |           |           |           |           |
|---|-----------|-----------|-----------|-----------|
| 6 | 2.6833333 | 1.0534072 | 1.3000000 | 4.4000000 |
|---|-----------|-----------|-----------|-----------|

---

Unique Subject Identifier=1405000000-0033

Assay variable : PTINR\_VAL1 PT-INR Value

N Mean Standard Deviation Minimum Maximum

---

|   |           |           |           |           |
|---|-----------|-----------|-----------|-----------|
| 6 | 1.9833333 | 0.4622409 | 1.4000000 | 2.6000000 |
|---|-----------|-----------|-----------|-----------|

---

Unique Subject Identifier=1406000000-0009

Assay variable : PTINR\_VAL1 PT-INR Value

N Mean Standard Deviation Minimum Maximum

---

|   |           |  |           |           |
|---|-----------|--|-----------|-----------|
| 1 | 1.2900000 |  | 1.2900000 | 1.2900000 |
|---|-----------|--|-----------|-----------|

---

Unique Subject Identifier=1406000000-0021

Assay variable : PTINR\_VAL1 PT-INR Value

N Mean Standard Deviation Minimum Maximum

---

|   |           |  |           |           |
|---|-----------|--|-----------|-----------|
| 1 | 1.0500000 |  | 1.0500000 | 1.0500000 |
|---|-----------|--|-----------|-----------|

---

Laboratory tests at the time of obtaining Table 2-6 consent, according to the presence or absence of proton-pump inhibitors

Unique Subject Identifier=1407000000-0004

MEANS Procedure

Assay variable : PTINR\_VAL1 PT-INR Value

N Mean Standard Deviation Minimum Maximum

---

|   |           |           |           |           |
|---|-----------|-----------|-----------|-----------|
| 6 | 1.9650000 | 0.1980656 | 1.7300000 | 2.3300000 |
|---|-----------|-----------|-----------|-----------|

---

Unique Subject Identifier=1407000000-0016

Assay variable : PTINR\_VAL1 PT-INR Value

N Mean Standard Deviation Minimum Maximum

---

|   |           |           |           |           |
|---|-----------|-----------|-----------|-----------|
| 6 | 2.3616667 | 0.2377744 | 2.0800000 | 2.7100000 |
|---|-----------|-----------|-----------|-----------|

---

Unique Subject Identifier=1407000000-0027

Assay variable : PTINR\_VAL1 PT-INR Value

N Mean Standard Deviation Minimum Maximum

---

|   |           |           |           |           |
|---|-----------|-----------|-----------|-----------|
| 5 | 2.1520000 | 0.2169562 | 1.8900000 | 2.4900000 |
|---|-----------|-----------|-----------|-----------|

---

Unique Subject Identifier=1407000000-0030

Assay variable : PTINR\_VAL1 PT-INR Value

N Mean Standard Deviation Minimum Maximum

---

|   |           |           |           |           |
|---|-----------|-----------|-----------|-----------|
| 6 | 1.8800000 | 0.3470447 | 1.3400000 | 2.2600000 |
|---|-----------|-----------|-----------|-----------|

---

Laboratory tests at the time of obtaining Table 2-6 consent, according to the presence or absence of proton-pump inhibitors

Unique Subject Identifier=1408010000-0029

MEANS Procedure

Assay variable : PTINR\_VAL1 PT-INR Value

N Mean Standard Deviation Minimum Maximum

---

|   |           |           |           |           |
|---|-----------|-----------|-----------|-----------|
| 4 | 2.5700000 | 0.1476482 | 2.4800000 | 2.7900000 |
|---|-----------|-----------|-----------|-----------|

---

Unique Subject Identifier=1412000000-0002

Assay variable : PTINR\_VAL1 PT-INR Value

N Mean Standard Deviation Minimum Maximum

---

|   |           |           |           |           |
|---|-----------|-----------|-----------|-----------|
| 6 | 2.0500000 | 0.0836660 | 1.9000000 | 2.1000000 |
|---|-----------|-----------|-----------|-----------|

---

Unique Subject Identifier=1412000000-0023

Assay variable : PTINR\_VAL1 PT-INR Value

N Mean Standard Deviation Minimum Maximum

---

|   |           |           |           |           |
|---|-----------|-----------|-----------|-----------|
| 6 | 1.7833333 | 0.1329160 | 1.7000000 | 2.0000000 |
|---|-----------|-----------|-----------|-----------|

---

Unique Subject Identifier=1412000000-0029



Assay variable : PTINR\_VAL1 PT-INR Value

N Mean Standard Deviation Minimum Maximum

---

|   |          |           |          |          |
|---|----------|-----------|----------|----------|
| 5 | 1.540000 | 0.1140175 | 1.400000 | 1.700000 |
|---|----------|-----------|----------|----------|

---

Laboratory tests at the time of obtaining Table 2-6 consent, according to the presence or absence of proton-pump inhibitors

Unique Subject Identifier=1420010000-0004

MEANS Procedure

Assay variable : PTINR\_VAL1 PT-INR Value

N Mean Standard Deviation Minimum Maximum

---

|   |           |           |           |           |
|---|-----------|-----------|-----------|-----------|
| 6 | 1.8333333 | 0.3881580 | 1.4000000 | 2.4000000 |
|---|-----------|-----------|-----------|-----------|

---

Unique Subject Identifier=1420010000-0010

Assay variable : PTINR\_VAL1 PT-INR Value

N Mean Standard Deviation Minimum Maximum

---

|   |           |           |           |           |
|---|-----------|-----------|-----------|-----------|
| 6 | 1.8333333 | 0.1751190 | 1.5000000 | 2.0000000 |
|---|-----------|-----------|-----------|-----------|

---

Unique Subject Identifier=1420010000-0017

Assay variable : PTINR\_VAL1 PT-INR Value

N Mean Standard Deviation Minimum Maximum

---

|   |           |           |           |           |
|---|-----------|-----------|-----------|-----------|
| 3 | 1.6333333 | 0.4041452 | 1.2000000 | 2.0000000 |
|---|-----------|-----------|-----------|-----------|

---

Unique Subject Identifier=1423000000-0021

Assay variable : PTINR\_VAL1 PT-INR Value

N Mean Standard Deviation Minimum Maximum

---

|   |           |  |           |           |
|---|-----------|--|-----------|-----------|
| 1 | 2.0200000 |  | 2.0200000 | 2.0200000 |
|---|-----------|--|-----------|-----------|

---

Laboratory tests at the time of obtaining Table 2-6 consent, according to the presence or absence of proton-pump inhibitors

Unique Subject Identifier=1423000000-0022

MEANS Procedure

Assay variable : PTINR\_VAL1 PT-INR Value

N Mean Standard Deviation Minimum Maximum

---

|   |           |           |           |           |
|---|-----------|-----------|-----------|-----------|
| 2 | 1.2700000 | 0.0282843 | 1.2500000 | 1.2900000 |
|---|-----------|-----------|-----------|-----------|

---

Unique Subject Identifier=1427000000-0003

Assay variable : PTINR\_VAL1 PT-INR Value

N Mean Standard Deviation Minimum Maximum

---

|   |           |           |           |           |
|---|-----------|-----------|-----------|-----------|
| 6 | 1.8000000 | 0.3521363 | 1.4000000 | 2.3000000 |
|---|-----------|-----------|-----------|-----------|

---

Unique Subject Identifier=1430011010-0003

Assay variable : PTINR\_VAL1 PT-INR Value

N Mean Standard Deviation Minimum Maximum

---

|   |           |           |           |           |
|---|-----------|-----------|-----------|-----------|
| 6 | 1.8166667 | 0.2786874 | 1.5000000 | 2.1000000 |
|---|-----------|-----------|-----------|-----------|

---

Unique Subject Identifier=1432000000-0011

Assay variable : PTINR\_VAL1 PT-INR Value

N Mean Standard Deviation Minimum Maximum

---

|   |           |           |           |           |
|---|-----------|-----------|-----------|-----------|
| 6 | 1.1833333 | 0.0752773 | 1.1000000 | 1.3000000 |
|---|-----------|-----------|-----------|-----------|

---

Laboratory tests at the time of obtaining Table 2-6 consent, according to the presence or absence of proton-pump inhibitors

Unique Subject Identifier=1432000000-0015

MEANS Procedure

Assay variable : PTINR\_VAL1 PT-INR Value

N Mean Standard Deviation Minimum Maximum

---

|   |           |           |           |           |
|---|-----------|-----------|-----------|-----------|
| 6 | 1.8333333 | 0.7865537 | 1.1000000 | 3.3000000 |
|---|-----------|-----------|-----------|-----------|

---

Unique Subject Identifier=1432000000-0017

Assay variable : PTINR\_VAL1 PT-INR Value

N Mean Standard Deviation Minimum Maximum

---

|   |           |           |           |           |
|---|-----------|-----------|-----------|-----------|
| 6 | 2.3500000 | 0.4549725 | 1.8000000 | 3.0000000 |
|---|-----------|-----------|-----------|-----------|

---

Unique Subject Identifier=1432000000-0020

Assay variable : PTINR\_VAL1 PT-INR Value

N Mean Standard Deviation Minimum Maximum

---

|   |           |           |           |           |
|---|-----------|-----------|-----------|-----------|
| 5 | 1.9400000 | 0.4449719 | 1.6000000 | 2.6000000 |
|---|-----------|-----------|-----------|-----------|

---

Unique Subject Identifier=1432000000-0023

Assay variable : PTINR\_VAL1 PT-INR Value

N Mean Standard Deviation Minimum Maximum

---

|   |          |          |          |          |
|---|----------|----------|----------|----------|
| 6 | 1.850000 | 0.564808 | 1.200000 | 2.700000 |
|---|----------|----------|----------|----------|

---

Laboratory tests at the time of obtaining Table 2-6 consent, according to the presence or absence of proton-pump inhibitors

Unique Subject Identifier=1432000000-0028

MEANS Procedure

Assay variable : PTINR\_VAL1 PT-INR Value

N Mean Standard Deviation Minimum Maximum

---

|   |           |           |           |           |
|---|-----------|-----------|-----------|-----------|
| 6 | 2.3333333 | 0.5465040 | 1.7000000 | 3.2000000 |
|---|-----------|-----------|-----------|-----------|

---

Unique Subject Identifier=1432000000-0034

Assay variable : PTINR\_VAL1 PT-INR Value

N Mean Standard Deviation Minimum Maximum

---

|   |           |           |           |           |
|---|-----------|-----------|-----------|-----------|
| 6 | 2.1000000 | 0.3162278 | 1.7000000 | 2.6000000 |
|---|-----------|-----------|-----------|-----------|

---

Unique Subject Identifier=1432000000-0037

Assay variable : PTINR\_VAL1 PT-INR Value

N Mean Standard Deviation Minimum Maximum

---

|   |           |           |           |           |
|---|-----------|-----------|-----------|-----------|
| 6 | 1.4333333 | 0.0516398 | 1.4000000 | 1.5000000 |
|---|-----------|-----------|-----------|-----------|

---

Unique Subject Identifier=1432000000-0042



Assay variable : PTINR\_VAL1 PT-INR Value

N Mean Standard Deviation Minimum Maximum

---

|   |          |           |          |          |
|---|----------|-----------|----------|----------|
| 5 | 1.760000 | 0.5176872 | 1.300000 | 2.600000 |
|---|----------|-----------|----------|----------|

---

Laboratory tests at the time of obtaining Table 2-6 consent, according to the presence or absence of proton-pump inhibitors

Unique Subject Identifier=1432000000-0072

MEANS Procedure

Assay variable : PTINR\_VAL1 PT-INR Value

N Mean Standard Deviation Minimum Maximum

---

|   |           |           |           |           |
|---|-----------|-----------|-----------|-----------|
| 6 | 1.7000000 | 0.3033150 | 1.3000000 | 2.2000000 |
|---|-----------|-----------|-----------|-----------|

---

Unique Subject Identifier=1435000000-0021

Assay variable : PTINR\_VAL1 PT-INR Value

N Mean Standard Deviation Minimum Maximum

---

|   |           |  |           |           |
|---|-----------|--|-----------|-----------|
| 1 | 1.1600000 |  | 1.1600000 | 1.1600000 |
|---|-----------|--|-----------|-----------|

---

Unique Subject Identifier=1435000000-0072

Assay variable : PTINR\_VAL1 PT-INR Value

N Mean Standard Deviation Minimum Maximum

---

|   |           |           |           |           |
|---|-----------|-----------|-----------|-----------|
| 4 | 1.8275000 | 0.2848830 | 1.5900000 | 2.2000000 |
|---|-----------|-----------|-----------|-----------|

---

Unique Subject Identifier=1435000000-0145

Assay variable : PTINR\_VAL1 PT-INR Value

N Mean Standard Deviation Minimum Maximum

---

|   |           |           |           |           |
|---|-----------|-----------|-----------|-----------|
| 6 | 1.5983333 | 0.3660829 | 1.1900000 | 2.1900000 |
|---|-----------|-----------|-----------|-----------|

---

Laboratory tests at the time of obtaining Table 2-6 consent, according to the presence or absence of proton-pump inhibitors

Unique Subject Identifier=1435000000-0177

MEANS Procedure

Assay variable : PTINR\_VAL1 PT-INR Value

N Mean Standard Deviation Minimum Maximum

---

|   |           |           |           |           |
|---|-----------|-----------|-----------|-----------|
| 5 | 1.9480000 | 0.3900897 | 1.5500000 | 2.4600000 |
|---|-----------|-----------|-----------|-----------|

---

Unique Subject Identifier=1436000000-0003

Assay variable : PTINR\_VAL1 PT-INR Value

N Mean Standard Deviation Minimum Maximum

---

|   |           |           |           |           |
|---|-----------|-----------|-----------|-----------|
| 3 | 1.7666667 | 0.1709776 | 1.5700000 | 1.8800000 |
|---|-----------|-----------|-----------|-----------|

---

Unique Subject Identifier=1436000000-0013

Assay variable : PTINR\_VAL1 PT-INR Value

N Mean Standard Deviation Minimum Maximum

---

|   |           |  |           |           |
|---|-----------|--|-----------|-----------|
| 1 | 2.2400000 |  | 2.2400000 | 2.2400000 |
|---|-----------|--|-----------|-----------|

---

Unique Subject Identifier=1436000000-0018

Assay variable : PTINR\_VAL1 PT-INR Value

N Mean Standard Deviation Minimum Maximum

---

|   |           |  |           |           |
|---|-----------|--|-----------|-----------|
| 1 | 1.7200000 |  | 1.7200000 | 1.7200000 |
|---|-----------|--|-----------|-----------|

---

Laboratory tests at the time of obtaining Table 2-6 consent, according to the presence or absence of proton-pump inhibitors

Unique Subject Identifier=1436000000-0020

MEANS Procedure

Assay variable : PTINR\_VAL1 PT-INR Value

| N | Mean      | Standard Deviation | Minimum   | Maximum   |
|---|-----------|--------------------|-----------|-----------|
| 2 | 2.4400000 | 0.3252691          | 2.2100000 | 2.6700000 |

Unique Subject Identifier=1436000000-0021

Assay variable : PTINR\_VAL1 PT-INR Value

| N | Mean      | Standard Deviation | Minimum   | Maximum   |
|---|-----------|--------------------|-----------|-----------|
| 1 | 1.3700000 |                    | 1.3700000 | 1.3700000 |

Unique Subject Identifier=1436000000-0022

Assay variable : PTINR\_VAL1 PT-INR Value

| N | Mean      | Standard Deviation | Minimum   | Maximum   |
|---|-----------|--------------------|-----------|-----------|
| 1 | 2.2200000 |                    | 2.2200000 | 2.2200000 |

Unique Subject Identifier=1436000000-0034

Assay variable : PTINR\_VAL1 PT-INR Value

N Mean Standard Deviation Minimum Maximum

---

|   |          |  |          |          |
|---|----------|--|----------|----------|
| 1 | 1.380000 |  | 1.380000 | 1.380000 |
|---|----------|--|----------|----------|

---

Laboratory tests at the time of obtaining Table 2-6 consent, according to the presence or absence of proton-pump inhibitors

Unique Subject Identifier=1436000000-0047

MEANS Procedure

Assay variable : PTINR\_VAL1 PT-INR Value

N Mean Standard Deviation Minimum Maximum

---

|   |           |  |           |           |
|---|-----------|--|-----------|-----------|
| 1 | 2.0700000 |  | 2.0700000 | 2.0700000 |
|---|-----------|--|-----------|-----------|

---

Unique Subject Identifier=1436000000-0063

Assay variable : PTINR\_VAL1 PT-INR Value

N Mean Standard Deviation Minimum Maximum

---

|   |           |  |           |           |
|---|-----------|--|-----------|-----------|
| 1 | 1.8600000 |  | 1.8600000 | 1.8600000 |
|---|-----------|--|-----------|-----------|

---

Unique Subject Identifier=1438000000-0001

Assay variable : PTINR\_VAL1 PT-INR Value

N Mean Standard Deviation Minimum Maximum

---

|   |           |           |           |           |
|---|-----------|-----------|-----------|-----------|
| 2 | 1.6550000 | 0.1343503 | 1.5600000 | 1.7500000 |
|---|-----------|-----------|-----------|-----------|

---

Unique Subject Identifier=1440000000-0001



Assay variable : PTINR\_VAL1 PT-INR Value

N Mean Standard Deviation Minimum Maximum

---

|   |          |           |          |          |
|---|----------|-----------|----------|----------|
| 4 | 1.300000 | 0.1920069 | 1.120000 | 1.490000 |
|---|----------|-----------|----------|----------|

---

Laboratory tests at the time of obtaining Table 2-6 consent, according to the presence or absence of proton-pump inhibitors

Unique Subject Identifier=1440000000-0011

MEANS Procedure

Assay variable : PTINR\_VAL1 PT-INR Value

| N | Mean      | Standard Deviation | Minimum   | Maximum   |
|---|-----------|--------------------|-----------|-----------|
| 3 | 1.9133333 | 0.5744853          | 1.2500000 | 2.2500000 |

Unique Subject Identifier=1440000000-0014

Assay variable : PTINR\_VAL1 PT-INR Value

| N | Mean      | Standard Deviation | Minimum   | Maximum   |
|---|-----------|--------------------|-----------|-----------|
| 5 | 2.0280000 | 0.2251000          | 1.7000000 | 2.3000000 |

Unique Subject Identifier=1446000000-0004

Assay variable : PTINR\_VAL1 PT-INR Value

| N | Mean      | Standard Deviation | Minimum   | Maximum   |
|---|-----------|--------------------|-----------|-----------|
| 5 | 1.6200000 | 0.1095445          | 1.5000000 | 1.8000000 |

Unique Subject Identifier=1446000000-0010

Assay variable : PTINR\_VAL1 PT-INR Value

N Mean Standard Deviation Minimum Maximum

---

|   |           |           |           |           |
|---|-----------|-----------|-----------|-----------|
| 3 | 1.7666667 | 0.2081666 | 1.6000000 | 2.0000000 |
|---|-----------|-----------|-----------|-----------|

---

Laboratory tests at the time of obtaining Table 2-6 consent, according to the presence or absence of proton-pump inhibitors

Unique Subject Identifier=1446000000-0012

MEANS Procedure

Assay variable : PTINR\_VAL1 PT-INR Value

N Mean Standard Deviation Minimum Maximum

---

|   |           |           |           |           |
|---|-----------|-----------|-----------|-----------|
| 3 | 1.8666667 | 0.0577350 | 1.8000000 | 1.9000000 |
|---|-----------|-----------|-----------|-----------|

---

Unique Subject Identifier=1446000000-0014

Assay variable : PTINR\_VAL1 PT-INR Value

N Mean Standard Deviation Minimum Maximum

---

|   |           |           |           |           |
|---|-----------|-----------|-----------|-----------|
| 6 | 1.9666667 | 0.2160247 | 1.6000000 | 2.2000000 |
|---|-----------|-----------|-----------|-----------|

---

Unique Subject Identifier=1448000000-0002

Assay variable : PTINR\_VAL1 PT-INR Value

N Mean Standard Deviation Minimum Maximum

---

|   |           |  |           |           |
|---|-----------|--|-----------|-----------|
| 1 | 1.4300000 |  | 1.4300000 | 1.4300000 |
|---|-----------|--|-----------|-----------|

---

Unique Subject Identifier=1448000000-0004

Assay variable : PTINR\_VAL1 PT-INR Value

N Mean Standard Deviation Minimum Maximum

---

|   |           |           |           |           |
|---|-----------|-----------|-----------|-----------|
| 2 | 1.6800000 | 0.1697056 | 1.5600000 | 1.8000000 |
|---|-----------|-----------|-----------|-----------|

---

Laboratory tests at the time of obtaining Table 2-6 consent, according to the presence or absence of proton-pump inhibitors

Unique Subject Identifier=1448000000-0009

MEANS Procedure

Assay variable : PTINR\_VAL1 PT-INR Value

| N | Mean      | Standard Deviation | Minimum   | Maximum   |
|---|-----------|--------------------|-----------|-----------|
| 2 | 1.6750000 | 0.0070711          | 1.6700000 | 1.6800000 |

Unique Subject Identifier=1448000000-0016

Assay variable : PTINR\_VAL1 PT-INR Value

| N | Mean      | Standard Deviation | Minimum   | Maximum   |
|---|-----------|--------------------|-----------|-----------|
| 2 | 2.1150000 | 0.6434672          | 1.6600000 | 2.5700000 |

Unique Subject Identifier=1449000000-0003

Assay variable : PTINR\_VAL1 PT-INR Value

| N | Mean      | Standard Deviation | Minimum   | Maximum   |
|---|-----------|--------------------|-----------|-----------|
| 5 | 2.2800000 | 0.2863564          | 1.9000000 | 2.7000000 |

Unique Subject Identifier=1451000000-0013

Assay variable : PTINR\_VAL1 PT-INR Value

N Mean Standard Deviation Minimum Maximum

---

|   |           |           |           |           |
|---|-----------|-----------|-----------|-----------|
| 6 | 1.8166667 | 0.2714160 | 1.5000000 | 2.3000000 |
|---|-----------|-----------|-----------|-----------|

---

Laboratory tests at the time of obtaining Table 2-6 consent, according to the presence or absence of proton-pump inhibitors

Unique Subject Identifier=1451000000-0023

MEANS Procedure

Assay variable : PTINR\_VAL1 PT-INR Value

N Mean Standard Deviation Minimum Maximum

---

|   |           |           |           |           |
|---|-----------|-----------|-----------|-----------|
| 6 | 1.7833333 | 0.1329160 | 1.7000000 | 2.0000000 |
|---|-----------|-----------|-----------|-----------|

---

Unique Subject Identifier=1451000000-0025

Assay variable : PTINR\_VAL1 PT-INR Value

N Mean Standard Deviation Minimum Maximum

---

|   |           |  |           |           |
|---|-----------|--|-----------|-----------|
| 1 | 2.9000000 |  | 2.9000000 | 2.9000000 |
|---|-----------|--|-----------|-----------|

---

Unique Subject Identifier=1451000000-0026

Assay variable : PTINR\_VAL1 PT-INR Value

N Mean Standard Deviation Minimum Maximum

---

|   |           |           |           |           |
|---|-----------|-----------|-----------|-----------|
| 6 | 1.9000000 | 0.4098780 | 1.4000000 | 2.5000000 |
|---|-----------|-----------|-----------|-----------|

---

Unique Subject Identifier=1451000000-0027



Assay variable : PTINR\_VAL1 PT-INR Value

N Mean Standard Deviation Minimum Maximum

---

|   |           |           |           |           |
|---|-----------|-----------|-----------|-----------|
| 5 | 2.0800000 | 0.1788854 | 1.9000000 | 2.3000000 |
|---|-----------|-----------|-----------|-----------|

---

Laboratory tests at the time of obtaining Table 2-6 consent, according to the presence or absence of proton-pump inhibitors

Unique Subject Identifier=1451000000-0028

MEANS Procedure

Assay variable : PTINR\_VAL1 PT-INR Value

N Mean Standard Deviation Minimum Maximum

---

|   |           |           |           |           |
|---|-----------|-----------|-----------|-----------|
| 6 | 2.2500000 | 0.4183300 | 1.6000000 | 2.8000000 |
|---|-----------|-----------|-----------|-----------|

---

Unique Subject Identifier=1451000000-0029

Assay variable : PTINR\_VAL1 PT-INR Value

N Mean Standard Deviation Minimum Maximum

---

|   |           |           |           |           |
|---|-----------|-----------|-----------|-----------|
| 6 | 1.8333333 | 0.2250926 | 1.6000000 | 2.2000000 |
|---|-----------|-----------|-----------|-----------|

---

Unique Subject Identifier=1451000000-0032

Assay variable : PTINR\_VAL1 PT-INR Value

N Mean Standard Deviation Minimum Maximum

---

|   |           |           |           |           |
|---|-----------|-----------|-----------|-----------|
| 6 | 1.8500000 | 0.3728270 | 1.4000000 | 2.3000000 |
|---|-----------|-----------|-----------|-----------|

---

Unique Subject Identifier=1451000000-0043

Assay variable : PTINR\_VAL1 PT-INR Value

N Mean Standard Deviation Minimum Maximum

---

|   |           |           |           |           |
|---|-----------|-----------|-----------|-----------|
| 6 | 1.8833333 | 0.2786874 | 1.6000000 | 2.3000000 |
|---|-----------|-----------|-----------|-----------|

---

Laboratory tests at the time of obtaining Table 2-6 consent, according to the presence or absence of proton-pump inhibitors

Unique Subject Identifier=1451000000-0048

MEANS Procedure

Assay variable : PTINR\_VAL1 PT-INR Value

N Mean Standard Deviation Minimum Maximum

---

|   |           |           |           |           |
|---|-----------|-----------|-----------|-----------|
| 6 | 1.8000000 | 0.6066300 | 1.1000000 | 2.9000000 |
|---|-----------|-----------|-----------|-----------|

---

Unique Subject Identifier=1451000000-0049

Assay variable : PTINR\_VAL1 PT-INR Value

N Mean Standard Deviation Minimum Maximum

---

|   |           |           |           |           |
|---|-----------|-----------|-----------|-----------|
| 6 | 2.0833333 | 0.3544949 | 1.7000000 | 2.6000000 |
|---|-----------|-----------|-----------|-----------|

---

Unique Subject Identifier=1451000000-0052

Assay variable : PTINR\_VAL1 PT-INR Value

N Mean Standard Deviation Minimum Maximum

---

|   |           |           |           |           |
|---|-----------|-----------|-----------|-----------|
| 6 | 2.0666667 | 0.6314006 | 1.1000000 | 2.8000000 |
|---|-----------|-----------|-----------|-----------|

---

Unique Subject Identifier=1451000000-0053

Assay variable : PTINR\_VAL1 PT-INR Value

N Mean Standard Deviation Minimum Maximum

---

|   |           |           |           |           |
|---|-----------|-----------|-----------|-----------|
| 6 | 1.8666667 | 0.2338090 | 1.5000000 | 2.2000000 |
|---|-----------|-----------|-----------|-----------|

---

Laboratory tests at the time of obtaining Table 2-6 consent, according to the presence or absence of proton-pump inhibitors

Unique Subject Identifier=1451000000-0054

MEANS Procedure

Assay variable : PTINR\_VAL1 PT-INR Value

N Mean Standard Deviation Minimum Maximum

---

|   |           |           |           |           |
|---|-----------|-----------|-----------|-----------|
| 6 | 2.2000000 | 0.4472136 | 1.4000000 | 2.7000000 |
|---|-----------|-----------|-----------|-----------|

---

Unique Subject Identifier=1452000000-0006

Assay variable : PTINR\_VAL1 PT-INR Value

N Mean Standard Deviation Minimum Maximum

---

|   |           |           |           |           |
|---|-----------|-----------|-----------|-----------|
| 6 | 2.5516667 | 0.2155381 | 2.3600000 | 2.9500000 |
|---|-----------|-----------|-----------|-----------|

---

Unique Subject Identifier=1452000000-0018

Assay variable : PTINR\_VAL1 PT-INR Value

N Mean Standard Deviation Minimum Maximum

---

|   |           |           |           |           |
|---|-----------|-----------|-----------|-----------|
| 5 | 2.4340000 | 0.4462398 | 1.6900000 | 2.8000000 |
|---|-----------|-----------|-----------|-----------|

---

Unique Subject Identifier=1452000000-0025

Assay variable : PTINR\_VAL1 PT-INR Value

N Mean Standard Deviation Minimum Maximum

---

|   |           |           |           |           |
|---|-----------|-----------|-----------|-----------|
| 6 | 1.7983333 | 0.2129241 | 1.5100000 | 2.1600000 |
|---|-----------|-----------|-----------|-----------|

---

Laboratory tests at the time of obtaining Table 2-6 consent, according to the presence or absence of proton-pump inhibitors

Unique Subject Identifier=1452000000-0028

MEANS Procedure

Assay variable : PTINR\_VAL1 PT-INR Value

N Mean Standard Deviation Minimum Maximum

---

|   |          |           |          |          |
|---|----------|-----------|----------|----------|
| 6 | 2.240000 | 0.5422914 | 1.610000 | 3.220000 |
|---|----------|-----------|----------|----------|

---

Unique Subject Identifier=1452000000-0034

Assay variable : PTINR\_VAL1 PT-INR Value

N Mean Standard Deviation Minimum Maximum

---

|   |           |           |          |          |
|---|-----------|-----------|----------|----------|
| 6 | 2.0716667 | 0.2058559 | 1.870000 | 2.300000 |
|---|-----------|-----------|----------|----------|

---

Unique Subject Identifier=1452000000-0040

Assay variable : PTINR\_VAL1 PT-INR Value

N Mean Standard Deviation Minimum Maximum

---

|   |          |           |          |          |
|---|----------|-----------|----------|----------|
| 3 | 1.810000 | 0.3704052 | 1.530000 | 2.230000 |
|---|----------|-----------|----------|----------|

---

Unique Subject Identifier=1452000000-0042



Assay variable : PTINR\_VAL1 PT-INR Value

N Mean Standard Deviation Minimum Maximum

---

|   |           |           |           |           |
|---|-----------|-----------|-----------|-----------|
| 6 | 1.8716667 | 0.3365363 | 1.5500000 | 2.3800000 |
|---|-----------|-----------|-----------|-----------|

---

Laboratory tests at the time of obtaining Table 2-6 consent, according to the presence or absence of proton-pump inhibitors

Unique Subject Identifier=1452000000-0048

MEANS Procedure

Assay variable : PTINR\_VAL1 PT-INR Value

N Mean Standard Deviation Minimum Maximum

---

|   |           |           |           |           |
|---|-----------|-----------|-----------|-----------|
| 5 | 2.0620000 | 0.6736245 | 1.3600000 | 3.0500000 |
|---|-----------|-----------|-----------|-----------|

---

Unique Subject Identifier=1452000000-0049

Assay variable : PTINR\_VAL1 PT-INR Value

N Mean Standard Deviation Minimum Maximum

---

|   |           |           |           |           |
|---|-----------|-----------|-----------|-----------|
| 5 | 2.5280000 | 0.4078235 | 2.0800000 | 3.1000000 |
|---|-----------|-----------|-----------|-----------|

---

Unique Subject Identifier=1452000000-0067

Assay variable : PTINR\_VAL1 PT-INR Value

N Mean Standard Deviation Minimum Maximum

---

|   |           |           |           |           |
|---|-----------|-----------|-----------|-----------|
| 6 | 2.0500000 | 0.1951410 | 1.8000000 | 2.3000000 |
|---|-----------|-----------|-----------|-----------|

---

Unique Subject Identifier=1452000000-0090

Assay variable : PTINR\_VAL1 PT-INR Value

N Mean Standard Deviation Minimum Maximum

---

|   |           |           |           |           |
|---|-----------|-----------|-----------|-----------|
| 6 | 1.9233333 | 0.3040833 | 1.6300000 | 2.3100000 |
|---|-----------|-----------|-----------|-----------|

---

Laboratory tests at the time of obtaining Table 2-6 consent, according to the presence or absence of proton-pump inhibitors

Unique Subject Identifier=1452000000-0095

MEANS Procedure

Assay variable : PTINR\_VAL1 PT-INR Value

N Mean Standard Deviation Minimum Maximum

---

|   |           |           |           |           |
|---|-----------|-----------|-----------|-----------|
| 3 | 1.9766667 | 0.5643876 | 1.3300000 | 2.3700000 |
|---|-----------|-----------|-----------|-----------|

---

Unique Subject Identifier=1454000000-0022

Assay variable : PTINR\_VAL1 PT-INR Value

N Mean Standard Deviation Minimum Maximum

---

|   |           |           |           |           |
|---|-----------|-----------|-----------|-----------|
| 6 | 1.9100000 | 0.6382789 | 1.1400000 | 2.5600000 |
|---|-----------|-----------|-----------|-----------|

---

Unique Subject Identifier=1454000000-0061

Assay variable : PTINR\_VAL1 PT-INR Value

N Mean Standard Deviation Minimum Maximum

---

|   |           |           |           |           |
|---|-----------|-----------|-----------|-----------|
| 5 | 2.0200000 | 0.2285826 | 1.7200000 | 2.3300000 |
|---|-----------|-----------|-----------|-----------|

---

Unique Subject Identifier=1454000000-0066

Assay variable : PTINR\_VAL1 PT-INR Value

N Mean Standard Deviation Minimum Maximum

---

|   |          |  |          |          |
|---|----------|--|----------|----------|
| 1 | 2.110000 |  | 2.110000 | 2.110000 |
|---|----------|--|----------|----------|

---

Laboratory tests at the time of obtaining Table 2-6 consent, according to the presence or absence of proton-pump inhibitors

Unique Subject Identifier=1463010000-0017

MEANS Procedure

Assay variable : PTINR\_VAL1 PT-INR Value

| N | Mean      | Standard Deviation | Minimum   | Maximum   |
|---|-----------|--------------------|-----------|-----------|
| 6 | 1.7950000 | 0.1617096          | 1.6400000 | 2.0700000 |

Unique Subject Identifier=1463010000-0025

Assay variable : PTINR\_VAL1 PT-INR Value

| N | Mean      | Standard Deviation | Minimum   | Maximum   |
|---|-----------|--------------------|-----------|-----------|
| 6 | 2.2816667 | 0.2688804          | 1.8900000 | 2.6000000 |

Unique Subject Identifier=1463010000-0035

Assay variable : PTINR\_VAL1 PT-INR Value

| N | Mean      | Standard Deviation | Minimum   | Maximum   |
|---|-----------|--------------------|-----------|-----------|
| 5 | 2.4900000 | 0.4252646          | 1.8200000 | 2.8700000 |

Unique Subject Identifier=1469010110-0011

Assay variable : PTINR\_VAL1 PT-INR Value

N Mean Standard Deviation Minimum Maximum

---

|   |          |           |          |          |
|---|----------|-----------|----------|----------|
| 3 | 1.580000 | 0.1252996 | 1.450000 | 1.700000 |
|---|----------|-----------|----------|----------|

---

Laboratory tests at the time of obtaining Table 2-6 consent, according to the presence or absence of proton-pump inhibitors

Unique Subject Identifier=147000000-0003

MEANS Procedure

Assay variable : PTINR\_VAL1 PT-INR Value

N Mean Standard Deviation Minimum Maximum

---

|   |           |           |           |           |
|---|-----------|-----------|-----------|-----------|
| 4 | 1.6775000 | 0.1960230 | 1.4700000 | 1.9400000 |
|---|-----------|-----------|-----------|-----------|

---

Unique Subject Identifier=147500000-0005

Assay variable : PTINR\_VAL1 PT-INR Value

N Mean Standard Deviation Minimum Maximum

---

|   |           |           |           |           |
|---|-----------|-----------|-----------|-----------|
| 3 | 1.9000000 | 0.1000000 | 1.8000000 | 2.0000000 |
|---|-----------|-----------|-----------|-----------|

---

Unique Subject Identifier=147500000-0006

Assay variable : PTINR\_VAL1 PT-INR Value

N Mean Standard Deviation Minimum Maximum

---

|   |           |           |           |           |
|---|-----------|-----------|-----------|-----------|
| 3 | 2.6333333 | 0.8020806 | 1.8000000 | 3.4000000 |
|---|-----------|-----------|-----------|-----------|

---

Unique Subject Identifier=147500000-0012



Assay variable : PTINR\_VAL1 PT-INR Value

N Mean Standard Deviation Minimum Maximum

---

|   |           |   |           |           |
|---|-----------|---|-----------|-----------|
| 2 | 1.7000000 | 0 | 1.7000000 | 1.7000000 |
|---|-----------|---|-----------|-----------|

---

Laboratory tests at the time of obtaining Table 2-6 consent, according to the presence or absence of proton-pump inhibitors

Unique Subject Identifier=1477000000-0005

MEANS Procedure

Assay variable : PTINR\_VAL1 PT-INR Value

| N | Mean      | Standard Deviation | Minimum   | Maximum   |
|---|-----------|--------------------|-----------|-----------|
| 6 | 2.0833333 | 0.1717750          | 1.9900000 | 2.4300000 |

Unique Subject Identifier=1478011111-0034

Assay variable : PTINR\_VAL1 PT-INR Value

| N | Mean      | Standard Deviation | Minimum   | Maximum   |
|---|-----------|--------------------|-----------|-----------|
| 3 | 1.6966667 | 0.2200757          | 1.4800000 | 1.9200000 |

Unique Subject Identifier=1478011111-0037

Assay variable : PTINR\_VAL1 PT-INR Value

| N | Mean      | Standard Deviation | Minimum   | Maximum   |
|---|-----------|--------------------|-----------|-----------|
| 3 | 2.6400000 | 0.3451087          | 2.3000000 | 2.9900000 |

Unique Subject Identifier=1478011111-0041

Assay variable : PTINR\_VAL1 PT-INR Value

N Mean Standard Deviation Minimum Maximum

---

|   |           |           |           |           |
|---|-----------|-----------|-----------|-----------|
| 3 | 2.3966667 | 0.0602771 | 2.3400000 | 2.4600000 |
|---|-----------|-----------|-----------|-----------|

---

Laboratory tests at the time of obtaining Table 2-6 consent, according to the presence or absence of proton-pump inhibitors

Unique Subject Identifier=1478011111-0051

MEANS Procedure

Assay variable : PTINR\_VAL1 PT-INR Value

N Mean Standard Deviation Minimum Maximum

---

|   |           |           |           |           |
|---|-----------|-----------|-----------|-----------|
| 2 | 1.1900000 | 0.0565685 | 1.1500000 | 1.2300000 |
|---|-----------|-----------|-----------|-----------|

---

Unique Subject Identifier=1478011111-0070

Assay variable : PTINR\_VAL1 PT-INR Value

N Mean Standard Deviation Minimum Maximum

---

|   |           |           |           |           |
|---|-----------|-----------|-----------|-----------|
| 3 | 1.9900000 | 0.4450843 | 1.4800000 | 2.3000000 |
|---|-----------|-----------|-----------|-----------|

---

Unique Subject Identifier=1478011111-0079

Assay variable : PTINR\_VAL1 PT-INR Value

N Mean Standard Deviation Minimum Maximum

---

|   |           |           |           |           |
|---|-----------|-----------|-----------|-----------|
| 4 | 2.7100000 | 0.9296236 | 1.9100000 | 3.9700000 |
|---|-----------|-----------|-----------|-----------|

---

Unique Subject Identifier=1478011111-0096

Assay variable : PTINR\_VAL1 PT-INR Value

N Mean Standard Deviation Minimum Maximum

---

|   |           |           |           |           |
|---|-----------|-----------|-----------|-----------|
| 2 | 2.5350000 | 0.1626346 | 2.4200000 | 2.6500000 |
|---|-----------|-----------|-----------|-----------|

---

Laboratory tests at the time of obtaining Table 2-6 consent, according to the presence or absence of proton-pump inhibitors

Unique Subject Identifier=1478011111-0120

MEANS Procedure

Assay variable : PTINR\_VAL1 PT-INR Value

N Mean Standard Deviation Minimum Maximum

---

|   |           |           |           |           |
|---|-----------|-----------|-----------|-----------|
| 4 | 2.0225000 | 0.5209846 | 1.4000000 | 2.5100000 |
|---|-----------|-----------|-----------|-----------|

---

Unique Subject Identifier=1478011111-0144

Assay variable : PTINR\_VAL1 PT-INR Value

N Mean Standard Deviation Minimum Maximum

---

|   |           |           |           |           |
|---|-----------|-----------|-----------|-----------|
| 2 | 2.2250000 | 0.1909188 | 2.0900000 | 2.3600000 |
|---|-----------|-----------|-----------|-----------|

---

Unique Subject Identifier=1480011111-0002

Assay variable : PTINR\_VAL1 PT-INR Value

N Mean Standard Deviation Minimum Maximum

---

|   |           |  |           |           |
|---|-----------|--|-----------|-----------|
| 1 | 1.0800000 |  | 1.0800000 | 1.0800000 |
|---|-----------|--|-----------|-----------|

---

Unique Subject Identifier=1487000000-0002

Assay variable : PTINR\_VAL1 PT-INR Value

N Mean Standard Deviation Minimum Maximum

---

|   |           |           |           |           |
|---|-----------|-----------|-----------|-----------|
| 6 | 2.1166667 | 0.3710346 | 1.7000000 | 2.7000000 |
|---|-----------|-----------|-----------|-----------|

---

Laboratory tests at the time of obtaining Table 2-6 consent, according to the presence or absence of proton-pump inhibitors

Unique Subject Identifier=1487000000-0007

MEANS Procedure

Assay variable : PTINR\_VAL1 PT-INR Value

N Mean Standard Deviation Minimum Maximum

---

|   |           |           |           |           |
|---|-----------|-----------|-----------|-----------|
| 6 | 1.9166667 | 0.1834848 | 1.6000000 | 2.1000000 |
|---|-----------|-----------|-----------|-----------|

---

Unique Subject Identifier=1487000000-0031

Assay variable : PTINR\_VAL1 PT-INR Value

N Mean Standard Deviation Minimum Maximum

---

|   |           |           |           |           |
|---|-----------|-----------|-----------|-----------|
| 6 | 2.0833333 | 0.4622409 | 1.5000000 | 2.8000000 |
|---|-----------|-----------|-----------|-----------|

---

Unique Subject Identifier=1491000000-0002

Assay variable : PTINR\_VAL1 PT-INR Value

N Mean Standard Deviation Minimum Maximum

---

|   |           |           |           |           |
|---|-----------|-----------|-----------|-----------|
| 4 | 2.3225000 | 0.9042262 | 1.7200000 | 3.6500000 |
|---|-----------|-----------|-----------|-----------|

---

Unique Subject Identifier=1491000000-0006



Assay variable : PTINR\_VAL1 PT-INR Value

N Mean Standard Deviation Minimum Maximum

---

|   |           |           |           |           |
|---|-----------|-----------|-----------|-----------|
| 4 | 2.1075000 | 0.2436357 | 1.7600000 | 2.3300000 |
|---|-----------|-----------|-----------|-----------|

---

Laboratory tests at the time of obtaining Table 2-6 consent, according to the presence or absence of proton-pump inhibitors

Unique Subject Identifier=1491000000-0007

MEANS Procedure

Assay variable : PTINR\_VAL1 PT-INR Value

| N | Mean      | Standard Deviation | Minimum   | Maximum   |
|---|-----------|--------------------|-----------|-----------|
| 6 | 1.6833333 | 0.2338090          | 1.4200000 | 2.0600000 |

Unique Subject Identifier=1491000000-0020

Assay variable : PTINR\_VAL1 PT-INR Value

| N | Mean      | Standard Deviation | Minimum   | Maximum   |
|---|-----------|--------------------|-----------|-----------|
| 3 | 1.9133333 | 0.1601041          | 1.7500000 | 2.0700000 |

Unique Subject Identifier=1491000000-0041

Assay variable : PTINR\_VAL1 PT-INR Value

| N | Mean      | Standard Deviation | Minimum   | Maximum   |
|---|-----------|--------------------|-----------|-----------|
| 4 | 2.0400000 | 0.5090514          | 1.6000000 | 2.6300000 |

Unique Subject Identifier=1491000000-0045

Assay variable : PTINR\_VAL1 PT-INR Value

N Mean Standard Deviation Minimum Maximum

---

|   |           |           |           |           |
|---|-----------|-----------|-----------|-----------|
| 4 | 1.9100000 | 0.2947315 | 1.6100000 | 2.3000000 |
|---|-----------|-----------|-----------|-----------|

---

Laboratory tests at the time of obtaining Table 2-6 consent, according to the presence or absence of proton-pump inhibitors

Unique Subject Identifier=1491000000-0047

MEANS Procedure

Assay variable : PTINR\_VAL1 PT-INR Value

N Mean Standard Deviation Minimum Maximum

---

|   |           |           |           |           |
|---|-----------|-----------|-----------|-----------|
| 6 | 1.8016667 | 0.1619156 | 1.6200000 | 2.0900000 |
|---|-----------|-----------|-----------|-----------|

---

Unique Subject Identifier=1491000000-0050

Assay variable : PTINR\_VAL1 PT-INR Value

N Mean Standard Deviation Minimum Maximum

---

|   |           |           |           |           |
|---|-----------|-----------|-----------|-----------|
| 3 | 1.8200000 | 0.0818535 | 1.7300000 | 1.8900000 |
|---|-----------|-----------|-----------|-----------|

---

Unique Subject Identifier=1491000000-0057

Assay variable : PTINR\_VAL1 PT-INR Value

N Mean Standard Deviation Minimum Maximum

---

|   |           |           |           |           |
|---|-----------|-----------|-----------|-----------|
| 3 | 2.0800000 | 0.2718455 | 1.7800000 | 2.3100000 |
|---|-----------|-----------|-----------|-----------|

---

Unique Subject Identifier=1491000000-0074

Assay variable : PTINR\_VAL1 PT-INR Value

N Mean Standard Deviation Minimum Maximum

---

|   |           |           |           |           |
|---|-----------|-----------|-----------|-----------|
| 4 | 2.0675000 | 0.1901534 | 1.8100000 | 2.2300000 |
|---|-----------|-----------|-----------|-----------|

---

Laboratory tests at the time of obtaining Table 2-6 consent, according to the presence or absence of proton-pump inhibitors

Unique Subject Identifier=1491000000-0082

MEANS Procedure

Assay variable : PTINR\_VAL1 PT-INR Value

N Mean Standard Deviation Minimum Maximum

---

|   |           |           |           |           |
|---|-----------|-----------|-----------|-----------|
| 4 | 2.3575000 | 0.3834384 | 2.1200000 | 2.9300000 |
|---|-----------|-----------|-----------|-----------|

---

Unique Subject Identifier=1491000000-0084

Assay variable : PTINR\_VAL1 PT-INR Value

N Mean Standard Deviation Minimum Maximum

---

|   |           |           |           |           |
|---|-----------|-----------|-----------|-----------|
| 3 | 2.0066667 | 0.2441994 | 1.8100000 | 2.2800000 |
|---|-----------|-----------|-----------|-----------|

---

Unique Subject Identifier=1491000000-0088

Assay variable : PTINR\_VAL1 PT-INR Value

N Mean Standard Deviation Minimum Maximum

---

|   |           |           |           |           |
|---|-----------|-----------|-----------|-----------|
| 4 | 2.7900000 | 0.8003749 | 2.3600000 | 3.9900000 |
|---|-----------|-----------|-----------|-----------|

---

Unique Subject Identifier=1491000000-0089

Assay variable : PTINR\_VAL1 PT-INR Value

N Mean Standard Deviation Minimum Maximum

---

|   |           |           |           |           |
|---|-----------|-----------|-----------|-----------|
| 4 | 1.5925000 | 0.1152895 | 1.4200000 | 1.6600000 |
|---|-----------|-----------|-----------|-----------|

---

Laboratory tests at the time of obtaining Table 2-6 consent, according to the presence or absence of proton-pump inhibitors

Unique Subject Identifier=1491000000-0101

MEANS Procedure

Assay variable : PTINR\_VAL1 PT-INR Value

N Mean Standard Deviation Minimum Maximum

---

|   |           |           |           |           |
|---|-----------|-----------|-----------|-----------|
| 4 | 1.7700000 | 0.2044505 | 1.4700000 | 1.9300000 |
|---|-----------|-----------|-----------|-----------|

---

Unique Subject Identifier=1491000000-0103

Assay variable : PTINR\_VAL1 PT-INR Value

N Mean Standard Deviation Minimum Maximum

---

|   |           |           |           |           |
|---|-----------|-----------|-----------|-----------|
| 4 | 2.5075000 | 0.2325762 | 2.2900000 | 2.8200000 |
|---|-----------|-----------|-----------|-----------|

---

Unique Subject Identifier=1492011100-0027

Assay variable : PTINR\_VAL1 PT-INR Value

N Mean Standard Deviation Minimum Maximum

---

|   |           |           |           |           |
|---|-----------|-----------|-----------|-----------|
| 6 | 2.1500000 | 0.2509980 | 1.8000000 | 2.4000000 |
|---|-----------|-----------|-----------|-----------|

---

Unique Subject Identifier=1494000000-0005



Assay variable : PTINR\_VAL1 PT-INR Value

N Mean Standard Deviation Minimum Maximum

---

|   |           |           |           |           |
|---|-----------|-----------|-----------|-----------|
| 2 | 0.9500000 | 0.0424264 | 0.9200000 | 0.9800000 |
|---|-----------|-----------|-----------|-----------|

---

Laboratory tests at the time of obtaining Table 2-6 consent, according to the presence or absence of proton-pump inhibitors

Unique Subject Identifier=1494000000-0007

MEANS Procedure

Assay variable : PTINR\_VAL1 PT-INR Value

N Mean Standard Deviation Minimum Maximum

---

|   |          |           |          |          |
|---|----------|-----------|----------|----------|
| 4 | 1.550000 | 0.2585859 | 1.200000 | 1.790000 |
|---|----------|-----------|----------|----------|

---

Unique Subject Identifier=1494000000-0008

Assay variable : PTINR\_VAL1 PT-INR Value

N Mean Standard Deviation Minimum Maximum

---

|   |          |           |          |          |
|---|----------|-----------|----------|----------|
| 3 | 1.950000 | 0.1058301 | 1.830000 | 2.030000 |
|---|----------|-----------|----------|----------|

---

Unique Subject Identifier=1494000000-0017

Assay variable : PTINR\_VAL1 PT-INR Value

N Mean Standard Deviation Minimum Maximum

---

|   |          |           |          |          |
|---|----------|-----------|----------|----------|
| 4 | 1.682500 | 0.2443188 | 1.390000 | 1.930000 |
|---|----------|-----------|----------|----------|

---

Unique Subject Identifier=1494000000-0033

Assay variable : PTINR\_VAL1 PT-INR Value

N Mean Standard Deviation Minimum Maximum

---

|   |           |           |           |           |
|---|-----------|-----------|-----------|-----------|
| 2 | 1.8150000 | 0.1484924 | 1.7100000 | 1.9200000 |
|---|-----------|-----------|-----------|-----------|

---

Laboratory tests at the time of obtaining Table 2-6 consent, according to the presence or absence of proton-pump inhibitors

Unique Subject Identifier=1495011010-0003

MEANS Procedure

Assay variable : PTINR\_VAL1 PT-INR Value

N Mean Standard Deviation Minimum Maximum

---

|   |          |           |          |          |
|---|----------|-----------|----------|----------|
| 3 | 2.360000 | 0.2193171 | 2.170000 | 2.600000 |
|---|----------|-----------|----------|----------|

---

Unique Subject Identifier=1499000000-0001

Assay variable : PTINR\_VAL1 PT-INR Value

N Mean Standard Deviation Minimum Maximum

---

|   |          |           |          |          |
|---|----------|-----------|----------|----------|
| 2 | 2.085000 | 0.1343503 | 1.990000 | 2.180000 |
|---|----------|-----------|----------|----------|

---

Unique Subject Identifier=1501000000-0009

Assay variable : PTINR\_VAL1 PT-INR Value

N Mean Standard Deviation Minimum Maximum

---

|   |          |           |          |          |
|---|----------|-----------|----------|----------|
| 5 | 1.592000 | 0.0729383 | 1.500000 | 1.700000 |
|---|----------|-----------|----------|----------|

---

Unique Subject Identifier=1501000000-0010

Assay variable : PTINR\_VAL1 PT-INR Value

N Mean Standard Deviation Minimum Maximum

---

|   |           |           |           |           |
|---|-----------|-----------|-----------|-----------|
| 4 | 1.9700000 | 0.5339788 | 1.5100000 | 2.6700000 |
|---|-----------|-----------|-----------|-----------|

---

Laboratory tests at the time of obtaining Table 2-6 consent, according to the presence or absence of proton-pump inhibitors

Unique Subject Identifier=1501000000-0035

MEANS Procedure

Assay variable : PTINR\_VAL1 PT-INR Value

N Mean Standard Deviation Minimum Maximum

---

|   |           |           |           |           |
|---|-----------|-----------|-----------|-----------|
| 2 | 1.6400000 | 0.2262742 | 1.4800000 | 1.8000000 |
|---|-----------|-----------|-----------|-----------|

---

Unique Subject Identifier=1502000000-0001

Assay variable : PTINR\_VAL1 PT-INR Value

N Mean Standard Deviation Minimum Maximum

---

|   |           |           |           |           |
|---|-----------|-----------|-----------|-----------|
| 4 | 1.6900000 | 0.2336664 | 1.4600000 | 1.9700000 |
|---|-----------|-----------|-----------|-----------|

---

Unique Subject Identifier=1502000000-0003

Assay variable : PTINR\_VAL1 PT-INR Value

N Mean Standard Deviation Minimum Maximum

---

|   |           |  |           |           |
|---|-----------|--|-----------|-----------|
| 1 | 1.5600000 |  | 1.5600000 | 1.5600000 |
|---|-----------|--|-----------|-----------|

---

Unique Subject Identifier=1502000000-0004

Assay variable : PTINR\_VAL1 PT-INR Value

N Mean Standard Deviation Minimum Maximum

---

|   |          |          |          |          |
|---|----------|----------|----------|----------|
| 4 | 2.160000 | 0.473075 | 1.800000 | 2.850000 |
|---|----------|----------|----------|----------|

---

Laboratory tests at the time of obtaining Table 2-6 consent, according to the presence or absence of proton-pump inhibitors

Unique Subject Identifier=1502000000-0008

MEANS Procedure

Assay variable : PTINR\_VAL1 PT-INR Value

N Mean Standard Deviation Minimum Maximum

---

|   |           |           |           |           |
|---|-----------|-----------|-----------|-----------|
| 2 | 1.9900000 | 0.0141421 | 1.9800000 | 2.0000000 |
|---|-----------|-----------|-----------|-----------|

---

Unique Subject Identifier=1502000000-0010

Assay variable : PTINR\_VAL1 PT-INR Value

N Mean Standard Deviation Minimum Maximum

---

|   |           |  |           |           |
|---|-----------|--|-----------|-----------|
| 1 | 1.3700000 |  | 1.3700000 | 1.3700000 |
|---|-----------|--|-----------|-----------|

---

Unique Subject Identifier=1503000000-0010

Assay variable : PTINR\_VAL1 PT-INR Value

N Mean Standard Deviation Minimum Maximum

---

|   |           |           |           |           |
|---|-----------|-----------|-----------|-----------|
| 2 | 1.4200000 | 0.1838478 | 1.2900000 | 1.5500000 |
|---|-----------|-----------|-----------|-----------|

---

Unique Subject Identifier=1504000000-0009



Assay variable : PTINR\_VAL1 PT-INR Value

N Mean Standard Deviation Minimum Maximum

---

|   |          |  |          |          |
|---|----------|--|----------|----------|
| 1 | 2.380000 |  | 2.380000 | 2.380000 |
|---|----------|--|----------|----------|

---

Laboratory tests at the time of obtaining Table 2-6 consent, according to the presence or absence of proton-pump inhibitors

Unique Subject Identifier=1513000000-0011

MEANS Procedure

Assay variable : PTINR\_VAL1 PT-INR Value

| N | Mean      | Standard Deviation | Minimum   | Maximum   |
|---|-----------|--------------------|-----------|-----------|
| 3 | 1.5200000 | 0.2306513          | 1.2600000 | 1.7000000 |

Unique Subject Identifier=1516011000-0013

Assay variable : PTINR\_VAL1 PT-INR Value

| N | Mean      | Standard Deviation | Minimum   | Maximum   |
|---|-----------|--------------------|-----------|-----------|
| 6 | 2.0500000 | 0.1516575          | 1.9000000 | 2.3000000 |

Unique Subject Identifier=1516011000-0020

Assay variable : PTINR\_VAL1 PT-INR Value

| N | Mean      | Standard Deviation | Minimum   | Maximum   |
|---|-----------|--------------------|-----------|-----------|
| 5 | 2.1400000 | 0.5549775          | 1.3000000 | 2.7000000 |

Unique Subject Identifier=1516011000-0041

Assay variable : PTINR\_VAL1 PT-INR Value

N Mean Standard Deviation Minimum Maximum

---

|   |          |           |          |          |
|---|----------|-----------|----------|----------|
| 6 | 2.123333 | 0.4757590 | 1.450000 | 2.560000 |
|---|----------|-----------|----------|----------|

---

Laboratory tests at the time of obtaining Table 2-6 consent, according to the presence or absence of proton-pump inhibitors

Unique Subject Identifier=1516011000-0051

MEANS Procedure

Assay variable : PTINR\_VAL1 PT-INR Value

| N | Mean      | Standard Deviation | Minimum   | Maximum   |
|---|-----------|--------------------|-----------|-----------|
| 2 | 2.0000000 | 0.9899495          | 1.3000000 | 2.7000000 |

Unique Subject Identifier=1516011000-0079

Assay variable : PTINR\_VAL1 PT-INR Value

| N | Mean      | Standard Deviation | Minimum   | Maximum   |
|---|-----------|--------------------|-----------|-----------|
| 6 | 1.8500000 | 0.4086563          | 1.5000000 | 2.6000000 |

Unique Subject Identifier=1517010100-0005

Assay variable : PTINR\_VAL1 PT-INR Value

| N | Mean      | Standard Deviation | Minimum   | Maximum   |
|---|-----------|--------------------|-----------|-----------|
| 3 | 1.8766667 | 0.2650157          | 1.6100000 | 2.1400000 |

Unique Subject Identifier=1517010100-0008

Assay variable : PTINR\_VAL1 PT-INR Value

N Mean Standard Deviation Minimum Maximum

---

|   |           |           |           |           |
|---|-----------|-----------|-----------|-----------|
| 4 | 1.2925000 | 0.0330404 | 1.2600000 | 1.3300000 |
|---|-----------|-----------|-----------|-----------|

---

Laboratory tests at the time of obtaining Table 2-6 consent, according to the presence or absence of proton-pump inhibitors

Unique Subject Identifier=1522000000-0009

MEANS Procedure

Assay variable : PTINR\_VAL1 PT-INR Value

| N | Mean      | Standard Deviation | Minimum   | Maximum   |
|---|-----------|--------------------|-----------|-----------|
| 6 | 2.0883333 | 0.5870747          | 1.5500000 | 3.1100000 |

Unique Subject Identifier=1522000000-0022

Assay variable : PTINR\_VAL1 PT-INR Value

| N | Mean      | Standard Deviation | Minimum   | Maximum   |
|---|-----------|--------------------|-----------|-----------|
| 4 | 2.5100000 | 0.3154890          | 2.1600000 | 2.8900000 |

Unique Subject Identifier=1522000000-0023

Assay variable : PTINR\_VAL1 PT-INR Value

| N | Mean      | Standard Deviation | Minimum   | Maximum   |
|---|-----------|--------------------|-----------|-----------|
| 5 | 2.0600000 | 0.1140175          | 1.8900000 | 2.2100000 |

Unique Subject Identifier=1522000000-0033

Assay variable : PTINR\_VAL1 PT-INR Value

N Mean Standard Deviation Minimum Maximum

---

|   |           |           |           |           |
|---|-----------|-----------|-----------|-----------|
| 3 | 1.2466667 | 0.3384277 | 0.9600000 | 1.6200000 |
|---|-----------|-----------|-----------|-----------|

---

Laboratory tests at the time of obtaining Table 2-6 consent, according to the presence or absence of proton-pump inhibitors

Unique Subject Identifier=1523010111-0011

MEANS Procedure

Assay variable : PTINR\_VAL1 PT-INR Value

N Mean Standard Deviation Minimum Maximum

---

|   |           |           |           |           |
|---|-----------|-----------|-----------|-----------|
| 6 | 1.8616667 | 0.3711828 | 1.5900000 | 2.5800000 |
|---|-----------|-----------|-----------|-----------|

---

Unique Subject Identifier=1524010000-0003

Assay variable : PTINR\_VAL1 PT-INR Value

N Mean Standard Deviation Minimum Maximum

---

|   |           |  |           |           |
|---|-----------|--|-----------|-----------|
| 1 | 2.3200000 |  | 2.3200000 | 2.3200000 |
|---|-----------|--|-----------|-----------|

---

Unique Subject Identifier=1524010000-0006

Assay variable : PTINR\_VAL1 PT-INR Value

N Mean Standard Deviation Minimum Maximum

---

|   |           |  |           |           |
|---|-----------|--|-----------|-----------|
| 1 | 2.4200000 |  | 2.4200000 | 2.4200000 |
|---|-----------|--|-----------|-----------|

---

Unique Subject Identifier=1524010000-0007



Assay variable : PTINR\_VAL1 PT-INR Value

N Mean Standard Deviation Minimum Maximum

---

|   |           |           |           |           |
|---|-----------|-----------|-----------|-----------|
| 3 | 2.2233333 | 0.1154701 | 2.0900000 | 2.2900000 |
|---|-----------|-----------|-----------|-----------|

---

Laboratory tests at the time of obtaining Table 2-6 consent, according to the presence or absence of proton-pump inhibitors

Unique Subject Identifier=1524010000-0008

MEANS Procedure

Assay variable : PTINR\_VAL1 PT-INR Value

N Mean Standard Deviation Minimum Maximum

---

|   |           |           |           |           |
|---|-----------|-----------|-----------|-----------|
| 4 | 1.8575000 | 0.3262284 | 1.5700000 | 2.3000000 |
|---|-----------|-----------|-----------|-----------|

---

Unique Subject Identifier=1524010000-0009

Assay variable : PTINR\_VAL1 PT-INR Value

N Mean Standard Deviation Minimum Maximum

---

|   |           |           |           |           |
|---|-----------|-----------|-----------|-----------|
| 4 | 1.8200000 | 0.4307358 | 1.2300000 | 2.2000000 |
|---|-----------|-----------|-----------|-----------|

---

Unique Subject Identifier=1527010000-0005

Assay variable : PTINR\_VAL1 PT-INR Value

N Mean Standard Deviation Minimum Maximum

---

|   |           |           |           |           |
|---|-----------|-----------|-----------|-----------|
| 5 | 2.4140000 | 0.5662861 | 2.0300000 | 3.3900000 |
|---|-----------|-----------|-----------|-----------|

---

Unique Subject Identifier=1528000000-0001

Assay variable : PTINR\_VAL1 PT-INR Value

N Mean Standard Deviation Minimum Maximum

---

|   |           |           |           |           |
|---|-----------|-----------|-----------|-----------|
| 6 | 1.7533333 | 0.1539697 | 1.5100000 | 1.9700000 |
|---|-----------|-----------|-----------|-----------|

---

Laboratory tests at the time of obtaining Table 2-6 consent, according to the presence or absence of proton-pump inhibitors

Unique Subject Identifier=1528000000-0004

MEANS Procedure

Assay variable : PTINR\_VAL1 PT-INR Value

N Mean Standard Deviation Minimum Maximum

---

|   |           |           |           |           |
|---|-----------|-----------|-----------|-----------|
| 4 | 1.8200000 | 0.2580698 | 1.4900000 | 2.1000000 |
|---|-----------|-----------|-----------|-----------|

---

Unique Subject Identifier=1530000000-0002

Assay variable : PTINR\_VAL1 PT-INR Value

N Mean Standard Deviation Minimum Maximum

---

|   |           |           |           |           |
|---|-----------|-----------|-----------|-----------|
| 5 | 1.5800000 | 0.1923538 | 1.4000000 | 1.9000000 |
|---|-----------|-----------|-----------|-----------|

---

Unique Subject Identifier=1600011000-0016

Assay variable : PTINR\_VAL1 PT-INR Value

N Mean Standard Deviation Minimum Maximum

---

|   |           |           |           |           |
|---|-----------|-----------|-----------|-----------|
| 3 | 1.3533333 | 0.0680686 | 1.3000000 | 1.4300000 |
|---|-----------|-----------|-----------|-----------|

---

Unique Subject Identifier=1600011000-0018

Assay variable : PTINR\_VAL1 PT-INR Value

N Mean Standard Deviation Minimum Maximum

---

|   |          |           |          |          |
|---|----------|-----------|----------|----------|
| 6 | 2.033333 | 0.5442671 | 1.390000 | 2.720000 |
|---|----------|-----------|----------|----------|

---

Laboratory tests at the time of obtaining Table 2-6 consent, according to the presence or absence of proton-pump inhibitors

Unique Subject Identifier=1600011000-0023

MEANS Procedure

Assay variable : PTINR\_VAL1 PT-INR Value

N Mean Standard Deviation Minimum Maximum

---

|   |           |           |           |           |
|---|-----------|-----------|-----------|-----------|
| 3 | 2.0266667 | 0.2706166 | 1.8100000 | 2.3300000 |
|---|-----------|-----------|-----------|-----------|

---

Unique Subject Identifier=1600011000-0024

Assay variable : PTINR\_VAL1 PT-INR Value

N Mean Standard Deviation Minimum Maximum

---

|   |           |  |           |           |
|---|-----------|--|-----------|-----------|
| 1 | 1.8300000 |  | 1.8300000 | 1.8300000 |
|---|-----------|--|-----------|-----------|

---

Unique Subject Identifier=1600011000-0027

Assay variable : PTINR\_VAL1 PT-INR Value

N Mean Standard Deviation Minimum Maximum

---

|   |           |           |           |           |
|---|-----------|-----------|-----------|-----------|
| 6 | 1.7750000 | 0.3326710 | 1.3100000 | 2.1700000 |
|---|-----------|-----------|-----------|-----------|

---

Unique Subject Identifier=1603000000-0015

Assay variable : PTINR\_VAL1 PT-INR Value

N Mean Standard Deviation Minimum Maximum

---

|   |          |           |          |          |
|---|----------|-----------|----------|----------|
| 5 | 1.760000 | 0.4669047 | 1.300000 | 2.400000 |
|---|----------|-----------|----------|----------|

---

Laboratory tests at the time of obtaining Table 2-6 consent, according to the presence or absence of proton-pump inhibitors

Unique Subject Identifier=1701010000-0011

MEANS Procedure

Assay variable : PTINR\_VAL1 PT-INR Value

N Mean Standard Deviation Minimum Maximum

---

|   |           |           |           |           |
|---|-----------|-----------|-----------|-----------|
| 4 | 1.4125000 | 0.2327194 | 1.1000000 | 1.5900000 |
|---|-----------|-----------|-----------|-----------|

---

Unique Subject Identifier=1702010000-0009

Assay variable : PTINR\_VAL1 PT-INR Value

N Mean Standard Deviation Minimum Maximum

---

|   |           |           |           |           |
|---|-----------|-----------|-----------|-----------|
| 2 | 2.1850000 | 0.1343503 | 2.0900000 | 2.2800000 |
|---|-----------|-----------|-----------|-----------|

---

Unique Subject Identifier=1705010000-0002

Assay variable : PTINR\_VAL1 PT-INR Value

N Mean Standard Deviation Minimum Maximum

---

|   |           |           |           |           |
|---|-----------|-----------|-----------|-----------|
| 6 | 1.8116667 | 0.1802683 | 1.5000000 | 1.9700000 |
|---|-----------|-----------|-----------|-----------|

---

Unique Subject Identifier=1710000000-0001



Assay variable : PTINR\_VAL1 PT-INR Value

N Mean Standard Deviation Minimum Maximum

---

|   |           |           |           |           |
|---|-----------|-----------|-----------|-----------|
| 6 | 2.2450000 | 0.2115420 | 1.9800000 | 2.4700000 |
|---|-----------|-----------|-----------|-----------|

---

Laboratory tests at the time of obtaining Table 2-6 consent, according to the presence or absence of proton-pump inhibitors

Unique Subject Identifier=171000000-0009

MEANS Procedure

Assay variable : PTINR\_VAL1 PT-INR Value

| N | Mean      | Standard Deviation | Minimum   | Maximum   |
|---|-----------|--------------------|-----------|-----------|
| 5 | 1.9600000 | 0.4259108          | 1.5300000 | 2.5900000 |

Unique Subject Identifier=1716010000-0006

Assay variable : PTINR\_VAL1 PT-INR Value

| N | Mean      | Standard Deviation | Minimum   | Maximum   |
|---|-----------|--------------------|-----------|-----------|
| 2 | 2.0500000 | 0.4808326          | 1.7100000 | 2.3900000 |

Unique Subject Identifier=1718000000-0008

Assay variable : PTINR\_VAL1 PT-INR Value

| N | Mean      | Standard Deviation | Minimum   | Maximum   |
|---|-----------|--------------------|-----------|-----------|
| 6 | 1.7333333 | 0.3559026          | 1.2000000 | 2.1000000 |

Unique Subject Identifier=1750100000-0005

Assay variable : PTINR\_VAL1 PT-INR Value

N Mean Standard Deviation Minimum Maximum

---

|   |          |           |          |          |
|---|----------|-----------|----------|----------|
| 3 | 1.803333 | 0.1550269 | 1.650000 | 1.960000 |
|---|----------|-----------|----------|----------|

---

Laboratory tests at the time of obtaining Table 2-6 consent, according to the presence or absence of proton-pump inhibitors

Unique Subject Identifier=1750100000-0006

MEANS Procedure

Assay variable : PTINR\_VAL1 PT-INR Value

N Mean Standard Deviation Minimum Maximum

---

|   |           |           |           |           |
|---|-----------|-----------|-----------|-----------|
| 6 | 1.7966667 | 0.1076414 | 1.6300000 | 1.9000000 |
|---|-----------|-----------|-----------|-----------|

---

Unique Subject Identifier=1750100000-0018

Assay variable : PTINR\_VAL1 PT-INR Value

N Mean Standard Deviation Minimum Maximum

---

|   |           |           |           |           |
|---|-----------|-----------|-----------|-----------|
| 3 | 2.0766667 | 0.2402776 | 1.8300000 | 2.3100000 |
|---|-----------|-----------|-----------|-----------|

---

Unique Subject Identifier=1750100000-0040

Assay variable : PTINR\_VAL1 PT-INR Value

N Mean Standard Deviation Minimum Maximum

---

|   |           |           |           |           |
|---|-----------|-----------|-----------|-----------|
| 6 | 1.8750000 | 0.1408190 | 1.6800000 | 2.0400000 |
|---|-----------|-----------|-----------|-----------|

---

Unique Subject Identifier=1750100000-0043

Assay variable : PTINR\_VAL1 PT-INR Value

N Mean Standard Deviation Minimum Maximum

---

|   |          |           |          |          |
|---|----------|-----------|----------|----------|
| 5 | 1.810000 | 0.2511971 | 1.640000 | 2.250000 |
|---|----------|-----------|----------|----------|

---

Laboratory tests at the time of obtaining Table 2-6 consent, according to the presence or absence of proton-pump inhibitors

Unique Subject Identifier=1750100000-0047

MEANS Procedure

Assay variable : PTINR\_VAL1 PT-INR Value

N Mean Standard Deviation Minimum Maximum

---

|   |           |           |           |           |
|---|-----------|-----------|-----------|-----------|
| 4 | 1.8800000 | 0.7425631 | 1.4300000 | 2.9900000 |
|---|-----------|-----------|-----------|-----------|

---

Unique Subject Identifier=1810000000-0014

Assay variable : PTINR\_VAL1 PT-INR Value

N Mean Standard Deviation Minimum Maximum

---

|   |           |           |           |           |
|---|-----------|-----------|-----------|-----------|
| 6 | 1.9666667 | 0.2732520 | 1.5900000 | 2.2300000 |
|---|-----------|-----------|-----------|-----------|

---

Unique Subject Identifier=1811000000-0006

Assay variable : PTINR\_VAL1 PT-INR Value

N Mean Standard Deviation Minimum Maximum

---

|   |           |           |           |           |
|---|-----------|-----------|-----------|-----------|
| 6 | 2.0950000 | 0.7683684 | 1.2700000 | 3.2500000 |
|---|-----------|-----------|-----------|-----------|

---

Unique Subject Identifier=1811000000-0015

Assay variable : PTINR\_VAL1 PT-INR Value

N Mean Standard Deviation Minimum Maximum

---

|   |          |           |          |          |
|---|----------|-----------|----------|----------|
| 4 | 2.500000 | 0.3900427 | 2.130000 | 3.050000 |
|---|----------|-----------|----------|----------|

---

Laboratory tests at the time of obtaining Table 2-6 consent, according to the presence or absence of proton-pump inhibitors

Unique Subject Identifier=1811000000-0021

MEANS Procedure

Assay variable : PTINR\_VAL1 PT-INR Value

N Mean Standard Deviation Minimum Maximum

---

|   |           |           |           |           |
|---|-----------|-----------|-----------|-----------|
| 5 | 2.3140000 | 0.4056230 | 1.8800000 | 2.9500000 |
|---|-----------|-----------|-----------|-----------|

---

Unique Subject Identifier=1811000000-0028

Assay variable : PTINR\_VAL1 PT-INR Value

N Mean Standard Deviation Minimum Maximum

---

|   |           |           |           |           |
|---|-----------|-----------|-----------|-----------|
| 3 | 2.5866667 | 0.4980295 | 2.0300000 | 2.9900000 |
|---|-----------|-----------|-----------|-----------|

---

Unique Subject Identifier=1812000000-0018

Assay variable : PTINR\_VAL1 PT-INR Value

N Mean Standard Deviation Minimum Maximum

---

|   |           |           |           |           |
|---|-----------|-----------|-----------|-----------|
| 6 | 1.5166667 | 0.0983192 | 1.4000000 | 1.6000000 |
|---|-----------|-----------|-----------|-----------|

---

Unique Subject Identifier=1813100000-0009



Assay variable : PTINR\_VAL1 PT-INR Value

N Mean Standard Deviation Minimum Maximum

---

|   |           |           |           |           |
|---|-----------|-----------|-----------|-----------|
| 6 | 2.0850000 | 0.3976305 | 1.7300000 | 2.6200000 |
|---|-----------|-----------|-----------|-----------|

---

Laboratory tests at the time of obtaining Table 2-6 consent, according to the presence or absence of proton-pump inhibitors

Unique Subject Identifier=1813100000-0015

MEANS Procedure

Assay variable : PTINR\_VAL1 PT-INR Value

N Mean Standard Deviation Minimum Maximum

---

|   |           |           |           |           |
|---|-----------|-----------|-----------|-----------|
| 4 | 1.9550000 | 0.1250333 | 1.8100000 | 2.1100000 |
|---|-----------|-----------|-----------|-----------|

---

Unique Subject Identifier=1813100000-0024

Assay variable : PTINR\_VAL1 PT-INR Value

N Mean Standard Deviation Minimum Maximum

---

|   |           |           |           |           |
|---|-----------|-----------|-----------|-----------|
| 3 | 2.1166667 | 0.1201388 | 2.0000000 | 2.2400000 |
|---|-----------|-----------|-----------|-----------|

---

Unique Subject Identifier=1813100000-0025

Assay variable : PTINR\_VAL1 PT-INR Value

N Mean Standard Deviation Minimum Maximum

---

|   |           |  |           |           |
|---|-----------|--|-----------|-----------|
| 1 | 1.6400000 |  | 1.6400000 | 1.6400000 |
|---|-----------|--|-----------|-----------|

---

Unique Subject Identifier=1813100000-0046

Assay variable : PTINR\_VAL1 PT-INR Value

N Mean Standard Deviation Minimum Maximum

---

|   |          |           |          |          |
|---|----------|-----------|----------|----------|
| 2 | 2.190000 | 0.1697056 | 2.070000 | 2.310000 |
|---|----------|-----------|----------|----------|

---

Laboratory tests at the time of obtaining Table 2-6 consent, according to the presence or absence of proton-pump inhibitors

Unique Subject Identifier=1813100000-0048

MEANS Procedure

Assay variable : PTINR\_VAL1 PT-INR Value

N Mean Standard Deviation Minimum Maximum

---

|   |           |           |           |           |
|---|-----------|-----------|-----------|-----------|
| 4 | 1.7750000 | 0.2340228 | 1.4300000 | 1.9300000 |
|---|-----------|-----------|-----------|-----------|

---

Unique Subject Identifier=1814100000-0017

Assay variable : PTINR\_VAL1 PT-INR Value

N Mean Standard Deviation Minimum Maximum

---

|   |           |           |           |           |
|---|-----------|-----------|-----------|-----------|
| 6 | 2.0050000 | 0.6320680 | 1.2700000 | 2.9600000 |
|---|-----------|-----------|-----------|-----------|

---

Unique Subject Identifier=1814100000-0022

Assay variable : PTINR\_VAL1 PT-INR Value

N Mean Standard Deviation Minimum Maximum

---

|   |           |           |           |           |
|---|-----------|-----------|-----------|-----------|
| 6 | 1.8650000 | 0.2738430 | 1.4500000 | 2.1600000 |
|---|-----------|-----------|-----------|-----------|

---

Unique Subject Identifier=1814100000-0026

Assay variable : PTINR\_VAL1 PT-INR Value

N Mean Standard Deviation Minimum Maximum

---

|   |           |           |           |           |
|---|-----------|-----------|-----------|-----------|
| 6 | 2.6150000 | 0.3059902 | 2.2300000 | 2.9600000 |
|---|-----------|-----------|-----------|-----------|

---

Laboratory tests at the time of obtaining Table 2-6 consent, according to the presence or absence of proton-pump inhibitors

Unique Subject Identifier=1814100000-0050

MEANS Procedure

Assay variable : PTINR\_VAL1 PT-INR Value

N Mean Standard Deviation Minimum Maximum

---

|   |           |           |           |           |
|---|-----------|-----------|-----------|-----------|
| 4 | 1.7250000 | 0.9980815 | 1.1600000 | 3.2200000 |
|---|-----------|-----------|-----------|-----------|

---

Unique Subject Identifier=1814100000-0053

Assay variable : PTINR\_VAL1 PT-INR Value

N Mean Standard Deviation Minimum Maximum

---

|   |           |           |           |           |
|---|-----------|-----------|-----------|-----------|
| 5 | 1.7200000 | 0.2049390 | 1.5000000 | 1.9000000 |
|---|-----------|-----------|-----------|-----------|

---

Unique Subject Identifier=1814100000-0055

Assay variable : PTINR\_VAL1 PT-INR Value

N Mean Standard Deviation Minimum Maximum

---

|   |           |           |           |           |
|---|-----------|-----------|-----------|-----------|
| 3 | 2.1200000 | 0.4233202 | 1.6400000 | 2.4400000 |
|---|-----------|-----------|-----------|-----------|

---

Unique Subject Identifier=1815100000-0004

Assay variable : PTINR\_VAL1 PT-INR Value

N Mean Standard Deviation Minimum Maximum

---

|   |           |  |           |           |
|---|-----------|--|-----------|-----------|
| 1 | 1.0500000 |  | 1.0500000 | 1.0500000 |
|---|-----------|--|-----------|-----------|

---

Laboratory tests at the time of obtaining Table 2-6 consent, according to the presence or absence of proton-pump inhibitors

Unique Subject Identifier=1973000000-0002

MEANS Procedure

Assay variable : PTINR\_VAL1 PT-INR Value

N Mean Standard Deviation Minimum Maximum

---

|   |           |           |           |           |
|---|-----------|-----------|-----------|-----------|
| 5 | 1.8800000 | 0.1923538 | 1.6000000 | 2.1000000 |
|---|-----------|-----------|-----------|-----------|

---

Unique Subject Identifier=1973000000-0004

Assay variable : PTINR\_VAL1 PT-INR Value

N Mean Standard Deviation Minimum Maximum

---

|   |           |           |           |           |
|---|-----------|-----------|-----------|-----------|
| 6 | 2.3000000 | 0.8602325 | 1.7000000 | 4.0000000 |
|---|-----------|-----------|-----------|-----------|

---

Unique Subject Identifier=1973000000-0016

Assay variable : PTINR\_VAL1 PT-INR Value

N Mean Standard Deviation Minimum Maximum

---

|   |           |           |           |           |
|---|-----------|-----------|-----------|-----------|
| 6 | 1.7166667 | 0.2926887 | 1.5000000 | 2.3000000 |
|---|-----------|-----------|-----------|-----------|

---

Unique Subject Identifier=1973000000-0017



Assay variable : PTINR\_VAL1 PT-INR Value

N Mean Standard Deviation Minimum Maximum

---

|   |          |           |          |          |
|---|----------|-----------|----------|----------|
| 5 | 1.600000 | 0.5787918 | 1.200000 | 2.600000 |
|---|----------|-----------|----------|----------|

---

Laboratory tests at the time of obtaining Table 2-6 consent, according to the presence or absence of proton-pump inhibitors

Unique Subject Identifier=2008010000-0031

MEANS Procedure

Assay variable : PTINR\_VAL1 PT-INR Value

N Mean Standard Deviation Minimum Maximum

---

|   |           |           |           |           |
|---|-----------|-----------|-----------|-----------|
| 6 | 1.8166667 | 0.3656045 | 1.4000000 | 2.3000000 |
|---|-----------|-----------|-----------|-----------|

---

Unique Subject Identifier=2008010000-0038

Assay variable : PTINR\_VAL1 PT-INR Value

N Mean Standard Deviation Minimum Maximum

---

|   |           |           |           |           |
|---|-----------|-----------|-----------|-----------|
| 6 | 1.9500000 | 0.1643168 | 1.8000000 | 2.2000000 |
|---|-----------|-----------|-----------|-----------|

---

Unique Subject Identifier=2008010000-0041

Assay variable : PTINR\_VAL1 PT-INR Value

N Mean Standard Deviation Minimum Maximum

---

|   |           |           |           |           |
|---|-----------|-----------|-----------|-----------|
| 6 | 1.8166667 | 0.5913262 | 1.5000000 | 3.0000000 |
|---|-----------|-----------|-----------|-----------|

---

Unique Subject Identifier=2016011111-0018

Assay variable : PTINR\_VAL1 PT-INR Value

N Mean Standard Deviation Minimum Maximum

---

|   |           |           |           |           |
|---|-----------|-----------|-----------|-----------|
| 4 | 1.7375000 | 0.3456757 | 1.5200000 | 2.2500000 |
|---|-----------|-----------|-----------|-----------|

---

Laboratory tests at the time of obtaining Table 2-6 consent, according to the presence or absence of proton-pump inhibitors

Unique Subject Identifier=2016011111-0023

MEANS Procedure

Assay variable : PTINR\_VAL1 PT-INR Value

N Mean Standard Deviation Minimum Maximum

---

|   |          |           |          |          |
|---|----------|-----------|----------|----------|
| 6 | 2.300000 | 0.6515213 | 1.630000 | 3.160000 |
|---|----------|-----------|----------|----------|

---

Unique Subject Identifier=2017011100-0006

Assay variable : PTINR\_VAL1 PT-INR Value

N Mean Standard Deviation Minimum Maximum

---

|   |          |           |          |          |
|---|----------|-----------|----------|----------|
| 5 | 1.976000 | 0.1540454 | 1.840000 | 2.210000 |
|---|----------|-----------|----------|----------|

---

Unique Subject Identifier=2017011100-0012

Assay variable : PTINR\_VAL1 PT-INR Value

N Mean Standard Deviation Minimum Maximum

---

|   |          |           |          |          |
|---|----------|-----------|----------|----------|
| 6 | 2.015000 | 0.3148174 | 1.630000 | 2.430000 |
|---|----------|-----------|----------|----------|

---

Unique Subject Identifier=2017011100-0025

Assay variable : PTINR\_VAL1 PT-INR Value

N Mean Standard Deviation Minimum Maximum

---

|   |           |           |           |           |
|---|-----------|-----------|-----------|-----------|
| 4 | 1.7850000 | 0.1317826 | 1.6400000 | 1.9600000 |
|---|-----------|-----------|-----------|-----------|

---

Laboratory tests at the time of obtaining Table 2-6 consent, according to the presence or absence of proton-pump inhibitors

Unique Subject Identifier=2017011100-0035

MEANS Procedure

Assay variable : PTINR\_VAL1 PT-INR Value

N Mean Standard Deviation Minimum Maximum

---

|   |           |  |           |           |
|---|-----------|--|-----------|-----------|
| 1 | 2.2700000 |  | 2.2700000 | 2.2700000 |
|---|-----------|--|-----------|-----------|

---

Unique Subject Identifier=2017011100-0059

Assay variable : PTINR\_VAL1 PT-INR Value

N Mean Standard Deviation Minimum Maximum

---

|   |           |           |           |           |
|---|-----------|-----------|-----------|-----------|
| 5 | 2.0640000 | 0.5264314 | 1.4000000 | 2.8500000 |
|---|-----------|-----------|-----------|-----------|

---

Unique Subject Identifier=2017011100-0088

Assay variable : PTINR\_VAL1 PT-INR Value

N Mean Standard Deviation Minimum Maximum

---

|   |           |           |           |           |
|---|-----------|-----------|-----------|-----------|
| 6 | 2.1233333 | 0.2399722 | 1.8400000 | 2.5100000 |
|---|-----------|-----------|-----------|-----------|

---

Unique Subject Identifier=2017011100-0093

Assay variable : PTINR\_VAL1 PT-INR Value

N Mean Standard Deviation Minimum Maximum

---

|   |           |           |           |           |
|---|-----------|-----------|-----------|-----------|
| 6 | 1.8216667 | 0.1090718 | 1.6400000 | 1.9600000 |
|---|-----------|-----------|-----------|-----------|

---

Laboratory tests at the time of obtaining Table 2-6 consent, according to the presence or absence of proton-pump inhibitors

Unique Subject Identifier=2017011100-0113

MEANS Procedure

Assay variable : PTINR\_VAL1 PT-INR Value

N Mean Standard Deviation Minimum Maximum

---

|   |           |           |           |           |
|---|-----------|-----------|-----------|-----------|
| 4 | 1.3725000 | 0.1711481 | 1.2000000 | 1.5900000 |
|---|-----------|-----------|-----------|-----------|

---

Unique Subject Identifier=2017011100-0116

Assay variable : PTINR\_VAL1 PT-INR Value

N Mean Standard Deviation Minimum Maximum

---

|   |           |           |           |           |
|---|-----------|-----------|-----------|-----------|
| 6 | 1.9816667 | 0.2195829 | 1.7300000 | 2.3700000 |
|---|-----------|-----------|-----------|-----------|

---

Unique Subject Identifier=2018000000-0005

Assay variable : PTINR\_VAL1 PT-INR Value

N Mean Standard Deviation Minimum Maximum

---

|   |           |           |           |           |
|---|-----------|-----------|-----------|-----------|
| 5 | 1.8820000 | 0.1771158 | 1.6800000 | 2.0500000 |
|---|-----------|-----------|-----------|-----------|

---

Unique Subject Identifier=2018000000-0006



Assay variable : PTINR\_VAL1 PT-INR Value

N Mean Standard Deviation Minimum Maximum

---

|   |           |           |           |           |
|---|-----------|-----------|-----------|-----------|
| 2 | 2.5900000 | 0.2828427 | 2.3900000 | 2.7900000 |
|---|-----------|-----------|-----------|-----------|

---

Laboratory tests at the time of obtaining Table 2-6 consent, according to the presence or absence of proton-pump inhibitors

Unique Subject Identifier=2018000000-0010

MEANS Procedure

Assay variable : PTINR\_VAL1 PT-INR Value

N Mean Standard Deviation Minimum Maximum

---

|   |           |           |           |           |
|---|-----------|-----------|-----------|-----------|
| 5 | 1.8100000 | 0.3000000 | 1.3900000 | 2.1500000 |
|---|-----------|-----------|-----------|-----------|

---

Unique Subject Identifier=2026011111-0004

Assay variable : PTINR\_VAL1 PT-INR Value

N Mean Standard Deviation Minimum Maximum

---

|   |           |           |           |           |
|---|-----------|-----------|-----------|-----------|
| 6 | 1.6000000 | 0.2000000 | 1.3000000 | 1.8000000 |
|---|-----------|-----------|-----------|-----------|

---

Unique Subject Identifier=2026011111-0006

Assay variable : PTINR\_VAL1 PT-INR Value

N Mean Standard Deviation Minimum Maximum

---

|   |           |           |           |           |
|---|-----------|-----------|-----------|-----------|
| 6 | 1.9500000 | 0.1870829 | 1.7000000 | 2.2000000 |
|---|-----------|-----------|-----------|-----------|

---

Unique Subject Identifier=2027010010-0004

Assay variable : PTINR\_VAL1 PT-INR Value

N Mean Standard Deviation Minimum Maximum

---

|   |           |           |           |           |
|---|-----------|-----------|-----------|-----------|
| 6 | 2.0166667 | 0.1966384 | 1.6600000 | 2.1700000 |
|---|-----------|-----------|-----------|-----------|

---

Laboratory tests at the time of obtaining Table 2-6 consent, according to the presence or absence of proton-pump inhibitors

Unique Subject Identifier=2027010010-0007

MEANS Procedure

Assay variable : PTINR\_VAL1 PT-INR Value

N Mean Standard Deviation Minimum Maximum

---

|   |           |           |           |           |
|---|-----------|-----------|-----------|-----------|
| 3 | 1.6766667 | 0.0665833 | 1.6000000 | 1.7200000 |
|---|-----------|-----------|-----------|-----------|

---

Unique Subject Identifier=2047011111-0012

Assay variable : PTINR\_VAL1 PT-INR Value

N Mean Standard Deviation Minimum Maximum

---

|   |           |           |           |           |
|---|-----------|-----------|-----------|-----------|
| 2 | 2.4900000 | 0.2687006 | 2.3000000 | 2.6800000 |
|---|-----------|-----------|-----------|-----------|

---

Unique Subject Identifier=2048011011-0035

Assay variable : PTINR\_VAL1 PT-INR Value

N Mean Standard Deviation Minimum Maximum

---

|   |           |           |           |           |
|---|-----------|-----------|-----------|-----------|
| 3 | 1.9000000 | 0.1000000 | 1.8000000 | 2.0000000 |
|---|-----------|-----------|-----------|-----------|

---

Unique Subject Identifier=2048011011-0067

Assay variable : PTINR\_VAL1 PT-INR Value

N Mean Standard Deviation Minimum Maximum

---

|   |           |           |           |           |
|---|-----------|-----------|-----------|-----------|
| 4 | 2.2000000 | 0.1825742 | 2.0000000 | 2.4000000 |
|---|-----------|-----------|-----------|-----------|

---

Laboratory tests at the time of obtaining Table 2-6 consent, according to the presence or absence of proton-pump inhibitors

Unique Subject Identifier=2064011111-0008

MEANS Procedure

Assay variable : PTINR\_VAL1 PT-INR Value

N Mean Standard Deviation Minimum Maximum

---

|   |           |  |           |           |
|---|-----------|--|-----------|-----------|
| 1 | 1.9700000 |  | 1.9700000 | 1.9700000 |
|---|-----------|--|-----------|-----------|

---

Unique Subject Identifier=2064011111-0011

Assay variable : PTINR\_VAL1 PT-INR Value

N Mean Standard Deviation Minimum Maximum

---

|   |           |           |           |           |
|---|-----------|-----------|-----------|-----------|
| 3 | 2.6533333 | 0.8775154 | 1.7400000 | 3.4900000 |
|---|-----------|-----------|-----------|-----------|

---

Unique Subject Identifier=2069000000-0002

Assay variable : PTINR\_VAL1 PT-INR Value

N Mean Standard Deviation Minimum Maximum

---

|   |           |           |           |           |
|---|-----------|-----------|-----------|-----------|
| 4 | 2.2425000 | 0.2984823 | 1.8600000 | 2.5600000 |
|---|-----------|-----------|-----------|-----------|

---

Unique Subject Identifier=2077011111-0003

Assay variable : PTINR\_VAL1 PT-INR Value

N Mean Standard Deviation Minimum Maximum

---

|   |           |           |           |           |
|---|-----------|-----------|-----------|-----------|
| 5 | 2.2580000 | 0.3998375 | 1.8400000 | 2.8100000 |
|---|-----------|-----------|-----------|-----------|

---

Laboratory tests at the time of obtaining Table 2-6 consent, according to the presence or absence of proton-pump inhibitors

Unique Subject Identifier=2077011111-0004

MEANS Procedure

Assay variable : PTINR\_VAL1 PT-INR Value

N Mean Standard Deviation Minimum Maximum

---

|   |           |           |           |           |
|---|-----------|-----------|-----------|-----------|
| 6 | 1.9366667 | 0.6416749 | 1.3200000 | 2.6800000 |
|---|-----------|-----------|-----------|-----------|

---

Unique Subject Identifier=2077011111-0022

Assay variable : PTINR\_VAL1 PT-INR Value

N Mean Standard Deviation Minimum Maximum

---

|   |           |           |           |           |
|---|-----------|-----------|-----------|-----------|
| 5 | 1.9780000 | 0.1329286 | 1.8300000 | 2.1600000 |
|---|-----------|-----------|-----------|-----------|

---

Unique Subject Identifier=2107011000-0024

Assay variable : PTINR\_VAL1 PT-INR Value

N Mean Standard Deviation Minimum Maximum

---

|   |           |           |           |           |
|---|-----------|-----------|-----------|-----------|
| 6 | 2.1416667 | 0.4149418 | 1.5100000 | 2.6100000 |
|---|-----------|-----------|-----------|-----------|

---

Unique Subject Identifier=2107011000-0037



Assay variable : PTINR\_VAL1 PT-INR Value

N Mean Standard Deviation Minimum Maximum

---

|   |           |           |           |           |
|---|-----------|-----------|-----------|-----------|
| 3 | 2.4533333 | 0.6792888 | 1.9700000 | 3.2300000 |
|---|-----------|-----------|-----------|-----------|

---

Laboratory tests at the time of obtaining Table 2-6 consent, according to the presence or absence of proton-pump inhibitors

Unique Subject Identifier=2117011111-0001

MEANS Procedure

Assay variable : PTINR\_VAL1 PT-INR Value

N Mean Standard Deviation Minimum Maximum

---

|   |           |           |           |           |
|---|-----------|-----------|-----------|-----------|
| 6 | 1.7750000 | 0.4429334 | 1.1200000 | 2.3800000 |
|---|-----------|-----------|-----------|-----------|

---

Unique Subject Identifier=2125011111-0014

Assay variable : PTINR\_VAL1 PT-INR Value

N Mean Standard Deviation Minimum Maximum

---

|   |           |           |           |           |
|---|-----------|-----------|-----------|-----------|
| 5 | 1.8920000 | 0.3536524 | 1.4200000 | 2.2900000 |
|---|-----------|-----------|-----------|-----------|

---

Unique Subject Identifier=2127011011-0003

Assay variable : PTINR\_VAL1 PT-INR Value

N Mean Standard Deviation Minimum Maximum

---

|   |           |   |           |           |
|---|-----------|---|-----------|-----------|
| 2 | 1.4000000 | 0 | 1.4000000 | 1.4000000 |
|---|-----------|---|-----------|-----------|

---

Unique Subject Identifier=2127011011-0009

Assay variable : PTINR\_VAL1 PT-INR Value

N Mean Standard Deviation Minimum Maximum

---

|   |          |           |          |          |
|---|----------|-----------|----------|----------|
| 3 | 1.500000 | 0.4358899 | 1.200000 | 2.000000 |
|---|----------|-----------|----------|----------|

---

Laboratory tests at the time of obtaining Table 2-6 consent, according to the presence or absence of proton-pump inhibitors

Unique Subject Identifier=2127011011-0011

MEANS Procedure

Assay variable : PTINR\_VAL1 PT-INR Value

| N | Mean      | Standard Deviation | Minimum   | Maximum   |
|---|-----------|--------------------|-----------|-----------|
| 6 | 1.5333333 | 0.2943920          | 1.1000000 | 1.9000000 |

Unique Subject Identifier=2127011011-0023

Assay variable : PTINR\_VAL1 PT-INR Value

| N | Mean      | Standard Deviation | Minimum   | Maximum   |
|---|-----------|--------------------|-----------|-----------|
| 5 | 1.6400000 | 0.1341641          | 1.5000000 | 1.8000000 |

Unique Subject Identifier=2127011011-0039

Assay variable : PTINR\_VAL1 PT-INR Value

| N | Mean      | Standard Deviation | Minimum   | Maximum   |
|---|-----------|--------------------|-----------|-----------|
| 5 | 1.2400000 | 0.1140175          | 1.1000000 | 1.4000000 |

Unique Subject Identifier=2127011011-0041

Assay variable : PTINR\_VAL1 PT-INR Value

N Mean Standard Deviation Minimum Maximum

---

|   |           |           |           |           |
|---|-----------|-----------|-----------|-----------|
| 6 | 2.0166667 | 0.4578937 | 1.6000000 | 2.6000000 |
|---|-----------|-----------|-----------|-----------|

---

Laboratory tests at the time of obtaining Table 2-6 consent, according to the presence or absence of proton-pump inhibitors

Unique Subject Identifier=2138011111-0002

MEANS Procedure

Assay variable : PTINR\_VAL1 PT-INR Value

N Mean Standard Deviation Minimum Maximum

---

|   |           |           |           |           |
|---|-----------|-----------|-----------|-----------|
| 4 | 1.4375000 | 0.1021029 | 1.3100000 | 1.5600000 |
|---|-----------|-----------|-----------|-----------|

---

Unique Subject Identifier=2138011111-0009

Assay variable : PTINR\_VAL1 PT-INR Value

N Mean Standard Deviation Minimum Maximum

---

|   |           |           |           |           |
|---|-----------|-----------|-----------|-----------|
| 5 | 2.0520000 | 0.1943451 | 1.8100000 | 2.3400000 |
|---|-----------|-----------|-----------|-----------|

---

Unique Subject Identifier=2138011111-0028

Assay variable : PTINR\_VAL1 PT-INR Value

N Mean Standard Deviation Minimum Maximum

---

|   |           |           |           |           |
|---|-----------|-----------|-----------|-----------|
| 5 | 1.5300000 | 0.2331309 | 1.1900000 | 1.7800000 |
|---|-----------|-----------|-----------|-----------|

---

Unique Subject Identifier=2138011111-0031

Assay variable : PTINR\_VAL1 PT-INR Value

N Mean Standard Deviation Minimum Maximum

---

|   |           |           |           |           |
|---|-----------|-----------|-----------|-----------|
| 4 | 1.7425000 | 0.1851801 | 1.6000000 | 2.0100000 |
|---|-----------|-----------|-----------|-----------|

---

Laboratory tests at the time of obtaining Table 2-6 consent, according to the presence or absence of proton-pump inhibitors

Unique Subject Identifier=2138011111-0046

MEANS Procedure

Assay variable : PTINR\_VAL1 PT-INR Value

N Mean Standard Deviation Minimum Maximum

---

|   |           |           |           |           |
|---|-----------|-----------|-----------|-----------|
| 3 | 1.6033333 | 0.3744774 | 1.1900000 | 1.9200000 |
|---|-----------|-----------|-----------|-----------|

---

Unique Subject Identifier=2138011111-0059

Assay variable : PTINR\_VAL1 PT-INR Value

N Mean Standard Deviation Minimum Maximum

---

|   |           |           |           |           |
|---|-----------|-----------|-----------|-----------|
| 6 | 1.8566667 | 0.4131182 | 1.2200000 | 2.3000000 |
|---|-----------|-----------|-----------|-----------|

---

Unique Subject Identifier=2140011100-0001

Assay variable : PTINR\_VAL1 PT-INR Value

N Mean Standard Deviation Minimum Maximum

---

|   |           |           |           |           |
|---|-----------|-----------|-----------|-----------|
| 3 | 2.2000000 | 0.9165151 | 1.4000000 | 3.2000000 |
|---|-----------|-----------|-----------|-----------|

---

Unique Subject Identifier=2163000000-0035



Assay variable : PTINR\_VAL1 PT-INR Value

N Mean Standard Deviation Minimum Maximum

---

|   |          |  |          |          |
|---|----------|--|----------|----------|
| 1 | 1.100000 |  | 1.100000 | 1.100000 |
|---|----------|--|----------|----------|

---

Laboratory tests at the time of obtaining Table 2-6 consent, according to the presence or absence of proton-pump inhibitors

Unique Subject Identifier=216300000-0047

MEANS Procedure

Assay variable : PTINR\_VAL1 PT-INR Value

| N | Mean     | Standard Deviation | Minimum  | Maximum  |
|---|----------|--------------------|----------|----------|
| 2 | 3.400000 | 1.2727922          | 2.500000 | 4.300000 |

Unique Subject Identifier=216300000-0060

Assay variable : PTINR\_VAL1 PT-INR Value

| N | Mean     | Standard Deviation | Minimum  | Maximum  |
|---|----------|--------------------|----------|----------|
| 2 | 1.650000 | 0.0707107          | 1.600000 | 1.700000 |

Unique Subject Identifier=2174011011-0021

Assay variable : PTINR\_VAL1 PT-INR Value

| N | Mean     | Standard Deviation | Minimum  | Maximum  |
|---|----------|--------------------|----------|----------|
| 6 | 2.633333 | 0.2732520          | 2.200000 | 3.000000 |

Unique Subject Identifier=2176011011-0013

Assay variable : PTINR\_VAL1 PT-INR Value

N Mean Standard Deviation Minimum Maximum

---

|   |           |           |           |           |
|---|-----------|-----------|-----------|-----------|
| 2 | 2.2250000 | 0.8697413 | 1.6100000 | 2.8400000 |
|---|-----------|-----------|-----------|-----------|

---

Laboratory tests at the time of obtaining Table 2-6 consent, according to the presence or absence of proton-pump inhibitors

Unique Subject Identifier=2176011011-0015

MEANS Procedure

Assay variable : PTINR\_VAL1 PT-INR Value

N Mean Standard Deviation Minimum Maximum

---

|   |           |           |           |           |
|---|-----------|-----------|-----------|-----------|
| 4 | 1.2325000 | 0.0419325 | 1.1900000 | 1.2900000 |
|---|-----------|-----------|-----------|-----------|

---

Unique Subject Identifier=2176011011-0022

Assay variable : PTINR\_VAL1 PT-INR Value

N Mean Standard Deviation Minimum Maximum

---

|   |           |           |           |           |
|---|-----------|-----------|-----------|-----------|
| 4 | 1.8175000 | 0.2969147 | 1.4000000 | 2.1000000 |
|---|-----------|-----------|-----------|-----------|

---

Unique Subject Identifier=2176011011-0026

Assay variable : PTINR\_VAL1 PT-INR Value

N Mean Standard Deviation Minimum Maximum

---

|   |           |           |           |           |
|---|-----------|-----------|-----------|-----------|
| 2 | 2.1450000 | 0.0636396 | 2.1000000 | 2.1900000 |
|---|-----------|-----------|-----------|-----------|

---

Unique Subject Identifier=2176011011-0034

Assay variable : PTINR\_VAL1 PT-INR Value

N Mean Standard Deviation Minimum Maximum

---

|   |           |  |           |           |
|---|-----------|--|-----------|-----------|
| 1 | 2.5200000 |  | 2.5200000 | 2.5200000 |
|---|-----------|--|-----------|-----------|

---

Laboratory tests at the time of obtaining Table 2-6 consent, according to the presence or absence of proton-pump inhibitors

Unique Subject Identifier=2176011011-0044

MEANS Procedure

Assay variable : PTINR\_VAL1 PT-INR Value

N Mean Standard Deviation Minimum Maximum

---

|   |           |  |           |           |
|---|-----------|--|-----------|-----------|
| 1 | 2.2900000 |  | 2.2900000 | 2.2900000 |
|---|-----------|--|-----------|-----------|

---

Unique Subject Identifier=2183011011-0009

Assay variable : PTINR\_VAL1 PT-INR Value

N Mean Standard Deviation Minimum Maximum

---

|   |           |           |           |           |
|---|-----------|-----------|-----------|-----------|
| 3 | 1.5333333 | 0.2081666 | 1.3000000 | 1.7000000 |
|---|-----------|-----------|-----------|-----------|

---

Unique Subject Identifier=2183011011-0014

Assay variable : PTINR\_VAL1 PT-INR Value

N Mean Standard Deviation Minimum Maximum

---

|   |           |           |           |           |
|---|-----------|-----------|-----------|-----------|
| 2 | 1.6000000 | 0.5656854 | 1.2000000 | 2.0000000 |
|---|-----------|-----------|-----------|-----------|

---

Unique Subject Identifier=2185010010-0005

Assay variable : PTINR\_VAL1 PT-INR Value

N Mean Standard Deviation Minimum Maximum

---

|   |          |           |          |          |
|---|----------|-----------|----------|----------|
| 6 | 1.950000 | 0.3391165 | 1.600000 | 2.500000 |
|---|----------|-----------|----------|----------|

---

Laboratory tests at the time of obtaining Table 2-6 consent, according to the presence or absence of proton-pump inhibitors

Unique Subject Identifier=2185010010-0008

MEANS Procedure

Assay variable : PTINR\_VAL1 PT-INR Value

N Mean Standard Deviation Minimum Maximum

---

|   |           |           |           |           |
|---|-----------|-----------|-----------|-----------|
| 6 | 1.9666667 | 0.5645057 | 1.4000000 | 2.9000000 |
|---|-----------|-----------|-----------|-----------|

---

Unique Subject Identifier=2205001111-0027

Assay variable : PTINR\_VAL1 PT-INR Value

N Mean Standard Deviation Minimum Maximum

---

|   |           |           |           |           |
|---|-----------|-----------|-----------|-----------|
| 6 | 1.7333333 | 0.1632993 | 1.6000000 | 2.0000000 |
|---|-----------|-----------|-----------|-----------|

---

Unique Subject Identifier=2205001111-0049

Assay variable : PTINR\_VAL1 PT-INR Value

N Mean Standard Deviation Minimum Maximum

---

|   |           |           |           |           |
|---|-----------|-----------|-----------|-----------|
| 6 | 1.9450000 | 0.7634854 | 1.1700000 | 3.2300000 |
|---|-----------|-----------|-----------|-----------|

---

Unique Subject Identifier=2211011111-0001



Assay variable : PTINR\_VAL1 PT-INR Value

N Mean Standard Deviation Minimum Maximum

---

|   |          |  |          |          |
|---|----------|--|----------|----------|
| 1 | 2.600000 |  | 2.600000 | 2.600000 |
|---|----------|--|----------|----------|

---

Laboratory tests at the time of obtaining Table 2-6 consent, according to the presence or absence of proton-pump inhibitors

Unique Subject Identifier=2211011111-0037

MEANS Procedure

Assay variable : PTINR\_VAL1 PT-INR Value

N Mean Standard Deviation Minimum Maximum

---

|   |           |           |           |           |
|---|-----------|-----------|-----------|-----------|
| 6 | 1.7000000 | 0.6131884 | 1.0000000 | 2.6000000 |
|---|-----------|-----------|-----------|-----------|

---

Unique Subject Identifier=2211011111-0039

Assay variable : PTINR\_VAL1 PT-INR Value

N Mean Standard Deviation Minimum Maximum

---

|   |           |           |           |           |
|---|-----------|-----------|-----------|-----------|
| 5 | 1.4000000 | 0.1870829 | 1.2000000 | 1.7000000 |
|---|-----------|-----------|-----------|-----------|

---

Unique Subject Identifier=2211011111-0041

Assay variable : PTINR\_VAL1 PT-INR Value

N Mean Standard Deviation Minimum Maximum

---

|   |           |  |           |           |
|---|-----------|--|-----------|-----------|
| 1 | 2.5000000 |  | 2.5000000 | 2.5000000 |
|---|-----------|--|-----------|-----------|

---

Unique Subject Identifier=2211011111-0044

Assay variable : PTINR\_VAL1 PT-INR Value

N Mean Standard Deviation Minimum Maximum

---

|   |           |           |           |           |
|---|-----------|-----------|-----------|-----------|
| 5 | 1.0940000 | 0.0531977 | 1.0500000 | 1.1800000 |
|---|-----------|-----------|-----------|-----------|

---

Laboratory tests at the time of obtaining Table 2-6 consent, according to the presence or absence of proton-pump inhibitors

Unique Subject Identifier=2211011111-0058

MEANS Procedure

Assay variable : PTINR\_VAL1 PT-INR Value

N Mean Standard Deviation Minimum Maximum

---

|   |           |  |           |           |
|---|-----------|--|-----------|-----------|
| 1 | 1.1900000 |  | 1.1900000 | 1.1900000 |
|---|-----------|--|-----------|-----------|

---

Unique Subject Identifier=2211011111-0060

Assay variable : PTINR\_VAL1 PT-INR Value

N Mean Standard Deviation Minimum Maximum

---

|   |           |  |           |           |
|---|-----------|--|-----------|-----------|
| 1 | 1.9100000 |  | 1.9100000 | 1.9100000 |
|---|-----------|--|-----------|-----------|

---

Unique Subject Identifier=2233011111-0014

Assay variable : PTINR\_VAL1 PT-INR Value

N Mean Standard Deviation Minimum Maximum

---

|   |           |           |           |           |
|---|-----------|-----------|-----------|-----------|
| 4 | 1.4800000 | 0.2044505 | 1.1800000 | 1.6100000 |
|---|-----------|-----------|-----------|-----------|

---

Unique Subject Identifier=2233011111-0023

Assay variable : PTINR\_VAL1 PT-INR Value

N Mean Standard Deviation Minimum Maximum

---

|   |           |           |           |           |
|---|-----------|-----------|-----------|-----------|
| 5 | 1.7000000 | 0.2354782 | 1.3500000 | 1.9700000 |
|---|-----------|-----------|-----------|-----------|

---

Laboratory tests at the time of obtaining Table 2-6 consent, according to the presence or absence of proton-pump inhibitors

Unique Subject Identifier=2233011111-0024

MEANS Procedure

Assay variable : PTINR\_VAL1 PT-INR Value

N Mean Standard Deviation Minimum Maximum

---

|   |           |           |           |           |
|---|-----------|-----------|-----------|-----------|
| 6 | 1.5616667 | 0.2039036 | 1.3400000 | 1.8800000 |
|---|-----------|-----------|-----------|-----------|

---

Unique Subject Identifier=2233011111-0025

Assay variable : PTINR\_VAL1 PT-INR Value

N Mean Standard Deviation Minimum Maximum

---

|   |           |           |           |           |
|---|-----------|-----------|-----------|-----------|
| 3 | 1.5566667 | 0.1556706 | 1.4100000 | 1.7200000 |
|---|-----------|-----------|-----------|-----------|

---

Unique Subject Identifier=2233011111-0034

Assay variable : PTINR\_VAL1 PT-INR Value

N Mean Standard Deviation Minimum Maximum

---

|   |           |           |           |           |
|---|-----------|-----------|-----------|-----------|
| 4 | 1.3150000 | 0.2056696 | 1.1200000 | 1.5800000 |
|---|-----------|-----------|-----------|-----------|

---

Unique Subject Identifier=2241011111-0011

Assay variable : PTINR\_VAL1 PT-INR Value

N Mean Standard Deviation Minimum Maximum

---

|   |           |           |           |           |
|---|-----------|-----------|-----------|-----------|
| 5 | 1.9700000 | 0.1996246 | 1.8000000 | 2.2600000 |
|---|-----------|-----------|-----------|-----------|

---

Laboratory tests at the time of obtaining Table 2-6 consent, according to the presence or absence of proton-pump inhibitors

Unique Subject Identifier=2247010011-0006

MEANS Procedure

Assay variable : PTINR\_VAL1 PT-INR Value

N Mean Standard Deviation Minimum Maximum

---

|   |           |           |           |           |
|---|-----------|-----------|-----------|-----------|
| 4 | 1.8550000 | 0.1123981 | 1.7100000 | 1.9700000 |
|---|-----------|-----------|-----------|-----------|

---

Unique Subject Identifier=2247010011-0010

Assay variable : PTINR\_VAL1 PT-INR Value

N Mean Standard Deviation Minimum Maximum

---

|   |           |           |           |           |
|---|-----------|-----------|-----------|-----------|
| 4 | 2.5575000 | 0.3375772 | 2.1200000 | 2.8700000 |
|---|-----------|-----------|-----------|-----------|

---

Unique Subject Identifier=2247010011-0012

Assay variable : PTINR\_VAL1 PT-INR Value

N Mean Standard Deviation Minimum Maximum

---

|   |           |           |           |           |
|---|-----------|-----------|-----------|-----------|
| 4 | 1.5250000 | 0.2338803 | 1.1900000 | 1.7200000 |
|---|-----------|-----------|-----------|-----------|

---

Unique Subject Identifier=2247010011-0013



Assay variable : PTINR\_VAL1 PT-INR Value

N Mean Standard Deviation Minimum Maximum

---

|   |           |           |           |           |
|---|-----------|-----------|-----------|-----------|
| 4 | 2.3450000 | 0.2517274 | 2.0700000 | 2.6600000 |
|---|-----------|-----------|-----------|-----------|

---

Laboratory tests at the time of obtaining Table 2-6 consent, according to the presence or absence of proton-pump inhibitors

Unique Subject Identifier=2247010011-0015

MEANS Procedure

Assay variable : PTINR\_VAL1 PT-INR Value

N Mean Standard Deviation Minimum Maximum

---

|   |           |           |           |           |
|---|-----------|-----------|-----------|-----------|
| 5 | 1.8440000 | 0.1425833 | 1.6400000 | 2.0300000 |
|---|-----------|-----------|-----------|-----------|

---

Unique Subject Identifier=2247010011-0016

Assay variable : PTINR\_VAL1 PT-INR Value

N Mean Standard Deviation Minimum Maximum

---

|   |           |           |           |           |
|---|-----------|-----------|-----------|-----------|
| 4 | 1.5300000 | 0.1219289 | 1.4300000 | 1.6900000 |
|---|-----------|-----------|-----------|-----------|

---

Unique Subject Identifier=2247010011-0018

Assay variable : PTINR\_VAL1 PT-INR Value

N Mean Standard Deviation Minimum Maximum

---

|   |           |           |           |           |
|---|-----------|-----------|-----------|-----------|
| 4 | 1.7825000 | 0.3397425 | 1.2800000 | 2.0300000 |
|---|-----------|-----------|-----------|-----------|

---

Unique Subject Identifier=2247010011-0020

Assay variable : PTINR\_VAL1 PT-INR Value

N Mean Standard Deviation Minimum Maximum

---

|   |           |           |           |           |
|---|-----------|-----------|-----------|-----------|
| 3 | 1.9966667 | 0.1965536 | 1.7700000 | 2.1200000 |
|---|-----------|-----------|-----------|-----------|

---

Laboratory tests at the time of obtaining Table 2-6 consent, according to the presence or absence of proton-pump inhibitors

Unique Subject Identifier=2247010011-0021

MEANS Procedure

Assay variable : PTINR\_VAL1 PT-INR Value

N Mean Standard Deviation Minimum Maximum

---

|   |           |           |           |           |
|---|-----------|-----------|-----------|-----------|
| 6 | 1.4100000 | 0.3959798 | 1.0800000 | 2.0700000 |
|---|-----------|-----------|-----------|-----------|

---

Unique Subject Identifier=2247010011-0022

Assay variable : PTINR\_VAL1 PT-INR Value

N Mean Standard Deviation Minimum Maximum

---

|   |           |           |           |           |
|---|-----------|-----------|-----------|-----------|
| 4 | 1.5900000 | 0.1227464 | 1.4400000 | 1.7400000 |
|---|-----------|-----------|-----------|-----------|

---

Unique Subject Identifier=2247010011-0023

Assay variable : PTINR\_VAL1 PT-INR Value

N Mean Standard Deviation Minimum Maximum

---

|   |           |           |           |           |
|---|-----------|-----------|-----------|-----------|
| 4 | 2.3800000 | 0.3067029 | 2.1700000 | 2.8200000 |
|---|-----------|-----------|-----------|-----------|

---

Unique Subject Identifier=2247010011-0024

Assay variable : PTINR\_VAL1 PT-INR Value

N Mean Standard Deviation Minimum Maximum

---

|   |           |           |           |           |
|---|-----------|-----------|-----------|-----------|
| 4 | 2.0825000 | 0.1840969 | 1.8500000 | 2.3000000 |
|---|-----------|-----------|-----------|-----------|

---

Laboratory tests at the time of obtaining Table 2-6 consent, according to the presence or absence of proton-pump inhibitors

Unique Subject Identifier=2247010011-0028

MEANS Procedure

Assay variable : PTINR\_VAL1 PT-INR Value

N Mean Standard Deviation Minimum Maximum

---

|   |           |           |           |           |
|---|-----------|-----------|-----------|-----------|
| 4 | 2.2100000 | 0.1311488 | 2.0200000 | 2.3200000 |
|---|-----------|-----------|-----------|-----------|

---

Unique Subject Identifier=2247010011-0029

Assay variable : PTINR\_VAL1 PT-INR Value

N Mean Standard Deviation Minimum Maximum

---

|   |           |           |           |           |
|---|-----------|-----------|-----------|-----------|
| 4 | 2.2475000 | 0.3852597 | 1.8100000 | 2.7400000 |
|---|-----------|-----------|-----------|-----------|

---

Unique Subject Identifier=2247010011-0033

Assay variable : PTINR\_VAL1 PT-INR Value

N Mean Standard Deviation Minimum Maximum

---

|   |           |           |           |           |
|---|-----------|-----------|-----------|-----------|
| 4 | 1.6950000 | 0.3319136 | 1.2900000 | 2.0000000 |
|---|-----------|-----------|-----------|-----------|

---

Unique Subject Identifier=2247010011-0035

Assay variable : PTINR\_VAL1 PT-INR Value

N Mean Standard Deviation Minimum Maximum

---

|   |           |           |           |           |
|---|-----------|-----------|-----------|-----------|
| 5 | 2.4340000 | 0.4240637 | 2.0900000 | 3.1500000 |
|---|-----------|-----------|-----------|-----------|

---

Laboratory tests at the time of obtaining Table 2-6 consent, according to the presence or absence of proton-pump inhibitors

Unique Subject Identifier=2247010011-0036

MEANS Procedure

Assay variable : PTINR\_VAL1 PT-INR Value

N Mean Standard Deviation Minimum Maximum

---

|   |           |           |           |           |
|---|-----------|-----------|-----------|-----------|
| 6 | 1.6916667 | 0.1110705 | 1.5600000 | 1.8800000 |
|---|-----------|-----------|-----------|-----------|

---

Unique Subject Identifier=2247010011-0039

Assay variable : PTINR\_VAL1 PT-INR Value

N Mean Standard Deviation Minimum Maximum

---

|   |           |           |           |           |
|---|-----------|-----------|-----------|-----------|
| 4 | 1.9850000 | 0.2522565 | 1.7200000 | 2.2600000 |
|---|-----------|-----------|-----------|-----------|

---

Unique Subject Identifier=2247010011-0040

Assay variable : PTINR\_VAL1 PT-INR Value

N Mean Standard Deviation Minimum Maximum

---

|   |           |           |           |           |
|---|-----------|-----------|-----------|-----------|
| 4 | 1.8800000 | 0.1446836 | 1.7100000 | 2.0100000 |
|---|-----------|-----------|-----------|-----------|

---

Unique Subject Identifier=2247010011-0041



Assay variable : PTINR\_VAL1 PT-INR Value

N Mean Standard Deviation Minimum Maximum

---

|   |           |           |           |           |
|---|-----------|-----------|-----------|-----------|
| 4 | 2.4325000 | 0.6373578 | 1.5500000 | 3.0200000 |
|---|-----------|-----------|-----------|-----------|

---

Laboratory tests at the time of obtaining Table 2-6 consent, according to the presence or absence of proton-pump inhibitors

Unique Subject Identifier=2247010011-0042

MEANS Procedure

Assay variable : PTINR\_VAL1 PT-INR Value

N Mean Standard Deviation Minimum Maximum

---

|   |           |           |           |           |
|---|-----------|-----------|-----------|-----------|
| 5 | 1.7160000 | 0.4074678 | 1.3000000 | 2.2000000 |
|---|-----------|-----------|-----------|-----------|

---

Unique Subject Identifier=2247010011-0043

Assay variable : PTINR\_VAL1 PT-INR Value

N Mean Standard Deviation Minimum Maximum

---

|   |           |           |           |           |
|---|-----------|-----------|-----------|-----------|
| 4 | 1.8125000 | 0.2784930 | 1.6000000 | 2.2000000 |
|---|-----------|-----------|-----------|-----------|

---

Unique Subject Identifier=2247010011-0044

Assay variable : PTINR\_VAL1 PT-INR Value

N Mean Standard Deviation Minimum Maximum

---

|   |           |           |           |           |
|---|-----------|-----------|-----------|-----------|
| 4 | 2.3600000 | 0.2565151 | 1.9800000 | 2.5200000 |
|---|-----------|-----------|-----------|-----------|

---

Unique Subject Identifier=2247010011-0045

Assay variable : PTINR\_VAL1 PT-INR Value

N Mean Standard Deviation Minimum Maximum

---

|   |           |           |           |           |
|---|-----------|-----------|-----------|-----------|
| 4 | 1.9025000 | 0.1508587 | 1.7500000 | 2.1000000 |
|---|-----------|-----------|-----------|-----------|

---

Laboratory tests at the time of obtaining Table 2-6 consent, according to the presence or absence of proton-pump inhibitors

Unique Subject Identifier=2247010011-0046

MEANS Procedure

Assay variable : PTINR\_VAL1 PT-INR Value

N Mean Standard Deviation Minimum Maximum

---

|   |           |           |           |           |
|---|-----------|-----------|-----------|-----------|
| 4 | 2.0975000 | 0.2850000 | 1.7900000 | 2.4600000 |
|---|-----------|-----------|-----------|-----------|

---

Unique Subject Identifier=2247010011-0047

Assay variable : PTINR\_VAL1 PT-INR Value

N Mean Standard Deviation Minimum Maximum

---

|   |           |           |           |           |
|---|-----------|-----------|-----------|-----------|
| 4 | 2.1025000 | 0.0942956 | 1.9900000 | 2.1900000 |
|---|-----------|-----------|-----------|-----------|

---

Unique Subject Identifier=2247010011-0048

Assay variable : PTINR\_VAL1 PT-INR Value

N Mean Standard Deviation Minimum Maximum

---

|   |           |           |           |           |
|---|-----------|-----------|-----------|-----------|
| 4 | 3.2375000 | 0.8573360 | 2.4900000 | 4.4400000 |
|---|-----------|-----------|-----------|-----------|

---

Unique Subject Identifier=2247010011-0052

Assay variable : PTINR\_VAL1 PT-INR Value

N Mean Standard Deviation Minimum Maximum

---

|   |           |  |           |           |
|---|-----------|--|-----------|-----------|
| 1 | 1.4300000 |  | 1.4300000 | 1.4300000 |
|---|-----------|--|-----------|-----------|

---

Laboratory tests at the time of obtaining Table 2-6 consent, according to the presence or absence of proton-pump inhibitors

Unique Subject Identifier=2247010011-0053

MEANS Procedure

Assay variable : PTINR\_VAL1 PT-INR Value

N Mean Standard Deviation Minimum Maximum

---

|   |           |           |           |           |
|---|-----------|-----------|-----------|-----------|
| 6 | 2.3283333 | 0.4026620 | 1.5600000 | 2.6900000 |
|---|-----------|-----------|-----------|-----------|

---

Unique Subject Identifier=2247010011-0056

Assay variable : PTINR\_VAL1 PT-INR Value

N Mean Standard Deviation Minimum Maximum

---

|   |           |           |           |           |
|---|-----------|-----------|-----------|-----------|
| 6 | 2.1866667 | 0.2207865 | 1.8800000 | 2.5200000 |
|---|-----------|-----------|-----------|-----------|

---

Unique Subject Identifier=2247010011-0057

Assay variable : PTINR\_VAL1 PT-INR Value

N Mean Standard Deviation Minimum Maximum

---

|   |           |           |           |           |
|---|-----------|-----------|-----------|-----------|
| 4 | 2.1075000 | 0.6416840 | 1.6100000 | 3.0500000 |
|---|-----------|-----------|-----------|-----------|

---

Unique Subject Identifier=2247010011-0058

Assay variable : PTINR\_VAL1 PT-INR Value

N Mean Standard Deviation Minimum Maximum

---

|   |          |          |          |          |
|---|----------|----------|----------|----------|
| 3 | 1.550000 | 0.070000 | 1.470000 | 1.600000 |
|---|----------|----------|----------|----------|

---

Laboratory tests at the time of obtaining Table 2-6 consent, according to the presence or absence of proton-pump inhibitors

Unique Subject Identifier=2247010011-0060

MEANS Procedure

Assay variable : PTINR\_VAL1 PT-INR Value

N Mean Standard Deviation Minimum Maximum

---

|   |           |           |           |           |
|---|-----------|-----------|-----------|-----------|
| 6 | 2.1866667 | 0.6503743 | 1.4200000 | 2.9700000 |
|---|-----------|-----------|-----------|-----------|

---

Unique Subject Identifier=2247010011-0061

Assay variable : PTINR\_VAL1 PT-INR Value

N Mean Standard Deviation Minimum Maximum

---

|   |           |           |           |           |
|---|-----------|-----------|-----------|-----------|
| 6 | 2.1000000 | 0.1716974 | 1.8400000 | 2.2900000 |
|---|-----------|-----------|-----------|-----------|

---

Unique Subject Identifier=2247010011-0064

Assay variable : PTINR\_VAL1 PT-INR Value

N Mean Standard Deviation Minimum Maximum

---

|   |           |           |           |           |
|---|-----------|-----------|-----------|-----------|
| 4 | 1.6325000 | 0.2839454 | 1.2800000 | 1.9400000 |
|---|-----------|-----------|-----------|-----------|

---

Unique Subject Identifier=2247010011-0066



Assay variable : PTINR\_VAL1 PT-INR Value

N Mean Standard Deviation Minimum Maximum

---

|   |           |           |           |           |
|---|-----------|-----------|-----------|-----------|
| 5 | 1.9060000 | 0.2160555 | 1.7300000 | 2.1700000 |
|---|-----------|-----------|-----------|-----------|

---

Laboratory tests at the time of obtaining Table 2-6 consent, according to the presence or absence of proton-pump inhibitors

Unique Subject Identifier=2247010011-0067

MEANS Procedure

Assay variable : PTINR\_VAL1 PT-INR Value

N Mean Standard Deviation Minimum Maximum

---

|   |           |           |           |           |
|---|-----------|-----------|-----------|-----------|
| 4 | 1.4775000 | 0.1908533 | 1.2100000 | 1.6600000 |
|---|-----------|-----------|-----------|-----------|

---

Unique Subject Identifier=2247010011-0068

Assay variable : PTINR\_VAL1 PT-INR Value

N Mean Standard Deviation Minimum Maximum

---

|   |           |           |           |           |
|---|-----------|-----------|-----------|-----------|
| 5 | 2.0100000 | 0.3930649 | 1.6100000 | 2.5200000 |
|---|-----------|-----------|-----------|-----------|

---

Unique Subject Identifier=2247010011-0069

Assay variable : PTINR\_VAL1 PT-INR Value

N Mean Standard Deviation Minimum Maximum

---

|   |           |           |           |           |
|---|-----------|-----------|-----------|-----------|
| 5 | 1.5540000 | 0.2886694 | 1.2900000 | 1.9200000 |
|---|-----------|-----------|-----------|-----------|

---

Unique Subject Identifier=2247010011-0070

Assay variable : PTINR\_VAL1 PT-INR Value

N Mean Standard Deviation Minimum Maximum

---

|   |           |           |           |           |
|---|-----------|-----------|-----------|-----------|
| 4 | 2.2375000 | 0.3467348 | 2.0200000 | 2.7500000 |
|---|-----------|-----------|-----------|-----------|

---

Laboratory tests at the time of obtaining Table 2-6 consent, according to the presence or absence of proton-pump inhibitors

Unique Subject Identifier=2247010011-0071

MEANS Procedure

Assay variable : PTINR\_VAL1 PT-INR Value

N Mean Standard Deviation Minimum Maximum

---

|   |           |           |           |           |
|---|-----------|-----------|-----------|-----------|
| 4 | 2.2725000 | 0.6687987 | 1.7000000 | 3.0300000 |
|---|-----------|-----------|-----------|-----------|

---

Unique Subject Identifier=2247010011-0073

Assay variable : PTINR\_VAL1 PT-INR Value

N Mean Standard Deviation Minimum Maximum

---

|   |           |           |           |           |
|---|-----------|-----------|-----------|-----------|
| 3 | 1.2500000 | 0.2981610 | 1.0000000 | 1.5800000 |
|---|-----------|-----------|-----------|-----------|

---

Unique Subject Identifier=2247010011-0074

Assay variable : PTINR\_VAL1 PT-INR Value

N Mean Standard Deviation Minimum Maximum

---

|   |           |           |           |           |
|---|-----------|-----------|-----------|-----------|
| 3 | 1.6533333 | 0.2177919 | 1.4100000 | 1.8300000 |
|---|-----------|-----------|-----------|-----------|

---

Unique Subject Identifier=2247010011-0078

Assay variable : PTINR\_VAL1 PT-INR Value

N Mean Standard Deviation Minimum Maximum

---

|   |           |           |           |           |
|---|-----------|-----------|-----------|-----------|
| 3 | 1.7633333 | 0.0750555 | 1.6900000 | 1.8400000 |
|---|-----------|-----------|-----------|-----------|

---

Laboratory tests at the time of obtaining Table 2-6 consent, according to the presence or absence of proton-pump inhibitors

Unique Subject Identifier=2258010111-0014

MEANS Procedure

Assay variable : PTINR\_VAL1 PT-INR Value

N Mean Standard Deviation Minimum Maximum

---

|   |          |  |          |          |
|---|----------|--|----------|----------|
| 1 | 1.100000 |  | 1.100000 | 1.100000 |
|---|----------|--|----------|----------|

---

Unique Subject Identifier=2268011111-0013

Assay variable : PTINR\_VAL1 PT-INR Value

N Mean Standard Deviation Minimum Maximum

---

|   |          |           |          |          |
|---|----------|-----------|----------|----------|
| 4 | 1.850000 | 0.1290994 | 1.700000 | 2.000000 |
|---|----------|-----------|----------|----------|

---

Unique Subject Identifier=2268011111-0029

Assay variable : PTINR\_VAL1 PT-INR Value

N Mean Standard Deviation Minimum Maximum

---

|   |          |           |          |          |
|---|----------|-----------|----------|----------|
| 6 | 1.883333 | 0.5776389 | 1.500000 | 3.000000 |
|---|----------|-----------|----------|----------|

---

Unique Subject Identifier=2292000000-0014

Assay variable : PTINR\_VAL1 PT-INR Value

N Mean Standard Deviation Minimum Maximum

---

|   |          |           |          |          |
|---|----------|-----------|----------|----------|
| 6 | 2.250000 | 0.3619392 | 1.800000 | 2.900000 |
|---|----------|-----------|----------|----------|

---

Laboratory tests at the time of obtaining Table 2-6 consent, according to the presence or absence of proton-pump inhibitors

Unique Subject Identifier=2296010111-0002

MEANS Procedure

Assay variable : PTINR\_VAL1 PT-INR Value

N Mean Standard Deviation Minimum Maximum

---

|   |           |           |           |           |
|---|-----------|-----------|-----------|-----------|
| 5 | 1.7000000 | 0.0707107 | 1.6000000 | 1.8000000 |
|---|-----------|-----------|-----------|-----------|

---

Unique Subject Identifier=2301011111-0022

Assay variable : PTINR\_VAL1 PT-INR Value

N Mean Standard Deviation Minimum Maximum

---

|   |           |           |           |           |
|---|-----------|-----------|-----------|-----------|
| 2 | 1.4950000 | 0.0919239 | 1.4300000 | 1.5600000 |
|---|-----------|-----------|-----------|-----------|

---

Unique Subject Identifier=2301011111-0027

Assay variable : PTINR\_VAL1 PT-INR Value

N Mean Standard Deviation Minimum Maximum

---

|   |           |           |           |           |
|---|-----------|-----------|-----------|-----------|
| 4 | 1.7500000 | 0.2745906 | 1.3600000 | 2.0000000 |
|---|-----------|-----------|-----------|-----------|

---

Unique Subject Identifier=2301011111-0031



Assay variable : PTINR\_VAL1 PT-INR Value

N Mean Standard Deviation Minimum Maximum

---

|   |           |  |           |           |
|---|-----------|--|-----------|-----------|
| 1 | 1.9500000 |  | 1.9500000 | 1.9500000 |
|---|-----------|--|-----------|-----------|

---

Laboratory tests at the time of obtaining Table 2-6 consent, according to the presence or absence of proton-pump inhibitors

Unique Subject Identifier=2310011111-0011

MEANS Procedure

Assay variable : PTINR\_VAL1 PT-INR Value

N Mean Standard Deviation Minimum Maximum

---

|   |           |           |           |           |
|---|-----------|-----------|-----------|-----------|
| 3 | 1.7933333 | 0.1800926 | 1.6100000 | 1.9700000 |
|---|-----------|-----------|-----------|-----------|

---

Unique Subject Identifier=2312011111-0010

Assay variable : PTINR\_VAL1 PT-INR Value

N Mean Standard Deviation Minimum Maximum

---

|   |           |           |           |           |
|---|-----------|-----------|-----------|-----------|
| 4 | 1.6750000 | 0.0957427 | 1.6000000 | 1.8000000 |
|---|-----------|-----------|-----------|-----------|

---

Unique Subject Identifier=2327011011-0005

Assay variable : PTINR\_VAL1 PT-INR Value

N Mean Standard Deviation Minimum Maximum

---

|   |           |           |           |           |
|---|-----------|-----------|-----------|-----------|
| 4 | 1.7100000 | 0.2096028 | 1.4600000 | 1.9400000 |
|---|-----------|-----------|-----------|-----------|

---

Unique Subject Identifier=2327011011-0007

Assay variable : PTINR\_VAL1 PT-INR Value

N Mean Standard Deviation Minimum Maximum

---

|   |           |           |           |           |
|---|-----------|-----------|-----------|-----------|
| 3 | 2.0733333 | 0.9042308 | 1.3300000 | 3.0800000 |
|---|-----------|-----------|-----------|-----------|

---

Laboratory tests at the time of obtaining Table 2-6 consent, according to the presence or absence of proton-pump inhibitors

Unique Subject Identifier=2327011011-0020

MEANS Procedure

Assay variable : PTINR\_VAL1 PT-INR Value

N Mean Standard Deviation Minimum Maximum

---

|   |           |           |           |           |
|---|-----------|-----------|-----------|-----------|
| 4 | 2.2000000 | 0.1512173 | 2.0000000 | 2.3400000 |
|---|-----------|-----------|-----------|-----------|

---

Unique Subject Identifier=2327011011-0022

Assay variable : PTINR\_VAL1 PT-INR Value

N Mean Standard Deviation Minimum Maximum

---

|   |           |           |           |           |
|---|-----------|-----------|-----------|-----------|
| 4 | 1.9525000 | 0.1477329 | 1.7700000 | 2.1000000 |
|---|-----------|-----------|-----------|-----------|

---

Unique Subject Identifier=2327011011-0028

Assay variable : PTINR\_VAL1 PT-INR Value

N Mean Standard Deviation Minimum Maximum

---

|   |           |           |           |           |
|---|-----------|-----------|-----------|-----------|
| 3 | 1.9733333 | 0.1137248 | 1.8800000 | 2.1000000 |
|---|-----------|-----------|-----------|-----------|

---

Unique Subject Identifier=2327011011-0031

Assay variable : PTINR\_VAL1 PT-INR Value

N Mean Standard Deviation Minimum Maximum

---

|   |           |           |           |           |
|---|-----------|-----------|-----------|-----------|
| 4 | 1.8800000 | 0.2592296 | 1.5600000 | 2.1600000 |
|---|-----------|-----------|-----------|-----------|

---

Laboratory tests at the time of obtaining Table 2-6 consent, according to the presence or absence of proton-pump inhibitors

Unique Subject Identifier=2327011011-0034

MEANS Procedure

Assay variable : PTINR\_VAL1 PT-INR Value

N Mean Standard Deviation Minimum Maximum

---

|   |           |           |           |           |
|---|-----------|-----------|-----------|-----------|
| 4 | 1.8725000 | 0.0531507 | 1.8300000 | 1.9500000 |
|---|-----------|-----------|-----------|-----------|

---

Unique Subject Identifier=2327011011-0039

Assay variable : PTINR\_VAL1 PT-INR Value

N Mean Standard Deviation Minimum Maximum

---

|   |           |           |           |           |
|---|-----------|-----------|-----------|-----------|
| 4 | 2.1100000 | 0.2201515 | 1.9000000 | 2.4200000 |
|---|-----------|-----------|-----------|-----------|

---

Unique Subject Identifier=2327011011-0041

Assay variable : PTINR\_VAL1 PT-INR Value

N Mean Standard Deviation Minimum Maximum

---

|   |           |           |           |           |
|---|-----------|-----------|-----------|-----------|
| 4 | 1.9600000 | 0.5112729 | 1.5600000 | 2.7100000 |
|---|-----------|-----------|-----------|-----------|

---

Unique Subject Identifier=2327011011-0047

Assay variable : PTINR\_VAL1 PT-INR Value

N Mean Standard Deviation Minimum Maximum

---

|   |           |           |           |           |
|---|-----------|-----------|-----------|-----------|
| 6 | 2.3916667 | 0.1847611 | 2.0900000 | 2.6100000 |
|---|-----------|-----------|-----------|-----------|

---

Laboratory tests at the time of obtaining Table 2-6 consent, according to the presence or absence of proton-pump inhibitors

Unique Subject Identifier=2341001000-0003

MEANS Procedure

Assay variable : PTINR\_VAL1 PT-INR Value

N Mean Standard Deviation Minimum Maximum

---

|   |           |  |           |           |
|---|-----------|--|-----------|-----------|
| 1 | 1.4200000 |  | 1.4200000 | 1.4200000 |
|---|-----------|--|-----------|-----------|

---

Unique Subject Identifier=2341001000-0013

Assay variable : PTINR\_VAL1 PT-INR Value

N Mean Standard Deviation Minimum Maximum

---

|   |           |  |           |           |
|---|-----------|--|-----------|-----------|
| 1 | 1.6000000 |  | 1.6000000 | 1.6000000 |
|---|-----------|--|-----------|-----------|

---

Unique Subject Identifier=2341001000-0015

Assay variable : PTINR\_VAL1 PT-INR Value

N Mean Standard Deviation Minimum Maximum

---

|   |           |  |           |           |
|---|-----------|--|-----------|-----------|
| 1 | 1.4600000 |  | 1.4600000 | 1.4600000 |
|---|-----------|--|-----------|-----------|

---

Unique Subject Identifier=2347011111-0002



Assay variable : PTINR\_VAL1 PT-INR Value

N Mean Standard Deviation Minimum Maximum

---

|   |           |           |           |           |
|---|-----------|-----------|-----------|-----------|
| 6 | 2.6183333 | 0.4615373 | 2.1500000 | 3.4700000 |
|---|-----------|-----------|-----------|-----------|

---

Laboratory tests at the time of obtaining Table 2-6 consent, according to the presence or absence of proton-pump inhibitors

Unique Subject Identifier=2347011111-0005

MEANS Procedure

Assay variable : PTINR\_VAL1 PT-INR Value

N Mean Standard Deviation Minimum Maximum

---

|   |           |           |           |           |
|---|-----------|-----------|-----------|-----------|
| 5 | 1.4620000 | 0.3902179 | 0.9700000 | 2.0500000 |
|---|-----------|-----------|-----------|-----------|

---

Unique Subject Identifier=2347011111-0009

Assay variable : PTINR\_VAL1 PT-INR Value

N Mean Standard Deviation Minimum Maximum

---

|   |           |           |           |           |
|---|-----------|-----------|-----------|-----------|
| 6 | 2.5550000 | 0.4134126 | 2.0100000 | 3.1600000 |
|---|-----------|-----------|-----------|-----------|

---

Unique Subject Identifier=2347011111-0011

Assay variable : PTINR\_VAL1 PT-INR Value

N Mean Standard Deviation Minimum Maximum

---

|   |           |           |           |           |
|---|-----------|-----------|-----------|-----------|
| 6 | 2.3883333 | 0.4908937 | 1.8900000 | 3.0600000 |
|---|-----------|-----------|-----------|-----------|

---

Unique Subject Identifier=2347011111-0012

Assay variable : PTINR\_VAL1 PT-INR Value

N Mean Standard Deviation Minimum Maximum

---

|   |           |           |           |           |
|---|-----------|-----------|-----------|-----------|
| 5 | 2.3960000 | 0.3449348 | 1.9700000 | 2.7800000 |
|---|-----------|-----------|-----------|-----------|

---

Laboratory tests at the time of obtaining Table 2-6 consent, according to the presence or absence of proton-pump inhibitors

Unique Subject Identifier=2347011111-0016

MEANS Procedure

Assay variable : PTINR\_VAL1 PT-INR Value

N Mean Standard Deviation Minimum Maximum

---

|   |           |           |           |           |
|---|-----------|-----------|-----------|-----------|
| 6 | 1.9300000 | 0.1825377 | 1.6200000 | 2.1500000 |
|---|-----------|-----------|-----------|-----------|

---

Unique Subject Identifier=2347011111-0018

Assay variable : PTINR\_VAL1 PT-INR Value

N Mean Standard Deviation Minimum Maximum

---

|   |           |           |           |           |
|---|-----------|-----------|-----------|-----------|
| 6 | 1.4783333 | 0.1919809 | 1.2800000 | 1.8100000 |
|---|-----------|-----------|-----------|-----------|

---

Unique Subject Identifier=2347011111-0019

Assay variable : PTINR\_VAL1 PT-INR Value

N Mean Standard Deviation Minimum Maximum

---

|   |           |           |           |           |
|---|-----------|-----------|-----------|-----------|
| 6 | 1.7483333 | 0.2143284 | 1.4900000 | 1.9500000 |
|---|-----------|-----------|-----------|-----------|

---

Unique Subject Identifier=2347011111-0021

Assay variable : PTINR\_VAL1 PT-INR Value

N Mean Standard Deviation Minimum Maximum

---

|   |           |           |           |           |
|---|-----------|-----------|-----------|-----------|
| 6 | 1.8633333 | 0.1841376 | 1.5400000 | 2.0700000 |
|---|-----------|-----------|-----------|-----------|

---

Laboratory tests at the time of obtaining Table 2-6 consent, according to the presence or absence of proton-pump inhibitors

Unique Subject Identifier=2347011111-0026

MEANS Procedure

Assay variable : PTINR\_VAL1 PT-INR Value

N Mean Standard Deviation Minimum Maximum

---

|   |           |           |           |           |
|---|-----------|-----------|-----------|-----------|
| 6 | 1.8900000 | 0.3367492 | 1.3300000 | 2.2000000 |
|---|-----------|-----------|-----------|-----------|

---

Unique Subject Identifier=2347011111-0030

Assay variable : PTINR\_VAL1 PT-INR Value

N Mean Standard Deviation Minimum Maximum

---

|   |           |           |           |           |
|---|-----------|-----------|-----------|-----------|
| 6 | 1.3700000 | 0.1685230 | 1.1600000 | 1.6000000 |
|---|-----------|-----------|-----------|-----------|

---

Unique Subject Identifier=2347011111-0032

Assay variable : PTINR\_VAL1 PT-INR Value

N Mean Standard Deviation Minimum Maximum

---

|   |           |           |           |           |
|---|-----------|-----------|-----------|-----------|
| 6 | 1.9483333 | 0.3411402 | 1.3800000 | 2.3000000 |
|---|-----------|-----------|-----------|-----------|

---

Unique Subject Identifier=2347011111-0034

Assay variable : PTINR\_VAL1 PT-INR Value

N Mean Standard Deviation Minimum Maximum

---

|   |           |           |           |           |
|---|-----------|-----------|-----------|-----------|
| 6 | 2.0850000 | 0.3237746 | 1.6800000 | 2.4400000 |
|---|-----------|-----------|-----------|-----------|

---

Laboratory tests at the time of obtaining Table 2-6 consent, according to the presence or absence of proton-pump inhibitors

Unique Subject Identifier=2347011111-0043

MEANS Procedure

Assay variable : PTINR\_VAL1 PT-INR Value

N Mean Standard Deviation Minimum Maximum

---

|   |           |           |           |           |
|---|-----------|-----------|-----------|-----------|
| 6 | 1.9233333 | 0.2250926 | 1.6900000 | 2.3300000 |
|---|-----------|-----------|-----------|-----------|

---

Unique Subject Identifier=2348000000-0006

Assay variable : PTINR\_VAL1 PT-INR Value

N Mean Standard Deviation Minimum Maximum

---

|   |           |           |           |           |
|---|-----------|-----------|-----------|-----------|
| 3 | 1.7866667 | 0.1680278 | 1.6400000 | 1.9700000 |
|---|-----------|-----------|-----------|-----------|

---

Unique Subject Identifier=2354011111-0001

Assay variable : PTINR\_VAL1 PT-INR Value

N Mean Standard Deviation Minimum Maximum

---

|   |           |           |           |           |
|---|-----------|-----------|-----------|-----------|
| 5 | 1.7280000 | 0.2139392 | 1.4100000 | 1.9500000 |
|---|-----------|-----------|-----------|-----------|

---

Unique Subject Identifier=2354011111-0012



Assay variable : PTINR\_VAL1 PT-INR Value

N Mean Standard Deviation Minimum Maximum

---

|   |          |           |          |          |
|---|----------|-----------|----------|----------|
| 4 | 2.390000 | 0.0824621 | 2.280000 | 2.480000 |
|---|----------|-----------|----------|----------|

---

Laboratory tests at the time of obtaining Table 2-6 consent, according to the presence or absence of proton-pump inhibitors

Unique Subject Identifier=2354011111-0014

MEANS Procedure

Assay variable : PTINR\_VAL1 PT-INR Value

N Mean Standard Deviation Minimum Maximum

---

|   |           |           |           |           |
|---|-----------|-----------|-----------|-----------|
| 6 | 1.5150000 | 0.2960912 | 1.1900000 | 1.9300000 |
|---|-----------|-----------|-----------|-----------|

---

Unique Subject Identifier=2356011111-0007

Assay variable : PTINR\_VAL1 PT-INR Value

N Mean Standard Deviation Minimum Maximum

---

|   |           |           |           |           |
|---|-----------|-----------|-----------|-----------|
| 2 | 2.0700000 | 0.5232590 | 1.7000000 | 2.4400000 |
|---|-----------|-----------|-----------|-----------|

---

Unique Subject Identifier=2356011111-0019

Assay variable : PTINR\_VAL1 PT-INR Value

N Mean Standard Deviation Minimum Maximum

---

|   |           |           |           |           |
|---|-----------|-----------|-----------|-----------|
| 2 | 1.9900000 | 0.1555635 | 1.8800000 | 2.1000000 |
|---|-----------|-----------|-----------|-----------|

---

Unique Subject Identifier=2357011010-0018

Assay variable : PTINR\_VAL1 PT-INR Value

N Mean Standard Deviation Minimum Maximum

---

|   |           |           |           |           |
|---|-----------|-----------|-----------|-----------|
| 3 | 2.3866667 | 1.3743847 | 1.0800000 | 3.8200000 |
|---|-----------|-----------|-----------|-----------|

---

Laboratory tests at the time of obtaining Table 2-6 consent, according to the presence or absence of proton-pump inhibitors

Unique Subject Identifier=2357011010-0021

MEANS Procedure

Assay variable : PTINR\_VAL1 PT-INR Value

N Mean Standard Deviation Minimum Maximum

---

|   |           |           |           |           |
|---|-----------|-----------|-----------|-----------|
| 4 | 1.8350000 | 0.8066598 | 1.2700000 | 3.0200000 |
|---|-----------|-----------|-----------|-----------|

---

Unique Subject Identifier=2357011010-0027

Assay variable : PTINR\_VAL1 PT-INR Value

N Mean Standard Deviation Minimum Maximum

---

|   |           |           |           |           |
|---|-----------|-----------|-----------|-----------|
| 3 | 2.5733333 | 0.2154840 | 2.3300000 | 2.7400000 |
|---|-----------|-----------|-----------|-----------|

---

Unique Subject Identifier=2358000000-0001

Assay variable : PTINR\_VAL1 PT-INR Value

N Mean Standard Deviation Minimum Maximum

---

|   |           |           |           |           |
|---|-----------|-----------|-----------|-----------|
| 6 | 1.6133333 | 0.1127239 | 1.4400000 | 1.7500000 |
|---|-----------|-----------|-----------|-----------|

---

Unique Subject Identifier=2361011111-0012

Assay variable : PTINR\_VAL1 PT-INR Value

N Mean Standard Deviation Minimum Maximum

---

|   |          |  |          |          |
|---|----------|--|----------|----------|
| 1 | 1.490000 |  | 1.490000 | 1.490000 |
|---|----------|--|----------|----------|

---

Laboratory tests at the time of obtaining Table 2-6 consent, according to the presence or absence of proton-pump inhibitors

Unique Subject Identifier=2366011111-0017

MEANS Procedure

Assay variable : PTINR\_VAL1 PT-INR Value

N Mean Standard Deviation Minimum Maximum

---

|   |           |  |           |           |
|---|-----------|--|-----------|-----------|
| 1 | 2.1000000 |  | 2.1000000 | 2.1000000 |
|---|-----------|--|-----------|-----------|

---

Unique Subject Identifier=2370011111-0006

Assay variable : PTINR\_VAL1 PT-INR Value

N Mean Standard Deviation Minimum Maximum

---

|   |           |           |           |           |
|---|-----------|-----------|-----------|-----------|
| 6 | 2.0500000 | 0.2866357 | 1.6200000 | 2.3800000 |
|---|-----------|-----------|-----------|-----------|

---

Unique Subject Identifier=2378000010-0013

Assay variable : PTINR\_VAL1 PT-INR Value

N Mean Standard Deviation Minimum Maximum

---

|   |           |           |           |           |
|---|-----------|-----------|-----------|-----------|
| 6 | 1.5733333 | 0.1177568 | 1.4000000 | 1.7000000 |
|---|-----------|-----------|-----------|-----------|

---

Unique Subject Identifier=2378000010-0034

Assay variable : PTINR\_VAL1 PT-INR Value

N Mean Standard Deviation Minimum Maximum

---

|   |          |           |          |          |
|---|----------|-----------|----------|----------|
| 6 | 1.383333 | 0.1169045 | 1.200000 | 1.500000 |
|---|----------|-----------|----------|----------|

---

Laboratory tests at the time of obtaining Table 2-6 consent, according to the presence or absence of proton-pump inhibitors

Unique Subject Identifier=2378000010-0043

MEANS Procedure

Assay variable : PTINR\_VAL1 PT-INR Value

| N | Mean      | Standard Deviation | Minimum   | Maximum   |
|---|-----------|--------------------|-----------|-----------|
| 5 | 1.3000000 | 0.0707107          | 1.2000000 | 1.4000000 |

Unique Subject Identifier=2383011110-0013

Assay variable : PTINR\_VAL1 PT-INR Value

| N | Mean      | Standard Deviation | Minimum   | Maximum   |
|---|-----------|--------------------|-----------|-----------|
| 4 | 2.0225000 | 0.2067809          | 1.8300000 | 2.2300000 |

Unique Subject Identifier=2383011110-0030

Assay variable : PTINR\_VAL1 PT-INR Value

| N | Mean      | Standard Deviation | Minimum   | Maximum   |
|---|-----------|--------------------|-----------|-----------|
| 3 | 1.7966667 | 0.0513160          | 1.7400000 | 1.8400000 |

Unique Subject Identifier=2386011111-0003



Assay variable : PTINR\_VAL1 PT-INR Value

N Mean Standard Deviation Minimum Maximum

---

|   |           |           |           |           |
|---|-----------|-----------|-----------|-----------|
| 6 | 1.8833333 | 0.3060501 | 1.6000000 | 2.4000000 |
|---|-----------|-----------|-----------|-----------|

---

Laboratory tests at the time of obtaining Table 2-6 consent, according to the presence or absence of proton-pump inhibitors

Unique Subject Identifier=2386011111-0010

MEANS Procedure

Assay variable : PTINR\_VAL1 PT-INR Value

N Mean Standard Deviation Minimum Maximum

---

|   |           |           |           |           |
|---|-----------|-----------|-----------|-----------|
| 5 | 2.3000000 | 0.3807887 | 1.7000000 | 2.7000000 |
|---|-----------|-----------|-----------|-----------|

---

Unique Subject Identifier=2393011111-0008

Assay variable : PTINR\_VAL1 PT-INR Value

N Mean Standard Deviation Minimum Maximum

---

|   |           |           |           |           |
|---|-----------|-----------|-----------|-----------|
| 6 | 1.4066667 | 0.1474675 | 1.1900000 | 1.5600000 |
|---|-----------|-----------|-----------|-----------|

---

Unique Subject Identifier=2393011111-0009

Assay variable : PTINR\_VAL1 PT-INR Value

N Mean Standard Deviation Minimum Maximum

---

|   |           |           |           |           |
|---|-----------|-----------|-----------|-----------|
| 6 | 1.6000000 | 0.2359661 | 1.2900000 | 2.0100000 |
|---|-----------|-----------|-----------|-----------|

---

Unique Subject Identifier=2393011111-0021

Assay variable : PTINR\_VAL1 PT-INR Value

N Mean Standard Deviation Minimum Maximum

---

|   |          |  |          |          |
|---|----------|--|----------|----------|
| 1 | 1.420000 |  | 1.420000 | 1.420000 |
|---|----------|--|----------|----------|

---

Laboratory tests at the time of obtaining Table 2-6 consent, according to the presence or absence of proton-pump inhibitors

Unique Subject Identifier=2393011111-0023

MEANS Procedure

Assay variable : PTINR\_VAL1 PT-INR Value

N Mean Standard Deviation Minimum Maximum

---

|   |           |  |           |           |
|---|-----------|--|-----------|-----------|
| 1 | 1.0400000 |  | 1.0400000 | 1.0400000 |
|---|-----------|--|-----------|-----------|

---

Unique Subject Identifier=2396000000-0005

Assay variable : PTINR\_VAL1 PT-INR Value

N Mean Standard Deviation Minimum Maximum

---

|   |           |           |           |           |
|---|-----------|-----------|-----------|-----------|
| 6 | 2.3800000 | 1.3431902 | 1.0100000 | 4.6600000 |
|---|-----------|-----------|-----------|-----------|

---

Unique Subject Identifier=2399011111-0014

Assay variable : PTINR\_VAL1 PT-INR Value

N Mean Standard Deviation Minimum Maximum

---

|   |           |           |           |           |
|---|-----------|-----------|-----------|-----------|
| 5 | 2.0540000 | 0.2409979 | 1.7000000 | 2.3700000 |
|---|-----------|-----------|-----------|-----------|

---

Unique Subject Identifier=2403010000-0002

Assay variable : PTINR\_VAL1 PT-INR Value

N Mean Standard Deviation Minimum Maximum

---

|   |           |           |           |           |
|---|-----------|-----------|-----------|-----------|
| 6 | 1.9816667 | 0.5278036 | 1.3400000 | 2.8600000 |
|---|-----------|-----------|-----------|-----------|

---

Laboratory tests at the time of obtaining Table 2-6 consent, according to the presence or absence of proton-pump inhibitors

Unique Subject Identifier=2403010000-0003

MEANS Procedure

Assay variable : PTINR\_VAL1 PT-INR Value

N Mean Standard Deviation Minimum Maximum

---

|   |           |           |           |           |
|---|-----------|-----------|-----------|-----------|
| 6 | 2.2700000 | 0.4328048 | 1.6200000 | 2.7500000 |
|---|-----------|-----------|-----------|-----------|

---

Unique Subject Identifier=2403010000-0010

Assay variable : PTINR\_VAL1 PT-INR Value

N Mean Standard Deviation Minimum Maximum

---

|   |           |           |           |           |
|---|-----------|-----------|-----------|-----------|
| 6 | 2.1766667 | 0.3940389 | 1.6100000 | 2.6700000 |
|---|-----------|-----------|-----------|-----------|

---

Unique Subject Identifier=2403010000-0015

Assay variable : PTINR\_VAL1 PT-INR Value

N Mean Standard Deviation Minimum Maximum

---

|   |           |  |           |           |
|---|-----------|--|-----------|-----------|
| 1 | 2.1800000 |  | 2.1800000 | 2.1800000 |
|---|-----------|--|-----------|-----------|

---

Unique Subject Identifier=2403010000-0016

Assay variable : PTINR\_VAL1 PT-INR Value

N Mean Standard Deviation Minimum Maximum

---

|   |           |           |           |           |
|---|-----------|-----------|-----------|-----------|
| 5 | 1.7780000 | 0.5202596 | 1.1900000 | 2.6100000 |
|---|-----------|-----------|-----------|-----------|

---

Laboratory tests at the time of obtaining Table 2-6 consent, according to the presence or absence of proton-pump inhibitors

Unique Subject Identifier=2403010000-0027

MEANS Procedure

Assay variable : PTINR\_VAL1 PT-INR Value

N Mean Standard Deviation Minimum Maximum

---

|   |           |           |           |           |
|---|-----------|-----------|-----------|-----------|
| 6 | 1.7783333 | 0.1731377 | 1.5200000 | 1.9800000 |
|---|-----------|-----------|-----------|-----------|

---

Unique Subject Identifier=2403010000-0048

Assay variable : PTINR\_VAL1 PT-INR Value

N Mean Standard Deviation Minimum Maximum

---

|   |           |           |           |           |
|---|-----------|-----------|-----------|-----------|
| 6 | 2.1666667 | 0.1751190 | 1.9000000 | 2.4000000 |
|---|-----------|-----------|-----------|-----------|

---

Unique Subject Identifier=2403010000-0077

Assay variable : PTINR\_VAL1 PT-INR Value

N Mean Standard Deviation Minimum Maximum

---

|   |           |  |           |           |
|---|-----------|--|-----------|-----------|
| 1 | 2.0800000 |  | 2.0800000 | 2.0800000 |
|---|-----------|--|-----------|-----------|

---

Unique Subject Identifier=2403110000-0004



Assay variable : PTINR\_VAL1 PT-INR Value

N Mean Standard Deviation Minimum Maximum

---

|   |           |           |           |           |
|---|-----------|-----------|-----------|-----------|
| 4 | 2.2075000 | 0.8871443 | 1.3300000 | 3.4200000 |
|---|-----------|-----------|-----------|-----------|

---

Laboratory tests at the time of obtaining Table 2-6 consent, according to the presence or absence of proton-pump inhibitors

Unique Subject Identifier=2403110000-0005

MEANS Procedure

Assay variable : PTINR\_VAL1 PT-INR Value

N Mean Standard Deviation Minimum Maximum

---

|   |           |           |           |           |
|---|-----------|-----------|-----------|-----------|
| 3 | 1.5200000 | 0.3235738 | 1.1500000 | 1.7500000 |
|---|-----------|-----------|-----------|-----------|

---

Unique Subject Identifier=2403110000-0013

Assay variable : PTINR\_VAL1 PT-INR Value

N Mean Standard Deviation Minimum Maximum

---

|   |           |           |           |           |
|---|-----------|-----------|-----------|-----------|
| 5 | 1.8800000 | 0.1172604 | 1.7400000 | 2.0200000 |
|---|-----------|-----------|-----------|-----------|

---

Unique Subject Identifier=2403110000-0018

Assay variable : PTINR\_VAL1 PT-INR Value

N Mean Standard Deviation Minimum Maximum

---

|   |           |           |           |           |
|---|-----------|-----------|-----------|-----------|
| 6 | 2.2583333 | 0.5069287 | 1.8100000 | 2.8900000 |
|---|-----------|-----------|-----------|-----------|

---

Unique Subject Identifier=2403110000-0021

Assay variable : PTINR\_VAL1 PT-INR Value

N Mean Standard Deviation Minimum Maximum

---

|   |           |           |           |           |
|---|-----------|-----------|-----------|-----------|
| 4 | 2.1075000 | 0.1560716 | 1.8800000 | 2.2300000 |
|---|-----------|-----------|-----------|-----------|

---

Laboratory tests at the time of obtaining Table 2-6 consent, according to the presence or absence of proton-pump inhibitors

Unique Subject Identifier=2403110000-0022

MEANS Procedure

Assay variable : PTINR\_VAL1 PT-INR Value

N Mean Standard Deviation Minimum Maximum

---

|   |           |           |           |           |
|---|-----------|-----------|-----------|-----------|
| 6 | 1.9016667 | 0.5437800 | 1.1300000 | 2.7500000 |
|---|-----------|-----------|-----------|-----------|

---

Unique Subject Identifier=2404011111-0003

Assay variable : PTINR\_VAL1 PT-INR Value

N Mean Standard Deviation Minimum Maximum

---

|   |           |           |           |           |
|---|-----------|-----------|-----------|-----------|
| 6 | 1.9833333 | 0.3430258 | 1.3000000 | 2.2000000 |
|---|-----------|-----------|-----------|-----------|

---

Unique Subject Identifier=2404011111-0006

Assay variable : PTINR\_VAL1 PT-INR Value

N Mean Standard Deviation Minimum Maximum

---

|   |           |           |           |           |
|---|-----------|-----------|-----------|-----------|
| 6 | 1.8833333 | 0.2857738 | 1.5000000 | 2.3000000 |
|---|-----------|-----------|-----------|-----------|

---

Unique Subject Identifier=2405011111-0008

Assay variable : PTINR\_VAL1 PT-INR Value

N Mean Standard Deviation Minimum Maximum

---

|   |           |           |           |           |
|---|-----------|-----------|-----------|-----------|
| 6 | 2.1950000 | 0.1857687 | 2.0300000 | 2.5000000 |
|---|-----------|-----------|-----------|-----------|

---

Laboratory tests at the time of obtaining Table 2-6 consent, according to the presence or absence of proton-pump inhibitors

Unique Subject Identifier=2410011111-0013

MEANS Procedure

Assay variable : PTINR\_VAL1 PT-INR Value

N Mean Standard Deviation Minimum Maximum

---

|   |           |           |           |           |
|---|-----------|-----------|-----------|-----------|
| 2 | 2.3000000 | 0.4242641 | 2.0000000 | 2.6000000 |
|---|-----------|-----------|-----------|-----------|

---

Unique Subject Identifier=2410011111-0017

Assay variable : PTINR\_VAL1 PT-INR Value

N Mean Standard Deviation Minimum Maximum

---

|   |           |  |           |           |
|---|-----------|--|-----------|-----------|
| 1 | 2.2800000 |  | 2.2800000 | 2.2800000 |
|---|-----------|--|-----------|-----------|

---

Unique Subject Identifier=2410011111-0019

Assay variable : PTINR\_VAL1 PT-INR Value

N Mean Standard Deviation Minimum Maximum

---

|   |           |  |           |           |
|---|-----------|--|-----------|-----------|
| 1 | 1.7700000 |  | 1.7700000 | 1.7700000 |
|---|-----------|--|-----------|-----------|

---

Unique Subject Identifier=2410011111-0020

Assay variable : PTINR\_VAL1 PT-INR Value

N Mean Standard Deviation Minimum Maximum

---

|   |           |           |           |           |
|---|-----------|-----------|-----------|-----------|
| 2 | 1.7100000 | 0.8343860 | 1.1200000 | 2.3000000 |
|---|-----------|-----------|-----------|-----------|

---

Laboratory tests at the time of obtaining Table 2-6 consent, according to the presence or absence of proton-pump inhibitors

Unique Subject Identifier=2410011111-0032

MEANS Procedure

Assay variable : PTINR\_VAL1 PT-INR Value

N Mean Standard Deviation Minimum Maximum

---

|   |           |           |           |           |
|---|-----------|-----------|-----------|-----------|
| 2 | 1.8400000 | 0.7636753 | 1.3000000 | 2.3800000 |
|---|-----------|-----------|-----------|-----------|

---

Unique Subject Identifier=2412011111-0001

Assay variable : PTINR\_VAL1 PT-INR Value

N Mean Standard Deviation Minimum Maximum

---

|   |           |           |           |           |
|---|-----------|-----------|-----------|-----------|
| 2 | 1.4300000 | 0.0282843 | 1.4100000 | 1.4500000 |
|---|-----------|-----------|-----------|-----------|

---

Unique Subject Identifier=2421010000-0003

Assay variable : PTINR\_VAL1 PT-INR Value

N Mean Standard Deviation Minimum Maximum

---

|   |           |           |           |           |
|---|-----------|-----------|-----------|-----------|
| 2 | 1.5850000 | 0.0212132 | 1.5700000 | 1.6000000 |
|---|-----------|-----------|-----------|-----------|

---

Unique Subject Identifier=2421010000-0041



Assay variable : PTINR\_VAL1 PT-INR Value

N Mean Standard Deviation Minimum Maximum

---

|   |          |  |          |          |
|---|----------|--|----------|----------|
| 1 | 1.810000 |  | 1.810000 | 1.810000 |
|---|----------|--|----------|----------|

---

Laboratory tests at the time of obtaining Table 2-6 consent, according to the presence or absence of proton-pump inhibitors

Unique Subject Identifier=2421010000-0064

MEANS Procedure

Assay variable : PTINR\_VAL1 PT-INR Value

N Mean Standard Deviation Minimum Maximum

---

|   |           |           |           |           |
|---|-----------|-----------|-----------|-----------|
| 4 | 1.3700000 | 0.1749286 | 1.1100000 | 1.4900000 |
|---|-----------|-----------|-----------|-----------|

---

Unique Subject Identifier=2421010000-0079

Assay variable : PTINR\_VAL1 PT-INR Value

N Mean Standard Deviation Minimum Maximum

---

|   |           |  |           |           |
|---|-----------|--|-----------|-----------|
| 1 | 1.4200000 |  | 1.4200000 | 1.4200000 |
|---|-----------|--|-----------|-----------|

---

Unique Subject Identifier=2421010000-0095

Assay variable : PTINR\_VAL1 PT-INR Value

N Mean Standard Deviation Minimum Maximum

---

|   |           |           |           |           |
|---|-----------|-----------|-----------|-----------|
| 4 | 1.7950000 | 0.3303029 | 1.3900000 | 2.1200000 |
|---|-----------|-----------|-----------|-----------|

---

Unique Subject Identifier=2421010000-0097

Assay variable : PTINR\_VAL1 PT-INR Value

N Mean Standard Deviation Minimum Maximum

---

|   |           |           |           |           |
|---|-----------|-----------|-----------|-----------|
| 6 | 2.2066667 | 0.5789185 | 1.5500000 | 2.9500000 |
|---|-----------|-----------|-----------|-----------|

---

Laboratory tests at the time of obtaining Table 2-6 consent, according to the presence or absence of proton-pump inhibitors

Unique Subject Identifier=2421010000-0119

MEANS Procedure

Assay variable : PTINR\_VAL1 PT-INR Value

N Mean Standard Deviation Minimum Maximum

---

|   |           |  |           |           |
|---|-----------|--|-----------|-----------|
| 1 | 2.4900000 |  | 2.4900000 | 2.4900000 |
|---|-----------|--|-----------|-----------|

---

Unique Subject Identifier=2421010000-0144

Assay variable : PTINR\_VAL1 PT-INR Value

N Mean Standard Deviation Minimum Maximum

---

|   |           |           |           |           |
|---|-----------|-----------|-----------|-----------|
| 2 | 2.1350000 | 0.1909188 | 2.0000000 | 2.2700000 |
|---|-----------|-----------|-----------|-----------|

---

Unique Subject Identifier=2421010000-0150

Assay variable : PTINR\_VAL1 PT-INR Value

N Mean Standard Deviation Minimum Maximum

---

|   |           |           |           |           |
|---|-----------|-----------|-----------|-----------|
| 4 | 1.9025000 | 0.2670050 | 1.7000000 | 2.2700000 |
|---|-----------|-----------|-----------|-----------|

---

Unique Subject Identifier=2421010000-0157

Assay variable : PTINR\_VAL1 PT-INR Value

N Mean Standard Deviation Minimum Maximum

---

|   |           |           |           |           |
|---|-----------|-----------|-----------|-----------|
| 4 | 2.3325000 | 1.0938426 | 1.2200000 | 3.8400000 |
|---|-----------|-----------|-----------|-----------|

---

Laboratory tests at the time of obtaining Table 2-6 consent, according to the presence or absence of proton-pump inhibitors

Unique Subject Identifier=2421010000-0232

MEANS Procedure

Assay variable : PTINR\_VAL1 PT-INR Value

N Mean Standard Deviation Minimum Maximum

---

|   |          |  |          |          |
|---|----------|--|----------|----------|
| 1 | 1.140000 |  | 1.140000 | 1.140000 |
|---|----------|--|----------|----------|

---

Unique Subject Identifier=2421010000-0238

Assay variable : PTINR\_VAL1 PT-INR Value

N Mean Standard Deviation Minimum Maximum

---

|   |          |           |          |          |
|---|----------|-----------|----------|----------|
| 6 | 2.180000 | 0.1436663 | 1.950000 | 2.340000 |
|---|----------|-----------|----------|----------|

---

Unique Subject Identifier=2423010010-0001

Assay variable : PTINR\_VAL1 PT-INR Value

N Mean Standard Deviation Minimum Maximum

---

|   |          |  |          |          |
|---|----------|--|----------|----------|
| 1 | 1.710000 |  | 1.710000 | 1.710000 |
|---|----------|--|----------|----------|

---

Unique Subject Identifier=2423010010-0006

Assay variable : PTINR\_VAL1 PT-INR Value

N Mean Standard Deviation Minimum Maximum

---

|   |          |  |          |          |
|---|----------|--|----------|----------|
| 1 | 3.840000 |  | 3.840000 | 3.840000 |
|---|----------|--|----------|----------|

---

Laboratory tests at the time of obtaining Table 2-6 consent, according to the presence or absence of proton-pump inhibitors

Unique Subject Identifier=2425010000-0003

MEANS Procedure

Assay variable : PTINR\_VAL1 PT-INR Value

N Mean Standard Deviation Minimum Maximum

---

|   |           |           |           |
|---|-----------|-----------|-----------|
| 1 | 1.0600000 | 1.0600000 | 1.0600000 |
|---|-----------|-----------|-----------|

---

Unique Subject Identifier=2425010000-0008

Assay variable : PTINR\_VAL1 PT-INR Value

N Mean Standard Deviation Minimum Maximum

---

|   |           |           |           |
|---|-----------|-----------|-----------|
| 1 | 1.1700000 | 1.1700000 | 1.1700000 |
|---|-----------|-----------|-----------|

---

Unique Subject Identifier=2425010000-0009

Assay variable : PTINR\_VAL1 PT-INR Value

N Mean Standard Deviation Minimum Maximum

---

|   |           |           |           |
|---|-----------|-----------|-----------|
| 1 | 2.0800000 | 2.0800000 | 2.0800000 |
|---|-----------|-----------|-----------|

---

Unique Subject Identifier=2425010000-0017



Assay variable : PTINR\_VAL1 PT-INR Value

N Mean Standard Deviation Minimum Maximum

---

|   |           |  |           |           |
|---|-----------|--|-----------|-----------|
| 1 | 1.7900000 |  | 1.7900000 | 1.7900000 |
|---|-----------|--|-----------|-----------|

---

Laboratory tests at the time of obtaining Table 2-6 consent, according to the presence or absence of proton-pump inhibitors

Unique Subject Identifier=2425010000-0029

MEANS Procedure

Assay variable : PTINR\_VAL1 PT-INR Value

N Mean Standard Deviation Minimum Maximum

---

|   |           |  |           |           |
|---|-----------|--|-----------|-----------|
| 1 | 1.4200000 |  | 1.4200000 | 1.4200000 |
|---|-----------|--|-----------|-----------|

---

Unique Subject Identifier=2425010000-0035

Assay variable : PTINR\_VAL1 PT-INR Value

N Mean Standard Deviation Minimum Maximum

---

|   |           |  |           |           |
|---|-----------|--|-----------|-----------|
| 1 | 1.4300000 |  | 1.4300000 | 1.4300000 |
|---|-----------|--|-----------|-----------|

---

Unique Subject Identifier=2425010000-0041

Assay variable : PTINR\_VAL1 PT-INR Value

N Mean Standard Deviation Minimum Maximum

---

|   |           |  |           |           |
|---|-----------|--|-----------|-----------|
| 1 | 2.3700000 |  | 2.3700000 | 2.3700000 |
|---|-----------|--|-----------|-----------|

---

Unique Subject Identifier=2425010000-0050

Assay variable : PTINR\_VAL1 PT-INR Value

N Mean Standard Deviation Minimum Maximum

---

|   |          |  |          |          |
|---|----------|--|----------|----------|
| 1 | 1.860000 |  | 1.860000 | 1.860000 |
|---|----------|--|----------|----------|

---

Laboratory tests at the time of obtaining Table 2-6 consent, according to the presence or absence of proton-pump inhibitors

Unique Subject Identifier=2425010000-0051

MEANS Procedure

Assay variable : PTINR\_VAL1 PT-INR Value

N Mean Standard Deviation Minimum Maximum

---

|   |           |  |           |           |
|---|-----------|--|-----------|-----------|
| 1 | 2.1200000 |  | 2.1200000 | 2.1200000 |
|---|-----------|--|-----------|-----------|

---

Unique Subject Identifier=2425010000-0061

Assay variable : PTINR\_VAL1 PT-INR Value

N Mean Standard Deviation Minimum Maximum

---

|   |           |           |           |           |
|---|-----------|-----------|-----------|-----------|
| 3 | 2.4133333 | 0.1069268 | 2.3200000 | 2.5300000 |
|---|-----------|-----------|-----------|-----------|

---

Unique Subject Identifier=2426011100-0001

Assay variable : PTINR\_VAL1 PT-INR Value

N Mean Standard Deviation Minimum Maximum

---

|   |           |           |           |           |
|---|-----------|-----------|-----------|-----------|
| 6 | 2.1000000 | 0.4049691 | 1.7000000 | 2.8000000 |
|---|-----------|-----------|-----------|-----------|

---

Unique Subject Identifier=2426011100-0003

Assay variable : PTINR\_VAL1 PT-INR Value

N Mean Standard Deviation Minimum Maximum

---

|   |           |           |           |           |
|---|-----------|-----------|-----------|-----------|
| 6 | 1.6833333 | 0.3710346 | 1.1000000 | 2.1000000 |
|---|-----------|-----------|-----------|-----------|

---

Laboratory tests at the time of obtaining Table 2-6 consent, according to the presence or absence of proton-pump inhibitors

Unique Subject Identifier=2427000000-0006

MEANS Procedure

Assay variable : PTINR\_VAL1 PT-INR Value

N Mean Standard Deviation Minimum Maximum

---

|   |           |           |           |           |
|---|-----------|-----------|-----------|-----------|
| 6 | 1.7833333 | 0.8420135 | 0.9900000 | 2.9600000 |
|---|-----------|-----------|-----------|-----------|

---

Unique Subject Identifier=2434011000-0007

Assay variable : PTINR\_VAL1 PT-INR Value

N Mean Standard Deviation Minimum Maximum

---

|   |           |           |           |           |
|---|-----------|-----------|-----------|-----------|
| 3 | 2.8000000 | 0.7937254 | 2.2000000 | 3.7000000 |
|---|-----------|-----------|-----------|-----------|

---

Unique Subject Identifier=2434011000-0015

Assay variable : PTINR\_VAL1 PT-INR Value

N Mean Standard Deviation Minimum Maximum

---

|   |           |           |           |           |
|---|-----------|-----------|-----------|-----------|
| 4 | 2.5000000 | 0.2581989 | 2.2000000 | 2.8000000 |
|---|-----------|-----------|-----------|-----------|

---

Unique Subject Identifier=2437000000-0006

Assay variable : PTINR\_VAL1 PT-INR Value

N Mean Standard Deviation Minimum Maximum

---

|   |           |           |           |           |
|---|-----------|-----------|-----------|-----------|
| 3 | 1.6300000 | 0.1216553 | 1.4900000 | 1.7100000 |
|---|-----------|-----------|-----------|-----------|

---

Laboratory tests at the time of obtaining Table 2-6 consent, according to the presence or absence of proton-pump inhibitors

Unique Subject Identifier=2438010011-0006

MEANS Procedure

Assay variable : PTINR\_VAL1 PT-INR Value

| N | Mean      | Standard Deviation | Minimum   | Maximum   |
|---|-----------|--------------------|-----------|-----------|
| 6 | 1.9350000 | 0.1947049          | 1.7500000 | 2.2800000 |

Unique Subject Identifier=2438010011-0017

Assay variable : PTINR\_VAL1 PT-INR Value

| N | Mean      | Standard Deviation | Minimum   | Maximum   |
|---|-----------|--------------------|-----------|-----------|
| 4 | 1.8500000 | 0.2362202          | 1.5900000 | 2.0600000 |

Unique Subject Identifier=2438010011-0036

Assay variable : PTINR\_VAL1 PT-INR Value

| N | Mean      | Standard Deviation | Minimum   | Maximum   |
|---|-----------|--------------------|-----------|-----------|
| 5 | 1.7040000 | 0.1722788          | 1.4600000 | 1.8700000 |

Unique Subject Identifier=2438010011-0048



Assay variable : PTINR\_VAL1 PT-INR Value

N Mean Standard Deviation Minimum Maximum

---

|   |           |           |           |           |
|---|-----------|-----------|-----------|-----------|
| 5 | 2.4760000 | 0.6522500 | 2.0400000 | 3.6100000 |
|---|-----------|-----------|-----------|-----------|

---

Laboratory tests at the time of obtaining Table 2-6 consent, according to the presence or absence of proton-pump inhibitors

Unique Subject Identifier=2448011111-0001

MEANS Procedure

Assay variable : PTINR\_VAL1 PT-INR Value

N Mean Standard Deviation Minimum Maximum

---

|   |           |  |           |           |
|---|-----------|--|-----------|-----------|
| 1 | 1.1800000 |  | 1.1800000 | 1.1800000 |
|---|-----------|--|-----------|-----------|

---

Unique Subject Identifier=2449011111-0042

Assay variable : PTINR\_VAL1 PT-INR Value

N Mean Standard Deviation Minimum Maximum

---

|   |           |           |           |           |
|---|-----------|-----------|-----------|-----------|
| 6 | 1.7833333 | 0.1329160 | 1.7000000 | 2.0000000 |
|---|-----------|-----------|-----------|-----------|

---

Unique Subject Identifier=2449011111-0043

Assay variable : PTINR\_VAL1 PT-INR Value

N Mean Standard Deviation Minimum Maximum

---

|   |           |           |           |           |
|---|-----------|-----------|-----------|-----------|
| 6 | 1.7666667 | 0.5354126 | 1.3000000 | 2.7000000 |
|---|-----------|-----------|-----------|-----------|

---

Unique Subject Identifier=2453011111-0001

Assay variable : PTINR\_VAL1 PT-INR Value

N Mean Standard Deviation Minimum Maximum

---

|   |           |           |           |           |
|---|-----------|-----------|-----------|-----------|
| 5 | 2.0720000 | 0.1876699 | 1.8500000 | 2.3600000 |
|---|-----------|-----------|-----------|-----------|

---

Laboratory tests at the time of obtaining Table 2-6 consent, according to the presence or absence of proton-pump inhibitors

Unique Subject Identifier=2480011111-0013

MEANS Procedure

Assay variable : PTINR\_VAL1 PT-INR Value

N Mean Standard Deviation Minimum Maximum

---

|   |           |           |           |           |
|---|-----------|-----------|-----------|-----------|
| 3 | 2.3933333 | 0.0450925 | 2.3500000 | 2.4400000 |
|---|-----------|-----------|-----------|-----------|

---

Unique Subject Identifier=2485000000-0002

Assay variable : PTINR\_VAL1 PT-INR Value

N Mean Standard Deviation Minimum Maximum

---

|   |           |           |           |           |
|---|-----------|-----------|-----------|-----------|
| 4 | 1.7050000 | 0.1144552 | 1.5700000 | 1.8000000 |
|---|-----------|-----------|-----------|-----------|

---

Unique Subject Identifier=2487000000-0004

Assay variable : PTINR\_VAL1 PT-INR Value

N Mean Standard Deviation Minimum Maximum

---

|   |           |           |           |           |
|---|-----------|-----------|-----------|-----------|
| 3 | 1.5000000 | 0.2645751 | 1.3000000 | 1.8000000 |
|---|-----------|-----------|-----------|-----------|

---

Unique Subject Identifier=2498010111-0010

Assay variable : PTINR\_VAL1 PT-INR Value

N Mean Standard Deviation Minimum Maximum

---

|   |          |           |          |          |
|---|----------|-----------|----------|----------|
| 5 | 1.840000 | 0.1516575 | 1.600000 | 2.000000 |
|---|----------|-----------|----------|----------|

---

Laboratory tests at the time of obtaining Table 2-6 consent, according to the presence or absence of proton-pump inhibitors

Unique Subject Identifier=2498010111-0013

MEANS Procedure

Assay variable : PTINR\_VAL1 PT-INR Value

N Mean Standard Deviation Minimum Maximum

---

|   |           |           |           |           |
|---|-----------|-----------|-----------|-----------|
| 5 | 1.7600000 | 0.1140175 | 1.6000000 | 1.9000000 |
|---|-----------|-----------|-----------|-----------|

---

Unique Subject Identifier=2511011000-0001

Assay variable : PTINR\_VAL1 PT-INR Value

N Mean Standard Deviation Minimum Maximum

---

|   |           |           |           |           |
|---|-----------|-----------|-----------|-----------|
| 6 | 2.1833333 | 0.7521081 | 1.5000000 | 3.4000000 |
|---|-----------|-----------|-----------|-----------|

---

Unique Subject Identifier=2511011000-0065

Assay variable : PTINR\_VAL1 PT-INR Value

N Mean Standard Deviation Minimum Maximum

---

|   |           |           |           |           |
|---|-----------|-----------|-----------|-----------|
| 6 | 1.7333333 | 0.1632993 | 1.5000000 | 1.9000000 |
|---|-----------|-----------|-----------|-----------|

---

Unique Subject Identifier=2522011111-0002

Assay variable : PTINR\_VAL1 PT-INR Value

N Mean Standard Deviation Minimum Maximum

---

|   |           |           |           |           |
|---|-----------|-----------|-----------|-----------|
| 2 | 2.2150000 | 1.3364318 | 1.2700000 | 3.1600000 |
|---|-----------|-----------|-----------|-----------|

---

Laboratory tests at the time of obtaining Table 2-6 consent, according to the presence or absence of proton-pump inhibitors

Unique Subject Identifier=2527000000-0009

MEANS Procedure

Assay variable : PTINR\_VAL1 PT-INR Value

N Mean Standard Deviation Minimum Maximum

---

|   |           |           |           |           |
|---|-----------|-----------|-----------|-----------|
| 6 | 1.9833333 | 0.2483277 | 1.5000000 | 2.2000000 |
|---|-----------|-----------|-----------|-----------|

---

Unique Subject Identifier=2527000000-0022

Assay variable : PTINR\_VAL1 PT-INR Value

N Mean Standard Deviation Minimum Maximum

---

|   |           |           |           |           |
|---|-----------|-----------|-----------|-----------|
| 5 | 1.8600000 | 0.6465292 | 1.4000000 | 3.0000000 |
|---|-----------|-----------|-----------|-----------|

---

Unique Subject Identifier=2527000000-0024

Assay variable : PTINR\_VAL1 PT-INR Value

N Mean Standard Deviation Minimum Maximum

---

|   |           |           |           |           |
|---|-----------|-----------|-----------|-----------|
| 6 | 2.1166667 | 0.5154286 | 1.5000000 | 2.9000000 |
|---|-----------|-----------|-----------|-----------|

---

Unique Subject Identifier=2527000000-0037



Assay variable : PTINR\_VAL1 PT-INR Value

N Mean Standard Deviation Minimum Maximum

---

|   |          |           |          |          |
|---|----------|-----------|----------|----------|
| 6 | 2.033333 | 0.2422120 | 1.800000 | 2.400000 |
|---|----------|-----------|----------|----------|

---

Laboratory tests at the time of obtaining Table 2-6 consent, according to the presence or absence of proton-pump inhibitors

Unique Subject Identifier=2527000000-0042

MEANS Procedure

Assay variable : PTINR\_VAL1 PT-INR Value

N Mean Standard Deviation Minimum Maximum

---

|   |           |           |           |           |
|---|-----------|-----------|-----------|-----------|
| 6 | 2.0666667 | 0.4273952 | 1.6000000 | 2.8000000 |
|---|-----------|-----------|-----------|-----------|

---

Unique Subject Identifier=2527000000-0048

Assay variable : PTINR\_VAL1 PT-INR Value

N Mean Standard Deviation Minimum Maximum

---

|   |           |           |           |           |
|---|-----------|-----------|-----------|-----------|
| 6 | 1.6833333 | 0.2401388 | 1.3000000 | 1.9000000 |
|---|-----------|-----------|-----------|-----------|

---

Unique Subject Identifier=2527000000-0050

Assay variable : PTINR\_VAL1 PT-INR Value

N Mean Standard Deviation Minimum Maximum

---

|   |           |           |           |           |
|---|-----------|-----------|-----------|-----------|
| 6 | 1.9500000 | 0.1224745 | 1.8000000 | 2.1000000 |
|---|-----------|-----------|-----------|-----------|

---

Unique Subject Identifier=2527000000-0060

Assay variable : PTINR\_VAL1 PT-INR Value

N Mean Standard Deviation Minimum Maximum

---

|   |          |          |          |          |
|---|----------|----------|----------|----------|
| 5 | 1.580000 | 0.130384 | 1.400000 | 1.700000 |
|---|----------|----------|----------|----------|

---

Laboratory tests at the time of obtaining Table 2-6 consent, according to the presence or absence of proton-pump inhibitors

Unique Subject Identifier=2527000000-0074

MEANS Procedure

Assay variable : PTINR\_VAL1 PT-INR Value

N Mean Standard Deviation Minimum Maximum

---

|   |           |           |           |           |
|---|-----------|-----------|-----------|-----------|
| 6 | 2.2500000 | 0.4929503 | 1.6000000 | 2.9000000 |
|---|-----------|-----------|-----------|-----------|

---

Unique Subject Identifier=2527000000-0076

Assay variable : PTINR\_VAL1 PT-INR Value

N Mean Standard Deviation Minimum Maximum

---

|   |           |           |           |           |
|---|-----------|-----------|-----------|-----------|
| 5 | 1.5800000 | 0.3420526 | 1.2000000 | 2.1000000 |
|---|-----------|-----------|-----------|-----------|

---

Unique Subject Identifier=2527000000-0077

Assay variable : PTINR\_VAL1 PT-INR Value

N Mean Standard Deviation Minimum Maximum

---

|   |           |           |           |           |
|---|-----------|-----------|-----------|-----------|
| 6 | 1.8333333 | 0.2065591 | 1.6000000 | 2.2000000 |
|---|-----------|-----------|-----------|-----------|

---

Unique Subject Identifier=2582010000-0002

Assay variable : PTINR\_VAL1 PT-INR Value

N Mean Standard Deviation Minimum Maximum

---

|   |           |           |           |           |
|---|-----------|-----------|-----------|-----------|
| 4 | 2.4450000 | 0.3622614 | 2.1800000 | 2.9800000 |
|---|-----------|-----------|-----------|-----------|

---

Laboratory tests at the time of obtaining Table 2-6 consent, according to the presence or absence of proton-pump inhibitors

Unique Subject Identifier=2582010000-0007

MEANS Procedure

Assay variable : PTINR\_VAL1 PT-INR Value

N Mean Standard Deviation Minimum Maximum

---

|   |           |           |           |           |
|---|-----------|-----------|-----------|-----------|
| 6 | 2.0100000 | 0.1256981 | 1.8000000 | 2.1500000 |
|---|-----------|-----------|-----------|-----------|

---

Unique Subject Identifier=2582010000-0015

Assay variable : PTINR\_VAL1 PT-INR Value

N Mean Standard Deviation Minimum Maximum

---

|   |           |           |           |           |
|---|-----------|-----------|-----------|-----------|
| 6 | 1.7083333 | 0.2526196 | 1.3400000 | 2.0500000 |
|---|-----------|-----------|-----------|-----------|

---

Unique Subject Identifier=2582010000-0016

Assay variable : PTINR\_VAL1 PT-INR Value

N Mean Standard Deviation Minimum Maximum

---

|   |           |           |           |           |
|---|-----------|-----------|-----------|-----------|
| 6 | 1.4516667 | 0.0798540 | 1.3800000 | 1.5800000 |
|---|-----------|-----------|-----------|-----------|

---

Unique Subject Identifier=2582010000-0018

Assay variable : PTINR\_VAL1 PT-INR Value

N Mean Standard Deviation Minimum Maximum

---

|   |           |           |           |           |
|---|-----------|-----------|-----------|-----------|
| 6 | 1.5866667 | 0.0688961 | 1.4700000 | 1.6500000 |
|---|-----------|-----------|-----------|-----------|

---

Laboratory tests at the time of obtaining Table 2-6 consent, according to the presence or absence of proton-pump inhibitors

Unique Subject Identifier=2582010000-0019

MEANS Procedure

Assay variable : PTINR\_VAL1 PT-INR Value

N Mean Standard Deviation Minimum Maximum

---

|   |          |           |          |          |
|---|----------|-----------|----------|----------|
| 6 | 1.400000 | 0.4267552 | 1.010000 | 2.100000 |
|---|----------|-----------|----------|----------|

---

Unique Subject Identifier=2582010000-0025

Assay variable : PTINR\_VAL1 PT-INR Value

N Mean Standard Deviation Minimum Maximum

---

|   |           |           |          |          |
|---|-----------|-----------|----------|----------|
| 6 | 1.7133333 | 0.1846799 | 1.630000 | 2.090000 |
|---|-----------|-----------|----------|----------|

---

Unique Subject Identifier=2600000000-0002

Assay variable : PTINR\_VAL1 PT-INR Value

N Mean Standard Deviation Minimum Maximum

---

|   |           |           |          |          |
|---|-----------|-----------|----------|----------|
| 6 | 1.7333333 | 0.1505545 | 1.600000 | 1.900000 |
|---|-----------|-----------|----------|----------|

---

Unique Subject Identifier=2603011011-0001



Assay variable : PTINR\_VAL1 PT-INR Value

N Mean Standard Deviation Minimum Maximum

---

|   |          |           |          |          |
|---|----------|-----------|----------|----------|
| 6 | 2.166667 | 0.3669696 | 1.500000 | 2.600000 |
|---|----------|-----------|----------|----------|

---

Laboratory tests at the time of obtaining Table 2-6 consent, according to the presence or absence of proton-pump inhibitors

Unique Subject Identifier=2603011011-0002

MEANS Procedure

Assay variable : PTINR\_VAL1 PT-INR Value

| N | Mean      | Standard Deviation | Minimum   | Maximum   |
|---|-----------|--------------------|-----------|-----------|
| 6 | 2.0333333 | 0.3141125          | 1.8000000 | 2.6000000 |

Unique Subject Identifier=2603011011-0012

Assay variable : PTINR\_VAL1 PT-INR Value

| N | Mean      | Standard Deviation | Minimum   | Maximum   |
|---|-----------|--------------------|-----------|-----------|
| 6 | 2.1833333 | 0.4445972          | 1.7000000 | 2.9000000 |

Unique Subject Identifier=2603011011-0015

Assay variable : PTINR\_VAL1 PT-INR Value

| N | Mean      | Standard Deviation | Minimum   | Maximum   |
|---|-----------|--------------------|-----------|-----------|
| 6 | 2.2000000 | 0.4289522          | 1.7000000 | 2.9000000 |

Unique Subject Identifier=2603011011-0025

Assay variable : PTINR\_VAL1 PT-INR Value

N Mean Standard Deviation Minimum Maximum

---

|   |           |           |           |           |
|---|-----------|-----------|-----------|-----------|
| 6 | 2.2833333 | 0.1940790 | 2.0000000 | 2.5000000 |
|---|-----------|-----------|-----------|-----------|

---

Laboratory tests at the time of obtaining Table 2-6 consent, according to the presence or absence of proton-pump inhibitors

Unique Subject Identifier=2603011011-0032

MEANS Procedure

Assay variable : PTINR\_VAL1 PT-INR Value

N Mean Standard Deviation Minimum Maximum

---

|   |           |           |           |           |
|---|-----------|-----------|-----------|-----------|
| 6 | 2.0666667 | 0.2065591 | 1.7000000 | 2.3000000 |
|---|-----------|-----------|-----------|-----------|

---

Unique Subject Identifier=2603011011-0041

Assay variable : PTINR\_VAL1 PT-INR Value

N Mean Standard Deviation Minimum Maximum

---

|   |           |           |           |           |
|---|-----------|-----------|-----------|-----------|
| 6 | 2.2166667 | 0.3600926 | 1.6000000 | 2.7000000 |
|---|-----------|-----------|-----------|-----------|

---

Unique Subject Identifier=2605010000-0003

Assay variable : PTINR\_VAL1 PT-INR Value

N Mean Standard Deviation Minimum Maximum

---

|   |           |           |           |           |
|---|-----------|-----------|-----------|-----------|
| 3 | 1.4800000 | 0.3666061 | 1.1600000 | 1.8800000 |
|---|-----------|-----------|-----------|-----------|

---

Unique Subject Identifier=2605010000-0014

Assay variable : PTINR\_VAL1 PT-INR Value

N Mean Standard Deviation Minimum Maximum

---

|   |          |           |          |          |
|---|----------|-----------|----------|----------|
| 5 | 2.000000 | 0.3970516 | 1.470000 | 2.540000 |
|---|----------|-----------|----------|----------|

---

Laboratory tests at the time of obtaining Table 2-6 consent, according to the presence or absence of proton-pump inhibitors

Unique Subject Identifier=2605010000-0015

MEANS Procedure

Assay variable : PTINR\_VAL1 PT-INR Value

| N | Mean      | Standard Deviation | Minimum   | Maximum   |
|---|-----------|--------------------|-----------|-----------|
| 5 | 2.0100000 | 0.2220360          | 1.6900000 | 2.2400000 |

Unique Subject Identifier=2606011111-0091

Assay variable : PTINR\_VAL1 PT-INR Value

| N | Mean      | Standard Deviation | Minimum   | Maximum   |
|---|-----------|--------------------|-----------|-----------|
| 4 | 1.7650000 | 0.1866369          | 1.5800000 | 2.0100000 |

Unique Subject Identifier=2606011111-0098

Assay variable : PTINR\_VAL1 PT-INR Value

| N | Mean      | Standard Deviation | Minimum   | Maximum   |
|---|-----------|--------------------|-----------|-----------|
| 5 | 1.3240000 | 0.0832466          | 1.2600000 | 1.4200000 |

Unique Subject Identifier=2606011111-0104

Assay variable : PTINR\_VAL1 PT-INR Value

N Mean Standard Deviation Minimum Maximum

---

|   |           |           |           |           |
|---|-----------|-----------|-----------|-----------|
| 3 | 1.8133333 | 0.4743768 | 1.5100000 | 2.3600000 |
|---|-----------|-----------|-----------|-----------|

---

Laboratory tests at the time of obtaining Table 2-6 consent, according to the presence or absence of proton-pump inhibitors

Unique Subject Identifier=2606011111-0124

MEANS Procedure

Assay variable : PTINR\_VAL1 PT-INR Value

N Mean Standard Deviation Minimum Maximum

---

|   |          |  |          |          |
|---|----------|--|----------|----------|
| 1 | 3.510000 |  | 3.510000 | 3.510000 |
|---|----------|--|----------|----------|

---

Unique Subject Identifier=2606011111-0130

Assay variable : PTINR\_VAL1 PT-INR Value

N Mean Standard Deviation Minimum Maximum

---

|   |          |           |          |          |
|---|----------|-----------|----------|----------|
| 6 | 1.835000 | 0.1123833 | 1.630000 | 1.970000 |
|---|----------|-----------|----------|----------|

---

Unique Subject Identifier=2607010010-0004

Assay variable : PTINR\_VAL1 PT-INR Value

N Mean Standard Deviation Minimum Maximum

---

|   |           |           |          |          |
|---|-----------|-----------|----------|----------|
| 6 | 2.4316667 | 0.3943307 | 1.750000 | 2.760000 |
|---|-----------|-----------|----------|----------|

---

Unique Subject Identifier=2607010010-0007



Assay variable : PTINR\_VAL1 PT-INR Value

N Mean Standard Deviation Minimum Maximum

---

|   |           |           |           |           |
|---|-----------|-----------|-----------|-----------|
| 4 | 2.1750000 | 0.1454877 | 1.9800000 | 2.3200000 |
|---|-----------|-----------|-----------|-----------|

---

Laboratory tests at the time of obtaining Table 2-6 consent, according to the presence or absence of proton-pump inhibitors

Unique Subject Identifier=2607010010-0023

MEANS Procedure

Assay variable : PTINR\_VAL1 PT-INR Value

N Mean Standard Deviation Minimum Maximum

---

|   |           |           |           |           |
|---|-----------|-----------|-----------|-----------|
| 3 | 1.6366667 | 0.2059935 | 1.4200000 | 1.8300000 |
|---|-----------|-----------|-----------|-----------|

---

Unique Subject Identifier=2607010010-0058

Assay variable : PTINR\_VAL1 PT-INR Value

N Mean Standard Deviation Minimum Maximum

---

|   |           |           |           |           |
|---|-----------|-----------|-----------|-----------|
| 6 | 2.1583333 | 0.5357394 | 1.5700000 | 3.1000000 |
|---|-----------|-----------|-----------|-----------|

---

Unique Subject Identifier=2607010010-0072

Assay variable : PTINR\_VAL1 PT-INR Value

N Mean Standard Deviation Minimum Maximum

---

|   |           |           |           |           |
|---|-----------|-----------|-----------|-----------|
| 6 | 2.0650000 | 0.3690935 | 1.4600000 | 2.5800000 |
|---|-----------|-----------|-----------|-----------|

---

Unique Subject Identifier=2607010010-0076

Assay variable : PTINR\_VAL1 PT-INR Value

N Mean Standard Deviation Minimum Maximum

---

|   |           |           |           |           |
|---|-----------|-----------|-----------|-----------|
| 6 | 1.9866667 | 0.4856199 | 1.4700000 | 2.8200000 |
|---|-----------|-----------|-----------|-----------|

---

Laboratory tests at the time of obtaining Table 2-6 consent, according to the presence or absence of proton-pump inhibitors

Unique Subject Identifier=2608010010-0027

MEANS Procedure

Assay variable : PTINR\_VAL1 PT-INR Value

| N | Mean      | Standard Deviation | Minimum   | Maximum   |
|---|-----------|--------------------|-----------|-----------|
| 3 | 1.2100000 | 0.1044031          | 1.0900000 | 1.2800000 |

Unique Subject Identifier=2608010010-0035

Assay variable : PTINR\_VAL1 PT-INR Value

| N | Mean      | Standard Deviation | Minimum   | Maximum   |
|---|-----------|--------------------|-----------|-----------|
| 5 | 2.1140000 | 0.3235429          | 1.7700000 | 2.6300000 |

Unique Subject Identifier=2608010010-0056

Assay variable : PTINR\_VAL1 PT-INR Value

| N | Mean      | Standard Deviation | Minimum   | Maximum   |
|---|-----------|--------------------|-----------|-----------|
| 5 | 1.5960000 | 0.2307163          | 1.4200000 | 1.9000000 |

Unique Subject Identifier=2608010010-0061

Assay variable : PTINR\_VAL1 PT-INR Value

N Mean Standard Deviation Minimum Maximum

---

|   |           |           |           |           |
|---|-----------|-----------|-----------|-----------|
| 5 | 1.7180000 | 0.1935717 | 1.4900000 | 2.0100000 |
|---|-----------|-----------|-----------|-----------|

---

Laboratory tests at the time of obtaining Table 2-6 consent, according to the presence or absence of proton-pump inhibitors

Unique Subject Identifier=2608010010-0067

MEANS Procedure

Assay variable : PTINR\_VAL1 PT-INR Value

N Mean Standard Deviation Minimum Maximum

---

|   |           |           |           |           |
|---|-----------|-----------|-----------|-----------|
| 5 | 1.7880000 | 0.2141728 | 1.5100000 | 2.1100000 |
|---|-----------|-----------|-----------|-----------|

---

Unique Subject Identifier=2608010010-0077

Assay variable : PTINR\_VAL1 PT-INR Value

N Mean Standard Deviation Minimum Maximum

---

|   |           |  |           |           |
|---|-----------|--|-----------|-----------|
| 1 | 1.4700000 |  | 1.4700000 | 1.4700000 |
|---|-----------|--|-----------|-----------|

---

Unique Subject Identifier=2608010010-0084

Assay variable : PTINR\_VAL1 PT-INR Value

N Mean Standard Deviation Minimum Maximum

---

|   |           |           |           |           |
|---|-----------|-----------|-----------|-----------|
| 4 | 1.5075000 | 0.0788987 | 1.4200000 | 1.6000000 |
|---|-----------|-----------|-----------|-----------|

---

Unique Subject Identifier=2608010010-0097

Assay variable : PTINR\_VAL1 PT-INR Value

N Mean Standard Deviation Minimum Maximum

---

|   |           |           |           |           |
|---|-----------|-----------|-----------|-----------|
| 2 | 2.5050000 | 0.6717514 | 2.0300000 | 2.9800000 |
|---|-----------|-----------|-----------|-----------|

---

Laboratory tests at the time of obtaining Table 2-6 consent, according to the presence or absence of proton-pump inhibitors

Unique Subject Identifier=2608010010-0102

MEANS Procedure

Assay variable : PTINR\_VAL1 PT-INR Value

| N | Mean      | Standard Deviation | Minimum   | Maximum   |
|---|-----------|--------------------|-----------|-----------|
| 1 | 2.3300000 |                    | 2.3300000 | 2.3300000 |

Unique Subject Identifier=2614000000-0001

Assay variable : PTINR\_VAL1 PT-INR Value

| N | Mean      | Standard Deviation | Minimum   | Maximum   |
|---|-----------|--------------------|-----------|-----------|
| 3 | 1.9033333 | 0.7136059          | 1.4000000 | 2.7200000 |

Unique Subject Identifier=2614000000-0008

Assay variable : PTINR\_VAL1 PT-INR Value

| N | Mean      | Standard Deviation | Minimum   | Maximum   |
|---|-----------|--------------------|-----------|-----------|
| 3 | 2.0466667 | 0.1386843          | 1.9300000 | 2.2000000 |

Unique Subject Identifier=2614000000-0010



Assay variable : PTINR\_VAL1 PT-INR Value

N Mean Standard Deviation Minimum Maximum

---

|   |          |           |          |          |
|---|----------|-----------|----------|----------|
| 3 | 1.750000 | 0.1637071 | 1.610000 | 1.930000 |
|---|----------|-----------|----------|----------|

---

Laboratory tests at the time of obtaining Table 2-6 consent, according to the presence or absence of proton-pump inhibitors

Unique Subject Identifier=261400000-0047

MEANS Procedure

Assay variable : PTINR\_VAL1 PT-INR Value

N Mean Standard Deviation Minimum Maximum

---

|   |           |           |           |           |
|---|-----------|-----------|-----------|-----------|
| 3 | 2.0400000 | 0.4243819 | 1.7900000 | 2.5300000 |
|---|-----------|-----------|-----------|-----------|

---

Unique Subject Identifier=261400000-0061

Assay variable : PTINR\_VAL1 PT-INR Value

N Mean Standard Deviation Minimum Maximum

---

|   |           |           |           |           |
|---|-----------|-----------|-----------|-----------|
| 3 | 2.5233333 | 0.0680686 | 2.4700000 | 2.6000000 |
|---|-----------|-----------|-----------|-----------|

---

Unique Subject Identifier=261400000-0073

Assay variable : PTINR\_VAL1 PT-INR Value

N Mean Standard Deviation Minimum Maximum

---

|   |           |           |           |           |
|---|-----------|-----------|-----------|-----------|
| 4 | 1.3475000 | 0.3710683 | 1.0700000 | 1.8800000 |
|---|-----------|-----------|-----------|-----------|

---

Unique Subject Identifier=261400000-0081

Assay variable : PTINR\_VAL1 PT-INR Value

N Mean Standard Deviation Minimum Maximum

---

|   |           |           |           |           |
|---|-----------|-----------|-----------|-----------|
| 2 | 1.5550000 | 0.0353553 | 1.5300000 | 1.5800000 |
|---|-----------|-----------|-----------|-----------|

---

Laboratory tests at the time of obtaining Table 2-6 consent, according to the presence or absence of proton-pump inhibitors

Unique Subject Identifier=261400000-0083

MEANS Procedure

Assay variable : PTINR\_VAL1 PT-INR Value

N Mean Standard Deviation Minimum Maximum

---

|   |           |           |           |           |
|---|-----------|-----------|-----------|-----------|
| 3 | 2.2300000 | 0.0953939 | 2.1200000 | 2.2900000 |
|---|-----------|-----------|-----------|-----------|

---

Unique Subject Identifier=261400000-0085

Assay variable : PTINR\_VAL1 PT-INR Value

N Mean Standard Deviation Minimum Maximum

---

|   |           |           |           |           |
|---|-----------|-----------|-----------|-----------|
| 3 | 1.7400000 | 0.0655744 | 1.6800000 | 1.8100000 |
|---|-----------|-----------|-----------|-----------|

---

Unique Subject Identifier=261400000-0091

Assay variable : PTINR\_VAL1 PT-INR Value

N Mean Standard Deviation Minimum Maximum

---

|   |           |           |           |           |
|---|-----------|-----------|-----------|-----------|
| 2 | 1.6500000 | 0.1555635 | 1.5400000 | 1.7600000 |
|---|-----------|-----------|-----------|-----------|

---

Unique Subject Identifier=261400000-0095

Assay variable : PTINR\_VAL1 PT-INR Value

N Mean Standard Deviation Minimum Maximum

---

|   |          |           |          |          |
|---|----------|-----------|----------|----------|
| 3 | 2.620000 | 0.8020598 | 1.910000 | 3.490000 |
|---|----------|-----------|----------|----------|

---

Laboratory tests at the time of obtaining Table 2-6 consent, according to the presence or absence of proton-pump inhibitors

Unique Subject Identifier=261600000-0005

MEANS Procedure

Assay variable : PTINR\_VAL1 PT-INR Value

N Mean Standard Deviation Minimum Maximum

---

|   |           |           |           |           |
|---|-----------|-----------|-----------|-----------|
| 3 | 1.5200000 | 0.1216553 | 1.3800000 | 1.6000000 |
|---|-----------|-----------|-----------|-----------|

---

Unique Subject Identifier=261600000-0006

Assay variable : PTINR\_VAL1 PT-INR Value

N Mean Standard Deviation Minimum Maximum

---

|   |           |           |           |           |
|---|-----------|-----------|-----------|-----------|
| 4 | 2.7000000 | 0.4152911 | 2.2300000 | 3.2400000 |
|---|-----------|-----------|-----------|-----------|

---

Unique Subject Identifier=261600000-0009

Assay variable : PTINR\_VAL1 PT-INR Value

N Mean Standard Deviation Minimum Maximum

---

|   |           |           |           |           |
|---|-----------|-----------|-----------|-----------|
| 4 | 2.6675000 | 0.9233048 | 1.7600000 | 3.9400000 |
|---|-----------|-----------|-----------|-----------|

---

Unique Subject Identifier=261600000-0011

Assay variable : PTINR\_VAL1 PT-INR Value

N Mean Standard Deviation Minimum Maximum

---

|   |           |           |           |           |
|---|-----------|-----------|-----------|-----------|
| 5 | 1.9420000 | 0.4100854 | 1.5800000 | 2.6500000 |
|---|-----------|-----------|-----------|-----------|

---

Laboratory tests at the time of obtaining Table 2-6 consent, according to the presence or absence of proton-pump inhibitors

Unique Subject Identifier=261600000-0013

MEANS Procedure

Assay variable : PTINR\_VAL1 PT-INR Value

N Mean Standard Deviation Minimum Maximum

---

|   |           |           |           |           |
|---|-----------|-----------|-----------|-----------|
| 3 | 2.1300000 | 0.4744470 | 1.7800000 | 2.6700000 |
|---|-----------|-----------|-----------|-----------|

---

Unique Subject Identifier=261600000-0017

Assay variable : PTINR\_VAL1 PT-INR Value

N Mean Standard Deviation Minimum Maximum

---

|   |           |           |           |           |
|---|-----------|-----------|-----------|-----------|
| 4 | 1.6800000 | 0.1319091 | 1.5200000 | 1.8300000 |
|---|-----------|-----------|-----------|-----------|

---

Unique Subject Identifier=261600000-0021

Assay variable : PTINR\_VAL1 PT-INR Value

N Mean Standard Deviation Minimum Maximum

---

|   |           |           |           |           |
|---|-----------|-----------|-----------|-----------|
| 3 | 2.3666667 | 0.0802081 | 2.2900000 | 2.4500000 |
|---|-----------|-----------|-----------|-----------|

---

Unique Subject Identifier=261600000-0022



Assay variable : PTINR\_VAL1 PT-INR Value

N Mean Standard Deviation Minimum Maximum

---

|   |           |           |           |           |
|---|-----------|-----------|-----------|-----------|
| 4 | 1.8850000 | 0.2046949 | 1.5800000 | 2.0200000 |
|---|-----------|-----------|-----------|-----------|

---

Laboratory tests at the time of obtaining Table 2-6 consent, according to the presence or absence of proton-pump inhibitors

Unique Subject Identifier=261600000-0045

MEANS Procedure

Assay variable : PTINR\_VAL1 PT-INR Value

N Mean Standard Deviation Minimum Maximum

---

|   |           |           |           |           |
|---|-----------|-----------|-----------|-----------|
| 6 | 2.1783333 | 0.1834575 | 1.9200000 | 2.3900000 |
|---|-----------|-----------|-----------|-----------|

---

Unique Subject Identifier=261600000-0046

Assay variable : PTINR\_VAL1 PT-INR Value

N Mean Standard Deviation Minimum Maximum

---

|   |           |           |           |           |
|---|-----------|-----------|-----------|-----------|
| 3 | 1.9466667 | 0.1738774 | 1.7500000 | 2.0800000 |
|---|-----------|-----------|-----------|-----------|

---

Unique Subject Identifier=261600000-0052

Assay variable : PTINR\_VAL1 PT-INR Value

N Mean Standard Deviation Minimum Maximum

---

|   |           |           |           |           |
|---|-----------|-----------|-----------|-----------|
| 2 | 1.8850000 | 0.5444722 | 1.5000000 | 2.2700000 |
|---|-----------|-----------|-----------|-----------|

---

Unique Subject Identifier=261600000-0053

Assay variable : PTINR\_VAL1 PT-INR Value

N Mean Standard Deviation Minimum Maximum

---

|   |          |           |          |          |
|---|----------|-----------|----------|----------|
| 4 | 1.420000 | 0.1180395 | 1.340000 | 1.590000 |
|---|----------|-----------|----------|----------|

---

Laboratory tests at the time of obtaining Table 2-6 consent, according to the presence or absence of proton-pump inhibitors

Unique Subject Identifier=261600000-0055

MEANS Procedure

Assay variable : PTINR\_VAL1 PT-INR Value

| N | Mean      | Standard Deviation | Minimum   | Maximum   |
|---|-----------|--------------------|-----------|-----------|
| 2 | 2.5750000 | 0.5020458          | 2.2200000 | 2.9300000 |

Unique Subject Identifier=261600000-0056

Assay variable : PTINR\_VAL1 PT-INR Value

| N | Mean      | Standard Deviation | Minimum   | Maximum   |
|---|-----------|--------------------|-----------|-----------|
| 2 | 2.1350000 | 0.3606245          | 1.8800000 | 2.3900000 |

Unique Subject Identifier=261600000-0058

Assay variable : PTINR\_VAL1 PT-INR Value

| N | Mean      | Standard Deviation | Minimum   | Maximum   |
|---|-----------|--------------------|-----------|-----------|
| 2 | 1.7150000 | 0.4171930          | 1.4200000 | 2.0100000 |

Unique Subject Identifier=261600000-0059

Assay variable : PTINR\_VAL1 PT-INR Value

N Mean Standard Deviation Minimum Maximum

---

|   |           |           |           |           |
|---|-----------|-----------|-----------|-----------|
| 3 | 2.0733333 | 0.0950438 | 1.9800000 | 2.1700000 |
|---|-----------|-----------|-----------|-----------|

---

Laboratory tests at the time of obtaining Table 2-6 consent, according to the presence or absence of proton-pump inhibitors

Unique Subject Identifier=261600000-0061

MEANS Procedure

Assay variable : PTINR\_VAL1 PT-INR Value

| N | Mean     | Standard Deviation | Minimum  | Maximum  |
|---|----------|--------------------|----------|----------|
| 2 | 3.100000 | 0.2545584          | 2.920000 | 3.280000 |

Unique Subject Identifier=261600000-0069

Assay variable : PTINR\_VAL1 PT-INR Value

| N | Mean     | Standard Deviation | Minimum  | Maximum  |
|---|----------|--------------------|----------|----------|
| 2 | 2.235000 | 0.0494975          | 2.200000 | 2.270000 |

Unique Subject Identifier=261600000-0074

Assay variable : PTINR\_VAL1 PT-INR Value

| N | Mean     | Standard Deviation | Minimum  | Maximum  |
|---|----------|--------------------|----------|----------|
| 3 | 2.083333 | 0.3987898          | 1.720000 | 2.510000 |

Unique Subject Identifier=261600000-0078

Assay variable : PTINR\_VAL1 PT-INR Value

N Mean Standard Deviation Minimum Maximum

---

|   |           |           |           |           |
|---|-----------|-----------|-----------|-----------|
| 2 | 1.3950000 | 0.3040559 | 1.1800000 | 1.6100000 |
|---|-----------|-----------|-----------|-----------|

---

Laboratory tests at the time of obtaining Table 2-6 consent, according to the presence or absence of proton-pump inhibitors

Unique Subject Identifier=2617000000-0001

MEANS Procedure

Assay variable : PTINR\_VAL1 PT-INR Value

| N | Mean      | Standard Deviation | Minimum   | Maximum   |
|---|-----------|--------------------|-----------|-----------|
| 5 | 2.3840000 | 0.1942421          | 2.0900000 | 2.5800000 |

Unique Subject Identifier=2617000000-0004

Assay variable : PTINR\_VAL1 PT-INR Value

| N | Mean      | Standard Deviation | Minimum   | Maximum   |
|---|-----------|--------------------|-----------|-----------|
| 3 | 2.0966667 | 0.4186088          | 1.8500000 | 2.5800000 |

Unique Subject Identifier=2617000000-0013

Assay variable : PTINR\_VAL1 PT-INR Value

| N | Mean      | Standard Deviation | Minimum   | Maximum   |
|---|-----------|--------------------|-----------|-----------|
| 2 | 2.5400000 | 1.3010765          | 1.6200000 | 3.4600000 |

Unique Subject Identifier=2617000000-0017



Assay variable : PTINR\_VAL1 PT-INR Value

N Mean Standard Deviation Minimum Maximum

---

|   |           |           |           |           |
|---|-----------|-----------|-----------|-----------|
| 6 | 2.3483333 | 0.1633911 | 2.1900000 | 2.5400000 |
|---|-----------|-----------|-----------|-----------|

---

Laboratory tests at the time of obtaining Table 2-6 consent, according to the presence or absence of proton-pump inhibitors

Unique Subject Identifier=2617000000-0020

MEANS Procedure

Assay variable : PTINR\_VAL1 PT-INR Value

N Mean Standard Deviation Minimum Maximum

---

|   |          |           |          |          |
|---|----------|-----------|----------|----------|
| 4 | 1.850000 | 0.4354308 | 1.250000 | 2.270000 |
|---|----------|-----------|----------|----------|

---

Unique Subject Identifier=2617000000-0031

Assay variable : PTINR\_VAL1 PT-INR Value

N Mean Standard Deviation Minimum Maximum

---

|   |          |           |          |          |
|---|----------|-----------|----------|----------|
| 4 | 2.192500 | 0.5868773 | 1.340000 | 2.590000 |
|---|----------|-----------|----------|----------|

---

Unique Subject Identifier=2617000000-0041

Assay variable : PTINR\_VAL1 PT-INR Value

N Mean Standard Deviation Minimum Maximum

---

|   |          |           |          |          |
|---|----------|-----------|----------|----------|
| 4 | 1.775000 | 0.1234234 | 1.650000 | 1.900000 |
|---|----------|-----------|----------|----------|

---

Unique Subject Identifier=2617000000-0044

Assay variable : PTINR\_VAL1 PT-INR Value

N Mean Standard Deviation Minimum Maximum

---

|   |           |           |           |           |
|---|-----------|-----------|-----------|-----------|
| 2 | 1.7150000 | 0.0212132 | 1.7000000 | 1.7300000 |
|---|-----------|-----------|-----------|-----------|

---

Laboratory tests at the time of obtaining Table 2-6 consent, according to the presence or absence of proton-pump inhibitors

Unique Subject Identifier=2617000000-0047

MEANS Procedure

Assay variable : PTINR\_VAL1 PT-INR Value

N Mean Standard Deviation Minimum Maximum

---

|   |           |           |           |           |
|---|-----------|-----------|-----------|-----------|
| 4 | 2.1525000 | 0.1925920 | 1.9500000 | 2.3500000 |
|---|-----------|-----------|-----------|-----------|

---

Unique Subject Identifier=2617000000-0056

Assay variable : PTINR\_VAL1 PT-INR Value

N Mean Standard Deviation Minimum Maximum

---

|   |           |           |           |           |
|---|-----------|-----------|-----------|-----------|
| 6 | 1.4783333 | 0.2339587 | 1.2400000 | 1.7100000 |
|---|-----------|-----------|-----------|-----------|

---

Unique Subject Identifier=2617000000-0058

Assay variable : PTINR\_VAL1 PT-INR Value

N Mean Standard Deviation Minimum Maximum

---

|   |           |           |           |           |
|---|-----------|-----------|-----------|-----------|
| 6 | 1.6966667 | 0.3600926 | 1.3300000 | 2.2100000 |
|---|-----------|-----------|-----------|-----------|

---

Unique Subject Identifier=2617000000-0061

Assay variable : PTINR\_VAL1 PT-INR Value

N Mean Standard Deviation Minimum Maximum

---

|   |           |           |           |           |
|---|-----------|-----------|-----------|-----------|
| 3 | 1.7833333 | 0.3910669 | 1.3500000 | 2.1100000 |
|---|-----------|-----------|-----------|-----------|

---

Laboratory tests at the time of obtaining Table 2-6 consent, according to the presence or absence of proton-pump inhibitors

Unique Subject Identifier=2617000000-0068

MEANS Procedure

Assay variable : PTINR\_VAL1 PT-INR Value

N Mean Standard Deviation Minimum Maximum

---

|   |           |           |           |           |
|---|-----------|-----------|-----------|-----------|
| 3 | 1.7166667 | 0.3875994 | 1.2800000 | 2.0200000 |
|---|-----------|-----------|-----------|-----------|

---

Unique Subject Identifier=2617000000-0076

Assay variable : PTINR\_VAL1 PT-INR Value

N Mean Standard Deviation Minimum Maximum

---

|   |           |           |           |           |
|---|-----------|-----------|-----------|-----------|
| 4 | 2.2675000 | 0.4007805 | 1.8800000 | 2.7800000 |
|---|-----------|-----------|-----------|-----------|

---

Unique Subject Identifier=2617000000-0082

Assay variable : PTINR\_VAL1 PT-INR Value

N Mean Standard Deviation Minimum Maximum

---

|   |           |           |           |           |
|---|-----------|-----------|-----------|-----------|
| 4 | 2.2950000 | 0.2372762 | 2.0500000 | 2.6200000 |
|---|-----------|-----------|-----------|-----------|

---

Unique Subject Identifier=2617000000-0083

Assay variable : PTINR\_VAL1 PT-INR Value

N Mean Standard Deviation Minimum Maximum

---

|   |           |  |           |           |
|---|-----------|--|-----------|-----------|
| 1 | 1.9100000 |  | 1.9100000 | 1.9100000 |
|---|-----------|--|-----------|-----------|

---

Laboratory tests at the time of obtaining Table 2-6 consent, according to the presence or absence of proton-pump inhibitors

Unique Subject Identifier=2617000000-0087

MEANS Procedure

Assay variable : PTINR\_VAL1 PT-INR Value

| N | Mean      | Standard Deviation | Minimum   | Maximum   |
|---|-----------|--------------------|-----------|-----------|
| 3 | 1.9233333 | 0.3312602          | 1.6100000 | 2.2700000 |

Unique Subject Identifier=2617000000-0109

Assay variable : PTINR\_VAL1 PT-INR Value

| N | Mean      | Standard Deviation | Minimum   | Maximum   |
|---|-----------|--------------------|-----------|-----------|
| 4 | 2.3750000 | 0.5471441          | 1.9300000 | 3.1500000 |

Unique Subject Identifier=2617000000-0115

Assay variable : PTINR\_VAL1 PT-INR Value

| N | Mean      | Standard Deviation | Minimum   | Maximum   |
|---|-----------|--------------------|-----------|-----------|
| 3 | 1.7333333 | 0.0737111          | 1.6500000 | 1.7900000 |

Unique Subject Identifier=2617000000-0119



Assay variable : PTINR\_VAL1 PT-INR Value

N Mean Standard Deviation Minimum Maximum

---

|   |          |           |          |          |
|---|----------|-----------|----------|----------|
| 3 | 1.900000 | 0.0519615 | 1.840000 | 1.930000 |
|---|----------|-----------|----------|----------|

---

Laboratory tests at the time of obtaining Table 2-6 consent, according to the presence or absence of proton-pump inhibitors

Unique Subject Identifier=2617000000-0128

MEANS Procedure

Assay variable : PTINR\_VAL1 PT-INR Value

| N | Mean      | Standard Deviation | Minimum   | Maximum   |
|---|-----------|--------------------|-----------|-----------|
| 2 | 1.7500000 | 0.2262742          | 1.5900000 | 1.9100000 |

Unique Subject Identifier=2617000000-0136

Assay variable : PTINR\_VAL1 PT-INR Value

| N | Mean      | Standard Deviation | Minimum   | Maximum   |
|---|-----------|--------------------|-----------|-----------|
| 1 | 1.4600000 |                    | 1.4600000 | 1.4600000 |

Unique Subject Identifier=2617000000-0140

Assay variable : PTINR\_VAL1 PT-INR Value

| N | Mean      | Standard Deviation | Minimum   | Maximum   |
|---|-----------|--------------------|-----------|-----------|
| 6 | 1.2533333 | 0.0691857          | 1.1500000 | 1.3400000 |

Unique Subject Identifier=2617000000-0148

Assay variable : PTINR\_VAL1 PT-INR Value

N Mean Standard Deviation Minimum Maximum

---

|   |           |           |           |           |
|---|-----------|-----------|-----------|-----------|
| 3 | 2.0666667 | 0.2600641 | 1.8100000 | 2.3300000 |
|---|-----------|-----------|-----------|-----------|

---

Laboratory tests at the time of obtaining Table 2-6 consent, according to the presence or absence of proton-pump inhibitors

Unique Subject Identifier=2617000000-0149

MEANS Procedure

Assay variable : PTINR\_VAL1 PT-INR Value

| N | Mean      | Standard Deviation | Minimum   | Maximum   |
|---|-----------|--------------------|-----------|-----------|
| 3 | 1.6800000 | 0.1705872          | 1.5400000 | 1.8700000 |

Unique Subject Identifier=2617000000-0152

Assay variable : PTINR\_VAL1 PT-INR Value

| N | Mean      | Standard Deviation | Minimum   | Maximum   |
|---|-----------|--------------------|-----------|-----------|
| 4 | 2.2000000 | 0.2255364          | 1.9400000 | 2.4900000 |

Unique Subject Identifier=2617000000-0153

Assay variable : PTINR\_VAL1 PT-INR Value

| N | Mean      | Standard Deviation | Minimum   | Maximum   |
|---|-----------|--------------------|-----------|-----------|
| 2 | 2.0400000 | 0.1414214          | 1.9400000 | 2.1400000 |

Unique Subject Identifier=2617000000-0162

Assay variable : PTINR\_VAL1 PT-INR Value

N Mean Standard Deviation Minimum Maximum

---

|   |           |           |           |           |
|---|-----------|-----------|-----------|-----------|
| 6 | 2.2416667 | 0.2527779 | 1.9100000 | 2.6000000 |
|---|-----------|-----------|-----------|-----------|

---

Laboratory tests at the time of obtaining Table 2-6 consent, according to the presence or absence of proton-pump inhibitors

Unique Subject Identifier=2617000000-0169

MEANS Procedure

Assay variable : PTINR\_VAL1 PT-INR Value

N Mean Standard Deviation Minimum Maximum

---

|   |           |           |           |           |
|---|-----------|-----------|-----------|-----------|
| 4 | 2.1750000 | 0.2441994 | 1.9600000 | 2.4200000 |
|---|-----------|-----------|-----------|-----------|

---

Unique Subject Identifier=2617000000-0177

Assay variable : PTINR\_VAL1 PT-INR Value

N Mean Standard Deviation Minimum Maximum

---

|   |           |           |           |           |
|---|-----------|-----------|-----------|-----------|
| 3 | 2.2433333 | 0.0321455 | 2.2200000 | 2.2800000 |
|---|-----------|-----------|-----------|-----------|

---

Unique Subject Identifier=2617000000-0178

Assay variable : PTINR\_VAL1 PT-INR Value

N Mean Standard Deviation Minimum Maximum

---

|   |           |           |           |           |
|---|-----------|-----------|-----------|-----------|
| 5 | 1.8060000 | 0.5015775 | 1.0800000 | 2.4800000 |
|---|-----------|-----------|-----------|-----------|

---

Unique Subject Identifier=2617000000-0179

Assay variable : PTINR\_VAL1 PT-INR Value

N Mean Standard Deviation Minimum Maximum

---

|   |           |           |           |           |
|---|-----------|-----------|-----------|-----------|
| 3 | 2.2233333 | 0.5672154 | 1.8100000 | 2.8700000 |
|---|-----------|-----------|-----------|-----------|

---

Laboratory tests at the time of obtaining Table 2-6 consent, according to the presence or absence of proton-pump inhibitors

Unique Subject Identifier=2617000000-0188

MEANS Procedure

Assay variable : PTINR\_VAL1 PT-INR Value

N Mean Standard Deviation Minimum Maximum

---

|   |           |           |           |           |
|---|-----------|-----------|-----------|-----------|
| 3 | 1.9066667 | 0.3707200 | 1.6400000 | 2.3300000 |
|---|-----------|-----------|-----------|-----------|

---

Unique Subject Identifier=2617000000-0190

Assay variable : PTINR\_VAL1 PT-INR Value

N Mean Standard Deviation Minimum Maximum

---

|   |           |           |           |           |
|---|-----------|-----------|-----------|-----------|
| 4 | 1.8875000 | 0.3312980 | 1.5300000 | 2.2300000 |
|---|-----------|-----------|-----------|-----------|

---

Unique Subject Identifier=2617000000-0200

Assay variable : PTINR\_VAL1 PT-INR Value

N Mean Standard Deviation Minimum Maximum

---

|   |           |           |           |           |
|---|-----------|-----------|-----------|-----------|
| 3 | 1.9633333 | 0.6379133 | 1.4300000 | 2.6700000 |
|---|-----------|-----------|-----------|-----------|

---

Unique Subject Identifier=2617000000-0204



Assay variable : PTINR\_VAL1 PT-INR Value

N Mean Standard Deviation Minimum Maximum

---

|   |           |           |           |           |
|---|-----------|-----------|-----------|-----------|
| 5 | 1.2140000 | 0.0901665 | 1.0600000 | 1.2800000 |
|---|-----------|-----------|-----------|-----------|

---

Laboratory tests at the time of obtaining Table 2-6 consent, according to the presence or absence of proton-pump inhibitors

Unique Subject Identifier=2617000000-0210

MEANS Procedure

Assay variable : PTINR\_VAL1 PT-INR Value

N Mean Standard Deviation Minimum Maximum

---

|   |           |           |           |           |
|---|-----------|-----------|-----------|-----------|
| 3 | 1.7466667 | 0.1250333 | 1.6200000 | 1.8700000 |
|---|-----------|-----------|-----------|-----------|

---

Unique Subject Identifier=2617000000-0232

Assay variable : PTINR\_VAL1 PT-INR Value

N Mean Standard Deviation Minimum Maximum

---

|   |           |           |           |           |
|---|-----------|-----------|-----------|-----------|
| 3 | 2.0600000 | 0.2981610 | 1.7300000 | 2.3100000 |
|---|-----------|-----------|-----------|-----------|

---

Unique Subject Identifier=2617000000-0233

Assay variable : PTINR\_VAL1 PT-INR Value

N Mean Standard Deviation Minimum Maximum

---

|   |           |           |           |           |
|---|-----------|-----------|-----------|-----------|
| 3 | 1.7766667 | 0.0850490 | 1.6900000 | 1.8600000 |
|---|-----------|-----------|-----------|-----------|

---

Unique Subject Identifier=2617000000-0239

Assay variable : PTINR\_VAL1 PT-INR Value

N Mean Standard Deviation Minimum Maximum

---

|   |          |           |          |          |
|---|----------|-----------|----------|----------|
| 3 | 2.133333 | 0.1106044 | 2.030000 | 2.250000 |
|---|----------|-----------|----------|----------|

---

Laboratory tests at the time of obtaining Table 2-6 consent, according to the presence or absence of proton-pump inhibitors

Unique Subject Identifier=2617000000-0251

MEANS Procedure

Assay variable : PTINR\_VAL1 PT-INR Value

N Mean Standard Deviation Minimum Maximum

---

|   |           |           |           |           |
|---|-----------|-----------|-----------|-----------|
| 4 | 1.7475000 | 0.1723127 | 1.5000000 | 1.8700000 |
|---|-----------|-----------|-----------|-----------|

---

Unique Subject Identifier=2617000000-0256

Assay variable : PTINR\_VAL1 PT-INR Value

N Mean Standard Deviation Minimum Maximum

---

|   |           |           |           |           |
|---|-----------|-----------|-----------|-----------|
| 3 | 1.5733333 | 0.1497776 | 1.4500000 | 1.7400000 |
|---|-----------|-----------|-----------|-----------|

---

Unique Subject Identifier=2617000000-0261

Assay variable : PTINR\_VAL1 PT-INR Value

N Mean Standard Deviation Minimum Maximum

---

|   |           |           |           |           |
|---|-----------|-----------|-----------|-----------|
| 3 | 2.6266667 | 0.2400694 | 2.4200000 | 2.8900000 |
|---|-----------|-----------|-----------|-----------|

---

Unique Subject Identifier=2617000000-0270

Assay variable : PTINR\_VAL1 PT-INR Value

N Mean Standard Deviation Minimum Maximum

---

|   |           |           |           |           |
|---|-----------|-----------|-----------|-----------|
| 5 | 1.8940000 | 0.5493906 | 1.0500000 | 2.5500000 |
|---|-----------|-----------|-----------|-----------|

---

Laboratory tests at the time of obtaining Table 2-6 consent, according to the presence or absence of proton-pump inhibitors

Unique Subject Identifier=2617000000-0272

MEANS Procedure

Assay variable : PTINR\_VAL1 PT-INR Value

N Mean Standard Deviation Minimum Maximum

---

|   |           |           |           |           |
|---|-----------|-----------|-----------|-----------|
| 2 | 1.9200000 | 0.0282843 | 1.9000000 | 1.9400000 |
|---|-----------|-----------|-----------|-----------|

---

Unique Subject Identifier=2617000000-0278

Assay variable : PTINR\_VAL1 PT-INR Value

N Mean Standard Deviation Minimum Maximum

---

|   |           |           |           |           |
|---|-----------|-----------|-----------|-----------|
| 2 | 1.2200000 | 0.2828427 | 1.0200000 | 1.4200000 |
|---|-----------|-----------|-----------|-----------|

---

Unique Subject Identifier=2617000000-0279

Assay variable : PTINR\_VAL1 PT-INR Value

N Mean Standard Deviation Minimum Maximum

---

|   |           |           |           |           |
|---|-----------|-----------|-----------|-----------|
| 4 | 2.0075000 | 0.2286737 | 1.6800000 | 2.2100000 |
|---|-----------|-----------|-----------|-----------|

---

Unique Subject Identifier=2617000000-0282

Assay variable : PTINR\_VAL1 PT-INR Value

N Mean Standard Deviation Minimum Maximum

---

|   |           |           |           |           |
|---|-----------|-----------|-----------|-----------|
| 4 | 2.2625000 | 0.8172464 | 1.5000000 | 3.3800000 |
|---|-----------|-----------|-----------|-----------|

---

Laboratory tests at the time of obtaining Table 2-6 consent, according to the presence or absence of proton-pump inhibitors

Unique Subject Identifier=2617000000-0290

MEANS Procedure

Assay variable : PTINR\_VAL1 PT-INR Value

N Mean Standard Deviation Minimum Maximum

---

|   |           |           |           |           |
|---|-----------|-----------|-----------|-----------|
| 3 | 1.7466667 | 0.0896289 | 1.6900000 | 1.8500000 |
|---|-----------|-----------|-----------|-----------|

---

Unique Subject Identifier=2617000000-0295

Assay variable : PTINR\_VAL1 PT-INR Value

N Mean Standard Deviation Minimum Maximum

---

|   |           |           |           |           |
|---|-----------|-----------|-----------|-----------|
| 2 | 1.9150000 | 0.2899138 | 1.7100000 | 2.1200000 |
|---|-----------|-----------|-----------|-----------|

---

Unique Subject Identifier=2617000000-0296

Assay variable : PTINR\_VAL1 PT-INR Value

N Mean Standard Deviation Minimum Maximum

---

|   |           |           |           |           |
|---|-----------|-----------|-----------|-----------|
| 4 | 1.9500000 | 0.1373560 | 1.7500000 | 2.0400000 |
|---|-----------|-----------|-----------|-----------|

---

Unique Subject Identifier=2617000000-0301



Assay variable : PTINR\_VAL1 PT-INR Value

N Mean Standard Deviation Minimum Maximum

---

|   |           |  |           |           |
|---|-----------|--|-----------|-----------|
| 1 | 1.5500000 |  | 1.5500000 | 1.5500000 |
|---|-----------|--|-----------|-----------|

---

Laboratory tests at the time of obtaining Table 2-6 consent, according to the presence or absence of proton-pump inhibitors

Unique Subject Identifier=2617000000-0305

MEANS Procedure

Assay variable : PTINR\_VAL1 PT-INR Value

| N | Mean      | Standard Deviation | Minimum   | Maximum   |
|---|-----------|--------------------|-----------|-----------|
| 3 | 2.5733333 | 0.5810622          | 1.9300000 | 3.0600000 |

Unique Subject Identifier=2617000000-0312

Assay variable : PTINR\_VAL1 PT-INR Value

| N | Mean      | Standard Deviation | Minimum   | Maximum   |
|---|-----------|--------------------|-----------|-----------|
| 3 | 1.5666667 | 0.5598512          | 1.1900000 | 2.2100000 |

Unique Subject Identifier=2617000000-0315

Assay variable : PTINR\_VAL1 PT-INR Value

| N | Mean      | Standard Deviation | Minimum   | Maximum   |
|---|-----------|--------------------|-----------|-----------|
| 2 | 2.0850000 | 0.3606245          | 1.8300000 | 2.3400000 |

Unique Subject Identifier=2617000000-0325

Assay variable : PTINR\_VAL1 PT-INR Value

N Mean Standard Deviation Minimum Maximum

---

|   |          |           |          |          |
|---|----------|-----------|----------|----------|
| 3 | 2.200000 | 0.1014889 | 2.090000 | 2.290000 |
|---|----------|-----------|----------|----------|

---

Laboratory tests at the time of obtaining Table 2-6 consent, according to the presence or absence of proton-pump inhibitors

Unique Subject Identifier=2617000000-0328

MEANS Procedure

Assay variable : PTINR\_VAL1 PT-INR Value

N Mean Standard Deviation Minimum Maximum

---

|   |           |           |           |           |
|---|-----------|-----------|-----------|-----------|
| 6 | 1.8083333 | 0.5617977 | 1.2100000 | 2.5100000 |
|---|-----------|-----------|-----------|-----------|

---

Unique Subject Identifier=2617000000-0344

Assay variable : PTINR\_VAL1 PT-INR Value

N Mean Standard Deviation Minimum Maximum

---

|   |           |  |           |           |
|---|-----------|--|-----------|-----------|
| 1 | 0.9800000 |  | 0.9800000 | 0.9800000 |
|---|-----------|--|-----------|-----------|

---

Unique Subject Identifier=2617000000-0356

Assay variable : PTINR\_VAL1 PT-INR Value

N Mean Standard Deviation Minimum Maximum

---

|   |           |           |           |           |
|---|-----------|-----------|-----------|-----------|
| 4 | 1.7250000 | 0.1470827 | 1.5500000 | 1.9100000 |
|---|-----------|-----------|-----------|-----------|

---

Unique Subject Identifier=2617000000-0359

Assay variable : PTINR\_VAL1 PT-INR Value

N Mean Standard Deviation Minimum Maximum

---

|   |           |           |           |           |
|---|-----------|-----------|-----------|-----------|
| 4 | 1.6275000 | 0.1982213 | 1.4800000 | 1.9100000 |
|---|-----------|-----------|-----------|-----------|

---

Laboratory tests at the time of obtaining Table 2-6 consent, according to the presence or absence of proton-pump inhibitors

Unique Subject Identifier=2617000000-0366

MEANS Procedure

Assay variable : PTINR\_VAL1 PT-INR Value

N Mean Standard Deviation Minimum Maximum

---

|   |           |           |           |           |
|---|-----------|-----------|-----------|-----------|
| 3 | 1.8433333 | 0.1850225 | 1.6300000 | 1.9600000 |
|---|-----------|-----------|-----------|-----------|

---

Unique Subject Identifier=2621011111-0002

Assay variable : PTINR\_VAL1 PT-INR Value

N Mean Standard Deviation Minimum Maximum

---

|   |           |  |           |           |
|---|-----------|--|-----------|-----------|
| 1 | 1.5600000 |  | 1.5600000 | 1.5600000 |
|---|-----------|--|-----------|-----------|

---

Unique Subject Identifier=2621011111-0004

Assay variable : PTINR\_VAL1 PT-INR Value

N Mean Standard Deviation Minimum Maximum

---

|   |           |           |           |           |
|---|-----------|-----------|-----------|-----------|
| 5 | 1.7460000 | 0.1094532 | 1.6100000 | 1.8800000 |
|---|-----------|-----------|-----------|-----------|

---

Unique Subject Identifier=2623000000-0009

Assay variable : PTINR\_VAL1 PT-INR Value

N Mean Standard Deviation Minimum Maximum

---

|   |           |           |           |           |
|---|-----------|-----------|-----------|-----------|
| 6 | 1.8883333 | 0.7314757 | 1.0700000 | 2.9900000 |
|---|-----------|-----------|-----------|-----------|

---

Laboratory tests at the time of obtaining Table 2-6 consent, according to the presence or absence of proton-pump inhibitors

Unique Subject Identifier=2623000000-0016

MEANS Procedure

Assay variable : PTINR\_VAL1 PT-INR Value

N Mean Standard Deviation Minimum Maximum

---

|   |           |           |           |           |
|---|-----------|-----------|-----------|-----------|
| 3 | 2.0500000 | 0.1637071 | 1.8700000 | 2.1900000 |
|---|-----------|-----------|-----------|-----------|

---

Unique Subject Identifier=2623000000-0018

Assay variable : PTINR\_VAL1 PT-INR Value

N Mean Standard Deviation Minimum Maximum

---

|   |           |           |           |           |
|---|-----------|-----------|-----------|-----------|
| 6 | 1.6016667 | 0.1927088 | 1.3200000 | 1.8800000 |
|---|-----------|-----------|-----------|-----------|

---

Unique Subject Identifier=2623000000-0034

Assay variable : PTINR\_VAL1 PT-INR Value

N Mean Standard Deviation Minimum Maximum

---

|   |           |           |           |           |
|---|-----------|-----------|-----------|-----------|
| 3 | 2.5966667 | 0.2315887 | 2.3400000 | 2.7900000 |
|---|-----------|-----------|-----------|-----------|

---

Unique Subject Identifier=2623000000-0035



Assay variable : PTINR\_VAL1 PT-INR Value

N Mean Standard Deviation Minimum Maximum

---

|   |           |           |           |           |
|---|-----------|-----------|-----------|-----------|
| 5 | 2.4620000 | 0.2728919 | 2.2700000 | 2.9400000 |
|---|-----------|-----------|-----------|-----------|

---

Laboratory tests at the time of obtaining Table 2-6 consent, according to the presence or absence of proton-pump inhibitors

Unique Subject Identifier=2623000000-0051

MEANS Procedure

Assay variable : PTINR\_VAL1 PT-INR Value

N Mean Standard Deviation Minimum Maximum

---

|   |           |  |           |           |
|---|-----------|--|-----------|-----------|
| 1 | 2.5000000 |  | 2.5000000 | 2.5000000 |
|---|-----------|--|-----------|-----------|

---

Unique Subject Identifier=2623000000-0059

Assay variable : PTINR\_VAL1 PT-INR Value

N Mean Standard Deviation Minimum Maximum

---

|   |           |           |           |           |
|---|-----------|-----------|-----------|-----------|
| 4 | 2.1325000 | 0.2364142 | 1.7900000 | 2.3200000 |
|---|-----------|-----------|-----------|-----------|

---

Unique Subject Identifier=2623000000-0063

Assay variable : PTINR\_VAL1 PT-INR Value

N Mean Standard Deviation Minimum Maximum

---

|   |           |           |           |           |
|---|-----------|-----------|-----------|-----------|
| 3 | 2.0000000 | 0.0346410 | 1.9800000 | 2.0400000 |
|---|-----------|-----------|-----------|-----------|

---

Unique Subject Identifier=2623000000-0069

Assay variable : PTINR\_VAL1 PT-INR Value

N Mean Standard Deviation Minimum Maximum

---

|   |           |           |           |           |
|---|-----------|-----------|-----------|-----------|
| 4 | 1.7950000 | 0.1027943 | 1.6600000 | 1.9100000 |
|---|-----------|-----------|-----------|-----------|

---

Laboratory tests at the time of obtaining Table 2-6 consent, according to the presence or absence of proton-pump inhibitors

Unique Subject Identifier=2623000000-0075

MEANS Procedure

Assay variable : PTINR\_VAL1 PT-INR Value

N Mean Standard Deviation Minimum Maximum

---

|   |           |           |           |           |
|---|-----------|-----------|-----------|-----------|
| 2 | 2.1300000 | 0.3535534 | 1.8800000 | 2.3800000 |
|---|-----------|-----------|-----------|-----------|

---

Unique Subject Identifier=2623000000-0086

Assay variable : PTINR\_VAL1 PT-INR Value

N Mean Standard Deviation Minimum Maximum

---

|   |           |           |           |           |
|---|-----------|-----------|-----------|-----------|
| 2 | 1.5900000 | 0.0424264 | 1.5600000 | 1.6200000 |
|---|-----------|-----------|-----------|-----------|

---

Unique Subject Identifier=2626011111-0005

Assay variable : PTINR\_VAL1 PT-INR Value

N Mean Standard Deviation Minimum Maximum

---

|   |           |           |           |           |
|---|-----------|-----------|-----------|-----------|
| 3 | 1.7066667 | 0.4697162 | 1.2800000 | 2.2100000 |
|---|-----------|-----------|-----------|-----------|

---

Unique Subject Identifier=2626011111-0006

Assay variable : PTINR\_VAL1 PT-INR Value

N Mean Standard Deviation Minimum Maximum

---

|   |          |           |          |          |
|---|----------|-----------|----------|----------|
| 3 | 1.600000 | 0.1389244 | 1.440000 | 1.690000 |
|---|----------|-----------|----------|----------|

---

Laboratory tests at the time of obtaining Table 2-6 consent, according to the presence or absence of proton-pump inhibitors

Unique Subject Identifier=2626011111-0012

MEANS Procedure

Assay variable : PTINR\_VAL1 PT-INR Value

N Mean Standard Deviation Minimum Maximum

---

|   |           |           |           |           |
|---|-----------|-----------|-----------|-----------|
| 4 | 1.8325000 | 0.4608959 | 1.2600000 | 2.3700000 |
|---|-----------|-----------|-----------|-----------|

---

Unique Subject Identifier=2626011111-0021

Assay variable : PTINR\_VAL1 PT-INR Value

N Mean Standard Deviation Minimum Maximum

---

|   |           |           |           |           |
|---|-----------|-----------|-----------|-----------|
| 5 | 1.8620000 | 0.4428544 | 1.2700000 | 2.4900000 |
|---|-----------|-----------|-----------|-----------|

---

Unique Subject Identifier=2626011111-0035

Assay variable : PTINR\_VAL1 PT-INR Value

N Mean Standard Deviation Minimum Maximum

---

|   |           |           |           |           |
|---|-----------|-----------|-----------|-----------|
| 3 | 1.6600000 | 0.0600000 | 1.6000000 | 1.7200000 |
|---|-----------|-----------|-----------|-----------|

---

Unique Subject Identifier=2626011111-0043

Assay variable : PTINR\_VAL1 PT-INR Value

N Mean Standard Deviation Minimum Maximum

---

|   |           |           |           |           |
|---|-----------|-----------|-----------|-----------|
| 4 | 1.7700000 | 0.2409703 | 1.5100000 | 1.9800000 |
|---|-----------|-----------|-----------|-----------|

---

Laboratory tests at the time of obtaining Table 2-6 consent, according to the presence or absence of proton-pump inhibitors

Unique Subject Identifier=2627011111-0002

MEANS Procedure

Assay variable : PTINR\_VAL1 PT-INR Value

N Mean Standard Deviation Minimum Maximum

---

|   |           |           |           |           |
|---|-----------|-----------|-----------|-----------|
| 6 | 2.1716667 | 0.1154845 | 1.9700000 | 2.2900000 |
|---|-----------|-----------|-----------|-----------|

---

Unique Subject Identifier=2627011111-0033

Assay variable : PTINR\_VAL1 PT-INR Value

N Mean Standard Deviation Minimum Maximum

---

|   |           |           |           |           |
|---|-----------|-----------|-----------|-----------|
| 4 | 1.9225000 | 0.1543535 | 1.7200000 | 2.0900000 |
|---|-----------|-----------|-----------|-----------|

---

Unique Subject Identifier=2628011111-0004

Assay variable : PTINR\_VAL1 PT-INR Value

N Mean Standard Deviation Minimum Maximum

---

|   |           |           |           |           |
|---|-----------|-----------|-----------|-----------|
| 4 | 2.1850000 | 0.3445287 | 1.7000000 | 2.4500000 |
|---|-----------|-----------|-----------|-----------|

---

Unique Subject Identifier=2628011111-0006



Assay variable : PTINR\_VAL1 PT-INR Value

N Mean Standard Deviation Minimum Maximum

---

|   |           |           |           |           |
|---|-----------|-----------|-----------|-----------|
| 4 | 2.2875000 | 0.5296776 | 1.8500000 | 2.9500000 |
|---|-----------|-----------|-----------|-----------|

---

Laboratory tests at the time of obtaining Table 2-6 consent, according to the presence or absence of proton-pump inhibitors

Unique Subject Identifier=2628011111-0007

MEANS Procedure

Assay variable : PTINR\_VAL1 PT-INR Value

N Mean Standard Deviation Minimum Maximum

---

|   |           |           |           |           |
|---|-----------|-----------|-----------|-----------|
| 3 | 1.9333333 | 0.2064784 | 1.7900000 | 2.1700000 |
|---|-----------|-----------|-----------|-----------|

---

Unique Subject Identifier=2628011111-0011

Assay variable : PTINR\_VAL1 PT-INR Value

N Mean Standard Deviation Minimum Maximum

---

|   |           |           |           |           |
|---|-----------|-----------|-----------|-----------|
| 3 | 1.8900000 | 0.2389561 | 1.6300000 | 2.1000000 |
|---|-----------|-----------|-----------|-----------|

---

Unique Subject Identifier=2628011111-0025

Assay variable : PTINR\_VAL1 PT-INR Value

N Mean Standard Deviation Minimum Maximum

---

|   |           |           |           |           |
|---|-----------|-----------|-----------|-----------|
| 5 | 1.8240000 | 0.1524139 | 1.6400000 | 2.0500000 |
|---|-----------|-----------|-----------|-----------|

---

Unique Subject Identifier=2628011111-0042

Assay variable : PTINR\_VAL1 PT-INR Value

N Mean Standard Deviation Minimum Maximum

---

|   |           |           |           |           |
|---|-----------|-----------|-----------|-----------|
| 4 | 1.4575000 | 0.2721978 | 1.2100000 | 1.8000000 |
|---|-----------|-----------|-----------|-----------|

---

Laboratory tests at the time of obtaining Table 2-6 consent, according to the presence or absence of proton-pump inhibitors

Unique Subject Identifier=2628011111-0043

MEANS Procedure

Assay variable : PTINR\_VAL1 PT-INR Value

N Mean Standard Deviation Minimum Maximum

---

|   |           |           |           |           |
|---|-----------|-----------|-----------|-----------|
| 5 | 1.8300000 | 0.3910882 | 1.4100000 | 2.2400000 |
|---|-----------|-----------|-----------|-----------|

---

Unique Subject Identifier=2628011111-0061

Assay variable : PTINR\_VAL1 PT-INR Value

N Mean Standard Deviation Minimum Maximum

---

|   |           |           |           |           |
|---|-----------|-----------|-----------|-----------|
| 6 | 1.4683333 | 0.0453505 | 1.4200000 | 1.5300000 |
|---|-----------|-----------|-----------|-----------|

---

Unique Subject Identifier=2628011111-0066

Assay variable : PTINR\_VAL1 PT-INR Value

N Mean Standard Deviation Minimum Maximum

---

|   |           |           |           |           |
|---|-----------|-----------|-----------|-----------|
| 4 | 2.3500000 | 0.2585859 | 2.0600000 | 2.6500000 |
|---|-----------|-----------|-----------|-----------|

---

Unique Subject Identifier=2634000000-0002

Assay variable : PTINR\_VAL1 PT-INR Value

N Mean Standard Deviation Minimum Maximum

---

|   |           |           |           |           |
|---|-----------|-----------|-----------|-----------|
| 3 | 2.2466667 | 0.2888483 | 2.0700000 | 2.5800000 |
|---|-----------|-----------|-----------|-----------|

---

Laboratory tests at the time of obtaining Table 2-6 consent, according to the presence or absence of proton-pump inhibitors

Unique Subject Identifier=2636011000-0004

MEANS Procedure

Assay variable : PTINR\_VAL1 PT-INR Value

N Mean Standard Deviation Minimum Maximum

---

|   |           |           |           |           |
|---|-----------|-----------|-----------|-----------|
| 5 | 2.0400000 | 0.2709243 | 1.7300000 | 2.3400000 |
|---|-----------|-----------|-----------|-----------|

---

Unique Subject Identifier=2636011000-0007

Assay variable : PTINR\_VAL1 PT-INR Value

N Mean Standard Deviation Minimum Maximum

---

|   |           |           |           |           |
|---|-----------|-----------|-----------|-----------|
| 3 | 1.8400000 | 0.1249000 | 1.7000000 | 1.9400000 |
|---|-----------|-----------|-----------|-----------|

---

Unique Subject Identifier=2636011000-0010

Assay variable : PTINR\_VAL1 PT-INR Value

N Mean Standard Deviation Minimum Maximum

---

|   |           |           |           |           |
|---|-----------|-----------|-----------|-----------|
| 4 | 2.0000000 | 0.0571548 | 1.9300000 | 2.0700000 |
|---|-----------|-----------|-----------|-----------|

---

Unique Subject Identifier=2636011000-0019

Assay variable : PTINR\_VAL1 PT-INR Value

N Mean Standard Deviation Minimum Maximum

---

|   |           |  |           |           |
|---|-----------|--|-----------|-----------|
| 1 | 2.2100000 |  | 2.2100000 | 2.2100000 |
|---|-----------|--|-----------|-----------|

---

Laboratory tests at the time of obtaining Table 2-6 consent, according to the presence or absence of proton-pump inhibitors

Unique Subject Identifier=2636011000-0032

MEANS Procedure

Assay variable : PTINR\_VAL1 PT-INR Value

N Mean Standard Deviation Minimum Maximum

---

|   |           |           |           |           |
|---|-----------|-----------|-----------|-----------|
| 6 | 2.1766667 | 0.5461380 | 1.5700000 | 2.8800000 |
|---|-----------|-----------|-----------|-----------|

---

Unique Subject Identifier=2636011000-0043

Assay variable : PTINR\_VAL1 PT-INR Value

N Mean Standard Deviation Minimum Maximum

---

|   |           |           |           |           |
|---|-----------|-----------|-----------|-----------|
| 3 | 2.1000000 | 0.8351647 | 1.3500000 | 3.0000000 |
|---|-----------|-----------|-----------|-----------|

---

Unique Subject Identifier=2638000000-0010

Assay variable : PTINR\_VAL1 PT-INR Value

N Mean Standard Deviation Minimum Maximum

---

|   |           |           |           |           |
|---|-----------|-----------|-----------|-----------|
| 4 | 1.2550000 | 0.0412311 | 1.2100000 | 1.2900000 |
|---|-----------|-----------|-----------|-----------|

---

Unique Subject Identifier=2638000000-0020



Assay variable : PTINR\_VAL1 PT-INR Value

N Mean Standard Deviation Minimum Maximum

---

|   |          |           |          |          |
|---|----------|-----------|----------|----------|
| 3 | 2.180000 | 0.0655744 | 2.120000 | 2.250000 |
|---|----------|-----------|----------|----------|

---

Laboratory tests at the time of obtaining Table 2-6 consent, according to the presence or absence of proton-pump inhibitors

Unique Subject Identifier=2640011000-0004

MEANS Procedure

Assay variable : PTINR\_VAL1 PT-INR Value

N Mean Standard Deviation Minimum Maximum

---

|   |           |           |           |           |
|---|-----------|-----------|-----------|-----------|
| 6 | 2.4166667 | 0.4273952 | 1.9800000 | 3.0700000 |
|---|-----------|-----------|-----------|-----------|

---

Unique Subject Identifier=2640011000-0006

Assay variable : PTINR\_VAL1 PT-INR Value

N Mean Standard Deviation Minimum Maximum

---

|   |           |           |           |           |
|---|-----------|-----------|-----------|-----------|
| 6 | 1.9783333 | 0.6804533 | 1.2000000 | 3.0600000 |
|---|-----------|-----------|-----------|-----------|

---

Unique Subject Identifier=2641010000-0009

Assay variable : PTINR\_VAL1 PT-INR Value

N Mean Standard Deviation Minimum Maximum

---

|   |           |           |           |           |
|---|-----------|-----------|-----------|-----------|
| 3 | 2.3300000 | 0.3726929 | 1.9000000 | 2.5600000 |
|---|-----------|-----------|-----------|-----------|

---

Unique Subject Identifier=2641010000-0011

Assay variable : PTINR\_VAL1 PT-INR Value

N Mean Standard Deviation Minimum Maximum

---

|   |           |           |           |           |
|---|-----------|-----------|-----------|-----------|
| 5 | 2.3120000 | 0.2875239 | 1.9200000 | 2.6200000 |
|---|-----------|-----------|-----------|-----------|

---

Laboratory tests at the time of obtaining Table 2-6 consent, according to the presence or absence of proton-pump inhibitors

Unique Subject Identifier=2656011000-0005

MEANS Procedure

Assay variable : PTINR\_VAL1 PT-INR Value

N Mean Standard Deviation Minimum Maximum

---

|   |           |           |           |           |
|---|-----------|-----------|-----------|-----------|
| 3 | 2.1766667 | 0.1078579 | 2.1000000 | 2.3000000 |
|---|-----------|-----------|-----------|-----------|

---

Unique Subject Identifier=2656011000-0013

Assay variable : PTINR\_VAL1 PT-INR Value

N Mean Standard Deviation Minimum Maximum

---

|   |           |           |           |           |
|---|-----------|-----------|-----------|-----------|
| 2 | 1.6850000 | 0.4171930 | 1.3900000 | 1.9800000 |
|---|-----------|-----------|-----------|-----------|

---

Unique Subject Identifier=2656011000-0016

Assay variable : PTINR\_VAL1 PT-INR Value

N Mean Standard Deviation Minimum Maximum

---

|   |           |           |           |           |
|---|-----------|-----------|-----------|-----------|
| 2 | 1.6550000 | 0.0919239 | 1.5900000 | 1.7200000 |
|---|-----------|-----------|-----------|-----------|

---

Unique Subject Identifier=2662011111-0004

Assay variable : PTINR\_VAL1 PT-INR Value

N Mean Standard Deviation Minimum Maximum

---

|   |           |           |           |           |
|---|-----------|-----------|-----------|-----------|
| 6 | 1.9166667 | 0.3656045 | 1.5000000 | 2.4000000 |
|---|-----------|-----------|-----------|-----------|

---

Laboratory tests at the time of obtaining Table 2-6 consent, according to the presence or absence of proton-pump inhibitors

Unique Subject Identifier=2662011111-0005

MEANS Procedure

Assay variable : PTINR\_VAL1 PT-INR Value

N Mean Standard Deviation Minimum Maximum

---

|   |           |           |           |           |
|---|-----------|-----------|-----------|-----------|
| 6 | 1.9000000 | 0.2966479 | 1.4000000 | 2.2000000 |
|---|-----------|-----------|-----------|-----------|

---

Unique Subject Identifier=2662011111-0036

Assay variable : PTINR\_VAL1 PT-INR Value

N Mean Standard Deviation Minimum Maximum

---

|   |           |           |           |           |
|---|-----------|-----------|-----------|-----------|
| 3 | 1.5666667 | 0.3511885 | 1.2000000 | 1.9000000 |
|---|-----------|-----------|-----------|-----------|

---

Unique Subject Identifier=2662011111-0039

Assay variable : PTINR\_VAL1 PT-INR Value

N Mean Standard Deviation Minimum Maximum

---

|   |           |           |           |           |
|---|-----------|-----------|-----------|-----------|
| 6 | 1.9666667 | 0.2250926 | 1.7000000 | 2.2000000 |
|---|-----------|-----------|-----------|-----------|

---

Unique Subject Identifier=2662011111-0046

Assay variable : PTINR\_VAL1 PT-INR Value

N Mean Standard Deviation Minimum Maximum

---

|   |           |           |           |           |
|---|-----------|-----------|-----------|-----------|
| 4 | 1.8250000 | 0.1258306 | 1.7000000 | 2.0000000 |
|---|-----------|-----------|-----------|-----------|

---

Laboratory tests at the time of obtaining Table 2-6 consent, according to the presence or absence of proton-pump inhibitors

Unique Subject Identifier=2662011111-0047

MEANS Procedure

Assay variable : PTINR\_VAL1 PT-INR Value

N Mean Standard Deviation Minimum Maximum

---

|   |           |           |           |           |
|---|-----------|-----------|-----------|-----------|
| 3 | 1.6433333 | 0.2040425 | 1.4200000 | 1.8200000 |
|---|-----------|-----------|-----------|-----------|

---

Unique Subject Identifier=2662011111-0049

Assay variable : PTINR\_VAL1 PT-INR Value

N Mean Standard Deviation Minimum Maximum

---

|   |           |           |           |           |
|---|-----------|-----------|-----------|-----------|
| 4 | 1.8750000 | 0.5188127 | 1.4000000 | 2.5000000 |
|---|-----------|-----------|-----------|-----------|

---

Unique Subject Identifier=2662011111-0063

Assay variable : PTINR\_VAL1 PT-INR Value

N Mean Standard Deviation Minimum Maximum

---

|   |           |           |           |           |
|---|-----------|-----------|-----------|-----------|
| 4 | 1.4750000 | 0.4573474 | 1.0000000 | 2.1000000 |
|---|-----------|-----------|-----------|-----------|

---

Unique Subject Identifier=2668011000-0030



Assay variable : PTINR\_VAL1 PT-INR Value

N Mean Standard Deviation Minimum Maximum

---

|   |           |           |           |           |
|---|-----------|-----------|-----------|-----------|
| 4 | 1.9975000 | 0.1977161 | 1.7700000 | 2.2000000 |
|---|-----------|-----------|-----------|-----------|

---

Laboratory tests at the time of obtaining Table 2-6 consent, according to the presence or absence of proton-pump inhibitors

Unique Subject Identifier=2669000000-0001

MEANS Procedure

Assay variable : PTINR\_VAL1 PT-INR Value

N Mean Standard Deviation Minimum Maximum

---

|   |           |           |           |           |
|---|-----------|-----------|-----------|-----------|
| 6 | 1.8700000 | 0.4251588 | 1.3500000 | 2.5500000 |
|---|-----------|-----------|-----------|-----------|

---

Unique Subject Identifier=2669000000-0015

Assay variable : PTINR\_VAL1 PT-INR Value

N Mean Standard Deviation Minimum Maximum

---

|   |           |           |           |           |
|---|-----------|-----------|-----------|-----------|
| 3 | 2.2933333 | 0.1850225 | 2.1100000 | 2.4800000 |
|---|-----------|-----------|-----------|-----------|

---

Unique Subject Identifier=2671000000-0023

Assay variable : PTINR\_VAL1 PT-INR Value

N Mean Standard Deviation Minimum Maximum

---

|   |           |           |           |           |
|---|-----------|-----------|-----------|-----------|
| 3 | 2.4033333 | 0.1379613 | 2.3000000 | 2.5600000 |
|---|-----------|-----------|-----------|-----------|

---

Unique Subject Identifier=2671000000-0055

Assay variable : PTINR\_VAL1 PT-INR Value

N Mean Standard Deviation Minimum Maximum

---

|   |           |           |           |           |
|---|-----------|-----------|-----------|-----------|
| 5 | 1.9900000 | 0.2740438 | 1.7500000 | 2.4000000 |
|---|-----------|-----------|-----------|-----------|

---

Laboratory tests at the time of obtaining Table 2-6 consent, according to the presence or absence of proton-pump inhibitors

Unique Subject Identifier=2671000000-0058

MEANS Procedure

Assay variable : PTINR\_VAL1 PT-INR Value

N Mean Standard Deviation Minimum Maximum

---

|   |           |           |           |           |
|---|-----------|-----------|-----------|-----------|
| 6 | 2.4900000 | 0.9104504 | 1.5700000 | 3.6100000 |
|---|-----------|-----------|-----------|-----------|

---

Unique Subject Identifier=2671000000-0064

Assay variable : PTINR\_VAL1 PT-INR Value

N Mean Standard Deviation Minimum Maximum

---

|   |           |           |           |           |
|---|-----------|-----------|-----------|-----------|
| 5 | 1.8620000 | 0.5265169 | 1.2400000 | 2.6400000 |
|---|-----------|-----------|-----------|-----------|

---

Unique Subject Identifier=2672000000-0020

Assay variable : PTINR\_VAL1 PT-INR Value

N Mean Standard Deviation Minimum Maximum

---

|   |           |           |           |           |
|---|-----------|-----------|-----------|-----------|
| 3 | 2.0666667 | 0.2804164 | 1.7600000 | 2.3100000 |
|---|-----------|-----------|-----------|-----------|

---

Unique Subject Identifier=2672000000-0027

Assay variable : PTINR\_VAL1 PT-INR Value

N Mean Standard Deviation Minimum Maximum

---

|   |          |           |          |          |
|---|----------|-----------|----------|----------|
| 2 | 2.300000 | 0.2687006 | 2.110000 | 2.490000 |
|---|----------|-----------|----------|----------|

---

Laboratory tests at the time of obtaining Table 2-6 consent, according to the presence or absence of proton-pump inhibitors

Unique Subject Identifier=2672000000-0028

MEANS Procedure

Assay variable : PTINR\_VAL1 PT-INR Value

N Mean Standard Deviation Minimum Maximum

---

|   |           |           |           |           |
|---|-----------|-----------|-----------|-----------|
| 2 | 1.6800000 | 0.2687006 | 1.4900000 | 1.8700000 |
|---|-----------|-----------|-----------|-----------|

---

Unique Subject Identifier=2675000000-0005

Assay variable : PTINR\_VAL1 PT-INR Value

N Mean Standard Deviation Minimum Maximum

---

|   |           |           |           |           |
|---|-----------|-----------|-----------|-----------|
| 4 | 2.3200000 | 0.3329665 | 1.9900000 | 2.7500000 |
|---|-----------|-----------|-----------|-----------|

---

Unique Subject Identifier=2675000000-0013

Assay variable : PTINR\_VAL1 PT-INR Value

N Mean Standard Deviation Minimum Maximum

---

|   |           |           |           |           |
|---|-----------|-----------|-----------|-----------|
| 5 | 1.9460000 | 0.3591379 | 1.3600000 | 2.2100000 |
|---|-----------|-----------|-----------|-----------|

---

Unique Subject Identifier=2678010000-0002

Assay variable : PTINR\_VAL1 PT-INR Value

N Mean Standard Deviation Minimum Maximum

---

|   |           |           |           |           |
|---|-----------|-----------|-----------|-----------|
| 3 | 2.2166667 | 0.2020726 | 2.1000000 | 2.4500000 |
|---|-----------|-----------|-----------|-----------|

---

Laboratory tests at the time of obtaining Table 2-6 consent, according to the presence or absence of proton-pump inhibitors

Unique Subject Identifier=2678010000-0005

MEANS Procedure

Assay variable : PTINR\_VAL1 PT-INR Value

| N | Mean      | Standard Deviation | Minimum   | Maximum   |
|---|-----------|--------------------|-----------|-----------|
| 5 | 1.9020000 | 0.2669644          | 1.6500000 | 2.2800000 |

Unique Subject Identifier=2678010000-0014

Assay variable : PTINR\_VAL1 PT-INR Value

| N | Mean      | Standard Deviation | Minimum   | Maximum   |
|---|-----------|--------------------|-----------|-----------|
| 4 | 2.0950000 | 0.3875134          | 1.6900000 | 2.6000000 |

Unique Subject Identifier=2678010000-0034

Assay variable : PTINR\_VAL1 PT-INR Value

| N | Mean      | Standard Deviation | Minimum   | Maximum   |
|---|-----------|--------------------|-----------|-----------|
| 3 | 1.5233333 | 0.0251661          | 1.5000000 | 1.5500000 |

Unique Subject Identifier=2687001000-0001



Assay variable : PTINR\_VAL1 PT-INR Value

N Mean Standard Deviation Minimum Maximum

---

|   |          |          |          |          |
|---|----------|----------|----------|----------|
| 5 | 1.840000 | 0.167332 | 1.600000 | 2.000000 |
|---|----------|----------|----------|----------|

---

Laboratory tests at the time of obtaining Table 2-6 consent, according to the presence or absence of proton-pump inhibitors

Unique Subject Identifier=2687001000-0016

MEANS Procedure

Assay variable : PTINR\_VAL1 PT-INR Value

N Mean Standard Deviation Minimum Maximum

---

|   |           |           |           |           |
|---|-----------|-----------|-----------|-----------|
| 5 | 2.2000000 | 0.2236068 | 1.9000000 | 2.5000000 |
|---|-----------|-----------|-----------|-----------|

---

Unique Subject Identifier=2687001000-0036

Assay variable : PTINR\_VAL1 PT-INR Value

N Mean Standard Deviation Minimum Maximum

---

|   |           |           |           |           |
|---|-----------|-----------|-----------|-----------|
| 5 | 2.1200000 | 0.2863564 | 1.9000000 | 2.6000000 |
|---|-----------|-----------|-----------|-----------|

---

Unique Subject Identifier=2687001000-0042

Assay variable : PTINR\_VAL1 PT-INR Value

N Mean Standard Deviation Minimum Maximum

---

|   |           |           |           |           |
|---|-----------|-----------|-----------|-----------|
| 5 | 1.6000000 | 0.0707107 | 1.5000000 | 1.7000000 |
|---|-----------|-----------|-----------|-----------|

---

Unique Subject Identifier=2688011111-0001

Assay variable : PTINR\_VAL1 PT-INR Value

N Mean Standard Deviation Minimum Maximum

---

|   |          |           |          |          |
|---|----------|-----------|----------|----------|
| 6 | 2.500000 | 0.4604346 | 2.000000 | 3.300000 |
|---|----------|-----------|----------|----------|

---

Laboratory tests at the time of obtaining Table 2-6 consent, according to the presence or absence of proton-pump inhibitors

Unique Subject Identifier=2688011111-0003

MEANS Procedure

Assay variable : PTINR\_VAL1 PT-INR Value

N Mean Standard Deviation Minimum Maximum

---

|   |           |           |           |           |
|---|-----------|-----------|-----------|-----------|
| 5 | 2.0400000 | 0.2302173 | 1.8000000 | 2.4000000 |
|---|-----------|-----------|-----------|-----------|

---

Unique Subject Identifier=2688011111-0006

Assay variable : PTINR\_VAL1 PT-INR Value

N Mean Standard Deviation Minimum Maximum

---

|   |           |           |           |           |
|---|-----------|-----------|-----------|-----------|
| 6 | 1.5500000 | 0.0836660 | 1.5000000 | 1.7000000 |
|---|-----------|-----------|-----------|-----------|

---

Unique Subject Identifier=2688011111-0007

Assay variable : PTINR\_VAL1 PT-INR Value

N Mean Standard Deviation Minimum Maximum

---

|   |           |           |           |           |
|---|-----------|-----------|-----------|-----------|
| 6 | 2.3500000 | 0.5958188 | 1.3000000 | 3.0000000 |
|---|-----------|-----------|-----------|-----------|

---

Unique Subject Identifier=2688011111-0008

Assay variable : PTINR\_VAL1 PT-INR Value

N Mean Standard Deviation Minimum Maximum

---

|   |           |           |           |           |
|---|-----------|-----------|-----------|-----------|
| 6 | 1.6666667 | 0.1505545 | 1.5000000 | 1.8000000 |
|---|-----------|-----------|-----------|-----------|

---

Laboratory tests at the time of obtaining Table 2-6 consent, according to the presence or absence of proton-pump inhibitors

Unique Subject Identifier=2688011111-0010

MEANS Procedure

Assay variable : PTINR\_VAL1 PT-INR Value

N Mean Standard Deviation Minimum Maximum

---

|   |           |           |           |           |
|---|-----------|-----------|-----------|-----------|
| 6 | 2.0166667 | 0.3970726 | 1.7000000 | 2.7000000 |
|---|-----------|-----------|-----------|-----------|

---

Unique Subject Identifier=2688011111-0012

Assay variable : PTINR\_VAL1 PT-INR Value

N Mean Standard Deviation Minimum Maximum

---

|   |           |           |           |           |
|---|-----------|-----------|-----------|-----------|
| 5 | 1.9600000 | 0.1140175 | 1.8000000 | 2.1000000 |
|---|-----------|-----------|-----------|-----------|

---

Unique Subject Identifier=2688011111-0013

Assay variable : PTINR\_VAL1 PT-INR Value

N Mean Standard Deviation Minimum Maximum

---

|   |           |           |           |           |
|---|-----------|-----------|-----------|-----------|
| 6 | 1.6833333 | 0.2136976 | 1.4000000 | 2.0000000 |
|---|-----------|-----------|-----------|-----------|

---

Unique Subject Identifier=2688011111-0015

Assay variable : PTINR\_VAL1 PT-INR Value

N Mean Standard Deviation Minimum Maximum

---

|   |          |           |          |          |
|---|----------|-----------|----------|----------|
| 5 | 1.800000 | 0.1581139 | 1.600000 | 2.000000 |
|---|----------|-----------|----------|----------|

---

Laboratory tests at the time of obtaining Table 2-6 consent, according to the presence or absence of proton-pump inhibitors

Unique Subject Identifier=2688011111-0016

MEANS Procedure

Assay variable : PTINR\_VAL1 PT-INR Value

N Mean Standard Deviation Minimum Maximum

---

|   |           |           |           |           |
|---|-----------|-----------|-----------|-----------|
| 5 | 2.3800000 | 0.3898718 | 2.0000000 | 3.0000000 |
|---|-----------|-----------|-----------|-----------|

---

Unique Subject Identifier=2688011111-0018

Assay variable : PTINR\_VAL1 PT-INR Value

N Mean Standard Deviation Minimum Maximum

---

|   |           |           |           |           |
|---|-----------|-----------|-----------|-----------|
| 6 | 1.5666667 | 0.2160247 | 1.3000000 | 1.9000000 |
|---|-----------|-----------|-----------|-----------|

---

Unique Subject Identifier=2688011111-0020

Assay variable : PTINR\_VAL1 PT-INR Value

N Mean Standard Deviation Minimum Maximum

---

|   |           |           |           |           |
|---|-----------|-----------|-----------|-----------|
| 5 | 1.8600000 | 0.2408319 | 1.6000000 | 2.1000000 |
|---|-----------|-----------|-----------|-----------|

---

Unique Subject Identifier=2688011111-0023



Assay variable : PTINR\_VAL1 PT-INR Value

N Mean Standard Deviation Minimum Maximum

---

|   |          |           |          |          |
|---|----------|-----------|----------|----------|
| 5 | 2.080000 | 0.3271085 | 1.700000 | 2.600000 |
|---|----------|-----------|----------|----------|

---

Laboratory tests at the time of obtaining Table 2-6 consent, according to the presence or absence of proton-pump inhibitors

Unique Subject Identifier=2688011111-0026

MEANS Procedure

Assay variable : PTINR\_VAL1 PT-INR Value

| N | Mean      | Standard Deviation | Minimum   | Maximum   |
|---|-----------|--------------------|-----------|-----------|
| 1 | 1.5000000 |                    | 1.5000000 | 1.5000000 |

Unique Subject Identifier=2688011111-0027

Assay variable : PTINR\_VAL1 PT-INR Value

| N | Mean      | Standard Deviation | Minimum   | Maximum   |
|---|-----------|--------------------|-----------|-----------|
| 5 | 2.2600000 | 0.5224940          | 1.7000000 | 3.1000000 |

Unique Subject Identifier=2688011111-0028

Assay variable : PTINR\_VAL1 PT-INR Value

| N | Mean      | Standard Deviation | Minimum   | Maximum   |
|---|-----------|--------------------|-----------|-----------|
| 5 | 1.6000000 | 0.2915476          | 1.2000000 | 1.9000000 |

Unique Subject Identifier=2688011111-0034

Assay variable : PTINR\_VAL1 PT-INR Value

N Mean Standard Deviation Minimum Maximum

---

|   |          |           |          |          |
|---|----------|-----------|----------|----------|
| 5 | 1.760000 | 0.1516575 | 1.600000 | 2.000000 |
|---|----------|-----------|----------|----------|

---

Laboratory tests at the time of obtaining Table 2-6 consent, according to the presence or absence of proton-pump inhibitors

Unique Subject Identifier=2688011111-0036

MEANS Procedure

Assay variable : PTINR\_VAL1 PT-INR Value

N Mean Standard Deviation Minimum Maximum

---

|   |          |           |          |          |
|---|----------|-----------|----------|----------|
| 5 | 1.660000 | 0.1816590 | 1.400000 | 1.900000 |
|---|----------|-----------|----------|----------|

---

Unique Subject Identifier=2688011111-0037

Assay variable : PTINR\_VAL1 PT-INR Value

N Mean Standard Deviation Minimum Maximum

---

|   |          |           |          |          |
|---|----------|-----------|----------|----------|
| 5 | 1.680000 | 0.5718391 | 1.200000 | 2.600000 |
|---|----------|-----------|----------|----------|

---

Unique Subject Identifier=2688011111-0040

Assay variable : PTINR\_VAL1 PT-INR Value

N Mean Standard Deviation Minimum Maximum

---

|   |          |           |          |          |
|---|----------|-----------|----------|----------|
| 3 | 2.166667 | 0.3511885 | 1.800000 | 2.500000 |
|---|----------|-----------|----------|----------|

---

Unique Subject Identifier=2688011111-0041

Assay variable : PTINR\_VAL1 PT-INR Value

N Mean Standard Deviation Minimum Maximum

---

|   |           |           |           |           |
|---|-----------|-----------|-----------|-----------|
| 6 | 1.4333333 | 0.2943920 | 1.2000000 | 2.0000000 |
|---|-----------|-----------|-----------|-----------|

---

Laboratory tests at the time of obtaining Table 2-6 consent, according to the presence or absence of proton-pump inhibitors

Unique Subject Identifier=2688011111-0044

MEANS Procedure

Assay variable : PTINR\_VAL1 PT-INR Value

N Mean Standard Deviation Minimum Maximum

---

|   |           |           |           |           |
|---|-----------|-----------|-----------|-----------|
| 5 | 1.7800000 | 0.1095445 | 1.6000000 | 1.9000000 |
|---|-----------|-----------|-----------|-----------|

---

Unique Subject Identifier=2688011111-0047

Assay variable : PTINR\_VAL1 PT-INR Value

N Mean Standard Deviation Minimum Maximum

---

|   |           |           |           |           |
|---|-----------|-----------|-----------|-----------|
| 6 | 1.5500000 | 0.1378405 | 1.4000000 | 1.8000000 |
|---|-----------|-----------|-----------|-----------|

---

Unique Subject Identifier=2688011111-0048

Assay variable : PTINR\_VAL1 PT-INR Value

N Mean Standard Deviation Minimum Maximum

---

|   |           |           |           |           |
|---|-----------|-----------|-----------|-----------|
| 6 | 2.1000000 | 0.4774935 | 1.4000000 | 2.7000000 |
|---|-----------|-----------|-----------|-----------|

---

Unique Subject Identifier=2688011111-0049

Assay variable : PTINR\_VAL1 PT-INR Value

N Mean Standard Deviation Minimum Maximum

---

|   |          |          |          |          |
|---|----------|----------|----------|----------|
| 5 | 2.000000 | 0.200000 | 1.700000 | 2.200000 |
|---|----------|----------|----------|----------|

---

Laboratory tests at the time of obtaining Table 2-6 consent, according to the presence or absence of proton-pump inhibitors

Unique Subject Identifier=2688011111-0050

MEANS Procedure

Assay variable : PTINR\_VAL1 PT-INR Value

| N | Mean      | Standard Deviation | Minimum   | Maximum   |
|---|-----------|--------------------|-----------|-----------|
| 4 | 2.3250000 | 0.6994045          | 1.4000000 | 3.0000000 |

Unique Subject Identifier=2688011111-0052

Assay variable : PTINR\_VAL1 PT-INR Value

| N | Mean      | Standard Deviation | Minimum   | Maximum   |
|---|-----------|--------------------|-----------|-----------|
| 4 | 2.0000000 | 0.1414214          | 1.9000000 | 2.2000000 |

Unique Subject Identifier=2688011111-0054

Assay variable : PTINR\_VAL1 PT-INR Value

| N | Mean      | Standard Deviation | Minimum   | Maximum   |
|---|-----------|--------------------|-----------|-----------|
| 5 | 2.0600000 | 0.3286335          | 1.7000000 | 2.4000000 |

Unique Subject Identifier=2688011111-0057



Assay variable : PTINR\_VAL1 PT-INR Value

N Mean Standard Deviation Minimum Maximum

---

|   |          |           |          |          |
|---|----------|-----------|----------|----------|
| 5 | 2.320000 | 0.1923538 | 2.100000 | 2.600000 |
|---|----------|-----------|----------|----------|

---

Laboratory tests at the time of obtaining Table 2-6 consent, according to the presence or absence of proton-pump inhibitors

Unique Subject Identifier=2688011111-0058

MEANS Procedure

Assay variable : PTINR\_VAL1 PT-INR Value

N Mean Standard Deviation Minimum Maximum

---

|   |           |           |           |           |
|---|-----------|-----------|-----------|-----------|
| 5 | 1.9600000 | 0.2302173 | 1.6000000 | 2.2000000 |
|---|-----------|-----------|-----------|-----------|

---

Unique Subject Identifier=2688011111-0059

Assay variable : PTINR\_VAL1 PT-INR Value

N Mean Standard Deviation Minimum Maximum

---

|   |           |           |           |           |
|---|-----------|-----------|-----------|-----------|
| 6 | 1.8000000 | 0.3898718 | 1.3000000 | 2.4000000 |
|---|-----------|-----------|-----------|-----------|

---

Unique Subject Identifier=2688011111-0061

Assay variable : PTINR\_VAL1 PT-INR Value

N Mean Standard Deviation Minimum Maximum

---

|   |           |           |           |           |
|---|-----------|-----------|-----------|-----------|
| 5 | 1.6200000 | 0.2167948 | 1.3000000 | 1.8000000 |
|---|-----------|-----------|-----------|-----------|

---

Unique Subject Identifier=2688011111-0062

Assay variable : PTINR\_VAL1 PT-INR Value

N Mean Standard Deviation Minimum Maximum

---

|   |           |           |           |           |
|---|-----------|-----------|-----------|-----------|
| 6 | 2.5833333 | 1.0008330 | 1.3000000 | 4.1000000 |
|---|-----------|-----------|-----------|-----------|

---

Laboratory tests at the time of obtaining Table 2-6 consent, according to the presence or absence of proton-pump inhibitors

Unique Subject Identifier=2688011111-0064

MEANS Procedure

Assay variable : PTINR\_VAL1 PT-INR Value

N Mean Standard Deviation Minimum Maximum

---

|   |           |           |           |           |
|---|-----------|-----------|-----------|-----------|
| 5 | 1.8400000 | 0.8443933 | 1.2000000 | 3.3000000 |
|---|-----------|-----------|-----------|-----------|

---

Unique Subject Identifier=2688011111-0065

Assay variable : PTINR\_VAL1 PT-INR Value

N Mean Standard Deviation Minimum Maximum

---

|   |           |           |           |           |
|---|-----------|-----------|-----------|-----------|
| 5 | 1.9400000 | 0.2966479 | 1.5000000 | 2.2000000 |
|---|-----------|-----------|-----------|-----------|

---

Unique Subject Identifier=2688011111-0074

Assay variable : PTINR\_VAL1 PT-INR Value

N Mean Standard Deviation Minimum Maximum

---

|   |           |           |           |           |
|---|-----------|-----------|-----------|-----------|
| 5 | 2.1400000 | 0.3130495 | 1.8000000 | 2.6000000 |
|---|-----------|-----------|-----------|-----------|

---

Unique Subject Identifier=2688011111-0078

Assay variable : PTINR\_VAL1 PT-INR Value

N Mean Standard Deviation Minimum Maximum

---

|   |          |          |          |          |
|---|----------|----------|----------|----------|
| 5 | 2.340000 | 0.219089 | 2.000000 | 2.600000 |
|---|----------|----------|----------|----------|

---

Laboratory tests at the time of obtaining Table 2-6 consent, according to the presence or absence of proton-pump inhibitors

Unique Subject Identifier=2688011111-0082

MEANS Procedure

Assay variable : PTINR\_VAL1 PT-INR Value

N Mean Standard Deviation Minimum Maximum

---

|   |           |           |           |           |
|---|-----------|-----------|-----------|-----------|
| 6 | 2.2333333 | 0.1032796 | 2.1000000 | 2.4000000 |
|---|-----------|-----------|-----------|-----------|

---

Unique Subject Identifier=2692000000-0005

Assay variable : PTINR\_VAL1 PT-INR Value

N Mean Standard Deviation Minimum Maximum

---

|   |           |           |           |           |
|---|-----------|-----------|-----------|-----------|
| 6 | 1.8283333 | 0.3561694 | 1.4500000 | 2.4900000 |
|---|-----------|-----------|-----------|-----------|

---

Unique Subject Identifier=2692000000-0009

Assay variable : PTINR\_VAL1 PT-INR Value

N Mean Standard Deviation Minimum Maximum

---

|   |           |           |           |           |
|---|-----------|-----------|-----------|-----------|
| 6 | 1.9716667 | 0.4512834 | 1.5800000 | 2.6200000 |
|---|-----------|-----------|-----------|-----------|

---

Unique Subject Identifier=2703000000-0010

Assay variable : PTINR\_VAL1 PT-INR Value

N Mean Standard Deviation Minimum Maximum

---

|   |          |  |          |          |
|---|----------|--|----------|----------|
| 1 | 2.100000 |  | 2.100000 | 2.100000 |
|---|----------|--|----------|----------|

---

Laboratory tests at the time of obtaining Table 2-6 consent, according to the presence or absence of proton-pump inhibitors

Unique Subject Identifier=2703000000-0019

MEANS Procedure

Assay variable : PTINR\_VAL1 PT-INR Value

| N | Mean      | Standard Deviation | Minimum   | Maximum   |
|---|-----------|--------------------|-----------|-----------|
| 3 | 1.5533333 | 0.3233162          | 1.2600000 | 1.9000000 |

Unique Subject Identifier=2737011111-0002

Assay variable : PTINR\_VAL1 PT-INR Value

| N | Mean      | Standard Deviation | Minimum   | Maximum   |
|---|-----------|--------------------|-----------|-----------|
| 6 | 1.5500000 | 0.1048809          | 1.4000000 | 1.7000000 |

Unique Subject Identifier=2737011111-0007

Assay variable : PTINR\_VAL1 PT-INR Value

| N | Mean      | Standard Deviation | Minimum   | Maximum   |
|---|-----------|--------------------|-----------|-----------|
| 4 | 1.9500000 | 0.4123106          | 1.4000000 | 2.4000000 |

Unique Subject Identifier=2737011111-0008



Assay variable : PTINR\_VAL1 PT-INR Value

N Mean Standard Deviation Minimum Maximum

---

|   |           |           |           |           |
|---|-----------|-----------|-----------|-----------|
| 6 | 1.4666667 | 0.1505545 | 1.3000000 | 1.7000000 |
|---|-----------|-----------|-----------|-----------|

---

Laboratory tests at the time of obtaining Table 2-6 consent, according to the presence or absence of proton-pump inhibitors

Unique Subject Identifier=2748011000-0036

MEANS Procedure

Assay variable : PTINR\_VAL1 PT-INR Value

N Mean Standard Deviation Minimum Maximum

---

|   |           |           |           |           |
|---|-----------|-----------|-----------|-----------|
| 3 | 2.6733333 | 0.1761628 | 2.5100000 | 2.8600000 |
|---|-----------|-----------|-----------|-----------|

---

Unique Subject Identifier=2748011000-0042

Assay variable : PTINR\_VAL1 PT-INR Value

N Mean Standard Deviation Minimum Maximum

---

|   |           |           |           |           |
|---|-----------|-----------|-----------|-----------|
| 3 | 2.0900000 | 0.2722132 | 1.8400000 | 2.3800000 |
|---|-----------|-----------|-----------|-----------|

---

Unique Subject Identifier=2748011000-0059

Assay variable : PTINR\_VAL1 PT-INR Value

N Mean Standard Deviation Minimum Maximum

---

|   |           |           |           |           |
|---|-----------|-----------|-----------|-----------|
| 4 | 2.7425000 | 0.2808766 | 2.4100000 | 3.0500000 |
|---|-----------|-----------|-----------|-----------|

---

Unique Subject Identifier=2749000000-0003

Assay variable : PTINR\_VAL1 PT-INR Value

N Mean Standard Deviation Minimum Maximum

---

|   |          |           |          |          |
|---|----------|-----------|----------|----------|
| 2 | 2.260000 | 0.2545584 | 2.080000 | 2.440000 |
|---|----------|-----------|----------|----------|

---

Laboratory tests at the time of obtaining Table 2-6 consent, according to the presence or absence of proton-pump inhibitors

Unique Subject Identifier=2749000000-0007

MEANS Procedure

Assay variable : PTINR\_VAL1 PT-INR Value

N Mean Standard Deviation Minimum Maximum

---

|   |           |           |           |           |
|---|-----------|-----------|-----------|-----------|
| 6 | 2.1766667 | 0.2716370 | 1.8900000 | 2.4800000 |
|---|-----------|-----------|-----------|-----------|

---

Unique Subject Identifier=2765000000-0002

Assay variable : PTINR\_VAL1 PT-INR Value

N Mean Standard Deviation Minimum Maximum

---

|   |           |           |           |           |
|---|-----------|-----------|-----------|-----------|
| 5 | 1.7420000 | 0.4029516 | 1.2400000 | 2.3500000 |
|---|-----------|-----------|-----------|-----------|

---

Unique Subject Identifier=2765000000-0009

Assay variable : PTINR\_VAL1 PT-INR Value

N Mean Standard Deviation Minimum Maximum

---

|   |           |           |           |           |
|---|-----------|-----------|-----------|-----------|
| 4 | 1.9475000 | 0.1848197 | 1.8100000 | 2.2200000 |
|---|-----------|-----------|-----------|-----------|

---

Unique Subject Identifier=2777011010-0013

Assay variable : PTINR\_VAL1 PT-INR Value

N Mean Standard Deviation Minimum Maximum

---

|   |           |           |           |           |
|---|-----------|-----------|-----------|-----------|
| 3 | 1.7033333 | 0.2413158 | 1.5000000 | 1.9700000 |
|---|-----------|-----------|-----------|-----------|

---

Laboratory tests at the time of obtaining Table 2-6 consent, according to the presence or absence of proton-pump inhibitors

Unique Subject Identifier=2777011010-0021

MEANS Procedure

Assay variable : PTINR\_VAL1 PT-INR Value

N Mean Standard Deviation Minimum Maximum

---

|   |           |           |           |           |
|---|-----------|-----------|-----------|-----------|
| 4 | 1.6625000 | 0.4193149 | 1.1500000 | 2.0200000 |
|---|-----------|-----------|-----------|-----------|

---

Unique Subject Identifier=2777011010-0023

Assay variable : PTINR\_VAL1 PT-INR Value

N Mean Standard Deviation Minimum Maximum

---

|   |           |           |           |           |
|---|-----------|-----------|-----------|-----------|
| 5 | 1.9680000 | 0.2752635 | 1.5800000 | 2.2700000 |
|---|-----------|-----------|-----------|-----------|

---

Unique Subject Identifier=2777011010-0025

Assay variable : PTINR\_VAL1 PT-INR Value

N Mean Standard Deviation Minimum Maximum

---

|   |           |           |           |           |
|---|-----------|-----------|-----------|-----------|
| 3 | 2.0800000 | 0.0264575 | 2.0600000 | 2.1100000 |
|---|-----------|-----------|-----------|-----------|

---

Unique Subject Identifier=2777011010-0031

Assay variable : PTINR\_VAL1 PT-INR Value

N Mean Standard Deviation Minimum Maximum

---

|   |           |           |           |           |
|---|-----------|-----------|-----------|-----------|
| 2 | 1.7950000 | 0.6010408 | 1.3700000 | 2.2200000 |
|---|-----------|-----------|-----------|-----------|

---

Laboratory tests at the time of obtaining Table 2-6 consent, according to the presence or absence of proton-pump inhibitors

Unique Subject Identifier=2777011010-0033

MEANS Procedure

Assay variable : PTINR\_VAL1 PT-INR Value

N Mean Standard Deviation Minimum Maximum

---

|   |           |           |           |           |
|---|-----------|-----------|-----------|-----------|
| 3 | 1.8100000 | 0.1907878 | 1.5900000 | 1.9300000 |
|---|-----------|-----------|-----------|-----------|

---

Unique Subject Identifier=2777011010-0043

Assay variable : PTINR\_VAL1 PT-INR Value

N Mean Standard Deviation Minimum Maximum

---

|   |           |           |           |           |
|---|-----------|-----------|-----------|-----------|
| 3 | 2.0100000 | 0.2605763 | 1.7400000 | 2.2600000 |
|---|-----------|-----------|-----------|-----------|

---

Unique Subject Identifier=2777011010-0046

Assay variable : PTINR\_VAL1 PT-INR Value

N Mean Standard Deviation Minimum Maximum

---

|   |           |           |           |           |
|---|-----------|-----------|-----------|-----------|
| 3 | 2.0400000 | 0.3996248 | 1.6800000 | 2.4700000 |
|---|-----------|-----------|-----------|-----------|

---

Unique Subject Identifier=2782000000-0007



Assay variable : PTINR\_VAL1 PT-INR Value

N Mean Standard Deviation Minimum Maximum

---

|   |           |           |           |           |
|---|-----------|-----------|-----------|-----------|
| 3 | 2.0633333 | 0.1537314 | 1.9600000 | 2.2400000 |
|---|-----------|-----------|-----------|-----------|

---

Laboratory tests at the time of obtaining Table 2-6 consent, according to the presence or absence of proton-pump inhibitors

Unique Subject Identifier=2784011111-0009

MEANS Procedure

Assay variable : PTINR\_VAL1 PT-INR Value

N Mean Standard Deviation Minimum Maximum

---

|   |           |           |           |           |
|---|-----------|-----------|-----------|-----------|
| 5 | 1.7400000 | 0.2073644 | 1.6000000 | 2.1000000 |
|---|-----------|-----------|-----------|-----------|

---

Unique Subject Identifier=2784011111-0013

Assay variable : PTINR\_VAL1 PT-INR Value

N Mean Standard Deviation Minimum Maximum

---

|   |           |           |           |           |
|---|-----------|-----------|-----------|-----------|
| 5 | 1.4800000 | 0.2683282 | 1.2000000 | 1.8000000 |
|---|-----------|-----------|-----------|-----------|

---

Unique Subject Identifier=2791010010-0004

Assay variable : PTINR\_VAL1 PT-INR Value

N Mean Standard Deviation Minimum Maximum

---

|   |           |           |           |           |
|---|-----------|-----------|-----------|-----------|
| 6 | 1.8000000 | 0.1095445 | 1.6000000 | 1.9000000 |
|---|-----------|-----------|-----------|-----------|

---

Unique Subject Identifier=2809000000-0009

Assay variable : PTINR\_VAL1 PT-INR Value

N Mean Standard Deviation Minimum Maximum

---

|   |           |           |           |           |
|---|-----------|-----------|-----------|-----------|
| 5 | 2.0760000 | 0.1779888 | 1.8600000 | 2.2800000 |
|---|-----------|-----------|-----------|-----------|

---

Laboratory tests at the time of obtaining Table 2-6 consent, according to the presence or absence of proton-pump inhibitors

Unique Subject Identifier=2872000000-0003

MEANS Procedure

Assay variable : PTINR\_VAL1 PT-INR Value

N Mean Standard Deviation Minimum Maximum

---

|   |           |           |           |           |
|---|-----------|-----------|-----------|-----------|
| 3 | 1.7366667 | 0.2746513 | 1.4200000 | 1.9100000 |
|---|-----------|-----------|-----------|-----------|

---

Unique Subject Identifier=2875000000-0004

Assay variable : PTINR\_VAL1 PT-INR Value

N Mean Standard Deviation Minimum Maximum

---

|   |           |  |           |           |
|---|-----------|--|-----------|-----------|
| 1 | 1.0200000 |  | 1.0200000 | 1.0200000 |
|---|-----------|--|-----------|-----------|

---

Unique Subject Identifier=2875000000-0017

Assay variable : PTINR\_VAL1 PT-INR Value

N Mean Standard Deviation Minimum Maximum

---

|   |           |           |           |           |
|---|-----------|-----------|-----------|-----------|
| 4 | 1.9275000 | 0.2639918 | 1.6800000 | 2.2800000 |
|---|-----------|-----------|-----------|-----------|

---

Unique Subject Identifier=2875000000-0026

Assay variable : PTINR\_VAL1 PT-INR Value

N Mean Standard Deviation Minimum Maximum

---

|   |          |           |          |          |
|---|----------|-----------|----------|----------|
| 5 | 1.510000 | 0.1721918 | 1.340000 | 1.710000 |
|---|----------|-----------|----------|----------|

---

Laboratory tests at the time of obtaining Table 2-6 consent, according to the presence or absence of proton-pump inhibitors

Unique Subject Identifier=2875000000-0027

MEANS Procedure

Assay variable : PTINR\_VAL1 PT-INR Value

N Mean Standard Deviation Minimum Maximum

---

|   |           |           |           |           |
|---|-----------|-----------|-----------|-----------|
| 6 | 1.7183333 | 0.3345096 | 1.3500000 | 2.2000000 |
|---|-----------|-----------|-----------|-----------|

---

Unique Subject Identifier=2875000000-0030

Assay variable : PTINR\_VAL1 PT-INR Value

N Mean Standard Deviation Minimum Maximum

---

|   |           |           |           |           |
|---|-----------|-----------|-----------|-----------|
| 5 | 2.1120000 | 0.2107605 | 1.8400000 | 2.3700000 |
|---|-----------|-----------|-----------|-----------|

---

Unique Subject Identifier=2875000000-0035

Assay variable : PTINR\_VAL1 PT-INR Value

N Mean Standard Deviation Minimum Maximum

---

|   |           |           |           |           |
|---|-----------|-----------|-----------|-----------|
| 4 | 1.5375000 | 0.3564992 | 1.2000000 | 1.9200000 |
|---|-----------|-----------|-----------|-----------|

---

Unique Subject Identifier=2889010000-0003

Assay variable : PTINR\_VAL1 PT-INR Value

N Mean Standard Deviation Minimum Maximum

---

|   |           |           |           |           |
|---|-----------|-----------|-----------|-----------|
| 5 | 1.7200000 | 1.1529744 | 0.9200000 | 3.7100000 |
|---|-----------|-----------|-----------|-----------|

---

Laboratory tests at the time of obtaining Table 2-6 consent, according to the presence or absence of proton-pump inhibitors

Unique Subject Identifier=2890001000-0003

MEANS Procedure

Assay variable : PTINR\_VAL1 PT-INR Value

N Mean Standard Deviation Minimum Maximum

---

|   |           |           |           |           |
|---|-----------|-----------|-----------|-----------|
| 4 | 2.6925000 | 0.2248518 | 2.4500000 | 2.9300000 |
|---|-----------|-----------|-----------|-----------|

---

Unique Subject Identifier=2890001000-0006

Assay variable : PTINR\_VAL1 PT-INR Value

N Mean Standard Deviation Minimum Maximum

---

|   |           |           |           |           |
|---|-----------|-----------|-----------|-----------|
| 3 | 1.2100000 | 0.0435890 | 1.1800000 | 1.2600000 |
|---|-----------|-----------|-----------|-----------|

---

Unique Subject Identifier=2890001000-0007

Assay variable : PTINR\_VAL1 PT-INR Value

N Mean Standard Deviation Minimum Maximum

---

|   |           |           |           |           |
|---|-----------|-----------|-----------|-----------|
| 4 | 2.3225000 | 0.1635797 | 2.1900000 | 2.5600000 |
|---|-----------|-----------|-----------|-----------|

---

Unique Subject Identifier=2898010000-0012



Assay variable : PTINR\_VAL1 PT-INR Value

N Mean Standard Deviation Minimum Maximum

---

|   |           |           |           |           |
|---|-----------|-----------|-----------|-----------|
| 5 | 1.9440000 | 0.2618778 | 1.7100000 | 2.2800000 |
|---|-----------|-----------|-----------|-----------|

---

Laboratory tests at the time of obtaining Table 2-6 consent, according to the presence or absence of proton-pump inhibitors

Unique Subject Identifier=2898010000-0018

MEANS Procedure

Assay variable : PTINR\_VAL1 PT-INR Value

N Mean Standard Deviation Minimum Maximum

---

|   |           |           |           |           |
|---|-----------|-----------|-----------|-----------|
| 6 | 2.1266667 | 0.6186976 | 1.3800000 | 2.8400000 |
|---|-----------|-----------|-----------|-----------|

---

Unique Subject Identifier=2898010000-0020

Assay variable : PTINR\_VAL1 PT-INR Value

N Mean Standard Deviation Minimum Maximum

---

|   |           |           |           |           |
|---|-----------|-----------|-----------|-----------|
| 3 | 1.6000000 | 0.0888819 | 1.5300000 | 1.7000000 |
|---|-----------|-----------|-----------|-----------|

---

Unique Subject Identifier=2898010000-0021

Assay variable : PTINR\_VAL1 PT-INR Value

N Mean Standard Deviation Minimum Maximum

---

|   |           |           |           |           |
|---|-----------|-----------|-----------|-----------|
| 3 | 1.8000000 | 0.3605551 | 1.5000000 | 2.2000000 |
|---|-----------|-----------|-----------|-----------|

---

Unique Subject Identifier=2898010000-0025

Assay variable : PTINR\_VAL1 PT-INR Value

N Mean Standard Deviation Minimum Maximum

---

|   |          |           |          |          |
|---|----------|-----------|----------|----------|
| 5 | 1.610000 | 0.1612452 | 1.460000 | 1.880000 |
|---|----------|-----------|----------|----------|

---

Laboratory tests at the time of obtaining Table 2-6 consent, according to the presence or absence of proton-pump inhibitors

Unique Subject Identifier=2898010000-0030

MEANS Procedure

Assay variable : PTINR\_VAL1 PT-INR Value

N Mean Standard Deviation Minimum Maximum

---

|   |           |           |           |           |
|---|-----------|-----------|-----------|-----------|
| 3 | 2.4900000 | 0.5565070 | 1.8800000 | 2.9700000 |
|---|-----------|-----------|-----------|-----------|

---

Unique Subject Identifier=2910000000-0010

Assay variable : PTINR\_VAL1 PT-INR Value

N Mean Standard Deviation Minimum Maximum

---

|   |           |           |           |           |
|---|-----------|-----------|-----------|-----------|
| 2 | 2.2300000 | 0.1555635 | 2.1200000 | 2.3400000 |
|---|-----------|-----------|-----------|-----------|

---

Unique Subject Identifier=2910000000-0018

Assay variable : PTINR\_VAL1 PT-INR Value

N Mean Standard Deviation Minimum Maximum

---

|   |           |           |           |           |
|---|-----------|-----------|-----------|-----------|
| 3 | 1.9100000 | 0.2193171 | 1.6600000 | 2.0700000 |
|---|-----------|-----------|-----------|-----------|

---

Unique Subject Identifier=2910000000-0020

Assay variable : PTINR\_VAL1 PT-INR Value

N Mean Standard Deviation Minimum Maximum

---

|   |           |           |           |           |
|---|-----------|-----------|-----------|-----------|
| 6 | 2.3700000 | 0.4295579 | 1.8500000 | 2.8900000 |
|---|-----------|-----------|-----------|-----------|

---

Laboratory tests at the time of obtaining Table 2-6 consent, according to the presence or absence of proton-pump inhibitors

Unique Subject Identifier=291000000-0027

MEANS Procedure

Assay variable : PTINR\_VAL1 PT-INR Value

| N | Mean      | Standard Deviation | Minimum   | Maximum   |
|---|-----------|--------------------|-----------|-----------|
| 2 | 2.1300000 | 0.1131371          | 2.0500000 | 2.2100000 |

Unique Subject Identifier=291300000-0004

Assay variable : PTINR\_VAL1 PT-INR Value

| N | Mean      | Standard Deviation | Minimum   | Maximum   |
|---|-----------|--------------------|-----------|-----------|
| 3 | 1.6633333 | 0.0776745          | 1.6000000 | 1.7500000 |

Unique Subject Identifier=291300000-0005

Assay variable : PTINR\_VAL1 PT-INR Value

| N | Mean      | Standard Deviation | Minimum   | Maximum   |
|---|-----------|--------------------|-----------|-----------|
| 5 | 2.3100000 | 0.2511971          | 1.9200000 | 2.6000000 |

Unique Subject Identifier=291300000-0016

Assay variable : PTINR\_VAL1 PT-INR Value

N Mean Standard Deviation Minimum Maximum

---

|   |          |           |          |          |
|---|----------|-----------|----------|----------|
| 5 | 1.740000 | 0.5002499 | 1.060000 | 2.400000 |
|---|----------|-----------|----------|----------|

---

Laboratory tests at the time of obtaining Table 2-6 consent, according to the presence or absence of proton-pump inhibitors

Unique Subject Identifier=2913000000-0023

MEANS Procedure

Assay variable : PTINR\_VAL1 PT-INR Value

N Mean Standard Deviation Minimum Maximum

---

|   |           |           |           |           |
|---|-----------|-----------|-----------|-----------|
| 6 | 1.7716667 | 0.2058559 | 1.4800000 | 2.0900000 |
|---|-----------|-----------|-----------|-----------|

---

Unique Subject Identifier=2913000000-0027

Assay variable : PTINR\_VAL1 PT-INR Value

N Mean Standard Deviation Minimum Maximum

---

|   |           |           |           |           |
|---|-----------|-----------|-----------|-----------|
| 4 | 2.3625000 | 0.9694113 | 1.5200000 | 3.7600000 |
|---|-----------|-----------|-----------|-----------|

---

Unique Subject Identifier=2913000000-0034

Assay variable : PTINR\_VAL1 PT-INR Value

N Mean Standard Deviation Minimum Maximum

---

|   |           |           |           |           |
|---|-----------|-----------|-----------|-----------|
| 6 | 1.8983333 | 0.4070586 | 1.3500000 | 2.4300000 |
|---|-----------|-----------|-----------|-----------|

---

Unique Subject Identifier=2926011010-0001



Assay variable : PTINR\_VAL1 PT-INR Value

N Mean Standard Deviation Minimum Maximum

---

|   |           |           |           |           |
|---|-----------|-----------|-----------|-----------|
| 4 | 1.8650000 | 0.2991655 | 1.6000000 | 2.2600000 |
|---|-----------|-----------|-----------|-----------|

---

Laboratory tests at the time of obtaining Table 2-6 consent, according to the presence or absence of proton-pump inhibitors

Unique Subject Identifier=2926011010-0016

MEANS Procedure

Assay variable : PTINR\_VAL1 PT-INR Value

N Mean Standard Deviation Minimum Maximum

---

|   |           |           |           |           |
|---|-----------|-----------|-----------|-----------|
| 5 | 1.6280000 | 0.1584929 | 1.4000000 | 1.7700000 |
|---|-----------|-----------|-----------|-----------|

---

Unique Subject Identifier=2941010110-0016

Assay variable : PTINR\_VAL1 PT-INR Value

N Mean Standard Deviation Minimum Maximum

---

|   |           |           |           |           |
|---|-----------|-----------|-----------|-----------|
| 5 | 1.8400000 | 0.3435113 | 1.5000000 | 2.3000000 |
|---|-----------|-----------|-----------|-----------|

---

Unique Subject Identifier=2949000000-0012

Assay variable : PTINR\_VAL1 PT-INR Value

N Mean Standard Deviation Minimum Maximum

---

|   |           |  |           |           |
|---|-----------|--|-----------|-----------|
| 1 | 2.0300000 |  | 2.0300000 | 2.0300000 |
|---|-----------|--|-----------|-----------|

---

Unique Subject Identifier=2949000000-0016

Assay variable : PTINR\_VAL1 PT-INR Value

N Mean Standard Deviation Minimum Maximum

---

|   |           |           |           |           |
|---|-----------|-----------|-----------|-----------|
| 2 | 1.8300000 | 0.2404163 | 1.6600000 | 2.0000000 |
|---|-----------|-----------|-----------|-----------|

---

Laboratory tests at the time of obtaining Table 2-6 consent, according to the presence or absence of proton-pump inhibitors

Unique Subject Identifier=2949000000-0018

MEANS Procedure

Assay variable : PTINR\_VAL1 PT-INR Value

N Mean Standard Deviation Minimum Maximum

---

|   |          |  |          |          |
|---|----------|--|----------|----------|
| 1 | 2.110000 |  | 2.110000 | 2.110000 |
|---|----------|--|----------|----------|

---

Unique Subject Identifier=2949000000-0021

Assay variable : PTINR\_VAL1 PT-INR Value

N Mean Standard Deviation Minimum Maximum

---

|   |          |           |          |          |
|---|----------|-----------|----------|----------|
| 2 | 2.215000 | 0.4737615 | 1.880000 | 2.550000 |
|---|----------|-----------|----------|----------|

---

Unique Subject Identifier=2949000000-0026

Assay variable : PTINR\_VAL1 PT-INR Value

N Mean Standard Deviation Minimum Maximum

---

|   |          |           |          |          |
|---|----------|-----------|----------|----------|
| 3 | 2.153333 | 0.0709460 | 2.090000 | 2.230000 |
|---|----------|-----------|----------|----------|

---

Unique Subject Identifier=2949000000-0039

Assay variable : PTINR\_VAL1 PT-INR Value

N Mean Standard Deviation Minimum Maximum

---

|   |           |           |           |           |
|---|-----------|-----------|-----------|-----------|
| 3 | 1.8733333 | 0.6087966 | 1.3700000 | 2.5500000 |
|---|-----------|-----------|-----------|-----------|

---

Laboratory tests at the time of obtaining Table 2-6 consent, according to the presence or absence of proton-pump inhibitors

Unique Subject Identifier=2954000000-0003

MEANS Procedure

Assay variable : PTINR\_VAL1 PT-INR Value

N Mean Standard Deviation Minimum Maximum

---

|   |           |           |           |           |
|---|-----------|-----------|-----------|-----------|
| 4 | 2.6250000 | 0.8148006 | 1.8000000 | 3.7500000 |
|---|-----------|-----------|-----------|-----------|

---

Unique Subject Identifier=2954000000-0015

Assay variable : PTINR\_VAL1 PT-INR Value

N Mean Standard Deviation Minimum Maximum

---

|   |           |           |           |           |
|---|-----------|-----------|-----------|-----------|
| 3 | 2.1066667 | 0.4186088 | 1.8600000 | 2.5900000 |
|---|-----------|-----------|-----------|-----------|

---

Unique Subject Identifier=2957000000-0016

Assay variable : PTINR\_VAL1 PT-INR Value

N Mean Standard Deviation Minimum Maximum

---

|   |           |           |           |           |
|---|-----------|-----------|-----------|-----------|
| 6 | 2.0816667 | 0.2756387 | 1.6300000 | 2.4100000 |
|---|-----------|-----------|-----------|-----------|

---

Unique Subject Identifier=2957000000-0018

Assay variable : PTINR\_VAL1 PT-INR Value

N Mean Standard Deviation Minimum Maximum

---

|   |           |           |           |           |
|---|-----------|-----------|-----------|-----------|
| 6 | 1.8816667 | 0.2513497 | 1.5900000 | 2.3300000 |
|---|-----------|-----------|-----------|-----------|

---

Laboratory tests at the time of obtaining Table 2-6 consent, according to the presence or absence of proton-pump inhibitors

Unique Subject Identifier=3001010001-0002

MEANS Procedure

Assay variable : PTINR\_VAL1 PT-INR Value

N Mean Standard Deviation Minimum Maximum

---

|   |           |           |           |           |
|---|-----------|-----------|-----------|-----------|
| 4 | 1.8975000 | 0.2953388 | 1.4900000 | 2.1600000 |
|---|-----------|-----------|-----------|-----------|

---

Unique Subject Identifier=3001010001-0010

Assay variable : PTINR\_VAL1 PT-INR Value

N Mean Standard Deviation Minimum Maximum

---

|   |           |           |           |           |
|---|-----------|-----------|-----------|-----------|
| 4 | 2.0650000 | 0.2483948 | 1.7700000 | 2.3700000 |
|---|-----------|-----------|-----------|-----------|

---

Unique Subject Identifier=3001010001-0014

Assay variable : PTINR\_VAL1 PT-INR Value

N Mean Standard Deviation Minimum Maximum

---

|   |           |           |           |           |
|---|-----------|-----------|-----------|-----------|
| 6 | 2.1550000 | 0.2165872 | 1.9100000 | 2.4800000 |
|---|-----------|-----------|-----------|-----------|

---

Unique Subject Identifier=3001010001-0015



Assay variable : PTINR\_VAL1 PT-INR Value

N Mean Standard Deviation Minimum Maximum

---

|   |           |           |           |           |
|---|-----------|-----------|-----------|-----------|
| 6 | 2.1016667 | 0.3437101 | 1.6300000 | 2.5100000 |
|---|-----------|-----------|-----------|-----------|

---

Laboratory tests at the time of obtaining Table 2-6 consent, according to the presence or absence of proton-pump inhibitors

Unique Subject Identifier=3001010001-0016

MEANS Procedure

Assay variable : PTINR\_VAL1 PT-INR Value

N Mean Standard Deviation Minimum Maximum

---

|   |           |           |           |           |
|---|-----------|-----------|-----------|-----------|
| 6 | 1.9816667 | 0.4285985 | 1.6800000 | 2.8300000 |
|---|-----------|-----------|-----------|-----------|

---

Unique Subject Identifier=3001010001-0017

Assay variable : PTINR\_VAL1 PT-INR Value

N Mean Standard Deviation Minimum Maximum

---

|   |           |           |           |           |
|---|-----------|-----------|-----------|-----------|
| 6 | 1.7166667 | 0.3188521 | 1.4000000 | 2.3000000 |
|---|-----------|-----------|-----------|-----------|

---

Unique Subject Identifier=3001010001-0018

Assay variable : PTINR\_VAL1 PT-INR Value

N Mean Standard Deviation Minimum Maximum

---

|   |           |           |           |           |
|---|-----------|-----------|-----------|-----------|
| 6 | 2.1366667 | 0.2878657 | 1.7900000 | 2.6000000 |
|---|-----------|-----------|-----------|-----------|

---

Unique Subject Identifier=3001010001-0020

Assay variable : PTINR\_VAL1 PT-INR Value

N Mean Standard Deviation Minimum Maximum

---

|   |           |           |           |           |
|---|-----------|-----------|-----------|-----------|
| 6 | 1.8433333 | 0.1123684 | 1.6700000 | 1.9900000 |
|---|-----------|-----------|-----------|-----------|

---

Laboratory tests at the time of obtaining Table 2-6 consent, according to the presence or absence of proton-pump inhibitors

Unique Subject Identifier=3001010001-0026

MEANS Procedure

Assay variable : PTINR\_VAL1 PT-INR Value

| N | Mean      | Standard Deviation | Minimum   | Maximum   |
|---|-----------|--------------------|-----------|-----------|
| 5 | 1.9760000 | 0.1064425          | 1.8900000 | 2.1200000 |

Unique Subject Identifier=3001010001-0037

Assay variable : PTINR\_VAL1 PT-INR Value

| N | Mean      | Standard Deviation | Minimum   | Maximum   |
|---|-----------|--------------------|-----------|-----------|
| 4 | 1.5500000 | 0.1329160          | 1.3800000 | 1.6900000 |

Unique Subject Identifier=3001010001-0041

Assay variable : PTINR\_VAL1 PT-INR Value

| N | Mean      | Standard Deviation | Minimum   | Maximum   |
|---|-----------|--------------------|-----------|-----------|
| 3 | 1.9433333 | 0.1457166          | 1.7900000 | 2.0800000 |

Unique Subject Identifier=3001010001-0051

Assay variable : PTINR\_VAL1 PT-INR Value

N Mean Standard Deviation Minimum Maximum

---

|   |           |           |           |           |
|---|-----------|-----------|-----------|-----------|
| 6 | 1.8866667 | 0.3142398 | 1.4500000 | 2.2700000 |
|---|-----------|-----------|-----------|-----------|

---

Laboratory tests at the time of obtaining Table 2-6 consent, according to the presence or absence of proton-pump inhibitors

Unique Subject Identifier=3001010001-0055

MEANS Procedure

Assay variable : PTINR\_VAL1 PT-INR Value

N Mean Standard Deviation Minimum Maximum

---

|   |           |           |           |           |
|---|-----------|-----------|-----------|-----------|
| 5 | 1.7960000 | 0.1291511 | 1.6200000 | 1.9200000 |
|---|-----------|-----------|-----------|-----------|

---

Unique Subject Identifier=3001010001-0062

Assay variable : PTINR\_VAL1 PT-INR Value

N Mean Standard Deviation Minimum Maximum

---

|   |           |           |           |           |
|---|-----------|-----------|-----------|-----------|
| 5 | 1.9160000 | 0.3692289 | 1.5200000 | 2.4600000 |
|---|-----------|-----------|-----------|-----------|

---

Unique Subject Identifier=3001010001-0064

Assay variable : PTINR\_VAL1 PT-INR Value

N Mean Standard Deviation Minimum Maximum

---

|   |           |           |           |           |
|---|-----------|-----------|-----------|-----------|
| 4 | 1.6625000 | 0.2707243 | 1.2700000 | 1.8800000 |
|---|-----------|-----------|-----------|-----------|

---

Unique Subject Identifier=3003011110-0007

Assay variable : PTINR\_VAL1 PT-INR Value

N Mean Standard Deviation Minimum Maximum

---

|   |           |           |           |           |
|---|-----------|-----------|-----------|-----------|
| 3 | 1.3933333 | 0.3564174 | 1.0200000 | 1.7300000 |
|---|-----------|-----------|-----------|-----------|

---

Laboratory tests at the time of obtaining Table 2-6 consent, according to the presence or absence of proton-pump inhibitors

Unique Subject Identifier=3003011110-0015

MEANS Procedure

Assay variable : PTINR\_VAL1 PT-INR Value

N Mean Standard Deviation Minimum Maximum

---

|   |           |           |           |           |
|---|-----------|-----------|-----------|-----------|
| 6 | 2.1916667 | 0.2978870 | 1.8400000 | 2.6300000 |
|---|-----------|-----------|-----------|-----------|

---

Unique Subject Identifier=3009011111-0012

Assay variable : PTINR\_VAL1 PT-INR Value

N Mean Standard Deviation Minimum Maximum

---

|   |           |           |           |           |
|---|-----------|-----------|-----------|-----------|
| 3 | 1.6000000 | 0.2913760 | 1.2800000 | 1.8500000 |
|---|-----------|-----------|-----------|-----------|

---

Unique Subject Identifier=3009011111-0019

Assay variable : PTINR\_VAL1 PT-INR Value

N Mean Standard Deviation Minimum Maximum

---

|   |           |           |           |           |
|---|-----------|-----------|-----------|-----------|
| 3 | 2.0800000 | 0.0700000 | 2.0100000 | 2.1500000 |
|---|-----------|-----------|-----------|-----------|

---

Unique Subject Identifier=3009011111-0020



Assay variable : PTINR\_VAL1 PT-INR Value

N Mean Standard Deviation Minimum Maximum

---

|   |           |           |           |           |
|---|-----------|-----------|-----------|-----------|
| 2 | 2.0500000 | 0.1414214 | 1.9500000 | 2.1500000 |
|---|-----------|-----------|-----------|-----------|

---

Laboratory tests at the time of obtaining Table 2-6 consent, according to the presence or absence of proton-pump inhibitors

Unique Subject Identifier=3010011111-0002

MEANS Procedure

Assay variable : PTINR\_VAL1 PT-INR Value

N Mean Standard Deviation Minimum Maximum

---

|   |           |           |           |           |
|---|-----------|-----------|-----------|-----------|
| 6 | 1.9800000 | 0.2705550 | 1.5500000 | 2.3400000 |
|---|-----------|-----------|-----------|-----------|

---

Unique Subject Identifier=3016111111-0026

Assay variable : PTINR\_VAL1 PT-INR Value

N Mean Standard Deviation Minimum Maximum

---

|   |           |           |           |           |
|---|-----------|-----------|-----------|-----------|
| 6 | 1.6416667 | 0.3370114 | 1.2000000 | 2.0300000 |
|---|-----------|-----------|-----------|-----------|

---

Unique Subject Identifier=3016111111-0037

Assay variable : PTINR\_VAL1 PT-INR Value

N Mean Standard Deviation Minimum Maximum

---

|   |           |  |           |           |
|---|-----------|--|-----------|-----------|
| 1 | 1.2000000 |  | 1.2000000 | 1.2000000 |
|---|-----------|--|-----------|-----------|

---

Unique Subject Identifier=3019011110-0021

Assay variable : PTINR\_VAL1 PT-INR Value

N Mean Standard Deviation Minimum Maximum

---

|   |           |           |           |           |
|---|-----------|-----------|-----------|-----------|
| 3 | 1.7200000 | 0.1212436 | 1.6100000 | 1.8500000 |
|---|-----------|-----------|-----------|-----------|

---

Laboratory tests at the time of obtaining Table 2-6 consent, according to the presence or absence of proton-pump inhibitors

Unique Subject Identifier=3019011110-0026

MEANS Procedure

Assay variable : PTINR\_VAL1 PT-INR Value

N Mean Standard Deviation Minimum Maximum

---

|   |           |           |           |           |
|---|-----------|-----------|-----------|-----------|
| 3 | 1.5400000 | 0.1646208 | 1.3500000 | 1.6400000 |
|---|-----------|-----------|-----------|-----------|

---

Unique Subject Identifier=3019011110-0035

Assay variable : PTINR\_VAL1 PT-INR Value

N Mean Standard Deviation Minimum Maximum

---

|   |           |           |           |           |
|---|-----------|-----------|-----------|-----------|
| 5 | 1.6800000 | 0.1743560 | 1.5400000 | 1.9600000 |
|---|-----------|-----------|-----------|-----------|

---

Unique Subject Identifier=3019011110-0038

Assay variable : PTINR\_VAL1 PT-INR Value

N Mean Standard Deviation Minimum Maximum

---

|   |           |           |           |           |
|---|-----------|-----------|-----------|-----------|
| 2 | 1.9100000 | 0.1272792 | 1.8200000 | 2.0000000 |
|---|-----------|-----------|-----------|-----------|

---

Unique Subject Identifier=3019011110-0039

Assay variable : PTINR\_VAL1 PT-INR Value

N Mean Standard Deviation Minimum Maximum

---

|   |           |           |           |           |
|---|-----------|-----------|-----------|-----------|
| 3 | 1.9833333 | 0.7320064 | 1.2000000 | 2.6500000 |
|---|-----------|-----------|-----------|-----------|

---

Laboratory tests at the time of obtaining Table 2-6 consent, according to the presence or absence of proton-pump inhibitors

Unique Subject Identifier=3019011110-0044

MEANS Procedure

Assay variable : PTINR\_VAL1 PT-INR Value

N Mean Standard Deviation Minimum Maximum

---

|   |           |           |           |           |
|---|-----------|-----------|-----------|-----------|
| 3 | 1.9200000 | 0.1178983 | 1.8200000 | 2.0500000 |
|---|-----------|-----------|-----------|-----------|

---

Unique Subject Identifier=3019011110-0046

Assay variable : PTINR\_VAL1 PT-INR Value

N Mean Standard Deviation Minimum Maximum

---

|   |           |           |           |           |
|---|-----------|-----------|-----------|-----------|
| 4 | 1.8450000 | 0.2100000 | 1.6000000 | 2.1000000 |
|---|-----------|-----------|-----------|-----------|

---

Unique Subject Identifier=3019011110-0052

Assay variable : PTINR\_VAL1 PT-INR Value

N Mean Standard Deviation Minimum Maximum

---

|   |           |  |           |           |
|---|-----------|--|-----------|-----------|
| 1 | 1.5800000 |  | 1.5800000 | 1.5800000 |
|---|-----------|--|-----------|-----------|

---

Unique Subject Identifier=3021011010-0005

Assay variable : PTINR\_VAL1 PT-INR Value

N Mean Standard Deviation Minimum Maximum

---

|   |           |           |           |           |
|---|-----------|-----------|-----------|-----------|
| 3 | 2.3466667 | 1.0304045 | 1.3000000 | 3.3600000 |
|---|-----------|-----------|-----------|-----------|

---

Laboratory tests at the time of obtaining Table 2-6 consent, according to the presence or absence of proton-pump inhibitors

Unique Subject Identifier=3022000000-0002

MEANS Procedure

Assay variable : PTINR\_VAL1 PT-INR Value

N Mean Standard Deviation Minimum Maximum

---

|   |           |           |           |           |
|---|-----------|-----------|-----------|-----------|
| 6 | 1.4950000 | 0.6555227 | 1.1000000 | 2.8000000 |
|---|-----------|-----------|-----------|-----------|

---

Unique Subject Identifier=3022000000-0005

Assay variable : PTINR\_VAL1 PT-INR Value

N Mean Standard Deviation Minimum Maximum

---

|   |           |           |           |           |
|---|-----------|-----------|-----------|-----------|
| 3 | 1.6166667 | 0.4532475 | 1.3500000 | 2.1400000 |
|---|-----------|-----------|-----------|-----------|

---

Unique Subject Identifier=3026011100-0028

Assay variable : PTINR\_VAL1 PT-INR Value

N Mean Standard Deviation Minimum Maximum

---

|   |           |           |           |           |
|---|-----------|-----------|-----------|-----------|
| 3 | 1.8900000 | 0.2882707 | 1.5800000 | 2.1500000 |
|---|-----------|-----------|-----------|-----------|

---

Unique Subject Identifier=3026011100-0031



Assay variable : PTINR\_VAL1 PT-INR Value

N Mean Standard Deviation Minimum Maximum

---

|   |           |           |           |           |
|---|-----------|-----------|-----------|-----------|
| 3 | 2.0366667 | 0.4331666 | 1.5500000 | 2.3800000 |
|---|-----------|-----------|-----------|-----------|

---

Laboratory tests at the time of obtaining Table 2-6 consent, according to the presence or absence of proton-pump inhibitors

Unique Subject Identifier=3026011100-0039

MEANS Procedure

Assay variable : PTINR\_VAL1 PT-INR Value

N Mean Standard Deviation Minimum Maximum

---

|   |           |           |           |           |
|---|-----------|-----------|-----------|-----------|
| 3 | 2.7100000 | 1.0318430 | 1.5700000 | 3.5800000 |
|---|-----------|-----------|-----------|-----------|

---

Unique Subject Identifier=3026011100-0040

Assay variable : PTINR\_VAL1 PT-INR Value

N Mean Standard Deviation Minimum Maximum

---

|   |           |           |           |           |
|---|-----------|-----------|-----------|-----------|
| 6 | 1.5600000 | 0.1363818 | 1.3100000 | 1.6800000 |
|---|-----------|-----------|-----------|-----------|

---

Unique Subject Identifier=3026011100-0043

Assay variable : PTINR\_VAL1 PT-INR Value

N Mean Standard Deviation Minimum Maximum

---

|   |           |           |           |           |
|---|-----------|-----------|-----------|-----------|
| 2 | 1.6750000 | 0.3606245 | 1.4200000 | 1.9300000 |
|---|-----------|-----------|-----------|-----------|

---

Unique Subject Identifier=3026011100-0055

Assay variable : PTINR\_VAL1 PT-INR Value

N Mean Standard Deviation Minimum Maximum

---

|   |           |           |           |           |
|---|-----------|-----------|-----------|-----------|
| 3 | 2.6866667 | 0.2437895 | 2.4100000 | 2.8700000 |
|---|-----------|-----------|-----------|-----------|

---

Laboratory tests at the time of obtaining Table 2-6 consent, according to the presence or absence of proton-pump inhibitors

Unique Subject Identifier=3026011100-0064

MEANS Procedure

Assay variable : PTINR\_VAL1 PT-INR Value

| N | Mean      | Standard Deviation | Minimum   | Maximum   |
|---|-----------|--------------------|-----------|-----------|
| 5 | 1.6760000 | 0.7995186          | 1.0800000 | 3.0400000 |

Unique Subject Identifier=3056000000-0007

Assay variable : PTINR\_VAL1 PT-INR Value

| N | Mean      | Standard Deviation | Minimum   | Maximum   |
|---|-----------|--------------------|-----------|-----------|
| 5 | 1.6560000 | 0.1505988          | 1.5100000 | 1.9000000 |

Unique Subject Identifier=3060011100-0004

Assay variable : PTINR\_VAL1 PT-INR Value

| N | Mean      | Standard Deviation | Minimum   | Maximum   |
|---|-----------|--------------------|-----------|-----------|
| 6 | 1.7333333 | 0.5202563          | 1.2000000 | 2.6000000 |

Unique Subject Identifier=3060011100-0016

Assay variable : PTINR\_VAL1 PT-INR Value

N Mean Standard Deviation Minimum Maximum

---

|   |           |           |           |           |
|---|-----------|-----------|-----------|-----------|
| 6 | 1.5666667 | 0.1966384 | 1.4000000 | 1.9000000 |
|---|-----------|-----------|-----------|-----------|

---

Laboratory tests at the time of obtaining Table 2-6 consent, according to the presence or absence of proton-pump inhibitors

Unique Subject Identifier=3077010011-0014

MEANS Procedure

Assay variable : PTINR\_VAL1 PT-INR Value

N Mean Standard Deviation Minimum Maximum

---

|   |           |           |           |           |
|---|-----------|-----------|-----------|-----------|
| 3 | 1.5033333 | 0.0461880 | 1.4500000 | 1.5300000 |
|---|-----------|-----------|-----------|-----------|

---

Unique Subject Identifier=3084010000-0002

Assay variable : PTINR\_VAL1 PT-INR Value

N Mean Standard Deviation Minimum Maximum

---

|   |           |           |           |           |
|---|-----------|-----------|-----------|-----------|
| 2 | 1.2550000 | 0.2333452 | 1.0900000 | 1.4200000 |
|---|-----------|-----------|-----------|-----------|

---

Unique Subject Identifier=3084010000-0004

Assay variable : PTINR\_VAL1 PT-INR Value

N Mean Standard Deviation Minimum Maximum

---

|   |           |           |           |           |
|---|-----------|-----------|-----------|-----------|
| 2 | 2.2200000 | 0.2121320 | 2.0700000 | 2.3700000 |
|---|-----------|-----------|-----------|-----------|

---

Unique Subject Identifier=3084010000-0018

Assay variable : PTINR\_VAL1 PT-INR Value

N Mean Standard Deviation Minimum Maximum

---

|   |           |           |           |           |
|---|-----------|-----------|-----------|-----------|
| 2 | 1.9150000 | 0.1484924 | 1.8100000 | 2.0200000 |
|---|-----------|-----------|-----------|-----------|

---

Laboratory tests at the time of obtaining Table 2-6 consent, according to the presence or absence of proton-pump inhibitors

Unique Subject Identifier=3084010000-0019

MEANS Procedure

Assay variable : PTINR\_VAL1 PT-INR Value

| N | Mean      | Standard Deviation | Minimum   | Maximum   |
|---|-----------|--------------------|-----------|-----------|
| 3 | 1.6133333 | 0.2565801          | 1.3300000 | 1.8300000 |

Unique Subject Identifier=3084010000-0032

Assay variable : PTINR\_VAL1 PT-INR Value

| N | Mean      | Standard Deviation | Minimum   | Maximum   |
|---|-----------|--------------------|-----------|-----------|
| 1 | 1.5700000 |                    | 1.5700000 | 1.5700000 |

Unique Subject Identifier=3085010000-0007

Assay variable : PTINR\_VAL1 PT-INR Value

| N | Mean      | Standard Deviation | Minimum   | Maximum   |
|---|-----------|--------------------|-----------|-----------|
| 3 | 1.5333333 | 0.0585947          | 1.4900000 | 1.6000000 |

Unique Subject Identifier=3085010000-0010



Assay variable : PTINR\_VAL1 PT-INR Value

N Mean Standard Deviation Minimum Maximum

---

|   |           |           |           |           |
|---|-----------|-----------|-----------|-----------|
| 3 | 1.9633333 | 0.4086971 | 1.5900000 | 2.4000000 |
|---|-----------|-----------|-----------|-----------|

---

Laboratory tests at the time of obtaining Table 2-6 consent, according to the presence or absence of proton-pump inhibitors

Unique Subject Identifier=3085010000-0025

MEANS Procedure

Assay variable : PTINR\_VAL1 PT-INR Value

N Mean Standard Deviation Minimum Maximum

---

|   |           |           |           |           |
|---|-----------|-----------|-----------|-----------|
| 3 | 1.9366667 | 0.1285820 | 1.7900000 | 2.0300000 |
|---|-----------|-----------|-----------|-----------|

---

Unique Subject Identifier=3096000000-0003

Assay variable : PTINR\_VAL1 PT-INR Value

N Mean Standard Deviation Minimum Maximum

---

|   |           |           |           |           |
|---|-----------|-----------|-----------|-----------|
| 5 | 1.8800000 | 0.2774887 | 1.6000000 | 2.3000000 |
|---|-----------|-----------|-----------|-----------|

---

Unique Subject Identifier=3097011000-0004

Assay variable : PTINR\_VAL1 PT-INR Value

N Mean Standard Deviation Minimum Maximum

---

|   |           |           |           |           |
|---|-----------|-----------|-----------|-----------|
| 4 | 1.4775000 | 0.0708872 | 1.3900000 | 1.5400000 |
|---|-----------|-----------|-----------|-----------|

---

Unique Subject Identifier=3102111011-0013

Assay variable : PTINR\_VAL1 PT-INR Value

N Mean Standard Deviation Minimum Maximum

---

|   |          |           |          |          |
|---|----------|-----------|----------|----------|
| 2 | 1.850000 | 0.0707107 | 1.800000 | 1.900000 |
|---|----------|-----------|----------|----------|

---

Laboratory tests at the time of obtaining Table 2-6 consent, according to the presence or absence of proton-pump inhibitors

Unique Subject Identifier=3102111011-0045

MEANS Procedure

Assay variable : PTINR\_VAL1 PT-INR Value

| N | Mean      | Standard Deviation | Minimum   | Maximum   |
|---|-----------|--------------------|-----------|-----------|
| 3 | 1.6300000 | 0.2151743          | 1.4200000 | 1.8500000 |

Unique Subject Identifier=3102111011-0057

Assay variable : PTINR\_VAL1 PT-INR Value

| N | Mean      | Standard Deviation | Minimum   | Maximum   |
|---|-----------|--------------------|-----------|-----------|
| 4 | 1.5350000 | 0.1405940          | 1.3900000 | 1.6700000 |

Unique Subject Identifier=3102111011-0059

Assay variable : PTINR\_VAL1 PT-INR Value

| N | Mean      | Standard Deviation | Minimum   | Maximum   |
|---|-----------|--------------------|-----------|-----------|
| 5 | 1.7100000 | 0.3766298          | 1.4000000 | 2.3500000 |

Unique Subject Identifier=3102111011-0067

Assay variable : PTINR\_VAL1 PT-INR Value

N Mean Standard Deviation Minimum Maximum

---

|   |           |           |           |           |
|---|-----------|-----------|-----------|-----------|
| 3 | 1.7966667 | 0.1250333 | 1.6700000 | 1.9200000 |
|---|-----------|-----------|-----------|-----------|

---

Laboratory tests at the time of obtaining Table 2-6 consent, according to the presence or absence of proton-pump inhibitors

Unique Subject Identifier=3102111011-0071

MEANS Procedure

Assay variable : PTINR\_VAL1 PT-INR Value

| N | Mean     | Standard Deviation | Minimum  | Maximum  |
|---|----------|--------------------|----------|----------|
| 2 | 1.350000 | 0.1131371          | 1.270000 | 1.430000 |

Unique Subject Identifier=3102111011-0073

Assay variable : PTINR\_VAL1 PT-INR Value

| N | Mean     | Standard Deviation | Minimum  | Maximum  |
|---|----------|--------------------|----------|----------|
| 3 | 2.020000 | 0.3950949          | 1.630000 | 2.420000 |

Unique Subject Identifier=3102111011-0085

Assay variable : PTINR\_VAL1 PT-INR Value

| N | Mean     | Standard Deviation | Minimum  | Maximum  |
|---|----------|--------------------|----------|----------|
| 2 | 1.715000 | 0.0919239          | 1.650000 | 1.780000 |

Unique Subject Identifier=3102111011-0088

Assay variable : PTINR\_VAL1 PT-INR Value

N Mean Standard Deviation Minimum Maximum

---

|   |           |           |           |           |
|---|-----------|-----------|-----------|-----------|
| 5 | 2.0980000 | 0.5374663 | 1.5100000 | 2.6000000 |
|---|-----------|-----------|-----------|-----------|

---

Laboratory tests at the time of obtaining Table 2-6 consent, according to the presence or absence of proton-pump inhibitors

Unique Subject Identifier=3102111011-0112

MEANS Procedure

Assay variable : PTINR\_VAL1 PT-INR Value

N Mean Standard Deviation Minimum Maximum

---

|   |           |           |           |           |
|---|-----------|-----------|-----------|-----------|
| 3 | 2.5833333 | 0.3231615 | 2.3400000 | 2.9500000 |
|---|-----------|-----------|-----------|-----------|

---

Unique Subject Identifier=3102111011-0115

Assay variable : PTINR\_VAL1 PT-INR Value

N Mean Standard Deviation Minimum Maximum

---

|   |           |  |           |           |
|---|-----------|--|-----------|-----------|
| 1 | 1.3300000 |  | 1.3300000 | 1.3300000 |
|---|-----------|--|-----------|-----------|

---

Unique Subject Identifier=3102111011-0119

Assay variable : PTINR\_VAL1 PT-INR Value

N Mean Standard Deviation Minimum Maximum

---

|   |           |           |           |           |
|---|-----------|-----------|-----------|-----------|
| 4 | 1.7300000 | 0.3841007 | 1.2900000 | 2.1300000 |
|---|-----------|-----------|-----------|-----------|

---

Unique Subject Identifier=3105011000-0007



Assay variable : PTINR\_VAL1 PT-INR Value

N Mean Standard Deviation Minimum Maximum

---

|   |           |           |           |           |
|---|-----------|-----------|-----------|-----------|
| 4 | 2.0450000 | 0.5570458 | 1.4700000 | 2.7300000 |
|---|-----------|-----------|-----------|-----------|

---

Laboratory tests at the time of obtaining Table 2-6 consent, according to the presence or absence of proton-pump inhibitors

Unique Subject Identifier=3105011000-0009

MEANS Procedure

Assay variable : PTINR\_VAL1 PT-INR Value

N Mean Standard Deviation Minimum Maximum

---

|   |           |           |           |           |
|---|-----------|-----------|-----------|-----------|
| 3 | 1.6966667 | 0.2811287 | 1.5100000 | 2.0200000 |
|---|-----------|-----------|-----------|-----------|

---

Unique Subject Identifier=3114011111-0014

Assay variable : PTINR\_VAL1 PT-INR Value

N Mean Standard Deviation Minimum Maximum

---

|   |           |           |           |           |
|---|-----------|-----------|-----------|-----------|
| 3 | 1.2133333 | 0.1556706 | 1.0500000 | 1.3600000 |
|---|-----------|-----------|-----------|-----------|

---

Unique Subject Identifier=3122010111-0017

Assay variable : PTINR\_VAL1 PT-INR Value

N Mean Standard Deviation Minimum Maximum

---

|   |           |  |           |           |
|---|-----------|--|-----------|-----------|
| 1 | 1.9500000 |  | 1.9500000 | 1.9500000 |
|---|-----------|--|-----------|-----------|

---

Unique Subject Identifier=3122010111-0024

Assay variable : PTINR\_VAL1 PT-INR Value

N Mean Standard Deviation Minimum Maximum

---

|   |           |           |           |           |
|---|-----------|-----------|-----------|-----------|
| 4 | 2.1075000 | 0.2934138 | 1.8900000 | 2.5400000 |
|---|-----------|-----------|-----------|-----------|

---

Laboratory tests at the time of obtaining Table 2-6 consent, according to the presence or absence of proton-pump inhibitors

Unique Subject Identifier=3122010111-0030

MEANS Procedure

Assay variable : PTINR\_VAL1 PT-INR Value

| N | Mean      | Standard Deviation | Minimum   | Maximum   |
|---|-----------|--------------------|-----------|-----------|
| 2 | 2.0750000 | 0.7283200          | 1.5600000 | 2.5900000 |

Unique Subject Identifier=3122010111-0050

Assay variable : PTINR\_VAL1 PT-INR Value

| N | Mean      | Standard Deviation | Minimum   | Maximum   |
|---|-----------|--------------------|-----------|-----------|
| 6 | 2.3250000 | 0.6476033          | 1.4300000 | 3.2800000 |

Unique Subject Identifier=3122010111-0058

Assay variable : PTINR\_VAL1 PT-INR Value

| N | Mean      | Standard Deviation | Minimum   | Maximum   |
|---|-----------|--------------------|-----------|-----------|
| 1 | 1.7600000 |                    | 1.7600000 | 1.7600000 |

Unique Subject Identifier=3122010111-0061

Assay variable : PTINR\_VAL1 PT-INR Value

N Mean Standard Deviation Minimum Maximum

---

|   |           |           |           |           |
|---|-----------|-----------|-----------|-----------|
| 4 | 2.6700000 | 0.5993886 | 2.0600000 | 3.4900000 |
|---|-----------|-----------|-----------|-----------|

---

Laboratory tests at the time of obtaining Table 2-6 consent, according to the presence or absence of proton-pump inhibitors

Unique Subject Identifier=3122010111-0071

MEANS Procedure

Assay variable : PTINR\_VAL1 PT-INR Value

| N | Mean      | Standard Deviation | Minimum   | Maximum   |
|---|-----------|--------------------|-----------|-----------|
| 3 | 2.0633333 | 0.1942507          | 1.8500000 | 2.2300000 |

Unique Subject Identifier=3122010111-0079

Assay variable : PTINR\_VAL1 PT-INR Value

| N | Mean      | Standard Deviation | Minimum   | Maximum   |
|---|-----------|--------------------|-----------|-----------|
| 4 | 1.7450000 | 0.1466288          | 1.5400000 | 1.8800000 |

Unique Subject Identifier=3122010111-0080

Assay variable : PTINR\_VAL1 PT-INR Value

| N | Mean      | Standard Deviation | Minimum   | Maximum   |
|---|-----------|--------------------|-----------|-----------|
| 3 | 1.4966667 | 0.1101514          | 1.3700000 | 1.5700000 |

Unique Subject Identifier=3122010111-0084

Assay variable : PTINR\_VAL1 PT-INR Value

N Mean Standard Deviation Minimum Maximum

---

|   |          |           |          |          |
|---|----------|-----------|----------|----------|
| 3 | 1.860000 | 0.1178983 | 1.760000 | 1.990000 |
|---|----------|-----------|----------|----------|

---

Laboratory tests at the time of obtaining Table 2-6 consent, according to the presence or absence of proton-pump inhibitors

Unique Subject Identifier=3122010111-0106

MEANS Procedure

Assay variable : PTINR\_VAL1 PT-INR Value

| N | Mean      | Standard Deviation | Minimum   | Maximum   |
|---|-----------|--------------------|-----------|-----------|
| 4 | 1.9350000 | 0.1126943          | 1.8300000 | 2.0600000 |

Unique Subject Identifier=3122010111-0126

Assay variable : PTINR\_VAL1 PT-INR Value

| N | Mean      | Standard Deviation | Minimum   | Maximum   |
|---|-----------|--------------------|-----------|-----------|
| 1 | 1.8300000 |                    | 1.8300000 | 1.8300000 |

Unique Subject Identifier=3122010111-0145

Assay variable : PTINR\_VAL1 PT-INR Value

| N | Mean      | Standard Deviation | Minimum   | Maximum   |
|---|-----------|--------------------|-----------|-----------|
| 3 | 2.0733333 | 0.2757414          | 1.8100000 | 2.3600000 |

Unique Subject Identifier=3122010111-0148



Assay variable : PTINR\_VAL1 PT-INR Value

N Mean Standard Deviation Minimum Maximum

---

|   |           |           |           |           |
|---|-----------|-----------|-----------|-----------|
| 4 | 2.5925000 | 0.6295700 | 2.0400000 | 3.3900000 |
|---|-----------|-----------|-----------|-----------|

---

Laboratory tests at the time of obtaining Table 2-6 consent, according to the presence or absence of proton-pump inhibitors

Unique Subject Identifier=3122010111-0150

MEANS Procedure

Assay variable : PTINR\_VAL1 PT-INR Value

N Mean Standard Deviation Minimum Maximum

---

|   |           |  |           |           |
|---|-----------|--|-----------|-----------|
| 1 | 2.2200000 |  | 2.2200000 | 2.2200000 |
|---|-----------|--|-----------|-----------|

---

Unique Subject Identifier=3122010111-0170

Assay variable : PTINR\_VAL1 PT-INR Value

N Mean Standard Deviation Minimum Maximum

---

|   |           |  |           |           |
|---|-----------|--|-----------|-----------|
| 1 | 2.0900000 |  | 2.0900000 | 2.0900000 |
|---|-----------|--|-----------|-----------|

---

Unique Subject Identifier=3122010111-0172

Assay variable : PTINR\_VAL1 PT-INR Value

N Mean Standard Deviation Minimum Maximum

---

|   |           |  |           |           |
|---|-----------|--|-----------|-----------|
| 1 | 1.3200000 |  | 1.3200000 | 1.3200000 |
|---|-----------|--|-----------|-----------|

---

Unique Subject Identifier=3122010111-0173

Assay variable : PTINR\_VAL1 PT-INR Value

N Mean Standard Deviation Minimum Maximum

---

|   |           |  |           |           |
|---|-----------|--|-----------|-----------|
| 1 | 2.5300000 |  | 2.5300000 | 2.5300000 |
|---|-----------|--|-----------|-----------|

---

Laboratory tests at the time of obtaining Table 2-6 consent, according to the presence or absence of proton-pump inhibitors

Unique Subject Identifier=3122010111-0176

MEANS Procedure

Assay variable : PTINR\_VAL1 PT-INR Value

| N | Mean      | Standard Deviation | Minimum   | Maximum   |
|---|-----------|--------------------|-----------|-----------|
| 5 | 2.5260000 | 0.5103724          | 1.9300000 | 3.2100000 |

Unique Subject Identifier=3122010111-0187

Assay variable : PTINR\_VAL1 PT-INR Value

| N | Mean      | Standard Deviation | Minimum   | Maximum   |
|---|-----------|--------------------|-----------|-----------|
| 1 | 1.6700000 |                    | 1.6700000 | 1.6700000 |

Unique Subject Identifier=3122010111-0191

Assay variable : PTINR\_VAL1 PT-INR Value

| N | Mean      | Standard Deviation | Minimum   | Maximum   |
|---|-----------|--------------------|-----------|-----------|
| 1 | 2.1400000 |                    | 2.1400000 | 2.1400000 |

Unique Subject Identifier=3122010111-0201

Assay variable : PTINR\_VAL1 PT-INR Value

N Mean Standard Deviation Minimum Maximum

---

|   |          |          |          |          |
|---|----------|----------|----------|----------|
| 3 | 2.300000 | 0.070000 | 2.220000 | 2.350000 |
|---|----------|----------|----------|----------|

---

Laboratory tests at the time of obtaining Table 2-6 consent, according to the presence or absence of proton-pump inhibitors

Unique Subject Identifier=3122010111-0212

MEANS Procedure

Assay variable : PTINR\_VAL1 PT-INR Value

N Mean Standard Deviation Minimum Maximum

---

|   |           |  |           |           |
|---|-----------|--|-----------|-----------|
| 1 | 2.7100000 |  | 2.7100000 | 2.7100000 |
|---|-----------|--|-----------|-----------|

---

Unique Subject Identifier=3122010111-0213

Assay variable : PTINR\_VAL1 PT-INR Value

N Mean Standard Deviation Minimum Maximum

---

|   |           |           |           |           |
|---|-----------|-----------|-----------|-----------|
| 4 | 1.5050000 | 0.1126943 | 1.3900000 | 1.6600000 |
|---|-----------|-----------|-----------|-----------|

---

Unique Subject Identifier=3122010111-0216

Assay variable : PTINR\_VAL1 PT-INR Value

N Mean Standard Deviation Minimum Maximum

---

|   |           |  |           |           |
|---|-----------|--|-----------|-----------|
| 1 | 2.1900000 |  | 2.1900000 | 2.1900000 |
|---|-----------|--|-----------|-----------|

---

Unique Subject Identifier=3122010111-0254

Assay variable : PTINR\_VAL1 PT-INR Value

N Mean Standard Deviation Minimum Maximum

---

|   |           |  |           |           |
|---|-----------|--|-----------|-----------|
| 1 | 2.5500000 |  | 2.5500000 | 2.5500000 |
|---|-----------|--|-----------|-----------|

---

Laboratory tests at the time of obtaining Table 2-6 consent, according to the presence or absence of proton-pump inhibitors

Unique Subject Identifier=3122010111-0263

MEANS Procedure

Assay variable : PTINR\_VAL1 PT-INR Value

N Mean Standard Deviation Minimum Maximum

---

|   |           |           |           |           |
|---|-----------|-----------|-----------|-----------|
| 5 | 1.8240000 | 0.1383112 | 1.7100000 | 2.0600000 |
|---|-----------|-----------|-----------|-----------|

---

Unique Subject Identifier=3131010000-0012

Assay variable : PTINR\_VAL1 PT-INR Value

N Mean Standard Deviation Minimum Maximum

---

|   |           |           |           |           |
|---|-----------|-----------|-----------|-----------|
| 4 | 2.1800000 | 1.7153037 | 1.1300000 | 4.7300000 |
|---|-----------|-----------|-----------|-----------|

---

Unique Subject Identifier=3131010000-0021

Assay variable : PTINR\_VAL1 PT-INR Value

N Mean Standard Deviation Minimum Maximum

---

|   |           |  |           |           |
|---|-----------|--|-----------|-----------|
| 1 | 2.2300000 |  | 2.2300000 | 2.2300000 |
|---|-----------|--|-----------|-----------|

---

Unique Subject Identifier=3131010000-0044



Assay variable : PTINR\_VAL1 PT-INR Value

N Mean Standard Deviation Minimum Maximum

---

|   |           |           |           |           |
|---|-----------|-----------|-----------|-----------|
| 4 | 1.7825000 | 0.4825194 | 1.0600000 | 2.0600000 |
|---|-----------|-----------|-----------|-----------|

---

Laboratory tests at the time of obtaining Table 2-6 consent, according to the presence or absence of proton-pump inhibitors

Unique Subject Identifier=313300000-0009

MEANS Procedure

Assay variable : PTINR\_VAL1 PT-INR Value

| N | Mean      | Standard Deviation | Minimum   | Maximum   |
|---|-----------|--------------------|-----------|-----------|
| 3 | 2.5533333 | 2.1909207          | 1.1800000 | 5.0800000 |

Unique Subject Identifier=313300000-0010

Assay variable : PTINR\_VAL1 PT-INR Value

| N | Mean      | Standard Deviation | Minimum   | Maximum   |
|---|-----------|--------------------|-----------|-----------|
| 5 | 1.9100000 | 0.3012474          | 1.5400000 | 2.3500000 |

Unique Subject Identifier=313300000-0012

Assay variable : PTINR\_VAL1 PT-INR Value

| N | Mean      | Standard Deviation | Minimum   | Maximum   |
|---|-----------|--------------------|-----------|-----------|
| 3 | 1.0800000 | 0.0360555          | 1.0500000 | 1.1200000 |

Unique Subject Identifier=313300000-0015

Assay variable : PTINR\_VAL1 PT-INR Value

N Mean Standard Deviation Minimum Maximum

---

|   |           |           |           |           |
|---|-----------|-----------|-----------|-----------|
| 4 | 1.9100000 | 0.0989949 | 1.7700000 | 1.9800000 |
|---|-----------|-----------|-----------|-----------|

---

Laboratory tests at the time of obtaining Table 2-6 consent, according to the presence or absence of proton-pump inhibitors

Unique Subject Identifier=313300000-0022

MEANS Procedure

Assay variable : PTINR\_VAL1 PT-INR Value

N Mean Standard Deviation Minimum Maximum

---

|   |          |           |          |          |
|---|----------|-----------|----------|----------|
| 2 | 2.100000 | 0.6222540 | 1.660000 | 2.540000 |
|---|----------|-----------|----------|----------|

---

Unique Subject Identifier=313300000-0026

Assay variable : PTINR\_VAL1 PT-INR Value

N Mean Standard Deviation Minimum Maximum

---

|   |           |           |          |          |
|---|-----------|-----------|----------|----------|
| 3 | 0.9866667 | 0.0472582 | 0.950000 | 1.040000 |
|---|-----------|-----------|----------|----------|

---

Unique Subject Identifier=313300000-0031

Assay variable : PTINR\_VAL1 PT-INR Value

N Mean Standard Deviation Minimum Maximum

---

|   |          |           |          |          |
|---|----------|-----------|----------|----------|
| 2 | 2.250000 | 0.9899495 | 1.550000 | 2.950000 |
|---|----------|-----------|----------|----------|

---

Unique Subject Identifier=313300000-0032

Assay variable : PTINR\_VAL1 PT-INR Value

N Mean Standard Deviation Minimum Maximum

---

|   |           |           |           |           |
|---|-----------|-----------|-----------|-----------|
| 5 | 2.5380000 | 0.7537042 | 1.8200000 | 3.6500000 |
|---|-----------|-----------|-----------|-----------|

---

Laboratory tests at the time of obtaining Table 2-6 consent, according to the presence or absence of proton-pump inhibitors

Unique Subject Identifier=313300000-0054

MEANS Procedure

Assay variable : PTINR\_VAL1 PT-INR Value

| N | Mean      | Standard Deviation | Minimum   | Maximum   |
|---|-----------|--------------------|-----------|-----------|
| 5 | 2.0560000 | 0.9046436          | 1.3100000 | 3.5900000 |

Unique Subject Identifier=313300000-0061

Assay variable : PTINR\_VAL1 PT-INR Value

| N | Mean      | Standard Deviation | Minimum   | Maximum   |
|---|-----------|--------------------|-----------|-----------|
| 6 | 1.6583333 | 0.2319842          | 1.2900000 | 1.8900000 |

Unique Subject Identifier=313300000-0086

Assay variable : PTINR\_VAL1 PT-INR Value

| N | Mean      | Standard Deviation | Minimum   | Maximum   |
|---|-----------|--------------------|-----------|-----------|
| 3 | 2.3833333 | 0.2950141          | 2.1700000 | 2.7200000 |

Unique Subject Identifier=313300000-0090

Assay variable : PTINR\_VAL1 PT-INR Value

N Mean Standard Deviation Minimum Maximum

---

|   |           |           |           |           |
|---|-----------|-----------|-----------|-----------|
| 4 | 1.2775000 | 0.0377492 | 1.2300000 | 1.3200000 |
|---|-----------|-----------|-----------|-----------|

---

Laboratory tests at the time of obtaining Table 2-6 consent, according to the presence or absence of proton-pump inhibitors

Unique Subject Identifier=3135000000-0009

MEANS Procedure

Assay variable : PTINR\_VAL1 PT-INR Value

N Mean Standard Deviation Minimum Maximum

---

|   |           |           |           |           |
|---|-----------|-----------|-----------|-----------|
| 2 | 1.9400000 | 0.0707107 | 1.8900000 | 1.9900000 |
|---|-----------|-----------|-----------|-----------|

---

Unique Subject Identifier=3135000000-0034

Assay variable : PTINR\_VAL1 PT-INR Value

N Mean Standard Deviation Minimum Maximum

---

|   |           |           |           |           |
|---|-----------|-----------|-----------|-----------|
| 2 | 2.0350000 | 0.2333452 | 1.8700000 | 2.2000000 |
|---|-----------|-----------|-----------|-----------|

---

Unique Subject Identifier=3139000000-0021

Assay variable : PTINR\_VAL1 PT-INR Value

N Mean Standard Deviation Minimum Maximum

---

|   |           |           |           |           |
|---|-----------|-----------|-----------|-----------|
| 2 | 1.9200000 | 0.0282843 | 1.9000000 | 1.9400000 |
|---|-----------|-----------|-----------|-----------|

---

Unique Subject Identifier=3143000000-0001



Assay variable : PTINR\_VAL1 PT-INR Value

N Mean Standard Deviation Minimum Maximum

---

|   |           |           |           |           |
|---|-----------|-----------|-----------|-----------|
| 4 | 1.3000000 | 0.1414214 | 1.1000000 | 1.4000000 |
|---|-----------|-----------|-----------|-----------|

---

Laboratory tests at the time of obtaining Table 2-6 consent, according to the presence or absence of proton-pump inhibitors

Unique Subject Identifier=3143000000-0010

MEANS Procedure

Assay variable : PTINR\_VAL1 PT-INR Value

N Mean Standard Deviation Minimum Maximum

---

|   |           |           |           |           |
|---|-----------|-----------|-----------|-----------|
| 6 | 1.7066667 | 0.2299275 | 1.4900000 | 2.0900000 |
|---|-----------|-----------|-----------|-----------|

---

Unique Subject Identifier=3150000000-0002

Assay variable : PTINR\_VAL1 PT-INR Value

N Mean Standard Deviation Minimum Maximum

---

|   |           |           |           |           |
|---|-----------|-----------|-----------|-----------|
| 6 | 2.3833333 | 0.6400521 | 1.9000000 | 3.5000000 |
|---|-----------|-----------|-----------|-----------|

---

Unique Subject Identifier=3150000000-0003

Assay variable : PTINR\_VAL1 PT-INR Value

N Mean Standard Deviation Minimum Maximum

---

|   |           |           |           |           |
|---|-----------|-----------|-----------|-----------|
| 6 | 1.9833333 | 0.4792355 | 1.5000000 | 2.6000000 |
|---|-----------|-----------|-----------|-----------|

---

Unique Subject Identifier=3150000000-0006

Assay variable : PTINR\_VAL1 PT-INR Value

N Mean Standard Deviation Minimum Maximum

---

|   |          |           |          |          |
|---|----------|-----------|----------|----------|
| 6 | 1.800000 | 0.3405877 | 1.200000 | 2.200000 |
|---|----------|-----------|----------|----------|

---

Laboratory tests at the time of obtaining Table 2-6 consent, according to the presence or absence of proton-pump inhibitors

Unique Subject Identifier=3151000000-0001

MEANS Procedure

Assay variable : PTINR\_VAL1 PT-INR Value

N Mean Standard Deviation Minimum Maximum

---

|   |           |           |           |           |
|---|-----------|-----------|-----------|-----------|
| 5 | 1.4560000 | 0.2850088 | 1.1100000 | 1.7800000 |
|---|-----------|-----------|-----------|-----------|

---

Unique Subject Identifier=3151000000-0003

Assay variable : PTINR\_VAL1 PT-INR Value

N Mean Standard Deviation Minimum Maximum

---

|   |           |           |           |           |
|---|-----------|-----------|-----------|-----------|
| 6 | 2.2800000 | 0.0933809 | 2.1100000 | 2.3700000 |
|---|-----------|-----------|-----------|-----------|

---

Unique Subject Identifier=3151000000-0011

Assay variable : PTINR\_VAL1 PT-INR Value

N Mean Standard Deviation Minimum Maximum

---

|   |           |           |           |           |
|---|-----------|-----------|-----------|-----------|
| 3 | 0.9800000 | 0.0100000 | 0.9700000 | 0.9900000 |
|---|-----------|-----------|-----------|-----------|

---

Unique Subject Identifier=3152011000-0019

Assay variable : PTINR\_VAL1 PT-INR Value

N Mean Standard Deviation Minimum Maximum

---

|   |          |           |          |          |
|---|----------|-----------|----------|----------|
| 4 | 1.650000 | 0.1914854 | 1.400000 | 1.800000 |
|---|----------|-----------|----------|----------|

---

Laboratory tests at the time of obtaining Table 2-6 consent, according to the presence or absence of proton-pump inhibitors

Unique Subject Identifier=3158111111-0003

MEANS Procedure

Assay variable : PTINR\_VAL1 PT-INR Value

N Mean Standard Deviation Minimum Maximum

---

|   |           |           |           |           |
|---|-----------|-----------|-----------|-----------|
| 4 | 2.1125000 | 0.2077458 | 1.9200000 | 2.3800000 |
|---|-----------|-----------|-----------|-----------|

---

Unique Subject Identifier=3158111111-0006

Assay variable : PTINR\_VAL1 PT-INR Value

N Mean Standard Deviation Minimum Maximum

---

|   |           |           |           |           |
|---|-----------|-----------|-----------|-----------|
| 6 | 2.1500000 | 0.4448820 | 1.6000000 | 2.7500000 |
|---|-----------|-----------|-----------|-----------|

---

Unique Subject Identifier=3158111111-0007

Assay variable : PTINR\_VAL1 PT-INR Value

N Mean Standard Deviation Minimum Maximum

---

|   |           |           |           |           |
|---|-----------|-----------|-----------|-----------|
| 6 | 1.9750000 | 0.4844275 | 1.4500000 | 2.7500000 |
|---|-----------|-----------|-----------|-----------|

---

Unique Subject Identifier=3158111111-0015

Assay variable : PTINR\_VAL1 PT-INR Value

N Mean Standard Deviation Minimum Maximum

---

|   |           |           |           |           |
|---|-----------|-----------|-----------|-----------|
| 4 | 2.0750000 | 0.2230844 | 1.9000000 | 2.4000000 |
|---|-----------|-----------|-----------|-----------|

---

Laboratory tests at the time of obtaining Table 2-6 consent, according to the presence or absence of proton-pump inhibitors

Unique Subject Identifier=3158111111-0019

MEANS Procedure

Assay variable : PTINR\_VAL1 PT-INR Value

N Mean Standard Deviation Minimum Maximum

---

|   |           |           |           |           |
|---|-----------|-----------|-----------|-----------|
| 3 | 1.9700000 | 0.1915724 | 1.8400000 | 2.1900000 |
|---|-----------|-----------|-----------|-----------|

---

Unique Subject Identifier=3158111111-0020

Assay variable : PTINR\_VAL1 PT-INR Value

N Mean Standard Deviation Minimum Maximum

---

|   |           |           |           |           |
|---|-----------|-----------|-----------|-----------|
| 6 | 1.3966667 | 0.1936664 | 1.2200000 | 1.7000000 |
|---|-----------|-----------|-----------|-----------|

---

Unique Subject Identifier=3158111111-0024

Assay variable : PTINR\_VAL1 PT-INR Value

N Mean Standard Deviation Minimum Maximum

---

|   |           |           |           |           |
|---|-----------|-----------|-----------|-----------|
| 3 | 2.5300000 | 0.8201829 | 1.7000000 | 3.3400000 |
|---|-----------|-----------|-----------|-----------|

---

Unique Subject Identifier=3158111111-0027



Assay variable : PTINR\_VAL1 PT-INR Value

N Mean Standard Deviation Minimum Maximum

---

|   |           |           |           |           |
|---|-----------|-----------|-----------|-----------|
| 4 | 1.9050000 | 0.3092464 | 1.4800000 | 2.2100000 |
|---|-----------|-----------|-----------|-----------|

---

Laboratory tests at the time of obtaining Table 2-6 consent, according to the presence or absence of proton-pump inhibitors

Unique Subject Identifier=3158111111-0036

MEANS Procedure

Assay variable : PTINR\_VAL1 PT-INR Value

N Mean Standard Deviation Minimum Maximum

---

|   |           |           |           |           |
|---|-----------|-----------|-----------|-----------|
| 4 | 1.9800000 | 0.0752773 | 1.8900000 | 2.0600000 |
|---|-----------|-----------|-----------|-----------|

---

Unique Subject Identifier=3158111111-0042

Assay variable : PTINR\_VAL1 PT-INR Value

N Mean Standard Deviation Minimum Maximum

---

|   |           |           |           |           |
|---|-----------|-----------|-----------|-----------|
| 4 | 2.2750000 | 0.1717556 | 2.1600000 | 2.5300000 |
|---|-----------|-----------|-----------|-----------|

---

Unique Subject Identifier=3158111111-0046

Assay variable : PTINR\_VAL1 PT-INR Value

N Mean Standard Deviation Minimum Maximum

---

|   |           |           |           |           |
|---|-----------|-----------|-----------|-----------|
| 3 | 1.6600000 | 0.3041381 | 1.4600000 | 2.0100000 |
|---|-----------|-----------|-----------|-----------|

---

Unique Subject Identifier=3158111111-0048

Assay variable : PTINR\_VAL1 PT-INR Value

N Mean Standard Deviation Minimum Maximum

---

|   |           |           |           |           |
|---|-----------|-----------|-----------|-----------|
| 4 | 2.0875000 | 0.3432565 | 1.7500000 | 2.4400000 |
|---|-----------|-----------|-----------|-----------|

---

Laboratory tests at the time of obtaining Table 2-6 consent, according to the presence or absence of proton-pump inhibitors

Unique Subject Identifier=3158111111-0050

MEANS Procedure

Assay variable : PTINR\_VAL1 PT-INR Value

N Mean Standard Deviation Minimum Maximum

---

|   |          |           |          |          |
|---|----------|-----------|----------|----------|
| 6 | 2.060000 | 0.1970787 | 1.840000 | 2.310000 |
|---|----------|-----------|----------|----------|

---

Unique Subject Identifier=3158111111-0056

Assay variable : PTINR\_VAL1 PT-INR Value

N Mean Standard Deviation Minimum Maximum

---

|   |          |           |          |          |
|---|----------|-----------|----------|----------|
| 2 | 1.170000 | 0.0424264 | 1.140000 | 1.200000 |
|---|----------|-----------|----------|----------|

---

Unique Subject Identifier=3158111111-0057

Assay variable : PTINR\_VAL1 PT-INR Value

N Mean Standard Deviation Minimum Maximum

---

|   |           |           |          |          |
|---|-----------|-----------|----------|----------|
| 6 | 1.7616667 | 0.4397007 | 1.280000 | 2.510000 |
|---|-----------|-----------|----------|----------|

---

Unique Subject Identifier=3158111111-0060

Assay variable : PTINR\_VAL1 PT-INR Value

N Mean Standard Deviation Minimum Maximum

---

|   |           |           |           |           |
|---|-----------|-----------|-----------|-----------|
| 6 | 2.5533333 | 0.3623074 | 2.1100000 | 3.0200000 |
|---|-----------|-----------|-----------|-----------|

---

Laboratory tests at the time of obtaining Table 2-6 consent, according to the presence or absence of proton-pump inhibitors

Unique Subject Identifier=3158111111-0062

MEANS Procedure

Assay variable : PTINR\_VAL1 PT-INR Value

N Mean Standard Deviation Minimum Maximum

---

|   |           |           |           |           |
|---|-----------|-----------|-----------|-----------|
| 4 | 1.9500000 | 0.3721111 | 1.4400000 | 2.3000000 |
|---|-----------|-----------|-----------|-----------|

---

Unique Subject Identifier=3158111111-0064

Assay variable : PTINR\_VAL1 PT-INR Value

N Mean Standard Deviation Minimum Maximum

---

|   |           |           |           |           |
|---|-----------|-----------|-----------|-----------|
| 3 | 2.2800000 | 0.0624500 | 2.2300000 | 2.3500000 |
|---|-----------|-----------|-----------|-----------|

---

Unique Subject Identifier=3158111111-0068

Assay variable : PTINR\_VAL1 PT-INR Value

N Mean Standard Deviation Minimum Maximum

---

|   |           |           |           |           |
|---|-----------|-----------|-----------|-----------|
| 6 | 1.7716667 | 0.4928455 | 1.4300000 | 2.7500000 |
|---|-----------|-----------|-----------|-----------|

---

Unique Subject Identifier=3162011000-0001

Assay variable : PTINR\_VAL1 PT-INR Value

N Mean Standard Deviation Minimum Maximum

---

|   |          |           |          |          |
|---|----------|-----------|----------|----------|
| 4 | 2.130000 | 0.3909817 | 1.650000 | 2.560000 |
|---|----------|-----------|----------|----------|

---

Laboratory tests at the time of obtaining Table 2-6 consent, according to the presence or absence of proton-pump inhibitors

Unique Subject Identifier=3162011000-0003

MEANS Procedure

Assay variable : PTINR\_VAL1 PT-INR Value

N Mean Standard Deviation Minimum Maximum

---

|   |           |           |           |           |
|---|-----------|-----------|-----------|-----------|
| 3 | 1.9200000 | 0.2051828 | 1.7200000 | 2.1300000 |
|---|-----------|-----------|-----------|-----------|

---

Unique Subject Identifier=3162011000-0007

Assay variable : PTINR\_VAL1 PT-INR Value

N Mean Standard Deviation Minimum Maximum

---

|   |           |  |           |           |
|---|-----------|--|-----------|-----------|
| 1 | 2.0600000 |  | 2.0600000 | 2.0600000 |
|---|-----------|--|-----------|-----------|

---

Unique Subject Identifier=3162011000-0012

Assay variable : PTINR\_VAL1 PT-INR Value

N Mean Standard Deviation Minimum Maximum

---

|   |           |  |           |           |
|---|-----------|--|-----------|-----------|
| 1 | 1.5000000 |  | 1.5000000 | 1.5000000 |
|---|-----------|--|-----------|-----------|

---

Unique Subject Identifier=3162011000-0018



Assay variable : PTINR\_VAL1 PT-INR Value

N Mean Standard Deviation Minimum Maximum

---

|   |           |           |           |           |
|---|-----------|-----------|-----------|-----------|
| 4 | 1.8050000 | 0.3591193 | 1.3100000 | 2.1200000 |
|---|-----------|-----------|-----------|-----------|

---

Laboratory tests at the time of obtaining Table 2-6 consent, according to the presence or absence of proton-pump inhibitors

Unique Subject Identifier=3162011000-0024

MEANS Procedure

Assay variable : PTINR\_VAL1 PT-INR Value

N Mean Standard Deviation Minimum Maximum

---

|   |           |           |           |           |
|---|-----------|-----------|-----------|-----------|
| 4 | 2.1125000 | 0.2831225 | 1.6900000 | 2.2900000 |
|---|-----------|-----------|-----------|-----------|

---

Unique Subject Identifier=3163011011-0002

Assay variable : PTINR\_VAL1 PT-INR Value

N Mean Standard Deviation Minimum Maximum

---

|   |           |           |           |           |
|---|-----------|-----------|-----------|-----------|
| 5 | 1.9200000 | 0.7823043 | 1.2000000 | 3.2000000 |
|---|-----------|-----------|-----------|-----------|

---

Unique Subject Identifier=3164011100-0003

Assay variable : PTINR\_VAL1 PT-INR Value

N Mean Standard Deviation Minimum Maximum

---

|   |           |           |           |           |
|---|-----------|-----------|-----------|-----------|
| 4 | 1.3925000 | 0.1678044 | 1.1500000 | 1.5100000 |
|---|-----------|-----------|-----------|-----------|

---

Unique Subject Identifier=3175011000-0002

Assay variable : PTINR\_VAL1 PT-INR Value

N Mean Standard Deviation Minimum Maximum

---

|   |           |           |           |           |
|---|-----------|-----------|-----------|-----------|
| 4 | 1.7375000 | 0.1878608 | 1.5800000 | 2.0100000 |
|---|-----------|-----------|-----------|-----------|

---

Laboratory tests at the time of obtaining Table 2-6 consent, according to the presence or absence of proton-pump inhibitors

Unique Subject Identifier=3175011000-0005

MEANS Procedure

Assay variable : PTINR\_VAL1 PT-INR Value

| N | Mean      | Standard Deviation | Minimum   | Maximum   |
|---|-----------|--------------------|-----------|-----------|
| 6 | 1.8583333 | 0.1468900          | 1.6500000 | 2.0500000 |

Unique Subject Identifier=3179010000-0007

Assay variable : PTINR\_VAL1 PT-INR Value

| N | Mean      | Standard Deviation | Minimum   | Maximum   |
|---|-----------|--------------------|-----------|-----------|
| 3 | 1.5833333 | 0.5345403          | 0.9700000 | 1.9500000 |

Unique Subject Identifier=3180010000-0002

Assay variable : PTINR\_VAL1 PT-INR Value

| N | Mean      | Standard Deviation | Minimum   | Maximum   |
|---|-----------|--------------------|-----------|-----------|
| 6 | 1.8366667 | 0.6839201          | 1.2700000 | 3.1600000 |

Unique Subject Identifier=3185010010-0018

Assay variable : PTINR\_VAL1 PT-INR Value

N Mean Standard Deviation Minimum Maximum

---

|   |           |           |           |           |
|---|-----------|-----------|-----------|-----------|
| 3 | 1.8466667 | 0.2844878 | 1.5200000 | 2.0400000 |
|---|-----------|-----------|-----------|-----------|

---

Laboratory tests at the time of obtaining Table 2-6 consent, according to the presence or absence of proton-pump inhibitors

Unique Subject Identifier=3185010010-0019

MEANS Procedure

Assay variable : PTINR\_VAL1 PT-INR Value

| N | Mean      | Standard Deviation | Minimum   | Maximum   |
|---|-----------|--------------------|-----------|-----------|
| 3 | 2.4433333 | 0.7543430          | 1.7400000 | 3.2400000 |

Unique Subject Identifier=3185010010-0020

Assay variable : PTINR\_VAL1 PT-INR Value

| N | Mean      | Standard Deviation | Minimum   | Maximum   |
|---|-----------|--------------------|-----------|-----------|
| 6 | 1.2866667 | 0.0668331          | 1.2200000 | 1.4000000 |

Unique Subject Identifier=3185010010-0024

Assay variable : PTINR\_VAL1 PT-INR Value

| N | Mean      | Standard Deviation | Minimum   | Maximum   |
|---|-----------|--------------------|-----------|-----------|
| 5 | 1.5640000 | 0.3812873          | 1.1900000 | 2.0900000 |

Unique Subject Identifier=3185010010-0029

Assay variable : PTINR\_VAL1 PT-INR Value

N Mean Standard Deviation Minimum Maximum

---

|   |           |           |           |           |
|---|-----------|-----------|-----------|-----------|
| 6 | 1.5650000 | 0.8708329 | 1.0500000 | 3.2800000 |
|---|-----------|-----------|-----------|-----------|

---

Laboratory tests at the time of obtaining Table 2-6 consent, according to the presence or absence of proton-pump inhibitors

Unique Subject Identifier=3185010010-0030

MEANS Procedure

Assay variable : PTINR\_VAL1 PT-INR Value

| N | Mean      | Standard Deviation | Minimum   | Maximum   |
|---|-----------|--------------------|-----------|-----------|
| 4 | 1.3100000 | 0.1505545          | 1.1300000 | 1.4900000 |

Unique Subject Identifier=3185010010-0032

Assay variable : PTINR\_VAL1 PT-INR Value

| N | Mean      | Standard Deviation | Minimum   | Maximum   |
|---|-----------|--------------------|-----------|-----------|
| 4 | 2.5475000 | 0.7944547          | 1.6600000 | 3.4000000 |

Unique Subject Identifier=3185010010-0040

Assay variable : PTINR\_VAL1 PT-INR Value

| N | Mean      | Standard Deviation | Minimum   | Maximum   |
|---|-----------|--------------------|-----------|-----------|
| 6 | 1.5733333 | 0.1688392          | 1.3800000 | 1.8200000 |

Unique Subject Identifier=3185010010-0042



Assay variable : PTINR\_VAL1 PT-INR Value

N Mean Standard Deviation Minimum Maximum

---

|   |           |           |           |           |
|---|-----------|-----------|-----------|-----------|
| 3 | 2.3966667 | 0.7870409 | 1.7700000 | 3.2800000 |
|---|-----------|-----------|-----------|-----------|

---

Laboratory tests at the time of obtaining Table 2-6 consent, according to the presence or absence of proton-pump inhibitors

Unique Subject Identifier=3185010010-0046

MEANS Procedure

Assay variable : PTINR\_VAL1 PT-INR Value

N Mean Standard Deviation Minimum Maximum

---

|   |           |           |           |           |
|---|-----------|-----------|-----------|-----------|
| 6 | 1.6483333 | 0.3326510 | 1.4000000 | 2.3000000 |
|---|-----------|-----------|-----------|-----------|

---

Unique Subject Identifier=3187000000-0008

Assay variable : PTINR\_VAL1 PT-INR Value

N Mean Standard Deviation Minimum Maximum

---

|   |           |           |           |           |
|---|-----------|-----------|-----------|-----------|
| 6 | 1.9483333 | 0.3566745 | 1.4600000 | 2.2500000 |
|---|-----------|-----------|-----------|-----------|

---

Unique Subject Identifier=3190111111-0004

Assay variable : PTINR\_VAL1 PT-INR Value

N Mean Standard Deviation Minimum Maximum

---

|   |           |           |           |           |
|---|-----------|-----------|-----------|-----------|
| 4 | 1.8375000 | 0.2088660 | 1.6800000 | 2.1400000 |
|---|-----------|-----------|-----------|-----------|

---

Unique Subject Identifier=3197000000-0005

Assay variable : PTINR\_VAL1 PT-INR Value

N Mean Standard Deviation Minimum Maximum

---

|   |           |           |           |           |
|---|-----------|-----------|-----------|-----------|
| 6 | 2.3916667 | 0.4574458 | 1.8700000 | 3.1900000 |
|---|-----------|-----------|-----------|-----------|

---

Laboratory tests at the time of obtaining Table 2-6 consent, according to the presence or absence of proton-pump inhibitors

Unique Subject Identifier=3197000000-0017

MEANS Procedure

Assay variable : PTINR\_VAL1 PT-INR Value

N Mean Standard Deviation Minimum Maximum

---

|   |           |           |           |           |
|---|-----------|-----------|-----------|-----------|
| 6 | 2.1116667 | 0.9602378 | 1.1900000 | 3.6400000 |
|---|-----------|-----------|-----------|-----------|

---

Unique Subject Identifier=3197000000-0058

Assay variable : PTINR\_VAL1 PT-INR Value

N Mean Standard Deviation Minimum Maximum

---

|   |           |           |           |           |
|---|-----------|-----------|-----------|-----------|
| 6 | 2.2750000 | 0.5256900 | 1.6700000 | 3.1000000 |
|---|-----------|-----------|-----------|-----------|

---

Unique Subject Identifier=3205011100-0001

Assay variable : PTINR\_VAL1 PT-INR Value

N Mean Standard Deviation Minimum Maximum

---

|   |           |           |           |           |
|---|-----------|-----------|-----------|-----------|
| 5 | 1.6800000 | 0.1095445 | 1.5000000 | 1.8000000 |
|---|-----------|-----------|-----------|-----------|

---

Unique Subject Identifier=3205011100-0019

Assay variable : PTINR\_VAL1 PT-INR Value

N Mean Standard Deviation Minimum Maximum

---

|   |           |           |           |           |
|---|-----------|-----------|-----------|-----------|
| 6 | 1.7000000 | 0.1788854 | 1.5000000 | 2.0000000 |
|---|-----------|-----------|-----------|-----------|

---

Laboratory tests at the time of obtaining Table 2-6 consent, according to the presence or absence of proton-pump inhibitors

Unique Subject Identifier=3206011010-0004

MEANS Procedure

Assay variable : PTINR\_VAL1 PT-INR Value

N Mean Standard Deviation Minimum Maximum

---

|   |           |           |           |           |
|---|-----------|-----------|-----------|-----------|
| 2 | 2.5150000 | 0.2192031 | 2.3600000 | 2.6700000 |
|---|-----------|-----------|-----------|-----------|

---

Unique Subject Identifier=3208000000-0006

Assay variable : PTINR\_VAL1 PT-INR Value

N Mean Standard Deviation Minimum Maximum

---

|   |           |           |           |           |
|---|-----------|-----------|-----------|-----------|
| 6 | 1.7600000 | 0.5092347 | 0.9800000 | 2.3000000 |
|---|-----------|-----------|-----------|-----------|

---

Unique Subject Identifier=3214111000-0004

Assay variable : PTINR\_VAL1 PT-INR Value

N Mean Standard Deviation Minimum Maximum

---

|   |           |  |           |           |
|---|-----------|--|-----------|-----------|
| 1 | 2.1100000 |  | 2.1100000 | 2.1100000 |
|---|-----------|--|-----------|-----------|

---

Unique Subject Identifier=3301010000-0013

Assay variable : PTINR\_VAL1 PT-INR Value

N Mean Standard Deviation Minimum Maximum

---

|   |          |           |          |          |
|---|----------|-----------|----------|----------|
| 6 | 1.600000 | 0.1095445 | 1.400000 | 1.700000 |
|---|----------|-----------|----------|----------|

---

Laboratory tests at the time of obtaining Table 2-6 consent, according to the presence or absence of proton-pump inhibitors

Unique Subject Identifier=3301010000-0027

MEANS Procedure

Assay variable : PTINR\_VAL1 PT-INR Value

N Mean Standard Deviation Minimum Maximum

---

|   |           |           |           |           |
|---|-----------|-----------|-----------|-----------|
| 6 | 1.8166667 | 0.2228602 | 1.4000000 | 2.0000000 |
|---|-----------|-----------|-----------|-----------|

---

Unique Subject Identifier=3302010000-0023

Assay variable : PTINR\_VAL1 PT-INR Value

N Mean Standard Deviation Minimum Maximum

---

|   |           |           |           |           |
|---|-----------|-----------|-----------|-----------|
| 6 | 1.9566667 | 0.3199167 | 1.6300000 | 2.5000000 |
|---|-----------|-----------|-----------|-----------|

---

Unique Subject Identifier=3304011000-0005

Assay variable : PTINR\_VAL1 PT-INR Value

N Mean Standard Deviation Minimum Maximum

---

|   |           |           |           |           |
|---|-----------|-----------|-----------|-----------|
| 4 | 1.8000000 | 0.2160247 | 1.6000000 | 2.1000000 |
|---|-----------|-----------|-----------|-----------|

---

Unique Subject Identifier=3344010000-0006



Assay variable : PTINR\_VAL1 PT-INR Value

N Mean Standard Deviation Minimum Maximum

---

|   |          |  |          |          |
|---|----------|--|----------|----------|
| 1 | 2.100000 |  | 2.100000 | 2.100000 |
|---|----------|--|----------|----------|

---

Laboratory tests at the time of obtaining Table 2-6 consent, according to the presence or absence of proton-pump inhibitors

Unique Subject Identifier=3347010000-0008

MEANS Procedure

Assay variable : PTINR\_VAL1 PT-INR Value

N Mean Standard Deviation Minimum Maximum

---

|   |           |           |           |           |
|---|-----------|-----------|-----------|-----------|
| 6 | 2.1000000 | 0.3577709 | 1.7000000 | 2.7000000 |
|---|-----------|-----------|-----------|-----------|

---

Unique Subject Identifier=3347010000-0017

Assay variable : PTINR\_VAL1 PT-INR Value

N Mean Standard Deviation Minimum Maximum

---

|   |           |           |           |           |
|---|-----------|-----------|-----------|-----------|
| 6 | 1.7200000 | 0.2433105 | 1.4200000 | 2.1000000 |
|---|-----------|-----------|-----------|-----------|

---

Unique Subject Identifier=3347010000-0020

Assay variable : PTINR\_VAL1 PT-INR Value

N Mean Standard Deviation Minimum Maximum

---

|   |           |           |           |           |
|---|-----------|-----------|-----------|-----------|
| 6 | 2.1083333 | 0.1855173 | 1.8000000 | 2.3000000 |
|---|-----------|-----------|-----------|-----------|

---

Unique Subject Identifier=3347010000-0027

Assay variable : PTINR\_VAL1 PT-INR Value

N Mean Standard Deviation Minimum Maximum

---

|   |          |           |          |          |
|---|----------|-----------|----------|----------|
| 6 | 1.500000 | 0.0894427 | 1.400000 | 1.600000 |
|---|----------|-----------|----------|----------|

---

Laboratory tests at the time of obtaining Table 2-6 consent, according to the presence or absence of proton-pump inhibitors

Unique Subject Identifier=3347010000-0039

MEANS Procedure

Assay variable : PTINR\_VAL1 PT-INR Value

N Mean Standard Deviation Minimum Maximum

---

|   |           |           |           |           |
|---|-----------|-----------|-----------|-----------|
| 6 | 1.9050000 | 0.4900510 | 1.4000000 | 2.8000000 |
|---|-----------|-----------|-----------|-----------|

---

Unique Subject Identifier=3347010000-0041

Assay variable : PTINR\_VAL1 PT-INR Value

N Mean Standard Deviation Minimum Maximum

---

|   |           |           |           |           |
|---|-----------|-----------|-----------|-----------|
| 6 | 1.8800000 | 0.2262742 | 1.6000000 | 2.1800000 |
|---|-----------|-----------|-----------|-----------|

---

Unique Subject Identifier=3347010000-0045

Assay variable : PTINR\_VAL1 PT-INR Value

N Mean Standard Deviation Minimum Maximum

---

|   |           |           |           |           |
|---|-----------|-----------|-----------|-----------|
| 6 | 2.5000000 | 0.5796551 | 1.9000000 | 3.3000000 |
|---|-----------|-----------|-----------|-----------|

---

Unique Subject Identifier=3349010000-0003

Assay variable : PTINR\_VAL1 PT-INR Value

N Mean Standard Deviation Minimum Maximum

---

|   |           |           |           |           |
|---|-----------|-----------|-----------|-----------|
| 6 | 1.8500000 | 0.1643168 | 1.6000000 | 2.0000000 |
|---|-----------|-----------|-----------|-----------|

---

Laboratory tests at the time of obtaining Table 2-6 consent, according to the presence or absence of proton-pump inhibitors

Unique Subject Identifier=3349010000-0010

MEANS Procedure

Assay variable : PTINR\_VAL1 PT-INR Value

N Mean Standard Deviation Minimum Maximum

---

|   |          |           |          |          |
|---|----------|-----------|----------|----------|
| 6 | 2.100000 | 0.7694154 | 1.200000 | 3.400000 |
|---|----------|-----------|----------|----------|

---

Unique Subject Identifier=3350010000-0002

Assay variable : PTINR\_VAL1 PT-INR Value

N Mean Standard Deviation Minimum Maximum

---

|   |          |           |          |          |
|---|----------|-----------|----------|----------|
| 4 | 2.175000 | 0.4645787 | 1.600000 | 2.600000 |
|---|----------|-----------|----------|----------|

---

Unique Subject Identifier=3350010000-0004

Assay variable : PTINR\_VAL1 PT-INR Value

N Mean Standard Deviation Minimum Maximum

---

|   |          |           |          |          |
|---|----------|-----------|----------|----------|
| 6 | 1.583333 | 0.1329160 | 1.400000 | 1.800000 |
|---|----------|-----------|----------|----------|

---

Unique Subject Identifier=3401000000-0016

Assay variable : PTINR\_VAL1 PT-INR Value

N Mean Standard Deviation Minimum Maximum

---

|   |           |           |           |           |
|---|-----------|-----------|-----------|-----------|
| 5 | 1.8900000 | 0.6411708 | 1.3300000 | 2.9000000 |
|---|-----------|-----------|-----------|-----------|

---

Laboratory tests at the time of obtaining Table 2-6 consent, according to the presence or absence of proton-pump inhibitors

Unique Subject Identifier=3401000000-0017

MEANS Procedure

Assay variable : PTINR\_VAL1 PT-INR Value

N Mean Standard Deviation Minimum Maximum

---

|   |           |           |           |           |
|---|-----------|-----------|-----------|-----------|
| 6 | 1.5116667 | 0.2470155 | 1.2700000 | 1.9700000 |
|---|-----------|-----------|-----------|-----------|

---

Unique Subject Identifier=3401000000-0026

Assay variable : PTINR\_VAL1 PT-INR Value

N Mean Standard Deviation Minimum Maximum

---

|   |           |           |           |           |
|---|-----------|-----------|-----------|-----------|
| 4 | 1.9875000 | 0.2729316 | 1.7100000 | 2.3600000 |
|---|-----------|-----------|-----------|-----------|

---

Unique Subject Identifier=3402010011-0040

Assay variable : PTINR\_VAL1 PT-INR Value

N Mean Standard Deviation Minimum Maximum

---

|   |           |           |           |           |
|---|-----------|-----------|-----------|-----------|
| 6 | 2.0000000 | 0.2097618 | 1.7000000 | 2.2000000 |
|---|-----------|-----------|-----------|-----------|

---

Unique Subject Identifier=3406010000-0008



Assay variable : PTINR\_VAL1 PT-INR Value

N Mean Standard Deviation Minimum Maximum

---

|   |          |          |          |          |
|---|----------|----------|----------|----------|
| 3 | 1.980000 | 0.918477 | 1.280000 | 3.020000 |
|---|----------|----------|----------|----------|

---

Laboratory tests at the time of obtaining Table 2-6 consent, according to the presence or absence of proton-pump inhibitors

Unique Subject Identifier=3407010011-0006

MEANS Procedure

Assay variable : PTINR\_VAL1 PT-INR Value

N Mean Standard Deviation Minimum Maximum

---

|   |           |           |           |           |
|---|-----------|-----------|-----------|-----------|
| 2 | 2.0600000 | 0.0282843 | 2.0400000 | 2.0800000 |
|---|-----------|-----------|-----------|-----------|

---

Unique Subject Identifier=3412000000-0005

Assay variable : PTINR\_VAL1 PT-INR Value

N Mean Standard Deviation Minimum Maximum

---

|   |           |           |           |           |
|---|-----------|-----------|-----------|-----------|
| 6 | 2.1700000 | 1.4140438 | 1.1700000 | 5.0000000 |
|---|-----------|-----------|-----------|-----------|

---

Unique Subject Identifier=3415011000-0011

Assay variable : PTINR\_VAL1 PT-INR Value

N Mean Standard Deviation Minimum Maximum

---

|   |           |           |           |           |
|---|-----------|-----------|-----------|-----------|
| 4 | 2.3175000 | 0.1071992 | 2.2300000 | 2.4600000 |
|---|-----------|-----------|-----------|-----------|

---

Unique Subject Identifier=3421000000-0002

Assay variable : PTINR\_VAL1 PT-INR Value

N Mean Standard Deviation Minimum Maximum

---

|   |           |           |           |           |
|---|-----------|-----------|-----------|-----------|
| 6 | 2.1883333 | 0.3823829 | 1.7300000 | 2.8500000 |
|---|-----------|-----------|-----------|-----------|

---

Laboratory tests at the time of obtaining Table 2-6 consent, according to the presence or absence of proton-pump inhibitors

Unique Subject Identifier=3421000000-0019

MEANS Procedure

Assay variable : PTINR\_VAL1 PT-INR Value

N Mean Standard Deviation Minimum Maximum

---

|   |           |           |           |           |
|---|-----------|-----------|-----------|-----------|
| 5 | 1.7980000 | 0.1801943 | 1.6100000 | 1.9800000 |
|---|-----------|-----------|-----------|-----------|

---

Unique Subject Identifier=3421000000-0023

Assay variable : PTINR\_VAL1 PT-INR Value

N Mean Standard Deviation Minimum Maximum

---

|   |           |           |           |           |
|---|-----------|-----------|-----------|-----------|
| 3 | 1.7433333 | 0.0152753 | 1.7300000 | 1.7600000 |
|---|-----------|-----------|-----------|-----------|

---

Unique Subject Identifier=3421000000-0028

Assay variable : PTINR\_VAL1 PT-INR Value

N Mean Standard Deviation Minimum Maximum

---

|   |           |           |           |           |
|---|-----------|-----------|-----------|-----------|
| 3 | 2.0400000 | 0.3576311 | 1.7100000 | 2.4200000 |
|---|-----------|-----------|-----------|-----------|

---

Unique Subject Identifier=3421000000-0030

Assay variable : PTINR\_VAL1 PT-INR Value

N Mean Standard Deviation Minimum Maximum

---

|   |           |           |           |           |
|---|-----------|-----------|-----------|-----------|
| 4 | 2.3175000 | 0.2288194 | 2.0300000 | 2.5900000 |
|---|-----------|-----------|-----------|-----------|

---

Laboratory tests at the time of obtaining Table 2-6 consent, according to the presence or absence of proton-pump inhibitors

Unique Subject Identifier=3422000000-0026

MEANS Procedure

Assay variable : PTINR\_VAL1 PT-INR Value

N Mean Standard Deviation Minimum Maximum

---

|   |           |           |           |           |
|---|-----------|-----------|-----------|-----------|
| 4 | 2.0750000 | 0.6184658 | 1.7000000 | 3.0000000 |
|---|-----------|-----------|-----------|-----------|

---

Unique Subject Identifier=3422000000-0046

Assay variable : PTINR\_VAL1 PT-INR Value

N Mean Standard Deviation Minimum Maximum

---

|   |           |           |           |           |
|---|-----------|-----------|-----------|-----------|
| 2 | 2.0500000 | 0.2121320 | 1.9000000 | 2.2000000 |
|---|-----------|-----------|-----------|-----------|

---

Unique Subject Identifier=3422000000-0098

Assay variable : PTINR\_VAL1 PT-INR Value

N Mean Standard Deviation Minimum Maximum

---

|   |           |           |           |           |
|---|-----------|-----------|-----------|-----------|
| 4 | 1.6750000 | 0.2872281 | 1.5000000 | 2.1000000 |
|---|-----------|-----------|-----------|-----------|

---

Unique Subject Identifier=3422000000-0115

Assay variable : PTINR\_VAL1 PT-INR Value

N Mean Standard Deviation Minimum Maximum

---

|   |           |           |           |           |
|---|-----------|-----------|-----------|-----------|
| 4 | 1.7500000 | 0.2081666 | 1.5000000 | 2.0000000 |
|---|-----------|-----------|-----------|-----------|

---

Laboratory tests at the time of obtaining Table 2-6 consent, according to the presence or absence of proton-pump inhibitors

Unique Subject Identifier=3423000000-0021

MEANS Procedure

Assay variable : PTINR\_VAL1 PT-INR Value

N Mean Standard Deviation Minimum Maximum

---

|   |           |           |           |           |
|---|-----------|-----------|-----------|-----------|
| 3 | 2.3600000 | 0.0888819 | 2.2600000 | 2.4300000 |
|---|-----------|-----------|-----------|-----------|

---

Unique Subject Identifier=3423000000-0036

Assay variable : PTINR\_VAL1 PT-INR Value

N Mean Standard Deviation Minimum Maximum

---

|   |           |   |           |           |
|---|-----------|---|-----------|-----------|
| 2 | 2.0200000 | 0 | 2.0200000 | 2.0200000 |
|---|-----------|---|-----------|-----------|

---

Unique Subject Identifier=3423000000-0037

Assay variable : PTINR\_VAL1 PT-INR Value

N Mean Standard Deviation Minimum Maximum

---

|   |           |           |           |           |
|---|-----------|-----------|-----------|-----------|
| 4 | 1.8475000 | 0.6827091 | 1.0700000 | 2.4600000 |
|---|-----------|-----------|-----------|-----------|

---

Unique Subject Identifier=3423000000-0041



Assay variable : PTINR\_VAL1 PT-INR Value

N Mean Standard Deviation Minimum Maximum

---

|   |           |           |           |           |
|---|-----------|-----------|-----------|-----------|
| 2 | 1.7300000 | 0.3535534 | 1.4800000 | 1.9800000 |
|---|-----------|-----------|-----------|-----------|

---

Laboratory tests at the time of obtaining Table 2-6 consent, according to the presence or absence of proton-pump inhibitors

Unique Subject Identifier=3424000000-0035

MEANS Procedure

Assay variable : PTINR\_VAL1 PT-INR Value

N Mean Standard Deviation Minimum Maximum

---

|   |           |           |           |           |
|---|-----------|-----------|-----------|-----------|
| 4 | 2.3150000 | 0.1968925 | 2.2100000 | 2.6100000 |
|---|-----------|-----------|-----------|-----------|

---

Unique Subject Identifier=3424000000-0036

Assay variable : PTINR\_VAL1 PT-INR Value

N Mean Standard Deviation Minimum Maximum

---

|   |           |           |           |           |
|---|-----------|-----------|-----------|-----------|
| 6 | 1.9500000 | 0.4419502 | 1.4000000 | 2.7300000 |
|---|-----------|-----------|-----------|-----------|

---

Unique Subject Identifier=3424000000-0038

Assay variable : PTINR\_VAL1 PT-INR Value

N Mean Standard Deviation Minimum Maximum

---

|   |           |           |           |           |
|---|-----------|-----------|-----------|-----------|
| 3 | 1.7366667 | 0.1222020 | 1.6300000 | 1.8700000 |
|---|-----------|-----------|-----------|-----------|

---

Unique Subject Identifier=3424000000-0040

Assay variable : PTINR\_VAL1 PT-INR Value

N Mean Standard Deviation Minimum Maximum

---

|   |           |           |           |           |
|---|-----------|-----------|-----------|-----------|
| 3 | 2.3266667 | 0.3850108 | 1.9400000 | 2.7100000 |
|---|-----------|-----------|-----------|-----------|

---

Laboratory tests at the time of obtaining Table 2-6 consent, according to the presence or absence of proton-pump inhibitors

Unique Subject Identifier=3424000000-0042

MEANS Procedure

Assay variable : PTINR\_VAL1 PT-INR Value

N Mean Standard Deviation Minimum Maximum

---

|   |           |           |           |           |
|---|-----------|-----------|-----------|-----------|
| 5 | 2.6560000 | 0.6932027 | 1.8700000 | 3.5200000 |
|---|-----------|-----------|-----------|-----------|

---

Unique Subject Identifier=3424000000-0046

Assay variable : PTINR\_VAL1 PT-INR Value

N Mean Standard Deviation Minimum Maximum

---

|   |           |           |           |           |
|---|-----------|-----------|-----------|-----------|
| 3 | 2.4666667 | 0.8658137 | 1.5800000 | 3.3100000 |
|---|-----------|-----------|-----------|-----------|

---

Unique Subject Identifier=3424000000-0058

Assay variable : PTINR\_VAL1 PT-INR Value

N Mean Standard Deviation Minimum Maximum

---

|   |           |           |           |           |
|---|-----------|-----------|-----------|-----------|
| 2 | 2.3650000 | 1.4919953 | 1.3100000 | 3.4200000 |
|---|-----------|-----------|-----------|-----------|

---

Unique Subject Identifier=3424000000-0060

Assay variable : PTINR\_VAL1 PT-INR Value

N Mean Standard Deviation Minimum Maximum

---

|   |           |           |           |           |
|---|-----------|-----------|-----------|-----------|
| 4 | 2.2725000 | 0.6992079 | 1.5900000 | 3.1600000 |
|---|-----------|-----------|-----------|-----------|

---

Laboratory tests at the time of obtaining Table 2-6 consent, according to the presence or absence of proton-pump inhibitors

Unique Subject Identifier=3425001000-0006

MEANS Procedure

Assay variable : PTINR\_VAL1 PT-INR Value

| N | Mean      | Standard Deviation | Minimum   | Maximum   |
|---|-----------|--------------------|-----------|-----------|
| 3 | 1.8233333 | 0.0115470          | 1.8100000 | 1.8300000 |

Unique Subject Identifier=3426100000-0008

Assay variable : PTINR\_VAL1 PT-INR Value

| N | Mean      | Standard Deviation | Minimum   | Maximum   |
|---|-----------|--------------------|-----------|-----------|
| 3 | 1.8866667 | 0.7471501          | 1.3500000 | 2.7400000 |

Unique Subject Identifier=3426100000-0031

Assay variable : PTINR\_VAL1 PT-INR Value

| N | Mean      | Standard Deviation | Minimum   | Maximum   |
|---|-----------|--------------------|-----------|-----------|
| 5 | 2.6220000 | 0.3401029          | 2.0700000 | 2.9900000 |

Unique Subject Identifier=3426100000-0033

Assay variable : PTINR\_VAL1 PT-INR Value

N Mean Standard Deviation Minimum Maximum

---

|   |           |  |           |           |
|---|-----------|--|-----------|-----------|
| 1 | 0.9900000 |  | 0.9900000 | 0.9900000 |
|---|-----------|--|-----------|-----------|

---

Laboratory tests at the time of obtaining Table 2-6 consent, according to the presence or absence of proton-pump inhibitors

Unique Subject Identifier=3426100000-0036

MEANS Procedure

Assay variable : PTINR\_VAL1 PT-INR Value

N Mean Standard Deviation Minimum Maximum

---

|   |           |  |           |           |
|---|-----------|--|-----------|-----------|
| 1 | 1.5800000 |  | 1.5800000 | 1.5800000 |
|---|-----------|--|-----------|-----------|

---

Unique Subject Identifier=3428000000-0002

Assay variable : PTINR\_VAL1 PT-INR Value

N Mean Standard Deviation Minimum Maximum

---

|   |           |           |           |           |
|---|-----------|-----------|-----------|-----------|
| 6 | 2.0283333 | 0.3252947 | 1.6300000 | 2.5000000 |
|---|-----------|-----------|-----------|-----------|

---

Unique Subject Identifier=3443011001-0004

Assay variable : PTINR\_VAL1 PT-INR Value

N Mean Standard Deviation Minimum Maximum

---

|   |           |           |           |           |
|---|-----------|-----------|-----------|-----------|
| 6 | 2.0316667 | 0.4054833 | 1.5800000 | 2.5500000 |
|---|-----------|-----------|-----------|-----------|

---

Unique Subject Identifier=3443011001-0011



Assay variable : PTINR\_VAL1 PT-INR Value

N Mean Standard Deviation Minimum Maximum

---

|   |           |           |           |           |
|---|-----------|-----------|-----------|-----------|
| 6 | 2.2616667 | 0.2148876 | 1.8600000 | 2.4400000 |
|---|-----------|-----------|-----------|-----------|

---

Laboratory tests at the time of obtaining Table 2-6 consent, according to the presence or absence of proton-pump inhibitors

Unique Subject Identifier=3444000000-0006

MEANS Procedure

Assay variable : PTINR\_VAL1 PT-INR Value

N Mean Standard Deviation Minimum Maximum

---

|   |           |           |           |           |
|---|-----------|-----------|-----------|-----------|
| 3 | 2.1733333 | 0.1755942 | 1.9900000 | 2.3400000 |
|---|-----------|-----------|-----------|-----------|

---

Unique Subject Identifier=3444000000-0009

Assay variable : PTINR\_VAL1 PT-INR Value

N Mean Standard Deviation Minimum Maximum

---

|   |           |           |           |           |
|---|-----------|-----------|-----------|-----------|
| 4 | 2.2650000 | 0.3875994 | 1.7300000 | 2.5700000 |
|---|-----------|-----------|-----------|-----------|

---

Unique Subject Identifier=3444000000-0010

Assay variable : PTINR\_VAL1 PT-INR Value

N Mean Standard Deviation Minimum Maximum

---

|   |           |           |           |           |
|---|-----------|-----------|-----------|-----------|
| 4 | 2.3450000 | 0.1586401 | 2.1800000 | 2.5400000 |
|---|-----------|-----------|-----------|-----------|

---

Unique Subject Identifier=3444000000-0025

Assay variable : PTINR\_VAL1 PT-INR Value

N Mean Standard Deviation Minimum Maximum

---

|   |           |           |           |           |
|---|-----------|-----------|-----------|-----------|
| 4 | 2.2175000 | 0.2156193 | 1.9100000 | 2.4100000 |
|---|-----------|-----------|-----------|-----------|

---

Laboratory tests at the time of obtaining Table 2-6 consent, according to the presence or absence of proton-pump inhibitors

Unique Subject Identifier=3444000000-0030

MEANS Procedure

Assay variable : PTINR\_VAL1 PT-INR Value

N Mean Standard Deviation Minimum Maximum

---

|   |           |           |           |           |
|---|-----------|-----------|-----------|-----------|
| 3 | 1.8300000 | 0.2251666 | 1.6100000 | 2.0600000 |
|---|-----------|-----------|-----------|-----------|

---

Unique Subject Identifier=3444000000-0032

Assay variable : PTINR\_VAL1 PT-INR Value

N Mean Standard Deviation Minimum Maximum

---

|   |           |           |           |           |
|---|-----------|-----------|-----------|-----------|
| 6 | 2.6150000 | 0.5350421 | 1.6100000 | 3.1400000 |
|---|-----------|-----------|-----------|-----------|

---

Unique Subject Identifier=3444000000-0036

Assay variable : PTINR\_VAL1 PT-INR Value

N Mean Standard Deviation Minimum Maximum

---

|   |           |           |           |           |
|---|-----------|-----------|-----------|-----------|
| 3 | 1.6233333 | 0.0288675 | 1.5900000 | 1.6400000 |
|---|-----------|-----------|-----------|-----------|

---

Unique Subject Identifier=3444000000-0038

Assay variable : PTINR\_VAL1 PT-INR Value

N Mean Standard Deviation Minimum Maximum

---

|   |           |           |           |           |
|---|-----------|-----------|-----------|-----------|
| 3 | 1.7700000 | 0.0556776 | 1.7100000 | 1.8200000 |
|---|-----------|-----------|-----------|-----------|

---

Laboratory tests at the time of obtaining Table 2-6 consent, according to the presence or absence of proton-pump inhibitors

Unique Subject Identifier=3444000000-0041

MEANS Procedure

Assay variable : PTINR\_VAL1 PT-INR Value

N Mean Standard Deviation Minimum Maximum

---

|   |           |           |           |           |
|---|-----------|-----------|-----------|-----------|
| 5 | 2.3560000 | 0.1558204 | 2.1300000 | 2.5100000 |
|---|-----------|-----------|-----------|-----------|

---

Unique Subject Identifier=3444000000-0043

Assay variable : PTINR\_VAL1 PT-INR Value

N Mean Standard Deviation Minimum Maximum

---

|   |           |           |           |           |
|---|-----------|-----------|-----------|-----------|
| 6 | 2.4000000 | 0.2827720 | 1.9600000 | 2.6500000 |
|---|-----------|-----------|-----------|-----------|

---

Unique Subject Identifier=3444000000-0046

Assay variable : PTINR\_VAL1 PT-INR Value

N Mean Standard Deviation Minimum Maximum

---

|   |           |           |           |           |
|---|-----------|-----------|-----------|-----------|
| 4 | 1.8350000 | 0.0810350 | 1.7200000 | 1.9100000 |
|---|-----------|-----------|-----------|-----------|

---

Unique Subject Identifier=3444000000-0050

Assay variable : PTINR\_VAL1 PT-INR Value

N Mean Standard Deviation Minimum Maximum

---

|   |           |           |           |           |
|---|-----------|-----------|-----------|-----------|
| 4 | 1.9400000 | 0.4112582 | 1.3900000 | 2.2600000 |
|---|-----------|-----------|-----------|-----------|

---

Laboratory tests at the time of obtaining Table 2-6 consent, according to the presence or absence of proton-pump inhibitors

Unique Subject Identifier=3444000000-0051

MEANS Procedure

Assay variable : PTINR\_VAL1 PT-INR Value

N Mean Standard Deviation Minimum Maximum

---

|   |           |           |           |           |
|---|-----------|-----------|-----------|-----------|
| 4 | 2.4825000 | 0.1286792 | 2.2900000 | 2.5600000 |
|---|-----------|-----------|-----------|-----------|

---

Unique Subject Identifier=3444000000-0052

Assay variable : PTINR\_VAL1 PT-INR Value

N Mean Standard Deviation Minimum Maximum

---

|   |           |           |           |           |
|---|-----------|-----------|-----------|-----------|
| 4 | 1.7050000 | 0.1517674 | 1.5800000 | 1.9200000 |
|---|-----------|-----------|-----------|-----------|

---

Unique Subject Identifier=3444000000-0054

Assay variable : PTINR\_VAL1 PT-INR Value

N Mean Standard Deviation Minimum Maximum

---

|   |           |           |           |           |
|---|-----------|-----------|-----------|-----------|
| 5 | 2.0200000 | 0.1488288 | 1.8800000 | 2.1900000 |
|---|-----------|-----------|-----------|-----------|

---

Unique Subject Identifier=3444000000-0063



Assay variable : PTINR\_VAL1 PT-INR Value

N Mean Standard Deviation Minimum Maximum

---

|   |           |           |           |           |
|---|-----------|-----------|-----------|-----------|
| 3 | 1.9566667 | 0.1446836 | 1.7900000 | 2.0500000 |
|---|-----------|-----------|-----------|-----------|

---

Laboratory tests at the time of obtaining Table 2-6 consent, according to the presence or absence of proton-pump inhibitors

Unique Subject Identifier=3444000000-0064

MEANS Procedure

Assay variable : PTINR\_VAL1 PT-INR Value

N Mean Standard Deviation Minimum Maximum

---

|   |           |           |           |           |
|---|-----------|-----------|-----------|-----------|
| 3 | 2.0033333 | 0.1803700 | 1.8300000 | 2.1900000 |
|---|-----------|-----------|-----------|-----------|

---

Unique Subject Identifier=3444000000-0066

Assay variable : PTINR\_VAL1 PT-INR Value

N Mean Standard Deviation Minimum Maximum

---

|   |           |           |           |           |
|---|-----------|-----------|-----------|-----------|
| 3 | 1.6233333 | 0.0057735 | 1.6200000 | 1.6300000 |
|---|-----------|-----------|-----------|-----------|

---

Unique Subject Identifier=3444000000-0067

Assay variable : PTINR\_VAL1 PT-INR Value

N Mean Standard Deviation Minimum Maximum

---

|   |           |           |           |           |
|---|-----------|-----------|-----------|-----------|
| 3 | 2.0766667 | 0.3900427 | 1.6900000 | 2.4700000 |
|---|-----------|-----------|-----------|-----------|

---

Unique Subject Identifier=3444000000-0071

Assay variable : PTINR\_VAL1 PT-INR Value

N Mean Standard Deviation Minimum Maximum

---

|   |           |           |           |           |
|---|-----------|-----------|-----------|-----------|
| 3 | 1.8800000 | 0.2600000 | 1.5800000 | 2.0400000 |
|---|-----------|-----------|-----------|-----------|

---

Laboratory tests at the time of obtaining Table 2-6 consent, according to the presence or absence of proton-pump inhibitors

Unique Subject Identifier=3444000000-0072

MEANS Procedure

Assay variable : PTINR\_VAL1 PT-INR Value

N Mean Standard Deviation Minimum Maximum

---

|   |           |           |           |           |
|---|-----------|-----------|-----------|-----------|
| 4 | 1.6925000 | 0.1664081 | 1.4800000 | 1.8800000 |
|---|-----------|-----------|-----------|-----------|

---

Unique Subject Identifier=3444000000-0073

Assay variable : PTINR\_VAL1 PT-INR Value

N Mean Standard Deviation Minimum Maximum

---

|   |           |           |           |           |
|---|-----------|-----------|-----------|-----------|
| 3 | 1.8633333 | 0.1677299 | 1.6700000 | 1.9700000 |
|---|-----------|-----------|-----------|-----------|

---

Unique Subject Identifier=3444000000-0075

Assay variable : PTINR\_VAL1 PT-INR Value

N Mean Standard Deviation Minimum Maximum

---

|   |           |           |           |           |
|---|-----------|-----------|-----------|-----------|
| 4 | 2.0800000 | 0.6319810 | 1.6200000 | 3.0100000 |
|---|-----------|-----------|-----------|-----------|

---

Unique Subject Identifier=3444000000-0083

Assay variable : PTINR\_VAL1 PT-INR Value

N Mean Standard Deviation Minimum Maximum

---

|   |           |           |           |           |
|---|-----------|-----------|-----------|-----------|
| 3 | 2.2700000 | 0.3477068 | 1.9000000 | 2.5900000 |
|---|-----------|-----------|-----------|-----------|

---

Laboratory tests at the time of obtaining Table 2-6 consent, according to the presence or absence of proton-pump inhibitors

Unique Subject Identifier=3444000000-0086

MEANS Procedure

Assay variable : PTINR\_VAL1 PT-INR Value

N Mean Standard Deviation Minimum Maximum

---

|   |          |           |          |          |
|---|----------|-----------|----------|----------|
| 4 | 2.600000 | 0.1230176 | 2.460000 | 2.760000 |
|---|----------|-----------|----------|----------|

---

Unique Subject Identifier=3452000000-0004

Assay variable : PTINR\_VAL1 PT-INR Value

N Mean Standard Deviation Minimum Maximum

---

|   |          |           |          |          |
|---|----------|-----------|----------|----------|
| 4 | 2.192500 | 0.2632331 | 1.960000 | 2.520000 |
|---|----------|-----------|----------|----------|

---

Unique Subject Identifier=3452000000-0005

Assay variable : PTINR\_VAL1 PT-INR Value

N Mean Standard Deviation Minimum Maximum

---

|   |          |           |          |          |
|---|----------|-----------|----------|----------|
| 5 | 2.192000 | 0.2230919 | 1.870000 | 2.380000 |
|---|----------|-----------|----------|----------|

---

Unique Subject Identifier=3452000000-0006

Assay variable : PTINR\_VAL1 PT-INR Value

N Mean Standard Deviation Minimum Maximum

---

|   |           |           |           |           |
|---|-----------|-----------|-----------|-----------|
| 4 | 2.2675000 | 0.4836235 | 1.7800000 | 2.9100000 |
|---|-----------|-----------|-----------|-----------|

---

Laboratory tests at the time of obtaining Table 2-6 consent, according to the presence or absence of proton-pump inhibitors

Unique Subject Identifier=3452000000-0008

MEANS Procedure

Assay variable : PTINR\_VAL1 PT-INR Value

N Mean Standard Deviation Minimum Maximum

---

|   |           |           |           |           |
|---|-----------|-----------|-----------|-----------|
| 4 | 1.7400000 | 0.4661902 | 1.2800000 | 2.2600000 |
|---|-----------|-----------|-----------|-----------|

---

Unique Subject Identifier=3462011111-0002

Assay variable : PTINR\_VAL1 PT-INR Value

N Mean Standard Deviation Minimum Maximum

---

|   |           |           |           |           |
|---|-----------|-----------|-----------|-----------|
| 4 | 2.0175000 | 0.0946485 | 1.9100000 | 2.1400000 |
|---|-----------|-----------|-----------|-----------|

---

Unique Subject Identifier=3462011111-0011

Assay variable : PTINR\_VAL1 PT-INR Value

N Mean Standard Deviation Minimum Maximum

---

|   |           |           |           |           |
|---|-----------|-----------|-----------|-----------|
| 6 | 1.9033333 | 0.1689576 | 1.7200000 | 2.1100000 |
|---|-----------|-----------|-----------|-----------|

---

Unique Subject Identifier=3462011111-0023



Assay variable : PTINR\_VAL1 PT-INR Value

N Mean Standard Deviation Minimum Maximum

---

|   |           |           |           |           |
|---|-----------|-----------|-----------|-----------|
| 6 | 2.1783333 | 0.3364174 | 1.9000000 | 2.7700000 |
|---|-----------|-----------|-----------|-----------|

---

Laboratory tests at the time of obtaining Table 2-6 consent, according to the presence or absence of proton-pump inhibitors

Unique Subject Identifier=3472000000-0013

MEANS Procedure

Assay variable : PTINR\_VAL1 PT-INR Value

N Mean Standard Deviation Minimum Maximum

---

|   |           |  |           |           |
|---|-----------|--|-----------|-----------|
| 1 | 2.3600000 |  | 2.3600000 | 2.3600000 |
|---|-----------|--|-----------|-----------|

---

Unique Subject Identifier=3481010111-0004

Assay variable : PTINR\_VAL1 PT-INR Value

N Mean Standard Deviation Minimum Maximum

---

|   |           |           |           |           |
|---|-----------|-----------|-----------|-----------|
| 4 | 1.8000000 | 0.0816497 | 1.7000000 | 1.9000000 |
|---|-----------|-----------|-----------|-----------|

---

Unique Subject Identifier=3481010111-0014

Assay variable : PTINR\_VAL1 PT-INR Value

N Mean Standard Deviation Minimum Maximum

---

|   |           |           |           |           |
|---|-----------|-----------|-----------|-----------|
| 3 | 1.1666667 | 0.0577350 | 1.1000000 | 1.2000000 |
|---|-----------|-----------|-----------|-----------|

---

Unique Subject Identifier=3491001000-0032

Assay variable : PTINR\_VAL1 PT-INR Value

N Mean Standard Deviation Minimum Maximum

---

|   |           |  |           |           |
|---|-----------|--|-----------|-----------|
| 1 | 2.2200000 |  | 2.2200000 | 2.2200000 |
|---|-----------|--|-----------|-----------|

---

Laboratory tests at the time of obtaining Table 2-6 consent, according to the presence or absence of proton-pump inhibitors

Unique Subject Identifier=350111111-0012

MEANS Procedure

Assay variable : PTINR\_VAL1 PT-INR Value

N Mean Standard Deviation Minimum Maximum

---

|   |          |           |          |          |
|---|----------|-----------|----------|----------|
| 2 | 1.960000 | 0.1131371 | 1.880000 | 2.040000 |
|---|----------|-----------|----------|----------|

---

Unique Subject Identifier=5001010000-0033

Assay variable : PTINR\_VAL1 PT-INR Value

N Mean Standard Deviation Minimum Maximum

---

|   |          |           |          |          |
|---|----------|-----------|----------|----------|
| 4 | 1.822500 | 0.1948290 | 1.540000 | 1.970000 |
|---|----------|-----------|----------|----------|

---

Unique Subject Identifier=5002010010-0002

Assay variable : PTINR\_VAL1 PT-INR Value

N Mean Standard Deviation Minimum Maximum

---

|   |          |           |          |          |
|---|----------|-----------|----------|----------|
| 5 | 1.880000 | 0.1519868 | 1.630000 | 2.030000 |
|---|----------|-----------|----------|----------|

---

Unique Subject Identifier=5002010010-0008

Assay variable : PTINR\_VAL1 PT-INR Value

N Mean Standard Deviation Minimum Maximum

---

|   |           |           |           |           |
|---|-----------|-----------|-----------|-----------|
| 4 | 2.6300000 | 0.4993996 | 2.0800000 | 3.2200000 |
|---|-----------|-----------|-----------|-----------|

---

Laboratory tests at the time of obtaining Table 2-6 consent, according to the presence or absence of proton-pump inhibitors

Unique Subject Identifier=5002010010-0015

MEANS Procedure

Assay variable : PTINR\_VAL1 PT-INR Value

| N | Mean      | Standard Deviation | Minimum   | Maximum   |
|---|-----------|--------------------|-----------|-----------|
| 2 | 1.8750000 | 0.1909188          | 1.7400000 | 2.0100000 |

Unique Subject Identifier=5002010010-0016

Assay variable : PTINR\_VAL1 PT-INR Value

| N | Mean      | Standard Deviation | Minimum   | Maximum   |
|---|-----------|--------------------|-----------|-----------|
| 3 | 1.7700000 | 0.0781025          | 1.7200000 | 1.8600000 |

Unique Subject Identifier=5002010010-0030

Assay variable : PTINR\_VAL1 PT-INR Value

| N | Mean      | Standard Deviation | Minimum   | Maximum   |
|---|-----------|--------------------|-----------|-----------|
| 6 | 2.4650000 | 0.1486943          | 2.2800000 | 2.6900000 |

Unique Subject Identifier=5002010010-0037

Assay variable : PTINR\_VAL1 PT-INR Value

N Mean Standard Deviation Minimum Maximum

---

|   |           |           |           |           |
|---|-----------|-----------|-----------|-----------|
| 3 | 2.3233333 | 0.3696395 | 2.1000000 | 2.7500000 |
|---|-----------|-----------|-----------|-----------|

---

Laboratory tests at the time of obtaining Table 2-6 consent, according to the presence or absence of proton-pump inhibitors

Unique Subject Identifier=5002010010-0045

MEANS Procedure

Assay variable : PTINR\_VAL1 PT-INR Value

N Mean Standard Deviation Minimum Maximum

---

|   |           |           |           |           |
|---|-----------|-----------|-----------|-----------|
| 6 | 1.8216667 | 0.3260930 | 1.5300000 | 2.4200000 |
|---|-----------|-----------|-----------|-----------|

---

Unique Subject Identifier=5002010010-0050

Assay variable : PTINR\_VAL1 PT-INR Value

N Mean Standard Deviation Minimum Maximum

---

|   |           |           |           |           |
|---|-----------|-----------|-----------|-----------|
| 5 | 2.2620000 | 0.4080686 | 1.8400000 | 2.9300000 |
|---|-----------|-----------|-----------|-----------|

---

Unique Subject Identifier=5002010010-0070

Assay variable : PTINR\_VAL1 PT-INR Value

N Mean Standard Deviation Minimum Maximum

---

|   |           |           |           |           |
|---|-----------|-----------|-----------|-----------|
| 4 | 2.1350000 | 0.3702702 | 1.8600000 | 2.6600000 |
|---|-----------|-----------|-----------|-----------|

---

Unique Subject Identifier=5002010010-0074



Assay variable : PTINR\_VAL1 PT-INR Value

N Mean Standard Deviation Minimum Maximum

---

|   |           |           |           |           |
|---|-----------|-----------|-----------|-----------|
| 3 | 1.8133333 | 0.1814754 | 1.6200000 | 1.9800000 |
|---|-----------|-----------|-----------|-----------|

---

Laboratory tests at the time of obtaining Table 2-6 consent, according to the presence or absence of proton-pump inhibitors

Unique Subject Identifier=5002010010-0079

MEANS Procedure

Assay variable : PTINR\_VAL1 PT-INR Value

| N | Mean     | Standard Deviation | Minimum  | Maximum  |
|---|----------|--------------------|----------|----------|
| 3 | 1.960000 | 0.1081665          | 1.840000 | 2.050000 |

Unique Subject Identifier=5002010010-0080

Assay variable : PTINR\_VAL1 PT-INR Value

| N | Mean     | Standard Deviation | Minimum  | Maximum  |
|---|----------|--------------------|----------|----------|
| 2 | 1.915000 | 0.0494975          | 1.880000 | 1.950000 |

Unique Subject Identifier=5002010010-0091

Assay variable : PTINR\_VAL1 PT-INR Value

| N | Mean     | Standard Deviation | Minimum  | Maximum  |
|---|----------|--------------------|----------|----------|
| 3 | 1.703333 | 0.0230940          | 1.690000 | 1.730000 |

Unique Subject Identifier=5004000111-0024

Assay variable : PTINR\_VAL1 PT-INR Value

N Mean Standard Deviation Minimum Maximum

---

|   |           |           |           |           |
|---|-----------|-----------|-----------|-----------|
| 2 | 1.9250000 | 0.0494975 | 1.8900000 | 1.9600000 |
|---|-----------|-----------|-----------|-----------|

---

Laboratory tests at the time of obtaining Table 2-6 consent, according to the presence or absence of proton-pump inhibitors

Unique Subject Identifier=5004000111-0033

MEANS Procedure

Assay variable : PTINR\_VAL1 PT-INR Value

| N | Mean     | Standard Deviation | Minimum  | Maximum  |
|---|----------|--------------------|----------|----------|
| 3 | 2.430000 | 0.2165641          | 2.180000 | 2.560000 |

Unique Subject Identifier=5004000111-0037

Assay variable : PTINR\_VAL1 PT-INR Value

| N | Mean     | Standard Deviation | Minimum  | Maximum  |
|---|----------|--------------------|----------|----------|
| 4 | 2.437500 | 0.1645955          | 2.200000 | 2.570000 |

Unique Subject Identifier=5004000111-0059

Assay variable : PTINR\_VAL1 PT-INR Value

| N | Mean     | Standard Deviation | Minimum  | Maximum  |
|---|----------|--------------------|----------|----------|
| 2 | 2.160000 | 0.1979899          | 2.020000 | 2.300000 |

Unique Subject Identifier=5004000111-0062

Assay variable : PTINR\_VAL1 PT-INR Value

N Mean Standard Deviation Minimum Maximum

---

|   |          |           |          |          |
|---|----------|-----------|----------|----------|
| 2 | 2.125000 | 0.4737615 | 1.790000 | 2.460000 |
|---|----------|-----------|----------|----------|

---

Laboratory tests at the time of obtaining Table 2-6 consent, according to the presence or absence of proton-pump inhibitors

Unique Subject Identifier=5004000111-0063

MEANS Procedure

Assay variable : PTINR\_VAL1 PT-INR Value

N Mean Standard Deviation Minimum Maximum

---

|   |           |           |           |           |
|---|-----------|-----------|-----------|-----------|
| 3 | 2.2166667 | 0.1882374 | 2.0000000 | 2.3400000 |
|---|-----------|-----------|-----------|-----------|

---

Unique Subject Identifier=5004000111-0073

Assay variable : PTINR\_VAL1 PT-INR Value

N Mean Standard Deviation Minimum Maximum

---

|   |           |           |           |           |
|---|-----------|-----------|-----------|-----------|
| 4 | 2.0550000 | 0.4651523 | 1.6200000 | 2.6800000 |
|---|-----------|-----------|-----------|-----------|

---

Unique Subject Identifier=5004000111-0076

Assay variable : PTINR\_VAL1 PT-INR Value

N Mean Standard Deviation Minimum Maximum

---

|   |           |           |           |           |
|---|-----------|-----------|-----------|-----------|
| 4 | 2.4300000 | 0.6195159 | 2.0000000 | 3.3500000 |
|---|-----------|-----------|-----------|-----------|

---

Unique Subject Identifier=5004000111-0079

Assay variable : PTINR\_VAL1 PT-INR Value

N Mean Standard Deviation Minimum Maximum

---

|   |           |           |           |           |
|---|-----------|-----------|-----------|-----------|
| 5 | 1.4820000 | 0.1173456 | 1.2900000 | 1.6100000 |
|---|-----------|-----------|-----------|-----------|

---

Laboratory tests at the time of obtaining Table 2-6 consent, according to the presence or absence of proton-pump inhibitors

Unique Subject Identifier=5007111000-0024

MEANS Procedure

Assay variable : PTINR\_VAL1 PT-INR Value

N Mean Standard Deviation Minimum Maximum

---

|   |           |           |           |           |
|---|-----------|-----------|-----------|-----------|
| 3 | 2.1866667 | 0.1331666 | 2.0400000 | 2.3000000 |
|---|-----------|-----------|-----------|-----------|

---

Unique Subject Identifier=5007111000-0025

Assay variable : PTINR\_VAL1 PT-INR Value

N Mean Standard Deviation Minimum Maximum

---

|   |           |           |           |           |
|---|-----------|-----------|-----------|-----------|
| 3 | 2.2133333 | 0.3153305 | 1.8900000 | 2.5200000 |
|---|-----------|-----------|-----------|-----------|

---

Unique Subject Identifier=5007111000-0030

Assay variable : PTINR\_VAL1 PT-INR Value

N Mean Standard Deviation Minimum Maximum

---

|   |           |           |           |           |
|---|-----------|-----------|-----------|-----------|
| 3 | 1.7200000 | 0.3966106 | 1.3900000 | 2.1600000 |
|---|-----------|-----------|-----------|-----------|

---

Unique Subject Identifier=5007111000-0036



Assay variable : PTINR\_VAL1 PT-INR Value

N Mean Standard Deviation Minimum Maximum

---

|   |           |           |           |           |
|---|-----------|-----------|-----------|-----------|
| 6 | 1.9566667 | 0.3189148 | 1.5900000 | 2.4400000 |
|---|-----------|-----------|-----------|-----------|

---

Laboratory tests at the time of obtaining Table 2-6 consent, according to the presence or absence of proton-pump inhibitors

Unique Subject Identifier=5007111000-0060

MEANS Procedure

Assay variable : PTINR\_VAL1 PT-INR Value

N Mean Standard Deviation Minimum Maximum

---

|   |           |           |           |           |
|---|-----------|-----------|-----------|-----------|
| 4 | 1.7900000 | 0.1512173 | 1.5700000 | 1.9100000 |
|---|-----------|-----------|-----------|-----------|

---

Unique Subject Identifier=5009000010-0010

Assay variable : PTINR\_VAL1 PT-INR Value

N Mean Standard Deviation Minimum Maximum

---

|   |           |           |           |           |
|---|-----------|-----------|-----------|-----------|
| 6 | 1.9866667 | 0.2273910 | 1.7700000 | 2.3800000 |
|---|-----------|-----------|-----------|-----------|

---

Unique Subject Identifier=5010000100-0005

Assay variable : PTINR\_VAL1 PT-INR Value

N Mean Standard Deviation Minimum Maximum

---

|   |           |           |           |           |
|---|-----------|-----------|-----------|-----------|
| 2 | 2.0550000 | 0.2899138 | 1.8500000 | 2.2600000 |
|---|-----------|-----------|-----------|-----------|

---

Unique Subject Identifier=5010000100-0011

Assay variable : PTINR\_VAL1 PT-INR Value

N Mean Standard Deviation Minimum Maximum

---

|   |           |           |           |           |
|---|-----------|-----------|-----------|-----------|
| 3 | 1.7133333 | 0.4266536 | 1.2500000 | 2.0900000 |
|---|-----------|-----------|-----------|-----------|

---

Laboratory tests at the time of obtaining Table 2-6 consent, according to the presence or absence of proton-pump inhibitors

Unique Subject Identifier=5010000100-0026

MEANS Procedure

Assay variable : PTINR\_VAL1 PT-INR Value

| N | Mean      | Standard Deviation | Minimum   | Maximum   |
|---|-----------|--------------------|-----------|-----------|
| 1 | 2.0400000 |                    | 2.0400000 | 2.0400000 |

Unique Subject Identifier=5010000100-0038

Assay variable : PTINR\_VAL1 PT-INR Value

| N | Mean      | Standard Deviation | Minimum   | Maximum   |
|---|-----------|--------------------|-----------|-----------|
| 6 | 2.1550000 | 0.7552682          | 1.4500000 | 3.2200000 |

Unique Subject Identifier=5010000100-0041

Assay variable : PTINR\_VAL1 PT-INR Value

| N | Mean      | Standard Deviation | Minimum   | Maximum   |
|---|-----------|--------------------|-----------|-----------|
| 3 | 2.1866667 | 0.2182506          | 1.9500000 | 2.3800000 |

Unique Subject Identifier=5011010000-0022

Assay variable : PTINR\_VAL1 PT-INR Value

N Mean Standard Deviation Minimum Maximum

---

|   |           |           |           |           |
|---|-----------|-----------|-----------|-----------|
| 3 | 2.2466667 | 0.0757188 | 2.1600000 | 2.3000000 |
|---|-----------|-----------|-----------|-----------|

---

Laboratory tests at the time of obtaining Table 2-6 consent, according to the presence or absence of proton-pump inhibitors

Unique Subject Identifier=5011010000-0035

MEANS Procedure

Assay variable : PTINR\_VAL1 PT-INR Value

| N | Mean      | Standard Deviation | Minimum   | Maximum   |
|---|-----------|--------------------|-----------|-----------|
| 5 | 2.1540000 | 0.1908664          | 1.9900000 | 2.4800000 |

Unique Subject Identifier=5011010000-0040

Assay variable : PTINR\_VAL1 PT-INR Value

| N | Mean      | Standard Deviation | Minimum   | Maximum   |
|---|-----------|--------------------|-----------|-----------|
| 3 | 2.0000000 | 0.0700000          | 1.9200000 | 2.0500000 |

Unique Subject Identifier=5011010000-0048

Assay variable : PTINR\_VAL1 PT-INR Value

| N | Mean      | Standard Deviation | Minimum   | Maximum   |
|---|-----------|--------------------|-----------|-----------|
| 4 | 2.4225000 | 0.3162673          | 2.0000000 | 2.7600000 |

Unique Subject Identifier=5011010000-0049

Assay variable : PTINR\_VAL1 PT-INR Value

N Mean Standard Deviation Minimum Maximum

---

|   |           |           |           |           |
|---|-----------|-----------|-----------|-----------|
| 4 | 1.6875000 | 0.2389386 | 1.4700000 | 1.9700000 |
|---|-----------|-----------|-----------|-----------|

---

Laboratory tests at the time of obtaining Table 2-6 consent, according to the presence or absence of proton-pump inhibitors

Unique Subject Identifier=5011010000-0052

MEANS Procedure

Assay variable : PTINR\_VAL1 PT-INR Value

| N | Mean      | Standard Deviation | Minimum   | Maximum   |
|---|-----------|--------------------|-----------|-----------|
| 3 | 2.4233333 | 0.3372437          | 2.1900000 | 2.8100000 |

Unique Subject Identifier=5012000000-0004

Assay variable : PTINR\_VAL1 PT-INR Value

| N | Mean      | Standard Deviation | Minimum   | Maximum   |
|---|-----------|--------------------|-----------|-----------|
| 5 | 1.6800000 | 0.0961769          | 1.5400000 | 1.7700000 |

Unique Subject Identifier=5012000000-0016

Assay variable : PTINR\_VAL1 PT-INR Value

| N | Mean      | Standard Deviation | Minimum   | Maximum   |
|---|-----------|--------------------|-----------|-----------|
| 4 | 2.0800000 | 0.1505545          | 1.9000000 | 2.2400000 |

Unique Subject Identifier=5012000000-0020



Assay variable : PTINR\_VAL1 PT-INR Value

N Mean Standard Deviation Minimum Maximum

---

|   |           |           |           |           |
|---|-----------|-----------|-----------|-----------|
| 4 | 1.5025000 | 0.0457347 | 1.4400000 | 1.5500000 |
|---|-----------|-----------|-----------|-----------|

---

Laboratory tests at the time of obtaining Table 2-6 consent, according to the presence or absence of proton-pump inhibitors

Unique Subject Identifier=5013000000-0016

MEANS Procedure

Assay variable : PTINR\_VAL1 PT-INR Value

N Mean Standard Deviation Minimum Maximum

---

|   |           |           |           |           |
|---|-----------|-----------|-----------|-----------|
| 6 | 1.8733333 | 0.2174090 | 1.5400000 | 2.1000000 |
|---|-----------|-----------|-----------|-----------|

---

Unique Subject Identifier=5013000000-0019

Assay variable : PTINR\_VAL1 PT-INR Value

N Mean Standard Deviation Minimum Maximum

---

|   |           |           |           |           |
|---|-----------|-----------|-----------|-----------|
| 3 | 1.7566667 | 0.0416333 | 1.7100000 | 1.7900000 |
|---|-----------|-----------|-----------|-----------|

---

Unique Subject Identifier=5013000000-0032

Assay variable : PTINR\_VAL1 PT-INR Value

N Mean Standard Deviation Minimum Maximum

---

|   |           |           |           |           |
|---|-----------|-----------|-----------|-----------|
| 4 | 2.0975000 | 0.1286792 | 1.9800000 | 2.2800000 |
|---|-----------|-----------|-----------|-----------|

---

Unique Subject Identifier=5013000000-0040

Assay variable : PTINR\_VAL1 PT-INR Value

N Mean Standard Deviation Minimum Maximum

---

|   |           |           |           |           |
|---|-----------|-----------|-----------|-----------|
| 6 | 1.6983333 | 0.3235686 | 1.1400000 | 2.0000000 |
|---|-----------|-----------|-----------|-----------|

---

Laboratory tests at the time of obtaining Table 2-6 consent, according to the presence or absence of proton-pump inhibitors

Unique Subject Identifier=5013000000-0045

MEANS Procedure

Assay variable : PTINR\_VAL1 PT-INR Value

N Mean Standard Deviation Minimum Maximum

---

|   |           |           |           |           |
|---|-----------|-----------|-----------|-----------|
| 3 | 2.0633333 | 0.2891943 | 1.7500000 | 2.3200000 |
|---|-----------|-----------|-----------|-----------|

---

Unique Subject Identifier=5013000000-0051

Assay variable : PTINR\_VAL1 PT-INR Value

N Mean Standard Deviation Minimum Maximum

---

|   |           |           |           |           |
|---|-----------|-----------|-----------|-----------|
| 3 | 2.2133333 | 0.2309401 | 2.0800000 | 2.4800000 |
|---|-----------|-----------|-----------|-----------|

---

Unique Subject Identifier=5013000000-0055

Assay variable : PTINR\_VAL1 PT-INR Value

N Mean Standard Deviation Minimum Maximum

---

|   |           |           |           |           |
|---|-----------|-----------|-----------|-----------|
| 4 | 1.7875000 | 0.3181588 | 1.3600000 | 2.0300000 |
|---|-----------|-----------|-----------|-----------|

---

Unique Subject Identifier=5013000000-0071

Assay variable : PTINR\_VAL1 PT-INR Value

N Mean Standard Deviation Minimum Maximum

---

|   |           |  |           |           |
|---|-----------|--|-----------|-----------|
| 1 | 2.5300000 |  | 2.5300000 | 2.5300000 |
|---|-----------|--|-----------|-----------|

---

Laboratory tests at the time of obtaining Table 2-6 consent, according to the presence or absence of proton-pump inhibitors

Unique Subject Identifier=5013000000-0099

MEANS Procedure

Assay variable : PTINR\_VAL1 PT-INR Value

| N | Mean      | Standard Deviation | Minimum   | Maximum   |
|---|-----------|--------------------|-----------|-----------|
| 6 | 2.0050000 | 0.2776869          | 1.5000000 | 2.3100000 |

Unique Subject Identifier=5013000000-0102

Assay variable : PTINR\_VAL1 PT-INR Value

| N | Mean      | Standard Deviation | Minimum   | Maximum   |
|---|-----------|--------------------|-----------|-----------|
| 2 | 2.2250000 | 0.1060660          | 2.1500000 | 2.3000000 |

Unique Subject Identifier=5013000000-0106

Assay variable : PTINR\_VAL1 PT-INR Value

| N | Mean      | Standard Deviation | Minimum   | Maximum   |
|---|-----------|--------------------|-----------|-----------|
| 6 | 1.5150000 | 0.2665896          | 1.2700000 | 1.9600000 |

Unique Subject Identifier=5013000000-0120

Assay variable : PTINR\_VAL1 PT-INR Value

N Mean Standard Deviation Minimum Maximum

---

|   |           |           |           |           |
|---|-----------|-----------|-----------|-----------|
| 3 | 1.6633333 | 0.1855622 | 1.4700000 | 1.8400000 |
|---|-----------|-----------|-----------|-----------|

---

Laboratory tests at the time of obtaining Table 2-6 consent, according to the presence or absence of proton-pump inhibitors

Unique Subject Identifier=5013000000-0126

MEANS Procedure

Assay variable : PTINR\_VAL1 PT-INR Value

| N | Mean      | Standard Deviation | Minimum   | Maximum   |
|---|-----------|--------------------|-----------|-----------|
| 3 | 2.7233333 | 0.1942507          | 2.5100000 | 2.8900000 |

Unique Subject Identifier=5013000000-0142

Assay variable : PTINR\_VAL1 PT-INR Value

| N | Mean      | Standard Deviation | Minimum   | Maximum   |
|---|-----------|--------------------|-----------|-----------|
| 3 | 1.8033333 | 0.2023199          | 1.5700000 | 1.9300000 |

Unique Subject Identifier=5013000000-0157

Assay variable : PTINR\_VAL1 PT-INR Value

| N | Mean      | Standard Deviation | Minimum   | Maximum   |
|---|-----------|--------------------|-----------|-----------|
| 6 | 1.7683333 | 0.0968332          | 1.6900000 | 1.9100000 |

Unique Subject Identifier=5013000000-0174



Assay variable : PTINR\_VAL1 PT-INR Value

N Mean Standard Deviation Minimum Maximum

---

|   |           |           |           |           |
|---|-----------|-----------|-----------|-----------|
| 2 | 1.6700000 | 0.5091169 | 1.3100000 | 2.0300000 |
|---|-----------|-----------|-----------|-----------|

---

Laboratory tests at the time of obtaining Table 2-6 consent, according to the presence or absence of proton-pump inhibitors

Unique Subject Identifier=5013000000-0176

MEANS Procedure

Assay variable : PTINR\_VAL1 PT-INR Value

N Mean Standard Deviation Minimum Maximum

---

|   |           |           |           |           |
|---|-----------|-----------|-----------|-----------|
| 3 | 2.1200000 | 0.1135782 | 2.0400000 | 2.2500000 |
|---|-----------|-----------|-----------|-----------|

---

Unique Subject Identifier=5013000000-0203

Assay variable : PTINR\_VAL1 PT-INR Value

N Mean Standard Deviation Minimum Maximum

---

|   |           |           |           |           |
|---|-----------|-----------|-----------|-----------|
| 4 | 2.0350000 | 0.4690771 | 1.7000000 | 2.7000000 |
|---|-----------|-----------|-----------|-----------|

---

Unique Subject Identifier=5013000000-0204

Assay variable : PTINR\_VAL1 PT-INR Value

N Mean Standard Deviation Minimum Maximum

---

|   |           |           |           |           |
|---|-----------|-----------|-----------|-----------|
| 4 | 2.0300000 | 0.0778888 | 1.9300000 | 2.1200000 |
|---|-----------|-----------|-----------|-----------|

---

Unique Subject Identifier=5013000000-0205

Assay variable : PTINR\_VAL1 PT-INR Value

N Mean Standard Deviation Minimum Maximum

---

|   |           |  |           |           |
|---|-----------|--|-----------|-----------|
| 1 | 1.9600000 |  | 1.9600000 | 1.9600000 |
|---|-----------|--|-----------|-----------|

---

Laboratory tests at the time of obtaining Table 2-6 consent, according to the presence or absence of proton-pump inhibitors

Unique Subject Identifier=5013000000-0209

MEANS Procedure

Assay variable : PTINR\_VAL1 PT-INR Value

N Mean Standard Deviation Minimum Maximum

---

|   |           |           |           |           |
|---|-----------|-----------|-----------|-----------|
| 3 | 1.9533333 | 0.1890326 | 1.7400000 | 2.1000000 |
|---|-----------|-----------|-----------|-----------|

---

Unique Subject Identifier=5013000000-0227

Assay variable : PTINR\_VAL1 PT-INR Value

N Mean Standard Deviation Minimum Maximum

---

|   |           |           |           |           |
|---|-----------|-----------|-----------|-----------|
| 4 | 2.3125000 | 0.7481254 | 1.6600000 | 3.2900000 |
|---|-----------|-----------|-----------|-----------|

---

Unique Subject Identifier=5013000000-0261

Assay variable : PTINR\_VAL1 PT-INR Value

N Mean Standard Deviation Minimum Maximum

---

|   |           |           |           |           |
|---|-----------|-----------|-----------|-----------|
| 3 | 1.9133333 | 0.3685557 | 1.6300000 | 2.3300000 |
|---|-----------|-----------|-----------|-----------|

---

Unique Subject Identifier=5013000000-0263

Assay variable : PTINR\_VAL1 PT-INR Value

N Mean Standard Deviation Minimum Maximum

---

|   |           |           |           |           |
|---|-----------|-----------|-----------|-----------|
| 6 | 2.5300000 | 0.5399630 | 1.7400000 | 3.3300000 |
|---|-----------|-----------|-----------|-----------|

---

Laboratory tests at the time of obtaining Table 2-6 consent, according to the presence or absence of proton-pump inhibitors

Unique Subject Identifier=5013000000-0282

MEANS Procedure

Assay variable : PTINR\_VAL1 PT-INR Value

N Mean Standard Deviation Minimum Maximum

---

|   |           |           |           |           |
|---|-----------|-----------|-----------|-----------|
| 5 | 1.8660000 | 0.6208704 | 1.3200000 | 2.8600000 |
|---|-----------|-----------|-----------|-----------|

---

Unique Subject Identifier=5013000000-0301

Assay variable : PTINR\_VAL1 PT-INR Value

N Mean Standard Deviation Minimum Maximum

---

|   |           |           |           |           |
|---|-----------|-----------|-----------|-----------|
| 4 | 1.7025000 | 0.3012612 | 1.3900000 | 2.1100000 |
|---|-----------|-----------|-----------|-----------|

---

Unique Subject Identifier=5013000000-0312

Assay variable : PTINR\_VAL1 PT-INR Value

N Mean Standard Deviation Minimum Maximum

---

|   |           |           |           |           |
|---|-----------|-----------|-----------|-----------|
| 3 | 2.1366667 | 0.1497776 | 1.9700000 | 2.2600000 |
|---|-----------|-----------|-----------|-----------|

---

Unique Subject Identifier=5013000000-0338

Assay variable : PTINR\_VAL1 PT-INR Value

N Mean Standard Deviation Minimum Maximum

---

|   |          |           |          |          |
|---|----------|-----------|----------|----------|
| 3 | 2.360000 | 0.3508561 | 1.970000 | 2.650000 |
|---|----------|-----------|----------|----------|

---

Laboratory tests at the time of obtaining Table 2-6 consent, according to the presence or absence of proton-pump inhibitors

Unique Subject Identifier=5013000000-0345

MEANS Procedure

Assay variable : PTINR\_VAL1 PT-INR Value

| N | Mean      | Standard Deviation | Minimum   | Maximum   |
|---|-----------|--------------------|-----------|-----------|
| 6 | 2.0850000 | 1.1294556          | 0.9500000 | 3.9600000 |

Unique Subject Identifier=5013000000-0356

Assay variable : PTINR\_VAL1 PT-INR Value

| N | Mean      | Standard Deviation | Minimum   | Maximum   |
|---|-----------|--------------------|-----------|-----------|
| 5 | 2.0840000 | 1.1571646          | 1.1400000 | 3.8200000 |

Unique Subject Identifier=5013000000-0366

Assay variable : PTINR\_VAL1 PT-INR Value

| N | Mean      | Standard Deviation | Minimum   | Maximum   |
|---|-----------|--------------------|-----------|-----------|
| 3 | 1.8333333 | 0.0950438          | 1.7400000 | 1.9300000 |

Unique Subject Identifier=5013000000-0372



Assay variable : PTINR\_VAL1 PT-INR Value

N Mean Standard Deviation Minimum Maximum

---

|   |          |           |          |          |
|---|----------|-----------|----------|----------|
| 6 | 1.483333 | 0.1162182 | 1.310000 | 1.650000 |
|---|----------|-----------|----------|----------|

---

Laboratory tests at the time of obtaining Table 2-6 consent, according to the presence or absence of proton-pump inhibitors

Unique Subject Identifier=5013000000-0374

MEANS Procedure

Assay variable : PTINR\_VAL1 PT-INR Value

N Mean Standard Deviation Minimum Maximum

---

|   |           |           |           |           |
|---|-----------|-----------|-----------|-----------|
| 3 | 2.5533333 | 0.1692139 | 2.4100000 | 2.7400000 |
|---|-----------|-----------|-----------|-----------|

---

Unique Subject Identifier=5013000000-0377

Assay variable : PTINR\_VAL1 PT-INR Value

N Mean Standard Deviation Minimum Maximum

---

|   |           |           |           |           |
|---|-----------|-----------|-----------|-----------|
| 2 | 1.7450000 | 0.0494975 | 1.7100000 | 1.7800000 |
|---|-----------|-----------|-----------|-----------|

---

Unique Subject Identifier=5013000000-0379

Assay variable : PTINR\_VAL1 PT-INR Value

N Mean Standard Deviation Minimum Maximum

---

|   |           |           |           |           |
|---|-----------|-----------|-----------|-----------|
| 6 | 2.2350000 | 0.9610567 | 1.3700000 | 3.7700000 |
|---|-----------|-----------|-----------|-----------|

---

Unique Subject Identifier=5013000000-0394

Assay variable : PTINR\_VAL1 PT-INR Value

N Mean Standard Deviation Minimum Maximum

---

|   |           |           |           |           |
|---|-----------|-----------|-----------|-----------|
| 3 | 1.6366667 | 0.0814453 | 1.5800000 | 1.7300000 |
|---|-----------|-----------|-----------|-----------|

---

Laboratory tests at the time of obtaining Table 2-6 consent, according to the presence or absence of proton-pump inhibitors

Unique Subject Identifier=5013000000-0419

MEANS Procedure

Assay variable : PTINR\_VAL1 PT-INR Value

| N | Mean      | Standard Deviation | Minimum   | Maximum   |
|---|-----------|--------------------|-----------|-----------|
| 2 | 2.0100000 | 0.1131371          | 1.9300000 | 2.0900000 |

Unique Subject Identifier=5013000000-0476

Assay variable : PTINR\_VAL1 PT-INR Value

| N | Mean      | Standard Deviation | Minimum   | Maximum   |
|---|-----------|--------------------|-----------|-----------|
| 1 | 1.8200000 |                    | 1.8200000 | 1.8200000 |

Unique Subject Identifier=5013000000-0486

Assay variable : PTINR\_VAL1 PT-INR Value

| N | Mean      | Standard Deviation | Minimum   | Maximum   |
|---|-----------|--------------------|-----------|-----------|
| 1 | 2.9500000 |                    | 2.9500000 | 2.9500000 |

Unique Subject Identifier=5013000000-0493

Assay variable : PTINR\_VAL1 PT-INR Value

N Mean Standard Deviation Minimum Maximum

---

|   |          |           |          |          |
|---|----------|-----------|----------|----------|
| 2 | 1.840000 | 0.1555635 | 1.730000 | 1.950000 |
|---|----------|-----------|----------|----------|

---

Laboratory tests at the time of obtaining Table 2-6 consent, according to the presence or absence of proton-pump inhibitors

Unique Subject Identifier=5013000000-0506

MEANS Procedure

Assay variable : PTINR\_VAL1 PT-INR Value

N Mean Standard Deviation Minimum Maximum

---

|   |           |           |           |           |
|---|-----------|-----------|-----------|-----------|
| 3 | 2.1766667 | 0.4821134 | 1.8000000 | 2.7200000 |
|---|-----------|-----------|-----------|-----------|

---

Unique Subject Identifier=5013000000-0543

Assay variable : PTINR\_VAL1 PT-INR Value

N Mean Standard Deviation Minimum Maximum

---

|   |           |  |           |           |
|---|-----------|--|-----------|-----------|
| 1 | 1.4800000 |  | 1.4800000 | 1.4800000 |
|---|-----------|--|-----------|-----------|

---

Unique Subject Identifier=5013000000-0544

Assay variable : PTINR\_VAL1 PT-INR Value

N Mean Standard Deviation Minimum Maximum

---

|   |           |           |           |           |
|---|-----------|-----------|-----------|-----------|
| 3 | 2.7800000 | 0.1969772 | 2.6200000 | 3.0000000 |
|---|-----------|-----------|-----------|-----------|

---

Unique Subject Identifier=5013000000-0546

Assay variable : PTINR\_VAL1 PT-INR Value

N Mean Standard Deviation Minimum Maximum

---

|   |           |           |           |           |
|---|-----------|-----------|-----------|-----------|
| 3 | 2.5366667 | 0.3855299 | 2.1400000 | 2.9100000 |
|---|-----------|-----------|-----------|-----------|

---

Laboratory tests at the time of obtaining Table 2-6 consent, according to the presence or absence of proton-pump inhibitors

Unique Subject Identifier=5013000000-0557

MEANS Procedure

Assay variable : PTINR\_VAL1 PT-INR Value

N Mean Standard Deviation Minimum Maximum

---

|   |           |  |           |           |
|---|-----------|--|-----------|-----------|
| 1 | 1.7800000 |  | 1.7800000 | 1.7800000 |
|---|-----------|--|-----------|-----------|

---

Unique Subject Identifier=5013000000-0560

Assay variable : PTINR\_VAL1 PT-INR Value

N Mean Standard Deviation Minimum Maximum

---

|   |           |           |           |           |
|---|-----------|-----------|-----------|-----------|
| 4 | 2.5125000 | 0.7355893 | 1.8700000 | 3.5700000 |
|---|-----------|-----------|-----------|-----------|

---

Unique Subject Identifier=5013000000-0576

Assay variable : PTINR\_VAL1 PT-INR Value

N Mean Standard Deviation Minimum Maximum

---

|   |           |           |           |           |
|---|-----------|-----------|-----------|-----------|
| 6 | 1.9100000 | 0.7090839 | 1.1900000 | 2.8200000 |
|---|-----------|-----------|-----------|-----------|

---

Unique Subject Identifier=5013000000-0580



Assay variable : PTINR\_VAL1 PT-INR Value

N Mean Standard Deviation Minimum Maximum

---

|   |          |           |          |          |
|---|----------|-----------|----------|----------|
| 4 | 1.610000 | 0.2672078 | 1.360000 | 1.960000 |
|---|----------|-----------|----------|----------|

---

Laboratory tests at the time of obtaining Table 2-6 consent, according to the presence or absence of proton-pump inhibitors

Unique Subject Identifier=5014010001-0024

MEANS Procedure

Assay variable : PTINR\_VAL1 PT-INR Value

N Mean Standard Deviation Minimum Maximum

---

|   |           |  |           |           |
|---|-----------|--|-----------|-----------|
| 1 | 2.6400000 |  | 2.6400000 | 2.6400000 |
|---|-----------|--|-----------|-----------|

---

Unique Subject Identifier=5015000000-0012

Assay variable : PTINR\_VAL1 PT-INR Value

N Mean Standard Deviation Minimum Maximum

---

|   |           |           |           |           |
|---|-----------|-----------|-----------|-----------|
| 3 | 1.7666667 | 0.0472582 | 1.7300000 | 1.8200000 |
|---|-----------|-----------|-----------|-----------|

---

Unique Subject Identifier=5015000000-0025

Assay variable : PTINR\_VAL1 PT-INR Value

N Mean Standard Deviation Minimum Maximum

---

|   |           |           |           |           |
|---|-----------|-----------|-----------|-----------|
| 3 | 1.7700000 | 0.0984886 | 1.6900000 | 1.8800000 |
|---|-----------|-----------|-----------|-----------|

---

Unique Subject Identifier=5016000000-0016

Assay variable : PTINR\_VAL1 PT-INR Value

N Mean Standard Deviation Minimum Maximum

---

|   |           |           |           |           |
|---|-----------|-----------|-----------|-----------|
| 3 | 1.9133333 | 0.2742870 | 1.7500000 | 2.2300000 |
|---|-----------|-----------|-----------|-----------|

---

Laboratory tests at the time of obtaining Table 2-6 consent, according to the presence or absence of proton-pump inhibitors

Unique Subject Identifier=5016000000-0018

MEANS Procedure

Assay variable : PTINR\_VAL1 PT-INR Value

| N | Mean      | Standard Deviation | Minimum   | Maximum   |
|---|-----------|--------------------|-----------|-----------|
| 2 | 2.1750000 | 0.3747666          | 1.9100000 | 2.4400000 |

Unique Subject Identifier=5016000000-0021

Assay variable : PTINR\_VAL1 PT-INR Value

| N | Mean      | Standard Deviation | Minimum   | Maximum   |
|---|-----------|--------------------|-----------|-----------|
| 6 | 1.6933333 | 0.0542832          | 1.6200000 | 1.7600000 |

Unique Subject Identifier=5016000000-0035

Assay variable : PTINR\_VAL1 PT-INR Value

| N | Mean      | Standard Deviation | Minimum   | Maximum   |
|---|-----------|--------------------|-----------|-----------|
| 3 | 1.9333333 | 0.0503322          | 1.8800000 | 1.9800000 |

Unique Subject Identifier=5016000000-0038

Assay variable : PTINR\_VAL1 PT-INR Value

N Mean Standard Deviation Minimum Maximum

---

|   |           |           |           |           |
|---|-----------|-----------|-----------|-----------|
| 3 | 1.2966667 | 0.1069268 | 1.1800000 | 1.3900000 |
|---|-----------|-----------|-----------|-----------|

---

Laboratory tests at the time of obtaining Table 2-6 consent, according to the presence or absence of proton-pump inhibitors

Unique Subject Identifier=5016000000-0047

MEANS Procedure

Assay variable : PTINR\_VAL1 PT-INR Value

N Mean Standard Deviation Minimum Maximum

---

|   |           |           |           |           |
|---|-----------|-----------|-----------|-----------|
| 4 | 2.1975000 | 0.6012418 | 1.3800000 | 2.7400000 |
|---|-----------|-----------|-----------|-----------|

---

Unique Subject Identifier=5016000000-0052

Assay variable : PTINR\_VAL1 PT-INR Value

N Mean Standard Deviation Minimum Maximum

---

|   |           |           |           |           |
|---|-----------|-----------|-----------|-----------|
| 3 | 1.8100000 | 0.4677606 | 1.2700000 | 2.0900000 |
|---|-----------|-----------|-----------|-----------|

---

Unique Subject Identifier=5016000000-0053

Assay variable : PTINR\_VAL1 PT-INR Value

N Mean Standard Deviation Minimum Maximum

---

|   |           |           |           |           |
|---|-----------|-----------|-----------|-----------|
| 5 | 1.6480000 | 0.3802236 | 1.2400000 | 2.2600000 |
|---|-----------|-----------|-----------|-----------|

---

Unique Subject Identifier=5016000000-0058

Assay variable : PTINR\_VAL1 PT-INR Value

N Mean Standard Deviation Minimum Maximum

---

|   |          |           |          |          |
|---|----------|-----------|----------|----------|
| 4 | 2.420000 | 0.4606517 | 1.770000 | 2.850000 |
|---|----------|-----------|----------|----------|

---

Laboratory tests at the time of obtaining Table 2-6 consent, according to the presence or absence of proton-pump inhibitors

Unique Subject Identifier=5016000000-0090

MEANS Procedure

Assay variable : PTINR\_VAL1 PT-INR Value

N Mean Standard Deviation Minimum Maximum

---

|   |           |           |           |           |
|---|-----------|-----------|-----------|-----------|
| 4 | 2.1400000 | 0.5934644 | 1.5800000 | 2.8900000 |
|---|-----------|-----------|-----------|-----------|

---

Unique Subject Identifier=5016000000-0094

Assay variable : PTINR\_VAL1 PT-INR Value

N Mean Standard Deviation Minimum Maximum

---

|   |           |           |           |           |
|---|-----------|-----------|-----------|-----------|
| 2 | 1.7000000 | 0.0282843 | 1.6800000 | 1.7200000 |
|---|-----------|-----------|-----------|-----------|

---

Unique Subject Identifier=5016000000-0095

Assay variable : PTINR\_VAL1 PT-INR Value

N Mean Standard Deviation Minimum Maximum

---

|   |           |           |           |           |
|---|-----------|-----------|-----------|-----------|
| 3 | 2.6333333 | 0.0513160 | 2.5900000 | 2.6900000 |
|---|-----------|-----------|-----------|-----------|

---

Unique Subject Identifier=5016000000-0109



Assay variable : PTINR\_VAL1 PT-INR Value

N Mean Standard Deviation Minimum Maximum

---

|   |           |           |           |           |
|---|-----------|-----------|-----------|-----------|
| 2 | 1.9900000 | 0.5374012 | 1.6100000 | 2.3700000 |
|---|-----------|-----------|-----------|-----------|

---

Laboratory tests at the time of obtaining Table 2-6 consent, according to the presence or absence of proton-pump inhibitors

Unique Subject Identifier=5016000000-0112

MEANS Procedure

Assay variable : PTINR\_VAL1 PT-INR Value

N Mean Standard Deviation Minimum Maximum

---

|   |           |  |           |           |
|---|-----------|--|-----------|-----------|
| 1 | 2.2600000 |  | 2.2600000 | 2.2600000 |
|---|-----------|--|-----------|-----------|

---

Unique Subject Identifier=5016000000-0137

Assay variable : PTINR\_VAL1 PT-INR Value

N Mean Standard Deviation Minimum Maximum

---

|   |           |           |           |           |
|---|-----------|-----------|-----------|-----------|
| 3 | 1.9800000 | 0.1705872 | 1.8400000 | 2.1700000 |
|---|-----------|-----------|-----------|-----------|

---

Unique Subject Identifier=5016000000-0142

Assay variable : PTINR\_VAL1 PT-INR Value

N Mean Standard Deviation Minimum Maximum

---

|   |           |           |           |           |
|---|-----------|-----------|-----------|-----------|
| 4 | 2.2250000 | 0.4744470 | 1.9000000 | 2.9300000 |
|---|-----------|-----------|-----------|-----------|

---

Unique Subject Identifier=5016000000-0146

Assay variable : PTINR\_VAL1 PT-INR Value

N Mean Standard Deviation Minimum Maximum

---

|   |          |           |          |          |
|---|----------|-----------|----------|----------|
| 3 | 2.200000 | 0.8861151 | 1.180000 | 2.780000 |
|---|----------|-----------|----------|----------|

---

Laboratory tests at the time of obtaining Table 2-6 consent, according to the presence or absence of proton-pump inhibitors

Unique Subject Identifier=5016000000-0147

MEANS Procedure

Assay variable : PTINR\_VAL1 PT-INR Value

N Mean Standard Deviation Minimum Maximum

---

|   |           |           |           |           |
|---|-----------|-----------|-----------|-----------|
| 4 | 1.7075000 | 0.0713559 | 1.6200000 | 1.7900000 |
|---|-----------|-----------|-----------|-----------|

---

Unique Subject Identifier=5016000000-0153

Assay variable : PTINR\_VAL1 PT-INR Value

N Mean Standard Deviation Minimum Maximum

---

|   |           |           |           |           |
|---|-----------|-----------|-----------|-----------|
| 4 | 2.1400000 | 0.1013246 | 2.0100000 | 2.2300000 |
|---|-----------|-----------|-----------|-----------|

---

Unique Subject Identifier=5016000000-0157

Assay variable : PTINR\_VAL1 PT-INR Value

N Mean Standard Deviation Minimum Maximum

---

|   |           |           |           |           |
|---|-----------|-----------|-----------|-----------|
| 3 | 2.3133333 | 0.5451911 | 1.7300000 | 2.8100000 |
|---|-----------|-----------|-----------|-----------|

---

Unique Subject Identifier=5016000000-0164

Assay variable : PTINR\_VAL1 PT-INR Value

N Mean Standard Deviation Minimum Maximum

---

|   |          |           |          |          |
|---|----------|-----------|----------|----------|
| 5 | 2.154000 | 0.4639289 | 1.680000 | 2.800000 |
|---|----------|-----------|----------|----------|

---

Laboratory tests at the time of obtaining Table 2-6 consent, according to the presence or absence of proton-pump inhibitors

Unique Subject Identifier=5016000000-0168

MEANS Procedure

Assay variable : PTINR\_VAL1 PT-INR Value

| N | Mean      | Standard Deviation | Minimum   | Maximum   |
|---|-----------|--------------------|-----------|-----------|
| 5 | 1.9020000 | 0.5697982          | 1.3700000 | 2.8700000 |

Unique Subject Identifier=5016000000-0174

Assay variable : PTINR\_VAL1 PT-INR Value

| N | Mean      | Standard Deviation | Minimum   | Maximum   |
|---|-----------|--------------------|-----------|-----------|
| 2 | 1.8050000 | 1.1101576          | 1.0200000 | 2.5900000 |

Unique Subject Identifier=5016000000-0188

Assay variable : PTINR\_VAL1 PT-INR Value

| N | Mean      | Standard Deviation | Minimum   | Maximum   |
|---|-----------|--------------------|-----------|-----------|
| 5 | 2.4440000 | 0.3880464          | 2.0600000 | 2.8500000 |

Unique Subject Identifier=5016000000-0213

Assay variable : PTINR\_VAL1 PT-INR Value

N Mean Standard Deviation Minimum Maximum

---

|   |           |           |           |           |
|---|-----------|-----------|-----------|-----------|
| 6 | 2.0316667 | 0.5348800 | 1.4800000 | 2.8400000 |
|---|-----------|-----------|-----------|-----------|

---

Laboratory tests at the time of obtaining Table 2-6 consent, according to the presence or absence of proton-pump inhibitors

Unique Subject Identifier=5016000000-0242

MEANS Procedure

Assay variable : PTINR\_VAL1 PT-INR Value

N Mean Standard Deviation Minimum Maximum

---

|   |           |           |           |           |
|---|-----------|-----------|-----------|-----------|
| 4 | 1.9025000 | 0.1637834 | 1.6900000 | 2.0800000 |
|---|-----------|-----------|-----------|-----------|

---

Unique Subject Identifier=5016000000-0251

Assay variable : PTINR\_VAL1 PT-INR Value

N Mean Standard Deviation Minimum Maximum

---

|   |           |           |           |           |
|---|-----------|-----------|-----------|-----------|
| 6 | 1.9333333 | 0.8179405 | 1.0800000 | 3.2100000 |
|---|-----------|-----------|-----------|-----------|

---

Unique Subject Identifier=5016000000-0255

Assay variable : PTINR\_VAL1 PT-INR Value

N Mean Standard Deviation Minimum Maximum

---

|   |           |           |           |           |
|---|-----------|-----------|-----------|-----------|
| 3 | 1.6133333 | 0.2722744 | 1.4000000 | 1.9200000 |
|---|-----------|-----------|-----------|-----------|

---

Unique Subject Identifier=5016000000-0265



Assay variable : PTINR\_VAL1 PT-INR Value

N Mean Standard Deviation Minimum Maximum

---

|   |           |           |           |           |
|---|-----------|-----------|-----------|-----------|
| 4 | 2.2125000 | 0.1332604 | 2.0900000 | 2.3600000 |
|---|-----------|-----------|-----------|-----------|

---

Laboratory tests at the time of obtaining Table 2-6 consent, according to the presence or absence of proton-pump inhibitors

Unique Subject Identifier=5016000000-0272

MEANS Procedure

Assay variable : PTINR\_VAL1 PT-INR Value

N Mean Standard Deviation Minimum Maximum

---

|   |          |           |          |          |
|---|----------|-----------|----------|----------|
| 3 | 2.460000 | 0.6478426 | 1.850000 | 3.140000 |
|---|----------|-----------|----------|----------|

---

Unique Subject Identifier=5016000000-0284

Assay variable : PTINR\_VAL1 PT-INR Value

N Mean Standard Deviation Minimum Maximum

---

|   |           |           |          |          |
|---|-----------|-----------|----------|----------|
| 6 | 2.1316667 | 0.3020210 | 1.850000 | 2.630000 |
|---|-----------|-----------|----------|----------|

---

Unique Subject Identifier=5016000000-0285

Assay variable : PTINR\_VAL1 PT-INR Value

N Mean Standard Deviation Minimum Maximum

---

|   |           |           |          |          |
|---|-----------|-----------|----------|----------|
| 3 | 1.8233333 | 0.1792577 | 1.710000 | 2.030000 |
|---|-----------|-----------|----------|----------|

---

Unique Subject Identifier=5016000000-0317

Assay variable : PTINR\_VAL1 PT-INR Value

N Mean Standard Deviation Minimum Maximum

---

|   |           |           |           |           |
|---|-----------|-----------|-----------|-----------|
| 3 | 1.8300000 | 0.4714870 | 1.5000000 | 2.3700000 |
|---|-----------|-----------|-----------|-----------|

---

Laboratory tests at the time of obtaining Table 2-6 consent, according to the presence or absence of proton-pump inhibitors

Unique Subject Identifier=5016000000-0341

MEANS Procedure

Assay variable : PTINR\_VAL1 PT-INR Value

N Mean Standard Deviation Minimum Maximum

---

|   |           |           |           |           |
|---|-----------|-----------|-----------|-----------|
| 4 | 2.1125000 | 0.1337597 | 1.9700000 | 2.2800000 |
|---|-----------|-----------|-----------|-----------|

---

Unique Subject Identifier=5016000000-0348

Assay variable : PTINR\_VAL1 PT-INR Value

N Mean Standard Deviation Minimum Maximum

---

|   |           |           |           |           |
|---|-----------|-----------|-----------|-----------|
| 6 | 1.9631667 | 0.3504628 | 1.3400000 | 2.3100000 |
|---|-----------|-----------|-----------|-----------|

---

Unique Subject Identifier=5017011110-0001

Assay variable : PTINR\_VAL1 PT-INR Value

N Mean Standard Deviation Minimum Maximum

---

|   |           |           |           |           |
|---|-----------|-----------|-----------|-----------|
| 4 | 2.6750000 | 0.3767846 | 2.2800000 | 3.1400000 |
|---|-----------|-----------|-----------|-----------|

---

Unique Subject Identifier=5017011110-0008

Assay variable : PTINR\_VAL1 PT-INR Value

N Mean Standard Deviation Minimum Maximum

---

|   |           |           |           |           |
|---|-----------|-----------|-----------|-----------|
| 4 | 2.1975000 | 0.3617895 | 1.7300000 | 2.5300000 |
|---|-----------|-----------|-----------|-----------|

---

Laboratory tests at the time of obtaining Table 2-6 consent, according to the presence or absence of proton-pump inhibitors

Unique Subject Identifier=5017011110-0015

MEANS Procedure

Assay variable : PTINR\_VAL1 PT-INR Value

N Mean Standard Deviation Minimum Maximum

---

|   |           |           |           |           |
|---|-----------|-----------|-----------|-----------|
| 3 | 2.0833333 | 0.5263396 | 1.5800000 | 2.6300000 |
|---|-----------|-----------|-----------|-----------|

---

Unique Subject Identifier=5017011110-0016

Assay variable : PTINR\_VAL1 PT-INR Value

N Mean Standard Deviation Minimum Maximum

---

|   |           |           |           |           |
|---|-----------|-----------|-----------|-----------|
| 5 | 1.2760000 | 0.1040673 | 1.1800000 | 1.4200000 |
|---|-----------|-----------|-----------|-----------|

---

Unique Subject Identifier=5017011110-0019

Assay variable : PTINR\_VAL1 PT-INR Value

N Mean Standard Deviation Minimum Maximum

---

|   |           |           |           |           |
|---|-----------|-----------|-----------|-----------|
| 6 | 1.9083333 | 0.6652343 | 1.3500000 | 3.1200000 |
|---|-----------|-----------|-----------|-----------|

---

Unique Subject Identifier=5017011110-0032

Assay variable : PTINR\_VAL1 PT-INR Value

N Mean Standard Deviation Minimum Maximum

---

|   |           |           |           |           |
|---|-----------|-----------|-----------|-----------|
| 6 | 2.0500000 | 0.6796764 | 1.4900000 | 3.0700000 |
|---|-----------|-----------|-----------|-----------|

---

Laboratory tests at the time of obtaining Table 2-6 consent, according to the presence or absence of proton-pump inhibitors

Unique Subject Identifier=5020011000-0004

MEANS Procedure

Assay variable : PTINR\_VAL1 PT-INR Value

N Mean Standard Deviation Minimum Maximum

---

|   |           |           |           |           |
|---|-----------|-----------|-----------|-----------|
| 3 | 2.8800000 | 0.5499091 | 2.4000000 | 3.4800000 |
|---|-----------|-----------|-----------|-----------|

---

Unique Subject Identifier=5020011000-0014

Assay variable : PTINR\_VAL1 PT-INR Value

N Mean Standard Deviation Minimum Maximum

---

|   |           |           |           |           |
|---|-----------|-----------|-----------|-----------|
| 3 | 2.0200000 | 0.4003748 | 1.6100000 | 2.4100000 |
|---|-----------|-----------|-----------|-----------|

---

Unique Subject Identifier=5020011000-0016

Assay variable : PTINR\_VAL1 PT-INR Value

N Mean Standard Deviation Minimum Maximum

---

|   |           |           |           |           |
|---|-----------|-----------|-----------|-----------|
| 3 | 2.7800000 | 0.1997498 | 2.5600000 | 2.9500000 |
|---|-----------|-----------|-----------|-----------|

---

Unique Subject Identifier=5020011000-0020



Assay variable : PTINR\_VAL1 PT-INR Value

N Mean Standard Deviation Minimum Maximum

---

|   |           |           |           |           |
|---|-----------|-----------|-----------|-----------|
| 4 | 2.3350000 | 0.5791085 | 1.5000000 | 2.8300000 |
|---|-----------|-----------|-----------|-----------|

---

Laboratory tests at the time of obtaining Table 2-6 consent, according to the presence or absence of proton-pump inhibitors

Unique Subject Identifier=5020011000-0030

MEANS Procedure

Assay variable : PTINR\_VAL1 PT-INR Value

N Mean Standard Deviation Minimum Maximum

---

|   |           |           |           |           |
|---|-----------|-----------|-----------|-----------|
| 6 | 1.6700000 | 0.1637071 | 1.4600000 | 1.9000000 |
|---|-----------|-----------|-----------|-----------|

---

Unique Subject Identifier=5020011000-0036

Assay variable : PTINR\_VAL1 PT-INR Value

N Mean Standard Deviation Minimum Maximum

---

|   |           |           |           |           |
|---|-----------|-----------|-----------|-----------|
| 4 | 1.8025000 | 0.1547848 | 1.5900000 | 1.9400000 |
|---|-----------|-----------|-----------|-----------|

---

Unique Subject Identifier=5020011000-0039

Assay variable : PTINR\_VAL1 PT-INR Value

N Mean Standard Deviation Minimum Maximum

---

|   |           |           |           |           |
|---|-----------|-----------|-----------|-----------|
| 3 | 2.2300000 | 0.3061046 | 1.9400000 | 2.5500000 |
|---|-----------|-----------|-----------|-----------|

---

Unique Subject Identifier=5020011000-0042

Assay variable : PTINR\_VAL1 PT-INR Value

N Mean Standard Deviation Minimum Maximum

---

|   |          |           |          |          |
|---|----------|-----------|----------|----------|
| 3 | 2.220000 | 0.3011644 | 1.890000 | 2.480000 |
|---|----------|-----------|----------|----------|

---

Laboratory tests at the time of obtaining Table 2-6 consent, according to the presence or absence of proton-pump inhibitors

Unique Subject Identifier=5020011000-0043

MEANS Procedure

Assay variable : PTINR\_VAL1 PT-INR Value

N Mean Standard Deviation Minimum Maximum

---

|   |           |           |           |           |
|---|-----------|-----------|-----------|-----------|
| 6 | 2.3666667 | 0.3654951 | 1.8200000 | 2.8600000 |
|---|-----------|-----------|-----------|-----------|

---

Unique Subject Identifier=5020011000-0048

Assay variable : PTINR\_VAL1 PT-INR Value

N Mean Standard Deviation Minimum Maximum

---

|   |           |           |           |           |
|---|-----------|-----------|-----------|-----------|
| 4 | 1.8675000 | 0.2920474 | 1.4400000 | 2.1000000 |
|---|-----------|-----------|-----------|-----------|

---

Unique Subject Identifier=5020011000-0064

Assay variable : PTINR\_VAL1 PT-INR Value

N Mean Standard Deviation Minimum Maximum

---

|   |           |           |           |           |
|---|-----------|-----------|-----------|-----------|
| 4 | 1.5050000 | 0.1420094 | 1.3700000 | 1.6600000 |
|---|-----------|-----------|-----------|-----------|

---

Unique Subject Identifier=5021011111-0039

Assay variable : PTINR\_VAL1 PT-INR Value

N Mean Standard Deviation Minimum Maximum

---

|   |           |           |           |           |
|---|-----------|-----------|-----------|-----------|
| 6 | 1.9983333 | 0.1591750 | 1.7400000 | 2.1900000 |
|---|-----------|-----------|-----------|-----------|

---

Laboratory tests at the time of obtaining Table 2-6 consent, according to the presence or absence of proton-pump inhibitors

Unique Subject Identifier=5021011111-0048

MEANS Procedure

Assay variable : PTINR\_VAL1 PT-INR Value

N Mean Standard Deviation Minimum Maximum

---

|   |           |           |           |           |
|---|-----------|-----------|-----------|-----------|
| 4 | 2.0650000 | 0.4353160 | 1.5800000 | 2.5600000 |
|---|-----------|-----------|-----------|-----------|

---

Unique Subject Identifier=5025000100-0001

Assay variable : PTINR\_VAL1 PT-INR Value

N Mean Standard Deviation Minimum Maximum

---

|   |           |           |           |           |
|---|-----------|-----------|-----------|-----------|
| 4 | 2.5750000 | 0.9542012 | 1.8100000 | 3.9700000 |
|---|-----------|-----------|-----------|-----------|

---

Unique Subject Identifier=5025000100-0009

Assay variable : PTINR\_VAL1 PT-INR Value

N Mean Standard Deviation Minimum Maximum

---

|   |           |           |           |           |
|---|-----------|-----------|-----------|-----------|
| 2 | 1.7400000 | 0.2969848 | 1.5300000 | 1.9500000 |
|---|-----------|-----------|-----------|-----------|

---

Unique Subject Identifier=5025000100-0013

Assay variable : PTINR\_VAL1 PT-INR Value

N Mean Standard Deviation Minimum Maximum

---

|   |           |           |           |           |
|---|-----------|-----------|-----------|-----------|
| 3 | 2.5633333 | 0.2968726 | 2.3100000 | 2.8900000 |
|---|-----------|-----------|-----------|-----------|

---

Laboratory tests at the time of obtaining Table 2-6 consent, according to the presence or absence of proton-pump inhibitors

Unique Subject Identifier=5025000100-0015

MEANS Procedure

Assay variable : PTINR\_VAL1 PT-INR Value

| N | Mean      | Standard Deviation | Minimum   | Maximum   |
|---|-----------|--------------------|-----------|-----------|
| 6 | 1.7016667 | 0.1265570          | 1.5500000 | 1.8900000 |

Unique Subject Identifier=5026101000-0010

Assay variable : PTINR\_VAL1 PT-INR Value

| N | Mean      | Standard Deviation | Minimum   | Maximum   |
|---|-----------|--------------------|-----------|-----------|
| 3 | 1.6133333 | 0.3288363          | 1.2400000 | 1.8600000 |

Unique Subject Identifier=5026101000-0011

Assay variable : PTINR\_VAL1 PT-INR Value

| N | Mean      | Standard Deviation | Minimum   | Maximum   |
|---|-----------|--------------------|-----------|-----------|
| 6 | 1.8550000 | 0.2261637          | 1.7100000 | 2.3000000 |

Unique Subject Identifier=5026101000-0016



Assay variable : PTINR\_VAL1 PT-INR Value

N Mean Standard Deviation Minimum Maximum

---

|   |           |           |           |           |
|---|-----------|-----------|-----------|-----------|
| 5 | 1.9960000 | 0.0952890 | 1.8400000 | 2.0700000 |
|---|-----------|-----------|-----------|-----------|

---

Laboratory tests at the time of obtaining Table 2-6 consent, according to the presence or absence of proton-pump inhibitors

Unique Subject Identifier=5026101000-0018

MEANS Procedure

Assay variable : PTINR\_VAL1 PT-INR Value

| N | Mean      | Standard Deviation | Minimum   | Maximum   |
|---|-----------|--------------------|-----------|-----------|
| 6 | 1.5350000 | 0.2157545          | 1.2500000 | 1.7700000 |

Unique Subject Identifier=5026101000-0020

Assay variable : PTINR\_VAL1 PT-INR Value

| N | Mean      | Standard Deviation | Minimum   | Maximum   |
|---|-----------|--------------------|-----------|-----------|
| 6 | 1.9700000 | 0.3825180          | 1.5000000 | 2.5400000 |

Unique Subject Identifier=5026101000-0023

Assay variable : PTINR\_VAL1 PT-INR Value

| N | Mean      | Standard Deviation | Minimum   | Maximum   |
|---|-----------|--------------------|-----------|-----------|
| 5 | 1.9020000 | 0.5618897          | 1.5600000 | 2.9000000 |

Unique Subject Identifier=5026101000-0026

Assay variable : PTINR\_VAL1 PT-INR Value

N Mean Standard Deviation Minimum Maximum

---

|   |           |           |           |           |
|---|-----------|-----------|-----------|-----------|
| 6 | 1.9766667 | 0.2718578 | 1.5400000 | 2.3100000 |
|---|-----------|-----------|-----------|-----------|

---

Laboratory tests at the time of obtaining Table 2-6 consent, according to the presence or absence of proton-pump inhibitors

Unique Subject Identifier=5026101000-0031

MEANS Procedure

Assay variable : PTINR\_VAL1 PT-INR Value

| N | Mean      | Standard Deviation | Minimum   | Maximum   |
|---|-----------|--------------------|-----------|-----------|
| 3 | 1.9700000 | 0.3044667          | 1.7000000 | 2.3000000 |

Unique Subject Identifier=5026101000-0037

Assay variable : PTINR\_VAL1 PT-INR Value

| N | Mean      | Standard Deviation | Minimum   | Maximum   |
|---|-----------|--------------------|-----------|-----------|
| 3 | 1.5166667 | 0.2454248          | 1.2800000 | 1.7700000 |

Unique Subject Identifier=5026101000-0039

Assay variable : PTINR\_VAL1 PT-INR Value

| N | Mean      | Standard Deviation | Minimum   | Maximum   |
|---|-----------|--------------------|-----------|-----------|
| 3 | 2.1100000 | 0.2773085          | 1.7900000 | 2.2800000 |

Unique Subject Identifier=5026101000-0040

Assay variable : PTINR\_VAL1 PT-INR Value

N Mean Standard Deviation Minimum Maximum

---

|   |           |           |           |           |
|---|-----------|-----------|-----------|-----------|
| 6 | 2.1850000 | 0.1707337 | 1.9800000 | 2.3900000 |
|---|-----------|-----------|-----------|-----------|

---

Laboratory tests at the time of obtaining Table 2-6 consent, according to the presence or absence of proton-pump inhibitors

Unique Subject Identifier=5026101000-0041

MEANS Procedure

Assay variable : PTINR\_VAL1 PT-INR Value

N Mean Standard Deviation Minimum Maximum

---

|   |           |           |           |           |
|---|-----------|-----------|-----------|-----------|
| 4 | 1.8425000 | 0.5897104 | 1.3000000 | 2.6800000 |
|---|-----------|-----------|-----------|-----------|

---

Unique Subject Identifier=5026101000-0044

Assay variable : PTINR\_VAL1 PT-INR Value

N Mean Standard Deviation Minimum Maximum

---

|   |           |           |           |           |
|---|-----------|-----------|-----------|-----------|
| 3 | 1.5833333 | 0.1418920 | 1.4300000 | 1.7100000 |
|---|-----------|-----------|-----------|-----------|

---

Unique Subject Identifier=5026101000-0045

Assay variable : PTINR\_VAL1 PT-INR Value

N Mean Standard Deviation Minimum Maximum

---

|   |           |           |           |           |
|---|-----------|-----------|-----------|-----------|
| 3 | 2.2400000 | 0.3551056 | 1.8900000 | 2.6000000 |
|---|-----------|-----------|-----------|-----------|

---

Unique Subject Identifier=5026101000-0049

Assay variable : PTINR\_VAL1 PT-INR Value

N Mean Standard Deviation Minimum Maximum

---

|   |           |           |           |           |
|---|-----------|-----------|-----------|-----------|
| 6 | 1.9166667 | 0.3360754 | 1.3900000 | 2.2500000 |
|---|-----------|-----------|-----------|-----------|

---

Laboratory tests at the time of obtaining Table 2-6 consent, according to the presence or absence of proton-pump inhibitors

Unique Subject Identifier=5026101000-0051

MEANS Procedure

Assay variable : PTINR\_VAL1 PT-INR Value

N Mean Standard Deviation Minimum Maximum

---

|   |           |           |           |           |
|---|-----------|-----------|-----------|-----------|
| 6 | 1.9233333 | 0.5225961 | 1.3500000 | 2.8100000 |
|---|-----------|-----------|-----------|-----------|

---

Unique Subject Identifier=5026101000-0058

Assay variable : PTINR\_VAL1 PT-INR Value

N Mean Standard Deviation Minimum Maximum

---

|   |           |           |           |           |
|---|-----------|-----------|-----------|-----------|
| 3 | 2.9366667 | 2.0850020 | 1.4500000 | 5.3200000 |
|---|-----------|-----------|-----------|-----------|

---

Unique Subject Identifier=5026101000-0065

Assay variable : PTINR\_VAL1 PT-INR Value

N Mean Standard Deviation Minimum Maximum

---

|   |           |           |           |           |
|---|-----------|-----------|-----------|-----------|
| 4 | 2.2250000 | 0.3145897 | 1.9200000 | 2.5700000 |
|---|-----------|-----------|-----------|-----------|

---

Unique Subject Identifier=5026101000-0066



Assay variable : PTINR\_VAL1 PT-INR Value

N Mean Standard Deviation Minimum Maximum

---

|   |           |           |           |           |
|---|-----------|-----------|-----------|-----------|
| 6 | 2.3000000 | 0.3119615 | 1.9300000 | 2.8800000 |
|---|-----------|-----------|-----------|-----------|

---

Laboratory tests at the time of obtaining Table 2-6 consent, according to the presence or absence of proton-pump inhibitors

Unique Subject Identifier=5026101000-0068

MEANS Procedure

Assay variable : PTINR\_VAL1 PT-INR Value

N Mean Standard Deviation Minimum Maximum

---

|   |           |           |           |           |
|---|-----------|-----------|-----------|-----------|
| 2 | 2.2050000 | 0.2899138 | 2.0000000 | 2.4100000 |
|---|-----------|-----------|-----------|-----------|

---

Unique Subject Identifier=5026101000-0071

Assay variable : PTINR\_VAL1 PT-INR Value

N Mean Standard Deviation Minimum Maximum

---

|   |           |           |           |           |
|---|-----------|-----------|-----------|-----------|
| 3 | 1.6766667 | 0.4675824 | 1.3000000 | 2.2000000 |
|---|-----------|-----------|-----------|-----------|

---

Unique Subject Identifier=5026101000-0074

Assay variable : PTINR\_VAL1 PT-INR Value

N Mean Standard Deviation Minimum Maximum

---

|   |           |           |           |           |
|---|-----------|-----------|-----------|-----------|
| 5 | 2.4080000 | 0.8267829 | 1.1200000 | 3.1600000 |
|---|-----------|-----------|-----------|-----------|

---

Unique Subject Identifier=5026101000-0100

Assay variable : PTINR\_VAL1 PT-INR Value

N Mean Standard Deviation Minimum Maximum

---

|   |           |           |           |           |
|---|-----------|-----------|-----------|-----------|
| 6 | 2.0300000 | 0.2504396 | 1.6800000 | 2.4500000 |
|---|-----------|-----------|-----------|-----------|

---

Laboratory tests at the time of obtaining Table 2-6 consent, according to the presence or absence of proton-pump inhibitors

Unique Subject Identifier=5026101000-0111

MEANS Procedure

Assay variable : PTINR\_VAL1 PT-INR Value

N Mean Standard Deviation Minimum Maximum

---

|   |           |           |           |           |
|---|-----------|-----------|-----------|-----------|
| 3 | 1.9033333 | 0.0665833 | 1.8600000 | 1.9800000 |
|---|-----------|-----------|-----------|-----------|

---

Unique Subject Identifier=5026101000-0116

Assay variable : PTINR\_VAL1 PT-INR Value

N Mean Standard Deviation Minimum Maximum

---

|   |           |           |           |           |
|---|-----------|-----------|-----------|-----------|
| 4 | 1.8525000 | 0.0830161 | 1.7400000 | 1.9400000 |
|---|-----------|-----------|-----------|-----------|

---

Unique Subject Identifier=5026101000-0119

Assay variable : PTINR\_VAL1 PT-INR Value

N Mean Standard Deviation Minimum Maximum

---

|   |           |           |           |           |
|---|-----------|-----------|-----------|-----------|
| 6 | 2.5766667 | 1.0478295 | 1.4800000 | 3.9100000 |
|---|-----------|-----------|-----------|-----------|

---

Unique Subject Identifier=5030010000-0008

Assay variable : PTINR\_VAL1 PT-INR Value

N Mean Standard Deviation Minimum Maximum

---

|   |           |           |           |           |
|---|-----------|-----------|-----------|-----------|
| 6 | 1.5750000 | 0.2702406 | 1.2700000 | 2.0200000 |
|---|-----------|-----------|-----------|-----------|

---

Laboratory tests at the time of obtaining Table 2-6 consent, according to the presence or absence of proton-pump inhibitors

Unique Subject Identifier=5030010000-0031

MEANS Procedure

Assay variable : PTINR\_VAL1 PT-INR Value

| N | Mean      | Standard Deviation | Minimum   | Maximum   |
|---|-----------|--------------------|-----------|-----------|
| 5 | 2.2100000 | 0.2586503          | 1.9400000 | 2.6400000 |

Unique Subject Identifier=5030010000-0035

Assay variable : PTINR\_VAL1 PT-INR Value

| N | Mean      | Standard Deviation | Minimum   | Maximum   |
|---|-----------|--------------------|-----------|-----------|
| 6 | 1.7733333 | 0.1737431          | 1.5700000 | 2.0200000 |

Unique Subject Identifier=5030010000-0047

Assay variable : PTINR\_VAL1 PT-INR Value

| N | Mean      | Standard Deviation | Minimum   | Maximum   |
|---|-----------|--------------------|-----------|-----------|
| 2 | 1.2850000 | 0.0212132          | 1.2700000 | 1.3000000 |

Unique Subject Identifier=5030010000-0057

Assay variable : PTINR\_VAL1 PT-INR Value

N Mean Standard Deviation Minimum Maximum

---

|   |           |  |           |           |
|---|-----------|--|-----------|-----------|
| 1 | 1.2900000 |  | 1.2900000 | 1.2900000 |
|---|-----------|--|-----------|-----------|

---

Laboratory tests at the time of obtaining Table 2-6 consent, according to the presence or absence of proton-pump inhibitors

Unique Subject Identifier=5031111000-0018

MEANS Procedure

Assay variable : PTINR\_VAL1 PT-INR Value

| N | Mean      | Standard Deviation | Minimum   | Maximum   |
|---|-----------|--------------------|-----------|-----------|
| 3 | 2.0000000 | 0.0793725          | 1.9100000 | 2.0600000 |

Unique Subject Identifier=5032010000-0001

Assay variable : PTINR\_VAL1 PT-INR Value

| N | Mean      | Standard Deviation | Minimum   | Maximum   |
|---|-----------|--------------------|-----------|-----------|
| 6 | 2.3283333 | 0.0913053          | 2.2000000 | 2.4500000 |

Unique Subject Identifier=5032010000-0005

Assay variable : PTINR\_VAL1 PT-INR Value

| N | Mean      | Standard Deviation | Minimum   | Maximum   |
|---|-----------|--------------------|-----------|-----------|
| 5 | 2.4120000 | 0.2832314          | 2.0700000 | 2.8300000 |

Unique Subject Identifier=5032010000-0006



Assay variable : PTINR\_VAL1 PT-INR Value

N Mean Standard Deviation Minimum Maximum

---

|   |           |           |           |           |
|---|-----------|-----------|-----------|-----------|
| 5 | 1.7180000 | 0.3067083 | 1.1800000 | 1.9000000 |
|---|-----------|-----------|-----------|-----------|

---

Laboratory tests at the time of obtaining Table 2-6 consent, according to the presence or absence of proton-pump inhibitors

Unique Subject Identifier=5032010000-0009

MEANS Procedure

Assay variable : PTINR\_VAL1 PT-INR Value

N Mean Standard Deviation Minimum Maximum

---

|   |           |           |           |           |
|---|-----------|-----------|-----------|-----------|
| 5 | 2.4320000 | 0.5597946 | 1.6800000 | 3.1200000 |
|---|-----------|-----------|-----------|-----------|

---

Unique Subject Identifier=5032010000-0010

Assay variable : PTINR\_VAL1 PT-INR Value

N Mean Standard Deviation Minimum Maximum

---

|   |           |           |           |           |
|---|-----------|-----------|-----------|-----------|
| 6 | 1.2650000 | 0.3125860 | 1.0800000 | 1.8900000 |
|---|-----------|-----------|-----------|-----------|

---

Unique Subject Identifier=5032010000-0013

Assay variable : PTINR\_VAL1 PT-INR Value

N Mean Standard Deviation Minimum Maximum

---

|   |           |           |           |           |
|---|-----------|-----------|-----------|-----------|
| 6 | 2.4083333 | 0.1874478 | 2.2400000 | 2.6800000 |
|---|-----------|-----------|-----------|-----------|

---

Unique Subject Identifier=5034000010-0002

Assay variable : PTINR\_VAL1 PT-INR Value

N Mean Standard Deviation Minimum Maximum

---

|   |           |           |           |           |
|---|-----------|-----------|-----------|-----------|
| 3 | 2.0033333 | 0.2565801 | 1.7200000 | 2.2200000 |
|---|-----------|-----------|-----------|-----------|

---

Laboratory tests at the time of obtaining Table 2-6 consent, according to the presence or absence of proton-pump inhibitors

Unique Subject Identifier=5034000010-0004

MEANS Procedure

Assay variable : PTINR\_VAL1 PT-INR Value

| N | Mean      | Standard Deviation | Minimum   | Maximum   |
|---|-----------|--------------------|-----------|-----------|
| 2 | 1.7950000 | 0.0070711          | 1.7900000 | 1.8000000 |

Unique Subject Identifier=5034000010-0024

Assay variable : PTINR\_VAL1 PT-INR Value

| N | Mean      | Standard Deviation | Minimum   | Maximum   |
|---|-----------|--------------------|-----------|-----------|
| 4 | 1.8900000 | 0.1930458          | 1.7100000 | 2.0900000 |

Unique Subject Identifier=5035010010-0004

Assay variable : PTINR\_VAL1 PT-INR Value

| N | Mean      | Standard Deviation | Minimum   | Maximum   |
|---|-----------|--------------------|-----------|-----------|
| 3 | 1.8266667 | 0.3231615          | 1.4700000 | 2.1000000 |

Unique Subject Identifier=5035010010-0012

Assay variable : PTINR\_VAL1 PT-INR Value

N Mean Standard Deviation Minimum Maximum

---

|   |           |           |           |           |
|---|-----------|-----------|-----------|-----------|
| 3 | 1.7266667 | 0.4821134 | 1.3500000 | 2.2700000 |
|---|-----------|-----------|-----------|-----------|

---

Laboratory tests at the time of obtaining Table 2-6 consent, according to the presence or absence of proton-pump inhibitors

Unique Subject Identifier=5035010010-0019

MEANS Procedure

Assay variable : PTINR\_VAL1 PT-INR Value

| N | Mean      | Standard Deviation | Minimum   | Maximum   |
|---|-----------|--------------------|-----------|-----------|
| 6 | 1.7366667 | 0.1521403          | 1.5500000 | 1.9800000 |

Unique Subject Identifier=5035010010-0036

Assay variable : PTINR\_VAL1 PT-INR Value

| N | Mean      | Standard Deviation | Minimum   | Maximum   |
|---|-----------|--------------------|-----------|-----------|
| 4 | 2.1125000 | 0.4731719          | 1.6100000 | 2.7300000 |

Unique Subject Identifier=5035010010-0045

Assay variable : PTINR\_VAL1 PT-INR Value

| N | Mean      | Standard Deviation | Minimum   | Maximum   |
|---|-----------|--------------------|-----------|-----------|
| 3 | 1.7666667 | 0.2914332          | 1.5600000 | 2.1000000 |

Unique Subject Identifier=5035010010-0053

Assay variable : PTINR\_VAL1 PT-INR Value

N Mean Standard Deviation Minimum Maximum

---

|   |           |           |           |           |
|---|-----------|-----------|-----------|-----------|
| 6 | 2.0250000 | 0.1277106 | 1.8900000 | 2.2100000 |
|---|-----------|-----------|-----------|-----------|

---

Laboratory tests at the time of obtaining Table 2-6 consent, according to the presence or absence of proton-pump inhibitors

Unique Subject Identifier=5035010010-0055

MEANS Procedure

Assay variable : PTINR\_VAL1 PT-INR Value

N Mean Standard Deviation Minimum Maximum

---

|   |           |           |           |           |
|---|-----------|-----------|-----------|-----------|
| 5 | 1.5440000 | 0.5030209 | 1.1400000 | 2.1700000 |
|---|-----------|-----------|-----------|-----------|

---

Unique Subject Identifier=5036010000-0003

Assay variable : PTINR\_VAL1 PT-INR Value

N Mean Standard Deviation Minimum Maximum

---

|   |           |           |           |           |
|---|-----------|-----------|-----------|-----------|
| 4 | 1.7175000 | 0.2444552 | 1.5500000 | 2.0800000 |
|---|-----------|-----------|-----------|-----------|

---

Unique Subject Identifier=5036010000-0007

Assay variable : PTINR\_VAL1 PT-INR Value

N Mean Standard Deviation Minimum Maximum

---

|   |           |           |           |           |
|---|-----------|-----------|-----------|-----------|
| 5 | 2.2340000 | 0.4251235 | 1.8000000 | 2.9400000 |
|---|-----------|-----------|-----------|-----------|

---

Unique Subject Identifier=5036010000-0012



Assay variable : PTINR\_VAL1 PT-INR Value

N Mean Standard Deviation Minimum Maximum

---

|   |           |           |           |           |
|---|-----------|-----------|-----------|-----------|
| 5 | 1.8520000 | 0.3199531 | 1.4000000 | 2.1300000 |
|---|-----------|-----------|-----------|-----------|

---

Laboratory tests at the time of obtaining Table 2-6 consent, according to the presence or absence of proton-pump inhibitors

Unique Subject Identifier=5036010000-0021

MEANS Procedure

Assay variable : PTINR\_VAL1 PT-INR Value

N Mean Standard Deviation Minimum Maximum

---

|   |           |  |           |           |
|---|-----------|--|-----------|-----------|
| 1 | 1.9600000 |  | 1.9600000 | 1.9600000 |
|---|-----------|--|-----------|-----------|

---

Unique Subject Identifier=5036010000-0034

Assay variable : PTINR\_VAL1 PT-INR Value

N Mean Standard Deviation Minimum Maximum

---

|   |           |           |           |           |
|---|-----------|-----------|-----------|-----------|
| 6 | 1.6266667 | 0.2657568 | 1.2400000 | 1.9400000 |
|---|-----------|-----------|-----------|-----------|

---

Unique Subject Identifier=5036010000-0050

Assay variable : PTINR\_VAL1 PT-INR Value

N Mean Standard Deviation Minimum Maximum

---

|   |           |           |           |           |
|---|-----------|-----------|-----------|-----------|
| 4 | 1.9450000 | 0.2318764 | 1.6400000 | 2.1400000 |
|---|-----------|-----------|-----------|-----------|

---

Unique Subject Identifier=5040011000-0003

Assay variable : PTINR\_VAL1 PT-INR Value

N Mean Standard Deviation Minimum Maximum

---

|   |          |           |          |          |
|---|----------|-----------|----------|----------|
| 3 | 2.310000 | 0.3559494 | 2.080000 | 2.720000 |
|---|----------|-----------|----------|----------|

---

Laboratory tests at the time of obtaining Table 2-6 consent, according to the presence or absence of proton-pump inhibitors

Unique Subject Identifier=5040011000-0006

MEANS Procedure

Assay variable : PTINR\_VAL1 PT-INR Value

N Mean Standard Deviation Minimum Maximum

---

|   |           |           |           |           |
|---|-----------|-----------|-----------|-----------|
| 4 | 1.7900000 | 0.1023067 | 1.6600000 | 1.8900000 |
|---|-----------|-----------|-----------|-----------|

---

Unique Subject Identifier=5040011000-0008

Assay variable : PTINR\_VAL1 PT-INR Value

N Mean Standard Deviation Minimum Maximum

---

|   |           |           |           |           |
|---|-----------|-----------|-----------|-----------|
| 5 | 2.0520000 | 0.7066612 | 1.5500000 | 3.2900000 |
|---|-----------|-----------|-----------|-----------|

---

Unique Subject Identifier=5040011000-0010

Assay variable : PTINR\_VAL1 PT-INR Value

N Mean Standard Deviation Minimum Maximum

---

|   |           |           |           |           |
|---|-----------|-----------|-----------|-----------|
| 4 | 2.8625000 | 0.3236639 | 2.4100000 | 3.1200000 |
|---|-----------|-----------|-----------|-----------|

---

Unique Subject Identifier=5041011000-0007

Assay variable : PTINR\_VAL1 PT-INR Value

N Mean Standard Deviation Minimum Maximum

---

|   |           |           |           |           |
|---|-----------|-----------|-----------|-----------|
| 3 | 1.9166667 | 0.2454248 | 1.6800000 | 2.1700000 |
|---|-----------|-----------|-----------|-----------|

---

Laboratory tests at the time of obtaining Table 2-6 consent, according to the presence or absence of proton-pump inhibitors

Unique Subject Identifier=5044000000-0013

MEANS Procedure

Assay variable : PTINR\_VAL1 PT-INR Value

| N | Mean      | Standard Deviation | Minimum   | Maximum   |
|---|-----------|--------------------|-----------|-----------|
| 2 | 2.2100000 | 0.1979899          | 2.0700000 | 2.3500000 |

Unique Subject Identifier=5044000000-0043

Assay variable : PTINR\_VAL1 PT-INR Value

| N | Mean      | Standard Deviation | Minimum   | Maximum   |
|---|-----------|--------------------|-----------|-----------|
| 6 | 1.9166667 | 0.3020375          | 1.5600000 | 2.3600000 |

Unique Subject Identifier=5046010000-0007

Assay variable : PTINR\_VAL1 PT-INR Value

| N | Mean      | Standard Deviation | Minimum   | Maximum   |
|---|-----------|--------------------|-----------|-----------|
| 3 | 1.9066667 | 0.3302020          | 1.5700000 | 2.2300000 |

Unique Subject Identifier=5046010000-0010

Assay variable : PTINR\_VAL1 PT-INR Value

N Mean Standard Deviation Minimum Maximum

---

|   |           |           |           |           |
|---|-----------|-----------|-----------|-----------|
| 4 | 1.9700000 | 0.4588391 | 1.5400000 | 2.4600000 |
|---|-----------|-----------|-----------|-----------|

---

Laboratory tests at the time of obtaining Table 2-6 consent, according to the presence or absence of proton-pump inhibitors

Unique Subject Identifier=5046010000-0023

MEANS Procedure

Assay variable : PTINR\_VAL1 PT-INR Value

N Mean Standard Deviation Minimum Maximum

---

|   |           |           |           |           |
|---|-----------|-----------|-----------|-----------|
| 5 | 1.6520000 | 0.2872629 | 1.2400000 | 1.9800000 |
|---|-----------|-----------|-----------|-----------|

---

Unique Subject Identifier=5046010000-0028

Assay variable : PTINR\_VAL1 PT-INR Value

N Mean Standard Deviation Minimum Maximum

---

|   |           |           |           |           |
|---|-----------|-----------|-----------|-----------|
| 6 | 2.2566667 | 0.2976351 | 1.7600000 | 2.5400000 |
|---|-----------|-----------|-----------|-----------|

---

Unique Subject Identifier=5047000010-0001

Assay variable : PTINR\_VAL1 PT-INR Value

N Mean Standard Deviation Minimum Maximum

---

|   |           |           |           |           |
|---|-----------|-----------|-----------|-----------|
| 6 | 1.8633333 | 0.2439399 | 1.5700000 | 2.2700000 |
|---|-----------|-----------|-----------|-----------|

---

Unique Subject Identifier=5047000010-0002



Assay variable : PTINR\_VAL1 PT-INR Value

N Mean Standard Deviation Minimum Maximum

---

|   |           |           |           |           |
|---|-----------|-----------|-----------|-----------|
| 6 | 1.9133333 | 0.2501733 | 1.5900000 | 2.3200000 |
|---|-----------|-----------|-----------|-----------|

---

Laboratory tests at the time of obtaining Table 2-6 consent, according to the presence or absence of proton-pump inhibitors

Unique Subject Identifier=5048011000-0015

MEANS Procedure

Assay variable : PTINR\_VAL1 PT-INR Value

N Mean Standard Deviation Minimum Maximum

---

|   |           |           |           |           |
|---|-----------|-----------|-----------|-----------|
| 6 | 1.2033333 | 0.2780408 | 0.9700000 | 1.7300000 |
|---|-----------|-----------|-----------|-----------|

---

Unique Subject Identifier=5048011000-0017

Assay variable : PTINR\_VAL1 PT-INR Value

N Mean Standard Deviation Minimum Maximum

---

|   |           |           |           |           |
|---|-----------|-----------|-----------|-----------|
| 6 | 1.7366667 | 0.2778249 | 1.3600000 | 2.1300000 |
|---|-----------|-----------|-----------|-----------|

---

Unique Subject Identifier=5048011000-0032

Assay variable : PTINR\_VAL1 PT-INR Value

N Mean Standard Deviation Minimum Maximum

---

|   |           |           |           |           |
|---|-----------|-----------|-----------|-----------|
| 6 | 1.5533333 | 0.3556215 | 1.3600000 | 2.2700000 |
|---|-----------|-----------|-----------|-----------|

---

Unique Subject Identifier=5048011000-0063

Assay variable : PTINR\_VAL1 PT-INR Value

N Mean Standard Deviation Minimum Maximum

---

|   |           |           |           |           |
|---|-----------|-----------|-----------|-----------|
| 4 | 1.9700000 | 0.1555635 | 1.8700000 | 2.2000000 |
|---|-----------|-----------|-----------|-----------|

---

Laboratory tests at the time of obtaining Table 2-6 consent, according to the presence or absence of proton-pump inhibitors

Unique Subject Identifier=5048011000-0068

MEANS Procedure

Assay variable : PTINR\_VAL1 PT-INR Value

N Mean Standard Deviation Minimum Maximum

---

|   |           |           |           |           |
|---|-----------|-----------|-----------|-----------|
| 4 | 1.3250000 | 0.0772442 | 1.2200000 | 1.4000000 |
|---|-----------|-----------|-----------|-----------|

---

Unique Subject Identifier=5048011000-0075

Assay variable : PTINR\_VAL1 PT-INR Value

N Mean Standard Deviation Minimum Maximum

---

|   |           |           |           |           |
|---|-----------|-----------|-----------|-----------|
| 6 | 1.6916667 | 0.2980884 | 1.3700000 | 2.0500000 |
|---|-----------|-----------|-----------|-----------|

---

Unique Subject Identifier=5048011000-0087

Assay variable : PTINR\_VAL1 PT-INR Value

N Mean Standard Deviation Minimum Maximum

---

|   |           |           |           |           |
|---|-----------|-----------|-----------|-----------|
| 4 | 2.1875000 | 0.1873277 | 1.9700000 | 2.4000000 |
|---|-----------|-----------|-----------|-----------|

---

Unique Subject Identifier=5048011000-0105

Assay variable : PTINR\_VAL1 PT-INR Value

N Mean Standard Deviation Minimum Maximum

---

|   |          |          |          |          |
|---|----------|----------|----------|----------|
| 3 | 2.190000 | 0.130000 | 2.110000 | 2.340000 |
|---|----------|----------|----------|----------|

---

Laboratory tests at the time of obtaining Table 2-6 consent, according to the presence or absence of proton-pump inhibitors

Unique Subject Identifier=5050011100-0002

MEANS Procedure

Assay variable : PTINR\_VAL1 PT-INR Value

N Mean Standard Deviation Minimum Maximum

---

|   |           |           |           |           |
|---|-----------|-----------|-----------|-----------|
| 5 | 2.3140000 | 0.4131344 | 1.8600000 | 2.8300000 |
|---|-----------|-----------|-----------|-----------|

---

Unique Subject Identifier=5050011100-0005

Assay variable : PTINR\_VAL1 PT-INR Value

N Mean Standard Deviation Minimum Maximum

---

|   |           |           |           |           |
|---|-----------|-----------|-----------|-----------|
| 5 | 2.3660000 | 0.4697127 | 2.0700000 | 3.1700000 |
|---|-----------|-----------|-----------|-----------|

---

Unique Subject Identifier=5050011100-0007

Assay variable : PTINR\_VAL1 PT-INR Value

N Mean Standard Deviation Minimum Maximum

---

|   |           |           |           |           |
|---|-----------|-----------|-----------|-----------|
| 4 | 2.3125000 | 0.4699202 | 1.9100000 | 2.9600000 |
|---|-----------|-----------|-----------|-----------|

---

Unique Subject Identifier=5050011100-0008

Assay variable : PTINR\_VAL1 PT-INR Value

N Mean Standard Deviation Minimum Maximum

---

|   |           |           |           |           |
|---|-----------|-----------|-----------|-----------|
| 6 | 2.0516667 | 0.5068892 | 1.5400000 | 2.9100000 |
|---|-----------|-----------|-----------|-----------|

---

Laboratory tests at the time of obtaining Table 2-6 consent, according to the presence or absence of proton-pump inhibitors

Unique Subject Identifier=5050011100-0009

MEANS Procedure

Assay variable : PTINR\_VAL1 PT-INR Value

| N | Mean      | Standard Deviation | Minimum   | Maximum   |
|---|-----------|--------------------|-----------|-----------|
| 5 | 2.3420000 | 0.1531992          | 2.1800000 | 2.5300000 |

Unique Subject Identifier=5050011100-0010

Assay variable : PTINR\_VAL1 PT-INR Value

| N | Mean      | Standard Deviation | Minimum   | Maximum   |
|---|-----------|--------------------|-----------|-----------|
| 4 | 2.0425000 | 0.5867637          | 1.5700000 | 2.9000000 |

Unique Subject Identifier=5050011100-0011

Assay variable : PTINR\_VAL1 PT-INR Value

| N | Mean      | Standard Deviation | Minimum   | Maximum   |
|---|-----------|--------------------|-----------|-----------|
| 3 | 1.9266667 | 0.1059874          | 1.8300000 | 2.0400000 |

Unique Subject Identifier=5050011100-0012



Assay variable : PTINR\_VAL1 PT-INR Value

N Mean Standard Deviation Minimum Maximum

---

|   |           |           |           |           |
|---|-----------|-----------|-----------|-----------|
| 4 | 2.1525000 | 0.1813606 | 1.9200000 | 2.3200000 |
|---|-----------|-----------|-----------|-----------|

---

Laboratory tests at the time of obtaining Table 2-6 consent, according to the presence or absence of proton-pump inhibitors

Unique Subject Identifier=5050011100-0026

MEANS Procedure

Assay variable : PTINR\_VAL1 PT-INR Value

N Mean Standard Deviation Minimum Maximum

---

|   |           |           |           |           |
|---|-----------|-----------|-----------|-----------|
| 5 | 1.9080000 | 0.1536880 | 1.7700000 | 2.1100000 |
|---|-----------|-----------|-----------|-----------|

---

Unique Subject Identifier=5051100000-0021

Assay variable : PTINR\_VAL1 PT-INR Value

N Mean Standard Deviation Minimum Maximum

---

|   |           |           |           |           |
|---|-----------|-----------|-----------|-----------|
| 4 | 1.8375000 | 0.4241364 | 1.2600000 | 2.1800000 |
|---|-----------|-----------|-----------|-----------|

---

Unique Subject Identifier=5052000000-0009

Assay variable : PTINR\_VAL1 PT-INR Value

N Mean Standard Deviation Minimum Maximum

---

|   |           |           |           |           |
|---|-----------|-----------|-----------|-----------|
| 4 | 2.2775000 | 0.8479141 | 1.6200000 | 3.4300000 |
|---|-----------|-----------|-----------|-----------|

---

Unique Subject Identifier=5052000000-0022

Assay variable : PTINR\_VAL1 PT-INR Value

N Mean Standard Deviation Minimum Maximum

---

|   |          |          |          |          |
|---|----------|----------|----------|----------|
| 3 | 2.280000 | 0.130767 | 2.190000 | 2.430000 |
|---|----------|----------|----------|----------|

---

Laboratory tests at the time of obtaining Table 2-6 consent, according to the presence or absence of proton-pump inhibitors

Unique Subject Identifier=5052000000-0023

MEANS Procedure

Assay variable : PTINR\_VAL1 PT-INR Value

| N | Mean      | Standard Deviation | Minimum   | Maximum   |
|---|-----------|--------------------|-----------|-----------|
| 3 | 1.8233333 | 0.1270171          | 1.7500000 | 1.9700000 |

Unique Subject Identifier=5052000000-0024

Assay variable : PTINR\_VAL1 PT-INR Value

| N | Mean      | Standard Deviation | Minimum   | Maximum   |
|---|-----------|--------------------|-----------|-----------|
| 3 | 2.1366667 | 0.5468394          | 1.7000000 | 2.7500000 |

Unique Subject Identifier=5052000000-0032

Assay variable : PTINR\_VAL1 PT-INR Value

| N | Mean      | Standard Deviation | Minimum   | Maximum   |
|---|-----------|--------------------|-----------|-----------|
| 5 | 1.8520000 | 0.1704993          | 1.7000000 | 2.0900000 |

Unique Subject Identifier=5052000000-0035

Assay variable : PTINR\_VAL1 PT-INR Value

N Mean Standard Deviation Minimum Maximum

---

|   |          |           |          |          |
|---|----------|-----------|----------|----------|
| 4 | 1.940000 | 0.0658281 | 1.870000 | 2.010000 |
|---|----------|-----------|----------|----------|

---

Laboratory tests at the time of obtaining Table 2-6 consent, according to the presence or absence of proton-pump inhibitors

Unique Subject Identifier=5052000000-0038

MEANS Procedure

Assay variable : PTINR\_VAL1 PT-INR Value

N Mean Standard Deviation Minimum Maximum

---

|   |           |           |           |           |
|---|-----------|-----------|-----------|-----------|
| 4 | 1.6425000 | 0.2814694 | 1.4200000 | 2.0500000 |
|---|-----------|-----------|-----------|-----------|

---

Unique Subject Identifier=5052000000-0041

Assay variable : PTINR\_VAL1 PT-INR Value

N Mean Standard Deviation Minimum Maximum

---

|   |           |           |           |           |
|---|-----------|-----------|-----------|-----------|
| 6 | 1.7566667 | 0.1502886 | 1.6000000 | 1.9700000 |
|---|-----------|-----------|-----------|-----------|

---

Unique Subject Identifier=5052000000-0042

Assay variable : PTINR\_VAL1 PT-INR Value

N Mean Standard Deviation Minimum Maximum

---

|   |           |           |           |           |
|---|-----------|-----------|-----------|-----------|
| 3 | 1.5200000 | 0.1513275 | 1.3500000 | 1.6400000 |
|---|-----------|-----------|-----------|-----------|

---

Unique Subject Identifier=5052000000-0045

Assay variable : PTINR\_VAL1 PT-INR Value

N Mean Standard Deviation Minimum Maximum

---

|   |           |           |           |           |
|---|-----------|-----------|-----------|-----------|
| 4 | 1.9025000 | 0.0946485 | 1.7800000 | 2.0100000 |
|---|-----------|-----------|-----------|-----------|

---

Laboratory tests at the time of obtaining Table 2-6 consent, according to the presence or absence of proton-pump inhibitors

Unique Subject Identifier=5053000000-0006

MEANS Procedure

Assay variable : PTINR\_VAL1 PT-INR Value

N Mean Standard Deviation Minimum Maximum

---

|   |          |          |          |          |
|---|----------|----------|----------|----------|
| 3 | 2.040000 | 0.020000 | 2.020000 | 2.060000 |
|---|----------|----------|----------|----------|

---

Unique Subject Identifier=5053000000-0010

Assay variable : PTINR\_VAL1 PT-INR Value

N Mean Standard Deviation Minimum Maximum

---

|   |          |           |          |          |
|---|----------|-----------|----------|----------|
| 5 | 1.814000 | 0.3134167 | 1.400000 | 2.110000 |
|---|----------|-----------|----------|----------|

---

Unique Subject Identifier=5053000000-0011

Assay variable : PTINR\_VAL1 PT-INR Value

N Mean Standard Deviation Minimum Maximum

---

|   |          |          |          |          |
|---|----------|----------|----------|----------|
| 3 | 1.640000 | 0.124900 | 1.500000 | 1.740000 |
|---|----------|----------|----------|----------|

---

Unique Subject Identifier=5053000000-0027



Assay variable : PTINR\_VAL1 PT-INR Value

N Mean Standard Deviation Minimum Maximum

---

|   |           |           |           |           |
|---|-----------|-----------|-----------|-----------|
| 3 | 1.8300000 | 0.1374773 | 1.6800000 | 1.9500000 |
|---|-----------|-----------|-----------|-----------|

---

Laboratory tests at the time of obtaining Table 2-6 consent, according to the presence or absence of proton-pump inhibitors

Unique Subject Identifier=5053000000-0028

MEANS Procedure

Assay variable : PTINR\_VAL1 PT-INR Value

| N | Mean      | Standard Deviation | Minimum   | Maximum   |
|---|-----------|--------------------|-----------|-----------|
| 3 | 1.5800000 | 0.3345146          | 1.2000000 | 1.8300000 |

Unique Subject Identifier=5054010000-0006

Assay variable : PTINR\_VAL1 PT-INR Value

| N | Mean      | Standard Deviation | Minimum   | Maximum   |
|---|-----------|--------------------|-----------|-----------|
| 6 | 1.4033333 | 0.2957476          | 1.0600000 | 1.8700000 |

Unique Subject Identifier=5054010000-0011

Assay variable : PTINR\_VAL1 PT-INR Value

| N | Mean      | Standard Deviation | Minimum   | Maximum   |
|---|-----------|--------------------|-----------|-----------|
| 6 | 2.2150000 | 0.4840558          | 1.7800000 | 3.0700000 |

Unique Subject Identifier=5054010000-0018

Assay variable : PTINR\_VAL1 PT-INR Value

N Mean Standard Deviation Minimum Maximum

---

|   |           |           |           |           |
|---|-----------|-----------|-----------|-----------|
| 4 | 1.8250000 | 0.3304038 | 1.5000000 | 2.2000000 |
|---|-----------|-----------|-----------|-----------|

---

Laboratory tests at the time of obtaining Table 2-6 consent, according to the presence or absence of proton-pump inhibitors

Unique Subject Identifier=5054010000-0020

MEANS Procedure

Assay variable : PTINR\_VAL1 PT-INR Value

N Mean Standard Deviation Minimum Maximum

---

|   |           |           |           |           |
|---|-----------|-----------|-----------|-----------|
| 6 | 2.0433333 | 0.7488569 | 1.1300000 | 3.0200000 |
|---|-----------|-----------|-----------|-----------|

---

Unique Subject Identifier=5054010000-0025

Assay variable : PTINR\_VAL1 PT-INR Value

N Mean Standard Deviation Minimum Maximum

---

|   |           |           |           |           |
|---|-----------|-----------|-----------|-----------|
| 3 | 1.1966667 | 0.1401190 | 1.0600000 | 1.3400000 |
|---|-----------|-----------|-----------|-----------|

---

Unique Subject Identifier=5054010000-0026

Assay variable : PTINR\_VAL1 PT-INR Value

N Mean Standard Deviation Minimum Maximum

---

|   |           |           |           |           |
|---|-----------|-----------|-----------|-----------|
| 2 | 1.9000000 | 0.1697056 | 1.7800000 | 2.0200000 |
|---|-----------|-----------|-----------|-----------|

---

Unique Subject Identifier=5055000000-0003

Assay variable : PTINR\_VAL1 PT-INR Value

N Mean Standard Deviation Minimum Maximum

---

|   |           |           |           |           |
|---|-----------|-----------|-----------|-----------|
| 6 | 1.7266667 | 0.3415065 | 1.4200000 | 2.2900000 |
|---|-----------|-----------|-----------|-----------|

---

Laboratory tests at the time of obtaining Table 2-6 consent, according to the presence or absence of proton-pump inhibitors

Unique Subject Identifier=5055000000-0013

MEANS Procedure

Assay variable : PTINR\_VAL1 PT-INR Value

N Mean Standard Deviation Minimum Maximum

---

|   |           |           |           |           |
|---|-----------|-----------|-----------|-----------|
| 4 | 1.2450000 | 0.0288675 | 1.2100000 | 1.2800000 |
|---|-----------|-----------|-----------|-----------|

---

Unique Subject Identifier=5055000000-0018

Assay variable : PTINR\_VAL1 PT-INR Value

N Mean Standard Deviation Minimum Maximum

---

|   |           |           |           |           |
|---|-----------|-----------|-----------|-----------|
| 6 | 1.7750000 | 0.2356905 | 1.5000000 | 2.1100000 |
|---|-----------|-----------|-----------|-----------|

---

Unique Subject Identifier=5055000000-0019

Assay variable : PTINR\_VAL1 PT-INR Value

N Mean Standard Deviation Minimum Maximum

---

|   |           |           |           |           |
|---|-----------|-----------|-----------|-----------|
| 3 | 1.5633333 | 0.3262412 | 1.2800000 | 1.9200000 |
|---|-----------|-----------|-----------|-----------|

---

Unique Subject Identifier=5055000000-0022

Assay variable : PTINR\_VAL1 PT-INR Value

N Mean Standard Deviation Minimum Maximum

---

|   |           |           |           |           |
|---|-----------|-----------|-----------|-----------|
| 6 | 2.2383333 | 0.3947869 | 1.8900000 | 2.9900000 |
|---|-----------|-----------|-----------|-----------|

---

Laboratory tests at the time of obtaining Table 2-6 consent, according to the presence or absence of proton-pump inhibitors

Unique Subject Identifier=5055000000-0025

MEANS Procedure

Assay variable : PTINR\_VAL1 PT-INR Value

| N | Mean      | Standard Deviation | Minimum   | Maximum   |
|---|-----------|--------------------|-----------|-----------|
| 6 | 2.0750000 | 0.2662893          | 1.6000000 | 2.4000000 |

Unique Subject Identifier=5055000000-0026

Assay variable : PTINR\_VAL1 PT-INR Value

| N | Mean      | Standard Deviation | Minimum   | Maximum   |
|---|-----------|--------------------|-----------|-----------|
| 5 | 1.8460000 | 0.1716974          | 1.6600000 | 2.0600000 |

Unique Subject Identifier=5055000000-0028

Assay variable : PTINR\_VAL1 PT-INR Value

| N | Mean      | Standard Deviation | Minimum   | Maximum   |
|---|-----------|--------------------|-----------|-----------|
| 5 | 1.8840000 | 0.0907193          | 1.7300000 | 1.9600000 |

Unique Subject Identifier=5058011111-0028



Assay variable : PTINR\_VAL1 PT-INR Value

N Mean Standard Deviation Minimum Maximum

---

|   |           |           |           |           |
|---|-----------|-----------|-----------|-----------|
| 5 | 2.0800000 | 0.3664014 | 1.5400000 | 2.4200000 |
|---|-----------|-----------|-----------|-----------|

---

Laboratory tests at the time of obtaining Table 2-6 consent, according to the presence or absence of proton-pump inhibitors

Unique Subject Identifier=5060111000-0004

MEANS Procedure

Assay variable : PTINR\_VAL1 PT-INR Value

| N | Mean      | Standard Deviation | Minimum   | Maximum   |
|---|-----------|--------------------|-----------|-----------|
| 5 | 1.8600000 | 0.4219005          | 1.3000000 | 2.4000000 |

Unique Subject Identifier=5063000000-0008

Assay variable : PTINR\_VAL1 PT-INR Value

| N | Mean      | Standard Deviation | Minimum   | Maximum   |
|---|-----------|--------------------|-----------|-----------|
| 3 | 1.9233333 | 0.1955335          | 1.7600000 | 2.1400000 |

Unique Subject Identifier=5064000000-0003

Assay variable : PTINR\_VAL1 PT-INR Value

| N | Mean      | Standard Deviation | Minimum   | Maximum   |
|---|-----------|--------------------|-----------|-----------|
| 6 | 2.4566667 | 0.7464226          | 1.4700000 | 3.4000000 |

Unique Subject Identifier=5066000100-0015

Assay variable : PTINR\_VAL1 PT-INR Value

N Mean Standard Deviation Minimum Maximum

---

|   |           |           |           |           |
|---|-----------|-----------|-----------|-----------|
| 6 | 2.0683333 | 0.1002829 | 1.9300000 | 2.2300000 |
|---|-----------|-----------|-----------|-----------|

---

Laboratory tests at the time of obtaining Table 2-6 consent, according to the presence or absence of proton-pump inhibitors

Unique Subject Identifier=5066000100-0030

MEANS Procedure

Assay variable : PTINR\_VAL1 PT-INR Value

N Mean Standard Deviation Minimum Maximum

---

|   |           |           |           |           |
|---|-----------|-----------|-----------|-----------|
| 3 | 2.0833333 | 0.2542309 | 1.8600000 | 2.3600000 |
|---|-----------|-----------|-----------|-----------|

---

Unique Subject Identifier=5068011111-0023

Assay variable : PTINR\_VAL1 PT-INR Value

N Mean Standard Deviation Minimum Maximum

---

|   |           |           |           |           |
|---|-----------|-----------|-----------|-----------|
| 3 | 1.7666667 | 0.0650641 | 1.7000000 | 1.8300000 |
|---|-----------|-----------|-----------|-----------|

---

Unique Subject Identifier=5071110000-0021

Assay variable : PTINR\_VAL1 PT-INR Value

N Mean Standard Deviation Minimum Maximum

---

|   |           |           |           |           |
|---|-----------|-----------|-----------|-----------|
| 6 | 1.2183333 | 0.2004412 | 1.0300000 | 1.6000000 |
|---|-----------|-----------|-----------|-----------|

---

Unique Subject Identifier=5071110000-0022

Assay variable : PTINR\_VAL1 PT-INR Value

N Mean Standard Deviation Minimum Maximum

---

|   |          |           |          |          |
|---|----------|-----------|----------|----------|
| 5 | 2.000000 | 0.4756049 | 1.500000 | 2.780000 |
|---|----------|-----------|----------|----------|

---

Laboratory tests at the time of obtaining Table 2-6 consent, according to the presence or absence of proton-pump inhibitors

Unique Subject Identifier=5073000010-0003

MEANS Procedure

Assay variable : PTINR\_VAL1 PT-INR Value

N Mean Standard Deviation Minimum Maximum

---

|   |           |           |           |           |
|---|-----------|-----------|-----------|-----------|
| 6 | 1.9633333 | 0.9886287 | 1.0700000 | 3.7200000 |
|---|-----------|-----------|-----------|-----------|

---

Unique Subject Identifier=5073000010-0005

Assay variable : PTINR\_VAL1 PT-INR Value

N Mean Standard Deviation Minimum Maximum

---

|   |           |           |           |           |
|---|-----------|-----------|-----------|-----------|
| 6 | 1.8433333 | 0.5318521 | 1.1900000 | 2.3700000 |
|---|-----------|-----------|-----------|-----------|

---

Unique Subject Identifier=5073000010-0010

Assay variable : PTINR\_VAL1 PT-INR Value

N Mean Standard Deviation Minimum Maximum

---

|   |           |           |           |           |
|---|-----------|-----------|-----------|-----------|
| 6 | 1.7983333 | 0.6251853 | 1.1700000 | 2.7100000 |
|---|-----------|-----------|-----------|-----------|

---

Unique Subject Identifier=5073000010-0013

Assay variable : PTINR\_VAL1 PT-INR Value

N Mean Standard Deviation Minimum Maximum

---

|   |           |           |           |           |
|---|-----------|-----------|-----------|-----------|
| 4 | 1.8775000 | 0.1372042 | 1.7000000 | 2.0000000 |
|---|-----------|-----------|-----------|-----------|

---

Laboratory tests at the time of obtaining Table 2-6 consent, according to the presence or absence of proton-pump inhibitors

Unique Subject Identifier=5073000010-0015

MEANS Procedure

Assay variable : PTINR\_VAL1 PT-INR Value

| N | Mean      | Standard Deviation | Minimum   | Maximum   |
|---|-----------|--------------------|-----------|-----------|
| 5 | 1.6880000 | 0.3448478          | 1.4300000 | 2.2900000 |

Unique Subject Identifier=5073000010-0017

Assay variable : PTINR\_VAL1 PT-INR Value

| N | Mean      | Standard Deviation | Minimum   | Maximum   |
|---|-----------|--------------------|-----------|-----------|
| 3 | 2.1266667 | 0.1242310          | 2.0500000 | 2.2700000 |

Unique Subject Identifier=5073000010-0031

Assay variable : PTINR\_VAL1 PT-INR Value

| N | Mean      | Standard Deviation | Minimum   | Maximum   |
|---|-----------|--------------------|-----------|-----------|
| 4 | 1.7225000 | 0.1839157          | 1.5000000 | 1.9100000 |

Unique Subject Identifier=5073000010-0048



Assay variable : PTINR\_VAL1 PT-INR Value

N Mean Standard Deviation Minimum Maximum

---

|   |           |           |           |           |
|---|-----------|-----------|-----------|-----------|
| 4 | 2.0825000 | 0.2471673 | 1.8500000 | 2.4200000 |
|---|-----------|-----------|-----------|-----------|

---

Laboratory tests at the time of obtaining Table 2-6 consent, according to the presence or absence of proton-pump inhibitors

Unique Subject Identifier=5073000010-0051

MEANS Procedure

Assay variable : PTINR\_VAL1 PT-INR Value

N Mean Standard Deviation Minimum Maximum

---

|   |           |           |           |           |
|---|-----------|-----------|-----------|-----------|
| 3 | 2.6566667 | 0.1201388 | 2.5400000 | 2.7800000 |
|---|-----------|-----------|-----------|-----------|

---

Unique Subject Identifier=5073000010-0055

Assay variable : PTINR\_VAL1 PT-INR Value

N Mean Standard Deviation Minimum Maximum

---

|   |           |           |           |           |
|---|-----------|-----------|-----------|-----------|
| 2 | 2.4400000 | 0.2121320 | 2.2900000 | 2.5900000 |
|---|-----------|-----------|-----------|-----------|

---

Unique Subject Identifier=5073000010-0066

Assay variable : PTINR\_VAL1 PT-INR Value

N Mean Standard Deviation Minimum Maximum

---

|   |           |           |           |           |
|---|-----------|-----------|-----------|-----------|
| 4 | 2.7025000 | 0.2994857 | 2.3900000 | 3.1000000 |
|---|-----------|-----------|-----------|-----------|

---

Unique Subject Identifier=5073000010-0083

Assay variable : PTINR\_VAL1 PT-INR Value

N Mean Standard Deviation Minimum Maximum

---

|   |           |           |           |           |
|---|-----------|-----------|-----------|-----------|
| 3 | 2.0100000 | 0.6153861 | 1.6300000 | 2.7200000 |
|---|-----------|-----------|-----------|-----------|

---

Laboratory tests at the time of obtaining Table 2-6 consent, according to the presence or absence of proton-pump inhibitors

Unique Subject Identifier=5073000010-0086

MEANS Procedure

Assay variable : PTINR\_VAL1 PT-INR Value

N Mean Standard Deviation Minimum Maximum

---

|   |           |           |           |           |
|---|-----------|-----------|-----------|-----------|
| 4 | 1.6675000 | 0.5208567 | 1.1400000 | 2.3500000 |
|---|-----------|-----------|-----------|-----------|

---

Unique Subject Identifier=5098010011-0007

Assay variable : PTINR\_VAL1 PT-INR Value

N Mean Standard Deviation Minimum Maximum

---

|   |           |           |           |           |
|---|-----------|-----------|-----------|-----------|
| 5 | 2.1400000 | 0.3208582 | 1.7600000 | 2.6400000 |
|---|-----------|-----------|-----------|-----------|

---

Unique Subject Identifier=5098010011-0017

Assay variable : PTINR\_VAL1 PT-INR Value

N Mean Standard Deviation Minimum Maximum

---

|   |           |           |           |           |
|---|-----------|-----------|-----------|-----------|
| 6 | 2.1183333 | 0.4181587 | 1.6800000 | 2.8900000 |
|---|-----------|-----------|-----------|-----------|

---

Unique Subject Identifier=5098010011-0021

Assay variable : PTINR\_VAL1 PT-INR Value

N Mean Standard Deviation Minimum Maximum

---

|   |           |           |           |           |
|---|-----------|-----------|-----------|-----------|
| 4 | 1.9525000 | 0.2828869 | 1.6300000 | 2.2800000 |
|---|-----------|-----------|-----------|-----------|

---

Laboratory tests at the time of obtaining Table 2-6 consent, according to the presence or absence of proton-pump inhibitors

Unique Subject Identifier=5098010011-0027

MEANS Procedure

Assay variable : PTINR\_VAL1 PT-INR Value

| N | Mean      | Standard Deviation | Minimum   | Maximum   |
|---|-----------|--------------------|-----------|-----------|
| 4 | 1.6925000 | 0.3346018          | 1.2700000 | 2.0400000 |

Unique Subject Identifier=5098010011-0028

Assay variable : PTINR\_VAL1 PT-INR Value

| N | Mean      | Standard Deviation | Minimum   | Maximum   |
|---|-----------|--------------------|-----------|-----------|
| 6 | 1.6383333 | 0.0915241          | 1.5000000 | 1.7300000 |

Unique Subject Identifier=5098010011-0030

Assay variable : PTINR\_VAL1 PT-INR Value

| N | Mean      | Standard Deviation | Minimum   | Maximum   |
|---|-----------|--------------------|-----------|-----------|
| 6 | 2.0366667 | 0.8263091          | 1.2600000 | 3.6100000 |

Unique Subject Identifier=5098010011-0038

Assay variable : PTINR\_VAL1 PT-INR Value

N Mean Standard Deviation Minimum Maximum

---

|   |           |           |           |           |
|---|-----------|-----------|-----------|-----------|
| 4 | 2.9025000 | 0.7606740 | 2.1600000 | 3.9300000 |
|---|-----------|-----------|-----------|-----------|

---

Laboratory tests at the time of obtaining Table 2-6 consent, according to the presence or absence of proton-pump inhibitors

Unique Subject Identifier=5098010011-0061

MEANS Procedure

Assay variable : PTINR\_VAL1 PT-INR Value

N Mean Standard Deviation Minimum Maximum

---

|   |           |           |           |           |
|---|-----------|-----------|-----------|-----------|
| 4 | 1.8800000 | 0.2367840 | 1.6300000 | 2.1800000 |
|---|-----------|-----------|-----------|-----------|

---

Unique Subject Identifier=5098010011-0063

Assay variable : PTINR\_VAL1 PT-INR Value

N Mean Standard Deviation Minimum Maximum

---

|   |           |           |           |           |
|---|-----------|-----------|-----------|-----------|
| 5 | 2.3260000 | 0.3467420 | 1.9200000 | 2.6700000 |
|---|-----------|-----------|-----------|-----------|

---

Unique Subject Identifier=5098010011-0066

Assay variable : PTINR\_VAL1 PT-INR Value

N Mean Standard Deviation Minimum Maximum

---

|   |           |           |           |           |
|---|-----------|-----------|-----------|-----------|
| 4 | 2.2750000 | 0.4327817 | 1.8500000 | 2.8700000 |
|---|-----------|-----------|-----------|-----------|

---

Unique Subject Identifier=5098010011-0069



Assay variable : PTINR\_VAL1 PT-INR Value

N Mean Standard Deviation Minimum Maximum

---

|   |           |           |           |           |
|---|-----------|-----------|-----------|-----------|
| 4 | 2.3350000 | 0.6630485 | 1.5600000 | 3.1800000 |
|---|-----------|-----------|-----------|-----------|

---

Laboratory tests at the time of obtaining Table 2-6 consent, according to the presence or absence of proton-pump inhibitors

Unique Subject Identifier=5098010011-0076

MEANS Procedure

Assay variable : PTINR\_VAL1 PT-INR Value

N Mean Standard Deviation Minimum Maximum

---

|   |           |           |           |           |
|---|-----------|-----------|-----------|-----------|
| 4 | 2.1050000 | 0.4198809 | 1.5400000 | 2.5000000 |
|---|-----------|-----------|-----------|-----------|

---

Unique Subject Identifier=5098010011-0087

Assay variable : PTINR\_VAL1 PT-INR Value

N Mean Standard Deviation Minimum Maximum

---

|   |           |           |           |           |
|---|-----------|-----------|-----------|-----------|
| 4 | 2.1250000 | 0.1135782 | 2.0100000 | 2.2500000 |
|---|-----------|-----------|-----------|-----------|

---

Unique Subject Identifier=5098010011-0089

Assay variable : PTINR\_VAL1 PT-INR Value

N Mean Standard Deviation Minimum Maximum

---

|   |           |           |           |           |
|---|-----------|-----------|-----------|-----------|
| 5 | 1.9860000 | 0.2320129 | 1.6700000 | 2.2600000 |
|---|-----------|-----------|-----------|-----------|

---

Unique Subject Identifier=5100001000-0001

Assay variable : PTINR\_VAL1 PT-INR Value

N Mean Standard Deviation Minimum Maximum

---

|   |           |           |           |           |
|---|-----------|-----------|-----------|-----------|
| 4 | 1.4300000 | 0.1205543 | 1.3200000 | 1.6000000 |
|---|-----------|-----------|-----------|-----------|

---

Laboratory tests at the time of obtaining Table 2-6 consent, according to the presence or absence of proton-pump inhibitors

Unique Subject Identifier=5100001000-0006

MEANS Procedure

Assay variable : PTINR\_VAL1 PT-INR Value

N Mean Standard Deviation Minimum Maximum

---

|   |           |           |           |           |
|---|-----------|-----------|-----------|-----------|
| 4 | 1.7250000 | 0.2724579 | 1.4600000 | 1.9600000 |
|---|-----------|-----------|-----------|-----------|

---

Unique Subject Identifier=5103000000-0050

Assay variable : PTINR\_VAL1 PT-INR Value

N Mean Standard Deviation Minimum Maximum

---

|   |           |           |           |           |
|---|-----------|-----------|-----------|-----------|
| 6 | 2.1166667 | 0.2786874 | 1.7000000 | 2.4000000 |
|---|-----------|-----------|-----------|-----------|

---

Unique Subject Identifier=5103000000-0058

Assay variable : PTINR\_VAL1 PT-INR Value

N Mean Standard Deviation Minimum Maximum

---

|   |           |           |           |           |
|---|-----------|-----------|-----------|-----------|
| 6 | 1.5833333 | 0.1329160 | 1.4000000 | 1.8000000 |
|---|-----------|-----------|-----------|-----------|

---

Unique Subject Identifier=5103000000-0067

Assay variable : PTINR\_VAL1 PT-INR Value

N Mean Standard Deviation Minimum Maximum

---

|   |          |           |          |          |
|---|----------|-----------|----------|----------|
| 6 | 2.050000 | 0.6090977 | 1.200000 | 3.000000 |
|---|----------|-----------|----------|----------|

---

Laboratory tests at the time of obtaining Table 2-6 consent, according to the presence or absence of proton-pump inhibitors

Unique Subject Identifier=5103000000-0075

MEANS Procedure

Assay variable : PTINR\_VAL1 PT-INR Value

N Mean Standard Deviation Minimum Maximum

---

|   |           |           |           |           |
|---|-----------|-----------|-----------|-----------|
| 6 | 1.8333333 | 0.1632993 | 1.6000000 | 2.1000000 |
|---|-----------|-----------|-----------|-----------|

---

Unique Subject Identifier=5103000000-0079

Assay variable : PTINR\_VAL1 PT-INR Value

N Mean Standard Deviation Minimum Maximum

---

|   |           |           |           |           |
|---|-----------|-----------|-----------|-----------|
| 6 | 2.1500000 | 0.2345208 | 1.7000000 | 2.3000000 |
|---|-----------|-----------|-----------|-----------|

---

Unique Subject Identifier=5103000000-0142

Assay variable : PTINR\_VAL1 PT-INR Value

N Mean Standard Deviation Minimum Maximum

---

|   |           |           |           |           |
|---|-----------|-----------|-----------|-----------|
| 6 | 2.3666667 | 1.1395906 | 1.4000000 | 4.6000000 |
|---|-----------|-----------|-----------|-----------|

---

Unique Subject Identifier=5103000000-0150

Assay variable : PTINR\_VAL1 PT-INR Value

N Mean Standard Deviation Minimum Maximum

---

|   |          |           |          |          |
|---|----------|-----------|----------|----------|
| 6 | 2.233333 | 1.1570076 | 1.100000 | 4.100000 |
|---|----------|-----------|----------|----------|

---

Laboratory tests at the time of obtaining Table 2-6 consent, according to the presence or absence of proton-pump inhibitors

Unique Subject Identifier=5108001000-0017

MEANS Procedure

Assay variable : PTINR\_VAL1 PT-INR Value

N Mean Standard Deviation Minimum Maximum

---

|   |           |           |           |           |
|---|-----------|-----------|-----------|-----------|
| 4 | 1.3500000 | 0.1290994 | 1.2000000 | 1.5000000 |
|---|-----------|-----------|-----------|-----------|

---

Unique Subject Identifier=5108001000-0023

Assay variable : PTINR\_VAL1 PT-INR Value

N Mean Standard Deviation Minimum Maximum

---

|   |           |           |           |           |
|---|-----------|-----------|-----------|-----------|
| 6 | 1.2166667 | 0.0752773 | 1.1000000 | 1.3000000 |
|---|-----------|-----------|-----------|-----------|

---

Unique Subject Identifier=5114000000-0001

Assay variable : PTINR\_VAL1 PT-INR Value

N Mean Standard Deviation Minimum Maximum

---

|   |           |  |           |           |
|---|-----------|--|-----------|-----------|
| 1 | 3.6800000 |  | 3.6800000 | 3.6800000 |
|---|-----------|--|-----------|-----------|

---

Unique Subject Identifier=5114000000-0007



Assay variable : PTINR\_VAL1 PT-INR Value

N Mean Standard Deviation Minimum Maximum

---

|   |           |           |           |           |
|---|-----------|-----------|-----------|-----------|
| 2 | 1.8350000 | 0.1202082 | 1.7500000 | 1.9200000 |
|---|-----------|-----------|-----------|-----------|

---

Laboratory tests at the time of obtaining Table 2-6 consent, according to the presence or absence of proton-pump inhibitors

Unique Subject Identifier=511400000-0009

MEANS Procedure

Assay variable : PTINR\_VAL1 PT-INR Value

| N | Mean      | Standard Deviation | Minimum   | Maximum   |
|---|-----------|--------------------|-----------|-----------|
| 6 | 1.4816667 | 0.2443290          | 1.2500000 | 1.9600000 |

Unique Subject Identifier=511400000-0010

Assay variable : PTINR\_VAL1 PT-INR Value

| N | Mean      | Standard Deviation | Minimum   | Maximum   |
|---|-----------|--------------------|-----------|-----------|
| 1 | 1.0300000 |                    | 1.0300000 | 1.0300000 |

Unique Subject Identifier=511400000-0028

Assay variable : PTINR\_VAL1 PT-INR Value

| N | Mean      | Standard Deviation | Minimum   | Maximum   |
|---|-----------|--------------------|-----------|-----------|
| 4 | 2.0700000 | 0.6102459          | 1.3400000 | 2.7800000 |

Unique Subject Identifier=5120011000-0008

Assay variable : PTINR\_VAL1 PT-INR Value

N Mean Standard Deviation Minimum Maximum

---

|   |           |           |           |           |
|---|-----------|-----------|-----------|-----------|
| 4 | 1.7975000 | 0.4035984 | 1.4300000 | 2.2600000 |
|---|-----------|-----------|-----------|-----------|

---

Laboratory tests at the time of obtaining Table 2-6 consent, according to the presence or absence of proton-pump inhibitors

Unique Subject Identifier=5120011000-0014

MEANS Procedure

Assay variable : PTINR\_VAL1 PT-INR Value

N Mean Standard Deviation Minimum Maximum

---

|   |           |           |           |           |
|---|-----------|-----------|-----------|-----------|
| 3 | 2.0666667 | 0.2967041 | 1.7300000 | 2.2900000 |
|---|-----------|-----------|-----------|-----------|

---

Unique Subject Identifier=5125000000-0001

Assay variable : PTINR\_VAL1 PT-INR Value

N Mean Standard Deviation Minimum Maximum

---

|   |           |           |           |           |
|---|-----------|-----------|-----------|-----------|
| 6 | 1.9500000 | 0.1974842 | 1.7000000 | 2.3000000 |
|---|-----------|-----------|-----------|-----------|

---

Unique Subject Identifier=5131011111-0005

Assay variable : PTINR\_VAL1 PT-INR Value

N Mean Standard Deviation Minimum Maximum

---

|   |           |           |           |           |
|---|-----------|-----------|-----------|-----------|
| 3 | 2.1333333 | 0.3098925 | 1.9300000 | 2.4900000 |
|---|-----------|-----------|-----------|-----------|

---

Unique Subject Identifier=5131011111-0019

Assay variable : PTINR\_VAL1 PT-INR Value

N Mean Standard Deviation Minimum Maximum

---

|   |          |           |          |          |
|---|----------|-----------|----------|----------|
| 5 | 2.280000 | 0.8635103 | 1.280000 | 3.180000 |
|---|----------|-----------|----------|----------|

---

Laboratory tests at the time of obtaining Table 2-6 consent, according to the presence or absence of proton-pump inhibitors

Unique Subject Identifier=513600000-0003

MEANS Procedure

Assay variable : PTINR\_VAL1 PT-INR Value

N Mean Standard Deviation Minimum Maximum

---

|   |           |           |           |           |
|---|-----------|-----------|-----------|-----------|
| 4 | 2.1800000 | 0.6470446 | 1.6000000 | 2.7600000 |
|---|-----------|-----------|-----------|-----------|

---

Unique Subject Identifier=513600000-0005

Assay variable : PTINR\_VAL1 PT-INR Value

N Mean Standard Deviation Minimum Maximum

---

|   |           |           |           |           |
|---|-----------|-----------|-----------|-----------|
| 6 | 1.3500000 | 0.3485972 | 1.0400000 | 1.9900000 |
|---|-----------|-----------|-----------|-----------|

---

Unique Subject Identifier=513600000-0011

Assay variable : PTINR\_VAL1 PT-INR Value

N Mean Standard Deviation Minimum Maximum

---

|   |           |           |           |           |
|---|-----------|-----------|-----------|-----------|
| 6 | 2.1800000 | 1.1414552 | 0.9600000 | 3.6700000 |
|---|-----------|-----------|-----------|-----------|

---

Unique Subject Identifier=513600000-0016

Assay variable : PTINR\_VAL1 PT-INR Value

N Mean Standard Deviation Minimum Maximum

---

|   |          |           |          |          |
|---|----------|-----------|----------|----------|
| 5 | 2.320000 | 0.1864135 | 2.040000 | 2.530000 |
|---|----------|-----------|----------|----------|

---

Laboratory tests at the time of obtaining Table 2-6 consent, according to the presence or absence of proton-pump inhibitors

Unique Subject Identifier=513600000-0022

MEANS Procedure

Assay variable : PTINR\_VAL1 PT-INR Value

| N | Mean     | Standard Deviation | Minimum  | Maximum  |
|---|----------|--------------------|----------|----------|
| 3 | 1.610000 | 0.2505993          | 1.350000 | 1.850000 |

Unique Subject Identifier=513600000-0026

Assay variable : PTINR\_VAL1 PT-INR Value

| N | Mean     | Standard Deviation | Minimum  | Maximum  |
|---|----------|--------------------|----------|----------|
| 5 | 1.746000 | 0.4400341          | 1.170000 | 2.290000 |

Unique Subject Identifier=5137010111-0002

Assay variable : PTINR\_VAL1 PT-INR Value

| N | Mean     | Standard Deviation | Minimum  | Maximum  |
|---|----------|--------------------|----------|----------|
| 4 | 2.405000 | 0.3504759          | 2.040000 | 2.860000 |

Unique Subject Identifier=5141111100-0001



Assay variable : PTINR\_VAL1 PT-INR Value

N Mean Standard Deviation Minimum Maximum

---

|   |           |           |           |           |
|---|-----------|-----------|-----------|-----------|
| 6 | 1.7983333 | 0.2667146 | 1.4300000 | 2.1700000 |
|---|-----------|-----------|-----------|-----------|

---

Laboratory tests at the time of obtaining Table 2-6 consent, according to the presence or absence of proton-pump inhibitors

Unique Subject Identifier=5141111100-0012

MEANS Procedure

Assay variable : PTINR\_VAL1 PT-INR Value

N Mean Standard Deviation Minimum Maximum

---

|   |           |  |           |           |
|---|-----------|--|-----------|-----------|
| 1 | 1.6800000 |  | 1.6800000 | 1.6800000 |
|---|-----------|--|-----------|-----------|

---

Unique Subject Identifier=5141111100-0018

Assay variable : PTINR\_VAL1 PT-INR Value

N Mean Standard Deviation Minimum Maximum

---

|   |           |           |           |           |
|---|-----------|-----------|-----------|-----------|
| 3 | 1.7200000 | 0.2515949 | 1.5600000 | 2.0100000 |
|---|-----------|-----------|-----------|-----------|

---

Unique Subject Identifier=5141111100-0030

Assay variable : PTINR\_VAL1 PT-INR Value

N Mean Standard Deviation Minimum Maximum

---

|   |           |           |           |           |
|---|-----------|-----------|-----------|-----------|
| 3 | 1.1266667 | 0.1266228 | 1.0300000 | 1.2700000 |
|---|-----------|-----------|-----------|-----------|

---

Unique Subject Identifier=5155000000-0012

Assay variable : PTINR\_VAL1 PT-INR Value

N Mean Standard Deviation Minimum Maximum

---

|   |           |           |           |           |
|---|-----------|-----------|-----------|-----------|
| 4 | 1.6750000 | 0.0939858 | 1.5600000 | 1.7700000 |
|---|-----------|-----------|-----------|-----------|

---

Laboratory tests at the time of obtaining Table 2-6 consent, according to the presence or absence of proton-pump inhibitors

Unique Subject Identifier=5157010010-0014

MEANS Procedure

Assay variable : PTINR\_VAL1 PT-INR Value

| N | Mean      | Standard Deviation | Minimum   | Maximum   |
|---|-----------|--------------------|-----------|-----------|
| 3 | 2.3300000 | 0.2463737          | 2.0700000 | 2.5600000 |

Unique Subject Identifier=5157010010-0015

Assay variable : PTINR\_VAL1 PT-INR Value

| N | Mean      | Standard Deviation | Minimum   | Maximum   |
|---|-----------|--------------------|-----------|-----------|
| 3 | 2.3833333 | 0.1422439          | 2.2200000 | 2.4800000 |

Unique Subject Identifier=5161010010-0004

Assay variable : PTINR\_VAL1 PT-INR Value

| N | Mean      | Standard Deviation | Minimum   | Maximum   |
|---|-----------|--------------------|-----------|-----------|
| 4 | 1.9275000 | 0.2324328          | 1.7300000 | 2.2500000 |

Unique Subject Identifier=5171010000-0025

Assay variable : PTINR\_VAL1 PT-INR Value

N Mean Standard Deviation Minimum Maximum

---

|   |           |           |           |           |
|---|-----------|-----------|-----------|-----------|
| 3 | 1.9033333 | 0.2914332 | 1.6700000 | 2.2300000 |
|---|-----------|-----------|-----------|-----------|

---

Laboratory tests at the time of obtaining Table 2-6 consent, according to the presence or absence of proton-pump inhibitors

Unique Subject Identifier=5198000001-0019

MEANS Procedure

Assay variable : PTINR\_VAL1 PT-INR Value

| N | Mean      | Standard Deviation | Minimum   | Maximum   |
|---|-----------|--------------------|-----------|-----------|
| 1 | 1.3000000 |                    | 1.3000000 | 1.3000000 |

Unique Subject Identifier=5198000001-0025

Assay variable : PTINR\_VAL1 PT-INR Value

| N | Mean      | Standard Deviation | Minimum   | Maximum   |
|---|-----------|--------------------|-----------|-----------|
| 2 | 1.9250000 | 0.2899138          | 1.7200000 | 2.1300000 |

Unique Subject Identifier=5198000001-0053

Assay variable : PTINR\_VAL1 PT-INR Value

| N | Mean      | Standard Deviation | Minimum   | Maximum   |
|---|-----------|--------------------|-----------|-----------|
| 4 | 2.2575000 | 0.3925451          | 1.9900000 | 2.8400000 |

Unique Subject Identifier=5198000001-0057

Assay variable : PTINR\_VAL1 PT-INR Value

N Mean Standard Deviation Minimum Maximum

---

|   |          |  |          |          |
|---|----------|--|----------|----------|
| 1 | 2.480000 |  | 2.480000 | 2.480000 |
|---|----------|--|----------|----------|

---

Laboratory tests at the time of obtaining Table 2-6 consent, according to the presence or absence of proton-pump inhibitors

Unique Subject Identifier=5198000001-0071

MEANS Procedure

Assay variable : PTINR\_VAL1 PT-INR Value

| N | Mean      | Standard Deviation | Minimum   | Maximum   |
|---|-----------|--------------------|-----------|-----------|
| 1 | 2.2000000 |                    | 2.2000000 | 2.2000000 |

Unique Subject Identifier=5198000001-0081

Assay variable : PTINR\_VAL1 PT-INR Value

| N | Mean      | Standard Deviation | Minimum   | Maximum   |
|---|-----------|--------------------|-----------|-----------|
| 4 | 2.1250000 | 0.7048641          | 1.5300000 | 3.1400000 |

Unique Subject Identifier=5198000001-0101

Assay variable : PTINR\_VAL1 PT-INR Value

| N | Mean      | Standard Deviation | Minimum   | Maximum   |
|---|-----------|--------------------|-----------|-----------|
| 5 | 1.7960000 | 0.7152832          | 0.9600000 | 2.8300000 |

Unique Subject Identifier=5198000001-0116



Assay variable : PTINR\_VAL1 PT-INR Value

N Mean Standard Deviation Minimum Maximum

---

|   |           |           |           |           |
|---|-----------|-----------|-----------|-----------|
| 2 | 1.4900000 | 0.5939697 | 1.0700000 | 1.9100000 |
|---|-----------|-----------|-----------|-----------|

---

Laboratory tests at the time of obtaining Table 2-6 consent, according to the presence or absence of proton-pump inhibitors

Unique Subject Identifier=5198000001-0117

MEANS Procedure

Assay variable : PTINR\_VAL1 PT-INR Value

| N | Mean      | Standard Deviation | Minimum   | Maximum   |
|---|-----------|--------------------|-----------|-----------|
| 3 | 2.1300000 | 0.2851315          | 1.8500000 | 2.4200000 |

Unique Subject Identifier=5198000001-0137

Assay variable : PTINR\_VAL1 PT-INR Value

| N | Mean      | Standard Deviation | Minimum   | Maximum   |
|---|-----------|--------------------|-----------|-----------|
| 1 | 1.4100000 |                    | 1.4100000 | 1.4100000 |

Unique Subject Identifier=5198000001-0138

Assay variable : PTINR\_VAL1 PT-INR Value

| N | Mean      | Standard Deviation | Minimum   | Maximum   |
|---|-----------|--------------------|-----------|-----------|
| 1 | 2.4300000 |                    | 2.4300000 | 2.4300000 |

Unique Subject Identifier=5198000001-0152

Assay variable : PTINR\_VAL1 PT-INR Value

N Mean Standard Deviation Minimum Maximum

---

|   |           |           |           |           |
|---|-----------|-----------|-----------|-----------|
| 5 | 1.9880000 | 0.6437546 | 1.2200000 | 2.9700000 |
|---|-----------|-----------|-----------|-----------|

---

Laboratory tests at the time of obtaining Table 2-6 consent, according to the presence or absence of proton-pump inhibitors

Unique Subject Identifier=5198000001-0165

MEANS Procedure

Assay variable : PTINR\_VAL1 PT-INR Value

| N | Mean      | Standard Deviation | Minimum   | Maximum   |
|---|-----------|--------------------|-----------|-----------|
| 1 | 2.2000000 |                    | 2.2000000 | 2.2000000 |

Unique Subject Identifier=5198000001-0186

Assay variable : PTINR\_VAL1 PT-INR Value

| N | Mean      | Standard Deviation | Minimum   | Maximum   |
|---|-----------|--------------------|-----------|-----------|
| 3 | 1.1200000 | 0.1757840          | 0.9900000 | 1.3200000 |

Unique Subject Identifier=5198000001-0230

Assay variable : PTINR\_VAL1 PT-INR Value

| N | Mean      | Standard Deviation | Minimum   | Maximum   |
|---|-----------|--------------------|-----------|-----------|
| 2 | 2.2850000 | 0.4313351          | 1.9800000 | 2.5900000 |

Unique Subject Identifier=5198000001-0234

Assay variable : PTINR\_VAL1 PT-INR Value

N Mean Standard Deviation Minimum Maximum

---

|   |           |  |           |           |
|---|-----------|--|-----------|-----------|
| 1 | 1.9500000 |  | 1.9500000 | 1.9500000 |
|---|-----------|--|-----------|-----------|

---

Laboratory tests at the time of obtaining Table 2-6 consent, according to the presence or absence of proton-pump inhibitors

Unique Subject Identifier=5210000100-0026

MEANS Procedure

Assay variable : PTINR\_VAL1 PT-INR Value

N Mean Standard Deviation Minimum Maximum

---

|   |           |           |           |           |
|---|-----------|-----------|-----------|-----------|
| 3 | 2.4066667 | 0.1193035 | 2.3100000 | 2.5400000 |
|---|-----------|-----------|-----------|-----------|

---

Unique Subject Identifier=5223000000-0001

Assay variable : PTINR\_VAL1 PT-INR Value

N Mean Standard Deviation Minimum Maximum

---

|   |           |           |           |           |
|---|-----------|-----------|-----------|-----------|
| 6 | 1.1266667 | 0.0868716 | 1.0000000 | 1.2100000 |
|---|-----------|-----------|-----------|-----------|

---

Unique Subject Identifier=5223000000-0010

Assay variable : PTINR\_VAL1 PT-INR Value

N Mean Standard Deviation Minimum Maximum

---

|   |           |           |           |           |
|---|-----------|-----------|-----------|-----------|
| 4 | 2.2075000 | 0.2393568 | 1.9200000 | 2.4700000 |
|---|-----------|-----------|-----------|-----------|

---

Unique Subject Identifier=5223000000-0012

Assay variable : PTINR\_VAL1 PT-INR Value

N Mean Standard Deviation Minimum Maximum

---

|   |           |           |           |           |
|---|-----------|-----------|-----------|-----------|
| 3 | 3.0733333 | 0.4499259 | 2.5900000 | 3.4800000 |
|---|-----------|-----------|-----------|-----------|

---

Laboratory tests at the time of obtaining Table 2-6 consent, according to the presence or absence of proton-pump inhibitors

Unique Subject Identifier=5223000000-0014

MEANS Procedure

Assay variable : PTINR\_VAL1 PT-INR Value

| N | Mean      | Standard Deviation | Minimum   | Maximum   |
|---|-----------|--------------------|-----------|-----------|
| 3 | 1.4166667 | 0.1550269          | 1.2400000 | 1.5300000 |

Unique Subject Identifier=5223000000-0019

Assay variable : PTINR\_VAL1 PT-INR Value

| N | Mean      | Standard Deviation | Minimum   | Maximum   |
|---|-----------|--------------------|-----------|-----------|
| 3 | 1.9466667 | 0.1069268          | 1.8800000 | 2.0700000 |

Unique Subject Identifier=5223000000-0021

Assay variable : PTINR\_VAL1 PT-INR Value

| N | Mean      | Standard Deviation | Minimum   | Maximum   |
|---|-----------|--------------------|-----------|-----------|
| 3 | 1.8433333 | 0.2345918          | 1.6400000 | 2.1000000 |

Unique Subject Identifier=5224000000-0001



Assay variable : PTINR\_VAL1 PT-INR Value

N Mean Standard Deviation Minimum Maximum

---

|   |           |           |           |           |
|---|-----------|-----------|-----------|-----------|
| 4 | 1.6775000 | 0.1925920 | 1.4800000 | 1.9400000 |
|---|-----------|-----------|-----------|-----------|

---

Laboratory tests at the time of obtaining Table 2-6 consent, according to the presence or absence of proton-pump inhibitors

Unique Subject Identifier=5232010000-0007

MEANS Procedure

Assay variable : PTINR\_VAL1 PT-INR Value

N Mean Standard Deviation Minimum Maximum

---

|   |           |           |           |           |
|---|-----------|-----------|-----------|-----------|
| 5 | 1.7300000 | 0.2442335 | 1.4900000 | 2.0500000 |
|---|-----------|-----------|-----------|-----------|

---

Unique Subject Identifier=5232010000-0012

Assay variable : PTINR\_VAL1 PT-INR Value

N Mean Standard Deviation Minimum Maximum

---

|   |           |           |           |           |
|---|-----------|-----------|-----------|-----------|
| 4 | 1.7875000 | 0.1767060 | 1.5300000 | 1.9300000 |
|---|-----------|-----------|-----------|-----------|

---

Unique Subject Identifier=5233000000-0008

Assay variable : PTINR\_VAL1 PT-INR Value

N Mean Standard Deviation Minimum Maximum

---

|   |           |           |           |           |
|---|-----------|-----------|-----------|-----------|
| 4 | 1.9125000 | 0.8410460 | 1.1000000 | 3.0500000 |
|---|-----------|-----------|-----------|-----------|

---

Unique Subject Identifier=5235000000-0015

Assay variable : PTINR\_VAL1 PT-INR Value

N Mean Standard Deviation Minimum Maximum

---

|   |          |           |          |          |
|---|----------|-----------|----------|----------|
| 6 | 2.150000 | 0.2073644 | 1.900000 | 2.500000 |
|---|----------|-----------|----------|----------|

---

Laboratory tests at the time of obtaining Table 2-6 consent, according to the presence or absence of proton-pump inhibitors

Unique Subject Identifier=5235000000-0030

MEANS Procedure

Assay variable : PTINR\_VAL1 PT-INR Value

N Mean Standard Deviation Minimum Maximum

---

|   |           |           |           |           |
|---|-----------|-----------|-----------|-----------|
| 6 | 2.0616667 | 0.1830209 | 1.9500000 | 2.4200000 |
|---|-----------|-----------|-----------|-----------|

---

Unique Subject Identifier=5235000000-0050

Assay variable : PTINR\_VAL1 PT-INR Value

N Mean Standard Deviation Minimum Maximum

---

|   |           |           |           |           |
|---|-----------|-----------|-----------|-----------|
| 6 | 1.6666667 | 0.1005319 | 1.5500000 | 1.8100000 |
|---|-----------|-----------|-----------|-----------|

---

Unique Subject Identifier=5236000000-0019

Assay variable : PTINR\_VAL1 PT-INR Value

N Mean Standard Deviation Minimum Maximum

---

|   |           |           |           |           |
|---|-----------|-----------|-----------|-----------|
| 5 | 2.0580000 | 0.2839366 | 1.8600000 | 2.5600000 |
|---|-----------|-----------|-----------|-----------|

---

Unique Subject Identifier=5236000000-0021

Assay variable : PTINR\_VAL1 PT-INR Value

N Mean Standard Deviation Minimum Maximum

---

|   |           |           |           |           |
|---|-----------|-----------|-----------|-----------|
| 6 | 2.2716667 | 0.7649161 | 1.4800000 | 3.2800000 |
|---|-----------|-----------|-----------|-----------|

---

Laboratory tests at the time of obtaining Table 2-6 consent, according to the presence or absence of proton-pump inhibitors

Unique Subject Identifier=5237010000-0010

MEANS Procedure

Assay variable : PTINR\_VAL1 PT-INR Value

N Mean Standard Deviation Minimum Maximum

---

|   |           |           |           |           |
|---|-----------|-----------|-----------|-----------|
| 6 | 2.1066667 | 0.1736280 | 1.9400000 | 2.3300000 |
|---|-----------|-----------|-----------|-----------|

---

Unique Subject Identifier=5255000000-0006

Assay variable : PTINR\_VAL1 PT-INR Value

N Mean Standard Deviation Minimum Maximum

---

|   |           |           |           |           |
|---|-----------|-----------|-----------|-----------|
| 4 | 2.3950000 | 0.3145897 | 2.1300000 | 2.7700000 |
|---|-----------|-----------|-----------|-----------|

---

Unique Subject Identifier=5260010000-0013

Assay variable : PTINR\_VAL1 PT-INR Value

N Mean Standard Deviation Minimum Maximum

---

|   |           |           |           |           |
|---|-----------|-----------|-----------|-----------|
| 4 | 2.1075000 | 0.2550000 | 1.8500000 | 2.4600000 |
|---|-----------|-----------|-----------|-----------|

---

Unique Subject Identifier=5260010000-0019

Assay variable : PTINR\_VAL1 PT-INR Value

N Mean Standard Deviation Minimum Maximum

---

|   |           |           |           |           |
|---|-----------|-----------|-----------|-----------|
| 5 | 1.6580000 | 0.2629068 | 1.2500000 | 1.9700000 |
|---|-----------|-----------|-----------|-----------|

---

Laboratory tests at the time of obtaining Table 2-6 consent, according to the presence or absence of proton-pump inhibitors

Unique Subject Identifier=5260010000-0025

MEANS Procedure

Assay variable : PTINR\_VAL1 PT-INR Value

| N | Mean      | Standard Deviation | Minimum   | Maximum   |
|---|-----------|--------------------|-----------|-----------|
| 3 | 1.8800000 | 0.3897435          | 1.4600000 | 2.2300000 |

Unique Subject Identifier=5261010010-0014

Assay variable : PTINR\_VAL1 PT-INR Value

| N | Mean      | Standard Deviation | Minimum   | Maximum   |
|---|-----------|--------------------|-----------|-----------|
| 3 | 1.8066667 | 0.1331666          | 1.6600000 | 1.9200000 |

Unique Subject Identifier=5261010010-0018

Assay variable : PTINR\_VAL1 PT-INR Value

| N | Mean      | Standard Deviation | Minimum   | Maximum   |
|---|-----------|--------------------|-----------|-----------|
| 4 | 1.6675000 | 0.3820449          | 1.2000000 | 2.0400000 |

Unique Subject Identifier=5305000000-0009



Assay variable : PTINR\_VAL1 PT-INR Value

N Mean Standard Deviation Minimum Maximum

---

|   |           |           |           |           |
|---|-----------|-----------|-----------|-----------|
| 6 | 2.0983333 | 0.5871769 | 1.3300000 | 2.8800000 |
|---|-----------|-----------|-----------|-----------|

---

Laboratory tests at the time of obtaining Table 2-6 consent, according to the presence or absence of proton-pump inhibitors

Unique Subject Identifier=5305000000-0016

MEANS Procedure

Assay variable : PTINR\_VAL1 PT-INR Value

N Mean Standard Deviation Minimum Maximum

---

|   |           |           |           |           |
|---|-----------|-----------|-----------|-----------|
| 4 | 1.8925000 | 0.3764195 | 1.4200000 | 2.3200000 |
|---|-----------|-----------|-----------|-----------|

---

Unique Subject Identifier=5305000000-0039

Assay variable : PTINR\_VAL1 PT-INR Value

N Mean Standard Deviation Minimum Maximum

---

|   |           |           |           |           |
|---|-----------|-----------|-----------|-----------|
| 3 | 2.2633333 | 0.5253887 | 1.8700000 | 2.8600000 |
|---|-----------|-----------|-----------|-----------|

---

Unique Subject Identifier=5342011001-0023

Assay variable : PTINR\_VAL1 PT-INR Value

N Mean Standard Deviation Minimum Maximum

---

|   |           |           |           |           |
|---|-----------|-----------|-----------|-----------|
| 6 | 1.9283333 | 0.3761604 | 1.3700000 | 2.2700000 |
|---|-----------|-----------|-----------|-----------|

---

Unique Subject Identifier=5355000000-0019

Assay variable : PTINR\_VAL1 PT-INR Value

N Mean Standard Deviation Minimum Maximum

---

|   |           |           |           |           |
|---|-----------|-----------|-----------|-----------|
| 6 | 2.0066667 | 0.8450010 | 1.6100000 | 3.7300000 |
|---|-----------|-----------|-----------|-----------|

---

Laboratory tests at the time of obtaining Table 2-6 consent, according to the presence or absence of proton-pump inhibitors

Unique Subject Identifier=5355000000-0027

MEANS Procedure

Assay variable : PTINR\_VAL1 PT-INR Value

| N | Mean      | Standard Deviation | Minimum   | Maximum   |
|---|-----------|--------------------|-----------|-----------|
| 2 | 2.0350000 | 0.0212132          | 2.0200000 | 2.0500000 |

Unique Subject Identifier=5414010000-0006

Assay variable : PTINR\_VAL1 PT-INR Value

| N | Mean      | Standard Deviation | Minimum   | Maximum   |
|---|-----------|--------------------|-----------|-----------|
| 5 | 1.4400000 | 0.4939636          | 1.0700000 | 2.2900000 |

Unique Subject Identifier=5414010000-0007

Assay variable : PTINR\_VAL1 PT-INR Value

| N | Mean      | Standard Deviation | Minimum   | Maximum   |
|---|-----------|--------------------|-----------|-----------|
| 5 | 2.2880000 | 0.6480895          | 1.6300000 | 3.3500000 |

Unique Subject Identifier=5414010000-0009

Assay variable : PTINR\_VAL1 PT-INR Value

N Mean Standard Deviation Minimum Maximum

---

|   |          |           |          |          |
|---|----------|-----------|----------|----------|
| 5 | 1.290000 | 0.5819364 | 0.940000 | 2.290000 |
|---|----------|-----------|----------|----------|

---

Laboratory tests at the time of obtaining Table 2-6 consent, according to the presence or absence of proton-pump inhibitors

Unique Subject Identifier=5414010000-0012

MEANS Procedure

Assay variable : PTINR\_VAL1 PT-INR Value

N Mean Standard Deviation Minimum Maximum

---

|   |           |           |           |           |
|---|-----------|-----------|-----------|-----------|
| 6 | 1.5450000 | 0.1681368 | 1.2600000 | 1.7700000 |
|---|-----------|-----------|-----------|-----------|

---

Unique Subject Identifier=5414010000-0014

Assay variable : PTINR\_VAL1 PT-INR Value

N Mean Standard Deviation Minimum Maximum

---

|   |           |           |           |           |
|---|-----------|-----------|-----------|-----------|
| 6 | 1.7450000 | 0.2980436 | 1.2800000 | 2.1900000 |
|---|-----------|-----------|-----------|-----------|

---

Unique Subject Identifier=5414010000-0033

Assay variable : PTINR\_VAL1 PT-INR Value

N Mean Standard Deviation Minimum Maximum

---

|   |           |           |           |           |
|---|-----------|-----------|-----------|-----------|
| 6 | 1.7183333 | 0.1582930 | 1.5600000 | 1.9900000 |
|---|-----------|-----------|-----------|-----------|

---

Unique Subject Identifier=5414010000-0034

Assay variable : PTINR\_VAL1 PT-INR Value

N Mean Standard Deviation Minimum Maximum

---

|   |           |           |           |           |
|---|-----------|-----------|-----------|-----------|
| 4 | 1.4325000 | 0.1167262 | 1.2800000 | 1.5500000 |
|---|-----------|-----------|-----------|-----------|

---

Laboratory tests at the time of obtaining Table 2-6 consent, according to the presence or absence of proton-pump inhibitors

Unique Subject Identifier=5414010000-0046

MEANS Procedure

Assay variable : PTINR\_VAL1 PT-INR Value

| N | Mean      | Standard Deviation | Minimum   | Maximum   |
|---|-----------|--------------------|-----------|-----------|
| 2 | 2.0000000 | 0.6081118          | 1.5700000 | 2.4300000 |

Unique Subject Identifier=5414010000-0057

Assay variable : PTINR\_VAL1 PT-INR Value

| N | Mean      | Standard Deviation | Minimum   | Maximum   |
|---|-----------|--------------------|-----------|-----------|
| 1 | 2.3000000 |                    | 2.3000000 | 2.3000000 |

Unique Subject Identifier=5414010000-0059

Assay variable : PTINR\_VAL1 PT-INR Value

| N | Mean      | Standard Deviation | Minimum   | Maximum   |
|---|-----------|--------------------|-----------|-----------|
| 5 | 2.0720000 | 0.8327785          | 1.2200000 | 3.4200000 |

Unique Subject Identifier=5414010000-0064



Assay variable : PTINR\_VAL1 PT-INR Value

N Mean Standard Deviation Minimum Maximum

---

|   |           |           |           |           |
|---|-----------|-----------|-----------|-----------|
| 4 | 1.9275000 | 0.5612709 | 1.2800000 | 2.4500000 |
|---|-----------|-----------|-----------|-----------|

---

Laboratory tests at the time of obtaining Table 2-6 consent, according to the presence or absence of proton-pump inhibitors

Unique Subject Identifier=546600000-0003

MEANS Procedure

Assay variable : PTINR\_VAL1 PT-INR Value

N Mean Standard Deviation Minimum Maximum

---

|   |           |           |           |           |
|---|-----------|-----------|-----------|-----------|
| 6 | 2.3516667 | 0.4270090 | 2.0200000 | 3.1400000 |
|---|-----------|-----------|-----------|-----------|

---

Unique Subject Identifier=546600000-0004

Assay variable : PTINR\_VAL1 PT-INR Value

N Mean Standard Deviation Minimum Maximum

---

|   |           |           |           |           |
|---|-----------|-----------|-----------|-----------|
| 5 | 2.5000000 | 0.1102270 | 2.4100000 | 2.6200000 |
|---|-----------|-----------|-----------|-----------|

---

Unique Subject Identifier=546600000-0005

Assay variable : PTINR\_VAL1 PT-INR Value

N Mean Standard Deviation Minimum Maximum

---

|   |           |           |           |           |
|---|-----------|-----------|-----------|-----------|
| 4 | 2.3175000 | 0.3972719 | 2.0600000 | 2.9100000 |
|---|-----------|-----------|-----------|-----------|

---

Unique Subject Identifier=546600000-0010

Assay variable : PTINR\_VAL1 PT-INR Value

N Mean Standard Deviation Minimum Maximum

---

|   |           |           |           |           |
|---|-----------|-----------|-----------|-----------|
| 6 | 2.4283333 | 0.6023094 | 1.6900000 | 3.1400000 |
|---|-----------|-----------|-----------|-----------|

---

Laboratory tests at the time of obtaining Table 2-6 consent, according to the presence or absence of proton-pump inhibitors

Unique Subject Identifier=551400000-0004

MEANS Procedure

Assay variable : PTINR\_VAL1 PT-INR Value

N Mean Standard Deviation Minimum Maximum

---

|   |           |           |           |           |
|---|-----------|-----------|-----------|-----------|
| 6 | 1.5866667 | 0.2106814 | 1.3000000 | 1.8400000 |
|---|-----------|-----------|-----------|-----------|

---

Unique Subject Identifier=551400000-0006

Assay variable : PTINR\_VAL1 PT-INR Value

N Mean Standard Deviation Minimum Maximum

---

|   |           |           |           |           |
|---|-----------|-----------|-----------|-----------|
| 4 | 1.5150000 | 0.0810350 | 1.4400000 | 1.6300000 |
|---|-----------|-----------|-----------|-----------|

---

Unique Subject Identifier=551400000-0016

Assay variable : PTINR\_VAL1 PT-INR Value

N Mean Standard Deviation Minimum Maximum

---

|   |           |           |           |           |
|---|-----------|-----------|-----------|-----------|
| 6 | 1.8500000 | 0.3519091 | 1.2700000 | 2.2700000 |
|---|-----------|-----------|-----------|-----------|

---

Unique Subject Identifier=551400000-0026

Assay variable : PTINR\_VAL1 PT-INR Value

N Mean Standard Deviation Minimum Maximum

---

|   |           |           |           |           |
|---|-----------|-----------|-----------|-----------|
| 6 | 2.2283333 | 0.2108475 | 1.8300000 | 2.4300000 |
|---|-----------|-----------|-----------|-----------|

---

Laboratory tests at the time of obtaining Table 2-6 consent, according to the presence or absence of proton-pump inhibitors

Unique Subject Identifier=551400000-0038

MEANS Procedure

Assay variable : PTINR\_VAL1 PT-INR Value

N Mean Standard Deviation Minimum Maximum

---

|   |           |           |           |           |
|---|-----------|-----------|-----------|-----------|
| 4 | 1.8175000 | 0.2489143 | 1.5000000 | 2.0900000 |
|---|-----------|-----------|-----------|-----------|

---

Unique Subject Identifier=551400000-0041

Assay variable : PTINR\_VAL1 PT-INR Value

N Mean Standard Deviation Minimum Maximum

---

|   |           |           |           |           |
|---|-----------|-----------|-----------|-----------|
| 4 | 2.6175000 | 0.3613286 | 2.1200000 | 2.9500000 |
|---|-----------|-----------|-----------|-----------|

---

Unique Subject Identifier=554200000-0008

Assay variable : PTINR\_VAL1 PT-INR Value

N Mean Standard Deviation Minimum Maximum

---

|   |           |           |           |           |
|---|-----------|-----------|-----------|-----------|
| 2 | 2.3800000 | 0.6222540 | 1.9400000 | 2.8200000 |
|---|-----------|-----------|-----------|-----------|

---

Unique Subject Identifier=554200000-0013

Assay variable : PTINR\_VAL1 PT-INR Value

N Mean Standard Deviation Minimum Maximum

---

|   |          |           |          |          |
|---|----------|-----------|----------|----------|
| 5 | 1.112000 | 0.0303315 | 1.080000 | 1.160000 |
|---|----------|-----------|----------|----------|

---

Laboratory tests at the time of obtaining Table 2-6 consent, according to the presence or absence of proton-pump inhibitors

Unique Subject Identifier=5542000000-0016

MEANS Procedure

Assay variable : PTINR\_VAL1 PT-INR Value

N Mean Standard Deviation Minimum Maximum

---

|   |           |  |           |           |
|---|-----------|--|-----------|-----------|
| 1 | 1.5300000 |  | 1.5300000 | 1.5300000 |
|---|-----------|--|-----------|-----------|

---

Unique Subject Identifier=5542000000-0017

Assay variable : PTINR\_VAL1 PT-INR Value

N Mean Standard Deviation Minimum Maximum

---

|   |           |           |           |           |
|---|-----------|-----------|-----------|-----------|
| 6 | 2.1666667 | 0.4706449 | 1.6600000 | 2.8900000 |
|---|-----------|-----------|-----------|-----------|

---

Unique Subject Identifier=5542000000-0019

Assay variable : PTINR\_VAL1 PT-INR Value

N Mean Standard Deviation Minimum Maximum

---

|   |           |           |           |           |
|---|-----------|-----------|-----------|-----------|
| 6 | 1.8383333 | 0.3072730 | 1.4400000 | 2.1600000 |
|---|-----------|-----------|-----------|-----------|

---

Unique Subject Identifier=5542000000-0024



Assay variable : PTINR\_VAL1 PT-INR Value

N Mean Standard Deviation Minimum Maximum

---

|   |           |           |           |           |
|---|-----------|-----------|-----------|-----------|
| 2 | 1.9250000 | 0.1626346 | 1.8100000 | 2.0400000 |
|---|-----------|-----------|-----------|-----------|

---

Laboratory tests at the time of obtaining Table 2-6 consent, according to the presence or absence of proton-pump inhibitors

Unique Subject Identifier=5542000000-0027

MEANS Procedure

Assay variable : PTINR\_VAL1 PT-INR Value

| N | Mean      | Standard Deviation | Minimum   | Maximum   |
|---|-----------|--------------------|-----------|-----------|
| 5 | 1.7600000 | 0.6942622          | 1.1400000 | 2.8700000 |

Unique Subject Identifier=5542000000-0031

Assay variable : PTINR\_VAL1 PT-INR Value

| N | Mean      | Standard Deviation | Minimum   | Maximum   |
|---|-----------|--------------------|-----------|-----------|
| 1 | 2.0600000 |                    | 2.0600000 | 2.0600000 |

Unique Subject Identifier=5542000000-0034

Assay variable : PTINR\_VAL1 PT-INR Value

| N | Mean      | Standard Deviation | Minimum   | Maximum   |
|---|-----------|--------------------|-----------|-----------|
| 2 | 1.4250000 | 0.0212132          | 1.4100000 | 1.4400000 |

Unique Subject Identifier=5542000000-0041

Assay variable : PTINR\_VAL1 PT-INR Value

N Mean Standard Deviation Minimum Maximum

---

|   |           |           |           |           |
|---|-----------|-----------|-----------|-----------|
| 6 | 1.7100000 | 0.1954482 | 1.5000000 | 2.0000000 |
|---|-----------|-----------|-----------|-----------|

---

Laboratory tests at the time of obtaining Table 2-6 consent, according to the presence or absence of proton-pump inhibitors

Unique Subject Identifier=5542000000-0043

MEANS Procedure

Assay variable : PTINR\_VAL1 PT-INR Value

N Mean Standard Deviation Minimum Maximum

---

|   |           |           |           |           |
|---|-----------|-----------|-----------|-----------|
| 4 | 1.7350000 | 0.7977259 | 1.2900000 | 2.9300000 |
|---|-----------|-----------|-----------|-----------|

---

Unique Subject Identifier=5717000000-0005

Assay variable : PTINR\_VAL1 PT-INR Value

N Mean Standard Deviation Minimum Maximum

---

|   |           |           |           |           |
|---|-----------|-----------|-----------|-----------|
| 6 | 2.0900000 | 0.1194990 | 1.9500000 | 2.3000000 |
|---|-----------|-----------|-----------|-----------|

---

Unique Subject Identifier=6000010011-0001

Assay variable : PTINR\_VAL1 PT-INR Value

N Mean Standard Deviation Minimum Maximum

---

|   |           |           |           |           |
|---|-----------|-----------|-----------|-----------|
| 4 | 2.4150000 | 0.2066398 | 2.2200000 | 2.6600000 |
|---|-----------|-----------|-----------|-----------|

---

Unique Subject Identifier=6002010000-0030

Assay variable : PTINR\_VAL1 PT-INR Value

N Mean Standard Deviation Minimum Maximum

---

|   |           |           |           |           |
|---|-----------|-----------|-----------|-----------|
| 5 | 2.4440000 | 0.9090820 | 1.4900000 | 3.5800000 |
|---|-----------|-----------|-----------|-----------|

---

Laboratory tests at the time of obtaining Table 2-6 consent, according to the presence or absence of proton-pump inhibitors

Unique Subject Identifier=6002010000-0102

MEANS Procedure

Assay variable : PTINR\_VAL1 PT-INR Value

N Mean Standard Deviation Minimum Maximum

---

|   |           |           |           |           |
|---|-----------|-----------|-----------|-----------|
| 4 | 2.3100000 | 0.1235584 | 2.1300000 | 2.4000000 |
|---|-----------|-----------|-----------|-----------|

---

Unique Subject Identifier=6009000000-0016

Assay variable : PTINR\_VAL1 PT-INR Value

N Mean Standard Deviation Minimum Maximum

---

|   |           |           |           |           |
|---|-----------|-----------|-----------|-----------|
| 5 | 1.9400000 | 0.4449719 | 1.2000000 | 2.4000000 |
|---|-----------|-----------|-----------|-----------|

---

Unique Subject Identifier=6009000000-0017

Assay variable : PTINR\_VAL1 PT-INR Value

N Mean Standard Deviation Minimum Maximum

---

|   |           |           |           |           |
|---|-----------|-----------|-----------|-----------|
| 6 | 1.6666667 | 0.6772493 | 1.1000000 | 3.0000000 |
|---|-----------|-----------|-----------|-----------|

---

Unique Subject Identifier=6009000000-0026

Assay variable : PTINR\_VAL1 PT-INR Value

N Mean Standard Deviation Minimum Maximum

---

|   |          |           |          |          |
|---|----------|-----------|----------|----------|
| 6 | 1.533333 | 0.1966384 | 1.300000 | 1.800000 |
|---|----------|-----------|----------|----------|

---

Laboratory tests at the time of obtaining Table 2-6 consent, according to the presence or absence of proton-pump inhibitors

Unique Subject Identifier=6009000000-0027

MEANS Procedure

Assay variable : PTINR\_VAL1 PT-INR Value

N Mean Standard Deviation Minimum Maximum

---

|   |           |           |           |           |
|---|-----------|-----------|-----------|-----------|
| 5 | 1.8600000 | 0.8763561 | 1.2000000 | 3.4000000 |
|---|-----------|-----------|-----------|-----------|

---

Unique Subject Identifier=6009000000-0032

Assay variable : PTINR\_VAL1 PT-INR Value

N Mean Standard Deviation Minimum Maximum

---

|   |           |           |           |           |
|---|-----------|-----------|-----------|-----------|
| 4 | 1.6250000 | 0.2061553 | 1.4000000 | 1.8000000 |
|---|-----------|-----------|-----------|-----------|

---

Unique Subject Identifier=6014011010-0002

Assay variable : PTINR\_VAL1 PT-INR Value

N Mean Standard Deviation Minimum Maximum

---

|   |           |  |           |           |
|---|-----------|--|-----------|-----------|
| 1 | 2.3200000 |  | 2.3200000 | 2.3200000 |
|---|-----------|--|-----------|-----------|

---

Unique Subject Identifier=6014011010-0009



Assay variable : PTINR\_VAL1 PT-INR Value

N Mean Standard Deviation Minimum Maximum

---

|   |           |           |           |           |
|---|-----------|-----------|-----------|-----------|
| 5 | 2.6520000 | 0.2508386 | 2.2800000 | 2.8700000 |
|---|-----------|-----------|-----------|-----------|

---

Laboratory tests at the time of obtaining Table 2-6 consent, according to the presence or absence of proton-pump inhibitors

Unique Subject Identifier=6014011010-0021

MEANS Procedure

Assay variable : PTINR\_VAL1 PT-INR Value

N Mean Standard Deviation Minimum Maximum

---

|   |           |           |           |           |
|---|-----------|-----------|-----------|-----------|
| 5 | 2.1020000 | 0.8499235 | 1.4500000 | 3.3500000 |
|---|-----------|-----------|-----------|-----------|

---

Unique Subject Identifier=6014011010-0032

Assay variable : PTINR\_VAL1 PT-INR Value

N Mean Standard Deviation Minimum Maximum

---

|   |           |           |           |           |
|---|-----------|-----------|-----------|-----------|
| 4 | 2.0000000 | 0.4690416 | 1.4000000 | 2.5000000 |
|---|-----------|-----------|-----------|-----------|

---

Unique Subject Identifier=6022000000-0008

Assay variable : PTINR\_VAL1 PT-INR Value

N Mean Standard Deviation Minimum Maximum

---

|   |           |           |           |           |
|---|-----------|-----------|-----------|-----------|
| 2 | 1.7150000 | 0.2757716 | 1.5200000 | 1.9100000 |
|---|-----------|-----------|-----------|-----------|

---

Unique Subject Identifier=6022000000-0024

Assay variable : PTINR\_VAL1 PT-INR Value

N Mean Standard Deviation Minimum Maximum

---

|   |           |           |           |           |
|---|-----------|-----------|-----------|-----------|
| 4 | 2.2525000 | 0.4459727 | 1.7900000 | 2.8600000 |
|---|-----------|-----------|-----------|-----------|

---

Laboratory tests at the time of obtaining Table 2-6 consent, according to the presence or absence of proton-pump inhibitors

Unique Subject Identifier=6022000000-0030

MEANS Procedure

Assay variable : PTINR\_VAL1 PT-INR Value

N Mean Standard Deviation Minimum Maximum

---

|   |           |           |           |           |
|---|-----------|-----------|-----------|-----------|
| 4 | 2.7850000 | 1.8992016 | 1.2400000 | 5.5100000 |
|---|-----------|-----------|-----------|-----------|

---

Unique Subject Identifier=6023000000-0003

Assay variable : PTINR\_VAL1 PT-INR Value

N Mean Standard Deviation Minimum Maximum

---

|   |           |           |           |           |
|---|-----------|-----------|-----------|-----------|
| 3 | 1.7666667 | 0.3785939 | 1.5000000 | 2.2000000 |
|---|-----------|-----------|-----------|-----------|

---

Unique Subject Identifier=6023000000-0007

Assay variable : PTINR\_VAL1 PT-INR Value

N Mean Standard Deviation Minimum Maximum

---

|   |           |           |           |           |
|---|-----------|-----------|-----------|-----------|
| 4 | 1.9250000 | 0.4573474 | 1.4000000 | 2.4000000 |
|---|-----------|-----------|-----------|-----------|

---

Unique Subject Identifier=6023000000-0009

Assay variable : PTINR\_VAL1 PT-INR Value

N Mean Standard Deviation Minimum Maximum

---

|   |           |           |           |           |
|---|-----------|-----------|-----------|-----------|
| 3 | 1.6666667 | 0.0577350 | 1.6000000 | 1.7000000 |
|---|-----------|-----------|-----------|-----------|

---

Laboratory tests at the time of obtaining Table 2-6 consent, according to the presence or absence of proton-pump inhibitors

Unique Subject Identifier=6023000000-0010

MEANS Procedure

Assay variable : PTINR\_VAL1 PT-INR Value

N Mean Standard Deviation Minimum Maximum

---

|   |           |           |           |           |
|---|-----------|-----------|-----------|-----------|
| 6 | 1.6000000 | 0.2966479 | 1.2000000 | 1.9000000 |
|---|-----------|-----------|-----------|-----------|

---

Unique Subject Identifier=6023000000-0013

Assay variable : PTINR\_VAL1 PT-INR Value

N Mean Standard Deviation Minimum Maximum

---

|   |           |           |           |           |
|---|-----------|-----------|-----------|-----------|
| 6 | 2.1833333 | 0.1722401 | 2.0000000 | 2.4000000 |
|---|-----------|-----------|-----------|-----------|

---

Unique Subject Identifier=6023000000-0014

Assay variable : PTINR\_VAL1 PT-INR Value

N Mean Standard Deviation Minimum Maximum

---

|   |           |           |           |           |
|---|-----------|-----------|-----------|-----------|
| 3 | 1.7666667 | 0.0577350 | 1.7000000 | 1.8000000 |
|---|-----------|-----------|-----------|-----------|

---

Unique Subject Identifier=6023000000-0022

Assay variable : PTINR\_VAL1 PT-INR Value

N Mean Standard Deviation Minimum Maximum

---

|   |          |           |          |          |
|---|----------|-----------|----------|----------|
| 6 | 2.500000 | 0.9591663 | 1.600000 | 3.800000 |
|---|----------|-----------|----------|----------|

---

Laboratory tests at the time of obtaining Table 2-6 consent, according to the presence or absence of proton-pump inhibitors

Unique Subject Identifier=6023000000-0025

MEANS Procedure

Assay variable : PTINR\_VAL1 PT-INR Value

N Mean Standard Deviation Minimum Maximum

---

|   |           |           |           |           |
|---|-----------|-----------|-----------|-----------|
| 2 | 1.9500000 | 0.0707107 | 1.9000000 | 2.0000000 |
|---|-----------|-----------|-----------|-----------|

---

Unique Subject Identifier=6023000000-0043

Assay variable : PTINR\_VAL1 PT-INR Value

N Mean Standard Deviation Minimum Maximum

---

|   |           |           |           |           |
|---|-----------|-----------|-----------|-----------|
| 6 | 2.3500000 | 1.1040833 | 1.0000000 | 3.7000000 |
|---|-----------|-----------|-----------|-----------|

---

Unique Subject Identifier=6023000000-0045

Assay variable : PTINR\_VAL1 PT-INR Value

N Mean Standard Deviation Minimum Maximum

---

|   |           |           |           |           |
|---|-----------|-----------|-----------|-----------|
| 3 | 2.2666667 | 0.1527525 | 2.1000000 | 2.4000000 |
|---|-----------|-----------|-----------|-----------|

---

Unique Subject Identifier=6023000000-0048



Assay variable : PTINR\_VAL1 PT-INR Value

N Mean Standard Deviation Minimum Maximum

---

|   |          |           |          |          |
|---|----------|-----------|----------|----------|
| 5 | 1.600000 | 0.2915476 | 1.200000 | 2.000000 |
|---|----------|-----------|----------|----------|

---

Laboratory tests at the time of obtaining Table 2-6 consent, according to the presence or absence of proton-pump inhibitors

Unique Subject Identifier=6023000000-0049

MEANS Procedure

Assay variable : PTINR\_VAL1 PT-INR Value

N Mean Standard Deviation Minimum Maximum

---

|   |           |           |           |           |
|---|-----------|-----------|-----------|-----------|
| 3 | 1.7333333 | 0.2516611 | 1.5000000 | 2.0000000 |
|---|-----------|-----------|-----------|-----------|

---

Unique Subject Identifier=6026000000-0021

Assay variable : PTINR\_VAL1 PT-INR Value

N Mean Standard Deviation Minimum Maximum

---

|   |           |           |           |           |
|---|-----------|-----------|-----------|-----------|
| 4 | 1.8675000 | 0.2617091 | 1.5600000 | 2.2000000 |
|---|-----------|-----------|-----------|-----------|

---

Unique Subject Identifier=6027000000-0003

Assay variable : PTINR\_VAL1 PT-INR Value

N Mean Standard Deviation Minimum Maximum

---

|   |           |           |           |           |
|---|-----------|-----------|-----------|-----------|
| 3 | 1.7766667 | 0.2802380 | 1.4900000 | 2.0500000 |
|---|-----------|-----------|-----------|-----------|

---

Unique Subject Identifier=6027000000-0015

Assay variable : PTINR\_VAL1 PT-INR Value

N Mean Standard Deviation Minimum Maximum

---

|   |           |           |           |           |
|---|-----------|-----------|-----------|-----------|
| 3 | 2.3333333 | 0.3784618 | 2.1000000 | 2.7700000 |
|---|-----------|-----------|-----------|-----------|

---

Laboratory tests at the time of obtaining Table 2-6 consent, according to the presence or absence of proton-pump inhibitors

Unique Subject Identifier=6027000000-0020

MEANS Procedure

Assay variable : PTINR\_VAL1 PT-INR Value

N Mean Standard Deviation Minimum Maximum

---

|   |           |           |           |           |
|---|-----------|-----------|-----------|-----------|
| 3 | 2.6366667 | 0.3239341 | 2.4300000 | 3.0100000 |
|---|-----------|-----------|-----------|-----------|

---

Unique Subject Identifier=6029000000-0001

Assay variable : PTINR\_VAL1 PT-INR Value

N Mean Standard Deviation Minimum Maximum

---

|   |           |           |           |           |
|---|-----------|-----------|-----------|-----------|
| 6 | 2.1400000 | 0.1475127 | 1.9900000 | 2.4100000 |
|---|-----------|-----------|-----------|-----------|

---

Unique Subject Identifier=6029000000-0005

Assay variable : PTINR\_VAL1 PT-INR Value

N Mean Standard Deviation Minimum Maximum

---

|   |           |           |           |           |
|---|-----------|-----------|-----------|-----------|
| 6 | 2.0750000 | 0.3825049 | 1.5500000 | 2.6800000 |
|---|-----------|-----------|-----------|-----------|

---

Unique Subject Identifier=6029000000-0011

Assay variable : PTINR\_VAL1 PT-INR Value

N Mean Standard Deviation Minimum Maximum

---

|   |           |           |           |           |
|---|-----------|-----------|-----------|-----------|
| 4 | 1.4875000 | 0.3539656 | 1.1800000 | 1.9900000 |
|---|-----------|-----------|-----------|-----------|

---

Laboratory tests at the time of obtaining Table 2-6 consent, according to the presence or absence of proton-pump inhibitors

Unique Subject Identifier=6029000000-0012

MEANS Procedure

Assay variable : PTINR\_VAL1 PT-INR Value

N Mean Standard Deviation Minimum Maximum

---

|   |           |           |           |           |
|---|-----------|-----------|-----------|-----------|
| 4 | 2.0125000 | 0.1699755 | 1.8200000 | 2.1700000 |
|---|-----------|-----------|-----------|-----------|

---

Unique Subject Identifier=6031011010-0003

Assay variable : PTINR\_VAL1 PT-INR Value

N Mean Standard Deviation Minimum Maximum

---

|   |           |           |           |           |
|---|-----------|-----------|-----------|-----------|
| 3 | 1.6800000 | 0.0360555 | 1.6400000 | 1.7100000 |
|---|-----------|-----------|-----------|-----------|

---

Unique Subject Identifier=6031011010-0006

Assay variable : PTINR\_VAL1 PT-INR Value

N Mean Standard Deviation Minimum Maximum

---

|   |           |           |           |           |
|---|-----------|-----------|-----------|-----------|
| 6 | 1.7933333 | 0.2618142 | 1.4000000 | 2.1600000 |
|---|-----------|-----------|-----------|-----------|

---

Unique Subject Identifier=6031011010-0009

Assay variable : PTINR\_VAL1 PT-INR Value

N Mean Standard Deviation Minimum Maximum

---

|   |           |           |           |           |
|---|-----------|-----------|-----------|-----------|
| 4 | 2.1325000 | 0.3088014 | 1.7600000 | 2.4500000 |
|---|-----------|-----------|-----------|-----------|

---

Laboratory tests at the time of obtaining Table 2-6 consent, according to the presence or absence of proton-pump inhibitors

Unique Subject Identifier=6031011010-0017

MEANS Procedure

Assay variable : PTINR\_VAL1 PT-INR Value

| N | Mean     | Standard Deviation | Minimum  | Maximum  |
|---|----------|--------------------|----------|----------|
| 6 | 2.420000 | 0.3189357          | 2.040000 | 2.920000 |

Unique Subject Identifier=6031011010-0023

Assay variable : PTINR\_VAL1 PT-INR Value

| N | Mean     | Standard Deviation | Minimum  | Maximum  |
|---|----------|--------------------|----------|----------|
| 6 | 1.698333 | 0.1800463          | 1.540000 | 2.020000 |

Unique Subject Identifier=6031011010-0027

Assay variable : PTINR\_VAL1 PT-INR Value

| N | Mean     | Standard Deviation | Minimum  | Maximum  |
|---|----------|--------------------|----------|----------|
| 5 | 2.272000 | 0.2816381          | 1.910000 | 2.590000 |

Unique Subject Identifier=6032010000-0018



Assay variable : PTINR\_VAL1 PT-INR Value

N Mean Standard Deviation Minimum Maximum

---

|   |           |           |           |           |
|---|-----------|-----------|-----------|-----------|
| 3 | 1.9066667 | 0.0577350 | 1.8400000 | 1.9400000 |
|---|-----------|-----------|-----------|-----------|

---

Laboratory tests at the time of obtaining Table 2-6 consent, according to the presence or absence of proton-pump inhibitors

Unique Subject Identifier=6032010000-0074

MEANS Procedure

Assay variable : PTINR\_VAL1 PT-INR Value

N Mean Standard Deviation Minimum Maximum

---

|   |           |           |           |           |
|---|-----------|-----------|-----------|-----------|
| 3 | 2.2933333 | 0.2138535 | 2.0600000 | 2.4800000 |
|---|-----------|-----------|-----------|-----------|

---

Unique Subject Identifier=6032010000-0080

Assay variable : PTINR\_VAL1 PT-INR Value

N Mean Standard Deviation Minimum Maximum

---

|   |           |           |           |           |
|---|-----------|-----------|-----------|-----------|
| 2 | 2.4400000 | 0.4808326 | 2.1000000 | 2.7800000 |
|---|-----------|-----------|-----------|-----------|

---

Unique Subject Identifier=6032010000-0081

Assay variable : PTINR\_VAL1 PT-INR Value

N Mean Standard Deviation Minimum Maximum

---

|   |           |           |           |           |
|---|-----------|-----------|-----------|-----------|
| 4 | 2.9875000 | 0.5244918 | 2.4000000 | 3.4300000 |
|---|-----------|-----------|-----------|-----------|

---

Unique Subject Identifier=6035000000-0018

Assay variable : PTINR\_VAL1 PT-INR Value

N Mean Standard Deviation Minimum Maximum

---

|   |           |           |           |           |
|---|-----------|-----------|-----------|-----------|
| 6 | 2.0516667 | 0.5956985 | 1.4500000 | 3.0500000 |
|---|-----------|-----------|-----------|-----------|

---

Laboratory tests at the time of obtaining Table 2-6 consent, according to the presence or absence of proton-pump inhibitors

Unique Subject Identifier=6035000000-0019

MEANS Procedure

Assay variable : PTINR\_VAL1 PT-INR Value

| N | Mean      | Standard Deviation | Minimum   | Maximum   |
|---|-----------|--------------------|-----------|-----------|
| 3 | 2.0300000 | 0.2306513          | 1.7900000 | 2.2500000 |

Unique Subject Identifier=6035000000-0022

Assay variable : PTINR\_VAL1 PT-INR Value

| N | Mean      | Standard Deviation | Minimum   | Maximum   |
|---|-----------|--------------------|-----------|-----------|
| 3 | 1.5866667 | 0.1703917          | 1.3900000 | 1.6900000 |

Unique Subject Identifier=6035000000-0023

Assay variable : PTINR\_VAL1 PT-INR Value

| N | Mean      | Standard Deviation | Minimum   | Maximum   |
|---|-----------|--------------------|-----------|-----------|
| 1 | 2.2000000 |                    | 2.2000000 | 2.2000000 |

Unique Subject Identifier=6036000000-0006

Assay variable : PTINR\_VAL1 PT-INR Value

N Mean Standard Deviation Minimum Maximum

---

|   |           |           |           |           |
|---|-----------|-----------|-----------|-----------|
| 6 | 1.7333333 | 0.4803193 | 1.3000000 | 2.6400000 |
|---|-----------|-----------|-----------|-----------|

---

Laboratory tests at the time of obtaining Table 2-6 consent, according to the presence or absence of proton-pump inhibitors

Unique Subject Identifier=6040011000-0001

MEANS Procedure

Assay variable : PTINR\_VAL1 PT-INR Value

N Mean Standard Deviation Minimum Maximum

---

|   |           |           |           |           |
|---|-----------|-----------|-----------|-----------|
| 5 | 2.2780000 | 0.3104352 | 1.8600000 | 2.6700000 |
|---|-----------|-----------|-----------|-----------|

---

Unique Subject Identifier=6041000000-0001

Assay variable : PTINR\_VAL1 PT-INR Value

N Mean Standard Deviation Minimum Maximum

---

|   |           |           |           |           |
|---|-----------|-----------|-----------|-----------|
| 3 | 1.6700000 | 0.1307670 | 1.5200000 | 1.7600000 |
|---|-----------|-----------|-----------|-----------|

---

Unique Subject Identifier=6041000000-0006

Assay variable : PTINR\_VAL1 PT-INR Value

N Mean Standard Deviation Minimum Maximum

---

|   |           |           |           |           |
|---|-----------|-----------|-----------|-----------|
| 6 | 1.5233333 | 0.4314935 | 1.1200000 | 2.2500000 |
|---|-----------|-----------|-----------|-----------|

---

Unique Subject Identifier=6041000000-0007

Assay variable : PTINR\_VAL1 PT-INR Value

N Mean Standard Deviation Minimum Maximum

---

|   |           |           |           |           |
|---|-----------|-----------|-----------|-----------|
| 3 | 1.9133333 | 0.1861003 | 1.7400000 | 2.1100000 |
|---|-----------|-----------|-----------|-----------|

---

Laboratory tests at the time of obtaining Table 2-6 consent, according to the presence or absence of proton-pump inhibitors

Unique Subject Identifier=6041000000-0013

MEANS Procedure

Assay variable : PTINR\_VAL1 PT-INR Value

N Mean Standard Deviation Minimum Maximum

---

|   |           |           |           |           |
|---|-----------|-----------|-----------|-----------|
| 3 | 1.8533333 | 0.2458319 | 1.6200000 | 2.1100000 |
|---|-----------|-----------|-----------|-----------|

---

Unique Subject Identifier=6041000000-0020

Assay variable : PTINR\_VAL1 PT-INR Value

N Mean Standard Deviation Minimum Maximum

---

|   |           |           |           |           |
|---|-----------|-----------|-----------|-----------|
| 6 | 2.0016667 | 0.3270117 | 1.3700000 | 2.3100000 |
|---|-----------|-----------|-----------|-----------|

---

Unique Subject Identifier=6041000000-0022

Assay variable : PTINR\_VAL1 PT-INR Value

N Mean Standard Deviation Minimum Maximum

---

|   |           |           |           |           |
|---|-----------|-----------|-----------|-----------|
| 3 | 2.0866667 | 0.2484619 | 1.8000000 | 2.2400000 |
|---|-----------|-----------|-----------|-----------|

---

Unique Subject Identifier=6041000000-0024



Assay variable : PTINR\_VAL1 PT-INR Value

N Mean Standard Deviation Minimum Maximum

---

|   |          |           |          |          |
|---|----------|-----------|----------|----------|
| 6 | 1.903333 | 0.2281812 | 1.610000 | 2.130000 |
|---|----------|-----------|----------|----------|

---

Laboratory tests at the time of obtaining Table 2-6 consent, according to the presence or absence of proton-pump inhibitors

Unique Subject Identifier=6041000000-0029

MEANS Procedure

Assay variable : PTINR\_VAL1 PT-INR Value

N Mean Standard Deviation Minimum Maximum

---

|   |           |           |           |           |
|---|-----------|-----------|-----------|-----------|
| 6 | 1.5833333 | 0.3390968 | 1.2400000 | 2.1600000 |
|---|-----------|-----------|-----------|-----------|

---

Unique Subject Identifier=6041000000-0032

Assay variable : PTINR\_VAL1 PT-INR Value

N Mean Standard Deviation Minimum Maximum

---

|   |           |           |           |           |
|---|-----------|-----------|-----------|-----------|
| 3 | 1.4500000 | 0.0529150 | 1.3900000 | 1.4900000 |
|---|-----------|-----------|-----------|-----------|

---

Unique Subject Identifier=6041000000-0038

Assay variable : PTINR\_VAL1 PT-INR Value

N Mean Standard Deviation Minimum Maximum

---

|   |           |           |           |           |
|---|-----------|-----------|-----------|-----------|
| 6 | 1.5633333 | 0.1440370 | 1.4400000 | 1.7800000 |
|---|-----------|-----------|-----------|-----------|

---

Unique Subject Identifier=6041000000-0042

Assay variable : PTINR\_VAL1 PT-INR Value

N Mean Standard Deviation Minimum Maximum

---

|   |           |           |           |           |
|---|-----------|-----------|-----------|-----------|
| 3 | 1.5166667 | 0.1150362 | 1.4000000 | 1.6300000 |
|---|-----------|-----------|-----------|-----------|

---

Laboratory tests at the time of obtaining Table 2-6 consent, according to the presence or absence of proton-pump inhibitors

Unique Subject Identifier=6041000000-0059

MEANS Procedure

Assay variable : PTINR\_VAL1 PT-INR Value

N Mean Standard Deviation Minimum Maximum

---

|   |           |           |           |           |
|---|-----------|-----------|-----------|-----------|
| 3 | 1.6933333 | 0.2157159 | 1.5400000 | 1.9400000 |
|---|-----------|-----------|-----------|-----------|

---

Unique Subject Identifier=6045010111-0002

Assay variable : PTINR\_VAL1 PT-INR Value

N Mean Standard Deviation Minimum Maximum

---

|   |           |           |           |           |
|---|-----------|-----------|-----------|-----------|
| 3 | 2.5033333 | 1.0830205 | 1.5300000 | 3.6700000 |
|---|-----------|-----------|-----------|-----------|

---

Unique Subject Identifier=6048010000-0043

Assay variable : PTINR\_VAL1 PT-INR Value

N Mean Standard Deviation Minimum Maximum

---

|   |           |           |           |           |
|---|-----------|-----------|-----------|-----------|
| 2 | 2.1000000 | 0.4242641 | 1.8000000 | 2.4000000 |
|---|-----------|-----------|-----------|-----------|

---

Unique Subject Identifier=6048010000-0046

Assay variable : PTINR\_VAL1 PT-INR Value

N Mean Standard Deviation Minimum Maximum

---

|   |          |           |          |          |
|---|----------|-----------|----------|----------|
| 2 | 3.450000 | 0.0707107 | 3.400000 | 3.500000 |
|---|----------|-----------|----------|----------|

---

Laboratory tests at the time of obtaining Table 2-6 consent, according to the presence or absence of proton-pump inhibitors

Unique Subject Identifier=6048010000-0047

MEANS Procedure

Assay variable : PTINR\_VAL1 PT-INR Value

N Mean Standard Deviation Minimum Maximum

---

|   |           |  |           |           |
|---|-----------|--|-----------|-----------|
| 1 | 2.3000000 |  | 2.3000000 | 2.3000000 |
|---|-----------|--|-----------|-----------|

---

Unique Subject Identifier=6048010000-0049

Assay variable : PTINR\_VAL1 PT-INR Value

N Mean Standard Deviation Minimum Maximum

---

|   |           |           |           |           |
|---|-----------|-----------|-----------|-----------|
| 2 | 1.9000000 | 0.4242641 | 1.6000000 | 2.2000000 |
|---|-----------|-----------|-----------|-----------|

---

Unique Subject Identifier=6048010000-0050

Assay variable : PTINR\_VAL1 PT-INR Value

N Mean Standard Deviation Minimum Maximum

---

|   |           |  |           |           |
|---|-----------|--|-----------|-----------|
| 1 | 3.5000000 |  | 3.5000000 | 3.5000000 |
|---|-----------|--|-----------|-----------|

---

Unique Subject Identifier=6048010000-0054

Assay variable : PTINR\_VAL1 PT-INR Value

N Mean Standard Deviation Minimum Maximum

---

|   |          |           |          |          |
|---|----------|-----------|----------|----------|
| 2 | 2.800000 | 0.7071068 | 2.300000 | 3.300000 |
|---|----------|-----------|----------|----------|

---

Laboratory tests at the time of obtaining Table 2-6 consent, according to the presence or absence of proton-pump inhibitors

Unique Subject Identifier=6048010000-0058

MEANS Procedure

Assay variable : PTINR\_VAL1 PT-INR Value

N Mean Standard Deviation Minimum Maximum

---

|   |           |           |           |           |
|---|-----------|-----------|-----------|-----------|
| 3 | 2.4666667 | 0.6027714 | 1.9000000 | 3.1000000 |
|---|-----------|-----------|-----------|-----------|

---

Unique Subject Identifier=6048010000-0066

Assay variable : PTINR\_VAL1 PT-INR Value

N Mean Standard Deviation Minimum Maximum

---

|   |           |  |           |           |
|---|-----------|--|-----------|-----------|
| 1 | 2.2000000 |  | 2.2000000 | 2.2000000 |
|---|-----------|--|-----------|-----------|

---

Unique Subject Identifier=6048010000-0076

Assay variable : PTINR\_VAL1 PT-INR Value

N Mean Standard Deviation Minimum Maximum

---

|   |           |           |           |           |
|---|-----------|-----------|-----------|-----------|
| 2 | 2.2500000 | 0.4949747 | 1.9000000 | 2.6000000 |
|---|-----------|-----------|-----------|-----------|

---

Unique Subject Identifier=6048010000-0080



Assay variable : PTINR\_VAL1 PT-INR Value

N Mean Standard Deviation Minimum Maximum

---

|   |           |           |           |           |
|---|-----------|-----------|-----------|-----------|
| 6 | 1.6333333 | 0.4179314 | 1.2000000 | 2.3000000 |
|---|-----------|-----------|-----------|-----------|

---

Laboratory tests at the time of obtaining Table 2-6 consent, according to the presence or absence of proton-pump inhibitors

Unique Subject Identifier=6048010000-0082

MEANS Procedure

Assay variable : PTINR\_VAL1 PT-INR Value

N Mean Standard Deviation Minimum Maximum

---

|   |           |           |           |           |
|---|-----------|-----------|-----------|-----------|
| 3 | 1.0666667 | 0.0577350 | 1.0000000 | 1.1000000 |
|---|-----------|-----------|-----------|-----------|

---

Unique Subject Identifier=6048010000-0086

Assay variable : PTINR\_VAL1 PT-INR Value

N Mean Standard Deviation Minimum Maximum

---

|   |           |           |           |           |
|---|-----------|-----------|-----------|-----------|
| 6 | 2.1333333 | 0.9584710 | 1.5000000 | 3.8000000 |
|---|-----------|-----------|-----------|-----------|

---

Unique Subject Identifier=6048010000-0092

Assay variable : PTINR\_VAL1 PT-INR Value

N Mean Standard Deviation Minimum Maximum

---

|   |           |           |           |           |
|---|-----------|-----------|-----------|-----------|
| 3 | 1.3666667 | 0.0577350 | 1.3000000 | 1.4000000 |
|---|-----------|-----------|-----------|-----------|

---

Unique Subject Identifier=6048010000-0093

Assay variable : PTINR\_VAL1 PT-INR Value

N Mean Standard Deviation Minimum Maximum

---

|   |          |  |          |          |
|---|----------|--|----------|----------|
| 1 | 1.800000 |  | 1.800000 | 1.800000 |
|---|----------|--|----------|----------|

---

Laboratory tests at the time of obtaining Table 2-6 consent, according to the presence or absence of proton-pump inhibitors

Unique Subject Identifier=6048010000-0100

MEANS Procedure

Assay variable : PTINR\_VAL1 PT-INR Value

| N | Mean      | Standard Deviation | Minimum   | Maximum   |
|---|-----------|--------------------|-----------|-----------|
| 1 | 2.3000000 |                    | 2.3000000 | 2.3000000 |

Unique Subject Identifier=6050011100-0001

Assay variable : PTINR\_VAL1 PT-INR Value

| N | Mean      | Standard Deviation | Minimum   | Maximum   |
|---|-----------|--------------------|-----------|-----------|
| 3 | 2.3033333 | 0.4990324          | 1.7400000 | 2.6900000 |

Unique Subject Identifier=6050011100-0002

Assay variable : PTINR\_VAL1 PT-INR Value

| N | Mean      | Standard Deviation | Minimum   | Maximum   |
|---|-----------|--------------------|-----------|-----------|
| 3 | 1.8866667 | 0.0838650          | 1.7900000 | 1.9400000 |

Unique Subject Identifier=6050011100-0004

Assay variable : PTINR\_VAL1 PT-INR Value

N Mean Standard Deviation Minimum Maximum

---

|   |           |           |           |           |
|---|-----------|-----------|-----------|-----------|
| 4 | 2.3300000 | 0.3524202 | 2.0700000 | 2.8500000 |
|---|-----------|-----------|-----------|-----------|

---

Laboratory tests at the time of obtaining Table 2-6 consent, according to the presence or absence of proton-pump inhibitors

Unique Subject Identifier=6050011100-0009

MEANS Procedure

Assay variable : PTINR\_VAL1 PT-INR Value

| N | Mean      | Standard Deviation | Minimum   | Maximum   |
|---|-----------|--------------------|-----------|-----------|
| 2 | 2.1150000 | 0.2616295          | 1.9300000 | 2.3000000 |

Unique Subject Identifier=6050011100-0012

Assay variable : PTINR\_VAL1 PT-INR Value

| N | Mean      | Standard Deviation | Minimum   | Maximum   |
|---|-----------|--------------------|-----------|-----------|
| 3 | 2.0933333 | 0.6208328          | 1.5500000 | 2.7700000 |

Unique Subject Identifier=6050011100-0016

Assay variable : PTINR\_VAL1 PT-INR Value

| N | Mean      | Standard Deviation | Minimum   | Maximum   |
|---|-----------|--------------------|-----------|-----------|
| 3 | 2.1500000 | 0.0529150          | 2.1100000 | 2.2100000 |

Unique Subject Identifier=6050011100-0022

Assay variable : PTINR\_VAL1 PT-INR Value

N Mean Standard Deviation Minimum Maximum

---

|   |           |           |           |           |
|---|-----------|-----------|-----------|-----------|
| 2 | 2.0900000 | 0.1414214 | 1.9900000 | 2.1900000 |
|---|-----------|-----------|-----------|-----------|

---

Laboratory tests at the time of obtaining Table 2-6 consent, according to the presence or absence of proton-pump inhibitors

Unique Subject Identifier=6050011100-0026

MEANS Procedure

Assay variable : PTINR\_VAL1 PT-INR Value

N Mean Standard Deviation Minimum Maximum

---

|   |           |           |           |           |
|---|-----------|-----------|-----------|-----------|
| 5 | 2.1080000 | 0.8909938 | 1.2500000 | 3.4200000 |
|---|-----------|-----------|-----------|-----------|

---

Unique Subject Identifier=6055000000-0021

Assay variable : PTINR\_VAL1 PT-INR Value

N Mean Standard Deviation Minimum Maximum

---

|   |           |           |           |           |
|---|-----------|-----------|-----------|-----------|
| 4 | 2.0050000 | 0.8294777 | 1.4700000 | 3.2300000 |
|---|-----------|-----------|-----------|-----------|

---

Unique Subject Identifier=6058010011-0003

Assay variable : PTINR\_VAL1 PT-INR Value

N Mean Standard Deviation Minimum Maximum

---

|   |           |           |           |           |
|---|-----------|-----------|-----------|-----------|
| 6 | 2.0733333 | 0.5177515 | 1.4000000 | 2.6400000 |
|---|-----------|-----------|-----------|-----------|

---

Unique Subject Identifier=6058010011-0004



Assay variable : PTINR\_VAL1 PT-INR Value

N Mean Standard Deviation Minimum Maximum

---

|   |          |           |          |          |
|---|----------|-----------|----------|----------|
| 6 | 2.463333 | 0.2251814 | 2.130000 | 2.810000 |
|---|----------|-----------|----------|----------|

---

Laboratory tests at the time of obtaining Table 2-6 consent, according to the presence or absence of proton-pump inhibitors

Unique Subject Identifier=6058010011-0005

MEANS Procedure

Assay variable : PTINR\_VAL1 PT-INR Value

N Mean Standard Deviation Minimum Maximum

---

|   |           |           |           |           |
|---|-----------|-----------|-----------|-----------|
| 6 | 2.7083333 | 1.3459631 | 1.6700000 | 5.3000000 |
|---|-----------|-----------|-----------|-----------|

---

Unique Subject Identifier=6058010011-0013

Assay variable : PTINR\_VAL1 PT-INR Value

N Mean Standard Deviation Minimum Maximum

---

|   |           |           |           |           |
|---|-----------|-----------|-----------|-----------|
| 6 | 2.1533333 | 0.1315548 | 1.9400000 | 2.2900000 |
|---|-----------|-----------|-----------|-----------|

---

Unique Subject Identifier=6058010011-0014

Assay variable : PTINR\_VAL1 PT-INR Value

N Mean Standard Deviation Minimum Maximum

---

|   |           |           |           |           |
|---|-----------|-----------|-----------|-----------|
| 6 | 1.9000000 | 0.3553027 | 1.2800000 | 2.2200000 |
|---|-----------|-----------|-----------|-----------|

---

Unique Subject Identifier=6058010011-0015

Assay variable : PTINR\_VAL1 PT-INR Value

N Mean Standard Deviation Minimum Maximum

---

|   |           |           |           |           |
|---|-----------|-----------|-----------|-----------|
| 6 | 1.8283333 | 0.1251266 | 1.6400000 | 2.0000000 |
|---|-----------|-----------|-----------|-----------|

---

Laboratory tests at the time of obtaining Table 2-6 consent, according to the presence or absence of proton-pump inhibitors

Unique Subject Identifier=6058010011-0019

MEANS Procedure

Assay variable : PTINR\_VAL1 PT-INR Value

N Mean Standard Deviation Minimum Maximum

---

|   |           |           |           |           |
|---|-----------|-----------|-----------|-----------|
| 6 | 2.2000000 | 0.2450306 | 1.9600000 | 2.5700000 |
|---|-----------|-----------|-----------|-----------|

---

Unique Subject Identifier=6058010011-0021

Assay variable : PTINR\_VAL1 PT-INR Value

N Mean Standard Deviation Minimum Maximum

---

|   |           |           |           |           |
|---|-----------|-----------|-----------|-----------|
| 6 | 2.4066667 | 0.4194123 | 2.1300000 | 3.2400000 |
|---|-----------|-----------|-----------|-----------|

---

Unique Subject Identifier=6058010011-0022

Assay variable : PTINR\_VAL1 PT-INR Value

N Mean Standard Deviation Minimum Maximum

---

|   |           |           |           |           |
|---|-----------|-----------|-----------|-----------|
| 6 | 2.3033333 | 0.2956800 | 1.9300000 | 2.7600000 |
|---|-----------|-----------|-----------|-----------|

---

Unique Subject Identifier=6058010011-0027

Assay variable : PTINR\_VAL1 PT-INR Value

N Mean Standard Deviation Minimum Maximum

---

|   |           |           |           |           |
|---|-----------|-----------|-----------|-----------|
| 6 | 2.1966667 | 0.1939759 | 2.0200000 | 2.5500000 |
|---|-----------|-----------|-----------|-----------|

---

Laboratory tests at the time of obtaining Table 2-6 consent, according to the presence or absence of proton-pump inhibitors

Unique Subject Identifier=6060011000-0002

MEANS Procedure

Assay variable : PTINR\_VAL1 PT-INR Value

N Mean Standard Deviation Minimum Maximum

---

|   |           |           |           |           |
|---|-----------|-----------|-----------|-----------|
| 4 | 2.4750000 | 0.0675771 | 2.4000000 | 2.5500000 |
|---|-----------|-----------|-----------|-----------|

---

Unique Subject Identifier=6060011000-0014

Assay variable : PTINR\_VAL1 PT-INR Value

N Mean Standard Deviation Minimum Maximum

---

|   |           |           |           |           |
|---|-----------|-----------|-----------|-----------|
| 3 | 1.8866667 | 0.2433790 | 1.6700000 | 2.1500000 |
|---|-----------|-----------|-----------|-----------|

---

Unique Subject Identifier=6061000000-0004

Assay variable : PTINR\_VAL1 PT-INR Value

N Mean Standard Deviation Minimum Maximum

---

|   |           |           |           |           |
|---|-----------|-----------|-----------|-----------|
| 3 | 2.3900000 | 0.2858321 | 2.2200000 | 2.7200000 |
|---|-----------|-----------|-----------|-----------|

---

Unique Subject Identifier=6071010010-0002

Assay variable : PTINR\_VAL1 PT-INR Value

N Mean Standard Deviation Minimum Maximum

---

|   |           |           |           |           |
|---|-----------|-----------|-----------|-----------|
| 4 | 2.0525000 | 0.2657536 | 1.8300000 | 2.4000000 |
|---|-----------|-----------|-----------|-----------|

---

Laboratory tests at the time of obtaining Table 2-6 consent, according to the presence or absence of proton-pump inhibitors

Unique Subject Identifier=6071010010-0006

MEANS Procedure

Assay variable : PTINR\_VAL1 PT-INR Value

N Mean Standard Deviation Minimum Maximum

---

|   |           |           |           |           |
|---|-----------|-----------|-----------|-----------|
| 4 | 2.0900000 | 0.3558089 | 1.6500000 | 2.5200000 |
|---|-----------|-----------|-----------|-----------|

---

Unique Subject Identifier=6071010010-0008

Assay variable : PTINR\_VAL1 PT-INR Value

N Mean Standard Deviation Minimum Maximum

---

|   |           |           |           |           |
|---|-----------|-----------|-----------|-----------|
| 6 | 2.3166667 | 0.0852447 | 2.2300000 | 2.4300000 |
|---|-----------|-----------|-----------|-----------|

---

Unique Subject Identifier=6071010010-0016

Assay variable : PTINR\_VAL1 PT-INR Value

N Mean Standard Deviation Minimum Maximum

---

|   |           |           |           |           |
|---|-----------|-----------|-----------|-----------|
| 3 | 2.7133333 | 0.5978573 | 2.0300000 | 3.1400000 |
|---|-----------|-----------|-----------|-----------|

---

Unique Subject Identifier=6098000000-0021



Assay variable : PTINR\_VAL1 PT-INR Value

N Mean Standard Deviation Minimum Maximum

---

|   |          |           |          |          |
|---|----------|-----------|----------|----------|
| 3 | 1.900000 | 0.1732051 | 1.800000 | 2.100000 |
|---|----------|-----------|----------|----------|

---

Laboratory tests at the time of obtaining Table 2-6 consent, according to the presence or absence of proton-pump inhibitors

Unique Subject Identifier=6104000000-0002

MEANS Procedure

Assay variable : PTINR\_VAL1 PT-INR Value

N Mean Standard Deviation Minimum Maximum

---

|   |           |           |           |           |
|---|-----------|-----------|-----------|-----------|
| 6 | 1.9000000 | 0.0843801 | 1.7900000 | 2.0000000 |
|---|-----------|-----------|-----------|-----------|

---

Unique Subject Identifier=6104000000-0004

Assay variable : PTINR\_VAL1 PT-INR Value

N Mean Standard Deviation Minimum Maximum

---

|   |           |           |           |           |
|---|-----------|-----------|-----------|-----------|
| 6 | 1.9866667 | 0.6669533 | 1.2700000 | 3.2500000 |
|---|-----------|-----------|-----------|-----------|

---

Unique Subject Identifier=6104000000-0008

Assay variable : PTINR\_VAL1 PT-INR Value

N Mean Standard Deviation Minimum Maximum

---

|   |           |           |           |           |
|---|-----------|-----------|-----------|-----------|
| 6 | 1.6550000 | 0.3602638 | 1.1500000 | 2.0600000 |
|---|-----------|-----------|-----------|-----------|

---

Unique Subject Identifier=6104000000-0012

Assay variable : PTINR\_VAL1 PT-INR Value

N Mean Standard Deviation Minimum Maximum

---

|   |           |           |           |           |
|---|-----------|-----------|-----------|-----------|
| 5 | 2.0900000 | 0.2411431 | 1.7200000 | 2.3600000 |
|---|-----------|-----------|-----------|-----------|

---

Laboratory tests at the time of obtaining Table 2-6 consent, according to the presence or absence of proton-pump inhibitors

Unique Subject Identifier=6104000000-0013

MEANS Procedure

Assay variable : PTINR\_VAL1 PT-INR Value

| N | Mean     | Standard Deviation | Minimum  | Maximum  |
|---|----------|--------------------|----------|----------|
| 3 | 1.940000 | 0.4103657          | 1.520000 | 2.340000 |

Unique Subject Identifier=6105000000-0004

Assay variable : PTINR\_VAL1 PT-INR Value

| N | Mean     | Standard Deviation | Minimum  | Maximum  |
|---|----------|--------------------|----------|----------|
| 5 | 1.652000 | 0.1347961          | 1.520000 | 1.820000 |

Unique Subject Identifier=6105000000-0010

Assay variable : PTINR\_VAL1 PT-INR Value

| N | Mean     | Standard Deviation | Minimum  | Maximum  |
|---|----------|--------------------|----------|----------|
| 4 | 2.002500 | 0.7981802          | 1.340000 | 3.120000 |

Unique Subject Identifier=6105000000-0014

Assay variable : PTINR\_VAL1 PT-INR Value

N Mean Standard Deviation Minimum Maximum

---

|   |           |           |           |           |
|---|-----------|-----------|-----------|-----------|
| 5 | 1.8740000 | 0.2150116 | 1.5100000 | 2.0200000 |
|---|-----------|-----------|-----------|-----------|

---

Laboratory tests at the time of obtaining Table 2-6 consent, according to the presence or absence of proton-pump inhibitors

Unique Subject Identifier=6105000000-0015

MEANS Procedure

Assay variable : PTINR\_VAL1 PT-INR Value

N Mean Standard Deviation Minimum Maximum

---

|   |           |           |           |           |
|---|-----------|-----------|-----------|-----------|
| 6 | 1.7683333 | 0.3649338 | 1.4800000 | 2.3900000 |
|---|-----------|-----------|-----------|-----------|

---

Unique Subject Identifier=6105000000-0018

Assay variable : PTINR\_VAL1 PT-INR Value

N Mean Standard Deviation Minimum Maximum

---

|   |           |           |           |           |
|---|-----------|-----------|-----------|-----------|
| 3 | 1.9766667 | 0.4052571 | 1.5800000 | 2.3900000 |
|---|-----------|-----------|-----------|-----------|

---

Unique Subject Identifier=6105000000-0021

Assay variable : PTINR\_VAL1 PT-INR Value

N Mean Standard Deviation Minimum Maximum

---

|   |           |           |           |           |
|---|-----------|-----------|-----------|-----------|
| 6 | 2.1183333 | 0.2009395 | 1.8000000 | 2.3500000 |
|---|-----------|-----------|-----------|-----------|

---

Unique Subject Identifier=6109000000-0007

Assay variable : PTINR\_VAL1 PT-INR Value

N Mean Standard Deviation Minimum Maximum

---

|   |           |           |           |           |
|---|-----------|-----------|-----------|-----------|
| 5 | 1.9740000 | 0.3146903 | 1.6000000 | 2.3100000 |
|---|-----------|-----------|-----------|-----------|

---

Laboratory tests at the time of obtaining Table 2-6 consent, according to the presence or absence of proton-pump inhibitors

Unique Subject Identifier=6109000000-0034

MEANS Procedure

Assay variable : PTINR\_VAL1 PT-INR Value

N Mean Standard Deviation Minimum Maximum

---

|   |           |           |           |           |
|---|-----------|-----------|-----------|-----------|
| 6 | 2.6500000 | 0.4605214 | 1.9200000 | 3.3000000 |
|---|-----------|-----------|-----------|-----------|

---

Unique Subject Identifier=6109000000-0036

Assay variable : PTINR\_VAL1 PT-INR Value

N Mean Standard Deviation Minimum Maximum

---

|   |           |           |           |           |
|---|-----------|-----------|-----------|-----------|
| 3 | 1.5533333 | 0.0351188 | 1.5200000 | 1.5900000 |
|---|-----------|-----------|-----------|-----------|

---

Unique Subject Identifier=6117010000-0003

Assay variable : PTINR\_VAL1 PT-INR Value

N Mean Standard Deviation Minimum Maximum

---

|   |           |           |           |           |
|---|-----------|-----------|-----------|-----------|
| 6 | 1.7133333 | 0.1693123 | 1.5000000 | 1.9900000 |
|---|-----------|-----------|-----------|-----------|

---

Unique Subject Identifier=6117010000-0004



Assay variable : PTINR\_VAL1 PT-INR Value

N Mean Standard Deviation Minimum Maximum

---

|   |           |           |           |           |
|---|-----------|-----------|-----------|-----------|
| 5 | 1.9080000 | 0.7322022 | 1.2300000 | 3.0700000 |
|---|-----------|-----------|-----------|-----------|

---

Laboratory tests at the time of obtaining Table 2-6 consent, according to the presence or absence of proton-pump inhibitors

Unique Subject Identifier=6117010000-0006

MEANS Procedure

Assay variable : PTINR\_VAL1 PT-INR Value

N Mean Standard Deviation Minimum Maximum

---

|   |           |           |           |           |
|---|-----------|-----------|-----------|-----------|
| 6 | 1.9516667 | 0.2314663 | 1.5900000 | 2.1600000 |
|---|-----------|-----------|-----------|-----------|

---

Unique Subject Identifier=6117010000-0008

Assay variable : PTINR\_VAL1 PT-INR Value

N Mean Standard Deviation Minimum Maximum

---

|   |           |           |           |           |
|---|-----------|-----------|-----------|-----------|
| 4 | 1.9425000 | 0.2324328 | 1.6200000 | 2.1400000 |
|---|-----------|-----------|-----------|-----------|

---

Unique Subject Identifier=6117010000-0009

Assay variable : PTINR\_VAL1 PT-INR Value

N Mean Standard Deviation Minimum Maximum

---

|   |           |           |           |           |
|---|-----------|-----------|-----------|-----------|
| 6 | 2.2366667 | 0.5143021 | 1.7700000 | 3.0500000 |
|---|-----------|-----------|-----------|-----------|

---

Unique Subject Identifier=6117010000-0010

Assay variable : PTINR\_VAL1 PT-INR Value

N Mean Standard Deviation Minimum Maximum

---

|   |           |           |           |           |
|---|-----------|-----------|-----------|-----------|
| 4 | 1.8275000 | 0.2718302 | 1.6100000 | 2.2200000 |
|---|-----------|-----------|-----------|-----------|

---

Laboratory tests at the time of obtaining Table 2-6 consent, according to the presence or absence of proton-pump inhibitors

Unique Subject Identifier=612400000-0006

MEANS Procedure

Assay variable : PTINR\_VAL1 PT-INR Value

| N | Mean      | Standard Deviation | Minimum   | Maximum   |
|---|-----------|--------------------|-----------|-----------|
| 5 | 1.9800000 | 0.1923538          | 1.7000000 | 2.2000000 |

Unique Subject Identifier=612500000-0006

Assay variable : PTINR\_VAL1 PT-INR Value

| N | Mean      | Standard Deviation | Minimum   | Maximum   |
|---|-----------|--------------------|-----------|-----------|
| 6 | 1.7200000 | 0.5220728          | 1.1900000 | 2.5000000 |

Unique Subject Identifier=612500000-0007

Assay variable : PTINR\_VAL1 PT-INR Value

| N | Mean      | Standard Deviation | Minimum   | Maximum   |
|---|-----------|--------------------|-----------|-----------|
| 3 | 2.4566667 | 0.3957693          | 2.0000000 | 2.7000000 |

Unique Subject Identifier=612500000-0009

Assay variable : PTINR\_VAL1 PT-INR Value

N Mean Standard Deviation Minimum Maximum

---

|   |          |           |          |          |
|---|----------|-----------|----------|----------|
| 5 | 1.840000 | 0.3435113 | 1.500000 | 2.300000 |
|---|----------|-----------|----------|----------|

---

Laboratory tests at the time of obtaining Table 2-6 consent, according to the presence or absence of proton-pump inhibitors

Unique Subject Identifier=6125000000-0010

MEANS Procedure

Assay variable : PTINR\_VAL1 PT-INR Value

| N | Mean      | Standard Deviation | Minimum   | Maximum   |
|---|-----------|--------------------|-----------|-----------|
| 5 | 2.3800000 | 0.2167948          | 2.2000000 | 2.7000000 |

Unique Subject Identifier=6125000000-0013

Assay variable : PTINR\_VAL1 PT-INR Value

| N | Mean      | Standard Deviation | Minimum   | Maximum   |
|---|-----------|--------------------|-----------|-----------|
| 6 | 2.6166667 | 0.5231316          | 2.0000000 | 3.3000000 |

Unique Subject Identifier=6125000000-0014

Assay variable : PTINR\_VAL1 PT-INR Value

| N | Mean      | Standard Deviation | Minimum   | Maximum   |
|---|-----------|--------------------|-----------|-----------|
| 6 | 2.2616667 | 0.4834632          | 1.8000000 | 3.1600000 |

Unique Subject Identifier=6125000000-0019

Assay variable : PTINR\_VAL1 PT-INR Value

N Mean Standard Deviation Minimum Maximum

---

|   |           |           |           |           |
|---|-----------|-----------|-----------|-----------|
| 4 | 1.7025000 | 0.3671852 | 1.4000000 | 2.2200000 |
|---|-----------|-----------|-----------|-----------|

---

Laboratory tests at the time of obtaining Table 2-6 consent, according to the presence or absence of proton-pump inhibitors

Unique Subject Identifier=612500000-0020

MEANS Procedure

Assay variable : PTINR\_VAL1 PT-INR Value

N Mean Standard Deviation Minimum Maximum

---

|   |           |           |           |           |
|---|-----------|-----------|-----------|-----------|
| 6 | 2.2766667 | 0.4222164 | 1.7000000 | 2.8600000 |
|---|-----------|-----------|-----------|-----------|

---

Unique Subject Identifier=612500000-0023

Assay variable : PTINR\_VAL1 PT-INR Value

N Mean Standard Deviation Minimum Maximum

---

|   |           |           |           |           |
|---|-----------|-----------|-----------|-----------|
| 3 | 1.1900000 | 0.0435890 | 1.1400000 | 1.2200000 |
|---|-----------|-----------|-----------|-----------|

---

Unique Subject Identifier=612500000-0032

Assay variable : PTINR\_VAL1 PT-INR Value

N Mean Standard Deviation Minimum Maximum

---

|   |           |           |           |           |
|---|-----------|-----------|-----------|-----------|
| 5 | 1.9120000 | 0.2340299 | 1.8000000 | 2.3300000 |
|---|-----------|-----------|-----------|-----------|

---

Unique Subject Identifier=612500000-0035



Assay variable : PTINR\_VAL1 PT-INR Value

N Mean Standard Deviation Minimum Maximum

---

|   |          |           |          |          |
|---|----------|-----------|----------|----------|
| 3 | 2.460000 | 0.3421988 | 2.070000 | 2.710000 |
|---|----------|-----------|----------|----------|

---

Laboratory tests at the time of obtaining Table 2-6 consent, according to the presence or absence of proton-pump inhibitors

Unique Subject Identifier=612500000-0040

MEANS Procedure

Assay variable : PTINR\_VAL1 PT-INR Value

N Mean Standard Deviation Minimum Maximum

---

|   |           |           |           |           |
|---|-----------|-----------|-----------|-----------|
| 2 | 1.8200000 | 0.3818377 | 1.5500000 | 2.0900000 |
|---|-----------|-----------|-----------|-----------|

---

Unique Subject Identifier=612500000-0041

Assay variable : PTINR\_VAL1 PT-INR Value

N Mean Standard Deviation Minimum Maximum

---

|   |           |           |           |           |
|---|-----------|-----------|-----------|-----------|
| 3 | 1.8033333 | 0.3326159 | 1.5500000 | 2.1800000 |
|---|-----------|-----------|-----------|-----------|

---

Unique Subject Identifier=612500000-0044

Assay variable : PTINR\_VAL1 PT-INR Value

N Mean Standard Deviation Minimum Maximum

---

|   |           |           |           |           |
|---|-----------|-----------|-----------|-----------|
| 3 | 1.7333333 | 0.2081666 | 1.5000000 | 1.9000000 |
|---|-----------|-----------|-----------|-----------|

---

Unique Subject Identifier=612500000-0045

Assay variable : PTINR\_VAL1 PT-INR Value

N Mean Standard Deviation Minimum Maximum

---

|   |           |           |           |           |
|---|-----------|-----------|-----------|-----------|
| 5 | 2.0560000 | 0.7491195 | 1.5100000 | 3.3700000 |
|---|-----------|-----------|-----------|-----------|

---

Laboratory tests at the time of obtaining Table 2-6 consent, according to the presence or absence of proton-pump inhibitors

Unique Subject Identifier=612500000-0050

MEANS Procedure

Assay variable : PTINR\_VAL1 PT-INR Value

N Mean Standard Deviation Minimum Maximum

---

|   |           |           |           |           |
|---|-----------|-----------|-----------|-----------|
| 4 | 1.9400000 | 0.5424021 | 1.3800000 | 2.4900000 |
|---|-----------|-----------|-----------|-----------|

---

Unique Subject Identifier=612500000-0061

Assay variable : PTINR\_VAL1 PT-INR Value

N Mean Standard Deviation Minimum Maximum

---

|   |           |           |           |           |
|---|-----------|-----------|-----------|-----------|
| 4 | 2.1075000 | 0.2066196 | 1.9300000 | 2.3900000 |
|---|-----------|-----------|-----------|-----------|

---

Unique Subject Identifier=612500000-0074

Assay variable : PTINR\_VAL1 PT-INR Value

N Mean Standard Deviation Minimum Maximum

---

|   |           |           |           |           |
|---|-----------|-----------|-----------|-----------|
| 4 | 2.1900000 | 0.1518771 | 2.0600000 | 2.4000000 |
|---|-----------|-----------|-----------|-----------|

---

Unique Subject Identifier=612500000-0086

Assay variable : PTINR\_VAL1 PT-INR Value

N Mean Standard Deviation Minimum Maximum

---

|   |           |           |           |           |
|---|-----------|-----------|-----------|-----------|
| 5 | 1.5580000 | 0.1559487 | 1.3000000 | 1.7000000 |
|---|-----------|-----------|-----------|-----------|

---

Laboratory tests at the time of obtaining Table 2-6 consent, according to the presence or absence of proton-pump inhibitors

Unique Subject Identifier=612600000-0003

MEANS Procedure

Assay variable : PTINR\_VAL1 PT-INR Value

N Mean Standard Deviation Minimum Maximum

---

|   |           |           |           |           |
|---|-----------|-----------|-----------|-----------|
| 3 | 1.9700000 | 0.5204805 | 1.3700000 | 2.3000000 |
|---|-----------|-----------|-----------|-----------|

---

Unique Subject Identifier=612700000-0011

Assay variable : PTINR\_VAL1 PT-INR Value

N Mean Standard Deviation Minimum Maximum

---

|   |           |           |           |           |
|---|-----------|-----------|-----------|-----------|
| 5 | 1.8040000 | 0.1327780 | 1.6400000 | 1.9500000 |
|---|-----------|-----------|-----------|-----------|

---

Unique Subject Identifier=612700000-0019

Assay variable : PTINR\_VAL1 PT-INR Value

N Mean Standard Deviation Minimum Maximum

---

|   |           |           |           |           |
|---|-----------|-----------|-----------|-----------|
| 6 | 1.8316667 | 0.5717838 | 1.3100000 | 2.9100000 |
|---|-----------|-----------|-----------|-----------|

---

Unique Subject Identifier=612700000-0021

Assay variable : PTINR\_VAL1 PT-INR Value

N Mean Standard Deviation Minimum Maximum

---

|   |           |           |           |           |
|---|-----------|-----------|-----------|-----------|
| 6 | 1.6133333 | 0.3310388 | 1.1800000 | 2.0300000 |
|---|-----------|-----------|-----------|-----------|

---

Laboratory tests at the time of obtaining Table 2-6 consent, according to the presence or absence of proton-pump inhibitors

Unique Subject Identifier=6136110000-0004

MEANS Procedure

Assay variable : PTINR\_VAL1 PT-INR Value

N Mean Standard Deviation Minimum Maximum

---

|   |           |           |           |           |
|---|-----------|-----------|-----------|-----------|
| 4 | 1.9325000 | 1.5902909 | 1.0200000 | 4.3100000 |
|---|-----------|-----------|-----------|-----------|

---

Unique Subject Identifier=6142000000-0014

Assay variable : PTINR\_VAL1 PT-INR Value

N Mean Standard Deviation Minimum Maximum

---

|   |           |           |           |           |
|---|-----------|-----------|-----------|-----------|
| 6 | 1.8433333 | 0.2362767 | 1.5300000 | 2.2100000 |
|---|-----------|-----------|-----------|-----------|

---

Unique Subject Identifier=6142000000-0015

Assay variable : PTINR\_VAL1 PT-INR Value

N Mean Standard Deviation Minimum Maximum

---

|   |           |           |           |           |
|---|-----------|-----------|-----------|-----------|
| 5 | 1.7940000 | 0.1411737 | 1.6600000 | 2.0300000 |
|---|-----------|-----------|-----------|-----------|

---

Unique Subject Identifier=6142000000-0026



Assay variable : PTINR\_VAL1 PT-INR Value

N Mean Standard Deviation Minimum Maximum

---

|   |           |           |           |           |
|---|-----------|-----------|-----------|-----------|
| 5 | 2.1560000 | 0.4077744 | 1.6100000 | 2.5700000 |
|---|-----------|-----------|-----------|-----------|

---

Laboratory tests at the time of obtaining Table 2-6 consent, according to the presence or absence of proton-pump inhibitors

Unique Subject Identifier=614200000-0027

MEANS Procedure

Assay variable : PTINR\_VAL1 PT-INR Value

N Mean Standard Deviation Minimum Maximum

---

|   |           |           |           |           |
|---|-----------|-----------|-----------|-----------|
| 3 | 1.9166667 | 0.6803920 | 1.2500000 | 2.6100000 |
|---|-----------|-----------|-----------|-----------|

---

Unique Subject Identifier=614200000-0028

Assay variable : PTINR\_VAL1 PT-INR Value

N Mean Standard Deviation Minimum Maximum

---

|   |           |           |           |           |
|---|-----------|-----------|-----------|-----------|
| 6 | 1.8650000 | 0.4125409 | 1.5200000 | 2.6600000 |
|---|-----------|-----------|-----------|-----------|

---

Unique Subject Identifier=614700000-0003

Assay variable : PTINR\_VAL1 PT-INR Value

N Mean Standard Deviation Minimum Maximum

---

|   |           |           |           |           |
|---|-----------|-----------|-----------|-----------|
| 2 | 2.1300000 | 0.5091169 | 1.7700000 | 2.4900000 |
|---|-----------|-----------|-----------|-----------|

---

Unique Subject Identifier=614700000-0005

Assay variable : PTINR\_VAL1 PT-INR Value

N Mean Standard Deviation Minimum Maximum

---

|   |           |  |           |           |
|---|-----------|--|-----------|-----------|
| 1 | 1.8900000 |  | 1.8900000 | 1.8900000 |
|---|-----------|--|-----------|-----------|

---

Laboratory tests at the time of obtaining Table 2-6 consent, according to the presence or absence of proton-pump inhibitors

Unique Subject Identifier=616600000-0016

MEANS Procedure

Assay variable : PTINR\_VAL1 PT-INR Value

N Mean Standard Deviation Minimum Maximum

---

|   |           |           |           |           |
|---|-----------|-----------|-----------|-----------|
| 6 | 2.1366667 | 0.3290390 | 1.6800000 | 2.6600000 |
|---|-----------|-----------|-----------|-----------|

---

Unique Subject Identifier=616600000-0026

Assay variable : PTINR\_VAL1 PT-INR Value

N Mean Standard Deviation Minimum Maximum

---

|   |           |           |           |           |
|---|-----------|-----------|-----------|-----------|
| 6 | 1.1700000 | 0.0456070 | 1.1300000 | 1.2600000 |
|---|-----------|-----------|-----------|-----------|

---

Unique Subject Identifier=6171011010-0004

Assay variable : PTINR\_VAL1 PT-INR Value

N Mean Standard Deviation Minimum Maximum

---

|   |           |           |           |           |
|---|-----------|-----------|-----------|-----------|
| 5 | 2.1380000 | 0.2712379 | 1.9300000 | 2.5900000 |
|---|-----------|-----------|-----------|-----------|

---

Unique Subject Identifier=6171011010-0020

Assay variable : PTINR\_VAL1 PT-INR Value

N Mean Standard Deviation Minimum Maximum

---

|   |           |           |           |           |
|---|-----------|-----------|-----------|-----------|
| 6 | 2.0083333 | 0.3429529 | 1.6500000 | 2.4500000 |
|---|-----------|-----------|-----------|-----------|

---

Laboratory tests at the time of obtaining Table 2-6 consent, according to the presence or absence of proton-pump inhibitors

Unique Subject Identifier=6171011010-0021

MEANS Procedure

Assay variable : PTINR\_VAL1 PT-INR Value

N Mean Standard Deviation Minimum Maximum

---

|   |           |           |           |           |
|---|-----------|-----------|-----------|-----------|
| 5 | 2.4160000 | 0.6340978 | 1.5800000 | 3.2600000 |
|---|-----------|-----------|-----------|-----------|

---

Unique Subject Identifier=6171011010-0022

Assay variable : PTINR\_VAL1 PT-INR Value

N Mean Standard Deviation Minimum Maximum

---

|   |           |           |           |           |
|---|-----------|-----------|-----------|-----------|
| 6 | 1.9416667 | 0.3609109 | 1.5900000 | 2.6400000 |
|---|-----------|-----------|-----------|-----------|

---

Unique Subject Identifier=6198011000-0002

Assay variable : PTINR\_VAL1 PT-INR Value

N Mean Standard Deviation Minimum Maximum

---

|   |           |           |           |           |
|---|-----------|-----------|-----------|-----------|
| 6 | 1.7216667 | 0.1783723 | 1.5700000 | 1.9800000 |
|---|-----------|-----------|-----------|-----------|

---

Unique Subject Identifier=6198011000-0043

Assay variable : PTINR\_VAL1 PT-INR Value

N Mean Standard Deviation Minimum Maximum

---

|   |          |           |          |          |
|---|----------|-----------|----------|----------|
| 6 | 1.818333 | 0.7112923 | 1.250000 | 3.230000 |
|---|----------|-----------|----------|----------|

---

Laboratory tests at the time of obtaining Table 2-6 consent, according to the presence or absence of proton-pump inhibitors

Unique Subject Identifier=621400000-0010

MEANS Procedure

Assay variable : PTINR\_VAL1 PT-INR Value

| N | Mean      | Standard Deviation | Minimum   | Maximum   |
|---|-----------|--------------------|-----------|-----------|
| 4 | 2.0100000 | 0.7942712          | 1.4100000 | 3.1800000 |

Unique Subject Identifier=621400000-0016

Assay variable : PTINR\_VAL1 PT-INR Value

| N | Mean      | Standard Deviation | Minimum   | Maximum   |
|---|-----------|--------------------|-----------|-----------|
| 6 | 1.7383333 | 0.5724130          | 1.2900000 | 2.8000000 |

Unique Subject Identifier=621400000-0040

Assay variable : PTINR\_VAL1 PT-INR Value

| N | Mean      | Standard Deviation | Minimum   | Maximum   |
|---|-----------|--------------------|-----------|-----------|
| 5 | 1.6740000 | 0.1550161          | 1.4900000 | 1.8000000 |

Unique Subject Identifier=621400000-0045



Assay variable : PTINR\_VAL1 PT-INR Value

N Mean Standard Deviation Minimum Maximum

---

|   |           |           |           |           |
|---|-----------|-----------|-----------|-----------|
| 4 | 2.4100000 | 0.4181706 | 1.9100000 | 2.7700000 |
|---|-----------|-----------|-----------|-----------|

---

Laboratory tests at the time of obtaining Table 2-6 consent, according to the presence or absence of proton-pump inhibitors

Unique Subject Identifier=6214000000-0061

MEANS Procedure

Assay variable : PTINR\_VAL1 PT-INR Value

N Mean Standard Deviation Minimum Maximum

---

|   |           |           |           |           |
|---|-----------|-----------|-----------|-----------|
| 3 | 1.7900000 | 0.0754983 | 1.7200000 | 1.8700000 |
|---|-----------|-----------|-----------|-----------|

---

Unique Subject Identifier=6223000000-0002

Assay variable : PTINR\_VAL1 PT-INR Value

N Mean Standard Deviation Minimum Maximum

---

|   |           |           |           |           |
|---|-----------|-----------|-----------|-----------|
| 3 | 2.2266667 | 0.2663331 | 2.0000000 | 2.5200000 |
|---|-----------|-----------|-----------|-----------|

---

Unique Subject Identifier=6235000000-0017

Assay variable : PTINR\_VAL1 PT-INR Value

N Mean Standard Deviation Minimum Maximum

---

|   |           |           |           |           |
|---|-----------|-----------|-----------|-----------|
| 4 | 1.9500000 | 0.2380476 | 1.7000000 | 2.2000000 |
|---|-----------|-----------|-----------|-----------|

---

Unique Subject Identifier=6236010000-0001

Assay variable : PTINR\_VAL1 PT-INR Value

N Mean Standard Deviation Minimum Maximum

---

|   |           |           |           |           |
|---|-----------|-----------|-----------|-----------|
| 6 | 1.5750000 | 0.3858886 | 1.1300000 | 2.1100000 |
|---|-----------|-----------|-----------|-----------|

---

Laboratory tests at the time of obtaining Table 2-6 consent, according to the presence or absence of proton-pump inhibitors

Unique Subject Identifier=6236010000-0010

MEANS Procedure

Assay variable : PTINR\_VAL1 PT-INR Value

N Mean Standard Deviation Minimum Maximum

---

|   |           |           |           |           |
|---|-----------|-----------|-----------|-----------|
| 6 | 1.8783333 | 0.3113465 | 1.5300000 | 2.2000000 |
|---|-----------|-----------|-----------|-----------|

---

Unique Subject Identifier=6236010000-0013

Assay variable : PTINR\_VAL1 PT-INR Value

N Mean Standard Deviation Minimum Maximum

---

|   |           |           |           |           |
|---|-----------|-----------|-----------|-----------|
| 3 | 1.9400000 | 0.7847930 | 1.2100000 | 2.7700000 |
|---|-----------|-----------|-----------|-----------|

---

Unique Subject Identifier=6236010000-0016

Assay variable : PTINR\_VAL1 PT-INR Value

N Mean Standard Deviation Minimum Maximum

---

|   |           |           |           |           |
|---|-----------|-----------|-----------|-----------|
| 6 | 1.6433333 | 0.4206503 | 1.1700000 | 2.3700000 |
|---|-----------|-----------|-----------|-----------|

---

Unique Subject Identifier=6240011000-0011

Assay variable : PTINR\_VAL1 PT-INR Value

N Mean Standard Deviation Minimum Maximum

---

|   |           |           |           |           |
|---|-----------|-----------|-----------|-----------|
| 6 | 1.7300000 | 0.2445404 | 1.3700000 | 2.1100000 |
|---|-----------|-----------|-----------|-----------|

---

Laboratory tests at the time of obtaining Table 2-6 consent, according to the presence or absence of proton-pump inhibitors

Unique Subject Identifier=6240011000-0014

MEANS Procedure

Assay variable : PTINR\_VAL1 PT-INR Value

N Mean Standard Deviation Minimum Maximum

---

|   |           |           |           |           |
|---|-----------|-----------|-----------|-----------|
| 5 | 2.2900000 | 0.1367479 | 2.0600000 | 2.4000000 |
|---|-----------|-----------|-----------|-----------|

---

Unique Subject Identifier=6240011000-0018

Assay variable : PTINR\_VAL1 PT-INR Value

N Mean Standard Deviation Minimum Maximum

---

|   |           |           |           |           |
|---|-----------|-----------|-----------|-----------|
| 6 | 2.3033333 | 0.4195553 | 1.6200000 | 2.9300000 |
|---|-----------|-----------|-----------|-----------|

---

Unique Subject Identifier=6240011000-0024

Assay variable : PTINR\_VAL1 PT-INR Value

N Mean Standard Deviation Minimum Maximum

---

|   |           |           |           |           |
|---|-----------|-----------|-----------|-----------|
| 6 | 2.0950000 | 0.1867351 | 1.7900000 | 2.2800000 |
|---|-----------|-----------|-----------|-----------|

---

Unique Subject Identifier=6245000000-0023

Assay variable : PTINR\_VAL1 PT-INR Value

N Mean Standard Deviation Minimum Maximum

---

|   |           |           |           |           |
|---|-----------|-----------|-----------|-----------|
| 4 | 1.8700000 | 0.1570563 | 1.7000000 | 2.0800000 |
|---|-----------|-----------|-----------|-----------|

---

Laboratory tests at the time of obtaining Table 2-6 consent, according to the presence or absence of proton-pump inhibitors

Unique Subject Identifier=6248110111-0006

MEANS Procedure

Assay variable : PTINR\_VAL1 PT-INR Value

N Mean Standard Deviation Minimum Maximum

---

|   |           |           |           |           |
|---|-----------|-----------|-----------|-----------|
| 3 | 1.4266667 | 0.0850490 | 1.3300000 | 1.4900000 |
|---|-----------|-----------|-----------|-----------|

---

Unique Subject Identifier=6298000000-0001

Assay variable : PTINR\_VAL1 PT-INR Value

N Mean Standard Deviation Minimum Maximum

---

|   |           |           |           |           |
|---|-----------|-----------|-----------|-----------|
| 4 | 1.8100000 | 0.2816617 | 1.5000000 | 2.1800000 |
|---|-----------|-----------|-----------|-----------|

---

Unique Subject Identifier=6298000000-0017

Assay variable : PTINR\_VAL1 PT-INR Value

N Mean Standard Deviation Minimum Maximum

---

|   |           |           |           |           |
|---|-----------|-----------|-----------|-----------|
| 4 | 2.1225000 | 0.1532699 | 1.9800000 | 2.3300000 |
|---|-----------|-----------|-----------|-----------|

---

Unique Subject Identifier=6298000000-0026



Assay variable : PTINR\_VAL1 PT-INR Value

N Mean Standard Deviation Minimum Maximum

---

|   |           |           |           |           |
|---|-----------|-----------|-----------|-----------|
| 4 | 1.6875000 | 0.2535580 | 1.3300000 | 1.9200000 |
|---|-----------|-----------|-----------|-----------|

---

Laboratory tests at the time of obtaining Table 2-6 consent, according to the presence or absence of proton-pump inhibitors

Unique Subject Identifier=6298000000-0028

MEANS Procedure

Assay variable : PTINR\_VAL1 PT-INR Value

N Mean Standard Deviation Minimum Maximum

---

|   |           |           |           |           |
|---|-----------|-----------|-----------|-----------|
| 5 | 1.7580000 | 0.0605805 | 1.6900000 | 1.8300000 |
|---|-----------|-----------|-----------|-----------|

---

Unique Subject Identifier=6298000000-0029

Assay variable : PTINR\_VAL1 PT-INR Value

N Mean Standard Deviation Minimum Maximum

---

|   |           |           |           |           |
|---|-----------|-----------|-----------|-----------|
| 6 | 1.5116667 | 0.3346291 | 1.1200000 | 1.8900000 |
|---|-----------|-----------|-----------|-----------|

---

Unique Subject Identifier=6298000000-0037

Assay variable : PTINR\_VAL1 PT-INR Value

N Mean Standard Deviation Minimum Maximum

---

|   |           |           |           |           |
|---|-----------|-----------|-----------|-----------|
| 4 | 2.2650000 | 0.1738774 | 2.0300000 | 2.4500000 |
|---|-----------|-----------|-----------|-----------|

---

Unique Subject Identifier=6298000000-0046

Assay variable : PTINR\_VAL1 PT-INR Value

N Mean Standard Deviation Minimum Maximum

---

|   |           |           |           |           |
|---|-----------|-----------|-----------|-----------|
| 4 | 1.9975000 | 0.0801561 | 1.9200000 | 2.1100000 |
|---|-----------|-----------|-----------|-----------|

---

Laboratory tests at the time of obtaining Table 2-6 consent, according to the presence or absence of proton-pump inhibitors

Unique Subject Identifier=6298000000-0064

MEANS Procedure

Assay variable : PTINR\_VAL1 PT-INR Value

N Mean Standard Deviation Minimum Maximum

---

|   |           |           |           |           |
|---|-----------|-----------|-----------|-----------|
| 3 | 1.7366667 | 0.1908752 | 1.5200000 | 1.8800000 |
|---|-----------|-----------|-----------|-----------|

---

Unique Subject Identifier=6298000000-0068

Assay variable : PTINR\_VAL1 PT-INR Value

N Mean Standard Deviation Minimum Maximum

---

|   |           |           |           |           |
|---|-----------|-----------|-----------|-----------|
| 3 | 2.4133333 | 0.9972629 | 1.5400000 | 3.5000000 |
|---|-----------|-----------|-----------|-----------|

---

Unique Subject Identifier=6298000000-0075

Assay variable : PTINR\_VAL1 PT-INR Value

N Mean Standard Deviation Minimum Maximum

---

|   |           |           |           |           |
|---|-----------|-----------|-----------|-----------|
| 3 | 1.7733333 | 0.1123981 | 1.6500000 | 1.8700000 |
|---|-----------|-----------|-----------|-----------|

---

Unique Subject Identifier=6298000000-0082

Assay variable : PTINR\_VAL1 PT-INR Value

N Mean Standard Deviation Minimum Maximum

---

|   |          |  |          |          |
|---|----------|--|----------|----------|
| 1 | 1.240000 |  | 1.240000 | 1.240000 |
|---|----------|--|----------|----------|

---

Laboratory tests at the time of obtaining Table 2-6 consent, according to the presence or absence of proton-pump inhibitors

Unique Subject Identifier=6298000000-0096

MEANS Procedure

Assay variable : PTINR\_VAL1 PT-INR Value

| N | Mean      | Standard Deviation | Minimum   | Maximum   |
|---|-----------|--------------------|-----------|-----------|
| 1 | 1.8400000 |                    | 1.8400000 | 1.8400000 |

Unique Subject Identifier=6298000000-0120

Assay variable : PTINR\_VAL1 PT-INR Value

| N | Mean      | Standard Deviation | Minimum   | Maximum   |
|---|-----------|--------------------|-----------|-----------|
| 3 | 1.9733333 | 0.5163655          | 1.5100000 | 2.5300000 |

Unique Subject Identifier=6298000000-0167

Assay variable : PTINR\_VAL1 PT-INR Value

| N | Mean      | Standard Deviation | Minimum   | Maximum   |
|---|-----------|--------------------|-----------|-----------|
| 4 | 1.9150000 | 0.1927866          | 1.6600000 | 2.1200000 |

Unique Subject Identifier=6298000000-0169

Assay variable : PTINR\_VAL1 PT-INR Value

N Mean Standard Deviation Minimum Maximum

---

|   |          |           |          |          |
|---|----------|-----------|----------|----------|
| 6 | 1.903333 | 0.2122891 | 1.640000 | 2.150000 |
|---|----------|-----------|----------|----------|

---

Laboratory tests at the time of obtaining Table 2-6 consent, according to the presence or absence of proton-pump inhibitors

Unique Subject Identifier=6304000000-0011

MEANS Procedure

Assay variable : PTINR\_VAL1 PT-INR Value

N Mean Standard Deviation Minimum Maximum

---

|   |           |  |           |           |
|---|-----------|--|-----------|-----------|
| 1 | 1.9600000 |  | 1.9600000 | 1.9600000 |
|---|-----------|--|-----------|-----------|

---

Unique Subject Identifier=6304000000-0025

Assay variable : PTINR\_VAL1 PT-INR Value

N Mean Standard Deviation Minimum Maximum

---

|   |           |  |           |           |
|---|-----------|--|-----------|-----------|
| 1 | 2.5100000 |  | 2.5100000 | 2.5100000 |
|---|-----------|--|-----------|-----------|

---

Unique Subject Identifier=6309000000-0005

Assay variable : PTINR\_VAL1 PT-INR Value

N Mean Standard Deviation Minimum Maximum

---

|   |           |           |           |           |
|---|-----------|-----------|-----------|-----------|
| 3 | 2.7133333 | 0.0757188 | 2.6600000 | 2.8000000 |
|---|-----------|-----------|-----------|-----------|

---

Unique Subject Identifier=6309000000-0013



Assay variable : PTINR\_VAL1 PT-INR Value

N Mean Standard Deviation Minimum Maximum

---

|   |          |           |          |          |
|---|----------|-----------|----------|----------|
| 5 | 2.220000 | 0.3342155 | 1.690000 | 2.570000 |
|---|----------|-----------|----------|----------|

---

Laboratory tests at the time of obtaining Table 2-6 consent, according to the presence or absence of proton-pump inhibitors

Unique Subject Identifier=6309000000-0017

MEANS Procedure

Assay variable : PTINR\_VAL1 PT-INR Value

| N | Mean      | Standard Deviation | Minimum   | Maximum   |
|---|-----------|--------------------|-----------|-----------|
| 3 | 1.8566667 | 0.2532456          | 1.5700000 | 2.0500000 |

Unique Subject Identifier=6309000000-0030

Assay variable : PTINR\_VAL1 PT-INR Value

| N | Mean      | Standard Deviation | Minimum   | Maximum   |
|---|-----------|--------------------|-----------|-----------|
| 2 | 2.5000000 | 0.3959798          | 2.2200000 | 2.7800000 |

Unique Subject Identifier=6310000100-0009

Assay variable : PTINR\_VAL1 PT-INR Value

| N | Mean      | Standard Deviation | Minimum   | Maximum   |
|---|-----------|--------------------|-----------|-----------|
| 5 | 1.9400000 | 0.4992494          | 1.4000000 | 2.7400000 |

Unique Subject Identifier=6310000100-0012

Assay variable : PTINR\_VAL1 PT-INR Value

N Mean Standard Deviation Minimum Maximum

---

|   |          |           |          |          |
|---|----------|-----------|----------|----------|
| 6 | 2.390000 | 0.6134493 | 1.530000 | 3.280000 |
|---|----------|-----------|----------|----------|

---

Laboratory tests at the time of obtaining Table 2-6 consent, according to the presence or absence of proton-pump inhibitors

Unique Subject Identifier=6310000100-0016

MEANS Procedure

Assay variable : PTINR\_VAL1 PT-INR Value

N Mean Standard Deviation Minimum Maximum

---

|   |           |           |           |           |
|---|-----------|-----------|-----------|-----------|
| 5 | 1.9120000 | 0.4343040 | 1.1900000 | 2.3500000 |
|---|-----------|-----------|-----------|-----------|

---

Unique Subject Identifier=6310000100-0019

Assay variable : PTINR\_VAL1 PT-INR Value

N Mean Standard Deviation Minimum Maximum

---

|   |           |           |           |           |
|---|-----------|-----------|-----------|-----------|
| 5 | 2.3420000 | 0.4076395 | 1.6800000 | 2.6700000 |
|---|-----------|-----------|-----------|-----------|

---

Unique Subject Identifier=6366000000-0015

Assay variable : PTINR\_VAL1 PT-INR Value

N Mean Standard Deviation Minimum Maximum

---

|   |           |           |           |           |
|---|-----------|-----------|-----------|-----------|
| 6 | 2.2650000 | 0.2011716 | 1.9300000 | 2.5400000 |
|---|-----------|-----------|-----------|-----------|

---

Unique Subject Identifier=6426000000-0001

Assay variable : PTINR\_VAL1 PT-INR Value

N Mean Standard Deviation Minimum Maximum

---

|   |           |           |           |           |
|---|-----------|-----------|-----------|-----------|
| 5 | 2.3820000 | 0.2289541 | 2.2200000 | 2.7800000 |
|---|-----------|-----------|-----------|-----------|

---

Laboratory tests at the time of obtaining Table 2-6 consent, according to the presence or absence of proton-pump inhibitors

Unique Subject Identifier=642600000-0009

MEANS Procedure

Assay variable : PTINR\_VAL1 PT-INR Value

N Mean Standard Deviation Minimum Maximum

---

|   |           |           |           |           |
|---|-----------|-----------|-----------|-----------|
| 5 | 1.7180000 | 0.2357329 | 1.4800000 | 2.0600000 |
|---|-----------|-----------|-----------|-----------|

---

Unique Subject Identifier=642600000-0015

Assay variable : PTINR\_VAL1 PT-INR Value

N Mean Standard Deviation Minimum Maximum

---

|   |           |           |           |           |
|---|-----------|-----------|-----------|-----------|
| 5 | 1.9220000 | 0.0967988 | 1.8000000 | 2.0300000 |
|---|-----------|-----------|-----------|-----------|

---

Unique Subject Identifier=642600000-0016

Assay variable : PTINR\_VAL1 PT-INR Value

N Mean Standard Deviation Minimum Maximum

---

|   |           |           |           |           |
|---|-----------|-----------|-----------|-----------|
| 3 | 2.1966667 | 0.7054313 | 1.6400000 | 2.9900000 |
|---|-----------|-----------|-----------|-----------|

---

Unique Subject Identifier=642600000-0017

Assay variable : PTINR\_VAL1 PT-INR Value

N Mean Standard Deviation Minimum Maximum

---

|   |           |  |           |           |
|---|-----------|--|-----------|-----------|
| 1 | 1.0400000 |  | 1.0400000 | 1.0400000 |
|---|-----------|--|-----------|-----------|

---

Laboratory tests at the time of obtaining Table 2-6 consent, according to the presence or absence of proton-pump inhibitors

Unique Subject Identifier=642600000-0019

MEANS Procedure

Assay variable : PTINR\_VAL1 PT-INR Value

N Mean Standard Deviation Minimum Maximum

---

|   |           |           |           |           |
|---|-----------|-----------|-----------|-----------|
| 5 | 1.6720000 | 0.4934268 | 1.1700000 | 2.4900000 |
|---|-----------|-----------|-----------|-----------|

---

Unique Subject Identifier=642600000-0021

Assay variable : PTINR\_VAL1 PT-INR Value

N Mean Standard Deviation Minimum Maximum

---

|   |           |           |           |           |
|---|-----------|-----------|-----------|-----------|
| 4 | 2.3925000 | 0.3836991 | 1.8900000 | 2.8100000 |
|---|-----------|-----------|-----------|-----------|

---

Unique Subject Identifier=6642010010-0003

Assay variable : PTINR\_VAL1 PT-INR Value

N Mean Standard Deviation Minimum Maximum

---

|   |           |           |           |           |
|---|-----------|-----------|-----------|-----------|
| 6 | 1.8100000 | 0.1882551 | 1.5800000 | 2.1000000 |
|---|-----------|-----------|-----------|-----------|

---

Unique Subject Identifier=7001010000-0004



Assay variable : PTINR\_VAL1 PT-INR Value

N Mean Standard Deviation Minimum Maximum

---

|   |           |           |           |           |
|---|-----------|-----------|-----------|-----------|
| 6 | 1.3983333 | 0.1105290 | 1.2700000 | 1.5600000 |
|---|-----------|-----------|-----------|-----------|

---

Laboratory tests at the time of obtaining Table 2-6 consent, according to the presence or absence of proton-pump inhibitors

Unique Subject Identifier=7002000000-0017

MEANS Procedure

Assay variable : PTINR\_VAL1 PT-INR Value

N Mean Standard Deviation Minimum Maximum

---

|   |           |           |           |           |
|---|-----------|-----------|-----------|-----------|
| 6 | 2.0300000 | 0.5932285 | 1.3200000 | 3.1000000 |
|---|-----------|-----------|-----------|-----------|

---

Unique Subject Identifier=7002000000-0018

Assay variable : PTINR\_VAL1 PT-INR Value

N Mean Standard Deviation Minimum Maximum

---

|   |           |           |           |           |
|---|-----------|-----------|-----------|-----------|
| 2 | 2.6450000 | 0.6858936 | 2.1600000 | 3.1300000 |
|---|-----------|-----------|-----------|-----------|

---

Unique Subject Identifier=7002000000-0020

Assay variable : PTINR\_VAL1 PT-INR Value

N Mean Standard Deviation Minimum Maximum

---

|   |           |           |           |           |
|---|-----------|-----------|-----------|-----------|
| 3 | 1.7266667 | 0.2631223 | 1.4900000 | 2.0100000 |
|---|-----------|-----------|-----------|-----------|

---

Unique Subject Identifier=7002000000-0039

Assay variable : PTINR\_VAL1 PT-INR Value

N Mean Standard Deviation Minimum Maximum

---

|   |           |           |           |           |
|---|-----------|-----------|-----------|-----------|
| 4 | 2.4050000 | 0.7684834 | 1.6700000 | 3.3800000 |
|---|-----------|-----------|-----------|-----------|

---

Laboratory tests at the time of obtaining Table 2-6 consent, according to the presence or absence of proton-pump inhibitors

Unique Subject Identifier=7004000000-0002

MEANS Procedure

Assay variable : PTINR\_VAL1 PT-INR Value

N Mean Standard Deviation Minimum Maximum

---

|   |           |           |           |           |
|---|-----------|-----------|-----------|-----------|
| 6 | 1.6400000 | 0.1906830 | 1.3200000 | 1.8100000 |
|---|-----------|-----------|-----------|-----------|

---

Unique Subject Identifier=7004000000-0008

Assay variable : PTINR\_VAL1 PT-INR Value

N Mean Standard Deviation Minimum Maximum

---

|   |           |           |           |           |
|---|-----------|-----------|-----------|-----------|
| 3 | 2.1933333 | 0.1305118 | 2.0900000 | 2.3400000 |
|---|-----------|-----------|-----------|-----------|

---

Unique Subject Identifier=7004000000-0018

Assay variable : PTINR\_VAL1 PT-INR Value

N Mean Standard Deviation Minimum Maximum

---

|   |           |           |           |           |
|---|-----------|-----------|-----------|-----------|
| 3 | 2.0600000 | 0.1400000 | 1.9000000 | 2.1600000 |
|---|-----------|-----------|-----------|-----------|

---

Unique Subject Identifier=7005000000-0008

Assay variable : PTINR\_VAL1 PT-INR Value

N Mean Standard Deviation Minimum Maximum

---

|   |          |           |          |          |
|---|----------|-----------|----------|----------|
| 4 | 1.560000 | 0.5383308 | 1.140000 | 2.310000 |
|---|----------|-----------|----------|----------|

---

Laboratory tests at the time of obtaining Table 2-6 consent, according to the presence or absence of proton-pump inhibitors

Unique Subject Identifier=7005000000-0015

MEANS Procedure

Assay variable : PTINR\_VAL1 PT-INR Value

N Mean Standard Deviation Minimum Maximum

---

|   |          |           |          |          |
|---|----------|-----------|----------|----------|
| 5 | 2.480000 | 0.4851288 | 1.880000 | 3.110000 |
|---|----------|-----------|----------|----------|

---

Unique Subject Identifier=7008000000-0007

Assay variable : PTINR\_VAL1 PT-INR Value

N Mean Standard Deviation Minimum Maximum

---

|   |          |           |          |          |
|---|----------|-----------|----------|----------|
| 6 | 1.685000 | 0.2126735 | 1.470000 | 2.040000 |
|---|----------|-----------|----------|----------|

---

Unique Subject Identifier=7008000000-0027

Assay variable : PTINR\_VAL1 PT-INR Value

N Mean Standard Deviation Minimum Maximum

---

|   |          |           |          |          |
|---|----------|-----------|----------|----------|
| 6 | 1.860000 | 0.4904692 | 1.170000 | 2.450000 |
|---|----------|-----------|----------|----------|

---

Unique Subject Identifier=7009010000-0007

Assay variable : PTINR\_VAL1 PT-INR Value

N Mean Standard Deviation Minimum Maximum

---

|   |           |           |           |           |
|---|-----------|-----------|-----------|-----------|
| 4 | 1.7175000 | 0.2490482 | 1.5400000 | 2.0800000 |
|---|-----------|-----------|-----------|-----------|

---

Laboratory tests at the time of obtaining Table 2-6 consent, according to the presence or absence of proton-pump inhibitors

Unique Subject Identifier=7009010000-0016

MEANS Procedure

Assay variable : PTINR\_VAL1 PT-INR Value

N Mean Standard Deviation Minimum Maximum

---

|   |           |           |           |           |
|---|-----------|-----------|-----------|-----------|
| 3 | 2.6766667 | 0.1955335 | 2.4900000 | 2.8800000 |
|---|-----------|-----------|-----------|-----------|

---

Unique Subject Identifier=7014000000-0005

Assay variable : PTINR\_VAL1 PT-INR Value

N Mean Standard Deviation Minimum Maximum

---

|   |           |           |           |           |
|---|-----------|-----------|-----------|-----------|
| 6 | 2.4600000 | 0.5049752 | 1.7300000 | 3.0800000 |
|---|-----------|-----------|-----------|-----------|

---

Unique Subject Identifier=7014000000-0010

Assay variable : PTINR\_VAL1 PT-INR Value

N Mean Standard Deviation Minimum Maximum

---

|   |           |           |           |           |
|---|-----------|-----------|-----------|-----------|
| 2 | 2.3950000 | 0.4879037 | 2.0500000 | 2.7400000 |
|---|-----------|-----------|-----------|-----------|

---

Unique Subject Identifier=7026000000-0020



Assay variable : PTINR\_VAL1 PT-INR Value

N Mean Standard Deviation Minimum Maximum

---

|   |           |           |           |           |
|---|-----------|-----------|-----------|-----------|
| 6 | 1.9583333 | 0.5064550 | 1.2000000 | 2.7400000 |
|---|-----------|-----------|-----------|-----------|

---

Laboratory tests at the time of obtaining Table 2-6 consent, according to the presence or absence of proton-pump inhibitors

Unique Subject Identifier=7026000000-0025

MEANS Procedure

Assay variable : PTINR\_VAL1 PT-INR Value

| N | Mean      | Standard Deviation | Minimum   | Maximum   |
|---|-----------|--------------------|-----------|-----------|
| 3 | 2.0766667 | 0.8183724          | 1.4100000 | 2.9900000 |

Unique Subject Identifier=7026000000-0026

Assay variable : PTINR\_VAL1 PT-INR Value

| N | Mean      | Standard Deviation | Minimum   | Maximum   |
|---|-----------|--------------------|-----------|-----------|
| 2 | 1.7650000 | 0.3181981          | 1.5400000 | 1.9900000 |

Unique Subject Identifier=7026000000-0029

Assay variable : PTINR\_VAL1 PT-INR Value

| N | Mean      | Standard Deviation | Minimum   | Maximum   |
|---|-----------|--------------------|-----------|-----------|
| 4 | 2.2500000 | 0.3271085          | 1.9800000 | 2.7200000 |

Unique Subject Identifier=7026000000-0034

Assay variable : PTINR\_VAL1 PT-INR Value

N Mean Standard Deviation Minimum Maximum

---

|   |           |           |           |           |
|---|-----------|-----------|-----------|-----------|
| 4 | 1.7175000 | 0.1732772 | 1.5400000 | 1.8900000 |
|---|-----------|-----------|-----------|-----------|

---

Laboratory tests at the time of obtaining Table 2-6 consent, according to the presence or absence of proton-pump inhibitors

Unique Subject Identifier=7026000000-0037

MEANS Procedure

Assay variable : PTINR\_VAL1 PT-INR Value

| N | Mean      | Standard Deviation | Minimum   | Maximum   |
|---|-----------|--------------------|-----------|-----------|
| 2 | 1.7150000 | 0.0070711          | 1.7100000 | 1.7200000 |

Unique Subject Identifier=7030010000-0013

Assay variable : PTINR\_VAL1 PT-INR Value

| N | Mean      | Standard Deviation | Minimum   | Maximum   |
|---|-----------|--------------------|-----------|-----------|
| 5 | 2.1060000 | 0.1677200          | 1.9200000 | 2.3100000 |

Unique Subject Identifier=7030010000-0023

Assay variable : PTINR\_VAL1 PT-INR Value

| N | Mean      | Standard Deviation | Minimum   | Maximum   |
|---|-----------|--------------------|-----------|-----------|
| 5 | 1.8140000 | 0.1689083          | 1.5500000 | 2.0000000 |

Unique Subject Identifier=7030010000-0031

Assay variable : PTINR\_VAL1 PT-INR Value

N Mean Standard Deviation Minimum Maximum

---

|   |           |           |           |           |
|---|-----------|-----------|-----------|-----------|
| 4 | 2.3525000 | 0.3063087 | 2.0600000 | 2.6600000 |
|---|-----------|-----------|-----------|-----------|

---

Laboratory tests at the time of obtaining Table 2-6 consent, according to the presence or absence of proton-pump inhibitors

Unique Subject Identifier=7030010000-0034

MEANS Procedure

Assay variable : PTINR\_VAL1 PT-INR Value

N Mean Standard Deviation Minimum Maximum

---

|   |           |           |           |           |
|---|-----------|-----------|-----------|-----------|
| 4 | 1.9250000 | 0.3516153 | 1.4800000 | 2.3400000 |
|---|-----------|-----------|-----------|-----------|

---

Unique Subject Identifier=7031011111-0013

Assay variable : PTINR\_VAL1 PT-INR Value

N Mean Standard Deviation Minimum Maximum

---

|   |           |           |           |           |
|---|-----------|-----------|-----------|-----------|
| 3 | 2.1766667 | 0.2983845 | 1.9800000 | 2.5200000 |
|---|-----------|-----------|-----------|-----------|

---

Unique Subject Identifier=7031011111-0019

Assay variable : PTINR\_VAL1 PT-INR Value

N Mean Standard Deviation Minimum Maximum

---

|   |           |           |           |           |
|---|-----------|-----------|-----------|-----------|
| 5 | 2.1200000 | 0.2667396 | 1.8500000 | 2.5300000 |
|---|-----------|-----------|-----------|-----------|

---

Unique Subject Identifier=7031011111-0026

Assay variable : PTINR\_VAL1 PT-INR Value

N Mean Standard Deviation Minimum Maximum

---

|   |           |           |           |           |
|---|-----------|-----------|-----------|-----------|
| 6 | 2.6250000 | 0.1683746 | 2.4700000 | 2.9300000 |
|---|-----------|-----------|-----------|-----------|

---

Laboratory tests at the time of obtaining Table 2-6 consent, according to the presence or absence of proton-pump inhibitors

Unique Subject Identifier=7031011111-0034

MEANS Procedure

Assay variable : PTINR\_VAL1 PT-INR Value

N Mean Standard Deviation Minimum Maximum

---

|   |           |           |           |           |
|---|-----------|-----------|-----------|-----------|
| 4 | 2.1175000 | 0.6155418 | 1.4500000 | 2.9000000 |
|---|-----------|-----------|-----------|-----------|

---

Unique Subject Identifier=7031011111-0037

Assay variable : PTINR\_VAL1 PT-INR Value

N Mean Standard Deviation Minimum Maximum

---

|   |           |           |           |           |
|---|-----------|-----------|-----------|-----------|
| 4 | 1.7200000 | 0.1718527 | 1.5500000 | 1.9500000 |
|---|-----------|-----------|-----------|-----------|

---

Unique Subject Identifier=7035000000-0026

Assay variable : PTINR\_VAL1 PT-INR Value

N Mean Standard Deviation Minimum Maximum

---

|   |           |           |           |           |
|---|-----------|-----------|-----------|-----------|
| 4 | 1.5450000 | 0.1337909 | 1.3900000 | 1.6800000 |
|---|-----------|-----------|-----------|-----------|

---

Unique Subject Identifier=7035000000-0028



Assay variable : PTINR\_VAL1 PT-INR Value

N Mean Standard Deviation Minimum Maximum

---

|   |           |           |           |           |
|---|-----------|-----------|-----------|-----------|
| 4 | 1.7625000 | 0.1931105 | 1.5900000 | 2.0300000 |
|---|-----------|-----------|-----------|-----------|

---

Laboratory tests at the time of obtaining Table 2-6 consent, according to the presence or absence of proton-pump inhibitors

Unique Subject Identifier=7035000000-0050

MEANS Procedure

Assay variable : PTINR\_VAL1 PT-INR Value

N Mean Standard Deviation Minimum Maximum

---

|   |           |           |           |           |
|---|-----------|-----------|-----------|-----------|
| 4 | 1.4325000 | 0.0518813 | 1.3600000 | 1.4700000 |
|---|-----------|-----------|-----------|-----------|

---

Unique Subject Identifier=7035000000-0054

Assay variable : PTINR\_VAL1 PT-INR Value

N Mean Standard Deviation Minimum Maximum

---

|   |           |           |           |           |
|---|-----------|-----------|-----------|-----------|
| 3 | 1.7533333 | 0.0503322 | 1.7000000 | 1.8000000 |
|---|-----------|-----------|-----------|-----------|

---

Unique Subject Identifier=7035000000-0055

Assay variable : PTINR\_VAL1 PT-INR Value

N Mean Standard Deviation Minimum Maximum

---

|   |           |           |           |           |
|---|-----------|-----------|-----------|-----------|
| 3 | 2.2566667 | 0.1877054 | 2.0400000 | 2.3700000 |
|---|-----------|-----------|-----------|-----------|

---

Unique Subject Identifier=7035000000-0057

Assay variable : PTINR\_VAL1 PT-INR Value

N Mean Standard Deviation Minimum Maximum

---

|   |          |  |          |          |
|---|----------|--|----------|----------|
| 1 | 2.320000 |  | 2.320000 | 2.320000 |
|---|----------|--|----------|----------|

---

Laboratory tests at the time of obtaining Table 2-6 consent, according to the presence or absence of proton-pump inhibitors

Unique Subject Identifier=7035000000-0068

MEANS Procedure

Assay variable : PTINR\_VAL1 PT-INR Value

N Mean Standard Deviation Minimum Maximum

---

|   |           |           |           |           |
|---|-----------|-----------|-----------|-----------|
| 2 | 2.0100000 | 0.4101219 | 1.7200000 | 2.3000000 |
|---|-----------|-----------|-----------|-----------|

---

Unique Subject Identifier=7035000000-0071

Assay variable : PTINR\_VAL1 PT-INR Value

N Mean Standard Deviation Minimum Maximum

---

|   |           |           |           |           |
|---|-----------|-----------|-----------|-----------|
| 3 | 2.0800000 | 0.1228821 | 1.9400000 | 2.1700000 |
|---|-----------|-----------|-----------|-----------|

---

Unique Subject Identifier=7035000000-0072

Assay variable : PTINR\_VAL1 PT-INR Value

N Mean Standard Deviation Minimum Maximum

---

|   |           |           |           |           |
|---|-----------|-----------|-----------|-----------|
| 4 | 1.9850000 | 0.4655105 | 1.5200000 | 2.4700000 |
|---|-----------|-----------|-----------|-----------|

---

Unique Subject Identifier=7035000000-0084

Assay variable : PTINR\_VAL1 PT-INR Value

N Mean Standard Deviation Minimum Maximum

---

|   |           |           |           |           |
|---|-----------|-----------|-----------|-----------|
| 3 | 2.7966667 | 0.2750152 | 2.5200000 | 3.0700000 |
|---|-----------|-----------|-----------|-----------|

---

Laboratory tests at the time of obtaining Table 2-6 consent, according to the presence or absence of proton-pump inhibitors

Unique Subject Identifier=7035000000-0086

MEANS Procedure

Assay variable : PTINR\_VAL1 PT-INR Value

N Mean Standard Deviation Minimum Maximum

---

|   |           |           |           |           |
|---|-----------|-----------|-----------|-----------|
| 2 | 1.6950000 | 0.2050610 | 1.5500000 | 1.8400000 |
|---|-----------|-----------|-----------|-----------|

---

Unique Subject Identifier=7035000000-0090

Assay variable : PTINR\_VAL1 PT-INR Value

N Mean Standard Deviation Minimum Maximum

---

|   |           |           |           |           |
|---|-----------|-----------|-----------|-----------|
| 3 | 2.2766667 | 0.1858315 | 2.1500000 | 2.4900000 |
|---|-----------|-----------|-----------|-----------|

---

Unique Subject Identifier=7035000000-0097

Assay variable : PTINR\_VAL1 PT-INR Value

N Mean Standard Deviation Minimum Maximum

---

|   |           |  |           |           |
|---|-----------|--|-----------|-----------|
| 1 | 2.4600000 |  | 2.4600000 | 2.4600000 |
|---|-----------|--|-----------|-----------|

---

Unique Subject Identifier=7037000000-0012

Assay variable : PTINR\_VAL1 PT-INR Value

N Mean Standard Deviation Minimum Maximum

---

|   |           |           |           |           |
|---|-----------|-----------|-----------|-----------|
| 6 | 2.1016667 | 0.5417164 | 1.7000000 | 3.1000000 |
|---|-----------|-----------|-----------|-----------|

---

Laboratory tests at the time of obtaining Table 2-6 consent, according to the presence or absence of proton-pump inhibitors

Unique Subject Identifier=7042010110-0006

MEANS Procedure

Assay variable : PTINR\_VAL1 PT-INR Value

N Mean Standard Deviation Minimum Maximum

---

|   |           |           |           |           |
|---|-----------|-----------|-----------|-----------|
| 3 | 2.2100000 | 0.1100000 | 2.1000000 | 2.3200000 |
|---|-----------|-----------|-----------|-----------|

---

Unique Subject Identifier=7042010110-0011

Assay variable : PTINR\_VAL1 PT-INR Value

N Mean Standard Deviation Minimum Maximum

---

|   |           |           |           |           |
|---|-----------|-----------|-----------|-----------|
| 3 | 1.9200000 | 0.1252996 | 1.8000000 | 2.0500000 |
|---|-----------|-----------|-----------|-----------|

---

Unique Subject Identifier=7042010110-0013

Assay variable : PTINR\_VAL1 PT-INR Value

N Mean Standard Deviation Minimum Maximum

---

|   |           |           |           |           |
|---|-----------|-----------|-----------|-----------|
| 6 | 2.2466667 | 0.2058802 | 1.8900000 | 2.4400000 |
|---|-----------|-----------|-----------|-----------|

---

Unique Subject Identifier=7042010110-0014



Assay variable : PTINR\_VAL1 PT-INR Value

N Mean Standard Deviation Minimum Maximum

---

|   |           |           |           |           |
|---|-----------|-----------|-----------|-----------|
| 6 | 1.3150000 | 0.2433721 | 1.0300000 | 1.7600000 |
|---|-----------|-----------|-----------|-----------|

---

Laboratory tests at the time of obtaining Table 2-6 consent, according to the presence or absence of proton-pump inhibitors

Unique Subject Identifier=7042010110-0017

MEANS Procedure

Assay variable : PTINR\_VAL1 PT-INR Value

N Mean Standard Deviation Minimum Maximum

---

|   |           |           |           |           |
|---|-----------|-----------|-----------|-----------|
| 6 | 2.1166667 | 1.2655697 | 1.4100000 | 4.6700000 |
|---|-----------|-----------|-----------|-----------|

---

Unique Subject Identifier=7042010110-0018

Assay variable : PTINR\_VAL1 PT-INR Value

N Mean Standard Deviation Minimum Maximum

---

|   |           |           |           |           |
|---|-----------|-----------|-----------|-----------|
| 6 | 1.4266667 | 0.0799166 | 1.3100000 | 1.5200000 |
|---|-----------|-----------|-----------|-----------|

---

Unique Subject Identifier=7042010110-0021

Assay variable : PTINR\_VAL1 PT-INR Value

N Mean Standard Deviation Minimum Maximum

---

|   |           |           |           |           |
|---|-----------|-----------|-----------|-----------|
| 3 | 2.2633333 | 0.0208167 | 2.2400000 | 2.2800000 |
|---|-----------|-----------|-----------|-----------|

---

Unique Subject Identifier=7042010110-0022

Assay variable : PTINR\_VAL1 PT-INR Value

N Mean Standard Deviation Minimum Maximum

---

|   |          |           |          |          |
|---|----------|-----------|----------|----------|
| 5 | 1.512000 | 0.1613072 | 1.230000 | 1.630000 |
|---|----------|-----------|----------|----------|

---

Laboratory tests at the time of obtaining Table 2-6 consent, according to the presence or absence of proton-pump inhibitors

Unique Subject Identifier=7045000000-0001

MEANS Procedure

Assay variable : PTINR\_VAL1 PT-INR Value

N Mean Standard Deviation Minimum Maximum

---

|   |           |           |           |           |
|---|-----------|-----------|-----------|-----------|
| 5 | 1.9640000 | 0.2596729 | 1.7400000 | 2.4000000 |
|---|-----------|-----------|-----------|-----------|

---

Unique Subject Identifier=7045000000-0010

Assay variable : PTINR\_VAL1 PT-INR Value

N Mean Standard Deviation Minimum Maximum

---

|   |           |           |           |           |
|---|-----------|-----------|-----------|-----------|
| 6 | 2.3050000 | 0.2608256 | 1.8900000 | 2.6200000 |
|---|-----------|-----------|-----------|-----------|

---

Unique Subject Identifier=7045000000-0011

Assay variable : PTINR\_VAL1 PT-INR Value

N Mean Standard Deviation Minimum Maximum

---

|   |           |           |           |           |
|---|-----------|-----------|-----------|-----------|
| 6 | 1.9750000 | 0.2833196 | 1.5400000 | 2.2500000 |
|---|-----------|-----------|-----------|-----------|

---

Unique Subject Identifier=7045000000-0024

Assay variable : PTINR\_VAL1 PT-INR Value

N Mean Standard Deviation Minimum Maximum

---

|   |          |           |          |          |
|---|----------|-----------|----------|----------|
| 5 | 2.150000 | 0.3277194 | 1.670000 | 2.590000 |
|---|----------|-----------|----------|----------|

---

Laboratory tests at the time of obtaining Table 2-6 consent, according to the presence or absence of proton-pump inhibitors

Unique Subject Identifier=7045000000-0026

MEANS Procedure

Assay variable : PTINR\_VAL1 PT-INR Value

N Mean Standard Deviation Minimum Maximum

---

|   |           |           |           |           |
|---|-----------|-----------|-----------|-----------|
| 4 | 1.7650000 | 0.1415392 | 1.5600000 | 1.8800000 |
|---|-----------|-----------|-----------|-----------|

---

Unique Subject Identifier=7045000000-0028

Assay variable : PTINR\_VAL1 PT-INR Value

N Mean Standard Deviation Minimum Maximum

---

|   |           |           |           |           |
|---|-----------|-----------|-----------|-----------|
| 6 | 2.1716667 | 0.4511060 | 1.4500000 | 2.6600000 |
|---|-----------|-----------|-----------|-----------|

---

Unique Subject Identifier=7045000000-0029

Assay variable : PTINR\_VAL1 PT-INR Value

N Mean Standard Deviation Minimum Maximum

---

|   |           |           |           |           |
|---|-----------|-----------|-----------|-----------|
| 4 | 2.0725000 | 0.1486327 | 1.9300000 | 2.2800000 |
|---|-----------|-----------|-----------|-----------|

---

Unique Subject Identifier=7047000000-0001

Assay variable : PTINR\_VAL1 PT-INR Value

N Mean Standard Deviation Minimum Maximum

---

|   |           |           |           |           |
|---|-----------|-----------|-----------|-----------|
| 6 | 1.6450000 | 0.5950714 | 1.2000000 | 2.6400000 |
|---|-----------|-----------|-----------|-----------|

---

Laboratory tests at the time of obtaining Table 2-6 consent, according to the presence or absence of proton-pump inhibitors

Unique Subject Identifier=7055000000-0007

MEANS Procedure

Assay variable : PTINR\_VAL1 PT-INR Value

N Mean Standard Deviation Minimum Maximum

---

|   |           |           |           |           |
|---|-----------|-----------|-----------|-----------|
| 6 | 2.0216667 | 0.1614208 | 1.8200000 | 2.2600000 |
|---|-----------|-----------|-----------|-----------|

---

Unique Subject Identifier=7061010010-0002

Assay variable : PTINR\_VAL1 PT-INR Value

N Mean Standard Deviation Minimum Maximum

---

|   |           |           |           |           |
|---|-----------|-----------|-----------|-----------|
| 6 | 1.9500000 | 0.2588436 | 1.7000000 | 2.4000000 |
|---|-----------|-----------|-----------|-----------|

---

Unique Subject Identifier=7061010010-0004

Assay variable : PTINR\_VAL1 PT-INR Value

N Mean Standard Deviation Minimum Maximum

---

|   |           |           |           |           |
|---|-----------|-----------|-----------|-----------|
| 6 | 1.5500000 | 0.3563706 | 1.1000000 | 2.1000000 |
|---|-----------|-----------|-----------|-----------|

---

Unique Subject Identifier=7061010010-0007



Assay variable : PTINR\_VAL1 PT-INR Value

N Mean Standard Deviation Minimum Maximum

---

|   |           |           |           |           |
|---|-----------|-----------|-----------|-----------|
| 3 | 1.9666667 | 0.5033223 | 1.5000000 | 2.5000000 |
|---|-----------|-----------|-----------|-----------|

---

Laboratory tests at the time of obtaining Table 2-6 consent, according to the presence or absence of proton-pump inhibitors

Unique Subject Identifier=7061010010-0009

MEANS Procedure

Assay variable : PTINR\_VAL1 PT-INR Value

N Mean Standard Deviation Minimum Maximum

---

|   |           |           |           |           |
|---|-----------|-----------|-----------|-----------|
| 4 | 2.3250000 | 0.5737305 | 1.8000000 | 3.1000000 |
|---|-----------|-----------|-----------|-----------|

---

Unique Subject Identifier=7066000000-0002

Assay variable : PTINR\_VAL1 PT-INR Value

N Mean Standard Deviation Minimum Maximum

---

|   |           |           |           |           |
|---|-----------|-----------|-----------|-----------|
| 6 | 2.6683333 | 1.5619913 | 1.1900000 | 5.4500000 |
|---|-----------|-----------|-----------|-----------|

---

Unique Subject Identifier=7066000000-0007

Assay variable : PTINR\_VAL1 PT-INR Value

N Mean Standard Deviation Minimum Maximum

---

|   |           |           |           |           |
|---|-----------|-----------|-----------|-----------|
| 6 | 1.9766667 | 0.2334666 | 1.6000000 | 2.2900000 |
|---|-----------|-----------|-----------|-----------|

---

Unique Subject Identifier=7066000000-0013

Assay variable : PTINR\_VAL1 PT-INR Value

N Mean Standard Deviation Minimum Maximum

---

|   |           |           |           |           |
|---|-----------|-----------|-----------|-----------|
| 6 | 1.9066667 | 0.1186030 | 1.7200000 | 2.0300000 |
|---|-----------|-----------|-----------|-----------|

---

Laboratory tests at the time of obtaining Table 2-6 consent, according to the presence or absence of proton-pump inhibitors

Unique Subject Identifier=7066000000-0021

MEANS Procedure

Assay variable : PTINR\_VAL1 PT-INR Value

N Mean Standard Deviation Minimum Maximum

---

|   |           |           |           |           |
|---|-----------|-----------|-----------|-----------|
| 6 | 1.7133333 | 0.3478889 | 1.3200000 | 2.2000000 |
|---|-----------|-----------|-----------|-----------|

---

Unique Subject Identifier=7104010000-0020

Assay variable : PTINR\_VAL1 PT-INR Value

N Mean Standard Deviation Minimum Maximum

---

|   |           |           |           |           |
|---|-----------|-----------|-----------|-----------|
| 6 | 2.4650000 | 0.1415274 | 2.2900000 | 2.6500000 |
|---|-----------|-----------|-----------|-----------|

---

Unique Subject Identifier=7132010000-0017

Assay variable : PTINR\_VAL1 PT-INR Value

N Mean Standard Deviation Minimum Maximum

---

|   |           |           |           |           |
|---|-----------|-----------|-----------|-----------|
| 4 | 2.4975000 | 0.8896582 | 1.5000000 | 3.6100000 |
|---|-----------|-----------|-----------|-----------|

---

Unique Subject Identifier=7132010000-0020

Assay variable : PTINR\_VAL1 PT-INR Value

N Mean Standard Deviation Minimum Maximum

---

|   |          |           |          |          |
|---|----------|-----------|----------|----------|
| 3 | 1.840000 | 0.2260531 | 1.690000 | 2.100000 |
|---|----------|-----------|----------|----------|

---

Laboratory tests at the time of obtaining Table 2-6 consent, according to the presence or absence of proton-pump inhibitors

Unique Subject Identifier=713300000-0001

MEANS Procedure

Assay variable : PTINR\_VAL1 PT-INR Value

N Mean Standard Deviation Minimum Maximum

---

|   |           |           |           |           |
|---|-----------|-----------|-----------|-----------|
| 6 | 2.3316667 | 1.1864471 | 1.0700000 | 4.5200000 |
|---|-----------|-----------|-----------|-----------|

---

Unique Subject Identifier=713600000-0003

Assay variable : PTINR\_VAL1 PT-INR Value

N Mean Standard Deviation Minimum Maximum

---

|   |           |           |           |           |
|---|-----------|-----------|-----------|-----------|
| 4 | 2.3200000 | 0.2786874 | 2.0500000 | 2.7100000 |
|---|-----------|-----------|-----------|-----------|

---

Unique Subject Identifier=713600000-0005

Assay variable : PTINR\_VAL1 PT-INR Value

N Mean Standard Deviation Minimum Maximum

---

|   |           |           |           |           |
|---|-----------|-----------|-----------|-----------|
| 3 | 1.7033333 | 0.0814453 | 1.6100000 | 1.7600000 |
|---|-----------|-----------|-----------|-----------|

---

Unique Subject Identifier=713600000-0006

Assay variable : PTINR\_VAL1 PT-INR Value

N Mean Standard Deviation Minimum Maximum

---

|   |           |           |           |           |
|---|-----------|-----------|-----------|-----------|
| 4 | 1.5450000 | 0.2235322 | 1.2900000 | 1.7700000 |
|---|-----------|-----------|-----------|-----------|

---

Laboratory tests at the time of obtaining Table 2-6 consent, according to the presence or absence of proton-pump inhibitors

Unique Subject Identifier=713600000-0007

MEANS Procedure

Assay variable : PTINR\_VAL1 PT-INR Value

| N | Mean     | Standard Deviation | Minimum  | Maximum  |
|---|----------|--------------------|----------|----------|
| 5 | 2.360000 | 0.6914478          | 1.370000 | 3.000000 |

Unique Subject Identifier=713600000-0011

Assay variable : PTINR\_VAL1 PT-INR Value

| N | Mean     | Standard Deviation | Minimum  | Maximum  |
|---|----------|--------------------|----------|----------|
| 5 | 1.430000 | 0.1609348          | 1.220000 | 1.620000 |

Unique Subject Identifier=713600000-0015

Assay variable : PTINR\_VAL1 PT-INR Value

| N | Mean     | Standard Deviation | Minimum  | Maximum  |
|---|----------|--------------------|----------|----------|
| 4 | 2.280000 | 0.1390444          | 2.150000 | 2.410000 |

Unique Subject Identifier=713600000-0016



Assay variable : PTINR\_VAL1 PT-INR Value

N Mean Standard Deviation Minimum Maximum

---

|   |          |           |          |          |
|---|----------|-----------|----------|----------|
| 3 | 1.910000 | 0.3477068 | 1.590000 | 2.280000 |
|---|----------|-----------|----------|----------|

---

Laboratory tests at the time of obtaining Table 2-6 consent, according to the presence or absence of proton-pump inhibitors

Unique Subject Identifier=713600000-0017

MEANS Procedure

Assay variable : PTINR\_VAL1 PT-INR Value

N Mean Standard Deviation Minimum Maximum

---

|   |           |           |           |           |
|---|-----------|-----------|-----------|-----------|
| 6 | 2.2816667 | 0.7896940 | 1.4800000 | 3.5500000 |
|---|-----------|-----------|-----------|-----------|

---

Unique Subject Identifier=713600000-0021

Assay variable : PTINR\_VAL1 PT-INR Value

N Mean Standard Deviation Minimum Maximum

---

|   |           |           |           |           |
|---|-----------|-----------|-----------|-----------|
| 6 | 2.1450000 | 0.4427528 | 1.6400000 | 2.7900000 |
|---|-----------|-----------|-----------|-----------|

---

Unique Subject Identifier=713600000-0025

Assay variable : PTINR\_VAL1 PT-INR Value

N Mean Standard Deviation Minimum Maximum

---

|   |           |           |           |           |
|---|-----------|-----------|-----------|-----------|
| 6 | 1.7150000 | 0.3321897 | 1.3700000 | 2.1200000 |
|---|-----------|-----------|-----------|-----------|

---

Unique Subject Identifier=713600000-0028

Assay variable : PTINR\_VAL1 PT-INR Value

N Mean Standard Deviation Minimum Maximum

---

|   |           |           |           |           |
|---|-----------|-----------|-----------|-----------|
| 4 | 1.9450000 | 0.4199603 | 1.5500000 | 2.4900000 |
|---|-----------|-----------|-----------|-----------|

---

Laboratory tests at the time of obtaining Table 2-6 consent, according to the presence or absence of proton-pump inhibitors

Unique Subject Identifier=713600000-0029

MEANS Procedure

Assay variable : PTINR\_VAL1 PT-INR Value

N Mean Standard Deviation Minimum Maximum

---

|   |           |           |           |           |
|---|-----------|-----------|-----------|-----------|
| 3 | 2.4300000 | 0.0871780 | 2.3700000 | 2.5300000 |
|---|-----------|-----------|-----------|-----------|

---

Unique Subject Identifier=713600000-0037

Assay variable : PTINR\_VAL1 PT-INR Value

N Mean Standard Deviation Minimum Maximum

---

|   |           |           |           |           |
|---|-----------|-----------|-----------|-----------|
| 3 | 2.1100000 | 0.1300000 | 2.0300000 | 2.2600000 |
|---|-----------|-----------|-----------|-----------|

---

Unique Subject Identifier=713600000-0039

Assay variable : PTINR\_VAL1 PT-INR Value

N Mean Standard Deviation Minimum Maximum

---

|   |           |           |           |           |
|---|-----------|-----------|-----------|-----------|
| 3 | 2.2033333 | 0.1616581 | 2.1100000 | 2.3900000 |
|---|-----------|-----------|-----------|-----------|

---

Unique Subject Identifier=713600000-0040

Assay variable : PTINR\_VAL1 PT-INR Value

N Mean Standard Deviation Minimum Maximum

---

|   |           |           |           |           |
|---|-----------|-----------|-----------|-----------|
| 3 | 1.9866667 | 0.1569501 | 1.8100000 | 2.1100000 |
|---|-----------|-----------|-----------|-----------|

---

Laboratory tests at the time of obtaining Table 2-6 consent, according to the presence or absence of proton-pump inhibitors

Unique Subject Identifier=713600000-0042

MEANS Procedure

Assay variable : PTINR\_VAL1 PT-INR Value

N Mean Standard Deviation Minimum Maximum

---

|   |           |           |           |           |
|---|-----------|-----------|-----------|-----------|
| 4 | 1.7850000 | 0.3411256 | 1.3800000 | 2.2000000 |
|---|-----------|-----------|-----------|-----------|

---

Unique Subject Identifier=713600000-0049

Assay variable : PTINR\_VAL1 PT-INR Value

N Mean Standard Deviation Minimum Maximum

---

|   |           |           |           |           |
|---|-----------|-----------|-----------|-----------|
| 3 | 2.3166667 | 0.3942503 | 1.9600000 | 2.7400000 |
|---|-----------|-----------|-----------|-----------|

---

Unique Subject Identifier=7137010000-0001

Assay variable : PTINR\_VAL1 PT-INR Value

N Mean Standard Deviation Minimum Maximum

---

|   |           |           |           |           |
|---|-----------|-----------|-----------|-----------|
| 5 | 1.5740000 | 0.2757354 | 1.1700000 | 1.8700000 |
|---|-----------|-----------|-----------|-----------|

---

Unique Subject Identifier=7154000000-0002

Assay variable : PTINR\_VAL1 PT-INR Value

N Mean Standard Deviation Minimum Maximum

---

|   |          |           |          |          |
|---|----------|-----------|----------|----------|
| 5 | 2.162000 | 0.6197338 | 1.550000 | 3.100000 |
|---|----------|-----------|----------|----------|

---

Laboratory tests at the time of obtaining Table 2-6 consent, according to the presence or absence of proton-pump inhibitors

Unique Subject Identifier=715400000-0009

MEANS Procedure

Assay variable : PTINR\_VAL1 PT-INR Value

N Mean Standard Deviation Minimum Maximum

---

|   |           |           |           |           |
|---|-----------|-----------|-----------|-----------|
| 5 | 2.2640000 | 0.3001333 | 1.9800000 | 2.7700000 |
|---|-----------|-----------|-----------|-----------|

---

Unique Subject Identifier=715400000-0018

Assay variable : PTINR\_VAL1 PT-INR Value

N Mean Standard Deviation Minimum Maximum

---

|   |           |           |           |           |
|---|-----------|-----------|-----------|-----------|
| 5 | 1.9240000 | 0.2447039 | 1.6800000 | 2.3100000 |
|---|-----------|-----------|-----------|-----------|

---

Unique Subject Identifier=715400000-0024

Assay variable : PTINR\_VAL1 PT-INR Value

N Mean Standard Deviation Minimum Maximum

---

|   |           |           |           |           |
|---|-----------|-----------|-----------|-----------|
| 4 | 2.0525000 | 0.3732180 | 1.7000000 | 2.5300000 |
|---|-----------|-----------|-----------|-----------|

---

Unique Subject Identifier=715400000-0025



Assay variable : PTINR\_VAL1 PT-INR Value

N Mean Standard Deviation Minimum Maximum

---

|   |           |           |           |           |
|---|-----------|-----------|-----------|-----------|
| 4 | 2.2275000 | 0.0974252 | 2.1500000 | 2.3700000 |
|---|-----------|-----------|-----------|-----------|

---

Laboratory tests at the time of obtaining Table 2-6 consent, according to the presence or absence of proton-pump inhibitors

Unique Subject Identifier=715500000-0014

MEANS Procedure

Assay variable : PTINR\_VAL1 PT-INR Value

N Mean Standard Deviation Minimum Maximum

---

|   |           |           |           |           |
|---|-----------|-----------|-----------|-----------|
| 6 | 1.4666667 | 0.3201041 | 1.1100000 | 1.9000000 |
|---|-----------|-----------|-----------|-----------|

---

Unique Subject Identifier=715500000-0016

Assay variable : PTINR\_VAL1 PT-INR Value

N Mean Standard Deviation Minimum Maximum

---

|   |           |  |           |           |
|---|-----------|--|-----------|-----------|
| 1 | 1.0500000 |  | 1.0500000 | 1.0500000 |
|---|-----------|--|-----------|-----------|

---

Unique Subject Identifier=715500000-0039

Assay variable : PTINR\_VAL1 PT-INR Value

N Mean Standard Deviation Minimum Maximum

---

|   |           |           |           |           |
|---|-----------|-----------|-----------|-----------|
| 4 | 2.3650000 | 0.4262628 | 1.8300000 | 2.7900000 |
|---|-----------|-----------|-----------|-----------|

---

Unique Subject Identifier=7171010000-0001

Assay variable : PTINR\_VAL1 PT-INR Value

N Mean Standard Deviation Minimum Maximum

---

|   |           |           |           |           |
|---|-----------|-----------|-----------|-----------|
| 6 | 1.9683333 | 0.3200260 | 1.6800000 | 2.5600000 |
|---|-----------|-----------|-----------|-----------|

---

Laboratory tests at the time of obtaining Table 2-6 consent, according to the presence or absence of proton-pump inhibitors

Unique Subject Identifier=7171010000-0004

MEANS Procedure

Assay variable : PTINR\_VAL1 PT-INR Value

| N | Mean      | Standard Deviation | Minimum   | Maximum   |
|---|-----------|--------------------|-----------|-----------|
| 5 | 1.7980000 | 0.1628496          | 1.6200000 | 2.0200000 |

Unique Subject Identifier=7198010000-0019

Assay variable : PTINR\_VAL1 PT-INR Value

| N | Mean      | Standard Deviation | Minimum   | Maximum   |
|---|-----------|--------------------|-----------|-----------|
| 4 | 1.6625000 | 0.1850000          | 1.4500000 | 1.9000000 |

Unique Subject Identifier=7198010000-0031

Assay variable : PTINR\_VAL1 PT-INR Value

| N | Mean      | Standard Deviation | Minimum   | Maximum   |
|---|-----------|--------------------|-----------|-----------|
| 5 | 1.8700000 | 0.3157531          | 1.6400000 | 2.4200000 |

Unique Subject Identifier=7198010000-0044

Assay variable : PTINR\_VAL1 PT-INR Value

N Mean Standard Deviation Minimum Maximum

---

|   |           |           |           |           |
|---|-----------|-----------|-----------|-----------|
| 2 | 1.9250000 | 0.1767767 | 1.8000000 | 2.0500000 |
|---|-----------|-----------|-----------|-----------|

---

Laboratory tests at the time of obtaining Table 2-6 consent, according to the presence or absence of proton-pump inhibitors

Unique Subject Identifier=7198010000-0048

MEANS Procedure

Assay variable : PTINR\_VAL1 PT-INR Value

N Mean Standard Deviation Minimum Maximum

---

|   |           |  |           |           |
|---|-----------|--|-----------|-----------|
| 1 | 1.5200000 |  | 1.5200000 | 1.5200000 |
|---|-----------|--|-----------|-----------|

---

Unique Subject Identifier=7198010000-0051

Assay variable : PTINR\_VAL1 PT-INR Value

N Mean Standard Deviation Minimum Maximum

---

|   |           |           |           |           |
|---|-----------|-----------|-----------|-----------|
| 4 | 2.1575000 | 0.5864228 | 1.6400000 | 3.0000000 |
|---|-----------|-----------|-----------|-----------|

---

Unique Subject Identifier=7198010000-0053

Assay variable : PTINR\_VAL1 PT-INR Value

N Mean Standard Deviation Minimum Maximum

---

|   |           |           |           |           |
|---|-----------|-----------|-----------|-----------|
| 6 | 1.9600000 | 0.1584929 | 1.8100000 | 2.2200000 |
|---|-----------|-----------|-----------|-----------|

---

Unique Subject Identifier=7198010000-0067

Assay variable : PTINR\_VAL1 PT-INR Value

N Mean Standard Deviation Minimum Maximum

---

|   |          |           |          |          |
|---|----------|-----------|----------|----------|
| 3 | 2.303333 | 0.5783886 | 1.650000 | 2.750000 |
|---|----------|-----------|----------|----------|

---

Laboratory tests at the time of obtaining Table 2-6 consent, according to the presence or absence of proton-pump inhibitors

Unique Subject Identifier=7198010000-0092

MEANS Procedure

Assay variable : PTINR\_VAL1 PT-INR Value

N Mean Standard Deviation Minimum Maximum

---

|   |           |           |           |           |
|---|-----------|-----------|-----------|-----------|
| 3 | 1.7466667 | 0.3002221 | 1.4400000 | 2.0400000 |
|---|-----------|-----------|-----------|-----------|

---

Unique Subject Identifier=7204000000-0002

Assay variable : PTINR\_VAL1 PT-INR Value

N Mean Standard Deviation Minimum Maximum

---

|   |           |           |           |           |
|---|-----------|-----------|-----------|-----------|
| 5 | 1.8680000 | 0.2940578 | 1.6000000 | 2.3500000 |
|---|-----------|-----------|-----------|-----------|

---

Unique Subject Identifier=7204000000-0024

Assay variable : PTINR\_VAL1 PT-INR Value

N Mean Standard Deviation Minimum Maximum

---

|   |           |           |           |           |
|---|-----------|-----------|-----------|-----------|
| 5 | 1.3140000 | 0.1689083 | 1.0900000 | 1.5600000 |
|---|-----------|-----------|-----------|-----------|

---

Unique Subject Identifier=7204000000-0026



Assay variable : PTINR\_VAL1 PT-INR Value

N Mean Standard Deviation Minimum Maximum

---

|   |           |           |           |           |
|---|-----------|-----------|-----------|-----------|
| 6 | 1.8383333 | 0.5723431 | 1.1400000 | 2.7900000 |
|---|-----------|-----------|-----------|-----------|

---

Laboratory tests at the time of obtaining Table 2-6 consent, according to the presence or absence of proton-pump inhibitors

Unique Subject Identifier=7204000000-0030

MEANS Procedure

Assay variable : PTINR\_VAL1 PT-INR Value

N Mean Standard Deviation Minimum Maximum

---

|   |           |           |           |           |
|---|-----------|-----------|-----------|-----------|
| 5 | 1.5080000 | 0.2537124 | 1.2800000 | 1.8900000 |
|---|-----------|-----------|-----------|-----------|

---

Unique Subject Identifier=7204000000-0033

Assay variable : PTINR\_VAL1 PT-INR Value

N Mean Standard Deviation Minimum Maximum

---

|   |           |           |           |           |
|---|-----------|-----------|-----------|-----------|
| 6 | 2.4266667 | 1.2527197 | 1.4600000 | 4.8300000 |
|---|-----------|-----------|-----------|-----------|

---

Unique Subject Identifier=7205000000-0027

Assay variable : PTINR\_VAL1 PT-INR Value

N Mean Standard Deviation Minimum Maximum

---

|   |           |           |           |           |
|---|-----------|-----------|-----------|-----------|
| 3 | 2.0700000 | 0.3593049 | 1.8100000 | 2.4800000 |
|---|-----------|-----------|-----------|-----------|

---

Unique Subject Identifier=7208011010-0011

Assay variable : PTINR\_VAL1 PT-INR Value

N Mean Standard Deviation Minimum Maximum

---

|   |           |           |           |           |
|---|-----------|-----------|-----------|-----------|
| 6 | 1.7300000 | 0.2324651 | 1.4900000 | 1.9900000 |
|---|-----------|-----------|-----------|-----------|

---

Laboratory tests at the time of obtaining Table 2-6 consent, according to the presence or absence of proton-pump inhibitors

Unique Subject Identifier=7208011010-0012

MEANS Procedure

Assay variable : PTINR\_VAL1 PT-INR Value

N Mean Standard Deviation Minimum Maximum

---

|   |           |           |           |           |
|---|-----------|-----------|-----------|-----------|
| 3 | 1.4966667 | 0.0503322 | 1.4500000 | 1.5500000 |
|---|-----------|-----------|-----------|-----------|

---

Unique Subject Identifier=7209000000-0002

Assay variable : PTINR\_VAL1 PT-INR Value

N Mean Standard Deviation Minimum Maximum

---

|   |           |           |           |           |
|---|-----------|-----------|-----------|-----------|
| 3 | 2.1400000 | 0.2651415 | 1.8500000 | 2.3700000 |
|---|-----------|-----------|-----------|-----------|

---

Unique Subject Identifier=7209000000-0008

Assay variable : PTINR\_VAL1 PT-INR Value

N Mean Standard Deviation Minimum Maximum

---

|   |           |           |           |           |
|---|-----------|-----------|-----------|-----------|
| 4 | 1.9075000 | 0.2458150 | 1.7500000 | 2.2700000 |
|---|-----------|-----------|-----------|-----------|

---

Unique Subject Identifier=7209000000-0014

Assay variable : PTINR\_VAL1 PT-INR Value

N Mean Standard Deviation Minimum Maximum

---

|   |          |           |          |          |
|---|----------|-----------|----------|----------|
| 4 | 2.050000 | 0.3359563 | 1.570000 | 2.340000 |
|---|----------|-----------|----------|----------|

---

Laboratory tests at the time of obtaining Table 2-6 consent, according to the presence or absence of proton-pump inhibitors

Unique Subject Identifier=7209000000-0034

MEANS Procedure

Assay variable : PTINR\_VAL1 PT-INR Value

N Mean Standard Deviation Minimum Maximum

---

|   |           |           |           |           |
|---|-----------|-----------|-----------|-----------|
| 4 | 1.8975000 | 0.0758837 | 1.8200000 | 2.0000000 |
|---|-----------|-----------|-----------|-----------|

---

Unique Subject Identifier=7209000000-0037

Assay variable : PTINR\_VAL1 PT-INR Value

N Mean Standard Deviation Minimum Maximum

---

|   |           |           |           |           |
|---|-----------|-----------|-----------|-----------|
| 4 | 2.0650000 | 0.1690168 | 1.8900000 | 2.2900000 |
|---|-----------|-----------|-----------|-----------|

---

Unique Subject Identifier=7209000000-0048

Assay variable : PTINR\_VAL1 PT-INR Value

N Mean Standard Deviation Minimum Maximum

---

|   |           |           |           |           |
|---|-----------|-----------|-----------|-----------|
| 3 | 1.6966667 | 0.1721434 | 1.5600000 | 1.8900000 |
|---|-----------|-----------|-----------|-----------|

---

Unique Subject Identifier=7209000000-0049

Assay variable : PTINR\_VAL1 PT-INR Value

N Mean Standard Deviation Minimum Maximum

---

|   |           |           |           |           |
|---|-----------|-----------|-----------|-----------|
| 6 | 2.9650000 | 0.6056979 | 2.1300000 | 3.9400000 |
|---|-----------|-----------|-----------|-----------|

---

Laboratory tests at the time of obtaining Table 2-6 consent, according to the presence or absence of proton-pump inhibitors

Unique Subject Identifier=7209000000-0061

MEANS Procedure

Assay variable : PTINR\_VAL1 PT-INR Value

N Mean Standard Deviation Minimum Maximum

---

|   |           |           |           |           |
|---|-----------|-----------|-----------|-----------|
| 4 | 1.8175000 | 0.4486554 | 1.2500000 | 2.3100000 |
|---|-----------|-----------|-----------|-----------|

---

Unique Subject Identifier=7209000000-0073

Assay variable : PTINR\_VAL1 PT-INR Value

N Mean Standard Deviation Minimum Maximum

---

|   |           |           |           |           |
|---|-----------|-----------|-----------|-----------|
| 2 | 1.8300000 | 0.8202439 | 1.2500000 | 2.4100000 |
|---|-----------|-----------|-----------|-----------|

---

Unique Subject Identifier=7209000000-0074

Assay variable : PTINR\_VAL1 PT-INR Value

N Mean Standard Deviation Minimum Maximum

---

|   |           |           |           |           |
|---|-----------|-----------|-----------|-----------|
| 4 | 1.9750000 | 0.8438602 | 1.2800000 | 3.0200000 |
|---|-----------|-----------|-----------|-----------|

---

Unique Subject Identifier=7209000000-0089



Assay variable : PTINR\_VAL1 PT-INR Value

N Mean Standard Deviation Minimum Maximum

---

|   |           |           |           |           |
|---|-----------|-----------|-----------|-----------|
| 3 | 1.7333333 | 0.5928181 | 1.0500000 | 2.1100000 |
|---|-----------|-----------|-----------|-----------|

---

Laboratory tests at the time of obtaining Table 2-6 consent, according to the presence or absence of proton-pump inhibitors

Unique Subject Identifier=7209000000-0090

MEANS Procedure

Assay variable : PTINR\_VAL1 PT-INR Value

N Mean Standard Deviation Minimum Maximum

---

|   |           |           |           |           |
|---|-----------|-----------|-----------|-----------|
| 3 | 2.5233333 | 0.5186842 | 2.1800000 | 3.1200000 |
|---|-----------|-----------|-----------|-----------|

---

Unique Subject Identifier=7209000000-0095

Assay variable : PTINR\_VAL1 PT-INR Value

N Mean Standard Deviation Minimum Maximum

---

|   |           |  |           |           |
|---|-----------|--|-----------|-----------|
| 1 | 1.8800000 |  | 1.8800000 | 1.8800000 |
|---|-----------|--|-----------|-----------|

---

Unique Subject Identifier=7209000000-0114

Assay variable : PTINR\_VAL1 PT-INR Value

N Mean Standard Deviation Minimum Maximum

---

|   |           |           |           |           |
|---|-----------|-----------|-----------|-----------|
| 4 | 2.2475000 | 0.5292999 | 1.6200000 | 2.8900000 |
|---|-----------|-----------|-----------|-----------|

---

Unique Subject Identifier=7209000000-0116

Assay variable : PTINR\_VAL1 PT-INR Value

N Mean Standard Deviation Minimum Maximum

---

|   |           |           |           |           |
|---|-----------|-----------|-----------|-----------|
| 3 | 1.6533333 | 0.1715615 | 1.4700000 | 1.8100000 |
|---|-----------|-----------|-----------|-----------|

---

Laboratory tests at the time of obtaining Table 2-6 consent, according to the presence or absence of proton-pump inhibitors

Unique Subject Identifier=7209000000-0148

MEANS Procedure

Assay variable : PTINR\_VAL1 PT-INR Value

N Mean Standard Deviation Minimum Maximum

---

|   |           |           |           |           |
|---|-----------|-----------|-----------|-----------|
| 4 | 1.7325000 | 0.0623832 | 1.6500000 | 1.8000000 |
|---|-----------|-----------|-----------|-----------|

---

Unique Subject Identifier=7221000000-0016

Assay variable : PTINR\_VAL1 PT-INR Value

N Mean Standard Deviation Minimum Maximum

---

|   |           |           |           |           |
|---|-----------|-----------|-----------|-----------|
| 5 | 2.3400000 | 0.3435113 | 2.0000000 | 2.8000000 |
|---|-----------|-----------|-----------|-----------|

---

Unique Subject Identifier=7224011010-0006

Assay variable : PTINR\_VAL1 PT-INR Value

N Mean Standard Deviation Minimum Maximum

---

|   |           |  |           |           |
|---|-----------|--|-----------|-----------|
| 1 | 1.9000000 |  | 1.9000000 | 1.9000000 |
|---|-----------|--|-----------|-----------|

---

Unique Subject Identifier=7224011010-0011

Assay variable : PTINR\_VAL1 PT-INR Value

N Mean Standard Deviation Minimum Maximum

---

|   |           |           |           |           |
|---|-----------|-----------|-----------|-----------|
| 3 | 1.4700000 | 0.2389561 | 1.2600000 | 1.7300000 |
|---|-----------|-----------|-----------|-----------|

---

Laboratory tests at the time of obtaining Table 2-6 consent, according to the presence or absence of proton-pump inhibitors

Unique Subject Identifier=722600000-0005

MEANS Procedure

Assay variable : PTINR\_VAL1 PT-INR Value

N Mean Standard Deviation Minimum Maximum

---

|   |          |           |          |          |
|---|----------|-----------|----------|----------|
| 4 | 1.750000 | 0.2714160 | 1.420000 | 2.010000 |
|---|----------|-----------|----------|----------|

---

Unique Subject Identifier=722600000-0013

Assay variable : PTINR\_VAL1 PT-INR Value

N Mean Standard Deviation Minimum Maximum

---

|   |          |           |          |          |
|---|----------|-----------|----------|----------|
| 4 | 2.237500 | 0.3244868 | 1.930000 | 2.690000 |
|---|----------|-----------|----------|----------|

---

Unique Subject Identifier=723500000-0011

Assay variable : PTINR\_VAL1 PT-INR Value

N Mean Standard Deviation Minimum Maximum

---

|   |          |           |          |          |
|---|----------|-----------|----------|----------|
| 2 | 2.185000 | 0.2616295 | 2.000000 | 2.370000 |
|---|----------|-----------|----------|----------|

---

Unique Subject Identifier=731400000-0009

Assay variable : PTINR\_VAL1 PT-INR Value

N Mean Standard Deviation Minimum Maximum

---

|   |           |           |           |           |
|---|-----------|-----------|-----------|-----------|
| 4 | 1.7750000 | 0.2362908 | 1.6000000 | 2.1000000 |
|---|-----------|-----------|-----------|-----------|

---

Laboratory tests at the time of obtaining Table 2-6 consent, according to the presence or absence of proton-pump inhibitors

Unique Subject Identifier=7314000000-0016

MEANS Procedure

Assay variable : PTINR\_VAL1 PT-INR Value

N Mean Standard Deviation Minimum Maximum

---

|   |           |           |           |           |
|---|-----------|-----------|-----------|-----------|
| 5 | 1.5800000 | 0.0836660 | 1.5000000 | 1.7000000 |
|---|-----------|-----------|-----------|-----------|

---

Unique Subject Identifier=7326000000-0001

Assay variable : PTINR\_VAL1 PT-INR Value

N Mean Standard Deviation Minimum Maximum

---

|   |           |           |           |           |
|---|-----------|-----------|-----------|-----------|
| 5 | 1.6100000 | 0.3037269 | 1.2800000 | 2.0500000 |
|---|-----------|-----------|-----------|-----------|

---

Unique Subject Identifier=7326000000-0004

Assay variable : PTINR\_VAL1 PT-INR Value

N Mean Standard Deviation Minimum Maximum

---

|   |           |           |           |           |
|---|-----------|-----------|-----------|-----------|
| 3 | 2.1566667 | 0.2074448 | 1.9700000 | 2.3800000 |
|---|-----------|-----------|-----------|-----------|

---

Unique Subject Identifier=7326000000-0006



Assay variable : PTINR\_VAL1 PT-INR Value

N Mean Standard Deviation Minimum Maximum

---

|   |          |           |          |          |
|---|----------|-----------|----------|----------|
| 5 | 1.940000 | 0.2518928 | 1.610000 | 2.260000 |
|---|----------|-----------|----------|----------|

---

Laboratory tests at the time of obtaining Table 2-6 consent, according to the presence or absence of proton-pump inhibitors

Unique Subject Identifier=732600000-0007

MEANS Procedure

Assay variable : PTINR\_VAL1 PT-INR Value

N Mean Standard Deviation Minimum Maximum

---

|   |           |           |           |           |
|---|-----------|-----------|-----------|-----------|
| 4 | 1.8825000 | 0.2154646 | 1.5800000 | 2.0600000 |
|---|-----------|-----------|-----------|-----------|

---

Unique Subject Identifier=7332010000-0002

Assay variable : PTINR\_VAL1 PT-INR Value

N Mean Standard Deviation Minimum Maximum

---

|   |           |           |           |           |
|---|-----------|-----------|-----------|-----------|
| 5 | 2.1080000 | 1.0816977 | 1.3600000 | 3.9600000 |
|---|-----------|-----------|-----------|-----------|

---

Unique Subject Identifier=7332010000-0005

Assay variable : PTINR\_VAL1 PT-INR Value

N Mean Standard Deviation Minimum Maximum

---

|   |           |           |           |           |
|---|-----------|-----------|-----------|-----------|
| 4 | 2.2150000 | 0.1815673 | 2.0400000 | 2.4500000 |
|---|-----------|-----------|-----------|-----------|

---

Unique Subject Identifier=7332010000-0029

Assay variable : PTINR\_VAL1 PT-INR Value

N Mean Standard Deviation Minimum Maximum

---

|   |           |           |           |           |
|---|-----------|-----------|-----------|-----------|
| 3 | 1.9233333 | 0.2400694 | 1.6600000 | 2.1300000 |
|---|-----------|-----------|-----------|-----------|

---

Laboratory tests at the time of obtaining Table 2-6 consent, according to the presence or absence of proton-pump inhibitors

Unique Subject Identifier=7345000010-0008

MEANS Procedure

Assay variable : PTINR\_VAL1 PT-INR Value

N Mean Standard Deviation Minimum Maximum

---

|   |           |           |           |           |
|---|-----------|-----------|-----------|-----------|
| 6 | 2.2266667 | 0.4322345 | 1.5300000 | 2.6900000 |
|---|-----------|-----------|-----------|-----------|

---

Unique Subject Identifier=7345000010-0011

Assay variable : PTINR\_VAL1 PT-INR Value

N Mean Standard Deviation Minimum Maximum

---

|   |           |           |           |           |
|---|-----------|-----------|-----------|-----------|
| 6 | 2.0033333 | 0.2483277 | 1.7300000 | 2.4300000 |
|---|-----------|-----------|-----------|-----------|

---

Unique Subject Identifier=7345000010-0012

Assay variable : PTINR\_VAL1 PT-INR Value

N Mean Standard Deviation Minimum Maximum

---

|   |           |           |           |           |
|---|-----------|-----------|-----------|-----------|
| 6 | 1.7850000 | 0.4234973 | 1.2100000 | 2.1900000 |
|---|-----------|-----------|-----------|-----------|

---

Unique Subject Identifier=7345000010-0014

Assay variable : PTINR\_VAL1 PT-INR Value

N Mean Standard Deviation Minimum Maximum

---

|   |           |           |           |           |
|---|-----------|-----------|-----------|-----------|
| 4 | 2.2275000 | 0.6051102 | 1.4200000 | 2.8700000 |
|---|-----------|-----------|-----------|-----------|

---

Laboratory tests at the time of obtaining Table 2-6 consent, according to the presence or absence of proton-pump inhibitors

Unique Subject Identifier=7345000010-0017

MEANS Procedure

Assay variable : PTINR\_VAL1 PT-INR Value

N Mean Standard Deviation Minimum Maximum

---

|   |          |           |          |          |
|---|----------|-----------|----------|----------|
| 6 | 1.500000 | 0.5067544 | 1.110000 | 2.410000 |
|---|----------|-----------|----------|----------|

---

Unique Subject Identifier=7345000010-0023

Assay variable : PTINR\_VAL1 PT-INR Value

N Mean Standard Deviation Minimum Maximum

---

|   |           |           |          |          |
|---|-----------|-----------|----------|----------|
| 6 | 1.9916667 | 0.3581852 | 1.540000 | 2.410000 |
|---|-----------|-----------|----------|----------|

---

Unique Subject Identifier=7345000010-0024

Assay variable : PTINR\_VAL1 PT-INR Value

N Mean Standard Deviation Minimum Maximum

---

|   |          |           |          |          |
|---|----------|-----------|----------|----------|
| 5 | 2.058000 | 0.2605187 | 1.810000 | 2.460000 |
|---|----------|-----------|----------|----------|

---

Unique Subject Identifier=7345000010-0025

Assay variable : PTINR\_VAL1 PT-INR Value

N Mean Standard Deviation Minimum Maximum

---

|   |           |           |           |           |
|---|-----------|-----------|-----------|-----------|
| 6 | 1.7316667 | 0.3022196 | 1.3400000 | 2.0900000 |
|---|-----------|-----------|-----------|-----------|

---

Laboratory tests at the time of obtaining Table 2-6 consent, according to the presence or absence of proton-pump inhibitors

Unique Subject Identifier=7345000010-0040

MEANS Procedure

Assay variable : PTINR\_VAL1 PT-INR Value

N Mean Standard Deviation Minimum Maximum

---

|   |           |           |           |           |
|---|-----------|-----------|-----------|-----------|
| 6 | 1.7333333 | 0.2383834 | 1.3900000 | 1.9200000 |
|---|-----------|-----------|-----------|-----------|

---

Unique Subject Identifier=7366011100-0002

Assay variable : PTINR\_VAL1 PT-INR Value

N Mean Standard Deviation Minimum Maximum

---

|   |           |           |           |           |
|---|-----------|-----------|-----------|-----------|
| 6 | 1.7066667 | 0.3946982 | 1.2400000 | 2.3800000 |
|---|-----------|-----------|-----------|-----------|

---

Unique Subject Identifier=7366011100-0010

Assay variable : PTINR\_VAL1 PT-INR Value

N Mean Standard Deviation Minimum Maximum

---

|   |           |           |           |           |
|---|-----------|-----------|-----------|-----------|
| 4 | 2.4100000 | 0.3554340 | 1.8800000 | 2.6400000 |
|---|-----------|-----------|-----------|-----------|

---

Unique Subject Identifier=7366011100-0016



Assay variable : PTINR\_VAL1 PT-INR Value

N Mean Standard Deviation Minimum Maximum

---

|   |          |           |          |          |
|---|----------|-----------|----------|----------|
| 6 | 2.135000 | 0.4511652 | 1.740000 | 3.010000 |
|---|----------|-----------|----------|----------|

---

Laboratory tests at the time of obtaining Table 2-6 consent, according to the presence or absence of proton-pump inhibitors

Unique Subject Identifier=7414010000-0001

MEANS Procedure

Assay variable : PTINR\_VAL1 PT-INR Value

N Mean Standard Deviation Minimum Maximum

---

|   |           |           |           |           |
|---|-----------|-----------|-----------|-----------|
| 6 | 1.7383333 | 0.2650597 | 1.3300000 | 2.1000000 |
|---|-----------|-----------|-----------|-----------|

---

Unique Subject Identifier=7414010000-0019

Assay variable : PTINR\_VAL1 PT-INR Value

N Mean Standard Deviation Minimum Maximum

---

|   |           |           |           |           |
|---|-----------|-----------|-----------|-----------|
| 5 | 2.1620000 | 0.6068113 | 1.3700000 | 2.6800000 |
|---|-----------|-----------|-----------|-----------|

---

Unique Subject Identifier=7414010000-0033

Assay variable : PTINR\_VAL1 PT-INR Value

N Mean Standard Deviation Minimum Maximum

---

|   |           |           |           |           |
|---|-----------|-----------|-----------|-----------|
| 6 | 1.9616667 | 0.1038107 | 1.8300000 | 2.1000000 |
|---|-----------|-----------|-----------|-----------|

---

Unique Subject Identifier=7414010000-0034

Assay variable : PTINR\_VAL1 PT-INR Value

N Mean Standard Deviation Minimum Maximum

---

|   |          |           |          |          |
|---|----------|-----------|----------|----------|
| 6 | 1.610000 | 0.1550484 | 1.420000 | 1.870000 |
|---|----------|-----------|----------|----------|

---

Laboratory tests at the time of obtaining Table 2-6 consent, according to the presence or absence of proton-pump inhibitors

Unique Subject Identifier=7423000000-0003

MEANS Procedure

Assay variable : PTINR\_VAL1 PT-INR Value

| N | Mean      | Standard Deviation | Minimum   | Maximum   |
|---|-----------|--------------------|-----------|-----------|
| 4 | 1.7500000 | 0.1264911          | 1.5900000 | 1.8700000 |

Unique Subject Identifier=7423000000-0005

Assay variable : PTINR\_VAL1 PT-INR Value

| N | Mean      | Standard Deviation | Minimum   | Maximum   |
|---|-----------|--------------------|-----------|-----------|
| 6 | 1.8283333 | 0.4879105          | 1.3300000 | 2.4600000 |

Unique Subject Identifier=7423000000-0006

Assay variable : PTINR\_VAL1 PT-INR Value

| N | Mean      | Standard Deviation | Minimum   | Maximum   |
|---|-----------|--------------------|-----------|-----------|
| 4 | 1.6550000 | 0.1668333          | 1.5400000 | 1.9000000 |

Unique Subject Identifier=7423000000-0014

Assay variable : PTINR\_VAL1 PT-INR Value

N Mean Standard Deviation Minimum Maximum

---

|   |           |           |           |           |
|---|-----------|-----------|-----------|-----------|
| 3 | 2.2466667 | 0.3239341 | 2.0400000 | 2.6200000 |
|---|-----------|-----------|-----------|-----------|

---

Laboratory tests at the time of obtaining Table 2-6 consent, according to the presence or absence of proton-pump inhibitors

Unique Subject Identifier=7423000000-0017

MEANS Procedure

Assay variable : PTINR\_VAL1 PT-INR Value

| N | Mean      | Standard Deviation | Minimum   | Maximum   |
|---|-----------|--------------------|-----------|-----------|
| 4 | 1.4725000 | 0.1138347          | 1.3500000 | 1.6200000 |

Unique Subject Identifier=7423000000-0020

Assay variable : PTINR\_VAL1 PT-INR Value

| N | Mean      | Standard Deviation | Minimum   | Maximum   |
|---|-----------|--------------------|-----------|-----------|
| 2 | 1.2050000 | 0.0636396          | 1.1600000 | 1.2500000 |

Unique Subject Identifier=7423000000-0026

Assay variable : PTINR\_VAL1 PT-INR Value

| N | Mean      | Standard Deviation | Minimum   | Maximum   |
|---|-----------|--------------------|-----------|-----------|
| 4 | 2.5350000 | 0.8121781          | 1.5200000 | 3.4300000 |

Unique Subject Identifier=7423000000-0029

Assay variable : PTINR\_VAL1 PT-INR Value

N Mean Standard Deviation Minimum Maximum

---

|   |          |           |          |          |
|---|----------|-----------|----------|----------|
| 5 | 1.620000 | 0.1680774 | 1.490000 | 1.880000 |
|---|----------|-----------|----------|----------|

---

Laboratory tests at the time of obtaining Table 2-6 consent, according to the presence or absence of proton-pump inhibitors

Unique Subject Identifier=7423000000-0030

MEANS Procedure

Assay variable : PTINR\_VAL1 PT-INR Value

| N | Mean      | Standard Deviation | Minimum   | Maximum   |
|---|-----------|--------------------|-----------|-----------|
| 5 | 1.8160000 | 0.3728002          | 1.3200000 | 2.1100000 |

Unique Subject Identifier=7423000000-0040

Assay variable : PTINR\_VAL1 PT-INR Value

| N | Mean      | Standard Deviation | Minimum   | Maximum   |
|---|-----------|--------------------|-----------|-----------|
| 2 | 2.4000000 | 0.0989949          | 2.3300000 | 2.4700000 |

Unique Subject Identifier=7423000000-0044

Assay variable : PTINR\_VAL1 PT-INR Value

| N | Mean      | Standard Deviation | Minimum   | Maximum   |
|---|-----------|--------------------|-----------|-----------|
| 5 | 1.6500000 | 0.2155226          | 1.4200000 | 1.9200000 |

Unique Subject Identifier=7423000000-0052



Assay variable : PTINR\_VAL1 PT-INR Value

N Mean Standard Deviation Minimum Maximum

---

|   |          |           |          |          |
|---|----------|-----------|----------|----------|
| 4 | 2.320000 | 0.2422120 | 2.080000 | 2.640000 |
|---|----------|-----------|----------|----------|

---

Laboratory tests at the time of obtaining Table 2-6 consent, according to the presence or absence of proton-pump inhibitors

Unique Subject Identifier=7423000000-0053

MEANS Procedure

Assay variable : PTINR\_VAL1 PT-INR Value

N Mean Standard Deviation Minimum Maximum

---

|   |           |           |           |           |
|---|-----------|-----------|-----------|-----------|
| 6 | 2.0233333 | 0.2628815 | 1.7500000 | 2.4100000 |
|---|-----------|-----------|-----------|-----------|

---

Unique Subject Identifier=7423000000-0061

Assay variable : PTINR\_VAL1 PT-INR Value

N Mean Standard Deviation Minimum Maximum

---

|   |           |           |           |           |
|---|-----------|-----------|-----------|-----------|
| 5 | 1.7380000 | 0.1310343 | 1.5800000 | 1.8900000 |
|---|-----------|-----------|-----------|-----------|

---

Unique Subject Identifier=7423000000-0062

Assay variable : PTINR\_VAL1 PT-INR Value

N Mean Standard Deviation Minimum Maximum

---

|   |           |           |           |           |
|---|-----------|-----------|-----------|-----------|
| 5 | 1.7300000 | 0.1811077 | 1.4800000 | 1.9400000 |
|---|-----------|-----------|-----------|-----------|

---

Unique Subject Identifier=7423000000-0064

Assay variable : PTINR\_VAL1 PT-INR Value

N Mean Standard Deviation Minimum Maximum

---

|   |           |           |           |           |
|---|-----------|-----------|-----------|-----------|
| 4 | 1.8525000 | 0.1408013 | 1.6600000 | 1.9800000 |
|---|-----------|-----------|-----------|-----------|

---

Laboratory tests at the time of obtaining Table 2-6 consent, according to the presence or absence of proton-pump inhibitors

Unique Subject Identifier=7423000000-0071

MEANS Procedure

Assay variable : PTINR\_VAL1 PT-INR Value

N Mean Standard Deviation Minimum Maximum

---

|   |           |  |           |           |
|---|-----------|--|-----------|-----------|
| 1 | 1.5600000 |  | 1.5600000 | 1.5600000 |
|---|-----------|--|-----------|-----------|

---

Unique Subject Identifier=7423000000-0072

Assay variable : PTINR\_VAL1 PT-INR Value

N Mean Standard Deviation Minimum Maximum

---

|   |           |           |           |           |
|---|-----------|-----------|-----------|-----------|
| 4 | 1.6525000 | 0.2732978 | 1.3500000 | 1.9900000 |
|---|-----------|-----------|-----------|-----------|

---

Unique Subject Identifier=7423000000-0074

Assay variable : PTINR\_VAL1 PT-INR Value

N Mean Standard Deviation Minimum Maximum

---

|   |           |           |           |           |
|---|-----------|-----------|-----------|-----------|
| 2 | 1.9250000 | 0.0070711 | 1.9200000 | 1.9300000 |
|---|-----------|-----------|-----------|-----------|

---

Unique Subject Identifier=7423000000-0075

Assay variable : PTINR\_VAL1 PT-INR Value

N Mean Standard Deviation Minimum Maximum

---

|   |           |           |           |           |
|---|-----------|-----------|-----------|-----------|
| 2 | 1.5850000 | 0.0494975 | 1.5500000 | 1.6200000 |
|---|-----------|-----------|-----------|-----------|

---

Laboratory tests at the time of obtaining Table 2-6 consent, according to the presence or absence of proton-pump inhibitors

Unique Subject Identifier=7423000000-0076

MEANS Procedure

Assay variable : PTINR\_VAL1 PT-INR Value

| N | Mean      | Standard Deviation | Minimum   | Maximum   |
|---|-----------|--------------------|-----------|-----------|
| 3 | 2.2800000 | 0.3604164          | 1.9100000 | 2.6300000 |

Unique Subject Identifier=7423000000-0081

Assay variable : PTINR\_VAL1 PT-INR Value

| N | Mean      | Standard Deviation | Minimum   | Maximum   |
|---|-----------|--------------------|-----------|-----------|
| 1 | 1.5700000 |                    | 1.5700000 | 1.5700000 |

Unique Subject Identifier=7423000000-0090

Assay variable : PTINR\_VAL1 PT-INR Value

| N | Mean      | Standard Deviation | Minimum   | Maximum   |
|---|-----------|--------------------|-----------|-----------|
| 5 | 1.6720000 | 0.6956795          | 1.0500000 | 2.6600000 |

Unique Subject Identifier=7423000000-0097

Assay variable : PTINR\_VAL1 PT-INR Value

N Mean Standard Deviation Minimum Maximum

---

|   |           |           |           |           |
|---|-----------|-----------|-----------|-----------|
| 4 | 1.7925000 | 0.1867931 | 1.6200000 | 2.0000000 |
|---|-----------|-----------|-----------|-----------|

---

Laboratory tests at the time of obtaining Table 2-6 consent, according to the presence or absence of proton-pump inhibitors

Unique Subject Identifier=7542000000-0003

MEANS Procedure

Assay variable : PTINR\_VAL1 PT-INR Value

N Mean Standard Deviation Minimum Maximum

---

|   |           |           |           |           |
|---|-----------|-----------|-----------|-----------|
| 6 | 2.0333333 | 0.6377042 | 1.6000000 | 3.3000000 |
|---|-----------|-----------|-----------|-----------|

---

Unique Subject Identifier=7542000000-0005

Assay variable : PTINR\_VAL1 PT-INR Value

N Mean Standard Deviation Minimum Maximum

---

|   |           |           |           |           |
|---|-----------|-----------|-----------|-----------|
| 6 | 2.5833333 | 1.2416387 | 1.5000000 | 4.5000000 |
|---|-----------|-----------|-----------|-----------|

---

Unique Subject Identifier=7542000000-0008

Assay variable : PTINR\_VAL1 PT-INR Value

N Mean Standard Deviation Minimum Maximum

---

|   |           |           |           |           |
|---|-----------|-----------|-----------|-----------|
| 6 | 2.2666667 | 0.5391351 | 1.4000000 | 2.9000000 |
|---|-----------|-----------|-----------|-----------|

---

Unique Subject Identifier=7542000000-0009



Assay variable : PTINR\_VAL1 PT-INR Value

N Mean Standard Deviation Minimum Maximum

---

|   |           |           |           |           |
|---|-----------|-----------|-----------|-----------|
| 6 | 2.2166667 | 0.1602082 | 1.9000000 | 2.3000000 |
|---|-----------|-----------|-----------|-----------|

---

Laboratory tests at the time of obtaining Table 2-6 consent, according to the presence or absence of proton-pump inhibitors

Unique Subject Identifier=7542000000-0015

MEANS Procedure

Assay variable : PTINR\_VAL1 PT-INR Value

N Mean Standard Deviation Minimum Maximum

---

|   |           |           |           |           |
|---|-----------|-----------|-----------|-----------|
| 6 | 2.1900000 | 0.2202726 | 1.9900000 | 2.5800000 |
|---|-----------|-----------|-----------|-----------|

---

Unique Subject Identifier=7542000000-0017

Assay variable : PTINR\_VAL1 PT-INR Value

N Mean Standard Deviation Minimum Maximum

---

|   |           |           |           |           |
|---|-----------|-----------|-----------|-----------|
| 6 | 2.3833333 | 0.9368387 | 1.5000000 | 3.9000000 |
|---|-----------|-----------|-----------|-----------|

---

Unique Subject Identifier=7542000000-0025

Assay variable : PTINR\_VAL1 PT-INR Value

N Mean Standard Deviation Minimum Maximum

---

|   |           |           |           |           |
|---|-----------|-----------|-----------|-----------|
| 5 | 2.1400000 | 0.2073644 | 1.9000000 | 2.4000000 |
|---|-----------|-----------|-----------|-----------|

---

Unique Subject Identifier=7542000000-0026

Assay variable : PTINR\_VAL1 PT-INR Value

N Mean Standard Deviation Minimum Maximum

---

|   |           |           |           |           |
|---|-----------|-----------|-----------|-----------|
| 6 | 1.7833333 | 0.1329160 | 1.6000000 | 2.0000000 |
|---|-----------|-----------|-----------|-----------|

---

Laboratory tests at the time of obtaining Table 2-6 consent, according to the presence or absence of proton-pump inhibitors

Unique Subject Identifier=7642010000-0001

MEANS Procedure

Assay variable : PTINR\_VAL1 PT-INR Value

N Mean Standard Deviation Minimum Maximum

---

|   |           |           |           |           |
|---|-----------|-----------|-----------|-----------|
| 3 | 2.2033333 | 0.4838733 | 1.8300000 | 2.7500000 |
|---|-----------|-----------|-----------|-----------|

---

Unique Subject Identifier=8005000000-0002

Assay variable : PTINR\_VAL1 PT-INR Value

N Mean Standard Deviation Minimum Maximum

---

|   |           |           |           |           |
|---|-----------|-----------|-----------|-----------|
| 6 | 2.0000000 | 0.1436663 | 1.8400000 | 2.2500000 |
|---|-----------|-----------|-----------|-----------|

---

Unique Subject Identifier=8005000000-0010

Assay variable : PTINR\_VAL1 PT-INR Value

N Mean Standard Deviation Minimum Maximum

---

|   |           |           |           |           |
|---|-----------|-----------|-----------|-----------|
| 5 | 1.9360000 | 0.4195593 | 1.4700000 | 2.5200000 |
|---|-----------|-----------|-----------|-----------|

---

Unique Subject Identifier=8005000000-0011

Assay variable : PTINR\_VAL1 PT-INR Value

N Mean Standard Deviation Minimum Maximum

---

|   |           |           |           |           |
|---|-----------|-----------|-----------|-----------|
| 5 | 1.7220000 | 0.2052316 | 1.5300000 | 2.0500000 |
|---|-----------|-----------|-----------|-----------|

---

Laboratory tests at the time of obtaining Table 2-6 consent, according to the presence or absence of proton-pump inhibitors

Unique Subject Identifier=8009000000-0001

MEANS Procedure

Assay variable : PTINR\_VAL1 PT-INR Value

N Mean Standard Deviation Minimum Maximum

---

|   |           |           |           |           |
|---|-----------|-----------|-----------|-----------|
| 6 | 1.7416667 | 0.4793085 | 1.1800000 | 2.5100000 |
|---|-----------|-----------|-----------|-----------|

---

Unique Subject Identifier=8009000000-0002

Assay variable : PTINR\_VAL1 PT-INR Value

N Mean Standard Deviation Minimum Maximum

---

|   |           |           |           |           |
|---|-----------|-----------|-----------|-----------|
| 5 | 2.2660000 | 0.5860717 | 1.8800000 | 3.3000000 |
|---|-----------|-----------|-----------|-----------|

---

Unique Subject Identifier=8009000000-0005

Assay variable : PTINR\_VAL1 PT-INR Value

N Mean Standard Deviation Minimum Maximum

---

|   |           |           |           |           |
|---|-----------|-----------|-----------|-----------|
| 4 | 1.6425000 | 0.0939415 | 1.5200000 | 1.7300000 |
|---|-----------|-----------|-----------|-----------|

---

Unique Subject Identifier=8009000000-0030

Assay variable : PTINR\_VAL1 PT-INR Value

N Mean Standard Deviation Minimum Maximum

---

|   |           |           |           |           |
|---|-----------|-----------|-----------|-----------|
| 4 | 1.5125000 | 0.1631717 | 1.3600000 | 1.7300000 |
|---|-----------|-----------|-----------|-----------|

---

Laboratory tests at the time of obtaining Table 2-6 consent, according to the presence or absence of proton-pump inhibitors

Unique Subject Identifier=8010000100-0012

MEANS Procedure

Assay variable : PTINR\_VAL1 PT-INR Value

N Mean Standard Deviation Minimum Maximum

---

|   |           |           |           |           |
|---|-----------|-----------|-----------|-----------|
| 6 | 2.0383333 | 0.2545912 | 1.5800000 | 2.3100000 |
|---|-----------|-----------|-----------|-----------|

---

Unique Subject Identifier=8010000100-0060

Assay variable : PTINR\_VAL1 PT-INR Value

N Mean Standard Deviation Minimum Maximum

---

|   |           |           |           |           |
|---|-----------|-----------|-----------|-----------|
| 3 | 2.1866667 | 0.2967041 | 1.9100000 | 2.5000000 |
|---|-----------|-----------|-----------|-----------|

---

Unique Subject Identifier=8020011000-0032

Assay variable : PTINR\_VAL1 PT-INR Value

N Mean Standard Deviation Minimum Maximum

---

|   |           |  |           |           |
|---|-----------|--|-----------|-----------|
| 1 | 1.3700000 |  | 1.3700000 | 1.3700000 |
|---|-----------|--|-----------|-----------|

---

Unique Subject Identifier=8020011000-0040



Assay variable : PTINR\_VAL1 PT-INR Value

N Mean Standard Deviation Minimum Maximum

---

|   |          |           |          |          |
|---|----------|-----------|----------|----------|
| 2 | 1.800000 | 0.5798276 | 1.390000 | 2.210000 |
|---|----------|-----------|----------|----------|

---

Laboratory tests at the time of obtaining Table 2-6 consent, according to the presence or absence of proton-pump inhibitors

Unique Subject Identifier=8020011000-0042

MEANS Procedure

Assay variable : PTINR\_VAL1 PT-INR Value

N Mean Standard Deviation Minimum Maximum

---

|   |           |  |           |           |
|---|-----------|--|-----------|-----------|
| 1 | 2.9400000 |  | 2.9400000 | 2.9400000 |
|---|-----------|--|-----------|-----------|

---

Unique Subject Identifier=8020011000-0046

Assay variable : PTINR\_VAL1 PT-INR Value

N Mean Standard Deviation Minimum Maximum

---

|   |           |  |           |           |
|---|-----------|--|-----------|-----------|
| 1 | 1.3200000 |  | 1.3200000 | 1.3200000 |
|---|-----------|--|-----------|-----------|

---

Unique Subject Identifier=8023000000-0010

Assay variable : PTINR\_VAL1 PT-INR Value

N Mean Standard Deviation Minimum Maximum

---

|   |           |           |           |           |
|---|-----------|-----------|-----------|-----------|
| 4 | 1.9550000 | 0.6821779 | 1.5200000 | 2.9700000 |
|---|-----------|-----------|-----------|-----------|

---

Unique Subject Identifier=8023000000-0011

Assay variable : PTINR\_VAL1 PT-INR Value

N Mean Standard Deviation Minimum Maximum

---

|   |          |           |          |          |
|---|----------|-----------|----------|----------|
| 6 | 1.430000 | 0.1912067 | 1.240000 | 1.800000 |
|---|----------|-----------|----------|----------|

---

Laboratory tests at the time of obtaining Table 2-6 consent, according to the presence or absence of proton-pump inhibitors

Unique Subject Identifier=8023000000-0016

MEANS Procedure

Assay variable : PTINR\_VAL1 PT-INR Value

N Mean Standard Deviation Minimum Maximum

---

|   |           |           |           |           |
|---|-----------|-----------|-----------|-----------|
| 3 | 2.0233333 | 0.2557994 | 1.7800000 | 2.2900000 |
|---|-----------|-----------|-----------|-----------|

---

Unique Subject Identifier=8023000000-0020

Assay variable : PTINR\_VAL1 PT-INR Value

N Mean Standard Deviation Minimum Maximum

---

|   |           |           |           |           |
|---|-----------|-----------|-----------|-----------|
| 3 | 1.9100000 | 0.1802776 | 1.7600000 | 2.1100000 |
|---|-----------|-----------|-----------|-----------|

---

Unique Subject Identifier=8023000000-0021

Assay variable : PTINR\_VAL1 PT-INR Value

N Mean Standard Deviation Minimum Maximum

---

|   |           |           |           |           |
|---|-----------|-----------|-----------|-----------|
| 3 | 2.0333333 | 0.1550269 | 1.9200000 | 2.2100000 |
|---|-----------|-----------|-----------|-----------|

---

Unique Subject Identifier=8023000000-0033

Assay variable : PTINR\_VAL1 PT-INR Value

N Mean Standard Deviation Minimum Maximum

---

|   |          |           |          |          |
|---|----------|-----------|----------|----------|
| 3 | 1.490000 | 0.3051229 | 1.140000 | 1.700000 |
|---|----------|-----------|----------|----------|

---

Laboratory tests at the time of obtaining Table 2-6 consent, according to the presence or absence of proton-pump inhibitors

Unique Subject Identifier=8023000000-0037

MEANS Procedure

Assay variable : PTINR\_VAL1 PT-INR Value

N Mean Standard Deviation Minimum Maximum

---

|   |           |           |           |           |
|---|-----------|-----------|-----------|-----------|
| 4 | 1.6125000 | 0.2650000 | 1.2800000 | 1.8800000 |
|---|-----------|-----------|-----------|-----------|

---

Unique Subject Identifier=8023000000-0042

Assay variable : PTINR\_VAL1 PT-INR Value

N Mean Standard Deviation Minimum Maximum

---

|   |           |           |           |           |
|---|-----------|-----------|-----------|-----------|
| 2 | 2.3350000 | 0.4454773 | 2.0200000 | 2.6500000 |
|---|-----------|-----------|-----------|-----------|

---

Unique Subject Identifier=8023000000-0045

Assay variable : PTINR\_VAL1 PT-INR Value

N Mean Standard Deviation Minimum Maximum

---

|   |           |           |           |           |
|---|-----------|-----------|-----------|-----------|
| 3 | 1.6966667 | 0.4239497 | 1.3100000 | 2.1500000 |
|---|-----------|-----------|-----------|-----------|

---

Unique Subject Identifier=8026000000-0003

Assay variable : PTINR\_VAL1 PT-INR Value

N Mean Standard Deviation Minimum Maximum

---

|   |           |           |           |           |
|---|-----------|-----------|-----------|-----------|
| 3 | 2.2133333 | 0.2136196 | 1.9700000 | 2.3700000 |
|---|-----------|-----------|-----------|-----------|

---

Laboratory tests at the time of obtaining Table 2-6 consent, according to the presence or absence of proton-pump inhibitors

Unique Subject Identifier=8026000000-0004

MEANS Procedure

Assay variable : PTINR\_VAL1 PT-INR Value

| N | Mean      | Standard Deviation | Minimum   | Maximum   |
|---|-----------|--------------------|-----------|-----------|
| 3 | 1.9600000 | 1.0142485          | 1.3300000 | 3.1300000 |

Unique Subject Identifier=8026000000-0007

Assay variable : PTINR\_VAL1 PT-INR Value

| N | Mean      | Standard Deviation | Minimum   | Maximum   |
|---|-----------|--------------------|-----------|-----------|
| 2 | 1.8300000 | 0.4384062          | 1.5200000 | 2.1400000 |

Unique Subject Identifier=8026000000-0027

Assay variable : PTINR\_VAL1 PT-INR Value

| N | Mean      | Standard Deviation | Minimum   | Maximum   |
|---|-----------|--------------------|-----------|-----------|
| 2 | 2.2950000 | 0.3606245          | 2.0400000 | 2.5500000 |

Unique Subject Identifier=8026000000-0028



Assay variable : PTINR\_VAL1 PT-INR Value

N Mean Standard Deviation Minimum Maximum

---

|   |           |           |           |           |
|---|-----------|-----------|-----------|-----------|
| 2 | 1.8650000 | 0.2474874 | 1.6900000 | 2.0400000 |
|---|-----------|-----------|-----------|-----------|

---

Laboratory tests at the time of obtaining Table 2-6 consent, according to the presence or absence of proton-pump inhibitors

Unique Subject Identifier=802600000-0030

MEANS Procedure

Assay variable : PTINR\_VAL1 PT-INR Value

N Mean Standard Deviation Minimum Maximum

---

|   |          |           |          |          |
|---|----------|-----------|----------|----------|
| 3 | 1.920000 | 0.2402082 | 1.730000 | 2.190000 |
|---|----------|-----------|----------|----------|

---

Unique Subject Identifier=8030011000-0021

Assay variable : PTINR\_VAL1 PT-INR Value

N Mean Standard Deviation Minimum Maximum

---

|   |          |           |          |          |
|---|----------|-----------|----------|----------|
| 6 | 2.343333 | 0.1875811 | 2.100000 | 2.550000 |
|---|----------|-----------|----------|----------|

---

Unique Subject Identifier=8030011000-0027

Assay variable : PTINR\_VAL1 PT-INR Value

N Mean Standard Deviation Minimum Maximum

---

|   |          |           |          |          |
|---|----------|-----------|----------|----------|
| 6 | 2.178333 | 0.2555321 | 1.850000 | 2.510000 |
|---|----------|-----------|----------|----------|

---

Unique Subject Identifier=803100000-0005

Assay variable : PTINR\_VAL1 PT-INR Value

N Mean Standard Deviation Minimum Maximum

---

|   |           |           |           |           |
|---|-----------|-----------|-----------|-----------|
| 4 | 1.9000000 | 0.1016530 | 1.7700000 | 2.0100000 |
|---|-----------|-----------|-----------|-----------|

---

Laboratory tests at the time of obtaining Table 2-6 consent, according to the presence or absence of proton-pump inhibitors

Unique Subject Identifier=8031000000-0009

MEANS Procedure

Assay variable : PTINR\_VAL1 PT-INR Value

| N | Mean      | Standard Deviation | Minimum   | Maximum   |
|---|-----------|--------------------|-----------|-----------|
| 4 | 1.9700000 | 0.8517824          | 1.2300000 | 2.9800000 |

Unique Subject Identifier=8031000000-0014

Assay variable : PTINR\_VAL1 PT-INR Value

| N | Mean      | Standard Deviation | Minimum   | Maximum   |
|---|-----------|--------------------|-----------|-----------|
| 5 | 1.8780000 | 0.1722498          | 1.6200000 | 2.0500000 |

Unique Subject Identifier=8031000000-0023

Assay variable : PTINR\_VAL1 PT-INR Value

| N | Mean      | Standard Deviation | Minimum   | Maximum   |
|---|-----------|--------------------|-----------|-----------|
| 5 | 1.9620000 | 0.4747315          | 1.3400000 | 2.4400000 |

Unique Subject Identifier=8031000000-0048

Assay variable : PTINR\_VAL1 PT-INR Value

N Mean Standard Deviation Minimum Maximum

---

|   |           |           |           |           |
|---|-----------|-----------|-----------|-----------|
| 6 | 1.6966667 | 0.1569289 | 1.4000000 | 1.8600000 |
|---|-----------|-----------|-----------|-----------|

---

Laboratory tests at the time of obtaining Table 2-6 consent, according to the presence or absence of proton-pump inhibitors

Unique Subject Identifier=8031000000-0049

MEANS Procedure

Assay variable : PTINR\_VAL1 PT-INR Value

N Mean Standard Deviation Minimum Maximum

---

|   |           |           |           |           |
|---|-----------|-----------|-----------|-----------|
| 5 | 2.3820000 | 0.7620171 | 1.7900000 | 3.4100000 |
|---|-----------|-----------|-----------|-----------|

---

Unique Subject Identifier=8035000000-0005

Assay variable : PTINR\_VAL1 PT-INR Value

N Mean Standard Deviation Minimum Maximum

---

|   |           |           |           |           |
|---|-----------|-----------|-----------|-----------|
| 2 | 1.9000000 | 0.1414214 | 1.8000000 | 2.0000000 |
|---|-----------|-----------|-----------|-----------|

---

Unique Subject Identifier=8035000000-0010

Assay variable : PTINR\_VAL1 PT-INR Value

N Mean Standard Deviation Minimum Maximum

---

|   |           |           |           |           |
|---|-----------|-----------|-----------|-----------|
| 3 | 2.1333333 | 0.2386071 | 1.9400000 | 2.4000000 |
|---|-----------|-----------|-----------|-----------|

---

Unique Subject Identifier=8035000000-0016

Assay variable : PTINR\_VAL1 PT-INR Value

N Mean Standard Deviation Minimum Maximum

---

|   |           |  |           |           |
|---|-----------|--|-----------|-----------|
| 1 | 2.5900000 |  | 2.5900000 | 2.5900000 |
|---|-----------|--|-----------|-----------|

---

Laboratory tests at the time of obtaining Table 2-6 consent, according to the presence or absence of proton-pump inhibitors

Unique Subject Identifier=8047000000-0015

MEANS Procedure

Assay variable : PTINR\_VAL1 PT-INR Value

N Mean Standard Deviation Minimum Maximum

---

|   |           |           |           |           |
|---|-----------|-----------|-----------|-----------|
| 3 | 1.8966667 | 0.7503555 | 1.3400000 | 2.7500000 |
|---|-----------|-----------|-----------|-----------|

---

Unique Subject Identifier=8047000000-0029

Assay variable : PTINR\_VAL1 PT-INR Value

N Mean Standard Deviation Minimum Maximum

---

|   |           |           |           |           |
|---|-----------|-----------|-----------|-----------|
| 3 | 1.6866667 | 0.2311565 | 1.4700000 | 1.9300000 |
|---|-----------|-----------|-----------|-----------|

---

Unique Subject Identifier=8048010011-0002

Assay variable : PTINR\_VAL1 PT-INR Value

N Mean Standard Deviation Minimum Maximum

---

|   |           |           |           |           |
|---|-----------|-----------|-----------|-----------|
| 2 | 1.3900000 | 0.0565685 | 1.3500000 | 1.4300000 |
|---|-----------|-----------|-----------|-----------|

---

Unique Subject Identifier=8048010011-0028



Assay variable : PTINR\_VAL1 PT-INR Value

N Mean Standard Deviation Minimum Maximum

---

|   |           |           |           |           |
|---|-----------|-----------|-----------|-----------|
| 6 | 2.0916667 | 0.1070358 | 1.9700000 | 2.2800000 |
|---|-----------|-----------|-----------|-----------|

---

Laboratory tests at the time of obtaining Table 2-6 consent, according to the presence or absence of proton-pump inhibitors

Unique Subject Identifier=8048010011-0034

MEANS Procedure

Assay variable : PTINR\_VAL1 PT-INR Value

N Mean Standard Deviation Minimum Maximum

---

|   |           |           |           |           |
|---|-----------|-----------|-----------|-----------|
| 2 | 1.6400000 | 0.6363961 | 1.1900000 | 2.0900000 |
|---|-----------|-----------|-----------|-----------|

---

Unique Subject Identifier=8057011000-0001

Assay variable : PTINR\_VAL1 PT-INR Value

N Mean Standard Deviation Minimum Maximum

---

|   |           |  |           |           |
|---|-----------|--|-----------|-----------|
| 1 | 1.3800000 |  | 1.3800000 | 1.3800000 |
|---|-----------|--|-----------|-----------|

---

Unique Subject Identifier=8057011000-0012

Assay variable : PTINR\_VAL1 PT-INR Value

N Mean Standard Deviation Minimum Maximum

---

|   |           |           |           |           |
|---|-----------|-----------|-----------|-----------|
| 6 | 1.7183333 | 0.3896879 | 1.3100000 | 2.2200000 |
|---|-----------|-----------|-----------|-----------|

---

Unique Subject Identifier=8057011000-0014

Assay variable : PTINR\_VAL1 PT-INR Value

N Mean Standard Deviation Minimum Maximum

---

|   |           |           |           |           |
|---|-----------|-----------|-----------|-----------|
| 3 | 2.2566667 | 0.3689625 | 1.8500000 | 2.5700000 |
|---|-----------|-----------|-----------|-----------|

---

Laboratory tests at the time of obtaining Table 2-6 consent, according to the presence or absence of proton-pump inhibitors

Unique Subject Identifier=8057011000-0015

MEANS Procedure

Assay variable : PTINR\_VAL1 PT-INR Value

N Mean Standard Deviation Minimum Maximum

---

|   |           |           |           |           |
|---|-----------|-----------|-----------|-----------|
| 6 | 2.1483333 | 0.6102923 | 1.4900000 | 3.1000000 |
|---|-----------|-----------|-----------|-----------|

---

Unique Subject Identifier=8060011000-0001

Assay variable : PTINR\_VAL1 PT-INR Value

N Mean Standard Deviation Minimum Maximum

---

|   |           |           |           |           |
|---|-----------|-----------|-----------|-----------|
| 6 | 2.3666667 | 0.4273952 | 1.9000000 | 3.1000000 |
|---|-----------|-----------|-----------|-----------|

---

Unique Subject Identifier=8060011000-0002

Assay variable : PTINR\_VAL1 PT-INR Value

N Mean Standard Deviation Minimum Maximum

---

|   |           |           |           |           |
|---|-----------|-----------|-----------|-----------|
| 3 | 2.7333333 | 1.0066446 | 1.8000000 | 3.8000000 |
|---|-----------|-----------|-----------|-----------|

---

Unique Subject Identifier=8060011000-0003

Assay variable : PTINR\_VAL1 PT-INR Value

N Mean Standard Deviation Minimum Maximum

---

|   |          |           |          |          |
|---|----------|-----------|----------|----------|
| 3 | 2.600000 | 0.4582576 | 2.100000 | 3.000000 |
|---|----------|-----------|----------|----------|

---

Laboratory tests at the time of obtaining Table 2-6 consent, according to the presence or absence of proton-pump inhibitors

Unique Subject Identifier=8060011000-0012

MEANS Procedure

Assay variable : PTINR\_VAL1 PT-INR Value

N Mean Standard Deviation Minimum Maximum

---

|   |           |           |           |           |
|---|-----------|-----------|-----------|-----------|
| 5 | 1.9200000 | 0.4438468 | 1.5000000 | 2.4000000 |
|---|-----------|-----------|-----------|-----------|

---

Unique Subject Identifier=8060011000-0013

Assay variable : PTINR\_VAL1 PT-INR Value

N Mean Standard Deviation Minimum Maximum

---

|   |           |           |           |           |
|---|-----------|-----------|-----------|-----------|
| 6 | 1.9333333 | 0.3932768 | 1.5000000 | 2.5000000 |
|---|-----------|-----------|-----------|-----------|

---

Unique Subject Identifier=8060011000-0020

Assay variable : PTINR\_VAL1 PT-INR Value

N Mean Standard Deviation Minimum Maximum

---

|   |           |           |           |           |
|---|-----------|-----------|-----------|-----------|
| 6 | 2.3166667 | 0.3125167 | 1.9000000 | 2.8000000 |
|---|-----------|-----------|-----------|-----------|

---

Unique Subject Identifier=8060011000-0023

Assay variable : PTINR\_VAL1 PT-INR Value

N Mean Standard Deviation Minimum Maximum

---

|   |           |           |           |           |
|---|-----------|-----------|-----------|-----------|
| 6 | 1.9833333 | 0.3311596 | 1.7000000 | 2.6000000 |
|---|-----------|-----------|-----------|-----------|

---

Laboratory tests at the time of obtaining Table 2-6 consent, according to the presence or absence of proton-pump inhibitors

Unique Subject Identifier=810400000-0002

MEANS Procedure

Assay variable : PTINR\_VAL1 PT-INR Value

N Mean Standard Deviation Minimum Maximum

---

|   |           |           |           |           |
|---|-----------|-----------|-----------|-----------|
| 2 | 2.8700000 | 0.6081118 | 2.4400000 | 3.3000000 |
|---|-----------|-----------|-----------|-----------|

---

Unique Subject Identifier=810400000-0003

Assay variable : PTINR\_VAL1 PT-INR Value

N Mean Standard Deviation Minimum Maximum

---

|   |           |           |           |           |
|---|-----------|-----------|-----------|-----------|
| 2 | 1.3500000 | 0.0707107 | 1.3000000 | 1.4000000 |
|---|-----------|-----------|-----------|-----------|

---

Unique Subject Identifier=810400000-0007

Assay variable : PTINR\_VAL1 PT-INR Value

N Mean Standard Deviation Minimum Maximum

---

|   |           |           |           |           |
|---|-----------|-----------|-----------|-----------|
| 4 | 1.5350000 | 0.1473092 | 1.3900000 | 1.6900000 |
|---|-----------|-----------|-----------|-----------|

---

Unique Subject Identifier=810400000-0018



Assay variable : PTINR\_VAL1 PT-INR Value

N Mean Standard Deviation Minimum Maximum

---

|   |           |           |           |           |
|---|-----------|-----------|-----------|-----------|
| 6 | 2.0150000 | 0.2504196 | 1.6900000 | 2.4400000 |
|---|-----------|-----------|-----------|-----------|

---

Laboratory tests at the time of obtaining Table 2-6 consent, according to the presence or absence of proton-pump inhibitors

Unique Subject Identifier=810400000-0021

MEANS Procedure

Assay variable : PTINR\_VAL1 PT-INR Value

| N | Mean      | Standard Deviation | Minimum   | Maximum   |
|---|-----------|--------------------|-----------|-----------|
| 3 | 1.6700000 | 0.4063250          | 1.3300000 | 2.1200000 |

Unique Subject Identifier=810400000-0027

Assay variable : PTINR\_VAL1 PT-INR Value

| N | Mean      | Standard Deviation | Minimum   | Maximum   |
|---|-----------|--------------------|-----------|-----------|
| 3 | 1.9133333 | 0.5225259          | 1.3100000 | 2.2200000 |

Unique Subject Identifier=8110000100-0002

Assay variable : PTINR\_VAL1 PT-INR Value

| N | Mean      | Standard Deviation | Minimum   | Maximum   |
|---|-----------|--------------------|-----------|-----------|
| 3 | 2.1833333 | 0.1167619          | 2.0800000 | 2.3100000 |

Unique Subject Identifier=8110000100-0004

Assay variable : PTINR\_VAL1 PT-INR Value

N Mean Standard Deviation Minimum Maximum

---

|   |           |           |           |           |
|---|-----------|-----------|-----------|-----------|
| 3 | 2.2466667 | 0.4954123 | 1.8200000 | 2.7900000 |
|---|-----------|-----------|-----------|-----------|

---

Laboratory tests at the time of obtaining Table 2-6 consent, according to the presence or absence of proton-pump inhibitors

Unique Subject Identifier=811400000-0008

MEANS Procedure

Assay variable : PTINR\_VAL1 PT-INR Value

N Mean Standard Deviation Minimum Maximum

---

|   |           |           |           |           |
|---|-----------|-----------|-----------|-----------|
| 6 | 1.7950000 | 0.2055967 | 1.4900000 | 2.0900000 |
|---|-----------|-----------|-----------|-----------|

---

Unique Subject Identifier=8117011010-0002

Assay variable : PTINR\_VAL1 PT-INR Value

N Mean Standard Deviation Minimum Maximum

---

|   |           |           |           |           |
|---|-----------|-----------|-----------|-----------|
| 3 | 1.6833333 | 0.4539089 | 1.1600000 | 1.9700000 |
|---|-----------|-----------|-----------|-----------|

---

Unique Subject Identifier=8117011010-0005

Assay variable : PTINR\_VAL1 PT-INR Value

N Mean Standard Deviation Minimum Maximum

---

|   |           |           |           |           |
|---|-----------|-----------|-----------|-----------|
| 2 | 1.7700000 | 0.2121320 | 1.6200000 | 1.9200000 |
|---|-----------|-----------|-----------|-----------|

---

Unique Subject Identifier=8117011010-0009

Assay variable : PTINR\_VAL1 PT-INR Value

N Mean Standard Deviation Minimum Maximum

---

|   |           |           |           |           |
|---|-----------|-----------|-----------|-----------|
| 5 | 1.9260000 | 0.1119375 | 1.7700000 | 2.0400000 |
|---|-----------|-----------|-----------|-----------|

---

Laboratory tests at the time of obtaining Table 2-6 consent, according to the presence or absence of proton-pump inhibitors

Unique Subject Identifier=8123000000-0004

MEANS Procedure

Assay variable : PTINR\_VAL1 PT-INR Value

N Mean Standard Deviation Minimum Maximum

---

|   |           |           |           |           |
|---|-----------|-----------|-----------|-----------|
| 6 | 1.8983333 | 0.2920559 | 1.4500000 | 2.2300000 |
|---|-----------|-----------|-----------|-----------|

---

Unique Subject Identifier=8123000000-0010

Assay variable : PTINR\_VAL1 PT-INR Value

N Mean Standard Deviation Minimum Maximum

---

|   |           |           |           |           |
|---|-----------|-----------|-----------|-----------|
| 5 | 1.9240000 | 0.3630840 | 1.4900000 | 2.4600000 |
|---|-----------|-----------|-----------|-----------|

---

Unique Subject Identifier=8123000000-0011

Assay variable : PTINR\_VAL1 PT-INR Value

N Mean Standard Deviation Minimum Maximum

---

|   |           |           |           |           |
|---|-----------|-----------|-----------|-----------|
| 4 | 1.8825000 | 0.2151550 | 1.6800000 | 2.1500000 |
|---|-----------|-----------|-----------|-----------|

---

Unique Subject Identifier=8123000000-0012

Assay variable : PTINR\_VAL1 PT-INR Value

N Mean Standard Deviation Minimum Maximum

---

|   |           |           |           |           |
|---|-----------|-----------|-----------|-----------|
| 4 | 1.9625000 | 0.1668083 | 1.7300000 | 2.1100000 |
|---|-----------|-----------|-----------|-----------|

---

Laboratory tests at the time of obtaining Table 2-6 consent, according to the presence or absence of proton-pump inhibitors

Unique Subject Identifier=8123000000-0013

MEANS Procedure

Assay variable : PTINR\_VAL1 PT-INR Value

N Mean Standard Deviation Minimum Maximum

---

|   |           |           |           |           |
|---|-----------|-----------|-----------|-----------|
| 5 | 2.1160000 | 0.1350185 | 1.9500000 | 2.3000000 |
|---|-----------|-----------|-----------|-----------|

---

Unique Subject Identifier=8123000000-0018

Assay variable : PTINR\_VAL1 PT-INR Value

N Mean Standard Deviation Minimum Maximum

---

|   |           |           |           |           |
|---|-----------|-----------|-----------|-----------|
| 6 | 1.8600000 | 0.3850714 | 1.5200000 | 2.5700000 |
|---|-----------|-----------|-----------|-----------|

---

Unique Subject Identifier=8136000000-0002

Assay variable : PTINR\_VAL1 PT-INR Value

N Mean Standard Deviation Minimum Maximum

---

|   |           |           |           |           |
|---|-----------|-----------|-----------|-----------|
| 6 | 1.8233333 | 0.2530349 | 1.4000000 | 2.1300000 |
|---|-----------|-----------|-----------|-----------|

---

Unique Subject Identifier=8136000000-0010



Assay variable : PTINR\_VAL1 PT-INR Value

N Mean Standard Deviation Minimum Maximum

---

|   |          |           |          |          |
|---|----------|-----------|----------|----------|
| 4 | 1.840000 | 0.0294392 | 1.810000 | 1.880000 |
|---|----------|-----------|----------|----------|

---

Laboratory tests at the time of obtaining Table 2-6 consent, according to the presence or absence of proton-pump inhibitors

Unique Subject Identifier=813600000-0015

MEANS Procedure

Assay variable : PTINR\_VAL1 PT-INR Value

N Mean Standard Deviation Minimum Maximum

---

|   |           |           |           |           |
|---|-----------|-----------|-----------|-----------|
| 4 | 2.1425000 | 0.8701485 | 1.5400000 | 3.4300000 |
|---|-----------|-----------|-----------|-----------|

---

Unique Subject Identifier=8137010000-0002

Assay variable : PTINR\_VAL1 PT-INR Value

N Mean Standard Deviation Minimum Maximum

---

|   |           |           |           |           |
|---|-----------|-----------|-----------|-----------|
| 3 | 2.3833333 | 0.7011657 | 1.8600000 | 3.1800000 |
|---|-----------|-----------|-----------|-----------|

---

Unique Subject Identifier=8137010000-0007

Assay variable : PTINR\_VAL1 PT-INR Value

N Mean Standard Deviation Minimum Maximum

---

|   |           |           |           |           |
|---|-----------|-----------|-----------|-----------|
| 5 | 1.9260000 | 0.2608256 | 1.5500000 | 2.2100000 |
|---|-----------|-----------|-----------|-----------|

---

Unique Subject Identifier=8154011000-0020

Assay variable : PTINR\_VAL1 PT-INR Value

N Mean Standard Deviation Minimum Maximum

---

|   |           |           |           |           |
|---|-----------|-----------|-----------|-----------|
| 6 | 2.1566667 | 0.4464378 | 1.8000000 | 3.0400000 |
|---|-----------|-----------|-----------|-----------|

---

Laboratory tests at the time of obtaining Table 2-6 consent, according to the presence or absence of proton-pump inhibitors

Unique Subject Identifier=8154011000-0021

MEANS Procedure

Assay variable : PTINR\_VAL1 PT-INR Value

N Mean Standard Deviation Minimum Maximum

---

|   |           |           |           |           |
|---|-----------|-----------|-----------|-----------|
| 5 | 2.1940000 | 0.2634008 | 1.9800000 | 2.6500000 |
|---|-----------|-----------|-----------|-----------|

---

Unique Subject Identifier=8160000000-0003

Assay variable : PTINR\_VAL1 PT-INR Value

N Mean Standard Deviation Minimum Maximum

---

|   |           |           |           |           |
|---|-----------|-----------|-----------|-----------|
| 6 | 1.8100000 | 0.2372341 | 1.6000000 | 2.2000000 |
|---|-----------|-----------|-----------|-----------|

---

Unique Subject Identifier=8160000000-0006

Assay variable : PTINR\_VAL1 PT-INR Value

N Mean Standard Deviation Minimum Maximum

---

|   |           |           |           |           |
|---|-----------|-----------|-----------|-----------|
| 6 | 1.7850000 | 0.3574213 | 1.4000000 | 2.3000000 |
|---|-----------|-----------|-----------|-----------|

---

Unique Subject Identifier=8160000000-0007

Assay variable : PTINR\_VAL1 PT-INR Value

N Mean Standard Deviation Minimum Maximum

---

|   |           |           |           |           |
|---|-----------|-----------|-----------|-----------|
| 5 | 1.9880000 | 0.1475466 | 1.7700000 | 2.1000000 |
|---|-----------|-----------|-----------|-----------|

---

Laboratory tests at the time of obtaining Table 2-6 consent, according to the presence or absence of proton-pump inhibitors

Unique Subject Identifier=816000000-0008

MEANS Procedure

Assay variable : PTINR\_VAL1 PT-INR Value

N Mean Standard Deviation Minimum Maximum

---

|   |           |           |           |           |
|---|-----------|-----------|-----------|-----------|
| 6 | 2.1683333 | 0.4108731 | 1.7100000 | 2.8000000 |
|---|-----------|-----------|-----------|-----------|

---

Unique Subject Identifier=816000000-0010

Assay variable : PTINR\_VAL1 PT-INR Value

N Mean Standard Deviation Minimum Maximum

---

|   |           |           |           |           |
|---|-----------|-----------|-----------|-----------|
| 6 | 1.8516667 | 0.2371005 | 1.6300000 | 2.3000000 |
|---|-----------|-----------|-----------|-----------|

---

Unique Subject Identifier=816000000-0017

Assay variable : PTINR\_VAL1 PT-INR Value

N Mean Standard Deviation Minimum Maximum

---

|   |           |           |           |           |
|---|-----------|-----------|-----------|-----------|
| 6 | 1.8283333 | 0.1000833 | 1.7000000 | 2.0000000 |
|---|-----------|-----------|-----------|-----------|

---

Unique Subject Identifier=816000000-0018

Assay variable : PTINR\_VAL1 PT-INR Value

N Mean Standard Deviation Minimum Maximum

---

|   |          |           |          |          |
|---|----------|-----------|----------|----------|
| 6 | 1.633333 | 0.2111556 | 1.400000 | 2.000000 |
|---|----------|-----------|----------|----------|

---

Laboratory tests at the time of obtaining Table 2-6 consent, according to the presence or absence of proton-pump inhibitors

Unique Subject Identifier=816000000-0022

MEANS Procedure

Assay variable : PTINR\_VAL1 PT-INR Value

N Mean Standard Deviation Minimum Maximum

---

|   |           |           |           |           |
|---|-----------|-----------|-----------|-----------|
| 6 | 1.7250000 | 0.2403123 | 1.5000000 | 2.0000000 |
|---|-----------|-----------|-----------|-----------|

---

Unique Subject Identifier=816000000-0026

Assay variable : PTINR\_VAL1 PT-INR Value

N Mean Standard Deviation Minimum Maximum

---

|   |           |           |           |           |
|---|-----------|-----------|-----------|-----------|
| 6 | 1.6266667 | 0.1751190 | 1.3600000 | 1.9000000 |
|---|-----------|-----------|-----------|-----------|

---

Unique Subject Identifier=8161010010-0002

Assay variable : PTINR\_VAL1 PT-INR Value

N Mean Standard Deviation Minimum Maximum

---

|   |           |           |           |           |
|---|-----------|-----------|-----------|-----------|
| 4 | 1.9625000 | 0.3406244 | 1.5400000 | 2.3600000 |
|---|-----------|-----------|-----------|-----------|

---

Unique Subject Identifier=8161010010-0003



Assay variable : PTINR\_VAL1 PT-INR Value

N Mean Standard Deviation Minimum Maximum

---

|   |           |           |           |           |
|---|-----------|-----------|-----------|-----------|
| 3 | 2.6700000 | 0.3439477 | 2.3000000 | 2.9800000 |
|---|-----------|-----------|-----------|-----------|

---

Laboratory tests at the time of obtaining Table 2-6 consent, according to the presence or absence of proton-pump inhibitors

Unique Subject Identifier=8161010010-0011

MEANS Procedure

Assay variable : PTINR\_VAL1 PT-INR Value

N Mean Standard Deviation Minimum Maximum

---

|   |          |           |          |          |
|---|----------|-----------|----------|----------|
| 5 | 1.780000 | 0.1607794 | 1.600000 | 1.980000 |
|---|----------|-----------|----------|----------|

---

Unique Subject Identifier=8161010010-0018

Assay variable : PTINR\_VAL1 PT-INR Value

N Mean Standard Deviation Minimum Maximum

---

|   |          |           |          |          |
|---|----------|-----------|----------|----------|
| 5 | 1.508000 | 0.2834078 | 1.290000 | 1.990000 |
|---|----------|-----------|----------|----------|

---

Unique Subject Identifier=8161010010-0024

Assay variable : PTINR\_VAL1 PT-INR Value

N Mean Standard Deviation Minimum Maximum

---

|   |          |           |          |          |
|---|----------|-----------|----------|----------|
| 5 | 2.114000 | 0.6029760 | 1.660000 | 3.160000 |
|---|----------|-----------|----------|----------|

---

Unique Subject Identifier=8161010010-0025

Assay variable : PTINR\_VAL1 PT-INR Value

N Mean Standard Deviation Minimum Maximum

---

|   |          |           |          |          |
|---|----------|-----------|----------|----------|
| 4 | 2.410000 | 0.2201515 | 2.230000 | 2.730000 |
|---|----------|-----------|----------|----------|

---

Laboratory tests at the time of obtaining Table 2-6 consent, according to the presence or absence of proton-pump inhibitors

Unique Subject Identifier=8205000000-0001

MEANS Procedure

Assay variable : PTINR\_VAL1 PT-INR Value

N Mean Standard Deviation Minimum Maximum

---

|   |           |           |           |           |
|---|-----------|-----------|-----------|-----------|
| 4 | 1.6725000 | 0.1225765 | 1.5000000 | 1.7900000 |
|---|-----------|-----------|-----------|-----------|

---

Unique Subject Identifier=8205000000-0020

Assay variable : PTINR\_VAL1 PT-INR Value

N Mean Standard Deviation Minimum Maximum

---

|   |           |           |           |           |
|---|-----------|-----------|-----------|-----------|
| 3 | 2.6433333 | 0.1877054 | 2.5300000 | 2.8600000 |
|---|-----------|-----------|-----------|-----------|

---

Unique Subject Identifier=8205000000-0027

Assay variable : PTINR\_VAL1 PT-INR Value

N Mean Standard Deviation Minimum Maximum

---

|   |           |           |           |           |
|---|-----------|-----------|-----------|-----------|
| 4 | 2.0325000 | 0.2025463 | 1.8800000 | 2.3300000 |
|---|-----------|-----------|-----------|-----------|

---

Unique Subject Identifier=8205000000-0028

Assay variable : PTINR\_VAL1 PT-INR Value

N Mean Standard Deviation Minimum Maximum

---

|   |          |           |          |          |
|---|----------|-----------|----------|----------|
| 3 | 1.820000 | 0.2463737 | 1.590000 | 2.080000 |
|---|----------|-----------|----------|----------|

---

Laboratory tests at the time of obtaining Table 2-6 consent, according to the presence or absence of proton-pump inhibitors

Unique Subject Identifier=8205000000-0042

MEANS Procedure

Assay variable : PTINR\_VAL1 PT-INR Value

N Mean Standard Deviation Minimum Maximum

---

|   |           |           |           |           |
|---|-----------|-----------|-----------|-----------|
| 4 | 1.8975000 | 0.3986122 | 1.6300000 | 2.4800000 |
|---|-----------|-----------|-----------|-----------|

---

Unique Subject Identifier=8209000000-0003

Assay variable : PTINR\_VAL1 PT-INR Value

N Mean Standard Deviation Minimum Maximum

---

|   |           |           |           |           |
|---|-----------|-----------|-----------|-----------|
| 6 | 2.2900000 | 0.3209984 | 1.9000000 | 2.6400000 |
|---|-----------|-----------|-----------|-----------|

---

Unique Subject Identifier=8209000000-0004

Assay variable : PTINR\_VAL1 PT-INR Value

N Mean Standard Deviation Minimum Maximum

---

|   |           |           |           |           |
|---|-----------|-----------|-----------|-----------|
| 6 | 2.2233333 | 0.7048593 | 1.6500000 | 3.2500000 |
|---|-----------|-----------|-----------|-----------|

---

Unique Subject Identifier=8209000000-0007

Assay variable : PTINR\_VAL1 PT-INR Value

N Mean Standard Deviation Minimum Maximum

---

|   |           |           |           |           |
|---|-----------|-----------|-----------|-----------|
| 5 | 1.6820000 | 0.2108791 | 1.3700000 | 1.9200000 |
|---|-----------|-----------|-----------|-----------|

---

Laboratory tests at the time of obtaining Table 2-6 consent, according to the presence or absence of proton-pump inhibitors

Unique Subject Identifier=8209000000-0008

MEANS Procedure

Assay variable : PTINR\_VAL1 PT-INR Value

N Mean Standard Deviation Minimum Maximum

---

|   |           |           |           |           |
|---|-----------|-----------|-----------|-----------|
| 6 | 2.0366667 | 0.4864018 | 1.5400000 | 2.8300000 |
|---|-----------|-----------|-----------|-----------|

---

Unique Subject Identifier=8209000000-0024

Assay variable : PTINR\_VAL1 PT-INR Value

N Mean Standard Deviation Minimum Maximum

---

|   |           |           |           |           |
|---|-----------|-----------|-----------|-----------|
| 4 | 1.7000000 | 0.3987480 | 1.2600000 | 2.2200000 |
|---|-----------|-----------|-----------|-----------|

---

Unique Subject Identifier=8209000000-0028

Assay variable : PTINR\_VAL1 PT-INR Value

N Mean Standard Deviation Minimum Maximum

---

|   |           |           |           |           |
|---|-----------|-----------|-----------|-----------|
| 6 | 2.2266667 | 0.2068494 | 1.9600000 | 2.5000000 |
|---|-----------|-----------|-----------|-----------|

---

Unique Subject Identifier=8223000000-0023



Assay variable : PTINR\_VAL1 PT-INR Value

N Mean Standard Deviation Minimum Maximum

---

|   |           |           |           |           |
|---|-----------|-----------|-----------|-----------|
| 3 | 1.8933333 | 0.4461315 | 1.3900000 | 2.2400000 |
|---|-----------|-----------|-----------|-----------|

---

Laboratory tests at the time of obtaining Table 2-6 consent, according to the presence or absence of proton-pump inhibitors

Unique Subject Identifier=8223000000-0024

MEANS Procedure

Assay variable : PTINR\_VAL1 PT-INR Value

| N | Mean      | Standard Deviation | Minimum   | Maximum   |
|---|-----------|--------------------|-----------|-----------|
| 5 | 1.8820000 | 0.5756040          | 1.2900000 | 2.5300000 |

Unique Subject Identifier=8233000000-0018

Assay variable : PTINR\_VAL1 PT-INR Value

| N | Mean      | Standard Deviation | Minimum   | Maximum   |
|---|-----------|--------------------|-----------|-----------|
| 2 | 1.3900000 | 0.2687006          | 1.2000000 | 1.5800000 |

Unique Subject Identifier=8233000000-0019

Assay variable : PTINR\_VAL1 PT-INR Value

| N | Mean      | Standard Deviation | Minimum   | Maximum   |
|---|-----------|--------------------|-----------|-----------|
| 2 | 2.6950000 | 0.1909188          | 2.5600000 | 2.8300000 |

Unique Subject Identifier=8237011000-0003

Assay variable : PTINR\_VAL1 PT-INR Value

N Mean Standard Deviation Minimum Maximum

---

|   |           |           |           |           |
|---|-----------|-----------|-----------|-----------|
| 3 | 2.2333333 | 0.2886751 | 1.9000000 | 2.4000000 |
|---|-----------|-----------|-----------|-----------|

---

Laboratory tests at the time of obtaining Table 2-6 consent, according to the presence or absence of proton-pump inhibitors

Unique Subject Identifier=8237011000-0005

MEANS Procedure

Assay variable : PTINR\_VAL1 PT-INR Value

N Mean Standard Deviation Minimum Maximum

---

|   |           |           |           |           |
|---|-----------|-----------|-----------|-----------|
| 2 | 2.3000000 | 0.1414214 | 2.2000000 | 2.4000000 |
|---|-----------|-----------|-----------|-----------|

---

Unique Subject Identifier=8237011000-0017

Assay variable : PTINR\_VAL1 PT-INR Value

N Mean Standard Deviation Minimum Maximum

---

|   |           |           |           |           |
|---|-----------|-----------|-----------|-----------|
| 2 | 1.4000000 | 0.1414214 | 1.3000000 | 1.5000000 |
|---|-----------|-----------|-----------|-----------|

---

Unique Subject Identifier=8237011000-0023

Assay variable : PTINR\_VAL1 PT-INR Value

N Mean Standard Deviation Minimum Maximum

---

|   |           |           |           |           |
|---|-----------|-----------|-----------|-----------|
| 3 | 2.5666667 | 0.3214550 | 2.2000000 | 2.8000000 |
|---|-----------|-----------|-----------|-----------|

---

Unique Subject Identifier=8237011000-0029

Assay variable : PTINR\_VAL1 PT-INR Value

N Mean Standard Deviation Minimum Maximum

---

|   |           |           |           |           |
|---|-----------|-----------|-----------|-----------|
| 6 | 1.7166667 | 0.4400758 | 1.3000000 | 2.5000000 |
|---|-----------|-----------|-----------|-----------|

---

Laboratory tests at the time of obtaining Table 2-6 consent, according to the presence or absence of proton-pump inhibitors

Unique Subject Identifier=8240011000-0008

MEANS Procedure

Assay variable : PTINR\_VAL1 PT-INR Value

N Mean Standard Deviation Minimum Maximum

---

|   |           |           |           |           |
|---|-----------|-----------|-----------|-----------|
| 6 | 2.2466667 | 0.2787592 | 1.9700000 | 2.6700000 |
|---|-----------|-----------|-----------|-----------|

---

Unique Subject Identifier=8241000000-0014

Assay variable : PTINR\_VAL1 PT-INR Value

N Mean Standard Deviation Minimum Maximum

---

|   |           |  |           |           |
|---|-----------|--|-----------|-----------|
| 1 | 1.8500000 |  | 1.8500000 | 1.8500000 |
|---|-----------|--|-----------|-----------|

---

Unique Subject Identifier=8241000000-0023

Assay variable : PTINR\_VAL1 PT-INR Value

N Mean Standard Deviation Minimum Maximum

---

|   |           |           |           |           |
|---|-----------|-----------|-----------|-----------|
| 4 | 1.7300000 | 0.3918333 | 1.2400000 | 2.1900000 |
|---|-----------|-----------|-----------|-----------|

---

Unique Subject Identifier=8241000000-0024

Assay variable : PTINR\_VAL1 PT-INR Value

N Mean Standard Deviation Minimum Maximum

---

|   |           |           |           |           |
|---|-----------|-----------|-----------|-----------|
| 4 | 1.9350000 | 0.1491085 | 1.7500000 | 2.1100000 |
|---|-----------|-----------|-----------|-----------|

---

Laboratory tests at the time of obtaining Table 2-6 consent, according to the presence or absence of proton-pump inhibitors

Unique Subject Identifier=8241000000-0027

MEANS Procedure

Assay variable : PTINR\_VAL1 PT-INR Value

N Mean Standard Deviation Minimum Maximum

---

|   |           |           |           |           |
|---|-----------|-----------|-----------|-----------|
| 4 | 1.8400000 | 0.4162531 | 1.3100000 | 2.3100000 |
|---|-----------|-----------|-----------|-----------|

---

Unique Subject Identifier=8241000000-0029

Assay variable : PTINR\_VAL1 PT-INR Value

N Mean Standard Deviation Minimum Maximum

---

|   |           |           |           |           |
|---|-----------|-----------|-----------|-----------|
| 3 | 2.0566667 | 0.2107922 | 1.9300000 | 2.3000000 |
|---|-----------|-----------|-----------|-----------|

---

Unique Subject Identifier=8245000000-0007

Assay variable : PTINR\_VAL1 PT-INR Value

N Mean Standard Deviation Minimum Maximum

---

|   |           |           |           |           |
|---|-----------|-----------|-----------|-----------|
| 2 | 1.7900000 | 0.0989949 | 1.7200000 | 1.8600000 |
|---|-----------|-----------|-----------|-----------|

---

Unique Subject Identifier=8245000000-0008



Assay variable : PTINR\_VAL1 PT-INR Value

N Mean Standard Deviation Minimum Maximum

---

|   |          |          |          |          |
|---|----------|----------|----------|----------|
| 2 | 2.500000 | 1.088944 | 1.730000 | 3.270000 |
|---|----------|----------|----------|----------|

---

Laboratory tests at the time of obtaining Table 2-6 consent, according to the presence or absence of proton-pump inhibitors

Unique Subject Identifier=8245000000-0013

MEANS Procedure

Assay variable : PTINR\_VAL1 PT-INR Value

N Mean Standard Deviation Minimum Maximum

---

|   |           |           |           |           |
|---|-----------|-----------|-----------|-----------|
| 3 | 2.0166667 | 0.1761628 | 1.8200000 | 2.1600000 |
|---|-----------|-----------|-----------|-----------|

---

Unique Subject Identifier=8245000000-0016

Assay variable : PTINR\_VAL1 PT-INR Value

N Mean Standard Deviation Minimum Maximum

---

|   |           |           |           |           |
|---|-----------|-----------|-----------|-----------|
| 3 | 1.8500000 | 0.2029778 | 1.6300000 | 2.0300000 |
|---|-----------|-----------|-----------|-----------|

---

Unique Subject Identifier=8257010001-0011

Assay variable : PTINR\_VAL1 PT-INR Value

N Mean Standard Deviation Minimum Maximum

---

|   |           |           |           |           |
|---|-----------|-----------|-----------|-----------|
| 6 | 2.1350000 | 0.2946693 | 1.7500000 | 2.6500000 |
|---|-----------|-----------|-----------|-----------|

---

Unique Subject Identifier=8257010001-0015

Assay variable : PTINR\_VAL1 PT-INR Value

N Mean Standard Deviation Minimum Maximum

---

|   |          |           |          |          |
|---|----------|-----------|----------|----------|
| 3 | 1.463333 | 0.2557994 | 1.220000 | 1.730000 |
|---|----------|-----------|----------|----------|

---

Laboratory tests at the time of obtaining Table 2-6 consent, according to the presence or absence of proton-pump inhibitors

Unique Subject Identifier=8257010001-0016

MEANS Procedure

Assay variable : PTINR\_VAL1 PT-INR Value

N Mean Standard Deviation Minimum Maximum

---

|   |           |           |           |           |
|---|-----------|-----------|-----------|-----------|
| 3 | 2.2433333 | 0.3477547 | 1.8500000 | 2.5100000 |
|---|-----------|-----------|-----------|-----------|

---

Unique Subject Identifier=8257010001-0030

Assay variable : PTINR\_VAL1 PT-INR Value

N Mean Standard Deviation Minimum Maximum

---

|   |           |           |           |           |
|---|-----------|-----------|-----------|-----------|
| 4 | 2.1250000 | 0.7816436 | 1.1700000 | 3.0100000 |
|---|-----------|-----------|-----------|-----------|

---

Unique Subject Identifier=8266000000-0017

Assay variable : PTINR\_VAL1 PT-INR Value

N Mean Standard Deviation Minimum Maximum

---

|   |           |           |           |           |
|---|-----------|-----------|-----------|-----------|
| 3 | 2.4100000 | 0.2389561 | 2.2000000 | 2.6700000 |
|---|-----------|-----------|-----------|-----------|

---

Unique Subject Identifier=8266000000-0020

Assay variable : PTINR\_VAL1 PT-INR Value

N Mean Standard Deviation Minimum Maximum

---

|   |           |           |           |           |
|---|-----------|-----------|-----------|-----------|
| 6 | 2.5250000 | 0.3613170 | 2.0700000 | 3.1400000 |
|---|-----------|-----------|-----------|-----------|

---

Laboratory tests at the time of obtaining Table 2-6 consent, according to the presence or absence of proton-pump inhibitors

Unique Subject Identifier=8301010000-0004

MEANS Procedure

Assay variable : PTINR\_VAL1 PT-INR Value

N Mean Standard Deviation Minimum Maximum

---

|   |           |           |           |           |
|---|-----------|-----------|-----------|-----------|
| 6 | 1.7666667 | 0.3141125 | 1.2000000 | 2.1000000 |
|---|-----------|-----------|-----------|-----------|

---

Unique Subject Identifier=8326000000-0014

Assay variable : PTINR\_VAL1 PT-INR Value

N Mean Standard Deviation Minimum Maximum

---

|   |           |           |           |           |
|---|-----------|-----------|-----------|-----------|
| 6 | 2.1600000 | 0.2707767 | 1.8200000 | 2.5000000 |
|---|-----------|-----------|-----------|-----------|

---

Unique Subject Identifier=8326000000-0026

Assay variable : PTINR\_VAL1 PT-INR Value

N Mean Standard Deviation Minimum Maximum

---

|   |           |           |           |           |
|---|-----------|-----------|-----------|-----------|
| 5 | 2.1620000 | 0.2448877 | 1.9000000 | 2.5300000 |
|---|-----------|-----------|-----------|-----------|

---

Unique Subject Identifier=8326000000-0033

Assay variable : PTINR\_VAL1 PT-INR Value

N Mean Standard Deviation Minimum Maximum

---

|   |           |           |           |           |
|---|-----------|-----------|-----------|-----------|
| 6 | 1.8983333 | 0.4345304 | 1.5000000 | 2.5000000 |
|---|-----------|-----------|-----------|-----------|

---

Laboratory tests at the time of obtaining Table 2-6 consent, according to the presence or absence of proton-pump inhibitors

Unique Subject Identifier=832600000-0035

MEANS Procedure

Assay variable : PTINR\_VAL1 PT-INR Value

| N | Mean      | Standard Deviation | Minimum   | Maximum   |
|---|-----------|--------------------|-----------|-----------|
| 5 | 1.7980000 | 0.1549839          | 1.6000000 | 1.9900000 |

Unique Subject Identifier=832600000-0038

Assay variable : PTINR\_VAL1 PT-INR Value

| N | Mean      | Standard Deviation | Minimum   | Maximum   |
|---|-----------|--------------------|-----------|-----------|
| 6 | 1.4966667 | 0.0941630          | 1.3800000 | 1.6000000 |

Unique Subject Identifier=8332010000-0005

Assay variable : PTINR\_VAL1 PT-INR Value

| N | Mean      | Standard Deviation | Minimum   | Maximum   |
|---|-----------|--------------------|-----------|-----------|
| 5 | 1.7620000 | 0.3076849          | 1.5100000 | 2.2200000 |

Unique Subject Identifier=8332010000-0017



Assay variable : PTINR\_VAL1 PT-INR Value

N Mean Standard Deviation Minimum Maximum

---

|   |           |           |           |           |
|---|-----------|-----------|-----------|-----------|
| 4 | 2.1225000 | 0.2233644 | 1.8100000 | 2.3400000 |
|---|-----------|-----------|-----------|-----------|

---

Laboratory tests at the time of obtaining Table 2-6 consent, according to the presence or absence of proton-pump inhibitors

Unique Subject Identifier=8332010000-0028

MEANS Procedure

Assay variable : PTINR\_VAL1 PT-INR Value

N Mean Standard Deviation Minimum Maximum

---

|   |           |           |           |           |
|---|-----------|-----------|-----------|-----------|
| 6 | 2.7833333 | 0.3792976 | 2.1700000 | 3.2100000 |
|---|-----------|-----------|-----------|-----------|

---

Unique Subject Identifier=8332010000-0043

Assay variable : PTINR\_VAL1 PT-INR Value

N Mean Standard Deviation Minimum Maximum

---

|   |           |           |           |           |
|---|-----------|-----------|-----------|-----------|
| 4 | 1.5925000 | 0.0689807 | 1.4900000 | 1.6400000 |
|---|-----------|-----------|-----------|-----------|

---

Unique Subject Identifier=8332010000-0052

Assay variable : PTINR\_VAL1 PT-INR Value

N Mean Standard Deviation Minimum Maximum

---

|   |           |           |           |           |
|---|-----------|-----------|-----------|-----------|
| 6 | 2.0950000 | 0.3677907 | 1.7000000 | 2.6000000 |
|---|-----------|-----------|-----------|-----------|

---

Unique Subject Identifier=8332010000-0055

Assay variable : PTINR\_VAL1 PT-INR Value

N Mean Standard Deviation Minimum Maximum

---

|   |           |           |           |           |
|---|-----------|-----------|-----------|-----------|
| 6 | 1.9950000 | 0.5670185 | 1.5500000 | 3.0300000 |
|---|-----------|-----------|-----------|-----------|

---

Laboratory tests at the time of obtaining Table 2-6 consent, according to the presence or absence of proton-pump inhibitors

Unique Subject Identifier=8332010000-0056

MEANS Procedure

Assay variable : PTINR\_VAL1 PT-INR Value

N Mean Standard Deviation Minimum Maximum

---

|   |           |           |           |           |
|---|-----------|-----------|-----------|-----------|
| 6 | 2.2566667 | 0.4317715 | 1.6200000 | 2.7300000 |
|---|-----------|-----------|-----------|-----------|

---

Unique Subject Identifier=8332010000-0093

Assay variable : PTINR\_VAL1 PT-INR Value

N Mean Standard Deviation Minimum Maximum

---

|   |           |  |           |           |
|---|-----------|--|-----------|-----------|
| 1 | 2.0300000 |  | 2.0300000 | 2.0300000 |
|---|-----------|--|-----------|-----------|

---

Unique Subject Identifier=8332010000-0095

Assay variable : PTINR\_VAL1 PT-INR Value

N Mean Standard Deviation Minimum Maximum

---

|   |           |  |           |           |
|---|-----------|--|-----------|-----------|
| 1 | 1.6800000 |  | 1.6800000 | 1.6800000 |
|---|-----------|--|-----------|-----------|

---

Unique Subject Identifier=8332010000-0121

Assay variable : PTINR\_VAL1 PT-INR Value

N Mean Standard Deviation Minimum Maximum

---

|   |           |           |           |           |
|---|-----------|-----------|-----------|-----------|
| 2 | 1.7250000 | 0.2333452 | 1.5600000 | 1.8900000 |
|---|-----------|-----------|-----------|-----------|

---

Laboratory tests at the time of obtaining Table 2-6 consent, according to the presence or absence of proton-pump inhibitors

Unique Subject Identifier=8332010000-0141

MEANS Procedure

Assay variable : PTINR\_VAL1 PT-INR Value

N Mean Standard Deviation Minimum Maximum

---

|   |           |           |           |           |
|---|-----------|-----------|-----------|-----------|
| 3 | 2.0033333 | 0.0416333 | 1.9700000 | 2.0500000 |
|---|-----------|-----------|-----------|-----------|

---

Unique Subject Identifier=8332010000-0145

Assay variable : PTINR\_VAL1 PT-INR Value

N Mean Standard Deviation Minimum Maximum

---

|   |           |  |           |           |
|---|-----------|--|-----------|-----------|
| 1 | 1.8200000 |  | 1.8200000 | 1.8200000 |
|---|-----------|--|-----------|-----------|

---

Unique Subject Identifier=8332010000-0151

Assay variable : PTINR\_VAL1 PT-INR Value

N Mean Standard Deviation Minimum Maximum

---

|   |           |           |           |           |
|---|-----------|-----------|-----------|-----------|
| 6 | 2.1100000 | 0.2538503 | 1.7200000 | 2.3300000 |
|---|-----------|-----------|-----------|-----------|

---

Unique Subject Identifier=8332010000-0180

Assay variable : PTINR\_VAL1 PT-INR Value

N Mean Standard Deviation Minimum Maximum

---

|   |           |           |           |           |
|---|-----------|-----------|-----------|-----------|
| 4 | 1.8625000 | 0.1791415 | 1.7000000 | 2.1100000 |
|---|-----------|-----------|-----------|-----------|

---

Laboratory tests at the time of obtaining Table 2-6 consent, according to the presence or absence of proton-pump inhibitors

Unique Subject Identifier=8332010000-0192

MEANS Procedure

Assay variable : PTINR\_VAL1 PT-INR Value

N Mean Standard Deviation Minimum Maximum

---

|   |           |  |           |           |
|---|-----------|--|-----------|-----------|
| 1 | 1.9600000 |  | 1.9600000 | 1.9600000 |
|---|-----------|--|-----------|-----------|

---

Unique Subject Identifier=8332010000-0194

Assay variable : PTINR\_VAL1 PT-INR Value

N Mean Standard Deviation Minimum Maximum

---

|   |           |           |           |           |
|---|-----------|-----------|-----------|-----------|
| 4 | 1.3850000 | 0.1550269 | 1.2400000 | 1.5600000 |
|---|-----------|-----------|-----------|-----------|

---

Unique Subject Identifier=8340011000-0025

Assay variable : PTINR\_VAL1 PT-INR Value

N Mean Standard Deviation Minimum Maximum

---

|   |           |           |           |           |
|---|-----------|-----------|-----------|-----------|
| 5 | 2.1240000 | 0.4209869 | 1.5300000 | 2.6200000 |
|---|-----------|-----------|-----------|-----------|

---

Unique Subject Identifier=8345000000-0006



Assay variable : PTINR\_VAL1 PT-INR Value

N Mean Standard Deviation Minimum Maximum

---

|   |          |           |          |          |
|---|----------|-----------|----------|----------|
| 6 | 1.460000 | 0.0876356 | 1.340000 | 1.570000 |
|---|----------|-----------|----------|----------|

---

Laboratory tests at the time of obtaining Table 2-6 consent, according to the presence or absence of proton-pump inhibitors

Unique Subject Identifier=834500000-0009

MEANS Procedure

Assay variable : PTINR\_VAL1 PT-INR Value

N Mean Standard Deviation Minimum Maximum

---

|   |           |           |           |           |
|---|-----------|-----------|-----------|-----------|
| 6 | 2.0716667 | 0.4374205 | 1.5300000 | 2.8300000 |
|---|-----------|-----------|-----------|-----------|

---

Unique Subject Identifier=834500000-0023

Assay variable : PTINR\_VAL1 PT-INR Value

N Mean Standard Deviation Minimum Maximum

---

|   |           |           |           |           |
|---|-----------|-----------|-----------|-----------|
| 3 | 2.2200000 | 0.3380828 | 2.0100000 | 2.6100000 |
|---|-----------|-----------|-----------|-----------|

---

Unique Subject Identifier=8442010000-0002

Assay variable : PTINR\_VAL1 PT-INR Value

N Mean Standard Deviation Minimum Maximum

---

|   |           |           |           |           |
|---|-----------|-----------|-----------|-----------|
| 3 | 1.7133333 | 0.2074448 | 1.4900000 | 1.9000000 |
|---|-----------|-----------|-----------|-----------|

---

Unique Subject Identifier=8514000000-0001

Assay variable : PTINR\_VAL1 PT-INR Value

N Mean Standard Deviation Minimum Maximum

---

|   |           |           |           |           |
|---|-----------|-----------|-----------|-----------|
| 5 | 1.8760000 | 0.5155386 | 1.0700000 | 2.4900000 |
|---|-----------|-----------|-----------|-----------|

---

Laboratory tests at the time of obtaining Table 2-6 consent, according to the presence or absence of proton-pump inhibitors

Unique Subject Identifier=8514000000-0004

MEANS Procedure

Assay variable : PTINR\_VAL1 PT-INR Value

N Mean Standard Deviation Minimum Maximum

---

|   |           |           |           |           |
|---|-----------|-----------|-----------|-----------|
| 6 | 2.0583333 | 0.1905168 | 1.7900000 | 2.3600000 |
|---|-----------|-----------|-----------|-----------|

---

Unique Subject Identifier=8623000000-0001

Assay variable : PTINR\_VAL1 PT-INR Value

N Mean Standard Deviation Minimum Maximum

---

|   |           |           |           |           |
|---|-----------|-----------|-----------|-----------|
| 4 | 2.0100000 | 0.0787401 | 1.9200000 | 2.0900000 |
|---|-----------|-----------|-----------|-----------|

---

Unique Subject Identifier=8623000000-0005

Assay variable : PTINR\_VAL1 PT-INR Value

N Mean Standard Deviation Minimum Maximum

---

|   |           |           |           |           |
|---|-----------|-----------|-----------|-----------|
| 2 | 1.8250000 | 0.1060660 | 1.7500000 | 1.9000000 |
|---|-----------|-----------|-----------|-----------|

---

Unique Subject Identifier=8623000000-0016

Assay variable : PTINR\_VAL1 PT-INR Value

N Mean Standard Deviation Minimum Maximum

---

|   |           |           |           |           |
|---|-----------|-----------|-----------|-----------|
| 6 | 2.1816667 | 0.2010390 | 1.9700000 | 2.4500000 |
|---|-----------|-----------|-----------|-----------|

---

Laboratory tests at the time of obtaining Table 2-6 consent, according to the presence or absence of proton-pump inhibitors

Unique Subject Identifier=8623000000-0026

MEANS Procedure

Assay variable : PTINR\_VAL1 PT-INR Value

N Mean Standard Deviation Minimum Maximum

---

|   |           |           |           |           |
|---|-----------|-----------|-----------|-----------|
| 4 | 1.9875000 | 0.5948319 | 1.4900000 | 2.8400000 |
|---|-----------|-----------|-----------|-----------|

---

Unique Subject Identifier=8623000000-0027

Assay variable : PTINR\_VAL1 PT-INR Value

N Mean Standard Deviation Minimum Maximum

---

|   |           |           |           |           |
|---|-----------|-----------|-----------|-----------|
| 5 | 1.5660000 | 0.0808084 | 1.4900000 | 1.6800000 |
|---|-----------|-----------|-----------|-----------|

---

Unique Subject Identifier=8623000000-0029

Assay variable : PTINR\_VAL1 PT-INR Value

N Mean Standard Deviation Minimum Maximum

---

|   |           |           |           |           |
|---|-----------|-----------|-----------|-----------|
| 4 | 1.4850000 | 0.1933046 | 1.2500000 | 1.6800000 |
|---|-----------|-----------|-----------|-----------|

---

Unique Subject Identifier=8748000000-0003

Assay variable : PTINR\_VAL1 PT-INR Value

N Mean Standard Deviation Minimum Maximum

---

|   |           |  |           |           |
|---|-----------|--|-----------|-----------|
| 1 | 1.4300000 |  | 1.4300000 | 1.4300000 |
|---|-----------|--|-----------|-----------|

---

Laboratory tests at the time of obtaining Table 2-6 consent, according to the presence or absence of proton-pump inhibitors

Unique Subject Identifier=9001010000-0009

MEANS Procedure

Assay variable : PTINR\_VAL1 PT-INR Value

N Mean Standard Deviation Minimum Maximum

---

|   |           |           |           |           |
|---|-----------|-----------|-----------|-----------|
| 6 | 1.8500000 | 0.3271085 | 1.4000000 | 2.2000000 |
|---|-----------|-----------|-----------|-----------|

---

Unique Subject Identifier=9001010000-0010

Assay variable : PTINR\_VAL1 PT-INR Value

N Mean Standard Deviation Minimum Maximum

---

|   |           |           |           |           |
|---|-----------|-----------|-----------|-----------|
| 6 | 2.1833333 | 0.3311596 | 1.8000000 | 2.7000000 |
|---|-----------|-----------|-----------|-----------|

---

Unique Subject Identifier=9002010000-0057

Assay variable : PTINR\_VAL1 PT-INR Value

N Mean Standard Deviation Minimum Maximum

---

|   |           |           |           |           |
|---|-----------|-----------|-----------|-----------|
| 4 | 1.6625000 | 0.1725060 | 1.4400000 | 1.8600000 |
|---|-----------|-----------|-----------|-----------|

---

Unique Subject Identifier=9002010000-0069



Assay variable : PTINR\_VAL1 PT-INR Value

N Mean Standard Deviation Minimum Maximum

---

|   |           |           |           |           |
|---|-----------|-----------|-----------|-----------|
| 6 | 1.9333333 | 0.3015073 | 1.5700000 | 2.3700000 |
|---|-----------|-----------|-----------|-----------|

---

Laboratory tests at the time of obtaining Table 2-6 consent, according to the presence or absence of proton-pump inhibitors

Unique Subject Identifier=9005000000-0004

MEANS Procedure

Assay variable : PTINR\_VAL1 PT-INR Value

| N | Mean      | Standard Deviation | Minimum   | Maximum   |
|---|-----------|--------------------|-----------|-----------|
| 3 | 1.7166667 | 0.2285461          | 1.5700000 | 1.9800000 |

Unique Subject Identifier=9005000000-0005

Assay variable : PTINR\_VAL1 PT-INR Value

| N | Mean      | Standard Deviation | Minimum   | Maximum   |
|---|-----------|--------------------|-----------|-----------|
| 3 | 1.7833333 | 0.2150194          | 1.6000000 | 2.0200000 |

Unique Subject Identifier=9005000000-0009

Assay variable : PTINR\_VAL1 PT-INR Value

| N | Mean      | Standard Deviation | Minimum   | Maximum   |
|---|-----------|--------------------|-----------|-----------|
| 6 | 2.4033333 | 0.3593698          | 1.9600000 | 3.0200000 |

Unique Subject Identifier=9008010000-0012

Assay variable : PTINR\_VAL1 PT-INR Value

N Mean Standard Deviation Minimum Maximum

---

|   |           |           |           |           |
|---|-----------|-----------|-----------|-----------|
| 3 | 2.3766667 | 0.2554082 | 2.0900000 | 2.5800000 |
|---|-----------|-----------|-----------|-----------|

---

Laboratory tests at the time of obtaining Table 2-6 consent, according to the presence or absence of proton-pump inhibitors

Unique Subject Identifier=9008010000-0017

MEANS Procedure

Assay variable : PTINR\_VAL1 PT-INR Value

N Mean Standard Deviation Minimum Maximum

---

|   |           |           |           |           |
|---|-----------|-----------|-----------|-----------|
| 2 | 1.8100000 | 0.1414214 | 1.7100000 | 1.9100000 |
|---|-----------|-----------|-----------|-----------|

---

Unique Subject Identifier=9008010000-0021

Assay variable : PTINR\_VAL1 PT-INR Value

N Mean Standard Deviation Minimum Maximum

---

|   |           |           |           |           |
|---|-----------|-----------|-----------|-----------|
| 4 | 1.8275000 | 0.2637391 | 1.5600000 | 2.1300000 |
|---|-----------|-----------|-----------|-----------|

---

Unique Subject Identifier=9008010000-0027

Assay variable : PTINR\_VAL1 PT-INR Value

N Mean Standard Deviation Minimum Maximum

---

|   |           |           |           |           |
|---|-----------|-----------|-----------|-----------|
| 4 | 1.3375000 | 0.2895255 | 1.0500000 | 1.7100000 |
|---|-----------|-----------|-----------|-----------|

---

Unique Subject Identifier=9009010000-0003

Assay variable : PTINR\_VAL1 PT-INR Value

N Mean Standard Deviation Minimum Maximum

---

|   |           |           |           |           |
|---|-----------|-----------|-----------|-----------|
| 4 | 1.7750000 | 0.1660321 | 1.5900000 | 1.9900000 |
|---|-----------|-----------|-----------|-----------|

---

Laboratory tests at the time of obtaining Table 2-6 consent, according to the presence or absence of proton-pump inhibitors

Unique Subject Identifier=9009010000-0013

MEANS Procedure

Assay variable : PTINR\_VAL1 PT-INR Value

N Mean Standard Deviation Minimum Maximum

---

|   |           |           |           |           |
|---|-----------|-----------|-----------|-----------|
| 4 | 1.3275000 | 0.0419325 | 1.2700000 | 1.3700000 |
|---|-----------|-----------|-----------|-----------|

---

Unique Subject Identifier=9009010000-0015

Assay variable : PTINR\_VAL1 PT-INR Value

N Mean Standard Deviation Minimum Maximum

---

|   |           |           |           |           |
|---|-----------|-----------|-----------|-----------|
| 6 | 2.2666667 | 0.3688722 | 1.8900000 | 2.9200000 |
|---|-----------|-----------|-----------|-----------|

---

Unique Subject Identifier=9009010000-0022

Assay variable : PTINR\_VAL1 PT-INR Value

N Mean Standard Deviation Minimum Maximum

---

|   |           |           |           |           |
|---|-----------|-----------|-----------|-----------|
| 3 | 1.4166667 | 0.0665833 | 1.3600000 | 1.4900000 |
|---|-----------|-----------|-----------|-----------|

---

Unique Subject Identifier=9014000000-0008

Assay variable : PTINR\_VAL1 PT-INR Value

N Mean Standard Deviation Minimum Maximum

---

|   |           |           |           |           |
|---|-----------|-----------|-----------|-----------|
| 4 | 1.9625000 | 0.1302242 | 1.8600000 | 2.1400000 |
|---|-----------|-----------|-----------|-----------|

---

Laboratory tests at the time of obtaining Table 2-6 consent, according to the presence or absence of proton-pump inhibitors

Unique Subject Identifier=9014000000-0013

MEANS Procedure

Assay variable : PTINR\_VAL1 PT-INR Value

N Mean Standard Deviation Minimum Maximum

---

|   |           |           |           |           |
|---|-----------|-----------|-----------|-----------|
| 6 | 2.0133333 | 0.2587405 | 1.7200000 | 2.4800000 |
|---|-----------|-----------|-----------|-----------|

---

Unique Subject Identifier=9014000000-0019

Assay variable : PTINR\_VAL1 PT-INR Value

N Mean Standard Deviation Minimum Maximum

---

|   |           |           |           |           |
|---|-----------|-----------|-----------|-----------|
| 5 | 2.3220000 | 0.7481110 | 1.5400000 | 3.1100000 |
|---|-----------|-----------|-----------|-----------|

---

Unique Subject Identifier=9014000000-0023

Assay variable : PTINR\_VAL1 PT-INR Value

N Mean Standard Deviation Minimum Maximum

---

|   |           |           |           |           |
|---|-----------|-----------|-----------|-----------|
| 4 | 2.0475000 | 0.0981071 | 1.9500000 | 2.1700000 |
|---|-----------|-----------|-----------|-----------|

---

Unique Subject Identifier=9020011000-0001



Assay variable : PTINR\_VAL1 PT-INR Value

N Mean Standard Deviation Minimum Maximum

---

|   |           |           |           |           |
|---|-----------|-----------|-----------|-----------|
| 5 | 2.2440000 | 0.3773990 | 1.6800000 | 2.7000000 |
|---|-----------|-----------|-----------|-----------|

---

Laboratory tests at the time of obtaining Table 2-6 consent, according to the presence or absence of proton-pump inhibitors

Unique Subject Identifier=9020011000-0010

MEANS Procedure

Assay variable : PTINR\_VAL1 PT-INR Value

N Mean Standard Deviation Minimum Maximum

---

|   |           |           |           |           |
|---|-----------|-----------|-----------|-----------|
| 3 | 1.4700000 | 0.1126943 | 1.4000000 | 1.6000000 |
|---|-----------|-----------|-----------|-----------|

---

Unique Subject Identifier=9024000000-0005

Assay variable : PTINR\_VAL1 PT-INR Value

N Mean Standard Deviation Minimum Maximum

---

|   |           |           |           |           |
|---|-----------|-----------|-----------|-----------|
| 6 | 1.6800000 | 0.4543567 | 1.1000000 | 2.2200000 |
|---|-----------|-----------|-----------|-----------|

---

Unique Subject Identifier=9032011000-0009

Assay variable : PTINR\_VAL1 PT-INR Value

N Mean Standard Deviation Minimum Maximum

---

|   |           |           |           |           |
|---|-----------|-----------|-----------|-----------|
| 4 | 2.0000000 | 0.3162278 | 1.6000000 | 2.3000000 |
|---|-----------|-----------|-----------|-----------|

---

Unique Subject Identifier=9035000000-0061

Assay variable : PTINR\_VAL1 PT-INR Value

N Mean Standard Deviation Minimum Maximum

---

|   |           |           |           |           |
|---|-----------|-----------|-----------|-----------|
| 5 | 1.7380000 | 0.2872629 | 1.5100000 | 2.1700000 |
|---|-----------|-----------|-----------|-----------|

---

Laboratory tests at the time of obtaining Table 2-6 consent, according to the presence or absence of proton-pump inhibitors

Unique Subject Identifier=9035000000-0062

MEANS Procedure

Assay variable : PTINR\_VAL1 PT-INR Value

N Mean Standard Deviation Minimum Maximum

---

|   |           |           |           |           |
|---|-----------|-----------|-----------|-----------|
| 3 | 1.8933333 | 0.3875994 | 1.5900000 | 2.3300000 |
|---|-----------|-----------|-----------|-----------|

---

Unique Subject Identifier=9035000000-0078

Assay variable : PTINR\_VAL1 PT-INR Value

N Mean Standard Deviation Minimum Maximum

---

|   |           |           |           |           |
|---|-----------|-----------|-----------|-----------|
| 3 | 1.7866667 | 0.3807011 | 1.4200000 | 2.1800000 |
|---|-----------|-----------|-----------|-----------|

---

Unique Subject Identifier=9035000000-0084

Assay variable : PTINR\_VAL1 PT-INR Value

N Mean Standard Deviation Minimum Maximum

---

|   |           |           |           |           |
|---|-----------|-----------|-----------|-----------|
| 3 | 1.4033333 | 0.1871719 | 1.1900000 | 1.5400000 |
|---|-----------|-----------|-----------|-----------|

---

Unique Subject Identifier=9035000000-0094

Assay variable : PTINR\_VAL1 PT-INR Value

N Mean Standard Deviation Minimum Maximum

---

|   |           |           |           |           |
|---|-----------|-----------|-----------|-----------|
| 3 | 1.6166667 | 0.2956913 | 1.3600000 | 1.9400000 |
|---|-----------|-----------|-----------|-----------|

---

Laboratory tests at the time of obtaining Table 2-6 consent, according to the presence or absence of proton-pump inhibitors

Unique Subject Identifier=9036000000-0015

MEANS Procedure

Assay variable : PTINR\_VAL1 PT-INR Value

| N | Mean      | Standard Deviation | Minimum   | Maximum   |
|---|-----------|--------------------|-----------|-----------|
| 3 | 1.9733333 | 0.0503322          | 1.9200000 | 2.0200000 |

Unique Subject Identifier=9037000010-0003

Assay variable : PTINR\_VAL1 PT-INR Value

| N | Mean      | Standard Deviation | Minimum   | Maximum   |
|---|-----------|--------------------|-----------|-----------|
| 5 | 2.2560000 | 1.0411676          | 1.5800000 | 4.0700000 |

Unique Subject Identifier=9037000010-0007

Assay variable : PTINR\_VAL1 PT-INR Value

| N | Mean      | Standard Deviation | Minimum   | Maximum   |
|---|-----------|--------------------|-----------|-----------|
| 2 | 2.0700000 | 0.0424264          | 2.0400000 | 2.1000000 |

Unique Subject Identifier=9037000010-0009

Assay variable : PTINR\_VAL1 PT-INR Value

N Mean Standard Deviation Minimum Maximum

---

|   |           |           |           |           |
|---|-----------|-----------|-----------|-----------|
| 3 | 2.1466667 | 0.8800189 | 1.1400000 | 2.7700000 |
|---|-----------|-----------|-----------|-----------|

---

Laboratory tests at the time of obtaining Table 2-6 consent, according to the presence or absence of proton-pump inhibitors

Unique Subject Identifier=9037000010-0010

MEANS Procedure

Assay variable : PTINR\_VAL1 PT-INR Value

N Mean Standard Deviation Minimum Maximum

---

|   |           |           |           |           |
|---|-----------|-----------|-----------|-----------|
| 5 | 1.7520000 | 0.4846855 | 1.3200000 | 2.5800000 |
|---|-----------|-----------|-----------|-----------|

---

Unique Subject Identifier=9057000000-0014

Assay variable : PTINR\_VAL1 PT-INR Value

N Mean Standard Deviation Minimum Maximum

---

|   |           |           |           |           |
|---|-----------|-----------|-----------|-----------|
| 5 | 2.0500000 | 0.2982449 | 1.7800000 | 2.5100000 |
|---|-----------|-----------|-----------|-----------|

---

Unique Subject Identifier=9071010000-0003

Assay variable : PTINR\_VAL1 PT-INR Value

N Mean Standard Deviation Minimum Maximum

---

|   |           |           |           |           |
|---|-----------|-----------|-----------|-----------|
| 5 | 1.8520000 | 0.3769217 | 1.5400000 | 2.4300000 |
|---|-----------|-----------|-----------|-----------|

---

Unique Subject Identifier=9071010000-0004



Assay variable : PTINR\_VAL1 PT-INR Value

N Mean Standard Deviation Minimum Maximum

---

|   |          |  |          |          |
|---|----------|--|----------|----------|
| 1 | 2.480000 |  | 2.480000 | 2.480000 |
|---|----------|--|----------|----------|

---

Laboratory tests at the time of obtaining Table 2-6 consent, according to the presence or absence of proton-pump inhibitors

Unique Subject Identifier=9100001000-0010

MEANS Procedure

Assay variable : PTINR\_VAL1 PT-INR Value

N Mean Standard Deviation Minimum Maximum

---

|   |           |           |           |           |
|---|-----------|-----------|-----------|-----------|
| 4 | 1.8100000 | 0.8195934 | 1.0700000 | 2.7300000 |
|---|-----------|-----------|-----------|-----------|

---

Unique Subject Identifier=9100001000-0012

Assay variable : PTINR\_VAL1 PT-INR Value

N Mean Standard Deviation Minimum Maximum

---

|   |           |           |           |           |
|---|-----------|-----------|-----------|-----------|
| 4 | 1.4100000 | 0.1902630 | 1.2100000 | 1.6300000 |
|---|-----------|-----------|-----------|-----------|

---

Unique Subject Identifier=9100001000-0015

Assay variable : PTINR\_VAL1 PT-INR Value

N Mean Standard Deviation Minimum Maximum

---

|   |           |           |           |           |
|---|-----------|-----------|-----------|-----------|
| 3 | 1.8333333 | 0.7793801 | 1.1900000 | 2.7000000 |
|---|-----------|-----------|-----------|-----------|

---

Unique Subject Identifier=9100001000-0019

Assay variable : PTINR\_VAL1 PT-INR Value

N Mean Standard Deviation Minimum Maximum

---

|   |           |           |           |           |
|---|-----------|-----------|-----------|-----------|
| 3 | 1.5066667 | 0.2318045 | 1.2600000 | 1.7200000 |
|---|-----------|-----------|-----------|-----------|

---

Laboratory tests at the time of obtaining Table 2-6 consent, according to the presence or absence of proton-pump inhibitors

Unique Subject Identifier=9100001000-0024

MEANS Procedure

Assay variable : PTINR\_VAL1 PT-INR Value

| N | Mean      | Standard Deviation | Minimum   | Maximum   |
|---|-----------|--------------------|-----------|-----------|
| 3 | 2.0100000 | 0.1873499          | 1.8600000 | 2.2200000 |

Unique Subject Identifier=9100001000-0030

Assay variable : PTINR\_VAL1 PT-INR Value

| N | Mean      | Standard Deviation | Minimum   | Maximum   |
|---|-----------|--------------------|-----------|-----------|
| 4 | 1.8500000 | 0.2499333          | 1.6100000 | 2.0900000 |

Unique Subject Identifier=9101010000-0003

Assay variable : PTINR\_VAL1 PT-INR Value

| N | Mean      | Standard Deviation | Minimum   | Maximum   |
|---|-----------|--------------------|-----------|-----------|
| 2 | 1.2500000 | 0.0707107          | 1.2000000 | 1.3000000 |

Unique Subject Identifier=9101010000-0007

Assay variable : PTINR\_VAL1 PT-INR Value

N Mean Standard Deviation Minimum Maximum

---

|   |          |           |          |          |
|---|----------|-----------|----------|----------|
| 2 | 1.600000 | 0.1414214 | 1.500000 | 1.700000 |
|---|----------|-----------|----------|----------|

---

Laboratory tests at the time of obtaining Table 2-6 consent, according to the presence or absence of proton-pump inhibitors

Unique Subject Identifier=9101010000-0013

MEANS Procedure

Assay variable : PTINR\_VAL1 PT-INR Value

N Mean Standard Deviation Minimum Maximum

---

|   |           |           |           |           |
|---|-----------|-----------|-----------|-----------|
| 4 | 2.1250000 | 1.3400871 | 1.2000000 | 4.1000000 |
|---|-----------|-----------|-----------|-----------|

---

Unique Subject Identifier=9101010000-0029

Assay variable : PTINR\_VAL1 PT-INR Value

N Mean Standard Deviation Minimum Maximum

---

|   |           |           |           |           |
|---|-----------|-----------|-----------|-----------|
| 3 | 1.6666667 | 0.1154701 | 1.6000000 | 1.8000000 |
|---|-----------|-----------|-----------|-----------|

---

Unique Subject Identifier=9101010000-0031

Assay variable : PTINR\_VAL1 PT-INR Value

N Mean Standard Deviation Minimum Maximum

---

|   |           |           |           |           |
|---|-----------|-----------|-----------|-----------|
| 3 | 2.0666667 | 0.1527525 | 1.9000000 | 2.2000000 |
|---|-----------|-----------|-----------|-----------|

---

Unique Subject Identifier=9101010000-0032

Assay variable : PTINR\_VAL1 PT-INR Value

N Mean Standard Deviation Minimum Maximum

---

|   |          |           |          |          |
|---|----------|-----------|----------|----------|
| 3 | 2.100000 | 0.2645751 | 1.800000 | 2.300000 |
|---|----------|-----------|----------|----------|

---

Laboratory tests at the time of obtaining Table 2-6 consent, according to the presence or absence of proton-pump inhibitors

Unique Subject Identifier=9101010000-0033

MEANS Procedure

Assay variable : PTINR\_VAL1 PT-INR Value

N Mean Standard Deviation Minimum Maximum

---

|   |           |           |           |           |
|---|-----------|-----------|-----------|-----------|
| 4 | 1.4250000 | 0.0957427 | 1.3000000 | 1.5000000 |
|---|-----------|-----------|-----------|-----------|

---

Unique Subject Identifier=9101010000-0039

Assay variable : PTINR\_VAL1 PT-INR Value

N Mean Standard Deviation Minimum Maximum

---

|   |           |           |           |           |
|---|-----------|-----------|-----------|-----------|
| 2 | 1.9000000 | 0.1414214 | 1.8000000 | 2.0000000 |
|---|-----------|-----------|-----------|-----------|

---

Unique Subject Identifier=9101010000-0045

Assay variable : PTINR\_VAL1 PT-INR Value

N Mean Standard Deviation Minimum Maximum

---

|   |           |           |           |           |
|---|-----------|-----------|-----------|-----------|
| 3 | 1.0666667 | 0.0577350 | 1.0000000 | 1.1000000 |
|---|-----------|-----------|-----------|-----------|

---

Unique Subject Identifier=9101010000-0048



Assay variable : PTINR\_VAL1 PT-INR Value

N Mean Standard Deviation Minimum Maximum

---

|   |          |           |          |          |
|---|----------|-----------|----------|----------|
| 2 | 1.250000 | 0.0707107 | 1.200000 | 1.300000 |
|---|----------|-----------|----------|----------|

---

Laboratory tests at the time of obtaining Table 2-6 consent, according to the presence or absence of proton-pump inhibitors

Unique Subject Identifier=9105000000-0017

MEANS Procedure

Assay variable : PTINR\_VAL1 PT-INR Value

| N | Mean      | Standard Deviation | Minimum   | Maximum   |
|---|-----------|--------------------|-----------|-----------|
| 5 | 1.9320000 | 0.5714630          | 1.2000000 | 2.7800000 |

Unique Subject Identifier=9108011111-0007

Assay variable : PTINR\_VAL1 PT-INR Value

| N | Mean      | Standard Deviation | Minimum   | Maximum   |
|---|-----------|--------------------|-----------|-----------|
| 3 | 1.9500000 | 0.4334743          | 1.6800000 | 2.4500000 |

Unique Subject Identifier=9127000000-0003

Assay variable : PTINR\_VAL1 PT-INR Value

| N | Mean      | Standard Deviation | Minimum   | Maximum   |
|---|-----------|--------------------|-----------|-----------|
| 1 | 1.9300000 |                    | 1.9300000 | 1.9300000 |

Unique Subject Identifier=9127000000-0010

Assay variable : PTINR\_VAL1 PT-INR Value

N Mean Standard Deviation Minimum Maximum

---

|   |          |           |          |          |
|---|----------|-----------|----------|----------|
| 5 | 2.130000 | 0.1070047 | 1.970000 | 2.220000 |
|---|----------|-----------|----------|----------|

---

Laboratory tests at the time of obtaining Table 2-6 consent, according to the presence or absence of proton-pump inhibitors

Unique Subject Identifier=9136010000-0006

MEANS Procedure

Assay variable : PTINR\_VAL1 PT-INR Value

| N | Mean      | Standard Deviation | Minimum   | Maximum   |
|---|-----------|--------------------|-----------|-----------|
| 3 | 2.1933333 | 0.3382800          | 1.8100000 | 2.4500000 |

Unique Subject Identifier=9136010000-0014

Assay variable : PTINR\_VAL1 PT-INR Value

| N | Mean      | Standard Deviation | Minimum   | Maximum   |
|---|-----------|--------------------|-----------|-----------|
| 5 | 1.7640000 | 0.1040673          | 1.6700000 | 1.9200000 |

Unique Subject Identifier=9136010000-0018

Assay variable : PTINR\_VAL1 PT-INR Value

| N | Mean      | Standard Deviation | Minimum   | Maximum   |
|---|-----------|--------------------|-----------|-----------|
| 3 | 2.4366667 | 0.4005413          | 2.0800000 | 2.8700000 |

Unique Subject Identifier=9136010000-0025

Assay variable : PTINR\_VAL1 PT-INR Value

N Mean Standard Deviation Minimum Maximum

---

|   |           |           |           |           |
|---|-----------|-----------|-----------|-----------|
| 3 | 2.5166667 | 0.1913984 | 2.3600000 | 2.7300000 |
|---|-----------|-----------|-----------|-----------|

---

Laboratory tests at the time of obtaining Table 2-6 consent, according to the presence or absence of proton-pump inhibitors

Unique Subject Identifier=9136010000-0036

MEANS Procedure

Assay variable : PTINR\_VAL1 PT-INR Value

N Mean Standard Deviation Minimum Maximum

---

|   |           |           |           |           |
|---|-----------|-----------|-----------|-----------|
| 4 | 2.2800000 | 0.2290560 | 2.0400000 | 2.5900000 |
|---|-----------|-----------|-----------|-----------|

---

Unique Subject Identifier=9137010000-0001

Assay variable : PTINR\_VAL1 PT-INR Value

N Mean Standard Deviation Minimum Maximum

---

|   |           |           |           |           |
|---|-----------|-----------|-----------|-----------|
| 4 | 1.8950000 | 0.5202884 | 1.1200000 | 2.2300000 |
|---|-----------|-----------|-----------|-----------|

---

Unique Subject Identifier=9141000000-0002

Assay variable : PTINR\_VAL1 PT-INR Value

N Mean Standard Deviation Minimum Maximum

---

|   |           |           |           |           |
|---|-----------|-----------|-----------|-----------|
| 5 | 1.9540000 | 0.2758260 | 1.5100000 | 2.1600000 |
|---|-----------|-----------|-----------|-----------|

---

Unique Subject Identifier=9141000000-0005

Assay variable : PTINR\_VAL1 PT-INR Value

N Mean Standard Deviation Minimum Maximum

---

|   |          |           |          |          |
|---|----------|-----------|----------|----------|
| 5 | 2.040000 | 0.2370654 | 1.720000 | 2.380000 |
|---|----------|-----------|----------|----------|

---

Laboratory tests at the time of obtaining Table 2-6 consent, according to the presence or absence of proton-pump inhibitors

Unique Subject Identifier=914100000-0006

MEANS Procedure

Assay variable : PTINR\_VAL1 PT-INR Value

N Mean Standard Deviation Minimum Maximum

---

|   |           |           |           |           |
|---|-----------|-----------|-----------|-----------|
| 4 | 1.6450000 | 0.1408309 | 1.4600000 | 1.8000000 |
|---|-----------|-----------|-----------|-----------|

---

Unique Subject Identifier=9142010000-0005

Assay variable : PTINR\_VAL1 PT-INR Value

N Mean Standard Deviation Minimum Maximum

---

|   |           |           |           |           |
|---|-----------|-----------|-----------|-----------|
| 3 | 1.7000000 | 0.2879236 | 1.5000000 | 2.0300000 |
|---|-----------|-----------|-----------|-----------|

---

Unique Subject Identifier=9142010000-0013

Assay variable : PTINR\_VAL1 PT-INR Value

N Mean Standard Deviation Minimum Maximum

---

|   |           |           |           |           |
|---|-----------|-----------|-----------|-----------|
| 2 | 1.7500000 | 0.3252691 | 1.5200000 | 1.9800000 |
|---|-----------|-----------|-----------|-----------|

---

Unique Subject Identifier=9142010000-0014



Assay variable : PTINR\_VAL1 PT-INR Value

N Mean Standard Deviation Minimum Maximum

---

|   |           |  |           |           |
|---|-----------|--|-----------|-----------|
| 1 | 1.6200000 |  | 1.6200000 | 1.6200000 |
|---|-----------|--|-----------|-----------|

---

Laboratory tests at the time of obtaining Table 2-6 consent, according to the presence or absence of proton-pump inhibitors

Unique Subject Identifier=9142010000-0027

MEANS Procedure

Assay variable : PTINR\_VAL1 PT-INR Value

N Mean Standard Deviation Minimum Maximum

---

|   |           |           |           |           |
|---|-----------|-----------|-----------|-----------|
| 2 | 2.4250000 | 0.4313351 | 2.1200000 | 2.7300000 |
|---|-----------|-----------|-----------|-----------|

---

Unique Subject Identifier=9142010000-0036

Assay variable : PTINR\_VAL1 PT-INR Value

N Mean Standard Deviation Minimum Maximum

---

|   |           |           |           |           |
|---|-----------|-----------|-----------|-----------|
| 3 | 1.5100000 | 0.1646208 | 1.3200000 | 1.6100000 |
|---|-----------|-----------|-----------|-----------|

---

Unique Subject Identifier=9142010000-0037

Assay variable : PTINR\_VAL1 PT-INR Value

N Mean Standard Deviation Minimum Maximum

---

|   |           |           |           |           |
|---|-----------|-----------|-----------|-----------|
| 3 | 2.0333333 | 0.4867580 | 1.6000000 | 2.5600000 |
|---|-----------|-----------|-----------|-----------|

---

Unique Subject Identifier=9154010000-0001

Assay variable : PTINR\_VAL1 PT-INR Value

N Mean Standard Deviation Minimum Maximum

---

|   |           |           |           |           |
|---|-----------|-----------|-----------|-----------|
| 4 | 1.7475000 | 0.1175798 | 1.5800000 | 1.8500000 |
|---|-----------|-----------|-----------|-----------|

---

Laboratory tests at the time of obtaining Table 2-6 consent, according to the presence or absence of proton-pump inhibitors

Unique Subject Identifier=9154010000-0009

MEANS Procedure

Assay variable : PTINR\_VAL1 PT-INR Value

| N | Mean      | Standard Deviation | Minimum   | Maximum   |
|---|-----------|--------------------|-----------|-----------|
| 5 | 1.9180000 | 0.6155648          | 1.4200000 | 2.9800000 |

Unique Subject Identifier=9154010000-0015

Assay variable : PTINR\_VAL1 PT-INR Value

| N | Mean      | Standard Deviation | Minimum   | Maximum   |
|---|-----------|--------------------|-----------|-----------|
| 4 | 2.3175000 | 0.1291962          | 2.1800000 | 2.4900000 |

Unique Subject Identifier=9154010000-0027

Assay variable : PTINR\_VAL1 PT-INR Value

| N | Mean      | Standard Deviation | Minimum   | Maximum   |
|---|-----------|--------------------|-----------|-----------|
| 4 | 2.6075000 | 0.2267708          | 2.3500000 | 2.8600000 |

Unique Subject Identifier=9154010000-0029

Assay variable : PTINR\_VAL1 PT-INR Value

N Mean Standard Deviation Minimum Maximum

---

|   |           |           |           |           |
|---|-----------|-----------|-----------|-----------|
| 5 | 1.5140000 | 0.3269251 | 1.1900000 | 2.0000000 |
|---|-----------|-----------|-----------|-----------|

---

Laboratory tests at the time of obtaining Table 2-6 consent, according to the presence or absence of proton-pump inhibitors

Unique Subject Identifier=9154010000-0030

MEANS Procedure

Assay variable : PTINR\_VAL1 PT-INR Value

N Mean Standard Deviation Minimum Maximum

---

|   |           |           |           |           |
|---|-----------|-----------|-----------|-----------|
| 4 | 2.2300000 | 0.0559762 | 2.1500000 | 2.2800000 |
|---|-----------|-----------|-----------|-----------|

---

Unique Subject Identifier=9166000000-0005

Assay variable : PTINR\_VAL1 PT-INR Value

N Mean Standard Deviation Minimum Maximum

---

|   |           |           |           |           |
|---|-----------|-----------|-----------|-----------|
| 3 | 1.7233333 | 0.1890326 | 1.5100000 | 1.8700000 |
|---|-----------|-----------|-----------|-----------|

---

Unique Subject Identifier=9166000000-0009

Assay variable : PTINR\_VAL1 PT-INR Value

N Mean Standard Deviation Minimum Maximum

---

|   |           |           |           |           |
|---|-----------|-----------|-----------|-----------|
| 5 | 2.1800000 | 0.1788854 | 2.0000000 | 2.4100000 |
|---|-----------|-----------|-----------|-----------|

---

Unique Subject Identifier=9210000100-0007

Assay variable : PTINR\_VAL1 PT-INR Value

N Mean Standard Deviation Minimum Maximum

---

|   |           |           |           |           |
|---|-----------|-----------|-----------|-----------|
| 5 | 2.2660000 | 0.4350057 | 1.7700000 | 2.7200000 |
|---|-----------|-----------|-----------|-----------|

---

Laboratory tests at the time of obtaining Table 2-6 consent, according to the presence or absence of proton-pump inhibitors

Unique Subject Identifier=921400000-0002

MEANS Procedure

Assay variable : PTINR\_VAL1 PT-INR Value

N Mean Standard Deviation Minimum Maximum

---

|   |           |  |           |           |
|---|-----------|--|-----------|-----------|
| 1 | 1.7300000 |  | 1.7300000 | 1.7300000 |
|---|-----------|--|-----------|-----------|

---

Unique Subject Identifier=921400000-0022

Assay variable : PTINR\_VAL1 PT-INR Value

N Mean Standard Deviation Minimum Maximum

---

|   |           |           |           |           |
|---|-----------|-----------|-----------|-----------|
| 4 | 1.5850000 | 0.3219213 | 1.2000000 | 1.9700000 |
|---|-----------|-----------|-----------|-----------|

---

Unique Subject Identifier=923500000-0002

Assay variable : PTINR\_VAL1 PT-INR Value

N Mean Standard Deviation Minimum Maximum

---

|   |           |           |           |           |
|---|-----------|-----------|-----------|-----------|
| 3 | 1.7000000 | 0.1000000 | 1.6000000 | 1.8000000 |
|---|-----------|-----------|-----------|-----------|

---

Unique Subject Identifier=923500000-0009



Assay variable : PTINR\_VAL1 PT-INR Value

N Mean Standard Deviation Minimum Maximum

---

|   |          |          |          |          |
|---|----------|----------|----------|----------|
| 3 | 1.500000 | 0.100000 | 1.400000 | 1.600000 |
|---|----------|----------|----------|----------|

---

Laboratory tests at the time of obtaining Table 2-6 consent, according to the presence or absence of proton-pump inhibitors

Unique Subject Identifier=923500000-0012

MEANS Procedure

Assay variable : PTINR\_VAL1 PT-INR Value

N Mean Standard Deviation Minimum Maximum

---

|   |           |           |           |           |
|---|-----------|-----------|-----------|-----------|
| 3 | 1.9000000 | 0.2000000 | 1.7000000 | 2.1000000 |
|---|-----------|-----------|-----------|-----------|

---

Unique Subject Identifier=924100000-0003

Assay variable : PTINR\_VAL1 PT-INR Value

N Mean Standard Deviation Minimum Maximum

---

|   |           |           |           |           |
|---|-----------|-----------|-----------|-----------|
| 3 | 2.2033333 | 0.3728717 | 1.8600000 | 2.6000000 |
|---|-----------|-----------|-----------|-----------|

---

Unique Subject Identifier=924100000-0005

Assay variable : PTINR\_VAL1 PT-INR Value

N Mean Standard Deviation Minimum Maximum

---

|   |           |           |           |           |
|---|-----------|-----------|-----------|-----------|
| 3 | 1.5566667 | 0.0709460 | 1.4800000 | 1.6200000 |
|---|-----------|-----------|-----------|-----------|

---

Unique Subject Identifier=924100000-0007

Assay variable : PTINR\_VAL1 PT-INR Value

N Mean Standard Deviation Minimum Maximum

---

|   |          |           |          |          |
|---|----------|-----------|----------|----------|
| 3 | 2.100000 | 0.1587451 | 1.920000 | 2.220000 |
|---|----------|-----------|----------|----------|

---

Laboratory tests at the time of obtaining Table 2-6 consent, according to the presence or absence of proton-pump inhibitors

Unique Subject Identifier=9241000000-0012

MEANS Procedure

Assay variable : PTINR\_VAL1 PT-INR Value

N Mean Standard Deviation Minimum Maximum

---

|   |           |           |           |           |
|---|-----------|-----------|-----------|-----------|
| 3 | 1.8133333 | 0.2557994 | 1.5200000 | 1.9900000 |
|---|-----------|-----------|-----------|-----------|

---

Unique Subject Identifier=9242011011-0003

Assay variable : PTINR\_VAL1 PT-INR Value

N Mean Standard Deviation Minimum Maximum

---

|   |           |           |           |           |
|---|-----------|-----------|-----------|-----------|
| 6 | 1.1233333 | 0.0571548 | 1.0500000 | 1.2000000 |
|---|-----------|-----------|-----------|-----------|

---

Unique Subject Identifier=9257010000-0009

Assay variable : PTINR\_VAL1 PT-INR Value

N Mean Standard Deviation Minimum Maximum

---

|   |           |           |           |           |
|---|-----------|-----------|-----------|-----------|
| 6 | 2.0683333 | 1.0299013 | 1.4400000 | 4.1400000 |
|---|-----------|-----------|-----------|-----------|

---

Unique Subject Identifier=9257010000-0012

Assay variable : PTINR\_VAL1 PT-INR Value

N Mean Standard Deviation Minimum Maximum

---

|   |          |           |          |          |
|---|----------|-----------|----------|----------|
| 3 | 1.400000 | 0.0435890 | 1.370000 | 1.450000 |
|---|----------|-----------|----------|----------|

---

Laboratory tests at the time of obtaining Table 2-6 consent, according to the presence or absence of proton-pump inhibitors

Unique Subject Identifier=9257010000-0025

MEANS Procedure

Assay variable : PTINR\_VAL1 PT-INR Value

N Mean Standard Deviation Minimum Maximum

---

|   |           |           |           |           |
|---|-----------|-----------|-----------|-----------|
| 6 | 1.4900000 | 0.5108424 | 0.9700000 | 2.3000000 |
|---|-----------|-----------|-----------|-----------|

---

Unique Subject Identifier=9342010000-0002

Assay variable : PTINR\_VAL1 PT-INR Value

N Mean Standard Deviation Minimum Maximum

---

|   |           |           |           |           |
|---|-----------|-----------|-----------|-----------|
| 6 | 1.6016667 | 0.1135635 | 1.5100000 | 1.7700000 |
|---|-----------|-----------|-----------|-----------|

---

Unique Subject Identifier=9345000010-0006

Assay variable : PTINR\_VAL1 PT-INR Value

N Mean Standard Deviation Minimum Maximum

---

|   |           |           |           |           |
|---|-----------|-----------|-----------|-----------|
| 3 | 2.4233333 | 0.2084067 | 2.2400000 | 2.6500000 |
|---|-----------|-----------|-----------|-----------|

---

Unique Subject Identifier=9345000010-0007

Assay variable : PTINR\_VAL1 PT-INR Value

N Mean Standard Deviation Minimum Maximum

---

|   |          |  |          |          |
|---|----------|--|----------|----------|
| 1 | 2.130000 |  | 2.130000 | 2.130000 |
|---|----------|--|----------|----------|

---

Laboratory tests at the time of obtaining Table 2-6 consent, according to the presence or absence of proton-pump inhibitors

Unique Subject Identifier=9348010000-0005

MEANS Procedure

Assay variable : PTINR\_VAL1 PT-INR Value

N Mean Standard Deviation Minimum Maximum

---

|   |           |           |           |           |
|---|-----------|-----------|-----------|-----------|
| 3 | 1.7166667 | 0.1101514 | 1.6100000 | 1.8300000 |
|---|-----------|-----------|-----------|-----------|

---

Unique Subject Identifier=9348010000-0028

Assay variable : PTINR\_VAL1 PT-INR Value

N Mean Standard Deviation Minimum Maximum

---

|   |           |           |           |           |
|---|-----------|-----------|-----------|-----------|
| 2 | 1.7800000 | 0.2545584 | 1.6000000 | 1.9600000 |
|---|-----------|-----------|-----------|-----------|

---

Unique Subject Identifier=9348010000-0029

Assay variable : PTINR\_VAL1 PT-INR Value

N Mean Standard Deviation Minimum Maximum

---

|   |           |           |           |           |
|---|-----------|-----------|-----------|-----------|
| 6 | 1.4150000 | 0.2147324 | 1.2000000 | 1.7300000 |
|---|-----------|-----------|-----------|-----------|

---

Unique Subject Identifier=9348010000-0040



Assay variable : PTINR\_VAL1 PT-INR Value

N Mean Standard Deviation Minimum Maximum

---

|   |           |           |           |           |
|---|-----------|-----------|-----------|-----------|
| 4 | 2.0700000 | 0.5057008 | 1.4300000 | 2.5900000 |
|---|-----------|-----------|-----------|-----------|

---

Laboratory tests at the time of obtaining Table 2-6 consent, according to the presence or absence of proton-pump inhibitors

Unique Subject Identifier=9348010000-0072

MEANS Procedure

Assay variable : PTINR\_VAL1 PT-INR Value

N Mean Standard Deviation Minimum Maximum

---

|   |           |           |           |           |
|---|-----------|-----------|-----------|-----------|
| 3 | 2.6566667 | 0.1650253 | 2.4900000 | 2.8200000 |
|---|-----------|-----------|-----------|-----------|

---

Unique Subject Identifier=9348010000-0094

Assay variable : PTINR\_VAL1 PT-INR Value

N Mean Standard Deviation Minimum Maximum

---

|   |           |           |           |           |
|---|-----------|-----------|-----------|-----------|
| 3 | 2.0833333 | 0.8114391 | 1.5000000 | 3.0100000 |
|---|-----------|-----------|-----------|-----------|

---

Unique Subject Identifier=9348010000-0098

Assay variable : PTINR\_VAL1 PT-INR Value

N Mean Standard Deviation Minimum Maximum

---

|   |           |           |           |           |
|---|-----------|-----------|-----------|-----------|
| 4 | 2.4000000 | 0.9819369 | 1.6200000 | 3.6900000 |
|---|-----------|-----------|-----------|-----------|

---

Unique Subject Identifier=9348010000-0114

Assay variable : PTINR\_VAL1 PT-INR Value

N Mean Standard Deviation Minimum Maximum

---

|   |           |           |           |           |
|---|-----------|-----------|-----------|-----------|
| 5 | 1.7580000 | 0.2359449 | 1.4200000 | 2.0100000 |
|---|-----------|-----------|-----------|-----------|

---

Laboratory tests at the time of obtaining Table 2-6 consent, according to the presence or absence of proton-pump inhibitors

Unique Subject Identifier=9348010000-0117

MEANS Procedure

Assay variable : PTINR\_VAL1 PT-INR Value

N Mean Standard Deviation Minimum Maximum

---

|   |           |           |           |           |
|---|-----------|-----------|-----------|-----------|
| 3 | 1.5300000 | 0.3803945 | 1.1400000 | 1.9000000 |
|---|-----------|-----------|-----------|-----------|

---

Unique Subject Identifier=9348010000-0131

Assay variable : PTINR\_VAL1 PT-INR Value

N Mean Standard Deviation Minimum Maximum

---

|   |           |           |           |           |
|---|-----------|-----------|-----------|-----------|
| 3 | 1.1200000 | 0.0458258 | 1.0700000 | 1.1600000 |
|---|-----------|-----------|-----------|-----------|

---

Unique Subject Identifier=9348010000-0132

Assay variable : PTINR\_VAL1 PT-INR Value

N Mean Standard Deviation Minimum Maximum

---

|   |           |           |           |           |
|---|-----------|-----------|-----------|-----------|
| 3 | 1.5533333 | 0.4306197 | 1.1100000 | 1.9700000 |
|---|-----------|-----------|-----------|-----------|

---

Unique Subject Identifier=9366000000-0001

Assay variable : PTINR\_VAL1 PT-INR Value

N Mean Standard Deviation Minimum Maximum

---

|   |           |           |           |           |
|---|-----------|-----------|-----------|-----------|
| 6 | 2.3066667 | 0.4933829 | 1.6900000 | 2.9500000 |
|---|-----------|-----------|-----------|-----------|

---

Laboratory tests at the time of obtaining Table 2-6 consent, according to the presence or absence of proton-pump inhibitors

Unique Subject Identifier=936600000-0002

MEANS Procedure

Assay variable : PTINR\_VAL1 PT-INR Value

N Mean Standard Deviation Minimum Maximum

---

|   |           |           |           |           |
|---|-----------|-----------|-----------|-----------|
| 6 | 2.7283333 | 0.6265275 | 1.6400000 | 3.4200000 |
|---|-----------|-----------|-----------|-----------|

---

Unique Subject Identifier=936600000-0003

Assay variable : PTINR\_VAL1 PT-INR Value

N Mean Standard Deviation Minimum Maximum

---

|   |           |           |           |           |
|---|-----------|-----------|-----------|-----------|
| 6 | 2.2566667 | 0.7819378 | 1.5100000 | 3.7200000 |
|---|-----------|-----------|-----------|-----------|

---

Unique Subject Identifier=954800000-0002

Assay variable : PTINR\_VAL1 PT-INR Value

N Mean Standard Deviation Minimum Maximum

---

|   |           |           |           |           |
|---|-----------|-----------|-----------|-----------|
| 2 | 1.2150000 | 0.0212132 | 1.2000000 | 1.2300000 |
|---|-----------|-----------|-----------|-----------|

---

Unique Subject Identifier=962310000-0003

Assay variable : PTINR\_VAL1 PT-INR Value

N Mean Standard Deviation Minimum Maximum

---

|   |           |           |           |           |
|---|-----------|-----------|-----------|-----------|
| 2 | 1.3450000 | 0.1060660 | 1.2700000 | 1.4200000 |
|---|-----------|-----------|-----------|-----------|

---

Laboratory tests at the time of obtaining Table 2-6 consent, according to the presence or absence of proton-pump inhibitors

Unique Subject Identifier=9623100000-0007

MEANS Procedure

Assay variable : PTINR\_VAL1 PT-INR Value

| N | Mean      | Standard Deviation | Minimum   | Maximum   |
|---|-----------|--------------------|-----------|-----------|
| 5 | 1.6000000 | 0.1528071          | 1.4400000 | 1.8200000 |



Laboratory tests at the time of obtaining Table 2-6 consent, according to the presence or absence of proton-pump inhibitors

FREQ Procedure

Table : ALL \* \_PTINRCT

ALL \_PTINRCT

Power |

Percent |

Percent of rows

Percentage of columns | 1| 2| 3| 4| 9| Total

|       |        |        |        |        |        |        |   |
|-------|--------|--------|--------|--------|--------|--------|---|
|       | +      | +      | +      | +      | +      | +      | + |
| 1     | 399    | 1204   | 1159   | 99     | 94     | 2955   |   |
|       | 13.50  | 40.74  | 39.22  | 3.35   | 3.18   | 100.00 |   |
|       | 13.50  | 40.74  | 39.22  | 3.35   | 3.18   |        |   |
|       | 100.00 | 100.00 | 100.00 | 100.00 | 100.00 |        |   |
|       | +      | +      | +      | +      | +      | +      | + |
| Total | 399    | 1204   | 1159   | 99     | 94     | 2955   |   |
|       | 13.50  | 40.74  | 39.22  | 3.35   | 3.18   | 100.00 |   |

Laboratory tests at the time of obtaining Table 2-6 consent, according to the presence or absence of proton-pump inhibitors

FREQ Procedure

Table : ALL \* \_PTINRCT

ALL \_PTINRCT

Power |

Percent |

Percent of rows

Percentage of columns | 1| 2| 3| 4| 9| Total

|       |        |        |        |        |        |        |   |
|-------|--------|--------|--------|--------|--------|--------|---|
|       | +      | +      | +      | +      | +      | +      | + |
| 1     | 399    | 1204   | 1159   | 99     | 94     | 2955   |   |
|       | 13.50  | 40.74  | 39.22  | 3.35   | 3.18   | 100.00 |   |
|       | 13.50  | 40.74  | 39.22  | 3.35   | 3.18   |        |   |
|       | 100.00 | 100.00 | 100.00 | 100.00 | 100.00 |        |   |
|       | +      | +      | +      | +      | +      | +      | + |
| Total | 399    | 1204   | 1159   | 99     | 94     | 2955   |   |
|       | 13.50  | 40.74  | 39.22  | 3.35   | 3.18   | 100.00 |   |

Laboratory tests at the time of obtaining Table 2-6 consent, according to the presence or absence of proton-pump inhibitors

FREQ Procedure

Table : ALL \* \_PTINRCT

ALL \_PTINRCT

Power |

Percent |

Percent of rows

Percentage of columns | 1| 2| 3| 4| 9| Total

|       |        |        |        |        |        |        |   |
|-------|--------|--------|--------|--------|--------|--------|---|
|       | +      | +      | +      | +      | +      | +      | + |
| 1     | 399    | 1204   | 1159   | 99     | 94     | 2955   |   |
|       | 13.50  | 40.74  | 39.22  | 3.35   | 3.18   | 100.00 |   |
|       | 13.50  | 40.74  | 39.22  | 3.35   | 3.18   |        |   |
|       | 100.00 | 100.00 | 100.00 | 100.00 | 100.00 |        |   |
|       | +      | +      | +      | +      | +      | +      | + |
| Total | 399    | 1204   | 1159   | 99     | 94     | 2955   |   |
|       | 13.50  | 40.74  | 39.22  | 3.35   | 3.18   | 100.00 |   |

Laboratory tests at the time of obtaining Table 2-6 consent, according to the presence or absence of proton-pump inhibitors

FREQ Procedure

Table : ALL \* \_PTINRCT

ALL \_PTINRCT

Power |

Percent |

Percent of rows

Percentage of columns | 1| 2| 3| 4| 9| Total

|       |        |        |        |        |        |        |   |
|-------|--------|--------|--------|--------|--------|--------|---|
|       | +      | +      | +      | +      | +      | +      | + |
| 1     | 399    | 1204   | 1159   | 99     | 94     | 2955   |   |
|       | 13.50  | 40.74  | 39.22  | 3.35   | 3.18   | 100.00 |   |
|       | 13.50  | 40.74  | 39.22  | 3.35   | 3.18   |        |   |
|       | 100.00 | 100.00 | 100.00 | 100.00 | 100.00 |        |   |
|       | +      | +      | +      | +      | +      | +      | + |
| Total | 399    | 1204   | 1159   | 99     | 94     | 2955   |   |
|       | 13.50  | 40.74  | 39.22  | 3.35   | 3.18   | 100.00 |   |

Laboratory tests at the time of obtaining Table 2-6 consent, according to the presence or absence of proton-pump inhibitors

FREQ Procedure

Table : ALL \* \_PTINRCT

ALL \_PTINRCT

Power |

Percent |

Percent of rows

Percentage of columns | 1| 2| 3| 4| 9| Total

|       |        |        |        |        |        |        |   |
|-------|--------|--------|--------|--------|--------|--------|---|
|       | +      | +      | +      | +      | +      | +      | + |
| 1     | 399    | 1204   | 1159   | 99     | 94     | 2955   |   |
|       | 13.50  | 40.74  | 39.22  | 3.35   | 3.18   | 100.00 |   |
|       | 13.50  | 40.74  | 39.22  | 3.35   | 3.18   |        |   |
|       | 100.00 | 100.00 | 100.00 | 100.00 | 100.00 |        |   |
|       | +      | +      | +      | +      | +      | +      | + |
| Total | 399    | 1204   | 1159   | 99     | 94     | 2955   |   |
|       | 13.50  | 40.74  | 39.22  | 3.35   | 3.18   | 100.00 |   |

Laboratory tests at the time of obtaining Table 2-6 consent, according to the presence or absence of proton-pump inhibitors

FREQ Procedure

Table : ALL \* \_TTRCT

ALL \_TTRCT

Power |

Percent |

Percent of rows

Percentage of columns | 1| 2| 3| 4| 9| Total

|       |        |        |        |        |        |        |   |  |   |  |   |
|-------|--------|--------|--------|--------|--------|--------|---|--|---|--|---|
|       | +      |        | +      |        | +      |        | + |  | + |  | + |
| 1     | 385    | 297    | 443    | 1405   | 425    | 2955   |   |  |   |  |   |
|       | 13.03  | 10.05  | 14.99  | 47.55  | 14.38  | 100.00 |   |  |   |  |   |
|       | 13.03  | 10.05  | 14.99  | 47.55  | 14.38  |        |   |  |   |  |   |
|       | 100.00 | 100.00 | 100.00 | 100.00 | 100.00 |        |   |  |   |  |   |
|       | +      |        | +      |        | +      |        | + |  | + |  | + |
| Total | 385    | 297    | 443    | 1405   | 425    | 2955   |   |  |   |  |   |
|       | 13.03  | 10.05  | 14.99  | 47.55  | 14.38  | 100.00 |   |  |   |  |   |

Laboratory tests at the time of obtaining Table 2-6 consent, according to the presence or absence of proton-pump inhibitors

FREQ Procedure

Table : ALL \* \_TTRCT

ALL \_TTRCT

Power |

Percent |

Percent of rows

Percentage of columns | 1| 2| 3| 4| 9| Total

|       |        |        |        |        |        |        |   |
|-------|--------|--------|--------|--------|--------|--------|---|
|       | +      | +      | +      | +      | +      | +      | + |
| 1     | 385    | 297    | 443    | 1405   | 425    | 2955   |   |
|       | 13.03  | 10.05  | 14.99  | 47.55  | 14.38  | 100.00 |   |
|       | 13.03  | 10.05  | 14.99  | 47.55  | 14.38  |        |   |
|       | 100.00 | 100.00 | 100.00 | 100.00 | 100.00 |        |   |
|       | +      | +      | +      | +      | +      | +      | + |
| Total | 385    | 297    | 443    | 1405   | 425    | 2955   |   |
|       | 13.03  | 10.05  | 14.99  | 47.55  | 14.38  | 100.00 |   |

Laboratory tests at the time of obtaining Table 2-6 consent, according to the presence or absence of proton-pump inhibitors

FREQ Procedure

Table : ALL \* \_TTRCT

ALL \_TTRCT

Power |

Percent |

Percent of rows

Percentage of columns | 1| 2| 3| 4| 9| Total

|       |        |        |        |        |        |        |   |
|-------|--------|--------|--------|--------|--------|--------|---|
|       | +      | +      | +      | +      | +      | +      | + |
| 1     | 385    | 297    | 443    | 1405   | 425    | 2955   |   |
|       | 13.03  | 10.05  | 14.99  | 47.55  | 14.38  | 100.00 |   |
|       | 13.03  | 10.05  | 14.99  | 47.55  | 14.38  |        |   |
|       | 100.00 | 100.00 | 100.00 | 100.00 | 100.00 |        |   |
|       | +      | +      | +      | +      | +      | +      | + |
| Total | 385    | 297    | 443    | 1405   | 425    | 2955   |   |
|       | 13.03  | 10.05  | 14.99  | 47.55  | 14.38  | 100.00 |   |



Laboratory tests at the time of obtaining Table 2-6 consent, according to the presence or absence of proton-pump inhibitors

FREQ Procedure

Table : ALL \* \_TTRCT

ALL \_TTRCT

Power |

Percent |

Percent of rows

Percentage of columns | 1| 2| 3| 4| 9| Total

|       |        |        |        |        |        |        |   |
|-------|--------|--------|--------|--------|--------|--------|---|
|       | +      | +      | +      | +      | +      | +      | + |
| 1     | 385    | 297    | 443    | 1405   | 425    | 2955   |   |
|       | 13.03  | 10.05  | 14.99  | 47.55  | 14.38  | 100.00 |   |
|       | 13.03  | 10.05  | 14.99  | 47.55  | 14.38  |        |   |
|       | 100.00 | 100.00 | 100.00 | 100.00 | 100.00 |        |   |
|       | +      | +      | +      | +      | +      | +      | + |
| Total | 385    | 297    | 443    | 1405   | 425    | 2955   |   |
|       | 13.03  | 10.05  | 14.99  | 47.55  | 14.38  | 100.00 |   |

Laboratory tests at the time of obtaining Table 2-6 consent, according to the presence or absence of proton-pump inhibitors

FREQ Procedure

Table : ALL \* \_TTRCT

ALL \_TTRCT

Power |

Percent |

Percent of rows

Percentage of columns | 1| 2| 3| 4| 9| Total

|       |        |        |        |        |        |        |   |
|-------|--------|--------|--------|--------|--------|--------|---|
|       | +      | +      | +      | +      | +      | +      | + |
| 1     | 385    | 297    | 443    | 1405   | 425    | 2955   |   |
|       | 13.03  | 10.05  | 14.99  | 47.55  | 14.38  | 100.00 |   |
|       | 13.03  | 10.05  | 14.99  | 47.55  | 14.38  |        |   |
|       | 100.00 | 100.00 | 100.00 | 100.00 | 100.00 |        |   |
|       | +      | +      | +      | +      | +      | +      | + |
| Total | 385    | 297    | 443    | 1405   | 425    | 2955   |   |
|       | 13.03  | 10.05  | 14.99  | 47.55  | 14.38  | 100.00 |   |

Laboratory tests at the time of obtaining Table 2-6 consent, according to the presence or absence of proton-pump inhibitors

FREQ Procedure

Table : ALL \* \_FIRCT

ALL \_FIRCT

Power |

Percent |

Percent of rows

Percentage of columns | 1| 2| 3| 4| 9| Total

|       |        |        |        |        |        |        |   |  |   |  |   |
|-------|--------|--------|--------|--------|--------|--------|---|--|---|--|---|
|       | +      |        | +      |        | +      |        | + |  | + |  | + |
| 1     | 396    | 313    | 588    | 1250   | 408    | 2955   |   |  |   |  |   |
|       | 13.40  | 10.59  | 19.90  | 42.30  | 13.81  | 100.00 |   |  |   |  |   |
|       | 13.40  | 10.59  | 19.90  | 42.30  | 13.81  |        |   |  |   |  |   |
|       | 100.00 | 100.00 | 100.00 | 100.00 | 100.00 |        |   |  |   |  |   |
|       | +      |        | +      |        | +      |        | + |  | + |  | + |
| Total | 396    | 313    | 588    | 1250   | 408    | 2955   |   |  |   |  |   |
|       | 13.40  | 10.59  | 19.90  | 42.30  | 13.81  | 100.00 |   |  |   |  |   |

Laboratory tests at the time of obtaining Table 2-6 consent, according to the presence or absence of proton-pump inhibitors

FREQ Procedure

Table : ALL \* \_FIRCT

ALL \_FIRCT

Power |

Percent |

Percent of rows

Percentage of columns | 1| 2| 3| 4| 9| Total

|       |        |        |        |        |        |        |   |  |   |  |   |
|-------|--------|--------|--------|--------|--------|--------|---|--|---|--|---|
|       | +      |        | +      |        | +      |        | + |  | + |  | + |
| 1     | 396    | 313    | 588    | 1250   | 408    | 2955   |   |  |   |  |   |
|       | 13.40  | 10.59  | 19.90  | 42.30  | 13.81  | 100.00 |   |  |   |  |   |
|       | 13.40  | 10.59  | 19.90  | 42.30  | 13.81  |        |   |  |   |  |   |
|       | 100.00 | 100.00 | 100.00 | 100.00 | 100.00 |        |   |  |   |  |   |
|       | +      |        | +      |        | +      |        | + |  | + |  | + |
| Total | 396    | 313    | 588    | 1250   | 408    | 2955   |   |  |   |  |   |
|       | 13.40  | 10.59  | 19.90  | 42.30  | 13.81  | 100.00 |   |  |   |  |   |

Laboratory tests at the time of obtaining Table 2-6 consent, according to the presence or absence of proton-pump inhibitors

FREQ Procedure

Table : ALL \* \_FIRCT

ALL \_FIRCT

Power |

Percent |

Percent of rows

Percentage of columns | 1| 2| 3| 4| 9| Total

|       |        |        |        |        |        |        |   |  |   |  |   |
|-------|--------|--------|--------|--------|--------|--------|---|--|---|--|---|
|       | +      |        | +      |        | +      |        | + |  | + |  | + |
| 1     | 396    | 313    | 588    | 1250   | 408    | 2955   |   |  |   |  |   |
|       | 13.40  | 10.59  | 19.90  | 42.30  | 13.81  | 100.00 |   |  |   |  |   |
|       | 13.40  | 10.59  | 19.90  | 42.30  | 13.81  |        |   |  |   |  |   |
|       | 100.00 | 100.00 | 100.00 | 100.00 | 100.00 |        |   |  |   |  |   |
|       | +      |        | +      |        | +      |        | + |  | + |  | + |
| Total | 396    | 313    | 588    | 1250   | 408    | 2955   |   |  |   |  |   |
|       | 13.40  | 10.59  | 19.90  | 42.30  | 13.81  | 100.00 |   |  |   |  |   |

Laboratory tests at the time of obtaining Table 2-6 consent, according to the presence or absence of proton-pump inhibitors

FREQ Procedure

Table : ALL \* \_FIRCT

ALL \_FIRCT

Power |

Percent |

Percent of rows

Percentage of columns | 1| 2| 3| 4| 9| Total

|       |        |        |        |        |        |        |   |  |   |  |   |
|-------|--------|--------|--------|--------|--------|--------|---|--|---|--|---|
|       | +      |        | +      |        | +      |        | + |  | + |  | + |
| 1     | 396    | 313    | 588    | 1250   | 408    | 2955   |   |  |   |  |   |
|       | 13.40  | 10.59  | 19.90  | 42.30  | 13.81  | 100.00 |   |  |   |  |   |
|       | 13.40  | 10.59  | 19.90  | 42.30  | 13.81  |        |   |  |   |  |   |
|       | 100.00 | 100.00 | 100.00 | 100.00 | 100.00 |        |   |  |   |  |   |
|       | +      |        | +      |        | +      |        | + |  | + |  | + |
| Total | 396    | 313    | 588    | 1250   | 408    | 2955   |   |  |   |  |   |
|       | 13.40  | 10.59  | 19.90  | 42.30  | 13.81  | 100.00 |   |  |   |  |   |

Laboratory tests at the time of obtaining Table 2-6 consent, according to the presence or absence of proton-pump inhibitors

FREQ Procedure

Table : ALL \* \_FIRCT

ALL \_FIRCT

Power |

Percent |

Percent of rows

Percentage of columns | 1| 2| 3| 4| 9| Total

|       |        |        |        |        |        |        |   |  |   |  |   |
|-------|--------|--------|--------|--------|--------|--------|---|--|---|--|---|
|       | +      |        | +      |        | +      |        | + |  | + |  | + |
| 1     | 396    | 313    | 588    | 1250   | 408    | 2955   |   |  |   |  |   |
|       | 13.40  | 10.59  | 19.90  | 42.30  | 13.81  | 100.00 |   |  |   |  |   |
|       | 13.40  | 10.59  | 19.90  | 42.30  | 13.81  |        |   |  |   |  |   |
|       | 100.00 | 100.00 | 100.00 | 100.00 | 100.00 |        |   |  |   |  |   |
|       | +      |        | +      |        | +      |        | + |  | + |  | + |
| Total | 396    | 313    | 588    | 1250   | 408    | 2955   |   |  |   |  |   |
|       | 13.40  | 10.59  | 19.90  | 42.30  | 13.81  | 100.00 |   |  |   |  |   |

Laboratory tests at the time of obtaining Table 2-6 consent, according to the presence or absence of proton-pump inhibitors

FREQ Procedure

Table : ALL \* t\_CRCC1

ALL t\_CRCC1

Power |

Percent |

Percent of rows

Percentage of columns | 1| 2| 3| 4| 5| Total

|       | 1      | 2      | 3      | 4      | 5      | Total  |
|-------|--------|--------|--------|--------|--------|--------|
| 1     | 223    | 1626   | 4292   | 3539   | 355    | 10035  |
|       | 2.22   | 16.20  | 42.77  | 35.27  | 3.54   | 100.00 |
|       | 2.22   | 16.20  | 42.77  | 35.27  | 3.54   |        |
|       | 100.00 | 100.00 | 100.00 | 100.00 | 100.00 |        |
| Total | 223    | 1626   | 4292   | 3539   | 355    | 10035  |
|       | 2.22   | 16.20  | 42.77  | 35.27  | 3.54   | 100.00 |

Frequency of missing values = 1946



Laboratory tests at the time of obtaining Table 2-6 consent, according to the presence or absence of proton-pump inhibitors

FREQ Procedure

Table : ALL \* t\_CRCC1

ALL t\_CRCC1

Power |

Percent |

Percent of rows

Percentage of columns | 1| 2| 3| 4| 5| Total

|       | 1      | 2      | 3      | 4      | 5      | Total  |
|-------|--------|--------|--------|--------|--------|--------|
| 1     | 223    | 1626   | 4292   | 3539   | 355    | 10035  |
|       | 2.22   | 16.20  | 42.77  | 35.27  | 3.54   | 100.00 |
|       | 2.22   | 16.20  | 42.77  | 35.27  | 3.54   |        |
|       | 100.00 | 100.00 | 100.00 | 100.00 | 100.00 |        |
| Total | 223    | 1626   | 4292   | 3539   | 355    | 10035  |
|       | 2.22   | 16.20  | 42.77  | 35.27  | 3.54   | 100.00 |

Frequency of missing values = 1946

Laboratory tests at the time of obtaining Table 2-6 consent, according to the presence or absence of proton-pump inhibitors

FREQ Procedure

Table : ALL \* t\_CRCC1

ALL t\_CRCC1

Power |

Percent |

Percent of rows

Percentage of columns | 1| 2| 3| 4| 5| Total

|       | 1      | 2      | 3      | 4      | 5      | Total  |
|-------|--------|--------|--------|--------|--------|--------|
| 1     | 223    | 1626   | 4292   | 3539   | 355    | 10035  |
|       | 2.22   | 16.20  | 42.77  | 35.27  | 3.54   | 100.00 |
|       | 2.22   | 16.20  | 42.77  | 35.27  | 3.54   |        |
|       | 100.00 | 100.00 | 100.00 | 100.00 | 100.00 |        |
| Total | 223    | 1626   | 4292   | 3539   | 355    | 10035  |
|       | 2.22   | 16.20  | 42.77  | 35.27  | 3.54   | 100.00 |

Frequency of missing values = 1946

Laboratory tests at the time of obtaining Table 2-6 consent, according to the presence or absence of proton-pump inhibitors

FREQ Procedure

Table : ALL \* t\_CRCC1

ALL t\_CRCC1

Power |

Percent |

Percent of rows

Percentage of columns | 1| 2| 3| 4| 5| Total

|       | 1      | 2      | 3      | 4      | 5      | Total  |
|-------|--------|--------|--------|--------|--------|--------|
| 1     | 223    | 1626   | 4292   | 3539   | 355    | 10035  |
|       | 2.22   | 16.20  | 42.77  | 35.27  | 3.54   | 100.00 |
|       | 2.22   | 16.20  | 42.77  | 35.27  | 3.54   |        |
|       | 100.00 | 100.00 | 100.00 | 100.00 | 100.00 |        |
| Total | 223    | 1626   | 4292   | 3539   | 355    | 10035  |
|       | 2.22   | 16.20  | 42.77  | 35.27  | 3.54   | 100.00 |

Frequency of missing values = 1946

Laboratory tests at the time of obtaining Table 2-6 consent, according to the presence or absence of proton-pump inhibitors

FREQ Procedure

Table : ALL \* t\_CRCC1

ALL t\_CRCC1

Power |

Percent |

Percent of rows

Percentage of columns | 1| 2| 3| 4| 5| Total

|       | 1      | 2      | 3      | 4      | 5      | Total  |
|-------|--------|--------|--------|--------|--------|--------|
| 1     | 223    | 1626   | 4292   | 3539   | 355    | 10035  |
|       | 2.22   | 16.20  | 42.77  | 35.27  | 3.54   | 100.00 |
|       | 2.22   | 16.20  | 42.77  | 35.27  | 3.54   |        |
|       | 100.00 | 100.00 | 100.00 | 100.00 | 100.00 |        |
| Total | 223    | 1626   | 4292   | 3539   | 355    | 10035  |
|       | 2.22   | 16.20  | 42.77  | 35.27  | 3.54   | 100.00 |

Frequency of missing values = 1946

Laboratory tests at the time of obtaining Table 2-6 consent, according to the presence or absence of proton-pump inhibitors

FREQ Procedure

Table : ALL \* non\_CRCC1

ALL non\_CRCC1

Power |

Percent |

Percent of rows

Percent of columns | 1 | Total

|        |        |        |  |
|--------|--------|--------|--|
| _____+ |        | _____+ |  |
| 1      | 1946   | 1946   |  |
|        | 100.00 | 100.00 |  |
|        | 100.00 |        |  |
|        | 100.00 |        |  |
| _____+ |        | _____+ |  |
| Total  | 1946   | 1946   |  |
|        | 100.00 | 100.00 |  |

Degree of missing values = 10035

Laboratory tests at the time of obtaining Table 2-6 consent, according to the presence or absence of proton-pump inhibitors

FREQ Procedure

Table : ALL \* t\_EGFR1

ALL t\_EGFR1

Power |

Percent |

Percent of rows

Percentage of columns | 1| 2| 3| 4| 5| 6| Total

|       | 1      | 2      | 3      | 4      | 5      | 6      | Total  |
|-------|--------|--------|--------|--------|--------|--------|--------|
| 1     | 134    | 919    | 2806   | 3672   | 3082   | 176    | 10789  |
|       | 1.24   | 8.52   | 26.01  | 34.03  | 28.57  | 1.63   | 100.00 |
|       | 1.24   | 8.52   | 26.01  | 34.03  | 28.57  | 1.63   |        |
|       | 100.00 | 100.00 | 100.00 | 100.00 | 100.00 | 100.00 |        |
| Total | 134    | 919    | 2806   | 3672   | 3082   | 176    | 10789  |
|       | 1.24   | 8.52   | 26.01  | 34.03  | 28.57  | 1.63   | 100.00 |

Frequency of missing values = 1192

Laboratory tests at the time of obtaining Table 2-6 consent, according to the presence or absence of proton-pump inhibitors

FREQ Procedure

Table : ALL \* t\_EGFR1

ALL t\_EGFR1

Power |

Percent |

Percent of rows

Percentage of columns | 1| 2| 3| 4| 5| 6| Total

|       | 1      | 2      | 3      | 4      | 5      | 6      | Total  |
|-------|--------|--------|--------|--------|--------|--------|--------|
| 1     | 134    | 919    | 2806   | 3672   | 3082   | 176    | 10789  |
|       | 1.24   | 8.52   | 26.01  | 34.03  | 28.57  | 1.63   | 100.00 |
|       | 1.24   | 8.52   | 26.01  | 34.03  | 28.57  | 1.63   |        |
|       | 100.00 | 100.00 | 100.00 | 100.00 | 100.00 | 100.00 |        |
| Total | 134    | 919    | 2806   | 3672   | 3082   | 176    | 10789  |
|       | 1.24   | 8.52   | 26.01  | 34.03  | 28.57  | 1.63   | 100.00 |

Frequency of missing values = 1192

Laboratory tests at the time of obtaining Table 2-6 consent, according to the presence or absence of proton-pump inhibitors

FREQ Procedure

Table : ALL \* t\_EGFR1

ALL t\_EGFR1

Power |

Percent |

Percent of rows

Percentage of columns | 1| 2| 3| 4| 5| 6| Total

|       | 1      | 2      | 3      | 4      | 5      | 6      | Total  |
|-------|--------|--------|--------|--------|--------|--------|--------|
| 1     | 134    | 919    | 2806   | 3672   | 3082   | 176    | 10789  |
|       | 1.24   | 8.52   | 26.01  | 34.03  | 28.57  | 1.63   | 100.00 |
|       | 1.24   | 8.52   | 26.01  | 34.03  | 28.57  | 1.63   |        |
|       | 100.00 | 100.00 | 100.00 | 100.00 | 100.00 | 100.00 |        |
| Total | 134    | 919    | 2806   | 3672   | 3082   | 176    | 10789  |
|       | 1.24   | 8.52   | 26.01  | 34.03  | 28.57  | 1.63   | 100.00 |

Frequency of missing values = 1192



Laboratory tests at the time of obtaining Table 2-6 consent, according to the presence or absence of proton-pump inhibitors

FREQ Procedure

Table : ALL \* t\_EGFR1

ALL t\_EGFR1

Power |

Percent |

Percent of rows

Percentage of columns | 1| 2| 3| 4| 5| 6| Total

|       | 1      | 2      | 3      | 4      | 5      | 6      | Total  |
|-------|--------|--------|--------|--------|--------|--------|--------|
| 1     | 134    | 919    | 2806   | 3672   | 3082   | 176    | 10789  |
|       | 1.24   | 8.52   | 26.01  | 34.03  | 28.57  | 1.63   | 100.00 |
|       | 1.24   | 8.52   | 26.01  | 34.03  | 28.57  | 1.63   |        |
|       | 100.00 | 100.00 | 100.00 | 100.00 | 100.00 | 100.00 |        |
| Total | 134    | 919    | 2806   | 3672   | 3082   | 176    | 10789  |
|       | 1.24   | 8.52   | 26.01  | 34.03  | 28.57  | 1.63   | 100.00 |

Frequency of missing values = 1192

Laboratory tests at the time of obtaining Table 2-6 consent, according to the presence or absence of proton-pump inhibitors

FREQ Procedure

Table : ALL \* t\_EGFR1

ALL t\_EGFR1

Power |

Percent |

Percent of rows

Percentage of columns | 1| 2| 3| 4| 5| 6| Total

|       | 1      | 2      | 3      | 4      | 5      | 6      | Total  |
|-------|--------|--------|--------|--------|--------|--------|--------|
| 1     | 134    | 919    | 2806   | 3672   | 3082   | 176    | 10789  |
|       | 1.24   | 8.52   | 26.01  | 34.03  | 28.57  | 1.63   | 100.00 |
|       | 1.24   | 8.52   | 26.01  | 34.03  | 28.57  | 1.63   |        |
|       | 100.00 | 100.00 | 100.00 | 100.00 | 100.00 | 100.00 |        |
| Total | 134    | 919    | 2806   | 3672   | 3082   | 176    | 10789  |
|       | 1.24   | 8.52   | 26.01  | 34.03  | 28.57  | 1.63   | 100.00 |

Frequency of missing values = 1192

Laboratory tests at the time of obtaining Table 2-6 consent, according to the presence or absence of proton-pump inhibitors

FREQ Procedure

Table : ALL \* t\_EGFR1

ALL t\_EGFR1

Power |

Percent |

Percent of rows

Percentage of columns | 1| 2| 3| 4| 5| 6| Total

|       | 1      | 2      | 3      | 4      | 5      | 6      | Total  |
|-------|--------|--------|--------|--------|--------|--------|--------|
| 1     | 134    | 919    | 2806   | 3672   | 3082   | 176    | 10789  |
|       | 1.24   | 8.52   | 26.01  | 34.03  | 28.57  | 1.63   | 100.00 |
|       | 1.24   | 8.52   | 26.01  | 34.03  | 28.57  | 1.63   |        |
|       | 100.00 | 100.00 | 100.00 | 100.00 | 100.00 | 100.00 |        |
| Total | 134    | 919    | 2806   | 3672   | 3082   | 176    | 10789  |
|       | 1.24   | 8.52   | 26.01  | 34.03  | 28.57  | 1.63   | 100.00 |

Frequency of missing values = 1192

Laboratory tests at the time of obtaining Table 2-6 consent, according to the presence or absence of proton-pump inhibitors

FREQ Procedure

Table : ALL \* non\_EGFR1

ALL non\_EGFR1

Power |

Percent |

Percent of rows

Percent of columns | 1 | Total

|        |        |        |  |
|--------|--------|--------|--|
| _____+ |        | _____+ |  |
| 1      | 1192   | 1192   |  |
|        | 100.00 | 100.00 |  |
|        | 100.00 |        |  |
|        | 100.00 |        |  |
| _____+ |        | _____+ |  |
| Total  | 1192   | 1192   |  |
|        | 100.00 | 100.00 |  |

Degree of missing values = 10789

Laboratory tests at the time of obtaining Table 2-6 consent, according to the presence or absence of proton-pump inhibitors

FREQ Procedure

Table : ALL \* HBAC\_BL

ALL HBAC\_BL(Category of Hemoglobin A1c at Baseline)

Power |

Percent |

Percent of rows

Column Percent|<6.0%|6.0%|More than |7.0%|More than |8.0%|Missing|Total

|       | < 7.0% | 7.0% < 8.0% | 8.0% < 9.0% | 9.0% < 10.0% | 10.0% < 11.0% | Missing | Total |
|-------|--------|-------------|-------------|--------------|---------------|---------|-------|
| 1     | 3184   | 2745        | 679         | 231          | 5142          | 11981   |       |
|       | 26.58  | 22.91       | 5.67        | 1.93         | 42.92         | 100.00  |       |
|       | 26.58  | 22.91       | 5.67        | 1.93         | 42.92         |         |       |
|       | 100.00 | 100.00      | 100.00      | 100.00       | 100.00        |         |       |
| Total | 3184   | 2745        | 679         | 231          | 5142          | 11981   |       |
|       | 26.58  | 22.91       | 5.67        | 1.93         | 42.92         | 100.00  |       |

Laboratory tests at the time of obtaining Table 2-6 consent, according to the presence or absence of proton-pump inhibitors

FREQ Procedure

Table : ALL \* HBAC\_BL

ALL HBAC\_BL(Category of Hemoglobin A1c at Baseline)

Power |

Percent |

Percent of rows

Column Percent|<6.0%|6.0%|More than |7.0%|More than |8.0%|Missing|Total

|| < 7.0%| < 8.0%| ||

|       | <6.0%  | 6.0%   | More than 7.0% | More than 8.0% | Missing | Total  |
|-------|--------|--------|----------------|----------------|---------|--------|
| 1     | 3184   | 2745   | 679            | 231            | 5142    | 11981  |
|       | 26.58  | 22.91  | 5.67           | 1.93           | 42.92   | 100.00 |
|       | 26.58  | 22.91  | 5.67           | 1.93           | 42.92   |        |
|       | 100.00 | 100.00 | 100.00         | 100.00         | 100.00  |        |
| Total | 3184   | 2745   | 679            | 231            | 5142    | 11981  |
|       | 26.58  | 22.91  | 5.67           | 1.93           | 42.92   | 100.00 |

Laboratory tests at the time of obtaining Table 2-6 consent, according to the presence or absence of proton-pump inhibitors

FREQ Procedure

Table : ALL \* HBAC\_BL

ALL HBAC\_BL(Category of Hemoglobin A1c at Baseline)

Power |

Percent |

Percent of rows

Column Percent|<6.0%|6.0%|More than |7.0%|More than |8.0%|Missing|Total

|       | < 7.0% | 7.0% < 8.0% | 8.0% < 9.0% | 9.0% < 10.0% | 10.0% < 11.0% | Missing | Total |
|-------|--------|-------------|-------------|--------------|---------------|---------|-------|
| 1     | 3184   | 2745        | 679         | 231          | 5142          | 11981   |       |
|       | 26.58  | 22.91       | 5.67        | 1.93         | 42.92         | 100.00  |       |
|       | 26.58  | 22.91       | 5.67        | 1.93         | 42.92         |         |       |
|       | 100.00 | 100.00      | 100.00      | 100.00       | 100.00        |         |       |
| Total | 3184   | 2745        | 679         | 231          | 5142          | 11981   |       |
|       | 26.58  | 22.91       | 5.67        | 1.93         | 42.92         | 100.00  |       |

Laboratory tests at the time of obtaining Table 2-6 consent, according to the presence or absence of proton-pump inhibitors

FREQ Procedure

Table : ALL \* HBAC\_BL

ALL HBAC\_BL(Category of Hemoglobin A1c at Baseline)

Power |

Percent |

Percent of rows

Column Percent|<6.0%|6.0%|More than |7.0%|More than |8.0%|Missing|Total

|| < 7.0%| < 8.0%| ||

|       | <6.0%  | 6.0%   | More than  7.0% | More than  8.0% | Missing | Total  |
|-------|--------|--------|-----------------|-----------------|---------|--------|
| 1     | 3184   | 2745   | 679             | 231             | 5142    | 11981  |
|       | 26.58  | 22.91  | 5.67            | 1.93            | 42.92   | 100.00 |
|       | 26.58  | 22.91  | 5.67            | 1.93            | 42.92   |        |
|       | 100.00 | 100.00 | 100.00          | 100.00          | 100.00  |        |
| Total | 3184   | 2745   | 679             | 231             | 5142    | 11981  |
|       | 26.58  | 22.91  | 5.67            | 1.93            | 42.92   | 100.00 |



Laboratory tests at the time of obtaining Table 2-6 consent, according to the presence or absence of proton-pump inhibitors

FREQ Procedure

Table : ALL \* HBAC\_BL

ALL HBAC\_BL(Category of Hemoglobin A1c at Baseline)

Power |

Percent |

Percent of rows

Column Percent|<6.0%|6.0%|More than |7.0%|More than |8.0%|Missing|Total

|       | < 7.0% | 7.0% < 8.0% | 8.0% < 9.0% | 9.0% < 10.0% | 10.0% < 11.0% | Missing | Total |
|-------|--------|-------------|-------------|--------------|---------------|---------|-------|
| 1     | 3184   | 2745        | 679         | 231          | 5142          | 11981   |       |
|       | 26.58  | 22.91       | 5.67        | 1.93         | 42.92         | 100.00  |       |
|       | 26.58  | 22.91       | 5.67        | 1.93         | 42.92         |         |       |
|       | 100.00 | 100.00      | 100.00      | 100.00       | 100.00        |         |       |
| Total | 3184   | 2745        | 679         | 231          | 5142          | 11981   |       |
|       | 26.58  | 22.91       | 5.67        | 1.93         | 42.92         | 100.00  |       |

Laboratory tests at the time of obtaining Table 2-6 consent, according to the presence or absence of proton-pump inhibitors

FREQ Procedure

|   |                      |                  | Cumulative |        |
|---|----------------------|------------------|------------|--------|
|   | Percent of ALL power | Percent of power |            |        |
| 1 | 20509                | 100.00           | 20509      | 100.00 |

Laboratory tests at the time of obtaining Table 2-6 consent, according to the presence or absence of proton-pump inhibitors

FREQ Procedure

Tables: ALL\* ACTYP

ALL

ACTYP(Type of AF)

Power |

Percent |

Percent of rows

Percent of column|Warfa| Total

|Phosphate|

| | |

+ +

1 | 5340 | 5340

| 100.00 | 100.00

| 100.00 |

| 100.00 |

+ +

Total 5340 5340

100.00 100.00

Laboratory tests at the time of obtaining Table 2-6 consent, according to the presence or absence of proton-pump inhibitors

Unique Subject Identifier=0001110010-0005

MEANS Procedure

Assay variable : PTINR\_VAL1 PT-INR Value

N Mean Standard Deviation Minimum Maximum

---

|   |           |           |           |           |
|---|-----------|-----------|-----------|-----------|
| 5 | 2.1760000 | 0.2298478 | 2.0100000 | 2.5600000 |
|---|-----------|-----------|-----------|-----------|

---

Unique Subject Identifier=0001110010-0018

Assay variable : PTINR\_VAL1 PT-INR Value

N Mean Standard Deviation Minimum Maximum

---

|   |           |           |           |           |
|---|-----------|-----------|-----------|-----------|
| 4 | 2.7475000 | 0.4163632 | 2.4500000 | 3.3500000 |
|---|-----------|-----------|-----------|-----------|

---

Unique Subject Identifier=0001110010-0027

Assay variable : PTINR\_VAL1 PT-INR Value

N Mean Standard Deviation Minimum Maximum

---

|   |           |           |           |           |
|---|-----------|-----------|-----------|-----------|
| 4 | 2.2725000 | 0.0665207 | 2.1900000 | 2.3400000 |
|---|-----------|-----------|-----------|-----------|

---

Unique Subject Identifier=0004110010-0007

Assay variable : PTINR\_VAL1 PT-INR Value

N Mean Standard Deviation Minimum Maximum

---

|   |           |           |           |           |
|---|-----------|-----------|-----------|-----------|
| 5 | 1.7880000 | 0.1658915 | 1.5600000 | 1.9300000 |
|---|-----------|-----------|-----------|-----------|

---

Laboratory tests at the time of obtaining Table 2-6 consent, according to the presence or absence of proton-pump inhibitors

Unique Subject Identifier=0004110010-0008

MEANS Procedure

Assay variable : PTINR\_VAL1 PT-INR Value

N Mean Standard Deviation Minimum Maximum

---

|   |           |           |           |           |
|---|-----------|-----------|-----------|-----------|
| 2 | 1.6800000 | 0.3535534 | 1.4300000 | 1.9300000 |
|---|-----------|-----------|-----------|-----------|

---

Unique Subject Identifier=0004110010-0009

Assay variable : PTINR\_VAL1 PT-INR Value

N Mean Standard Deviation Minimum Maximum

---

|   |           |           |           |           |
|---|-----------|-----------|-----------|-----------|
| 6 | 2.1000000 | 0.4030385 | 1.7400000 | 2.8000000 |
|---|-----------|-----------|-----------|-----------|

---

Unique Subject Identifier=0004110010-0011

Assay variable : PTINR\_VAL1 PT-INR Value

N Mean Standard Deviation Minimum Maximum

---

|   |           |           |           |           |
|---|-----------|-----------|-----------|-----------|
| 4 | 2.0425000 | 0.1662077 | 1.8600000 | 2.2200000 |
|---|-----------|-----------|-----------|-----------|

---

Unique Subject Identifier=0004110010-0017

Assay variable : PTINR\_VAL1 PT-INR Value

N Mean Standard Deviation Minimum Maximum

---

|   |           |           |           |           |
|---|-----------|-----------|-----------|-----------|
| 5 | 1.9240000 | 0.8984320 | 1.3900000 | 3.5100000 |
|---|-----------|-----------|-----------|-----------|

---

Laboratory tests at the time of obtaining Table 2-6 consent, according to the presence or absence of proton-pump inhibitors

Unique Subject Identifier=0004110010-0021

MEANS Procedure

Assay variable : PTINR\_VAL1 PT-INR Value

N Mean Standard Deviation Minimum Maximum

---

|   |           |           |           |           |
|---|-----------|-----------|-----------|-----------|
| 3 | 1.8900000 | 0.2233831 | 1.7100000 | 2.1400000 |
|---|-----------|-----------|-----------|-----------|

---

Unique Subject Identifier=0004110010-0022

Assay variable : PTINR\_VAL1 PT-INR Value

N Mean Standard Deviation Minimum Maximum

---

|   |           |           |           |           |
|---|-----------|-----------|-----------|-----------|
| 4 | 1.6350000 | 0.3158586 | 1.2900000 | 2.0100000 |
|---|-----------|-----------|-----------|-----------|

---

Unique Subject Identifier=0004110010-0029

Assay variable : PTINR\_VAL1 PT-INR Value

N Mean Standard Deviation Minimum Maximum

---

|   |           |           |           |           |
|---|-----------|-----------|-----------|-----------|
| 4 | 2.0075000 | 0.2956772 | 1.5900000 | 2.2800000 |
|---|-----------|-----------|-----------|-----------|

---

Unique Subject Identifier=0004110010-0032



Assay variable : PTINR\_VAL1 PT-INR Value

N Mean Standard Deviation Minimum Maximum

---

|   |          |          |          |          |
|---|----------|----------|----------|----------|
| 3 | 2.210000 | 0.190000 | 2.020000 | 2.400000 |
|---|----------|----------|----------|----------|

---

Laboratory tests at the time of obtaining Table 2-6 consent, according to the presence or absence of proton-pump inhibitors

Unique Subject Identifier=0004110010-0033

MEANS Procedure

Assay variable : PTINR\_VAL1 PT-INR Value

N Mean Standard Deviation Minimum Maximum

---

|   |           |           |           |           |
|---|-----------|-----------|-----------|-----------|
| 4 | 2.1400000 | 0.1019804 | 2.0000000 | 2.2400000 |
|---|-----------|-----------|-----------|-----------|

---

Unique Subject Identifier=0004110010-0034

Assay variable : PTINR\_VAL1 PT-INR Value

N Mean Standard Deviation Minimum Maximum

---

|   |           |           |           |           |
|---|-----------|-----------|-----------|-----------|
| 4 | 1.9650000 | 0.1391642 | 1.8000000 | 2.1400000 |
|---|-----------|-----------|-----------|-----------|

---

Unique Subject Identifier=0004110010-0037

Assay variable : PTINR\_VAL1 PT-INR Value

N Mean Standard Deviation Minimum Maximum

---

|   |           |           |           |           |
|---|-----------|-----------|-----------|-----------|
| 3 | 2.4966667 | 0.5108163 | 2.0900000 | 3.0700000 |
|---|-----------|-----------|-----------|-----------|

---

Unique Subject Identifier=0004110010-0040

Assay variable : PTINR\_VAL1 PT-INR Value

N Mean Standard Deviation Minimum Maximum

---

|   |          |           |          |          |
|---|----------|-----------|----------|----------|
| 4 | 2.320000 | 0.2684524 | 1.970000 | 2.620000 |
|---|----------|-----------|----------|----------|

---

Laboratory tests at the time of obtaining Table 2-6 consent, according to the presence or absence of proton-pump inhibitors

Unique Subject Identifier=0004110010-0043

MEANS Procedure

Assay variable : PTINR\_VAL1 PT-INR Value

N Mean Standard Deviation Minimum Maximum

---

|   |           |           |           |           |
|---|-----------|-----------|-----------|-----------|
| 3 | 2.5533333 | 0.0776745 | 2.4900000 | 2.6400000 |
|---|-----------|-----------|-----------|-----------|

---

Unique Subject Identifier=0004110010-0044

Assay variable : PTINR\_VAL1 PT-INR Value

N Mean Standard Deviation Minimum Maximum

---

|   |           |           |           |           |
|---|-----------|-----------|-----------|-----------|
| 3 | 2.5333333 | 0.1386843 | 2.3800000 | 2.6500000 |
|---|-----------|-----------|-----------|-----------|

---

Unique Subject Identifier=0004110010-0046

Assay variable : PTINR\_VAL1 PT-INR Value

N Mean Standard Deviation Minimum Maximum

---

|   |           |           |           |           |
|---|-----------|-----------|-----------|-----------|
| 3 | 2.4433333 | 0.5312564 | 1.8300000 | 2.7600000 |
|---|-----------|-----------|-----------|-----------|

---

Unique Subject Identifier=0004110010-0048

Assay variable : PTINR\_VAL1 PT-INR Value

N Mean Standard Deviation Minimum Maximum

---

|   |           |           |           |           |
|---|-----------|-----------|-----------|-----------|
| 4 | 1.7050000 | 0.2266422 | 1.5400000 | 2.0400000 |
|---|-----------|-----------|-----------|-----------|

---

Laboratory tests at the time of obtaining Table 2-6 consent, according to the presence or absence of proton-pump inhibitors

Unique Subject Identifier=0004110010-0049

MEANS Procedure

Assay variable : PTINR\_VAL1 PT-INR Value

N Mean Standard Deviation Minimum Maximum

---

|   |           |           |           |           |
|---|-----------|-----------|-----------|-----------|
| 4 | 2.3000000 | 0.2121320 | 2.0500000 | 2.5000000 |
|---|-----------|-----------|-----------|-----------|

---

Unique Subject Identifier=0004110010-0051

Assay variable : PTINR\_VAL1 PT-INR Value

N Mean Standard Deviation Minimum Maximum

---

|   |           |           |           |           |
|---|-----------|-----------|-----------|-----------|
| 6 | 2.4366667 | 0.3922074 | 1.8300000 | 2.9100000 |
|---|-----------|-----------|-----------|-----------|

---

Unique Subject Identifier=0004110010-0052

Assay variable : PTINR\_VAL1 PT-INR Value

N Mean Standard Deviation Minimum Maximum

---

|   |           |           |           |           |
|---|-----------|-----------|-----------|-----------|
| 6 | 2.1983333 | 0.2008399 | 1.9600000 | 2.4600000 |
|---|-----------|-----------|-----------|-----------|

---

Unique Subject Identifier=0004110010-0053

Assay variable : PTINR\_VAL1 PT-INR Value

N Mean Standard Deviation Minimum Maximum

---

|   |           |           |           |           |
|---|-----------|-----------|-----------|-----------|
| 6 | 2.4883333 | 0.3756816 | 2.2400000 | 3.1700000 |
|---|-----------|-----------|-----------|-----------|

---

Laboratory tests at the time of obtaining Table 2-6 consent, according to the presence or absence of proton-pump inhibitors

Unique Subject Identifier=0005010000-0012

MEANS Procedure

Assay variable : PTINR\_VAL1 PT-INR Value

N Mean Standard Deviation Minimum Maximum

---

|   |           |           |           |           |
|---|-----------|-----------|-----------|-----------|
| 6 | 2.6266667 | 0.3273327 | 2.1800000 | 3.1700000 |
|---|-----------|-----------|-----------|-----------|

---

Unique Subject Identifier=0005010000-0028

Assay variable : PTINR\_VAL1 PT-INR Value

N Mean Standard Deviation Minimum Maximum

---

|   |           |           |           |           |
|---|-----------|-----------|-----------|-----------|
| 3 | 1.9700000 | 0.6065476 | 1.6000000 | 2.6700000 |
|---|-----------|-----------|-----------|-----------|

---

Unique Subject Identifier=0005010000-0036

Assay variable : PTINR\_VAL1 PT-INR Value

N Mean Standard Deviation Minimum Maximum

---

|   |           |           |           |           |
|---|-----------|-----------|-----------|-----------|
| 3 | 2.1866667 | 0.1721434 | 1.9900000 | 2.3100000 |
|---|-----------|-----------|-----------|-----------|

---

Unique Subject Identifier=0005010000-0045



Assay variable : PTINR\_VAL1 PT-INR Value

N Mean Standard Deviation Minimum Maximum

---

|   |           |           |           |           |
|---|-----------|-----------|-----------|-----------|
| 4 | 1.8525000 | 0.2305609 | 1.5800000 | 2.1400000 |
|---|-----------|-----------|-----------|-----------|

---

Laboratory tests at the time of obtaining Table 2-6 consent, according to the presence or absence of proton-pump inhibitors

Unique Subject Identifier=0006100000-0012

MEANS Procedure

Assay variable : PTINR\_VAL1 PT-INR Value

| N | Mean      | Standard Deviation | Minimum   | Maximum   |
|---|-----------|--------------------|-----------|-----------|
| 2 | 1.9450000 | 0.3181981          | 1.7200000 | 2.1700000 |

Unique Subject Identifier=0006100000-0014

Assay variable : PTINR\_VAL1 PT-INR Value

| N | Mean      | Standard Deviation | Minimum   | Maximum   |
|---|-----------|--------------------|-----------|-----------|
| 4 | 2.1925000 | 0.0713559          | 2.1300000 | 2.2900000 |

Unique Subject Identifier=0006100000-0021

Assay variable : PTINR\_VAL1 PT-INR Value

| N | Mean      | Standard Deviation | Minimum   | Maximum   |
|---|-----------|--------------------|-----------|-----------|
| 1 | 1.5100000 |                    | 1.5100000 | 1.5100000 |

Unique Subject Identifier=0006100000-0032

Assay variable : PTINR\_VAL1 PT-INR Value

N Mean Standard Deviation Minimum Maximum

---

|   |           |           |           |           |
|---|-----------|-----------|-----------|-----------|
| 6 | 2.3083333 | 0.3635611 | 1.8600000 | 2.7700000 |
|---|-----------|-----------|-----------|-----------|

---

Laboratory tests at the time of obtaining Table 2-6 consent, according to the presence or absence of proton-pump inhibitors

Unique Subject Identifier=0006100000-0034

MEANS Procedure

Assay variable : PTINR\_VAL1 PT-INR Value

N Mean Standard Deviation Minimum Maximum

---

|   |           |  |           |           |
|---|-----------|--|-----------|-----------|
| 1 | 2.8900000 |  | 2.8900000 | 2.8900000 |
|---|-----------|--|-----------|-----------|

---

Unique Subject Identifier=0006100000-0036

Assay variable : PTINR\_VAL1 PT-INR Value

N Mean Standard Deviation Minimum Maximum

---

|   |           |           |           |           |
|---|-----------|-----------|-----------|-----------|
| 3 | 1.7233333 | 0.6992377 | 1.2900000 | 2.5300000 |
|---|-----------|-----------|-----------|-----------|

---

Unique Subject Identifier=0006100000-0050

Assay variable : PTINR\_VAL1 PT-INR Value

N Mean Standard Deviation Minimum Maximum

---

|   |           |           |           |           |
|---|-----------|-----------|-----------|-----------|
| 4 | 2.6000000 | 0.2682039 | 2.3800000 | 2.9500000 |
|---|-----------|-----------|-----------|-----------|

---

Unique Subject Identifier=0006100000-0055

Assay variable : PTINR\_VAL1 PT-INR Value

N Mean Standard Deviation Minimum Maximum

---

|   |           |           |           |           |
|---|-----------|-----------|-----------|-----------|
| 4 | 1.8725000 | 0.1350000 | 1.6800000 | 1.9800000 |
|---|-----------|-----------|-----------|-----------|

---

Laboratory tests at the time of obtaining Table 2-6 consent, according to the presence or absence of proton-pump inhibitors

Unique Subject Identifier=0006100000-0057

MEANS Procedure

Assay variable : PTINR\_VAL1 PT-INR Value

N Mean Standard Deviation Minimum Maximum

---

|   |          |           |          |          |
|---|----------|-----------|----------|----------|
| 3 | 2.410000 | 0.2206808 | 2.200000 | 2.640000 |
|---|----------|-----------|----------|----------|

---

Unique Subject Identifier=0007011000-0004

Assay variable : PTINR\_VAL1 PT-INR Value

N Mean Standard Deviation Minimum Maximum

---

|   |          |           |          |          |
|---|----------|-----------|----------|----------|
| 4 | 1.825000 | 0.2629956 | 1.600000 | 2.100000 |
|---|----------|-----------|----------|----------|

---

Unique Subject Identifier=0007011000-0011

Assay variable : PTINR\_VAL1 PT-INR Value

N Mean Standard Deviation Minimum Maximum

---

|   |          |           |          |          |
|---|----------|-----------|----------|----------|
| 3 | 2.543333 | 0.1193035 | 2.460000 | 2.680000 |
|---|----------|-----------|----------|----------|

---

Unique Subject Identifier=0007011000-0012

Assay variable : PTINR\_VAL1 PT-INR Value

N Mean Standard Deviation Minimum Maximum

---

|   |           |           |           |           |
|---|-----------|-----------|-----------|-----------|
| 5 | 1.7060000 | 0.0861974 | 1.6100000 | 1.8200000 |
|---|-----------|-----------|-----------|-----------|

---

Laboratory tests at the time of obtaining Table 2-6 consent, according to the presence or absence of proton-pump inhibitors

Unique Subject Identifier=0007011000-0014

MEANS Procedure

Assay variable : PTINR\_VAL1 PT-INR Value

N Mean Standard Deviation Minimum Maximum

---

|   |           |           |           |           |
|---|-----------|-----------|-----------|-----------|
| 3 | 1.8666667 | 0.0404145 | 1.8200000 | 1.8900000 |
|---|-----------|-----------|-----------|-----------|

---

Unique Subject Identifier=0007011000-0028

Assay variable : PTINR\_VAL1 PT-INR Value

N Mean Standard Deviation Minimum Maximum

---

|   |           |           |           |           |
|---|-----------|-----------|-----------|-----------|
| 3 | 2.0833333 | 0.5838093 | 1.4500000 | 2.6000000 |
|---|-----------|-----------|-----------|-----------|

---

Unique Subject Identifier=0007011000-0031

Assay variable : PTINR\_VAL1 PT-INR Value

N Mean Standard Deviation Minimum Maximum

---

|   |           |           |           |           |
|---|-----------|-----------|-----------|-----------|
| 3 | 1.9800000 | 0.4073082 | 1.5500000 | 2.3600000 |
|---|-----------|-----------|-----------|-----------|

---

Unique Subject Identifier=0007011000-0034



Assay variable : PTINR\_VAL1 PT-INR Value

N Mean Standard Deviation Minimum Maximum

---

|   |           |           |           |           |
|---|-----------|-----------|-----------|-----------|
| 4 | 1.7350000 | 0.2042058 | 1.5700000 | 2.0100000 |
|---|-----------|-----------|-----------|-----------|

---

Laboratory tests at the time of obtaining Table 2-6 consent, according to the presence or absence of proton-pump inhibitors

Unique Subject Identifier=0007011000-0037

MEANS Procedure

Assay variable : PTINR\_VAL1 PT-INR Value

N Mean Standard Deviation Minimum Maximum

---

|   |           |           |           |           |
|---|-----------|-----------|-----------|-----------|
| 3 | 2.2366667 | 0.6185736 | 1.5300000 | 2.6800000 |
|---|-----------|-----------|-----------|-----------|

---

Unique Subject Identifier=0007011000-0042

Assay variable : PTINR\_VAL1 PT-INR Value

N Mean Standard Deviation Minimum Maximum

---

|   |           |  |           |           |
|---|-----------|--|-----------|-----------|
| 1 | 1.7900000 |  | 1.7900000 | 1.7900000 |
|---|-----------|--|-----------|-----------|

---

Unique Subject Identifier=0007011000-0048

Assay variable : PTINR\_VAL1 PT-INR Value

N Mean Standard Deviation Minimum Maximum

---

|   |           |           |           |           |
|---|-----------|-----------|-----------|-----------|
| 3 | 1.7733333 | 0.0945163 | 1.7000000 | 1.8800000 |
|---|-----------|-----------|-----------|-----------|

---

Unique Subject Identifier=0007011000-0053

Assay variable : PTINR\_VAL1 PT-INR Value

N Mean Standard Deviation Minimum Maximum

---

|   |           |           |           |           |
|---|-----------|-----------|-----------|-----------|
| 3 | 1.8866667 | 0.0230940 | 1.8600000 | 1.9000000 |
|---|-----------|-----------|-----------|-----------|

---

Laboratory tests at the time of obtaining Table 2-6 consent, according to the presence or absence of proton-pump inhibitors

Unique Subject Identifier=0007011000-0057

MEANS Procedure

Assay variable : PTINR\_VAL1 PT-INR Value

N Mean Standard Deviation Minimum Maximum

---

|   |           |           |           |           |
|---|-----------|-----------|-----------|-----------|
| 4 | 2.0075000 | 0.1024288 | 1.9400000 | 2.1600000 |
|---|-----------|-----------|-----------|-----------|

---

Unique Subject Identifier=0007011000-0058

Assay variable : PTINR\_VAL1 PT-INR Value

N Mean Standard Deviation Minimum Maximum

---

|   |           |           |           |           |
|---|-----------|-----------|-----------|-----------|
| 4 | 2.1775000 | 0.2439091 | 1.8400000 | 2.4000000 |
|---|-----------|-----------|-----------|-----------|

---

Unique Subject Identifier=0007011000-0067

Assay variable : PTINR\_VAL1 PT-INR Value

N Mean Standard Deviation Minimum Maximum

---

|   |           |  |           |           |
|---|-----------|--|-----------|-----------|
| 1 | 1.2900000 |  | 1.2900000 | 1.2900000 |
|---|-----------|--|-----------|-----------|

---

Unique Subject Identifier=0007011000-0070

Assay variable : PTINR\_VAL1 PT-INR Value

N Mean Standard Deviation Minimum Maximum

---

|   |           |           |           |           |
|---|-----------|-----------|-----------|-----------|
| 2 | 3.1950000 | 1.1101576 | 2.4100000 | 3.9800000 |
|---|-----------|-----------|-----------|-----------|

---

Laboratory tests at the time of obtaining Table 2-6 consent, according to the presence or absence of proton-pump inhibitors

Unique Subject Identifier=0007011000-0072

MEANS Procedure

Assay variable : PTINR\_VAL1 PT-INR Value

| N | Mean      | Standard Deviation | Minimum   | Maximum   |
|---|-----------|--------------------|-----------|-----------|
| 2 | 2.2050000 | 0.4454773          | 1.8900000 | 2.5200000 |

Unique Subject Identifier=0007011000-0075

Assay variable : PTINR\_VAL1 PT-INR Value

| N | Mean      | Standard Deviation | Minimum   | Maximum   |
|---|-----------|--------------------|-----------|-----------|
| 6 | 1.9633333 | 0.6006219          | 1.4100000 | 2.8300000 |

Unique Subject Identifier=0007011000-0079

Assay variable : PTINR\_VAL1 PT-INR Value

| N | Mean      | Standard Deviation | Minimum   | Maximum   |
|---|-----------|--------------------|-----------|-----------|
| 2 | 2.2000000 | 0.4242641          | 1.9000000 | 2.5000000 |

Unique Subject Identifier=0007011000-0094

Assay variable : PTINR\_VAL1 PT-INR Value

N Mean Standard Deviation Minimum Maximum

---

|   |           |           |           |           |
|---|-----------|-----------|-----------|-----------|
| 4 | 1.6375000 | 0.4458980 | 1.0400000 | 2.1200000 |
|---|-----------|-----------|-----------|-----------|

---

Laboratory tests at the time of obtaining Table 2-6 consent, according to the presence or absence of proton-pump inhibitors

Unique Subject Identifier=0007011000-0100

MEANS Procedure

Assay variable : PTINR\_VAL1 PT-INR Value

N Mean Standard Deviation Minimum Maximum

---

|   |           |           |           |           |
|---|-----------|-----------|-----------|-----------|
| 4 | 2.0300000 | 0.6737457 | 1.3000000 | 2.7700000 |
|---|-----------|-----------|-----------|-----------|

---

Unique Subject Identifier=0007011000-0116

Assay variable : PTINR\_VAL1 PT-INR Value

N Mean Standard Deviation Minimum Maximum

---

|   |           |           |           |           |
|---|-----------|-----------|-----------|-----------|
| 3 | 2.0733333 | 0.5900282 | 1.4000000 | 2.5000000 |
|---|-----------|-----------|-----------|-----------|

---

Unique Subject Identifier=0007011000-0121

Assay variable : PTINR\_VAL1 PT-INR Value

N Mean Standard Deviation Minimum Maximum

---

|   |           |           |           |           |
|---|-----------|-----------|-----------|-----------|
| 3 | 2.1766667 | 0.5600298 | 1.5300000 | 2.5000000 |
|---|-----------|-----------|-----------|-----------|

---

Unique Subject Identifier=0007011000-0130



Assay variable : PTINR\_VAL1 PT-INR Value

N Mean Standard Deviation Minimum Maximum

---

|   |           |  |           |           |
|---|-----------|--|-----------|-----------|
| 1 | 1.7600000 |  | 1.7600000 | 1.7600000 |
|---|-----------|--|-----------|-----------|

---

Laboratory tests at the time of obtaining Table 2-6 consent, according to the presence or absence of proton-pump inhibitors

Unique Subject Identifier=0007011000-0139

MEANS Procedure

Assay variable : PTINR\_VAL1 PT-INR Value

N Mean Standard Deviation Minimum Maximum

---

|   |           |           |           |           |
|---|-----------|-----------|-----------|-----------|
| 3 | 2.9266667 | 0.2052641 | 2.7000000 | 3.1000000 |
|---|-----------|-----------|-----------|-----------|

---

Unique Subject Identifier=0008000110-0007

Assay variable : PTINR\_VAL1 PT-INR Value

N Mean Standard Deviation Minimum Maximum

---

|   |           |           |           |           |
|---|-----------|-----------|-----------|-----------|
| 6 | 1.9166667 | 0.3415650 | 1.3700000 | 2.3000000 |
|---|-----------|-----------|-----------|-----------|

---

Unique Subject Identifier=0008000110-0016

Assay variable : PTINR\_VAL1 PT-INR Value

N Mean Standard Deviation Minimum Maximum

---

|   |           |           |           |           |
|---|-----------|-----------|-----------|-----------|
| 4 | 1.8175000 | 0.2196019 | 1.5600000 | 2.0100000 |
|---|-----------|-----------|-----------|-----------|

---

Unique Subject Identifier=0009010000-0002

Assay variable : PTINR\_VAL1 PT-INR Value

N Mean Standard Deviation Minimum Maximum

---

|   |           |           |           |           |
|---|-----------|-----------|-----------|-----------|
| 4 | 2.0575000 | 0.1802544 | 1.8400000 | 2.2700000 |
|---|-----------|-----------|-----------|-----------|

---

Laboratory tests at the time of obtaining Table 2-6 consent, according to the presence or absence of proton-pump inhibitors

Unique Subject Identifier=0009010000-0004

MEANS Procedure

Assay variable : PTINR\_VAL1 PT-INR Value

N Mean Standard Deviation Minimum Maximum

---

|   |           |           |           |           |
|---|-----------|-----------|-----------|-----------|
| 3 | 2.0366667 | 0.1985783 | 1.8800000 | 2.2600000 |
|---|-----------|-----------|-----------|-----------|

---

Unique Subject Identifier=0009010000-0006

Assay variable : PTINR\_VAL1 PT-INR Value

N Mean Standard Deviation Minimum Maximum

---

|   |           |           |           |           |
|---|-----------|-----------|-----------|-----------|
| 6 | 1.6366667 | 0.0915787 | 1.5500000 | 1.7500000 |
|---|-----------|-----------|-----------|-----------|

---

Unique Subject Identifier=0009010000-0008

Assay variable : PTINR\_VAL1 PT-INR Value

N Mean Standard Deviation Minimum Maximum

---

|   |           |           |           |           |
|---|-----------|-----------|-----------|-----------|
| 2 | 2.4600000 | 0.1131371 | 2.3800000 | 2.5400000 |
|---|-----------|-----------|-----------|-----------|

---

Unique Subject Identifier=0009010000-0010

Assay variable : PTINR\_VAL1 PT-INR Value

N Mean Standard Deviation Minimum Maximum

---

|   |          |           |          |          |
|---|----------|-----------|----------|----------|
| 2 | 2.180000 | 0.0282843 | 2.160000 | 2.200000 |
|---|----------|-----------|----------|----------|

---

Laboratory tests at the time of obtaining Table 2-6 consent, according to the presence or absence of proton-pump inhibitors

Unique Subject Identifier=0009010000-0018

MEANS Procedure

Assay variable : PTINR\_VAL1 PT-INR Value

N Mean Standard Deviation Minimum Maximum

---

|   |           |           |           |           |
|---|-----------|-----------|-----------|-----------|
| 6 | 2.0583333 | 0.2135806 | 1.7500000 | 2.3100000 |
|---|-----------|-----------|-----------|-----------|

---

Unique Subject Identifier=0009010000-0019

Assay variable : PTINR\_VAL1 PT-INR Value

N Mean Standard Deviation Minimum Maximum

---

|   |           |           |           |           |
|---|-----------|-----------|-----------|-----------|
| 5 | 2.4300000 | 0.5772781 | 1.9300000 | 3.4200000 |
|---|-----------|-----------|-----------|-----------|

---

Unique Subject Identifier=0009010000-0021

Assay variable : PTINR\_VAL1 PT-INR Value

N Mean Standard Deviation Minimum Maximum

---

|   |           |           |           |           |
|---|-----------|-----------|-----------|-----------|
| 6 | 1.8750000 | 0.5326443 | 1.1600000 | 2.7900000 |
|---|-----------|-----------|-----------|-----------|

---

Unique Subject Identifier=0009010000-0024

Assay variable : PTINR\_VAL1 PT-INR Value

N Mean Standard Deviation Minimum Maximum

---

|   |          |          |          |          |
|---|----------|----------|----------|----------|
| 6 | 2.060000 | 0.193083 | 1.710000 | 2.270000 |
|---|----------|----------|----------|----------|

---

Laboratory tests at the time of obtaining Table 2-6 consent, according to the presence or absence of proton-pump inhibitors

Unique Subject Identifier=0009010000-0029

MEANS Procedure

Assay variable : PTINR\_VAL1 PT-INR Value

N Mean Standard Deviation Minimum Maximum

---

|   |           |           |           |           |
|---|-----------|-----------|-----------|-----------|
| 5 | 2.8740000 | 0.5623433 | 2.3800000 | 3.5500000 |
|---|-----------|-----------|-----------|-----------|

---

Unique Subject Identifier=0009010000-0032

Assay variable : PTINR\_VAL1 PT-INR Value

N Mean Standard Deviation Minimum Maximum

---

|   |           |           |           |           |
|---|-----------|-----------|-----------|-----------|
| 4 | 1.7675000 | 0.1362290 | 1.6300000 | 1.9500000 |
|---|-----------|-----------|-----------|-----------|

---

Unique Subject Identifier=0009010000-0033

Assay variable : PTINR\_VAL1 PT-INR Value

N Mean Standard Deviation Minimum Maximum

---

|   |           |           |           |           |
|---|-----------|-----------|-----------|-----------|
| 3 | 2.3200000 | 0.0264575 | 2.2900000 | 2.3400000 |
|---|-----------|-----------|-----------|-----------|

---

Unique Subject Identifier=0009010000-0036



Assay variable : PTINR\_VAL1 PT-INR Value

N Mean Standard Deviation Minimum Maximum

---

|   |           |           |           |           |
|---|-----------|-----------|-----------|-----------|
| 3 | 2.3766667 | 0.4796179 | 1.9400000 | 2.8900000 |
|---|-----------|-----------|-----------|-----------|

---

Laboratory tests at the time of obtaining Table 2-6 consent, according to the presence or absence of proton-pump inhibitors

Unique Subject Identifier=0009010000-0037

MEANS Procedure

Assay variable : PTINR\_VAL1 PT-INR Value

N Mean Standard Deviation Minimum Maximum

---

|   |           |           |           |           |
|---|-----------|-----------|-----------|-----------|
| 3 | 1.6200000 | 0.1664332 | 1.4300000 | 1.7400000 |
|---|-----------|-----------|-----------|-----------|

---

Unique Subject Identifier=0009010000-0039

Assay variable : PTINR\_VAL1 PT-INR Value

N Mean Standard Deviation Minimum Maximum

---

|   |           |           |           |           |
|---|-----------|-----------|-----------|-----------|
| 3 | 1.7366667 | 0.1357694 | 1.5800000 | 1.8200000 |
|---|-----------|-----------|-----------|-----------|

---

Unique Subject Identifier=0009010000-0046

Assay variable : PTINR\_VAL1 PT-INR Value

N Mean Standard Deviation Minimum Maximum

---

|   |           |           |           |           |
|---|-----------|-----------|-----------|-----------|
| 3 | 2.1500000 | 0.4313931 | 1.7000000 | 2.5600000 |
|---|-----------|-----------|-----------|-----------|

---

Unique Subject Identifier=0009010000-0047

Assay variable : PTINR\_VAL1 PT-INR Value

N Mean Standard Deviation Minimum Maximum

---

|   |           |           |           |           |
|---|-----------|-----------|-----------|-----------|
| 3 | 2.0633333 | 0.7159143 | 1.6500000 | 2.8900000 |
|---|-----------|-----------|-----------|-----------|

---

Laboratory tests at the time of obtaining Table 2-6 consent, according to the presence or absence of proton-pump inhibitors

Unique Subject Identifier=0009010000-0048

MEANS Procedure

Assay variable : PTINR\_VAL1 PT-INR Value

N Mean Standard Deviation Minimum Maximum

---

|   |           |           |           |           |
|---|-----------|-----------|-----------|-----------|
| 3 | 1.9066667 | 0.3288363 | 1.6600000 | 2.2800000 |
|---|-----------|-----------|-----------|-----------|

---

Unique Subject Identifier=0009010000-0050

Assay variable : PTINR\_VAL1 PT-INR Value

N Mean Standard Deviation Minimum Maximum

---

|   |           |           |           |           |
|---|-----------|-----------|-----------|-----------|
| 3 | 2.1800000 | 0.1300000 | 2.1000000 | 2.3300000 |
|---|-----------|-----------|-----------|-----------|

---

Unique Subject Identifier=0009010000-0061

Assay variable : PTINR\_VAL1 PT-INR Value

N Mean Standard Deviation Minimum Maximum

---

|   |           |           |           |           |
|---|-----------|-----------|-----------|-----------|
| 2 | 2.2950000 | 0.5161880 | 1.9300000 | 2.6600000 |
|---|-----------|-----------|-----------|-----------|

---

Unique Subject Identifier=0009010000-0062

Assay variable : PTINR\_VAL1 PT-INR Value

N Mean Standard Deviation Minimum Maximum

---

|   |           |           |           |           |
|---|-----------|-----------|-----------|-----------|
| 3 | 2.0800000 | 0.2690725 | 1.7800000 | 2.3000000 |
|---|-----------|-----------|-----------|-----------|

---

Laboratory tests at the time of obtaining Table 2-6 consent, according to the presence or absence of proton-pump inhibitors

Unique Subject Identifier=0009010000-0078

MEANS Procedure

Assay variable : PTINR\_VAL1 PT-INR Value

| N | Mean      | Standard Deviation | Minimum   | Maximum   |
|---|-----------|--------------------|-----------|-----------|
| 3 | 1.9533333 | 0.1517674          | 1.7900000 | 2.0900000 |

Unique Subject Identifier=0009010000-0079

Assay variable : PTINR\_VAL1 PT-INR Value

| N | Mean      | Standard Deviation | Minimum   | Maximum   |
|---|-----------|--------------------|-----------|-----------|
| 4 | 2.4000000 | 0.3892728          | 1.9700000 | 2.8400000 |

Unique Subject Identifier=0009010000-0084

Assay variable : PTINR\_VAL1 PT-INR Value

| N | Mean      | Standard Deviation | Minimum   | Maximum   |
|---|-----------|--------------------|-----------|-----------|
| 5 | 1.9940000 | 0.1761533          | 1.8200000 | 2.2600000 |

Unique Subject Identifier=0009010000-0089

Assay variable : PTINR\_VAL1 PT-INR Value

N Mean Standard Deviation Minimum Maximum

---

|   |          |          |          |          |
|---|----------|----------|----------|----------|
| 3 | 2.463333 | 0.545191 | 1.880000 | 2.960000 |
|---|----------|----------|----------|----------|

---

Laboratory tests at the time of obtaining Table 2-6 consent, according to the presence or absence of proton-pump inhibitors

Unique Subject Identifier=0009010000-0093

MEANS Procedure

Assay variable : PTINR\_VAL1 PT-INR Value

N Mean Standard Deviation Minimum Maximum

---

|   |           |           |           |           |
|---|-----------|-----------|-----------|-----------|
| 6 | 2.1100000 | 0.2913417 | 1.7500000 | 2.4600000 |
|---|-----------|-----------|-----------|-----------|

---

Unique Subject Identifier=0009010000-0097

Assay variable : PTINR\_VAL1 PT-INR Value

N Mean Standard Deviation Minimum Maximum

---

|   |           |           |           |           |
|---|-----------|-----------|-----------|-----------|
| 3 | 2.3400000 | 0.2594224 | 2.1300000 | 2.6300000 |
|---|-----------|-----------|-----------|-----------|

---

Unique Subject Identifier=0009010000-0099

Assay variable : PTINR\_VAL1 PT-INR Value

N Mean Standard Deviation Minimum Maximum

---

|   |           |           |           |           |
|---|-----------|-----------|-----------|-----------|
| 3 | 2.7266667 | 0.6957250 | 2.3200000 | 3.5300000 |
|---|-----------|-----------|-----------|-----------|

---

Unique Subject Identifier=0009010000-0102



Assay variable : PTINR\_VAL1 PT-INR Value

N Mean Standard Deviation Minimum Maximum

---

|   |           |           |           |           |
|---|-----------|-----------|-----------|-----------|
| 3 | 1.6266667 | 0.3937427 | 1.3700000 | 2.0800000 |
|---|-----------|-----------|-----------|-----------|

---

Laboratory tests at the time of obtaining Table 2-6 consent, according to the presence or absence of proton-pump inhibitors

Unique Subject Identifier=0009010000-0104

MEANS Procedure

Assay variable : PTINR\_VAL1 PT-INR Value

N Mean Standard Deviation Minimum Maximum

---

|   |           |           |           |           |
|---|-----------|-----------|-----------|-----------|
| 6 | 2.1083333 | 0.6375395 | 1.3300000 | 3.0000000 |
|---|-----------|-----------|-----------|-----------|

---

Unique Subject Identifier=0009010000-0106

Assay variable : PTINR\_VAL1 PT-INR Value

N Mean Standard Deviation Minimum Maximum

---

|   |           |           |           |           |
|---|-----------|-----------|-----------|-----------|
| 3 | 1.9833333 | 0.3879863 | 1.7300000 | 2.4300000 |
|---|-----------|-----------|-----------|-----------|

---

Unique Subject Identifier=0009010000-0107

Assay variable : PTINR\_VAL1 PT-INR Value

N Mean Standard Deviation Minimum Maximum

---

|   |           |           |           |           |
|---|-----------|-----------|-----------|-----------|
| 3 | 2.2800000 | 0.3174902 | 2.0400000 | 2.6400000 |
|---|-----------|-----------|-----------|-----------|

---

Unique Subject Identifier=0009010000-0108

Assay variable : PTINR\_VAL1 PT-INR Value

N Mean Standard Deviation Minimum Maximum

---

|   |           |           |           |           |
|---|-----------|-----------|-----------|-----------|
| 3 | 1.9233333 | 0.0568624 | 1.8600000 | 1.9700000 |
|---|-----------|-----------|-----------|-----------|

---

Laboratory tests at the time of obtaining Table 2-6 consent, according to the presence or absence of proton-pump inhibitors

Unique Subject Identifier=0009010000-0109

MEANS Procedure

Assay variable : PTINR\_VAL1 PT-INR Value

N Mean Standard Deviation Minimum Maximum

---

|   |          |           |          |          |
|---|----------|-----------|----------|----------|
| 4 | 2.400000 | 0.2871701 | 2.030000 | 2.700000 |
|---|----------|-----------|----------|----------|

---

Unique Subject Identifier=0009010000-0117

Assay variable : PTINR\_VAL1 PT-INR Value

N Mean Standard Deviation Minimum Maximum

---

|   |          |           |          |          |
|---|----------|-----------|----------|----------|
| 3 | 2.180000 | 0.0435890 | 2.150000 | 2.230000 |
|---|----------|-----------|----------|----------|

---

Unique Subject Identifier=0009010000-0139

Assay variable : PTINR\_VAL1 PT-INR Value

N Mean Standard Deviation Minimum Maximum

---

|   |          |           |          |          |
|---|----------|-----------|----------|----------|
| 3 | 2.146667 | 0.6335877 | 1.690000 | 2.870000 |
|---|----------|-----------|----------|----------|

---

Unique Subject Identifier=0009010000-0141

Assay variable : PTINR\_VAL1 PT-INR Value

N Mean Standard Deviation Minimum Maximum

---

|   |           |           |           |           |
|---|-----------|-----------|-----------|-----------|
| 4 | 2.4450000 | 0.3221283 | 2.0300000 | 2.7000000 |
|---|-----------|-----------|-----------|-----------|

---

Laboratory tests at the time of obtaining Table 2-6 consent, according to the presence or absence of proton-pump inhibitors

Unique Subject Identifier=0009010000-0142

MEANS Procedure

Assay variable : PTINR\_VAL1 PT-INR Value

N Mean Standard Deviation Minimum Maximum

---

|   |           |           |           |           |
|---|-----------|-----------|-----------|-----------|
| 4 | 2.0500000 | 0.2815434 | 1.7200000 | 2.3800000 |
|---|-----------|-----------|-----------|-----------|

---

Unique Subject Identifier=0009010000-0143

Assay variable : PTINR\_VAL1 PT-INR Value

N Mean Standard Deviation Minimum Maximum

---

|   |           |           |           |           |
|---|-----------|-----------|-----------|-----------|
| 2 | 1.8850000 | 0.2474874 | 1.7100000 | 2.0600000 |
|---|-----------|-----------|-----------|-----------|

---

Unique Subject Identifier=0009010000-0147

Assay variable : PTINR\_VAL1 PT-INR Value

N Mean Standard Deviation Minimum Maximum

---

|   |           |           |           |           |
|---|-----------|-----------|-----------|-----------|
| 4 | 1.7300000 | 0.1726268 | 1.5900000 | 1.9700000 |
|---|-----------|-----------|-----------|-----------|

---

Unique Subject Identifier=0009010000-0150

Assay variable : PTINR\_VAL1 PT-INR Value

N Mean Standard Deviation Minimum Maximum

---

|   |           |           |           |           |
|---|-----------|-----------|-----------|-----------|
| 2 | 1.8450000 | 0.2050610 | 1.7000000 | 1.9900000 |
|---|-----------|-----------|-----------|-----------|

---

Laboratory tests at the time of obtaining Table 2-6 consent, according to the presence or absence of proton-pump inhibitors

Unique Subject Identifier=0009010000-0151

MEANS Procedure

Assay variable : PTINR\_VAL1 PT-INR Value

N Mean Standard Deviation Minimum Maximum

---

|   |           |           |           |           |
|---|-----------|-----------|-----------|-----------|
| 3 | 1.5366667 | 0.1504438 | 1.4400000 | 1.7100000 |
|---|-----------|-----------|-----------|-----------|

---

Unique Subject Identifier=0009010000-0153

Assay variable : PTINR\_VAL1 PT-INR Value

N Mean Standard Deviation Minimum Maximum

---

|   |           |           |           |           |
|---|-----------|-----------|-----------|-----------|
| 4 | 2.2850000 | 0.2056696 | 2.0300000 | 2.5300000 |
|---|-----------|-----------|-----------|-----------|

---

Unique Subject Identifier=0009010000-0154

Assay variable : PTINR\_VAL1 PT-INR Value

N Mean Standard Deviation Minimum Maximum

---

|   |           |           |           |           |
|---|-----------|-----------|-----------|-----------|
| 5 | 2.0180000 | 0.3054832 | 1.7100000 | 2.3700000 |
|---|-----------|-----------|-----------|-----------|

---

Unique Subject Identifier=0009010000-0156



Assay variable : PTINR\_VAL1 PT-INR Value

N Mean Standard Deviation Minimum Maximum

---

|   |           |           |           |           |
|---|-----------|-----------|-----------|-----------|
| 3 | 2.3700000 | 0.1345362 | 2.2200000 | 2.4800000 |
|---|-----------|-----------|-----------|-----------|

---

Laboratory tests at the time of obtaining Table 2-6 consent, according to the presence or absence of proton-pump inhibitors

Unique Subject Identifier=0009010000-0162

MEANS Procedure

Assay variable : PTINR\_VAL1 PT-INR Value

| N | Mean      | Standard Deviation | Minimum   | Maximum   |
|---|-----------|--------------------|-----------|-----------|
| 3 | 1.6933333 | 0.1205543          | 1.5800000 | 1.8200000 |

Unique Subject Identifier=0009010000-0163

Assay variable : PTINR\_VAL1 PT-INR Value

| N | Mean      | Standard Deviation | Minimum   | Maximum   |
|---|-----------|--------------------|-----------|-----------|
| 3 | 2.2966667 | 0.1677299          | 2.1900000 | 2.4900000 |

Unique Subject Identifier=0009010000-0166

Assay variable : PTINR\_VAL1 PT-INR Value

| N | Mean      | Standard Deviation | Minimum   | Maximum   |
|---|-----------|--------------------|-----------|-----------|
| 3 | 1.8800000 | 0.1479865          | 1.7100000 | 1.9800000 |

Unique Subject Identifier=0009010000-0167

Assay variable : PTINR\_VAL1 PT-INR Value

N Mean Standard Deviation Minimum Maximum

---

|   |           |           |           |           |
|---|-----------|-----------|-----------|-----------|
| 3 | 2.0033333 | 0.3251666 | 1.7500000 | 2.3700000 |
|---|-----------|-----------|-----------|-----------|

---

Laboratory tests at the time of obtaining Table 2-6 consent, according to the presence or absence of proton-pump inhibitors

Unique Subject Identifier=0009010000-0168

MEANS Procedure

Assay variable : PTINR\_VAL1 PT-INR Value

N Mean Standard Deviation Minimum Maximum

---

|   |           |           |           |           |
|---|-----------|-----------|-----------|-----------|
| 3 | 2.2400000 | 0.0400000 | 2.2000000 | 2.2800000 |
|---|-----------|-----------|-----------|-----------|

---

Unique Subject Identifier=0009010000-0180

Assay variable : PTINR\_VAL1 PT-INR Value

N Mean Standard Deviation Minimum Maximum

---

|   |           |           |           |           |
|---|-----------|-----------|-----------|-----------|
| 3 | 2.2466667 | 0.0585947 | 2.1800000 | 2.2900000 |
|---|-----------|-----------|-----------|-----------|

---

Unique Subject Identifier=0009010000-0197

Assay variable : PTINR\_VAL1 PT-INR Value

N Mean Standard Deviation Minimum Maximum

---

|   |           |           |           |           |
|---|-----------|-----------|-----------|-----------|
| 3 | 1.8233333 | 0.0351188 | 1.7900000 | 1.8600000 |
|---|-----------|-----------|-----------|-----------|

---

Unique Subject Identifier=0009010000-0198

Assay variable : PTINR\_VAL1 PT-INR Value

N Mean Standard Deviation Minimum Maximum

---

|   |          |           |          |          |
|---|----------|-----------|----------|----------|
| 6 | 1.560000 | 0.1628496 | 1.350000 | 1.820000 |
|---|----------|-----------|----------|----------|

---

Laboratory tests at the time of obtaining Table 2-6 consent, according to the presence or absence of proton-pump inhibitors

Unique Subject Identifier=0009010000-0200

MEANS Procedure

Assay variable : PTINR\_VAL1 PT-INR Value

N Mean Standard Deviation Minimum Maximum

---

|   |           |           |           |           |
|---|-----------|-----------|-----------|-----------|
| 2 | 2.3700000 | 0.1131371 | 2.2900000 | 2.4500000 |
|---|-----------|-----------|-----------|-----------|

---

Unique Subject Identifier=0009010000-0204

Assay variable : PTINR\_VAL1 PT-INR Value

N Mean Standard Deviation Minimum Maximum

---

|   |           |           |           |           |
|---|-----------|-----------|-----------|-----------|
| 5 | 2.2680000 | 0.1293058 | 2.1400000 | 2.4400000 |
|---|-----------|-----------|-----------|-----------|

---

Unique Subject Identifier=0009010000-0217

Assay variable : PTINR\_VAL1 PT-INR Value

N Mean Standard Deviation Minimum Maximum

---

|   |           |           |           |           |
|---|-----------|-----------|-----------|-----------|
| 6 | 1.3750000 | 0.0768765 | 1.2500000 | 1.4700000 |
|---|-----------|-----------|-----------|-----------|

---

Unique Subject Identifier=0009010000-0220

Assay variable : PTINR\_VAL1 PT-INR Value

N Mean Standard Deviation Minimum Maximum

---

|   |           |           |           |           |
|---|-----------|-----------|-----------|-----------|
| 6 | 2.0316667 | 0.0970395 | 1.8700000 | 2.1300000 |
|---|-----------|-----------|-----------|-----------|

---

Laboratory tests at the time of obtaining Table 2-6 consent, according to the presence or absence of proton-pump inhibitors

Unique Subject Identifier=0009010000-0222

MEANS Procedure

Assay variable : PTINR\_VAL1 PT-INR Value

| N | Mean      | Standard Deviation | Minimum   | Maximum   |
|---|-----------|--------------------|-----------|-----------|
| 6 | 1.7883333 | 0.1853016          | 1.5200000 | 2.0600000 |

Unique Subject Identifier=0009010000-0224

Assay variable : PTINR\_VAL1 PT-INR Value

| N | Mean      | Standard Deviation | Minimum   | Maximum   |
|---|-----------|--------------------|-----------|-----------|
| 5 | 2.2180000 | 0.0772658          | 2.1000000 | 2.3100000 |

Unique Subject Identifier=0009010000-0229

Assay variable : PTINR\_VAL1 PT-INR Value

| N | Mean      | Standard Deviation | Minimum   | Maximum   |
|---|-----------|--------------------|-----------|-----------|
| 3 | 1.8700000 | 0.1307670          | 1.7800000 | 2.0200000 |

Unique Subject Identifier=0009010000-0234



Assay variable : PTINR\_VAL1 PT-INR Value

N Mean Standard Deviation Minimum Maximum

---

|   |           |  |           |           |
|---|-----------|--|-----------|-----------|
| 1 | 2.7500000 |  | 2.7500000 | 2.7500000 |
|---|-----------|--|-----------|-----------|

---

Laboratory tests at the time of obtaining Table 2-6 consent, according to the presence or absence of proton-pump inhibitors

Unique Subject Identifier=0009010000-0235

MEANS Procedure

Assay variable : PTINR\_VAL1 PT-INR Value

N Mean Standard Deviation Minimum Maximum

---

|   |           |           |           |           |
|---|-----------|-----------|-----------|-----------|
| 6 | 1.5416667 | 0.1703428 | 1.3300000 | 1.7400000 |
|---|-----------|-----------|-----------|-----------|

---

Unique Subject Identifier=0009010000-0238

Assay variable : PTINR\_VAL1 PT-INR Value

N Mean Standard Deviation Minimum Maximum

---

|   |           |           |           |           |
|---|-----------|-----------|-----------|-----------|
| 3 | 2.2100000 | 0.5456189 | 1.8900000 | 2.8400000 |
|---|-----------|-----------|-----------|-----------|

---

Unique Subject Identifier=0009010000-0244

Assay variable : PTINR\_VAL1 PT-INR Value

N Mean Standard Deviation Minimum Maximum

---

|   |           |           |           |           |
|---|-----------|-----------|-----------|-----------|
| 4 | 2.1200000 | 0.6906519 | 1.5500000 | 3.0400000 |
|---|-----------|-----------|-----------|-----------|

---

Unique Subject Identifier=0009010000-0247

Assay variable : PTINR\_VAL1 PT-INR Value

N Mean Standard Deviation Minimum Maximum

---

|   |           |           |           |           |
|---|-----------|-----------|-----------|-----------|
| 3 | 1.6566667 | 0.3817504 | 1.3700000 | 2.0900000 |
|---|-----------|-----------|-----------|-----------|

---

Laboratory tests at the time of obtaining Table 2-6 consent, according to the presence or absence of proton-pump inhibitors

Unique Subject Identifier=0013011100-0002

MEANS Procedure

Assay variable : PTINR\_VAL1 PT-INR Value

N Mean Standard Deviation Minimum Maximum

---

|   |           |           |           |           |
|---|-----------|-----------|-----------|-----------|
| 5 | 2.1560000 | 0.0944987 | 2.0300000 | 2.2800000 |
|---|-----------|-----------|-----------|-----------|

---

Unique Subject Identifier=0013011100-0008

Assay variable : PTINR\_VAL1 PT-INR Value

N Mean Standard Deviation Minimum Maximum

---

|   |           |           |           |           |
|---|-----------|-----------|-----------|-----------|
| 6 | 1.8916667 | 0.1126795 | 1.7700000 | 2.0700000 |
|---|-----------|-----------|-----------|-----------|

---

Unique Subject Identifier=0013011100-0016

Assay variable : PTINR\_VAL1 PT-INR Value

N Mean Standard Deviation Minimum Maximum

---

|   |           |           |           |           |
|---|-----------|-----------|-----------|-----------|
| 4 | 1.9625000 | 0.1768945 | 1.7600000 | 2.1700000 |
|---|-----------|-----------|-----------|-----------|

---

Unique Subject Identifier=0013011100-0022

Assay variable : PTINR\_VAL1 PT-INR Value

N Mean Standard Deviation Minimum Maximum

---

|   |           |           |           |           |
|---|-----------|-----------|-----------|-----------|
| 3 | 1.4700000 | 0.2351595 | 1.2000000 | 1.6300000 |
|---|-----------|-----------|-----------|-----------|

---

Laboratory tests at the time of obtaining Table 2-6 consent, according to the presence or absence of proton-pump inhibitors

Unique Subject Identifier=0013011100-0027

MEANS Procedure

Assay variable : PTINR\_VAL1 PT-INR Value

N Mean Standard Deviation Minimum Maximum

---

|   |           |           |           |           |
|---|-----------|-----------|-----------|-----------|
| 3 | 2.4366667 | 0.3259346 | 2.1700000 | 2.8000000 |
|---|-----------|-----------|-----------|-----------|

---

Unique Subject Identifier=0014010000-0001

Assay variable : PTINR\_VAL1 PT-INR Value

N Mean Standard Deviation Minimum Maximum

---

|   |           |           |           |           |
|---|-----------|-----------|-----------|-----------|
| 4 | 2.2700000 | 0.2674572 | 2.1100000 | 2.6700000 |
|---|-----------|-----------|-----------|-----------|

---

Unique Subject Identifier=0014010000-0004

Assay variable : PTINR\_VAL1 PT-INR Value

N Mean Standard Deviation Minimum Maximum

---

|   |           |           |           |           |
|---|-----------|-----------|-----------|-----------|
| 6 | 1.5366667 | 0.3691432 | 1.2200000 | 2.2400000 |
|---|-----------|-----------|-----------|-----------|

---

Unique Subject Identifier=0017010000-0001

Assay variable : PTINR\_VAL1 PT-INR Value

N Mean Standard Deviation Minimum Maximum

---

|   |           |           |           |           |
|---|-----------|-----------|-----------|-----------|
| 3 | 1.7100000 | 0.1969772 | 1.5500000 | 1.9300000 |
|---|-----------|-----------|-----------|-----------|

---

Laboratory tests at the time of obtaining Table 2-6 consent, according to the presence or absence of proton-pump inhibitors

Unique Subject Identifier=0017010000-0007

MEANS Procedure

Assay variable : PTINR\_VAL1 PT-INR Value

| N | Mean      | Standard Deviation | Minimum   | Maximum   |
|---|-----------|--------------------|-----------|-----------|
| 2 | 2.1550000 | 0.2192031          | 2.0000000 | 2.3100000 |

Unique Subject Identifier=0017010000-0014

Assay variable : PTINR\_VAL1 PT-INR Value

| N | Mean      | Standard Deviation | Minimum   | Maximum   |
|---|-----------|--------------------|-----------|-----------|
| 6 | 2.1916667 | 0.2579470          | 1.9200000 | 2.5500000 |

Unique Subject Identifier=0017010000-0017

Assay variable : PTINR\_VAL1 PT-INR Value

| N | Mean      | Standard Deviation | Minimum   | Maximum   |
|---|-----------|--------------------|-----------|-----------|
| 3 | 2.1833333 | 0.2482606          | 2.0400000 | 2.4700000 |

Unique Subject Identifier=0017010000-0020



Assay variable : PTINR\_VAL1 PT-INR Value

N Mean Standard Deviation Minimum Maximum

---

|   |          |           |          |          |
|---|----------|-----------|----------|----------|
| 3 | 1.950000 | 0.1228821 | 1.810000 | 2.040000 |
|---|----------|-----------|----------|----------|

---

Laboratory tests at the time of obtaining Table 2-6 consent, according to the presence or absence of proton-pump inhibitors

Unique Subject Identifier=0017010000-0024

MEANS Procedure

Assay variable : PTINR\_VAL1 PT-INR Value

| N | Mean      | Standard Deviation | Minimum   | Maximum   |
|---|-----------|--------------------|-----------|-----------|
| 3 | 2.0533333 | 0.0208167          | 2.0300000 | 2.0700000 |

Unique Subject Identifier=0017010000-0029

Assay variable : PTINR\_VAL1 PT-INR Value

| N | Mean      | Standard Deviation | Minimum   | Maximum   |
|---|-----------|--------------------|-----------|-----------|
| 4 | 2.6250000 | 0.7736709          | 1.8500000 | 3.6000000 |

Unique Subject Identifier=0017010000-0031

Assay variable : PTINR\_VAL1 PT-INR Value

| N | Mean      | Standard Deviation | Minimum   | Maximum   |
|---|-----------|--------------------|-----------|-----------|
| 2 | 2.3350000 | 0.0070711          | 2.3300000 | 2.3400000 |

Unique Subject Identifier=0017010000-0032

Assay variable : PTINR\_VAL1 PT-INR Value

N Mean Standard Deviation Minimum Maximum

---

|   |          |           |          |          |
|---|----------|-----------|----------|----------|
| 2 | 2.010000 | 0.1131371 | 1.930000 | 2.090000 |
|---|----------|-----------|----------|----------|

---

Laboratory tests at the time of obtaining Table 2-6 consent, according to the presence or absence of proton-pump inhibitors

Unique Subject Identifier=0017010000-0035

MEANS Procedure

Assay variable : PTINR\_VAL1 PT-INR Value

| N | Mean      | Standard Deviation | Minimum   | Maximum   |
|---|-----------|--------------------|-----------|-----------|
| 2 | 1.8100000 | 0.5232590          | 1.4400000 | 2.1800000 |

Unique Subject Identifier=0017010000-0039

Assay variable : PTINR\_VAL1 PT-INR Value

| N | Mean      | Standard Deviation | Minimum   | Maximum   |
|---|-----------|--------------------|-----------|-----------|
| 4 | 1.7600000 | 0.1032796          | 1.6400000 | 1.8800000 |

Unique Subject Identifier=0017010000-0040

Assay variable : PTINR\_VAL1 PT-INR Value

| N | Mean      | Standard Deviation | Minimum   | Maximum   |
|---|-----------|--------------------|-----------|-----------|
| 3 | 1.6533333 | 0.2050203          | 1.4500000 | 1.8600000 |

Unique Subject Identifier=0017010000-0042

Assay variable : PTINR\_VAL1 PT-INR Value

N Mean Standard Deviation Minimum Maximum

---

|   |          |           |          |          |
|---|----------|-----------|----------|----------|
| 3 | 2.200000 | 0.0888819 | 2.130000 | 2.300000 |
|---|----------|-----------|----------|----------|

---

Laboratory tests at the time of obtaining Table 2-6 consent, according to the presence or absence of proton-pump inhibitors

Unique Subject Identifier=0017010000-0044

MEANS Procedure

Assay variable : PTINR\_VAL1 PT-INR Value

| N | Mean      | Standard Deviation | Minimum   | Maximum   |
|---|-----------|--------------------|-----------|-----------|
| 5 | 1.9300000 | 0.1246996          | 1.7900000 | 2.1300000 |

Unique Subject Identifier=0017010000-0056

Assay variable : PTINR\_VAL1 PT-INR Value

| N | Mean      | Standard Deviation | Minimum   | Maximum   |
|---|-----------|--------------------|-----------|-----------|
| 3 | 1.9366667 | 0.5896892          | 1.2700000 | 2.3900000 |

Unique Subject Identifier=0017010000-0060

Assay variable : PTINR\_VAL1 PT-INR Value

| N | Mean      | Standard Deviation | Minimum   | Maximum   |
|---|-----------|--------------------|-----------|-----------|
| 3 | 2.2133333 | 0.6601767          | 1.6300000 | 2.9300000 |

Unique Subject Identifier=0017010000-0069

Assay variable : PTINR\_VAL1 PT-INR Value

N Mean Standard Deviation Minimum Maximum

---

|   |           |           |           |           |
|---|-----------|-----------|-----------|-----------|
| 3 | 1.7033333 | 0.2052641 | 1.5300000 | 1.9300000 |
|---|-----------|-----------|-----------|-----------|

---

Laboratory tests at the time of obtaining Table 2-6 consent, according to the presence or absence of proton-pump inhibitors

Unique Subject Identifier=0017010000-0076

MEANS Procedure

Assay variable : PTINR\_VAL1 PT-INR Value

N Mean Standard Deviation Minimum Maximum

---

|   |           |           |           |           |
|---|-----------|-----------|-----------|-----------|
| 3 | 2.5266667 | 0.2640707 | 2.2400000 | 2.7600000 |
|---|-----------|-----------|-----------|-----------|

---

Unique Subject Identifier=0017010000-0084

Assay variable : PTINR\_VAL1 PT-INR Value

N Mean Standard Deviation Minimum Maximum

---

|   |           |           |           |           |
|---|-----------|-----------|-----------|-----------|
| 3 | 1.8366667 | 0.1965536 | 1.6100000 | 1.9600000 |
|---|-----------|-----------|-----------|-----------|

---

Unique Subject Identifier=0019010000-0003

Assay variable : PTINR\_VAL1 PT-INR Value

N Mean Standard Deviation Minimum Maximum

---

|   |           |           |           |           |
|---|-----------|-----------|-----------|-----------|
| 3 | 1.8966667 | 0.4006661 | 1.5100000 | 2.3100000 |
|---|-----------|-----------|-----------|-----------|

---

Unique Subject Identifier=0019010000-0010



Assay variable : PTINR\_VAL1 PT-INR Value

N Mean Standard Deviation Minimum Maximum

---

|   |           |           |           |           |
|---|-----------|-----------|-----------|-----------|
| 2 | 1.8950000 | 0.0777817 | 1.8400000 | 1.9500000 |
|---|-----------|-----------|-----------|-----------|

---

Laboratory tests at the time of obtaining Table 2-6 consent, according to the presence or absence of proton-pump inhibitors

Unique Subject Identifier=0019010000-0012

MEANS Procedure

Assay variable : PTINR\_VAL1 PT-INR Value

N Mean Standard Deviation Minimum Maximum

---

|   |           |           |           |           |
|---|-----------|-----------|-----------|-----------|
| 6 | 1.8150000 | 0.3632492 | 1.3100000 | 2.3500000 |
|---|-----------|-----------|-----------|-----------|

---

Unique Subject Identifier=0019010000-0017

Assay variable : PTINR\_VAL1 PT-INR Value

N Mean Standard Deviation Minimum Maximum

---

|   |           |           |           |           |
|---|-----------|-----------|-----------|-----------|
| 6 | 1.9300000 | 0.4606083 | 1.0600000 | 2.3900000 |
|---|-----------|-----------|-----------|-----------|

---

Unique Subject Identifier=0019010000-0035

Assay variable : PTINR\_VAL1 PT-INR Value

N Mean Standard Deviation Minimum Maximum

---

|   |           |           |           |           |
|---|-----------|-----------|-----------|-----------|
| 3 | 1.9733333 | 0.2138535 | 1.7400000 | 2.1600000 |
|---|-----------|-----------|-----------|-----------|

---

Unique Subject Identifier=0019010000-0038

Assay variable : PTINR\_VAL1 PT-INR Value

N Mean Standard Deviation Minimum Maximum

---

|   |           |           |           |           |
|---|-----------|-----------|-----------|-----------|
| 3 | 1.3966667 | 0.2657693 | 1.1200000 | 1.6500000 |
|---|-----------|-----------|-----------|-----------|

---

Laboratory tests at the time of obtaining Table 2-6 consent, according to the presence or absence of proton-pump inhibitors

Unique Subject Identifier=0019010000-0039

MEANS Procedure

Assay variable : PTINR\_VAL1 PT-INR Value

| N | Mean      | Standard Deviation | Minimum   | Maximum   |
|---|-----------|--------------------|-----------|-----------|
| 2 | 2.0800000 | 0.2121320          | 1.9300000 | 2.2300000 |

Unique Subject Identifier=0019010000-0045

Assay variable : PTINR\_VAL1 PT-INR Value

| N | Mean      | Standard Deviation | Minimum   | Maximum   |
|---|-----------|--------------------|-----------|-----------|
| 4 | 1.8050000 | 0.3639139          | 1.6000000 | 2.3500000 |

Unique Subject Identifier=0019010000-0056

Assay variable : PTINR\_VAL1 PT-INR Value

| N | Mean      | Standard Deviation | Minimum   | Maximum   |
|---|-----------|--------------------|-----------|-----------|
| 4 | 2.4125000 | 0.4027716          | 1.8800000 | 2.7800000 |

Unique Subject Identifier=0019010000-0065

Assay variable : PTINR\_VAL1 PT-INR Value

N Mean Standard Deviation Minimum Maximum

---

|   |          |           |          |          |
|---|----------|-----------|----------|----------|
| 4 | 1.490000 | 0.2083267 | 1.240000 | 1.690000 |
|---|----------|-----------|----------|----------|

---

Laboratory tests at the time of obtaining Table 2-6 consent, according to the presence or absence of proton-pump inhibitors

Unique Subject Identifier=0019010000-0070

MEANS Procedure

Assay variable : PTINR\_VAL1 PT-INR Value

| N | Mean      | Standard Deviation | Minimum   | Maximum   |
|---|-----------|--------------------|-----------|-----------|
| 2 | 2.1300000 | 0.2545584          | 1.9500000 | 2.3100000 |

Unique Subject Identifier=0019010000-0092

Assay variable : PTINR\_VAL1 PT-INR Value

| N | Mean      | Standard Deviation | Minimum   | Maximum   |
|---|-----------|--------------------|-----------|-----------|
| 2 | 2.0850000 | 0.2192031          | 1.9300000 | 2.2400000 |

Unique Subject Identifier=0019010000-0094

Assay variable : PTINR\_VAL1 PT-INR Value

| N | Mean      | Standard Deviation | Minimum   | Maximum   |
|---|-----------|--------------------|-----------|-----------|
| 3 | 1.4366667 | 0.1680278          | 1.2900000 | 1.6200000 |

Unique Subject Identifier=0019010000-0096

Assay variable : PTINR\_VAL1 PT-INR Value

N Mean Standard Deviation Minimum Maximum

---

|   |           |           |           |           |
|---|-----------|-----------|-----------|-----------|
| 2 | 1.8300000 | 0.4101219 | 1.5400000 | 2.1200000 |
|---|-----------|-----------|-----------|-----------|

---

Laboratory tests at the time of obtaining Table 2-6 consent, according to the presence or absence of proton-pump inhibitors

Unique Subject Identifier=0019010000-0098

MEANS Procedure

Assay variable : PTINR\_VAL1 PT-INR Value

N Mean Standard Deviation Minimum Maximum

---

|   |           |           |           |           |
|---|-----------|-----------|-----------|-----------|
| 2 | 2.0450000 | 0.0070711 | 2.0400000 | 2.0500000 |
|---|-----------|-----------|-----------|-----------|

---

Unique Subject Identifier=0019010000-0114

Assay variable : PTINR\_VAL1 PT-INR Value

N Mean Standard Deviation Minimum Maximum

---

|   |           |           |           |           |
|---|-----------|-----------|-----------|-----------|
| 5 | 2.1180000 | 0.2438647 | 1.9400000 | 2.5400000 |
|---|-----------|-----------|-----------|-----------|

---

Unique Subject Identifier=0019010000-0118

Assay variable : PTINR\_VAL1 PT-INR Value

N Mean Standard Deviation Minimum Maximum

---

|   |           |           |           |           |
|---|-----------|-----------|-----------|-----------|
| 3 | 1.8733333 | 0.3617089 | 1.6400000 | 2.2900000 |
|---|-----------|-----------|-----------|-----------|

---

Unique Subject Identifier=0021000000-0008



Assay variable : PTINR\_VAL1 PT-INR Value

N Mean Standard Deviation Minimum Maximum

---

|   |           |           |           |           |
|---|-----------|-----------|-----------|-----------|
| 6 | 1.9783333 | 0.5227013 | 1.6500000 | 3.0300000 |
|---|-----------|-----------|-----------|-----------|

---

Laboratory tests at the time of obtaining Table 2-6 consent, according to the presence or absence of proton-pump inhibitors

Unique Subject Identifier=0024010000-0001

MEANS Procedure

Assay variable : PTINR\_VAL1 PT-INR Value

N Mean Standard Deviation Minimum Maximum

---

|   |           |           |           |           |
|---|-----------|-----------|-----------|-----------|
| 6 | 2.1833333 | 0.1940790 | 1.9000000 | 2.4000000 |
|---|-----------|-----------|-----------|-----------|

---

Unique Subject Identifier=0027000000-0001

Assay variable : PTINR\_VAL1 PT-INR Value

N Mean Standard Deviation Minimum Maximum

---

|   |           |           |           |           |
|---|-----------|-----------|-----------|-----------|
| 4 | 4.1550000 | 1.3986779 | 2.1300000 | 5.1600000 |
|---|-----------|-----------|-----------|-----------|

---

Unique Subject Identifier=0027000000-0012

Assay variable : PTINR\_VAL1 PT-INR Value

N Mean Standard Deviation Minimum Maximum

---

|   |           |           |           |           |
|---|-----------|-----------|-----------|-----------|
| 6 | 1.9250000 | 0.4174087 | 1.2100000 | 2.4200000 |
|---|-----------|-----------|-----------|-----------|

---

Unique Subject Identifier=0027000000-0018

Assay variable : PTINR\_VAL1 PT-INR Value

N Mean Standard Deviation Minimum Maximum

---

|   |           |           |           |           |
|---|-----------|-----------|-----------|-----------|
| 6 | 2.2250000 | 0.6775470 | 1.0600000 | 3.0800000 |
|---|-----------|-----------|-----------|-----------|

---

Laboratory tests at the time of obtaining Table 2-6 consent, according to the presence or absence of proton-pump inhibitors

Unique Subject Identifier=0027000000-0027

MEANS Procedure

Assay variable : PTINR\_VAL1 PT-INR Value

N Mean Standard Deviation Minimum Maximum

---

|   |           |           |           |           |
|---|-----------|-----------|-----------|-----------|
| 2 | 2.9300000 | 0.2262742 | 2.7700000 | 3.0900000 |
|---|-----------|-----------|-----------|-----------|

---

Unique Subject Identifier=0027000000-0028

Assay variable : PTINR\_VAL1 PT-INR Value

N Mean Standard Deviation Minimum Maximum

---

|   |           |           |           |           |
|---|-----------|-----------|-----------|-----------|
| 6 | 2.0700000 | 0.1446375 | 1.9100000 | 2.2700000 |
|---|-----------|-----------|-----------|-----------|

---

Unique Subject Identifier=0027000000-0029

Assay variable : PTINR\_VAL1 PT-INR Value

N Mean Standard Deviation Minimum Maximum

---

|   |           |           |           |           |
|---|-----------|-----------|-----------|-----------|
| 2 | 2.5500000 | 0.2545584 | 2.3700000 | 2.7300000 |
|---|-----------|-----------|-----------|-----------|

---

Unique Subject Identifier=0030010010-0001

Assay variable : PTINR\_VAL1 PT-INR Value

N Mean Standard Deviation Minimum Maximum

---

|   |           |           |           |           |
|---|-----------|-----------|-----------|-----------|
| 3 | 1.7333333 | 0.3326159 | 1.4800000 | 2.1100000 |
|---|-----------|-----------|-----------|-----------|

---

Laboratory tests at the time of obtaining Table 2-6 consent, according to the presence or absence of proton-pump inhibitors

Unique Subject Identifier=0030010010-0005

MEANS Procedure

Assay variable : PTINR\_VAL1 PT-INR Value

N Mean Standard Deviation Minimum Maximum

---

|   |           |           |           |           |
|---|-----------|-----------|-----------|-----------|
| 3 | 2.1000000 | 0.1442221 | 1.9400000 | 2.2200000 |
|---|-----------|-----------|-----------|-----------|

---

Unique Subject Identifier=0030010010-0007

Assay variable : PTINR\_VAL1 PT-INR Value

N Mean Standard Deviation Minimum Maximum

---

|   |           |           |           |           |
|---|-----------|-----------|-----------|-----------|
| 6 | 1.8966667 | 0.4332974 | 1.5100000 | 2.4700000 |
|---|-----------|-----------|-----------|-----------|

---

Unique Subject Identifier=0030010010-0011

Assay variable : PTINR\_VAL1 PT-INR Value

N Mean Standard Deviation Minimum Maximum

---

|   |           |           |           |           |
|---|-----------|-----------|-----------|-----------|
| 3 | 2.4633333 | 0.5852635 | 1.7900000 | 2.8500000 |
|---|-----------|-----------|-----------|-----------|

---

Unique Subject Identifier=0031110001-0005

Assay variable : PTINR\_VAL1 PT-INR Value

N Mean Standard Deviation Minimum Maximum

---

|   |           |           |           |           |
|---|-----------|-----------|-----------|-----------|
| 5 | 2.1180000 | 0.4717203 | 1.7100000 | 2.8900000 |
|---|-----------|-----------|-----------|-----------|

---

Laboratory tests at the time of obtaining Table 2-6 consent, according to the presence or absence of proton-pump inhibitors

Unique Subject Identifier=0031110001-0008

MEANS Procedure

Assay variable : PTINR\_VAL1 PT-INR Value

| N | Mean     | Standard Deviation | Minimum  | Maximum  |
|---|----------|--------------------|----------|----------|
| 2 | 2.340000 | 0.3535534          | 2.090000 | 2.590000 |

Unique Subject Identifier=0031110001-0016

Assay variable : PTINR\_VAL1 PT-INR Value

| N | Mean     | Standard Deviation | Minimum  | Maximum  |
|---|----------|--------------------|----------|----------|
| 3 | 2.076667 | 0.2354428          | 1.850000 | 2.320000 |

Unique Subject Identifier=0031110001-0018

Assay variable : PTINR\_VAL1 PT-INR Value

| N | Mean     | Standard Deviation | Minimum  | Maximum  |
|---|----------|--------------------|----------|----------|
| 5 | 2.064000 | 0.4643598          | 1.360000 | 2.510000 |

Unique Subject Identifier=0031110001-0020



Assay variable : PTINR\_VAL1 PT-INR Value

N Mean Standard Deviation Minimum Maximum

---

|   |           |           |           |           |
|---|-----------|-----------|-----------|-----------|
| 3 | 2.9833333 | 0.1939931 | 2.7600000 | 3.1100000 |
|---|-----------|-----------|-----------|-----------|

---

Laboratory tests at the time of obtaining Table 2-6 consent, according to the presence or absence of proton-pump inhibitors

Unique Subject Identifier=0031110001-0026

MEANS Procedure

Assay variable : PTINR\_VAL1 PT-INR Value

N Mean Standard Deviation Minimum Maximum

---

|   |           |           |           |           |
|---|-----------|-----------|-----------|-----------|
| 4 | 1.6300000 | 0.3492850 | 1.1600000 | 2.0000000 |
|---|-----------|-----------|-----------|-----------|

---

Unique Subject Identifier=0032110000-0004

Assay variable : PTINR\_VAL1 PT-INR Value

N Mean Standard Deviation Minimum Maximum

---

|   |           |           |           |           |
|---|-----------|-----------|-----------|-----------|
| 4 | 1.6025000 | 0.1512999 | 1.4900000 | 1.8200000 |
|---|-----------|-----------|-----------|-----------|

---

Unique Subject Identifier=0032110000-0007

Assay variable : PTINR\_VAL1 PT-INR Value

N Mean Standard Deviation Minimum Maximum

---

|   |           |           |           |           |
|---|-----------|-----------|-----------|-----------|
| 4 | 2.0075000 | 0.2425387 | 1.7700000 | 2.3100000 |
|---|-----------|-----------|-----------|-----------|

---

Unique Subject Identifier=0032110000-0009

Assay variable : PTINR\_VAL1 PT-INR Value

N Mean Standard Deviation Minimum Maximum

---

|   |           |           |           |           |
|---|-----------|-----------|-----------|-----------|
| 6 | 1.5466667 | 0.1057670 | 1.4200000 | 1.6900000 |
|---|-----------|-----------|-----------|-----------|

---

Laboratory tests at the time of obtaining Table 2-6 consent, according to the presence or absence of proton-pump inhibitors

Unique Subject Identifier=0038111111-0002

MEANS Procedure

Assay variable : PTINR\_VAL1 PT-INR Value

N Mean Standard Deviation Minimum Maximum

---

|   |           |           |           |           |
|---|-----------|-----------|-----------|-----------|
| 5 | 1.7800000 | 0.1973575 | 1.5500000 | 1.9800000 |
|---|-----------|-----------|-----------|-----------|

---

Unique Subject Identifier=0038111111-0008

Assay variable : PTINR\_VAL1 PT-INR Value

N Mean Standard Deviation Minimum Maximum

---

|   |           |           |           |           |
|---|-----------|-----------|-----------|-----------|
| 5 | 2.3140000 | 0.2132604 | 1.9600000 | 2.4800000 |
|---|-----------|-----------|-----------|-----------|

---

Unique Subject Identifier=0038111111-0023

Assay variable : PTINR\_VAL1 PT-INR Value

N Mean Standard Deviation Minimum Maximum

---

|   |           |           |           |           |
|---|-----------|-----------|-----------|-----------|
| 5 | 2.2580000 | 0.6187649 | 1.3000000 | 2.8500000 |
|---|-----------|-----------|-----------|-----------|

---

Unique Subject Identifier=0041110000-0002

Assay variable : PTINR\_VAL1 PT-INR Value

N Mean Standard Deviation Minimum Maximum

---

|   |           |           |           |           |
|---|-----------|-----------|-----------|-----------|
| 6 | 1.9350000 | 0.4455895 | 1.5400000 | 2.7500000 |
|---|-----------|-----------|-----------|-----------|

---

Laboratory tests at the time of obtaining Table 2-6 consent, according to the presence or absence of proton-pump inhibitors

Unique Subject Identifier=0041110000-0003

MEANS Procedure

Assay variable : PTINR\_VAL1 PT-INR Value

N Mean Standard Deviation Minimum Maximum

---

|   |           |           |           |           |
|---|-----------|-----------|-----------|-----------|
| 3 | 2.1166667 | 0.0611010 | 2.0500000 | 2.1700000 |
|---|-----------|-----------|-----------|-----------|

---

Unique Subject Identifier=0041110000-0017

Assay variable : PTINR\_VAL1 PT-INR Value

N Mean Standard Deviation Minimum Maximum

---

|   |           |           |           |           |
|---|-----------|-----------|-----------|-----------|
| 2 | 2.2000000 | 0.1838478 | 2.0700000 | 2.3300000 |
|---|-----------|-----------|-----------|-----------|

---

Unique Subject Identifier=0041110000-0018

Assay variable : PTINR\_VAL1 PT-INR Value

N Mean Standard Deviation Minimum Maximum

---

|   |           |           |           |           |
|---|-----------|-----------|-----------|-----------|
| 4 | 1.6275000 | 0.5288588 | 1.1700000 | 2.1800000 |
|---|-----------|-----------|-----------|-----------|

---

Unique Subject Identifier=0041110000-0020

Assay variable : PTINR\_VAL1 PT-INR Value

N Mean Standard Deviation Minimum Maximum

---

|   |           |           |           |           |
|---|-----------|-----------|-----------|-----------|
| 3 | 2.0300000 | 0.5715768 | 1.3700000 | 2.3600000 |
|---|-----------|-----------|-----------|-----------|

---

Laboratory tests at the time of obtaining Table 2-6 consent, according to the presence or absence of proton-pump inhibitors

Unique Subject Identifier=0041110000-0022

MEANS Procedure

Assay variable : PTINR\_VAL1 PT-INR Value

N Mean Standard Deviation Minimum Maximum

---

|   |           |           |           |           |
|---|-----------|-----------|-----------|-----------|
| 4 | 1.6175000 | 0.2218671 | 1.3100000 | 1.7800000 |
|---|-----------|-----------|-----------|-----------|

---

Unique Subject Identifier=0042100010-0001

Assay variable : PTINR\_VAL1 PT-INR Value

N Mean Standard Deviation Minimum Maximum

---

|   |           |           |           |           |
|---|-----------|-----------|-----------|-----------|
| 4 | 2.0150000 | 0.7527948 | 1.3900000 | 3.1000000 |
|---|-----------|-----------|-----------|-----------|

---

Unique Subject Identifier=0042100010-0002

Assay variable : PTINR\_VAL1 PT-INR Value

N Mean Standard Deviation Minimum Maximum

---

|   |           |           |           |           |
|---|-----------|-----------|-----------|-----------|
| 3 | 1.7866667 | 0.3384277 | 1.5000000 | 2.1600000 |
|---|-----------|-----------|-----------|-----------|

---

Unique Subject Identifier=0042100010-0004



Assay variable : PTINR\_VAL1 PT-INR Value

N Mean Standard Deviation Minimum Maximum

---

|   |           |           |           |           |
|---|-----------|-----------|-----------|-----------|
| 5 | 1.9240000 | 0.0756968 | 1.8200000 | 2.0200000 |
|---|-----------|-----------|-----------|-----------|

---

Laboratory tests at the time of obtaining Table 2-6 consent, according to the presence or absence of proton-pump inhibitors

Unique Subject Identifier=0043010010-0005

MEANS Procedure

Assay variable : PTINR\_VAL1 PT-INR Value

N Mean Standard Deviation Minimum Maximum

---

|   |           |           |           |           |
|---|-----------|-----------|-----------|-----------|
| 3 | 1.7700000 | 0.1587451 | 1.6500000 | 1.9500000 |
|---|-----------|-----------|-----------|-----------|

---

Unique Subject Identifier=0043010010-0009

Assay variable : PTINR\_VAL1 PT-INR Value

N Mean Standard Deviation Minimum Maximum

---

|   |           |           |           |           |
|---|-----------|-----------|-----------|-----------|
| 3 | 2.5600000 | 0.1824829 | 2.3500000 | 2.6800000 |
|---|-----------|-----------|-----------|-----------|

---

Unique Subject Identifier=0044110000-0014

Assay variable : PTINR\_VAL1 PT-INR Value

N Mean Standard Deviation Minimum Maximum

---

|   |           |           |           |           |
|---|-----------|-----------|-----------|-----------|
| 3 | 1.6800000 | 0.2605763 | 1.3800000 | 1.8500000 |
|---|-----------|-----------|-----------|-----------|

---

Unique Subject Identifier=0046100001-0015

Assay variable : PTINR\_VAL1 PT-INR Value

N Mean Standard Deviation Minimum Maximum

---

|   |           |           |           |           |
|---|-----------|-----------|-----------|-----------|
| 2 | 1.5500000 | 0.0707107 | 1.5000000 | 1.6000000 |
|---|-----------|-----------|-----------|-----------|

---

Laboratory tests at the time of obtaining Table 2-6 consent, according to the presence or absence of proton-pump inhibitors

Unique Subject Identifier=0046100001-0018

MEANS Procedure

Assay variable : PTINR\_VAL1 PT-INR Value

N Mean Standard Deviation Minimum Maximum

---

|   |           |           |           |           |
|---|-----------|-----------|-----------|-----------|
| 3 | 2.1766667 | 0.5727419 | 1.5300000 | 2.6200000 |
|---|-----------|-----------|-----------|-----------|

---

Unique Subject Identifier=0046100001-0051

Assay variable : PTINR\_VAL1 PT-INR Value

N Mean Standard Deviation Minimum Maximum

---

|   |           |           |           |           |
|---|-----------|-----------|-----------|-----------|
| 2 | 1.6000000 | 0.3111270 | 1.3800000 | 1.8200000 |
|---|-----------|-----------|-----------|-----------|

---

Unique Subject Identifier=0046100001-0065

Assay variable : PTINR\_VAL1 PT-INR Value

N Mean Standard Deviation Minimum Maximum

---

|   |           |  |           |           |
|---|-----------|--|-----------|-----------|
| 1 | 1.9200000 |  | 1.9200000 | 1.9200000 |
|---|-----------|--|-----------|-----------|

---

Unique Subject Identifier=0046100001-0079

Assay variable : PTINR\_VAL1 PT-INR Value

N Mean Standard Deviation Minimum Maximum

---

|   |           |           |           |           |
|---|-----------|-----------|-----------|-----------|
| 5 | 2.0460000 | 0.8770006 | 1.3100000 | 3.4600000 |
|---|-----------|-----------|-----------|-----------|

---

Laboratory tests at the time of obtaining Table 2-6 consent, according to the presence or absence of proton-pump inhibitors

Unique Subject Identifier=0048000010-0002

MEANS Procedure

Assay variable : PTINR\_VAL1 PT-INR Value

N Mean Standard Deviation Minimum Maximum

---

|   |           |           |           |           |
|---|-----------|-----------|-----------|-----------|
| 3 | 2.1433333 | 0.7721615 | 1.2600000 | 2.6900000 |
|---|-----------|-----------|-----------|-----------|

---

Unique Subject Identifier=0048000010-0004

Assay variable : PTINR\_VAL1 PT-INR Value

N Mean Standard Deviation Minimum Maximum

---

|   |           |           |           |           |
|---|-----------|-----------|-----------|-----------|
| 5 | 2.2000000 | 0.0984886 | 2.0300000 | 2.2700000 |
|---|-----------|-----------|-----------|-----------|

---

Unique Subject Identifier=0048000010-0010

Assay variable : PTINR\_VAL1 PT-INR Value

N Mean Standard Deviation Minimum Maximum

---

|   |           |  |           |           |
|---|-----------|--|-----------|-----------|
| 1 | 1.7300000 |  | 1.7300000 | 1.7300000 |
|---|-----------|--|-----------|-----------|

---

Unique Subject Identifier=0049000010-0002

Assay variable : PTINR\_VAL1 PT-INR Value

N Mean Standard Deviation Minimum Maximum

---

|   |           |           |           |           |
|---|-----------|-----------|-----------|-----------|
| 6 | 1.8866667 | 0.2731056 | 1.5600000 | 2.3300000 |
|---|-----------|-----------|-----------|-----------|

---

Laboratory tests at the time of obtaining Table 2-6 consent, according to the presence or absence of proton-pump inhibitors

Unique Subject Identifier=0049000010-0004

MEANS Procedure

Assay variable : PTINR\_VAL1 PT-INR Value

N Mean Standard Deviation Minimum Maximum

---

|   |           |           |           |           |
|---|-----------|-----------|-----------|-----------|
| 6 | 1.9850000 | 0.1707337 | 1.7600000 | 2.1700000 |
|---|-----------|-----------|-----------|-----------|

---

Unique Subject Identifier=0049000010-0029

Assay variable : PTINR\_VAL1 PT-INR Value

N Mean Standard Deviation Minimum Maximum

---

|   |           |           |           |           |
|---|-----------|-----------|-----------|-----------|
| 6 | 1.9883333 | 0.2657380 | 1.6800000 | 2.2900000 |
|---|-----------|-----------|-----------|-----------|

---

Unique Subject Identifier=0049000010-0031

Assay variable : PTINR\_VAL1 PT-INR Value

N Mean Standard Deviation Minimum Maximum

---

|   |           |           |           |           |
|---|-----------|-----------|-----------|-----------|
| 6 | 1.9050000 | 0.2059854 | 1.5900000 | 2.1400000 |
|---|-----------|-----------|-----------|-----------|

---

Unique Subject Identifier=0049000010-0036



Assay variable : PTINR\_VAL1 PT-INR Value

N Mean Standard Deviation Minimum Maximum

---

|   |           |           |           |           |
|---|-----------|-----------|-----------|-----------|
| 6 | 2.2200000 | 0.4799167 | 1.7700000 | 3.0900000 |
|---|-----------|-----------|-----------|-----------|

---

Laboratory tests at the time of obtaining Table 2-6 consent, according to the presence or absence of proton-pump inhibitors

Unique Subject Identifier=0049000010-0037

MEANS Procedure

Assay variable : PTINR\_VAL1 PT-INR Value

N Mean Standard Deviation Minimum Maximum

---

|   |           |           |           |           |
|---|-----------|-----------|-----------|-----------|
| 6 | 2.5400000 | 0.3212476 | 2.1400000 | 2.9400000 |
|---|-----------|-----------|-----------|-----------|

---

Unique Subject Identifier=0052000000-0001

Assay variable : PTINR\_VAL1 PT-INR Value

N Mean Standard Deviation Minimum Maximum

---

|   |           |           |           |           |
|---|-----------|-----------|-----------|-----------|
| 5 | 2.0080000 | 0.6680344 | 1.0900000 | 2.6800000 |
|---|-----------|-----------|-----------|-----------|

---

Unique Subject Identifier=0052000000-0003

Assay variable : PTINR\_VAL1 PT-INR Value

N Mean Standard Deviation Minimum Maximum

---

|   |           |           |           |           |
|---|-----------|-----------|-----------|-----------|
| 6 | 1.7916667 | 0.1185608 | 1.6900000 | 2.0000000 |
|---|-----------|-----------|-----------|-----------|

---

Unique Subject Identifier=0052000000-0004

Assay variable : PTINR\_VAL1 PT-INR Value

N Mean Standard Deviation Minimum Maximum

---

|   |           |           |           |           |
|---|-----------|-----------|-----------|-----------|
| 6 | 1.9250000 | 0.1330789 | 1.6900000 | 2.0600000 |
|---|-----------|-----------|-----------|-----------|

---

Laboratory tests at the time of obtaining Table 2-6 consent, according to the presence or absence of proton-pump inhibitors

Unique Subject Identifier=0054010000-0004

MEANS Procedure

Assay variable : PTINR\_VAL1 PT-INR Value

| N | Mean      | Standard Deviation | Minimum   | Maximum   |
|---|-----------|--------------------|-----------|-----------|
| 3 | 2.4300000 | 0.6701492          | 1.8900000 | 3.1800000 |

Unique Subject Identifier=0054010000-0005

Assay variable : PTINR\_VAL1 PT-INR Value

| N | Mean      | Standard Deviation | Minimum   | Maximum   |
|---|-----------|--------------------|-----------|-----------|
| 5 | 2.2800000 | 0.1093161          | 2.1800000 | 2.4300000 |

Unique Subject Identifier=0054010000-0007

Assay variable : PTINR\_VAL1 PT-INR Value

| N | Mean      | Standard Deviation | Minimum   | Maximum   |
|---|-----------|--------------------|-----------|-----------|
| 3 | 2.1000000 | 0.1931321          | 1.9300000 | 2.3100000 |

Unique Subject Identifier=0054010000-0017

Assay variable : PTINR\_VAL1 PT-INR Value

N Mean Standard Deviation Minimum Maximum

---

|   |           |           |           |           |
|---|-----------|-----------|-----------|-----------|
| 4 | 1.8950000 | 0.3164912 | 1.6100000 | 2.3400000 |
|---|-----------|-----------|-----------|-----------|

---

Laboratory tests at the time of obtaining Table 2-6 consent, according to the presence or absence of proton-pump inhibitors

Unique Subject Identifier=0054010000-0022

MEANS Procedure

Assay variable : PTINR\_VAL1 PT-INR Value

N Mean Standard Deviation Minimum Maximum

---

|   |           |           |           |           |
|---|-----------|-----------|-----------|-----------|
| 6 | 1.3066667 | 0.1929421 | 1.1300000 | 1.6700000 |
|---|-----------|-----------|-----------|-----------|

---

Unique Subject Identifier=0054010000-0026

Assay variable : PTINR\_VAL1 PT-INR Value

N Mean Standard Deviation Minimum Maximum

---

|   |           |           |           |           |
|---|-----------|-----------|-----------|-----------|
| 3 | 1.6966667 | 0.3189566 | 1.4300000 | 2.0500000 |
|---|-----------|-----------|-----------|-----------|

---

Unique Subject Identifier=0054010000-0028

Assay variable : PTINR\_VAL1 PT-INR Value

N Mean Standard Deviation Minimum Maximum

---

|   |           |           |           |           |
|---|-----------|-----------|-----------|-----------|
| 5 | 2.3900000 | 0.2317326 | 2.0800000 | 2.7100000 |
|---|-----------|-----------|-----------|-----------|

---

Unique Subject Identifier=0054010000-0029

Assay variable : PTINR\_VAL1 PT-INR Value

N Mean Standard Deviation Minimum Maximum

---

|   |          |           |          |          |
|---|----------|-----------|----------|----------|
| 3 | 2.420000 | 0.2351595 | 2.260000 | 2.690000 |
|---|----------|-----------|----------|----------|

---

Laboratory tests at the time of obtaining Table 2-6 consent, according to the presence or absence of proton-pump inhibitors

Unique Subject Identifier=0054010000-0033

MEANS Procedure

Assay variable : PTINR\_VAL1 PT-INR Value

N Mean Standard Deviation Minimum Maximum

---

|   |           |           |           |           |
|---|-----------|-----------|-----------|-----------|
| 3 | 2.5566667 | 0.1266228 | 2.4600000 | 2.7000000 |
|---|-----------|-----------|-----------|-----------|

---

Unique Subject Identifier=0058000100-0007

Assay variable : PTINR\_VAL1 PT-INR Value

N Mean Standard Deviation Minimum Maximum

---

|   |           |           |           |           |
|---|-----------|-----------|-----------|-----------|
| 2 | 1.6900000 | 0.8343860 | 1.1000000 | 2.2800000 |
|---|-----------|-----------|-----------|-----------|

---

Unique Subject Identifier=0059100000-0001

Assay variable : PTINR\_VAL1 PT-INR Value

N Mean Standard Deviation Minimum Maximum

---

|   |           |           |           |           |
|---|-----------|-----------|-----------|-----------|
| 3 | 1.6000000 | 0.0953939 | 1.5000000 | 1.6900000 |
|---|-----------|-----------|-----------|-----------|

---

Unique Subject Identifier=0059100000-0002



Assay variable : PTINR\_VAL1 PT-INR Value

N Mean Standard Deviation Minimum Maximum

---

|   |           |           |           |           |
|---|-----------|-----------|-----------|-----------|
| 5 | 1.5640000 | 0.1342758 | 1.3600000 | 1.7300000 |
|---|-----------|-----------|-----------|-----------|

---

Laboratory tests at the time of obtaining Table 2-6 consent, according to the presence or absence of proton-pump inhibitors

Unique Subject Identifier=0061000000-0001

MEANS Procedure

Assay variable : PTINR\_VAL1 PT-INR Value

N Mean Standard Deviation Minimum Maximum

---

|   |           |           |           |           |
|---|-----------|-----------|-----------|-----------|
| 3 | 1.9800000 | 0.2170253 | 1.8400000 | 2.2300000 |
|---|-----------|-----------|-----------|-----------|

---

Unique Subject Identifier=0061000000-0006

Assay variable : PTINR\_VAL1 PT-INR Value

N Mean Standard Deviation Minimum Maximum

---

|   |           |           |           |           |
|---|-----------|-----------|-----------|-----------|
| 2 | 2.2100000 | 0.2828427 | 2.0100000 | 2.4100000 |
|---|-----------|-----------|-----------|-----------|

---

Unique Subject Identifier=0061000000-0010

Assay variable : PTINR\_VAL1 PT-INR Value

N Mean Standard Deviation Minimum Maximum

---

|   |           |           |           |           |
|---|-----------|-----------|-----------|-----------|
| 4 | 2.0625000 | 0.4855495 | 1.6000000 | 2.7400000 |
|---|-----------|-----------|-----------|-----------|

---

Unique Subject Identifier=0061000000-0021

Assay variable : PTINR\_VAL1 PT-INR Value

N Mean Standard Deviation Minimum Maximum

---

|   |           |           |           |           |
|---|-----------|-----------|-----------|-----------|
| 6 | 1.9633333 | 0.6763333 | 1.2700000 | 3.1700000 |
|---|-----------|-----------|-----------|-----------|

---

Laboratory tests at the time of obtaining Table 2-6 consent, according to the presence or absence of proton-pump inhibitors

Unique Subject Identifier=0063010000-0012

MEANS Procedure

Assay variable : PTINR\_VAL1 PT-INR Value

| N | Mean      | Standard Deviation | Minimum   | Maximum   |
|---|-----------|--------------------|-----------|-----------|
| 3 | 1.6033333 | 0.0757188          | 1.5500000 | 1.6900000 |

Unique Subject Identifier=0063010000-0013

Assay variable : PTINR\_VAL1 PT-INR Value

| N | Mean      | Standard Deviation | Minimum   | Maximum   |
|---|-----------|--------------------|-----------|-----------|
| 1 | 2.7000000 |                    | 2.7000000 | 2.7000000 |

Unique Subject Identifier=0063010000-0015

Assay variable : PTINR\_VAL1 PT-INR Value

| N | Mean      | Standard Deviation | Minimum   | Maximum   |
|---|-----------|--------------------|-----------|-----------|
| 2 | 1.5100000 | 0.0707107          | 1.4600000 | 1.5600000 |

Unique Subject Identifier=0063010000-0016

Assay variable : PTINR\_VAL1 PT-INR Value

N Mean Standard Deviation Minimum Maximum

---

|   |           |           |           |           |
|---|-----------|-----------|-----------|-----------|
| 3 | 1.5333333 | 0.1761628 | 1.3700000 | 1.7200000 |
|---|-----------|-----------|-----------|-----------|

---

Laboratory tests at the time of obtaining Table 2-6 consent, according to the presence or absence of proton-pump inhibitors

Unique Subject Identifier=0063010000-0018

MEANS Procedure

Assay variable : PTINR\_VAL1 PT-INR Value

N Mean Standard Deviation Minimum Maximum

---

|   |           |           |           |           |
|---|-----------|-----------|-----------|-----------|
| 4 | 1.9150000 | 0.4522905 | 1.5300000 | 2.5700000 |
|---|-----------|-----------|-----------|-----------|

---

Unique Subject Identifier=0063010000-0024

Assay variable : PTINR\_VAL1 PT-INR Value

N Mean Standard Deviation Minimum Maximum

---

|   |           |           |           |           |
|---|-----------|-----------|-----------|-----------|
| 6 | 2.0466667 | 0.4078071 | 1.6100000 | 2.6000000 |
|---|-----------|-----------|-----------|-----------|

---

Unique Subject Identifier=0063010000-0030

Assay variable : PTINR\_VAL1 PT-INR Value

N Mean Standard Deviation Minimum Maximum

---

|   |           |           |           |           |
|---|-----------|-----------|-----------|-----------|
| 3 | 1.9133333 | 0.2902298 | 1.6300000 | 2.2100000 |
|---|-----------|-----------|-----------|-----------|

---

Unique Subject Identifier=0063010000-0033

Assay variable : PTINR\_VAL1 PT-INR Value

N Mean Standard Deviation Minimum Maximum

---

|   |           |           |           |           |
|---|-----------|-----------|-----------|-----------|
| 3 | 1.7900000 | 0.3328663 | 1.5500000 | 2.1700000 |
|---|-----------|-----------|-----------|-----------|

---

Laboratory tests at the time of obtaining Table 2-6 consent, according to the presence or absence of proton-pump inhibitors

Unique Subject Identifier=0063010000-0036

MEANS Procedure

Assay variable : PTINR\_VAL1 PT-INR Value

N Mean Standard Deviation Minimum Maximum

---

|   |           |           |           |           |
|---|-----------|-----------|-----------|-----------|
| 3 | 2.0900000 | 0.1509967 | 1.9300000 | 2.2300000 |
|---|-----------|-----------|-----------|-----------|

---

Unique Subject Identifier=0064010110-0003

Assay variable : PTINR\_VAL1 PT-INR Value

N Mean Standard Deviation Minimum Maximum

---

|   |           |           |           |           |
|---|-----------|-----------|-----------|-----------|
| 6 | 2.4583333 | 0.1922932 | 2.2600000 | 2.7800000 |
|---|-----------|-----------|-----------|-----------|

---

Unique Subject Identifier=0064010110-0012

Assay variable : PTINR\_VAL1 PT-INR Value

N Mean Standard Deviation Minimum Maximum

---

|   |           |           |           |           |
|---|-----------|-----------|-----------|-----------|
| 3 | 1.5666667 | 0.3768731 | 1.1700000 | 1.9200000 |
|---|-----------|-----------|-----------|-----------|

---

Unique Subject Identifier=0064010110-0014



Assay variable : PTINR\_VAL1 PT-INR Value

N Mean Standard Deviation Minimum Maximum

---

|   |           |           |           |           |
|---|-----------|-----------|-----------|-----------|
| 6 | 1.8866667 | 0.1789600 | 1.7200000 | 2.1100000 |
|---|-----------|-----------|-----------|-----------|

---

Laboratory tests at the time of obtaining Table 2-6 consent, according to the presence or absence of proton-pump inhibitors

Unique Subject Identifier=0064010110-0015

MEANS Procedure

Assay variable : PTINR\_VAL1 PT-INR Value

N Mean Standard Deviation Minimum Maximum

---

|   |           |           |           |           |
|---|-----------|-----------|-----------|-----------|
| 5 | 1.6900000 | 0.3061862 | 1.4100000 | 2.1700000 |
|---|-----------|-----------|-----------|-----------|

---

Unique Subject Identifier=0070000000-0003

Assay variable : PTINR\_VAL1 PT-INR Value

N Mean Standard Deviation Minimum Maximum

---

|   |           |           |           |           |
|---|-----------|-----------|-----------|-----------|
| 6 | 2.0000000 | 0.3207491 | 1.7300000 | 2.4700000 |
|---|-----------|-----------|-----------|-----------|

---

Unique Subject Identifier=0070000000-0005

Assay variable : PTINR\_VAL1 PT-INR Value

N Mean Standard Deviation Minimum Maximum

---

|   |           |           |           |           |
|---|-----------|-----------|-----------|-----------|
| 3 | 1.8533333 | 0.4343194 | 1.4800000 | 2.3300000 |
|---|-----------|-----------|-----------|-----------|

---

Unique Subject Identifier=0070000000-0008

Assay variable : PTINR\_VAL1 PT-INR Value

N Mean Standard Deviation Minimum Maximum

---

|   |           |           |           |           |
|---|-----------|-----------|-----------|-----------|
| 4 | 2.2175000 | 0.1260622 | 2.0600000 | 2.3600000 |
|---|-----------|-----------|-----------|-----------|

---

Laboratory tests at the time of obtaining Table 2-6 consent, according to the presence or absence of proton-pump inhibitors

Unique Subject Identifier=0070000000-0009

MEANS Procedure

Assay variable : PTINR\_VAL1 PT-INR Value

| N | Mean      | Standard Deviation | Minimum   | Maximum   |
|---|-----------|--------------------|-----------|-----------|
| 5 | 2.0500000 | 0.6826419          | 1.4600000 | 3.0000000 |

Unique Subject Identifier=0070000000-0016

Assay variable : PTINR\_VAL1 PT-INR Value

| N | Mean      | Standard Deviation | Minimum   | Maximum   |
|---|-----------|--------------------|-----------|-----------|
| 5 | 2.7660000 | 0.8777984          | 1.9700000 | 4.2300000 |

Unique Subject Identifier=0070000000-0018

Assay variable : PTINR\_VAL1 PT-INR Value

| N | Mean      | Standard Deviation | Minimum   | Maximum   |
|---|-----------|--------------------|-----------|-----------|
| 5 | 1.5540000 | 0.3332867          | 1.0600000 | 1.8600000 |

Unique Subject Identifier=0070000000-0022

Assay variable : PTINR\_VAL1 PT-INR Value

N Mean Standard Deviation Minimum Maximum

---

|   |           |           |           |           |
|---|-----------|-----------|-----------|-----------|
| 4 | 2.1075000 | 0.3629853 | 1.7900000 | 2.5300000 |
|---|-----------|-----------|-----------|-----------|

---

Laboratory tests at the time of obtaining Table 2-6 consent, according to the presence or absence of proton-pump inhibitors

Unique Subject Identifier=0070000000-0030

MEANS Procedure

Assay variable : PTINR\_VAL1 PT-INR Value

N Mean Standard Deviation Minimum Maximum

---

|   |           |           |           |           |
|---|-----------|-----------|-----------|-----------|
| 3 | 1.9400000 | 0.3465545 | 1.7300000 | 2.3400000 |
|---|-----------|-----------|-----------|-----------|

---

Unique Subject Identifier=0070000000-0032

Assay variable : PTINR\_VAL1 PT-INR Value

N Mean Standard Deviation Minimum Maximum

---

|   |           |           |           |           |
|---|-----------|-----------|-----------|-----------|
| 3 | 2.1766667 | 0.1250333 | 2.0900000 | 2.3200000 |
|---|-----------|-----------|-----------|-----------|

---

Unique Subject Identifier=0070000000-0035

Assay variable : PTINR\_VAL1 PT-INR Value

N Mean Standard Deviation Minimum Maximum

---

|   |           |           |           |           |
|---|-----------|-----------|-----------|-----------|
| 3 | 1.6000000 | 0.1000000 | 1.5000000 | 1.7000000 |
|---|-----------|-----------|-----------|-----------|

---

Unique Subject Identifier=0070000000-0039

Assay variable : PTINR\_VAL1 PT-INR Value

N Mean Standard Deviation Minimum Maximum

---

|   |          |           |          |          |
|---|----------|-----------|----------|----------|
| 4 | 1.550000 | 0.4002499 | 1.130000 | 2.070000 |
|---|----------|-----------|----------|----------|

---

Laboratory tests at the time of obtaining Table 2-6 consent, according to the presence or absence of proton-pump inhibitors

Unique Subject Identifier=0070000000-0041

MEANS Procedure

Assay variable : PTINR\_VAL1 PT-INR Value

N Mean Standard Deviation Minimum Maximum

---

|   |          |           |          |          |
|---|----------|-----------|----------|----------|
| 4 | 2.180000 | 0.2409703 | 1.820000 | 2.330000 |
|---|----------|-----------|----------|----------|

---

Unique Subject Identifier=0070000000-0046

Assay variable : PTINR\_VAL1 PT-INR Value

N Mean Standard Deviation Minimum Maximum

---

|   |           |           |          |          |
|---|-----------|-----------|----------|----------|
| 3 | 2.0866667 | 0.1504438 | 1.930000 | 2.230000 |
|---|-----------|-----------|----------|----------|

---

Unique Subject Identifier=0070000000-0048

Assay variable : PTINR\_VAL1 PT-INR Value

N Mean Standard Deviation Minimum Maximum

---

|   |          |           |          |          |
|---|----------|-----------|----------|----------|
| 4 | 1.815000 | 0.1554563 | 1.680000 | 2.020000 |
|---|----------|-----------|----------|----------|

---

Unique Subject Identifier=0070000000-0049



Assay variable : PTINR\_VAL1 PT-INR Value

N Mean Standard Deviation Minimum Maximum

---

|   |           |           |           |           |
|---|-----------|-----------|-----------|-----------|
| 5 | 2.0280000 | 0.4447134 | 1.5700000 | 2.6600000 |
|---|-----------|-----------|-----------|-----------|

---

Laboratory tests at the time of obtaining Table 2-6 consent, according to the presence or absence of proton-pump inhibitors

Unique Subject Identifier=0070000000-0053

MEANS Procedure

Assay variable : PTINR\_VAL1 PT-INR Value

N Mean Standard Deviation Minimum Maximum

---

|   |           |           |           |           |
|---|-----------|-----------|-----------|-----------|
| 3 | 1.7166667 | 0.1001665 | 1.6400000 | 1.8300000 |
|---|-----------|-----------|-----------|-----------|

---

Unique Subject Identifier=0070000000-0056

Assay variable : PTINR\_VAL1 PT-INR Value

N Mean Standard Deviation Minimum Maximum

---

|   |           |           |           |           |
|---|-----------|-----------|-----------|-----------|
| 3 | 2.4266667 | 0.7861510 | 1.5900000 | 3.1500000 |
|---|-----------|-----------|-----------|-----------|

---

Unique Subject Identifier=0070000000-0061

Assay variable : PTINR\_VAL1 PT-INR Value

N Mean Standard Deviation Minimum Maximum

---

|   |           |           |           |           |
|---|-----------|-----------|-----------|-----------|
| 5 | 1.8480000 | 0.3226763 | 1.3500000 | 2.2100000 |
|---|-----------|-----------|-----------|-----------|

---

Unique Subject Identifier=0070000000-0063

Assay variable : PTINR\_VAL1 PT-INR Value

N Mean Standard Deviation Minimum Maximum

---

|   |           |           |           |           |
|---|-----------|-----------|-----------|-----------|
| 3 | 1.5533333 | 0.0838650 | 1.5000000 | 1.6500000 |
|---|-----------|-----------|-----------|-----------|

---

Laboratory tests at the time of obtaining Table 2-6 consent, according to the presence or absence of proton-pump inhibitors

Unique Subject Identifier=0070000000-0064

MEANS Procedure

Assay variable : PTINR\_VAL1 PT-INR Value

N Mean Standard Deviation Minimum Maximum

---

|   |           |           |           |           |
|---|-----------|-----------|-----------|-----------|
| 3 | 2.1933333 | 0.3875994 | 1.8900000 | 2.6300000 |
|---|-----------|-----------|-----------|-----------|

---

Unique Subject Identifier=0070000000-0066

Assay variable : PTINR\_VAL1 PT-INR Value

N Mean Standard Deviation Minimum Maximum

---

|   |           |           |           |           |
|---|-----------|-----------|-----------|-----------|
| 3 | 1.8166667 | 0.1484363 | 1.6900000 | 1.9800000 |
|---|-----------|-----------|-----------|-----------|

---

Unique Subject Identifier=0070000000-0070

Assay variable : PTINR\_VAL1 PT-INR Value

N Mean Standard Deviation Minimum Maximum

---

|   |           |           |           |           |
|---|-----------|-----------|-----------|-----------|
| 4 | 2.2600000 | 0.6172520 | 1.6200000 | 3.0400000 |
|---|-----------|-----------|-----------|-----------|

---

Unique Subject Identifier=0070000000-0071

Assay variable : PTINR\_VAL1 PT-INR Value

N Mean Standard Deviation Minimum Maximum

---

|   |           |           |           |           |
|---|-----------|-----------|-----------|-----------|
| 3 | 1.9133333 | 0.2454248 | 1.6600000 | 2.1500000 |
|---|-----------|-----------|-----------|-----------|

---

Laboratory tests at the time of obtaining Table 2-6 consent, according to the presence or absence of proton-pump inhibitors

Unique Subject Identifier=0070000000-0073

MEANS Procedure

Assay variable : PTINR\_VAL1 PT-INR Value

| N | Mean      | Standard Deviation | Minimum   | Maximum   |
|---|-----------|--------------------|-----------|-----------|
| 5 | 1.8960000 | 0.4698191          | 1.4000000 | 2.4600000 |

Unique Subject Identifier=0070000000-0074

Assay variable : PTINR\_VAL1 PT-INR Value

| N | Mean      | Standard Deviation | Minimum   | Maximum   |
|---|-----------|--------------------|-----------|-----------|
| 4 | 1.7525000 | 0.0991211          | 1.6100000 | 1.8200000 |

Unique Subject Identifier=0071000000-0001

Assay variable : PTINR\_VAL1 PT-INR Value

| N | Mean      | Standard Deviation | Minimum   | Maximum   |
|---|-----------|--------------------|-----------|-----------|
| 4 | 1.6275000 | 0.1065755          | 1.4900000 | 1.7300000 |

Unique Subject Identifier=0071000000-0003

Assay variable : PTINR\_VAL1 PT-INR Value

N Mean Standard Deviation Minimum Maximum

---

|   |           |           |           |           |
|---|-----------|-----------|-----------|-----------|
| 4 | 2.5250000 | 0.7388505 | 1.9500000 | 3.5600000 |
|---|-----------|-----------|-----------|-----------|

---

Laboratory tests at the time of obtaining Table 2-6 consent, according to the presence or absence of proton-pump inhibitors

Unique Subject Identifier=0071000000-0004

MEANS Procedure

Assay variable : PTINR\_VAL1 PT-INR Value

N Mean Standard Deviation Minimum Maximum

---

|   |           |           |           |           |
|---|-----------|-----------|-----------|-----------|
| 4 | 2.1550000 | 0.2315887 | 1.9500000 | 2.4800000 |
|---|-----------|-----------|-----------|-----------|

---

Unique Subject Identifier=0071000000-0006

Assay variable : PTINR\_VAL1 PT-INR Value

N Mean Standard Deviation Minimum Maximum

---

|   |           |           |           |           |
|---|-----------|-----------|-----------|-----------|
| 3 | 1.8133333 | 0.4452340 | 1.3600000 | 2.2500000 |
|---|-----------|-----------|-----------|-----------|

---

Unique Subject Identifier=0071000000-0007

Assay variable : PTINR\_VAL1 PT-INR Value

N Mean Standard Deviation Minimum Maximum

---

|   |           |           |           |           |
|---|-----------|-----------|-----------|-----------|
| 6 | 1.8166667 | 0.3808762 | 1.4000000 | 2.3400000 |
|---|-----------|-----------|-----------|-----------|

---

Unique Subject Identifier=0071000000-0009



Assay variable : PTINR\_VAL1 PT-INR Value

N Mean Standard Deviation Minimum Maximum

---

|   |           |           |           |           |
|---|-----------|-----------|-----------|-----------|
| 4 | 1.7650000 | 0.1239624 | 1.6100000 | 1.8700000 |
|---|-----------|-----------|-----------|-----------|

---

Laboratory tests at the time of obtaining Table 2-6 consent, according to the presence or absence of proton-pump inhibitors

Unique Subject Identifier=0071000000-0013

MEANS Procedure

Assay variable : PTINR\_VAL1 PT-INR Value

N Mean Standard Deviation Minimum Maximum

---

|   |           |           |           |           |
|---|-----------|-----------|-----------|-----------|
| 4 | 2.0150000 | 0.1584298 | 1.9200000 | 2.2500000 |
|---|-----------|-----------|-----------|-----------|

---

Unique Subject Identifier=0071000000-0015

Assay variable : PTINR\_VAL1 PT-INR Value

N Mean Standard Deviation Minimum Maximum

---

|   |           |           |           |           |
|---|-----------|-----------|-----------|-----------|
| 4 | 1.8825000 | 0.1547848 | 1.7500000 | 2.0900000 |
|---|-----------|-----------|-----------|-----------|

---

Unique Subject Identifier=0071000000-0018

Assay variable : PTINR\_VAL1 PT-INR Value

N Mean Standard Deviation Minimum Maximum

---

|   |           |           |           |           |
|---|-----------|-----------|-----------|-----------|
| 3 | 1.8100000 | 0.2343075 | 1.6600000 | 2.0800000 |
|---|-----------|-----------|-----------|-----------|

---

Unique Subject Identifier=0071000000-0021

Assay variable : PTINR\_VAL1 PT-INR Value

N Mean Standard Deviation Minimum Maximum

---

|   |           |           |           |           |
|---|-----------|-----------|-----------|-----------|
| 5 | 1.9080000 | 0.2037646 | 1.7200000 | 2.1900000 |
|---|-----------|-----------|-----------|-----------|

---

Laboratory tests at the time of obtaining Table 2-6 consent, according to the presence or absence of proton-pump inhibitors

Unique Subject Identifier=0071000000-0022

MEANS Procedure

Assay variable : PTINR\_VAL1 PT-INR Value

| N | Mean      | Standard Deviation | Minimum   | Maximum   |
|---|-----------|--------------------|-----------|-----------|
| 5 | 1.9380000 | 0.1781011          | 1.7000000 | 2.2000000 |

Unique Subject Identifier=0071000000-0025

Assay variable : PTINR\_VAL1 PT-INR Value

| N | Mean      | Standard Deviation | Minimum   | Maximum   |
|---|-----------|--------------------|-----------|-----------|
| 3 | 1.4066667 | 0.2466441          | 1.2400000 | 1.6900000 |

Unique Subject Identifier=0071000000-0028

Assay variable : PTINR\_VAL1 PT-INR Value

| N | Mean      | Standard Deviation | Minimum   | Maximum   |
|---|-----------|--------------------|-----------|-----------|
| 3 | 2.1533333 | 0.6351640          | 1.4200000 | 2.5300000 |

Unique Subject Identifier=0071000000-0030

Assay variable : PTINR\_VAL1 PT-INR Value

N Mean Standard Deviation Minimum Maximum

---

|   |           |           |           |           |
|---|-----------|-----------|-----------|-----------|
| 3 | 2.5500000 | 0.3465545 | 2.3400000 | 2.9500000 |
|---|-----------|-----------|-----------|-----------|

---

Laboratory tests at the time of obtaining Table 2-6 consent, according to the presence or absence of proton-pump inhibitors

Unique Subject Identifier=0072000000-0006

MEANS Procedure

Assay variable : PTINR\_VAL1 PT-INR Value

N Mean Standard Deviation Minimum Maximum

---

|   |           |           |           |           |
|---|-----------|-----------|-----------|-----------|
| 5 | 2.2060000 | 0.1829754 | 2.0400000 | 2.5200000 |
|---|-----------|-----------|-----------|-----------|

---

Unique Subject Identifier=0072000000-0010

Assay variable : PTINR\_VAL1 PT-INR Value

N Mean Standard Deviation Minimum Maximum

---

|   |           |           |           |           |
|---|-----------|-----------|-----------|-----------|
| 6 | 2.3000000 | 0.4325737 | 1.6100000 | 2.7300000 |
|---|-----------|-----------|-----------|-----------|

---

Unique Subject Identifier=0073000000-0003

Assay variable : PTINR\_VAL1 PT-INR Value

N Mean Standard Deviation Minimum Maximum

---

|   |           |           |           |           |
|---|-----------|-----------|-----------|-----------|
| 5 | 1.8840000 | 0.3686190 | 1.3200000 | 2.3000000 |
|---|-----------|-----------|-----------|-----------|

---

Unique Subject Identifier=0073000000-0022

Assay variable : PTINR\_VAL1 PT-INR Value

N Mean Standard Deviation Minimum Maximum

---

|   |           |           |           |           |
|---|-----------|-----------|-----------|-----------|
| 6 | 1.4116667 | 0.5947577 | 1.0300000 | 2.5800000 |
|---|-----------|-----------|-----------|-----------|

---

Laboratory tests at the time of obtaining Table 2-6 consent, according to the presence or absence of proton-pump inhibitors

Unique Subject Identifier=0073000000-0035

MEANS Procedure

Assay variable : PTINR\_VAL1 PT-INR Value

N Mean Standard Deviation Minimum Maximum

---

|   |           |           |           |           |
|---|-----------|-----------|-----------|-----------|
| 3 | 2.1766667 | 0.1150362 | 2.0600000 | 2.2900000 |
|---|-----------|-----------|-----------|-----------|

---

Unique Subject Identifier=0076011000-0003

Assay variable : PTINR\_VAL1 PT-INR Value

N Mean Standard Deviation Minimum Maximum

---

|   |           |  |           |           |
|---|-----------|--|-----------|-----------|
| 1 | 1.5300000 |  | 1.5300000 | 1.5300000 |
|---|-----------|--|-----------|-----------|

---

Unique Subject Identifier=0076011000-0004

Assay variable : PTINR\_VAL1 PT-INR Value

N Mean Standard Deviation Minimum Maximum

---

|   |           |  |           |           |
|---|-----------|--|-----------|-----------|
| 1 | 1.6900000 |  | 1.6900000 | 1.6900000 |
|---|-----------|--|-----------|-----------|

---

Unique Subject Identifier=0076011000-0008



Assay variable : PTINR\_VAL1 PT-INR Value

N Mean Standard Deviation Minimum Maximum

---

|   |          |           |           |           |
|---|----------|-----------|-----------|-----------|
| 6 | 1.443333 | 0.3104620 | 1.2000000 | 1.9800000 |
|---|----------|-----------|-----------|-----------|

---

Laboratory tests at the time of obtaining Table 2-6 consent, according to the presence or absence of proton-pump inhibitors

Unique Subject Identifier=0076011000-0009

MEANS Procedure

Assay variable : PTINR\_VAL1 PT-INR Value

N Mean Standard Deviation Minimum Maximum

---

|   |           |  |           |           |
|---|-----------|--|-----------|-----------|
| 1 | 1.2100000 |  | 1.2100000 | 1.2100000 |
|---|-----------|--|-----------|-----------|

---

Unique Subject Identifier=0076011000-0020

Assay variable : PTINR\_VAL1 PT-INR Value

N Mean Standard Deviation Minimum Maximum

---

|   |           |           |           |           |
|---|-----------|-----------|-----------|-----------|
| 2 | 2.1250000 | 0.2757716 | 1.9300000 | 2.3200000 |
|---|-----------|-----------|-----------|-----------|

---

Unique Subject Identifier=0076011000-0024

Assay variable : PTINR\_VAL1 PT-INR Value

N Mean Standard Deviation Minimum Maximum

---

|   |           |  |           |           |
|---|-----------|--|-----------|-----------|
| 1 | 2.0300000 |  | 2.0300000 | 2.0300000 |
|---|-----------|--|-----------|-----------|

---

Unique Subject Identifier=0076011000-0025

Assay variable : PTINR\_VAL1 PT-INR Value

N Mean Standard Deviation Minimum Maximum

---

|   |           |           |           |           |
|---|-----------|-----------|-----------|-----------|
| 2 | 2.0250000 | 0.6858936 | 1.5400000 | 2.5100000 |
|---|-----------|-----------|-----------|-----------|

---

Laboratory tests at the time of obtaining Table 2-6 consent, according to the presence or absence of proton-pump inhibitors

Unique Subject Identifier=0077000000-0005

MEANS Procedure

Assay variable : PTINR\_VAL1 PT-INR Value

N Mean Standard Deviation Minimum Maximum

---

|   |           |  |           |           |
|---|-----------|--|-----------|-----------|
| 1 | 1.6400000 |  | 1.6400000 | 1.6400000 |
|---|-----------|--|-----------|-----------|

---

Unique Subject Identifier=0077000000-0010

Assay variable : PTINR\_VAL1 PT-INR Value

N Mean Standard Deviation Minimum Maximum

---

|   |           |           |           |           |
|---|-----------|-----------|-----------|-----------|
| 3 | 2.1966667 | 0.7328256 | 1.4100000 | 2.8600000 |
|---|-----------|-----------|-----------|-----------|

---

Unique Subject Identifier=0078001000-0001

Assay variable : PTINR\_VAL1 PT-INR Value

N Mean Standard Deviation Minimum Maximum

---

|   |           |           |           |           |
|---|-----------|-----------|-----------|-----------|
| 6 | 2.1783333 | 0.1894642 | 1.8300000 | 2.3400000 |
|---|-----------|-----------|-----------|-----------|

---

Unique Subject Identifier=0078001000-0003

Assay variable : PTINR\_VAL1 PT-INR Value

N Mean Standard Deviation Minimum Maximum

---

|   |           |           |           |           |
|---|-----------|-----------|-----------|-----------|
| 3 | 2.0466667 | 0.5746593 | 1.7000000 | 2.7100000 |
|---|-----------|-----------|-----------|-----------|

---

Laboratory tests at the time of obtaining Table 2-6 consent, according to the presence or absence of proton-pump inhibitors

Unique Subject Identifier=0078001000-0004

MEANS Procedure

Assay variable : PTINR\_VAL1 PT-INR Value

N Mean Standard Deviation Minimum Maximum

---

|   |           |           |           |           |
|---|-----------|-----------|-----------|-----------|
| 4 | 1.8150000 | 0.1748333 | 1.5900000 | 2.0000000 |
|---|-----------|-----------|-----------|-----------|

---

Unique Subject Identifier=0078001000-0007

Assay variable : PTINR\_VAL1 PT-INR Value

N Mean Standard Deviation Minimum Maximum

---

|   |           |           |           |           |
|---|-----------|-----------|-----------|-----------|
| 3 | 1.6066667 | 0.0321455 | 1.5700000 | 1.6300000 |
|---|-----------|-----------|-----------|-----------|

---

Unique Subject Identifier=0078001000-0008

Assay variable : PTINR\_VAL1 PT-INR Value

N Mean Standard Deviation Minimum Maximum

---

|   |           |           |           |           |
|---|-----------|-----------|-----------|-----------|
| 5 | 2.1140000 | 0.3263893 | 1.7700000 | 2.5100000 |
|---|-----------|-----------|-----------|-----------|

---

Unique Subject Identifier=0078001000-0010

Assay variable : PTINR\_VAL1 PT-INR Value

N Mean Standard Deviation Minimum Maximum

---

|   |           |           |           |           |
|---|-----------|-----------|-----------|-----------|
| 3 | 1.8933333 | 0.0251661 | 1.8700000 | 1.9200000 |
|---|-----------|-----------|-----------|-----------|

---

Laboratory tests at the time of obtaining Table 2-6 consent, according to the presence or absence of proton-pump inhibitors

Unique Subject Identifier=0078001000-0011

MEANS Procedure

Assay variable : PTINR\_VAL1 PT-INR Value

| N | Mean     | Standard Deviation | Minimum  | Maximum  |
|---|----------|--------------------|----------|----------|
| 3 | 2.160000 | 0.3551056          | 1.750000 | 2.370000 |

Unique Subject Identifier=0078001000-0012

Assay variable : PTINR\_VAL1 PT-INR Value

| N | Mean     | Standard Deviation | Minimum  | Maximum  |
|---|----------|--------------------|----------|----------|
| 3 | 1.940000 | 0.1212436          | 1.870000 | 2.080000 |

Unique Subject Identifier=0078001000-0013

Assay variable : PTINR\_VAL1 PT-INR Value

| N | Mean     | Standard Deviation | Minimum  | Maximum  |
|---|----------|--------------------|----------|----------|
| 3 | 1.960000 | 0.0964365          | 1.890000 | 2.070000 |

Unique Subject Identifier=0079000000-0001



Assay variable : PTINR\_VAL1 PT-INR Value

N Mean Standard Deviation Minimum Maximum

---

|   |           |           |           |           |
|---|-----------|-----------|-----------|-----------|
| 4 | 2.3750000 | 0.5081666 | 1.9000000 | 3.0600000 |
|---|-----------|-----------|-----------|-----------|

---

Laboratory tests at the time of obtaining Table 2-6 consent, according to the presence or absence of proton-pump inhibitors

Unique Subject Identifier=0079000000-0003

MEANS Procedure

Assay variable : PTINR\_VAL1 PT-INR Value

N Mean Standard Deviation Minimum Maximum

---

|   |           |           |           |           |
|---|-----------|-----------|-----------|-----------|
| 4 | 1.7800000 | 0.1219289 | 1.6900000 | 1.9600000 |
|---|-----------|-----------|-----------|-----------|

---

Unique Subject Identifier=0079000000-0021

Assay variable : PTINR\_VAL1 PT-INR Value

N Mean Standard Deviation Minimum Maximum

---

|   |           |           |           |           |
|---|-----------|-----------|-----------|-----------|
| 3 | 1.7900000 | 0.0300000 | 1.7600000 | 1.8200000 |
|---|-----------|-----------|-----------|-----------|

---

Unique Subject Identifier=0079000000-0022

Assay variable : PTINR\_VAL1 PT-INR Value

N Mean Standard Deviation Minimum Maximum

---

|   |           |           |           |           |
|---|-----------|-----------|-----------|-----------|
| 2 | 2.1400000 | 0.5939697 | 1.7200000 | 2.5600000 |
|---|-----------|-----------|-----------|-----------|

---

Unique Subject Identifier=0079000000-0023

Assay variable : PTINR\_VAL1 PT-INR Value

N Mean Standard Deviation Minimum Maximum

---

|   |          |           |          |          |
|---|----------|-----------|----------|----------|
| 3 | 1.600000 | 0.2007486 | 1.460000 | 1.830000 |
|---|----------|-----------|----------|----------|

---

Laboratory tests at the time of obtaining Table 2-6 consent, according to the presence or absence of proton-pump inhibitors

Unique Subject Identifier=0079000000-0026

MEANS Procedure

Assay variable : PTINR\_VAL1 PT-INR Value

N Mean Standard Deviation Minimum Maximum

---

|   |           |  |           |           |
|---|-----------|--|-----------|-----------|
| 1 | 1.4000000 |  | 1.4000000 | 1.4000000 |
|---|-----------|--|-----------|-----------|

---

Unique Subject Identifier=0079000000-0028

Assay variable : PTINR\_VAL1 PT-INR Value

N Mean Standard Deviation Minimum Maximum

---

|   |           |           |           |           |
|---|-----------|-----------|-----------|-----------|
| 3 | 1.8666667 | 0.7486877 | 1.3200000 | 2.7200000 |
|---|-----------|-----------|-----------|-----------|

---

Unique Subject Identifier=0079000000-0030

Assay variable : PTINR\_VAL1 PT-INR Value

N Mean Standard Deviation Minimum Maximum

---

|   |           |           |           |           |
|---|-----------|-----------|-----------|-----------|
| 3 | 2.1600000 | 1.1421033 | 1.0600000 | 3.3400000 |
|---|-----------|-----------|-----------|-----------|

---

Unique Subject Identifier=0085000000-0004

Assay variable : PTINR\_VAL1 PT-INR Value

N Mean Standard Deviation Minimum Maximum

---

|   |           |           |           |           |
|---|-----------|-----------|-----------|-----------|
| 6 | 2.0100000 | 0.1941134 | 1.7200000 | 2.3100000 |
|---|-----------|-----------|-----------|-----------|

---

Laboratory tests at the time of obtaining Table 2-6 consent, according to the presence or absence of proton-pump inhibitors

Unique Subject Identifier=0086100000-0005

MEANS Procedure

Assay variable : PTINR\_VAL1 PT-INR Value

N Mean Standard Deviation Minimum Maximum

---

|   |           |  |           |           |
|---|-----------|--|-----------|-----------|
| 1 | 1.4700000 |  | 1.4700000 | 1.4700000 |
|---|-----------|--|-----------|-----------|

---

Unique Subject Identifier=0086100000-0011

Assay variable : PTINR\_VAL1 PT-INR Value

N Mean Standard Deviation Minimum Maximum

---

|   |           |  |           |           |
|---|-----------|--|-----------|-----------|
| 1 | 1.7600000 |  | 1.7600000 | 1.7600000 |
|---|-----------|--|-----------|-----------|

---

Unique Subject Identifier=0094001000-0012

Assay variable : PTINR\_VAL1 PT-INR Value

N Mean Standard Deviation Minimum Maximum

---

|   |           |           |           |           |
|---|-----------|-----------|-----------|-----------|
| 4 | 2.2625000 | 0.3564992 | 1.8800000 | 2.7400000 |
|---|-----------|-----------|-----------|-----------|

---

Unique Subject Identifier=0094001000-0026

Assay variable : PTINR\_VAL1 PT-INR Value

N Mean Standard Deviation Minimum Maximum

---

|   |           |           |           |           |
|---|-----------|-----------|-----------|-----------|
| 4 | 1.7525000 | 0.1004573 | 1.6400000 | 1.8600000 |
|---|-----------|-----------|-----------|-----------|

---

Laboratory tests at the time of obtaining Table 2-6 consent, according to the presence or absence of proton-pump inhibitors

Unique Subject Identifier=0094001000-0028

MEANS Procedure

Assay variable : PTINR\_VAL1 PT-INR Value

N Mean Standard Deviation Minimum Maximum

---

|   |           |           |           |           |
|---|-----------|-----------|-----------|-----------|
| 3 | 1.9366667 | 0.1721434 | 1.8000000 | 2.1300000 |
|---|-----------|-----------|-----------|-----------|

---

Unique Subject Identifier=0094001000-0038

Assay variable : PTINR\_VAL1 PT-INR Value

N Mean Standard Deviation Minimum Maximum

---

|   |           |           |           |           |
|---|-----------|-----------|-----------|-----------|
| 4 | 1.5600000 | 0.1336663 | 1.4200000 | 1.7400000 |
|---|-----------|-----------|-----------|-----------|

---

Unique Subject Identifier=0094001000-0047

Assay variable : PTINR\_VAL1 PT-INR Value

N Mean Standard Deviation Minimum Maximum

---

|   |           |           |           |           |
|---|-----------|-----------|-----------|-----------|
| 4 | 2.0950000 | 0.1156143 | 1.9600000 | 2.2400000 |
|---|-----------|-----------|-----------|-----------|

---

Unique Subject Identifier=0094001000-0050



Assay variable : PTINR\_VAL1 PT-INR Value

N Mean Standard Deviation Minimum Maximum

---

|   |           |           |           |           |
|---|-----------|-----------|-----------|-----------|
| 3 | 1.5833333 | 0.1069268 | 1.4900000 | 1.7000000 |
|---|-----------|-----------|-----------|-----------|

---

Laboratory tests at the time of obtaining Table 2-6 consent, according to the presence or absence of proton-pump inhibitors

Unique Subject Identifier=0098000000-0001

MEANS Procedure

Assay variable : PTINR\_VAL1 PT-INR Value

| N | Mean      | Standard Deviation | Minimum   | Maximum   |
|---|-----------|--------------------|-----------|-----------|
| 5 | 1.9820000 | 0.1485598          | 1.7700000 | 2.0900000 |

Unique Subject Identifier=0098000000-0006

Assay variable : PTINR\_VAL1 PT-INR Value

| N | Mean      | Standard Deviation | Minimum   | Maximum   |
|---|-----------|--------------------|-----------|-----------|
| 4 | 2.7275000 | 0.7020150          | 2.0900000 | 3.7300000 |

Unique Subject Identifier=0098000000-0008

Assay variable : PTINR\_VAL1 PT-INR Value

| N | Mean      | Standard Deviation | Minimum   | Maximum   |
|---|-----------|--------------------|-----------|-----------|
| 6 | 2.4516667 | 1.3166232          | 0.9800000 | 4.0900000 |

Unique Subject Identifier=0098000000-0009

Assay variable : PTINR\_VAL1 PT-INR Value

N Mean Standard Deviation Minimum Maximum

---

|   |           |           |           |           |
|---|-----------|-----------|-----------|-----------|
| 6 | 1.6316667 | 0.3060338 | 1.4500000 | 2.2300000 |
|---|-----------|-----------|-----------|-----------|

---

Laboratory tests at the time of obtaining Table 2-6 consent, according to the presence or absence of proton-pump inhibitors

Unique Subject Identifier=0098000000-0011

MEANS Procedure

Assay variable : PTINR\_VAL1 PT-INR Value

| N | Mean      | Standard Deviation | Minimum   | Maximum   |
|---|-----------|--------------------|-----------|-----------|
| 3 | 2.3533333 | 0.2119748          | 2.1600000 | 2.5800000 |

Unique Subject Identifier=0098000000-0014

Assay variable : PTINR\_VAL1 PT-INR Value

| N | Mean      | Standard Deviation | Minimum   | Maximum   |
|---|-----------|--------------------|-----------|-----------|
| 5 | 1.9940000 | 0.2743720          | 1.6700000 | 2.3200000 |

Unique Subject Identifier=0102000000-0003

Assay variable : PTINR\_VAL1 PT-INR Value

| N | Mean      | Standard Deviation | Minimum   | Maximum   |
|---|-----------|--------------------|-----------|-----------|
| 6 | 1.6333333 | 0.3881580          | 1.1000000 | 2.2000000 |

Unique Subject Identifier=0102000000-0004

Assay variable : PTINR\_VAL1 PT-INR Value

N Mean Standard Deviation Minimum Maximum

---

|   |          |           |          |          |
|---|----------|-----------|----------|----------|
| 6 | 1.500000 | 0.2097618 | 1.200000 | 1.700000 |
|---|----------|-----------|----------|----------|

---

Laboratory tests at the time of obtaining Table 2-6 consent, according to the presence or absence of proton-pump inhibitors

Unique Subject Identifier=0102000000-0006

MEANS Procedure

Assay variable : PTINR\_VAL1 PT-INR Value

N Mean Standard Deviation Minimum Maximum

---

|   |           |           |           |           |
|---|-----------|-----------|-----------|-----------|
| 5 | 1.8800000 | 0.2683282 | 1.6000000 | 2.3000000 |
|---|-----------|-----------|-----------|-----------|

---

Unique Subject Identifier=0102000000-0007

Assay variable : PTINR\_VAL1 PT-INR Value

N Mean Standard Deviation Minimum Maximum

---

|   |           |           |           |           |
|---|-----------|-----------|-----------|-----------|
| 6 | 2.1500000 | 0.2073644 | 1.9000000 | 2.4000000 |
|---|-----------|-----------|-----------|-----------|

---

Unique Subject Identifier=0102000000-0010

Assay variable : PTINR\_VAL1 PT-INR Value

N Mean Standard Deviation Minimum Maximum

---

|   |           |           |           |           |
|---|-----------|-----------|-----------|-----------|
| 5 | 1.9400000 | 0.4159327 | 1.4000000 | 2.3000000 |
|---|-----------|-----------|-----------|-----------|

---

Unique Subject Identifier=0103000000-0006

Assay variable : PTINR\_VAL1 PT-INR Value

N Mean Standard Deviation Minimum Maximum

---

|   |           |           |           |           |
|---|-----------|-----------|-----------|-----------|
| 6 | 1.7466667 | 0.8857690 | 1.0800000 | 3.3600000 |
|---|-----------|-----------|-----------|-----------|

---

Laboratory tests at the time of obtaining Table 2-6 consent, according to the presence or absence of proton-pump inhibitors

Unique Subject Identifier=0103000000-0007

MEANS Procedure

Assay variable : PTINR\_VAL1 PT-INR Value

N Mean Standard Deviation Minimum Maximum

---

|   |           |           |           |           |
|---|-----------|-----------|-----------|-----------|
| 6 | 2.1916667 | 0.9971443 | 1.3500000 | 4.0400000 |
|---|-----------|-----------|-----------|-----------|

---

Unique Subject Identifier=0103000000-0008

Assay variable : PTINR\_VAL1 PT-INR Value

N Mean Standard Deviation Minimum Maximum

---

|   |           |           |           |           |
|---|-----------|-----------|-----------|-----------|
| 3 | 1.9300000 | 0.3304542 | 1.5900000 | 2.2500000 |
|---|-----------|-----------|-----------|-----------|

---

Unique Subject Identifier=0103000000-0010

Assay variable : PTINR\_VAL1 PT-INR Value

N Mean Standard Deviation Minimum Maximum

---

|   |           |           |           |           |
|---|-----------|-----------|-----------|-----------|
| 4 | 1.8375000 | 0.3439356 | 1.4400000 | 2.2100000 |
|---|-----------|-----------|-----------|-----------|

---

Unique Subject Identifier=0103000000-0013



Assay variable : PTINR\_VAL1 PT-INR Value

N Mean Standard Deviation Minimum Maximum

---

|   |           |           |           |           |
|---|-----------|-----------|-----------|-----------|
| 4 | 2.0525000 | 0.3345021 | 1.7700000 | 2.5100000 |
|---|-----------|-----------|-----------|-----------|

---

Laboratory tests at the time of obtaining Table 2-6 consent, according to the presence or absence of proton-pump inhibitors

Unique Subject Identifier=0103000000-0014

MEANS Procedure

Assay variable : PTINR\_VAL1 PT-INR Value

N Mean Standard Deviation Minimum Maximum

---

|   |           |           |           |           |
|---|-----------|-----------|-----------|-----------|
| 5 | 1.8040000 | 0.2051341 | 1.6200000 | 2.1200000 |
|---|-----------|-----------|-----------|-----------|

---

Unique Subject Identifier=0103000000-0018

Assay variable : PTINR\_VAL1 PT-INR Value

N Mean Standard Deviation Minimum Maximum

---

|   |           |           |           |           |
|---|-----------|-----------|-----------|-----------|
| 4 | 1.8650000 | 0.2754995 | 1.5000000 | 2.1600000 |
|---|-----------|-----------|-----------|-----------|

---

Unique Subject Identifier=0103000000-0019

Assay variable : PTINR\_VAL1 PT-INR Value

N Mean Standard Deviation Minimum Maximum

---

|   |           |           |           |           |
|---|-----------|-----------|-----------|-----------|
| 4 | 1.7175000 | 0.1768945 | 1.5600000 | 1.9700000 |
|---|-----------|-----------|-----------|-----------|

---

Unique Subject Identifier=0103000000-0022

Assay variable : PTINR\_VAL1 PT-INR Value

N Mean Standard Deviation Minimum Maximum

---

|   |           |           |           |           |
|---|-----------|-----------|-----------|-----------|
| 4 | 2.2825000 | 0.4733128 | 1.6600000 | 2.6800000 |
|---|-----------|-----------|-----------|-----------|

---

Laboratory tests at the time of obtaining Table 2-6 consent, according to the presence or absence of proton-pump inhibitors

Unique Subject Identifier=0116000000-0001

MEANS Procedure

Assay variable : PTINR\_VAL1 PT-INR Value

N Mean Standard Deviation Minimum Maximum

---

|   |           |           |           |           |
|---|-----------|-----------|-----------|-----------|
| 3 | 2.3666667 | 0.5357549 | 1.9900000 | 2.9800000 |
|---|-----------|-----------|-----------|-----------|

---

Unique Subject Identifier=0120000000-0002

Assay variable : PTINR\_VAL1 PT-INR Value

N Mean Standard Deviation Minimum Maximum

---

|   |           |  |           |           |
|---|-----------|--|-----------|-----------|
| 1 | 1.4800000 |  | 1.4800000 | 1.4800000 |
|---|-----------|--|-----------|-----------|

---

Unique Subject Identifier=0120000000-0007

Assay variable : PTINR\_VAL1 PT-INR Value

N Mean Standard Deviation Minimum Maximum

---

|   |           |  |           |           |
|---|-----------|--|-----------|-----------|
| 1 | 1.7100000 |  | 1.7100000 | 1.7100000 |
|---|-----------|--|-----------|-----------|

---

Unique Subject Identifier=0121010000-0001

Assay variable : PTINR\_VAL1 PT-INR Value

N Mean Standard Deviation Minimum Maximum

---

|   |          |           |          |          |
|---|----------|-----------|----------|----------|
| 4 | 2.125000 | 0.2753785 | 1.800000 | 2.400000 |
|---|----------|-----------|----------|----------|

---

Laboratory tests at the time of obtaining Table 2-6 consent, according to the presence or absence of proton-pump inhibitors

Unique Subject Identifier=0121010000-0002

MEANS Procedure

Assay variable : PTINR\_VAL1 PT-INR Value

N Mean Standard Deviation Minimum Maximum

---

|   |           |           |           |           |
|---|-----------|-----------|-----------|-----------|
| 4 | 1.6250000 | 0.0500000 | 1.6000000 | 1.7000000 |
|---|-----------|-----------|-----------|-----------|

---

Unique Subject Identifier=0121010000-0006

Assay variable : PTINR\_VAL1 PT-INR Value

N Mean Standard Deviation Minimum Maximum

---

|   |           |           |           |           |
|---|-----------|-----------|-----------|-----------|
| 6 | 2.2166667 | 0.2562551 | 1.9000000 | 2.6000000 |
|---|-----------|-----------|-----------|-----------|

---

Unique Subject Identifier=0121010000-0016

Assay variable : PTINR\_VAL1 PT-INR Value

N Mean Standard Deviation Minimum Maximum

---

|   |           |           |           |           |
|---|-----------|-----------|-----------|-----------|
| 5 | 1.6800000 | 0.2949576 | 1.3000000 | 2.1000000 |
|---|-----------|-----------|-----------|-----------|

---

Unique Subject Identifier=0121010000-0018

Assay variable : PTINR\_VAL1 PT-INR Value

N Mean Standard Deviation Minimum Maximum

---

|   |          |           |          |          |
|---|----------|-----------|----------|----------|
| 5 | 2.640000 | 0.4722288 | 2.000000 | 3.200000 |
|---|----------|-----------|----------|----------|

---

Laboratory tests at the time of obtaining Table 2-6 consent, according to the presence or absence of proton-pump inhibitors

Unique Subject Identifier=0121010000-0020

MEANS Procedure

Assay variable : PTINR\_VAL1 PT-INR Value

N Mean Standard Deviation Minimum Maximum

---

|   |           |           |           |           |
|---|-----------|-----------|-----------|-----------|
| 4 | 2.2750000 | 0.0957427 | 2.2000000 | 2.4000000 |
|---|-----------|-----------|-----------|-----------|

---

Unique Subject Identifier=0121010000-0021

Assay variable : PTINR\_VAL1 PT-INR Value

N Mean Standard Deviation Minimum Maximum

---

|   |           |           |           |           |
|---|-----------|-----------|-----------|-----------|
| 4 | 1.6500000 | 0.2645751 | 1.3000000 | 1.9000000 |
|---|-----------|-----------|-----------|-----------|

---

Unique Subject Identifier=0121010000-0028

Assay variable : PTINR\_VAL1 PT-INR Value

N Mean Standard Deviation Minimum Maximum

---

|   |           |           |           |           |
|---|-----------|-----------|-----------|-----------|
| 6 | 2.3500000 | 0.6833740 | 1.9000000 | 3.7000000 |
|---|-----------|-----------|-----------|-----------|

---

Unique Subject Identifier=0122010000-0001



Assay variable : PTINR\_VAL1 PT-INR Value

N Mean Standard Deviation Minimum Maximum

---

|   |           |           |           |           |
|---|-----------|-----------|-----------|-----------|
| 4 | 1.6000000 | 0.3741657 | 1.1000000 | 2.0000000 |
|---|-----------|-----------|-----------|-----------|

---

Laboratory tests at the time of obtaining Table 2-6 consent, according to the presence or absence of proton-pump inhibitors

Unique Subject Identifier=0122010000-0002

MEANS Procedure

Assay variable : PTINR\_VAL1 PT-INR Value

N Mean Standard Deviation Minimum Maximum

---

|   |           |           |           |           |
|---|-----------|-----------|-----------|-----------|
| 6 | 1.8666667 | 0.5819507 | 1.1000000 | 2.9000000 |
|---|-----------|-----------|-----------|-----------|

---

Unique Subject Identifier=0124010000-0010

Assay variable : PTINR\_VAL1 PT-INR Value

N Mean Standard Deviation Minimum Maximum

---

|   |           |           |           |           |
|---|-----------|-----------|-----------|-----------|
| 2 | 2.7000000 | 0.4242641 | 2.4000000 | 3.0000000 |
|---|-----------|-----------|-----------|-----------|

---

Unique Subject Identifier=0124010000-0012

Assay variable : PTINR\_VAL1 PT-INR Value

N Mean Standard Deviation Minimum Maximum

---

|   |           |           |           |           |
|---|-----------|-----------|-----------|-----------|
| 3 | 1.6666667 | 0.0577350 | 1.6000000 | 1.7000000 |
|---|-----------|-----------|-----------|-----------|

---

Unique Subject Identifier=0124010000-0021

Assay variable : PTINR\_VAL1 PT-INR Value

N Mean Standard Deviation Minimum Maximum

---

|   |          |           |          |          |
|---|----------|-----------|----------|----------|
| 2 | 2.100000 | 0.1414214 | 2.000000 | 2.200000 |
|---|----------|-----------|----------|----------|

---

Laboratory tests at the time of obtaining Table 2-6 consent, according to the presence or absence of proton-pump inhibitors

Unique Subject Identifier=0132000000-0005

MEANS Procedure

Assay variable : PTINR\_VAL1 PT-INR Value

N Mean Standard Deviation Minimum Maximum

---

|   |           |           |           |           |
|---|-----------|-----------|-----------|-----------|
| 3 | 1.5900000 | 0.3132092 | 1.2300000 | 1.8000000 |
|---|-----------|-----------|-----------|-----------|

---

Unique Subject Identifier=0133000000-0003

Assay variable : PTINR\_VAL1 PT-INR Value

N Mean Standard Deviation Minimum Maximum

---

|   |           |           |           |           |
|---|-----------|-----------|-----------|-----------|
| 4 | 1.4125000 | 0.3732180 | 1.1300000 | 1.9600000 |
|---|-----------|-----------|-----------|-----------|

---

Unique Subject Identifier=0133000000-0020

Assay variable : PTINR\_VAL1 PT-INR Value

N Mean Standard Deviation Minimum Maximum

---

|   |           |           |           |           |
|---|-----------|-----------|-----------|-----------|
| 2 | 1.9950000 | 0.1202082 | 1.9100000 | 2.0800000 |
|---|-----------|-----------|-----------|-----------|

---

Unique Subject Identifier=0133000000-0037

Assay variable : PTINR\_VAL1 PT-INR Value

N Mean Standard Deviation Minimum Maximum

---

|   |           |           |           |           |
|---|-----------|-----------|-----------|-----------|
| 2 | 1.9100000 | 0.0141421 | 1.9000000 | 1.9200000 |
|---|-----------|-----------|-----------|-----------|

---

Laboratory tests at the time of obtaining Table 2-6 consent, according to the presence or absence of proton-pump inhibitors

Unique Subject Identifier=0133000000-0038

MEANS Procedure

Assay variable : PTINR\_VAL1 PT-INR Value

N Mean Standard Deviation Minimum Maximum

---

|   |           |           |           |           |
|---|-----------|-----------|-----------|-----------|
| 2 | 1.9850000 | 0.0212132 | 1.9700000 | 2.0000000 |
|---|-----------|-----------|-----------|-----------|

---

Unique Subject Identifier=0134100000-0001

Assay variable : PTINR\_VAL1 PT-INR Value

N Mean Standard Deviation Minimum Maximum

---

|   |           |           |           |           |
|---|-----------|-----------|-----------|-----------|
| 2 | 1.8950000 | 0.0353553 | 1.8700000 | 1.9200000 |
|---|-----------|-----------|-----------|-----------|

---

Unique Subject Identifier=0134100000-0002

Assay variable : PTINR\_VAL1 PT-INR Value

N Mean Standard Deviation Minimum Maximum

---

|   |           |           |           |           |
|---|-----------|-----------|-----------|-----------|
| 3 | 2.0033333 | 0.5802011 | 1.5600000 | 2.6600000 |
|---|-----------|-----------|-----------|-----------|

---

Unique Subject Identifier=0134100000-0009

Assay variable : PTINR\_VAL1 PT-INR Value

N Mean Standard Deviation Minimum Maximum

---

|   |           |           |           |           |
|---|-----------|-----------|-----------|-----------|
| 3 | 1.6433333 | 0.1159023 | 1.5100000 | 1.7200000 |
|---|-----------|-----------|-----------|-----------|

---

Laboratory tests at the time of obtaining Table 2-6 consent, according to the presence or absence of proton-pump inhibitors

Unique Subject Identifier=0134100000-0010

MEANS Procedure

Assay variable : PTINR\_VAL1 PT-INR Value

N Mean Standard Deviation Minimum Maximum

---

|   |           |           |           |           |
|---|-----------|-----------|-----------|-----------|
| 3 | 2.5700000 | 0.2007486 | 2.3800000 | 2.7800000 |
|---|-----------|-----------|-----------|-----------|

---

Unique Subject Identifier=0134100000-0012

Assay variable : PTINR\_VAL1 PT-INR Value

N Mean Standard Deviation Minimum Maximum

---

|   |           |           |           |           |
|---|-----------|-----------|-----------|-----------|
| 4 | 1.6850000 | 0.2500000 | 1.5000000 | 2.0400000 |
|---|-----------|-----------|-----------|-----------|

---

Unique Subject Identifier=0134100000-0014

Assay variable : PTINR\_VAL1 PT-INR Value

N Mean Standard Deviation Minimum Maximum

---

|   |           |           |           |           |
|---|-----------|-----------|-----------|-----------|
| 6 | 2.4033333 | 1.2899716 | 1.0400000 | 4.2300000 |
|---|-----------|-----------|-----------|-----------|

---

Unique Subject Identifier=0134100000-0016



Assay variable : PTINR\_VAL1 PT-INR Value

N Mean Standard Deviation Minimum Maximum

---

|   |           |           |           |           |
|---|-----------|-----------|-----------|-----------|
| 4 | 1.9800000 | 0.7144228 | 1.4800000 | 3.0400000 |
|---|-----------|-----------|-----------|-----------|

---

Laboratory tests at the time of obtaining Table 2-6 consent, according to the presence or absence of proton-pump inhibitors

Unique Subject Identifier=0134100000-0019

MEANS Procedure

Assay variable : PTINR\_VAL1 PT-INR Value

N Mean Standard Deviation Minimum Maximum

---

|   |           |           |           |           |
|---|-----------|-----------|-----------|-----------|
| 3 | 1.8800000 | 0.3500000 | 1.5300000 | 2.2300000 |
|---|-----------|-----------|-----------|-----------|

---

Unique Subject Identifier=0134100000-0021

Assay variable : PTINR\_VAL1 PT-INR Value

N Mean Standard Deviation Minimum Maximum

---

|   |           |           |           |           |
|---|-----------|-----------|-----------|-----------|
| 4 | 1.8950000 | 0.2353012 | 1.6400000 | 2.1000000 |
|---|-----------|-----------|-----------|-----------|

---

Unique Subject Identifier=0134100000-0023

Assay variable : PTINR\_VAL1 PT-INR Value

N Mean Standard Deviation Minimum Maximum

---

|   |           |           |           |           |
|---|-----------|-----------|-----------|-----------|
| 4 | 2.0275000 | 0.2627261 | 1.7000000 | 2.2900000 |
|---|-----------|-----------|-----------|-----------|

---

Unique Subject Identifier=0135000000-0006

Assay variable : PTINR\_VAL1 PT-INR Value

N Mean Standard Deviation Minimum Maximum

---

|   |           |           |           |           |
|---|-----------|-----------|-----------|-----------|
| 3 | 1.9733333 | 0.7523519 | 1.4200000 | 2.8300000 |
|---|-----------|-----------|-----------|-----------|

---

Laboratory tests at the time of obtaining Table 2-6 consent, according to the presence or absence of proton-pump inhibitors

Unique Subject Identifier=0135000000-0008

MEANS Procedure

Assay variable : PTINR\_VAL1 PT-INR Value

N Mean Standard Deviation Minimum Maximum

---

|   |           |           |           |           |
|---|-----------|-----------|-----------|-----------|
| 4 | 1.7050000 | 0.3637307 | 1.2800000 | 2.1500000 |
|---|-----------|-----------|-----------|-----------|

---

Unique Subject Identifier=0135000000-0009

Assay variable : PTINR\_VAL1 PT-INR Value

N Mean Standard Deviation Minimum Maximum

---

|   |           |           |           |           |
|---|-----------|-----------|-----------|-----------|
| 5 | 1.7160000 | 0.3756062 | 1.2000000 | 2.0600000 |
|---|-----------|-----------|-----------|-----------|

---

Unique Subject Identifier=0135000000-0013

Assay variable : PTINR\_VAL1 PT-INR Value

N Mean Standard Deviation Minimum Maximum

---

|   |           |           |           |           |
|---|-----------|-----------|-----------|-----------|
| 3 | 1.5833333 | 0.0873689 | 1.5100000 | 1.6800000 |
|---|-----------|-----------|-----------|-----------|

---

Unique Subject Identifier=0135000000-0024

Assay variable : PTINR\_VAL1 PT-INR Value

N Mean Standard Deviation Minimum Maximum

---

|   |          |           |          |          |
|---|----------|-----------|----------|----------|
| 4 | 2.340000 | 0.2906315 | 2.110000 | 2.760000 |
|---|----------|-----------|----------|----------|

---

Laboratory tests at the time of obtaining Table 2-6 consent, according to the presence or absence of proton-pump inhibitors

Unique Subject Identifier=0136000010-0002

MEANS Procedure

Assay variable : PTINR\_VAL1 PT-INR Value

N Mean Standard Deviation Minimum Maximum

---

|   |           |           |           |           |
|---|-----------|-----------|-----------|-----------|
| 6 | 2.0766667 | 0.2477633 | 1.7400000 | 2.5000000 |
|---|-----------|-----------|-----------|-----------|

---

Unique Subject Identifier=0138000010-0009

Assay variable : PTINR\_VAL1 PT-INR Value

N Mean Standard Deviation Minimum Maximum

---

|   |           |           |           |           |
|---|-----------|-----------|-----------|-----------|
| 4 | 1.9200000 | 0.5023279 | 1.4800000 | 2.6000000 |
|---|-----------|-----------|-----------|-----------|

---

Unique Subject Identifier=0138000010-0024

Assay variable : PTINR\_VAL1 PT-INR Value

N Mean Standard Deviation Minimum Maximum

---

|   |           |           |           |           |
|---|-----------|-----------|-----------|-----------|
| 6 | 1.7050000 | 0.2649340 | 1.3000000 | 2.0100000 |
|---|-----------|-----------|-----------|-----------|

---

Unique Subject Identifier=0138000010-0027

Assay variable : PTINR\_VAL1 PT-INR Value

N Mean Standard Deviation Minimum Maximum

---

|   |           |           |           |           |
|---|-----------|-----------|-----------|-----------|
| 2 | 2.2700000 | 0.0424264 | 2.2400000 | 2.3000000 |
|---|-----------|-----------|-----------|-----------|

---

Laboratory tests at the time of obtaining Table 2-6 consent, according to the presence or absence of proton-pump inhibitors

Unique Subject Identifier=0138000010-0029

MEANS Procedure

Assay variable : PTINR\_VAL1 PT-INR Value

N Mean Standard Deviation Minimum Maximum

---

|   |           |           |           |           |
|---|-----------|-----------|-----------|-----------|
| 2 | 1.7550000 | 0.0353553 | 1.7300000 | 1.7800000 |
|---|-----------|-----------|-----------|-----------|

---

Unique Subject Identifier=0138000010-0039

Assay variable : PTINR\_VAL1 PT-INR Value

N Mean Standard Deviation Minimum Maximum

---

|   |           |           |           |           |
|---|-----------|-----------|-----------|-----------|
| 6 | 2.1250000 | 0.7332598 | 1.3000000 | 3.2100000 |
|---|-----------|-----------|-----------|-----------|

---

Unique Subject Identifier=0138000010-0042

Assay variable : PTINR\_VAL1 PT-INR Value

N Mean Standard Deviation Minimum Maximum

---

|   |           |           |           |           |
|---|-----------|-----------|-----------|-----------|
| 4 | 1.7075000 | 0.3138338 | 1.3800000 | 2.1200000 |
|---|-----------|-----------|-----------|-----------|

---

Unique Subject Identifier=0138000010-0043



Assay variable : PTINR\_VAL1 PT-INR Value

N Mean Standard Deviation Minimum Maximum

---

|   |           |           |           |           |
|---|-----------|-----------|-----------|-----------|
| 5 | 1.8960000 | 0.3864324 | 1.3100000 | 2.2800000 |
|---|-----------|-----------|-----------|-----------|

---

Laboratory tests at the time of obtaining Table 2-6 consent, according to the presence or absence of proton-pump inhibitors

Unique Subject Identifier=0138000010-0050

MEANS Procedure

Assay variable : PTINR\_VAL1 PT-INR Value

| N | Mean      | Standard Deviation | Minimum   | Maximum   |
|---|-----------|--------------------|-----------|-----------|
| 1 | 1.0700000 |                    | 1.0700000 | 1.0700000 |

Unique Subject Identifier=0139000010-0001

Assay variable : PTINR\_VAL1 PT-INR Value

| N | Mean      | Standard Deviation | Minimum   | Maximum   |
|---|-----------|--------------------|-----------|-----------|
| 5 | 1.5100000 | 0.2919760          | 1.1000000 | 1.8800000 |

Unique Subject Identifier=0139000010-0003

Assay variable : PTINR\_VAL1 PT-INR Value

| N | Mean      | Standard Deviation | Minimum   | Maximum   |
|---|-----------|--------------------|-----------|-----------|
| 6 | 1.4283333 | 0.2696232          | 1.1800000 | 1.9300000 |

Unique Subject Identifier=0139000010-0008

Assay variable : PTINR\_VAL1 PT-INR Value

N Mean Standard Deviation Minimum Maximum

---

|   |           |           |           |           |
|---|-----------|-----------|-----------|-----------|
| 6 | 2.1450000 | 0.5838750 | 1.4600000 | 2.9500000 |
|---|-----------|-----------|-----------|-----------|

---

Laboratory tests at the time of obtaining Table 2-6 consent, according to the presence or absence of proton-pump inhibitors

Unique Subject Identifier=0139000010-0009

MEANS Procedure

Assay variable : PTINR\_VAL1 PT-INR Value

N Mean Standard Deviation Minimum Maximum

---

|   |           |           |           |           |
|---|-----------|-----------|-----------|-----------|
| 6 | 1.5516667 | 0.3399068 | 1.2000000 | 2.1900000 |
|---|-----------|-----------|-----------|-----------|

---

Unique Subject Identifier=0139000010-0010

Assay variable : PTINR\_VAL1 PT-INR Value

N Mean Standard Deviation Minimum Maximum

---

|   |           |           |           |           |
|---|-----------|-----------|-----------|-----------|
| 6 | 2.3816667 | 0.2837898 | 2.0400000 | 2.7900000 |
|---|-----------|-----------|-----------|-----------|

---

Unique Subject Identifier=0140000010-0003

Assay variable : PTINR\_VAL1 PT-INR Value

N Mean Standard Deviation Minimum Maximum

---

|   |           |           |           |           |
|---|-----------|-----------|-----------|-----------|
| 4 | 2.2525000 | 0.9731863 | 1.5100000 | 3.6400000 |
|---|-----------|-----------|-----------|-----------|

---

Unique Subject Identifier=0140000010-0011

Assay variable : PTINR\_VAL1 PT-INR Value

N Mean Standard Deviation Minimum Maximum

---

|   |           |           |           |           |
|---|-----------|-----------|-----------|-----------|
| 4 | 2.1425000 | 0.2451360 | 1.9700000 | 2.4900000 |
|---|-----------|-----------|-----------|-----------|

---

Laboratory tests at the time of obtaining Table 2-6 consent, according to the presence or absence of proton-pump inhibitors

Unique Subject Identifier=0140000010-0018

MEANS Procedure

Assay variable : PTINR\_VAL1 PT-INR Value

N Mean Standard Deviation Minimum Maximum

---

|   |           |           |           |           |
|---|-----------|-----------|-----------|-----------|
| 3 | 2.1766667 | 0.1078579 | 2.1000000 | 2.3000000 |
|---|-----------|-----------|-----------|-----------|

---

Unique Subject Identifier=0140000010-0024

Assay variable : PTINR\_VAL1 PT-INR Value

N Mean Standard Deviation Minimum Maximum

---

|   |           |           |           |           |
|---|-----------|-----------|-----------|-----------|
| 3 | 2.3200000 | 0.9263369 | 1.5100000 | 3.3300000 |
|---|-----------|-----------|-----------|-----------|

---

Unique Subject Identifier=0140000010-0026

Assay variable : PTINR\_VAL1 PT-INR Value

N Mean Standard Deviation Minimum Maximum

---

|   |           |           |           |           |
|---|-----------|-----------|-----------|-----------|
| 4 | 2.6675000 | 0.5993538 | 2.0600000 | 3.4300000 |
|---|-----------|-----------|-----------|-----------|

---

Unique Subject Identifier=0141000000-0002

Assay variable : PTINR\_VAL1 PT-INR Value

N Mean Standard Deviation Minimum Maximum

---

|   |          |           |          |          |
|---|----------|-----------|----------|----------|
| 4 | 1.950000 | 0.1732051 | 1.720000 | 2.140000 |
|---|----------|-----------|----------|----------|

---

Laboratory tests at the time of obtaining Table 2-6 consent, according to the presence or absence of proton-pump inhibitors

Unique Subject Identifier=0142000000-0001

MEANS Procedure

Assay variable : PTINR\_VAL1 PT-INR Value

N Mean Standard Deviation Minimum Maximum

---

|   |           |           |           |           |
|---|-----------|-----------|-----------|-----------|
| 6 | 2.0316667 | 0.2256029 | 1.7500000 | 2.3700000 |
|---|-----------|-----------|-----------|-----------|

---

Unique Subject Identifier=0143010000-0002

Assay variable : PTINR\_VAL1 PT-INR Value

N Mean Standard Deviation Minimum Maximum

---

|   |           |           |           |           |
|---|-----------|-----------|-----------|-----------|
| 5 | 2.1980000 | 0.6462739 | 1.5900000 | 3.1700000 |
|---|-----------|-----------|-----------|-----------|

---

Unique Subject Identifier=0143010000-0004

Assay variable : PTINR\_VAL1 PT-INR Value

N Mean Standard Deviation Minimum Maximum

---

|   |           |           |           |           |
|---|-----------|-----------|-----------|-----------|
| 3 | 1.1233333 | 0.0602771 | 1.0600000 | 1.1800000 |
|---|-----------|-----------|-----------|-----------|

---

Unique Subject Identifier=0143010000-0015



Assay variable : PTINR\_VAL1 PT-INR Value

N Mean Standard Deviation Minimum Maximum

---

|   |           |           |           |           |
|---|-----------|-----------|-----------|-----------|
| 2 | 1.6050000 | 0.0353553 | 1.5800000 | 1.6300000 |
|---|-----------|-----------|-----------|-----------|

---

Laboratory tests at the time of obtaining Table 2-6 consent, according to the presence or absence of proton-pump inhibitors

Unique Subject Identifier=0143010000-0018

MEANS Procedure

Assay variable : PTINR\_VAL1 PT-INR Value

N Mean Standard Deviation Minimum Maximum

---

|   |           |           |           |           |
|---|-----------|-----------|-----------|-----------|
| 6 | 2.2983333 | 0.1756607 | 2.1500000 | 2.5500000 |
|---|-----------|-----------|-----------|-----------|

---

Unique Subject Identifier=0143010000-0030

Assay variable : PTINR\_VAL1 PT-INR Value

N Mean Standard Deviation Minimum Maximum

---

|   |           |           |           |           |
|---|-----------|-----------|-----------|-----------|
| 6 | 1.8116667 | 0.0953764 | 1.7000000 | 1.9600000 |
|---|-----------|-----------|-----------|-----------|

---

Unique Subject Identifier=0143010000-0032

Assay variable : PTINR\_VAL1 PT-INR Value

N Mean Standard Deviation Minimum Maximum

---

|   |           |           |           |           |
|---|-----------|-----------|-----------|-----------|
| 3 | 1.9900000 | 0.1700000 | 1.8200000 | 2.1600000 |
|---|-----------|-----------|-----------|-----------|

---

Unique Subject Identifier=0143010000-0034

Assay variable : PTINR\_VAL1 PT-INR Value

N Mean Standard Deviation Minimum Maximum

---

|   |           |           |           |           |
|---|-----------|-----------|-----------|-----------|
| 6 | 1.9183333 | 0.2634704 | 1.6700000 | 2.4300000 |
|---|-----------|-----------|-----------|-----------|

---

Laboratory tests at the time of obtaining Table 2-6 consent, according to the presence or absence of proton-pump inhibitors

Unique Subject Identifier=0143010000-0038

MEANS Procedure

Assay variable : PTINR\_VAL1 PT-INR Value

N Mean Standard Deviation Minimum Maximum

---

|   |           |           |           |           |
|---|-----------|-----------|-----------|-----------|
| 6 | 2.1483333 | 0.2359167 | 1.8900000 | 2.5300000 |
|---|-----------|-----------|-----------|-----------|

---

Unique Subject Identifier=0143010000-0039

Assay variable : PTINR\_VAL1 PT-INR Value

N Mean Standard Deviation Minimum Maximum

---

|   |           |           |           |           |
|---|-----------|-----------|-----------|-----------|
| 6 | 1.9333333 | 0.5831524 | 1.2100000 | 2.6100000 |
|---|-----------|-----------|-----------|-----------|

---

Unique Subject Identifier=0143010000-0069

Assay variable : PTINR\_VAL1 PT-INR Value

N Mean Standard Deviation Minimum Maximum

---

|   |           |           |           |           |
|---|-----------|-----------|-----------|-----------|
| 6 | 2.2150000 | 0.4219360 | 1.5000000 | 2.6700000 |
|---|-----------|-----------|-----------|-----------|

---

Unique Subject Identifier=0143010000-0070

Assay variable : PTINR\_VAL1 PT-INR Value

N Mean Standard Deviation Minimum Maximum

---

|   |           |           |           |           |
|---|-----------|-----------|-----------|-----------|
| 6 | 1.5666667 | 0.2264214 | 1.3200000 | 1.8800000 |
|---|-----------|-----------|-----------|-----------|

---

Laboratory tests at the time of obtaining Table 2-6 consent, according to the presence or absence of proton-pump inhibitors

Unique Subject Identifier=0143010000-0084

MEANS Procedure

Assay variable : PTINR\_VAL1 PT-INR Value

| N | Mean      | Standard Deviation | Minimum   | Maximum   |
|---|-----------|--------------------|-----------|-----------|
| 3 | 1.6266667 | 0.2218859          | 1.3900000 | 1.8300000 |

Unique Subject Identifier=0143010000-0095

Assay variable : PTINR\_VAL1 PT-INR Value

| N | Mean      | Standard Deviation | Minimum   | Maximum   |
|---|-----------|--------------------|-----------|-----------|
| 6 | 1.6300000 | 0.0651153          | 1.5700000 | 1.7200000 |

Unique Subject Identifier=0143010000-0106

Assay variable : PTINR\_VAL1 PT-INR Value

| N | Mean      | Standard Deviation | Minimum   | Maximum   |
|---|-----------|--------------------|-----------|-----------|
| 6 | 2.1100000 | 0.3531572          | 1.5500000 | 2.5600000 |

Unique Subject Identifier=0143010000-0128

Assay variable : PTINR\_VAL1 PT-INR Value

N Mean Standard Deviation Minimum Maximum

---

|   |           |           |           |           |
|---|-----------|-----------|-----------|-----------|
| 4 | 1.8725000 | 0.2088660 | 1.6900000 | 2.1700000 |
|---|-----------|-----------|-----------|-----------|

---

Laboratory tests at the time of obtaining Table 2-6 consent, according to the presence or absence of proton-pump inhibitors

Unique Subject Identifier=0143010000-0144

MEANS Procedure

Assay variable : PTINR\_VAL1 PT-INR Value

N Mean Standard Deviation Minimum Maximum

---

|   |           |           |           |           |
|---|-----------|-----------|-----------|-----------|
| 3 | 2.1100000 | 0.0721110 | 2.0300000 | 2.1700000 |
|---|-----------|-----------|-----------|-----------|

---

Unique Subject Identifier=0143010000-0158

Assay variable : PTINR\_VAL1 PT-INR Value

N Mean Standard Deviation Minimum Maximum

---

|   |           |           |           |           |
|---|-----------|-----------|-----------|-----------|
| 3 | 2.9500000 | 0.3026549 | 2.6100000 | 3.1900000 |
|---|-----------|-----------|-----------|-----------|

---

Unique Subject Identifier=0143010000-0166

Assay variable : PTINR\_VAL1 PT-INR Value

N Mean Standard Deviation Minimum Maximum

---

|   |           |           |           |           |
|---|-----------|-----------|-----------|-----------|
| 6 | 1.9800000 | 0.2815670 | 1.5700000 | 2.3400000 |
|---|-----------|-----------|-----------|-----------|

---

Unique Subject Identifier=0143010000-0167



Assay variable : PTINR\_VAL1 PT-INR Value

N Mean Standard Deviation Minimum Maximum

---

|   |           |           |           |           |
|---|-----------|-----------|-----------|-----------|
| 6 | 1.8383333 | 0.5036434 | 1.3600000 | 2.7100000 |
|---|-----------|-----------|-----------|-----------|

---

Laboratory tests at the time of obtaining Table 2-6 consent, according to the presence or absence of proton-pump inhibitors

Unique Subject Identifier=0143010000-0197

MEANS Procedure

Assay variable : PTINR\_VAL1 PT-INR Value

N Mean Standard Deviation Minimum Maximum

---

|   |           |           |           |           |
|---|-----------|-----------|-----------|-----------|
| 3 | 2.2800000 | 0.3119295 | 1.9900000 | 2.6100000 |
|---|-----------|-----------|-----------|-----------|

---

Unique Subject Identifier=0143010000-0203

Assay variable : PTINR\_VAL1 PT-INR Value

N Mean Standard Deviation Minimum Maximum

---

|   |           |  |           |           |
|---|-----------|--|-----------|-----------|
| 1 | 1.9600000 |  | 1.9600000 | 1.9600000 |
|---|-----------|--|-----------|-----------|

---

Unique Subject Identifier=0144000000-0008

Assay variable : PTINR\_VAL1 PT-INR Value

N Mean Standard Deviation Minimum Maximum

---

|   |           |  |           |           |
|---|-----------|--|-----------|-----------|
| 1 | 1.4700000 |  | 1.4700000 | 1.4700000 |
|---|-----------|--|-----------|-----------|

---

Unique Subject Identifier=0144000000-0009

Assay variable : PTINR\_VAL1 PT-INR Value

N Mean Standard Deviation Minimum Maximum

---

|   |           |  |           |           |
|---|-----------|--|-----------|-----------|
| 1 | 1.7900000 |  | 1.7900000 | 1.7900000 |
|---|-----------|--|-----------|-----------|

---

Laboratory tests at the time of obtaining Table 2-6 consent, according to the presence or absence of proton-pump inhibitors

Unique Subject Identifier=0145000000-0010

MEANS Procedure

Assay variable : PTINR\_VAL1 PT-INR Value

N Mean Standard Deviation Minimum Maximum

---

|   |           |           |           |           |
|---|-----------|-----------|-----------|-----------|
| 3 | 2.2833333 | 0.6672581 | 1.5300000 | 2.8000000 |
|---|-----------|-----------|-----------|-----------|

---

Unique Subject Identifier=0145000000-0016

Assay variable : PTINR\_VAL1 PT-INR Value

N Mean Standard Deviation Minimum Maximum

---

|   |           |           |           |           |
|---|-----------|-----------|-----------|-----------|
| 6 | 2.7600000 | 0.4118738 | 2.1800000 | 3.3000000 |
|---|-----------|-----------|-----------|-----------|

---

Unique Subject Identifier=0145000000-0022

Assay variable : PTINR\_VAL1 PT-INR Value

N Mean Standard Deviation Minimum Maximum

---

|   |           |           |           |           |
|---|-----------|-----------|-----------|-----------|
| 6 | 1.5066667 | 0.2136040 | 1.2900000 | 1.7600000 |
|---|-----------|-----------|-----------|-----------|

---

Unique Subject Identifier=0146000000-0008

Assay variable : PTINR\_VAL1 PT-INR Value

N Mean Standard Deviation Minimum Maximum

---

|   |          |           |          |          |
|---|----------|-----------|----------|----------|
| 3 | 3.103333 | 0.5450076 | 2.500000 | 3.560000 |
|---|----------|-----------|----------|----------|

---

Laboratory tests at the time of obtaining Table 2-6 consent, according to the presence or absence of proton-pump inhibitors

Unique Subject Identifier=014600000-0016

MEANS Procedure

Assay variable : PTINR\_VAL1 PT-INR Value

N Mean Standard Deviation Minimum Maximum

---

|   |          |           |          |          |
|---|----------|-----------|----------|----------|
| 4 | 2.140000 | 0.5618422 | 1.460000 | 2.830000 |
|---|----------|-----------|----------|----------|

---

Unique Subject Identifier=014700000-0002

Assay variable : PTINR\_VAL1 PT-INR Value

N Mean Standard Deviation Minimum Maximum

---

|   |           |           |          |          |
|---|-----------|-----------|----------|----------|
| 3 | 1.8766667 | 0.0642910 | 1.830000 | 1.950000 |
|---|-----------|-----------|----------|----------|

---

Unique Subject Identifier=014700000-0003

Assay variable : PTINR\_VAL1 PT-INR Value

N Mean Standard Deviation Minimum Maximum

---

|   |          |           |          |          |
|---|----------|-----------|----------|----------|
| 4 | 2.100000 | 0.3108054 | 1.790000 | 2.520000 |
|---|----------|-----------|----------|----------|

---

Unique Subject Identifier=014700000-0005

Assay variable : PTINR\_VAL1 PT-INR Value

N Mean Standard Deviation Minimum Maximum

---

|   |           |           |           |           |
|---|-----------|-----------|-----------|-----------|
| 3 | 2.2733333 | 0.1803700 | 2.1000000 | 2.4600000 |
|---|-----------|-----------|-----------|-----------|

---

Laboratory tests at the time of obtaining Table 2-6 consent, according to the presence or absence of proton-pump inhibitors

Unique Subject Identifier=0147000000-0016

MEANS Procedure

Assay variable : PTINR\_VAL1 PT-INR Value

| N | Mean      | Standard Deviation | Minimum   | Maximum   |
|---|-----------|--------------------|-----------|-----------|
| 3 | 1.7900000 | 0.4853864          | 1.2300000 | 2.0900000 |

Unique Subject Identifier=0154010000-0018

Assay variable : PTINR\_VAL1 PT-INR Value

| N | Mean      | Standard Deviation | Minimum   | Maximum   |
|---|-----------|--------------------|-----------|-----------|
| 5 | 1.7200000 | 0.3033150          | 1.4000000 | 2.2000000 |

Unique Subject Identifier=0155010000-0002

Assay variable : PTINR\_VAL1 PT-INR Value

| N | Mean      | Standard Deviation | Minimum   | Maximum   |
|---|-----------|--------------------|-----------|-----------|
| 3 | 2.5333333 | 0.3511885          | 2.2000000 | 2.9000000 |

Unique Subject Identifier=0161000000-0007



Assay variable : PTINR\_VAL1 PT-INR Value

N Mean Standard Deviation Minimum Maximum

---

|   |           |           |           |           |
|---|-----------|-----------|-----------|-----------|
| 5 | 2.3540000 | 0.2361779 | 2.1000000 | 2.7000000 |
|---|-----------|-----------|-----------|-----------|

---

Laboratory tests at the time of obtaining Table 2-6 consent, according to the presence or absence of proton-pump inhibitors

Unique Subject Identifier=0161000000-0009

MEANS Procedure

Assay variable : PTINR\_VAL1 PT-INR Value

N Mean Standard Deviation Minimum Maximum

---

|   |           |           |           |           |
|---|-----------|-----------|-----------|-----------|
| 6 | 2.1766667 | 0.1732820 | 2.0000000 | 2.4800000 |
|---|-----------|-----------|-----------|-----------|

---

Unique Subject Identifier=0161000000-0010

Assay variable : PTINR\_VAL1 PT-INR Value

N Mean Standard Deviation Minimum Maximum

---

|   |           |           |           |           |
|---|-----------|-----------|-----------|-----------|
| 6 | 2.3066667 | 0.1711919 | 2.1300000 | 2.6000000 |
|---|-----------|-----------|-----------|-----------|

---

Unique Subject Identifier=0161000000-0014

Assay variable : PTINR\_VAL1 PT-INR Value

N Mean Standard Deviation Minimum Maximum

---

|   |           |           |           |           |
|---|-----------|-----------|-----------|-----------|
| 6 | 2.1716667 | 0.2199470 | 1.8400000 | 2.3700000 |
|---|-----------|-----------|-----------|-----------|

---

Unique Subject Identifier=0162000000-0002

Assay variable : PTINR\_VAL1 PT-INR Value

N Mean Standard Deviation Minimum Maximum

---

|   |           |           |           |           |
|---|-----------|-----------|-----------|-----------|
| 4 | 1.4850000 | 0.3445287 | 1.0400000 | 1.8800000 |
|---|-----------|-----------|-----------|-----------|

---

Laboratory tests at the time of obtaining Table 2-6 consent, according to the presence or absence of proton-pump inhibitors

Unique Subject Identifier=0165000000-0005

MEANS Procedure

Assay variable : PTINR\_VAL1 PT-INR Value

| N | Mean      | Standard Deviation | Minimum   | Maximum   |
|---|-----------|--------------------|-----------|-----------|
| 4 | 1.9300000 | 0.1540563          | 1.7700000 | 2.0900000 |

Unique Subject Identifier=0165000000-0012

Assay variable : PTINR\_VAL1 PT-INR Value

| N | Mean      | Standard Deviation | Minimum   | Maximum   |
|---|-----------|--------------------|-----------|-----------|
| 5 | 2.2620000 | 0.5316672          | 1.6800000 | 3.1300000 |

Unique Subject Identifier=0165000000-0015

Assay variable : PTINR\_VAL1 PT-INR Value

| N | Mean      | Standard Deviation | Minimum   | Maximum   |
|---|-----------|--------------------|-----------|-----------|
| 3 | 2.6666667 | 0.8590887          | 1.9800000 | 3.6300000 |

Unique Subject Identifier=0166000000-0027

Assay variable : PTINR\_VAL1 PT-INR Value

N Mean Standard Deviation Minimum Maximum

---

|   |          |           |           |           |
|---|----------|-----------|-----------|-----------|
| 3 | 2.166667 | 0.4495924 | 1.7800000 | 2.6600000 |
|---|----------|-----------|-----------|-----------|

---

Laboratory tests at the time of obtaining Table 2-6 consent, according to the presence or absence of proton-pump inhibitors

Unique Subject Identifier=016600000-0031

MEANS Procedure

Assay variable : PTINR\_VAL1 PT-INR Value

N Mean Standard Deviation Minimum Maximum

---

|   |           |           |           |           |
|---|-----------|-----------|-----------|-----------|
| 3 | 2.0333333 | 0.3536005 | 1.6300000 | 2.2900000 |
|---|-----------|-----------|-----------|-----------|

---

Unique Subject Identifier=016600000-0035

Assay variable : PTINR\_VAL1 PT-INR Value

N Mean Standard Deviation Minimum Maximum

---

|   |           |           |           |           |
|---|-----------|-----------|-----------|-----------|
| 2 | 1.8450000 | 0.2474874 | 1.6700000 | 2.0200000 |
|---|-----------|-----------|-----------|-----------|

---

Unique Subject Identifier=016600000-0036

Assay variable : PTINR\_VAL1 PT-INR Value

N Mean Standard Deviation Minimum Maximum

---

|   |           |           |           |           |
|---|-----------|-----------|-----------|-----------|
| 2 | 1.8350000 | 0.5020458 | 1.4800000 | 2.1900000 |
|---|-----------|-----------|-----------|-----------|

---

Unique Subject Identifier=016600000-0043

Assay variable : PTINR\_VAL1 PT-INR Value

N Mean Standard Deviation Minimum Maximum

---

|   |          |           |          |          |
|---|----------|-----------|----------|----------|
| 2 | 2.360000 | 0.8485281 | 1.760000 | 2.960000 |
|---|----------|-----------|----------|----------|

---

Laboratory tests at the time of obtaining Table 2-6 consent, according to the presence or absence of proton-pump inhibitors

Unique Subject Identifier=016600000-0053

MEANS Procedure

Assay variable : PTINR\_VAL1 PT-INR Value

N Mean Standard Deviation Minimum Maximum

---

|   |          |           |          |          |
|---|----------|-----------|----------|----------|
| 6 | 2.400000 | 0.3407052 | 2.140000 | 3.010000 |
|---|----------|-----------|----------|----------|

---

Unique Subject Identifier=016600000-0056

Assay variable : PTINR\_VAL1 PT-INR Value

N Mean Standard Deviation Minimum Maximum

---

|   |          |           |          |          |
|---|----------|-----------|----------|----------|
| 5 | 1.776000 | 0.3803682 | 1.430000 | 2.390000 |
|---|----------|-----------|----------|----------|

---

Unique Subject Identifier=016600000-0059

Assay variable : PTINR\_VAL1 PT-INR Value

N Mean Standard Deviation Minimum Maximum

---

|   |          |           |          |          |
|---|----------|-----------|----------|----------|
| 2 | 1.555000 | 0.0212132 | 1.540000 | 1.570000 |
|---|----------|-----------|----------|----------|

---

Unique Subject Identifier=016600000-0063



Assay variable : PTINR\_VAL1 PT-INR Value

N Mean Standard Deviation Minimum Maximum

---

|   |          |           |          |          |
|---|----------|-----------|----------|----------|
| 2 | 2.620000 | 0.3959798 | 2.340000 | 2.900000 |
|---|----------|-----------|----------|----------|

---

Laboratory tests at the time of obtaining Table 2-6 consent, according to the presence or absence of proton-pump inhibitors

Unique Subject Identifier=0168000000-0004

MEANS Procedure

Assay variable : PTINR\_VAL1 PT-INR Value

N Mean Standard Deviation Minimum Maximum

---

|   |           |  |           |           |
|---|-----------|--|-----------|-----------|
| 1 | 1.6600000 |  | 1.6600000 | 1.6600000 |
|---|-----------|--|-----------|-----------|

---

Unique Subject Identifier=0170000000-0001

Assay variable : PTINR\_VAL1 PT-INR Value

N Mean Standard Deviation Minimum Maximum

---

|   |           |           |           |           |
|---|-----------|-----------|-----------|-----------|
| 5 | 2.0320000 | 0.1811629 | 1.8300000 | 2.3100000 |
|---|-----------|-----------|-----------|-----------|

---

Unique Subject Identifier=0170000000-0003

Assay variable : PTINR\_VAL1 PT-INR Value

N Mean Standard Deviation Minimum Maximum

---

|   |           |           |           |           |
|---|-----------|-----------|-----------|-----------|
| 3 | 1.7100000 | 0.0435890 | 1.6800000 | 1.7600000 |
|---|-----------|-----------|-----------|-----------|

---

Unique Subject Identifier=0170000000-0004

Assay variable : PTINR\_VAL1 PT-INR Value

N Mean Standard Deviation Minimum Maximum

---

|   |           |           |           |           |
|---|-----------|-----------|-----------|-----------|
| 6 | 1.9316667 | 0.1543265 | 1.6500000 | 2.1000000 |
|---|-----------|-----------|-----------|-----------|

---

Laboratory tests at the time of obtaining Table 2-6 consent, according to the presence or absence of proton-pump inhibitors

Unique Subject Identifier=0170000000-0005

MEANS Procedure

Assay variable : PTINR\_VAL1 PT-INR Value

N Mean Standard Deviation Minimum Maximum

---

|   |           |           |           |           |
|---|-----------|-----------|-----------|-----------|
| 5 | 1.6840000 | 0.2586117 | 1.2900000 | 1.9700000 |
|---|-----------|-----------|-----------|-----------|

---

Unique Subject Identifier=0170000000-0007

Assay variable : PTINR\_VAL1 PT-INR Value

N Mean Standard Deviation Minimum Maximum

---

|   |           |           |           |           |
|---|-----------|-----------|-----------|-----------|
| 6 | 2.0150000 | 0.7322773 | 1.3900000 | 3.4300000 |
|---|-----------|-----------|-----------|-----------|

---

Unique Subject Identifier=0170000000-0011

Assay variable : PTINR\_VAL1 PT-INR Value

N Mean Standard Deviation Minimum Maximum

---

|   |           |           |           |           |
|---|-----------|-----------|-----------|-----------|
| 6 | 1.8316667 | 0.2192183 | 1.5300000 | 2.1700000 |
|---|-----------|-----------|-----------|-----------|

---

Unique Subject Identifier=0170000000-0017

Assay variable : PTINR\_VAL1 PT-INR Value

N Mean Standard Deviation Minimum Maximum

---

|   |           |           |           |           |
|---|-----------|-----------|-----------|-----------|
| 2 | 1.5650000 | 0.1626346 | 1.4500000 | 1.6800000 |
|---|-----------|-----------|-----------|-----------|

---

Laboratory tests at the time of obtaining Table 2-6 consent, according to the presence or absence of proton-pump inhibitors

Unique Subject Identifier=0170000000-0018

MEANS Procedure

Assay variable : PTINR\_VAL1 PT-INR Value

| N | Mean      | Standard Deviation | Minimum   | Maximum   |
|---|-----------|--------------------|-----------|-----------|
| 3 | 1.5433333 | 0.2145538          | 1.4000000 | 1.7900000 |

Unique Subject Identifier=0170000000-0020

Assay variable : PTINR\_VAL1 PT-INR Value

| N | Mean      | Standard Deviation | Minimum   | Maximum   |
|---|-----------|--------------------|-----------|-----------|
| 3 | 1.7366667 | 0.1457166          | 1.5700000 | 1.8400000 |

Unique Subject Identifier=0177100000-0004

Assay variable : PTINR\_VAL1 PT-INR Value

| N | Mean      | Standard Deviation | Minimum   | Maximum   |
|---|-----------|--------------------|-----------|-----------|
| 4 | 1.6575000 | 0.3102015          | 1.2300000 | 1.9500000 |

Unique Subject Identifier=0177100000-0005

Assay variable : PTINR\_VAL1 PT-INR Value

N Mean Standard Deviation Minimum Maximum

---

|   |           |           |           |           |
|---|-----------|-----------|-----------|-----------|
| 3 | 2.6233333 | 1.0400641 | 1.8700000 | 3.8100000 |
|---|-----------|-----------|-----------|-----------|

---

Laboratory tests at the time of obtaining Table 2-6 consent, according to the presence or absence of proton-pump inhibitors

Unique Subject Identifier=0177100000-0006

MEANS Procedure

Assay variable : PTINR\_VAL1 PT-INR Value

| N | Mean      | Standard Deviation | Minimum   | Maximum   |
|---|-----------|--------------------|-----------|-----------|
| 2 | 2.0950000 | 0.0636396          | 2.0500000 | 2.1400000 |

Unique Subject Identifier=0177100000-0008

Assay variable : PTINR\_VAL1 PT-INR Value

| N | Mean      | Standard Deviation | Minimum   | Maximum   |
|---|-----------|--------------------|-----------|-----------|
| 5 | 1.5720000 | 0.5142665          | 1.1600000 | 2.4600000 |

Unique Subject Identifier=0177100000-0021

Assay variable : PTINR\_VAL1 PT-INR Value

| N | Mean      | Standard Deviation | Minimum   | Maximum   |
|---|-----------|--------------------|-----------|-----------|
| 6 | 1.7683333 | 0.1376106          | 1.5300000 | 1.8700000 |

Unique Subject Identifier=0177100000-0046



Assay variable : PTINR\_VAL1 PT-INR Value

N Mean Standard Deviation Minimum Maximum

---

|   |           |           |           |           |
|---|-----------|-----------|-----------|-----------|
| 5 | 1.7960000 | 0.2356480 | 1.5000000 | 2.1600000 |
|---|-----------|-----------|-----------|-----------|

---

Laboratory tests at the time of obtaining Table 2-6 consent, according to the presence or absence of proton-pump inhibitors

Unique Subject Identifier=0177100000-0047

MEANS Procedure

Assay variable : PTINR\_VAL1 PT-INR Value

N Mean Standard Deviation Minimum Maximum

---

|   |           |           |           |           |
|---|-----------|-----------|-----------|-----------|
| 4 | 2.0475000 | 0.7650000 | 1.2600000 | 3.0900000 |
|---|-----------|-----------|-----------|-----------|

---

Unique Subject Identifier=0177100000-0049

Assay variable : PTINR\_VAL1 PT-INR Value

N Mean Standard Deviation Minimum Maximum

---

|   |           |           |           |           |
|---|-----------|-----------|-----------|-----------|
| 6 | 2.1883333 | 1.2622427 | 1.2800000 | 4.5700000 |
|---|-----------|-----------|-----------|-----------|

---

Unique Subject Identifier=0177100000-0059

Assay variable : PTINR\_VAL1 PT-INR Value

N Mean Standard Deviation Minimum Maximum

---

|   |           |           |           |           |
|---|-----------|-----------|-----------|-----------|
| 4 | 2.1500000 | 0.5255473 | 1.6200000 | 2.7000000 |
|---|-----------|-----------|-----------|-----------|

---

Unique Subject Identifier=0178100000-0002

Assay variable : PTINR\_VAL1 PT-INR Value

N Mean Standard Deviation Minimum Maximum

---

|   |           |           |           |           |
|---|-----------|-----------|-----------|-----------|
| 2 | 2.4250000 | 0.1767767 | 2.3000000 | 2.5500000 |
|---|-----------|-----------|-----------|-----------|

---

Laboratory tests at the time of obtaining Table 2-6 consent, according to the presence or absence of proton-pump inhibitors

Unique Subject Identifier=0178100000-0005

MEANS Procedure

Assay variable : PTINR\_VAL1 PT-INR Value

N Mean Standard Deviation Minimum Maximum

---

|   |           |           |           |           |
|---|-----------|-----------|-----------|-----------|
| 4 | 1.8325000 | 0.1774589 | 1.6000000 | 1.9900000 |
|---|-----------|-----------|-----------|-----------|

---

Unique Subject Identifier=0178100000-0016

Assay variable : PTINR\_VAL1 PT-INR Value

N Mean Standard Deviation Minimum Maximum

---

|   |           |           |           |           |
|---|-----------|-----------|-----------|-----------|
| 4 | 2.1400000 | 0.3703152 | 1.6800000 | 2.5700000 |
|---|-----------|-----------|-----------|-----------|

---

Unique Subject Identifier=0178100000-0018

Assay variable : PTINR\_VAL1 PT-INR Value

N Mean Standard Deviation Minimum Maximum

---

|   |           |           |           |           |
|---|-----------|-----------|-----------|-----------|
| 5 | 1.9420000 | 0.3721156 | 1.2900000 | 2.2100000 |
|---|-----------|-----------|-----------|-----------|

---

Unique Subject Identifier=0178100000-0020

Assay variable : PTINR\_VAL1 PT-INR Value

N Mean Standard Deviation Minimum Maximum

---

|   |           |           |           |           |
|---|-----------|-----------|-----------|-----------|
| 3 | 1.9466667 | 0.3900427 | 1.5000000 | 2.2200000 |
|---|-----------|-----------|-----------|-----------|

---

Laboratory tests at the time of obtaining Table 2-6 consent, according to the presence or absence of proton-pump inhibitors

Unique Subject Identifier=0178100000-0022

MEANS Procedure

Assay variable : PTINR\_VAL1 PT-INR Value

N Mean Standard Deviation Minimum Maximum

---

|   |           |           |           |           |
|---|-----------|-----------|-----------|-----------|
| 4 | 2.1325000 | 0.2404683 | 1.9200000 | 2.4600000 |
|---|-----------|-----------|-----------|-----------|

---

Unique Subject Identifier=0178100000-0024

Assay variable : PTINR\_VAL1 PT-INR Value

N Mean Standard Deviation Minimum Maximum

---

|   |           |           |           |           |
|---|-----------|-----------|-----------|-----------|
| 5 | 1.6500000 | 0.2331309 | 1.2500000 | 1.8600000 |
|---|-----------|-----------|-----------|-----------|

---

Unique Subject Identifier=0178100000-0025

Assay variable : PTINR\_VAL1 PT-INR Value

N Mean Standard Deviation Minimum Maximum

---

|   |           |           |           |           |
|---|-----------|-----------|-----------|-----------|
| 4 | 2.5775000 | 0.5395291 | 2.0200000 | 3.1800000 |
|---|-----------|-----------|-----------|-----------|

---

Unique Subject Identifier=0178100000-0026

Assay variable : PTINR\_VAL1 PT-INR Value

N Mean Standard Deviation Minimum Maximum

---

|   |           |           |           |           |
|---|-----------|-----------|-----------|-----------|
| 4 | 2.2275000 | 0.2595348 | 2.0500000 | 2.6000000 |
|---|-----------|-----------|-----------|-----------|

---

Laboratory tests at the time of obtaining Table 2-6 consent, according to the presence or absence of proton-pump inhibitors

Unique Subject Identifier=0178100000-0028

MEANS Procedure

Assay variable : PTINR\_VAL1 PT-INR Value

N Mean Standard Deviation Minimum Maximum

---

|   |           |           |           |           |
|---|-----------|-----------|-----------|-----------|
| 4 | 2.4700000 | 0.6106281 | 1.9900000 | 3.3500000 |
|---|-----------|-----------|-----------|-----------|

---

Unique Subject Identifier=0178100000-0032

Assay variable : PTINR\_VAL1 PT-INR Value

N Mean Standard Deviation Minimum Maximum

---

|   |           |           |           |           |
|---|-----------|-----------|-----------|-----------|
| 4 | 2.3750000 | 0.1332917 | 2.2300000 | 2.5200000 |
|---|-----------|-----------|-----------|-----------|

---

Unique Subject Identifier=0178100000-0034

Assay variable : PTINR\_VAL1 PT-INR Value

N Mean Standard Deviation Minimum Maximum

---

|   |           |           |           |           |
|---|-----------|-----------|-----------|-----------|
| 4 | 2.1450000 | 0.3443351 | 1.8600000 | 2.5700000 |
|---|-----------|-----------|-----------|-----------|

---

Unique Subject Identifier=0178100000-0035



Assay variable : PTINR\_VAL1 PT-INR Value

N Mean Standard Deviation Minimum Maximum

---

|   |           |           |           |           |
|---|-----------|-----------|-----------|-----------|
| 4 | 1.8975000 | 0.1925920 | 1.6400000 | 2.0500000 |
|---|-----------|-----------|-----------|-----------|

---

Laboratory tests at the time of obtaining Table 2-6 consent, according to the presence or absence of proton-pump inhibitors

Unique Subject Identifier=0178100000-0036

MEANS Procedure

Assay variable : PTINR\_VAL1 PT-INR Value

N Mean Standard Deviation Minimum Maximum

---

|   |           |           |           |           |
|---|-----------|-----------|-----------|-----------|
| 4 | 2.1075000 | 0.1736615 | 1.9400000 | 2.3500000 |
|---|-----------|-----------|-----------|-----------|

---

Unique Subject Identifier=0178100000-0037

Assay variable : PTINR\_VAL1 PT-INR Value

N Mean Standard Deviation Minimum Maximum

---

|   |           |           |           |           |
|---|-----------|-----------|-----------|-----------|
| 4 | 2.4725000 | 0.1510794 | 2.2600000 | 2.5900000 |
|---|-----------|-----------|-----------|-----------|

---

Unique Subject Identifier=0178100000-0052

Assay variable : PTINR\_VAL1 PT-INR Value

N Mean Standard Deviation Minimum Maximum

---

|   |           |           |           |           |
|---|-----------|-----------|-----------|-----------|
| 4 | 1.8575000 | 0.1530523 | 1.7100000 | 2.0700000 |
|---|-----------|-----------|-----------|-----------|

---

Unique Subject Identifier=0178100000-0055

Assay variable : PTINR\_VAL1 PT-INR Value

N Mean Standard Deviation Minimum Maximum

---

|   |           |           |           |           |
|---|-----------|-----------|-----------|-----------|
| 5 | 1.5840000 | 0.3295907 | 1.1900000 | 1.8600000 |
|---|-----------|-----------|-----------|-----------|

---

Laboratory tests at the time of obtaining Table 2-6 consent, according to the presence or absence of proton-pump inhibitors

Unique Subject Identifier=0178100000-0057

MEANS Procedure

Assay variable : PTINR\_VAL1 PT-INR Value

| N | Mean     | Standard Deviation | Minimum  | Maximum  |
|---|----------|--------------------|----------|----------|
| 2 | 1.850000 | 0.1131371          | 1.770000 | 1.930000 |

Unique Subject Identifier=0178100000-0059

Assay variable : PTINR\_VAL1 PT-INR Value

| N | Mean     | Standard Deviation | Minimum  | Maximum  |
|---|----------|--------------------|----------|----------|
| 4 | 2.357500 | 0.3051093          | 2.020000 | 2.750000 |

Unique Subject Identifier=0178100000-0063

Assay variable : PTINR\_VAL1 PT-INR Value

| N | Mean     | Standard Deviation | Minimum  | Maximum  |
|---|----------|--------------------|----------|----------|
| 5 | 2.344000 | 0.5912106          | 1.740000 | 3.310000 |

Unique Subject Identifier=0178100000-0066

Assay variable : PTINR\_VAL1 PT-INR Value

N Mean Standard Deviation Minimum Maximum

---

|   |           |           |           |           |
|---|-----------|-----------|-----------|-----------|
| 4 | 1.4700000 | 0.0983192 | 1.3800000 | 1.6000000 |
|---|-----------|-----------|-----------|-----------|

---

Laboratory tests at the time of obtaining Table 2-6 consent, according to the presence or absence of proton-pump inhibitors

Unique Subject Identifier=0178100000-0069

MEANS Procedure

Assay variable : PTINR\_VAL1 PT-INR Value

N Mean Standard Deviation Minimum Maximum

---

|   |           |           |           |           |
|---|-----------|-----------|-----------|-----------|
| 3 | 2.0066667 | 0.1504438 | 1.9100000 | 2.1800000 |
|---|-----------|-----------|-----------|-----------|

---

Unique Subject Identifier=0180000000-0006

Assay variable : PTINR\_VAL1 PT-INR Value

N Mean Standard Deviation Minimum Maximum

---

|   |           |           |           |           |
|---|-----------|-----------|-----------|-----------|
| 5 | 2.1520000 | 0.3898333 | 1.9200000 | 2.8400000 |
|---|-----------|-----------|-----------|-----------|

---

Unique Subject Identifier=0180000000-0007

Assay variable : PTINR\_VAL1 PT-INR Value

N Mean Standard Deviation Minimum Maximum

---

|   |           |           |           |           |
|---|-----------|-----------|-----------|-----------|
| 3 | 1.8466667 | 0.7490216 | 1.3700000 | 2.7100000 |
|---|-----------|-----------|-----------|-----------|

---

Unique Subject Identifier=0180000000-0011

Assay variable : PTINR\_VAL1 PT-INR Value

N Mean Standard Deviation Minimum Maximum

---

|   |           |           |           |           |
|---|-----------|-----------|-----------|-----------|
| 6 | 2.2966667 | 0.5308358 | 1.5600000 | 2.9700000 |
|---|-----------|-----------|-----------|-----------|

---

Laboratory tests at the time of obtaining Table 2-6 consent, according to the presence or absence of proton-pump inhibitors

Unique Subject Identifier=018000000-0015

MEANS Procedure

Assay variable : PTINR\_VAL1 PT-INR Value

N Mean Standard Deviation Minimum Maximum

---

|   |           |           |           |           |
|---|-----------|-----------|-----------|-----------|
| 4 | 1.9575000 | 0.2581182 | 1.6300000 | 2.2600000 |
|---|-----------|-----------|-----------|-----------|

---

Unique Subject Identifier=018100000-0002

Assay variable : PTINR\_VAL1 PT-INR Value

N Mean Standard Deviation Minimum Maximum

---

|   |           |           |           |           |
|---|-----------|-----------|-----------|-----------|
| 5 | 2.0420000 | 0.6430163 | 1.2100000 | 2.9700000 |
|---|-----------|-----------|-----------|-----------|

---

Unique Subject Identifier=018100000-0003

Assay variable : PTINR\_VAL1 PT-INR Value

N Mean Standard Deviation Minimum Maximum

---

|   |           |           |           |           |
|---|-----------|-----------|-----------|-----------|
| 2 | 1.8150000 | 0.2757716 | 1.6200000 | 2.0100000 |
|---|-----------|-----------|-----------|-----------|

---

Unique Subject Identifier=018100000-0005



Assay variable : PTINR\_VAL1 PT-INR Value

N Mean Standard Deviation Minimum Maximum

---

|   |          |           |          |          |
|---|----------|-----------|----------|----------|
| 6 | 1.980000 | 0.3001333 | 1.610000 | 2.310000 |
|---|----------|-----------|----------|----------|

---

Laboratory tests at the time of obtaining Table 2-6 consent, according to the presence or absence of proton-pump inhibitors

Unique Subject Identifier=0189000000-0012

MEANS Procedure

Assay variable : PTINR\_VAL1 PT-INR Value

| N | Mean      | Standard Deviation | Minimum   | Maximum   |
|---|-----------|--------------------|-----------|-----------|
| 3 | 1.8700000 | 0.1400000          | 1.7300000 | 2.0100000 |

Unique Subject Identifier=0189000000-0013

Assay variable : PTINR\_VAL1 PT-INR Value

| N | Mean      | Standard Deviation | Minimum   | Maximum   |
|---|-----------|--------------------|-----------|-----------|
| 6 | 2.1350000 | 0.3800395          | 1.7000000 | 2.7400000 |

Unique Subject Identifier=0189000000-0026

Assay variable : PTINR\_VAL1 PT-INR Value

| N | Mean      | Standard Deviation | Minimum   | Maximum   |
|---|-----------|--------------------|-----------|-----------|
| 2 | 2.0650000 | 0.2192031          | 1.9100000 | 2.2200000 |

Unique Subject Identifier=0189000000-0035

Assay variable : PTINR\_VAL1 PT-INR Value

N Mean Standard Deviation Minimum Maximum

---

|   |           |           |           |           |
|---|-----------|-----------|-----------|-----------|
| 3 | 1.7900000 | 0.3850974 | 1.4100000 | 2.1800000 |
|---|-----------|-----------|-----------|-----------|

---

Laboratory tests at the time of obtaining Table 2-6 consent, according to the presence or absence of proton-pump inhibitors

Unique Subject Identifier=0189000000-0043

MEANS Procedure

Assay variable : PTINR\_VAL1 PT-INR Value

N Mean Standard Deviation Minimum Maximum

---

|   |           |           |           |           |
|---|-----------|-----------|-----------|-----------|
| 4 | 1.6900000 | 0.1845716 | 1.5400000 | 1.9300000 |
|---|-----------|-----------|-----------|-----------|

---

Unique Subject Identifier=0189000000-0046

Assay variable : PTINR\_VAL1 PT-INR Value

N Mean Standard Deviation Minimum Maximum

---

|   |           |           |           |           |
|---|-----------|-----------|-----------|-----------|
| 3 | 2.6200000 | 0.4150904 | 2.2100000 | 3.0400000 |
|---|-----------|-----------|-----------|-----------|

---

Unique Subject Identifier=0205100000-0001

Assay variable : PTINR\_VAL1 PT-INR Value

N Mean Standard Deviation Minimum Maximum

---

|   |           |           |           |           |
|---|-----------|-----------|-----------|-----------|
| 3 | 1.8133333 | 0.1703917 | 1.7100000 | 2.0100000 |
|---|-----------|-----------|-----------|-----------|

---

Unique Subject Identifier=0205100000-0002

Assay variable : PTINR\_VAL1 PT-INR Value

N Mean Standard Deviation Minimum Maximum

---

|   |           |           |           |           |
|---|-----------|-----------|-----------|-----------|
| 4 | 2.2575000 | 0.2478407 | 2.0300000 | 2.5700000 |
|---|-----------|-----------|-----------|-----------|

---

Laboratory tests at the time of obtaining Table 2-6 consent, according to the presence or absence of proton-pump inhibitors

Unique Subject Identifier=0205100000-0006

MEANS Procedure

Assay variable : PTINR\_VAL1 PT-INR Value

N Mean Standard Deviation Minimum Maximum

---

|   |           |           |           |           |
|---|-----------|-----------|-----------|-----------|
| 3 | 1.8000000 | 0.3700000 | 1.4000000 | 2.1300000 |
|---|-----------|-----------|-----------|-----------|

---

Unique Subject Identifier=0205100000-0013

Assay variable : PTINR\_VAL1 PT-INR Value

N Mean Standard Deviation Minimum Maximum

---

|   |           |           |           |           |
|---|-----------|-----------|-----------|-----------|
| 2 | 2.6600000 | 0.0989949 | 2.5900000 | 2.7300000 |
|---|-----------|-----------|-----------|-----------|

---

Unique Subject Identifier=0206100000-0004

Assay variable : PTINR\_VAL1 PT-INR Value

N Mean Standard Deviation Minimum Maximum

---

|   |           |           |           |           |
|---|-----------|-----------|-----------|-----------|
| 6 | 2.1800000 | 0.3240988 | 1.8500000 | 2.5700000 |
|---|-----------|-----------|-----------|-----------|

---

Unique Subject Identifier=0206100000-0005

Assay variable : PTINR\_VAL1 PT-INR Value

N Mean Standard Deviation Minimum Maximum

---

|   |           |           |           |           |
|---|-----------|-----------|-----------|-----------|
| 5 | 1.7040000 | 0.3691612 | 1.3300000 | 2.2300000 |
|---|-----------|-----------|-----------|-----------|

---

Laboratory tests at the time of obtaining Table 2-6 consent, according to the presence or absence of proton-pump inhibitors

Unique Subject Identifier=0206100000-0006

MEANS Procedure

Assay variable : PTINR\_VAL1 PT-INR Value

N Mean Standard Deviation Minimum Maximum

---

|   |           |           |           |           |
|---|-----------|-----------|-----------|-----------|
| 6 | 1.8666667 | 0.3144307 | 1.3600000 | 2.2400000 |
|---|-----------|-----------|-----------|-----------|

---

Unique Subject Identifier=0207100000-0005

Assay variable : PTINR\_VAL1 PT-INR Value

N Mean Standard Deviation Minimum Maximum

---

|   |           |  |           |           |
|---|-----------|--|-----------|-----------|
| 1 | 2.0600000 |  | 2.0600000 | 2.0600000 |
|---|-----------|--|-----------|-----------|

---

Unique Subject Identifier=0207100000-0011

Assay variable : PTINR\_VAL1 PT-INR Value

N Mean Standard Deviation Minimum Maximum

---

|   |           |  |           |           |
|---|-----------|--|-----------|-----------|
| 1 | 1.9000000 |  | 1.9000000 | 1.9000000 |
|---|-----------|--|-----------|-----------|

---

Unique Subject Identifier=0210000000-0006



Assay variable : PTINR\_VAL1 PT-INR Value

N Mean Standard Deviation Minimum Maximum

---

|   |          |           |          |          |
|---|----------|-----------|----------|----------|
| 5 | 2.500000 | 0.3316625 | 2.200000 | 2.900000 |
|---|----------|-----------|----------|----------|

---

Laboratory tests at the time of obtaining Table 2-6 consent, according to the presence or absence of proton-pump inhibitors

Unique Subject Identifier=021000000-0011

MEANS Procedure

Assay variable : PTINR\_VAL1 PT-INR Value

N Mean Standard Deviation Minimum Maximum

---

|   |           |           |           |           |
|---|-----------|-----------|-----------|-----------|
| 5 | 2.0400000 | 0.2966479 | 1.7000000 | 2.4000000 |
|---|-----------|-----------|-----------|-----------|

---

Unique Subject Identifier=021100000-0001

Assay variable : PTINR\_VAL1 PT-INR Value

N Mean Standard Deviation Minimum Maximum

---

|   |           |           |           |           |
|---|-----------|-----------|-----------|-----------|
| 6 | 1.7983333 | 0.0679461 | 1.7100000 | 1.8800000 |
|---|-----------|-----------|-----------|-----------|

---

Unique Subject Identifier=021400000-0003

Assay variable : PTINR\_VAL1 PT-INR Value

N Mean Standard Deviation Minimum Maximum

---

|   |           |           |           |           |
|---|-----------|-----------|-----------|-----------|
| 4 | 1.9250000 | 0.1642153 | 1.7800000 | 2.1500000 |
|---|-----------|-----------|-----------|-----------|

---

Unique Subject Identifier=021400000-0011

Assay variable : PTINR\_VAL1 PT-INR Value

N Mean Standard Deviation Minimum Maximum

---

|   |           |           |           |           |
|---|-----------|-----------|-----------|-----------|
| 6 | 1.6166667 | 0.2517671 | 1.2900000 | 1.9000000 |
|---|-----------|-----------|-----------|-----------|

---

Laboratory tests at the time of obtaining Table 2-6 consent, according to the presence or absence of proton-pump inhibitors

Unique Subject Identifier=0218000000-0005

MEANS Procedure

Assay variable : PTINR\_VAL1 PT-INR Value

N Mean Standard Deviation Minimum Maximum

---

|   |           |           |           |           |
|---|-----------|-----------|-----------|-----------|
| 5 | 1.7120000 | 0.0970567 | 1.6100000 | 1.8500000 |
|---|-----------|-----------|-----------|-----------|

---

Unique Subject Identifier=0218000000-0006

Assay variable : PTINR\_VAL1 PT-INR Value

N Mean Standard Deviation Minimum Maximum

---

|   |           |           |           |           |
|---|-----------|-----------|-----------|-----------|
| 6 | 1.9866667 | 0.2605123 | 1.5900000 | 2.3100000 |
|---|-----------|-----------|-----------|-----------|

---

Unique Subject Identifier=0220000000-0001

Assay variable : PTINR\_VAL1 PT-INR Value

N Mean Standard Deviation Minimum Maximum

---

|   |           |           |           |           |
|---|-----------|-----------|-----------|-----------|
| 3 | 1.4300000 | 0.2553429 | 1.2100000 | 1.7100000 |
|---|-----------|-----------|-----------|-----------|

---

Unique Subject Identifier=0220000000-0003

Assay variable : PTINR\_VAL1 PT-INR Value

N Mean Standard Deviation Minimum Maximum

---

|   |           |           |           |           |
|---|-----------|-----------|-----------|-----------|
| 6 | 2.2166667 | 0.3910328 | 1.5100000 | 2.6300000 |
|---|-----------|-----------|-----------|-----------|

---

Laboratory tests at the time of obtaining Table 2-6 consent, according to the presence or absence of proton-pump inhibitors

Unique Subject Identifier=0220000000-0011

MEANS Procedure

Assay variable : PTINR\_VAL1 PT-INR Value

N Mean Standard Deviation Minimum Maximum

---

|   |           |           |           |           |
|---|-----------|-----------|-----------|-----------|
| 4 | 2.2225000 | 0.2317146 | 1.9700000 | 2.5000000 |
|---|-----------|-----------|-----------|-----------|

---

Unique Subject Identifier=0220000000-0014

Assay variable : PTINR\_VAL1 PT-INR Value

N Mean Standard Deviation Minimum Maximum

---

|   |           |           |           |           |
|---|-----------|-----------|-----------|-----------|
| 3 | 2.1600000 | 0.0556776 | 2.1000000 | 2.2100000 |
|---|-----------|-----------|-----------|-----------|

---

Unique Subject Identifier=0220000000-0018

Assay variable : PTINR\_VAL1 PT-INR Value

N Mean Standard Deviation Minimum Maximum

---

|   |           |           |           |           |
|---|-----------|-----------|-----------|-----------|
| 4 | 2.2825000 | 0.3902456 | 2.0400000 | 2.8600000 |
|---|-----------|-----------|-----------|-----------|

---

Unique Subject Identifier=0220000000-0022

Assay variable : PTINR\_VAL1 PT-INR Value

N Mean Standard Deviation Minimum Maximum

---

|   |           |           |           |           |
|---|-----------|-----------|-----------|-----------|
| 4 | 1.8825000 | 0.1030776 | 1.7300000 | 1.9500000 |
|---|-----------|-----------|-----------|-----------|

---

Laboratory tests at the time of obtaining Table 2-6 consent, according to the presence or absence of proton-pump inhibitors

Unique Subject Identifier=0220000000-0024

MEANS Procedure

Assay variable : PTINR\_VAL1 PT-INR Value

N Mean Standard Deviation Minimum Maximum

---

|   |           |           |           |           |
|---|-----------|-----------|-----------|-----------|
| 3 | 2.1566667 | 0.2196209 | 2.0200000 | 2.4100000 |
|---|-----------|-----------|-----------|-----------|

---

Unique Subject Identifier=0220000000-0026

Assay variable : PTINR\_VAL1 PT-INR Value

N Mean Standard Deviation Minimum Maximum

---

|   |           |           |           |           |
|---|-----------|-----------|-----------|-----------|
| 4 | 2.6825000 | 0.3057641 | 2.3900000 | 3.1000000 |
|---|-----------|-----------|-----------|-----------|

---

Unique Subject Identifier=0220000000-0028

Assay variable : PTINR\_VAL1 PT-INR Value

N Mean Standard Deviation Minimum Maximum

---

|   |           |           |           |           |
|---|-----------|-----------|-----------|-----------|
| 3 | 1.9566667 | 0.2973774 | 1.6400000 | 2.2300000 |
|---|-----------|-----------|-----------|-----------|

---

Unique Subject Identifier=0220000000-0029



Assay variable : PTINR\_VAL1 PT-INR Value

N Mean Standard Deviation Minimum Maximum

---

|   |          |           |          |          |
|---|----------|-----------|----------|----------|
| 4 | 2.425000 | 0.4878183 | 1.800000 | 2.980000 |
|---|----------|-----------|----------|----------|

---

Laboratory tests at the time of obtaining Table 2-6 consent, according to the presence or absence of proton-pump inhibitors

Unique Subject Identifier=0220000000-0030

MEANS Procedure

Assay variable : PTINR\_VAL1 PT-INR Value

N Mean Standard Deviation Minimum Maximum

---

|   |           |           |           |           |
|---|-----------|-----------|-----------|-----------|
| 5 | 2.3060000 | 0.2898793 | 2.0400000 | 2.7900000 |
|---|-----------|-----------|-----------|-----------|

---

Unique Subject Identifier=0220000000-0034

Assay variable : PTINR\_VAL1 PT-INR Value

N Mean Standard Deviation Minimum Maximum

---

|   |           |           |           |           |
|---|-----------|-----------|-----------|-----------|
| 3 | 2.1133333 | 0.3843609 | 1.7000000 | 2.4600000 |
|---|-----------|-----------|-----------|-----------|

---

Unique Subject Identifier=0220000000-0035

Assay variable : PTINR\_VAL1 PT-INR Value

N Mean Standard Deviation Minimum Maximum

---

|   |           |           |           |           |
|---|-----------|-----------|-----------|-----------|
| 5 | 2.1000000 | 0.6643041 | 1.4600000 | 2.9700000 |
|---|-----------|-----------|-----------|-----------|

---

Unique Subject Identifier=0222011000-0011

Assay variable : PTINR\_VAL1 PT-INR Value

N Mean Standard Deviation Minimum Maximum

---

|   |           |           |           |           |
|---|-----------|-----------|-----------|-----------|
| 5 | 1.9480000 | 0.2641401 | 1.5600000 | 2.2100000 |
|---|-----------|-----------|-----------|-----------|

---

Laboratory tests at the time of obtaining Table 2-6 consent, according to the presence or absence of proton-pump inhibitors

Unique Subject Identifier=0222011000-0012

MEANS Procedure

Assay variable : PTINR\_VAL1 PT-INR Value

N Mean Standard Deviation Minimum Maximum

---

|   |           |           |           |           |
|---|-----------|-----------|-----------|-----------|
| 6 | 2.0866667 | 0.3141125 | 1.5900000 | 2.4900000 |
|---|-----------|-----------|-----------|-----------|

---

Unique Subject Identifier=0222011000-0014

Assay variable : PTINR\_VAL1 PT-INR Value

N Mean Standard Deviation Minimum Maximum

---

|   |           |           |           |           |
|---|-----------|-----------|-----------|-----------|
| 5 | 2.2420000 | 0.3429577 | 1.8000000 | 2.6400000 |
|---|-----------|-----------|-----------|-----------|

---

Unique Subject Identifier=0222011000-0015

Assay variable : PTINR\_VAL1 PT-INR Value

N Mean Standard Deviation Minimum Maximum

---

|   |           |           |           |           |
|---|-----------|-----------|-----------|-----------|
| 6 | 2.5283333 | 0.7471658 | 1.5500000 | 3.7500000 |
|---|-----------|-----------|-----------|-----------|

---

Unique Subject Identifier=0222011000-0016

Assay variable : PTINR\_VAL1 PT-INR Value

N Mean Standard Deviation Minimum Maximum

---

|   |           |           |           |           |
|---|-----------|-----------|-----------|-----------|
| 6 | 2.2533333 | 0.3077445 | 1.9000000 | 2.8200000 |
|---|-----------|-----------|-----------|-----------|

---

Laboratory tests at the time of obtaining Table 2-6 consent, according to the presence or absence of proton-pump inhibitors

Unique Subject Identifier=0225001000-0001

MEANS Procedure

Assay variable : PTINR\_VAL1 PT-INR Value

| N | Mean      | Standard Deviation | Minimum   | Maximum   |
|---|-----------|--------------------|-----------|-----------|
| 3 | 1.8900000 | 0.0692820          | 1.8500000 | 1.9700000 |

Unique Subject Identifier=0226010000-0001

Assay variable : PTINR\_VAL1 PT-INR Value

| N | Mean      | Standard Deviation | Minimum   | Maximum   |
|---|-----------|--------------------|-----------|-----------|
| 2 | 1.3250000 | 0.1060660          | 1.2500000 | 1.4000000 |

Unique Subject Identifier=0226010000-0014

Assay variable : PTINR\_VAL1 PT-INR Value

| N | Mean      | Standard Deviation | Minimum   | Maximum   |
|---|-----------|--------------------|-----------|-----------|
| 3 | 2.1166667 | 0.6819335          | 1.5200000 | 2.8600000 |

Unique Subject Identifier=0228100000-0016

Assay variable : PTINR\_VAL1 PT-INR Value

N Mean Standard Deviation Minimum Maximum

---

|   |           |           |           |           |
|---|-----------|-----------|-----------|-----------|
| 5 | 2.2440000 | 0.6254838 | 1.5400000 | 2.8200000 |
|---|-----------|-----------|-----------|-----------|

---

Laboratory tests at the time of obtaining Table 2-6 consent, according to the presence or absence of proton-pump inhibitors

Unique Subject Identifier=0228100000-0027

MEANS Procedure

Assay variable : PTINR\_VAL1 PT-INR Value

| N | Mean      | Standard Deviation | Minimum   | Maximum   |
|---|-----------|--------------------|-----------|-----------|
| 1 | 1.9100000 |                    | 1.9100000 | 1.9100000 |

Unique Subject Identifier=0228100000-0030

Assay variable : PTINR\_VAL1 PT-INR Value

| N | Mean      | Standard Deviation | Minimum   | Maximum   |
|---|-----------|--------------------|-----------|-----------|
| 2 | 2.0750000 | 0.4596194          | 1.7500000 | 2.4000000 |

Unique Subject Identifier=0228100000-0042

Assay variable : PTINR\_VAL1 PT-INR Value

| N | Mean      | Standard Deviation | Minimum   | Maximum   |
|---|-----------|--------------------|-----------|-----------|
| 3 | 1.8566667 | 0.1415392          | 1.7700000 | 2.0200000 |

Unique Subject Identifier=0229100000-0002



Assay variable : PTINR\_VAL1 PT-INR Value

N Mean Standard Deviation Minimum Maximum

---

|   |           |           |           |           |
|---|-----------|-----------|-----------|-----------|
| 5 | 1.6040000 | 0.2085186 | 1.4300000 | 1.9500000 |
|---|-----------|-----------|-----------|-----------|

---

Laboratory tests at the time of obtaining Table 2-6 consent, according to the presence or absence of proton-pump inhibitors

Unique Subject Identifier=0229100000-0010

MEANS Procedure

Assay variable : PTINR\_VAL1 PT-INR Value

N Mean Standard Deviation Minimum Maximum

---

|   |           |           |           |           |
|---|-----------|-----------|-----------|-----------|
| 6 | 2.0566667 | 0.2180520 | 1.6600000 | 2.3200000 |
|---|-----------|-----------|-----------|-----------|

---

Unique Subject Identifier=0229100000-0016

Assay variable : PTINR\_VAL1 PT-INR Value

N Mean Standard Deviation Minimum Maximum

---

|   |           |           |           |           |
|---|-----------|-----------|-----------|-----------|
| 3 | 2.2333333 | 0.1553491 | 2.0600000 | 2.3600000 |
|---|-----------|-----------|-----------|-----------|

---

Unique Subject Identifier=0229100000-0021

Assay variable : PTINR\_VAL1 PT-INR Value

N Mean Standard Deviation Minimum Maximum

---

|   |           |           |           |           |
|---|-----------|-----------|-----------|-----------|
| 3 | 2.0766667 | 0.2193931 | 1.8300000 | 2.2500000 |
|---|-----------|-----------|-----------|-----------|

---

Unique Subject Identifier=0230100000-0003

Assay variable : PTINR\_VAL1 PT-INR Value

N Mean Standard Deviation Minimum Maximum

---

|   |           |           |           |           |
|---|-----------|-----------|-----------|-----------|
| 5 | 2.2280000 | 0.1807484 | 1.9500000 | 2.4000000 |
|---|-----------|-----------|-----------|-----------|

---

Laboratory tests at the time of obtaining Table 2-6 consent, according to the presence or absence of proton-pump inhibitors

Unique Subject Identifier=0231100000-0011

MEANS Procedure

Assay variable : PTINR\_VAL1 PT-INR Value

N Mean Standard Deviation Minimum Maximum

---

|   |           |           |           |           |
|---|-----------|-----------|-----------|-----------|
| 4 | 2.4275000 | 0.2596632 | 2.1300000 | 2.7000000 |
|---|-----------|-----------|-----------|-----------|

---

Unique Subject Identifier=0231100000-0016

Assay variable : PTINR\_VAL1 PT-INR Value

N Mean Standard Deviation Minimum Maximum

---

|   |           |           |           |           |
|---|-----------|-----------|-----------|-----------|
| 6 | 1.5616667 | 0.7512234 | 0.9600000 | 2.9800000 |
|---|-----------|-----------|-----------|-----------|

---

Unique Subject Identifier=0231100000-0018

Assay variable : PTINR\_VAL1 PT-INR Value

N Mean Standard Deviation Minimum Maximum

---

|   |           |           |           |           |
|---|-----------|-----------|-----------|-----------|
| 3 | 2.4833333 | 0.5810622 | 1.8600000 | 3.0100000 |
|---|-----------|-----------|-----------|-----------|

---

Unique Subject Identifier=0231100000-0031

Assay variable : PTINR\_VAL1 PT-INR Value

N Mean Standard Deviation Minimum Maximum

---

|   |           |           |           |           |
|---|-----------|-----------|-----------|-----------|
| 4 | 2.6050000 | 0.2838427 | 2.3500000 | 2.9400000 |
|---|-----------|-----------|-----------|-----------|

---

Laboratory tests at the time of obtaining Table 2-6 consent, according to the presence or absence of proton-pump inhibitors

Unique Subject Identifier=0231100000-0036

MEANS Procedure

Assay variable : PTINR\_VAL1 PT-INR Value

N Mean Standard Deviation Minimum Maximum

---

|   |           |           |           |           |
|---|-----------|-----------|-----------|-----------|
| 3 | 2.3133333 | 0.3952636 | 1.9800000 | 2.7500000 |
|---|-----------|-----------|-----------|-----------|

---

Unique Subject Identifier=1003000000-0001

Assay variable : PTINR\_VAL1 PT-INR Value

N Mean Standard Deviation Minimum Maximum

---

|   |           |           |           |           |
|---|-----------|-----------|-----------|-----------|
| 5 | 2.1320000 | 0.3756594 | 1.6700000 | 2.6500000 |
|---|-----------|-----------|-----------|-----------|

---

Unique Subject Identifier=1003000000-0005

Assay variable : PTINR\_VAL1 PT-INR Value

N Mean Standard Deviation Minimum Maximum

---

|   |           |           |           |           |
|---|-----------|-----------|-----------|-----------|
| 5 | 1.9140000 | 0.3326860 | 1.6400000 | 2.3800000 |
|---|-----------|-----------|-----------|-----------|

---

Unique Subject Identifier=1003000000-0015

Assay variable : PTINR\_VAL1 PT-INR Value

N Mean Standard Deviation Minimum Maximum

---

|   |           |           |           |           |
|---|-----------|-----------|-----------|-----------|
| 5 | 2.0080000 | 0.1275539 | 1.9200000 | 2.2100000 |
|---|-----------|-----------|-----------|-----------|

---

Laboratory tests at the time of obtaining Table 2-6 consent, according to the presence or absence of proton-pump inhibitors

Unique Subject Identifier=1004000000-0003

MEANS Procedure

Assay variable : PTINR\_VAL1 PT-INR Value

N Mean Standard Deviation Minimum Maximum

---

|   |           |           |           |           |
|---|-----------|-----------|-----------|-----------|
| 6 | 1.7833333 | 0.5741661 | 1.2000000 | 2.6000000 |
|---|-----------|-----------|-----------|-----------|

---

Unique Subject Identifier=1005000000-0003

Assay variable : PTINR\_VAL1 PT-INR Value

N Mean Standard Deviation Minimum Maximum

---

|   |           |           |           |           |
|---|-----------|-----------|-----------|-----------|
| 5 | 1.7580000 | 0.0813634 | 1.6800000 | 1.8800000 |
|---|-----------|-----------|-----------|-----------|

---

Unique Subject Identifier=1005000000-0007

Assay variable : PTINR\_VAL1 PT-INR Value

N Mean Standard Deviation Minimum Maximum

---

|   |           |           |           |           |
|---|-----------|-----------|-----------|-----------|
| 5 | 2.0040000 | 0.1986957 | 1.6600000 | 2.1600000 |
|---|-----------|-----------|-----------|-----------|

---

Unique Subject Identifier=1005000000-0015



Assay variable : PTINR\_VAL1 PT-INR Value

N Mean Standard Deviation Minimum Maximum

---

|   |           |           |           |           |
|---|-----------|-----------|-----------|-----------|
| 6 | 1.8366667 | 0.1015218 | 1.6900000 | 1.9400000 |
|---|-----------|-----------|-----------|-----------|

---

Laboratory tests at the time of obtaining Table 2-6 consent, according to the presence or absence of proton-pump inhibitors

Unique Subject Identifier=1006010010-0003

MEANS Procedure

Assay variable : PTINR\_VAL1 PT-INR Value

N Mean Standard Deviation Minimum Maximum

---

|   |           |           |           |           |
|---|-----------|-----------|-----------|-----------|
| 6 | 2.0116667 | 0.2691778 | 1.7100000 | 2.4600000 |
|---|-----------|-----------|-----------|-----------|

---

Unique Subject Identifier=1006010010-0005

Assay variable : PTINR\_VAL1 PT-INR Value

N Mean Standard Deviation Minimum Maximum

---

|   |           |           |           |           |
|---|-----------|-----------|-----------|-----------|
| 4 | 2.2850000 | 0.1613485 | 2.1400000 | 2.4700000 |
|---|-----------|-----------|-----------|-----------|

---

Unique Subject Identifier=1006010010-0013

Assay variable : PTINR\_VAL1 PT-INR Value

N Mean Standard Deviation Minimum Maximum

---

|   |           |           |           |           |
|---|-----------|-----------|-----------|-----------|
| 4 | 2.3500000 | 0.1602082 | 2.2600000 | 2.5900000 |
|---|-----------|-----------|-----------|-----------|

---

Unique Subject Identifier=1009010010-0003

Assay variable : PTINR\_VAL1 PT-INR Value

N Mean Standard Deviation Minimum Maximum

---

|   |           |           |           |           |
|---|-----------|-----------|-----------|-----------|
| 2 | 2.0650000 | 0.1767767 | 1.9400000 | 2.1900000 |
|---|-----------|-----------|-----------|-----------|

---

Laboratory tests at the time of obtaining Table 2-6 consent, according to the presence or absence of proton-pump inhibitors

Unique Subject Identifier=1009010010-0012

MEANS Procedure

Assay variable : PTINR\_VAL1 PT-INR Value

N Mean Standard Deviation Minimum Maximum

---

|   |           |           |           |           |
|---|-----------|-----------|-----------|-----------|
| 6 | 2.2833333 | 0.3868678 | 1.9000000 | 2.9000000 |
|---|-----------|-----------|-----------|-----------|

---

Unique Subject Identifier=1009010010-0025

Assay variable : PTINR\_VAL1 PT-INR Value

N Mean Standard Deviation Minimum Maximum

---

|   |           |           |           |           |
|---|-----------|-----------|-----------|-----------|
| 6 | 1.8500000 | 0.2880972 | 1.5000000 | 2.3000000 |
|---|-----------|-----------|-----------|-----------|

---

Unique Subject Identifier=1011000000-0004

Assay variable : PTINR\_VAL1 PT-INR Value

N Mean Standard Deviation Minimum Maximum

---

|   |           |           |           |           |
|---|-----------|-----------|-----------|-----------|
| 4 | 2.1750000 | 0.3304038 | 1.7000000 | 2.4000000 |
|---|-----------|-----------|-----------|-----------|

---

Unique Subject Identifier=1013010110-0010

Assay variable : PTINR\_VAL1 PT-INR Value

N Mean Standard Deviation Minimum Maximum

---

|   |           |           |           |           |
|---|-----------|-----------|-----------|-----------|
| 5 | 2.7000000 | 0.7035624 | 1.9000000 | 3.7000000 |
|---|-----------|-----------|-----------|-----------|

---

Laboratory tests at the time of obtaining Table 2-6 consent, according to the presence or absence of proton-pump inhibitors

Unique Subject Identifier=1018000000-0001

MEANS Procedure

Assay variable : PTINR\_VAL1 PT-INR Value

| N | Mean      | Standard Deviation | Minimum   | Maximum   |
|---|-----------|--------------------|-----------|-----------|
| 3 | 2.2666667 | 0.1527525          | 2.1000000 | 2.4000000 |

Unique Subject Identifier=1019010100-0001

Assay variable : PTINR\_VAL1 PT-INR Value

| N | Mean      | Standard Deviation | Minimum   | Maximum   |
|---|-----------|--------------------|-----------|-----------|
| 4 | 1.4700000 | 0.1834848          | 1.2600000 | 1.6900000 |

Unique Subject Identifier=1019010100-0005

Assay variable : PTINR\_VAL1 PT-INR Value

| N | Mean      | Standard Deviation | Minimum   | Maximum   |
|---|-----------|--------------------|-----------|-----------|
| 5 | 1.4920000 | 0.2501400          | 1.1800000 | 1.8200000 |

Unique Subject Identifier=1024011100-0009

Assay variable : PTINR\_VAL1 PT-INR Value

N Mean Standard Deviation Minimum Maximum

---

|   |           |           |           |           |
|---|-----------|-----------|-----------|-----------|
| 5 | 1.9780000 | 0.2764417 | 1.5000000 | 2.2000000 |
|---|-----------|-----------|-----------|-----------|

---

Laboratory tests at the time of obtaining Table 2-6 consent, according to the presence or absence of proton-pump inhibitors

Unique Subject Identifier=1026011000-0006

MEANS Procedure

Assay variable : PTINR\_VAL1 PT-INR Value

N Mean Standard Deviation Minimum Maximum

---

|   |           |           |           |           |
|---|-----------|-----------|-----------|-----------|
| 4 | 1.9250000 | 0.3590265 | 1.5400000 | 2.2600000 |
|---|-----------|-----------|-----------|-----------|

---

Unique Subject Identifier=1026011000-0024

Assay variable : PTINR\_VAL1 PT-INR Value

N Mean Standard Deviation Minimum Maximum

---

|   |           |           |           |           |
|---|-----------|-----------|-----------|-----------|
| 4 | 1.3275000 | 0.0505800 | 1.2700000 | 1.3900000 |
|---|-----------|-----------|-----------|-----------|

---

Unique Subject Identifier=1031010000-0037

Assay variable : PTINR\_VAL1 PT-INR Value

N Mean Standard Deviation Minimum Maximum

---

|   |           |           |           |           |
|---|-----------|-----------|-----------|-----------|
| 6 | 2.5666667 | 0.1144844 | 2.4400000 | 2.7700000 |
|---|-----------|-----------|-----------|-----------|

---

Unique Subject Identifier=1031010000-0127



Assay variable : PTINR\_VAL1 PT-INR Value

N Mean Standard Deviation Minimum Maximum

---

|   |          |  |          |          |
|---|----------|--|----------|----------|
| 1 | 3.200000 |  | 3.200000 | 3.200000 |
|---|----------|--|----------|----------|

---

Laboratory tests at the time of obtaining Table 2-6 consent, according to the presence or absence of proton-pump inhibitors

Unique Subject Identifier=1031010000-0134

MEANS Procedure

Assay variable : PTINR\_VAL1 PT-INR Value

N Mean Standard Deviation Minimum Maximum

---

|   |          |           |          |          |
|---|----------|-----------|----------|----------|
| 3 | 2.440000 | 0.3157531 | 2.080000 | 2.670000 |
|---|----------|-----------|----------|----------|

---

Unique Subject Identifier=1031010000-0155

Assay variable : PTINR\_VAL1 PT-INR Value

N Mean Standard Deviation Minimum Maximum

---

|   |          |           |          |          |
|---|----------|-----------|----------|----------|
| 3 | 2.503333 | 0.4366158 | 2.010000 | 2.840000 |
|---|----------|-----------|----------|----------|

---

Unique Subject Identifier=1032000000-0002

Assay variable : PTINR\_VAL1 PT-INR Value

N Mean Standard Deviation Minimum Maximum

---

|   |           |           |          |          |
|---|-----------|-----------|----------|----------|
| 6 | 1.6216667 | 0.1612968 | 1.390000 | 1.850000 |
|---|-----------|-----------|----------|----------|

---

Unique Subject Identifier=1032000000-0003

Assay variable : PTINR\_VAL1 PT-INR Value

N Mean Standard Deviation Minimum Maximum

---

|   |           |           |           |           |
|---|-----------|-----------|-----------|-----------|
| 6 | 1.9133333 | 0.2606658 | 1.6200000 | 2.3700000 |
|---|-----------|-----------|-----------|-----------|

---

Laboratory tests at the time of obtaining Table 2-6 consent, according to the presence or absence of proton-pump inhibitors

Unique Subject Identifier=1032000000-0012

MEANS Procedure

Assay variable : PTINR\_VAL1 PT-INR Value

N Mean Standard Deviation Minimum Maximum

---

|   |           |           |           |           |
|---|-----------|-----------|-----------|-----------|
| 6 | 1.5000000 | 0.1784377 | 1.3700000 | 1.8400000 |
|---|-----------|-----------|-----------|-----------|

---

Unique Subject Identifier=1032000000-0019

Assay variable : PTINR\_VAL1 PT-INR Value

N Mean Standard Deviation Minimum Maximum

---

|   |           |           |           |           |
|---|-----------|-----------|-----------|-----------|
| 6 | 1.6533333 | 0.1123684 | 1.4600000 | 1.7600000 |
|---|-----------|-----------|-----------|-----------|

---

Unique Subject Identifier=1032000000-0020

Assay variable : PTINR\_VAL1 PT-INR Value

N Mean Standard Deviation Minimum Maximum

---

|   |           |           |           |           |
|---|-----------|-----------|-----------|-----------|
| 6 | 2.0083333 | 0.3642206 | 1.4100000 | 2.5200000 |
|---|-----------|-----------|-----------|-----------|

---

Unique Subject Identifier=1032000000-0022

Assay variable : PTINR\_VAL1 PT-INR Value

N Mean Standard Deviation Minimum Maximum

---

|   |          |           |          |          |
|---|----------|-----------|----------|----------|
| 6 | 2.420000 | 0.3159747 | 2.100000 | 2.920000 |
|---|----------|-----------|----------|----------|

---

Laboratory tests at the time of obtaining Table 2-6 consent, according to the presence or absence of proton-pump inhibitors

Unique Subject Identifier=1032000000-0023

MEANS Procedure

Assay variable : PTINR\_VAL1 PT-INR Value

N Mean Standard Deviation Minimum Maximum

---

|   |           |           |           |           |
|---|-----------|-----------|-----------|-----------|
| 6 | 1.5783333 | 0.3328914 | 1.1900000 | 2.0600000 |
|---|-----------|-----------|-----------|-----------|

---

Unique Subject Identifier=1032000000-0026

Assay variable : PTINR\_VAL1 PT-INR Value

N Mean Standard Deviation Minimum Maximum

---

|   |           |           |           |           |
|---|-----------|-----------|-----------|-----------|
| 6 | 2.1383333 | 0.3119241 | 1.6300000 | 2.4500000 |
|---|-----------|-----------|-----------|-----------|

---

Unique Subject Identifier=1032000000-0029

Assay variable : PTINR\_VAL1 PT-INR Value

N Mean Standard Deviation Minimum Maximum

---

|   |           |           |           |           |
|---|-----------|-----------|-----------|-----------|
| 5 | 2.3460000 | 0.5855169 | 1.4400000 | 3.0100000 |
|---|-----------|-----------|-----------|-----------|

---

Unique Subject Identifier=1034000000-0002

Assay variable : PTINR\_VAL1 PT-INR Value

N Mean Standard Deviation Minimum Maximum

---

|   |           |           |           |           |
|---|-----------|-----------|-----------|-----------|
| 3 | 2.0666667 | 0.3511885 | 1.7000000 | 2.4000000 |
|---|-----------|-----------|-----------|-----------|

---

Laboratory tests at the time of obtaining Table 2-6 consent, according to the presence or absence of proton-pump inhibitors

Unique Subject Identifier=1034000000-0006

MEANS Procedure

Assay variable : PTINR\_VAL1 PT-INR Value

N Mean Standard Deviation Minimum Maximum

---

|   |           |           |           |           |
|---|-----------|-----------|-----------|-----------|
| 4 | 2.5250000 | 0.4112988 | 2.0000000 | 2.9000000 |
|---|-----------|-----------|-----------|-----------|

---

Unique Subject Identifier=1035000000-0017

Assay variable : PTINR\_VAL1 PT-INR Value

N Mean Standard Deviation Minimum Maximum

---

|   |           |           |           |           |
|---|-----------|-----------|-----------|-----------|
| 4 | 1.8325000 | 0.3057641 | 1.5400000 | 2.2500000 |
|---|-----------|-----------|-----------|-----------|

---

Unique Subject Identifier=1038000000-0002

Assay variable : PTINR\_VAL1 PT-INR Value

N Mean Standard Deviation Minimum Maximum

---

|   |           |           |           |           |
|---|-----------|-----------|-----------|-----------|
| 6 | 2.7833333 | 0.3600926 | 2.3000000 | 3.3000000 |
|---|-----------|-----------|-----------|-----------|

---

Unique Subject Identifier=1038000000-0005



Assay variable : PTINR\_VAL1 PT-INR Value

N Mean Standard Deviation Minimum Maximum

---

|   |          |           |          |          |
|---|----------|-----------|----------|----------|
| 6 | 1.800000 | 0.2966479 | 1.300000 | 2.100000 |
|---|----------|-----------|----------|----------|

---

Laboratory tests at the time of obtaining Table 2-6 consent, according to the presence or absence of proton-pump inhibitors

Unique Subject Identifier=1038000000-0006

MEANS Procedure

Assay variable : PTINR\_VAL1 PT-INR Value

N Mean Standard Deviation Minimum Maximum

---

|   |           |           |           |           |
|---|-----------|-----------|-----------|-----------|
| 4 | 1.8250000 | 0.1500000 | 1.7000000 | 2.0000000 |
|---|-----------|-----------|-----------|-----------|

---

Unique Subject Identifier=1038000000-0007

Assay variable : PTINR\_VAL1 PT-INR Value

N Mean Standard Deviation Minimum Maximum

---

|   |           |           |           |           |
|---|-----------|-----------|-----------|-----------|
| 6 | 1.9000000 | 0.4939636 | 1.4000000 | 2.8000000 |
|---|-----------|-----------|-----------|-----------|

---

Unique Subject Identifier=1038000000-0008

Assay variable : PTINR\_VAL1 PT-INR Value

N Mean Standard Deviation Minimum Maximum

---

|   |           |           |           |           |
|---|-----------|-----------|-----------|-----------|
| 6 | 2.1333333 | 0.5537749 | 1.5000000 | 3.0000000 |
|---|-----------|-----------|-----------|-----------|

---

Unique Subject Identifier=1041011110-0003

Assay variable : PTINR\_VAL1 PT-INR Value

N Mean Standard Deviation Minimum Maximum

---

|   |           |           |           |           |
|---|-----------|-----------|-----------|-----------|
| 5 | 1.7000000 | 0.1581139 | 1.5000000 | 1.9000000 |
|---|-----------|-----------|-----------|-----------|

---

Laboratory tests at the time of obtaining Table 2-6 consent, according to the presence or absence of proton-pump inhibitors

Unique Subject Identifier=1041011110-0004

MEANS Procedure

Assay variable : PTINR\_VAL1 PT-INR Value

N Mean Standard Deviation Minimum Maximum

---

|   |           |           |           |           |
|---|-----------|-----------|-----------|-----------|
| 6 | 1.9833333 | 0.1471960 | 1.8000000 | 2.2000000 |
|---|-----------|-----------|-----------|-----------|

---

Unique Subject Identifier=1041011110-0005

Assay variable : PTINR\_VAL1 PT-INR Value

N Mean Standard Deviation Minimum Maximum

---

|   |           |           |           |           |
|---|-----------|-----------|-----------|-----------|
| 6 | 1.9333333 | 0.2338090 | 1.7000000 | 2.3000000 |
|---|-----------|-----------|-----------|-----------|

---

Unique Subject Identifier=1041011110-0011

Assay variable : PTINR\_VAL1 PT-INR Value

N Mean Standard Deviation Minimum Maximum

---

|   |           |           |           |           |
|---|-----------|-----------|-----------|-----------|
| 6 | 2.2166667 | 0.3763863 | 1.8000000 | 2.9000000 |
|---|-----------|-----------|-----------|-----------|

---

Unique Subject Identifier=1041011110-0024

Assay variable : PTINR\_VAL1 PT-INR Value

N Mean Standard Deviation Minimum Maximum

---

|   |          |           |          |          |
|---|----------|-----------|----------|----------|
| 5 | 1.860000 | 0.2701851 | 1.500000 | 2.200000 |
|---|----------|-----------|----------|----------|

---

Laboratory tests at the time of obtaining Table 2-6 consent, according to the presence or absence of proton-pump inhibitors

Unique Subject Identifier=1041011110-0026

MEANS Procedure

Assay variable : PTINR\_VAL1 PT-INR Value

N Mean Standard Deviation Minimum Maximum

---

|   |           |           |           |           |
|---|-----------|-----------|-----------|-----------|
| 6 | 1.8000000 | 0.2097618 | 1.6000000 | 2.1000000 |
|---|-----------|-----------|-----------|-----------|

---

Unique Subject Identifier=1041011110-0029

Assay variable : PTINR\_VAL1 PT-INR Value

N Mean Standard Deviation Minimum Maximum

---

|   |           |           |           |           |
|---|-----------|-----------|-----------|-----------|
| 6 | 2.2666667 | 0.5202563 | 1.7000000 | 3.1000000 |
|---|-----------|-----------|-----------|-----------|

---

Unique Subject Identifier=1041011110-0034

Assay variable : PTINR\_VAL1 PT-INR Value

N Mean Standard Deviation Minimum Maximum

---

|   |           |           |           |           |
|---|-----------|-----------|-----------|-----------|
| 3 | 1.6666667 | 0.3511885 | 1.3000000 | 2.0000000 |
|---|-----------|-----------|-----------|-----------|

---

Unique Subject Identifier=1041011110-0035

Assay variable : PTINR\_VAL1 PT-INR Value

N Mean Standard Deviation Minimum Maximum

---

|   |          |           |          |          |
|---|----------|-----------|----------|----------|
| 6 | 2.250000 | 0.1870829 | 2.100000 | 2.600000 |
|---|----------|-----------|----------|----------|

---

Laboratory tests at the time of obtaining Table 2-6 consent, according to the presence or absence of proton-pump inhibitors

Unique Subject Identifier=1049000000-0001

MEANS Procedure

Assay variable : PTINR\_VAL1 PT-INR Value

N Mean Standard Deviation Minimum Maximum

---

|   |           |           |           |           |
|---|-----------|-----------|-----------|-----------|
| 4 | 1.6150000 | 0.0967815 | 1.5300000 | 1.7300000 |
|---|-----------|-----------|-----------|-----------|

---

Unique Subject Identifier=1049000000-0003

Assay variable : PTINR\_VAL1 PT-INR Value

N Mean Standard Deviation Minimum Maximum

---

|   |           |           |           |           |
|---|-----------|-----------|-----------|-----------|
| 5 | 1.9400000 | 0.1164045 | 1.8400000 | 2.1400000 |
|---|-----------|-----------|-----------|-----------|

---

Unique Subject Identifier=1049000000-0004

Assay variable : PTINR\_VAL1 PT-INR Value

N Mean Standard Deviation Minimum Maximum

---

|   |           |           |           |           |
|---|-----------|-----------|-----------|-----------|
| 3 | 1.9400000 | 0.4309292 | 1.6200000 | 2.4300000 |
|---|-----------|-----------|-----------|-----------|

---

Unique Subject Identifier=1055000000-0015



Assay variable : PTINR\_VAL1 PT-INR Value

N Mean Standard Deviation Minimum Maximum

---

|   |          |           |          |          |
|---|----------|-----------|----------|----------|
| 3 | 1.960000 | 0.2749545 | 1.720000 | 2.260000 |
|---|----------|-----------|----------|----------|

---

Laboratory tests at the time of obtaining Table 2-6 consent, according to the presence or absence of proton-pump inhibitors

Unique Subject Identifier=1055000000-0021

MEANS Procedure

Assay variable : PTINR\_VAL1 PT-INR Value

N Mean Standard Deviation Minimum Maximum

---

|   |           |           |           |           |
|---|-----------|-----------|-----------|-----------|
| 2 | 2.5300000 | 0.1131371 | 2.4500000 | 2.6100000 |
|---|-----------|-----------|-----------|-----------|

---

Unique Subject Identifier=1055000000-0030

Assay variable : PTINR\_VAL1 PT-INR Value

N Mean Standard Deviation Minimum Maximum

---

|   |           |  |           |           |
|---|-----------|--|-----------|-----------|
| 1 | 2.1600000 |  | 2.1600000 | 2.1600000 |
|---|-----------|--|-----------|-----------|

---

Unique Subject Identifier=1058011111-0002

Assay variable : PTINR\_VAL1 PT-INR Value

N Mean Standard Deviation Minimum Maximum

---

|   |           |           |           |           |
|---|-----------|-----------|-----------|-----------|
| 6 | 1.4233333 | 0.1148332 | 1.3000000 | 1.6300000 |
|---|-----------|-----------|-----------|-----------|

---

Unique Subject Identifier=1058011111-0004

Assay variable : PTINR\_VAL1 PT-INR Value

N Mean Standard Deviation Minimum Maximum

---

|   |           |           |           |           |
|---|-----------|-----------|-----------|-----------|
| 6 | 1.8550000 | 0.2703146 | 1.5800000 | 2.1900000 |
|---|-----------|-----------|-----------|-----------|

---

Laboratory tests at the time of obtaining Table 2-6 consent, according to the presence or absence of proton-pump inhibitors

Unique Subject Identifier=1060000000-0007

MEANS Procedure

Assay variable : PTINR\_VAL1 PT-INR Value

| N | Mean      | Standard Deviation | Minimum   | Maximum   |
|---|-----------|--------------------|-----------|-----------|
| 2 | 1.5200000 | 0.3252691          | 1.2900000 | 1.7500000 |

Unique Subject Identifier=1060000000-0013

Assay variable : PTINR\_VAL1 PT-INR Value

| N | Mean      | Standard Deviation | Minimum   | Maximum   |
|---|-----------|--------------------|-----------|-----------|
| 3 | 1.7833333 | 0.3274650          | 1.5200000 | 2.1500000 |

Unique Subject Identifier=1060000000-0027

Assay variable : PTINR\_VAL1 PT-INR Value

| N | Mean      | Standard Deviation | Minimum   | Maximum   |
|---|-----------|--------------------|-----------|-----------|
| 2 | 1.7750000 | 0.1060660          | 1.7000000 | 1.8500000 |

Unique Subject Identifier=1061000000-0001

Assay variable : PTINR\_VAL1 PT-INR Value

N Mean Standard Deviation Minimum Maximum

---

|   |          |          |          |          |
|---|----------|----------|----------|----------|
| 6 | 2.033333 | 0.233809 | 1.700000 | 2.400000 |
|---|----------|----------|----------|----------|

---

Laboratory tests at the time of obtaining Table 2-6 consent, according to the presence or absence of proton-pump inhibitors

Unique Subject Identifier=1061000000-0022

MEANS Procedure

Assay variable : PTINR\_VAL1 PT-INR Value

N Mean Standard Deviation Minimum Maximum

---

|   |           |           |           |           |
|---|-----------|-----------|-----------|-----------|
| 6 | 1.9000000 | 0.1897367 | 1.7000000 | 2.2000000 |
|---|-----------|-----------|-----------|-----------|

---

Unique Subject Identifier=1065010011-0005

Assay variable : PTINR\_VAL1 PT-INR Value

N Mean Standard Deviation Minimum Maximum

---

|   |           |           |           |           |
|---|-----------|-----------|-----------|-----------|
| 6 | 1.7666667 | 0.3011091 | 1.4000000 | 2.1000000 |
|---|-----------|-----------|-----------|-----------|

---

Unique Subject Identifier=1065010011-0006

Assay variable : PTINR\_VAL1 PT-INR Value

N Mean Standard Deviation Minimum Maximum

---

|   |           |           |           |           |
|---|-----------|-----------|-----------|-----------|
| 6 | 2.0333333 | 0.3011091 | 1.6000000 | 2.4000000 |
|---|-----------|-----------|-----------|-----------|

---

Unique Subject Identifier=1065010011-0007

Assay variable : PTINR\_VAL1 PT-INR Value

N Mean Standard Deviation Minimum Maximum

---

|   |          |           |          |          |
|---|----------|-----------|----------|----------|
| 6 | 2.300000 | 0.3898718 | 1.800000 | 2.800000 |
|---|----------|-----------|----------|----------|

---

Laboratory tests at the time of obtaining Table 2-6 consent, according to the presence or absence of proton-pump inhibitors

Unique Subject Identifier=1065010011-0014

MEANS Procedure

Assay variable : PTINR\_VAL1 PT-INR Value

N Mean Standard Deviation Minimum Maximum

---

|   |           |           |           |           |
|---|-----------|-----------|-----------|-----------|
| 6 | 2.4333333 | 0.2581989 | 2.1000000 | 2.8000000 |
|---|-----------|-----------|-----------|-----------|

---

Unique Subject Identifier=1065010011-0017

Assay variable : PTINR\_VAL1 PT-INR Value

N Mean Standard Deviation Minimum Maximum

---

|   |           |           |           |           |
|---|-----------|-----------|-----------|-----------|
| 6 | 1.9666667 | 0.7229569 | 1.1000000 | 2.9000000 |
|---|-----------|-----------|-----------|-----------|

---

Unique Subject Identifier=1065010011-0019

Assay variable : PTINR\_VAL1 PT-INR Value

N Mean Standard Deviation Minimum Maximum

---

|   |           |           |           |           |
|---|-----------|-----------|-----------|-----------|
| 4 | 1.6750000 | 0.0957427 | 1.6000000 | 1.8000000 |
|---|-----------|-----------|-----------|-----------|

---

Unique Subject Identifier=1065010011-0026



Assay variable : PTINR\_VAL1 PT-INR Value

N Mean Standard Deviation Minimum Maximum

---

|   |           |           |           |           |
|---|-----------|-----------|-----------|-----------|
| 6 | 2.2666667 | 0.6713171 | 1.7000000 | 3.5000000 |
|---|-----------|-----------|-----------|-----------|

---

Laboratory tests at the time of obtaining Table 2-6 consent, according to the presence or absence of proton-pump inhibitors

Unique Subject Identifier=1065010011-0031

MEANS Procedure

Assay variable : PTINR\_VAL1 PT-INR Value

N Mean Standard Deviation Minimum Maximum

---

|   |           |           |           |           |
|---|-----------|-----------|-----------|-----------|
| 6 | 1.9666667 | 0.4082483 | 1.6000000 | 2.7000000 |
|---|-----------|-----------|-----------|-----------|

---

Unique Subject Identifier=1065010011-0032

Assay variable : PTINR\_VAL1 PT-INR Value

N Mean Standard Deviation Minimum Maximum

---

|   |           |           |           |           |
|---|-----------|-----------|-----------|-----------|
| 6 | 2.1833333 | 0.5706721 | 1.4000000 | 3.1000000 |
|---|-----------|-----------|-----------|-----------|

---

Unique Subject Identifier=1065010011-0037

Assay variable : PTINR\_VAL1 PT-INR Value

N Mean Standard Deviation Minimum Maximum

---

|   |           |           |           |           |
|---|-----------|-----------|-----------|-----------|
| 3 | 1.6000000 | 0.3605551 | 1.2000000 | 1.9000000 |
|---|-----------|-----------|-----------|-----------|

---

Unique Subject Identifier=1065010011-0041

Assay variable : PTINR\_VAL1 PT-INR Value

N Mean Standard Deviation Minimum Maximum

---

|   |          |           |          |          |
|---|----------|-----------|----------|----------|
| 6 | 2.650000 | 0.7395945 | 1.600000 | 3.600000 |
|---|----------|-----------|----------|----------|

---

Laboratory tests at the time of obtaining Table 2-6 consent, according to the presence or absence of proton-pump inhibitors

Unique Subject Identifier=1065010011-0044

MEANS Procedure

Assay variable : PTINR\_VAL1 PT-INR Value

N Mean Standard Deviation Minimum Maximum

---

|   |           |           |           |           |
|---|-----------|-----------|-----------|-----------|
| 6 | 2.0666667 | 0.7711463 | 1.3000000 | 3.4000000 |
|---|-----------|-----------|-----------|-----------|

---

Unique Subject Identifier=1065010011-0048

Assay variable : PTINR\_VAL1 PT-INR Value

N Mean Standard Deviation Minimum Maximum

---

|   |           |           |           |           |
|---|-----------|-----------|-----------|-----------|
| 6 | 1.7500000 | 0.2345208 | 1.6000000 | 2.1000000 |
|---|-----------|-----------|-----------|-----------|

---

Unique Subject Identifier=1065010011-0054

Assay variable : PTINR\_VAL1 PT-INR Value

N Mean Standard Deviation Minimum Maximum

---

|   |           |           |           |           |
|---|-----------|-----------|-----------|-----------|
| 6 | 1.9000000 | 0.4195235 | 1.5000000 | 2.6000000 |
|---|-----------|-----------|-----------|-----------|

---

Unique Subject Identifier=1065010011-0058

Assay variable : PTINR\_VAL1 PT-INR Value

N Mean Standard Deviation Minimum Maximum

---

|   |          |           |          |          |
|---|----------|-----------|----------|----------|
| 6 | 2.250000 | 0.1643168 | 2.100000 | 2.500000 |
|---|----------|-----------|----------|----------|

---

Laboratory tests at the time of obtaining Table 2-6 consent, according to the presence or absence of proton-pump inhibitors

Unique Subject Identifier=1065010011-0059

MEANS Procedure

Assay variable : PTINR\_VAL1 PT-INR Value

N Mean Standard Deviation Minimum Maximum

---

|   |           |           |           |           |
|---|-----------|-----------|-----------|-----------|
| 6 | 1.8333333 | 0.4633213 | 1.4000000 | 2.6000000 |
|---|-----------|-----------|-----------|-----------|

---

Unique Subject Identifier=1065010011-0067

Assay variable : PTINR\_VAL1 PT-INR Value

N Mean Standard Deviation Minimum Maximum

---

|   |           |           |           |           |
|---|-----------|-----------|-----------|-----------|
| 6 | 2.4333333 | 0.8286535 | 1.5000000 | 3.5000000 |
|---|-----------|-----------|-----------|-----------|

---

Unique Subject Identifier=1065010011-0072

Assay variable : PTINR\_VAL1 PT-INR Value

N Mean Standard Deviation Minimum Maximum

---

|   |           |           |           |           |
|---|-----------|-----------|-----------|-----------|
| 6 | 1.6500000 | 0.2509980 | 1.2000000 | 1.9000000 |
|---|-----------|-----------|-----------|-----------|

---

Unique Subject Identifier=1068010111-0003

Assay variable : PTINR\_VAL1 PT-INR Value

N Mean Standard Deviation Minimum Maximum

---

|   |          |          |          |          |
|---|----------|----------|----------|----------|
| 2 | 2.200000 | 0.523259 | 1.830000 | 2.570000 |
|---|----------|----------|----------|----------|

---

Laboratory tests at the time of obtaining Table 2-6 consent, according to the presence or absence of proton-pump inhibitors

Unique Subject Identifier=1068010111-0008

MEANS Procedure

Assay variable : PTINR\_VAL1 PT-INR Value

N Mean Standard Deviation Minimum Maximum

---

|   |           |           |           |           |
|---|-----------|-----------|-----------|-----------|
| 3 | 1.8300000 | 0.3034798 | 1.6400000 | 2.1800000 |
|---|-----------|-----------|-----------|-----------|

---

Unique Subject Identifier=1068010111-0009

Assay variable : PTINR\_VAL1 PT-INR Value

N Mean Standard Deviation Minimum Maximum

---

|   |           |           |           |           |
|---|-----------|-----------|-----------|-----------|
| 3 | 1.8366667 | 0.0513160 | 1.7800000 | 1.8800000 |
|---|-----------|-----------|-----------|-----------|

---

Unique Subject Identifier=1068010111-0013

Assay variable : PTINR\_VAL1 PT-INR Value

N Mean Standard Deviation Minimum Maximum

---

|   |           |           |           |           |
|---|-----------|-----------|-----------|-----------|
| 6 | 1.3250000 | 0.1399643 | 1.2000000 | 1.5900000 |
|---|-----------|-----------|-----------|-----------|

---

Unique Subject Identifier=1068010111-0017



Assay variable : PTINR\_VAL1 PT-INR Value

N Mean Standard Deviation Minimum Maximum

---

|   |           |           |           |           |
|---|-----------|-----------|-----------|-----------|
| 4 | 1.7875000 | 0.2692428 | 1.5400000 | 2.1200000 |
|---|-----------|-----------|-----------|-----------|

---

Laboratory tests at the time of obtaining Table 2-6 consent, according to the presence or absence of proton-pump inhibitors

Unique Subject Identifier=1068010111-0035

MEANS Procedure

Assay variable : PTINR\_VAL1 PT-INR Value

N Mean Standard Deviation Minimum Maximum

---

|   |           |           |           |           |
|---|-----------|-----------|-----------|-----------|
| 4 | 1.9750000 | 0.3275668 | 1.6200000 | 2.4000000 |
|---|-----------|-----------|-----------|-----------|

---

Unique Subject Identifier=1068010111-0060

Assay variable : PTINR\_VAL1 PT-INR Value

N Mean Standard Deviation Minimum Maximum

---

|   |           |           |           |           |
|---|-----------|-----------|-----------|-----------|
| 6 | 1.4650000 | 0.4579847 | 0.9700000 | 2.1600000 |
|---|-----------|-----------|-----------|-----------|

---

Unique Subject Identifier=1070000000-0002

Assay variable : PTINR\_VAL1 PT-INR Value

N Mean Standard Deviation Minimum Maximum

---

|   |           |           |           |           |
|---|-----------|-----------|-----------|-----------|
| 6 | 2.0833333 | 0.4875107 | 1.6000000 | 2.9000000 |
|---|-----------|-----------|-----------|-----------|

---

Unique Subject Identifier=1070000000-0003

Assay variable : PTINR\_VAL1 PT-INR Value

N Mean Standard Deviation Minimum Maximum

---

|   |          |           |          |          |
|---|----------|-----------|----------|----------|
| 6 | 2.150000 | 0.5319774 | 1.600000 | 3.100000 |
|---|----------|-----------|----------|----------|

---

Laboratory tests at the time of obtaining Table 2-6 consent, according to the presence or absence of proton-pump inhibitors

Unique Subject Identifier=1071000000-0003

MEANS Procedure

Assay variable : PTINR\_VAL1 PT-INR Value

N Mean Standard Deviation Minimum Maximum

---

|   |           |  |           |           |
|---|-----------|--|-----------|-----------|
| 1 | 1.0400000 |  | 1.0400000 | 1.0400000 |
|---|-----------|--|-----------|-----------|

---

Unique Subject Identifier=1071000000-0006

Assay variable : PTINR\_VAL1 PT-INR Value

N Mean Standard Deviation Minimum Maximum

---

|   |           |  |           |           |
|---|-----------|--|-----------|-----------|
| 1 | 1.8400000 |  | 1.8400000 | 1.8400000 |
|---|-----------|--|-----------|-----------|

---

Unique Subject Identifier=1072000000-0026

Assay variable : PTINR\_VAL1 PT-INR Value

N Mean Standard Deviation Minimum Maximum

---

|   |           |           |           |           |
|---|-----------|-----------|-----------|-----------|
| 6 | 1.7383333 | 0.1383353 | 1.6100000 | 1.8900000 |
|---|-----------|-----------|-----------|-----------|

---

Unique Subject Identifier=1072000000-0029

Assay variable : PTINR\_VAL1 PT-INR Value

N Mean Standard Deviation Minimum Maximum

---

|   |           |           |           |           |
|---|-----------|-----------|-----------|-----------|
| 5 | 1.6960000 | 0.2785319 | 1.4300000 | 2.1700000 |
|---|-----------|-----------|-----------|-----------|

---

Laboratory tests at the time of obtaining Table 2-6 consent, according to the presence or absence of proton-pump inhibitors

Unique Subject Identifier=1072000000-0033

MEANS Procedure

Assay variable : PTINR\_VAL1 PT-INR Value

N Mean Standard Deviation Minimum Maximum

---

|   |           |           |           |           |
|---|-----------|-----------|-----------|-----------|
| 6 | 1.8366667 | 0.1885382 | 1.5900000 | 2.1000000 |
|---|-----------|-----------|-----------|-----------|

---

Unique Subject Identifier=1074011010-0005

Assay variable : PTINR\_VAL1 PT-INR Value

N Mean Standard Deviation Minimum Maximum

---

|   |           |           |           |           |
|---|-----------|-----------|-----------|-----------|
| 6 | 1.9383333 | 0.4533174 | 1.4500000 | 2.5200000 |
|---|-----------|-----------|-----------|-----------|

---

Unique Subject Identifier=1079000000-0003

Assay variable : PTINR\_VAL1 PT-INR Value

N Mean Standard Deviation Minimum Maximum

---

|   |           |           |           |           |
|---|-----------|-----------|-----------|-----------|
| 3 | 1.8433333 | 0.2300725 | 1.6100000 | 2.0700000 |
|---|-----------|-----------|-----------|-----------|

---

Unique Subject Identifier=1079000000-0004

Assay variable : PTINR\_VAL1 PT-INR Value

N Mean Standard Deviation Minimum Maximum

---

|   |           |           |           |           |
|---|-----------|-----------|-----------|-----------|
| 3 | 1.4633333 | 0.1738774 | 1.3300000 | 1.6600000 |
|---|-----------|-----------|-----------|-----------|

---

Laboratory tests at the time of obtaining Table 2-6 consent, according to the presence or absence of proton-pump inhibitors

Unique Subject Identifier=1080000000-0002

MEANS Procedure

Assay variable : PTINR\_VAL1 PT-INR Value

N Mean Standard Deviation Minimum Maximum

---

|   |           |           |           |           |
|---|-----------|-----------|-----------|-----------|
| 6 | 2.3483333 | 0.4951532 | 1.5200000 | 2.9300000 |
|---|-----------|-----------|-----------|-----------|

---

Unique Subject Identifier=1080000000-0003

Assay variable : PTINR\_VAL1 PT-INR Value

N Mean Standard Deviation Minimum Maximum

---

|   |           |           |           |           |
|---|-----------|-----------|-----------|-----------|
| 6 | 2.1516667 | 0.2041976 | 1.8200000 | 2.4400000 |
|---|-----------|-----------|-----------|-----------|

---

Unique Subject Identifier=1080000000-0005

Assay variable : PTINR\_VAL1 PT-INR Value

N Mean Standard Deviation Minimum Maximum

---

|   |           |           |           |           |
|---|-----------|-----------|-----------|-----------|
| 6 | 2.1616667 | 0.4302286 | 1.6900000 | 2.8600000 |
|---|-----------|-----------|-----------|-----------|

---

Unique Subject Identifier=1085000000-0001



Assay variable : PTINR\_VAL1 PT-INR Value

N Mean Standard Deviation Minimum Maximum

---

|   |           |  |           |           |
|---|-----------|--|-----------|-----------|
| 1 | 2.4700000 |  | 2.4700000 | 2.4700000 |
|---|-----------|--|-----------|-----------|

---

Laboratory tests at the time of obtaining Table 2-6 consent, according to the presence or absence of proton-pump inhibitors

Unique Subject Identifier=1085000000-0004

MEANS Procedure

Assay variable : PTINR\_VAL1 PT-INR Value

N Mean Standard Deviation Minimum Maximum

---

|   |           |           |           |           |
|---|-----------|-----------|-----------|-----------|
| 2 | 1.5600000 | 0.3535534 | 1.3100000 | 1.8100000 |
|---|-----------|-----------|-----------|-----------|

---

Unique Subject Identifier=1085000000-0007

Assay variable : PTINR\_VAL1 PT-INR Value

N Mean Standard Deviation Minimum Maximum

---

|   |           |  |           |           |
|---|-----------|--|-----------|-----------|
| 1 | 1.6200000 |  | 1.6200000 | 1.6200000 |
|---|-----------|--|-----------|-----------|

---

Unique Subject Identifier=1085000000-0009

Assay variable : PTINR\_VAL1 PT-INR Value

N Mean Standard Deviation Minimum Maximum

---

|   |           |  |           |           |
|---|-----------|--|-----------|-----------|
| 1 | 2.4900000 |  | 2.4900000 | 2.4900000 |
|---|-----------|--|-----------|-----------|

---

Unique Subject Identifier=1085000000-0012

Assay variable : PTINR\_VAL1 PT-INR Value

N Mean Standard Deviation Minimum Maximum

---

|   |           |           |           |           |
|---|-----------|-----------|-----------|-----------|
| 2 | 1.8250000 | 0.1060660 | 1.7500000 | 1.9000000 |
|---|-----------|-----------|-----------|-----------|

---

Laboratory tests at the time of obtaining Table 2-6 consent, according to the presence or absence of proton-pump inhibitors

Unique Subject Identifier=1087000000-0003

MEANS Procedure

Assay variable : PTINR\_VAL1 PT-INR Value

| N | Mean      | Standard Deviation | Minimum   | Maximum   |
|---|-----------|--------------------|-----------|-----------|
| 3 | 1.9000000 | 0.1646208          | 1.7100000 | 2.0000000 |

Unique Subject Identifier=1087000000-0006

Assay variable : PTINR\_VAL1 PT-INR Value

| N | Mean      | Standard Deviation | Minimum   | Maximum   |
|---|-----------|--------------------|-----------|-----------|
| 4 | 2.3725000 | 0.2224672          | 2.0500000 | 2.5500000 |

Unique Subject Identifier=1091010000-0008

Assay variable : PTINR\_VAL1 PT-INR Value

| N | Mean      | Standard Deviation | Minimum   | Maximum   |
|---|-----------|--------------------|-----------|-----------|
| 6 | 1.6833333 | 0.2401388          | 1.3000000 | 1.9000000 |

Unique Subject Identifier=1091010000-0024

Assay variable : PTINR\_VAL1 PT-INR Value

N Mean Standard Deviation Minimum Maximum

---

|   |          |           |          |          |
|---|----------|-----------|----------|----------|
| 6 | 1.650000 | 0.2880972 | 1.400000 | 2.100000 |
|---|----------|-----------|----------|----------|

---

Laboratory tests at the time of obtaining Table 2-6 consent, according to the presence or absence of proton-pump inhibitors

Unique Subject Identifier=1091010000-0046

MEANS Procedure

Assay variable : PTINR\_VAL1 PT-INR Value

N Mean Standard Deviation Minimum Maximum

---

|   |           |           |           |           |
|---|-----------|-----------|-----------|-----------|
| 6 | 1.7666667 | 0.3011091 | 1.3000000 | 2.0000000 |
|---|-----------|-----------|-----------|-----------|

---

Unique Subject Identifier=1091010000-0063

Assay variable : PTINR\_VAL1 PT-INR Value

N Mean Standard Deviation Minimum Maximum

---

|   |           |           |           |           |
|---|-----------|-----------|-----------|-----------|
| 6 | 2.9333333 | 1.1639015 | 1.9000000 | 5.0000000 |
|---|-----------|-----------|-----------|-----------|

---

Unique Subject Identifier=1094000000-0004

Assay variable : PTINR\_VAL1 PT-INR Value

N Mean Standard Deviation Minimum Maximum

---

|   |           |           |           |           |
|---|-----------|-----------|-----------|-----------|
| 5 | 1.8200000 | 0.1701470 | 1.5800000 | 1.9800000 |
|---|-----------|-----------|-----------|-----------|

---

Unique Subject Identifier=1094000000-0008

Assay variable : PTINR\_VAL1 PT-INR Value

N Mean Standard Deviation Minimum Maximum

---

|   |           |           |           |           |
|---|-----------|-----------|-----------|-----------|
| 6 | 2.1550000 | 0.3011810 | 1.8100000 | 2.6300000 |
|---|-----------|-----------|-----------|-----------|

---

Laboratory tests at the time of obtaining Table 2-6 consent, according to the presence or absence of proton-pump inhibitors

Unique Subject Identifier=1095000000-0029

MEANS Procedure

Assay variable : PTINR\_VAL1 PT-INR Value

| N | Mean      | Standard Deviation | Minimum   | Maximum   |
|---|-----------|--------------------|-----------|-----------|
| 6 | 2.3000000 | 0.2000000          | 2.2000000 | 2.7000000 |

Unique Subject Identifier=1095000000-0034

Assay variable : PTINR\_VAL1 PT-INR Value

| N | Mean      | Standard Deviation | Minimum   | Maximum   |
|---|-----------|--------------------|-----------|-----------|
| 5 | 1.8600000 | 0.7469940          | 1.2000000 | 2.8000000 |

Unique Subject Identifier=1102000000-0005

Assay variable : PTINR\_VAL1 PT-INR Value

| N | Mean      | Standard Deviation | Minimum   | Maximum   |
|---|-----------|--------------------|-----------|-----------|
| 2 | 1.7000000 | 0.1272792          | 1.6100000 | 1.7900000 |

Unique Subject Identifier=1102000000-0010



Assay variable : PTINR\_VAL1 PT-INR Value

N Mean Standard Deviation Minimum Maximum

---

|   |           |  |           |           |
|---|-----------|--|-----------|-----------|
| 1 | 2.1700000 |  | 2.1700000 | 2.1700000 |
|---|-----------|--|-----------|-----------|

---

Laboratory tests at the time of obtaining Table 2-6 consent, according to the presence or absence of proton-pump inhibitors

Unique Subject Identifier=1102000000-0013

MEANS Procedure

Assay variable : PTINR\_VAL1 PT-INR Value

| N | Mean      | Standard Deviation | Minimum   | Maximum   |
|---|-----------|--------------------|-----------|-----------|
| 2 | 1.6300000 | 0.0989949          | 1.5600000 | 1.7000000 |

Unique Subject Identifier=1102000000-0036

Assay variable : PTINR\_VAL1 PT-INR Value

| N | Mean      | Standard Deviation | Minimum   | Maximum   |
|---|-----------|--------------------|-----------|-----------|
| 3 | 1.6500000 | 0.2475884          | 1.3700000 | 1.8400000 |

Unique Subject Identifier=1103001000-0011

Assay variable : PTINR\_VAL1 PT-INR Value

| N | Mean      | Standard Deviation | Minimum   | Maximum   |
|---|-----------|--------------------|-----------|-----------|
| 2 | 1.5600000 | 0.2545584          | 1.3800000 | 1.7400000 |

Unique Subject Identifier=1107011010-0001

Assay variable : PTINR\_VAL1 PT-INR Value

N Mean Standard Deviation Minimum Maximum

---

|   |           |           |           |           |
|---|-----------|-----------|-----------|-----------|
| 4 | 2.0250000 | 0.3545420 | 1.7700000 | 2.5500000 |
|---|-----------|-----------|-----------|-----------|

---

Laboratory tests at the time of obtaining Table 2-6 consent, according to the presence or absence of proton-pump inhibitors

Unique Subject Identifier=1107011010-0002

MEANS Procedure

Assay variable : PTINR\_VAL1 PT-INR Value

N Mean Standard Deviation Minimum Maximum

---

|   |           |           |           |           |
|---|-----------|-----------|-----------|-----------|
| 6 | 1.8416667 | 0.1804901 | 1.6500000 | 2.1500000 |
|---|-----------|-----------|-----------|-----------|

---

Unique Subject Identifier=1107011010-0005

Assay variable : PTINR\_VAL1 PT-INR Value

N Mean Standard Deviation Minimum Maximum

---

|   |           |           |           |           |
|---|-----------|-----------|-----------|-----------|
| 5 | 1.9100000 | 0.9907321 | 0.9700000 | 3.5100000 |
|---|-----------|-----------|-----------|-----------|

---

Unique Subject Identifier=1107011010-0006

Assay variable : PTINR\_VAL1 PT-INR Value

N Mean Standard Deviation Minimum Maximum

---

|   |           |           |           |           |
|---|-----------|-----------|-----------|-----------|
| 4 | 1.8075000 | 0.3854327 | 1.2700000 | 2.1200000 |
|---|-----------|-----------|-----------|-----------|

---

Unique Subject Identifier=1107011010-0007

Assay variable : PTINR\_VAL1 PT-INR Value

N Mean Standard Deviation Minimum Maximum

---

|   |           |           |           |           |
|---|-----------|-----------|-----------|-----------|
| 6 | 1.6666667 | 0.0886942 | 1.5600000 | 1.7700000 |
|---|-----------|-----------|-----------|-----------|

---

Laboratory tests at the time of obtaining Table 2-6 consent, according to the presence or absence of proton-pump inhibitors

Unique Subject Identifier=1107011010-0011

MEANS Procedure

Assay variable : PTINR\_VAL1 PT-INR Value

N Mean Standard Deviation Minimum Maximum

---

|   |           |           |           |           |
|---|-----------|-----------|-----------|-----------|
| 6 | 1.7083333 | 0.2064380 | 1.4600000 | 1.9900000 |
|---|-----------|-----------|-----------|-----------|

---

Unique Subject Identifier=1110000000-0013

Assay variable : PTINR\_VAL1 PT-INR Value

N Mean Standard Deviation Minimum Maximum

---

|   |           |           |           |           |
|---|-----------|-----------|-----------|-----------|
| 5 | 1.7800000 | 0.2588436 | 1.5000000 | 2.2000000 |
|---|-----------|-----------|-----------|-----------|

---

Unique Subject Identifier=1110000000-0016

Assay variable : PTINR\_VAL1 PT-INR Value

N Mean Standard Deviation Minimum Maximum

---

|   |           |           |           |           |
|---|-----------|-----------|-----------|-----------|
| 4 | 2.2250000 | 0.1500000 | 2.1000000 | 2.4000000 |
|---|-----------|-----------|-----------|-----------|

---

Unique Subject Identifier=1110000000-0017

Assay variable : PTINR\_VAL1 PT-INR Value

N Mean Standard Deviation Minimum Maximum

---

|   |           |           |           |           |
|---|-----------|-----------|-----------|-----------|
| 4 | 1.9250000 | 0.4573474 | 1.4000000 | 2.4000000 |
|---|-----------|-----------|-----------|-----------|

---

Laboratory tests at the time of obtaining Table 2-6 consent, according to the presence or absence of proton-pump inhibitors

Unique Subject Identifier=111000000-0019

MEANS Procedure

Assay variable : PTINR\_VAL1 PT-INR Value

N Mean Standard Deviation Minimum Maximum

---

|   |           |  |           |           |
|---|-----------|--|-----------|-----------|
| 1 | 1.7200000 |  | 1.7200000 | 1.7200000 |
|---|-----------|--|-----------|-----------|

---

Unique Subject Identifier=111000000-0020

Assay variable : PTINR\_VAL1 PT-INR Value

N Mean Standard Deviation Minimum Maximum

---

|   |           |           |           |           |
|---|-----------|-----------|-----------|-----------|
| 6 | 1.7000000 | 0.1788854 | 1.5000000 | 2.0000000 |
|---|-----------|-----------|-----------|-----------|

---

Unique Subject Identifier=111000000-0022

Assay variable : PTINR\_VAL1 PT-INR Value

N Mean Standard Deviation Minimum Maximum

---

|   |           |           |           |           |
|---|-----------|-----------|-----------|-----------|
| 5 | 1.7600000 | 0.1516575 | 1.6000000 | 2.0000000 |
|---|-----------|-----------|-----------|-----------|

---

Unique Subject Identifier=111100000-0017



Assay variable : PTINR\_VAL1 PT-INR Value

N Mean Standard Deviation Minimum Maximum

---

|   |           |           |           |           |
|---|-----------|-----------|-----------|-----------|
| 3 | 1.7166667 | 0.1050397 | 1.6100000 | 1.8200000 |
|---|-----------|-----------|-----------|-----------|

---

Laboratory tests at the time of obtaining Table 2-6 consent, according to the presence or absence of proton-pump inhibitors

Unique Subject Identifier=1111000000-0021

MEANS Procedure

Assay variable : PTINR\_VAL1 PT-INR Value

N Mean Standard Deviation Minimum Maximum

---

|   |           |           |           |           |
|---|-----------|-----------|-----------|-----------|
| 6 | 1.8016667 | 0.2604931 | 1.4300000 | 2.1700000 |
|---|-----------|-----------|-----------|-----------|

---

Unique Subject Identifier=1112000000-0003

Assay variable : PTINR\_VAL1 PT-INR Value

N Mean Standard Deviation Minimum Maximum

---

|   |           |           |           |           |
|---|-----------|-----------|-----------|-----------|
| 5 | 1.7200000 | 0.2181742 | 1.5100000 | 2.0700000 |
|---|-----------|-----------|-----------|-----------|

---

Unique Subject Identifier=1112000000-0009

Assay variable : PTINR\_VAL1 PT-INR Value

N Mean Standard Deviation Minimum Maximum

---

|   |           |           |           |           |
|---|-----------|-----------|-----------|-----------|
| 6 | 2.5000000 | 1.1120611 | 1.4000000 | 4.2900000 |
|---|-----------|-----------|-----------|-----------|

---

Unique Subject Identifier=1112000000-0013

Assay variable : PTINR\_VAL1 PT-INR Value

N Mean Standard Deviation Minimum Maximum

---

|   |           |           |           |           |
|---|-----------|-----------|-----------|-----------|
| 4 | 2.1475000 | 0.4944610 | 1.7800000 | 2.8600000 |
|---|-----------|-----------|-----------|-----------|

---

Laboratory tests at the time of obtaining Table 2-6 consent, according to the presence or absence of proton-pump inhibitors

Unique Subject Identifier=1118011000-0005

MEANS Procedure

Assay variable : PTINR\_VAL1 PT-INR Value

N Mean Standard Deviation Minimum Maximum

---

|   |          |           |          |          |
|---|----------|-----------|----------|----------|
| 5 | 2.420000 | 0.3033150 | 2.000000 | 2.800000 |
|---|----------|-----------|----------|----------|

---

Unique Subject Identifier=1118011000-0007

Assay variable : PTINR\_VAL1 PT-INR Value

N Mean Standard Deviation Minimum Maximum

---

|   |          |           |          |          |
|---|----------|-----------|----------|----------|
| 4 | 1.475000 | 0.0957427 | 1.400000 | 1.600000 |
|---|----------|-----------|----------|----------|

---

Unique Subject Identifier=1118011000-0008

Assay variable : PTINR\_VAL1 PT-INR Value

N Mean Standard Deviation Minimum Maximum

---

|   |          |           |          |          |
|---|----------|-----------|----------|----------|
| 6 | 2.166667 | 0.5354126 | 1.800000 | 3.200000 |
|---|----------|-----------|----------|----------|

---

Unique Subject Identifier=1118011000-0012

Assay variable : PTINR\_VAL1 PT-INR Value

N Mean Standard Deviation Minimum Maximum

---

|   |          |           |          |          |
|---|----------|-----------|----------|----------|
| 5 | 1.500000 | 0.2549510 | 1.300000 | 1.900000 |
|---|----------|-----------|----------|----------|

---

Laboratory tests at the time of obtaining Table 2-6 consent, according to the presence or absence of proton-pump inhibitors

Unique Subject Identifier=1118011000-0014

MEANS Procedure

Assay variable : PTINR\_VAL1 PT-INR Value

| N | Mean      | Standard Deviation | Minimum   | Maximum   |
|---|-----------|--------------------|-----------|-----------|
| 5 | 2.0000000 | 0.0707107          | 1.9000000 | 2.1000000 |

Unique Subject Identifier=1118011000-0018

Assay variable : PTINR\_VAL1 PT-INR Value

| N | Mean      | Standard Deviation | Minimum   | Maximum   |
|---|-----------|--------------------|-----------|-----------|
| 5 | 2.3000000 | 0.6324555          | 1.3000000 | 3.0000000 |

Unique Subject Identifier=1118011000-0019

Assay variable : PTINR\_VAL1 PT-INR Value

| N | Mean      | Standard Deviation | Minimum   | Maximum   |
|---|-----------|--------------------|-----------|-----------|
| 6 | 2.0166667 | 0.2994439          | 1.7000000 | 2.5000000 |

Unique Subject Identifier=1118011000-0024

Assay variable : PTINR\_VAL1 PT-INR Value

N Mean Standard Deviation Minimum Maximum

---

|   |           |           |           |           |
|---|-----------|-----------|-----------|-----------|
| 4 | 1.4750000 | 0.2629956 | 1.1000000 | 1.7000000 |
|---|-----------|-----------|-----------|-----------|

---

Laboratory tests at the time of obtaining Table 2-6 consent, according to the presence or absence of proton-pump inhibitors

Unique Subject Identifier=1118011000-0030

MEANS Procedure

Assay variable : PTINR\_VAL1 PT-INR Value

N Mean Standard Deviation Minimum Maximum

---

|   |           |           |           |           |
|---|-----------|-----------|-----------|-----------|
| 5 | 1.9600000 | 0.2792848 | 1.5000000 | 2.2000000 |
|---|-----------|-----------|-----------|-----------|

---

Unique Subject Identifier=1118011000-0032

Assay variable : PTINR\_VAL1 PT-INR Value

N Mean Standard Deviation Minimum Maximum

---

|   |           |           |           |           |
|---|-----------|-----------|-----------|-----------|
| 5 | 1.9800000 | 0.3114482 | 1.7000000 | 2.4000000 |
|---|-----------|-----------|-----------|-----------|

---

Unique Subject Identifier=1118011000-0035

Assay variable : PTINR\_VAL1 PT-INR Value

N Mean Standard Deviation Minimum Maximum

---

|   |           |           |           |           |
|---|-----------|-----------|-----------|-----------|
| 5 | 2.1000000 | 0.4358899 | 1.6000000 | 2.8000000 |
|---|-----------|-----------|-----------|-----------|

---

Unique Subject Identifier=1118011000-0038



Assay variable : PTINR\_VAL1 PT-INR Value

N Mean Standard Deviation Minimum Maximum

---

|   |           |           |           |           |
|---|-----------|-----------|-----------|-----------|
| 6 | 2.1166667 | 0.1722401 | 1.9000000 | 2.4000000 |
|---|-----------|-----------|-----------|-----------|

---

Laboratory tests at the time of obtaining Table 2-6 consent, according to the presence or absence of proton-pump inhibitors

Unique Subject Identifier=1118011000-0041

MEANS Procedure

Assay variable : PTINR\_VAL1 PT-INR Value

N Mean Standard Deviation Minimum Maximum

---

|   |           |           |           |           |
|---|-----------|-----------|-----------|-----------|
| 6 | 2.6000000 | 0.3521363 | 2.2000000 | 3.2000000 |
|---|-----------|-----------|-----------|-----------|

---

Unique Subject Identifier=1118011000-0048

Assay variable : PTINR\_VAL1 PT-INR Value

N Mean Standard Deviation Minimum Maximum

---

|   |           |           |           |           |
|---|-----------|-----------|-----------|-----------|
| 6 | 1.6000000 | 0.2000000 | 1.4000000 | 1.9000000 |
|---|-----------|-----------|-----------|-----------|

---

Unique Subject Identifier=1118011000-0049

Assay variable : PTINR\_VAL1 PT-INR Value

N Mean Standard Deviation Minimum Maximum

---

|   |           |           |           |           |
|---|-----------|-----------|-----------|-----------|
| 6 | 2.2166667 | 0.2994439 | 1.8000000 | 2.6000000 |
|---|-----------|-----------|-----------|-----------|

---

Unique Subject Identifier=1118011000-0051

Assay variable : PTINR\_VAL1 PT-INR Value

N Mean Standard Deviation Minimum Maximum

---

|   |          |           |          |          |
|---|----------|-----------|----------|----------|
| 5 | 1.740000 | 0.3714835 | 1.200000 | 2.200000 |
|---|----------|-----------|----------|----------|

---

Laboratory tests at the time of obtaining Table 2-6 consent, according to the presence or absence of proton-pump inhibitors

Unique Subject Identifier=1118011000-0057

MEANS Procedure

Assay variable : PTINR\_VAL1 PT-INR Value

N Mean Standard Deviation Minimum Maximum

---

|   |           |           |           |           |
|---|-----------|-----------|-----------|-----------|
| 6 | 1.6166667 | 0.1471960 | 1.5000000 | 1.8000000 |
|---|-----------|-----------|-----------|-----------|

---

Unique Subject Identifier=1118011000-0060

Assay variable : PTINR\_VAL1 PT-INR Value

N Mean Standard Deviation Minimum Maximum

---

|   |           |           |           |           |
|---|-----------|-----------|-----------|-----------|
| 4 | 1.5000000 | 0.2828427 | 1.1000000 | 1.7000000 |
|---|-----------|-----------|-----------|-----------|

---

Unique Subject Identifier=1118011000-0062

Assay variable : PTINR\_VAL1 PT-INR Value

N Mean Standard Deviation Minimum Maximum

---

|   |           |           |           |           |
|---|-----------|-----------|-----------|-----------|
| 6 | 2.1500000 | 0.4324350 | 1.3000000 | 2.5000000 |
|---|-----------|-----------|-----------|-----------|

---

Unique Subject Identifier=1118011000-0064

Assay variable : PTINR\_VAL1 PT-INR Value

N Mean Standard Deviation Minimum Maximum

---

|   |          |          |          |          |
|---|----------|----------|----------|----------|
| 6 | 2.750000 | 0.441588 | 2.000000 | 3.300000 |
|---|----------|----------|----------|----------|

---

Laboratory tests at the time of obtaining Table 2-6 consent, according to the presence or absence of proton-pump inhibitors

Unique Subject Identifier=1118011000-0067

MEANS Procedure

Assay variable : PTINR\_VAL1 PT-INR Value

N Mean Standard Deviation Minimum Maximum

---

|   |           |           |           |           |
|---|-----------|-----------|-----------|-----------|
| 4 | 1.8250000 | 0.1707825 | 1.6000000 | 2.0000000 |
|---|-----------|-----------|-----------|-----------|

---

Unique Subject Identifier=1118011000-0068

Assay variable : PTINR\_VAL1 PT-INR Value

N Mean Standard Deviation Minimum Maximum

---

|   |           |           |           |           |
|---|-----------|-----------|-----------|-----------|
| 6 | 1.6833333 | 0.2041241 | 1.4000000 | 1.9000000 |
|---|-----------|-----------|-----------|-----------|

---

Unique Subject Identifier=1118011000-0069

Assay variable : PTINR\_VAL1 PT-INR Value

N Mean Standard Deviation Minimum Maximum

---

|   |           |           |           |           |
|---|-----------|-----------|-----------|-----------|
| 6 | 1.8166667 | 0.2401388 | 1.6000000 | 2.2000000 |
|---|-----------|-----------|-----------|-----------|

---

Unique Subject Identifier=1118011000-0070

Assay variable : PTINR\_VAL1 PT-INR Value

N Mean Standard Deviation Minimum Maximum

---

|   |          |           |          |          |
|---|----------|-----------|----------|----------|
| 4 | 1.800000 | 0.2160247 | 1.600000 | 2.100000 |
|---|----------|-----------|----------|----------|

---

Laboratory tests at the time of obtaining Table 2-6 consent, according to the presence or absence of proton-pump inhibitors

Unique Subject Identifier=1118011000-0072

MEANS Procedure

Assay variable : PTINR\_VAL1 PT-INR Value

N Mean Standard Deviation Minimum Maximum

---

|   |           |           |           |           |
|---|-----------|-----------|-----------|-----------|
| 6 | 2.0333333 | 0.1861899 | 1.8000000 | 2.3000000 |
|---|-----------|-----------|-----------|-----------|

---

Unique Subject Identifier=1118011000-0078

Assay variable : PTINR\_VAL1 PT-INR Value

N Mean Standard Deviation Minimum Maximum

---

|   |           |           |           |           |
|---|-----------|-----------|-----------|-----------|
| 5 | 1.9600000 | 0.5504544 | 1.4000000 | 2.6000000 |
|---|-----------|-----------|-----------|-----------|

---

Unique Subject Identifier=1118011000-0079

Assay variable : PTINR\_VAL1 PT-INR Value

N Mean Standard Deviation Minimum Maximum

---

|   |           |           |           |           |
|---|-----------|-----------|-----------|-----------|
| 5 | 2.2800000 | 0.6534524 | 1.7000000 | 3.4000000 |
|---|-----------|-----------|-----------|-----------|

---

Unique Subject Identifier=1118011000-0082



Assay variable : PTINR\_VAL1 PT-INR Value

N Mean Standard Deviation Minimum Maximum

---

|   |          |           |          |          |
|---|----------|-----------|----------|----------|
| 6 | 1.383333 | 0.3250641 | 1.000000 | 1.900000 |
|---|----------|-----------|----------|----------|

---

Laboratory tests at the time of obtaining Table 2-6 consent, according to the presence or absence of proton-pump inhibitors

Unique Subject Identifier=1118011000-0086

MEANS Procedure

Assay variable : PTINR\_VAL1 PT-INR Value

N Mean Standard Deviation Minimum Maximum

---

|   |           |           |           |           |
|---|-----------|-----------|-----------|-----------|
| 5 | 2.0200000 | 0.5449771 | 1.3000000 | 2.8000000 |
|---|-----------|-----------|-----------|-----------|

---

Unique Subject Identifier=1118011000-0089

Assay variable : PTINR\_VAL1 PT-INR Value

N Mean Standard Deviation Minimum Maximum

---

|   |           |           |           |           |
|---|-----------|-----------|-----------|-----------|
| 5 | 1.8600000 | 0.1949359 | 1.6000000 | 2.1000000 |
|---|-----------|-----------|-----------|-----------|

---

Unique Subject Identifier=1118011000-0091

Assay variable : PTINR\_VAL1 PT-INR Value

N Mean Standard Deviation Minimum Maximum

---

|   |           |           |           |           |
|---|-----------|-----------|-----------|-----------|
| 6 | 2.0833333 | 0.5231316 | 1.5000000 | 2.9000000 |
|---|-----------|-----------|-----------|-----------|

---

Unique Subject Identifier=1118011000-0093

Assay variable : PTINR\_VAL1 PT-INR Value

N Mean Standard Deviation Minimum Maximum

---

|   |          |           |          |          |
|---|----------|-----------|----------|----------|
| 6 | 2.100000 | 0.3794733 | 1.700000 | 2.700000 |
|---|----------|-----------|----------|----------|

---

Laboratory tests at the time of obtaining Table 2-6 consent, according to the presence or absence of proton-pump inhibitors

Unique Subject Identifier=1118011000-0099

MEANS Procedure

Assay variable : PTINR\_VAL1 PT-INR Value

N Mean Standard Deviation Minimum Maximum

---

|   |           |           |           |           |
|---|-----------|-----------|-----------|-----------|
| 6 | 1.4333333 | 0.1505545 | 1.3000000 | 1.7000000 |
|---|-----------|-----------|-----------|-----------|

---

Unique Subject Identifier=1118011000-0101

Assay variable : PTINR\_VAL1 PT-INR Value

N Mean Standard Deviation Minimum Maximum

---

|   |           |           |           |           |
|---|-----------|-----------|-----------|-----------|
| 6 | 2.0333333 | 0.2658320 | 1.6000000 | 2.3000000 |
|---|-----------|-----------|-----------|-----------|

---

Unique Subject Identifier=1118011000-0105

Assay variable : PTINR\_VAL1 PT-INR Value

N Mean Standard Deviation Minimum Maximum

---

|   |           |           |           |           |
|---|-----------|-----------|-----------|-----------|
| 4 | 1.7750000 | 0.2753785 | 1.5000000 | 2.1000000 |
|---|-----------|-----------|-----------|-----------|

---

Unique Subject Identifier=1118011000-0113

Assay variable : PTINR\_VAL1 PT-INR Value

N Mean Standard Deviation Minimum Maximum

---

|   |           |           |           |           |
|---|-----------|-----------|-----------|-----------|
| 3 | 1.7666667 | 0.2516611 | 1.5000000 | 2.0000000 |
|---|-----------|-----------|-----------|-----------|

---

Laboratory tests at the time of obtaining Table 2-6 consent, according to the presence or absence of proton-pump inhibitors

Unique Subject Identifier=1118011000-0116

MEANS Procedure

Assay variable : PTINR\_VAL1 PT-INR Value

N Mean Standard Deviation Minimum Maximum

---

|   |           |           |           |           |
|---|-----------|-----------|-----------|-----------|
| 3 | 1.6333333 | 0.3214550 | 1.4000000 | 2.0000000 |
|---|-----------|-----------|-----------|-----------|

---

Unique Subject Identifier=1118011000-0118

Assay variable : PTINR\_VAL1 PT-INR Value

N Mean Standard Deviation Minimum Maximum

---

|   |           |           |           |           |
|---|-----------|-----------|-----------|-----------|
| 4 | 1.6000000 | 0.2828427 | 1.4000000 | 2.0000000 |
|---|-----------|-----------|-----------|-----------|

---

Unique Subject Identifier=1119000000-0001

Assay variable : PTINR\_VAL1 PT-INR Value

N Mean Standard Deviation Minimum Maximum

---

|   |           |           |           |           |
|---|-----------|-----------|-----------|-----------|
| 6 | 1.6500000 | 0.1649242 | 1.4400000 | 1.9100000 |
|---|-----------|-----------|-----------|-----------|

---

Unique Subject Identifier=1119000000-0010

Assay variable : PTINR\_VAL1 PT-INR Value

N Mean Standard Deviation Minimum Maximum

---

|   |          |           |          |          |
|---|----------|-----------|----------|----------|
| 3 | 2.800000 | 0.4358899 | 2.500000 | 3.300000 |
|---|----------|-----------|----------|----------|

---

Laboratory tests at the time of obtaining Table 2-6 consent, according to the presence or absence of proton-pump inhibitors

Unique Subject Identifier=1119000000-0022

MEANS Procedure

Assay variable : PTINR\_VAL1 PT-INR Value

N Mean Standard Deviation Minimum Maximum

---

|   |           |           |           |           |
|---|-----------|-----------|-----------|-----------|
| 6 | 2.1466667 | 0.3819249 | 1.7800000 | 2.8000000 |
|---|-----------|-----------|-----------|-----------|

---

Unique Subject Identifier=1119000000-0025

Assay variable : PTINR\_VAL1 PT-INR Value

N Mean Standard Deviation Minimum Maximum

---

|   |           |           |           |           |
|---|-----------|-----------|-----------|-----------|
| 6 | 2.2500000 | 0.5244044 | 1.8000000 | 3.2000000 |
|---|-----------|-----------|-----------|-----------|

---

Unique Subject Identifier=1119000000-0030

Assay variable : PTINR\_VAL1 PT-INR Value

N Mean Standard Deviation Minimum Maximum

---

|   |           |           |           |           |
|---|-----------|-----------|-----------|-----------|
| 4 | 2.4500000 | 0.2380476 | 2.3000000 | 2.8000000 |
|---|-----------|-----------|-----------|-----------|

---

Unique Subject Identifier=1119000000-0031



Assay variable : PTINR\_VAL1 PT-INR Value

N Mean Standard Deviation Minimum Maximum

---

|   |           |           |           |           |
|---|-----------|-----------|-----------|-----------|
| 3 | 3.4333333 | 0.7505553 | 2.7000000 | 4.2000000 |
|---|-----------|-----------|-----------|-----------|

---

Laboratory tests at the time of obtaining Table 2-6 consent, according to the presence or absence of proton-pump inhibitors

Unique Subject Identifier=1119000000-0036

MEANS Procedure

Assay variable : PTINR\_VAL1 PT-INR Value

N Mean Standard Deviation Minimum Maximum

---

|   |           |           |           |           |
|---|-----------|-----------|-----------|-----------|
| 5 | 2.7260000 | 0.2380756 | 2.4900000 | 3.0600000 |
|---|-----------|-----------|-----------|-----------|

---

Unique Subject Identifier=1119000000-0039

Assay variable : PTINR\_VAL1 PT-INR Value

N Mean Standard Deviation Minimum Maximum

---

|   |           |           |           |           |
|---|-----------|-----------|-----------|-----------|
| 5 | 2.0000000 | 0.3605551 | 1.6000000 | 2.5000000 |
|---|-----------|-----------|-----------|-----------|

---

Unique Subject Identifier=1119000000-0041

Assay variable : PTINR\_VAL1 PT-INR Value

N Mean Standard Deviation Minimum Maximum

---

|   |           |           |           |           |
|---|-----------|-----------|-----------|-----------|
| 6 | 2.1833333 | 0.5231316 | 1.5000000 | 2.9000000 |
|---|-----------|-----------|-----------|-----------|

---

Unique Subject Identifier=1119000000-0055

Assay variable : PTINR\_VAL1 PT-INR Value

N Mean Standard Deviation Minimum Maximum

---

|   |           |  |           |           |
|---|-----------|--|-----------|-----------|
| 1 | 2.9000000 |  | 2.9000000 | 2.9000000 |
|---|-----------|--|-----------|-----------|

---

Laboratory tests at the time of obtaining Table 2-6 consent, according to the presence or absence of proton-pump inhibitors

Unique Subject Identifier=1119000000-0060

MEANS Procedure

Assay variable : PTINR\_VAL1 PT-INR Value

| N | Mean      | Standard Deviation | Minimum   | Maximum   |
|---|-----------|--------------------|-----------|-----------|
| 2 | 3.0350000 | 0.0212132          | 3.0200000 | 3.0500000 |

Unique Subject Identifier=1122001010-0014

Assay variable : PTINR\_VAL1 PT-INR Value

| N | Mean      | Standard Deviation | Minimum   | Maximum   |
|---|-----------|--------------------|-----------|-----------|
| 6 | 1.4283333 | 0.1697547          | 1.2700000 | 1.7000000 |

Unique Subject Identifier=1122001010-0032

Assay variable : PTINR\_VAL1 PT-INR Value

| N | Mean      | Standard Deviation | Minimum   | Maximum   |
|---|-----------|--------------------|-----------|-----------|
| 6 | 1.8566667 | 0.2010638          | 1.6200000 | 2.1600000 |

Unique Subject Identifier=1122001010-0033

Assay variable : PTINR\_VAL1 PT-INR Value

N Mean Standard Deviation Minimum Maximum

---

|   |          |           |          |          |
|---|----------|-----------|----------|----------|
| 6 | 2.150000 | 0.5616761 | 1.110000 | 2.610000 |
|---|----------|-----------|----------|----------|

---

Laboratory tests at the time of obtaining Table 2-6 consent, according to the presence or absence of proton-pump inhibitors

Unique Subject Identifier=1122001010-0034

MEANS Procedure

Assay variable : PTINR\_VAL1 PT-INR Value

N Mean Standard Deviation Minimum Maximum

---

|   |           |           |           |           |
|---|-----------|-----------|-----------|-----------|
| 6 | 2.6000000 | 1.0848594 | 1.1100000 | 4.3800000 |
|---|-----------|-----------|-----------|-----------|

---

Unique Subject Identifier=1122001010-0037

Assay variable : PTINR\_VAL1 PT-INR Value

N Mean Standard Deviation Minimum Maximum

---

|   |           |           |           |           |
|---|-----------|-----------|-----------|-----------|
| 6 | 1.7116667 | 0.2398680 | 1.4300000 | 2.1300000 |
|---|-----------|-----------|-----------|-----------|

---

Unique Subject Identifier=1122001010-0039

Assay variable : PTINR\_VAL1 PT-INR Value

N Mean Standard Deviation Minimum Maximum

---

|   |           |  |           |           |
|---|-----------|--|-----------|-----------|
| 1 | 2.0600000 |  | 2.0600000 | 2.0600000 |
|---|-----------|--|-----------|-----------|

---

Unique Subject Identifier=1122001010-0041

Assay variable : PTINR\_VAL1 PT-INR Value

N Mean Standard Deviation Minimum Maximum

---

|   |           |           |           |           |
|---|-----------|-----------|-----------|-----------|
| 6 | 2.0583333 | 0.1683350 | 1.8300000 | 2.3300000 |
|---|-----------|-----------|-----------|-----------|

---

Laboratory tests at the time of obtaining Table 2-6 consent, according to the presence or absence of proton-pump inhibitors

Unique Subject Identifier=1122001010-0045

MEANS Procedure

Assay variable : PTINR\_VAL1 PT-INR Value

N Mean Standard Deviation Minimum Maximum

---

|   |           |           |           |           |
|---|-----------|-----------|-----------|-----------|
| 6 | 1.5966667 | 0.2299275 | 1.3100000 | 1.9900000 |
|---|-----------|-----------|-----------|-----------|

---

Unique Subject Identifier=1122001010-0046

Assay variable : PTINR\_VAL1 PT-INR Value

N Mean Standard Deviation Minimum Maximum

---

|   |           |           |           |           |
|---|-----------|-----------|-----------|-----------|
| 6 | 2.5183333 | 1.0548823 | 1.3100000 | 3.7600000 |
|---|-----------|-----------|-----------|-----------|

---

Unique Subject Identifier=1122001010-0047

Assay variable : PTINR\_VAL1 PT-INR Value

N Mean Standard Deviation Minimum Maximum

---

|   |           |           |           |           |
|---|-----------|-----------|-----------|-----------|
| 6 | 2.1283333 | 0.3985181 | 1.5500000 | 2.5300000 |
|---|-----------|-----------|-----------|-----------|

---

Unique Subject Identifier=1122001010-0048



Assay variable : PTINR\_VAL1 PT-INR Value

N Mean Standard Deviation Minimum Maximum

---

|   |          |           |          |          |
|---|----------|-----------|----------|----------|
| 6 | 2.410000 | 0.4795832 | 1.680000 | 3.120000 |
|---|----------|-----------|----------|----------|

---

Laboratory tests at the time of obtaining Table 2-6 consent, according to the presence or absence of proton-pump inhibitors

Unique Subject Identifier=1122001010-0050

MEANS Procedure

Assay variable : PTINR\_VAL1 PT-INR Value

N Mean Standard Deviation Minimum Maximum

---

|   |           |           |           |           |
|---|-----------|-----------|-----------|-----------|
| 6 | 1.7233333 | 0.3512074 | 1.4100000 | 2.3800000 |
|---|-----------|-----------|-----------|-----------|

---

Unique Subject Identifier=1122001010-0053

Assay variable : PTINR\_VAL1 PT-INR Value

N Mean Standard Deviation Minimum Maximum

---

|   |           |           |           |           |
|---|-----------|-----------|-----------|-----------|
| 6 | 2.6066667 | 0.4033691 | 2.0400000 | 3.1200000 |
|---|-----------|-----------|-----------|-----------|

---

Unique Subject Identifier=1122001010-0054

Assay variable : PTINR\_VAL1 PT-INR Value

N Mean Standard Deviation Minimum Maximum

---

|   |           |           |           |           |
|---|-----------|-----------|-----------|-----------|
| 6 | 2.3033333 | 1.1264221 | 1.1600000 | 4.3800000 |
|---|-----------|-----------|-----------|-----------|

---

Unique Subject Identifier=1122001010-0057

Assay variable : PTINR\_VAL1 PT-INR Value

N Mean Standard Deviation Minimum Maximum

---

|   |           |           |           |           |
|---|-----------|-----------|-----------|-----------|
| 6 | 1.9350000 | 0.3984344 | 1.5500000 | 2.6400000 |
|---|-----------|-----------|-----------|-----------|

---

Laboratory tests at the time of obtaining Table 2-6 consent, according to the presence or absence of proton-pump inhibitors

Unique Subject Identifier=1122001010-0059

MEANS Procedure

Assay variable : PTINR\_VAL1 PT-INR Value

N Mean Standard Deviation Minimum Maximum

---

|   |          |           |           |           |
|---|----------|-----------|-----------|-----------|
| 6 | 2.180000 | 0.4648010 | 1.8600000 | 3.0600000 |
|---|----------|-----------|-----------|-----------|

---

Unique Subject Identifier=1122001010-0062

Assay variable : PTINR\_VAL1 PT-INR Value

N Mean Standard Deviation Minimum Maximum

---

|   |           |           |           |           |
|---|-----------|-----------|-----------|-----------|
| 6 | 2.4733333 | 0.5971153 | 1.5500000 | 3.2000000 |
|---|-----------|-----------|-----------|-----------|

---

Unique Subject Identifier=1122001010-0064

Assay variable : PTINR\_VAL1 PT-INR Value

N Mean Standard Deviation Minimum Maximum

---

|   |           |           |           |           |
|---|-----------|-----------|-----------|-----------|
| 6 | 2.0216667 | 0.4163372 | 1.4500000 | 2.5600000 |
|---|-----------|-----------|-----------|-----------|

---

Unique Subject Identifier=1122001010-0065

Assay variable : PTINR\_VAL1 PT-INR Value

N Mean Standard Deviation Minimum Maximum

---

|   |           |           |           |           |
|---|-----------|-----------|-----------|-----------|
| 6 | 1.7000000 | 0.3573234 | 1.3100000 | 2.3300000 |
|---|-----------|-----------|-----------|-----------|

---

Laboratory tests at the time of obtaining Table 2-6 consent, according to the presence or absence of proton-pump inhibitors

Unique Subject Identifier=1122001010-0069

MEANS Procedure

Assay variable : PTINR\_VAL1 PT-INR Value

N Mean Standard Deviation Minimum Maximum

---

|   |           |           |           |           |
|---|-----------|-----------|-----------|-----------|
| 6 | 1.7300000 | 0.1856879 | 1.5500000 | 2.0600000 |
|---|-----------|-----------|-----------|-----------|

---

Unique Subject Identifier=1122001010-0074

Assay variable : PTINR\_VAL1 PT-INR Value

N Mean Standard Deviation Minimum Maximum

---

|   |           |           |           |           |
|---|-----------|-----------|-----------|-----------|
| 3 | 2.4233333 | 0.2294196 | 2.1600000 | 2.5800000 |
|---|-----------|-----------|-----------|-----------|

---

Unique Subject Identifier=1126011000-0002

Assay variable : PTINR\_VAL1 PT-INR Value

N Mean Standard Deviation Minimum Maximum

---

|   |           |           |           |           |
|---|-----------|-----------|-----------|-----------|
| 6 | 1.5816667 | 0.3057722 | 1.2700000 | 2.0500000 |
|---|-----------|-----------|-----------|-----------|

---

Unique Subject Identifier=1126011000-0004

Assay variable : PTINR\_VAL1 PT-INR Value

N Mean Standard Deviation Minimum Maximum

---

|   |           |           |           |           |
|---|-----------|-----------|-----------|-----------|
| 4 | 1.5700000 | 0.5963221 | 1.0600000 | 2.3400000 |
|---|-----------|-----------|-----------|-----------|

---

Laboratory tests at the time of obtaining Table 2-6 consent, according to the presence or absence of proton-pump inhibitors

Unique Subject Identifier=1126011000-0010

MEANS Procedure

Assay variable : PTINR\_VAL1 PT-INR Value

N Mean Standard Deviation Minimum Maximum

---

|   |           |           |           |           |
|---|-----------|-----------|-----------|-----------|
| 6 | 1.9316667 | 0.3364174 | 1.5900000 | 2.5300000 |
|---|-----------|-----------|-----------|-----------|

---

Unique Subject Identifier=1126011000-0011

Assay variable : PTINR\_VAL1 PT-INR Value

N Mean Standard Deviation Minimum Maximum

---

|   |           |           |           |           |
|---|-----------|-----------|-----------|-----------|
| 5 | 2.0320000 | 0.3856423 | 1.5500000 | 2.4900000 |
|---|-----------|-----------|-----------|-----------|

---

Unique Subject Identifier=1126011000-0013

Assay variable : PTINR\_VAL1 PT-INR Value

N Mean Standard Deviation Minimum Maximum

---

|   |           |           |           |           |
|---|-----------|-----------|-----------|-----------|
| 6 | 1.7583333 | 0.2245366 | 1.6000000 | 2.2000000 |
|---|-----------|-----------|-----------|-----------|

---

Unique Subject Identifier=1126011000-0014



Assay variable : PTINR\_VAL1 PT-INR Value

N Mean Standard Deviation Minimum Maximum

---

|   |           |           |           |           |
|---|-----------|-----------|-----------|-----------|
| 5 | 1.6700000 | 0.6279729 | 1.1000000 | 2.7300000 |
|---|-----------|-----------|-----------|-----------|

---

Laboratory tests at the time of obtaining Table 2-6 consent, according to the presence or absence of proton-pump inhibitors

Unique Subject Identifier=1126011000-0015

MEANS Procedure

Assay variable : PTINR\_VAL1 PT-INR Value

N Mean Standard Deviation Minimum Maximum

---

|   |           |           |           |           |
|---|-----------|-----------|-----------|-----------|
| 6 | 1.9166667 | 0.4128276 | 1.4500000 | 2.4900000 |
|---|-----------|-----------|-----------|-----------|

---

Unique Subject Identifier=1127010000-0002

Assay variable : PTINR\_VAL1 PT-INR Value

N Mean Standard Deviation Minimum Maximum

---

|   |           |           |           |           |
|---|-----------|-----------|-----------|-----------|
| 4 | 1.4500000 | 0.0577350 | 1.4000000 | 1.5000000 |
|---|-----------|-----------|-----------|-----------|

---

Unique Subject Identifier=1127010000-0003

Assay variable : PTINR\_VAL1 PT-INR Value

N Mean Standard Deviation Minimum Maximum

---

|   |           |           |           |           |
|---|-----------|-----------|-----------|-----------|
| 5 | 2.1800000 | 0.1483240 | 2.0000000 | 2.4000000 |
|---|-----------|-----------|-----------|-----------|

---

Unique Subject Identifier=1127010000-0005

Assay variable : PTINR\_VAL1 PT-INR Value

N Mean Standard Deviation Minimum Maximum

---

|   |          |  |          |          |
|---|----------|--|----------|----------|
| 1 | 1.100000 |  | 1.100000 | 1.100000 |
|---|----------|--|----------|----------|

---

Laboratory tests at the time of obtaining Table 2-6 consent, according to the presence or absence of proton-pump inhibitors

Unique Subject Identifier=1128011000-0002

MEANS Procedure

Assay variable : PTINR\_VAL1 PT-INR Value

N Mean Standard Deviation Minimum Maximum

---

|   |           |           |           |           |
|---|-----------|-----------|-----------|-----------|
| 6 | 1.9333333 | 0.3265986 | 1.6000000 | 2.5000000 |
|---|-----------|-----------|-----------|-----------|

---

Unique Subject Identifier=1128011000-0003

Assay variable : PTINR\_VAL1 PT-INR Value

N Mean Standard Deviation Minimum Maximum

---

|   |           |           |           |           |
|---|-----------|-----------|-----------|-----------|
| 6 | 1.8666667 | 0.1032796 | 1.7000000 | 2.0000000 |
|---|-----------|-----------|-----------|-----------|

---

Unique Subject Identifier=1128011000-0004

Assay variable : PTINR\_VAL1 PT-INR Value

N Mean Standard Deviation Minimum Maximum

---

|   |           |           |           |           |
|---|-----------|-----------|-----------|-----------|
| 5 | 1.8600000 | 0.1516575 | 1.7000000 | 2.1000000 |
|---|-----------|-----------|-----------|-----------|

---

Unique Subject Identifier=1128011000-0005

Assay variable : PTINR\_VAL1 PT-INR Value

N Mean Standard Deviation Minimum Maximum

---

|   |           |           |           |           |
|---|-----------|-----------|-----------|-----------|
| 6 | 2.0666667 | 0.3983298 | 1.6000000 | 2.6000000 |
|---|-----------|-----------|-----------|-----------|

---

Laboratory tests at the time of obtaining Table 2-6 consent, according to the presence or absence of proton-pump inhibitors

Unique Subject Identifier=1128011000-0009

MEANS Procedure

Assay variable : PTINR\_VAL1 PT-INR Value

N Mean Standard Deviation Minimum Maximum

---

|   |           |           |           |           |
|---|-----------|-----------|-----------|-----------|
| 4 | 2.2000000 | 0.2943920 | 1.9000000 | 2.6000000 |
|---|-----------|-----------|-----------|-----------|

---

Unique Subject Identifier=1128011000-0010

Assay variable : PTINR\_VAL1 PT-INR Value

N Mean Standard Deviation Minimum Maximum

---

|   |           |           |           |           |
|---|-----------|-----------|-----------|-----------|
| 5 | 2.2400000 | 0.8988882 | 1.0000000 | 3.3000000 |
|---|-----------|-----------|-----------|-----------|

---

Unique Subject Identifier=1131000000-0001

Assay variable : PTINR\_VAL1 PT-INR Value

N Mean Standard Deviation Minimum Maximum

---

|   |           |           |           |           |
|---|-----------|-----------|-----------|-----------|
| 6 | 1.5016667 | 0.3225161 | 1.1300000 | 1.8700000 |
|---|-----------|-----------|-----------|-----------|

---

Unique Subject Identifier=1131000000-0002

Assay variable : PTINR\_VAL1 PT-INR Value

N Mean Standard Deviation Minimum Maximum

---

|   |           |           |           |           |
|---|-----------|-----------|-----------|-----------|
| 5 | 1.3300000 | 0.2933428 | 1.0500000 | 1.7900000 |
|---|-----------|-----------|-----------|-----------|

---

Laboratory tests at the time of obtaining Table 2-6 consent, according to the presence or absence of proton-pump inhibitors

Unique Subject Identifier=1131000000-0003

MEANS Procedure

Assay variable : PTINR\_VAL1 PT-INR Value

N Mean Standard Deviation Minimum Maximum

---

|   |           |           |           |           |
|---|-----------|-----------|-----------|-----------|
| 6 | 2.0800000 | 0.2337520 | 1.7300000 | 2.3300000 |
|---|-----------|-----------|-----------|-----------|

---

Unique Subject Identifier=1131000000-0004

Assay variable : PTINR\_VAL1 PT-INR Value

N Mean Standard Deviation Minimum Maximum

---

|   |           |           |           |           |
|---|-----------|-----------|-----------|-----------|
| 6 | 1.4550000 | 0.4079583 | 1.0800000 | 2.2300000 |
|---|-----------|-----------|-----------|-----------|

---

Unique Subject Identifier=1131000000-0005

Assay variable : PTINR\_VAL1 PT-INR Value

N Mean Standard Deviation Minimum Maximum

---

|   |           |           |           |           |
|---|-----------|-----------|-----------|-----------|
| 6 | 2.2650000 | 0.4269309 | 1.8500000 | 2.8000000 |
|---|-----------|-----------|-----------|-----------|

---

Unique Subject Identifier=1131000000-0006



Assay variable : PTINR\_VAL1 PT-INR Value

N Mean Standard Deviation Minimum Maximum

---

|   |           |           |           |           |
|---|-----------|-----------|-----------|-----------|
| 6 | 1.6383333 | 0.2778789 | 1.3600000 | 2.1700000 |
|---|-----------|-----------|-----------|-----------|

---

Laboratory tests at the time of obtaining Table 2-6 consent, according to the presence or absence of proton-pump inhibitors

Unique Subject Identifier=1131000000-0007

MEANS Procedure

Assay variable : PTINR\_VAL1 PT-INR Value

N Mean Standard Deviation Minimum Maximum

---

|   |          |           |          |          |
|---|----------|-----------|----------|----------|
| 6 | 2.160000 | 0.6108355 | 1.650000 | 3.110000 |
|---|----------|-----------|----------|----------|

---

Unique Subject Identifier=1131000000-0008

Assay variable : PTINR\_VAL1 PT-INR Value

N Mean Standard Deviation Minimum Maximum

---

|   |          |           |          |          |
|---|----------|-----------|----------|----------|
| 5 | 1.522000 | 0.3168122 | 1.240000 | 1.970000 |
|---|----------|-----------|----------|----------|

---

Unique Subject Identifier=1131000000-0009

Assay variable : PTINR\_VAL1 PT-INR Value

N Mean Standard Deviation Minimum Maximum

---

|   |          |           |          |          |
|---|----------|-----------|----------|----------|
| 3 | 1.940000 | 0.2107131 | 1.720000 | 2.140000 |
|---|----------|-----------|----------|----------|

---

Unique Subject Identifier=1137000000-0007

Assay variable : PTINR\_VAL1 PT-INR Value

N Mean Standard Deviation Minimum Maximum

---

|   |           |           |           |           |
|---|-----------|-----------|-----------|-----------|
| 3 | 1.0366667 | 0.0208167 | 1.0200000 | 1.0600000 |
|---|-----------|-----------|-----------|-----------|

---

Laboratory tests at the time of obtaining Table 2-6 consent, according to the presence or absence of proton-pump inhibitors

Unique Subject Identifier=1137000000-0032

MEANS Procedure

Assay variable : PTINR\_VAL1 PT-INR Value

| N | Mean      | Standard Deviation | Minimum   | Maximum   |
|---|-----------|--------------------|-----------|-----------|
| 2 | 1.0400000 | 0.0989949          | 0.9700000 | 1.1100000 |

Unique Subject Identifier=1141000000-0002

Assay variable : PTINR\_VAL1 PT-INR Value

| N | Mean      | Standard Deviation | Minimum   | Maximum   |
|---|-----------|--------------------|-----------|-----------|
| 1 | 1.6800000 |                    | 1.6800000 | 1.6800000 |

Unique Subject Identifier=1141000000-0005

Assay variable : PTINR\_VAL1 PT-INR Value

| N | Mean      | Standard Deviation | Minimum   | Maximum   |
|---|-----------|--------------------|-----------|-----------|
| 1 | 1.2000000 |                    | 1.2000000 | 1.2000000 |

Unique Subject Identifier=1146011000-0001

Assay variable : PTINR\_VAL1 PT-INR Value

N Mean Standard Deviation Minimum Maximum

---

|   |           |           |           |           |
|---|-----------|-----------|-----------|-----------|
| 4 | 2.2750000 | 0.4607602 | 1.9800000 | 2.9500000 |
|---|-----------|-----------|-----------|-----------|

---

Laboratory tests at the time of obtaining Table 2-6 consent, according to the presence or absence of proton-pump inhibitors

Unique Subject Identifier=1146011000-0002

MEANS Procedure

Assay variable : PTINR\_VAL1 PT-INR Value

N Mean Standard Deviation Minimum Maximum

---

|   |           |           |           |           |
|---|-----------|-----------|-----------|-----------|
| 3 | 2.0566667 | 0.6293118 | 1.5800000 | 2.7700000 |
|---|-----------|-----------|-----------|-----------|

---

Unique Subject Identifier=1146011000-0003

Assay variable : PTINR\_VAL1 PT-INR Value

N Mean Standard Deviation Minimum Maximum

---

|   |           |           |           |           |
|---|-----------|-----------|-----------|-----------|
| 2 | 1.8400000 | 0.2969848 | 1.6300000 | 2.0500000 |
|---|-----------|-----------|-----------|-----------|

---

Unique Subject Identifier=1149000000-0001

Assay variable : PTINR\_VAL1 PT-INR Value

N Mean Standard Deviation Minimum Maximum

---

|   |           |           |           |           |
|---|-----------|-----------|-----------|-----------|
| 6 | 1.7333333 | 0.2581989 | 1.4000000 | 2.1000000 |
|---|-----------|-----------|-----------|-----------|

---

Unique Subject Identifier=1149000000-0002

Assay variable : PTINR\_VAL1 PT-INR Value

N Mean Standard Deviation Minimum Maximum

---

|   |           |           |           |           |
|---|-----------|-----------|-----------|-----------|
| 6 | 1.8500000 | 0.4135215 | 1.4000000 | 2.6000000 |
|---|-----------|-----------|-----------|-----------|

---

Laboratory tests at the time of obtaining Table 2-6 consent, according to the presence or absence of proton-pump inhibitors

Unique Subject Identifier=1149000000-0003

MEANS Procedure

Assay variable : PTINR\_VAL1 PT-INR Value

N Mean Standard Deviation Minimum Maximum

---

|   |           |           |           |           |
|---|-----------|-----------|-----------|-----------|
| 6 | 2.2000000 | 0.0894427 | 2.1000000 | 2.3000000 |
|---|-----------|-----------|-----------|-----------|

---

Unique Subject Identifier=1149000000-0004

Assay variable : PTINR\_VAL1 PT-INR Value

N Mean Standard Deviation Minimum Maximum

---

|   |           |           |           |           |
|---|-----------|-----------|-----------|-----------|
| 6 | 1.8666667 | 0.2804758 | 1.6000000 | 2.2000000 |
|---|-----------|-----------|-----------|-----------|

---

Unique Subject Identifier=1149000000-0005

Assay variable : PTINR\_VAL1 PT-INR Value

N Mean Standard Deviation Minimum Maximum

---

|   |           |           |           |           |
|---|-----------|-----------|-----------|-----------|
| 6 | 2.1333333 | 0.6186006 | 1.4000000 | 3.2000000 |
|---|-----------|-----------|-----------|-----------|

---

Unique Subject Identifier=1149000000-0006



Assay variable : PTINR\_VAL1 PT-INR Value

N Mean Standard Deviation Minimum Maximum

---

|   |           |           |           |           |
|---|-----------|-----------|-----------|-----------|
| 6 | 1.7166667 | 0.2041241 | 1.5000000 | 1.9000000 |
|---|-----------|-----------|-----------|-----------|

---

Laboratory tests at the time of obtaining Table 2-6 consent, according to the presence or absence of proton-pump inhibitors

Unique Subject Identifier=1149000000-0007

MEANS Procedure

Assay variable : PTINR\_VAL1 PT-INR Value

N Mean Standard Deviation Minimum Maximum

---

|   |           |           |           |           |
|---|-----------|-----------|-----------|-----------|
| 6 | 1.8666667 | 0.4676181 | 1.0000000 | 2.4000000 |
|---|-----------|-----------|-----------|-----------|

---

Unique Subject Identifier=1156000000-0001

Assay variable : PTINR\_VAL1 PT-INR Value

N Mean Standard Deviation Minimum Maximum

---

|   |           |           |           |           |
|---|-----------|-----------|-----------|-----------|
| 6 | 1.4766667 | 0.0945868 | 1.3600000 | 1.6100000 |
|---|-----------|-----------|-----------|-----------|

---

Unique Subject Identifier=1156000000-0002

Assay variable : PTINR\_VAL1 PT-INR Value

N Mean Standard Deviation Minimum Maximum

---

|   |           |           |           |           |
|---|-----------|-----------|-----------|-----------|
| 5 | 1.7920000 | 0.4152349 | 1.3900000 | 2.2500000 |
|---|-----------|-----------|-----------|-----------|

---

Unique Subject Identifier=1156000000-0004

Assay variable : PTINR\_VAL1 PT-INR Value

N Mean Standard Deviation Minimum Maximum

---

|   |          |           |          |          |
|---|----------|-----------|----------|----------|
| 5 | 2.210000 | 0.6031998 | 1.660000 | 2.970000 |
|---|----------|-----------|----------|----------|

---

Laboratory tests at the time of obtaining Table 2-6 consent, according to the presence or absence of proton-pump inhibitors

Unique Subject Identifier=115600000-0005

MEANS Procedure

Assay variable : PTINR\_VAL1 PT-INR Value

N Mean Standard Deviation Minimum Maximum

---

|   |          |  |          |          |
|---|----------|--|----------|----------|
| 1 | 1.410000 |  | 1.410000 | 1.410000 |
|---|----------|--|----------|----------|

---

Unique Subject Identifier=115600000-0009

Assay variable : PTINR\_VAL1 PT-INR Value

N Mean Standard Deviation Minimum Maximum

---

|   |          |           |          |          |
|---|----------|-----------|----------|----------|
| 6 | 1.825000 | 0.3733497 | 1.420000 | 2.500000 |
|---|----------|-----------|----------|----------|

---

Unique Subject Identifier=115600000-0014

Assay variable : PTINR\_VAL1 PT-INR Value

N Mean Standard Deviation Minimum Maximum

---

|   |          |           |          |          |
|---|----------|-----------|----------|----------|
| 6 | 1.370000 | 0.1842824 | 1.210000 | 1.620000 |
|---|----------|-----------|----------|----------|

---

Unique Subject Identifier=115600000-0015

Assay variable : PTINR\_VAL1 PT-INR Value

N Mean Standard Deviation Minimum Maximum

---

|   |          |           |          |          |
|---|----------|-----------|----------|----------|
| 6 | 2.333333 | 0.3844303 | 1.860000 | 2.940000 |
|---|----------|-----------|----------|----------|

---

Laboratory tests at the time of obtaining Table 2-6 consent, according to the presence or absence of proton-pump inhibitors

Unique Subject Identifier=115600000-0018

MEANS Procedure

Assay variable : PTINR\_VAL1 PT-INR Value

| N | Mean      | Standard Deviation | Minimum   | Maximum   |
|---|-----------|--------------------|-----------|-----------|
| 6 | 1.3150000 | 0.1224337          | 1.1700000 | 1.4600000 |

Unique Subject Identifier=115600000-0022

Assay variable : PTINR\_VAL1 PT-INR Value

| N | Mean      | Standard Deviation | Minimum   | Maximum   |
|---|-----------|--------------------|-----------|-----------|
| 5 | 1.7720000 | 0.3772532          | 1.2000000 | 2.0900000 |

Unique Subject Identifier=115600000-0023

Assay variable : PTINR\_VAL1 PT-INR Value

| N | Mean      | Standard Deviation | Minimum   | Maximum   |
|---|-----------|--------------------|-----------|-----------|
| 5 | 1.8680000 | 0.4928184          | 0.9900000 | 2.1400000 |

Unique Subject Identifier=115600000-0056

Assay variable : PTINR\_VAL1 PT-INR Value

N Mean Standard Deviation Minimum Maximum

---

|   |           |           |           |           |
|---|-----------|-----------|-----------|-----------|
| 5 | 1.8560000 | 0.1073778 | 1.7100000 | 1.9700000 |
|---|-----------|-----------|-----------|-----------|

---

Laboratory tests at the time of obtaining Table 2-6 consent, according to the presence or absence of proton-pump inhibitors

Unique Subject Identifier=1156000000-0057

MEANS Procedure

Assay variable : PTINR\_VAL1 PT-INR Value

N Mean Standard Deviation Minimum Maximum

---

|   |           |           |           |           |
|---|-----------|-----------|-----------|-----------|
| 2 | 1.2900000 | 0.0707107 | 1.2400000 | 1.3400000 |
|---|-----------|-----------|-----------|-----------|

---

Unique Subject Identifier=1156000000-0062

Assay variable : PTINR\_VAL1 PT-INR Value

N Mean Standard Deviation Minimum Maximum

---

|   |           |           |           |           |
|---|-----------|-----------|-----------|-----------|
| 6 | 1.3416667 | 0.0584523 | 1.2500000 | 1.4000000 |
|---|-----------|-----------|-----------|-----------|

---

Unique Subject Identifier=1157000000-0002

Assay variable : PTINR\_VAL1 PT-INR Value

N Mean Standard Deviation Minimum Maximum

---

|   |           |           |           |           |
|---|-----------|-----------|-----------|-----------|
| 6 | 2.5000000 | 0.5099020 | 1.7000000 | 3.1000000 |
|---|-----------|-----------|-----------|-----------|

---

Unique Subject Identifier=1157000000-0003



Assay variable : PTINR\_VAL1 PT-INR Value

N Mean Standard Deviation Minimum Maximum

---

|   |          |           |          |          |
|---|----------|-----------|----------|----------|
| 6 | 2.133333 | 0.4760952 | 1.500000 | 2.900000 |
|---|----------|-----------|----------|----------|

---

Laboratory tests at the time of obtaining Table 2-6 consent, according to the presence or absence of proton-pump inhibitors

Unique Subject Identifier=1157000000-0006

MEANS Procedure

Assay variable : PTINR\_VAL1 PT-INR Value

N Mean Standard Deviation Minimum Maximum

---

|   |           |           |           |           |
|---|-----------|-----------|-----------|-----------|
| 6 | 2.0016667 | 0.4574021 | 1.5000000 | 2.7000000 |
|---|-----------|-----------|-----------|-----------|

---

Unique Subject Identifier=1157000000-0011

Assay variable : PTINR\_VAL1 PT-INR Value

N Mean Standard Deviation Minimum Maximum

---

|   |           |           |           |           |
|---|-----------|-----------|-----------|-----------|
| 6 | 1.8666667 | 0.2732520 | 1.7000000 | 2.4000000 |
|---|-----------|-----------|-----------|-----------|

---

Unique Subject Identifier=1157000000-0013

Assay variable : PTINR\_VAL1 PT-INR Value

N Mean Standard Deviation Minimum Maximum

---

|   |           |           |           |           |
|---|-----------|-----------|-----------|-----------|
| 4 | 2.3000000 | 0.4546061 | 1.8000000 | 2.9000000 |
|---|-----------|-----------|-----------|-----------|

---

Unique Subject Identifier=1157000000-0033

Assay variable : PTINR\_VAL1 PT-INR Value

N Mean Standard Deviation Minimum Maximum

---

|   |           |           |           |           |
|---|-----------|-----------|-----------|-----------|
| 6 | 1.8666667 | 0.3076795 | 1.6000000 | 2.4000000 |
|---|-----------|-----------|-----------|-----------|

---

Laboratory tests at the time of obtaining Table 2-6 consent, according to the presence or absence of proton-pump inhibitors

Unique Subject Identifier=1157000000-0034

MEANS Procedure

Assay variable : PTINR\_VAL1 PT-INR Value

N Mean Standard Deviation Minimum Maximum

---

|   |           |           |           |           |
|---|-----------|-----------|-----------|-----------|
| 6 | 2.1333333 | 0.1751190 | 1.9000000 | 2.4000000 |
|---|-----------|-----------|-----------|-----------|

---

Unique Subject Identifier=1158010000-0022

Assay variable : PTINR\_VAL1 PT-INR Value

N Mean Standard Deviation Minimum Maximum

---

|   |           |           |           |           |
|---|-----------|-----------|-----------|-----------|
| 6 | 1.9133333 | 0.1423610 | 1.7700000 | 2.1300000 |
|---|-----------|-----------|-----------|-----------|

---

Unique Subject Identifier=1158010000-0023

Assay variable : PTINR\_VAL1 PT-INR Value

N Mean Standard Deviation Minimum Maximum

---

|   |           |           |           |           |
|---|-----------|-----------|-----------|-----------|
| 6 | 1.8900000 | 0.4136665 | 1.6000000 | 2.7100000 |
|---|-----------|-----------|-----------|-----------|

---

Unique Subject Identifier=1158010000-0027

Assay variable : PTINR\_VAL1 PT-INR Value

N Mean Standard Deviation Minimum Maximum

---

|   |          |           |          |          |
|---|----------|-----------|----------|----------|
| 6 | 1.860000 | 0.3269251 | 1.430000 | 2.250000 |
|---|----------|-----------|----------|----------|

---

Laboratory tests at the time of obtaining Table 2-6 consent, according to the presence or absence of proton-pump inhibitors

Unique Subject Identifier=1158010000-0035

MEANS Procedure

Assay variable : PTINR\_VAL1 PT-INR Value

N Mean Standard Deviation Minimum Maximum

---

|   |           |           |           |           |
|---|-----------|-----------|-----------|-----------|
| 6 | 2.3366667 | 0.5368302 | 1.6800000 | 3.2300000 |
|---|-----------|-----------|-----------|-----------|

---

Unique Subject Identifier=1158010000-0042

Assay variable : PTINR\_VAL1 PT-INR Value

N Mean Standard Deviation Minimum Maximum

---

|   |           |           |           |           |
|---|-----------|-----------|-----------|-----------|
| 6 | 2.0683333 | 0.3535770 | 1.6400000 | 2.5000000 |
|---|-----------|-----------|-----------|-----------|

---

Unique Subject Identifier=1158010000-0045

Assay variable : PTINR\_VAL1 PT-INR Value

N Mean Standard Deviation Minimum Maximum

---

|   |           |           |           |           |
|---|-----------|-----------|-----------|-----------|
| 6 | 1.9533333 | 0.5908525 | 1.4700000 | 3.1200000 |
|---|-----------|-----------|-----------|-----------|

---

Unique Subject Identifier=1158010000-0055

Assay variable : PTINR\_VAL1 PT-INR Value

N Mean Standard Deviation Minimum Maximum

---

|   |          |           |          |          |
|---|----------|-----------|----------|----------|
| 6 | 2.118333 | 0.1340771 | 1.990000 | 2.350000 |
|---|----------|-----------|----------|----------|

---

Laboratory tests at the time of obtaining Table 2-6 consent, according to the presence or absence of proton-pump inhibitors

Unique Subject Identifier=1158010000-0065

MEANS Procedure

Assay variable : PTINR\_VAL1 PT-INR Value

N Mean Standard Deviation Minimum Maximum

---

|   |           |           |           |           |
|---|-----------|-----------|-----------|-----------|
| 6 | 2.0816667 | 0.3621832 | 1.4700000 | 2.4500000 |
|---|-----------|-----------|-----------|-----------|

---

Unique Subject Identifier=1158010000-0080

Assay variable : PTINR\_VAL1 PT-INR Value

N Mean Standard Deviation Minimum Maximum

---

|   |           |           |           |           |
|---|-----------|-----------|-----------|-----------|
| 6 | 2.0250000 | 0.0875785 | 1.9000000 | 2.1600000 |
|---|-----------|-----------|-----------|-----------|

---

Unique Subject Identifier=1158010000-0082

Assay variable : PTINR\_VAL1 PT-INR Value

N Mean Standard Deviation Minimum Maximum

---

|   |           |           |           |           |
|---|-----------|-----------|-----------|-----------|
| 6 | 2.4200000 | 0.3996498 | 1.8100000 | 2.9800000 |
|---|-----------|-----------|-----------|-----------|

---

Unique Subject Identifier=1158010000-0104



Assay variable : PTINR\_VAL1 PT-INR Value

N Mean Standard Deviation Minimum Maximum

---

|   |           |           |           |           |
|---|-----------|-----------|-----------|-----------|
| 6 | 1.8666667 | 0.3042148 | 1.4700000 | 2.3800000 |
|---|-----------|-----------|-----------|-----------|

---

Laboratory tests at the time of obtaining Table 2-6 consent, according to the presence or absence of proton-pump inhibitors

Unique Subject Identifier=1158010000-0106

MEANS Procedure

Assay variable : PTINR\_VAL1 PT-INR Value

N Mean Standard Deviation Minimum Maximum

---

|   |           |           |           |           |
|---|-----------|-----------|-----------|-----------|
| 6 | 2.2600000 | 0.4376300 | 1.7700000 | 3.0100000 |
|---|-----------|-----------|-----------|-----------|

---

Unique Subject Identifier=1158010000-0117

Assay variable : PTINR\_VAL1 PT-INR Value

N Mean Standard Deviation Minimum Maximum

---

|   |           |           |           |           |
|---|-----------|-----------|-----------|-----------|
| 6 | 2.0533333 | 0.3923094 | 1.6400000 | 2.7100000 |
|---|-----------|-----------|-----------|-----------|

---

Unique Subject Identifier=1158010000-0126

Assay variable : PTINR\_VAL1 PT-INR Value

N Mean Standard Deviation Minimum Maximum

---

|   |           |           |           |           |
|---|-----------|-----------|-----------|-----------|
| 6 | 2.1750000 | 0.4345457 | 1.4700000 | 2.6600000 |
|---|-----------|-----------|-----------|-----------|

---

Unique Subject Identifier=1159000000-0002

Assay variable : PTINR\_VAL1 PT-INR Value

N Mean Standard Deviation Minimum Maximum

---

|   |           |           |           |           |
|---|-----------|-----------|-----------|-----------|
| 6 | 2.2666667 | 0.1966384 | 1.9000000 | 2.4000000 |
|---|-----------|-----------|-----------|-----------|

---

Laboratory tests at the time of obtaining Table 2-6 consent, according to the presence or absence of proton-pump inhibitors

Unique Subject Identifier=1159000000-0003

MEANS Procedure

Assay variable : PTINR\_VAL1 PT-INR Value

N Mean Standard Deviation Minimum Maximum

---

|   |           |           |           |           |
|---|-----------|-----------|-----------|-----------|
| 6 | 2.0500000 | 0.6348228 | 1.1000000 | 2.8000000 |
|---|-----------|-----------|-----------|-----------|

---

Unique Subject Identifier=1159000000-0005

Assay variable : PTINR\_VAL1 PT-INR Value

N Mean Standard Deviation Minimum Maximum

---

|   |           |           |           |           |
|---|-----------|-----------|-----------|-----------|
| 6 | 2.3666667 | 0.6121002 | 1.5000000 | 3.1000000 |
|---|-----------|-----------|-----------|-----------|

---

Unique Subject Identifier=1159000000-0010

Assay variable : PTINR\_VAL1 PT-INR Value

N Mean Standard Deviation Minimum Maximum

---

|   |           |           |           |           |
|---|-----------|-----------|-----------|-----------|
| 5 | 2.1600000 | 0.4037326 | 1.8000000 | 2.8000000 |
|---|-----------|-----------|-----------|-----------|

---

Unique Subject Identifier=1159000000-0013

Assay variable : PTINR\_VAL1 PT-INR Value

N Mean Standard Deviation Minimum Maximum

---

|   |           |           |           |           |
|---|-----------|-----------|-----------|-----------|
| 6 | 2.4833333 | 0.4956477 | 1.5000000 | 2.9000000 |
|---|-----------|-----------|-----------|-----------|

---

Laboratory tests at the time of obtaining Table 2-6 consent, according to the presence or absence of proton-pump inhibitors

Unique Subject Identifier=1159000000-0015

MEANS Procedure

Assay variable : PTINR\_VAL1 PT-INR Value

N Mean Standard Deviation Minimum Maximum

---

|   |           |           |           |           |
|---|-----------|-----------|-----------|-----------|
| 6 | 2.3000000 | 0.2898275 | 1.9000000 | 2.7000000 |
|---|-----------|-----------|-----------|-----------|

---

Unique Subject Identifier=1159000000-0016

Assay variable : PTINR\_VAL1 PT-INR Value

N Mean Standard Deviation Minimum Maximum

---

|   |           |           |           |           |
|---|-----------|-----------|-----------|-----------|
| 6 | 2.1500000 | 0.6220932 | 1.3000000 | 3.1000000 |
|---|-----------|-----------|-----------|-----------|

---

Unique Subject Identifier=1159000000-0017

Assay variable : PTINR\_VAL1 PT-INR Value

N Mean Standard Deviation Minimum Maximum

---

|   |           |           |           |           |
|---|-----------|-----------|-----------|-----------|
| 6 | 2.2333333 | 0.4033196 | 1.8000000 | 2.9000000 |
|---|-----------|-----------|-----------|-----------|

---

Unique Subject Identifier=1159000000-0018

Assay variable : PTINR\_VAL1 PT-INR Value

N Mean Standard Deviation Minimum Maximum

---

|   |           |           |           |           |
|---|-----------|-----------|-----------|-----------|
| 6 | 1.9333333 | 0.4718757 | 1.5000000 | 2.8000000 |
|---|-----------|-----------|-----------|-----------|

---

Laboratory tests at the time of obtaining Table 2-6 consent, according to the presence or absence of proton-pump inhibitors

Unique Subject Identifier=1159000000-0019

MEANS Procedure

Assay variable : PTINR\_VAL1 PT-INR Value

N Mean Standard Deviation Minimum Maximum

---

|   |           |           |           |           |
|---|-----------|-----------|-----------|-----------|
| 6 | 2.0000000 | 0.2097618 | 1.8000000 | 2.3000000 |
|---|-----------|-----------|-----------|-----------|

---

Unique Subject Identifier=1160000000-0005

Assay variable : PTINR\_VAL1 PT-INR Value

N Mean Standard Deviation Minimum Maximum

---

|   |           |           |           |           |
|---|-----------|-----------|-----------|-----------|
| 4 | 2.4125000 | 1.2308906 | 1.2400000 | 4.1300000 |
|---|-----------|-----------|-----------|-----------|

---

Unique Subject Identifier=1160000000-0035

Assay variable : PTINR\_VAL1 PT-INR Value

N Mean Standard Deviation Minimum Maximum

---

|   |           |           |           |           |
|---|-----------|-----------|-----------|-----------|
| 5 | 1.9560000 | 0.2402707 | 1.6800000 | 2.2100000 |
|---|-----------|-----------|-----------|-----------|

---

Unique Subject Identifier=1160000000-0055



Assay variable : PTINR\_VAL1 PT-INR Value

N Mean Standard Deviation Minimum Maximum

---

|   |          |           |          |          |
|---|----------|-----------|----------|----------|
| 4 | 2.480000 | 1.0526158 | 1.700000 | 3.940000 |
|---|----------|-----------|----------|----------|

---

Laboratory tests at the time of obtaining Table 2-6 consent, according to the presence or absence of proton-pump inhibitors

Unique Subject Identifier=116000000-0057

MEANS Procedure

Assay variable : PTINR\_VAL1 PT-INR Value

N Mean Standard Deviation Minimum Maximum

---

|   |           |           |           |           |
|---|-----------|-----------|-----------|-----------|
| 5 | 1.8660000 | 0.2176695 | 1.6600000 | 2.2100000 |
|---|-----------|-----------|-----------|-----------|

---

Unique Subject Identifier=116000000-0094

Assay variable : PTINR\_VAL1 PT-INR Value

N Mean Standard Deviation Minimum Maximum

---

|   |           |           |           |           |
|---|-----------|-----------|-----------|-----------|
| 2 | 1.8650000 | 0.0777817 | 1.8100000 | 1.9200000 |
|---|-----------|-----------|-----------|-----------|

---

Unique Subject Identifier=116000000-0104

Assay variable : PTINR\_VAL1 PT-INR Value

N Mean Standard Deviation Minimum Maximum

---

|   |           |           |           |           |
|---|-----------|-----------|-----------|-----------|
| 4 | 2.1450000 | 0.2487971 | 1.8800000 | 2.4800000 |
|---|-----------|-----------|-----------|-----------|

---

Unique Subject Identifier=116000000-0112

Assay variable : PTINR\_VAL1 PT-INR Value

N Mean Standard Deviation Minimum Maximum

---

|   |           |           |           |           |
|---|-----------|-----------|-----------|-----------|
| 5 | 1.9240000 | 0.2338376 | 1.7200000 | 2.2500000 |
|---|-----------|-----------|-----------|-----------|

---

Laboratory tests at the time of obtaining Table 2-6 consent, according to the presence or absence of proton-pump inhibitors

Unique Subject Identifier=116000000-0118

MEANS Procedure

Assay variable : PTINR\_VAL1 PT-INR Value

N Mean Standard Deviation Minimum Maximum

---

|   |           |           |           |           |
|---|-----------|-----------|-----------|-----------|
| 5 | 1.8360000 | 0.7326527 | 1.2700000 | 3.0900000 |
|---|-----------|-----------|-----------|-----------|

---

Unique Subject Identifier=116000000-0120

Assay variable : PTINR\_VAL1 PT-INR Value

N Mean Standard Deviation Minimum Maximum

---

|   |           |           |           |           |
|---|-----------|-----------|-----------|-----------|
| 6 | 2.7600000 | 0.4822448 | 2.1300000 | 3.4900000 |
|---|-----------|-----------|-----------|-----------|

---

Unique Subject Identifier=1161010100-0001

Assay variable : PTINR\_VAL1 PT-INR Value

N Mean Standard Deviation Minimum Maximum

---

|   |           |  |           |           |
|---|-----------|--|-----------|-----------|
| 1 | 2.4900000 |  | 2.4900000 | 2.4900000 |
|---|-----------|--|-----------|-----------|

---

Unique Subject Identifier=1161010100-0006

Assay variable : PTINR\_VAL1 PT-INR Value

N Mean Standard Deviation Minimum Maximum

---

|   |           |           |           |           |
|---|-----------|-----------|-----------|-----------|
| 3 | 1.6566667 | 0.0321455 | 1.6200000 | 1.6800000 |
|---|-----------|-----------|-----------|-----------|

---

Laboratory tests at the time of obtaining Table 2-6 consent, according to the presence or absence of proton-pump inhibitors

Unique Subject Identifier=1161010100-0011

MEANS Procedure

Assay variable : PTINR\_VAL1 PT-INR Value

| N | Mean      | Standard Deviation | Minimum   | Maximum   |
|---|-----------|--------------------|-----------|-----------|
| 2 | 1.8250000 | 0.0070711          | 1.8200000 | 1.8300000 |

Unique Subject Identifier=1161010100-0017

Assay variable : PTINR\_VAL1 PT-INR Value

| N | Mean      | Standard Deviation | Minimum   | Maximum   |
|---|-----------|--------------------|-----------|-----------|
| 1 | 2.1900000 |                    | 2.1900000 | 2.1900000 |

Unique Subject Identifier=1161010100-0022

Assay variable : PTINR\_VAL1 PT-INR Value

| N | Mean      | Standard Deviation | Minimum   | Maximum   |
|---|-----------|--------------------|-----------|-----------|
| 1 | 2.0500000 |                    | 2.0500000 | 2.0500000 |

Unique Subject Identifier=1162011100-0003

Assay variable : PTINR\_VAL1 PT-INR Value

N Mean Standard Deviation Minimum Maximum

---

|   |           |           |           |           |
|---|-----------|-----------|-----------|-----------|
| 4 | 1.9900000 | 0.1618641 | 1.7700000 | 2.1600000 |
|---|-----------|-----------|-----------|-----------|

---

Laboratory tests at the time of obtaining Table 2-6 consent, according to the presence or absence of proton-pump inhibitors

Unique Subject Identifier=1167000000-0010

MEANS Procedure

Assay variable : PTINR\_VAL1 PT-INR Value

N Mean Standard Deviation Minimum Maximum

---

|   |           |           |           |
|---|-----------|-----------|-----------|
| 1 | 2.2100000 | 2.2100000 | 2.2100000 |
|---|-----------|-----------|-----------|

---

Unique Subject Identifier=1168011000-0026

Assay variable : PTINR\_VAL1 PT-INR Value

N Mean Standard Deviation Minimum Maximum

---

|   |           |           |           |
|---|-----------|-----------|-----------|
| 1 | 1.6400000 | 1.6400000 | 1.6400000 |
|---|-----------|-----------|-----------|

---

Unique Subject Identifier=1168011000-0028

Assay variable : PTINR\_VAL1 PT-INR Value

N Mean Standard Deviation Minimum Maximum

---

|   |           |           |           |
|---|-----------|-----------|-----------|
| 1 | 1.6000000 | 1.6000000 | 1.6000000 |
|---|-----------|-----------|-----------|

---

Unique Subject Identifier=1168011000-0039



Assay variable : PTINR\_VAL1 PT-INR Value

N Mean Standard Deviation Minimum Maximum

---

|   |           |           |           |           |
|---|-----------|-----------|-----------|-----------|
| 2 | 2.5300000 | 0.1272792 | 2.4400000 | 2.6200000 |
|---|-----------|-----------|-----------|-----------|

---

Laboratory tests at the time of obtaining Table 2-6 consent, according to the presence or absence of proton-pump inhibitors

Unique Subject Identifier=1168011000-0040

MEANS Procedure

Assay variable : PTINR\_VAL1 PT-INR Value

| N | Mean      | Standard Deviation | Minimum   | Maximum   |
|---|-----------|--------------------|-----------|-----------|
| 2 | 2.6600000 | 0.3818377          | 2.3900000 | 2.9300000 |

Unique Subject Identifier=1168011000-0050

Assay variable : PTINR\_VAL1 PT-INR Value

| N | Mean      | Standard Deviation | Minimum   | Maximum   |
|---|-----------|--------------------|-----------|-----------|
| 2 | 1.4200000 | 0.0424264          | 1.3900000 | 1.4500000 |

Unique Subject Identifier=1169010100-0013

Assay variable : PTINR\_VAL1 PT-INR Value

| N | Mean      | Standard Deviation | Minimum   | Maximum   |
|---|-----------|--------------------|-----------|-----------|
| 5 | 2.4200000 | 0.2774887          | 2.1000000 | 2.8000000 |

Unique Subject Identifier=1171000000-0003

Assay variable : PTINR\_VAL1 PT-INR Value

N Mean Standard Deviation Minimum Maximum

---

|   |           |           |           |           |
|---|-----------|-----------|-----------|-----------|
| 5 | 1.6760000 | 0.0391152 | 1.6400000 | 1.7300000 |
|---|-----------|-----------|-----------|-----------|

---

Laboratory tests at the time of obtaining Table 2-6 consent, according to the presence or absence of proton-pump inhibitors

Unique Subject Identifier=1172011000-0005

MEANS Procedure

Assay variable : PTINR\_VAL1 PT-INR Value

N Mean Standard Deviation Minimum Maximum

---

|   |           |           |           |           |
|---|-----------|-----------|-----------|-----------|
| 6 | 2.1166667 | 0.1169045 | 2.0000000 | 2.3000000 |
|---|-----------|-----------|-----------|-----------|

---

Unique Subject Identifier=1173011100-0011

Assay variable : PTINR\_VAL1 PT-INR Value

N Mean Standard Deviation Minimum Maximum

---

|   |           |           |           |           |
|---|-----------|-----------|-----------|-----------|
| 6 | 1.9000000 | 0.3033150 | 1.4000000 | 2.2000000 |
|---|-----------|-----------|-----------|-----------|

---

Unique Subject Identifier=1173011100-0015

Assay variable : PTINR\_VAL1 PT-INR Value

N Mean Standard Deviation Minimum Maximum

---

|   |           |           |           |           |
|---|-----------|-----------|-----------|-----------|
| 6 | 1.6666667 | 0.3265986 | 1.3000000 | 2.2000000 |
|---|-----------|-----------|-----------|-----------|

---

Unique Subject Identifier=1173011100-0018

Assay variable : PTINR\_VAL1 PT-INR Value

N Mean Standard Deviation Minimum Maximum

---

|   |           |           |           |           |
|---|-----------|-----------|-----------|-----------|
| 6 | 2.2833333 | 0.2316607 | 1.9000000 | 2.6000000 |
|---|-----------|-----------|-----------|-----------|

---

Laboratory tests at the time of obtaining Table 2-6 consent, according to the presence or absence of proton-pump inhibitors

Unique Subject Identifier=1173011100-0019

MEANS Procedure

Assay variable : PTINR\_VAL1 PT-INR Value

N Mean Standard Deviation Minimum Maximum

---

|   |           |           |           |           |
|---|-----------|-----------|-----------|-----------|
| 6 | 2.3500000 | 1.0445095 | 1.1000000 | 3.6000000 |
|---|-----------|-----------|-----------|-----------|

---

Unique Subject Identifier=1173011100-0021

Assay variable : PTINR\_VAL1 PT-INR Value

N Mean Standard Deviation Minimum Maximum

---

|   |           |           |           |           |
|---|-----------|-----------|-----------|-----------|
| 6 | 2.5000000 | 0.8221922 | 1.7000000 | 3.8000000 |
|---|-----------|-----------|-----------|-----------|

---

Unique Subject Identifier=1173011100-0026

Assay variable : PTINR\_VAL1 PT-INR Value

N Mean Standard Deviation Minimum Maximum

---

|   |           |           |           |           |
|---|-----------|-----------|-----------|-----------|
| 6 | 2.2500000 | 1.0634848 | 1.5000000 | 4.3000000 |
|---|-----------|-----------|-----------|-----------|

---

Unique Subject Identifier=1173011100-0031

Assay variable : PTINR\_VAL1 PT-INR Value

N Mean Standard Deviation Minimum Maximum

---

|   |           |           |           |           |
|---|-----------|-----------|-----------|-----------|
| 6 | 1.6833333 | 0.4445972 | 1.3000000 | 2.3000000 |
|---|-----------|-----------|-----------|-----------|

---

Laboratory tests at the time of obtaining Table 2-6 consent, according to the presence or absence of proton-pump inhibitors

Unique Subject Identifier=1175011000-0004

MEANS Procedure

Assay variable : PTINR\_VAL1 PT-INR Value

N Mean Standard Deviation Minimum Maximum

---

|   |           |           |           |           |
|---|-----------|-----------|-----------|-----------|
| 6 | 1.7833333 | 0.2316607 | 1.5000000 | 2.1000000 |
|---|-----------|-----------|-----------|-----------|

---

Unique Subject Identifier=1175011000-0005

Assay variable : PTINR\_VAL1 PT-INR Value

N Mean Standard Deviation Minimum Maximum

---

|   |           |           |           |           |
|---|-----------|-----------|-----------|-----------|
| 6 | 2.3666667 | 2.7645373 | 1.0000000 | 8.0000000 |
|---|-----------|-----------|-----------|-----------|

---

Unique Subject Identifier=1175011000-0009

Assay variable : PTINR\_VAL1 PT-INR Value

N Mean Standard Deviation Minimum Maximum

---

|   |           |           |           |           |
|---|-----------|-----------|-----------|-----------|
| 6 | 2.0000000 | 0.2756810 | 1.6000000 | 2.4000000 |
|---|-----------|-----------|-----------|-----------|

---

Unique Subject Identifier=1175011000-0010



Assay variable : PTINR\_VAL1 PT-INR Value

N Mean Standard Deviation Minimum Maximum

---

|   |           |           |           |           |
|---|-----------|-----------|-----------|-----------|
| 6 | 1.8500000 | 0.2428992 | 1.5000000 | 2.1000000 |
|---|-----------|-----------|-----------|-----------|

---

Laboratory tests at the time of obtaining Table 2-6 consent, according to the presence or absence of proton-pump inhibitors

Unique Subject Identifier=1175011000-0016

MEANS Procedure

Assay variable : PTINR\_VAL1 PT-INR Value

| N | Mean      | Standard Deviation | Minimum   | Maximum   |
|---|-----------|--------------------|-----------|-----------|
| 6 | 1.7666667 | 0.1366260          | 1.6000000 | 2.0000000 |

Unique Subject Identifier=1175011000-0019

Assay variable : PTINR\_VAL1 PT-INR Value

| N | Mean      | Standard Deviation | Minimum   | Maximum   |
|---|-----------|--------------------|-----------|-----------|
| 6 | 2.0500000 | 0.4764452          | 1.5000000 | 2.6000000 |

Unique Subject Identifier=1179000000-0002

Assay variable : PTINR\_VAL1 PT-INR Value

| N | Mean      | Standard Deviation | Minimum   | Maximum   |
|---|-----------|--------------------|-----------|-----------|
| 3 | 1.8333333 | 0.3511885          | 1.5000000 | 2.2000000 |

Unique Subject Identifier=1179000000-0003

Assay variable : PTINR\_VAL1 PT-INR Value

N Mean Standard Deviation Minimum Maximum

---

|   |          |           |          |          |
|---|----------|-----------|----------|----------|
| 6 | 1.950000 | 1.0310189 | 1.100000 | 4.000000 |
|---|----------|-----------|----------|----------|

---

Laboratory tests at the time of obtaining Table 2-6 consent, according to the presence or absence of proton-pump inhibitors

Unique Subject Identifier=1179000000-0004

MEANS Procedure

Assay variable : PTINR\_VAL1 PT-INR Value

N Mean Standard Deviation Minimum Maximum

---

|   |           |           |           |           |
|---|-----------|-----------|-----------|-----------|
| 3 | 2.0333333 | 0.2081666 | 1.8000000 | 2.2000000 |
|---|-----------|-----------|-----------|-----------|

---

Unique Subject Identifier=1179000000-0006

Assay variable : PTINR\_VAL1 PT-INR Value

N Mean Standard Deviation Minimum Maximum

---

|   |           |           |           |           |
|---|-----------|-----------|-----------|-----------|
| 3 | 2.2333333 | 0.3214550 | 2.0000000 | 2.6000000 |
|---|-----------|-----------|-----------|-----------|

---

Unique Subject Identifier=1181000000-0003

Assay variable : PTINR\_VAL1 PT-INR Value

N Mean Standard Deviation Minimum Maximum

---

|   |           |  |           |           |
|---|-----------|--|-----------|-----------|
| 1 | 2.0300000 |  | 2.0300000 | 2.0300000 |
|---|-----------|--|-----------|-----------|

---

Unique Subject Identifier=1181000000-0004

Assay variable : PTINR\_VAL1 PT-INR Value

N Mean Standard Deviation Minimum Maximum

---

|   |           |  |           |           |
|---|-----------|--|-----------|-----------|
| 1 | 2.3900000 |  | 2.3900000 | 2.3900000 |
|---|-----------|--|-----------|-----------|

---

Laboratory tests at the time of obtaining Table 2-6 consent, according to the presence or absence of proton-pump inhibitors

Unique Subject Identifier=1181000000-0005

MEANS Procedure

Assay variable : PTINR\_VAL1 PT-INR Value

| N | Mean      | Standard Deviation | Minimum   | Maximum   |
|---|-----------|--------------------|-----------|-----------|
| 2 | 2.7950000 | 0.3889087          | 2.5200000 | 3.0700000 |

Unique Subject Identifier=1181000000-0006

Assay variable : PTINR\_VAL1 PT-INR Value

| N | Mean      | Standard Deviation | Minimum   | Maximum   |
|---|-----------|--------------------|-----------|-----------|
| 2 | 2.1000000 | 0.3676955          | 1.8400000 | 2.3600000 |

Unique Subject Identifier=1181000000-0007

Assay variable : PTINR\_VAL1 PT-INR Value

| N | Mean      | Standard Deviation | Minimum   | Maximum   |
|---|-----------|--------------------|-----------|-----------|
| 3 | 1.6866667 | 0.3360556          | 1.3200000 | 1.9800000 |

Unique Subject Identifier=1181000000-0008

Assay variable : PTINR\_VAL1 PT-INR Value

N Mean Standard Deviation Minimum Maximum

---

|   |           |           |           |           |
|---|-----------|-----------|-----------|-----------|
| 2 | 1.4650000 | 0.2050610 | 1.3200000 | 1.6100000 |
|---|-----------|-----------|-----------|-----------|

---

Laboratory tests at the time of obtaining Table 2-6 consent, according to the presence or absence of proton-pump inhibitors

Unique Subject Identifier=1181000000-0009

MEANS Procedure

Assay variable : PTINR\_VAL1 PT-INR Value

N Mean Standard Deviation Minimum Maximum

---

|   |           |  |           |           |
|---|-----------|--|-----------|-----------|
| 1 | 3.5700000 |  | 3.5700000 | 3.5700000 |
|---|-----------|--|-----------|-----------|

---

Unique Subject Identifier=1181000000-0010

Assay variable : PTINR\_VAL1 PT-INR Value

N Mean Standard Deviation Minimum Maximum

---

|   |           |           |           |           |
|---|-----------|-----------|-----------|-----------|
| 2 | 1.7950000 | 0.4030509 | 1.5100000 | 2.0800000 |
|---|-----------|-----------|-----------|-----------|

---

Unique Subject Identifier=1181000000-0012

Assay variable : PTINR\_VAL1 PT-INR Value

N Mean Standard Deviation Minimum Maximum

---

|   |           |  |           |           |
|---|-----------|--|-----------|-----------|
| 1 | 1.6200000 |  | 1.6200000 | 1.6200000 |
|---|-----------|--|-----------|-----------|

---

Unique Subject Identifier=1181000000-0013



Assay variable : PTINR\_VAL1 PT-INR Value

N Mean Standard Deviation Minimum Maximum

---

|   |          |           |          |          |
|---|----------|-----------|----------|----------|
| 3 | 1.660000 | 0.0754983 | 1.590000 | 1.740000 |
|---|----------|-----------|----------|----------|

---

Laboratory tests at the time of obtaining Table 2-6 consent, according to the presence or absence of proton-pump inhibitors

Unique Subject Identifier=1181000000-0018

MEANS Procedure

Assay variable : PTINR\_VAL1 PT-INR Value

| N | Mean      | Standard Deviation | Minimum   | Maximum   |
|---|-----------|--------------------|-----------|-----------|
| 2 | 2.5450000 | 0.2192031          | 2.3900000 | 2.7000000 |

Unique Subject Identifier=1181000000-0019

Assay variable : PTINR\_VAL1 PT-INR Value

| N | Mean      | Standard Deviation | Minimum   | Maximum   |
|---|-----------|--------------------|-----------|-----------|
| 1 | 1.7200000 |                    | 1.7200000 | 1.7200000 |

Unique Subject Identifier=1182000000-0001

Assay variable : PTINR\_VAL1 PT-INR Value

| N | Mean      | Standard Deviation | Minimum   | Maximum   |
|---|-----------|--------------------|-----------|-----------|
| 4 | 1.4750000 | 0.3403430          | 1.2000000 | 1.9000000 |

Unique Subject Identifier=1182000000-0002

Assay variable : PTINR\_VAL1 PT-INR Value

N Mean Standard Deviation Minimum Maximum

---

|   |          |           |          |          |
|---|----------|-----------|----------|----------|
| 6 | 2.000000 | 0.3741657 | 1.600000 | 2.600000 |
|---|----------|-----------|----------|----------|

---

Laboratory tests at the time of obtaining Table 2-6 consent, according to the presence or absence of proton-pump inhibitors

Unique Subject Identifier=118600000-0008

MEANS Procedure

Assay variable : PTINR\_VAL1 PT-INR Value

| N | Mean      | Standard Deviation | Minimum   | Maximum   |
|---|-----------|--------------------|-----------|-----------|
| 4 | 2.2750000 | 0.9535023          | 1.7000000 | 3.7000000 |

Unique Subject Identifier=1188011110-0027

Assay variable : PTINR\_VAL1 PT-INR Value

| N | Mean      | Standard Deviation | Minimum   | Maximum   |
|---|-----------|--------------------|-----------|-----------|
| 5 | 2.0420000 | 0.1953714          | 1.8100000 | 2.2700000 |

Unique Subject Identifier=1188011110-0068

Assay variable : PTINR\_VAL1 PT-INR Value

| N | Mean      | Standard Deviation | Minimum   | Maximum   |
|---|-----------|--------------------|-----------|-----------|
| 3 | 2.1433333 | 0.0971253          | 2.0600000 | 2.2500000 |

Unique Subject Identifier=1188011110-0124

Assay variable : PTINR\_VAL1 PT-INR Value

N Mean Standard Deviation Minimum Maximum

---

|   |           |           |           |           |
|---|-----------|-----------|-----------|-----------|
| 4 | 1.5925000 | 0.1569235 | 1.4200000 | 1.8000000 |
|---|-----------|-----------|-----------|-----------|

---

Laboratory tests at the time of obtaining Table 2-6 consent, according to the presence or absence of proton-pump inhibitors

Unique Subject Identifier=1189001100-0001

MEANS Procedure

Assay variable : PTINR\_VAL1 PT-INR Value

| N | Mean      | Standard Deviation | Minimum   | Maximum   |
|---|-----------|--------------------|-----------|-----------|
| 2 | 1.3950000 | 0.0636396          | 1.3500000 | 1.4400000 |

Unique Subject Identifier=1189001100-0008

Assay variable : PTINR\_VAL1 PT-INR Value

| N | Mean      | Standard Deviation | Minimum   | Maximum   |
|---|-----------|--------------------|-----------|-----------|
| 4 | 3.1475000 | 0.8403323          | 1.9500000 | 3.8500000 |

Unique Subject Identifier=1189001100-0017

Assay variable : PTINR\_VAL1 PT-INR Value

| N | Mean      | Standard Deviation | Minimum   | Maximum   |
|---|-----------|--------------------|-----------|-----------|
| 1 | 1.8800000 |                    | 1.8800000 | 1.8800000 |

Unique Subject Identifier=1191000000-0001

Assay variable : PTINR\_VAL1 PT-INR Value

N Mean Standard Deviation Minimum Maximum

---

|   |           |           |           |           |
|---|-----------|-----------|-----------|-----------|
| 6 | 1.4550000 | 0.1266096 | 1.3100000 | 1.6200000 |
|---|-----------|-----------|-----------|-----------|

---

Laboratory tests at the time of obtaining Table 2-6 consent, according to the presence or absence of proton-pump inhibitors

Unique Subject Identifier=1194000000-0014

MEANS Procedure

Assay variable : PTINR\_VAL1 PT-INR Value

N Mean Standard Deviation Minimum Maximum

---

|   |           |           |           |           |
|---|-----------|-----------|-----------|-----------|
| 2 | 1.8650000 | 0.1484924 | 1.7600000 | 1.9700000 |
|---|-----------|-----------|-----------|-----------|

---

Unique Subject Identifier=1195000000-0006

Assay variable : PTINR\_VAL1 PT-INR Value

N Mean Standard Deviation Minimum Maximum

---

|   |           |           |           |           |
|---|-----------|-----------|-----------|-----------|
| 4 | 1.6700000 | 0.3436083 | 1.4300000 | 2.1700000 |
|---|-----------|-----------|-----------|-----------|

---

Unique Subject Identifier=1195000000-0007

Assay variable : PTINR\_VAL1 PT-INR Value

N Mean Standard Deviation Minimum Maximum

---

|   |           |           |           |           |
|---|-----------|-----------|-----------|-----------|
| 5 | 1.4120000 | 0.1223520 | 1.2400000 | 1.5500000 |
|---|-----------|-----------|-----------|-----------|

---

Unique Subject Identifier=1195000000-0008



Assay variable : PTINR\_VAL1 PT-INR Value

N Mean Standard Deviation Minimum Maximum

---

|   |           |           |           |           |
|---|-----------|-----------|-----------|-----------|
| 2 | 1.8800000 | 0.1414214 | 1.7800000 | 1.9800000 |
|---|-----------|-----------|-----------|-----------|

---

Laboratory tests at the time of obtaining Table 2-6 consent, according to the presence or absence of proton-pump inhibitors

Unique Subject Identifier=1195000000-0009

MEANS Procedure

Assay variable : PTINR\_VAL1 PT-INR Value

N Mean Standard Deviation Minimum Maximum

---

|   |           |           |           |           |
|---|-----------|-----------|-----------|-----------|
| 4 | 2.1350000 | 0.4702836 | 1.8800000 | 2.8400000 |
|---|-----------|-----------|-----------|-----------|

---

Unique Subject Identifier=1195000000-0010

Assay variable : PTINR\_VAL1 PT-INR Value

N Mean Standard Deviation Minimum Maximum

---

|   |           |           |           |           |
|---|-----------|-----------|-----------|-----------|
| 6 | 1.8816667 | 0.2770138 | 1.4300000 | 2.1500000 |
|---|-----------|-----------|-----------|-----------|

---

Unique Subject Identifier=1195000000-0011

Assay variable : PTINR\_VAL1 PT-INR Value

N Mean Standard Deviation Minimum Maximum

---

|   |           |           |           |           |
|---|-----------|-----------|-----------|-----------|
| 5 | 1.9100000 | 0.2876630 | 1.5000000 | 2.2600000 |
|---|-----------|-----------|-----------|-----------|

---

Unique Subject Identifier=1195000000-0012

Assay variable : PTINR\_VAL1 PT-INR Value

N Mean Standard Deviation Minimum Maximum

---

|   |           |           |           |           |
|---|-----------|-----------|-----------|-----------|
| 4 | 1.6900000 | 0.1166190 | 1.5900000 | 1.8100000 |
|---|-----------|-----------|-----------|-----------|

---

Laboratory tests at the time of obtaining Table 2-6 consent, according to the presence or absence of proton-pump inhibitors

Unique Subject Identifier=1195000000-0013

MEANS Procedure

Assay variable : PTINR\_VAL1 PT-INR Value

N Mean Standard Deviation Minimum Maximum

---

|   |           |           |           |           |
|---|-----------|-----------|-----------|-----------|
| 4 | 1.3575000 | 0.1613227 | 1.1200000 | 1.4800000 |
|---|-----------|-----------|-----------|-----------|

---

Unique Subject Identifier=1195000000-0014

Assay variable : PTINR\_VAL1 PT-INR Value

N Mean Standard Deviation Minimum Maximum

---

|   |           |           |           |           |
|---|-----------|-----------|-----------|-----------|
| 4 | 1.9225000 | 0.6399154 | 1.3400000 | 2.8300000 |
|---|-----------|-----------|-----------|-----------|

---

Unique Subject Identifier=1195000000-0015

Assay variable : PTINR\_VAL1 PT-INR Value

N Mean Standard Deviation Minimum Maximum

---

|   |           |           |           |           |
|---|-----------|-----------|-----------|-----------|
| 4 | 1.2400000 | 0.0905539 | 1.1400000 | 1.3600000 |
|---|-----------|-----------|-----------|-----------|

---

Unique Subject Identifier=1195000000-0016

Assay variable : PTINR\_VAL1 PT-INR Value

N Mean Standard Deviation Minimum Maximum

---

|   |           |           |           |           |
|---|-----------|-----------|-----------|-----------|
| 4 | 2.4325000 | 0.2061351 | 2.2300000 | 2.6200000 |
|---|-----------|-----------|-----------|-----------|

---

Laboratory tests at the time of obtaining Table 2-6 consent, according to the presence or absence of proton-pump inhibitors

Unique Subject Identifier=1195000000-0017

MEANS Procedure

Assay variable : PTINR\_VAL1 PT-INR Value

| N | Mean      | Standard Deviation | Minimum   | Maximum   |
|---|-----------|--------------------|-----------|-----------|
| 4 | 1.8775000 | 0.1164403          | 1.7300000 | 2.0100000 |

Unique Subject Identifier=1195000000-0018

Assay variable : PTINR\_VAL1 PT-INR Value

| N | Mean      | Standard Deviation | Minimum   | Maximum   |
|---|-----------|--------------------|-----------|-----------|
| 5 | 1.3260000 | 0.1223928          | 1.1600000 | 1.4200000 |

Unique Subject Identifier=1195000000-0019

Assay variable : PTINR\_VAL1 PT-INR Value

| N | Mean      | Standard Deviation | Minimum   | Maximum   |
|---|-----------|--------------------|-----------|-----------|
| 5 | 1.4920000 | 0.0947101          | 1.3400000 | 1.6000000 |

Unique Subject Identifier=1195000000-0020

Assay variable : PTINR\_VAL1 PT-INR Value

N Mean Standard Deviation Minimum Maximum

---

|   |          |           |          |          |
|---|----------|-----------|----------|----------|
| 4 | 1.920000 | 0.0621825 | 1.870000 | 2.010000 |
|---|----------|-----------|----------|----------|

---

Laboratory tests at the time of obtaining Table 2-6 consent, according to the presence or absence of proton-pump inhibitors

Unique Subject Identifier=1198000000-0003

MEANS Procedure

Assay variable : PTINR\_VAL1 PT-INR Value

N Mean Standard Deviation Minimum Maximum

---

|   |           |           |           |           |
|---|-----------|-----------|-----------|-----------|
| 6 | 2.0616667 | 0.3142876 | 1.6500000 | 2.6000000 |
|---|-----------|-----------|-----------|-----------|

---

Unique Subject Identifier=1198000000-0005

Assay variable : PTINR\_VAL1 PT-INR Value

N Mean Standard Deviation Minimum Maximum

---

|   |           |           |           |           |
|---|-----------|-----------|-----------|-----------|
| 6 | 1.8083333 | 0.0970395 | 1.6500000 | 1.9000000 |
|---|-----------|-----------|-----------|-----------|

---

Unique Subject Identifier=1198000000-0008

Assay variable : PTINR\_VAL1 PT-INR Value

N Mean Standard Deviation Minimum Maximum

---

|   |           |           |           |           |
|---|-----------|-----------|-----------|-----------|
| 6 | 1.9200000 | 0.1963670 | 1.7000000 | 2.1600000 |
|---|-----------|-----------|-----------|-----------|

---

Unique Subject Identifier=1198000000-0009



Assay variable : PTINR\_VAL1 PT-INR Value

N Mean Standard Deviation Minimum Maximum

---

|   |           |           |           |           |
|---|-----------|-----------|-----------|-----------|
| 6 | 1.6250000 | 0.1635543 | 1.4000000 | 1.8500000 |
|---|-----------|-----------|-----------|-----------|

---

Laboratory tests at the time of obtaining Table 2-6 consent, according to the presence or absence of proton-pump inhibitors

Unique Subject Identifier=1198000000-0010

MEANS Procedure

Assay variable : PTINR\_VAL1 PT-INR Value

| N | Mean      | Standard Deviation | Minimum   | Maximum   |
|---|-----------|--------------------|-----------|-----------|
| 5 | 1.6800000 | 0.3213254          | 1.1500000 | 2.0000000 |

Unique Subject Identifier=1198000000-0011

Assay variable : PTINR\_VAL1 PT-INR Value

| N | Mean      | Standard Deviation | Minimum   | Maximum   |
|---|-----------|--------------------|-----------|-----------|
| 6 | 2.2183333 | 0.1158303          | 2.0100000 | 2.3100000 |

Unique Subject Identifier=1198000000-0014

Assay variable : PTINR\_VAL1 PT-INR Value

| N | Mean      | Standard Deviation | Minimum   | Maximum   |
|---|-----------|--------------------|-----------|-----------|
| 5 | 2.3660000 | 0.0536656          | 2.3000000 | 2.4500000 |

Unique Subject Identifier=1198000000-0015

Assay variable : PTINR\_VAL1 PT-INR Value

N Mean Standard Deviation Minimum Maximum

---

|   |           |           |           |           |
|---|-----------|-----------|-----------|-----------|
| 6 | 1.5350000 | 0.2105944 | 1.1500000 | 1.7500000 |
|---|-----------|-----------|-----------|-----------|

---

Laboratory tests at the time of obtaining Table 2-6 consent, according to the presence or absence of proton-pump inhibitors

Unique Subject Identifier=1198000000-0017

MEANS Procedure

Assay variable : PTINR\_VAL1 PT-INR Value

| N | Mean      | Standard Deviation | Minimum   | Maximum   |
|---|-----------|--------------------|-----------|-----------|
| 5 | 2.3000000 | 0.0651920          | 2.2100000 | 2.3600000 |

Unique Subject Identifier=1198000000-0018

Assay variable : PTINR\_VAL1 PT-INR Value

| N | Mean      | Standard Deviation | Minimum   | Maximum   |
|---|-----------|--------------------|-----------|-----------|
| 6 | 1.7033333 | 0.6047038          | 0.4900000 | 2.0600000 |

Unique Subject Identifier=1198000000-0021

Assay variable : PTINR\_VAL1 PT-INR Value

| N | Mean      | Standard Deviation | Minimum   | Maximum   |
|---|-----------|--------------------|-----------|-----------|
| 2 | 1.9500000 | 0                  | 1.9500000 | 1.9500000 |

Unique Subject Identifier=1198000000-0023

Assay variable : PTINR\_VAL1 PT-INR Value

N Mean Standard Deviation Minimum Maximum

---

|   |          |           |          |          |
|---|----------|-----------|----------|----------|
| 5 | 2.240000 | 0.0908295 | 2.110000 | 2.360000 |
|---|----------|-----------|----------|----------|

---

Laboratory tests at the time of obtaining Table 2-6 consent, according to the presence or absence of proton-pump inhibitors

Unique Subject Identifier=1198000000-0024

MEANS Procedure

Assay variable : PTINR\_VAL1 PT-INR Value

| N | Mean      | Standard Deviation | Minimum   | Maximum   |
|---|-----------|--------------------|-----------|-----------|
| 2 | 2.2100000 | 0.0707107          | 2.1600000 | 2.2600000 |

Unique Subject Identifier=1198000000-0026

Assay variable : PTINR\_VAL1 PT-INR Value

| N | Mean      | Standard Deviation | Minimum   | Maximum   |
|---|-----------|--------------------|-----------|-----------|
| 5 | 1.5820000 | 0.3864842          | 1.1500000 | 2.0600000 |

Unique Subject Identifier=1198000000-0029

Assay variable : PTINR\_VAL1 PT-INR Value

| N | Mean      | Standard Deviation | Minimum   | Maximum   |
|---|-----------|--------------------|-----------|-----------|
| 5 | 1.7740000 | 0.3963332          | 1.3500000 | 2.3100000 |

Unique Subject Identifier=1198000000-0030

Assay variable : PTINR\_VAL1 PT-INR Value

N Mean Standard Deviation Minimum Maximum

---

|   |           |           |           |           |
|---|-----------|-----------|-----------|-----------|
| 5 | 1.8860000 | 0.2642537 | 1.5500000 | 2.1100000 |
|---|-----------|-----------|-----------|-----------|

---

Laboratory tests at the time of obtaining Table 2-6 consent, according to the presence or absence of proton-pump inhibitors

Unique Subject Identifier=1198000000-0031

MEANS Procedure

Assay variable : PTINR\_VAL1 PT-INR Value

N Mean Standard Deviation Minimum Maximum

---

|   |           |           |           |           |
|---|-----------|-----------|-----------|-----------|
| 5 | 1.9940000 | 0.4897755 | 1.4000000 | 2.6000000 |
|---|-----------|-----------|-----------|-----------|

---

Unique Subject Identifier=1198000000-0032

Assay variable : PTINR\_VAL1 PT-INR Value

N Mean Standard Deviation Minimum Maximum

---

|   |           |           |           |           |
|---|-----------|-----------|-----------|-----------|
| 5 | 1.6720000 | 0.4745208 | 0.8500000 | 2.0600000 |
|---|-----------|-----------|-----------|-----------|

---

Unique Subject Identifier=1198000000-0033

Assay variable : PTINR\_VAL1 PT-INR Value

N Mean Standard Deviation Minimum Maximum

---

|   |           |           |           |           |
|---|-----------|-----------|-----------|-----------|
| 2 | 0.4950000 | 0.5020458 | 0.1400000 | 0.8500000 |
|---|-----------|-----------|-----------|-----------|

---

Unique Subject Identifier=1198000000-0034



Assay variable : PTINR\_VAL1 PT-INR Value

N Mean Standard Deviation Minimum Maximum

---

|   |          |           |          |          |
|---|----------|-----------|----------|----------|
| 2 | 1.145000 | 0.9263099 | 0.490000 | 1.800000 |
|---|----------|-----------|----------|----------|

---

Laboratory tests at the time of obtaining Table 2-6 consent, according to the presence or absence of proton-pump inhibitors

Unique Subject Identifier=1198000000-0035

MEANS Procedure

Assay variable : PTINR\_VAL1 PT-INR Value

N Mean Standard Deviation Minimum Maximum

---

|   |           |           |           |           |
|---|-----------|-----------|-----------|-----------|
| 2 | 2.3350000 | 0.0353553 | 2.3100000 | 2.3600000 |
|---|-----------|-----------|-----------|-----------|

---

Unique Subject Identifier=1198000000-0039

Assay variable : PTINR\_VAL1 PT-INR Value

N Mean Standard Deviation Minimum Maximum

---

|   |           |           |           |           |
|---|-----------|-----------|-----------|-----------|
| 6 | 1.9050000 | 0.1755847 | 1.7000000 | 2.1100000 |
|---|-----------|-----------|-----------|-----------|

---

Unique Subject Identifier=1198000000-0041

Assay variable : PTINR\_VAL1 PT-INR Value

N Mean Standard Deviation Minimum Maximum

---

|   |           |           |           |           |
|---|-----------|-----------|-----------|-----------|
| 6 | 2.3350000 | 0.0689202 | 2.2100000 | 2.4100000 |
|---|-----------|-----------|-----------|-----------|

---

Unique Subject Identifier=1200010111-0005

Assay variable : PTINR\_VAL1 PT-INR Value

N Mean Standard Deviation Minimum Maximum

---

|   |           |           |           |           |
|---|-----------|-----------|-----------|-----------|
| 4 | 1.5250000 | 0.2500000 | 1.4000000 | 1.9000000 |
|---|-----------|-----------|-----------|-----------|

---

Laboratory tests at the time of obtaining Table 2-6 consent, according to the presence or absence of proton-pump inhibitors

Unique Subject Identifier=1200010111-0007

MEANS Procedure

Assay variable : PTINR\_VAL1 PT-INR Value

N Mean Standard Deviation Minimum Maximum

---

|   |           |           |           |           |
|---|-----------|-----------|-----------|-----------|
| 3 | 1.9000000 | 0.1732051 | 1.7000000 | 2.0000000 |
|---|-----------|-----------|-----------|-----------|

---

Unique Subject Identifier=1200010111-0013

Assay variable : PTINR\_VAL1 PT-INR Value

N Mean Standard Deviation Minimum Maximum

---

|   |           |           |           |           |
|---|-----------|-----------|-----------|-----------|
| 3 | 1.8000000 | 0.1000000 | 1.7000000 | 1.9000000 |
|---|-----------|-----------|-----------|-----------|

---

Unique Subject Identifier=1200010111-0019

Assay variable : PTINR\_VAL1 PT-INR Value

N Mean Standard Deviation Minimum Maximum

---

|   |           |           |           |           |
|---|-----------|-----------|-----------|-----------|
| 3 | 1.6333333 | 0.2081666 | 1.4000000 | 1.8000000 |
|---|-----------|-----------|-----------|-----------|

---

Unique Subject Identifier=1200010111-0020

Assay variable : PTINR\_VAL1 PT-INR Value

N Mean Standard Deviation Minimum Maximum

---

|   |          |          |          |          |
|---|----------|----------|----------|----------|
| 3 | 1.600000 | 0.200000 | 1.400000 | 1.800000 |
|---|----------|----------|----------|----------|

---

Laboratory tests at the time of obtaining Table 2-6 consent, according to the presence or absence of proton-pump inhibitors

Unique Subject Identifier=1200010111-0026

MEANS Procedure

Assay variable : PTINR\_VAL1 PT-INR Value

N Mean Standard Deviation Minimum Maximum

---

|   |           |  |           |           |
|---|-----------|--|-----------|-----------|
| 1 | 1.6000000 |  | 1.6000000 | 1.6000000 |
|---|-----------|--|-----------|-----------|

---

Unique Subject Identifier=1201000000-0001

Assay variable : PTINR\_VAL1 PT-INR Value

N Mean Standard Deviation Minimum Maximum

---

|   |           |           |           |           |
|---|-----------|-----------|-----------|-----------|
| 4 | 1.7175000 | 0.0997914 | 1.6100000 | 1.8400000 |
|---|-----------|-----------|-----------|-----------|

---

Unique Subject Identifier=1201000000-0003

Assay variable : PTINR\_VAL1 PT-INR Value

N Mean Standard Deviation Minimum Maximum

---

|   |           |           |           |           |
|---|-----------|-----------|-----------|-----------|
| 4 | 1.5600000 | 0.1540563 | 1.4200000 | 1.7600000 |
|---|-----------|-----------|-----------|-----------|

---

Unique Subject Identifier=1201000000-0004

Assay variable : PTINR\_VAL1 PT-INR Value

N Mean Standard Deviation Minimum Maximum

---

|   |           |           |           |           |
|---|-----------|-----------|-----------|-----------|
| 5 | 1.9460000 | 0.3261595 | 1.4400000 | 2.3000000 |
|---|-----------|-----------|-----------|-----------|

---

Laboratory tests at the time of obtaining Table 2-6 consent, according to the presence or absence of proton-pump inhibitors

Unique Subject Identifier=1201000000-0007

MEANS Procedure

Assay variable : PTINR\_VAL1 PT-INR Value

N Mean Standard Deviation Minimum Maximum

---

|   |           |           |           |           |
|---|-----------|-----------|-----------|-----------|
| 5 | 1.9120000 | 0.3495283 | 1.4300000 | 2.2400000 |
|---|-----------|-----------|-----------|-----------|

---

Unique Subject Identifier=1201000000-0008

Assay variable : PTINR\_VAL1 PT-INR Value

N Mean Standard Deviation Minimum Maximum

---

|   |           |           |           |           |
|---|-----------|-----------|-----------|-----------|
| 4 | 2.0050000 | 0.3845777 | 1.4800000 | 2.3700000 |
|---|-----------|-----------|-----------|-----------|

---

Unique Subject Identifier=1201000000-0010

Assay variable : PTINR\_VAL1 PT-INR Value

N Mean Standard Deviation Minimum Maximum

---

|   |           |           |           |           |
|---|-----------|-----------|-----------|-----------|
| 4 | 1.8475000 | 0.1090489 | 1.6900000 | 1.9300000 |
|---|-----------|-----------|-----------|-----------|

---

Unique Subject Identifier=1201000000-0011



Assay variable : PTINR\_VAL1 PT-INR Value

N Mean Standard Deviation Minimum Maximum

---

|   |           |           |           |           |
|---|-----------|-----------|-----------|-----------|
| 4 | 1.7400000 | 0.1476482 | 1.6000000 | 1.9300000 |
|---|-----------|-----------|-----------|-----------|

---

Laboratory tests at the time of obtaining Table 2-6 consent, according to the presence or absence of proton-pump inhibitors

Unique Subject Identifier=1203010000-0004

MEANS Procedure

Assay variable : PTINR\_VAL1 PT-INR Value

N Mean Standard Deviation Minimum Maximum

---

|   |           |           |           |           |
|---|-----------|-----------|-----------|-----------|
| 6 | 2.3183333 | 0.3921947 | 1.8800000 | 3.0100000 |
|---|-----------|-----------|-----------|-----------|

---

Unique Subject Identifier=1203010000-0005

Assay variable : PTINR\_VAL1 PT-INR Value

N Mean Standard Deviation Minimum Maximum

---

|   |           |           |           |           |
|---|-----------|-----------|-----------|-----------|
| 6 | 2.0366667 | 0.3356586 | 1.6800000 | 2.6100000 |
|---|-----------|-----------|-----------|-----------|

---

Unique Subject Identifier=1203010000-0006

Assay variable : PTINR\_VAL1 PT-INR Value

N Mean Standard Deviation Minimum Maximum

---

|   |           |           |           |           |
|---|-----------|-----------|-----------|-----------|
| 6 | 2.7866667 | 0.2260678 | 2.4300000 | 3.0400000 |
|---|-----------|-----------|-----------|-----------|

---

Unique Subject Identifier=1203010000-0009

Assay variable : PTINR\_VAL1 PT-INR Value

N Mean Standard Deviation Minimum Maximum

---

|   |           |           |           |           |
|---|-----------|-----------|-----------|-----------|
| 6 | 2.1983333 | 0.7104764 | 1.5100000 | 3.4000000 |
|---|-----------|-----------|-----------|-----------|

---

Laboratory tests at the time of obtaining Table 2-6 consent, according to the presence or absence of proton-pump inhibitors

Unique Subject Identifier=1203010000-0010

MEANS Procedure

Assay variable : PTINR\_VAL1 PT-INR Value

N Mean Standard Deviation Minimum Maximum

---

|   |           |           |           |           |
|---|-----------|-----------|-----------|-----------|
| 6 | 2.8366667 | 0.6295289 | 2.1100000 | 3.8500000 |
|---|-----------|-----------|-----------|-----------|

---

Unique Subject Identifier=1203010000-0013

Assay variable : PTINR\_VAL1 PT-INR Value

N Mean Standard Deviation Minimum Maximum

---

|   |           |           |           |           |
|---|-----------|-----------|-----------|-----------|
| 6 | 2.3300000 | 0.2451938 | 2.0200000 | 2.6900000 |
|---|-----------|-----------|-----------|-----------|

---

Unique Subject Identifier=1203010000-0017

Assay variable : PTINR\_VAL1 PT-INR Value

N Mean Standard Deviation Minimum Maximum

---

|   |           |           |           |           |
|---|-----------|-----------|-----------|-----------|
| 6 | 2.4350000 | 1.0120623 | 1.1200000 | 3.8800000 |
|---|-----------|-----------|-----------|-----------|

---

Unique Subject Identifier=1203010000-0018

Assay variable : PTINR\_VAL1 PT-INR Value

N Mean Standard Deviation Minimum Maximum

---

|   |           |           |           |           |
|---|-----------|-----------|-----------|-----------|
| 6 | 2.6266667 | 0.4180750 | 2.0200000 | 3.3200000 |
|---|-----------|-----------|-----------|-----------|

---

Laboratory tests at the time of obtaining Table 2-6 consent, according to the presence or absence of proton-pump inhibitors

Unique Subject Identifier=1203010000-0020

MEANS Procedure

Assay variable : PTINR\_VAL1 PT-INR Value

N Mean Standard Deviation Minimum Maximum

---

|   |           |           |           |           |
|---|-----------|-----------|-----------|-----------|
| 6 | 2.3416667 | 0.3456829 | 1.9700000 | 2.7900000 |
|---|-----------|-----------|-----------|-----------|

---

Unique Subject Identifier=1203010000-0022

Assay variable : PTINR\_VAL1 PT-INR Value

N Mean Standard Deviation Minimum Maximum

---

|   |           |           |           |           |
|---|-----------|-----------|-----------|-----------|
| 6 | 2.2500000 | 0.2279474 | 1.9900000 | 2.6300000 |
|---|-----------|-----------|-----------|-----------|

---

Unique Subject Identifier=1203010000-0026

Assay variable : PTINR\_VAL1 PT-INR Value

N Mean Standard Deviation Minimum Maximum

---

|   |           |           |           |           |
|---|-----------|-----------|-----------|-----------|
| 6 | 2.0316667 | 0.1986370 | 1.7900000 | 2.3800000 |
|---|-----------|-----------|-----------|-----------|

---

Unique Subject Identifier=1203010000-0028

Assay variable : PTINR\_VAL1 PT-INR Value

N Mean Standard Deviation Minimum Maximum

---

|   |           |           |           |           |
|---|-----------|-----------|-----------|-----------|
| 6 | 2.4366667 | 0.9070759 | 1.7500000 | 4.1600000 |
|---|-----------|-----------|-----------|-----------|

---

Laboratory tests at the time of obtaining Table 2-6 consent, according to the presence or absence of proton-pump inhibitors

Unique Subject Identifier=1203010000-0030

MEANS Procedure

Assay variable : PTINR\_VAL1 PT-INR Value

N Mean Standard Deviation Minimum Maximum

---

|   |           |           |           |           |
|---|-----------|-----------|-----------|-----------|
| 6 | 2.0050000 | 0.3174114 | 1.6800000 | 2.5800000 |
|---|-----------|-----------|-----------|-----------|

---

Unique Subject Identifier=1203010000-0031

Assay variable : PTINR\_VAL1 PT-INR Value

N Mean Standard Deviation Minimum Maximum

---

|   |           |           |           |           |
|---|-----------|-----------|-----------|-----------|
| 6 | 2.6183333 | 0.3869582 | 2.2100000 | 3.1200000 |
|---|-----------|-----------|-----------|-----------|

---

Unique Subject Identifier=1203010000-0038

Assay variable : PTINR\_VAL1 PT-INR Value

N Mean Standard Deviation Minimum Maximum

---

|   |           |           |           |           |
|---|-----------|-----------|-----------|-----------|
| 6 | 2.6850000 | 0.5224844 | 2.0900000 | 3.4600000 |
|---|-----------|-----------|-----------|-----------|

---

Unique Subject Identifier=1203010000-0040



Assay variable : PTINR\_VAL1 PT-INR Value

N Mean Standard Deviation Minimum Maximum

---

|   |          |           |          |          |
|---|----------|-----------|----------|----------|
| 6 | 1.840000 | 0.1788854 | 1.550000 | 2.060000 |
|---|----------|-----------|----------|----------|

---

Laboratory tests at the time of obtaining Table 2-6 consent, according to the presence or absence of proton-pump inhibitors

Unique Subject Identifier=1206000000-0003

MEANS Procedure

Assay variable : PTINR\_VAL1 PT-INR Value

N Mean Standard Deviation Minimum Maximum

---

|   |           |           |           |           |
|---|-----------|-----------|-----------|-----------|
| 3 | 2.3833333 | 0.2050203 | 2.1800000 | 2.5900000 |
|---|-----------|-----------|-----------|-----------|

---

Unique Subject Identifier=1212000000-0001

Assay variable : PTINR\_VAL1 PT-INR Value

N Mean Standard Deviation Minimum Maximum

---

|   |           |           |           |           |
|---|-----------|-----------|-----------|-----------|
| 6 | 1.9650000 | 0.3414528 | 1.6200000 | 2.5300000 |
|---|-----------|-----------|-----------|-----------|

---

Unique Subject Identifier=1212000000-0002

Assay variable : PTINR\_VAL1 PT-INR Value

N Mean Standard Deviation Minimum Maximum

---

|   |           |           |           |           |
|---|-----------|-----------|-----------|-----------|
| 6 | 2.0916667 | 0.7101385 | 1.4500000 | 3.4000000 |
|---|-----------|-----------|-----------|-----------|

---

Unique Subject Identifier=1212000000-0004

Assay variable : PTINR\_VAL1 PT-INR Value

N Mean Standard Deviation Minimum Maximum

---

|   |           |           |           |           |
|---|-----------|-----------|-----------|-----------|
| 5 | 1.9220000 | 0.6746999 | 1.4900000 | 3.1200000 |
|---|-----------|-----------|-----------|-----------|

---

Laboratory tests at the time of obtaining Table 2-6 consent, according to the presence or absence of proton-pump inhibitors

Unique Subject Identifier=1212000000-0006

MEANS Procedure

Assay variable : PTINR\_VAL1 PT-INR Value

N Mean Standard Deviation Minimum Maximum

---

|   |           |           |           |           |
|---|-----------|-----------|-----------|-----------|
| 6 | 2.3450000 | 0.3283748 | 1.8300000 | 2.7300000 |
|---|-----------|-----------|-----------|-----------|

---

Unique Subject Identifier=1212000000-0007

Assay variable : PTINR\_VAL1 PT-INR Value

N Mean Standard Deviation Minimum Maximum

---

|   |           |           |           |           |
|---|-----------|-----------|-----------|-----------|
| 3 | 2.2766667 | 0.1101514 | 2.1500000 | 2.3500000 |
|---|-----------|-----------|-----------|-----------|

---

Unique Subject Identifier=1212000000-0012

Assay variable : PTINR\_VAL1 PT-INR Value

N Mean Standard Deviation Minimum Maximum

---

|   |           |           |           |           |
|---|-----------|-----------|-----------|-----------|
| 4 | 1.7750000 | 0.4110556 | 1.4900000 | 2.3800000 |
|---|-----------|-----------|-----------|-----------|

---

Unique Subject Identifier=1212000000-0014

Assay variable : PTINR\_VAL1 PT-INR Value

N Mean Standard Deviation Minimum Maximum

---

|   |          |           |          |          |
|---|----------|-----------|----------|----------|
| 6 | 2.320000 | 0.2384114 | 1.980000 | 2.630000 |
|---|----------|-----------|----------|----------|

---

Laboratory tests at the time of obtaining Table 2-6 consent, according to the presence or absence of proton-pump inhibitors

Unique Subject Identifier=1212000000-0015

MEANS Procedure

Assay variable : PTINR\_VAL1 PT-INR Value

N Mean Standard Deviation Minimum Maximum

---

|   |           |           |           |           |
|---|-----------|-----------|-----------|-----------|
| 5 | 2.0980000 | 0.4196070 | 1.7500000 | 2.5800000 |
|---|-----------|-----------|-----------|-----------|

---

Unique Subject Identifier=1216000000-0001

Assay variable : PTINR\_VAL1 PT-INR Value

N Mean Standard Deviation Minimum Maximum

---

|   |           |           |           |           |
|---|-----------|-----------|-----------|-----------|
| 5 | 1.3360000 | 0.4370698 | 1.0600000 | 2.1100000 |
|---|-----------|-----------|-----------|-----------|

---

Unique Subject Identifier=1216000000-0002

Assay variable : PTINR\_VAL1 PT-INR Value

N Mean Standard Deviation Minimum Maximum

---

|   |           |           |           |           |
|---|-----------|-----------|-----------|-----------|
| 5 | 1.5400000 | 0.2750455 | 1.0900000 | 1.7900000 |
|---|-----------|-----------|-----------|-----------|

---

Unique Subject Identifier=1216000000-0004

Assay variable : PTINR\_VAL1 PT-INR Value

N Mean Standard Deviation Minimum Maximum

---

|   |           |           |           |           |
|---|-----------|-----------|-----------|-----------|
| 3 | 1.3433333 | 0.1619671 | 1.2400000 | 1.5300000 |
|---|-----------|-----------|-----------|-----------|

---

Laboratory tests at the time of obtaining Table 2-6 consent, according to the presence or absence of proton-pump inhibitors

Unique Subject Identifier=1219000000-0005

MEANS Procedure

Assay variable : PTINR\_VAL1 PT-INR Value

N Mean Standard Deviation Minimum Maximum

---

|   |           |           |           |           |
|---|-----------|-----------|-----------|-----------|
| 2 | 1.5700000 | 0.1272792 | 1.4800000 | 1.6600000 |
|---|-----------|-----------|-----------|-----------|

---

Unique Subject Identifier=1219000000-0006

Assay variable : PTINR\_VAL1 PT-INR Value

N Mean Standard Deviation Minimum Maximum

---

|   |           |           |           |           |
|---|-----------|-----------|-----------|-----------|
| 3 | 2.0300000 | 0.3315117 | 1.7600000 | 2.4000000 |
|---|-----------|-----------|-----------|-----------|

---

Unique Subject Identifier=1219000000-0009

Assay variable : PTINR\_VAL1 PT-INR Value

N Mean Standard Deviation Minimum Maximum

---

|   |           |           |           |           |
|---|-----------|-----------|-----------|-----------|
| 4 | 1.9000000 | 0.0787401 | 1.8000000 | 1.9900000 |
|---|-----------|-----------|-----------|-----------|

---

Unique Subject Identifier=1219000000-0011



Assay variable : PTINR\_VAL1 PT-INR Value

N Mean Standard Deviation Minimum Maximum

---

|   |          |           |          |          |
|---|----------|-----------|----------|----------|
| 3 | 2.250000 | 0.2007486 | 2.060000 | 2.460000 |
|---|----------|-----------|----------|----------|

---

Laboratory tests at the time of obtaining Table 2-6 consent, according to the presence or absence of proton-pump inhibitors

Unique Subject Identifier=1219000000-0013

MEANS Procedure

Assay variable : PTINR\_VAL1 PT-INR Value

| N | Mean      | Standard Deviation | Minimum   | Maximum   |
|---|-----------|--------------------|-----------|-----------|
| 3 | 2.2433333 | 0.2608320          | 2.0500000 | 2.5400000 |

Unique Subject Identifier=1219000000-0014

Assay variable : PTINR\_VAL1 PT-INR Value

| N | Mean      | Standard Deviation | Minimum   | Maximum   |
|---|-----------|--------------------|-----------|-----------|
| 4 | 1.7850000 | 0.0723418          | 1.7200000 | 1.8700000 |

Unique Subject Identifier=1219000000-0016

Assay variable : PTINR\_VAL1 PT-INR Value

| N | Mean      | Standard Deviation | Minimum   | Maximum   |
|---|-----------|--------------------|-----------|-----------|
| 3 | 2.2466667 | 0.4842864          | 1.9000000 | 2.8000000 |

Unique Subject Identifier=1219000000-0017

Assay variable : PTINR\_VAL1 PT-INR Value

N Mean Standard Deviation Minimum Maximum

---

|   |           |           |           |           |
|---|-----------|-----------|-----------|-----------|
| 3 | 2.2833333 | 0.3089229 | 1.9500000 | 2.5600000 |
|---|-----------|-----------|-----------|-----------|

---

Laboratory tests at the time of obtaining Table 2-6 consent, according to the presence or absence of proton-pump inhibitors

Unique Subject Identifier=1219000000-0018

MEANS Procedure

Assay variable : PTINR\_VAL1 PT-INR Value

N Mean Standard Deviation Minimum Maximum

---

|   |           |           |           |           |
|---|-----------|-----------|-----------|-----------|
| 4 | 2.0450000 | 1.3675647 | 1.0200000 | 4.0600000 |
|---|-----------|-----------|-----------|-----------|

---

Unique Subject Identifier=1219000000-0021

Assay variable : PTINR\_VAL1 PT-INR Value

N Mean Standard Deviation Minimum Maximum

---

|   |           |           |           |           |
|---|-----------|-----------|-----------|-----------|
| 3 | 1.7666667 | 0.4128357 | 1.2900000 | 2.0100000 |
|---|-----------|-----------|-----------|-----------|

---

Unique Subject Identifier=1219000000-0023

Assay variable : PTINR\_VAL1 PT-INR Value

N Mean Standard Deviation Minimum Maximum

---

|   |           |           |           |           |
|---|-----------|-----------|-----------|-----------|
| 3 | 2.2100000 | 0.1571623 | 2.0700000 | 2.3800000 |
|---|-----------|-----------|-----------|-----------|

---

Unique Subject Identifier=1219000000-0024

Assay variable : PTINR\_VAL1 PT-INR Value

N Mean Standard Deviation Minimum Maximum

---

|   |          |           |          |          |
|---|----------|-----------|----------|----------|
| 3 | 2.280000 | 0.1571623 | 2.140000 | 2.450000 |
|---|----------|-----------|----------|----------|

---

Laboratory tests at the time of obtaining Table 2-6 consent, according to the presence or absence of proton-pump inhibitors

Unique Subject Identifier=1219000000-0026

MEANS Procedure

Assay variable : PTINR\_VAL1 PT-INR Value

N Mean Standard Deviation Minimum Maximum

---

|   |           |           |           |           |
|---|-----------|-----------|-----------|-----------|
| 2 | 1.7800000 | 0.1414214 | 1.6800000 | 1.8800000 |
|---|-----------|-----------|-----------|-----------|

---

Unique Subject Identifier=1219000000-0030

Assay variable : PTINR\_VAL1 PT-INR Value

N Mean Standard Deviation Minimum Maximum

---

|   |           |           |           |           |
|---|-----------|-----------|-----------|-----------|
| 3 | 1.8000000 | 0.0100000 | 1.7900000 | 1.8100000 |
|---|-----------|-----------|-----------|-----------|

---

Unique Subject Identifier=1219000000-0033

Assay variable : PTINR\_VAL1 PT-INR Value

N Mean Standard Deviation Minimum Maximum

---

|   |           |           |           |           |
|---|-----------|-----------|-----------|-----------|
| 3 | 1.8300000 | 0.8029321 | 1.1000000 | 2.6900000 |
|---|-----------|-----------|-----------|-----------|

---

Unique Subject Identifier=1219000000-0034

Assay variable : PTINR\_VAL1 PT-INR Value

N Mean Standard Deviation Minimum Maximum

---

|   |           |           |           |           |
|---|-----------|-----------|-----------|-----------|
| 4 | 1.5650000 | 0.0704746 | 1.4700000 | 1.6400000 |
|---|-----------|-----------|-----------|-----------|

---

Laboratory tests at the time of obtaining Table 2-6 consent, according to the presence or absence of proton-pump inhibitors

Unique Subject Identifier=1219000000-0035

MEANS Procedure

Assay variable : PTINR\_VAL1 PT-INR Value

N Mean Standard Deviation Minimum Maximum

---

|   |           |  |           |           |
|---|-----------|--|-----------|-----------|
| 1 | 1.9500000 |  | 1.9500000 | 1.9500000 |
|---|-----------|--|-----------|-----------|

---

Unique Subject Identifier=1219000000-0036

Assay variable : PTINR\_VAL1 PT-INR Value

N Mean Standard Deviation Minimum Maximum

---

|   |           |           |           |           |
|---|-----------|-----------|-----------|-----------|
| 2 | 2.0200000 | 0.1697056 | 1.9000000 | 2.1400000 |
|---|-----------|-----------|-----------|-----------|

---

Unique Subject Identifier=1221000000-0001

Assay variable : PTINR\_VAL1 PT-INR Value

N Mean Standard Deviation Minimum Maximum

---

|   |           |           |           |           |
|---|-----------|-----------|-----------|-----------|
| 6 | 2.1000000 | 0.5621388 | 1.5000000 | 3.1000000 |
|---|-----------|-----------|-----------|-----------|

---

Unique Subject Identifier=1222000000-0002



Assay variable : PTINR\_VAL1 PT-INR Value

N Mean Standard Deviation Minimum Maximum

---

|   |           |           |           |           |
|---|-----------|-----------|-----------|-----------|
| 6 | 2.5166667 | 0.4020779 | 1.9000000 | 3.1000000 |
|---|-----------|-----------|-----------|-----------|

---

Laboratory tests at the time of obtaining Table 2-6 consent, according to the presence or absence of proton-pump inhibitors

Unique Subject Identifier=1222000000-0005

MEANS Procedure

Assay variable : PTINR\_VAL1 PT-INR Value

N Mean Standard Deviation Minimum Maximum

---

|   |           |           |           |           |
|---|-----------|-----------|-----------|-----------|
| 6 | 1.9666667 | 0.3204164 | 1.7000000 | 2.5000000 |
|---|-----------|-----------|-----------|-----------|

---

Unique Subject Identifier=1222000000-0009

Assay variable : PTINR\_VAL1 PT-INR Value

N Mean Standard Deviation Minimum Maximum

---

|   |           |           |           |           |
|---|-----------|-----------|-----------|-----------|
| 5 | 1.8600000 | 0.2880972 | 1.5000000 | 2.2000000 |
|---|-----------|-----------|-----------|-----------|

---

Unique Subject Identifier=1222000000-0012

Assay variable : PTINR\_VAL1 PT-INR Value

N Mean Standard Deviation Minimum Maximum

---

|   |           |           |           |           |
|---|-----------|-----------|-----------|-----------|
| 6 | 1.8833333 | 0.3250641 | 1.6000000 | 2.5000000 |
|---|-----------|-----------|-----------|-----------|

---

Unique Subject Identifier=1223010000-0002

Assay variable : PTINR\_VAL1 PT-INR Value

N Mean Standard Deviation Minimum Maximum

---

|   |           |           |           |           |
|---|-----------|-----------|-----------|-----------|
| 4 | 2.2250000 | 0.4645787 | 1.6000000 | 2.7000000 |
|---|-----------|-----------|-----------|-----------|

---

Laboratory tests at the time of obtaining Table 2-6 consent, according to the presence or absence of proton-pump inhibitors

Unique Subject Identifier=1223010000-0003

MEANS Procedure

Assay variable : PTINR\_VAL1 PT-INR Value

N Mean Standard Deviation Minimum Maximum

---

|   |           |           |           |           |
|---|-----------|-----------|-----------|-----------|
| 4 | 2.4750000 | 0.8958236 | 1.6000000 | 3.7000000 |
|---|-----------|-----------|-----------|-----------|

---

Unique Subject Identifier=1223010000-0005

Assay variable : PTINR\_VAL1 PT-INR Value

N Mean Standard Deviation Minimum Maximum

---

|   |           |           |           |           |
|---|-----------|-----------|-----------|-----------|
| 4 | 2.3250000 | 0.2986079 | 2.0000000 | 2.7000000 |
|---|-----------|-----------|-----------|-----------|

---

Unique Subject Identifier=1223010000-0006

Assay variable : PTINR\_VAL1 PT-INR Value

N Mean Standard Deviation Minimum Maximum

---

|   |           |           |           |           |
|---|-----------|-----------|-----------|-----------|
| 4 | 1.6000000 | 0.2160247 | 1.3000000 | 1.8000000 |
|---|-----------|-----------|-----------|-----------|

---

Unique Subject Identifier=1223010000-0008

Assay variable : PTINR\_VAL1 PT-INR Value

N Mean Standard Deviation Minimum Maximum

---

|   |           |           |           |           |
|---|-----------|-----------|-----------|-----------|
| 6 | 2.2000000 | 0.1788854 | 2.0000000 | 2.5000000 |
|---|-----------|-----------|-----------|-----------|

---

Laboratory tests at the time of obtaining Table 2-6 consent, according to the presence or absence of proton-pump inhibitors

Unique Subject Identifier=1223010000-0012

MEANS Procedure

Assay variable : PTINR\_VAL1 PT-INR Value

| N | Mean      | Standard Deviation | Minimum   | Maximum   |
|---|-----------|--------------------|-----------|-----------|
| 5 | 1.8400000 | 0.2408319          | 1.6000000 | 2.1000000 |

Unique Subject Identifier=1223010000-0015

Assay variable : PTINR\_VAL1 PT-INR Value

| N | Mean      | Standard Deviation | Minimum   | Maximum   |
|---|-----------|--------------------|-----------|-----------|
| 4 | 2.0500000 | 0.1290994          | 1.9000000 | 2.2000000 |

Unique Subject Identifier=1223010000-0023

Assay variable : PTINR\_VAL1 PT-INR Value

| N | Mean      | Standard Deviation | Minimum   | Maximum   |
|---|-----------|--------------------|-----------|-----------|
| 4 | 1.8500000 | 0.2081666          | 1.6000000 | 2.1000000 |

Unique Subject Identifier=1223010000-0025

Assay variable : PTINR\_VAL1 PT-INR Value

N Mean Standard Deviation Minimum Maximum

---

|   |           |           |           |           |
|---|-----------|-----------|-----------|-----------|
| 6 | 1.7500000 | 0.0836660 | 1.7000000 | 1.9000000 |
|---|-----------|-----------|-----------|-----------|

---

Laboratory tests at the time of obtaining Table 2-6 consent, according to the presence or absence of proton-pump inhibitors

Unique Subject Identifier=1223010000-0030

MEANS Procedure

Assay variable : PTINR\_VAL1 PT-INR Value

N Mean Standard Deviation Minimum Maximum

---

|   |           |           |           |           |
|---|-----------|-----------|-----------|-----------|
| 4 | 1.9000000 | 0.1825742 | 1.7000000 | 2.1000000 |
|---|-----------|-----------|-----------|-----------|

---

Unique Subject Identifier=1223010000-0031

Assay variable : PTINR\_VAL1 PT-INR Value

N Mean Standard Deviation Minimum Maximum

---

|   |           |           |           |           |
|---|-----------|-----------|-----------|-----------|
| 5 | 2.0000000 | 0.2236068 | 1.7000000 | 2.3000000 |
|---|-----------|-----------|-----------|-----------|

---

Unique Subject Identifier=1223010000-0033

Assay variable : PTINR\_VAL1 PT-INR Value

N Mean Standard Deviation Minimum Maximum

---

|   |           |           |           |           |
|---|-----------|-----------|-----------|-----------|
| 4 | 2.3250000 | 0.3862210 | 1.8000000 | 2.7000000 |
|---|-----------|-----------|-----------|-----------|

---

Unique Subject Identifier=1223010000-0035



Assay variable : PTINR\_VAL1 PT-INR Value

N Mean Standard Deviation Minimum Maximum

---

|   |           |           |           |           |
|---|-----------|-----------|-----------|-----------|
| 4 | 2.0500000 | 0.3872983 | 1.5000000 | 2.4000000 |
|---|-----------|-----------|-----------|-----------|

---

Laboratory tests at the time of obtaining Table 2-6 consent, according to the presence or absence of proton-pump inhibitors

Unique Subject Identifier=1223010000-0037

MEANS Procedure

Assay variable : PTINR\_VAL1 PT-INR Value

N Mean Standard Deviation Minimum Maximum

---

|   |           |           |           |           |
|---|-----------|-----------|-----------|-----------|
| 4 | 1.6250000 | 0.1258306 | 1.5000000 | 1.8000000 |
|---|-----------|-----------|-----------|-----------|

---

Unique Subject Identifier=1223010000-0039

Assay variable : PTINR\_VAL1 PT-INR Value

N Mean Standard Deviation Minimum Maximum

---

|   |           |           |           |           |
|---|-----------|-----------|-----------|-----------|
| 4 | 2.1250000 | 0.1500000 | 2.0000000 | 2.3000000 |
|---|-----------|-----------|-----------|-----------|

---

Unique Subject Identifier=1223010000-0041

Assay variable : PTINR\_VAL1 PT-INR Value

N Mean Standard Deviation Minimum Maximum

---

|   |           |           |           |           |
|---|-----------|-----------|-----------|-----------|
| 6 | 2.1166667 | 0.3763863 | 1.7000000 | 2.8000000 |
|---|-----------|-----------|-----------|-----------|

---

Unique Subject Identifier=1223010000-0042

Assay variable : PTINR\_VAL1 PT-INR Value

N Mean Standard Deviation Minimum Maximum

---

|   |           |           |           |           |
|---|-----------|-----------|-----------|-----------|
| 4 | 1.8500000 | 0.3696846 | 1.4000000 | 2.3000000 |
|---|-----------|-----------|-----------|-----------|

---

Laboratory tests at the time of obtaining Table 2-6 consent, according to the presence or absence of proton-pump inhibitors

Unique Subject Identifier=1223010000-0043

MEANS Procedure

Assay variable : PTINR\_VAL1 PT-INR Value

| N | Mean      | Standard Deviation | Minimum   | Maximum   |
|---|-----------|--------------------|-----------|-----------|
| 5 | 2.3800000 | 0.4147288          | 2.0000000 | 3.0000000 |

Unique Subject Identifier=1226000000-0002

Assay variable : PTINR\_VAL1 PT-INR Value

| N | Mean      | Standard Deviation | Minimum   | Maximum   |
|---|-----------|--------------------|-----------|-----------|
| 2 | 1.2300000 | 0.0707107          | 1.1800000 | 1.2800000 |

Unique Subject Identifier=1226000000-0003

Assay variable : PTINR\_VAL1 PT-INR Value

| N | Mean      | Standard Deviation | Minimum   | Maximum   |
|---|-----------|--------------------|-----------|-----------|
| 5 | 1.9180000 | 0.2087343          | 1.6600000 | 2.2100000 |

Unique Subject Identifier=1226000000-0005

Assay variable : PTINR\_VAL1 PT-INR Value

N Mean Standard Deviation Minimum Maximum

---

|   |           |           |           |           |
|---|-----------|-----------|-----------|-----------|
| 4 | 2.0700000 | 0.1626858 | 1.9200000 | 2.2300000 |
|---|-----------|-----------|-----------|-----------|

---

Laboratory tests at the time of obtaining Table 2-6 consent, according to the presence or absence of proton-pump inhibitors

Unique Subject Identifier=1226000000-0006

MEANS Procedure

Assay variable : PTINR\_VAL1 PT-INR Value

N Mean Standard Deviation Minimum Maximum

---

|   |           |           |           |           |
|---|-----------|-----------|-----------|-----------|
| 5 | 1.9680000 | 0.1283355 | 1.8000000 | 2.1300000 |
|---|-----------|-----------|-----------|-----------|

---

Unique Subject Identifier=1226000000-0008

Assay variable : PTINR\_VAL1 PT-INR Value

N Mean Standard Deviation Minimum Maximum

---

|   |           |           |           |           |
|---|-----------|-----------|-----------|-----------|
| 5 | 1.6360000 | 0.1327780 | 1.5000000 | 1.8400000 |
|---|-----------|-----------|-----------|-----------|

---

Unique Subject Identifier=1226000000-0010

Assay variable : PTINR\_VAL1 PT-INR Value

N Mean Standard Deviation Minimum Maximum

---

|   |           |           |           |           |
|---|-----------|-----------|-----------|-----------|
| 5 | 1.8080000 | 0.0846759 | 1.7100000 | 1.9200000 |
|---|-----------|-----------|-----------|-----------|

---

Unique Subject Identifier=1226000000-0011

Assay variable : PTINR\_VAL1 PT-INR Value

N Mean Standard Deviation Minimum Maximum

---

|   |           |           |           |           |
|---|-----------|-----------|-----------|-----------|
| 6 | 1.9116667 | 0.1921891 | 1.5600000 | 2.1400000 |
|---|-----------|-----------|-----------|-----------|

---

Laboratory tests at the time of obtaining Table 2-6 consent, according to the presence or absence of proton-pump inhibitors

Unique Subject Identifier=1226000000-0012

MEANS Procedure

Assay variable : PTINR\_VAL1 PT-INR Value

| N | Mean      | Standard Deviation | Minimum   | Maximum   |
|---|-----------|--------------------|-----------|-----------|
| 3 | 2.0133333 | 0.4960175          | 1.5000000 | 2.4900000 |

Unique Subject Identifier=1226000000-0014

Assay variable : PTINR\_VAL1 PT-INR Value

| N | Mean      | Standard Deviation | Minimum   | Maximum   |
|---|-----------|--------------------|-----------|-----------|
| 5 | 2.0760000 | 0.4936902          | 1.5800000 | 2.8900000 |

Unique Subject Identifier=1226000000-0031

Assay variable : PTINR\_VAL1 PT-INR Value

| N | Mean      | Standard Deviation | Minimum   | Maximum   |
|---|-----------|--------------------|-----------|-----------|
| 5 | 1.7000000 | 0.2351595          | 1.4700000 | 2.0300000 |

Unique Subject Identifier=1226000000-0032



Assay variable : PTINR\_VAL1 PT-INR Value

N Mean Standard Deviation Minimum Maximum

---

|   |           |           |           |           |
|---|-----------|-----------|-----------|-----------|
| 5 | 1.9840000 | 0.1597811 | 1.7900000 | 2.2100000 |
|---|-----------|-----------|-----------|-----------|

---

Laboratory tests at the time of obtaining Table 2-6 consent, according to the presence or absence of proton-pump inhibitors

Unique Subject Identifier=1226000000-0034

MEANS Procedure

Assay variable : PTINR\_VAL1 PT-INR Value

N Mean Standard Deviation Minimum Maximum

---

|   |           |           |           |           |
|---|-----------|-----------|-----------|-----------|
| 4 | 2.1525000 | 0.3247948 | 1.8900000 | 2.5800000 |
|---|-----------|-----------|-----------|-----------|

---

Unique Subject Identifier=1227000000-0027

Assay variable : PTINR\_VAL1 PT-INR Value

N Mean Standard Deviation Minimum Maximum

---

|   |           |           |           |           |
|---|-----------|-----------|-----------|-----------|
| 4 | 2.3250000 | 0.2500000 | 2.0000000 | 2.6000000 |
|---|-----------|-----------|-----------|-----------|

---

Unique Subject Identifier=1227000000-0029

Assay variable : PTINR\_VAL1 PT-INR Value

N Mean Standard Deviation Minimum Maximum

---

|   |           |           |           |           |
|---|-----------|-----------|-----------|-----------|
| 4 | 2.3750000 | 0.5439056 | 1.6000000 | 2.8000000 |
|---|-----------|-----------|-----------|-----------|

---

Unique Subject Identifier=1227000000-0030

Assay variable : PTINR\_VAL1 PT-INR Value

N Mean Standard Deviation Minimum Maximum

---

|   |           |           |           |           |
|---|-----------|-----------|-----------|-----------|
| 3 | 2.0666667 | 0.5507571 | 1.7000000 | 2.7000000 |
|---|-----------|-----------|-----------|-----------|

---

Laboratory tests at the time of obtaining Table 2-6 consent, according to the presence or absence of proton-pump inhibitors

Unique Subject Identifier=1227000000-0031

MEANS Procedure

Assay variable : PTINR\_VAL1 PT-INR Value

N Mean Standard Deviation Minimum Maximum

---

|   |          |           |          |          |
|---|----------|-----------|----------|----------|
| 5 | 2.160000 | 0.2880972 | 1.900000 | 2.600000 |
|---|----------|-----------|----------|----------|

---

Unique Subject Identifier=1227000000-0032

Assay variable : PTINR\_VAL1 PT-INR Value

N Mean Standard Deviation Minimum Maximum

---

|   |          |          |          |          |
|---|----------|----------|----------|----------|
| 5 | 2.100000 | 0.200000 | 1.900000 | 2.400000 |
|---|----------|----------|----------|----------|

---

Unique Subject Identifier=1227000000-0035

Assay variable : PTINR\_VAL1 PT-INR Value

N Mean Standard Deviation Minimum Maximum

---

|   |          |           |          |          |
|---|----------|-----------|----------|----------|
| 4 | 2.075000 | 0.3862210 | 1.700000 | 2.600000 |
|---|----------|-----------|----------|----------|

---

Unique Subject Identifier=1227000000-0038

Assay variable : PTINR\_VAL1 PT-INR Value

N Mean Standard Deviation Minimum Maximum

---

|   |           |           |           |           |
|---|-----------|-----------|-----------|-----------|
| 5 | 2.3000000 | 0.2915476 | 1.9000000 | 2.7000000 |
|---|-----------|-----------|-----------|-----------|

---

Laboratory tests at the time of obtaining Table 2-6 consent, according to the presence or absence of proton-pump inhibitors

Unique Subject Identifier=1227000000-0041

MEANS Procedure

Assay variable : PTINR\_VAL1 PT-INR Value

N Mean Standard Deviation Minimum Maximum

---

|   |           |           |           |           |
|---|-----------|-----------|-----------|-----------|
| 4 | 2.3000000 | 0.4966555 | 1.7000000 | 2.8000000 |
|---|-----------|-----------|-----------|-----------|

---

Unique Subject Identifier=1227000000-0043

Assay variable : PTINR\_VAL1 PT-INR Value

N Mean Standard Deviation Minimum Maximum

---

|   |           |           |           |           |
|---|-----------|-----------|-----------|-----------|
| 5 | 2.2000000 | 0.1414214 | 2.1000000 | 2.4000000 |
|---|-----------|-----------|-----------|-----------|

---

Unique Subject Identifier=1227000000-0047

Assay variable : PTINR\_VAL1 PT-INR Value

N Mean Standard Deviation Minimum Maximum

---

|   |           |           |           |           |
|---|-----------|-----------|-----------|-----------|
| 5 | 2.0400000 | 0.3847077 | 1.6000000 | 2.6000000 |
|---|-----------|-----------|-----------|-----------|

---

Unique Subject Identifier=1227000000-0050

Assay variable : PTINR\_VAL1 PT-INR Value

N Mean Standard Deviation Minimum Maximum

---

|   |           |           |           |           |
|---|-----------|-----------|-----------|-----------|
| 6 | 1.9000000 | 0.1673320 | 1.7000000 | 2.1000000 |
|---|-----------|-----------|-----------|-----------|

---

Laboratory tests at the time of obtaining Table 2-6 consent, according to the presence or absence of proton-pump inhibitors

Unique Subject Identifier=1227000000-0055

MEANS Procedure

Assay variable : PTINR\_VAL1 PT-INR Value

N Mean Standard Deviation Minimum Maximum

---

|   |           |           |           |           |
|---|-----------|-----------|-----------|-----------|
| 6 | 2.4333333 | 0.7004760 | 1.4000000 | 3.3000000 |
|---|-----------|-----------|-----------|-----------|

---

Unique Subject Identifier=1227000000-0058

Assay variable : PTINR\_VAL1 PT-INR Value

N Mean Standard Deviation Minimum Maximum

---

|   |           |           |           |           |
|---|-----------|-----------|-----------|-----------|
| 6 | 2.0500000 | 0.2664583 | 1.7000000 | 2.4000000 |
|---|-----------|-----------|-----------|-----------|

---

Unique Subject Identifier=1227000000-0064

Assay variable : PTINR\_VAL1 PT-INR Value

N Mean Standard Deviation Minimum Maximum

---

|   |           |           |           |           |
|---|-----------|-----------|-----------|-----------|
| 4 | 2.9500000 | 0.5972158 | 2.4000000 | 3.8000000 |
|---|-----------|-----------|-----------|-----------|

---

Unique Subject Identifier=1227000000-0089



Assay variable : PTINR\_VAL1 PT-INR Value

N Mean Standard Deviation Minimum Maximum

---

|   |           |           |           |           |
|---|-----------|-----------|-----------|-----------|
| 6 | 1.8166667 | 0.2994439 | 1.3000000 | 2.1000000 |
|---|-----------|-----------|-----------|-----------|

---

Laboratory tests at the time of obtaining Table 2-6 consent, according to the presence or absence of proton-pump inhibitors

Unique Subject Identifier=1227000000-0091

MEANS Procedure

Assay variable : PTINR\_VAL1 PT-INR Value

N Mean Standard Deviation Minimum Maximum

---

|   |           |           |           |           |
|---|-----------|-----------|-----------|-----------|
| 6 | 2.3166667 | 0.3868678 | 1.9000000 | 3.0000000 |
|---|-----------|-----------|-----------|-----------|

---

Unique Subject Identifier=1228000000-0004

Assay variable : PTINR\_VAL1 PT-INR Value

N Mean Standard Deviation Minimum Maximum

---

|   |           |  |           |           |
|---|-----------|--|-----------|-----------|
| 1 | 2.9800000 |  | 2.9800000 | 2.9800000 |
|---|-----------|--|-----------|-----------|

---

Unique Subject Identifier=1229000000-0006

Assay variable : PTINR\_VAL1 PT-INR Value

N Mean Standard Deviation Minimum Maximum

---

|   |           |           |           |           |
|---|-----------|-----------|-----------|-----------|
| 6 | 2.0500000 | 0.1048809 | 1.9000000 | 2.2000000 |
|---|-----------|-----------|-----------|-----------|

---

Unique Subject Identifier=1229000000-0007

Assay variable : PTINR\_VAL1 PT-INR Value

N Mean Standard Deviation Minimum Maximum

---

|   |          |           |          |          |
|---|----------|-----------|----------|----------|
| 5 | 2.420000 | 0.1643168 | 2.300000 | 2.600000 |
|---|----------|-----------|----------|----------|

---

Laboratory tests at the time of obtaining Table 2-6 consent, according to the presence or absence of proton-pump inhibitors

Unique Subject Identifier=1229000000-0010

MEANS Procedure

Assay variable : PTINR\_VAL1 PT-INR Value

N Mean Standard Deviation Minimum Maximum

---

|   |           |           |           |           |
|---|-----------|-----------|-----------|-----------|
| 6 | 2.2333333 | 0.1032796 | 2.1000000 | 2.4000000 |
|---|-----------|-----------|-----------|-----------|

---

Unique Subject Identifier=1229000000-0017

Assay variable : PTINR\_VAL1 PT-INR Value

N Mean Standard Deviation Minimum Maximum

---

|   |           |           |           |           |
|---|-----------|-----------|-----------|-----------|
| 6 | 2.3666667 | 0.9114092 | 1.6000000 | 4.1000000 |
|---|-----------|-----------|-----------|-----------|

---

Unique Subject Identifier=1229000000-0020

Assay variable : PTINR\_VAL1 PT-INR Value

N Mean Standard Deviation Minimum Maximum

---

|   |           |           |           |           |
|---|-----------|-----------|-----------|-----------|
| 6 | 2.1833333 | 0.4119061 | 1.6000000 | 2.6000000 |
|---|-----------|-----------|-----------|-----------|

---

Unique Subject Identifier=1229000000-0021

Assay variable : PTINR\_VAL1 PT-INR Value

N Mean Standard Deviation Minimum Maximum

---

|   |           |           |           |           |
|---|-----------|-----------|-----------|-----------|
| 6 | 2.0500000 | 0.2073644 | 1.9000000 | 2.4000000 |
|---|-----------|-----------|-----------|-----------|

---

Laboratory tests at the time of obtaining Table 2-6 consent, according to the presence or absence of proton-pump inhibitors

Unique Subject Identifier=1232000000-0003

MEANS Procedure

Assay variable : PTINR\_VAL1 PT-INR Value

N Mean Standard Deviation Minimum Maximum

---

|   |           |           |           |           |
|---|-----------|-----------|-----------|-----------|
| 6 | 1.8166667 | 0.5913262 | 1.1000000 | 2.6000000 |
|---|-----------|-----------|-----------|-----------|

---

Unique Subject Identifier=1232000000-0004

Assay variable : PTINR\_VAL1 PT-INR Value

N Mean Standard Deviation Minimum Maximum

---

|   |           |           |           |           |
|---|-----------|-----------|-----------|-----------|
| 6 | 2.0166667 | 0.4708149 | 1.5000000 | 2.6000000 |
|---|-----------|-----------|-----------|-----------|

---

Unique Subject Identifier=1232000000-0014

Assay variable : PTINR\_VAL1 PT-INR Value

N Mean Standard Deviation Minimum Maximum

---

|   |           |           |           |           |
|---|-----------|-----------|-----------|-----------|
| 6 | 2.0833333 | 0.5946988 | 1.5000000 | 3.2000000 |
|---|-----------|-----------|-----------|-----------|

---

Unique Subject Identifier=1232000000-0016

Assay variable : PTINR\_VAL1 PT-INR Value

N Mean Standard Deviation Minimum Maximum

---

|   |          |           |          |          |
|---|----------|-----------|----------|----------|
| 6 | 1.750000 | 0.1048809 | 1.600000 | 1.900000 |
|---|----------|-----------|----------|----------|

---

Laboratory tests at the time of obtaining Table 2-6 consent, according to the presence or absence of proton-pump inhibitors

Unique Subject Identifier=1232000000-0017

MEANS Procedure

Assay variable : PTINR\_VAL1 PT-INR Value

N Mean Standard Deviation Minimum Maximum

---

|   |           |           |           |           |
|---|-----------|-----------|-----------|-----------|
| 5 | 1.8000000 | 0.1870829 | 1.6000000 | 2.1000000 |
|---|-----------|-----------|-----------|-----------|

---

Unique Subject Identifier=1232000000-0020

Assay variable : PTINR\_VAL1 PT-INR Value

N Mean Standard Deviation Minimum Maximum

---

|   |           |           |           |           |
|---|-----------|-----------|-----------|-----------|
| 6 | 2.4000000 | 0.4604346 | 1.8000000 | 3.2000000 |
|---|-----------|-----------|-----------|-----------|

---

Unique Subject Identifier=1235000000-0001

Assay variable : PTINR\_VAL1 PT-INR Value

N Mean Standard Deviation Minimum Maximum

---

|   |           |           |           |           |
|---|-----------|-----------|-----------|-----------|
| 5 | 1.6580000 | 0.1360882 | 1.4500000 | 1.7700000 |
|---|-----------|-----------|-----------|-----------|

---

Unique Subject Identifier=1235000000-0003



Assay variable : PTINR\_VAL1 PT-INR Value

N Mean Standard Deviation Minimum Maximum

---

|   |          |           |          |          |
|---|----------|-----------|----------|----------|
| 5 | 1.402000 | 0.0952365 | 1.250000 | 1.500000 |
|---|----------|-----------|----------|----------|

---

Laboratory tests at the time of obtaining Table 2-6 consent, according to the presence or absence of proton-pump inhibitors

Unique Subject Identifier=1235000000-0005

MEANS Procedure

Assay variable : PTINR\_VAL1 PT-INR Value

| N | Mean      | Standard Deviation | Minimum   | Maximum   |
|---|-----------|--------------------|-----------|-----------|
| 6 | 1.4550000 | 0.0971082          | 1.3600000 | 1.6300000 |

Unique Subject Identifier=1235000000-0008

Assay variable : PTINR\_VAL1 PT-INR Value

| N | Mean      | Standard Deviation | Minimum   | Maximum   |
|---|-----------|--------------------|-----------|-----------|
| 5 | 1.8520000 | 0.1255787          | 1.7100000 | 1.9800000 |

Unique Subject Identifier=1235000000-0011

Assay variable : PTINR\_VAL1 PT-INR Value

| N | Mean      | Standard Deviation | Minimum   | Maximum   |
|---|-----------|--------------------|-----------|-----------|
| 6 | 1.5500000 | 0.2484351          | 1.3500000 | 2.0400000 |

Unique Subject Identifier=1235000000-0015

Assay variable : PTINR\_VAL1 PT-INR Value

N Mean Standard Deviation Minimum Maximum

---

|   |           |           |           |           |
|---|-----------|-----------|-----------|-----------|
| 6 | 1.7150000 | 0.2714959 | 1.4700000 | 2.1800000 |
|---|-----------|-----------|-----------|-----------|

---

Laboratory tests at the time of obtaining Table 2-6 consent, according to the presence or absence of proton-pump inhibitors

Unique Subject Identifier=1235000000-0020

MEANS Procedure

Assay variable : PTINR\_VAL1 PT-INR Value

N Mean Standard Deviation Minimum Maximum

---

|   |           |           |           |           |
|---|-----------|-----------|-----------|-----------|
| 6 | 1.6316667 | 0.1404872 | 1.4800000 | 1.8400000 |
|---|-----------|-----------|-----------|-----------|

---

Unique Subject Identifier=1235000000-0022

Assay variable : PTINR\_VAL1 PT-INR Value

N Mean Standard Deviation Minimum Maximum

---

|   |           |           |           |           |
|---|-----------|-----------|-----------|-----------|
| 6 | 1.6166667 | 0.2487301 | 1.3500000 | 1.9500000 |
|---|-----------|-----------|-----------|-----------|

---

Unique Subject Identifier=1235000000-0023

Assay variable : PTINR\_VAL1 PT-INR Value

N Mean Standard Deviation Minimum Maximum

---

|   |           |           |           |           |
|---|-----------|-----------|-----------|-----------|
| 6 | 1.7250000 | 0.1375136 | 1.5800000 | 1.9100000 |
|---|-----------|-----------|-----------|-----------|

---

Unique Subject Identifier=1235000000-0026

Assay variable : PTINR\_VAL1 PT-INR Value

N Mean Standard Deviation Minimum Maximum

---

|   |           |           |           |           |
|---|-----------|-----------|-----------|-----------|
| 6 | 1.4750000 | 0.1710848 | 1.2200000 | 1.6600000 |
|---|-----------|-----------|-----------|-----------|

---

Laboratory tests at the time of obtaining Table 2-6 consent, according to the presence or absence of proton-pump inhibitors

Unique Subject Identifier=1235000000-0033

MEANS Procedure

Assay variable : PTINR\_VAL1 PT-INR Value

N Mean Standard Deviation Minimum Maximum

---

|   |           |           |           |           |
|---|-----------|-----------|-----------|-----------|
| 6 | 1.9400000 | 0.4784976 | 1.3500000 | 2.5200000 |
|---|-----------|-----------|-----------|-----------|

---

Unique Subject Identifier=1235000000-0040

Assay variable : PTINR\_VAL1 PT-INR Value

N Mean Standard Deviation Minimum Maximum

---

|   |           |           |           |           |
|---|-----------|-----------|-----------|-----------|
| 3 | 1.7733333 | 0.0404145 | 1.7300000 | 1.8100000 |
|---|-----------|-----------|-----------|-----------|

---

Unique Subject Identifier=1235000000-0043

Assay variable : PTINR\_VAL1 PT-INR Value

N Mean Standard Deviation Minimum Maximum

---

|   |           |           |           |           |
|---|-----------|-----------|-----------|-----------|
| 5 | 2.0400000 | 0.3647602 | 1.6800000 | 2.5400000 |
|---|-----------|-----------|-----------|-----------|

---

Unique Subject Identifier=1235000000-0045

Assay variable : PTINR\_VAL1 PT-INR Value

N Mean Standard Deviation Minimum Maximum

---

|   |           |           |           |           |
|---|-----------|-----------|-----------|-----------|
| 6 | 1.5666667 | 0.1751190 | 1.2900000 | 1.8000000 |
|---|-----------|-----------|-----------|-----------|

---

Laboratory tests at the time of obtaining Table 2-6 consent, according to the presence or absence of proton-pump inhibitors

Unique Subject Identifier=1235000000-0050

MEANS Procedure

Assay variable : PTINR\_VAL1 PT-INR Value

N Mean Standard Deviation Minimum Maximum

---

|   |           |           |           |           |
|---|-----------|-----------|-----------|-----------|
| 6 | 1.9616667 | 0.5810479 | 1.0400000 | 2.5200000 |
|---|-----------|-----------|-----------|-----------|

---

Unique Subject Identifier=1237000000-0006

Assay variable : PTINR\_VAL1 PT-INR Value

N Mean Standard Deviation Minimum Maximum

---

|   |           |           |           |           |
|---|-----------|-----------|-----------|-----------|
| 5 | 2.1000000 | 0.3162278 | 1.8000000 | 2.6000000 |
|---|-----------|-----------|-----------|-----------|

---

Unique Subject Identifier=1237000000-0007

Assay variable : PTINR\_VAL1 PT-INR Value

N Mean Standard Deviation Minimum Maximum

---

|   |           |           |           |           |
|---|-----------|-----------|-----------|-----------|
| 5 | 1.9000000 | 0.3872983 | 1.5000000 | 2.4000000 |
|---|-----------|-----------|-----------|-----------|

---

Unique Subject Identifier=1237000000-0010



Assay variable : PTINR\_VAL1 PT-INR Value

N Mean Standard Deviation Minimum Maximum

---

|   |           |           |           |           |
|---|-----------|-----------|-----------|-----------|
| 3 | 1.7333333 | 0.0577350 | 1.7000000 | 1.8000000 |
|---|-----------|-----------|-----------|-----------|

---

Laboratory tests at the time of obtaining Table 2-6 consent, according to the presence or absence of proton-pump inhibitors

Unique Subject Identifier=1237000000-0013

MEANS Procedure

Assay variable : PTINR\_VAL1 PT-INR Value

N Mean Standard Deviation Minimum Maximum

---

|   |           |           |           |           |
|---|-----------|-----------|-----------|-----------|
| 4 | 1.5250000 | 0.1500000 | 1.3000000 | 1.6000000 |
|---|-----------|-----------|-----------|-----------|

---

Unique Subject Identifier=1237000000-0014

Assay variable : PTINR\_VAL1 PT-INR Value

N Mean Standard Deviation Minimum Maximum

---

|   |           |           |           |           |
|---|-----------|-----------|-----------|-----------|
| 3 | 1.5666667 | 0.2516611 | 1.3000000 | 1.8000000 |
|---|-----------|-----------|-----------|-----------|

---

Unique Subject Identifier=1249000000-0002

Assay variable : PTINR\_VAL1 PT-INR Value

N Mean Standard Deviation Minimum Maximum

---

|   |           |           |           |           |
|---|-----------|-----------|-----------|-----------|
| 6 | 2.2166667 | 0.2141650 | 1.9700000 | 2.5600000 |
|---|-----------|-----------|-----------|-----------|

---

Unique Subject Identifier=1249000000-0008

Assay variable : PTINR\_VAL1 PT-INR Value

N Mean Standard Deviation Minimum Maximum

---

|   |           |           |           |           |
|---|-----------|-----------|-----------|-----------|
| 6 | 1.8083333 | 0.1435851 | 1.6400000 | 2.0400000 |
|---|-----------|-----------|-----------|-----------|

---

Laboratory tests at the time of obtaining Table 2-6 consent, according to the presence or absence of proton-pump inhibitors

Unique Subject Identifier=1254100000-0002

MEANS Procedure

Assay variable : PTINR\_VAL1 PT-INR Value

N Mean Standard Deviation Minimum Maximum

---

|   |           |           |           |           |
|---|-----------|-----------|-----------|-----------|
| 5 | 1.9600000 | 0.4159327 | 1.5000000 | 2.6000000 |
|---|-----------|-----------|-----------|-----------|

---

Unique Subject Identifier=1254100000-0013

Assay variable : PTINR\_VAL1 PT-INR Value

N Mean Standard Deviation Minimum Maximum

---

|   |           |           |           |           |
|---|-----------|-----------|-----------|-----------|
| 6 | 1.8000000 | 0.2190890 | 1.5000000 | 2.1000000 |
|---|-----------|-----------|-----------|-----------|

---

Unique Subject Identifier=1254100000-0018

Assay variable : PTINR\_VAL1 PT-INR Value

N Mean Standard Deviation Minimum Maximum

---

|   |           |           |           |           |
|---|-----------|-----------|-----------|-----------|
| 6 | 2.1333333 | 0.1211060 | 2.0000000 | 2.3000000 |
|---|-----------|-----------|-----------|-----------|

---

Unique Subject Identifier=1254100000-0019

Assay variable : PTINR\_VAL1 PT-INR Value

N Mean Standard Deviation Minimum Maximum

---

|   |           |           |           |           |
|---|-----------|-----------|-----------|-----------|
| 5 | 2.2200000 | 0.3563706 | 1.7000000 | 2.7000000 |
|---|-----------|-----------|-----------|-----------|

---

Laboratory tests at the time of obtaining Table 2-6 consent, according to the presence or absence of proton-pump inhibitors

Unique Subject Identifier=1254100000-0021

MEANS Procedure

Assay variable : PTINR\_VAL1 PT-INR Value

N Mean Standard Deviation Minimum Maximum

---

|   |           |           |           |           |
|---|-----------|-----------|-----------|-----------|
| 6 | 2.2166667 | 0.3311596 | 1.9000000 | 2.8000000 |
|---|-----------|-----------|-----------|-----------|

---

Unique Subject Identifier=1254100000-0024

Assay variable : PTINR\_VAL1 PT-INR Value

N Mean Standard Deviation Minimum Maximum

---

|   |           |           |           |           |
|---|-----------|-----------|-----------|-----------|
| 6 | 2.0666667 | 0.3204164 | 1.7000000 | 2.5000000 |
|---|-----------|-----------|-----------|-----------|

---

Unique Subject Identifier=1254100000-0025

Assay variable : PTINR\_VAL1 PT-INR Value

N Mean Standard Deviation Minimum Maximum

---

|   |           |           |           |           |
|---|-----------|-----------|-----------|-----------|
| 6 | 2.1166667 | 0.4665476 | 1.3000000 | 2.6000000 |
|---|-----------|-----------|-----------|-----------|

---

Unique Subject Identifier=1262000000-0019

Assay variable : PTINR\_VAL1 PT-INR Value

N Mean Standard Deviation Minimum Maximum

---

|   |          |           |          |          |
|---|----------|-----------|----------|----------|
| 2 | 1.350000 | 0.2121320 | 1.200000 | 1.500000 |
|---|----------|-----------|----------|----------|

---

Laboratory tests at the time of obtaining Table 2-6 consent, according to the presence or absence of proton-pump inhibitors

Unique Subject Identifier=1262000000-0030

MEANS Procedure

Assay variable : PTINR\_VAL1 PT-INR Value

| N | Mean      | Standard Deviation | Minimum   | Maximum   |
|---|-----------|--------------------|-----------|-----------|
| 3 | 1.7333333 | 0.2081666          | 1.5000000 | 1.9000000 |

Unique Subject Identifier=1262000000-0049

Assay variable : PTINR\_VAL1 PT-INR Value

| N | Mean      | Standard Deviation | Minimum   | Maximum   |
|---|-----------|--------------------|-----------|-----------|
| 1 | 1.3000000 |                    | 1.3000000 | 1.3000000 |

Unique Subject Identifier=1262000000-0071

Assay variable : PTINR\_VAL1 PT-INR Value

| N | Mean      | Standard Deviation | Minimum   | Maximum   |
|---|-----------|--------------------|-----------|-----------|
| 5 | 1.8200000 | 0.1303840          | 1.6000000 | 1.9000000 |

Unique Subject Identifier=1263011000-0014



Assay variable : PTINR\_VAL1 PT-INR Value

N Mean Standard Deviation Minimum Maximum

---

|   |           |           |           |           |
|---|-----------|-----------|-----------|-----------|
| 6 | 2.6133333 | 0.5203717 | 2.0400000 | 3.2300000 |
|---|-----------|-----------|-----------|-----------|

---

Laboratory tests at the time of obtaining Table 2-6 consent, according to the presence or absence of proton-pump inhibitors

Unique Subject Identifier=1263011000-0027

MEANS Procedure

Assay variable : PTINR\_VAL1 PT-INR Value

N Mean Standard Deviation Minimum Maximum

---

|   |          |           |          |          |
|---|----------|-----------|----------|----------|
| 6 | 2.020000 | 0.1589969 | 1.880000 | 2.290000 |
|---|----------|-----------|----------|----------|

---

Unique Subject Identifier=1263011000-0033

Assay variable : PTINR\_VAL1 PT-INR Value

N Mean Standard Deviation Minimum Maximum

---

|   |          |           |          |          |
|---|----------|-----------|----------|----------|
| 6 | 2.018333 | 0.6587994 | 1.510000 | 3.260000 |
|---|----------|-----------|----------|----------|

---

Unique Subject Identifier=1266000000-0005

Assay variable : PTINR\_VAL1 PT-INR Value

N Mean Standard Deviation Minimum Maximum

---

|   |          |           |          |          |
|---|----------|-----------|----------|----------|
| 6 | 2.261667 | 0.2018333 | 2.100000 | 2.600000 |
|---|----------|-----------|----------|----------|

---

Unique Subject Identifier=1266000000-0009

Assay variable : PTINR\_VAL1 PT-INR Value

N Mean Standard Deviation Minimum Maximum

---

|   |           |           |           |           |
|---|-----------|-----------|-----------|-----------|
| 6 | 2.2583333 | 0.3009596 | 1.9000000 | 2.6000000 |
|---|-----------|-----------|-----------|-----------|

---

Laboratory tests at the time of obtaining Table 2-6 consent, according to the presence or absence of proton-pump inhibitors

Unique Subject Identifier=1266000000-0015

MEANS Procedure

Assay variable : PTINR\_VAL1 PT-INR Value

N Mean Standard Deviation Minimum Maximum

---

|   |           |           |           |           |
|---|-----------|-----------|-----------|-----------|
| 6 | 2.0766667 | 0.5020624 | 1.4000000 | 2.6600000 |
|---|-----------|-----------|-----------|-----------|

---

Unique Subject Identifier=1266000000-0016

Assay variable : PTINR\_VAL1 PT-INR Value

N Mean Standard Deviation Minimum Maximum

---

|   |           |           |           |           |
|---|-----------|-----------|-----------|-----------|
| 6 | 2.0350000 | 0.8365584 | 1.3000000 | 3.2000000 |
|---|-----------|-----------|-----------|-----------|

---

Unique Subject Identifier=1266000000-0022

Assay variable : PTINR\_VAL1 PT-INR Value

N Mean Standard Deviation Minimum Maximum

---

|   |           |           |           |           |
|---|-----------|-----------|-----------|-----------|
| 4 | 2.1975000 | 0.2723203 | 2.0000000 | 2.6000000 |
|---|-----------|-----------|-----------|-----------|

---

Unique Subject Identifier=1266000000-0025

Assay variable : PTINR\_VAL1 PT-INR Value

N Mean Standard Deviation Minimum Maximum

---

|   |           |           |           |           |
|---|-----------|-----------|-----------|-----------|
| 6 | 2.5566667 | 0.6370767 | 1.5000000 | 3.3100000 |
|---|-----------|-----------|-----------|-----------|

---

Laboratory tests at the time of obtaining Table 2-6 consent, according to the presence or absence of proton-pump inhibitors

Unique Subject Identifier=1266000000-0027

MEANS Procedure

Assay variable : PTINR\_VAL1 PT-INR Value

N Mean Standard Deviation Minimum Maximum

---

|   |           |           |           |           |
|---|-----------|-----------|-----------|-----------|
| 6 | 2.2783333 | 0.1510519 | 2.1000000 | 2.5000000 |
|---|-----------|-----------|-----------|-----------|

---

Unique Subject Identifier=1266000000-0030

Assay variable : PTINR\_VAL1 PT-INR Value

N Mean Standard Deviation Minimum Maximum

---

|   |           |           |           |           |
|---|-----------|-----------|-----------|-----------|
| 6 | 2.2450000 | 0.2847279 | 1.8000000 | 2.6000000 |
|---|-----------|-----------|-----------|-----------|

---

Unique Subject Identifier=1266000000-0031

Assay variable : PTINR\_VAL1 PT-INR Value

N Mean Standard Deviation Minimum Maximum

---

|   |           |           |           |           |
|---|-----------|-----------|-----------|-----------|
| 6 | 1.7666667 | 0.1175868 | 1.7000000 | 2.0000000 |
|---|-----------|-----------|-----------|-----------|

---

Unique Subject Identifier=1266000000-0032

Assay variable : PTINR\_VAL1 PT-INR Value

N Mean Standard Deviation Minimum Maximum

---

|   |           |           |           |           |
|---|-----------|-----------|-----------|-----------|
| 6 | 1.6983333 | 0.5077959 | 0.7200000 | 2.1000000 |
|---|-----------|-----------|-----------|-----------|

---

Laboratory tests at the time of obtaining Table 2-6 consent, according to the presence or absence of proton-pump inhibitors

Unique Subject Identifier=1266000000-0033

MEANS Procedure

Assay variable : PTINR\_VAL1 PT-INR Value

N Mean Standard Deviation Minimum Maximum

---

|   |           |           |           |           |
|---|-----------|-----------|-----------|-----------|
| 6 | 1.8833333 | 0.1329160 | 1.7000000 | 2.0000000 |
|---|-----------|-----------|-----------|-----------|

---

Unique Subject Identifier=1266000000-0034

Assay variable : PTINR\_VAL1 PT-INR Value

N Mean Standard Deviation Minimum Maximum

---

|   |           |           |           |           |
|---|-----------|-----------|-----------|-----------|
| 6 | 1.6466667 | 0.1782882 | 1.5000000 | 2.0000000 |
|---|-----------|-----------|-----------|-----------|

---

Unique Subject Identifier=1266000000-0036

Assay variable : PTINR\_VAL1 PT-INR Value

N Mean Standard Deviation Minimum Maximum

---

|   |           |           |           |           |
|---|-----------|-----------|-----------|-----------|
| 6 | 1.8600000 | 0.1814387 | 1.7000000 | 2.1700000 |
|---|-----------|-----------|-----------|-----------|

---

Unique Subject Identifier=1266000000-0039



Assay variable : PTINR\_VAL1 PT-INR Value

N Mean Standard Deviation Minimum Maximum

---

|   |           |           |           |           |
|---|-----------|-----------|-----------|-----------|
| 6 | 1.6566667 | 0.1787363 | 1.4000000 | 1.9000000 |
|---|-----------|-----------|-----------|-----------|

---

Laboratory tests at the time of obtaining Table 2-6 consent, according to the presence or absence of proton-pump inhibitors

Unique Subject Identifier=1266000000-0041

MEANS Procedure

Assay variable : PTINR\_VAL1 PT-INR Value

N Mean Standard Deviation Minimum Maximum

---

|   |           |           |           |           |
|---|-----------|-----------|-----------|-----------|
| 6 | 1.9000000 | 0.2529822 | 1.6000000 | 2.2000000 |
|---|-----------|-----------|-----------|-----------|

---

Unique Subject Identifier=1266000000-0050

Assay variable : PTINR\_VAL1 PT-INR Value

N Mean Standard Deviation Minimum Maximum

---

|   |           |           |           |           |
|---|-----------|-----------|-----------|-----------|
| 6 | 1.6283333 | 0.3717212 | 1.3000000 | 2.3600000 |
|---|-----------|-----------|-----------|-----------|

---

Unique Subject Identifier=1266000000-0052

Assay variable : PTINR\_VAL1 PT-INR Value

N Mean Standard Deviation Minimum Maximum

---

|   |           |           |           |           |
|---|-----------|-----------|-----------|-----------|
| 6 | 1.9050000 | 0.1963415 | 1.6000000 | 2.1300000 |
|---|-----------|-----------|-----------|-----------|

---

Unique Subject Identifier=1266000000-0056

Assay variable : PTINR\_VAL1 PT-INR Value

N Mean Standard Deviation Minimum Maximum

---

|   |          |           |          |          |
|---|----------|-----------|----------|----------|
| 6 | 2.120000 | 0.3891015 | 1.600000 | 2.600000 |
|---|----------|-----------|----------|----------|

---

Laboratory tests at the time of obtaining Table 2-6 consent, according to the presence or absence of proton-pump inhibitors

Unique Subject Identifier=1266000000-0058

MEANS Procedure

Assay variable : PTINR\_VAL1 PT-INR Value

N Mean Standard Deviation Minimum Maximum

---

|   |           |           |           |           |
|---|-----------|-----------|-----------|-----------|
| 5 | 1.6980000 | 0.1298846 | 1.4800000 | 1.8000000 |
|---|-----------|-----------|-----------|-----------|

---

Unique Subject Identifier=1266000000-0061

Assay variable : PTINR\_VAL1 PT-INR Value

N Mean Standard Deviation Minimum Maximum

---

|   |           |           |           |           |
|---|-----------|-----------|-----------|-----------|
| 6 | 2.0400000 | 0.2387467 | 1.7000000 | 2.3900000 |
|---|-----------|-----------|-----------|-----------|

---

Unique Subject Identifier=1266000000-0062

Assay variable : PTINR\_VAL1 PT-INR Value

N Mean Standard Deviation Minimum Maximum

---

|   |           |           |           |           |
|---|-----------|-----------|-----------|-----------|
| 6 | 2.2116667 | 0.2049797 | 1.9200000 | 2.4500000 |
|---|-----------|-----------|-----------|-----------|

---

Unique Subject Identifier=1266000000-0070

Assay variable : PTINR\_VAL1 PT-INR Value

N Mean Standard Deviation Minimum Maximum

---

|   |           |           |           |           |
|---|-----------|-----------|-----------|-----------|
| 6 | 1.6433333 | 0.2367840 | 1.2000000 | 1.8000000 |
|---|-----------|-----------|-----------|-----------|

---

Laboratory tests at the time of obtaining Table 2-6 consent, according to the presence or absence of proton-pump inhibitors

Unique Subject Identifier=1266000000-0071

MEANS Procedure

Assay variable : PTINR\_VAL1 PT-INR Value

N Mean Standard Deviation Minimum Maximum

---

|   |           |           |           |           |
|---|-----------|-----------|-----------|-----------|
| 6 | 2.0916667 | 0.3350473 | 1.8000000 | 2.7000000 |
|---|-----------|-----------|-----------|-----------|

---

Unique Subject Identifier=1266000000-0072

Assay variable : PTINR\_VAL1 PT-INR Value

N Mean Standard Deviation Minimum Maximum

---

|   |           |           |           |           |
|---|-----------|-----------|-----------|-----------|
| 6 | 2.2333333 | 0.3023684 | 1.7000000 | 2.5000000 |
|---|-----------|-----------|-----------|-----------|

---

Unique Subject Identifier=1266000000-0077

Assay variable : PTINR\_VAL1 PT-INR Value

N Mean Standard Deviation Minimum Maximum

---

|   |           |           |           |           |
|---|-----------|-----------|-----------|-----------|
| 6 | 1.5250000 | 0.1405347 | 1.4000000 | 1.7000000 |
|---|-----------|-----------|-----------|-----------|

---

Unique Subject Identifier=1266000000-0082

Assay variable : PTINR\_VAL1 PT-INR Value

N Mean Standard Deviation Minimum Maximum

---

|   |           |           |           |           |
|---|-----------|-----------|-----------|-----------|
| 6 | 2.0666667 | 0.2726659 | 1.8500000 | 2.5900000 |
|---|-----------|-----------|-----------|-----------|

---

Laboratory tests at the time of obtaining Table 2-6 consent, according to the presence or absence of proton-pump inhibitors

Unique Subject Identifier=1268000000-0001

MEANS Procedure

Assay variable : PTINR\_VAL1 PT-INR Value

N Mean Standard Deviation Minimum Maximum

---

|   |           |           |           |           |
|---|-----------|-----------|-----------|-----------|
| 3 | 2.0066667 | 0.3500476 | 1.6600000 | 2.3600000 |
|---|-----------|-----------|-----------|-----------|

---

Unique Subject Identifier=1268000000-0003

Assay variable : PTINR\_VAL1 PT-INR Value

N Mean Standard Deviation Minimum Maximum

---

|   |           |           |           |           |
|---|-----------|-----------|-----------|-----------|
| 6 | 1.5916667 | 0.1704602 | 1.3800000 | 1.8900000 |
|---|-----------|-----------|-----------|-----------|

---

Unique Subject Identifier=1268000000-0004

Assay variable : PTINR\_VAL1 PT-INR Value

N Mean Standard Deviation Minimum Maximum

---

|   |           |           |           |           |
|---|-----------|-----------|-----------|-----------|
| 4 | 1.6150000 | 0.1047219 | 1.5200000 | 1.7200000 |
|---|-----------|-----------|-----------|-----------|

---

Unique Subject Identifier=1268000000-0006



Assay variable : PTINR\_VAL1 PT-INR Value

N Mean Standard Deviation Minimum Maximum

---

|   |           |           |           |           |
|---|-----------|-----------|-----------|-----------|
| 6 | 1.6616667 | 0.1433062 | 1.4300000 | 1.8200000 |
|---|-----------|-----------|-----------|-----------|

---

Laboratory tests at the time of obtaining Table 2-6 consent, according to the presence or absence of proton-pump inhibitors

Unique Subject Identifier=1268000000-0007

MEANS Procedure

Assay variable : PTINR\_VAL1 PT-INR Value

N Mean Standard Deviation Minimum Maximum

---

|   |           |           |           |           |
|---|-----------|-----------|-----------|-----------|
| 5 | 1.5580000 | 0.1822635 | 1.3000000 | 1.7000000 |
|---|-----------|-----------|-----------|-----------|

---

Unique Subject Identifier=1269000000-0008

Assay variable : PTINR\_VAL1 PT-INR Value

N Mean Standard Deviation Minimum Maximum

---

|   |           |           |           |           |
|---|-----------|-----------|-----------|-----------|
| 6 | 2.1200000 | 0.2794280 | 1.6200000 | 2.4400000 |
|---|-----------|-----------|-----------|-----------|

---

Unique Subject Identifier=1269000000-0018

Assay variable : PTINR\_VAL1 PT-INR Value

N Mean Standard Deviation Minimum Maximum

---

|   |           |           |           |           |
|---|-----------|-----------|-----------|-----------|
| 6 | 1.8233333 | 0.4719181 | 1.2600000 | 2.5500000 |
|---|-----------|-----------|-----------|-----------|

---

Unique Subject Identifier=1269000000-0019

Assay variable : PTINR\_VAL1 PT-INR Value

N Mean Standard Deviation Minimum Maximum

---

|   |          |           |          |          |
|---|----------|-----------|----------|----------|
| 2 | 1.550000 | 0.3252691 | 1.320000 | 1.780000 |
|---|----------|-----------|----------|----------|

---

Laboratory tests at the time of obtaining Table 2-6 consent, according to the presence or absence of proton-pump inhibitors

Unique Subject Identifier=1270000000-0001

MEANS Procedure

Assay variable : PTINR\_VAL1 PT-INR Value

N Mean Standard Deviation Minimum Maximum

---

|   |          |           |          |          |
|---|----------|-----------|----------|----------|
| 2 | 1.950000 | 0.2121320 | 1.800000 | 2.100000 |
|---|----------|-----------|----------|----------|

---

Unique Subject Identifier=1270000000-0003

Assay variable : PTINR\_VAL1 PT-INR Value

N Mean Standard Deviation Minimum Maximum

---

|   |          |           |          |          |
|---|----------|-----------|----------|----------|
| 2 | 1.875000 | 0.0353553 | 1.850000 | 1.900000 |
|---|----------|-----------|----------|----------|

---

Unique Subject Identifier=1270000000-0005

Assay variable : PTINR\_VAL1 PT-INR Value

N Mean Standard Deviation Minimum Maximum

---

|   |          |           |          |          |
|---|----------|-----------|----------|----------|
| 4 | 1.850000 | 0.3696846 | 1.400000 | 2.200000 |
|---|----------|-----------|----------|----------|

---

Unique Subject Identifier=1270000000-0007

Assay variable : PTINR\_VAL1 PT-INR Value

N Mean Standard Deviation Minimum Maximum

---

|   |          |           |          |          |
|---|----------|-----------|----------|----------|
| 2 | 1.850000 | 0.3535534 | 1.600000 | 2.100000 |
|---|----------|-----------|----------|----------|

---

Laboratory tests at the time of obtaining Table 2-6 consent, according to the presence or absence of proton-pump inhibitors

Unique Subject Identifier=1270000000-0008

MEANS Procedure

Assay variable : PTINR\_VAL1 PT-INR Value

N Mean Standard Deviation Minimum Maximum

---

|   |           |           |           |           |
|---|-----------|-----------|-----------|-----------|
| 2 | 1.8000000 | 0.2828427 | 1.6000000 | 2.0000000 |
|---|-----------|-----------|-----------|-----------|

---

Unique Subject Identifier=1270000000-0009

Assay variable : PTINR\_VAL1 PT-INR Value

N Mean Standard Deviation Minimum Maximum

---

|   |           |           |           |           |
|---|-----------|-----------|-----------|-----------|
| 3 | 2.3333333 | 0.1154701 | 2.2000000 | 2.4000000 |
|---|-----------|-----------|-----------|-----------|

---

Unique Subject Identifier=1270000000-0010

Assay variable : PTINR\_VAL1 PT-INR Value

N Mean Standard Deviation Minimum Maximum

---

|   |           |           |           |           |
|---|-----------|-----------|-----------|-----------|
| 3 | 1.9666667 | 0.2516611 | 1.7000000 | 2.2000000 |
|---|-----------|-----------|-----------|-----------|

---

Unique Subject Identifier=1270000000-0011

Assay variable : PTINR\_VAL1 PT-INR Value

N Mean Standard Deviation Minimum Maximum

---

|   |          |           |          |          |
|---|----------|-----------|----------|----------|
| 2 | 2.500000 | 1.5556349 | 1.400000 | 3.600000 |
|---|----------|-----------|----------|----------|

---

Laboratory tests at the time of obtaining Table 2-6 consent, according to the presence or absence of proton-pump inhibitors

Unique Subject Identifier=1270000000-0012

MEANS Procedure

Assay variable : PTINR\_VAL1 PT-INR Value

N Mean Standard Deviation Minimum Maximum

---

|   |           |           |           |           |
|---|-----------|-----------|-----------|-----------|
| 2 | 2.5750000 | 0.0353553 | 2.5500000 | 2.6000000 |
|---|-----------|-----------|-----------|-----------|

---

Unique Subject Identifier=1270000000-0013

Assay variable : PTINR\_VAL1 PT-INR Value

N Mean Standard Deviation Minimum Maximum

---

|   |           |  |           |           |
|---|-----------|--|-----------|-----------|
| 1 | 2.0000000 |  | 2.0000000 | 2.0000000 |
|---|-----------|--|-----------|-----------|

---

Unique Subject Identifier=1270000000-0015

Assay variable : PTINR\_VAL1 PT-INR Value

N Mean Standard Deviation Minimum Maximum

---

|   |           |           |           |           |
|---|-----------|-----------|-----------|-----------|
| 4 | 1.5275000 | 0.1001249 | 1.4100000 | 1.6500000 |
|---|-----------|-----------|-----------|-----------|

---

Unique Subject Identifier=1270000000-0016



Assay variable : PTINR\_VAL1 PT-INR Value

N Mean Standard Deviation Minimum Maximum

---

|   |           |           |           |           |
|---|-----------|-----------|-----------|-----------|
| 2 | 1.8500000 | 0.0707107 | 1.8000000 | 1.9000000 |
|---|-----------|-----------|-----------|-----------|

---

Laboratory tests at the time of obtaining Table 2-6 consent, according to the presence or absence of proton-pump inhibitors

Unique Subject Identifier=1270000000-0017

MEANS Procedure

Assay variable : PTINR\_VAL1 PT-INR Value

N Mean Standard Deviation Minimum Maximum

---

|   |           |           |           |           |
|---|-----------|-----------|-----------|-----------|
| 3 | 2.8000000 | 1.1532563 | 1.9000000 | 4.1000000 |
|---|-----------|-----------|-----------|-----------|

---

Unique Subject Identifier=1270000000-0021

Assay variable : PTINR\_VAL1 PT-INR Value

N Mean Standard Deviation Minimum Maximum

---

|   |           |           |           |           |
|---|-----------|-----------|-----------|-----------|
| 2 | 2.2300000 | 0.2404163 | 2.0600000 | 2.4000000 |
|---|-----------|-----------|-----------|-----------|

---

Unique Subject Identifier=1270000000-0023

Assay variable : PTINR\_VAL1 PT-INR Value

N Mean Standard Deviation Minimum Maximum

---

|   |           |           |           |           |
|---|-----------|-----------|-----------|-----------|
| 3 | 1.7666667 | 0.6027714 | 1.2000000 | 2.4000000 |
|---|-----------|-----------|-----------|-----------|

---

Unique Subject Identifier=1274000000-0003

Assay variable : PTINR\_VAL1 PT-INR Value

N Mean Standard Deviation Minimum Maximum

---

|   |           |           |           |           |
|---|-----------|-----------|-----------|-----------|
| 2 | 1.4550000 | 0.0494975 | 1.4200000 | 1.4900000 |
|---|-----------|-----------|-----------|-----------|

---

Laboratory tests at the time of obtaining Table 2-6 consent, according to the presence or absence of proton-pump inhibitors

Unique Subject Identifier=1276000000-0001

MEANS Procedure

Assay variable : PTINR\_VAL1 PT-INR Value

N Mean Standard Deviation Minimum Maximum

---

|   |           |           |           |           |
|---|-----------|-----------|-----------|-----------|
| 6 | 2.5900000 | 0.7753193 | 1.8000000 | 3.9000000 |
|---|-----------|-----------|-----------|-----------|

---

Unique Subject Identifier=1276000000-0002

Assay variable : PTINR\_VAL1 PT-INR Value

N Mean Standard Deviation Minimum Maximum

---

|   |           |           |           |           |
|---|-----------|-----------|-----------|-----------|
| 2 | 2.0500000 | 0.0565685 | 2.0100000 | 2.0900000 |
|---|-----------|-----------|-----------|-----------|

---

Unique Subject Identifier=1277010100-0001

Assay variable : PTINR\_VAL1 PT-INR Value

N Mean Standard Deviation Minimum Maximum

---

|   |           |           |           |           |
|---|-----------|-----------|-----------|-----------|
| 6 | 2.1900000 | 0.0678233 | 2.1000000 | 2.3000000 |
|---|-----------|-----------|-----------|-----------|

---

Unique Subject Identifier=1277010100-0002

Assay variable : PTINR\_VAL1 PT-INR Value

N Mean Standard Deviation Minimum Maximum

---

|   |           |           |           |           |
|---|-----------|-----------|-----------|-----------|
| 6 | 1.8416667 | 0.1357080 | 1.6000000 | 2.0000000 |
|---|-----------|-----------|-----------|-----------|

---

Laboratory tests at the time of obtaining Table 2-6 consent, according to the presence or absence of proton-pump inhibitors

Unique Subject Identifier=1277010100-0003

MEANS Procedure

Assay variable : PTINR\_VAL1 PT-INR Value

N Mean Standard Deviation Minimum Maximum

---

|   |           |           |           |           |
|---|-----------|-----------|-----------|-----------|
| 6 | 2.3333333 | 0.1632993 | 2.2000000 | 2.6000000 |
|---|-----------|-----------|-----------|-----------|

---

Unique Subject Identifier=1277010100-0004

Assay variable : PTINR\_VAL1 PT-INR Value

N Mean Standard Deviation Minimum Maximum

---

|   |           |           |           |           |
|---|-----------|-----------|-----------|-----------|
| 6 | 1.7750000 | 0.2444381 | 1.5000000 | 2.2000000 |
|---|-----------|-----------|-----------|-----------|

---

Unique Subject Identifier=1277010100-0005

Assay variable : PTINR\_VAL1 PT-INR Value

N Mean Standard Deviation Minimum Maximum

---

|   |           |           |           |           |
|---|-----------|-----------|-----------|-----------|
| 6 | 2.1783333 | 0.1040032 | 2.0700000 | 2.3000000 |
|---|-----------|-----------|-----------|-----------|

---

Unique Subject Identifier=1277010100-0006

Assay variable : PTINR\_VAL1 PT-INR Value

N Mean Standard Deviation Minimum Maximum

---

|   |          |           |          |          |
|---|----------|-----------|----------|----------|
| 6 | 2.433333 | 0.2732520 | 2.200000 | 2.900000 |
|---|----------|-----------|----------|----------|

---

Laboratory tests at the time of obtaining Table 2-6 consent, according to the presence or absence of proton-pump inhibitors

Unique Subject Identifier=1277010100-0007

MEANS Procedure

Assay variable : PTINR\_VAL1 PT-INR Value

N Mean Standard Deviation Minimum Maximum

---

|   |           |           |           |           |
|---|-----------|-----------|-----------|-----------|
| 6 | 1.9150000 | 0.2072438 | 1.5900000 | 2.2000000 |
|---|-----------|-----------|-----------|-----------|

---

Unique Subject Identifier=1277010100-0008

Assay variable : PTINR\_VAL1 PT-INR Value

N Mean Standard Deviation Minimum Maximum

---

|   |           |           |           |           |
|---|-----------|-----------|-----------|-----------|
| 6 | 2.3000000 | 0.2529822 | 1.9000000 | 2.6000000 |
|---|-----------|-----------|-----------|-----------|

---

Unique Subject Identifier=1277010100-0010

Assay variable : PTINR\_VAL1 PT-INR Value

N Mean Standard Deviation Minimum Maximum

---

|   |           |           |           |           |
|---|-----------|-----------|-----------|-----------|
| 6 | 1.9000000 | 0.0894427 | 1.8000000 | 2.0000000 |
|---|-----------|-----------|-----------|-----------|

---

Unique Subject Identifier=1277010100-0011



Assay variable : PTINR\_VAL1 PT-INR Value

N Mean Standard Deviation Minimum Maximum

---

|   |          |           |          |          |
|---|----------|-----------|----------|----------|
| 6 | 2.410000 | 0.4259108 | 1.800000 | 2.900000 |
|---|----------|-----------|----------|----------|

---

Laboratory tests at the time of obtaining Table 2-6 consent, according to the presence or absence of proton-pump inhibitors

Unique Subject Identifier=1277010100-0012

MEANS Procedure

Assay variable : PTINR\_VAL1 PT-INR Value

N Mean Standard Deviation Minimum Maximum

---

|   |           |           |           |           |
|---|-----------|-----------|-----------|-----------|
| 6 | 1.8666667 | 0.2804758 | 1.5000000 | 2.2000000 |
|---|-----------|-----------|-----------|-----------|

---

Unique Subject Identifier=1277010100-0015

Assay variable : PTINR\_VAL1 PT-INR Value

N Mean Standard Deviation Minimum Maximum

---

|   |           |           |           |           |
|---|-----------|-----------|-----------|-----------|
| 6 | 1.9000000 | 0.3577709 | 1.6000000 | 2.4000000 |
|---|-----------|-----------|-----------|-----------|

---

Unique Subject Identifier=1277010100-0016

Assay variable : PTINR\_VAL1 PT-INR Value

N Mean Standard Deviation Minimum Maximum

---

|   |           |           |           |           |
|---|-----------|-----------|-----------|-----------|
| 6 | 2.8000000 | 0.8390471 | 1.5000000 | 3.8000000 |
|---|-----------|-----------|-----------|-----------|

---

Unique Subject Identifier=1277010100-0017

Assay variable : PTINR\_VAL1 PT-INR Value

N Mean Standard Deviation Minimum Maximum

---

|   |           |           |           |           |
|---|-----------|-----------|-----------|-----------|
| 6 | 2.1950000 | 0.1554027 | 2.1000000 | 2.5000000 |
|---|-----------|-----------|-----------|-----------|

---

Laboratory tests at the time of obtaining Table 2-6 consent, according to the presence or absence of proton-pump inhibitors

Unique Subject Identifier=1278011100-0002

MEANS Procedure

Assay variable : PTINR\_VAL1 PT-INR Value

N Mean Standard Deviation Minimum Maximum

---

|   |           |           |           |           |
|---|-----------|-----------|-----------|-----------|
| 4 | 2.1750000 | 0.3361051 | 1.8900000 | 2.6600000 |
|---|-----------|-----------|-----------|-----------|

---

Unique Subject Identifier=1278011100-0006

Assay variable : PTINR\_VAL1 PT-INR Value

N Mean Standard Deviation Minimum Maximum

---

|   |           |           |           |           |
|---|-----------|-----------|-----------|-----------|
| 5 | 1.8340000 | 0.3822041 | 1.1900000 | 2.1200000 |
|---|-----------|-----------|-----------|-----------|

---

Unique Subject Identifier=1278011100-0009

Assay variable : PTINR\_VAL1 PT-INR Value

N Mean Standard Deviation Minimum Maximum

---

|   |           |           |           |           |
|---|-----------|-----------|-----------|-----------|
| 2 | 2.1350000 | 0.1484924 | 2.0300000 | 2.2400000 |
|---|-----------|-----------|-----------|-----------|

---

Unique Subject Identifier=1278011100-0011

Assay variable : PTINR\_VAL1 PT-INR Value

N Mean Standard Deviation Minimum Maximum

---

|   |           |           |           |           |
|---|-----------|-----------|-----------|-----------|
| 6 | 2.2816667 | 1.0698863 | 1.5800000 | 4.4200000 |
|---|-----------|-----------|-----------|-----------|

---

Laboratory tests at the time of obtaining Table 2-6 consent, according to the presence or absence of proton-pump inhibitors

Unique Subject Identifier=1278011100-0012

MEANS Procedure

Assay variable : PTINR\_VAL1 PT-INR Value

| N | Mean      | Standard Deviation | Minimum   | Maximum   |
|---|-----------|--------------------|-----------|-----------|
| 2 | 1.9950000 | 0.0353553          | 1.9700000 | 2.0200000 |

Unique Subject Identifier=1279000000-0003

Assay variable : PTINR\_VAL1 PT-INR Value

| N | Mean      | Standard Deviation | Minimum   | Maximum   |
|---|-----------|--------------------|-----------|-----------|
| 4 | 2.4500000 | 0.4358899          | 2.1000000 | 3.0000000 |

Unique Subject Identifier=1279000000-0007

Assay variable : PTINR\_VAL1 PT-INR Value

| N | Mean      | Standard Deviation | Minimum   | Maximum   |
|---|-----------|--------------------|-----------|-----------|
| 1 | 1.6000000 |                    | 1.6000000 | 1.6000000 |

Unique Subject Identifier=1279000000-0008

Assay variable : PTINR\_VAL1 PT-INR Value

N Mean Standard Deviation Minimum Maximum

---

|   |           |           |           |           |
|---|-----------|-----------|-----------|-----------|
| 2 | 1.5750000 | 0.1202082 | 1.4900000 | 1.6600000 |
|---|-----------|-----------|-----------|-----------|

---

Laboratory tests at the time of obtaining Table 2-6 consent, according to the presence or absence of proton-pump inhibitors

Unique Subject Identifier=1280001000-0003

MEANS Procedure

Assay variable : PTINR\_VAL1 PT-INR Value

N Mean Standard Deviation Minimum Maximum

---

|   |           |           |           |           |
|---|-----------|-----------|-----------|-----------|
| 4 | 1.4500000 | 0.2081666 | 1.2000000 | 1.7000000 |
|---|-----------|-----------|-----------|-----------|

---

Unique Subject Identifier=1280001000-0005

Assay variable : PTINR\_VAL1 PT-INR Value

N Mean Standard Deviation Minimum Maximum

---

|   |           |           |           |           |
|---|-----------|-----------|-----------|-----------|
| 6 | 2.0333333 | 0.2250926 | 1.7000000 | 2.2000000 |
|---|-----------|-----------|-----------|-----------|

---

Unique Subject Identifier=1281000000-0001

Assay variable : PTINR\_VAL1 PT-INR Value

N Mean Standard Deviation Minimum Maximum

---

|   |           |           |           |           |
|---|-----------|-----------|-----------|-----------|
| 6 | 2.1716667 | 0.1702253 | 2.0000000 | 2.4600000 |
|---|-----------|-----------|-----------|-----------|

---

Unique Subject Identifier=1281000000-0005



Assay variable : PTINR\_VAL1 PT-INR Value

N Mean Standard Deviation Minimum Maximum

---

|   |          |          |          |          |
|---|----------|----------|----------|----------|
| 5 | 1.820000 | 0.167332 | 1.560000 | 1.970000 |
|---|----------|----------|----------|----------|

---

Laboratory tests at the time of obtaining Table 2-6 consent, according to the presence or absence of proton-pump inhibitors

Unique Subject Identifier=1282011111-0001

MEANS Procedure

Assay variable : PTINR\_VAL1 PT-INR Value

N Mean Standard Deviation Minimum Maximum

---

|   |           |           |           |           |
|---|-----------|-----------|-----------|-----------|
| 6 | 2.3000000 | 0.2828427 | 2.0000000 | 2.8000000 |
|---|-----------|-----------|-----------|-----------|

---

Unique Subject Identifier=1282011111-0005

Assay variable : PTINR\_VAL1 PT-INR Value

N Mean Standard Deviation Minimum Maximum

---

|   |           |           |           |           |
|---|-----------|-----------|-----------|-----------|
| 6 | 1.9166667 | 0.4445972 | 1.1000000 | 2.4000000 |
|---|-----------|-----------|-----------|-----------|

---

Unique Subject Identifier=1286000000-0004

Assay variable : PTINR\_VAL1 PT-INR Value

N Mean Standard Deviation Minimum Maximum

---

|   |           |           |           |           |
|---|-----------|-----------|-----------|-----------|
| 6 | 1.9333333 | 0.3444803 | 1.6000000 | 2.5000000 |
|---|-----------|-----------|-----------|-----------|

---

Unique Subject Identifier=1286000000-0017

Assay variable : PTINR\_VAL1 PT-INR Value

N Mean Standard Deviation Minimum Maximum

---

|   |           |  |           |           |
|---|-----------|--|-----------|-----------|
| 1 | 1.7000000 |  | 1.7000000 | 1.7000000 |
|---|-----------|--|-----------|-----------|

---

Laboratory tests at the time of obtaining Table 2-6 consent, according to the presence or absence of proton-pump inhibitors

Unique Subject Identifier=1287000000-0005

MEANS Procedure

Assay variable : PTINR\_VAL1 PT-INR Value

N Mean Standard Deviation Minimum Maximum

---

|   |           |           |           |           |
|---|-----------|-----------|-----------|-----------|
| 6 | 1.8833333 | 0.1940790 | 1.6000000 | 2.1000000 |
|---|-----------|-----------|-----------|-----------|

---

Unique Subject Identifier=1287000000-0010

Assay variable : PTINR\_VAL1 PT-INR Value

N Mean Standard Deviation Minimum Maximum

---

|   |           |           |           |           |
|---|-----------|-----------|-----------|-----------|
| 5 | 1.5200000 | 0.1095445 | 1.4000000 | 1.7000000 |
|---|-----------|-----------|-----------|-----------|

---

Unique Subject Identifier=1287000000-0014

Assay variable : PTINR\_VAL1 PT-INR Value

N Mean Standard Deviation Minimum Maximum

---

|   |           |           |           |           |
|---|-----------|-----------|-----------|-----------|
| 6 | 1.9000000 | 0.4000000 | 1.4000000 | 2.5000000 |
|---|-----------|-----------|-----------|-----------|

---

Unique Subject Identifier=1287000000-0015

Assay variable : PTINR\_VAL1 PT-INR Value

N Mean Standard Deviation Minimum Maximum

---

|   |           |           |           |           |
|---|-----------|-----------|-----------|-----------|
| 2 | 1.9000000 | 0.2828427 | 1.7000000 | 2.1000000 |
|---|-----------|-----------|-----------|-----------|

---

Laboratory tests at the time of obtaining Table 2-6 consent, according to the presence or absence of proton-pump inhibitors

Unique Subject Identifier=1289000000-0001

MEANS Procedure

Assay variable : PTINR\_VAL1 PT-INR Value

N Mean Standard Deviation Minimum Maximum

---

|   |          |           |          |          |
|---|----------|-----------|----------|----------|
| 3 | 1.360000 | 0.1637071 | 1.180000 | 1.500000 |
|---|----------|-----------|----------|----------|

---

Unique Subject Identifier=1289000000-0002

Assay variable : PTINR\_VAL1 PT-INR Value

N Mean Standard Deviation Minimum Maximum

---

|   |           |           |          |          |
|---|-----------|-----------|----------|----------|
| 3 | 1.8566667 | 0.3137409 | 1.500000 | 2.090000 |
|---|-----------|-----------|----------|----------|

---

Unique Subject Identifier=1289000000-0003

Assay variable : PTINR\_VAL1 PT-INR Value

N Mean Standard Deviation Minimum Maximum

---

|   |          |           |          |          |
|---|----------|-----------|----------|----------|
| 2 | 1.415000 | 0.0070711 | 1.410000 | 1.420000 |
|---|----------|-----------|----------|----------|

---

Unique Subject Identifier=1289000000-0004

Assay variable : PTINR\_VAL1 PT-INR Value

N Mean Standard Deviation Minimum Maximum

---

|   |           |           |           |           |
|---|-----------|-----------|-----------|-----------|
| 2 | 1.5700000 | 0.2404163 | 1.4000000 | 1.7400000 |
|---|-----------|-----------|-----------|-----------|

---

Laboratory tests at the time of obtaining Table 2-6 consent, according to the presence or absence of proton-pump inhibitors

Unique Subject Identifier=1289000000-0005

MEANS Procedure

Assay variable : PTINR\_VAL1 PT-INR Value

N Mean Standard Deviation Minimum Maximum

---

|   |           |           |           |           |
|---|-----------|-----------|-----------|-----------|
| 2 | 1.6200000 | 0.0707107 | 1.5700000 | 1.6700000 |
|---|-----------|-----------|-----------|-----------|

---

Unique Subject Identifier=1289000000-0008

Assay variable : PTINR\_VAL1 PT-INR Value

N Mean Standard Deviation Minimum Maximum

---

|   |           |           |           |           |
|---|-----------|-----------|-----------|-----------|
| 4 | 1.8825000 | 0.3341033 | 1.4000000 | 2.1600000 |
|---|-----------|-----------|-----------|-----------|

---

Unique Subject Identifier=1291000000-0002

Assay variable : PTINR\_VAL1 PT-INR Value

N Mean Standard Deviation Minimum Maximum

---

|   |           |           |           |           |
|---|-----------|-----------|-----------|-----------|
| 2 | 1.3500000 | 0.2121320 | 1.2000000 | 1.5000000 |
|---|-----------|-----------|-----------|-----------|

---

Unique Subject Identifier=1291000000-0003



Assay variable : PTINR\_VAL1 PT-INR Value

N Mean Standard Deviation Minimum Maximum

---

|   |           |           |           |           |
|---|-----------|-----------|-----------|-----------|
| 6 | 1.9833333 | 0.6112828 | 1.5000000 | 2.9000000 |
|---|-----------|-----------|-----------|-----------|

---

Laboratory tests at the time of obtaining Table 2-6 consent, according to the presence or absence of proton-pump inhibitors

Unique Subject Identifier=1291000000-0004

MEANS Procedure

Assay variable : PTINR\_VAL1 PT-INR Value

N Mean Standard Deviation Minimum Maximum

---

|   |           |           |           |           |
|---|-----------|-----------|-----------|-----------|
| 6 | 1.6500000 | 0.1643168 | 1.4000000 | 1.9000000 |
|---|-----------|-----------|-----------|-----------|

---

Unique Subject Identifier=1291000000-0005

Assay variable : PTINR\_VAL1 PT-INR Value

N Mean Standard Deviation Minimum Maximum

---

|   |           |           |           |           |
|---|-----------|-----------|-----------|-----------|
| 5 | 1.8000000 | 0.1870829 | 1.5000000 | 2.0000000 |
|---|-----------|-----------|-----------|-----------|

---

Unique Subject Identifier=1291000000-0009

Assay variable : PTINR\_VAL1 PT-INR Value

N Mean Standard Deviation Minimum Maximum

---

|   |           |           |           |           |
|---|-----------|-----------|-----------|-----------|
| 5 | 1.6200000 | 0.1483240 | 1.4000000 | 1.8000000 |
|---|-----------|-----------|-----------|-----------|

---

Unique Subject Identifier=1291000000-0011

Assay variable : PTINR\_VAL1 PT-INR Value

N Mean Standard Deviation Minimum Maximum

---

|   |           |           |           |           |
|---|-----------|-----------|-----------|-----------|
| 4 | 1.7750000 | 0.3095696 | 1.5000000 | 2.2000000 |
|---|-----------|-----------|-----------|-----------|

---

Laboratory tests at the time of obtaining Table 2-6 consent, according to the presence or absence of proton-pump inhibitors

Unique Subject Identifier=1291000000-0012

MEANS Procedure

Assay variable : PTINR\_VAL1 PT-INR Value

N Mean Standard Deviation Minimum Maximum

---

|   |           |           |           |           |
|---|-----------|-----------|-----------|-----------|
| 5 | 1.6200000 | 0.4438468 | 1.2000000 | 2.3000000 |
|---|-----------|-----------|-----------|-----------|

---

Unique Subject Identifier=1291000000-0014

Assay variable : PTINR\_VAL1 PT-INR Value

N Mean Standard Deviation Minimum Maximum

---

|   |           |           |           |           |
|---|-----------|-----------|-----------|-----------|
| 5 | 1.5200000 | 0.0836660 | 1.4000000 | 1.6000000 |
|---|-----------|-----------|-----------|-----------|

---

Unique Subject Identifier=1291000000-0015

Assay variable : PTINR\_VAL1 PT-INR Value

N Mean Standard Deviation Minimum Maximum

---

|   |           |           |           |           |
|---|-----------|-----------|-----------|-----------|
| 2 | 2.0000000 | 0.8485281 | 1.4000000 | 2.6000000 |
|---|-----------|-----------|-----------|-----------|

---

Unique Subject Identifier=1291000000-0016

Assay variable : PTINR\_VAL1 PT-INR Value

N Mean Standard Deviation Minimum Maximum

---

|   |          |          |          |          |
|---|----------|----------|----------|----------|
| 3 | 1.833333 | 0.305505 | 1.500000 | 2.100000 |
|---|----------|----------|----------|----------|

---

Laboratory tests at the time of obtaining Table 2-6 consent, according to the presence or absence of proton-pump inhibitors

Unique Subject Identifier=1291000000-0018

MEANS Procedure

Assay variable : PTINR\_VAL1 PT-INR Value

N Mean Standard Deviation Minimum Maximum

---

|   |           |  |           |           |
|---|-----------|--|-----------|-----------|
| 1 | 1.9000000 |  | 1.9000000 | 1.9000000 |
|---|-----------|--|-----------|-----------|

---

Unique Subject Identifier=1291000000-0019

Assay variable : PTINR\_VAL1 PT-INR Value

N Mean Standard Deviation Minimum Maximum

---

|   |           |           |           |           |
|---|-----------|-----------|-----------|-----------|
| 6 | 1.7166667 | 0.2786874 | 1.4000000 | 2.2000000 |
|---|-----------|-----------|-----------|-----------|

---

Unique Subject Identifier=1293000000-0001

Assay variable : PTINR\_VAL1 PT-INR Value

N Mean Standard Deviation Minimum Maximum

---

|   |           |           |           |           |
|---|-----------|-----------|-----------|-----------|
| 6 | 1.3166667 | 0.1169045 | 1.2000000 | 1.5000000 |
|---|-----------|-----------|-----------|-----------|

---

Unique Subject Identifier=1293000000-0003

Assay variable : PTINR\_VAL1 PT-INR Value

N Mean Standard Deviation Minimum Maximum

---

|   |           |           |           |           |
|---|-----------|-----------|-----------|-----------|
| 6 | 1.7833333 | 0.2041241 | 1.6000000 | 2.0000000 |
|---|-----------|-----------|-----------|-----------|

---

Laboratory tests at the time of obtaining Table 2-6 consent, according to the presence or absence of proton-pump inhibitors

Unique Subject Identifier=1293000000-0005

MEANS Procedure

Assay variable : PTINR\_VAL1 PT-INR Value

N Mean Standard Deviation Minimum Maximum

---

|   |           |           |           |           |
|---|-----------|-----------|-----------|-----------|
| 6 | 1.2333333 | 0.1861899 | 1.1000000 | 1.6000000 |
|---|-----------|-----------|-----------|-----------|

---

Unique Subject Identifier=1293000000-0007

Assay variable : PTINR\_VAL1 PT-INR Value

N Mean Standard Deviation Minimum Maximum

---

|   |           |           |           |           |
|---|-----------|-----------|-----------|-----------|
| 6 | 1.6166667 | 0.1329160 | 1.4000000 | 1.8000000 |
|---|-----------|-----------|-----------|-----------|

---

Unique Subject Identifier=1293000000-0008

Assay variable : PTINR\_VAL1 PT-INR Value

N Mean Standard Deviation Minimum Maximum

---

|   |           |           |           |           |
|---|-----------|-----------|-----------|-----------|
| 6 | 1.7333333 | 0.1861899 | 1.5000000 | 2.0000000 |
|---|-----------|-----------|-----------|-----------|

---

Unique Subject Identifier=1293000000-0010



Assay variable : PTINR\_VAL1 PT-INR Value

N Mean Standard Deviation Minimum Maximum

---

|   |          |           |          |          |
|---|----------|-----------|----------|----------|
| 6 | 1.533333 | 0.1632993 | 1.300000 | 1.700000 |
|---|----------|-----------|----------|----------|

---

Laboratory tests at the time of obtaining Table 2-6 consent, according to the presence or absence of proton-pump inhibitors

Unique Subject Identifier=1293000000-0011

MEANS Procedure

Assay variable : PTINR\_VAL1 PT-INR Value

| N | Mean      | Standard Deviation | Minimum   | Maximum   |
|---|-----------|--------------------|-----------|-----------|
| 5 | 1.3600000 | 0.0547723          | 1.3000000 | 1.4000000 |

Unique Subject Identifier=1293000000-0012

Assay variable : PTINR\_VAL1 PT-INR Value

| N | Mean      | Standard Deviation | Minimum   | Maximum   |
|---|-----------|--------------------|-----------|-----------|
| 6 | 1.3666667 | 0.0816497          | 1.3000000 | 1.5000000 |

Unique Subject Identifier=1293000000-0013

Assay variable : PTINR\_VAL1 PT-INR Value

| N | Mean      | Standard Deviation | Minimum   | Maximum   |
|---|-----------|--------------------|-----------|-----------|
| 1 | 1.6000000 |                    | 1.6000000 | 1.6000000 |

Unique Subject Identifier=1293000000-0016

Assay variable : PTINR\_VAL1 PT-INR Value

N Mean Standard Deviation Minimum Maximum

---

|   |           |           |           |           |
|---|-----------|-----------|-----------|-----------|
| 6 | 1.4333333 | 0.1632993 | 1.3000000 | 1.7000000 |
|---|-----------|-----------|-----------|-----------|

---

Laboratory tests at the time of obtaining Table 2-6 consent, according to the presence or absence of proton-pump inhibitors

Unique Subject Identifier=1293000000-0020

MEANS Procedure

Assay variable : PTINR\_VAL1 PT-INR Value

| N | Mean      | Standard Deviation | Minimum   | Maximum   |
|---|-----------|--------------------|-----------|-----------|
| 5 | 1.4800000 | 0.2489980          | 1.3000000 | 1.9000000 |

Unique Subject Identifier=1293000000-0023

Assay variable : PTINR\_VAL1 PT-INR Value

| N | Mean      | Standard Deviation | Minimum   | Maximum   |
|---|-----------|--------------------|-----------|-----------|
| 5 | 2.0200000 | 0.1923538          | 1.7000000 | 2.2000000 |

Unique Subject Identifier=1293000000-0024

Assay variable : PTINR\_VAL1 PT-INR Value

| N | Mean      | Standard Deviation | Minimum   | Maximum   |
|---|-----------|--------------------|-----------|-----------|
| 5 | 1.4200000 | 0.1643168          | 1.3000000 | 1.7000000 |

Unique Subject Identifier=1293000000-0029

Assay variable : PTINR\_VAL1 PT-INR Value

N Mean Standard Deviation Minimum Maximum

---

|   |          |           |          |          |
|---|----------|-----------|----------|----------|
| 5 | 1.500000 | 0.1581139 | 1.300000 | 1.700000 |
|---|----------|-----------|----------|----------|

---

Laboratory tests at the time of obtaining Table 2-6 consent, according to the presence or absence of proton-pump inhibitors

Unique Subject Identifier=1296011000-0006

MEANS Procedure

Assay variable : PTINR\_VAL1 PT-INR Value

N Mean Standard Deviation Minimum Maximum

---

|   |           |           |           |
|---|-----------|-----------|-----------|
| 1 | 2.0300000 | 2.0300000 | 2.0300000 |
|---|-----------|-----------|-----------|

---

Unique Subject Identifier=1296011000-0007

Assay variable : PTINR\_VAL1 PT-INR Value

N Mean Standard Deviation Minimum Maximum

---

|   |           |           |           |
|---|-----------|-----------|-----------|
| 1 | 1.1200000 | 1.1200000 | 1.1200000 |
|---|-----------|-----------|-----------|

---

Unique Subject Identifier=1296011000-0013

Assay variable : PTINR\_VAL1 PT-INR Value

N Mean Standard Deviation Minimum Maximum

---

|   |           |           |           |
|---|-----------|-----------|-----------|
| 1 | 2.2100000 | 2.2100000 | 2.2100000 |
|---|-----------|-----------|-----------|

---

Unique Subject Identifier=1296011000-0015

Assay variable : PTINR\_VAL1 PT-INR Value

N Mean Standard Deviation Minimum Maximum

---

|   |          |           |          |          |
|---|----------|-----------|----------|----------|
| 2 | 2.105000 | 0.6576093 | 1.640000 | 2.570000 |
|---|----------|-----------|----------|----------|

---

Laboratory tests at the time of obtaining Table 2-6 consent, according to the presence or absence of proton-pump inhibitors

Unique Subject Identifier=1296011000-0017

MEANS Procedure

Assay variable : PTINR\_VAL1 PT-INR Value

N Mean Standard Deviation Minimum Maximum

---

|   |           |           |           |           |
|---|-----------|-----------|-----------|-----------|
| 5 | 1.9820000 | 0.5526482 | 1.0800000 | 2.5500000 |
|---|-----------|-----------|-----------|-----------|

---

Unique Subject Identifier=1296011000-0026

Assay variable : PTINR\_VAL1 PT-INR Value

N Mean Standard Deviation Minimum Maximum

---

|   |           |           |           |           |
|---|-----------|-----------|-----------|-----------|
| 4 | 1.1550000 | 0.0793725 | 1.0400000 | 1.2200000 |
|---|-----------|-----------|-----------|-----------|

---

Unique Subject Identifier=1296011000-0028

Assay variable : PTINR\_VAL1 PT-INR Value

N Mean Standard Deviation Minimum Maximum

---

|   |           |  |           |           |
|---|-----------|--|-----------|-----------|
| 1 | 1.5500000 |  | 1.5500000 | 1.5500000 |
|---|-----------|--|-----------|-----------|

---

Unique Subject Identifier=1297011000-0005



Assay variable : PTINR\_VAL1 PT-INR Value

N Mean Standard Deviation Minimum Maximum

---

|   |           |           |           |           |
|---|-----------|-----------|-----------|-----------|
| 6 | 2.1833333 | 1.3166878 | 1.2000000 | 4.2000000 |
|---|-----------|-----------|-----------|-----------|

---

Laboratory tests at the time of obtaining Table 2-6 consent, according to the presence or absence of proton-pump inhibitors

Unique Subject Identifier=1297011000-0008

MEANS Procedure

Assay variable : PTINR\_VAL1 PT-INR Value

N Mean Standard Deviation Minimum Maximum

---

|   |           |           |           |           |
|---|-----------|-----------|-----------|-----------|
| 4 | 1.8500000 | 0.2645751 | 1.6000000 | 2.2000000 |
|---|-----------|-----------|-----------|-----------|

---

Unique Subject Identifier=1297011000-0010

Assay variable : PTINR\_VAL1 PT-INR Value

N Mean Standard Deviation Minimum Maximum

---

|   |           |           |           |           |
|---|-----------|-----------|-----------|-----------|
| 5 | 1.7600000 | 0.2408319 | 1.5000000 | 2.1000000 |
|---|-----------|-----------|-----------|-----------|

---

Unique Subject Identifier=1297011000-0017

Assay variable : PTINR\_VAL1 PT-INR Value

N Mean Standard Deviation Minimum Maximum

---

|   |           |           |           |           |
|---|-----------|-----------|-----------|-----------|
| 6 | 1.8333333 | 0.5125102 | 1.2000000 | 2.6000000 |
|---|-----------|-----------|-----------|-----------|

---

Unique Subject Identifier=1298011000-0002

Assay variable : PTINR\_VAL1 PT-INR Value

N Mean Standard Deviation Minimum Maximum

---

|   |          |           |          |          |
|---|----------|-----------|----------|----------|
| 5 | 2.320000 | 0.7049823 | 1.400000 | 3.300000 |
|---|----------|-----------|----------|----------|

---

Laboratory tests at the time of obtaining Table 2-6 consent, according to the presence or absence of proton-pump inhibitors

Unique Subject Identifier=1298011000-0010

MEANS Procedure

Assay variable : PTINR\_VAL1 PT-INR Value

N Mean Standard Deviation Minimum Maximum

---

|   |           |           |           |           |
|---|-----------|-----------|-----------|-----------|
| 6 | 1.6666667 | 0.1032796 | 1.5000000 | 1.8000000 |
|---|-----------|-----------|-----------|-----------|

---

Unique Subject Identifier=1298011000-0011

Assay variable : PTINR\_VAL1 PT-INR Value

N Mean Standard Deviation Minimum Maximum

---

|   |           |           |           |           |
|---|-----------|-----------|-----------|-----------|
| 6 | 2.1166667 | 0.2483277 | 1.7000000 | 2.4000000 |
|---|-----------|-----------|-----------|-----------|

---

Unique Subject Identifier=1298011000-0014

Assay variable : PTINR\_VAL1 PT-INR Value

N Mean Standard Deviation Minimum Maximum

---

|   |           |           |           |           |
|---|-----------|-----------|-----------|-----------|
| 5 | 1.8000000 | 0.3162278 | 1.5000000 | 2.3000000 |
|---|-----------|-----------|-----------|-----------|

---

Unique Subject Identifier=1298011000-0017

Assay variable : PTINR\_VAL1 PT-INR Value

N Mean Standard Deviation Minimum Maximum

---

|   |          |           |          |          |
|---|----------|-----------|----------|----------|
| 6 | 1.950000 | 0.2073644 | 1.600000 | 2.200000 |
|---|----------|-----------|----------|----------|

---

Laboratory tests at the time of obtaining Table 2-6 consent, according to the presence or absence of proton-pump inhibitors

Unique Subject Identifier=1298011000-0020

MEANS Procedure

Assay variable : PTINR\_VAL1 PT-INR Value

N Mean Standard Deviation Minimum Maximum

---

|   |           |           |           |           |
|---|-----------|-----------|-----------|-----------|
| 6 | 1.7500000 | 0.4636809 | 1.1000000 | 2.5000000 |
|---|-----------|-----------|-----------|-----------|

---

Unique Subject Identifier=1298011000-0021

Assay variable : PTINR\_VAL1 PT-INR Value

N Mean Standard Deviation Minimum Maximum

---

|   |           |           |           |           |
|---|-----------|-----------|-----------|-----------|
| 6 | 2.1000000 | 0.5138093 | 1.6000000 | 3.0000000 |
|---|-----------|-----------|-----------|-----------|

---

Unique Subject Identifier=1298011000-0022

Assay variable : PTINR\_VAL1 PT-INR Value

N Mean Standard Deviation Minimum Maximum

---

|   |           |           |           |           |
|---|-----------|-----------|-----------|-----------|
| 6 | 1.9833333 | 0.2316607 | 1.6000000 | 2.2000000 |
|---|-----------|-----------|-----------|-----------|

---

Unique Subject Identifier=1299010000-0006

Assay variable : PTINR\_VAL1 PT-INR Value

N Mean Standard Deviation Minimum Maximum

---

|   |           |           |           |           |
|---|-----------|-----------|-----------|-----------|
| 6 | 1.2783333 | 0.1197358 | 1.1800000 | 1.5000000 |
|---|-----------|-----------|-----------|-----------|

---

Laboratory tests at the time of obtaining Table 2-6 consent, according to the presence or absence of proton-pump inhibitors

Unique Subject Identifier=1299010000-0009

MEANS Procedure

Assay variable : PTINR\_VAL1 PT-INR Value

N Mean Standard Deviation Minimum Maximum

---

|   |           |  |           |           |
|---|-----------|--|-----------|-----------|
| 1 | 1.9000000 |  | 1.9000000 | 1.9000000 |
|---|-----------|--|-----------|-----------|

---

Unique Subject Identifier=1299010000-0012

Assay variable : PTINR\_VAL1 PT-INR Value

N Mean Standard Deviation Minimum Maximum

---

|   |           |           |           |           |
|---|-----------|-----------|-----------|-----------|
| 6 | 2.7700000 | 0.5978294 | 1.9000000 | 3.4000000 |
|---|-----------|-----------|-----------|-----------|

---

Unique Subject Identifier=1299010000-0013

Assay variable : PTINR\_VAL1 PT-INR Value

N Mean Standard Deviation Minimum Maximum

---

|   |           |           |           |           |
|---|-----------|-----------|-----------|-----------|
| 6 | 1.5600000 | 0.1979899 | 1.2600000 | 1.8000000 |
|---|-----------|-----------|-----------|-----------|

---

Unique Subject Identifier=1299010000-0016



Assay variable : PTINR\_VAL1 PT-INR Value

N Mean Standard Deviation Minimum Maximum

---

|   |           |           |           |           |
|---|-----------|-----------|-----------|-----------|
| 6 | 2.2666667 | 0.1211060 | 2.1000000 | 2.4000000 |
|---|-----------|-----------|-----------|-----------|

---

Laboratory tests at the time of obtaining Table 2-6 consent, according to the presence or absence of proton-pump inhibitors

Unique Subject Identifier=1299010000-0018

MEANS Procedure

Assay variable : PTINR\_VAL1 PT-INR Value

N Mean Standard Deviation Minimum Maximum

---

|   |           |           |           |           |
|---|-----------|-----------|-----------|-----------|
| 6 | 1.9700000 | 0.3685105 | 1.6200000 | 2.6000000 |
|---|-----------|-----------|-----------|-----------|

---

Unique Subject Identifier=1299010000-0020

Assay variable : PTINR\_VAL1 PT-INR Value

N Mean Standard Deviation Minimum Maximum

---

|   |           |           |           |           |
|---|-----------|-----------|-----------|-----------|
| 5 | 2.0580000 | 0.7316557 | 1.5000000 | 3.3000000 |
|---|-----------|-----------|-----------|-----------|

---

Unique Subject Identifier=1301000000-0001

Assay variable : PTINR\_VAL1 PT-INR Value

N Mean Standard Deviation Minimum Maximum

---

|   |           |           |           |           |
|---|-----------|-----------|-----------|-----------|
| 6 | 2.2200000 | 0.5196152 | 1.7300000 | 3.0600000 |
|---|-----------|-----------|-----------|-----------|

---

Unique Subject Identifier=1301000000-0005

Assay variable : PTINR\_VAL1 PT-INR Value

N Mean Standard Deviation Minimum Maximum

---

|   |           |           |           |           |
|---|-----------|-----------|-----------|-----------|
| 6 | 1.2366667 | 0.1616993 | 1.0700000 | 1.5100000 |
|---|-----------|-----------|-----------|-----------|

---

Laboratory tests at the time of obtaining Table 2-6 consent, according to the presence or absence of proton-pump inhibitors

Unique Subject Identifier=1301000000-0006

MEANS Procedure

Assay variable : PTINR\_VAL1 PT-INR Value

N Mean Standard Deviation Minimum Maximum

---

|   |          |           |          |          |
|---|----------|-----------|----------|----------|
| 4 | 1.340000 | 0.1089342 | 1.250000 | 1.470000 |
|---|----------|-----------|----------|----------|

---

Unique Subject Identifier=1303000000-0002

Assay variable : PTINR\_VAL1 PT-INR Value

N Mean Standard Deviation Minimum Maximum

---

|   |          |           |          |          |
|---|----------|-----------|----------|----------|
| 5 | 1.780000 | 0.3271085 | 1.500000 | 2.300000 |
|---|----------|-----------|----------|----------|

---

Unique Subject Identifier=1303000000-0003

Assay variable : PTINR\_VAL1 PT-INR Value

N Mean Standard Deviation Minimum Maximum

---

|   |          |           |          |          |
|---|----------|-----------|----------|----------|
| 3 | 2.533333 | 0.3511885 | 2.200000 | 2.900000 |
|---|----------|-----------|----------|----------|

---

Unique Subject Identifier=1303000000-0006

Assay variable : PTINR\_VAL1 PT-INR Value

N Mean Standard Deviation Minimum Maximum

---

|   |          |           |          |          |
|---|----------|-----------|----------|----------|
| 6 | 2.000000 | 0.1264911 | 1.800000 | 2.100000 |
|---|----------|-----------|----------|----------|

---

Laboratory tests at the time of obtaining Table 2-6 consent, according to the presence or absence of proton-pump inhibitors

Unique Subject Identifier=1303000000-0008

MEANS Procedure

Assay variable : PTINR\_VAL1 PT-INR Value

N Mean Standard Deviation Minimum Maximum

---

|   |           |           |           |           |
|---|-----------|-----------|-----------|-----------|
| 4 | 2.0000000 | 0.3559026 | 1.7000000 | 2.5000000 |
|---|-----------|-----------|-----------|-----------|

---

Unique Subject Identifier=1303000000-0009

Assay variable : PTINR\_VAL1 PT-INR Value

N Mean Standard Deviation Minimum Maximum

---

|   |           |           |           |           |
|---|-----------|-----------|-----------|-----------|
| 5 | 1.6800000 | 0.1095445 | 1.6000000 | 1.8000000 |
|---|-----------|-----------|-----------|-----------|

---

Unique Subject Identifier=1303000000-0015

Assay variable : PTINR\_VAL1 PT-INR Value

N Mean Standard Deviation Minimum Maximum

---

|   |           |           |           |           |
|---|-----------|-----------|-----------|-----------|
| 6 | 1.7166667 | 0.1169045 | 1.6000000 | 1.9000000 |
|---|-----------|-----------|-----------|-----------|

---

Unique Subject Identifier=1303000000-0016

Assay variable : PTINR\_VAL1 PT-INR Value

N Mean Standard Deviation Minimum Maximum

---

|   |          |           |          |          |
|---|----------|-----------|----------|----------|
| 6 | 1.750000 | 0.1048809 | 1.600000 | 1.900000 |
|---|----------|-----------|----------|----------|

---

Laboratory tests at the time of obtaining Table 2-6 consent, according to the presence or absence of proton-pump inhibitors

Unique Subject Identifier=1303000000-0025

MEANS Procedure

Assay variable : PTINR\_VAL1 PT-INR Value

N Mean Standard Deviation Minimum Maximum

---

|   |           |           |           |           |
|---|-----------|-----------|-----------|-----------|
| 6 | 2.0166667 | 0.4875107 | 1.3000000 | 2.7000000 |
|---|-----------|-----------|-----------|-----------|

---

Unique Subject Identifier=1303000000-0029

Assay variable : PTINR\_VAL1 PT-INR Value

N Mean Standard Deviation Minimum Maximum

---

|   |           |           |           |           |
|---|-----------|-----------|-----------|-----------|
| 4 | 1.6000000 | 0.2449490 | 1.3000000 | 1.8000000 |
|---|-----------|-----------|-----------|-----------|

---

Unique Subject Identifier=1306000000-0007

Assay variable : PTINR\_VAL1 PT-INR Value

N Mean Standard Deviation Minimum Maximum

---

|   |           |  |           |           |
|---|-----------|--|-----------|-----------|
| 1 | 1.5900000 |  | 1.5900000 | 1.5900000 |
|---|-----------|--|-----------|-----------|

---

Unique Subject Identifier=1308000000-0001



Assay variable : PTINR\_VAL1 PT-INR Value

N Mean Standard Deviation Minimum Maximum

---

|   |           |           |           |           |
|---|-----------|-----------|-----------|-----------|
| 5 | 1.7320000 | 0.2258761 | 1.5100000 | 2.0600000 |
|---|-----------|-----------|-----------|-----------|

---

Laboratory tests at the time of obtaining Table 2-6 consent, according to the presence or absence of proton-pump inhibitors

Unique Subject Identifier=1308000000-0004

MEANS Procedure

Assay variable : PTINR\_VAL1 PT-INR Value

N Mean Standard Deviation Minimum Maximum

---

|   |           |   |           |           |
|---|-----------|---|-----------|-----------|
| 2 | 1.1000000 | 0 | 1.1000000 | 1.1000000 |
|---|-----------|---|-----------|-----------|

---

Unique Subject Identifier=1312000000-0005

Assay variable : PTINR\_VAL1 PT-INR Value

N Mean Standard Deviation Minimum Maximum

---

|   |           |           |           |           |
|---|-----------|-----------|-----------|-----------|
| 6 | 2.0433333 | 0.3311596 | 1.7000000 | 2.4000000 |
|---|-----------|-----------|-----------|-----------|

---

Unique Subject Identifier=1312000000-0014

Assay variable : PTINR\_VAL1 PT-INR Value

N Mean Standard Deviation Minimum Maximum

---

|   |           |           |           |           |
|---|-----------|-----------|-----------|-----------|
| 6 | 2.3550000 | 0.3434967 | 1.7900000 | 2.6600000 |
|---|-----------|-----------|-----------|-----------|

---

Unique Subject Identifier=1313000000-0013

Assay variable : PTINR\_VAL1 PT-INR Value

N Mean Standard Deviation Minimum Maximum

---

|   |           |  |           |           |
|---|-----------|--|-----------|-----------|
| 1 | 1.4200000 |  | 1.4200000 | 1.4200000 |
|---|-----------|--|-----------|-----------|

---

Laboratory tests at the time of obtaining Table 2-6 consent, according to the presence or absence of proton-pump inhibitors

Unique Subject Identifier=1313000000-0018

MEANS Procedure

Assay variable : PTINR\_VAL1 PT-INR Value

N Mean Standard Deviation Minimum Maximum

---

|   |           |  |           |           |
|---|-----------|--|-----------|-----------|
| 1 | 1.3100000 |  | 1.3100000 | 1.3100000 |
|---|-----------|--|-----------|-----------|

---

Unique Subject Identifier=1319000000-0001

Assay variable : PTINR\_VAL1 PT-INR Value

N Mean Standard Deviation Minimum Maximum

---

|   |           |  |           |           |
|---|-----------|--|-----------|-----------|
| 1 | 3.0000000 |  | 3.0000000 | 3.0000000 |
|---|-----------|--|-----------|-----------|

---

Unique Subject Identifier=1319000000-0005

Assay variable : PTINR\_VAL1 PT-INR Value

N Mean Standard Deviation Minimum Maximum

---

|   |           |           |           |           |
|---|-----------|-----------|-----------|-----------|
| 6 | 1.9500000 | 0.2880972 | 1.6000000 | 2.3000000 |
|---|-----------|-----------|-----------|-----------|

---

Unique Subject Identifier=1319000000-0011

Assay variable : PTINR\_VAL1 PT-INR Value

N Mean Standard Deviation Minimum Maximum

---

|   |           |           |           |           |
|---|-----------|-----------|-----------|-----------|
| 3 | 1.5366667 | 0.1096966 | 1.4100000 | 1.6000000 |
|---|-----------|-----------|-----------|-----------|

---

Laboratory tests at the time of obtaining Table 2-6 consent, according to the presence or absence of proton-pump inhibitors

Unique Subject Identifier=1319000000-0018

MEANS Procedure

Assay variable : PTINR\_VAL1 PT-INR Value

N Mean Standard Deviation Minimum Maximum

---

|   |           |           |           |           |
|---|-----------|-----------|-----------|-----------|
| 6 | 2.4833333 | 0.4020779 | 1.8000000 | 3.0000000 |
|---|-----------|-----------|-----------|-----------|

---

Unique Subject Identifier=1319000000-0020

Assay variable : PTINR\_VAL1 PT-INR Value

N Mean Standard Deviation Minimum Maximum

---

|   |           |           |           |           |
|---|-----------|-----------|-----------|-----------|
| 6 | 1.8500000 | 0.2073644 | 1.6000000 | 2.1000000 |
|---|-----------|-----------|-----------|-----------|

---

Unique Subject Identifier=1320000000-0002

Assay variable : PTINR\_VAL1 PT-INR Value

N Mean Standard Deviation Minimum Maximum

---

|   |           |           |           |           |
|---|-----------|-----------|-----------|-----------|
| 6 | 2.0566667 | 0.2809033 | 1.7600000 | 2.4700000 |
|---|-----------|-----------|-----------|-----------|

---

Unique Subject Identifier=1320000000-0003

Assay variable : PTINR\_VAL1 PT-INR Value

N Mean Standard Deviation Minimum Maximum

---

|   |           |           |           |           |
|---|-----------|-----------|-----------|-----------|
| 4 | 1.8650000 | 0.3162805 | 1.5900000 | 2.3200000 |
|---|-----------|-----------|-----------|-----------|

---

Laboratory tests at the time of obtaining Table 2-6 consent, according to the presence or absence of proton-pump inhibitors

Unique Subject Identifier=1320000000-0004

MEANS Procedure

Assay variable : PTINR\_VAL1 PT-INR Value

N Mean Standard Deviation Minimum Maximum

---

|   |           |           |           |           |
|---|-----------|-----------|-----------|-----------|
| 6 | 2.3700000 | 0.3960303 | 1.9500000 | 3.0900000 |
|---|-----------|-----------|-----------|-----------|

---

Unique Subject Identifier=1320000000-0005

Assay variable : PTINR\_VAL1 PT-INR Value

N Mean Standard Deviation Minimum Maximum

---

|   |           |           |           |           |
|---|-----------|-----------|-----------|-----------|
| 6 | 2.1666667 | 0.3539868 | 1.7100000 | 2.5700000 |
|---|-----------|-----------|-----------|-----------|

---

Unique Subject Identifier=1320000000-0007

Assay variable : PTINR\_VAL1 PT-INR Value

N Mean Standard Deviation Minimum Maximum

---

|   |           |           |           |           |
|---|-----------|-----------|-----------|-----------|
| 4 | 1.8850000 | 0.5557877 | 1.3000000 | 2.6400000 |
|---|-----------|-----------|-----------|-----------|

---

Unique Subject Identifier=1320000000-0009



Assay variable : PTINR\_VAL1 PT-INR Value

N Mean Standard Deviation Minimum Maximum

---

|   |           |           |           |           |
|---|-----------|-----------|-----------|-----------|
| 5 | 1.9780000 | 0.5148495 | 1.3300000 | 2.4600000 |
|---|-----------|-----------|-----------|-----------|

---

Laboratory tests at the time of obtaining Table 2-6 consent, according to the presence or absence of proton-pump inhibitors

Unique Subject Identifier=1320000000-0011

MEANS Procedure

Assay variable : PTINR\_VAL1 PT-INR Value

N Mean Standard Deviation Minimum Maximum

---

|   |           |           |           |           |
|---|-----------|-----------|-----------|-----------|
| 5 | 1.7040000 | 0.2951779 | 1.3000000 | 2.0000000 |
|---|-----------|-----------|-----------|-----------|

---

Unique Subject Identifier=1320000000-0013

Assay variable : PTINR\_VAL1 PT-INR Value

N Mean Standard Deviation Minimum Maximum

---

|   |           |           |           |           |
|---|-----------|-----------|-----------|-----------|
| 6 | 1.7350000 | 0.1534601 | 1.5200000 | 1.9100000 |
|---|-----------|-----------|-----------|-----------|

---

Unique Subject Identifier=1320000000-0014

Assay variable : PTINR\_VAL1 PT-INR Value

N Mean Standard Deviation Minimum Maximum

---

|   |           |           |           |           |
|---|-----------|-----------|-----------|-----------|
| 5 | 1.7560000 | 0.3250846 | 1.4800000 | 2.2000000 |
|---|-----------|-----------|-----------|-----------|

---

Unique Subject Identifier=1320000000-0017

Assay variable : PTINR\_VAL1 PT-INR Value

N Mean Standard Deviation Minimum Maximum

---

|   |           |           |           |           |
|---|-----------|-----------|-----------|-----------|
| 6 | 2.2066667 | 0.3567445 | 1.9000000 | 2.7000000 |
|---|-----------|-----------|-----------|-----------|

---

Laboratory tests at the time of obtaining Table 2-6 consent, according to the presence or absence of proton-pump inhibitors

Unique Subject Identifier=1320000000-0020

MEANS Procedure

Assay variable : PTINR\_VAL1 PT-INR Value

N Mean Standard Deviation Minimum Maximum

---

|   |           |           |           |           |
|---|-----------|-----------|-----------|-----------|
| 6 | 2.1700000 | 0.6441739 | 1.4700000 | 3.1500000 |
|---|-----------|-----------|-----------|-----------|

---

Unique Subject Identifier=1320000000-0021

Assay variable : PTINR\_VAL1 PT-INR Value

N Mean Standard Deviation Minimum Maximum

---

|   |           |           |           |           |
|---|-----------|-----------|-----------|-----------|
| 6 | 1.8733333 | 0.5328289 | 1.1700000 | 2.5000000 |
|---|-----------|-----------|-----------|-----------|

---

Unique Subject Identifier=1320000000-0022

Assay variable : PTINR\_VAL1 PT-INR Value

N Mean Standard Deviation Minimum Maximum

---

|   |           |           |           |           |
|---|-----------|-----------|-----------|-----------|
| 5 | 2.2040000 | 0.2899655 | 1.8000000 | 2.6000000 |
|---|-----------|-----------|-----------|-----------|

---

Unique Subject Identifier=1320000000-0024

Assay variable : PTINR\_VAL1 PT-INR Value

N Mean Standard Deviation Minimum Maximum

---

|   |           |           |           |           |
|---|-----------|-----------|-----------|-----------|
| 6 | 1.9266667 | 0.3090415 | 1.5900000 | 2.4600000 |
|---|-----------|-----------|-----------|-----------|

---

Laboratory tests at the time of obtaining Table 2-6 consent, according to the presence or absence of proton-pump inhibitors

Unique Subject Identifier=1320000000-0025

MEANS Procedure

Assay variable : PTINR\_VAL1 PT-INR Value

N Mean Standard Deviation Minimum Maximum

---

|   |           |           |           |           |
|---|-----------|-----------|-----------|-----------|
| 6 | 2.2083333 | 0.7145185 | 1.5000000 | 3.5100000 |
|---|-----------|-----------|-----------|-----------|

---

Unique Subject Identifier=1320000000-0026

Assay variable : PTINR\_VAL1 PT-INR Value

N Mean Standard Deviation Minimum Maximum

---

|   |           |           |           |           |
|---|-----------|-----------|-----------|-----------|
| 5 | 2.5820000 | 1.0081766 | 1.2000000 | 4.0000000 |
|---|-----------|-----------|-----------|-----------|

---

Unique Subject Identifier=1320000000-0029

Assay variable : PTINR\_VAL1 PT-INR Value

N Mean Standard Deviation Minimum Maximum

---

|   |           |           |           |           |
|---|-----------|-----------|-----------|-----------|
| 6 | 1.7050000 | 0.4458139 | 1.0000000 | 2.1700000 |
|---|-----------|-----------|-----------|-----------|

---

Unique Subject Identifier=1321011110-0004

Assay variable : PTINR\_VAL1 PT-INR Value

N Mean Standard Deviation Minimum Maximum

---

|   |          |  |          |          |
|---|----------|--|----------|----------|
| 1 | 3.160000 |  | 3.160000 | 3.160000 |
|---|----------|--|----------|----------|

---

Laboratory tests at the time of obtaining Table 2-6 consent, according to the presence or absence of proton-pump inhibitors

Unique Subject Identifier=1321011110-0016

MEANS Procedure

Assay variable : PTINR\_VAL1 PT-INR Value

N Mean Standard Deviation Minimum Maximum

---

|   |           |  |           |           |
|---|-----------|--|-----------|-----------|
| 1 | 2.2900000 |  | 2.2900000 | 2.2900000 |
|---|-----------|--|-----------|-----------|

---

Unique Subject Identifier=1321011110-0023

Assay variable : PTINR\_VAL1 PT-INR Value

N Mean Standard Deviation Minimum Maximum

---

|   |           |           |           |           |
|---|-----------|-----------|-----------|-----------|
| 4 | 1.5975000 | 0.0660177 | 1.5100000 | 1.6700000 |
|---|-----------|-----------|-----------|-----------|

---

Unique Subject Identifier=1322000000-0001

Assay variable : PTINR\_VAL1 PT-INR Value

N Mean Standard Deviation Minimum Maximum

---

|   |           |           |           |           |
|---|-----------|-----------|-----------|-----------|
| 3 | 1.6600000 | 0.4613025 | 1.1800000 | 2.1000000 |
|---|-----------|-----------|-----------|-----------|

---

Unique Subject Identifier=1322000000-0002



Assay variable : PTINR\_VAL1 PT-INR Value

N Mean Standard Deviation Minimum Maximum

---

|   |          |  |          |          |
|---|----------|--|----------|----------|
| 1 | 0.980000 |  | 0.980000 | 0.980000 |
|---|----------|--|----------|----------|

---

Laboratory tests at the time of obtaining Table 2-6 consent, according to the presence or absence of proton-pump inhibitors

Unique Subject Identifier=1322000000-0009

MEANS Procedure

Assay variable : PTINR\_VAL1 PT-INR Value

N Mean Standard Deviation Minimum Maximum

---

|   |           |           |           |           |
|---|-----------|-----------|-----------|-----------|
| 2 | 1.1550000 | 0.0353553 | 1.1300000 | 1.1800000 |
|---|-----------|-----------|-----------|-----------|

---

Unique Subject Identifier=1324111000-0003

Assay variable : PTINR\_VAL1 PT-INR Value

N Mean Standard Deviation Minimum Maximum

---

|   |           |           |           |           |
|---|-----------|-----------|-----------|-----------|
| 6 | 2.1666667 | 0.4179314 | 1.7000000 | 2.8000000 |
|---|-----------|-----------|-----------|-----------|

---

Unique Subject Identifier=1324111000-0009

Assay variable : PTINR\_VAL1 PT-INR Value

N Mean Standard Deviation Minimum Maximum

---

|   |           |           |           |           |
|---|-----------|-----------|-----------|-----------|
| 6 | 2.5166667 | 0.3544949 | 2.0000000 | 3.1000000 |
|---|-----------|-----------|-----------|-----------|

---

Unique Subject Identifier=1324111000-0014

Assay variable : PTINR\_VAL1 PT-INR Value

N Mean Standard Deviation Minimum Maximum

---

|   |           |           |           |           |
|---|-----------|-----------|-----------|-----------|
| 6 | 1.7166667 | 0.3060501 | 1.4000000 | 2.2000000 |
|---|-----------|-----------|-----------|-----------|

---

Laboratory tests at the time of obtaining Table 2-6 consent, according to the presence or absence of proton-pump inhibitors

Unique Subject Identifier=1326000000-0001

MEANS Procedure

Assay variable : PTINR\_VAL1 PT-INR Value

| N | Mean      | Standard Deviation | Minimum   | Maximum   |
|---|-----------|--------------------|-----------|-----------|
| 5 | 1.5000000 | 0.1581139          | 1.3000000 | 1.7000000 |

Unique Subject Identifier=1328011111-0003

Assay variable : PTINR\_VAL1 PT-INR Value

| N | Mean      | Standard Deviation | Minimum   | Maximum   |
|---|-----------|--------------------|-----------|-----------|
| 6 | 2.3183333 | 0.4281783          | 1.7900000 | 3.0400000 |

Unique Subject Identifier=1328011111-0005

Assay variable : PTINR\_VAL1 PT-INR Value

| N | Mean      | Standard Deviation | Minimum   | Maximum   |
|---|-----------|--------------------|-----------|-----------|
| 6 | 2.4183333 | 0.3291454          | 1.8300000 | 2.7900000 |

Unique Subject Identifier=1328011111-0009

Assay variable : PTINR\_VAL1 PT-INR Value

N Mean Standard Deviation Minimum Maximum

---

|   |          |           |          |          |
|---|----------|-----------|----------|----------|
| 4 | 1.590000 | 0.2597435 | 1.390000 | 1.950000 |
|---|----------|-----------|----------|----------|

---

Laboratory tests at the time of obtaining Table 2-6 consent, according to the presence or absence of proton-pump inhibitors

Unique Subject Identifier=1328011111-0033

MEANS Procedure

Assay variable : PTINR\_VAL1 PT-INR Value

N Mean Standard Deviation Minimum Maximum

---

|   |           |           |           |           |
|---|-----------|-----------|-----------|-----------|
| 2 | 1.2250000 | 0.1202082 | 1.1400000 | 1.3100000 |
|---|-----------|-----------|-----------|-----------|

---

Unique Subject Identifier=1328011111-0036

Assay variable : PTINR\_VAL1 PT-INR Value

N Mean Standard Deviation Minimum Maximum

---

|   |           |           |           |           |
|---|-----------|-----------|-----------|-----------|
| 6 | 1.9633333 | 0.3518333 | 1.6200000 | 2.5600000 |
|---|-----------|-----------|-----------|-----------|

---

Unique Subject Identifier=1328011111-0044

Assay variable : PTINR\_VAL1 PT-INR Value

N Mean Standard Deviation Minimum Maximum

---

|   |           |           |           |           |
|---|-----------|-----------|-----------|-----------|
| 2 | 1.7600000 | 0.0424264 | 1.7300000 | 1.7900000 |
|---|-----------|-----------|-----------|-----------|

---

Unique Subject Identifier=1328011111-0045

Assay variable : PTINR\_VAL1 PT-INR Value

N Mean Standard Deviation Minimum Maximum

---

|   |           |           |           |           |
|---|-----------|-----------|-----------|-----------|
| 2 | 1.2450000 | 0.1767767 | 1.1200000 | 1.3700000 |
|---|-----------|-----------|-----------|-----------|

---

Laboratory tests at the time of obtaining Table 2-6 consent, according to the presence or absence of proton-pump inhibitors

Unique Subject Identifier=1328011111-0072

MEANS Procedure

Assay variable : PTINR\_VAL1 PT-INR Value

N Mean Standard Deviation Minimum Maximum

---

|   |           |           |           |           |
|---|-----------|-----------|-----------|-----------|
| 5 | 2.2160000 | 0.2659511 | 1.8800000 | 2.5800000 |
|---|-----------|-----------|-----------|-----------|

---

Unique Subject Identifier=1328011111-0074

Assay variable : PTINR\_VAL1 PT-INR Value

N Mean Standard Deviation Minimum Maximum

---

|   |           |  |           |           |
|---|-----------|--|-----------|-----------|
| 1 | 1.9900000 |  | 1.9900000 | 1.9900000 |
|---|-----------|--|-----------|-----------|

---

Unique Subject Identifier=1328011111-0079

Assay variable : PTINR\_VAL1 PT-INR Value

N Mean Standard Deviation Minimum Maximum

---

|   |           |           |           |           |
|---|-----------|-----------|-----------|-----------|
| 4 | 2.3575000 | 0.1252664 | 2.1700000 | 2.4300000 |
|---|-----------|-----------|-----------|-----------|

---

Unique Subject Identifier=1328011111-0090



Assay variable : PTINR\_VAL1 PT-INR Value

N Mean Standard Deviation Minimum Maximum

---

|   |           |           |           |           |
|---|-----------|-----------|-----------|-----------|
| 5 | 1.6440000 | 0.1130487 | 1.5100000 | 1.7700000 |
|---|-----------|-----------|-----------|-----------|

---

Laboratory tests at the time of obtaining Table 2-6 consent, according to the presence or absence of proton-pump inhibitors

Unique Subject Identifier=1336011110-0001

MEANS Procedure

Assay variable : PTINR\_VAL1 PT-INR Value

N Mean Standard Deviation Minimum Maximum

---

|   |           |           |           |           |
|---|-----------|-----------|-----------|-----------|
| 4 | 1.4250000 | 0.2629956 | 1.2000000 | 1.8000000 |
|---|-----------|-----------|-----------|-----------|

---

Unique Subject Identifier=1341011111-0011

Assay variable : PTINR\_VAL1 PT-INR Value

N Mean Standard Deviation Minimum Maximum

---

|   |           |           |           |           |
|---|-----------|-----------|-----------|-----------|
| 5 | 2.3500000 | 0.3421257 | 1.9100000 | 2.8700000 |
|---|-----------|-----------|-----------|-----------|

---

Unique Subject Identifier=1341011111-0014

Assay variable : PTINR\_VAL1 PT-INR Value

N Mean Standard Deviation Minimum Maximum

---

|   |           |  |           |           |
|---|-----------|--|-----------|-----------|
| 1 | 2.4300000 |  | 2.4300000 | 2.4300000 |
|---|-----------|--|-----------|-----------|

---

Unique Subject Identifier=1341011111-0015

Assay variable : PTINR\_VAL1 PT-INR Value

N Mean Standard Deviation Minimum Maximum

---

|   |          |           |          |          |
|---|----------|-----------|----------|----------|
| 3 | 2.510000 | 0.3950949 | 2.110000 | 2.900000 |
|---|----------|-----------|----------|----------|

---

Laboratory tests at the time of obtaining Table 2-6 consent, according to the presence or absence of proton-pump inhibitors

Unique Subject Identifier=1342000000-0006

MEANS Procedure

Assay variable : PTINR\_VAL1 PT-INR Value

N Mean Standard Deviation Minimum Maximum

---

|   |           |           |           |           |
|---|-----------|-----------|-----------|-----------|
| 6 | 2.3200000 | 0.3955250 | 1.7200000 | 2.8100000 |
|---|-----------|-----------|-----------|-----------|

---

Unique Subject Identifier=1351010111-0002

Assay variable : PTINR\_VAL1 PT-INR Value

N Mean Standard Deviation Minimum Maximum

---

|   |           |           |           |           |
|---|-----------|-----------|-----------|-----------|
| 6 | 1.8166667 | 0.2714160 | 1.3000000 | 2.1000000 |
|---|-----------|-----------|-----------|-----------|

---

Unique Subject Identifier=1351010111-0009

Assay variable : PTINR\_VAL1 PT-INR Value

N Mean Standard Deviation Minimum Maximum

---

|   |           |           |           |           |
|---|-----------|-----------|-----------|-----------|
| 6 | 1.8833333 | 0.3430258 | 1.4000000 | 2.3000000 |
|---|-----------|-----------|-----------|-----------|

---

Unique Subject Identifier=1351010111-0012

Assay variable : PTINR\_VAL1 PT-INR Value

N Mean Standard Deviation Minimum Maximum

---

|   |           |           |           |           |
|---|-----------|-----------|-----------|-----------|
| 6 | 1.5666667 | 0.2581989 | 1.2000000 | 1.9000000 |
|---|-----------|-----------|-----------|-----------|

---

Laboratory tests at the time of obtaining Table 2-6 consent, according to the presence or absence of proton-pump inhibitors

Unique Subject Identifier=1351010111-0013

MEANS Procedure

Assay variable : PTINR\_VAL1 PT-INR Value

N Mean Standard Deviation Minimum Maximum

---

|   |           |           |           |           |
|---|-----------|-----------|-----------|-----------|
| 6 | 1.7000000 | 0.2529822 | 1.5000000 | 2.2000000 |
|---|-----------|-----------|-----------|-----------|

---

Unique Subject Identifier=1351010111-0015

Assay variable : PTINR\_VAL1 PT-INR Value

N Mean Standard Deviation Minimum Maximum

---

|   |           |           |           |           |
|---|-----------|-----------|-----------|-----------|
| 6 | 2.1500000 | 0.3146427 | 1.7000000 | 2.6000000 |
|---|-----------|-----------|-----------|-----------|

---

Unique Subject Identifier=1351010111-0022

Assay variable : PTINR\_VAL1 PT-INR Value

N Mean Standard Deviation Minimum Maximum

---

|   |           |           |           |           |
|---|-----------|-----------|-----------|-----------|
| 6 | 1.9333333 | 0.7089899 | 1.0000000 | 3.1000000 |
|---|-----------|-----------|-----------|-----------|

---

Unique Subject Identifier=1352011010-0003

Assay variable : PTINR\_VAL1 PT-INR Value

N Mean Standard Deviation Minimum Maximum

---

|   |           |           |           |           |
|---|-----------|-----------|-----------|-----------|
| 6 | 2.2833333 | 0.6493587 | 1.3000000 | 3.0000000 |
|---|-----------|-----------|-----------|-----------|

---

Laboratory tests at the time of obtaining Table 2-6 consent, according to the presence or absence of proton-pump inhibitors

Unique Subject Identifier=1352011010-0011

MEANS Procedure

Assay variable : PTINR\_VAL1 PT-INR Value

N Mean Standard Deviation Minimum Maximum

---

|   |           |           |           |           |
|---|-----------|-----------|-----------|-----------|
| 6 | 2.0666667 | 0.3559026 | 1.6000000 | 2.7000000 |
|---|-----------|-----------|-----------|-----------|

---

Unique Subject Identifier=1352011010-0012

Assay variable : PTINR\_VAL1 PT-INR Value

N Mean Standard Deviation Minimum Maximum

---

|   |           |           |           |           |
|---|-----------|-----------|-----------|-----------|
| 6 | 1.6333333 | 0.4760952 | 1.2000000 | 2.5000000 |
|---|-----------|-----------|-----------|-----------|

---

Unique Subject Identifier=1353000000-0001

Assay variable : PTINR\_VAL1 PT-INR Value

N Mean Standard Deviation Minimum Maximum

---

|   |           |           |           |           |
|---|-----------|-----------|-----------|-----------|
| 2 | 1.8500000 | 0.0707107 | 1.8000000 | 1.9000000 |
|---|-----------|-----------|-----------|-----------|

---

Unique Subject Identifier=1353000000-0003



Assay variable : PTINR\_VAL1 PT-INR Value

N Mean Standard Deviation Minimum Maximum

---

|   |           |           |           |           |
|---|-----------|-----------|-----------|-----------|
| 2 | 1.9000000 | 0.1414214 | 1.8000000 | 2.0000000 |
|---|-----------|-----------|-----------|-----------|

---

Laboratory tests at the time of obtaining Table 2-6 consent, according to the presence or absence of proton-pump inhibitors

Unique Subject Identifier=1353000000-0005

MEANS Procedure

Assay variable : PTINR\_VAL1 PT-INR Value

N Mean Standard Deviation Minimum Maximum

---

|   |           |  |           |           |
|---|-----------|--|-----------|-----------|
| 1 | 2.2000000 |  | 2.2000000 | 2.2000000 |
|---|-----------|--|-----------|-----------|

---

Unique Subject Identifier=1353000000-0015

Assay variable : PTINR\_VAL1 PT-INR Value

N Mean Standard Deviation Minimum Maximum

---

|   |           |  |           |           |
|---|-----------|--|-----------|-----------|
| 1 | 2.4000000 |  | 2.4000000 | 2.4000000 |
|---|-----------|--|-----------|-----------|

---

Unique Subject Identifier=1353000000-0017

Assay variable : PTINR\_VAL1 PT-INR Value

N Mean Standard Deviation Minimum Maximum

---

|   |           |  |           |           |
|---|-----------|--|-----------|-----------|
| 1 | 1.9000000 |  | 1.9000000 | 1.9000000 |
|---|-----------|--|-----------|-----------|

---

Unique Subject Identifier=1353000000-0024

Assay variable : PTINR\_VAL1 PT-INR Value

N Mean Standard Deviation Minimum Maximum

---

|   |          |          |          |          |
|---|----------|----------|----------|----------|
| 2 | 2.150000 | 0.212132 | 2.000000 | 2.300000 |
|---|----------|----------|----------|----------|

---

Laboratory tests at the time of obtaining Table 2-6 consent, according to the presence or absence of proton-pump inhibitors

Unique Subject Identifier=1353000000-0028

MEANS Procedure

Assay variable : PTINR\_VAL1 PT-INR Value

N Mean Standard Deviation Minimum Maximum

---

|   |           |           |           |           |
|---|-----------|-----------|-----------|-----------|
| 2 | 1.8500000 | 0.2121320 | 1.7000000 | 2.0000000 |
|---|-----------|-----------|-----------|-----------|

---

Unique Subject Identifier=1353000000-0034

Assay variable : PTINR\_VAL1 PT-INR Value

N Mean Standard Deviation Minimum Maximum

---

|   |           |           |           |           |
|---|-----------|-----------|-----------|-----------|
| 2 | 1.5500000 | 0.0707107 | 1.5000000 | 1.6000000 |
|---|-----------|-----------|-----------|-----------|

---

Unique Subject Identifier=1353000000-0039

Assay variable : PTINR\_VAL1 PT-INR Value

N Mean Standard Deviation Minimum Maximum

---

|   |           |  |           |           |
|---|-----------|--|-----------|-----------|
| 1 | 2.2000000 |  | 2.2000000 | 2.2000000 |
|---|-----------|--|-----------|-----------|

---

Unique Subject Identifier=1353000000-0048

Assay variable : PTINR\_VAL1 PT-INR Value

N Mean Standard Deviation Minimum Maximum

---

|   |          |           |          |          |
|---|----------|-----------|----------|----------|
| 2 | 1.500000 | 0.4242641 | 1.200000 | 1.800000 |
|---|----------|-----------|----------|----------|

---

Laboratory tests at the time of obtaining Table 2-6 consent, according to the presence or absence of proton-pump inhibitors

Unique Subject Identifier=1353000000-0049

MEANS Procedure

Assay variable : PTINR\_VAL1 PT-INR Value

N Mean Standard Deviation Minimum Maximum

---

|   |           |           |           |           |
|---|-----------|-----------|-----------|-----------|
| 2 | 1.6500000 | 0.0707107 | 1.6000000 | 1.7000000 |
|---|-----------|-----------|-----------|-----------|

---

Unique Subject Identifier=1353000000-0051

Assay variable : PTINR\_VAL1 PT-INR Value

N Mean Standard Deviation Minimum Maximum

---

|   |           |  |           |           |
|---|-----------|--|-----------|-----------|
| 1 | 1.8000000 |  | 1.8000000 | 1.8000000 |
|---|-----------|--|-----------|-----------|

---

Unique Subject Identifier=1354010000-0001

Assay variable : PTINR\_VAL1 PT-INR Value

N Mean Standard Deviation Minimum Maximum

---

|   |           |           |           |           |
|---|-----------|-----------|-----------|-----------|
| 6 | 1.6100000 | 0.1005982 | 1.5100000 | 1.7400000 |
|---|-----------|-----------|-----------|-----------|

---

Unique Subject Identifier=1354010000-0004

Assay variable : PTINR\_VAL1 PT-INR Value

N Mean Standard Deviation Minimum Maximum

---

|   |           |           |           |           |
|---|-----------|-----------|-----------|-----------|
| 5 | 2.1960000 | 0.2434748 | 1.9300000 | 2.5500000 |
|---|-----------|-----------|-----------|-----------|

---

Laboratory tests at the time of obtaining Table 2-6 consent, according to the presence or absence of proton-pump inhibitors

Unique Subject Identifier=1354010000-0006

MEANS Procedure

Assay variable : PTINR\_VAL1 PT-INR Value

N Mean Standard Deviation Minimum Maximum

---

|   |           |           |           |           |
|---|-----------|-----------|-----------|-----------|
| 5 | 1.8140000 | 0.1443260 | 1.5900000 | 1.9600000 |
|---|-----------|-----------|-----------|-----------|

---

Unique Subject Identifier=1354010000-0007

Assay variable : PTINR\_VAL1 PT-INR Value

N Mean Standard Deviation Minimum Maximum

---

|   |           |           |           |           |
|---|-----------|-----------|-----------|-----------|
| 5 | 1.5680000 | 0.1219426 | 1.4800000 | 1.7800000 |
|---|-----------|-----------|-----------|-----------|

---

Unique Subject Identifier=1354010000-0011

Assay variable : PTINR\_VAL1 PT-INR Value

N Mean Standard Deviation Minimum Maximum

---

|   |           |           |           |           |
|---|-----------|-----------|-----------|-----------|
| 3 | 1.4733333 | 0.0757188 | 1.4200000 | 1.5600000 |
|---|-----------|-----------|-----------|-----------|

---

Unique Subject Identifier=1354010000-0015



Assay variable : PTINR\_VAL1 PT-INR Value

N Mean Standard Deviation Minimum Maximum

---

|   |           |           |           |           |
|---|-----------|-----------|-----------|-----------|
| 5 | 2.1240000 | 0.1504327 | 1.8600000 | 2.2100000 |
|---|-----------|-----------|-----------|-----------|

---

Laboratory tests at the time of obtaining Table 2-6 consent, according to the presence or absence of proton-pump inhibitors

Unique Subject Identifier=1354010000-0023

MEANS Procedure

Assay variable : PTINR\_VAL1 PT-INR Value

N Mean Standard Deviation Minimum Maximum

---

|   |           |           |           |           |
|---|-----------|-----------|-----------|-----------|
| 5 | 1.5940000 | 0.1277889 | 1.4400000 | 1.7900000 |
|---|-----------|-----------|-----------|-----------|

---

Unique Subject Identifier=1354010000-0024

Assay variable : PTINR\_VAL1 PT-INR Value

N Mean Standard Deviation Minimum Maximum

---

|   |           |           |           |           |
|---|-----------|-----------|-----------|-----------|
| 6 | 1.5616667 | 0.1185608 | 1.4100000 | 1.7500000 |
|---|-----------|-----------|-----------|-----------|

---

Unique Subject Identifier=1354010000-0027

Assay variable : PTINR\_VAL1 PT-INR Value

N Mean Standard Deviation Minimum Maximum

---

|   |           |           |           |           |
|---|-----------|-----------|-----------|-----------|
| 6 | 1.7050000 | 0.3923137 | 1.3700000 | 2.4400000 |
|---|-----------|-----------|-----------|-----------|

---

Unique Subject Identifier=1354010000-0032

Assay variable : PTINR\_VAL1 PT-INR Value

N Mean Standard Deviation Minimum Maximum

---

|   |           |           |           |           |
|---|-----------|-----------|-----------|-----------|
| 6 | 1.4733333 | 0.1116542 | 1.3000000 | 1.6100000 |
|---|-----------|-----------|-----------|-----------|

---

Laboratory tests at the time of obtaining Table 2-6 consent, according to the presence or absence of proton-pump inhibitors

Unique Subject Identifier=1354010000-0033

MEANS Procedure

Assay variable : PTINR\_VAL1 PT-INR Value

| N | Mean      | Standard Deviation | Minimum   | Maximum   |
|---|-----------|--------------------|-----------|-----------|
| 6 | 1.6900000 | 0.3095158          | 1.2200000 | 2.0600000 |

Unique Subject Identifier=1354010000-0035

Assay variable : PTINR\_VAL1 PT-INR Value

| N | Mean      | Standard Deviation | Minimum   | Maximum   |
|---|-----------|--------------------|-----------|-----------|
| 3 | 1.6100000 | 0.4330127          | 1.1100000 | 1.8600000 |

Unique Subject Identifier=1354010000-0046

Assay variable : PTINR\_VAL1 PT-INR Value

| N | Mean      | Standard Deviation | Minimum   | Maximum   |
|---|-----------|--------------------|-----------|-----------|
| 5 | 2.0760000 | 0.2469413          | 1.6600000 | 2.2700000 |

Unique Subject Identifier=1354010000-0050

Assay variable : PTINR\_VAL1 PT-INR Value

N Mean Standard Deviation Minimum Maximum

---

|   |           |           |           |           |
|---|-----------|-----------|-----------|-----------|
| 5 | 1.7380000 | 0.1728294 | 1.5400000 | 1.9800000 |
|---|-----------|-----------|-----------|-----------|

---

Laboratory tests at the time of obtaining Table 2-6 consent, according to the presence or absence of proton-pump inhibitors

Unique Subject Identifier=1355000000-0005

MEANS Procedure

Assay variable : PTINR\_VAL1 PT-INR Value

N Mean Standard Deviation Minimum Maximum

---

|   |           |           |           |           |
|---|-----------|-----------|-----------|-----------|
| 6 | 2.1166667 | 0.3371449 | 1.6000000 | 2.6000000 |
|---|-----------|-----------|-----------|-----------|

---

Unique Subject Identifier=1355000000-0007

Assay variable : PTINR\_VAL1 PT-INR Value

N Mean Standard Deviation Minimum Maximum

---

|   |           |           |           |           |
|---|-----------|-----------|-----------|-----------|
| 6 | 2.1166667 | 0.0752773 | 2.0000000 | 2.2000000 |
|---|-----------|-----------|-----------|-----------|

---

Unique Subject Identifier=1365010000-0004

Assay variable : PTINR\_VAL1 PT-INR Value

N Mean Standard Deviation Minimum Maximum

---

|   |           |           |           |           |
|---|-----------|-----------|-----------|-----------|
| 4 | 1.9325000 | 0.0607591 | 1.8600000 | 2.0000000 |
|---|-----------|-----------|-----------|-----------|

---

Unique Subject Identifier=1365010000-0005

Assay variable : PTINR\_VAL1 PT-INR Value

N Mean Standard Deviation Minimum Maximum

---

|   |           |           |           |           |
|---|-----------|-----------|-----------|-----------|
| 4 | 1.7650000 | 0.1040833 | 1.6400000 | 1.8900000 |
|---|-----------|-----------|-----------|-----------|

---

Laboratory tests at the time of obtaining Table 2-6 consent, according to the presence or absence of proton-pump inhibitors

Unique Subject Identifier=1365010000-0006

MEANS Procedure

Assay variable : PTINR\_VAL1 PT-INR Value

N Mean Standard Deviation Minimum Maximum

---

|   |           |           |           |           |
|---|-----------|-----------|-----------|-----------|
| 6 | 1.7083333 | 0.1762290 | 1.4900000 | 1.8800000 |
|---|-----------|-----------|-----------|-----------|

---

Unique Subject Identifier=1365010000-0021

Assay variable : PTINR\_VAL1 PT-INR Value

N Mean Standard Deviation Minimum Maximum

---

|   |           |  |           |           |
|---|-----------|--|-----------|-----------|
| 1 | 1.6500000 |  | 1.6500000 | 1.6500000 |
|---|-----------|--|-----------|-----------|

---

Unique Subject Identifier=1368011111-0001

Assay variable : PTINR\_VAL1 PT-INR Value

N Mean Standard Deviation Minimum Maximum

---

|   |           |           |           |           |
|---|-----------|-----------|-----------|-----------|
| 2 | 1.3250000 | 0.1060660 | 1.2500000 | 1.4000000 |
|---|-----------|-----------|-----------|-----------|

---

Unique Subject Identifier=1368011111-0002



Assay variable : PTINR\_VAL1 PT-INR Value

N Mean Standard Deviation Minimum Maximum

---

|   |          |           |          |          |
|---|----------|-----------|----------|----------|
| 2 | 1.960000 | 0.1131371 | 1.880000 | 2.040000 |
|---|----------|-----------|----------|----------|

---

Laboratory tests at the time of obtaining Table 2-6 consent, according to the presence or absence of proton-pump inhibitors

Unique Subject Identifier=1369010010-0001

MEANS Procedure

Assay variable : PTINR\_VAL1 PT-INR Value

N Mean Standard Deviation Minimum Maximum

---

|   |           |           |           |           |
|---|-----------|-----------|-----------|-----------|
| 5 | 1.9460000 | 0.2567684 | 1.7300000 | 2.3000000 |
|---|-----------|-----------|-----------|-----------|

---

Unique Subject Identifier=1371000000-0004

Assay variable : PTINR\_VAL1 PT-INR Value

N Mean Standard Deviation Minimum Maximum

---

|   |           |           |           |           |
|---|-----------|-----------|-----------|-----------|
| 6 | 2.1233333 | 0.3201666 | 1.6800000 | 2.5800000 |
|---|-----------|-----------|-----------|-----------|

---

Unique Subject Identifier=1371000000-0005

Assay variable : PTINR\_VAL1 PT-INR Value

N Mean Standard Deviation Minimum Maximum

---

|   |           |           |           |           |
|---|-----------|-----------|-----------|-----------|
| 6 | 1.6833333 | 0.2959504 | 1.4200000 | 2.1800000 |
|---|-----------|-----------|-----------|-----------|

---

Unique Subject Identifier=1371000000-0007

Assay variable : PTINR\_VAL1 PT-INR Value

N Mean Standard Deviation Minimum Maximum

---

|   |           |           |           |           |
|---|-----------|-----------|-----------|-----------|
| 6 | 2.0300000 | 0.1908926 | 1.7400000 | 2.2900000 |
|---|-----------|-----------|-----------|-----------|

---

Laboratory tests at the time of obtaining Table 2-6 consent, according to the presence or absence of proton-pump inhibitors

Unique Subject Identifier=1371000000-0009

MEANS Procedure

Assay variable : PTINR\_VAL1 PT-INR Value

N Mean Standard Deviation Minimum Maximum

---

|   |           |           |           |           |
|---|-----------|-----------|-----------|-----------|
| 6 | 1.7900000 | 0.1352036 | 1.6100000 | 1.9700000 |
|---|-----------|-----------|-----------|-----------|

---

Unique Subject Identifier=1371000000-0010

Assay variable : PTINR\_VAL1 PT-INR Value

N Mean Standard Deviation Minimum Maximum

---

|   |           |           |           |           |
|---|-----------|-----------|-----------|-----------|
| 6 | 1.7700000 | 0.3878144 | 1.4200000 | 2.5300000 |
|---|-----------|-----------|-----------|-----------|

---

Unique Subject Identifier=1371000000-0015

Assay variable : PTINR\_VAL1 PT-INR Value

N Mean Standard Deviation Minimum Maximum

---

|   |           |           |           |           |
|---|-----------|-----------|-----------|-----------|
| 5 | 1.8700000 | 0.2813361 | 1.5500000 | 2.1900000 |
|---|-----------|-----------|-----------|-----------|

---

Unique Subject Identifier=1371000000-0016

Assay variable : PTINR\_VAL1 PT-INR Value

N Mean Standard Deviation Minimum Maximum

---

|   |           |           |           |           |
|---|-----------|-----------|-----------|-----------|
| 6 | 1.9400000 | 0.3752333 | 1.4000000 | 2.4300000 |
|---|-----------|-----------|-----------|-----------|

---

Laboratory tests at the time of obtaining Table 2-6 consent, according to the presence or absence of proton-pump inhibitors

Unique Subject Identifier=1371000000-0017

MEANS Procedure

Assay variable : PTINR\_VAL1 PT-INR Value

N Mean Standard Deviation Minimum Maximum

---

|   |           |           |           |           |
|---|-----------|-----------|-----------|-----------|
| 6 | 1.6366667 | 0.1979562 | 1.4600000 | 1.9900000 |
|---|-----------|-----------|-----------|-----------|

---

Unique Subject Identifier=1371000000-0021

Assay variable : PTINR\_VAL1 PT-INR Value

N Mean Standard Deviation Minimum Maximum

---

|   |           |           |           |           |
|---|-----------|-----------|-----------|-----------|
| 6 | 1.8866667 | 0.2130415 | 1.6000000 | 2.0900000 |
|---|-----------|-----------|-----------|-----------|

---

Unique Subject Identifier=1371000000-0023

Assay variable : PTINR\_VAL1 PT-INR Value

N Mean Standard Deviation Minimum Maximum

---

|   |           |           |           |           |
|---|-----------|-----------|-----------|-----------|
| 6 | 1.7516667 | 0.6507662 | 1.0700000 | 2.9600000 |
|---|-----------|-----------|-----------|-----------|

---

Unique Subject Identifier=1371000000-0024

Assay variable : PTINR\_VAL1 PT-INR Value

N Mean Standard Deviation Minimum Maximum

---

|   |           |           |           |           |
|---|-----------|-----------|-----------|-----------|
| 6 | 1.7283333 | 0.3864410 | 1.2100000 | 2.0400000 |
|---|-----------|-----------|-----------|-----------|

---

Laboratory tests at the time of obtaining Table 2-6 consent, according to the presence or absence of proton-pump inhibitors

Unique Subject Identifier=1372011010-0006

MEANS Procedure

Assay variable : PTINR\_VAL1 PT-INR Value

N Mean Standard Deviation Minimum Maximum

---

|   |           |           |           |           |
|---|-----------|-----------|-----------|-----------|
| 4 | 1.8000000 | 0.7845593 | 1.2400000 | 2.9500000 |
|---|-----------|-----------|-----------|-----------|

---

Unique Subject Identifier=1377011000-0002

Assay variable : PTINR\_VAL1 PT-INR Value

N Mean Standard Deviation Minimum Maximum

---

|   |           |           |           |           |
|---|-----------|-----------|-----------|-----------|
| 5 | 2.3140000 | 0.3150079 | 1.8800000 | 2.7600000 |
|---|-----------|-----------|-----------|-----------|

---

Unique Subject Identifier=1377011000-0004

Assay variable : PTINR\_VAL1 PT-INR Value

N Mean Standard Deviation Minimum Maximum

---

|   |           |           |           |           |
|---|-----------|-----------|-----------|-----------|
| 4 | 2.1300000 | 1.0241419 | 1.1200000 | 3.3500000 |
|---|-----------|-----------|-----------|-----------|

---

Unique Subject Identifier=1377011000-0009



Assay variable : PTINR\_VAL1 PT-INR Value

N Mean Standard Deviation Minimum Maximum

---

|   |          |           |          |          |
|---|----------|-----------|----------|----------|
| 4 | 2.140000 | 0.4913926 | 1.450000 | 2.530000 |
|---|----------|-----------|----------|----------|

---

Laboratory tests at the time of obtaining Table 2-6 consent, according to the presence or absence of proton-pump inhibitors

Unique Subject Identifier=1377011000-0012

MEANS Procedure

Assay variable : PTINR\_VAL1 PT-INR Value

| N | Mean      | Standard Deviation | Minimum   | Maximum   |
|---|-----------|--------------------|-----------|-----------|
| 5 | 1.4240000 | 0.2244549          | 1.0900000 | 1.6800000 |

Unique Subject Identifier=1377011000-0016

Assay variable : PTINR\_VAL1 PT-INR Value

| N | Mean      | Standard Deviation | Minimum   | Maximum   |
|---|-----------|--------------------|-----------|-----------|
| 5 | 1.9560000 | 0.2370232          | 1.6200000 | 2.1300000 |

Unique Subject Identifier=1380000110-0016

Assay variable : PTINR\_VAL1 PT-INR Value

| N | Mean      | Standard Deviation | Minimum   | Maximum   |
|---|-----------|--------------------|-----------|-----------|
| 6 | 2.1000000 | 0.7293833          | 1.3000000 | 3.3000000 |

Unique Subject Identifier=1380000110-0027

Assay variable : PTINR\_VAL1 PT-INR Value

N Mean Standard Deviation Minimum Maximum

---

|   |          |          |          |          |
|---|----------|----------|----------|----------|
| 5 | 2.280000 | 0.303315 | 1.800000 | 2.600000 |
|---|----------|----------|----------|----------|

---

Laboratory tests at the time of obtaining Table 2-6 consent, according to the presence or absence of proton-pump inhibitors

Unique Subject Identifier=1381000000-0008

MEANS Procedure

Assay variable : PTINR\_VAL1 PT-INR Value

N Mean Standard Deviation Minimum Maximum

---

|   |           |           |           |           |
|---|-----------|-----------|-----------|-----------|
| 2 | 2.1150000 | 0.4171930 | 1.8200000 | 2.4100000 |
|---|-----------|-----------|-----------|-----------|

---

Unique Subject Identifier=1385011000-0035

Assay variable : PTINR\_VAL1 PT-INR Value

N Mean Standard Deviation Minimum Maximum

---

|   |           |  |           |           |
|---|-----------|--|-----------|-----------|
| 1 | 1.6800000 |  | 1.6800000 | 1.6800000 |
|---|-----------|--|-----------|-----------|

---

Unique Subject Identifier=1385011000-0057

Assay variable : PTINR\_VAL1 PT-INR Value

N Mean Standard Deviation Minimum Maximum

---

|   |           |  |           |           |
|---|-----------|--|-----------|-----------|
| 1 | 1.8200000 |  | 1.8200000 | 1.8200000 |
|---|-----------|--|-----------|-----------|

---

Unique Subject Identifier=1385011000-0110

Assay variable : PTINR\_VAL1 PT-INR Value

N Mean Standard Deviation Minimum Maximum

---

|   |          |           |          |          |
|---|----------|-----------|----------|----------|
| 2 | 2.100000 | 0.0282843 | 2.080000 | 2.120000 |
|---|----------|-----------|----------|----------|

---

Laboratory tests at the time of obtaining Table 2-6 consent, according to the presence or absence of proton-pump inhibitors

Unique Subject Identifier=1386000000-0006

MEANS Procedure

Assay variable : PTINR\_VAL1 PT-INR Value

N Mean Standard Deviation Minimum Maximum

---

|   |           |           |           |           |
|---|-----------|-----------|-----------|-----------|
| 6 | 2.6483333 | 0.8358808 | 1.4900000 | 3.7600000 |
|---|-----------|-----------|-----------|-----------|

---

Unique Subject Identifier=1386000000-0007

Assay variable : PTINR\_VAL1 PT-INR Value

N Mean Standard Deviation Minimum Maximum

---

|   |           |           |           |           |
|---|-----------|-----------|-----------|-----------|
| 3 | 1.2500000 | 0.0500000 | 1.2000000 | 1.3000000 |
|---|-----------|-----------|-----------|-----------|

---

Unique Subject Identifier=1386000000-0021

Assay variable : PTINR\_VAL1 PT-INR Value

N Mean Standard Deviation Minimum Maximum

---

|   |           |  |           |           |
|---|-----------|--|-----------|-----------|
| 1 | 3.3000000 |  | 3.3000000 | 3.3000000 |
|---|-----------|--|-----------|-----------|

---

Unique Subject Identifier=1386000000-0022

Assay variable : PTINR\_VAL1 PT-INR Value

N Mean Standard Deviation Minimum Maximum

---

|   |           |           |           |           |
|---|-----------|-----------|-----------|-----------|
| 3 | 2.7933333 | 0.9222979 | 1.9700000 | 3.7900000 |
|---|-----------|-----------|-----------|-----------|

---

Laboratory tests at the time of obtaining Table 2-6 consent, according to the presence or absence of proton-pump inhibitors

Unique Subject Identifier=1392011110-0007

MEANS Procedure

Assay variable : PTINR\_VAL1 PT-INR Value

N Mean Standard Deviation Minimum Maximum

---

|   |           |           |           |           |
|---|-----------|-----------|-----------|-----------|
| 6 | 1.8666667 | 0.3386247 | 1.6000000 | 2.5000000 |
|---|-----------|-----------|-----------|-----------|

---

Unique Subject Identifier=1392011110-0008

Assay variable : PTINR\_VAL1 PT-INR Value

N Mean Standard Deviation Minimum Maximum

---

|   |           |           |           |           |
|---|-----------|-----------|-----------|-----------|
| 6 | 1.5666667 | 0.2065591 | 1.2000000 | 1.8000000 |
|---|-----------|-----------|-----------|-----------|

---

Unique Subject Identifier=1392011110-0012

Assay variable : PTINR\_VAL1 PT-INR Value

N Mean Standard Deviation Minimum Maximum

---

|   |           |           |           |           |
|---|-----------|-----------|-----------|-----------|
| 6 | 1.9166667 | 0.3544949 | 1.7000000 | 2.6000000 |
|---|-----------|-----------|-----------|-----------|

---

Unique Subject Identifier=1392011110-0013



Assay variable : PTINR\_VAL1 PT-INR Value

N Mean Standard Deviation Minimum Maximum

---

|   |           |           |           |           |
|---|-----------|-----------|-----------|-----------|
| 6 | 2.0666667 | 0.3011091 | 1.8000000 | 2.5000000 |
|---|-----------|-----------|-----------|-----------|

---

Laboratory tests at the time of obtaining Table 2-6 consent, according to the presence or absence of proton-pump inhibitors

Unique Subject Identifier=1392011110-0016

MEANS Procedure

Assay variable : PTINR\_VAL1 PT-INR Value

N Mean Standard Deviation Minimum Maximum

---

|   |           |           |           |           |
|---|-----------|-----------|-----------|-----------|
| 6 | 2.2000000 | 0.3033150 | 1.8000000 | 2.6000000 |
|---|-----------|-----------|-----------|-----------|

---

Unique Subject Identifier=1392011110-0017

Assay variable : PTINR\_VAL1 PT-INR Value

N Mean Standard Deviation Minimum Maximum

---

|   |           |           |           |           |
|---|-----------|-----------|-----------|-----------|
| 6 | 1.8500000 | 0.1048809 | 1.7000000 | 2.0000000 |
|---|-----------|-----------|-----------|-----------|

---

Unique Subject Identifier=1394011010-0001

Assay variable : PTINR\_VAL1 PT-INR Value

N Mean Standard Deviation Minimum Maximum

---

|   |           |           |           |           |
|---|-----------|-----------|-----------|-----------|
| 2 | 3.4000000 | 1.1313708 | 2.6000000 | 4.2000000 |
|---|-----------|-----------|-----------|-----------|

---

Unique Subject Identifier=1396000000-0005

Assay variable : PTINR\_VAL1 PT-INR Value

N Mean Standard Deviation Minimum Maximum

---

|   |          |  |          |          |
|---|----------|--|----------|----------|
| 1 | 1.600000 |  | 1.600000 | 1.600000 |
|---|----------|--|----------|----------|

---

Laboratory tests at the time of obtaining Table 2-6 consent, according to the presence or absence of proton-pump inhibitors

Unique Subject Identifier=1396000000-0014

MEANS Procedure

Assay variable : PTINR\_VAL1 PT-INR Value

| N | Mean      | Standard Deviation | Minimum   | Maximum   |
|---|-----------|--------------------|-----------|-----------|
| 6 | 2.0000000 | 0.2607681          | 1.5000000 | 2.2000000 |

Unique Subject Identifier=1398010000-0007

Assay variable : PTINR\_VAL1 PT-INR Value

| N | Mean      | Standard Deviation | Minimum   | Maximum   |
|---|-----------|--------------------|-----------|-----------|
| 5 | 1.7400000 | 0.2302173          | 1.5000000 | 2.1000000 |

Unique Subject Identifier=1398010000-0016

Assay variable : PTINR\_VAL1 PT-INR Value

| N | Mean      | Standard Deviation | Minimum   | Maximum   |
|---|-----------|--------------------|-----------|-----------|
| 4 | 1.7000000 | 0.3366502          | 1.3000000 | 2.1000000 |

Unique Subject Identifier=1398010000-0018

Assay variable : PTINR\_VAL1 PT-INR Value

N Mean Standard Deviation Minimum Maximum

---

|   |           |           |           |           |
|---|-----------|-----------|-----------|-----------|
| 5 | 1.9800000 | 0.1923538 | 1.7000000 | 2.2000000 |
|---|-----------|-----------|-----------|-----------|

---

Laboratory tests at the time of obtaining Table 2-6 consent, according to the presence or absence of proton-pump inhibitors

Unique Subject Identifier=1398010000-0019

MEANS Procedure

Assay variable : PTINR\_VAL1 PT-INR Value

N Mean Standard Deviation Minimum Maximum

---

|   |           |           |           |           |
|---|-----------|-----------|-----------|-----------|
| 3 | 1.9333333 | 0.2309401 | 1.8000000 | 2.2000000 |
|---|-----------|-----------|-----------|-----------|

---

Unique Subject Identifier=1398010000-0021

Assay variable : PTINR\_VAL1 PT-INR Value

N Mean Standard Deviation Minimum Maximum

---

|   |           |           |           |           |
|---|-----------|-----------|-----------|-----------|
| 4 | 2.0500000 | 0.4509250 | 1.7000000 | 2.7000000 |
|---|-----------|-----------|-----------|-----------|

---

Unique Subject Identifier=1398010000-0026

Assay variable : PTINR\_VAL1 PT-INR Value

N Mean Standard Deviation Minimum Maximum

---

|   |           |           |           |           |
|---|-----------|-----------|-----------|-----------|
| 5 | 2.1200000 | 0.5069517 | 1.6000000 | 2.9000000 |
|---|-----------|-----------|-----------|-----------|

---

Unique Subject Identifier=1398010000-0032

Assay variable : PTINR\_VAL1 PT-INR Value

N Mean Standard Deviation Minimum Maximum

---

|   |           |           |           |           |
|---|-----------|-----------|-----------|-----------|
| 3 | 1.5333333 | 0.0577350 | 1.5000000 | 1.6000000 |
|---|-----------|-----------|-----------|-----------|

---

Laboratory tests at the time of obtaining Table 2-6 consent, according to the presence or absence of proton-pump inhibitors

Unique Subject Identifier=1398010000-0034

MEANS Procedure

Assay variable : PTINR\_VAL1 PT-INR Value

N Mean Standard Deviation Minimum Maximum

---

|   |           |           |           |           |
|---|-----------|-----------|-----------|-----------|
| 4 | 1.8000000 | 0.1414214 | 1.6000000 | 1.9000000 |
|---|-----------|-----------|-----------|-----------|

---

Unique Subject Identifier=1398010000-0036

Assay variable : PTINR\_VAL1 PT-INR Value

N Mean Standard Deviation Minimum Maximum

---

|   |           |           |           |           |
|---|-----------|-----------|-----------|-----------|
| 3 | 2.2333333 | 0.1527525 | 2.1000000 | 2.4000000 |
|---|-----------|-----------|-----------|-----------|

---

Unique Subject Identifier=1398010000-0038

Assay variable : PTINR\_VAL1 PT-INR Value

N Mean Standard Deviation Minimum Maximum

---

|   |           |           |           |           |
|---|-----------|-----------|-----------|-----------|
| 4 | 1.2750000 | 0.1500000 | 1.2000000 | 1.5000000 |
|---|-----------|-----------|-----------|-----------|

---

Unique Subject Identifier=1398010000-0043



Assay variable : PTINR\_VAL1 PT-INR Value

N Mean Standard Deviation Minimum Maximum

---

|   |          |          |          |          |
|---|----------|----------|----------|----------|
| 3 | 2.300000 | 0.100000 | 2.200000 | 2.400000 |
|---|----------|----------|----------|----------|

---

Laboratory tests at the time of obtaining Table 2-6 consent, according to the presence or absence of proton-pump inhibitors

Unique Subject Identifier=1400000000-0001

MEANS Procedure

Assay variable : PTINR\_VAL1 PT-INR Value

N Mean Standard Deviation Minimum Maximum

---

|   |           |           |           |           |
|---|-----------|-----------|-----------|-----------|
| 5 | 2.3120000 | 0.5893810 | 1.6700000 | 3.0800000 |
|---|-----------|-----------|-----------|-----------|

---

Unique Subject Identifier=1400000000-0002

Assay variable : PTINR\_VAL1 PT-INR Value

N Mean Standard Deviation Minimum Maximum

---

|   |           |           |           |           |
|---|-----------|-----------|-----------|-----------|
| 5 | 2.0620000 | 0.5821684 | 1.4600000 | 2.9300000 |
|---|-----------|-----------|-----------|-----------|

---

Unique Subject Identifier=1400000000-0005

Assay variable : PTINR\_VAL1 PT-INR Value

N Mean Standard Deviation Minimum Maximum

---

|   |           |  |           |           |
|---|-----------|--|-----------|-----------|
| 1 | 2.7800000 |  | 2.7800000 | 2.7800000 |
|---|-----------|--|-----------|-----------|

---

Unique Subject Identifier=1400000000-0006

Assay variable : PTINR\_VAL1 PT-INR Value

N Mean Standard Deviation Minimum Maximum

---

|   |           |           |           |           |
|---|-----------|-----------|-----------|-----------|
| 3 | 2.0666667 | 0.2514624 | 1.7800000 | 2.2500000 |
|---|-----------|-----------|-----------|-----------|

---

Laboratory tests at the time of obtaining Table 2-6 consent, according to the presence or absence of proton-pump inhibitors

Unique Subject Identifier=1400000000-0010

MEANS Procedure

Assay variable : PTINR\_VAL1 PT-INR Value

N Mean Standard Deviation Minimum Maximum

---

|   |           |           |           |           |
|---|-----------|-----------|-----------|-----------|
| 3 | 2.3233333 | 0.6473278 | 1.7100000 | 3.0000000 |
|---|-----------|-----------|-----------|-----------|

---

Unique Subject Identifier=1401000000-0002

Assay variable : PTINR\_VAL1 PT-INR Value

N Mean Standard Deviation Minimum Maximum

---

|   |           |           |           |           |
|---|-----------|-----------|-----------|-----------|
| 5 | 2.0780000 | 0.3787083 | 1.5800000 | 2.5100000 |
|---|-----------|-----------|-----------|-----------|

---

Unique Subject Identifier=1401000000-0003

Assay variable : PTINR\_VAL1 PT-INR Value

N Mean Standard Deviation Minimum Maximum

---

|   |           |           |           |           |
|---|-----------|-----------|-----------|-----------|
| 6 | 2.3716667 | 0.4688888 | 1.5400000 | 2.9400000 |
|---|-----------|-----------|-----------|-----------|

---

Unique Subject Identifier=1401000000-0004

Assay variable : PTINR\_VAL1 PT-INR Value

N Mean Standard Deviation Minimum Maximum

---

|   |           |           |           |           |
|---|-----------|-----------|-----------|-----------|
| 5 | 2.4740000 | 0.2583215 | 2.0800000 | 2.7500000 |
|---|-----------|-----------|-----------|-----------|

---

Laboratory tests at the time of obtaining Table 2-6 consent, according to the presence or absence of proton-pump inhibitors

Unique Subject Identifier=1401000000-0007

MEANS Procedure

Assay variable : PTINR\_VAL1 PT-INR Value

N Mean Standard Deviation Minimum Maximum

---

|   |           |           |           |           |
|---|-----------|-----------|-----------|-----------|
| 5 | 2.8940000 | 0.4098536 | 2.3800000 | 3.3100000 |
|---|-----------|-----------|-----------|-----------|

---

Unique Subject Identifier=1401000000-0008

Assay variable : PTINR\_VAL1 PT-INR Value

N Mean Standard Deviation Minimum Maximum

---

|   |           |           |           |           |
|---|-----------|-----------|-----------|-----------|
| 5 | 2.6740000 | 0.3907429 | 2.1900000 | 3.2600000 |
|---|-----------|-----------|-----------|-----------|

---

Unique Subject Identifier=1401000000-0009

Assay variable : PTINR\_VAL1 PT-INR Value

N Mean Standard Deviation Minimum Maximum

---

|   |           |           |           |           |
|---|-----------|-----------|-----------|-----------|
| 4 | 1.9450000 | 0.4747280 | 1.3900000 | 2.5500000 |
|---|-----------|-----------|-----------|-----------|

---

Unique Subject Identifier=1401000000-0010

Assay variable : PTINR\_VAL1 PT-INR Value

N Mean Standard Deviation Minimum Maximum

---

|   |           |           |           |           |
|---|-----------|-----------|-----------|-----------|
| 6 | 2.9566667 | 0.3767050 | 2.5200000 | 3.5300000 |
|---|-----------|-----------|-----------|-----------|

---

Laboratory tests at the time of obtaining Table 2-6 consent, according to the presence or absence of proton-pump inhibitors

Unique Subject Identifier=1405000000-0001

MEANS Procedure

Assay variable : PTINR\_VAL1 PT-INR Value

N Mean Standard Deviation Minimum Maximum

---

|   |          |           |          |          |
|---|----------|-----------|----------|----------|
| 5 | 2.140000 | 0.2792848 | 1.900000 | 2.600000 |
|---|----------|-----------|----------|----------|

---

Unique Subject Identifier=1405000000-0002

Assay variable : PTINR\_VAL1 PT-INR Value

N Mean Standard Deviation Minimum Maximum

---

|   |          |           |          |          |
|---|----------|-----------|----------|----------|
| 6 | 2.533333 | 0.6218253 | 1.900000 | 3.300000 |
|---|----------|-----------|----------|----------|

---

Unique Subject Identifier=1405000000-0004

Assay variable : PTINR\_VAL1 PT-INR Value

N Mean Standard Deviation Minimum Maximum

---

|   |          |           |          |          |
|---|----------|-----------|----------|----------|
| 6 | 2.000000 | 0.1549193 | 1.800000 | 2.200000 |
|---|----------|-----------|----------|----------|

---

Unique Subject Identifier=1405000000-0005



Assay variable : PTINR\_VAL1 PT-INR Value

N Mean Standard Deviation Minimum Maximum

---

|   |          |           |          |          |
|---|----------|-----------|----------|----------|
| 6 | 2.083333 | 0.2401388 | 1.900000 | 2.500000 |
|---|----------|-----------|----------|----------|

---

Laboratory tests at the time of obtaining Table 2-6 consent, according to the presence or absence of proton-pump inhibitors

Unique Subject Identifier=1405000000-0006

MEANS Procedure

Assay variable : PTINR\_VAL1 PT-INR Value

N Mean Standard Deviation Minimum Maximum

---

|   |           |           |           |           |
|---|-----------|-----------|-----------|-----------|
| 6 | 2.1666667 | 0.4082483 | 1.6000000 | 2.7000000 |
|---|-----------|-----------|-----------|-----------|

---

Unique Subject Identifier=1405000000-0008

Assay variable : PTINR\_VAL1 PT-INR Value

N Mean Standard Deviation Minimum Maximum

---

|   |           |           |           |           |
|---|-----------|-----------|-----------|-----------|
| 6 | 2.2666667 | 0.1861899 | 2.0000000 | 2.5000000 |
|---|-----------|-----------|-----------|-----------|

---

Unique Subject Identifier=1405000000-0010

Assay variable : PTINR\_VAL1 PT-INR Value

N Mean Standard Deviation Minimum Maximum

---

|   |           |           |           |           |
|---|-----------|-----------|-----------|-----------|
| 6 | 2.4500000 | 0.1048809 | 2.3000000 | 2.6000000 |
|---|-----------|-----------|-----------|-----------|

---

Unique Subject Identifier=1405000000-0011

Assay variable : PTINR\_VAL1 PT-INR Value

N Mean Standard Deviation Minimum Maximum

---

|   |           |           |           |           |
|---|-----------|-----------|-----------|-----------|
| 6 | 2.4666667 | 0.3502380 | 1.9000000 | 2.9000000 |
|---|-----------|-----------|-----------|-----------|

---

Laboratory tests at the time of obtaining Table 2-6 consent, according to the presence or absence of proton-pump inhibitors

Unique Subject Identifier=1405000000-0015

MEANS Procedure

Assay variable : PTINR\_VAL1 PT-INR Value

N Mean Standard Deviation Minimum Maximum

---

|   |           |           |           |           |
|---|-----------|-----------|-----------|-----------|
| 6 | 2.6666667 | 0.6947422 | 1.6000000 | 3.6000000 |
|---|-----------|-----------|-----------|-----------|

---

Unique Subject Identifier=1405000000-0017

Assay variable : PTINR\_VAL1 PT-INR Value

N Mean Standard Deviation Minimum Maximum

---

|   |           |           |           |           |
|---|-----------|-----------|-----------|-----------|
| 6 | 2.3666667 | 0.2658320 | 1.9000000 | 2.7000000 |
|---|-----------|-----------|-----------|-----------|

---

Unique Subject Identifier=1405000000-0018

Assay variable : PTINR\_VAL1 PT-INR Value

N Mean Standard Deviation Minimum Maximum

---

|   |           |           |           |           |
|---|-----------|-----------|-----------|-----------|
| 6 | 1.8333333 | 0.2422120 | 1.4000000 | 2.0000000 |
|---|-----------|-----------|-----------|-----------|

---

Unique Subject Identifier=1405000000-0021

Assay variable : PTINR\_VAL1 PT-INR Value

N Mean Standard Deviation Minimum Maximum

---

|   |          |           |          |          |
|---|----------|-----------|----------|----------|
| 6 | 2.166667 | 0.4501851 | 1.400000 | 2.600000 |
|---|----------|-----------|----------|----------|

---

Laboratory tests at the time of obtaining Table 2-6 consent, according to the presence or absence of proton-pump inhibitors

Unique Subject Identifier=1405000000-0023

MEANS Procedure

Assay variable : PTINR\_VAL1 PT-INR Value

N Mean Standard Deviation Minimum Maximum

---

|   |           |           |           |           |
|---|-----------|-----------|-----------|-----------|
| 6 | 2.0666667 | 0.1861899 | 1.9000000 | 2.4000000 |
|---|-----------|-----------|-----------|-----------|

---

Unique Subject Identifier=1405000000-0024

Assay variable : PTINR\_VAL1 PT-INR Value

N Mean Standard Deviation Minimum Maximum

---

|   |           |           |           |           |
|---|-----------|-----------|-----------|-----------|
| 6 | 2.4666667 | 0.3723797 | 1.8000000 | 2.8000000 |
|---|-----------|-----------|-----------|-----------|

---

Unique Subject Identifier=1405000000-0025

Assay variable : PTINR\_VAL1 PT-INR Value

N Mean Standard Deviation Minimum Maximum

---

|   |           |           |           |           |
|---|-----------|-----------|-----------|-----------|
| 6 | 2.3000000 | 0.1788854 | 2.1000000 | 2.6000000 |
|---|-----------|-----------|-----------|-----------|

---

Unique Subject Identifier=1405000000-0026

Assay variable : PTINR\_VAL1 PT-INR Value

N Mean Standard Deviation Minimum Maximum

---

|   |           |           |           |           |
|---|-----------|-----------|-----------|-----------|
| 6 | 2.1833333 | 0.2136976 | 1.9000000 | 2.4000000 |
|---|-----------|-----------|-----------|-----------|

---

Laboratory tests at the time of obtaining Table 2-6 consent, according to the presence or absence of proton-pump inhibitors

Unique Subject Identifier=1405000000-0028

MEANS Procedure

Assay variable : PTINR\_VAL1 PT-INR Value

N Mean Standard Deviation Minimum Maximum

---

|   |           |           |           |           |
|---|-----------|-----------|-----------|-----------|
| 6 | 2.3833333 | 0.5706721 | 1.7000000 | 3.4000000 |
|---|-----------|-----------|-----------|-----------|

---

Unique Subject Identifier=1405000000-0029

Assay variable : PTINR\_VAL1 PT-INR Value

N Mean Standard Deviation Minimum Maximum

---

|   |           |           |           |           |
|---|-----------|-----------|-----------|-----------|
| 6 | 2.7666667 | 0.6470446 | 1.9000000 | 3.6000000 |
|---|-----------|-----------|-----------|-----------|

---

Unique Subject Identifier=1405000000-0030

Assay variable : PTINR\_VAL1 PT-INR Value

N Mean Standard Deviation Minimum Maximum

---

|   |           |           |           |           |
|---|-----------|-----------|-----------|-----------|
| 6 | 2.5000000 | 0.2097618 | 2.3000000 | 2.9000000 |
|---|-----------|-----------|-----------|-----------|

---

Unique Subject Identifier=1406000000-0001



Assay variable : PTINR\_VAL1 PT-INR Value

N Mean Standard Deviation Minimum Maximum

---

|   |          |  |          |          |
|---|----------|--|----------|----------|
| 1 | 1.140000 |  | 1.140000 | 1.140000 |
|---|----------|--|----------|----------|

---

Laboratory tests at the time of obtaining Table 2-6 consent, according to the presence or absence of proton-pump inhibitors

Unique Subject Identifier=1406000000-0005

MEANS Procedure

Assay variable : PTINR\_VAL1 PT-INR Value

N Mean Standard Deviation Minimum Maximum

---

|   |           |  |           |           |
|---|-----------|--|-----------|-----------|
| 1 | 1.2800000 |  | 1.2800000 | 1.2800000 |
|---|-----------|--|-----------|-----------|

---

Unique Subject Identifier=1406000000-0006

Assay variable : PTINR\_VAL1 PT-INR Value

N Mean Standard Deviation Minimum Maximum

---

|   |           |  |           |           |
|---|-----------|--|-----------|-----------|
| 1 | 3.2600000 |  | 3.2600000 | 3.2600000 |
|---|-----------|--|-----------|-----------|

---

Unique Subject Identifier=1406000000-0007

Assay variable : PTINR\_VAL1 PT-INR Value

N Mean Standard Deviation Minimum Maximum

---

|   |           |  |           |           |
|---|-----------|--|-----------|-----------|
| 1 | 2.4500000 |  | 2.4500000 | 2.4500000 |
|---|-----------|--|-----------|-----------|

---

Unique Subject Identifier=1406000000-0008

Assay variable : PTINR\_VAL1 PT-INR Value

N Mean Standard Deviation Minimum Maximum

---

|   |           |  |           |           |
|---|-----------|--|-----------|-----------|
| 1 | 1.4300000 |  | 1.4300000 | 1.4300000 |
|---|-----------|--|-----------|-----------|

---

Laboratory tests at the time of obtaining Table 2-6 consent, according to the presence or absence of proton-pump inhibitors

Unique Subject Identifier=1406000000-0011

MEANS Procedure

Assay variable : PTINR\_VAL1 PT-INR Value

N Mean Standard Deviation Minimum Maximum

---

|   |           |  |           |           |
|---|-----------|--|-----------|-----------|
| 1 | 2.5000000 |  | 2.5000000 | 2.5000000 |
|---|-----------|--|-----------|-----------|

---

Unique Subject Identifier=1406000000-0014

Assay variable : PTINR\_VAL1 PT-INR Value

N Mean Standard Deviation Minimum Maximum

---

|   |           |  |           |           |
|---|-----------|--|-----------|-----------|
| 1 | 1.7700000 |  | 1.7700000 | 1.7700000 |
|---|-----------|--|-----------|-----------|

---

Unique Subject Identifier=1406000000-0018

Assay variable : PTINR\_VAL1 PT-INR Value

N Mean Standard Deviation Minimum Maximum

---

|   |           |  |           |           |
|---|-----------|--|-----------|-----------|
| 1 | 1.5300000 |  | 1.5300000 | 1.5300000 |
|---|-----------|--|-----------|-----------|

---

Unique Subject Identifier=1406000000-0019

Assay variable : PTINR\_VAL1 PT-INR Value

N Mean Standard Deviation Minimum Maximum

---

|   |          |  |          |          |
|---|----------|--|----------|----------|
| 1 | 1.600000 |  | 1.600000 | 1.600000 |
|---|----------|--|----------|----------|

---

Laboratory tests at the time of obtaining Table 2-6 consent, according to the presence or absence of proton-pump inhibitors

Unique Subject Identifier=1406000000-0020

MEANS Procedure

Assay variable : PTINR\_VAL1 PT-INR Value

N Mean Standard Deviation Minimum Maximum

---

|   |           |  |           |           |
|---|-----------|--|-----------|-----------|
| 1 | 1.2500000 |  | 1.2500000 | 1.2500000 |
|---|-----------|--|-----------|-----------|

---

Unique Subject Identifier=1407000000-0007

Assay variable : PTINR\_VAL1 PT-INR Value

N Mean Standard Deviation Minimum Maximum

---

|   |           |           |           |           |
|---|-----------|-----------|-----------|-----------|
| 6 | 2.0166667 | 0.1189398 | 1.9200000 | 2.2400000 |
|---|-----------|-----------|-----------|-----------|

---

Unique Subject Identifier=1407000000-0010

Assay variable : PTINR\_VAL1 PT-INR Value

N Mean Standard Deviation Minimum Maximum

---

|   |           |           |           |           |
|---|-----------|-----------|-----------|-----------|
| 6 | 1.6883333 | 0.2422739 | 1.5000000 | 2.1400000 |
|---|-----------|-----------|-----------|-----------|

---

Unique Subject Identifier=1407000000-0013

Assay variable : PTINR\_VAL1 PT-INR Value

N Mean Standard Deviation Minimum Maximum

---

|   |           |           |           |           |
|---|-----------|-----------|-----------|-----------|
| 6 | 1.8750000 | 0.1488288 | 1.6800000 | 2.0600000 |
|---|-----------|-----------|-----------|-----------|

---

Laboratory tests at the time of obtaining Table 2-6 consent, according to the presence or absence of proton-pump inhibitors

Unique Subject Identifier=1408010000-0001

MEANS Procedure

Assay variable : PTINR\_VAL1 PT-INR Value

N Mean Standard Deviation Minimum Maximum

---

|   |           |           |           |           |
|---|-----------|-----------|-----------|-----------|
| 5 | 2.1640000 | 0.2016928 | 1.8600000 | 2.3800000 |
|---|-----------|-----------|-----------|-----------|

---

Unique Subject Identifier=1408010000-0004

Assay variable : PTINR\_VAL1 PT-INR Value

N Mean Standard Deviation Minimum Maximum

---

|   |           |           |           |           |
|---|-----------|-----------|-----------|-----------|
| 5 | 2.6160000 | 0.3574633 | 2.3700000 | 3.2300000 |
|---|-----------|-----------|-----------|-----------|

---

Unique Subject Identifier=1408010000-0006

Assay variable : PTINR\_VAL1 PT-INR Value

N Mean Standard Deviation Minimum Maximum

---

|   |           |           |           |           |
|---|-----------|-----------|-----------|-----------|
| 6 | 2.6933333 | 0.4401666 | 1.9400000 | 3.1800000 |
|---|-----------|-----------|-----------|-----------|

---

Unique Subject Identifier=1408010000-0007



Assay variable : PTINR\_VAL1 PT-INR Value

N Mean Standard Deviation Minimum Maximum

---

|   |           |           |           |           |
|---|-----------|-----------|-----------|-----------|
| 5 | 2.4700000 | 0.4941660 | 2.1700000 | 3.3500000 |
|---|-----------|-----------|-----------|-----------|

---

Laboratory tests at the time of obtaining Table 2-6 consent, according to the presence or absence of proton-pump inhibitors

Unique Subject Identifier=1408010000-0008

MEANS Procedure

Assay variable : PTINR\_VAL1 PT-INR Value

N Mean Standard Deviation Minimum Maximum

---

|   |          |           |          |          |
|---|----------|-----------|----------|----------|
| 4 | 1.760000 | 0.0408248 | 1.700000 | 1.790000 |
|---|----------|-----------|----------|----------|

---

Unique Subject Identifier=1408010000-0012

Assay variable : PTINR\_VAL1 PT-INR Value

N Mean Standard Deviation Minimum Maximum

---

|   |          |           |          |          |
|---|----------|-----------|----------|----------|
| 5 | 3.072000 | 0.4856645 | 2.520000 | 3.850000 |
|---|----------|-----------|----------|----------|

---

Unique Subject Identifier=1408010000-0013

Assay variable : PTINR\_VAL1 PT-INR Value

N Mean Standard Deviation Minimum Maximum

---

|   |          |           |          |          |
|---|----------|-----------|----------|----------|
| 4 | 2.172500 | 0.2780138 | 1.780000 | 2.420000 |
|---|----------|-----------|----------|----------|

---

Unique Subject Identifier=1408010000-0015

Assay variable : PTINR\_VAL1 PT-INR Value

N Mean Standard Deviation Minimum Maximum

---

|   |          |           |          |          |
|---|----------|-----------|----------|----------|
| 6 | 2.420000 | 0.3701351 | 2.020000 | 2.910000 |
|---|----------|-----------|----------|----------|

---

Laboratory tests at the time of obtaining Table 2-6 consent, according to the presence or absence of proton-pump inhibitors

Unique Subject Identifier=1408010000-0021

MEANS Procedure

Assay variable : PTINR\_VAL1 PT-INR Value

N Mean Standard Deviation Minimum Maximum

---

|   |           |           |           |           |
|---|-----------|-----------|-----------|-----------|
| 4 | 1.8375000 | 0.1472809 | 1.6400000 | 1.9500000 |
|---|-----------|-----------|-----------|-----------|

---

Unique Subject Identifier=1408010000-0025

Assay variable : PTINR\_VAL1 PT-INR Value

N Mean Standard Deviation Minimum Maximum

---

|   |           |           |           |           |
|---|-----------|-----------|-----------|-----------|
| 4 | 2.1075000 | 0.3824809 | 1.8900000 | 2.6800000 |
|---|-----------|-----------|-----------|-----------|

---

Unique Subject Identifier=1408010000-0033

Assay variable : PTINR\_VAL1 PT-INR Value

N Mean Standard Deviation Minimum Maximum

---

|   |           |           |           |           |
|---|-----------|-----------|-----------|-----------|
| 5 | 1.9540000 | 0.1722788 | 1.7900000 | 2.2400000 |
|---|-----------|-----------|-----------|-----------|

---

Unique Subject Identifier=1412000000-0007

Assay variable : PTINR\_VAL1 PT-INR Value

N Mean Standard Deviation Minimum Maximum

---

|   |          |           |          |          |
|---|----------|-----------|----------|----------|
| 6 | 1.833333 | 0.4273952 | 1.300000 | 2.300000 |
|---|----------|-----------|----------|----------|

---

Laboratory tests at the time of obtaining Table 2-6 consent, according to the presence or absence of proton-pump inhibitors

Unique Subject Identifier=1412000000-0014

MEANS Procedure

Assay variable : PTINR\_VAL1 PT-INR Value

N Mean Standard Deviation Minimum Maximum

---

|   |           |           |           |           |
|---|-----------|-----------|-----------|-----------|
| 6 | 1.8333333 | 0.2065591 | 1.6000000 | 2.1000000 |
|---|-----------|-----------|-----------|-----------|

---

Unique Subject Identifier=1412000000-0021

Assay variable : PTINR\_VAL1 PT-INR Value

N Mean Standard Deviation Minimum Maximum

---

|   |           |           |           |           |
|---|-----------|-----------|-----------|-----------|
| 6 | 2.1666667 | 0.1632993 | 1.9000000 | 2.4000000 |
|---|-----------|-----------|-----------|-----------|

---

Unique Subject Identifier=1412000000-0025

Assay variable : PTINR\_VAL1 PT-INR Value

N Mean Standard Deviation Minimum Maximum

---

|   |           |           |           |           |
|---|-----------|-----------|-----------|-----------|
| 6 | 1.6333333 | 0.1632993 | 1.4000000 | 1.9000000 |
|---|-----------|-----------|-----------|-----------|

---

Unique Subject Identifier=1412000000-0028

Assay variable : PTINR\_VAL1 PT-INR Value

N Mean Standard Deviation Minimum Maximum

---

|   |          |           |          |          |
|---|----------|-----------|----------|----------|
| 6 | 2.600000 | 1.4926487 | 1.400000 | 5.500000 |
|---|----------|-----------|----------|----------|

---

Laboratory tests at the time of obtaining Table 2-6 consent, according to the presence or absence of proton-pump inhibitors

Unique Subject Identifier=1412000000-0031

MEANS Procedure

Assay variable : PTINR\_VAL1 PT-INR Value

N Mean Standard Deviation Minimum Maximum

---

|   |           |           |           |           |
|---|-----------|-----------|-----------|-----------|
| 6 | 2.2166667 | 0.3544949 | 2.0000000 | 2.9000000 |
|---|-----------|-----------|-----------|-----------|

---

Unique Subject Identifier=1420010000-0007

Assay variable : PTINR\_VAL1 PT-INR Value

N Mean Standard Deviation Minimum Maximum

---

|   |           |           |           |           |
|---|-----------|-----------|-----------|-----------|
| 6 | 2.2666667 | 0.3777124 | 1.8000000 | 2.8000000 |
|---|-----------|-----------|-----------|-----------|

---

Unique Subject Identifier=1420010000-0008

Assay variable : PTINR\_VAL1 PT-INR Value

N Mean Standard Deviation Minimum Maximum

---

|   |           |           |           |           |
|---|-----------|-----------|-----------|-----------|
| 5 | 1.7600000 | 0.1816590 | 1.5000000 | 2.0000000 |
|---|-----------|-----------|-----------|-----------|

---

Unique Subject Identifier=1420010000-0012



Assay variable : PTINR\_VAL1 PT-INR Value

N Mean Standard Deviation Minimum Maximum

---

|   |           |           |           |           |
|---|-----------|-----------|-----------|-----------|
| 6 | 2.1166667 | 0.2714160 | 1.6000000 | 2.4000000 |
|---|-----------|-----------|-----------|-----------|

---

Laboratory tests at the time of obtaining Table 2-6 consent, according to the presence or absence of proton-pump inhibitors

Unique Subject Identifier=1420010000-0013

MEANS Procedure

Assay variable : PTINR\_VAL1 PT-INR Value

| N | Mean     | Standard Deviation | Minimum  | Maximum  |
|---|----------|--------------------|----------|----------|
| 5 | 1.640000 | 0.304959           | 1.100000 | 1.800000 |

Unique Subject Identifier=1420010000-0014

Assay variable : PTINR\_VAL1 PT-INR Value

| N | Mean     | Standard Deviation | Minimum  | Maximum  |
|---|----------|--------------------|----------|----------|
| 6 | 2.083333 | 0.116904           | 1.900000 | 2.200000 |

Unique Subject Identifier=1423000000-0001

Assay variable : PTINR\_VAL1 PT-INR Value

| N | Mean     | Standard Deviation | Minimum  | Maximum  |
|---|----------|--------------------|----------|----------|
| 2 | 1.910000 | 0.466690           | 1.580000 | 2.240000 |

Unique Subject Identifier=1423000000-0006

Assay variable : PTINR\_VAL1 PT-INR Value

N Mean Standard Deviation Minimum Maximum

---

|   |           |  |           |           |
|---|-----------|--|-----------|-----------|
| 1 | 1.3900000 |  | 1.3900000 | 1.3900000 |
|---|-----------|--|-----------|-----------|

---

Laboratory tests at the time of obtaining Table 2-6 consent, according to the presence or absence of proton-pump inhibitors

Unique Subject Identifier=1423000000-0010

MEANS Procedure

Assay variable : PTINR\_VAL1 PT-INR Value

N Mean Standard Deviation Minimum Maximum

---

|   |           |           |           |           |
|---|-----------|-----------|-----------|-----------|
| 3 | 1.4900000 | 0.2251666 | 1.3600000 | 1.7500000 |
|---|-----------|-----------|-----------|-----------|

---

Unique Subject Identifier=1423000000-0015

Assay variable : PTINR\_VAL1 PT-INR Value

N Mean Standard Deviation Minimum Maximum

---

|   |           |           |           |           |
|---|-----------|-----------|-----------|-----------|
| 2 | 2.0550000 | 0.1626346 | 1.9400000 | 2.1700000 |
|---|-----------|-----------|-----------|-----------|

---

Unique Subject Identifier=1428011110-0001

Assay variable : PTINR\_VAL1 PT-INR Value

N Mean Standard Deviation Minimum Maximum

---

|   |           |           |           |           |
|---|-----------|-----------|-----------|-----------|
| 2 | 1.7850000 | 0.2616295 | 1.6000000 | 1.9700000 |
|---|-----------|-----------|-----------|-----------|

---

Unique Subject Identifier=1428011110-0002

Assay variable : PTINR\_VAL1 PT-INR Value

N Mean Standard Deviation Minimum Maximum

---

|   |           |           |           |           |
|---|-----------|-----------|-----------|-----------|
| 2 | 1.4650000 | 0.2474874 | 1.2900000 | 1.6400000 |
|---|-----------|-----------|-----------|-----------|

---

Laboratory tests at the time of obtaining Table 2-6 consent, according to the presence or absence of proton-pump inhibitors

Unique Subject Identifier=1428011110-0003

MEANS Procedure

Assay variable : PTINR\_VAL1 PT-INR Value

| N | Mean      | Standard Deviation | Minimum   | Maximum   |
|---|-----------|--------------------|-----------|-----------|
| 1 | 1.6900000 |                    | 1.6900000 | 1.6900000 |

Unique Subject Identifier=1428011110-0006

Assay variable : PTINR\_VAL1 PT-INR Value

| N | Mean      | Standard Deviation | Minimum   | Maximum   |
|---|-----------|--------------------|-----------|-----------|
| 2 | 1.7300000 | 0.0424264          | 1.7000000 | 1.7600000 |

Unique Subject Identifier=1428011110-0008

Assay variable : PTINR\_VAL1 PT-INR Value

| N | Mean      | Standard Deviation | Minimum   | Maximum   |
|---|-----------|--------------------|-----------|-----------|
| 2 | 2.4750000 | 0.7566043          | 1.9400000 | 3.0100000 |

Unique Subject Identifier=1428011110-0009

Assay variable : PTINR\_VAL1 PT-INR Value

N Mean Standard Deviation Minimum Maximum

---

|   |           |           |           |           |
|---|-----------|-----------|-----------|-----------|
| 2 | 1.7150000 | 0.7990307 | 1.1500000 | 2.2800000 |
|---|-----------|-----------|-----------|-----------|

---

Laboratory tests at the time of obtaining Table 2-6 consent, according to the presence or absence of proton-pump inhibitors

Unique Subject Identifier=1428011110-0010

MEANS Procedure

Assay variable : PTINR\_VAL1 PT-INR Value

N Mean Standard Deviation Minimum Maximum

---

|   |           |           |           |           |
|---|-----------|-----------|-----------|-----------|
| 2 | 2.2450000 | 0.1484924 | 2.1400000 | 2.3500000 |
|---|-----------|-----------|-----------|-----------|

---

Unique Subject Identifier=1428011110-0011

Assay variable : PTINR\_VAL1 PT-INR Value

N Mean Standard Deviation Minimum Maximum

---

|   |           |           |           |           |
|---|-----------|-----------|-----------|-----------|
| 2 | 2.1850000 | 0.3040559 | 1.9700000 | 2.4000000 |
|---|-----------|-----------|-----------|-----------|

---

Unique Subject Identifier=1428011110-0013

Assay variable : PTINR\_VAL1 PT-INR Value

N Mean Standard Deviation Minimum Maximum

---

|   |           |  |           |           |
|---|-----------|--|-----------|-----------|
| 1 | 1.6800000 |  | 1.6800000 | 1.6800000 |
|---|-----------|--|-----------|-----------|

---

Unique Subject Identifier=1428011110-0015



Assay variable : PTINR\_VAL1 PT-INR Value

N Mean Standard Deviation Minimum Maximum

---

|   |          |           |          |          |
|---|----------|-----------|----------|----------|
| 2 | 1.370000 | 0.2687006 | 1.180000 | 1.560000 |
|---|----------|-----------|----------|----------|

---

Laboratory tests at the time of obtaining Table 2-6 consent, according to the presence or absence of proton-pump inhibitors

Unique Subject Identifier=1428011110-0017

MEANS Procedure

Assay variable : PTINR\_VAL1 PT-INR Value

N Mean Standard Deviation Minimum Maximum

---

|   |           |  |           |           |
|---|-----------|--|-----------|-----------|
| 1 | 1.4900000 |  | 1.4900000 | 1.4900000 |
|---|-----------|--|-----------|-----------|

---

Unique Subject Identifier=1428011110-0019

Assay variable : PTINR\_VAL1 PT-INR Value

N Mean Standard Deviation Minimum Maximum

---

|   |           |           |           |           |
|---|-----------|-----------|-----------|-----------|
| 3 | 1.9833333 | 0.2309401 | 1.8500000 | 2.2500000 |
|---|-----------|-----------|-----------|-----------|

---

Unique Subject Identifier=1428011110-0021

Assay variable : PTINR\_VAL1 PT-INR Value

N Mean Standard Deviation Minimum Maximum

---

|   |           |  |           |           |
|---|-----------|--|-----------|-----------|
| 1 | 2.8600000 |  | 2.8600000 | 2.8600000 |
|---|-----------|--|-----------|-----------|

---

Unique Subject Identifier=1428011110-0023

Assay variable : PTINR\_VAL1 PT-INR Value

N Mean Standard Deviation Minimum Maximum

---

|   |           |  |           |           |
|---|-----------|--|-----------|-----------|
| 1 | 1.5800000 |  | 1.5800000 | 1.5800000 |
|---|-----------|--|-----------|-----------|

---

Laboratory tests at the time of obtaining Table 2-6 consent, according to the presence or absence of proton-pump inhibitors

Unique Subject Identifier=1428011110-0025

MEANS Procedure

Assay variable : PTINR\_VAL1 PT-INR Value

| N | Mean      | Standard Deviation | Minimum   | Maximum   |
|---|-----------|--------------------|-----------|-----------|
| 2 | 1.8100000 | 0.4666905          | 1.4800000 | 2.1400000 |

Unique Subject Identifier=1428011110-0032

Assay variable : PTINR\_VAL1 PT-INR Value

| N | Mean      | Standard Deviation | Minimum   | Maximum   |
|---|-----------|--------------------|-----------|-----------|
| 3 | 1.7866667 | 0.5345403          | 1.4200000 | 2.4000000 |

Unique Subject Identifier=1430011010-0004

Assay variable : PTINR\_VAL1 PT-INR Value

| N | Mean      | Standard Deviation | Minimum   | Maximum   |
|---|-----------|--------------------|-----------|-----------|
| 6 | 1.8666667 | 0.3444803          | 1.6000000 | 2.4000000 |

Unique Subject Identifier=1432000000-0049

Assay variable : PTINR\_VAL1 PT-INR Value

N Mean Standard Deviation Minimum Maximum

---

|   |           |           |           |           |
|---|-----------|-----------|-----------|-----------|
| 6 | 1.7833333 | 0.6112828 | 1.1000000 | 2.6000000 |
|---|-----------|-----------|-----------|-----------|

---

Laboratory tests at the time of obtaining Table 2-6 consent, according to the presence or absence of proton-pump inhibitors

Unique Subject Identifier=1432000000-0056

MEANS Procedure

Assay variable : PTINR\_VAL1 PT-INR Value

N Mean Standard Deviation Minimum Maximum

---

|   |           |           |           |           |
|---|-----------|-----------|-----------|-----------|
| 6 | 2.0833333 | 0.5455884 | 1.2000000 | 2.6000000 |
|---|-----------|-----------|-----------|-----------|

---

Unique Subject Identifier=1432000000-0071

Assay variable : PTINR\_VAL1 PT-INR Value

N Mean Standard Deviation Minimum Maximum

---

|   |           |           |           |           |
|---|-----------|-----------|-----------|-----------|
| 6 | 2.2833333 | 0.2483277 | 1.9000000 | 2.6000000 |
|---|-----------|-----------|-----------|-----------|

---

Unique Subject Identifier=1432000000-0073

Assay variable : PTINR\_VAL1 PT-INR Value

N Mean Standard Deviation Minimum Maximum

---

|   |           |           |           |           |
|---|-----------|-----------|-----------|-----------|
| 6 | 2.1166667 | 0.1602082 | 1.9000000 | 2.3000000 |
|---|-----------|-----------|-----------|-----------|

---

Unique Subject Identifier=1435000000-0003

Assay variable : PTINR\_VAL1 PT-INR Value

N Mean Standard Deviation Minimum Maximum

---

|   |          |  |          |          |
|---|----------|--|----------|----------|
| 1 | 2.140000 |  | 2.140000 | 2.140000 |
|---|----------|--|----------|----------|

---

Laboratory tests at the time of obtaining Table 2-6 consent, according to the presence or absence of proton-pump inhibitors

Unique Subject Identifier=1435000000-0018

MEANS Procedure

Assay variable : PTINR\_VAL1 PT-INR Value

N Mean Standard Deviation Minimum Maximum

---

|   |           |  |           |           |
|---|-----------|--|-----------|-----------|
| 1 | 1.6700000 |  | 1.6700000 | 1.6700000 |
|---|-----------|--|-----------|-----------|

---

Unique Subject Identifier=1435000000-0028

Assay variable : PTINR\_VAL1 PT-INR Value

N Mean Standard Deviation Minimum Maximum

---

|   |           |           |           |           |
|---|-----------|-----------|-----------|-----------|
| 3 | 2.6600000 | 0.1081665 | 2.5700000 | 2.7800000 |
|---|-----------|-----------|-----------|-----------|

---

Unique Subject Identifier=1435000000-0039

Assay variable : PTINR\_VAL1 PT-INR Value

N Mean Standard Deviation Minimum Maximum

---

|   |           |           |           |           |
|---|-----------|-----------|-----------|-----------|
| 3 | 1.7266667 | 0.2402776 | 1.4800000 | 1.9600000 |
|---|-----------|-----------|-----------|-----------|

---

Unique Subject Identifier=1435000000-0041



Assay variable : PTINR\_VAL1 PT-INR Value

N Mean Standard Deviation Minimum Maximum

---

|   |           |           |           |           |
|---|-----------|-----------|-----------|-----------|
| 5 | 2.2780000 | 0.2723417 | 1.9700000 | 2.5800000 |
|---|-----------|-----------|-----------|-----------|

---

Laboratory tests at the time of obtaining Table 2-6 consent, according to the presence or absence of proton-pump inhibitors

Unique Subject Identifier=1435000000-0042

MEANS Procedure

Assay variable : PTINR\_VAL1 PT-INR Value

| N | Mean      | Standard Deviation | Minimum   | Maximum   |
|---|-----------|--------------------|-----------|-----------|
| 5 | 2.1240000 | 0.1270039          | 2.0000000 | 2.2800000 |

Unique Subject Identifier=1435000000-0048

Assay variable : PTINR\_VAL1 PT-INR Value

| N | Mean      | Standard Deviation | Minimum   | Maximum   |
|---|-----------|--------------------|-----------|-----------|
| 5 | 1.9720000 | 0.6191688          | 1.3900000 | 3.0200000 |

Unique Subject Identifier=1435000000-0051

Assay variable : PTINR\_VAL1 PT-INR Value

| N | Mean      | Standard Deviation | Minimum   | Maximum   |
|---|-----------|--------------------|-----------|-----------|
| 1 | 2.0900000 |                    | 2.0900000 | 2.0900000 |

Unique Subject Identifier=1435000000-0055

Assay variable : PTINR\_VAL1 PT-INR Value

N Mean Standard Deviation Minimum Maximum

---

|   |          |           |          |          |
|---|----------|-----------|----------|----------|
| 6 | 1.550000 | 0.5843629 | 1.160000 | 2.710000 |
|---|----------|-----------|----------|----------|

---

Laboratory tests at the time of obtaining Table 2-6 consent, according to the presence or absence of proton-pump inhibitors

Unique Subject Identifier=1435000000-0065

MEANS Procedure

Assay variable : PTINR\_VAL1 PT-INR Value

N Mean Standard Deviation Minimum Maximum

---

|   |          |  |          |          |
|---|----------|--|----------|----------|
| 1 | 2.180000 |  | 2.180000 | 2.180000 |
|---|----------|--|----------|----------|

---

Unique Subject Identifier=1435000000-0071

Assay variable : PTINR\_VAL1 PT-INR Value

N Mean Standard Deviation Minimum Maximum

---

|   |          |           |          |          |
|---|----------|-----------|----------|----------|
| 6 | 1.245000 | 0.2508984 | 1.060000 | 1.640000 |
|---|----------|-----------|----------|----------|

---

Unique Subject Identifier=1435000000-0075

Assay variable : PTINR\_VAL1 PT-INR Value

N Mean Standard Deviation Minimum Maximum

---

|   |          |           |          |          |
|---|----------|-----------|----------|----------|
| 3 | 1.146667 | 0.0251661 | 1.120000 | 1.170000 |
|---|----------|-----------|----------|----------|

---

Unique Subject Identifier=1435000000-0091

Assay variable : PTINR\_VAL1 PT-INR Value

N Mean Standard Deviation Minimum Maximum

---

|   |          |           |          |          |
|---|----------|-----------|----------|----------|
| 3 | 2.150000 | 0.2505993 | 1.890000 | 2.390000 |
|---|----------|-----------|----------|----------|

---

Laboratory tests at the time of obtaining Table 2-6 consent, according to the presence or absence of proton-pump inhibitors

Unique Subject Identifier=1435000000-0103

MEANS Procedure

Assay variable : PTINR\_VAL1 PT-INR Value

N Mean Standard Deviation Minimum Maximum

---

|   |           |           |           |           |
|---|-----------|-----------|-----------|-----------|
| 2 | 2.7750000 | 0.0494975 | 2.7400000 | 2.8100000 |
|---|-----------|-----------|-----------|-----------|

---

Unique Subject Identifier=1435000000-0105

Assay variable : PTINR\_VAL1 PT-INR Value

N Mean Standard Deviation Minimum Maximum

---

|   |           |  |           |           |
|---|-----------|--|-----------|-----------|
| 1 | 1.5300000 |  | 1.5300000 | 1.5300000 |
|---|-----------|--|-----------|-----------|

---

Unique Subject Identifier=1435000000-0107

Assay variable : PTINR\_VAL1 PT-INR Value

N Mean Standard Deviation Minimum Maximum

---

|   |           |           |           |           |
|---|-----------|-----------|-----------|-----------|
| 3 | 1.5866667 | 0.2318045 | 1.3200000 | 1.7400000 |
|---|-----------|-----------|-----------|-----------|

---

Unique Subject Identifier=1435000000-0117

Assay variable : PTINR\_VAL1 PT-INR Value

N Mean Standard Deviation Minimum Maximum

---

|   |           |           |           |           |
|---|-----------|-----------|-----------|-----------|
| 6 | 2.4450000 | 0.2246553 | 2.2400000 | 2.8400000 |
|---|-----------|-----------|-----------|-----------|

---

Laboratory tests at the time of obtaining Table 2-6 consent, according to the presence or absence of proton-pump inhibitors

Unique Subject Identifier=1435000000-0119

MEANS Procedure

Assay variable : PTINR\_VAL1 PT-INR Value

N Mean Standard Deviation Minimum Maximum

---

|   |           |  |           |           |
|---|-----------|--|-----------|-----------|
| 1 | 2.4200000 |  | 2.4200000 | 2.4200000 |
|---|-----------|--|-----------|-----------|

---

Unique Subject Identifier=1435000000-0120

Assay variable : PTINR\_VAL1 PT-INR Value

N Mean Standard Deviation Minimum Maximum

---

|   |           |           |           |           |
|---|-----------|-----------|-----------|-----------|
| 6 | 1.6683333 | 0.4972491 | 1.1800000 | 2.5300000 |
|---|-----------|-----------|-----------|-----------|

---

Unique Subject Identifier=1435000000-0132

Assay variable : PTINR\_VAL1 PT-INR Value

N Mean Standard Deviation Minimum Maximum

---

|   |           |           |           |           |
|---|-----------|-----------|-----------|-----------|
| 2 | 2.4550000 | 0.4030509 | 2.1700000 | 2.7400000 |
|---|-----------|-----------|-----------|-----------|

---

Unique Subject Identifier=1435000000-0139



Assay variable : PTINR\_VAL1 PT-INR Value

N Mean Standard Deviation Minimum Maximum

---

|   |           |           |           |           |
|---|-----------|-----------|-----------|-----------|
| 2 | 2.6450000 | 1.4919953 | 1.5900000 | 3.7000000 |
|---|-----------|-----------|-----------|-----------|

---

Laboratory tests at the time of obtaining Table 2-6 consent, according to the presence or absence of proton-pump inhibitors

Unique Subject Identifier=1435000000-0140

MEANS Procedure

Assay variable : PTINR\_VAL1 PT-INR Value

N Mean Standard Deviation Minimum Maximum

---

|   |           |           |           |           |
|---|-----------|-----------|-----------|-----------|
| 6 | 1.4450000 | 0.1980656 | 1.2400000 | 1.8100000 |
|---|-----------|-----------|-----------|-----------|

---

Unique Subject Identifier=1435000000-0153

Assay variable : PTINR\_VAL1 PT-INR Value

N Mean Standard Deviation Minimum Maximum

---

|   |           |           |           |           |
|---|-----------|-----------|-----------|-----------|
| 5 | 1.7040000 | 0.1050238 | 1.5800000 | 1.8500000 |
|---|-----------|-----------|-----------|-----------|

---

Unique Subject Identifier=1435000000-0188

Assay variable : PTINR\_VAL1 PT-INR Value

N Mean Standard Deviation Minimum Maximum

---

|   |           |           |           |           |
|---|-----------|-----------|-----------|-----------|
| 4 | 1.4350000 | 0.3641886 | 1.2200000 | 1.9800000 |
|---|-----------|-----------|-----------|-----------|

---

Unique Subject Identifier=1435000000-0200

Assay variable : PTINR\_VAL1 PT-INR Value

N Mean Standard Deviation Minimum Maximum

---

|   |           |           |           |           |
|---|-----------|-----------|-----------|-----------|
| 2 | 1.1650000 | 0.0636396 | 1.1200000 | 1.2100000 |
|---|-----------|-----------|-----------|-----------|

---

Laboratory tests at the time of obtaining Table 2-6 consent, according to the presence or absence of proton-pump inhibitors

Unique Subject Identifier=1435000000-0209

MEANS Procedure

Assay variable : PTINR\_VAL1 PT-INR Value

N Mean Standard Deviation Minimum Maximum

---

|   |           |           |           |           |
|---|-----------|-----------|-----------|-----------|
| 6 | 1.4316667 | 0.3882482 | 1.2200000 | 2.2200000 |
|---|-----------|-----------|-----------|-----------|

---

Unique Subject Identifier=1435000000-0212

Assay variable : PTINR\_VAL1 PT-INR Value

N Mean Standard Deviation Minimum Maximum

---

|   |           |  |           |           |
|---|-----------|--|-----------|-----------|
| 1 | 1.5800000 |  | 1.5800000 | 1.5800000 |
|---|-----------|--|-----------|-----------|

---

Unique Subject Identifier=1435000000-0215

Assay variable : PTINR\_VAL1 PT-INR Value

N Mean Standard Deviation Minimum Maximum

---

|   |           |           |           |           |
|---|-----------|-----------|-----------|-----------|
| 3 | 1.8533333 | 0.2872862 | 1.6400000 | 2.1800000 |
|---|-----------|-----------|-----------|-----------|

---

Unique Subject Identifier=1436000000-0008

Assay variable : PTINR\_VAL1 PT-INR Value

N Mean Standard Deviation Minimum Maximum

---

|   |          |           |          |          |
|---|----------|-----------|----------|----------|
| 5 | 2.130000 | 0.2152905 | 1.770000 | 2.340000 |
|---|----------|-----------|----------|----------|

---

Laboratory tests at the time of obtaining Table 2-6 consent, according to the presence or absence of proton-pump inhibitors

Unique Subject Identifier=1436000000-0010

MEANS Procedure

Assay variable : PTINR\_VAL1 PT-INR Value

N Mean Standard Deviation Minimum Maximum

---

|   |           |  |           |           |
|---|-----------|--|-----------|-----------|
| 1 | 3.3300000 |  | 3.3300000 | 3.3300000 |
|---|-----------|--|-----------|-----------|

---

Unique Subject Identifier=1436000000-0019

Assay variable : PTINR\_VAL1 PT-INR Value

N Mean Standard Deviation Minimum Maximum

---

|   |           |           |           |           |
|---|-----------|-----------|-----------|-----------|
| 2 | 1.6350000 | 0.1484924 | 1.5300000 | 1.7400000 |
|---|-----------|-----------|-----------|-----------|

---

Unique Subject Identifier=1436000000-0023

Assay variable : PTINR\_VAL1 PT-INR Value

N Mean Standard Deviation Minimum Maximum

---

|   |           |  |           |           |
|---|-----------|--|-----------|-----------|
| 1 | 1.7900000 |  | 1.7900000 | 1.7900000 |
|---|-----------|--|-----------|-----------|

---

Unique Subject Identifier=1436000000-0024

Assay variable : PTINR\_VAL1 PT-INR Value

N Mean Standard Deviation Minimum Maximum

---

|   |           |           |           |           |
|---|-----------|-----------|-----------|-----------|
| 2 | 2.3150000 | 0.0212132 | 2.3000000 | 2.3300000 |
|---|-----------|-----------|-----------|-----------|

---

Laboratory tests at the time of obtaining Table 2-6 consent, according to the presence or absence of proton-pump inhibitors

Unique Subject Identifier=1436000000-0028

MEANS Procedure

Assay variable : PTINR\_VAL1 PT-INR Value

N Mean Standard Deviation Minimum Maximum

---

|   |           |           |           |           |
|---|-----------|-----------|-----------|-----------|
| 2 | 2.0900000 | 0.2121320 | 1.9400000 | 2.2400000 |
|---|-----------|-----------|-----------|-----------|

---

Unique Subject Identifier=1436000000-0032

Assay variable : PTINR\_VAL1 PT-INR Value

N Mean Standard Deviation Minimum Maximum

---

|   |           |  |           |           |
|---|-----------|--|-----------|-----------|
| 1 | 2.6300000 |  | 2.6300000 | 2.6300000 |
|---|-----------|--|-----------|-----------|

---

Unique Subject Identifier=1436000000-0038

Assay variable : PTINR\_VAL1 PT-INR Value

N Mean Standard Deviation Minimum Maximum

---

|   |           |           |           |           |
|---|-----------|-----------|-----------|-----------|
| 3 | 2.5166667 | 0.6859543 | 1.7300000 | 2.9900000 |
|---|-----------|-----------|-----------|-----------|

---

Unique Subject Identifier=1436000000-0048



Assay variable : PTINR\_VAL1 PT-INR Value

N Mean Standard Deviation Minimum Maximum

---

|   |           |  |           |           |
|---|-----------|--|-----------|-----------|
| 1 | 2.2200000 |  | 2.2200000 | 2.2200000 |
|---|-----------|--|-----------|-----------|

---

Laboratory tests at the time of obtaining Table 2-6 consent, according to the presence or absence of proton-pump inhibitors

Unique Subject Identifier=1437000000-0009

MEANS Procedure

Assay variable : PTINR\_VAL1 PT-INR Value

N Mean Standard Deviation Minimum Maximum

---

|   |          |           |          |          |
|---|----------|-----------|----------|----------|
| 6 | 1.850000 | 0.2258318 | 1.600000 | 2.200000 |
|---|----------|-----------|----------|----------|

---

Unique Subject Identifier=1437000000-0010

Assay variable : PTINR\_VAL1 PT-INR Value

N Mean Standard Deviation Minimum Maximum

---

|   |          |           |          |          |
|---|----------|-----------|----------|----------|
| 6 | 1.916667 | 0.3710346 | 1.300000 | 2.300000 |
|---|----------|-----------|----------|----------|

---

Unique Subject Identifier=1437000000-0011

Assay variable : PTINR\_VAL1 PT-INR Value

N Mean Standard Deviation Minimum Maximum

---

|   |          |           |          |          |
|---|----------|-----------|----------|----------|
| 6 | 1.783333 | 0.3060501 | 1.400000 | 2.300000 |
|---|----------|-----------|----------|----------|

---

Unique Subject Identifier=1438000000-0010

Assay variable : PTINR\_VAL1 PT-INR Value

N Mean Standard Deviation Minimum Maximum

---

|   |           |           |           |           |
|---|-----------|-----------|-----------|-----------|
| 5 | 2.3000000 | 0.0764853 | 2.2100000 | 2.3900000 |
|---|-----------|-----------|-----------|-----------|

---

Laboratory tests at the time of obtaining Table 2-6 consent, according to the presence or absence of proton-pump inhibitors

Unique Subject Identifier=1438000000-0017

MEANS Procedure

Assay variable : PTINR\_VAL1 PT-INR Value

| N | Mean      | Standard Deviation | Minimum   | Maximum   |
|---|-----------|--------------------|-----------|-----------|
| 2 | 2.8100000 | 0.2404163          | 2.6400000 | 2.9800000 |

Unique Subject Identifier=1438000000-0030

Assay variable : PTINR\_VAL1 PT-INR Value

| N | Mean      | Standard Deviation | Minimum   | Maximum   |
|---|-----------|--------------------|-----------|-----------|
| 1 | 1.7200000 |                    | 1.7200000 | 1.7200000 |

Unique Subject Identifier=1438000000-0036

Assay variable : PTINR\_VAL1 PT-INR Value

| N | Mean      | Standard Deviation | Minimum   | Maximum   |
|---|-----------|--------------------|-----------|-----------|
| 1 | 1.1800000 |                    | 1.1800000 | 1.1800000 |

Unique Subject Identifier=1438000000-0043

Assay variable : PTINR\_VAL1 PT-INR Value

N Mean Standard Deviation Minimum Maximum

---

|   |           |  |           |           |
|---|-----------|--|-----------|-----------|
| 1 | 1.6200000 |  | 1.6200000 | 1.6200000 |
|---|-----------|--|-----------|-----------|

---

Laboratory tests at the time of obtaining Table 2-6 consent, according to the presence or absence of proton-pump inhibitors

Unique Subject Identifier=1438000000-0047

MEANS Procedure

Assay variable : PTINR\_VAL1 PT-INR Value

N Mean Standard Deviation Minimum Maximum

---

|   |           |           |           |           |
|---|-----------|-----------|-----------|-----------|
| 5 | 1.3040000 | 0.0870632 | 1.1700000 | 1.4100000 |
|---|-----------|-----------|-----------|-----------|

---

Unique Subject Identifier=1438000000-0049

Assay variable : PTINR\_VAL1 PT-INR Value

N Mean Standard Deviation Minimum Maximum

---

|   |           |           |           |           |
|---|-----------|-----------|-----------|-----------|
| 4 | 2.4200000 | 0.3988316 | 2.0100000 | 2.8700000 |
|---|-----------|-----------|-----------|-----------|

---

Unique Subject Identifier=1440000000-0013

Assay variable : PTINR\_VAL1 PT-INR Value

N Mean Standard Deviation Minimum Maximum

---

|   |           |           |           |           |
|---|-----------|-----------|-----------|-----------|
| 3 | 1.9600000 | 0.1734935 | 1.8500000 | 2.1600000 |
|---|-----------|-----------|-----------|-----------|

---

Unique Subject Identifier=1440000000-0016

Assay variable : PTINR\_VAL1 PT-INR Value

N Mean Standard Deviation Minimum Maximum

---

|   |           |           |           |           |
|---|-----------|-----------|-----------|-----------|
| 3 | 2.9566667 | 0.2858904 | 2.7100000 | 3.2700000 |
|---|-----------|-----------|-----------|-----------|

---

Laboratory tests at the time of obtaining Table 2-6 consent, according to the presence or absence of proton-pump inhibitors

Unique Subject Identifier=144000000-0018

MEANS Procedure

Assay variable : PTINR\_VAL1 PT-INR Value

| N | Mean      | Standard Deviation | Minimum   | Maximum   |
|---|-----------|--------------------|-----------|-----------|
| 5 | 1.3940000 | 0.1556599          | 1.2800000 | 1.6500000 |

Unique Subject Identifier=144000000-0019

Assay variable : PTINR\_VAL1 PT-INR Value

| N | Mean      | Standard Deviation | Minimum   | Maximum   |
|---|-----------|--------------------|-----------|-----------|
| 2 | 1.1050000 | 0.0212132          | 1.0900000 | 1.1200000 |

Unique Subject Identifier=144100000-0001

Assay variable : PTINR\_VAL1 PT-INR Value

| N | Mean      | Standard Deviation | Minimum   | Maximum   |
|---|-----------|--------------------|-----------|-----------|
| 5 | 1.7880000 | 0.2462113          | 1.5000000 | 2.1500000 |

Unique Subject Identifier=144400000-0009



Assay variable : PTINR\_VAL1 PT-INR Value

N Mean Standard Deviation Minimum Maximum

---

|   |           |           |           |           |
|---|-----------|-----------|-----------|-----------|
| 5 | 1.9260000 | 0.3471023 | 1.4400000 | 2.3000000 |
|---|-----------|-----------|-----------|-----------|

---

Laboratory tests at the time of obtaining Table 2-6 consent, according to the presence or absence of proton-pump inhibitors

Unique Subject Identifier=1444000000-0019

MEANS Procedure

Assay variable : PTINR\_VAL1 PT-INR Value

N Mean Standard Deviation Minimum Maximum

---

|   |           |           |           |           |
|---|-----------|-----------|-----------|-----------|
| 6 | 1.9033333 | 0.1983599 | 1.7300000 | 2.2800000 |
|---|-----------|-----------|-----------|-----------|

---

Unique Subject Identifier=1444000000-0040

Assay variable : PTINR\_VAL1 PT-INR Value

N Mean Standard Deviation Minimum Maximum

---

|   |           |           |           |           |
|---|-----------|-----------|-----------|-----------|
| 6 | 2.0050000 | 0.3040230 | 1.6500000 | 2.5200000 |
|---|-----------|-----------|-----------|-----------|

---

Unique Subject Identifier=1444000000-0045

Assay variable : PTINR\_VAL1 PT-INR Value

N Mean Standard Deviation Minimum Maximum

---

|   |           |           |           |           |
|---|-----------|-----------|-----------|-----------|
| 6 | 1.9616667 | 0.5192462 | 1.3400000 | 2.8100000 |
|---|-----------|-----------|-----------|-----------|

---

Unique Subject Identifier=1444000000-0048

Assay variable : PTINR\_VAL1 PT-INR Value

N Mean Standard Deviation Minimum Maximum

---

|   |           |           |           |           |
|---|-----------|-----------|-----------|-----------|
| 6 | 2.3050000 | 0.4026289 | 1.8500000 | 3.0000000 |
|---|-----------|-----------|-----------|-----------|

---

Laboratory tests at the time of obtaining Table 2-6 consent, according to the presence or absence of proton-pump inhibitors

Unique Subject Identifier=1451000000-0001

MEANS Procedure

Assay variable : PTINR\_VAL1 PT-INR Value

N Mean Standard Deviation Minimum Maximum

---

|   |           |           |           |           |
|---|-----------|-----------|-----------|-----------|
| 6 | 1.9500000 | 0.1378405 | 1.8000000 | 2.1000000 |
|---|-----------|-----------|-----------|-----------|

---

Unique Subject Identifier=1451000000-0002

Assay variable : PTINR\_VAL1 PT-INR Value

N Mean Standard Deviation Minimum Maximum

---

|   |           |           |           |           |
|---|-----------|-----------|-----------|-----------|
| 2 | 1.8000000 | 0.1414214 | 1.7000000 | 1.9000000 |
|---|-----------|-----------|-----------|-----------|

---

Unique Subject Identifier=1451000000-0003

Assay variable : PTINR\_VAL1 PT-INR Value

N Mean Standard Deviation Minimum Maximum

---

|   |           |           |           |           |
|---|-----------|-----------|-----------|-----------|
| 4 | 1.6500000 | 0.3696846 | 1.4000000 | 2.2000000 |
|---|-----------|-----------|-----------|-----------|

---

Unique Subject Identifier=1451000000-0004

Assay variable : PTINR\_VAL1 PT-INR Value

N Mean Standard Deviation Minimum Maximum

---

|   |           |           |           |           |
|---|-----------|-----------|-----------|-----------|
| 3 | 2.3000000 | 0.5567764 | 1.8000000 | 2.9000000 |
|---|-----------|-----------|-----------|-----------|

---

Laboratory tests at the time of obtaining Table 2-6 consent, according to the presence or absence of proton-pump inhibitors

Unique Subject Identifier=1451000000-0005

MEANS Procedure

Assay variable : PTINR\_VAL1 PT-INR Value

N Mean Standard Deviation Minimum Maximum

---

|   |           |           |           |           |
|---|-----------|-----------|-----------|-----------|
| 5 | 2.2200000 | 0.2774887 | 1.9000000 | 2.5000000 |
|---|-----------|-----------|-----------|-----------|

---

Unique Subject Identifier=1451000000-0007

Assay variable : PTINR\_VAL1 PT-INR Value

N Mean Standard Deviation Minimum Maximum

---

|   |           |           |           |           |
|---|-----------|-----------|-----------|-----------|
| 6 | 2.0000000 | 0.2190890 | 1.7000000 | 2.3000000 |
|---|-----------|-----------|-----------|-----------|

---

Unique Subject Identifier=1451000000-0012

Assay variable : PTINR\_VAL1 PT-INR Value

N Mean Standard Deviation Minimum Maximum

---

|   |           |           |           |           |
|---|-----------|-----------|-----------|-----------|
| 6 | 1.8500000 | 0.1974842 | 1.6000000 | 2.2000000 |
|---|-----------|-----------|-----------|-----------|

---

Unique Subject Identifier=1451000000-0018

Assay variable : PTINR\_VAL1 PT-INR Value

N Mean Standard Deviation Minimum Maximum

---

|   |           |           |           |           |
|---|-----------|-----------|-----------|-----------|
| 6 | 1.9666667 | 0.4082483 | 1.3000000 | 2.5000000 |
|---|-----------|-----------|-----------|-----------|

---

Laboratory tests at the time of obtaining Table 2-6 consent, according to the presence or absence of proton-pump inhibitors

Unique Subject Identifier=1451000000-0019

MEANS Procedure

Assay variable : PTINR\_VAL1 PT-INR Value

N Mean Standard Deviation Minimum Maximum

---

|   |           |           |           |           |
|---|-----------|-----------|-----------|-----------|
| 2 | 1.9500000 | 0.6363961 | 1.5000000 | 2.4000000 |
|---|-----------|-----------|-----------|-----------|

---

Unique Subject Identifier=1451000000-0021

Assay variable : PTINR\_VAL1 PT-INR Value

N Mean Standard Deviation Minimum Maximum

---

|   |           |           |           |           |
|---|-----------|-----------|-----------|-----------|
| 6 | 1.9500000 | 0.1760682 | 1.8000000 | 2.2000000 |
|---|-----------|-----------|-----------|-----------|

---

Unique Subject Identifier=1451000000-0024

Assay variable : PTINR\_VAL1 PT-INR Value

N Mean Standard Deviation Minimum Maximum

---

|   |           |           |           |           |
|---|-----------|-----------|-----------|-----------|
| 6 | 2.5333333 | 0.6377042 | 2.0000000 | 3.8000000 |
|---|-----------|-----------|-----------|-----------|

---

Unique Subject Identifier=1451000000-0030



Assay variable : PTINR\_VAL1 PT-INR Value

N Mean Standard Deviation Minimum Maximum

---

|   |          |           |          |          |
|---|----------|-----------|----------|----------|
| 5 | 2.360000 | 1.0334409 | 1.300000 | 3.700000 |
|---|----------|-----------|----------|----------|

---

Laboratory tests at the time of obtaining Table 2-6 consent, according to the presence or absence of proton-pump inhibitors

Unique Subject Identifier=1451000000-0031

MEANS Procedure

Assay variable : PTINR\_VAL1 PT-INR Value

N Mean Standard Deviation Minimum Maximum

---

|   |           |           |           |           |
|---|-----------|-----------|-----------|-----------|
| 6 | 1.7333333 | 0.1966384 | 1.4000000 | 2.0000000 |
|---|-----------|-----------|-----------|-----------|

---

Unique Subject Identifier=1451000000-0033

Assay variable : PTINR\_VAL1 PT-INR Value

N Mean Standard Deviation Minimum Maximum

---

|   |           |           |           |           |
|---|-----------|-----------|-----------|-----------|
| 6 | 1.2450000 | 0.1819615 | 1.0600000 | 1.5000000 |
|---|-----------|-----------|-----------|-----------|

---

Unique Subject Identifier=1451000000-0034

Assay variable : PTINR\_VAL1 PT-INR Value

N Mean Standard Deviation Minimum Maximum

---

|   |           |           |           |           |
|---|-----------|-----------|-----------|-----------|
| 6 | 1.8666667 | 0.1632993 | 1.6000000 | 2.1000000 |
|---|-----------|-----------|-----------|-----------|

---

Unique Subject Identifier=1451000000-0035

Assay variable : PTINR\_VAL1 PT-INR Value

N Mean Standard Deviation Minimum Maximum

---

|   |           |           |           |           |
|---|-----------|-----------|-----------|-----------|
| 6 | 2.5333333 | 0.2338090 | 2.4000000 | 3.0000000 |
|---|-----------|-----------|-----------|-----------|

---

Laboratory tests at the time of obtaining Table 2-6 consent, according to the presence or absence of proton-pump inhibitors

Unique Subject Identifier=1451000000-0040

MEANS Procedure

Assay variable : PTINR\_VAL1 PT-INR Value

N Mean Standard Deviation Minimum Maximum

---

|   |           |           |           |           |
|---|-----------|-----------|-----------|-----------|
| 6 | 2.2833333 | 0.8886319 | 1.5000000 | 4.0000000 |
|---|-----------|-----------|-----------|-----------|

---

Unique Subject Identifier=1451000000-0042

Assay variable : PTINR\_VAL1 PT-INR Value

N Mean Standard Deviation Minimum Maximum

---

|   |           |           |           |           |
|---|-----------|-----------|-----------|-----------|
| 6 | 1.9333333 | 0.2160247 | 1.6000000 | 2.2000000 |
|---|-----------|-----------|-----------|-----------|

---

Unique Subject Identifier=1451000000-0044

Assay variable : PTINR\_VAL1 PT-INR Value

N Mean Standard Deviation Minimum Maximum

---

|   |           |           |           |           |
|---|-----------|-----------|-----------|-----------|
| 6 | 2.2166667 | 0.5636193 | 1.6000000 | 2.9000000 |
|---|-----------|-----------|-----------|-----------|

---

Unique Subject Identifier=1451000000-0046

Assay variable : PTINR\_VAL1 PT-INR Value

N Mean Standard Deviation Minimum Maximum

---

|   |          |           |          |          |
|---|----------|-----------|----------|----------|
| 6 | 1.500000 | 0.1673320 | 1.300000 | 1.700000 |
|---|----------|-----------|----------|----------|

---

Laboratory tests at the time of obtaining Table 2-6 consent, according to the presence or absence of proton-pump inhibitors

Unique Subject Identifier=1451000000-0047

MEANS Procedure

Assay variable : PTINR\_VAL1 PT-INR Value

N Mean Standard Deviation Minimum Maximum

---

|   |           |           |           |           |
|---|-----------|-----------|-----------|-----------|
| 6 | 2.4833333 | 0.8232051 | 1.4000000 | 3.5000000 |
|---|-----------|-----------|-----------|-----------|

---

Unique Subject Identifier=1451000000-0050

Assay variable : PTINR\_VAL1 PT-INR Value

N Mean Standard Deviation Minimum Maximum

---

|   |           |           |           |           |
|---|-----------|-----------|-----------|-----------|
| 6 | 2.3166667 | 0.9537645 | 1.1000000 | 3.9000000 |
|---|-----------|-----------|-----------|-----------|

---

Unique Subject Identifier=1451000000-0051

Assay variable : PTINR\_VAL1 PT-INR Value

N Mean Standard Deviation Minimum Maximum

---

|   |           |           |           |           |
|---|-----------|-----------|-----------|-----------|
| 6 | 1.9500000 | 0.3619392 | 1.5000000 | 2.4000000 |
|---|-----------|-----------|-----------|-----------|

---

Unique Subject Identifier=1451000000-0055

Assay variable : PTINR\_VAL1 PT-INR Value

N Mean Standard Deviation Minimum Maximum

---

|   |           |           |           |           |
|---|-----------|-----------|-----------|-----------|
| 6 | 1.7666667 | 0.1861899 | 1.6000000 | 2.1000000 |
|---|-----------|-----------|-----------|-----------|

---

Laboratory tests at the time of obtaining Table 2-6 consent, according to the presence or absence of proton-pump inhibitors

Unique Subject Identifier=1451000000-0063

MEANS Procedure

Assay variable : PTINR\_VAL1 PT-INR Value

N Mean Standard Deviation Minimum Maximum

---

|   |           |           |           |           |
|---|-----------|-----------|-----------|-----------|
| 6 | 1.4666667 | 0.2250926 | 1.1000000 | 1.7000000 |
|---|-----------|-----------|-----------|-----------|

---

Unique Subject Identifier=1452000000-0002

Assay variable : PTINR\_VAL1 PT-INR Value

N Mean Standard Deviation Minimum Maximum

---

|   |           |           |           |           |
|---|-----------|-----------|-----------|-----------|
| 5 | 2.2240000 | 0.2228901 | 1.9100000 | 2.5400000 |
|---|-----------|-----------|-----------|-----------|

---

Unique Subject Identifier=1452000000-0003

Assay variable : PTINR\_VAL1 PT-INR Value

N Mean Standard Deviation Minimum Maximum

---

|   |           |           |           |           |
|---|-----------|-----------|-----------|-----------|
| 6 | 2.4866667 | 0.4723840 | 1.9300000 | 3.2000000 |
|---|-----------|-----------|-----------|-----------|

---

Unique Subject Identifier=1452000000-0004



Assay variable : PTINR\_VAL1 PT-INR Value

N Mean Standard Deviation Minimum Maximum

---

|   |          |           |          |          |
|---|----------|-----------|----------|----------|
| 6 | 2.010000 | 0.2126029 | 1.740000 | 2.320000 |
|---|----------|-----------|----------|----------|

---

Laboratory tests at the time of obtaining Table 2-6 consent, according to the presence or absence of proton-pump inhibitors

Unique Subject Identifier=1452000000-0007

MEANS Procedure

Assay variable : PTINR\_VAL1 PT-INR Value

N Mean Standard Deviation Minimum Maximum

---

|   |           |           |           |           |
|---|-----------|-----------|-----------|-----------|
| 5 | 1.8660000 | 0.1379493 | 1.6900000 | 2.0600000 |
|---|-----------|-----------|-----------|-----------|

---

Unique Subject Identifier=1452000000-0008

Assay variable : PTINR\_VAL1 PT-INR Value

N Mean Standard Deviation Minimum Maximum

---

|   |           |           |           |           |
|---|-----------|-----------|-----------|-----------|
| 4 | 2.9475000 | 0.7501278 | 2.5000000 | 4.0700000 |
|---|-----------|-----------|-----------|-----------|

---

Unique Subject Identifier=1452000000-0010

Assay variable : PTINR\_VAL1 PT-INR Value

N Mean Standard Deviation Minimum Maximum

---

|   |           |           |           |           |
|---|-----------|-----------|-----------|-----------|
| 4 | 1.8200000 | 0.4180112 | 1.3800000 | 2.3800000 |
|---|-----------|-----------|-----------|-----------|

---

Unique Subject Identifier=1452000000-0011

Assay variable : PTINR\_VAL1 PT-INR Value

N Mean Standard Deviation Minimum Maximum

---

|   |           |           |           |           |
|---|-----------|-----------|-----------|-----------|
| 6 | 1.7016667 | 0.5537298 | 1.2000000 | 2.7800000 |
|---|-----------|-----------|-----------|-----------|

---

Laboratory tests at the time of obtaining Table 2-6 consent, according to the presence or absence of proton-pump inhibitors

Unique Subject Identifier=1452000000-0012

MEANS Procedure

Assay variable : PTINR\_VAL1 PT-INR Value

N Mean Standard Deviation Minimum Maximum

---

|   |           |           |           |           |
|---|-----------|-----------|-----------|-----------|
| 5 | 1.9400000 | 0.2756810 | 1.5700000 | 2.2500000 |
|---|-----------|-----------|-----------|-----------|

---

Unique Subject Identifier=1452000000-0013

Assay variable : PTINR\_VAL1 PT-INR Value

N Mean Standard Deviation Minimum Maximum

---

|   |           |           |           |           |
|---|-----------|-----------|-----------|-----------|
| 6 | 2.0800000 | 0.7291365 | 1.5500000 | 3.1700000 |
|---|-----------|-----------|-----------|-----------|

---

Unique Subject Identifier=1452000000-0014

Assay variable : PTINR\_VAL1 PT-INR Value

N Mean Standard Deviation Minimum Maximum

---

|   |           |           |           |           |
|---|-----------|-----------|-----------|-----------|
| 6 | 2.6233333 | 0.5473451 | 1.9500000 | 3.2800000 |
|---|-----------|-----------|-----------|-----------|

---

Unique Subject Identifier=1452000000-0015

Assay variable : PTINR\_VAL1 PT-INR Value

N Mean Standard Deviation Minimum Maximum

---

|   |           |           |           |           |
|---|-----------|-----------|-----------|-----------|
| 6 | 2.3266667 | 0.0886942 | 2.2300000 | 2.4500000 |
|---|-----------|-----------|-----------|-----------|

---

Laboratory tests at the time of obtaining Table 2-6 consent, according to the presence or absence of proton-pump inhibitors

Unique Subject Identifier=1452000000-0019

MEANS Procedure

Assay variable : PTINR\_VAL1 PT-INR Value

N Mean Standard Deviation Minimum Maximum

---

|   |           |           |           |           |
|---|-----------|-----------|-----------|-----------|
| 5 | 2.5580000 | 0.2932917 | 2.1600000 | 2.8800000 |
|---|-----------|-----------|-----------|-----------|

---

Unique Subject Identifier=1452000000-0020

Assay variable : PTINR\_VAL1 PT-INR Value

N Mean Standard Deviation Minimum Maximum

---

|   |           |           |           |           |
|---|-----------|-----------|-----------|-----------|
| 6 | 2.1000000 | 0.3241605 | 1.8300000 | 2.5700000 |
|---|-----------|-----------|-----------|-----------|

---

Unique Subject Identifier=1452000000-0021

Assay variable : PTINR\_VAL1 PT-INR Value

N Mean Standard Deviation Minimum Maximum

---

|   |           |           |           |           |
|---|-----------|-----------|-----------|-----------|
| 6 | 2.1700000 | 0.2033716 | 1.8900000 | 2.4600000 |
|---|-----------|-----------|-----------|-----------|

---

Unique Subject Identifier=1452000000-0024

Assay variable : PTINR\_VAL1 PT-INR Value

N Mean Standard Deviation Minimum Maximum

---

|   |           |           |           |           |
|---|-----------|-----------|-----------|-----------|
| 6 | 2.1966667 | 0.3460443 | 1.8500000 | 2.7800000 |
|---|-----------|-----------|-----------|-----------|

---

Laboratory tests at the time of obtaining Table 2-6 consent, according to the presence or absence of proton-pump inhibitors

Unique Subject Identifier=1452000000-0026

MEANS Procedure

Assay variable : PTINR\_VAL1 PT-INR Value

N Mean Standard Deviation Minimum Maximum

---

|   |           |           |           |           |
|---|-----------|-----------|-----------|-----------|
| 4 | 1.6925000 | 0.4897193 | 1.1700000 | 2.1200000 |
|---|-----------|-----------|-----------|-----------|

---

Unique Subject Identifier=1452000000-0027

Assay variable : PTINR\_VAL1 PT-INR Value

N Mean Standard Deviation Minimum Maximum

---

|   |           |           |           |           |
|---|-----------|-----------|-----------|-----------|
| 5 | 2.0800000 | 0.2931723 | 1.7400000 | 2.4400000 |
|---|-----------|-----------|-----------|-----------|

---

Unique Subject Identifier=1452000000-0029

Assay variable : PTINR\_VAL1 PT-INR Value

N Mean Standard Deviation Minimum Maximum

---

|   |           |           |           |           |
|---|-----------|-----------|-----------|-----------|
| 6 | 2.4833333 | 0.2224110 | 2.2900000 | 2.8800000 |
|---|-----------|-----------|-----------|-----------|

---

Unique Subject Identifier=1452000000-0030



Assay variable : PTINR\_VAL1 PT-INR Value

N Mean Standard Deviation Minimum Maximum

---

|   |          |           |           |           |
|---|----------|-----------|-----------|-----------|
| 6 | 2.433333 | 0.7724938 | 1.6900000 | 3.8500000 |
|---|----------|-----------|-----------|-----------|

---

Laboratory tests at the time of obtaining Table 2-6 consent, according to the presence or absence of proton-pump inhibitors

Unique Subject Identifier=1452000000-0031

MEANS Procedure

Assay variable : PTINR\_VAL1 PT-INR Value

N Mean Standard Deviation Minimum Maximum

---

|   |           |           |           |           |
|---|-----------|-----------|-----------|-----------|
| 6 | 1.8550000 | 0.1693222 | 1.6300000 | 2.1000000 |
|---|-----------|-----------|-----------|-----------|

---

Unique Subject Identifier=1452000000-0033

Assay variable : PTINR\_VAL1 PT-INR Value

N Mean Standard Deviation Minimum Maximum

---

|   |           |           |           |           |
|---|-----------|-----------|-----------|-----------|
| 6 | 1.7133333 | 0.3641245 | 1.2900000 | 2.2700000 |
|---|-----------|-----------|-----------|-----------|

---

Unique Subject Identifier=1452000000-0035

Assay variable : PTINR\_VAL1 PT-INR Value

N Mean Standard Deviation Minimum Maximum

---

|   |           |           |           |           |
|---|-----------|-----------|-----------|-----------|
| 6 | 2.4700000 | 0.5721888 | 1.6700000 | 3.3300000 |
|---|-----------|-----------|-----------|-----------|

---

Unique Subject Identifier=1452000000-0036

Assay variable : PTINR\_VAL1 PT-INR Value

N Mean Standard Deviation Minimum Maximum

---

|   |          |           |          |          |
|---|----------|-----------|----------|----------|
| 6 | 2.060000 | 0.5149369 | 1.700000 | 3.070000 |
|---|----------|-----------|----------|----------|

---

Laboratory tests at the time of obtaining Table 2-6 consent, according to the presence or absence of proton-pump inhibitors

Unique Subject Identifier=1452000000-0037

MEANS Procedure

Assay variable : PTINR\_VAL1 PT-INR Value

N Mean Standard Deviation Minimum Maximum

---

|   |           |           |           |           |
|---|-----------|-----------|-----------|-----------|
| 6 | 1.9033333 | 0.4987852 | 1.2900000 | 2.5900000 |
|---|-----------|-----------|-----------|-----------|

---

Unique Subject Identifier=1452000000-0038

Assay variable : PTINR\_VAL1 PT-INR Value

N Mean Standard Deviation Minimum Maximum

---

|   |           |           |           |           |
|---|-----------|-----------|-----------|-----------|
| 4 | 2.0875000 | 0.2972513 | 1.7600000 | 2.4600000 |
|---|-----------|-----------|-----------|-----------|

---

Unique Subject Identifier=1452000000-0041

Assay variable : PTINR\_VAL1 PT-INR Value

N Mean Standard Deviation Minimum Maximum

---

|   |           |           |           |           |
|---|-----------|-----------|-----------|-----------|
| 6 | 2.1350000 | 0.7433102 | 1.2200000 | 3.0200000 |
|---|-----------|-----------|-----------|-----------|

---

Unique Subject Identifier=1452000000-0050

Assay variable : PTINR\_VAL1 PT-INR Value

N Mean Standard Deviation Minimum Maximum

---

|   |           |           |           |           |
|---|-----------|-----------|-----------|-----------|
| 5 | 2.4340000 | 0.2597691 | 2.1000000 | 2.7800000 |
|---|-----------|-----------|-----------|-----------|

---

Laboratory tests at the time of obtaining Table 2-6 consent, according to the presence or absence of proton-pump inhibitors

Unique Subject Identifier=1452000000-0052

MEANS Procedure

Assay variable : PTINR\_VAL1 PT-INR Value

N Mean Standard Deviation Minimum Maximum

---

|   |           |           |           |           |
|---|-----------|-----------|-----------|-----------|
| 4 | 2.4450000 | 0.3181719 | 2.0800000 | 2.8300000 |
|---|-----------|-----------|-----------|-----------|

---

Unique Subject Identifier=1452000000-0054

Assay variable : PTINR\_VAL1 PT-INR Value

N Mean Standard Deviation Minimum Maximum

---

|   |           |           |           |           |
|---|-----------|-----------|-----------|-----------|
| 5 | 1.9160000 | 0.5048564 | 1.3600000 | 2.4200000 |
|---|-----------|-----------|-----------|-----------|

---

Unique Subject Identifier=1452000000-0055

Assay variable : PTINR\_VAL1 PT-INR Value

N Mean Standard Deviation Minimum Maximum

---

|   |           |           |           |           |
|---|-----------|-----------|-----------|-----------|
| 5 | 2.1360000 | 0.8257300 | 1.2200000 | 3.2500000 |
|---|-----------|-----------|-----------|-----------|

---

Unique Subject Identifier=1452000000-0056

Assay variable : PTINR\_VAL1 PT-INR Value

N Mean Standard Deviation Minimum Maximum

---

|   |           |           |           |           |
|---|-----------|-----------|-----------|-----------|
| 4 | 1.7975000 | 0.1203813 | 1.6300000 | 1.9100000 |
|---|-----------|-----------|-----------|-----------|

---

Laboratory tests at the time of obtaining Table 2-6 consent, according to the presence or absence of proton-pump inhibitors

Unique Subject Identifier=1452000000-0057

MEANS Procedure

Assay variable : PTINR\_VAL1 PT-INR Value

N Mean Standard Deviation Minimum Maximum

---

|   |           |           |           |           |
|---|-----------|-----------|-----------|-----------|
| 3 | 1.3766667 | 0.3212994 | 1.1300000 | 1.7400000 |
|---|-----------|-----------|-----------|-----------|

---

Unique Subject Identifier=1452000000-0059

Assay variable : PTINR\_VAL1 PT-INR Value

N Mean Standard Deviation Minimum Maximum

---

|   |           |           |           |           |
|---|-----------|-----------|-----------|-----------|
| 6 | 1.9800000 | 0.1879362 | 1.8400000 | 2.3400000 |
|---|-----------|-----------|-----------|-----------|

---

Unique Subject Identifier=1452000000-0060

Assay variable : PTINR\_VAL1 PT-INR Value

N Mean Standard Deviation Minimum Maximum

---

|   |           |           |           |           |
|---|-----------|-----------|-----------|-----------|
| 5 | 1.6220000 | 0.2580116 | 1.2500000 | 1.9400000 |
|---|-----------|-----------|-----------|-----------|

---

Unique Subject Identifier=1452000000-0061



Assay variable : PTINR\_VAL1 PT-INR Value

N Mean Standard Deviation Minimum Maximum

---

|   |           |           |           |           |
|---|-----------|-----------|-----------|-----------|
| 4 | 1.8200000 | 0.3842742 | 1.2500000 | 2.0800000 |
|---|-----------|-----------|-----------|-----------|

---

Laboratory tests at the time of obtaining Table 2-6 consent, according to the presence or absence of proton-pump inhibitors

Unique Subject Identifier=1452000000-0062

MEANS Procedure

Assay variable : PTINR\_VAL1 PT-INR Value

N Mean Standard Deviation Minimum Maximum

---

|   |           |           |           |           |
|---|-----------|-----------|-----------|-----------|
| 5 | 2.0620000 | 0.4810094 | 1.3000000 | 2.5500000 |
|---|-----------|-----------|-----------|-----------|

---

Unique Subject Identifier=1452000000-0065

Assay variable : PTINR\_VAL1 PT-INR Value

N Mean Standard Deviation Minimum Maximum

---

|   |           |           |           |           |
|---|-----------|-----------|-----------|-----------|
| 4 | 1.9900000 | 0.2694439 | 1.6400000 | 2.2700000 |
|---|-----------|-----------|-----------|-----------|

---

Unique Subject Identifier=1452000000-0066

Assay variable : PTINR\_VAL1 PT-INR Value

N Mean Standard Deviation Minimum Maximum

---

|   |           |           |           |           |
|---|-----------|-----------|-----------|-----------|
| 5 | 2.2800000 | 0.5793099 | 1.7000000 | 3.1300000 |
|---|-----------|-----------|-----------|-----------|

---

Unique Subject Identifier=1452000000-0068

Assay variable : PTINR\_VAL1 PT-INR Value

N Mean Standard Deviation Minimum Maximum

---

|   |           |           |           |           |
|---|-----------|-----------|-----------|-----------|
| 6 | 1.9450000 | 0.2251888 | 1.7600000 | 2.3800000 |
|---|-----------|-----------|-----------|-----------|

---

Laboratory tests at the time of obtaining Table 2-6 consent, according to the presence or absence of proton-pump inhibitors

Unique Subject Identifier=1452000000-0069

MEANS Procedure

Assay variable : PTINR\_VAL1 PT-INR Value

N Mean Standard Deviation Minimum Maximum

---

|   |           |           |           |           |
|---|-----------|-----------|-----------|-----------|
| 6 | 2.1883333 | 0.1330288 | 2.0600000 | 2.4200000 |
|---|-----------|-----------|-----------|-----------|

---

Unique Subject Identifier=1452000000-0074

Assay variable : PTINR\_VAL1 PT-INR Value

N Mean Standard Deviation Minimum Maximum

---

|   |           |           |           |           |
|---|-----------|-----------|-----------|-----------|
| 6 | 2.4333333 | 0.2188759 | 2.1300000 | 2.7300000 |
|---|-----------|-----------|-----------|-----------|

---

Unique Subject Identifier=1452000000-0080

Assay variable : PTINR\_VAL1 PT-INR Value

N Mean Standard Deviation Minimum Maximum

---

|   |           |           |           |           |
|---|-----------|-----------|-----------|-----------|
| 6 | 2.2450000 | 0.3602638 | 1.8300000 | 2.8000000 |
|---|-----------|-----------|-----------|-----------|

---

Unique Subject Identifier=1452000000-0081

Assay variable : PTINR\_VAL1 PT-INR Value

N Mean Standard Deviation Minimum Maximum

---

|   |           |           |           |           |
|---|-----------|-----------|-----------|-----------|
| 6 | 1.6683333 | 0.2830135 | 1.1400000 | 1.9400000 |
|---|-----------|-----------|-----------|-----------|

---

Laboratory tests at the time of obtaining Table 2-6 consent, according to the presence or absence of proton-pump inhibitors

Unique Subject Identifier=1452000000-0083

MEANS Procedure

Assay variable : PTINR\_VAL1 PT-INR Value

| N | Mean      | Standard Deviation | Minimum   | Maximum   |
|---|-----------|--------------------|-----------|-----------|
| 6 | 2.3450000 | 0.1808591          | 2.0600000 | 2.5100000 |

Unique Subject Identifier=1452000000-0084

Assay variable : PTINR\_VAL1 PT-INR Value

| N | Mean      | Standard Deviation | Minimum   | Maximum   |
|---|-----------|--------------------|-----------|-----------|
| 2 | 1.7850000 | 0.3747666          | 1.5200000 | 2.0500000 |

Unique Subject Identifier=1452000000-0086

Assay variable : PTINR\_VAL1 PT-INR Value

| N | Mean      | Standard Deviation | Minimum   | Maximum   |
|---|-----------|--------------------|-----------|-----------|
| 2 | 1.7200000 | 0.2828427          | 1.5200000 | 1.9200000 |

Unique Subject Identifier=1452000000-0101

Assay variable : PTINR\_VAL1 PT-INR Value

N Mean Standard Deviation Minimum Maximum

---

|   |           |           |           |           |
|---|-----------|-----------|-----------|-----------|
| 6 | 1.8083333 | 0.1702253 | 1.6600000 | 2.1100000 |
|---|-----------|-----------|-----------|-----------|

---

Laboratory tests at the time of obtaining Table 2-6 consent, according to the presence or absence of proton-pump inhibitors

Unique Subject Identifier=1452000000-0103

MEANS Procedure

Assay variable : PTINR\_VAL1 PT-INR Value

N Mean Standard Deviation Minimum Maximum

---

|   |           |           |           |           |
|---|-----------|-----------|-----------|-----------|
| 6 | 2.3233333 | 0.2125716 | 2.0100000 | 2.6600000 |
|---|-----------|-----------|-----------|-----------|

---

Unique Subject Identifier=1452000000-0107

Assay variable : PTINR\_VAL1 PT-INR Value

N Mean Standard Deviation Minimum Maximum

---

|   |           |           |           |           |
|---|-----------|-----------|-----------|-----------|
| 4 | 2.1375000 | 0.9040050 | 1.1400000 | 3.2200000 |
|---|-----------|-----------|-----------|-----------|

---

Unique Subject Identifier=1452000000-0109

Assay variable : PTINR\_VAL1 PT-INR Value

N Mean Standard Deviation Minimum Maximum

---

|   |           |           |           |           |
|---|-----------|-----------|-----------|-----------|
| 6 | 1.8366667 | 0.2488909 | 1.4900000 | 2.2100000 |
|---|-----------|-----------|-----------|-----------|

---

Unique Subject Identifier=1454000000-0005



Assay variable : PTINR\_VAL1 PT-INR Value

N Mean Standard Deviation Minimum Maximum

---

|   |           |           |           |           |
|---|-----------|-----------|-----------|-----------|
| 6 | 2.4533333 | 0.4206978 | 1.9000000 | 2.9500000 |
|---|-----------|-----------|-----------|-----------|

---

Laboratory tests at the time of obtaining Table 2-6 consent, according to the presence or absence of proton-pump inhibitors

Unique Subject Identifier=1454000000-0028

MEANS Procedure

Assay variable : PTINR\_VAL1 PT-INR Value

N Mean Standard Deviation Minimum Maximum

---

|   |           |           |           |           |
|---|-----------|-----------|-----------|-----------|
| 6 | 2.1466667 | 0.3545514 | 1.8300000 | 2.8200000 |
|---|-----------|-----------|-----------|-----------|

---

Unique Subject Identifier=1454000000-0039

Assay variable : PTINR\_VAL1 PT-INR Value

N Mean Standard Deviation Minimum Maximum

---

|   |           |           |           |           |
|---|-----------|-----------|-----------|-----------|
| 6 | 2.2066667 | 0.3184755 | 1.6400000 | 2.4800000 |
|---|-----------|-----------|-----------|-----------|

---

Unique Subject Identifier=1454000000-0064

Assay variable : PTINR\_VAL1 PT-INR Value

N Mean Standard Deviation Minimum Maximum

---

|   |           |           |           |           |
|---|-----------|-----------|-----------|-----------|
| 6 | 1.9216667 | 0.1290607 | 1.7700000 | 2.1100000 |
|---|-----------|-----------|-----------|-----------|

---

Unique Subject Identifier=1454000000-0067

Assay variable : PTINR\_VAL1 PT-INR Value

N Mean Standard Deviation Minimum Maximum

---

|   |          |           |          |          |
|---|----------|-----------|----------|----------|
| 6 | 2.103333 | 0.2608959 | 1.810000 | 2.560000 |
|---|----------|-----------|----------|----------|

---

Laboratory tests at the time of obtaining Table 2-6 consent, according to the presence or absence of proton-pump inhibitors

Unique Subject Identifier=1457000000-0001

MEANS Procedure

Assay variable : PTINR\_VAL1 PT-INR Value

N Mean Standard Deviation Minimum Maximum

---

|   |          |           |          |          |
|---|----------|-----------|----------|----------|
| 5 | 1.860000 | 0.4393177 | 1.300000 | 2.500000 |
|---|----------|-----------|----------|----------|

---

Unique Subject Identifier=1463010000-0002

Assay variable : PTINR\_VAL1 PT-INR Value

N Mean Standard Deviation Minimum Maximum

---

|   |          |           |          |          |
|---|----------|-----------|----------|----------|
| 5 | 1.684000 | 0.1745852 | 1.440000 | 1.840000 |
|---|----------|-----------|----------|----------|

---

Unique Subject Identifier=1463010000-0009

Assay variable : PTINR\_VAL1 PT-INR Value

N Mean Standard Deviation Minimum Maximum

---

|   |          |           |          |          |
|---|----------|-----------|----------|----------|
| 5 | 2.016000 | 0.6467070 | 1.300000 | 2.850000 |
|---|----------|-----------|----------|----------|

---

Unique Subject Identifier=1463010000-0014

Assay variable : PTINR\_VAL1 PT-INR Value

N Mean Standard Deviation Minimum Maximum

---

|   |           |           |           |           |
|---|-----------|-----------|-----------|-----------|
| 5 | 1.3880000 | 0.1267675 | 1.2800000 | 1.5900000 |
|---|-----------|-----------|-----------|-----------|

---

Laboratory tests at the time of obtaining Table 2-6 consent, according to the presence or absence of proton-pump inhibitors

Unique Subject Identifier=1463010000-0018

MEANS Procedure

Assay variable : PTINR\_VAL1 PT-INR Value

N Mean Standard Deviation Minimum Maximum

---

|   |           |           |           |           |
|---|-----------|-----------|-----------|-----------|
| 6 | 2.0333333 | 0.3765988 | 1.4900000 | 2.6100000 |
|---|-----------|-----------|-----------|-----------|

---

Unique Subject Identifier=1463010000-0030

Assay variable : PTINR\_VAL1 PT-INR Value

N Mean Standard Deviation Minimum Maximum

---

|   |           |           |           |           |
|---|-----------|-----------|-----------|-----------|
| 6 | 1.2266667 | 0.0121106 | 1.2100000 | 1.2400000 |
|---|-----------|-----------|-----------|-----------|

---

Unique Subject Identifier=1470000000-0001

Assay variable : PTINR\_VAL1 PT-INR Value

N Mean Standard Deviation Minimum Maximum

---

|   |           |           |           |           |
|---|-----------|-----------|-----------|-----------|
| 4 | 1.0075000 | 0.0095743 | 1.0000000 | 1.0200000 |
|---|-----------|-----------|-----------|-----------|

---

Unique Subject Identifier=1470000000-0002

Assay variable : PTINR\_VAL1 PT-INR Value

N Mean Standard Deviation Minimum Maximum

---

|   |           |           |           |           |
|---|-----------|-----------|-----------|-----------|
| 2 | 1.8550000 | 0.2474874 | 1.6800000 | 2.0300000 |
|---|-----------|-----------|-----------|-----------|

---

Laboratory tests at the time of obtaining Table 2-6 consent, according to the presence or absence of proton-pump inhibitors

Unique Subject Identifier=1470000000-0004

MEANS Procedure

Assay variable : PTINR\_VAL1 PT-INR Value

| N | Mean      | Standard Deviation | Minimum   | Maximum   |
|---|-----------|--------------------|-----------|-----------|
| 2 | 1.6950000 | 0.1626346          | 1.5800000 | 1.8100000 |

Unique Subject Identifier=1470000000-0009

Assay variable : PTINR\_VAL1 PT-INR Value

| N | Mean      | Standard Deviation | Minimum   | Maximum   |
|---|-----------|--------------------|-----------|-----------|
| 4 | 1.4350000 | 0.0675771          | 1.3600000 | 1.5100000 |

Unique Subject Identifier=1474000000-0002

Assay variable : PTINR\_VAL1 PT-INR Value

| N | Mean      | Standard Deviation | Minimum   | Maximum   |
|---|-----------|--------------------|-----------|-----------|
| 5 | 1.9200000 | 0.4764452          | 1.5000000 | 2.7000000 |

Unique Subject Identifier=1475000000-0016



Assay variable : PTINR\_VAL1 PT-INR Value

N Mean Standard Deviation Minimum Maximum

---

|   |           |           |           |           |
|---|-----------|-----------|-----------|-----------|
| 3 | 2.4333333 | 0.2516611 | 2.2000000 | 2.7000000 |
|---|-----------|-----------|-----------|-----------|

---

Laboratory tests at the time of obtaining Table 2-6 consent, according to the presence or absence of proton-pump inhibitors

Unique Subject Identifier=1477000000-0007

MEANS Procedure

Assay variable : PTINR\_VAL1 PT-INR Value

N Mean Standard Deviation Minimum Maximum

---

|   |           |           |           |           |
|---|-----------|-----------|-----------|-----------|
| 5 | 2.1800000 | 0.2062765 | 1.9700000 | 2.5200000 |
|---|-----------|-----------|-----------|-----------|

---

Unique Subject Identifier=1477000000-0014

Assay variable : PTINR\_VAL1 PT-INR Value

N Mean Standard Deviation Minimum Maximum

---

|   |           |           |           |           |
|---|-----------|-----------|-----------|-----------|
| 4 | 2.3300000 | 0.1902630 | 2.1400000 | 2.5900000 |
|---|-----------|-----------|-----------|-----------|

---

Unique Subject Identifier=1478011111-0011

Assay variable : PTINR\_VAL1 PT-INR Value

N Mean Standard Deviation Minimum Maximum

---

|   |           |           |           |           |
|---|-----------|-----------|-----------|-----------|
| 4 | 2.2625000 | 1.0897209 | 1.1200000 | 3.5400000 |
|---|-----------|-----------|-----------|-----------|

---

Unique Subject Identifier=1478011111-0016

Assay variable : PTINR\_VAL1 PT-INR Value

N Mean Standard Deviation Minimum Maximum

---

|   |          |           |          |          |
|---|----------|-----------|----------|----------|
| 2 | 2.560000 | 0.6646804 | 2.090000 | 3.030000 |
|---|----------|-----------|----------|----------|

---

Laboratory tests at the time of obtaining Table 2-6 consent, according to the presence or absence of proton-pump inhibitors

Unique Subject Identifier=1478011111-0028

MEANS Procedure

Assay variable : PTINR\_VAL1 PT-INR Value

N Mean Standard Deviation Minimum Maximum

---

|   |           |           |           |           |
|---|-----------|-----------|-----------|-----------|
| 4 | 2.5775000 | 1.1448835 | 1.4500000 | 4.1400000 |
|---|-----------|-----------|-----------|-----------|

---

Unique Subject Identifier=1478011111-0030

Assay variable : PTINR\_VAL1 PT-INR Value

N Mean Standard Deviation Minimum Maximum

---

|   |           |           |           |           |
|---|-----------|-----------|-----------|-----------|
| 3 | 2.4766667 | 0.1193035 | 2.3800000 | 2.6100000 |
|---|-----------|-----------|-----------|-----------|

---

Unique Subject Identifier=1478011111-0031

Assay variable : PTINR\_VAL1 PT-INR Value

N Mean Standard Deviation Minimum Maximum

---

|   |           |           |           |           |
|---|-----------|-----------|-----------|-----------|
| 5 | 2.7340000 | 1.1840524 | 1.9600000 | 4.7800000 |
|---|-----------|-----------|-----------|-----------|

---

Unique Subject Identifier=1478011111-0038

Assay variable : PTINR\_VAL1 PT-INR Value

N Mean Standard Deviation Minimum Maximum

---

|   |           |           |           |           |
|---|-----------|-----------|-----------|-----------|
| 3 | 2.9666667 | 0.2538372 | 2.7600000 | 3.2500000 |
|---|-----------|-----------|-----------|-----------|

---

Laboratory tests at the time of obtaining Table 2-6 consent, according to the presence or absence of proton-pump inhibitors

Unique Subject Identifier=1478011111-0040

MEANS Procedure

Assay variable : PTINR\_VAL1 PT-INR Value

N Mean Standard Deviation Minimum Maximum

---

|   |           |           |           |           |
|---|-----------|-----------|-----------|-----------|
| 3 | 2.1233333 | 0.0723418 | 2.0400000 | 2.1700000 |
|---|-----------|-----------|-----------|-----------|

---

Unique Subject Identifier=1478011111-0060

Assay variable : PTINR\_VAL1 PT-INR Value

N Mean Standard Deviation Minimum Maximum

---

|   |           |           |           |           |
|---|-----------|-----------|-----------|-----------|
| 3 | 2.8366667 | 0.6034346 | 2.4300000 | 3.5300000 |
|---|-----------|-----------|-----------|-----------|

---

Unique Subject Identifier=1478011111-0066

Assay variable : PTINR\_VAL1 PT-INR Value

N Mean Standard Deviation Minimum Maximum

---

|   |           |           |           |           |
|---|-----------|-----------|-----------|-----------|
| 3 | 1.8433333 | 0.3162805 | 1.4900000 | 2.1000000 |
|---|-----------|-----------|-----------|-----------|

---

Unique Subject Identifier=1478011111-0069

Assay variable : PTINR\_VAL1 PT-INR Value

N Mean Standard Deviation Minimum Maximum

---

|   |           |           |           |           |
|---|-----------|-----------|-----------|-----------|
| 3 | 2.5466667 | 0.0305505 | 2.5200000 | 2.5800000 |
|---|-----------|-----------|-----------|-----------|

---

Laboratory tests at the time of obtaining Table 2-6 consent, according to the presence or absence of proton-pump inhibitors

Unique Subject Identifier=1478011111-0093

MEANS Procedure

Assay variable : PTINR\_VAL1 PT-INR Value

N Mean Standard Deviation Minimum Maximum

---

|   |           |           |           |           |
|---|-----------|-----------|-----------|-----------|
| 4 | 1.6525000 | 0.2003954 | 1.4700000 | 1.9100000 |
|---|-----------|-----------|-----------|-----------|

---

Unique Subject Identifier=1478011111-0097

Assay variable : PTINR\_VAL1 PT-INR Value

N Mean Standard Deviation Minimum Maximum

---

|   |           |           |           |           |
|---|-----------|-----------|-----------|-----------|
| 3 | 2.2300000 | 0.7454529 | 1.4700000 | 2.9600000 |
|---|-----------|-----------|-----------|-----------|

---

Unique Subject Identifier=1478011111-0108

Assay variable : PTINR\_VAL1 PT-INR Value

N Mean Standard Deviation Minimum Maximum

---

|   |           |           |           |           |
|---|-----------|-----------|-----------|-----------|
| 4 | 2.1225000 | 0.2441823 | 1.8400000 | 2.4000000 |
|---|-----------|-----------|-----------|-----------|

---

Unique Subject Identifier=1478011111-0118



Assay variable : PTINR\_VAL1 PT-INR Value

N Mean Standard Deviation Minimum Maximum

---

|   |           |           |           |           |
|---|-----------|-----------|-----------|-----------|
| 4 | 2.7350000 | 0.0911043 | 2.6400000 | 2.8500000 |
|---|-----------|-----------|-----------|-----------|

---

Laboratory tests at the time of obtaining Table 2-6 consent, according to the presence or absence of proton-pump inhibitors

Unique Subject Identifier=1478011111-0121

MEANS Procedure

Assay variable : PTINR\_VAL1 PT-INR Value

N Mean Standard Deviation Minimum Maximum

---

|   |           |           |           |           |
|---|-----------|-----------|-----------|-----------|
| 3 | 2.0933333 | 0.1721434 | 1.9700000 | 2.2900000 |
|---|-----------|-----------|-----------|-----------|

---

Unique Subject Identifier=1478011111-0127

Assay variable : PTINR\_VAL1 PT-INR Value

N Mean Standard Deviation Minimum Maximum

---

|   |           |           |           |           |
|---|-----------|-----------|-----------|-----------|
| 4 | 1.8225000 | 0.0350000 | 1.7700000 | 1.8400000 |
|---|-----------|-----------|-----------|-----------|

---

Unique Subject Identifier=1478011111-0147

Assay variable : PTINR\_VAL1 PT-INR Value

N Mean Standard Deviation Minimum Maximum

---

|   |           |           |           |           |
|---|-----------|-----------|-----------|-----------|
| 3 | 2.1666667 | 0.2396525 | 1.8900000 | 2.3100000 |
|---|-----------|-----------|-----------|-----------|

---

Unique Subject Identifier=1480011111-0003

Assay variable : PTINR\_VAL1 PT-INR Value

N Mean Standard Deviation Minimum Maximum

---

|   |          |           |          |          |
|---|----------|-----------|----------|----------|
| 3 | 2.560000 | 0.9497895 | 1.470000 | 3.210000 |
|---|----------|-----------|----------|----------|

---

Laboratory tests at the time of obtaining Table 2-6 consent, according to the presence or absence of proton-pump inhibitors

Unique Subject Identifier=1480011111-0005

MEANS Procedure

Assay variable : PTINR\_VAL1 PT-INR Value

N Mean Standard Deviation Minimum Maximum

---

|   |           |           |           |           |
|---|-----------|-----------|-----------|-----------|
| 3 | 2.2533333 | 0.8220300 | 1.7200000 | 3.2000000 |
|---|-----------|-----------|-----------|-----------|

---

Unique Subject Identifier=1487000000-0001

Assay variable : PTINR\_VAL1 PT-INR Value

N Mean Standard Deviation Minimum Maximum

---

|   |           |           |           |           |
|---|-----------|-----------|-----------|-----------|
| 6 | 2.3333333 | 0.4320494 | 1.9000000 | 3.1000000 |
|---|-----------|-----------|-----------|-----------|

---

Unique Subject Identifier=1487000000-0010

Assay variable : PTINR\_VAL1 PT-INR Value

N Mean Standard Deviation Minimum Maximum

---

|   |           |           |           |           |
|---|-----------|-----------|-----------|-----------|
| 6 | 2.2000000 | 0.5513620 | 1.5000000 | 3.1000000 |
|---|-----------|-----------|-----------|-----------|

---

Unique Subject Identifier=1487000000-0012

Assay variable : PTINR\_VAL1 PT-INR Value

N Mean Standard Deviation Minimum Maximum

---

|   |          |           |          |          |
|---|----------|-----------|----------|----------|
| 6 | 2.133333 | 0.2581989 | 1.800000 | 2.500000 |
|---|----------|-----------|----------|----------|

---

Laboratory tests at the time of obtaining Table 2-6 consent, according to the presence or absence of proton-pump inhibitors

Unique Subject Identifier=1487000000-0017

MEANS Procedure

Assay variable : PTINR\_VAL1 PT-INR Value

N Mean Standard Deviation Minimum Maximum

---

|   |           |           |           |           |
|---|-----------|-----------|-----------|-----------|
| 6 | 2.0666667 | 0.3614784 | 1.6000000 | 2.7000000 |
|---|-----------|-----------|-----------|-----------|

---

Unique Subject Identifier=1487000000-0019

Assay variable : PTINR\_VAL1 PT-INR Value

N Mean Standard Deviation Minimum Maximum

---

|   |           |           |           |           |
|---|-----------|-----------|-----------|-----------|
| 6 | 2.1500000 | 0.1516575 | 2.0000000 | 2.4000000 |
|---|-----------|-----------|-----------|-----------|

---

Unique Subject Identifier=1487000000-0022

Assay variable : PTINR\_VAL1 PT-INR Value

N Mean Standard Deviation Minimum Maximum

---

|   |           |           |           |           |
|---|-----------|-----------|-----------|-----------|
| 5 | 2.1600000 | 0.4505552 | 1.7000000 | 2.8000000 |
|---|-----------|-----------|-----------|-----------|

---

Unique Subject Identifier=1487000000-0023

Assay variable : PTINR\_VAL1 PT-INR Value

N Mean Standard Deviation Minimum Maximum

---

|   |           |           |           |           |
|---|-----------|-----------|-----------|-----------|
| 6 | 2.0333333 | 0.3141125 | 1.6000000 | 2.5000000 |
|---|-----------|-----------|-----------|-----------|

---

Laboratory tests at the time of obtaining Table 2-6 consent, according to the presence or absence of proton-pump inhibitors

Unique Subject Identifier=1487000000-0027

MEANS Procedure

Assay variable : PTINR\_VAL1 PT-INR Value

N Mean Standard Deviation Minimum Maximum

---

|   |           |           |           |           |
|---|-----------|-----------|-----------|-----------|
| 6 | 2.1166667 | 0.3710346 | 1.6000000 | 2.6000000 |
|---|-----------|-----------|-----------|-----------|

---

Unique Subject Identifier=1487000000-0028

Assay variable : PTINR\_VAL1 PT-INR Value

N Mean Standard Deviation Minimum Maximum

---

|   |           |           |           |           |
|---|-----------|-----------|-----------|-----------|
| 6 | 1.8666667 | 0.4273952 | 1.5000000 | 2.5000000 |
|---|-----------|-----------|-----------|-----------|

---

Unique Subject Identifier=1487000000-0029

Assay variable : PTINR\_VAL1 PT-INR Value

N Mean Standard Deviation Minimum Maximum

---

|   |           |           |           |           |
|---|-----------|-----------|-----------|-----------|
| 6 | 2.3833333 | 0.9304121 | 1.5000000 | 4.0000000 |
|---|-----------|-----------|-----------|-----------|

---

Unique Subject Identifier=1487000000-0032



Assay variable : PTINR\_VAL1 PT-INR Value

N Mean Standard Deviation Minimum Maximum

---

|   |          |           |          |          |
|---|----------|-----------|----------|----------|
| 5 | 2.280000 | 0.1643168 | 2.100000 | 2.500000 |
|---|----------|-----------|----------|----------|

---

Laboratory tests at the time of obtaining Table 2-6 consent, according to the presence or absence of proton-pump inhibitors

Unique Subject Identifier=1487000000-0033

MEANS Procedure

Assay variable : PTINR\_VAL1 PT-INR Value

N Mean Standard Deviation Minimum Maximum

---

|   |           |           |           |           |
|---|-----------|-----------|-----------|-----------|
| 6 | 2.4666667 | 0.4802777 | 2.0000000 | 3.2000000 |
|---|-----------|-----------|-----------|-----------|

---

Unique Subject Identifier=1491000000-0008

Assay variable : PTINR\_VAL1 PT-INR Value

N Mean Standard Deviation Minimum Maximum

---

|   |           |           |           |           |
|---|-----------|-----------|-----------|-----------|
| 6 | 2.2966667 | 0.3324856 | 1.8900000 | 2.7700000 |
|---|-----------|-----------|-----------|-----------|

---

Unique Subject Identifier=1491000000-0009

Assay variable : PTINR\_VAL1 PT-INR Value

N Mean Standard Deviation Minimum Maximum

---

|   |           |           |           |           |
|---|-----------|-----------|-----------|-----------|
| 5 | 2.1060000 | 0.5477043 | 1.5400000 | 2.9700000 |
|---|-----------|-----------|-----------|-----------|

---

Unique Subject Identifier=1491000000-0010

Assay variable : PTINR\_VAL1 PT-INR Value

N Mean Standard Deviation Minimum Maximum

---

|   |          |           |          |          |
|---|----------|-----------|----------|----------|
| 4 | 2.360000 | 0.5832667 | 1.510000 | 2.830000 |
|---|----------|-----------|----------|----------|

---

Laboratory tests at the time of obtaining Table 2-6 consent, according to the presence or absence of proton-pump inhibitors

Unique Subject Identifier=1491000000-0011

MEANS Procedure

Assay variable : PTINR\_VAL1 PT-INR Value

N Mean Standard Deviation Minimum Maximum

---

|   |           |           |           |           |
|---|-----------|-----------|-----------|-----------|
| 4 | 2.4825000 | 0.8079759 | 1.5200000 | 3.3800000 |
|---|-----------|-----------|-----------|-----------|

---

Unique Subject Identifier=1491000000-0012

Assay variable : PTINR\_VAL1 PT-INR Value

N Mean Standard Deviation Minimum Maximum

---

|   |           |           |           |           |
|---|-----------|-----------|-----------|-----------|
| 4 | 1.8975000 | 0.0427200 | 1.8700000 | 1.9600000 |
|---|-----------|-----------|-----------|-----------|

---

Unique Subject Identifier=1491000000-0019

Assay variable : PTINR\_VAL1 PT-INR Value

N Mean Standard Deviation Minimum Maximum

---

|   |           |           |           |           |
|---|-----------|-----------|-----------|-----------|
| 4 | 2.2975000 | 0.3704389 | 1.9200000 | 2.7900000 |
|---|-----------|-----------|-----------|-----------|

---

Unique Subject Identifier=1491000000-0021

Assay variable : PTINR\_VAL1 PT-INR Value

N Mean Standard Deviation Minimum Maximum

---

|   |           |           |           |           |
|---|-----------|-----------|-----------|-----------|
| 6 | 2.0583333 | 0.3400833 | 1.7500000 | 2.5600000 |
|---|-----------|-----------|-----------|-----------|

---

Laboratory tests at the time of obtaining Table 2-6 consent, according to the presence or absence of proton-pump inhibitors

Unique Subject Identifier=1491000000-0025

MEANS Procedure

Assay variable : PTINR\_VAL1 PT-INR Value

N Mean Standard Deviation Minimum Maximum

---

|   |           |           |           |           |
|---|-----------|-----------|-----------|-----------|
| 3 | 2.3033333 | 0.0737111 | 2.2200000 | 2.3600000 |
|---|-----------|-----------|-----------|-----------|

---

Unique Subject Identifier=1491000000-0031

Assay variable : PTINR\_VAL1 PT-INR Value

N Mean Standard Deviation Minimum Maximum

---

|   |           |           |           |           |
|---|-----------|-----------|-----------|-----------|
| 3 | 1.8466667 | 0.0513160 | 1.7900000 | 1.8900000 |
|---|-----------|-----------|-----------|-----------|

---

Unique Subject Identifier=1491000000-0032

Assay variable : PTINR\_VAL1 PT-INR Value

N Mean Standard Deviation Minimum Maximum

---

|   |           |           |           |           |
|---|-----------|-----------|-----------|-----------|
| 3 | 1.8500000 | 0.2325941 | 1.6000000 | 2.0600000 |
|---|-----------|-----------|-----------|-----------|

---

Unique Subject Identifier=1491000000-0035

Assay variable : PTINR\_VAL1 PT-INR Value

N Mean Standard Deviation Minimum Maximum

---

|   |           |           |           |           |
|---|-----------|-----------|-----------|-----------|
| 4 | 1.9475000 | 0.3264327 | 1.6300000 | 2.4000000 |
|---|-----------|-----------|-----------|-----------|

---

Laboratory tests at the time of obtaining Table 2-6 consent, according to the presence or absence of proton-pump inhibitors

Unique Subject Identifier=1491000000-0040

MEANS Procedure

Assay variable : PTINR\_VAL1 PT-INR Value

N Mean Standard Deviation Minimum Maximum

---

|   |           |           |           |           |
|---|-----------|-----------|-----------|-----------|
| 6 | 2.6333333 | 0.5336915 | 1.8900000 | 3.5400000 |
|---|-----------|-----------|-----------|-----------|

---

Unique Subject Identifier=1491000000-0044

Assay variable : PTINR\_VAL1 PT-INR Value

N Mean Standard Deviation Minimum Maximum

---

|   |           |           |           |           |
|---|-----------|-----------|-----------|-----------|
| 4 | 1.9550000 | 0.4466542 | 1.6600000 | 2.6200000 |
|---|-----------|-----------|-----------|-----------|

---

Unique Subject Identifier=1491000000-0049

Assay variable : PTINR\_VAL1 PT-INR Value

N Mean Standard Deviation Minimum Maximum

---

|   |           |           |           |           |
|---|-----------|-----------|-----------|-----------|
| 6 | 1.8566667 | 0.4394390 | 1.3900000 | 2.6700000 |
|---|-----------|-----------|-----------|-----------|

---

Unique Subject Identifier=1491000000-0056



Assay variable : PTINR\_VAL1 PT-INR Value

N Mean Standard Deviation Minimum Maximum

---

|   |           |           |           |           |
|---|-----------|-----------|-----------|-----------|
| 3 | 1.9766667 | 0.0378594 | 1.9500000 | 2.0200000 |
|---|-----------|-----------|-----------|-----------|

---

Laboratory tests at the time of obtaining Table 2-6 consent, according to the presence or absence of proton-pump inhibitors

Unique Subject Identifier=1491000000-0059

MEANS Procedure

Assay variable : PTINR\_VAL1 PT-INR Value

N Mean Standard Deviation Minimum Maximum

---

|   |           |           |           |           |
|---|-----------|-----------|-----------|-----------|
| 4 | 2.3575000 | 0.2555223 | 2.1000000 | 2.6900000 |
|---|-----------|-----------|-----------|-----------|

---

Unique Subject Identifier=1491000000-0060

Assay variable : PTINR\_VAL1 PT-INR Value

N Mean Standard Deviation Minimum Maximum

---

|   |           |           |           |           |
|---|-----------|-----------|-----------|-----------|
| 4 | 1.9075000 | 0.1946578 | 1.7500000 | 2.1500000 |
|---|-----------|-----------|-----------|-----------|

---

Unique Subject Identifier=1491000000-0062

Assay variable : PTINR\_VAL1 PT-INR Value

N Mean Standard Deviation Minimum Maximum

---

|   |           |           |           |           |
|---|-----------|-----------|-----------|-----------|
| 5 | 1.8600000 | 0.2309762 | 1.6900000 | 2.2600000 |
|---|-----------|-----------|-----------|-----------|

---

Unique Subject Identifier=1491000000-0063

Assay variable : PTINR\_VAL1 PT-INR Value

N Mean Standard Deviation Minimum Maximum

---

|   |           |           |           |           |
|---|-----------|-----------|-----------|-----------|
| 4 | 2.2475000 | 0.2644964 | 1.9000000 | 2.5300000 |
|---|-----------|-----------|-----------|-----------|

---

Laboratory tests at the time of obtaining Table 2-6 consent, according to the presence or absence of proton-pump inhibitors

Unique Subject Identifier=1491000000-0066

MEANS Procedure

Assay variable : PTINR\_VAL1 PT-INR Value

N Mean Standard Deviation Minimum Maximum

---

|   |           |           |           |           |
|---|-----------|-----------|-----------|-----------|
| 4 | 2.0725000 | 0.2117192 | 1.8700000 | 2.3100000 |
|---|-----------|-----------|-----------|-----------|

---

Unique Subject Identifier=1491000000-0070

Assay variable : PTINR\_VAL1 PT-INR Value

N Mean Standard Deviation Minimum Maximum

---

|   |           |           |           |           |
|---|-----------|-----------|-----------|-----------|
| 4 | 2.0075000 | 0.0865544 | 1.9300000 | 2.1300000 |
|---|-----------|-----------|-----------|-----------|

---

Unique Subject Identifier=1491000000-0073

Assay variable : PTINR\_VAL1 PT-INR Value

N Mean Standard Deviation Minimum Maximum

---

|   |           |           |           |           |
|---|-----------|-----------|-----------|-----------|
| 3 | 1.9900000 | 0.1997498 | 1.7700000 | 2.1600000 |
|---|-----------|-----------|-----------|-----------|

---

Unique Subject Identifier=1491000000-0077

Assay variable : PTINR\_VAL1 PT-INR Value

N Mean Standard Deviation Minimum Maximum

---

|   |           |           |           |           |
|---|-----------|-----------|-----------|-----------|
| 3 | 2.2766667 | 0.4441096 | 1.7900000 | 2.6600000 |
|---|-----------|-----------|-----------|-----------|

---

Laboratory tests at the time of obtaining Table 2-6 consent, according to the presence or absence of proton-pump inhibitors

Unique Subject Identifier=1491000000-0086

MEANS Procedure

Assay variable : PTINR\_VAL1 PT-INR Value

N Mean Standard Deviation Minimum Maximum

---

|   |           |           |           |           |
|---|-----------|-----------|-----------|-----------|
| 4 | 2.1675000 | 0.2817061 | 1.9300000 | 2.5700000 |
|---|-----------|-----------|-----------|-----------|

---

Unique Subject Identifier=1491000000-0094

Assay variable : PTINR\_VAL1 PT-INR Value

N Mean Standard Deviation Minimum Maximum

---

|   |           |           |           |           |
|---|-----------|-----------|-----------|-----------|
| 4 | 2.1475000 | 0.1078193 | 2.0500000 | 2.2900000 |
|---|-----------|-----------|-----------|-----------|

---

Unique Subject Identifier=1491000000-0097

Assay variable : PTINR\_VAL1 PT-INR Value

N Mean Standard Deviation Minimum Maximum

---

|   |           |           |           |           |
|---|-----------|-----------|-----------|-----------|
| 3 | 2.6600000 | 0.6577994 | 2.0400000 | 3.3500000 |
|---|-----------|-----------|-----------|-----------|

---

Unique Subject Identifier=1491000000-0098

Assay variable : PTINR\_VAL1 PT-INR Value

N Mean Standard Deviation Minimum Maximum

---

|   |          |          |          |          |
|---|----------|----------|----------|----------|
| 4 | 2.130000 | 0.328126 | 1.860000 | 2.570000 |
|---|----------|----------|----------|----------|

---

Laboratory tests at the time of obtaining Table 2-6 consent, according to the presence or absence of proton-pump inhibitors

Unique Subject Identifier=1491000000-0105

MEANS Procedure

Assay variable : PTINR\_VAL1 PT-INR Value

N Mean Standard Deviation Minimum Maximum

---

|   |           |           |           |           |
|---|-----------|-----------|-----------|-----------|
| 5 | 1.8920000 | 0.3596804 | 1.5900000 | 2.5000000 |
|---|-----------|-----------|-----------|-----------|

---

Unique Subject Identifier=1494000000-0015

Assay variable : PTINR\_VAL1 PT-INR Value

N Mean Standard Deviation Minimum Maximum

---

|   |           |           |           |           |
|---|-----------|-----------|-----------|-----------|
| 2 | 1.5600000 | 0.2121320 | 1.4100000 | 1.7100000 |
|---|-----------|-----------|-----------|-----------|

---

Unique Subject Identifier=1494000000-0021

Assay variable : PTINR\_VAL1 PT-INR Value

N Mean Standard Deviation Minimum Maximum

---

|   |           |           |           |           |
|---|-----------|-----------|-----------|-----------|
| 4 | 1.9375000 | 0.6571847 | 1.4000000 | 2.8800000 |
|---|-----------|-----------|-----------|-----------|

---

Unique Subject Identifier=1494000000-0027



Assay variable : PTINR\_VAL1 PT-INR Value

N Mean Standard Deviation Minimum Maximum

---

|   |          |          |          |          |
|---|----------|----------|----------|----------|
| 3 | 1.740000 | 0.020000 | 1.720000 | 1.760000 |
|---|----------|----------|----------|----------|

---

Laboratory tests at the time of obtaining Table 2-6 consent, according to the presence or absence of proton-pump inhibitors

Unique Subject Identifier=1495011010-0005

MEANS Procedure

Assay variable : PTINR\_VAL1 PT-INR Value

N Mean Standard Deviation Minimum Maximum

---

|   |           |           |           |           |
|---|-----------|-----------|-----------|-----------|
| 2 | 2.6700000 | 0.5374012 | 2.2900000 | 3.0500000 |
|---|-----------|-----------|-----------|-----------|

---

Unique Subject Identifier=1495011010-0009

Assay variable : PTINR\_VAL1 PT-INR Value

N Mean Standard Deviation Minimum Maximum

---

|   |           |           |           |           |
|---|-----------|-----------|-----------|-----------|
| 3 | 2.4166667 | 0.5589574 | 1.9600000 | 3.0400000 |
|---|-----------|-----------|-----------|-----------|

---

Unique Subject Identifier=1495011010-0013

Assay variable : PTINR\_VAL1 PT-INR Value

N Mean Standard Deviation Minimum Maximum

---

|   |           |           |           |           |
|---|-----------|-----------|-----------|-----------|
| 2 | 2.7300000 | 0.9475231 | 2.0600000 | 3.4000000 |
|---|-----------|-----------|-----------|-----------|

---

Unique Subject Identifier=1495011010-0019

Assay variable : PTINR\_VAL1 PT-INR Value

N Mean Standard Deviation Minimum Maximum

---

|   |           |           |           |           |
|---|-----------|-----------|-----------|-----------|
| 2 | 2.2950000 | 0.1767767 | 2.1700000 | 2.4200000 |
|---|-----------|-----------|-----------|-----------|

---

Laboratory tests at the time of obtaining Table 2-6 consent, according to the presence or absence of proton-pump inhibitors

Unique Subject Identifier=1495011010-0022

MEANS Procedure

Assay variable : PTINR\_VAL1 PT-INR Value

N Mean Standard Deviation Minimum Maximum

---

|   |           |           |           |           |
|---|-----------|-----------|-----------|-----------|
| 3 | 2.1266667 | 0.7674199 | 1.5600000 | 3.0000000 |
|---|-----------|-----------|-----------|-----------|

---

Unique Subject Identifier=1495011010-0024

Assay variable : PTINR\_VAL1 PT-INR Value

N Mean Standard Deviation Minimum Maximum

---

|   |           |           |           |           |
|---|-----------|-----------|-----------|-----------|
| 2 | 2.0500000 | 0.3535534 | 1.8000000 | 2.3000000 |
|---|-----------|-----------|-----------|-----------|

---

Unique Subject Identifier=1495011010-0026

Assay variable : PTINR\_VAL1 PT-INR Value

N Mean Standard Deviation Minimum Maximum

---

|   |           |           |           |           |
|---|-----------|-----------|-----------|-----------|
| 3 | 2.2933333 | 0.3971566 | 1.8400000 | 2.5800000 |
|---|-----------|-----------|-----------|-----------|

---

Unique Subject Identifier=1495011010-0027

Assay variable : PTINR\_VAL1 PT-INR Value

N Mean Standard Deviation Minimum Maximum

---

|   |          |           |          |          |
|---|----------|-----------|----------|----------|
| 2 | 1.520000 | 0.0565685 | 1.480000 | 1.560000 |
|---|----------|-----------|----------|----------|

---

Laboratory tests at the time of obtaining Table 2-6 consent, according to the presence or absence of proton-pump inhibitors

Unique Subject Identifier=1496000000-0008

MEANS Procedure

Assay variable : PTINR\_VAL1 PT-INR Value

N Mean Standard Deviation Minimum Maximum

---

|   |           |  |           |           |
|---|-----------|--|-----------|-----------|
| 1 | 2.3000000 |  | 2.3000000 | 2.3000000 |
|---|-----------|--|-----------|-----------|

---

Unique Subject Identifier=1496000000-0012

Assay variable : PTINR\_VAL1 PT-INR Value

N Mean Standard Deviation Minimum Maximum

---

|   |           |  |           |           |
|---|-----------|--|-----------|-----------|
| 1 | 1.4000000 |  | 1.4000000 | 1.4000000 |
|---|-----------|--|-----------|-----------|

---

Unique Subject Identifier=1499000000-0008

Assay variable : PTINR\_VAL1 PT-INR Value

N Mean Standard Deviation Minimum Maximum

---

|   |           |           |           |           |
|---|-----------|-----------|-----------|-----------|
| 3 | 1.7566667 | 0.3942503 | 1.4000000 | 2.1800000 |
|---|-----------|-----------|-----------|-----------|

---

Unique Subject Identifier=1501000000-0004

Assay variable : PTINR\_VAL1 PT-INR Value

N Mean Standard Deviation Minimum Maximum

---

|   |          |           |          |          |
|---|----------|-----------|----------|----------|
| 6 | 2.103333 | 0.5933521 | 1.200000 | 3.000000 |
|---|----------|-----------|----------|----------|

---

Laboratory tests at the time of obtaining Table 2-6 consent, according to the presence or absence of proton-pump inhibitors

Unique Subject Identifier=1501000000-0012

MEANS Procedure

Assay variable : PTINR\_VAL1 PT-INR Value

N Mean Standard Deviation Minimum Maximum

---

|   |           |           |           |           |
|---|-----------|-----------|-----------|-----------|
| 6 | 2.2333333 | 0.3386247 | 1.7000000 | 2.6000000 |
|---|-----------|-----------|-----------|-----------|

---

Unique Subject Identifier=1501000000-0014

Assay variable : PTINR\_VAL1 PT-INR Value

N Mean Standard Deviation Minimum Maximum

---

|   |           |           |           |           |
|---|-----------|-----------|-----------|-----------|
| 5 | 1.7620000 | 0.3475917 | 1.4000000 | 2.2900000 |
|---|-----------|-----------|-----------|-----------|

---

Unique Subject Identifier=1501000000-0022

Assay variable : PTINR\_VAL1 PT-INR Value

N Mean Standard Deviation Minimum Maximum

---

|   |           |           |           |           |
|---|-----------|-----------|-----------|-----------|
| 6 | 1.8750000 | 0.3895510 | 1.5000000 | 2.5000000 |
|---|-----------|-----------|-----------|-----------|

---

Unique Subject Identifier=1501000000-0025



Assay variable : PTINR\_VAL1 PT-INR Value

N Mean Standard Deviation Minimum Maximum

---

|   |           |           |           |           |
|---|-----------|-----------|-----------|-----------|
| 6 | 2.2166667 | 0.5115336 | 1.5000000 | 2.8000000 |
|---|-----------|-----------|-----------|-----------|

---

Laboratory tests at the time of obtaining Table 2-6 consent, according to the presence or absence of proton-pump inhibitors

Unique Subject Identifier=1501000000-0033

MEANS Procedure

Assay variable : PTINR\_VAL1 PT-INR Value

| N | Mean      | Standard Deviation | Minimum   | Maximum   |
|---|-----------|--------------------|-----------|-----------|
| 3 | 1.6700000 | 0.0608276          | 1.6000000 | 1.7100000 |

Unique Subject Identifier=1501000000-0046

Assay variable : PTINR\_VAL1 PT-INR Value

| N | Mean      | Standard Deviation | Minimum   | Maximum   |
|---|-----------|--------------------|-----------|-----------|
| 5 | 2.3360000 | 0.8537740          | 1.2000000 | 3.3900000 |

Unique Subject Identifier=1502000000-0005

Assay variable : PTINR\_VAL1 PT-INR Value

| N | Mean      | Standard Deviation | Minimum   | Maximum   |
|---|-----------|--------------------|-----------|-----------|
| 1 | 2.1000000 |                    | 2.1000000 | 2.1000000 |

Unique Subject Identifier=1502000000-0007

Assay variable : PTINR\_VAL1 PT-INR Value

N Mean Standard Deviation Minimum Maximum

---

|   |           |           |           |           |
|---|-----------|-----------|-----------|-----------|
| 2 | 1.7200000 | 0.6646804 | 1.2500000 | 2.1900000 |
|---|-----------|-----------|-----------|-----------|

---

Laboratory tests at the time of obtaining Table 2-6 consent, according to the presence or absence of proton-pump inhibitors

Unique Subject Identifier=1503000000-0001

MEANS Procedure

Assay variable : PTINR\_VAL1 PT-INR Value

N Mean Standard Deviation Minimum Maximum

---

|   |           |  |           |           |
|---|-----------|--|-----------|-----------|
| 1 | 1.7500000 |  | 1.7500000 | 1.7500000 |
|---|-----------|--|-----------|-----------|

---

Unique Subject Identifier=1503000000-0005

Assay variable : PTINR\_VAL1 PT-INR Value

N Mean Standard Deviation Minimum Maximum

---

|   |           |           |           |           |
|---|-----------|-----------|-----------|-----------|
| 3 | 1.8066667 | 1.3367997 | 1.0100000 | 3.3500000 |
|---|-----------|-----------|-----------|-----------|

---

Unique Subject Identifier=1503000000-0007

Assay variable : PTINR\_VAL1 PT-INR Value

N Mean Standard Deviation Minimum Maximum

---

|   |           |           |           |           |
|---|-----------|-----------|-----------|-----------|
| 4 | 2.1825000 | 0.8794458 | 1.4100000 | 3.1000000 |
|---|-----------|-----------|-----------|-----------|

---

Unique Subject Identifier=1503000000-0008

Assay variable : PTINR\_VAL1 PT-INR Value

N Mean Standard Deviation Minimum Maximum

---

|   |           |           |           |           |
|---|-----------|-----------|-----------|-----------|
| 3 | 2.2033333 | 1.2630255 | 1.3200000 | 3.6500000 |
|---|-----------|-----------|-----------|-----------|

---

Laboratory tests at the time of obtaining Table 2-6 consent, according to the presence or absence of proton-pump inhibitors

Unique Subject Identifier=1504000000-0001

MEANS Procedure

Assay variable : PTINR\_VAL1 PT-INR Value

N Mean Standard Deviation Minimum Maximum

---

|   |          |           |          |          |
|---|----------|-----------|----------|----------|
| 3 | 2.160000 | 0.3351119 | 1.820000 | 2.490000 |
|---|----------|-----------|----------|----------|

---

Unique Subject Identifier=1504000000-0002

Assay variable : PTINR\_VAL1 PT-INR Value

N Mean Standard Deviation Minimum Maximum

---

|   |          |           |          |          |
|---|----------|-----------|----------|----------|
| 5 | 2.670000 | 0.3653081 | 2.140000 | 3.090000 |
|---|----------|-----------|----------|----------|

---

Unique Subject Identifier=1512000000-0004

Assay variable : PTINR\_VAL1 PT-INR Value

N Mean Standard Deviation Minimum Maximum

---

|   |          |           |          |          |
|---|----------|-----------|----------|----------|
| 5 | 1.800000 | 0.3706751 | 1.270000 | 2.310000 |
|---|----------|-----------|----------|----------|

---

Unique Subject Identifier=1512000000-0005

Assay variable : PTINR\_VAL1 PT-INR Value

N Mean Standard Deviation Minimum Maximum

---

|   |          |           |          |          |
|---|----------|-----------|----------|----------|
| 3 | 2.000000 | 0.2364318 | 1.750000 | 2.220000 |
|---|----------|-----------|----------|----------|

---

Laboratory tests at the time of obtaining Table 2-6 consent, according to the presence or absence of proton-pump inhibitors

Unique Subject Identifier=1512000000-0007

MEANS Procedure

Assay variable : PTINR\_VAL1 PT-INR Value

N Mean Standard Deviation Minimum Maximum

---

|   |           |           |           |           |
|---|-----------|-----------|-----------|-----------|
| 6 | 2.2116667 | 0.2878483 | 1.8600000 | 2.6900000 |
|---|-----------|-----------|-----------|-----------|

---

Unique Subject Identifier=1513000000-0006

Assay variable : PTINR\_VAL1 PT-INR Value

N Mean Standard Deviation Minimum Maximum

---

|   |           |           |           |           |
|---|-----------|-----------|-----------|-----------|
| 3 | 1.8700000 | 0.1664332 | 1.7500000 | 2.0600000 |
|---|-----------|-----------|-----------|-----------|

---

Unique Subject Identifier=1513000000-0010

Assay variable : PTINR\_VAL1 PT-INR Value

N Mean Standard Deviation Minimum Maximum

---

|   |           |           |           |           |
|---|-----------|-----------|-----------|-----------|
| 3 | 2.1700000 | 0.0435890 | 2.1200000 | 2.2000000 |
|---|-----------|-----------|-----------|-----------|

---

Unique Subject Identifier=1514011100-0011



Assay variable : PTINR\_VAL1 PT-INR Value

N Mean Standard Deviation Minimum Maximum

---

|   |          |  |          |          |
|---|----------|--|----------|----------|
| 1 | 2.180000 |  | 2.180000 | 2.180000 |
|---|----------|--|----------|----------|

---

Laboratory tests at the time of obtaining Table 2-6 consent, according to the presence or absence of proton-pump inhibitors

Unique Subject Identifier=1514011100-0012

MEANS Procedure

Assay variable : PTINR\_VAL1 PT-INR Value

| N | Mean      | Standard Deviation | Minimum   | Maximum   |
|---|-----------|--------------------|-----------|-----------|
| 2 | 1.8250000 | 0.2192031          | 1.6700000 | 1.9800000 |

Unique Subject Identifier=1516011000-0043

Assay variable : PTINR\_VAL1 PT-INR Value

| N | Mean      | Standard Deviation | Minimum   | Maximum   |
|---|-----------|--------------------|-----------|-----------|
| 5 | 1.6140000 | 0.0876356          | 1.4900000 | 1.7000000 |

Unique Subject Identifier=1516011000-0045

Assay variable : PTINR\_VAL1 PT-INR Value

| N | Mean      | Standard Deviation | Minimum   | Maximum   |
|---|-----------|--------------------|-----------|-----------|
| 6 | 1.5500000 | 0.1643168          | 1.4000000 | 1.8000000 |

Unique Subject Identifier=1516011000-0052

Assay variable : PTINR\_VAL1 PT-INR Value

N Mean Standard Deviation Minimum Maximum

---

|   |          |           |          |          |
|---|----------|-----------|----------|----------|
| 5 | 2.160000 | 0.5683309 | 1.200000 | 2.600000 |
|---|----------|-----------|----------|----------|

---

Laboratory tests at the time of obtaining Table 2-6 consent, according to the presence or absence of proton-pump inhibitors

Unique Subject Identifier=1517010100-0003

MEANS Procedure

Assay variable : PTINR\_VAL1 PT-INR Value

| N | Mean      | Standard Deviation | Minimum   | Maximum   |
|---|-----------|--------------------|-----------|-----------|
| 2 | 1.6900000 | 0.1272792          | 1.6000000 | 1.7800000 |

Unique Subject Identifier=1517010100-0004

Assay variable : PTINR\_VAL1 PT-INR Value

| N | Mean      | Standard Deviation | Minimum   | Maximum   |
|---|-----------|--------------------|-----------|-----------|
| 3 | 2.1733333 | 0.4986315          | 1.6300000 | 2.6100000 |

Unique Subject Identifier=1517010100-0006

Assay variable : PTINR\_VAL1 PT-INR Value

| N | Mean      | Standard Deviation | Minimum   | Maximum   |
|---|-----------|--------------------|-----------|-----------|
| 3 | 2.2633333 | 0.6664333          | 1.5500000 | 2.8700000 |

Unique Subject Identifier=1517010100-0009

Assay variable : PTINR\_VAL1 PT-INR Value

N Mean Standard Deviation Minimum Maximum

---

|   |          |           |          |          |
|---|----------|-----------|----------|----------|
| 3 | 1.950000 | 0.3502856 | 1.640000 | 2.330000 |
|---|----------|-----------|----------|----------|

---

Laboratory tests at the time of obtaining Table 2-6 consent, according to the presence or absence of proton-pump inhibitors

Unique Subject Identifier=1517010100-0011

MEANS Procedure

Assay variable : PTINR\_VAL1 PT-INR Value

| N | Mean      | Standard Deviation | Minimum   | Maximum   |
|---|-----------|--------------------|-----------|-----------|
| 3 | 1.6900000 | 0.1473092          | 1.5600000 | 1.8500000 |

Unique Subject Identifier=1521000000-0002

Assay variable : PTINR\_VAL1 PT-INR Value

| N | Mean      | Standard Deviation | Minimum   | Maximum   |
|---|-----------|--------------------|-----------|-----------|
| 1 | 1.7300000 |                    | 1.7300000 | 1.7300000 |

Unique Subject Identifier=1521000000-0003

Assay variable : PTINR\_VAL1 PT-INR Value

| N | Mean      | Standard Deviation | Minimum   | Maximum   |
|---|-----------|--------------------|-----------|-----------|
| 1 | 2.6600000 |                    | 2.6600000 | 2.6600000 |

Unique Subject Identifier=1521000000-0006

Assay variable : PTINR\_VAL1 PT-INR Value

N Mean Standard Deviation Minimum Maximum

---

|   |           |  |           |           |
|---|-----------|--|-----------|-----------|
| 1 | 1.7100000 |  | 1.7100000 | 1.7100000 |
|---|-----------|--|-----------|-----------|

---

Laboratory tests at the time of obtaining Table 2-6 consent, according to the presence or absence of proton-pump inhibitors

Unique Subject Identifier=1522000000-0001

MEANS Procedure

Assay variable : PTINR\_VAL1 PT-INR Value

N Mean Standard Deviation Minimum Maximum

---

|   |           |           |           |           |
|---|-----------|-----------|-----------|-----------|
| 4 | 2.1100000 | 0.5918896 | 1.6700000 | 2.9400000 |
|---|-----------|-----------|-----------|-----------|

---

Unique Subject Identifier=1522000000-0003

Assay variable : PTINR\_VAL1 PT-INR Value

N Mean Standard Deviation Minimum Maximum

---

|   |           |           |           |           |
|---|-----------|-----------|-----------|-----------|
| 2 | 1.4150000 | 0.4596194 | 1.0900000 | 1.7400000 |
|---|-----------|-----------|-----------|-----------|

---

Unique Subject Identifier=1522000000-0005

Assay variable : PTINR\_VAL1 PT-INR Value

N Mean Standard Deviation Minimum Maximum

---

|   |           |           |           |           |
|---|-----------|-----------|-----------|-----------|
| 5 | 1.9700000 | 0.3586781 | 1.6500000 | 2.4400000 |
|---|-----------|-----------|-----------|-----------|

---

Unique Subject Identifier=1522000000-0006



Assay variable : PTINR\_VAL1 PT-INR Value

N Mean Standard Deviation Minimum Maximum

---

|   |           |           |           |           |
|---|-----------|-----------|-----------|-----------|
| 4 | 1.8775000 | 0.2466272 | 1.6400000 | 2.1500000 |
|---|-----------|-----------|-----------|-----------|

---

Laboratory tests at the time of obtaining Table 2-6 consent, according to the presence or absence of proton-pump inhibitors

Unique Subject Identifier=1522000000-0010

MEANS Procedure

Assay variable : PTINR\_VAL1 PT-INR Value

| N | Mean      | Standard Deviation | Minimum   | Maximum   |
|---|-----------|--------------------|-----------|-----------|
| 6 | 2.4316667 | 0.7141545          | 1.5300000 | 3.4100000 |

Unique Subject Identifier=1522000000-0011

Assay variable : PTINR\_VAL1 PT-INR Value

| N | Mean      | Standard Deviation | Minimum   | Maximum   |
|---|-----------|--------------------|-----------|-----------|
| 5 | 2.2160000 | 0.7098098          | 1.3800000 | 2.8600000 |

Unique Subject Identifier=1522000000-0016

Assay variable : PTINR\_VAL1 PT-INR Value

| N | Mean      | Standard Deviation | Minimum   | Maximum   |
|---|-----------|--------------------|-----------|-----------|
| 4 | 1.7400000 | 0.1913113          | 1.5600000 | 1.9200000 |

Unique Subject Identifier=1522000000-0017

Assay variable : PTINR\_VAL1 PT-INR Value

N Mean Standard Deviation Minimum Maximum

---

|   |           |           |           |           |
|---|-----------|-----------|-----------|-----------|
| 4 | 1.9975000 | 0.5490826 | 1.3600000 | 2.4900000 |
|---|-----------|-----------|-----------|-----------|

---

Laboratory tests at the time of obtaining Table 2-6 consent, according to the presence or absence of proton-pump inhibitors

Unique Subject Identifier=1522000000-0024

MEANS Procedure

Assay variable : PTINR\_VAL1 PT-INR Value

N Mean Standard Deviation Minimum Maximum

---

|   |           |           |           |           |
|---|-----------|-----------|-----------|-----------|
| 4 | 1.9600000 | 0.5485131 | 1.2100000 | 2.5000000 |
|---|-----------|-----------|-----------|-----------|

---

Unique Subject Identifier=1522000000-0027

Assay variable : PTINR\_VAL1 PT-INR Value

N Mean Standard Deviation Minimum Maximum

---

|   |           |           |           |           |
|---|-----------|-----------|-----------|-----------|
| 4 | 1.6675000 | 0.1985573 | 1.5300000 | 1.9600000 |
|---|-----------|-----------|-----------|-----------|

---

Unique Subject Identifier=1522000000-0031

Assay variable : PTINR\_VAL1 PT-INR Value

N Mean Standard Deviation Minimum Maximum

---

|   |           |           |           |           |
|---|-----------|-----------|-----------|-----------|
| 3 | 1.4866667 | 0.0152753 | 1.4700000 | 1.5000000 |
|---|-----------|-----------|-----------|-----------|

---

Unique Subject Identifier=1522000000-0035

Assay variable : PTINR\_VAL1 PT-INR Value

N Mean Standard Deviation Minimum Maximum

---

|   |          |           |          |          |
|---|----------|-----------|----------|----------|
| 3 | 1.860000 | 0.4430576 | 1.350000 | 2.150000 |
|---|----------|-----------|----------|----------|

---

Laboratory tests at the time of obtaining Table 2-6 consent, according to the presence or absence of proton-pump inhibitors

Unique Subject Identifier=1523010111-0001

MEANS Procedure

Assay variable : PTINR\_VAL1 PT-INR Value

N Mean Standard Deviation Minimum Maximum

---

|   |           |           |           |           |
|---|-----------|-----------|-----------|-----------|
| 6 | 1.6800000 | 0.3017284 | 1.4100000 | 2.2500000 |
|---|-----------|-----------|-----------|-----------|

---

Unique Subject Identifier=1523010111-0006

Assay variable : PTINR\_VAL1 PT-INR Value

N Mean Standard Deviation Minimum Maximum

---

|   |           |           |           |           |
|---|-----------|-----------|-----------|-----------|
| 6 | 1.5683333 | 0.1646107 | 1.3300000 | 1.7300000 |
|---|-----------|-----------|-----------|-----------|

---

Unique Subject Identifier=1524010000-0002

Assay variable : PTINR\_VAL1 PT-INR Value

N Mean Standard Deviation Minimum Maximum

---

|   |           |           |           |           |
|---|-----------|-----------|-----------|-----------|
| 2 | 1.8450000 | 0.2050610 | 1.7000000 | 1.9900000 |
|---|-----------|-----------|-----------|-----------|

---

Unique Subject Identifier=1524010000-0005

Assay variable : PTINR\_VAL1 PT-INR Value

N Mean Standard Deviation Minimum Maximum

---

|   |           |           |           |           |
|---|-----------|-----------|-----------|-----------|
| 2 | 2.0050000 | 0.1484924 | 1.9000000 | 2.1100000 |
|---|-----------|-----------|-----------|-----------|

---

Laboratory tests at the time of obtaining Table 2-6 consent, according to the presence or absence of proton-pump inhibitors

Unique Subject Identifier=1524010000-0012

MEANS Procedure

Assay variable : PTINR\_VAL1 PT-INR Value

N Mean Standard Deviation Minimum Maximum

---

|   |           |           |           |           |
|---|-----------|-----------|-----------|-----------|
| 4 | 2.2575000 | 0.2129750 | 1.9600000 | 2.4500000 |
|---|-----------|-----------|-----------|-----------|

---

Unique Subject Identifier=1524010000-0018

Assay variable : PTINR\_VAL1 PT-INR Value

N Mean Standard Deviation Minimum Maximum

---

|   |           |           |           |           |
|---|-----------|-----------|-----------|-----------|
| 4 | 2.2350000 | 0.4086971 | 1.9100000 | 2.8300000 |
|---|-----------|-----------|-----------|-----------|

---

Unique Subject Identifier=1527010000-0001

Assay variable : PTINR\_VAL1 PT-INR Value

N Mean Standard Deviation Minimum Maximum

---

|   |           |           |           |           |
|---|-----------|-----------|-----------|-----------|
| 6 | 1.7250000 | 0.2076295 | 1.4500000 | 1.9900000 |
|---|-----------|-----------|-----------|-----------|

---

Unique Subject Identifier=1527010000-0002



Assay variable : PTINR\_VAL1 PT-INR Value

N Mean Standard Deviation Minimum Maximum

---

|   |           |           |           |           |
|---|-----------|-----------|-----------|-----------|
| 5 | 2.0180000 | 0.1130044 | 1.9300000 | 2.2000000 |
|---|-----------|-----------|-----------|-----------|

---

Laboratory tests at the time of obtaining Table 2-6 consent, according to the presence or absence of proton-pump inhibitors

Unique Subject Identifier=1527010000-0003

MEANS Procedure

Assay variable : PTINR\_VAL1 PT-INR Value

N Mean Standard Deviation Minimum Maximum

---

|   |           |           |           |           |
|---|-----------|-----------|-----------|-----------|
| 6 | 1.8283333 | 0.3559448 | 1.5600000 | 2.5000000 |
|---|-----------|-----------|-----------|-----------|

---

Unique Subject Identifier=1527010000-0004

Assay variable : PTINR\_VAL1 PT-INR Value

N Mean Standard Deviation Minimum Maximum

---

|   |           |           |           |           |
|---|-----------|-----------|-----------|-----------|
| 6 | 2.0766667 | 0.1527962 | 1.9300000 | 2.3000000 |
|---|-----------|-----------|-----------|-----------|

---

Unique Subject Identifier=1527010000-0006

Assay variable : PTINR\_VAL1 PT-INR Value

N Mean Standard Deviation Minimum Maximum

---

|   |           |           |           |           |
|---|-----------|-----------|-----------|-----------|
| 6 | 2.0616667 | 0.2521441 | 1.7100000 | 2.4000000 |
|---|-----------|-----------|-----------|-----------|

---

Unique Subject Identifier=1527010000-0007

Assay variable : PTINR\_VAL1 PT-INR Value

N Mean Standard Deviation Minimum Maximum

---

|   |           |           |           |           |
|---|-----------|-----------|-----------|-----------|
| 6 | 2.3883333 | 0.3098656 | 1.9300000 | 2.8000000 |
|---|-----------|-----------|-----------|-----------|

---

Laboratory tests at the time of obtaining Table 2-6 consent, according to the presence or absence of proton-pump inhibitors

Unique Subject Identifier=1527010000-0008

MEANS Procedure

Assay variable : PTINR\_VAL1 PT-INR Value

N Mean Standard Deviation Minimum Maximum

---

|   |           |           |           |           |
|---|-----------|-----------|-----------|-----------|
| 6 | 2.0716667 | 0.3989695 | 1.7100000 | 2.8000000 |
|---|-----------|-----------|-----------|-----------|

---

Unique Subject Identifier=1527010000-0009

Assay variable : PTINR\_VAL1 PT-INR Value

N Mean Standard Deviation Minimum Maximum

---

|   |           |           |           |           |
|---|-----------|-----------|-----------|-----------|
| 6 | 1.9333333 | 0.1298717 | 1.7100000 | 2.1100000 |
|---|-----------|-----------|-----------|-----------|

---

Unique Subject Identifier=1527010000-0010

Assay variable : PTINR\_VAL1 PT-INR Value

N Mean Standard Deviation Minimum Maximum

---

|   |           |           |           |           |
|---|-----------|-----------|-----------|-----------|
| 6 | 1.8316667 | 0.1595515 | 1.5600000 | 1.9300000 |
|---|-----------|-----------|-----------|-----------|

---

Unique Subject Identifier=1527010000-0011

Assay variable : PTINR\_VAL1 PT-INR Value

N Mean Standard Deviation Minimum Maximum

---

|   |           |           |           |           |
|---|-----------|-----------|-----------|-----------|
| 6 | 2.0683333 | 0.3099301 | 1.7100000 | 2.4000000 |
|---|-----------|-----------|-----------|-----------|

---

Laboratory tests at the time of obtaining Table 2-6 consent, according to the presence or absence of proton-pump inhibitors

Unique Subject Identifier=1527010000-0012

MEANS Procedure

Assay variable : PTINR\_VAL1 PT-INR Value

N Mean Standard Deviation Minimum Maximum

---

|   |           |           |           |           |
|---|-----------|-----------|-----------|-----------|
| 4 | 1.7100000 | 0.2933712 | 1.4500000 | 2.1200000 |
|---|-----------|-----------|-----------|-----------|

---

Unique Subject Identifier=1527010000-0013

Assay variable : PTINR\_VAL1 PT-INR Value

N Mean Standard Deviation Minimum Maximum

---

|   |           |           |           |           |
|---|-----------|-----------|-----------|-----------|
| 5 | 2.0380000 | 0.2314519 | 1.7100000 | 2.3000000 |
|---|-----------|-----------|-----------|-----------|

---

Unique Subject Identifier=1527010000-0016

Assay variable : PTINR\_VAL1 PT-INR Value

N Mean Standard Deviation Minimum Maximum

---

|   |           |           |           |           |
|---|-----------|-----------|-----------|-----------|
| 6 | 1.8516667 | 0.1699902 | 1.7100000 | 2.1200000 |
|---|-----------|-----------|-----------|-----------|

---

Unique Subject Identifier=1527010000-0017

Assay variable : PTINR\_VAL1 PT-INR Value

N Mean Standard Deviation Minimum Maximum

---

|   |          |           |          |          |
|---|----------|-----------|----------|----------|
| 5 | 1.950000 | 0.3967367 | 1.560000 | 2.400000 |
|---|----------|-----------|----------|----------|

---

Laboratory tests at the time of obtaining Table 2-6 consent, according to the presence or absence of proton-pump inhibitors

Unique Subject Identifier=1527010000-0018

MEANS Procedure

Assay variable : PTINR\_VAL1 PT-INR Value

N Mean Standard Deviation Minimum Maximum

---

|   |           |           |           |           |
|---|-----------|-----------|-----------|-----------|
| 6 | 2.2633333 | 0.2242023 | 1.9300000 | 2.5000000 |
|---|-----------|-----------|-----------|-----------|

---

Unique Subject Identifier=1527010000-0022

Assay variable : PTINR\_VAL1 PT-INR Value

N Mean Standard Deviation Minimum Maximum

---

|   |           |           |           |           |
|---|-----------|-----------|-----------|-----------|
| 6 | 1.9150000 | 0.6305791 | 1.2500000 | 2.8000000 |
|---|-----------|-----------|-----------|-----------|

---

Unique Subject Identifier=1527010000-0024

Assay variable : PTINR\_VAL1 PT-INR Value

N Mean Standard Deviation Minimum Maximum

---

|   |           |           |           |           |
|---|-----------|-----------|-----------|-----------|
| 6 | 1.9166667 | 0.4050021 | 1.4500000 | 2.6000000 |
|---|-----------|-----------|-----------|-----------|

---

Unique Subject Identifier=1527010000-0026



Assay variable : PTINR\_VAL1 PT-INR Value

N Mean Standard Deviation Minimum Maximum

---

|   |           |           |           |           |
|---|-----------|-----------|-----------|-----------|
| 6 | 2.1050000 | 0.3042860 | 1.7100000 | 2.6000000 |
|---|-----------|-----------|-----------|-----------|

---

Laboratory tests at the time of obtaining Table 2-6 consent, according to the presence or absence of proton-pump inhibitors

Unique Subject Identifier=1528000000-0003

MEANS Procedure

Assay variable : PTINR\_VAL1 PT-INR Value

| N | Mean      | Standard Deviation | Minimum   | Maximum   |
|---|-----------|--------------------|-----------|-----------|
| 6 | 2.2866667 | 0.5947324          | 1.3800000 | 3.1300000 |

Unique Subject Identifier=1530000000-0003

Assay variable : PTINR\_VAL1 PT-INR Value

| N | Mean      | Standard Deviation | Minimum   | Maximum   |
|---|-----------|--------------------|-----------|-----------|
| 5 | 1.5800000 | 0.1788854          | 1.3000000 | 1.7000000 |

Unique Subject Identifier=1530000000-0026

Assay variable : PTINR\_VAL1 PT-INR Value

| N | Mean      | Standard Deviation | Minimum   | Maximum   |
|---|-----------|--------------------|-----------|-----------|
| 2 | 4.0500000 | 2.3334524          | 2.4000000 | 5.7000000 |

Unique Subject Identifier=1530000000-0030

Assay variable : PTINR\_VAL1 PT-INR Value

N Mean Standard Deviation Minimum Maximum

---

|   |          |  |          |          |
|---|----------|--|----------|----------|
| 1 | 1.400000 |  | 1.400000 | 1.400000 |
|---|----------|--|----------|----------|

---

Laboratory tests at the time of obtaining Table 2-6 consent, according to the presence or absence of proton-pump inhibitors

Unique Subject Identifier=1531100000-0011

MEANS Procedure

Assay variable : PTINR\_VAL1 PT-INR Value

N Mean Standard Deviation Minimum Maximum

---

|   |           |           |           |           |
|---|-----------|-----------|-----------|-----------|
| 6 | 2.2833333 | 0.2639444 | 1.9000000 | 2.6000000 |
|---|-----------|-----------|-----------|-----------|

---

Unique Subject Identifier=1600011000-0001

Assay variable : PTINR\_VAL1 PT-INR Value

N Mean Standard Deviation Minimum Maximum

---

|   |           |           |           |           |
|---|-----------|-----------|-----------|-----------|
| 2 | 1.6600000 | 0.0848528 | 1.6000000 | 1.7200000 |
|---|-----------|-----------|-----------|-----------|

---

Unique Subject Identifier=1600011000-0006

Assay variable : PTINR\_VAL1 PT-INR Value

N Mean Standard Deviation Minimum Maximum

---

|   |           |  |           |           |
|---|-----------|--|-----------|-----------|
| 1 | 2.5700000 |  | 2.5700000 | 2.5700000 |
|---|-----------|--|-----------|-----------|

---

Unique Subject Identifier=1602000000-0002

Assay variable : PTINR\_VAL1 PT-INR Value

N Mean Standard Deviation Minimum Maximum

---

|   |          |          |          |          |
|---|----------|----------|----------|----------|
| 3 | 1.500000 | 0.100000 | 1.400000 | 1.600000 |
|---|----------|----------|----------|----------|

---

Laboratory tests at the time of obtaining Table 2-6 consent, according to the presence or absence of proton-pump inhibitors

Unique Subject Identifier=1602000000-0003

MEANS Procedure

Assay variable : PTINR\_VAL1 PT-INR Value

N Mean Standard Deviation Minimum Maximum

---

|   |           |           |           |           |
|---|-----------|-----------|-----------|-----------|
| 3 | 1.8333333 | 0.4041452 | 1.4000000 | 2.2000000 |
|---|-----------|-----------|-----------|-----------|

---

Unique Subject Identifier=1603000000-0019

Assay variable : PTINR\_VAL1 PT-INR Value

N Mean Standard Deviation Minimum Maximum

---

|   |           |           |           |           |
|---|-----------|-----------|-----------|-----------|
| 6 | 2.5000000 | 0.4939636 | 1.9000000 | 3.0000000 |
|---|-----------|-----------|-----------|-----------|

---

Unique Subject Identifier=1701010000-0003

Assay variable : PTINR\_VAL1 PT-INR Value

N Mean Standard Deviation Minimum Maximum

---

|   |           |           |           |           |
|---|-----------|-----------|-----------|-----------|
| 6 | 1.5016667 | 0.0685322 | 1.4300000 | 1.5700000 |
|---|-----------|-----------|-----------|-----------|

---

Unique Subject Identifier=1705010000-0003

Assay variable : PTINR\_VAL1 PT-INR Value

N Mean Standard Deviation Minimum Maximum

---

|   |          |           |          |          |
|---|----------|-----------|----------|----------|
| 2 | 1.660000 | 0.0989949 | 1.590000 | 1.730000 |
|---|----------|-----------|----------|----------|

---

Laboratory tests at the time of obtaining Table 2-6 consent, according to the presence or absence of proton-pump inhibitors

Unique Subject Identifier=1708010000-0003

MEANS Procedure

Assay variable : PTINR\_VAL1 PT-INR Value

| N | Mean      | Standard Deviation | Minimum   | Maximum   |
|---|-----------|--------------------|-----------|-----------|
| 5 | 2.3020000 | 0.3291960          | 2.0900000 | 2.8800000 |

Unique Subject Identifier=1710000000-0008

Assay variable : PTINR\_VAL1 PT-INR Value

| N | Mean      | Standard Deviation | Minimum   | Maximum   |
|---|-----------|--------------------|-----------|-----------|
| 6 | 2.1583333 | 0.3340309          | 1.8100000 | 2.7200000 |

Unique Subject Identifier=1716010000-0004

Assay variable : PTINR\_VAL1 PT-INR Value

| N | Mean      | Standard Deviation | Minimum   | Maximum   |
|---|-----------|--------------------|-----------|-----------|
| 3 | 1.6933333 | 0.4045162          | 1.3800000 | 2.1500000 |

Unique Subject Identifier=1718000000-0011



Assay variable : PTINR\_VAL1 PT-INR Value

N Mean Standard Deviation Minimum Maximum

---

|   |           |           |           |           |
|---|-----------|-----------|-----------|-----------|
| 6 | 1.7000000 | 0.1264911 | 1.6000000 | 1.9000000 |
|---|-----------|-----------|-----------|-----------|

---

Laboratory tests at the time of obtaining Table 2-6 consent, according to the presence or absence of proton-pump inhibitors

Unique Subject Identifier=1718000000-0015

MEANS Procedure

Assay variable : PTINR\_VAL1 PT-INR Value

N Mean Standard Deviation Minimum Maximum

---

|   |           |           |           |           |
|---|-----------|-----------|-----------|-----------|
| 5 | 1.9200000 | 0.2683282 | 1.5000000 | 2.2000000 |
|---|-----------|-----------|-----------|-----------|

---

Unique Subject Identifier=1718000000-0017

Assay variable : PTINR\_VAL1 PT-INR Value

N Mean Standard Deviation Minimum Maximum

---

|   |           |           |           |           |
|---|-----------|-----------|-----------|-----------|
| 6 | 2.2333333 | 0.5819507 | 1.9000000 | 3.4000000 |
|---|-----------|-----------|-----------|-----------|

---

Unique Subject Identifier=1718000000-0018

Assay variable : PTINR\_VAL1 PT-INR Value

N Mean Standard Deviation Minimum Maximum

---

|   |           |           |           |           |
|---|-----------|-----------|-----------|-----------|
| 6 | 1.7666667 | 0.3265986 | 1.4000000 | 2.2000000 |
|---|-----------|-----------|-----------|-----------|

---

Unique Subject Identifier=1718000000-0020

Assay variable : PTINR\_VAL1 PT-INR Value

N Mean Standard Deviation Minimum Maximum

---

|   |          |           |          |          |
|---|----------|-----------|----------|----------|
| 6 | 2.033333 | 1.2274635 | 1.200000 | 4.400000 |
|---|----------|-----------|----------|----------|

---

Laboratory tests at the time of obtaining Table 2-6 consent, according to the presence or absence of proton-pump inhibitors

Unique Subject Identifier=1750100000-0007

MEANS Procedure

Assay variable : PTINR\_VAL1 PT-INR Value

N Mean Standard Deviation Minimum Maximum

---

|   |           |           |           |           |
|---|-----------|-----------|-----------|-----------|
| 3 | 3.4466667 | 0.3952636 | 3.0100000 | 3.7800000 |
|---|-----------|-----------|-----------|-----------|

---

Unique Subject Identifier=1750100000-0009

Assay variable : PTINR\_VAL1 PT-INR Value

N Mean Standard Deviation Minimum Maximum

---

|   |           |           |           |           |
|---|-----------|-----------|-----------|-----------|
| 5 | 1.6380000 | 0.2701296 | 1.3600000 | 1.9500000 |
|---|-----------|-----------|-----------|-----------|

---

Unique Subject Identifier=1750100000-0012

Assay variable : PTINR\_VAL1 PT-INR Value

N Mean Standard Deviation Minimum Maximum

---

|   |           |           |           |           |
|---|-----------|-----------|-----------|-----------|
| 4 | 1.6325000 | 0.1138347 | 1.5100000 | 1.7800000 |
|---|-----------|-----------|-----------|-----------|

---

Unique Subject Identifier=1750100000-0021

Assay variable : PTINR\_VAL1 PT-INR Value

N Mean Standard Deviation Minimum Maximum

---

|   |           |           |           |           |
|---|-----------|-----------|-----------|-----------|
| 3 | 2.2633333 | 0.2419366 | 1.9900000 | 2.4500000 |
|---|-----------|-----------|-----------|-----------|

---

Laboratory tests at the time of obtaining Table 2-6 consent, according to the presence or absence of proton-pump inhibitors

Unique Subject Identifier=1750100000-0025

MEANS Procedure

Assay variable : PTINR\_VAL1 PT-INR Value

N Mean Standard Deviation Minimum Maximum

---

|   |           |           |           |           |
|---|-----------|-----------|-----------|-----------|
| 3 | 1.8366667 | 0.6619919 | 1.4200000 | 2.6000000 |
|---|-----------|-----------|-----------|-----------|

---

Unique Subject Identifier=1750100000-0028

Assay variable : PTINR\_VAL1 PT-INR Value

N Mean Standard Deviation Minimum Maximum

---

|   |           |           |           |           |
|---|-----------|-----------|-----------|-----------|
| 4 | 1.8700000 | 0.6558963 | 1.2100000 | 2.7700000 |
|---|-----------|-----------|-----------|-----------|

---

Unique Subject Identifier=1750100000-0035

Assay variable : PTINR\_VAL1 PT-INR Value

N Mean Standard Deviation Minimum Maximum

---

|   |           |           |           |           |
|---|-----------|-----------|-----------|-----------|
| 4 | 2.0775000 | 0.4478374 | 1.7900000 | 2.7400000 |
|---|-----------|-----------|-----------|-----------|

---

Unique Subject Identifier=1750100000-0036

Assay variable : PTINR\_VAL1 PT-INR Value

N Mean Standard Deviation Minimum Maximum

---

|   |           |           |           |           |
|---|-----------|-----------|-----------|-----------|
| 3 | 2.2033333 | 0.4614470 | 1.8700000 | 2.7300000 |
|---|-----------|-----------|-----------|-----------|

---

Laboratory tests at the time of obtaining Table 2-6 consent, according to the presence or absence of proton-pump inhibitors

Unique Subject Identifier=1750100000-0037

MEANS Procedure

Assay variable : PTINR\_VAL1 PT-INR Value

| N | Mean      | Standard Deviation | Minimum   | Maximum   |
|---|-----------|--------------------|-----------|-----------|
| 2 | 1.4650000 | 0.0494975          | 1.4300000 | 1.5000000 |

Unique Subject Identifier=1750100000-0039

Assay variable : PTINR\_VAL1 PT-INR Value

| N | Mean      | Standard Deviation | Minimum   | Maximum   |
|---|-----------|--------------------|-----------|-----------|
| 5 | 1.9720000 | 0.3858368          | 1.5900000 | 2.3900000 |

Unique Subject Identifier=1750100000-0045

Assay variable : PTINR\_VAL1 PT-INR Value

| N | Mean      | Standard Deviation | Minimum   | Maximum   |
|---|-----------|--------------------|-----------|-----------|
| 6 | 1.8700000 | 0.4787901          | 1.4200000 | 2.6700000 |

Unique Subject Identifier=1750100000-0052



Assay variable : PTINR\_VAL1 PT-INR Value

N Mean Standard Deviation Minimum Maximum

---

|   |           |           |           |           |
|---|-----------|-----------|-----------|-----------|
| 4 | 1.7825000 | 0.2523721 | 1.5700000 | 2.1200000 |
|---|-----------|-----------|-----------|-----------|

---

Laboratory tests at the time of obtaining Table 2-6 consent, according to the presence or absence of proton-pump inhibitors

Unique Subject Identifier=1800000000-0007

MEANS Procedure

Assay variable : PTINR\_VAL1 PT-INR Value

N Mean Standard Deviation Minimum Maximum

---

|   |           |           |           |           |
|---|-----------|-----------|-----------|-----------|
| 4 | 2.1750000 | 0.4645787 | 1.7000000 | 2.8000000 |
|---|-----------|-----------|-----------|-----------|

---

Unique Subject Identifier=1800000000-0008

Assay variable : PTINR\_VAL1 PT-INR Value

N Mean Standard Deviation Minimum Maximum

---

|   |           |           |           |           |
|---|-----------|-----------|-----------|-----------|
| 6 | 1.9166667 | 0.4622409 | 1.4000000 | 2.6000000 |
|---|-----------|-----------|-----------|-----------|

---

Unique Subject Identifier=1800000000-0012

Assay variable : PTINR\_VAL1 PT-INR Value

N Mean Standard Deviation Minimum Maximum

---

|   |           |           |           |           |
|---|-----------|-----------|-----------|-----------|
| 6 | 2.0650000 | 0.3887287 | 1.5000000 | 2.5900000 |
|---|-----------|-----------|-----------|-----------|

---

Unique Subject Identifier=1800000000-0015

Assay variable : PTINR\_VAL1 PT-INR Value

N Mean Standard Deviation Minimum Maximum

---

|   |           |           |           |           |
|---|-----------|-----------|-----------|-----------|
| 6 | 1.8300000 | 0.2909295 | 1.4000000 | 2.1800000 |
|---|-----------|-----------|-----------|-----------|

---

Laboratory tests at the time of obtaining Table 2-6 consent, according to the presence or absence of proton-pump inhibitors

Unique Subject Identifier=1800000000-0021

MEANS Procedure

Assay variable : PTINR\_VAL1 PT-INR Value

N Mean Standard Deviation Minimum Maximum

---

|   |           |           |           |           |
|---|-----------|-----------|-----------|-----------|
| 2 | 2.4950000 | 0.1484924 | 2.3900000 | 2.6000000 |
|---|-----------|-----------|-----------|-----------|

---

Unique Subject Identifier=1800000000-0028

Assay variable : PTINR\_VAL1 PT-INR Value

N Mean Standard Deviation Minimum Maximum

---

|   |           |           |           |           |
|---|-----------|-----------|-----------|-----------|
| 6 | 2.3250000 | 0.3151349 | 1.8500000 | 2.7300000 |
|---|-----------|-----------|-----------|-----------|

---

Unique Subject Identifier=1805000000-0006

Assay variable : PTINR\_VAL1 PT-INR Value

N Mean Standard Deviation Minimum Maximum

---

|   |           |  |           |           |
|---|-----------|--|-----------|-----------|
| 1 | 2.3000000 |  | 2.3000000 | 2.3000000 |
|---|-----------|--|-----------|-----------|

---

Unique Subject Identifier=1810000000-0001

Assay variable : PTINR\_VAL1 PT-INR Value

N Mean Standard Deviation Minimum Maximum

---

|   |           |           |           |           |
|---|-----------|-----------|-----------|-----------|
| 6 | 2.0850000 | 0.3365561 | 1.6200000 | 2.4400000 |
|---|-----------|-----------|-----------|-----------|

---

Laboratory tests at the time of obtaining Table 2-6 consent, according to the presence or absence of proton-pump inhibitors

Unique Subject Identifier=1810000000-0004

MEANS Procedure

Assay variable : PTINR\_VAL1 PT-INR Value

N Mean Standard Deviation Minimum Maximum

---

|   |           |           |           |           |
|---|-----------|-----------|-----------|-----------|
| 5 | 1.8100000 | 0.4154516 | 1.3800000 | 2.4400000 |
|---|-----------|-----------|-----------|-----------|

---

Unique Subject Identifier=1810000000-0005

Assay variable : PTINR\_VAL1 PT-INR Value

N Mean Standard Deviation Minimum Maximum

---

|   |           |           |           |           |
|---|-----------|-----------|-----------|-----------|
| 6 | 1.6716667 | 0.2863855 | 1.3200000 | 2.0700000 |
|---|-----------|-----------|-----------|-----------|

---

Unique Subject Identifier=1810000000-0006

Assay variable : PTINR\_VAL1 PT-INR Value

N Mean Standard Deviation Minimum Maximum

---

|   |           |           |           |           |
|---|-----------|-----------|-----------|-----------|
| 6 | 2.0350000 | 0.1342758 | 1.9100000 | 2.2100000 |
|---|-----------|-----------|-----------|-----------|

---

Unique Subject Identifier=1810000000-0009

Assay variable : PTINR\_VAL1 PT-INR Value

N Mean Standard Deviation Minimum Maximum

---

|   |           |           |           |           |
|---|-----------|-----------|-----------|-----------|
| 6 | 1.9783333 | 0.2976183 | 1.5600000 | 2.4600000 |
|---|-----------|-----------|-----------|-----------|

---

Laboratory tests at the time of obtaining Table 2-6 consent, according to the presence or absence of proton-pump inhibitors

Unique Subject Identifier=1810000000-0011

MEANS Procedure

Assay variable : PTINR\_VAL1 PT-INR Value

N Mean Standard Deviation Minimum Maximum

---

|   |           |           |           |           |
|---|-----------|-----------|-----------|-----------|
| 6 | 1.8600000 | 0.4210463 | 1.4500000 | 2.6500000 |
|---|-----------|-----------|-----------|-----------|

---

Unique Subject Identifier=1810000000-0012

Assay variable : PTINR\_VAL1 PT-INR Value

N Mean Standard Deviation Minimum Maximum

---

|   |           |           |           |           |
|---|-----------|-----------|-----------|-----------|
| 6 | 2.0400000 | 0.1073313 | 1.8900000 | 2.1700000 |
|---|-----------|-----------|-----------|-----------|

---

Unique Subject Identifier=1810000000-0017

Assay variable : PTINR\_VAL1 PT-INR Value

N Mean Standard Deviation Minimum Maximum

---

|   |           |           |           |           |
|---|-----------|-----------|-----------|-----------|
| 6 | 2.0200000 | 0.2748818 | 1.7000000 | 2.3200000 |
|---|-----------|-----------|-----------|-----------|

---

Unique Subject Identifier=1810000000-0018



Assay variable : PTINR\_VAL1 PT-INR Value

N Mean Standard Deviation Minimum Maximum

---

|   |           |           |           |           |
|---|-----------|-----------|-----------|-----------|
| 6 | 2.1750000 | 0.4289406 | 1.5900000 | 2.8300000 |
|---|-----------|-----------|-----------|-----------|

---

Laboratory tests at the time of obtaining Table 2-6 consent, according to the presence or absence of proton-pump inhibitors

Unique Subject Identifier=1811000000-0005

MEANS Procedure

Assay variable : PTINR\_VAL1 PT-INR Value

N Mean Standard Deviation Minimum Maximum

---

|   |           |           |           |           |
|---|-----------|-----------|-----------|-----------|
| 6 | 1.5900000 | 0.0660303 | 1.5300000 | 1.7000000 |
|---|-----------|-----------|-----------|-----------|

---

Unique Subject Identifier=1811000000-0007

Assay variable : PTINR\_VAL1 PT-INR Value

N Mean Standard Deviation Minimum Maximum

---

|   |           |           |           |           |
|---|-----------|-----------|-----------|-----------|
| 6 | 1.8766667 | 0.2086784 | 1.5400000 | 2.0800000 |
|---|-----------|-----------|-----------|-----------|

---

Unique Subject Identifier=1811000000-0023

Assay variable : PTINR\_VAL1 PT-INR Value

N Mean Standard Deviation Minimum Maximum

---

|   |           |           |           |           |
|---|-----------|-----------|-----------|-----------|
| 5 | 1.7200000 | 0.1100000 | 1.6100000 | 1.8700000 |
|---|-----------|-----------|-----------|-----------|

---

Unique Subject Identifier=1811000000-0026

Assay variable : PTINR\_VAL1 PT-INR Value

N Mean Standard Deviation Minimum Maximum

---

|   |           |           |           |           |
|---|-----------|-----------|-----------|-----------|
| 6 | 2.4616667 | 0.3459142 | 2.1300000 | 3.0900000 |
|---|-----------|-----------|-----------|-----------|

---

Laboratory tests at the time of obtaining Table 2-6 consent, according to the presence or absence of proton-pump inhibitors

Unique Subject Identifier=1812000000-0004

MEANS Procedure

Assay variable : PTINR\_VAL1 PT-INR Value

N Mean Standard Deviation Minimum Maximum

---

|   |           |           |           |           |
|---|-----------|-----------|-----------|-----------|
| 6 | 2.2166667 | 0.4535049 | 1.8000000 | 2.8000000 |
|---|-----------|-----------|-----------|-----------|

---

Unique Subject Identifier=1812000000-0011

Assay variable : PTINR\_VAL1 PT-INR Value

N Mean Standard Deviation Minimum Maximum

---

|   |           |           |           |           |
|---|-----------|-----------|-----------|-----------|
| 6 | 1.5000000 | 0.2190890 | 1.2000000 | 1.8000000 |
|---|-----------|-----------|-----------|-----------|

---

Unique Subject Identifier=1812000000-0013

Assay variable : PTINR\_VAL1 PT-INR Value

N Mean Standard Deviation Minimum Maximum

---

|   |           |           |           |           |
|---|-----------|-----------|-----------|-----------|
| 6 | 2.1166667 | 1.4372427 | 1.0000000 | 4.9000000 |
|---|-----------|-----------|-----------|-----------|

---

Unique Subject Identifier=1812000000-0019

Assay variable : PTINR\_VAL1 PT-INR Value

N Mean Standard Deviation Minimum Maximum

---

|   |           |           |           |           |
|---|-----------|-----------|-----------|-----------|
| 6 | 1.7333333 | 0.6742897 | 1.1000000 | 2.8000000 |
|---|-----------|-----------|-----------|-----------|

---

Laboratory tests at the time of obtaining Table 2-6 consent, according to the presence or absence of proton-pump inhibitors

Unique Subject Identifier=1813100000-0028

MEANS Procedure

Assay variable : PTINR\_VAL1 PT-INR Value

N Mean Standard Deviation Minimum Maximum

---

|   |           |           |           |           |
|---|-----------|-----------|-----------|-----------|
| 4 | 1.6850000 | 0.2810101 | 1.2800000 | 1.9100000 |
|---|-----------|-----------|-----------|-----------|

---

Unique Subject Identifier=1814100000-0001

Assay variable : PTINR\_VAL1 PT-INR Value

N Mean Standard Deviation Minimum Maximum

---

|   |           |  |           |           |
|---|-----------|--|-----------|-----------|
| 1 | 3.2100000 |  | 3.2100000 | 3.2100000 |
|---|-----------|--|-----------|-----------|

---

Unique Subject Identifier=1814100000-0002

Assay variable : PTINR\_VAL1 PT-INR Value

N Mean Standard Deviation Minimum Maximum

---

|   |           |  |           |           |
|---|-----------|--|-----------|-----------|
| 1 | 2.5700000 |  | 2.5700000 | 2.5700000 |
|---|-----------|--|-----------|-----------|

---

Unique Subject Identifier=1814100000-0005

Assay variable : PTINR\_VAL1 PT-INR Value

N Mean Standard Deviation Minimum Maximum

---

|   |           |  |           |           |
|---|-----------|--|-----------|-----------|
| 1 | 1.9500000 |  | 1.9500000 | 1.9500000 |
|---|-----------|--|-----------|-----------|

---

Laboratory tests at the time of obtaining Table 2-6 consent, according to the presence or absence of proton-pump inhibitors

Unique Subject Identifier=1814100000-0008

MEANS Procedure

Assay variable : PTINR\_VAL1 PT-INR Value

N Mean Standard Deviation Minimum Maximum

---

|   |           |           |           |           |
|---|-----------|-----------|-----------|-----------|
| 2 | 1.5200000 | 0.0707107 | 1.4700000 | 1.5700000 |
|---|-----------|-----------|-----------|-----------|

---

Unique Subject Identifier=1814100000-0010

Assay variable : PTINR\_VAL1 PT-INR Value

N Mean Standard Deviation Minimum Maximum

---

|   |           |           |           |           |
|---|-----------|-----------|-----------|-----------|
| 6 | 1.6450000 | 0.5125915 | 1.1400000 | 2.1900000 |
|---|-----------|-----------|-----------|-----------|

---

Unique Subject Identifier=1814100000-0038

Assay variable : PTINR\_VAL1 PT-INR Value

N Mean Standard Deviation Minimum Maximum

---

|   |           |           |           |           |
|---|-----------|-----------|-----------|-----------|
| 6 | 2.2566667 | 0.2811168 | 1.8200000 | 2.5500000 |
|---|-----------|-----------|-----------|-----------|

---

Unique Subject Identifier=1814100000-0058



Assay variable : PTINR\_VAL1 PT-INR Value

N Mean Standard Deviation Minimum Maximum

---

|   |           |           |           |           |
|---|-----------|-----------|-----------|-----------|
| 6 | 1.9416667 | 0.8153874 | 1.2700000 | 3.2300000 |
|---|-----------|-----------|-----------|-----------|

---

Laboratory tests at the time of obtaining Table 2-6 consent, according to the presence or absence of proton-pump inhibitors

Unique Subject Identifier=1814100000-0063

MEANS Procedure

Assay variable : PTINR\_VAL1 PT-INR Value

N Mean Standard Deviation Minimum Maximum

---

|   |           |           |           |           |
|---|-----------|-----------|-----------|-----------|
| 6 | 1.1066667 | 0.0524087 | 1.0300000 | 1.1800000 |
|---|-----------|-----------|-----------|-----------|

---

Unique Subject Identifier=1814100000-0067

Assay variable : PTINR\_VAL1 PT-INR Value

N Mean Standard Deviation Minimum Maximum

---

|   |           |  |           |           |
|---|-----------|--|-----------|-----------|
| 1 | 1.9900000 |  | 1.9900000 | 1.9900000 |
|---|-----------|--|-----------|-----------|

---

Unique Subject Identifier=1814100000-0069

Assay variable : PTINR\_VAL1 PT-INR Value

N Mean Standard Deviation Minimum Maximum

---

|   |           |           |           |           |
|---|-----------|-----------|-----------|-----------|
| 6 | 2.3416667 | 1.3300739 | 1.3200000 | 4.9500000 |
|---|-----------|-----------|-----------|-----------|

---

Unique Subject Identifier=1815100000-0044

Assay variable : PTINR\_VAL1 PT-INR Value

N Mean Standard Deviation Minimum Maximum

---

|   |           |           |           |           |
|---|-----------|-----------|-----------|-----------|
| 5 | 1.5640000 | 0.2307163 | 1.3000000 | 1.8800000 |
|---|-----------|-----------|-----------|-----------|

---

Laboratory tests at the time of obtaining Table 2-6 consent, according to the presence or absence of proton-pump inhibitors

Unique Subject Identifier=1815100000-0051

MEANS Procedure

Assay variable : PTINR\_VAL1 PT-INR Value

N Mean Standard Deviation Minimum Maximum

---

|   |           |           |           |           |
|---|-----------|-----------|-----------|-----------|
| 3 | 1.8600000 | 0.7807689 | 1.1000000 | 2.6600000 |
|---|-----------|-----------|-----------|-----------|

---

Unique Subject Identifier=1815100000-0069

Assay variable : PTINR\_VAL1 PT-INR Value

N Mean Standard Deviation Minimum Maximum

---

|   |           |           |           |           |
|---|-----------|-----------|-----------|-----------|
| 3 | 2.3200000 | 0.4063250 | 1.8700000 | 2.6600000 |
|---|-----------|-----------|-----------|-----------|

---

Unique Subject Identifier=1815100000-0079

Assay variable : PTINR\_VAL1 PT-INR Value

N Mean Standard Deviation Minimum Maximum

---

|   |           |  |           |           |
|---|-----------|--|-----------|-----------|
| 1 | 1.0600000 |  | 1.0600000 | 1.0600000 |
|---|-----------|--|-----------|-----------|

---

Unique Subject Identifier=1815100000-0080

Assay variable : PTINR\_VAL1 PT-INR Value

N Mean Standard Deviation Minimum Maximum

---

|   |          |           |          |          |
|---|----------|-----------|----------|----------|
| 2 | 1.840000 | 0.0848528 | 1.780000 | 1.900000 |
|---|----------|-----------|----------|----------|

---

Laboratory tests at the time of obtaining Table 2-6 consent, according to the presence or absence of proton-pump inhibitors

Unique Subject Identifier=1815100000-0082

MEANS Procedure

Assay variable : PTINR\_VAL1 PT-INR Value

| N | Mean      | Standard Deviation | Minimum   | Maximum   |
|---|-----------|--------------------|-----------|-----------|
| 1 | 1.3500000 |                    | 1.3500000 | 1.3500000 |

Unique Subject Identifier=1815100000-0093

Assay variable : PTINR\_VAL1 PT-INR Value

| N | Mean      | Standard Deviation | Minimum   | Maximum   |
|---|-----------|--------------------|-----------|-----------|
| 6 | 1.8450000 | 0.2425490          | 1.4200000 | 2.0700000 |

Unique Subject Identifier=1973000000-0003

Assay variable : PTINR\_VAL1 PT-INR Value

| N | Mean      | Standard Deviation | Minimum   | Maximum   |
|---|-----------|--------------------|-----------|-----------|
| 6 | 1.6666667 | 0.2250926          | 1.4000000 | 1.9000000 |

Unique Subject Identifier=1973000000-0006

Assay variable : PTINR\_VAL1 PT-INR Value

N Mean Standard Deviation Minimum Maximum

---

|   |           |           |           |           |
|---|-----------|-----------|-----------|-----------|
| 6 | 2.3000000 | 0.2828427 | 2.0000000 | 2.7000000 |
|---|-----------|-----------|-----------|-----------|

---

Laboratory tests at the time of obtaining Table 2-6 consent, according to the presence or absence of proton-pump inhibitors

Unique Subject Identifier=1973000000-0011

MEANS Procedure

Assay variable : PTINR\_VAL1 PT-INR Value

N Mean Standard Deviation Minimum Maximum

---

|   |           |           |           |           |
|---|-----------|-----------|-----------|-----------|
| 4 | 1.7750000 | 0.2500000 | 1.5000000 | 2.1000000 |
|---|-----------|-----------|-----------|-----------|

---

Unique Subject Identifier=2008010000-0011

Assay variable : PTINR\_VAL1 PT-INR Value

N Mean Standard Deviation Minimum Maximum

---

|   |           |           |           |           |
|---|-----------|-----------|-----------|-----------|
| 6 | 1.7000000 | 0.1673320 | 1.5000000 | 1.9000000 |
|---|-----------|-----------|-----------|-----------|

---

Unique Subject Identifier=2008010000-0016

Assay variable : PTINR\_VAL1 PT-INR Value

N Mean Standard Deviation Minimum Maximum

---

|   |           |           |           |           |
|---|-----------|-----------|-----------|-----------|
| 6 | 1.6833333 | 0.2562551 | 1.3000000 | 2.0000000 |
|---|-----------|-----------|-----------|-----------|

---

Unique Subject Identifier=2008010000-0018



Assay variable : PTINR\_VAL1 PT-INR Value

N Mean Standard Deviation Minimum Maximum

---

|   |          |          |          |          |
|---|----------|----------|----------|----------|
| 3 | 1.200000 | 0.100000 | 1.100000 | 1.300000 |
|---|----------|----------|----------|----------|

---

Laboratory tests at the time of obtaining Table 2-6 consent, according to the presence or absence of proton-pump inhibitors

Unique Subject Identifier=2008010000-0023

MEANS Procedure

Assay variable : PTINR\_VAL1 PT-INR Value

N Mean Standard Deviation Minimum Maximum

---

|   |           |           |           |           |
|---|-----------|-----------|-----------|-----------|
| 2 | 1.2750000 | 0.0777817 | 1.2200000 | 1.3300000 |
|---|-----------|-----------|-----------|-----------|

---

Unique Subject Identifier=2008010000-0027

Assay variable : PTINR\_VAL1 PT-INR Value

N Mean Standard Deviation Minimum Maximum

---

|   |           |           |           |           |
|---|-----------|-----------|-----------|-----------|
| 4 | 1.9500000 | 0.4123106 | 1.5000000 | 2.3000000 |
|---|-----------|-----------|-----------|-----------|

---

Unique Subject Identifier=2008010000-0037

Assay variable : PTINR\_VAL1 PT-INR Value

N Mean Standard Deviation Minimum Maximum

---

|   |           |           |           |           |
|---|-----------|-----------|-----------|-----------|
| 6 | 1.9500000 | 0.2073644 | 1.8000000 | 2.3000000 |
|---|-----------|-----------|-----------|-----------|

---

Unique Subject Identifier=2008010000-0043

Assay variable : PTINR\_VAL1 PT-INR Value

N Mean Standard Deviation Minimum Maximum

---

|   |           |           |           |           |
|---|-----------|-----------|-----------|-----------|
| 4 | 1.9250000 | 0.2753785 | 1.6000000 | 2.2000000 |
|---|-----------|-----------|-----------|-----------|

---

Laboratory tests at the time of obtaining Table 2-6 consent, according to the presence or absence of proton-pump inhibitors

Unique Subject Identifier=2008010000-0046

MEANS Procedure

Assay variable : PTINR\_VAL1 PT-INR Value

N Mean Standard Deviation Minimum Maximum

---

|   |           |           |           |           |
|---|-----------|-----------|-----------|-----------|
| 4 | 1.6000000 | 0.0816497 | 1.5000000 | 1.7000000 |
|---|-----------|-----------|-----------|-----------|

---

Unique Subject Identifier=2008010000-0047

Assay variable : PTINR\_VAL1 PT-INR Value

N Mean Standard Deviation Minimum Maximum

---

|   |           |           |           |           |
|---|-----------|-----------|-----------|-----------|
| 6 | 1.9500000 | 0.5991661 | 1.3000000 | 2.8000000 |
|---|-----------|-----------|-----------|-----------|

---

Unique Subject Identifier=2008010000-0052

Assay variable : PTINR\_VAL1 PT-INR Value

N Mean Standard Deviation Minimum Maximum

---

|   |           |           |           |           |
|---|-----------|-----------|-----------|-----------|
| 3 | 1.7000000 | 0.2645751 | 1.4000000 | 1.9000000 |
|---|-----------|-----------|-----------|-----------|

---

Unique Subject Identifier=2008010000-0055

Assay variable : PTINR\_VAL1 PT-INR Value

N Mean Standard Deviation Minimum Maximum

---

|   |           |  |           |           |
|---|-----------|--|-----------|-----------|
| 1 | 1.0200000 |  | 1.0200000 | 1.0200000 |
|---|-----------|--|-----------|-----------|

---

Laboratory tests at the time of obtaining Table 2-6 consent, according to the presence or absence of proton-pump inhibitors

Unique Subject Identifier=2016011111-0002

MEANS Procedure

Assay variable : PTINR\_VAL1 PT-INR Value

| N | Mean      | Standard Deviation | Minimum   | Maximum   |
|---|-----------|--------------------|-----------|-----------|
| 6 | 1.9450000 | 0.2212465          | 1.7600000 | 2.3200000 |

Unique Subject Identifier=2016011111-0004

Assay variable : PTINR\_VAL1 PT-INR Value

| N | Mean      | Standard Deviation | Minimum   | Maximum   |
|---|-----------|--------------------|-----------|-----------|
| 5 | 2.0080000 | 0.1116692          | 1.8500000 | 2.1300000 |

Unique Subject Identifier=2016011111-0006

Assay variable : PTINR\_VAL1 PT-INR Value

| N | Mean      | Standard Deviation | Minimum   | Maximum   |
|---|-----------|--------------------|-----------|-----------|
| 5 | 2.4700000 | 0.5487714          | 1.7300000 | 3.0300000 |

Unique Subject Identifier=2016011111-0010

Assay variable : PTINR\_VAL1 PT-INR Value

N Mean Standard Deviation Minimum Maximum

---

|   |          |           |          |          |
|---|----------|-----------|----------|----------|
| 5 | 2.164000 | 0.6723689 | 1.560000 | 3.320000 |
|---|----------|-----------|----------|----------|

---

Laboratory tests at the time of obtaining Table 2-6 consent, according to the presence or absence of proton-pump inhibitors

Unique Subject Identifier=2016011111-0017

MEANS Procedure

Assay variable : PTINR\_VAL1 PT-INR Value

| N | Mean      | Standard Deviation | Minimum   | Maximum   |
|---|-----------|--------------------|-----------|-----------|
| 6 | 1.8916667 | 0.2997610          | 1.5700000 | 2.1700000 |

Unique Subject Identifier=2016011111-0019

Assay variable : PTINR\_VAL1 PT-INR Value

| N | Mean      | Standard Deviation | Minimum   | Maximum   |
|---|-----------|--------------------|-----------|-----------|
| 5 | 2.4900000 | 0.3794074          | 2.0800000 | 2.9900000 |

Unique Subject Identifier=2016011111-0021

Assay variable : PTINR\_VAL1 PT-INR Value

| N | Mean      | Standard Deviation | Minimum   | Maximum   |
|---|-----------|--------------------|-----------|-----------|
| 4 | 2.5000000 | 0.5707889          | 2.0900000 | 3.3400000 |

Unique Subject Identifier=2016011111-0025



Assay variable : PTINR\_VAL1 PT-INR Value

N Mean Standard Deviation Minimum Maximum

---

|   |           |           |           |           |
|---|-----------|-----------|-----------|-----------|
| 5 | 2.6040000 | 0.3591379 | 2.3300000 | 3.1100000 |
|---|-----------|-----------|-----------|-----------|

---

Laboratory tests at the time of obtaining Table 2-6 consent, according to the presence or absence of proton-pump inhibitors

Unique Subject Identifier=2016011111-0028

MEANS Procedure

Assay variable : PTINR\_VAL1 PT-INR Value

N Mean Standard Deviation Minimum Maximum

---

|   |           |           |           |           |
|---|-----------|-----------|-----------|-----------|
| 3 | 1.5066667 | 0.2458319 | 1.3500000 | 1.7900000 |
|---|-----------|-----------|-----------|-----------|

---

Unique Subject Identifier=2016011111-0030

Assay variable : PTINR\_VAL1 PT-INR Value

N Mean Standard Deviation Minimum Maximum

---

|   |           |           |           |           |
|---|-----------|-----------|-----------|-----------|
| 5 | 2.0160000 | 0.4263567 | 1.6100000 | 2.5500000 |
|---|-----------|-----------|-----------|-----------|

---

Unique Subject Identifier=2016011111-0031

Assay variable : PTINR\_VAL1 PT-INR Value

N Mean Standard Deviation Minimum Maximum

---

|   |           |           |           |           |
|---|-----------|-----------|-----------|-----------|
| 6 | 2.1166667 | 0.2801190 | 1.7700000 | 2.4500000 |
|---|-----------|-----------|-----------|-----------|

---

Unique Subject Identifier=2016011111-0034

Assay variable : PTINR\_VAL1 PT-INR Value

N Mean Standard Deviation Minimum Maximum

---

|   |           |           |           |           |
|---|-----------|-----------|-----------|-----------|
| 3 | 2.3833333 | 0.1159023 | 2.2500000 | 2.4600000 |
|---|-----------|-----------|-----------|-----------|

---

Laboratory tests at the time of obtaining Table 2-6 consent, according to the presence or absence of proton-pump inhibitors

Unique Subject Identifier=2016011111-0035

MEANS Procedure

Assay variable : PTINR\_VAL1 PT-INR Value

N Mean Standard Deviation Minimum Maximum

---

|   |          |           |           |           |
|---|----------|-----------|-----------|-----------|
| 4 | 2.410000 | 0.8089911 | 1.7700000 | 3.5600000 |
|---|----------|-----------|-----------|-----------|

---

Unique Subject Identifier=2016011111-0036

Assay variable : PTINR\_VAL1 PT-INR Value

N Mean Standard Deviation Minimum Maximum

---

|   |           |           |           |           |
|---|-----------|-----------|-----------|-----------|
| 4 | 2.7700000 | 0.7043673 | 2.2200000 | 3.8000000 |
|---|-----------|-----------|-----------|-----------|

---

Unique Subject Identifier=2016011111-0037

Assay variable : PTINR\_VAL1 PT-INR Value

N Mean Standard Deviation Minimum Maximum

---

|   |           |           |           |           |
|---|-----------|-----------|-----------|-----------|
| 6 | 2.0900000 | 0.4848092 | 1.6100000 | 2.8500000 |
|---|-----------|-----------|-----------|-----------|

---

Unique Subject Identifier=2016011111-0040

Assay variable : PTINR\_VAL1 PT-INR Value

N Mean Standard Deviation Minimum Maximum

---

|   |           |           |           |           |
|---|-----------|-----------|-----------|-----------|
| 5 | 2.3620000 | 0.9487465 | 1.4300000 | 3.9100000 |
|---|-----------|-----------|-----------|-----------|

---

Laboratory tests at the time of obtaining Table 2-6 consent, according to the presence or absence of proton-pump inhibitors

Unique Subject Identifier=2016011111-0043

MEANS Procedure

Assay variable : PTINR\_VAL1 PT-INR Value

N Mean Standard Deviation Minimum Maximum

---

|   |           |           |           |           |
|---|-----------|-----------|-----------|-----------|
| 5 | 2.7300000 | 0.4640582 | 2.1500000 | 3.1900000 |
|---|-----------|-----------|-----------|-----------|

---

Unique Subject Identifier=2016011111-0050

Assay variable : PTINR\_VAL1 PT-INR Value

N Mean Standard Deviation Minimum Maximum

---

|   |           |           |           |           |
|---|-----------|-----------|-----------|-----------|
| 4 | 2.2000000 | 0.1363818 | 2.0800000 | 2.3700000 |
|---|-----------|-----------|-----------|-----------|

---

Unique Subject Identifier=2016011111-0057

Assay variable : PTINR\_VAL1 PT-INR Value

N Mean Standard Deviation Minimum Maximum

---

|   |           |           |           |           |
|---|-----------|-----------|-----------|-----------|
| 6 | 1.8666667 | 0.5833924 | 1.0800000 | 2.6700000 |
|---|-----------|-----------|-----------|-----------|

---

Unique Subject Identifier=2016011111-0060

Assay variable : PTINR\_VAL1 PT-INR Value

N Mean Standard Deviation Minimum Maximum

---

|   |          |           |          |          |
|---|----------|-----------|----------|----------|
| 6 | 1.680000 | 0.2228901 | 1.480000 | 2.120000 |
|---|----------|-----------|----------|----------|

---

Laboratory tests at the time of obtaining Table 2-6 consent, according to the presence or absence of proton-pump inhibitors

Unique Subject Identifier=2016011111-0062

MEANS Procedure

Assay variable : PTINR\_VAL1 PT-INR Value

N Mean Standard Deviation Minimum Maximum

---

|   |           |           |           |           |
|---|-----------|-----------|-----------|-----------|
| 4 | 1.8775000 | 0.1364734 | 1.7100000 | 2.0200000 |
|---|-----------|-----------|-----------|-----------|

---

Unique Subject Identifier=2016011111-0063

Assay variable : PTINR\_VAL1 PT-INR Value

N Mean Standard Deviation Minimum Maximum

---

|   |           |           |           |           |
|---|-----------|-----------|-----------|-----------|
| 5 | 2.4540000 | 0.1879628 | 2.2500000 | 2.7600000 |
|---|-----------|-----------|-----------|-----------|

---

Unique Subject Identifier=2016011111-0070

Assay variable : PTINR\_VAL1 PT-INR Value

N Mean Standard Deviation Minimum Maximum

---

|   |           |           |           |           |
|---|-----------|-----------|-----------|-----------|
| 3 | 2.2966667 | 0.3450121 | 1.9500000 | 2.6400000 |
|---|-----------|-----------|-----------|-----------|

---

Unique Subject Identifier=2016011111-0081



Assay variable : PTINR\_VAL1 PT-INR Value

N Mean Standard Deviation Minimum Maximum

---

|   |          |           |          |          |
|---|----------|-----------|----------|----------|
| 3 | 2.310000 | 0.2651415 | 2.080000 | 2.600000 |
|---|----------|-----------|----------|----------|

---

Laboratory tests at the time of obtaining Table 2-6 consent, according to the presence or absence of proton-pump inhibitors

Unique Subject Identifier=2016011111-0082

MEANS Procedure

Assay variable : PTINR\_VAL1 PT-INR Value

N Mean Standard Deviation Minimum Maximum

---

|   |           |           |           |           |
|---|-----------|-----------|-----------|-----------|
| 3 | 1.8933333 | 0.1850225 | 1.7100000 | 2.0800000 |
|---|-----------|-----------|-----------|-----------|

---

Unique Subject Identifier=2016011111-0085

Assay variable : PTINR\_VAL1 PT-INR Value

N Mean Standard Deviation Minimum Maximum

---

|   |           |           |           |           |
|---|-----------|-----------|-----------|-----------|
| 4 | 2.0225000 | 0.2652515 | 1.7700000 | 2.3700000 |
|---|-----------|-----------|-----------|-----------|

---

Unique Subject Identifier=2016011111-0091

Assay variable : PTINR\_VAL1 PT-INR Value

N Mean Standard Deviation Minimum Maximum

---

|   |           |           |           |           |
|---|-----------|-----------|-----------|-----------|
| 4 | 2.3850000 | 0.2666458 | 2.1700000 | 2.7400000 |
|---|-----------|-----------|-----------|-----------|

---

Unique Subject Identifier=2016011111-0095

Assay variable : PTINR\_VAL1 PT-INR Value

N Mean Standard Deviation Minimum Maximum

---

|   |           |           |           |           |
|---|-----------|-----------|-----------|-----------|
| 3 | 2.3833333 | 0.5108163 | 1.8100000 | 2.7900000 |
|---|-----------|-----------|-----------|-----------|

---

Laboratory tests at the time of obtaining Table 2-6 consent, according to the presence or absence of proton-pump inhibitors

Unique Subject Identifier=2016011111-0096

MEANS Procedure

Assay variable : PTINR\_VAL1 PT-INR Value

| N | Mean      | Standard Deviation | Minimum   | Maximum   |
|---|-----------|--------------------|-----------|-----------|
| 3 | 1.8700000 | 0.2497999          | 1.6700000 | 2.1500000 |

Unique Subject Identifier=2017011100-0002

Assay variable : PTINR\_VAL1 PT-INR Value

| N | Mean      | Standard Deviation | Minimum   | Maximum   |
|---|-----------|--------------------|-----------|-----------|
| 5 | 2.2540000 | 0.6454688          | 1.4000000 | 3.2000000 |

Unique Subject Identifier=2017011100-0004

Assay variable : PTINR\_VAL1 PT-INR Value

| N | Mean      | Standard Deviation | Minimum   | Maximum   |
|---|-----------|--------------------|-----------|-----------|
| 6 | 2.0483333 | 0.4900782          | 1.4500000 | 2.8500000 |

Unique Subject Identifier=2017011100-0011

Assay variable : PTINR\_VAL1 PT-INR Value

N Mean Standard Deviation Minimum Maximum

---

|   |           |           |           |           |
|---|-----------|-----------|-----------|-----------|
| 3 | 1.0866667 | 0.1975686 | 0.9100000 | 1.3000000 |
|---|-----------|-----------|-----------|-----------|

---

Laboratory tests at the time of obtaining Table 2-6 consent, according to the presence or absence of proton-pump inhibitors

Unique Subject Identifier=2017011100-0014

MEANS Procedure

Assay variable : PTINR\_VAL1 PT-INR Value

N Mean Standard Deviation Minimum Maximum

---

|   |           |           |           |           |
|---|-----------|-----------|-----------|-----------|
| 6 | 2.1366667 | 0.4337588 | 1.6300000 | 2.7800000 |
|---|-----------|-----------|-----------|-----------|

---

Unique Subject Identifier=2017011100-0017

Assay variable : PTINR\_VAL1 PT-INR Value

N Mean Standard Deviation Minimum Maximum

---

|   |           |           |           |           |
|---|-----------|-----------|-----------|-----------|
| 6 | 1.5383333 | 0.2977527 | 1.0900000 | 1.8400000 |
|---|-----------|-----------|-----------|-----------|

---

Unique Subject Identifier=2017011100-0019

Assay variable : PTINR\_VAL1 PT-INR Value

N Mean Standard Deviation Minimum Maximum

---

|   |           |           |           |           |
|---|-----------|-----------|-----------|-----------|
| 6 | 1.8083333 | 0.1414803 | 1.6400000 | 1.9400000 |
|---|-----------|-----------|-----------|-----------|

---

Unique Subject Identifier=2017011100-0020

Assay variable : PTINR\_VAL1 PT-INR Value

N Mean Standard Deviation Minimum Maximum

---

|   |           |           |           |           |
|---|-----------|-----------|-----------|-----------|
| 6 | 2.0466667 | 0.4457204 | 1.5000000 | 2.6400000 |
|---|-----------|-----------|-----------|-----------|

---

Laboratory tests at the time of obtaining Table 2-6 consent, according to the presence or absence of proton-pump inhibitors

Unique Subject Identifier=2017011100-0023

MEANS Procedure

Assay variable : PTINR\_VAL1 PT-INR Value

N Mean Standard Deviation Minimum Maximum

---

|   |           |           |           |           |
|---|-----------|-----------|-----------|-----------|
| 6 | 2.0133333 | 0.1944908 | 1.8400000 | 2.3700000 |
|---|-----------|-----------|-----------|-----------|

---

Unique Subject Identifier=2017011100-0027

Assay variable : PTINR\_VAL1 PT-INR Value

N Mean Standard Deviation Minimum Maximum

---

|   |           |           |           |           |
|---|-----------|-----------|-----------|-----------|
| 6 | 1.9050000 | 0.0850294 | 1.8300000 | 2.0100000 |
|---|-----------|-----------|-----------|-----------|

---

Unique Subject Identifier=2017011100-0033

Assay variable : PTINR\_VAL1 PT-INR Value

N Mean Standard Deviation Minimum Maximum

---

|   |           |           |           |           |
|---|-----------|-----------|-----------|-----------|
| 5 | 1.8620000 | 0.1572260 | 1.7200000 | 2.0900000 |
|---|-----------|-----------|-----------|-----------|

---

Unique Subject Identifier=2017011100-0037



Assay variable : PTINR\_VAL1 PT-INR Value

N Mean Standard Deviation Minimum Maximum

---

|   |           |           |           |           |
|---|-----------|-----------|-----------|-----------|
| 5 | 2.0360000 | 0.3995372 | 1.7300000 | 2.7200000 |
|---|-----------|-----------|-----------|-----------|

---

Laboratory tests at the time of obtaining Table 2-6 consent, according to the presence or absence of proton-pump inhibitors

Unique Subject Identifier=2017011100-0038

MEANS Procedure

Assay variable : PTINR\_VAL1 PT-INR Value

N Mean Standard Deviation Minimum Maximum

---

|   |          |           |          |          |
|---|----------|-----------|----------|----------|
| 6 | 2.060000 | 0.2354570 | 1.660000 | 2.270000 |
|---|----------|-----------|----------|----------|

---

Unique Subject Identifier=2017011100-0047

Assay variable : PTINR\_VAL1 PT-INR Value

N Mean Standard Deviation Minimum Maximum

---

|   |          |           |          |          |
|---|----------|-----------|----------|----------|
| 5 | 2.006000 | 0.0250998 | 1.980000 | 2.030000 |
|---|----------|-----------|----------|----------|

---

Unique Subject Identifier=2017011100-0048

Assay variable : PTINR\_VAL1 PT-INR Value

N Mean Standard Deviation Minimum Maximum

---

|   |           |           |          |          |
|---|-----------|-----------|----------|----------|
| 6 | 2.0516667 | 0.4543310 | 1.420000 | 2.610000 |
|---|-----------|-----------|----------|----------|

---

Unique Subject Identifier=2017011100-0049

Assay variable : PTINR\_VAL1 PT-INR Value

N Mean Standard Deviation Minimum Maximum

---

|   |           |           |           |           |
|---|-----------|-----------|-----------|-----------|
| 6 | 2.1283333 | 0.2574814 | 1.8400000 | 2.4300000 |
|---|-----------|-----------|-----------|-----------|

---

Laboratory tests at the time of obtaining Table 2-6 consent, according to the presence or absence of proton-pump inhibitors

Unique Subject Identifier=2017011100-0053

MEANS Procedure

Assay variable : PTINR\_VAL1 PT-INR Value

N Mean Standard Deviation Minimum Maximum

---

|   |           |           |           |           |
|---|-----------|-----------|-----------|-----------|
| 6 | 2.0550000 | 0.5021454 | 1.0800000 | 2.4900000 |
|---|-----------|-----------|-----------|-----------|

---

Unique Subject Identifier=2017011100-0056

Assay variable : PTINR\_VAL1 PT-INR Value

N Mean Standard Deviation Minimum Maximum

---

|   |           |           |           |           |
|---|-----------|-----------|-----------|-----------|
| 6 | 1.8083333 | 0.4073532 | 1.4000000 | 2.5900000 |
|---|-----------|-----------|-----------|-----------|

---

Unique Subject Identifier=2017011100-0058

Assay variable : PTINR\_VAL1 PT-INR Value

N Mean Standard Deviation Minimum Maximum

---

|   |           |           |           |           |
|---|-----------|-----------|-----------|-----------|
| 5 | 2.0100000 | 0.2955503 | 1.6100000 | 2.3300000 |
|---|-----------|-----------|-----------|-----------|

---

Unique Subject Identifier=2017011100-0060

Assay variable : PTINR\_VAL1 PT-INR Value

N Mean Standard Deviation Minimum Maximum

---

|   |           |           |           |           |
|---|-----------|-----------|-----------|-----------|
| 6 | 1.7566667 | 0.6880310 | 1.0900000 | 2.9800000 |
|---|-----------|-----------|-----------|-----------|

---

Laboratory tests at the time of obtaining Table 2-6 consent, according to the presence or absence of proton-pump inhibitors

Unique Subject Identifier=2017011100-0061

MEANS Procedure

Assay variable : PTINR\_VAL1 PT-INR Value

N Mean Standard Deviation Minimum Maximum

---

|   |           |           |           |           |
|---|-----------|-----------|-----------|-----------|
| 6 | 2.3733333 | 0.5452950 | 1.7700000 | 3.3300000 |
|---|-----------|-----------|-----------|-----------|

---

Unique Subject Identifier=2017011100-0062

Assay variable : PTINR\_VAL1 PT-INR Value

N Mean Standard Deviation Minimum Maximum

---

|   |           |           |           |           |
|---|-----------|-----------|-----------|-----------|
| 6 | 1.9933333 | 0.3309179 | 1.4500000 | 2.3300000 |
|---|-----------|-----------|-----------|-----------|

---

Unique Subject Identifier=2017011100-0064

Assay variable : PTINR\_VAL1 PT-INR Value

N Mean Standard Deviation Minimum Maximum

---

|   |           |           |           |           |
|---|-----------|-----------|-----------|-----------|
| 6 | 1.9000000 | 0.3244072 | 1.5400000 | 2.3500000 |
|---|-----------|-----------|-----------|-----------|

---

Unique Subject Identifier=2017011100-0075

Assay variable : PTINR\_VAL1 PT-INR Value

N Mean Standard Deviation Minimum Maximum

---

|   |           |           |           |           |
|---|-----------|-----------|-----------|-----------|
| 6 | 2.3216667 | 0.7310928 | 1.4500000 | 3.3300000 |
|---|-----------|-----------|-----------|-----------|

---

Laboratory tests at the time of obtaining Table 2-6 consent, according to the presence or absence of proton-pump inhibitors

Unique Subject Identifier=2017011100-0076

MEANS Procedure

Assay variable : PTINR\_VAL1 PT-INR Value

N Mean Standard Deviation Minimum Maximum

---

|   |           |           |           |           |
|---|-----------|-----------|-----------|-----------|
| 5 | 1.9520000 | 0.4097804 | 1.5900000 | 2.5700000 |
|---|-----------|-----------|-----------|-----------|

---

Unique Subject Identifier=2017011100-0082

Assay variable : PTINR\_VAL1 PT-INR Value

N Mean Standard Deviation Minimum Maximum

---

|   |           |           |           |           |
|---|-----------|-----------|-----------|-----------|
| 5 | 2.2040000 | 0.4834563 | 1.8400000 | 3.0200000 |
|---|-----------|-----------|-----------|-----------|

---

Unique Subject Identifier=2017011100-0085

Assay variable : PTINR\_VAL1 PT-INR Value

N Mean Standard Deviation Minimum Maximum

---

|   |           |           |           |           |
|---|-----------|-----------|-----------|-----------|
| 6 | 1.8333333 | 0.5709524 | 1.1100000 | 2.4900000 |
|---|-----------|-----------|-----------|-----------|

---

Unique Subject Identifier=2017011100-0092



Assay variable : PTINR\_VAL1 PT-INR Value

N Mean Standard Deviation Minimum Maximum

---

|   |           |           |           |           |
|---|-----------|-----------|-----------|-----------|
| 6 | 1.9066667 | 0.2593582 | 1.5600000 | 2.1900000 |
|---|-----------|-----------|-----------|-----------|

---

Laboratory tests at the time of obtaining Table 2-6 consent, according to the presence or absence of proton-pump inhibitors

Unique Subject Identifier=2017011100-0098

MEANS Procedure

Assay variable : PTINR\_VAL1 PT-INR Value

N Mean Standard Deviation Minimum Maximum

---

|   |           |           |           |           |
|---|-----------|-----------|-----------|-----------|
| 5 | 2.0640000 | 0.4530232 | 1.5600000 | 2.5900000 |
|---|-----------|-----------|-----------|-----------|

---

Unique Subject Identifier=2017011100-0100

Assay variable : PTINR\_VAL1 PT-INR Value

N Mean Standard Deviation Minimum Maximum

---

|   |           |           |           |           |
|---|-----------|-----------|-----------|-----------|
| 6 | 2.1566667 | 0.4348640 | 1.4200000 | 2.7600000 |
|---|-----------|-----------|-----------|-----------|

---

Unique Subject Identifier=2017011100-0109

Assay variable : PTINR\_VAL1 PT-INR Value

N Mean Standard Deviation Minimum Maximum

---

|   |           |           |           |           |
|---|-----------|-----------|-----------|-----------|
| 5 | 1.6940000 | 0.1669731 | 1.4500000 | 1.8600000 |
|---|-----------|-----------|-----------|-----------|

---

Unique Subject Identifier=2017011100-0115

Assay variable : PTINR\_VAL1 PT-INR Value

N Mean Standard Deviation Minimum Maximum

---

|   |           |           |           |           |
|---|-----------|-----------|-----------|-----------|
| 6 | 2.3416667 | 0.4252725 | 2.0000000 | 3.0400000 |
|---|-----------|-----------|-----------|-----------|

---

Laboratory tests at the time of obtaining Table 2-6 consent, according to the presence or absence of proton-pump inhibitors

Unique Subject Identifier=2017011100-0118

MEANS Procedure

Assay variable : PTINR\_VAL1 PT-INR Value

N Mean Standard Deviation Minimum Maximum

---

|   |           |           |           |           |
|---|-----------|-----------|-----------|-----------|
| 6 | 2.1233333 | 0.2985074 | 1.8300000 | 2.6800000 |
|---|-----------|-----------|-----------|-----------|

---

Unique Subject Identifier=2017011100-0120

Assay variable : PTINR\_VAL1 PT-INR Value

N Mean Standard Deviation Minimum Maximum

---

|   |           |           |           |           |
|---|-----------|-----------|-----------|-----------|
| 6 | 2.1383333 | 0.1697547 | 1.9200000 | 2.3700000 |
|---|-----------|-----------|-----------|-----------|

---

Unique Subject Identifier=2018000000-0007

Assay variable : PTINR\_VAL1 PT-INR Value

N Mean Standard Deviation Minimum Maximum

---

|   |           |           |           |           |
|---|-----------|-----------|-----------|-----------|
| 6 | 1.2283333 | 0.0604704 | 1.1700000 | 1.3400000 |
|---|-----------|-----------|-----------|-----------|

---

Unique Subject Identifier=2018000000-0008

Assay variable : PTINR\_VAL1 PT-INR Value

N Mean Standard Deviation Minimum Maximum

---

|   |           |           |           |           |
|---|-----------|-----------|-----------|-----------|
| 3 | 2.0666667 | 0.1289703 | 1.9600000 | 2.2100000 |
|---|-----------|-----------|-----------|-----------|

---

Laboratory tests at the time of obtaining Table 2-6 consent, according to the presence or absence of proton-pump inhibitors

Unique Subject Identifier=2018000000-0012

MEANS Procedure

Assay variable : PTINR\_VAL1 PT-INR Value

N Mean Standard Deviation Minimum Maximum

---

|   |           |           |           |           |
|---|-----------|-----------|-----------|-----------|
| 2 | 1.4000000 | 0.0565685 | 1.3600000 | 1.4400000 |
|---|-----------|-----------|-----------|-----------|

---

Unique Subject Identifier=2018000000-0013

Assay variable : PTINR\_VAL1 PT-INR Value

N Mean Standard Deviation Minimum Maximum

---

|   |           |           |           |           |
|---|-----------|-----------|-----------|-----------|
| 2 | 1.8000000 | 0.1414214 | 1.7000000 | 1.9000000 |
|---|-----------|-----------|-----------|-----------|

---

Unique Subject Identifier=2026011111-0008

Assay variable : PTINR\_VAL1 PT-INR Value

N Mean Standard Deviation Minimum Maximum

---

|   |           |           |           |           |
|---|-----------|-----------|-----------|-----------|
| 6 | 2.2666667 | 0.2422120 | 1.9000000 | 2.5000000 |
|---|-----------|-----------|-----------|-----------|

---

Unique Subject Identifier=2038000000-0005

Assay variable : PTINR\_VAL1 PT-INR Value

N Mean Standard Deviation Minimum Maximum

---

|   |           |           |           |           |
|---|-----------|-----------|-----------|-----------|
| 3 | 1.9933333 | 0.3225420 | 1.6500000 | 2.2900000 |
|---|-----------|-----------|-----------|-----------|

---

Laboratory tests at the time of obtaining Table 2-6 consent, according to the presence or absence of proton-pump inhibitors

Unique Subject Identifier=2038000000-0006

MEANS Procedure

Assay variable : PTINR\_VAL1 PT-INR Value

N Mean Standard Deviation Minimum Maximum

---

|   |           |           |           |           |
|---|-----------|-----------|-----------|-----------|
| 3 | 2.0133333 | 0.6656075 | 1.2900000 | 2.6000000 |
|---|-----------|-----------|-----------|-----------|

---

Unique Subject Identifier=2038000000-0007

Assay variable : PTINR\_VAL1 PT-INR Value

N Mean Standard Deviation Minimum Maximum

---

|   |           |           |           |           |
|---|-----------|-----------|-----------|-----------|
| 3 | 2.0933333 | 0.3108590 | 1.8800000 | 2.4500000 |
|---|-----------|-----------|-----------|-----------|

---

Unique Subject Identifier=2038000000-0009

Assay variable : PTINR\_VAL1 PT-INR Value

N Mean Standard Deviation Minimum Maximum

---

|   |           |           |           |           |
|---|-----------|-----------|-----------|-----------|
| 4 | 2.1650000 | 0.5704092 | 1.3400000 | 2.6500000 |
|---|-----------|-----------|-----------|-----------|

---

Unique Subject Identifier=2047011111-0007



Assay variable : PTINR\_VAL1 PT-INR Value

N Mean Standard Deviation Minimum Maximum

---

|   |           |           |           |           |
|---|-----------|-----------|-----------|-----------|
| 6 | 1.6216667 | 0.2102776 | 1.3700000 | 1.9300000 |
|---|-----------|-----------|-----------|-----------|

---

Laboratory tests at the time of obtaining Table 2-6 consent, according to the presence or absence of proton-pump inhibitors

Unique Subject Identifier=2048011011-0045

MEANS Procedure

Assay variable : PTINR\_VAL1 PT-INR Value

N Mean Standard Deviation Minimum Maximum

---

|   |           |           |           |           |
|---|-----------|-----------|-----------|-----------|
| 3 | 2.0000000 | 0.2645751 | 1.8000000 | 2.3000000 |
|---|-----------|-----------|-----------|-----------|

---

Unique Subject Identifier=2048011011-0048

Assay variable : PTINR\_VAL1 PT-INR Value

N Mean Standard Deviation Minimum Maximum

---

|   |           |           |           |           |
|---|-----------|-----------|-----------|-----------|
| 6 | 2.0166667 | 1.0068101 | 1.1000000 | 3.3000000 |
|---|-----------|-----------|-----------|-----------|

---

Unique Subject Identifier=2048011011-0049

Assay variable : PTINR\_VAL1 PT-INR Value

N Mean Standard Deviation Minimum Maximum

---

|   |           |           |           |           |
|---|-----------|-----------|-----------|-----------|
| 3 | 2.1666667 | 0.2081666 | 2.0000000 | 2.4000000 |
|---|-----------|-----------|-----------|-----------|

---

Unique Subject Identifier=2048011011-0052

Assay variable : PTINR\_VAL1 PT-INR Value

N Mean Standard Deviation Minimum Maximum

---

|   |          |          |          |          |
|---|----------|----------|----------|----------|
| 3 | 1.400000 | 0.500000 | 0.900000 | 1.900000 |
|---|----------|----------|----------|----------|

---

Laboratory tests at the time of obtaining Table 2-6 consent, according to the presence or absence of proton-pump inhibitors

Unique Subject Identifier=2048011011-0053

MEANS Procedure

Assay variable : PTINR\_VAL1 PT-INR Value

N Mean Standard Deviation Minimum Maximum

---

|   |           |           |           |           |
|---|-----------|-----------|-----------|-----------|
| 2 | 2.7500000 | 0.0707107 | 2.7000000 | 2.8000000 |
|---|-----------|-----------|-----------|-----------|

---

Unique Subject Identifier=2048011011-0056

Assay variable : PTINR\_VAL1 PT-INR Value

N Mean Standard Deviation Minimum Maximum

---

|   |           |           |           |           |
|---|-----------|-----------|-----------|-----------|
| 3 | 2.6666667 | 0.1527525 | 2.5000000 | 2.8000000 |
|---|-----------|-----------|-----------|-----------|

---

Unique Subject Identifier=2048011011-0057

Assay variable : PTINR\_VAL1 PT-INR Value

N Mean Standard Deviation Minimum Maximum

---

|   |           |  |           |           |
|---|-----------|--|-----------|-----------|
| 1 | 2.0000000 |  | 2.0000000 | 2.0000000 |
|---|-----------|--|-----------|-----------|

---

Unique Subject Identifier=2048011011-0070

Assay variable : PTINR\_VAL1 PT-INR Value

N Mean Standard Deviation Minimum Maximum

---

|   |          |           |          |          |
|---|----------|-----------|----------|----------|
| 3 | 2.500000 | 0.4582576 | 2.100000 | 3.000000 |
|---|----------|-----------|----------|----------|

---

Laboratory tests at the time of obtaining Table 2-6 consent, according to the presence or absence of proton-pump inhibitors

Unique Subject Identifier=2058011111-0006

MEANS Procedure

Assay variable : PTINR\_VAL1 PT-INR Value

N Mean Standard Deviation Minimum Maximum

---

|   |           |  |           |           |
|---|-----------|--|-----------|-----------|
| 1 | 1.7100000 |  | 1.7100000 | 1.7100000 |
|---|-----------|--|-----------|-----------|

---

Unique Subject Identifier=2077011111-0001

Assay variable : PTINR\_VAL1 PT-INR Value

N Mean Standard Deviation Minimum Maximum

---

|   |           |           |           |           |
|---|-----------|-----------|-----------|-----------|
| 6 | 2.2450000 | 0.7159539 | 1.3900000 | 3.2200000 |
|---|-----------|-----------|-----------|-----------|

---

Unique Subject Identifier=2077011111-0010

Assay variable : PTINR\_VAL1 PT-INR Value

N Mean Standard Deviation Minimum Maximum

---

|   |           |           |           |           |
|---|-----------|-----------|-----------|-----------|
| 6 | 1.6716667 | 0.1094380 | 1.5400000 | 1.8000000 |
|---|-----------|-----------|-----------|-----------|

---

Unique Subject Identifier=2077011111-0016

Assay variable : PTINR\_VAL1 PT-INR Value

N Mean Standard Deviation Minimum Maximum

---

|   |          |           |          |          |
|---|----------|-----------|----------|----------|
| 6 | 2.088333 | 0.8065089 | 1.190000 | 3.400000 |
|---|----------|-----------|----------|----------|

---

Laboratory tests at the time of obtaining Table 2-6 consent, according to the presence or absence of proton-pump inhibitors

Unique Subject Identifier=2092011111-0004

MEANS Procedure

Assay variable : PTINR\_VAL1 PT-INR Value

| N | Mean      | Standard Deviation | Minimum   | Maximum   |
|---|-----------|--------------------|-----------|-----------|
| 1 | 3.0500000 |                    | 3.0500000 | 3.0500000 |

Unique Subject Identifier=2096011111-0001

Assay variable : PTINR\_VAL1 PT-INR Value

| N | Mean      | Standard Deviation | Minimum   | Maximum   |
|---|-----------|--------------------|-----------|-----------|
| 2 | 1.3400000 | 0.1131371          | 1.2600000 | 1.4200000 |

Unique Subject Identifier=2107011000-0036

Assay variable : PTINR\_VAL1 PT-INR Value

| N | Mean      | Standard Deviation | Minimum   | Maximum   |
|---|-----------|--------------------|-----------|-----------|
| 3 | 2.0533333 | 0.6321656          | 1.3300000 | 2.5000000 |

Unique Subject Identifier=2108011000-0002



Assay variable : PTINR\_VAL1 PT-INR Value

N Mean Standard Deviation Minimum Maximum

---

|   |          |           |           |           |
|---|----------|-----------|-----------|-----------|
| 3 | 3.433333 | 1.6041613 | 1.9000000 | 5.1000000 |
|---|----------|-----------|-----------|-----------|

---

Laboratory tests at the time of obtaining Table 2-6 consent, according to the presence or absence of proton-pump inhibitors

Unique Subject Identifier=2112011011-0001

MEANS Procedure

Assay variable : PTINR\_VAL1 PT-INR Value

N Mean Standard Deviation Minimum Maximum

---

|   |           |           |           |           |
|---|-----------|-----------|-----------|-----------|
| 3 | 2.2266667 | 0.0680686 | 2.1500000 | 2.2800000 |
|---|-----------|-----------|-----------|-----------|

---

Unique Subject Identifier=2112011011-0006

Assay variable : PTINR\_VAL1 PT-INR Value

N Mean Standard Deviation Minimum Maximum

---

|   |           |           |           |           |
|---|-----------|-----------|-----------|-----------|
| 5 | 1.9400000 | 0.1846619 | 1.7500000 | 2.1700000 |
|---|-----------|-----------|-----------|-----------|

---

Unique Subject Identifier=2112011011-0008

Assay variable : PTINR\_VAL1 PT-INR Value

N Mean Standard Deviation Minimum Maximum

---

|   |           |           |           |           |
|---|-----------|-----------|-----------|-----------|
| 5 | 2.4060000 | 0.3755396 | 2.0000000 | 2.8700000 |
|---|-----------|-----------|-----------|-----------|

---

Unique Subject Identifier=2113010111-0001

Assay variable : PTINR\_VAL1 PT-INR Value

N Mean Standard Deviation Minimum Maximum

---

|   |           |           |           |           |
|---|-----------|-----------|-----------|-----------|
| 2 | 1.8700000 | 0.2121320 | 1.7200000 | 2.0200000 |
|---|-----------|-----------|-----------|-----------|

---

Laboratory tests at the time of obtaining Table 2-6 consent, according to the presence or absence of proton-pump inhibitors

Unique Subject Identifier=2113010111-0006

MEANS Procedure

Assay variable : PTINR\_VAL1 PT-INR Value

| N | Mean      | Standard Deviation | Minimum   | Maximum   |
|---|-----------|--------------------|-----------|-----------|
| 3 | 1.8500000 | 0.2066398          | 1.6800000 | 2.0800000 |

Unique Subject Identifier=2113010111-0015

Assay variable : PTINR\_VAL1 PT-INR Value

| N | Mean      | Standard Deviation | Minimum   | Maximum   |
|---|-----------|--------------------|-----------|-----------|
| 1 | 1.2100000 |                    | 1.2100000 | 1.2100000 |

Unique Subject Identifier=2115011111-0025

Assay variable : PTINR\_VAL1 PT-INR Value

| N | Mean      | Standard Deviation | Minimum   | Maximum   |
|---|-----------|--------------------|-----------|-----------|
| 3 | 1.6333333 | 0.1527525          | 1.5000000 | 1.8000000 |

Unique Subject Identifier=2118000000-0005

Assay variable : PTINR\_VAL1 PT-INR Value

N Mean Standard Deviation Minimum Maximum

---

|   |           |           |           |           |
|---|-----------|-----------|-----------|-----------|
| 2 | 1.5550000 | 0.2192031 | 1.4000000 | 1.7100000 |
|---|-----------|-----------|-----------|-----------|

---

Laboratory tests at the time of obtaining Table 2-6 consent, according to the presence or absence of proton-pump inhibitors

Unique Subject Identifier=2119011111-0001

MEANS Procedure

Assay variable : PTINR\_VAL1 PT-INR Value

N Mean Standard Deviation Minimum Maximum

---

|   |           |           |           |           |
|---|-----------|-----------|-----------|-----------|
| 5 | 1.8540000 | 0.1637987 | 1.6300000 | 2.0800000 |
|---|-----------|-----------|-----------|-----------|

---

Unique Subject Identifier=2123010000-0004

Assay variable : PTINR\_VAL1 PT-INR Value

N Mean Standard Deviation Minimum Maximum

---

|   |           |           |           |           |
|---|-----------|-----------|-----------|-----------|
| 6 | 2.3166667 | 0.1722401 | 2.1000000 | 2.6000000 |
|---|-----------|-----------|-----------|-----------|

---

Unique Subject Identifier=2123010000-0007

Assay variable : PTINR\_VAL1 PT-INR Value

N Mean Standard Deviation Minimum Maximum

---

|   |           |           |           |           |
|---|-----------|-----------|-----------|-----------|
| 6 | 1.8666667 | 0.2065591 | 1.7000000 | 2.2000000 |
|---|-----------|-----------|-----------|-----------|

---

Unique Subject Identifier=2123010000-0009

Assay variable : PTINR\_VAL1 PT-INR Value

N Mean Standard Deviation Minimum Maximum

---

|   |          |          |          |          |
|---|----------|----------|----------|----------|
| 6 | 2.050000 | 0.418330 | 1.600000 | 2.800000 |
|---|----------|----------|----------|----------|

---

Laboratory tests at the time of obtaining Table 2-6 consent, according to the presence or absence of proton-pump inhibitors

Unique Subject Identifier=2123010000-0011

MEANS Procedure

Assay variable : PTINR\_VAL1 PT-INR Value

N Mean Standard Deviation Minimum Maximum

---

|   |           |           |           |           |
|---|-----------|-----------|-----------|-----------|
| 6 | 1.9666667 | 0.2160247 | 1.7000000 | 2.3000000 |
|---|-----------|-----------|-----------|-----------|

---

Unique Subject Identifier=2123010000-0012

Assay variable : PTINR\_VAL1 PT-INR Value

N Mean Standard Deviation Minimum Maximum

---

|   |           |           |           |           |
|---|-----------|-----------|-----------|-----------|
| 6 | 1.5833333 | 0.1722401 | 1.3000000 | 1.8000000 |
|---|-----------|-----------|-----------|-----------|

---

Unique Subject Identifier=2123010000-0013

Assay variable : PTINR\_VAL1 PT-INR Value

N Mean Standard Deviation Minimum Maximum

---

|   |           |           |           |           |
|---|-----------|-----------|-----------|-----------|
| 5 | 1.9600000 | 0.2966479 | 1.5000000 | 2.3000000 |
|---|-----------|-----------|-----------|-----------|

---

Unique Subject Identifier=2123010000-0015



Assay variable : PTINR\_VAL1 PT-INR Value

N Mean Standard Deviation Minimum Maximum

---

|   |           |           |           |           |
|---|-----------|-----------|-----------|-----------|
| 6 | 2.0833333 | 0.1834848 | 1.8000000 | 2.2000000 |
|---|-----------|-----------|-----------|-----------|

---

Laboratory tests at the time of obtaining Table 2-6 consent, according to the presence or absence of proton-pump inhibitors

Unique Subject Identifier=2123010000-0016

MEANS Procedure

Assay variable : PTINR\_VAL1 PT-INR Value

N Mean Standard Deviation Minimum Maximum

---

|   |           |           |           |           |
|---|-----------|-----------|-----------|-----------|
| 6 | 1.9333333 | 0.2160247 | 1.7000000 | 2.2000000 |
|---|-----------|-----------|-----------|-----------|

---

Unique Subject Identifier=2123010000-0017

Assay variable : PTINR\_VAL1 PT-INR Value

N Mean Standard Deviation Minimum Maximum

---

|   |           |           |           |           |
|---|-----------|-----------|-----------|-----------|
| 4 | 2.2250000 | 0.2986079 | 1.8000000 | 2.5000000 |
|---|-----------|-----------|-----------|-----------|

---

Unique Subject Identifier=2123010000-0020

Assay variable : PTINR\_VAL1 PT-INR Value

N Mean Standard Deviation Minimum Maximum

---

|   |           |           |           |           |
|---|-----------|-----------|-----------|-----------|
| 4 | 2.0250000 | 0.4272002 | 1.5000000 | 2.5000000 |
|---|-----------|-----------|-----------|-----------|

---

Unique Subject Identifier=2123010000-0026

Assay variable : PTINR\_VAL1 PT-INR Value

N Mean Standard Deviation Minimum Maximum

---

|   |           |           |           |           |
|---|-----------|-----------|-----------|-----------|
| 6 | 1.9666667 | 0.0816497 | 1.9000000 | 2.1000000 |
|---|-----------|-----------|-----------|-----------|

---

Laboratory tests at the time of obtaining Table 2-6 consent, according to the presence or absence of proton-pump inhibitors

Unique Subject Identifier=2123010000-0029

MEANS Procedure

Assay variable : PTINR\_VAL1 PT-INR Value

| N | Mean      | Standard Deviation | Minimum   | Maximum   |
|---|-----------|--------------------|-----------|-----------|
| 6 | 1.6833333 | 0.1940790          | 1.5000000 | 2.0000000 |

Unique Subject Identifier=2125011111-0002

Assay variable : PTINR\_VAL1 PT-INR Value

| N | Mean      | Standard Deviation | Minimum   | Maximum   |
|---|-----------|--------------------|-----------|-----------|
| 5 | 2.3140000 | 0.1633401          | 2.1500000 | 2.5400000 |

Unique Subject Identifier=2125011111-0003

Assay variable : PTINR\_VAL1 PT-INR Value

| N | Mean      | Standard Deviation | Minimum   | Maximum   |
|---|-----------|--------------------|-----------|-----------|
| 5 | 2.2660000 | 0.2591910          | 1.9700000 | 2.6400000 |

Unique Subject Identifier=2125011111-0011

Assay variable : PTINR\_VAL1 PT-INR Value

N Mean Standard Deviation Minimum Maximum

---

|   |           |           |           |           |
|---|-----------|-----------|-----------|-----------|
| 2 | 1.9150000 | 0.0353553 | 1.8900000 | 1.9400000 |
|---|-----------|-----------|-----------|-----------|

---

Laboratory tests at the time of obtaining Table 2-6 consent, according to the presence or absence of proton-pump inhibitors

Unique Subject Identifier=2125011111-0013

MEANS Procedure

Assay variable : PTINR\_VAL1 PT-INR Value

N Mean Standard Deviation Minimum Maximum

---

|   |           |           |           |           |
|---|-----------|-----------|-----------|-----------|
| 5 | 2.3240000 | 0.7497866 | 1.4600000 | 3.4300000 |
|---|-----------|-----------|-----------|-----------|

---

Unique Subject Identifier=2125011111-0027

Assay variable : PTINR\_VAL1 PT-INR Value

N Mean Standard Deviation Minimum Maximum

---

|   |           |           |           |           |
|---|-----------|-----------|-----------|-----------|
| 6 | 2.3683333 | 1.0923629 | 1.1900000 | 3.9600000 |
|---|-----------|-----------|-----------|-----------|

---

Unique Subject Identifier=2127011011-0004

Assay variable : PTINR\_VAL1 PT-INR Value

N Mean Standard Deviation Minimum Maximum

---

|   |           |           |           |           |
|---|-----------|-----------|-----------|-----------|
| 4 | 2.0450000 | 0.3831014 | 1.7800000 | 2.6000000 |
|---|-----------|-----------|-----------|-----------|

---

Unique Subject Identifier=2127011011-0006

Assay variable : PTINR\_VAL1 PT-INR Value

N Mean Standard Deviation Minimum Maximum

---

|   |          |           |          |          |
|---|----------|-----------|----------|----------|
| 6 | 1.550000 | 0.1516575 | 1.400000 | 1.800000 |
|---|----------|-----------|----------|----------|

---

Laboratory tests at the time of obtaining Table 2-6 consent, according to the presence or absence of proton-pump inhibitors

Unique Subject Identifier=2127011011-0008

MEANS Procedure

Assay variable : PTINR\_VAL1 PT-INR Value

| N | Mean      | Standard Deviation | Minimum   | Maximum   |
|---|-----------|--------------------|-----------|-----------|
| 5 | 1.5000000 | 0.1581139          | 1.3000000 | 1.7000000 |

Unique Subject Identifier=2127011011-0010

Assay variable : PTINR\_VAL1 PT-INR Value

| N | Mean      | Standard Deviation | Minimum   | Maximum   |
|---|-----------|--------------------|-----------|-----------|
| 5 | 1.9200000 | 0.6180615          | 1.3000000 | 2.8000000 |

Unique Subject Identifier=2127011011-0012

Assay variable : PTINR\_VAL1 PT-INR Value

| N | Mean      | Standard Deviation | Minimum   | Maximum   |
|---|-----------|--------------------|-----------|-----------|
| 6 | 1.5000000 | 0.1414214          | 1.3000000 | 1.7000000 |

Unique Subject Identifier=2127011011-0016



Assay variable : PTINR\_VAL1 PT-INR Value

N Mean Standard Deviation Minimum Maximum

---

|   |           |           |           |           |
|---|-----------|-----------|-----------|-----------|
| 3 | 1.7000000 | 0.1000000 | 1.6000000 | 1.8000000 |
|---|-----------|-----------|-----------|-----------|

---

Laboratory tests at the time of obtaining Table 2-6 consent, according to the presence or absence of proton-pump inhibitors

Unique Subject Identifier=2127011011-0017

MEANS Procedure

Assay variable : PTINR\_VAL1 PT-INR Value

N Mean Standard Deviation Minimum Maximum

---

|   |           |           |           |           |
|---|-----------|-----------|-----------|-----------|
| 3 | 1.1666667 | 0.1527525 | 1.0000000 | 1.3000000 |
|---|-----------|-----------|-----------|-----------|

---

Unique Subject Identifier=2127011011-0018

Assay variable : PTINR\_VAL1 PT-INR Value

N Mean Standard Deviation Minimum Maximum

---

|   |           |           |           |           |
|---|-----------|-----------|-----------|-----------|
| 3 | 1.6333333 | 0.1527525 | 1.5000000 | 1.8000000 |
|---|-----------|-----------|-----------|-----------|

---

Unique Subject Identifier=2127011011-0019

Assay variable : PTINR\_VAL1 PT-INR Value

N Mean Standard Deviation Minimum Maximum

---

|   |           |           |           |           |
|---|-----------|-----------|-----------|-----------|
| 5 | 1.5000000 | 0.2449490 | 1.3000000 | 1.9000000 |
|---|-----------|-----------|-----------|-----------|

---

Unique Subject Identifier=2127011011-0021

Assay variable : PTINR\_VAL1 PT-INR Value

N Mean Standard Deviation Minimum Maximum

---

|   |           |  |           |           |
|---|-----------|--|-----------|-----------|
| 1 | 2.0000000 |  | 2.0000000 | 2.0000000 |
|---|-----------|--|-----------|-----------|

---

Laboratory tests at the time of obtaining Table 2-6 consent, according to the presence or absence of proton-pump inhibitors

Unique Subject Identifier=2127011011-0024

MEANS Procedure

Assay variable : PTINR\_VAL1 PT-INR Value

N Mean Standard Deviation Minimum Maximum

---

|   |           |           |           |           |
|---|-----------|-----------|-----------|-----------|
| 6 | 1.8833333 | 0.1169045 | 1.7000000 | 2.0000000 |
|---|-----------|-----------|-----------|-----------|

---

Unique Subject Identifier=2127011011-0025

Assay variable : PTINR\_VAL1 PT-INR Value

N Mean Standard Deviation Minimum Maximum

---

|   |           |           |           |           |
|---|-----------|-----------|-----------|-----------|
| 6 | 1.8833333 | 0.2401388 | 1.6000000 | 2.3000000 |
|---|-----------|-----------|-----------|-----------|

---

Unique Subject Identifier=2127011011-0026

Assay variable : PTINR\_VAL1 PT-INR Value

N Mean Standard Deviation Minimum Maximum

---

|   |           |           |           |           |
|---|-----------|-----------|-----------|-----------|
| 5 | 1.9800000 | 0.4147288 | 1.4000000 | 2.4000000 |
|---|-----------|-----------|-----------|-----------|

---

Unique Subject Identifier=2127011011-0027

Assay variable : PTINR\_VAL1 PT-INR Value

N Mean Standard Deviation Minimum Maximum

---

|   |           |           |           |           |
|---|-----------|-----------|-----------|-----------|
| 2 | 1.5500000 | 0.0707107 | 1.5000000 | 1.6000000 |
|---|-----------|-----------|-----------|-----------|

---

Laboratory tests at the time of obtaining Table 2-6 consent, according to the presence or absence of proton-pump inhibitors

Unique Subject Identifier=2127011011-0030

MEANS Procedure

Assay variable : PTINR\_VAL1 PT-INR Value

| N | Mean      | Standard Deviation | Minimum   | Maximum   |
|---|-----------|--------------------|-----------|-----------|
| 3 | 1.3333333 | 0.1154701          | 1.2000000 | 1.4000000 |

Unique Subject Identifier=2127011011-0034

Assay variable : PTINR\_VAL1 PT-INR Value

| N | Mean      | Standard Deviation | Minimum   | Maximum   |
|---|-----------|--------------------|-----------|-----------|
| 2 | 2.0000000 | 0.7071068          | 1.5000000 | 2.5000000 |

Unique Subject Identifier=2127011011-0036

Assay variable : PTINR\_VAL1 PT-INR Value

| N | Mean      | Standard Deviation | Minimum   | Maximum   |
|---|-----------|--------------------|-----------|-----------|
| 6 | 1.6500000 | 0.2428992          | 1.3000000 | 1.9000000 |

Unique Subject Identifier=2127011011-0046

Assay variable : PTINR\_VAL1 PT-INR Value

N Mean Standard Deviation Minimum Maximum

---

|   |          |           |          |          |
|---|----------|-----------|----------|----------|
| 4 | 1.460000 | 0.1720465 | 1.280000 | 1.660000 |
|---|----------|-----------|----------|----------|

---

Laboratory tests at the time of obtaining Table 2-6 consent, according to the presence or absence of proton-pump inhibitors

Unique Subject Identifier=2128010111-0001

MEANS Procedure

Assay variable : PTINR\_VAL1 PT-INR Value

N Mean Standard Deviation Minimum Maximum

---

|   |           |  |           |           |
|---|-----------|--|-----------|-----------|
| 1 | 1.7600000 |  | 1.7600000 | 1.7600000 |
|---|-----------|--|-----------|-----------|

---

Unique Subject Identifier=2134011111-0013

Assay variable : PTINR\_VAL1 PT-INR Value

N Mean Standard Deviation Minimum Maximum

---

|   |           |  |           |           |
|---|-----------|--|-----------|-----------|
| 1 | 1.6000000 |  | 1.6000000 | 1.6000000 |
|---|-----------|--|-----------|-----------|

---

Unique Subject Identifier=2138011111-0004

Assay variable : PTINR\_VAL1 PT-INR Value

N Mean Standard Deviation Minimum Maximum

---

|   |           |           |           |           |
|---|-----------|-----------|-----------|-----------|
| 3 | 1.9266667 | 0.0416333 | 1.8800000 | 1.9600000 |
|---|-----------|-----------|-----------|-----------|

---

Unique Subject Identifier=2138011111-0021



Assay variable : PTINR\_VAL1 PT-INR Value

N Mean Standard Deviation Minimum Maximum

---

|   |           |           |           |           |
|---|-----------|-----------|-----------|-----------|
| 5 | 1.9760000 | 0.2956011 | 1.5700000 | 2.3700000 |
|---|-----------|-----------|-----------|-----------|

---

Laboratory tests at the time of obtaining Table 2-6 consent, according to the presence or absence of proton-pump inhibitors

Unique Subject Identifier=2138011111-0026

MEANS Procedure

Assay variable : PTINR\_VAL1 PT-INR Value

N Mean Standard Deviation Minimum Maximum

---

|   |           |           |           |           |
|---|-----------|-----------|-----------|-----------|
| 6 | 1.8516667 | 0.2762185 | 1.4400000 | 2.1600000 |
|---|-----------|-----------|-----------|-----------|

---

Unique Subject Identifier=2138011111-0027

Assay variable : PTINR\_VAL1 PT-INR Value

N Mean Standard Deviation Minimum Maximum

---

|   |           |           |           |           |
|---|-----------|-----------|-----------|-----------|
| 6 | 2.4216667 | 0.5288257 | 1.4700000 | 2.8100000 |
|---|-----------|-----------|-----------|-----------|

---

Unique Subject Identifier=2138011111-0030

Assay variable : PTINR\_VAL1 PT-INR Value

N Mean Standard Deviation Minimum Maximum

---

|   |           |           |           |           |
|---|-----------|-----------|-----------|-----------|
| 3 | 2.0333333 | 0.1814754 | 1.8400000 | 2.2000000 |
|---|-----------|-----------|-----------|-----------|

---

Unique Subject Identifier=2138011111-0032

Assay variable : PTINR\_VAL1 PT-INR Value

N Mean Standard Deviation Minimum Maximum

---

|   |           |           |           |           |
|---|-----------|-----------|-----------|-----------|
| 5 | 1.9460000 | 0.2081586 | 1.6900000 | 2.1600000 |
|---|-----------|-----------|-----------|-----------|

---

Laboratory tests at the time of obtaining Table 2-6 consent, according to the presence or absence of proton-pump inhibitors

Unique Subject Identifier=2138011111-0033

MEANS Procedure

Assay variable : PTINR\_VAL1 PT-INR Value

N Mean Standard Deviation Minimum Maximum

---

|   |           |  |           |           |
|---|-----------|--|-----------|-----------|
| 1 | 1.2600000 |  | 1.2600000 | 1.2600000 |
|---|-----------|--|-----------|-----------|

---

Unique Subject Identifier=2138011111-0040

Assay variable : PTINR\_VAL1 PT-INR Value

N Mean Standard Deviation Minimum Maximum

---

|   |           |           |           |           |
|---|-----------|-----------|-----------|-----------|
| 5 | 1.9100000 | 0.2065188 | 1.6000000 | 2.1700000 |
|---|-----------|-----------|-----------|-----------|

---

Unique Subject Identifier=2138011111-0044

Assay variable : PTINR\_VAL1 PT-INR Value

N Mean Standard Deviation Minimum Maximum

---

|   |           |           |           |           |
|---|-----------|-----------|-----------|-----------|
| 3 | 1.6733333 | 0.0896289 | 1.5700000 | 1.7300000 |
|---|-----------|-----------|-----------|-----------|

---

Unique Subject Identifier=2138011111-0049

Assay variable : PTINR\_VAL1 PT-INR Value

N Mean Standard Deviation Minimum Maximum

---

|   |           |           |           |           |
|---|-----------|-----------|-----------|-----------|
| 4 | 2.3825000 | 0.2698611 | 1.9900000 | 2.6000000 |
|---|-----------|-----------|-----------|-----------|

---

Laboratory tests at the time of obtaining Table 2-6 consent, according to the presence or absence of proton-pump inhibitors

Unique Subject Identifier=2138011111-0054

MEANS Procedure

Assay variable : PTINR\_VAL1 PT-INR Value

N Mean Standard Deviation Minimum Maximum

---

|   |           |           |           |           |
|---|-----------|-----------|-----------|-----------|
| 3 | 2.2233333 | 0.5254839 | 1.9100000 | 2.8300000 |
|---|-----------|-----------|-----------|-----------|

---

Unique Subject Identifier=2138011111-0055

Assay variable : PTINR\_VAL1 PT-INR Value

N Mean Standard Deviation Minimum Maximum

---

|   |           |           |           |           |
|---|-----------|-----------|-----------|-----------|
| 6 | 2.1650000 | 0.5103234 | 1.3100000 | 2.7600000 |
|---|-----------|-----------|-----------|-----------|

---

Unique Subject Identifier=2138011111-0056

Assay variable : PTINR\_VAL1 PT-INR Value

N Mean Standard Deviation Minimum Maximum

---

|   |           |           |           |           |
|---|-----------|-----------|-----------|-----------|
| 6 | 1.2950000 | 0.2700926 | 1.0500000 | 1.6900000 |
|---|-----------|-----------|-----------|-----------|

---

Unique Subject Identifier=2138011111-0062

Assay variable : PTINR\_VAL1 PT-INR Value

N Mean Standard Deviation Minimum Maximum

---

|   |           |           |           |           |
|---|-----------|-----------|-----------|-----------|
| 3 | 1.8233333 | 0.1154701 | 1.6900000 | 1.8900000 |
|---|-----------|-----------|-----------|-----------|

---

Laboratory tests at the time of obtaining Table 2-6 consent, according to the presence or absence of proton-pump inhibitors

Unique Subject Identifier=2138011111-0065

MEANS Procedure

Assay variable : PTINR\_VAL1 PT-INR Value

N Mean Standard Deviation Minimum Maximum

---

|   |           |           |           |           |
|---|-----------|-----------|-----------|-----------|
| 6 | 2.1066667 | 0.2028464 | 1.8600000 | 2.3400000 |
|---|-----------|-----------|-----------|-----------|

---

Unique Subject Identifier=2140011100-0004

Assay variable : PTINR\_VAL1 PT-INR Value

N Mean Standard Deviation Minimum Maximum

---

|   |           |           |           |           |
|---|-----------|-----------|-----------|-----------|
| 5 | 2.3000000 | 0.7905694 | 1.7000000 | 3.6000000 |
|---|-----------|-----------|-----------|-----------|

---

Unique Subject Identifier=2148011111-0003

Assay variable : PTINR\_VAL1 PT-INR Value

N Mean Standard Deviation Minimum Maximum

---

|   |           |  |           |           |
|---|-----------|--|-----------|-----------|
| 1 | 1.2600000 |  | 1.2600000 | 1.2600000 |
|---|-----------|--|-----------|-----------|

---

Unique Subject Identifier=2148011111-0006



Assay variable : PTINR\_VAL1 PT-INR Value

N Mean Standard Deviation Minimum Maximum

---

|   |           |           |           |           |
|---|-----------|-----------|-----------|-----------|
| 3 | 1.0333333 | 0.0577350 | 1.0000000 | 1.1000000 |
|---|-----------|-----------|-----------|-----------|

---

Laboratory tests at the time of obtaining Table 2-6 consent, according to the presence or absence of proton-pump inhibitors

Unique Subject Identifier=2155011111-0008

MEANS Procedure

Assay variable : PTINR\_VAL1 PT-INR Value

N Mean Standard Deviation Minimum Maximum

---

|   |           |           |           |           |
|---|-----------|-----------|-----------|-----------|
| 4 | 2.6150000 | 0.4291464 | 2.1800000 | 3.2000000 |
|---|-----------|-----------|-----------|-----------|

---

Unique Subject Identifier=2155011111-0017

Assay variable : PTINR\_VAL1 PT-INR Value

N Mean Standard Deviation Minimum Maximum

---

|   |           |  |           |           |
|---|-----------|--|-----------|-----------|
| 1 | 1.7000000 |  | 1.7000000 | 1.7000000 |
|---|-----------|--|-----------|-----------|

---

Unique Subject Identifier=2157011111-0004

Assay variable : PTINR\_VAL1 PT-INR Value

N Mean Standard Deviation Minimum Maximum

---

|   |           |           |           |           |
|---|-----------|-----------|-----------|-----------|
| 6 | 2.2500000 | 0.2258318 | 2.0000000 | 2.6000000 |
|---|-----------|-----------|-----------|-----------|

---

Unique Subject Identifier=2163000000-0027

Assay variable : PTINR\_VAL1 PT-INR Value

N Mean Standard Deviation Minimum Maximum

---

|   |           |           |           |           |
|---|-----------|-----------|-----------|-----------|
| 2 | 1.8500000 | 0.0707107 | 1.8000000 | 1.9000000 |
|---|-----------|-----------|-----------|-----------|

---

Laboratory tests at the time of obtaining Table 2-6 consent, according to the presence or absence of proton-pump inhibitors

Unique Subject Identifier=216300000-0051

MEANS Procedure

Assay variable : PTINR\_VAL1 PT-INR Value

N Mean Standard Deviation Minimum Maximum

---

|   |           |  |           |           |
|---|-----------|--|-----------|-----------|
| 1 | 2.3000000 |  | 2.3000000 | 2.3000000 |
|---|-----------|--|-----------|-----------|

---

Unique Subject Identifier=216300000-0058

Assay variable : PTINR\_VAL1 PT-INR Value

N Mean Standard Deviation Minimum Maximum

---

|   |           |   |           |           |
|---|-----------|---|-----------|-----------|
| 2 | 2.0000000 | 0 | 2.0000000 | 2.0000000 |
|---|-----------|---|-----------|-----------|

---

Unique Subject Identifier=2176011011-0028

Assay variable : PTINR\_VAL1 PT-INR Value

N Mean Standard Deviation Minimum Maximum

---

|   |           |  |           |           |
|---|-----------|--|-----------|-----------|
| 1 | 1.7700000 |  | 1.7700000 | 1.7700000 |
|---|-----------|--|-----------|-----------|

---

Unique Subject Identifier=2183011011-0007

Assay variable : PTINR\_VAL1 PT-INR Value

N Mean Standard Deviation Minimum Maximum

---

|   |          |           |           |           |
|---|----------|-----------|-----------|-----------|
| 3 | 2.133333 | 0.4509250 | 1.7000000 | 2.6000000 |
|---|----------|-----------|-----------|-----------|

---

Laboratory tests at the time of obtaining Table 2-6 consent, according to the presence or absence of proton-pump inhibitors

Unique Subject Identifier=2183011011-0008

MEANS Procedure

Assay variable : PTINR\_VAL1 PT-INR Value

N Mean Standard Deviation Minimum Maximum

---

|   |           |           |           |           |
|---|-----------|-----------|-----------|-----------|
| 3 | 1.4666667 | 0.0577350 | 1.4000000 | 1.5000000 |
|---|-----------|-----------|-----------|-----------|

---

Unique Subject Identifier=2183011011-0011

Assay variable : PTINR\_VAL1 PT-INR Value

N Mean Standard Deviation Minimum Maximum

---

|   |           |   |           |           |
|---|-----------|---|-----------|-----------|
| 2 | 2.1000000 | 0 | 2.1000000 | 2.1000000 |
|---|-----------|---|-----------|-----------|

---

Unique Subject Identifier=2183011011-0012

Assay variable : PTINR\_VAL1 PT-INR Value

N Mean Standard Deviation Minimum Maximum

---

|   |           |           |           |           |
|---|-----------|-----------|-----------|-----------|
| 3 | 1.8666667 | 0.2309401 | 1.6000000 | 2.0000000 |
|---|-----------|-----------|-----------|-----------|

---

Unique Subject Identifier=2183011011-0017

Assay variable : PTINR\_VAL1 PT-INR Value

N Mean Standard Deviation Minimum Maximum

---

|   |          |           |          |          |
|---|----------|-----------|----------|----------|
| 2 | 2.100000 | 0.5656854 | 1.700000 | 2.500000 |
|---|----------|-----------|----------|----------|

---

Laboratory tests at the time of obtaining Table 2-6 consent, according to the presence or absence of proton-pump inhibitors

Unique Subject Identifier=2185010010-0002

MEANS Procedure

Assay variable : PTINR\_VAL1 PT-INR Value

N Mean Standard Deviation Minimum Maximum

---

|   |           |  |           |           |
|---|-----------|--|-----------|-----------|
| 1 | 1.7200000 |  | 1.7200000 | 1.7200000 |
|---|-----------|--|-----------|-----------|

---

Unique Subject Identifier=2185010010-0004

Assay variable : PTINR\_VAL1 PT-INR Value

N Mean Standard Deviation Minimum Maximum

---

|   |           |           |           |           |
|---|-----------|-----------|-----------|-----------|
| 6 | 1.9833333 | 0.1471960 | 1.8000000 | 2.1000000 |
|---|-----------|-----------|-----------|-----------|

---

Unique Subject Identifier=2185010010-0007

Assay variable : PTINR\_VAL1 PT-INR Value

N Mean Standard Deviation Minimum Maximum

---

|   |           |           |           |           |
|---|-----------|-----------|-----------|-----------|
| 6 | 2.3333333 | 0.4802777 | 1.6000000 | 2.8000000 |
|---|-----------|-----------|-----------|-----------|

---

Unique Subject Identifier=2185010010-0010



Assay variable : PTINR\_VAL1 PT-INR Value

N Mean Standard Deviation Minimum Maximum

---

|   |          |           |          |          |
|---|----------|-----------|----------|----------|
| 5 | 2.220000 | 0.4658326 | 1.400000 | 2.500000 |
|---|----------|-----------|----------|----------|

---

Laboratory tests at the time of obtaining Table 2-6 consent, according to the presence or absence of proton-pump inhibitors

Unique Subject Identifier=2191011011-0005

MEANS Procedure

Assay variable : PTINR\_VAL1 PT-INR Value

N Mean Standard Deviation Minimum Maximum

---

|   |           |           |           |           |
|---|-----------|-----------|-----------|-----------|
| 2 | 1.5950000 | 0.0353553 | 1.5700000 | 1.6200000 |
|---|-----------|-----------|-----------|-----------|

---

Unique Subject Identifier=2191011011-0008

Assay variable : PTINR\_VAL1 PT-INR Value

N Mean Standard Deviation Minimum Maximum

---

|   |           |           |           |           |
|---|-----------|-----------|-----------|-----------|
| 3 | 1.5233333 | 0.1422439 | 1.3600000 | 1.6200000 |
|---|-----------|-----------|-----------|-----------|

---

Unique Subject Identifier=2191011011-0012

Assay variable : PTINR\_VAL1 PT-INR Value

N Mean Standard Deviation Minimum Maximum

---

|   |           |  |           |           |
|---|-----------|--|-----------|-----------|
| 1 | 1.5100000 |  | 1.5100000 | 1.5100000 |
|---|-----------|--|-----------|-----------|

---

Unique Subject Identifier=2191011011-0013

Assay variable : PTINR\_VAL1 PT-INR Value

N Mean Standard Deviation Minimum Maximum

---

|   |           |  |           |           |
|---|-----------|--|-----------|-----------|
| 1 | 1.7300000 |  | 1.7300000 | 1.7300000 |
|---|-----------|--|-----------|-----------|

---

Laboratory tests at the time of obtaining Table 2-6 consent, according to the presence or absence of proton-pump inhibitors

Unique Subject Identifier=2192010011-0002

MEANS Procedure

Assay variable : PTINR\_VAL1 PT-INR Value

| N | Mean      | Standard Deviation | Minimum   | Maximum   |
|---|-----------|--------------------|-----------|-----------|
| 6 | 2.4333333 | 0.2943920          | 2.1000000 | 2.7000000 |

Unique Subject Identifier=2200000000-0001

Assay variable : PTINR\_VAL1 PT-INR Value

| N | Mean      | Standard Deviation | Minimum   | Maximum   |
|---|-----------|--------------------|-----------|-----------|
| 3 | 2.6166667 | 0.8975708          | 1.8900000 | 3.6200000 |

Unique Subject Identifier=2203011010-0002

Assay variable : PTINR\_VAL1 PT-INR Value

| N | Mean      | Standard Deviation | Minimum   | Maximum   |
|---|-----------|--------------------|-----------|-----------|
| 5 | 1.7800000 | 0.8671793          | 1.0000000 | 3.0000000 |

Unique Subject Identifier=2205001111-0003

Assay variable : PTINR\_VAL1 PT-INR Value

N Mean Standard Deviation Minimum Maximum

---

|   |           |           |           |           |
|---|-----------|-----------|-----------|-----------|
| 6 | 1.9000000 | 0.4690416 | 1.3000000 | 2.6000000 |
|---|-----------|-----------|-----------|-----------|

---

Laboratory tests at the time of obtaining Table 2-6 consent, according to the presence or absence of proton-pump inhibitors

Unique Subject Identifier=2205001111-0018

MEANS Procedure

Assay variable : PTINR\_VAL1 PT-INR Value

N Mean Standard Deviation Minimum Maximum

---

|   |           |           |           |           |
|---|-----------|-----------|-----------|-----------|
| 6 | 2.4666667 | 0.3502380 | 1.9000000 | 2.9000000 |
|---|-----------|-----------|-----------|-----------|

---

Unique Subject Identifier=2205001111-0025

Assay variable : PTINR\_VAL1 PT-INR Value

N Mean Standard Deviation Minimum Maximum

---

|   |           |           |           |           |
|---|-----------|-----------|-----------|-----------|
| 6 | 2.1333333 | 0.1032796 | 2.0000000 | 2.3000000 |
|---|-----------|-----------|-----------|-----------|

---

Unique Subject Identifier=2205001111-0041

Assay variable : PTINR\_VAL1 PT-INR Value

N Mean Standard Deviation Minimum Maximum

---

|   |           |           |           |           |
|---|-----------|-----------|-----------|-----------|
| 6 | 1.8166667 | 0.1471960 | 1.7000000 | 2.0000000 |
|---|-----------|-----------|-----------|-----------|

---

Unique Subject Identifier=2205001111-0046

Assay variable : PTINR\_VAL1 PT-INR Value

N Mean Standard Deviation Minimum Maximum

---

|   |           |           |           |           |
|---|-----------|-----------|-----------|-----------|
| 4 | 2.1325000 | 0.1699755 | 1.9000000 | 2.3000000 |
|---|-----------|-----------|-----------|-----------|

---

Laboratory tests at the time of obtaining Table 2-6 consent, according to the presence or absence of proton-pump inhibitors

Unique Subject Identifier=2211011111-0003

MEANS Procedure

Assay variable : PTINR\_VAL1 PT-INR Value

N Mean Standard Deviation Minimum Maximum

---

|   |           |  |           |           |
|---|-----------|--|-----------|-----------|
| 1 | 1.1000000 |  | 1.1000000 | 1.1000000 |
|---|-----------|--|-----------|-----------|

---

Unique Subject Identifier=2211011111-0038

Assay variable : PTINR\_VAL1 PT-INR Value

N Mean Standard Deviation Minimum Maximum

---

|   |           |           |           |           |
|---|-----------|-----------|-----------|-----------|
| 4 | 1.9250000 | 0.1892969 | 1.8000000 | 2.2000000 |
|---|-----------|-----------|-----------|-----------|

---

Unique Subject Identifier=2211011111-0054

Assay variable : PTINR\_VAL1 PT-INR Value

N Mean Standard Deviation Minimum Maximum

---

|   |           |  |           |           |
|---|-----------|--|-----------|-----------|
| 1 | 1.3500000 |  | 1.3500000 | 1.3500000 |
|---|-----------|--|-----------|-----------|

---

Unique Subject Identifier=2211011111-0057



Assay variable : PTINR\_VAL1 PT-INR Value

N Mean Standard Deviation Minimum Maximum

---

|   |          |  |          |          |
|---|----------|--|----------|----------|
| 1 | 1.600000 |  | 1.600000 | 1.600000 |
|---|----------|--|----------|----------|

---

Laboratory tests at the time of obtaining Table 2-6 consent, according to the presence or absence of proton-pump inhibitors

Unique Subject Identifier=2214011111-0003

MEANS Procedure

Assay variable : PTINR\_VAL1 PT-INR Value

N Mean Standard Deviation Minimum Maximum

---

|   |           |           |           |           |
|---|-----------|-----------|-----------|-----------|
| 6 | 2.1683333 | 0.2604163 | 1.8900000 | 2.5900000 |
|---|-----------|-----------|-----------|-----------|

---

Unique Subject Identifier=2227010011-0003

Assay variable : PTINR\_VAL1 PT-INR Value

N Mean Standard Deviation Minimum Maximum

---

|   |           |  |           |           |
|---|-----------|--|-----------|-----------|
| 1 | 1.9000000 |  | 1.9000000 | 1.9000000 |
|---|-----------|--|-----------|-----------|

---

Unique Subject Identifier=2227010011-0011

Assay variable : PTINR\_VAL1 PT-INR Value

N Mean Standard Deviation Minimum Maximum

---

|   |           |  |           |           |
|---|-----------|--|-----------|-----------|
| 1 | 2.8300000 |  | 2.8300000 | 2.8300000 |
|---|-----------|--|-----------|-----------|

---

Unique Subject Identifier=2233011111-0001

Assay variable : PTINR\_VAL1 PT-INR Value

N Mean Standard Deviation Minimum Maximum

---

|   |           |           |           |           |
|---|-----------|-----------|-----------|-----------|
| 6 | 1.9966667 | 0.4012314 | 1.4500000 | 2.5700000 |
|---|-----------|-----------|-----------|-----------|

---

Laboratory tests at the time of obtaining Table 2-6 consent, according to the presence or absence of proton-pump inhibitors

Unique Subject Identifier=2233011111-0002

MEANS Procedure

Assay variable : PTINR\_VAL1 PT-INR Value

N Mean Standard Deviation Minimum Maximum

---

|   |           |           |           |           |
|---|-----------|-----------|-----------|-----------|
| 6 | 1.9400000 | 0.1704113 | 1.7100000 | 2.1500000 |
|---|-----------|-----------|-----------|-----------|

---

Unique Subject Identifier=2233011111-0008

Assay variable : PTINR\_VAL1 PT-INR Value

N Mean Standard Deviation Minimum Maximum

---

|   |           |           |           |           |
|---|-----------|-----------|-----------|-----------|
| 4 | 1.4000000 | 0.1157584 | 1.2900000 | 1.5600000 |
|---|-----------|-----------|-----------|-----------|

---

Unique Subject Identifier=2233011111-0009

Assay variable : PTINR\_VAL1 PT-INR Value

N Mean Standard Deviation Minimum Maximum

---

|   |           |           |           |           |
|---|-----------|-----------|-----------|-----------|
| 4 | 1.7600000 | 0.2047763 | 1.5600000 | 2.0100000 |
|---|-----------|-----------|-----------|-----------|

---

Unique Subject Identifier=2233011111-0011

Assay variable : PTINR\_VAL1 PT-INR Value

N Mean Standard Deviation Minimum Maximum

---

|   |           |           |           |           |
|---|-----------|-----------|-----------|-----------|
| 5 | 2.2540000 | 0.2861468 | 1.9000000 | 2.6000000 |
|---|-----------|-----------|-----------|-----------|

---

Laboratory tests at the time of obtaining Table 2-6 consent, according to the presence or absence of proton-pump inhibitors

Unique Subject Identifier=2233011111-0015

MEANS Procedure

Assay variable : PTINR\_VAL1 PT-INR Value

N Mean Standard Deviation Minimum Maximum

---

|   |           |           |           |           |
|---|-----------|-----------|-----------|-----------|
| 6 | 1.6016667 | 0.1358553 | 1.4600000 | 1.8000000 |
|---|-----------|-----------|-----------|-----------|

---

Unique Subject Identifier=2233011111-0016

Assay variable : PTINR\_VAL1 PT-INR Value

N Mean Standard Deviation Minimum Maximum

---

|   |           |           |           |           |
|---|-----------|-----------|-----------|-----------|
| 6 | 1.9616667 | 0.2359167 | 1.6500000 | 2.3600000 |
|---|-----------|-----------|-----------|-----------|

---

Unique Subject Identifier=2233011111-0018

Assay variable : PTINR\_VAL1 PT-INR Value

N Mean Standard Deviation Minimum Maximum

---

|   |           |           |           |           |
|---|-----------|-----------|-----------|-----------|
| 4 | 1.5250000 | 0.1912241 | 1.3100000 | 1.7500000 |
|---|-----------|-----------|-----------|-----------|

---

Unique Subject Identifier=2233011111-0019

Assay variable : PTINR\_VAL1 PT-INR Value

N Mean Standard Deviation Minimum Maximum

---

|   |           |           |           |           |
|---|-----------|-----------|-----------|-----------|
| 2 | 2.2500000 | 0.3535534 | 2.0000000 | 2.5000000 |
|---|-----------|-----------|-----------|-----------|

---

Laboratory tests at the time of obtaining Table 2-6 consent, according to the presence or absence of proton-pump inhibitors

Unique Subject Identifier=2233011111-0020

MEANS Procedure

Assay variable : PTINR\_VAL1 PT-INR Value

N Mean Standard Deviation Minimum Maximum

---

|   |           |           |           |           |
|---|-----------|-----------|-----------|-----------|
| 4 | 1.9075000 | 0.3986122 | 1.3400000 | 2.2000000 |
|---|-----------|-----------|-----------|-----------|

---

Unique Subject Identifier=2233011111-0021

Assay variable : PTINR\_VAL1 PT-INR Value

N Mean Standard Deviation Minimum Maximum

---

|   |           |           |           |           |
|---|-----------|-----------|-----------|-----------|
| 5 | 1.4320000 | 0.1439444 | 1.3100000 | 1.6300000 |
|---|-----------|-----------|-----------|-----------|

---

Unique Subject Identifier=2233011111-0022

Assay variable : PTINR\_VAL1 PT-INR Value

N Mean Standard Deviation Minimum Maximum

---

|   |           |           |           |           |
|---|-----------|-----------|-----------|-----------|
| 5 | 1.5680000 | 0.1231666 | 1.4300000 | 1.7600000 |
|---|-----------|-----------|-----------|-----------|

---

Unique Subject Identifier=2233011111-0026



Assay variable : PTINR\_VAL1 PT-INR Value

N Mean Standard Deviation Minimum Maximum

---

|   |           |           |           |           |
|---|-----------|-----------|-----------|-----------|
| 3 | 1.4666667 | 0.1159023 | 1.3600000 | 1.5900000 |
|---|-----------|-----------|-----------|-----------|

---

Laboratory tests at the time of obtaining Table 2-6 consent, according to the presence or absence of proton-pump inhibitors

Unique Subject Identifier=2233011111-0032

MEANS Procedure

Assay variable : PTINR\_VAL1 PT-INR Value

| N | Mean      | Standard Deviation | Minimum   | Maximum   |
|---|-----------|--------------------|-----------|-----------|
| 3 | 2.0133333 | 0.2138535          | 1.7800000 | 2.2000000 |

Unique Subject Identifier=2233011111-0035

Assay variable : PTINR\_VAL1 PT-INR Value

| N | Mean      | Standard Deviation | Minimum   | Maximum   |
|---|-----------|--------------------|-----------|-----------|
| 5 | 1.7220000 | 0.2888252          | 1.3300000 | 1.9800000 |

Unique Subject Identifier=2233011111-0036

Assay variable : PTINR\_VAL1 PT-INR Value

| N | Mean      | Standard Deviation | Minimum   | Maximum   |
|---|-----------|--------------------|-----------|-----------|
| 4 | 1.6725000 | 0.0340343          | 1.6300000 | 1.7000000 |

Unique Subject Identifier=2233011111-0037

Assay variable : PTINR\_VAL1 PT-INR Value

N Mean Standard Deviation Minimum Maximum

---

|   |          |          |          |          |
|---|----------|----------|----------|----------|
| 3 | 2.020000 | 0.120000 | 1.900000 | 2.140000 |
|---|----------|----------|----------|----------|

---

Laboratory tests at the time of obtaining Table 2-6 consent, according to the presence or absence of proton-pump inhibitors

Unique Subject Identifier=2236011111-0001

MEANS Procedure

Assay variable : PTINR\_VAL1 PT-INR Value

N Mean Standard Deviation Minimum Maximum

---

|   |           |           |           |           |
|---|-----------|-----------|-----------|-----------|
| 6 | 2.3866667 | 0.2338090 | 2.0000000 | 2.6000000 |
|---|-----------|-----------|-----------|-----------|

---

Unique Subject Identifier=2236011111-0002

Assay variable : PTINR\_VAL1 PT-INR Value

N Mean Standard Deviation Minimum Maximum

---

|   |           |           |           |           |
|---|-----------|-----------|-----------|-----------|
| 6 | 1.9500000 | 0.4324350 | 1.4000000 | 2.6000000 |
|---|-----------|-----------|-----------|-----------|

---

Unique Subject Identifier=2236011111-0005

Assay variable : PTINR\_VAL1 PT-INR Value

N Mean Standard Deviation Minimum Maximum

---

|   |           |           |           |           |
|---|-----------|-----------|-----------|-----------|
| 4 | 1.7500000 | 0.0577350 | 1.7000000 | 1.8000000 |
|---|-----------|-----------|-----------|-----------|

---

Unique Subject Identifier=2236011111-0007

Assay variable : PTINR\_VAL1 PT-INR Value

N Mean Standard Deviation Minimum Maximum

---

|   |           |           |           |           |
|---|-----------|-----------|-----------|-----------|
| 6 | 1.6783333 | 0.2898563 | 1.3000000 | 2.0000000 |
|---|-----------|-----------|-----------|-----------|

---

Laboratory tests at the time of obtaining Table 2-6 consent, according to the presence or absence of proton-pump inhibitors

Unique Subject Identifier=2236011111-0009

MEANS Procedure

Assay variable : PTINR\_VAL1 PT-INR Value

N Mean Standard Deviation Minimum Maximum

---

|   |           |           |           |           |
|---|-----------|-----------|-----------|-----------|
| 5 | 1.9500000 | 0.2000000 | 1.6000000 | 2.1000000 |
|---|-----------|-----------|-----------|-----------|

---

Unique Subject Identifier=2236011111-0012

Assay variable : PTINR\_VAL1 PT-INR Value

N Mean Standard Deviation Minimum Maximum

---

|   |           |           |           |           |
|---|-----------|-----------|-----------|-----------|
| 5 | 1.5800000 | 0.1788854 | 1.3000000 | 1.7000000 |
|---|-----------|-----------|-----------|-----------|

---

Unique Subject Identifier=2236011111-0013

Assay variable : PTINR\_VAL1 PT-INR Value

N Mean Standard Deviation Minimum Maximum

---

|   |           |           |           |           |
|---|-----------|-----------|-----------|-----------|
| 4 | 2.3500000 | 0.5802298 | 1.8000000 | 3.1000000 |
|---|-----------|-----------|-----------|-----------|

---

Unique Subject Identifier=2236011111-0014

Assay variable : PTINR\_VAL1 PT-INR Value

N Mean Standard Deviation Minimum Maximum

---

|   |           |           |           |           |
|---|-----------|-----------|-----------|-----------|
| 3 | 1.7366667 | 0.3611556 | 1.3600000 | 2.0800000 |
|---|-----------|-----------|-----------|-----------|

---

Laboratory tests at the time of obtaining Table 2-6 consent, according to the presence or absence of proton-pump inhibitors

Unique Subject Identifier=2236011111-0017

MEANS Procedure

Assay variable : PTINR\_VAL1 PT-INR Value

N Mean Standard Deviation Minimum Maximum

---

|   |           |           |           |           |
|---|-----------|-----------|-----------|-----------|
| 6 | 1.7000000 | 0.3687818 | 1.4000000 | 2.3000000 |
|---|-----------|-----------|-----------|-----------|

---

Unique Subject Identifier=2236011111-0018

Assay variable : PTINR\_VAL1 PT-INR Value

N Mean Standard Deviation Minimum Maximum

---

|   |           |           |           |           |
|---|-----------|-----------|-----------|-----------|
| 5 | 2.3400000 | 0.1341641 | 2.2000000 | 2.5000000 |
|---|-----------|-----------|-----------|-----------|

---

Unique Subject Identifier=2236011111-0021

Assay variable : PTINR\_VAL1 PT-INR Value

N Mean Standard Deviation Minimum Maximum

---

|   |           |           |           |           |
|---|-----------|-----------|-----------|-----------|
| 4 | 1.7000000 | 0.1154701 | 1.6000000 | 1.8000000 |
|---|-----------|-----------|-----------|-----------|

---

Unique Subject Identifier=2236011111-0024



Assay variable : PTINR\_VAL1 PT-INR Value

N Mean Standard Deviation Minimum Maximum

---

|   |          |          |          |          |
|---|----------|----------|----------|----------|
| 6 | 1.400000 | 0.200000 | 1.100000 | 1.600000 |
|---|----------|----------|----------|----------|

---

Laboratory tests at the time of obtaining Table 2-6 consent, according to the presence or absence of proton-pump inhibitors

Unique Subject Identifier=2236011111-0025

MEANS Procedure

Assay variable : PTINR\_VAL1 PT-INR Value

| N | Mean      | Standard Deviation | Minimum   | Maximum   |
|---|-----------|--------------------|-----------|-----------|
| 1 | 1.5000000 |                    | 1.5000000 | 1.5000000 |

Unique Subject Identifier=2236011111-0027

Assay variable : PTINR\_VAL1 PT-INR Value

| N | Mean      | Standard Deviation | Minimum   | Maximum   |
|---|-----------|--------------------|-----------|-----------|
| 4 | 2.0500000 | 0.1732051          | 1.9000000 | 2.3000000 |

Unique Subject Identifier=2236011111-0028

Assay variable : PTINR\_VAL1 PT-INR Value

| N | Mean      | Standard Deviation | Minimum   | Maximum   |
|---|-----------|--------------------|-----------|-----------|
| 3 | 2.2666667 | 0.3055050          | 2.0000000 | 2.6000000 |

Unique Subject Identifier=2236011111-0031

Assay variable : PTINR\_VAL1 PT-INR Value

N Mean Standard Deviation Minimum Maximum

---

|   |          |          |          |          |
|---|----------|----------|----------|----------|
| 6 | 1.600000 | 0.244949 | 1.200000 | 1.900000 |
|---|----------|----------|----------|----------|

---

Laboratory tests at the time of obtaining Table 2-6 consent, according to the presence or absence of proton-pump inhibitors

Unique Subject Identifier=2236011111-0032

MEANS Procedure

Assay variable : PTINR\_VAL1 PT-INR Value

N Mean Standard Deviation Minimum Maximum

---

|   |           |           |           |           |
|---|-----------|-----------|-----------|-----------|
| 6 | 1.9166667 | 0.3125167 | 1.5000000 | 2.3000000 |
|---|-----------|-----------|-----------|-----------|

---

Unique Subject Identifier=2236011111-0034

Assay variable : PTINR\_VAL1 PT-INR Value

N Mean Standard Deviation Minimum Maximum

---

|   |           |           |           |           |
|---|-----------|-----------|-----------|-----------|
| 5 | 1.8000000 | 0.2121320 | 1.6000000 | 2.1000000 |
|---|-----------|-----------|-----------|-----------|

---

Unique Subject Identifier=2236011111-0039

Assay variable : PTINR\_VAL1 PT-INR Value

N Mean Standard Deviation Minimum Maximum

---

|   |           |           |           |           |
|---|-----------|-----------|-----------|-----------|
| 4 | 1.8000000 | 0.1414214 | 1.7000000 | 2.0000000 |
|---|-----------|-----------|-----------|-----------|

---

Unique Subject Identifier=2236011111-0042

Assay variable : PTINR\_VAL1 PT-INR Value

N Mean Standard Deviation Minimum Maximum

---

|   |           |           |           |           |
|---|-----------|-----------|-----------|-----------|
| 4 | 1.8250000 | 0.2629956 | 1.6000000 | 2.2000000 |
|---|-----------|-----------|-----------|-----------|

---

Laboratory tests at the time of obtaining Table 2-6 consent, according to the presence or absence of proton-pump inhibitors

Unique Subject Identifier=2236011111-0043

MEANS Procedure

Assay variable : PTINR\_VAL1 PT-INR Value

N Mean Standard Deviation Minimum Maximum

---

|   |           |           |           |           |
|---|-----------|-----------|-----------|-----------|
| 6 | 1.7833333 | 0.2857738 | 1.4000000 | 2.2000000 |
|---|-----------|-----------|-----------|-----------|

---

Unique Subject Identifier=2236011111-0045

Assay variable : PTINR\_VAL1 PT-INR Value

N Mean Standard Deviation Minimum Maximum

---

|   |           |           |           |           |
|---|-----------|-----------|-----------|-----------|
| 5 | 3.0000000 | 0.7681146 | 2.3000000 | 4.1000000 |
|---|-----------|-----------|-----------|-----------|

---

Unique Subject Identifier=2236011111-0052

Assay variable : PTINR\_VAL1 PT-INR Value

N Mean Standard Deviation Minimum Maximum

---

|   |           |           |           |           |
|---|-----------|-----------|-----------|-----------|
| 6 | 1.7000000 | 0.5215362 | 1.2000000 | 2.3000000 |
|---|-----------|-----------|-----------|-----------|

---

Unique Subject Identifier=2236011111-0053

Assay variable : PTINR\_VAL1 PT-INR Value

N Mean Standard Deviation Minimum Maximum

---

|   |           |           |           |           |
|---|-----------|-----------|-----------|-----------|
| 4 | 1.7750000 | 0.1707825 | 1.6000000 | 2.0000000 |
|---|-----------|-----------|-----------|-----------|

---

Laboratory tests at the time of obtaining Table 2-6 consent, according to the presence or absence of proton-pump inhibitors

Unique Subject Identifier=2236011111-0054

MEANS Procedure

Assay variable : PTINR\_VAL1 PT-INR Value

| N | Mean      | Standard Deviation | Minimum   | Maximum   |
|---|-----------|--------------------|-----------|-----------|
| 5 | 1.7160000 | 0.1152389          | 1.5800000 | 1.8000000 |

Unique Subject Identifier=2236011111-0059

Assay variable : PTINR\_VAL1 PT-INR Value

| N | Mean      | Standard Deviation | Minimum   | Maximum   |
|---|-----------|--------------------|-----------|-----------|
| 5 | 2.5720000 | 0.2567489          | 2.3600000 | 3.0000000 |

Unique Subject Identifier=2236011111-0062

Assay variable : PTINR\_VAL1 PT-INR Value

| N | Mean      | Standard Deviation | Minimum   | Maximum   |
|---|-----------|--------------------|-----------|-----------|
| 4 | 2.9000000 | 1.7088007          | 1.8000000 | 5.4000000 |

Unique Subject Identifier=2236011111-0064



Assay variable : PTINR\_VAL1 PT-INR Value

N Mean Standard Deviation Minimum Maximum

---

|   |           |           |           |           |
|---|-----------|-----------|-----------|-----------|
| 4 | 1.9000000 | 0.4966555 | 1.3000000 | 2.5000000 |
|---|-----------|-----------|-----------|-----------|

---

Laboratory tests at the time of obtaining Table 2-6 consent, according to the presence or absence of proton-pump inhibitors

Unique Subject Identifier=2236011111-0066

MEANS Procedure

Assay variable : PTINR\_VAL1 PT-INR Value

N Mean Standard Deviation Minimum Maximum

---

|   |           |           |           |           |
|---|-----------|-----------|-----------|-----------|
| 5 | 2.3320000 | 0.4734131 | 1.6000000 | 2.9000000 |
|---|-----------|-----------|-----------|-----------|

---

Unique Subject Identifier=2236011111-0070

Assay variable : PTINR\_VAL1 PT-INR Value

N Mean Standard Deviation Minimum Maximum

---

|   |           |           |           |           |
|---|-----------|-----------|-----------|-----------|
| 4 | 2.4500000 | 0.3415650 | 2.1000000 | 2.9000000 |
|---|-----------|-----------|-----------|-----------|

---

Unique Subject Identifier=2236011111-0073

Assay variable : PTINR\_VAL1 PT-INR Value

N Mean Standard Deviation Minimum Maximum

---

|   |           |           |           |           |
|---|-----------|-----------|-----------|-----------|
| 6 | 2.1000000 | 0.2828427 | 1.7000000 | 2.4000000 |
|---|-----------|-----------|-----------|-----------|

---

Unique Subject Identifier=2236011111-0075

Assay variable : PTINR\_VAL1 PT-INR Value

N Mean Standard Deviation Minimum Maximum

---

|   |          |          |          |          |
|---|----------|----------|----------|----------|
| 3 | 2.500000 | 0.200000 | 2.300000 | 2.700000 |
|---|----------|----------|----------|----------|

---

Laboratory tests at the time of obtaining Table 2-6 consent, according to the presence or absence of proton-pump inhibitors

Unique Subject Identifier=2236011111-0080

MEANS Procedure

Assay variable : PTINR\_VAL1 PT-INR Value

N Mean Standard Deviation Minimum Maximum

---

|   |           |           |           |           |
|---|-----------|-----------|-----------|-----------|
| 6 | 2.2166667 | 0.5845226 | 1.6000000 | 2.9000000 |
|---|-----------|-----------|-----------|-----------|

---

Unique Subject Identifier=2241011111-0004

Assay variable : PTINR\_VAL1 PT-INR Value

N Mean Standard Deviation Minimum Maximum

---

|   |           |           |           |           |
|---|-----------|-----------|-----------|-----------|
| 5 | 1.6100000 | 0.1189538 | 1.4700000 | 1.7800000 |
|---|-----------|-----------|-----------|-----------|

---

Unique Subject Identifier=2241011111-0009

Assay variable : PTINR\_VAL1 PT-INR Value

N Mean Standard Deviation Minimum Maximum

---

|   |           |           |           |           |
|---|-----------|-----------|-----------|-----------|
| 6 | 2.2183333 | 0.1267149 | 2.0400000 | 2.4300000 |
|---|-----------|-----------|-----------|-----------|

---

Unique Subject Identifier=2243011111-0011

Assay variable : PTINR\_VAL1 PT-INR Value

N Mean Standard Deviation Minimum Maximum

---

|   |           |           |           |           |
|---|-----------|-----------|-----------|-----------|
| 5 | 1.6260000 | 0.1171751 | 1.4500000 | 1.7600000 |
|---|-----------|-----------|-----------|-----------|

---

Laboratory tests at the time of obtaining Table 2-6 consent, according to the presence or absence of proton-pump inhibitors

Unique Subject Identifier=2243011111-0013

MEANS Procedure

Assay variable : PTINR\_VAL1 PT-INR Value

N Mean Standard Deviation Minimum Maximum

---

|   |           |           |           |           |
|---|-----------|-----------|-----------|-----------|
| 6 | 1.7483333 | 0.1584193 | 1.5800000 | 2.0300000 |
|---|-----------|-----------|-----------|-----------|

---

Unique Subject Identifier=2243011111-0014

Assay variable : PTINR\_VAL1 PT-INR Value

N Mean Standard Deviation Minimum Maximum

---

|   |           |           |           |           |
|---|-----------|-----------|-----------|-----------|
| 5 | 1.9360000 | 0.5542833 | 1.3400000 | 2.7400000 |
|---|-----------|-----------|-----------|-----------|

---

Unique Subject Identifier=2243011111-0015

Assay variable : PTINR\_VAL1 PT-INR Value

N Mean Standard Deviation Minimum Maximum

---

|   |           |           |           |           |
|---|-----------|-----------|-----------|-----------|
| 5 | 1.7240000 | 0.1645600 | 1.5200000 | 1.9300000 |
|---|-----------|-----------|-----------|-----------|

---

Unique Subject Identifier=2247010011-0001

Assay variable : PTINR\_VAL1 PT-INR Value

N Mean Standard Deviation Minimum Maximum

---

|   |           |           |           |           |
|---|-----------|-----------|-----------|-----------|
| 2 | 1.7100000 | 0.0424264 | 1.6800000 | 1.7400000 |
|---|-----------|-----------|-----------|-----------|

---

Laboratory tests at the time of obtaining Table 2-6 consent, according to the presence or absence of proton-pump inhibitors

Unique Subject Identifier=2247010011-0002

MEANS Procedure

Assay variable : PTINR\_VAL1 PT-INR Value

N Mean Standard Deviation Minimum Maximum

---

|   |           |           |           |           |
|---|-----------|-----------|-----------|-----------|
| 3 | 1.7266667 | 0.6180885 | 1.3500000 | 2.4400000 |
|---|-----------|-----------|-----------|-----------|

---

Unique Subject Identifier=2247010011-0003

Assay variable : PTINR\_VAL1 PT-INR Value

N Mean Standard Deviation Minimum Maximum

---

|   |           |           |           |           |
|---|-----------|-----------|-----------|-----------|
| 4 | 1.7700000 | 0.1732051 | 1.5600000 | 1.9400000 |
|---|-----------|-----------|-----------|-----------|

---

Unique Subject Identifier=2247010011-0004

Assay variable : PTINR\_VAL1 PT-INR Value

N Mean Standard Deviation Minimum Maximum

---

|   |           |           |           |           |
|---|-----------|-----------|-----------|-----------|
| 3 | 1.7900000 | 0.4059557 | 1.4300000 | 2.2300000 |
|---|-----------|-----------|-----------|-----------|

---

Unique Subject Identifier=2247010011-0005



Assay variable : PTINR\_VAL1 PT-INR Value

N Mean Standard Deviation Minimum Maximum

---

|   |           |           |           |           |
|---|-----------|-----------|-----------|-----------|
| 3 | 1.5466667 | 0.2837840 | 1.2400000 | 1.8000000 |
|---|-----------|-----------|-----------|-----------|

---

Laboratory tests at the time of obtaining Table 2-6 consent, according to the presence or absence of proton-pump inhibitors

Unique Subject Identifier=2247010011-0007

MEANS Procedure

Assay variable : PTINR\_VAL1 PT-INR Value

N Mean Standard Deviation Minimum Maximum

---

|   |           |           |           |           |
|---|-----------|-----------|-----------|-----------|
| 4 | 2.0175000 | 0.4503610 | 1.4400000 | 2.4800000 |
|---|-----------|-----------|-----------|-----------|

---

Unique Subject Identifier=2247010011-0008

Assay variable : PTINR\_VAL1 PT-INR Value

N Mean Standard Deviation Minimum Maximum

---

|   |           |           |           |           |
|---|-----------|-----------|-----------|-----------|
| 5 | 1.7020000 | 0.2327445 | 1.4800000 | 1.9700000 |
|---|-----------|-----------|-----------|-----------|

---

Unique Subject Identifier=2247010011-0009

Assay variable : PTINR\_VAL1 PT-INR Value

N Mean Standard Deviation Minimum Maximum

---

|   |           |           |           |           |
|---|-----------|-----------|-----------|-----------|
| 4 | 2.4950000 | 0.5238638 | 1.7100000 | 2.7900000 |
|---|-----------|-----------|-----------|-----------|

---

Unique Subject Identifier=2247010011-0011

Assay variable : PTINR\_VAL1 PT-INR Value

N Mean Standard Deviation Minimum Maximum

---

|   |           |           |           |           |
|---|-----------|-----------|-----------|-----------|
| 4 | 2.0500000 | 0.4388622 | 1.4100000 | 2.3800000 |
|---|-----------|-----------|-----------|-----------|

---

Laboratory tests at the time of obtaining Table 2-6 consent, according to the presence or absence of proton-pump inhibitors

Unique Subject Identifier=2247010011-0014

MEANS Procedure

Assay variable : PTINR\_VAL1 PT-INR Value

N Mean Standard Deviation Minimum Maximum

---

|   |           |           |           |           |
|---|-----------|-----------|-----------|-----------|
| 4 | 1.5475000 | 0.2715849 | 1.3100000 | 1.8900000 |
|---|-----------|-----------|-----------|-----------|

---

Unique Subject Identifier=2247010011-0017

Assay variable : PTINR\_VAL1 PT-INR Value

N Mean Standard Deviation Minimum Maximum

---

|   |           |           |           |           |
|---|-----------|-----------|-----------|-----------|
| 4 | 1.8850000 | 0.1502221 | 1.6600000 | 1.9700000 |
|---|-----------|-----------|-----------|-----------|

---

Unique Subject Identifier=2247010011-0019

Assay variable : PTINR\_VAL1 PT-INR Value

N Mean Standard Deviation Minimum Maximum

---

|   |           |           |           |           |
|---|-----------|-----------|-----------|-----------|
| 6 | 2.0133333 | 0.3028971 | 1.4900000 | 2.3900000 |
|---|-----------|-----------|-----------|-----------|

---

Unique Subject Identifier=2247010011-0025

Assay variable : PTINR\_VAL1 PT-INR Value

N Mean Standard Deviation Minimum Maximum

---

|   |           |           |           |           |
|---|-----------|-----------|-----------|-----------|
| 4 | 1.9700000 | 0.6274286 | 1.6300000 | 2.9100000 |
|---|-----------|-----------|-----------|-----------|

---

Laboratory tests at the time of obtaining Table 2-6 consent, according to the presence or absence of proton-pump inhibitors

Unique Subject Identifier=2247010011-0026

MEANS Procedure

Assay variable : PTINR\_VAL1 PT-INR Value

N Mean Standard Deviation Minimum Maximum

---

|   |           |           |           |           |
|---|-----------|-----------|-----------|-----------|
| 4 | 2.2625000 | 0.1685972 | 2.0900000 | 2.4800000 |
|---|-----------|-----------|-----------|-----------|

---

Unique Subject Identifier=2247010011-0027

Assay variable : PTINR\_VAL1 PT-INR Value

N Mean Standard Deviation Minimum Maximum

---

|   |           |           |           |           |
|---|-----------|-----------|-----------|-----------|
| 3 | 1.8466667 | 0.0513160 | 1.7900000 | 1.8900000 |
|---|-----------|-----------|-----------|-----------|

---

Unique Subject Identifier=2247010011-0031

Assay variable : PTINR\_VAL1 PT-INR Value

N Mean Standard Deviation Minimum Maximum

---

|   |           |           |           |           |
|---|-----------|-----------|-----------|-----------|
| 4 | 1.5300000 | 0.0820569 | 1.4500000 | 1.6400000 |
|---|-----------|-----------|-----------|-----------|

---

Unique Subject Identifier=2247010011-0032

Assay variable : PTINR\_VAL1 PT-INR Value

N Mean Standard Deviation Minimum Maximum

---

|   |          |           |          |          |
|---|----------|-----------|----------|----------|
| 4 | 2.320000 | 0.2585859 | 2.010000 | 2.620000 |
|---|----------|-----------|----------|----------|

---

Laboratory tests at the time of obtaining Table 2-6 consent, according to the presence or absence of proton-pump inhibitors

Unique Subject Identifier=2247010011-0037

MEANS Procedure

Assay variable : PTINR\_VAL1 PT-INR Value

N Mean Standard Deviation Minimum Maximum

---

|   |           |           |           |           |
|---|-----------|-----------|-----------|-----------|
| 5 | 1.8380000 | 0.1482228 | 1.6700000 | 2.0700000 |
|---|-----------|-----------|-----------|-----------|

---

Unique Subject Identifier=2247010011-0038

Assay variable : PTINR\_VAL1 PT-INR Value

N Mean Standard Deviation Minimum Maximum

---

|   |           |           |           |           |
|---|-----------|-----------|-----------|-----------|
| 4 | 1.4225000 | 0.1906786 | 1.2600000 | 1.6500000 |
|---|-----------|-----------|-----------|-----------|

---

Unique Subject Identifier=2247010011-0049

Assay variable : PTINR\_VAL1 PT-INR Value

N Mean Standard Deviation Minimum Maximum

---

|   |           |           |           |           |
|---|-----------|-----------|-----------|-----------|
| 4 | 1.8075000 | 0.1723127 | 1.6200000 | 2.0100000 |
|---|-----------|-----------|-----------|-----------|

---

Unique Subject Identifier=2247010011-0050



Assay variable : PTINR\_VAL1 PT-INR Value

N Mean Standard Deviation Minimum Maximum

---

|   |           |           |           |           |
|---|-----------|-----------|-----------|-----------|
| 4 | 2.3525000 | 0.1746186 | 2.2000000 | 2.6000000 |
|---|-----------|-----------|-----------|-----------|

---

Laboratory tests at the time of obtaining Table 2-6 consent, according to the presence or absence of proton-pump inhibitors

Unique Subject Identifier=2247010011-0051

MEANS Procedure

Assay variable : PTINR\_VAL1 PT-INR Value

N Mean Standard Deviation Minimum Maximum

---

|   |           |           |           |           |
|---|-----------|-----------|-----------|-----------|
| 5 | 1.6900000 | 0.1504992 | 1.5600000 | 1.9300000 |
|---|-----------|-----------|-----------|-----------|

---

Unique Subject Identifier=2247010011-0054

Assay variable : PTINR\_VAL1 PT-INR Value

N Mean Standard Deviation Minimum Maximum

---

|   |           |           |           |           |
|---|-----------|-----------|-----------|-----------|
| 4 | 1.5150000 | 0.1167619 | 1.3700000 | 1.6400000 |
|---|-----------|-----------|-----------|-----------|

---

Unique Subject Identifier=2247010011-0055

Assay variable : PTINR\_VAL1 PT-INR Value

N Mean Standard Deviation Minimum Maximum

---

|   |           |           |           |           |
|---|-----------|-----------|-----------|-----------|
| 4 | 1.6325000 | 0.2653771 | 1.3200000 | 1.9500000 |
|---|-----------|-----------|-----------|-----------|

---

Unique Subject Identifier=2247010011-0062

Assay variable : PTINR\_VAL1 PT-INR Value

N Mean Standard Deviation Minimum Maximum

---

|   |           |           |           |           |
|---|-----------|-----------|-----------|-----------|
| 3 | 1.9200000 | 1.0142485 | 1.2900000 | 3.0900000 |
|---|-----------|-----------|-----------|-----------|

---

Laboratory tests at the time of obtaining Table 2-6 consent, according to the presence or absence of proton-pump inhibitors

Unique Subject Identifier=2247010011-0063

MEANS Procedure

Assay variable : PTINR\_VAL1 PT-INR Value

N Mean Standard Deviation Minimum Maximum

---

|   |           |           |           |           |
|---|-----------|-----------|-----------|-----------|
| 3 | 1.5833333 | 0.2173323 | 1.3500000 | 1.7800000 |
|---|-----------|-----------|-----------|-----------|

---

Unique Subject Identifier=2247010011-0072

Assay variable : PTINR\_VAL1 PT-INR Value

N Mean Standard Deviation Minimum Maximum

---

|   |           |           |           |           |
|---|-----------|-----------|-----------|-----------|
| 2 | 3.0400000 | 0.5939697 | 2.6200000 | 3.4600000 |
|---|-----------|-----------|-----------|-----------|

---

Unique Subject Identifier=2247010011-0075

Assay variable : PTINR\_VAL1 PT-INR Value

N Mean Standard Deviation Minimum Maximum

---

|   |           |           |           |           |
|---|-----------|-----------|-----------|-----------|
| 3 | 1.2200000 | 0.1646208 | 1.1200000 | 1.4100000 |
|---|-----------|-----------|-----------|-----------|

---

Unique Subject Identifier=2247010011-0076

Assay variable : PTINR\_VAL1 PT-INR Value

N Mean Standard Deviation Minimum Maximum

---

|   |           |           |           |           |
|---|-----------|-----------|-----------|-----------|
| 4 | 1.7900000 | 0.3667879 | 1.3600000 | 2.1600000 |
|---|-----------|-----------|-----------|-----------|

---

Laboratory tests at the time of obtaining Table 2-6 consent, according to the presence or absence of proton-pump inhibitors

Unique Subject Identifier=2247010011-0077

MEANS Procedure

Assay variable : PTINR\_VAL1 PT-INR Value

N Mean Standard Deviation Minimum Maximum

---

|   |           |           |           |           |
|---|-----------|-----------|-----------|-----------|
| 2 | 1.9400000 | 0.5515433 | 1.5500000 | 2.3300000 |
|---|-----------|-----------|-----------|-----------|

---

Unique Subject Identifier=2249011111-0011

Assay variable : PTINR\_VAL1 PT-INR Value

N Mean Standard Deviation Minimum Maximum

---

|   |           |           |           |           |
|---|-----------|-----------|-----------|-----------|
| 2 | 1.4500000 | 0.2121320 | 1.3000000 | 1.6000000 |
|---|-----------|-----------|-----------|-----------|

---

Unique Subject Identifier=2249011111-0017

Assay variable : PTINR\_VAL1 PT-INR Value

N Mean Standard Deviation Minimum Maximum

---

|   |           |           |           |           |
|---|-----------|-----------|-----------|-----------|
| 3 | 2.0566667 | 0.2205297 | 1.8700000 | 2.3000000 |
|---|-----------|-----------|-----------|-----------|

---

Unique Subject Identifier=2258010111-0001

Assay variable : PTINR\_VAL1 PT-INR Value

N Mean Standard Deviation Minimum Maximum

---

|   |          |           |          |          |
|---|----------|-----------|----------|----------|
| 4 | 1.250000 | 0.1290994 | 1.100000 | 1.400000 |
|---|----------|-----------|----------|----------|

---

Laboratory tests at the time of obtaining Table 2-6 consent, according to the presence or absence of proton-pump inhibitors

Unique Subject Identifier=2259010111-0001

MEANS Procedure

Assay variable : PTINR\_VAL1 PT-INR Value

| N | Mean      | Standard Deviation | Minimum   | Maximum   |
|---|-----------|--------------------|-----------|-----------|
| 3 | 1.5066667 | 0.1960442          | 1.3000000 | 1.6900000 |

Unique Subject Identifier=2259010111-0002

Assay variable : PTINR\_VAL1 PT-INR Value

| N | Mean      | Standard Deviation | Minimum   | Maximum   |
|---|-----------|--------------------|-----------|-----------|
| 4 | 1.3350000 | 0.0881287          | 1.2400000 | 1.4400000 |

Unique Subject Identifier=2263011111-0001

Assay variable : PTINR\_VAL1 PT-INR Value

| N | Mean      | Standard Deviation | Minimum   | Maximum   |
|---|-----------|--------------------|-----------|-----------|
| 2 | 2.0600000 | 0.8626703          | 1.4500000 | 2.6700000 |

Unique Subject Identifier=2264011111-0003



Assay variable : PTINR\_VAL1 PT-INR Value

N Mean Standard Deviation Minimum Maximum

---

|   |           |           |           |           |
|---|-----------|-----------|-----------|-----------|
| 6 | 1.6116667 | 0.3074682 | 1.1800000 | 2.0100000 |
|---|-----------|-----------|-----------|-----------|

---

Laboratory tests at the time of obtaining Table 2-6 consent, according to the presence or absence of proton-pump inhibitors

Unique Subject Identifier=2264011111-0004

MEANS Procedure

Assay variable : PTINR\_VAL1 PT-INR Value

N Mean Standard Deviation Minimum Maximum

---

|   |           |           |           |           |
|---|-----------|-----------|-----------|-----------|
| 6 | 1.7650000 | 0.2074367 | 1.4900000 | 2.0300000 |
|---|-----------|-----------|-----------|-----------|

---

Unique Subject Identifier=2264011111-0006

Assay variable : PTINR\_VAL1 PT-INR Value

N Mean Standard Deviation Minimum Maximum

---

|   |           |           |           |           |
|---|-----------|-----------|-----------|-----------|
| 6 | 1.6650000 | 0.4120073 | 1.1500000 | 2.3200000 |
|---|-----------|-----------|-----------|-----------|

---

Unique Subject Identifier=2264011111-0008

Assay variable : PTINR\_VAL1 PT-INR Value

N Mean Standard Deviation Minimum Maximum

---

|   |           |           |           |           |
|---|-----------|-----------|-----------|-----------|
| 6 | 1.6550000 | 0.1005485 | 1.5100000 | 1.7700000 |
|---|-----------|-----------|-----------|-----------|

---

Unique Subject Identifier=2264011111-0009

Assay variable : PTINR\_VAL1 PT-INR Value

N Mean Standard Deviation Minimum Maximum

---

|   |           |           |           |           |
|---|-----------|-----------|-----------|-----------|
| 6 | 1.5383333 | 0.1626551 | 1.4100000 | 1.8200000 |
|---|-----------|-----------|-----------|-----------|

---

Laboratory tests at the time of obtaining Table 2-6 consent, according to the presence or absence of proton-pump inhibitors

Unique Subject Identifier=2264011111-0010

MEANS Procedure

Assay variable : PTINR\_VAL1 PT-INR Value

N Mean Standard Deviation Minimum Maximum

---

|   |           |           |           |           |
|---|-----------|-----------|-----------|-----------|
| 6 | 1.0516667 | 0.0240139 | 1.0200000 | 1.0800000 |
|---|-----------|-----------|-----------|-----------|

---

Unique Subject Identifier=2264011111-0012

Assay variable : PTINR\_VAL1 PT-INR Value

N Mean Standard Deviation Minimum Maximum

---

|   |           |           |           |           |
|---|-----------|-----------|-----------|-----------|
| 6 | 1.8066667 | 0.6258328 | 1.1600000 | 2.9600000 |
|---|-----------|-----------|-----------|-----------|

---

Unique Subject Identifier=2268011111-0021

Assay variable : PTINR\_VAL1 PT-INR Value

N Mean Standard Deviation Minimum Maximum

---

|   |           |           |           |           |
|---|-----------|-----------|-----------|-----------|
| 5 | 2.1400000 | 0.3361547 | 1.6000000 | 2.5000000 |
|---|-----------|-----------|-----------|-----------|

---

Unique Subject Identifier=2268011111-0023

Assay variable : PTINR\_VAL1 PT-INR Value

N Mean Standard Deviation Minimum Maximum

---

|   |          |           |          |          |
|---|----------|-----------|----------|----------|
| 5 | 2.000000 | 0.2121320 | 1.800000 | 2.300000 |
|---|----------|-----------|----------|----------|

---

Laboratory tests at the time of obtaining Table 2-6 consent, according to the presence or absence of proton-pump inhibitors

Unique Subject Identifier=2268011111-0024

MEANS Procedure

Assay variable : PTINR\_VAL1 PT-INR Value

N Mean Standard Deviation Minimum Maximum

---

|   |           |           |           |           |
|---|-----------|-----------|-----------|-----------|
| 5 | 1.6200000 | 0.1788854 | 1.5000000 | 1.9000000 |
|---|-----------|-----------|-----------|-----------|

---

Unique Subject Identifier=2268011111-0028

Assay variable : PTINR\_VAL1 PT-INR Value

N Mean Standard Deviation Minimum Maximum

---

|   |           |           |           |           |
|---|-----------|-----------|-----------|-----------|
| 6 | 2.3166667 | 0.4708149 | 1.9000000 | 3.2000000 |
|---|-----------|-----------|-----------|-----------|

---

Unique Subject Identifier=2268011111-0031

Assay variable : PTINR\_VAL1 PT-INR Value

N Mean Standard Deviation Minimum Maximum

---

|   |           |           |           |           |
|---|-----------|-----------|-----------|-----------|
| 3 | 2.3000000 | 0.2645751 | 2.1000000 | 2.6000000 |
|---|-----------|-----------|-----------|-----------|

---

Unique Subject Identifier=2268011111-0042

Assay variable : PTINR\_VAL1 PT-INR Value

N Mean Standard Deviation Minimum Maximum

---

|   |           |           |           |           |
|---|-----------|-----------|-----------|-----------|
| 6 | 1.9666667 | 0.1505545 | 1.7000000 | 2.1000000 |
|---|-----------|-----------|-----------|-----------|

---

Laboratory tests at the time of obtaining Table 2-6 consent, according to the presence or absence of proton-pump inhibitors

Unique Subject Identifier=2282011001-0006

MEANS Procedure

Assay variable : PTINR\_VAL1 PT-INR Value

N Mean Standard Deviation Minimum Maximum

---

|   |           |  |           |           |
|---|-----------|--|-----------|-----------|
| 1 | 1.9200000 |  | 1.9200000 | 1.9200000 |
|---|-----------|--|-----------|-----------|

---

Unique Subject Identifier=2283011000-0008

Assay variable : PTINR\_VAL1 PT-INR Value

N Mean Standard Deviation Minimum Maximum

---

|   |           |           |           |           |
|---|-----------|-----------|-----------|-----------|
| 3 | 2.1833333 | 0.3501904 | 1.7800000 | 2.4100000 |
|---|-----------|-----------|-----------|-----------|

---

Unique Subject Identifier=2283011000-0020

Assay variable : PTINR\_VAL1 PT-INR Value

N Mean Standard Deviation Minimum Maximum

---

|   |           |           |           |           |
|---|-----------|-----------|-----------|-----------|
| 4 | 1.7425000 | 0.2495830 | 1.5300000 | 2.0800000 |
|---|-----------|-----------|-----------|-----------|

---

Unique Subject Identifier=2284011111-0011



Assay variable : PTINR\_VAL1 PT-INR Value

N Mean Standard Deviation Minimum Maximum

---

|   |           |           |           |           |
|---|-----------|-----------|-----------|-----------|
| 5 | 1.7440000 | 0.2388095 | 1.5200000 | 2.1100000 |
|---|-----------|-----------|-----------|-----------|

---

Laboratory tests at the time of obtaining Table 2-6 consent, according to the presence or absence of proton-pump inhibitors

Unique Subject Identifier=2289000000-0001

MEANS Procedure

Assay variable : PTINR\_VAL1 PT-INR Value

N Mean Standard Deviation Minimum Maximum

---

|   |           |  |           |           |
|---|-----------|--|-----------|-----------|
| 1 | 1.7400000 |  | 1.7400000 | 1.7400000 |
|---|-----------|--|-----------|-----------|

---

Unique Subject Identifier=2292000000-0001

Assay variable : PTINR\_VAL1 PT-INR Value

N Mean Standard Deviation Minimum Maximum

---

|   |           |           |           |           |
|---|-----------|-----------|-----------|-----------|
| 4 | 2.2250000 | 0.1500000 | 2.1000000 | 2.4000000 |
|---|-----------|-----------|-----------|-----------|

---

Unique Subject Identifier=2292000000-0005

Assay variable : PTINR\_VAL1 PT-INR Value

N Mean Standard Deviation Minimum Maximum

---

|   |           |           |           |           |
|---|-----------|-----------|-----------|-----------|
| 6 | 1.6333333 | 0.1861899 | 1.3000000 | 1.8000000 |
|---|-----------|-----------|-----------|-----------|

---

Unique Subject Identifier=2292000000-0008

Assay variable : PTINR\_VAL1 PT-INR Value

N Mean Standard Deviation Minimum Maximum

---

|   |          |           |          |          |
|---|----------|-----------|----------|----------|
| 6 | 2.183333 | 0.4020779 | 1.700000 | 2.800000 |
|---|----------|-----------|----------|----------|

---

Laboratory tests at the time of obtaining Table 2-6 consent, according to the presence or absence of proton-pump inhibitors

Unique Subject Identifier=2292000000-0013

MEANS Procedure

Assay variable : PTINR\_VAL1 PT-INR Value

N Mean Standard Deviation Minimum Maximum

---

|   |           |           |           |           |
|---|-----------|-----------|-----------|-----------|
| 6 | 1.9333333 | 0.3614784 | 1.5000000 | 2.5000000 |
|---|-----------|-----------|-----------|-----------|

---

Unique Subject Identifier=2296010111-0005

Assay variable : PTINR\_VAL1 PT-INR Value

N Mean Standard Deviation Minimum Maximum

---

|   |           |           |           |           |
|---|-----------|-----------|-----------|-----------|
| 5 | 1.8600000 | 0.0547723 | 1.8000000 | 1.9000000 |
|---|-----------|-----------|-----------|-----------|

---

Unique Subject Identifier=2296010111-0006

Assay variable : PTINR\_VAL1 PT-INR Value

N Mean Standard Deviation Minimum Maximum

---

|   |           |           |           |           |
|---|-----------|-----------|-----------|-----------|
| 5 | 1.9000000 | 0.2549510 | 1.6000000 | 2.2000000 |
|---|-----------|-----------|-----------|-----------|

---

Unique Subject Identifier=2296010111-0009

Assay variable : PTINR\_VAL1 PT-INR Value

N Mean Standard Deviation Minimum Maximum

---

|   |          |          |          |          |
|---|----------|----------|----------|----------|
| 5 | 2.200000 | 0.200000 | 1.900000 | 2.400000 |
|---|----------|----------|----------|----------|

---

Laboratory tests at the time of obtaining Table 2-6 consent, according to the presence or absence of proton-pump inhibitors

Unique Subject Identifier=2296010111-0011

MEANS Procedure

Assay variable : PTINR\_VAL1 PT-INR Value

N Mean Standard Deviation Minimum Maximum

---

|   |           |           |           |           |
|---|-----------|-----------|-----------|-----------|
| 6 | 2.1666667 | 0.1211060 | 2.0000000 | 2.3000000 |
|---|-----------|-----------|-----------|-----------|

---

Unique Subject Identifier=2296010111-0012

Assay variable : PTINR\_VAL1 PT-INR Value

N Mean Standard Deviation Minimum Maximum

---

|   |           |           |           |           |
|---|-----------|-----------|-----------|-----------|
| 6 | 1.8500000 | 0.2509980 | 1.6000000 | 2.3000000 |
|---|-----------|-----------|-----------|-----------|

---

Unique Subject Identifier=2301011111-0002

Assay variable : PTINR\_VAL1 PT-INR Value

N Mean Standard Deviation Minimum Maximum

---

|   |           |  |           |           |
|---|-----------|--|-----------|-----------|
| 1 | 2.3400000 |  | 2.3400000 | 2.3400000 |
|---|-----------|--|-----------|-----------|

---

Unique Subject Identifier=2301011111-0010

Assay variable : PTINR\_VAL1 PT-INR Value

N Mean Standard Deviation Minimum Maximum

---

|   |           |           |           |           |
|---|-----------|-----------|-----------|-----------|
| 2 | 1.8950000 | 0.7707464 | 1.3500000 | 2.4400000 |
|---|-----------|-----------|-----------|-----------|

---

Laboratory tests at the time of obtaining Table 2-6 consent, according to the presence or absence of proton-pump inhibitors

Unique Subject Identifier=2301011111-0013

MEANS Procedure

Assay variable : PTINR\_VAL1 PT-INR Value

N Mean Standard Deviation Minimum Maximum

---

|   |           |           |           |           |
|---|-----------|-----------|-----------|-----------|
| 3 | 1.7000000 | 0.1539480 | 1.5700000 | 1.8700000 |
|---|-----------|-----------|-----------|-----------|

---

Unique Subject Identifier=2308011000-0001

Assay variable : PTINR\_VAL1 PT-INR Value

N Mean Standard Deviation Minimum Maximum

---

|   |           |           |           |           |
|---|-----------|-----------|-----------|-----------|
| 3 | 1.6333333 | 0.0577350 | 1.6000000 | 1.7000000 |
|---|-----------|-----------|-----------|-----------|

---

Unique Subject Identifier=2308011000-0002

Assay variable : PTINR\_VAL1 PT-INR Value

N Mean Standard Deviation Minimum Maximum

---

|   |           |           |           |           |
|---|-----------|-----------|-----------|-----------|
| 5 | 1.7000000 | 0.3872983 | 1.2000000 | 2.1000000 |
|---|-----------|-----------|-----------|-----------|

---

Unique Subject Identifier=2308011000-0004



Assay variable : PTINR\_VAL1 PT-INR Value

N Mean Standard Deviation Minimum Maximum

---

|   |           |           |           |           |
|---|-----------|-----------|-----------|-----------|
| 4 | 2.2250000 | 0.2629956 | 2.0000000 | 2.6000000 |
|---|-----------|-----------|-----------|-----------|

---

Laboratory tests at the time of obtaining Table 2-6 consent, according to the presence or absence of proton-pump inhibitors

Unique Subject Identifier=2308011000-0013

MEANS Procedure

Assay variable : PTINR\_VAL1 PT-INR Value

N Mean Standard Deviation Minimum Maximum

---

|   |           |           |           |           |
|---|-----------|-----------|-----------|-----------|
| 4 | 1.6000000 | 0.1414214 | 1.4000000 | 1.7000000 |
|---|-----------|-----------|-----------|-----------|

---

Unique Subject Identifier=2308011000-0017

Assay variable : PTINR\_VAL1 PT-INR Value

N Mean Standard Deviation Minimum Maximum

---

|   |           |           |           |           |
|---|-----------|-----------|-----------|-----------|
| 3 | 1.7666667 | 0.2886751 | 1.6000000 | 2.1000000 |
|---|-----------|-----------|-----------|-----------|

---

Unique Subject Identifier=2308011000-0018

Assay variable : PTINR\_VAL1 PT-INR Value

N Mean Standard Deviation Minimum Maximum

---

|   |           |           |           |           |
|---|-----------|-----------|-----------|-----------|
| 2 | 1.8500000 | 0.7778175 | 1.3000000 | 2.4000000 |
|---|-----------|-----------|-----------|-----------|

---

Unique Subject Identifier=2309000000-0001

Assay variable : PTINR\_VAL1 PT-INR Value

N Mean Standard Deviation Minimum Maximum

---

|   |           |           |           |           |
|---|-----------|-----------|-----------|-----------|
| 3 | 1.8766667 | 0.3707200 | 1.5200000 | 2.2600000 |
|---|-----------|-----------|-----------|-----------|

---

Laboratory tests at the time of obtaining Table 2-6 consent, according to the presence or absence of proton-pump inhibitors

Unique Subject Identifier=2309000000-0003

MEANS Procedure

Assay variable : PTINR\_VAL1 PT-INR Value

| N | Mean      | Standard Deviation | Minimum   | Maximum   |
|---|-----------|--------------------|-----------|-----------|
| 1 | 2.2900000 |                    | 2.2900000 | 2.2900000 |

Unique Subject Identifier=2310011111-0001

Assay variable : PTINR\_VAL1 PT-INR Value

| N | Mean      | Standard Deviation | Minimum   | Maximum   |
|---|-----------|--------------------|-----------|-----------|
| 2 | 1.8100000 | 0.2404163          | 1.6400000 | 1.9800000 |

Unique Subject Identifier=2310011111-0008

Assay variable : PTINR\_VAL1 PT-INR Value

| N | Mean      | Standard Deviation | Minimum   | Maximum   |
|---|-----------|--------------------|-----------|-----------|
| 4 | 1.9100000 | 0.8183316          | 1.0300000 | 2.6700000 |

Unique Subject Identifier=2310011111-0018

Assay variable : PTINR\_VAL1 PT-INR Value

N Mean Standard Deviation Minimum Maximum

---

|   |           |           |           |           |
|---|-----------|-----------|-----------|-----------|
| 4 | 2.2775000 | 0.7902057 | 1.8100000 | 3.4600000 |
|---|-----------|-----------|-----------|-----------|

---

Laboratory tests at the time of obtaining Table 2-6 consent, according to the presence or absence of proton-pump inhibitors

Unique Subject Identifier=2312011111-0005

MEANS Procedure

Assay variable : PTINR\_VAL1 PT-INR Value

| N | Mean      | Standard Deviation | Minimum   | Maximum   |
|---|-----------|--------------------|-----------|-----------|
| 3 | 2.3666667 | 0.4041452          | 1.9000000 | 2.6000000 |

Unique Subject Identifier=2312011111-0006

Assay variable : PTINR\_VAL1 PT-INR Value

| N | Mean      | Standard Deviation | Minimum   | Maximum   |
|---|-----------|--------------------|-----------|-----------|
| 1 | 2.0000000 |                    | 2.0000000 | 2.0000000 |

Unique Subject Identifier=2312011111-0008

Assay variable : PTINR\_VAL1 PT-INR Value

| N | Mean      | Standard Deviation | Minimum   | Maximum   |
|---|-----------|--------------------|-----------|-----------|
| 2 | 1.8000000 | 0.2828427          | 1.6000000 | 2.0000000 |

Unique Subject Identifier=2321011011-0006

Assay variable : PTINR\_VAL1 PT-INR Value

N Mean Standard Deviation Minimum Maximum

---

|   |           |  |           |           |
|---|-----------|--|-----------|-----------|
| 1 | 2.0100000 |  | 2.0100000 | 2.0100000 |
|---|-----------|--|-----------|-----------|

---

Laboratory tests at the time of obtaining Table 2-6 consent, according to the presence or absence of proton-pump inhibitors

Unique Subject Identifier=2327011011-0018

MEANS Procedure

Assay variable : PTINR\_VAL1 PT-INR Value

N Mean Standard Deviation Minimum Maximum

---

|   |           |           |           |           |
|---|-----------|-----------|-----------|-----------|
| 3 | 2.4900000 | 0.5604463 | 1.8900000 | 3.0000000 |
|---|-----------|-----------|-----------|-----------|

---

Unique Subject Identifier=2327011011-0027

Assay variable : PTINR\_VAL1 PT-INR Value

N Mean Standard Deviation Minimum Maximum

---

|   |           |           |           |           |
|---|-----------|-----------|-----------|-----------|
| 4 | 2.0950000 | 0.2829016 | 1.8500000 | 2.4900000 |
|---|-----------|-----------|-----------|-----------|

---

Unique Subject Identifier=2327011011-0032

Assay variable : PTINR\_VAL1 PT-INR Value

N Mean Standard Deviation Minimum Maximum

---

|   |           |           |           |           |
|---|-----------|-----------|-----------|-----------|
| 4 | 1.8250000 | 0.1292285 | 1.6500000 | 1.9600000 |
|---|-----------|-----------|-----------|-----------|

---

Unique Subject Identifier=2327011011-0038



Assay variable : PTINR\_VAL1 PT-INR Value

N Mean Standard Deviation Minimum Maximum

---

|   |           |           |           |           |
|---|-----------|-----------|-----------|-----------|
| 4 | 1.7275000 | 0.2396351 | 1.4900000 | 2.0200000 |
|---|-----------|-----------|-----------|-----------|

---

Laboratory tests at the time of obtaining Table 2-6 consent, according to the presence or absence of proton-pump inhibitors

Unique Subject Identifier=2327011011-0046

MEANS Procedure

Assay variable : PTINR\_VAL1 PT-INR Value

N Mean Standard Deviation Minimum Maximum

---

|   |           |           |           |           |
|---|-----------|-----------|-----------|-----------|
| 4 | 1.8125000 | 0.2794489 | 1.4600000 | 2.0700000 |
|---|-----------|-----------|-----------|-----------|

---

Unique Subject Identifier=2341001000-0004

Assay variable : PTINR\_VAL1 PT-INR Value

N Mean Standard Deviation Minimum Maximum

---

|   |           |           |           |           |
|---|-----------|-----------|-----------|-----------|
| 2 | 1.1450000 | 0.0070711 | 1.1400000 | 1.1500000 |
|---|-----------|-----------|-----------|-----------|

---

Unique Subject Identifier=2341001000-0008

Assay variable : PTINR\_VAL1 PT-INR Value

N Mean Standard Deviation Minimum Maximum

---

|   |           |  |           |           |
|---|-----------|--|-----------|-----------|
| 1 | 1.9100000 |  | 1.9100000 | 1.9100000 |
|---|-----------|--|-----------|-----------|

---

Unique Subject Identifier=2341001000-0010

Assay variable : PTINR\_VAL1 PT-INR Value

N Mean Standard Deviation Minimum Maximum

---

|   |           |  |           |           |
|---|-----------|--|-----------|-----------|
| 1 | 2.5900000 |  | 2.5900000 | 2.5900000 |
|---|-----------|--|-----------|-----------|

---

Laboratory tests at the time of obtaining Table 2-6 consent, according to the presence or absence of proton-pump inhibitors

Unique Subject Identifier=2347011111-0001

MEANS Procedure

Assay variable : PTINR\_VAL1 PT-INR Value

N Mean Standard Deviation Minimum Maximum

---

|   |           |           |           |           |
|---|-----------|-----------|-----------|-----------|
| 6 | 1.8633333 | 0.2362767 | 1.5300000 | 2.2000000 |
|---|-----------|-----------|-----------|-----------|

---

Unique Subject Identifier=2347011111-0006

Assay variable : PTINR\_VAL1 PT-INR Value

N Mean Standard Deviation Minimum Maximum

---

|   |           |           |           |           |
|---|-----------|-----------|-----------|-----------|
| 6 | 2.4033333 | 1.0029091 | 1.3200000 | 4.0000000 |
|---|-----------|-----------|-----------|-----------|

---

Unique Subject Identifier=2347011111-0007

Assay variable : PTINR\_VAL1 PT-INR Value

N Mean Standard Deviation Minimum Maximum

---

|   |           |           |           |           |
|---|-----------|-----------|-----------|-----------|
| 5 | 1.9680000 | 0.2846401 | 1.5900000 | 2.2800000 |
|---|-----------|-----------|-----------|-----------|

---

Unique Subject Identifier=2347011111-0008

Assay variable : PTINR\_VAL1 PT-INR Value

N Mean Standard Deviation Minimum Maximum

---

|   |           |           |           |           |
|---|-----------|-----------|-----------|-----------|
| 6 | 1.9616667 | 0.0646271 | 1.8600000 | 2.0500000 |
|---|-----------|-----------|-----------|-----------|

---

Laboratory tests at the time of obtaining Table 2-6 consent, according to the presence or absence of proton-pump inhibitors

Unique Subject Identifier=2347011111-0013

MEANS Procedure

Assay variable : PTINR\_VAL1 PT-INR Value

N Mean Standard Deviation Minimum Maximum

---

|   |           |           |           |           |
|---|-----------|-----------|-----------|-----------|
| 6 | 1.5333333 | 0.2520053 | 1.2300000 | 1.9000000 |
|---|-----------|-----------|-----------|-----------|

---

Unique Subject Identifier=2347011111-0014

Assay variable : PTINR\_VAL1 PT-INR Value

N Mean Standard Deviation Minimum Maximum

---

|   |           |           |           |           |
|---|-----------|-----------|-----------|-----------|
| 6 | 2.2316667 | 0.1570244 | 2.0500000 | 2.4700000 |
|---|-----------|-----------|-----------|-----------|

---

Unique Subject Identifier=2347011111-0020

Assay variable : PTINR\_VAL1 PT-INR Value

N Mean Standard Deviation Minimum Maximum

---

|   |           |           |           |           |
|---|-----------|-----------|-----------|-----------|
| 6 | 1.8816667 | 0.1767956 | 1.5600000 | 2.0700000 |
|---|-----------|-----------|-----------|-----------|

---

Unique Subject Identifier=2347011111-0022

Assay variable : PTINR\_VAL1 PT-INR Value

N Mean Standard Deviation Minimum Maximum

---

|   |           |           |           |           |
|---|-----------|-----------|-----------|-----------|
| 6 | 1.9066667 | 0.1297176 | 1.7200000 | 2.0700000 |
|---|-----------|-----------|-----------|-----------|

---

Laboratory tests at the time of obtaining Table 2-6 consent, according to the presence or absence of proton-pump inhibitors

Unique Subject Identifier=2347011111-0023

MEANS Procedure

Assay variable : PTINR\_VAL1 PT-INR Value

N Mean Standard Deviation Minimum Maximum

---

|   |           |           |           |           |
|---|-----------|-----------|-----------|-----------|
| 6 | 2.0066667 | 0.3538738 | 1.5300000 | 2.3700000 |
|---|-----------|-----------|-----------|-----------|

---

Unique Subject Identifier=2347011111-0024

Assay variable : PTINR\_VAL1 PT-INR Value

N Mean Standard Deviation Minimum Maximum

---

|   |           |           |           |           |
|---|-----------|-----------|-----------|-----------|
| 6 | 2.0033333 | 0.1116542 | 1.8400000 | 2.1500000 |
|---|-----------|-----------|-----------|-----------|

---

Unique Subject Identifier=2347011111-0029

Assay variable : PTINR\_VAL1 PT-INR Value

N Mean Standard Deviation Minimum Maximum

---

|   |           |           |           |           |
|---|-----------|-----------|-----------|-----------|
| 6 | 1.6933333 | 0.2259794 | 1.3600000 | 2.0100000 |
|---|-----------|-----------|-----------|-----------|

---

Unique Subject Identifier=2347011111-0033



Assay variable : PTINR\_VAL1 PT-INR Value

N Mean Standard Deviation Minimum Maximum

---

|   |          |           |          |          |
|---|----------|-----------|----------|----------|
| 6 | 1.820000 | 0.2174396 | 1.490000 | 2.110000 |
|---|----------|-----------|----------|----------|

---

Laboratory tests at the time of obtaining Table 2-6 consent, according to the presence or absence of proton-pump inhibitors

Unique Subject Identifier=2347011111-0035

MEANS Procedure

Assay variable : PTINR\_VAL1 PT-INR Value

N Mean Standard Deviation Minimum Maximum

---

|   |           |           |           |           |
|---|-----------|-----------|-----------|-----------|
| 6 | 1.9766667 | 0.2438579 | 1.7100000 | 2.4300000 |
|---|-----------|-----------|-----------|-----------|

---

Unique Subject Identifier=2347011111-0038

Assay variable : PTINR\_VAL1 PT-INR Value

N Mean Standard Deviation Minimum Maximum

---

|   |           |           |           |           |
|---|-----------|-----------|-----------|-----------|
| 4 | 1.6950000 | 0.8847033 | 1.0400000 | 2.9700000 |
|---|-----------|-----------|-----------|-----------|

---

Unique Subject Identifier=2353011111-0002

Assay variable : PTINR\_VAL1 PT-INR Value

N Mean Standard Deviation Minimum Maximum

---

|   |           |           |           |           |
|---|-----------|-----------|-----------|-----------|
| 6 | 1.8350000 | 0.2117310 | 1.6000000 | 2.2100000 |
|---|-----------|-----------|-----------|-----------|

---

Unique Subject Identifier=2353011111-0009

Assay variable : PTINR\_VAL1 PT-INR Value

N Mean Standard Deviation Minimum Maximum

---

|   |           |           |           |           |
|---|-----------|-----------|-----------|-----------|
| 6 | 2.2916667 | 0.3473567 | 1.7900000 | 2.5800000 |
|---|-----------|-----------|-----------|-----------|

---

Laboratory tests at the time of obtaining Table 2-6 consent, according to the presence or absence of proton-pump inhibitors

Unique Subject Identifier=2353011111-0010

MEANS Procedure

Assay variable : PTINR\_VAL1 PT-INR Value

N Mean Standard Deviation Minimum Maximum

---

|   |           |           |           |           |
|---|-----------|-----------|-----------|-----------|
| 6 | 1.8433333 | 0.1906480 | 1.6400000 | 2.1100000 |
|---|-----------|-----------|-----------|-----------|

---

Unique Subject Identifier=2353011111-0012

Assay variable : PTINR\_VAL1 PT-INR Value

N Mean Standard Deviation Minimum Maximum

---

|   |           |           |           |           |
|---|-----------|-----------|-----------|-----------|
| 6 | 1.9350000 | 0.2247443 | 1.5300000 | 2.1300000 |
|---|-----------|-----------|-----------|-----------|

---

Unique Subject Identifier=2353011111-0015

Assay variable : PTINR\_VAL1 PT-INR Value

N Mean Standard Deviation Minimum Maximum

---

|   |           |           |           |           |
|---|-----------|-----------|-----------|-----------|
| 4 | 1.8375000 | 0.7744407 | 1.0000000 | 2.7400000 |
|---|-----------|-----------|-----------|-----------|

---

Unique Subject Identifier=2353011111-0016

Assay variable : PTINR\_VAL1 PT-INR Value

N Mean Standard Deviation Minimum Maximum

---

|   |           |           |           |           |
|---|-----------|-----------|-----------|-----------|
| 6 | 2.1850000 | 0.5272096 | 1.5100000 | 2.9000000 |
|---|-----------|-----------|-----------|-----------|

---

Laboratory tests at the time of obtaining Table 2-6 consent, according to the presence or absence of proton-pump inhibitors

Unique Subject Identifier=2354011111-0002

MEANS Procedure

Assay variable : PTINR\_VAL1 PT-INR Value

N Mean Standard Deviation Minimum Maximum

---

|   |           |           |           |           |
|---|-----------|-----------|-----------|-----------|
| 4 | 1.6925000 | 0.0997914 | 1.6200000 | 1.8400000 |
|---|-----------|-----------|-----------|-----------|

---

Unique Subject Identifier=2354011111-0003

Assay variable : PTINR\_VAL1 PT-INR Value

N Mean Standard Deviation Minimum Maximum

---

|   |           |           |           |           |
|---|-----------|-----------|-----------|-----------|
| 6 | 1.5100000 | 0.0848528 | 1.4300000 | 1.6700000 |
|---|-----------|-----------|-----------|-----------|

---

Unique Subject Identifier=2354011111-0004

Assay variable : PTINR\_VAL1 PT-INR Value

N Mean Standard Deviation Minimum Maximum

---

|   |           |           |           |           |
|---|-----------|-----------|-----------|-----------|
| 6 | 1.7566667 | 0.2421294 | 1.4200000 | 2.0700000 |
|---|-----------|-----------|-----------|-----------|

---

Unique Subject Identifier=2354011111-0005

Assay variable : PTINR\_VAL1 PT-INR Value

N Mean Standard Deviation Minimum Maximum

---

|   |           |           |           |           |
|---|-----------|-----------|-----------|-----------|
| 6 | 2.2216667 | 0.1820348 | 1.9700000 | 2.5100000 |
|---|-----------|-----------|-----------|-----------|

---

Laboratory tests at the time of obtaining Table 2-6 consent, according to the presence or absence of proton-pump inhibitors

Unique Subject Identifier=2354011111-0007

MEANS Procedure

Assay variable : PTINR\_VAL1 PT-INR Value

N Mean Standard Deviation Minimum Maximum

---

|   |           |           |           |           |
|---|-----------|-----------|-----------|-----------|
| 5 | 2.0980000 | 0.9495894 | 1.1000000 | 3.1500000 |
|---|-----------|-----------|-----------|-----------|

---

Unique Subject Identifier=2354011111-0008

Assay variable : PTINR\_VAL1 PT-INR Value

N Mean Standard Deviation Minimum Maximum

---

|   |           |           |           |           |
|---|-----------|-----------|-----------|-----------|
| 6 | 2.0533333 | 0.4229736 | 1.3300000 | 2.4900000 |
|---|-----------|-----------|-----------|-----------|

---

Unique Subject Identifier=2354011111-0009

Assay variable : PTINR\_VAL1 PT-INR Value

N Mean Standard Deviation Minimum Maximum

---

|   |           |           |           |           |
|---|-----------|-----------|-----------|-----------|
| 5 | 2.2620000 | 0.2512369 | 2.0100000 | 2.5700000 |
|---|-----------|-----------|-----------|-----------|

---

Unique Subject Identifier=2354011111-0016



Assay variable : PTINR\_VAL1 PT-INR Value

N Mean Standard Deviation Minimum Maximum

---

|   |           |           |           |           |
|---|-----------|-----------|-----------|-----------|
| 4 | 1.6175000 | 0.0892095 | 1.5100000 | 1.7200000 |
|---|-----------|-----------|-----------|-----------|

---

Laboratory tests at the time of obtaining Table 2-6 consent, according to the presence or absence of proton-pump inhibitors

Unique Subject Identifier=2354011111-0019

MEANS Procedure

Assay variable : PTINR\_VAL1 PT-INR Value

N Mean Standard Deviation Minimum Maximum

---

|   |          |           |          |          |
|---|----------|-----------|----------|----------|
| 3 | 1.480000 | 0.1752142 | 1.310000 | 1.660000 |
|---|----------|-----------|----------|----------|

---

Unique Subject Identifier=2355011111-0004

Assay variable : PTINR\_VAL1 PT-INR Value

N Mean Standard Deviation Minimum Maximum

---

|   |          |           |          |          |
|---|----------|-----------|----------|----------|
| 2 | 3.930000 | 3.6203867 | 1.370000 | 6.490000 |
|---|----------|-----------|----------|----------|

---

Unique Subject Identifier=2355011111-0005

Assay variable : PTINR\_VAL1 PT-INR Value

N Mean Standard Deviation Minimum Maximum

---

|   |          |           |          |          |
|---|----------|-----------|----------|----------|
| 2 | 2.625000 | 0.3181981 | 2.400000 | 2.850000 |
|---|----------|-----------|----------|----------|

---

Unique Subject Identifier=2355011111-0007

Assay variable : PTINR\_VAL1 PT-INR Value

N Mean Standard Deviation Minimum Maximum

---

|   |          |           |          |          |
|---|----------|-----------|----------|----------|
| 2 | 1.560000 | 0.0141421 | 1.550000 | 1.570000 |
|---|----------|-----------|----------|----------|

---

Laboratory tests at the time of obtaining Table 2-6 consent, according to the presence or absence of proton-pump inhibitors

Unique Subject Identifier=2356011111-0001

MEANS Procedure

Assay variable : PTINR\_VAL1 PT-INR Value

| N | Mean      | Standard Deviation | Minimum   | Maximum   |
|---|-----------|--------------------|-----------|-----------|
| 2 | 1.6150000 | 0.1060660          | 1.5400000 | 1.6900000 |

Unique Subject Identifier=2356011111-0002

Assay variable : PTINR\_VAL1 PT-INR Value

| N | Mean      | Standard Deviation | Minimum   | Maximum   |
|---|-----------|--------------------|-----------|-----------|
| 3 | 1.6333333 | 0.0416333          | 1.6000000 | 1.6800000 |

Unique Subject Identifier=2356011111-0004

Assay variable : PTINR\_VAL1 PT-INR Value

| N | Mean      | Standard Deviation | Minimum   | Maximum   |
|---|-----------|--------------------|-----------|-----------|
| 3 | 1.8400000 | 0.3517101          | 1.4700000 | 2.1700000 |

Unique Subject Identifier=2356011111-0009

Assay variable : PTINR\_VAL1 PT-INR Value

N Mean Standard Deviation Minimum Maximum

---

|   |           |           |           |           |
|---|-----------|-----------|-----------|-----------|
| 2 | 1.9750000 | 0.0636396 | 1.9300000 | 2.0200000 |
|---|-----------|-----------|-----------|-----------|

---

Laboratory tests at the time of obtaining Table 2-6 consent, according to the presence or absence of proton-pump inhibitors

Unique Subject Identifier=2356011111-0015

MEANS Procedure

Assay variable : PTINR\_VAL1 PT-INR Value

| N | Mean      | Standard Deviation | Minimum   | Maximum   |
|---|-----------|--------------------|-----------|-----------|
| 2 | 1.8050000 | 0.6434672          | 1.3500000 | 2.2600000 |

Unique Subject Identifier=2356011111-0016

Assay variable : PTINR\_VAL1 PT-INR Value

| N | Mean      | Standard Deviation | Minimum   | Maximum   |
|---|-----------|--------------------|-----------|-----------|
| 2 | 2.7200000 | 0.6081118          | 2.2900000 | 3.1500000 |

Unique Subject Identifier=2356011111-0021

Assay variable : PTINR\_VAL1 PT-INR Value

| N | Mean      | Standard Deviation | Minimum   | Maximum   |
|---|-----------|--------------------|-----------|-----------|
| 1 | 1.6300000 |                    | 1.6300000 | 1.6300000 |

Unique Subject Identifier=2357011010-0005

Assay variable : PTINR\_VAL1 PT-INR Value

N Mean Standard Deviation Minimum Maximum

---

|   |          |           |          |          |
|---|----------|-----------|----------|----------|
| 3 | 1.850000 | 1.1435471 | 1.160000 | 3.170000 |
|---|----------|-----------|----------|----------|

---

Laboratory tests at the time of obtaining Table 2-6 consent, according to the presence or absence of proton-pump inhibitors

Unique Subject Identifier=2357011010-0009

MEANS Procedure

Assay variable : PTINR\_VAL1 PT-INR Value

N Mean Standard Deviation Minimum Maximum

---

|   |           |           |           |           |
|---|-----------|-----------|-----------|-----------|
| 4 | 1.5900000 | 0.4543860 | 1.2200000 | 2.2300000 |
|---|-----------|-----------|-----------|-----------|

---

Unique Subject Identifier=2357011010-0019

Assay variable : PTINR\_VAL1 PT-INR Value

N Mean Standard Deviation Minimum Maximum

---

|   |           |   |           |           |
|---|-----------|---|-----------|-----------|
| 2 | 2.0500000 | 0 | 2.0500000 | 2.0500000 |
|---|-----------|---|-----------|-----------|

---

Unique Subject Identifier=2357011010-0020

Assay variable : PTINR\_VAL1 PT-INR Value

N Mean Standard Deviation Minimum Maximum

---

|   |           |           |           |           |
|---|-----------|-----------|-----------|-----------|
| 2 | 1.6100000 | 0.5656854 | 1.2100000 | 2.0100000 |
|---|-----------|-----------|-----------|-----------|

---

Unique Subject Identifier=2358000000-0005



Assay variable : PTINR\_VAL1 PT-INR Value

N Mean Standard Deviation Minimum Maximum

---

|   |           |           |           |           |
|---|-----------|-----------|-----------|-----------|
| 3 | 1.5666667 | 0.0321455 | 1.5300000 | 1.5900000 |
|---|-----------|-----------|-----------|-----------|

---

Laboratory tests at the time of obtaining Table 2-6 consent, according to the presence or absence of proton-pump inhibitors

Unique Subject Identifier=2359000100-0001

MEANS Procedure

Assay variable : PTINR\_VAL1 PT-INR Value

N Mean Standard Deviation Minimum Maximum

---

|   |           |  |           |           |
|---|-----------|--|-----------|-----------|
| 1 | 1.7400000 |  | 1.7400000 | 1.7400000 |
|---|-----------|--|-----------|-----------|

---

Unique Subject Identifier=2361011111-0013

Assay variable : PTINR\_VAL1 PT-INR Value

N Mean Standard Deviation Minimum Maximum

---

|   |           |  |           |           |
|---|-----------|--|-----------|-----------|
| 1 | 1.3500000 |  | 1.3500000 | 1.3500000 |
|---|-----------|--|-----------|-----------|

---

Unique Subject Identifier=2362011111-0001

Assay variable : PTINR\_VAL1 PT-INR Value

N Mean Standard Deviation Minimum Maximum

---

|   |           |           |           |           |
|---|-----------|-----------|-----------|-----------|
| 3 | 1.6233333 | 0.2345918 | 1.3600000 | 1.8100000 |
|---|-----------|-----------|-----------|-----------|

---

Unique Subject Identifier=2362011111-0003

Assay variable : PTINR\_VAL1 PT-INR Value

N Mean Standard Deviation Minimum Maximum

---

|   |           |           |           |           |
|---|-----------|-----------|-----------|-----------|
| 3 | 1.7966667 | 0.4718404 | 1.4900000 | 2.3400000 |
|---|-----------|-----------|-----------|-----------|

---

Laboratory tests at the time of obtaining Table 2-6 consent, according to the presence or absence of proton-pump inhibitors

Unique Subject Identifier=2362011111-0006

MEANS Procedure

Assay variable : PTINR\_VAL1 PT-INR Value

N Mean Standard Deviation Minimum Maximum

---

|   |          |           |          |          |
|---|----------|-----------|----------|----------|
| 3 | 1.320000 | 0.1473092 | 1.190000 | 1.480000 |
|---|----------|-----------|----------|----------|

---

Unique Subject Identifier=2362011111-0007

Assay variable : PTINR\_VAL1 PT-INR Value

N Mean Standard Deviation Minimum Maximum

---

|   |          |           |          |          |
|---|----------|-----------|----------|----------|
| 4 | 1.197500 | 0.0736546 | 1.110000 | 1.280000 |
|---|----------|-----------|----------|----------|

---

Unique Subject Identifier=2365011111-0003

Assay variable : PTINR\_VAL1 PT-INR Value

N Mean Standard Deviation Minimum Maximum

---

|   |          |           |          |          |
|---|----------|-----------|----------|----------|
| 6 | 2.016667 | 0.8035339 | 1.200000 | 3.500000 |
|---|----------|-----------|----------|----------|

---

Unique Subject Identifier=2370011111-0002

Assay variable : PTINR\_VAL1 PT-INR Value

N Mean Standard Deviation Minimum Maximum

---

|   |          |           |          |          |
|---|----------|-----------|----------|----------|
| 5 | 2.166000 | 0.1866280 | 1.980000 | 2.410000 |
|---|----------|-----------|----------|----------|

---

Laboratory tests at the time of obtaining Table 2-6 consent, according to the presence or absence of proton-pump inhibitors

Unique Subject Identifier=2370011111-0003

MEANS Procedure

Assay variable : PTINR\_VAL1 PT-INR Value

N Mean Standard Deviation Minimum Maximum

---

|   |           |           |           |           |
|---|-----------|-----------|-----------|-----------|
| 5 | 2.1760000 | 0.4535747 | 1.7700000 | 2.7500000 |
|---|-----------|-----------|-----------|-----------|

---

Unique Subject Identifier=2378000010-0011

Assay variable : PTINR\_VAL1 PT-INR Value

N Mean Standard Deviation Minimum Maximum

---

|   |           |           |           |           |
|---|-----------|-----------|-----------|-----------|
| 6 | 2.3833333 | 0.3763863 | 1.7000000 | 2.7000000 |
|---|-----------|-----------|-----------|-----------|

---

Unique Subject Identifier=2378000010-0012

Assay variable : PTINR\_VAL1 PT-INR Value

N Mean Standard Deviation Minimum Maximum

---

|   |           |           |           |           |
|---|-----------|-----------|-----------|-----------|
| 6 | 1.9833333 | 0.4262237 | 1.4000000 | 2.7000000 |
|---|-----------|-----------|-----------|-----------|

---

Unique Subject Identifier=2378000010-0015

Assay variable : PTINR\_VAL1 PT-INR Value

N Mean Standard Deviation Minimum Maximum

---

|   |          |           |          |          |
|---|----------|-----------|----------|----------|
| 5 | 2.040000 | 0.3286335 | 1.500000 | 2.300000 |
|---|----------|-----------|----------|----------|

---

Laboratory tests at the time of obtaining Table 2-6 consent, according to the presence or absence of proton-pump inhibitors

Unique Subject Identifier=2378000010-0018

MEANS Procedure

Assay variable : PTINR\_VAL1 PT-INR Value

| N | Mean      | Standard Deviation | Minimum   | Maximum   |
|---|-----------|--------------------|-----------|-----------|
| 6 | 1.3666667 | 0.1751190          | 1.1000000 | 1.6000000 |

Unique Subject Identifier=2380011111-0001

Assay variable : PTINR\_VAL1 PT-INR Value

| N | Mean      | Standard Deviation | Minimum   | Maximum   |
|---|-----------|--------------------|-----------|-----------|
| 2 | 1.2650000 | 0.0636396          | 1.2200000 | 1.3100000 |

Unique Subject Identifier=2383011110-0031

Assay variable : PTINR\_VAL1 PT-INR Value

| N | Mean      | Standard Deviation | Minimum   | Maximum   |
|---|-----------|--------------------|-----------|-----------|
| 3 | 2.2500000 | 0.5056679          | 1.7600000 | 2.7700000 |

Unique Subject Identifier=2383011110-0033



Assay variable : PTINR\_VAL1 PT-INR Value

N Mean Standard Deviation Minimum Maximum

---

|   |          |           |          |          |
|---|----------|-----------|----------|----------|
| 6 | 2.130000 | 0.1433876 | 1.980000 | 2.400000 |
|---|----------|-----------|----------|----------|

---

Laboratory tests at the time of obtaining Table 2-6 consent, according to the presence or absence of proton-pump inhibitors

Unique Subject Identifier=2386011111-0008

MEANS Procedure

Assay variable : PTINR\_VAL1 PT-INR Value

N Mean Standard Deviation Minimum Maximum

---

|   |          |           |          |          |
|---|----------|-----------|----------|----------|
| 6 | 2.350000 | 0.7341662 | 1.500000 | 3.200000 |
|---|----------|-----------|----------|----------|

---

Unique Subject Identifier=2389011111-0003

Assay variable : PTINR\_VAL1 PT-INR Value

N Mean Standard Deviation Minimum Maximum

---

|   |          |           |          |          |
|---|----------|-----------|----------|----------|
| 3 | 2.113333 | 0.6242863 | 1.400000 | 2.560000 |
|---|----------|-----------|----------|----------|

---

Unique Subject Identifier=2389011111-0005

Assay variable : PTINR\_VAL1 PT-INR Value

N Mean Standard Deviation Minimum Maximum

---

|   |          |           |          |          |
|---|----------|-----------|----------|----------|
| 4 | 1.747500 | 0.3148942 | 1.480000 | 2.090000 |
|---|----------|-----------|----------|----------|

---

Unique Subject Identifier=2389011111-0017

Assay variable : PTINR\_VAL1 PT-INR Value

N Mean Standard Deviation Minimum Maximum

---

|   |           |           |           |           |
|---|-----------|-----------|-----------|-----------|
| 5 | 1.6260000 | 0.2085186 | 1.3600000 | 1.7900000 |
|---|-----------|-----------|-----------|-----------|

---

Laboratory tests at the time of obtaining Table 2-6 consent, according to the presence or absence of proton-pump inhibitors

Unique Subject Identifier=2392000000-0001

MEANS Procedure

Assay variable : PTINR\_VAL1 PT-INR Value

N Mean Standard Deviation Minimum Maximum

---

|   |           |           |           |           |
|---|-----------|-----------|-----------|-----------|
| 4 | 2.1000000 | 0.1825742 | 1.9000000 | 2.3000000 |
|---|-----------|-----------|-----------|-----------|

---

Unique Subject Identifier=2392000000-0005

Assay variable : PTINR\_VAL1 PT-INR Value

N Mean Standard Deviation Minimum Maximum

---

|   |           |           |           |           |
|---|-----------|-----------|-----------|-----------|
| 6 | 2.2333333 | 0.4676181 | 1.6000000 | 2.7000000 |
|---|-----------|-----------|-----------|-----------|

---

Unique Subject Identifier=2392000000-0006

Assay variable : PTINR\_VAL1 PT-INR Value

N Mean Standard Deviation Minimum Maximum

---

|   |           |           |           |           |
|---|-----------|-----------|-----------|-----------|
| 5 | 1.9400000 | 0.5366563 | 1.4000000 | 2.8000000 |
|---|-----------|-----------|-----------|-----------|

---

Unique Subject Identifier=2392000000-0013

Assay variable : PTINR\_VAL1 PT-INR Value

N Mean Standard Deviation Minimum Maximum

---

|   |          |           |          |          |
|---|----------|-----------|----------|----------|
| 6 | 2.166667 | 0.8453796 | 1.600000 | 3.800000 |
|---|----------|-----------|----------|----------|

---

Laboratory tests at the time of obtaining Table 2-6 consent, according to the presence or absence of proton-pump inhibitors

Unique Subject Identifier=2392000000-0017

MEANS Procedure

Assay variable : PTINR\_VAL1 PT-INR Value

N Mean Standard Deviation Minimum Maximum

---

|   |           |           |           |           |
|---|-----------|-----------|-----------|-----------|
| 5 | 2.0400000 | 0.1516575 | 1.8000000 | 2.2000000 |
|---|-----------|-----------|-----------|-----------|

---

Unique Subject Identifier=2392000000-0018

Assay variable : PTINR\_VAL1 PT-INR Value

N Mean Standard Deviation Minimum Maximum

---

|   |           |           |           |           |
|---|-----------|-----------|-----------|-----------|
| 6 | 1.9166667 | 0.2786874 | 1.6000000 | 2.3000000 |
|---|-----------|-----------|-----------|-----------|

---

Unique Subject Identifier=2392000000-0020

Assay variable : PTINR\_VAL1 PT-INR Value

N Mean Standard Deviation Minimum Maximum

---

|   |           |           |           |           |
|---|-----------|-----------|-----------|-----------|
| 4 | 2.0000000 | 0.1414214 | 1.9000000 | 2.2000000 |
|---|-----------|-----------|-----------|-----------|

---

Unique Subject Identifier=2393011111-0003

Assay variable : PTINR\_VAL1 PT-INR Value

N Mean Standard Deviation Minimum Maximum

---

|   |           |           |           |           |
|---|-----------|-----------|-----------|-----------|
| 6 | 1.7283333 | 0.1621625 | 1.5200000 | 1.9900000 |
|---|-----------|-----------|-----------|-----------|

---

Laboratory tests at the time of obtaining Table 2-6 consent, according to the presence or absence of proton-pump inhibitors

Unique Subject Identifier=2393011111-0004

MEANS Procedure

Assay variable : PTINR\_VAL1 PT-INR Value

| N | Mean      | Standard Deviation | Minimum   | Maximum   |
|---|-----------|--------------------|-----------|-----------|
| 3 | 1.2000000 | 0.1452584          | 1.0500000 | 1.3400000 |

Unique Subject Identifier=2393011111-0005

Assay variable : PTINR\_VAL1 PT-INR Value

| N | Mean      | Standard Deviation | Minimum   | Maximum   |
|---|-----------|--------------------|-----------|-----------|
| 5 | 1.7680000 | 0.2751727          | 1.5000000 | 2.1300000 |

Unique Subject Identifier=2393011111-0010

Assay variable : PTINR\_VAL1 PT-INR Value

| N | Mean      | Standard Deviation | Minimum   | Maximum   |
|---|-----------|--------------------|-----------|-----------|
| 3 | 2.0900000 | 0.5943063          | 1.6700000 | 2.7700000 |

Unique Subject Identifier=2393011111-0017



Assay variable : PTINR\_VAL1 PT-INR Value

N Mean Standard Deviation Minimum Maximum

---

|   |          |           |          |          |
|---|----------|-----------|----------|----------|
| 4 | 1.600000 | 0.0616441 | 1.510000 | 1.640000 |
|---|----------|-----------|----------|----------|

---

Laboratory tests at the time of obtaining Table 2-6 consent, according to the presence or absence of proton-pump inhibitors

Unique Subject Identifier=2393011111-0025

MEANS Procedure

Assay variable : PTINR\_VAL1 PT-INR Value

N Mean Standard Deviation Minimum Maximum

---

|   |          |  |          |          |
|---|----------|--|----------|----------|
| 1 | 3.400000 |  | 3.400000 | 3.400000 |
|---|----------|--|----------|----------|

---

Unique Subject Identifier=2399011111-0004

Assay variable : PTINR\_VAL1 PT-INR Value

N Mean Standard Deviation Minimum Maximum

---

|   |          |           |          |          |
|---|----------|-----------|----------|----------|
| 3 | 1.930000 | 0.5273519 | 1.330000 | 2.320000 |
|---|----------|-----------|----------|----------|

---

Unique Subject Identifier=2403010000-0004

Assay variable : PTINR\_VAL1 PT-INR Value

N Mean Standard Deviation Minimum Maximum

---

|   |           |           |          |          |
|---|-----------|-----------|----------|----------|
| 6 | 2.4583333 | 0.8422213 | 1.820000 | 4.110000 |
|---|-----------|-----------|----------|----------|

---

Unique Subject Identifier=2403010000-0005

Assay variable : PTINR\_VAL1 PT-INR Value

N Mean Standard Deviation Minimum Maximum

---

|   |           |           |           |           |
|---|-----------|-----------|-----------|-----------|
| 6 | 2.2833333 | 0.3762269 | 1.9600000 | 3.0300000 |
|---|-----------|-----------|-----------|-----------|

---

Laboratory tests at the time of obtaining Table 2-6 consent, according to the presence or absence of proton-pump inhibitors

Unique Subject Identifier=2403010000-0025

MEANS Procedure

Assay variable : PTINR\_VAL1 PT-INR Value

N Mean Standard Deviation Minimum Maximum

---

|   |           |           |           |           |
|---|-----------|-----------|-----------|-----------|
| 3 | 1.6433333 | 0.2829016 | 1.3300000 | 1.8800000 |
|---|-----------|-----------|-----------|-----------|

---

Unique Subject Identifier=2403010000-0043

Assay variable : PTINR\_VAL1 PT-INR Value

N Mean Standard Deviation Minimum Maximum

---

|   |           |           |           |           |
|---|-----------|-----------|-----------|-----------|
| 5 | 2.4040000 | 0.2707951 | 2.0300000 | 2.7400000 |
|---|-----------|-----------|-----------|-----------|

---

Unique Subject Identifier=2403010000-0051

Assay variable : PTINR\_VAL1 PT-INR Value

N Mean Standard Deviation Minimum Maximum

---

|   |           |           |           |           |
|---|-----------|-----------|-----------|-----------|
| 3 | 1.5300000 | 0.1915724 | 1.3100000 | 1.6600000 |
|---|-----------|-----------|-----------|-----------|

---

Unique Subject Identifier=2403010000-0060

Assay variable : PTINR\_VAL1 PT-INR Value

N Mean Standard Deviation Minimum Maximum

---

|   |           |           |           |           |
|---|-----------|-----------|-----------|-----------|
| 6 | 2.0750000 | 0.2072438 | 1.8800000 | 2.4600000 |
|---|-----------|-----------|-----------|-----------|

---

Laboratory tests at the time of obtaining Table 2-6 consent, according to the presence or absence of proton-pump inhibitors

Unique Subject Identifier=2403010000-0061

MEANS Procedure

Assay variable : PTINR\_VAL1 PT-INR Value

N Mean Standard Deviation Minimum Maximum

---

|   |           |           |           |           |
|---|-----------|-----------|-----------|-----------|
| 4 | 1.9300000 | 0.4208721 | 1.5000000 | 2.3300000 |
|---|-----------|-----------|-----------|-----------|

---

Unique Subject Identifier=2403010000-0069

Assay variable : PTINR\_VAL1 PT-INR Value

N Mean Standard Deviation Minimum Maximum

---

|   |           |  |           |           |
|---|-----------|--|-----------|-----------|
| 1 | 2.3100000 |  | 2.3100000 | 2.3100000 |
|---|-----------|--|-----------|-----------|

---

Unique Subject Identifier=2403110000-0008

Assay variable : PTINR\_VAL1 PT-INR Value

N Mean Standard Deviation Minimum Maximum

---

|   |           |           |           |           |
|---|-----------|-----------|-----------|-----------|
| 2 | 2.3350000 | 0.1767767 | 2.2100000 | 2.4600000 |
|---|-----------|-----------|-----------|-----------|

---

Unique Subject Identifier=2403110000-0016

Assay variable : PTINR\_VAL1 PT-INR Value

N Mean Standard Deviation Minimum Maximum

---

|   |           |           |           |           |
|---|-----------|-----------|-----------|-----------|
| 3 | 1.8866667 | 0.0850490 | 1.7900000 | 1.9500000 |
|---|-----------|-----------|-----------|-----------|

---

Laboratory tests at the time of obtaining Table 2-6 consent, according to the presence or absence of proton-pump inhibitors

Unique Subject Identifier=2403110000-0017

MEANS Procedure

Assay variable : PTINR\_VAL1 PT-INR Value

N Mean Standard Deviation Minimum Maximum

---

|   |           |  |           |           |
|---|-----------|--|-----------|-----------|
| 1 | 1.8000000 |  | 1.8000000 | 1.8000000 |
|---|-----------|--|-----------|-----------|

---

Unique Subject Identifier=2404011111-0005

Assay variable : PTINR\_VAL1 PT-INR Value

N Mean Standard Deviation Minimum Maximum

---

|   |           |           |           |           |
|---|-----------|-----------|-----------|-----------|
| 6 | 1.9500000 | 0.4415880 | 1.6000000 | 2.8000000 |
|---|-----------|-----------|-----------|-----------|

---

Unique Subject Identifier=2405011111-0002

Assay variable : PTINR\_VAL1 PT-INR Value

N Mean Standard Deviation Minimum Maximum

---

|   |           |           |           |           |
|---|-----------|-----------|-----------|-----------|
| 6 | 1.8466667 | 0.3586456 | 1.4900000 | 2.4600000 |
|---|-----------|-----------|-----------|-----------|

---

Unique Subject Identifier=2405011111-0005



Assay variable : PTINR\_VAL1 PT-INR Value

N Mean Standard Deviation Minimum Maximum

---

|   |           |           |           |           |
|---|-----------|-----------|-----------|-----------|
| 3 | 1.9866667 | 0.2369247 | 1.8400000 | 2.2600000 |
|---|-----------|-----------|-----------|-----------|

---

Laboratory tests at the time of obtaining Table 2-6 consent, according to the presence or absence of proton-pump inhibitors

Unique Subject Identifier=2405011111-0011

MEANS Procedure

Assay variable : PTINR\_VAL1 PT-INR Value

N Mean Standard Deviation Minimum Maximum

---

|   |           |           |           |           |
|---|-----------|-----------|-----------|-----------|
| 5 | 2.5240000 | 0.4204521 | 1.8700000 | 2.9500000 |
|---|-----------|-----------|-----------|-----------|

---

Unique Subject Identifier=2405011111-0014

Assay variable : PTINR\_VAL1 PT-INR Value

N Mean Standard Deviation Minimum Maximum

---

|   |           |           |           |           |
|---|-----------|-----------|-----------|-----------|
| 6 | 1.5200000 | 0.4461390 | 1.1300000 | 2.3900000 |
|---|-----------|-----------|-----------|-----------|

---

Unique Subject Identifier=2405011111-0015

Assay variable : PTINR\_VAL1 PT-INR Value

N Mean Standard Deviation Minimum Maximum

---

|   |           |           |           |           |
|---|-----------|-----------|-----------|-----------|
| 6 | 1.8216667 | 0.0934701 | 1.6900000 | 1.9700000 |
|---|-----------|-----------|-----------|-----------|

---

Unique Subject Identifier=2410011111-0002

Assay variable : PTINR\_VAL1 PT-INR Value

N Mean Standard Deviation Minimum Maximum

---

|   |           |           |           |           |
|---|-----------|-----------|-----------|-----------|
| 2 | 1.6800000 | 0.2545584 | 1.5000000 | 1.8600000 |
|---|-----------|-----------|-----------|-----------|

---

Laboratory tests at the time of obtaining Table 2-6 consent, according to the presence or absence of proton-pump inhibitors

Unique Subject Identifier=2410011111-0008

MEANS Procedure

Assay variable : PTINR\_VAL1 PT-INR Value

N Mean Standard Deviation Minimum Maximum

---

|   |          |           |          |          |
|---|----------|-----------|----------|----------|
| 3 | 1.610000 | 0.3732292 | 1.200000 | 1.930000 |
|---|----------|-----------|----------|----------|

---

Unique Subject Identifier=2410011111-0012

Assay variable : PTINR\_VAL1 PT-INR Value

N Mean Standard Deviation Minimum Maximum

---

|   |          |  |          |          |
|---|----------|--|----------|----------|
| 1 | 1.380000 |  | 1.380000 | 1.380000 |
|---|----------|--|----------|----------|

---

Unique Subject Identifier=2410011111-0022

Assay variable : PTINR\_VAL1 PT-INR Value

N Mean Standard Deviation Minimum Maximum

---

|   |          |           |          |          |
|---|----------|-----------|----------|----------|
| 2 | 2.615000 | 0.3040559 | 2.400000 | 2.830000 |
|---|----------|-----------|----------|----------|

---

Unique Subject Identifier=2410011111-0023

Assay variable : PTINR\_VAL1 PT-INR Value

N Mean Standard Deviation Minimum Maximum

---

|   |           |           |           |           |
|---|-----------|-----------|-----------|-----------|
| 2 | 2.7650000 | 1.0818734 | 2.0000000 | 3.5300000 |
|---|-----------|-----------|-----------|-----------|

---

Laboratory tests at the time of obtaining Table 2-6 consent, according to the presence or absence of proton-pump inhibitors

Unique Subject Identifier=2410011111-0025

MEANS Procedure

Assay variable : PTINR\_VAL1 PT-INR Value

N Mean Standard Deviation Minimum Maximum

---

|   |           |           |           |           |
|---|-----------|-----------|-----------|-----------|
| 2 | 2.2150000 | 0.0212132 | 2.2000000 | 2.2300000 |
|---|-----------|-----------|-----------|-----------|

---

Unique Subject Identifier=2410011111-0031

Assay variable : PTINR\_VAL1 PT-INR Value

N Mean Standard Deviation Minimum Maximum

---

|   |           |           |           |           |
|---|-----------|-----------|-----------|-----------|
| 3 | 2.0833333 | 0.3547299 | 1.7000000 | 2.4000000 |
|---|-----------|-----------|-----------|-----------|

---

Unique Subject Identifier=2412011111-0002

Assay variable : PTINR\_VAL1 PT-INR Value

N Mean Standard Deviation Minimum Maximum

---

|   |           |  |           |           |
|---|-----------|--|-----------|-----------|
| 1 | 2.3500000 |  | 2.3500000 | 2.3500000 |
|---|-----------|--|-----------|-----------|

---

Unique Subject Identifier=2412011111-0003

Assay variable : PTINR\_VAL1 PT-INR Value

N Mean Standard Deviation Minimum Maximum

---

|   |          |           |          |          |
|---|----------|-----------|----------|----------|
| 2 | 1.360000 | 0.2121320 | 1.210000 | 1.510000 |
|---|----------|-----------|----------|----------|

---

Laboratory tests at the time of obtaining Table 2-6 consent, according to the presence or absence of proton-pump inhibitors

Unique Subject Identifier=2412011111-0004

MEANS Procedure

Assay variable : PTINR\_VAL1 PT-INR Value

| N | Mean      | Standard Deviation | Minimum   | Maximum   |
|---|-----------|--------------------|-----------|-----------|
| 2 | 2.5000000 | 0.0848528          | 2.4400000 | 2.5600000 |

Unique Subject Identifier=2412011111-0006

Assay variable : PTINR\_VAL1 PT-INR Value

| N | Mean      | Standard Deviation | Minimum   | Maximum   |
|---|-----------|--------------------|-----------|-----------|
| 1 | 2.6300000 |                    | 2.6300000 | 2.6300000 |

Unique Subject Identifier=2421010000-0007

Assay variable : PTINR\_VAL1 PT-INR Value

| N | Mean      | Standard Deviation | Minimum   | Maximum   |
|---|-----------|--------------------|-----------|-----------|
| 1 | 1.6800000 |                    | 1.6800000 | 1.6800000 |

Unique Subject Identifier=2421010000-0020



Assay variable : PTINR\_VAL1 PT-INR Value

N Mean Standard Deviation Minimum Maximum

---

|   |          |           |          |          |
|---|----------|-----------|----------|----------|
| 2 | 2.500000 | 0.2545584 | 2.320000 | 2.680000 |
|---|----------|-----------|----------|----------|

---

Laboratory tests at the time of obtaining Table 2-6 consent, according to the presence or absence of proton-pump inhibitors

Unique Subject Identifier=2421010000-0035

MEANS Procedure

Assay variable : PTINR\_VAL1 PT-INR Value

N Mean Standard Deviation Minimum Maximum

---

|   |           |  |           |           |
|---|-----------|--|-----------|-----------|
| 1 | 1.4500000 |  | 1.4500000 | 1.4500000 |
|---|-----------|--|-----------|-----------|

---

Unique Subject Identifier=2421010000-0037

Assay variable : PTINR\_VAL1 PT-INR Value

N Mean Standard Deviation Minimum Maximum

---

|   |           |           |           |           |
|---|-----------|-----------|-----------|-----------|
| 4 | 2.3900000 | 0.1471960 | 2.2700000 | 2.6000000 |
|---|-----------|-----------|-----------|-----------|

---

Unique Subject Identifier=2421010000-0047

Assay variable : PTINR\_VAL1 PT-INR Value

N Mean Standard Deviation Minimum Maximum

---

|   |           |  |           |           |
|---|-----------|--|-----------|-----------|
| 1 | 2.0500000 |  | 2.0500000 | 2.0500000 |
|---|-----------|--|-----------|-----------|

---

Unique Subject Identifier=2421010000-0059

Assay variable : PTINR\_VAL1 PT-INR Value

N Mean Standard Deviation Minimum Maximum

---

|   |           |           |           |           |
|---|-----------|-----------|-----------|-----------|
| 4 | 1.5750000 | 0.1367479 | 1.3800000 | 1.6700000 |
|---|-----------|-----------|-----------|-----------|

---

Laboratory tests at the time of obtaining Table 2-6 consent, according to the presence or absence of proton-pump inhibitors

Unique Subject Identifier=2421010000-0066

MEANS Procedure

Assay variable : PTINR\_VAL1 PT-INR Value

N Mean Standard Deviation Minimum Maximum

---

|   |           |           |           |           |
|---|-----------|-----------|-----------|-----------|
| 5 | 1.2700000 | 0.2295648 | 1.1200000 | 1.6400000 |
|---|-----------|-----------|-----------|-----------|

---

Unique Subject Identifier=2421010000-0073

Assay variable : PTINR\_VAL1 PT-INR Value

N Mean Standard Deviation Minimum Maximum

---

|   |           |           |           |           |
|---|-----------|-----------|-----------|-----------|
| 4 | 2.4000000 | 0.4198412 | 1.9800000 | 2.8000000 |
|---|-----------|-----------|-----------|-----------|

---

Unique Subject Identifier=2421010000-0077

Assay variable : PTINR\_VAL1 PT-INR Value

N Mean Standard Deviation Minimum Maximum

---

|   |           |  |           |           |
|---|-----------|--|-----------|-----------|
| 1 | 1.1700000 |  | 1.1700000 | 1.1700000 |
|---|-----------|--|-----------|-----------|

---

Unique Subject Identifier=2421010000-0086

Assay variable : PTINR\_VAL1 PT-INR Value

N Mean Standard Deviation Minimum Maximum

---

|   |           |  |           |           |
|---|-----------|--|-----------|-----------|
| 1 | 2.3000000 |  | 2.3000000 | 2.3000000 |
|---|-----------|--|-----------|-----------|

---

Laboratory tests at the time of obtaining Table 2-6 consent, according to the presence or absence of proton-pump inhibitors

Unique Subject Identifier=2421010000-0096

MEANS Procedure

Assay variable : PTINR\_VAL1 PT-INR Value

N Mean Standard Deviation Minimum Maximum

---

|   |           |           |           |
|---|-----------|-----------|-----------|
| 1 | 1.9600000 | 1.9600000 | 1.9600000 |
|---|-----------|-----------|-----------|

---

Unique Subject Identifier=2421010000-0128

Assay variable : PTINR\_VAL1 PT-INR Value

N Mean Standard Deviation Minimum Maximum

---

|   |           |           |           |
|---|-----------|-----------|-----------|
| 1 | 1.8800000 | 1.8800000 | 1.8800000 |
|---|-----------|-----------|-----------|

---

Unique Subject Identifier=2421010000-0135

Assay variable : PTINR\_VAL1 PT-INR Value

N Mean Standard Deviation Minimum Maximum

---

|   |           |           |           |
|---|-----------|-----------|-----------|
| 1 | 2.0300000 | 2.0300000 | 2.0300000 |
|---|-----------|-----------|-----------|

---

Unique Subject Identifier=2421010000-0137

Assay variable : PTINR\_VAL1 PT-INR Value

N Mean Standard Deviation Minimum Maximum

---

|   |           |  |           |           |
|---|-----------|--|-----------|-----------|
| 1 | 1.9600000 |  | 1.9600000 | 1.9600000 |
|---|-----------|--|-----------|-----------|

---

Laboratory tests at the time of obtaining Table 2-6 consent, according to the presence or absence of proton-pump inhibitors

Unique Subject Identifier=2421010000-0138

MEANS Procedure

Assay variable : PTINR\_VAL1 PT-INR Value

N Mean Standard Deviation Minimum Maximum

---

|   |           |           |           |           |
|---|-----------|-----------|-----------|-----------|
| 3 | 1.5733333 | 0.0416333 | 1.5400000 | 1.6200000 |
|---|-----------|-----------|-----------|-----------|

---

Unique Subject Identifier=2421010000-0158

Assay variable : PTINR\_VAL1 PT-INR Value

N Mean Standard Deviation Minimum Maximum

---

|   |           |           |           |           |
|---|-----------|-----------|-----------|-----------|
| 6 | 1.8050000 | 0.3218540 | 1.4600000 | 2.2900000 |
|---|-----------|-----------|-----------|-----------|

---

Unique Subject Identifier=2421010000-0168

Assay variable : PTINR\_VAL1 PT-INR Value

N Mean Standard Deviation Minimum Maximum

---

|   |           |           |           |           |
|---|-----------|-----------|-----------|-----------|
| 4 | 1.6725000 | 0.7430736 | 1.2100000 | 2.7700000 |
|---|-----------|-----------|-----------|-----------|

---

Unique Subject Identifier=2421010000-0174



Assay variable : PTINR\_VAL1 PT-INR Value

N Mean Standard Deviation Minimum Maximum

---

|   |           |           |           |           |
|---|-----------|-----------|-----------|-----------|
| 4 | 2.5150000 | 0.9033456 | 1.8800000 | 3.8400000 |
|---|-----------|-----------|-----------|-----------|

---

Laboratory tests at the time of obtaining Table 2-6 consent, according to the presence or absence of proton-pump inhibitors

Unique Subject Identifier=2421010000-0198

MEANS Procedure

Assay variable : PTINR\_VAL1 PT-INR Value

N Mean Standard Deviation Minimum Maximum

---

|   |           |  |           |           |
|---|-----------|--|-----------|-----------|
| 1 | 2.7600000 |  | 2.7600000 | 2.7600000 |
|---|-----------|--|-----------|-----------|

---

Unique Subject Identifier=2421010000-0210

Assay variable : PTINR\_VAL1 PT-INR Value

N Mean Standard Deviation Minimum Maximum

---

|   |           |  |           |           |
|---|-----------|--|-----------|-----------|
| 1 | 1.6700000 |  | 1.6700000 | 1.6700000 |
|---|-----------|--|-----------|-----------|

---

Unique Subject Identifier=2421010000-0216

Assay variable : PTINR\_VAL1 PT-INR Value

N Mean Standard Deviation Minimum Maximum

---

|   |           |           |           |           |
|---|-----------|-----------|-----------|-----------|
| 2 | 2.0500000 | 0.2121320 | 1.9000000 | 2.2000000 |
|---|-----------|-----------|-----------|-----------|

---

Unique Subject Identifier=2423010010-0002

Assay variable : PTINR\_VAL1 PT-INR Value

N Mean Standard Deviation Minimum Maximum

---

|   |          |  |          |          |
|---|----------|--|----------|----------|
| 1 | 1.800000 |  | 1.800000 | 1.800000 |
|---|----------|--|----------|----------|

---

Laboratory tests at the time of obtaining Table 2-6 consent, according to the presence or absence of proton-pump inhibitors

Unique Subject Identifier=2423010010-0004

MEANS Procedure

Assay variable : PTINR\_VAL1 PT-INR Value

N Mean Standard Deviation Minimum Maximum

---

|   |           |           |           |           |
|---|-----------|-----------|-----------|-----------|
| 2 | 2.3050000 | 0.0636396 | 2.2600000 | 2.3500000 |
|---|-----------|-----------|-----------|-----------|

---

Unique Subject Identifier=2425010000-0001

Assay variable : PTINR\_VAL1 PT-INR Value

N Mean Standard Deviation Minimum Maximum

---

|   |           |  |           |           |
|---|-----------|--|-----------|-----------|
| 1 | 1.2200000 |  | 1.2200000 | 1.2200000 |
|---|-----------|--|-----------|-----------|

---

Unique Subject Identifier=2425010000-0002

Assay variable : PTINR\_VAL1 PT-INR Value

N Mean Standard Deviation Minimum Maximum

---

|   |           |  |           |           |
|---|-----------|--|-----------|-----------|
| 1 | 1.1200000 |  | 1.1200000 | 1.1200000 |
|---|-----------|--|-----------|-----------|

---

Unique Subject Identifier=2425010000-0004

Assay variable : PTINR\_VAL1 PT-INR Value

N Mean Standard Deviation Minimum Maximum

---

|   |          |  |          |          |
|---|----------|--|----------|----------|
| 1 | 1.060000 |  | 1.060000 | 1.060000 |
|---|----------|--|----------|----------|

---

Laboratory tests at the time of obtaining Table 2-6 consent, according to the presence or absence of proton-pump inhibitors

Unique Subject Identifier=2425010000-0006

MEANS Procedure

Assay variable : PTINR\_VAL1 PT-INR Value

N Mean Standard Deviation Minimum Maximum

---

|   |           |           |           |
|---|-----------|-----------|-----------|
| 1 | 1.1900000 | 1.1900000 | 1.1900000 |
|---|-----------|-----------|-----------|

---

Unique Subject Identifier=2425010000-0019

Assay variable : PTINR\_VAL1 PT-INR Value

N Mean Standard Deviation Minimum Maximum

---

|   |           |           |           |
|---|-----------|-----------|-----------|
| 1 | 2.0700000 | 2.0700000 | 2.0700000 |
|---|-----------|-----------|-----------|

---

Unique Subject Identifier=2425010000-0025

Assay variable : PTINR\_VAL1 PT-INR Value

N Mean Standard Deviation Minimum Maximum

---

|   |           |           |           |
|---|-----------|-----------|-----------|
| 1 | 1.4600000 | 1.4600000 | 1.4600000 |
|---|-----------|-----------|-----------|

---

Unique Subject Identifier=2427000000-0001

Assay variable : PTINR\_VAL1 PT-INR Value

N Mean Standard Deviation Minimum Maximum

---

|   |          |           |          |          |
|---|----------|-----------|----------|----------|
| 6 | 1.620000 | 0.1907878 | 1.370000 | 1.940000 |
|---|----------|-----------|----------|----------|

---

Laboratory tests at the time of obtaining Table 2-6 consent, according to the presence or absence of proton-pump inhibitors

Unique Subject Identifier=2428011111-0004

MEANS Procedure

Assay variable : PTINR\_VAL1 PT-INR Value

N Mean Standard Deviation Minimum Maximum

---

|   |           |           |           |           |
|---|-----------|-----------|-----------|-----------|
| 6 | 1.7733333 | 0.1287892 | 1.6000000 | 1.9700000 |
|---|-----------|-----------|-----------|-----------|

---

Unique Subject Identifier=2434011000-0002

Assay variable : PTINR\_VAL1 PT-INR Value

N Mean Standard Deviation Minimum Maximum

---

|   |           |           |           |           |
|---|-----------|-----------|-----------|-----------|
| 3 | 2.1333333 | 0.4932883 | 1.8000000 | 2.7000000 |
|---|-----------|-----------|-----------|-----------|

---

Unique Subject Identifier=2434011000-0004

Assay variable : PTINR\_VAL1 PT-INR Value

N Mean Standard Deviation Minimum Maximum

---

|   |           |           |           |           |
|---|-----------|-----------|-----------|-----------|
| 4 | 2.2250000 | 0.8139410 | 1.5000000 | 3.3000000 |
|---|-----------|-----------|-----------|-----------|

---

Unique Subject Identifier=2434011000-0009



Assay variable : PTINR\_VAL1 PT-INR Value

N Mean Standard Deviation Minimum Maximum

---

|   |           |           |           |           |
|---|-----------|-----------|-----------|-----------|
| 3 | 2.2666667 | 0.2516611 | 2.0000000 | 2.5000000 |
|---|-----------|-----------|-----------|-----------|

---

Laboratory tests at the time of obtaining Table 2-6 consent, according to the presence or absence of proton-pump inhibitors

Unique Subject Identifier=2434011000-0010

MEANS Procedure

Assay variable : PTINR\_VAL1 PT-INR Value

N Mean Standard Deviation Minimum Maximum

---

|   |           |           |           |           |
|---|-----------|-----------|-----------|-----------|
| 4 | 2.2000000 | 0.3464102 | 1.7000000 | 2.5000000 |
|---|-----------|-----------|-----------|-----------|

---

Unique Subject Identifier=2434011000-0011

Assay variable : PTINR\_VAL1 PT-INR Value

N Mean Standard Deviation Minimum Maximum

---

|   |           |           |           |           |
|---|-----------|-----------|-----------|-----------|
| 4 | 2.3750000 | 0.4991660 | 2.0000000 | 3.1000000 |
|---|-----------|-----------|-----------|-----------|

---

Unique Subject Identifier=2434011000-0016

Assay variable : PTINR\_VAL1 PT-INR Value

N Mean Standard Deviation Minimum Maximum

---

|   |           |           |           |           |
|---|-----------|-----------|-----------|-----------|
| 4 | 2.4250000 | 0.2217356 | 2.2000000 | 2.7000000 |
|---|-----------|-----------|-----------|-----------|

---

Unique Subject Identifier=2434011000-0018

Assay variable : PTINR\_VAL1 PT-INR Value

N Mean Standard Deviation Minimum Maximum

---

|   |           |           |           |           |
|---|-----------|-----------|-----------|-----------|
| 4 | 2.4750000 | 0.4031129 | 1.9000000 | 2.8000000 |
|---|-----------|-----------|-----------|-----------|

---

Laboratory tests at the time of obtaining Table 2-6 consent, according to the presence or absence of proton-pump inhibitors

Unique Subject Identifier=2437000000-0008

MEANS Procedure

Assay variable : PTINR\_VAL1 PT-INR Value

N Mean Standard Deviation Minimum Maximum

---

|   |           |           |           |           |
|---|-----------|-----------|-----------|-----------|
| 2 | 1.8500000 | 0.3818377 | 1.5800000 | 2.1200000 |
|---|-----------|-----------|-----------|-----------|

---

Unique Subject Identifier=2437000000-0011

Assay variable : PTINR\_VAL1 PT-INR Value

N Mean Standard Deviation Minimum Maximum

---

|   |           |  |           |           |
|---|-----------|--|-----------|-----------|
| 1 | 1.9500000 |  | 1.9500000 | 1.9500000 |
|---|-----------|--|-----------|-----------|

---

Unique Subject Identifier=2437000000-0013

Assay variable : PTINR\_VAL1 PT-INR Value

N Mean Standard Deviation Minimum Maximum

---

|   |           |           |           |           |
|---|-----------|-----------|-----------|-----------|
| 3 | 1.2066667 | 0.0577350 | 1.1400000 | 1.2400000 |
|---|-----------|-----------|-----------|-----------|

---

Unique Subject Identifier=2438010011-0002

Assay variable : PTINR\_VAL1 PT-INR Value

N Mean Standard Deviation Minimum Maximum

---

|   |           |           |           |           |
|---|-----------|-----------|-----------|-----------|
| 6 | 1.9016667 | 0.5045163 | 1.4400000 | 2.7400000 |
|---|-----------|-----------|-----------|-----------|

---

Laboratory tests at the time of obtaining Table 2-6 consent, according to the presence or absence of proton-pump inhibitors

Unique Subject Identifier=2438010011-0011

MEANS Procedure

Assay variable : PTINR\_VAL1 PT-INR Value

N Mean Standard Deviation Minimum Maximum

---

|   |           |           |           |           |
|---|-----------|-----------|-----------|-----------|
| 6 | 1.6466667 | 0.2516082 | 1.4100000 | 1.9700000 |
|---|-----------|-----------|-----------|-----------|

---

Unique Subject Identifier=2438010011-0025

Assay variable : PTINR\_VAL1 PT-INR Value

N Mean Standard Deviation Minimum Maximum

---

|   |           |           |           |           |
|---|-----------|-----------|-----------|-----------|
| 6 | 1.9216667 | 0.2240015 | 1.6500000 | 2.2500000 |
|---|-----------|-----------|-----------|-----------|

---

Unique Subject Identifier=2438010011-0027

Assay variable : PTINR\_VAL1 PT-INR Value

N Mean Standard Deviation Minimum Maximum

---

|   |           |           |           |           |
|---|-----------|-----------|-----------|-----------|
| 6 | 1.8233333 | 0.2899425 | 1.3500000 | 2.1200000 |
|---|-----------|-----------|-----------|-----------|

---

Unique Subject Identifier=2438010011-0035

Assay variable : PTINR\_VAL1 PT-INR Value

N Mean Standard Deviation Minimum Maximum

---

|   |           |           |           |           |
|---|-----------|-----------|-----------|-----------|
| 6 | 2.1566667 | 0.4078071 | 1.7900000 | 2.8100000 |
|---|-----------|-----------|-----------|-----------|

---

Laboratory tests at the time of obtaining Table 2-6 consent, according to the presence or absence of proton-pump inhibitors

Unique Subject Identifier=2438010011-0040

MEANS Procedure

Assay variable : PTINR\_VAL1 PT-INR Value

| N | Mean      | Standard Deviation | Minimum   | Maximum   |
|---|-----------|--------------------|-----------|-----------|
| 5 | 2.0300000 | 0.1927434          | 1.8300000 | 2.2800000 |

Unique Subject Identifier=2438010011-0044

Assay variable : PTINR\_VAL1 PT-INR Value

| N | Mean      | Standard Deviation | Minimum   | Maximum   |
|---|-----------|--------------------|-----------|-----------|
| 6 | 2.1583333 | 0.3638910          | 1.7700000 | 2.8100000 |

Unique Subject Identifier=2438010011-0053

Assay variable : PTINR\_VAL1 PT-INR Value

| N | Mean      | Standard Deviation | Minimum   | Maximum   |
|---|-----------|--------------------|-----------|-----------|
| 3 | 1.5733333 | 0.5519360          | 1.0500000 | 2.1500000 |

Unique Subject Identifier=2438010011-0059



Assay variable : PTINR\_VAL1 PT-INR Value

N Mean Standard Deviation Minimum Maximum

---

|   |          |           |          |          |
|---|----------|-----------|----------|----------|
| 2 | 1.600000 | 0.5656854 | 1.200000 | 2.000000 |
|---|----------|-----------|----------|----------|

---

Laboratory tests at the time of obtaining Table 2-6 consent, according to the presence or absence of proton-pump inhibitors

Unique Subject Identifier=2438010011-0062

MEANS Procedure

Assay variable : PTINR\_VAL1 PT-INR Value

| N | Mean      | Standard Deviation | Minimum   | Maximum   |
|---|-----------|--------------------|-----------|-----------|
| 6 | 2.3950000 | 0.4478727          | 1.9900000 | 3.1000000 |

Unique Subject Identifier=2438010011-0065

Assay variable : PTINR\_VAL1 PT-INR Value

| N | Mean      | Standard Deviation | Minimum   | Maximum   |
|---|-----------|--------------------|-----------|-----------|
| 3 | 1.5933333 | 0.0873689          | 1.5200000 | 1.6900000 |

Unique Subject Identifier=2438010011-0066

Assay variable : PTINR\_VAL1 PT-INR Value

| N | Mean      | Standard Deviation | Minimum   | Maximum   |
|---|-----------|--------------------|-----------|-----------|
| 3 | 2.0900000 | 0.6349803          | 1.6100000 | 2.8100000 |

Unique Subject Identifier=2438010011-0067

Assay variable : PTINR\_VAL1 PT-INR Value

N Mean Standard Deviation Minimum Maximum

---

|   |           |  |           |           |
|---|-----------|--|-----------|-----------|
| 1 | 1.0000000 |  | 1.0000000 | 1.0000000 |
|---|-----------|--|-----------|-----------|

---

Laboratory tests at the time of obtaining Table 2-6 consent, according to the presence or absence of proton-pump inhibitors

Unique Subject Identifier=2448011111-0002

MEANS Procedure

Assay variable : PTINR\_VAL1 PT-INR Value

N Mean Standard Deviation Minimum Maximum

---

|   |           |           |           |           |
|---|-----------|-----------|-----------|-----------|
| 2 | 1.4900000 | 0.4949747 | 1.1400000 | 1.8400000 |
|---|-----------|-----------|-----------|-----------|

---

Unique Subject Identifier=2449011111-0001

Assay variable : PTINR\_VAL1 PT-INR Value

N Mean Standard Deviation Minimum Maximum

---

|   |           |           |           |           |
|---|-----------|-----------|-----------|-----------|
| 6 | 1.9333333 | 0.7633261 | 1.2000000 | 3.2000000 |
|---|-----------|-----------|-----------|-----------|

---

Unique Subject Identifier=2449011111-0003

Assay variable : PTINR\_VAL1 PT-INR Value

N Mean Standard Deviation Minimum Maximum

---

|   |           |           |           |           |
|---|-----------|-----------|-----------|-----------|
| 6 | 2.3166667 | 0.4578937 | 1.6000000 | 2.7000000 |
|---|-----------|-----------|-----------|-----------|

---

Unique Subject Identifier=2449011111-0005

Assay variable : PTINR\_VAL1 PT-INR Value

N Mean Standard Deviation Minimum Maximum

---

|   |          |           |          |          |
|---|----------|-----------|----------|----------|
| 6 | 1.500000 | 0.2756810 | 1.200000 | 1.900000 |
|---|----------|-----------|----------|----------|

---

Laboratory tests at the time of obtaining Table 2-6 consent, according to the presence or absence of proton-pump inhibitors

Unique Subject Identifier=2449011111-0006

MEANS Procedure

Assay variable : PTINR\_VAL1 PT-INR Value

N Mean Standard Deviation Minimum Maximum

---

|   |           |           |           |           |
|---|-----------|-----------|-----------|-----------|
| 6 | 2.1000000 | 0.1673320 | 1.9000000 | 2.3000000 |
|---|-----------|-----------|-----------|-----------|

---

Unique Subject Identifier=2449011111-0008

Assay variable : PTINR\_VAL1 PT-INR Value

N Mean Standard Deviation Minimum Maximum

---

|   |           |           |           |           |
|---|-----------|-----------|-----------|-----------|
| 6 | 2.2166667 | 0.3868678 | 1.7000000 | 2.8000000 |
|---|-----------|-----------|-----------|-----------|

---

Unique Subject Identifier=2449011111-0010

Assay variable : PTINR\_VAL1 PT-INR Value

N Mean Standard Deviation Minimum Maximum

---

|   |           |           |           |           |
|---|-----------|-----------|-----------|-----------|
| 6 | 2.3500000 | 0.1048809 | 2.2000000 | 2.5000000 |
|---|-----------|-----------|-----------|-----------|

---

Unique Subject Identifier=2449011111-0014

Assay variable : PTINR\_VAL1 PT-INR Value

N Mean Standard Deviation Minimum Maximum

---

|   |           |           |           |           |
|---|-----------|-----------|-----------|-----------|
| 3 | 1.6333333 | 0.0577350 | 1.6000000 | 1.7000000 |
|---|-----------|-----------|-----------|-----------|

---

Laboratory tests at the time of obtaining Table 2-6 consent, according to the presence or absence of proton-pump inhibitors

Unique Subject Identifier=2449011111-0018

MEANS Procedure

Assay variable : PTINR\_VAL1 PT-INR Value

N Mean Standard Deviation Minimum Maximum

---

|   |           |           |           |           |
|---|-----------|-----------|-----------|-----------|
| 5 | 2.2000000 | 0.2549510 | 1.9000000 | 2.6000000 |
|---|-----------|-----------|-----------|-----------|

---

Unique Subject Identifier=2449011111-0019

Assay variable : PTINR\_VAL1 PT-INR Value

N Mean Standard Deviation Minimum Maximum

---

|   |           |           |           |           |
|---|-----------|-----------|-----------|-----------|
| 6 | 2.2833333 | 0.3600926 | 1.9000000 | 2.9000000 |
|---|-----------|-----------|-----------|-----------|

---

Unique Subject Identifier=2449011111-0020

Assay variable : PTINR\_VAL1 PT-INR Value

N Mean Standard Deviation Minimum Maximum

---

|   |           |           |           |           |
|---|-----------|-----------|-----------|-----------|
| 4 | 1.5000000 | 0.1414214 | 1.3000000 | 1.6000000 |
|---|-----------|-----------|-----------|-----------|

---

Unique Subject Identifier=2449011111-0021



Assay variable : PTINR\_VAL1 PT-INR Value

N Mean Standard Deviation Minimum Maximum

---

|   |          |           |          |          |
|---|----------|-----------|----------|----------|
| 6 | 1.550000 | 0.1378405 | 1.400000 | 1.700000 |
|---|----------|-----------|----------|----------|

---

Laboratory tests at the time of obtaining Table 2-6 consent, according to the presence or absence of proton-pump inhibitors

Unique Subject Identifier=2449011111-0022

MEANS Procedure

Assay variable : PTINR\_VAL1 PT-INR Value

N Mean Standard Deviation Minimum Maximum

---

|   |           |           |           |           |
|---|-----------|-----------|-----------|-----------|
| 6 | 1.9500000 | 0.6252999 | 1.2000000 | 3.1000000 |
|---|-----------|-----------|-----------|-----------|

---

Unique Subject Identifier=2449011111-0023

Assay variable : PTINR\_VAL1 PT-INR Value

N Mean Standard Deviation Minimum Maximum

---

|   |           |           |           |           |
|---|-----------|-----------|-----------|-----------|
| 5 | 1.5200000 | 0.1095445 | 1.4000000 | 1.6000000 |
|---|-----------|-----------|-----------|-----------|

---

Unique Subject Identifier=2449011111-0026

Assay variable : PTINR\_VAL1 PT-INR Value

N Mean Standard Deviation Minimum Maximum

---

|   |           |           |           |           |
|---|-----------|-----------|-----------|-----------|
| 6 | 1.8166667 | 0.2639444 | 1.6000000 | 2.3000000 |
|---|-----------|-----------|-----------|-----------|

---

Unique Subject Identifier=2449011111-0030

Assay variable : PTINR\_VAL1 PT-INR Value

N Mean Standard Deviation Minimum Maximum

---

|   |          |           |          |          |
|---|----------|-----------|----------|----------|
| 6 | 1.850000 | 0.1870829 | 1.700000 | 2.200000 |
|---|----------|-----------|----------|----------|

---

Laboratory tests at the time of obtaining Table 2-6 consent, according to the presence or absence of proton-pump inhibitors

Unique Subject Identifier=2449011111-0032

MEANS Procedure

Assay variable : PTINR\_VAL1 PT-INR Value

N Mean Standard Deviation Minimum Maximum

---

|   |           |           |           |           |
|---|-----------|-----------|-----------|-----------|
| 5 | 1.0400000 | 0.0547723 | 1.0000000 | 1.1000000 |
|---|-----------|-----------|-----------|-----------|

---

Unique Subject Identifier=2449011111-0033

Assay variable : PTINR\_VAL1 PT-INR Value

N Mean Standard Deviation Minimum Maximum

---

|   |           |           |           |           |
|---|-----------|-----------|-----------|-----------|
| 6 | 1.7833333 | 0.1834848 | 1.6000000 | 2.1000000 |
|---|-----------|-----------|-----------|-----------|

---

Unique Subject Identifier=2449011111-0034

Assay variable : PTINR\_VAL1 PT-INR Value

N Mean Standard Deviation Minimum Maximum

---

|   |           |           |           |           |
|---|-----------|-----------|-----------|-----------|
| 5 | 1.9400000 | 0.5029911 | 1.2000000 | 2.5000000 |
|---|-----------|-----------|-----------|-----------|

---

Unique Subject Identifier=2449011111-0036

Assay variable : PTINR\_VAL1 PT-INR Value

N Mean Standard Deviation Minimum Maximum

---

|   |           |           |           |           |
|---|-----------|-----------|-----------|-----------|
| 6 | 1.6833333 | 0.1169045 | 1.6000000 | 1.9000000 |
|---|-----------|-----------|-----------|-----------|

---

Laboratory tests at the time of obtaining Table 2-6 consent, according to the presence or absence of proton-pump inhibitors

Unique Subject Identifier=2449011111-0041

MEANS Procedure

Assay variable : PTINR\_VAL1 PT-INR Value

N Mean Standard Deviation Minimum Maximum

---

|   |           |           |           |           |
|---|-----------|-----------|-----------|-----------|
| 6 | 2.2000000 | 0.2097618 | 1.9000000 | 2.5000000 |
|---|-----------|-----------|-----------|-----------|

---

Unique Subject Identifier=2449011111-0046

Assay variable : PTINR\_VAL1 PT-INR Value

N Mean Standard Deviation Minimum Maximum

---

|   |           |           |           |           |
|---|-----------|-----------|-----------|-----------|
| 6 | 1.9500000 | 0.2880972 | 1.7000000 | 2.4000000 |
|---|-----------|-----------|-----------|-----------|

---

Unique Subject Identifier=2449011111-0047

Assay variable : PTINR\_VAL1 PT-INR Value

N Mean Standard Deviation Minimum Maximum

---

|   |           |           |           |           |
|---|-----------|-----------|-----------|-----------|
| 5 | 1.9200000 | 0.3033150 | 1.5000000 | 2.3000000 |
|---|-----------|-----------|-----------|-----------|

---

Unique Subject Identifier=2449011111-0048

Assay variable : PTINR\_VAL1 PT-INR Value

N Mean Standard Deviation Minimum Maximum

---

|   |          |  |          |          |
|---|----------|--|----------|----------|
| 1 | 2.600000 |  | 2.600000 | 2.600000 |
|---|----------|--|----------|----------|

---

Laboratory tests at the time of obtaining Table 2-6 consent, according to the presence or absence of proton-pump inhibitors

Unique Subject Identifier=2456000000-0001

MEANS Procedure

Assay variable : PTINR\_VAL1 PT-INR Value

| N | Mean      | Standard Deviation | Minimum   | Maximum   |
|---|-----------|--------------------|-----------|-----------|
| 3 | 1.6000000 | 0.0624500          | 1.5300000 | 1.6500000 |

Unique Subject Identifier=2456000000-0003

Assay variable : PTINR\_VAL1 PT-INR Value

| N | Mean      | Standard Deviation | Minimum   | Maximum   |
|---|-----------|--------------------|-----------|-----------|
| 3 | 1.7033333 | 0.1908752          | 1.5600000 | 1.9200000 |

Unique Subject Identifier=2456000000-0006

Assay variable : PTINR\_VAL1 PT-INR Value

| N | Mean      | Standard Deviation | Minimum   | Maximum   |
|---|-----------|--------------------|-----------|-----------|
| 2 | 1.8950000 | 0.0777817          | 1.8400000 | 1.9500000 |

Unique Subject Identifier=2456000000-0007



Assay variable : PTINR\_VAL1 PT-INR Value

N Mean Standard Deviation Minimum Maximum

---

|   |           |           |           |           |
|---|-----------|-----------|-----------|-----------|
| 3 | 1.6466667 | 0.2177919 | 1.4700000 | 1.8900000 |
|---|-----------|-----------|-----------|-----------|

---

Laboratory tests at the time of obtaining Table 2-6 consent, according to the presence or absence of proton-pump inhibitors

Unique Subject Identifier=2471011111-0001

MEANS Procedure

Assay variable : PTINR\_VAL1 PT-INR Value

N Mean Standard Deviation Minimum Maximum

---

|   |           |           |           |           |
|---|-----------|-----------|-----------|-----------|
| 6 | 1.6500000 | 0.1224745 | 1.5000000 | 1.8000000 |
|---|-----------|-----------|-----------|-----------|

---

Unique Subject Identifier=2471011111-0003

Assay variable : PTINR\_VAL1 PT-INR Value

N Mean Standard Deviation Minimum Maximum

---

|   |           |           |           |           |
|---|-----------|-----------|-----------|-----------|
| 5 | 2.3800000 | 0.2774887 | 2.1000000 | 2.8000000 |
|---|-----------|-----------|-----------|-----------|

---

Unique Subject Identifier=2471011111-0004

Assay variable : PTINR\_VAL1 PT-INR Value

N Mean Standard Deviation Minimum Maximum

---

|   |           |           |           |           |
|---|-----------|-----------|-----------|-----------|
| 6 | 2.3166667 | 0.3060501 | 1.9000000 | 2.6000000 |
|---|-----------|-----------|-----------|-----------|

---

Unique Subject Identifier=2471011111-0005

Assay variable : PTINR\_VAL1 PT-INR Value

N Mean Standard Deviation Minimum Maximum

---

|   |           |           |           |           |
|---|-----------|-----------|-----------|-----------|
| 5 | 1.9800000 | 0.1483240 | 1.8000000 | 2.2000000 |
|---|-----------|-----------|-----------|-----------|

---

Laboratory tests at the time of obtaining Table 2-6 consent, according to the presence or absence of proton-pump inhibitors

Unique Subject Identifier=2480011111-0003

MEANS Procedure

Assay variable : PTINR\_VAL1 PT-INR Value

N Mean Standard Deviation Minimum Maximum

---

|   |           |           |           |           |
|---|-----------|-----------|-----------|-----------|
| 6 | 2.3550000 | 0.2442744 | 2.0000000 | 2.7600000 |
|---|-----------|-----------|-----------|-----------|

---

Unique Subject Identifier=2480011111-0004

Assay variable : PTINR\_VAL1 PT-INR Value

N Mean Standard Deviation Minimum Maximum

---

|   |           |           |           |           |
|---|-----------|-----------|-----------|-----------|
| 4 | 2.3025000 | 0.1479583 | 2.1100000 | 2.4600000 |
|---|-----------|-----------|-----------|-----------|

---

Unique Subject Identifier=2480011111-0011

Assay variable : PTINR\_VAL1 PT-INR Value

N Mean Standard Deviation Minimum Maximum

---

|   |           |           |           |           |
|---|-----------|-----------|-----------|-----------|
| 2 | 1.3800000 | 0.0707107 | 1.3300000 | 1.4300000 |
|---|-----------|-----------|-----------|-----------|

---

Unique Subject Identifier=2487000000-0001

Assay variable : PTINR\_VAL1 PT-INR Value

N Mean Standard Deviation Minimum Maximum

---

|   |          |           |          |          |
|---|----------|-----------|----------|----------|
| 4 | 1.600000 | 0.4242641 | 1.200000 | 2.100000 |
|---|----------|-----------|----------|----------|

---

Laboratory tests at the time of obtaining Table 2-6 consent, according to the presence or absence of proton-pump inhibitors

Unique Subject Identifier=2487000000-0014

MEANS Procedure

Assay variable : PTINR\_VAL1 PT-INR Value

| N | Mean      | Standard Deviation | Minimum   | Maximum   |
|---|-----------|--------------------|-----------|-----------|
| 5 | 1.7200000 | 0.2489980          | 1.4000000 | 2.1000000 |

Unique Subject Identifier=2487000000-0016

Assay variable : PTINR\_VAL1 PT-INR Value

| N | Mean      | Standard Deviation | Minimum   | Maximum   |
|---|-----------|--------------------|-----------|-----------|
| 1 | 1.5000000 |                    | 1.5000000 | 1.5000000 |

Unique Subject Identifier=2488011100-0001

Assay variable : PTINR\_VAL1 PT-INR Value

| N | Mean      | Standard Deviation | Minimum   | Maximum   |
|---|-----------|--------------------|-----------|-----------|
| 1 | 1.6000000 |                    | 1.6000000 | 1.6000000 |

Unique Subject Identifier=2488011100-0008

Assay variable : PTINR\_VAL1 PT-INR Value

N Mean Standard Deviation Minimum Maximum

---

|   |           |           |           |           |
|---|-----------|-----------|-----------|-----------|
| 2 | 1.2300000 | 0.0424264 | 1.2000000 | 1.2600000 |
|---|-----------|-----------|-----------|-----------|

---

Laboratory tests at the time of obtaining Table 2-6 consent, according to the presence or absence of proton-pump inhibitors

Unique Subject Identifier=2488011100-0009

MEANS Procedure

Assay variable : PTINR\_VAL1 PT-INR Value

N Mean Standard Deviation Minimum Maximum

---

|   |           |           |           |           |
|---|-----------|-----------|-----------|-----------|
| 2 | 1.3950000 | 0.0777817 | 1.3400000 | 1.4500000 |
|---|-----------|-----------|-----------|-----------|

---

Unique Subject Identifier=2490011000-0006

Assay variable : PTINR\_VAL1 PT-INR Value

N Mean Standard Deviation Minimum Maximum

---

|   |           |           |           |           |
|---|-----------|-----------|-----------|-----------|
| 2 | 1.8350000 | 0.2050610 | 1.6900000 | 1.9800000 |
|---|-----------|-----------|-----------|-----------|

---

Unique Subject Identifier=2498010111-0001

Assay variable : PTINR\_VAL1 PT-INR Value

N Mean Standard Deviation Minimum Maximum

---

|   |           |           |           |           |
|---|-----------|-----------|-----------|-----------|
| 5 | 1.6800000 | 0.1483240 | 1.5000000 | 1.9000000 |
|---|-----------|-----------|-----------|-----------|

---

Unique Subject Identifier=2498010111-0006



Assay variable : PTINR\_VAL1 PT-INR Value

N Mean Standard Deviation Minimum Maximum

---

|   |           |           |           |           |
|---|-----------|-----------|-----------|-----------|
| 5 | 2.0800000 | 0.4438468 | 1.4000000 | 2.5000000 |
|---|-----------|-----------|-----------|-----------|

---

Laboratory tests at the time of obtaining Table 2-6 consent, according to the presence or absence of proton-pump inhibitors

Unique Subject Identifier=2498010111-0018

MEANS Procedure

Assay variable : PTINR\_VAL1 PT-INR Value

N Mean Standard Deviation Minimum Maximum

---

|   |           |           |           |           |
|---|-----------|-----------|-----------|-----------|
| 4 | 1.8250000 | 0.3403430 | 1.4000000 | 2.1000000 |
|---|-----------|-----------|-----------|-----------|

---

Unique Subject Identifier=2507000000-0004

Assay variable : PTINR\_VAL1 PT-INR Value

N Mean Standard Deviation Minimum Maximum

---

|   |           |           |           |           |
|---|-----------|-----------|-----------|-----------|
| 2 | 2.4150000 | 0.1202082 | 2.3300000 | 2.5000000 |
|---|-----------|-----------|-----------|-----------|

---

Unique Subject Identifier=2507000000-0008

Assay variable : PTINR\_VAL1 PT-INR Value

N Mean Standard Deviation Minimum Maximum

---

|   |           |           |           |           |
|---|-----------|-----------|-----------|-----------|
| 3 | 2.1300000 | 0.4158125 | 1.8800000 | 2.6100000 |
|---|-----------|-----------|-----------|-----------|

---

Unique Subject Identifier=2507000000-0009

Assay variable : PTINR\_VAL1 PT-INR Value

N Mean Standard Deviation Minimum Maximum

---

|   |          |           |           |           |
|---|----------|-----------|-----------|-----------|
| 2 | 2.410000 | 1.0606602 | 1.6600000 | 3.1600000 |
|---|----------|-----------|-----------|-----------|

---

Laboratory tests at the time of obtaining Table 2-6 consent, according to the presence or absence of proton-pump inhibitors

Unique Subject Identifier=2507000000-0014

MEANS Procedure

Assay variable : PTINR\_VAL1 PT-INR Value

| N | Mean      | Standard Deviation | Minimum   | Maximum   |
|---|-----------|--------------------|-----------|-----------|
| 5 | 2.1380000 | 0.1359044          | 1.9700000 | 2.3000000 |

Unique Subject Identifier=2507000000-0016

Assay variable : PTINR\_VAL1 PT-INR Value

| N | Mean      | Standard Deviation | Minimum   | Maximum   |
|---|-----------|--------------------|-----------|-----------|
| 1 | 2.1100000 |                    | 2.1100000 | 2.1100000 |

Unique Subject Identifier=2507000000-0019

Assay variable : PTINR\_VAL1 PT-INR Value

| N | Mean      | Standard Deviation | Minimum   | Maximum   |
|---|-----------|--------------------|-----------|-----------|
| 5 | 1.7300000 | 0.2517936          | 1.5500000 | 2.1300000 |

Unique Subject Identifier=2511011000-0002

Assay variable : PTINR\_VAL1 PT-INR Value

N Mean Standard Deviation Minimum Maximum

---

|   |           |           |           |           |
|---|-----------|-----------|-----------|-----------|
| 5 | 1.6800000 | 0.1303840 | 1.6000000 | 1.9000000 |
|---|-----------|-----------|-----------|-----------|

---

Laboratory tests at the time of obtaining Table 2-6 consent, according to the presence or absence of proton-pump inhibitors

Unique Subject Identifier=2511011000-0004

MEANS Procedure

Assay variable : PTINR\_VAL1 PT-INR Value

| N | Mean      | Standard Deviation | Minimum   | Maximum   |
|---|-----------|--------------------|-----------|-----------|
| 5 | 2.2460000 | 0.3950696          | 1.9000000 | 2.9000000 |

Unique Subject Identifier=2511011000-0007

Assay variable : PTINR\_VAL1 PT-INR Value

| N | Mean      | Standard Deviation | Minimum   | Maximum   |
|---|-----------|--------------------|-----------|-----------|
| 6 | 1.3333333 | 0.1632993          | 1.2000000 | 1.6000000 |

Unique Subject Identifier=2511011000-0008

Assay variable : PTINR\_VAL1 PT-INR Value

| N | Mean      | Standard Deviation | Minimum   | Maximum   |
|---|-----------|--------------------|-----------|-----------|
| 5 | 2.2200000 | 0.2387467          | 2.0000000 | 2.6000000 |

Unique Subject Identifier=2511011000-0023

Assay variable : PTINR\_VAL1 PT-INR Value

N Mean Standard Deviation Minimum Maximum

---

|   |           |           |           |           |
|---|-----------|-----------|-----------|-----------|
| 6 | 2.2333333 | 0.3747355 | 1.8800000 | 2.9000000 |
|---|-----------|-----------|-----------|-----------|

---

Laboratory tests at the time of obtaining Table 2-6 consent, according to the presence or absence of proton-pump inhibitors

Unique Subject Identifier=2511011000-0025

MEANS Procedure

Assay variable : PTINR\_VAL1 PT-INR Value

N Mean Standard Deviation Minimum Maximum

---

|   |           |           |           |           |
|---|-----------|-----------|-----------|-----------|
| 6 | 1.5833333 | 0.1940790 | 1.3000000 | 1.8000000 |
|---|-----------|-----------|-----------|-----------|

---

Unique Subject Identifier=2511011000-0027

Assay variable : PTINR\_VAL1 PT-INR Value

N Mean Standard Deviation Minimum Maximum

---

|   |           |           |           |           |
|---|-----------|-----------|-----------|-----------|
| 6 | 2.2033333 | 0.6986177 | 1.5000000 | 3.3000000 |
|---|-----------|-----------|-----------|-----------|

---

Unique Subject Identifier=2511011000-0033

Assay variable : PTINR\_VAL1 PT-INR Value

N Mean Standard Deviation Minimum Maximum

---

|   |           |           |           |           |
|---|-----------|-----------|-----------|-----------|
| 6 | 1.3833333 | 0.2786874 | 1.1000000 | 1.9000000 |
|---|-----------|-----------|-----------|-----------|

---

Unique Subject Identifier=2511011000-0044



Assay variable : PTINR\_VAL1 PT-INR Value

N Mean Standard Deviation Minimum Maximum

---

|   |          |           |          |          |
|---|----------|-----------|----------|----------|
| 6 | 1.800000 | 0.5549775 | 1.400000 | 2.800000 |
|---|----------|-----------|----------|----------|

---

Laboratory tests at the time of obtaining Table 2-6 consent, according to the presence or absence of proton-pump inhibitors

Unique Subject Identifier=2511011000-0050

MEANS Procedure

Assay variable : PTINR\_VAL1 PT-INR Value

N Mean Standard Deviation Minimum Maximum

---

|   |           |           |           |           |
|---|-----------|-----------|-----------|-----------|
| 5 | 2.1240000 | 0.4897755 | 1.9000000 | 3.0000000 |
|---|-----------|-----------|-----------|-----------|

---

Unique Subject Identifier=2511011000-0055

Assay variable : PTINR\_VAL1 PT-INR Value

N Mean Standard Deviation Minimum Maximum

---

|   |           |           |           |           |
|---|-----------|-----------|-----------|-----------|
| 6 | 1.7000000 | 0.6164414 | 1.3000000 | 2.9000000 |
|---|-----------|-----------|-----------|-----------|

---

Unique Subject Identifier=2511011000-0056

Assay variable : PTINR\_VAL1 PT-INR Value

N Mean Standard Deviation Minimum Maximum

---

|   |           |           |           |           |
|---|-----------|-----------|-----------|-----------|
| 6 | 1.7300000 | 0.1892089 | 1.5000000 | 2.0000000 |
|---|-----------|-----------|-----------|-----------|

---

Unique Subject Identifier=2511011000-0067

Assay variable : PTINR\_VAL1 PT-INR Value

N Mean Standard Deviation Minimum Maximum

---

|   |           |           |           |           |
|---|-----------|-----------|-----------|-----------|
| 6 | 1.9500000 | 0.2073644 | 1.7000000 | 2.3000000 |
|---|-----------|-----------|-----------|-----------|

---

Laboratory tests at the time of obtaining Table 2-6 consent, according to the presence or absence of proton-pump inhibitors

Unique Subject Identifier=2511011000-0075

MEANS Procedure

Assay variable : PTINR\_VAL1 PT-INR Value

N Mean Standard Deviation Minimum Maximum

---

|   |           |           |           |           |
|---|-----------|-----------|-----------|-----------|
| 5 | 2.1200000 | 0.2683282 | 1.9000000 | 2.5000000 |
|---|-----------|-----------|-----------|-----------|

---

Unique Subject Identifier=2524011001-0001

Assay variable : PTINR\_VAL1 PT-INR Value

N Mean Standard Deviation Minimum Maximum

---

|   |           |  |           |           |
|---|-----------|--|-----------|-----------|
| 1 | 1.7700000 |  | 1.7700000 | 1.7700000 |
|---|-----------|--|-----------|-----------|

---

Unique Subject Identifier=2524011001-0002

Assay variable : PTINR\_VAL1 PT-INR Value

N Mean Standard Deviation Minimum Maximum

---

|   |           |           |           |           |
|---|-----------|-----------|-----------|-----------|
| 2 | 1.8400000 | 0.2545584 | 1.6600000 | 2.0200000 |
|---|-----------|-----------|-----------|-----------|

---

Unique Subject Identifier=2527000000-0008

Assay variable : PTINR\_VAL1 PT-INR Value

N Mean Standard Deviation Minimum Maximum

---

|   |           |           |           |           |
|---|-----------|-----------|-----------|-----------|
| 6 | 2.0666667 | 0.2658320 | 1.8000000 | 2.4000000 |
|---|-----------|-----------|-----------|-----------|

---

Laboratory tests at the time of obtaining Table 2-6 consent, according to the presence or absence of proton-pump inhibitors

Unique Subject Identifier=2527000000-0012

MEANS Procedure

Assay variable : PTINR\_VAL1 PT-INR Value

N Mean Standard Deviation Minimum Maximum

---

|   |           |           |           |           |
|---|-----------|-----------|-----------|-----------|
| 5 | 1.6400000 | 0.1516575 | 1.5000000 | 1.8000000 |
|---|-----------|-----------|-----------|-----------|

---

Unique Subject Identifier=2527000000-0016

Assay variable : PTINR\_VAL1 PT-INR Value

N Mean Standard Deviation Minimum Maximum

---

|   |           |           |           |           |
|---|-----------|-----------|-----------|-----------|
| 6 | 2.0666667 | 0.2658320 | 1.7000000 | 2.4000000 |
|---|-----------|-----------|-----------|-----------|

---

Unique Subject Identifier=2527000000-0023

Assay variable : PTINR\_VAL1 PT-INR Value

N Mean Standard Deviation Minimum Maximum

---

|   |           |           |           |           |
|---|-----------|-----------|-----------|-----------|
| 6 | 2.3666667 | 0.3265986 | 2.1000000 | 3.0000000 |
|---|-----------|-----------|-----------|-----------|

---

Unique Subject Identifier=2527000000-0029

Assay variable : PTINR\_VAL1 PT-INR Value

N Mean Standard Deviation Minimum Maximum

---

|   |           |           |           |           |
|---|-----------|-----------|-----------|-----------|
| 6 | 2.0166667 | 0.4445972 | 1.5000000 | 2.6000000 |
|---|-----------|-----------|-----------|-----------|

---

Laboratory tests at the time of obtaining Table 2-6 consent, according to the presence or absence of proton-pump inhibitors

Unique Subject Identifier=2527000000-0033

MEANS Procedure

Assay variable : PTINR\_VAL1 PT-INR Value

N Mean Standard Deviation Minimum Maximum

---

|   |           |           |           |           |
|---|-----------|-----------|-----------|-----------|
| 5 | 1.7800000 | 0.2167948 | 1.5000000 | 2.1000000 |
|---|-----------|-----------|-----------|-----------|

---

Unique Subject Identifier=2527000000-0036

Assay variable : PTINR\_VAL1 PT-INR Value

N Mean Standard Deviation Minimum Maximum

---

|   |           |           |           |           |
|---|-----------|-----------|-----------|-----------|
| 6 | 2.0333333 | 0.3265986 | 1.6000000 | 2.5000000 |
|---|-----------|-----------|-----------|-----------|

---

Unique Subject Identifier=2527000000-0058

Assay variable : PTINR\_VAL1 PT-INR Value

N Mean Standard Deviation Minimum Maximum

---

|   |           |           |           |           |
|---|-----------|-----------|-----------|-----------|
| 6 | 1.5500000 | 0.2345208 | 1.3000000 | 2.0000000 |
|---|-----------|-----------|-----------|-----------|

---

Unique Subject Identifier=2527000000-0063



Assay variable : PTINR\_VAL1 PT-INR Value

N Mean Standard Deviation Minimum Maximum

---

|   |           |           |           |           |
|---|-----------|-----------|-----------|-----------|
| 6 | 2.0666667 | 0.6055301 | 1.4000000 | 3.0000000 |
|---|-----------|-----------|-----------|-----------|

---

Laboratory tests at the time of obtaining Table 2-6 consent, according to the presence or absence of proton-pump inhibitors

Unique Subject Identifier=2527000000-0065

MEANS Procedure

Assay variable : PTINR\_VAL1 PT-INR Value

N Mean Standard Deviation Minimum Maximum

---

|   |           |           |           |           |
|---|-----------|-----------|-----------|-----------|
| 6 | 2.3000000 | 0.5366563 | 1.7000000 | 3.2000000 |
|---|-----------|-----------|-----------|-----------|

---

Unique Subject Identifier=2527000000-0067

Assay variable : PTINR\_VAL1 PT-INR Value

N Mean Standard Deviation Minimum Maximum

---

|   |           |           |           |           |
|---|-----------|-----------|-----------|-----------|
| 6 | 1.8833333 | 0.1169045 | 1.8000000 | 2.1000000 |
|---|-----------|-----------|-----------|-----------|

---

Unique Subject Identifier=2527000000-0068

Assay variable : PTINR\_VAL1 PT-INR Value

N Mean Standard Deviation Minimum Maximum

---

|   |           |           |           |           |
|---|-----------|-----------|-----------|-----------|
| 5 | 1.8400000 | 0.3577709 | 1.3000000 | 2.2000000 |
|---|-----------|-----------|-----------|-----------|

---

Unique Subject Identifier=2527000000-0069

Assay variable : PTINR\_VAL1 PT-INR Value

N Mean Standard Deviation Minimum Maximum

---

|   |          |           |          |          |
|---|----------|-----------|----------|----------|
| 6 | 1.900000 | 0.1897367 | 1.700000 | 2.100000 |
|---|----------|-----------|----------|----------|

---

Laboratory tests at the time of obtaining Table 2-6 consent, according to the presence or absence of proton-pump inhibitors

Unique Subject Identifier=2527000000-0070

MEANS Procedure

Assay variable : PTINR\_VAL1 PT-INR Value

N Mean Standard Deviation Minimum Maximum

---

|   |           |           |           |           |
|---|-----------|-----------|-----------|-----------|
| 6 | 1.7166667 | 0.1471960 | 1.5000000 | 1.9000000 |
|---|-----------|-----------|-----------|-----------|

---

Unique Subject Identifier=2527000000-0071

Assay variable : PTINR\_VAL1 PT-INR Value

N Mean Standard Deviation Minimum Maximum

---

|   |           |           |           |           |
|---|-----------|-----------|-----------|-----------|
| 6 | 2.0166667 | 0.2639444 | 1.6000000 | 2.4000000 |
|---|-----------|-----------|-----------|-----------|

---

Unique Subject Identifier=2527000000-0073

Assay variable : PTINR\_VAL1 PT-INR Value

N Mean Standard Deviation Minimum Maximum

---

|   |           |           |           |           |
|---|-----------|-----------|-----------|-----------|
| 6 | 2.1166667 | 0.3868678 | 1.6000000 | 2.6000000 |
|---|-----------|-----------|-----------|-----------|

---

Unique Subject Identifier=2527000000-0075

Assay variable : PTINR\_VAL1 PT-INR Value

N Mean Standard Deviation Minimum Maximum

---

|   |          |           |          |          |
|---|----------|-----------|----------|----------|
| 5 | 1.660000 | 0.6107373 | 1.100000 | 2.500000 |
|---|----------|-----------|----------|----------|

---

Laboratory tests at the time of obtaining Table 2-6 consent, according to the presence or absence of proton-pump inhibitors

Unique Subject Identifier=2535000000-0001

MEANS Procedure

Assay variable : PTINR\_VAL1 PT-INR Value

N Mean Standard Deviation Minimum Maximum

---

|   |           |           |           |           |
|---|-----------|-----------|-----------|-----------|
| 6 | 2.3833333 | 0.4445972 | 1.6000000 | 2.7000000 |
|---|-----------|-----------|-----------|-----------|

---

Unique Subject Identifier=2560011100-0001

Assay variable : PTINR\_VAL1 PT-INR Value

N Mean Standard Deviation Minimum Maximum

---

|   |           |           |           |           |
|---|-----------|-----------|-----------|-----------|
| 6 | 1.0983333 | 0.0495648 | 1.0300000 | 1.1400000 |
|---|-----------|-----------|-----------|-----------|

---

Unique Subject Identifier=2560011100-0003

Assay variable : PTINR\_VAL1 PT-INR Value

N Mean Standard Deviation Minimum Maximum

---

|   |           |           |           |           |
|---|-----------|-----------|-----------|-----------|
| 2 | 1.5850000 | 0.1343503 | 1.4900000 | 1.6800000 |
|---|-----------|-----------|-----------|-----------|

---

Unique Subject Identifier=2560011100-0005

Assay variable : PTINR\_VAL1 PT-INR Value

N Mean Standard Deviation Minimum Maximum

---

|   |           |  |           |           |
|---|-----------|--|-----------|-----------|
| 1 | 1.7000000 |  | 1.7000000 | 1.7000000 |
|---|-----------|--|-----------|-----------|

---

Laboratory tests at the time of obtaining Table 2-6 consent, according to the presence or absence of proton-pump inhibitors

Unique Subject Identifier=2560011100-0006

MEANS Procedure

Assay variable : PTINR\_VAL1 PT-INR Value

N Mean Standard Deviation Minimum Maximum

---

|   |           |  |           |           |
|---|-----------|--|-----------|-----------|
| 1 | 1.6000000 |  | 1.6000000 | 1.6000000 |
|---|-----------|--|-----------|-----------|

---

Unique Subject Identifier=2560011100-0007

Assay variable : PTINR\_VAL1 PT-INR Value

N Mean Standard Deviation Minimum Maximum

---

|   |           |           |           |           |
|---|-----------|-----------|-----------|-----------|
| 3 | 1.4000000 | 0.4000000 | 1.0000000 | 1.8000000 |
|---|-----------|-----------|-----------|-----------|

---

Unique Subject Identifier=2560011100-0008

Assay variable : PTINR\_VAL1 PT-INR Value

N Mean Standard Deviation Minimum Maximum

---

|   |           |  |           |           |
|---|-----------|--|-----------|-----------|
| 1 | 1.5000000 |  | 1.5000000 | 1.5000000 |
|---|-----------|--|-----------|-----------|

---

Unique Subject Identifier=2582010000-0004



Assay variable : PTINR\_VAL1 PT-INR Value

N Mean Standard Deviation Minimum Maximum

---

|   |          |           |          |          |
|---|----------|-----------|----------|----------|
| 6 | 2.135000 | 0.3440203 | 1.800000 | 2.640000 |
|---|----------|-----------|----------|----------|

---

Laboratory tests at the time of obtaining Table 2-6 consent, according to the presence or absence of proton-pump inhibitors

Unique Subject Identifier=2582010000-0006

MEANS Procedure

Assay variable : PTINR\_VAL1 PT-INR Value

N Mean Standard Deviation Minimum Maximum

---

|   |           |           |           |           |
|---|-----------|-----------|-----------|-----------|
| 6 | 1.9433333 | 0.2124774 | 1.6500000 | 2.2000000 |
|---|-----------|-----------|-----------|-----------|

---

Unique Subject Identifier=2582010000-0020

Assay variable : PTINR\_VAL1 PT-INR Value

N Mean Standard Deviation Minimum Maximum

---

|   |           |           |           |           |
|---|-----------|-----------|-----------|-----------|
| 6 | 1.9683333 | 0.2100873 | 1.7300000 | 2.2100000 |
|---|-----------|-----------|-----------|-----------|

---

Unique Subject Identifier=2582010000-0029

Assay variable : PTINR\_VAL1 PT-INR Value

N Mean Standard Deviation Minimum Maximum

---

|   |           |           |           |           |
|---|-----------|-----------|-----------|-----------|
| 5 | 1.5660000 | 0.2020643 | 1.3400000 | 1.7900000 |
|---|-----------|-----------|-----------|-----------|

---

Unique Subject Identifier=2600000000-0001

Assay variable : PTINR\_VAL1 PT-INR Value

N Mean Standard Deviation Minimum Maximum

---

|   |          |           |          |          |
|---|----------|-----------|----------|----------|
| 6 | 2.250000 | 0.2738613 | 1.800000 | 2.500000 |
|---|----------|-----------|----------|----------|

---

Laboratory tests at the time of obtaining Table 2-6 consent, according to the presence or absence of proton-pump inhibitors

Unique Subject Identifier=2603011011-0029

MEANS Procedure

Assay variable : PTINR\_VAL1 PT-INR Value

N Mean Standard Deviation Minimum Maximum

---

|   |          |           |          |          |
|---|----------|-----------|----------|----------|
| 6 | 2.100000 | 0.5865151 | 1.500000 | 2.800000 |
|---|----------|-----------|----------|----------|

---

Unique Subject Identifier=2603011011-0035

Assay variable : PTINR\_VAL1 PT-INR Value

N Mean Standard Deviation Minimum Maximum

---

|   |           |           |          |          |
|---|-----------|-----------|----------|----------|
| 6 | 2.2166667 | 0.2136976 | 2.000000 | 2.600000 |
|---|-----------|-----------|----------|----------|

---

Unique Subject Identifier=2606011111-0002

Assay variable : PTINR\_VAL1 PT-INR Value

N Mean Standard Deviation Minimum Maximum

---

|   |          |           |          |          |
|---|----------|-----------|----------|----------|
| 2 | 1.410000 | 0.1697056 | 1.290000 | 1.530000 |
|---|----------|-----------|----------|----------|

---

Unique Subject Identifier=2606011111-0019

Assay variable : PTINR\_VAL1 PT-INR Value

N Mean Standard Deviation Minimum Maximum

---

|   |           |           |           |           |
|---|-----------|-----------|-----------|-----------|
| 6 | 1.5516667 | 0.2847045 | 1.1100000 | 1.9400000 |
|---|-----------|-----------|-----------|-----------|

---

Laboratory tests at the time of obtaining Table 2-6 consent, according to the presence or absence of proton-pump inhibitors

Unique Subject Identifier=2606011111-0029

MEANS Procedure

Assay variable : PTINR\_VAL1 PT-INR Value

N Mean Standard Deviation Minimum Maximum

---

|   |           |           |           |           |
|---|-----------|-----------|-----------|-----------|
| 6 | 2.1216667 | 0.5464583 | 1.1400000 | 2.6900000 |
|---|-----------|-----------|-----------|-----------|

---

Unique Subject Identifier=2606011111-0036

Assay variable : PTINR\_VAL1 PT-INR Value

N Mean Standard Deviation Minimum Maximum

---

|   |           |           |           |           |
|---|-----------|-----------|-----------|-----------|
| 6 | 2.1183333 | 0.1847611 | 1.8600000 | 2.4200000 |
|---|-----------|-----------|-----------|-----------|

---

Unique Subject Identifier=2606011111-0038

Assay variable : PTINR\_VAL1 PT-INR Value

N Mean Standard Deviation Minimum Maximum

---

|   |           |           |           |           |
|---|-----------|-----------|-----------|-----------|
| 3 | 1.8033333 | 0.0723418 | 1.7200000 | 1.8500000 |
|---|-----------|-----------|-----------|-----------|

---

Unique Subject Identifier=2606011111-0043

Assay variable : PTINR\_VAL1 PT-INR Value

N Mean Standard Deviation Minimum Maximum

---

|   |           |           |           |           |
|---|-----------|-----------|-----------|-----------|
| 3 | 1.9833333 | 0.1844813 | 1.7800000 | 2.1400000 |
|---|-----------|-----------|-----------|-----------|

---

Laboratory tests at the time of obtaining Table 2-6 consent, according to the presence or absence of proton-pump inhibitors

Unique Subject Identifier=2606011111-0046

MEANS Procedure

Assay variable : PTINR\_VAL1 PT-INR Value

N Mean Standard Deviation Minimum Maximum

---

|   |           |           |           |           |
|---|-----------|-----------|-----------|-----------|
| 3 | 2.3666667 | 0.0321455 | 2.3300000 | 2.3900000 |
|---|-----------|-----------|-----------|-----------|

---

Unique Subject Identifier=2606011111-0087

Assay variable : PTINR\_VAL1 PT-INR Value

N Mean Standard Deviation Minimum Maximum

---

|   |           |           |           |           |
|---|-----------|-----------|-----------|-----------|
| 5 | 1.6600000 | 0.6224950 | 1.0100000 | 2.5700000 |
|---|-----------|-----------|-----------|-----------|

---

Unique Subject Identifier=2606011111-0090

Assay variable : PTINR\_VAL1 PT-INR Value

N Mean Standard Deviation Minimum Maximum

---

|   |           |           |           |           |
|---|-----------|-----------|-----------|-----------|
| 5 | 1.8240000 | 0.2786216 | 1.3900000 | 2.1600000 |
|---|-----------|-----------|-----------|-----------|

---

Unique Subject Identifier=2606011111-0100



Assay variable : PTINR\_VAL1 PT-INR Value

N Mean Standard Deviation Minimum Maximum

---

|   |           |           |           |           |
|---|-----------|-----------|-----------|-----------|
| 6 | 1.0500000 | 0.1219836 | 0.9500000 | 1.2900000 |
|---|-----------|-----------|-----------|-----------|

---

Laboratory tests at the time of obtaining Table 2-6 consent, according to the presence or absence of proton-pump inhibitors

Unique Subject Identifier=2606011111-0101

MEANS Procedure

Assay variable : PTINR\_VAL1 PT-INR Value

N Mean Standard Deviation Minimum Maximum

---

|   |           |           |           |           |
|---|-----------|-----------|-----------|-----------|
| 6 | 1.4483333 | 0.3348084 | 0.9500000 | 1.8500000 |
|---|-----------|-----------|-----------|-----------|

---

Unique Subject Identifier=2606011111-0142

Assay variable : PTINR\_VAL1 PT-INR Value

N Mean Standard Deviation Minimum Maximum

---

|   |           |           |           |           |
|---|-----------|-----------|-----------|-----------|
| 6 | 1.9100000 | 0.4762352 | 1.4500000 | 2.7600000 |
|---|-----------|-----------|-----------|-----------|

---

Unique Subject Identifier=2607010010-0020

Assay variable : PTINR\_VAL1 PT-INR Value

N Mean Standard Deviation Minimum Maximum

---

|   |           |           |           |           |
|---|-----------|-----------|-----------|-----------|
| 3 | 2.2433333 | 0.6051722 | 1.6300000 | 2.8400000 |
|---|-----------|-----------|-----------|-----------|

---

Unique Subject Identifier=2607010010-0037

Assay variable : PTINR\_VAL1 PT-INR Value

N Mean Standard Deviation Minimum Maximum

---

|   |           |           |           |           |
|---|-----------|-----------|-----------|-----------|
| 3 | 2.0500000 | 0.4887740 | 1.5300000 | 2.5000000 |
|---|-----------|-----------|-----------|-----------|

---

Laboratory tests at the time of obtaining Table 2-6 consent, according to the presence or absence of proton-pump inhibitors

Unique Subject Identifier=2607010010-0038

MEANS Procedure

Assay variable : PTINR\_VAL1 PT-INR Value

N Mean Standard Deviation Minimum Maximum

---

|   |           |           |           |           |
|---|-----------|-----------|-----------|-----------|
| 4 | 2.1425000 | 0.0846069 | 2.0400000 | 2.2300000 |
|---|-----------|-----------|-----------|-----------|

---

Unique Subject Identifier=2607010010-0045

Assay variable : PTINR\_VAL1 PT-INR Value

N Mean Standard Deviation Minimum Maximum

---

|   |           |           |           |           |
|---|-----------|-----------|-----------|-----------|
| 4 | 1.5425000 | 0.0505800 | 1.4800000 | 1.6000000 |
|---|-----------|-----------|-----------|-----------|

---

Unique Subject Identifier=2607010010-0047

Assay variable : PTINR\_VAL1 PT-INR Value

N Mean Standard Deviation Minimum Maximum

---

|   |           |           |           |           |
|---|-----------|-----------|-----------|-----------|
| 3 | 1.8766667 | 0.4354691 | 1.4300000 | 2.3000000 |
|---|-----------|-----------|-----------|-----------|

---

Unique Subject Identifier=2607010010-0061

Assay variable : PTINR\_VAL1 PT-INR Value

N Mean Standard Deviation Minimum Maximum

---

|   |           |           |           |           |
|---|-----------|-----------|-----------|-----------|
| 3 | 1.7800000 | 0.0556776 | 1.7200000 | 1.8300000 |
|---|-----------|-----------|-----------|-----------|

---

Laboratory tests at the time of obtaining Table 2-6 consent, according to the presence or absence of proton-pump inhibitors

Unique Subject Identifier=2607010010-0063

MEANS Procedure

Assay variable : PTINR\_VAL1 PT-INR Value

N Mean Standard Deviation Minimum Maximum

---

|   |           |           |           |           |
|---|-----------|-----------|-----------|-----------|
| 4 | 2.0225000 | 0.3346018 | 1.6300000 | 2.4400000 |
|---|-----------|-----------|-----------|-----------|

---

Unique Subject Identifier=2608010010-0009

Assay variable : PTINR\_VAL1 PT-INR Value

N Mean Standard Deviation Minimum Maximum

---

|   |           |           |           |           |
|---|-----------|-----------|-----------|-----------|
| 3 | 2.1333333 | 0.7247298 | 1.7000000 | 2.9700000 |
|---|-----------|-----------|-----------|-----------|

---

Unique Subject Identifier=2608010010-0020

Assay variable : PTINR\_VAL1 PT-INR Value

N Mean Standard Deviation Minimum Maximum

---

|   |           |           |           |           |
|---|-----------|-----------|-----------|-----------|
| 4 | 1.9275000 | 0.1252664 | 1.8000000 | 2.0400000 |
|---|-----------|-----------|-----------|-----------|

---

Unique Subject Identifier=2608010010-0030

Assay variable : PTINR\_VAL1 PT-INR Value

N Mean Standard Deviation Minimum Maximum

---

|   |           |           |           |           |
|---|-----------|-----------|-----------|-----------|
| 5 | 1.6700000 | 0.1734935 | 1.4800000 | 1.9500000 |
|---|-----------|-----------|-----------|-----------|

---

Laboratory tests at the time of obtaining Table 2-6 consent, according to the presence or absence of proton-pump inhibitors

Unique Subject Identifier=2608010010-0038

MEANS Procedure

Assay variable : PTINR\_VAL1 PT-INR Value

| N | Mean      | Standard Deviation | Minimum   | Maximum   |
|---|-----------|--------------------|-----------|-----------|
| 2 | 1.4650000 | 0.1060660          | 1.3900000 | 1.5400000 |

Unique Subject Identifier=2608010010-0039

Assay variable : PTINR\_VAL1 PT-INR Value

| N | Mean      | Standard Deviation | Minimum   | Maximum   |
|---|-----------|--------------------|-----------|-----------|
| 3 | 1.5266667 | 0.1305118          | 1.3900000 | 1.6500000 |

Unique Subject Identifier=2608010010-0042

Assay variable : PTINR\_VAL1 PT-INR Value

| N | Mean      | Standard Deviation | Minimum   | Maximum   |
|---|-----------|--------------------|-----------|-----------|
| 4 | 1.6525000 | 0.0670199          | 1.5900000 | 1.7200000 |

Unique Subject Identifier=2608010010-0047



Assay variable : PTINR\_VAL1 PT-INR Value

N Mean Standard Deviation Minimum Maximum

---

|   |          |           |          |          |
|---|----------|-----------|----------|----------|
| 3 | 1.490000 | 0.2206808 | 1.280000 | 1.720000 |
|---|----------|-----------|----------|----------|

---

Laboratory tests at the time of obtaining Table 2-6 consent, according to the presence or absence of proton-pump inhibitors

Unique Subject Identifier=2608010010-0048

MEANS Procedure

Assay variable : PTINR\_VAL1 PT-INR Value

N Mean Standard Deviation Minimum Maximum

---

|   |           |           |           |           |
|---|-----------|-----------|-----------|-----------|
| 6 | 1.9200000 | 0.2499600 | 1.6800000 | 2.3700000 |
|---|-----------|-----------|-----------|-----------|

---

Unique Subject Identifier=2608010010-0051

Assay variable : PTINR\_VAL1 PT-INR Value

N Mean Standard Deviation Minimum Maximum

---

|   |           |           |           |           |
|---|-----------|-----------|-----------|-----------|
| 5 | 2.2680000 | 0.6436381 | 1.7400000 | 3.3600000 |
|---|-----------|-----------|-----------|-----------|

---

Unique Subject Identifier=2608010010-0052

Assay variable : PTINR\_VAL1 PT-INR Value

N Mean Standard Deviation Minimum Maximum

---

|   |           |           |           |           |
|---|-----------|-----------|-----------|-----------|
| 5 | 2.0280000 | 0.4770430 | 1.6900000 | 2.8700000 |
|---|-----------|-----------|-----------|-----------|

---

Unique Subject Identifier=2608010010-0060

Assay variable : PTINR\_VAL1 PT-INR Value

N Mean Standard Deviation Minimum Maximum

---

|   |           |           |           |           |
|---|-----------|-----------|-----------|-----------|
| 5 | 1.7520000 | 0.2411846 | 1.3900000 | 1.9600000 |
|---|-----------|-----------|-----------|-----------|

---

Laboratory tests at the time of obtaining Table 2-6 consent, according to the presence or absence of proton-pump inhibitors

Unique Subject Identifier=2608010010-0063

MEANS Procedure

Assay variable : PTINR\_VAL1 PT-INR Value

| N | Mean      | Standard Deviation | Minimum   | Maximum   |
|---|-----------|--------------------|-----------|-----------|
| 4 | 2.0700000 | 1.0701090          | 1.0400000 | 3.4300000 |

Unique Subject Identifier=2608010010-0064

Assay variable : PTINR\_VAL1 PT-INR Value

| N | Mean      | Standard Deviation | Minimum   | Maximum   |
|---|-----------|--------------------|-----------|-----------|
| 1 | 1.3400000 |                    | 1.3400000 | 1.3400000 |

Unique Subject Identifier=2608010010-0066

Assay variable : PTINR\_VAL1 PT-INR Value

| N | Mean      | Standard Deviation | Minimum   | Maximum   |
|---|-----------|--------------------|-----------|-----------|
| 5 | 1.9360000 | 0.1092245          | 1.7600000 | 2.0400000 |

Unique Subject Identifier=2608010010-0068

Assay variable : PTINR\_VAL1 PT-INR Value

N Mean Standard Deviation Minimum Maximum

---

|   |           |           |           |           |
|---|-----------|-----------|-----------|-----------|
| 6 | 2.1433333 | 0.1938728 | 1.8400000 | 2.4500000 |
|---|-----------|-----------|-----------|-----------|

---

Laboratory tests at the time of obtaining Table 2-6 consent, according to the presence or absence of proton-pump inhibitors

Unique Subject Identifier=2608010010-0078

MEANS Procedure

Assay variable : PTINR\_VAL1 PT-INR Value

N Mean Standard Deviation Minimum Maximum

---

|   |           |           |           |           |
|---|-----------|-----------|-----------|-----------|
| 4 | 1.7825000 | 0.2051625 | 1.4900000 | 1.9300000 |
|---|-----------|-----------|-----------|-----------|

---

Unique Subject Identifier=2608010010-0079

Assay variable : PTINR\_VAL1 PT-INR Value

N Mean Standard Deviation Minimum Maximum

---

|   |           |           |           |           |
|---|-----------|-----------|-----------|-----------|
| 6 | 2.2350000 | 1.1811308 | 1.2600000 | 4.3300000 |
|---|-----------|-----------|-----------|-----------|

---

Unique Subject Identifier=2608010010-0082

Assay variable : PTINR\_VAL1 PT-INR Value

N Mean Standard Deviation Minimum Maximum

---

|   |           |           |           |           |
|---|-----------|-----------|-----------|-----------|
| 2 | 2.2950000 | 0.0919239 | 2.2300000 | 2.3600000 |
|---|-----------|-----------|-----------|-----------|

---

Unique Subject Identifier=2608010010-0085

Assay variable : PTINR\_VAL1 PT-INR Value

N Mean Standard Deviation Minimum Maximum

---

|   |           |           |           |           |
|---|-----------|-----------|-----------|-----------|
| 6 | 1.6133333 | 0.0752773 | 1.5400000 | 1.7100000 |
|---|-----------|-----------|-----------|-----------|

---

Laboratory tests at the time of obtaining Table 2-6 consent, according to the presence or absence of proton-pump inhibitors

Unique Subject Identifier=2608010010-0086

MEANS Procedure

Assay variable : PTINR\_VAL1 PT-INR Value

N Mean Standard Deviation Minimum Maximum

---

|   |           |           |           |           |
|---|-----------|-----------|-----------|-----------|
| 6 | 2.0766667 | 0.4405754 | 1.5600000 | 2.6400000 |
|---|-----------|-----------|-----------|-----------|

---

Unique Subject Identifier=2612011111-0005

Assay variable : PTINR\_VAL1 PT-INR Value

N Mean Standard Deviation Minimum Maximum

---

|   |           |  |           |           |
|---|-----------|--|-----------|-----------|
| 1 | 1.8000000 |  | 1.8000000 | 1.8000000 |
|---|-----------|--|-----------|-----------|

---

Unique Subject Identifier=2614000000-0007

Assay variable : PTINR\_VAL1 PT-INR Value

N Mean Standard Deviation Minimum Maximum

---

|   |           |           |           |           |
|---|-----------|-----------|-----------|-----------|
| 5 | 1.4880000 | 0.2834078 | 1.2500000 | 1.9100000 |
|---|-----------|-----------|-----------|-----------|

---

Unique Subject Identifier=2614000000-0009



Assay variable : PTINR\_VAL1 PT-INR Value

N Mean Standard Deviation Minimum Maximum

---

|   |           |           |           |           |
|---|-----------|-----------|-----------|-----------|
| 2 | 1.8650000 | 0.2474874 | 1.6900000 | 2.0400000 |
|---|-----------|-----------|-----------|-----------|

---

Laboratory tests at the time of obtaining Table 2-6 consent, according to the presence or absence of proton-pump inhibitors

Unique Subject Identifier=261400000-0013

MEANS Procedure

Assay variable : PTINR\_VAL1 PT-INR Value

N Mean Standard Deviation Minimum Maximum

---

|   |           |           |           |           |
|---|-----------|-----------|-----------|-----------|
| 6 | 2.1933333 | 0.5227874 | 1.5500000 | 3.0400000 |
|---|-----------|-----------|-----------|-----------|

---

Unique Subject Identifier=261400000-0022

Assay variable : PTINR\_VAL1 PT-INR Value

N Mean Standard Deviation Minimum Maximum

---

|   |           |           |           |           |
|---|-----------|-----------|-----------|-----------|
| 3 | 2.5300000 | 0.3726929 | 2.3000000 | 2.9600000 |
|---|-----------|-----------|-----------|-----------|

---

Unique Subject Identifier=261400000-0028

Assay variable : PTINR\_VAL1 PT-INR Value

N Mean Standard Deviation Minimum Maximum

---

|   |           |           |           |           |
|---|-----------|-----------|-----------|-----------|
| 3 | 2.2566667 | 0.7925486 | 1.7500000 | 3.1700000 |
|---|-----------|-----------|-----------|-----------|

---

Unique Subject Identifier=261400000-0031

Assay variable : PTINR\_VAL1 PT-INR Value

N Mean Standard Deviation Minimum Maximum

---

|   |           |           |           |           |
|---|-----------|-----------|-----------|-----------|
| 4 | 2.0800000 | 0.2438579 | 1.8400000 | 2.3000000 |
|---|-----------|-----------|-----------|-----------|

---

Laboratory tests at the time of obtaining Table 2-6 consent, according to the presence or absence of proton-pump inhibitors

Unique Subject Identifier=261400000-0033

MEANS Procedure

Assay variable : PTINR\_VAL1 PT-INR Value

N Mean Standard Deviation Minimum Maximum

---

|   |           |           |           |           |
|---|-----------|-----------|-----------|-----------|
| 2 | 2.2250000 | 0.1626346 | 2.1100000 | 2.3400000 |
|---|-----------|-----------|-----------|-----------|

---

Unique Subject Identifier=261400000-0035

Assay variable : PTINR\_VAL1 PT-INR Value

N Mean Standard Deviation Minimum Maximum

---

|   |           |           |           |           |
|---|-----------|-----------|-----------|-----------|
| 4 | 1.3325000 | 0.2056494 | 1.1600000 | 1.6300000 |
|---|-----------|-----------|-----------|-----------|

---

Unique Subject Identifier=261400000-0036

Assay variable : PTINR\_VAL1 PT-INR Value

N Mean Standard Deviation Minimum Maximum

---

|   |           |  |           |           |
|---|-----------|--|-----------|-----------|
| 1 | 1.7500000 |  | 1.7500000 | 1.7500000 |
|---|-----------|--|-----------|-----------|

---

Unique Subject Identifier=261400000-0040

Assay variable : PTINR\_VAL1 PT-INR Value

N Mean Standard Deviation Minimum Maximum

---

|   |          |           |          |          |
|---|----------|-----------|----------|----------|
| 3 | 1.760000 | 0.2920616 | 1.450000 | 2.030000 |
|---|----------|-----------|----------|----------|

---

Laboratory tests at the time of obtaining Table 2-6 consent, according to the presence or absence of proton-pump inhibitors

Unique Subject Identifier=261400000-0046

MEANS Procedure

Assay variable : PTINR\_VAL1 PT-INR Value

N Mean Standard Deviation Minimum Maximum

---

|   |           |           |           |           |
|---|-----------|-----------|-----------|-----------|
| 4 | 1.7075000 | 0.2051625 | 1.5300000 | 1.9400000 |
|---|-----------|-----------|-----------|-----------|

---

Unique Subject Identifier=261400000-0055

Assay variable : PTINR\_VAL1 PT-INR Value

N Mean Standard Deviation Minimum Maximum

---

|   |           |           |           |           |
|---|-----------|-----------|-----------|-----------|
| 3 | 1.6266667 | 0.2150194 | 1.4100000 | 1.8400000 |
|---|-----------|-----------|-----------|-----------|

---

Unique Subject Identifier=261400000-0069

Assay variable : PTINR\_VAL1 PT-INR Value

N Mean Standard Deviation Minimum Maximum

---

|   |           |           |           |           |
|---|-----------|-----------|-----------|-----------|
| 3 | 1.4933333 | 0.1850225 | 1.2800000 | 1.6100000 |
|---|-----------|-----------|-----------|-----------|

---

Unique Subject Identifier=261400000-0071

Assay variable : PTINR\_VAL1 PT-INR Value

N Mean Standard Deviation Minimum Maximum

---

|   |           |           |           |           |
|---|-----------|-----------|-----------|-----------|
| 3 | 2.6266667 | 0.5005330 | 2.1400000 | 3.1400000 |
|---|-----------|-----------|-----------|-----------|

---

Laboratory tests at the time of obtaining Table 2-6 consent, according to the presence or absence of proton-pump inhibitors

Unique Subject Identifier=261600000-0007

MEANS Procedure

Assay variable : PTINR\_VAL1 PT-INR Value

N Mean Standard Deviation Minimum Maximum

---

|   |           |           |           |           |
|---|-----------|-----------|-----------|-----------|
| 6 | 2.5083333 | 1.2747614 | 1.5000000 | 4.9100000 |
|---|-----------|-----------|-----------|-----------|

---

Unique Subject Identifier=261600000-0008

Assay variable : PTINR\_VAL1 PT-INR Value

N Mean Standard Deviation Minimum Maximum

---

|   |           |           |           |           |
|---|-----------|-----------|-----------|-----------|
| 3 | 1.5800000 | 0.2000000 | 1.3800000 | 1.7800000 |
|---|-----------|-----------|-----------|-----------|

---

Unique Subject Identifier=261600000-0014

Assay variable : PTINR\_VAL1 PT-INR Value

N Mean Standard Deviation Minimum Maximum

---

|   |           |           |           |           |
|---|-----------|-----------|-----------|-----------|
| 3 | 1.8466667 | 0.6268439 | 1.2800000 | 2.5200000 |
|---|-----------|-----------|-----------|-----------|

---

Unique Subject Identifier=261600000-0015



Assay variable : PTINR\_VAL1 PT-INR Value

N Mean Standard Deviation Minimum Maximum

---

|   |           |           |           |           |
|---|-----------|-----------|-----------|-----------|
| 3 | 1.7533333 | 0.1700980 | 1.5600000 | 1.8800000 |
|---|-----------|-----------|-----------|-----------|

---

Laboratory tests at the time of obtaining Table 2-6 consent, according to the presence or absence of proton-pump inhibitors

Unique Subject Identifier=2616000000-0039

MEANS Procedure

Assay variable : PTINR\_VAL1 PT-INR Value

N Mean Standard Deviation Minimum Maximum

---

|   |           |  |           |           |
|---|-----------|--|-----------|-----------|
| 1 | 1.7800000 |  | 1.7800000 | 1.7800000 |
|---|-----------|--|-----------|-----------|

---

Unique Subject Identifier=2616000000-0051

Assay variable : PTINR\_VAL1 PT-INR Value

N Mean Standard Deviation Minimum Maximum

---

|   |           |           |           |           |
|---|-----------|-----------|-----------|-----------|
| 2 | 1.4600000 | 0.0848528 | 1.4000000 | 1.5200000 |
|---|-----------|-----------|-----------|-----------|

---

Unique Subject Identifier=2617000000-0006

Assay variable : PTINR\_VAL1 PT-INR Value

N Mean Standard Deviation Minimum Maximum

---

|   |           |           |           |           |
|---|-----------|-----------|-----------|-----------|
| 3 | 1.5366667 | 0.2369247 | 1.3900000 | 1.8100000 |
|---|-----------|-----------|-----------|-----------|

---

Unique Subject Identifier=2617000000-0011

Assay variable : PTINR\_VAL1 PT-INR Value

N Mean Standard Deviation Minimum Maximum

---

|   |           |           |           |           |
|---|-----------|-----------|-----------|-----------|
| 3 | 2.2266667 | 0.6164684 | 1.7800000 | 2.9300000 |
|---|-----------|-----------|-----------|-----------|

---

Laboratory tests at the time of obtaining Table 2-6 consent, according to the presence or absence of proton-pump inhibitors

Unique Subject Identifier=2617000000-0012

MEANS Procedure

Assay variable : PTINR\_VAL1 PT-INR Value

N Mean Standard Deviation Minimum Maximum

---

|   |           |           |           |           |
|---|-----------|-----------|-----------|-----------|
| 4 | 2.0250000 | 0.2157931 | 1.7100000 | 2.1700000 |
|---|-----------|-----------|-----------|-----------|

---

Unique Subject Identifier=2617000000-0015

Assay variable : PTINR\_VAL1 PT-INR Value

N Mean Standard Deviation Minimum Maximum

---

|   |           |           |           |           |
|---|-----------|-----------|-----------|-----------|
| 6 | 2.3516667 | 0.7882999 | 1.4300000 | 3.4000000 |
|---|-----------|-----------|-----------|-----------|

---

Unique Subject Identifier=2617000000-0016

Assay variable : PTINR\_VAL1 PT-INR Value

N Mean Standard Deviation Minimum Maximum

---

|   |           |           |           |           |
|---|-----------|-----------|-----------|-----------|
| 2 | 1.0350000 | 0.0353553 | 1.0100000 | 1.0600000 |
|---|-----------|-----------|-----------|-----------|

---

Unique Subject Identifier=2617000000-0019

Assay variable : PTINR\_VAL1 PT-INR Value

N Mean Standard Deviation Minimum Maximum

---

|   |           |           |           |           |
|---|-----------|-----------|-----------|-----------|
| 2 | 2.0050000 | 0.2616295 | 1.8200000 | 2.1900000 |
|---|-----------|-----------|-----------|-----------|

---

Laboratory tests at the time of obtaining Table 2-6 consent, according to the presence or absence of proton-pump inhibitors

Unique Subject Identifier=2617000000-0021

MEANS Procedure

Assay variable : PTINR\_VAL1 PT-INR Value

| N | Mean      | Standard Deviation | Minimum   | Maximum   |
|---|-----------|--------------------|-----------|-----------|
| 6 | 2.0633333 | 1.2088452          | 1.2200000 | 4.4300000 |

Unique Subject Identifier=2617000000-0025

Assay variable : PTINR\_VAL1 PT-INR Value

| N | Mean      | Standard Deviation | Minimum   | Maximum   |
|---|-----------|--------------------|-----------|-----------|
| 3 | 1.6633333 | 0.5430776          | 1.0900000 | 2.1700000 |

Unique Subject Identifier=2617000000-0029

Assay variable : PTINR\_VAL1 PT-INR Value

| N | Mean      | Standard Deviation | Minimum   | Maximum   |
|---|-----------|--------------------|-----------|-----------|
| 3 | 2.1400000 | 0.0916515          | 2.0600000 | 2.2400000 |

Unique Subject Identifier=2617000000-0036

Assay variable : PTINR\_VAL1 PT-INR Value

N Mean Standard Deviation Minimum Maximum

---

|   |          |  |          |          |
|---|----------|--|----------|----------|
| 1 | 1.840000 |  | 1.840000 | 1.840000 |
|---|----------|--|----------|----------|

---

Laboratory tests at the time of obtaining Table 2-6 consent, according to the presence or absence of proton-pump inhibitors

Unique Subject Identifier=2617000000-0042

MEANS Procedure

Assay variable : PTINR\_VAL1 PT-INR Value

| N | Mean      | Standard Deviation | Minimum   | Maximum   |
|---|-----------|--------------------|-----------|-----------|
| 3 | 1.4400000 | 0.1513275          | 1.2700000 | 1.5600000 |

Unique Subject Identifier=2617000000-0043

Assay variable : PTINR\_VAL1 PT-INR Value

| N | Mean      | Standard Deviation | Minimum   | Maximum   |
|---|-----------|--------------------|-----------|-----------|
| 4 | 1.7350000 | 0.1040833          | 1.6200000 | 1.8500000 |

Unique Subject Identifier=2617000000-0045

Assay variable : PTINR\_VAL1 PT-INR Value

| N | Mean      | Standard Deviation | Minimum   | Maximum   |
|---|-----------|--------------------|-----------|-----------|
| 2 | 1.8300000 | 0.0141421          | 1.8200000 | 1.8400000 |

Unique Subject Identifier=2617000000-0049



Assay variable : PTINR\_VAL1 PT-INR Value

N Mean Standard Deviation Minimum Maximum

---

|   |           |           |           |           |
|---|-----------|-----------|-----------|-----------|
| 2 | 2.7650000 | 0.4313351 | 2.4600000 | 3.0700000 |
|---|-----------|-----------|-----------|-----------|

---

Laboratory tests at the time of obtaining Table 2-6 consent, according to the presence or absence of proton-pump inhibitors

Unique Subject Identifier=2617000000-0060

MEANS Procedure

Assay variable : PTINR\_VAL1 PT-INR Value

N Mean Standard Deviation Minimum Maximum

---

|   |           |           |           |           |
|---|-----------|-----------|-----------|-----------|
| 5 | 2.1000000 | 0.3839271 | 1.6400000 | 2.6900000 |
|---|-----------|-----------|-----------|-----------|

---

Unique Subject Identifier=2617000000-0066

Assay variable : PTINR\_VAL1 PT-INR Value

N Mean Standard Deviation Minimum Maximum

---

|   |           |           |           |           |
|---|-----------|-----------|-----------|-----------|
| 3 | 2.6033333 | 0.5877358 | 2.2200000 | 3.2800000 |
|---|-----------|-----------|-----------|-----------|

---

Unique Subject Identifier=2617000000-0072

Assay variable : PTINR\_VAL1 PT-INR Value

N Mean Standard Deviation Minimum Maximum

---

|   |           |           |           |           |
|---|-----------|-----------|-----------|-----------|
| 3 | 2.8766667 | 0.3073001 | 2.5500000 | 3.1600000 |
|---|-----------|-----------|-----------|-----------|

---

Unique Subject Identifier=2617000000-0078

Assay variable : PTINR\_VAL1 PT-INR Value

N Mean Standard Deviation Minimum Maximum

---

|   |           |           |           |           |
|---|-----------|-----------|-----------|-----------|
| 4 | 1.9100000 | 0.3522310 | 1.5700000 | 2.3600000 |
|---|-----------|-----------|-----------|-----------|

---

Laboratory tests at the time of obtaining Table 2-6 consent, according to the presence or absence of proton-pump inhibitors

Unique Subject Identifier=2617000000-0081

MEANS Procedure

Assay variable : PTINR\_VAL1 PT-INR Value

N Mean Standard Deviation Minimum Maximum

---

|   |           |           |           |           |
|---|-----------|-----------|-----------|-----------|
| 4 | 2.4350000 | 0.4647939 | 1.9900000 | 3.0700000 |
|---|-----------|-----------|-----------|-----------|

---

Unique Subject Identifier=2617000000-0086

Assay variable : PTINR\_VAL1 PT-INR Value

N Mean Standard Deviation Minimum Maximum

---

|   |           |           |           |           |
|---|-----------|-----------|-----------|-----------|
| 3 | 2.3933333 | 0.0763763 | 2.3100000 | 2.4600000 |
|---|-----------|-----------|-----------|-----------|

---

Unique Subject Identifier=2617000000-0089

Assay variable : PTINR\_VAL1 PT-INR Value

N Mean Standard Deviation Minimum Maximum

---

|   |           |           |           |           |
|---|-----------|-----------|-----------|-----------|
| 2 | 1.9500000 | 0.0282843 | 1.9300000 | 1.9700000 |
|---|-----------|-----------|-----------|-----------|

---

Unique Subject Identifier=2617000000-0092

Assay variable : PTINR\_VAL1 PT-INR Value

N Mean Standard Deviation Minimum Maximum

---

|   |           |           |           |           |
|---|-----------|-----------|-----------|-----------|
| 4 | 1.8475000 | 0.1652019 | 1.7000000 | 2.0800000 |
|---|-----------|-----------|-----------|-----------|

---

Laboratory tests at the time of obtaining Table 2-6 consent, according to the presence or absence of proton-pump inhibitors

Unique Subject Identifier=2617000000-0093

MEANS Procedure

Assay variable : PTINR\_VAL1 PT-INR Value

| N | Mean      | Standard Deviation | Minimum   | Maximum   |
|---|-----------|--------------------|-----------|-----------|
| 1 | 1.6300000 |                    | 1.6300000 | 1.6300000 |

Unique Subject Identifier=2617000000-0094

Assay variable : PTINR\_VAL1 PT-INR Value

| N | Mean      | Standard Deviation | Minimum   | Maximum   |
|---|-----------|--------------------|-----------|-----------|
| 5 | 1.7620000 | 0.1003494          | 1.6500000 | 1.9000000 |

Unique Subject Identifier=2617000000-0096

Assay variable : PTINR\_VAL1 PT-INR Value

| N | Mean      | Standard Deviation | Minimum   | Maximum   |
|---|-----------|--------------------|-----------|-----------|
| 3 | 1.8500000 | 0.3377869          | 1.6500000 | 2.2400000 |

Unique Subject Identifier=2617000000-0101

Assay variable : PTINR\_VAL1 PT-INR Value

N Mean Standard Deviation Minimum Maximum

---

|   |           |           |           |           |
|---|-----------|-----------|-----------|-----------|
| 4 | 1.7575000 | 0.1405643 | 1.6400000 | 1.9200000 |
|---|-----------|-----------|-----------|-----------|

---

Laboratory tests at the time of obtaining Table 2-6 consent, according to the presence or absence of proton-pump inhibitors

Unique Subject Identifier=2617000000-0102

MEANS Procedure

Assay variable : PTINR\_VAL1 PT-INR Value

N Mean Standard Deviation Minimum Maximum

---

|   |           |           |           |           |
|---|-----------|-----------|-----------|-----------|
| 4 | 1.7275000 | 0.2099802 | 1.5000000 | 1.9600000 |
|---|-----------|-----------|-----------|-----------|

---

Unique Subject Identifier=2617000000-0108

Assay variable : PTINR\_VAL1 PT-INR Value

N Mean Standard Deviation Minimum Maximum

---

|   |           |           |           |           |
|---|-----------|-----------|-----------|-----------|
| 4 | 2.0475000 | 0.1701715 | 1.8100000 | 2.2100000 |
|---|-----------|-----------|-----------|-----------|

---

Unique Subject Identifier=2617000000-0114

Assay variable : PTINR\_VAL1 PT-INR Value

N Mean Standard Deviation Minimum Maximum

---

|   |           |           |           |           |
|---|-----------|-----------|-----------|-----------|
| 3 | 1.6166667 | 0.1006645 | 1.5100000 | 1.7100000 |
|---|-----------|-----------|-----------|-----------|

---

Unique Subject Identifier=2617000000-0116



Assay variable : PTINR\_VAL1 PT-INR Value

N Mean Standard Deviation Minimum Maximum

---

|   |           |           |           |           |
|---|-----------|-----------|-----------|-----------|
| 5 | 1.7680000 | 0.2922670 | 1.4900000 | 2.2500000 |
|---|-----------|-----------|-----------|-----------|

---

Laboratory tests at the time of obtaining Table 2-6 consent, according to the presence or absence of proton-pump inhibitors

Unique Subject Identifier=2617000000-0117

MEANS Procedure

Assay variable : PTINR\_VAL1 PT-INR Value

N Mean Standard Deviation Minimum Maximum

---

|   |           |           |           |           |
|---|-----------|-----------|-----------|-----------|
| 6 | 2.0733333 | 0.5709174 | 1.3300000 | 2.9900000 |
|---|-----------|-----------|-----------|-----------|

---

Unique Subject Identifier=2617000000-0120

Assay variable : PTINR\_VAL1 PT-INR Value

N Mean Standard Deviation Minimum Maximum

---

|   |           |           |           |           |
|---|-----------|-----------|-----------|-----------|
| 3 | 1.9566667 | 0.2400694 | 1.7800000 | 2.2300000 |
|---|-----------|-----------|-----------|-----------|

---

Unique Subject Identifier=2617000000-0121

Assay variable : PTINR\_VAL1 PT-INR Value

N Mean Standard Deviation Minimum Maximum

---

|   |           |           |           |           |
|---|-----------|-----------|-----------|-----------|
| 3 | 1.9566667 | 0.2400694 | 1.7800000 | 2.2300000 |
|---|-----------|-----------|-----------|-----------|

---

Unique Subject Identifier=2617000000-0127

Assay variable : PTINR\_VAL1 PT-INR Value

N Mean Standard Deviation Minimum Maximum

---

|   |           |           |           |           |
|---|-----------|-----------|-----------|-----------|
| 4 | 1.7925000 | 0.2643703 | 1.4100000 | 2.0000000 |
|---|-----------|-----------|-----------|-----------|

---

Laboratory tests at the time of obtaining Table 2-6 consent, according to the presence or absence of proton-pump inhibitors

Unique Subject Identifier=2617000000-0131

MEANS Procedure

Assay variable : PTINR\_VAL1 PT-INR Value

N Mean Standard Deviation Minimum Maximum

---

|   |           |           |           |           |
|---|-----------|-----------|-----------|-----------|
| 2 | 1.9800000 | 0.3394113 | 1.7400000 | 2.2200000 |
|---|-----------|-----------|-----------|-----------|

---

Unique Subject Identifier=2617000000-0139

Assay variable : PTINR\_VAL1 PT-INR Value

N Mean Standard Deviation Minimum Maximum

---

|   |           |           |           |           |
|---|-----------|-----------|-----------|-----------|
| 6 | 1.4883333 | 0.1599271 | 1.2100000 | 1.6900000 |
|---|-----------|-----------|-----------|-----------|

---

Unique Subject Identifier=2617000000-0143

Assay variable : PTINR\_VAL1 PT-INR Value

N Mean Standard Deviation Minimum Maximum

---

|   |           |           |           |           |
|---|-----------|-----------|-----------|-----------|
| 4 | 1.9025000 | 0.1144188 | 1.8000000 | 2.0600000 |
|---|-----------|-----------|-----------|-----------|

---

Unique Subject Identifier=2617000000-0144

Assay variable : PTINR\_VAL1 PT-INR Value

N Mean Standard Deviation Minimum Maximum

---

|   |           |           |           |           |
|---|-----------|-----------|-----------|-----------|
| 2 | 1.8250000 | 0.1060660 | 1.7500000 | 1.9000000 |
|---|-----------|-----------|-----------|-----------|

---

Laboratory tests at the time of obtaining Table 2-6 consent, according to the presence or absence of proton-pump inhibitors

Unique Subject Identifier=2617000000-0147

MEANS Procedure

Assay variable : PTINR\_VAL1 PT-INR Value

N Mean Standard Deviation Minimum Maximum

---

|   |           |           |           |           |
|---|-----------|-----------|-----------|-----------|
| 4 | 2.5900000 | 0.3365511 | 2.1500000 | 2.9700000 |
|---|-----------|-----------|-----------|-----------|

---

Unique Subject Identifier=2617000000-0151

Assay variable : PTINR\_VAL1 PT-INR Value

N Mean Standard Deviation Minimum Maximum

---

|   |           |           |           |           |
|---|-----------|-----------|-----------|-----------|
| 3 | 1.7833333 | 0.1778576 | 1.5800000 | 1.9100000 |
|---|-----------|-----------|-----------|-----------|

---

Unique Subject Identifier=2617000000-0155

Assay variable : PTINR\_VAL1 PT-INR Value

N Mean Standard Deviation Minimum Maximum

---

|   |           |           |           |           |
|---|-----------|-----------|-----------|-----------|
| 2 | 2.5350000 | 0.3606245 | 2.2800000 | 2.7900000 |
|---|-----------|-----------|-----------|-----------|

---

Unique Subject Identifier=2617000000-0160

Assay variable : PTINR\_VAL1 PT-INR Value

N Mean Standard Deviation Minimum Maximum

---

|   |          |           |           |           |
|---|----------|-----------|-----------|-----------|
| 3 | 2.313333 | 0.4781562 | 1.8700000 | 2.8200000 |
|---|----------|-----------|-----------|-----------|

---

Laboratory tests at the time of obtaining Table 2-6 consent, according to the presence or absence of proton-pump inhibitors

Unique Subject Identifier=2617000000-0166

MEANS Procedure

Assay variable : PTINR\_VAL1 PT-INR Value

N Mean Standard Deviation Minimum Maximum

---

|   |           |           |           |           |
|---|-----------|-----------|-----------|-----------|
| 4 | 2.2700000 | 0.3522310 | 1.9700000 | 2.7300000 |
|---|-----------|-----------|-----------|-----------|

---

Unique Subject Identifier=2617000000-0167

Assay variable : PTINR\_VAL1 PT-INR Value

N Mean Standard Deviation Minimum Maximum

---

|   |           |           |           |           |
|---|-----------|-----------|-----------|-----------|
| 4 | 1.8075000 | 0.2192981 | 1.5700000 | 2.1000000 |
|---|-----------|-----------|-----------|-----------|

---

Unique Subject Identifier=2617000000-0180

Assay variable : PTINR\_VAL1 PT-INR Value

N Mean Standard Deviation Minimum Maximum

---

|   |           |           |           |           |
|---|-----------|-----------|-----------|-----------|
| 2 | 1.5900000 | 0.4384062 | 1.2800000 | 1.9000000 |
|---|-----------|-----------|-----------|-----------|

---

Unique Subject Identifier=2617000000-0183



Assay variable : PTINR\_VAL1 PT-INR Value

N Mean Standard Deviation Minimum Maximum

---

|   |           |           |           |           |
|---|-----------|-----------|-----------|-----------|
| 2 | 1.5750000 | 0.1767767 | 1.4500000 | 1.7000000 |
|---|-----------|-----------|-----------|-----------|

---

Laboratory tests at the time of obtaining Table 2-6 consent, according to the presence or absence of proton-pump inhibitors

Unique Subject Identifier=2617000000-0184

MEANS Procedure

Assay variable : PTINR\_VAL1 PT-INR Value

N Mean Standard Deviation Minimum Maximum

---

|   |           |           |           |           |
|---|-----------|-----------|-----------|-----------|
| 3 | 2.3866667 | 0.3089229 | 2.0300000 | 2.5700000 |
|---|-----------|-----------|-----------|-----------|

---

Unique Subject Identifier=2617000000-0193

Assay variable : PTINR\_VAL1 PT-INR Value

N Mean Standard Deviation Minimum Maximum

---

|   |           |           |           |           |
|---|-----------|-----------|-----------|-----------|
| 3 | 2.0300000 | 0.5040833 | 1.4800000 | 2.4700000 |
|---|-----------|-----------|-----------|-----------|

---

Unique Subject Identifier=2617000000-0195

Assay variable : PTINR\_VAL1 PT-INR Value

N Mean Standard Deviation Minimum Maximum

---

|   |           |           |           |           |
|---|-----------|-----------|-----------|-----------|
| 4 | 2.3175000 | 0.1543535 | 2.1500000 | 2.5100000 |
|---|-----------|-----------|-----------|-----------|

---

Unique Subject Identifier=2617000000-0201

Assay variable : PTINR\_VAL1 PT-INR Value

N Mean Standard Deviation Minimum Maximum

---

|   |           |           |           |           |
|---|-----------|-----------|-----------|-----------|
| 4 | 2.0100000 | 0.7092719 | 0.9600000 | 2.4600000 |
|---|-----------|-----------|-----------|-----------|

---

Laboratory tests at the time of obtaining Table 2-6 consent, according to the presence or absence of proton-pump inhibitors

Unique Subject Identifier=2617000000-0202

MEANS Procedure

Assay variable : PTINR\_VAL1 PT-INR Value

N Mean Standard Deviation Minimum Maximum

---

|   |           |           |           |           |
|---|-----------|-----------|-----------|-----------|
| 2 | 2.3750000 | 0.1767767 | 2.2500000 | 2.5000000 |
|---|-----------|-----------|-----------|-----------|

---

Unique Subject Identifier=2617000000-0203

Assay variable : PTINR\_VAL1 PT-INR Value

N Mean Standard Deviation Minimum Maximum

---

|   |           |           |           |           |
|---|-----------|-----------|-----------|-----------|
| 5 | 2.1980000 | 0.6521273 | 1.4300000 | 3.0900000 |
|---|-----------|-----------|-----------|-----------|

---

Unique Subject Identifier=2617000000-0205

Assay variable : PTINR\_VAL1 PT-INR Value

N Mean Standard Deviation Minimum Maximum

---

|   |           |           |           |           |
|---|-----------|-----------|-----------|-----------|
| 2 | 2.1750000 | 0.5586144 | 1.7800000 | 2.5700000 |
|---|-----------|-----------|-----------|-----------|

---

Unique Subject Identifier=2617000000-0208

Assay variable : PTINR\_VAL1 PT-INR Value

N Mean Standard Deviation Minimum Maximum

---

|   |           |           |           |           |
|---|-----------|-----------|-----------|-----------|
| 4 | 1.7650000 | 0.2292742 | 1.4800000 | 1.9700000 |
|---|-----------|-----------|-----------|-----------|

---

Laboratory tests at the time of obtaining Table 2-6 consent, according to the presence or absence of proton-pump inhibitors

Unique Subject Identifier=2617000000-0213

MEANS Procedure

Assay variable : PTINR\_VAL1 PT-INR Value

| N | Mean      | Standard Deviation | Minimum   | Maximum   |
|---|-----------|--------------------|-----------|-----------|
| 4 | 1.8550000 | 0.1236932          | 1.7000000 | 2.0000000 |

Unique Subject Identifier=2617000000-0214

Assay variable : PTINR\_VAL1 PT-INR Value

| N | Mean      | Standard Deviation | Minimum   | Maximum   |
|---|-----------|--------------------|-----------|-----------|
| 3 | 2.1000000 | 0.5456189          | 1.7800000 | 2.7300000 |

Unique Subject Identifier=2617000000-0215

Assay variable : PTINR\_VAL1 PT-INR Value

| N | Mean      | Standard Deviation | Minimum   | Maximum   |
|---|-----------|--------------------|-----------|-----------|
| 2 | 2.1000000 | 0.3676955          | 1.8400000 | 2.3600000 |

Unique Subject Identifier=2617000000-0216

Assay variable : PTINR\_VAL1 PT-INR Value

N Mean Standard Deviation Minimum Maximum

---

|   |           |           |           |           |
|---|-----------|-----------|-----------|-----------|
| 4 | 1.5450000 | 0.1310216 | 1.3500000 | 1.6300000 |
|---|-----------|-----------|-----------|-----------|

---

Laboratory tests at the time of obtaining Table 2-6 consent, according to the presence or absence of proton-pump inhibitors

Unique Subject Identifier=2617000000-0218

MEANS Procedure

Assay variable : PTINR\_VAL1 PT-INR Value

N Mean Standard Deviation Minimum Maximum

---

|   |           |           |           |           |
|---|-----------|-----------|-----------|-----------|
| 6 | 2.1300000 | 0.1711140 | 2.0000000 | 2.4200000 |
|---|-----------|-----------|-----------|-----------|

---

Unique Subject Identifier=2617000000-0221

Assay variable : PTINR\_VAL1 PT-INR Value

N Mean Standard Deviation Minimum Maximum

---

|   |           |           |           |           |
|---|-----------|-----------|-----------|-----------|
| 4 | 2.1575000 | 0.2085466 | 1.8800000 | 2.3500000 |
|---|-----------|-----------|-----------|-----------|

---

Unique Subject Identifier=2617000000-0222

Assay variable : PTINR\_VAL1 PT-INR Value

N Mean Standard Deviation Minimum Maximum

---

|   |           |           |           |           |
|---|-----------|-----------|-----------|-----------|
| 3 | 1.9400000 | 0.9734988 | 1.1300000 | 3.0200000 |
|---|-----------|-----------|-----------|-----------|

---

Unique Subject Identifier=2617000000-0223



Assay variable : PTINR\_VAL1 PT-INR Value

N Mean Standard Deviation Minimum Maximum

---

|   |           |           |           |           |
|---|-----------|-----------|-----------|-----------|
| 3 | 2.0233333 | 0.0757188 | 1.9700000 | 2.1100000 |
|---|-----------|-----------|-----------|-----------|

---

Laboratory tests at the time of obtaining Table 2-6 consent, according to the presence or absence of proton-pump inhibitors

Unique Subject Identifier=2617000000-0224

MEANS Procedure

Assay variable : PTINR\_VAL1 PT-INR Value

N Mean Standard Deviation Minimum Maximum

---

|   |           |           |           |           |
|---|-----------|-----------|-----------|-----------|
| 3 | 1.6300000 | 0.1178983 | 1.5000000 | 1.7300000 |
|---|-----------|-----------|-----------|-----------|

---

Unique Subject Identifier=2617000000-0226

Assay variable : PTINR\_VAL1 PT-INR Value

N Mean Standard Deviation Minimum Maximum

---

|   |           |           |           |           |
|---|-----------|-----------|-----------|-----------|
| 4 | 2.2600000 | 0.2978814 | 1.9500000 | 2.5200000 |
|---|-----------|-----------|-----------|-----------|

---

Unique Subject Identifier=2617000000-0230

Assay variable : PTINR\_VAL1 PT-INR Value

N Mean Standard Deviation Minimum Maximum

---

|   |           |           |           |           |
|---|-----------|-----------|-----------|-----------|
| 3 | 2.4433333 | 0.8064945 | 1.5200000 | 3.0100000 |
|---|-----------|-----------|-----------|-----------|

---

Unique Subject Identifier=2617000000-0231

Assay variable : PTINR\_VAL1 PT-INR Value

N Mean Standard Deviation Minimum Maximum

---

|   |           |           |           |           |
|---|-----------|-----------|-----------|-----------|
| 4 | 2.0550000 | 0.3812698 | 1.5300000 | 2.3700000 |
|---|-----------|-----------|-----------|-----------|

---

Laboratory tests at the time of obtaining Table 2-6 consent, according to the presence or absence of proton-pump inhibitors

Unique Subject Identifier=2617000000-0243

MEANS Procedure

Assay variable : PTINR\_VAL1 PT-INR Value

N Mean Standard Deviation Minimum Maximum

---

|   |           |           |           |           |
|---|-----------|-----------|-----------|-----------|
| 3 | 1.8966667 | 0.2874601 | 1.6700000 | 2.2200000 |
|---|-----------|-----------|-----------|-----------|

---

Unique Subject Identifier=2617000000-0244

Assay variable : PTINR\_VAL1 PT-INR Value

N Mean Standard Deviation Minimum Maximum

---

|   |           |           |           |           |
|---|-----------|-----------|-----------|-----------|
| 5 | 2.1760000 | 0.4657574 | 1.3900000 | 2.6100000 |
|---|-----------|-----------|-----------|-----------|

---

Unique Subject Identifier=2617000000-0255

Assay variable : PTINR\_VAL1 PT-INR Value

N Mean Standard Deviation Minimum Maximum

---

|   |           |           |           |           |
|---|-----------|-----------|-----------|-----------|
| 2 | 2.3950000 | 0.1767767 | 2.2700000 | 2.5200000 |
|---|-----------|-----------|-----------|-----------|

---

Unique Subject Identifier=2617000000-0258

Assay variable : PTINR\_VAL1 PT-INR Value

N Mean Standard Deviation Minimum Maximum

---

|   |           |           |           |           |
|---|-----------|-----------|-----------|-----------|
| 3 | 1.8700000 | 0.0458258 | 1.8300000 | 1.9200000 |
|---|-----------|-----------|-----------|-----------|

---

Laboratory tests at the time of obtaining Table 2-6 consent, according to the presence or absence of proton-pump inhibitors

Unique Subject Identifier=2617000000-0259

MEANS Procedure

Assay variable : PTINR\_VAL1 PT-INR Value

| N | Mean      | Standard Deviation | Minimum   | Maximum   |
|---|-----------|--------------------|-----------|-----------|
| 6 | 1.9333333 | 0.2353437          | 1.6300000 | 2.2700000 |

Unique Subject Identifier=2617000000-0262

Assay variable : PTINR\_VAL1 PT-INR Value

| N | Mean      | Standard Deviation | Minimum   | Maximum   |
|---|-----------|--------------------|-----------|-----------|
| 4 | 1.6925000 | 0.2657536          | 1.3800000 | 2.0300000 |

Unique Subject Identifier=2617000000-0264

Assay variable : PTINR\_VAL1 PT-INR Value

| N | Mean      | Standard Deviation | Minimum   | Maximum   |
|---|-----------|--------------------|-----------|-----------|
| 5 | 2.0320000 | 1.1410828          | 1.1600000 | 3.7800000 |

Unique Subject Identifier=2617000000-0271

Assay variable : PTINR\_VAL1 PT-INR Value

N Mean Standard Deviation Minimum Maximum

---

|   |           |           |           |           |
|---|-----------|-----------|-----------|-----------|
| 4 | 1.6975000 | 0.1609089 | 1.4800000 | 1.8500000 |
|---|-----------|-----------|-----------|-----------|

---

Laboratory tests at the time of obtaining Table 2-6 consent, according to the presence or absence of proton-pump inhibitors

Unique Subject Identifier=2617000000-0274

MEANS Procedure

Assay variable : PTINR\_VAL1 PT-INR Value

| N | Mean      | Standard Deviation | Minimum   | Maximum   |
|---|-----------|--------------------|-----------|-----------|
| 2 | 1.8900000 | 0.1838478          | 1.7600000 | 2.0200000 |

Unique Subject Identifier=2617000000-0281

Assay variable : PTINR\_VAL1 PT-INR Value

| N | Mean      | Standard Deviation | Minimum   | Maximum   |
|---|-----------|--------------------|-----------|-----------|
| 3 | 2.0833333 | 0.2821938          | 1.7600000 | 2.2800000 |

Unique Subject Identifier=2617000000-0284

Assay variable : PTINR\_VAL1 PT-INR Value

| N | Mean      | Standard Deviation | Minimum   | Maximum   |
|---|-----------|--------------------|-----------|-----------|
| 6 | 1.7416667 | 0.2171098          | 1.5100000 | 2.0600000 |

Unique Subject Identifier=2617000000-0287



Assay variable : PTINR\_VAL1 PT-INR Value

N Mean Standard Deviation Minimum Maximum

---

|   |           |           |           |           |
|---|-----------|-----------|-----------|-----------|
| 4 | 1.9300000 | 0.3068116 | 1.5900000 | 2.2700000 |
|---|-----------|-----------|-----------|-----------|

---

Laboratory tests at the time of obtaining Table 2-6 consent, according to the presence or absence of proton-pump inhibitors

Unique Subject Identifier=2617000000-0288

MEANS Procedure

Assay variable : PTINR\_VAL1 PT-INR Value

N Mean Standard Deviation Minimum Maximum

---

|   |           |           |           |           |
|---|-----------|-----------|-----------|-----------|
| 3 | 1.9566667 | 0.3707200 | 1.6900000 | 2.3800000 |
|---|-----------|-----------|-----------|-----------|

---

Unique Subject Identifier=2617000000-0294

Assay variable : PTINR\_VAL1 PT-INR Value

N Mean Standard Deviation Minimum Maximum

---

|   |           |           |           |           |
|---|-----------|-----------|-----------|-----------|
| 4 | 2.3175000 | 0.9911735 | 1.3900000 | 3.7000000 |
|---|-----------|-----------|-----------|-----------|

---

Unique Subject Identifier=2617000000-0298

Assay variable : PTINR\_VAL1 PT-INR Value

N Mean Standard Deviation Minimum Maximum

---

|   |           |           |           |           |
|---|-----------|-----------|-----------|-----------|
| 4 | 1.0500000 | 0.0355903 | 1.0000000 | 1.0800000 |
|---|-----------|-----------|-----------|-----------|

---

Unique Subject Identifier=2617000000-0299

Assay variable : PTINR\_VAL1 PT-INR Value

N Mean Standard Deviation Minimum Maximum

---

|   |           |           |           |           |
|---|-----------|-----------|-----------|-----------|
| 4 | 1.8250000 | 0.0310913 | 1.8000000 | 1.8700000 |
|---|-----------|-----------|-----------|-----------|

---

Laboratory tests at the time of obtaining Table 2-6 consent, according to the presence or absence of proton-pump inhibitors

Unique Subject Identifier=2617000000-0303

MEANS Procedure

Assay variable : PTINR\_VAL1 PT-INR Value

N Mean Standard Deviation Minimum Maximum

---

|   |           |           |           |           |
|---|-----------|-----------|-----------|-----------|
| 5 | 1.9240000 | 0.1913897 | 1.7200000 | 2.1700000 |
|---|-----------|-----------|-----------|-----------|

---

Unique Subject Identifier=2617000000-0306

Assay variable : PTINR\_VAL1 PT-INR Value

N Mean Standard Deviation Minimum Maximum

---

|   |           |           |           |           |
|---|-----------|-----------|-----------|-----------|
| 4 | 1.6600000 | 0.1957890 | 1.4000000 | 1.8300000 |
|---|-----------|-----------|-----------|-----------|

---

Unique Subject Identifier=2617000000-0308

Assay variable : PTINR\_VAL1 PT-INR Value

N Mean Standard Deviation Minimum Maximum

---

|   |           |           |           |           |
|---|-----------|-----------|-----------|-----------|
| 3 | 1.7733333 | 0.1457166 | 1.6700000 | 1.9400000 |
|---|-----------|-----------|-----------|-----------|

---

Unique Subject Identifier=2617000000-0314

Assay variable : PTINR\_VAL1 PT-INR Value

N Mean Standard Deviation Minimum Maximum

---

|   |           |           |           |           |
|---|-----------|-----------|-----------|-----------|
| 3 | 1.5533333 | 0.0450925 | 1.5100000 | 1.6000000 |
|---|-----------|-----------|-----------|-----------|

---

Laboratory tests at the time of obtaining Table 2-6 consent, according to the presence or absence of proton-pump inhibitors

Unique Subject Identifier=2617000000-0320

MEANS Procedure

Assay variable : PTINR\_VAL1 PT-INR Value

N Mean Standard Deviation Minimum Maximum

---

|   |           |           |           |           |
|---|-----------|-----------|-----------|-----------|
| 4 | 2.1000000 | 0.7140028 | 1.5200000 | 3.0200000 |
|---|-----------|-----------|-----------|-----------|

---

Unique Subject Identifier=2617000000-0324

Assay variable : PTINR\_VAL1 PT-INR Value

N Mean Standard Deviation Minimum Maximum

---

|   |           |           |           |           |
|---|-----------|-----------|-----------|-----------|
| 3 | 2.3500000 | 0.4386342 | 1.8700000 | 2.7300000 |
|---|-----------|-----------|-----------|-----------|

---

Unique Subject Identifier=2617000000-0331

Assay variable : PTINR\_VAL1 PT-INR Value

N Mean Standard Deviation Minimum Maximum

---

|   |           |           |           |           |
|---|-----------|-----------|-----------|-----------|
| 2 | 2.1300000 | 0.0707107 | 2.0800000 | 2.1800000 |
|---|-----------|-----------|-----------|-----------|

---

Unique Subject Identifier=2617000000-0340

Assay variable : PTINR\_VAL1 PT-INR Value

N Mean Standard Deviation Minimum Maximum

---

|   |           |  |           |           |
|---|-----------|--|-----------|-----------|
| 1 | 1.3300000 |  | 1.3300000 | 1.3300000 |
|---|-----------|--|-----------|-----------|

---

Laboratory tests at the time of obtaining Table 2-6 consent, according to the presence or absence of proton-pump inhibitors

Unique Subject Identifier=2617000000-0341

MEANS Procedure

Assay variable : PTINR\_VAL1 PT-INR Value

N Mean Standard Deviation Minimum Maximum

---

|   |          |           |          |          |
|---|----------|-----------|----------|----------|
| 3 | 2.410000 | 0.7856208 | 1.730000 | 3.270000 |
|---|----------|-----------|----------|----------|

---

Unique Subject Identifier=2617000000-0348

Assay variable : PTINR\_VAL1 PT-INR Value

N Mean Standard Deviation Minimum Maximum

---

|   |          |           |          |          |
|---|----------|-----------|----------|----------|
| 4 | 1.910000 | 0.9333452 | 1.140000 | 3.190000 |
|---|----------|-----------|----------|----------|

---

Unique Subject Identifier=2617000000-0350

Assay variable : PTINR\_VAL1 PT-INR Value

N Mean Standard Deviation Minimum Maximum

---

|   |          |           |          |          |
|---|----------|-----------|----------|----------|
| 6 | 1.898333 | 0.4334243 | 1.170000 | 2.350000 |
|---|----------|-----------|----------|----------|

---

Unique Subject Identifier=2617000000-0358



Assay variable : PTINR\_VAL1 PT-INR Value

N Mean Standard Deviation Minimum Maximum

---

|   |          |          |          |          |
|---|----------|----------|----------|----------|
| 4 | 1.960000 | 0.308653 | 1.640000 | 2.370000 |
|---|----------|----------|----------|----------|

---

Laboratory tests at the time of obtaining Table 2-6 consent, according to the presence or absence of proton-pump inhibitors

Unique Subject Identifier=2619011010-0032

MEANS Procedure

Assay variable : PTINR\_VAL1 PT-INR Value

N Mean Standard Deviation Minimum Maximum

---

|   |           |           |           |           |
|---|-----------|-----------|-----------|-----------|
| 5 | 2.1040000 | 0.2884961 | 1.7700000 | 2.4200000 |
|---|-----------|-----------|-----------|-----------|

---

Unique Subject Identifier=2619011010-0037

Assay variable : PTINR\_VAL1 PT-INR Value

N Mean Standard Deviation Minimum Maximum

---

|   |           |           |           |           |
|---|-----------|-----------|-----------|-----------|
| 6 | 1.8666667 | 0.2574231 | 1.5100000 | 2.2800000 |
|---|-----------|-----------|-----------|-----------|

---

Unique Subject Identifier=2619011010-0039

Assay variable : PTINR\_VAL1 PT-INR Value

N Mean Standard Deviation Minimum Maximum

---

|   |           |           |           |           |
|---|-----------|-----------|-----------|-----------|
| 3 | 2.4033333 | 0.2411086 | 2.1500000 | 2.6300000 |
|---|-----------|-----------|-----------|-----------|

---

Unique Subject Identifier=2619011010-0042

Assay variable : PTINR\_VAL1 PT-INR Value

N Mean Standard Deviation Minimum Maximum

---

|   |           |           |           |           |
|---|-----------|-----------|-----------|-----------|
| 6 | 1.7050000 | 0.2647074 | 1.5500000 | 2.2400000 |
|---|-----------|-----------|-----------|-----------|

---

Laboratory tests at the time of obtaining Table 2-6 consent, according to the presence or absence of proton-pump inhibitors

Unique Subject Identifier=2619011010-0045

MEANS Procedure

Assay variable : PTINR\_VAL1 PT-INR Value

N Mean Standard Deviation Minimum Maximum

---

|   |          |           |          |          |
|---|----------|-----------|----------|----------|
| 3 | 2.140000 | 0.8944831 | 1.330000 | 3.100000 |
|---|----------|-----------|----------|----------|

---

Unique Subject Identifier=2619011010-0047

Assay variable : PTINR\_VAL1 PT-INR Value

N Mean Standard Deviation Minimum Maximum

---

|   |           |           |          |          |
|---|-----------|-----------|----------|----------|
| 6 | 1.5916667 | 0.5448455 | 1.090000 | 2.320000 |
|---|-----------|-----------|----------|----------|

---

Unique Subject Identifier=2619011010-0048

Assay variable : PTINR\_VAL1 PT-INR Value

N Mean Standard Deviation Minimum Maximum

---

|   |          |           |          |          |
|---|----------|-----------|----------|----------|
| 4 | 1.962500 | 0.5040751 | 1.350000 | 2.570000 |
|---|----------|-----------|----------|----------|

---

Unique Subject Identifier=2621011111-0013

Assay variable : PTINR\_VAL1 PT-INR Value

N Mean Standard Deviation Minimum Maximum

---

|   |          |          |          |          |
|---|----------|----------|----------|----------|
| 4 | 1.810000 | 0.293031 | 1.510000 | 2.150000 |
|---|----------|----------|----------|----------|

---

Laboratory tests at the time of obtaining Table 2-6 consent, according to the presence or absence of proton-pump inhibitors

Unique Subject Identifier=2621011111-0019

MEANS Procedure

Assay variable : PTINR\_VAL1 PT-INR Value

N Mean Standard Deviation Minimum Maximum

---

|   |           |           |           |           |
|---|-----------|-----------|-----------|-----------|
| 5 | 2.0720000 | 0.7127903 | 1.3500000 | 3.2700000 |
|---|-----------|-----------|-----------|-----------|

---

Unique Subject Identifier=2623000000-0005

Assay variable : PTINR\_VAL1 PT-INR Value

N Mean Standard Deviation Minimum Maximum

---

|   |           |           |           |           |
|---|-----------|-----------|-----------|-----------|
| 3 | 2.0366667 | 0.1159023 | 1.9300000 | 2.1600000 |
|---|-----------|-----------|-----------|-----------|

---

Unique Subject Identifier=2623000000-0006

Assay variable : PTINR\_VAL1 PT-INR Value

N Mean Standard Deviation Minimum Maximum

---

|   |           |           |           |           |
|---|-----------|-----------|-----------|-----------|
| 4 | 1.5675000 | 0.1682013 | 1.3500000 | 1.7100000 |
|---|-----------|-----------|-----------|-----------|

---

Unique Subject Identifier=2623000000-0008

Assay variable : PTINR\_VAL1 PT-INR Value

N Mean Standard Deviation Minimum Maximum

---

|   |           |           |           |           |
|---|-----------|-----------|-----------|-----------|
| 6 | 2.0266667 | 0.2779688 | 1.8200000 | 2.5800000 |
|---|-----------|-----------|-----------|-----------|

---

Laboratory tests at the time of obtaining Table 2-6 consent, according to the presence or absence of proton-pump inhibitors

Unique Subject Identifier=2623000000-0017

MEANS Procedure

Assay variable : PTINR\_VAL1 PT-INR Value

| N | Mean     | Standard Deviation | Minimum  | Maximum  |
|---|----------|--------------------|----------|----------|
| 3 | 1.600000 | 0.0529150          | 1.560000 | 1.660000 |

Unique Subject Identifier=2623000000-0025

Assay variable : PTINR\_VAL1 PT-INR Value

| N | Mean     | Standard Deviation | Minimum  | Maximum  |
|---|----------|--------------------|----------|----------|
| 4 | 2.190000 | 1.1400877          | 1.130000 | 3.320000 |

Unique Subject Identifier=2623000000-0030

Assay variable : PTINR\_VAL1 PT-INR Value

| N | Mean     | Standard Deviation | Minimum  | Maximum  |
|---|----------|--------------------|----------|----------|
| 4 | 2.040000 | 0.2563851          | 1.730000 | 2.270000 |

Unique Subject Identifier=2623000000-0031



Assay variable : PTINR\_VAL1 PT-INR Value

N Mean Standard Deviation Minimum Maximum

---

|   |           |           |           |           |
|---|-----------|-----------|-----------|-----------|
| 3 | 2.0033333 | 0.4675824 | 1.4800000 | 2.3800000 |
|---|-----------|-----------|-----------|-----------|

---

Laboratory tests at the time of obtaining Table 2-6 consent, according to the presence or absence of proton-pump inhibitors

Unique Subject Identifier=2623000000-0037

MEANS Procedure

Assay variable : PTINR\_VAL1 PT-INR Value

N Mean Standard Deviation Minimum Maximum

---

|   |           |           |           |           |
|---|-----------|-----------|-----------|-----------|
| 3 | 2.0633333 | 0.1418920 | 1.9100000 | 2.1900000 |
|---|-----------|-----------|-----------|-----------|

---

Unique Subject Identifier=2623000000-0039

Assay variable : PTINR\_VAL1 PT-INR Value

N Mean Standard Deviation Minimum Maximum

---

|   |           |           |           |           |
|---|-----------|-----------|-----------|-----------|
| 3 | 2.0533333 | 0.2324507 | 1.7900000 | 2.2300000 |
|---|-----------|-----------|-----------|-----------|

---

Unique Subject Identifier=2623000000-0040

Assay variable : PTINR\_VAL1 PT-INR Value

N Mean Standard Deviation Minimum Maximum

---

|   |           |           |           |           |
|---|-----------|-----------|-----------|-----------|
| 4 | 1.6875000 | 0.4157223 | 1.2700000 | 2.0500000 |
|---|-----------|-----------|-----------|-----------|

---

Unique Subject Identifier=2623000000-0043

Assay variable : PTINR\_VAL1 PT-INR Value

N Mean Standard Deviation Minimum Maximum

---

|   |          |           |          |          |
|---|----------|-----------|----------|----------|
| 3 | 1.820000 | 0.3051229 | 1.480000 | 2.070000 |
|---|----------|-----------|----------|----------|

---

Laboratory tests at the time of obtaining Table 2-6 consent, according to the presence or absence of proton-pump inhibitors

Unique Subject Identifier=2623000000-0049

MEANS Procedure

Assay variable : PTINR\_VAL1 PT-INR Value

N Mean Standard Deviation Minimum Maximum

---

|   |          |           |          |          |
|---|----------|-----------|----------|----------|
| 3 | 2.260000 | 0.1311488 | 2.140000 | 2.400000 |
|---|----------|-----------|----------|----------|

---

Unique Subject Identifier=2623000000-0062

Assay variable : PTINR\_VAL1 PT-INR Value

N Mean Standard Deviation Minimum Maximum

---

|   |          |           |          |          |
|---|----------|-----------|----------|----------|
| 4 | 1.757500 | 0.4713368 | 1.260000 | 2.340000 |
|---|----------|-----------|----------|----------|

---

Unique Subject Identifier=2623000000-0080

Assay variable : PTINR\_VAL1 PT-INR Value

N Mean Standard Deviation Minimum Maximum

---

|   |          |           |          |          |
|---|----------|-----------|----------|----------|
| 3 | 1.890000 | 0.1997498 | 1.720000 | 2.110000 |
|---|----------|-----------|----------|----------|

---

Unique Subject Identifier=2623000000-0081

Assay variable : PTINR\_VAL1 PT-INR Value

N Mean Standard Deviation Minimum Maximum

---

|   |           |           |           |           |
|---|-----------|-----------|-----------|-----------|
| 6 | 2.1366667 | 0.2517671 | 1.7700000 | 2.4600000 |
|---|-----------|-----------|-----------|-----------|

---

Laboratory tests at the time of obtaining Table 2-6 consent, according to the presence or absence of proton-pump inhibitors

Unique Subject Identifier=2623000000-0087

MEANS Procedure

Assay variable : PTINR\_VAL1 PT-INR Value

| N | Mean      | Standard Deviation | Minimum   | Maximum   |
|---|-----------|--------------------|-----------|-----------|
| 2 | 2.5300000 | 0.2545584          | 2.3500000 | 2.7100000 |

Unique Subject Identifier=2626011111-0010

Assay variable : PTINR\_VAL1 PT-INR Value

| N | Mean      | Standard Deviation | Minimum   | Maximum   |
|---|-----------|--------------------|-----------|-----------|
| 6 | 1.6633333 | 0.2174090          | 1.3400000 | 2.0200000 |

Unique Subject Identifier=2626011111-0017

Assay variable : PTINR\_VAL1 PT-INR Value

| N | Mean      | Standard Deviation | Minimum   | Maximum   |
|---|-----------|--------------------|-----------|-----------|
| 3 | 1.8466667 | 0.4495924          | 1.4600000 | 2.3400000 |

Unique Subject Identifier=2626011111-0026

Assay variable : PTINR\_VAL1 PT-INR Value

N Mean Standard Deviation Minimum Maximum

---

|   |           |           |           |           |
|---|-----------|-----------|-----------|-----------|
| 4 | 1.9150000 | 0.5519964 | 1.5100000 | 2.7200000 |
|---|-----------|-----------|-----------|-----------|

---

Laboratory tests at the time of obtaining Table 2-6 consent, according to the presence or absence of proton-pump inhibitors

Unique Subject Identifier=2626011111-0037

MEANS Procedure

Assay variable : PTINR\_VAL1 PT-INR Value

| N | Mean      | Standard Deviation | Minimum   | Maximum   |
|---|-----------|--------------------|-----------|-----------|
| 4 | 2.1725000 | 0.6584008          | 1.2700000 | 2.8400000 |

Unique Subject Identifier=2626011111-0038

Assay variable : PTINR\_VAL1 PT-INR Value

| N | Mean      | Standard Deviation | Minimum   | Maximum   |
|---|-----------|--------------------|-----------|-----------|
| 5 | 1.8500000 | 0.1440486          | 1.6900000 | 1.9800000 |

Unique Subject Identifier=2626011111-0044

Assay variable : PTINR\_VAL1 PT-INR Value

| N | Mean      | Standard Deviation | Minimum   | Maximum   |
|---|-----------|--------------------|-----------|-----------|
| 6 | 1.5550000 | 0.1405347          | 1.2900000 | 1.7100000 |

Unique Subject Identifier=2626011111-0046



Assay variable : PTINR\_VAL1 PT-INR Value

N Mean Standard Deviation Minimum Maximum

---

|   |           |           |           |           |
|---|-----------|-----------|-----------|-----------|
| 3 | 1.7933333 | 0.0907377 | 1.7100000 | 1.8900000 |
|---|-----------|-----------|-----------|-----------|

---

Laboratory tests at the time of obtaining Table 2-6 consent, according to the presence or absence of proton-pump inhibitors

Unique Subject Identifier=2626011111-0048

MEANS Procedure

Assay variable : PTINR\_VAL1 PT-INR Value

N Mean Standard Deviation Minimum Maximum

---

|   |           |           |           |           |
|---|-----------|-----------|-----------|-----------|
| 4 | 2.0125000 | 0.1541374 | 1.8500000 | 2.2200000 |
|---|-----------|-----------|-----------|-----------|

---

Unique Subject Identifier=2627011111-0010

Assay variable : PTINR\_VAL1 PT-INR Value

N Mean Standard Deviation Minimum Maximum

---

|   |           |           |           |           |
|---|-----------|-----------|-----------|-----------|
| 4 | 1.9200000 | 0.1009950 | 1.8500000 | 2.0700000 |
|---|-----------|-----------|-----------|-----------|

---

Unique Subject Identifier=2627011111-0012

Assay variable : PTINR\_VAL1 PT-INR Value

N Mean Standard Deviation Minimum Maximum

---

|   |           |           |           |           |
|---|-----------|-----------|-----------|-----------|
| 4 | 2.0675000 | 0.3966001 | 1.7300000 | 2.5800000 |
|---|-----------|-----------|-----------|-----------|

---

Unique Subject Identifier=2628011111-0001

Assay variable : PTINR\_VAL1 PT-INR Value

N Mean Standard Deviation Minimum Maximum

---

|   |           |           |           |           |
|---|-----------|-----------|-----------|-----------|
| 5 | 1.5540000 | 0.2530415 | 1.1900000 | 1.8400000 |
|---|-----------|-----------|-----------|-----------|

---

Laboratory tests at the time of obtaining Table 2-6 consent, according to the presence or absence of proton-pump inhibitors

Unique Subject Identifier=2628011111-0003

MEANS Procedure

Assay variable : PTINR\_VAL1 PT-INR Value

N Mean Standard Deviation Minimum Maximum

---

|   |           |           |           |           |
|---|-----------|-----------|-----------|-----------|
| 4 | 1.7775000 | 0.2260347 | 1.4400000 | 1.9200000 |
|---|-----------|-----------|-----------|-----------|

---

Unique Subject Identifier=2628011111-0009

Assay variable : PTINR\_VAL1 PT-INR Value

N Mean Standard Deviation Minimum Maximum

---

|   |           |           |           |           |
|---|-----------|-----------|-----------|-----------|
| 2 | 1.4950000 | 0.3040559 | 1.2800000 | 1.7100000 |
|---|-----------|-----------|-----------|-----------|

---

Unique Subject Identifier=2628011111-0012

Assay variable : PTINR\_VAL1 PT-INR Value

N Mean Standard Deviation Minimum Maximum

---

|   |           |           |           |           |
|---|-----------|-----------|-----------|-----------|
| 4 | 2.0325000 | 0.3850000 | 1.6400000 | 2.4200000 |
|---|-----------|-----------|-----------|-----------|

---

Unique Subject Identifier=2628011111-0016

Assay variable : PTINR\_VAL1 PT-INR Value

N Mean Standard Deviation Minimum Maximum

---

|   |           |           |           |           |
|---|-----------|-----------|-----------|-----------|
| 4 | 2.3575000 | 0.6473214 | 1.9100000 | 3.3100000 |
|---|-----------|-----------|-----------|-----------|

---

Laboratory tests at the time of obtaining Table 2-6 consent, according to the presence or absence of proton-pump inhibitors

Unique Subject Identifier=2628011111-0024

MEANS Procedure

Assay variable : PTINR\_VAL1 PT-INR Value

N Mean Standard Deviation Minimum Maximum

---

|   |           |           |           |           |
|---|-----------|-----------|-----------|-----------|
| 2 | 2.3600000 | 0.0848528 | 2.3000000 | 2.4200000 |
|---|-----------|-----------|-----------|-----------|

---

Unique Subject Identifier=2628011111-0052

Assay variable : PTINR\_VAL1 PT-INR Value

N Mean Standard Deviation Minimum Maximum

---

|   |           |           |           |           |
|---|-----------|-----------|-----------|-----------|
| 3 | 1.6333333 | 0.3000556 | 1.3300000 | 1.9300000 |
|---|-----------|-----------|-----------|-----------|

---

Unique Subject Identifier=2628011111-0065

Assay variable : PTINR\_VAL1 PT-INR Value

N Mean Standard Deviation Minimum Maximum

---

|   |           |           |           |           |
|---|-----------|-----------|-----------|-----------|
| 3 | 2.6666667 | 0.7023769 | 2.0000000 | 3.4000000 |
|---|-----------|-----------|-----------|-----------|

---

Unique Subject Identifier=2628011111-0067

Assay variable : PTINR\_VAL1 PT-INR Value

N Mean Standard Deviation Minimum Maximum

---

|   |           |           |           |           |
|---|-----------|-----------|-----------|-----------|
| 3 | 2.3866667 | 0.3300505 | 2.0600000 | 2.7200000 |
|---|-----------|-----------|-----------|-----------|

---

Laboratory tests at the time of obtaining Table 2-6 consent, according to the presence or absence of proton-pump inhibitors

Unique Subject Identifier=2630000000-0005

MEANS Procedure

Assay variable : PTINR\_VAL1 PT-INR Value

N Mean Standard Deviation Minimum Maximum

---

|   |          |           |          |          |
|---|----------|-----------|----------|----------|
| 2 | 1.500000 | 0.1414214 | 1.400000 | 1.600000 |
|---|----------|-----------|----------|----------|

---

Unique Subject Identifier=2630000000-0006

Assay variable : PTINR\_VAL1 PT-INR Value

N Mean Standard Deviation Minimum Maximum

---

|   |          |           |          |          |
|---|----------|-----------|----------|----------|
| 5 | 1.960000 | 0.3286335 | 1.600000 | 2.400000 |
|---|----------|-----------|----------|----------|

---

Unique Subject Identifier=2630000000-0011

Assay variable : PTINR\_VAL1 PT-INR Value

N Mean Standard Deviation Minimum Maximum

---

|   |          |  |          |          |
|---|----------|--|----------|----------|
| 1 | 2.400000 |  | 2.400000 | 2.400000 |
|---|----------|--|----------|----------|

---

Unique Subject Identifier=2630000000-0012



Assay variable : PTINR\_VAL1 PT-INR Value

N Mean Standard Deviation Minimum Maximum

---

|   |           |           |           |           |
|---|-----------|-----------|-----------|-----------|
| 3 | 1.7333333 | 0.3214550 | 1.5000000 | 2.1000000 |
|---|-----------|-----------|-----------|-----------|

---

Laboratory tests at the time of obtaining Table 2-6 consent, according to the presence or absence of proton-pump inhibitors

Unique Subject Identifier=2630000000-0013

MEANS Procedure

Assay variable : PTINR\_VAL1 PT-INR Value

N Mean Standard Deviation Minimum Maximum

---

|   |           |           |           |           |
|---|-----------|-----------|-----------|-----------|
| 2 | 2.0500000 | 0.0707107 | 2.0000000 | 2.1000000 |
|---|-----------|-----------|-----------|-----------|

---

Unique Subject Identifier=2630000000-0014

Assay variable : PTINR\_VAL1 PT-INR Value

N Mean Standard Deviation Minimum Maximum

---

|   |           |           |           |           |
|---|-----------|-----------|-----------|-----------|
| 3 | 1.4666667 | 0.2516611 | 1.2000000 | 1.7000000 |
|---|-----------|-----------|-----------|-----------|

---

Unique Subject Identifier=2630000000-0019

Assay variable : PTINR\_VAL1 PT-INR Value

N Mean Standard Deviation Minimum Maximum

---

|   |           |           |           |           |
|---|-----------|-----------|-----------|-----------|
| 2 | 2.2000000 | 0.2828427 | 2.0000000 | 2.4000000 |
|---|-----------|-----------|-----------|-----------|

---

Unique Subject Identifier=2630000000-0020

Assay variable : PTINR\_VAL1 PT-INR Value

N Mean Standard Deviation Minimum Maximum

---

|   |           |  |           |           |
|---|-----------|--|-----------|-----------|
| 1 | 1.9000000 |  | 1.9000000 | 1.9000000 |
|---|-----------|--|-----------|-----------|

---

Laboratory tests at the time of obtaining Table 2-6 consent, according to the presence or absence of proton-pump inhibitors

Unique Subject Identifier=2630000000-0021

MEANS Procedure

Assay variable : PTINR\_VAL1 PT-INR Value

N Mean Standard Deviation Minimum Maximum

---

|   |           |           |           |           |
|---|-----------|-----------|-----------|-----------|
| 5 | 1.9800000 | 0.6685806 | 1.5000000 | 3.1000000 |
|---|-----------|-----------|-----------|-----------|

---

Unique Subject Identifier=2630000000-0022

Assay variable : PTINR\_VAL1 PT-INR Value

N Mean Standard Deviation Minimum Maximum

---

|   |           |           |           |           |
|---|-----------|-----------|-----------|-----------|
| 2 | 2.0500000 | 0.7778175 | 1.5000000 | 2.6000000 |
|---|-----------|-----------|-----------|-----------|

---

Unique Subject Identifier=2630000000-0027

Assay variable : PTINR\_VAL1 PT-INR Value

N Mean Standard Deviation Minimum Maximum

---

|   |           |  |           |           |
|---|-----------|--|-----------|-----------|
| 1 | 1.7000000 |  | 1.7000000 | 1.7000000 |
|---|-----------|--|-----------|-----------|

---

Unique Subject Identifier=2630000000-0038

Assay variable : PTINR\_VAL1 PT-INR Value

N Mean Standard Deviation Minimum Maximum

---

|   |          |          |          |          |
|---|----------|----------|----------|----------|
| 5 | 1.120000 | 0.083666 | 1.000000 | 1.200000 |
|---|----------|----------|----------|----------|

---

Laboratory tests at the time of obtaining Table 2-6 consent, according to the presence or absence of proton-pump inhibitors

Unique Subject Identifier=2630000000-0040

MEANS Procedure

Assay variable : PTINR\_VAL1 PT-INR Value

N Mean Standard Deviation Minimum Maximum

---

|   |           |           |           |           |
|---|-----------|-----------|-----------|-----------|
| 4 | 1.8500000 | 0.2081666 | 1.6000000 | 2.1000000 |
|---|-----------|-----------|-----------|-----------|

---

Unique Subject Identifier=2634000000-0004

Assay variable : PTINR\_VAL1 PT-INR Value

N Mean Standard Deviation Minimum Maximum

---

|   |           |           |           |           |
|---|-----------|-----------|-----------|-----------|
| 3 | 1.6633333 | 0.5024274 | 1.3200000 | 2.2400000 |
|---|-----------|-----------|-----------|-----------|

---

Unique Subject Identifier=2634000000-0008

Assay variable : PTINR\_VAL1 PT-INR Value

N Mean Standard Deviation Minimum Maximum

---

|   |           |           |           |           |
|---|-----------|-----------|-----------|-----------|
| 3 | 1.8700000 | 0.2628688 | 1.6800000 | 2.1700000 |
|---|-----------|-----------|-----------|-----------|

---

Unique Subject Identifier=2634000000-0010

Assay variable : PTINR\_VAL1 PT-INR Value

N Mean Standard Deviation Minimum Maximum

---

|   |           |           |           |           |
|---|-----------|-----------|-----------|-----------|
| 4 | 1.7850000 | 0.1744515 | 1.5400000 | 1.9400000 |
|---|-----------|-----------|-----------|-----------|

---

Laboratory tests at the time of obtaining Table 2-6 consent, according to the presence or absence of proton-pump inhibitors

Unique Subject Identifier=2634000000-0017

MEANS Procedure

Assay variable : PTINR\_VAL1 PT-INR Value

N Mean Standard Deviation Minimum Maximum

---

|   |           |           |           |           |
|---|-----------|-----------|-----------|-----------|
| 3 | 2.0966667 | 0.1401190 | 1.9600000 | 2.2400000 |
|---|-----------|-----------|-----------|-----------|

---

Unique Subject Identifier=2634000000-0019

Assay variable : PTINR\_VAL1 PT-INR Value

N Mean Standard Deviation Minimum Maximum

---

|   |           |           |           |           |
|---|-----------|-----------|-----------|-----------|
| 3 | 2.5266667 | 0.7311863 | 2.0700000 | 3.3700000 |
|---|-----------|-----------|-----------|-----------|

---

Unique Subject Identifier=2634000000-0020

Assay variable : PTINR\_VAL1 PT-INR Value

N Mean Standard Deviation Minimum Maximum

---

|   |           |           |           |           |
|---|-----------|-----------|-----------|-----------|
| 4 | 2.2050000 | 0.5768015 | 1.6300000 | 3.0000000 |
|---|-----------|-----------|-----------|-----------|

---

Unique Subject Identifier=2634000000-0021



Assay variable : PTINR\_VAL1 PT-INR Value

N Mean Standard Deviation Minimum Maximum

---

|   |           |           |           |           |
|---|-----------|-----------|-----------|-----------|
| 6 | 1.5566667 | 0.0674290 | 1.4900000 | 1.6400000 |
|---|-----------|-----------|-----------|-----------|

---

Laboratory tests at the time of obtaining Table 2-6 consent, according to the presence or absence of proton-pump inhibitors

Unique Subject Identifier=2636011000-0016

MEANS Procedure

Assay variable : PTINR\_VAL1 PT-INR Value

N Mean Standard Deviation Minimum Maximum

---

|   |           |           |           |           |
|---|-----------|-----------|-----------|-----------|
| 4 | 1.9600000 | 0.2258318 | 1.7700000 | 2.2800000 |
|---|-----------|-----------|-----------|-----------|

---

Unique Subject Identifier=2636011000-0017

Assay variable : PTINR\_VAL1 PT-INR Value

N Mean Standard Deviation Minimum Maximum

---

|   |           |           |           |           |
|---|-----------|-----------|-----------|-----------|
| 4 | 1.6250000 | 0.4017877 | 1.3200000 | 2.2000000 |
|---|-----------|-----------|-----------|-----------|

---

Unique Subject Identifier=2638000000-0029

Assay variable : PTINR\_VAL1 PT-INR Value

N Mean Standard Deviation Minimum Maximum

---

|   |           |  |           |           |
|---|-----------|--|-----------|-----------|
| 1 | 2.1100000 |  | 2.1100000 | 2.1100000 |
|---|-----------|--|-----------|-----------|

---

Unique Subject Identifier=2640011000-0007

Assay variable : PTINR\_VAL1 PT-INR Value

N Mean Standard Deviation Minimum Maximum

---

|   |           |           |           |           |
|---|-----------|-----------|-----------|-----------|
| 5 | 1.7860000 | 0.1795272 | 1.6100000 | 1.9800000 |
|---|-----------|-----------|-----------|-----------|

---

Laboratory tests at the time of obtaining Table 2-6 consent, according to the presence or absence of proton-pump inhibitors

Unique Subject Identifier=2640011000-0008

MEANS Procedure

Assay variable : PTINR\_VAL1 PT-INR Value

N Mean Standard Deviation Minimum Maximum

---

|   |           |           |           |           |
|---|-----------|-----------|-----------|-----------|
| 6 | 2.1316667 | 0.5223568 | 1.6900000 | 2.9500000 |
|---|-----------|-----------|-----------|-----------|

---

Unique Subject Identifier=2640011000-0010

Assay variable : PTINR\_VAL1 PT-INR Value

N Mean Standard Deviation Minimum Maximum

---

|   |           |           |           |           |
|---|-----------|-----------|-----------|-----------|
| 6 | 1.8850000 | 0.3490415 | 1.3900000 | 2.4500000 |
|---|-----------|-----------|-----------|-----------|

---

Unique Subject Identifier=2641010000-0003

Assay variable : PTINR\_VAL1 PT-INR Value

N Mean Standard Deviation Minimum Maximum

---

|   |           |           |           |           |
|---|-----------|-----------|-----------|-----------|
| 3 | 1.9500000 | 0.3404409 | 1.6000000 | 2.2800000 |
|---|-----------|-----------|-----------|-----------|

---

Unique Subject Identifier=2641010000-0005

Assay variable : PTINR\_VAL1 PT-INR Value

N Mean Standard Deviation Minimum Maximum

---

|   |           |           |           |           |
|---|-----------|-----------|-----------|-----------|
| 5 | 2.3960000 | 0.5628321 | 1.9300000 | 3.3700000 |
|---|-----------|-----------|-----------|-----------|

---

Laboratory tests at the time of obtaining Table 2-6 consent, according to the presence or absence of proton-pump inhibitors

Unique Subject Identifier=2641010000-0007

MEANS Procedure

Assay variable : PTINR\_VAL1 PT-INR Value

N Mean Standard Deviation Minimum Maximum

---

|   |           |           |           |           |
|---|-----------|-----------|-----------|-----------|
| 3 | 2.2233333 | 0.2345918 | 2.0200000 | 2.4800000 |
|---|-----------|-----------|-----------|-----------|

---

Unique Subject Identifier=2641010000-0010

Assay variable : PTINR\_VAL1 PT-INR Value

N Mean Standard Deviation Minimum Maximum

---

|   |           |           |           |           |
|---|-----------|-----------|-----------|-----------|
| 4 | 1.9875000 | 0.5950560 | 1.1300000 | 2.4000000 |
|---|-----------|-----------|-----------|-----------|

---

Unique Subject Identifier=2641010000-0012

Assay variable : PTINR\_VAL1 PT-INR Value

N Mean Standard Deviation Minimum Maximum

---

|   |           |           |           |           |
|---|-----------|-----------|-----------|-----------|
| 3 | 1.8066667 | 0.2538372 | 1.6000000 | 2.0900000 |
|---|-----------|-----------|-----------|-----------|

---

Unique Subject Identifier=2655000000-0008

Assay variable : PTINR\_VAL1 PT-INR Value

N Mean Standard Deviation Minimum Maximum

---

|   |           |  |           |           |
|---|-----------|--|-----------|-----------|
| 1 | 3.7100000 |  | 3.7100000 | 3.7100000 |
|---|-----------|--|-----------|-----------|

---

Laboratory tests at the time of obtaining Table 2-6 consent, according to the presence or absence of proton-pump inhibitors

Unique Subject Identifier=2656011000-0001

MEANS Procedure

Assay variable : PTINR\_VAL1 PT-INR Value

N Mean Standard Deviation Minimum Maximum

---

|   |           |           |           |           |
|---|-----------|-----------|-----------|-----------|
| 3 | 1.9033333 | 0.2025669 | 1.7400000 | 2.1300000 |
|---|-----------|-----------|-----------|-----------|

---

Unique Subject Identifier=2656011000-0007

Assay variable : PTINR\_VAL1 PT-INR Value

N Mean Standard Deviation Minimum Maximum

---

|   |           |           |           |           |
|---|-----------|-----------|-----------|-----------|
| 3 | 2.3766667 | 0.4518112 | 1.9500000 | 2.8500000 |
|---|-----------|-----------|-----------|-----------|

---

Unique Subject Identifier=2656011000-0008

Assay variable : PTINR\_VAL1 PT-INR Value

N Mean Standard Deviation Minimum Maximum

---

|   |           |           |           |           |
|---|-----------|-----------|-----------|-----------|
| 3 | 1.9600000 | 0.3477068 | 1.7300000 | 2.3600000 |
|---|-----------|-----------|-----------|-----------|

---

Unique Subject Identifier=2660011111-0010



Assay variable : PTINR\_VAL1 PT-INR Value

N Mean Standard Deviation Minimum Maximum

---

|   |          |  |          |          |
|---|----------|--|----------|----------|
| 1 | 1.500000 |  | 1.500000 | 1.500000 |
|---|----------|--|----------|----------|

---

Laboratory tests at the time of obtaining Table 2-6 consent, according to the presence or absence of proton-pump inhibitors

Unique Subject Identifier=2662011111-0001

MEANS Procedure

Assay variable : PTINR\_VAL1 PT-INR Value

N Mean Standard Deviation Minimum Maximum

---

|   |           |           |           |           |
|---|-----------|-----------|-----------|-----------|
| 6 | 1.7166667 | 0.3371449 | 1.3000000 | 2.1000000 |
|---|-----------|-----------|-----------|-----------|

---

Unique Subject Identifier=2662011111-0014

Assay variable : PTINR\_VAL1 PT-INR Value

N Mean Standard Deviation Minimum Maximum

---

|   |           |           |           |           |
|---|-----------|-----------|-----------|-----------|
| 6 | 2.2333333 | 0.4273952 | 1.5000000 | 2.7000000 |
|---|-----------|-----------|-----------|-----------|

---

Unique Subject Identifier=2662011111-0018

Assay variable : PTINR\_VAL1 PT-INR Value

N Mean Standard Deviation Minimum Maximum

---

|   |           |           |           |           |
|---|-----------|-----------|-----------|-----------|
| 6 | 2.1500000 | 0.5958188 | 1.5000000 | 3.2000000 |
|---|-----------|-----------|-----------|-----------|

---

Unique Subject Identifier=2662011111-0026

Assay variable : PTINR\_VAL1 PT-INR Value

N Mean Standard Deviation Minimum Maximum

---

|   |          |           |          |          |
|---|----------|-----------|----------|----------|
| 6 | 1.950000 | 1.3187115 | 1.100000 | 4.600000 |
|---|----------|-----------|----------|----------|

---

Laboratory tests at the time of obtaining Table 2-6 consent, according to the presence or absence of proton-pump inhibitors

Unique Subject Identifier=2662011111-0035

MEANS Procedure

Assay variable : PTINR\_VAL1 PT-INR Value

N Mean Standard Deviation Minimum Maximum

---

|   |           |           |           |           |
|---|-----------|-----------|-----------|-----------|
| 5 | 2.0800000 | 0.2167948 | 1.9000000 | 2.4000000 |
|---|-----------|-----------|-----------|-----------|

---

Unique Subject Identifier=2662011111-0045

Assay variable : PTINR\_VAL1 PT-INR Value

N Mean Standard Deviation Minimum Maximum

---

|   |           |           |           |           |
|---|-----------|-----------|-----------|-----------|
| 4 | 2.1750000 | 0.4991660 | 1.8000000 | 2.9000000 |
|---|-----------|-----------|-----------|-----------|

---

Unique Subject Identifier=2662011111-0052

Assay variable : PTINR\_VAL1 PT-INR Value

N Mean Standard Deviation Minimum Maximum

---

|   |           |           |           |           |
|---|-----------|-----------|-----------|-----------|
| 3 | 2.0000000 | 0.1732051 | 1.9000000 | 2.2000000 |
|---|-----------|-----------|-----------|-----------|

---

Unique Subject Identifier=2668011000-0026

Assay variable : PTINR\_VAL1 PT-INR Value

N Mean Standard Deviation Minimum Maximum

---

|   |           |           |           |           |
|---|-----------|-----------|-----------|-----------|
| 5 | 2.2740000 | 0.9598854 | 1.3400000 | 3.8600000 |
|---|-----------|-----------|-----------|-----------|

---

Laboratory tests at the time of obtaining Table 2-6 consent, according to the presence or absence of proton-pump inhibitors

Unique Subject Identifier=2668011000-0031

MEANS Procedure

Assay variable : PTINR\_VAL1 PT-INR Value

N Mean Standard Deviation Minimum Maximum

---

|   |           |           |           |           |
|---|-----------|-----------|-----------|-----------|
| 3 | 1.8366667 | 0.1656301 | 1.6800000 | 2.0100000 |
|---|-----------|-----------|-----------|-----------|

---

Unique Subject Identifier=2668011000-0040

Assay variable : PTINR\_VAL1 PT-INR Value

N Mean Standard Deviation Minimum Maximum

---

|   |           |           |           |           |
|---|-----------|-----------|-----------|-----------|
| 3 | 1.8866667 | 0.4429823 | 1.5000000 | 2.3700000 |
|---|-----------|-----------|-----------|-----------|

---

Unique Subject Identifier=2668011000-0073

Assay variable : PTINR\_VAL1 PT-INR Value

N Mean Standard Deviation Minimum Maximum

---

|   |           |           |           |           |
|---|-----------|-----------|-----------|-----------|
| 3 | 1.8800000 | 0.2722132 | 1.6300000 | 2.1700000 |
|---|-----------|-----------|-----------|-----------|

---

Unique Subject Identifier=2669000000-0006

Assay variable : PTINR\_VAL1 PT-INR Value

N Mean Standard Deviation Minimum Maximum

---

|   |           |           |           |           |
|---|-----------|-----------|-----------|-----------|
| 4 | 2.1150000 | 0.4051749 | 1.7100000 | 2.5800000 |
|---|-----------|-----------|-----------|-----------|

---

Laboratory tests at the time of obtaining Table 2-6 consent, according to the presence or absence of proton-pump inhibitors

Unique Subject Identifier=2669000000-0014

MEANS Procedure

Assay variable : PTINR\_VAL1 PT-INR Value

N Mean Standard Deviation Minimum Maximum

---

|   |           |           |           |           |
|---|-----------|-----------|-----------|-----------|
| 3 | 2.0300000 | 0.1509967 | 1.8700000 | 2.1700000 |
|---|-----------|-----------|-----------|-----------|

---

Unique Subject Identifier=2671000000-0004

Assay variable : PTINR\_VAL1 PT-INR Value

N Mean Standard Deviation Minimum Maximum

---

|   |           |           |           |           |
|---|-----------|-----------|-----------|-----------|
| 6 | 1.7166667 | 0.6198602 | 1.1800000 | 2.8400000 |
|---|-----------|-----------|-----------|-----------|

---

Unique Subject Identifier=2671000000-0006

Assay variable : PTINR\_VAL1 PT-INR Value

N Mean Standard Deviation Minimum Maximum

---

|   |           |           |           |           |
|---|-----------|-----------|-----------|-----------|
| 2 | 1.9550000 | 0.4030509 | 1.6700000 | 2.2400000 |
|---|-----------|-----------|-----------|-----------|

---

Unique Subject Identifier=2671000000-0020



Assay variable : PTINR\_VAL1 PT-INR Value

N Mean Standard Deviation Minimum Maximum

---

|   |           |           |           |           |
|---|-----------|-----------|-----------|-----------|
| 2 | 2.0550000 | 0.0353553 | 2.0300000 | 2.0800000 |
|---|-----------|-----------|-----------|-----------|

---

Laboratory tests at the time of obtaining Table 2-6 consent, according to the presence or absence of proton-pump inhibitors

Unique Subject Identifier=2671000000-0025

MEANS Procedure

Assay variable : PTINR\_VAL1 PT-INR Value

| N | Mean      | Standard Deviation | Minimum   | Maximum   |
|---|-----------|--------------------|-----------|-----------|
| 3 | 2.3433333 | 0.2914332          | 2.0700000 | 2.6500000 |

Unique Subject Identifier=2671000000-0026

Assay variable : PTINR\_VAL1 PT-INR Value

| N | Mean      | Standard Deviation | Minimum   | Maximum   |
|---|-----------|--------------------|-----------|-----------|
| 4 | 1.8500000 | 0.3157003          | 1.6400000 | 2.3200000 |

Unique Subject Identifier=2671000000-0027

Assay variable : PTINR\_VAL1 PT-INR Value

| N | Mean      | Standard Deviation | Minimum   | Maximum   |
|---|-----------|--------------------|-----------|-----------|
| 3 | 2.1166667 | 0.3716629          | 1.8100000 | 2.5300000 |

Unique Subject Identifier=2671000000-0030

Assay variable : PTINR\_VAL1 PT-INR Value

N Mean Standard Deviation Minimum Maximum

---

|   |           |           |           |           |
|---|-----------|-----------|-----------|-----------|
| 3 | 1.9900000 | 0.5574944 | 1.3500000 | 2.3700000 |
|---|-----------|-----------|-----------|-----------|

---

Laboratory tests at the time of obtaining Table 2-6 consent, according to the presence or absence of proton-pump inhibitors

Unique Subject Identifier=2671000000-0031

MEANS Procedure

Assay variable : PTINR\_VAL1 PT-INR Value

N Mean Standard Deviation Minimum Maximum

---

|   |           |           |           |           |
|---|-----------|-----------|-----------|-----------|
| 3 | 1.8533333 | 0.2136196 | 1.7300000 | 2.1000000 |
|---|-----------|-----------|-----------|-----------|

---

Unique Subject Identifier=2671000000-0034

Assay variable : PTINR\_VAL1 PT-INR Value

N Mean Standard Deviation Minimum Maximum

---

|   |           |           |           |           |
|---|-----------|-----------|-----------|-----------|
| 3 | 1.6900000 | 0.2325941 | 1.4800000 | 1.9400000 |
|---|-----------|-----------|-----------|-----------|

---

Unique Subject Identifier=2671000000-0051

Assay variable : PTINR\_VAL1 PT-INR Value

N Mean Standard Deviation Minimum Maximum

---

|   |           |           |           |           |
|---|-----------|-----------|-----------|-----------|
| 4 | 2.2325000 | 0.2087063 | 2.0200000 | 2.4700000 |
|---|-----------|-----------|-----------|-----------|

---

Unique Subject Identifier=2671000000-0057

Assay variable : PTINR\_VAL1 PT-INR Value

N Mean Standard Deviation Minimum Maximum

---

|   |           |           |           |           |
|---|-----------|-----------|-----------|-----------|
| 3 | 1.8533333 | 0.2919475 | 1.6700000 | 2.1900000 |
|---|-----------|-----------|-----------|-----------|

---

Laboratory tests at the time of obtaining Table 2-6 consent, according to the presence or absence of proton-pump inhibitors

Unique Subject Identifier=2671000000-0060

MEANS Procedure

Assay variable : PTINR\_VAL1 PT-INR Value

N Mean Standard Deviation Minimum Maximum

---

|   |           |           |           |           |
|---|-----------|-----------|-----------|-----------|
| 3 | 2.4266667 | 0.2802380 | 2.2000000 | 2.7400000 |
|---|-----------|-----------|-----------|-----------|

---

Unique Subject Identifier=2671000000-0061

Assay variable : PTINR\_VAL1 PT-INR Value

N Mean Standard Deviation Minimum Maximum

---

|   |           |           |           |           |
|---|-----------|-----------|-----------|-----------|
| 3 | 3.2533333 | 1.4408447 | 2.0500000 | 4.8500000 |
|---|-----------|-----------|-----------|-----------|

---

Unique Subject Identifier=2671000000-0062

Assay variable : PTINR\_VAL1 PT-INR Value

N Mean Standard Deviation Minimum Maximum

---

|   |           |  |           |           |
|---|-----------|--|-----------|-----------|
| 1 | 2.3300000 |  | 2.3300000 | 2.3300000 |
|---|-----------|--|-----------|-----------|

---

Unique Subject Identifier=2671000000-0065

Assay variable : PTINR\_VAL1 PT-INR Value

N Mean Standard Deviation Minimum Maximum

---

|   |          |           |          |          |
|---|----------|-----------|----------|----------|
| 2 | 2.200000 | 0.2969848 | 1.990000 | 2.410000 |
|---|----------|-----------|----------|----------|

---

Laboratory tests at the time of obtaining Table 2-6 consent, according to the presence or absence of proton-pump inhibitors

Unique Subject Identifier=2671000000-0066

MEANS Procedure

Assay variable : PTINR\_VAL1 PT-INR Value

| N | Mean      | Standard Deviation | Minimum   | Maximum   |
|---|-----------|--------------------|-----------|-----------|
| 3 | 2.0700000 | 0.6122091          | 1.4300000 | 2.6500000 |

Unique Subject Identifier=2671000000-0071

Assay variable : PTINR\_VAL1 PT-INR Value

| N | Mean      | Standard Deviation | Minimum   | Maximum   |
|---|-----------|--------------------|-----------|-----------|
| 3 | 2.2866667 | 0.3165965          | 2.0700000 | 2.6500000 |

Unique Subject Identifier=2671000000-0072

Assay variable : PTINR\_VAL1 PT-INR Value

| N | Mean      | Standard Deviation | Minimum   | Maximum   |
|---|-----------|--------------------|-----------|-----------|
| 3 | 1.8700000 | 0.3176476          | 1.6000000 | 2.2200000 |

Unique Subject Identifier=2671000000-0073



Assay variable : PTINR\_VAL1 PT-INR Value

N Mean Standard Deviation Minimum Maximum

---

|   |          |           |          |          |
|---|----------|-----------|----------|----------|
| 3 | 2.110000 | 0.3559494 | 1.880000 | 2.520000 |
|---|----------|-----------|----------|----------|

---

Laboratory tests at the time of obtaining Table 2-6 consent, according to the presence or absence of proton-pump inhibitors

Unique Subject Identifier=2672000000-0010

MEANS Procedure

Assay variable : PTINR\_VAL1 PT-INR Value

| N | Mean      | Standard Deviation | Minimum   | Maximum   |
|---|-----------|--------------------|-----------|-----------|
| 3 | 2.1666667 | 0.1674316          | 2.0700000 | 2.3600000 |

Unique Subject Identifier=2672000000-0013

Assay variable : PTINR\_VAL1 PT-INR Value

| N | Mean      | Standard Deviation | Minimum   | Maximum   |
|---|-----------|--------------------|-----------|-----------|
| 3 | 1.7433333 | 0.2956913          | 1.4200000 | 2.0000000 |

Unique Subject Identifier=2672000000-0022

Assay variable : PTINR\_VAL1 PT-INR Value

| N | Mean      | Standard Deviation | Minimum   | Maximum   |
|---|-----------|--------------------|-----------|-----------|
| 2 | 2.1500000 | 0.2121320          | 2.0000000 | 2.3000000 |

Unique Subject Identifier=2673011101-0001

Assay variable : PTINR\_VAL1 PT-INR Value

N Mean Standard Deviation Minimum Maximum

---

|   |           |           |           |           |
|---|-----------|-----------|-----------|-----------|
| 3 | 1.8266667 | 0.0568624 | 1.7800000 | 1.8900000 |
|---|-----------|-----------|-----------|-----------|

---

Laboratory tests at the time of obtaining Table 2-6 consent, according to the presence or absence of proton-pump inhibitors

Unique Subject Identifier=2673011101-0002

MEANS Procedure

Assay variable : PTINR\_VAL1 PT-INR Value

N Mean Standard Deviation Minimum Maximum

---

|   |           |           |           |           |
|---|-----------|-----------|-----------|-----------|
| 2 | 1.5800000 | 0.0989949 | 1.5100000 | 1.6500000 |
|---|-----------|-----------|-----------|-----------|

---

Unique Subject Identifier=2675000000-0010

Assay variable : PTINR\_VAL1 PT-INR Value

N Mean Standard Deviation Minimum Maximum

---

|   |           |  |           |           |
|---|-----------|--|-----------|-----------|
| 1 | 0.9700000 |  | 0.9700000 | 0.9700000 |
|---|-----------|--|-----------|-----------|

---

Unique Subject Identifier=2675000000-0016

Assay variable : PTINR\_VAL1 PT-INR Value

N Mean Standard Deviation Minimum Maximum

---

|   |           |           |           |           |
|---|-----------|-----------|-----------|-----------|
| 2 | 1.1700000 | 0.0424264 | 1.1400000 | 1.2000000 |
|---|-----------|-----------|-----------|-----------|

---

Unique Subject Identifier=2675000000-0021

Assay variable : PTINR\_VAL1 PT-INR Value

N Mean Standard Deviation Minimum Maximum

---

|   |           |           |           |           |
|---|-----------|-----------|-----------|-----------|
| 5 | 1.9820000 | 0.2265392 | 1.7300000 | 2.1800000 |
|---|-----------|-----------|-----------|-----------|

---

Laboratory tests at the time of obtaining Table 2-6 consent, according to the presence or absence of proton-pump inhibitors

Unique Subject Identifier=2675000000-0022

MEANS Procedure

Assay variable : PTINR\_VAL1 PT-INR Value

N Mean Standard Deviation Minimum Maximum

---

|   |           |           |           |           |
|---|-----------|-----------|-----------|-----------|
| 3 | 1.7133333 | 0.2433790 | 1.4500000 | 1.9300000 |
|---|-----------|-----------|-----------|-----------|

---

Unique Subject Identifier=2678010000-0009

Assay variable : PTINR\_VAL1 PT-INR Value

N Mean Standard Deviation Minimum Maximum

---

|   |           |           |           |           |
|---|-----------|-----------|-----------|-----------|
| 4 | 1.7750000 | 0.2776689 | 1.4800000 | 2.1500000 |
|---|-----------|-----------|-----------|-----------|

---

Unique Subject Identifier=2678010000-0012

Assay variable : PTINR\_VAL1 PT-INR Value

N Mean Standard Deviation Minimum Maximum

---

|   |           |           |           |           |
|---|-----------|-----------|-----------|-----------|
| 4 | 1.9350000 | 0.1658312 | 1.7500000 | 2.0800000 |
|---|-----------|-----------|-----------|-----------|

---

Unique Subject Identifier=2678010000-0019

Assay variable : PTINR\_VAL1 PT-INR Value

N Mean Standard Deviation Minimum Maximum

---

|   |           |           |           |           |
|---|-----------|-----------|-----------|-----------|
| 3 | 2.2633333 | 0.1331666 | 2.1500000 | 2.4100000 |
|---|-----------|-----------|-----------|-----------|

---

Laboratory tests at the time of obtaining Table 2-6 consent, according to the presence or absence of proton-pump inhibitors

Unique Subject Identifier=2678010000-0035

MEANS Procedure

Assay variable : PTINR\_VAL1 PT-INR Value

| N | Mean      | Standard Deviation | Minimum   | Maximum   |
|---|-----------|--------------------|-----------|-----------|
| 3 | 2.0033333 | 0.3579572          | 1.6100000 | 2.3100000 |

Unique Subject Identifier=2678010000-0037

Assay variable : PTINR\_VAL1 PT-INR Value

| N | Mean      | Standard Deviation | Minimum   | Maximum   |
|---|-----------|--------------------|-----------|-----------|
| 5 | 1.7880000 | 0.2058397          | 1.5700000 | 1.9900000 |

Unique Subject Identifier=2678010000-0039

Assay variable : PTINR\_VAL1 PT-INR Value

| N | Mean      | Standard Deviation | Minimum   | Maximum   |
|---|-----------|--------------------|-----------|-----------|
| 5 | 2.1500000 | 0.4368066          | 1.6200000 | 2.5700000 |

Unique Subject Identifier=2678010000-0041



Assay variable : PTINR\_VAL1 PT-INR Value

N Mean Standard Deviation Minimum Maximum

---

|   |           |           |           |           |
|---|-----------|-----------|-----------|-----------|
| 4 | 1.7000000 | 0.1230176 | 1.5400000 | 1.8300000 |
|---|-----------|-----------|-----------|-----------|

---

Laboratory tests at the time of obtaining Table 2-6 consent, according to the presence or absence of proton-pump inhibitors

Unique Subject Identifier=2687001000-0003

MEANS Procedure

Assay variable : PTINR\_VAL1 PT-INR Value

| N | Mean      | Standard Deviation | Minimum   | Maximum   |
|---|-----------|--------------------|-----------|-----------|
| 6 | 2.1500000 | 0.4929503          | 1.5000000 | 3.0000000 |

Unique Subject Identifier=2687001000-0010

Assay variable : PTINR\_VAL1 PT-INR Value

| N | Mean      | Standard Deviation | Minimum   | Maximum   |
|---|-----------|--------------------|-----------|-----------|
| 6 | 1.9500000 | 0.2258318          | 1.6000000 | 2.3000000 |

Unique Subject Identifier=2687001000-0013

Assay variable : PTINR\_VAL1 PT-INR Value

| N | Mean      | Standard Deviation | Minimum   | Maximum   |
|---|-----------|--------------------|-----------|-----------|
| 3 | 2.0000000 | 0.4582576          | 1.5000000 | 2.4000000 |

Unique Subject Identifier=2687001000-0039

Assay variable : PTINR\_VAL1 PT-INR Value

N Mean Standard Deviation Minimum Maximum

---

|   |          |           |          |          |
|---|----------|-----------|----------|----------|
| 5 | 2.118000 | 0.4267552 | 1.500000 | 2.700000 |
|---|----------|-----------|----------|----------|

---

Laboratory tests at the time of obtaining Table 2-6 consent, according to the presence or absence of proton-pump inhibitors

Unique Subject Identifier=2687001000-0040

MEANS Procedure

Assay variable : PTINR\_VAL1 PT-INR Value

N Mean Standard Deviation Minimum Maximum

---

|   |           |           |           |           |
|---|-----------|-----------|-----------|-----------|
| 5 | 2.3600000 | 0.4615192 | 1.6000000 | 2.8000000 |
|---|-----------|-----------|-----------|-----------|

---

Unique Subject Identifier=2687001000-0046

Assay variable : PTINR\_VAL1 PT-INR Value

N Mean Standard Deviation Minimum Maximum

---

|   |           |           |           |           |
|---|-----------|-----------|-----------|-----------|
| 5 | 1.6800000 | 0.3346640 | 1.4000000 | 2.2000000 |
|---|-----------|-----------|-----------|-----------|

---

Unique Subject Identifier=2688011111-0002

Assay variable : PTINR\_VAL1 PT-INR Value

N Mean Standard Deviation Minimum Maximum

---

|   |           |           |           |           |
|---|-----------|-----------|-----------|-----------|
| 6 | 1.7833333 | 0.2714160 | 1.5000000 | 2.2000000 |
|---|-----------|-----------|-----------|-----------|

---

Unique Subject Identifier=2688011111-0011

Assay variable : PTINR\_VAL1 PT-INR Value

N Mean Standard Deviation Minimum Maximum

---

|   |          |           |          |          |
|---|----------|-----------|----------|----------|
| 6 | 2.183333 | 0.6493587 | 1.500000 | 3.000000 |
|---|----------|-----------|----------|----------|

---

Laboratory tests at the time of obtaining Table 2-6 consent, according to the presence or absence of proton-pump inhibitors

Unique Subject Identifier=2688011111-0014

MEANS Procedure

Assay variable : PTINR\_VAL1 PT-INR Value

N Mean Standard Deviation Minimum Maximum

---

|   |           |           |           |           |
|---|-----------|-----------|-----------|-----------|
| 6 | 1.7166667 | 0.2041241 | 1.4000000 | 2.0000000 |
|---|-----------|-----------|-----------|-----------|

---

Unique Subject Identifier=2688011111-0022

Assay variable : PTINR\_VAL1 PT-INR Value

N Mean Standard Deviation Minimum Maximum

---

|   |           |           |           |           |
|---|-----------|-----------|-----------|-----------|
| 5 | 1.6800000 | 0.7563068 | 1.2000000 | 3.0000000 |
|---|-----------|-----------|-----------|-----------|

---

Unique Subject Identifier=2688011111-0024

Assay variable : PTINR\_VAL1 PT-INR Value

N Mean Standard Deviation Minimum Maximum

---

|   |           |           |           |           |
|---|-----------|-----------|-----------|-----------|
| 5 | 2.2000000 | 0.3162278 | 1.9000000 | 2.7000000 |
|---|-----------|-----------|-----------|-----------|

---

Unique Subject Identifier=2688011111-0031

Assay variable : PTINR\_VAL1 PT-INR Value

N Mean Standard Deviation Minimum Maximum

---

|   |           |           |           |           |
|---|-----------|-----------|-----------|-----------|
| 5 | 1.6400000 | 0.0894427 | 1.5000000 | 1.7000000 |
|---|-----------|-----------|-----------|-----------|

---

Laboratory tests at the time of obtaining Table 2-6 consent, according to the presence or absence of proton-pump inhibitors

Unique Subject Identifier=2688011111-0038

MEANS Procedure

Assay variable : PTINR\_VAL1 PT-INR Value

N Mean Standard Deviation Minimum Maximum

---

|   |           |           |           |           |
|---|-----------|-----------|-----------|-----------|
| 5 | 2.3600000 | 0.1341641 | 2.2000000 | 2.5000000 |
|---|-----------|-----------|-----------|-----------|

---

Unique Subject Identifier=2688011111-0046

Assay variable : PTINR\_VAL1 PT-INR Value

N Mean Standard Deviation Minimum Maximum

---

|   |           |           |           |           |
|---|-----------|-----------|-----------|-----------|
| 6 | 1.7000000 | 0.1897367 | 1.5000000 | 2.0000000 |
|---|-----------|-----------|-----------|-----------|

---

Unique Subject Identifier=2688011111-0067

Assay variable : PTINR\_VAL1 PT-INR Value

N Mean Standard Deviation Minimum Maximum

---

|   |           |           |           |           |
|---|-----------|-----------|-----------|-----------|
| 5 | 1.7600000 | 0.0894427 | 1.7000000 | 1.9000000 |
|---|-----------|-----------|-----------|-----------|

---

Unique Subject Identifier=2688011111-0072



Assay variable : PTINR\_VAL1 PT-INR Value

N Mean Standard Deviation Minimum Maximum

---

|   |          |           |          |          |
|---|----------|-----------|----------|----------|
| 5 | 1.460000 | 0.2509980 | 1.100000 | 1.800000 |
|---|----------|-----------|----------|----------|

---

Laboratory tests at the time of obtaining Table 2-6 consent, according to the presence or absence of proton-pump inhibitors

Unique Subject Identifier=2688011111-0073

MEANS Procedure

Assay variable : PTINR\_VAL1 PT-INR Value

N Mean Standard Deviation Minimum Maximum

---

|   |           |           |           |           |
|---|-----------|-----------|-----------|-----------|
| 5 | 1.7400000 | 0.2302173 | 1.5000000 | 2.0000000 |
|---|-----------|-----------|-----------|-----------|

---

Unique Subject Identifier=2688011111-0077

Assay variable : PTINR\_VAL1 PT-INR Value

N Mean Standard Deviation Minimum Maximum

---

|   |           |           |           |           |
|---|-----------|-----------|-----------|-----------|
| 5 | 1.9000000 | 0.5000000 | 1.1000000 | 2.4000000 |
|---|-----------|-----------|-----------|-----------|

---

Unique Subject Identifier=2688011111-0079

Assay variable : PTINR\_VAL1 PT-INR Value

N Mean Standard Deviation Minimum Maximum

---

|   |           |           |           |           |
|---|-----------|-----------|-----------|-----------|
| 5 | 1.9200000 | 0.2280351 | 1.7000000 | 2.3000000 |
|---|-----------|-----------|-----------|-----------|

---

Unique Subject Identifier=2688011111-0083

Assay variable : PTINR\_VAL1 PT-INR Value

N Mean Standard Deviation Minimum Maximum

---

|   |           |  |           |           |
|---|-----------|--|-----------|-----------|
| 1 | 1.7000000 |  | 1.7000000 | 1.7000000 |
|---|-----------|--|-----------|-----------|

---

Laboratory tests at the time of obtaining Table 2-6 consent, according to the presence or absence of proton-pump inhibitors

Unique Subject Identifier=2690000000-0010

MEANS Procedure

Assay variable : PTINR\_VAL1 PT-INR Value

N Mean Standard Deviation Minimum Maximum

---

|   |           |           |           |           |
|---|-----------|-----------|-----------|-----------|
| 6 | 1.7683333 | 0.0875024 | 1.6300000 | 1.8800000 |
|---|-----------|-----------|-----------|-----------|

---

Unique Subject Identifier=2692000000-0001

Assay variable : PTINR\_VAL1 PT-INR Value

N Mean Standard Deviation Minimum Maximum

---

|   |           |           |           |           |
|---|-----------|-----------|-----------|-----------|
| 5 | 1.9120000 | 0.3250692 | 1.4700000 | 2.3600000 |
|---|-----------|-----------|-----------|-----------|

---

Unique Subject Identifier=2692000000-0015

Assay variable : PTINR\_VAL1 PT-INR Value

N Mean Standard Deviation Minimum Maximum

---

|   |           |           |           |           |
|---|-----------|-----------|-----------|-----------|
| 6 | 1.7700000 | 0.2934621 | 1.4100000 | 2.1200000 |
|---|-----------|-----------|-----------|-----------|

---

Unique Subject Identifier=2692000000-0016

Assay variable : PTINR\_VAL1 PT-INR Value

N Mean Standard Deviation Minimum Maximum

---

|   |           |           |           |           |
|---|-----------|-----------|-----------|-----------|
| 4 | 1.7650000 | 0.1771064 | 1.5800000 | 1.9900000 |
|---|-----------|-----------|-----------|-----------|

---

Laboratory tests at the time of obtaining Table 2-6 consent, according to the presence or absence of proton-pump inhibitors

Unique Subject Identifier=2692000000-0020

MEANS Procedure

Assay variable : PTINR\_VAL1 PT-INR Value

N Mean Standard Deviation Minimum Maximum

---

|   |           |           |           |           |
|---|-----------|-----------|-----------|-----------|
| 6 | 2.0366667 | 0.1949017 | 1.7500000 | 2.3600000 |
|---|-----------|-----------|-----------|-----------|

---

Unique Subject Identifier=2692000000-0021

Assay variable : PTINR\_VAL1 PT-INR Value

N Mean Standard Deviation Minimum Maximum

---

|   |           |           |           |           |
|---|-----------|-----------|-----------|-----------|
| 5 | 1.9980000 | 0.3875822 | 1.5600000 | 2.6200000 |
|---|-----------|-----------|-----------|-----------|

---

Unique Subject Identifier=2692000000-0029

Assay variable : PTINR\_VAL1 PT-INR Value

N Mean Standard Deviation Minimum Maximum

---

|   |           |           |           |           |
|---|-----------|-----------|-----------|-----------|
| 4 | 1.9550000 | 0.1147461 | 1.8100000 | 2.0900000 |
|---|-----------|-----------|-----------|-----------|

---

Unique Subject Identifier=2692000000-0033

Assay variable : PTINR\_VAL1 PT-INR Value

N Mean Standard Deviation Minimum Maximum

---

|   |           |           |           |           |
|---|-----------|-----------|-----------|-----------|
| 6 | 2.0916667 | 0.1158303 | 1.9000000 | 2.2100000 |
|---|-----------|-----------|-----------|-----------|

---

Laboratory tests at the time of obtaining Table 2-6 consent, according to the presence or absence of proton-pump inhibitors

Unique Subject Identifier=2699000000-0001

MEANS Procedure

Assay variable : PTINR\_VAL1 PT-INR Value

| N | Mean      | Standard Deviation | Minimum   | Maximum   |
|---|-----------|--------------------|-----------|-----------|
| 3 | 2.1466667 | 0.4473626          | 1.6600000 | 2.5400000 |

Unique Subject Identifier=2699000000-0004

Assay variable : PTINR\_VAL1 PT-INR Value

| N | Mean      | Standard Deviation | Minimum   | Maximum   |
|---|-----------|--------------------|-----------|-----------|
| 4 | 2.3075000 | 0.6827091          | 1.3600000 | 2.9600000 |

Unique Subject Identifier=2699000000-0005

Assay variable : PTINR\_VAL1 PT-INR Value

| N | Mean      | Standard Deviation | Minimum   | Maximum   |
|---|-----------|--------------------|-----------|-----------|
| 3 | 1.9433333 | 0.0832666          | 1.8500000 | 2.0100000 |

Unique Subject Identifier=2699000000-0009



Assay variable : PTINR\_VAL1 PT-INR Value

N Mean Standard Deviation Minimum Maximum

---

|   |           |           |           |           |
|---|-----------|-----------|-----------|-----------|
| 2 | 2.4450000 | 0.9828784 | 1.7500000 | 3.1400000 |
|---|-----------|-----------|-----------|-----------|

---

Laboratory tests at the time of obtaining Table 2-6 consent, according to the presence or absence of proton-pump inhibitors

Unique Subject Identifier=2699000000-0010

MEANS Procedure

Assay variable : PTINR\_VAL1 PT-INR Value

N Mean Standard Deviation Minimum Maximum

---

|   |           |           |           |           |
|---|-----------|-----------|-----------|-----------|
| 3 | 1.7766667 | 0.2150194 | 1.5400000 | 1.9600000 |
|---|-----------|-----------|-----------|-----------|

---

Unique Subject Identifier=2701011011-0001

Assay variable : PTINR\_VAL1 PT-INR Value

N Mean Standard Deviation Minimum Maximum

---

|   |           |           |           |           |
|---|-----------|-----------|-----------|-----------|
| 6 | 2.1500000 | 0.1516575 | 1.9000000 | 2.3000000 |
|---|-----------|-----------|-----------|-----------|

---

Unique Subject Identifier=2701011011-0002

Assay variable : PTINR\_VAL1 PT-INR Value

N Mean Standard Deviation Minimum Maximum

---

|   |           |           |           |           |
|---|-----------|-----------|-----------|-----------|
| 6 | 1.5500000 | 0.0547723 | 1.5000000 | 1.6000000 |
|---|-----------|-----------|-----------|-----------|

---

Unique Subject Identifier=2701011011-0003

Assay variable : PTINR\_VAL1 PT-INR Value

N Mean Standard Deviation Minimum Maximum

---

|   |           |           |           |           |
|---|-----------|-----------|-----------|-----------|
| 6 | 1.9333333 | 0.2250926 | 1.7000000 | 2.3000000 |
|---|-----------|-----------|-----------|-----------|

---

Laboratory tests at the time of obtaining Table 2-6 consent, according to the presence or absence of proton-pump inhibitors

Unique Subject Identifier=2703000000-0002

MEANS Procedure

Assay variable : PTINR\_VAL1 PT-INR Value

N Mean Standard Deviation Minimum Maximum

---

|   |           |           |           |           |
|---|-----------|-----------|-----------|-----------|
| 2 | 1.9000000 | 0.1414214 | 1.8000000 | 2.0000000 |
|---|-----------|-----------|-----------|-----------|

---

Unique Subject Identifier=2703000000-0003

Assay variable : PTINR\_VAL1 PT-INR Value

N Mean Standard Deviation Minimum Maximum

---

|   |           |           |           |           |
|---|-----------|-----------|-----------|-----------|
| 2 | 2.0500000 | 0.0707107 | 2.0000000 | 2.1000000 |
|---|-----------|-----------|-----------|-----------|

---

Unique Subject Identifier=2703000000-0005

Assay variable : PTINR\_VAL1 PT-INR Value

N Mean Standard Deviation Minimum Maximum

---

|   |           |  |           |           |
|---|-----------|--|-----------|-----------|
| 1 | 1.2000000 |  | 1.2000000 | 1.2000000 |
|---|-----------|--|-----------|-----------|

---

Unique Subject Identifier=2703000000-0006

Assay variable : PTINR\_VAL1 PT-INR Value

N Mean Standard Deviation Minimum Maximum

---

|   |          |           |          |          |
|---|----------|-----------|----------|----------|
| 3 | 2.033333 | 0.4725816 | 1.500000 | 2.400000 |
|---|----------|-----------|----------|----------|

---

Laboratory tests at the time of obtaining Table 2-6 consent, according to the presence or absence of proton-pump inhibitors

Unique Subject Identifier=2703000000-0007

MEANS Procedure

Assay variable : PTINR\_VAL1 PT-INR Value

N Mean Standard Deviation Minimum Maximum

---

|   |           |  |           |           |
|---|-----------|--|-----------|-----------|
| 1 | 2.1000000 |  | 2.1000000 | 2.1000000 |
|---|-----------|--|-----------|-----------|

---

Unique Subject Identifier=2703000000-0008

Assay variable : PTINR\_VAL1 PT-INR Value

N Mean Standard Deviation Minimum Maximum

---

|   |           |           |           |           |
|---|-----------|-----------|-----------|-----------|
| 2 | 1.5500000 | 0.0707107 | 1.5000000 | 1.6000000 |
|---|-----------|-----------|-----------|-----------|

---

Unique Subject Identifier=2703000000-0009

Assay variable : PTINR\_VAL1 PT-INR Value

N Mean Standard Deviation Minimum Maximum

---

|   |           |           |           |           |
|---|-----------|-----------|-----------|-----------|
| 6 | 1.6333333 | 0.1366260 | 1.4000000 | 1.8000000 |
|---|-----------|-----------|-----------|-----------|

---

Unique Subject Identifier=2703000000-0012

Assay variable : PTINR\_VAL1 PT-INR Value

N Mean Standard Deviation Minimum Maximum

---

|   |           |           |           |           |
|---|-----------|-----------|-----------|-----------|
| 3 | 1.9333333 | 0.7505553 | 1.5000000 | 2.8000000 |
|---|-----------|-----------|-----------|-----------|

---

Laboratory tests at the time of obtaining Table 2-6 consent, according to the presence or absence of proton-pump inhibitors

Unique Subject Identifier=2703000000-0013

MEANS Procedure

Assay variable : PTINR\_VAL1 PT-INR Value

| N | Mean      | Standard Deviation | Minimum | Maximum   |
|---|-----------|--------------------|---------|-----------|
| 2 | 1.6000000 |                    | 0       | 1.6000000 |
|   |           |                    |         | 1.6000000 |

Unique Subject Identifier=2703000000-0018

Assay variable : PTINR\_VAL1 PT-INR Value

| N | Mean      | Standard Deviation | Minimum | Maximum   |
|---|-----------|--------------------|---------|-----------|
| 1 | 1.3000000 |                    |         | 1.3000000 |
|   |           |                    |         | 1.3000000 |

Unique Subject Identifier=2729000000-0001

Assay variable : PTINR\_VAL1 PT-INR Value

| N | Mean      | Standard Deviation | Minimum   | Maximum   |
|---|-----------|--------------------|-----------|-----------|
| 6 | 1.7933333 | 0.2315743          | 1.3900000 | 2.0300000 |

Unique Subject Identifier=2729000000-0003



Assay variable : PTINR\_VAL1 PT-INR Value

N Mean Standard Deviation Minimum Maximum

---

|   |          |           |          |          |
|---|----------|-----------|----------|----------|
| 5 | 1.580000 | 0.1763519 | 1.370000 | 1.780000 |
|---|----------|-----------|----------|----------|

---

Laboratory tests at the time of obtaining Table 2-6 consent, according to the presence or absence of proton-pump inhibitors

Unique Subject Identifier=2729000000-0004

MEANS Procedure

Assay variable : PTINR\_VAL1 PT-INR Value

N Mean Standard Deviation Minimum Maximum

---

|   |           |           |           |           |
|---|-----------|-----------|-----------|-----------|
| 6 | 2.4433333 | 0.2484888 | 2.1100000 | 2.8100000 |
|---|-----------|-----------|-----------|-----------|

---

Unique Subject Identifier=2729000000-0005

Assay variable : PTINR\_VAL1 PT-INR Value

N Mean Standard Deviation Minimum Maximum

---

|   |           |           |           |           |
|---|-----------|-----------|-----------|-----------|
| 6 | 2.6083333 | 0.2908207 | 2.1800000 | 3.0100000 |
|---|-----------|-----------|-----------|-----------|

---

Unique Subject Identifier=2732010001-0004

Assay variable : PTINR\_VAL1 PT-INR Value

N Mean Standard Deviation Minimum Maximum

---

|   |           |           |           |           |
|---|-----------|-----------|-----------|-----------|
| 6 | 2.5000000 | 0.3633180 | 2.0000000 | 3.0000000 |
|---|-----------|-----------|-----------|-----------|

---

Unique Subject Identifier=2732010001-0005

Assay variable : PTINR\_VAL1 PT-INR Value

N Mean Standard Deviation Minimum Maximum

---

|   |           |           |           |           |
|---|-----------|-----------|-----------|-----------|
| 4 | 2.0750000 | 0.3403430 | 1.8000000 | 2.5000000 |
|---|-----------|-----------|-----------|-----------|

---

Laboratory tests at the time of obtaining Table 2-6 consent, according to the presence or absence of proton-pump inhibitors

Unique Subject Identifier=2733010000-0002

MEANS Procedure

Assay variable : PTINR\_VAL1 PT-INR Value

N Mean Standard Deviation Minimum Maximum

---

|   |           |           |           |           |
|---|-----------|-----------|-----------|-----------|
| 6 | 1.9633333 | 0.2173170 | 1.7600000 | 2.3100000 |
|---|-----------|-----------|-----------|-----------|

---

Unique Subject Identifier=2733010000-0008

Assay variable : PTINR\_VAL1 PT-INR Value

N Mean Standard Deviation Minimum Maximum

---

|   |           |           |           |           |
|---|-----------|-----------|-----------|-----------|
| 6 | 2.1783333 | 0.2780228 | 1.8100000 | 2.5600000 |
|---|-----------|-----------|-----------|-----------|

---

Unique Subject Identifier=2733010000-0009

Assay variable : PTINR\_VAL1 PT-INR Value

N Mean Standard Deviation Minimum Maximum

---

|   |           |           |           |           |
|---|-----------|-----------|-----------|-----------|
| 6 | 1.9383333 | 0.2949859 | 1.5300000 | 2.3800000 |
|---|-----------|-----------|-----------|-----------|

---

Unique Subject Identifier=2733010000-0011

Assay variable : PTINR\_VAL1 PT-INR Value

N Mean Standard Deviation Minimum Maximum

---

|   |           |           |           |           |
|---|-----------|-----------|-----------|-----------|
| 6 | 2.4550000 | 0.3565810 | 2.1400000 | 2.9500000 |
|---|-----------|-----------|-----------|-----------|

---

Laboratory tests at the time of obtaining Table 2-6 consent, according to the presence or absence of proton-pump inhibitors

Unique Subject Identifier=2733010000-0016

MEANS Procedure

Assay variable : PTINR\_VAL1 PT-INR Value

| N | Mean      | Standard Deviation | Minimum   | Maximum   |
|---|-----------|--------------------|-----------|-----------|
| 5 | 2.4400000 | 0.7313686          | 1.6500000 | 3.4900000 |

Unique Subject Identifier=2733010000-0017

Assay variable : PTINR\_VAL1 PT-INR Value

| N | Mean      | Standard Deviation | Minimum   | Maximum   |
|---|-----------|--------------------|-----------|-----------|
| 6 | 1.9500000 | 0.5913713          | 1.1400000 | 2.5900000 |

Unique Subject Identifier=2733010000-0018

Assay variable : PTINR\_VAL1 PT-INR Value

| N | Mean      | Standard Deviation | Minimum   | Maximum   |
|---|-----------|--------------------|-----------|-----------|
| 6 | 2.1716667 | 0.3365957          | 1.8300000 | 2.7800000 |

Unique Subject Identifier=2737011111-0001

Assay variable : PTINR\_VAL1 PT-INR Value

N Mean Standard Deviation Minimum Maximum

---

|   |           |           |           |           |
|---|-----------|-----------|-----------|-----------|
| 6 | 1.2666667 | 0.1032796 | 1.1000000 | 1.4000000 |
|---|-----------|-----------|-----------|-----------|

---

Laboratory tests at the time of obtaining Table 2-6 consent, according to the presence or absence of proton-pump inhibitors

Unique Subject Identifier=2737011111-0003

MEANS Procedure

Assay variable : PTINR\_VAL1 PT-INR Value

N Mean Standard Deviation Minimum Maximum

---

|   |           |           |           |           |
|---|-----------|-----------|-----------|-----------|
| 6 | 1.4833333 | 0.0983192 | 1.4000000 | 1.6000000 |
|---|-----------|-----------|-----------|-----------|

---

Unique Subject Identifier=2737011111-0005

Assay variable : PTINR\_VAL1 PT-INR Value

N Mean Standard Deviation Minimum Maximum

---

|   |           |           |           |           |
|---|-----------|-----------|-----------|-----------|
| 6 | 1.7500000 | 0.3987480 | 1.3000000 | 2.5000000 |
|---|-----------|-----------|-----------|-----------|

---

Unique Subject Identifier=2748011000-0004

Assay variable : PTINR\_VAL1 PT-INR Value

N Mean Standard Deviation Minimum Maximum

---

|   |           |           |           |           |
|---|-----------|-----------|-----------|-----------|
| 5 | 1.7120000 | 0.2275302 | 1.5400000 | 1.9900000 |
|---|-----------|-----------|-----------|-----------|

---

Unique Subject Identifier=2748011000-0022



Assay variable : PTINR\_VAL1 PT-INR Value

N Mean Standard Deviation Minimum Maximum

---

|   |           |           |           |           |
|---|-----------|-----------|-----------|-----------|
| 2 | 2.3750000 | 0.0353553 | 2.3500000 | 2.4000000 |
|---|-----------|-----------|-----------|-----------|

---

Laboratory tests at the time of obtaining Table 2-6 consent, according to the presence or absence of proton-pump inhibitors

Unique Subject Identifier=2748011000-0024

MEANS Procedure

Assay variable : PTINR\_VAL1 PT-INR Value

N Mean Standard Deviation Minimum Maximum

---

|   |           |           |           |           |
|---|-----------|-----------|-----------|-----------|
| 4 | 1.5300000 | 0.2615339 | 1.1800000 | 1.7400000 |
|---|-----------|-----------|-----------|-----------|

---

Unique Subject Identifier=2748011000-0031

Assay variable : PTINR\_VAL1 PT-INR Value

N Mean Standard Deviation Minimum Maximum

---

|   |           |           |           |           |
|---|-----------|-----------|-----------|-----------|
| 3 | 2.2200000 | 0.0435890 | 2.1900000 | 2.2700000 |
|---|-----------|-----------|-----------|-----------|

---

Unique Subject Identifier=2748011000-0045

Assay variable : PTINR\_VAL1 PT-INR Value

N Mean Standard Deviation Minimum Maximum

---

|   |           |           |           |           |
|---|-----------|-----------|-----------|-----------|
| 6 | 2.5850000 | 0.4136061 | 2.0900000 | 3.2400000 |
|---|-----------|-----------|-----------|-----------|

---

Unique Subject Identifier=2748011000-0051

Assay variable : PTINR\_VAL1 PT-INR Value

N Mean Standard Deviation Minimum Maximum

---

|   |           |           |           |           |
|---|-----------|-----------|-----------|-----------|
| 4 | 2.0875000 | 0.2372586 | 1.7900000 | 2.3200000 |
|---|-----------|-----------|-----------|-----------|

---

Laboratory tests at the time of obtaining Table 2-6 consent, according to the presence or absence of proton-pump inhibitors

Unique Subject Identifier=2748011000-0052

MEANS Procedure

Assay variable : PTINR\_VAL1 PT-INR Value

N Mean Standard Deviation Minimum Maximum

---

|   |           |           |           |           |
|---|-----------|-----------|-----------|-----------|
| 6 | 1.8716667 | 0.4007202 | 1.3600000 | 2.2600000 |
|---|-----------|-----------|-----------|-----------|

---

Unique Subject Identifier=2748011000-0053

Assay variable : PTINR\_VAL1 PT-INR Value

N Mean Standard Deviation Minimum Maximum

---

|   |           |           |           |           |
|---|-----------|-----------|-----------|-----------|
| 4 | 2.1175000 | 0.3013719 | 1.9000000 | 2.5600000 |
|---|-----------|-----------|-----------|-----------|

---

Unique Subject Identifier=2748011000-0054

Assay variable : PTINR\_VAL1 PT-INR Value

N Mean Standard Deviation Minimum Maximum

---

|   |           |           |           |           |
|---|-----------|-----------|-----------|-----------|
| 4 | 2.2450000 | 0.2223361 | 1.9400000 | 2.4200000 |
|---|-----------|-----------|-----------|-----------|

---

Unique Subject Identifier=2748011000-0057

Assay variable : PTINR\_VAL1 PT-INR Value

N Mean Standard Deviation Minimum Maximum

---

|   |           |           |           |           |
|---|-----------|-----------|-----------|-----------|
| 2 | 1.7600000 | 0.0424264 | 1.7300000 | 1.7900000 |
|---|-----------|-----------|-----------|-----------|

---

Laboratory tests at the time of obtaining Table 2-6 consent, according to the presence or absence of proton-pump inhibitors

Unique Subject Identifier=2748011000-0060

MEANS Procedure

Assay variable : PTINR\_VAL1 PT-INR Value

N Mean Standard Deviation Minimum Maximum

---

|   |           |           |           |           |
|---|-----------|-----------|-----------|-----------|
| 4 | 2.0300000 | 0.3232130 | 1.7200000 | 2.4800000 |
|---|-----------|-----------|-----------|-----------|

---

Unique Subject Identifier=2763011100-0002

Assay variable : PTINR\_VAL1 PT-INR Value

N Mean Standard Deviation Minimum Maximum

---

|   |           |           |           |           |
|---|-----------|-----------|-----------|-----------|
| 4 | 2.4250000 | 0.2753785 | 2.1000000 | 2.7000000 |
|---|-----------|-----------|-----------|-----------|

---

Unique Subject Identifier=2764000000-0009

Assay variable : PTINR\_VAL1 PT-INR Value

N Mean Standard Deviation Minimum Maximum

---

|   |           |  |           |           |
|---|-----------|--|-----------|-----------|
| 1 | 2.0000000 |  | 2.0000000 | 2.0000000 |
|---|-----------|--|-----------|-----------|

---

Unique Subject Identifier=2765000000-0003

Assay variable : PTINR\_VAL1 PT-INR Value

N Mean Standard Deviation Minimum Maximum

---

|   |          |           |          |          |
|---|----------|-----------|----------|----------|
| 6 | 1.760000 | 0.2596151 | 1.440000 | 2.180000 |
|---|----------|-----------|----------|----------|

---

Laboratory tests at the time of obtaining Table 2-6 consent, according to the presence or absence of proton-pump inhibitors

Unique Subject Identifier=2766010111-0005

MEANS Procedure

Assay variable : PTINR\_VAL1 PT-INR Value

N Mean Standard Deviation Minimum Maximum

---

|   |           |           |           |           |
|---|-----------|-----------|-----------|-----------|
| 6 | 2.1883333 | 0.4578828 | 1.7000000 | 2.9700000 |
|---|-----------|-----------|-----------|-----------|

---

Unique Subject Identifier=2766010111-0006

Assay variable : PTINR\_VAL1 PT-INR Value

N Mean Standard Deviation Minimum Maximum

---

|   |           |           |           |           |
|---|-----------|-----------|-----------|-----------|
| 6 | 1.9250000 | 0.1385280 | 1.7800000 | 2.1000000 |
|---|-----------|-----------|-----------|-----------|

---

Unique Subject Identifier=2769000000-0001

Assay variable : PTINR\_VAL1 PT-INR Value

N Mean Standard Deviation Minimum Maximum

---

|   |           |  |           |           |
|---|-----------|--|-----------|-----------|
| 1 | 1.7900000 |  | 1.7900000 | 1.7900000 |
|---|-----------|--|-----------|-----------|

---

Unique Subject Identifier=2777011010-0006



Assay variable : PTINR\_VAL1 PT-INR Value

N Mean Standard Deviation Minimum Maximum

---

|   |           |           |           |           |
|---|-----------|-----------|-----------|-----------|
| 4 | 2.1275000 | 0.3636276 | 1.6400000 | 2.4200000 |
|---|-----------|-----------|-----------|-----------|

---

Laboratory tests at the time of obtaining Table 2-6 consent, according to the presence or absence of proton-pump inhibitors

Unique Subject Identifier=2777011010-0007

MEANS Procedure

Assay variable : PTINR\_VAL1 PT-INR Value

N Mean Standard Deviation Minimum Maximum

---

|   |           |           |           |           |
|---|-----------|-----------|-----------|-----------|
| 4 | 1.4650000 | 0.2145538 | 1.2800000 | 1.7100000 |
|---|-----------|-----------|-----------|-----------|

---

Unique Subject Identifier=2777011010-0009

Assay variable : PTINR\_VAL1 PT-INR Value

N Mean Standard Deviation Minimum Maximum

---

|   |           |           |           |           |
|---|-----------|-----------|-----------|-----------|
| 3 | 2.3400000 | 0.1732051 | 2.2400000 | 2.5400000 |
|---|-----------|-----------|-----------|-----------|

---

Unique Subject Identifier=2777011010-0011

Assay variable : PTINR\_VAL1 PT-INR Value

N Mean Standard Deviation Minimum Maximum

---

|   |           |           |           |           |
|---|-----------|-----------|-----------|-----------|
| 5 | 2.3480000 | 0.1907092 | 2.0600000 | 2.5900000 |
|---|-----------|-----------|-----------|-----------|

---

Unique Subject Identifier=2777011010-0012

Assay variable : PTINR\_VAL1 PT-INR Value

N Mean Standard Deviation Minimum Maximum

---

|   |          |           |          |          |
|---|----------|-----------|----------|----------|
| 6 | 2.133333 | 0.4344038 | 1.770000 | 2.980000 |
|---|----------|-----------|----------|----------|

---

Laboratory tests at the time of obtaining Table 2-6 consent, according to the presence or absence of proton-pump inhibitors

Unique Subject Identifier=2777011010-0014

MEANS Procedure

Assay variable : PTINR\_VAL1 PT-INR Value

N Mean Standard Deviation Minimum Maximum

---

|   |          |           |          |          |
|---|----------|-----------|----------|----------|
| 3 | 2.150000 | 0.1852026 | 1.940000 | 2.290000 |
|---|----------|-----------|----------|----------|

---

Unique Subject Identifier=2777011010-0017

Assay variable : PTINR\_VAL1 PT-INR Value

N Mean Standard Deviation Minimum Maximum

---

|   |          |           |          |          |
|---|----------|-----------|----------|----------|
| 3 | 1.850000 | 0.3559494 | 1.620000 | 2.260000 |
|---|----------|-----------|----------|----------|

---

Unique Subject Identifier=2777011010-0020

Assay variable : PTINR\_VAL1 PT-INR Value

N Mean Standard Deviation Minimum Maximum

---

|   |          |           |          |          |
|---|----------|-----------|----------|----------|
| 3 | 2.203333 | 0.2665208 | 1.900000 | 2.400000 |
|---|----------|-----------|----------|----------|

---

Unique Subject Identifier=2777011010-0024

Assay variable : PTINR\_VAL1 PT-INR Value

N Mean Standard Deviation Minimum Maximum

---

|   |          |           |          |          |
|---|----------|-----------|----------|----------|
| 4 | 1.740000 | 0.1739732 | 1.570000 | 1.890000 |
|---|----------|-----------|----------|----------|

---

Laboratory tests at the time of obtaining Table 2-6 consent, according to the presence or absence of proton-pump inhibitors

Unique Subject Identifier=2777011010-0028

MEANS Procedure

Assay variable : PTINR\_VAL1 PT-INR Value

| N | Mean      | Standard Deviation | Minimum   | Maximum   |
|---|-----------|--------------------|-----------|-----------|
| 3 | 1.8300000 | 0.2570992          | 1.6300000 | 2.1200000 |

Unique Subject Identifier=2777011010-0035

Assay variable : PTINR\_VAL1 PT-INR Value

| N | Mean      | Standard Deviation | Minimum   | Maximum   |
|---|-----------|--------------------|-----------|-----------|
| 5 | 1.6860000 | 0.2124382          | 1.4000000 | 1.9900000 |

Unique Subject Identifier=2777011010-0036

Assay variable : PTINR\_VAL1 PT-INR Value

| N | Mean      | Standard Deviation | Minimum   | Maximum   |
|---|-----------|--------------------|-----------|-----------|
| 3 | 2.1900000 | 0.3704052          | 1.8300000 | 2.5700000 |

Unique Subject Identifier=2777011010-0039

Assay variable : PTINR\_VAL1 PT-INR Value

N Mean Standard Deviation Minimum Maximum

---

|   |           |           |           |           |
|---|-----------|-----------|-----------|-----------|
| 3 | 1.6566667 | 0.2020726 | 1.4400000 | 1.8400000 |
|---|-----------|-----------|-----------|-----------|

---

Laboratory tests at the time of obtaining Table 2-6 consent, according to the presence or absence of proton-pump inhibitors

Unique Subject Identifier=2777011010-0044

MEANS Procedure

Assay variable : PTINR\_VAL1 PT-INR Value

N Mean Standard Deviation Minimum Maximum

---

|   |           |           |           |           |
|---|-----------|-----------|-----------|-----------|
| 3 | 2.2833333 | 0.4722641 | 1.8400000 | 2.7800000 |
|---|-----------|-----------|-----------|-----------|

---

Unique Subject Identifier=2777011010-0045

Assay variable : PTINR\_VAL1 PT-INR Value

N Mean Standard Deviation Minimum Maximum

---

|   |           |           |           |           |
|---|-----------|-----------|-----------|-----------|
| 4 | 2.5600000 | 1.2616127 | 1.6600000 | 4.3600000 |
|---|-----------|-----------|-----------|-----------|

---

Unique Subject Identifier=2777011010-0049

Assay variable : PTINR\_VAL1 PT-INR Value

N Mean Standard Deviation Minimum Maximum

---

|   |           |           |           |           |
|---|-----------|-----------|-----------|-----------|
| 3 | 2.0166667 | 0.4758501 | 1.6100000 | 2.5400000 |
|---|-----------|-----------|-----------|-----------|

---

Unique Subject Identifier=2777011010-0050



Assay variable : PTINR\_VAL1 PT-INR Value

N Mean Standard Deviation Minimum Maximum

---

|   |           |           |           |           |
|---|-----------|-----------|-----------|-----------|
| 3 | 2.0166667 | 0.0568624 | 1.9700000 | 2.0800000 |
|---|-----------|-----------|-----------|-----------|

---

Laboratory tests at the time of obtaining Table 2-6 consent, according to the presence or absence of proton-pump inhibitors

Unique Subject Identifier=2780000000-0003

MEANS Procedure

Assay variable : PTINR\_VAL1 PT-INR Value

N Mean Standard Deviation Minimum Maximum

---

|   |           |           |           |           |
|---|-----------|-----------|-----------|-----------|
| 6 | 1.9833333 | 0.1602082 | 1.9000000 | 2.3000000 |
|---|-----------|-----------|-----------|-----------|

---

Unique Subject Identifier=2780000000-0008

Assay variable : PTINR\_VAL1 PT-INR Value

N Mean Standard Deviation Minimum Maximum

---

|   |           |           |           |           |
|---|-----------|-----------|-----------|-----------|
| 6 | 1.5166667 | 0.0752773 | 1.4000000 | 1.6000000 |
|---|-----------|-----------|-----------|-----------|

---

Unique Subject Identifier=2784011111-0002

Assay variable : PTINR\_VAL1 PT-INR Value

N Mean Standard Deviation Minimum Maximum

---

|   |           |           |           |           |
|---|-----------|-----------|-----------|-----------|
| 5 | 2.2200000 | 0.3701351 | 1.8000000 | 2.7000000 |
|---|-----------|-----------|-----------|-----------|

---

Unique Subject Identifier=2784011111-0010

Assay variable : PTINR\_VAL1 PT-INR Value

N Mean Standard Deviation Minimum Maximum

---

|   |          |          |          |          |
|---|----------|----------|----------|----------|
| 5 | 1.440000 | 0.763544 | 1.000000 | 2.800000 |
|---|----------|----------|----------|----------|

---

Laboratory tests at the time of obtaining Table 2-6 consent, according to the presence or absence of proton-pump inhibitors

Unique Subject Identifier=2800011010-0033

MEANS Procedure

Assay variable : PTINR\_VAL1 PT-INR Value

N Mean Standard Deviation Minimum Maximum

---

|   |           |           |           |           |
|---|-----------|-----------|-----------|-----------|
| 2 | 1.5050000 | 0.0919239 | 1.4400000 | 1.5700000 |
|---|-----------|-----------|-----------|-----------|

---

Unique Subject Identifier=2800011010-0037

Assay variable : PTINR\_VAL1 PT-INR Value

N Mean Standard Deviation Minimum Maximum

---

|   |           |  |           |           |
|---|-----------|--|-----------|-----------|
| 1 | 2.0600000 |  | 2.0600000 | 2.0600000 |
|---|-----------|--|-----------|-----------|

---

Unique Subject Identifier=2808000000-0002

Assay variable : PTINR\_VAL1 PT-INR Value

N Mean Standard Deviation Minimum Maximum

---

|   |           |           |           |           |
|---|-----------|-----------|-----------|-----------|
| 5 | 1.6500000 | 0.3323402 | 1.1900000 | 1.9500000 |
|---|-----------|-----------|-----------|-----------|

---

Unique Subject Identifier=2809000000-0011

Assay variable : PTINR\_VAL1 PT-INR Value

N Mean Standard Deviation Minimum Maximum

---

|   |           |           |           |           |
|---|-----------|-----------|-----------|-----------|
| 6 | 1.2133333 | 0.0618601 | 1.1400000 | 1.3000000 |
|---|-----------|-----------|-----------|-----------|

---

Laboratory tests at the time of obtaining Table 2-6 consent, according to the presence or absence of proton-pump inhibitors

Unique Subject Identifier=2828010110-0001

MEANS Procedure

Assay variable : PTINR\_VAL1 PT-INR Value

| N | Mean      | Standard Deviation | Minimum | Maximum   |
|---|-----------|--------------------|---------|-----------|
| 2 | 1.6000000 |                    | 0       | 1.6000000 |

Unique Subject Identifier=2861011011-0003

Assay variable : PTINR\_VAL1 PT-INR Value

| N | Mean      | Standard Deviation | Minimum   | Maximum   |
|---|-----------|--------------------|-----------|-----------|
| 3 | 2.0500000 | 0.2861818          | 1.8700000 | 2.3800000 |

Unique Subject Identifier=2861011011-0006

Assay variable : PTINR\_VAL1 PT-INR Value

| N | Mean      | Standard Deviation | Minimum   | Maximum   |
|---|-----------|--------------------|-----------|-----------|
| 5 | 1.3440000 | 0.2920274          | 1.1000000 | 1.8300000 |

Unique Subject Identifier=2861011011-0010

Assay variable : PTINR\_VAL1 PT-INR Value

N Mean Standard Deviation Minimum Maximum

---

|   |           |           |           |           |
|---|-----------|-----------|-----------|-----------|
| 6 | 1.7433333 | 0.1201111 | 1.6200000 | 1.9200000 |
|---|-----------|-----------|-----------|-----------|

---

Laboratory tests at the time of obtaining Table 2-6 consent, according to the presence or absence of proton-pump inhibitors

Unique Subject Identifier=2862000000-0003

MEANS Procedure

Assay variable : PTINR\_VAL1 PT-INR Value

N Mean Standard Deviation Minimum Maximum

---

|   |           |           |           |           |
|---|-----------|-----------|-----------|-----------|
| 3 | 2.2300000 | 0.0888819 | 2.1300000 | 2.3000000 |
|---|-----------|-----------|-----------|-----------|

---

Unique Subject Identifier=2862000000-0004

Assay variable : PTINR\_VAL1 PT-INR Value

N Mean Standard Deviation Minimum Maximum

---

|   |           |  |           |           |
|---|-----------|--|-----------|-----------|
| 1 | 1.9000000 |  | 1.9000000 | 1.9000000 |
|---|-----------|--|-----------|-----------|

---

Unique Subject Identifier=2868000000-0002

Assay variable : PTINR\_VAL1 PT-INR Value

N Mean Standard Deviation Minimum Maximum

---

|   |           |           |           |           |
|---|-----------|-----------|-----------|-----------|
| 4 | 1.9975000 | 0.3151058 | 1.5500000 | 2.2900000 |
|---|-----------|-----------|-----------|-----------|

---

Unique Subject Identifier=2868000000-0007



Assay variable : PTINR\_VAL1 PT-INR Value

N Mean Standard Deviation Minimum Maximum

---

|   |           |           |           |           |
|---|-----------|-----------|-----------|-----------|
| 2 | 2.3150000 | 1.0677312 | 1.5600000 | 3.0700000 |
|---|-----------|-----------|-----------|-----------|

---

Laboratory tests at the time of obtaining Table 2-6 consent, according to the presence or absence of proton-pump inhibitors

Unique Subject Identifier=2868000000-0009

MEANS Procedure

Assay variable : PTINR\_VAL1 PT-INR Value

| N | Mean      | Standard Deviation | Minimum   | Maximum   |
|---|-----------|--------------------|-----------|-----------|
| 5 | 2.1220000 | 0.5362555          | 1.5200000 | 2.8200000 |

Unique Subject Identifier=2868000000-0019

Assay variable : PTINR\_VAL1 PT-INR Value

| N | Mean      | Standard Deviation | Minimum   | Maximum   |
|---|-----------|--------------------|-----------|-----------|
| 3 | 2.2800000 | 0.2389561          | 2.0200000 | 2.4900000 |

Unique Subject Identifier=2872000000-0004

Assay variable : PTINR\_VAL1 PT-INR Value

| N | Mean      | Standard Deviation | Minimum   | Maximum   |
|---|-----------|--------------------|-----------|-----------|
| 3 | 1.6233333 | 0.2510644          | 1.4100000 | 1.9000000 |

Unique Subject Identifier=2872000000-0005

Assay variable : PTINR\_VAL1 PT-INR Value

N Mean Standard Deviation Minimum Maximum

---

|   |           |           |           |           |
|---|-----------|-----------|-----------|-----------|
| 4 | 2.3275000 | 0.8367148 | 1.5600000 | 3.5000000 |
|---|-----------|-----------|-----------|-----------|

---

Laboratory tests at the time of obtaining Table 2-6 consent, according to the presence or absence of proton-pump inhibitors

Unique Subject Identifier=2875000000-0012

MEANS Procedure

Assay variable : PTINR\_VAL1 PT-INR Value

| N | Mean      | Standard Deviation | Minimum   | Maximum   |
|---|-----------|--------------------|-----------|-----------|
| 6 | 1.5466667 | 0.2045157          | 1.3000000 | 1.8200000 |

Unique Subject Identifier=2875000000-0019

Assay variable : PTINR\_VAL1 PT-INR Value

| N | Mean      | Standard Deviation | Minimum   | Maximum   |
|---|-----------|--------------------|-----------|-----------|
| 5 | 1.4840000 | 0.1283745          | 1.3100000 | 1.6000000 |

Unique Subject Identifier=2875000000-0023

Assay variable : PTINR\_VAL1 PT-INR Value

| N | Mean      | Standard Deviation | Minimum   | Maximum   |
|---|-----------|--------------------|-----------|-----------|
| 2 | 2.1750000 | 0.2333452          | 2.0100000 | 2.3400000 |

Unique Subject Identifier=2875000000-0025

Assay variable : PTINR\_VAL1 PT-INR Value

N Mean Standard Deviation Minimum Maximum

---

|   |           |           |           |           |
|---|-----------|-----------|-----------|-----------|
| 2 | 1.8700000 | 0.0848528 | 1.8100000 | 1.9300000 |
|---|-----------|-----------|-----------|-----------|

---

Laboratory tests at the time of obtaining Table 2-6 consent, according to the presence or absence of proton-pump inhibitors

Unique Subject Identifier=2875000000-0038

MEANS Procedure

Assay variable : PTINR\_VAL1 PT-INR Value

N Mean Standard Deviation Minimum Maximum

---

|   |           |           |           |           |
|---|-----------|-----------|-----------|-----------|
| 3 | 2.0066667 | 0.2055075 | 1.8100000 | 2.2200000 |
|---|-----------|-----------|-----------|-----------|

---

Unique Subject Identifier=2875000000-0041

Assay variable : PTINR\_VAL1 PT-INR Value

N Mean Standard Deviation Minimum Maximum

---

|   |           |           |           |           |
|---|-----------|-----------|-----------|-----------|
| 3 | 2.1566667 | 0.1069268 | 2.0400000 | 2.2500000 |
|---|-----------|-----------|-----------|-----------|

---

Unique Subject Identifier=2875000000-0049

Assay variable : PTINR\_VAL1 PT-INR Value

N Mean Standard Deviation Minimum Maximum

---

|   |           |           |           |           |
|---|-----------|-----------|-----------|-----------|
| 4 | 1.9675000 | 0.3559377 | 1.6900000 | 2.4900000 |
|---|-----------|-----------|-----------|-----------|

---

Unique Subject Identifier=2889010000-0002

Assay variable : PTINR\_VAL1 PT-INR Value

N Mean Standard Deviation Minimum Maximum

---

|   |           |           |           |           |
|---|-----------|-----------|-----------|-----------|
| 5 | 1.3520000 | 0.0164317 | 1.3300000 | 1.3700000 |
|---|-----------|-----------|-----------|-----------|

---

Laboratory tests at the time of obtaining Table 2-6 consent, according to the presence or absence of proton-pump inhibitors

Unique Subject Identifier=2890001000-0001

MEANS Procedure

Assay variable : PTINR\_VAL1 PT-INR Value

N Mean Standard Deviation Minimum Maximum

---

|   |           |           |           |           |
|---|-----------|-----------|-----------|-----------|
| 4 | 3.1225000 | 0.4659310 | 2.5200000 | 3.6500000 |
|---|-----------|-----------|-----------|-----------|

---

Unique Subject Identifier=2898010000-0008

Assay variable : PTINR\_VAL1 PT-INR Value

N Mean Standard Deviation Minimum Maximum

---

|   |           |           |           |           |
|---|-----------|-----------|-----------|-----------|
| 4 | 1.7500000 | 0.0594418 | 1.6800000 | 1.8200000 |
|---|-----------|-----------|-----------|-----------|

---

Unique Subject Identifier=2898010000-0017

Assay variable : PTINR\_VAL1 PT-INR Value

N Mean Standard Deviation Minimum Maximum

---

|   |           |           |           |           |
|---|-----------|-----------|-----------|-----------|
| 6 | 2.1033333 | 0.2989091 | 1.6000000 | 2.4400000 |
|---|-----------|-----------|-----------|-----------|

---

Unique Subject Identifier=2910000000-0002



Assay variable : PTINR\_VAL1 PT-INR Value

N Mean Standard Deviation Minimum Maximum

---

|   |           |           |           |           |
|---|-----------|-----------|-----------|-----------|
| 2 | 2.0550000 | 0.1484924 | 1.9500000 | 2.1600000 |
|---|-----------|-----------|-----------|-----------|

---

Laboratory tests at the time of obtaining Table 2-6 consent, according to the presence or absence of proton-pump inhibitors

Unique Subject Identifier=2910000000-0005

MEANS Procedure

Assay variable : PTINR\_VAL1 PT-INR Value

N Mean Standard Deviation Minimum Maximum

---

|   |           |           |           |           |
|---|-----------|-----------|-----------|-----------|
| 3 | 2.0766667 | 0.2706166 | 1.8600000 | 2.3800000 |
|---|-----------|-----------|-----------|-----------|

---

Unique Subject Identifier=2910000000-0008

Assay variable : PTINR\_VAL1 PT-INR Value

N Mean Standard Deviation Minimum Maximum

---

|   |           |           |           |           |
|---|-----------|-----------|-----------|-----------|
| 2 | 2.1650000 | 0.1484924 | 2.0600000 | 2.2700000 |
|---|-----------|-----------|-----------|-----------|

---

Unique Subject Identifier=2910000000-0014

Assay variable : PTINR\_VAL1 PT-INR Value

N Mean Standard Deviation Minimum Maximum

---

|   |           |           |           |           |
|---|-----------|-----------|-----------|-----------|
| 4 | 2.2125000 | 0.6854864 | 1.5700000 | 2.8200000 |
|---|-----------|-----------|-----------|-----------|

---

Unique Subject Identifier=2910000000-0016

Assay variable : PTINR\_VAL1 PT-INR Value

N Mean Standard Deviation Minimum Maximum

---

|   |           |           |           |           |
|---|-----------|-----------|-----------|-----------|
| 2 | 2.0950000 | 0.0919239 | 2.0300000 | 2.1600000 |
|---|-----------|-----------|-----------|-----------|

---

Laboratory tests at the time of obtaining Table 2-6 consent, according to the presence or absence of proton-pump inhibitors

Unique Subject Identifier=2910000000-0021

MEANS Procedure

Assay variable : PTINR\_VAL1 PT-INR Value

N Mean Standard Deviation Minimum Maximum

---

|   |           |           |           |           |
|---|-----------|-----------|-----------|-----------|
| 2 | 1.4650000 | 0.0212132 | 1.4500000 | 1.4800000 |
|---|-----------|-----------|-----------|-----------|

---

Unique Subject Identifier=2910000000-0022

Assay variable : PTINR\_VAL1 PT-INR Value

N Mean Standard Deviation Minimum Maximum

---

|   |           |           |           |           |
|---|-----------|-----------|-----------|-----------|
| 4 | 1.8650000 | 0.3049044 | 1.6100000 | 2.2600000 |
|---|-----------|-----------|-----------|-----------|

---

Unique Subject Identifier=2910000000-0024

Assay variable : PTINR\_VAL1 PT-INR Value

N Mean Standard Deviation Minimum Maximum

---

|   |           |           |           |           |
|---|-----------|-----------|-----------|-----------|
| 3 | 1.8733333 | 0.3464583 | 1.5100000 | 2.2000000 |
|---|-----------|-----------|-----------|-----------|

---

Unique Subject Identifier=2910000000-0025

Assay variable : PTINR\_VAL1 PT-INR Value

N Mean Standard Deviation Minimum Maximum

---

|   |          |           |          |          |
|---|----------|-----------|----------|----------|
| 5 | 2.364000 | 0.3633593 | 1.800000 | 2.760000 |
|---|----------|-----------|----------|----------|

---

Laboratory tests at the time of obtaining Table 2-6 consent, according to the presence or absence of proton-pump inhibitors

Unique Subject Identifier=291000000-0026

MEANS Procedure

Assay variable : PTINR\_VAL1 PT-INR Value

N Mean Standard Deviation Minimum Maximum

---

|   |          |           |          |          |
|---|----------|-----------|----------|----------|
| 2 | 2.240000 | 0.0282843 | 2.220000 | 2.260000 |
|---|----------|-----------|----------|----------|

---

Unique Subject Identifier=291300000-0006

Assay variable : PTINR\_VAL1 PT-INR Value

N Mean Standard Deviation Minimum Maximum

---

|   |           |           |          |          |
|---|-----------|-----------|----------|----------|
| 3 | 1.8966667 | 0.1504438 | 1.800000 | 2.070000 |
|---|-----------|-----------|----------|----------|

---

Unique Subject Identifier=291300000-0014

Assay variable : PTINR\_VAL1 PT-INR Value

N Mean Standard Deviation Minimum Maximum

---

|   |           |           |          |          |
|---|-----------|-----------|----------|----------|
| 3 | 1.8066667 | 0.4212284 | 1.350000 | 2.180000 |
|---|-----------|-----------|----------|----------|

---

Unique Subject Identifier=291400000-0005

Assay variable : PTINR\_VAL1 PT-INR Value

N Mean Standard Deviation Minimum Maximum

---

|   |           |           |           |           |
|---|-----------|-----------|-----------|-----------|
| 4 | 2.0550000 | 0.0785281 | 1.9400000 | 2.1100000 |
|---|-----------|-----------|-----------|-----------|

---

Laboratory tests at the time of obtaining Table 2-6 consent, according to the presence or absence of proton-pump inhibitors

Unique Subject Identifier=291400000-0007

MEANS Procedure

Assay variable : PTINR\_VAL1 PT-INR Value

N Mean Standard Deviation Minimum Maximum

---

|   |          |           |          |          |
|---|----------|-----------|----------|----------|
| 4 | 2.140000 | 0.1373560 | 1.960000 | 2.290000 |
|---|----------|-----------|----------|----------|

---

Unique Subject Identifier=2937010011-0001

Assay variable : PTINR\_VAL1 PT-INR Value

N Mean Standard Deviation Minimum Maximum

---

|   |          |           |          |          |
|---|----------|-----------|----------|----------|
| 3 | 1.513333 | 0.1960442 | 1.330000 | 1.720000 |
|---|----------|-----------|----------|----------|

---

Unique Subject Identifier=2937010011-0009

Assay variable : PTINR\_VAL1 PT-INR Value

N Mean Standard Deviation Minimum Maximum

---

|   |          |           |          |          |
|---|----------|-----------|----------|----------|
| 4 | 1.742500 | 0.3920353 | 1.330000 | 2.130000 |
|---|----------|-----------|----------|----------|

---

Unique Subject Identifier=2937010011-0013



Assay variable : PTINR\_VAL1 PT-INR Value

N Mean Standard Deviation Minimum Maximum

---

|   |           |           |           |           |
|---|-----------|-----------|-----------|-----------|
| 5 | 1.8080000 | 1.0148497 | 1.0200000 | 3.5500000 |
|---|-----------|-----------|-----------|-----------|

---

Laboratory tests at the time of obtaining Table 2-6 consent, according to the presence or absence of proton-pump inhibitors

Unique Subject Identifier=2937010011-0015

MEANS Procedure

Assay variable : PTINR\_VAL1 PT-INR Value

N Mean Standard Deviation Minimum Maximum

---

|   |           |           |           |           |
|---|-----------|-----------|-----------|-----------|
| 6 | 1.7816667 | 0.1452469 | 1.6200000 | 1.9900000 |
|---|-----------|-----------|-----------|-----------|

---

Unique Subject Identifier=2937010011-0017

Assay variable : PTINR\_VAL1 PT-INR Value

N Mean Standard Deviation Minimum Maximum

---

|   |           |           |           |           |
|---|-----------|-----------|-----------|-----------|
| 6 | 1.9016667 | 0.4646899 | 1.5100000 | 2.6300000 |
|---|-----------|-----------|-----------|-----------|

---

Unique Subject Identifier=2937010011-0018

Assay variable : PTINR\_VAL1 PT-INR Value

N Mean Standard Deviation Minimum Maximum

---

|   |           |           |           |           |
|---|-----------|-----------|-----------|-----------|
| 6 | 2.0950000 | 0.2341581 | 1.7200000 | 2.4300000 |
|---|-----------|-----------|-----------|-----------|

---

Unique Subject Identifier=2937010011-0019

Assay variable : PTINR\_VAL1 PT-INR Value

N Mean Standard Deviation Minimum Maximum

---

|   |           |           |           |           |
|---|-----------|-----------|-----------|-----------|
| 6 | 1.7683333 | 0.1248065 | 1.6000000 | 1.9500000 |
|---|-----------|-----------|-----------|-----------|

---

Laboratory tests at the time of obtaining Table 2-6 consent, according to the presence or absence of proton-pump inhibitors

Unique Subject Identifier=2937010011-0022

MEANS Procedure

Assay variable : PTINR\_VAL1 PT-INR Value

| N | Mean      | Standard Deviation | Minimum   | Maximum   |
|---|-----------|--------------------|-----------|-----------|
| 4 | 1.9225000 | 0.3247948          | 1.6000000 | 2.2800000 |

Unique Subject Identifier=2941010110-0014

Assay variable : PTINR\_VAL1 PT-INR Value

| N | Mean      | Standard Deviation | Minimum   | Maximum   |
|---|-----------|--------------------|-----------|-----------|
| 5 | 1.8600000 | 0.3209361          | 1.6000000 | 2.4000000 |

Unique Subject Identifier=2949000000-0001

Assay variable : PTINR\_VAL1 PT-INR Value

| N | Mean      | Standard Deviation | Minimum   | Maximum   |
|---|-----------|--------------------|-----------|-----------|
| 3 | 1.6966667 | 0.3043572          | 1.4600000 | 2.0400000 |

Unique Subject Identifier=2949000000-0003

Assay variable : PTINR\_VAL1 PT-INR Value

N Mean Standard Deviation Minimum Maximum

---

|   |          |  |          |          |
|---|----------|--|----------|----------|
| 1 | 2.650000 |  | 2.650000 | 2.650000 |
|---|----------|--|----------|----------|

---

Laboratory tests at the time of obtaining Table 2-6 consent, according to the presence or absence of proton-pump inhibitors

Unique Subject Identifier=2949000000-0004

MEANS Procedure

Assay variable : PTINR\_VAL1 PT-INR Value

N Mean Standard Deviation Minimum Maximum

---

|   |           |           |           |           |
|---|-----------|-----------|-----------|-----------|
| 3 | 1.8433333 | 0.3027100 | 1.5200000 | 2.1200000 |
|---|-----------|-----------|-----------|-----------|

---

Unique Subject Identifier=2949000000-0027

Assay variable : PTINR\_VAL1 PT-INR Value

N Mean Standard Deviation Minimum Maximum

---

|   |           |           |           |           |
|---|-----------|-----------|-----------|-----------|
| 2 | 1.8300000 | 0.2404163 | 1.6600000 | 2.0000000 |
|---|-----------|-----------|-----------|-----------|

---

Unique Subject Identifier=2949000000-0033

Assay variable : PTINR\_VAL1 PT-INR Value

N Mean Standard Deviation Minimum Maximum

---

|   |           |           |           |           |
|---|-----------|-----------|-----------|-----------|
| 2 | 2.1850000 | 0.4030509 | 1.9000000 | 2.4700000 |
|---|-----------|-----------|-----------|-----------|

---

Unique Subject Identifier=2949000000-0037

Assay variable : PTINR\_VAL1 PT-INR Value

N Mean Standard Deviation Minimum Maximum

---

|   |           |           |           |           |
|---|-----------|-----------|-----------|-----------|
| 2 | 1.9250000 | 0.1060660 | 1.8500000 | 2.0000000 |
|---|-----------|-----------|-----------|-----------|

---

Laboratory tests at the time of obtaining Table 2-6 consent, according to the presence or absence of proton-pump inhibitors

Unique Subject Identifier=2953000000-0003

MEANS Procedure

Assay variable : PTINR\_VAL1 PT-INR Value

N Mean Standard Deviation Minimum Maximum

---

|   |           |           |           |           |
|---|-----------|-----------|-----------|-----------|
| 5 | 2.5620000 | 0.1061603 | 2.4300000 | 2.7000000 |
|---|-----------|-----------|-----------|-----------|

---

Unique Subject Identifier=2953000000-0004

Assay variable : PTINR\_VAL1 PT-INR Value

N Mean Standard Deviation Minimum Maximum

---

|   |           |           |           |           |
|---|-----------|-----------|-----------|-----------|
| 6 | 2.1066667 | 0.2170407 | 1.8400000 | 2.5000000 |
|---|-----------|-----------|-----------|-----------|

---

Unique Subject Identifier=2954000000-0009

Assay variable : PTINR\_VAL1 PT-INR Value

N Mean Standard Deviation Minimum Maximum

---

|   |           |           |           |           |
|---|-----------|-----------|-----------|-----------|
| 5 | 2.2960000 | 0.7554337 | 1.2500000 | 3.3800000 |
|---|-----------|-----------|-----------|-----------|

---

Unique Subject Identifier=2954000000-0013



Assay variable : PTINR\_VAL1 PT-INR Value

N Mean Standard Deviation Minimum Maximum

---

|   |           |           |           |           |
|---|-----------|-----------|-----------|-----------|
| 6 | 1.6766667 | 0.2069460 | 1.3800000 | 1.9800000 |
|---|-----------|-----------|-----------|-----------|

---

Laboratory tests at the time of obtaining Table 2-6 consent, according to the presence or absence of proton-pump inhibitors

Unique Subject Identifier=2957000000-0017

MEANS Procedure

Assay variable : PTINR\_VAL1 PT-INR Value

N Mean Standard Deviation Minimum Maximum

---

|   |           |           |           |           |
|---|-----------|-----------|-----------|-----------|
| 4 | 2.1925000 | 0.1144188 | 2.0900000 | 2.3500000 |
|---|-----------|-----------|-----------|-----------|

---

Unique Subject Identifier=3001010001-0003

Assay variable : PTINR\_VAL1 PT-INR Value

N Mean Standard Deviation Minimum Maximum

---

|   |           |           |           |           |
|---|-----------|-----------|-----------|-----------|
| 5 | 1.6920000 | 0.2604227 | 1.4900000 | 2.0200000 |
|---|-----------|-----------|-----------|-----------|

---

Unique Subject Identifier=3001010001-0004

Assay variable : PTINR\_VAL1 PT-INR Value

N Mean Standard Deviation Minimum Maximum

---

|   |           |           |           |           |
|---|-----------|-----------|-----------|-----------|
| 6 | 1.8250000 | 0.1170897 | 1.6500000 | 1.9400000 |
|---|-----------|-----------|-----------|-----------|

---

Unique Subject Identifier=3001010001-0009

Assay variable : PTINR\_VAL1 PT-INR Value

N Mean Standard Deviation Minimum Maximum

---

|   |           |           |           |           |
|---|-----------|-----------|-----------|-----------|
| 5 | 1.7360000 | 0.1699412 | 1.6100000 | 1.9800000 |
|---|-----------|-----------|-----------|-----------|

---

Laboratory tests at the time of obtaining Table 2-6 consent, according to the presence or absence of proton-pump inhibitors

Unique Subject Identifier=3001010001-0013

MEANS Procedure

Assay variable : PTINR\_VAL1 PT-INR Value

N Mean Standard Deviation Minimum Maximum

---

|   |           |           |           |           |
|---|-----------|-----------|-----------|-----------|
| 4 | 2.3675000 | 0.4050823 | 1.8500000 | 2.8400000 |
|---|-----------|-----------|-----------|-----------|

---

Unique Subject Identifier=3001010001-0035

Assay variable : PTINR\_VAL1 PT-INR Value

N Mean Standard Deviation Minimum Maximum

---

|   |           |           |           |           |
|---|-----------|-----------|-----------|-----------|
| 5 | 1.7440000 | 0.2411016 | 1.4800000 | 2.1300000 |
|---|-----------|-----------|-----------|-----------|

---

Unique Subject Identifier=3001010001-0044

Assay variable : PTINR\_VAL1 PT-INR Value

N Mean Standard Deviation Minimum Maximum

---

|   |           |           |           |           |
|---|-----------|-----------|-----------|-----------|
| 4 | 2.1825000 | 0.1685972 | 2.0200000 | 2.4100000 |
|---|-----------|-----------|-----------|-----------|

---

Unique Subject Identifier=3001010001-0046

Assay variable : PTINR\_VAL1 PT-INR Value

N Mean Standard Deviation Minimum Maximum

---

|   |           |           |           |           |
|---|-----------|-----------|-----------|-----------|
| 4 | 2.1900000 | 0.2171021 | 2.0300000 | 2.5000000 |
|---|-----------|-----------|-----------|-----------|

---

Laboratory tests at the time of obtaining Table 2-6 consent, according to the presence or absence of proton-pump inhibitors

Unique Subject Identifier=3001010001-0049

MEANS Procedure

Assay variable : PTINR\_VAL1 PT-INR Value

N Mean Standard Deviation Minimum Maximum

---

|   |           |           |           |           |
|---|-----------|-----------|-----------|-----------|
| 5 | 2.1920000 | 0.2622403 | 1.8900000 | 2.4700000 |
|---|-----------|-----------|-----------|-----------|

---

Unique Subject Identifier=3001010001-0057

Assay variable : PTINR\_VAL1 PT-INR Value

N Mean Standard Deviation Minimum Maximum

---

|   |           |           |           |           |
|---|-----------|-----------|-----------|-----------|
| 3 | 2.1066667 | 0.1803700 | 1.9200000 | 2.2800000 |
|---|-----------|-----------|-----------|-----------|

---

Unique Subject Identifier=3003011110-0001

Assay variable : PTINR\_VAL1 PT-INR Value

N Mean Standard Deviation Minimum Maximum

---

|   |           |           |           |           |
|---|-----------|-----------|-----------|-----------|
| 3 | 1.5333333 | 0.4933896 | 1.1500000 | 2.0900000 |
|---|-----------|-----------|-----------|-----------|

---

Unique Subject Identifier=3009011111-0006

Assay variable : PTINR\_VAL1 PT-INR Value

N Mean Standard Deviation Minimum Maximum

---

|   |           |           |           |           |
|---|-----------|-----------|-----------|-----------|
| 3 | 1.8800000 | 0.1473092 | 1.7500000 | 2.0400000 |
|---|-----------|-----------|-----------|-----------|

---

Laboratory tests at the time of obtaining Table 2-6 consent, according to the presence or absence of proton-pump inhibitors

Unique Subject Identifier=3010011111-0001

MEANS Procedure

Assay variable : PTINR\_VAL1 PT-INR Value

| N | Mean      | Standard Deviation | Minimum   | Maximum   |
|---|-----------|--------------------|-----------|-----------|
| 5 | 1.9020000 | 0.2240982          | 1.6000000 | 2.2300000 |

Unique Subject Identifier=3011010000-0004

Assay variable : PTINR\_VAL1 PT-INR Value

| N | Mean      | Standard Deviation | Minimum   | Maximum   |
|---|-----------|--------------------|-----------|-----------|
| 6 | 1.7550000 | 0.3245766          | 1.4300000 | 2.2000000 |

Unique Subject Identifier=3011010000-0006

Assay variable : PTINR\_VAL1 PT-INR Value

| N | Mean      | Standard Deviation | Minimum   | Maximum   |
|---|-----------|--------------------|-----------|-----------|
| 6 | 1.8150000 | 0.3179151          | 1.3900000 | 2.2400000 |

Unique Subject Identifier=3011010000-0010



Assay variable : PTINR\_VAL1 PT-INR Value

N Mean Standard Deviation Minimum Maximum

---

|   |           |           |           |           |
|---|-----------|-----------|-----------|-----------|
| 6 | 1.8383333 | 0.2523027 | 1.6300000 | 2.3100000 |
|---|-----------|-----------|-----------|-----------|

---

Laboratory tests at the time of obtaining Table 2-6 consent, according to the presence or absence of proton-pump inhibitors

Unique Subject Identifier=3016111111-0068

MEANS Procedure

Assay variable : PTINR\_VAL1 PT-INR Value

N Mean Standard Deviation Minimum Maximum

---

|   |           |           |           |           |
|---|-----------|-----------|-----------|-----------|
| 2 | 2.5450000 | 0.1767767 | 2.4200000 | 2.6700000 |
|---|-----------|-----------|-----------|-----------|

---

Unique Subject Identifier=3019011110-0002

Assay variable : PTINR\_VAL1 PT-INR Value

N Mean Standard Deviation Minimum Maximum

---

|   |           |  |           |           |
|---|-----------|--|-----------|-----------|
| 1 | 2.2700000 |  | 2.2700000 | 2.2700000 |
|---|-----------|--|-----------|-----------|

---

Unique Subject Identifier=3019011110-0005

Assay variable : PTINR\_VAL1 PT-INR Value

N Mean Standard Deviation Minimum Maximum

---

|   |           |           |           |           |
|---|-----------|-----------|-----------|-----------|
| 3 | 1.9733333 | 0.6493330 | 1.2700000 | 2.5500000 |
|---|-----------|-----------|-----------|-----------|

---

Unique Subject Identifier=3019011110-0008

Assay variable : PTINR\_VAL1 PT-INR Value

N Mean Standard Deviation Minimum Maximum

---

|   |           |           |           |           |
|---|-----------|-----------|-----------|-----------|
| 3 | 2.0133333 | 0.6242863 | 1.4800000 | 2.7000000 |
|---|-----------|-----------|-----------|-----------|

---

Laboratory tests at the time of obtaining Table 2-6 consent, according to the presence or absence of proton-pump inhibitors

Unique Subject Identifier=3019011110-0010

MEANS Procedure

Assay variable : PTINR\_VAL1 PT-INR Value

N Mean Standard Deviation Minimum Maximum

---

|   |           |           |           |           |
|---|-----------|-----------|-----------|-----------|
| 6 | 2.0133333 | 0.1240430 | 1.8100000 | 2.1400000 |
|---|-----------|-----------|-----------|-----------|

---

Unique Subject Identifier=3019011110-0012

Assay variable : PTINR\_VAL1 PT-INR Value

N Mean Standard Deviation Minimum Maximum

---

|   |           |           |           |           |
|---|-----------|-----------|-----------|-----------|
| 3 | 2.0366667 | 0.1709776 | 1.8400000 | 2.1500000 |
|---|-----------|-----------|-----------|-----------|

---

Unique Subject Identifier=3019011110-0014

Assay variable : PTINR\_VAL1 PT-INR Value

N Mean Standard Deviation Minimum Maximum

---

|   |           |           |           |           |
|---|-----------|-----------|-----------|-----------|
| 2 | 1.8850000 | 0.0636396 | 1.8400000 | 1.9300000 |
|---|-----------|-----------|-----------|-----------|

---

Unique Subject Identifier=3019011110-0019

Assay variable : PTINR\_VAL1 PT-INR Value

N Mean Standard Deviation Minimum Maximum

---

|   |          |  |          |          |
|---|----------|--|----------|----------|
| 1 | 1.300000 |  | 1.300000 | 1.300000 |
|---|----------|--|----------|----------|

---

Laboratory tests at the time of obtaining Table 2-6 consent, according to the presence or absence of proton-pump inhibitors

Unique Subject Identifier=3019011110-0023

MEANS Procedure

Assay variable : PTINR\_VAL1 PT-INR Value

N Mean Standard Deviation Minimum Maximum

---

|   |           |           |           |           |
|---|-----------|-----------|-----------|-----------|
| 3 | 2.1266667 | 0.2722744 | 1.8200000 | 2.3400000 |
|---|-----------|-----------|-----------|-----------|

---

Unique Subject Identifier=3019011110-0041

Assay variable : PTINR\_VAL1 PT-INR Value

N Mean Standard Deviation Minimum Maximum

---

|   |           |           |           |           |
|---|-----------|-----------|-----------|-----------|
| 3 | 1.6933333 | 0.3043572 | 1.4700000 | 2.0400000 |
|---|-----------|-----------|-----------|-----------|

---

Unique Subject Identifier=3019011110-0043

Assay variable : PTINR\_VAL1 PT-INR Value

N Mean Standard Deviation Minimum Maximum

---

|   |           |           |           |           |
|---|-----------|-----------|-----------|-----------|
| 3 | 1.6466667 | 0.3431229 | 1.2800000 | 1.9600000 |
|---|-----------|-----------|-----------|-----------|

---

Unique Subject Identifier=3019011110-0047

Assay variable : PTINR\_VAL1 PT-INR Value

N Mean Standard Deviation Minimum Maximum

---

|   |           |           |           |           |
|---|-----------|-----------|-----------|-----------|
| 3 | 1.8766667 | 0.0513160 | 1.8200000 | 1.9200000 |
|---|-----------|-----------|-----------|-----------|

---

Laboratory tests at the time of obtaining Table 2-6 consent, according to the presence or absence of proton-pump inhibitors

Unique Subject Identifier=3019011110-0051

MEANS Procedure

Assay variable : PTINR\_VAL1 PT-INR Value

N Mean Standard Deviation Minimum Maximum

---

|   |           |           |           |           |
|---|-----------|-----------|-----------|-----------|
| 3 | 1.6300000 | 0.1670329 | 1.4800000 | 1.8100000 |
|---|-----------|-----------|-----------|-----------|

---

Unique Subject Identifier=3026011100-0016

Assay variable : PTINR\_VAL1 PT-INR Value

N Mean Standard Deviation Minimum Maximum

---

|   |           |           |           |           |
|---|-----------|-----------|-----------|-----------|
| 3 | 2.5066667 | 0.3962743 | 2.1300000 | 2.9200000 |
|---|-----------|-----------|-----------|-----------|

---

Unique Subject Identifier=3026011100-0025

Assay variable : PTINR\_VAL1 PT-INR Value

N Mean Standard Deviation Minimum Maximum

---

|   |           |           |           |           |
|---|-----------|-----------|-----------|-----------|
| 3 | 1.9300000 | 0.3078961 | 1.5900000 | 2.1900000 |
|---|-----------|-----------|-----------|-----------|

---

Unique Subject Identifier=3026011100-0033



Assay variable : PTINR\_VAL1 PT-INR Value

N Mean Standard Deviation Minimum Maximum

---

|   |           |           |           |           |
|---|-----------|-----------|-----------|-----------|
| 3 | 2.6233333 | 0.6903864 | 1.9200000 | 3.3000000 |
|---|-----------|-----------|-----------|-----------|

---

Laboratory tests at the time of obtaining Table 2-6 consent, according to the presence or absence of proton-pump inhibitors

Unique Subject Identifier=3026011100-0058

MEANS Procedure

Assay variable : PTINR\_VAL1 PT-INR Value

N Mean Standard Deviation Minimum Maximum

---

|   |           |           |           |           |
|---|-----------|-----------|-----------|-----------|
| 4 | 1.7650000 | 0.1913984 | 1.5900000 | 1.9500000 |
|---|-----------|-----------|-----------|-----------|

---

Unique Subject Identifier=3056000000-0009

Assay variable : PTINR\_VAL1 PT-INR Value

N Mean Standard Deviation Minimum Maximum

---

|   |           |           |           |           |
|---|-----------|-----------|-----------|-----------|
| 4 | 2.1175000 | 0.3069609 | 1.7600000 | 2.5100000 |
|---|-----------|-----------|-----------|-----------|

---

Unique Subject Identifier=3056000000-0010

Assay variable : PTINR\_VAL1 PT-INR Value

N Mean Standard Deviation Minimum Maximum

---

|   |           |           |           |           |
|---|-----------|-----------|-----------|-----------|
| 6 | 1.9916667 | 0.6568232 | 1.2100000 | 2.8500000 |
|---|-----------|-----------|-----------|-----------|

---

Unique Subject Identifier=3056000000-0015

Assay variable : PTINR\_VAL1 PT-INR Value

N Mean Standard Deviation Minimum Maximum

---

|   |          |           |          |          |
|---|----------|-----------|----------|----------|
| 4 | 1.820000 | 0.4496665 | 1.350000 | 2.370000 |
|---|----------|-----------|----------|----------|

---

Laboratory tests at the time of obtaining Table 2-6 consent, according to the presence or absence of proton-pump inhibitors

Unique Subject Identifier=3056000000-0024

MEANS Procedure

Assay variable : PTINR\_VAL1 PT-INR Value

| N | Mean      | Standard Deviation | Minimum   | Maximum   |
|---|-----------|--------------------|-----------|-----------|
| 3 | 2.3133333 | 0.7900211          | 1.5200000 | 3.1000000 |

Unique Subject Identifier=3056000000-0025

Assay variable : PTINR\_VAL1 PT-INR Value

| N | Mean      | Standard Deviation | Minimum   | Maximum   |
|---|-----------|--------------------|-----------|-----------|
| 2 | 2.5600000 | 0.5374012          | 2.1800000 | 2.9400000 |

Unique Subject Identifier=3056000000-0028

Assay variable : PTINR\_VAL1 PT-INR Value

| N | Mean      | Standard Deviation | Minimum   | Maximum   |
|---|-----------|--------------------|-----------|-----------|
| 2 | 1.6950000 | 0.0636396          | 1.6500000 | 1.7400000 |

Unique Subject Identifier=3060011100-0007

Assay variable : PTINR\_VAL1 PT-INR Value

N Mean Standard Deviation Minimum Maximum

---

|   |          |           |          |          |
|---|----------|-----------|----------|----------|
| 5 | 2.180000 | 0.4086563 | 1.600000 | 2.700000 |
|---|----------|-----------|----------|----------|

---

Laboratory tests at the time of obtaining Table 2-6 consent, according to the presence or absence of proton-pump inhibitors

Unique Subject Identifier=3060011100-0011

MEANS Procedure

Assay variable : PTINR\_VAL1 PT-INR Value

N Mean Standard Deviation Minimum Maximum

---

|   |           |           |           |           |
|---|-----------|-----------|-----------|-----------|
| 6 | 1.5666667 | 0.1366260 | 1.4000000 | 1.7000000 |
|---|-----------|-----------|-----------|-----------|

---

Unique Subject Identifier=3060011100-0013

Assay variable : PTINR\_VAL1 PT-INR Value

N Mean Standard Deviation Minimum Maximum

---

|   |           |           |           |           |
|---|-----------|-----------|-----------|-----------|
| 3 | 1.6000000 | 0.2645751 | 1.4000000 | 1.9000000 |
|---|-----------|-----------|-----------|-----------|

---

Unique Subject Identifier=3060011100-0017

Assay variable : PTINR\_VAL1 PT-INR Value

N Mean Standard Deviation Minimum Maximum

---

|   |           |           |           |           |
|---|-----------|-----------|-----------|-----------|
| 6 | 1.7833333 | 0.4792355 | 1.4000000 | 2.7000000 |
|---|-----------|-----------|-----------|-----------|

---

Unique Subject Identifier=3060011100-0020

Assay variable : PTINR\_VAL1 PT-INR Value

N Mean Standard Deviation Minimum Maximum

---

|   |          |           |          |          |
|---|----------|-----------|----------|----------|
| 6 | 2.100000 | 0.0632456 | 2.000000 | 2.200000 |
|---|----------|-----------|----------|----------|

---

Laboratory tests at the time of obtaining Table 2-6 consent, according to the presence or absence of proton-pump inhibitors

Unique Subject Identifier=3076011000-0005

MEANS Procedure

Assay variable : PTINR\_VAL1 PT-INR Value

| N | Mean      | Standard Deviation | Minimum   | Maximum   |
|---|-----------|--------------------|-----------|-----------|
| 5 | 1.9200000 | 0.3420526          | 1.5000000 | 2.4000000 |

Unique Subject Identifier=3077010011-0007

Assay variable : PTINR\_VAL1 PT-INR Value

| N | Mean      | Standard Deviation | Minimum   | Maximum   |
|---|-----------|--------------------|-----------|-----------|
| 5 | 1.9840000 | 0.2069541          | 1.7200000 | 2.1700000 |

Unique Subject Identifier=3077010011-0011

Assay variable : PTINR\_VAL1 PT-INR Value

| N | Mean      | Standard Deviation | Minimum   | Maximum   |
|---|-----------|--------------------|-----------|-----------|
| 5 | 1.7660000 | 0.0835464          | 1.7000000 | 1.9100000 |

Unique Subject Identifier=3084010000-0007



Assay variable : PTINR\_VAL1 PT-INR Value

N Mean Standard Deviation Minimum Maximum

---

|   |           |  |           |           |
|---|-----------|--|-----------|-----------|
| 1 | 1.9500000 |  | 1.9500000 | 1.9500000 |
|---|-----------|--|-----------|-----------|

---

Laboratory tests at the time of obtaining Table 2-6 consent, according to the presence or absence of proton-pump inhibitors

Unique Subject Identifier=3084010000-0013

MEANS Procedure

Assay variable : PTINR\_VAL1 PT-INR Value

| N | Mean      | Standard Deviation | Minimum   | Maximum   |
|---|-----------|--------------------|-----------|-----------|
| 1 | 1.5000000 |                    | 1.5000000 | 1.5000000 |

Unique Subject Identifier=3084010000-0014

Assay variable : PTINR\_VAL1 PT-INR Value

| N | Mean      | Standard Deviation | Minimum   | Maximum   |
|---|-----------|--------------------|-----------|-----------|
| 3 | 1.6133333 | 0.2289833          | 1.4300000 | 1.8700000 |

Unique Subject Identifier=3084010000-0015

Assay variable : PTINR\_VAL1 PT-INR Value

| N | Mean      | Standard Deviation | Minimum   | Maximum   |
|---|-----------|--------------------|-----------|-----------|
| 3 | 1.6033333 | 0.0750555          | 1.5600000 | 1.6900000 |

Unique Subject Identifier=3084010000-0017

Assay variable : PTINR\_VAL1 PT-INR Value

N Mean Standard Deviation Minimum Maximum

---

|   |           |           |           |           |
|---|-----------|-----------|-----------|-----------|
| 2 | 2.0550000 | 0.3889087 | 1.7800000 | 2.3300000 |
|---|-----------|-----------|-----------|-----------|

---

Laboratory tests at the time of obtaining Table 2-6 consent, according to the presence or absence of proton-pump inhibitors

Unique Subject Identifier=3084010000-0021

MEANS Procedure

Assay variable : PTINR\_VAL1 PT-INR Value

N Mean Standard Deviation Minimum Maximum

---

|   |           |           |           |           |
|---|-----------|-----------|-----------|-----------|
| 3 | 1.1066667 | 0.0832666 | 1.0400000 | 1.2000000 |
|---|-----------|-----------|-----------|-----------|

---

Unique Subject Identifier=3085010000-0005

Assay variable : PTINR\_VAL1 PT-INR Value

N Mean Standard Deviation Minimum Maximum

---

|   |           |           |           |           |
|---|-----------|-----------|-----------|-----------|
| 3 | 1.5466667 | 0.4792007 | 1.2700000 | 2.1000000 |
|---|-----------|-----------|-----------|-----------|

---

Unique Subject Identifier=3085010000-0009

Assay variable : PTINR\_VAL1 PT-INR Value

N Mean Standard Deviation Minimum Maximum

---

|   |           |           |           |           |
|---|-----------|-----------|-----------|-----------|
| 3 | 2.1800000 | 0.4403408 | 1.7300000 | 2.6100000 |
|---|-----------|-----------|-----------|-----------|

---

Unique Subject Identifier=3085010000-0016

Assay variable : PTINR\_VAL1 PT-INR Value

N Mean Standard Deviation Minimum Maximum

---

|   |           |           |           |           |
|---|-----------|-----------|-----------|-----------|
| 2 | 1.7850000 | 0.1626346 | 1.6700000 | 1.9000000 |
|---|-----------|-----------|-----------|-----------|

---

Laboratory tests at the time of obtaining Table 2-6 consent, according to the presence or absence of proton-pump inhibitors

Unique Subject Identifier=3085010000-0018

MEANS Procedure

Assay variable : PTINR\_VAL1 PT-INR Value

N Mean Standard Deviation Minimum Maximum

---

|   |           |           |           |           |
|---|-----------|-----------|-----------|-----------|
| 5 | 1.8100000 | 0.2298913 | 1.5600000 | 2.0500000 |
|---|-----------|-----------|-----------|-----------|

---

Unique Subject Identifier=3085010000-0019

Assay variable : PTINR\_VAL1 PT-INR Value

N Mean Standard Deviation Minimum Maximum

---

|   |           |           |           |           |
|---|-----------|-----------|-----------|-----------|
| 3 | 1.8066667 | 0.1266228 | 1.6700000 | 1.9200000 |
|---|-----------|-----------|-----------|-----------|

---

Unique Subject Identifier=3085010000-0028

Assay variable : PTINR\_VAL1 PT-INR Value

N Mean Standard Deviation Minimum Maximum

---

|   |           |           |           |           |
|---|-----------|-----------|-----------|-----------|
| 3 | 1.7700000 | 0.0556776 | 1.7200000 | 1.8300000 |
|---|-----------|-----------|-----------|-----------|

---

Unique Subject Identifier=3092000000-0003

Assay variable : PTINR\_VAL1 PT-INR Value

N Mean Standard Deviation Minimum Maximum

---

|   |           |           |           |           |
|---|-----------|-----------|-----------|-----------|
| 5 | 2.0920000 | 0.1235718 | 1.9200000 | 2.2600000 |
|---|-----------|-----------|-----------|-----------|

---

Laboratory tests at the time of obtaining Table 2-6 consent, according to the presence or absence of proton-pump inhibitors

Unique Subject Identifier=3092000000-0008

MEANS Procedure

Assay variable : PTINR\_VAL1 PT-INR Value

N Mean Standard Deviation Minimum Maximum

---

|   |           |  |           |           |
|---|-----------|--|-----------|-----------|
| 1 | 1.6400000 |  | 1.6400000 | 1.6400000 |
|---|-----------|--|-----------|-----------|

---

Unique Subject Identifier=3096000000-0004

Assay variable : PTINR\_VAL1 PT-INR Value

N Mean Standard Deviation Minimum Maximum

---

|   |           |           |           |           |
|---|-----------|-----------|-----------|-----------|
| 4 | 2.5750000 | 0.5678908 | 2.0000000 | 3.2000000 |
|---|-----------|-----------|-----------|-----------|

---

Unique Subject Identifier=3096000000-0007

Assay variable : PTINR\_VAL1 PT-INR Value

N Mean Standard Deviation Minimum Maximum

---

|   |           |           |           |           |
|---|-----------|-----------|-----------|-----------|
| 4 | 2.2750000 | 0.5377422 | 1.6000000 | 2.8000000 |
|---|-----------|-----------|-----------|-----------|

---

Unique Subject Identifier=3096000000-0010



Assay variable : PTINR\_VAL1 PT-INR Value

N Mean Standard Deviation Minimum Maximum

---

|   |           |           |           |           |
|---|-----------|-----------|-----------|-----------|
| 4 | 2.6250000 | 0.7365460 | 1.8000000 | 3.5000000 |
|---|-----------|-----------|-----------|-----------|

---

Laboratory tests at the time of obtaining Table 2-6 consent, according to the presence or absence of proton-pump inhibitors

Unique Subject Identifier=3096000000-0012

MEANS Procedure

Assay variable : PTINR\_VAL1 PT-INR Value

N Mean Standard Deviation Minimum Maximum

---

|   |           |           |           |           |
|---|-----------|-----------|-----------|-----------|
| 4 | 1.9500000 | 0.1914854 | 1.7000000 | 2.1000000 |
|---|-----------|-----------|-----------|-----------|

---

Unique Subject Identifier=3098011000-0002

Assay variable : PTINR\_VAL1 PT-INR Value

N Mean Standard Deviation Minimum Maximum

---

|   |           |           |           |           |
|---|-----------|-----------|-----------|-----------|
| 3 | 2.2566667 | 0.1429452 | 2.1000000 | 2.3800000 |
|---|-----------|-----------|-----------|-----------|

---

Unique Subject Identifier=3098011000-0004

Assay variable : PTINR\_VAL1 PT-INR Value

N Mean Standard Deviation Minimum Maximum

---

|   |           |           |           |           |
|---|-----------|-----------|-----------|-----------|
| 3 | 1.4033333 | 0.0723418 | 1.3200000 | 1.4500000 |
|---|-----------|-----------|-----------|-----------|

---

Unique Subject Identifier=3098011000-0005

Assay variable : PTINR\_VAL1 PT-INR Value

N Mean Standard Deviation Minimum Maximum

---

|   |           |           |           |           |
|---|-----------|-----------|-----------|-----------|
| 4 | 1.9300000 | 0.2954093 | 1.5100000 | 2.1600000 |
|---|-----------|-----------|-----------|-----------|

---

Laboratory tests at the time of obtaining Table 2-6 consent, according to the presence or absence of proton-pump inhibitors

Unique Subject Identifier=3098011000-0006

MEANS Procedure

Assay variable : PTINR\_VAL1 PT-INR Value

N Mean Standard Deviation Minimum Maximum

---

|   |           |           |           |           |
|---|-----------|-----------|-----------|-----------|
| 4 | 2.3950000 | 0.7583535 | 1.3000000 | 2.9200000 |
|---|-----------|-----------|-----------|-----------|

---

Unique Subject Identifier=3102111011-0003

Assay variable : PTINR\_VAL1 PT-INR Value

N Mean Standard Deviation Minimum Maximum

---

|   |           |           |           |           |
|---|-----------|-----------|-----------|-----------|
| 2 | 2.3450000 | 0.2474874 | 2.1700000 | 2.5200000 |
|---|-----------|-----------|-----------|-----------|

---

Unique Subject Identifier=3102111011-0009

Assay variable : PTINR\_VAL1 PT-INR Value

N Mean Standard Deviation Minimum Maximum

---

|   |           |           |           |           |
|---|-----------|-----------|-----------|-----------|
| 2 | 1.0550000 | 0.0494975 | 1.0200000 | 1.0900000 |
|---|-----------|-----------|-----------|-----------|

---

Unique Subject Identifier=3102111011-0032

Assay variable : PTINR\_VAL1 PT-INR Value

N Mean Standard Deviation Minimum Maximum

---

|   |           |           |           |           |
|---|-----------|-----------|-----------|-----------|
| 4 | 1.9475000 | 0.5564396 | 1.5400000 | 2.7700000 |
|---|-----------|-----------|-----------|-----------|

---

Laboratory tests at the time of obtaining Table 2-6 consent, according to the presence or absence of proton-pump inhibitors

Unique Subject Identifier=3102111011-0066

MEANS Procedure

Assay variable : PTINR\_VAL1 PT-INR Value

| N | Mean     | Standard Deviation | Minimum  | Maximum  |
|---|----------|--------------------|----------|----------|
| 1 | 1.960000 |                    | 1.960000 | 1.960000 |

Unique Subject Identifier=3102111011-0114

Assay variable : PTINR\_VAL1 PT-INR Value

| N | Mean     | Standard Deviation | Minimum  | Maximum  |
|---|----------|--------------------|----------|----------|
| 2 | 1.845000 | 0.2192031          | 1.690000 | 2.000000 |

Unique Subject Identifier=3102111011-0138

Assay variable : PTINR\_VAL1 PT-INR Value

| N | Mean     | Standard Deviation | Minimum  | Maximum  |
|---|----------|--------------------|----------|----------|
| 4 | 2.222500 | 0.1062623          | 2.090000 | 2.350000 |

Unique Subject Identifier=3105011000-0001

Assay variable : PTINR\_VAL1 PT-INR Value

N Mean Standard Deviation Minimum Maximum

---

|   |           |           |           |           |
|---|-----------|-----------|-----------|-----------|
| 3 | 1.6533333 | 0.1361372 | 1.5000000 | 1.7600000 |
|---|-----------|-----------|-----------|-----------|

---

Laboratory tests at the time of obtaining Table 2-6 consent, according to the presence or absence of proton-pump inhibitors

Unique Subject Identifier=3105011000-0002

MEANS Procedure

Assay variable : PTINR\_VAL1 PT-INR Value

| N | Mean      | Standard Deviation | Minimum   | Maximum   |
|---|-----------|--------------------|-----------|-----------|
| 3 | 1.9033333 | 0.0493288          | 1.8700000 | 1.9600000 |

Unique Subject Identifier=3105011000-0003

Assay variable : PTINR\_VAL1 PT-INR Value

| N | Mean      | Standard Deviation | Minimum   | Maximum   |
|---|-----------|--------------------|-----------|-----------|
| 5 | 1.9400000 | 0.6307139          | 1.3600000 | 3.0100000 |

Unique Subject Identifier=3114011111-0027

Assay variable : PTINR\_VAL1 PT-INR Value

| N | Mean      | Standard Deviation | Minimum   | Maximum   |
|---|-----------|--------------------|-----------|-----------|
| 5 | 2.6620000 | 0.5276078          | 1.7900000 | 3.1900000 |

Unique Subject Identifier=3117010110-0003



Assay variable : PTINR\_VAL1 PT-INR Value

N Mean Standard Deviation Minimum Maximum

---

|   |          |  |          |          |
|---|----------|--|----------|----------|
| 1 | 2.500000 |  | 2.500000 | 2.500000 |
|---|----------|--|----------|----------|

---

Laboratory tests at the time of obtaining Table 2-6 consent, according to the presence or absence of proton-pump inhibitors

Unique Subject Identifier=3117010110-0007

MEANS Procedure

Assay variable : PTINR\_VAL1 PT-INR Value

| N | Mean      | Standard Deviation | Minimum   | Maximum   |
|---|-----------|--------------------|-----------|-----------|
| 2 | 1.9500000 | 0.0707107          | 1.9000000 | 2.0000000 |

Unique Subject Identifier=3121011111-0001

Assay variable : PTINR\_VAL1 PT-INR Value

| N | Mean      | Standard Deviation | Minimum   | Maximum   |
|---|-----------|--------------------|-----------|-----------|
| 3 | 1.9733333 | 0.6285168          | 1.2700000 | 2.4800000 |

Unique Subject Identifier=3122010111-0002

Assay variable : PTINR\_VAL1 PT-INR Value

| N | Mean      | Standard Deviation | Minimum   | Maximum   |
|---|-----------|--------------------|-----------|-----------|
| 2 | 2.3600000 | 0.8485281          | 1.7600000 | 2.9600000 |

Unique Subject Identifier=3122010111-0003

Assay variable : PTINR\_VAL1 PT-INR Value

N Mean Standard Deviation Minimum Maximum

---

|   |           |           |           |           |
|---|-----------|-----------|-----------|-----------|
| 3 | 1.9433333 | 0.2663331 | 1.6500000 | 2.1700000 |
|---|-----------|-----------|-----------|-----------|

---

Laboratory tests at the time of obtaining Table 2-6 consent, according to the presence or absence of proton-pump inhibitors

Unique Subject Identifier=3122010111-0005

MEANS Procedure

Assay variable : PTINR\_VAL1 PT-INR Value

N Mean Standard Deviation Minimum Maximum

---

|   |           |  |           |           |
|---|-----------|--|-----------|-----------|
| 1 | 2.8000000 |  | 2.8000000 | 2.8000000 |
|---|-----------|--|-----------|-----------|

---

Unique Subject Identifier=3122010111-0006

Assay variable : PTINR\_VAL1 PT-INR Value

N Mean Standard Deviation Minimum Maximum

---

|   |           |           |           |           |
|---|-----------|-----------|-----------|-----------|
| 4 | 1.4600000 | 0.2253886 | 1.2500000 | 1.7100000 |
|---|-----------|-----------|-----------|-----------|

---

Unique Subject Identifier=3122010111-0007

Assay variable : PTINR\_VAL1 PT-INR Value

N Mean Standard Deviation Minimum Maximum

---

|   |           |  |           |           |
|---|-----------|--|-----------|-----------|
| 1 | 2.5300000 |  | 2.5300000 | 2.5300000 |
|---|-----------|--|-----------|-----------|

---

Unique Subject Identifier=3122010111-0008

Assay variable : PTINR\_VAL1 PT-INR Value

N Mean Standard Deviation Minimum Maximum

---

|   |          |  |          |          |
|---|----------|--|----------|----------|
| 1 | 2.130000 |  | 2.130000 | 2.130000 |
|---|----------|--|----------|----------|

---

Laboratory tests at the time of obtaining Table 2-6 consent, according to the presence or absence of proton-pump inhibitors

Unique Subject Identifier=3122010111-0015

MEANS Procedure

Assay variable : PTINR\_VAL1 PT-INR Value

N Mean Standard Deviation Minimum Maximum

---

|   |           |  |           |           |
|---|-----------|--|-----------|-----------|
| 1 | 2.0000000 |  | 2.0000000 | 2.0000000 |
|---|-----------|--|-----------|-----------|

---

Unique Subject Identifier=3122010111-0018

Assay variable : PTINR\_VAL1 PT-INR Value

N Mean Standard Deviation Minimum Maximum

---

|   |           |  |           |           |
|---|-----------|--|-----------|-----------|
| 1 | 2.3600000 |  | 2.3600000 | 2.3600000 |
|---|-----------|--|-----------|-----------|

---

Unique Subject Identifier=3122010111-0019

Assay variable : PTINR\_VAL1 PT-INR Value

N Mean Standard Deviation Minimum Maximum

---

|   |           |           |           |           |
|---|-----------|-----------|-----------|-----------|
| 3 | 2.0466667 | 0.6585843 | 1.5800000 | 2.8000000 |
|---|-----------|-----------|-----------|-----------|

---

Unique Subject Identifier=3122010111-0023

Assay variable : PTINR\_VAL1 PT-INR Value

N Mean Standard Deviation Minimum Maximum

---

|   |           |  |           |           |
|---|-----------|--|-----------|-----------|
| 1 | 1.6500000 |  | 1.6500000 | 1.6500000 |
|---|-----------|--|-----------|-----------|

---

Laboratory tests at the time of obtaining Table 2-6 consent, according to the presence or absence of proton-pump inhibitors

Unique Subject Identifier=3122010111-0025

MEANS Procedure

Assay variable : PTINR\_VAL1 PT-INR Value

N Mean Standard Deviation Minimum Maximum

---

|   |           |  |           |           |
|---|-----------|--|-----------|-----------|
| 1 | 2.2800000 |  | 2.2800000 | 2.2800000 |
|---|-----------|--|-----------|-----------|

---

Unique Subject Identifier=3122010111-0026

Assay variable : PTINR\_VAL1 PT-INR Value

N Mean Standard Deviation Minimum Maximum

---

|   |           |  |           |           |
|---|-----------|--|-----------|-----------|
| 1 | 1.5000000 |  | 1.5000000 | 1.5000000 |
|---|-----------|--|-----------|-----------|

---

Unique Subject Identifier=3122010111-0028

Assay variable : PTINR\_VAL1 PT-INR Value

N Mean Standard Deviation Minimum Maximum

---

|   |           |           |           |           |
|---|-----------|-----------|-----------|-----------|
| 2 | 2.2950000 | 0.1626346 | 2.1800000 | 2.4100000 |
|---|-----------|-----------|-----------|-----------|

---

Unique Subject Identifier=3122010111-0031



Assay variable : PTINR\_VAL1 PT-INR Value

N Mean Standard Deviation Minimum Maximum

---

|   |           |           |           |           |
|---|-----------|-----------|-----------|-----------|
| 4 | 2.0875000 | 0.1719254 | 1.8800000 | 2.2800000 |
|---|-----------|-----------|-----------|-----------|

---

Laboratory tests at the time of obtaining Table 2-6 consent, according to the presence or absence of proton-pump inhibitors

Unique Subject Identifier=3122010111-0032

MEANS Procedure

Assay variable : PTINR\_VAL1 PT-INR Value

| N | Mean      | Standard Deviation | Minimum   | Maximum   |
|---|-----------|--------------------|-----------|-----------|
| 5 | 1.9520000 | 0.2588822          | 1.6300000 | 2.2700000 |

Unique Subject Identifier=3122010111-0033

Assay variable : PTINR\_VAL1 PT-INR Value

| N | Mean      | Standard Deviation | Minimum   | Maximum   |
|---|-----------|--------------------|-----------|-----------|
| 3 | 2.5533333 | 0.0493288          | 2.5200000 | 2.6100000 |

Unique Subject Identifier=3122010111-0034

Assay variable : PTINR\_VAL1 PT-INR Value

| N | Mean      | Standard Deviation | Minimum   | Maximum   |
|---|-----------|--------------------|-----------|-----------|
| 3 | 2.4933333 | 0.0493288          | 2.4600000 | 2.5500000 |

Unique Subject Identifier=3122010111-0041

Assay variable : PTINR\_VAL1 PT-INR Value

N Mean Standard Deviation Minimum Maximum

---

|   |           |           |           |           |
|---|-----------|-----------|-----------|-----------|
| 4 | 2.4675000 | 0.2072639 | 2.2100000 | 2.6500000 |
|---|-----------|-----------|-----------|-----------|

---

Laboratory tests at the time of obtaining Table 2-6 consent, according to the presence or absence of proton-pump inhibitors

Unique Subject Identifier=3122010111-0043

MEANS Procedure

Assay variable : PTINR\_VAL1 PT-INR Value

| N | Mean      | Standard Deviation | Minimum   | Maximum   |
|---|-----------|--------------------|-----------|-----------|
| 1 | 1.8200000 |                    | 1.8200000 | 1.8200000 |

Unique Subject Identifier=3122010111-0044

Assay variable : PTINR\_VAL1 PT-INR Value

| N | Mean      | Standard Deviation | Minimum   | Maximum   |
|---|-----------|--------------------|-----------|-----------|
| 1 | 1.4900000 |                    | 1.4900000 | 1.4900000 |

Unique Subject Identifier=3122010111-0047

Assay variable : PTINR\_VAL1 PT-INR Value

| N | Mean      | Standard Deviation | Minimum   | Maximum   |
|---|-----------|--------------------|-----------|-----------|
| 1 | 2.0800000 |                    | 2.0800000 | 2.0800000 |

Unique Subject Identifier=3122010111-0051

Assay variable : PTINR\_VAL1 PT-INR Value

N Mean Standard Deviation Minimum Maximum

---

|   |           |           |           |           |
|---|-----------|-----------|-----------|-----------|
| 4 | 2.0825000 | 0.1195478 | 1.9400000 | 2.2300000 |
|---|-----------|-----------|-----------|-----------|

---

Laboratory tests at the time of obtaining Table 2-6 consent, according to the presence or absence of proton-pump inhibitors

Unique Subject Identifier=3122010111-0054

MEANS Procedure

Assay variable : PTINR\_VAL1 PT-INR Value

N Mean Standard Deviation Minimum Maximum

---

|   |           |           |           |           |
|---|-----------|-----------|-----------|-----------|
| 5 | 2.0900000 | 0.4991493 | 1.2300000 | 2.4800000 |
|---|-----------|-----------|-----------|-----------|

---

Unique Subject Identifier=3122010111-0056

Assay variable : PTINR\_VAL1 PT-INR Value

N Mean Standard Deviation Minimum Maximum

---

|   |           |           |           |           |
|---|-----------|-----------|-----------|-----------|
| 4 | 2.2175000 | 0.2944345 | 1.9200000 | 2.6200000 |
|---|-----------|-----------|-----------|-----------|

---

Unique Subject Identifier=3122010111-0059

Assay variable : PTINR\_VAL1 PT-INR Value

N Mean Standard Deviation Minimum Maximum

---

|   |           |  |           |           |
|---|-----------|--|-----------|-----------|
| 1 | 1.8600000 |  | 1.8600000 | 1.8600000 |
|---|-----------|--|-----------|-----------|

---

Unique Subject Identifier=3122010111-0060

Assay variable : PTINR\_VAL1 PT-INR Value

N Mean Standard Deviation Minimum Maximum

---

|   |           |           |           |           |
|---|-----------|-----------|-----------|-----------|
| 4 | 1.5825000 | 0.1676057 | 1.3900000 | 1.7900000 |
|---|-----------|-----------|-----------|-----------|

---

Laboratory tests at the time of obtaining Table 2-6 consent, according to the presence or absence of proton-pump inhibitors

Unique Subject Identifier=3122010111-0062

MEANS Procedure

Assay variable : PTINR\_VAL1 PT-INR Value

N Mean Standard Deviation Minimum Maximum

---

|   |           |  |           |           |
|---|-----------|--|-----------|-----------|
| 1 | 2.4200000 |  | 2.4200000 | 2.4200000 |
|---|-----------|--|-----------|-----------|

---

Unique Subject Identifier=3122010111-0068

Assay variable : PTINR\_VAL1 PT-INR Value

N Mean Standard Deviation Minimum Maximum

---

|   |           |           |           |           |
|---|-----------|-----------|-----------|-----------|
| 3 | 1.8633333 | 0.0907377 | 1.7600000 | 1.9300000 |
|---|-----------|-----------|-----------|-----------|

---

Unique Subject Identifier=3122010111-0069

Assay variable : PTINR\_VAL1 PT-INR Value

N Mean Standard Deviation Minimum Maximum

---

|   |           |  |           |           |
|---|-----------|--|-----------|-----------|
| 1 | 2.0900000 |  | 2.0900000 | 2.0900000 |
|---|-----------|--|-----------|-----------|

---

Unique Subject Identifier=3122010111-0075



Assay variable : PTINR\_VAL1 PT-INR Value

N Mean Standard Deviation Minimum Maximum

---

|   |          |  |          |          |
|---|----------|--|----------|----------|
| 1 | 2.400000 |  | 2.400000 | 2.400000 |
|---|----------|--|----------|----------|

---

Laboratory tests at the time of obtaining Table 2-6 consent, according to the presence or absence of proton-pump inhibitors

Unique Subject Identifier=3122010111-0076

MEANS Procedure

Assay variable : PTINR\_VAL1 PT-INR Value

N Mean Standard Deviation Minimum Maximum

---

|   |           |  |           |           |
|---|-----------|--|-----------|-----------|
| 1 | 1.4300000 |  | 1.4300000 | 1.4300000 |
|---|-----------|--|-----------|-----------|

---

Unique Subject Identifier=3122010111-0078

Assay variable : PTINR\_VAL1 PT-INR Value

N Mean Standard Deviation Minimum Maximum

---

|   |           |  |           |           |
|---|-----------|--|-----------|-----------|
| 1 | 1.4700000 |  | 1.4700000 | 1.4700000 |
|---|-----------|--|-----------|-----------|

---

Unique Subject Identifier=3122010111-0081

Assay variable : PTINR\_VAL1 PT-INR Value

N Mean Standard Deviation Minimum Maximum

---

|   |           |           |           |           |
|---|-----------|-----------|-----------|-----------|
| 3 | 2.1600000 | 0.2364318 | 1.9900000 | 2.4300000 |
|---|-----------|-----------|-----------|-----------|

---

Unique Subject Identifier=3122010111-0082

Assay variable : PTINR\_VAL1 PT-INR Value

N Mean Standard Deviation Minimum Maximum

---

|   |          |           |          |          |
|---|----------|-----------|----------|----------|
| 3 | 1.600000 | 0.1228821 | 1.510000 | 1.740000 |
|---|----------|-----------|----------|----------|

---

Laboratory tests at the time of obtaining Table 2-6 consent, according to the presence or absence of proton-pump inhibitors

Unique Subject Identifier=3122010111-0083

MEANS Procedure

Assay variable : PTINR\_VAL1 PT-INR Value

N Mean Standard Deviation Minimum Maximum

---

|   |           |           |           |           |
|---|-----------|-----------|-----------|-----------|
| 3 | 1.7466667 | 0.3552933 | 1.4000000 | 2.1100000 |
|---|-----------|-----------|-----------|-----------|

---

Unique Subject Identifier=3122010111-0085

Assay variable : PTINR\_VAL1 PT-INR Value

N Mean Standard Deviation Minimum Maximum

---

|   |           |           |           |           |
|---|-----------|-----------|-----------|-----------|
| 3 | 2.0600000 | 0.1513275 | 1.9400000 | 2.2300000 |
|---|-----------|-----------|-----------|-----------|

---

Unique Subject Identifier=3122010111-0088

Assay variable : PTINR\_VAL1 PT-INR Value

N Mean Standard Deviation Minimum Maximum

---

|   |           |           |           |           |
|---|-----------|-----------|-----------|-----------|
| 4 | 2.3375000 | 1.0215144 | 1.6400000 | 3.8500000 |
|---|-----------|-----------|-----------|-----------|

---

Unique Subject Identifier=3122010111-0089

Assay variable : PTINR\_VAL1 PT-INR Value

N Mean Standard Deviation Minimum Maximum

---

|   |           |           |           |           |
|---|-----------|-----------|-----------|-----------|
| 6 | 2.1166667 | 0.5361219 | 1.3000000 | 2.8700000 |
|---|-----------|-----------|-----------|-----------|

---

Laboratory tests at the time of obtaining Table 2-6 consent, according to the presence or absence of proton-pump inhibitors

Unique Subject Identifier=3122010111-0092

MEANS Procedure

Assay variable : PTINR\_VAL1 PT-INR Value

N Mean Standard Deviation Minimum Maximum

---

|   |           |           |           |           |
|---|-----------|-----------|-----------|-----------|
| 3 | 2.7300000 | 0.8671217 | 2.0300000 | 3.7000000 |
|---|-----------|-----------|-----------|-----------|

---

Unique Subject Identifier=3122010111-0095

Assay variable : PTINR\_VAL1 PT-INR Value

N Mean Standard Deviation Minimum Maximum

---

|   |           |           |           |           |
|---|-----------|-----------|-----------|-----------|
| 3 | 2.1266667 | 0.0808290 | 2.0400000 | 2.2000000 |
|---|-----------|-----------|-----------|-----------|

---

Unique Subject Identifier=3122010111-0098

Assay variable : PTINR\_VAL1 PT-INR Value

N Mean Standard Deviation Minimum Maximum

---

|   |           |           |           |           |
|---|-----------|-----------|-----------|-----------|
| 3 | 1.6366667 | 0.1644182 | 1.4500000 | 1.7600000 |
|---|-----------|-----------|-----------|-----------|

---

Unique Subject Identifier=3122010111-0099

Assay variable : PTINR\_VAL1 PT-INR Value

N Mean Standard Deviation Minimum Maximum

---

|   |          |           |          |          |
|---|----------|-----------|----------|----------|
| 3 | 1.550000 | 0.3764306 | 1.140000 | 1.880000 |
|---|----------|-----------|----------|----------|

---

Laboratory tests at the time of obtaining Table 2-6 consent, according to the presence or absence of proton-pump inhibitors

Unique Subject Identifier=3122010111-0100

MEANS Procedure

Assay variable : PTINR\_VAL1 PT-INR Value

N Mean Standard Deviation Minimum Maximum

---

|   |           |           |           |           |
|---|-----------|-----------|-----------|-----------|
| 3 | 1.8333333 | 0.4007909 | 1.3900000 | 2.1700000 |
|---|-----------|-----------|-----------|-----------|

---

Unique Subject Identifier=3122010111-0102

Assay variable : PTINR\_VAL1 PT-INR Value

N Mean Standard Deviation Minimum Maximum

---

|   |           |           |           |           |
|---|-----------|-----------|-----------|-----------|
| 5 | 2.0740000 | 0.5116933 | 1.4500000 | 2.8000000 |
|---|-----------|-----------|-----------|-----------|

---

Unique Subject Identifier=3122010111-0103

Assay variable : PTINR\_VAL1 PT-INR Value

N Mean Standard Deviation Minimum Maximum

---

|   |           |  |           |           |
|---|-----------|--|-----------|-----------|
| 1 | 4.4300000 |  | 4.4300000 | 4.4300000 |
|---|-----------|--|-----------|-----------|

---

Unique Subject Identifier=3122010111-0107



Assay variable : PTINR\_VAL1 PT-INR Value

N Mean Standard Deviation Minimum Maximum

---

|   |          |  |          |          |
|---|----------|--|----------|----------|
| 1 | 2.440000 |  | 2.440000 | 2.440000 |
|---|----------|--|----------|----------|

---

Laboratory tests at the time of obtaining Table 2-6 consent, according to the presence or absence of proton-pump inhibitors

Unique Subject Identifier=3122010111-0108

MEANS Procedure

Assay variable : PTINR\_VAL1 PT-INR Value

N Mean Standard Deviation Minimum Maximum

---

|   |           |  |           |           |
|---|-----------|--|-----------|-----------|
| 1 | 2.1100000 |  | 2.1100000 | 2.1100000 |
|---|-----------|--|-----------|-----------|

---

Unique Subject Identifier=3122010111-0112

Assay variable : PTINR\_VAL1 PT-INR Value

N Mean Standard Deviation Minimum Maximum

---

|   |           |  |           |           |
|---|-----------|--|-----------|-----------|
| 1 | 2.1400000 |  | 2.1400000 | 2.1400000 |
|---|-----------|--|-----------|-----------|

---

Unique Subject Identifier=3122010111-0117

Assay variable : PTINR\_VAL1 PT-INR Value

N Mean Standard Deviation Minimum Maximum

---

|   |           |           |           |           |
|---|-----------|-----------|-----------|-----------|
| 4 | 1.9475000 | 0.2845318 | 1.6500000 | 2.3200000 |
|---|-----------|-----------|-----------|-----------|

---

Unique Subject Identifier=3122010111-0118

Assay variable : PTINR\_VAL1 PT-INR Value

N Mean Standard Deviation Minimum Maximum

---

|   |           |           |           |           |
|---|-----------|-----------|-----------|-----------|
| 2 | 1.6900000 | 0.3111270 | 1.4700000 | 1.9100000 |
|---|-----------|-----------|-----------|-----------|

---

Laboratory tests at the time of obtaining Table 2-6 consent, according to the presence or absence of proton-pump inhibitors

Unique Subject Identifier=3122010111-0122

MEANS Procedure

Assay variable : PTINR\_VAL1 PT-INR Value

N Mean Standard Deviation Minimum Maximum

---

|   |           |  |           |           |
|---|-----------|--|-----------|-----------|
| 1 | 2.0600000 |  | 2.0600000 | 2.0600000 |
|---|-----------|--|-----------|-----------|

---

Unique Subject Identifier=3122010111-0127

Assay variable : PTINR\_VAL1 PT-INR Value

N Mean Standard Deviation Minimum Maximum

---

|   |           |  |           |           |
|---|-----------|--|-----------|-----------|
| 1 | 2.3200000 |  | 2.3200000 | 2.3200000 |
|---|-----------|--|-----------|-----------|

---

Unique Subject Identifier=3122010111-0128

Assay variable : PTINR\_VAL1 PT-INR Value

N Mean Standard Deviation Minimum Maximum

---

|   |           |           |           |           |
|---|-----------|-----------|-----------|-----------|
| 3 | 1.6966667 | 0.3257811 | 1.4700000 | 2.0700000 |
|---|-----------|-----------|-----------|-----------|

---

Unique Subject Identifier=3122010111-0129

Assay variable : PTINR\_VAL1 PT-INR Value

N Mean Standard Deviation Minimum Maximum

---

|   |           |           |           |           |
|---|-----------|-----------|-----------|-----------|
| 3 | 2.3266667 | 0.2685765 | 2.0200000 | 2.5200000 |
|---|-----------|-----------|-----------|-----------|

---

Laboratory tests at the time of obtaining Table 2-6 consent, according to the presence or absence of proton-pump inhibitors

Unique Subject Identifier=3122010111-0131

MEANS Procedure

Assay variable : PTINR\_VAL1 PT-INR Value

N Mean Standard Deviation Minimum Maximum

---

|   |           |           |           |           |
|---|-----------|-----------|-----------|-----------|
| 6 | 3.0350000 | 2.4783442 | 1.2900000 | 7.8800000 |
|---|-----------|-----------|-----------|-----------|

---

Unique Subject Identifier=3122010111-0132

Assay variable : PTINR\_VAL1 PT-INR Value

N Mean Standard Deviation Minimum Maximum

---

|   |           |  |           |           |
|---|-----------|--|-----------|-----------|
| 1 | 1.8000000 |  | 1.8000000 | 1.8000000 |
|---|-----------|--|-----------|-----------|

---

Unique Subject Identifier=3122010111-0136

Assay variable : PTINR\_VAL1 PT-INR Value

N Mean Standard Deviation Minimum Maximum

---

|   |           |  |           |           |
|---|-----------|--|-----------|-----------|
| 1 | 2.1100000 |  | 2.1100000 | 2.1100000 |
|---|-----------|--|-----------|-----------|

---

Unique Subject Identifier=3122010111-0139

Assay variable : PTINR\_VAL1 PT-INR Value

N Mean Standard Deviation Minimum Maximum

---

|   |           |  |           |           |
|---|-----------|--|-----------|-----------|
| 1 | 1.7100000 |  | 1.7100000 | 1.7100000 |
|---|-----------|--|-----------|-----------|

---

Laboratory tests at the time of obtaining Table 2-6 consent, according to the presence or absence of proton-pump inhibitors

Unique Subject Identifier=3122010111-0142

MEANS Procedure

Assay variable : PTINR\_VAL1 PT-INR Value

N Mean Standard Deviation Minimum Maximum

---

|   |           |           |           |           |
|---|-----------|-----------|-----------|-----------|
| 6 | 2.2100000 | 0.7181643 | 1.3800000 | 3.3900000 |
|---|-----------|-----------|-----------|-----------|

---

Unique Subject Identifier=3122010111-0144

Assay variable : PTINR\_VAL1 PT-INR Value

N Mean Standard Deviation Minimum Maximum

---

|   |           |           |           |           |
|---|-----------|-----------|-----------|-----------|
| 3 | 1.8666667 | 0.3074627 | 1.6600000 | 2.2200000 |
|---|-----------|-----------|-----------|-----------|

---

Unique Subject Identifier=3122010111-0149

Assay variable : PTINR\_VAL1 PT-INR Value

N Mean Standard Deviation Minimum Maximum

---

|   |           |  |           |           |
|---|-----------|--|-----------|-----------|
| 1 | 3.2000000 |  | 3.2000000 | 3.2000000 |
|---|-----------|--|-----------|-----------|

---

Unique Subject Identifier=3122010111-0155



Assay variable : PTINR\_VAL1 PT-INR Value

N Mean Standard Deviation Minimum Maximum

---

|   |           |  |           |           |
|---|-----------|--|-----------|-----------|
| 1 | 1.2900000 |  | 1.2900000 | 1.2900000 |
|---|-----------|--|-----------|-----------|

---

Laboratory tests at the time of obtaining Table 2-6 consent, according to the presence or absence of proton-pump inhibitors

Unique Subject Identifier=3122010111-0165

MEANS Procedure

Assay variable : PTINR\_VAL1 PT-INR Value

N Mean Standard Deviation Minimum Maximum

---

|   |           |           |           |
|---|-----------|-----------|-----------|
| 1 | 1.6300000 | 1.6300000 | 1.6300000 |
|---|-----------|-----------|-----------|

---

Unique Subject Identifier=3122010111-0167

Assay variable : PTINR\_VAL1 PT-INR Value

N Mean Standard Deviation Minimum Maximum

---

|   |           |           |           |
|---|-----------|-----------|-----------|
| 1 | 2.1000000 | 2.1000000 | 2.1000000 |
|---|-----------|-----------|-----------|

---

Unique Subject Identifier=3122010111-0174

Assay variable : PTINR\_VAL1 PT-INR Value

N Mean Standard Deviation Minimum Maximum

---

|   |           |           |           |
|---|-----------|-----------|-----------|
| 1 | 2.3900000 | 2.3900000 | 2.3900000 |
|---|-----------|-----------|-----------|

---

Unique Subject Identifier=3122010111-0186

Assay variable : PTINR\_VAL1 PT-INR Value

N Mean Standard Deviation Minimum Maximum

---

|   |          |  |          |          |
|---|----------|--|----------|----------|
| 1 | 2.130000 |  | 2.130000 | 2.130000 |
|---|----------|--|----------|----------|

---

Laboratory tests at the time of obtaining Table 2-6 consent, according to the presence or absence of proton-pump inhibitors

Unique Subject Identifier=3122010111-0189

MEANS Procedure

Assay variable : PTINR\_VAL1 PT-INR Value

N Mean Standard Deviation Minimum Maximum

---

|   |           |  |           |           |
|---|-----------|--|-----------|-----------|
| 1 | 2.0000000 |  | 2.0000000 | 2.0000000 |
|---|-----------|--|-----------|-----------|

---

Unique Subject Identifier=3122010111-0192

Assay variable : PTINR\_VAL1 PT-INR Value

N Mean Standard Deviation Minimum Maximum

---

|   |           |  |           |           |
|---|-----------|--|-----------|-----------|
| 1 | 1.5200000 |  | 1.5200000 | 1.5200000 |
|---|-----------|--|-----------|-----------|

---

Unique Subject Identifier=3122010111-0194

Assay variable : PTINR\_VAL1 PT-INR Value

N Mean Standard Deviation Minimum Maximum

---

|   |           |           |           |           |
|---|-----------|-----------|-----------|-----------|
| 5 | 1.8440000 | 0.0918150 | 1.7100000 | 1.9400000 |
|---|-----------|-----------|-----------|-----------|

---

Unique Subject Identifier=3122010111-0195

Assay variable : PTINR\_VAL1 PT-INR Value

N Mean Standard Deviation Minimum Maximum

---

|   |           |  |           |           |
|---|-----------|--|-----------|-----------|
| 1 | 2.5200000 |  | 2.5200000 | 2.5200000 |
|---|-----------|--|-----------|-----------|

---

Laboratory tests at the time of obtaining Table 2-6 consent, according to the presence or absence of proton-pump inhibitors

Unique Subject Identifier=3122010111-0198

MEANS Procedure

Assay variable : PTINR\_VAL1 PT-INR Value

N Mean Standard Deviation Minimum Maximum

---

|   |           |  |           |           |
|---|-----------|--|-----------|-----------|
| 1 | 1.7800000 |  | 1.7800000 | 1.7800000 |
|---|-----------|--|-----------|-----------|

---

Unique Subject Identifier=3122010111-0202

Assay variable : PTINR\_VAL1 PT-INR Value

N Mean Standard Deviation Minimum Maximum

---

|   |           |  |           |           |
|---|-----------|--|-----------|-----------|
| 1 | 3.0900000 |  | 3.0900000 | 3.0900000 |
|---|-----------|--|-----------|-----------|

---

Unique Subject Identifier=3122010111-0206

Assay variable : PTINR\_VAL1 PT-INR Value

N Mean Standard Deviation Minimum Maximum

---

|   |           |  |           |           |
|---|-----------|--|-----------|-----------|
| 1 | 1.8500000 |  | 1.8500000 | 1.8500000 |
|---|-----------|--|-----------|-----------|

---

Unique Subject Identifier=3122010111-0208

Assay variable : PTINR\_VAL1 PT-INR Value

N Mean Standard Deviation Minimum Maximum

---

|   |           |  |           |           |
|---|-----------|--|-----------|-----------|
| 1 | 2.5500000 |  | 2.5500000 | 2.5500000 |
|---|-----------|--|-----------|-----------|

---

Laboratory tests at the time of obtaining Table 2-6 consent, according to the presence or absence of proton-pump inhibitors

Unique Subject Identifier=3122010111-0211

MEANS Procedure

Assay variable : PTINR\_VAL1 PT-INR Value

N Mean Standard Deviation Minimum Maximum

---

|   |           |  |           |           |
|---|-----------|--|-----------|-----------|
| 1 | 1.8100000 |  | 1.8100000 | 1.8100000 |
|---|-----------|--|-----------|-----------|

---

Unique Subject Identifier=3122010111-0214

Assay variable : PTINR\_VAL1 PT-INR Value

N Mean Standard Deviation Minimum Maximum

---

|   |           |  |           |           |
|---|-----------|--|-----------|-----------|
| 1 | 1.4900000 |  | 1.4900000 | 1.4900000 |
|---|-----------|--|-----------|-----------|

---

Unique Subject Identifier=3122010111-0217

Assay variable : PTINR\_VAL1 PT-INR Value

N Mean Standard Deviation Minimum Maximum

---

|   |           |  |           |           |
|---|-----------|--|-----------|-----------|
| 1 | 2.5000000 |  | 2.5000000 | 2.5000000 |
|---|-----------|--|-----------|-----------|

---

Unique Subject Identifier=3122010111-0218



Assay variable : PTINR\_VAL1 PT-INR Value

N Mean Standard Deviation Minimum Maximum

---

|   |           |  |           |           |
|---|-----------|--|-----------|-----------|
| 1 | 2.2200000 |  | 2.2200000 | 2.2200000 |
|---|-----------|--|-----------|-----------|

---

Laboratory tests at the time of obtaining Table 2-6 consent, according to the presence or absence of proton-pump inhibitors

Unique Subject Identifier=3122010111-0222

MEANS Procedure

Assay variable : PTINR\_VAL1 PT-INR Value

N Mean Standard Deviation Minimum Maximum

---

|   |           |           |           |
|---|-----------|-----------|-----------|
| 1 | 1.8500000 | 1.8500000 | 1.8500000 |
|---|-----------|-----------|-----------|

---

Unique Subject Identifier=3122010111-0226

Assay variable : PTINR\_VAL1 PT-INR Value

N Mean Standard Deviation Minimum Maximum

---

|   |           |           |           |
|---|-----------|-----------|-----------|
| 1 | 2.0700000 | 2.0700000 | 2.0700000 |
|---|-----------|-----------|-----------|

---

Unique Subject Identifier=3122010111-0230

Assay variable : PTINR\_VAL1 PT-INR Value

N Mean Standard Deviation Minimum Maximum

---

|   |           |           |           |
|---|-----------|-----------|-----------|
| 1 | 1.6500000 | 1.6500000 | 1.6500000 |
|---|-----------|-----------|-----------|

---

Unique Subject Identifier=3122010111-0231

Assay variable : PTINR\_VAL1 PT-INR Value

N Mean Standard Deviation Minimum Maximum

---

|   |           |           |           |           |
|---|-----------|-----------|-----------|-----------|
| 6 | 1.7316667 | 0.2162791 | 1.4500000 | 1.9400000 |
|---|-----------|-----------|-----------|-----------|

---

Laboratory tests at the time of obtaining Table 2-6 consent, according to the presence or absence of proton-pump inhibitors

Unique Subject Identifier=3122010111-0232

MEANS Procedure

Assay variable : PTINR\_VAL1 PT-INR Value

N Mean Standard Deviation Minimum Maximum

---

|   |           |           |           |
|---|-----------|-----------|-----------|
| 1 | 1.4800000 | 1.4800000 | 1.4800000 |
|---|-----------|-----------|-----------|

---

Unique Subject Identifier=3122010111-0234

Assay variable : PTINR\_VAL1 PT-INR Value

N Mean Standard Deviation Minimum Maximum

---

|   |           |           |           |
|---|-----------|-----------|-----------|
| 1 | 1.2000000 | 1.2000000 | 1.2000000 |
|---|-----------|-----------|-----------|

---

Unique Subject Identifier=3122010111-0237

Assay variable : PTINR\_VAL1 PT-INR Value

N Mean Standard Deviation Minimum Maximum

---

|   |           |           |           |
|---|-----------|-----------|-----------|
| 1 | 2.2100000 | 2.2100000 | 2.2100000 |
|---|-----------|-----------|-----------|

---

Unique Subject Identifier=3122010111-0239

Assay variable : PTINR\_VAL1 PT-INR Value

N Mean Standard Deviation Minimum Maximum

---

|   |           |  |           |           |
|---|-----------|--|-----------|-----------|
| 1 | 1.7800000 |  | 1.7800000 | 1.7800000 |
|---|-----------|--|-----------|-----------|

---

Laboratory tests at the time of obtaining Table 2-6 consent, according to the presence or absence of proton-pump inhibitors

Unique Subject Identifier=3122010111-0240

MEANS Procedure

Assay variable : PTINR\_VAL1 PT-INR Value

N Mean Standard Deviation Minimum Maximum

---

|   |           |  |           |           |
|---|-----------|--|-----------|-----------|
| 1 | 2.0000000 |  | 2.0000000 | 2.0000000 |
|---|-----------|--|-----------|-----------|

---

Unique Subject Identifier=3122010111-0241

Assay variable : PTINR\_VAL1 PT-INR Value

N Mean Standard Deviation Minimum Maximum

---

|   |           |  |           |           |
|---|-----------|--|-----------|-----------|
| 1 | 2.4100000 |  | 2.4100000 | 2.4100000 |
|---|-----------|--|-----------|-----------|

---

Unique Subject Identifier=3122010111-0242

Assay variable : PTINR\_VAL1 PT-INR Value

N Mean Standard Deviation Minimum Maximum

---

|   |           |  |           |           |
|---|-----------|--|-----------|-----------|
| 1 | 1.7700000 |  | 1.7700000 | 1.7700000 |
|---|-----------|--|-----------|-----------|

---

Unique Subject Identifier=3122010111-0243

Assay variable : PTINR\_VAL1 PT-INR Value

N Mean Standard Deviation Minimum Maximum

---

|   |           |  |           |           |
|---|-----------|--|-----------|-----------|
| 1 | 2.0100000 |  | 2.0100000 | 2.0100000 |
|---|-----------|--|-----------|-----------|

---

Laboratory tests at the time of obtaining Table 2-6 consent, according to the presence or absence of proton-pump inhibitors

Unique Subject Identifier=3122010111-0250

MEANS Procedure

Assay variable : PTINR\_VAL1 PT-INR Value

N Mean Standard Deviation Minimum Maximum

---

|   |           |  |           |           |
|---|-----------|--|-----------|-----------|
| 1 | 1.8800000 |  | 1.8800000 | 1.8800000 |
|---|-----------|--|-----------|-----------|

---

Unique Subject Identifier=3122010111-0259

Assay variable : PTINR\_VAL1 PT-INR Value

N Mean Standard Deviation Minimum Maximum

---

|   |           |           |           |           |
|---|-----------|-----------|-----------|-----------|
| 3 | 1.8866667 | 0.0321455 | 1.8500000 | 1.9100000 |
|---|-----------|-----------|-----------|-----------|

---

Unique Subject Identifier=3122010111-0260

Assay variable : PTINR\_VAL1 PT-INR Value

N Mean Standard Deviation Minimum Maximum

---

|   |           |           |           |           |
|---|-----------|-----------|-----------|-----------|
| 2 | 1.9550000 | 0.1484924 | 1.8500000 | 2.0600000 |
|---|-----------|-----------|-----------|-----------|

---

Unique Subject Identifier=3122010111-0262



Assay variable : PTINR\_VAL1 PT-INR Value

N Mean Standard Deviation Minimum Maximum

---

|   |          |  |          |          |
|---|----------|--|----------|----------|
| 1 | 2.960000 |  | 2.960000 | 2.960000 |
|---|----------|--|----------|----------|

---

Laboratory tests at the time of obtaining Table 2-6 consent, according to the presence or absence of proton-pump inhibitors

Unique Subject Identifier=3126000000-0002

MEANS Procedure

Assay variable : PTINR\_VAL1 PT-INR Value

N Mean Standard Deviation Minimum Maximum

---

|   |           |  |           |           |
|---|-----------|--|-----------|-----------|
| 1 | 2.1000000 |  | 2.1000000 | 2.1000000 |
|---|-----------|--|-----------|-----------|

---

Unique Subject Identifier=3129000000-0001

Assay variable : PTINR\_VAL1 PT-INR Value

N Mean Standard Deviation Minimum Maximum

---

|   |           |  |           |           |
|---|-----------|--|-----------|-----------|
| 1 | 1.9000000 |  | 1.9000000 | 1.9000000 |
|---|-----------|--|-----------|-----------|

---

Unique Subject Identifier=3129000000-0002

Assay variable : PTINR\_VAL1 PT-INR Value

N Mean Standard Deviation Minimum Maximum

---

|   |           |           |           |           |
|---|-----------|-----------|-----------|-----------|
| 6 | 2.4233333 | 0.2997777 | 1.8800000 | 2.7900000 |
|---|-----------|-----------|-----------|-----------|

---

Unique Subject Identifier=3129000000-0005

Assay variable : PTINR\_VAL1 PT-INR Value

N Mean Standard Deviation Minimum Maximum

---

|   |           |           |           |           |
|---|-----------|-----------|-----------|-----------|
| 6 | 1.9966667 | 0.3787171 | 1.4700000 | 2.6300000 |
|---|-----------|-----------|-----------|-----------|

---

Laboratory tests at the time of obtaining Table 2-6 consent, according to the presence or absence of proton-pump inhibitors

Unique Subject Identifier=3129000000-0006

MEANS Procedure

Assay variable : PTINR\_VAL1 PT-INR Value

N Mean Standard Deviation Minimum Maximum

---

|   |           |           |           |           |
|---|-----------|-----------|-----------|-----------|
| 6 | 2.3183333 | 0.6036031 | 1.6000000 | 3.3200000 |
|---|-----------|-----------|-----------|-----------|

---

Unique Subject Identifier=3129000000-0009

Assay variable : PTINR\_VAL1 PT-INR Value

N Mean Standard Deviation Minimum Maximum

---

|   |           |           |           |           |
|---|-----------|-----------|-----------|-----------|
| 4 | 1.8650000 | 0.4133199 | 1.2700000 | 2.1600000 |
|---|-----------|-----------|-----------|-----------|

---

Unique Subject Identifier=3131010000-0017

Assay variable : PTINR\_VAL1 PT-INR Value

N Mean Standard Deviation Minimum Maximum

---

|   |           |           |           |           |
|---|-----------|-----------|-----------|-----------|
| 2 | 2.7300000 | 0.3252691 | 2.5000000 | 2.9600000 |
|---|-----------|-----------|-----------|-----------|

---

Unique Subject Identifier=3131010000-0026

Assay variable : PTINR\_VAL1 PT-INR Value

N Mean Standard Deviation Minimum Maximum

---

|   |           |           |           |           |
|---|-----------|-----------|-----------|-----------|
| 3 | 2.1433333 | 0.4606879 | 1.7300000 | 2.6400000 |
|---|-----------|-----------|-----------|-----------|

---

Laboratory tests at the time of obtaining Table 2-6 consent, according to the presence or absence of proton-pump inhibitors

Unique Subject Identifier=3131010000-0034

MEANS Procedure

Assay variable : PTINR\_VAL1 PT-INR Value

| N | Mean      | Standard Deviation | Minimum   | Maximum   |
|---|-----------|--------------------|-----------|-----------|
| 2 | 1.6150000 | 0.1060660          | 1.5400000 | 1.6900000 |

Unique Subject Identifier=3131010000-0042

Assay variable : PTINR\_VAL1 PT-INR Value

| N | Mean      | Standard Deviation | Minimum   | Maximum   |
|---|-----------|--------------------|-----------|-----------|
| 4 | 1.4400000 | 0.1439907          | 1.3000000 | 1.6400000 |

Unique Subject Identifier=3133000000-0005

Assay variable : PTINR\_VAL1 PT-INR Value

| N | Mean      | Standard Deviation | Minimum   | Maximum   |
|---|-----------|--------------------|-----------|-----------|
| 3 | 2.3200000 | 0.2783882          | 2.0700000 | 2.6200000 |

Unique Subject Identifier=3133000000-0007

Assay variable : PTINR\_VAL1 PT-INR Value

N Mean Standard Deviation Minimum Maximum

---

|   |           |           |           |           |
|---|-----------|-----------|-----------|-----------|
| 4 | 1.6875000 | 0.1793274 | 1.5100000 | 1.9300000 |
|---|-----------|-----------|-----------|-----------|

---

Laboratory tests at the time of obtaining Table 2-6 consent, according to the presence or absence of proton-pump inhibitors

Unique Subject Identifier=313300000-0008

MEANS Procedure

Assay variable : PTINR\_VAL1 PT-INR Value

N Mean Standard Deviation Minimum Maximum

---

|   |           |           |           |           |
|---|-----------|-----------|-----------|-----------|
| 4 | 1.2450000 | 0.1869938 | 1.0800000 | 1.4400000 |
|---|-----------|-----------|-----------|-----------|

---

Unique Subject Identifier=313300000-0011

Assay variable : PTINR\_VAL1 PT-INR Value

N Mean Standard Deviation Minimum Maximum

---

|   |           |           |           |           |
|---|-----------|-----------|-----------|-----------|
| 3 | 1.9033333 | 0.3464583 | 1.6600000 | 2.3000000 |
|---|-----------|-----------|-----------|-----------|

---

Unique Subject Identifier=313300000-0014

Assay variable : PTINR\_VAL1 PT-INR Value

N Mean Standard Deviation Minimum Maximum

---

|   |           |           |           |           |
|---|-----------|-----------|-----------|-----------|
| 4 | 1.7950000 | 0.1317826 | 1.7000000 | 1.9900000 |
|---|-----------|-----------|-----------|-----------|

---

Unique Subject Identifier=313300000-0020



Assay variable : PTINR\_VAL1 PT-INR Value

N Mean Standard Deviation Minimum Maximum

---

|   |           |           |           |           |
|---|-----------|-----------|-----------|-----------|
| 3 | 2.6300000 | 0.6584831 | 2.2300000 | 3.3900000 |
|---|-----------|-----------|-----------|-----------|

---

Laboratory tests at the time of obtaining Table 2-6 consent, according to the presence or absence of proton-pump inhibitors

Unique Subject Identifier=313300000-0021

MEANS Procedure

Assay variable : PTINR\_VAL1 PT-INR Value

N Mean Standard Deviation Minimum Maximum

---

|   |           |           |           |           |
|---|-----------|-----------|-----------|-----------|
| 4 | 1.8425000 | 0.1828251 | 1.6400000 | 2.0500000 |
|---|-----------|-----------|-----------|-----------|

---

Unique Subject Identifier=313300000-0034

Assay variable : PTINR\_VAL1 PT-INR Value

N Mean Standard Deviation Minimum Maximum

---

|   |           |           |           |           |
|---|-----------|-----------|-----------|-----------|
| 3 | 2.3266667 | 0.1814754 | 2.1600000 | 2.5200000 |
|---|-----------|-----------|-----------|-----------|

---

Unique Subject Identifier=313300000-0040

Assay variable : PTINR\_VAL1 PT-INR Value

N Mean Standard Deviation Minimum Maximum

---

|   |           |           |           |           |
|---|-----------|-----------|-----------|-----------|
| 5 | 2.0400000 | 0.2650472 | 1.7200000 | 2.3600000 |
|---|-----------|-----------|-----------|-----------|

---

Unique Subject Identifier=313300000-0041

Assay variable : PTINR\_VAL1 PT-INR Value

N Mean Standard Deviation Minimum Maximum

---

|   |           |           |           |           |
|---|-----------|-----------|-----------|-----------|
| 3 | 1.6133333 | 0.2804164 | 1.3700000 | 1.9200000 |
|---|-----------|-----------|-----------|-----------|

---

Laboratory tests at the time of obtaining Table 2-6 consent, according to the presence or absence of proton-pump inhibitors

Unique Subject Identifier=313300000-0050

MEANS Procedure

Assay variable : PTINR\_VAL1 PT-INR Value

| N | Mean      | Standard Deviation | Minimum   | Maximum   |
|---|-----------|--------------------|-----------|-----------|
| 3 | 2.0766667 | 0.2274496          | 1.8900000 | 2.3300000 |

Unique Subject Identifier=313300000-0055

Assay variable : PTINR\_VAL1 PT-INR Value

| N | Mean      | Standard Deviation | Minimum   | Maximum   |
|---|-----------|--------------------|-----------|-----------|
| 2 | 2.0550000 | 0.2333452          | 1.8900000 | 2.2200000 |

Unique Subject Identifier=313300000-0056

Assay variable : PTINR\_VAL1 PT-INR Value

| N | Mean      | Standard Deviation | Minimum   | Maximum   |
|---|-----------|--------------------|-----------|-----------|
| 3 | 1.4766667 | 0.3066486          | 1.2300000 | 1.8200000 |

Unique Subject Identifier=313300000-0057

Assay variable : PTINR\_VAL1 PT-INR Value

N Mean Standard Deviation Minimum Maximum

---

|   |          |           |          |          |
|---|----------|-----------|----------|----------|
| 2 | 3.510000 | 0.1414214 | 3.410000 | 3.610000 |
|---|----------|-----------|----------|----------|

---

Laboratory tests at the time of obtaining Table 2-6 consent, according to the presence or absence of proton-pump inhibitors

Unique Subject Identifier=313300000-0073

MEANS Procedure

Assay variable : PTINR\_VAL1 PT-INR Value

N Mean Standard Deviation Minimum Maximum

---

|   |           |           |           |           |
|---|-----------|-----------|-----------|-----------|
| 4 | 2.2075000 | 0.2482438 | 2.0100000 | 2.5500000 |
|---|-----------|-----------|-----------|-----------|

---

Unique Subject Identifier=313300000-0076

Assay variable : PTINR\_VAL1 PT-INR Value

N Mean Standard Deviation Minimum Maximum

---

|   |           |           |           |           |
|---|-----------|-----------|-----------|-----------|
| 5 | 1.2160000 | 0.3338862 | 1.0100000 | 1.8100000 |
|---|-----------|-----------|-----------|-----------|

---

Unique Subject Identifier=313300000-0081

Assay variable : PTINR\_VAL1 PT-INR Value

N Mean Standard Deviation Minimum Maximum

---

|   |           |           |           |           |
|---|-----------|-----------|-----------|-----------|
| 3 | 1.4666667 | 0.1800926 | 1.2600000 | 1.5900000 |
|---|-----------|-----------|-----------|-----------|

---

Unique Subject Identifier=313300000-0084

Assay variable : PTINR\_VAL1 PT-INR Value

N Mean Standard Deviation Minimum Maximum

---

|   |          |           |          |          |
|---|----------|-----------|----------|----------|
| 2 | 1.620000 | 0.4949747 | 1.270000 | 1.970000 |
|---|----------|-----------|----------|----------|

---

Laboratory tests at the time of obtaining Table 2-6 consent, according to the presence or absence of proton-pump inhibitors

Unique Subject Identifier=313400000-0004

MEANS Procedure

Assay variable : PTINR\_VAL1 PT-INR Value

| N | Mean      | Standard Deviation | Minimum   | Maximum   |
|---|-----------|--------------------|-----------|-----------|
| 1 | 1.9000000 |                    | 1.9000000 | 1.9000000 |

Unique Subject Identifier=313500000-0004

Assay variable : PTINR\_VAL1 PT-INR Value

| N | Mean      | Standard Deviation | Minimum   | Maximum   |
|---|-----------|--------------------|-----------|-----------|
| 1 | 1.6400000 |                    | 1.6400000 | 1.6400000 |

Unique Subject Identifier=313500000-0005

Assay variable : PTINR\_VAL1 PT-INR Value

| N | Mean      | Standard Deviation | Minimum   | Maximum   |
|---|-----------|--------------------|-----------|-----------|
| 2 | 1.5800000 | 0.4808326          | 1.2400000 | 1.9200000 |

Unique Subject Identifier=313900000-0004



Assay variable : PTINR\_VAL1 PT-INR Value

N Mean Standard Deviation Minimum Maximum

---

|   |           |           |           |           |
|---|-----------|-----------|-----------|-----------|
| 3 | 1.5166667 | 0.2514624 | 1.3200000 | 1.8000000 |
|---|-----------|-----------|-----------|-----------|

---

Laboratory tests at the time of obtaining Table 2-6 consent, according to the presence or absence of proton-pump inhibitors

Unique Subject Identifier=3139000000-0012

MEANS Procedure

Assay variable : PTINR\_VAL1 PT-INR Value

N Mean Standard Deviation Minimum Maximum

---

|   |          |  |          |          |
|---|----------|--|----------|----------|
| 1 | 2.160000 |  | 2.160000 | 2.160000 |
|---|----------|--|----------|----------|

---

Unique Subject Identifier=3143000000-0012

Assay variable : PTINR\_VAL1 PT-INR Value

N Mean Standard Deviation Minimum Maximum

---

|   |          |           |          |          |
|---|----------|-----------|----------|----------|
| 5 | 1.910000 | 0.7227379 | 1.280000 | 3.110000 |
|---|----------|-----------|----------|----------|

---

Unique Subject Identifier=3147011110-0004

Assay variable : PTINR\_VAL1 PT-INR Value

N Mean Standard Deviation Minimum Maximum

---

|   |          |           |          |          |
|---|----------|-----------|----------|----------|
| 3 | 2.293333 | 0.1357694 | 2.150000 | 2.420000 |
|---|----------|-----------|----------|----------|

---

Unique Subject Identifier=3147011110-0005

Assay variable : PTINR\_VAL1 PT-INR Value

N Mean Standard Deviation Minimum Maximum

---

|   |           |           |           |           |
|---|-----------|-----------|-----------|-----------|
| 4 | 2.0050000 | 0.6614378 | 1.5300000 | 2.9800000 |
|---|-----------|-----------|-----------|-----------|

---

Laboratory tests at the time of obtaining Table 2-6 consent, according to the presence or absence of proton-pump inhibitors

Unique Subject Identifier=3147011110-0006

MEANS Procedure

Assay variable : PTINR\_VAL1 PT-INR Value

N Mean Standard Deviation Minimum Maximum

---

|   |           |           |           |           |
|---|-----------|-----------|-----------|-----------|
| 2 | 1.8150000 | 0.2333452 | 1.6500000 | 1.9800000 |
|---|-----------|-----------|-----------|-----------|

---

Unique Subject Identifier=3147011110-0009

Assay variable : PTINR\_VAL1 PT-INR Value

N Mean Standard Deviation Minimum Maximum

---

|   |           |  |           |           |
|---|-----------|--|-----------|-----------|
| 1 | 1.6800000 |  | 1.6800000 | 1.6800000 |
|---|-----------|--|-----------|-----------|

---

Unique Subject Identifier=3150000000-0001

Assay variable : PTINR\_VAL1 PT-INR Value

N Mean Standard Deviation Minimum Maximum

---

|   |           |           |           |           |
|---|-----------|-----------|-----------|-----------|
| 6 | 2.2833333 | 0.5845226 | 1.8000000 | 3.4000000 |
|---|-----------|-----------|-----------|-----------|

---

Unique Subject Identifier=3150000000-0004

Assay variable : PTINR\_VAL1 PT-INR Value

N Mean Standard Deviation Minimum Maximum

---

|   |           |           |           |           |
|---|-----------|-----------|-----------|-----------|
| 6 | 1.8666667 | 0.3204164 | 1.4000000 | 2.2000000 |
|---|-----------|-----------|-----------|-----------|

---

Laboratory tests at the time of obtaining Table 2-6 consent, according to the presence or absence of proton-pump inhibitors

Unique Subject Identifier=315000000-0005

MEANS Procedure

Assay variable : PTINR\_VAL1 PT-INR Value

N Mean Standard Deviation Minimum Maximum

---

|   |           |           |           |           |
|---|-----------|-----------|-----------|-----------|
| 6 | 2.1166667 | 0.5154286 | 1.3000000 | 2.7000000 |
|---|-----------|-----------|-----------|-----------|

---

Unique Subject Identifier=315000000-0009

Assay variable : PTINR\_VAL1 PT-INR Value

N Mean Standard Deviation Minimum Maximum

---

|   |           |           |           |           |
|---|-----------|-----------|-----------|-----------|
| 6 | 1.6833333 | 0.3250641 | 1.2000000 | 2.2000000 |
|---|-----------|-----------|-----------|-----------|

---

Unique Subject Identifier=315000000-0010

Assay variable : PTINR\_VAL1 PT-INR Value

N Mean Standard Deviation Minimum Maximum

---

|   |           |           |           |           |
|---|-----------|-----------|-----------|-----------|
| 6 | 1.6166667 | 0.2401388 | 1.5000000 | 2.1000000 |
|---|-----------|-----------|-----------|-----------|

---

Unique Subject Identifier=315100000-0002

Assay variable : PTINR\_VAL1 PT-INR Value

N Mean Standard Deviation Minimum Maximum

---

|   |          |           |          |          |
|---|----------|-----------|----------|----------|
| 5 | 1.280000 | 0.0845577 | 1.220000 | 1.420000 |
|---|----------|-----------|----------|----------|

---

Laboratory tests at the time of obtaining Table 2-6 consent, according to the presence or absence of proton-pump inhibitors

Unique Subject Identifier=3151000000-0007

MEANS Procedure

Assay variable : PTINR\_VAL1 PT-INR Value

N Mean Standard Deviation Minimum Maximum

---

|   |           |           |           |           |
|---|-----------|-----------|-----------|-----------|
| 6 | 1.5983333 | 0.1495883 | 1.3900000 | 1.7600000 |
|---|-----------|-----------|-----------|-----------|

---

Unique Subject Identifier=3151000000-0008

Assay variable : PTINR\_VAL1 PT-INR Value

N Mean Standard Deviation Minimum Maximum

---

|   |           |           |           |           |
|---|-----------|-----------|-----------|-----------|
| 6 | 1.8533333 | 0.1834848 | 1.6000000 | 2.0800000 |
|---|-----------|-----------|-----------|-----------|

---

Unique Subject Identifier=3151000000-0010

Assay variable : PTINR\_VAL1 PT-INR Value

N Mean Standard Deviation Minimum Maximum

---

|   |           |  |           |           |
|---|-----------|--|-----------|-----------|
| 1 | 1.4200000 |  | 1.4200000 | 1.4200000 |
|---|-----------|--|-----------|-----------|

---

Unique Subject Identifier=3152011000-0007



Assay variable : PTINR\_VAL1 PT-INR Value

N Mean Standard Deviation Minimum Maximum

---

|   |          |           |          |          |
|---|----------|-----------|----------|----------|
| 5 | 1.500000 | 0.1224745 | 1.400000 | 1.700000 |
|---|----------|-----------|----------|----------|

---

Laboratory tests at the time of obtaining Table 2-6 consent, according to the presence or absence of proton-pump inhibitors

Unique Subject Identifier=3152011000-0020

MEANS Procedure

Assay variable : PTINR\_VAL1 PT-INR Value

N Mean Standard Deviation Minimum Maximum

---

|   |           |           |           |           |
|---|-----------|-----------|-----------|-----------|
| 4 | 1.9500000 | 0.2380476 | 1.8000000 | 2.3000000 |
|---|-----------|-----------|-----------|-----------|

---

Unique Subject Identifier=3158111111-0002

Assay variable : PTINR\_VAL1 PT-INR Value

N Mean Standard Deviation Minimum Maximum

---

|   |           |           |           |           |
|---|-----------|-----------|-----------|-----------|
| 4 | 2.8050000 | 0.6251666 | 2.0900000 | 3.5500000 |
|---|-----------|-----------|-----------|-----------|

---

Unique Subject Identifier=3158111111-0005

Assay variable : PTINR\_VAL1 PT-INR Value

N Mean Standard Deviation Minimum Maximum

---

|   |           |           |           |           |
|---|-----------|-----------|-----------|-----------|
| 5 | 2.1540000 | 0.5195479 | 1.7300000 | 3.0500000 |
|---|-----------|-----------|-----------|-----------|

---

Unique Subject Identifier=3158111111-0009

Assay variable : PTINR\_VAL1 PT-INR Value

N Mean Standard Deviation Minimum Maximum

---

|   |          |           |          |          |
|---|----------|-----------|----------|----------|
| 3 | 2.400000 | 0.1473092 | 2.230000 | 2.490000 |
|---|----------|-----------|----------|----------|

---

Laboratory tests at the time of obtaining Table 2-6 consent, according to the presence or absence of proton-pump inhibitors

Unique Subject Identifier=3158111111-0010

MEANS Procedure

Assay variable : PTINR\_VAL1 PT-INR Value

N Mean Standard Deviation Minimum Maximum

---

|   |           |           |           |           |
|---|-----------|-----------|-----------|-----------|
| 5 | 2.2740000 | 0.2769115 | 1.9800000 | 2.6800000 |
|---|-----------|-----------|-----------|-----------|

---

Unique Subject Identifier=3158111111-0011

Assay variable : PTINR\_VAL1 PT-INR Value

N Mean Standard Deviation Minimum Maximum

---

|   |           |           |           |           |
|---|-----------|-----------|-----------|-----------|
| 4 | 2.0000000 | 0.1329160 | 1.8200000 | 2.1100000 |
|---|-----------|-----------|-----------|-----------|

---

Unique Subject Identifier=3158111111-0014

Assay variable : PTINR\_VAL1 PT-INR Value

N Mean Standard Deviation Minimum Maximum

---

|   |           |           |           |           |
|---|-----------|-----------|-----------|-----------|
| 5 | 1.9260000 | 0.0859069 | 1.8000000 | 2.0400000 |
|---|-----------|-----------|-----------|-----------|

---

Unique Subject Identifier=3158111111-0029

Assay variable : PTINR\_VAL1 PT-INR Value

N Mean Standard Deviation Minimum Maximum

---

|   |          |           |          |          |
|---|----------|-----------|----------|----------|
| 4 | 2.050000 | 0.0697615 | 1.990000 | 2.150000 |
|---|----------|-----------|----------|----------|

---

Laboratory tests at the time of obtaining Table 2-6 consent, according to the presence or absence of proton-pump inhibitors

Unique Subject Identifier=3158111111-0030

MEANS Procedure

Assay variable : PTINR\_VAL1 PT-INR Value

| N | Mean      | Standard Deviation | Minimum   | Maximum   |
|---|-----------|--------------------|-----------|-----------|
| 5 | 2.9220000 | 0.3417163          | 2.5500000 | 3.2800000 |

Unique Subject Identifier=3158111111-0034

Assay variable : PTINR\_VAL1 PT-INR Value

| N | Mean      | Standard Deviation | Minimum   | Maximum   |
|---|-----------|--------------------|-----------|-----------|
| 5 | 1.5860000 | 0.2169793          | 1.3200000 | 1.9200000 |

Unique Subject Identifier=3158111111-0035

Assay variable : PTINR\_VAL1 PT-INR Value

| N | Mean      | Standard Deviation | Minimum   | Maximum   |
|---|-----------|--------------------|-----------|-----------|
| 4 | 2.3925000 | 0.6396027          | 1.8000000 | 3.2500000 |

Unique Subject Identifier=3158111111-0038

Assay variable : PTINR\_VAL1 PT-INR Value

N Mean Standard Deviation Minimum Maximum

---

|   |          |           |          |          |
|---|----------|-----------|----------|----------|
| 4 | 2.760000 | 0.4667619 | 2.100000 | 3.200000 |
|---|----------|-----------|----------|----------|

---

Laboratory tests at the time of obtaining Table 2-6 consent, according to the presence or absence of proton-pump inhibitors

Unique Subject Identifier=3158111111-0047

MEANS Procedure

Assay variable : PTINR\_VAL1 PT-INR Value

N Mean Standard Deviation Minimum Maximum

---

|   |           |           |           |           |
|---|-----------|-----------|-----------|-----------|
| 5 | 2.3060000 | 0.2736421 | 1.9600000 | 2.5900000 |
|---|-----------|-----------|-----------|-----------|

---

Unique Subject Identifier=3158111111-0063

Assay variable : PTINR\_VAL1 PT-INR Value

N Mean Standard Deviation Minimum Maximum

---

|   |           |           |           |           |
|---|-----------|-----------|-----------|-----------|
| 3 | 1.9700000 | 0.1322876 | 1.8200000 | 2.0700000 |
|---|-----------|-----------|-----------|-----------|

---

Unique Subject Identifier=3158111111-0069

Assay variable : PTINR\_VAL1 PT-INR Value

N Mean Standard Deviation Minimum Maximum

---

|   |           |  |           |           |
|---|-----------|--|-----------|-----------|
| 1 | 1.4700000 |  | 1.4700000 | 1.4700000 |
|---|-----------|--|-----------|-----------|

---

Unique Subject Identifier=3158111111-0070



Assay variable : PTINR\_VAL1 PT-INR Value

N Mean Standard Deviation Minimum Maximum

---

|   |           |           |           |           |
|---|-----------|-----------|-----------|-----------|
| 4 | 1.9250000 | 0.2880393 | 1.6500000 | 2.3300000 |
|---|-----------|-----------|-----------|-----------|

---

Laboratory tests at the time of obtaining Table 2-6 consent, according to the presence or absence of proton-pump inhibitors

Unique Subject Identifier=3161010111-0002

MEANS Procedure

Assay variable : PTINR\_VAL1 PT-INR Value

| N | Mean      | Standard Deviation | Minimum   | Maximum   |
|---|-----------|--------------------|-----------|-----------|
| 3 | 2.0333333 | 0.0907377          | 1.9300000 | 2.1000000 |

Unique Subject Identifier=3161010111-0004

Assay variable : PTINR\_VAL1 PT-INR Value

| N | Mean      | Standard Deviation | Minimum   | Maximum   |
|---|-----------|--------------------|-----------|-----------|
| 4 | 2.3975000 | 0.3927998          | 2.0200000 | 2.7800000 |

Unique Subject Identifier=3162011000-0002

Assay variable : PTINR\_VAL1 PT-INR Value

| N | Mean      | Standard Deviation | Minimum   | Maximum   |
|---|-----------|--------------------|-----------|-----------|
| 2 | 2.4700000 | 0.6363961          | 2.0200000 | 2.9200000 |

Unique Subject Identifier=3162011000-0006

Assay variable : PTINR\_VAL1 PT-INR Value

N Mean Standard Deviation Minimum Maximum

---

|   |           |           |           |           |
|---|-----------|-----------|-----------|-----------|
| 4 | 2.0025000 | 0.4342330 | 1.6400000 | 2.5400000 |
|---|-----------|-----------|-----------|-----------|

---

Laboratory tests at the time of obtaining Table 2-6 consent, according to the presence or absence of proton-pump inhibitors

Unique Subject Identifier=3162011000-0025

MEANS Procedure

Assay variable : PTINR\_VAL1 PT-INR Value

| N | Mean      | Standard Deviation | Minimum   | Maximum   |
|---|-----------|--------------------|-----------|-----------|
| 2 | 1.8800000 | 0.1838478          | 1.7500000 | 2.0100000 |

Unique Subject Identifier=3163011011-0005

Assay variable : PTINR\_VAL1 PT-INR Value

| N | Mean      | Standard Deviation | Minimum   | Maximum   |
|---|-----------|--------------------|-----------|-----------|
| 4 | 2.0500000 | 0.1732051          | 1.8000000 | 2.2000000 |

Unique Subject Identifier=3163011011-0006

Assay variable : PTINR\_VAL1 PT-INR Value

| N | Mean      | Standard Deviation | Minimum   | Maximum   |
|---|-----------|--------------------|-----------|-----------|
| 5 | 1.9400000 | 0.3714835          | 1.4000000 | 2.4000000 |

Unique Subject Identifier=3163011011-0009

Assay variable : PTINR\_VAL1 PT-INR Value

N Mean Standard Deviation Minimum Maximum

---

|   |          |           |          |          |
|---|----------|-----------|----------|----------|
| 2 | 1.850000 | 0.3535534 | 1.600000 | 2.100000 |
|---|----------|-----------|----------|----------|

---

Laboratory tests at the time of obtaining Table 2-6 consent, according to the presence or absence of proton-pump inhibitors

Unique Subject Identifier=3166011110-0011

MEANS Procedure

Assay variable : PTINR\_VAL1 PT-INR Value

| N | Mean     | Standard Deviation | Minimum  | Maximum  |
|---|----------|--------------------|----------|----------|
| 1 | 1.610000 |                    | 1.610000 | 1.610000 |

Unique Subject Identifier=3166011110-0017

Assay variable : PTINR\_VAL1 PT-INR Value

| N | Mean     | Standard Deviation | Minimum  | Maximum  |
|---|----------|--------------------|----------|----------|
| 2 | 2.715000 | 0.6151829          | 2.280000 | 3.150000 |

Unique Subject Identifier=3171010000-0005

Assay variable : PTINR\_VAL1 PT-INR Value

| N | Mean     | Standard Deviation | Minimum  | Maximum  |
|---|----------|--------------------|----------|----------|
| 4 | 1.725000 | 0.1892969          | 1.600000 | 2.000000 |

Unique Subject Identifier=3175011000-0003

Assay variable : PTINR\_VAL1 PT-INR Value

N Mean Standard Deviation Minimum Maximum

---

|   |          |  |          |          |
|---|----------|--|----------|----------|
| 1 | 2.130000 |  | 2.130000 | 2.130000 |
|---|----------|--|----------|----------|

---

Laboratory tests at the time of obtaining Table 2-6 consent, according to the presence or absence of proton-pump inhibitors

Unique Subject Identifier=3180010000-0010

MEANS Procedure

Assay variable : PTINR\_VAL1 PT-INR Value

N Mean Standard Deviation Minimum Maximum

---

|   |           |           |           |           |
|---|-----------|-----------|-----------|-----------|
| 5 | 2.4440000 | 1.1439755 | 1.2100000 | 4.1600000 |
|---|-----------|-----------|-----------|-----------|

---

Unique Subject Identifier=3185010010-0012

Assay variable : PTINR\_VAL1 PT-INR Value

N Mean Standard Deviation Minimum Maximum

---

|   |           |           |           |           |
|---|-----------|-----------|-----------|-----------|
| 4 | 1.2725000 | 0.1826426 | 1.1100000 | 1.4500000 |
|---|-----------|-----------|-----------|-----------|

---

Unique Subject Identifier=3185010010-0023

Assay variable : PTINR\_VAL1 PT-INR Value

N Mean Standard Deviation Minimum Maximum

---

|   |           |           |           |           |
|---|-----------|-----------|-----------|-----------|
| 6 | 1.3466667 | 0.1136075 | 1.1900000 | 1.5100000 |
|---|-----------|-----------|-----------|-----------|

---

Unique Subject Identifier=3185010010-0034



Assay variable : PTINR\_VAL1 PT-INR Value

N Mean Standard Deviation Minimum Maximum

---

|   |           |           |           |           |
|---|-----------|-----------|-----------|-----------|
| 5 | 1.8280000 | 0.4853555 | 1.4000000 | 2.6100000 |
|---|-----------|-----------|-----------|-----------|

---

Laboratory tests at the time of obtaining Table 2-6 consent, according to the presence or absence of proton-pump inhibitors

Unique Subject Identifier=3185010010-0038

MEANS Procedure

Assay variable : PTINR\_VAL1 PT-INR Value

N Mean Standard Deviation Minimum Maximum

---

|   |           |           |           |           |
|---|-----------|-----------|-----------|-----------|
| 4 | 1.9350000 | 0.5476313 | 1.4600000 | 2.7200000 |
|---|-----------|-----------|-----------|-----------|

---

Unique Subject Identifier=3187000000-0001

Assay variable : PTINR\_VAL1 PT-INR Value

N Mean Standard Deviation Minimum Maximum

---

|   |           |           |           |           |
|---|-----------|-----------|-----------|-----------|
| 5 | 2.4800000 | 0.6445153 | 1.8100000 | 3.1800000 |
|---|-----------|-----------|-----------|-----------|

---

Unique Subject Identifier=3187000000-0003

Assay variable : PTINR\_VAL1 PT-INR Value

N Mean Standard Deviation Minimum Maximum

---

|   |           |           |           |           |
|---|-----------|-----------|-----------|-----------|
| 3 | 2.1000000 | 0.5469004 | 1.6100000 | 2.6900000 |
|---|-----------|-----------|-----------|-----------|

---

Unique Subject Identifier=3187000000-0006

Assay variable : PTINR\_VAL1 PT-INR Value

N Mean Standard Deviation Minimum Maximum

---

|   |          |           |          |          |
|---|----------|-----------|----------|----------|
| 6 | 2.460000 | 1.2437363 | 1.440000 | 4.930000 |
|---|----------|-----------|----------|----------|

---

Laboratory tests at the time of obtaining Table 2-6 consent, according to the presence or absence of proton-pump inhibitors

Unique Subject Identifier=3187000000-0009

MEANS Procedure

Assay variable : PTINR\_VAL1 PT-INR Value

N Mean Standard Deviation Minimum Maximum

---

|   |           |           |           |           |
|---|-----------|-----------|-----------|-----------|
| 3 | 2.4366667 | 0.1205543 | 2.3100000 | 2.5500000 |
|---|-----------|-----------|-----------|-----------|

---

Unique Subject Identifier=3190111111-0001

Assay variable : PTINR\_VAL1 PT-INR Value

N Mean Standard Deviation Minimum Maximum

---

|   |           |           |           |           |
|---|-----------|-----------|-----------|-----------|
| 6 | 2.1833333 | 0.3253716 | 1.6600000 | 2.5800000 |
|---|-----------|-----------|-----------|-----------|

---

Unique Subject Identifier=3190111111-0005

Assay variable : PTINR\_VAL1 PT-INR Value

N Mean Standard Deviation Minimum Maximum

---

|   |           |           |           |           |
|---|-----------|-----------|-----------|-----------|
| 5 | 1.8540000 | 0.1837934 | 1.5600000 | 2.0300000 |
|---|-----------|-----------|-----------|-----------|

---

Unique Subject Identifier=3190111111-0006

Assay variable : PTINR\_VAL1 PT-INR Value

N Mean Standard Deviation Minimum Maximum

---

|   |           |           |           |           |
|---|-----------|-----------|-----------|-----------|
| 2 | 2.0050000 | 0.1060660 | 1.9300000 | 2.0800000 |
|---|-----------|-----------|-----------|-----------|

---

Laboratory tests at the time of obtaining Table 2-6 consent, according to the presence or absence of proton-pump inhibitors

Unique Subject Identifier=3197000000-0003

MEANS Procedure

Assay variable : PTINR\_VAL1 PT-INR Value

| N | Mean      | Standard Deviation | Minimum   | Maximum   |
|---|-----------|--------------------|-----------|-----------|
| 2 | 1.3100000 | 0.2404163          | 1.1400000 | 1.4800000 |

Unique Subject Identifier=3197000000-0048

Assay variable : PTINR\_VAL1 PT-INR Value

| N | Mean      | Standard Deviation | Minimum   | Maximum   |
|---|-----------|--------------------|-----------|-----------|
| 6 | 1.7950000 | 0.4539053          | 1.2700000 | 2.3300000 |

Unique Subject Identifier=3204010110-0002

Assay variable : PTINR\_VAL1 PT-INR Value

| N | Mean      | Standard Deviation | Minimum   | Maximum   |
|---|-----------|--------------------|-----------|-----------|
| 3 | 2.1633333 | 0.0550757          | 2.1100000 | 2.2200000 |

Unique Subject Identifier=3205011100-0003

Assay variable : PTINR\_VAL1 PT-INR Value

N Mean Standard Deviation Minimum Maximum

---

|   |          |           |          |          |
|---|----------|-----------|----------|----------|
| 3 | 2.300000 | 0.1732051 | 2.200000 | 2.500000 |
|---|----------|-----------|----------|----------|

---

Laboratory tests at the time of obtaining Table 2-6 consent, according to the presence or absence of proton-pump inhibitors

Unique Subject Identifier=3205011100-0010

MEANS Procedure

Assay variable : PTINR\_VAL1 PT-INR Value

| N | Mean      | Standard Deviation | Minimum   | Maximum   |
|---|-----------|--------------------|-----------|-----------|
| 3 | 1.7333333 | 0.0577350          | 1.7000000 | 1.8000000 |

Unique Subject Identifier=3205011100-0021

Assay variable : PTINR\_VAL1 PT-INR Value

| N | Mean      | Standard Deviation | Minimum   | Maximum   |
|---|-----------|--------------------|-----------|-----------|
| 6 | 2.2166667 | 0.4833908          | 1.7000000 | 3.0000000 |

Unique Subject Identifier=3205011100-0027

Assay variable : PTINR\_VAL1 PT-INR Value

| N | Mean      | Standard Deviation | Minimum   | Maximum   |
|---|-----------|--------------------|-----------|-----------|
| 6 | 2.1666667 | 0.3444803          | 1.6000000 | 2.5000000 |

Unique Subject Identifier=3206011010-0005



Assay variable : PTINR\_VAL1 PT-INR Value

N Mean Standard Deviation Minimum Maximum

---

|   |           |           |           |           |
|---|-----------|-----------|-----------|-----------|
| 2 | 1.9650000 | 0.2333452 | 1.8000000 | 2.1300000 |
|---|-----------|-----------|-----------|-----------|

---

Laboratory tests at the time of obtaining Table 2-6 consent, according to the presence or absence of proton-pump inhibitors

Unique Subject Identifier=3208000000-0002

MEANS Procedure

Assay variable : PTINR\_VAL1 PT-INR Value

N Mean Standard Deviation Minimum Maximum

---

|   |           |           |           |           |
|---|-----------|-----------|-----------|-----------|
| 6 | 1.4666667 | 0.2133229 | 1.2700000 | 1.8000000 |
|---|-----------|-----------|-----------|-----------|

---

Unique Subject Identifier=3208000000-0007

Assay variable : PTINR\_VAL1 PT-INR Value

N Mean Standard Deviation Minimum Maximum

---

|   |           |           |           |           |
|---|-----------|-----------|-----------|-----------|
| 5 | 2.0140000 | 0.3176161 | 1.7200000 | 2.4600000 |
|---|-----------|-----------|-----------|-----------|

---

Unique Subject Identifier=3214111000-0005

Assay variable : PTINR\_VAL1 PT-INR Value

N Mean Standard Deviation Minimum Maximum

---

|   |           |  |           |           |
|---|-----------|--|-----------|-----------|
| 1 | 1.0500000 |  | 1.0500000 | 1.0500000 |
|---|-----------|--|-----------|-----------|

---

Unique Subject Identifier=3301010000-0008

Assay variable : PTINR\_VAL1 PT-INR Value

N Mean Standard Deviation Minimum Maximum

---

|   |          |           |          |          |
|---|----------|-----------|----------|----------|
| 6 | 1.550000 | 0.1870829 | 1.300000 | 1.800000 |
|---|----------|-----------|----------|----------|

---

Laboratory tests at the time of obtaining Table 2-6 consent, according to the presence or absence of proton-pump inhibitors

Unique Subject Identifier=3301010000-0018

MEANS Procedure

Assay variable : PTINR\_VAL1 PT-INR Value

| N | Mean     | Standard Deviation | Minimum  | Maximum  |
|---|----------|--------------------|----------|----------|
| 5 | 2.160000 | 0.2302173          | 1.800000 | 2.400000 |

Unique Subject Identifier=3301010000-0021

Assay variable : PTINR\_VAL1 PT-INR Value

| N | Mean     | Standard Deviation | Minimum  | Maximum  |
|---|----------|--------------------|----------|----------|
| 6 | 2.183333 | 0.5419102          | 1.700000 | 3.100000 |

Unique Subject Identifier=3301010000-0026

Assay variable : PTINR\_VAL1 PT-INR Value

| N | Mean     | Standard Deviation | Minimum  | Maximum  |
|---|----------|--------------------|----------|----------|
| 6 | 1.316667 | 0.1169045          | 1.200000 | 1.500000 |

Unique Subject Identifier=3301010000-0033

Assay variable : PTINR\_VAL1 PT-INR Value

N Mean Standard Deviation Minimum Maximum

---

|   |           |           |           |           |
|---|-----------|-----------|-----------|-----------|
| 6 | 1.6500000 | 0.3146427 | 1.1000000 | 2.0000000 |
|---|-----------|-----------|-----------|-----------|

---

Laboratory tests at the time of obtaining Table 2-6 consent, according to the presence or absence of proton-pump inhibitors

Unique Subject Identifier=3302010000-0005

MEANS Procedure

Assay variable : PTINR\_VAL1 PT-INR Value

N Mean Standard Deviation Minimum Maximum

---

|   |           |           |           |           |
|---|-----------|-----------|-----------|-----------|
| 4 | 1.3875000 | 0.1260622 | 1.2900000 | 1.5700000 |
|---|-----------|-----------|-----------|-----------|

---

Unique Subject Identifier=3302010000-0010

Assay variable : PTINR\_VAL1 PT-INR Value

N Mean Standard Deviation Minimum Maximum

---

|   |           |           |           |           |
|---|-----------|-----------|-----------|-----------|
| 6 | 2.1733333 | 0.6104971 | 1.5800000 | 3.1000000 |
|---|-----------|-----------|-----------|-----------|

---

Unique Subject Identifier=3302010000-0021

Assay variable : PTINR\_VAL1 PT-INR Value

N Mean Standard Deviation Minimum Maximum

---

|   |           |           |           |           |
|---|-----------|-----------|-----------|-----------|
| 6 | 1.8050000 | 0.2564176 | 1.3800000 | 2.1400000 |
|---|-----------|-----------|-----------|-----------|

---

Unique Subject Identifier=3302010000-0028

Assay variable : PTINR\_VAL1 PT-INR Value

N Mean Standard Deviation Minimum Maximum

---

|   |           |           |           |           |
|---|-----------|-----------|-----------|-----------|
| 4 | 2.3175000 | 0.8429067 | 1.4100000 | 3.4500000 |
|---|-----------|-----------|-----------|-----------|

---

Laboratory tests at the time of obtaining Table 2-6 consent, according to the presence or absence of proton-pump inhibitors

Unique Subject Identifier=3304011000-0004

MEANS Procedure

Assay variable : PTINR\_VAL1 PT-INR Value

N Mean Standard Deviation Minimum Maximum

---

|   |          |           |          |          |
|---|----------|-----------|----------|----------|
| 5 | 2.440000 | 0.9343447 | 1.700000 | 4.000000 |
|---|----------|-----------|----------|----------|

---

Unique Subject Identifier=3347010000-0003

Assay variable : PTINR\_VAL1 PT-INR Value

N Mean Standard Deviation Minimum Maximum

---

|   |          |           |          |          |
|---|----------|-----------|----------|----------|
| 6 | 2.190000 | 0.3221801 | 1.840000 | 2.700000 |
|---|----------|-----------|----------|----------|

---

Unique Subject Identifier=3347010000-0004

Assay variable : PTINR\_VAL1 PT-INR Value

N Mean Standard Deviation Minimum Maximum

---

|   |          |           |          |          |
|---|----------|-----------|----------|----------|
| 6 | 2.183333 | 0.1169045 | 2.000000 | 2.300000 |
|---|----------|-----------|----------|----------|

---

Unique Subject Identifier=3347010000-0006



Assay variable : PTINR\_VAL1 PT-INR Value

N Mean Standard Deviation Minimum Maximum

---

|   |          |           |           |           |
|---|----------|-----------|-----------|-----------|
| 6 | 2.233333 | 0.3881580 | 1.9000000 | 3.0000000 |
|---|----------|-----------|-----------|-----------|

---

Laboratory tests at the time of obtaining Table 2-6 consent, according to the presence or absence of proton-pump inhibitors

Unique Subject Identifier=3347010000-0009

MEANS Procedure

Assay variable : PTINR\_VAL1 PT-INR Value

N Mean Standard Deviation Minimum Maximum

---

|   |           |           |           |           |
|---|-----------|-----------|-----------|-----------|
| 6 | 1.7183333 | 0.1166905 | 1.5000000 | 1.8000000 |
|---|-----------|-----------|-----------|-----------|

---

Unique Subject Identifier=3347010000-0011

Assay variable : PTINR\_VAL1 PT-INR Value

N Mean Standard Deviation Minimum Maximum

---

|   |           |           |           |           |
|---|-----------|-----------|-----------|-----------|
| 6 | 2.3800000 | 0.2332381 | 2.0000000 | 2.7000000 |
|---|-----------|-----------|-----------|-----------|

---

Unique Subject Identifier=3347010000-0012

Assay variable : PTINR\_VAL1 PT-INR Value

N Mean Standard Deviation Minimum Maximum

---

|   |           |           |           |           |
|---|-----------|-----------|-----------|-----------|
| 6 | 2.3450000 | 0.3668106 | 1.9000000 | 2.7000000 |
|---|-----------|-----------|-----------|-----------|

---

Unique Subject Identifier=3347010000-0013

Assay variable : PTINR\_VAL1 PT-INR Value

N Mean Standard Deviation Minimum Maximum

---

|   |           |           |           |           |
|---|-----------|-----------|-----------|-----------|
| 6 | 1.9150000 | 0.1433527 | 1.8000000 | 2.1900000 |
|---|-----------|-----------|-----------|-----------|

---

Laboratory tests at the time of obtaining Table 2-6 consent, according to the presence or absence of proton-pump inhibitors

Unique Subject Identifier=3347010000-0014

MEANS Procedure

Assay variable : PTINR\_VAL1 PT-INR Value

N Mean Standard Deviation Minimum Maximum

---

|   |           |           |           |           |
|---|-----------|-----------|-----------|-----------|
| 6 | 2.5000000 | 0.3464102 | 2.0000000 | 3.0000000 |
|---|-----------|-----------|-----------|-----------|

---

Unique Subject Identifier=3347010000-0016

Assay variable : PTINR\_VAL1 PT-INR Value

N Mean Standard Deviation Minimum Maximum

---

|   |           |           |           |           |
|---|-----------|-----------|-----------|-----------|
| 5 | 1.7920000 | 0.1879362 | 1.6000000 | 2.1000000 |
|---|-----------|-----------|-----------|-----------|

---

Unique Subject Identifier=3347010000-0021

Assay variable : PTINR\_VAL1 PT-INR Value

N Mean Standard Deviation Minimum Maximum

---

|   |           |           |           |           |
|---|-----------|-----------|-----------|-----------|
| 6 | 1.8483333 | 0.2891655 | 1.6000000 | 2.3000000 |
|---|-----------|-----------|-----------|-----------|

---

Unique Subject Identifier=3347010000-0023

Assay variable : PTINR\_VAL1 PT-INR Value

N Mean Standard Deviation Minimum Maximum

---

|   |           |           |           |           |
|---|-----------|-----------|-----------|-----------|
| 6 | 2.1666667 | 0.5125102 | 1.3000000 | 2.6000000 |
|---|-----------|-----------|-----------|-----------|

---

Laboratory tests at the time of obtaining Table 2-6 consent, according to the presence or absence of proton-pump inhibitors

Unique Subject Identifier=3347010000-0028

MEANS Procedure

Assay variable : PTINR\_VAL1 PT-INR Value

N Mean Standard Deviation Minimum Maximum

---

|   |           |           |           |           |
|---|-----------|-----------|-----------|-----------|
| 4 | 1.5250000 | 0.2217356 | 1.3000000 | 1.8000000 |
|---|-----------|-----------|-----------|-----------|

---

Unique Subject Identifier=3347010000-0030

Assay variable : PTINR\_VAL1 PT-INR Value

N Mean Standard Deviation Minimum Maximum

---

|   |           |           |           |           |
|---|-----------|-----------|-----------|-----------|
| 6 | 1.9666667 | 0.2250926 | 1.6000000 | 2.2000000 |
|---|-----------|-----------|-----------|-----------|

---

Unique Subject Identifier=3347010000-0037

Assay variable : PTINR\_VAL1 PT-INR Value

N Mean Standard Deviation Minimum Maximum

---

|   |           |           |           |           |
|---|-----------|-----------|-----------|-----------|
| 4 | 1.7375000 | 0.1265899 | 1.5600000 | 1.8600000 |
|---|-----------|-----------|-----------|-----------|

---

Unique Subject Identifier=3347010000-0044

Assay variable : PTINR\_VAL1 PT-INR Value

N Mean Standard Deviation Minimum Maximum

---

|   |           |           |           |           |
|---|-----------|-----------|-----------|-----------|
| 6 | 2.0783333 | 0.1371739 | 1.9000000 | 2.2000000 |
|---|-----------|-----------|-----------|-----------|

---

Laboratory tests at the time of obtaining Table 2-6 consent, according to the presence or absence of proton-pump inhibitors

Unique Subject Identifier=3347010000-0046

MEANS Procedure

Assay variable : PTINR\_VAL1 PT-INR Value

N Mean Standard Deviation Minimum Maximum

---

|   |           |           |           |           |
|---|-----------|-----------|-----------|-----------|
| 6 | 2.3250000 | 0.6570769 | 1.5000000 | 3.1000000 |
|---|-----------|-----------|-----------|-----------|

---

Unique Subject Identifier=3349010000-0006

Assay variable : PTINR\_VAL1 PT-INR Value

N Mean Standard Deviation Minimum Maximum

---

|   |           |           |           |           |
|---|-----------|-----------|-----------|-----------|
| 6 | 1.3333333 | 0.2065591 | 1.0000000 | 1.5000000 |
|---|-----------|-----------|-----------|-----------|

---

Unique Subject Identifier=3349010000-0008

Assay variable : PTINR\_VAL1 PT-INR Value

N Mean Standard Deviation Minimum Maximum

---

|   |           |           |           |           |
|---|-----------|-----------|-----------|-----------|
| 6 | 1.7833333 | 0.2316607 | 1.6000000 | 2.2000000 |
|---|-----------|-----------|-----------|-----------|

---

Unique Subject Identifier=3349010000-0009



Assay variable : PTINR\_VAL1 PT-INR Value

N Mean Standard Deviation Minimum Maximum

---

|   |           |           |           |           |
|---|-----------|-----------|-----------|-----------|
| 6 | 1.6666667 | 0.2338090 | 1.4000000 | 2.0000000 |
|---|-----------|-----------|-----------|-----------|

---

Laboratory tests at the time of obtaining Table 2-6 consent, according to the presence or absence of proton-pump inhibitors

Unique Subject Identifier=3350010000-0003

MEANS Procedure

Assay variable : PTINR\_VAL1 PT-INR Value

| N | Mean      | Standard Deviation | Minimum   | Maximum   |
|---|-----------|--------------------|-----------|-----------|
| 5 | 2.1800000 | 0.5761944          | 1.6000000 | 2.8000000 |

Unique Subject Identifier=3350010000-0005

Assay variable : PTINR\_VAL1 PT-INR Value

| N | Mean      | Standard Deviation | Minimum   | Maximum   |
|---|-----------|--------------------|-----------|-----------|
| 6 | 2.6333333 | 0.3265986          | 2.2000000 | 3.2000000 |

Unique Subject Identifier=3401000000-0004

Assay variable : PTINR\_VAL1 PT-INR Value

| N | Mean      | Standard Deviation | Minimum   | Maximum   |
|---|-----------|--------------------|-----------|-----------|
| 4 | 2.1125000 | 0.3233548          | 1.7500000 | 2.4000000 |

Unique Subject Identifier=3401000000-0011

Assay variable : PTINR\_VAL1 PT-INR Value

N Mean Standard Deviation Minimum Maximum

---

|   |           |           |           |           |
|---|-----------|-----------|-----------|-----------|
| 4 | 1.8850000 | 0.5774946 | 1.3900000 | 2.7200000 |
|---|-----------|-----------|-----------|-----------|

---

Laboratory tests at the time of obtaining Table 2-6 consent, according to the presence or absence of proton-pump inhibitors

Unique Subject Identifier=3401000000-0019

MEANS Procedure

Assay variable : PTINR\_VAL1 PT-INR Value

| N | Mean      | Standard Deviation | Minimum   | Maximum   |
|---|-----------|--------------------|-----------|-----------|
| 4 | 1.4175000 | 0.0736546          | 1.3300000 | 1.5000000 |

Unique Subject Identifier=3401000000-0020

Assay variable : PTINR\_VAL1 PT-INR Value

| N | Mean      | Standard Deviation | Minimum   | Maximum   |
|---|-----------|--------------------|-----------|-----------|
| 5 | 1.8460000 | 0.2968670          | 1.5100000 | 2.3200000 |

Unique Subject Identifier=3401000000-0021

Assay variable : PTINR\_VAL1 PT-INR Value

| N | Mean      | Standard Deviation | Minimum   | Maximum   |
|---|-----------|--------------------|-----------|-----------|
| 5 | 2.1180000 | 0.3089013          | 1.7100000 | 2.5200000 |

Unique Subject Identifier=3401000000-0024

Assay variable : PTINR\_VAL1 PT-INR Value

N Mean Standard Deviation Minimum Maximum

---

|   |           |           |           |           |
|---|-----------|-----------|-----------|-----------|
| 4 | 1.7325000 | 0.2478407 | 1.5700000 | 2.1000000 |
|---|-----------|-----------|-----------|-----------|

---

Laboratory tests at the time of obtaining Table 2-6 consent, according to the presence or absence of proton-pump inhibitors

Unique Subject Identifier=3401000000-0027

MEANS Procedure

Assay variable : PTINR\_VAL1 PT-INR Value

N Mean Standard Deviation Minimum Maximum

---

|   |           |           |           |           |
|---|-----------|-----------|-----------|-----------|
| 6 | 2.0616667 | 0.5977095 | 1.4000000 | 3.0400000 |
|---|-----------|-----------|-----------|-----------|

---

Unique Subject Identifier=3401000000-0033

Assay variable : PTINR\_VAL1 PT-INR Value

N Mean Standard Deviation Minimum Maximum

---

|   |           |           |           |           |
|---|-----------|-----------|-----------|-----------|
| 4 | 1.9625000 | 0.2766918 | 1.6200000 | 2.2900000 |
|---|-----------|-----------|-----------|-----------|

---

Unique Subject Identifier=3401000000-0034

Assay variable : PTINR\_VAL1 PT-INR Value

N Mean Standard Deviation Minimum Maximum

---

|   |           |           |           |           |
|---|-----------|-----------|-----------|-----------|
| 4 | 1.7450000 | 0.5634122 | 1.2700000 | 2.4900000 |
|---|-----------|-----------|-----------|-----------|

---

Unique Subject Identifier=3401000000-0035

Assay variable : PTINR\_VAL1 PT-INR Value

N Mean Standard Deviation Minimum Maximum

---

|   |           |           |           |           |
|---|-----------|-----------|-----------|-----------|
| 6 | 2.2150000 | 0.3503570 | 1.8400000 | 2.7200000 |
|---|-----------|-----------|-----------|-----------|

---

Laboratory tests at the time of obtaining Table 2-6 consent, according to the presence or absence of proton-pump inhibitors

Unique Subject Identifier=3401000000-0037

MEANS Procedure

Assay variable : PTINR\_VAL1 PT-INR Value

N Mean Standard Deviation Minimum Maximum

---

|   |           |           |           |           |
|---|-----------|-----------|-----------|-----------|
| 6 | 1.8566667 | 0.4036170 | 1.5000000 | 2.6000000 |
|---|-----------|-----------|-----------|-----------|

---

Unique Subject Identifier=3401000000-0038

Assay variable : PTINR\_VAL1 PT-INR Value

N Mean Standard Deviation Minimum Maximum

---

|   |           |           |           |           |
|---|-----------|-----------|-----------|-----------|
| 4 | 1.7975000 | 0.3088014 | 1.4800000 | 2.2200000 |
|---|-----------|-----------|-----------|-----------|

---

Unique Subject Identifier=3401000000-0039

Assay variable : PTINR\_VAL1 PT-INR Value

N Mean Standard Deviation Minimum Maximum

---

|   |           |           |           |           |
|---|-----------|-----------|-----------|-----------|
| 6 | 1.8083333 | 0.1068488 | 1.6600000 | 1.9900000 |
|---|-----------|-----------|-----------|-----------|

---

Unique Subject Identifier=3401000000-0041



Assay variable : PTINR\_VAL1 PT-INR Value

N Mean Standard Deviation Minimum Maximum

---

|   |           |           |           |           |
|---|-----------|-----------|-----------|-----------|
| 4 | 1.8075000 | 0.4439501 | 1.4300000 | 2.4400000 |
|---|-----------|-----------|-----------|-----------|

---

Laboratory tests at the time of obtaining Table 2-6 consent, according to the presence or absence of proton-pump inhibitors

Unique Subject Identifier=3401000000-0043

MEANS Procedure

Assay variable : PTINR\_VAL1 PT-INR Value

N Mean Standard Deviation Minimum Maximum

---

|   |           |           |           |           |
|---|-----------|-----------|-----------|-----------|
| 5 | 1.5840000 | 0.1375863 | 1.4900000 | 1.8200000 |
|---|-----------|-----------|-----------|-----------|

---

Unique Subject Identifier=3401000000-0045

Assay variable : PTINR\_VAL1 PT-INR Value

N Mean Standard Deviation Minimum Maximum

---

|   |           |           |           |           |
|---|-----------|-----------|-----------|-----------|
| 6 | 1.7283333 | 0.5647448 | 1.1400000 | 2.7900000 |
|---|-----------|-----------|-----------|-----------|

---

Unique Subject Identifier=3401000000-0046

Assay variable : PTINR\_VAL1 PT-INR Value

N Mean Standard Deviation Minimum Maximum

---

|   |           |           |           |           |
|---|-----------|-----------|-----------|-----------|
| 5 | 1.7800000 | 0.4046604 | 1.1300000 | 2.2200000 |
|---|-----------|-----------|-----------|-----------|

---

Unique Subject Identifier=3402010011-0007

Assay variable : PTINR\_VAL1 PT-INR Value

N Mean Standard Deviation Minimum Maximum

---

|   |           |           |           |           |
|---|-----------|-----------|-----------|-----------|
| 6 | 1.9833333 | 0.3060501 | 1.4000000 | 2.3000000 |
|---|-----------|-----------|-----------|-----------|

---

Laboratory tests at the time of obtaining Table 2-6 consent, according to the presence or absence of proton-pump inhibitors

Unique Subject Identifier=3402010011-0023

MEANS Procedure

Assay variable : PTINR\_VAL1 PT-INR Value

| N | Mean      | Standard Deviation | Minimum   | Maximum   |
|---|-----------|--------------------|-----------|-----------|
| 5 | 1.8000000 | 0.2000000          | 1.6000000 | 2.1000000 |

Unique Subject Identifier=3402010011-0025

Assay variable : PTINR\_VAL1 PT-INR Value

| N | Mean      | Standard Deviation | Minimum   | Maximum   |
|---|-----------|--------------------|-----------|-----------|
| 6 | 2.1666667 | 0.2503331          | 1.8000000 | 2.5000000 |

Unique Subject Identifier=3402010011-0027

Assay variable : PTINR\_VAL1 PT-INR Value

| N | Mean      | Standard Deviation | Minimum   | Maximum   |
|---|-----------|--------------------|-----------|-----------|
| 6 | 2.0666667 | 0.4802777          | 1.7000000 | 2.9000000 |

Unique Subject Identifier=3403011000-0012

Assay variable : PTINR\_VAL1 PT-INR Value

N Mean Standard Deviation Minimum Maximum

---

|   |           |           |           |           |
|---|-----------|-----------|-----------|-----------|
| 2 | 1.9000000 | 0.2828427 | 1.7000000 | 2.1000000 |
|---|-----------|-----------|-----------|-----------|

---

Laboratory tests at the time of obtaining Table 2-6 consent, according to the presence or absence of proton-pump inhibitors

Unique Subject Identifier=3406010000-0003

MEANS Procedure

Assay variable : PTINR\_VAL1 PT-INR Value

N Mean Standard Deviation Minimum Maximum

---

|   |           |           |           |           |
|---|-----------|-----------|-----------|-----------|
| 4 | 2.1775000 | 0.1528343 | 2.0400000 | 2.3900000 |
|---|-----------|-----------|-----------|-----------|

---

Unique Subject Identifier=3407010011-0001

Assay variable : PTINR\_VAL1 PT-INR Value

N Mean Standard Deviation Minimum Maximum

---

|   |           |           |           |           |
|---|-----------|-----------|-----------|-----------|
| 6 | 1.8250000 | 0.2720110 | 1.4700000 | 2.2700000 |
|---|-----------|-----------|-----------|-----------|

---

Unique Subject Identifier=3412000000-0002

Assay variable : PTINR\_VAL1 PT-INR Value

N Mean Standard Deviation Minimum Maximum

---

|   |           |           |           |           |
|---|-----------|-----------|-----------|-----------|
| 4 | 1.7000000 | 0.1113553 | 1.5500000 | 1.8100000 |
|---|-----------|-----------|-----------|-----------|

---

Unique Subject Identifier=3412000000-0004

Assay variable : PTINR\_VAL1 PT-INR Value

N Mean Standard Deviation Minimum Maximum

---

|   |           |           |           |           |
|---|-----------|-----------|-----------|-----------|
| 4 | 1.4925000 | 0.0471699 | 1.4600000 | 1.5600000 |
|---|-----------|-----------|-----------|-----------|

---

Laboratory tests at the time of obtaining Table 2-6 consent, according to the presence or absence of proton-pump inhibitors

Unique Subject Identifier=3417111111-0003

MEANS Procedure

Assay variable : PTINR\_VAL1 PT-INR Value

N Mean Standard Deviation Minimum Maximum

---

|   |           |           |           |           |
|---|-----------|-----------|-----------|-----------|
| 4 | 1.4900000 | 0.1745470 | 1.2600000 | 1.6400000 |
|---|-----------|-----------|-----------|-----------|

---

Unique Subject Identifier=3417111111-0008

Assay variable : PTINR\_VAL1 PT-INR Value

N Mean Standard Deviation Minimum Maximum

---

|   |           |           |           |           |
|---|-----------|-----------|-----------|-----------|
| 6 | 1.7100000 | 0.2366432 | 1.4000000 | 2.0100000 |
|---|-----------|-----------|-----------|-----------|

---

Unique Subject Identifier=3417111111-0009

Assay variable : PTINR\_VAL1 PT-INR Value

N Mean Standard Deviation Minimum Maximum

---

|   |           |           |           |           |
|---|-----------|-----------|-----------|-----------|
| 6 | 1.9400000 | 0.2276840 | 1.6800000 | 2.2500000 |
|---|-----------|-----------|-----------|-----------|

---

Unique Subject Identifier=3417111111-0013



Assay variable : PTINR\_VAL1 PT-INR Value

N Mean Standard Deviation Minimum Maximum

---

|   |           |           |           |           |
|---|-----------|-----------|-----------|-----------|
| 6 | 1.9016667 | 0.0511534 | 1.8500000 | 1.9900000 |
|---|-----------|-----------|-----------|-----------|

---

Laboratory tests at the time of obtaining Table 2-6 consent, according to the presence or absence of proton-pump inhibitors

Unique Subject Identifier=3421000000-0014

MEANS Procedure

Assay variable : PTINR\_VAL1 PT-INR Value

N Mean Standard Deviation Minimum Maximum

---

|   |           |           |           |           |
|---|-----------|-----------|-----------|-----------|
| 6 | 2.0916667 | 0.3975634 | 1.4600000 | 2.6400000 |
|---|-----------|-----------|-----------|-----------|

---

Unique Subject Identifier=3421000000-0015

Assay variable : PTINR\_VAL1 PT-INR Value

N Mean Standard Deviation Minimum Maximum

---

|   |           |           |           |           |
|---|-----------|-----------|-----------|-----------|
| 4 | 2.5025000 | 0.6128825 | 1.6400000 | 2.9400000 |
|---|-----------|-----------|-----------|-----------|

---

Unique Subject Identifier=3421000000-0022

Assay variable : PTINR\_VAL1 PT-INR Value

N Mean Standard Deviation Minimum Maximum

---

|   |           |           |           |           |
|---|-----------|-----------|-----------|-----------|
| 4 | 1.9800000 | 0.1630951 | 1.7800000 | 2.1600000 |
|---|-----------|-----------|-----------|-----------|

---

Unique Subject Identifier=3421000000-0025

Assay variable : PTINR\_VAL1 PT-INR Value

N Mean Standard Deviation Minimum Maximum

---

|   |           |           |           |           |
|---|-----------|-----------|-----------|-----------|
| 4 | 1.9800000 | 0.1858315 | 1.7900000 | 2.2300000 |
|---|-----------|-----------|-----------|-----------|

---

Laboratory tests at the time of obtaining Table 2-6 consent, according to the presence or absence of proton-pump inhibitors

Unique Subject Identifier=3421000000-0031

MEANS Procedure

Assay variable : PTINR\_VAL1 PT-INR Value

N Mean Standard Deviation Minimum Maximum

---

|   |           |           |           |           |
|---|-----------|-----------|-----------|-----------|
| 3 | 2.1066667 | 0.9450044 | 1.0700000 | 2.9200000 |
|---|-----------|-----------|-----------|-----------|

---

Unique Subject Identifier=3422000000-0003

Assay variable : PTINR\_VAL1 PT-INR Value

N Mean Standard Deviation Minimum Maximum

---

|   |           |           |           |           |
|---|-----------|-----------|-----------|-----------|
| 3 | 1.8666667 | 0.5507571 | 1.5000000 | 2.5000000 |
|---|-----------|-----------|-----------|-----------|

---

Unique Subject Identifier=3422000000-0004

Assay variable : PTINR\_VAL1 PT-INR Value

N Mean Standard Deviation Minimum Maximum

---

|   |           |           |           |           |
|---|-----------|-----------|-----------|-----------|
| 5 | 1.4000000 | 0.1000000 | 1.3000000 | 1.5000000 |
|---|-----------|-----------|-----------|-----------|

---

Unique Subject Identifier=3422000000-0009

Assay variable : PTINR\_VAL1 PT-INR Value

N Mean Standard Deviation Minimum Maximum

---

|   |           |           |           |           |
|---|-----------|-----------|-----------|-----------|
| 3 | 1.5666667 | 0.4041452 | 1.2000000 | 2.0000000 |
|---|-----------|-----------|-----------|-----------|

---

Laboratory tests at the time of obtaining Table 2-6 consent, according to the presence or absence of proton-pump inhibitors

Unique Subject Identifier=3422000000-0011

MEANS Procedure

Assay variable : PTINR\_VAL1 PT-INR Value

N Mean Standard Deviation Minimum Maximum

---

|   |           |           |           |           |
|---|-----------|-----------|-----------|-----------|
| 3 | 2.1000000 | 0.4582576 | 1.7000000 | 2.6000000 |
|---|-----------|-----------|-----------|-----------|

---

Unique Subject Identifier=3422000000-0024

Assay variable : PTINR\_VAL1 PT-INR Value

N Mean Standard Deviation Minimum Maximum

---

|   |           |           |           |           |
|---|-----------|-----------|-----------|-----------|
| 3 | 2.0666667 | 0.2081666 | 1.9000000 | 2.3000000 |
|---|-----------|-----------|-----------|-----------|

---

Unique Subject Identifier=3422000000-0025

Assay variable : PTINR\_VAL1 PT-INR Value

N Mean Standard Deviation Minimum Maximum

---

|   |           |           |           |           |
|---|-----------|-----------|-----------|-----------|
| 5 | 1.8800000 | 0.8526429 | 1.4000000 | 3.4000000 |
|---|-----------|-----------|-----------|-----------|

---

Unique Subject Identifier=3422000000-0048

Assay variable : PTINR\_VAL1 PT-INR Value

N Mean Standard Deviation Minimum Maximum

---

|   |          |           |          |          |
|---|----------|-----------|----------|----------|
| 2 | 2.100000 | 0.4242641 | 1.800000 | 2.400000 |
|---|----------|-----------|----------|----------|

---

Laboratory tests at the time of obtaining Table 2-6 consent, according to the presence or absence of proton-pump inhibitors

Unique Subject Identifier=3422000000-0056

MEANS Procedure

Assay variable : PTINR\_VAL1 PT-INR Value

N Mean Standard Deviation Minimum Maximum

---

|   |           |           |           |           |
|---|-----------|-----------|-----------|-----------|
| 3 | 2.2000000 | 0.7937254 | 1.6000000 | 3.1000000 |
|---|-----------|-----------|-----------|-----------|

---

Unique Subject Identifier=3422000000-0060

Assay variable : PTINR\_VAL1 PT-INR Value

N Mean Standard Deviation Minimum Maximum

---

|   |           |           |           |           |
|---|-----------|-----------|-----------|-----------|
| 3 | 1.6333333 | 0.1527525 | 1.5000000 | 1.8000000 |
|---|-----------|-----------|-----------|-----------|

---

Unique Subject Identifier=3422000000-0069

Assay variable : PTINR\_VAL1 PT-INR Value

N Mean Standard Deviation Minimum Maximum

---

|   |           |           |           |           |
|---|-----------|-----------|-----------|-----------|
| 3 | 1.2666667 | 0.1154701 | 1.2000000 | 1.4000000 |
|---|-----------|-----------|-----------|-----------|

---

Unique Subject Identifier=3422000000-0070



Assay variable : PTINR\_VAL1 PT-INR Value

N Mean Standard Deviation Minimum Maximum

---

|   |          |          |          |          |
|---|----------|----------|----------|----------|
| 3 | 2.200000 | 0.360551 | 1.900000 | 2.600000 |
|---|----------|----------|----------|----------|

---

Laboratory tests at the time of obtaining Table 2-6 consent, according to the presence or absence of proton-pump inhibitors

Unique Subject Identifier=3422000000-0073

MEANS Procedure

Assay variable : PTINR\_VAL1 PT-INR Value

N Mean Standard Deviation Minimum Maximum

---

|   |          |          |          |          |
|---|----------|----------|----------|----------|
| 3 | 2.100000 | 0.400000 | 1.700000 | 2.500000 |
|---|----------|----------|----------|----------|

---

Unique Subject Identifier=3422000000-0089

Assay variable : PTINR\_VAL1 PT-INR Value

N Mean Standard Deviation Minimum Maximum

---

|   |          |           |          |          |
|---|----------|-----------|----------|----------|
| 4 | 1.525000 | 0.2217356 | 1.200000 | 1.700000 |
|---|----------|-----------|----------|----------|

---

Unique Subject Identifier=3422000000-0090

Assay variable : PTINR\_VAL1 PT-INR Value

N Mean Standard Deviation Minimum Maximum

---

|   |          |           |          |          |
|---|----------|-----------|----------|----------|
| 3 | 1.900000 | 0.3605551 | 1.500000 | 2.200000 |
|---|----------|-----------|----------|----------|

---

Unique Subject Identifier=3423000000-0003

Assay variable : PTINR\_VAL1 PT-INR Value

N Mean Standard Deviation Minimum Maximum

---

|   |           |           |           |           |
|---|-----------|-----------|-----------|-----------|
| 6 | 1.5466667 | 0.6122962 | 0.9900000 | 2.6700000 |
|---|-----------|-----------|-----------|-----------|

---

Laboratory tests at the time of obtaining Table 2-6 consent, according to the presence or absence of proton-pump inhibitors

Unique Subject Identifier=3423000000-0031

MEANS Procedure

Assay variable : PTINR\_VAL1 PT-INR Value

| N | Mean      | Standard Deviation | Minimum   | Maximum   |
|---|-----------|--------------------|-----------|-----------|
| 5 | 1.8400000 | 0.6213292          | 1.4400000 | 2.9400000 |

Unique Subject Identifier=3424000000-0016

Assay variable : PTINR\_VAL1 PT-INR Value

| N | Mean      | Standard Deviation | Minimum   | Maximum   |
|---|-----------|--------------------|-----------|-----------|
| 3 | 1.9466667 | 0.5093460          | 1.5900000 | 2.5300000 |

Unique Subject Identifier=3424000000-0021

Assay variable : PTINR\_VAL1 PT-INR Value

| N | Mean      | Standard Deviation | Minimum   | Maximum   |
|---|-----------|--------------------|-----------|-----------|
| 3 | 1.5466667 | 0.4271222          | 1.2200000 | 2.0300000 |

Unique Subject Identifier=3424000000-0026

Assay variable : PTINR\_VAL1 PT-INR Value

N Mean Standard Deviation Minimum Maximum

---

|   |           |           |           |           |
|---|-----------|-----------|-----------|-----------|
| 5 | 1.8960000 | 0.6223584 | 1.1400000 | 2.6900000 |
|---|-----------|-----------|-----------|-----------|

---

Laboratory tests at the time of obtaining Table 2-6 consent, according to the presence or absence of proton-pump inhibitors

Unique Subject Identifier=342400000-0032

MEANS Procedure

Assay variable : PTINR\_VAL1 PT-INR Value

N Mean Standard Deviation Minimum Maximum

---

|   |           |           |           |           |
|---|-----------|-----------|-----------|-----------|
| 3 | 2.2933333 | 0.1069268 | 2.2000000 | 2.4100000 |
|---|-----------|-----------|-----------|-----------|

---

Unique Subject Identifier=342400000-0033

Assay variable : PTINR\_VAL1 PT-INR Value

N Mean Standard Deviation Minimum Maximum

---

|   |           |           |           |           |
|---|-----------|-----------|-----------|-----------|
| 2 | 2.5600000 | 0.1979899 | 2.4200000 | 2.7000000 |
|---|-----------|-----------|-----------|-----------|

---

Unique Subject Identifier=342400000-0041

Assay variable : PTINR\_VAL1 PT-INR Value

N Mean Standard Deviation Minimum Maximum

---

|   |           |           |           |           |
|---|-----------|-----------|-----------|-----------|
| 3 | 2.0966667 | 0.5300314 | 1.6700000 | 2.6900000 |
|---|-----------|-----------|-----------|-----------|

---

Unique Subject Identifier=342400000-0044

Assay variable : PTINR\_VAL1 PT-INR Value

N Mean Standard Deviation Minimum Maximum

---

|   |           |           |           |           |
|---|-----------|-----------|-----------|-----------|
| 6 | 1.8483333 | 0.4343002 | 1.1400000 | 2.3600000 |
|---|-----------|-----------|-----------|-----------|

---

Laboratory tests at the time of obtaining Table 2-6 consent, according to the presence or absence of proton-pump inhibitors

Unique Subject Identifier=342400000-0047

MEANS Procedure

Assay variable : PTINR\_VAL1 PT-INR Value

N Mean Standard Deviation Minimum Maximum

---

|   |          |           |          |          |
|---|----------|-----------|----------|----------|
| 2 | 2.250000 | 0.1838478 | 2.120000 | 2.380000 |
|---|----------|-----------|----------|----------|

---

Unique Subject Identifier=342400000-0049

Assay variable : PTINR\_VAL1 PT-INR Value

N Mean Standard Deviation Minimum Maximum

---

|   |          |           |          |          |
|---|----------|-----------|----------|----------|
| 3 | 2.610000 | 0.7644606 | 2.110000 | 3.490000 |
|---|----------|-----------|----------|----------|

---

Unique Subject Identifier=342400000-0055

Assay variable : PTINR\_VAL1 PT-INR Value

N Mean Standard Deviation Minimum Maximum

---

|   |          |           |          |          |
|---|----------|-----------|----------|----------|
| 3 | 1.810000 | 0.3148015 | 1.550000 | 2.160000 |
|---|----------|-----------|----------|----------|

---

Unique Subject Identifier=3425001000-0005



Assay variable : PTINR\_VAL1 PT-INR Value

N Mean Standard Deviation Minimum Maximum

---

|   |           |           |           |           |
|---|-----------|-----------|-----------|-----------|
| 4 | 1.9175000 | 0.5340022 | 1.3300000 | 2.5900000 |
|---|-----------|-----------|-----------|-----------|

---

Laboratory tests at the time of obtaining Table 2-6 consent, according to the presence or absence of proton-pump inhibitors

Unique Subject Identifier=3425001000-0007

MEANS Procedure

Assay variable : PTINR\_VAL1 PT-INR Value

N Mean Standard Deviation Minimum Maximum

---

|   |           |           |           |           |
|---|-----------|-----------|-----------|-----------|
| 4 | 2.2100000 | 0.2409703 | 1.9700000 | 2.5000000 |
|---|-----------|-----------|-----------|-----------|

---

Unique Subject Identifier=3425001000-0010

Assay variable : PTINR\_VAL1 PT-INR Value

N Mean Standard Deviation Minimum Maximum

---

|   |           |           |           |           |
|---|-----------|-----------|-----------|-----------|
| 3 | 2.3200000 | 0.0818535 | 2.2300000 | 2.3900000 |
|---|-----------|-----------|-----------|-----------|

---

Unique Subject Identifier=3425001000-0015

Assay variable : PTINR\_VAL1 PT-INR Value

N Mean Standard Deviation Minimum Maximum

---

|   |           |           |           |           |
|---|-----------|-----------|-----------|-----------|
| 3 | 2.1333333 | 0.2350177 | 1.9000000 | 2.3700000 |
|---|-----------|-----------|-----------|-----------|

---

Unique Subject Identifier=3425001000-0022

Assay variable : PTINR\_VAL1 PT-INR Value

N Mean Standard Deviation Minimum Maximum

---

|   |          |           |          |          |
|---|----------|-----------|----------|----------|
| 4 | 1.920000 | 0.2708013 | 1.520000 | 2.120000 |
|---|----------|-----------|----------|----------|

---

Laboratory tests at the time of obtaining Table 2-6 consent, according to the presence or absence of proton-pump inhibitors

Unique Subject Identifier=3425001000-0023

MEANS Procedure

Assay variable : PTINR\_VAL1 PT-INR Value

N Mean Standard Deviation Minimum Maximum

---

|   |           |           |           |           |
|---|-----------|-----------|-----------|-----------|
| 4 | 2.0025000 | 0.1147098 | 1.8500000 | 2.1200000 |
|---|-----------|-----------|-----------|-----------|

---

Unique Subject Identifier=3425001000-0034

Assay variable : PTINR\_VAL1 PT-INR Value

N Mean Standard Deviation Minimum Maximum

---

|   |           |           |           |           |
|---|-----------|-----------|-----------|-----------|
| 4 | 2.2450000 | 0.2392349 | 1.9100000 | 2.4600000 |
|---|-----------|-----------|-----------|-----------|

---

Unique Subject Identifier=3425001000-0037

Assay variable : PTINR\_VAL1 PT-INR Value

N Mean Standard Deviation Minimum Maximum

---

|   |           |           |           |           |
|---|-----------|-----------|-----------|-----------|
| 4 | 1.7900000 | 0.0761577 | 1.6800000 | 1.8500000 |
|---|-----------|-----------|-----------|-----------|

---

Unique Subject Identifier=3425001000-0040

Assay variable : PTINR\_VAL1 PT-INR Value

N Mean Standard Deviation Minimum Maximum

---

|   |           |           |           |           |
|---|-----------|-----------|-----------|-----------|
| 5 | 2.4440000 | 0.2576432 | 2.2200000 | 2.8700000 |
|---|-----------|-----------|-----------|-----------|

---

Laboratory tests at the time of obtaining Table 2-6 consent, according to the presence or absence of proton-pump inhibitors

Unique Subject Identifier=3427001000-0002

MEANS Procedure

Assay variable : PTINR\_VAL1 PT-INR Value

N Mean Standard Deviation Minimum Maximum

---

|   |           |           |           |           |
|---|-----------|-----------|-----------|-----------|
| 5 | 1.9920000 | 0.2752635 | 1.6500000 | 2.4000000 |
|---|-----------|-----------|-----------|-----------|

---

Unique Subject Identifier=3427001000-0015

Assay variable : PTINR\_VAL1 PT-INR Value

N Mean Standard Deviation Minimum Maximum

---

|   |           |           |           |           |
|---|-----------|-----------|-----------|-----------|
| 4 | 2.0675000 | 0.2777739 | 1.8000000 | 2.3500000 |
|---|-----------|-----------|-----------|-----------|

---

Unique Subject Identifier=3428000000-0001

Assay variable : PTINR\_VAL1 PT-INR Value

N Mean Standard Deviation Minimum Maximum

---

|   |           |           |           |           |
|---|-----------|-----------|-----------|-----------|
| 6 | 1.9483333 | 0.3818595 | 1.4500000 | 2.4400000 |
|---|-----------|-----------|-----------|-----------|

---

Unique Subject Identifier=3428000000-0004

Assay variable : PTINR\_VAL1 PT-INR Value

N Mean Standard Deviation Minimum Maximum

---

|   |           |           |           |           |
|---|-----------|-----------|-----------|-----------|
| 3 | 1.6466667 | 0.3980368 | 1.3200000 | 2.0900000 |
|---|-----------|-----------|-----------|-----------|

---

Laboratory tests at the time of obtaining Table 2-6 consent, according to the presence or absence of proton-pump inhibitors

Unique Subject Identifier=3428000000-0005

MEANS Procedure

Assay variable : PTINR\_VAL1 PT-INR Value

N Mean Standard Deviation Minimum Maximum

---

|   |           |           |           |           |
|---|-----------|-----------|-----------|-----------|
| 4 | 2.1175000 | 0.1796988 | 1.8600000 | 2.2700000 |
|---|-----------|-----------|-----------|-----------|

---

Unique Subject Identifier=3442000011-0001

Assay variable : PTINR\_VAL1 PT-INR Value

N Mean Standard Deviation Minimum Maximum

---

|   |           |           |           |           |
|---|-----------|-----------|-----------|-----------|
| 5 | 2.1200000 | 0.0796869 | 2.0400000 | 2.2400000 |
|---|-----------|-----------|-----------|-----------|

---

Unique Subject Identifier=3442000011-0003

Assay variable : PTINR\_VAL1 PT-INR Value

N Mean Standard Deviation Minimum Maximum

---

|   |           |           |           |           |
|---|-----------|-----------|-----------|-----------|
| 4 | 1.5750000 | 0.1912241 | 1.2900000 | 1.6900000 |
|---|-----------|-----------|-----------|-----------|

---

Unique Subject Identifier=3442000011-0007



Assay variable : PTINR\_VAL1 PT-INR Value

N Mean Standard Deviation Minimum Maximum

---

|   |           |           |           |           |
|---|-----------|-----------|-----------|-----------|
| 5 | 1.9040000 | 0.2250111 | 1.6300000 | 2.1600000 |
|---|-----------|-----------|-----------|-----------|

---

Laboratory tests at the time of obtaining Table 2-6 consent, according to the presence or absence of proton-pump inhibitors

Unique Subject Identifier=3442000011-0008

MEANS Procedure

Assay variable : PTINR\_VAL1 PT-INR Value

N Mean Standard Deviation Minimum Maximum

---

|   |           |           |           |           |
|---|-----------|-----------|-----------|-----------|
| 3 | 2.0866667 | 0.1908752 | 1.8700000 | 2.2300000 |
|---|-----------|-----------|-----------|-----------|

---

Unique Subject Identifier=3443011001-0009

Assay variable : PTINR\_VAL1 PT-INR Value

N Mean Standard Deviation Minimum Maximum

---

|   |           |           |           |           |
|---|-----------|-----------|-----------|-----------|
| 6 | 1.9483333 | 0.3301767 | 1.5000000 | 2.4200000 |
|---|-----------|-----------|-----------|-----------|

---

Unique Subject Identifier=3444000000-0002

Assay variable : PTINR\_VAL1 PT-INR Value

N Mean Standard Deviation Minimum Maximum

---

|   |           |           |           |           |
|---|-----------|-----------|-----------|-----------|
| 4 | 2.0475000 | 0.1071992 | 1.9200000 | 2.1700000 |
|---|-----------|-----------|-----------|-----------|

---

Unique Subject Identifier=3444000000-0004

Assay variable : PTINR\_VAL1 PT-INR Value

N Mean Standard Deviation Minimum Maximum

---

|   |           |           |           |           |
|---|-----------|-----------|-----------|-----------|
| 4 | 2.0975000 | 0.6357345 | 1.6000000 | 3.0000000 |
|---|-----------|-----------|-----------|-----------|

---

Laboratory tests at the time of obtaining Table 2-6 consent, according to the presence or absence of proton-pump inhibitors

Unique Subject Identifier=3444000000-0011

MEANS Procedure

Assay variable : PTINR\_VAL1 PT-INR Value

| N | Mean     | Standard Deviation | Minimum  | Maximum  |
|---|----------|--------------------|----------|----------|
| 3 | 2.470000 | 0.4392038          | 2.000000 | 2.870000 |

Unique Subject Identifier=3444000000-0015

Assay variable : PTINR\_VAL1 PT-INR Value

| N | Mean     | Standard Deviation | Minimum  | Maximum  |
|---|----------|--------------------|----------|----------|
| 5 | 2.202000 | 0.6975815          | 1.450000 | 3.220000 |

Unique Subject Identifier=3444000000-0017

Assay variable : PTINR\_VAL1 PT-INR Value

| N | Mean     | Standard Deviation | Minimum  | Maximum  |
|---|----------|--------------------|----------|----------|
| 4 | 1.917500 | 0.4294473          | 1.440000 | 2.400000 |

Unique Subject Identifier=3444000000-0019

Assay variable : PTINR\_VAL1 PT-INR Value

N Mean Standard Deviation Minimum Maximum

---

|   |           |           |           |           |
|---|-----------|-----------|-----------|-----------|
| 3 | 2.0633333 | 0.3189566 | 1.8500000 | 2.4300000 |
|---|-----------|-----------|-----------|-----------|

---

Laboratory tests at the time of obtaining Table 2-6 consent, according to the presence or absence of proton-pump inhibitors

Unique Subject Identifier=3444000000-0021

MEANS Procedure

Assay variable : PTINR\_VAL1 PT-INR Value

N Mean Standard Deviation Minimum Maximum

---

|   |           |           |           |           |
|---|-----------|-----------|-----------|-----------|
| 3 | 2.3333333 | 0.3023795 | 1.9900000 | 2.5600000 |
|---|-----------|-----------|-----------|-----------|

---

Unique Subject Identifier=3444000000-0027

Assay variable : PTINR\_VAL1 PT-INR Value

N Mean Standard Deviation Minimum Maximum

---

|   |           |           |           |           |
|---|-----------|-----------|-----------|-----------|
| 4 | 2.3850000 | 1.0434718 | 1.2700000 | 3.7900000 |
|---|-----------|-----------|-----------|-----------|

---

Unique Subject Identifier=3444000000-0029

Assay variable : PTINR\_VAL1 PT-INR Value

N Mean Standard Deviation Minimum Maximum

---

|   |           |           |           |           |
|---|-----------|-----------|-----------|-----------|
| 3 | 2.1833333 | 0.4883987 | 1.7900000 | 2.7300000 |
|---|-----------|-----------|-----------|-----------|

---

Unique Subject Identifier=3444000000-0035

Assay variable : PTINR\_VAL1 PT-INR Value

N Mean Standard Deviation Minimum Maximum

---

|   |           |           |           |           |
|---|-----------|-----------|-----------|-----------|
| 4 | 2.3025000 | 0.3510342 | 1.8800000 | 2.6600000 |
|---|-----------|-----------|-----------|-----------|

---

Laboratory tests at the time of obtaining Table 2-6 consent, according to the presence or absence of proton-pump inhibitors

Unique Subject Identifier=3444000000-0037

MEANS Procedure

Assay variable : PTINR\_VAL1 PT-INR Value

N Mean Standard Deviation Minimum Maximum

---

|   |           |           |           |           |
|---|-----------|-----------|-----------|-----------|
| 4 | 2.3550000 | 0.9300358 | 1.8000000 | 3.7400000 |
|---|-----------|-----------|-----------|-----------|

---

Unique Subject Identifier=3444000000-0039

Assay variable : PTINR\_VAL1 PT-INR Value

N Mean Standard Deviation Minimum Maximum

---

|   |           |           |           |           |
|---|-----------|-----------|-----------|-----------|
| 3 | 2.5333333 | 0.2967041 | 2.3100000 | 2.8700000 |
|---|-----------|-----------|-----------|-----------|

---

Unique Subject Identifier=3444000000-0048

Assay variable : PTINR\_VAL1 PT-INR Value

N Mean Standard Deviation Minimum Maximum

---

|   |           |           |           |           |
|---|-----------|-----------|-----------|-----------|
| 3 | 1.9133333 | 0.1985783 | 1.6900000 | 2.0700000 |
|---|-----------|-----------|-----------|-----------|

---

Unique Subject Identifier=3444000000-0049



Assay variable : PTINR\_VAL1 PT-INR Value

N Mean Standard Deviation Minimum Maximum

---

|   |          |           |          |          |
|---|----------|-----------|----------|----------|
| 3 | 2.410000 | 0.1819341 | 2.300000 | 2.620000 |
|---|----------|-----------|----------|----------|

---

Laboratory tests at the time of obtaining Table 2-6 consent, according to the presence or absence of proton-pump inhibitors

Unique Subject Identifier=3444000000-0055

MEANS Procedure

Assay variable : PTINR\_VAL1 PT-INR Value

N Mean Standard Deviation Minimum Maximum

---

|   |           |           |           |           |
|---|-----------|-----------|-----------|-----------|
| 4 | 1.5700000 | 0.1860108 | 1.3400000 | 1.7900000 |
|---|-----------|-----------|-----------|-----------|

---

Unique Subject Identifier=3444000000-0057

Assay variable : PTINR\_VAL1 PT-INR Value

N Mean Standard Deviation Minimum Maximum

---

|   |           |           |           |           |
|---|-----------|-----------|-----------|-----------|
| 4 | 2.4625000 | 0.2615817 | 2.1400000 | 2.7800000 |
|---|-----------|-----------|-----------|-----------|

---

Unique Subject Identifier=3444000000-0060

Assay variable : PTINR\_VAL1 PT-INR Value

N Mean Standard Deviation Minimum Maximum

---

|   |           |           |           |           |
|---|-----------|-----------|-----------|-----------|
| 3 | 1.8100000 | 0.3732292 | 1.5700000 | 2.2400000 |
|---|-----------|-----------|-----------|-----------|

---

Unique Subject Identifier=3444000000-0061

Assay variable : PTINR\_VAL1 PT-INR Value

N Mean Standard Deviation Minimum Maximum

---

|   |           |           |           |           |
|---|-----------|-----------|-----------|-----------|
| 4 | 1.7900000 | 0.1378405 | 1.6300000 | 1.9600000 |
|---|-----------|-----------|-----------|-----------|

---

Laboratory tests at the time of obtaining Table 2-6 consent, according to the presence or absence of proton-pump inhibitors

Unique Subject Identifier=3444000000-0065

MEANS Procedure

Assay variable : PTINR\_VAL1 PT-INR Value

N Mean Standard Deviation Minimum Maximum

---

|   |           |           |           |           |
|---|-----------|-----------|-----------|-----------|
| 3 | 1.5666667 | 0.0737111 | 1.5100000 | 1.6500000 |
|---|-----------|-----------|-----------|-----------|

---

Unique Subject Identifier=3444000000-0070

Assay variable : PTINR\_VAL1 PT-INR Value

N Mean Standard Deviation Minimum Maximum

---

|   |           |           |           |           |
|---|-----------|-----------|-----------|-----------|
| 5 | 1.7880000 | 0.3751933 | 1.4100000 | 2.3200000 |
|---|-----------|-----------|-----------|-----------|

---

Unique Subject Identifier=3444000000-0074

Assay variable : PTINR\_VAL1 PT-INR Value

N Mean Standard Deviation Minimum Maximum

---

|   |           |           |           |           |
|---|-----------|-----------|-----------|-----------|
| 5 | 1.6780000 | 0.4704997 | 1.1800000 | 2.3900000 |
|---|-----------|-----------|-----------|-----------|

---

Unique Subject Identifier=3444000000-0084

Assay variable : PTINR\_VAL1 PT-INR Value

N Mean Standard Deviation Minimum Maximum

---

|   |           |           |           |           |
|---|-----------|-----------|-----------|-----------|
| 4 | 1.7800000 | 0.1435270 | 1.6000000 | 1.9500000 |
|---|-----------|-----------|-----------|-----------|

---

Laboratory tests at the time of obtaining Table 2-6 consent, according to the presence or absence of proton-pump inhibitors

Unique Subject Identifier=3444000000-0092

MEANS Procedure

Assay variable : PTINR\_VAL1 PT-INR Value

N Mean Standard Deviation Minimum Maximum

---

|   |           |           |           |           |
|---|-----------|-----------|-----------|-----------|
| 6 | 2.4283333 | 1.0451682 | 1.1200000 | 3.8500000 |
|---|-----------|-----------|-----------|-----------|

---

Unique Subject Identifier=3448111011-0005

Assay variable : PTINR\_VAL1 PT-INR Value

N Mean Standard Deviation Minimum Maximum

---

|   |           |           |           |           |
|---|-----------|-----------|-----------|-----------|
| 4 | 1.7225000 | 0.2860507 | 1.4100000 | 2.0900000 |
|---|-----------|-----------|-----------|-----------|

---

Unique Subject Identifier=3452000000-0002

Assay variable : PTINR\_VAL1 PT-INR Value

N Mean Standard Deviation Minimum Maximum

---

|   |           |           |           |           |
|---|-----------|-----------|-----------|-----------|
| 3 | 1.7100000 | 0.1276715 | 1.5700000 | 1.8200000 |
|---|-----------|-----------|-----------|-----------|

---

Unique Subject Identifier=3452000000-0007

Assay variable : PTINR\_VAL1 PT-INR Value

N Mean Standard Deviation Minimum Maximum

---

|   |           |           |           |           |
|---|-----------|-----------|-----------|-----------|
| 3 | 1.9633333 | 0.0750555 | 1.9200000 | 2.0500000 |
|---|-----------|-----------|-----------|-----------|

---

Laboratory tests at the time of obtaining Table 2-6 consent, according to the presence or absence of proton-pump inhibitors

Unique Subject Identifier=3452000000-0009

MEANS Procedure

Assay variable : PTINR\_VAL1 PT-INR Value

N Mean Standard Deviation Minimum Maximum

---

|   |           |           |           |           |
|---|-----------|-----------|-----------|-----------|
| 3 | 2.3866667 | 0.5604760 | 1.8400000 | 2.9600000 |
|---|-----------|-----------|-----------|-----------|

---

Unique Subject Identifier=3453000000-0002

Assay variable : PTINR\_VAL1 PT-INR Value

N Mean Standard Deviation Minimum Maximum

---

|   |           |           |           |           |
|---|-----------|-----------|-----------|-----------|
| 2 | 1.9450000 | 0.4313351 | 1.6400000 | 2.2500000 |
|---|-----------|-----------|-----------|-----------|

---

Unique Subject Identifier=3453000000-0005

Assay variable : PTINR\_VAL1 PT-INR Value

N Mean Standard Deviation Minimum Maximum

---

|   |           |           |           |           |
|---|-----------|-----------|-----------|-----------|
| 2 | 2.0650000 | 0.3181981 | 1.8400000 | 2.2900000 |
|---|-----------|-----------|-----------|-----------|

---

Unique Subject Identifier=3453000000-0007



Assay variable : PTINR\_VAL1 PT-INR Value

N Mean Standard Deviation Minimum Maximum

---

|   |           |           |           |           |
|---|-----------|-----------|-----------|-----------|
| 2 | 1.7100000 | 0.1697056 | 1.5900000 | 1.8300000 |
|---|-----------|-----------|-----------|-----------|

---

Laboratory tests at the time of obtaining Table 2-6 consent, according to the presence or absence of proton-pump inhibitors

Unique Subject Identifier=3453000000-0008

MEANS Procedure

Assay variable : PTINR\_VAL1 PT-INR Value

| N | Mean      | Standard Deviation | Minimum   | Maximum   |
|---|-----------|--------------------|-----------|-----------|
| 2 | 2.0350000 | 0.0353553          | 2.0100000 | 2.0600000 |

Unique Subject Identifier=3472000000-0017

Assay variable : PTINR\_VAL1 PT-INR Value

| N | Mean      | Standard Deviation | Minimum   | Maximum   |
|---|-----------|--------------------|-----------|-----------|
| 6 | 1.8333333 | 0.3983298          | 1.2000000 | 2.3000000 |

Unique Subject Identifier=3481010111-0002

Assay variable : PTINR\_VAL1 PT-INR Value

| N | Mean      | Standard Deviation | Minimum   | Maximum   |
|---|-----------|--------------------|-----------|-----------|
| 5 | 1.4600000 | 0.0547723          | 1.4000000 | 1.5000000 |

Unique Subject Identifier=3481010111-0006

Assay variable : PTINR\_VAL1 PT-INR Value

N Mean Standard Deviation Minimum Maximum

---

|   |           |           |           |           |
|---|-----------|-----------|-----------|-----------|
| 3 | 2.0666667 | 0.2516611 | 1.8000000 | 2.3000000 |
|---|-----------|-----------|-----------|-----------|

---

Laboratory tests at the time of obtaining Table 2-6 consent, according to the presence or absence of proton-pump inhibitors

Unique Subject Identifier=3481010111-0007

MEANS Procedure

Assay variable : PTINR\_VAL1 PT-INR Value

N Mean Standard Deviation Minimum Maximum

---

|   |           |           |           |           |
|---|-----------|-----------|-----------|-----------|
| 3 | 2.1666667 | 0.0577350 | 2.1000000 | 2.2000000 |
|---|-----------|-----------|-----------|-----------|

---

Unique Subject Identifier=3481010111-0008

Assay variable : PTINR\_VAL1 PT-INR Value

N Mean Standard Deviation Minimum Maximum

---

|   |           |  |           |           |
|---|-----------|--|-----------|-----------|
| 1 | 1.1000000 |  | 1.1000000 | 1.1000000 |
|---|-----------|--|-----------|-----------|

---

Unique Subject Identifier=3481010111-0009

Assay variable : PTINR\_VAL1 PT-INR Value

N Mean Standard Deviation Minimum Maximum

---

|   |           |           |           |           |
|---|-----------|-----------|-----------|-----------|
| 5 | 1.3200000 | 0.0836660 | 1.2000000 | 1.4000000 |
|---|-----------|-----------|-----------|-----------|

---

Unique Subject Identifier=3481010111-0010

Assay variable : PTINR\_VAL1 PT-INR Value

N Mean Standard Deviation Minimum Maximum

---

|   |           |           |           |           |
|---|-----------|-----------|-----------|-----------|
| 2 | 1.6000000 | 0.1414214 | 1.5000000 | 1.7000000 |
|---|-----------|-----------|-----------|-----------|

---

Laboratory tests at the time of obtaining Table 2-6 consent, according to the presence or absence of proton-pump inhibitors

Unique Subject Identifier=3481010111-0012

MEANS Procedure

Assay variable : PTINR\_VAL1 PT-INR Value

N Mean Standard Deviation Minimum Maximum

---

|   |           |           |           |           |
|---|-----------|-----------|-----------|-----------|
| 4 | 1.6750000 | 0.0957427 | 1.6000000 | 1.8000000 |
|---|-----------|-----------|-----------|-----------|

---

Unique Subject Identifier=3481010111-0013

Assay variable : PTINR\_VAL1 PT-INR Value

N Mean Standard Deviation Minimum Maximum

---

|   |           |           |           |           |
|---|-----------|-----------|-----------|-----------|
| 5 | 2.4400000 | 0.5319774 | 1.8000000 | 3.0000000 |
|---|-----------|-----------|-----------|-----------|

---

Unique Subject Identifier=3481010111-0015

Assay variable : PTINR\_VAL1 PT-INR Value

N Mean Standard Deviation Minimum Maximum

---

|   |           |           |           |           |
|---|-----------|-----------|-----------|-----------|
| 3 | 2.4666667 | 0.1527525 | 2.3000000 | 2.6000000 |
|---|-----------|-----------|-----------|-----------|

---

Unique Subject Identifier=3481010111-0016

Assay variable : PTINR\_VAL1 PT-INR Value

N Mean Standard Deviation Minimum Maximum

---

|   |          |           |          |          |
|---|----------|-----------|----------|----------|
| 6 | 1.500000 | 0.1264911 | 1.300000 | 1.600000 |
|---|----------|-----------|----------|----------|

---

Laboratory tests at the time of obtaining Table 2-6 consent, according to the presence or absence of proton-pump inhibitors

Unique Subject Identifier=3481010111-0017

MEANS Procedure

Assay variable : PTINR\_VAL1 PT-INR Value

N Mean Standard Deviation Minimum Maximum

---

|   |           |           |           |           |
|---|-----------|-----------|-----------|-----------|
| 4 | 1.9250000 | 0.8057088 | 1.4000000 | 3.1000000 |
|---|-----------|-----------|-----------|-----------|

---

Unique Subject Identifier=3481010111-0019

Assay variable : PTINR\_VAL1 PT-INR Value

N Mean Standard Deviation Minimum Maximum

---

|   |           |           |           |           |
|---|-----------|-----------|-----------|-----------|
| 3 | 2.0000000 | 0.5000000 | 1.5000000 | 2.5000000 |
|---|-----------|-----------|-----------|-----------|

---

Unique Subject Identifier=3481010111-0022

Assay variable : PTINR\_VAL1 PT-INR Value

N Mean Standard Deviation Minimum Maximum

---

|   |           |           |           |           |
|---|-----------|-----------|-----------|-----------|
| 3 | 1.5666667 | 0.3214550 | 1.2000000 | 1.8000000 |
|---|-----------|-----------|-----------|-----------|

---

Unique Subject Identifier=3481010111-0024



Assay variable : PTINR\_VAL1 PT-INR Value

N Mean Standard Deviation Minimum Maximum

---

|   |          |           |          |          |
|---|----------|-----------|----------|----------|
| 2 | 1.400000 | 0.4242641 | 1.100000 | 1.700000 |
|---|----------|-----------|----------|----------|

---

Laboratory tests at the time of obtaining Table 2-6 consent, according to the presence or absence of proton-pump inhibitors

Unique Subject Identifier=3481010111-0026

MEANS Procedure

Assay variable : PTINR\_VAL1 PT-INR Value

N Mean Standard Deviation Minimum Maximum

---

|   |           |           |           |           |
|---|-----------|-----------|-----------|-----------|
| 3 | 2.5666667 | 0.6110101 | 1.9000000 | 3.1000000 |
|---|-----------|-----------|-----------|-----------|

---

Unique Subject Identifier=3481010111-0029

Assay variable : PTINR\_VAL1 PT-INR Value

N Mean Standard Deviation Minimum Maximum

---

|   |           |           |           |           |
|---|-----------|-----------|-----------|-----------|
| 4 | 2.2000000 | 0.9933110 | 1.0000000 | 3.4000000 |
|---|-----------|-----------|-----------|-----------|

---

Unique Subject Identifier=3491001000-0031

Assay variable : PTINR\_VAL1 PT-INR Value

N Mean Standard Deviation Minimum Maximum

---

|   |           |  |           |           |
|---|-----------|--|-----------|-----------|
| 1 | 1.7800000 |  | 1.7800000 | 1.7800000 |
|---|-----------|--|-----------|-----------|

---

Unique Subject Identifier=3501111111-0003

Assay variable : PTINR\_VAL1 PT-INR Value

N Mean Standard Deviation Minimum Maximum

---

|   |           |           |           |           |
|---|-----------|-----------|-----------|-----------|
| 6 | 2.3950000 | 0.9346604 | 1.0600000 | 3.7800000 |
|---|-----------|-----------|-----------|-----------|

---

Laboratory tests at the time of obtaining Table 2-6 consent, according to the presence or absence of proton-pump inhibitors

Unique Subject Identifier=350111111-0004

MEANS Procedure

Assay variable : PTINR\_VAL1 PT-INR Value

N Mean Standard Deviation Minimum Maximum

---

|   |           |           |           |           |
|---|-----------|-----------|-----------|-----------|
| 6 | 1.4916667 | 0.3354649 | 1.0000000 | 2.0000000 |
|---|-----------|-----------|-----------|-----------|

---

Unique Subject Identifier=350111111-0011

Assay variable : PTINR\_VAL1 PT-INR Value

N Mean Standard Deviation Minimum Maximum

---

|   |           |           |           |           |
|---|-----------|-----------|-----------|-----------|
| 3 | 2.2133333 | 0.4027820 | 1.7500000 | 2.4800000 |
|---|-----------|-----------|-----------|-----------|

---

Unique Subject Identifier=350111111-0019

Assay variable : PTINR\_VAL1 PT-INR Value

N Mean Standard Deviation Minimum Maximum

---

|   |           |           |           |           |
|---|-----------|-----------|-----------|-----------|
| 5 | 1.9360000 | 0.2223286 | 1.6800000 | 2.1700000 |
|---|-----------|-----------|-----------|-----------|

---

Unique Subject Identifier=350111111-0026

Assay variable : PTINR\_VAL1 PT-INR Value

N Mean Standard Deviation Minimum Maximum

---

|   |           |           |           |           |
|---|-----------|-----------|-----------|-----------|
| 3 | 2.7700000 | 1.7963296 | 1.5300000 | 4.8300000 |
|---|-----------|-----------|-----------|-----------|

---

Laboratory tests at the time of obtaining Table 2-6 consent, according to the presence or absence of proton-pump inhibitors

Unique Subject Identifier=5001010000-0001

MEANS Procedure

Assay variable : PTINR\_VAL1 PT-INR Value

N Mean Standard Deviation Minimum Maximum

---

|   |           |  |           |           |
|---|-----------|--|-----------|-----------|
| 1 | 2.2500000 |  | 2.2500000 | 2.2500000 |
|---|-----------|--|-----------|-----------|

---

Unique Subject Identifier=5001010000-0007

Assay variable : PTINR\_VAL1 PT-INR Value

N Mean Standard Deviation Minimum Maximum

---

|   |           |           |           |           |
|---|-----------|-----------|-----------|-----------|
| 3 | 1.9333333 | 0.0723418 | 1.8500000 | 1.9800000 |
|---|-----------|-----------|-----------|-----------|

---

Unique Subject Identifier=5001010000-0012

Assay variable : PTINR\_VAL1 PT-INR Value

N Mean Standard Deviation Minimum Maximum

---

|   |           |           |           |           |
|---|-----------|-----------|-----------|-----------|
| 3 | 1.5000000 | 0.1000000 | 1.4000000 | 1.6000000 |
|---|-----------|-----------|-----------|-----------|

---

Unique Subject Identifier=5001010000-0013

Assay variable : PTINR\_VAL1 PT-INR Value

N Mean Standard Deviation Minimum Maximum

---

|   |           |  |           |           |
|---|-----------|--|-----------|-----------|
| 1 | 2.0300000 |  | 2.0300000 | 2.0300000 |
|---|-----------|--|-----------|-----------|

---

Laboratory tests at the time of obtaining Table 2-6 consent, according to the presence or absence of proton-pump inhibitors

Unique Subject Identifier=5001010000-0021

MEANS Procedure

Assay variable : PTINR\_VAL1 PT-INR Value

N Mean Standard Deviation Minimum Maximum

---

|   |           |           |           |           |
|---|-----------|-----------|-----------|-----------|
| 4 | 2.2300000 | 0.2041241 | 1.9600000 | 2.4200000 |
|---|-----------|-----------|-----------|-----------|

---

Unique Subject Identifier=5001010000-0031

Assay variable : PTINR\_VAL1 PT-INR Value

N Mean Standard Deviation Minimum Maximum

---

|   |           |           |           |           |
|---|-----------|-----------|-----------|-----------|
| 6 | 2.3466667 | 0.7982898 | 1.1800000 | 3.5400000 |
|---|-----------|-----------|-----------|-----------|

---

Unique Subject Identifier=5002010010-0006

Assay variable : PTINR\_VAL1 PT-INR Value

N Mean Standard Deviation Minimum Maximum

---

|   |           |           |           |           |
|---|-----------|-----------|-----------|-----------|
| 2 | 1.6550000 | 0.3889087 | 1.3800000 | 1.9300000 |
|---|-----------|-----------|-----------|-----------|

---

Unique Subject Identifier=5002010010-0012



Assay variable : PTINR\_VAL1 PT-INR Value

N Mean Standard Deviation Minimum Maximum

---

|   |           |           |           |           |
|---|-----------|-----------|-----------|-----------|
| 2 | 1.9050000 | 0.1484924 | 1.8000000 | 2.0100000 |
|---|-----------|-----------|-----------|-----------|

---

Laboratory tests at the time of obtaining Table 2-6 consent, according to the presence or absence of proton-pump inhibitors

Unique Subject Identifier=5002010010-0013

MEANS Procedure

Assay variable : PTINR\_VAL1 PT-INR Value

| N | Mean      | Standard Deviation | Minimum   | Maximum   |
|---|-----------|--------------------|-----------|-----------|
| 2 | 1.6150000 | 0.1484924          | 1.5100000 | 1.7200000 |

Unique Subject Identifier=5002010010-0014

Assay variable : PTINR\_VAL1 PT-INR Value

| N | Mean      | Standard Deviation | Minimum   | Maximum   |
|---|-----------|--------------------|-----------|-----------|
| 4 | 1.9625000 | 0.1658061          | 1.8000000 | 2.1200000 |

Unique Subject Identifier=5002010010-0022

Assay variable : PTINR\_VAL1 PT-INR Value

| N | Mean      | Standard Deviation | Minimum   | Maximum   |
|---|-----------|--------------------|-----------|-----------|
| 4 | 1.7100000 | 0.6702736          | 1.2800000 | 2.7100000 |

Unique Subject Identifier=5002010010-0023

Assay variable : PTINR\_VAL1 PT-INR Value

N Mean Standard Deviation Minimum Maximum

---

|   |           |           |           |           |
|---|-----------|-----------|-----------|-----------|
| 6 | 2.0566667 | 0.4529312 | 1.6400000 | 2.9000000 |
|---|-----------|-----------|-----------|-----------|

---

Laboratory tests at the time of obtaining Table 2-6 consent, according to the presence or absence of proton-pump inhibitors

Unique Subject Identifier=5002010010-0025

MEANS Procedure

Assay variable : PTINR\_VAL1 PT-INR Value

N Mean Standard Deviation Minimum Maximum

---

|   |          |           |          |          |
|---|----------|-----------|----------|----------|
| 3 | 2.160000 | 0.7269113 | 1.540000 | 2.960000 |
|---|----------|-----------|----------|----------|

---

Unique Subject Identifier=5002010010-0026

Assay variable : PTINR\_VAL1 PT-INR Value

N Mean Standard Deviation Minimum Maximum

---

|   |          |           |          |          |
|---|----------|-----------|----------|----------|
| 6 | 2.340000 | 0.2816381 | 1.890000 | 2.730000 |
|---|----------|-----------|----------|----------|

---

Unique Subject Identifier=5002010010-0031

Assay variable : PTINR\_VAL1 PT-INR Value

N Mean Standard Deviation Minimum Maximum

---

|   |          |           |          |          |
|---|----------|-----------|----------|----------|
| 6 | 1.830000 | 0.2572159 | 1.500000 | 2.220000 |
|---|----------|-----------|----------|----------|

---

Unique Subject Identifier=5002010010-0032

Assay variable : PTINR\_VAL1 PT-INR Value

N Mean Standard Deviation Minimum Maximum

---

|   |           |           |           |           |
|---|-----------|-----------|-----------|-----------|
| 6 | 2.1933333 | 0.1517454 | 1.9500000 | 2.3400000 |
|---|-----------|-----------|-----------|-----------|

---

Laboratory tests at the time of obtaining Table 2-6 consent, according to the presence or absence of proton-pump inhibitors

Unique Subject Identifier=5002010010-0039

MEANS Procedure

Assay variable : PTINR\_VAL1 PT-INR Value

| N | Mean      | Standard Deviation | Minimum   | Maximum   |
|---|-----------|--------------------|-----------|-----------|
| 3 | 1.7600000 | 0.3567913          | 1.5200000 | 2.1700000 |

Unique Subject Identifier=5002010010-0044

Assay variable : PTINR\_VAL1 PT-INR Value

| N | Mean      | Standard Deviation | Minimum   | Maximum   |
|---|-----------|--------------------|-----------|-----------|
| 3 | 1.7700000 | 0.2233831          | 1.5900000 | 2.0200000 |

Unique Subject Identifier=5002010010-0053

Assay variable : PTINR\_VAL1 PT-INR Value

| N | Mean      | Standard Deviation | Minimum   | Maximum   |
|---|-----------|--------------------|-----------|-----------|
| 2 | 2.2700000 | 0.1131371          | 2.1900000 | 2.3500000 |

Unique Subject Identifier=5002010010-0054

Assay variable : PTINR\_VAL1 PT-INR Value

N Mean Standard Deviation Minimum Maximum

---

|   |           |           |           |           |
|---|-----------|-----------|-----------|-----------|
| 4 | 2.0025000 | 0.1297112 | 1.8800000 | 2.1800000 |
|---|-----------|-----------|-----------|-----------|

---

Laboratory tests at the time of obtaining Table 2-6 consent, according to the presence or absence of proton-pump inhibitors

Unique Subject Identifier=5002010010-0058

MEANS Procedure

Assay variable : PTINR\_VAL1 PT-INR Value

N Mean Standard Deviation Minimum Maximum

---

|   |           |           |           |           |
|---|-----------|-----------|-----------|-----------|
| 5 | 1.5980000 | 0.5341535 | 1.0400000 | 2.2400000 |
|---|-----------|-----------|-----------|-----------|

---

Unique Subject Identifier=5002010010-0060

Assay variable : PTINR\_VAL1 PT-INR Value

N Mean Standard Deviation Minimum Maximum

---

|   |           |           |           |           |
|---|-----------|-----------|-----------|-----------|
| 6 | 1.8800000 | 0.6824368 | 1.3900000 | 3.2500000 |
|---|-----------|-----------|-----------|-----------|

---

Unique Subject Identifier=5002010010-0063

Assay variable : PTINR\_VAL1 PT-INR Value

N Mean Standard Deviation Minimum Maximum

---

|   |           |           |           |           |
|---|-----------|-----------|-----------|-----------|
| 2 | 2.2750000 | 0.1909188 | 2.1400000 | 2.4100000 |
|---|-----------|-----------|-----------|-----------|

---

Unique Subject Identifier=5002010010-0069



Assay variable : PTINR\_VAL1 PT-INR Value

N Mean Standard Deviation Minimum Maximum

---

|   |           |           |           |           |
|---|-----------|-----------|-----------|-----------|
| 4 | 1.9350000 | 0.5406478 | 1.4700000 | 2.6000000 |
|---|-----------|-----------|-----------|-----------|

---

Laboratory tests at the time of obtaining Table 2-6 consent, according to the presence or absence of proton-pump inhibitors

Unique Subject Identifier=5002010010-0085

MEANS Procedure

Assay variable : PTINR\_VAL1 PT-INR Value

N Mean Standard Deviation Minimum Maximum

---

|   |           |           |           |           |
|---|-----------|-----------|-----------|-----------|
| 3 | 1.6433333 | 0.2914332 | 1.3100000 | 1.8500000 |
|---|-----------|-----------|-----------|-----------|

---

Unique Subject Identifier=5002010010-0086

Assay variable : PTINR\_VAL1 PT-INR Value

N Mean Standard Deviation Minimum Maximum

---

|   |           |           |           |           |
|---|-----------|-----------|-----------|-----------|
| 3 | 1.7300000 | 0.3304542 | 1.4100000 | 2.0700000 |
|---|-----------|-----------|-----------|-----------|

---

Unique Subject Identifier=5002010010-0092

Assay variable : PTINR\_VAL1 PT-INR Value

N Mean Standard Deviation Minimum Maximum

---

|   |           |           |           |           |
|---|-----------|-----------|-----------|-----------|
| 3 | 1.6733333 | 0.2478575 | 1.3900000 | 1.8500000 |
|---|-----------|-----------|-----------|-----------|

---

Unique Subject Identifier=5002010010-0095

Assay variable : PTINR\_VAL1 PT-INR Value

N Mean Standard Deviation Minimum Maximum

---

|   |          |           |          |          |
|---|----------|-----------|----------|----------|
| 2 | 2.000000 | 0.1979899 | 1.860000 | 2.140000 |
|---|----------|-----------|----------|----------|

---

Laboratory tests at the time of obtaining Table 2-6 consent, according to the presence or absence of proton-pump inhibitors

Unique Subject Identifier=5004000111-0003

MEANS Procedure

Assay variable : PTINR\_VAL1 PT-INR Value

N Mean Standard Deviation Minimum Maximum

---

|   |           |           |           |           |
|---|-----------|-----------|-----------|-----------|
| 6 | 2.0816667 | 0.3817023 | 1.3900000 | 2.5000000 |
|---|-----------|-----------|-----------|-----------|

---

Unique Subject Identifier=5004000111-0008

Assay variable : PTINR\_VAL1 PT-INR Value

N Mean Standard Deviation Minimum Maximum

---

|   |           |           |           |           |
|---|-----------|-----------|-----------|-----------|
| 4 | 2.0650000 | 0.5967970 | 1.6500000 | 2.9200000 |
|---|-----------|-----------|-----------|-----------|

---

Unique Subject Identifier=5004000111-0012

Assay variable : PTINR\_VAL1 PT-INR Value

N Mean Standard Deviation Minimum Maximum

---

|   |           |           |           |           |
|---|-----------|-----------|-----------|-----------|
| 3 | 2.1733333 | 0.2052641 | 2.0000000 | 2.4000000 |
|---|-----------|-----------|-----------|-----------|

---

Unique Subject Identifier=5004000111-0016

Assay variable : PTINR\_VAL1 PT-INR Value

N Mean Standard Deviation Minimum Maximum

---

|   |           |           |           |           |
|---|-----------|-----------|-----------|-----------|
| 4 | 2.0350000 | 0.1181807 | 1.9500000 | 2.2100000 |
|---|-----------|-----------|-----------|-----------|

---

Laboratory tests at the time of obtaining Table 2-6 consent, according to the presence or absence of proton-pump inhibitors

Unique Subject Identifier=5004000111-0019

MEANS Procedure

Assay variable : PTINR\_VAL1 PT-INR Value

N Mean Standard Deviation Minimum Maximum

---

|   |           |           |           |           |
|---|-----------|-----------|-----------|-----------|
| 6 | 2.2416667 | 0.7647069 | 1.7100000 | 3.7600000 |
|---|-----------|-----------|-----------|-----------|

---

Unique Subject Identifier=5004000111-0022

Assay variable : PTINR\_VAL1 PT-INR Value

N Mean Standard Deviation Minimum Maximum

---

|   |           |           |           |           |
|---|-----------|-----------|-----------|-----------|
| 6 | 1.6416667 | 0.1238413 | 1.4400000 | 1.7900000 |
|---|-----------|-----------|-----------|-----------|

---

Unique Subject Identifier=5004000111-0026

Assay variable : PTINR\_VAL1 PT-INR Value

N Mean Standard Deviation Minimum Maximum

---

|   |           |           |           |           |
|---|-----------|-----------|-----------|-----------|
| 5 | 1.9580000 | 0.9992847 | 1.0200000 | 3.2700000 |
|---|-----------|-----------|-----------|-----------|

---

Unique Subject Identifier=5004000111-0031

Assay variable : PTINR\_VAL1 PT-INR Value

N Mean Standard Deviation Minimum Maximum

---

|   |          |           |          |          |
|---|----------|-----------|----------|----------|
| 2 | 1.810000 | 0.1697056 | 1.690000 | 1.930000 |
|---|----------|-----------|----------|----------|

---

Laboratory tests at the time of obtaining Table 2-6 consent, according to the presence or absence of proton-pump inhibitors

Unique Subject Identifier=5004000111-0035

MEANS Procedure

Assay variable : PTINR\_VAL1 PT-INR Value

N Mean Standard Deviation Minimum Maximum

---

|   |           |           |           |           |
|---|-----------|-----------|-----------|-----------|
| 6 | 1.9033333 | 0.3640696 | 1.4700000 | 2.3700000 |
|---|-----------|-----------|-----------|-----------|

---

Unique Subject Identifier=5004000111-0039

Assay variable : PTINR\_VAL1 PT-INR Value

N Mean Standard Deviation Minimum Maximum

---

|   |           |           |           |           |
|---|-----------|-----------|-----------|-----------|
| 3 | 2.0966667 | 0.5300314 | 1.4900000 | 2.4700000 |
|---|-----------|-----------|-----------|-----------|

---

Unique Subject Identifier=5004000111-0041

Assay variable : PTINR\_VAL1 PT-INR Value

N Mean Standard Deviation Minimum Maximum

---

|   |           |           |           |           |
|---|-----------|-----------|-----------|-----------|
| 4 | 1.7425000 | 0.0607591 | 1.6900000 | 1.8300000 |
|---|-----------|-----------|-----------|-----------|

---

Unique Subject Identifier=5004000111-0043



Assay variable : PTINR\_VAL1 PT-INR Value

N Mean Standard Deviation Minimum Maximum

---

|   |           |           |           |           |
|---|-----------|-----------|-----------|-----------|
| 2 | 1.5650000 | 0.0636396 | 1.5200000 | 1.6100000 |
|---|-----------|-----------|-----------|-----------|

---

Laboratory tests at the time of obtaining Table 2-6 consent, according to the presence or absence of proton-pump inhibitors

Unique Subject Identifier=5004000111-0047

MEANS Procedure

Assay variable : PTINR\_VAL1 PT-INR Value

N Mean Standard Deviation Minimum Maximum

---

|   |           |           |           |           |
|---|-----------|-----------|-----------|-----------|
| 4 | 1.9275000 | 0.1908533 | 1.7700000 | 2.1700000 |
|---|-----------|-----------|-----------|-----------|

---

Unique Subject Identifier=5004000111-0052

Assay variable : PTINR\_VAL1 PT-INR Value

N Mean Standard Deviation Minimum Maximum

---

|   |           |           |           |           |
|---|-----------|-----------|-----------|-----------|
| 6 | 1.7916667 | 0.2430158 | 1.4900000 | 2.1800000 |
|---|-----------|-----------|-----------|-----------|

---

Unique Subject Identifier=5004000111-0057

Assay variable : PTINR\_VAL1 PT-INR Value

N Mean Standard Deviation Minimum Maximum

---

|   |           |           |           |           |
|---|-----------|-----------|-----------|-----------|
| 4 | 2.5250000 | 0.8266599 | 1.6600000 | 3.6500000 |
|---|-----------|-----------|-----------|-----------|

---

Unique Subject Identifier=5004000111-0061

Assay variable : PTINR\_VAL1 PT-INR Value

N Mean Standard Deviation Minimum Maximum

---

|   |          |           |          |          |
|---|----------|-----------|----------|----------|
| 6 | 1.760000 | 0.0834266 | 1.660000 | 1.870000 |
|---|----------|-----------|----------|----------|

---

Laboratory tests at the time of obtaining Table 2-6 consent, according to the presence or absence of proton-pump inhibitors

Unique Subject Identifier=5004000111-0071

MEANS Procedure

Assay variable : PTINR\_VAL1 PT-INR Value

N Mean Standard Deviation Minimum Maximum

---

|   |           |           |           |           |
|---|-----------|-----------|-----------|-----------|
| 4 | 2.7925000 | 0.6411643 | 1.9500000 | 3.4900000 |
|---|-----------|-----------|-----------|-----------|

---

Unique Subject Identifier=5004000111-0072

Assay variable : PTINR\_VAL1 PT-INR Value

N Mean Standard Deviation Minimum Maximum

---

|   |           |           |           |           |
|---|-----------|-----------|-----------|-----------|
| 5 | 1.8100000 | 0.2359025 | 1.4800000 | 2.1100000 |
|---|-----------|-----------|-----------|-----------|

---

Unique Subject Identifier=5004000111-0078

Assay variable : PTINR\_VAL1 PT-INR Value

N Mean Standard Deviation Minimum Maximum

---

|   |           |           |           |           |
|---|-----------|-----------|-----------|-----------|
| 4 | 1.9325000 | 0.3089094 | 1.5000000 | 2.2200000 |
|---|-----------|-----------|-----------|-----------|

---

Unique Subject Identifier=5004000111-0080

Assay variable : PTINR\_VAL1 PT-INR Value

N Mean Standard Deviation Minimum Maximum

---

|   |           |           |           |           |
|---|-----------|-----------|-----------|-----------|
| 3 | 2.2766667 | 0.1553491 | 2.1500000 | 2.4500000 |
|---|-----------|-----------|-----------|-----------|

---

Laboratory tests at the time of obtaining Table 2-6 consent, according to the presence or absence of proton-pump inhibitors

Unique Subject Identifier=5007111000-0005

MEANS Procedure

Assay variable : PTINR\_VAL1 PT-INR Value

N Mean Standard Deviation Minimum Maximum

---

|   |           |           |           |           |
|---|-----------|-----------|-----------|-----------|
| 3 | 1.8800000 | 0.2251666 | 1.6200000 | 2.0100000 |
|---|-----------|-----------|-----------|-----------|

---

Unique Subject Identifier=5007111000-0008

Assay variable : PTINR\_VAL1 PT-INR Value

N Mean Standard Deviation Minimum Maximum

---

|   |           |           |           |           |
|---|-----------|-----------|-----------|-----------|
| 3 | 1.8800000 | 0.2251666 | 1.6200000 | 2.0100000 |
|---|-----------|-----------|-----------|-----------|

---

Unique Subject Identifier=5007111000-0010

Assay variable : PTINR\_VAL1 PT-INR Value

N Mean Standard Deviation Minimum Maximum

---

|   |           |           |           |           |
|---|-----------|-----------|-----------|-----------|
| 3 | 1.9666667 | 0.0305505 | 1.9400000 | 2.0000000 |
|---|-----------|-----------|-----------|-----------|

---

Unique Subject Identifier=5007111000-0012

Assay variable : PTINR\_VAL1 PT-INR Value

N Mean Standard Deviation Minimum Maximum

---

|   |           |           |           |           |
|---|-----------|-----------|-----------|-----------|
| 3 | 2.0566667 | 0.0680686 | 1.9800000 | 2.1100000 |
|---|-----------|-----------|-----------|-----------|

---

Laboratory tests at the time of obtaining Table 2-6 consent, according to the presence or absence of proton-pump inhibitors

Unique Subject Identifier=5007111000-0037

MEANS Procedure

Assay variable : PTINR\_VAL1 PT-INR Value

| N | Mean      | Standard Deviation | Minimum   | Maximum   |
|---|-----------|--------------------|-----------|-----------|
| 3 | 1.9300000 | 0.0871780          | 1.8300000 | 1.9900000 |

Unique Subject Identifier=5007111000-0038

Assay variable : PTINR\_VAL1 PT-INR Value

| N | Mean      | Standard Deviation | Minimum   | Maximum   |
|---|-----------|--------------------|-----------|-----------|
| 3 | 2.0533333 | 0.1569501          | 1.9300000 | 2.2300000 |

Unique Subject Identifier=5007111000-0044

Assay variable : PTINR\_VAL1 PT-INR Value

| N | Mean      | Standard Deviation | Minimum   | Maximum   |
|---|-----------|--------------------|-----------|-----------|
| 4 | 2.0825000 | 0.5145467          | 1.3300000 | 2.4900000 |

Unique Subject Identifier=5007111000-0049



Assay variable : PTINR\_VAL1 PT-INR Value

N Mean Standard Deviation Minimum Maximum

---

|   |          |           |          |          |
|---|----------|-----------|----------|----------|
| 6 | 2.340000 | 0.5876053 | 1.770000 | 3.440000 |
|---|----------|-----------|----------|----------|

---

Laboratory tests at the time of obtaining Table 2-6 consent, according to the presence or absence of proton-pump inhibitors

Unique Subject Identifier=5007111000-0055

MEANS Procedure

Assay variable : PTINR\_VAL1 PT-INR Value

| N | Mean      | Standard Deviation | Minimum   | Maximum   |
|---|-----------|--------------------|-----------|-----------|
| 5 | 1.9460000 | 0.2939898          | 1.6900000 | 2.4400000 |

Unique Subject Identifier=5007111000-0058

Assay variable : PTINR\_VAL1 PT-INR Value

| N | Mean      | Standard Deviation | Minimum   | Maximum   |
|---|-----------|--------------------|-----------|-----------|
| 5 | 2.0260000 | 0.4407720          | 1.3300000 | 2.4500000 |

Unique Subject Identifier=5008011111-0007

Assay variable : PTINR\_VAL1 PT-INR Value

| N | Mean      | Standard Deviation | Minimum   | Maximum   |
|---|-----------|--------------------|-----------|-----------|
| 5 | 2.3140000 | 0.5144706          | 1.8600000 | 3.2000000 |

Unique Subject Identifier=5008011111-0009

Assay variable : PTINR\_VAL1 PT-INR Value

N Mean Standard Deviation Minimum Maximum

---

|   |          |           |          |          |
|---|----------|-----------|----------|----------|
| 5 | 2.132000 | 0.2678992 | 1.830000 | 2.460000 |
|---|----------|-----------|----------|----------|

---

Laboratory tests at the time of obtaining Table 2-6 consent, according to the presence or absence of proton-pump inhibitors

Unique Subject Identifier=5008011111-0011

MEANS Procedure

Assay variable : PTINR\_VAL1 PT-INR Value

N Mean Standard Deviation Minimum Maximum

---

|   |           |           |           |           |
|---|-----------|-----------|-----------|-----------|
| 4 | 2.3225000 | 0.3250000 | 2.0500000 | 2.7800000 |
|---|-----------|-----------|-----------|-----------|

---

Unique Subject Identifier=5009000010-0013

Assay variable : PTINR\_VAL1 PT-INR Value

N Mean Standard Deviation Minimum Maximum

---

|   |           |           |           |           |
|---|-----------|-----------|-----------|-----------|
| 6 | 1.9050000 | 0.4008865 | 1.4700000 | 2.4000000 |
|---|-----------|-----------|-----------|-----------|

---

Unique Subject Identifier=5010000100-0018

Assay variable : PTINR\_VAL1 PT-INR Value

N Mean Standard Deviation Minimum Maximum

---

|   |           |  |           |           |
|---|-----------|--|-----------|-----------|
| 1 | 2.1500000 |  | 2.1500000 | 2.1500000 |
|---|-----------|--|-----------|-----------|

---

Unique Subject Identifier=5010000100-0024

Assay variable : PTINR\_VAL1 PT-INR Value

N Mean Standard Deviation Minimum Maximum

---

|   |          |           |          |          |
|---|----------|-----------|----------|----------|
| 2 | 1.920000 | 0.3535534 | 1.670000 | 2.170000 |
|---|----------|-----------|----------|----------|

---

Laboratory tests at the time of obtaining Table 2-6 consent, according to the presence or absence of proton-pump inhibitors

Unique Subject Identifier=5011010000-0002

MEANS Procedure

Assay variable : PTINR\_VAL1 PT-INR Value

N Mean Standard Deviation Minimum Maximum

---

|   |           |           |           |           |
|---|-----------|-----------|-----------|-----------|
| 5 | 1.9640000 | 0.5542833 | 1.5400000 | 2.9200000 |
|---|-----------|-----------|-----------|-----------|

---

Unique Subject Identifier=5011010000-0006

Assay variable : PTINR\_VAL1 PT-INR Value

N Mean Standard Deviation Minimum Maximum

---

|   |           |           |           |           |
|---|-----------|-----------|-----------|-----------|
| 4 | 2.3650000 | 0.4891830 | 1.8600000 | 3.0000000 |
|---|-----------|-----------|-----------|-----------|

---

Unique Subject Identifier=5011010000-0014

Assay variable : PTINR\_VAL1 PT-INR Value

N Mean Standard Deviation Minimum Maximum

---

|   |           |           |           |           |
|---|-----------|-----------|-----------|-----------|
| 5 | 1.7880000 | 0.2721580 | 1.3400000 | 2.0000000 |
|---|-----------|-----------|-----------|-----------|

---

Unique Subject Identifier=5011010000-0016

Assay variable : PTINR\_VAL1 PT-INR Value

N Mean Standard Deviation Minimum Maximum

---

|   |           |           |           |           |
|---|-----------|-----------|-----------|-----------|
| 6 | 1.9633333 | 0.2535087 | 1.6300000 | 2.3000000 |
|---|-----------|-----------|-----------|-----------|

---

Laboratory tests at the time of obtaining Table 2-6 consent, according to the presence or absence of proton-pump inhibitors

Unique Subject Identifier=5011010000-0020

MEANS Procedure

Assay variable : PTINR\_VAL1 PT-INR Value

N Mean Standard Deviation Minimum Maximum

---

|   |           |           |           |           |
|---|-----------|-----------|-----------|-----------|
| 6 | 1.6966667 | 0.3229654 | 1.4100000 | 2.1600000 |
|---|-----------|-----------|-----------|-----------|

---

Unique Subject Identifier=5011010000-0026

Assay variable : PTINR\_VAL1 PT-INR Value

N Mean Standard Deviation Minimum Maximum

---

|   |           |           |           |           |
|---|-----------|-----------|-----------|-----------|
| 6 | 2.0316667 | 0.6728274 | 1.4900000 | 3.1100000 |
|---|-----------|-----------|-----------|-----------|

---

Unique Subject Identifier=5011010000-0045

Assay variable : PTINR\_VAL1 PT-INR Value

N Mean Standard Deviation Minimum Maximum

---

|   |           |           |           |           |
|---|-----------|-----------|-----------|-----------|
| 5 | 1.8460000 | 0.4565413 | 1.2900000 | 2.3300000 |
|---|-----------|-----------|-----------|-----------|

---

Unique Subject Identifier=5011010000-0046



Assay variable : PTINR\_VAL1 PT-INR Value

N Mean Standard Deviation Minimum Maximum

---

|   |          |           |          |          |
|---|----------|-----------|----------|----------|
| 3 | 1.940000 | 0.3204684 | 1.630000 | 2.270000 |
|---|----------|-----------|----------|----------|

---

Laboratory tests at the time of obtaining Table 2-6 consent, according to the presence or absence of proton-pump inhibitors

Unique Subject Identifier=5012000000-0001

MEANS Procedure

Assay variable : PTINR\_VAL1 PT-INR Value

N Mean Standard Deviation Minimum Maximum

---

|   |           |           |           |           |
|---|-----------|-----------|-----------|-----------|
| 6 | 2.5500000 | 0.4408174 | 2.1200000 | 3.2000000 |
|---|-----------|-----------|-----------|-----------|

---

Unique Subject Identifier=5012000000-0006

Assay variable : PTINR\_VAL1 PT-INR Value

N Mean Standard Deviation Minimum Maximum

---

|   |           |           |           |           |
|---|-----------|-----------|-----------|-----------|
| 5 | 2.0240000 | 0.4243583 | 1.5900000 | 2.5900000 |
|---|-----------|-----------|-----------|-----------|

---

Unique Subject Identifier=5012000000-0007

Assay variable : PTINR\_VAL1 PT-INR Value

N Mean Standard Deviation Minimum Maximum

---

|   |           |           |           |           |
|---|-----------|-----------|-----------|-----------|
| 6 | 2.1583333 | 0.5896920 | 1.6700000 | 3.1100000 |
|---|-----------|-----------|-----------|-----------|

---

Unique Subject Identifier=5012000000-0013

Assay variable : PTINR\_VAL1 PT-INR Value

N Mean Standard Deviation Minimum Maximum

---

|   |           |           |           |           |
|---|-----------|-----------|-----------|-----------|
| 6 | 1.5616667 | 0.1090718 | 1.3900000 | 1.6900000 |
|---|-----------|-----------|-----------|-----------|

---

Laboratory tests at the time of obtaining Table 2-6 consent, according to the presence or absence of proton-pump inhibitors

Unique Subject Identifier=5012000000-0015

MEANS Procedure

Assay variable : PTINR\_VAL1 PT-INR Value

N Mean Standard Deviation Minimum Maximum

---

|   |           |           |           |           |
|---|-----------|-----------|-----------|-----------|
| 4 | 2.2625000 | 0.3517930 | 1.8300000 | 2.6800000 |
|---|-----------|-----------|-----------|-----------|

---

Unique Subject Identifier=5012000000-0017

Assay variable : PTINR\_VAL1 PT-INR Value

N Mean Standard Deviation Minimum Maximum

---

|   |           |           |           |           |
|---|-----------|-----------|-----------|-----------|
| 5 | 1.8700000 | 0.3196091 | 1.5100000 | 2.2000000 |
|---|-----------|-----------|-----------|-----------|

---

Unique Subject Identifier=5012000000-0018

Assay variable : PTINR\_VAL1 PT-INR Value

N Mean Standard Deviation Minimum Maximum

---

|   |           |           |           |           |
|---|-----------|-----------|-----------|-----------|
| 6 | 1.5150000 | 0.2935132 | 1.1700000 | 1.8000000 |
|---|-----------|-----------|-----------|-----------|

---

Unique Subject Identifier=5012000000-0023

Assay variable : PTINR\_VAL1 PT-INR Value

N Mean Standard Deviation Minimum Maximum

---

|   |           |           |           |           |
|---|-----------|-----------|-----------|-----------|
| 3 | 2.0266667 | 0.1250333 | 1.9000000 | 2.1500000 |
|---|-----------|-----------|-----------|-----------|

---

Laboratory tests at the time of obtaining Table 2-6 consent, according to the presence or absence of proton-pump inhibitors

Unique Subject Identifier=5012000000-0028

MEANS Procedure

Assay variable : PTINR\_VAL1 PT-INR Value

N Mean Standard Deviation Minimum Maximum

---

|   |           |           |           |           |
|---|-----------|-----------|-----------|-----------|
| 4 | 1.9950000 | 0.0580230 | 1.9300000 | 2.0700000 |
|---|-----------|-----------|-----------|-----------|

---

Unique Subject Identifier=5013000000-0042

Assay variable : PTINR\_VAL1 PT-INR Value

N Mean Standard Deviation Minimum Maximum

---

|   |           |           |           |           |
|---|-----------|-----------|-----------|-----------|
| 3 | 1.9866667 | 0.2657693 | 1.6800000 | 2.1500000 |
|---|-----------|-----------|-----------|-----------|

---

Unique Subject Identifier=5013000000-0059

Assay variable : PTINR\_VAL1 PT-INR Value

N Mean Standard Deviation Minimum Maximum

---

|   |           |           |           |           |
|---|-----------|-----------|-----------|-----------|
| 3 | 2.2000000 | 0.0556776 | 2.1400000 | 2.2500000 |
|---|-----------|-----------|-----------|-----------|

---

Unique Subject Identifier=5013000000-0063

Assay variable : PTINR\_VAL1 PT-INR Value

N Mean Standard Deviation Minimum Maximum

---

|   |           |           |           |           |
|---|-----------|-----------|-----------|-----------|
| 2 | 1.7350000 | 0.1060660 | 1.6600000 | 1.8100000 |
|---|-----------|-----------|-----------|-----------|

---

Laboratory tests at the time of obtaining Table 2-6 consent, according to the presence or absence of proton-pump inhibitors

Unique Subject Identifier=5013000000-0132

MEANS Procedure

Assay variable : PTINR\_VAL1 PT-INR Value

| N | Mean      | Standard Deviation | Minimum   | Maximum   |
|---|-----------|--------------------|-----------|-----------|
| 6 | 1.8350000 | 0.2517737          | 1.4700000 | 2.1300000 |

Unique Subject Identifier=5013000000-0143

Assay variable : PTINR\_VAL1 PT-INR Value

| N | Mean      | Standard Deviation | Minimum   | Maximum   |
|---|-----------|--------------------|-----------|-----------|
| 3 | 1.8100000 | 0.2685144          | 1.5000000 | 1.9700000 |

Unique Subject Identifier=5013000000-0156

Assay variable : PTINR\_VAL1 PT-INR Value

| N | Mean      | Standard Deviation | Minimum   | Maximum   |
|---|-----------|--------------------|-----------|-----------|
| 5 | 1.9140000 | 0.1687602          | 1.7400000 | 2.1400000 |

Unique Subject Identifier=5013000000-0166



Assay variable : PTINR\_VAL1 PT-INR Value

N Mean Standard Deviation Minimum Maximum

---

|   |           |           |           |           |
|---|-----------|-----------|-----------|-----------|
| 6 | 2.1516667 | 0.2797439 | 1.7400000 | 2.5400000 |
|---|-----------|-----------|-----------|-----------|

---

Laboratory tests at the time of obtaining Table 2-6 consent, according to the presence or absence of proton-pump inhibitors

Unique Subject Identifier=5013000000-0217

MEANS Procedure

Assay variable : PTINR\_VAL1 PT-INR Value

N Mean Standard Deviation Minimum Maximum

---

|   |           |           |           |           |
|---|-----------|-----------|-----------|-----------|
| 3 | 2.3033333 | 0.3286842 | 1.9500000 | 2.6000000 |
|---|-----------|-----------|-----------|-----------|

---

Unique Subject Identifier=5013000000-0262

Assay variable : PTINR\_VAL1 PT-INR Value

N Mean Standard Deviation Minimum Maximum

---

|   |           |           |           |           |
|---|-----------|-----------|-----------|-----------|
| 2 | 1.6900000 | 0.1555635 | 1.5800000 | 1.8000000 |
|---|-----------|-----------|-----------|-----------|

---

Unique Subject Identifier=5013000000-0279

Assay variable : PTINR\_VAL1 PT-INR Value

N Mean Standard Deviation Minimum Maximum

---

|   |           |           |           |           |
|---|-----------|-----------|-----------|-----------|
| 6 | 1.7266667 | 0.2202423 | 1.5800000 | 2.1700000 |
|---|-----------|-----------|-----------|-----------|

---

Unique Subject Identifier=5013000000-0283

Assay variable : PTINR\_VAL1 PT-INR Value

N Mean Standard Deviation Minimum Maximum

---

|   |           |           |           |           |
|---|-----------|-----------|-----------|-----------|
| 5 | 2.2880000 | 0.1943451 | 2.1600000 | 2.6300000 |
|---|-----------|-----------|-----------|-----------|

---

Laboratory tests at the time of obtaining Table 2-6 consent, according to the presence or absence of proton-pump inhibitors

Unique Subject Identifier=5013000000-0286

MEANS Procedure

Assay variable : PTINR\_VAL1 PT-INR Value

N Mean Standard Deviation Minimum Maximum

---

|   |          |           |          |          |
|---|----------|-----------|----------|----------|
| 2 | 2.410000 | 0.2687006 | 2.220000 | 2.600000 |
|---|----------|-----------|----------|----------|

---

Unique Subject Identifier=5013000000-0297

Assay variable : PTINR\_VAL1 PT-INR Value

N Mean Standard Deviation Minimum Maximum

---

|   |          |           |          |          |
|---|----------|-----------|----------|----------|
| 6 | 1.865000 | 0.3950063 | 1.080000 | 2.130000 |
|---|----------|-----------|----------|----------|

---

Unique Subject Identifier=5013000000-0304

Assay variable : PTINR\_VAL1 PT-INR Value

N Mean Standard Deviation Minimum Maximum

---

|   |           |           |          |          |
|---|-----------|-----------|----------|----------|
| 6 | 1.7016667 | 0.1655798 | 1.490000 | 1.970000 |
|---|-----------|-----------|----------|----------|

---

Unique Subject Identifier=5013000000-0318

Assay variable : PTINR\_VAL1 PT-INR Value

N Mean Standard Deviation Minimum Maximum

---

|   |          |           |          |          |
|---|----------|-----------|----------|----------|
| 4 | 2.150000 | 0.2152518 | 1.840000 | 2.310000 |
|---|----------|-----------|----------|----------|

---

Laboratory tests at the time of obtaining Table 2-6 consent, according to the presence or absence of proton-pump inhibitors

Unique Subject Identifier=5013000000-0323

MEANS Procedure

Assay variable : PTINR\_VAL1 PT-INR Value

N Mean Standard Deviation Minimum Maximum

---

|   |           |           |           |           |
|---|-----------|-----------|-----------|-----------|
| 6 | 1.4400000 | 0.2419917 | 1.1500000 | 1.7500000 |
|---|-----------|-----------|-----------|-----------|

---

Unique Subject Identifier=5013000000-0330

Assay variable : PTINR\_VAL1 PT-INR Value

N Mean Standard Deviation Minimum Maximum

---

|   |           |           |           |           |
|---|-----------|-----------|-----------|-----------|
| 6 | 2.4500000 | 0.3728270 | 1.9000000 | 3.0000000 |
|---|-----------|-----------|-----------|-----------|

---

Unique Subject Identifier=5013000000-0347

Assay variable : PTINR\_VAL1 PT-INR Value

N Mean Standard Deviation Minimum Maximum

---

|   |           |           |           |           |
|---|-----------|-----------|-----------|-----------|
| 5 | 1.3920000 | 0.2519325 | 1.0800000 | 1.7600000 |
|---|-----------|-----------|-----------|-----------|

---

Unique Subject Identifier=5013000000-0355

Assay variable : PTINR\_VAL1 PT-INR Value

N Mean Standard Deviation Minimum Maximum

---

|   |           |           |           |           |
|---|-----------|-----------|-----------|-----------|
| 3 | 2.2200000 | 0.4744470 | 1.6800000 | 2.5700000 |
|---|-----------|-----------|-----------|-----------|

---

Laboratory tests at the time of obtaining Table 2-6 consent, according to the presence or absence of proton-pump inhibitors

Unique Subject Identifier=5013000000-0401

MEANS Procedure

Assay variable : PTINR\_VAL1 PT-INR Value

N Mean Standard Deviation Minimum Maximum

---

|   |           |  |           |           |
|---|-----------|--|-----------|-----------|
| 1 | 2.0600000 |  | 2.0600000 | 2.0600000 |
|---|-----------|--|-----------|-----------|

---

Unique Subject Identifier=5013000000-0426

Assay variable : PTINR\_VAL1 PT-INR Value

N Mean Standard Deviation Minimum Maximum

---

|   |           |           |           |           |
|---|-----------|-----------|-----------|-----------|
| 3 | 1.8133333 | 0.2013289 | 1.6000000 | 2.0000000 |
|---|-----------|-----------|-----------|-----------|

---

Unique Subject Identifier=5013000000-0435

Assay variable : PTINR\_VAL1 PT-INR Value

N Mean Standard Deviation Minimum Maximum

---

|   |           |           |           |           |
|---|-----------|-----------|-----------|-----------|
| 2 | 1.9650000 | 0.1060660 | 1.8900000 | 2.0400000 |
|---|-----------|-----------|-----------|-----------|

---

Unique Subject Identifier=5013000000-0465



Assay variable : PTINR\_VAL1 PT-INR Value

N Mean Standard Deviation Minimum Maximum

---

|   |           |           |           |           |
|---|-----------|-----------|-----------|-----------|
| 6 | 1.9433333 | 0.2307957 | 1.7000000 | 2.2800000 |
|---|-----------|-----------|-----------|-----------|

---

Laboratory tests at the time of obtaining Table 2-6 consent, according to the presence or absence of proton-pump inhibitors

Unique Subject Identifier=5013000000-0483

MEANS Procedure

Assay variable : PTINR\_VAL1 PT-INR Value

N Mean Standard Deviation Minimum Maximum

---

|   |           |           |           |           |
|---|-----------|-----------|-----------|-----------|
| 4 | 2.4825000 | 0.1284199 | 2.3800000 | 2.6700000 |
|---|-----------|-----------|-----------|-----------|

---

Unique Subject Identifier=5013000000-0508

Assay variable : PTINR\_VAL1 PT-INR Value

N Mean Standard Deviation Minimum Maximum

---

|   |           |           |           |           |
|---|-----------|-----------|-----------|-----------|
| 3 | 1.9533333 | 0.0709460 | 1.8900000 | 2.0300000 |
|---|-----------|-----------|-----------|-----------|

---

Unique Subject Identifier=5013000000-0518

Assay variable : PTINR\_VAL1 PT-INR Value

N Mean Standard Deviation Minimum Maximum

---

|   |           |           |           |           |
|---|-----------|-----------|-----------|-----------|
| 4 | 2.4150000 | 0.3169122 | 2.0800000 | 2.7100000 |
|---|-----------|-----------|-----------|-----------|

---

Unique Subject Identifier=5013000000-0523

Assay variable : PTINR\_VAL1 PT-INR Value

N Mean Standard Deviation Minimum Maximum

---

|   |           |  |           |           |
|---|-----------|--|-----------|-----------|
| 1 | 1.2200000 |  | 1.2200000 | 1.2200000 |
|---|-----------|--|-----------|-----------|

---

Laboratory tests at the time of obtaining Table 2-6 consent, according to the presence or absence of proton-pump inhibitors

Unique Subject Identifier=5013000000-0547

MEANS Procedure

Assay variable : PTINR\_VAL1 PT-INR Value

N Mean Standard Deviation Minimum Maximum

---

|   |           |           |           |           |
|---|-----------|-----------|-----------|-----------|
| 2 | 1.3950000 | 0.1626346 | 1.2800000 | 1.5100000 |
|---|-----------|-----------|-----------|-----------|

---

Unique Subject Identifier=5013000000-0553

Assay variable : PTINR\_VAL1 PT-INR Value

N Mean Standard Deviation Minimum Maximum

---

|   |           |           |           |           |
|---|-----------|-----------|-----------|-----------|
| 6 | 1.3106667 | 0.2588024 | 1.1100000 | 1.8000000 |
|---|-----------|-----------|-----------|-----------|

---

Unique Subject Identifier=5013000000-0556

Assay variable : PTINR\_VAL1 PT-INR Value

N Mean Standard Deviation Minimum Maximum

---

|   |           |  |           |           |
|---|-----------|--|-----------|-----------|
| 1 | 1.5300000 |  | 1.5300000 | 1.5300000 |
|---|-----------|--|-----------|-----------|

---

Unique Subject Identifier=5013000000-0568

Assay variable : PTINR\_VAL1 PT-INR Value

N Mean Standard Deviation Minimum Maximum

---

|   |           |           |           |           |
|---|-----------|-----------|-----------|-----------|
| 6 | 1.2783333 | 0.4282717 | 0.9300000 | 1.8400000 |
|---|-----------|-----------|-----------|-----------|

---

Laboratory tests at the time of obtaining Table 2-6 consent, according to the presence or absence of proton-pump inhibitors

Unique Subject Identifier=5013000000-0589

MEANS Procedure

Assay variable : PTINR\_VAL1 PT-INR Value

N Mean Standard Deviation Minimum Maximum

---

|   |           |           |           |           |
|---|-----------|-----------|-----------|-----------|
| 6 | 1.2466667 | 0.2231293 | 0.9900000 | 1.6100000 |
|---|-----------|-----------|-----------|-----------|

---

Unique Subject Identifier=5013000000-0595

Assay variable : PTINR\_VAL1 PT-INR Value

N Mean Standard Deviation Minimum Maximum

---

|   |           |           |           |           |
|---|-----------|-----------|-----------|-----------|
| 6 | 2.3666667 | 0.4015304 | 1.9400000 | 2.9900000 |
|---|-----------|-----------|-----------|-----------|

---

Unique Subject Identifier=5014010001-0009

Assay variable : PTINR\_VAL1 PT-INR Value

N Mean Standard Deviation Minimum Maximum

---

|   |           |           |           |           |
|---|-----------|-----------|-----------|-----------|
| 3 | 1.7433333 | 0.2059935 | 1.5500000 | 1.9600000 |
|---|-----------|-----------|-----------|-----------|

---

Unique Subject Identifier=5014010001-0013

Assay variable : PTINR\_VAL1 PT-INR Value

N Mean Standard Deviation Minimum Maximum

---

|   |          |  |          |          |
|---|----------|--|----------|----------|
| 1 | 1.250000 |  | 1.250000 | 1.250000 |
|---|----------|--|----------|----------|

---

Laboratory tests at the time of obtaining Table 2-6 consent, according to the presence or absence of proton-pump inhibitors

Unique Subject Identifier=5014010001-0016

MEANS Procedure

Assay variable : PTINR\_VAL1 PT-INR Value

N Mean Standard Deviation Minimum Maximum

---

|   |           |           |           |           |
|---|-----------|-----------|-----------|-----------|
| 5 | 1.9560000 | 0.3299697 | 1.6000000 | 2.5000000 |
|---|-----------|-----------|-----------|-----------|

---

Unique Subject Identifier=5014010001-0020

Assay variable : PTINR\_VAL1 PT-INR Value

N Mean Standard Deviation Minimum Maximum

---

|   |           |           |           |           |
|---|-----------|-----------|-----------|-----------|
| 5 | 2.2520000 | 0.3851234 | 1.8500000 | 2.8700000 |
|---|-----------|-----------|-----------|-----------|

---

Unique Subject Identifier=5014010001-0022

Assay variable : PTINR\_VAL1 PT-INR Value

N Mean Standard Deviation Minimum Maximum

---

|   |           |           |           |           |
|---|-----------|-----------|-----------|-----------|
| 5 | 2.4280000 | 0.2007984 | 2.1800000 | 2.6600000 |
|---|-----------|-----------|-----------|-----------|

---

Unique Subject Identifier=5014010001-0027



Assay variable : PTINR\_VAL1 PT-INR Value

N Mean Standard Deviation Minimum Maximum

---

|   |           |           |           |           |
|---|-----------|-----------|-----------|-----------|
| 3 | 1.5366667 | 0.0702377 | 1.4700000 | 1.6100000 |
|---|-----------|-----------|-----------|-----------|

---

Laboratory tests at the time of obtaining Table 2-6 consent, according to the presence or absence of proton-pump inhibitors

Unique Subject Identifier=5015000000-0014

MEANS Procedure

Assay variable : PTINR\_VAL1 PT-INR Value

N Mean Standard Deviation Minimum Maximum

---

|   |           |           |           |           |
|---|-----------|-----------|-----------|-----------|
| 3 | 2.3800000 | 0.3019934 | 2.1000000 | 2.7000000 |
|---|-----------|-----------|-----------|-----------|

---

Unique Subject Identifier=5015000000-0017

Assay variable : PTINR\_VAL1 PT-INR Value

N Mean Standard Deviation Minimum Maximum

---

|   |           |           |           |           |
|---|-----------|-----------|-----------|-----------|
| 6 | 2.4000000 | 0.1836301 | 2.0600000 | 2.5800000 |
|---|-----------|-----------|-----------|-----------|

---

Unique Subject Identifier=5015000000-0021

Assay variable : PTINR\_VAL1 PT-INR Value

N Mean Standard Deviation Minimum Maximum

---

|   |           |           |           |           |
|---|-----------|-----------|-----------|-----------|
| 5 | 1.8780000 | 0.2754451 | 1.4200000 | 2.1100000 |
|---|-----------|-----------|-----------|-----------|

---

Unique Subject Identifier=5016000000-0004

Assay variable : PTINR\_VAL1 PT-INR Value

N Mean Standard Deviation Minimum Maximum

---

|   |           |           |           |           |
|---|-----------|-----------|-----------|-----------|
| 3 | 2.4700000 | 0.8685045 | 1.5600000 | 3.2900000 |
|---|-----------|-----------|-----------|-----------|

---

Laboratory tests at the time of obtaining Table 2-6 consent, according to the presence or absence of proton-pump inhibitors

Unique Subject Identifier=5016000000-0007

MEANS Procedure

Assay variable : PTINR\_VAL1 PT-INR Value

N Mean Standard Deviation Minimum Maximum

---

|   |           |           |           |           |
|---|-----------|-----------|-----------|-----------|
| 2 | 2.0050000 | 0.3323402 | 1.7700000 | 2.2400000 |
|---|-----------|-----------|-----------|-----------|

---

Unique Subject Identifier=5016000000-0008

Assay variable : PTINR\_VAL1 PT-INR Value

N Mean Standard Deviation Minimum Maximum

---

|   |           |           |           |           |
|---|-----------|-----------|-----------|-----------|
| 4 | 2.4450000 | 0.2111082 | 2.1300000 | 2.5800000 |
|---|-----------|-----------|-----------|-----------|

---

Unique Subject Identifier=5016000000-0013

Assay variable : PTINR\_VAL1 PT-INR Value

N Mean Standard Deviation Minimum Maximum

---

|   |           |           |           |           |
|---|-----------|-----------|-----------|-----------|
| 4 | 1.2800000 | 0.1606238 | 1.0600000 | 1.4300000 |
|---|-----------|-----------|-----------|-----------|

---

Unique Subject Identifier=5016000000-0014

Assay variable : PTINR\_VAL1 PT-INR Value

N Mean Standard Deviation Minimum Maximum

---

|   |           |           |           |           |
|---|-----------|-----------|-----------|-----------|
| 4 | 2.1325000 | 0.1918984 | 2.0300000 | 2.4200000 |
|---|-----------|-----------|-----------|-----------|

---

Laboratory tests at the time of obtaining Table 2-6 consent, according to the presence or absence of proton-pump inhibitors

Unique Subject Identifier=5016000000-0019

MEANS Procedure

Assay variable : PTINR\_VAL1 PT-INR Value

| N | Mean      | Standard Deviation | Minimum   | Maximum   |
|---|-----------|--------------------|-----------|-----------|
| 3 | 2.8533333 | 0.0808290          | 2.7800000 | 2.9400000 |

Unique Subject Identifier=5016000000-0020

Assay variable : PTINR\_VAL1 PT-INR Value

| N | Mean      | Standard Deviation | Minimum   | Maximum   |
|---|-----------|--------------------|-----------|-----------|
| 3 | 2.2800000 | 0.5765414          | 1.7600000 | 2.9000000 |

Unique Subject Identifier=5016000000-0023

Assay variable : PTINR\_VAL1 PT-INR Value

| N | Mean      | Standard Deviation | Minimum   | Maximum   |
|---|-----------|--------------------|-----------|-----------|
| 1 | 1.6600000 |                    | 1.6600000 | 1.6600000 |

Unique Subject Identifier=5016000000-0026

Assay variable : PTINR\_VAL1 PT-INR Value

N Mean Standard Deviation Minimum Maximum

---

|   |           |           |           |           |
|---|-----------|-----------|-----------|-----------|
| 3 | 2.5066667 | 0.5472050 | 1.9900000 | 3.0800000 |
|---|-----------|-----------|-----------|-----------|

---

Laboratory tests at the time of obtaining Table 2-6 consent, according to the presence or absence of proton-pump inhibitors

Unique Subject Identifier=5016000000-0029

MEANS Procedure

Assay variable : PTINR\_VAL1 PT-INR Value

N Mean Standard Deviation Minimum Maximum

---

|   |           |  |           |           |
|---|-----------|--|-----------|-----------|
| 1 | 1.6700000 |  | 1.6700000 | 1.6700000 |
|---|-----------|--|-----------|-----------|

---

Unique Subject Identifier=5016000000-0030

Assay variable : PTINR\_VAL1 PT-INR Value

N Mean Standard Deviation Minimum Maximum

---

|   |           |           |           |           |
|---|-----------|-----------|-----------|-----------|
| 4 | 2.1525000 | 0.2244066 | 1.8500000 | 2.3800000 |
|---|-----------|-----------|-----------|-----------|

---

Unique Subject Identifier=5016000000-0039

Assay variable : PTINR\_VAL1 PT-INR Value

N Mean Standard Deviation Minimum Maximum

---

|   |           |           |           |           |
|---|-----------|-----------|-----------|-----------|
| 2 | 2.2150000 | 0.2757716 | 2.0200000 | 2.4100000 |
|---|-----------|-----------|-----------|-----------|

---

Unique Subject Identifier=5016000000-0057



Assay variable : PTINR\_VAL1 PT-INR Value

N Mean Standard Deviation Minimum Maximum

---

|   |           |  |           |           |
|---|-----------|--|-----------|-----------|
| 1 | 1.9300000 |  | 1.9300000 | 1.9300000 |
|---|-----------|--|-----------|-----------|

---

Laboratory tests at the time of obtaining Table 2-6 consent, according to the presence or absence of proton-pump inhibitors

Unique Subject Identifier=5016000000-0059

MEANS Procedure

Assay variable : PTINR\_VAL1 PT-INR Value

N Mean Standard Deviation Minimum Maximum

---

|   |           |           |           |           |
|---|-----------|-----------|-----------|-----------|
| 5 | 2.5160000 | 0.4261807 | 2.2200000 | 3.2500000 |
|---|-----------|-----------|-----------|-----------|

---

Unique Subject Identifier=5016000000-0062

Assay variable : PTINR\_VAL1 PT-INR Value

N Mean Standard Deviation Minimum Maximum

---

|   |           |           |           |           |
|---|-----------|-----------|-----------|-----------|
| 3 | 2.0366667 | 0.5862025 | 1.6400000 | 2.7100000 |
|---|-----------|-----------|-----------|-----------|

---

Unique Subject Identifier=5016000000-0073

Assay variable : PTINR\_VAL1 PT-INR Value

N Mean Standard Deviation Minimum Maximum

---

|   |           |           |           |           |
|---|-----------|-----------|-----------|-----------|
| 2 | 2.2900000 | 0.1697056 | 2.1700000 | 2.4100000 |
|---|-----------|-----------|-----------|-----------|

---

Unique Subject Identifier=5016000000-0077

Assay variable : PTINR\_VAL1 PT-INR Value

N Mean Standard Deviation Minimum Maximum

---

|   |           |           |           |           |
|---|-----------|-----------|-----------|-----------|
| 3 | 2.6766667 | 0.3442867 | 2.4300000 | 3.0700000 |
|---|-----------|-----------|-----------|-----------|

---

Laboratory tests at the time of obtaining Table 2-6 consent, according to the presence or absence of proton-pump inhibitors

Unique Subject Identifier=501600000-0078

MEANS Procedure

Assay variable : PTINR\_VAL1 PT-INR Value

N Mean Standard Deviation Minimum Maximum

---

|   |           |           |           |           |
|---|-----------|-----------|-----------|-----------|
| 4 | 1.7225000 | 0.3238698 | 1.2800000 | 2.0100000 |
|---|-----------|-----------|-----------|-----------|

---

Unique Subject Identifier=501600000-0083

Assay variable : PTINR\_VAL1 PT-INR Value

N Mean Standard Deviation Minimum Maximum

---

|   |           |           |           |           |
|---|-----------|-----------|-----------|-----------|
| 4 | 1.8875000 | 0.2458150 | 1.6900000 | 2.2300000 |
|---|-----------|-----------|-----------|-----------|

---

Unique Subject Identifier=501600000-0093

Assay variable : PTINR\_VAL1 PT-INR Value

N Mean Standard Deviation Minimum Maximum

---

|   |           |           |           |           |
|---|-----------|-----------|-----------|-----------|
| 5 | 1.9360000 | 0.2903963 | 1.6300000 | 2.2900000 |
|---|-----------|-----------|-----------|-----------|

---

Unique Subject Identifier=501600000-0098

Assay variable : PTINR\_VAL1 PT-INR Value

N Mean Standard Deviation Minimum Maximum

---

|   |           |           |           |           |
|---|-----------|-----------|-----------|-----------|
| 3 | 2.1166667 | 0.4239497 | 1.7300000 | 2.5700000 |
|---|-----------|-----------|-----------|-----------|

---

Laboratory tests at the time of obtaining Table 2-6 consent, according to the presence or absence of proton-pump inhibitors

Unique Subject Identifier=5016000000-0100

MEANS Procedure

Assay variable : PTINR\_VAL1 PT-INR Value

N Mean Standard Deviation Minimum Maximum

---

|   |           |           |           |           |
|---|-----------|-----------|-----------|-----------|
| 3 | 1.8866667 | 0.0901850 | 1.8000000 | 1.9800000 |
|---|-----------|-----------|-----------|-----------|

---

Unique Subject Identifier=5016000000-0101

Assay variable : PTINR\_VAL1 PT-INR Value

N Mean Standard Deviation Minimum Maximum

---

|   |           |           |           |           |
|---|-----------|-----------|-----------|-----------|
| 3 | 2.1433333 | 0.2400694 | 1.9000000 | 2.3800000 |
|---|-----------|-----------|-----------|-----------|

---

Unique Subject Identifier=5016000000-0102

Assay variable : PTINR\_VAL1 PT-INR Value

N Mean Standard Deviation Minimum Maximum

---

|   |           |           |           |           |
|---|-----------|-----------|-----------|-----------|
| 3 | 2.3733333 | 0.0378594 | 2.3300000 | 2.4000000 |
|---|-----------|-----------|-----------|-----------|

---

Unique Subject Identifier=5016000000-0107

Assay variable : PTINR\_VAL1 PT-INR Value

N Mean Standard Deviation Minimum Maximum

---

|   |           |           |           |           |
|---|-----------|-----------|-----------|-----------|
| 3 | 1.9866667 | 0.1950214 | 1.7900000 | 2.1800000 |
|---|-----------|-----------|-----------|-----------|

---

Laboratory tests at the time of obtaining Table 2-6 consent, according to the presence or absence of proton-pump inhibitors

Unique Subject Identifier=5016000000-0111

MEANS Procedure

Assay variable : PTINR\_VAL1 PT-INR Value

N Mean Standard Deviation Minimum Maximum

---

|   |           |           |           |           |
|---|-----------|-----------|-----------|-----------|
| 4 | 1.6925000 | 0.2677530 | 1.4200000 | 2.0600000 |
|---|-----------|-----------|-----------|-----------|

---

Unique Subject Identifier=5016000000-0116

Assay variable : PTINR\_VAL1 PT-INR Value

N Mean Standard Deviation Minimum Maximum

---

|   |           |           |           |           |
|---|-----------|-----------|-----------|-----------|
| 4 | 1.8425000 | 0.2160825 | 1.5200000 | 1.9800000 |
|---|-----------|-----------|-----------|-----------|

---

Unique Subject Identifier=5016000000-0117

Assay variable : PTINR\_VAL1 PT-INR Value

N Mean Standard Deviation Minimum Maximum

---

|   |           |           |           |           |
|---|-----------|-----------|-----------|-----------|
| 3 | 1.7933333 | 0.1882374 | 1.6700000 | 2.0100000 |
|---|-----------|-----------|-----------|-----------|

---

Unique Subject Identifier=5016000000-0120



Assay variable : PTINR\_VAL1 PT-INR Value

N Mean Standard Deviation Minimum Maximum

---

|   |           |           |           |           |
|---|-----------|-----------|-----------|-----------|
| 2 | 2.2850000 | 0.2899138 | 2.0800000 | 2.4900000 |
|---|-----------|-----------|-----------|-----------|

---

Laboratory tests at the time of obtaining Table 2-6 consent, according to the presence or absence of proton-pump inhibitors

Unique Subject Identifier=5016000000-0122

MEANS Procedure

Assay variable : PTINR\_VAL1 PT-INR Value

N Mean Standard Deviation Minimum Maximum

---

|   |           |           |           |           |
|---|-----------|-----------|-----------|-----------|
| 3 | 1.6133333 | 0.2157159 | 1.4600000 | 1.8600000 |
|---|-----------|-----------|-----------|-----------|

---

Unique Subject Identifier=5016000000-0124

Assay variable : PTINR\_VAL1 PT-INR Value

N Mean Standard Deviation Minimum Maximum

---

|   |           |           |           |           |
|---|-----------|-----------|-----------|-----------|
| 3 | 1.8066667 | 0.1305118 | 1.6600000 | 1.9100000 |
|---|-----------|-----------|-----------|-----------|

---

Unique Subject Identifier=5016000000-0125

Assay variable : PTINR\_VAL1 PT-INR Value

N Mean Standard Deviation Minimum Maximum

---

|   |           |  |           |           |
|---|-----------|--|-----------|-----------|
| 1 | 2.1000000 |  | 2.1000000 | 2.1000000 |
|---|-----------|--|-----------|-----------|

---

Unique Subject Identifier=5016000000-0128

Assay variable : PTINR\_VAL1 PT-INR Value

N Mean Standard Deviation Minimum Maximum

---

|   |           |           |           |           |
|---|-----------|-----------|-----------|-----------|
| 4 | 1.7575000 | 0.3929695 | 1.3000000 | 2.1000000 |
|---|-----------|-----------|-----------|-----------|

---

Laboratory tests at the time of obtaining Table 2-6 consent, according to the presence or absence of proton-pump inhibitors

Unique Subject Identifier=5016000000-0129

MEANS Procedure

Assay variable : PTINR\_VAL1 PT-INR Value

N Mean Standard Deviation Minimum Maximum

---

|   |           |           |           |           |
|---|-----------|-----------|-----------|-----------|
| 4 | 1.9700000 | 0.5846366 | 1.4400000 | 2.7300000 |
|---|-----------|-----------|-----------|-----------|

---

Unique Subject Identifier=5016000000-0131

Assay variable : PTINR\_VAL1 PT-INR Value

N Mean Standard Deviation Minimum Maximum

---

|   |           |           |           |           |
|---|-----------|-----------|-----------|-----------|
| 3 | 2.2300000 | 0.1442221 | 2.0700000 | 2.3500000 |
|---|-----------|-----------|-----------|-----------|

---

Unique Subject Identifier=5016000000-0140

Assay variable : PTINR\_VAL1 PT-INR Value

N Mean Standard Deviation Minimum Maximum

---

|   |           |           |           |           |
|---|-----------|-----------|-----------|-----------|
| 3 | 2.2766667 | 0.7696969 | 1.7500000 | 3.1600000 |
|---|-----------|-----------|-----------|-----------|

---

Unique Subject Identifier=5016000000-0141

Assay variable : PTINR\_VAL1 PT-INR Value

N Mean Standard Deviation Minimum Maximum

---

|   |           |           |           |           |
|---|-----------|-----------|-----------|-----------|
| 3 | 1.9566667 | 0.4554485 | 1.4900000 | 2.4000000 |
|---|-----------|-----------|-----------|-----------|

---

Laboratory tests at the time of obtaining Table 2-6 consent, according to the presence or absence of proton-pump inhibitors

Unique Subject Identifier=5016000000-0148

MEANS Procedure

Assay variable : PTINR\_VAL1 PT-INR Value

N Mean Standard Deviation Minimum Maximum

---

|   |           |           |           |           |
|---|-----------|-----------|-----------|-----------|
| 3 | 2.4966667 | 0.8981277 | 1.7000000 | 3.4700000 |
|---|-----------|-----------|-----------|-----------|

---

Unique Subject Identifier=5016000000-0149

Assay variable : PTINR\_VAL1 PT-INR Value

N Mean Standard Deviation Minimum Maximum

---

|   |           |           |           |           |
|---|-----------|-----------|-----------|-----------|
| 3 | 2.3366667 | 0.7788667 | 1.8000000 | 3.2300000 |
|---|-----------|-----------|-----------|-----------|

---

Unique Subject Identifier=5016000000-0155

Assay variable : PTINR\_VAL1 PT-INR Value

N Mean Standard Deviation Minimum Maximum

---

|   |           |           |           |           |
|---|-----------|-----------|-----------|-----------|
| 5 | 1.8480000 | 0.1084896 | 1.6600000 | 1.9300000 |
|---|-----------|-----------|-----------|-----------|

---

Unique Subject Identifier=5016000000-0159

Assay variable : PTINR\_VAL1 PT-INR Value

N Mean Standard Deviation Minimum Maximum

---

|   |           |           |           |           |
|---|-----------|-----------|-----------|-----------|
| 3 | 2.0733333 | 0.3056687 | 1.7800000 | 2.3900000 |
|---|-----------|-----------|-----------|-----------|

---

Laboratory tests at the time of obtaining Table 2-6 consent, according to the presence or absence of proton-pump inhibitors

Unique Subject Identifier=501600000-0177

MEANS Procedure

Assay variable : PTINR\_VAL1 PT-INR Value

N Mean Standard Deviation Minimum Maximum

---

|   |           |           |           |           |
|---|-----------|-----------|-----------|-----------|
| 6 | 1.8883333 | 0.3213980 | 1.4900000 | 2.3000000 |
|---|-----------|-----------|-----------|-----------|

---

Unique Subject Identifier=501600000-0178

Assay variable : PTINR\_VAL1 PT-INR Value

N Mean Standard Deviation Minimum Maximum

---

|   |           |           |           |           |
|---|-----------|-----------|-----------|-----------|
| 4 | 2.1100000 | 0.2019901 | 1.9100000 | 2.3900000 |
|---|-----------|-----------|-----------|-----------|

---

Unique Subject Identifier=501600000-0179

Assay variable : PTINR\_VAL1 PT-INR Value

N Mean Standard Deviation Minimum Maximum

---

|   |           |           |           |           |
|---|-----------|-----------|-----------|-----------|
| 4 | 2.0625000 | 0.1426826 | 1.8500000 | 2.1500000 |
|---|-----------|-----------|-----------|-----------|

---

Unique Subject Identifier=501600000-0182



Assay variable : PTINR\_VAL1 PT-INR Value

N Mean Standard Deviation Minimum Maximum

---

|   |          |           |          |          |
|---|----------|-----------|----------|----------|
| 2 | 2.180000 | 0.0565685 | 2.140000 | 2.220000 |
|---|----------|-----------|----------|----------|

---

Laboratory tests at the time of obtaining Table 2-6 consent, according to the presence or absence of proton-pump inhibitors

Unique Subject Identifier=501600000-0184

MEANS Procedure

Assay variable : PTINR\_VAL1 PT-INR Value

N Mean Standard Deviation Minimum Maximum

---

|   |           |  |           |           |
|---|-----------|--|-----------|-----------|
| 1 | 1.4100000 |  | 1.4100000 | 1.4100000 |
|---|-----------|--|-----------|-----------|

---

Unique Subject Identifier=501600000-0187

Assay variable : PTINR\_VAL1 PT-INR Value

N Mean Standard Deviation Minimum Maximum

---

|   |           |           |           |           |
|---|-----------|-----------|-----------|-----------|
| 4 | 1.6200000 | 0.1089342 | 1.5300000 | 1.7500000 |
|---|-----------|-----------|-----------|-----------|

---

Unique Subject Identifier=501600000-0191

Assay variable : PTINR\_VAL1 PT-INR Value

N Mean Standard Deviation Minimum Maximum

---

|   |           |           |           |           |
|---|-----------|-----------|-----------|-----------|
| 3 | 2.0533333 | 0.1101514 | 1.9800000 | 2.1800000 |
|---|-----------|-----------|-----------|-----------|

---

Unique Subject Identifier=501600000-0207

Assay variable : PTINR\_VAL1 PT-INR Value

N Mean Standard Deviation Minimum Maximum

---

|   |           |           |           |           |
|---|-----------|-----------|-----------|-----------|
| 2 | 1.8150000 | 0.2757716 | 1.6200000 | 2.0100000 |
|---|-----------|-----------|-----------|-----------|

---

Laboratory tests at the time of obtaining Table 2-6 consent, according to the presence or absence of proton-pump inhibitors

Unique Subject Identifier=501600000-0211

MEANS Procedure

Assay variable : PTINR\_VAL1 PT-INR Value

N Mean Standard Deviation Minimum Maximum

---

|   |           |           |           |           |
|---|-----------|-----------|-----------|-----------|
| 6 | 2.3150000 | 0.7912206 | 1.6700000 | 3.8300000 |
|---|-----------|-----------|-----------|-----------|

---

Unique Subject Identifier=501600000-0222

Assay variable : PTINR\_VAL1 PT-INR Value

N Mean Standard Deviation Minimum Maximum

---

|   |           |           |           |           |
|---|-----------|-----------|-----------|-----------|
| 3 | 2.4900000 | 0.5367495 | 1.8800000 | 2.8900000 |
|---|-----------|-----------|-----------|-----------|

---

Unique Subject Identifier=501600000-0235

Assay variable : PTINR\_VAL1 PT-INR Value

N Mean Standard Deviation Minimum Maximum

---

|   |           |           |           |           |
|---|-----------|-----------|-----------|-----------|
| 6 | 2.0733333 | 0.6205052 | 1.5000000 | 3.2800000 |
|---|-----------|-----------|-----------|-----------|

---

Unique Subject Identifier=501600000-0237

Assay variable : PTINR\_VAL1 PT-INR Value

N Mean Standard Deviation Minimum Maximum

---

|   |           |           |           |           |
|---|-----------|-----------|-----------|-----------|
| 3 | 1.7733333 | 0.1607275 | 1.5900000 | 1.8900000 |
|---|-----------|-----------|-----------|-----------|

---

Laboratory tests at the time of obtaining Table 2-6 consent, according to the presence or absence of proton-pump inhibitors

Unique Subject Identifier=5016000000-0238

MEANS Procedure

Assay variable : PTINR\_VAL1 PT-INR Value

N Mean Standard Deviation Minimum Maximum

---

|   |           |           |           |           |
|---|-----------|-----------|-----------|-----------|
| 4 | 1.7250000 | 0.1206924 | 1.6400000 | 1.9000000 |
|---|-----------|-----------|-----------|-----------|

---

Unique Subject Identifier=5016000000-0240

Assay variable : PTINR\_VAL1 PT-INR Value

N Mean Standard Deviation Minimum Maximum

---

|   |           |           |           |           |
|---|-----------|-----------|-----------|-----------|
| 4 | 2.0850000 | 0.3399510 | 1.7500000 | 2.5500000 |
|---|-----------|-----------|-----------|-----------|

---

Unique Subject Identifier=5016000000-0241

Assay variable : PTINR\_VAL1 PT-INR Value

N Mean Standard Deviation Minimum Maximum

---

|   |           |           |           |           |
|---|-----------|-----------|-----------|-----------|
| 3 | 2.6233333 | 0.9609544 | 2.0000000 | 3.7300000 |
|---|-----------|-----------|-----------|-----------|

---

Unique Subject Identifier=5016000000-0244

Assay variable : PTINR\_VAL1 PT-INR Value

N Mean Standard Deviation Minimum Maximum

---

|   |           |           |           |           |
|---|-----------|-----------|-----------|-----------|
| 3 | 1.5933333 | 0.0680686 | 1.5400000 | 1.6700000 |
|---|-----------|-----------|-----------|-----------|

---

Laboratory tests at the time of obtaining Table 2-6 consent, according to the presence or absence of proton-pump inhibitors

Unique Subject Identifier=5016000000-0248

MEANS Procedure

Assay variable : PTINR\_VAL1 PT-INR Value

N Mean Standard Deviation Minimum Maximum

---

|   |           |           |           |           |
|---|-----------|-----------|-----------|-----------|
| 3 | 1.9166667 | 0.2685765 | 1.6100000 | 2.1100000 |
|---|-----------|-----------|-----------|-----------|

---

Unique Subject Identifier=5016000000-0249

Assay variable : PTINR\_VAL1 PT-INR Value

N Mean Standard Deviation Minimum Maximum

---

|   |           |           |           |           |
|---|-----------|-----------|-----------|-----------|
| 5 | 2.5460000 | 0.9822067 | 2.0500000 | 4.3000000 |
|---|-----------|-----------|-----------|-----------|

---

Unique Subject Identifier=5016000000-0252

Assay variable : PTINR\_VAL1 PT-INR Value

N Mean Standard Deviation Minimum Maximum

---

|   |           |           |           |           |
|---|-----------|-----------|-----------|-----------|
| 3 | 2.3000000 | 0.1153256 | 2.2100000 | 2.4300000 |
|---|-----------|-----------|-----------|-----------|

---

Unique Subject Identifier=5016000000-0258



Assay variable : PTINR\_VAL1 PT-INR Value

N Mean Standard Deviation Minimum Maximum

---

|   |          |  |          |          |
|---|----------|--|----------|----------|
| 1 | 2.180000 |  | 2.180000 | 2.180000 |
|---|----------|--|----------|----------|

---

Laboratory tests at the time of obtaining Table 2-6 consent, according to the presence or absence of proton-pump inhibitors

Unique Subject Identifier=5016000000-0263

MEANS Procedure

Assay variable : PTINR\_VAL1 PT-INR Value

N Mean Standard Deviation Minimum Maximum

---

|   |           |  |           |           |
|---|-----------|--|-----------|-----------|
| 1 | 1.4500000 |  | 1.4500000 | 1.4500000 |
|---|-----------|--|-----------|-----------|

---

Unique Subject Identifier=5016000000-0264

Assay variable : PTINR\_VAL1 PT-INR Value

N Mean Standard Deviation Minimum Maximum

---

|   |           |           |           |           |
|---|-----------|-----------|-----------|-----------|
| 4 | 2.0650000 | 0.1506652 | 1.9300000 | 2.2100000 |
|---|-----------|-----------|-----------|-----------|

---

Unique Subject Identifier=5016000000-0267

Assay variable : PTINR\_VAL1 PT-INR Value

N Mean Standard Deviation Minimum Maximum

---

|   |           |           |           |           |
|---|-----------|-----------|-----------|-----------|
| 5 | 1.8500000 | 0.4913247 | 1.4300000 | 2.6900000 |
|---|-----------|-----------|-----------|-----------|

---

Unique Subject Identifier=5016000000-0273

Assay variable : PTINR\_VAL1 PT-INR Value

N Mean Standard Deviation Minimum Maximum

---

|   |           |           |           |           |
|---|-----------|-----------|-----------|-----------|
| 3 | 1.6266667 | 0.8285731 | 0.6800000 | 2.2200000 |
|---|-----------|-----------|-----------|-----------|

---

Laboratory tests at the time of obtaining Table 2-6 consent, according to the presence or absence of proton-pump inhibitors

Unique Subject Identifier=5016000000-0275

MEANS Procedure

Assay variable : PTINR\_VAL1 PT-INR Value

N Mean Standard Deviation Minimum Maximum

---

|   |           |           |           |           |
|---|-----------|-----------|-----------|-----------|
| 3 | 2.0166667 | 0.0602771 | 1.9600000 | 2.0800000 |
|---|-----------|-----------|-----------|-----------|

---

Unique Subject Identifier=5016000000-0277

Assay variable : PTINR\_VAL1 PT-INR Value

N Mean Standard Deviation Minimum Maximum

---

|   |           |           |           |           |
|---|-----------|-----------|-----------|-----------|
| 3 | 2.0033333 | 0.1903506 | 1.8200000 | 2.2000000 |
|---|-----------|-----------|-----------|-----------|

---

Unique Subject Identifier=5016000000-0279

Assay variable : PTINR\_VAL1 PT-INR Value

N Mean Standard Deviation Minimum Maximum

---

|   |           |           |           |           |
|---|-----------|-----------|-----------|-----------|
| 2 | 2.1550000 | 0.8697413 | 1.5400000 | 2.7700000 |
|---|-----------|-----------|-----------|-----------|

---

Unique Subject Identifier=5016000000-0280

Assay variable : PTINR\_VAL1 PT-INR Value

N Mean Standard Deviation Minimum Maximum

---

|   |           |           |           |           |
|---|-----------|-----------|-----------|-----------|
| 2 | 1.2850000 | 0.3606245 | 1.0300000 | 1.5400000 |
|---|-----------|-----------|-----------|-----------|

---

Laboratory tests at the time of obtaining Table 2-6 consent, according to the presence or absence of proton-pump inhibitors

Unique Subject Identifier=5016000000-0282

MEANS Procedure

Assay variable : PTINR\_VAL1 PT-INR Value

N Mean Standard Deviation Minimum Maximum

---

|   |           |           |           |           |
|---|-----------|-----------|-----------|-----------|
| 2 | 2.1200000 | 0.0141421 | 2.1100000 | 2.1300000 |
|---|-----------|-----------|-----------|-----------|

---

Unique Subject Identifier=5016000000-0283

Assay variable : PTINR\_VAL1 PT-INR Value

N Mean Standard Deviation Minimum Maximum

---

|   |           |           |           |           |
|---|-----------|-----------|-----------|-----------|
| 3 | 1.9733333 | 0.1401190 | 1.8300000 | 2.1100000 |
|---|-----------|-----------|-----------|-----------|

---

Unique Subject Identifier=5016000000-0290

Assay variable : PTINR\_VAL1 PT-INR Value

N Mean Standard Deviation Minimum Maximum

---

|   |           |           |           |           |
|---|-----------|-----------|-----------|-----------|
| 4 | 2.8375000 | 0.6825626 | 2.0300000 | 3.7000000 |
|---|-----------|-----------|-----------|-----------|

---

Unique Subject Identifier=5016000000-0291

Assay variable : PTINR\_VAL1 PT-INR Value

N Mean Standard Deviation Minimum Maximum

---

|   |           |  |           |           |
|---|-----------|--|-----------|-----------|
| 1 | 1.0200000 |  | 1.0200000 | 1.0200000 |
|---|-----------|--|-----------|-----------|

---

Laboratory tests at the time of obtaining Table 2-6 consent, according to the presence or absence of proton-pump inhibitors

Unique Subject Identifier=5016000000-0295

MEANS Procedure

Assay variable : PTINR\_VAL1 PT-INR Value

N Mean Standard Deviation Minimum Maximum

---

|   |           |           |           |           |
|---|-----------|-----------|-----------|-----------|
| 3 | 1.5966667 | 0.0351188 | 1.5600000 | 1.6300000 |
|---|-----------|-----------|-----------|-----------|

---

Unique Subject Identifier=5016000000-0297

Assay variable : PTINR\_VAL1 PT-INR Value

N Mean Standard Deviation Minimum Maximum

---

|   |           |           |           |           |
|---|-----------|-----------|-----------|-----------|
| 4 | 1.4025000 | 0.1357387 | 1.2200000 | 1.5200000 |
|---|-----------|-----------|-----------|-----------|

---

Unique Subject Identifier=5016000000-0306

Assay variable : PTINR\_VAL1 PT-INR Value

N Mean Standard Deviation Minimum Maximum

---

|   |           |           |           |           |
|---|-----------|-----------|-----------|-----------|
| 2 | 1.5600000 | 0.0989949 | 1.4900000 | 1.6300000 |
|---|-----------|-----------|-----------|-----------|

---

Unique Subject Identifier=5016000000-0322



Assay variable : PTINR\_VAL1 PT-INR Value

N Mean Standard Deviation Minimum Maximum

---

|   |          |  |          |          |
|---|----------|--|----------|----------|
| 1 | 2.610000 |  | 2.610000 | 2.610000 |
|---|----------|--|----------|----------|

---

Laboratory tests at the time of obtaining Table 2-6 consent, according to the presence or absence of proton-pump inhibitors

Unique Subject Identifier=5016000000-0328

MEANS Procedure

Assay variable : PTINR\_VAL1 PT-INR Value

N Mean Standard Deviation Minimum Maximum

---

|   |           |           |           |           |
|---|-----------|-----------|-----------|-----------|
| 6 | 2.3616667 | 0.1689280 | 2.1000000 | 2.5500000 |
|---|-----------|-----------|-----------|-----------|

---

Unique Subject Identifier=5016000000-0330

Assay variable : PTINR\_VAL1 PT-INR Value

N Mean Standard Deviation Minimum Maximum

---

|   |           |  |           |           |
|---|-----------|--|-----------|-----------|
| 1 | 2.1900000 |  | 2.1900000 | 2.1900000 |
|---|-----------|--|-----------|-----------|

---

Unique Subject Identifier=5016000000-0333

Assay variable : PTINR\_VAL1 PT-INR Value

N Mean Standard Deviation Minimum Maximum

---

|   |           |           |           |           |
|---|-----------|-----------|-----------|-----------|
| 3 | 2.8833333 | 0.3910669 | 2.5100000 | 3.2900000 |
|---|-----------|-----------|-----------|-----------|

---

Unique Subject Identifier=5016000000-0335

Assay variable : PTINR\_VAL1 PT-INR Value

N Mean Standard Deviation Minimum Maximum

---

|   |           |           |           |           |
|---|-----------|-----------|-----------|-----------|
| 3 | 2.3833333 | 0.2631223 | 2.0800000 | 2.5500000 |
|---|-----------|-----------|-----------|-----------|

---

Laboratory tests at the time of obtaining Table 2-6 consent, according to the presence or absence of proton-pump inhibitors

Unique Subject Identifier=5016000000-0337

MEANS Procedure

Assay variable : PTINR\_VAL1 PT-INR Value

| N | Mean      | Standard Deviation | Minimum   | Maximum   |
|---|-----------|--------------------|-----------|-----------|
| 2 | 1.9450000 | 0.2474874          | 1.7700000 | 2.1200000 |

Unique Subject Identifier=5017011110-0005

Assay variable : PTINR\_VAL1 PT-INR Value

| N | Mean      | Standard Deviation | Minimum   | Maximum   |
|---|-----------|--------------------|-----------|-----------|
| 2 | 2.5000000 | 0.4242641          | 2.2000000 | 2.8000000 |

Unique Subject Identifier=5017011110-0012

Assay variable : PTINR\_VAL1 PT-INR Value

| N | Mean      | Standard Deviation | Minimum   | Maximum   |
|---|-----------|--------------------|-----------|-----------|
| 4 | 2.1050000 | 0.2563201          | 1.7900000 | 2.3900000 |

Unique Subject Identifier=5017011110-0017

Assay variable : PTINR\_VAL1 PT-INR Value

N Mean Standard Deviation Minimum Maximum

---

|   |           |           |           |           |
|---|-----------|-----------|-----------|-----------|
| 6 | 1.4250000 | 0.1671825 | 1.2400000 | 1.7000000 |
|---|-----------|-----------|-----------|-----------|

---

Laboratory tests at the time of obtaining Table 2-6 consent, according to the presence or absence of proton-pump inhibitors

Unique Subject Identifier=5017011110-0021

MEANS Procedure

Assay variable : PTINR\_VAL1 PT-INR Value

N Mean Standard Deviation Minimum Maximum

---

|   |           |           |           |           |
|---|-----------|-----------|-----------|-----------|
| 5 | 1.9860000 | 0.2021880 | 1.8300000 | 2.3400000 |
|---|-----------|-----------|-----------|-----------|

---

Unique Subject Identifier=5020011000-0010

Assay variable : PTINR\_VAL1 PT-INR Value

N Mean Standard Deviation Minimum Maximum

---

|   |           |           |           |           |
|---|-----------|-----------|-----------|-----------|
| 3 | 2.5300000 | 0.7458552 | 2.0600000 | 3.3900000 |
|---|-----------|-----------|-----------|-----------|

---

Unique Subject Identifier=5020011000-0012

Assay variable : PTINR\_VAL1 PT-INR Value

N Mean Standard Deviation Minimum Maximum

---

|   |           |           |           |           |
|---|-----------|-----------|-----------|-----------|
| 3 | 2.1766667 | 0.2709859 | 1.9200000 | 2.4600000 |
|---|-----------|-----------|-----------|-----------|

---

Unique Subject Identifier=5020011000-0013

Assay variable : PTINR\_VAL1 PT-INR Value

N Mean Standard Deviation Minimum Maximum

---

|   |          |          |          |          |
|---|----------|----------|----------|----------|
| 3 | 1.850000 | 0.270555 | 1.590000 | 2.130000 |
|---|----------|----------|----------|----------|

---

Laboratory tests at the time of obtaining Table 2-6 consent, according to the presence or absence of proton-pump inhibitors

Unique Subject Identifier=5020011000-0021

MEANS Procedure

Assay variable : PTINR\_VAL1 PT-INR Value

N Mean Standard Deviation Minimum Maximum

---

|   |           |           |           |           |
|---|-----------|-----------|-----------|-----------|
| 3 | 2.0766667 | 0.2119748 | 1.8500000 | 2.2700000 |
|---|-----------|-----------|-----------|-----------|

---

Unique Subject Identifier=5020011000-0025

Assay variable : PTINR\_VAL1 PT-INR Value

N Mean Standard Deviation Minimum Maximum

---

|   |           |           |           |           |
|---|-----------|-----------|-----------|-----------|
| 3 | 1.8966667 | 0.6645550 | 1.3600000 | 2.6400000 |
|---|-----------|-----------|-----------|-----------|

---

Unique Subject Identifier=5021011111-0028

Assay variable : PTINR\_VAL1 PT-INR Value

N Mean Standard Deviation Minimum Maximum

---

|   |           |           |           |           |
|---|-----------|-----------|-----------|-----------|
| 6 | 2.1150000 | 0.2025586 | 1.9400000 | 2.5100000 |
|---|-----------|-----------|-----------|-----------|

---

Unique Subject Identifier=5021011111-0032



Assay variable : PTINR\_VAL1 PT-INR Value

N Mean Standard Deviation Minimum Maximum

---

|   |          |           |          |          |
|---|----------|-----------|----------|----------|
| 5 | 2.412000 | 0.2942278 | 2.100000 | 2.880000 |
|---|----------|-----------|----------|----------|

---

Laboratory tests at the time of obtaining Table 2-6 consent, according to the presence or absence of proton-pump inhibitors

Unique Subject Identifier=5021011111-0036

MEANS Procedure

Assay variable : PTINR\_VAL1 PT-INR Value

N Mean Standard Deviation Minimum Maximum

---

|   |           |           |           |           |
|---|-----------|-----------|-----------|-----------|
| 4 | 2.4425000 | 0.2789713 | 2.1500000 | 2.7100000 |
|---|-----------|-----------|-----------|-----------|

---

Unique Subject Identifier=5021011111-0040

Assay variable : PTINR\_VAL1 PT-INR Value

N Mean Standard Deviation Minimum Maximum

---

|   |           |           |           |           |
|---|-----------|-----------|-----------|-----------|
| 3 | 2.0500000 | 0.1513275 | 1.8800000 | 2.1700000 |
|---|-----------|-----------|-----------|-----------|

---

Unique Subject Identifier=5021011111-0045

Assay variable : PTINR\_VAL1 PT-INR Value

N Mean Standard Deviation Minimum Maximum

---

|   |           |           |           |           |
|---|-----------|-----------|-----------|-----------|
| 4 | 1.4300000 | 0.4081666 | 0.9600000 | 1.8500000 |
|---|-----------|-----------|-----------|-----------|

---

Unique Subject Identifier=5021011111-0050

Assay variable : PTINR\_VAL1 PT-INR Value

N Mean Standard Deviation Minimum Maximum

---

|   |          |           |          |          |
|---|----------|-----------|----------|----------|
| 3 | 1.820000 | 0.1053565 | 1.720000 | 1.930000 |
|---|----------|-----------|----------|----------|

---

Laboratory tests at the time of obtaining Table 2-6 consent, according to the presence or absence of proton-pump inhibitors

Unique Subject Identifier=502400000-0001

MEANS Procedure

Assay variable : PTINR\_VAL1 PT-INR Value

| N | Mean     | Standard Deviation | Minimum  | Maximum  |
|---|----------|--------------------|----------|----------|
| 2 | 1.720000 | 0.1697056          | 1.600000 | 1.840000 |

Unique Subject Identifier=5025000100-0007

Assay variable : PTINR\_VAL1 PT-INR Value

| N | Mean     | Standard Deviation | Minimum  | Maximum  |
|---|----------|--------------------|----------|----------|
| 6 | 2.365000 | 0.4174087          | 1.980000 | 3.110000 |

Unique Subject Identifier=5026101000-0001

Assay variable : PTINR\_VAL1 PT-INR Value

| N | Mean     | Standard Deviation | Minimum  | Maximum  |
|---|----------|--------------------|----------|----------|
| 4 | 1.835000 | 0.1340398          | 1.730000 | 2.030000 |

Unique Subject Identifier=5026101000-0006

Assay variable : PTINR\_VAL1 PT-INR Value

N Mean Standard Deviation Minimum Maximum

---

|   |           |           |           |           |
|---|-----------|-----------|-----------|-----------|
| 6 | 2.0266667 | 0.3228416 | 1.5800000 | 2.4300000 |
|---|-----------|-----------|-----------|-----------|

---

Laboratory tests at the time of obtaining Table 2-6 consent, according to the presence or absence of proton-pump inhibitors

Unique Subject Identifier=5026101000-0007

MEANS Procedure

Assay variable : PTINR\_VAL1 PT-INR Value

| N | Mean      | Standard Deviation | Minimum   | Maximum   |
|---|-----------|--------------------|-----------|-----------|
| 3 | 1.7766667 | 0.2600641          | 1.5200000 | 2.0400000 |

Unique Subject Identifier=5026101000-0014

Assay variable : PTINR\_VAL1 PT-INR Value

| N | Mean      | Standard Deviation | Minimum   | Maximum   |
|---|-----------|--------------------|-----------|-----------|
| 5 | 2.2200000 | 0.2930017          | 1.9000000 | 2.6200000 |

Unique Subject Identifier=5026101000-0019

Assay variable : PTINR\_VAL1 PT-INR Value

| N | Mean      | Standard Deviation | Minimum   | Maximum   |
|---|-----------|--------------------|-----------|-----------|
| 5 | 2.3420000 | 0.3293478          | 1.9400000 | 2.8100000 |

Unique Subject Identifier=5026101000-0024

Assay variable : PTINR\_VAL1 PT-INR Value

N Mean Standard Deviation Minimum Maximum

---

|   |           |           |           |           |
|---|-----------|-----------|-----------|-----------|
| 4 | 1.5175000 | 0.3023657 | 1.2100000 | 1.8200000 |
|---|-----------|-----------|-----------|-----------|

---

Laboratory tests at the time of obtaining Table 2-6 consent, according to the presence or absence of proton-pump inhibitors

Unique Subject Identifier=5026101000-0038

MEANS Procedure

Assay variable : PTINR\_VAL1 PT-INR Value

N Mean Standard Deviation Minimum Maximum

---

|   |           |           |           |           |
|---|-----------|-----------|-----------|-----------|
| 4 | 2.0675000 | 0.1481834 | 1.8700000 | 2.2000000 |
|---|-----------|-----------|-----------|-----------|

---

Unique Subject Identifier=5026101000-0050

Assay variable : PTINR\_VAL1 PT-INR Value

N Mean Standard Deviation Minimum Maximum

---

|   |           |           |           |           |
|---|-----------|-----------|-----------|-----------|
| 3 | 2.3033333 | 0.5601190 | 1.9700000 | 2.9500000 |
|---|-----------|-----------|-----------|-----------|

---

Unique Subject Identifier=5026101000-0063

Assay variable : PTINR\_VAL1 PT-INR Value

N Mean Standard Deviation Minimum Maximum

---

|   |           |           |           |           |
|---|-----------|-----------|-----------|-----------|
| 3 | 1.7033333 | 0.1101514 | 1.6300000 | 1.8300000 |
|---|-----------|-----------|-----------|-----------|

---

Unique Subject Identifier=5026101000-0089



Assay variable : PTINR\_VAL1 PT-INR Value

N Mean Standard Deviation Minimum Maximum

---

|   |          |           |          |          |
|---|----------|-----------|----------|----------|
| 4 | 1.520000 | 0.1516575 | 1.360000 | 1.690000 |
|---|----------|-----------|----------|----------|

---

Laboratory tests at the time of obtaining Table 2-6 consent, according to the presence or absence of proton-pump inhibitors

Unique Subject Identifier=5026101000-0095

MEANS Procedure

Assay variable : PTINR\_VAL1 PT-INR Value

N Mean Standard Deviation Minimum Maximum

---

|   |           |           |           |           |
|---|-----------|-----------|-----------|-----------|
| 2 | 1.8750000 | 0.1484924 | 1.7700000 | 1.9800000 |
|---|-----------|-----------|-----------|-----------|

---

Unique Subject Identifier=5026101000-0096

Assay variable : PTINR\_VAL1 PT-INR Value

N Mean Standard Deviation Minimum Maximum

---

|   |           |           |           |           |
|---|-----------|-----------|-----------|-----------|
| 3 | 2.1033333 | 0.1193035 | 2.0200000 | 2.2400000 |
|---|-----------|-----------|-----------|-----------|

---

Unique Subject Identifier=5026101000-0105

Assay variable : PTINR\_VAL1 PT-INR Value

N Mean Standard Deviation Minimum Maximum

---

|   |           |           |           |           |
|---|-----------|-----------|-----------|-----------|
| 4 | 2.4200000 | 0.1718527 | 2.2200000 | 2.6400000 |
|---|-----------|-----------|-----------|-----------|

---

Unique Subject Identifier=5026101000-0107

Assay variable : PTINR\_VAL1 PT-INR Value

N Mean Standard Deviation Minimum Maximum

---

|   |           |  |           |           |
|---|-----------|--|-----------|-----------|
| 1 | 1.3000000 |  | 1.3000000 | 1.3000000 |
|---|-----------|--|-----------|-----------|

---

Laboratory tests at the time of obtaining Table 2-6 consent, according to the presence or absence of proton-pump inhibitors

Unique Subject Identifier=5026101000-0118

MEANS Procedure

Assay variable : PTINR\_VAL1 PT-INR Value

N Mean Standard Deviation Minimum Maximum

---

|   |           |           |           |           |
|---|-----------|-----------|-----------|-----------|
| 5 | 2.5160000 | 0.5725644 | 1.7600000 | 3.3500000 |
|---|-----------|-----------|-----------|-----------|

---

Unique Subject Identifier=5027000100-0006

Assay variable : PTINR\_VAL1 PT-INR Value

N Mean Standard Deviation Minimum Maximum

---

|   |           |           |           |           |
|---|-----------|-----------|-----------|-----------|
| 6 | 2.2366667 | 0.3651666 | 1.6000000 | 2.6400000 |
|---|-----------|-----------|-----------|-----------|

---

Unique Subject Identifier=5030010000-0007

Assay variable : PTINR\_VAL1 PT-INR Value

N Mean Standard Deviation Minimum Maximum

---

|   |           |           |           |           |
|---|-----------|-----------|-----------|-----------|
| 5 | 1.7780000 | 0.3134007 | 1.2200000 | 1.9600000 |
|---|-----------|-----------|-----------|-----------|

---

Unique Subject Identifier=5030010000-0009

Assay variable : PTINR\_VAL1 PT-INR Value

N Mean Standard Deviation Minimum Maximum

---

|   |           |           |           |           |
|---|-----------|-----------|-----------|-----------|
| 6 | 1.7266667 | 0.1522717 | 1.4700000 | 1.8600000 |
|---|-----------|-----------|-----------|-----------|

---

Laboratory tests at the time of obtaining Table 2-6 consent, according to the presence or absence of proton-pump inhibitors

Unique Subject Identifier=5030010000-0014

MEANS Procedure

Assay variable : PTINR\_VAL1 PT-INR Value

N Mean Standard Deviation Minimum Maximum

---

|   |           |           |           |           |
|---|-----------|-----------|-----------|-----------|
| 6 | 2.0733333 | 0.7299224 | 1.4100000 | 3.2000000 |
|---|-----------|-----------|-----------|-----------|

---

Unique Subject Identifier=5030010000-0026

Assay variable : PTINR\_VAL1 PT-INR Value

N Mean Standard Deviation Minimum Maximum

---

|   |           |           |           |           |
|---|-----------|-----------|-----------|-----------|
| 5 | 1.8320000 | 0.3149921 | 1.6500000 | 2.3900000 |
|---|-----------|-----------|-----------|-----------|

---

Unique Subject Identifier=5030010000-0036

Assay variable : PTINR\_VAL1 PT-INR Value

N Mean Standard Deviation Minimum Maximum

---

|   |           |           |           |           |
|---|-----------|-----------|-----------|-----------|
| 6 | 1.7983333 | 0.4104347 | 1.2800000 | 2.4600000 |
|---|-----------|-----------|-----------|-----------|

---

Unique Subject Identifier=5030010000-0037

Assay variable : PTINR\_VAL1 PT-INR Value

N Mean Standard Deviation Minimum Maximum

---

|   |           |           |           |           |
|---|-----------|-----------|-----------|-----------|
| 6 | 2.2283333 | 0.3453356 | 1.8900000 | 2.8400000 |
|---|-----------|-----------|-----------|-----------|

---

Laboratory tests at the time of obtaining Table 2-6 consent, according to the presence or absence of proton-pump inhibitors

Unique Subject Identifier=5030010000-0038

MEANS Procedure

Assay variable : PTINR\_VAL1 PT-INR Value

| N | Mean      | Standard Deviation | Minimum   | Maximum   |
|---|-----------|--------------------|-----------|-----------|
| 1 | 2.8100000 |                    | 2.8100000 | 2.8100000 |

Unique Subject Identifier=5030010000-0039

Assay variable : PTINR\_VAL1 PT-INR Value

| N | Mean      | Standard Deviation | Minimum   | Maximum   |
|---|-----------|--------------------|-----------|-----------|
| 5 | 1.6400000 | 0.2021138          | 1.3600000 | 1.8500000 |

Unique Subject Identifier=5030010000-0040

Assay variable : PTINR\_VAL1 PT-INR Value

| N | Mean      | Standard Deviation | Minimum   | Maximum   |
|---|-----------|--------------------|-----------|-----------|
| 6 | 1.7150000 | 0.2550882          | 1.5000000 | 2.1900000 |

Unique Subject Identifier=5030010000-0049



Assay variable : PTINR\_VAL1 PT-INR Value

N Mean Standard Deviation Minimum Maximum

---

|   |           |           |           |           |
|---|-----------|-----------|-----------|-----------|
| 4 | 1.9925000 | 0.2573422 | 1.6800000 | 2.2800000 |
|---|-----------|-----------|-----------|-----------|

---

Laboratory tests at the time of obtaining Table 2-6 consent, according to the presence or absence of proton-pump inhibitors

Unique Subject Identifier=5030010000-0052

MEANS Procedure

Assay variable : PTINR\_VAL1 PT-INR Value

| N | Mean      | Standard Deviation | Minimum   | Maximum   |
|---|-----------|--------------------|-----------|-----------|
| 6 | 1.9466667 | 0.2022540          | 1.7000000 | 2.2400000 |

Unique Subject Identifier=5030010000-0054

Assay variable : PTINR\_VAL1 PT-INR Value

| N | Mean      | Standard Deviation | Minimum   | Maximum   |
|---|-----------|--------------------|-----------|-----------|
| 5 | 1.8960000 | 0.1393915          | 1.7500000 | 2.0600000 |

Unique Subject Identifier=5030010000-0055

Assay variable : PTINR\_VAL1 PT-INR Value

| N | Mean      | Standard Deviation | Minimum   | Maximum   |
|---|-----------|--------------------|-----------|-----------|
| 1 | 1.6300000 |                    | 1.6300000 | 1.6300000 |

Unique Subject Identifier=5030010000-0058

Assay variable : PTINR\_VAL1 PT-INR Value

N Mean Standard Deviation Minimum Maximum

---

|   |          |           |          |          |
|---|----------|-----------|----------|----------|
| 2 | 1.800000 | 0.4242641 | 1.500000 | 2.100000 |
|---|----------|-----------|----------|----------|

---

Laboratory tests at the time of obtaining Table 2-6 consent, according to the presence or absence of proton-pump inhibitors

Unique Subject Identifier=5031111000-0019

MEANS Procedure

Assay variable : PTINR\_VAL1 PT-INR Value

| N | Mean      | Standard Deviation | Minimum   | Maximum   |
|---|-----------|--------------------|-----------|-----------|
| 3 | 1.8766667 | 0.1457166          | 1.7400000 | 2.0300000 |

Unique Subject Identifier=5033000000-0001

Assay variable : PTINR\_VAL1 PT-INR Value

| N | Mean      | Standard Deviation | Minimum   | Maximum   |
|---|-----------|--------------------|-----------|-----------|
| 3 | 1.8100000 | 0.3732292          | 1.4900000 | 2.2200000 |

Unique Subject Identifier=5034000010-0018

Assay variable : PTINR\_VAL1 PT-INR Value

| N | Mean      | Standard Deviation | Minimum   | Maximum   |
|---|-----------|--------------------|-----------|-----------|
| 4 | 1.4850000 | 0.2444722          | 1.2600000 | 1.7800000 |

Unique Subject Identifier=5035010010-0001

Assay variable : PTINR\_VAL1 PT-INR Value

N Mean Standard Deviation Minimum Maximum

---

|   |          |           |          |          |
|---|----------|-----------|----------|----------|
| 2 | 2.060000 | 0.0282843 | 2.040000 | 2.080000 |
|---|----------|-----------|----------|----------|

---

Laboratory tests at the time of obtaining Table 2-6 consent, according to the presence or absence of proton-pump inhibitors

Unique Subject Identifier=5035010010-0003

MEANS Procedure

Assay variable : PTINR\_VAL1 PT-INR Value

| N | Mean      | Standard Deviation | Minimum   | Maximum   |
|---|-----------|--------------------|-----------|-----------|
| 3 | 1.9300000 | 0.3340659          | 1.5700000 | 2.2300000 |

Unique Subject Identifier=5035010010-0008

Assay variable : PTINR\_VAL1 PT-INR Value

| N | Mean      | Standard Deviation | Minimum   | Maximum   |
|---|-----------|--------------------|-----------|-----------|
| 4 | 1.7075000 | 0.5095995          | 1.3300000 | 2.4600000 |

Unique Subject Identifier=5035010010-0017

Assay variable : PTINR\_VAL1 PT-INR Value

| N | Mean      | Standard Deviation | Minimum   | Maximum   |
|---|-----------|--------------------|-----------|-----------|
| 1 | 2.2300000 |                    | 2.2300000 | 2.2300000 |

Unique Subject Identifier=5035010010-0018

Assay variable : PTINR\_VAL1 PT-INR Value

N Mean Standard Deviation Minimum Maximum

---

|   |           |           |           |           |
|---|-----------|-----------|-----------|-----------|
| 4 | 2.1350000 | 0.1554563 | 2.0000000 | 2.3300000 |
|---|-----------|-----------|-----------|-----------|

---

Laboratory tests at the time of obtaining Table 2-6 consent, according to the presence or absence of proton-pump inhibitors

Unique Subject Identifier=5035010010-0041

MEANS Procedure

Assay variable : PTINR\_VAL1 PT-INR Value

| N | Mean      | Standard Deviation | Minimum   | Maximum   |
|---|-----------|--------------------|-----------|-----------|
| 5 | 2.1840000 | 0.5774340          | 1.2200000 | 2.6300000 |

Unique Subject Identifier=5035010010-0044

Assay variable : PTINR\_VAL1 PT-INR Value

| N | Mean      | Standard Deviation | Minimum   | Maximum   |
|---|-----------|--------------------|-----------|-----------|
| 6 | 2.2566667 | 0.9109482          | 1.6000000 | 4.0800000 |

Unique Subject Identifier=5035010010-0056

Assay variable : PTINR\_VAL1 PT-INR Value

| N | Mean      | Standard Deviation | Minimum   | Maximum   |
|---|-----------|--------------------|-----------|-----------|
| 3 | 2.3366667 | 0.2203028          | 2.1100000 | 2.5500000 |

Unique Subject Identifier=5036010000-0013



Assay variable : PTINR\_VAL1 PT-INR Value

N Mean Standard Deviation Minimum Maximum

---

|   |           |           |           |           |
|---|-----------|-----------|-----------|-----------|
| 6 | 1.1466667 | 0.2329521 | 0.9300000 | 1.5400000 |
|---|-----------|-----------|-----------|-----------|

---

Laboratory tests at the time of obtaining Table 2-6 consent, according to the presence or absence of proton-pump inhibitors

Unique Subject Identifier=5036010000-0026

MEANS Procedure

Assay variable : PTINR\_VAL1 PT-INR Value

N Mean Standard Deviation Minimum Maximum

---

|   |           |           |           |           |
|---|-----------|-----------|-----------|-----------|
| 4 | 1.8500000 | 0.0621825 | 1.8000000 | 1.9400000 |
|---|-----------|-----------|-----------|-----------|

---

Unique Subject Identifier=5036010000-0039

Assay variable : PTINR\_VAL1 PT-INR Value

N Mean Standard Deviation Minimum Maximum

---

|   |           |           |           |           |
|---|-----------|-----------|-----------|-----------|
| 4 | 1.7600000 | 0.2146315 | 1.5800000 | 2.0700000 |
|---|-----------|-----------|-----------|-----------|

---

Unique Subject Identifier=5036010000-0054

Assay variable : PTINR\_VAL1 PT-INR Value

N Mean Standard Deviation Minimum Maximum

---

|   |           |           |           |           |
|---|-----------|-----------|-----------|-----------|
| 6 | 2.1000000 | 0.1555635 | 1.8900000 | 2.3000000 |
|---|-----------|-----------|-----------|-----------|

---

Unique Subject Identifier=5036010000-0055

Assay variable : PTINR\_VAL1 PT-INR Value

N Mean Standard Deviation Minimum Maximum

---

|   |           |           |           |           |
|---|-----------|-----------|-----------|-----------|
| 4 | 1.8000000 | 0.2293469 | 1.5000000 | 2.0500000 |
|---|-----------|-----------|-----------|-----------|

---

Laboratory tests at the time of obtaining Table 2-6 consent, according to the presence or absence of proton-pump inhibitors

Unique Subject Identifier=5037010000-0002

MEANS Procedure

Assay variable : PTINR\_VAL1 PT-INR Value

N Mean Standard Deviation Minimum Maximum

---

|   |           |  |           |           |
|---|-----------|--|-----------|-----------|
| 1 | 1.4600000 |  | 1.4600000 | 1.4600000 |
|---|-----------|--|-----------|-----------|

---

Unique Subject Identifier=5037010000-0007

Assay variable : PTINR\_VAL1 PT-INR Value

N Mean Standard Deviation Minimum Maximum

---

|   |           |  |           |           |
|---|-----------|--|-----------|-----------|
| 1 | 1.2000000 |  | 1.2000000 | 1.2000000 |
|---|-----------|--|-----------|-----------|

---

Unique Subject Identifier=5037010000-0026

Assay variable : PTINR\_VAL1 PT-INR Value

N Mean Standard Deviation Minimum Maximum

---

|   |           |           |           |           |
|---|-----------|-----------|-----------|-----------|
| 2 | 1.5150000 | 0.1909188 | 1.3800000 | 1.6500000 |
|---|-----------|-----------|-----------|-----------|

---

Unique Subject Identifier=5037010000-0039

Assay variable : PTINR\_VAL1 PT-INR Value

N Mean Standard Deviation Minimum Maximum

---

|   |           |  |           |           |
|---|-----------|--|-----------|-----------|
| 1 | 3.0300000 |  | 3.0300000 | 3.0300000 |
|---|-----------|--|-----------|-----------|

---

Laboratory tests at the time of obtaining Table 2-6 consent, according to the presence or absence of proton-pump inhibitors

Unique Subject Identifier=5040011000-0001

MEANS Procedure

Assay variable : PTINR\_VAL1 PT-INR Value

N Mean Standard Deviation Minimum Maximum

---

|   |           |           |           |           |
|---|-----------|-----------|-----------|-----------|
| 4 | 2.4025000 | 0.1830073 | 2.1400000 | 2.5600000 |
|---|-----------|-----------|-----------|-----------|

---

Unique Subject Identifier=5040011000-0004

Assay variable : PTINR\_VAL1 PT-INR Value

N Mean Standard Deviation Minimum Maximum

---

|   |           |           |           |           |
|---|-----------|-----------|-----------|-----------|
| 2 | 1.8000000 | 0.1272792 | 1.7100000 | 1.8900000 |
|---|-----------|-----------|-----------|-----------|

---

Unique Subject Identifier=5040011000-0007

Assay variable : PTINR\_VAL1 PT-INR Value

N Mean Standard Deviation Minimum Maximum

---

|   |           |           |           |           |
|---|-----------|-----------|-----------|-----------|
| 4 | 1.3375000 | 0.1081280 | 1.2100000 | 1.4500000 |
|---|-----------|-----------|-----------|-----------|

---

Unique Subject Identifier=5040011000-0015

Assay variable : PTINR\_VAL1 PT-INR Value

N Mean Standard Deviation Minimum Maximum

---

|   |           |           |           |           |
|---|-----------|-----------|-----------|-----------|
| 5 | 1.9920000 | 0.3459335 | 1.6000000 | 2.5200000 |
|---|-----------|-----------|-----------|-----------|

---

Laboratory tests at the time of obtaining Table 2-6 consent, according to the presence or absence of proton-pump inhibitors

Unique Subject Identifier=5041011000-0008

MEANS Procedure

Assay variable : PTINR\_VAL1 PT-INR Value

N Mean Standard Deviation Minimum Maximum

---

|   |           |           |           |           |
|---|-----------|-----------|-----------|-----------|
| 6 | 1.8900000 | 0.5465528 | 1.3800000 | 2.5900000 |
|---|-----------|-----------|-----------|-----------|

---

Unique Subject Identifier=5044000000-0002

Assay variable : PTINR\_VAL1 PT-INR Value

N Mean Standard Deviation Minimum Maximum

---

|   |           |           |           |           |
|---|-----------|-----------|-----------|-----------|
| 6 | 1.7016667 | 0.6760301 | 1.0900000 | 2.6400000 |
|---|-----------|-----------|-----------|-----------|

---

Unique Subject Identifier=5044000000-0016

Assay variable : PTINR\_VAL1 PT-INR Value

N Mean Standard Deviation Minimum Maximum

---

|   |           |           |           |           |
|---|-----------|-----------|-----------|-----------|
| 5 | 2.0000000 | 0.2738613 | 1.7000000 | 2.4000000 |
|---|-----------|-----------|-----------|-----------|

---

Unique Subject Identifier=5044000000-0021



Assay variable : PTINR\_VAL1 PT-INR Value

N Mean Standard Deviation Minimum Maximum

---

|   |          |           |          |          |
|---|----------|-----------|----------|----------|
| 5 | 2.114000 | 0.3083504 | 1.790000 | 2.560000 |
|---|----------|-----------|----------|----------|

---

Laboratory tests at the time of obtaining Table 2-6 consent, according to the presence or absence of proton-pump inhibitors

Unique Subject Identifier=5044000000-0026

MEANS Procedure

Assay variable : PTINR\_VAL1 PT-INR Value

N Mean Standard Deviation Minimum Maximum

---

|   |           |           |           |           |
|---|-----------|-----------|-----------|-----------|
| 3 | 2.3133333 | 0.3050137 | 2.0100000 | 2.6200000 |
|---|-----------|-----------|-----------|-----------|

---

Unique Subject Identifier=5044000000-0038

Assay variable : PTINR\_VAL1 PT-INR Value

N Mean Standard Deviation Minimum Maximum

---

|   |           |           |           |           |
|---|-----------|-----------|-----------|-----------|
| 4 | 2.2325000 | 0.3142584 | 1.8600000 | 2.5800000 |
|---|-----------|-----------|-----------|-----------|

---

Unique Subject Identifier=5044000000-0044

Assay variable : PTINR\_VAL1 PT-INR Value

N Mean Standard Deviation Minimum Maximum

---

|   |           |           |           |           |
|---|-----------|-----------|-----------|-----------|
| 5 | 2.2780000 | 0.5363488 | 1.5900000 | 2.9700000 |
|---|-----------|-----------|-----------|-----------|

---

Unique Subject Identifier=5044000000-0053

Assay variable : PTINR\_VAL1 PT-INR Value

N Mean Standard Deviation Minimum Maximum

---

|   |           |           |           |           |
|---|-----------|-----------|-----------|-----------|
| 5 | 1.9900000 | 0.3931921 | 1.3500000 | 2.4300000 |
|---|-----------|-----------|-----------|-----------|

---

Laboratory tests at the time of obtaining Table 2-6 consent, according to the presence or absence of proton-pump inhibitors

Unique Subject Identifier=5045010110-0011

MEANS Procedure

Assay variable : PTINR\_VAL1 PT-INR Value

N Mean Standard Deviation Minimum Maximum

---

|   |           |           |           |           |
|---|-----------|-----------|-----------|-----------|
| 4 | 1.8250000 | 0.1968925 | 1.5700000 | 1.9900000 |
|---|-----------|-----------|-----------|-----------|

---

Unique Subject Identifier=5046010000-0035

Assay variable : PTINR\_VAL1 PT-INR Value

N Mean Standard Deviation Minimum Maximum

---

|   |           |           |           |           |
|---|-----------|-----------|-----------|-----------|
| 6 | 2.1500000 | 1.1623253 | 1.1000000 | 4.1000000 |
|---|-----------|-----------|-----------|-----------|

---

Unique Subject Identifier=5047000010-0003

Assay variable : PTINR\_VAL1 PT-INR Value

N Mean Standard Deviation Minimum Maximum

---

|   |           |           |           |           |
|---|-----------|-----------|-----------|-----------|
| 4 | 1.6425000 | 0.1372042 | 1.5100000 | 1.7800000 |
|---|-----------|-----------|-----------|-----------|

---

Unique Subject Identifier=5047000010-0004

Assay variable : PTINR\_VAL1 PT-INR Value

N Mean Standard Deviation Minimum Maximum

---

|   |           |           |           |           |
|---|-----------|-----------|-----------|-----------|
| 3 | 1.5266667 | 0.1342882 | 1.4300000 | 1.6800000 |
|---|-----------|-----------|-----------|-----------|

---

Laboratory tests at the time of obtaining Table 2-6 consent, according to the presence or absence of proton-pump inhibitors

Unique Subject Identifier=5047000010-0012

MEANS Procedure

Assay variable : PTINR\_VAL1 PT-INR Value

N Mean Standard Deviation Minimum Maximum

---

|   |           |           |           |           |
|---|-----------|-----------|-----------|-----------|
| 4 | 2.2000000 | 0.1714643 | 2.0500000 | 2.4400000 |
|---|-----------|-----------|-----------|-----------|

---

Unique Subject Identifier=5048011000-0006

Assay variable : PTINR\_VAL1 PT-INR Value

N Mean Standard Deviation Minimum Maximum

---

|   |           |           |           |           |
|---|-----------|-----------|-----------|-----------|
| 5 | 2.1380000 | 0.2873500 | 1.8900000 | 2.5500000 |
|---|-----------|-----------|-----------|-----------|

---

Unique Subject Identifier=5048011000-0008

Assay variable : PTINR\_VAL1 PT-INR Value

N Mean Standard Deviation Minimum Maximum

---

|   |           |           |           |           |
|---|-----------|-----------|-----------|-----------|
| 3 | 1.9566667 | 0.5398457 | 1.3800000 | 2.4500000 |
|---|-----------|-----------|-----------|-----------|

---

Unique Subject Identifier=5048011000-0013

Assay variable : PTINR\_VAL1 PT-INR Value

N Mean Standard Deviation Minimum Maximum

---

|   |           |           |           |           |
|---|-----------|-----------|-----------|-----------|
| 4 | 2.0225000 | 0.0485627 | 1.9600000 | 2.0700000 |
|---|-----------|-----------|-----------|-----------|

---

Laboratory tests at the time of obtaining Table 2-6 consent, according to the presence or absence of proton-pump inhibitors

Unique Subject Identifier=5048011000-0016

MEANS Procedure

Assay variable : PTINR\_VAL1 PT-INR Value

N Mean Standard Deviation Minimum Maximum

---

|   |           |           |           |           |
|---|-----------|-----------|-----------|-----------|
| 4 | 1.2150000 | 0.0450925 | 1.1800000 | 1.2800000 |
|---|-----------|-----------|-----------|-----------|

---

Unique Subject Identifier=5048011000-0019

Assay variable : PTINR\_VAL1 PT-INR Value

N Mean Standard Deviation Minimum Maximum

---

|   |           |           |           |           |
|---|-----------|-----------|-----------|-----------|
| 2 | 1.4800000 | 0.0848528 | 1.4200000 | 1.5400000 |
|---|-----------|-----------|-----------|-----------|

---

Unique Subject Identifier=5048011000-0022

Assay variable : PTINR\_VAL1 PT-INR Value

N Mean Standard Deviation Minimum Maximum

---

|   |           |           |           |           |
|---|-----------|-----------|-----------|-----------|
| 3 | 1.6100000 | 0.6000833 | 1.0600000 | 2.2500000 |
|---|-----------|-----------|-----------|-----------|

---

Unique Subject Identifier=5048011000-0023



Assay variable : PTINR\_VAL1 PT-INR Value

N Mean Standard Deviation Minimum Maximum

---

|   |          |           |          |          |
|---|----------|-----------|----------|----------|
| 6 | 1.980000 | 0.3051557 | 1.560000 | 2.310000 |
|---|----------|-----------|----------|----------|

---

Laboratory tests at the time of obtaining Table 2-6 consent, according to the presence or absence of proton-pump inhibitors

Unique Subject Identifier=5048011000-0025

MEANS Procedure

Assay variable : PTINR\_VAL1 PT-INR Value

N Mean Standard Deviation Minimum Maximum

---

|   |           |           |           |           |
|---|-----------|-----------|-----------|-----------|
| 3 | 1.2133333 | 0.1379613 | 1.1100000 | 1.3700000 |
|---|-----------|-----------|-----------|-----------|

---

Unique Subject Identifier=5048011000-0029

Assay variable : PTINR\_VAL1 PT-INR Value

N Mean Standard Deviation Minimum Maximum

---

|   |           |           |           |           |
|---|-----------|-----------|-----------|-----------|
| 3 | 1.8800000 | 0.3223352 | 1.6600000 | 2.2500000 |
|---|-----------|-----------|-----------|-----------|

---

Unique Subject Identifier=5048011000-0031

Assay variable : PTINR\_VAL1 PT-INR Value

N Mean Standard Deviation Minimum Maximum

---

|   |           |           |           |           |
|---|-----------|-----------|-----------|-----------|
| 3 | 1.5233333 | 0.1527525 | 1.3900000 | 1.6900000 |
|---|-----------|-----------|-----------|-----------|

---

Unique Subject Identifier=5048011000-0035

Assay variable : PTINR\_VAL1 PT-INR Value

N Mean Standard Deviation Minimum Maximum

---

|   |           |           |           |           |
|---|-----------|-----------|-----------|-----------|
| 3 | 1.9100000 | 0.0953939 | 1.8000000 | 1.9700000 |
|---|-----------|-----------|-----------|-----------|

---

Laboratory tests at the time of obtaining Table 2-6 consent, according to the presence or absence of proton-pump inhibitors

Unique Subject Identifier=5048011000-0036

MEANS Procedure

Assay variable : PTINR\_VAL1 PT-INR Value

N Mean Standard Deviation Minimum Maximum

---

|   |           |           |           |           |
|---|-----------|-----------|-----------|-----------|
| 4 | 1.5375000 | 0.1746186 | 1.3300000 | 1.7300000 |
|---|-----------|-----------|-----------|-----------|

---

Unique Subject Identifier=5048011000-0037

Assay variable : PTINR\_VAL1 PT-INR Value

N Mean Standard Deviation Minimum Maximum

---

|   |           |           |           |           |
|---|-----------|-----------|-----------|-----------|
| 3 | 1.4500000 | 0.2861818 | 1.2700000 | 1.7800000 |
|---|-----------|-----------|-----------|-----------|

---

Unique Subject Identifier=5048011000-0038

Assay variable : PTINR\_VAL1 PT-INR Value

N Mean Standard Deviation Minimum Maximum

---

|   |           |           |           |           |
|---|-----------|-----------|-----------|-----------|
| 4 | 1.9575000 | 0.6702425 | 1.4400000 | 2.9000000 |
|---|-----------|-----------|-----------|-----------|

---

Unique Subject Identifier=5048011000-0040

Assay variable : PTINR\_VAL1 PT-INR Value

N Mean Standard Deviation Minimum Maximum

---

|   |           |           |           |           |
|---|-----------|-----------|-----------|-----------|
| 4 | 1.4925000 | 0.0888351 | 1.4100000 | 1.6100000 |
|---|-----------|-----------|-----------|-----------|

---

Laboratory tests at the time of obtaining Table 2-6 consent, according to the presence or absence of proton-pump inhibitors

Unique Subject Identifier=5048011000-0044

MEANS Procedure

Assay variable : PTINR\_VAL1 PT-INR Value

N Mean Standard Deviation Minimum Maximum

---

|   |           |           |           |           |
|---|-----------|-----------|-----------|-----------|
| 6 | 1.5466667 | 0.1360392 | 1.3200000 | 1.6900000 |
|---|-----------|-----------|-----------|-----------|

---

Unique Subject Identifier=5048011000-0045

Assay variable : PTINR\_VAL1 PT-INR Value

N Mean Standard Deviation Minimum Maximum

---

|   |           |           |           |           |
|---|-----------|-----------|-----------|-----------|
| 4 | 1.5825000 | 0.3831775 | 1.2500000 | 2.1200000 |
|---|-----------|-----------|-----------|-----------|

---

Unique Subject Identifier=5048011000-0046

Assay variable : PTINR\_VAL1 PT-INR Value

N Mean Standard Deviation Minimum Maximum

---

|   |           |           |           |           |
|---|-----------|-----------|-----------|-----------|
| 3 | 1.4566667 | 0.0702377 | 1.3900000 | 1.5300000 |
|---|-----------|-----------|-----------|-----------|

---

Unique Subject Identifier=5048011000-0049

Assay variable : PTINR\_VAL1 PT-INR Value

N Mean Standard Deviation Minimum Maximum

---

|   |           |           |           |           |
|---|-----------|-----------|-----------|-----------|
| 3 | 1.5900000 | 0.3204684 | 1.2600000 | 1.9000000 |
|---|-----------|-----------|-----------|-----------|

---

Laboratory tests at the time of obtaining Table 2-6 consent, according to the presence or absence of proton-pump inhibitors

Unique Subject Identifier=5048011000-0051

MEANS Procedure

Assay variable : PTINR\_VAL1 PT-INR Value

| N | Mean      | Standard Deviation | Minimum   | Maximum   |
|---|-----------|--------------------|-----------|-----------|
| 2 | 1.8350000 | 0.1767767          | 1.7100000 | 1.9600000 |

Unique Subject Identifier=5048011000-0070

Assay variable : PTINR\_VAL1 PT-INR Value

| N | Mean      | Standard Deviation | Minimum   | Maximum   |
|---|-----------|--------------------|-----------|-----------|
| 5 | 1.8340000 | 0.2289760          | 1.4500000 | 2.0500000 |

Unique Subject Identifier=5048011000-0084

Assay variable : PTINR\_VAL1 PT-INR Value

| N | Mean      | Standard Deviation | Minimum   | Maximum   |
|---|-----------|--------------------|-----------|-----------|
| 3 | 1.8700000 | 0.2426932          | 1.7200000 | 2.1500000 |

Unique Subject Identifier=5048011000-0088



Assay variable : PTINR\_VAL1 PT-INR Value

N Mean Standard Deviation Minimum Maximum

---

|   |           |           |           |           |
|---|-----------|-----------|-----------|-----------|
| 3 | 1.8266667 | 0.0873689 | 1.7300000 | 1.9000000 |
|---|-----------|-----------|-----------|-----------|

---

Laboratory tests at the time of obtaining Table 2-6 consent, according to the presence or absence of proton-pump inhibitors

Unique Subject Identifier=5048011000-0091

MEANS Procedure

Assay variable : PTINR\_VAL1 PT-INR Value

N Mean Standard Deviation Minimum Maximum

---

|   |           |           |           |           |
|---|-----------|-----------|-----------|-----------|
| 3 | 1.7133333 | 0.1222020 | 1.5800000 | 1.8200000 |
|---|-----------|-----------|-----------|-----------|

---

Unique Subject Identifier=5048011000-0106

Assay variable : PTINR\_VAL1 PT-INR Value

N Mean Standard Deviation Minimum Maximum

---

|   |           |           |           |           |
|---|-----------|-----------|-----------|-----------|
| 5 | 1.5540000 | 0.2092367 | 1.2500000 | 1.8400000 |
|---|-----------|-----------|-----------|-----------|

---

Unique Subject Identifier=5048011000-0108

Assay variable : PTINR\_VAL1 PT-INR Value

N Mean Standard Deviation Minimum Maximum

---

|   |           |           |           |           |
|---|-----------|-----------|-----------|-----------|
| 6 | 2.5083333 | 0.3590775 | 2.0400000 | 3.0400000 |
|---|-----------|-----------|-----------|-----------|

---

Unique Subject Identifier=5048011000-0109

Assay variable : PTINR\_VAL1 PT-INR Value

N Mean Standard Deviation Minimum Maximum

---

|   |           |           |           |           |
|---|-----------|-----------|-----------|-----------|
| 3 | 1.5133333 | 0.2468468 | 1.2400000 | 1.7200000 |
|---|-----------|-----------|-----------|-----------|

---

Laboratory tests at the time of obtaining Table 2-6 consent, according to the presence or absence of proton-pump inhibitors

Unique Subject Identifier=5048011000-0128

MEANS Procedure

Assay variable : PTINR\_VAL1 PT-INR Value

| N | Mean      | Standard Deviation | Minimum   | Maximum   |
|---|-----------|--------------------|-----------|-----------|
| 5 | 2.1680000 | 0.9975821          | 1.0900000 | 3.3600000 |

Unique Subject Identifier=5048011000-0130

Assay variable : PTINR\_VAL1 PT-INR Value

| N | Mean      | Standard Deviation | Minimum   | Maximum   |
|---|-----------|--------------------|-----------|-----------|
| 3 | 1.9033333 | 0.6439203          | 1.1600000 | 2.2900000 |

Unique Subject Identifier=5050011100-0003

Assay variable : PTINR\_VAL1 PT-INR Value

| N | Mean      | Standard Deviation | Minimum   | Maximum   |
|---|-----------|--------------------|-----------|-----------|
| 5 | 2.3000000 | 0.2877499          | 1.8800000 | 2.5900000 |

Unique Subject Identifier=5050011100-0016

Assay variable : PTINR\_VAL1 PT-INR Value

N Mean Standard Deviation Minimum Maximum

---

|   |          |           |          |          |
|---|----------|-----------|----------|----------|
| 3 | 2.633333 | 0.8372773 | 1.990000 | 3.580000 |
|---|----------|-----------|----------|----------|

---

Laboratory tests at the time of obtaining Table 2-6 consent, according to the presence or absence of proton-pump inhibitors

Unique Subject Identifier=5050011100-0028

MEANS Procedure

Assay variable : PTINR\_VAL1 PT-INR Value

N Mean Standard Deviation Minimum Maximum

---

|   |           |           |           |           |
|---|-----------|-----------|-----------|-----------|
| 4 | 1.7525000 | 0.5141579 | 1.1500000 | 2.4000000 |
|---|-----------|-----------|-----------|-----------|

---

Unique Subject Identifier=5051100000-0006

Assay variable : PTINR\_VAL1 PT-INR Value

N Mean Standard Deviation Minimum Maximum

---

|   |           |           |           |           |
|---|-----------|-----------|-----------|-----------|
| 4 | 2.0025000 | 0.1878608 | 1.7600000 | 2.1700000 |
|---|-----------|-----------|-----------|-----------|

---

Unique Subject Identifier=5052000000-0003

Assay variable : PTINR\_VAL1 PT-INR Value

N Mean Standard Deviation Minimum Maximum

---

|   |           |           |           |           |
|---|-----------|-----------|-----------|-----------|
| 3 | 1.6333333 | 0.2950141 | 1.3400000 | 1.9300000 |
|---|-----------|-----------|-----------|-----------|

---

Unique Subject Identifier=5052000000-0015

Assay variable : PTINR\_VAL1 PT-INR Value

N Mean Standard Deviation Minimum Maximum

---

|   |           |           |           |           |
|---|-----------|-----------|-----------|-----------|
| 6 | 2.0050000 | 0.4781945 | 1.5300000 | 2.7300000 |
|---|-----------|-----------|-----------|-----------|

---

Laboratory tests at the time of obtaining Table 2-6 consent, according to the presence or absence of proton-pump inhibitors

Unique Subject Identifier=5052000000-0029

MEANS Procedure

Assay variable : PTINR\_VAL1 PT-INR Value

N Mean Standard Deviation Minimum Maximum

---

|   |           |           |           |           |
|---|-----------|-----------|-----------|-----------|
| 6 | 1.6866667 | 0.1709581 | 1.4700000 | 1.9800000 |
|---|-----------|-----------|-----------|-----------|

---

Unique Subject Identifier=5052000000-0030

Assay variable : PTINR\_VAL1 PT-INR Value

N Mean Standard Deviation Minimum Maximum

---

|   |           |           |           |           |
|---|-----------|-----------|-----------|-----------|
| 5 | 1.8400000 | 0.2315167 | 1.5900000 | 2.1500000 |
|---|-----------|-----------|-----------|-----------|

---

Unique Subject Identifier=5052000000-0033

Assay variable : PTINR\_VAL1 PT-INR Value

N Mean Standard Deviation Minimum Maximum

---

|   |           |           |           |           |
|---|-----------|-----------|-----------|-----------|
| 5 | 1.8560000 | 0.2249000 | 1.6100000 | 2.1300000 |
|---|-----------|-----------|-----------|-----------|

---

Unique Subject Identifier=5052000000-0051



Assay variable : PTINR\_VAL1 PT-INR Value

N Mean Standard Deviation Minimum Maximum

---

|   |           |           |           |           |
|---|-----------|-----------|-----------|-----------|
| 3 | 1.7133333 | 0.0378594 | 1.6700000 | 1.7400000 |
|---|-----------|-----------|-----------|-----------|

---

Laboratory tests at the time of obtaining Table 2-6 consent, according to the presence or absence of proton-pump inhibitors

Unique Subject Identifier=5052000000-0063

MEANS Procedure

Assay variable : PTINR\_VAL1 PT-INR Value

N Mean Standard Deviation Minimum Maximum

---

|   |           |  |           |           |
|---|-----------|--|-----------|-----------|
| 1 | 1.4100000 |  | 1.4100000 | 1.4100000 |
|---|-----------|--|-----------|-----------|

---

Unique Subject Identifier=5053000000-0004

Assay variable : PTINR\_VAL1 PT-INR Value

N Mean Standard Deviation Minimum Maximum

---

|   |           |           |           |           |
|---|-----------|-----------|-----------|-----------|
| 3 | 2.5333333 | 0.9330238 | 1.5600000 | 3.4200000 |
|---|-----------|-----------|-----------|-----------|

---

Unique Subject Identifier=5053000000-0005

Assay variable : PTINR\_VAL1 PT-INR Value

N Mean Standard Deviation Minimum Maximum

---

|   |           |           |           |           |
|---|-----------|-----------|-----------|-----------|
| 2 | 1.6750000 | 0.0494975 | 1.6400000 | 1.7100000 |
|---|-----------|-----------|-----------|-----------|

---

Unique Subject Identifier=5053000000-0009

Assay variable : PTINR\_VAL1 PT-INR Value

N Mean Standard Deviation Minimum Maximum

---

|   |           |  |           |           |
|---|-----------|--|-----------|-----------|
| 1 | 2.7000000 |  | 2.7000000 | 2.7000000 |
|---|-----------|--|-----------|-----------|

---

Laboratory tests at the time of obtaining Table 2-6 consent, according to the presence or absence of proton-pump inhibitors

Unique Subject Identifier=5053000000-0013

MEANS Procedure

Assay variable : PTINR\_VAL1 PT-INR Value

N Mean Standard Deviation Minimum Maximum

---

|   |           |           |           |           |
|---|-----------|-----------|-----------|-----------|
| 2 | 1.5750000 | 0.0212132 | 1.5600000 | 1.5900000 |
|---|-----------|-----------|-----------|-----------|

---

Unique Subject Identifier=5053000000-0014

Assay variable : PTINR\_VAL1 PT-INR Value

N Mean Standard Deviation Minimum Maximum

---

|   |           |           |           |           |
|---|-----------|-----------|-----------|-----------|
| 4 | 1.8875000 | 0.2467624 | 1.6100000 | 2.1800000 |
|---|-----------|-----------|-----------|-----------|

---

Unique Subject Identifier=5053000000-0017

Assay variable : PTINR\_VAL1 PT-INR Value

N Mean Standard Deviation Minimum Maximum

---

|   |           |           |           |           |
|---|-----------|-----------|-----------|-----------|
| 4 | 1.6025000 | 0.6232375 | 1.0300000 | 2.2000000 |
|---|-----------|-----------|-----------|-----------|

---

Unique Subject Identifier=5053000000-0019

Assay variable : PTINR\_VAL1 PT-INR Value

N Mean Standard Deviation Minimum Maximum

---

|   |           |           |           |           |
|---|-----------|-----------|-----------|-----------|
| 2 | 2.1650000 | 0.0777817 | 2.1100000 | 2.2200000 |
|---|-----------|-----------|-----------|-----------|

---

Laboratory tests at the time of obtaining Table 2-6 consent, according to the presence or absence of proton-pump inhibitors

Unique Subject Identifier=5053000000-0021

MEANS Procedure

Assay variable : PTINR\_VAL1 PT-INR Value

N Mean Standard Deviation Minimum Maximum

---

|   |           |           |           |           |
|---|-----------|-----------|-----------|-----------|
| 3 | 2.2600000 | 0.4648656 | 1.8600000 | 2.7700000 |
|---|-----------|-----------|-----------|-----------|

---

Unique Subject Identifier=5053000000-0023

Assay variable : PTINR\_VAL1 PT-INR Value

N Mean Standard Deviation Minimum Maximum

---

|   |           |           |           |           |
|---|-----------|-----------|-----------|-----------|
| 3 | 2.2933333 | 0.4932883 | 1.9600000 | 2.8600000 |
|---|-----------|-----------|-----------|-----------|

---

Unique Subject Identifier=5053000000-0024

Assay variable : PTINR\_VAL1 PT-INR Value

N Mean Standard Deviation Minimum Maximum

---

|   |           |           |           |           |
|---|-----------|-----------|-----------|-----------|
| 3 | 1.9833333 | 0.2444040 | 1.7700000 | 2.2500000 |
|---|-----------|-----------|-----------|-----------|

---

Unique Subject Identifier=5053000000-0026

Assay variable : PTINR\_VAL1 PT-INR Value

N Mean Standard Deviation Minimum Maximum

---

|   |          |           |          |          |
|---|----------|-----------|----------|----------|
| 3 | 1.560000 | 0.3835362 | 1.210000 | 1.970000 |
|---|----------|-----------|----------|----------|

---

Laboratory tests at the time of obtaining Table 2-6 consent, according to the presence or absence of proton-pump inhibitors

Unique Subject Identifier=5053000000-0030

MEANS Procedure

Assay variable : PTINR\_VAL1 PT-INR Value

N Mean Standard Deviation Minimum Maximum

---

|   |           |           |           |           |
|---|-----------|-----------|-----------|-----------|
| 3 | 2.1166667 | 0.5950070 | 1.4300000 | 2.4800000 |
|---|-----------|-----------|-----------|-----------|

---

Unique Subject Identifier=5054010000-0001

Assay variable : PTINR\_VAL1 PT-INR Value

N Mean Standard Deviation Minimum Maximum

---

|   |           |           |           |           |
|---|-----------|-----------|-----------|-----------|
| 3 | 2.3633333 | 0.7921069 | 1.4700000 | 2.9800000 |
|---|-----------|-----------|-----------|-----------|

---

Unique Subject Identifier=5054010000-0009

Assay variable : PTINR\_VAL1 PT-INR Value

N Mean Standard Deviation Minimum Maximum

---

|   |           |           |           |           |
|---|-----------|-----------|-----------|-----------|
| 3 | 2.1666667 | 0.7379928 | 1.4700000 | 2.9400000 |
|---|-----------|-----------|-----------|-----------|

---

Unique Subject Identifier=5054010000-0013



Assay variable : PTINR\_VAL1 PT-INR Value

N Mean Standard Deviation Minimum Maximum

---

|   |          |  |          |          |
|---|----------|--|----------|----------|
| 1 | 3.150000 |  | 3.150000 | 3.150000 |
|---|----------|--|----------|----------|

---

Laboratory tests at the time of obtaining Table 2-6 consent, according to the presence or absence of proton-pump inhibitors

Unique Subject Identifier=5054010000-0015

MEANS Procedure

Assay variable : PTINR\_VAL1 PT-INR Value

| N | Mean      | Standard Deviation | Minimum   | Maximum   |
|---|-----------|--------------------|-----------|-----------|
| 5 | 2.1420000 | 0.3011146          | 1.8300000 | 2.5900000 |

Unique Subject Identifier=5054010000-0017

Assay variable : PTINR\_VAL1 PT-INR Value

| N | Mean      | Standard Deviation | Minimum   | Maximum   |
|---|-----------|--------------------|-----------|-----------|
| 2 | 1.6800000 | 0.1414214          | 1.5800000 | 1.7800000 |

Unique Subject Identifier=5055000000-0001

Assay variable : PTINR\_VAL1 PT-INR Value

| N | Mean      | Standard Deviation | Minimum   | Maximum   |
|---|-----------|--------------------|-----------|-----------|
| 4 | 2.0125000 | 0.0895824          | 1.8900000 | 2.1000000 |

Unique Subject Identifier=5055000000-0002

Assay variable : PTINR\_VAL1 PT-INR Value

N Mean Standard Deviation Minimum Maximum

---

|   |           |           |           |           |
|---|-----------|-----------|-----------|-----------|
| 6 | 2.0100000 | 0.4378127 | 1.4100000 | 2.5000000 |
|---|-----------|-----------|-----------|-----------|

---

Laboratory tests at the time of obtaining Table 2-6 consent, according to the presence or absence of proton-pump inhibitors

Unique Subject Identifier=5055000000-0004

MEANS Procedure

Assay variable : PTINR\_VAL1 PT-INR Value

N Mean Standard Deviation Minimum Maximum

---

|   |           |           |           |           |
|---|-----------|-----------|-----------|-----------|
| 6 | 1.6916667 | 0.1571517 | 1.5200000 | 1.9200000 |
|---|-----------|-----------|-----------|-----------|

---

Unique Subject Identifier=5055000000-0005

Assay variable : PTINR\_VAL1 PT-INR Value

N Mean Standard Deviation Minimum Maximum

---

|   |           |           |           |           |
|---|-----------|-----------|-----------|-----------|
| 6 | 2.0633333 | 0.4966152 | 1.6200000 | 2.9700000 |
|---|-----------|-----------|-----------|-----------|

---

Unique Subject Identifier=5055000000-0007

Assay variable : PTINR\_VAL1 PT-INR Value

N Mean Standard Deviation Minimum Maximum

---

|   |           |           |           |           |
|---|-----------|-----------|-----------|-----------|
| 5 | 1.9540000 | 0.1852836 | 1.7700000 | 2.2400000 |
|---|-----------|-----------|-----------|-----------|

---

Unique Subject Identifier=5055000000-0008

Assay variable : PTINR\_VAL1 PT-INR Value

N Mean Standard Deviation Minimum Maximum

---

|   |           |           |           |           |
|---|-----------|-----------|-----------|-----------|
| 4 | 2.3650000 | 0.2500000 | 2.1300000 | 2.7100000 |
|---|-----------|-----------|-----------|-----------|

---

Laboratory tests at the time of obtaining Table 2-6 consent, according to the presence or absence of proton-pump inhibitors

Unique Subject Identifier=5055000000-0009

MEANS Procedure

Assay variable : PTINR\_VAL1 PT-INR Value

N Mean Standard Deviation Minimum Maximum

---

|   |          |           |          |          |
|---|----------|-----------|----------|----------|
| 5 | 2.260000 | 0.2685144 | 2.010000 | 2.700000 |
|---|----------|-----------|----------|----------|

---

Unique Subject Identifier=5055000000-0010

Assay variable : PTINR\_VAL1 PT-INR Value

N Mean Standard Deviation Minimum Maximum

---

|   |           |           |          |          |
|---|-----------|-----------|----------|----------|
| 6 | 2.1116667 | 0.2282469 | 1.880000 | 2.540000 |
|---|-----------|-----------|----------|----------|

---

Unique Subject Identifier=5055000000-0011

Assay variable : PTINR\_VAL1 PT-INR Value

N Mean Standard Deviation Minimum Maximum

---

|   |          |           |          |          |
|---|----------|-----------|----------|----------|
| 4 | 1.512500 | 0.4283593 | 1.130000 | 2.120000 |
|---|----------|-----------|----------|----------|

---

Unique Subject Identifier=5055000000-0012

Assay variable : PTINR\_VAL1 PT-INR Value

N Mean Standard Deviation Minimum Maximum

---

|   |           |           |           |           |
|---|-----------|-----------|-----------|-----------|
| 3 | 1.8300000 | 0.3214032 | 1.6200000 | 2.2000000 |
|---|-----------|-----------|-----------|-----------|

---

Laboratory tests at the time of obtaining Table 2-6 consent, according to the presence or absence of proton-pump inhibitors

Unique Subject Identifier=5055000000-0017

MEANS Procedure

Assay variable : PTINR\_VAL1 PT-INR Value

N Mean Standard Deviation Minimum Maximum

---

|   |           |           |           |           |
|---|-----------|-----------|-----------|-----------|
| 5 | 1.8380000 | 0.0920326 | 1.7100000 | 1.9600000 |
|---|-----------|-----------|-----------|-----------|

---

Unique Subject Identifier=5055000000-0020

Assay variable : PTINR\_VAL1 PT-INR Value

N Mean Standard Deviation Minimum Maximum

---

|   |           |           |           |           |
|---|-----------|-----------|-----------|-----------|
| 6 | 2.1500000 | 0.2940748 | 1.7900000 | 2.6600000 |
|---|-----------|-----------|-----------|-----------|

---

Unique Subject Identifier=5055000000-0023

Assay variable : PTINR\_VAL1 PT-INR Value

N Mean Standard Deviation Minimum Maximum

---

|   |           |           |           |           |
|---|-----------|-----------|-----------|-----------|
| 6 | 1.8283333 | 0.2577919 | 1.5200000 | 2.2900000 |
|---|-----------|-----------|-----------|-----------|

---

Unique Subject Identifier=5055000000-0024



Assay variable : PTINR\_VAL1 PT-INR Value

N Mean Standard Deviation Minimum Maximum

---

|   |           |           |           |           |
|---|-----------|-----------|-----------|-----------|
| 6 | 1.9183333 | 0.5442212 | 1.4200000 | 2.8700000 |
|---|-----------|-----------|-----------|-----------|

---

Laboratory tests at the time of obtaining Table 2-6 consent, according to the presence or absence of proton-pump inhibitors

Unique Subject Identifier=5056000000-0002

MEANS Procedure

Assay variable : PTINR\_VAL1 PT-INR Value

N Mean Standard Deviation Minimum Maximum

---

|   |           |           |           |           |
|---|-----------|-----------|-----------|-----------|
| 4 | 2.1750000 | 0.5678908 | 1.6000000 | 2.8000000 |
|---|-----------|-----------|-----------|-----------|

---

Unique Subject Identifier=5056000000-0005

Assay variable : PTINR\_VAL1 PT-INR Value

N Mean Standard Deviation Minimum Maximum

---

|   |           |  |           |           |
|---|-----------|--|-----------|-----------|
| 1 | 2.5000000 |  | 2.5000000 | 2.5000000 |
|---|-----------|--|-----------|-----------|

---

Unique Subject Identifier=5056000000-0009

Assay variable : PTINR\_VAL1 PT-INR Value

N Mean Standard Deviation Minimum Maximum

---

|   |           |           |           |           |
|---|-----------|-----------|-----------|-----------|
| 4 | 2.3250000 | 0.1892969 | 2.2000000 | 2.6000000 |
|---|-----------|-----------|-----------|-----------|

---

Unique Subject Identifier=5056000000-0010

Assay variable : PTINR\_VAL1 PT-INR Value

N Mean Standard Deviation Minimum Maximum

---

|   |           |           |           |           |
|---|-----------|-----------|-----------|-----------|
| 3 | 1.7000000 | 0.1000000 | 1.6000000 | 1.8000000 |
|---|-----------|-----------|-----------|-----------|

---

Laboratory tests at the time of obtaining Table 2-6 consent, according to the presence or absence of proton-pump inhibitors

Unique Subject Identifier=5056000000-0012

MEANS Procedure

Assay variable : PTINR\_VAL1 PT-INR Value

N Mean Standard Deviation Minimum Maximum

---

|   |           |           |           |           |
|---|-----------|-----------|-----------|-----------|
| 4 | 2.3500000 | 1.0408330 | 1.2000000 | 3.5000000 |
|---|-----------|-----------|-----------|-----------|

---

Unique Subject Identifier=5056000000-0014

Assay variable : PTINR\_VAL1 PT-INR Value

N Mean Standard Deviation Minimum Maximum

---

|   |           |           |           |           |
|---|-----------|-----------|-----------|-----------|
| 5 | 1.6200000 | 0.1303840 | 1.5000000 | 1.8000000 |
|---|-----------|-----------|-----------|-----------|

---

Unique Subject Identifier=5056000000-0021

Assay variable : PTINR\_VAL1 PT-INR Value

N Mean Standard Deviation Minimum Maximum

---

|   |           |  |           |           |
|---|-----------|--|-----------|-----------|
| 1 | 2.1000000 |  | 2.1000000 | 2.1000000 |
|---|-----------|--|-----------|-----------|

---

Unique Subject Identifier=5056000000-0023

Assay variable : PTINR\_VAL1 PT-INR Value

N Mean Standard Deviation Minimum Maximum

---

|   |           |           |           |           |
|---|-----------|-----------|-----------|-----------|
| 4 | 2.4750000 | 0.3947573 | 2.0000000 | 2.8000000 |
|---|-----------|-----------|-----------|-----------|

---

Laboratory tests at the time of obtaining Table 2-6 consent, according to the presence or absence of proton-pump inhibitors

Unique Subject Identifier=5056000000-0025

MEANS Procedure

Assay variable : PTINR\_VAL1 PT-INR Value

N Mean Standard Deviation Minimum Maximum

---

|   |           |           |           |           |
|---|-----------|-----------|-----------|-----------|
| 3 | 2.7600000 | 0.3616628 | 2.3800000 | 3.1000000 |
|---|-----------|-----------|-----------|-----------|

---

Unique Subject Identifier=5056000000-0027

Assay variable : PTINR\_VAL1 PT-INR Value

N Mean Standard Deviation Minimum Maximum

---

|   |           |           |           |           |
|---|-----------|-----------|-----------|-----------|
| 3 | 2.3333333 | 0.1527525 | 2.2000000 | 2.5000000 |
|---|-----------|-----------|-----------|-----------|

---

Unique Subject Identifier=5056000000-0028

Assay variable : PTINR\_VAL1 PT-INR Value

N Mean Standard Deviation Minimum Maximum

---

|   |           |           |           |           |
|---|-----------|-----------|-----------|-----------|
| 4 | 1.5750000 | 0.2217356 | 1.4000000 | 1.9000000 |
|---|-----------|-----------|-----------|-----------|

---

Unique Subject Identifier=5056000000-0036

Assay variable : PTINR\_VAL1 PT-INR Value

N Mean Standard Deviation Minimum Maximum

---

|   |          |           |          |          |
|---|----------|-----------|----------|----------|
| 4 | 2.000000 | 0.4618802 | 1.600000 | 2.400000 |
|---|----------|-----------|----------|----------|

---

Laboratory tests at the time of obtaining Table 2-6 consent, according to the presence or absence of proton-pump inhibitors

Unique Subject Identifier=5056000000-0038

MEANS Procedure

Assay variable : PTINR\_VAL1 PT-INR Value

N Mean Standard Deviation Minimum Maximum

---

|   |           |           |           |           |
|---|-----------|-----------|-----------|-----------|
| 3 | 2.1666667 | 0.5131601 | 1.6000000 | 2.6000000 |
|---|-----------|-----------|-----------|-----------|

---

Unique Subject Identifier=5056000000-0039

Assay variable : PTINR\_VAL1 PT-INR Value

N Mean Standard Deviation Minimum Maximum

---

|   |           |           |           |           |
|---|-----------|-----------|-----------|-----------|
| 3 | 2.1666667 | 0.0577350 | 2.1000000 | 2.2000000 |
|---|-----------|-----------|-----------|-----------|

---

Unique Subject Identifier=5057111111-0006

Assay variable : PTINR\_VAL1 PT-INR Value

N Mean Standard Deviation Minimum Maximum

---

|   |           |           |           |           |
|---|-----------|-----------|-----------|-----------|
| 3 | 1.4533333 | 0.1504438 | 1.2800000 | 1.5500000 |
|---|-----------|-----------|-----------|-----------|

---

Unique Subject Identifier=5057111111-0016



Assay variable : PTINR\_VAL1 PT-INR Value

N Mean Standard Deviation Minimum Maximum

---

|   |           |           |           |           |
|---|-----------|-----------|-----------|-----------|
| 3 | 2.5966667 | 1.0110556 | 1.5600000 | 3.5800000 |
|---|-----------|-----------|-----------|-----------|

---

Laboratory tests at the time of obtaining Table 2-6 consent, according to the presence or absence of proton-pump inhibitors

Unique Subject Identifier=5057111111-0023

MEANS Procedure

Assay variable : PTINR\_VAL1 PT-INR Value

N Mean Standard Deviation Minimum Maximum

---

|   |           |           |           |           |
|---|-----------|-----------|-----------|-----------|
| 5 | 2.0460000 | 0.3861088 | 1.3900000 | 2.4100000 |
|---|-----------|-----------|-----------|-----------|

---

Unique Subject Identifier=5058011111-0003

Assay variable : PTINR\_VAL1 PT-INR Value

N Mean Standard Deviation Minimum Maximum

---

|   |           |           |           |           |
|---|-----------|-----------|-----------|-----------|
| 4 | 2.2775000 | 0.6266512 | 1.8400000 | 3.2000000 |
|---|-----------|-----------|-----------|-----------|

---

Unique Subject Identifier=5058011111-0006

Assay variable : PTINR\_VAL1 PT-INR Value

N Mean Standard Deviation Minimum Maximum

---

|   |           |           |           |           |
|---|-----------|-----------|-----------|-----------|
| 3 | 1.9666667 | 0.3121431 | 1.7000000 | 2.3100000 |
|---|-----------|-----------|-----------|-----------|

---

Unique Subject Identifier=5058011111-0007

Assay variable : PTINR\_VAL1 PT-INR Value

N Mean Standard Deviation Minimum Maximum

---

|   |           |           |           |           |
|---|-----------|-----------|-----------|-----------|
| 6 | 1.8466667 | 0.4288900 | 1.2500000 | 2.2700000 |
|---|-----------|-----------|-----------|-----------|

---

Laboratory tests at the time of obtaining Table 2-6 consent, according to the presence or absence of proton-pump inhibitors

Unique Subject Identifier=5058011111-0009

MEANS Procedure

Assay variable : PTINR\_VAL1 PT-INR Value

| N | Mean      | Standard Deviation | Minimum   | Maximum   |
|---|-----------|--------------------|-----------|-----------|
| 3 | 2.7700000 | 1.0826357          | 2.1300000 | 4.0200000 |

Unique Subject Identifier=5058011111-0011

Assay variable : PTINR\_VAL1 PT-INR Value

| N | Mean      | Standard Deviation | Minimum   | Maximum   |
|---|-----------|--------------------|-----------|-----------|
| 2 | 1.3700000 | 0.0424264          | 1.3400000 | 1.4000000 |

Unique Subject Identifier=5058011111-0012

Assay variable : PTINR\_VAL1 PT-INR Value

| N | Mean      | Standard Deviation | Minimum   | Maximum   |
|---|-----------|--------------------|-----------|-----------|
| 2 | 2.3650000 | 0.5727565          | 1.9600000 | 2.7700000 |

Unique Subject Identifier=5058011111-0017

Assay variable : PTINR\_VAL1 PT-INR Value

N Mean Standard Deviation Minimum Maximum

---

|   |           |           |           |           |
|---|-----------|-----------|-----------|-----------|
| 3 | 2.1766667 | 0.4895236 | 1.6200000 | 2.5400000 |
|---|-----------|-----------|-----------|-----------|

---

Laboratory tests at the time of obtaining Table 2-6 consent, according to the presence or absence of proton-pump inhibitors

Unique Subject Identifier=5058011111-0019

MEANS Procedure

Assay variable : PTINR\_VAL1 PT-INR Value

N Mean Standard Deviation Minimum Maximum

---

|   |           |           |           |           |
|---|-----------|-----------|-----------|-----------|
| 4 | 1.8350000 | 0.2305790 | 1.5300000 | 2.0500000 |
|---|-----------|-----------|-----------|-----------|

---

Unique Subject Identifier=5060111000-0002

Assay variable : PTINR\_VAL1 PT-INR Value

N Mean Standard Deviation Minimum Maximum

---

|   |           |   |           |           |
|---|-----------|---|-----------|-----------|
| 5 | 1.9000000 | 0 | 1.9000000 | 1.9000000 |
|---|-----------|---|-----------|-----------|

---

Unique Subject Identifier=5060111000-0008

Assay variable : PTINR\_VAL1 PT-INR Value

N Mean Standard Deviation Minimum Maximum

---

|   |           |           |           |           |
|---|-----------|-----------|-----------|-----------|
| 3 | 1.7000000 | 0.3000000 | 1.4000000 | 2.0000000 |
|---|-----------|-----------|-----------|-----------|

---

Unique Subject Identifier=5060111000-0012

Assay variable : PTINR\_VAL1 PT-INR Value

N Mean Standard Deviation Minimum Maximum

---

|   |          |           |          |          |
|---|----------|-----------|----------|----------|
| 2 | 1.640000 | 0.2969848 | 1.430000 | 1.850000 |
|---|----------|-----------|----------|----------|

---

Laboratory tests at the time of obtaining Table 2-6 consent, according to the presence or absence of proton-pump inhibitors

Unique Subject Identifier=5060111000-0016

MEANS Procedure

Assay variable : PTINR\_VAL1 PT-INR Value

N Mean Standard Deviation Minimum Maximum

---

|   |           |           |           |           |
|---|-----------|-----------|-----------|-----------|
| 3 | 1.8333333 | 0.3214550 | 1.6000000 | 2.2000000 |
|---|-----------|-----------|-----------|-----------|

---

Unique Subject Identifier=5060111000-0018

Assay variable : PTINR\_VAL1 PT-INR Value

N Mean Standard Deviation Minimum Maximum

---

|   |           |           |           |           |
|---|-----------|-----------|-----------|-----------|
| 6 | 2.4133333 | 0.5181763 | 1.9300000 | 3.1100000 |
|---|-----------|-----------|-----------|-----------|

---

Unique Subject Identifier=5060111000-0025

Assay variable : PTINR\_VAL1 PT-INR Value

N Mean Standard Deviation Minimum Maximum

---

|   |           |           |           |           |
|---|-----------|-----------|-----------|-----------|
| 3 | 2.6000000 | 0.5291503 | 2.0000000 | 3.0000000 |
|---|-----------|-----------|-----------|-----------|

---

Unique Subject Identifier=5060111000-0028



Assay variable : PTINR\_VAL1 PT-INR Value

N Mean Standard Deviation Minimum Maximum

---

|   |           |           |           |           |
|---|-----------|-----------|-----------|-----------|
| 2 | 1.8300000 | 0.1838478 | 1.7000000 | 1.9600000 |
|---|-----------|-----------|-----------|-----------|

---

Laboratory tests at the time of obtaining Table 2-6 consent, according to the presence or absence of proton-pump inhibitors

Unique Subject Identifier=5063000000-0006

MEANS Procedure

Assay variable : PTINR\_VAL1 PT-INR Value

N Mean Standard Deviation Minimum Maximum

---

|   |           |           |           |           |
|---|-----------|-----------|-----------|-----------|
| 3 | 2.2933333 | 0.1850225 | 2.1100000 | 2.4800000 |
|---|-----------|-----------|-----------|-----------|

---

Unique Subject Identifier=5064000000-0004

Assay variable : PTINR\_VAL1 PT-INR Value

N Mean Standard Deviation Minimum Maximum

---

|   |           |           |           |           |
|---|-----------|-----------|-----------|-----------|
| 6 | 2.1483333 | 0.2926716 | 1.6900000 | 2.6000000 |
|---|-----------|-----------|-----------|-----------|

---

Unique Subject Identifier=5064000000-0005

Assay variable : PTINR\_VAL1 PT-INR Value

N Mean Standard Deviation Minimum Maximum

---

|   |           |           |           |           |
|---|-----------|-----------|-----------|-----------|
| 6 | 2.0800000 | 0.8060025 | 1.1300000 | 3.2400000 |
|---|-----------|-----------|-----------|-----------|

---

Unique Subject Identifier=5064000000-0006

Assay variable : PTINR\_VAL1 PT-INR Value

N Mean Standard Deviation Minimum Maximum

---

|   |           |           |           |           |
|---|-----------|-----------|-----------|-----------|
| 6 | 1.9083333 | 0.2874312 | 1.6800000 | 2.4600000 |
|---|-----------|-----------|-----------|-----------|

---

Laboratory tests at the time of obtaining Table 2-6 consent, according to the presence or absence of proton-pump inhibitors

Unique Subject Identifier=5066000100-0002

MEANS Procedure

Assay variable : PTINR\_VAL1 PT-INR Value

N Mean Standard Deviation Minimum Maximum

---

|   |           |           |           |           |
|---|-----------|-----------|-----------|-----------|
| 3 | 1.6700000 | 0.2426932 | 1.4000000 | 1.8700000 |
|---|-----------|-----------|-----------|-----------|

---

Unique Subject Identifier=5066000100-0004

Assay variable : PTINR\_VAL1 PT-INR Value

N Mean Standard Deviation Minimum Maximum

---

|   |           |           |           |           |
|---|-----------|-----------|-----------|-----------|
| 4 | 2.4850000 | 0.3889730 | 2.0500000 | 2.8700000 |
|---|-----------|-----------|-----------|-----------|

---

Unique Subject Identifier=5066000100-0012

Assay variable : PTINR\_VAL1 PT-INR Value

N Mean Standard Deviation Minimum Maximum

---

|   |           |           |           |           |
|---|-----------|-----------|-----------|-----------|
| 6 | 1.5566667 | 0.3164596 | 1.1900000 | 2.0400000 |
|---|-----------|-----------|-----------|-----------|

---

Unique Subject Identifier=5066000100-0013

Assay variable : PTINR\_VAL1 PT-INR Value

N Mean Standard Deviation Minimum Maximum

---

|   |          |           |          |          |
|---|----------|-----------|----------|----------|
| 2 | 1.940000 | 0.1272792 | 1.850000 | 2.030000 |
|---|----------|-----------|----------|----------|

---

Laboratory tests at the time of obtaining Table 2-6 consent, according to the presence or absence of proton-pump inhibitors

Unique Subject Identifier=5066000100-0027

MEANS Procedure

Assay variable : PTINR\_VAL1 PT-INR Value

N Mean Standard Deviation Minimum Maximum

---

|   |           |           |           |           |
|---|-----------|-----------|-----------|-----------|
| 3 | 2.2033333 | 0.2358672 | 1.9800000 | 2.4500000 |
|---|-----------|-----------|-----------|-----------|

---

Unique Subject Identifier=5067000000-0001

Assay variable : PTINR\_VAL1 PT-INR Value

N Mean Standard Deviation Minimum Maximum

---

|   |           |           |           |           |
|---|-----------|-----------|-----------|-----------|
| 5 | 2.1580000 | 0.5593478 | 1.6000000 | 3.0500000 |
|---|-----------|-----------|-----------|-----------|

---

Unique Subject Identifier=5068011111-0001

Assay variable : PTINR\_VAL1 PT-INR Value

N Mean Standard Deviation Minimum Maximum

---

|   |           |           |           |           |
|---|-----------|-----------|-----------|-----------|
| 3 | 2.2366667 | 0.4652240 | 1.7800000 | 2.7100000 |
|---|-----------|-----------|-----------|-----------|

---

Unique Subject Identifier=5068011111-0002

Assay variable : PTINR\_VAL1 PT-INR Value

N Mean Standard Deviation Minimum Maximum

---

|   |           |           |           |           |
|---|-----------|-----------|-----------|-----------|
| 3 | 2.0066667 | 0.3150132 | 1.6900000 | 2.3200000 |
|---|-----------|-----------|-----------|-----------|

---

Laboratory tests at the time of obtaining Table 2-6 consent, according to the presence or absence of proton-pump inhibitors

Unique Subject Identifier=5068011111-0015

MEANS Procedure

Assay variable : PTINR\_VAL1 PT-INR Value

N Mean Standard Deviation Minimum Maximum

---

|   |           |           |           |           |
|---|-----------|-----------|-----------|-----------|
| 4 | 1.9275000 | 0.1972097 | 1.7100000 | 2.1400000 |
|---|-----------|-----------|-----------|-----------|

---

Unique Subject Identifier=5068011111-0020

Assay variable : PTINR\_VAL1 PT-INR Value

N Mean Standard Deviation Minimum Maximum

---

|   |           |           |           |           |
|---|-----------|-----------|-----------|-----------|
| 3 | 1.9900000 | 0.1417745 | 1.8300000 | 2.1000000 |
|---|-----------|-----------|-----------|-----------|

---

Unique Subject Identifier=5068011111-0030

Assay variable : PTINR\_VAL1 PT-INR Value

N Mean Standard Deviation Minimum Maximum

---

|   |           |           |           |           |
|---|-----------|-----------|-----------|-----------|
| 3 | 1.9366667 | 0.4916638 | 1.4700000 | 2.4500000 |
|---|-----------|-----------|-----------|-----------|

---

Unique Subject Identifier=5071110000-0003



Assay variable : PTINR\_VAL1 PT-INR Value

N Mean Standard Deviation Minimum Maximum

---

|   |           |           |           |           |
|---|-----------|-----------|-----------|-----------|
| 4 | 1.6650000 | 0.1271482 | 1.5300000 | 1.8200000 |
|---|-----------|-----------|-----------|-----------|

---

Laboratory tests at the time of obtaining Table 2-6 consent, according to the presence or absence of proton-pump inhibitors

Unique Subject Identifier=5071110000-0011

MEANS Procedure

Assay variable : PTINR\_VAL1 PT-INR Value

| N | Mean      | Standard Deviation | Minimum   | Maximum   |
|---|-----------|--------------------|-----------|-----------|
| 6 | 0.9700000 | 0.0167332          | 0.9400000 | 0.9800000 |

Unique Subject Identifier=5073000010-0026

Assay variable : PTINR\_VAL1 PT-INR Value

| N | Mean      | Standard Deviation | Minimum   | Maximum   |
|---|-----------|--------------------|-----------|-----------|
| 5 | 2.0220000 | 0.3020265          | 1.6000000 | 2.3600000 |

Unique Subject Identifier=5073000010-0075

Assay variable : PTINR\_VAL1 PT-INR Value

| N | Mean      | Standard Deviation | Minimum   | Maximum   |
|---|-----------|--------------------|-----------|-----------|
| 3 | 1.7166667 | 0.0971253          | 1.6100000 | 1.8000000 |

Unique Subject Identifier=5073000010-0081

Assay variable : PTINR\_VAL1 PT-INR Value

N Mean Standard Deviation Minimum Maximum

---

|   |           |           |           |           |
|---|-----------|-----------|-----------|-----------|
| 5 | 2.0520000 | 0.5072179 | 1.5300000 | 2.8200000 |
|---|-----------|-----------|-----------|-----------|

---

Laboratory tests at the time of obtaining Table 2-6 consent, according to the presence or absence of proton-pump inhibitors

Unique Subject Identifier=5073000010-0085

MEANS Procedure

Assay variable : PTINR\_VAL1 PT-INR Value

N Mean Standard Deviation Minimum Maximum

---

|   |           |           |           |           |
|---|-----------|-----------|-----------|-----------|
| 4 | 1.3875000 | 0.1244655 | 1.2100000 | 1.5000000 |
|---|-----------|-----------|-----------|-----------|

---

Unique Subject Identifier=5098010011-0005

Assay variable : PTINR\_VAL1 PT-INR Value

N Mean Standard Deviation Minimum Maximum

---

|   |           |           |           |           |
|---|-----------|-----------|-----------|-----------|
| 4 | 1.7200000 | 0.1430618 | 1.5600000 | 1.9000000 |
|---|-----------|-----------|-----------|-----------|

---

Unique Subject Identifier=5098010011-0008

Assay variable : PTINR\_VAL1 PT-INR Value

N Mean Standard Deviation Minimum Maximum

---

|   |           |           |           |           |
|---|-----------|-----------|-----------|-----------|
| 5 | 2.0060000 | 0.2215401 | 1.7800000 | 2.3600000 |
|---|-----------|-----------|-----------|-----------|

---

Unique Subject Identifier=5098010011-0009

Assay variable : PTINR\_VAL1 PT-INR Value

N Mean Standard Deviation Minimum Maximum

---

|   |           |           |           |           |
|---|-----------|-----------|-----------|-----------|
| 5 | 1.9680000 | 0.3094673 | 1.6900000 | 2.4800000 |
|---|-----------|-----------|-----------|-----------|

---

Laboratory tests at the time of obtaining Table 2-6 consent, according to the presence or absence of proton-pump inhibitors

Unique Subject Identifier=5098010011-0016

MEANS Procedure

Assay variable : PTINR\_VAL1 PT-INR Value

| N | Mean      | Standard Deviation | Minimum   | Maximum   |
|---|-----------|--------------------|-----------|-----------|
| 5 | 1.8220000 | 0.1934425          | 1.5000000 | 2.0000000 |

Unique Subject Identifier=5098010011-0020

Assay variable : PTINR\_VAL1 PT-INR Value

| N | Mean      | Standard Deviation | Minimum   | Maximum   |
|---|-----------|--------------------|-----------|-----------|
| 2 | 2.4150000 | 0.0212132          | 2.4000000 | 2.4300000 |

Unique Subject Identifier=5098010011-0024

Assay variable : PTINR\_VAL1 PT-INR Value

| N | Mean      | Standard Deviation | Minimum   | Maximum   |
|---|-----------|--------------------|-----------|-----------|
| 6 | 2.2450000 | 0.2388933          | 2.0100000 | 2.6700000 |

Unique Subject Identifier=5098010011-0031

Assay variable : PTINR\_VAL1 PT-INR Value

N Mean Standard Deviation Minimum Maximum

---

|   |           |           |           |           |
|---|-----------|-----------|-----------|-----------|
| 4 | 2.3425000 | 0.1327592 | 2.2000000 | 2.4700000 |
|---|-----------|-----------|-----------|-----------|

---

Laboratory tests at the time of obtaining Table 2-6 consent, according to the presence or absence of proton-pump inhibitors

Unique Subject Identifier=5098010011-0032

MEANS Procedure

Assay variable : PTINR\_VAL1 PT-INR Value

N Mean Standard Deviation Minimum Maximum

---

|   |           |           |           |           |
|---|-----------|-----------|-----------|-----------|
| 5 | 1.8900000 | 0.1146734 | 1.7500000 | 2.0600000 |
|---|-----------|-----------|-----------|-----------|

---

Unique Subject Identifier=5098010011-0035

Assay variable : PTINR\_VAL1 PT-INR Value

N Mean Standard Deviation Minimum Maximum

---

|   |           |           |           |           |
|---|-----------|-----------|-----------|-----------|
| 5 | 2.0460000 | 0.4027779 | 1.8000000 | 2.7600000 |
|---|-----------|-----------|-----------|-----------|

---

Unique Subject Identifier=5098010011-0043

Assay variable : PTINR\_VAL1 PT-INR Value

N Mean Standard Deviation Minimum Maximum

---

|   |           |           |           |           |
|---|-----------|-----------|-----------|-----------|
| 5 | 1.8640000 | 0.1955249 | 1.6300000 | 2.1000000 |
|---|-----------|-----------|-----------|-----------|

---

Unique Subject Identifier=5098010011-0044



Assay variable : PTINR\_VAL1 PT-INR Value

N Mean Standard Deviation Minimum Maximum

---

|   |          |           |          |          |
|---|----------|-----------|----------|----------|
| 5 | 1.614000 | 0.3165912 | 1.300000 | 2.110000 |
|---|----------|-----------|----------|----------|

---

Laboratory tests at the time of obtaining Table 2-6 consent, according to the presence or absence of proton-pump inhibitors

Unique Subject Identifier=5098010011-0054

MEANS Procedure

Assay variable : PTINR\_VAL1 PT-INR Value

N Mean Standard Deviation Minimum Maximum

---

|   |           |           |           |           |
|---|-----------|-----------|-----------|-----------|
| 6 | 1.4150000 | 0.4225044 | 1.0600000 | 2.1300000 |
|---|-----------|-----------|-----------|-----------|

---

Unique Subject Identifier=5098010011-0059

Assay variable : PTINR\_VAL1 PT-INR Value

N Mean Standard Deviation Minimum Maximum

---

|   |           |           |           |           |
|---|-----------|-----------|-----------|-----------|
| 6 | 1.7233333 | 0.2260678 | 1.4600000 | 2.0200000 |
|---|-----------|-----------|-----------|-----------|

---

Unique Subject Identifier=5098010011-0065

Assay variable : PTINR\_VAL1 PT-INR Value

N Mean Standard Deviation Minimum Maximum

---

|   |           |           |           |           |
|---|-----------|-----------|-----------|-----------|
| 3 | 2.3366667 | 0.1401190 | 2.1800000 | 2.4500000 |
|---|-----------|-----------|-----------|-----------|

---

Unique Subject Identifier=5098010011-0067

Assay variable : PTINR\_VAL1 PT-INR Value

N Mean Standard Deviation Minimum Maximum

---

|   |           |           |           |           |
|---|-----------|-----------|-----------|-----------|
| 3 | 2.0966667 | 0.1305118 | 1.9600000 | 2.2200000 |
|---|-----------|-----------|-----------|-----------|

---

Laboratory tests at the time of obtaining Table 2-6 consent, according to the presence or absence of proton-pump inhibitors

Unique Subject Identifier=5098010011-0068

MEANS Procedure

Assay variable : PTINR\_VAL1 PT-INR Value

N Mean Standard Deviation Minimum Maximum

---

|   |           |           |           |           |
|---|-----------|-----------|-----------|-----------|
| 4 | 2.3975000 | 0.2943213 | 2.0300000 | 2.6900000 |
|---|-----------|-----------|-----------|-----------|

---

Unique Subject Identifier=5098010011-0070

Assay variable : PTINR\_VAL1 PT-INR Value

N Mean Standard Deviation Minimum Maximum

---

|   |           |           |           |           |
|---|-----------|-----------|-----------|-----------|
| 5 | 1.9560000 | 0.3090793 | 1.6300000 | 2.3600000 |
|---|-----------|-----------|-----------|-----------|

---

Unique Subject Identifier=5098010011-0072

Assay variable : PTINR\_VAL1 PT-INR Value

N Mean Standard Deviation Minimum Maximum

---

|   |           |           |           |           |
|---|-----------|-----------|-----------|-----------|
| 4 | 2.2850000 | 0.3152248 | 2.0500000 | 2.7500000 |
|---|-----------|-----------|-----------|-----------|

---

Unique Subject Identifier=5098010011-0074

Assay variable : PTINR\_VAL1 PT-INR Value

N Mean Standard Deviation Minimum Maximum

---

|   |           |           |           |           |
|---|-----------|-----------|-----------|-----------|
| 4 | 2.5325000 | 0.9687578 | 1.2400000 | 3.4100000 |
|---|-----------|-----------|-----------|-----------|

---

Laboratory tests at the time of obtaining Table 2-6 consent, according to the presence or absence of proton-pump inhibitors

Unique Subject Identifier=5098010011-0077

MEANS Procedure

Assay variable : PTINR\_VAL1 PT-INR Value

N Mean Standard Deviation Minimum Maximum

---

|   |           |           |           |           |
|---|-----------|-----------|-----------|-----------|
| 4 | 2.1875000 | 0.3866415 | 1.6100000 | 2.4100000 |
|---|-----------|-----------|-----------|-----------|

---

Unique Subject Identifier=5098010011-0080

Assay variable : PTINR\_VAL1 PT-INR Value

N Mean Standard Deviation Minimum Maximum

---

|   |           |           |           |           |
|---|-----------|-----------|-----------|-----------|
| 4 | 1.9800000 | 0.2224110 | 1.7300000 | 2.2500000 |
|---|-----------|-----------|-----------|-----------|

---

Unique Subject Identifier=5098010011-0082

Assay variable : PTINR\_VAL1 PT-INR Value

N Mean Standard Deviation Minimum Maximum

---

|   |           |           |           |           |
|---|-----------|-----------|-----------|-----------|
| 5 | 2.0840000 | 0.1331540 | 1.9700000 | 2.2700000 |
|---|-----------|-----------|-----------|-----------|

---

Unique Subject Identifier=5100001000-0003

Assay variable : PTINR\_VAL1 PT-INR Value

N Mean Standard Deviation Minimum Maximum

---

|   |           |           |           |           |
|---|-----------|-----------|-----------|-----------|
| 4 | 1.8025000 | 0.3967682 | 1.5100000 | 2.3500000 |
|---|-----------|-----------|-----------|-----------|

---

Laboratory tests at the time of obtaining Table 2-6 consent, according to the presence or absence of proton-pump inhibitors

Unique Subject Identifier=5101010000-0002

MEANS Procedure

Assay variable : PTINR\_VAL1 PT-INR Value

N Mean Standard Deviation Minimum Maximum

---

|   |           |           |           |           |
|---|-----------|-----------|-----------|-----------|
| 2 | 2.3000000 | 0.1131371 | 2.2200000 | 2.3800000 |
|---|-----------|-----------|-----------|-----------|

---

Unique Subject Identifier=5103000000-0002

Assay variable : PTINR\_VAL1 PT-INR Value

N Mean Standard Deviation Minimum Maximum

---

|   |           |           |           |           |
|---|-----------|-----------|-----------|-----------|
| 6 | 2.0833333 | 0.3970726 | 1.5000000 | 2.7000000 |
|---|-----------|-----------|-----------|-----------|

---

Unique Subject Identifier=5103000000-0003

Assay variable : PTINR\_VAL1 PT-INR Value

N Mean Standard Deviation Minimum Maximum

---

|   |           |           |           |           |
|---|-----------|-----------|-----------|-----------|
| 6 | 2.3500000 | 0.3937004 | 1.8000000 | 2.8000000 |
|---|-----------|-----------|-----------|-----------|

---

Unique Subject Identifier=5103000000-0009



Assay variable : PTINR\_VAL1 PT-INR Value

N Mean Standard Deviation Minimum Maximum

---

|   |           |           |           |           |
|---|-----------|-----------|-----------|-----------|
| 6 | 1.9333333 | 0.4457204 | 1.6000000 | 2.8000000 |
|---|-----------|-----------|-----------|-----------|

---

Laboratory tests at the time of obtaining Table 2-6 consent, according to the presence or absence of proton-pump inhibitors

Unique Subject Identifier=5103000000-0017

MEANS Procedure

Assay variable : PTINR\_VAL1 PT-INR Value

N Mean Standard Deviation Minimum Maximum

---

|   |           |           |           |           |
|---|-----------|-----------|-----------|-----------|
| 6 | 1.9166667 | 0.9108604 | 1.2000000 | 3.7000000 |
|---|-----------|-----------|-----------|-----------|

---

Unique Subject Identifier=5103000000-0019

Assay variable : PTINR\_VAL1 PT-INR Value

N Mean Standard Deviation Minimum Maximum

---

|   |           |           |           |           |
|---|-----------|-----------|-----------|-----------|
| 6 | 2.4333333 | 0.3614784 | 2.0000000 | 3.0000000 |
|---|-----------|-----------|-----------|-----------|

---

Unique Subject Identifier=5103000000-0020

Assay variable : PTINR\_VAL1 PT-INR Value

N Mean Standard Deviation Minimum Maximum

---

|   |           |           |           |           |
|---|-----------|-----------|-----------|-----------|
| 6 | 2.0000000 | 0.2966479 | 1.7000000 | 2.5000000 |
|---|-----------|-----------|-----------|-----------|

---

Unique Subject Identifier=5103000000-0026

Assay variable : PTINR\_VAL1 PT-INR Value

N Mean Standard Deviation Minimum Maximum

---

|   |           |           |           |           |
|---|-----------|-----------|-----------|-----------|
| 6 | 1.6666667 | 0.2422120 | 1.3000000 | 2.0000000 |
|---|-----------|-----------|-----------|-----------|

---

Laboratory tests at the time of obtaining Table 2-6 consent, according to the presence or absence of proton-pump inhibitors

Unique Subject Identifier=5103000000-0034

MEANS Procedure

Assay variable : PTINR\_VAL1 PT-INR Value

N Mean Standard Deviation Minimum Maximum

---

|   |           |           |           |           |
|---|-----------|-----------|-----------|-----------|
| 6 | 1.7833333 | 0.3371449 | 1.3000000 | 2.3000000 |
|---|-----------|-----------|-----------|-----------|

---

Unique Subject Identifier=5103000000-0039

Assay variable : PTINR\_VAL1 PT-INR Value

N Mean Standard Deviation Minimum Maximum

---

|   |           |           |           |           |
|---|-----------|-----------|-----------|-----------|
| 6 | 1.8833333 | 0.2041241 | 1.6000000 | 2.2000000 |
|---|-----------|-----------|-----------|-----------|

---

Unique Subject Identifier=5103000000-0040

Assay variable : PTINR\_VAL1 PT-INR Value

N Mean Standard Deviation Minimum Maximum

---

|   |           |           |           |           |
|---|-----------|-----------|-----------|-----------|
| 6 | 2.2500000 | 0.6024948 | 1.6000000 | 3.1000000 |
|---|-----------|-----------|-----------|-----------|

---

Unique Subject Identifier=5103000000-0044

Assay variable : PTINR\_VAL1 PT-INR Value

N Mean Standard Deviation Minimum Maximum

---

|   |          |           |          |          |
|---|----------|-----------|----------|----------|
| 6 | 1.950000 | 0.3507136 | 1.600000 | 2.300000 |
|---|----------|-----------|----------|----------|

---

Laboratory tests at the time of obtaining Table 2-6 consent, according to the presence or absence of proton-pump inhibitors

Unique Subject Identifier=5103000000-0045

MEANS Procedure

Assay variable : PTINR\_VAL1 PT-INR Value

N Mean Standard Deviation Minimum Maximum

---

|   |           |           |           |           |
|---|-----------|-----------|-----------|-----------|
| 6 | 1.7833333 | 0.2136976 | 1.5000000 | 2.0000000 |
|---|-----------|-----------|-----------|-----------|

---

Unique Subject Identifier=5103000000-0047

Assay variable : PTINR\_VAL1 PT-INR Value

N Mean Standard Deviation Minimum Maximum

---

|   |           |           |           |           |
|---|-----------|-----------|-----------|-----------|
| 6 | 2.0833333 | 0.3920034 | 1.5000000 | 2.7000000 |
|---|-----------|-----------|-----------|-----------|

---

Unique Subject Identifier=5103000000-0049

Assay variable : PTINR\_VAL1 PT-INR Value

N Mean Standard Deviation Minimum Maximum

---

|   |           |           |           |           |
|---|-----------|-----------|-----------|-----------|
| 6 | 1.9833333 | 0.3763863 | 1.4000000 | 2.5000000 |
|---|-----------|-----------|-----------|-----------|

---

Unique Subject Identifier=5103000000-0051

Assay variable : PTINR\_VAL1 PT-INR Value

N Mean Standard Deviation Minimum Maximum

---

|   |          |          |          |          |
|---|----------|----------|----------|----------|
| 5 | 1.800000 | 0.324037 | 1.400000 | 2.100000 |
|---|----------|----------|----------|----------|

---

Laboratory tests at the time of obtaining Table 2-6 consent, according to the presence or absence of proton-pump inhibitors

Unique Subject Identifier=5103000000-0060

MEANS Procedure

Assay variable : PTINR\_VAL1 PT-INR Value

N Mean Standard Deviation Minimum Maximum

---

|   |           |           |           |           |
|---|-----------|-----------|-----------|-----------|
| 6 | 1.9833333 | 0.4020779 | 1.5000000 | 2.7000000 |
|---|-----------|-----------|-----------|-----------|

---

Unique Subject Identifier=5103000000-0061

Assay variable : PTINR\_VAL1 PT-INR Value

N Mean Standard Deviation Minimum Maximum

---

|   |           |           |           |           |
|---|-----------|-----------|-----------|-----------|
| 5 | 1.6600000 | 0.2509980 | 1.3000000 | 2.0000000 |
|---|-----------|-----------|-----------|-----------|

---

Unique Subject Identifier=5103000000-0062

Assay variable : PTINR\_VAL1 PT-INR Value

N Mean Standard Deviation Minimum Maximum

---

|   |           |           |           |           |
|---|-----------|-----------|-----------|-----------|
| 6 | 1.6300000 | 0.1412799 | 1.5000000 | 1.9000000 |
|---|-----------|-----------|-----------|-----------|

---

Unique Subject Identifier=5103000000-0064



Assay variable : PTINR\_VAL1 PT-INR Value

N Mean Standard Deviation Minimum Maximum

---

|   |           |           |           |           |
|---|-----------|-----------|-----------|-----------|
| 6 | 2.0666667 | 0.2875181 | 1.7000000 | 2.5000000 |
|---|-----------|-----------|-----------|-----------|

---

Laboratory tests at the time of obtaining Table 2-6 consent, according to the presence or absence of proton-pump inhibitors

Unique Subject Identifier=5103000000-0069

MEANS Procedure

Assay variable : PTINR\_VAL1 PT-INR Value

N Mean Standard Deviation Minimum Maximum

---

|   |           |           |           |           |
|---|-----------|-----------|-----------|-----------|
| 6 | 2.2000000 | 0.5176872 | 1.6000000 | 2.8000000 |
|---|-----------|-----------|-----------|-----------|

---

Unique Subject Identifier=5103000000-0076

Assay variable : PTINR\_VAL1 PT-INR Value

N Mean Standard Deviation Minimum Maximum

---

|   |           |           |           |           |
|---|-----------|-----------|-----------|-----------|
| 6 | 1.8166667 | 0.1329160 | 1.6000000 | 1.9000000 |
|---|-----------|-----------|-----------|-----------|

---

Unique Subject Identifier=5103000000-0078

Assay variable : PTINR\_VAL1 PT-INR Value

N Mean Standard Deviation Minimum Maximum

---

|   |           |           |           |           |
|---|-----------|-----------|-----------|-----------|
| 6 | 1.4500000 | 0.2073644 | 1.1000000 | 1.7000000 |
|---|-----------|-----------|-----------|-----------|

---

Unique Subject Identifier=5103000000-0084

Assay variable : PTINR\_VAL1 PT-INR Value

N Mean Standard Deviation Minimum Maximum

---

|   |           |           |           |           |
|---|-----------|-----------|-----------|-----------|
| 6 | 1.8666667 | 0.2732520 | 1.5000000 | 2.3000000 |
|---|-----------|-----------|-----------|-----------|

---

Laboratory tests at the time of obtaining Table 2-6 consent, according to the presence or absence of proton-pump inhibitors

Unique Subject Identifier=5103000000-0087

MEANS Procedure

Assay variable : PTINR\_VAL1 PT-INR Value

N Mean Standard Deviation Minimum Maximum

---

|   |           |           |           |           |
|---|-----------|-----------|-----------|-----------|
| 6 | 1.7666667 | 0.3614784 | 1.4000000 | 2.4000000 |
|---|-----------|-----------|-----------|-----------|

---

Unique Subject Identifier=5103000000-0089

Assay variable : PTINR\_VAL1 PT-INR Value

N Mean Standard Deviation Minimum Maximum

---

|   |           |           |           |           |
|---|-----------|-----------|-----------|-----------|
| 6 | 1.7833333 | 0.2714160 | 1.4000000 | 2.2000000 |
|---|-----------|-----------|-----------|-----------|

---

Unique Subject Identifier=5103000000-0091

Assay variable : PTINR\_VAL1 PT-INR Value

N Mean Standard Deviation Minimum Maximum

---

|   |           |           |           |           |
|---|-----------|-----------|-----------|-----------|
| 6 | 1.5833333 | 0.2926887 | 1.3000000 | 2.0000000 |
|---|-----------|-----------|-----------|-----------|

---

Unique Subject Identifier=5103000000-0092

Assay variable : PTINR\_VAL1 PT-INR Value

N Mean Standard Deviation Minimum Maximum

---

|   |           |           |           |           |
|---|-----------|-----------|-----------|-----------|
| 6 | 1.9666667 | 0.3829708 | 1.6000000 | 2.5000000 |
|---|-----------|-----------|-----------|-----------|

---

Laboratory tests at the time of obtaining Table 2-6 consent, according to the presence or absence of proton-pump inhibitors

Unique Subject Identifier=5103000000-0098

MEANS Procedure

Assay variable : PTINR\_VAL1 PT-INR Value

N Mean Standard Deviation Minimum Maximum

---

|   |           |           |           |           |
|---|-----------|-----------|-----------|-----------|
| 6 | 2.1333333 | 0.4844241 | 1.5000000 | 2.8000000 |
|---|-----------|-----------|-----------|-----------|

---

Unique Subject Identifier=5103000000-0106

Assay variable : PTINR\_VAL1 PT-INR Value

N Mean Standard Deviation Minimum Maximum

---

|   |           |           |           |           |
|---|-----------|-----------|-----------|-----------|
| 6 | 1.7333333 | 0.2503331 | 1.4000000 | 2.1000000 |
|---|-----------|-----------|-----------|-----------|

---

Unique Subject Identifier=5103000000-0108

Assay variable : PTINR\_VAL1 PT-INR Value

N Mean Standard Deviation Minimum Maximum

---

|   |           |           |           |           |
|---|-----------|-----------|-----------|-----------|
| 6 | 1.7166667 | 0.2483277 | 1.5000000 | 2.2000000 |
|---|-----------|-----------|-----------|-----------|

---

Unique Subject Identifier=5103000000-0112

Assay variable : PTINR\_VAL1 PT-INR Value

N Mean Standard Deviation Minimum Maximum

---

|   |          |           |          |          |
|---|----------|-----------|----------|----------|
| 5 | 2.180000 | 0.5540758 | 1.700000 | 3.000000 |
|---|----------|-----------|----------|----------|

---

Laboratory tests at the time of obtaining Table 2-6 consent, according to the presence or absence of proton-pump inhibitors

Unique Subject Identifier=5103000000-0134

MEANS Procedure

Assay variable : PTINR\_VAL1 PT-INR Value

N Mean Standard Deviation Minimum Maximum

---

|   |           |           |           |           |
|---|-----------|-----------|-----------|-----------|
| 5 | 2.6200000 | 0.2863564 | 2.2000000 | 3.0000000 |
|---|-----------|-----------|-----------|-----------|

---

Unique Subject Identifier=5103000000-0139

Assay variable : PTINR\_VAL1 PT-INR Value

N Mean Standard Deviation Minimum Maximum

---

|   |           |           |           |           |
|---|-----------|-----------|-----------|-----------|
| 4 | 1.7750000 | 0.3095696 | 1.5000000 | 2.2000000 |
|---|-----------|-----------|-----------|-----------|

---

Unique Subject Identifier=5103000000-0141

Assay variable : PTINR\_VAL1 PT-INR Value

N Mean Standard Deviation Minimum Maximum

---

|   |           |           |           |           |
|---|-----------|-----------|-----------|-----------|
| 6 | 1.9666667 | 0.3011091 | 1.6000000 | 2.3000000 |
|---|-----------|-----------|-----------|-----------|

---

Unique Subject Identifier=5103000000-0147



Assay variable : PTINR\_VAL1 PT-INR Value

N Mean Standard Deviation Minimum Maximum

---

|   |           |           |           |           |
|---|-----------|-----------|-----------|-----------|
| 6 | 1.6666667 | 0.7229569 | 1.1000000 | 3.1000000 |
|---|-----------|-----------|-----------|-----------|

---

Laboratory tests at the time of obtaining Table 2-6 consent, according to the presence or absence of proton-pump inhibitors

Unique Subject Identifier=5108001000-0010

MEANS Procedure

Assay variable : PTINR\_VAL1 PT-INR Value

N Mean Standard Deviation Minimum Maximum

---

|   |           |           |           |           |
|---|-----------|-----------|-----------|-----------|
| 4 | 2.3250000 | 0.4031129 | 2.0000000 | 2.9000000 |
|---|-----------|-----------|-----------|-----------|

---

Unique Subject Identifier=5108001000-0015

Assay variable : PTINR\_VAL1 PT-INR Value

N Mean Standard Deviation Minimum Maximum

---

|   |           |           |           |           |
|---|-----------|-----------|-----------|-----------|
| 3 | 1.3566667 | 0.4843897 | 0.9700000 | 1.9000000 |
|---|-----------|-----------|-----------|-----------|

---

Unique Subject Identifier=5114000000-0016

Assay variable : PTINR\_VAL1 PT-INR Value

N Mean Standard Deviation Minimum Maximum

---

|   |           |           |           |           |
|---|-----------|-----------|-----------|-----------|
| 2 | 2.0700000 | 0.3111270 | 1.8500000 | 2.2900000 |
|---|-----------|-----------|-----------|-----------|

---

Unique Subject Identifier=5114000000-0030

Assay variable : PTINR\_VAL1 PT-INR Value

N Mean Standard Deviation Minimum Maximum

---

|   |          |  |          |          |
|---|----------|--|----------|----------|
| 1 | 1.280000 |  | 1.280000 | 1.280000 |
|---|----------|--|----------|----------|

---

Laboratory tests at the time of obtaining Table 2-6 consent, according to the presence or absence of proton-pump inhibitors

Unique Subject Identifier=5120011000-0005

MEANS Procedure

Assay variable : PTINR\_VAL1 PT-INR Value

N Mean Standard Deviation Minimum Maximum

---

|   |           |           |           |           |
|---|-----------|-----------|-----------|-----------|
| 5 | 2.1240000 | 0.4569245 | 1.6300000 | 2.6500000 |
|---|-----------|-----------|-----------|-----------|

---

Unique Subject Identifier=5120011000-0007

Assay variable : PTINR\_VAL1 PT-INR Value

N Mean Standard Deviation Minimum Maximum

---

|   |           |           |           |           |
|---|-----------|-----------|-----------|-----------|
| 4 | 2.1225000 | 0.6075840 | 1.5700000 | 2.8700000 |
|---|-----------|-----------|-----------|-----------|

---

Unique Subject Identifier=5120011000-0015

Assay variable : PTINR\_VAL1 PT-INR Value

N Mean Standard Deviation Minimum Maximum

---

|   |           |           |           |           |
|---|-----------|-----------|-----------|-----------|
| 4 | 2.4300000 | 0.6185467 | 2.0100000 | 3.3500000 |
|---|-----------|-----------|-----------|-----------|

---

Unique Subject Identifier=5124000000-0005

Assay variable : PTINR\_VAL1 PT-INR Value

N Mean Standard Deviation Minimum Maximum

---

|   |          |           |          |          |
|---|----------|-----------|----------|----------|
| 3 | 2.060000 | 0.7432362 | 1.280000 | 2.760000 |
|---|----------|-----------|----------|----------|

---

Laboratory tests at the time of obtaining Table 2-6 consent, according to the presence or absence of proton-pump inhibitors

Unique Subject Identifier=512400000-0008

MEANS Procedure

Assay variable : PTINR\_VAL1 PT-INR Value

N Mean Standard Deviation Minimum Maximum

---

|   |          |           |          |          |
|---|----------|-----------|----------|----------|
| 6 | 2.610000 | 0.4574713 | 2.070000 | 3.420000 |
|---|----------|-----------|----------|----------|

---

Unique Subject Identifier=5131011111-0004

Assay variable : PTINR\_VAL1 PT-INR Value

N Mean Standard Deviation Minimum Maximum

---

|   |           |           |          |          |
|---|-----------|-----------|----------|----------|
| 3 | 1.7933333 | 0.3493327 | 1.480000 | 2.170000 |
|---|-----------|-----------|----------|----------|

---

Unique Subject Identifier=5131011111-0010

Assay variable : PTINR\_VAL1 PT-INR Value

N Mean Standard Deviation Minimum Maximum

---

|   |          |           |          |          |
|---|----------|-----------|----------|----------|
| 3 | 1.880000 | 0.1992486 | 1.760000 | 2.110000 |
|---|----------|-----------|----------|----------|

---

Unique Subject Identifier=5131011111-0013

Assay variable : PTINR\_VAL1 PT-INR Value

N Mean Standard Deviation Minimum Maximum

---

|   |          |           |          |          |
|---|----------|-----------|----------|----------|
| 3 | 1.760000 | 0.3109662 | 1.420000 | 2.030000 |
|---|----------|-----------|----------|----------|

---

Laboratory tests at the time of obtaining Table 2-6 consent, according to the presence or absence of proton-pump inhibitors

Unique Subject Identifier=5131011111-0017

MEANS Procedure

Assay variable : PTINR\_VAL1 PT-INR Value

| N | Mean      | Standard Deviation | Minimum   | Maximum   |
|---|-----------|--------------------|-----------|-----------|
| 5 | 1.6320000 | 0.4152951          | 1.3200000 | 2.3100000 |

Unique Subject Identifier=5131011111-0018

Assay variable : PTINR\_VAL1 PT-INR Value

| N | Mean      | Standard Deviation | Minimum   | Maximum   |
|---|-----------|--------------------|-----------|-----------|
| 3 | 1.5666667 | 0.1530795          | 1.4500000 | 1.7400000 |

Unique Subject Identifier=5135000000-0003

Assay variable : PTINR\_VAL1 PT-INR Value

| N | Mean      | Standard Deviation | Minimum   | Maximum   |
|---|-----------|--------------------|-----------|-----------|
| 3 | 1.6666667 | 0.0981495          | 1.6100000 | 1.7800000 |

Unique Subject Identifier=5135000000-0004



Assay variable : PTINR\_VAL1 PT-INR Value

N Mean Standard Deviation Minimum Maximum

---

|   |          |  |          |          |
|---|----------|--|----------|----------|
| 1 | 2.480000 |  | 2.480000 | 2.480000 |
|---|----------|--|----------|----------|

---

Laboratory tests at the time of obtaining Table 2-6 consent, according to the presence or absence of proton-pump inhibitors

Unique Subject Identifier=5135000000-0006

MEANS Procedure

Assay variable : PTINR\_VAL1 PT-INR Value

N Mean Standard Deviation Minimum Maximum

---

|   |           |           |           |           |
|---|-----------|-----------|-----------|-----------|
| 3 | 2.0166667 | 0.2577466 | 1.7400000 | 2.2500000 |
|---|-----------|-----------|-----------|-----------|

---

Unique Subject Identifier=5136000000-0004

Assay variable : PTINR\_VAL1 PT-INR Value

N Mean Standard Deviation Minimum Maximum

---

|   |           |           |           |           |
|---|-----------|-----------|-----------|-----------|
| 4 | 1.4375000 | 0.2802826 | 1.1200000 | 1.7200000 |
|---|-----------|-----------|-----------|-----------|

---

Unique Subject Identifier=5136000000-0012

Assay variable : PTINR\_VAL1 PT-INR Value

N Mean Standard Deviation Minimum Maximum

---

|   |           |           |           |           |
|---|-----------|-----------|-----------|-----------|
| 3 | 1.9033333 | 0.1415392 | 1.7400000 | 1.9900000 |
|---|-----------|-----------|-----------|-----------|

---

Unique Subject Identifier=5136000000-0028

Assay variable : PTINR\_VAL1 PT-INR Value

N Mean Standard Deviation Minimum Maximum

---

|   |           |  |           |           |
|---|-----------|--|-----------|-----------|
| 1 | 1.7300000 |  | 1.7300000 | 1.7300000 |
|---|-----------|--|-----------|-----------|

---

Laboratory tests at the time of obtaining Table 2-6 consent, according to the presence or absence of proton-pump inhibitors

Unique Subject Identifier=5140011000-0004

MEANS Procedure

Assay variable : PTINR\_VAL1 PT-INR Value

N Mean Standard Deviation Minimum Maximum

---

|   |           |           |           |           |
|---|-----------|-----------|-----------|-----------|
| 3 | 1.8300000 | 0.3508561 | 1.4400000 | 2.1200000 |
|---|-----------|-----------|-----------|-----------|

---

Unique Subject Identifier=5141111100-0010

Assay variable : PTINR\_VAL1 PT-INR Value

N Mean Standard Deviation Minimum Maximum

---

|   |           |           |           |           |
|---|-----------|-----------|-----------|-----------|
| 4 | 1.8150000 | 0.3570714 | 1.5300000 | 2.3200000 |
|---|-----------|-----------|-----------|-----------|

---

Unique Subject Identifier=5141111100-0016

Assay variable : PTINR\_VAL1 PT-INR Value

N Mean Standard Deviation Minimum Maximum

---

|   |           |  |           |           |
|---|-----------|--|-----------|-----------|
| 1 | 2.5400000 |  | 2.5400000 | 2.5400000 |
|---|-----------|--|-----------|-----------|

---

Unique Subject Identifier=5141111100-0017

Assay variable : PTINR\_VAL1 PT-INR Value

N Mean Standard Deviation Minimum Maximum

---

|   |          |           |          |          |
|---|----------|-----------|----------|----------|
| 3 | 2.510000 | 0.1652271 | 2.350000 | 2.680000 |
|---|----------|-----------|----------|----------|

---

Laboratory tests at the time of obtaining Table 2-6 consent, according to the presence or absence of proton-pump inhibitors

Unique Subject Identifier=5141111100-0023

MEANS Procedure

Assay variable : PTINR\_VAL1 PT-INR Value

N Mean Standard Deviation Minimum Maximum

---

|   |           |           |           |           |
|---|-----------|-----------|-----------|-----------|
| 3 | 1.5166667 | 0.3442867 | 1.2700000 | 1.9100000 |
|---|-----------|-----------|-----------|-----------|

---

Unique Subject Identifier=5141111100-0027

Assay variable : PTINR\_VAL1 PT-INR Value

N Mean Standard Deviation Minimum Maximum

---

|   |           |           |           |           |
|---|-----------|-----------|-----------|-----------|
| 3 | 2.5066667 | 0.3360556 | 2.1400000 | 2.8000000 |
|---|-----------|-----------|-----------|-----------|

---

Unique Subject Identifier=5155000000-0004

Assay variable : PTINR\_VAL1 PT-INR Value

N Mean Standard Deviation Minimum Maximum

---

|   |           |           |           |           |
|---|-----------|-----------|-----------|-----------|
| 5 | 2.3660000 | 0.3339611 | 1.8700000 | 2.7200000 |
|---|-----------|-----------|-----------|-----------|

---

Unique Subject Identifier=5155000000-0011

Assay variable : PTINR\_VAL1 PT-INR Value

N Mean Standard Deviation Minimum Maximum

---

|   |           |           |           |           |
|---|-----------|-----------|-----------|-----------|
| 4 | 1.7075000 | 0.0873212 | 1.6300000 | 1.8100000 |
|---|-----------|-----------|-----------|-----------|

---

Laboratory tests at the time of obtaining Table 2-6 consent, according to the presence or absence of proton-pump inhibitors

Unique Subject Identifier=5155000000-0015

MEANS Procedure

Assay variable : PTINR\_VAL1 PT-INR Value

N Mean Standard Deviation Minimum Maximum

---

|   |           |           |           |           |
|---|-----------|-----------|-----------|-----------|
| 3 | 2.2466667 | 0.0929157 | 2.1400000 | 2.3100000 |
|---|-----------|-----------|-----------|-----------|

---

Unique Subject Identifier=5155000000-0022

Assay variable : PTINR\_VAL1 PT-INR Value

N Mean Standard Deviation Minimum Maximum

---

|   |           |           |           |           |
|---|-----------|-----------|-----------|-----------|
| 6 | 2.9050000 | 1.0010744 | 2.0000000 | 4.8000000 |
|---|-----------|-----------|-----------|-----------|

---

Unique Subject Identifier=5157010010-0003

Assay variable : PTINR\_VAL1 PT-INR Value

N Mean Standard Deviation Minimum Maximum

---

|   |           |           |           |           |
|---|-----------|-----------|-----------|-----------|
| 3 | 1.7033333 | 0.1628906 | 1.5900000 | 1.8900000 |
|---|-----------|-----------|-----------|-----------|

---

Unique Subject Identifier=5161010010-0005



Assay variable : PTINR\_VAL1 PT-INR Value

N Mean Standard Deviation Minimum Maximum

---

|   |          |           |          |          |
|---|----------|-----------|----------|----------|
| 3 | 3.280000 | 1.2038688 | 2.570000 | 4.670000 |
|---|----------|-----------|----------|----------|

---

Laboratory tests at the time of obtaining Table 2-6 consent, according to the presence or absence of proton-pump inhibitors

Unique Subject Identifier=516600000-0002

MEANS Procedure

Assay variable : PTINR\_VAL1 PT-INR Value

| N | Mean      | Standard Deviation | Minimum   | Maximum   |
|---|-----------|--------------------|-----------|-----------|
| 4 | 1.7825000 | 0.1206579          | 1.6900000 | 1.9600000 |

Unique Subject Identifier=516600000-0009

Assay variable : PTINR\_VAL1 PT-INR Value

| N | Mean      | Standard Deviation | Minimum   | Maximum   |
|---|-----------|--------------------|-----------|-----------|
| 5 | 1.9960000 | 0.1213672          | 1.8100000 | 2.1100000 |

Unique Subject Identifier=5171010000-0023

Assay variable : PTINR\_VAL1 PT-INR Value

| N | Mean      | Standard Deviation | Minimum   | Maximum   |
|---|-----------|--------------------|-----------|-----------|
| 5 | 2.0320000 | 0.1370036          | 1.8700000 | 2.2500000 |

Unique Subject Identifier=5198000001-0010

Assay variable : PTINR\_VAL1 PT-INR Value

N Mean Standard Deviation Minimum Maximum

---

|   |           |           |           |           |
|---|-----------|-----------|-----------|-----------|
| 4 | 1.9300000 | 0.3190611 | 1.5800000 | 2.3500000 |
|---|-----------|-----------|-----------|-----------|

---

Laboratory tests at the time of obtaining Table 2-6 consent, according to the presence or absence of proton-pump inhibitors

Unique Subject Identifier=5198000001-0015

MEANS Procedure

Assay variable : PTINR\_VAL1 PT-INR Value

| N | Mean      | Standard Deviation | Minimum   | Maximum   |
|---|-----------|--------------------|-----------|-----------|
| 2 | 2.0000000 | 0.2545584          | 1.8200000 | 2.1800000 |

Unique Subject Identifier=5198000001-0031

Assay variable : PTINR\_VAL1 PT-INR Value

| N | Mean      | Standard Deviation | Minimum   | Maximum   |
|---|-----------|--------------------|-----------|-----------|
| 1 | 1.2000000 |                    | 1.2000000 | 1.2000000 |

Unique Subject Identifier=5198000001-0033

Assay variable : PTINR\_VAL1 PT-INR Value

| N | Mean      | Standard Deviation | Minimum   | Maximum   |
|---|-----------|--------------------|-----------|-----------|
| 2 | 2.4300000 | 0.0848528          | 2.3700000 | 2.4900000 |

Unique Subject Identifier=5198000001-0034

Assay variable : PTINR\_VAL1 PT-INR Value

N Mean Standard Deviation Minimum Maximum

---

|   |           |           |           |           |
|---|-----------|-----------|-----------|-----------|
| 4 | 1.9700000 | 0.6019413 | 1.2100000 | 2.5900000 |
|---|-----------|-----------|-----------|-----------|

---

Laboratory tests at the time of obtaining Table 2-6 consent, according to the presence or absence of proton-pump inhibitors

Unique Subject Identifier=5198000001-0044

MEANS Procedure

Assay variable : PTINR\_VAL1 PT-INR Value

| N | Mean      | Standard Deviation | Minimum   | Maximum   |
|---|-----------|--------------------|-----------|-----------|
| 6 | 2.2950000 | 0.3868721          | 1.6800000 | 2.7400000 |

Unique Subject Identifier=5198000001-0046

Assay variable : PTINR\_VAL1 PT-INR Value

| N | Mean      | Standard Deviation | Minimum   | Maximum   |
|---|-----------|--------------------|-----------|-----------|
| 2 | 1.6700000 | 0.1414214          | 1.5700000 | 1.7700000 |

Unique Subject Identifier=5198000001-0050

Assay variable : PTINR\_VAL1 PT-INR Value

| N | Mean      | Standard Deviation | Minimum   | Maximum   |
|---|-----------|--------------------|-----------|-----------|
| 4 | 1.5300000 | 0.3408812          | 1.1200000 | 1.9500000 |

Unique Subject Identifier=5198000001-0073

Assay variable : PTINR\_VAL1 PT-INR Value

N Mean Standard Deviation Minimum Maximum

---

|   |           |   |           |           |
|---|-----------|---|-----------|-----------|
| 2 | 1.7100000 | 0 | 1.7100000 | 1.7100000 |
|---|-----------|---|-----------|-----------|

---

Laboratory tests at the time of obtaining Table 2-6 consent, according to the presence or absence of proton-pump inhibitors

Unique Subject Identifier=5198000001-0076

MEANS Procedure

Assay variable : PTINR\_VAL1 PT-INR Value

| N | Mean      | Standard Deviation | Minimum   | Maximum   |
|---|-----------|--------------------|-----------|-----------|
| 2 | 2.1650000 | 0.2616295          | 1.9800000 | 2.3500000 |

Unique Subject Identifier=5198000001-0085

Assay variable : PTINR\_VAL1 PT-INR Value

| N | Mean      | Standard Deviation | Minimum   | Maximum   |
|---|-----------|--------------------|-----------|-----------|
| 1 | 2.4400000 |                    | 2.4400000 | 2.4400000 |

Unique Subject Identifier=5198000001-0093

Assay variable : PTINR\_VAL1 PT-INR Value

| N | Mean      | Standard Deviation | Minimum   | Maximum   |
|---|-----------|--------------------|-----------|-----------|
| 1 | 2.0700000 |                    | 2.0700000 | 2.0700000 |

Unique Subject Identifier=5198000001-0098



Assay variable : PTINR\_VAL1 PT-INR Value

N Mean Standard Deviation Minimum Maximum

---

|   |          |  |          |          |
|---|----------|--|----------|----------|
| 1 | 1.340000 |  | 1.340000 | 1.340000 |
|---|----------|--|----------|----------|

---

Laboratory tests at the time of obtaining Table 2-6 consent, according to the presence or absence of proton-pump inhibitors

Unique Subject Identifier=5198000001-0107

MEANS Procedure

Assay variable : PTINR\_VAL1 PT-INR Value

N Mean Standard Deviation Minimum Maximum

---

|   |           |           |           |           |
|---|-----------|-----------|-----------|-----------|
| 2 | 1.7850000 | 0.6151829 | 1.3500000 | 2.2200000 |
|---|-----------|-----------|-----------|-----------|

---

Unique Subject Identifier=5198000001-0115

Assay variable : PTINR\_VAL1 PT-INR Value

N Mean Standard Deviation Minimum Maximum

---

|   |           |           |           |           |
|---|-----------|-----------|-----------|-----------|
| 2 | 2.0250000 | 0.0919239 | 1.9600000 | 2.0900000 |
|---|-----------|-----------|-----------|-----------|

---

Unique Subject Identifier=5198000001-0120

Assay variable : PTINR\_VAL1 PT-INR Value

N Mean Standard Deviation Minimum Maximum

---

|   |           |  |           |           |
|---|-----------|--|-----------|-----------|
| 1 | 1.7800000 |  | 1.7800000 | 1.7800000 |
|---|-----------|--|-----------|-----------|

---

Unique Subject Identifier=5198000001-0122

Assay variable : PTINR\_VAL1 PT-INR Value

N Mean Standard Deviation Minimum Maximum

---

|   |           |           |           |           |
|---|-----------|-----------|-----------|-----------|
| 5 | 1.9300000 | 0.2166795 | 1.7800000 | 2.3100000 |
|---|-----------|-----------|-----------|-----------|

---

Laboratory tests at the time of obtaining Table 2-6 consent, according to the presence or absence of proton-pump inhibitors

Unique Subject Identifier=5198000001-0143

MEANS Procedure

Assay variable : PTINR\_VAL1 PT-INR Value

| N | Mean      | Standard Deviation | Minimum   | Maximum   |
|---|-----------|--------------------|-----------|-----------|
| 1 | 2.0100000 |                    | 2.0100000 | 2.0100000 |

Unique Subject Identifier=5198000001-0147

Assay variable : PTINR\_VAL1 PT-INR Value

| N | Mean      | Standard Deviation | Minimum   | Maximum   |
|---|-----------|--------------------|-----------|-----------|
| 1 | 1.8000000 |                    | 1.8000000 | 1.8000000 |

Unique Subject Identifier=5198000001-0162

Assay variable : PTINR\_VAL1 PT-INR Value

| N | Mean      | Standard Deviation | Minimum   | Maximum   |
|---|-----------|--------------------|-----------|-----------|
| 1 | 2.8300000 |                    | 2.8300000 | 2.8300000 |

Unique Subject Identifier=5198000001-0169

Assay variable : PTINR\_VAL1 PT-INR Value

N Mean Standard Deviation Minimum Maximum

---

|   |           |  |           |           |
|---|-----------|--|-----------|-----------|
| 1 | 1.5700000 |  | 1.5700000 | 1.5700000 |
|---|-----------|--|-----------|-----------|

---

Laboratory tests at the time of obtaining Table 2-6 consent, according to the presence or absence of proton-pump inhibitors

Unique Subject Identifier=5198000001-0172

MEANS Procedure

Assay variable : PTINR\_VAL1 PT-INR Value

| N | Mean      | Standard Deviation | Minimum   | Maximum   |
|---|-----------|--------------------|-----------|-----------|
| 1 | 1.7900000 |                    | 1.7900000 | 1.7900000 |

Unique Subject Identifier=5198000001-0176

Assay variable : PTINR\_VAL1 PT-INR Value

| N | Mean      | Standard Deviation | Minimum   | Maximum   |
|---|-----------|--------------------|-----------|-----------|
| 1 | 1.9500000 |                    | 1.9500000 | 1.9500000 |

Unique Subject Identifier=5198000001-0188

Assay variable : PTINR\_VAL1 PT-INR Value

| N | Mean      | Standard Deviation | Minimum   | Maximum   |
|---|-----------|--------------------|-----------|-----------|
| 5 | 2.1740000 | 0.5151019          | 1.7900000 | 3.0600000 |

Unique Subject Identifier=5198000001-0194

Assay variable : PTINR\_VAL1 PT-INR Value

N Mean Standard Deviation Minimum Maximum

---

|   |           |           |           |           |
|---|-----------|-----------|-----------|-----------|
| 6 | 1.6433333 | 0.1795179 | 1.5000000 | 1.9200000 |
|---|-----------|-----------|-----------|-----------|

---

Laboratory tests at the time of obtaining Table 2-6 consent, according to the presence or absence of proton-pump inhibitors

Unique Subject Identifier=5198000001-0195

MEANS Procedure

Assay variable : PTINR\_VAL1 PT-INR Value

| N | Mean      | Standard Deviation | Minimum   | Maximum   |
|---|-----------|--------------------|-----------|-----------|
| 1 | 1.2300000 |                    | 1.2300000 | 1.2300000 |

Unique Subject Identifier=5198000001-0198

Assay variable : PTINR\_VAL1 PT-INR Value

| N | Mean      | Standard Deviation | Minimum   | Maximum   |
|---|-----------|--------------------|-----------|-----------|
| 6 | 1.6000000 | 0.3036445          | 1.1900000 | 1.8900000 |

Unique Subject Identifier=5198000001-0201

Assay variable : PTINR\_VAL1 PT-INR Value

| N | Mean      | Standard Deviation | Minimum   | Maximum   |
|---|-----------|--------------------|-----------|-----------|
| 1 | 3.4000000 |                    | 3.4000000 | 3.4000000 |

Unique Subject Identifier=5198000001-0210



Assay variable : PTINR\_VAL1 PT-INR Value

N Mean Standard Deviation Minimum Maximum

---

|   |           |  |           |           |
|---|-----------|--|-----------|-----------|
| 1 | 2.3800000 |  | 2.3800000 | 2.3800000 |
|---|-----------|--|-----------|-----------|

---

Laboratory tests at the time of obtaining Table 2-6 consent, according to the presence or absence of proton-pump inhibitors

Unique Subject Identifier=5198000001-0218

MEANS Procedure

Assay variable : PTINR\_VAL1 PT-INR Value

| N | Mean      | Standard Deviation | Minimum   | Maximum   |
|---|-----------|--------------------|-----------|-----------|
| 3 | 2.1633333 | 0.3066486          | 1.8400000 | 2.4500000 |

Unique Subject Identifier=5198000001-0219

Assay variable : PTINR\_VAL1 PT-INR Value

| N | Mean      | Standard Deviation | Minimum   | Maximum   |
|---|-----------|--------------------|-----------|-----------|
| 6 | 1.6366667 | 0.1802961          | 1.4800000 | 1.8800000 |

Unique Subject Identifier=5198000001-0224

Assay variable : PTINR\_VAL1 PT-INR Value

| N | Mean      | Standard Deviation | Minimum   | Maximum   |
|---|-----------|--------------------|-----------|-----------|
| 2 | 2.3550000 | 0.1484924          | 2.2500000 | 2.4600000 |

Unique Subject Identifier=5198000001-0228

Assay variable : PTINR\_VAL1 PT-INR Value

N Mean Standard Deviation Minimum Maximum

---

|   |           |  |           |           |
|---|-----------|--|-----------|-----------|
| 1 | 1.9700000 |  | 1.9700000 | 1.9700000 |
|---|-----------|--|-----------|-----------|

---

Laboratory tests at the time of obtaining Table 2-6 consent, according to the presence or absence of proton-pump inhibitors

Unique Subject Identifier=5198000001-0243

MEANS Procedure

Assay variable : PTINR\_VAL1 PT-INR Value

N Mean Standard Deviation Minimum Maximum

---

|   |          |  |          |          |
|---|----------|--|----------|----------|
| 1 | 3.480000 |  | 3.480000 | 3.480000 |
|---|----------|--|----------|----------|

---

Unique Subject Identifier=5198000001-0248

Assay variable : PTINR\_VAL1 PT-INR Value

N Mean Standard Deviation Minimum Maximum

---

|   |          |           |          |          |
|---|----------|-----------|----------|----------|
| 2 | 1.370000 | 0.0848528 | 1.310000 | 1.430000 |
|---|----------|-----------|----------|----------|

---

Unique Subject Identifier=5208011010-0002

Assay variable : PTINR\_VAL1 PT-INR Value

N Mean Standard Deviation Minimum Maximum

---

|   |          |           |          |          |
|---|----------|-----------|----------|----------|
| 2 | 1.995000 | 0.0919239 | 1.930000 | 2.060000 |
|---|----------|-----------|----------|----------|

---

Unique Subject Identifier=5208011010-0008

Assay variable : PTINR\_VAL1 PT-INR Value

N Mean Standard Deviation Minimum Maximum

---

|   |           |           |           |           |
|---|-----------|-----------|-----------|-----------|
| 5 | 2.1160000 | 0.2524480 | 1.9000000 | 2.5400000 |
|---|-----------|-----------|-----------|-----------|

---

Laboratory tests at the time of obtaining Table 2-6 consent, according to the presence or absence of proton-pump inhibitors

Unique Subject Identifier=5208011010-0011

MEANS Procedure

Assay variable : PTINR\_VAL1 PT-INR Value

N Mean Standard Deviation Minimum Maximum

---

|   |           |           |           |           |
|---|-----------|-----------|-----------|-----------|
| 5 | 2.4020000 | 0.2808380 | 2.1500000 | 2.8200000 |
|---|-----------|-----------|-----------|-----------|

---

Unique Subject Identifier=5210000100-0019

Assay variable : PTINR\_VAL1 PT-INR Value

N Mean Standard Deviation Minimum Maximum

---

|   |           |           |           |           |
|---|-----------|-----------|-----------|-----------|
| 3 | 1.9333333 | 0.5179125 | 1.6000000 | 2.5300000 |
|---|-----------|-----------|-----------|-----------|

---

Unique Subject Identifier=5210000100-0023

Assay variable : PTINR\_VAL1 PT-INR Value

N Mean Standard Deviation Minimum Maximum

---

|   |           |           |           |           |
|---|-----------|-----------|-----------|-----------|
| 3 | 1.8766667 | 0.2914332 | 1.5500000 | 2.1100000 |
|---|-----------|-----------|-----------|-----------|

---

Unique Subject Identifier=5210000100-0024

Assay variable : PTINR\_VAL1 PT-INR Value

N Mean Standard Deviation Minimum Maximum

---

|   |           |           |           |           |
|---|-----------|-----------|-----------|-----------|
| 3 | 1.8333333 | 0.0929157 | 1.7300000 | 1.9100000 |
|---|-----------|-----------|-----------|-----------|

---

Laboratory tests at the time of obtaining Table 2-6 consent, according to the presence or absence of proton-pump inhibitors

Unique Subject Identifier=5214010110-0002

MEANS Procedure

Assay variable : PTINR\_VAL1 PT-INR Value

| N | Mean      | Standard Deviation | Minimum   | Maximum   |
|---|-----------|--------------------|-----------|-----------|
| 2 | 1.7750000 | 0.1202082          | 1.6900000 | 1.8600000 |

Unique Subject Identifier=5223000000-0005

Assay variable : PTINR\_VAL1 PT-INR Value

| N | Mean      | Standard Deviation | Minimum   | Maximum   |
|---|-----------|--------------------|-----------|-----------|
| 3 | 2.7833333 | 0.3003886          | 2.6000000 | 3.1300000 |

Unique Subject Identifier=5223000000-0011

Assay variable : PTINR\_VAL1 PT-INR Value

| N | Mean      | Standard Deviation | Minimum   | Maximum   |
|---|-----------|--------------------|-----------|-----------|
| 5 | 1.9060000 | 0.5252904          | 1.3700000 | 2.7000000 |

Unique Subject Identifier=5232010000-0010



Assay variable : PTINR\_VAL1 PT-INR Value

N Mean Standard Deviation Minimum Maximum

---

|   |           |           |           |           |
|---|-----------|-----------|-----------|-----------|
| 4 | 1.9550000 | 0.2636285 | 1.5900000 | 2.2200000 |
|---|-----------|-----------|-----------|-----------|

---

Laboratory tests at the time of obtaining Table 2-6 consent, according to the presence or absence of proton-pump inhibitors

Unique Subject Identifier=5232010000-0015

MEANS Procedure

Assay variable : PTINR\_VAL1 PT-INR Value

N Mean Standard Deviation Minimum Maximum

---

|   |           |           |           |           |
|---|-----------|-----------|-----------|-----------|
| 6 | 1.9083333 | 0.4707618 | 1.4800000 | 2.6100000 |
|---|-----------|-----------|-----------|-----------|

---

Unique Subject Identifier=5232010000-0023

Assay variable : PTINR\_VAL1 PT-INR Value

N Mean Standard Deviation Minimum Maximum

---

|   |           |           |           |           |
|---|-----------|-----------|-----------|-----------|
| 6 | 1.8066667 | 0.1840290 | 1.6200000 | 2.0700000 |
|---|-----------|-----------|-----------|-----------|

---

Unique Subject Identifier=5232010000-0027

Assay variable : PTINR\_VAL1 PT-INR Value

N Mean Standard Deviation Minimum Maximum

---

|   |           |           |           |           |
|---|-----------|-----------|-----------|-----------|
| 3 | 2.1000000 | 0.4765501 | 1.8100000 | 2.6500000 |
|---|-----------|-----------|-----------|-----------|

---

Unique Subject Identifier=5233000000-0009

Assay variable : PTINR\_VAL1 PT-INR Value

N Mean Standard Deviation Minimum Maximum

---

|   |           |           |           |           |
|---|-----------|-----------|-----------|-----------|
| 5 | 1.5960000 | 0.3983466 | 1.2800000 | 2.2900000 |
|---|-----------|-----------|-----------|-----------|

---

Laboratory tests at the time of obtaining Table 2-6 consent, according to the presence or absence of proton-pump inhibitors

Unique Subject Identifier=523500000-0005

MEANS Procedure

Assay variable : PTINR\_VAL1 PT-INR Value

N Mean Standard Deviation Minimum Maximum

---

|   |           |           |           |           |
|---|-----------|-----------|-----------|-----------|
| 6 | 2.2833333 | 0.4622409 | 1.9000000 | 3.1000000 |
|---|-----------|-----------|-----------|-----------|

---

Unique Subject Identifier=523500000-0026

Assay variable : PTINR\_VAL1 PT-INR Value

N Mean Standard Deviation Minimum Maximum

---

|   |           |           |           |           |
|---|-----------|-----------|-----------|-----------|
| 6 | 2.0500000 | 0.1378405 | 1.9000000 | 2.2000000 |
|---|-----------|-----------|-----------|-----------|

---

Unique Subject Identifier=523500000-0057

Assay variable : PTINR\_VAL1 PT-INR Value

N Mean Standard Deviation Minimum Maximum

---

|   |           |           |           |           |
|---|-----------|-----------|-----------|-----------|
| 4 | 1.7825000 | 0.1426826 | 1.6200000 | 1.9300000 |
|---|-----------|-----------|-----------|-----------|

---

Unique Subject Identifier=523500000-0068

Assay variable : PTINR\_VAL1 PT-INR Value

N Mean Standard Deviation Minimum Maximum

---

|   |           |           |           |           |
|---|-----------|-----------|-----------|-----------|
| 6 | 1.7000000 | 0.0894427 | 1.6000000 | 1.8000000 |
|---|-----------|-----------|-----------|-----------|

---

Laboratory tests at the time of obtaining Table 2-6 consent, according to the presence or absence of proton-pump inhibitors

Unique Subject Identifier=523600000-0003

MEANS Procedure

Assay variable : PTINR\_VAL1 PT-INR Value

| N | Mean      | Standard Deviation | Minimum   | Maximum   |
|---|-----------|--------------------|-----------|-----------|
| 6 | 1.6133333 | 0.2304488          | 1.1600000 | 1.7700000 |

Unique Subject Identifier=523600000-0010

Assay variable : PTINR\_VAL1 PT-INR Value

| N | Mean      | Standard Deviation | Minimum   | Maximum   |
|---|-----------|--------------------|-----------|-----------|
| 6 | 1.9266667 | 0.7148613          | 1.2600000 | 2.8500000 |

Unique Subject Identifier=5237010000-0002

Assay variable : PTINR\_VAL1 PT-INR Value

| N | Mean      | Standard Deviation | Minimum   | Maximum   |
|---|-----------|--------------------|-----------|-----------|
| 6 | 2.1433333 | 0.2946637          | 1.8700000 | 2.7000000 |

Unique Subject Identifier=5237010000-0003

Assay variable : PTINR\_VAL1 PT-INR Value

N Mean Standard Deviation Minimum Maximum

---

|   |           |           |           |           |
|---|-----------|-----------|-----------|-----------|
| 5 | 2.0260000 | 0.6477114 | 1.3300000 | 2.9300000 |
|---|-----------|-----------|-----------|-----------|

---

Laboratory tests at the time of obtaining Table 2-6 consent, according to the presence or absence of proton-pump inhibitors

Unique Subject Identifier=5237010000-0004

MEANS Procedure

Assay variable : PTINR\_VAL1 PT-INR Value

N Mean Standard Deviation Minimum Maximum

---

|   |           |           |           |           |
|---|-----------|-----------|-----------|-----------|
| 4 | 1.9300000 | 0.2853069 | 1.6400000 | 2.3000000 |
|---|-----------|-----------|-----------|-----------|

---

Unique Subject Identifier=5237010000-0007

Assay variable : PTINR\_VAL1 PT-INR Value

N Mean Standard Deviation Minimum Maximum

---

|   |           |           |           |           |
|---|-----------|-----------|-----------|-----------|
| 5 | 2.2840000 | 0.3001333 | 1.9300000 | 2.6900000 |
|---|-----------|-----------|-----------|-----------|

---

Unique Subject Identifier=5237010000-0008

Assay variable : PTINR\_VAL1 PT-INR Value

N Mean Standard Deviation Minimum Maximum

---

|   |           |           |           |           |
|---|-----------|-----------|-----------|-----------|
| 5 | 1.7160000 | 0.2997165 | 1.4600000 | 2.2300000 |
|---|-----------|-----------|-----------|-----------|

---

Unique Subject Identifier=5237010000-0013



Assay variable : PTINR\_VAL1 PT-INR Value

N Mean Standard Deviation Minimum Maximum

---

|   |           |           |           |           |
|---|-----------|-----------|-----------|-----------|
| 5 | 2.0320000 | 0.1488959 | 1.8400000 | 2.2400000 |
|---|-----------|-----------|-----------|-----------|

---

Laboratory tests at the time of obtaining Table 2-6 consent, according to the presence or absence of proton-pump inhibitors

Unique Subject Identifier=5237010000-0014

MEANS Procedure

Assay variable : PTINR\_VAL1 PT-INR Value

N Mean Standard Deviation Minimum Maximum

---

|   |           |           |           |           |
|---|-----------|-----------|-----------|-----------|
| 4 | 1.7275000 | 0.4285149 | 1.2700000 | 2.3000000 |
|---|-----------|-----------|-----------|-----------|

---

Unique Subject Identifier=5255000000-0001

Assay variable : PTINR\_VAL1 PT-INR Value

N Mean Standard Deviation Minimum Maximum

---

|   |           |           |           |           |
|---|-----------|-----------|-----------|-----------|
| 2 | 2.4450000 | 0.2474874 | 2.2700000 | 2.6200000 |
|---|-----------|-----------|-----------|-----------|

---

Unique Subject Identifier=5255000000-0010

Assay variable : PTINR\_VAL1 PT-INR Value

N Mean Standard Deviation Minimum Maximum

---

|   |           |  |           |           |
|---|-----------|--|-----------|-----------|
| 1 | 2.1800000 |  | 2.1800000 | 2.1800000 |
|---|-----------|--|-----------|-----------|

---

Unique Subject Identifier=5260010000-0001

Assay variable : PTINR\_VAL1 PT-INR Value

N Mean Standard Deviation Minimum Maximum

---

|   |           |           |           |           |
|---|-----------|-----------|-----------|-----------|
| 5 | 1.8320000 | 0.2392070 | 1.5600000 | 2.2100000 |
|---|-----------|-----------|-----------|-----------|

---

Laboratory tests at the time of obtaining Table 2-6 consent, according to the presence or absence of proton-pump inhibitors

Unique Subject Identifier=5260010000-0002

MEANS Procedure

Assay variable : PTINR\_VAL1 PT-INR Value

N Mean Standard Deviation Minimum Maximum

---

|   |           |           |           |           |
|---|-----------|-----------|-----------|-----------|
| 6 | 1.9116667 | 0.3362985 | 1.5200000 | 2.3400000 |
|---|-----------|-----------|-----------|-----------|

---

Unique Subject Identifier=5260010000-0003

Assay variable : PTINR\_VAL1 PT-INR Value

N Mean Standard Deviation Minimum Maximum

---

|   |           |           |           |           |
|---|-----------|-----------|-----------|-----------|
| 6 | 2.0700000 | 0.1692336 | 1.8900000 | 2.3900000 |
|---|-----------|-----------|-----------|-----------|

---

Unique Subject Identifier=5260010000-0004

Assay variable : PTINR\_VAL1 PT-INR Value

N Mean Standard Deviation Minimum Maximum

---

|   |           |           |           |           |
|---|-----------|-----------|-----------|-----------|
| 2 | 1.5450000 | 0.0353553 | 1.5200000 | 1.5700000 |
|---|-----------|-----------|-----------|-----------|

---

Unique Subject Identifier=5260010000-0008

Assay variable : PTINR\_VAL1 PT-INR Value

N Mean Standard Deviation Minimum Maximum

---

|   |           |           |           |           |
|---|-----------|-----------|-----------|-----------|
| 3 | 1.8800000 | 0.3897435 | 1.4600000 | 2.2300000 |
|---|-----------|-----------|-----------|-----------|

---

Laboratory tests at the time of obtaining Table 2-6 consent, according to the presence or absence of proton-pump inhibitors

Unique Subject Identifier=5260010000-0010

MEANS Procedure

Assay variable : PTINR\_VAL1 PT-INR Value

| N | Mean      | Standard Deviation | Minimum   | Maximum   |
|---|-----------|--------------------|-----------|-----------|
| 3 | 1.8833333 | 0.2484619          | 1.7300000 | 2.1700000 |

Unique Subject Identifier=5260010000-0011

Assay variable : PTINR\_VAL1 PT-INR Value

| N | Mean      | Standard Deviation | Minimum   | Maximum   |
|---|-----------|--------------------|-----------|-----------|
| 6 | 2.2766667 | 0.1167333          | 2.1000000 | 2.4100000 |

Unique Subject Identifier=5260010000-0015

Assay variable : PTINR\_VAL1 PT-INR Value

| N | Mean      | Standard Deviation | Minimum   | Maximum   |
|---|-----------|--------------------|-----------|-----------|
| 5 | 1.8720000 | 0.1892617          | 1.6100000 | 2.1200000 |

Unique Subject Identifier=5260010000-0018

Assay variable : PTINR\_VAL1 PT-INR Value

N Mean Standard Deviation Minimum Maximum

---

|   |           |           |           |           |
|---|-----------|-----------|-----------|-----------|
| 2 | 2.1700000 | 0.2121320 | 2.0200000 | 2.3200000 |
|---|-----------|-----------|-----------|-----------|

---

Laboratory tests at the time of obtaining Table 2-6 consent, according to the presence or absence of proton-pump inhibitors

Unique Subject Identifier=5260010000-0023

MEANS Procedure

Assay variable : PTINR\_VAL1 PT-INR Value

| N | Mean      | Standard Deviation | Minimum   | Maximum   |
|---|-----------|--------------------|-----------|-----------|
| 4 | 1.8075000 | 0.3661853          | 1.2600000 | 2.0200000 |

Unique Subject Identifier=5260010000-0024

Assay variable : PTINR\_VAL1 PT-INR Value

| N | Mean      | Standard Deviation | Minimum   | Maximum   |
|---|-----------|--------------------|-----------|-----------|
| 3 | 2.0666667 | 0.2196209          | 1.9300000 | 2.3200000 |

Unique Subject Identifier=5261010010-0025

Assay variable : PTINR\_VAL1 PT-INR Value

| N | Mean      | Standard Deviation | Minimum   | Maximum   |
|---|-----------|--------------------|-----------|-----------|
| 2 | 2.4700000 | 0.7071068          | 1.9700000 | 2.9700000 |

Unique Subject Identifier=5298011110-0001



Assay variable : PTINR\_VAL1 PT-INR Value

N Mean Standard Deviation Minimum Maximum

---

|   |           |           |           |           |
|---|-----------|-----------|-----------|-----------|
| 5 | 2.2760000 | 0.1408190 | 2.1000000 | 2.4300000 |
|---|-----------|-----------|-----------|-----------|

---

Laboratory tests at the time of obtaining Table 2-6 consent, according to the presence or absence of proton-pump inhibitors

Unique Subject Identifier=5298011110-0016

MEANS Procedure

Assay variable : PTINR\_VAL1 PT-INR Value

| N | Mean      | Standard Deviation | Minimum   | Maximum   |
|---|-----------|--------------------|-----------|-----------|
| 5 | 2.0460000 | 0.2341581          | 1.7500000 | 2.2900000 |

Unique Subject Identifier=5298011110-0020

Assay variable : PTINR\_VAL1 PT-INR Value

| N | Mean      | Standard Deviation | Minimum   | Maximum   |
|---|-----------|--------------------|-----------|-----------|
| 6 | 2.6066667 | 0.3750022          | 2.1900000 | 3.3000000 |

Unique Subject Identifier=5298011110-0034

Assay variable : PTINR\_VAL1 PT-INR Value

| N | Mean      | Standard Deviation | Minimum   | Maximum   |
|---|-----------|--------------------|-----------|-----------|
| 3 | 2.2733333 | 0.2874601          | 2.0100000 | 2.5800000 |

Unique Subject Identifier=5326000000-0001

Assay variable : PTINR\_VAL1 PT-INR Value

N Mean Standard Deviation Minimum Maximum

---

|   |          |           |          |          |
|---|----------|-----------|----------|----------|
| 3 | 2.000000 | 0.3260368 | 1.660000 | 2.310000 |
|---|----------|-----------|----------|----------|

---

Laboratory tests at the time of obtaining Table 2-6 consent, according to the presence or absence of proton-pump inhibitors

Unique Subject Identifier=5342011001-0013

MEANS Procedure

Assay variable : PTINR\_VAL1 PT-INR Value

| N | Mean      | Standard Deviation | Minimum   | Maximum   |
|---|-----------|--------------------|-----------|-----------|
| 6 | 2.1483333 | 0.6879947          | 1.5300000 | 3.4600000 |

Unique Subject Identifier=5355000000-0014

Assay variable : PTINR\_VAL1 PT-INR Value

| N | Mean      | Standard Deviation | Minimum   | Maximum   |
|---|-----------|--------------------|-----------|-----------|
| 3 | 1.8133333 | 0.2948446          | 1.4800000 | 2.0400000 |

Unique Subject Identifier=5357000010-0021

Assay variable : PTINR\_VAL1 PT-INR Value

| N | Mean      | Standard Deviation | Minimum   | Maximum   |
|---|-----------|--------------------|-----------|-----------|
| 3 | 1.7666667 | 0.2081666          | 1.6000000 | 2.0000000 |

Unique Subject Identifier=5357000010-0030

Assay variable : PTINR\_VAL1 PT-INR Value

N Mean Standard Deviation Minimum Maximum

---

|   |          |          |          |          |
|---|----------|----------|----------|----------|
| 3 | 2.100000 | 0.600000 | 1.500000 | 2.700000 |
|---|----------|----------|----------|----------|

---

Laboratory tests at the time of obtaining Table 2-6 consent, according to the presence or absence of proton-pump inhibitors

Unique Subject Identifier=5414010000-0001

MEANS Procedure

Assay variable : PTINR\_VAL1 PT-INR Value

N Mean Standard Deviation Minimum Maximum

---

|   |           |           |           |           |
|---|-----------|-----------|-----------|-----------|
| 4 | 1.4500000 | 0.1568439 | 1.3000000 | 1.6000000 |
|---|-----------|-----------|-----------|-----------|

---

Unique Subject Identifier=5414010000-0017

Assay variable : PTINR\_VAL1 PT-INR Value

N Mean Standard Deviation Minimum Maximum

---

|   |           |           |           |           |
|---|-----------|-----------|-----------|-----------|
| 6 | 1.5800000 | 0.2282981 | 1.3200000 | 1.9600000 |
|---|-----------|-----------|-----------|-----------|

---

Unique Subject Identifier=5414010000-0022

Assay variable : PTINR\_VAL1 PT-INR Value

N Mean Standard Deviation Minimum Maximum

---

|   |           |           |           |           |
|---|-----------|-----------|-----------|-----------|
| 2 | 2.1950000 | 0.1202082 | 2.1100000 | 2.2800000 |
|---|-----------|-----------|-----------|-----------|

---

Unique Subject Identifier=5414010000-0023

Assay variable : PTINR\_VAL1 PT-INR Value

N Mean Standard Deviation Minimum Maximum

---

|   |           |           |           |           |
|---|-----------|-----------|-----------|-----------|
| 3 | 1.9100000 | 0.1212436 | 1.8000000 | 2.0400000 |
|---|-----------|-----------|-----------|-----------|

---

Laboratory tests at the time of obtaining Table 2-6 consent, according to the presence or absence of proton-pump inhibitors

Unique Subject Identifier=5414010000-0027

MEANS Procedure

Assay variable : PTINR\_VAL1 PT-INR Value

N Mean Standard Deviation Minimum Maximum

---

|   |           |           |           |           |
|---|-----------|-----------|-----------|-----------|
| 3 | 1.5333333 | 0.3785939 | 1.1000000 | 1.8000000 |
|---|-----------|-----------|-----------|-----------|

---

Unique Subject Identifier=5414010000-0030

Assay variable : PTINR\_VAL1 PT-INR Value

N Mean Standard Deviation Minimum Maximum

---

|   |           |           |           |           |
|---|-----------|-----------|-----------|-----------|
| 6 | 1.5650000 | 0.1674216 | 1.4300000 | 1.8900000 |
|---|-----------|-----------|-----------|-----------|

---

Unique Subject Identifier=5414010000-0031

Assay variable : PTINR\_VAL1 PT-INR Value

N Mean Standard Deviation Minimum Maximum

---

|   |           |           |           |           |
|---|-----------|-----------|-----------|-----------|
| 5 | 1.6520000 | 0.4814250 | 1.0600000 | 2.0900000 |
|---|-----------|-----------|-----------|-----------|

---

Unique Subject Identifier=5414010000-0032



Assay variable : PTINR\_VAL1 PT-INR Value

N Mean Standard Deviation Minimum Maximum

---

|   |           |           |           |           |
|---|-----------|-----------|-----------|-----------|
| 6 | 1.6383333 | 0.2628624 | 1.3400000 | 1.9600000 |
|---|-----------|-----------|-----------|-----------|

---

Laboratory tests at the time of obtaining Table 2-6 consent, according to the presence or absence of proton-pump inhibitors

Unique Subject Identifier=5414010000-0035

MEANS Procedure

Assay variable : PTINR\_VAL1 PT-INR Value

N Mean Standard Deviation Minimum Maximum

---

|   |           |           |           |           |
|---|-----------|-----------|-----------|-----------|
| 2 | 1.9300000 | 0.7495332 | 1.4000000 | 2.4600000 |
|---|-----------|-----------|-----------|-----------|

---

Unique Subject Identifier=5414010000-0039

Assay variable : PTINR\_VAL1 PT-INR Value

N Mean Standard Deviation Minimum Maximum

---

|   |           |           |           |           |
|---|-----------|-----------|-----------|-----------|
| 5 | 1.7420000 | 0.1389964 | 1.6700000 | 1.9900000 |
|---|-----------|-----------|-----------|-----------|

---

Unique Subject Identifier=5414010000-0040

Assay variable : PTINR\_VAL1 PT-INR Value

N Mean Standard Deviation Minimum Maximum

---

|   |           |           |           |           |
|---|-----------|-----------|-----------|-----------|
| 2 | 2.3100000 | 0.4384062 | 2.0000000 | 2.6200000 |
|---|-----------|-----------|-----------|-----------|

---

Unique Subject Identifier=5414010000-0048

Assay variable : PTINR\_VAL1 PT-INR Value

N Mean Standard Deviation Minimum Maximum

---

|   |           |           |           |           |
|---|-----------|-----------|-----------|-----------|
| 3 | 1.6333333 | 0.3821431 | 1.3600000 | 2.0700000 |
|---|-----------|-----------|-----------|-----------|

---

Laboratory tests at the time of obtaining Table 2-6 consent, according to the presence or absence of proton-pump inhibitors

Unique Subject Identifier=5414010000-0063

MEANS Procedure

Assay variable : PTINR\_VAL1 PT-INR Value

N Mean Standard Deviation Minimum Maximum

---

|   |           |           |           |           |
|---|-----------|-----------|-----------|-----------|
| 5 | 1.9340000 | 0.3501857 | 1.5900000 | 2.5200000 |
|---|-----------|-----------|-----------|-----------|

---

Unique Subject Identifier=5466000000-0009

Assay variable : PTINR\_VAL1 PT-INR Value

N Mean Standard Deviation Minimum Maximum

---

|   |           |           |           |           |
|---|-----------|-----------|-----------|-----------|
| 6 | 2.1033333 | 0.2243806 | 1.7700000 | 2.3900000 |
|---|-----------|-----------|-----------|-----------|

---

Unique Subject Identifier=5466000000-0012

Assay variable : PTINR\_VAL1 PT-INR Value

N Mean Standard Deviation Minimum Maximum

---

|   |           |           |           |           |
|---|-----------|-----------|-----------|-----------|
| 6 | 1.8900000 | 0.1517893 | 1.7100000 | 2.1500000 |
|---|-----------|-----------|-----------|-----------|

---

Unique Subject Identifier=5466000000-0015

Assay variable : PTINR\_VAL1 PT-INR Value

N Mean Standard Deviation Minimum Maximum

---

|   |           |           |           |           |
|---|-----------|-----------|-----------|-----------|
| 6 | 2.1550000 | 0.1650152 | 1.9100000 | 2.3700000 |
|---|-----------|-----------|-----------|-----------|

---

Laboratory tests at the time of obtaining Table 2-6 consent, according to the presence or absence of proton-pump inhibitors

Unique Subject Identifier=551400000-0005

MEANS Procedure

Assay variable : PTINR\_VAL1 PT-INR Value

| N | Mean      | Standard Deviation | Minimum   | Maximum   |
|---|-----------|--------------------|-----------|-----------|
| 4 | 2.1650000 | 0.5940539          | 1.7300000 | 3.0300000 |

Unique Subject Identifier=551400000-0009

Assay variable : PTINR\_VAL1 PT-INR Value

| N | Mean      | Standard Deviation | Minimum   | Maximum   |
|---|-----------|--------------------|-----------|-----------|
| 3 | 1.6333333 | 0.2081666          | 1.4000000 | 1.8000000 |

Unique Subject Identifier=551400000-0039

Assay variable : PTINR\_VAL1 PT-INR Value

| N | Mean      | Standard Deviation | Minimum   | Maximum   |
|---|-----------|--------------------|-----------|-----------|
| 2 | 2.0150000 | 0.1909188          | 1.8800000 | 2.1500000 |

Unique Subject Identifier=551400000-0040

Assay variable : PTINR\_VAL1 PT-INR Value

N Mean Standard Deviation Minimum Maximum

---

|   |          |           |          |          |
|---|----------|-----------|----------|----------|
| 2 | 2.460000 | 0.0424264 | 2.430000 | 2.490000 |
|---|----------|-----------|----------|----------|

---

Laboratory tests at the time of obtaining Table 2-6 consent, according to the presence or absence of proton-pump inhibitors

Unique Subject Identifier=5542000000-0004

MEANS Procedure

Assay variable : PTINR\_VAL1 PT-INR Value

N Mean Standard Deviation Minimum Maximum

---

|   |           |  |           |           |
|---|-----------|--|-----------|-----------|
| 1 | 2.1000000 |  | 2.1000000 | 2.1000000 |
|---|-----------|--|-----------|-----------|

---

Unique Subject Identifier=5542000000-0005

Assay variable : PTINR\_VAL1 PT-INR Value

N Mean Standard Deviation Minimum Maximum

---

|   |           |           |           |           |
|---|-----------|-----------|-----------|-----------|
| 6 | 1.7450000 | 0.4741624 | 1.2700000 | 2.3300000 |
|---|-----------|-----------|-----------|-----------|

---

Unique Subject Identifier=5542000000-0009

Assay variable : PTINR\_VAL1 PT-INR Value

N Mean Standard Deviation Minimum Maximum

---

|   |           |  |           |           |
|---|-----------|--|-----------|-----------|
| 1 | 1.6500000 |  | 1.6500000 | 1.6500000 |
|---|-----------|--|-----------|-----------|

---

Unique Subject Identifier=5542000000-0014



Assay variable : PTINR\_VAL1 PT-INR Value

N Mean Standard Deviation Minimum Maximum

---

|   |           |  |           |           |
|---|-----------|--|-----------|-----------|
| 1 | 2.0300000 |  | 2.0300000 | 2.0300000 |
|---|-----------|--|-----------|-----------|

---

Laboratory tests at the time of obtaining Table 2-6 consent, according to the presence or absence of proton-pump inhibitors

Unique Subject Identifier=5542000000-0015

MEANS Procedure

Assay variable : PTINR\_VAL1 PT-INR Value

| N | Mean      | Standard Deviation | Minimum   | Maximum   |
|---|-----------|--------------------|-----------|-----------|
| 2 | 1.4200000 | 0.3959798          | 1.1400000 | 1.7000000 |

Unique Subject Identifier=5542000000-0022

Assay variable : PTINR\_VAL1 PT-INR Value

| N | Mean      | Standard Deviation | Minimum   | Maximum   |
|---|-----------|--------------------|-----------|-----------|
| 4 | 1.6675000 | 0.3675482          | 1.3300000 | 2.1200000 |

Unique Subject Identifier=5542000000-0030

Assay variable : PTINR\_VAL1 PT-INR Value

| N | Mean      | Standard Deviation | Minimum   | Maximum   |
|---|-----------|--------------------|-----------|-----------|
| 3 | 1.7433333 | 0.1234234          | 1.6400000 | 1.8800000 |

Unique Subject Identifier=5542000000-0033

Assay variable : PTINR\_VAL1 PT-INR Value

N Mean Standard Deviation Minimum Maximum

---

|   |           |  |           |           |
|---|-----------|--|-----------|-----------|
| 1 | 1.1700000 |  | 1.1700000 | 1.1700000 |
|---|-----------|--|-----------|-----------|

---

Laboratory tests at the time of obtaining Table 2-6 consent, according to the presence or absence of proton-pump inhibitors

Unique Subject Identifier=5542000000-0035

MEANS Procedure

Assay variable : PTINR\_VAL1 PT-INR Value

| N | Mean      | Standard Deviation | Minimum   | Maximum   |
|---|-----------|--------------------|-----------|-----------|
| 1 | 1.7700000 |                    | 1.7700000 | 1.7700000 |

Unique Subject Identifier=5542000000-0039

Assay variable : PTINR\_VAL1 PT-INR Value

| N | Mean      | Standard Deviation | Minimum   | Maximum   |
|---|-----------|--------------------|-----------|-----------|
| 2 | 1.6100000 | 0.1838478          | 1.4800000 | 1.7400000 |

Unique Subject Identifier=5717000000-0001

Assay variable : PTINR\_VAL1 PT-INR Value

| N | Mean      | Standard Deviation | Minimum   | Maximum   |
|---|-----------|--------------------|-----------|-----------|
| 5 | 1.6360000 | 0.2290851          | 1.5000000 | 2.0400000 |

Unique Subject Identifier=5717000000-0003

Assay variable : PTINR\_VAL1 PT-INR Value

N Mean Standard Deviation Minimum Maximum

---

|   |           |           |           |           |
|---|-----------|-----------|-----------|-----------|
| 6 | 1.8283333 | 0.1218879 | 1.7000000 | 1.9900000 |
|---|-----------|-----------|-----------|-----------|

---

Laboratory tests at the time of obtaining Table 2-6 consent, according to the presence or absence of proton-pump inhibitors

Unique Subject Identifier=5717000000-0004

MEANS Procedure

Assay variable : PTINR\_VAL1 PT-INR Value

N Mean Standard Deviation Minimum Maximum

---

|   |           |           |           |           |
|---|-----------|-----------|-----------|-----------|
| 5 | 1.8480000 | 0.2364741 | 1.5600000 | 2.1800000 |
|---|-----------|-----------|-----------|-----------|

---

Unique Subject Identifier=5717000000-0008

Assay variable : PTINR\_VAL1 PT-INR Value

N Mean Standard Deviation Minimum Maximum

---

|   |           |           |           |           |
|---|-----------|-----------|-----------|-----------|
| 5 | 1.8780000 | 0.1063955 | 1.7500000 | 1.9900000 |
|---|-----------|-----------|-----------|-----------|

---

Unique Subject Identifier=5717000000-0010

Assay variable : PTINR\_VAL1 PT-INR Value

N Mean Standard Deviation Minimum Maximum

---

|   |           |           |           |           |
|---|-----------|-----------|-----------|-----------|
| 5 | 1.8700000 | 0.1437011 | 1.6900000 | 2.0900000 |
|---|-----------|-----------|-----------|-----------|

---

Unique Subject Identifier=6000010011-0002

Assay variable : PTINR\_VAL1 PT-INR Value

N Mean Standard Deviation Minimum Maximum

---

|   |           |           |           |           |
|---|-----------|-----------|-----------|-----------|
| 6 | 2.3916667 | 0.3663559 | 1.6800000 | 2.7200000 |
|---|-----------|-----------|-----------|-----------|

---

Laboratory tests at the time of obtaining Table 2-6 consent, according to the presence or absence of proton-pump inhibitors

Unique Subject Identifier=6002010000-0008

MEANS Procedure

Assay variable : PTINR\_VAL1 PT-INR Value

N Mean Standard Deviation Minimum Maximum

---

|   |           |           |           |           |
|---|-----------|-----------|-----------|-----------|
| 5 | 1.7980000 | 0.5187678 | 0.9900000 | 2.3100000 |
|---|-----------|-----------|-----------|-----------|

---

Unique Subject Identifier=6002010000-0014

Assay variable : PTINR\_VAL1 PT-INR Value

N Mean Standard Deviation Minimum Maximum

---

|   |           |           |           |           |
|---|-----------|-----------|-----------|-----------|
| 6 | 2.0833333 | 0.6929262 | 1.3200000 | 3.1100000 |
|---|-----------|-----------|-----------|-----------|

---

Unique Subject Identifier=6002010000-0015

Assay variable : PTINR\_VAL1 PT-INR Value

N Mean Standard Deviation Minimum Maximum

---

|   |           |           |           |           |
|---|-----------|-----------|-----------|-----------|
| 6 | 2.1150000 | 0.4907443 | 1.2900000 | 2.6900000 |
|---|-----------|-----------|-----------|-----------|

---

Unique Subject Identifier=6002010000-0016



Assay variable : PTINR\_VAL1 PT-INR Value

N Mean Standard Deviation Minimum Maximum

---

|   |           |           |           |           |
|---|-----------|-----------|-----------|-----------|
| 4 | 2.3325000 | 0.5786983 | 1.5200000 | 2.7900000 |
|---|-----------|-----------|-----------|-----------|

---

Laboratory tests at the time of obtaining Table 2-6 consent, according to the presence or absence of proton-pump inhibitors

Unique Subject Identifier=6002010000-0018

MEANS Procedure

Assay variable : PTINR\_VAL1 PT-INR Value

N Mean Standard Deviation Minimum Maximum

---

|   |           |           |           |           |
|---|-----------|-----------|-----------|-----------|
| 5 | 1.8240000 | 0.3764705 | 1.4200000 | 2.3100000 |
|---|-----------|-----------|-----------|-----------|

---

Unique Subject Identifier=6002010000-0020

Assay variable : PTINR\_VAL1 PT-INR Value

N Mean Standard Deviation Minimum Maximum

---

|   |           |           |           |           |
|---|-----------|-----------|-----------|-----------|
| 4 | 2.4325000 | 0.2321458 | 2.1700000 | 2.7200000 |
|---|-----------|-----------|-----------|-----------|

---

Unique Subject Identifier=6002010000-0021

Assay variable : PTINR\_VAL1 PT-INR Value

N Mean Standard Deviation Minimum Maximum

---

|   |           |           |           |           |
|---|-----------|-----------|-----------|-----------|
| 5 | 2.3460000 | 0.7411680 | 1.5600000 | 3.2300000 |
|---|-----------|-----------|-----------|-----------|

---

Unique Subject Identifier=6002010000-0037

Assay variable : PTINR\_VAL1 PT-INR Value

N Mean Standard Deviation Minimum Maximum

---

|   |          |           |          |          |
|---|----------|-----------|----------|----------|
| 6 | 2.133333 | 0.1736280 | 1.940000 | 2.450000 |
|---|----------|-----------|----------|----------|

---

Laboratory tests at the time of obtaining Table 2-6 consent, according to the presence or absence of proton-pump inhibitors

Unique Subject Identifier=6002010000-0038

MEANS Procedure

Assay variable : PTINR\_VAL1 PT-INR Value

N Mean Standard Deviation Minimum Maximum

---

|   |           |           |           |           |
|---|-----------|-----------|-----------|-----------|
| 6 | 2.0050000 | 0.2820461 | 1.7300000 | 2.4600000 |
|---|-----------|-----------|-----------|-----------|

---

Unique Subject Identifier=6002010000-0041

Assay variable : PTINR\_VAL1 PT-INR Value

N Mean Standard Deviation Minimum Maximum

---

|   |           |           |           |           |
|---|-----------|-----------|-----------|-----------|
| 5 | 2.1500000 | 0.2091650 | 1.9500000 | 2.4700000 |
|---|-----------|-----------|-----------|-----------|

---

Unique Subject Identifier=6002010000-0042

Assay variable : PTINR\_VAL1 PT-INR Value

N Mean Standard Deviation Minimum Maximum

---

|   |           |           |           |           |
|---|-----------|-----------|-----------|-----------|
| 6 | 2.5133333 | 1.4973799 | 1.5400000 | 5.4900000 |
|---|-----------|-----------|-----------|-----------|

---

Unique Subject Identifier=6002010000-0043

Assay variable : PTINR\_VAL1 PT-INR Value

N Mean Standard Deviation Minimum Maximum

---

|   |           |           |           |           |
|---|-----------|-----------|-----------|-----------|
| 6 | 1.9883333 | 0.1926049 | 1.7900000 | 2.2000000 |
|---|-----------|-----------|-----------|-----------|

---

Laboratory tests at the time of obtaining Table 2-6 consent, according to the presence or absence of proton-pump inhibitors

Unique Subject Identifier=6002010000-0044

MEANS Procedure

Assay variable : PTINR\_VAL1 PT-INR Value

N Mean Standard Deviation Minimum Maximum

---

|   |           |           |           |           |
|---|-----------|-----------|-----------|-----------|
| 6 | 2.3183333 | 0.1923972 | 2.0800000 | 2.5700000 |
|---|-----------|-----------|-----------|-----------|

---

Unique Subject Identifier=6002010000-0047

Assay variable : PTINR\_VAL1 PT-INR Value

N Mean Standard Deviation Minimum Maximum

---

|   |           |           |           |           |
|---|-----------|-----------|-----------|-----------|
| 5 | 2.2220000 | 1.2194548 | 1.0800000 | 4.1100000 |
|---|-----------|-----------|-----------|-----------|

---

Unique Subject Identifier=6002010000-0048

Assay variable : PTINR\_VAL1 PT-INR Value

N Mean Standard Deviation Minimum Maximum

---

|   |           |           |           |           |
|---|-----------|-----------|-----------|-----------|
| 6 | 2.3250000 | 0.7963605 | 1.5600000 | 3.8000000 |
|---|-----------|-----------|-----------|-----------|

---

Unique Subject Identifier=6002010000-0052

Assay variable : PTINR\_VAL1 PT-INR Value

N Mean Standard Deviation Minimum Maximum

---

|   |           |           |           |           |
|---|-----------|-----------|-----------|-----------|
| 6 | 2.1016667 | 0.4427829 | 1.6200000 | 2.7900000 |
|---|-----------|-----------|-----------|-----------|

---

Laboratory tests at the time of obtaining Table 2-6 consent, according to the presence or absence of proton-pump inhibitors

Unique Subject Identifier=6002010000-0058

MEANS Procedure

Assay variable : PTINR\_VAL1 PT-INR Value

N Mean Standard Deviation Minimum Maximum

---

|   |           |           |           |           |
|---|-----------|-----------|-----------|-----------|
| 6 | 2.1616667 | 0.2437553 | 1.8800000 | 2.5200000 |
|---|-----------|-----------|-----------|-----------|

---

Unique Subject Identifier=6002010000-0067

Assay variable : PTINR\_VAL1 PT-INR Value

N Mean Standard Deviation Minimum Maximum

---

|   |           |           |           |           |
|---|-----------|-----------|-----------|-----------|
| 5 | 2.4180000 | 0.3492420 | 1.9500000 | 2.7800000 |
|---|-----------|-----------|-----------|-----------|

---

Unique Subject Identifier=6002010000-0080

Assay variable : PTINR\_VAL1 PT-INR Value

N Mean Standard Deviation Minimum Maximum

---

|   |           |           |           |           |
|---|-----------|-----------|-----------|-----------|
| 5 | 2.0600000 | 0.1369306 | 1.8400000 | 2.1800000 |
|---|-----------|-----------|-----------|-----------|

---

Unique Subject Identifier=6002010000-0082



Assay variable : PTINR\_VAL1 PT-INR Value

N Mean Standard Deviation Minimum Maximum

---

|   |           |           |           |           |
|---|-----------|-----------|-----------|-----------|
| 6 | 1.9950000 | 0.1850135 | 1.8400000 | 2.3200000 |
|---|-----------|-----------|-----------|-----------|

---

Laboratory tests at the time of obtaining Table 2-6 consent, according to the presence or absence of proton-pump inhibitors

Unique Subject Identifier=6002010000-0083

MEANS Procedure

Assay variable : PTINR\_VAL1 PT-INR Value

N Mean Standard Deviation Minimum Maximum

---

|   |           |           |           |           |
|---|-----------|-----------|-----------|-----------|
| 6 | 1.9666667 | 0.1942850 | 1.5800000 | 2.1200000 |
|---|-----------|-----------|-----------|-----------|

---

Unique Subject Identifier=6002010000-0085

Assay variable : PTINR\_VAL1 PT-INR Value

N Mean Standard Deviation Minimum Maximum

---

|   |           |           |           |           |
|---|-----------|-----------|-----------|-----------|
| 6 | 2.1383333 | 0.3679357 | 1.8300000 | 2.8300000 |
|---|-----------|-----------|-----------|-----------|

---

Unique Subject Identifier=6002010000-0088

Assay variable : PTINR\_VAL1 PT-INR Value

N Mean Standard Deviation Minimum Maximum

---

|   |           |           |           |           |
|---|-----------|-----------|-----------|-----------|
| 6 | 1.8133333 | 0.4719605 | 1.0700000 | 2.3200000 |
|---|-----------|-----------|-----------|-----------|

---

Unique Subject Identifier=6002010000-0090

Assay variable : PTINR\_VAL1 PT-INR Value

N Mean Standard Deviation Minimum Maximum

---

|   |          |           |          |          |
|---|----------|-----------|----------|----------|
| 6 | 2.240000 | 0.3439767 | 1.750000 | 2.600000 |
|---|----------|-----------|----------|----------|

---

Laboratory tests at the time of obtaining Table 2-6 consent, according to the presence or absence of proton-pump inhibitors

Unique Subject Identifier=6002010000-0098

MEANS Procedure

Assay variable : PTINR\_VAL1 PT-INR Value

N Mean Standard Deviation Minimum Maximum

---

|   |           |           |           |           |
|---|-----------|-----------|-----------|-----------|
| 6 | 1.7633333 | 0.4236823 | 1.3500000 | 2.4500000 |
|---|-----------|-----------|-----------|-----------|

---

Unique Subject Identifier=6002010000-0103

Assay variable : PTINR\_VAL1 PT-INR Value

N Mean Standard Deviation Minimum Maximum

---

|   |           |           |           |           |
|---|-----------|-----------|-----------|-----------|
| 6 | 2.4200000 | 1.1630305 | 1.5400000 | 4.6000000 |
|---|-----------|-----------|-----------|-----------|

---

Unique Subject Identifier=6002010000-0105

Assay variable : PTINR\_VAL1 PT-INR Value

N Mean Standard Deviation Minimum Maximum

---

|   |           |           |           |           |
|---|-----------|-----------|-----------|-----------|
| 6 | 2.6083333 | 1.4570713 | 1.4700000 | 5.4000000 |
|---|-----------|-----------|-----------|-----------|

---

Unique Subject Identifier=6002010000-0107

Assay variable : PTINR\_VAL1 PT-INR Value

N Mean Standard Deviation Minimum Maximum

---

|   |           |           |           |           |
|---|-----------|-----------|-----------|-----------|
| 6 | 2.5300000 | 0.2744449 | 2.2400000 | 3.0400000 |
|---|-----------|-----------|-----------|-----------|

---

Laboratory tests at the time of obtaining Table 2-6 consent, according to the presence or absence of proton-pump inhibitors

Unique Subject Identifier=6005000000-0004

MEANS Procedure

Assay variable : PTINR\_VAL1 PT-INR Value

N Mean Standard Deviation Minimum Maximum

---

|   |           |           |           |           |
|---|-----------|-----------|-----------|-----------|
| 5 | 1.9520000 | 0.2555778 | 1.7100000 | 2.2900000 |
|---|-----------|-----------|-----------|-----------|

---

Unique Subject Identifier=6005000000-0005

Assay variable : PTINR\_VAL1 PT-INR Value

N Mean Standard Deviation Minimum Maximum

---

|   |           |           |           |           |
|---|-----------|-----------|-----------|-----------|
| 3 | 2.6733333 | 0.3197395 | 2.3900000 | 3.0200000 |
|---|-----------|-----------|-----------|-----------|

---

Unique Subject Identifier=6008011111-0001

Assay variable : PTINR\_VAL1 PT-INR Value

N Mean Standard Deviation Minimum Maximum

---

|   |           |           |           |           |
|---|-----------|-----------|-----------|-----------|
| 3 | 1.1366667 | 0.0723418 | 1.0900000 | 1.2200000 |
|---|-----------|-----------|-----------|-----------|

---

Unique Subject Identifier=6009000000-0009

Assay variable : PTINR\_VAL1 PT-INR Value

N Mean Standard Deviation Minimum Maximum

---

|   |           |           |           |           |
|---|-----------|-----------|-----------|-----------|
| 6 | 1.9000000 | 0.4516636 | 1.2000000 | 2.5000000 |
|---|-----------|-----------|-----------|-----------|

---

Laboratory tests at the time of obtaining Table 2-6 consent, according to the presence or absence of proton-pump inhibitors

Unique Subject Identifier=6009000000-0014

MEANS Procedure

Assay variable : PTINR\_VAL1 PT-INR Value

N Mean Standard Deviation Minimum Maximum

---

|   |           |           |           |           |
|---|-----------|-----------|-----------|-----------|
| 6 | 1.8500000 | 0.5049752 | 1.3000000 | 2.8000000 |
|---|-----------|-----------|-----------|-----------|

---

Unique Subject Identifier=6009000000-0015

Assay variable : PTINR\_VAL1 PT-INR Value

N Mean Standard Deviation Minimum Maximum

---

|   |           |           |           |           |
|---|-----------|-----------|-----------|-----------|
| 5 | 1.7000000 | 0.1000000 | 1.6000000 | 1.8000000 |
|---|-----------|-----------|-----------|-----------|

---

Unique Subject Identifier=6009000000-0019

Assay variable : PTINR\_VAL1 PT-INR Value

N Mean Standard Deviation Minimum Maximum

---

|   |           |           |           |           |
|---|-----------|-----------|-----------|-----------|
| 5 | 1.9800000 | 0.6833740 | 1.3000000 | 3.1000000 |
|---|-----------|-----------|-----------|-----------|

---

Unique Subject Identifier=6009000000-0022



Assay variable : PTINR\_VAL1 PT-INR Value

N Mean Standard Deviation Minimum Maximum

---

|   |          |           |          |          |
|---|----------|-----------|----------|----------|
| 5 | 1.820000 | 0.2683282 | 1.400000 | 2.100000 |
|---|----------|-----------|----------|----------|

---

Laboratory tests at the time of obtaining Table 2-6 consent, according to the presence or absence of proton-pump inhibitors

Unique Subject Identifier=6009000000-0024

MEANS Procedure

Assay variable : PTINR\_VAL1 PT-INR Value

N Mean Standard Deviation Minimum Maximum

---

|   |           |           |           |           |
|---|-----------|-----------|-----------|-----------|
| 3 | 1.5333333 | 0.3214550 | 1.3000000 | 1.9000000 |
|---|-----------|-----------|-----------|-----------|

---

Unique Subject Identifier=6009000000-0029

Assay variable : PTINR\_VAL1 PT-INR Value

N Mean Standard Deviation Minimum Maximum

---

|   |           |           |           |           |
|---|-----------|-----------|-----------|-----------|
| 3 | 2.3666667 | 2.1126603 | 1.0000000 | 4.8000000 |
|---|-----------|-----------|-----------|-----------|

---

Unique Subject Identifier=6009000000-0030

Assay variable : PTINR\_VAL1 PT-INR Value

N Mean Standard Deviation Minimum Maximum

---

|   |           |           |           |           |
|---|-----------|-----------|-----------|-----------|
| 5 | 2.2400000 | 0.4393177 | 1.5000000 | 2.6000000 |
|---|-----------|-----------|-----------|-----------|

---

Unique Subject Identifier=6009000000-0035

Assay variable : PTINR\_VAL1 PT-INR Value

N Mean Standard Deviation Minimum Maximum

---

|   |           |           |           |           |
|---|-----------|-----------|-----------|-----------|
| 6 | 2.1833333 | 0.4400758 | 1.7000000 | 3.0000000 |
|---|-----------|-----------|-----------|-----------|

---

Laboratory tests at the time of obtaining Table 2-6 consent, according to the presence or absence of proton-pump inhibitors

Unique Subject Identifier=6009000000-0037

MEANS Procedure

Assay variable : PTINR\_VAL1 PT-INR Value

N Mean Standard Deviation Minimum Maximum

---

|   |           |           |           |           |
|---|-----------|-----------|-----------|-----------|
| 6 | 1.8666667 | 0.0816497 | 1.8000000 | 2.0000000 |
|---|-----------|-----------|-----------|-----------|

---

Unique Subject Identifier=6009000000-0040

Assay variable : PTINR\_VAL1 PT-INR Value

N Mean Standard Deviation Minimum Maximum

---

|   |           |           |           |           |
|---|-----------|-----------|-----------|-----------|
| 4 | 1.8750000 | 0.4856267 | 1.4000000 | 2.5000000 |
|---|-----------|-----------|-----------|-----------|

---

Unique Subject Identifier=6009000000-0041

Assay variable : PTINR\_VAL1 PT-INR Value

N Mean Standard Deviation Minimum Maximum

---

|   |           |           |           |           |
|---|-----------|-----------|-----------|-----------|
| 2 | 2.9000000 | 2.5455844 | 1.1000000 | 4.7000000 |
|---|-----------|-----------|-----------|-----------|

---

Unique Subject Identifier=6009000000-0045

Assay variable : PTINR\_VAL1 PT-INR Value

N Mean Standard Deviation Minimum Maximum

---

|   |          |           |          |          |
|---|----------|-----------|----------|----------|
| 4 | 1.850000 | 0.2081666 | 1.600000 | 2.100000 |
|---|----------|-----------|----------|----------|

---

Laboratory tests at the time of obtaining Table 2-6 consent, according to the presence or absence of proton-pump inhibitors

Unique Subject Identifier=6009000000-0050

MEANS Procedure

Assay variable : PTINR\_VAL1 PT-INR Value

N Mean Standard Deviation Minimum Maximum

---

|   |           |           |           |           |
|---|-----------|-----------|-----------|-----------|
| 2 | 1.7500000 | 0.4949747 | 1.4000000 | 2.1000000 |
|---|-----------|-----------|-----------|-----------|

---

Unique Subject Identifier=6009000000-0051

Assay variable : PTINR\_VAL1 PT-INR Value

N Mean Standard Deviation Minimum Maximum

---

|   |           |           |           |           |
|---|-----------|-----------|-----------|-----------|
| 3 | 2.3000000 | 0.3464102 | 2.1000000 | 2.7000000 |
|---|-----------|-----------|-----------|-----------|

---

Unique Subject Identifier=6011010000-0003

Assay variable : PTINR\_VAL1 PT-INR Value

N Mean Standard Deviation Minimum Maximum

---

|   |           |           |           |           |
|---|-----------|-----------|-----------|-----------|
| 2 | 1.9450000 | 0.7990307 | 1.3800000 | 2.5100000 |
|---|-----------|-----------|-----------|-----------|

---

Unique Subject Identifier=6014011010-0004

Assay variable : PTINR\_VAL1 PT-INR Value

N Mean Standard Deviation Minimum Maximum

---

|   |           |           |           |           |
|---|-----------|-----------|-----------|-----------|
| 4 | 1.6250000 | 0.0932738 | 1.5400000 | 1.7200000 |
|---|-----------|-----------|-----------|-----------|

---

Laboratory tests at the time of obtaining Table 2-6 consent, according to the presence or absence of proton-pump inhibitors

Unique Subject Identifier=6014011010-0005

MEANS Procedure

Assay variable : PTINR\_VAL1 PT-INR Value

N Mean Standard Deviation Minimum Maximum

---

|   |           |           |           |           |
|---|-----------|-----------|-----------|-----------|
| 3 | 2.4933333 | 0.6476367 | 1.9500000 | 3.2100000 |
|---|-----------|-----------|-----------|-----------|

---

Unique Subject Identifier=6014011010-0007

Assay variable : PTINR\_VAL1 PT-INR Value

N Mean Standard Deviation Minimum Maximum

---

|   |           |           |           |           |
|---|-----------|-----------|-----------|-----------|
| 3 | 2.1333333 | 0.5036202 | 1.7800000 | 2.7100000 |
|---|-----------|-----------|-----------|-----------|

---

Unique Subject Identifier=6014011010-0010

Assay variable : PTINR\_VAL1 PT-INR Value

N Mean Standard Deviation Minimum Maximum

---

|   |           |           |           |           |
|---|-----------|-----------|-----------|-----------|
| 3 | 2.3866667 | 0.1342882 | 2.2900000 | 2.5400000 |
|---|-----------|-----------|-----------|-----------|

---

Unique Subject Identifier=6014011010-0013



Assay variable : PTINR\_VAL1 PT-INR Value

N Mean Standard Deviation Minimum Maximum

---

|   |           |           |           |           |
|---|-----------|-----------|-----------|-----------|
| 3 | 2.2833333 | 0.6351640 | 1.7000000 | 2.9600000 |
|---|-----------|-----------|-----------|-----------|

---

Laboratory tests at the time of obtaining Table 2-6 consent, according to the presence or absence of proton-pump inhibitors

Unique Subject Identifier=6014011010-0015

MEANS Procedure

Assay variable : PTINR\_VAL1 PT-INR Value

| N | Mean     | Standard Deviation | Minimum  | Maximum  |
|---|----------|--------------------|----------|----------|
| 6 | 2.100000 | 0.3025888          | 1.580000 | 2.390000 |

Unique Subject Identifier=6014011010-0016

Assay variable : PTINR\_VAL1 PT-INR Value

| N | Mean     | Standard Deviation | Minimum  | Maximum  |
|---|----------|--------------------|----------|----------|
| 3 | 2.053333 | 0.4021608          | 1.720000 | 2.500000 |

Unique Subject Identifier=6014011010-0018

Assay variable : PTINR\_VAL1 PT-INR Value

| N | Mean     | Standard Deviation | Minimum  | Maximum  |
|---|----------|--------------------|----------|----------|
| 4 | 1.822500 | 0.4914858          | 1.130000 | 2.290000 |

Unique Subject Identifier=6014011010-0019

Assay variable : PTINR\_VAL1 PT-INR Value

N Mean Standard Deviation Minimum Maximum

---

|   |          |           |          |          |
|---|----------|-----------|----------|----------|
| 3 | 2.333333 | 0.6515622 | 1.880000 | 3.080000 |
|---|----------|-----------|----------|----------|

---

Laboratory tests at the time of obtaining Table 2-6 consent, according to the presence or absence of proton-pump inhibitors

Unique Subject Identifier=6014011010-0020

MEANS Procedure

Assay variable : PTINR\_VAL1 PT-INR Value

| N | Mean      | Standard Deviation | Minimum   | Maximum   |
|---|-----------|--------------------|-----------|-----------|
| 2 | 1.8350000 | 0.5586144          | 1.4400000 | 2.2300000 |

Unique Subject Identifier=6014011010-0026

Assay variable : PTINR\_VAL1 PT-INR Value

| N | Mean      | Standard Deviation | Minimum   | Maximum   |
|---|-----------|--------------------|-----------|-----------|
| 5 | 1.7540000 | 0.4057462          | 1.3000000 | 2.2500000 |

Unique Subject Identifier=6014011010-0029

Assay variable : PTINR\_VAL1 PT-INR Value

| N | Mean      | Standard Deviation | Minimum   | Maximum   |
|---|-----------|--------------------|-----------|-----------|
| 2 | 2.1150000 | 0.2333452          | 1.9500000 | 2.2800000 |

Unique Subject Identifier=6014011010-0033

Assay variable : PTINR\_VAL1 PT-INR Value

N Mean Standard Deviation Minimum Maximum

---

|   |          |           |          |          |
|---|----------|-----------|----------|----------|
| 3 | 2.190000 | 0.4014972 | 1.810000 | 2.610000 |
|---|----------|-----------|----------|----------|

---

Laboratory tests at the time of obtaining Table 2-6 consent, according to the presence or absence of proton-pump inhibitors

Unique Subject Identifier=6014011010-0034

MEANS Procedure

Assay variable : PTINR\_VAL1 PT-INR Value

N Mean Standard Deviation Minimum Maximum

---

|   |           |           |           |           |
|---|-----------|-----------|-----------|-----------|
| 3 | 1.9333333 | 0.7076958 | 1.5000000 | 2.7500000 |
|---|-----------|-----------|-----------|-----------|

---

Unique Subject Identifier=6014011010-0037

Assay variable : PTINR\_VAL1 PT-INR Value

N Mean Standard Deviation Minimum Maximum

---

|   |           |           |           |           |
|---|-----------|-----------|-----------|-----------|
| 4 | 1.9775000 | 0.4458980 | 1.6400000 | 2.6000000 |
|---|-----------|-----------|-----------|-----------|

---

Unique Subject Identifier=6014011010-0038

Assay variable : PTINR\_VAL1 PT-INR Value

N Mean Standard Deviation Minimum Maximum

---

|   |           |           |           |           |
|---|-----------|-----------|-----------|-----------|
| 2 | 1.0000000 | 0.0141421 | 0.9900000 | 1.0100000 |
|---|-----------|-----------|-----------|-----------|

---

Unique Subject Identifier=6014011010-0040

Assay variable : PTINR\_VAL1 PT-INR Value

N Mean Standard Deviation Minimum Maximum

---

|   |           |           |           |           |
|---|-----------|-----------|-----------|-----------|
| 2 | 1.4150000 | 0.1626346 | 1.3000000 | 1.5300000 |
|---|-----------|-----------|-----------|-----------|

---

Laboratory tests at the time of obtaining Table 2-6 consent, according to the presence or absence of proton-pump inhibitors

Unique Subject Identifier=6017010000-0007

MEANS Procedure

Assay variable : PTINR\_VAL1 PT-INR Value

| N | Mean      | Standard Deviation | Minimum   | Maximum   |
|---|-----------|--------------------|-----------|-----------|
| 5 | 1.5800000 | 0.2303259          | 1.2400000 | 1.8000000 |

Unique Subject Identifier=6017010000-0008

Assay variable : PTINR\_VAL1 PT-INR Value

| N | Mean      | Standard Deviation | Minimum   | Maximum   |
|---|-----------|--------------------|-----------|-----------|
| 3 | 2.0233333 | 0.2064784          | 1.8800000 | 2.2600000 |

Unique Subject Identifier=6017010000-0017

Assay variable : PTINR\_VAL1 PT-INR Value

| N | Mean      | Standard Deviation | Minimum   | Maximum   |
|---|-----------|--------------------|-----------|-----------|
| 5 | 1.6260000 | 0.2253442          | 1.3800000 | 1.9600000 |

Unique Subject Identifier=6017010000-0018



Assay variable : PTINR\_VAL1 PT-INR Value

N Mean Standard Deviation Minimum Maximum

---

|   |           |           |           |           |
|---|-----------|-----------|-----------|-----------|
| 4 | 2.4350000 | 0.2340228 | 2.2600000 | 2.7800000 |
|---|-----------|-----------|-----------|-----------|

---

Laboratory tests at the time of obtaining Table 2-6 consent, according to the presence or absence of proton-pump inhibitors

Unique Subject Identifier=6017010000-0021

MEANS Procedure

Assay variable : PTINR\_VAL1 PT-INR Value

| N | Mean      | Standard Deviation | Minimum   | Maximum   |
|---|-----------|--------------------|-----------|-----------|
| 3 | 2.0033333 | 0.3970306          | 1.7400000 | 2.4600000 |

Unique Subject Identifier=6017010000-0026

Assay variable : PTINR\_VAL1 PT-INR Value

| N | Mean      | Standard Deviation | Minimum   | Maximum   |
|---|-----------|--------------------|-----------|-----------|
| 2 | 1.4300000 | 0.1414214          | 1.3300000 | 1.5300000 |

Unique Subject Identifier=6017010000-0028

Assay variable : PTINR\_VAL1 PT-INR Value

| N | Mean      | Standard Deviation | Minimum   | Maximum   |
|---|-----------|--------------------|-----------|-----------|
| 4 | 2.3150000 | 0.9781786          | 1.6200000 | 3.7500000 |

Unique Subject Identifier=6022000000-0006

Assay variable : PTINR\_VAL1 PT-INR Value

N Mean Standard Deviation Minimum Maximum

---

|   |           |  |           |           |
|---|-----------|--|-----------|-----------|
| 1 | 1.5400000 |  | 1.5400000 | 1.5400000 |
|---|-----------|--|-----------|-----------|

---

Laboratory tests at the time of obtaining Table 2-6 consent, according to the presence or absence of proton-pump inhibitors

Unique Subject Identifier=6022000000-0013

MEANS Procedure

Assay variable : PTINR\_VAL1 PT-INR Value

N Mean Standard Deviation Minimum Maximum

---

|   |           |  |           |           |
|---|-----------|--|-----------|-----------|
| 1 | 2.2300000 |  | 2.2300000 | 2.2300000 |
|---|-----------|--|-----------|-----------|

---

Unique Subject Identifier=6022000000-0015

Assay variable : PTINR\_VAL1 PT-INR Value

N Mean Standard Deviation Minimum Maximum

---

|   |           |           |           |           |
|---|-----------|-----------|-----------|-----------|
| 3 | 1.7566667 | 0.2466441 | 1.5900000 | 2.0400000 |
|---|-----------|-----------|-----------|-----------|

---

Unique Subject Identifier=6022000000-0018

Assay variable : PTINR\_VAL1 PT-INR Value

N Mean Standard Deviation Minimum Maximum

---

|   |           |  |           |           |
|---|-----------|--|-----------|-----------|
| 1 | 1.6700000 |  | 1.6700000 | 1.6700000 |
|---|-----------|--|-----------|-----------|

---

Unique Subject Identifier=6022000000-0033

Assay variable : PTINR\_VAL1 PT-INR Value

N Mean Standard Deviation Minimum Maximum

---

|   |           |           |           |           |
|---|-----------|-----------|-----------|-----------|
| 3 | 2.3566667 | 1.3392660 | 1.5000000 | 3.9000000 |
|---|-----------|-----------|-----------|-----------|

---

Laboratory tests at the time of obtaining Table 2-6 consent, according to the presence or absence of proton-pump inhibitors

Unique Subject Identifier=6022000000-0060

MEANS Procedure

Assay variable : PTINR\_VAL1 PT-INR Value

N Mean Standard Deviation Minimum Maximum

---

|   |           |  |           |           |
|---|-----------|--|-----------|-----------|
| 1 | 2.8500000 |  | 2.8500000 | 2.8500000 |
|---|-----------|--|-----------|-----------|

---

Unique Subject Identifier=6023000000-0001

Assay variable : PTINR\_VAL1 PT-INR Value

N Mean Standard Deviation Minimum Maximum

---

|   |           |           |           |           |
|---|-----------|-----------|-----------|-----------|
| 4 | 2.2500000 | 0.9469248 | 1.3000000 | 3.5000000 |
|---|-----------|-----------|-----------|-----------|

---

Unique Subject Identifier=6023000000-0002

Assay variable : PTINR\_VAL1 PT-INR Value

N Mean Standard Deviation Minimum Maximum

---

|   |           |           |           |           |
|---|-----------|-----------|-----------|-----------|
| 5 | 1.6400000 | 0.1140175 | 1.5000000 | 1.8000000 |
|---|-----------|-----------|-----------|-----------|

---

Unique Subject Identifier=6023000000-0004

Assay variable : PTINR\_VAL1 PT-INR Value

N Mean Standard Deviation Minimum Maximum

---

|   |          |          |          |          |
|---|----------|----------|----------|----------|
| 4 | 1.950000 | 0.251661 | 1.700000 | 2.300000 |
|---|----------|----------|----------|----------|

---

Laboratory tests at the time of obtaining Table 2-6 consent, according to the presence or absence of proton-pump inhibitors

Unique Subject Identifier=6023000000-0005

MEANS Procedure

Assay variable : PTINR\_VAL1 PT-INR Value

N Mean Standard Deviation Minimum Maximum

---

|   |           |           |           |           |
|---|-----------|-----------|-----------|-----------|
| 4 | 1.7500000 | 0.2645751 | 1.4000000 | 2.0000000 |
|---|-----------|-----------|-----------|-----------|

---

Unique Subject Identifier=6023000000-0015

Assay variable : PTINR\_VAL1 PT-INR Value

N Mean Standard Deviation Minimum Maximum

---

|   |           |           |           |           |
|---|-----------|-----------|-----------|-----------|
| 3 | 1.8666667 | 0.3055050 | 1.6000000 | 2.2000000 |
|---|-----------|-----------|-----------|-----------|

---

Unique Subject Identifier=6023000000-0017

Assay variable : PTINR\_VAL1 PT-INR Value

N Mean Standard Deviation Minimum Maximum

---

|   |           |           |           |           |
|---|-----------|-----------|-----------|-----------|
| 5 | 1.7400000 | 0.1816590 | 1.5000000 | 1.9000000 |
|---|-----------|-----------|-----------|-----------|

---

Unique Subject Identifier=6023000000-0020



Assay variable : PTINR\_VAL1 PT-INR Value

N Mean Standard Deviation Minimum Maximum

---

|   |           |  |           |           |
|---|-----------|--|-----------|-----------|
| 1 | 2.2000000 |  | 2.2000000 | 2.2000000 |
|---|-----------|--|-----------|-----------|

---

Laboratory tests at the time of obtaining Table 2-6 consent, according to the presence or absence of proton-pump inhibitors

Unique Subject Identifier=6023000000-0026

MEANS Procedure

Assay variable : PTINR\_VAL1 PT-INR Value

N Mean Standard Deviation Minimum Maximum

---

|   |           |           |           |           |
|---|-----------|-----------|-----------|-----------|
| 4 | 2.0250000 | 0.2217356 | 1.7000000 | 2.2000000 |
|---|-----------|-----------|-----------|-----------|

---

Unique Subject Identifier=6023000000-0031

Assay variable : PTINR\_VAL1 PT-INR Value

N Mean Standard Deviation Minimum Maximum

---

|   |           |           |           |           |
|---|-----------|-----------|-----------|-----------|
| 4 | 2.6250000 | 0.1892969 | 2.5000000 | 2.9000000 |
|---|-----------|-----------|-----------|-----------|

---

Unique Subject Identifier=6023000000-0032

Assay variable : PTINR\_VAL1 PT-INR Value

N Mean Standard Deviation Minimum Maximum

---

|   |           |           |           |           |
|---|-----------|-----------|-----------|-----------|
| 6 | 2.2666667 | 0.5465040 | 1.2000000 | 2.7000000 |
|---|-----------|-----------|-----------|-----------|

---

Unique Subject Identifier=6023000000-0034

Assay variable : PTINR\_VAL1 PT-INR Value

N Mean Standard Deviation Minimum Maximum

---

|   |           |           |           |           |
|---|-----------|-----------|-----------|-----------|
| 4 | 1.7250000 | 0.2753785 | 1.4000000 | 2.0000000 |
|---|-----------|-----------|-----------|-----------|

---

Laboratory tests at the time of obtaining Table 2-6 consent, according to the presence or absence of proton-pump inhibitors

Unique Subject Identifier=6023000000-0035

MEANS Procedure

Assay variable : PTINR\_VAL1 PT-INR Value

N Mean Standard Deviation Minimum Maximum

---

|   |           |           |           |           |
|---|-----------|-----------|-----------|-----------|
| 5 | 1.8400000 | 0.3781534 | 1.5000000 | 2.4000000 |
|---|-----------|-----------|-----------|-----------|

---

Unique Subject Identifier=6023000000-0039

Assay variable : PTINR\_VAL1 PT-INR Value

N Mean Standard Deviation Minimum Maximum

---

|   |           |           |           |           |
|---|-----------|-----------|-----------|-----------|
| 2 | 2.3500000 | 0.9192388 | 1.7000000 | 3.0000000 |
|---|-----------|-----------|-----------|-----------|

---

Unique Subject Identifier=6023000000-0042

Assay variable : PTINR\_VAL1 PT-INR Value

N Mean Standard Deviation Minimum Maximum

---

|   |           |           |           |           |
|---|-----------|-----------|-----------|-----------|
| 3 | 2.0666667 | 0.1527525 | 1.9000000 | 2.2000000 |
|---|-----------|-----------|-----------|-----------|

---

Unique Subject Identifier=6023000000-0044

Assay variable : PTINR\_VAL1 PT-INR Value

N Mean Standard Deviation Minimum Maximum

---

|   |           |           |           |           |
|---|-----------|-----------|-----------|-----------|
| 2 | 2.0500000 | 0.0707107 | 2.0000000 | 2.1000000 |
|---|-----------|-----------|-----------|-----------|

---

Laboratory tests at the time of obtaining Table 2-6 consent, according to the presence or absence of proton-pump inhibitors

Unique Subject Identifier=6023000000-0046

MEANS Procedure

Assay variable : PTINR\_VAL1 PT-INR Value

N Mean Standard Deviation Minimum Maximum

---

|   |           |           |           |           |
|---|-----------|-----------|-----------|-----------|
| 4 | 1.9500000 | 0.4654747 | 1.5000000 | 2.6000000 |
|---|-----------|-----------|-----------|-----------|

---

Unique Subject Identifier=6023000000-0052

Assay variable : PTINR\_VAL1 PT-INR Value

N Mean Standard Deviation Minimum Maximum

---

|   |           |           |           |           |
|---|-----------|-----------|-----------|-----------|
| 2 | 2.4500000 | 0.0707107 | 2.4000000 | 2.5000000 |
|---|-----------|-----------|-----------|-----------|

---

Unique Subject Identifier=6023000000-0054

Assay variable : PTINR\_VAL1 PT-INR Value

N Mean Standard Deviation Minimum Maximum

---

|   |           |           |           |           |
|---|-----------|-----------|-----------|-----------|
| 5 | 1.9200000 | 0.6648308 | 1.5000000 | 3.1000000 |
|---|-----------|-----------|-----------|-----------|

---

Unique Subject Identifier=6027000000-0002

Assay variable : PTINR\_VAL1 PT-INR Value

N Mean Standard Deviation Minimum Maximum

---

|   |           |           |           |           |
|---|-----------|-----------|-----------|-----------|
| 5 | 1.7820000 | 0.2258761 | 1.4400000 | 2.0200000 |
|---|-----------|-----------|-----------|-----------|

---

Laboratory tests at the time of obtaining Table 2-6 consent, according to the presence or absence of proton-pump inhibitors

Unique Subject Identifier=6027000000-0012

MEANS Procedure

Assay variable : PTINR\_VAL1 PT-INR Value

N Mean Standard Deviation Minimum Maximum

---

|   |           |           |           |           |
|---|-----------|-----------|-----------|-----------|
| 4 | 2.0075000 | 0.5292369 | 1.6400000 | 2.7800000 |
|---|-----------|-----------|-----------|-----------|

---

Unique Subject Identifier=6027000000-0024

Assay variable : PTINR\_VAL1 PT-INR Value

N Mean Standard Deviation Minimum Maximum

---

|   |           |           |           |           |
|---|-----------|-----------|-----------|-----------|
| 5 | 2.6820000 | 0.8302229 | 1.7100000 | 3.9800000 |
|---|-----------|-----------|-----------|-----------|

---

Unique Subject Identifier=6029000000-0006

Assay variable : PTINR\_VAL1 PT-INR Value

N Mean Standard Deviation Minimum Maximum

---

|   |           |           |           |           |
|---|-----------|-----------|-----------|-----------|
| 3 | 1.9600000 | 0.5910161 | 1.3500000 | 2.5300000 |
|---|-----------|-----------|-----------|-----------|

---

Unique Subject Identifier=6029000000-0020



Assay variable : PTINR\_VAL1 PT-INR Value

N Mean Standard Deviation Minimum Maximum

---

|   |           |           |           |           |
|---|-----------|-----------|-----------|-----------|
| 2 | 1.7400000 | 0.2828427 | 1.5400000 | 1.9400000 |
|---|-----------|-----------|-----------|-----------|

---

Laboratory tests at the time of obtaining Table 2-6 consent, according to the presence or absence of proton-pump inhibitors

Unique Subject Identifier=6029000000-0026

MEANS Procedure

Assay variable : PTINR\_VAL1 PT-INR Value

N Mean Standard Deviation Minimum Maximum

---

|   |           |  |           |           |
|---|-----------|--|-----------|-----------|
| 1 | 2.7900000 |  | 2.7900000 | 2.7900000 |
|---|-----------|--|-----------|-----------|

---

Unique Subject Identifier=6031011010-0010

Assay variable : PTINR\_VAL1 PT-INR Value

N Mean Standard Deviation Minimum Maximum

---

|   |           |           |           |           |
|---|-----------|-----------|-----------|-----------|
| 5 | 1.9780000 | 0.3420819 | 1.5700000 | 2.4000000 |
|---|-----------|-----------|-----------|-----------|

---

Unique Subject Identifier=6031011010-0011

Assay variable : PTINR\_VAL1 PT-INR Value

N Mean Standard Deviation Minimum Maximum

---

|   |           |           |           |           |
|---|-----------|-----------|-----------|-----------|
| 4 | 1.7575000 | 0.2321458 | 1.5000000 | 2.0200000 |
|---|-----------|-----------|-----------|-----------|

---

Unique Subject Identifier=6031011010-0012

Assay variable : PTINR\_VAL1 PT-INR Value

N Mean Standard Deviation Minimum Maximum

---

|   |          |          |          |          |
|---|----------|----------|----------|----------|
| 5 | 2.112000 | 0.802041 | 1.280000 | 3.290000 |
|---|----------|----------|----------|----------|

---

Laboratory tests at the time of obtaining Table 2-6 consent, according to the presence or absence of proton-pump inhibitors

Unique Subject Identifier=6031011010-0018

MEANS Procedure

Assay variable : PTINR\_VAL1 PT-INR Value

N Mean Standard Deviation Minimum Maximum

---

|   |          |           |          |          |
|---|----------|-----------|----------|----------|
| 4 | 2.360000 | 0.3468910 | 1.950000 | 2.740000 |
|---|----------|-----------|----------|----------|

---

Unique Subject Identifier=6031011010-0019

Assay variable : PTINR\_VAL1 PT-INR Value

N Mean Standard Deviation Minimum Maximum

---

|   |          |           |          |          |
|---|----------|-----------|----------|----------|
| 6 | 2.093333 | 0.5123540 | 1.510000 | 2.670000 |
|---|----------|-----------|----------|----------|

---

Unique Subject Identifier=6031011010-0021

Assay variable : PTINR\_VAL1 PT-INR Value

N Mean Standard Deviation Minimum Maximum

---

|   |          |          |          |          |
|---|----------|----------|----------|----------|
| 3 | 1.750000 | 0.010000 | 1.740000 | 1.760000 |
|---|----------|----------|----------|----------|

---

Unique Subject Identifier=6031011010-0024

Assay variable : PTINR\_VAL1 PT-INR Value

N Mean Standard Deviation Minimum Maximum

---

|   |           |           |           |           |
|---|-----------|-----------|-----------|-----------|
| 5 | 1.9160000 | 0.2597691 | 1.5600000 | 2.1400000 |
|---|-----------|-----------|-----------|-----------|

---

Laboratory tests at the time of obtaining Table 2-6 consent, according to the presence or absence of proton-pump inhibitors

Unique Subject Identifier=6031011010-0025

MEANS Procedure

Assay variable : PTINR\_VAL1 PT-INR Value

N Mean Standard Deviation Minimum Maximum

---

|   |           |           |           |           |
|---|-----------|-----------|-----------|-----------|
| 6 | 1.7383333 | 0.2262226 | 1.4500000 | 2.0600000 |
|---|-----------|-----------|-----------|-----------|

---

Unique Subject Identifier=6032010000-0011

Assay variable : PTINR\_VAL1 PT-INR Value

N Mean Standard Deviation Minimum Maximum

---

|   |           |           |           |           |
|---|-----------|-----------|-----------|-----------|
| 2 | 3.3050000 | 0.9687363 | 2.6200000 | 3.9900000 |
|---|-----------|-----------|-----------|-----------|

---

Unique Subject Identifier=6032010000-0012

Assay variable : PTINR\_VAL1 PT-INR Value

N Mean Standard Deviation Minimum Maximum

---

|   |           |           |           |           |
|---|-----------|-----------|-----------|-----------|
| 6 | 2.4733333 | 1.3273382 | 1.0500000 | 4.2200000 |
|---|-----------|-----------|-----------|-----------|

---

Unique Subject Identifier=6032010000-0013

Assay variable : PTINR\_VAL1 PT-INR Value

N Mean Standard Deviation Minimum Maximum

---

|   |           |           |           |           |
|---|-----------|-----------|-----------|-----------|
| 6 | 1.6966667 | 0.1120119 | 1.4900000 | 1.8300000 |
|---|-----------|-----------|-----------|-----------|

---

Laboratory tests at the time of obtaining Table 2-6 consent, according to the presence or absence of proton-pump inhibitors

Unique Subject Identifier=6032010000-0015

MEANS Procedure

Assay variable : PTINR\_VAL1 PT-INR Value

N Mean Standard Deviation Minimum Maximum

---

|   |           |           |           |           |
|---|-----------|-----------|-----------|-----------|
| 2 | 1.6500000 | 0.2121320 | 1.5000000 | 1.8000000 |
|---|-----------|-----------|-----------|-----------|

---

Unique Subject Identifier=6032010000-0019

Assay variable : PTINR\_VAL1 PT-INR Value

N Mean Standard Deviation Minimum Maximum

---

|   |           |           |           |           |
|---|-----------|-----------|-----------|-----------|
| 4 | 1.8025000 | 0.5687633 | 1.4400000 | 2.6500000 |
|---|-----------|-----------|-----------|-----------|

---

Unique Subject Identifier=6032010000-0020

Assay variable : PTINR\_VAL1 PT-INR Value

N Mean Standard Deviation Minimum Maximum

---

|   |           |           |           |           |
|---|-----------|-----------|-----------|-----------|
| 3 | 2.1533333 | 0.1833939 | 2.0100000 | 2.3600000 |
|---|-----------|-----------|-----------|-----------|

---

Unique Subject Identifier=6032010000-0026



Assay variable : PTINR\_VAL1 PT-INR Value

N Mean Standard Deviation Minimum Maximum

---

|   |           |  |           |           |
|---|-----------|--|-----------|-----------|
| 1 | 2.5900000 |  | 2.5900000 | 2.5900000 |
|---|-----------|--|-----------|-----------|

---

Laboratory tests at the time of obtaining Table 2-6 consent, according to the presence or absence of proton-pump inhibitors

Unique Subject Identifier=6032010000-0028

MEANS Procedure

Assay variable : PTINR\_VAL1 PT-INR Value

N Mean Standard Deviation Minimum Maximum

---

|   |           |  |           |           |
|---|-----------|--|-----------|-----------|
| 1 | 1.8000000 |  | 1.8000000 | 1.8000000 |
|---|-----------|--|-----------|-----------|

---

Unique Subject Identifier=6032010000-0030

Assay variable : PTINR\_VAL1 PT-INR Value

N Mean Standard Deviation Minimum Maximum

---

|   |           |           |           |           |
|---|-----------|-----------|-----------|-----------|
| 2 | 2.7150000 | 0.6717514 | 2.2400000 | 3.1900000 |
|---|-----------|-----------|-----------|-----------|

---

Unique Subject Identifier=6032010000-0032

Assay variable : PTINR\_VAL1 PT-INR Value

N Mean Standard Deviation Minimum Maximum

---

|   |           |           |           |           |
|---|-----------|-----------|-----------|-----------|
| 2 | 1.3650000 | 0.1484924 | 1.2600000 | 1.4700000 |
|---|-----------|-----------|-----------|-----------|

---

Unique Subject Identifier=6032010000-0038

Assay variable : PTINR\_VAL1 PT-INR Value

N Mean Standard Deviation Minimum Maximum

---

|   |           |           |           |           |
|---|-----------|-----------|-----------|-----------|
| 6 | 2.5766667 | 0.4231627 | 2.1100000 | 3.2800000 |
|---|-----------|-----------|-----------|-----------|

---

Laboratory tests at the time of obtaining Table 2-6 consent, according to the presence or absence of proton-pump inhibitors

Unique Subject Identifier=6032010000-0042

MEANS Procedure

Assay variable : PTINR\_VAL1 PT-INR Value

N Mean Standard Deviation Minimum Maximum

---

|   |           |           |           |           |
|---|-----------|-----------|-----------|-----------|
| 5 | 2.3060000 | 0.2140794 | 2.0800000 | 2.5500000 |
|---|-----------|-----------|-----------|-----------|

---

Unique Subject Identifier=6032010000-0044

Assay variable : PTINR\_VAL1 PT-INR Value

N Mean Standard Deviation Minimum Maximum

---

|   |           |           |           |           |
|---|-----------|-----------|-----------|-----------|
| 3 | 2.0033333 | 0.0404145 | 1.9800000 | 2.0500000 |
|---|-----------|-----------|-----------|-----------|

---

Unique Subject Identifier=6032010000-0045

Assay variable : PTINR\_VAL1 PT-INR Value

N Mean Standard Deviation Minimum Maximum

---

|   |           |           |           |           |
|---|-----------|-----------|-----------|-----------|
| 3 | 2.2966667 | 0.2579406 | 2.0100000 | 2.5100000 |
|---|-----------|-----------|-----------|-----------|

---

Unique Subject Identifier=6032010000-0046

Assay variable : PTINR\_VAL1 PT-INR Value

N Mean Standard Deviation Minimum Maximum

---

|   |          |           |          |          |
|---|----------|-----------|----------|----------|
| 2 | 2.340000 | 0.4242641 | 2.040000 | 2.640000 |
|---|----------|-----------|----------|----------|

---

Laboratory tests at the time of obtaining Table 2-6 consent, according to the presence or absence of proton-pump inhibitors

Unique Subject Identifier=6032010000-0059

MEANS Procedure

Assay variable : PTINR\_VAL1 PT-INR Value

| N | Mean     | Standard Deviation | Minimum  | Maximum  |
|---|----------|--------------------|----------|----------|
| 3 | 3.590000 | 2.8840770          | 1.890000 | 6.920000 |

Unique Subject Identifier=6032010000-0064

Assay variable : PTINR\_VAL1 PT-INR Value

| N | Mean     | Standard Deviation | Minimum  | Maximum  |
|---|----------|--------------------|----------|----------|
| 2 | 2.235000 | 0.9687363          | 1.550000 | 2.920000 |

Unique Subject Identifier=6032010000-0065

Assay variable : PTINR\_VAL1 PT-INR Value

| N | Mean     | Standard Deviation | Minimum  | Maximum  |
|---|----------|--------------------|----------|----------|
| 5 | 1.944000 | 0.4271768          | 1.250000 | 2.390000 |

Unique Subject Identifier=6032010000-0072

Assay variable : PTINR\_VAL1 PT-INR Value

N Mean Standard Deviation Minimum Maximum

---

|   |           |           |           |           |
|---|-----------|-----------|-----------|-----------|
| 3 | 2.4966667 | 0.6601010 | 1.9500000 | 3.2300000 |
|---|-----------|-----------|-----------|-----------|

---

Laboratory tests at the time of obtaining Table 2-6 consent, according to the presence or absence of proton-pump inhibitors

Unique Subject Identifier=6032010000-0077

MEANS Procedure

Assay variable : PTINR\_VAL1 PT-INR Value

N Mean Standard Deviation Minimum Maximum

---

|   |           |           |           |           |
|---|-----------|-----------|-----------|-----------|
| 2 | 2.4850000 | 0.4879037 | 2.1400000 | 2.8300000 |
|---|-----------|-----------|-----------|-----------|

---

Unique Subject Identifier=6032010000-0079

Assay variable : PTINR\_VAL1 PT-INR Value

N Mean Standard Deviation Minimum Maximum

---

|   |           |           |           |           |
|---|-----------|-----------|-----------|-----------|
| 4 | 2.0100000 | 0.2181742 | 1.7400000 | 2.2400000 |
|---|-----------|-----------|-----------|-----------|

---

Unique Subject Identifier=6032010000-0082

Assay variable : PTINR\_VAL1 PT-INR Value

N Mean Standard Deviation Minimum Maximum

---

|   |           |           |           |           |
|---|-----------|-----------|-----------|-----------|
| 3 | 2.0333333 | 0.6908208 | 1.6000000 | 2.8300000 |
|---|-----------|-----------|-----------|-----------|

---

Unique Subject Identifier=6035000000-0002



Assay variable : PTINR\_VAL1 PT-INR Value

N Mean Standard Deviation Minimum Maximum

---

|   |           |  |           |           |
|---|-----------|--|-----------|-----------|
| 1 | 2.9300000 |  | 2.9300000 | 2.9300000 |
|---|-----------|--|-----------|-----------|

---

Laboratory tests at the time of obtaining Table 2-6 consent, according to the presence or absence of proton-pump inhibitors

Unique Subject Identifier=6035000000-0010

MEANS Procedure

Assay variable : PTINR\_VAL1 PT-INR Value

N Mean Standard Deviation Minimum Maximum

---

|   |           |           |           |           |
|---|-----------|-----------|-----------|-----------|
| 3 | 2.2766667 | 0.3481858 | 1.9800000 | 2.6600000 |
|---|-----------|-----------|-----------|-----------|

---

Unique Subject Identifier=6035000000-0017

Assay variable : PTINR\_VAL1 PT-INR Value

N Mean Standard Deviation Minimum Maximum

---

|   |           |           |           |           |
|---|-----------|-----------|-----------|-----------|
| 5 | 2.2120000 | 0.7254792 | 1.4800000 | 3.4000000 |
|---|-----------|-----------|-----------|-----------|

---

Unique Subject Identifier=6036000000-0004

Assay variable : PTINR\_VAL1 PT-INR Value

N Mean Standard Deviation Minimum Maximum

---

|   |           |           |           |           |
|---|-----------|-----------|-----------|-----------|
| 4 | 2.2525000 | 0.3569664 | 1.8400000 | 2.7100000 |
|---|-----------|-----------|-----------|-----------|

---

Unique Subject Identifier=6036000000-0009

Assay variable : PTINR\_VAL1 PT-INR Value

N Mean Standard Deviation Minimum Maximum

---

|   |           |           |           |           |
|---|-----------|-----------|-----------|-----------|
| 4 | 2.2800000 | 0.2741046 | 2.0000000 | 2.6500000 |
|---|-----------|-----------|-----------|-----------|

---

Laboratory tests at the time of obtaining Table 2-6 consent, according to the presence or absence of proton-pump inhibitors

Unique Subject Identifier=6036000000-0010

MEANS Procedure

Assay variable : PTINR\_VAL1 PT-INR Value

N Mean Standard Deviation Minimum Maximum

---

|   |           |           |           |           |
|---|-----------|-----------|-----------|-----------|
| 4 | 1.9225000 | 0.2474369 | 1.5600000 | 2.1100000 |
|---|-----------|-----------|-----------|-----------|

---

Unique Subject Identifier=6041000000-0002

Assay variable : PTINR\_VAL1 PT-INR Value

N Mean Standard Deviation Minimum Maximum

---

|   |           |           |           |           |
|---|-----------|-----------|-----------|-----------|
| 4 | 1.9825000 | 0.1723127 | 1.8100000 | 2.1800000 |
|---|-----------|-----------|-----------|-----------|

---

Unique Subject Identifier=6041000000-0008

Assay variable : PTINR\_VAL1 PT-INR Value

N Mean Standard Deviation Minimum Maximum

---

|   |           |           |           |           |
|---|-----------|-----------|-----------|-----------|
| 3 | 1.5700000 | 0.0500000 | 1.5200000 | 1.6200000 |
|---|-----------|-----------|-----------|-----------|

---

Unique Subject Identifier=6041000000-0017

Assay variable : PTINR\_VAL1 PT-INR Value

N Mean Standard Deviation Minimum Maximum

---

|   |           |           |           |           |
|---|-----------|-----------|-----------|-----------|
| 5 | 1.6480000 | 0.3406905 | 1.3600000 | 2.0600000 |
|---|-----------|-----------|-----------|-----------|

---

Laboratory tests at the time of obtaining Table 2-6 consent, according to the presence or absence of proton-pump inhibitors

Unique Subject Identifier=6041000000-0019

MEANS Procedure

Assay variable : PTINR\_VAL1 PT-INR Value

N Mean Standard Deviation Minimum Maximum

---

|   |           |           |           |           |
|---|-----------|-----------|-----------|-----------|
| 3 | 1.6633333 | 0.0503322 | 1.6100000 | 1.7100000 |
|---|-----------|-----------|-----------|-----------|

---

Unique Subject Identifier=6041000000-0025

Assay variable : PTINR\_VAL1 PT-INR Value

N Mean Standard Deviation Minimum Maximum

---

|   |           |           |           |           |
|---|-----------|-----------|-----------|-----------|
| 6 | 2.0683333 | 0.2205826 | 1.6800000 | 2.2400000 |
|---|-----------|-----------|-----------|-----------|

---

Unique Subject Identifier=6041000000-0027

Assay variable : PTINR\_VAL1 PT-INR Value

N Mean Standard Deviation Minimum Maximum

---

|   |           |           |           |           |
|---|-----------|-----------|-----------|-----------|
| 3 | 1.5166667 | 0.0929157 | 1.4400000 | 1.6200000 |
|---|-----------|-----------|-----------|-----------|

---

Unique Subject Identifier=6041000000-0028

Assay variable : PTINR\_VAL1 PT-INR Value

N Mean Standard Deviation Minimum Maximum

---

|   |           |           |           |           |
|---|-----------|-----------|-----------|-----------|
| 3 | 1.4966667 | 0.1530795 | 1.3200000 | 1.5900000 |
|---|-----------|-----------|-----------|-----------|

---

Laboratory tests at the time of obtaining Table 2-6 consent, according to the presence or absence of proton-pump inhibitors

Unique Subject Identifier=6041000000-0037

MEANS Procedure

Assay variable : PTINR\_VAL1 PT-INR Value

N Mean Standard Deviation Minimum Maximum

---

|   |           |           |           |           |
|---|-----------|-----------|-----------|-----------|
| 4 | 1.6000000 | 0.1893850 | 1.4300000 | 1.8700000 |
|---|-----------|-----------|-----------|-----------|

---

Unique Subject Identifier=6041000000-0048

Assay variable : PTINR\_VAL1 PT-INR Value

N Mean Standard Deviation Minimum Maximum

---

|   |           |           |           |           |
|---|-----------|-----------|-----------|-----------|
| 4 | 1.5850000 | 0.4695033 | 1.2900000 | 2.2800000 |
|---|-----------|-----------|-----------|-----------|

---

Unique Subject Identifier=6041000000-0049

Assay variable : PTINR\_VAL1 PT-INR Value

N Mean Standard Deviation Minimum Maximum

---

|   |           |           |           |           |
|---|-----------|-----------|-----------|-----------|
| 4 | 1.5425000 | 0.1550000 | 1.3800000 | 1.7400000 |
|---|-----------|-----------|-----------|-----------|

---

Unique Subject Identifier=6041000000-0050



Assay variable : PTINR\_VAL1 PT-INR Value

N Mean Standard Deviation Minimum Maximum

---

|   |           |           |           |           |
|---|-----------|-----------|-----------|-----------|
| 3 | 2.0766667 | 0.0838650 | 1.9800000 | 2.1300000 |
|---|-----------|-----------|-----------|-----------|

---

Laboratory tests at the time of obtaining Table 2-6 consent, according to the presence or absence of proton-pump inhibitors

Unique Subject Identifier=6042000000-0001

MEANS Procedure

Assay variable : PTINR\_VAL1 PT-INR Value

N Mean Standard Deviation Minimum Maximum

---

|   |           |           |           |           |
|---|-----------|-----------|-----------|-----------|
| 6 | 1.6650000 | 0.5169429 | 1.1000000 | 2.3300000 |
|---|-----------|-----------|-----------|-----------|

---

Unique Subject Identifier=6042000000-0002

Assay variable : PTINR\_VAL1 PT-INR Value

N Mean Standard Deviation Minimum Maximum

---

|   |           |           |           |           |
|---|-----------|-----------|-----------|-----------|
| 5 | 1.1920000 | 0.0614003 | 1.1300000 | 1.2800000 |
|---|-----------|-----------|-----------|-----------|

---

Unique Subject Identifier=6042000000-0003

Assay variable : PTINR\_VAL1 PT-INR Value

N Mean Standard Deviation Minimum Maximum

---

|   |           |           |           |           |
|---|-----------|-----------|-----------|-----------|
| 6 | 1.9383333 | 0.5394225 | 1.5000000 | 2.9200000 |
|---|-----------|-----------|-----------|-----------|

---

Unique Subject Identifier=6042000000-0004

Assay variable : PTINR\_VAL1 PT-INR Value

N Mean Standard Deviation Minimum Maximum

---

|   |           |           |           |           |
|---|-----------|-----------|-----------|-----------|
| 6 | 1.7316667 | 0.1911457 | 1.5600000 | 1.9700000 |
|---|-----------|-----------|-----------|-----------|

---

Laboratory tests at the time of obtaining Table 2-6 consent, according to the presence or absence of proton-pump inhibitors

Unique Subject Identifier=6042000000-0007

MEANS Procedure

Assay variable : PTINR\_VAL1 PT-INR Value

N Mean Standard Deviation Minimum Maximum

---

|   |           |           |           |           |
|---|-----------|-----------|-----------|-----------|
| 3 | 1.5933333 | 0.3611556 | 1.3700000 | 2.0100000 |
|---|-----------|-----------|-----------|-----------|

---

Unique Subject Identifier=6045010111-0013

Assay variable : PTINR\_VAL1 PT-INR Value

N Mean Standard Deviation Minimum Maximum

---

|   |           |           |           |           |
|---|-----------|-----------|-----------|-----------|
| 4 | 2.1025000 | 0.1664081 | 1.9900000 | 2.3500000 |
|---|-----------|-----------|-----------|-----------|

---

Unique Subject Identifier=6045010111-0021

Assay variable : PTINR\_VAL1 PT-INR Value

N Mean Standard Deviation Minimum Maximum

---

|   |           |           |           |           |
|---|-----------|-----------|-----------|-----------|
| 6 | 1.7933333 | 0.3669696 | 1.5100000 | 2.5100000 |
|---|-----------|-----------|-----------|-----------|

---

Unique Subject Identifier=6045010111-0039

Assay variable : PTINR\_VAL1 PT-INR Value

N Mean Standard Deviation Minimum Maximum

---

|   |           |           |           |           |
|---|-----------|-----------|-----------|-----------|
| 4 | 2.0350000 | 0.3765191 | 1.6300000 | 2.5400000 |
|---|-----------|-----------|-----------|-----------|

---

Laboratory tests at the time of obtaining Table 2-6 consent, according to the presence or absence of proton-pump inhibitors

Unique Subject Identifier=6045010111-0040

MEANS Procedure

Assay variable : PTINR\_VAL1 PT-INR Value

N Mean Standard Deviation Minimum Maximum

---

|   |           |           |           |           |
|---|-----------|-----------|-----------|-----------|
| 6 | 2.1716667 | 0.1719787 | 1.8700000 | 2.3600000 |
|---|-----------|-----------|-----------|-----------|

---

Unique Subject Identifier=6045010111-0052

Assay variable : PTINR\_VAL1 PT-INR Value

N Mean Standard Deviation Minimum Maximum

---

|   |           |           |           |           |
|---|-----------|-----------|-----------|-----------|
| 4 | 2.1425000 | 0.1317510 | 2.0200000 | 2.3200000 |
|---|-----------|-----------|-----------|-----------|

---

Unique Subject Identifier=6045010111-0063

Assay variable : PTINR\_VAL1 PT-INR Value

N Mean Standard Deviation Minimum Maximum

---

|   |           |           |           |           |
|---|-----------|-----------|-----------|-----------|
| 3 | 2.2200000 | 0.4293018 | 1.7600000 | 2.6100000 |
|---|-----------|-----------|-----------|-----------|

---

Unique Subject Identifier=6045010111-0067

Assay variable : PTINR\_VAL1 PT-INR Value

N Mean Standard Deviation Minimum Maximum

---

|   |           |           |           |           |
|---|-----------|-----------|-----------|-----------|
| 4 | 1.9250000 | 0.2298550 | 1.6300000 | 2.1400000 |
|---|-----------|-----------|-----------|-----------|

---

Laboratory tests at the time of obtaining Table 2-6 consent, according to the presence or absence of proton-pump inhibitors

Unique Subject Identifier=6045010111-0073

MEANS Procedure

Assay variable : PTINR\_VAL1 PT-INR Value

N Mean Standard Deviation Minimum Maximum

---

|   |           |           |           |           |
|---|-----------|-----------|-----------|-----------|
| 3 | 2.0933333 | 0.4061199 | 1.8200000 | 2.5600000 |
|---|-----------|-----------|-----------|-----------|

---

Unique Subject Identifier=6048010000-0001

Assay variable : PTINR\_VAL1 PT-INR Value

N Mean Standard Deviation Minimum Maximum

---

|   |           |  |           |           |
|---|-----------|--|-----------|-----------|
| 1 | 2.9000000 |  | 2.9000000 | 2.9000000 |
|---|-----------|--|-----------|-----------|

---

Unique Subject Identifier=6048010000-0021

Assay variable : PTINR\_VAL1 PT-INR Value

N Mean Standard Deviation Minimum Maximum

---

|   |           |  |           |           |
|---|-----------|--|-----------|-----------|
| 1 | 2.5000000 |  | 2.5000000 | 2.5000000 |
|---|-----------|--|-----------|-----------|

---

Unique Subject Identifier=6048010000-0024



Assay variable : PTINR\_VAL1 PT-INR Value

N Mean Standard Deviation Minimum Maximum

---

|   |           |           |           |           |
|---|-----------|-----------|-----------|-----------|
| 4 | 2.6500000 | 0.1914854 | 2.5000000 | 2.9000000 |
|---|-----------|-----------|-----------|-----------|

---

Laboratory tests at the time of obtaining Table 2-6 consent, according to the presence or absence of proton-pump inhibitors

Unique Subject Identifier=6048010000-0045

MEANS Procedure

Assay variable : PTINR\_VAL1 PT-INR Value

N Mean Standard Deviation Minimum Maximum

---

|   |           |  |           |           |
|---|-----------|--|-----------|-----------|
| 1 | 1.9000000 |  | 1.9000000 | 1.9000000 |
|---|-----------|--|-----------|-----------|

---

Unique Subject Identifier=6048010000-0048

Assay variable : PTINR\_VAL1 PT-INR Value

N Mean Standard Deviation Minimum Maximum

---

|   |           |  |           |           |
|---|-----------|--|-----------|-----------|
| 1 | 1.8000000 |  | 1.8000000 | 1.8000000 |
|---|-----------|--|-----------|-----------|

---

Unique Subject Identifier=6048010000-0061

Assay variable : PTINR\_VAL1 PT-INR Value

N Mean Standard Deviation Minimum Maximum

---

|   |           |  |           |           |
|---|-----------|--|-----------|-----------|
| 1 | 1.8000000 |  | 1.8000000 | 1.8000000 |
|---|-----------|--|-----------|-----------|

---

Unique Subject Identifier=6050011100-0017

Assay variable : PTINR\_VAL1 PT-INR Value

N Mean Standard Deviation Minimum Maximum

---

|   |          |           |          |          |
|---|----------|-----------|----------|----------|
| 2 | 2.150000 | 0.4666905 | 1.820000 | 2.480000 |
|---|----------|-----------|----------|----------|

---

Laboratory tests at the time of obtaining Table 2-6 consent, according to the presence or absence of proton-pump inhibitors

Unique Subject Identifier=6050011100-0019

MEANS Procedure

Assay variable : PTINR\_VAL1 PT-INR Value

N Mean Standard Deviation Minimum Maximum

---

|   |           |           |           |           |
|---|-----------|-----------|-----------|-----------|
| 3 | 2.0766667 | 0.2112660 | 1.9400000 | 2.3200000 |
|---|-----------|-----------|-----------|-----------|

---

Unique Subject Identifier=6050011100-0023

Assay variable : PTINR\_VAL1 PT-INR Value

N Mean Standard Deviation Minimum Maximum

---

|   |           |           |           |           |
|---|-----------|-----------|-----------|-----------|
| 3 | 1.9033333 | 0.0635085 | 1.8300000 | 1.9400000 |
|---|-----------|-----------|-----------|-----------|

---

Unique Subject Identifier=6050011100-0025

Assay variable : PTINR\_VAL1 PT-INR Value

N Mean Standard Deviation Minimum Maximum

---

|   |           |           |           |           |
|---|-----------|-----------|-----------|-----------|
| 3 | 1.8833333 | 0.0896289 | 1.7800000 | 1.9400000 |
|---|-----------|-----------|-----------|-----------|

---

Unique Subject Identifier=6058010011-0007

Assay variable : PTINR\_VAL1 PT-INR Value

N Mean Standard Deviation Minimum Maximum

---

|   |           |           |           |           |
|---|-----------|-----------|-----------|-----------|
| 6 | 2.4300000 | 0.1980909 | 2.3000000 | 2.8100000 |
|---|-----------|-----------|-----------|-----------|

---

Laboratory tests at the time of obtaining Table 2-6 consent, according to the presence or absence of proton-pump inhibitors

Unique Subject Identifier=6058010011-0012

MEANS Procedure

Assay variable : PTINR\_VAL1 PT-INR Value

N Mean Standard Deviation Minimum Maximum

---

|   |           |           |           |           |
|---|-----------|-----------|-----------|-----------|
| 6 | 1.8066667 | 0.2935075 | 1.5000000 | 2.2900000 |
|---|-----------|-----------|-----------|-----------|

---

Unique Subject Identifier=6058010011-0016

Assay variable : PTINR\_VAL1 PT-INR Value

N Mean Standard Deviation Minimum Maximum

---

|   |           |           |           |           |
|---|-----------|-----------|-----------|-----------|
| 6 | 2.2083333 | 0.3705896 | 1.7000000 | 2.6400000 |
|---|-----------|-----------|-----------|-----------|

---

Unique Subject Identifier=6058010011-0020

Assay variable : PTINR\_VAL1 PT-INR Value

N Mean Standard Deviation Minimum Maximum

---

|   |           |           |           |           |
|---|-----------|-----------|-----------|-----------|
| 6 | 2.0750000 | 0.3429140 | 1.8100000 | 2.7500000 |
|---|-----------|-----------|-----------|-----------|

---

Unique Subject Identifier=6058010011-0023

Assay variable : PTINR\_VAL1 PT-INR Value

N Mean Standard Deviation Minimum Maximum

---

|   |           |           |           |           |
|---|-----------|-----------|-----------|-----------|
| 4 | 2.4350000 | 0.0597216 | 2.3700000 | 2.5100000 |
|---|-----------|-----------|-----------|-----------|

---

Laboratory tests at the time of obtaining Table 2-6 consent, according to the presence or absence of proton-pump inhibitors

Unique Subject Identifier=6058010011-0028

MEANS Procedure

Assay variable : PTINR\_VAL1 PT-INR Value

N Mean Standard Deviation Minimum Maximum

---

|   |           |           |           |           |
|---|-----------|-----------|-----------|-----------|
| 6 | 1.7450000 | 0.1386723 | 1.6200000 | 1.9900000 |
|---|-----------|-----------|-----------|-----------|

---

Unique Subject Identifier=6060011000-0016

Assay variable : PTINR\_VAL1 PT-INR Value

N Mean Standard Deviation Minimum Maximum

---

|   |           |           |           |           |
|---|-----------|-----------|-----------|-----------|
| 3 | 1.7866667 | 0.1900877 | 1.6000000 | 1.9800000 |
|---|-----------|-----------|-----------|-----------|

---

Unique Subject Identifier=6071010010-0013

Assay variable : PTINR\_VAL1 PT-INR Value

N Mean Standard Deviation Minimum Maximum

---

|   |           |           |           |           |
|---|-----------|-----------|-----------|-----------|
| 6 | 2.2750000 | 0.2051097 | 2.0400000 | 2.6000000 |
|---|-----------|-----------|-----------|-----------|

---

Unique Subject Identifier=6071010010-0018



Assay variable : PTINR\_VAL1 PT-INR Value

N Mean Standard Deviation Minimum Maximum

---

|   |           |           |           |           |
|---|-----------|-----------|-----------|-----------|
| 4 | 2.7750000 | 0.9058513 | 1.7600000 | 3.9600000 |
|---|-----------|-----------|-----------|-----------|

---

Laboratory tests at the time of obtaining Table 2-6 consent, according to the presence or absence of proton-pump inhibitors

Unique Subject Identifier=6071010010-0020

MEANS Procedure

Assay variable : PTINR\_VAL1 PT-INR Value

N Mean Standard Deviation Minimum Maximum

---

|   |           |           |           |           |
|---|-----------|-----------|-----------|-----------|
| 3 | 1.8500000 | 0.1385641 | 1.6900000 | 1.9300000 |
|---|-----------|-----------|-----------|-----------|

---

Unique Subject Identifier=6098000000-0011

Assay variable : PTINR\_VAL1 PT-INR Value

N Mean Standard Deviation Minimum Maximum

---

|   |           |           |           |           |
|---|-----------|-----------|-----------|-----------|
| 3 | 1.4666667 | 0.2081666 | 1.3000000 | 1.7000000 |
|---|-----------|-----------|-----------|-----------|

---

Unique Subject Identifier=6098000000-0013

Assay variable : PTINR\_VAL1 PT-INR Value

N Mean Standard Deviation Minimum Maximum

---

|   |           |           |           |           |
|---|-----------|-----------|-----------|-----------|
| 2 | 2.0000000 | 0.1414214 | 1.9000000 | 2.1000000 |
|---|-----------|-----------|-----------|-----------|

---

Unique Subject Identifier=6098000000-0014

Assay variable : PTINR\_VAL1 PT-INR Value

N Mean Standard Deviation Minimum Maximum

---

|   |          |           |          |          |
|---|----------|-----------|----------|----------|
| 6 | 2.133333 | 0.6562520 | 1.200000 | 3.100000 |
|---|----------|-----------|----------|----------|

---

Laboratory tests at the time of obtaining Table 2-6 consent, according to the presence or absence of proton-pump inhibitors

Unique Subject Identifier=6098000000-0017

MEANS Procedure

Assay variable : PTINR\_VAL1 PT-INR Value

N Mean Standard Deviation Minimum Maximum

---

|   |           |           |           |           |
|---|-----------|-----------|-----------|-----------|
| 3 | 2.4666667 | 0.1527525 | 2.3000000 | 2.6000000 |
|---|-----------|-----------|-----------|-----------|

---

Unique Subject Identifier=6104000000-0001

Assay variable : PTINR\_VAL1 PT-INR Value

N Mean Standard Deviation Minimum Maximum

---

|   |           |           |           |           |
|---|-----------|-----------|-----------|-----------|
| 6 | 1.9516667 | 0.3741880 | 1.4200000 | 2.3600000 |
|---|-----------|-----------|-----------|-----------|

---

Unique Subject Identifier=6104000000-0006

Assay variable : PTINR\_VAL1 PT-INR Value

N Mean Standard Deviation Minimum Maximum

---

|   |           |           |           |           |
|---|-----------|-----------|-----------|-----------|
| 2 | 1.7550000 | 0.2192031 | 1.6000000 | 1.9100000 |
|---|-----------|-----------|-----------|-----------|

---

Unique Subject Identifier=6105000000-0012

Assay variable : PTINR\_VAL1 PT-INR Value

N Mean Standard Deviation Minimum Maximum

---

|   |          |           |          |          |
|---|----------|-----------|----------|----------|
| 4 | 1.850000 | 0.1801851 | 1.610000 | 2.020000 |
|---|----------|-----------|----------|----------|

---

Laboratory tests at the time of obtaining Table 2-6 consent, according to the presence or absence of proton-pump inhibitors

Unique Subject Identifier=6105000000-0016

MEANS Procedure

Assay variable : PTINR\_VAL1 PT-INR Value

N Mean Standard Deviation Minimum Maximum

---

|   |           |           |           |           |
|---|-----------|-----------|-----------|-----------|
| 6 | 1.7483333 | 0.2955278 | 1.2700000 | 2.1000000 |
|---|-----------|-----------|-----------|-----------|

---

Unique Subject Identifier=6108011010-0006

Assay variable : PTINR\_VAL1 PT-INR Value

N Mean Standard Deviation Minimum Maximum

---

|   |           |           |           |           |
|---|-----------|-----------|-----------|-----------|
| 4 | 1.6700000 | 0.1435270 | 1.5400000 | 1.8700000 |
|---|-----------|-----------|-----------|-----------|

---

Unique Subject Identifier=6108011010-0007

Assay variable : PTINR\_VAL1 PT-INR Value

N Mean Standard Deviation Minimum Maximum

---

|   |           |           |           |           |
|---|-----------|-----------|-----------|-----------|
| 6 | 1.8816667 | 0.4183499 | 1.3500000 | 2.5800000 |
|---|-----------|-----------|-----------|-----------|

---

Unique Subject Identifier=6109000000-0002

Assay variable : PTINR\_VAL1 PT-INR Value

N Mean Standard Deviation Minimum Maximum

---

|   |           |           |           |           |
|---|-----------|-----------|-----------|-----------|
| 5 | 1.5680000 | 0.0637966 | 1.4800000 | 1.6400000 |
|---|-----------|-----------|-----------|-----------|

---

Laboratory tests at the time of obtaining Table 2-6 consent, according to the presence or absence of proton-pump inhibitors

Unique Subject Identifier=6109000000-0015

MEANS Procedure

Assay variable : PTINR\_VAL1 PT-INR Value

N Mean Standard Deviation Minimum Maximum

---

|   |           |           |           |           |
|---|-----------|-----------|-----------|-----------|
| 4 | 1.9525000 | 0.1596611 | 1.7400000 | 2.1100000 |
|---|-----------|-----------|-----------|-----------|

---

Unique Subject Identifier=6109000000-0016

Assay variable : PTINR\_VAL1 PT-INR Value

N Mean Standard Deviation Minimum Maximum

---

|   |           |           |           |           |
|---|-----------|-----------|-----------|-----------|
| 4 | 2.2550000 | 0.7723773 | 1.7300000 | 3.3700000 |
|---|-----------|-----------|-----------|-----------|

---

Unique Subject Identifier=6109000000-0027

Assay variable : PTINR\_VAL1 PT-INR Value

N Mean Standard Deviation Minimum Maximum

---

|   |           |           |           |           |
|---|-----------|-----------|-----------|-----------|
| 5 | 1.9120000 | 0.1799166 | 1.6500000 | 2.1400000 |
|---|-----------|-----------|-----------|-----------|

---

Unique Subject Identifier=6109000000-0043



Assay variable : PTINR\_VAL1 PT-INR Value

N Mean Standard Deviation Minimum Maximum

---

|   |          |           |          |          |
|---|----------|-----------|----------|----------|
| 4 | 2.500000 | 0.6245532 | 2.050000 | 3.410000 |
|---|----------|-----------|----------|----------|

---

Laboratory tests at the time of obtaining Table 2-6 consent, according to the presence or absence of proton-pump inhibitors

Unique Subject Identifier=6117010000-0002

MEANS Procedure

Assay variable : PTINR\_VAL1 PT-INR Value

N Mean Standard Deviation Minimum Maximum

---

|   |           |           |           |           |
|---|-----------|-----------|-----------|-----------|
| 6 | 2.1916667 | 0.1675012 | 2.0300000 | 2.4100000 |
|---|-----------|-----------|-----------|-----------|

---

Unique Subject Identifier=6117010000-0005

Assay variable : PTINR\_VAL1 PT-INR Value

N Mean Standard Deviation Minimum Maximum

---

|   |           |           |           |           |
|---|-----------|-----------|-----------|-----------|
| 4 | 2.2325000 | 0.3031364 | 1.8200000 | 2.5500000 |
|---|-----------|-----------|-----------|-----------|

---

Unique Subject Identifier=6123000000-0001

Assay variable : PTINR\_VAL1 PT-INR Value

N Mean Standard Deviation Minimum Maximum

---

|   |           |           |           |           |
|---|-----------|-----------|-----------|-----------|
| 4 | 2.5575000 | 0.9107277 | 1.6500000 | 3.8000000 |
|---|-----------|-----------|-----------|-----------|

---

Unique Subject Identifier=6123000000-0002

Assay variable : PTINR\_VAL1 PT-INR Value

N Mean Standard Deviation Minimum Maximum

---

|   |           |           |           |           |
|---|-----------|-----------|-----------|-----------|
| 3 | 1.5566667 | 0.5326662 | 1.2100000 | 2.1700000 |
|---|-----------|-----------|-----------|-----------|

---

Laboratory tests at the time of obtaining Table 2-6 consent, according to the presence or absence of proton-pump inhibitors

Unique Subject Identifier=6123000000-0014

MEANS Procedure

Assay variable : PTINR\_VAL1 PT-INR Value

N Mean Standard Deviation Minimum Maximum

---

|   |           |           |           |           |
|---|-----------|-----------|-----------|-----------|
| 3 | 2.0233333 | 0.4771094 | 1.6200000 | 2.5500000 |
|---|-----------|-----------|-----------|-----------|

---

Unique Subject Identifier=6123000000-0028

Assay variable : PTINR\_VAL1 PT-INR Value

N Mean Standard Deviation Minimum Maximum

---

|   |           |           |           |           |
|---|-----------|-----------|-----------|-----------|
| 3 | 1.8400000 | 0.3218695 | 1.5800000 | 2.2000000 |
|---|-----------|-----------|-----------|-----------|

---

Unique Subject Identifier=6123000000-0029

Assay variable : PTINR\_VAL1 PT-INR Value

N Mean Standard Deviation Minimum Maximum

---

|   |           |           |           |           |
|---|-----------|-----------|-----------|-----------|
| 3 | 1.6766667 | 0.0550757 | 1.6400000 | 1.7400000 |
|---|-----------|-----------|-----------|-----------|

---

Unique Subject Identifier=6123000000-0030

Assay variable : PTINR\_VAL1 PT-INR Value

N Mean Standard Deviation Minimum Maximum

---

|   |           |  |           |           |
|---|-----------|--|-----------|-----------|
| 1 | 1.6300000 |  | 1.6300000 | 1.6300000 |
|---|-----------|--|-----------|-----------|

---

Laboratory tests at the time of obtaining Table 2-6 consent, according to the presence or absence of proton-pump inhibitors

Unique Subject Identifier=612400000-0003

MEANS Procedure

Assay variable : PTINR\_VAL1 PT-INR Value

N Mean Standard Deviation Minimum Maximum

---

|   |           |           |           |           |
|---|-----------|-----------|-----------|-----------|
| 6 | 1.4066667 | 0.1163901 | 1.3200000 | 1.6300000 |
|---|-----------|-----------|-----------|-----------|

---

Unique Subject Identifier=612400000-0004

Assay variable : PTINR\_VAL1 PT-INR Value

N Mean Standard Deviation Minimum Maximum

---

|   |           |           |           |           |
|---|-----------|-----------|-----------|-----------|
| 6 | 1.5600000 | 0.0933809 | 1.4400000 | 1.6500000 |
|---|-----------|-----------|-----------|-----------|

---

Unique Subject Identifier=612500000-0002

Assay variable : PTINR\_VAL1 PT-INR Value

N Mean Standard Deviation Minimum Maximum

---

|   |           |           |           |           |
|---|-----------|-----------|-----------|-----------|
| 5 | 1.3860000 | 0.1935975 | 1.1000000 | 1.6000000 |
|---|-----------|-----------|-----------|-----------|

---

Unique Subject Identifier=612500000-0003

Assay variable : PTINR\_VAL1 PT-INR Value

N Mean Standard Deviation Minimum Maximum

---

|   |           |           |           |           |
|---|-----------|-----------|-----------|-----------|
| 6 | 2.2683333 | 0.2877093 | 1.8700000 | 2.6500000 |
|---|-----------|-----------|-----------|-----------|

---

Laboratory tests at the time of obtaining Table 2-6 consent, according to the presence or absence of proton-pump inhibitors

Unique Subject Identifier=6125000000-0029

MEANS Procedure

Assay variable : PTINR\_VAL1 PT-INR Value

| N | Mean      | Standard Deviation | Minimum   | Maximum   |
|---|-----------|--------------------|-----------|-----------|
| 6 | 1.8383333 | 0.1580401          | 1.6000000 | 2.0300000 |

Unique Subject Identifier=6125000000-0039

Assay variable : PTINR\_VAL1 PT-INR Value

| N | Mean      | Standard Deviation | Minimum   | Maximum   |
|---|-----------|--------------------|-----------|-----------|
| 3 | 2.1000000 | 0.4358899          | 1.8000000 | 2.6000000 |

Unique Subject Identifier=6125000000-0047

Assay variable : PTINR\_VAL1 PT-INR Value

| N | Mean      | Standard Deviation | Minimum   | Maximum   |
|---|-----------|--------------------|-----------|-----------|
| 4 | 1.5750000 | 0.1258306          | 1.4000000 | 1.7000000 |

Unique Subject Identifier=6125000000-0065



Assay variable : PTINR\_VAL1 PT-INR Value

N Mean Standard Deviation Minimum Maximum

---

|   |          |  |          |          |
|---|----------|--|----------|----------|
| 1 | 2.340000 |  | 2.340000 | 2.340000 |
|---|----------|--|----------|----------|

---

Laboratory tests at the time of obtaining Table 2-6 consent, according to the presence or absence of proton-pump inhibitors

Unique Subject Identifier=612500000-0069

MEANS Procedure

Assay variable : PTINR\_VAL1 PT-INR Value

N Mean Standard Deviation Minimum Maximum

---

|   |           |           |           |           |
|---|-----------|-----------|-----------|-----------|
| 3 | 1.8800000 | 0.5902542 | 1.5000000 | 2.5600000 |
|---|-----------|-----------|-----------|-----------|

---

Unique Subject Identifier=612500000-0076

Assay variable : PTINR\_VAL1 PT-INR Value

N Mean Standard Deviation Minimum Maximum

---

|   |           |           |           |           |
|---|-----------|-----------|-----------|-----------|
| 6 | 2.3383333 | 0.5295061 | 1.4000000 | 2.9700000 |
|---|-----------|-----------|-----------|-----------|

---

Unique Subject Identifier=612500000-0085

Assay variable : PTINR\_VAL1 PT-INR Value

N Mean Standard Deviation Minimum Maximum

---

|   |           |           |           |           |
|---|-----------|-----------|-----------|-----------|
| 3 | 1.9200000 | 0.2986637 | 1.7000000 | 2.2600000 |
|---|-----------|-----------|-----------|-----------|

---

Unique Subject Identifier=612500000-0091

Assay variable : PTINR\_VAL1 PT-INR Value

N Mean Standard Deviation Minimum Maximum

---

|   |           |           |           |           |
|---|-----------|-----------|-----------|-----------|
| 4 | 2.1350000 | 0.2801785 | 1.7300000 | 2.3500000 |
|---|-----------|-----------|-----------|-----------|

---

Laboratory tests at the time of obtaining Table 2-6 consent, according to the presence or absence of proton-pump inhibitors

Unique Subject Identifier=6125000000-0096

MEANS Procedure

Assay variable : PTINR\_VAL1 PT-INR Value

N Mean Standard Deviation Minimum Maximum

---

|   |           |           |           |           |
|---|-----------|-----------|-----------|-----------|
| 4 | 2.2325000 | 0.1228481 | 2.0600000 | 2.3300000 |
|---|-----------|-----------|-----------|-----------|

---

Unique Subject Identifier=6126000000-0001

Assay variable : PTINR\_VAL1 PT-INR Value

N Mean Standard Deviation Minimum Maximum

---

|   |           |           |           |           |
|---|-----------|-----------|-----------|-----------|
| 4 | 2.1500000 | 0.3834058 | 1.6600000 | 2.5900000 |
|---|-----------|-----------|-----------|-----------|

---

Unique Subject Identifier=6126000000-0004

Assay variable : PTINR\_VAL1 PT-INR Value

N Mean Standard Deviation Minimum Maximum

---

|   |           |           |           |           |
|---|-----------|-----------|-----------|-----------|
| 3 | 2.0333333 | 0.0929157 | 1.9300000 | 2.1100000 |
|---|-----------|-----------|-----------|-----------|

---

Unique Subject Identifier=6127000000-0012

Assay variable : PTINR\_VAL1 PT-INR Value

N Mean Standard Deviation Minimum Maximum

---

|   |           |           |           |           |
|---|-----------|-----------|-----------|-----------|
| 5 | 1.9780000 | 0.4507438 | 1.5400000 | 2.6900000 |
|---|-----------|-----------|-----------|-----------|

---

Laboratory tests at the time of obtaining Table 2-6 consent, according to the presence or absence of proton-pump inhibitors

Unique Subject Identifier=6127000000-0015

MEANS Procedure

Assay variable : PTINR\_VAL1 PT-INR Value

N Mean Standard Deviation Minimum Maximum

---

|   |           |           |           |           |
|---|-----------|-----------|-----------|-----------|
| 6 | 1.8600000 | 0.1479189 | 1.6500000 | 2.0500000 |
|---|-----------|-----------|-----------|-----------|

---

Unique Subject Identifier=6127000000-0017

Assay variable : PTINR\_VAL1 PT-INR Value

N Mean Standard Deviation Minimum Maximum

---

|   |           |           |           |           |
|---|-----------|-----------|-----------|-----------|
| 6 | 1.7133333 | 0.2376272 | 1.3200000 | 2.0000000 |
|---|-----------|-----------|-----------|-----------|

---

Unique Subject Identifier=6127000000-0020

Assay variable : PTINR\_VAL1 PT-INR Value

N Mean Standard Deviation Minimum Maximum

---

|   |           |           |           |           |
|---|-----------|-----------|-----------|-----------|
| 6 | 1.7950000 | 0.7933410 | 1.3400000 | 3.4000000 |
|---|-----------|-----------|-----------|-----------|

---

Unique Subject Identifier=6127000000-0022

Assay variable : PTINR\_VAL1 PT-INR Value

N Mean Standard Deviation Minimum Maximum

---

|   |           |           |           |           |
|---|-----------|-----------|-----------|-----------|
| 5 | 2.0580000 | 0.4012107 | 1.3500000 | 2.3100000 |
|---|-----------|-----------|-----------|-----------|

---

Laboratory tests at the time of obtaining Table 2-6 consent, according to the presence or absence of proton-pump inhibitors

Unique Subject Identifier=6127000000-0024

MEANS Procedure

Assay variable : PTINR\_VAL1 PT-INR Value

N Mean Standard Deviation Minimum Maximum

---

|   |           |           |           |           |
|---|-----------|-----------|-----------|-----------|
| 6 | 2.1700000 | 0.4394997 | 1.4700000 | 2.7100000 |
|---|-----------|-----------|-----------|-----------|

---

Unique Subject Identifier=6131011111-0001

Assay variable : PTINR\_VAL1 PT-INR Value

N Mean Standard Deviation Minimum Maximum

---

|   |           |           |           |           |
|---|-----------|-----------|-----------|-----------|
| 5 | 1.6300000 | 0.1305756 | 1.4900000 | 1.8300000 |
|---|-----------|-----------|-----------|-----------|

---

Unique Subject Identifier=6131011111-0003

Assay variable : PTINR\_VAL1 PT-INR Value

N Mean Standard Deviation Minimum Maximum

---

|   |           |           |           |           |
|---|-----------|-----------|-----------|-----------|
| 6 | 1.7933333 | 0.1645195 | 1.6700000 | 2.1100000 |
|---|-----------|-----------|-----------|-----------|

---

Unique Subject Identifier=6136110000-0008



Assay variable : PTINR\_VAL1 PT-INR Value

N Mean Standard Deviation Minimum Maximum

---

|   |           |           |           |           |
|---|-----------|-----------|-----------|-----------|
| 3 | 2.0133333 | 0.6305817 | 1.3400000 | 2.5900000 |
|---|-----------|-----------|-----------|-----------|

---

Laboratory tests at the time of obtaining Table 2-6 consent, according to the presence or absence of proton-pump inhibitors

Unique Subject Identifier=6140011000-0006

MEANS Procedure

Assay variable : PTINR\_VAL1 PT-INR Value

N Mean Standard Deviation Minimum Maximum

---

|   |           |           |           |           |
|---|-----------|-----------|-----------|-----------|
| 6 | 2.0516667 | 0.5531516 | 1.3500000 | 2.7900000 |
|---|-----------|-----------|-----------|-----------|

---

Unique Subject Identifier=6142000000-0001

Assay variable : PTINR\_VAL1 PT-INR Value

N Mean Standard Deviation Minimum Maximum

---

|   |           |           |           |           |
|---|-----------|-----------|-----------|-----------|
| 4 | 3.2150000 | 0.4759902 | 2.6900000 | 3.7900000 |
|---|-----------|-----------|-----------|-----------|

---

Unique Subject Identifier=6142000000-0005

Assay variable : PTINR\_VAL1 PT-INR Value

N Mean Standard Deviation Minimum Maximum

---

|   |           |           |           |           |
|---|-----------|-----------|-----------|-----------|
| 6 | 2.0533333 | 0.4994263 | 1.4600000 | 2.6200000 |
|---|-----------|-----------|-----------|-----------|

---

Unique Subject Identifier=6142000000-0008

Assay variable : PTINR\_VAL1 PT-INR Value

N Mean Standard Deviation Minimum Maximum

---

|   |           |           |           |           |
|---|-----------|-----------|-----------|-----------|
| 6 | 1.7200000 | 0.6161493 | 1.1400000 | 2.8400000 |
|---|-----------|-----------|-----------|-----------|

---

Laboratory tests at the time of obtaining Table 2-6 consent, according to the presence or absence of proton-pump inhibitors

Unique Subject Identifier=614200000-0009

MEANS Procedure

Assay variable : PTINR\_VAL1 PT-INR Value

N Mean Standard Deviation Minimum Maximum

---

|   |          |           |          |          |
|---|----------|-----------|----------|----------|
| 5 | 1.650000 | 0.1623268 | 1.470000 | 1.840000 |
|---|----------|-----------|----------|----------|

---

Unique Subject Identifier=614200000-0012

Assay variable : PTINR\_VAL1 PT-INR Value

N Mean Standard Deviation Minimum Maximum

---

|   |          |           |          |          |
|---|----------|-----------|----------|----------|
| 4 | 2.370000 | 0.4627454 | 2.030000 | 3.010000 |
|---|----------|-----------|----------|----------|

---

Unique Subject Identifier=614200000-0023

Assay variable : PTINR\_VAL1 PT-INR Value

N Mean Standard Deviation Minimum Maximum

---

|   |          |           |          |          |
|---|----------|-----------|----------|----------|
| 5 | 2.112000 | 0.3702297 | 1.730000 | 2.730000 |
|---|----------|-----------|----------|----------|

---

Unique Subject Identifier=614200000-0029

Assay variable : PTINR\_VAL1 PT-INR Value

N Mean Standard Deviation Minimum Maximum

---

|   |           |           |           |           |
|---|-----------|-----------|-----------|-----------|
| 6 | 1.5066667 | 0.0671317 | 1.4400000 | 1.6100000 |
|---|-----------|-----------|-----------|-----------|

---

Laboratory tests at the time of obtaining Table 2-6 consent, according to the presence or absence of proton-pump inhibitors

Unique Subject Identifier=614200000-0030

MEANS Procedure

Assay variable : PTINR\_VAL1 PT-INR Value

N Mean Standard Deviation Minimum Maximum

---

|   |           |           |           |           |
|---|-----------|-----------|-----------|-----------|
| 3 | 1.9400000 | 0.4186884 | 1.6500000 | 2.4200000 |
|---|-----------|-----------|-----------|-----------|

---

Unique Subject Identifier=614200000-0037

Assay variable : PTINR\_VAL1 PT-INR Value

N Mean Standard Deviation Minimum Maximum

---

|   |           |           |           |           |
|---|-----------|-----------|-----------|-----------|
| 6 | 2.2533333 | 0.2558645 | 1.9200000 | 2.5300000 |
|---|-----------|-----------|-----------|-----------|

---

Unique Subject Identifier=614200000-0045

Assay variable : PTINR\_VAL1 PT-INR Value

N Mean Standard Deviation Minimum Maximum

---

|   |           |           |           |           |
|---|-----------|-----------|-----------|-----------|
| 3 | 1.3200000 | 0.1743560 | 1.1200000 | 1.4400000 |
|---|-----------|-----------|-----------|-----------|

---

Unique Subject Identifier=614200000-0046

Assay variable : PTINR\_VAL1 PT-INR Value

N Mean Standard Deviation Minimum Maximum

---

|   |           |           |           |           |
|---|-----------|-----------|-----------|-----------|
| 6 | 2.3266667 | 0.6191177 | 1.5900000 | 3.2200000 |
|---|-----------|-----------|-----------|-----------|

---

Laboratory tests at the time of obtaining Table 2-6 consent, according to the presence or absence of proton-pump inhibitors

Unique Subject Identifier=6142000000-0050

MEANS Procedure

Assay variable : PTINR\_VAL1 PT-INR Value

| N | Mean      | Standard Deviation | Minimum   | Maximum   |
|---|-----------|--------------------|-----------|-----------|
| 6 | 1.8333333 | 0.0796660          | 1.7400000 | 1.9600000 |

Unique Subject Identifier=6143001010-0003

Assay variable : PTINR\_VAL1 PT-INR Value

| N | Mean      | Standard Deviation | Minimum   | Maximum   |
|---|-----------|--------------------|-----------|-----------|
| 3 | 2.5200000 | 0.2722132          | 2.2300000 | 2.7700000 |

Unique Subject Identifier=6154000000-0015

Assay variable : PTINR\_VAL1 PT-INR Value

| N | Mean      | Standard Deviation | Minimum   | Maximum   |
|---|-----------|--------------------|-----------|-----------|
| 4 | 2.0475000 | 0.5223265          | 1.3100000 | 2.5200000 |

Unique Subject Identifier=6161010010-0001



Assay variable : PTINR\_VAL1 PT-INR Value

N Mean Standard Deviation Minimum Maximum

---

|   |          |           |          |          |
|---|----------|-----------|----------|----------|
| 2 | 2.200000 | 0.9899495 | 1.500000 | 2.900000 |
|---|----------|-----------|----------|----------|

---

Laboratory tests at the time of obtaining Table 2-6 consent, according to the presence or absence of proton-pump inhibitors

Unique Subject Identifier=6161010010-0004

MEANS Procedure

Assay variable : PTINR\_VAL1 PT-INR Value

N Mean Standard Deviation Minimum Maximum

---

|   |           |           |           |           |
|---|-----------|-----------|-----------|-----------|
| 4 | 1.5500000 | 0.0577350 | 1.5000000 | 1.6000000 |
|---|-----------|-----------|-----------|-----------|

---

Unique Subject Identifier=6166000000-0006

Assay variable : PTINR\_VAL1 PT-INR Value

N Mean Standard Deviation Minimum Maximum

---

|   |           |           |           |           |
|---|-----------|-----------|-----------|-----------|
| 4 | 2.0100000 | 0.5443038 | 1.2900000 | 2.5300000 |
|---|-----------|-----------|-----------|-----------|

---

Unique Subject Identifier=6166000000-0007

Assay variable : PTINR\_VAL1 PT-INR Value

N Mean Standard Deviation Minimum Maximum

---

|   |           |           |           |           |
|---|-----------|-----------|-----------|-----------|
| 4 | 2.0650000 | 0.1178983 | 1.9000000 | 2.1800000 |
|---|-----------|-----------|-----------|-----------|

---

Unique Subject Identifier=6166000000-0022

Assay variable : PTINR\_VAL1 PT-INR Value

N Mean Standard Deviation Minimum Maximum

---

|   |          |           |          |          |
|---|----------|-----------|----------|----------|
| 6 | 1.510000 | 0.0529150 | 1.450000 | 1.600000 |
|---|----------|-----------|----------|----------|

---

Laboratory tests at the time of obtaining Table 2-6 consent, according to the presence or absence of proton-pump inhibitors

Unique Subject Identifier=616600000-0025

MEANS Procedure

Assay variable : PTINR\_VAL1 PT-INR Value

| N | Mean      | Standard Deviation | Minimum   | Maximum   |
|---|-----------|--------------------|-----------|-----------|
| 4 | 1.8475000 | 0.1785824          | 1.7100000 | 2.1100000 |

Unique Subject Identifier=6171011010-0001

Assay variable : PTINR\_VAL1 PT-INR Value

| N | Mean      | Standard Deviation | Minimum   | Maximum   |
|---|-----------|--------------------|-----------|-----------|
| 5 | 2.0220000 | 0.8532116          | 1.3000000 | 3.2800000 |

Unique Subject Identifier=6171011010-0002

Assay variable : PTINR\_VAL1 PT-INR Value

| N | Mean      | Standard Deviation | Minimum   | Maximum   |
|---|-----------|--------------------|-----------|-----------|
| 3 | 1.6766667 | 0.1680278          | 1.5300000 | 1.8600000 |

Unique Subject Identifier=6171011010-0010

Assay variable : PTINR\_VAL1 PT-INR Value

N Mean Standard Deviation Minimum Maximum

---

|   |           |           |           |           |
|---|-----------|-----------|-----------|-----------|
| 3 | 2.1233333 | 0.3579572 | 1.7100000 | 2.3300000 |
|---|-----------|-----------|-----------|-----------|

---

Laboratory tests at the time of obtaining Table 2-6 consent, according to the presence or absence of proton-pump inhibitors

Unique Subject Identifier=6171011010-0012

MEANS Procedure

Assay variable : PTINR\_VAL1 PT-INR Value

N Mean Standard Deviation Minimum Maximum

---

|   |           |           |           |           |
|---|-----------|-----------|-----------|-----------|
| 6 | 2.0033333 | 0.2031420 | 1.6900000 | 2.2900000 |
|---|-----------|-----------|-----------|-----------|

---

Unique Subject Identifier=6171011010-0014

Assay variable : PTINR\_VAL1 PT-INR Value

N Mean Standard Deviation Minimum Maximum

---

|   |           |           |           |           |
|---|-----------|-----------|-----------|-----------|
| 6 | 1.8833333 | 0.0968848 | 1.7200000 | 1.9800000 |
|---|-----------|-----------|-----------|-----------|

---

Unique Subject Identifier=6171011010-0018

Assay variable : PTINR\_VAL1 PT-INR Value

N Mean Standard Deviation Minimum Maximum

---

|   |           |           |           |           |
|---|-----------|-----------|-----------|-----------|
| 6 | 2.5916667 | 0.3220818 | 2.1600000 | 3.1200000 |
|---|-----------|-----------|-----------|-----------|

---

Unique Subject Identifier=6171011010-0024

Assay variable : PTINR\_VAL1 PT-INR Value

N Mean Standard Deviation Minimum Maximum

---

|   |          |           |          |          |
|---|----------|-----------|----------|----------|
| 6 | 2.180000 | 0.3216831 | 1.780000 | 2.760000 |
|---|----------|-----------|----------|----------|

---

Laboratory tests at the time of obtaining Table 2-6 consent, according to the presence or absence of proton-pump inhibitors

Unique Subject Identifier=6171011010-0025

MEANS Procedure

Assay variable : PTINR\_VAL1 PT-INR Value

N Mean Standard Deviation Minimum Maximum

---

|   |           |           |           |           |
|---|-----------|-----------|-----------|-----------|
| 4 | 2.1675000 | 0.4269563 | 1.5900000 | 2.5100000 |
|---|-----------|-----------|-----------|-----------|

---

Unique Subject Identifier=6171011010-0027

Assay variable : PTINR\_VAL1 PT-INR Value

N Mean Standard Deviation Minimum Maximum

---

|   |           |           |           |           |
|---|-----------|-----------|-----------|-----------|
| 6 | 1.7116667 | 0.1954908 | 1.4700000 | 2.0200000 |
|---|-----------|-----------|-----------|-----------|

---

Unique Subject Identifier=6171011010-0030

Assay variable : PTINR\_VAL1 PT-INR Value

N Mean Standard Deviation Minimum Maximum

---

|   |           |           |           |           |
|---|-----------|-----------|-----------|-----------|
| 4 | 2.5100000 | 1.0395512 | 1.4000000 | 3.7200000 |
|---|-----------|-----------|-----------|-----------|

---

Unique Subject Identifier=6198011000-0004



Assay variable : PTINR\_VAL1 PT-INR Value

N Mean Standard Deviation Minimum Maximum

---

|   |           |           |           |           |
|---|-----------|-----------|-----------|-----------|
| 5 | 1.8160000 | 0.2906544 | 1.4900000 | 2.2700000 |
|---|-----------|-----------|-----------|-----------|

---

Laboratory tests at the time of obtaining Table 2-6 consent, according to the presence or absence of proton-pump inhibitors

Unique Subject Identifier=6198011000-0005

MEANS Procedure

Assay variable : PTINR\_VAL1 PT-INR Value

| N | Mean      | Standard Deviation | Minimum   | Maximum   |
|---|-----------|--------------------|-----------|-----------|
| 3 | 1.8066667 | 0.1270171          | 1.6600000 | 1.8800000 |

Unique Subject Identifier=6198011000-0008

Assay variable : PTINR\_VAL1 PT-INR Value

| N | Mean      | Standard Deviation | Minimum   | Maximum   |
|---|-----------|--------------------|-----------|-----------|
| 4 | 1.7500000 | 0.0648074          | 1.6900000 | 1.8400000 |

Unique Subject Identifier=6198011000-0011

Assay variable : PTINR\_VAL1 PT-INR Value

| N | Mean      | Standard Deviation | Minimum   | Maximum   |
|---|-----------|--------------------|-----------|-----------|
| 5 | 1.9540000 | 0.3189514          | 1.5700000 | 2.3400000 |

Unique Subject Identifier=6198011000-0013

Assay variable : PTINR\_VAL1 PT-INR Value

N Mean Standard Deviation Minimum Maximum

---

|   |          |           |          |          |
|---|----------|-----------|----------|----------|
| 5 | 2.104000 | 0.2198409 | 1.760000 | 2.320000 |
|---|----------|-----------|----------|----------|

---

Laboratory tests at the time of obtaining Table 2-6 consent, according to the presence or absence of proton-pump inhibitors

Unique Subject Identifier=6201010000-0002

MEANS Procedure

Assay variable : PTINR\_VAL1 PT-INR Value

N Mean Standard Deviation Minimum Maximum

---

|   |           |           |           |           |
|---|-----------|-----------|-----------|-----------|
| 6 | 1.8000000 | 0.1264911 | 1.7000000 | 2.0000000 |
|---|-----------|-----------|-----------|-----------|

---

Unique Subject Identifier=6201010000-0007

Assay variable : PTINR\_VAL1 PT-INR Value

N Mean Standard Deviation Minimum Maximum

---

|   |           |           |           |           |
|---|-----------|-----------|-----------|-----------|
| 6 | 2.2833333 | 0.0983192 | 2.2000000 | 2.4000000 |
|---|-----------|-----------|-----------|-----------|

---

Unique Subject Identifier=6201010000-0010

Assay variable : PTINR\_VAL1 PT-INR Value

N Mean Standard Deviation Minimum Maximum

---

|   |           |           |           |           |
|---|-----------|-----------|-----------|-----------|
| 6 | 1.7500000 | 0.0836660 | 1.6000000 | 1.8000000 |
|---|-----------|-----------|-----------|-----------|

---

Unique Subject Identifier=6204000000-0001

Assay variable : PTINR\_VAL1 PT-INR Value

N Mean Standard Deviation Minimum Maximum

---

|   |           |           |           |           |
|---|-----------|-----------|-----------|-----------|
| 3 | 2.3533333 | 0.3028751 | 2.1400000 | 2.7000000 |
|---|-----------|-----------|-----------|-----------|

---

Laboratory tests at the time of obtaining Table 2-6 consent, according to the presence or absence of proton-pump inhibitors

Unique Subject Identifier=6204000000-0002

MEANS Procedure

Assay variable : PTINR\_VAL1 PT-INR Value

N Mean Standard Deviation Minimum Maximum

---

|   |           |           |           |           |
|---|-----------|-----------|-----------|-----------|
| 4 | 1.6650000 | 0.1936492 | 1.5200000 | 1.9500000 |
|---|-----------|-----------|-----------|-----------|

---

Unique Subject Identifier=6204000000-0003

Assay variable : PTINR\_VAL1 PT-INR Value

N Mean Standard Deviation Minimum Maximum

---

|   |           |           |           |           |
|---|-----------|-----------|-----------|-----------|
| 2 | 2.0150000 | 0.2192031 | 1.8600000 | 2.1700000 |
|---|-----------|-----------|-----------|-----------|

---

Unique Subject Identifier=6204000000-0004

Assay variable : PTINR\_VAL1 PT-INR Value

N Mean Standard Deviation Minimum Maximum

---

|   |           |           |           |           |
|---|-----------|-----------|-----------|-----------|
| 3 | 2.0033333 | 0.1662328 | 1.8500000 | 2.1800000 |
|---|-----------|-----------|-----------|-----------|

---

Unique Subject Identifier=6204000000-0005

Assay variable : PTINR\_VAL1 PT-INR Value

N Mean Standard Deviation Minimum Maximum

---

|   |           |           |           |           |
|---|-----------|-----------|-----------|-----------|
| 3 | 2.2066667 | 0.3496188 | 1.9900000 | 2.6100000 |
|---|-----------|-----------|-----------|-----------|

---

Laboratory tests at the time of obtaining Table 2-6 consent, according to the presence or absence of proton-pump inhibitors

Unique Subject Identifier=6204000000-0006

MEANS Procedure

Assay variable : PTINR\_VAL1 PT-INR Value

N Mean Standard Deviation Minimum Maximum

---

|   |           |           |           |           |
|---|-----------|-----------|-----------|-----------|
| 2 | 1.4950000 | 0.1343503 | 1.4000000 | 1.5900000 |
|---|-----------|-----------|-----------|-----------|

---

Unique Subject Identifier=6204000000-0007

Assay variable : PTINR\_VAL1 PT-INR Value

N Mean Standard Deviation Minimum Maximum

---

|   |           |           |           |           |
|---|-----------|-----------|-----------|-----------|
| 4 | 2.1050000 | 0.3890587 | 1.7700000 | 2.6000000 |
|---|-----------|-----------|-----------|-----------|

---

Unique Subject Identifier=6204000000-0008

Assay variable : PTINR\_VAL1 PT-INR Value

N Mean Standard Deviation Minimum Maximum

---

|   |           |           |           |           |
|---|-----------|-----------|-----------|-----------|
| 3 | 1.5800000 | 0.1352775 | 1.4400000 | 1.7100000 |
|---|-----------|-----------|-----------|-----------|

---

Unique Subject Identifier=6204000000-0011



Assay variable : PTINR\_VAL1 PT-INR Value

N Mean Standard Deviation Minimum Maximum

---

|   |           |           |           |           |
|---|-----------|-----------|-----------|-----------|
| 3 | 1.9133333 | 0.5560875 | 1.4500000 | 2.5300000 |
|---|-----------|-----------|-----------|-----------|

---

Laboratory tests at the time of obtaining Table 2-6 consent, according to the presence or absence of proton-pump inhibitors

Unique Subject Identifier=6204000000-0012

MEANS Procedure

Assay variable : PTINR\_VAL1 PT-INR Value

| N | Mean      | Standard Deviation | Minimum   | Maximum   |
|---|-----------|--------------------|-----------|-----------|
| 5 | 2.4280000 | 1.2278111          | 1.2300000 | 4.0300000 |

Unique Subject Identifier=6204000000-0013

Assay variable : PTINR\_VAL1 PT-INR Value

| N | Mean      | Standard Deviation | Minimum   | Maximum   |
|---|-----------|--------------------|-----------|-----------|
| 3 | 1.7100000 | 0.1442221          | 1.5500000 | 1.8300000 |

Unique Subject Identifier=6204000000-0014

Assay variable : PTINR\_VAL1 PT-INR Value

| N | Mean      | Standard Deviation | Minimum   | Maximum   |
|---|-----------|--------------------|-----------|-----------|
| 3 | 2.4066667 | 0.3234708          | 2.2100000 | 2.7800000 |

Unique Subject Identifier=6208000000-0006

Assay variable : PTINR\_VAL1 PT-INR Value

N Mean Standard Deviation Minimum Maximum

---

|   |           |  |           |           |
|---|-----------|--|-----------|-----------|
| 1 | 1.6500000 |  | 1.6500000 | 1.6500000 |
|---|-----------|--|-----------|-----------|

---

Laboratory tests at the time of obtaining Table 2-6 consent, according to the presence or absence of proton-pump inhibitors

Unique Subject Identifier=621400000-0049

MEANS Procedure

Assay variable : PTINR\_VAL1 PT-INR Value

N Mean Standard Deviation Minimum Maximum

---

|   |           |           |           |           |
|---|-----------|-----------|-----------|-----------|
| 4 | 1.9000000 | 0.2076857 | 1.6700000 | 2.1600000 |
|---|-----------|-----------|-----------|-----------|

---

Unique Subject Identifier=622300000-0001

Assay variable : PTINR\_VAL1 PT-INR Value

N Mean Standard Deviation Minimum Maximum

---

|   |           |           |           |           |
|---|-----------|-----------|-----------|-----------|
| 3 | 1.6966667 | 0.2829016 | 1.3700000 | 1.8600000 |
|---|-----------|-----------|-----------|-----------|

---

Unique Subject Identifier=622300000-0008

Assay variable : PTINR\_VAL1 PT-INR Value

N Mean Standard Deviation Minimum Maximum

---

|   |           |           |           |           |
|---|-----------|-----------|-----------|-----------|
| 3 | 2.0333333 | 0.2025669 | 1.8700000 | 2.2600000 |
|---|-----------|-----------|-----------|-----------|

---

Unique Subject Identifier=6232010000-0006

Assay variable : PTINR\_VAL1 PT-INR Value

N Mean Standard Deviation Minimum Maximum

---

|   |           |           |           |           |
|---|-----------|-----------|-----------|-----------|
| 3 | 2.1866667 | 0.2150194 | 1.9700000 | 2.4000000 |
|---|-----------|-----------|-----------|-----------|

---

Laboratory tests at the time of obtaining Table 2-6 consent, according to the presence or absence of proton-pump inhibitors

Unique Subject Identifier=6232010000-0013

MEANS Procedure

Assay variable : PTINR\_VAL1 PT-INR Value

N Mean Standard Deviation Minimum Maximum

---

|   |           |           |           |           |
|---|-----------|-----------|-----------|-----------|
| 3 | 1.6366667 | 0.1401190 | 1.4800000 | 1.7500000 |
|---|-----------|-----------|-----------|-----------|

---

Unique Subject Identifier=6236010000-0020

Assay variable : PTINR\_VAL1 PT-INR Value

N Mean Standard Deviation Minimum Maximum

---

|   |           |           |           |           |
|---|-----------|-----------|-----------|-----------|
| 2 | 1.7250000 | 0.3181981 | 1.5000000 | 1.9500000 |
|---|-----------|-----------|-----------|-----------|

---

Unique Subject Identifier=6236010000-0021

Assay variable : PTINR\_VAL1 PT-INR Value

N Mean Standard Deviation Minimum Maximum

---

|   |           |           |           |           |
|---|-----------|-----------|-----------|-----------|
| 4 | 2.1575000 | 0.4836235 | 1.8200000 | 2.8700000 |
|---|-----------|-----------|-----------|-----------|

---

Unique Subject Identifier=6237010111-0002

Assay variable : PTINR\_VAL1 PT-INR Value

N Mean Standard Deviation Minimum Maximum

---

|   |           |           |           |           |
|---|-----------|-----------|-----------|-----------|
| 4 | 2.2575000 | 0.1322561 | 2.1400000 | 2.4200000 |
|---|-----------|-----------|-----------|-----------|

---

Laboratory tests at the time of obtaining Table 2-6 consent, according to the presence or absence of proton-pump inhibitors

Unique Subject Identifier=6240011000-0002

MEANS Procedure

Assay variable : PTINR\_VAL1 PT-INR Value

N Mean Standard Deviation Minimum Maximum

---

|   |           |           |           |           |
|---|-----------|-----------|-----------|-----------|
| 6 | 2.1983333 | 0.4192096 | 1.8100000 | 2.8400000 |
|---|-----------|-----------|-----------|-----------|

---

Unique Subject Identifier=6240011000-0004

Assay variable : PTINR\_VAL1 PT-INR Value

N Mean Standard Deviation Minimum Maximum

---

|   |           |           |           |           |
|---|-----------|-----------|-----------|-----------|
| 6 | 2.1033333 | 0.4317715 | 1.5100000 | 2.5800000 |
|---|-----------|-----------|-----------|-----------|

---

Unique Subject Identifier=6240011000-0005

Assay variable : PTINR\_VAL1 PT-INR Value

N Mean Standard Deviation Minimum Maximum

---

|   |           |           |           |           |
|---|-----------|-----------|-----------|-----------|
| 6 | 2.4300000 | 0.6781150 | 1.5100000 | 3.0600000 |
|---|-----------|-----------|-----------|-----------|

---

Unique Subject Identifier=6240011000-0006



Assay variable : PTINR\_VAL1 PT-INR Value

N Mean Standard Deviation Minimum Maximum

---

|   |           |           |           |           |
|---|-----------|-----------|-----------|-----------|
| 6 | 1.8933333 | 0.4325120 | 1.3900000 | 2.6300000 |
|---|-----------|-----------|-----------|-----------|

---

Laboratory tests at the time of obtaining Table 2-6 consent, according to the presence or absence of proton-pump inhibitors

Unique Subject Identifier=6240011000-0007

MEANS Procedure

Assay variable : PTINR\_VAL1 PT-INR Value

N Mean Standard Deviation Minimum Maximum

---

|   |           |           |           |           |
|---|-----------|-----------|-----------|-----------|
| 6 | 1.8466667 | 0.1219289 | 1.6800000 | 2.0400000 |
|---|-----------|-----------|-----------|-----------|

---

Unique Subject Identifier=6240011000-0008

Assay variable : PTINR\_VAL1 PT-INR Value

N Mean Standard Deviation Minimum Maximum

---

|   |           |           |           |           |
|---|-----------|-----------|-----------|-----------|
| 6 | 2.3083333 | 0.3014907 | 1.9500000 | 2.8200000 |
|---|-----------|-----------|-----------|-----------|

---

Unique Subject Identifier=6240011000-0019

Assay variable : PTINR\_VAL1 PT-INR Value

N Mean Standard Deviation Minimum Maximum

---

|   |           |           |           |           |
|---|-----------|-----------|-----------|-----------|
| 6 | 2.1966667 | 0.9717956 | 1.5300000 | 4.0700000 |
|---|-----------|-----------|-----------|-----------|

---

Unique Subject Identifier=6240011000-0021

Assay variable : PTINR\_VAL1 PT-INR Value

N Mean Standard Deviation Minimum Maximum

---

|   |           |           |           |           |
|---|-----------|-----------|-----------|-----------|
| 6 | 2.1016667 | 0.3192752 | 1.6800000 | 2.6300000 |
|---|-----------|-----------|-----------|-----------|

---

Laboratory tests at the time of obtaining Table 2-6 consent, according to the presence or absence of proton-pump inhibitors

Unique Subject Identifier=6240011000-0026

MEANS Procedure

Assay variable : PTINR\_VAL1 PT-INR Value

N Mean Standard Deviation Minimum Maximum

---

|   |          |           |          |          |
|---|----------|-----------|----------|----------|
| 6 | 1.850000 | 0.1414214 | 1.700000 | 2.090000 |
|---|----------|-----------|----------|----------|

---

Unique Subject Identifier=6240011000-0027

Assay variable : PTINR\_VAL1 PT-INR Value

N Mean Standard Deviation Minimum Maximum

---

|   |          |           |          |          |
|---|----------|-----------|----------|----------|
| 6 | 1.875000 | 0.3347686 | 1.510000 | 2.430000 |
|---|----------|-----------|----------|----------|

---

Unique Subject Identifier=6240011000-0029

Assay variable : PTINR\_VAL1 PT-INR Value

N Mean Standard Deviation Minimum Maximum

---

|   |          |           |          |          |
|---|----------|-----------|----------|----------|
| 6 | 2.368333 | 0.9636891 | 1.250000 | 4.100000 |
|---|----------|-----------|----------|----------|

---

Unique Subject Identifier=6240011000-0032

Assay variable : PTINR\_VAL1 PT-INR Value

N Mean Standard Deviation Minimum Maximum

---

|   |           |           |           |           |
|---|-----------|-----------|-----------|-----------|
| 6 | 1.7783333 | 0.2232861 | 1.4700000 | 2.1300000 |
|---|-----------|-----------|-----------|-----------|

---

Laboratory tests at the time of obtaining Table 2-6 consent, according to the presence or absence of proton-pump inhibitors

Unique Subject Identifier=624500000-0002

MEANS Procedure

Assay variable : PTINR\_VAL1 PT-INR Value

| N | Mean      | Standard Deviation | Minimum   | Maximum   |
|---|-----------|--------------------|-----------|-----------|
| 3 | 1.9333333 | 0.0960902          | 1.8300000 | 2.0200000 |

Unique Subject Identifier=624500000-0006

Assay variable : PTINR\_VAL1 PT-INR Value

| N | Mean      | Standard Deviation | Minimum   | Maximum   |
|---|-----------|--------------------|-----------|-----------|
| 3 | 2.3000000 | 0.3988734          | 2.0500000 | 2.7600000 |

Unique Subject Identifier=624500000-0007

Assay variable : PTINR\_VAL1 PT-INR Value

| N | Mean      | Standard Deviation | Minimum   | Maximum   |
|---|-----------|--------------------|-----------|-----------|
| 3 | 1.9700000 | 0.4881598          | 1.4300000 | 2.3800000 |

Unique Subject Identifier=624500000-0010

Assay variable : PTINR\_VAL1 PT-INR Value

N Mean Standard Deviation Minimum Maximum

---

|   |           |           |           |           |
|---|-----------|-----------|-----------|-----------|
| 4 | 2.0175000 | 0.3185776 | 1.6800000 | 2.4200000 |
|---|-----------|-----------|-----------|-----------|

---

Laboratory tests at the time of obtaining Table 2-6 consent, according to the presence or absence of proton-pump inhibitors

Unique Subject Identifier=624500000-0011

MEANS Procedure

Assay variable : PTINR\_VAL1 PT-INR Value

N Mean Standard Deviation Minimum Maximum

---

|   |           |           |           |           |
|---|-----------|-----------|-----------|-----------|
| 3 | 2.2433333 | 0.2702468 | 1.9800000 | 2.5200000 |
|---|-----------|-----------|-----------|-----------|

---

Unique Subject Identifier=624500000-0012

Assay variable : PTINR\_VAL1 PT-INR Value

N Mean Standard Deviation Minimum Maximum

---

|   |           |           |           |           |
|---|-----------|-----------|-----------|-----------|
| 3 | 2.2766667 | 0.2059935 | 2.0600000 | 2.4700000 |
|---|-----------|-----------|-----------|-----------|

---

Unique Subject Identifier=624500000-0013

Assay variable : PTINR\_VAL1 PT-INR Value

N Mean Standard Deviation Minimum Maximum

---

|   |           |           |           |           |
|---|-----------|-----------|-----------|-----------|
| 3 | 1.6433333 | 0.0305505 | 1.6100000 | 1.6700000 |
|---|-----------|-----------|-----------|-----------|

---

Unique Subject Identifier=624500000-0014



Assay variable : PTINR\_VAL1 PT-INR Value

N Mean Standard Deviation Minimum Maximum

---

|   |           |           |           |           |
|---|-----------|-----------|-----------|-----------|
| 3 | 1.8833333 | 0.1320353 | 1.7400000 | 2.0000000 |
|---|-----------|-----------|-----------|-----------|

---

Laboratory tests at the time of obtaining Table 2-6 consent, according to the presence or absence of proton-pump inhibitors

Unique Subject Identifier=6245000000-0016

MEANS Procedure

Assay variable : PTINR\_VAL1 PT-INR Value

N Mean Standard Deviation Minimum Maximum

---

|   |           |           |           |           |
|---|-----------|-----------|-----------|-----------|
| 3 | 1.6333333 | 0.1550269 | 1.4800000 | 1.7900000 |
|---|-----------|-----------|-----------|-----------|

---

Unique Subject Identifier=6245000000-0026

Assay variable : PTINR\_VAL1 PT-INR Value

N Mean Standard Deviation Minimum Maximum

---

|   |           |           |           |           |
|---|-----------|-----------|-----------|-----------|
| 4 | 1.9400000 | 1.2091319 | 1.2300000 | 3.7500000 |
|---|-----------|-----------|-----------|-----------|

---

Unique Subject Identifier=6248110111-0005

Assay variable : PTINR\_VAL1 PT-INR Value

N Mean Standard Deviation Minimum Maximum

---

|   |           |  |           |           |
|---|-----------|--|-----------|-----------|
| 1 | 2.7400000 |  | 2.7400000 | 2.7400000 |
|---|-----------|--|-----------|-----------|

---

Unique Subject Identifier=6254000000-0003

Assay variable : PTINR\_VAL1 PT-INR Value

N Mean Standard Deviation Minimum Maximum

---

|   |           |  |           |           |
|---|-----------|--|-----------|-----------|
| 1 | 2.0900000 |  | 2.0900000 | 2.0900000 |
|---|-----------|--|-----------|-----------|

---

Laboratory tests at the time of obtaining Table 2-6 consent, according to the presence or absence of proton-pump inhibitors

Unique Subject Identifier=6298000000-0008

MEANS Procedure

Assay variable : PTINR\_VAL1 PT-INR Value

N Mean Standard Deviation Minimum Maximum

---

|   |           |           |           |           |
|---|-----------|-----------|-----------|-----------|
| 3 | 2.1833333 | 0.5762233 | 1.5200000 | 2.5600000 |
|---|-----------|-----------|-----------|-----------|

---

Unique Subject Identifier=6298000000-0012

Assay variable : PTINR\_VAL1 PT-INR Value

N Mean Standard Deviation Minimum Maximum

---

|   |           |           |           |           |
|---|-----------|-----------|-----------|-----------|
| 6 | 1.9550000 | 0.1189538 | 1.7900000 | 2.1100000 |
|---|-----------|-----------|-----------|-----------|

---

Unique Subject Identifier=6298000000-0013

Assay variable : PTINR\_VAL1 PT-INR Value

N Mean Standard Deviation Minimum Maximum

---

|   |           |           |           |           |
|---|-----------|-----------|-----------|-----------|
| 2 | 1.8450000 | 0.0636396 | 1.8000000 | 1.8900000 |
|---|-----------|-----------|-----------|-----------|

---

Unique Subject Identifier=6298000000-0022

Assay variable : PTINR\_VAL1 PT-INR Value

N Mean Standard Deviation Minimum Maximum

---

|   |           |           |           |           |
|---|-----------|-----------|-----------|-----------|
| 5 | 1.7700000 | 0.4071241 | 1.3200000 | 2.3900000 |
|---|-----------|-----------|-----------|-----------|

---

Laboratory tests at the time of obtaining Table 2-6 consent, according to the presence or absence of proton-pump inhibitors

Unique Subject Identifier=6298000000-0024

MEANS Procedure

Assay variable : PTINR\_VAL1 PT-INR Value

N Mean Standard Deviation Minimum Maximum

---

|   |           |           |           |           |
|---|-----------|-----------|-----------|-----------|
| 6 | 2.3266667 | 0.2387188 | 2.0400000 | 2.6700000 |
|---|-----------|-----------|-----------|-----------|

---

Unique Subject Identifier=6298000000-0036

Assay variable : PTINR\_VAL1 PT-INR Value

N Mean Standard Deviation Minimum Maximum

---

|   |           |           |           |           |
|---|-----------|-----------|-----------|-----------|
| 3 | 2.3333333 | 0.0115470 | 2.3200000 | 2.3400000 |
|---|-----------|-----------|-----------|-----------|

---

Unique Subject Identifier=6298000000-0040

Assay variable : PTINR\_VAL1 PT-INR Value

N Mean Standard Deviation Minimum Maximum

---

|   |           |  |           |           |
|---|-----------|--|-----------|-----------|
| 1 | 1.1500000 |  | 1.1500000 | 1.1500000 |
|---|-----------|--|-----------|-----------|

---

Unique Subject Identifier=6298000000-0042

Assay variable : PTINR\_VAL1 PT-INR Value

N Mean Standard Deviation Minimum Maximum

---

|   |           |           |           |           |
|---|-----------|-----------|-----------|-----------|
| 6 | 1.9783333 | 0.4015678 | 1.4000000 | 2.6300000 |
|---|-----------|-----------|-----------|-----------|

---

Laboratory tests at the time of obtaining Table 2-6 consent, according to the presence or absence of proton-pump inhibitors

Unique Subject Identifier=6298000000-0044

MEANS Procedure

Assay variable : PTINR\_VAL1 PT-INR Value

| N | Mean     | Standard Deviation | Minimum  | Maximum  |
|---|----------|--------------------|----------|----------|
| 3 | 1.500000 | 0.1178983          | 1.400000 | 1.630000 |

Unique Subject Identifier=6298000000-0048

Assay variable : PTINR\_VAL1 PT-INR Value

| N | Mean     | Standard Deviation | Minimum  | Maximum  |
|---|----------|--------------------|----------|----------|
| 4 | 1.945000 | 0.0834666          | 1.870000 | 2.060000 |

Unique Subject Identifier=6298000000-0052

Assay variable : PTINR\_VAL1 PT-INR Value

| N | Mean     | Standard Deviation | Minimum  | Maximum  |
|---|----------|--------------------|----------|----------|
| 4 | 1.865000 | 0.6180345          | 1.320000 | 2.740000 |

Unique Subject Identifier=6298000000-0055



Assay variable : PTINR\_VAL1 PT-INR Value

N Mean Standard Deviation Minimum Maximum

---

|   |           |           |           |           |
|---|-----------|-----------|-----------|-----------|
| 5 | 2.0980000 | 0.4737827 | 1.3800000 | 2.6600000 |
|---|-----------|-----------|-----------|-----------|

---

Laboratory tests at the time of obtaining Table 2-6 consent, according to the presence or absence of proton-pump inhibitors

Unique Subject Identifier=6298000000-0058

MEANS Procedure

Assay variable : PTINR\_VAL1 PT-INR Value

N Mean Standard Deviation Minimum Maximum

---

|   |           |           |           |           |
|---|-----------|-----------|-----------|-----------|
| 6 | 2.5566667 | 0.4728495 | 1.8000000 | 3.0800000 |
|---|-----------|-----------|-----------|-----------|

---

Unique Subject Identifier=6298000000-0059

Assay variable : PTINR\_VAL1 PT-INR Value

N Mean Standard Deviation Minimum Maximum

---

|   |           |           |           |           |
|---|-----------|-----------|-----------|-----------|
| 5 | 2.2380000 | 0.7084631 | 1.3700000 | 2.9200000 |
|---|-----------|-----------|-----------|-----------|

---

Unique Subject Identifier=6298000000-0060

Assay variable : PTINR\_VAL1 PT-INR Value

N Mean Standard Deviation Minimum Maximum

---

|   |           |           |           |           |
|---|-----------|-----------|-----------|-----------|
| 3 | 2.0500000 | 0.4648656 | 1.6500000 | 2.5600000 |
|---|-----------|-----------|-----------|-----------|

---

Unique Subject Identifier=6298000000-0061

Assay variable : PTINR\_VAL1 PT-INR Value

N Mean Standard Deviation Minimum Maximum

---

|   |           |           |           |           |
|---|-----------|-----------|-----------|-----------|
| 6 | 1.6083333 | 0.2803866 | 1.2200000 | 1.9300000 |
|---|-----------|-----------|-----------|-----------|

---

Laboratory tests at the time of obtaining Table 2-6 consent, according to the presence or absence of proton-pump inhibitors

Unique Subject Identifier=6298000000-0067

MEANS Procedure

Assay variable : PTINR\_VAL1 PT-INR Value

N Mean Standard Deviation Minimum Maximum

---

|   |           |           |           |           |
|---|-----------|-----------|-----------|-----------|
| 3 | 1.9666667 | 0.1418920 | 1.8400000 | 2.1200000 |
|---|-----------|-----------|-----------|-----------|

---

Unique Subject Identifier=6298000000-0073

Assay variable : PTINR\_VAL1 PT-INR Value

N Mean Standard Deviation Minimum Maximum

---

|   |           |  |           |           |
|---|-----------|--|-----------|-----------|
| 1 | 2.1200000 |  | 2.1200000 | 2.1200000 |
|---|-----------|--|-----------|-----------|

---

Unique Subject Identifier=6298000000-0076

Assay variable : PTINR\_VAL1 PT-INR Value

N Mean Standard Deviation Minimum Maximum

---

|   |           |           |           |           |
|---|-----------|-----------|-----------|-----------|
| 2 | 1.7150000 | 0.0212132 | 1.7000000 | 1.7300000 |
|---|-----------|-----------|-----------|-----------|

---

Unique Subject Identifier=6298000000-0077

Assay variable : PTINR\_VAL1 PT-INR Value

N Mean Standard Deviation Minimum Maximum

---

|   |           |           |           |           |
|---|-----------|-----------|-----------|-----------|
| 5 | 1.8940000 | 0.2623547 | 1.5500000 | 2.2100000 |
|---|-----------|-----------|-----------|-----------|

---

Laboratory tests at the time of obtaining Table 2-6 consent, according to the presence or absence of proton-pump inhibitors

Unique Subject Identifier=6298000000-0080

MEANS Procedure

Assay variable : PTINR\_VAL1 PT-INR Value

| N | Mean      | Standard Deviation | Minimum   | Maximum   |
|---|-----------|--------------------|-----------|-----------|
| 2 | 1.8750000 | 0.0919239          | 1.8100000 | 1.9400000 |

Unique Subject Identifier=6298000000-0081

Assay variable : PTINR\_VAL1 PT-INR Value

| N | Mean      | Standard Deviation | Minimum   | Maximum   |
|---|-----------|--------------------|-----------|-----------|
| 2 | 2.8250000 | 0.0919239          | 2.7600000 | 2.8900000 |

Unique Subject Identifier=6298000000-0091

Assay variable : PTINR\_VAL1 PT-INR Value

| N | Mean      | Standard Deviation | Minimum   | Maximum   |
|---|-----------|--------------------|-----------|-----------|
| 3 | 1.9966667 | 0.1975686          | 1.8200000 | 2.2100000 |

Unique Subject Identifier=6298000000-0092

Assay variable : PTINR\_VAL1 PT-INR Value

N Mean Standard Deviation Minimum Maximum

---

|   |           |           |           |           |
|---|-----------|-----------|-----------|-----------|
| 6 | 2.4116667 | 0.0773089 | 2.3100000 | 2.5000000 |
|---|-----------|-----------|-----------|-----------|

---

Laboratory tests at the time of obtaining Table 2-6 consent, according to the presence or absence of proton-pump inhibitors

Unique Subject Identifier=6298000000-0093

MEANS Procedure

Assay variable : PTINR\_VAL1 PT-INR Value

N Mean Standard Deviation Minimum Maximum

---

|   |           |           |           |           |
|---|-----------|-----------|-----------|-----------|
| 6 | 1.9733333 | 0.2540604 | 1.6600000 | 2.2800000 |
|---|-----------|-----------|-----------|-----------|

---

Unique Subject Identifier=6298000000-0095

Assay variable : PTINR\_VAL1 PT-INR Value

N Mean Standard Deviation Minimum Maximum

---

|   |           |           |           |           |
|---|-----------|-----------|-----------|-----------|
| 6 | 2.2033333 | 0.8501686 | 1.4700000 | 3.8100000 |
|---|-----------|-----------|-----------|-----------|

---

Unique Subject Identifier=6298000000-0098

Assay variable : PTINR\_VAL1 PT-INR Value

N Mean Standard Deviation Minimum Maximum

---

|   |           |           |           |           |
|---|-----------|-----------|-----------|-----------|
| 2 | 2.1250000 | 0.0353553 | 2.1000000 | 2.1500000 |
|---|-----------|-----------|-----------|-----------|

---

Unique Subject Identifier=6298000000-0109



Assay variable : PTINR\_VAL1 PT-INR Value

N Mean Standard Deviation Minimum Maximum

---

|   |          |           |          |          |
|---|----------|-----------|----------|----------|
| 2 | 2.750000 | 0.5798276 | 2.340000 | 3.160000 |
|---|----------|-----------|----------|----------|

---

Laboratory tests at the time of obtaining Table 2-6 consent, according to the presence or absence of proton-pump inhibitors

Unique Subject Identifier=6298000000-0110

MEANS Procedure

Assay variable : PTINR\_VAL1 PT-INR Value

N Mean Standard Deviation Minimum Maximum

---

|   |           |           |           |           |
|---|-----------|-----------|-----------|-----------|
| 3 | 2.1933333 | 0.2371357 | 1.9400000 | 2.4100000 |
|---|-----------|-----------|-----------|-----------|

---

Unique Subject Identifier=6298000000-0111

Assay variable : PTINR\_VAL1 PT-INR Value

N Mean Standard Deviation Minimum Maximum

---

|   |           |           |           |           |
|---|-----------|-----------|-----------|-----------|
| 3 | 1.8100000 | 0.1442221 | 1.6500000 | 1.9300000 |
|---|-----------|-----------|-----------|-----------|

---

Unique Subject Identifier=6298000000-0112

Assay variable : PTINR\_VAL1 PT-INR Value

N Mean Standard Deviation Minimum Maximum

---

|   |           |           |           |           |
|---|-----------|-----------|-----------|-----------|
| 4 | 2.2050000 | 0.6450581 | 1.5000000 | 3.0000000 |
|---|-----------|-----------|-----------|-----------|

---

Unique Subject Identifier=6298000000-0113

Assay variable : PTINR\_VAL1 PT-INR Value

N Mean Standard Deviation Minimum Maximum

---

|   |          |           |          |          |
|---|----------|-----------|----------|----------|
| 6 | 2.083333 | 0.5444508 | 1.360000 | 2.720000 |
|---|----------|-----------|----------|----------|

---

Laboratory tests at the time of obtaining Table 2-6 consent, according to the presence or absence of proton-pump inhibitors

Unique Subject Identifier=6298000000-0137

MEANS Procedure

Assay variable : PTINR\_VAL1 PT-INR Value

N Mean Standard Deviation Minimum Maximum

---

|   |           |           |           |           |
|---|-----------|-----------|-----------|-----------|
| 4 | 2.0575000 | 0.6261190 | 1.5800000 | 2.9200000 |
|---|-----------|-----------|-----------|-----------|

---

Unique Subject Identifier=6298000000-0147

Assay variable : PTINR\_VAL1 PT-INR Value

N Mean Standard Deviation Minimum Maximum

---

|   |           |           |           |           |
|---|-----------|-----------|-----------|-----------|
| 4 | 2.4400000 | 0.7682448 | 1.9400000 | 3.5800000 |
|---|-----------|-----------|-----------|-----------|

---

Unique Subject Identifier=6298000000-0151

Assay variable : PTINR\_VAL1 PT-INR Value

N Mean Standard Deviation Minimum Maximum

---

|   |           |           |           |           |
|---|-----------|-----------|-----------|-----------|
| 4 | 2.2125000 | 0.5720358 | 1.7100000 | 2.7800000 |
|---|-----------|-----------|-----------|-----------|

---

Unique Subject Identifier=6298000000-0154

Assay variable : PTINR\_VAL1 PT-INR Value

N Mean Standard Deviation Minimum Maximum

---

|   |           |           |           |           |
|---|-----------|-----------|-----------|-----------|
| 6 | 1.7283333 | 0.1859480 | 1.5300000 | 1.9500000 |
|---|-----------|-----------|-----------|-----------|

---

Laboratory tests at the time of obtaining Table 2-6 consent, according to the presence or absence of proton-pump inhibitors

Unique Subject Identifier=6298000000-0159

MEANS Procedure

Assay variable : PTINR\_VAL1 PT-INR Value

| N | Mean      | Standard Deviation | Minimum   | Maximum   |
|---|-----------|--------------------|-----------|-----------|
| 3 | 2.0533333 | 0.2100794          | 1.8400000 | 2.2600000 |

Unique Subject Identifier=6298000000-0170

Assay variable : PTINR\_VAL1 PT-INR Value

| N | Mean      | Standard Deviation | Minimum   | Maximum   |
|---|-----------|--------------------|-----------|-----------|
| 4 | 1.8300000 | 0.7481978          | 1.3300000 | 2.9400000 |

Unique Subject Identifier=6304000000-0005

Assay variable : PTINR\_VAL1 PT-INR Value

| N | Mean      | Standard Deviation | Minimum   | Maximum   |
|---|-----------|--------------------|-----------|-----------|
| 4 | 2.2475000 | 0.4780080          | 1.6400000 | 2.7200000 |

Unique Subject Identifier=6304000000-0012

Assay variable : PTINR\_VAL1 PT-INR Value

N Mean Standard Deviation Minimum Maximum

---

|   |           |  |           |           |
|---|-----------|--|-----------|-----------|
| 1 | 1.7000000 |  | 1.7000000 | 1.7000000 |
|---|-----------|--|-----------|-----------|

---

Laboratory tests at the time of obtaining Table 2-6 consent, according to the presence or absence of proton-pump inhibitors

Unique Subject Identifier=6304000000-0021

MEANS Procedure

Assay variable : PTINR\_VAL1 PT-INR Value

N Mean Standard Deviation Minimum Maximum

---

|   |           |           |           |           |
|---|-----------|-----------|-----------|-----------|
| 3 | 1.7233333 | 0.4135618 | 1.4600000 | 2.2000000 |
|---|-----------|-----------|-----------|-----------|

---

Unique Subject Identifier=6304000000-0023

Assay variable : PTINR\_VAL1 PT-INR Value

N Mean Standard Deviation Minimum Maximum

---

|   |           |           |           |           |
|---|-----------|-----------|-----------|-----------|
| 2 | 2.1250000 | 0.3464823 | 1.8800000 | 2.3700000 |
|---|-----------|-----------|-----------|-----------|

---

Unique Subject Identifier=6304000000-0024

Assay variable : PTINR\_VAL1 PT-INR Value

N Mean Standard Deviation Minimum Maximum

---

|   |           |           |           |           |
|---|-----------|-----------|-----------|-----------|
| 3 | 1.7866667 | 0.1101514 | 1.6600000 | 1.8600000 |
|---|-----------|-----------|-----------|-----------|

---

Unique Subject Identifier=6309000000-0007



Assay variable : PTINR\_VAL1 PT-INR Value

N Mean Standard Deviation Minimum Maximum

---

|   |          |           |          |          |
|---|----------|-----------|----------|----------|
| 2 | 2.800000 | 0.0141421 | 2.790000 | 2.810000 |
|---|----------|-----------|----------|----------|

---

Laboratory tests at the time of obtaining Table 2-6 consent, according to the presence or absence of proton-pump inhibitors

Unique Subject Identifier=6309000000-0014

MEANS Procedure

Assay variable : PTINR\_VAL1 PT-INR Value

N Mean Standard Deviation Minimum Maximum

---

|   |           |           |           |           |
|---|-----------|-----------|-----------|-----------|
| 4 | 1.9350000 | 0.1100000 | 1.7900000 | 2.0300000 |
|---|-----------|-----------|-----------|-----------|

---

Unique Subject Identifier=6309000000-0018

Assay variable : PTINR\_VAL1 PT-INR Value

N Mean Standard Deviation Minimum Maximum

---

|   |           |           |           |           |
|---|-----------|-----------|-----------|-----------|
| 3 | 2.5700000 | 0.2426932 | 2.3700000 | 2.8400000 |
|---|-----------|-----------|-----------|-----------|

---

Unique Subject Identifier=6310000100-0001

Assay variable : PTINR\_VAL1 PT-INR Value

N Mean Standard Deviation Minimum Maximum

---

|   |           |           |           |           |
|---|-----------|-----------|-----------|-----------|
| 5 | 1.8760000 | 0.1974335 | 1.6300000 | 2.1000000 |
|---|-----------|-----------|-----------|-----------|

---

Unique Subject Identifier=6310000100-0003

Assay variable : PTINR\_VAL1 PT-INR Value

N Mean Standard Deviation Minimum Maximum

---

|   |           |           |           |           |
|---|-----------|-----------|-----------|-----------|
| 6 | 2.0233333 | 0.2492923 | 1.6700000 | 2.2600000 |
|---|-----------|-----------|-----------|-----------|

---

Laboratory tests at the time of obtaining Table 2-6 consent, according to the presence or absence of proton-pump inhibitors

Unique Subject Identifier=6310000100-0005

MEANS Procedure

Assay variable : PTINR\_VAL1 PT-INR Value

N Mean Standard Deviation Minimum Maximum

---

|   |           |           |           |           |
|---|-----------|-----------|-----------|-----------|
| 6 | 2.0816667 | 0.4285518 | 1.6600000 | 2.7200000 |
|---|-----------|-----------|-----------|-----------|

---

Unique Subject Identifier=6310000100-0007

Assay variable : PTINR\_VAL1 PT-INR Value

N Mean Standard Deviation Minimum Maximum

---

|   |           |           |           |           |
|---|-----------|-----------|-----------|-----------|
| 5 | 2.3380000 | 0.5558507 | 1.6600000 | 2.8900000 |
|---|-----------|-----------|-----------|-----------|

---

Unique Subject Identifier=6310000100-0008

Assay variable : PTINR\_VAL1 PT-INR Value

N Mean Standard Deviation Minimum Maximum

---

|   |           |           |           |           |
|---|-----------|-----------|-----------|-----------|
| 5 | 2.4180000 | 0.5912867 | 1.7600000 | 3.3200000 |
|---|-----------|-----------|-----------|-----------|

---

Unique Subject Identifier=6310000100-0014

Assay variable : PTINR\_VAL1 PT-INR Value

N Mean Standard Deviation Minimum Maximum

---

|   |           |           |           |           |
|---|-----------|-----------|-----------|-----------|
| 5 | 2.3340000 | 0.8346436 | 1.5700000 | 3.7600000 |
|---|-----------|-----------|-----------|-----------|

---

Laboratory tests at the time of obtaining Table 2-6 consent, according to the presence or absence of proton-pump inhibitors

Unique Subject Identifier=6310000100-0021

MEANS Procedure

Assay variable : PTINR\_VAL1 PT-INR Value

N Mean Standard Deviation Minimum Maximum

---

|   |           |           |           |           |
|---|-----------|-----------|-----------|-----------|
| 6 | 2.2133333 | 0.6199892 | 1.5300000 | 3.1600000 |
|---|-----------|-----------|-----------|-----------|

---

Unique Subject Identifier=6310000100-0024

Assay variable : PTINR\_VAL1 PT-INR Value

N Mean Standard Deviation Minimum Maximum

---

|   |           |           |           |           |
|---|-----------|-----------|-----------|-----------|
| 5 | 2.0120000 | 0.5511533 | 1.3400000 | 2.8200000 |
|---|-----------|-----------|-----------|-----------|

---

Unique Subject Identifier=6310000100-0026

Assay variable : PTINR\_VAL1 PT-INR Value

N Mean Standard Deviation Minimum Maximum

---

|   |           |           |           |           |
|---|-----------|-----------|-----------|-----------|
| 4 | 1.9675000 | 0.4823812 | 1.4300000 | 2.5900000 |
|---|-----------|-----------|-----------|-----------|

---

Unique Subject Identifier=6310000100-0030

Assay variable : PTINR\_VAL1 PT-INR Value

N Mean Standard Deviation Minimum Maximum

---

|   |           |           |           |           |
|---|-----------|-----------|-----------|-----------|
| 6 | 1.8666667 | 0.1127239 | 1.7100000 | 1.9700000 |
|---|-----------|-----------|-----------|-----------|

---

Laboratory tests at the time of obtaining Table 2-6 consent, according to the presence or absence of proton-pump inhibitors

Unique Subject Identifier=6310000100-0031

MEANS Procedure

Assay variable : PTINR\_VAL1 PT-INR Value

N Mean Standard Deviation Minimum Maximum

---

|   |           |           |           |           |
|---|-----------|-----------|-----------|-----------|
| 5 | 2.4940000 | 0.2847455 | 2.0800000 | 2.8600000 |
|---|-----------|-----------|-----------|-----------|

---

Unique Subject Identifier=6310000100-0033

Assay variable : PTINR\_VAL1 PT-INR Value

N Mean Standard Deviation Minimum Maximum

---

|   |           |           |           |           |
|---|-----------|-----------|-----------|-----------|
| 5 | 1.9360000 | 0.5511170 | 1.3400000 | 2.6400000 |
|---|-----------|-----------|-----------|-----------|

---

Unique Subject Identifier=6310000100-0035

Assay variable : PTINR\_VAL1 PT-INR Value

N Mean Standard Deviation Minimum Maximum

---

|   |           |           |           |           |
|---|-----------|-----------|-----------|-----------|
| 5 | 1.8880000 | 0.3094673 | 1.5500000 | 2.2200000 |
|---|-----------|-----------|-----------|-----------|

---

Unique Subject Identifier=6310000100-0036



Assay variable : PTINR\_VAL1 PT-INR Value

N Mean Standard Deviation Minimum Maximum

---

|   |           |           |           |           |
|---|-----------|-----------|-----------|-----------|
| 6 | 2.1116667 | 0.3047239 | 1.7000000 | 2.5100000 |
|---|-----------|-----------|-----------|-----------|

---

Laboratory tests at the time of obtaining Table 2-6 consent, according to the presence or absence of proton-pump inhibitors

Unique Subject Identifier=6333000000-0001

MEANS Procedure

Assay variable : PTINR\_VAL1 PT-INR Value

N Mean Standard Deviation Minimum Maximum

---

|   |           |           |           |           |
|---|-----------|-----------|-----------|-----------|
| 4 | 2.4175000 | 0.7544258 | 1.4700000 | 3.2300000 |
|---|-----------|-----------|-----------|-----------|

---

Unique Subject Identifier=6340011000-0002

Assay variable : PTINR\_VAL1 PT-INR Value

N Mean Standard Deviation Minimum Maximum

---

|   |           |           |           |           |
|---|-----------|-----------|-----------|-----------|
| 6 | 1.7666667 | 0.1966384 | 1.6000000 | 2.1000000 |
|---|-----------|-----------|-----------|-----------|

---

Unique Subject Identifier=6340011000-0008

Assay variable : PTINR\_VAL1 PT-INR Value

N Mean Standard Deviation Minimum Maximum

---

|   |           |           |           |           |
|---|-----------|-----------|-----------|-----------|
| 3 | 1.5666667 | 0.0577350 | 1.5000000 | 1.6000000 |
|---|-----------|-----------|-----------|-----------|

---

Unique Subject Identifier=6340011000-0009

Assay variable : PTINR\_VAL1 PT-INR Value

N Mean Standard Deviation Minimum Maximum

---

|   |          |          |          |          |
|---|----------|----------|----------|----------|
| 5 | 1.820000 | 0.130384 | 1.700000 | 2.000000 |
|---|----------|----------|----------|----------|

---

Laboratory tests at the time of obtaining Table 2-6 consent, according to the presence or absence of proton-pump inhibitors

Unique Subject Identifier=6340011000-0010

MEANS Procedure

Assay variable : PTINR\_VAL1 PT-INR Value

N Mean Standard Deviation Minimum Maximum

---

|   |           |           |           |           |
|---|-----------|-----------|-----------|-----------|
| 4 | 1.9750000 | 0.3593976 | 1.5000000 | 2.3000000 |
|---|-----------|-----------|-----------|-----------|

---

Unique Subject Identifier=6426000000-0002

Assay variable : PTINR\_VAL1 PT-INR Value

N Mean Standard Deviation Minimum Maximum

---

|   |           |           |           |           |
|---|-----------|-----------|-----------|-----------|
| 6 | 1.8916667 | 0.5451024 | 1.2100000 | 2.4500000 |
|---|-----------|-----------|-----------|-----------|

---

Unique Subject Identifier=6426000000-0006

Assay variable : PTINR\_VAL1 PT-INR Value

N Mean Standard Deviation Minimum Maximum

---

|   |           |           |           |           |
|---|-----------|-----------|-----------|-----------|
| 3 | 2.4766667 | 0.3066486 | 2.1400000 | 2.7400000 |
|---|-----------|-----------|-----------|-----------|

---

Unique Subject Identifier=6426000000-0008

Assay variable : PTINR\_VAL1 PT-INR Value

N Mean Standard Deviation Minimum Maximum

---

|   |           |           |           |           |
|---|-----------|-----------|-----------|-----------|
| 6 | 1.7933333 | 0.3691973 | 1.4400000 | 2.4900000 |
|---|-----------|-----------|-----------|-----------|

---

Laboratory tests at the time of obtaining Table 2-6 consent, according to the presence or absence of proton-pump inhibitors

Unique Subject Identifier=642600000-0010

MEANS Procedure

Assay variable : PTINR\_VAL1 PT-INR Value

| N | Mean      | Standard Deviation | Minimum   | Maximum   |
|---|-----------|--------------------|-----------|-----------|
| 5 | 1.5780000 | 0.0995992          | 1.4300000 | 1.6800000 |

Unique Subject Identifier=642600000-0014

Assay variable : PTINR\_VAL1 PT-INR Value

| N | Mean      | Standard Deviation | Minimum   | Maximum   |
|---|-----------|--------------------|-----------|-----------|
| 3 | 1.7433333 | 0.0808290          | 1.6700000 | 1.8300000 |

Unique Subject Identifier=642600000-0023

Assay variable : PTINR\_VAL1 PT-INR Value

| N | Mean      | Standard Deviation | Minimum   | Maximum   |
|---|-----------|--------------------|-----------|-----------|
| 6 | 2.2016667 | 0.3270117          | 1.7600000 | 2.6600000 |

Unique Subject Identifier=6542010000-0005

Assay variable : PTINR\_VAL1 PT-INR Value

N Mean Standard Deviation Minimum Maximum

---

|   |           |           |           |           |
|---|-----------|-----------|-----------|-----------|
| 5 | 1.5580000 | 0.1697645 | 1.3000000 | 1.7500000 |
|---|-----------|-----------|-----------|-----------|

---

Laboratory tests at the time of obtaining Table 2-6 consent, according to the presence or absence of proton-pump inhibitors

Unique Subject Identifier=6542010000-0009

MEANS Procedure

Assay variable : PTINR\_VAL1 PT-INR Value

N Mean Standard Deviation Minimum Maximum

---

|   |           |           |           |           |
|---|-----------|-----------|-----------|-----------|
| 2 | 2.4000000 | 0.2828427 | 2.2000000 | 2.6000000 |
|---|-----------|-----------|-----------|-----------|

---

Unique Subject Identifier=6542010000-0010

Assay variable : PTINR\_VAL1 PT-INR Value

N Mean Standard Deviation Minimum Maximum

---

|   |           |           |           |           |
|---|-----------|-----------|-----------|-----------|
| 5 | 1.8400000 | 0.1516575 | 1.7000000 | 2.1000000 |
|---|-----------|-----------|-----------|-----------|

---

Unique Subject Identifier=6542010000-0011

Assay variable : PTINR\_VAL1 PT-INR Value

N Mean Standard Deviation Minimum Maximum

---

|   |           |           |           |           |
|---|-----------|-----------|-----------|-----------|
| 5 | 1.8000000 | 0.3082207 | 1.5000000 | 2.2000000 |
|---|-----------|-----------|-----------|-----------|

---

Unique Subject Identifier=6542010000-0012



Assay variable : PTINR\_VAL1 PT-INR Value

N Mean Standard Deviation Minimum Maximum

---

|   |           |           |           |           |
|---|-----------|-----------|-----------|-----------|
| 6 | 1.4866667 | 0.1143095 | 1.4000000 | 1.7000000 |
|---|-----------|-----------|-----------|-----------|

---

Laboratory tests at the time of obtaining Table 2-6 consent, according to the presence or absence of proton-pump inhibitors

Unique Subject Identifier=6542010000-0017

MEANS Procedure

Assay variable : PTINR\_VAL1 PT-INR Value

N Mean Standard Deviation Minimum Maximum

---

|   |           |           |           |           |
|---|-----------|-----------|-----------|-----------|
| 6 | 2.2666667 | 0.5921711 | 1.6000000 | 3.0000000 |
|---|-----------|-----------|-----------|-----------|

---

Unique Subject Identifier=6542010000-0019

Assay variable : PTINR\_VAL1 PT-INR Value

N Mean Standard Deviation Minimum Maximum

---

|   |           |           |           |           |
|---|-----------|-----------|-----------|-----------|
| 5 | 1.8560000 | 0.3077012 | 1.6000000 | 2.2000000 |
|---|-----------|-----------|-----------|-----------|

---

Unique Subject Identifier=6614001000-0004

Assay variable : PTINR\_VAL1 PT-INR Value

N Mean Standard Deviation Minimum Maximum

---

|   |           |  |           |           |
|---|-----------|--|-----------|-----------|
| 1 | 2.7900000 |  | 2.7900000 | 2.7900000 |
|---|-----------|--|-----------|-----------|

---

Unique Subject Identifier=6614001000-0006

Assay variable : PTINR\_VAL1 PT-INR Value

N Mean Standard Deviation Minimum Maximum

---

|   |           |           |           |           |
|---|-----------|-----------|-----------|-----------|
| 3 | 2.1066667 | 0.4781562 | 1.7500000 | 2.6500000 |
|---|-----------|-----------|-----------|-----------|

---

Laboratory tests at the time of obtaining Table 2-6 consent, according to the presence or absence of proton-pump inhibitors

Unique Subject Identifier=6614001000-0007

MEANS Procedure

Assay variable : PTINR\_VAL1 PT-INR Value

| N | Mean      | Standard Deviation | Minimum   | Maximum   |
|---|-----------|--------------------|-----------|-----------|
| 5 | 2.0940000 | 0.1668233          | 1.8100000 | 2.2200000 |

Unique Subject Identifier=6614001000-0009

Assay variable : PTINR\_VAL1 PT-INR Value

| N | Mean      | Standard Deviation | Minimum   | Maximum   |
|---|-----------|--------------------|-----------|-----------|
| 2 | 1.6600000 | 0.4242641          | 1.3600000 | 1.9600000 |

Unique Subject Identifier=6623000000-0003

Assay variable : PTINR\_VAL1 PT-INR Value

| N | Mean      | Standard Deviation | Minimum   | Maximum   |
|---|-----------|--------------------|-----------|-----------|
| 6 | 1.8516667 | 0.1552310          | 1.6500000 | 2.1000000 |

Unique Subject Identifier=6623000000-0004

Assay variable : PTINR\_VAL1 PT-INR Value

N Mean Standard Deviation Minimum Maximum

---

|   |           |           |           |           |
|---|-----------|-----------|-----------|-----------|
| 4 | 2.1275000 | 0.1711481 | 2.0000000 | 2.3800000 |
|---|-----------|-----------|-----------|-----------|

---

Laboratory tests at the time of obtaining Table 2-6 consent, according to the presence or absence of proton-pump inhibitors

Unique Subject Identifier=6623000000-0012

MEANS Procedure

Assay variable : PTINR\_VAL1 PT-INR Value

| N | Mean      | Standard Deviation | Minimum   | Maximum   |
|---|-----------|--------------------|-----------|-----------|
| 3 | 1.2633333 | 0.0776745          | 1.2000000 | 1.3500000 |

Unique Subject Identifier=6623000000-0016

Assay variable : PTINR\_VAL1 PT-INR Value

| N | Mean      | Standard Deviation | Minimum   | Maximum   |
|---|-----------|--------------------|-----------|-----------|
| 5 | 1.7220000 | 0.3189357          | 1.2500000 | 2.0300000 |

Unique Subject Identifier=6642010010-0004

Assay variable : PTINR\_VAL1 PT-INR Value

| N | Mean      | Standard Deviation | Minimum   | Maximum   |
|---|-----------|--------------------|-----------|-----------|
| 6 | 1.7483333 | 0.1020621          | 1.6000000 | 1.8400000 |

Unique Subject Identifier=6642010010-0010

Assay variable : PTINR\_VAL1 PT-INR Value

N Mean Standard Deviation Minimum Maximum

---

|   |           |           |           |           |
|---|-----------|-----------|-----------|-----------|
| 5 | 2.2960000 | 0.5373360 | 1.8000000 | 3.0600000 |
|---|-----------|-----------|-----------|-----------|

---

Laboratory tests at the time of obtaining Table 2-6 consent, according to the presence or absence of proton-pump inhibitors

Unique Subject Identifier=6642010010-0015

MEANS Procedure

Assay variable : PTINR\_VAL1 PT-INR Value

N Mean Standard Deviation Minimum Maximum

---

|   |           |           |           |           |
|---|-----------|-----------|-----------|-----------|
| 6 | 1.6866667 | 0.2398889 | 1.4700000 | 2.0100000 |
|---|-----------|-----------|-----------|-----------|

---

Unique Subject Identifier=6748000000-0001

Assay variable : PTINR\_VAL1 PT-INR Value

N Mean Standard Deviation Minimum Maximum

---

|   |           |           |           |           |
|---|-----------|-----------|-----------|-----------|
| 6 | 1.8666667 | 0.2338090 | 1.6000000 | 2.2000000 |
|---|-----------|-----------|-----------|-----------|

---

Unique Subject Identifier=6748000000-0002

Assay variable : PTINR\_VAL1 PT-INR Value

N Mean Standard Deviation Minimum Maximum

---

|   |           |           |           |           |
|---|-----------|-----------|-----------|-----------|
| 5 | 2.1400000 | 0.2880972 | 1.7000000 | 2.5000000 |
|---|-----------|-----------|-----------|-----------|

---

Unique Subject Identifier=6748000000-0004



Assay variable : PTINR\_VAL1 PT-INR Value

N Mean Standard Deviation Minimum Maximum

---

|   |           |           |           |           |
|---|-----------|-----------|-----------|-----------|
| 6 | 1.8833333 | 0.4308906 | 1.5000000 | 2.7000000 |
|---|-----------|-----------|-----------|-----------|

---

Laboratory tests at the time of obtaining Table 2-6 consent, according to the presence or absence of proton-pump inhibitors

Unique Subject Identifier=7001010000-0005

MEANS Procedure

Assay variable : PTINR\_VAL1 PT-INR Value

N Mean Standard Deviation Minimum Maximum

---

|   |           |           |           |           |
|---|-----------|-----------|-----------|-----------|
| 4 | 1.4525000 | 0.1034005 | 1.3300000 | 1.5800000 |
|---|-----------|-----------|-----------|-----------|

---

Unique Subject Identifier=7002000000-0004

Assay variable : PTINR\_VAL1 PT-INR Value

N Mean Standard Deviation Minimum Maximum

---

|   |           |           |           |           |
|---|-----------|-----------|-----------|-----------|
| 3 | 2.1266667 | 0.3200521 | 1.7600000 | 2.3500000 |
|---|-----------|-----------|-----------|-----------|

---

Unique Subject Identifier=7002000000-0011

Assay variable : PTINR\_VAL1 PT-INR Value

N Mean Standard Deviation Minimum Maximum

---

|   |           |           |           |           |
|---|-----------|-----------|-----------|-----------|
| 6 | 1.9516667 | 0.2183957 | 1.6700000 | 2.2000000 |
|---|-----------|-----------|-----------|-----------|

---

Unique Subject Identifier=7002000000-0013

Assay variable : PTINR\_VAL1 PT-INR Value

N Mean Standard Deviation Minimum Maximum

---

|   |           |           |           |           |
|---|-----------|-----------|-----------|-----------|
| 3 | 2.0033333 | 0.2441994 | 1.7300000 | 2.2000000 |
|---|-----------|-----------|-----------|-----------|

---

Laboratory tests at the time of obtaining Table 2-6 consent, according to the presence or absence of proton-pump inhibitors

Unique Subject Identifier=7002000000-0016

MEANS Procedure

Assay variable : PTINR\_VAL1 PT-INR Value

N Mean Standard Deviation Minimum Maximum

---

|   |           |           |           |           |
|---|-----------|-----------|-----------|-----------|
| 6 | 1.9100000 | 0.1604992 | 1.7600000 | 2.2000000 |
|---|-----------|-----------|-----------|-----------|

---

Unique Subject Identifier=7002000000-0026

Assay variable : PTINR\_VAL1 PT-INR Value

N Mean Standard Deviation Minimum Maximum

---

|   |           |           |           |           |
|---|-----------|-----------|-----------|-----------|
| 3 | 2.2900000 | 0.0754983 | 2.2200000 | 2.3700000 |
|---|-----------|-----------|-----------|-----------|

---

Unique Subject Identifier=7002000000-0032

Assay variable : PTINR\_VAL1 PT-INR Value

N Mean Standard Deviation Minimum Maximum

---

|   |           |           |           |           |
|---|-----------|-----------|-----------|-----------|
| 4 | 2.1050000 | 0.4320880 | 1.7400000 | 2.7300000 |
|---|-----------|-----------|-----------|-----------|

---

Unique Subject Identifier=7002000000-0038

Assay variable : PTINR\_VAL1 PT-INR Value

N Mean Standard Deviation Minimum Maximum

---

|   |           |           |           |           |
|---|-----------|-----------|-----------|-----------|
| 4 | 2.1075000 | 0.4912145 | 1.5400000 | 2.5800000 |
|---|-----------|-----------|-----------|-----------|

---

Laboratory tests at the time of obtaining Table 2-6 consent, according to the presence or absence of proton-pump inhibitors

Unique Subject Identifier=7002000000-0041

MEANS Procedure

Assay variable : PTINR\_VAL1 PT-INR Value

N Mean Standard Deviation Minimum Maximum

---

|   |           |           |           |           |
|---|-----------|-----------|-----------|-----------|
| 4 | 2.3250000 | 0.4141256 | 1.8700000 | 2.7100000 |
|---|-----------|-----------|-----------|-----------|

---

Unique Subject Identifier=7002000000-0042

Assay variable : PTINR\_VAL1 PT-INR Value

N Mean Standard Deviation Minimum Maximum

---

|   |           |           |           |           |
|---|-----------|-----------|-----------|-----------|
| 4 | 2.2700000 | 0.0734847 | 2.1700000 | 2.3300000 |
|---|-----------|-----------|-----------|-----------|

---

Unique Subject Identifier=7004000000-0011

Assay variable : PTINR\_VAL1 PT-INR Value

N Mean Standard Deviation Minimum Maximum

---

|   |           |           |           |           |
|---|-----------|-----------|-----------|-----------|
| 3 | 2.2066667 | 0.0971253 | 2.1000000 | 2.2900000 |
|---|-----------|-----------|-----------|-----------|

---

Unique Subject Identifier=7005000000-0001

Assay variable : PTINR\_VAL1 PT-INR Value

N Mean Standard Deviation Minimum Maximum

---

|   |           |           |           |           |
|---|-----------|-----------|-----------|-----------|
| 3 | 1.9966667 | 0.3552933 | 1.7300000 | 2.4000000 |
|---|-----------|-----------|-----------|-----------|

---

Laboratory tests at the time of obtaining Table 2-6 consent, according to the presence or absence of proton-pump inhibitors

Unique Subject Identifier=7005000000-0002

MEANS Procedure

Assay variable : PTINR\_VAL1 PT-INR Value

| N | Mean      | Standard Deviation | Minimum   | Maximum   |
|---|-----------|--------------------|-----------|-----------|
| 3 | 1.8633333 | 0.3758102          | 1.5500000 | 2.2800000 |

Unique Subject Identifier=7005000000-0003

Assay variable : PTINR\_VAL1 PT-INR Value

| N | Mean      | Standard Deviation | Minimum   | Maximum   |
|---|-----------|--------------------|-----------|-----------|
| 3 | 1.4366667 | 0.2177919          | 1.2600000 | 1.6800000 |

Unique Subject Identifier=7005000000-0006

Assay variable : PTINR\_VAL1 PT-INR Value

| N | Mean      | Standard Deviation | Minimum   | Maximum   |
|---|-----------|--------------------|-----------|-----------|
| 5 | 2.3880000 | 0.1505656          | 2.1400000 | 2.5200000 |

Unique Subject Identifier=7005000000-0007



Assay variable : PTINR\_VAL1 PT-INR Value

N Mean Standard Deviation Minimum Maximum

---

|   |          |          |          |          |
|---|----------|----------|----------|----------|
| 4 | 2.350000 | 0.767333 | 1.630000 | 3.390000 |
|---|----------|----------|----------|----------|

---

Laboratory tests at the time of obtaining Table 2-6 consent, according to the presence or absence of proton-pump inhibitors

Unique Subject Identifier=7005000000-0009

MEANS Procedure

Assay variable : PTINR\_VAL1 PT-INR Value

N Mean Standard Deviation Minimum Maximum

---

|   |           |           |           |           |
|---|-----------|-----------|-----------|-----------|
| 6 | 2.0566667 | 0.1980572 | 1.8200000 | 2.2800000 |
|---|-----------|-----------|-----------|-----------|

---

Unique Subject Identifier=7005000000-0010

Assay variable : PTINR\_VAL1 PT-INR Value

N Mean Standard Deviation Minimum Maximum

---

|   |           |           |           |           |
|---|-----------|-----------|-----------|-----------|
| 3 | 1.8400000 | 0.2022375 | 1.6900000 | 2.0700000 |
|---|-----------|-----------|-----------|-----------|

---

Unique Subject Identifier=7005000000-0011

Assay variable : PTINR\_VAL1 PT-INR Value

N Mean Standard Deviation Minimum Maximum

---

|   |           |           |           |           |
|---|-----------|-----------|-----------|-----------|
| 3 | 1.7033333 | 0.8807005 | 1.0300000 | 2.7000000 |
|---|-----------|-----------|-----------|-----------|

---

Unique Subject Identifier=7005000000-0012

Assay variable : PTINR\_VAL1 PT-INR Value

N Mean Standard Deviation Minimum Maximum

---

|   |           |           |           |           |
|---|-----------|-----------|-----------|-----------|
| 3 | 2.1700000 | 0.6636264 | 1.4700000 | 2.7900000 |
|---|-----------|-----------|-----------|-----------|

---

Laboratory tests at the time of obtaining Table 2-6 consent, according to the presence or absence of proton-pump inhibitors

Unique Subject Identifier=7005000000-0013

MEANS Procedure

Assay variable : PTINR\_VAL1 PT-INR Value

N Mean Standard Deviation Minimum Maximum

---

|   |           |           |           |           |
|---|-----------|-----------|-----------|-----------|
| 4 | 1.5550000 | 0.1569501 | 1.4000000 | 1.7000000 |
|---|-----------|-----------|-----------|-----------|

---

Unique Subject Identifier=7005000000-0014

Assay variable : PTINR\_VAL1 PT-INR Value

N Mean Standard Deviation Minimum Maximum

---

|   |           |           |           |           |
|---|-----------|-----------|-----------|-----------|
| 3 | 1.8066667 | 0.1800926 | 1.6000000 | 1.9300000 |
|---|-----------|-----------|-----------|-----------|

---

Unique Subject Identifier=7005000000-0016

Assay variable : PTINR\_VAL1 PT-INR Value

N Mean Standard Deviation Minimum Maximum

---

|   |           |           |           |           |
|---|-----------|-----------|-----------|-----------|
| 3 | 2.0133333 | 0.1464013 | 1.8800000 | 2.1700000 |
|---|-----------|-----------|-----------|-----------|

---

Unique Subject Identifier=7008000000-0005

Assay variable : PTINR\_VAL1 PT-INR Value

N Mean Standard Deviation Minimum Maximum

---

|   |          |           |          |          |
|---|----------|-----------|----------|----------|
| 6 | 2.240000 | 0.3352014 | 1.800000 | 2.800000 |
|---|----------|-----------|----------|----------|

---

Laboratory tests at the time of obtaining Table 2-6 consent, according to the presence or absence of proton-pump inhibitors

Unique Subject Identifier=7008000000-0011

MEANS Procedure

Assay variable : PTINR\_VAL1 PT-INR Value

N Mean Standard Deviation Minimum Maximum

---

|   |           |           |           |           |
|---|-----------|-----------|-----------|-----------|
| 4 | 2.2325000 | 0.3472151 | 1.9200000 | 2.5900000 |
|---|-----------|-----------|-----------|-----------|

---

Unique Subject Identifier=7008000000-0013

Assay variable : PTINR\_VAL1 PT-INR Value

N Mean Standard Deviation Minimum Maximum

---

|   |           |           |           |           |
|---|-----------|-----------|-----------|-----------|
| 3 | 1.7566667 | 0.0907377 | 1.6900000 | 1.8600000 |
|---|-----------|-----------|-----------|-----------|

---

Unique Subject Identifier=7008000000-0022

Assay variable : PTINR\_VAL1 PT-INR Value

N Mean Standard Deviation Minimum Maximum

---

|   |           |           |           |           |
|---|-----------|-----------|-----------|-----------|
| 5 | 1.9140000 | 0.4508104 | 1.2900000 | 2.5100000 |
|---|-----------|-----------|-----------|-----------|

---

Unique Subject Identifier=7008000000-0023

Assay variable : PTINR\_VAL1 PT-INR Value

N Mean Standard Deviation Minimum Maximum

---

|   |          |           |          |          |
|---|----------|-----------|----------|----------|
| 3 | 2.280000 | 0.3551056 | 2.070000 | 2.690000 |
|---|----------|-----------|----------|----------|

---

Laboratory tests at the time of obtaining Table 2-6 consent, according to the presence or absence of proton-pump inhibitors

Unique Subject Identifier=7009010000-0003

MEANS Procedure

Assay variable : PTINR\_VAL1 PT-INR Value

N Mean Standard Deviation Minimum Maximum

---

|   |          |           |          |          |
|---|----------|-----------|----------|----------|
| 3 | 2.150000 | 0.2457641 | 1.970000 | 2.430000 |
|---|----------|-----------|----------|----------|

---

Unique Subject Identifier=7009010000-0004

Assay variable : PTINR\_VAL1 PT-INR Value

N Mean Standard Deviation Minimum Maximum

---

|   |           |           |          |          |
|---|-----------|-----------|----------|----------|
| 6 | 2.4316667 | 0.5638587 | 1.550000 | 3.210000 |
|---|-----------|-----------|----------|----------|

---

Unique Subject Identifier=7014000000-0003

Assay variable : PTINR\_VAL1 PT-INR Value

N Mean Standard Deviation Minimum Maximum

---

|   |           |           |          |          |
|---|-----------|-----------|----------|----------|
| 6 | 2.2066667 | 0.1984607 | 1.980000 | 2.550000 |
|---|-----------|-----------|----------|----------|

---

Unique Subject Identifier=7014000000-0007



Assay variable : PTINR\_VAL1 PT-INR Value

N Mean Standard Deviation Minimum Maximum

---

|   |          |           |          |          |
|---|----------|-----------|----------|----------|
| 5 | 2.222000 | 0.4557631 | 1.790000 | 2.930000 |
|---|----------|-----------|----------|----------|

---

Laboratory tests at the time of obtaining Table 2-6 consent, according to the presence or absence of proton-pump inhibitors

Unique Subject Identifier=7014000000-0008

MEANS Procedure

Assay variable : PTINR\_VAL1 PT-INR Value

N Mean Standard Deviation Minimum Maximum

---

|   |           |  |           |           |
|---|-----------|--|-----------|-----------|
| 1 | 1.6500000 |  | 1.6500000 | 1.6500000 |
|---|-----------|--|-----------|-----------|

---

Unique Subject Identifier=7026000000-0012

Assay variable : PTINR\_VAL1 PT-INR Value

N Mean Standard Deviation Minimum Maximum

---

|   |           |           |           |           |
|---|-----------|-----------|-----------|-----------|
| 6 | 2.6666667 | 0.9492242 | 1.5000000 | 4.2800000 |
|---|-----------|-----------|-----------|-----------|

---

Unique Subject Identifier=7026000000-0013

Assay variable : PTINR\_VAL1 PT-INR Value

N Mean Standard Deviation Minimum Maximum

---

|   |           |           |           |           |
|---|-----------|-----------|-----------|-----------|
| 5 | 2.5980000 | 1.4820830 | 1.1000000 | 5.0000000 |
|---|-----------|-----------|-----------|-----------|

---

Unique Subject Identifier=7026000000-0021

Assay variable : PTINR\_VAL1 PT-INR Value

N Mean Standard Deviation Minimum Maximum

---

|   |           |           |           |           |
|---|-----------|-----------|-----------|-----------|
| 6 | 1.6650000 | 0.1202913 | 1.5200000 | 1.8000000 |
|---|-----------|-----------|-----------|-----------|

---

Laboratory tests at the time of obtaining Table 2-6 consent, according to the presence or absence of proton-pump inhibitors

Unique Subject Identifier=7026000000-0023

MEANS Procedure

Assay variable : PTINR\_VAL1 PT-INR Value

| N | Mean      | Standard Deviation | Minimum   | Maximum   |
|---|-----------|--------------------|-----------|-----------|
| 4 | 1.5375000 | 0.2137561          | 1.2600000 | 1.7500000 |

Unique Subject Identifier=7026000000-0035

Assay variable : PTINR\_VAL1 PT-INR Value

| N | Mean      | Standard Deviation | Minimum   | Maximum   |
|---|-----------|--------------------|-----------|-----------|
| 5 | 1.4540000 | 0.1748714          | 1.2800000 | 1.7200000 |

Unique Subject Identifier=7026000000-0036

Assay variable : PTINR\_VAL1 PT-INR Value

| N | Mean      | Standard Deviation | Minimum   | Maximum   |
|---|-----------|--------------------|-----------|-----------|
| 2 | 1.8600000 | 0.5656854          | 1.4600000 | 2.2600000 |

Unique Subject Identifier=7026000000-0040

Assay variable : PTINR\_VAL1 PT-INR Value

N Mean Standard Deviation Minimum Maximum

---

|   |           |           |           |           |
|---|-----------|-----------|-----------|-----------|
| 3 | 1.8066667 | 0.2173323 | 1.5600000 | 1.9700000 |
|---|-----------|-----------|-----------|-----------|

---

Laboratory tests at the time of obtaining Table 2-6 consent, according to the presence or absence of proton-pump inhibitors

Unique Subject Identifier=7030010000-0006

MEANS Procedure

Assay variable : PTINR\_VAL1 PT-INR Value

N Mean Standard Deviation Minimum Maximum

---

|   |           |           |           |           |
|---|-----------|-----------|-----------|-----------|
| 5 | 2.5320000 | 0.6437934 | 1.9800000 | 3.6000000 |
|---|-----------|-----------|-----------|-----------|

---

Unique Subject Identifier=7030010000-0008

Assay variable : PTINR\_VAL1 PT-INR Value

N Mean Standard Deviation Minimum Maximum

---

|   |           |           |           |           |
|---|-----------|-----------|-----------|-----------|
| 4 | 1.8550000 | 0.3162805 | 1.4400000 | 2.1600000 |
|---|-----------|-----------|-----------|-----------|

---

Unique Subject Identifier=7030010000-0009

Assay variable : PTINR\_VAL1 PT-INR Value

N Mean Standard Deviation Minimum Maximum

---

|   |           |           |           |           |
|---|-----------|-----------|-----------|-----------|
| 5 | 2.1940000 | 0.4893669 | 1.6100000 | 2.6300000 |
|---|-----------|-----------|-----------|-----------|

---

Unique Subject Identifier=7030010000-0018

Assay variable : PTINR\_VAL1 PT-INR Value

N Mean Standard Deviation Minimum Maximum

---

|   |          |           |          |          |
|---|----------|-----------|----------|----------|
| 4 | 2.180000 | 0.1272792 | 2.040000 | 2.340000 |
|---|----------|-----------|----------|----------|

---

Laboratory tests at the time of obtaining Table 2-6 consent, according to the presence or absence of proton-pump inhibitors

Unique Subject Identifier=7030010000-0020

MEANS Procedure

Assay variable : PTINR\_VAL1 PT-INR Value

| N | Mean      | Standard Deviation | Minimum   | Maximum   |
|---|-----------|--------------------|-----------|-----------|
| 5 | 1.5300000 | 0.1873499          | 1.2800000 | 1.8000000 |

Unique Subject Identifier=7030010000-0027

Assay variable : PTINR\_VAL1 PT-INR Value

| N | Mean      | Standard Deviation | Minimum   | Maximum   |
|---|-----------|--------------------|-----------|-----------|
| 4 | 1.9275000 | 0.4454492          | 1.5900000 | 2.5700000 |

Unique Subject Identifier=7030010000-0028

Assay variable : PTINR\_VAL1 PT-INR Value

| N | Mean      | Standard Deviation | Minimum   | Maximum   |
|---|-----------|--------------------|-----------|-----------|
| 4 | 2.0875000 | 0.6229700          | 1.6400000 | 2.9800000 |

Unique Subject Identifier=7030010000-0032



Assay variable : PTINR\_VAL1 PT-INR Value

N Mean Standard Deviation Minimum Maximum

---

|   |           |           |           |           |
|---|-----------|-----------|-----------|-----------|
| 5 | 2.4060000 | 0.4752683 | 1.6900000 | 2.8700000 |
|---|-----------|-----------|-----------|-----------|

---

Laboratory tests at the time of obtaining Table 2-6 consent, according to the presence or absence of proton-pump inhibitors

Unique Subject Identifier=7030010000-0033

MEANS Procedure

Assay variable : PTINR\_VAL1 PT-INR Value

N Mean Standard Deviation Minimum Maximum

---

|   |           |           |           |           |
|---|-----------|-----------|-----------|-----------|
| 4 | 2.3750000 | 0.9238146 | 1.7700000 | 3.7500000 |
|---|-----------|-----------|-----------|-----------|

---

Unique Subject Identifier=7030010000-0039

Assay variable : PTINR\_VAL1 PT-INR Value

N Mean Standard Deviation Minimum Maximum

---

|   |           |           |           |           |
|---|-----------|-----------|-----------|-----------|
| 4 | 1.9325000 | 0.0917878 | 1.8400000 | 2.0300000 |
|---|-----------|-----------|-----------|-----------|

---

Unique Subject Identifier=7030010000-0040

Assay variable : PTINR\_VAL1 PT-INR Value

N Mean Standard Deviation Minimum Maximum

---

|   |           |           |           |           |
|---|-----------|-----------|-----------|-----------|
| 4 | 1.8700000 | 0.2855404 | 1.6500000 | 2.2700000 |
|---|-----------|-----------|-----------|-----------|

---

Unique Subject Identifier=7030010000-0041

Assay variable : PTINR\_VAL1 PT-INR Value

N Mean Standard Deviation Minimum Maximum

---

|   |          |           |          |          |
|---|----------|-----------|----------|----------|
| 4 | 2.600000 | 1.2533422 | 1.650000 | 4.340000 |
|---|----------|-----------|----------|----------|

---

Laboratory tests at the time of obtaining Table 2-6 consent, according to the presence or absence of proton-pump inhibitors

Unique Subject Identifier=7030010000-0042

MEANS Procedure

Assay variable : PTINR\_VAL1 PT-INR Value

N Mean Standard Deviation Minimum Maximum

---

|   |           |           |           |           |
|---|-----------|-----------|-----------|-----------|
| 4 | 2.2000000 | 0.2679552 | 1.8700000 | 2.4600000 |
|---|-----------|-----------|-----------|-----------|

---

Unique Subject Identifier=7031011111-0006

Assay variable : PTINR\_VAL1 PT-INR Value

N Mean Standard Deviation Minimum Maximum

---

|   |           |           |           |           |
|---|-----------|-----------|-----------|-----------|
| 6 | 1.7516667 | 0.4393821 | 1.1700000 | 2.4100000 |
|---|-----------|-----------|-----------|-----------|

---

Unique Subject Identifier=7031011111-0008

Assay variable : PTINR\_VAL1 PT-INR Value

N Mean Standard Deviation Minimum Maximum

---

|   |           |           |           |           |
|---|-----------|-----------|-----------|-----------|
| 4 | 1.8225000 | 0.3039051 | 1.4300000 | 2.1700000 |
|---|-----------|-----------|-----------|-----------|

---

Unique Subject Identifier=7031011111-0012

Assay variable : PTINR\_VAL1 PT-INR Value

N Mean Standard Deviation Minimum Maximum

---

|   |           |           |           |           |
|---|-----------|-----------|-----------|-----------|
| 3 | 1.9900000 | 0.3862642 | 1.6500000 | 2.4100000 |
|---|-----------|-----------|-----------|-----------|

---

Laboratory tests at the time of obtaining Table 2-6 consent, according to the presence or absence of proton-pump inhibitors

Unique Subject Identifier=7031011111-0015

MEANS Procedure

Assay variable : PTINR\_VAL1 PT-INR Value

N Mean Standard Deviation Minimum Maximum

---

|   |           |           |           |           |
|---|-----------|-----------|-----------|-----------|
| 4 | 1.9800000 | 0.2738613 | 1.7000000 | 2.2200000 |
|---|-----------|-----------|-----------|-----------|

---

Unique Subject Identifier=7031011111-0022

Assay variable : PTINR\_VAL1 PT-INR Value

N Mean Standard Deviation Minimum Maximum

---

|   |           |           |           |           |
|---|-----------|-----------|-----------|-----------|
| 4 | 1.7775000 | 0.2590206 | 1.4800000 | 2.1000000 |
|---|-----------|-----------|-----------|-----------|

---

Unique Subject Identifier=7031011111-0027

Assay variable : PTINR\_VAL1 PT-INR Value

N Mean Standard Deviation Minimum Maximum

---

|   |           |           |           |           |
|---|-----------|-----------|-----------|-----------|
| 3 | 2.2533333 | 0.4850086 | 1.7700000 | 2.7400000 |
|---|-----------|-----------|-----------|-----------|

---

Unique Subject Identifier=7031011111-0029

Assay variable : PTINR\_VAL1 PT-INR Value

N Mean Standard Deviation Minimum Maximum

---

|   |           |           |           |           |
|---|-----------|-----------|-----------|-----------|
| 4 | 2.3375000 | 0.2215664 | 2.0400000 | 2.5300000 |
|---|-----------|-----------|-----------|-----------|

---

Laboratory tests at the time of obtaining Table 2-6 consent, according to the presence or absence of proton-pump inhibitors

Unique Subject Identifier=7031011111-0030

MEANS Procedure

Assay variable : PTINR\_VAL1 PT-INR Value

N Mean Standard Deviation Minimum Maximum

---

|   |           |           |           |           |
|---|-----------|-----------|-----------|-----------|
| 5 | 1.8260000 | 0.2589981 | 1.5000000 | 2.1900000 |
|---|-----------|-----------|-----------|-----------|

---

Unique Subject Identifier=7031011111-0043

Assay variable : PTINR\_VAL1 PT-INR Value

N Mean Standard Deviation Minimum Maximum

---

|   |           |           |           |           |
|---|-----------|-----------|-----------|-----------|
| 4 | 2.7425000 | 0.2351418 | 2.4500000 | 3.0100000 |
|---|-----------|-----------|-----------|-----------|

---

Unique Subject Identifier=7035000000-0009

Assay variable : PTINR\_VAL1 PT-INR Value

N Mean Standard Deviation Minimum Maximum

---

|   |           |           |           |           |
|---|-----------|-----------|-----------|-----------|
| 3 | 2.8666667 | 0.2811287 | 2.6800000 | 3.1900000 |
|---|-----------|-----------|-----------|-----------|

---

Unique Subject Identifier=7035000000-0010



Assay variable : PTINR\_VAL1 PT-INR Value

N Mean Standard Deviation Minimum Maximum

---

|   |          |           |          |          |
|---|----------|-----------|----------|----------|
| 3 | 1.940000 | 0.2007486 | 1.710000 | 2.080000 |
|---|----------|-----------|----------|----------|

---

Laboratory tests at the time of obtaining Table 2-6 consent, according to the presence or absence of proton-pump inhibitors

Unique Subject Identifier=7035000000-0011

MEANS Procedure

Assay variable : PTINR\_VAL1 PT-INR Value

N Mean Standard Deviation Minimum Maximum

---

|   |           |           |           |           |
|---|-----------|-----------|-----------|-----------|
| 6 | 1.7483333 | 0.3171382 | 1.3600000 | 2.1500000 |
|---|-----------|-----------|-----------|-----------|

---

Unique Subject Identifier=7035000000-0012

Assay variable : PTINR\_VAL1 PT-INR Value

N Mean Standard Deviation Minimum Maximum

---

|   |           |           |           |           |
|---|-----------|-----------|-----------|-----------|
| 5 | 1.5500000 | 0.0790569 | 1.4700000 | 1.6600000 |
|---|-----------|-----------|-----------|-----------|

---

Unique Subject Identifier=7035000000-0022

Assay variable : PTINR\_VAL1 PT-INR Value

N Mean Standard Deviation Minimum Maximum

---

|   |           |           |           |           |
|---|-----------|-----------|-----------|-----------|
| 3 | 1.8900000 | 0.2688866 | 1.7200000 | 2.2000000 |
|---|-----------|-----------|-----------|-----------|

---

Unique Subject Identifier=7035000000-0027

Assay variable : PTINR\_VAL1 PT-INR Value

N Mean Standard Deviation Minimum Maximum

---

|   |           |           |           |           |
|---|-----------|-----------|-----------|-----------|
| 6 | 2.2966667 | 0.6932147 | 1.9700000 | 3.7100000 |
|---|-----------|-----------|-----------|-----------|

---

Laboratory tests at the time of obtaining Table 2-6 consent, according to the presence or absence of proton-pump inhibitors

Unique Subject Identifier=7035000000-0032

MEANS Procedure

Assay variable : PTINR\_VAL1 PT-INR Value

N Mean Standard Deviation Minimum Maximum

---

|   |           |           |           |           |
|---|-----------|-----------|-----------|-----------|
| 4 | 2.2075000 | 0.1721191 | 1.9900000 | 2.3600000 |
|---|-----------|-----------|-----------|-----------|

---

Unique Subject Identifier=7035000000-0038

Assay variable : PTINR\_VAL1 PT-INR Value

N Mean Standard Deviation Minimum Maximum

---

|   |           |           |           |           |
|---|-----------|-----------|-----------|-----------|
| 4 | 2.5200000 | 0.8057709 | 1.8400000 | 3.5400000 |
|---|-----------|-----------|-----------|-----------|

---

Unique Subject Identifier=7035000000-0039

Assay variable : PTINR\_VAL1 PT-INR Value

N Mean Standard Deviation Minimum Maximum

---

|   |           |           |           |           |
|---|-----------|-----------|-----------|-----------|
| 4 | 2.3600000 | 0.3371449 | 1.8800000 | 2.6000000 |
|---|-----------|-----------|-----------|-----------|

---

Unique Subject Identifier=7035000000-0041

Assay variable : PTINR\_VAL1 PT-INR Value

N Mean Standard Deviation Minimum Maximum

---

|   |           |           |           |           |
|---|-----------|-----------|-----------|-----------|
| 3 | 1.9266667 | 0.3431229 | 1.5600000 | 2.2400000 |
|---|-----------|-----------|-----------|-----------|

---

Laboratory tests at the time of obtaining Table 2-6 consent, according to the presence or absence of proton-pump inhibitors

Unique Subject Identifier=7035000000-0043

MEANS Procedure

Assay variable : PTINR\_VAL1 PT-INR Value

| N | Mean      | Standard Deviation | Minimum   | Maximum   |
|---|-----------|--------------------|-----------|-----------|
| 4 | 1.8850000 | 0.3070831          | 1.6300000 | 2.3300000 |

Unique Subject Identifier=7035000000-0052

Assay variable : PTINR\_VAL1 PT-INR Value

| N | Mean      | Standard Deviation | Minimum   | Maximum   |
|---|-----------|--------------------|-----------|-----------|
| 3 | 2.0600000 | 0.2351595          | 1.9000000 | 2.3300000 |

Unique Subject Identifier=7035000000-0061

Assay variable : PTINR\_VAL1 PT-INR Value

| N | Mean      | Standard Deviation | Minimum   | Maximum   |
|---|-----------|--------------------|-----------|-----------|
| 3 | 2.4400000 | 0.1609348          | 2.2700000 | 2.5900000 |

Unique Subject Identifier=7035000000-0062

Assay variable : PTINR\_VAL1 PT-INR Value

N Mean Standard Deviation Minimum Maximum

---

|   |           |           |           |           |
|---|-----------|-----------|-----------|-----------|
| 2 | 2.0050000 | 0.2474874 | 1.8300000 | 2.1800000 |
|---|-----------|-----------|-----------|-----------|

---

Laboratory tests at the time of obtaining Table 2-6 consent, according to the presence or absence of proton-pump inhibitors

Unique Subject Identifier=7035000000-0064

MEANS Procedure

Assay variable : PTINR\_VAL1 PT-INR Value

N Mean Standard Deviation Minimum Maximum

---

|   |           |           |           |           |
|---|-----------|-----------|-----------|-----------|
| 3 | 1.8733333 | 0.3552933 | 1.4700000 | 2.1400000 |
|---|-----------|-----------|-----------|-----------|

---

Unique Subject Identifier=7035000000-0066

Assay variable : PTINR\_VAL1 PT-INR Value

N Mean Standard Deviation Minimum Maximum

---

|   |           |           |           |           |
|---|-----------|-----------|-----------|-----------|
| 2 | 1.5500000 | 0.2121320 | 1.4000000 | 1.7000000 |
|---|-----------|-----------|-----------|-----------|

---

Unique Subject Identifier=7035000000-0074

Assay variable : PTINR\_VAL1 PT-INR Value

N Mean Standard Deviation Minimum Maximum

---

|   |           |           |           |           |
|---|-----------|-----------|-----------|-----------|
| 3 | 1.6933333 | 0.0577350 | 1.6600000 | 1.7600000 |
|---|-----------|-----------|-----------|-----------|

---

Unique Subject Identifier=7035000000-0075



Assay variable : PTINR\_VAL1 PT-INR Value

N Mean Standard Deviation Minimum Maximum

---

|   |           |           |           |           |
|---|-----------|-----------|-----------|-----------|
| 2 | 2.4450000 | 0.5444722 | 2.0600000 | 2.8300000 |
|---|-----------|-----------|-----------|-----------|

---

Laboratory tests at the time of obtaining Table 2-6 consent, according to the presence or absence of proton-pump inhibitors

Unique Subject Identifier=7035000000-0076

MEANS Procedure

Assay variable : PTINR\_VAL1 PT-INR Value

N Mean Standard Deviation Minimum Maximum

---

|   |           |           |           |           |
|---|-----------|-----------|-----------|-----------|
| 3 | 1.8600000 | 0.4214262 | 1.4200000 | 2.2600000 |
|---|-----------|-----------|-----------|-----------|

---

Unique Subject Identifier=7035000000-0079

Assay variable : PTINR\_VAL1 PT-INR Value

N Mean Standard Deviation Minimum Maximum

---

|   |           |           |           |           |
|---|-----------|-----------|-----------|-----------|
| 3 | 2.3800000 | 0.3961060 | 2.0300000 | 2.8100000 |
|---|-----------|-----------|-----------|-----------|

---

Unique Subject Identifier=7035000000-0088

Assay variable : PTINR\_VAL1 PT-INR Value

N Mean Standard Deviation Minimum Maximum

---

|   |           |           |           |           |
|---|-----------|-----------|-----------|-----------|
| 4 | 1.9900000 | 0.2070427 | 1.7500000 | 2.2200000 |
|---|-----------|-----------|-----------|-----------|

---

Unique Subject Identifier=7035000000-0095

Assay variable : PTINR\_VAL1 PT-INR Value

N Mean Standard Deviation Minimum Maximum

---

|   |           |           |           |           |
|---|-----------|-----------|-----------|-----------|
| 4 | 2.1625000 | 0.7162576 | 1.5900000 | 3.2100000 |
|---|-----------|-----------|-----------|-----------|

---

Laboratory tests at the time of obtaining Table 2-6 consent, according to the presence or absence of proton-pump inhibitors

Unique Subject Identifier=703600000-0003

MEANS Procedure

Assay variable : PTINR\_VAL1 PT-INR Value

N Mean Standard Deviation Minimum Maximum

---

|   |           |           |           |           |
|---|-----------|-----------|-----------|-----------|
| 5 | 2.2800000 | 0.5263079 | 1.7000000 | 3.1000000 |
|---|-----------|-----------|-----------|-----------|

---

Unique Subject Identifier=7040011000-0001

Assay variable : PTINR\_VAL1 PT-INR Value

N Mean Standard Deviation Minimum Maximum

---

|   |           |           |           |           |
|---|-----------|-----------|-----------|-----------|
| 6 | 2.3516667 | 0.5745752 | 1.3200000 | 2.9400000 |
|---|-----------|-----------|-----------|-----------|

---

Unique Subject Identifier=7040011000-0002

Assay variable : PTINR\_VAL1 PT-INR Value

N Mean Standard Deviation Minimum Maximum

---

|   |           |           |           |           |
|---|-----------|-----------|-----------|-----------|
| 5 | 2.5740000 | 0.3576031 | 2.0600000 | 2.9600000 |
|---|-----------|-----------|-----------|-----------|

---

Unique Subject Identifier=7042010110-0003

Assay variable : PTINR\_VAL1 PT-INR Value

N Mean Standard Deviation Minimum Maximum

---

|   |          |           |          |          |
|---|----------|-----------|----------|----------|
| 6 | 1.803333 | 0.6052988 | 1.370000 | 2.950000 |
|---|----------|-----------|----------|----------|

---

Laboratory tests at the time of obtaining Table 2-6 consent, according to the presence or absence of proton-pump inhibitors

Unique Subject Identifier=7042010110-0005

MEANS Procedure

Assay variable : PTINR\_VAL1 PT-INR Value

N Mean Standard Deviation Minimum Maximum

---

|   |           |           |           |           |
|---|-----------|-----------|-----------|-----------|
| 4 | 1.6250000 | 0.5434765 | 1.2300000 | 2.4200000 |
|---|-----------|-----------|-----------|-----------|

---

Unique Subject Identifier=7042010110-0010

Assay variable : PTINR\_VAL1 PT-INR Value

N Mean Standard Deviation Minimum Maximum

---

|   |           |           |           |           |
|---|-----------|-----------|-----------|-----------|
| 6 | 2.0633333 | 0.1961292 | 1.8600000 | 2.3900000 |
|---|-----------|-----------|-----------|-----------|

---

Unique Subject Identifier=7042010110-0030

Assay variable : PTINR\_VAL1 PT-INR Value

N Mean Standard Deviation Minimum Maximum

---

|   |           |           |           |           |
|---|-----------|-----------|-----------|-----------|
| 3 | 1.3633333 | 0.1266228 | 1.2500000 | 1.5000000 |
|---|-----------|-----------|-----------|-----------|

---

Unique Subject Identifier=7042010110-0033

Assay variable : PTINR\_VAL1 PT-INR Value

N Mean Standard Deviation Minimum Maximum

---

|   |          |           |          |          |
|---|----------|-----------|----------|----------|
| 3 | 2.220000 | 0.3934463 | 1.800000 | 2.580000 |
|---|----------|-----------|----------|----------|

---

Laboratory tests at the time of obtaining Table 2-6 consent, according to the presence or absence of proton-pump inhibitors

Unique Subject Identifier=7042010110-0036

MEANS Procedure

Assay variable : PTINR\_VAL1 PT-INR Value

N Mean Standard Deviation Minimum Maximum

---

|   |           |           |           |           |
|---|-----------|-----------|-----------|-----------|
| 4 | 1.9200000 | 0.3194787 | 1.6200000 | 2.2700000 |
|---|-----------|-----------|-----------|-----------|

---

Unique Subject Identifier=7045000000-0002

Assay variable : PTINR\_VAL1 PT-INR Value

N Mean Standard Deviation Minimum Maximum

---

|   |           |           |           |           |
|---|-----------|-----------|-----------|-----------|
| 6 | 2.0250000 | 0.2338162 | 1.8300000 | 2.4900000 |
|---|-----------|-----------|-----------|-----------|

---

Unique Subject Identifier=7045000000-0009

Assay variable : PTINR\_VAL1 PT-INR Value

N Mean Standard Deviation Minimum Maximum

---

|   |           |           |           |           |
|---|-----------|-----------|-----------|-----------|
| 4 | 2.0150000 | 0.2143984 | 1.7300000 | 2.1900000 |
|---|-----------|-----------|-----------|-----------|

---

Unique Subject Identifier=7045000000-0012



Assay variable : PTINR\_VAL1 PT-INR Value

N Mean Standard Deviation Minimum Maximum

---

|   |           |           |           |           |
|---|-----------|-----------|-----------|-----------|
| 6 | 2.5050000 | 0.2514558 | 2.0500000 | 2.6800000 |
|---|-----------|-----------|-----------|-----------|

---

Laboratory tests at the time of obtaining Table 2-6 consent, according to the presence or absence of proton-pump inhibitors

Unique Subject Identifier=7045000000-0013

MEANS Procedure

Assay variable : PTINR\_VAL1 PT-INR Value

N Mean Standard Deviation Minimum Maximum

---

|   |           |           |           |           |
|---|-----------|-----------|-----------|-----------|
| 6 | 2.1566667 | 0.6226288 | 1.3300000 | 3.0500000 |
|---|-----------|-----------|-----------|-----------|

---

Unique Subject Identifier=7045000000-0020

Assay variable : PTINR\_VAL1 PT-INR Value

N Mean Standard Deviation Minimum Maximum

---

|   |           |           |           |           |
|---|-----------|-----------|-----------|-----------|
| 5 | 2.0620000 | 0.0849706 | 1.9600000 | 2.1400000 |
|---|-----------|-----------|-----------|-----------|

---

Unique Subject Identifier=7045000000-0021

Assay variable : PTINR\_VAL1 PT-INR Value

N Mean Standard Deviation Minimum Maximum

---

|   |           |           |           |           |
|---|-----------|-----------|-----------|-----------|
| 6 | 2.1316667 | 0.5024109 | 1.6700000 | 2.8300000 |
|---|-----------|-----------|-----------|-----------|

---

Unique Subject Identifier=7045000000-0023

Assay variable : PTINR\_VAL1 PT-INR Value

N Mean Standard Deviation Minimum Maximum

---

|   |           |           |           |           |
|---|-----------|-----------|-----------|-----------|
| 4 | 2.2825000 | 0.4265657 | 1.8300000 | 2.6900000 |
|---|-----------|-----------|-----------|-----------|

---

Laboratory tests at the time of obtaining Table 2-6 consent, according to the presence or absence of proton-pump inhibitors

Unique Subject Identifier=7045000000-0030

MEANS Procedure

Assay variable : PTINR\_VAL1 PT-INR Value

N Mean Standard Deviation Minimum Maximum

---

|   |           |           |           |           |
|---|-----------|-----------|-----------|-----------|
| 4 | 2.0825000 | 0.3003748 | 1.6700000 | 2.3900000 |
|---|-----------|-----------|-----------|-----------|

---

Unique Subject Identifier=7047000000-0004

Assay variable : PTINR\_VAL1 PT-INR Value

N Mean Standard Deviation Minimum Maximum

---

|   |           |           |           |           |
|---|-----------|-----------|-----------|-----------|
| 6 | 1.6333333 | 0.2356834 | 1.4200000 | 2.0300000 |
|---|-----------|-----------|-----------|-----------|

---

Unique Subject Identifier=7047000000-0005

Assay variable : PTINR\_VAL1 PT-INR Value

N Mean Standard Deviation Minimum Maximum

---

|   |           |           |           |           |
|---|-----------|-----------|-----------|-----------|
| 5 | 1.4900000 | 0.1770593 | 1.2500000 | 1.7000000 |
|---|-----------|-----------|-----------|-----------|

---

Unique Subject Identifier=7047000000-0007

Assay variable : PTINR\_VAL1 PT-INR Value

N Mean Standard Deviation Minimum Maximum

---

|   |           |           |           |           |
|---|-----------|-----------|-----------|-----------|
| 2 | 1.4050000 | 0.0636396 | 1.3600000 | 1.4500000 |
|---|-----------|-----------|-----------|-----------|

---

Laboratory tests at the time of obtaining Table 2-6 consent, according to the presence or absence of proton-pump inhibitors

Unique Subject Identifier=7047000000-0008

MEANS Procedure

Assay variable : PTINR\_VAL1 PT-INR Value

| N | Mean      | Standard Deviation | Minimum   | Maximum   |
|---|-----------|--------------------|-----------|-----------|
| 2 | 1.5200000 | 0.3252691          | 1.2900000 | 1.7500000 |

Unique Subject Identifier=7047000000-0009

Assay variable : PTINR\_VAL1 PT-INR Value

| N | Mean      | Standard Deviation | Minimum   | Maximum   |
|---|-----------|--------------------|-----------|-----------|
| 3 | 1.7633333 | 0.3592121          | 1.4600000 | 2.1600000 |

Unique Subject Identifier=7066000000-0008

Assay variable : PTINR\_VAL1 PT-INR Value

| N | Mean      | Standard Deviation | Minimum   | Maximum   |
|---|-----------|--------------------|-----------|-----------|
| 5 | 2.1600000 | 0.5041825          | 1.4600000 | 2.7900000 |

Unique Subject Identifier=7066000000-0028

Assay variable : PTINR\_VAL1 PT-INR Value

N Mean Standard Deviation Minimum Maximum

---

|   |           |           |           |           |
|---|-----------|-----------|-----------|-----------|
| 6 | 2.3533333 | 0.7609380 | 1.6100000 | 3.5400000 |
|---|-----------|-----------|-----------|-----------|

---

Laboratory tests at the time of obtaining Table 2-6 consent, according to the presence or absence of proton-pump inhibitors

Unique Subject Identifier=7066000000-0029

MEANS Procedure

Assay variable : PTINR\_VAL1 PT-INR Value

N Mean Standard Deviation Minimum Maximum

---

|   |           |           |           |           |
|---|-----------|-----------|-----------|-----------|
| 5 | 2.1020000 | 0.1020784 | 1.9600000 | 2.2200000 |
|---|-----------|-----------|-----------|-----------|

---

Unique Subject Identifier=7066000000-0030

Assay variable : PTINR\_VAL1 PT-INR Value

N Mean Standard Deviation Minimum Maximum

---

|   |           |           |           |           |
|---|-----------|-----------|-----------|-----------|
| 4 | 1.9500000 | 0.6216108 | 1.3900000 | 2.6100000 |
|---|-----------|-----------|-----------|-----------|

---

Unique Subject Identifier=7104010000-0010

Assay variable : PTINR\_VAL1 PT-INR Value

N Mean Standard Deviation Minimum Maximum

---

|   |           |           |           |           |
|---|-----------|-----------|-----------|-----------|
| 6 | 2.2700000 | 0.3199375 | 1.7500000 | 2.6700000 |
|---|-----------|-----------|-----------|-----------|

---

Unique Subject Identifier=7132010000-0011



Assay variable : PTINR\_VAL1 PT-INR Value

N Mean Standard Deviation Minimum Maximum

---

|   |           |           |           |           |
|---|-----------|-----------|-----------|-----------|
| 4 | 2.2025000 | 0.5558402 | 1.5000000 | 2.7100000 |
|---|-----------|-----------|-----------|-----------|

---

Laboratory tests at the time of obtaining Table 2-6 consent, according to the presence or absence of proton-pump inhibitors

Unique Subject Identifier=7132010000-0018

MEANS Procedure

Assay variable : PTINR\_VAL1 PT-INR Value

N Mean Standard Deviation Minimum Maximum

---

|   |           |           |           |           |
|---|-----------|-----------|-----------|-----------|
| 3 | 1.9233333 | 0.0650641 | 1.8600000 | 1.9900000 |
|---|-----------|-----------|-----------|-----------|

---

Unique Subject Identifier=7136000000-0002

Assay variable : PTINR\_VAL1 PT-INR Value

N Mean Standard Deviation Minimum Maximum

---

|   |           |           |           |           |
|---|-----------|-----------|-----------|-----------|
| 3 | 2.3066667 | 0.4752192 | 1.8400000 | 2.7900000 |
|---|-----------|-----------|-----------|-----------|

---

Unique Subject Identifier=7136000000-0008

Assay variable : PTINR\_VAL1 PT-INR Value

N Mean Standard Deviation Minimum Maximum

---

|   |           |           |           |           |
|---|-----------|-----------|-----------|-----------|
| 6 | 1.6066667 | 0.7731666 | 1.1100000 | 3.1000000 |
|---|-----------|-----------|-----------|-----------|

---

Unique Subject Identifier=7136000000-0013

Assay variable : PTINR\_VAL1 PT-INR Value

N Mean Standard Deviation Minimum Maximum

---

|   |          |           |          |          |
|---|----------|-----------|----------|----------|
| 4 | 2.000000 | 0.1647220 | 1.770000 | 2.160000 |
|---|----------|-----------|----------|----------|

---

Laboratory tests at the time of obtaining Table 2-6 consent, according to the presence or absence of proton-pump inhibitors

Unique Subject Identifier=713600000-0014

MEANS Procedure

Assay variable : PTINR\_VAL1 PT-INR Value

| N | Mean      | Standard Deviation | Minimum   | Maximum   |
|---|-----------|--------------------|-----------|-----------|
| 3 | 2.3633333 | 0.4532475          | 1.8400000 | 2.6300000 |

Unique Subject Identifier=713600000-0020

Assay variable : PTINR\_VAL1 PT-INR Value

| N | Mean      | Standard Deviation | Minimum   | Maximum   |
|---|-----------|--------------------|-----------|-----------|
| 3 | 2.4700000 | 0.3996248          | 2.0400000 | 2.8300000 |

Unique Subject Identifier=713600000-0035

Assay variable : PTINR\_VAL1 PT-INR Value

| N | Mean      | Standard Deviation | Minimum   | Maximum   |
|---|-----------|--------------------|-----------|-----------|
| 4 | 2.4650000 | 0.2752575          | 2.1200000 | 2.7700000 |

Unique Subject Identifier=713600000-0044

Assay variable : PTINR\_VAL1 PT-INR Value

N Mean Standard Deviation Minimum Maximum

---

|   |           |           |           |           |
|---|-----------|-----------|-----------|-----------|
| 3 | 2.1866667 | 0.3338163 | 1.9600000 | 2.5700000 |
|---|-----------|-----------|-----------|-----------|

---

Laboratory tests at the time of obtaining Table 2-6 consent, according to the presence or absence of proton-pump inhibitors

Unique Subject Identifier=715400000-0012

MEANS Procedure

Assay variable : PTINR\_VAL1 PT-INR Value

N Mean Standard Deviation Minimum Maximum

---

|   |           |           |           |           |
|---|-----------|-----------|-----------|-----------|
| 3 | 2.3266667 | 0.3888873 | 1.8800000 | 2.5900000 |
|---|-----------|-----------|-----------|-----------|

---

Unique Subject Identifier=715400000-0028

Assay variable : PTINR\_VAL1 PT-INR Value

N Mean Standard Deviation Minimum Maximum

---

|   |           |           |           |           |
|---|-----------|-----------|-----------|-----------|
| 3 | 1.4433333 | 0.1001665 | 1.3400000 | 1.5400000 |
|---|-----------|-----------|-----------|-----------|

---

Unique Subject Identifier=715400000-0030

Assay variable : PTINR\_VAL1 PT-INR Value

N Mean Standard Deviation Minimum Maximum

---

|   |           |           |           |           |
|---|-----------|-----------|-----------|-----------|
| 3 | 2.0633333 | 0.5601190 | 1.5100000 | 2.6300000 |
|---|-----------|-----------|-----------|-----------|

---

Unique Subject Identifier=715400000-0031

Assay variable : PTINR\_VAL1 PT-INR Value

N Mean Standard Deviation Minimum Maximum

---

|   |           |           |           |           |
|---|-----------|-----------|-----------|-----------|
| 6 | 2.3266667 | 0.2047112 | 2.1100000 | 2.6100000 |
|---|-----------|-----------|-----------|-----------|

---

Laboratory tests at the time of obtaining Table 2-6 consent, according to the presence or absence of proton-pump inhibitors

Unique Subject Identifier=715500000-0004

MEANS Procedure

Assay variable : PTINR\_VAL1 PT-INR Value

| N | Mean     | Standard Deviation | Minimum  | Maximum  |
|---|----------|--------------------|----------|----------|
| 5 | 1.250000 | 0.0574456          | 1.160000 | 1.300000 |

Unique Subject Identifier=715500000-0007

Assay variable : PTINR\_VAL1 PT-INR Value

| N | Mean     | Standard Deviation | Minimum  | Maximum  |
|---|----------|--------------------|----------|----------|
| 2 | 1.820000 | 0.4666905          | 1.490000 | 2.150000 |

Unique Subject Identifier=715500000-0020

Assay variable : PTINR\_VAL1 PT-INR Value

| N | Mean     | Standard Deviation | Minimum  | Maximum  |
|---|----------|--------------------|----------|----------|
| 4 | 2.005000 | 0.1793507          | 1.810000 | 2.240000 |

Unique Subject Identifier=715500000-0031



Assay variable : PTINR\_VAL1 PT-INR Value

N Mean Standard Deviation Minimum Maximum

---

|   |           |           |           |           |
|---|-----------|-----------|-----------|-----------|
| 3 | 1.6966667 | 0.1569501 | 1.5200000 | 1.8200000 |
|---|-----------|-----------|-----------|-----------|

---

Laboratory tests at the time of obtaining Table 2-6 consent, according to the presence or absence of proton-pump inhibitors

Unique Subject Identifier=7167000000-0001

MEANS Procedure

Assay variable : PTINR\_VAL1 PT-INR Value

N Mean Standard Deviation Minimum Maximum

---

|   |           |           |           |           |
|---|-----------|-----------|-----------|-----------|
| 6 | 1.1450000 | 0.1162325 | 0.9800000 | 1.2700000 |
|---|-----------|-----------|-----------|-----------|

---

Unique Subject Identifier=7167000000-0003

Assay variable : PTINR\_VAL1 PT-INR Value

N Mean Standard Deviation Minimum Maximum

---

|   |           |           |           |           |
|---|-----------|-----------|-----------|-----------|
| 3 | 2.1766667 | 0.2000833 | 1.9800000 | 2.3800000 |
|---|-----------|-----------|-----------|-----------|

---

Unique Subject Identifier=7171010000-0002

Assay variable : PTINR\_VAL1 PT-INR Value

N Mean Standard Deviation Minimum Maximum

---

|   |           |           |           |           |
|---|-----------|-----------|-----------|-----------|
| 6 | 1.7250000 | 0.1789693 | 1.4700000 | 1.9700000 |
|---|-----------|-----------|-----------|-----------|

---

Unique Subject Identifier=7198010000-0001

Assay variable : PTINR\_VAL1 PT-INR Value

N Mean Standard Deviation Minimum Maximum

---

|   |          |           |          |          |
|---|----------|-----------|----------|----------|
| 3 | 1.510000 | 0.1670329 | 1.330000 | 1.660000 |
|---|----------|-----------|----------|----------|

---

Laboratory tests at the time of obtaining Table 2-6 consent, according to the presence or absence of proton-pump inhibitors

Unique Subject Identifier=7198010000-0011

MEANS Procedure

Assay variable : PTINR\_VAL1 PT-INR Value

N Mean Standard Deviation Minimum Maximum

---

|   |           |           |           |           |
|---|-----------|-----------|-----------|-----------|
| 6 | 1.8333333 | 0.1242041 | 1.6800000 | 2.0100000 |
|---|-----------|-----------|-----------|-----------|

---

Unique Subject Identifier=7198010000-0017

Assay variable : PTINR\_VAL1 PT-INR Value

N Mean Standard Deviation Minimum Maximum

---

|   |           |           |           |           |
|---|-----------|-----------|-----------|-----------|
| 6 | 2.1916667 | 0.4857743 | 1.5900000 | 3.0000000 |
|---|-----------|-----------|-----------|-----------|

---

Unique Subject Identifier=7198010000-0038

Assay variable : PTINR\_VAL1 PT-INR Value

N Mean Standard Deviation Minimum Maximum

---

|   |           |           |           |           |
|---|-----------|-----------|-----------|-----------|
| 6 | 1.9550000 | 0.4408968 | 1.3800000 | 2.5300000 |
|---|-----------|-----------|-----------|-----------|

---

Unique Subject Identifier=7198010000-0039

Assay variable : PTINR\_VAL1 PT-INR Value

N Mean Standard Deviation Minimum Maximum

---

|   |           |           |           |           |
|---|-----------|-----------|-----------|-----------|
| 4 | 2.3550000 | 0.0838650 | 2.2700000 | 2.4700000 |
|---|-----------|-----------|-----------|-----------|

---

Laboratory tests at the time of obtaining Table 2-6 consent, according to the presence or absence of proton-pump inhibitors

Unique Subject Identifier=7198010000-0040

MEANS Procedure

Assay variable : PTINR\_VAL1 PT-INR Value

| N | Mean      | Standard Deviation | Minimum   | Maximum   |
|---|-----------|--------------------|-----------|-----------|
| 4 | 1.9075000 | 0.1607016          | 1.7000000 | 2.0900000 |

Unique Subject Identifier=7198010000-0057

Assay variable : PTINR\_VAL1 PT-INR Value

| N | Mean      | Standard Deviation | Minimum   | Maximum   |
|---|-----------|--------------------|-----------|-----------|
| 5 | 2.1120000 | 0.2903791          | 1.7700000 | 2.4200000 |

Unique Subject Identifier=7198010000-0074

Assay variable : PTINR\_VAL1 PT-INR Value

| N | Mean      | Standard Deviation | Minimum   | Maximum   |
|---|-----------|--------------------|-----------|-----------|
| 6 | 1.7716667 | 0.4282250          | 1.4100000 | 2.3100000 |

Unique Subject Identifier=7198010000-0085

Assay variable : PTINR\_VAL1 PT-INR Value

N Mean Standard Deviation Minimum Maximum

---

|   |          |           |          |          |
|---|----------|-----------|----------|----------|
| 3 | 1.820000 | 0.4014972 | 1.440000 | 2.240000 |
|---|----------|-----------|----------|----------|

---

Laboratory tests at the time of obtaining Table 2-6 consent, according to the presence or absence of proton-pump inhibitors

Unique Subject Identifier=7204000000-0010

MEANS Procedure

Assay variable : PTINR\_VAL1 PT-INR Value

N Mean Standard Deviation Minimum Maximum

---

|   |           |           |           |           |
|---|-----------|-----------|-----------|-----------|
| 4 | 1.6300000 | 0.3236253 | 1.2800000 | 1.9200000 |
|---|-----------|-----------|-----------|-----------|

---

Unique Subject Identifier=7204000000-0017

Assay variable : PTINR\_VAL1 PT-INR Value

N Mean Standard Deviation Minimum Maximum

---

|   |           |           |           |           |
|---|-----------|-----------|-----------|-----------|
| 6 | 1.1933333 | 0.0588784 | 1.1100000 | 1.2800000 |
|---|-----------|-----------|-----------|-----------|

---

Unique Subject Identifier=7204000000-0028

Assay variable : PTINR\_VAL1 PT-INR Value

N Mean Standard Deviation Minimum Maximum

---

|   |           |           |           |           |
|---|-----------|-----------|-----------|-----------|
| 6 | 1.7533333 | 0.1148332 | 1.6400000 | 1.9100000 |
|---|-----------|-----------|-----------|-----------|

---

Unique Subject Identifier=7205000000-0001



Assay variable : PTINR\_VAL1 PT-INR Value

N Mean Standard Deviation Minimum Maximum

---

|   |           |           |           |           |
|---|-----------|-----------|-----------|-----------|
| 3 | 1.9266667 | 0.5118919 | 1.4700000 | 2.4800000 |
|---|-----------|-----------|-----------|-----------|

---

Laboratory tests at the time of obtaining Table 2-6 consent, according to the presence or absence of proton-pump inhibitors

Unique Subject Identifier=7205000000-0061

MEANS Procedure

Assay variable : PTINR\_VAL1 PT-INR Value

N Mean Standard Deviation Minimum Maximum

---

|   |           |           |           |           |
|---|-----------|-----------|-----------|-----------|
| 4 | 2.7075000 | 1.1173891 | 1.5500000 | 3.9700000 |
|---|-----------|-----------|-----------|-----------|

---

Unique Subject Identifier=7205000000-0075

Assay variable : PTINR\_VAL1 PT-INR Value

N Mean Standard Deviation Minimum Maximum

---

|   |           |           |           |           |
|---|-----------|-----------|-----------|-----------|
| 4 | 1.9125000 | 0.4852748 | 1.5700000 | 2.6300000 |
|---|-----------|-----------|-----------|-----------|

---

Unique Subject Identifier=7205000000-0080

Assay variable : PTINR\_VAL1 PT-INR Value

N Mean Standard Deviation Minimum Maximum

---

|   |           |           |           |           |
|---|-----------|-----------|-----------|-----------|
| 3 | 2.4900000 | 1.1468653 | 1.5300000 | 3.7600000 |
|---|-----------|-----------|-----------|-----------|

---

Unique Subject Identifier=7208011010-0005

Assay variable : PTINR\_VAL1 PT-INR Value

N Mean Standard Deviation Minimum Maximum

---

|   |          |           |          |          |
|---|----------|-----------|----------|----------|
| 4 | 2.110000 | 0.1925271 | 1.870000 | 2.310000 |
|---|----------|-----------|----------|----------|

---

Laboratory tests at the time of obtaining Table 2-6 consent, according to the presence or absence of proton-pump inhibitors

Unique Subject Identifier=7208011010-0007

MEANS Procedure

Assay variable : PTINR\_VAL1 PT-INR Value

N Mean Standard Deviation Minimum Maximum

---

|   |           |           |           |           |
|---|-----------|-----------|-----------|-----------|
| 4 | 1.8925000 | 0.2736634 | 1.6600000 | 2.2600000 |
|---|-----------|-----------|-----------|-----------|

---

Unique Subject Identifier=7208011010-0009

Assay variable : PTINR\_VAL1 PT-INR Value

N Mean Standard Deviation Minimum Maximum

---

|   |           |           |           |           |
|---|-----------|-----------|-----------|-----------|
| 6 | 2.2666667 | 1.2165141 | 1.2300000 | 4.6400000 |
|---|-----------|-----------|-----------|-----------|

---

Unique Subject Identifier=7208011010-0013

Assay variable : PTINR\_VAL1 PT-INR Value

N Mean Standard Deviation Minimum Maximum

---

|   |           |  |           |           |
|---|-----------|--|-----------|-----------|
| 1 | 2.3100000 |  | 2.3100000 | 2.3100000 |
|---|-----------|--|-----------|-----------|

---

Unique Subject Identifier=7208011010-0015

Assay variable : PTINR\_VAL1 PT-INR Value

N Mean Standard Deviation Minimum Maximum

---

|   |          |           |          |          |
|---|----------|-----------|----------|----------|
| 3 | 1.543333 | 0.4148895 | 1.170000 | 1.990000 |
|---|----------|-----------|----------|----------|

---

Laboratory tests at the time of obtaining Table 2-6 consent, according to the presence or absence of proton-pump inhibitors

Unique Subject Identifier=7209000000-0003

MEANS Procedure

Assay variable : PTINR\_VAL1 PT-INR Value

| N | Mean      | Standard Deviation | Minimum   | Maximum   |
|---|-----------|--------------------|-----------|-----------|
| 3 | 2.3333333 | 0.1594783          | 2.1500000 | 2.4400000 |

Unique Subject Identifier=7209000000-0006

Assay variable : PTINR\_VAL1 PT-INR Value

| N | Mean      | Standard Deviation | Minimum   | Maximum   |
|---|-----------|--------------------|-----------|-----------|
| 1 | 1.5700000 |                    | 1.5700000 | 1.5700000 |

Unique Subject Identifier=7209000000-0007

Assay variable : PTINR\_VAL1 PT-INR Value

| N | Mean      | Standard Deviation | Minimum   | Maximum   |
|---|-----------|--------------------|-----------|-----------|
| 4 | 1.1625000 | 0.0994569          | 1.0800000 | 1.2800000 |

Unique Subject Identifier=7209000000-0010

Assay variable : PTINR\_VAL1 PT-INR Value

N Mean Standard Deviation Minimum Maximum

---

|   |           |           |           |           |
|---|-----------|-----------|-----------|-----------|
| 4 | 1.8575000 | 0.3522665 | 1.5500000 | 2.3500000 |
|---|-----------|-----------|-----------|-----------|

---

Laboratory tests at the time of obtaining Table 2-6 consent, according to the presence or absence of proton-pump inhibitors

Unique Subject Identifier=7209000000-0011

MEANS Procedure

Assay variable : PTINR\_VAL1 PT-INR Value

N Mean Standard Deviation Minimum Maximum

---

|   |           |           |           |           |
|---|-----------|-----------|-----------|-----------|
| 4 | 1.9475000 | 0.1793274 | 1.6800000 | 2.0500000 |
|---|-----------|-----------|-----------|-----------|

---

Unique Subject Identifier=7209000000-0019

Assay variable : PTINR\_VAL1 PT-INR Value

N Mean Standard Deviation Minimum Maximum

---

|   |           |           |           |           |
|---|-----------|-----------|-----------|-----------|
| 4 | 2.2150000 | 0.1398809 | 2.0500000 | 2.3500000 |
|---|-----------|-----------|-----------|-----------|

---

Unique Subject Identifier=7209000000-0021

Assay variable : PTINR\_VAL1 PT-INR Value

N Mean Standard Deviation Minimum Maximum

---

|   |           |           |           |           |
|---|-----------|-----------|-----------|-----------|
| 3 | 1.9133333 | 0.3455913 | 1.5800000 | 2.2700000 |
|---|-----------|-----------|-----------|-----------|

---

Unique Subject Identifier=7209000000-0025



Assay variable : PTINR\_VAL1 PT-INR Value

N Mean Standard Deviation Minimum Maximum

---

|   |           |           |           |           |
|---|-----------|-----------|-----------|-----------|
| 3 | 1.8266667 | 0.2761038 | 1.5900000 | 2.1300000 |
|---|-----------|-----------|-----------|-----------|

---

Laboratory tests at the time of obtaining Table 2-6 consent, according to the presence or absence of proton-pump inhibitors

Unique Subject Identifier=7209000000-0026

MEANS Procedure

Assay variable : PTINR\_VAL1 PT-INR Value

N Mean Standard Deviation Minimum Maximum

---

|   |           |           |           |           |
|---|-----------|-----------|-----------|-----------|
| 2 | 1.5100000 | 0.0707107 | 1.4600000 | 1.5600000 |
|---|-----------|-----------|-----------|-----------|

---

Unique Subject Identifier=7209000000-0027

Assay variable : PTINR\_VAL1 PT-INR Value

N Mean Standard Deviation Minimum Maximum

---

|   |           |           |           |           |
|---|-----------|-----------|-----------|-----------|
| 4 | 1.8250000 | 0.4704962 | 1.2300000 | 2.3800000 |
|---|-----------|-----------|-----------|-----------|

---

Unique Subject Identifier=7209000000-0028

Assay variable : PTINR\_VAL1 PT-INR Value

N Mean Standard Deviation Minimum Maximum

---

|   |           |           |           |           |
|---|-----------|-----------|-----------|-----------|
| 4 | 2.2975000 | 0.0877021 | 2.2000000 | 2.3900000 |
|---|-----------|-----------|-----------|-----------|

---

Unique Subject Identifier=7209000000-0036

Assay variable : PTINR\_VAL1 PT-INR Value

N Mean Standard Deviation Minimum Maximum

---

|   |           |           |           |           |
|---|-----------|-----------|-----------|-----------|
| 4 | 1.8700000 | 0.4377975 | 1.4200000 | 2.2700000 |
|---|-----------|-----------|-----------|-----------|

---

Laboratory tests at the time of obtaining Table 2-6 consent, according to the presence or absence of proton-pump inhibitors

Unique Subject Identifier=7209000000-0050

MEANS Procedure

Assay variable : PTINR\_VAL1 PT-INR Value

N Mean Standard Deviation Minimum Maximum

---

|   |           |           |           |           |
|---|-----------|-----------|-----------|-----------|
| 3 | 1.2866667 | 0.3592121 | 0.9000000 | 1.6100000 |
|---|-----------|-----------|-----------|-----------|

---

Unique Subject Identifier=7209000000-0056

Assay variable : PTINR\_VAL1 PT-INR Value

N Mean Standard Deviation Minimum Maximum

---

|   |           |           |           |           |
|---|-----------|-----------|-----------|-----------|
| 6 | 1.5700000 | 0.1340149 | 1.3900000 | 1.7700000 |
|---|-----------|-----------|-----------|-----------|

---

Unique Subject Identifier=7209000000-0057

Assay variable : PTINR\_VAL1 PT-INR Value

N Mean Standard Deviation Minimum Maximum

---

|   |           |           |           |           |
|---|-----------|-----------|-----------|-----------|
| 6 | 1.8100000 | 0.3024566 | 1.4600000 | 2.2100000 |
|---|-----------|-----------|-----------|-----------|

---

Unique Subject Identifier=7209000000-0060

Assay variable : PTINR\_VAL1 PT-INR Value

N Mean Standard Deviation Minimum Maximum

---

|   |           |           |           |           |
|---|-----------|-----------|-----------|-----------|
| 4 | 2.0250000 | 0.1470827 | 1.8100000 | 2.1200000 |
|---|-----------|-----------|-----------|-----------|

---

Laboratory tests at the time of obtaining Table 2-6 consent, according to the presence or absence of proton-pump inhibitors

Unique Subject Identifier=7209000000-0062

MEANS Procedure

Assay variable : PTINR\_VAL1 PT-INR Value

N Mean Standard Deviation Minimum Maximum

---

|   |           |           |           |           |
|---|-----------|-----------|-----------|-----------|
| 4 | 2.8925000 | 0.0906918 | 2.8000000 | 2.9800000 |
|---|-----------|-----------|-----------|-----------|

---

Unique Subject Identifier=7209000000-0066

Assay variable : PTINR\_VAL1 PT-INR Value

N Mean Standard Deviation Minimum Maximum

---

|   |           |           |           |           |
|---|-----------|-----------|-----------|-----------|
| 4 | 1.6500000 | 0.3350622 | 1.3500000 | 2.1300000 |
|---|-----------|-----------|-----------|-----------|

---

Unique Subject Identifier=7209000000-0068

Assay variable : PTINR\_VAL1 PT-INR Value

N Mean Standard Deviation Minimum Maximum

---

|   |           |           |           |           |
|---|-----------|-----------|-----------|-----------|
| 4 | 2.3250000 | 0.2700000 | 2.1000000 | 2.7000000 |
|---|-----------|-----------|-----------|-----------|

---

Unique Subject Identifier=7209000000-0072

Assay variable : PTINR\_VAL1 PT-INR Value

N Mean Standard Deviation Minimum Maximum

---

|   |           |           |           |           |
|---|-----------|-----------|-----------|-----------|
| 4 | 2.4225000 | 0.2519755 | 2.1200000 | 2.6400000 |
|---|-----------|-----------|-----------|-----------|

---

Laboratory tests at the time of obtaining Table 2-6 consent, according to the presence or absence of proton-pump inhibitors

Unique Subject Identifier=7209000000-0085

MEANS Procedure

Assay variable : PTINR\_VAL1 PT-INR Value

| N | Mean      | Standard Deviation | Minimum   | Maximum   |
|---|-----------|--------------------|-----------|-----------|
| 3 | 2.8000000 | 0.2971532          | 2.4600000 | 3.0100000 |

Unique Subject Identifier=7209000000-0093

Assay variable : PTINR\_VAL1 PT-INR Value

| N | Mean      | Standard Deviation | Minimum   | Maximum   |
|---|-----------|--------------------|-----------|-----------|
| 4 | 1.8825000 | 0.4947979          | 1.2900000 | 2.3200000 |

Unique Subject Identifier=7209000000-0094

Assay variable : PTINR\_VAL1 PT-INR Value

| N | Mean      | Standard Deviation | Minimum   | Maximum   |
|---|-----------|--------------------|-----------|-----------|
| 3 | 2.0833333 | 0.2569695          | 1.8100000 | 2.3200000 |

Unique Subject Identifier=7209000000-0097



Assay variable : PTINR\_VAL1 PT-INR Value

N Mean Standard Deviation Minimum Maximum

---

|   |           |           |           |           |
|---|-----------|-----------|-----------|-----------|
| 2 | 2.3950000 | 1.3364318 | 1.4500000 | 3.3400000 |
|---|-----------|-----------|-----------|-----------|

---

Laboratory tests at the time of obtaining Table 2-6 consent, according to the presence or absence of proton-pump inhibitors

Unique Subject Identifier=7209000000-0098

MEANS Procedure

Assay variable : PTINR\_VAL1 PT-INR Value

N Mean Standard Deviation Minimum Maximum

---

|   |          |           |          |          |
|---|----------|-----------|----------|----------|
| 3 | 2.520000 | 0.1345362 | 2.370000 | 2.630000 |
|---|----------|-----------|----------|----------|

---

Unique Subject Identifier=7209000000-0099

Assay variable : PTINR\_VAL1 PT-INR Value

N Mean Standard Deviation Minimum Maximum

---

|   |          |           |          |          |
|---|----------|-----------|----------|----------|
| 4 | 1.927500 | 0.1412740 | 1.720000 | 2.030000 |
|---|----------|-----------|----------|----------|

---

Unique Subject Identifier=7209000000-0110

Assay variable : PTINR\_VAL1 PT-INR Value

N Mean Standard Deviation Minimum Maximum

---

|   |          |  |          |          |
|---|----------|--|----------|----------|
| 1 | 2.810000 |  | 2.810000 | 2.810000 |
|---|----------|--|----------|----------|

---

Unique Subject Identifier=7209000000-0111

Assay variable : PTINR\_VAL1 PT-INR Value

N Mean Standard Deviation Minimum Maximum

---

|   |           |  |           |           |
|---|-----------|--|-----------|-----------|
| 1 | 1.5700000 |  | 1.5700000 | 1.5700000 |
|---|-----------|--|-----------|-----------|

---

Laboratory tests at the time of obtaining Table 2-6 consent, according to the presence or absence of proton-pump inhibitors

Unique Subject Identifier=7209000000-0112

MEANS Procedure

Assay variable : PTINR\_VAL1 PT-INR Value

N Mean Standard Deviation Minimum Maximum

---

|   |           |  |           |           |
|---|-----------|--|-----------|-----------|
| 1 | 1.6600000 |  | 1.6600000 | 1.6600000 |
|---|-----------|--|-----------|-----------|

---

Unique Subject Identifier=7209000000-0136

Assay variable : PTINR\_VAL1 PT-INR Value

N Mean Standard Deviation Minimum Maximum

---

|   |           |           |           |           |
|---|-----------|-----------|-----------|-----------|
| 3 | 1.9733333 | 0.1436431 | 1.8100000 | 2.0800000 |
|---|-----------|-----------|-----------|-----------|

---

Unique Subject Identifier=7209000000-0149

Assay variable : PTINR\_VAL1 PT-INR Value

N Mean Standard Deviation Minimum Maximum

---

|   |           |           |           |           |
|---|-----------|-----------|-----------|-----------|
| 3 | 1.9566667 | 0.4895236 | 1.5800000 | 2.5100000 |
|---|-----------|-----------|-----------|-----------|

---

Unique Subject Identifier=7221000000-0003

Assay variable : PTINR\_VAL1 PT-INR Value

N Mean Standard Deviation Minimum Maximum

---

|   |          |           |          |          |
|---|----------|-----------|----------|----------|
| 5 | 1.900000 | 0.3807887 | 1.400000 | 2.400000 |
|---|----------|-----------|----------|----------|

---

Laboratory tests at the time of obtaining Table 2-6 consent, according to the presence or absence of proton-pump inhibitors

Unique Subject Identifier=7221000000-0008

MEANS Procedure

Assay variable : PTINR\_VAL1 PT-INR Value

N Mean Standard Deviation Minimum Maximum

---

|   |           |           |           |           |
|---|-----------|-----------|-----------|-----------|
| 5 | 1.7600000 | 0.2073644 | 1.4000000 | 1.9000000 |
|---|-----------|-----------|-----------|-----------|

---

Unique Subject Identifier=7221000000-0020

Assay variable : PTINR\_VAL1 PT-INR Value

N Mean Standard Deviation Minimum Maximum

---

|   |           |           |           |           |
|---|-----------|-----------|-----------|-----------|
| 5 | 2.1800000 | 0.1923538 | 1.9000000 | 2.4000000 |
|---|-----------|-----------|-----------|-----------|

---

Unique Subject Identifier=7224011010-0002

Assay variable : PTINR\_VAL1 PT-INR Value

N Mean Standard Deviation Minimum Maximum

---

|   |           |  |           |           |
|---|-----------|--|-----------|-----------|
| 1 | 2.3800000 |  | 2.3800000 | 2.3800000 |
|---|-----------|--|-----------|-----------|

---

Unique Subject Identifier=7224011010-0004

Assay variable : PTINR\_VAL1 PT-INR Value

N Mean Standard Deviation Minimum Maximum

---

|   |           |  |           |           |
|---|-----------|--|-----------|-----------|
| 1 | 2.0300000 |  | 2.0300000 | 2.0300000 |
|---|-----------|--|-----------|-----------|

---

Laboratory tests at the time of obtaining Table 2-6 consent, according to the presence or absence of proton-pump inhibitors

Unique Subject Identifier=7224011010-0009

MEANS Procedure

Assay variable : PTINR\_VAL1 PT-INR Value

N Mean Standard Deviation Minimum Maximum

---

|   |           |           |           |           |
|---|-----------|-----------|-----------|-----------|
| 5 | 1.7500000 | 0.2431049 | 1.5200000 | 2.1400000 |
|---|-----------|-----------|-----------|-----------|

---

Unique Subject Identifier=7226000000-0001

Assay variable : PTINR\_VAL1 PT-INR Value

N Mean Standard Deviation Minimum Maximum

---

|   |           |           |           |           |
|---|-----------|-----------|-----------|-----------|
| 3 | 1.4700000 | 0.1587451 | 1.2900000 | 1.5900000 |
|---|-----------|-----------|-----------|-----------|

---

Unique Subject Identifier=7226000000-0006

Assay variable : PTINR\_VAL1 PT-INR Value

N Mean Standard Deviation Minimum Maximum

---

|   |           |           |           |           |
|---|-----------|-----------|-----------|-----------|
| 4 | 2.2900000 | 1.0512532 | 1.4400000 | 3.7100000 |
|---|-----------|-----------|-----------|-----------|

---

Unique Subject Identifier=7226000000-0012



Assay variable : PTINR\_VAL1 PT-INR Value

N Mean Standard Deviation Minimum Maximum

---

|   |           |           |           |           |
|---|-----------|-----------|-----------|-----------|
| 3 | 2.3866667 | 0.3066486 | 2.1900000 | 2.7400000 |
|---|-----------|-----------|-----------|-----------|

---

Laboratory tests at the time of obtaining Table 2-6 consent, according to the presence or absence of proton-pump inhibitors

Unique Subject Identifier=7226000000-0017

MEANS Procedure

Assay variable : PTINR\_VAL1 PT-INR Value

| N | Mean      | Standard Deviation | Minimum   | Maximum   |
|---|-----------|--------------------|-----------|-----------|
| 5 | 1.8540000 | 0.3089984          | 1.4200000 | 2.2900000 |

Unique Subject Identifier=7226000000-0019

Assay variable : PTINR\_VAL1 PT-INR Value

| N | Mean      | Standard Deviation | Minimum   | Maximum   |
|---|-----------|--------------------|-----------|-----------|
| 3 | 1.9366667 | 0.4315476          | 1.5900000 | 2.4200000 |

Unique Subject Identifier=7226000000-0020

Assay variable : PTINR\_VAL1 PT-INR Value

| N | Mean      | Standard Deviation | Minimum   | Maximum   |
|---|-----------|--------------------|-----------|-----------|
| 3 | 1.8766667 | 0.5612783          | 1.3700000 | 2.4800000 |

Unique Subject Identifier=7226000000-0022

Assay variable : PTINR\_VAL1 PT-INR Value

N Mean Standard Deviation Minimum Maximum

---

|   |           |           |           |           |
|---|-----------|-----------|-----------|-----------|
| 3 | 2.0766667 | 0.6251666 | 1.4600000 | 2.7100000 |
|---|-----------|-----------|-----------|-----------|

---

Laboratory tests at the time of obtaining Table 2-6 consent, according to the presence or absence of proton-pump inhibitors

Unique Subject Identifier=7226000000-0024

MEANS Procedure

Assay variable : PTINR\_VAL1 PT-INR Value

| N | Mean      | Standard Deviation | Minimum   | Maximum   |
|---|-----------|--------------------|-----------|-----------|
| 5 | 1.6380000 | 0.4292086          | 1.2000000 | 2.3500000 |

Unique Subject Identifier=7226000000-0026

Assay variable : PTINR\_VAL1 PT-INR Value

| N | Mean      | Standard Deviation | Minimum   | Maximum   |
|---|-----------|--------------------|-----------|-----------|
| 3 | 1.9100000 | 0.6080296          | 1.3400000 | 2.5500000 |

Unique Subject Identifier=7226000000-0029

Assay variable : PTINR\_VAL1 PT-INR Value

| N | Mean      | Standard Deviation | Minimum   | Maximum   |
|---|-----------|--------------------|-----------|-----------|
| 3 | 1.6866667 | 0.3027100          | 1.4100000 | 2.0100000 |

Unique Subject Identifier=7233000000-0007

Assay variable : PTINR\_VAL1 PT-INR Value

N Mean Standard Deviation Minimum Maximum

---

|   |          |          |          |          |
|---|----------|----------|----------|----------|
| 4 | 2.280000 | 0.166333 | 2.090000 | 2.460000 |
|---|----------|----------|----------|----------|

---

Laboratory tests at the time of obtaining Table 2-6 consent, according to the presence or absence of proton-pump inhibitors

Unique Subject Identifier=7235000000-0002

MEANS Procedure

Assay variable : PTINR\_VAL1 PT-INR Value

N Mean Standard Deviation Minimum Maximum

---

|   |           |  |           |           |
|---|-----------|--|-----------|-----------|
| 1 | 2.9300000 |  | 2.9300000 | 2.9300000 |
|---|-----------|--|-----------|-----------|

---

Unique Subject Identifier=7235000000-0003

Assay variable : PTINR\_VAL1 PT-INR Value

N Mean Standard Deviation Minimum Maximum

---

|   |           |  |           |           |
|---|-----------|--|-----------|-----------|
| 1 | 2.2700000 |  | 2.2700000 | 2.2700000 |
|---|-----------|--|-----------|-----------|

---

Unique Subject Identifier=7235000000-0012

Assay variable : PTINR\_VAL1 PT-INR Value

N Mean Standard Deviation Minimum Maximum

---

|   |           |  |           |           |
|---|-----------|--|-----------|-----------|
| 1 | 3.0300000 |  | 3.0300000 | 3.0300000 |
|---|-----------|--|-----------|-----------|

---

Unique Subject Identifier=7235000000-0013

Assay variable : PTINR\_VAL1 PT-INR Value

N Mean Standard Deviation Minimum Maximum

---

|   |           |           |           |           |
|---|-----------|-----------|-----------|-----------|
| 2 | 1.7250000 | 0.5161880 | 1.3600000 | 2.0900000 |
|---|-----------|-----------|-----------|-----------|

---

Laboratory tests at the time of obtaining Table 2-6 consent, according to the presence or absence of proton-pump inhibitors

Unique Subject Identifier=723500000-0015

MEANS Procedure

Assay variable : PTINR\_VAL1 PT-INR Value

N Mean Standard Deviation Minimum Maximum

---

|   |           |  |           |           |
|---|-----------|--|-----------|-----------|
| 1 | 2.2800000 |  | 2.2800000 | 2.2800000 |
|---|-----------|--|-----------|-----------|

---

Unique Subject Identifier=723500000-0018

Assay variable : PTINR\_VAL1 PT-INR Value

N Mean Standard Deviation Minimum Maximum

---

|   |           |  |           |           |
|---|-----------|--|-----------|-----------|
| 1 | 1.4900000 |  | 1.4900000 | 1.4900000 |
|---|-----------|--|-----------|-----------|

---

Unique Subject Identifier=723701000-0001

Assay variable : PTINR\_VAL1 PT-INR Value

N Mean Standard Deviation Minimum Maximum

---

|   |           |           |           |           |
|---|-----------|-----------|-----------|-----------|
| 3 | 1.5800000 | 0.0346410 | 1.5400000 | 1.6000000 |
|---|-----------|-----------|-----------|-----------|

---

Unique Subject Identifier=723701000-0002



Assay variable : PTINR\_VAL1 PT-INR Value

N Mean Standard Deviation Minimum Maximum

---

|   |           |           |           |           |
|---|-----------|-----------|-----------|-----------|
| 3 | 1.8833333 | 0.4650090 | 1.4200000 | 2.3500000 |
|---|-----------|-----------|-----------|-----------|

---

Laboratory tests at the time of obtaining Table 2-6 consent, according to the presence or absence of proton-pump inhibitors

Unique Subject Identifier=7237010000-0003

MEANS Procedure

Assay variable : PTINR\_VAL1 PT-INR Value

N Mean Standard Deviation Minimum Maximum

---

|   |          |           |          |          |
|---|----------|-----------|----------|----------|
| 3 | 1.400000 | 0.3143247 | 1.040000 | 1.620000 |
|---|----------|-----------|----------|----------|

---

Unique Subject Identifier=7242010000-0001

Assay variable : PTINR\_VAL1 PT-INR Value

N Mean Standard Deviation Minimum Maximum

---

|   |          |           |          |          |
|---|----------|-----------|----------|----------|
| 2 | 1.325000 | 0.2050610 | 1.180000 | 1.470000 |
|---|----------|-----------|----------|----------|

---

Unique Subject Identifier=7242010000-0003

Assay variable : PTINR\_VAL1 PT-INR Value

N Mean Standard Deviation Minimum Maximum

---

|   |          |           |          |          |
|---|----------|-----------|----------|----------|
| 2 | 2.205000 | 0.1060660 | 2.130000 | 2.280000 |
|---|----------|-----------|----------|----------|

---

Unique Subject Identifier=7242010000-0008

Assay variable : PTINR\_VAL1 PT-INR Value

N Mean Standard Deviation Minimum Maximum

---

|   |           |           |           |           |
|---|-----------|-----------|-----------|-----------|
| 2 | 1.6850000 | 0.0070711 | 1.6800000 | 1.6900000 |
|---|-----------|-----------|-----------|-----------|

---

Laboratory tests at the time of obtaining Table 2-6 consent, according to the presence or absence of proton-pump inhibitors

Unique Subject Identifier=7242010000-0009

MEANS Procedure

Assay variable : PTINR\_VAL1 PT-INR Value

N Mean Standard Deviation Minimum Maximum

---

|   |           |           |           |           |
|---|-----------|-----------|-----------|-----------|
| 2 | 2.3100000 | 0.4101219 | 2.0200000 | 2.6000000 |
|---|-----------|-----------|-----------|-----------|

---

Unique Subject Identifier=7242010000-0012

Assay variable : PTINR\_VAL1 PT-INR Value

N Mean Standard Deviation Minimum Maximum

---

|   |           |           |           |           |
|---|-----------|-----------|-----------|-----------|
| 2 | 1.9250000 | 0.4737615 | 1.5900000 | 2.2600000 |
|---|-----------|-----------|-----------|-----------|

---

Unique Subject Identifier=7314000000-0020

Assay variable : PTINR\_VAL1 PT-INR Value

N Mean Standard Deviation Minimum Maximum

---

|   |           |           |           |           |
|---|-----------|-----------|-----------|-----------|
| 6 | 1.7666667 | 0.1632993 | 1.6000000 | 2.0000000 |
|---|-----------|-----------|-----------|-----------|

---

Unique Subject Identifier=7326000000-0005

Assay variable : PTINR\_VAL1 PT-INR Value

N Mean Standard Deviation Minimum Maximum

---

|   |           |           |           |           |
|---|-----------|-----------|-----------|-----------|
| 5 | 2.4660000 | 0.3561320 | 1.9400000 | 2.9100000 |
|---|-----------|-----------|-----------|-----------|

---

Laboratory tests at the time of obtaining Table 2-6 consent, according to the presence or absence of proton-pump inhibitors

Unique Subject Identifier=7332010000-0004

MEANS Procedure

Assay variable : PTINR\_VAL1 PT-INR Value

| N | Mean      | Standard Deviation | Minimum   | Maximum   |
|---|-----------|--------------------|-----------|-----------|
| 4 | 1.8125000 | 0.2139120          | 1.5300000 | 2.0500000 |

Unique Subject Identifier=7332010000-0006

Assay variable : PTINR\_VAL1 PT-INR Value

| N | Mean      | Standard Deviation | Minimum   | Maximum   |
|---|-----------|--------------------|-----------|-----------|
| 6 | 1.8366667 | 0.2407211          | 1.5800000 | 2.2400000 |

Unique Subject Identifier=7332010000-0007

Assay variable : PTINR\_VAL1 PT-INR Value

| N | Mean      | Standard Deviation | Minimum   | Maximum   |
|---|-----------|--------------------|-----------|-----------|
| 6 | 2.3350000 | 0.3577569          | 1.9900000 | 2.9900000 |

Unique Subject Identifier=7332010000-0008

Assay variable : PTINR\_VAL1 PT-INR Value

N Mean Standard Deviation Minimum Maximum

---

|   |           |           |           |           |
|---|-----------|-----------|-----------|-----------|
| 5 | 1.6520000 | 0.0990959 | 1.5300000 | 1.7900000 |
|---|-----------|-----------|-----------|-----------|

---

Laboratory tests at the time of obtaining Table 2-6 consent, according to the presence or absence of proton-pump inhibitors

Unique Subject Identifier=7332010000-0014

MEANS Procedure

Assay variable : PTINR\_VAL1 PT-INR Value

N Mean Standard Deviation Minimum Maximum

---

|   |           |           |           |           |
|---|-----------|-----------|-----------|-----------|
| 3 | 1.8333333 | 0.1021437 | 1.7600000 | 1.9500000 |
|---|-----------|-----------|-----------|-----------|

---

Unique Subject Identifier=7332010000-0016

Assay variable : PTINR\_VAL1 PT-INR Value

N Mean Standard Deviation Minimum Maximum

---

|   |           |           |           |           |
|---|-----------|-----------|-----------|-----------|
| 3 | 1.8733333 | 0.1674316 | 1.6800000 | 1.9700000 |
|---|-----------|-----------|-----------|-----------|

---

Unique Subject Identifier=7332010000-0017

Assay variable : PTINR\_VAL1 PT-INR Value

N Mean Standard Deviation Minimum Maximum

---

|   |           |           |           |           |
|---|-----------|-----------|-----------|-----------|
| 3 | 2.2433333 | 0.5253887 | 1.9400000 | 2.8500000 |
|---|-----------|-----------|-----------|-----------|

---

Unique Subject Identifier=7332010000-0018



Assay variable : PTINR\_VAL1 PT-INR Value

N Mean Standard Deviation Minimum Maximum

---

|   |           |           |           |           |
|---|-----------|-----------|-----------|-----------|
| 3 | 2.0533333 | 0.3925982 | 1.6000000 | 2.2800000 |
|---|-----------|-----------|-----------|-----------|

---

Laboratory tests at the time of obtaining Table 2-6 consent, according to the presence or absence of proton-pump inhibitors

Unique Subject Identifier=7332010000-0023

MEANS Procedure

Assay variable : PTINR\_VAL1 PT-INR Value

N Mean Standard Deviation Minimum Maximum

---

|   |           |           |           |           |
|---|-----------|-----------|-----------|-----------|
| 4 | 2.0575000 | 0.3232517 | 1.7500000 | 2.4500000 |
|---|-----------|-----------|-----------|-----------|

---

Unique Subject Identifier=7332010000-0026

Assay variable : PTINR\_VAL1 PT-INR Value

N Mean Standard Deviation Minimum Maximum

---

|   |           |           |           |           |
|---|-----------|-----------|-----------|-----------|
| 4 | 2.0350000 | 0.4239890 | 1.6600000 | 2.5400000 |
|---|-----------|-----------|-----------|-----------|

---

Unique Subject Identifier=7332010000-0032

Assay variable : PTINR\_VAL1 PT-INR Value

N Mean Standard Deviation Minimum Maximum

---

|   |           |           |           |           |
|---|-----------|-----------|-----------|-----------|
| 3 | 1.7233333 | 0.1446836 | 1.6300000 | 1.8900000 |
|---|-----------|-----------|-----------|-----------|

---

Unique Subject Identifier=7340011000-0001

Assay variable : PTINR\_VAL1 PT-INR Value

N Mean Standard Deviation Minimum Maximum

---

|   |          |           |          |          |
|---|----------|-----------|----------|----------|
| 6 | 2.033333 | 0.0816497 | 1.900000 | 2.100000 |
|---|----------|-----------|----------|----------|

---

Laboratory tests at the time of obtaining Table 2-6 consent, according to the presence or absence of proton-pump inhibitors

Unique Subject Identifier=7345000010-0004

MEANS Procedure

Assay variable : PTINR\_VAL1 PT-INR Value

N Mean Standard Deviation Minimum Maximum

---

|   |           |           |           |           |
|---|-----------|-----------|-----------|-----------|
| 6 | 2.0566667 | 0.4411651 | 1.6700000 | 2.9000000 |
|---|-----------|-----------|-----------|-----------|

---

Unique Subject Identifier=7345000010-0005

Assay variable : PTINR\_VAL1 PT-INR Value

N Mean Standard Deviation Minimum Maximum

---

|   |           |           |           |           |
|---|-----------|-----------|-----------|-----------|
| 4 | 1.8300000 | 0.3754997 | 1.3200000 | 2.2000000 |
|---|-----------|-----------|-----------|-----------|

---

Unique Subject Identifier=7345000010-0009

Assay variable : PTINR\_VAL1 PT-INR Value

N Mean Standard Deviation Minimum Maximum

---

|   |           |           |           |           |
|---|-----------|-----------|-----------|-----------|
| 6 | 2.1466667 | 0.4553973 | 1.6800000 | 2.8100000 |
|---|-----------|-----------|-----------|-----------|

---

Unique Subject Identifier=7345000010-0015

Assay variable : PTINR\_VAL1 PT-INR Value

N Mean Standard Deviation Minimum Maximum

---

|   |           |           |           |           |
|---|-----------|-----------|-----------|-----------|
| 5 | 1.8660000 | 0.1965452 | 1.5900000 | 2.1400000 |
|---|-----------|-----------|-----------|-----------|

---

Laboratory tests at the time of obtaining Table 2-6 consent, according to the presence or absence of proton-pump inhibitors

Unique Subject Identifier=7345000010-0020

MEANS Procedure

Assay variable : PTINR\_VAL1 PT-INR Value

N Mean Standard Deviation Minimum Maximum

---

|   |          |           |          |          |
|---|----------|-----------|----------|----------|
| 6 | 2.160000 | 0.3951202 | 1.700000 | 2.720000 |
|---|----------|-----------|----------|----------|

---

Unique Subject Identifier=7345000010-0026

Assay variable : PTINR\_VAL1 PT-INR Value

N Mean Standard Deviation Minimum Maximum

---

|   |          |           |          |          |
|---|----------|-----------|----------|----------|
| 3 | 2.216667 | 0.2746513 | 1.910000 | 2.440000 |
|---|----------|-----------|----------|----------|

---

Unique Subject Identifier=7345000010-0027

Assay variable : PTINR\_VAL1 PT-INR Value

N Mean Standard Deviation Minimum Maximum

---

|   |          |           |          |          |
|---|----------|-----------|----------|----------|
| 6 | 2.265000 | 0.3276431 | 1.930000 | 2.770000 |
|---|----------|-----------|----------|----------|

---

Unique Subject Identifier=7345000010-0029

Assay variable : PTINR\_VAL1 PT-INR Value

N Mean Standard Deviation Minimum Maximum

---

|   |           |           |           |           |
|---|-----------|-----------|-----------|-----------|
| 4 | 1.6425000 | 0.2725650 | 1.3000000 | 1.9200000 |
|---|-----------|-----------|-----------|-----------|

---

Laboratory tests at the time of obtaining Table 2-6 consent, according to the presence or absence of proton-pump inhibitors

Unique Subject Identifier=7345000010-0039

MEANS Procedure

Assay variable : PTINR\_VAL1 PT-INR Value

| N | Mean      | Standard Deviation | Minimum   | Maximum   |
|---|-----------|--------------------|-----------|-----------|
| 3 | 1.4266667 | 0.0723418          | 1.3800000 | 1.5100000 |

Unique Subject Identifier=7345000010-0044

Assay variable : PTINR\_VAL1 PT-INR Value

| N | Mean      | Standard Deviation | Minimum   | Maximum   |
|---|-----------|--------------------|-----------|-----------|
| 3 | 1.9400000 | 0.0888819          | 1.8400000 | 2.0100000 |

Unique Subject Identifier=7366011100-0006

Assay variable : PTINR\_VAL1 PT-INR Value

| N | Mean      | Standard Deviation | Minimum   | Maximum   |
|---|-----------|--------------------|-----------|-----------|
| 6 | 1.9866667 | 0.1116542          | 1.8400000 | 2.1100000 |

Unique Subject Identifier=7366011100-0009



Assay variable : PTINR\_VAL1 PT-INR Value

N Mean Standard Deviation Minimum Maximum

---

|   |           |           |           |           |
|---|-----------|-----------|-----------|-----------|
| 6 | 1.8883333 | 0.3343900 | 1.4900000 | 2.4700000 |
|---|-----------|-----------|-----------|-----------|

---

Laboratory tests at the time of obtaining Table 2-6 consent, according to the presence or absence of proton-pump inhibitors

Unique Subject Identifier=7366011100-0013

MEANS Procedure

Assay variable : PTINR\_VAL1 PT-INR Value

N Mean Standard Deviation Minimum Maximum

---

|   |           |           |           |           |
|---|-----------|-----------|-----------|-----------|
| 5 | 2.0740000 | 0.2734593 | 1.7400000 | 2.3200000 |
|---|-----------|-----------|-----------|-----------|

---

Unique Subject Identifier=7414010000-0004

Assay variable : PTINR\_VAL1 PT-INR Value

N Mean Standard Deviation Minimum Maximum

---

|   |           |           |           |           |
|---|-----------|-----------|-----------|-----------|
| 6 | 1.8016667 | 0.4156160 | 1.3900000 | 2.5300000 |
|---|-----------|-----------|-----------|-----------|

---

Unique Subject Identifier=7414010000-0014

Assay variable : PTINR\_VAL1 PT-INR Value

N Mean Standard Deviation Minimum Maximum

---

|   |           |           |           |           |
|---|-----------|-----------|-----------|-----------|
| 4 | 2.3650000 | 0.1204159 | 2.2100000 | 2.4700000 |
|---|-----------|-----------|-----------|-----------|

---

Unique Subject Identifier=7414010000-0016

Assay variable : PTINR\_VAL1 PT-INR Value

N Mean Standard Deviation Minimum Maximum

---

|   |          |           |          |          |
|---|----------|-----------|----------|----------|
| 5 | 2.176000 | 0.1050238 | 2.080000 | 2.350000 |
|---|----------|-----------|----------|----------|

---

Laboratory tests at the time of obtaining Table 2-6 consent, according to the presence or absence of proton-pump inhibitors

Unique Subject Identifier=7414010000-0020

MEANS Procedure

Assay variable : PTINR\_VAL1 PT-INR Value

N Mean Standard Deviation Minimum Maximum

---

|   |           |           |           |           |
|---|-----------|-----------|-----------|-----------|
| 5 | 1.9640000 | 0.6578982 | 1.4600000 | 2.9700000 |
|---|-----------|-----------|-----------|-----------|

---

Unique Subject Identifier=7414010000-0021

Assay variable : PTINR\_VAL1 PT-INR Value

N Mean Standard Deviation Minimum Maximum

---

|   |           |           |           |           |
|---|-----------|-----------|-----------|-----------|
| 4 | 1.6950000 | 0.4900680 | 1.2800000 | 2.3400000 |
|---|-----------|-----------|-----------|-----------|

---

Unique Subject Identifier=7414010000-0025

Assay variable : PTINR\_VAL1 PT-INR Value

N Mean Standard Deviation Minimum Maximum

---

|   |           |           |           |           |
|---|-----------|-----------|-----------|-----------|
| 6 | 1.7083333 | 0.4653780 | 1.3200000 | 2.5600000 |
|---|-----------|-----------|-----------|-----------|

---

Unique Subject Identifier=7414010000-0028

Assay variable : PTINR\_VAL1 PT-INR Value

N Mean Standard Deviation Minimum Maximum

---

|   |           |           |           |           |
|---|-----------|-----------|-----------|-----------|
| 4 | 1.3650000 | 0.0519615 | 1.3100000 | 1.4300000 |
|---|-----------|-----------|-----------|-----------|

---

Laboratory tests at the time of obtaining Table 2-6 consent, according to the presence or absence of proton-pump inhibitors

Unique Subject Identifier=7414010000-0035

MEANS Procedure

Assay variable : PTINR\_VAL1 PT-INR Value

| N | Mean     | Standard Deviation | Minimum  | Maximum  |
|---|----------|--------------------|----------|----------|
| 3 | 2.100000 | 0.2451530          | 1.860000 | 2.350000 |

Unique Subject Identifier=7414010000-0038

Assay variable : PTINR\_VAL1 PT-INR Value

| N | Mean      | Standard Deviation | Minimum  | Maximum  |
|---|-----------|--------------------|----------|----------|
| 6 | 1.7816667 | 0.1220519          | 1.620000 | 1.960000 |

Unique Subject Identifier=7414010000-0041

Assay variable : PTINR\_VAL1 PT-INR Value

| N | Mean     | Standard Deviation | Minimum  | Maximum  |
|---|----------|--------------------|----------|----------|
| 4 | 2.142500 | 0.2148449          | 1.920000 | 2.400000 |

Unique Subject Identifier=7414010000-0044

Assay variable : PTINR\_VAL1 PT-INR Value

N Mean Standard Deviation Minimum Maximum

---

|   |           |           |           |           |
|---|-----------|-----------|-----------|-----------|
| 6 | 2.0483333 | 0.1449713 | 1.8800000 | 2.2900000 |
|---|-----------|-----------|-----------|-----------|

---

Laboratory tests at the time of obtaining Table 2-6 consent, according to the presence or absence of proton-pump inhibitors

Unique Subject Identifier=7414010000-0045

MEANS Procedure

Assay variable : PTINR\_VAL1 PT-INR Value

N Mean Standard Deviation Minimum Maximum

---

|   |           |           |           |           |
|---|-----------|-----------|-----------|-----------|
| 6 | 1.3216667 | 0.1364429 | 1.2200000 | 1.5700000 |
|---|-----------|-----------|-----------|-----------|

---

Unique Subject Identifier=7414010000-0054

Assay variable : PTINR\_VAL1 PT-INR Value

N Mean Standard Deviation Minimum Maximum

---

|   |           |           |           |           |
|---|-----------|-----------|-----------|-----------|
| 5 | 1.2300000 | 0.0479583 | 1.1900000 | 1.3000000 |
|---|-----------|-----------|-----------|-----------|

---

Unique Subject Identifier=7423000000-0007

Assay variable : PTINR\_VAL1 PT-INR Value

N Mean Standard Deviation Minimum Maximum

---

|   |           |  |           |           |
|---|-----------|--|-----------|-----------|
| 1 | 2.0500000 |  | 2.0500000 | 2.0500000 |
|---|-----------|--|-----------|-----------|

---

Unique Subject Identifier=7423000000-0012



Assay variable : PTINR\_VAL1 PT-INR Value

N Mean Standard Deviation Minimum Maximum

---

|   |           |           |           |           |
|---|-----------|-----------|-----------|-----------|
| 3 | 1.9333333 | 0.3265476 | 1.7300000 | 2.3100000 |
|---|-----------|-----------|-----------|-----------|

---

Laboratory tests at the time of obtaining Table 2-6 consent, according to the presence or absence of proton-pump inhibitors

Unique Subject Identifier=7423000000-0025

MEANS Procedure

Assay variable : PTINR\_VAL1 PT-INR Value

N Mean Standard Deviation Minimum Maximum

---

|   |           |           |           |           |
|---|-----------|-----------|-----------|-----------|
| 5 | 1.5060000 | 0.0770065 | 1.4400000 | 1.6200000 |
|---|-----------|-----------|-----------|-----------|

---

Unique Subject Identifier=7423000000-0028

Assay variable : PTINR\_VAL1 PT-INR Value

N Mean Standard Deviation Minimum Maximum

---

|   |           |           |           |           |
|---|-----------|-----------|-----------|-----------|
| 2 | 1.8000000 | 0.4101219 | 1.5100000 | 2.0900000 |
|---|-----------|-----------|-----------|-----------|

---

Unique Subject Identifier=7423000000-0038

Assay variable : PTINR\_VAL1 PT-INR Value

N Mean Standard Deviation Minimum Maximum

---

|   |           |           |           |           |
|---|-----------|-----------|-----------|-----------|
| 2 | 1.7950000 | 0.0353553 | 1.7700000 | 1.8200000 |
|---|-----------|-----------|-----------|-----------|

---

Unique Subject Identifier=7423000000-0039

Assay variable : PTINR\_VAL1 PT-INR Value

N Mean Standard Deviation Minimum Maximum

---

|   |           |           |           |           |
|---|-----------|-----------|-----------|-----------|
| 6 | 1.7416667 | 0.5770760 | 1.1300000 | 2.4800000 |
|---|-----------|-----------|-----------|-----------|

---

Laboratory tests at the time of obtaining Table 2-6 consent, according to the presence or absence of proton-pump inhibitors

Unique Subject Identifier=7423000000-0043

MEANS Procedure

Assay variable : PTINR\_VAL1 PT-INR Value

N Mean Standard Deviation Minimum Maximum

---

|   |           |           |           |           |
|---|-----------|-----------|-----------|-----------|
| 3 | 2.8633333 | 0.7456764 | 2.3600000 | 3.7200000 |
|---|-----------|-----------|-----------|-----------|

---

Unique Subject Identifier=7423000000-0058

Assay variable : PTINR\_VAL1 PT-INR Value

N Mean Standard Deviation Minimum Maximum

---

|   |           |           |           |           |
|---|-----------|-----------|-----------|-----------|
| 2 | 1.8750000 | 0.3606245 | 1.6200000 | 2.1300000 |
|---|-----------|-----------|-----------|-----------|

---

Unique Subject Identifier=7423000000-0060

Assay variable : PTINR\_VAL1 PT-INR Value

N Mean Standard Deviation Minimum Maximum

---

|   |           |           |           |           |
|---|-----------|-----------|-----------|-----------|
| 2 | 1.7700000 | 0.4242641 | 1.4700000 | 2.0700000 |
|---|-----------|-----------|-----------|-----------|

---

Unique Subject Identifier=7423000000-0063

Assay variable : PTINR\_VAL1 PT-INR Value

N Mean Standard Deviation Minimum Maximum

---

|   |          |          |          |          |
|---|----------|----------|----------|----------|
| 6 | 1.640000 | 0.239583 | 1.350000 | 2.000000 |
|---|----------|----------|----------|----------|

---

Laboratory tests at the time of obtaining Table 2-6 consent, according to the presence or absence of proton-pump inhibitors

Unique Subject Identifier=7423000000-0065

MEANS Procedure

Assay variable : PTINR\_VAL1 PT-INR Value

| N | Mean      | Standard Deviation | Minimum   | Maximum   |
|---|-----------|--------------------|-----------|-----------|
| 2 | 1.9850000 | 0.2474874          | 1.8100000 | 2.1600000 |

Unique Subject Identifier=7423000000-0066

Assay variable : PTINR\_VAL1 PT-INR Value

| N | Mean      | Standard Deviation | Minimum   | Maximum   |
|---|-----------|--------------------|-----------|-----------|
| 2 | 2.2600000 | 0.0707107          | 2.2100000 | 2.3100000 |

Unique Subject Identifier=7423000000-0070

Assay variable : PTINR\_VAL1 PT-INR Value

| N | Mean      | Standard Deviation | Minimum   | Maximum   |
|---|-----------|--------------------|-----------|-----------|
| 3 | 1.7100000 | 0.0556776          | 1.6500000 | 1.7600000 |

Unique Subject Identifier=7423000000-0080

Assay variable : PTINR\_VAL1 PT-INR Value

N Mean Standard Deviation Minimum Maximum

---

|   |           |           |           |           |
|---|-----------|-----------|-----------|-----------|
| 3 | 1.7333333 | 0.0378594 | 1.6900000 | 1.7600000 |
|---|-----------|-----------|-----------|-----------|

---

Laboratory tests at the time of obtaining Table 2-6 consent, according to the presence or absence of proton-pump inhibitors

Unique Subject Identifier=7423000000-0086

MEANS Procedure

Assay variable : PTINR\_VAL1 PT-INR Value

| N | Mean      | Standard Deviation | Minimum   | Maximum   |
|---|-----------|--------------------|-----------|-----------|
| 3 | 2.2666667 | 0.0404145          | 2.2200000 | 2.2900000 |

Unique Subject Identifier=7423000000-0087

Assay variable : PTINR\_VAL1 PT-INR Value

| N | Mean      | Standard Deviation | Minimum   | Maximum   |
|---|-----------|--------------------|-----------|-----------|
| 2 | 1.9600000 | 0.0989949          | 1.8900000 | 2.0300000 |

Unique Subject Identifier=7423000000-0088

Assay variable : PTINR\_VAL1 PT-INR Value

| N | Mean      | Standard Deviation | Minimum   | Maximum   |
|---|-----------|--------------------|-----------|-----------|
| 3 | 1.8633333 | 0.3108590          | 1.6500000 | 2.2200000 |

Unique Subject Identifier=7423000000-0095



Assay variable : PTINR\_VAL1 PT-INR Value

N Mean Standard Deviation Minimum Maximum

---

|   |           |           |           |           |
|---|-----------|-----------|-----------|-----------|
| 3 | 1.7266667 | 0.0680686 | 1.6500000 | 1.7800000 |
|---|-----------|-----------|-----------|-----------|

---

Laboratory tests at the time of obtaining Table 2-6 consent, according to the presence or absence of proton-pump inhibitors

Unique Subject Identifier=7423000000-0099

MEANS Procedure

Assay variable : PTINR\_VAL1 PT-INR Value

| N | Mean      | Standard Deviation | Minimum   | Maximum   |
|---|-----------|--------------------|-----------|-----------|
| 3 | 1.6133333 | 0.0152753          | 1.6000000 | 1.6300000 |

Unique Subject Identifier=7542000000-0006

Assay variable : PTINR\_VAL1 PT-INR Value

| N | Mean      | Standard Deviation | Minimum   | Maximum   |
|---|-----------|--------------------|-----------|-----------|
| 5 | 1.4200000 | 0.2167948          | 1.3000000 | 1.8000000 |

Unique Subject Identifier=7542000000-0007

Assay variable : PTINR\_VAL1 PT-INR Value

| N | Mean      | Standard Deviation | Minimum   | Maximum   |
|---|-----------|--------------------|-----------|-----------|
| 6 | 2.5066667 | 1.1654641          | 1.4600000 | 4.3000000 |

Unique Subject Identifier=7542000000-0021

Assay variable : PTINR\_VAL1 PT-INR Value

N Mean Standard Deviation Minimum Maximum

---

|   |           |           |           |           |
|---|-----------|-----------|-----------|-----------|
| 6 | 1.9666667 | 0.2804758 | 1.7000000 | 2.5000000 |
|---|-----------|-----------|-----------|-----------|

---

Laboratory tests at the time of obtaining Table 2-6 consent, according to the presence or absence of proton-pump inhibitors

Unique Subject Identifier=7542000000-0023

MEANS Procedure

Assay variable : PTINR\_VAL1 PT-INR Value

N Mean Standard Deviation Minimum Maximum

---

|   |           |           |           |           |
|---|-----------|-----------|-----------|-----------|
| 6 | 2.1333333 | 0.1632993 | 1.9000000 | 2.3000000 |
|---|-----------|-----------|-----------|-----------|

---

Unique Subject Identifier=7542000000-0029

Assay variable : PTINR\_VAL1 PT-INR Value

N Mean Standard Deviation Minimum Maximum

---

|   |           |           |           |           |
|---|-----------|-----------|-----------|-----------|
| 6 | 2.3000000 | 0.7014271 | 1.4000000 | 3.3000000 |
|---|-----------|-----------|-----------|-----------|

---

Unique Subject Identifier=7542000000-0030

Assay variable : PTINR\_VAL1 PT-INR Value

N Mean Standard Deviation Minimum Maximum

---

|   |           |           |           |           |
|---|-----------|-----------|-----------|-----------|
| 2 | 2.1500000 | 0.3535534 | 1.9000000 | 2.4000000 |
|---|-----------|-----------|-----------|-----------|

---

Unique Subject Identifier=7542000000-0031

Assay variable : PTINR\_VAL1 PT-INR Value

N Mean Standard Deviation Minimum Maximum

---

|   |           |           |           |           |
|---|-----------|-----------|-----------|-----------|
| 3 | 1.6666667 | 0.4041452 | 1.3000000 | 2.1000000 |
|---|-----------|-----------|-----------|-----------|

---

Laboratory tests at the time of obtaining Table 2-6 consent, according to the presence or absence of proton-pump inhibitors

Unique Subject Identifier=7542000000-0032

MEANS Procedure

Assay variable : PTINR\_VAL1 PT-INR Value

| N | Mean      | Standard Deviation | Minimum   | Maximum   |
|---|-----------|--------------------|-----------|-----------|
| 6 | 1.5666667 | 0.2804758          | 1.3000000 | 2.0000000 |

Unique Subject Identifier=7542000000-0037

Assay variable : PTINR\_VAL1 PT-INR Value

| N | Mean      | Standard Deviation | Minimum   | Maximum   |
|---|-----------|--------------------|-----------|-----------|
| 5 | 1.9200000 | 0.2167948          | 1.7000000 | 2.2000000 |

Unique Subject Identifier=7642010000-0002

Assay variable : PTINR\_VAL1 PT-INR Value

| N | Mean      | Standard Deviation | Minimum   | Maximum   |
|---|-----------|--------------------|-----------|-----------|
| 3 | 2.3966667 | 0.0737111          | 2.3400000 | 2.4800000 |

Unique Subject Identifier=7642010000-0003

Assay variable : PTINR\_VAL1 PT-INR Value

N Mean Standard Deviation Minimum Maximum

---

|   |           |           |           |           |
|---|-----------|-----------|-----------|-----------|
| 4 | 2.1725000 | 0.4658594 | 1.7000000 | 2.8000000 |
|---|-----------|-----------|-----------|-----------|

---

Laboratory tests at the time of obtaining Table 2-6 consent, according to the presence or absence of proton-pump inhibitors

Unique Subject Identifier=8005000000-0001

MEANS Procedure

Assay variable : PTINR\_VAL1 PT-INR Value

N Mean Standard Deviation Minimum Maximum

---

|   |           |           |           |           |
|---|-----------|-----------|-----------|-----------|
| 6 | 1.6983333 | 0.2394508 | 1.3400000 | 1.9300000 |
|---|-----------|-----------|-----------|-----------|

---

Unique Subject Identifier=8005000000-0006

Assay variable : PTINR\_VAL1 PT-INR Value

N Mean Standard Deviation Minimum Maximum

---

|   |           |           |           |           |
|---|-----------|-----------|-----------|-----------|
| 5 | 2.2320000 | 0.2921815 | 1.9600000 | 2.6400000 |
|---|-----------|-----------|-----------|-----------|

---

Unique Subject Identifier=8005000000-0007

Assay variable : PTINR\_VAL1 PT-INR Value

N Mean Standard Deviation Minimum Maximum

---

|   |           |           |           |           |
|---|-----------|-----------|-----------|-----------|
| 4 | 1.8350000 | 0.5570458 | 1.2300000 | 2.4600000 |
|---|-----------|-----------|-----------|-----------|

---

Unique Subject Identifier=8009000000-0003



Assay variable : PTINR\_VAL1 PT-INR Value

N Mean Standard Deviation Minimum Maximum

---

|   |           |           |           |           |
|---|-----------|-----------|-----------|-----------|
| 4 | 2.1725000 | 0.4624842 | 1.5800000 | 2.5500000 |
|---|-----------|-----------|-----------|-----------|

---

Laboratory tests at the time of obtaining Table 2-6 consent, according to the presence or absence of proton-pump inhibitors

Unique Subject Identifier=8009000000-0014

MEANS Procedure

Assay variable : PTINR\_VAL1 PT-INR Value

N Mean Standard Deviation Minimum Maximum

---

|   |           |           |           |           |
|---|-----------|-----------|-----------|-----------|
| 4 | 2.3925000 | 0.2822971 | 2.0400000 | 2.7300000 |
|---|-----------|-----------|-----------|-----------|

---

Unique Subject Identifier=8009000000-0016

Assay variable : PTINR\_VAL1 PT-INR Value

N Mean Standard Deviation Minimum Maximum

---

|   |           |           |           |           |
|---|-----------|-----------|-----------|-----------|
| 4 | 2.2550000 | 1.0195914 | 1.3800000 | 3.6200000 |
|---|-----------|-----------|-----------|-----------|

---

Unique Subject Identifier=8009000000-0023

Assay variable : PTINR\_VAL1 PT-INR Value

N Mean Standard Deviation Minimum Maximum

---

|   |           |           |           |           |
|---|-----------|-----------|-----------|-----------|
| 5 | 2.1700000 | 1.0790042 | 0.9600000 | 3.6500000 |
|---|-----------|-----------|-----------|-----------|

---

Unique Subject Identifier=8009000000-0029

Assay variable : PTINR\_VAL1 PT-INR Value

N Mean Standard Deviation Minimum Maximum

---

|   |           |           |           |           |
|---|-----------|-----------|-----------|-----------|
| 5 | 1.9920000 | 0.2108791 | 1.7200000 | 2.2500000 |
|---|-----------|-----------|-----------|-----------|

---

Laboratory tests at the time of obtaining Table 2-6 consent, according to the presence or absence of proton-pump inhibitors

Unique Subject Identifier=8010000100-0007

MEANS Procedure

Assay variable : PTINR\_VAL1 PT-INR Value

| N | Mean      | Standard Deviation | Minimum   | Maximum   |
|---|-----------|--------------------|-----------|-----------|
| 3 | 1.4333333 | 0.1305118          | 1.3300000 | 1.5800000 |

Unique Subject Identifier=8010000100-0016

Assay variable : PTINR\_VAL1 PT-INR Value

| N | Mean      | Standard Deviation | Minimum   | Maximum   |
|---|-----------|--------------------|-----------|-----------|
| 5 | 2.3700000 | 0.5013482          | 1.7600000 | 3.1300000 |

Unique Subject Identifier=8010000100-0022

Assay variable : PTINR\_VAL1 PT-INR Value

| N | Mean      | Standard Deviation | Minimum   | Maximum   |
|---|-----------|--------------------|-----------|-----------|
| 6 | 1.5650000 | 0.3614831          | 1.1400000 | 1.9600000 |

Unique Subject Identifier=8010000100-0029

Assay variable : PTINR\_VAL1 PT-INR Value

N Mean Standard Deviation Minimum Maximum

---

|   |          |           |          |          |
|---|----------|-----------|----------|----------|
| 5 | 2.040000 | 0.7243273 | 1.290000 | 3.110000 |
|---|----------|-----------|----------|----------|

---

Laboratory tests at the time of obtaining Table 2-6 consent, according to the presence or absence of proton-pump inhibitors

Unique Subject Identifier=8010000100-0030

MEANS Procedure

Assay variable : PTINR\_VAL1 PT-INR Value

N Mean Standard Deviation Minimum Maximum

---

|   |           |           |           |           |
|---|-----------|-----------|-----------|-----------|
| 3 | 2.5700000 | 0.1212436 | 2.4300000 | 2.6400000 |
|---|-----------|-----------|-----------|-----------|

---

Unique Subject Identifier=8014000000-0001

Assay variable : PTINR\_VAL1 PT-INR Value

N Mean Standard Deviation Minimum Maximum

---

|   |           |           |           |           |
|---|-----------|-----------|-----------|-----------|
| 2 | 2.7150000 | 0.0636396 | 2.6700000 | 2.7600000 |
|---|-----------|-----------|-----------|-----------|

---

Unique Subject Identifier=8017000000-0001

Assay variable : PTINR\_VAL1 PT-INR Value

N Mean Standard Deviation Minimum Maximum

---

|   |           |           |           |           |
|---|-----------|-----------|-----------|-----------|
| 3 | 1.9800000 | 0.3386739 | 1.6000000 | 2.2500000 |
|---|-----------|-----------|-----------|-----------|

---

Unique Subject Identifier=8020011000-0002

Assay variable : PTINR\_VAL1 PT-INR Value

N Mean Standard Deviation Minimum Maximum

---

|   |          |  |          |          |
|---|----------|--|----------|----------|
| 1 | 2.350000 |  | 2.350000 | 2.350000 |
|---|----------|--|----------|----------|

---

Laboratory tests at the time of obtaining Table 2-6 consent, according to the presence or absence of proton-pump inhibitors

Unique Subject Identifier=8020011000-0007

MEANS Procedure

Assay variable : PTINR\_VAL1 PT-INR Value

N Mean Standard Deviation Minimum Maximum

---

|   |           |  |           |           |
|---|-----------|--|-----------|-----------|
| 1 | 1.8400000 |  | 1.8400000 | 1.8400000 |
|---|-----------|--|-----------|-----------|

---

Unique Subject Identifier=8020011000-0029

Assay variable : PTINR\_VAL1 PT-INR Value

N Mean Standard Deviation Minimum Maximum

---

|   |           |  |           |           |
|---|-----------|--|-----------|-----------|
| 1 | 2.3600000 |  | 2.3600000 | 2.3600000 |
|---|-----------|--|-----------|-----------|

---

Unique Subject Identifier=8020011000-0043

Assay variable : PTINR\_VAL1 PT-INR Value

N Mean Standard Deviation Minimum Maximum

---

|   |           |           |           |           |
|---|-----------|-----------|-----------|-----------|
| 2 | 1.5300000 | 0.1838478 | 1.4000000 | 1.6600000 |
|---|-----------|-----------|-----------|-----------|

---

Unique Subject Identifier=8023000000-0003



Assay variable : PTINR\_VAL1 PT-INR Value

N Mean Standard Deviation Minimum Maximum

---

|   |          |           |          |          |
|---|----------|-----------|----------|----------|
| 2 | 2.180000 | 0.2404163 | 2.010000 | 2.350000 |
|---|----------|-----------|----------|----------|

---

Laboratory tests at the time of obtaining Table 2-6 consent, according to the presence or absence of proton-pump inhibitors

Unique Subject Identifier=8023000000-0008

MEANS Procedure

Assay variable : PTINR\_VAL1 PT-INR Value

| N | Mean      | Standard Deviation | Minimum   | Maximum   |
|---|-----------|--------------------|-----------|-----------|
| 1 | 2.0100000 |                    | 2.0100000 | 2.0100000 |

Unique Subject Identifier=8023000000-0012

Assay variable : PTINR\_VAL1 PT-INR Value

| N | Mean      | Standard Deviation | Minimum   | Maximum   |
|---|-----------|--------------------|-----------|-----------|
| 3 | 2.0833333 | 0.2829016          | 1.9200000 | 2.4100000 |

Unique Subject Identifier=8023000000-0013

Assay variable : PTINR\_VAL1 PT-INR Value

| N | Mean      | Standard Deviation | Minimum   | Maximum   |
|---|-----------|--------------------|-----------|-----------|
| 3 | 2.0533333 | 0.1258306          | 1.9200000 | 2.1700000 |

Unique Subject Identifier=8023000000-0018

Assay variable : PTINR\_VAL1 PT-INR Value

N Mean Standard Deviation Minimum Maximum

---

|   |           |           |           |           |
|---|-----------|-----------|-----------|-----------|
| 3 | 2.0666667 | 0.2950141 | 1.7700000 | 2.3600000 |
|---|-----------|-----------|-----------|-----------|

---

Laboratory tests at the time of obtaining Table 2-6 consent, according to the presence or absence of proton-pump inhibitors

Unique Subject Identifier=8023000000-0019

MEANS Procedure

Assay variable : PTINR\_VAL1 PT-INR Value

N Mean Standard Deviation Minimum Maximum

---

|   |           |           |           |           |
|---|-----------|-----------|-----------|-----------|
| 3 | 1.4900000 | 0.0556776 | 1.4300000 | 1.5400000 |
|---|-----------|-----------|-----------|-----------|

---

Unique Subject Identifier=8023000000-0025

Assay variable : PTINR\_VAL1 PT-INR Value

N Mean Standard Deviation Minimum Maximum

---

|   |           |           |           |           |
|---|-----------|-----------|-----------|-----------|
| 3 | 2.1266667 | 0.1115049 | 2.0000000 | 2.2100000 |
|---|-----------|-----------|-----------|-----------|

---

Unique Subject Identifier=8023000000-0034

Assay variable : PTINR\_VAL1 PT-INR Value

N Mean Standard Deviation Minimum Maximum

---

|   |           |           |           |           |
|---|-----------|-----------|-----------|-----------|
| 3 | 2.5033333 | 0.1266228 | 2.3600000 | 2.6000000 |
|---|-----------|-----------|-----------|-----------|

---

Unique Subject Identifier=8023000000-0036

Assay variable : PTINR\_VAL1 PT-INR Value

N Mean Standard Deviation Minimum Maximum

---

|   |          |          |          |          |
|---|----------|----------|----------|----------|
| 3 | 1.803333 | 0.125033 | 1.660000 | 1.890000 |
|---|----------|----------|----------|----------|

---

Laboratory tests at the time of obtaining Table 2-6 consent, according to the presence or absence of proton-pump inhibitors

Unique Subject Identifier=8023000000-0041

MEANS Procedure

Assay variable : PTINR\_VAL1 PT-INR Value

| N | Mean      | Standard Deviation | Minimum   | Maximum   |
|---|-----------|--------------------|-----------|-----------|
| 2 | 1.9000000 | 0.2828427          | 1.7000000 | 2.1000000 |

Unique Subject Identifier=8023000000-0043

Assay variable : PTINR\_VAL1 PT-INR Value

| N | Mean      | Standard Deviation | Minimum   | Maximum   |
|---|-----------|--------------------|-----------|-----------|
| 1 | 1.7700000 |                    | 1.7700000 | 1.7700000 |

Unique Subject Identifier=8023000000-0048

Assay variable : PTINR\_VAL1 PT-INR Value

| N | Mean      | Standard Deviation | Minimum   | Maximum   |
|---|-----------|--------------------|-----------|-----------|
| 1 | 2.3200000 |                    | 2.3200000 | 2.3200000 |

Unique Subject Identifier=8023000000-0049

Assay variable : PTINR\_VAL1 PT-INR Value

N Mean Standard Deviation Minimum Maximum

---

|   |           |   |           |           |
|---|-----------|---|-----------|-----------|
| 2 | 1.7100000 | 0 | 1.7100000 | 1.7100000 |
|---|-----------|---|-----------|-----------|

---

Laboratory tests at the time of obtaining Table 2-6 consent, according to the presence or absence of proton-pump inhibitors

Unique Subject Identifier=8024000000-0003

MEANS Procedure

Assay variable : PTINR\_VAL1 PT-INR Value

N Mean Standard Deviation Minimum Maximum

---

|   |           |           |           |           |
|---|-----------|-----------|-----------|-----------|
| 5 | 1.6740000 | 0.0901665 | 1.5800000 | 1.7700000 |
|---|-----------|-----------|-----------|-----------|

---

Unique Subject Identifier=8026000000-0002

Assay variable : PTINR\_VAL1 PT-INR Value

N Mean Standard Deviation Minimum Maximum

---

|   |           |           |           |           |
|---|-----------|-----------|-----------|-----------|
| 4 | 2.1300000 | 0.5430776 | 1.4300000 | 2.7500000 |
|---|-----------|-----------|-----------|-----------|

---

Unique Subject Identifier=8026000000-0008

Assay variable : PTINR\_VAL1 PT-INR Value

N Mean Standard Deviation Minimum Maximum

---

|   |           |           |           |           |
|---|-----------|-----------|-----------|-----------|
| 2 | 1.1350000 | 0.0636396 | 1.0900000 | 1.1800000 |
|---|-----------|-----------|-----------|-----------|

---

Unique Subject Identifier=8026000000-0012



Assay variable : PTINR\_VAL1 PT-INR Value

N Mean Standard Deviation Minimum Maximum

---

|   |           |           |           |           |
|---|-----------|-----------|-----------|-----------|
| 3 | 1.9900000 | 0.4513314 | 1.5200000 | 2.4200000 |
|---|-----------|-----------|-----------|-----------|

---

Laboratory tests at the time of obtaining Table 2-6 consent, according to the presence or absence of proton-pump inhibitors

Unique Subject Identifier=8026000000-0018

MEANS Procedure

Assay variable : PTINR\_VAL1 PT-INR Value

N Mean Standard Deviation Minimum Maximum

---

|   |           |           |           |           |
|---|-----------|-----------|-----------|-----------|
| 3 | 1.6266667 | 0.0945163 | 1.5200000 | 1.7000000 |
|---|-----------|-----------|-----------|-----------|

---

Unique Subject Identifier=8026000000-0026

Assay variable : PTINR\_VAL1 PT-INR Value

N Mean Standard Deviation Minimum Maximum

---

|   |           |           |           |           |
|---|-----------|-----------|-----------|-----------|
| 3 | 2.3400000 | 0.8098765 | 1.6700000 | 3.2400000 |
|---|-----------|-----------|-----------|-----------|

---

Unique Subject Identifier=8026000000-0029

Assay variable : PTINR\_VAL1 PT-INR Value

N Mean Standard Deviation Minimum Maximum

---

|   |           |           |           |           |
|---|-----------|-----------|-----------|-----------|
| 3 | 2.2333333 | 0.1209683 | 2.1400000 | 2.3700000 |
|---|-----------|-----------|-----------|-----------|

---

Unique Subject Identifier=8030011000-0001

Assay variable : PTINR\_VAL1 PT-INR Value

N Mean Standard Deviation Minimum Maximum

---

|   |           |           |           |           |
|---|-----------|-----------|-----------|-----------|
| 4 | 1.8025000 | 0.3365883 | 1.4100000 | 2.2300000 |
|---|-----------|-----------|-----------|-----------|

---

Laboratory tests at the time of obtaining Table 2-6 consent, according to the presence or absence of proton-pump inhibitors

Unique Subject Identifier=8030011000-0002

MEANS Procedure

Assay variable : PTINR\_VAL1 PT-INR Value

N Mean Standard Deviation Minimum Maximum

---

|   |           |           |           |           |
|---|-----------|-----------|-----------|-----------|
| 6 | 1.9350000 | 0.2510578 | 1.7200000 | 2.4200000 |
|---|-----------|-----------|-----------|-----------|

---

Unique Subject Identifier=8030011000-0007

Assay variable : PTINR\_VAL1 PT-INR Value

N Mean Standard Deviation Minimum Maximum

---

|   |           |           |           |           |
|---|-----------|-----------|-----------|-----------|
| 6 | 2.5100000 | 0.6117189 | 1.9100000 | 3.6600000 |
|---|-----------|-----------|-----------|-----------|

---

Unique Subject Identifier=8030011000-0008

Assay variable : PTINR\_VAL1 PT-INR Value

N Mean Standard Deviation Minimum Maximum

---

|   |           |           |           |           |
|---|-----------|-----------|-----------|-----------|
| 4 | 2.3600000 | 0.4857297 | 1.7500000 | 2.8800000 |
|---|-----------|-----------|-----------|-----------|

---

Unique Subject Identifier=8030011000-0018

Assay variable : PTINR\_VAL1 PT-INR Value

N Mean Standard Deviation Minimum Maximum

---

|   |           |           |           |           |
|---|-----------|-----------|-----------|-----------|
| 4 | 1.5875000 | 0.2430878 | 1.2700000 | 1.8500000 |
|---|-----------|-----------|-----------|-----------|

---

Laboratory tests at the time of obtaining Table 2-6 consent, according to the presence or absence of proton-pump inhibitors

Unique Subject Identifier=8030011000-0026

MEANS Procedure

Assay variable : PTINR\_VAL1 PT-INR Value

N Mean Standard Deviation Minimum Maximum

---

|   |           |           |           |           |
|---|-----------|-----------|-----------|-----------|
| 4 | 2.3300000 | 0.2210581 | 2.1400000 | 2.6300000 |
|---|-----------|-----------|-----------|-----------|

---

Unique Subject Identifier=8030011000-0029

Assay variable : PTINR\_VAL1 PT-INR Value

N Mean Standard Deviation Minimum Maximum

---

|   |           |           |           |           |
|---|-----------|-----------|-----------|-----------|
| 5 | 1.9740000 | 0.1647119 | 1.7500000 | 2.1900000 |
|---|-----------|-----------|-----------|-----------|

---

Unique Subject Identifier=8031000000-0028

Assay variable : PTINR\_VAL1 PT-INR Value

N Mean Standard Deviation Minimum Maximum

---

|   |           |           |           |           |
|---|-----------|-----------|-----------|-----------|
| 2 | 1.9250000 | 0.0636396 | 1.8800000 | 1.9700000 |
|---|-----------|-----------|-----------|-----------|

---

Unique Subject Identifier=8031000000-0040

Assay variable : PTINR\_VAL1 PT-INR Value

N Mean Standard Deviation Minimum Maximum

---

|   |           |           |           |           |
|---|-----------|-----------|-----------|-----------|
| 6 | 2.5016667 | 1.3092962 | 1.1200000 | 4.3600000 |
|---|-----------|-----------|-----------|-----------|

---

Laboratory tests at the time of obtaining Table 2-6 consent, according to the presence or absence of proton-pump inhibitors

Unique Subject Identifier=8031000000-0046

MEANS Procedure

Assay variable : PTINR\_VAL1 PT-INR Value

| N | Mean      | Standard Deviation | Minimum   | Maximum   |
|---|-----------|--------------------|-----------|-----------|
| 4 | 2.0850000 | 0.4438093          | 1.7500000 | 2.7000000 |

Unique Subject Identifier=8031000000-0050

Assay variable : PTINR\_VAL1 PT-INR Value

| N | Mean      | Standard Deviation | Minimum   | Maximum   |
|---|-----------|--------------------|-----------|-----------|
| 6 | 1.9216667 | 0.2844234          | 1.6600000 | 2.4000000 |

Unique Subject Identifier=8033000000-0003

Assay variable : PTINR\_VAL1 PT-INR Value

| N | Mean      | Standard Deviation | Minimum   | Maximum   |
|---|-----------|--------------------|-----------|-----------|
| 6 | 1.6350000 | 1.0143323          | 0.9200000 | 3.6300000 |

Unique Subject Identifier=8035000000-0014



Assay variable : PTINR\_VAL1 PT-INR Value

N Mean Standard Deviation Minimum Maximum

---

|   |           |           |           |           |
|---|-----------|-----------|-----------|-----------|
| 3 | 1.8766667 | 0.1436431 | 1.7700000 | 2.0400000 |
|---|-----------|-----------|-----------|-----------|

---

Laboratory tests at the time of obtaining Table 2-6 consent, according to the presence or absence of proton-pump inhibitors

Unique Subject Identifier=8035000000-0015

MEANS Procedure

Assay variable : PTINR\_VAL1 PT-INR Value

N Mean Standard Deviation Minimum Maximum

---

|   |           |           |           |           |
|---|-----------|-----------|-----------|-----------|
| 3 | 2.0900000 | 0.2475884 | 1.9000000 | 2.3700000 |
|---|-----------|-----------|-----------|-----------|

---

Unique Subject Identifier=8036000000-0001

Assay variable : PTINR\_VAL1 PT-INR Value

N Mean Standard Deviation Minimum Maximum

---

|   |           |           |           |           |
|---|-----------|-----------|-----------|-----------|
| 4 | 2.1950000 | 0.8135724 | 1.4600000 | 3.3100000 |
|---|-----------|-----------|-----------|-----------|

---

Unique Subject Identifier=8036000000-0007

Assay variable : PTINR\_VAL1 PT-INR Value

N Mean Standard Deviation Minimum Maximum

---

|   |           |           |           |           |
|---|-----------|-----------|-----------|-----------|
| 6 | 1.7033333 | 0.1907529 | 1.4600000 | 1.9500000 |
|---|-----------|-----------|-----------|-----------|

---

Unique Subject Identifier=8040011000-0007

Assay variable : PTINR\_VAL1 PT-INR Value

N Mean Standard Deviation Minimum Maximum

---

|   |           |           |           |           |
|---|-----------|-----------|-----------|-----------|
| 6 | 2.1116667 | 0.2406173 | 1.8700000 | 2.4400000 |
|---|-----------|-----------|-----------|-----------|

---

Laboratory tests at the time of obtaining Table 2-6 consent, according to the presence or absence of proton-pump inhibitors

Unique Subject Identifier=8047000000-0016

MEANS Procedure

Assay variable : PTINR\_VAL1 PT-INR Value

N Mean Standard Deviation Minimum Maximum

---

|   |           |           |           |           |
|---|-----------|-----------|-----------|-----------|
| 5 | 1.3080000 | 0.1616168 | 1.1300000 | 1.5300000 |
|---|-----------|-----------|-----------|-----------|

---

Unique Subject Identifier=8047000000-0025

Assay variable : PTINR\_VAL1 PT-INR Value

N Mean Standard Deviation Minimum Maximum

---

|   |           |           |           |           |
|---|-----------|-----------|-----------|-----------|
| 3 | 1.9100000 | 0.1113553 | 1.7900000 | 2.0100000 |
|---|-----------|-----------|-----------|-----------|

---

Unique Subject Identifier=8047000000-0028

Assay variable : PTINR\_VAL1 PT-INR Value

N Mean Standard Deviation Minimum Maximum

---

|   |           |           |           |           |
|---|-----------|-----------|-----------|-----------|
| 3 | 1.5933333 | 0.0472582 | 1.5400000 | 1.6300000 |
|---|-----------|-----------|-----------|-----------|

---

Unique Subject Identifier=8048010011-0007

Assay variable : PTINR\_VAL1 PT-INR Value

N Mean Standard Deviation Minimum Maximum

---

|   |           |           |           |           |
|---|-----------|-----------|-----------|-----------|
| 3 | 1.9533333 | 0.4188476 | 1.6100000 | 2.4200000 |
|---|-----------|-----------|-----------|-----------|

---

Laboratory tests at the time of obtaining Table 2-6 consent, according to the presence or absence of proton-pump inhibitors

Unique Subject Identifier=8054010000-0001

MEANS Procedure

Assay variable : PTINR\_VAL1 PT-INR Value

N Mean Standard Deviation Minimum Maximum

---

|   |           |           |           |           |
|---|-----------|-----------|-----------|-----------|
| 4 | 2.5475000 | 0.5144819 | 1.9100000 | 3.1200000 |
|---|-----------|-----------|-----------|-----------|

---

Unique Subject Identifier=8055000000-0004

Assay variable : PTINR\_VAL1 PT-INR Value

N Mean Standard Deviation Minimum Maximum

---

|   |           |           |           |           |
|---|-----------|-----------|-----------|-----------|
| 4 | 1.8375000 | 0.0997914 | 1.7300000 | 1.9600000 |
|---|-----------|-----------|-----------|-----------|

---

Unique Subject Identifier=8055000000-0006

Assay variable : PTINR\_VAL1 PT-INR Value

N Mean Standard Deviation Minimum Maximum

---

|   |           |           |           |           |
|---|-----------|-----------|-----------|-----------|
| 4 | 2.1900000 | 0.6639779 | 1.7200000 | 3.1700000 |
|---|-----------|-----------|-----------|-----------|

---

Unique Subject Identifier=8060011000-0004

Assay variable : PTINR\_VAL1 PT-INR Value

N Mean Standard Deviation Minimum Maximum

---

|   |          |  |          |          |
|---|----------|--|----------|----------|
| 1 | 1.800000 |  | 1.800000 | 1.800000 |
|---|----------|--|----------|----------|

---

Laboratory tests at the time of obtaining Table 2-6 consent, according to the presence or absence of proton-pump inhibitors

Unique Subject Identifier=8060011000-0008

MEANS Procedure

Assay variable : PTINR\_VAL1 PT-INR Value

N Mean Standard Deviation Minimum Maximum

---

|   |           |           |           |           |
|---|-----------|-----------|-----------|-----------|
| 6 | 2.1166667 | 0.7305249 | 1.4000000 | 3.0000000 |
|---|-----------|-----------|-----------|-----------|

---

Unique Subject Identifier=8060011000-0009

Assay variable : PTINR\_VAL1 PT-INR Value

N Mean Standard Deviation Minimum Maximum

---

|   |           |           |           |           |
|---|-----------|-----------|-----------|-----------|
| 6 | 2.4000000 | 0.0894427 | 2.3000000 | 2.5000000 |
|---|-----------|-----------|-----------|-----------|

---

Unique Subject Identifier=8060011000-0011

Assay variable : PTINR\_VAL1 PT-INR Value

N Mean Standard Deviation Minimum Maximum

---

|   |           |           |           |           |
|---|-----------|-----------|-----------|-----------|
| 2 | 1.9500000 | 0.4949747 | 1.6000000 | 2.3000000 |
|---|-----------|-----------|-----------|-----------|

---

Unique Subject Identifier=8060011000-0017



Assay variable : PTINR\_VAL1 PT-INR Value

N Mean Standard Deviation Minimum Maximum

---

|   |           |           |           |           |
|---|-----------|-----------|-----------|-----------|
| 3 | 2.2333333 | 0.1527525 | 2.1000000 | 2.4000000 |
|---|-----------|-----------|-----------|-----------|

---

Laboratory tests at the time of obtaining Table 2-6 consent, according to the presence or absence of proton-pump inhibitors

Unique Subject Identifier=8060011000-0021

MEANS Procedure

Assay variable : PTINR\_VAL1 PT-INR Value

N Mean Standard Deviation Minimum Maximum

---

|   |           |           |           |           |
|---|-----------|-----------|-----------|-----------|
| 6 | 1.9666667 | 0.1632993 | 1.7000000 | 2.2000000 |
|---|-----------|-----------|-----------|-----------|

---

Unique Subject Identifier=8060011000-0022

Assay variable : PTINR\_VAL1 PT-INR Value

N Mean Standard Deviation Minimum Maximum

---

|   |           |           |           |           |
|---|-----------|-----------|-----------|-----------|
| 3 | 2.0666667 | 0.1527525 | 1.9000000 | 2.2000000 |
|---|-----------|-----------|-----------|-----------|

---

Unique Subject Identifier=8060011000-0026

Assay variable : PTINR\_VAL1 PT-INR Value

N Mean Standard Deviation Minimum Maximum

---

|   |           |           |           |           |
|---|-----------|-----------|-----------|-----------|
| 4 | 2.3000000 | 0.2449490 | 2.0000000 | 2.6000000 |
|---|-----------|-----------|-----------|-----------|

---

Unique Subject Identifier=8060011000-0029

Assay variable : PTINR\_VAL1 PT-INR Value

N Mean Standard Deviation Minimum Maximum

---

|   |          |           |          |          |
|---|----------|-----------|----------|----------|
| 2 | 2.450000 | 0.0707107 | 2.400000 | 2.500000 |
|---|----------|-----------|----------|----------|

---

Laboratory tests at the time of obtaining Table 2-6 consent, according to the presence or absence of proton-pump inhibitors

Unique Subject Identifier=8060011000-0030

MEANS Procedure

Assay variable : PTINR\_VAL1 PT-INR Value

N Mean Standard Deviation Minimum Maximum

---

|   |           |           |           |           |
|---|-----------|-----------|-----------|-----------|
| 3 | 1.9000000 | 0.2645751 | 1.6000000 | 2.1000000 |
|---|-----------|-----------|-----------|-----------|

---

Unique Subject Identifier=8061010010-0002

Assay variable : PTINR\_VAL1 PT-INR Value

N Mean Standard Deviation Minimum Maximum

---

|   |           |           |           |           |
|---|-----------|-----------|-----------|-----------|
| 4 | 1.7425000 | 0.4847938 | 1.0900000 | 2.2500000 |
|---|-----------|-----------|-----------|-----------|

---

Unique Subject Identifier=8067000000-0001

Assay variable : PTINR\_VAL1 PT-INR Value

N Mean Standard Deviation Minimum Maximum

---

|   |           |           |           |           |
|---|-----------|-----------|-----------|-----------|
| 6 | 2.0366667 | 0.2960856 | 1.7900000 | 2.4900000 |
|---|-----------|-----------|-----------|-----------|

---

Unique Subject Identifier=8100000000-0002

Assay variable : PTINR\_VAL1 PT-INR Value

N Mean Standard Deviation Minimum Maximum

---

|   |           |           |           |           |
|---|-----------|-----------|-----------|-----------|
| 5 | 2.1960000 | 0.2891021 | 1.8900000 | 2.5300000 |
|---|-----------|-----------|-----------|-----------|

---

Laboratory tests at the time of obtaining Table 2-6 consent, according to the presence or absence of proton-pump inhibitors

Unique Subject Identifier=810000000-0005

MEANS Procedure

Assay variable : PTINR\_VAL1 PT-INR Value

N Mean Standard Deviation Minimum Maximum

---

|   |           |           |           |           |
|---|-----------|-----------|-----------|-----------|
| 4 | 1.8875000 | 0.2543456 | 1.5400000 | 2.1500000 |
|---|-----------|-----------|-----------|-----------|

---

Unique Subject Identifier=810400000-0001

Assay variable : PTINR\_VAL1 PT-INR Value

N Mean Standard Deviation Minimum Maximum

---

|   |           |           |           |           |
|---|-----------|-----------|-----------|-----------|
| 2 | 1.8600000 | 0.0141421 | 1.8500000 | 1.8700000 |
|---|-----------|-----------|-----------|-----------|

---

Unique Subject Identifier=810400000-0005

Assay variable : PTINR\_VAL1 PT-INR Value

N Mean Standard Deviation Minimum Maximum

---

|   |           |           |           |           |
|---|-----------|-----------|-----------|-----------|
| 4 | 2.3900000 | 0.1764464 | 2.1600000 | 2.5900000 |
|---|-----------|-----------|-----------|-----------|

---

Unique Subject Identifier=810400000-0008

Assay variable : PTINR\_VAL1 PT-INR Value

N Mean Standard Deviation Minimum Maximum

---

|   |           |           |           |           |
|---|-----------|-----------|-----------|-----------|
| 4 | 1.8350000 | 0.2037155 | 1.6000000 | 2.0200000 |
|---|-----------|-----------|-----------|-----------|

---

Laboratory tests at the time of obtaining Table 2-6 consent, according to the presence or absence of proton-pump inhibitors

Unique Subject Identifier=8108111100-0026

MEANS Procedure

Assay variable : PTINR\_VAL1 PT-INR Value

N Mean Standard Deviation Minimum Maximum

---

|   |          |  |          |          |
|---|----------|--|----------|----------|
| 1 | 2.260000 |  | 2.260000 | 2.260000 |
|---|----------|--|----------|----------|

---

Unique Subject Identifier=8110000100-0001

Assay variable : PTINR\_VAL1 PT-INR Value

N Mean Standard Deviation Minimum Maximum

---

|   |          |          |          |          |
|---|----------|----------|----------|----------|
| 3 | 1.643333 | 0.175594 | 1.460000 | 1.810000 |
|---|----------|----------|----------|----------|

---

Unique Subject Identifier=8110000100-0003

Assay variable : PTINR\_VAL1 PT-INR Value

N Mean Standard Deviation Minimum Maximum

---

|   |          |          |          |          |
|---|----------|----------|----------|----------|
| 5 | 2.276000 | 0.354936 | 1.950000 | 2.710000 |
|---|----------|----------|----------|----------|

---

Unique Subject Identifier=8110000100-0006



Assay variable : PTINR\_VAL1 PT-INR Value

N Mean Standard Deviation Minimum Maximum

---

|   |           |           |           |           |
|---|-----------|-----------|-----------|-----------|
| 5 | 2.0980000 | 0.1888650 | 1.8400000 | 2.2900000 |
|---|-----------|-----------|-----------|-----------|

---

Laboratory tests at the time of obtaining Table 2-6 consent, according to the presence or absence of proton-pump inhibitors

Unique Subject Identifier=811400000-0002

MEANS Procedure

Assay variable : PTINR\_VAL1 PT-INR Value

N Mean Standard Deviation Minimum Maximum

---

|   |           |           |           |           |
|---|-----------|-----------|-----------|-----------|
| 4 | 1.7950000 | 0.3923859 | 1.5600000 | 2.3800000 |
|---|-----------|-----------|-----------|-----------|

---

Unique Subject Identifier=811400000-0006

Assay variable : PTINR\_VAL1 PT-INR Value

N Mean Standard Deviation Minimum Maximum

---

|   |           |           |           |           |
|---|-----------|-----------|-----------|-----------|
| 3 | 1.4600000 | 0.1374773 | 1.3400000 | 1.6100000 |
|---|-----------|-----------|-----------|-----------|

---

Unique Subject Identifier=811400000-0009

Assay variable : PTINR\_VAL1 PT-INR Value

N Mean Standard Deviation Minimum Maximum

---

|   |           |           |           |           |
|---|-----------|-----------|-----------|-----------|
| 4 | 1.4150000 | 0.3961902 | 1.0400000 | 1.9500000 |
|---|-----------|-----------|-----------|-----------|

---

Unique Subject Identifier=8117011010-0004

Assay variable : PTINR\_VAL1 PT-INR Value

N Mean Standard Deviation Minimum Maximum

---

|   |           |  |           |           |
|---|-----------|--|-----------|-----------|
| 1 | 2.0900000 |  | 2.0900000 | 2.0900000 |
|---|-----------|--|-----------|-----------|

---

Laboratory tests at the time of obtaining Table 2-6 consent, according to the presence or absence of proton-pump inhibitors

Unique Subject Identifier=8117011010-0010

MEANS Procedure

Assay variable : PTINR\_VAL1 PT-INR Value

| N | Mean      | Standard Deviation | Minimum   | Maximum   |
|---|-----------|--------------------|-----------|-----------|
| 6 | 1.7433333 | 0.2410532          | 1.4200000 | 2.1300000 |

Unique Subject Identifier=8117011010-0016

Assay variable : PTINR\_VAL1 PT-INR Value

| N | Mean      | Standard Deviation | Minimum   | Maximum   |
|---|-----------|--------------------|-----------|-----------|
| 3 | 1.7100000 | 0.1708801          | 1.5500000 | 1.8900000 |

Unique Subject Identifier=8117011010-0024

Assay variable : PTINR\_VAL1 PT-INR Value

| N | Mean      | Standard Deviation | Minimum   | Maximum   |
|---|-----------|--------------------|-----------|-----------|
| 2 | 2.3050000 | 0.0777817          | 2.2500000 | 2.3600000 |

Unique Subject Identifier=8117011010-0025

Assay variable : PTINR\_VAL1 PT-INR Value

N Mean Standard Deviation Minimum Maximum

---

|   |           |           |           |           |
|---|-----------|-----------|-----------|-----------|
| 5 | 2.0960000 | 0.2261194 | 1.8200000 | 2.3200000 |
|---|-----------|-----------|-----------|-----------|

---

Laboratory tests at the time of obtaining Table 2-6 consent, according to the presence or absence of proton-pump inhibitors

Unique Subject Identifier=8117011010-0028

MEANS Procedure

Assay variable : PTINR\_VAL1 PT-INR Value

N Mean Standard Deviation Minimum Maximum

---

|   |           |           |           |           |
|---|-----------|-----------|-----------|-----------|
| 6 | 1.9283333 | 0.3702117 | 1.3900000 | 2.3500000 |
|---|-----------|-----------|-----------|-----------|

---

Unique Subject Identifier=8123000000-0002

Assay variable : PTINR\_VAL1 PT-INR Value

N Mean Standard Deviation Minimum Maximum

---

|   |           |           |           |           |
|---|-----------|-----------|-----------|-----------|
| 6 | 1.9000000 | 0.2909983 | 1.5900000 | 2.3800000 |
|---|-----------|-----------|-----------|-----------|

---

Unique Subject Identifier=8123000000-0005

Assay variable : PTINR\_VAL1 PT-INR Value

N Mean Standard Deviation Minimum Maximum

---

|   |           |           |           |           |
|---|-----------|-----------|-----------|-----------|
| 3 | 2.0866667 | 0.2542309 | 1.8100000 | 2.3100000 |
|---|-----------|-----------|-----------|-----------|

---

Unique Subject Identifier=8124000000-0001

Assay variable : PTINR\_VAL1 PT-INR Value

N Mean Standard Deviation Minimum Maximum

---

|   |          |  |          |          |
|---|----------|--|----------|----------|
| 1 | 3.650000 |  | 3.650000 | 3.650000 |
|---|----------|--|----------|----------|

---

Laboratory tests at the time of obtaining Table 2-6 consent, according to the presence or absence of proton-pump inhibitors

Unique Subject Identifier=813300000-0001

MEANS Procedure

Assay variable : PTINR\_VAL1 PT-INR Value

N Mean Standard Deviation Minimum Maximum

---

|   |          |  |          |          |
|---|----------|--|----------|----------|
| 1 | 2.340000 |  | 2.340000 | 2.340000 |
|---|----------|--|----------|----------|

---

Unique Subject Identifier=813500000-0002

Assay variable : PTINR\_VAL1 PT-INR Value

N Mean Standard Deviation Minimum Maximum

---

|   |          |  |          |          |
|---|----------|--|----------|----------|
| 1 | 1.850000 |  | 1.850000 | 1.850000 |
|---|----------|--|----------|----------|

---

Unique Subject Identifier=813500000-0004

Assay variable : PTINR\_VAL1 PT-INR Value

N Mean Standard Deviation Minimum Maximum

---

|   |          |           |          |          |
|---|----------|-----------|----------|----------|
| 2 | 1.490000 | 0.1555635 | 1.380000 | 1.600000 |
|---|----------|-----------|----------|----------|

---

Unique Subject Identifier=813500000-0006



Assay variable : PTINR\_VAL1 PT-INR Value

N Mean Standard Deviation Minimum Maximum

---

|   |           |           |           |           |
|---|-----------|-----------|-----------|-----------|
| 2 | 1.5700000 | 0.0282843 | 1.5500000 | 1.5900000 |
|---|-----------|-----------|-----------|-----------|

---

Laboratory tests at the time of obtaining Table 2-6 consent, according to the presence or absence of proton-pump inhibitors

Unique Subject Identifier=813500000-0007

MEANS Procedure

Assay variable : PTINR\_VAL1 PT-INR Value

N Mean Standard Deviation Minimum Maximum

---

|   |           |           |           |           |
|---|-----------|-----------|-----------|-----------|
| 3 | 2.0833333 | 0.2635021 | 1.7900000 | 2.3000000 |
|---|-----------|-----------|-----------|-----------|

---

Unique Subject Identifier=813500000-0009

Assay variable : PTINR\_VAL1 PT-INR Value

N Mean Standard Deviation Minimum Maximum

---

|   |           |           |           |           |
|---|-----------|-----------|-----------|-----------|
| 3 | 2.1200000 | 0.3815757 | 1.6800000 | 2.3600000 |
|---|-----------|-----------|-----------|-----------|

---

Unique Subject Identifier=813500000-0013

Assay variable : PTINR\_VAL1 PT-INR Value

N Mean Standard Deviation Minimum Maximum

---

|   |           |           |           |           |
|---|-----------|-----------|-----------|-----------|
| 3 | 2.1000000 | 0.5543465 | 1.7700000 | 2.7400000 |
|---|-----------|-----------|-----------|-----------|

---

Unique Subject Identifier=813500000-0014

Assay variable : PTINR\_VAL1 PT-INR Value

N Mean Standard Deviation Minimum Maximum

---

|   |          |           |          |          |
|---|----------|-----------|----------|----------|
| 3 | 1.750000 | 0.5369358 | 1.440000 | 2.370000 |
|---|----------|-----------|----------|----------|

---

Laboratory tests at the time of obtaining Table 2-6 consent, according to the presence or absence of proton-pump inhibitors

Unique Subject Identifier=813600000-0022

MEANS Procedure

Assay variable : PTINR\_VAL1 PT-INR Value

N Mean Standard Deviation Minimum Maximum

---

|   |           |           |           |           |
|---|-----------|-----------|-----------|-----------|
| 4 | 2.0050000 | 0.6165225 | 1.5300000 | 2.9100000 |
|---|-----------|-----------|-----------|-----------|

---

Unique Subject Identifier=8137010000-0004

Assay variable : PTINR\_VAL1 PT-INR Value

N Mean Standard Deviation Minimum Maximum

---

|   |           |           |           |           |
|---|-----------|-----------|-----------|-----------|
| 3 | 1.8800000 | 0.1705872 | 1.6900000 | 2.0200000 |
|---|-----------|-----------|-----------|-----------|

---

Unique Subject Identifier=8137010000-0013

Assay variable : PTINR\_VAL1 PT-INR Value

N Mean Standard Deviation Minimum Maximum

---

|   |           |           |           |           |
|---|-----------|-----------|-----------|-----------|
| 2 | 1.8400000 | 0.4242641 | 1.5400000 | 2.1400000 |
|---|-----------|-----------|-----------|-----------|

---

Unique Subject Identifier=8137010000-0015

Assay variable : PTINR\_VAL1 PT-INR Value

N Mean Standard Deviation Minimum Maximum

---

|   |           |           |           |           |
|---|-----------|-----------|-----------|-----------|
| 2 | 1.9550000 | 0.2757716 | 1.7600000 | 2.1500000 |
|---|-----------|-----------|-----------|-----------|

---

Laboratory tests at the time of obtaining Table 2-6 consent, according to the presence or absence of proton-pump inhibitors

Unique Subject Identifier=8137010000-0019

MEANS Procedure

Assay variable : PTINR\_VAL1 PT-INR Value

| N | Mean      | Standard Deviation | Minimum   | Maximum   |
|---|-----------|--------------------|-----------|-----------|
| 3 | 1.6933333 | 0.0709460          | 1.6300000 | 1.7700000 |

Unique Subject Identifier=8148010111-0001

Assay variable : PTINR\_VAL1 PT-INR Value

| N | Mean      | Standard Deviation | Minimum   | Maximum   |
|---|-----------|--------------------|-----------|-----------|
| 6 | 2.5416667 | 0.6447144          | 1.7300000 | 3.3800000 |

Unique Subject Identifier=8148010111-0002

Assay variable : PTINR\_VAL1 PT-INR Value

| N | Mean      | Standard Deviation | Minimum   | Maximum   |
|---|-----------|--------------------|-----------|-----------|
| 3 | 1.7133333 | 0.1650253          | 1.5500000 | 1.8800000 |

Unique Subject Identifier=8148010111-0015

Assay variable : PTINR\_VAL1 PT-INR Value

N Mean Standard Deviation Minimum Maximum

---

|   |           |           |           |           |
|---|-----------|-----------|-----------|-----------|
| 5 | 1.9880000 | 0.3409839 | 1.6400000 | 2.4500000 |
|---|-----------|-----------|-----------|-----------|

---

Laboratory tests at the time of obtaining Table 2-6 consent, according to the presence or absence of proton-pump inhibitors

Unique Subject Identifier=8154011000-0003

MEANS Procedure

Assay variable : PTINR\_VAL1 PT-INR Value

N Mean Standard Deviation Minimum Maximum

---

|   |           |           |           |           |
|---|-----------|-----------|-----------|-----------|
| 3 | 1.4433333 | 0.1715615 | 1.2600000 | 1.6000000 |
|---|-----------|-----------|-----------|-----------|

---

Unique Subject Identifier=8154011000-0027

Assay variable : PTINR\_VAL1 PT-INR Value

N Mean Standard Deviation Minimum Maximum

---

|   |           |           |           |           |
|---|-----------|-----------|-----------|-----------|
| 4 | 1.8125000 | 0.2051625 | 1.6000000 | 2.0300000 |
|---|-----------|-----------|-----------|-----------|

---

Unique Subject Identifier=8160000000-0004

Assay variable : PTINR\_VAL1 PT-INR Value

N Mean Standard Deviation Minimum Maximum

---

|   |           |           |           |           |
|---|-----------|-----------|-----------|-----------|
| 6 | 1.9666667 | 0.1751190 | 1.7000000 | 2.2000000 |
|---|-----------|-----------|-----------|-----------|

---

Unique Subject Identifier=8160000000-0009



Assay variable : PTINR\_VAL1 PT-INR Value

N Mean Standard Deviation Minimum Maximum

---

|   |          |           |          |          |
|---|----------|-----------|----------|----------|
| 6 | 1.560000 | 0.1019804 | 1.400000 | 1.700000 |
|---|----------|-----------|----------|----------|

---

Laboratory tests at the time of obtaining Table 2-6 consent, according to the presence or absence of proton-pump inhibitors

Unique Subject Identifier=816000000-0011

MEANS Procedure

Assay variable : PTINR\_VAL1 PT-INR Value

N Mean Standard Deviation Minimum Maximum

---

|   |           |           |           |           |
|---|-----------|-----------|-----------|-----------|
| 5 | 1.5800000 | 0.2774887 | 1.3000000 | 2.0000000 |
|---|-----------|-----------|-----------|-----------|

---

Unique Subject Identifier=816000000-0013

Assay variable : PTINR\_VAL1 PT-INR Value

N Mean Standard Deviation Minimum Maximum

---

|   |           |           |           |           |
|---|-----------|-----------|-----------|-----------|
| 6 | 2.0950000 | 0.4871858 | 1.5000000 | 2.9700000 |
|---|-----------|-----------|-----------|-----------|

---

Unique Subject Identifier=816000000-0025

Assay variable : PTINR\_VAL1 PT-INR Value

N Mean Standard Deviation Minimum Maximum

---

|   |           |           |           |           |
|---|-----------|-----------|-----------|-----------|
| 6 | 1.7800000 | 0.1707630 | 1.5000000 | 2.0000000 |
|---|-----------|-----------|-----------|-----------|

---

Unique Subject Identifier=8161010010-0006

Assay variable : PTINR\_VAL1 PT-INR Value

N Mean Standard Deviation Minimum Maximum

---

|   |           |           |           |           |
|---|-----------|-----------|-----------|-----------|
| 2 | 1.8250000 | 0.2333452 | 1.6600000 | 1.9900000 |
|---|-----------|-----------|-----------|-----------|

---

Laboratory tests at the time of obtaining Table 2-6 consent, according to the presence or absence of proton-pump inhibitors

Unique Subject Identifier=8161010010-0008

MEANS Procedure

Assay variable : PTINR\_VAL1 PT-INR Value

| N | Mean      | Standard Deviation | Minimum   | Maximum   |
|---|-----------|--------------------|-----------|-----------|
| 2 | 1.6500000 | 0.1555635          | 1.5400000 | 1.7600000 |

Unique Subject Identifier=8161010010-0010

Assay variable : PTINR\_VAL1 PT-INR Value

| N | Mean      | Standard Deviation | Minimum   | Maximum   |
|---|-----------|--------------------|-----------|-----------|
| 3 | 1.3700000 | 0.2260531          | 1.1200000 | 1.5600000 |

Unique Subject Identifier=8161010010-0016

Assay variable : PTINR\_VAL1 PT-INR Value

| N | Mean      | Standard Deviation | Minimum   | Maximum   |
|---|-----------|--------------------|-----------|-----------|
| 4 | 2.3000000 | 0.5686827          | 1.7900000 | 2.9900000 |

Unique Subject Identifier=8161010010-0022

Assay variable : PTINR\_VAL1 PT-INR Value

N Mean Standard Deviation Minimum Maximum

---

|   |           |           |           |           |
|---|-----------|-----------|-----------|-----------|
| 3 | 2.8366667 | 0.3043572 | 2.6000000 | 3.1800000 |
|---|-----------|-----------|-----------|-----------|

---

Laboratory tests at the time of obtaining Table 2-6 consent, according to the presence or absence of proton-pump inhibitors

Unique Subject Identifier=8161010010-0023

MEANS Procedure

Assay variable : PTINR\_VAL1 PT-INR Value

N Mean Standard Deviation Minimum Maximum

---

|   |           |           |           |           |
|---|-----------|-----------|-----------|-----------|
| 3 | 2.5333333 | 0.4272392 | 2.2200000 | 3.0200000 |
|---|-----------|-----------|-----------|-----------|

---

Unique Subject Identifier=8164000000-0001

Assay variable : PTINR\_VAL1 PT-INR Value

N Mean Standard Deviation Minimum Maximum

---

|   |           |           |           |           |
|---|-----------|-----------|-----------|-----------|
| 6 | 2.1366667 | 0.1568014 | 1.9800000 | 2.3300000 |
|---|-----------|-----------|-----------|-----------|

---

Unique Subject Identifier=8164000000-0003

Assay variable : PTINR\_VAL1 PT-INR Value

N Mean Standard Deviation Minimum Maximum

---

|   |           |           |           |           |
|---|-----------|-----------|-----------|-----------|
| 5 | 2.1320000 | 0.2025339 | 1.8700000 | 2.3400000 |
|---|-----------|-----------|-----------|-----------|

---

Unique Subject Identifier=8164000000-0004

Assay variable : PTINR\_VAL1 PT-INR Value

N Mean Standard Deviation Minimum Maximum

---

|   |           |           |           |           |
|---|-----------|-----------|-----------|-----------|
| 3 | 1.5166667 | 0.2302897 | 1.3200000 | 1.7700000 |
|---|-----------|-----------|-----------|-----------|

---

Laboratory tests at the time of obtaining Table 2-6 consent, according to the presence or absence of proton-pump inhibitors

Unique Subject Identifier=8171010100-0002

MEANS Procedure

Assay variable : PTINR\_VAL1 PT-INR Value

N Mean Standard Deviation Minimum Maximum

---

|   |           |           |           |           |
|---|-----------|-----------|-----------|-----------|
| 4 | 1.7700000 | 0.5373391 | 1.1600000 | 2.4700000 |
|---|-----------|-----------|-----------|-----------|

---

Unique Subject Identifier=8171010100-0003

Assay variable : PTINR\_VAL1 PT-INR Value

N Mean Standard Deviation Minimum Maximum

---

|   |           |           |           |           |
|---|-----------|-----------|-----------|-----------|
| 2 | 1.7250000 | 0.1626346 | 1.6100000 | 1.8400000 |
|---|-----------|-----------|-----------|-----------|

---

Unique Subject Identifier=8171010100-0004

Assay variable : PTINR\_VAL1 PT-INR Value

N Mean Standard Deviation Minimum Maximum

---

|   |           |           |           |           |
|---|-----------|-----------|-----------|-----------|
| 2 | 2.0500000 | 0.1838478 | 1.9200000 | 2.1800000 |
|---|-----------|-----------|-----------|-----------|

---

Unique Subject Identifier=8171010100-0006



Assay variable : PTINR\_VAL1 PT-INR Value

N Mean Standard Deviation Minimum Maximum

---

|   |           |           |           |           |
|---|-----------|-----------|-----------|-----------|
| 4 | 2.0450000 | 0.1247664 | 1.8800000 | 2.1600000 |
|---|-----------|-----------|-----------|-----------|

---

Laboratory tests at the time of obtaining Table 2-6 consent, according to the presence or absence of proton-pump inhibitors

Unique Subject Identifier=8171010100-0007

MEANS Procedure

Assay variable : PTINR\_VAL1 PT-INR Value

N Mean Standard Deviation Minimum Maximum

---

|   |           |           |           |           |
|---|-----------|-----------|-----------|-----------|
| 3 | 1.8766667 | 0.3955165 | 1.4700000 | 2.2600000 |
|---|-----------|-----------|-----------|-----------|

---

Unique Subject Identifier=8171010100-0008

Assay variable : PTINR\_VAL1 PT-INR Value

N Mean Standard Deviation Minimum Maximum

---

|   |           |           |           |           |
|---|-----------|-----------|-----------|-----------|
| 3 | 1.9600000 | 0.1835756 | 1.8300000 | 2.1700000 |
|---|-----------|-----------|-----------|-----------|

---

Unique Subject Identifier=8198010000-0036

Assay variable : PTINR\_VAL1 PT-INR Value

N Mean Standard Deviation Minimum Maximum

---

|   |           |           |           |           |
|---|-----------|-----------|-----------|-----------|
| 6 | 2.2000000 | 0.4560702 | 1.8000000 | 3.1000000 |
|---|-----------|-----------|-----------|-----------|

---

Unique Subject Identifier=8198010000-0039

Assay variable : PTINR\_VAL1 PT-INR Value

N Mean Standard Deviation Minimum Maximum

---

|   |          |           |          |          |
|---|----------|-----------|----------|----------|
| 4 | 2.150000 | 0.3696846 | 1.700000 | 2.600000 |
|---|----------|-----------|----------|----------|

---

Laboratory tests at the time of obtaining Table 2-6 consent, according to the presence or absence of proton-pump inhibitors

Unique Subject Identifier=8198010000-0045

MEANS Procedure

Assay variable : PTINR\_VAL1 PT-INR Value

N Mean Standard Deviation Minimum Maximum

---

|   |           |           |           |           |
|---|-----------|-----------|-----------|-----------|
| 5 | 1.9200000 | 0.1095445 | 1.8000000 | 2.1000000 |
|---|-----------|-----------|-----------|-----------|

---

Unique Subject Identifier=8198010000-0047

Assay variable : PTINR\_VAL1 PT-INR Value

N Mean Standard Deviation Minimum Maximum

---

|   |           |           |           |           |
|---|-----------|-----------|-----------|-----------|
| 6 | 1.6833333 | 0.3060501 | 1.4000000 | 2.2000000 |
|---|-----------|-----------|-----------|-----------|

---

Unique Subject Identifier=8204000000-0002

Assay variable : PTINR\_VAL1 PT-INR Value

N Mean Standard Deviation Minimum Maximum

---

|   |           |           |           |           |
|---|-----------|-----------|-----------|-----------|
| 3 | 1.9800000 | 0.2095233 | 1.7500000 | 2.1600000 |
|---|-----------|-----------|-----------|-----------|

---

Unique Subject Identifier=8204000000-0010

Assay variable : PTINR\_VAL1 PT-INR Value

N Mean Standard Deviation Minimum Maximum

---

|   |           |           |           |           |
|---|-----------|-----------|-----------|-----------|
| 5 | 1.8460000 | 0.6179239 | 1.1200000 | 2.7900000 |
|---|-----------|-----------|-----------|-----------|

---

Laboratory tests at the time of obtaining Table 2-6 consent, according to the presence or absence of proton-pump inhibitors

Unique Subject Identifier=8204000000-0014

MEANS Procedure

Assay variable : PTINR\_VAL1 PT-INR Value

N Mean Standard Deviation Minimum Maximum

---

|   |           |           |           |           |
|---|-----------|-----------|-----------|-----------|
| 3 | 1.6766667 | 0.1123981 | 1.5800000 | 1.8000000 |
|---|-----------|-----------|-----------|-----------|

---

Unique Subject Identifier=8204000000-0015

Assay variable : PTINR\_VAL1 PT-INR Value

N Mean Standard Deviation Minimum Maximum

---

|   |           |           |           |           |
|---|-----------|-----------|-----------|-----------|
| 3 | 2.0000000 | 0.6939741 | 1.4000000 | 2.7600000 |
|---|-----------|-----------|-----------|-----------|

---

Unique Subject Identifier=8204000000-0019

Assay variable : PTINR\_VAL1 PT-INR Value

N Mean Standard Deviation Minimum Maximum

---

|   |           |           |           |           |
|---|-----------|-----------|-----------|-----------|
| 5 | 2.0960000 | 0.4102804 | 1.7200000 | 2.6600000 |
|---|-----------|-----------|-----------|-----------|

---

Unique Subject Identifier=8205000000-0008

Assay variable : PTINR\_VAL1 PT-INR Value

N Mean Standard Deviation Minimum Maximum

---

|   |           |           |           |           |
|---|-----------|-----------|-----------|-----------|
| 3 | 2.4466667 | 0.2569695 | 2.2100000 | 2.7200000 |
|---|-----------|-----------|-----------|-----------|

---

Laboratory tests at the time of obtaining Table 2-6 consent, according to the presence or absence of proton-pump inhibitors

Unique Subject Identifier=8205000000-0036

MEANS Procedure

Assay variable : PTINR\_VAL1 PT-INR Value

N Mean Standard Deviation Minimum Maximum

---

|   |           |           |           |           |
|---|-----------|-----------|-----------|-----------|
| 4 | 2.2500000 | 0.2450850 | 2.0400000 | 2.5800000 |
|---|-----------|-----------|-----------|-----------|

---

Unique Subject Identifier=8209000000-0005

Assay variable : PTINR\_VAL1 PT-INR Value

N Mean Standard Deviation Minimum Maximum

---

|   |           |           |           |           |
|---|-----------|-----------|-----------|-----------|
| 6 | 2.3283333 | 0.4630515 | 1.7800000 | 2.9800000 |
|---|-----------|-----------|-----------|-----------|

---

Unique Subject Identifier=8209000000-0010

Assay variable : PTINR\_VAL1 PT-INR Value

N Mean Standard Deviation Minimum Maximum

---

|   |           |           |           |           |
|---|-----------|-----------|-----------|-----------|
| 4 | 2.2750000 | 0.3152248 | 1.9200000 | 2.6500000 |
|---|-----------|-----------|-----------|-----------|

---

Unique Subject Identifier=8209000000-0014



Assay variable : PTINR\_VAL1 PT-INR Value

N Mean Standard Deviation Minimum Maximum

---

|   |           |           |           |           |
|---|-----------|-----------|-----------|-----------|
| 6 | 2.3583333 | 0.3791262 | 1.8000000 | 2.8700000 |
|---|-----------|-----------|-----------|-----------|

---

Laboratory tests at the time of obtaining Table 2-6 consent, according to the presence or absence of proton-pump inhibitors

Unique Subject Identifier=8209000000-0017

MEANS Procedure

Assay variable : PTINR\_VAL1 PT-INR Value

N Mean Standard Deviation Minimum Maximum

---

|   |           |           |           |           |
|---|-----------|-----------|-----------|-----------|
| 4 | 2.0750000 | 0.2619796 | 1.7800000 | 2.4000000 |
|---|-----------|-----------|-----------|-----------|

---

Unique Subject Identifier=8209000000-0019

Assay variable : PTINR\_VAL1 PT-INR Value

N Mean Standard Deviation Minimum Maximum

---

|   |           |           |           |           |
|---|-----------|-----------|-----------|-----------|
| 3 | 2.2633333 | 0.1154701 | 2.1300000 | 2.3300000 |
|---|-----------|-----------|-----------|-----------|

---

Unique Subject Identifier=8209000000-0023

Assay variable : PTINR\_VAL1 PT-INR Value

N Mean Standard Deviation Minimum Maximum

---

|   |           |           |           |           |
|---|-----------|-----------|-----------|-----------|
| 6 | 1.8800000 | 0.3602222 | 1.5000000 | 2.5700000 |
|---|-----------|-----------|-----------|-----------|

---

Unique Subject Identifier=8209000000-0026

Assay variable : PTINR\_VAL1 PT-INR Value

N Mean Standard Deviation Minimum Maximum

---

|   |           |           |           |           |
|---|-----------|-----------|-----------|-----------|
| 4 | 1.9675000 | 0.5758689 | 1.3100000 | 2.5400000 |
|---|-----------|-----------|-----------|-----------|

---

Laboratory tests at the time of obtaining Table 2-6 consent, according to the presence or absence of proton-pump inhibitors

Unique Subject Identifier=8209000000-0027

MEANS Procedure

Assay variable : PTINR\_VAL1 PT-INR Value

N Mean Standard Deviation Minimum Maximum

---

|   |           |           |           |           |
|---|-----------|-----------|-----------|-----------|
| 6 | 2.4133333 | 0.2027478 | 2.1700000 | 2.7200000 |
|---|-----------|-----------|-----------|-----------|

---

Unique Subject Identifier=8210000100-0002

Assay variable : PTINR\_VAL1 PT-INR Value

N Mean Standard Deviation Minimum Maximum

---

|   |           |  |           |           |
|---|-----------|--|-----------|-----------|
| 1 | 1.0800000 |  | 1.0800000 | 1.0800000 |
|---|-----------|--|-----------|-----------|

---

Unique Subject Identifier=8223000000-0004

Assay variable : PTINR\_VAL1 PT-INR Value

N Mean Standard Deviation Minimum Maximum

---

|   |           |           |           |           |
|---|-----------|-----------|-----------|-----------|
| 3 | 1.8933333 | 0.3043572 | 1.6700000 | 2.2400000 |
|---|-----------|-----------|-----------|-----------|

---

Unique Subject Identifier=8223000000-0016

Assay variable : PTINR\_VAL1 PT-INR Value

N Mean Standard Deviation Minimum Maximum

---

|   |           |           |           |           |
|---|-----------|-----------|-----------|-----------|
| 6 | 1.8766667 | 0.8429630 | 1.3900000 | 3.5600000 |
|---|-----------|-----------|-----------|-----------|

---

Laboratory tests at the time of obtaining Table 2-6 consent, according to the presence or absence of proton-pump inhibitors

Unique Subject Identifier=8223000000-0022

MEANS Procedure

Assay variable : PTINR\_VAL1 PT-INR Value

| N | Mean     | Standard Deviation | Minimum  | Maximum  |
|---|----------|--------------------|----------|----------|
| 3 | 2.020000 | 0.3835362          | 1.670000 | 2.430000 |

Unique Subject Identifier=8223000000-0025

Assay variable : PTINR\_VAL1 PT-INR Value

| N | Mean     | Standard Deviation | Minimum  | Maximum  |
|---|----------|--------------------|----------|----------|
| 1 | 2.150000 |                    | 2.150000 | 2.150000 |

Unique Subject Identifier=8233000000-0006

Assay variable : PTINR\_VAL1 PT-INR Value

| N | Mean     | Standard Deviation | Minimum  | Maximum  |
|---|----------|--------------------|----------|----------|
| 5 | 1.612000 | 0.1308434          | 1.400000 | 1.760000 |

Unique Subject Identifier=8237011000-0002

Assay variable : PTINR\_VAL1 PT-INR Value

N Mean Standard Deviation Minimum Maximum

---

|   |           |           |           |           |
|---|-----------|-----------|-----------|-----------|
| 2 | 1.8500000 | 0.0707107 | 1.8000000 | 1.9000000 |
|---|-----------|-----------|-----------|-----------|

---

Laboratory tests at the time of obtaining Table 2-6 consent, according to the presence or absence of proton-pump inhibitors

Unique Subject Identifier=8237011000-0006

MEANS Procedure

Assay variable : PTINR\_VAL1 PT-INR Value

N Mean Standard Deviation Minimum Maximum

---

|   |           |           |           |           |
|---|-----------|-----------|-----------|-----------|
| 2 | 1.8000000 | 0.2828427 | 1.6000000 | 2.0000000 |
|---|-----------|-----------|-----------|-----------|

---

Unique Subject Identifier=8237011000-0008

Assay variable : PTINR\_VAL1 PT-INR Value

N Mean Standard Deviation Minimum Maximum

---

|   |           |           |           |           |
|---|-----------|-----------|-----------|-----------|
| 3 | 1.9666667 | 0.2081666 | 1.8000000 | 2.2000000 |
|---|-----------|-----------|-----------|-----------|

---

Unique Subject Identifier=8237011000-0011

Assay variable : PTINR\_VAL1 PT-INR Value

N Mean Standard Deviation Minimum Maximum

---

|   |           |           |           |           |
|---|-----------|-----------|-----------|-----------|
| 3 | 2.1000000 | 0.1732051 | 1.9000000 | 2.2000000 |
|---|-----------|-----------|-----------|-----------|

---

Unique Subject Identifier=8237011000-0014



Assay variable : PTINR\_VAL1 PT-INR Value

N Mean Standard Deviation Minimum Maximum

---

|   |           |           |           |           |
|---|-----------|-----------|-----------|-----------|
| 6 | 2.1166667 | 0.6675827 | 1.4000000 | 3.1000000 |
|---|-----------|-----------|-----------|-----------|

---

Laboratory tests at the time of obtaining Table 2-6 consent, according to the presence or absence of proton-pump inhibitors

Unique Subject Identifier=8237011000-0015

MEANS Procedure

Assay variable : PTINR\_VAL1 PT-INR Value

N Mean Standard Deviation Minimum Maximum

---

|   |          |           |          |          |
|---|----------|-----------|----------|----------|
| 2 | 2.500000 | 0.9899495 | 1.800000 | 3.200000 |
|---|----------|-----------|----------|----------|

---

Unique Subject Identifier=8237011000-0018

Assay variable : PTINR\_VAL1 PT-INR Value

N Mean Standard Deviation Minimum Maximum

---

|   |          |           |          |          |
|---|----------|-----------|----------|----------|
| 4 | 2.050000 | 0.1732051 | 1.900000 | 2.300000 |
|---|----------|-----------|----------|----------|

---

Unique Subject Identifier=8237011000-0025

Assay variable : PTINR\_VAL1 PT-INR Value

N Mean Standard Deviation Minimum Maximum

---

|   |          |          |          |          |
|---|----------|----------|----------|----------|
| 3 | 2.400000 | 0.200000 | 2.200000 | 2.600000 |
|---|----------|----------|----------|----------|

---

Unique Subject Identifier=8237011000-0028

Assay variable : PTINR\_VAL1 PT-INR Value

N Mean Standard Deviation Minimum Maximum

---

|   |          |  |          |          |
|---|----------|--|----------|----------|
| 1 | 2.400000 |  | 2.400000 | 2.400000 |
|---|----------|--|----------|----------|

---

Laboratory tests at the time of obtaining Table 2-6 consent, according to the presence or absence of proton-pump inhibitors

Unique Subject Identifier=8240011000-0004

MEANS Procedure

Assay variable : PTINR\_VAL1 PT-INR Value

N Mean Standard Deviation Minimum Maximum

---

|   |           |           |           |           |
|---|-----------|-----------|-----------|-----------|
| 4 | 2.3950000 | 0.3850974 | 1.8500000 | 2.7200000 |
|---|-----------|-----------|-----------|-----------|

---

Unique Subject Identifier=8240011000-0006

Assay variable : PTINR\_VAL1 PT-INR Value

N Mean Standard Deviation Minimum Maximum

---

|   |           |           |           |           |
|---|-----------|-----------|-----------|-----------|
| 6 | 2.1900000 | 0.3000667 | 1.7700000 | 2.5500000 |
|---|-----------|-----------|-----------|-----------|

---

Unique Subject Identifier=8240011000-0007

Assay variable : PTINR\_VAL1 PT-INR Value

N Mean Standard Deviation Minimum Maximum

---

|   |           |           |           |           |
|---|-----------|-----------|-----------|-----------|
| 6 | 2.3183333 | 0.5312030 | 1.8300000 | 3.2400000 |
|---|-----------|-----------|-----------|-----------|

---

Unique Subject Identifier=8240011000-0009

Assay variable : PTINR\_VAL1 PT-INR Value

N Mean Standard Deviation Minimum Maximum

---

|   |           |           |           |           |
|---|-----------|-----------|-----------|-----------|
| 6 | 2.0766667 | 0.1127239 | 1.9200000 | 2.2100000 |
|---|-----------|-----------|-----------|-----------|

---

Laboratory tests at the time of obtaining Table 2-6 consent, according to the presence or absence of proton-pump inhibitors

Unique Subject Identifier=8240011000-0020

MEANS Procedure

Assay variable : PTINR\_VAL1 PT-INR Value

N Mean Standard Deviation Minimum Maximum

---

|   |           |           |           |           |
|---|-----------|-----------|-----------|-----------|
| 6 | 1.8100000 | 0.3050246 | 1.5200000 | 2.3700000 |
|---|-----------|-----------|-----------|-----------|

---

Unique Subject Identifier=8240011000-0021

Assay variable : PTINR\_VAL1 PT-INR Value

N Mean Standard Deviation Minimum Maximum

---

|   |           |           |           |           |
|---|-----------|-----------|-----------|-----------|
| 5 | 1.8580000 | 0.2609023 | 1.5700000 | 2.2700000 |
|---|-----------|-----------|-----------|-----------|

---

Unique Subject Identifier=8240011000-0025

Assay variable : PTINR\_VAL1 PT-INR Value

N Mean Standard Deviation Minimum Maximum

---

|   |           |           |           |           |
|---|-----------|-----------|-----------|-----------|
| 6 | 1.6516667 | 0.1531557 | 1.4100000 | 1.7700000 |
|---|-----------|-----------|-----------|-----------|

---

Unique Subject Identifier=8240011000-0035

Assay variable : PTINR\_VAL1 PT-INR Value

N Mean Standard Deviation Minimum Maximum

---

|   |          |           |          |          |
|---|----------|-----------|----------|----------|
| 6 | 1.818333 | 0.3077282 | 1.400000 | 2.150000 |
|---|----------|-----------|----------|----------|

---

Laboratory tests at the time of obtaining Table 2-6 consent, according to the presence or absence of proton-pump inhibitors

Unique Subject Identifier=8240011000-0042

MEANS Procedure

Assay variable : PTINR\_VAL1 PT-INR Value

N Mean Standard Deviation Minimum Maximum

---

|   |           |           |           |           |
|---|-----------|-----------|-----------|-----------|
| 5 | 2.2280000 | 0.4447696 | 1.5800000 | 2.6500000 |
|---|-----------|-----------|-----------|-----------|

---

Unique Subject Identifier=8240011000-0043

Assay variable : PTINR\_VAL1 PT-INR Value

N Mean Standard Deviation Minimum Maximum

---

|   |           |           |           |           |
|---|-----------|-----------|-----------|-----------|
| 6 | 1.8783333 | 0.2213971 | 1.6400000 | 2.2500000 |
|---|-----------|-----------|-----------|-----------|

---

Unique Subject Identifier=8240011000-0044

Assay variable : PTINR\_VAL1 PT-INR Value

N Mean Standard Deviation Minimum Maximum

---

|   |           |           |           |           |
|---|-----------|-----------|-----------|-----------|
| 6 | 2.5533333 | 0.4300543 | 2.1700000 | 3.3200000 |
|---|-----------|-----------|-----------|-----------|

---

Unique Subject Identifier=8241000000-0001



Assay variable : PTINR\_VAL1 PT-INR Value

N Mean Standard Deviation Minimum Maximum

---

|   |           |           |           |           |
|---|-----------|-----------|-----------|-----------|
| 2 | 2.3550000 | 0.1767767 | 2.2300000 | 2.4800000 |
|---|-----------|-----------|-----------|-----------|

---

Laboratory tests at the time of obtaining Table 2-6 consent, according to the presence or absence of proton-pump inhibitors

Unique Subject Identifier=8241000000-0010

MEANS Procedure

Assay variable : PTINR\_VAL1 PT-INR Value

N Mean Standard Deviation Minimum Maximum

---

|   |           |           |           |           |
|---|-----------|-----------|-----------|-----------|
| 4 | 2.0475000 | 0.3894761 | 1.7500000 | 2.6000000 |
|---|-----------|-----------|-----------|-----------|

---

Unique Subject Identifier=8241000000-0018

Assay variable : PTINR\_VAL1 PT-INR Value

N Mean Standard Deviation Minimum Maximum

---

|   |           |           |           |           |
|---|-----------|-----------|-----------|-----------|
| 5 | 1.5240000 | 0.1637987 | 1.3200000 | 1.7500000 |
|---|-----------|-----------|-----------|-----------|

---

Unique Subject Identifier=8241000000-0021

Assay variable : PTINR\_VAL1 PT-INR Value

N Mean Standard Deviation Minimum Maximum

---

|   |           |           |           |           |
|---|-----------|-----------|-----------|-----------|
| 6 | 1.8233333 | 0.1009290 | 1.6800000 | 1.9600000 |
|---|-----------|-----------|-----------|-----------|

---

Unique Subject Identifier=8241000000-0028

Assay variable : PTINR\_VAL1 PT-INR Value

N Mean Standard Deviation Minimum Maximum

---

|   |           |           |           |           |
|---|-----------|-----------|-----------|-----------|
| 4 | 2.4300000 | 0.2320919 | 2.2500000 | 2.7700000 |
|---|-----------|-----------|-----------|-----------|

---

Laboratory tests at the time of obtaining Table 2-6 consent, according to the presence or absence of proton-pump inhibitors

Unique Subject Identifier=8241000000-0030

MEANS Procedure

Assay variable : PTINR\_VAL1 PT-INR Value

N Mean Standard Deviation Minimum Maximum

---

|   |           |           |           |           |
|---|-----------|-----------|-----------|-----------|
| 4 | 2.2750000 | 0.5987487 | 1.8400000 | 3.1200000 |
|---|-----------|-----------|-----------|-----------|

---

Unique Subject Identifier=8245000000-0003

Assay variable : PTINR\_VAL1 PT-INR Value

N Mean Standard Deviation Minimum Maximum

---

|   |           |           |           |           |
|---|-----------|-----------|-----------|-----------|
| 3 | 2.8333333 | 0.1365040 | 2.7100000 | 2.9800000 |
|---|-----------|-----------|-----------|-----------|

---

Unique Subject Identifier=8245000000-0004

Assay variable : PTINR\_VAL1 PT-INR Value

N Mean Standard Deviation Minimum Maximum

---

|   |           |           |           |           |
|---|-----------|-----------|-----------|-----------|
| 4 | 1.7650000 | 0.2053452 | 1.5600000 | 2.0000000 |
|---|-----------|-----------|-----------|-----------|

---

Unique Subject Identifier=8245000000-0005

Assay variable : PTINR\_VAL1 PT-INR Value

N Mean Standard Deviation Minimum Maximum

---

|   |          |           |          |          |
|---|----------|-----------|----------|----------|
| 2 | 2.060000 | 0.1838478 | 1.930000 | 2.190000 |
|---|----------|-----------|----------|----------|

---

Laboratory tests at the time of obtaining Table 2-6 consent, according to the presence or absence of proton-pump inhibitors

Unique Subject Identifier=824500000-0006

MEANS Procedure

Assay variable : PTINR\_VAL1 PT-INR Value

N Mean Standard Deviation Minimum Maximum

---

|   |           |           |           |           |
|---|-----------|-----------|-----------|-----------|
| 2 | 1.9400000 | 0.0565685 | 1.9000000 | 1.9800000 |
|---|-----------|-----------|-----------|-----------|

---

Unique Subject Identifier=824500000-0009

Assay variable : PTINR\_VAL1 PT-INR Value

N Mean Standard Deviation Minimum Maximum

---

|   |           |  |           |           |
|---|-----------|--|-----------|-----------|
| 1 | 2.5000000 |  | 2.5000000 | 2.5000000 |
|---|-----------|--|-----------|-----------|

---

Unique Subject Identifier=824500000-0010

Assay variable : PTINR\_VAL1 PT-INR Value

N Mean Standard Deviation Minimum Maximum

---

|   |           |           |           |           |
|---|-----------|-----------|-----------|-----------|
| 2 | 2.0550000 | 0.2192031 | 1.9000000 | 2.2100000 |
|---|-----------|-----------|-----------|-----------|

---

Unique Subject Identifier=824500000-0012

Assay variable : PTINR\_VAL1 PT-INR Value

N Mean Standard Deviation Minimum Maximum

---

|   |           |           |           |           |
|---|-----------|-----------|-----------|-----------|
| 2 | 2.5850000 | 0.8131728 | 2.0100000 | 3.1600000 |
|---|-----------|-----------|-----------|-----------|

---

Laboratory tests at the time of obtaining Table 2-6 consent, according to the presence or absence of proton-pump inhibitors

Unique Subject Identifier=824500000-0019

MEANS Procedure

Assay variable : PTINR\_VAL1 PT-INR Value

N Mean Standard Deviation Minimum Maximum

---

|   |           |           |           |           |
|---|-----------|-----------|-----------|-----------|
| 2 | 1.9850000 | 0.2899138 | 1.7800000 | 2.1900000 |
|---|-----------|-----------|-----------|-----------|

---

Unique Subject Identifier=824500000-0025

Assay variable : PTINR\_VAL1 PT-INR Value

N Mean Standard Deviation Minimum Maximum

---

|   |           |           |           |           |
|---|-----------|-----------|-----------|-----------|
| 2 | 2.6200000 | 0.3818377 | 2.3500000 | 2.8900000 |
|---|-----------|-----------|-----------|-----------|

---

Unique Subject Identifier=824500000-0027

Assay variable : PTINR\_VAL1 PT-INR Value

N Mean Standard Deviation Minimum Maximum

---

|   |           |           |           |           |
|---|-----------|-----------|-----------|-----------|
| 3 | 2.3433333 | 0.2650157 | 2.0800000 | 2.6100000 |
|---|-----------|-----------|-----------|-----------|

---

Unique Subject Identifier=824500000-0028



Assay variable : PTINR\_VAL1 PT-INR Value

N Mean Standard Deviation Minimum Maximum

---

|   |           |           |           |           |
|---|-----------|-----------|-----------|-----------|
| 4 | 1.9225000 | 0.2891799 | 1.5900000 | 2.2200000 |
|---|-----------|-----------|-----------|-----------|

---

Laboratory tests at the time of obtaining Table 2-6 consent, according to the presence or absence of proton-pump inhibitors

Unique Subject Identifier=8257010001-0002

MEANS Procedure

Assay variable : PTINR\_VAL1 PT-INR Value

N Mean Standard Deviation Minimum Maximum

---

|   |           |           |           |           |
|---|-----------|-----------|-----------|-----------|
| 6 | 1.5250000 | 0.4353734 | 1.1300000 | 2.3600000 |
|---|-----------|-----------|-----------|-----------|

---

Unique Subject Identifier=8257010001-0003

Assay variable : PTINR\_VAL1 PT-INR Value

N Mean Standard Deviation Minimum Maximum

---

|   |           |           |           |           |
|---|-----------|-----------|-----------|-----------|
| 4 | 2.2125000 | 0.7436117 | 1.3100000 | 3.0400000 |
|---|-----------|-----------|-----------|-----------|

---

Unique Subject Identifier=8257010001-0004

Assay variable : PTINR\_VAL1 PT-INR Value

N Mean Standard Deviation Minimum Maximum

---

|   |           |           |           |           |
|---|-----------|-----------|-----------|-----------|
| 6 | 1.9466667 | 0.0480278 | 1.9100000 | 2.0400000 |
|---|-----------|-----------|-----------|-----------|

---

Unique Subject Identifier=8257010001-0006

Assay variable : PTINR\_VAL1 PT-INR Value

N Mean Standard Deviation Minimum Maximum

---

|   |           |           |           |           |
|---|-----------|-----------|-----------|-----------|
| 3 | 2.4566667 | 0.8939985 | 1.4400000 | 3.1200000 |
|---|-----------|-----------|-----------|-----------|

---

Laboratory tests at the time of obtaining Table 2-6 consent, according to the presence or absence of proton-pump inhibitors

Unique Subject Identifier=8257010001-0010

MEANS Procedure

Assay variable : PTINR\_VAL1 PT-INR Value

| N | Mean      | Standard Deviation | Minimum   | Maximum   |
|---|-----------|--------------------|-----------|-----------|
| 2 | 1.2300000 | 0.1838478          | 1.1000000 | 1.3600000 |

Unique Subject Identifier=8257010001-0012

Assay variable : PTINR\_VAL1 PT-INR Value

| N | Mean      | Standard Deviation | Minimum   | Maximum   |
|---|-----------|--------------------|-----------|-----------|
| 6 | 1.5666667 | 0.4684300          | 1.1700000 | 2.4900000 |

Unique Subject Identifier=8257010001-0024

Assay variable : PTINR\_VAL1 PT-INR Value

| N | Mean      | Standard Deviation | Minimum   | Maximum   |
|---|-----------|--------------------|-----------|-----------|
| 2 | 1.7650000 | 0.4171930          | 1.4700000 | 2.0600000 |

Unique Subject Identifier=8257010001-0029

Assay variable : PTINR\_VAL1 PT-INR Value

N Mean Standard Deviation Minimum Maximum

---

|   |           |           |           |           |
|---|-----------|-----------|-----------|-----------|
| 3 | 1.7733333 | 0.3181719 | 1.5700000 | 2.1400000 |
|---|-----------|-----------|-----------|-----------|

---

Laboratory tests at the time of obtaining Table 2-6 consent, according to the presence or absence of proton-pump inhibitors

Unique Subject Identifier=826600000-0026

MEANS Procedure

Assay variable : PTINR\_VAL1 PT-INR Value

N Mean Standard Deviation Minimum Maximum

---

|   |           |           |           |           |
|---|-----------|-----------|-----------|-----------|
| 4 | 2.7025000 | 0.4548535 | 2.2100000 | 3.2400000 |
|---|-----------|-----------|-----------|-----------|

---

Unique Subject Identifier=826600000-0027

Assay variable : PTINR\_VAL1 PT-INR Value

N Mean Standard Deviation Minimum Maximum

---

|   |           |           |           |           |
|---|-----------|-----------|-----------|-----------|
| 6 | 2.6733333 | 0.5607733 | 2.1000000 | 3.4200000 |
|---|-----------|-----------|-----------|-----------|

---

Unique Subject Identifier=832600000-0003

Assay variable : PTINR\_VAL1 PT-INR Value

N Mean Standard Deviation Minimum Maximum

---

|   |           |           |           |           |
|---|-----------|-----------|-----------|-----------|
| 3 | 1.6633333 | 0.2281082 | 1.4000000 | 1.8000000 |
|---|-----------|-----------|-----------|-----------|

---

Unique Subject Identifier=832600000-0006

Assay variable : PTINR\_VAL1 PT-INR Value

N Mean Standard Deviation Minimum Maximum

---

|   |           |           |           |           |
|---|-----------|-----------|-----------|-----------|
| 4 | 2.2975000 | 1.4179886 | 1.3000000 | 4.4000000 |
|---|-----------|-----------|-----------|-----------|

---

Laboratory tests at the time of obtaining Table 2-6 consent, according to the presence or absence of proton-pump inhibitors

Unique Subject Identifier=832600000-0009

MEANS Procedure

Assay variable : PTINR\_VAL1 PT-INR Value

N Mean Standard Deviation Minimum Maximum

---

|   |           |           |           |           |
|---|-----------|-----------|-----------|-----------|
| 4 | 2.4150000 | 0.3139533 | 2.1000000 | 2.8500000 |
|---|-----------|-----------|-----------|-----------|

---

Unique Subject Identifier=832600000-0012

Assay variable : PTINR\_VAL1 PT-INR Value

N Mean Standard Deviation Minimum Maximum

---

|   |           |           |           |           |
|---|-----------|-----------|-----------|-----------|
| 4 | 2.3250000 | 0.2564501 | 1.9500000 | 2.5200000 |
|---|-----------|-----------|-----------|-----------|

---

Unique Subject Identifier=832600000-0013

Assay variable : PTINR\_VAL1 PT-INR Value

N Mean Standard Deviation Minimum Maximum

---

|   |           |           |           |           |
|---|-----------|-----------|-----------|-----------|
| 6 | 2.0000000 | 1.3607057 | 1.1100000 | 4.7100000 |
|---|-----------|-----------|-----------|-----------|

---

Unique Subject Identifier=832600000-0020



Assay variable : PTINR\_VAL1 PT-INR Value

N Mean Standard Deviation Minimum Maximum

---

|   |           |           |           |           |
|---|-----------|-----------|-----------|-----------|
| 5 | 2.0620000 | 0.4699149 | 1.5900000 | 2.7800000 |
|---|-----------|-----------|-----------|-----------|

---

Laboratory tests at the time of obtaining Table 2-6 consent, according to the presence or absence of proton-pump inhibitors

Unique Subject Identifier=832600000-0021

MEANS Procedure

Assay variable : PTINR\_VAL1 PT-INR Value

N Mean Standard Deviation Minimum Maximum

---

|   |           |           |           |           |
|---|-----------|-----------|-----------|-----------|
| 2 | 2.3350000 | 0.2474874 | 2.1600000 | 2.5100000 |
|---|-----------|-----------|-----------|-----------|

---

Unique Subject Identifier=832600000-0023

Assay variable : PTINR\_VAL1 PT-INR Value

N Mean Standard Deviation Minimum Maximum

---

|   |           |           |           |           |
|---|-----------|-----------|-----------|-----------|
| 4 | 2.1175000 | 0.1120640 | 2.0000000 | 2.2700000 |
|---|-----------|-----------|-----------|-----------|

---

Unique Subject Identifier=832600000-0024

Assay variable : PTINR\_VAL1 PT-INR Value

N Mean Standard Deviation Minimum Maximum

---

|   |           |           |           |           |
|---|-----------|-----------|-----------|-----------|
| 3 | 1.7500000 | 0.3148015 | 1.4900000 | 2.1000000 |
|---|-----------|-----------|-----------|-----------|

---

Unique Subject Identifier=832600000-0028

Assay variable : PTINR\_VAL1 PT-INR Value

N Mean Standard Deviation Minimum Maximum

---

|   |          |           |          |          |
|---|----------|-----------|----------|----------|
| 3 | 2.360000 | 0.2286919 | 2.100000 | 2.530000 |
|---|----------|-----------|----------|----------|

---

Laboratory tests at the time of obtaining Table 2-6 consent, according to the presence or absence of proton-pump inhibitors

Unique Subject Identifier=832600000-0029

MEANS Procedure

Assay variable : PTINR\_VAL1 PT-INR Value

| N | Mean     | Standard Deviation | Minimum  | Maximum  |
|---|----------|--------------------|----------|----------|
| 3 | 2.440000 | 0.6109828          | 1.850000 | 3.070000 |

Unique Subject Identifier=832600000-0031

Assay variable : PTINR\_VAL1 PT-INR Value

| N | Mean     | Standard Deviation | Minimum  | Maximum  |
|---|----------|--------------------|----------|----------|
| 5 | 1.840000 | 0.2701851          | 1.400000 | 2.100000 |

Unique Subject Identifier=832600000-0036

Assay variable : PTINR\_VAL1 PT-INR Value

| N | Mean     | Standard Deviation | Minimum  | Maximum  |
|---|----------|--------------------|----------|----------|
| 6 | 1.640000 | 0.1035374          | 1.490000 | 1.760000 |

Unique Subject Identifier=832600000-0040

Assay variable : PTINR\_VAL1 PT-INR Value

N Mean Standard Deviation Minimum Maximum

---

|   |           |           |           |           |
|---|-----------|-----------|-----------|-----------|
| 3 | 2.0766667 | 0.2916048 | 1.7400000 | 2.2500000 |
|---|-----------|-----------|-----------|-----------|

---

Laboratory tests at the time of obtaining Table 2-6 consent, according to the presence or absence of proton-pump inhibitors

Unique Subject Identifier=8332010000-0008

MEANS Procedure

Assay variable : PTINR\_VAL1 PT-INR Value

N Mean Standard Deviation Minimum Maximum

---

|   |           |           |           |           |
|---|-----------|-----------|-----------|-----------|
| 4 | 2.1475000 | 0.1114675 | 2.0000000 | 2.2700000 |
|---|-----------|-----------|-----------|-----------|

---

Unique Subject Identifier=8332010000-0009

Assay variable : PTINR\_VAL1 PT-INR Value

N Mean Standard Deviation Minimum Maximum

---

|   |           |           |           |           |
|---|-----------|-----------|-----------|-----------|
| 5 | 2.6960000 | 0.3958282 | 2.1100000 | 3.1800000 |
|---|-----------|-----------|-----------|-----------|

---

Unique Subject Identifier=8332010000-0015

Assay variable : PTINR\_VAL1 PT-INR Value

N Mean Standard Deviation Minimum Maximum

---

|   |           |           |           |           |
|---|-----------|-----------|-----------|-----------|
| 6 | 2.4466667 | 0.6553981 | 1.7400000 | 3.3300000 |
|---|-----------|-----------|-----------|-----------|

---

Unique Subject Identifier=8332010000-0020

Assay variable : PTINR\_VAL1 PT-INR Value

N Mean Standard Deviation Minimum Maximum

---

|   |           |           |           |           |
|---|-----------|-----------|-----------|-----------|
| 6 | 2.6250000 | 0.7922563 | 1.9700000 | 4.1100000 |
|---|-----------|-----------|-----------|-----------|

---

Laboratory tests at the time of obtaining Table 2-6 consent, according to the presence or absence of proton-pump inhibitors

Unique Subject Identifier=8332010000-0046

MEANS Procedure

Assay variable : PTINR\_VAL1 PT-INR Value

N Mean Standard Deviation Minimum Maximum

---

|   |           |           |           |           |
|---|-----------|-----------|-----------|-----------|
| 3 | 2.1833333 | 0.3803069 | 1.8800000 | 2.6100000 |
|---|-----------|-----------|-----------|-----------|

---

Unique Subject Identifier=8332010000-0068

Assay variable : PTINR\_VAL1 PT-INR Value

N Mean Standard Deviation Minimum Maximum

---

|   |           |           |           |           |
|---|-----------|-----------|-----------|-----------|
| 5 | 1.9500000 | 0.3262668 | 1.5800000 | 2.2300000 |
|---|-----------|-----------|-----------|-----------|

---

Unique Subject Identifier=8332010000-0072

Assay variable : PTINR\_VAL1 PT-INR Value

N Mean Standard Deviation Minimum Maximum

---

|   |           |           |           |           |
|---|-----------|-----------|-----------|-----------|
| 5 | 2.8200000 | 0.2271563 | 2.6100000 | 3.2000000 |
|---|-----------|-----------|-----------|-----------|

---

Unique Subject Identifier=8332010000-0101



Assay variable : PTINR\_VAL1 PT-INR Value

N Mean Standard Deviation Minimum Maximum

---

|   |           |           |           |           |
|---|-----------|-----------|-----------|-----------|
| 2 | 1.9700000 | 0.0424264 | 1.9400000 | 2.0000000 |
|---|-----------|-----------|-----------|-----------|

---

Laboratory tests at the time of obtaining Table 2-6 consent, according to the presence or absence of proton-pump inhibitors

Unique Subject Identifier=8332010000-0142

MEANS Procedure

Assay variable : PTINR\_VAL1 PT-INR Value

N Mean Standard Deviation Minimum Maximum

---

|   |           |           |           |           |
|---|-----------|-----------|-----------|-----------|
| 4 | 2.3750000 | 0.1707825 | 2.2000000 | 2.6000000 |
|---|-----------|-----------|-----------|-----------|

---

Unique Subject Identifier=8340011000-0013

Assay variable : PTINR\_VAL1 PT-INR Value

N Mean Standard Deviation Minimum Maximum

---

|   |           |           |           |           |
|---|-----------|-----------|-----------|-----------|
| 4 | 1.7675000 | 0.2636127 | 1.5300000 | 2.0200000 |
|---|-----------|-----------|-----------|-----------|

---

Unique Subject Identifier=8340011000-0022

Assay variable : PTINR\_VAL1 PT-INR Value

N Mean Standard Deviation Minimum Maximum

---

|   |           |           |           |           |
|---|-----------|-----------|-----------|-----------|
| 4 | 2.1000000 | 0.3261901 | 1.7600000 | 2.5400000 |
|---|-----------|-----------|-----------|-----------|

---

Unique Subject Identifier=8345000000-0007

Assay variable : PTINR\_VAL1 PT-INR Value

N Mean Standard Deviation Minimum Maximum

---

|   |          |           |          |          |
|---|----------|-----------|----------|----------|
| 3 | 2.510000 | 0.4132796 | 2.070000 | 2.890000 |
|---|----------|-----------|----------|----------|

---

Laboratory tests at the time of obtaining Table 2-6 consent, according to the presence or absence of proton-pump inhibitors

Unique Subject Identifier=834500000-0020

MEANS Procedure

Assay variable : PTINR\_VAL1 PT-INR Value

N Mean Standard Deviation Minimum Maximum

---

|   |           |           |           |           |
|---|-----------|-----------|-----------|-----------|
| 3 | 2.1166667 | 0.1985783 | 1.8900000 | 2.2600000 |
|---|-----------|-----------|-----------|-----------|

---

Unique Subject Identifier=834500000-0025

Assay variable : PTINR\_VAL1 PT-INR Value

N Mean Standard Deviation Minimum Maximum

---

|   |           |  |           |           |
|---|-----------|--|-----------|-----------|
| 1 | 1.6600000 |  | 1.6600000 | 1.6600000 |
|---|-----------|--|-----------|-----------|

---

Unique Subject Identifier=8417010011-0004

Assay variable : PTINR\_VAL1 PT-INR Value

N Mean Standard Deviation Minimum Maximum

---

|   |           |           |           |           |
|---|-----------|-----------|-----------|-----------|
| 6 | 2.2533333 | 0.2838779 | 1.9400000 | 2.6300000 |
|---|-----------|-----------|-----------|-----------|

---

Unique Subject Identifier=8442010000-0005

Assay variable : PTINR\_VAL1 PT-INR Value

N Mean Standard Deviation Minimum Maximum

---

|   |           |           |           |           |
|---|-----------|-----------|-----------|-----------|
| 4 | 2.2075000 | 0.5354982 | 1.4600000 | 2.6100000 |
|---|-----------|-----------|-----------|-----------|

---

Laboratory tests at the time of obtaining Table 2-6 consent, according to the presence or absence of proton-pump inhibitors

Unique Subject Identifier=8442010000-0008

MEANS Procedure

Assay variable : PTINR\_VAL1 PT-INR Value

N Mean Standard Deviation Minimum Maximum

---

|   |           |           |           |           |
|---|-----------|-----------|-----------|-----------|
| 3 | 1.6866667 | 0.2514624 | 1.4900000 | 1.9700000 |
|---|-----------|-----------|-----------|-----------|

---

Unique Subject Identifier=8442010000-0010

Assay variable : PTINR\_VAL1 PT-INR Value

N Mean Standard Deviation Minimum Maximum

---

|   |           |           |           |           |
|---|-----------|-----------|-----------|-----------|
| 3 | 2.1933333 | 0.2502665 | 1.9500000 | 2.4500000 |
|---|-----------|-----------|-----------|-----------|

---

Unique Subject Identifier=8442010000-0017

Assay variable : PTINR\_VAL1 PT-INR Value

N Mean Standard Deviation Minimum Maximum

---

|   |           |           |           |           |
|---|-----------|-----------|-----------|-----------|
| 2 | 1.7450000 | 0.0919239 | 1.6800000 | 1.8100000 |
|---|-----------|-----------|-----------|-----------|

---

Unique Subject Identifier=8442010000-0021

Assay variable : PTINR\_VAL1 PT-INR Value

N Mean Standard Deviation Minimum Maximum

---

|   |           |           |           |           |
|---|-----------|-----------|-----------|-----------|
| 3 | 1.6566667 | 0.1877054 | 1.4900000 | 1.8600000 |
|---|-----------|-----------|-----------|-----------|

---

Laboratory tests at the time of obtaining Table 2-6 consent, according to the presence or absence of proton-pump inhibitors

Unique Subject Identifier=8623000000-0004

MEANS Procedure

Assay variable : PTINR\_VAL1 PT-INR Value

N Mean Standard Deviation Minimum Maximum

---

|   |           |           |           |           |
|---|-----------|-----------|-----------|-----------|
| 4 | 2.1550000 | 0.5980803 | 1.4900000 | 2.9300000 |
|---|-----------|-----------|-----------|-----------|

---

Unique Subject Identifier=8623000000-0009

Assay variable : PTINR\_VAL1 PT-INR Value

N Mean Standard Deviation Minimum Maximum

---

|   |           |           |           |           |
|---|-----------|-----------|-----------|-----------|
| 2 | 1.9350000 | 0.0494975 | 1.9000000 | 1.9700000 |
|---|-----------|-----------|-----------|-----------|

---

Unique Subject Identifier=8623000000-0010

Assay variable : PTINR\_VAL1 PT-INR Value

N Mean Standard Deviation Minimum Maximum

---

|   |           |  |           |           |
|---|-----------|--|-----------|-----------|
| 1 | 1.7200000 |  | 1.7200000 | 1.7200000 |
|---|-----------|--|-----------|-----------|

---

Unique Subject Identifier=8623000000-0011



Assay variable : PTINR\_VAL1 PT-INR Value

N Mean Standard Deviation Minimum Maximum

---

|   |          |           |          |          |
|---|----------|-----------|----------|----------|
| 3 | 2.430000 | 0.2662705 | 2.180000 | 2.710000 |
|---|----------|-----------|----------|----------|

---

Laboratory tests at the time of obtaining Table 2-6 consent, according to the presence or absence of proton-pump inhibitors

Unique Subject Identifier=8623000000-0025

MEANS Procedure

Assay variable : PTINR\_VAL1 PT-INR Value

| N | Mean      | Standard Deviation | Minimum   | Maximum   |
|---|-----------|--------------------|-----------|-----------|
| 3 | 2.6033333 | 1.0813109          | 1.9200000 | 3.8500000 |

Unique Subject Identifier=8623000000-0030

Assay variable : PTINR\_VAL1 PT-INR Value

| N | Mean      | Standard Deviation | Minimum   | Maximum   |
|---|-----------|--------------------|-----------|-----------|
| 2 | 2.0000000 | 1.2727922          | 1.1000000 | 2.9000000 |

Unique Subject Identifier=9002010000-0051

Assay variable : PTINR\_VAL1 PT-INR Value

| N | Mean      | Standard Deviation | Minimum   | Maximum   |
|---|-----------|--------------------|-----------|-----------|
| 5 | 2.0380000 | 0.3810118          | 1.5400000 | 2.5500000 |

Unique Subject Identifier=9002010000-0067

Assay variable : PTINR\_VAL1 PT-INR Value

N Mean Standard Deviation Minimum Maximum

---

|   |           |           |           |           |
|---|-----------|-----------|-----------|-----------|
| 5 | 1.8720000 | 0.1495660 | 1.6300000 | 2.0200000 |
|---|-----------|-----------|-----------|-----------|

---

Laboratory tests at the time of obtaining Table 2-6 consent, according to the presence or absence of proton-pump inhibitors

Unique Subject Identifier=9002010000-0079

MEANS Procedure

Assay variable : PTINR\_VAL1 PT-INR Value

N Mean Standard Deviation Minimum Maximum

---

|   |           |           |           |           |
|---|-----------|-----------|-----------|-----------|
| 4 | 2.0350000 | 1.1125197 | 1.0500000 | 3.6300000 |
|---|-----------|-----------|-----------|-----------|

---

Unique Subject Identifier=9002010000-0088

Assay variable : PTINR\_VAL1 PT-INR Value

N Mean Standard Deviation Minimum Maximum

---

|   |           |           |           |           |
|---|-----------|-----------|-----------|-----------|
| 4 | 1.5800000 | 0.2423496 | 1.3800000 | 1.9300000 |
|---|-----------|-----------|-----------|-----------|

---

Unique Subject Identifier=9002010000-0139

Assay variable : PTINR\_VAL1 PT-INR Value

N Mean Standard Deviation Minimum Maximum

---

|   |           |           |           |           |
|---|-----------|-----------|-----------|-----------|
| 4 | 2.1200000 | 0.4318179 | 1.6100000 | 2.6000000 |
|---|-----------|-----------|-----------|-----------|

---

Unique Subject Identifier=9002010000-0164

Assay variable : PTINR\_VAL1 PT-INR Value

N Mean Standard Deviation Minimum Maximum

---

|   |           |           |           |           |
|---|-----------|-----------|-----------|-----------|
| 6 | 2.1116667 | 0.3227021 | 1.8600000 | 2.7100000 |
|---|-----------|-----------|-----------|-----------|

---

Laboratory tests at the time of obtaining Table 2-6 consent, according to the presence or absence of proton-pump inhibitors

Unique Subject Identifier=9002010000-0223

MEANS Procedure

Assay variable : PTINR\_VAL1 PT-INR Value

N Mean Standard Deviation Minimum Maximum

---

|   |           |           |           |           |
|---|-----------|-----------|-----------|-----------|
| 6 | 1.7866667 | 0.2677810 | 1.5100000 | 2.2500000 |
|---|-----------|-----------|-----------|-----------|

---

Unique Subject Identifier=9005000000-0007

Assay variable : PTINR\_VAL1 PT-INR Value

N Mean Standard Deviation Minimum Maximum

---

|   |           |           |           |           |
|---|-----------|-----------|-----------|-----------|
| 3 | 1.5000000 | 0.1442221 | 1.3800000 | 1.6600000 |
|---|-----------|-----------|-----------|-----------|

---

Unique Subject Identifier=9005000000-0015

Assay variable : PTINR\_VAL1 PT-INR Value

N Mean Standard Deviation Minimum Maximum

---

|   |           |           |           |           |
|---|-----------|-----------|-----------|-----------|
| 3 | 1.9733333 | 0.1357694 | 1.8300000 | 2.1000000 |
|---|-----------|-----------|-----------|-----------|

---

Unique Subject Identifier=9005000000-0023

Assay variable : PTINR\_VAL1 PT-INR Value

N Mean Standard Deviation Minimum Maximum

---

|   |           |           |           |           |
|---|-----------|-----------|-----------|-----------|
| 3 | 1.4833333 | 0.0923760 | 1.4300000 | 1.5900000 |
|---|-----------|-----------|-----------|-----------|

---

Laboratory tests at the time of obtaining Table 2-6 consent, according to the presence or absence of proton-pump inhibitors

Unique Subject Identifier=9005000000-0033

MEANS Procedure

Assay variable : PTINR\_VAL1 PT-INR Value

N Mean Standard Deviation Minimum Maximum

---

|   |           |           |           |           |
|---|-----------|-----------|-----------|-----------|
| 3 | 1.8233333 | 0.2218859 | 1.6200000 | 2.0600000 |
|---|-----------|-----------|-----------|-----------|

---

Unique Subject Identifier=9008010000-0006

Assay variable : PTINR\_VAL1 PT-INR Value

N Mean Standard Deviation Minimum Maximum

---

|   |           |           |           |           |
|---|-----------|-----------|-----------|-----------|
| 3 | 1.9466667 | 0.1858315 | 1.7400000 | 2.1000000 |
|---|-----------|-----------|-----------|-----------|

---

Unique Subject Identifier=9009010000-0001

Assay variable : PTINR\_VAL1 PT-INR Value

N Mean Standard Deviation Minimum Maximum

---

|   |           |           |           |           |
|---|-----------|-----------|-----------|-----------|
| 6 | 1.7666667 | 0.1512173 | 1.6000000 | 2.0100000 |
|---|-----------|-----------|-----------|-----------|

---

Unique Subject Identifier=9009010000-0017



Assay variable : PTINR\_VAL1 PT-INR Value

N Mean Standard Deviation Minimum Maximum

---

|   |           |           |           |           |
|---|-----------|-----------|-----------|-----------|
| 4 | 1.6525000 | 0.2736634 | 1.4200000 | 2.0400000 |
|---|-----------|-----------|-----------|-----------|

---

Laboratory tests at the time of obtaining Table 2-6 consent, according to the presence or absence of proton-pump inhibitors

Unique Subject Identifier=9009010000-0030

MEANS Procedure

Assay variable : PTINR\_VAL1 PT-INR Value

N Mean Standard Deviation Minimum Maximum

---

|   |           |           |           |           |
|---|-----------|-----------|-----------|-----------|
| 4 | 1.6875000 | 0.1787689 | 1.5200000 | 1.9400000 |
|---|-----------|-----------|-----------|-----------|

---

Unique Subject Identifier=9014000000-0002

Assay variable : PTINR\_VAL1 PT-INR Value

N Mean Standard Deviation Minimum Maximum

---

|   |           |           |           |           |
|---|-----------|-----------|-----------|-----------|
| 5 | 1.8480000 | 0.1758408 | 1.7000000 | 2.1400000 |
|---|-----------|-----------|-----------|-----------|

---

Unique Subject Identifier=9014000000-0003

Assay variable : PTINR\_VAL1 PT-INR Value

N Mean Standard Deviation Minimum Maximum

---

|   |           |           |           |           |
|---|-----------|-----------|-----------|-----------|
| 4 | 2.1700000 | 0.1529706 | 2.0300000 | 2.3800000 |
|---|-----------|-----------|-----------|-----------|

---

Unique Subject Identifier=9014000000-0004

Assay variable : PTINR\_VAL1 PT-INR Value

N Mean Standard Deviation Minimum Maximum

---

|   |           |           |           |           |
|---|-----------|-----------|-----------|-----------|
| 5 | 2.2540000 | 0.2352233 | 2.0200000 | 2.6400000 |
|---|-----------|-----------|-----------|-----------|

---

Laboratory tests at the time of obtaining Table 2-6 consent, according to the presence or absence of proton-pump inhibitors

Unique Subject Identifier=9014000000-0007

MEANS Procedure

Assay variable : PTINR\_VAL1 PT-INR Value

N Mean Standard Deviation Minimum Maximum

---

|   |           |           |           |           |
|---|-----------|-----------|-----------|-----------|
| 3 | 2.3133333 | 0.1569501 | 2.1900000 | 2.4900000 |
|---|-----------|-----------|-----------|-----------|

---

Unique Subject Identifier=9014000000-0010

Assay variable : PTINR\_VAL1 PT-INR Value

N Mean Standard Deviation Minimum Maximum

---

|   |           |           |           |           |
|---|-----------|-----------|-----------|-----------|
| 3 | 2.0033333 | 0.3700450 | 1.7700000 | 2.4300000 |
|---|-----------|-----------|-----------|-----------|

---

Unique Subject Identifier=9014000000-0021

Assay variable : PTINR\_VAL1 PT-INR Value

N Mean Standard Deviation Minimum Maximum

---

|   |           |           |           |           |
|---|-----------|-----------|-----------|-----------|
| 5 | 2.3020000 | 0.6430941 | 1.5200000 | 3.0900000 |
|---|-----------|-----------|-----------|-----------|

---

Unique Subject Identifier=9014000000-0022

Assay variable : PTINR\_VAL1 PT-INR Value

N Mean Standard Deviation Minimum Maximum

---

|   |           |           |           |           |
|---|-----------|-----------|-----------|-----------|
| 6 | 1.7750000 | 0.3111752 | 1.3500000 | 2.2400000 |
|---|-----------|-----------|-----------|-----------|

---

Laboratory tests at the time of obtaining Table 2-6 consent, according to the presence or absence of proton-pump inhibitors

Unique Subject Identifier=9014000000-0025

MEANS Procedure

Assay variable : PTINR\_VAL1 PT-INR Value

N Mean Standard Deviation Minimum Maximum

---

|   |           |           |           |           |
|---|-----------|-----------|-----------|-----------|
| 4 | 1.9575000 | 0.2604323 | 1.6400000 | 2.2700000 |
|---|-----------|-----------|-----------|-----------|

---

Unique Subject Identifier=9014000000-0027

Assay variable : PTINR\_VAL1 PT-INR Value

N Mean Standard Deviation Minimum Maximum

---

|   |           |           |           |           |
|---|-----------|-----------|-----------|-----------|
| 3 | 1.8500000 | 0.0692820 | 1.8100000 | 1.9300000 |
|---|-----------|-----------|-----------|-----------|

---

Unique Subject Identifier=9014000000-0028

Assay variable : PTINR\_VAL1 PT-INR Value

N Mean Standard Deviation Minimum Maximum

---

|   |           |           |           |           |
|---|-----------|-----------|-----------|-----------|
| 5 | 2.5640000 | 0.8219976 | 1.8500000 | 3.8300000 |
|---|-----------|-----------|-----------|-----------|

---

Unique Subject Identifier=9014000000-0029

Assay variable : PTINR\_VAL1 PT-INR Value

N Mean Standard Deviation Minimum Maximum

---

|   |           |           |           |           |
|---|-----------|-----------|-----------|-----------|
| 5 | 2.6740000 | 0.6759290 | 1.9800000 | 3.4800000 |
|---|-----------|-----------|-----------|-----------|

---

Laboratory tests at the time of obtaining Table 2-6 consent, according to the presence or absence of proton-pump inhibitors

Unique Subject Identifier=9014000000-0030

MEANS Procedure

Assay variable : PTINR\_VAL1 PT-INR Value

N Mean Standard Deviation Minimum Maximum

---

|   |           |           |           |           |
|---|-----------|-----------|-----------|-----------|
| 5 | 1.8000000 | 0.0751665 | 1.7200000 | 1.8800000 |
|---|-----------|-----------|-----------|-----------|

---

Unique Subject Identifier=9020011000-0005

Assay variable : PTINR\_VAL1 PT-INR Value

N Mean Standard Deviation Minimum Maximum

---

|   |           |           |           |           |
|---|-----------|-----------|-----------|-----------|
| 3 | 1.5033333 | 0.1850225 | 1.2900000 | 1.6200000 |
|---|-----------|-----------|-----------|-----------|

---

Unique Subject Identifier=9020011000-0028

Assay variable : PTINR\_VAL1 PT-INR Value

N Mean Standard Deviation Minimum Maximum

---

|   |           |           |           |           |
|---|-----------|-----------|-----------|-----------|
| 3 | 1.8933333 | 0.2294196 | 1.6300000 | 2.0500000 |
|---|-----------|-----------|-----------|-----------|

---

Unique Subject Identifier=9024000000-0002



Assay variable : PTINR\_VAL1 PT-INR Value

N Mean Standard Deviation Minimum Maximum

---

|   |           |           |           |           |
|---|-----------|-----------|-----------|-----------|
| 6 | 2.2916667 | 0.2705858 | 1.9500000 | 2.5700000 |
|---|-----------|-----------|-----------|-----------|

---

Laboratory tests at the time of obtaining Table 2-6 consent, according to the presence or absence of proton-pump inhibitors

Unique Subject Identifier=902400000-0007

MEANS Procedure

Assay variable : PTINR\_VAL1 PT-INR Value

N Mean Standard Deviation Minimum Maximum

---

|   |           |           |           |           |
|---|-----------|-----------|-----------|-----------|
| 3 | 2.5966667 | 0.2138535 | 2.4100000 | 2.8300000 |
|---|-----------|-----------|-----------|-----------|

---

Unique Subject Identifier=9031010000-0016

Assay variable : PTINR\_VAL1 PT-INR Value

N Mean Standard Deviation Minimum Maximum

---

|   |           |           |           |           |
|---|-----------|-----------|-----------|-----------|
| 3 | 2.0600000 | 0.2981610 | 1.8100000 | 2.3900000 |
|---|-----------|-----------|-----------|-----------|

---

Unique Subject Identifier=9032011000-0005

Assay variable : PTINR\_VAL1 PT-INR Value

N Mean Standard Deviation Minimum Maximum

---

|   |           |           |           |           |
|---|-----------|-----------|-----------|-----------|
| 4 | 2.1000000 | 0.2160247 | 1.8000000 | 2.3000000 |
|---|-----------|-----------|-----------|-----------|

---

Unique Subject Identifier=9032011000-0008

Assay variable : PTINR\_VAL1 PT-INR Value

N Mean Standard Deviation Minimum Maximum

---

|   |          |           |          |          |
|---|----------|-----------|----------|----------|
| 4 | 1.850000 | 0.6608076 | 1.400000 | 2.800000 |
|---|----------|-----------|----------|----------|

---

Laboratory tests at the time of obtaining Table 2-6 consent, according to the presence or absence of proton-pump inhibitors

Unique Subject Identifier=9035000000-0005

MEANS Procedure

Assay variable : PTINR\_VAL1 PT-INR Value

| N | Mean     | Standard Deviation | Minimum  | Maximum  |
|---|----------|--------------------|----------|----------|
| 3 | 2.350000 | 0.130000           | 2.200000 | 2.430000 |

Unique Subject Identifier=9035000000-0045

Assay variable : PTINR\_VAL1 PT-INR Value

| N | Mean     | Standard Deviation | Minimum  | Maximum  |
|---|----------|--------------------|----------|----------|
| 2 | 2.035000 | 0.0212132          | 2.020000 | 2.050000 |

Unique Subject Identifier=9035000000-0058

Assay variable : PTINR\_VAL1 PT-INR Value

| N | Mean     | Standard Deviation | Minimum  | Maximum  |
|---|----------|--------------------|----------|----------|
| 4 | 2.010000 | 0.5874805          | 1.240000 | 2.660000 |

Unique Subject Identifier=9035000000-0069

Assay variable : PTINR\_VAL1 PT-INR Value

N Mean Standard Deviation Minimum Maximum

---

|   |           |           |           |           |
|---|-----------|-----------|-----------|-----------|
| 3 | 1.8800000 | 0.1915724 | 1.7500000 | 2.1000000 |
|---|-----------|-----------|-----------|-----------|

---

Laboratory tests at the time of obtaining Table 2-6 consent, according to the presence or absence of proton-pump inhibitors

Unique Subject Identifier=9035000000-0081

MEANS Procedure

Assay variable : PTINR\_VAL1 PT-INR Value

N Mean Standard Deviation Minimum Maximum

---

|   |           |           |           |           |
|---|-----------|-----------|-----------|-----------|
| 6 | 1.6900000 | 0.2090933 | 1.3500000 | 1.9500000 |
|---|-----------|-----------|-----------|-----------|

---

Unique Subject Identifier=9035000000-0095

Assay variable : PTINR\_VAL1 PT-INR Value

N Mean Standard Deviation Minimum Maximum

---

|   |           |           |           |           |
|---|-----------|-----------|-----------|-----------|
| 3 | 1.9266667 | 0.0650641 | 1.8600000 | 1.9900000 |
|---|-----------|-----------|-----------|-----------|

---

Unique Subject Identifier=9035000000-0100

Assay variable : PTINR\_VAL1 PT-INR Value

N Mean Standard Deviation Minimum Maximum

---

|   |           |           |           |           |
|---|-----------|-----------|-----------|-----------|
| 4 | 1.7525000 | 0.6388205 | 0.9800000 | 2.4400000 |
|---|-----------|-----------|-----------|-----------|

---

Unique Subject Identifier=9037000010-0006

Assay variable : PTINR\_VAL1 PT-INR Value

N Mean Standard Deviation Minimum Maximum

---

|   |           |           |           |           |
|---|-----------|-----------|-----------|-----------|
| 2 | 1.8450000 | 0.3606245 | 1.5900000 | 2.1000000 |
|---|-----------|-----------|-----------|-----------|

---

Laboratory tests at the time of obtaining Table 2-6 consent, according to the presence or absence of proton-pump inhibitors

Unique Subject Identifier=9040011000-0003

MEANS Procedure

Assay variable : PTINR\_VAL1 PT-INR Value

N Mean Standard Deviation Minimum Maximum

---

|   |           |           |           |           |
|---|-----------|-----------|-----------|-----------|
| 4 | 1.8200000 | 0.0336650 | 1.7800000 | 1.8600000 |
|---|-----------|-----------|-----------|-----------|

---

Unique Subject Identifier=9047000000-0011

Assay variable : PTINR\_VAL1 PT-INR Value

N Mean Standard Deviation Minimum Maximum

---

|   |           |           |           |           |
|---|-----------|-----------|-----------|-----------|
| 3 | 1.1000000 | 0.1153256 | 1.0100000 | 1.2300000 |
|---|-----------|-----------|-----------|-----------|

---

Unique Subject Identifier=9047000000-0012

Assay variable : PTINR\_VAL1 PT-INR Value

N Mean Standard Deviation Minimum Maximum

---

|   |           |           |           |           |
|---|-----------|-----------|-----------|-----------|
| 4 | 1.5700000 | 0.2437212 | 1.4200000 | 1.9300000 |
|---|-----------|-----------|-----------|-----------|

---

Unique Subject Identifier=9047000000-0013



Assay variable : PTINR\_VAL1 PT-INR Value

N Mean Standard Deviation Minimum Maximum

---

|   |           |           |           |           |
|---|-----------|-----------|-----------|-----------|
| 3 | 1.7666667 | 0.1361372 | 1.6600000 | 1.9200000 |
|---|-----------|-----------|-----------|-----------|

---

Laboratory tests at the time of obtaining Table 2-6 consent, according to the presence or absence of proton-pump inhibitors

Unique Subject Identifier=9047000000-0014

MEANS Procedure

Assay variable : PTINR\_VAL1 PT-INR Value

N Mean Standard Deviation Minimum Maximum

---

|   |           |           |           |           |
|---|-----------|-----------|-----------|-----------|
| 4 | 2.3525000 | 0.5212405 | 1.6800000 | 2.8900000 |
|---|-----------|-----------|-----------|-----------|

---

Unique Subject Identifier=9047000000-0015

Assay variable : PTINR\_VAL1 PT-INR Value

N Mean Standard Deviation Minimum Maximum

---

|   |           |           |           |           |
|---|-----------|-----------|-----------|-----------|
| 2 | 1.7500000 | 0.2404163 | 1.5800000 | 1.9200000 |
|---|-----------|-----------|-----------|-----------|

---

Unique Subject Identifier=9047000000-0017

Assay variable : PTINR\_VAL1 PT-INR Value

N Mean Standard Deviation Minimum Maximum

---

|   |           |           |           |           |
|---|-----------|-----------|-----------|-----------|
| 5 | 1.8880000 | 0.1759830 | 1.6800000 | 2.0700000 |
|---|-----------|-----------|-----------|-----------|

---

Unique Subject Identifier=9047000000-0019

Assay variable : PTINR\_VAL1 PT-INR Value

N Mean Standard Deviation Minimum Maximum

---

|   |           |           |           |           |
|---|-----------|-----------|-----------|-----------|
| 4 | 1.6550000 | 0.4173328 | 1.1100000 | 2.0200000 |
|---|-----------|-----------|-----------|-----------|

---

Laboratory tests at the time of obtaining Table 2-6 consent, according to the presence or absence of proton-pump inhibitors

Unique Subject Identifier=9055000000-0001

MEANS Procedure

Assay variable : PTINR\_VAL1 PT-INR Value

N Mean Standard Deviation Minimum Maximum

---

|   |           |           |           |           |
|---|-----------|-----------|-----------|-----------|
| 4 | 1.6950000 | 0.2852484 | 1.4300000 | 2.1000000 |
|---|-----------|-----------|-----------|-----------|

---

Unique Subject Identifier=9055000000-0002

Assay variable : PTINR\_VAL1 PT-INR Value

N Mean Standard Deviation Minimum Maximum

---

|   |           |           |           |           |
|---|-----------|-----------|-----------|-----------|
| 4 | 1.6700000 | 0.1842100 | 1.5000000 | 1.9300000 |
|---|-----------|-----------|-----------|-----------|

---

Unique Subject Identifier=9057000000-0006

Assay variable : PTINR\_VAL1 PT-INR Value

N Mean Standard Deviation Minimum Maximum

---

|   |           |           |           |           |
|---|-----------|-----------|-----------|-----------|
| 3 | 2.0800000 | 0.0600000 | 2.0200000 | 2.1400000 |
|---|-----------|-----------|-----------|-----------|

---

Unique Subject Identifier=9057000000-0007

Assay variable : PTINR\_VAL1 PT-INR Value

N Mean Standard Deviation Minimum Maximum

---

|   |           |           |           |           |
|---|-----------|-----------|-----------|-----------|
| 5 | 1.7260000 | 0.1522498 | 1.5600000 | 1.9500000 |
|---|-----------|-----------|-----------|-----------|

---

Laboratory tests at the time of obtaining Table 2-6 consent, according to the presence or absence of proton-pump inhibitors

Unique Subject Identifier=9057000000-0010

MEANS Procedure

Assay variable : PTINR\_VAL1 PT-INR Value

| N | Mean      | Standard Deviation | Minimum   | Maximum   |
|---|-----------|--------------------|-----------|-----------|
| 3 | 1.8133333 | 0.2470493          | 1.5500000 | 2.0400000 |

Unique Subject Identifier=9057000000-0011

Assay variable : PTINR\_VAL1 PT-INR Value

| N | Mean      | Standard Deviation | Minimum   | Maximum   |
|---|-----------|--------------------|-----------|-----------|
| 5 | 1.8460000 | 0.3114964          | 1.5000000 | 2.3300000 |

Unique Subject Identifier=9057000000-0015

Assay variable : PTINR\_VAL1 PT-INR Value

| N | Mean      | Standard Deviation | Minimum   | Maximum   |
|---|-----------|--------------------|-----------|-----------|
| 4 | 2.1025000 | 0.4014453          | 1.8500000 | 2.7000000 |

Unique Subject Identifier=9100001000-0004

Assay variable : PTINR\_VAL1 PT-INR Value

N Mean Standard Deviation Minimum Maximum

---

|   |           |           |           |           |
|---|-----------|-----------|-----------|-----------|
| 3 | 2.2366667 | 0.1761628 | 2.0400000 | 2.3800000 |
|---|-----------|-----------|-----------|-----------|

---

Laboratory tests at the time of obtaining Table 2-6 consent, according to the presence or absence of proton-pump inhibitors

Unique Subject Identifier=9100001000-0005

MEANS Procedure

Assay variable : PTINR\_VAL1 PT-INR Value

N Mean Standard Deviation Minimum Maximum

---

|   |           |           |           |           |
|---|-----------|-----------|-----------|-----------|
| 5 | 1.8000000 | 0.3383046 | 1.4400000 | 2.2900000 |
|---|-----------|-----------|-----------|-----------|

---

Unique Subject Identifier=9100001000-0006

Assay variable : PTINR\_VAL1 PT-INR Value

N Mean Standard Deviation Minimum Maximum

---

|   |           |           |           |           |
|---|-----------|-----------|-----------|-----------|
| 3 | 1.9733333 | 0.0986577 | 1.8600000 | 2.0400000 |
|---|-----------|-----------|-----------|-----------|

---

Unique Subject Identifier=9100001000-0011

Assay variable : PTINR\_VAL1 PT-INR Value

N Mean Standard Deviation Minimum Maximum

---

|   |           |           |           |           |
|---|-----------|-----------|-----------|-----------|
| 4 | 1.8975000 | 0.0754431 | 1.7900000 | 1.9500000 |
|---|-----------|-----------|-----------|-----------|

---

Unique Subject Identifier=9100001000-0013



Assay variable : PTINR\_VAL1 PT-INR Value

N Mean Standard Deviation Minimum Maximum

---

|   |           |           |           |           |
|---|-----------|-----------|-----------|-----------|
| 3 | 1.9266667 | 0.3707200 | 1.5100000 | 2.2200000 |
|---|-----------|-----------|-----------|-----------|

---

Laboratory tests at the time of obtaining Table 2-6 consent, according to the presence or absence of proton-pump inhibitors

Unique Subject Identifier=9100001000-0014

MEANS Procedure

Assay variable : PTINR\_VAL1 PT-INR Value

N Mean Standard Deviation Minimum Maximum

---

|   |           |           |           |           |
|---|-----------|-----------|-----------|-----------|
| 5 | 2.4900000 | 0.4428882 | 1.7600000 | 2.8500000 |
|---|-----------|-----------|-----------|-----------|

---

Unique Subject Identifier=9100001000-0016

Assay variable : PTINR\_VAL1 PT-INR Value

N Mean Standard Deviation Minimum Maximum

---

|   |           |           |           |           |
|---|-----------|-----------|-----------|-----------|
| 4 | 1.8700000 | 0.4128761 | 1.4600000 | 2.3500000 |
|---|-----------|-----------|-----------|-----------|

---

Unique Subject Identifier=9100001000-0021

Assay variable : PTINR\_VAL1 PT-INR Value

N Mean Standard Deviation Minimum Maximum

---

|   |           |           |           |           |
|---|-----------|-----------|-----------|-----------|
| 2 | 1.7300000 | 0.0848528 | 1.6700000 | 1.7900000 |
|---|-----------|-----------|-----------|-----------|

---

Unique Subject Identifier=9100001000-0026

Assay variable : PTINR\_VAL1 PT-INR Value

N Mean Standard Deviation Minimum Maximum

---

|   |           |           |           |           |
|---|-----------|-----------|-----------|-----------|
| 4 | 2.3650000 | 0.7005474 | 1.6800000 | 3.2600000 |
|---|-----------|-----------|-----------|-----------|

---

Laboratory tests at the time of obtaining Table 2-6 consent, according to the presence or absence of proton-pump inhibitors

Unique Subject Identifier=9100001000-0027

MEANS Procedure

Assay variable : PTINR\_VAL1 PT-INR Value

N Mean Standard Deviation Minimum Maximum

---

|   |           |           |           |           |
|---|-----------|-----------|-----------|-----------|
| 4 | 2.6375000 | 2.0399244 | 1.4300000 | 5.6900000 |
|---|-----------|-----------|-----------|-----------|

---

Unique Subject Identifier=9101010000-0001

Assay variable : PTINR\_VAL1 PT-INR Value

N Mean Standard Deviation Minimum Maximum

---

|   |           |           |           |           |
|---|-----------|-----------|-----------|-----------|
| 3 | 2.0000000 | 0.3605551 | 1.7000000 | 2.4000000 |
|---|-----------|-----------|-----------|-----------|

---

Unique Subject Identifier=9101010000-0002

Assay variable : PTINR\_VAL1 PT-INR Value

N Mean Standard Deviation Minimum Maximum

---

|   |           |           |           |           |
|---|-----------|-----------|-----------|-----------|
| 4 | 2.8000000 | 0.8602325 | 1.9000000 | 3.9000000 |
|---|-----------|-----------|-----------|-----------|

---

Unique Subject Identifier=9101010000-0004

Assay variable : PTINR\_VAL1 PT-INR Value

N Mean Standard Deviation Minimum Maximum

---

|   |          |          |          |          |
|---|----------|----------|----------|----------|
| 5 | 2.140000 | 0.219089 | 1.800000 | 2.400000 |
|---|----------|----------|----------|----------|

---

Laboratory tests at the time of obtaining Table 2-6 consent, according to the presence or absence of proton-pump inhibitors

Unique Subject Identifier=9101010000-0008

MEANS Procedure

Assay variable : PTINR\_VAL1 PT-INR Value

N Mean Standard Deviation Minimum Maximum

---

|   |           |           |           |           |
|---|-----------|-----------|-----------|-----------|
| 2 | 1.7000000 | 0.1414214 | 1.6000000 | 1.8000000 |
|---|-----------|-----------|-----------|-----------|

---

Unique Subject Identifier=9101010000-0010

Assay variable : PTINR\_VAL1 PT-INR Value

N Mean Standard Deviation Minimum Maximum

---

|   |           |           |           |           |
|---|-----------|-----------|-----------|-----------|
| 3 | 1.5666667 | 0.1154701 | 1.5000000 | 1.7000000 |
|---|-----------|-----------|-----------|-----------|

---

Unique Subject Identifier=9101010000-0011

Assay variable : PTINR\_VAL1 PT-INR Value

N Mean Standard Deviation Minimum Maximum

---

|   |           |           |           |           |
|---|-----------|-----------|-----------|-----------|
| 3 | 1.5333333 | 0.1154701 | 1.4000000 | 1.6000000 |
|---|-----------|-----------|-----------|-----------|

---

Unique Subject Identifier=9101010000-0018

Assay variable : PTINR\_VAL1 PT-INR Value

N Mean Standard Deviation Minimum Maximum

---

|   |          |          |          |          |
|---|----------|----------|----------|----------|
| 3 | 2.000000 | 0.200000 | 1.800000 | 2.200000 |
|---|----------|----------|----------|----------|

---

Laboratory tests at the time of obtaining Table 2-6 consent, according to the presence or absence of proton-pump inhibitors

Unique Subject Identifier=9101010000-0021

MEANS Procedure

Assay variable : PTINR\_VAL1 PT-INR Value

N Mean Standard Deviation Minimum Maximum

---

|   |           |           |           |           |
|---|-----------|-----------|-----------|-----------|
| 3 | 1.3666667 | 0.1154701 | 1.3000000 | 1.5000000 |
|---|-----------|-----------|-----------|-----------|

---

Unique Subject Identifier=9101010000-0022

Assay variable : PTINR\_VAL1 PT-INR Value

N Mean Standard Deviation Minimum Maximum

---

|   |           |           |           |           |
|---|-----------|-----------|-----------|-----------|
| 3 | 2.8000000 | 1.5000000 | 1.3000000 | 4.3000000 |
|---|-----------|-----------|-----------|-----------|

---

Unique Subject Identifier=9101010000-0025

Assay variable : PTINR\_VAL1 PT-INR Value

N Mean Standard Deviation Minimum Maximum

---

|   |           |           |           |           |
|---|-----------|-----------|-----------|-----------|
| 3 | 2.1333333 | 0.8020806 | 1.3000000 | 2.9000000 |
|---|-----------|-----------|-----------|-----------|

---

Unique Subject Identifier=9101010000-0028



Assay variable : PTINR\_VAL1 PT-INR Value

N Mean Standard Deviation Minimum Maximum

---

|   |           |           |           |           |
|---|-----------|-----------|-----------|-----------|
| 2 | 1.3000000 | 0.1414214 | 1.2000000 | 1.4000000 |
|---|-----------|-----------|-----------|-----------|

---

Laboratory tests at the time of obtaining Table 2-6 consent, according to the presence or absence of proton-pump inhibitors

Unique Subject Identifier=9101010000-0037

MEANS Procedure

Assay variable : PTINR\_VAL1 PT-INR Value

N Mean Standard Deviation Minimum Maximum

---

|   |           |           |           |           |
|---|-----------|-----------|-----------|-----------|
| 3 | 1.2666667 | 0.2886751 | 1.1000000 | 1.6000000 |
|---|-----------|-----------|-----------|-----------|

---

Unique Subject Identifier=9101010000-0038

Assay variable : PTINR\_VAL1 PT-INR Value

N Mean Standard Deviation Minimum Maximum

---

|   |           |           |           |           |
|---|-----------|-----------|-----------|-----------|
| 6 | 2.4000000 | 0.3687818 | 2.1000000 | 3.0000000 |
|---|-----------|-----------|-----------|-----------|

---

Unique Subject Identifier=9101010000-0040

Assay variable : PTINR\_VAL1 PT-INR Value

N Mean Standard Deviation Minimum Maximum

---

|   |           |           |           |           |
|---|-----------|-----------|-----------|-----------|
| 4 | 1.4750000 | 0.2629956 | 1.2000000 | 1.7000000 |
|---|-----------|-----------|-----------|-----------|

---

Unique Subject Identifier=9104000000-0002

Assay variable : PTINR\_VAL1 PT-INR Value

N Mean Standard Deviation Minimum Maximum

---

|   |           |           |           |           |
|---|-----------|-----------|-----------|-----------|
| 4 | 2.2725000 | 0.3339037 | 2.0700000 | 2.7700000 |
|---|-----------|-----------|-----------|-----------|

---

Laboratory tests at the time of obtaining Table 2-6 consent, according to the presence or absence of proton-pump inhibitors

Unique Subject Identifier=9105000000-0011

MEANS Procedure

Assay variable : PTINR\_VAL1 PT-INR Value

N Mean Standard Deviation Minimum Maximum

---

|   |           |           |           |           |
|---|-----------|-----------|-----------|-----------|
| 4 | 2.0950000 | 0.2757414 | 1.7000000 | 2.3300000 |
|---|-----------|-----------|-----------|-----------|

---

Unique Subject Identifier=9105000000-0016

Assay variable : PTINR\_VAL1 PT-INR Value

N Mean Standard Deviation Minimum Maximum

---

|   |           |           |           |           |
|---|-----------|-----------|-----------|-----------|
| 2 | 2.4500000 | 0.2545584 | 2.2700000 | 2.6300000 |
|---|-----------|-----------|-----------|-----------|

---

Unique Subject Identifier=9105000000-0023

Assay variable : PTINR\_VAL1 PT-INR Value

N Mean Standard Deviation Minimum Maximum

---

|   |           |           |           |           |
|---|-----------|-----------|-----------|-----------|
| 3 | 1.8933333 | 0.2514624 | 1.7100000 | 2.1800000 |
|---|-----------|-----------|-----------|-----------|

---

Unique Subject Identifier=9108011111-0005

Assay variable : PTINR\_VAL1 PT-INR Value

N Mean Standard Deviation Minimum Maximum

---

|   |           |           |           |           |
|---|-----------|-----------|-----------|-----------|
| 6 | 2.2700000 | 0.2148488 | 1.9700000 | 2.5000000 |
|---|-----------|-----------|-----------|-----------|

---

Laboratory tests at the time of obtaining Table 2-6 consent, according to the presence or absence of proton-pump inhibitors

Unique Subject Identifier=912400000-0001

MEANS Procedure

Assay variable : PTINR\_VAL1 PT-INR Value

| N | Mean     | Standard Deviation | Minimum  | Maximum  |
|---|----------|--------------------|----------|----------|
| 3 | 2.240000 | 0.2357965          | 2.040000 | 2.500000 |

Unique Subject Identifier=912700000-0011

Assay variable : PTINR\_VAL1 PT-INR Value

| N | Mean     | Standard Deviation | Minimum  | Maximum  |
|---|----------|--------------------|----------|----------|
| 5 | 2.078000 | 0.3126020          | 1.780000 | 2.520000 |

Unique Subject Identifier=912700000-0012

Assay variable : PTINR\_VAL1 PT-INR Value

| N | Mean     | Standard Deviation | Minimum  | Maximum  |
|---|----------|--------------------|----------|----------|
| 3 | 2.403333 | 0.1001665          | 2.290000 | 2.480000 |

Unique Subject Identifier=913500000-0008

Assay variable : PTINR\_VAL1 PT-INR Value

N Mean Standard Deviation Minimum Maximum

---

|   |           |  |           |           |
|---|-----------|--|-----------|-----------|
| 1 | 2.3900000 |  | 2.3900000 | 2.3900000 |
|---|-----------|--|-----------|-----------|

---

Laboratory tests at the time of obtaining Table 2-6 consent, according to the presence or absence of proton-pump inhibitors

Unique Subject Identifier=9136010000-0003

MEANS Procedure

Assay variable : PTINR\_VAL1 PT-INR Value

N Mean Standard Deviation Minimum Maximum

---

|   |           |           |           |           |
|---|-----------|-----------|-----------|-----------|
| 3 | 2.0733333 | 0.2050203 | 1.9500000 | 2.3100000 |
|---|-----------|-----------|-----------|-----------|

---

Unique Subject Identifier=9136010000-0005

Assay variable : PTINR\_VAL1 PT-INR Value

N Mean Standard Deviation Minimum Maximum

---

|   |           |           |           |           |
|---|-----------|-----------|-----------|-----------|
| 4 | 1.8575000 | 0.3407223 | 1.5800000 | 2.3100000 |
|---|-----------|-----------|-----------|-----------|

---

Unique Subject Identifier=9136010000-0008

Assay variable : PTINR\_VAL1 PT-INR Value

N Mean Standard Deviation Minimum Maximum

---

|   |           |           |           |           |
|---|-----------|-----------|-----------|-----------|
| 3 | 1.4733333 | 0.2055075 | 1.3400000 | 1.7100000 |
|---|-----------|-----------|-----------|-----------|

---

Unique Subject Identifier=9136010000-0009



Assay variable : PTINR\_VAL1 PT-INR Value

N Mean Standard Deviation Minimum Maximum

---

|   |           |           |           |           |
|---|-----------|-----------|-----------|-----------|
| 3 | 2.0366667 | 0.3555747 | 1.6700000 | 2.3800000 |
|---|-----------|-----------|-----------|-----------|

---

Laboratory tests at the time of obtaining Table 2-6 consent, according to the presence or absence of proton-pump inhibitors

Unique Subject Identifier=9136010000-0010

MEANS Procedure

Assay variable : PTINR\_VAL1 PT-INR Value

N Mean Standard Deviation Minimum Maximum

---

|   |          |           |          |          |
|---|----------|-----------|----------|----------|
| 3 | 1.850000 | 0.2858321 | 1.530000 | 2.080000 |
|---|----------|-----------|----------|----------|

---

Unique Subject Identifier=9136010000-0012

Assay variable : PTINR\_VAL1 PT-INR Value

N Mean Standard Deviation Minimum Maximum

---

|   |          |           |          |          |
|---|----------|-----------|----------|----------|
| 4 | 2.155000 | 0.1791647 | 1.960000 | 2.360000 |
|---|----------|-----------|----------|----------|

---

Unique Subject Identifier=9136010000-0015

Assay variable : PTINR\_VAL1 PT-INR Value

N Mean Standard Deviation Minimum Maximum

---

|   |          |           |          |          |
|---|----------|-----------|----------|----------|
| 3 | 2.513333 | 0.4801389 | 2.100000 | 3.040000 |
|---|----------|-----------|----------|----------|

---

Unique Subject Identifier=9136010000-0019

Assay variable : PTINR\_VAL1 PT-INR Value

N Mean Standard Deviation Minimum Maximum

---

|   |           |           |           |           |
|---|-----------|-----------|-----------|-----------|
| 3 | 1.8533333 | 0.1662328 | 1.7000000 | 2.0300000 |
|---|-----------|-----------|-----------|-----------|

---

Laboratory tests at the time of obtaining Table 2-6 consent, according to the presence or absence of proton-pump inhibitors

Unique Subject Identifier=9136010000-0035

MEANS Procedure

Assay variable : PTINR\_VAL1 PT-INR Value

| N | Mean      | Standard Deviation | Minimum   | Maximum   |
|---|-----------|--------------------|-----------|-----------|
| 3 | 1.7700000 | 0.2264950          | 1.5600000 | 2.0100000 |

Unique Subject Identifier=9136010000-0040

Assay variable : PTINR\_VAL1 PT-INR Value

| N | Mean      | Standard Deviation | Minimum   | Maximum   |
|---|-----------|--------------------|-----------|-----------|
| 3 | 1.4800000 | 0.3364521          | 1.2200000 | 1.8600000 |

Unique Subject Identifier=9141000000-0001

Assay variable : PTINR\_VAL1 PT-INR Value

| N | Mean      | Standard Deviation | Minimum   | Maximum   |
|---|-----------|--------------------|-----------|-----------|
| 4 | 2.0550000 | 0.1330413          | 1.8600000 | 2.1600000 |

Unique Subject Identifier=9141000000-0003

Assay variable : PTINR\_VAL1 PT-INR Value

N Mean Standard Deviation Minimum Maximum

---

|   |          |           |          |          |
|---|----------|-----------|----------|----------|
| 5 | 2.160000 | 0.3426368 | 1.570000 | 2.460000 |
|---|----------|-----------|----------|----------|

---

Laboratory tests at the time of obtaining Table 2-6 consent, according to the presence or absence of proton-pump inhibitors

Unique Subject Identifier=914100000-0004

MEANS Procedure

Assay variable : PTINR\_VAL1 PT-INR Value

N Mean Standard Deviation Minimum Maximum

---

|   |           |           |           |           |
|---|-----------|-----------|-----------|-----------|
| 3 | 1.9000000 | 0.1833030 | 1.7000000 | 2.0600000 |
|---|-----------|-----------|-----------|-----------|

---

Unique Subject Identifier=914100000-0007

Assay variable : PTINR\_VAL1 PT-INR Value

N Mean Standard Deviation Minimum Maximum

---

|   |           |           |           |           |
|---|-----------|-----------|-----------|-----------|
| 6 | 1.9016667 | 0.2760012 | 1.5000000 | 2.1600000 |
|---|-----------|-----------|-----------|-----------|

---

Unique Subject Identifier=9142010000-0009

Assay variable : PTINR\_VAL1 PT-INR Value

N Mean Standard Deviation Minimum Maximum

---

|   |           |           |           |           |
|---|-----------|-----------|-----------|-----------|
| 3 | 1.3900000 | 0.0818535 | 1.3200000 | 1.4800000 |
|---|-----------|-----------|-----------|-----------|

---

Unique Subject Identifier=9142010000-0017

Assay variable : PTINR\_VAL1 PT-INR Value

N Mean Standard Deviation Minimum Maximum

---

|   |           |  |           |           |
|---|-----------|--|-----------|-----------|
| 1 | 2.0800000 |  | 2.0800000 | 2.0800000 |
|---|-----------|--|-----------|-----------|

---

Laboratory tests at the time of obtaining Table 2-6 consent, according to the presence or absence of proton-pump inhibitors

Unique Subject Identifier=9142010000-0026

MEANS Procedure

Assay variable : PTINR\_VAL1 PT-INR Value

N Mean Standard Deviation Minimum Maximum

---

|   |           |           |           |           |
|---|-----------|-----------|-----------|-----------|
| 3 | 2.2733333 | 0.0351188 | 2.2400000 | 2.3100000 |
|---|-----------|-----------|-----------|-----------|

---

Unique Subject Identifier=9142010000-0029

Assay variable : PTINR\_VAL1 PT-INR Value

N Mean Standard Deviation Minimum Maximum

---

|   |           |           |           |           |
|---|-----------|-----------|-----------|-----------|
| 3 | 1.8100000 | 0.0556776 | 1.7600000 | 1.8700000 |
|---|-----------|-----------|-----------|-----------|

---

Unique Subject Identifier=9142010000-0034

Assay variable : PTINR\_VAL1 PT-INR Value

N Mean Standard Deviation Minimum Maximum

---

|   |           |  |           |           |
|---|-----------|--|-----------|-----------|
| 1 | 1.3500000 |  | 1.3500000 | 1.3500000 |
|---|-----------|--|-----------|-----------|

---

Unique Subject Identifier=9148000000-0006



Assay variable : PTINR\_VAL1 PT-INR Value

N Mean Standard Deviation Minimum Maximum

---

|   |           |           |           |           |
|---|-----------|-----------|-----------|-----------|
| 6 | 2.4450000 | 0.6390853 | 1.5200000 | 3.4200000 |
|---|-----------|-----------|-----------|-----------|

---

Laboratory tests at the time of obtaining Table 2-6 consent, according to the presence or absence of proton-pump inhibitors

Unique Subject Identifier=914800000-0007

MEANS Procedure

Assay variable : PTINR\_VAL1 PT-INR Value

N Mean Standard Deviation Minimum Maximum

---

|   |           |           |           |           |
|---|-----------|-----------|-----------|-----------|
| 5 | 1.9100000 | 0.3306055 | 1.4400000 | 2.3000000 |
|---|-----------|-----------|-----------|-----------|

---

Unique Subject Identifier=914800000-0010

Assay variable : PTINR\_VAL1 PT-INR Value

N Mean Standard Deviation Minimum Maximum

---

|   |           |           |           |           |
|---|-----------|-----------|-----------|-----------|
| 2 | 2.1450000 | 0.3323402 | 1.9100000 | 2.3800000 |
|---|-----------|-----------|-----------|-----------|

---

Unique Subject Identifier=914800000-0013

Assay variable : PTINR\_VAL1 PT-INR Value

N Mean Standard Deviation Minimum Maximum

---

|   |           |           |           |           |
|---|-----------|-----------|-----------|-----------|
| 4 | 1.6500000 | 0.0860233 | 1.5500000 | 1.7600000 |
|---|-----------|-----------|-----------|-----------|

---

Unique Subject Identifier=9154010000-0005

Assay variable : PTINR\_VAL1 PT-INR Value

N Mean Standard Deviation Minimum Maximum

---

|   |          |           |          |          |
|---|----------|-----------|----------|----------|
| 4 | 2.400000 | 0.1449138 | 2.230000 | 2.560000 |
|---|----------|-----------|----------|----------|

---

Laboratory tests at the time of obtaining Table 2-6 consent, according to the presence or absence of proton-pump inhibitors

Unique Subject Identifier=9154010000-0011

MEANS Procedure

Assay variable : PTINR\_VAL1 PT-INR Value

N Mean Standard Deviation Minimum Maximum

---

|   |           |           |           |           |
|---|-----------|-----------|-----------|-----------|
| 4 | 2.0875000 | 0.3872445 | 1.5300000 | 2.3600000 |
|---|-----------|-----------|-----------|-----------|

---

Unique Subject Identifier=9154010000-0012

Assay variable : PTINR\_VAL1 PT-INR Value

N Mean Standard Deviation Minimum Maximum

---

|   |           |           |           |           |
|---|-----------|-----------|-----------|-----------|
| 4 | 2.4750000 | 0.9984488 | 1.6500000 | 3.7900000 |
|---|-----------|-----------|-----------|-----------|

---

Unique Subject Identifier=9154010000-0014

Assay variable : PTINR\_VAL1 PT-INR Value

N Mean Standard Deviation Minimum Maximum

---

|   |           |           |           |           |
|---|-----------|-----------|-----------|-----------|
| 4 | 2.0575000 | 0.1883923 | 1.8400000 | 2.3000000 |
|---|-----------|-----------|-----------|-----------|

---

Unique Subject Identifier=9154010000-0019

Assay variable : PTINR\_VAL1 PT-INR Value

N Mean Standard Deviation Minimum Maximum

---

|   |           |           |           |           |
|---|-----------|-----------|-----------|-----------|
| 6 | 1.9866667 | 0.4823553 | 1.2700000 | 2.6300000 |
|---|-----------|-----------|-----------|-----------|

---

Laboratory tests at the time of obtaining Table 2-6 consent, according to the presence or absence of proton-pump inhibitors

Unique Subject Identifier=9154010000-0028

MEANS Procedure

Assay variable : PTINR\_VAL1 PT-INR Value

N Mean Standard Deviation Minimum Maximum

---

|   |           |           |           |           |
|---|-----------|-----------|-----------|-----------|
| 6 | 1.2216667 | 0.0861201 | 1.1400000 | 1.3900000 |
|---|-----------|-----------|-----------|-----------|

---

Unique Subject Identifier=9164000000-0002

Assay variable : PTINR\_VAL1 PT-INR Value

N Mean Standard Deviation Minimum Maximum

---

|   |           |           |           |           |
|---|-----------|-----------|-----------|-----------|
| 6 | 2.3750000 | 0.1931580 | 2.0500000 | 2.6100000 |
|---|-----------|-----------|-----------|-----------|

---

Unique Subject Identifier=9164000000-0003

Assay variable : PTINR\_VAL1 PT-INR Value

N Mean Standard Deviation Minimum Maximum

---

|   |           |           |           |           |
|---|-----------|-----------|-----------|-----------|
| 6 | 2.1133333 | 0.5858214 | 1.2700000 | 2.7400000 |
|---|-----------|-----------|-----------|-----------|

---

Unique Subject Identifier=9164000000-0005

Assay variable : PTINR\_VAL1 PT-INR Value

N Mean Standard Deviation Minimum Maximum

---

|   |           |           |           |           |
|---|-----------|-----------|-----------|-----------|
| 6 | 1.9916667 | 0.2276327 | 1.6500000 | 2.3600000 |
|---|-----------|-----------|-----------|-----------|

---

Laboratory tests at the time of obtaining Table 2-6 consent, according to the presence or absence of proton-pump inhibitors

Unique Subject Identifier=916400000-0006

MEANS Procedure

Assay variable : PTINR\_VAL1 PT-INR Value

| N | Mean      | Standard Deviation | Minimum   | Maximum   |
|---|-----------|--------------------|-----------|-----------|
| 3 | 2.4333333 | 0.6278800          | 1.9800000 | 3.1500000 |

Unique Subject Identifier=916400000-0012

Assay variable : PTINR\_VAL1 PT-INR Value

| N | Mean      | Standard Deviation | Minimum   | Maximum   |
|---|-----------|--------------------|-----------|-----------|
| 3 | 2.0300000 | 0.1212436          | 1.9000000 | 2.1400000 |

Unique Subject Identifier=916400000-0013

Assay variable : PTINR\_VAL1 PT-INR Value

| N | Mean      | Standard Deviation | Minimum   | Maximum   |
|---|-----------|--------------------|-----------|-----------|
| 1 | 1.8300000 |                    | 1.8300000 | 1.8300000 |

Unique Subject Identifier=916600000-0008



Assay variable : PTINR\_VAL1 PT-INR Value

N Mean Standard Deviation Minimum Maximum

---

|   |           |           |           |           |
|---|-----------|-----------|-----------|-----------|
| 3 | 1.8900000 | 0.4396590 | 1.5300000 | 2.3800000 |
|---|-----------|-----------|-----------|-----------|

---

Laboratory tests at the time of obtaining Table 2-6 consent, according to the presence or absence of proton-pump inhibitors

Unique Subject Identifier=9210000100-0017

MEANS Procedure

Assay variable : PTINR\_VAL1 PT-INR Value

N Mean Standard Deviation Minimum Maximum

---

|   |           |           |           |           |
|---|-----------|-----------|-----------|-----------|
| 4 | 2.0425000 | 0.5600818 | 1.3900000 | 2.7300000 |
|---|-----------|-----------|-----------|-----------|

---

Unique Subject Identifier=9210000100-0027

Assay variable : PTINR\_VAL1 PT-INR Value

N Mean Standard Deviation Minimum Maximum

---

|   |           |           |           |           |
|---|-----------|-----------|-----------|-----------|
| 5 | 1.7020000 | 0.1355360 | 1.6100000 | 1.9400000 |
|---|-----------|-----------|-----------|-----------|

---

Unique Subject Identifier=9210000100-0030

Assay variable : PTINR\_VAL1 PT-INR Value

N Mean Standard Deviation Minimum Maximum

---

|   |           |           |           |           |
|---|-----------|-----------|-----------|-----------|
| 6 | 1.5966667 | 0.2411362 | 1.3400000 | 1.9800000 |
|---|-----------|-----------|-----------|-----------|

---

Unique Subject Identifier=9235000000-0008

Assay variable : PTINR\_VAL1 PT-INR Value

N Mean Standard Deviation Minimum Maximum

---

|   |           |           |           |           |
|---|-----------|-----------|-----------|-----------|
| 2 | 1.7250000 | 0.3889087 | 1.4500000 | 2.0000000 |
|---|-----------|-----------|-----------|-----------|

---

Laboratory tests at the time of obtaining Table 2-6 consent, according to the presence or absence of proton-pump inhibitors

Unique Subject Identifier=9235000000-0019

MEANS Procedure

Assay variable : PTINR\_VAL1 PT-INR Value

| N | Mean      | Standard Deviation | Minimum   | Maximum   |
|---|-----------|--------------------|-----------|-----------|
| 2 | 2.1500000 | 0.0707107          | 2.1000000 | 2.2000000 |

Unique Subject Identifier=9241000000-0011

Assay variable : PTINR\_VAL1 PT-INR Value

| N | Mean      | Standard Deviation | Minimum   | Maximum   |
|---|-----------|--------------------|-----------|-----------|
| 3 | 1.4533333 | 0.2223361          | 1.3200000 | 1.7100000 |

Unique Subject Identifier=9241000000-0015

Assay variable : PTINR\_VAL1 PT-INR Value

| N | Mean      | Standard Deviation | Minimum   | Maximum   |
|---|-----------|--------------------|-----------|-----------|
| 3 | 2.1733333 | 0.3837100          | 1.8900000 | 2.6100000 |

Unique Subject Identifier=9241000000-0017

Assay variable : PTINR\_VAL1 PT-INR Value

N Mean Standard Deviation Minimum Maximum

---

|   |           |           |           |           |
|---|-----------|-----------|-----------|-----------|
| 3 | 1.1666667 | 0.2478575 | 0.9900000 | 1.4500000 |
|---|-----------|-----------|-----------|-----------|

---

Laboratory tests at the time of obtaining Table 2-6 consent, according to the presence or absence of proton-pump inhibitors

Unique Subject Identifier=9257010000-0001

MEANS Procedure

Assay variable : PTINR\_VAL1 PT-INR Value

| N | Mean      | Standard Deviation | Minimum   | Maximum   |
|---|-----------|--------------------|-----------|-----------|
| 3 | 1.3333333 | 0.0305505          | 1.3000000 | 1.3600000 |

Unique Subject Identifier=9257010000-0002

Assay variable : PTINR\_VAL1 PT-INR Value

| N | Mean      | Standard Deviation | Minimum   | Maximum   |
|---|-----------|--------------------|-----------|-----------|
| 3 | 1.1666667 | 0.1050397          | 1.0600000 | 1.2700000 |

Unique Subject Identifier=9257010000-0003

Assay variable : PTINR\_VAL1 PT-INR Value

| N | Mean      | Standard Deviation | Minimum   | Maximum   |
|---|-----------|--------------------|-----------|-----------|
| 5 | 1.9600000 | 0.7876865          | 1.0700000 | 3.0600000 |

Unique Subject Identifier=9257010000-0004

Assay variable : PTINR\_VAL1 PT-INR Value

N Mean Standard Deviation Minimum Maximum

---

|   |           |           |           |           |
|---|-----------|-----------|-----------|-----------|
| 3 | 1.9866667 | 0.1096966 | 1.8600000 | 2.0500000 |
|---|-----------|-----------|-----------|-----------|

---

Laboratory tests at the time of obtaining Table 2-6 consent, according to the presence or absence of proton-pump inhibitors

Unique Subject Identifier=9257010000-0005

MEANS Procedure

Assay variable : PTINR\_VAL1 PT-INR Value

N Mean Standard Deviation Minimum Maximum

---

|   |           |           |           |           |
|---|-----------|-----------|-----------|-----------|
| 5 | 1.5140000 | 0.0971082 | 1.4000000 | 1.6300000 |
|---|-----------|-----------|-----------|-----------|

---

Unique Subject Identifier=9257010000-0006

Assay variable : PTINR\_VAL1 PT-INR Value

N Mean Standard Deviation Minimum Maximum

---

|   |           |           |           |           |
|---|-----------|-----------|-----------|-----------|
| 3 | 1.5133333 | 0.2610236 | 1.2200000 | 1.7200000 |
|---|-----------|-----------|-----------|-----------|

---

Unique Subject Identifier=9257010000-0007

Assay variable : PTINR\_VAL1 PT-INR Value

N Mean Standard Deviation Minimum Maximum

---

|   |           |           |           |           |
|---|-----------|-----------|-----------|-----------|
| 4 | 1.4750000 | 0.1464013 | 1.2700000 | 1.5900000 |
|---|-----------|-----------|-----------|-----------|

---

Unique Subject Identifier=9257010000-0008



Assay variable : PTINR\_VAL1 PT-INR Value

N Mean Standard Deviation Minimum Maximum

---

|   |           |           |           |           |
|---|-----------|-----------|-----------|-----------|
| 4 | 1.4725000 | 0.1961929 | 1.2300000 | 1.6600000 |
|---|-----------|-----------|-----------|-----------|

---

Laboratory tests at the time of obtaining Table 2-6 consent, according to the presence or absence of proton-pump inhibitors

Unique Subject Identifier=9257010000-0010

MEANS Procedure

Assay variable : PTINR\_VAL1 PT-INR Value

N Mean Standard Deviation Minimum Maximum

---

|   |           |           |           |           |
|---|-----------|-----------|-----------|-----------|
| 2 | 2.2350000 | 0.3889087 | 1.9600000 | 2.5100000 |
|---|-----------|-----------|-----------|-----------|

---

Unique Subject Identifier=9257010000-0013

Assay variable : PTINR\_VAL1 PT-INR Value

N Mean Standard Deviation Minimum Maximum

---

|   |           |           |           |           |
|---|-----------|-----------|-----------|-----------|
| 3 | 1.5366667 | 0.1703917 | 1.3400000 | 1.6400000 |
|---|-----------|-----------|-----------|-----------|

---

Unique Subject Identifier=9257010000-0014

Assay variable : PTINR\_VAL1 PT-INR Value

N Mean Standard Deviation Minimum Maximum

---

|   |           |           |           |           |
|---|-----------|-----------|-----------|-----------|
| 3 | 1.2100000 | 0.1000000 | 1.1100000 | 1.3100000 |
|---|-----------|-----------|-----------|-----------|

---

Unique Subject Identifier=9257010000-0019

Assay variable : PTINR\_VAL1 PT-INR Value

N Mean Standard Deviation Minimum Maximum

---

|   |           |           |           |           |
|---|-----------|-----------|-----------|-----------|
| 5 | 1.4320000 | 0.2583989 | 1.1800000 | 1.8200000 |
|---|-----------|-----------|-----------|-----------|

---

Laboratory tests at the time of obtaining Table 2-6 consent, according to the presence or absence of proton-pump inhibitors

Unique Subject Identifier=9257010000-0020

MEANS Procedure

Assay variable : PTINR\_VAL1 PT-INR Value

| N | Mean      | Standard Deviation | Minimum   | Maximum   |
|---|-----------|--------------------|-----------|-----------|
| 3 | 1.2266667 | 0.0057735          | 1.2200000 | 1.2300000 |

Unique Subject Identifier=9257010000-0021

Assay variable : PTINR\_VAL1 PT-INR Value

| N | Mean      | Standard Deviation | Minimum   | Maximum   |
|---|-----------|--------------------|-----------|-----------|
| 4 | 1.5275000 | 0.1359841          | 1.4000000 | 1.7000000 |

Unique Subject Identifier=9257010000-0023

Assay variable : PTINR\_VAL1 PT-INR Value

| N | Mean      | Standard Deviation | Minimum   | Maximum   |
|---|-----------|--------------------|-----------|-----------|
| 3 | 2.3233333 | 0.6915442          | 1.6600000 | 3.0400000 |

Unique Subject Identifier=9326000000-0004

Assay variable : PTINR\_VAL1 PT-INR Value

N Mean Standard Deviation Minimum Maximum

---

|   |           |           |           |           |
|---|-----------|-----------|-----------|-----------|
| 6 | 1.9966667 | 0.1367723 | 1.8500000 | 2.1600000 |
|---|-----------|-----------|-----------|-----------|

---

Laboratory tests at the time of obtaining Table 2-6 consent, according to the presence or absence of proton-pump inhibitors

Unique Subject Identifier=9348010000-0001

MEANS Procedure

Assay variable : PTINR\_VAL1 PT-INR Value

N Mean Standard Deviation Minimum Maximum

---

|   |           |           |           |           |
|---|-----------|-----------|-----------|-----------|
| 4 | 2.4325000 | 0.5248730 | 1.9600000 | 3.1700000 |
|---|-----------|-----------|-----------|-----------|

---

Unique Subject Identifier=9348010000-0002

Assay variable : PTINR\_VAL1 PT-INR Value

N Mean Standard Deviation Minimum Maximum

---

|   |           |           |           |           |
|---|-----------|-----------|-----------|-----------|
| 2 | 1.8700000 | 0.1272792 | 1.7800000 | 1.9600000 |
|---|-----------|-----------|-----------|-----------|

---

Unique Subject Identifier=9348010000-0004

Assay variable : PTINR\_VAL1 PT-INR Value

N Mean Standard Deviation Minimum Maximum

---

|   |           |           |           |           |
|---|-----------|-----------|-----------|-----------|
| 6 | 1.8600000 | 0.2059126 | 1.6200000 | 2.2300000 |
|---|-----------|-----------|-----------|-----------|

---

Unique Subject Identifier=9348010000-0007

Assay variable : PTINR\_VAL1 PT-INR Value

N Mean Standard Deviation Minimum Maximum

---

|   |           |           |           |           |
|---|-----------|-----------|-----------|-----------|
| 6 | 2.1533333 | 0.6930993 | 1.5300000 | 3.3200000 |
|---|-----------|-----------|-----------|-----------|

---

Laboratory tests at the time of obtaining Table 2-6 consent, according to the presence or absence of proton-pump inhibitors

Unique Subject Identifier=9348010000-0010

MEANS Procedure

Assay variable : PTINR\_VAL1 PT-INR Value

N Mean Standard Deviation Minimum Maximum

---

|   |           |           |           |           |
|---|-----------|-----------|-----------|-----------|
| 3 | 2.4533333 | 0.2354428 | 2.2100000 | 2.6800000 |
|---|-----------|-----------|-----------|-----------|

---

Unique Subject Identifier=9348010000-0020

Assay variable : PTINR\_VAL1 PT-INR Value

N Mean Standard Deviation Minimum Maximum

---

|   |           |           |           |           |
|---|-----------|-----------|-----------|-----------|
| 3 | 1.8866667 | 0.2367136 | 1.7500000 | 2.1600000 |
|---|-----------|-----------|-----------|-----------|

---

Unique Subject Identifier=9348010000-0033

Assay variable : PTINR\_VAL1 PT-INR Value

N Mean Standard Deviation Minimum Maximum

---

|   |           |           |           |           |
|---|-----------|-----------|-----------|-----------|
| 3 | 1.9400000 | 0.2193171 | 1.7800000 | 2.1900000 |
|---|-----------|-----------|-----------|-----------|

---

Unique Subject Identifier=9348010000-0039



Assay variable : PTINR\_VAL1 PT-INR Value

N Mean Standard Deviation Minimum Maximum

---

|   |           |           |           |           |
|---|-----------|-----------|-----------|-----------|
| 5 | 1.6740000 | 0.2322283 | 1.2700000 | 1.8500000 |
|---|-----------|-----------|-----------|-----------|

---

Laboratory tests at the time of obtaining Table 2-6 consent, according to the presence or absence of proton-pump inhibitors

Unique Subject Identifier=9348010000-0046

MEANS Procedure

Assay variable : PTINR\_VAL1 PT-INR Value

N Mean Standard Deviation Minimum Maximum

---

|   |           |           |           |           |
|---|-----------|-----------|-----------|-----------|
| 6 | 2.0550000 | 0.8034613 | 1.1700000 | 3.4400000 |
|---|-----------|-----------|-----------|-----------|

---

Unique Subject Identifier=9348010000-0055

Assay variable : PTINR\_VAL1 PT-INR Value

N Mean Standard Deviation Minimum Maximum

---

|   |           |           |           |           |
|---|-----------|-----------|-----------|-----------|
| 3 | 2.1500000 | 0.1216553 | 2.0100000 | 2.2300000 |
|---|-----------|-----------|-----------|-----------|

---

Unique Subject Identifier=9348010000-0058

Assay variable : PTINR\_VAL1 PT-INR Value

N Mean Standard Deviation Minimum Maximum

---

|   |           |           |           |           |
|---|-----------|-----------|-----------|-----------|
| 6 | 2.3483333 | 0.5566836 | 1.5900000 | 3.2400000 |
|---|-----------|-----------|-----------|-----------|

---

Unique Subject Identifier=9348010000-0063

Assay variable : PTINR\_VAL1 PT-INR Value

N Mean Standard Deviation Minimum Maximum

---

|   |           |           |           |           |
|---|-----------|-----------|-----------|-----------|
| 2 | 1.9800000 | 0.2545584 | 1.8000000 | 2.1600000 |
|---|-----------|-----------|-----------|-----------|

---

Laboratory tests at the time of obtaining Table 2-6 consent, according to the presence or absence of proton-pump inhibitors

Unique Subject Identifier=9348010000-0065

MEANS Procedure

Assay variable : PTINR\_VAL1 PT-INR Value

N Mean Standard Deviation Minimum Maximum

---

|   |           |           |           |           |
|---|-----------|-----------|-----------|-----------|
| 3 | 1.9866667 | 0.2112660 | 1.7900000 | 2.2100000 |
|---|-----------|-----------|-----------|-----------|

---

Unique Subject Identifier=9348010000-0083

Assay variable : PTINR\_VAL1 PT-INR Value

N Mean Standard Deviation Minimum Maximum

---

|   |           |           |           |           |
|---|-----------|-----------|-----------|-----------|
| 3 | 2.6333333 | 0.3501904 | 2.2900000 | 2.9900000 |
|---|-----------|-----------|-----------|-----------|

---

Unique Subject Identifier=9348010000-0088

Assay variable : PTINR\_VAL1 PT-INR Value

N Mean Standard Deviation Minimum Maximum

---

|   |           |           |           |           |
|---|-----------|-----------|-----------|-----------|
| 3 | 2.2800000 | 0.2051828 | 2.0700000 | 2.4800000 |
|---|-----------|-----------|-----------|-----------|

---

Unique Subject Identifier=9348010000-0093

Assay variable : PTINR\_VAL1 PT-INR Value

N Mean Standard Deviation Minimum Maximum

---

|   |           |           |           |           |
|---|-----------|-----------|-----------|-----------|
| 4 | 1.7250000 | 0.2547548 | 1.3900000 | 1.9900000 |
|---|-----------|-----------|-----------|-----------|

---

Laboratory tests at the time of obtaining Table 2-6 consent, according to the presence or absence of proton-pump inhibitors

Unique Subject Identifier=9348010000-0095

MEANS Procedure

Assay variable : PTINR\_VAL1 PT-INR Value

N Mean Standard Deviation Minimum Maximum

---

|   |           |  |           |           |
|---|-----------|--|-----------|-----------|
| 1 | 1.9300000 |  | 1.9300000 | 1.9300000 |
|---|-----------|--|-----------|-----------|

---

Unique Subject Identifier=9348010000-0096

Assay variable : PTINR\_VAL1 PT-INR Value

N Mean Standard Deviation Minimum Maximum

---

|   |           |           |           |           |
|---|-----------|-----------|-----------|-----------|
| 4 | 2.4150000 | 0.6133243 | 1.8600000 | 3.1300000 |
|---|-----------|-----------|-----------|-----------|

---

Unique Subject Identifier=9348010000-0097

Assay variable : PTINR\_VAL1 PT-INR Value

N Mean Standard Deviation Minimum Maximum

---

|   |           |           |           |           |
|---|-----------|-----------|-----------|-----------|
| 3 | 2.6066667 | 0.3995414 | 2.1600000 | 2.9300000 |
|---|-----------|-----------|-----------|-----------|

---

Unique Subject Identifier=9348010000-0105

Assay variable : PTINR\_VAL1 PT-INR Value

N Mean Standard Deviation Minimum Maximum

---

|   |           |           |           |           |
|---|-----------|-----------|-----------|-----------|
| 4 | 2.0250000 | 0.2706166 | 1.7900000 | 2.3800000 |
|---|-----------|-----------|-----------|-----------|

---

Laboratory tests at the time of obtaining Table 2-6 consent, according to the presence or absence of proton-pump inhibitors

Unique Subject Identifier=9348010000-0115

MEANS Procedure

Assay variable : PTINR\_VAL1 PT-INR Value

N Mean Standard Deviation Minimum Maximum

---

|   |           |           |           |           |
|---|-----------|-----------|-----------|-----------|
| 4 | 2.3700000 | 0.3962323 | 2.1300000 | 2.9600000 |
|---|-----------|-----------|-----------|-----------|

---

Unique Subject Identifier=9348010000-0127

Assay variable : PTINR\_VAL1 PT-INR Value

N Mean Standard Deviation Minimum Maximum

---

|   |           |           |           |           |
|---|-----------|-----------|-----------|-----------|
| 2 | 2.1100000 | 0.7495332 | 1.5800000 | 2.6400000 |
|---|-----------|-----------|-----------|-----------|

---

Unique Subject Identifier=9366000000-0004

Assay variable : PTINR\_VAL1 PT-INR Value

N Mean Standard Deviation Minimum Maximum

---

|   |           |           |           |           |
|---|-----------|-----------|-----------|-----------|
| 6 | 2.6233333 | 0.1745470 | 2.3500000 | 2.8300000 |
|---|-----------|-----------|-----------|-----------|

---

Unique Subject Identifier=9366000000-0006



Assay variable : PTINR\_VAL1 PT-INR Value

N Mean Standard Deviation Minimum Maximum

---

|   |          |           |          |          |
|---|----------|-----------|----------|----------|
| 6 | 1.818333 | 0.8000854 | 1.130000 | 3.240000 |
|---|----------|-----------|----------|----------|

---

Laboratory tests at the time of obtaining Table 2-6 consent, according to the presence or absence of proton-pump inhibitors

Unique Subject Identifier=951400000-0002

MEANS Procedure

Assay variable : PTINR\_VAL1 PT-INR Value

N Mean Standard Deviation Minimum Maximum

---

|   |           |           |           |           |
|---|-----------|-----------|-----------|-----------|
| 3 | 2.3766667 | 1.0442860 | 1.6300000 | 3.5700000 |
|---|-----------|-----------|-----------|-----------|

---

Unique Subject Identifier=951400000-0006

Assay variable : PTINR\_VAL1 PT-INR Value

N Mean Standard Deviation Minimum Maximum

---

|   |           |           |           |           |
|---|-----------|-----------|-----------|-----------|
| 3 | 1.7633333 | 0.3178574 | 1.5100000 | 2.1200000 |
|---|-----------|-----------|-----------|-----------|

---

Unique Subject Identifier=951400000-0007

Assay variable : PTINR\_VAL1 PT-INR Value

N Mean Standard Deviation Minimum Maximum

---

|   |           |           |           |           |
|---|-----------|-----------|-----------|-----------|
| 5 | 1.6980000 | 0.1586506 | 1.5200000 | 1.8900000 |
|---|-----------|-----------|-----------|-----------|

---

Unique Subject Identifier=951400000-0009

Assay variable : PTINR\_VAL1 PT-INR Value

N Mean Standard Deviation Minimum Maximum

---

|   |          |           |          |          |
|---|----------|-----------|----------|----------|
| 4 | 1.500000 | 0.0883176 | 1.440000 | 1.630000 |
|---|----------|-----------|----------|----------|

---

Laboratory tests at the time of obtaining Table 2-6 consent, according to the presence or absence of proton-pump inhibitors

Unique Subject Identifier=951400000-0011

MEANS Procedure

Assay variable : PTINR\_VAL1 PT-INR Value

N Mean Standard Deviation Minimum Maximum

---

|   |           |           |           |           |
|---|-----------|-----------|-----------|-----------|
| 4 | 1.7575000 | 0.2359908 | 1.5100000 | 2.0600000 |
|---|-----------|-----------|-----------|-----------|

---

Unique Subject Identifier=951400000-0016

Assay variable : PTINR\_VAL1 PT-INR Value

N Mean Standard Deviation Minimum Maximum

---

|   |           |           |           |           |
|---|-----------|-----------|-----------|-----------|
| 4 | 1.6700000 | 0.3421501 | 1.3900000 | 2.1300000 |
|---|-----------|-----------|-----------|-----------|

---

Unique Subject Identifier=951400000-0018

Assay variable : PTINR\_VAL1 PT-INR Value

N Mean Standard Deviation Minimum Maximum

---

|   |           |           |           |           |
|---|-----------|-----------|-----------|-----------|
| 4 | 2.1200000 | 0.3594440 | 1.6700000 | 2.4100000 |
|---|-----------|-----------|-----------|-----------|

---

Unique Subject Identifier=951400000-0021

Assay variable : PTINR\_VAL1 PT-INR Value

N Mean Standard Deviation Minimum Maximum

---

|   |          |           |          |          |
|---|----------|-----------|----------|----------|
| 4 | 2.040000 | 0.1831211 | 1.790000 | 2.230000 |
|---|----------|-----------|----------|----------|

---

Laboratory tests at the time of obtaining Table 2-6 consent, according to the presence or absence of proton-pump inhibitors

Unique Subject Identifier=951400000-0022

MEANS Procedure

Assay variable : PTINR\_VAL1 PT-INR Value

N Mean Standard Deviation Minimum Maximum

---

|   |           |           |           |           |
|---|-----------|-----------|-----------|-----------|
| 4 | 1.5775000 | 0.0590903 | 1.5300000 | 1.6600000 |
|---|-----------|-----------|-----------|-----------|

---

Unique Subject Identifier=951400000-0023

Assay variable : PTINR\_VAL1 PT-INR Value

N Mean Standard Deviation Minimum Maximum

---

|   |           |           |           |           |
|---|-----------|-----------|-----------|-----------|
| 4 | 1.5075000 | 0.1209339 | 1.4000000 | 1.6800000 |
|---|-----------|-----------|-----------|-----------|

---

Unique Subject Identifier=951400000-0026

Assay variable : PTINR\_VAL1 PT-INR Value

N Mean Standard Deviation Minimum Maximum

---

|   |           |           |           |           |
|---|-----------|-----------|-----------|-----------|
| 4 | 2.3200000 | 0.0979796 | 2.2000000 | 2.4400000 |
|---|-----------|-----------|-----------|-----------|

---

Unique Subject Identifier=951400000-0034

Assay variable : PTINR\_VAL1 PT-INR Value

N Mean Standard Deviation Minimum Maximum

---

|   |          |           |          |          |
|---|----------|-----------|----------|----------|
| 4 | 2.125000 | 0.1417745 | 2.000000 | 2.300000 |
|---|----------|-----------|----------|----------|

---

Laboratory tests at the time of obtaining Table 2-6 consent, according to the presence or absence of proton-pump inhibitors

Unique Subject Identifier=9623100000-0004

MEANS Procedure

Assay variable : PTINR\_VAL1 PT-INR Value

| N | Mean      | Standard Deviation | Minimum   | Maximum   |
|---|-----------|--------------------|-----------|-----------|
| 2 | 1.7900000 | 0.2687006          | 1.6000000 | 1.9800000 |

Unique Subject Identifier=9623100000-0005

Assay variable : PTINR\_VAL1 PT-INR Value

| N | Mean      | Standard Deviation | Minimum   | Maximum   |
|---|-----------|--------------------|-----------|-----------|
| 3 | 1.4600000 | 0.1732051          | 1.2600000 | 1.5600000 |

Unique Subject Identifier=9648000000-0006

Assay variable : PTINR\_VAL1 PT-INR Value

| N | Mean      | Standard Deviation | Minimum   | Maximum   |
|---|-----------|--------------------|-----------|-----------|
| 3 | 2.6066667 | 1.1305898          | 1.8900000 | 3.9100000 |

Unique Subject Identifier=9648000000-0012



Assay variable : PTINR\_VAL1 PT-INR Value

N Mean Standard Deviation Minimum Maximum

---

|   |           |           |           |           |
|---|-----------|-----------|-----------|-----------|
| 2 | 2.6800000 | 0.0141421 | 2.6700000 | 2.6900000 |
|---|-----------|-----------|-----------|-----------|

---

Laboratory tests at the time of obtaining Table 2-6 consent, according to the presence or absence of proton-pump inhibitors

Unique Subject Identifier=964800000-0014

MEANS Procedure

Assay variable : PTINR\_VAL1 PT-INR Value

N Mean Standard Deviation Minimum Maximum

---

|   |           |           |           |           |
|---|-----------|-----------|-----------|-----------|
| 2 | 1.7100000 | 0.0989949 | 1.6400000 | 1.7800000 |
|---|-----------|-----------|-----------|-----------|

---

Unique Subject Identifier=964800000-0021

Assay variable : PTINR\_VAL1 PT-INR Value

N Mean Standard Deviation Minimum Maximum

---

|   |           |           |           |           |
|---|-----------|-----------|-----------|-----------|
| 3 | 2.4466667 | 0.3758102 | 2.2100000 | 2.8800000 |
|---|-----------|-----------|-----------|-----------|

---

Unique Subject Identifier=964800000-0023

Assay variable : PTINR\_VAL1 PT-INR Value

N Mean Standard Deviation Minimum Maximum

---

|   |           |  |           |           |
|---|-----------|--|-----------|-----------|
| 1 | 1.7800000 |  | 1.7800000 | 1.7800000 |
|---|-----------|--|-----------|-----------|

---

Laboratory tests at the time of obtaining Table 2-6 consent, according to the presence or absence of proton-pump inhibitors

FREQ Procedure

Table : ALL \* \_PTINRCT

ALL \_PTINRCT

Power |

Percent |

Percent of rows

Percentage of columns | 1| 2| 3| 4| 9| Total

|       |        |        |        |        |        |        |   |
|-------|--------|--------|--------|--------|--------|--------|---|
|       | +      | +      | +      | +      | +      | +      | + |
| 1     | 675    | 2062   | 2157   | 225    | 221    | 5340   |   |
|       | 12.64  | 38.61  | 40.39  | 4.21   | 4.14   | 100.00 |   |
|       | 12.64  | 38.61  | 40.39  | 4.21   | 4.14   |        |   |
|       | 100.00 | 100.00 | 100.00 | 100.00 | 100.00 |        |   |
|       | +      | +      | +      | +      | +      | +      | + |
| Total | 675    | 2062   | 2157   | 225    | 221    | 5340   |   |
|       | 12.64  | 38.61  | 40.39  | 4.21   | 4.14   | 100.00 |   |

Laboratory tests at the time of obtaining Table 2-6 consent, according to the presence or absence of proton-pump inhibitors

FREQ Procedure

Table : ALL \* \_PTINRCT

ALL \_PTINRCT

Power |

Percent |

Percent of rows

Percentage of columns | 1| 2| 3| 4| 9| Total

|       |        |        |        |        |        |        |   |
|-------|--------|--------|--------|--------|--------|--------|---|
|       | +      | +      | +      | +      | +      | +      | + |
| 1     | 675    | 2062   | 2157   | 225    | 221    | 5340   |   |
|       | 12.64  | 38.61  | 40.39  | 4.21   | 4.14   | 100.00 |   |
|       | 12.64  | 38.61  | 40.39  | 4.21   | 4.14   |        |   |
|       | 100.00 | 100.00 | 100.00 | 100.00 | 100.00 |        |   |
|       | +      | +      | +      | +      | +      | +      | + |
| Total | 675    | 2062   | 2157   | 225    | 221    | 5340   |   |
|       | 12.64  | 38.61  | 40.39  | 4.21   | 4.14   | 100.00 |   |

Laboratory tests at the time of obtaining Table 2-6 consent, according to the presence or absence of proton-pump inhibitors

FREQ Procedure

Table : ALL \* \_PTINRCT

ALL \_PTINRCT

Power |

Percent |

Percent of rows

Percentage of columns | 1| 2| 3| 4| 9| Total

|       |        |        |        |        |        |        |   |
|-------|--------|--------|--------|--------|--------|--------|---|
|       | +      | +      | +      | +      | +      | +      | + |
| 1     | 675    | 2062   | 2157   | 225    | 221    | 5340   |   |
|       | 12.64  | 38.61  | 40.39  | 4.21   | 4.14   | 100.00 |   |
|       | 12.64  | 38.61  | 40.39  | 4.21   | 4.14   |        |   |
|       | 100.00 | 100.00 | 100.00 | 100.00 | 100.00 |        |   |
|       | +      | +      | +      | +      | +      | +      | + |
| Total | 675    | 2062   | 2157   | 225    | 221    | 5340   |   |
|       | 12.64  | 38.61  | 40.39  | 4.21   | 4.14   | 100.00 |   |

Laboratory tests at the time of obtaining Table 2-6 consent, according to the presence or absence of proton-pump inhibitors

FREQ Procedure

Table : ALL \* \_PTINRCT

ALL \_PTINRCT

Power |

Percent |

Percent of rows

Percentage of columns | 1| 2| 3| 4| 9| Total

|       |        |        |        |        |        |        |   |
|-------|--------|--------|--------|--------|--------|--------|---|
|       | +      | +      | +      | +      | +      | +      | + |
| 1     | 675    | 2062   | 2157   | 225    | 221    | 5340   |   |
|       | 12.64  | 38.61  | 40.39  | 4.21   | 4.14   | 100.00 |   |
|       | 12.64  | 38.61  | 40.39  | 4.21   | 4.14   |        |   |
|       | 100.00 | 100.00 | 100.00 | 100.00 | 100.00 |        |   |
|       | +      | +      | +      | +      | +      | +      | + |
| Total | 675    | 2062   | 2157   | 225    | 221    | 5340   |   |
|       | 12.64  | 38.61  | 40.39  | 4.21   | 4.14   | 100.00 |   |

Laboratory tests at the time of obtaining Table 2-6 consent, according to the presence or absence of proton-pump inhibitors

FREQ Procedure

Table : ALL \* \_PTINRCT

ALL \_PTINRCT

Power |

Percent |

Percent of rows

Percentage of columns | 1| 2| 3| 4| 9| Total

|       |        |        |        |        |        |        |   |
|-------|--------|--------|--------|--------|--------|--------|---|
|       | +      | +      | +      | +      | +      | +      | + |
| 1     | 675    | 2062   | 2157   | 225    | 221    | 5340   |   |
|       | 12.64  | 38.61  | 40.39  | 4.21   | 4.14   | 100.00 |   |
|       | 12.64  | 38.61  | 40.39  | 4.21   | 4.14   |        |   |
|       | 100.00 | 100.00 | 100.00 | 100.00 | 100.00 |        |   |
|       | +      | +      | +      | +      | +      | +      | + |
| Total | 675    | 2062   | 2157   | 225    | 221    | 5340   |   |
|       | 12.64  | 38.61  | 40.39  | 4.21   | 4.14   | 100.00 |   |

Laboratory tests at the time of obtaining Table 2-6 consent, according to the presence or absence of proton-pump inhibitors

FREQ Procedure

Table : ALL \* \_TTRCT

ALL \_TTRCT

Power |

Percent |

Percent of rows

Percentage of columns | 1| 2| 3| 4| 9| Total

|       | 1      | 2      | 3      | 4      | 9      | Total  |
|-------|--------|--------|--------|--------|--------|--------|
| 1     | 658    | 439    | 723    | 2598   | 922    | 5340   |
|       | 12.32  | 8.22   | 13.54  | 48.65  | 17.27  | 100.00 |
|       | 12.32  | 8.22   | 13.54  | 48.65  | 17.27  |        |
|       | 100.00 | 100.00 | 100.00 | 100.00 | 100.00 |        |
| Total | 658    | 439    | 723    | 2598   | 922    | 5340   |
|       | 12.32  | 8.22   | 13.54  | 48.65  | 17.27  | 100.00 |



Laboratory tests at the time of obtaining Table 2-6 consent, according to the presence or absence of proton-pump inhibitors

FREQ Procedure

Table : ALL \* \_TTRCT

ALL \_TTRCT

Power |

Percent |

Percent of rows

Percentage of columns | 1| 2| 3| 4| 9| Total

|       | 1      | 2      | 3      | 4      | 9      | Total  |
|-------|--------|--------|--------|--------|--------|--------|
| 1     | 658    | 439    | 723    | 2598   | 922    | 5340   |
|       | 12.32  | 8.22   | 13.54  | 48.65  | 17.27  | 100.00 |
|       | 12.32  | 8.22   | 13.54  | 48.65  | 17.27  |        |
|       | 100.00 | 100.00 | 100.00 | 100.00 | 100.00 |        |
| Total | 658    | 439    | 723    | 2598   | 922    | 5340   |
|       | 12.32  | 8.22   | 13.54  | 48.65  | 17.27  | 100.00 |

Laboratory tests at the time of obtaining Table 2-6 consent, according to the presence or absence of proton-pump inhibitors

FREQ Procedure

Table : ALL \* \_TTRCT

ALL \_TTRCT

Power |

Percent |

Percent of rows

Percentage of columns | 1| 2| 3| 4| 9| Total

|       | 1      | 2      | 3      | 4      | 9      | Total  |
|-------|--------|--------|--------|--------|--------|--------|
|       | 658    | 439    | 723    | 2598   | 922    | 5340   |
|       | 12.32  | 8.22   | 13.54  | 48.65  | 17.27  | 100.00 |
|       | 12.32  | 8.22   | 13.54  | 48.65  | 17.27  |        |
|       | 100.00 | 100.00 | 100.00 | 100.00 | 100.00 |        |
| Total | 658    | 439    | 723    | 2598   | 922    | 5340   |
|       | 12.32  | 8.22   | 13.54  | 48.65  | 17.27  | 100.00 |

Laboratory tests at the time of obtaining Table 2-6 consent, according to the presence or absence of proton-pump inhibitors

FREQ Procedure

Table : ALL \* \_TTRCT

ALL \_TTRCT

Power |

Percent |

Percent of rows

Percentage of columns | 1| 2| 3| 4| 9| Total

|       |        |        |        |        |        |        |   |
|-------|--------|--------|--------|--------|--------|--------|---|
|       | +      | +      | +      | +      | +      | +      | + |
| 1     | 658    | 439    | 723    | 2598   | 922    | 5340   |   |
|       | 12.32  | 8.22   | 13.54  | 48.65  | 17.27  | 100.00 |   |
|       | 12.32  | 8.22   | 13.54  | 48.65  | 17.27  |        |   |
|       | 100.00 | 100.00 | 100.00 | 100.00 | 100.00 |        |   |
|       | +      | +      | +      | +      | +      | +      | + |
| Total | 658    | 439    | 723    | 2598   | 922    | 5340   |   |
|       | 12.32  | 8.22   | 13.54  | 48.65  | 17.27  | 100.00 |   |

Laboratory tests at the time of obtaining Table 2-6 consent, according to the presence or absence of proton-pump inhibitors

FREQ Procedure

Table : ALL \* \_TTRCT

ALL \_TTRCT

Power |

Percent |

Percent of rows

Percentage of columns | 1| 2| 3| 4| 9| Total

|       | 1      | 2      | 3      | 4      | 9      | Total  |
|-------|--------|--------|--------|--------|--------|--------|
| 1     | 658    | 439    | 723    | 2598   | 922    | 5340   |
|       | 12.32  | 8.22   | 13.54  | 48.65  | 17.27  | 100.00 |
|       | 12.32  | 8.22   | 13.54  | 48.65  | 17.27  |        |
|       | 100.00 | 100.00 | 100.00 | 100.00 | 100.00 |        |
| Total | 658    | 439    | 723    | 2598   | 922    | 5340   |
|       | 12.32  | 8.22   | 13.54  | 48.65  | 17.27  | 100.00 |

Laboratory tests at the time of obtaining Table 2-6 consent, according to the presence or absence of proton-pump inhibitors

FREQ Procedure

Table : ALL \* \_FIRCT

ALL \_FIRCT

Power |

Percent |

Percent of rows

Percentage of columns | 1| 2| 3| 4| 9| Total

|       |        |        |        |        |        |        |   |  |   |  |   |
|-------|--------|--------|--------|--------|--------|--------|---|--|---|--|---|
|       | +      |        | +      |        | +      |        | + |  | + |  | + |
| 1     | 637    | 510    | 1033   | 2267   | 893    | 5340   |   |  |   |  |   |
|       | 11.93  | 9.55   | 19.34  | 42.45  | 16.72  | 100.00 |   |  |   |  |   |
|       | 11.93  | 9.55   | 19.34  | 42.45  | 16.72  |        |   |  |   |  |   |
|       | 100.00 | 100.00 | 100.00 | 100.00 | 100.00 |        |   |  |   |  |   |
|       | +      |        | +      |        | +      |        | + |  | + |  | + |
| Total | 637    | 510    | 1033   | 2267   | 893    | 5340   |   |  |   |  |   |
|       | 11.93  | 9.55   | 19.34  | 42.45  | 16.72  | 100.00 |   |  |   |  |   |

Laboratory tests at the time of obtaining Table 2-6 consent, according to the presence or absence of proton-pump inhibitors

FREQ Procedure

Table : ALL \* \_FIRCT

ALL \_FIRCT

Power |

Percent |

Percent of rows

Percentage of columns | 1| 2| 3| 4| 9| Total

|       |        |        |        |        |        |        |   |
|-------|--------|--------|--------|--------|--------|--------|---|
|       | +      | +      | +      | +      | +      | +      | + |
| 1     | 637    | 510    | 1033   | 2267   | 893    | 5340   |   |
|       | 11.93  | 9.55   | 19.34  | 42.45  | 16.72  | 100.00 |   |
|       | 11.93  | 9.55   | 19.34  | 42.45  | 16.72  |        |   |
|       | 100.00 | 100.00 | 100.00 | 100.00 | 100.00 |        |   |
|       | +      | +      | +      | +      | +      | +      | + |
| Total | 637    | 510    | 1033   | 2267   | 893    | 5340   |   |
|       | 11.93  | 9.55   | 19.34  | 42.45  | 16.72  | 100.00 |   |

Laboratory tests at the time of obtaining Table 2-6 consent, according to the presence or absence of proton-pump inhibitors

FREQ Procedure

Table : ALL \* \_FIRCT

ALL \_FIRCT

Power |

Percent |

Percent of rows

Percentage of columns | 1| 2| 3| 4| 9| Total

|       |        |        |        |        |        |        |   |
|-------|--------|--------|--------|--------|--------|--------|---|
|       | +      | +      | +      | +      | +      | +      | + |
| 1     | 637    | 510    | 1033   | 2267   | 893    | 5340   |   |
|       | 11.93  | 9.55   | 19.34  | 42.45  | 16.72  | 100.00 |   |
|       | 11.93  | 9.55   | 19.34  | 42.45  | 16.72  |        |   |
|       | 100.00 | 100.00 | 100.00 | 100.00 | 100.00 |        |   |
|       | +      | +      | +      | +      | +      | +      | + |
| Total | 637    | 510    | 1033   | 2267   | 893    | 5340   |   |
|       | 11.93  | 9.55   | 19.34  | 42.45  | 16.72  | 100.00 |   |

Laboratory tests at the time of obtaining Table 2-6 consent, according to the presence or absence of proton-pump inhibitors

FREQ Procedure

Table : ALL \* \_FIRCT

ALL \_FIRCT

Power |

Percent |

Percent of rows

Percentage of columns | 1| 2| 3| 4| 9| Total

|       |        |        |        |        |        |        |   |
|-------|--------|--------|--------|--------|--------|--------|---|
|       | +      | +      | +      | +      | +      | +      | + |
| 1     | 637    | 510    | 1033   | 2267   | 893    | 5340   |   |
|       | 11.93  | 9.55   | 19.34  | 42.45  | 16.72  | 100.00 |   |
|       | 11.93  | 9.55   | 19.34  | 42.45  | 16.72  |        |   |
|       | 100.00 | 100.00 | 100.00 | 100.00 | 100.00 |        |   |
|       | +      | +      | +      | +      | +      | +      | + |
| Total | 637    | 510    | 1033   | 2267   | 893    | 5340   |   |
|       | 11.93  | 9.55   | 19.34  | 42.45  | 16.72  | 100.00 |   |



Laboratory tests at the time of obtaining Table 2-6 consent, according to the presence or absence of proton-pump inhibitors

FREQ Procedure

Table : ALL \* \_FIRCT

ALL \_FIRCT

Power |

Percent |

Percent of rows

Percentage of columns | 1| 2| 3| 4| 9| Total

|       |        |        |        |        |        |        |   |
|-------|--------|--------|--------|--------|--------|--------|---|
|       | +      | +      | +      | +      | +      | +      | + |
| 1     | 637    | 510    | 1033   | 2267   | 893    | 5340   |   |
|       | 11.93  | 9.55   | 19.34  | 42.45  | 16.72  | 100.00 |   |
|       | 11.93  | 9.55   | 19.34  | 42.45  | 16.72  |        |   |
|       | 100.00 | 100.00 | 100.00 | 100.00 | 100.00 |        |   |
|       | +      | +      | +      | +      | +      | +      | + |
| Total | 637    | 510    | 1033   | 2267   | 893    | 5340   |   |
|       | 11.93  | 9.55   | 19.34  | 42.45  | 16.72  | 100.00 |   |

Laboratory tests at the time of obtaining Table 2-6 consent, according to the presence or absence of proton-pump inhibitors

FREQ Procedure

Table : ALL \* t\_CRCC1

ALL t\_CRCC1

Power |

Percent |

Percent of rows

Percentage of columns | 1| 2| 3| 4| 5| Total

|       | 1      | 2      | 3      | 4      | 5      | Total  |
|-------|--------|--------|--------|--------|--------|--------|
| 1     | 200    | 1880   | 6541   | 6986   | 762    | 16369  |
|       | 1.22   | 11.49  | 39.96  | 42.68  | 4.66   | 100.00 |
|       | 1.22   | 11.49  | 39.96  | 42.68  | 4.66   |        |
|       | 100.00 | 100.00 | 100.00 | 100.00 | 100.00 |        |
| Total | 200    | 1880   | 6541   | 6986   | 762    | 16369  |
|       | 1.22   | 11.49  | 39.96  | 42.68  | 4.66   | 100.00 |

Degree of missing values = 4140

Laboratory tests at the time of obtaining Table 2-6 consent, according to the presence or absence of proton-pump inhibitors

FREQ Procedure

Table : ALL \* t\_CRCC1

ALL t\_CRCC1

Power |

Percent |

Percent of rows

Percentage of columns | 1| 2| 3| 4| 5| Total

|       | 1      | 2      | 3      | 4      | 5      | Total  |
|-------|--------|--------|--------|--------|--------|--------|
| 1     | 200    | 1880   | 6541   | 6986   | 762    | 16369  |
|       | 1.22   | 11.49  | 39.96  | 42.68  | 4.66   | 100.00 |
|       | 1.22   | 11.49  | 39.96  | 42.68  | 4.66   |        |
|       | 100.00 | 100.00 | 100.00 | 100.00 | 100.00 |        |
| Total | 200    | 1880   | 6541   | 6986   | 762    | 16369  |
|       | 1.22   | 11.49  | 39.96  | 42.68  | 4.66   | 100.00 |

Degree of missing values = 4140

Laboratory tests at the time of obtaining Table 2-6 consent, according to the presence or absence of proton-pump inhibitors

FREQ Procedure

Table : ALL \* t\_CRCC1

ALL t\_CRCC1

Power |

Percent |

Percent of rows

Percentage of columns | 1| 2| 3| 4| 5| Total

|       | 1      | 2      | 3      | 4      | 5      | Total  |
|-------|--------|--------|--------|--------|--------|--------|
| 1     | 200    | 1880   | 6541   | 6986   | 762    | 16369  |
|       | 1.22   | 11.49  | 39.96  | 42.68  | 4.66   | 100.00 |
|       | 1.22   | 11.49  | 39.96  | 42.68  | 4.66   |        |
|       | 100.00 | 100.00 | 100.00 | 100.00 | 100.00 |        |
| Total | 200    | 1880   | 6541   | 6986   | 762    | 16369  |
|       | 1.22   | 11.49  | 39.96  | 42.68  | 4.66   | 100.00 |

Degree of missing values = 4140

Laboratory tests at the time of obtaining Table 2-6 consent, according to the presence or absence of proton-pump inhibitors

FREQ Procedure

Table : ALL \* t\_CRCC1

ALL t\_CRCC1

Power |

Percent |

Percent of rows

Percentage of columns | 1| 2| 3| 4| 5| Total

|       | 1      | 2      | 3      | 4      | 5      | Total  |
|-------|--------|--------|--------|--------|--------|--------|
| 1     | 200    | 1880   | 6541   | 6986   | 762    | 16369  |
|       | 1.22   | 11.49  | 39.96  | 42.68  | 4.66   | 100.00 |
|       | 1.22   | 11.49  | 39.96  | 42.68  | 4.66   |        |
|       | 100.00 | 100.00 | 100.00 | 100.00 | 100.00 |        |
| Total | 200    | 1880   | 6541   | 6986   | 762    | 16369  |
|       | 1.22   | 11.49  | 39.96  | 42.68  | 4.66   | 100.00 |

Degree of missing values = 4140

Laboratory tests at the time of obtaining Table 2-6 consent, according to the presence or absence of proton-pump inhibitors

FREQ Procedure

Table : ALL \* t\_CRCC1

ALL t\_CRCC1

Power |

Percent |

Percent of rows

Percentage of columns | 1| 2| 3| 4| 5| Total

|       | 1      | 2      | 3      | 4      | 5      | Total  |
|-------|--------|--------|--------|--------|--------|--------|
| 1     | 200    | 1880   | 6541   | 6986   | 762    | 16369  |
|       | 1.22   | 11.49  | 39.96  | 42.68  | 4.66   | 100.00 |
|       | 1.22   | 11.49  | 39.96  | 42.68  | 4.66   |        |
|       | 100.00 | 100.00 | 100.00 | 100.00 | 100.00 |        |
| Total | 200    | 1880   | 6541   | 6986   | 762    | 16369  |
|       | 1.22   | 11.49  | 39.96  | 42.68  | 4.66   | 100.00 |

Degree of missing values = 4140

Laboratory tests at the time of obtaining Table 2-6 consent, according to the presence or absence of proton-pump inhibitors

FREQ Procedure

Table : ALL \* non\_CRCC1

ALL non\_CRCC1

Power |

Percent |

Percent of rows

Percent of columns | 1 | Total

|        |        |        |  |
|--------|--------|--------|--|
| _____+ |        | _____+ |  |
| 1      | 4140   | 4140   |  |
|        | 100.00 | 100.00 |  |
|        | 100.00 |        |  |
|        | 100.00 |        |  |
| _____+ |        | _____+ |  |
| Total  | 4140   | 4140   |  |
|        | 100.00 | 100.00 |  |

Degree of missing values = 16369

Laboratory tests at the time of obtaining Table 2-6 consent, according to the presence or absence of proton-pump inhibitors

FREQ Procedure

Table : ALL \* t\_EGFR1

ALL t\_EGFR1

Power |

Percent |

Percent of rows

Percentage of columns | 1| 2| 3| 4| 5| 6| Total

|       | 1      | 2      | 3      | 4      | 5      | 6      | Total  |
|-------|--------|--------|--------|--------|--------|--------|--------|
| 1     | 142    | 1004   | 3577   | 6532   | 6155   | 399    | 17809  |
|       | 0.80   | 5.64   | 20.09  | 36.68  | 34.56  | 2.24   | 100.00 |
|       | 0.80   | 5.64   | 20.09  | 36.68  | 34.56  | 2.24   |        |
|       | 100.00 | 100.00 | 100.00 | 100.00 | 100.00 | 100.00 |        |
| Total | 142    | 1004   | 3577   | 6532   | 6155   | 399    | 17809  |
|       | 0.80   | 5.64   | 20.09  | 36.68  | 34.56  | 2.24   | 100.00 |

Frequency of missing values = 2700



Laboratory tests at the time of obtaining Table 2-6 consent, according to the presence or absence of proton-pump inhibitors

FREQ Procedure

Table : ALL \* t\_EGFR1

ALL t\_EGFR1

Power |

Percent |

Percent of rows

Percentage of columns | 1| 2| 3| 4| 5| 6| Total

|       | 1      | 2      | 3      | 4      | 5      | 6      | Total  |
|-------|--------|--------|--------|--------|--------|--------|--------|
| 1     | 142    | 1004   | 3577   | 6532   | 6155   | 399    | 17809  |
|       | 0.80   | 5.64   | 20.09  | 36.68  | 34.56  | 2.24   | 100.00 |
|       | 0.80   | 5.64   | 20.09  | 36.68  | 34.56  | 2.24   |        |
|       | 100.00 | 100.00 | 100.00 | 100.00 | 100.00 | 100.00 |        |
| Total | 142    | 1004   | 3577   | 6532   | 6155   | 399    | 17809  |
|       | 0.80   | 5.64   | 20.09  | 36.68  | 34.56  | 2.24   | 100.00 |

Frequency of missing values = 2700

Laboratory tests at the time of obtaining Table 2-6 consent, according to the presence or absence of proton-pump inhibitors

FREQ Procedure

Table : ALL \* t\_EGFR1

ALL t\_EGFR1

Power |

Percent |

Percent of rows

Percentage of columns | 1| 2| 3| 4| 5| 6| Total

|       | 1      | 2      | 3      | 4      | 5      | 6      | Total  |
|-------|--------|--------|--------|--------|--------|--------|--------|
| 1     | 142    | 1004   | 3577   | 6532   | 6155   | 399    | 17809  |
|       | 0.80   | 5.64   | 20.09  | 36.68  | 34.56  | 2.24   | 100.00 |
|       | 0.80   | 5.64   | 20.09  | 36.68  | 34.56  | 2.24   |        |
|       | 100.00 | 100.00 | 100.00 | 100.00 | 100.00 | 100.00 |        |
| Total | 142    | 1004   | 3577   | 6532   | 6155   | 399    | 17809  |
|       | 0.80   | 5.64   | 20.09  | 36.68  | 34.56  | 2.24   | 100.00 |

Frequency of missing values = 2700

Laboratory tests at the time of obtaining Table 2-6 consent, according to the presence or absence of proton-pump inhibitors

FREQ Procedure

Table : ALL \* t\_EGFR1

ALL t\_EGFR1

Power |

Percent |

Percent of rows

Percentage of columns | 1| 2| 3| 4| 5| 6| Total

|       | 1      | 2      | 3      | 4      | 5      | 6      | Total  |
|-------|--------|--------|--------|--------|--------|--------|--------|
| 1     | 142    | 1004   | 3577   | 6532   | 6155   | 399    | 17809  |
|       | 0.80   | 5.64   | 20.09  | 36.68  | 34.56  | 2.24   | 100.00 |
|       | 0.80   | 5.64   | 20.09  | 36.68  | 34.56  | 2.24   |        |
|       | 100.00 | 100.00 | 100.00 | 100.00 | 100.00 | 100.00 |        |
| Total | 142    | 1004   | 3577   | 6532   | 6155   | 399    | 17809  |
|       | 0.80   | 5.64   | 20.09  | 36.68  | 34.56  | 2.24   | 100.00 |

Frequency of missing values = 2700

Laboratory tests at the time of obtaining Table 2-6 consent, according to the presence or absence of proton-pump inhibitors

FREQ Procedure

Table : ALL \* t\_EGFR1

ALL t\_EGFR1

Power |

Percent |

Percent of rows

Percentage of columns | 1| 2| 3| 4| 5| 6| Total

|       | 1      | 2      | 3      | 4      | 5      | 6      | Total  |
|-------|--------|--------|--------|--------|--------|--------|--------|
| 1     | 142    | 1004   | 3577   | 6532   | 6155   | 399    | 17809  |
|       | 0.80   | 5.64   | 20.09  | 36.68  | 34.56  | 2.24   | 100.00 |
|       | 0.80   | 5.64   | 20.09  | 36.68  | 34.56  | 2.24   |        |
|       | 100.00 | 100.00 | 100.00 | 100.00 | 100.00 | 100.00 |        |
| Total | 142    | 1004   | 3577   | 6532   | 6155   | 399    | 17809  |
|       | 0.80   | 5.64   | 20.09  | 36.68  | 34.56  | 2.24   | 100.00 |

Frequency of missing values = 2700

Laboratory tests at the time of obtaining Table 2-6 consent, according to the presence or absence of proton-pump inhibitors

FREQ Procedure

Table : ALL \* t\_EGFR1

ALL t\_EGFR1

Power |

Percent |

Percent of rows

Percentage of columns | 1| 2| 3| 4| 5| 6| Total

|       | 1      | 2      | 3      | 4      | 5      | 6      | Total  |
|-------|--------|--------|--------|--------|--------|--------|--------|
| 1     | 142    | 1004   | 3577   | 6532   | 6155   | 399    | 17809  |
|       | 0.80   | 5.64   | 20.09  | 36.68  | 34.56  | 2.24   | 100.00 |
|       | 0.80   | 5.64   | 20.09  | 36.68  | 34.56  | 2.24   |        |
|       | 100.00 | 100.00 | 100.00 | 100.00 | 100.00 | 100.00 |        |
| Total | 142    | 1004   | 3577   | 6532   | 6155   | 399    | 17809  |
|       | 0.80   | 5.64   | 20.09  | 36.68  | 34.56  | 2.24   | 100.00 |

Frequency of missing values = 2700

Laboratory tests at the time of obtaining Table 2-6 consent, according to the presence or absence of proton-pump inhibitors

FREQ Procedure

Table : ALL \* non\_EGFR1

ALL non\_EGFR1

Power |

Percent |

Percent of rows

Percent of columns | 1 | Total

|                 |        |
|-----------------|--------|
| _____+          | _____+ |
| 1   2700   2700 |        |
| 100.00   100.00 |        |
| 100.00          |        |
| 100.00          |        |
| _____+          | _____+ |
| Total 2700 2700 |        |
| 100.00          | 100.00 |

Frequency of missing values = 17809

Laboratory tests at the time of obtaining Table 2-6 consent, according to the presence or absence of proton-pump inhibitors

FREQ Procedure

Table : ALL \* HBAC\_BL

ALL HBAC\_BL(Category of Hemoglobin A1c at Baseline)

Power |

Percent |

Percent of rows

Column Percent|<6.0%|6.0%|More than |7.0%|More than |8.0%|Missing|Total

|| < 7.0%| < 8.0%| ||

|       | < 7.0% | < 8.0% |        |        |        |        |  |
|-------|--------|--------|--------|--------|--------|--------|--|
| 1     | 5612   | 4009   | 886    | 325    | 9677   | 20509  |  |
|       | 27.36  | 19.55  | 4.32   | 1.58   | 47.18  | 100.00 |  |
|       | 27.36  | 19.55  | 4.32   | 1.58   | 47.18  |        |  |
|       | 100.00 | 100.00 | 100.00 | 100.00 | 100.00 |        |  |
| Total | 5612   | 4009   | 886    | 325    | 9677   | 20509  |  |
|       | 27.36  | 19.55  | 4.32   | 1.58   | 47.18  | 100.00 |  |

Laboratory tests at the time of obtaining Table 2-6 consent, according to the presence or absence of proton-pump inhibitors

FREQ Procedure

Table : ALL \* HBAC\_BL

ALL HBAC\_BL(Category of Hemoglobin A1c at Baseline)

Power |

Percent |

Percent of rows

Column Percent|<6.0%|6.0%|More than |7.0%|More than |8.0%|Missing|Total

|| < 7.0%| < 8.0%| ||

|       | < 7.0% | < 8.0% |        |        |        |        |  |
|-------|--------|--------|--------|--------|--------|--------|--|
| 1     | 5612   | 4009   | 886    | 325    | 9677   | 20509  |  |
|       | 27.36  | 19.55  | 4.32   | 1.58   | 47.18  | 100.00 |  |
|       | 27.36  | 19.55  | 4.32   | 1.58   | 47.18  |        |  |
|       | 100.00 | 100.00 | 100.00 | 100.00 | 100.00 |        |  |
| Total | 5612   | 4009   | 886    | 325    | 9677   | 20509  |  |
|       | 27.36  | 19.55  | 4.32   | 1.58   | 47.18  | 100.00 |  |



Laboratory tests at the time of obtaining Table 2-6 consent, according to the presence or absence of proton-pump inhibitors

FREQ Procedure

Table : ALL \* HBAC\_BL

ALL HBAC\_BL(Category of Hemoglobin A1c at Baseline)

Power |

Percent |

Percent of rows

Column Percent|<6.0%|6.0%|More than |7.0%|More than |8.0%|Missing|Total

|| < 7.0%| < 8.0%| ||

|       | < 7.0% | < 8.0% |        |        |        |        |  |
|-------|--------|--------|--------|--------|--------|--------|--|
| 1     | 5612   | 4009   | 886    | 325    | 9677   | 20509  |  |
|       | 27.36  | 19.55  | 4.32   | 1.58   | 47.18  | 100.00 |  |
|       | 27.36  | 19.55  | 4.32   | 1.58   | 47.18  |        |  |
|       | 100.00 | 100.00 | 100.00 | 100.00 | 100.00 |        |  |
| Total | 5612   | 4009   | 886    | 325    | 9677   | 20509  |  |
|       | 27.36  | 19.55  | 4.32   | 1.58   | 47.18  | 100.00 |  |

Laboratory tests at the time of obtaining Table 2-6 consent, according to the presence or absence of proton-pump inhibitors

FREQ Procedure

Table : ALL \* HBAC\_BL

ALL HBAC\_BL(Category of Hemoglobin A1c at Baseline)

Power |

Percent |

Percent of rows

Column Percent|<6.0%|6.0%|More than |7.0%|More than |8.0%|Missing|Total

|| < 7.0%| < 8.0%| ||

|       | < 7.0% | < 8.0% |        |        |        |        |  |
|-------|--------|--------|--------|--------|--------|--------|--|
| 1     | 5612   | 4009   | 886    | 325    | 9677   | 20509  |  |
|       | 27.36  | 19.55  | 4.32   | 1.58   | 47.18  | 100.00 |  |
|       | 27.36  | 19.55  | 4.32   | 1.58   | 47.18  |        |  |
|       | 100.00 | 100.00 | 100.00 | 100.00 | 100.00 |        |  |
| Total | 5612   | 4009   | 886    | 325    | 9677   | 20509  |  |
|       | 27.36  | 19.55  | 4.32   | 1.58   | 47.18  | 100.00 |  |

Laboratory tests at the time of obtaining Table 2-6 consent, according to the presence or absence of proton-pump inhibitors

FREQ Procedure

Table : ALL \* HBAC\_BL

ALL HBAC\_BL(Category of Hemoglobin A1c at Baseline)

Power |

Percent |

Percent of rows

Column Percent|<6.0%|6.0%|More than |7.0%|More than |8.0%|Missing|Total

|| < 7.0%| < 8.0%| ||

|       | < 7.0% | < 8.0% |        |        |        |        |  |
|-------|--------|--------|--------|--------|--------|--------|--|
| 1     | 5612   | 4009   | 886    | 325    | 9677   | 20509  |  |
|       | 27.36  | 19.55  | 4.32   | 1.58   | 47.18  | 100.00 |  |
|       | 27.36  | 19.55  | 4.32   | 1.58   | 47.18  |        |  |
|       | 100.00 | 100.00 | 100.00 | 100.00 | 100.00 |        |  |
| Total | 5612   | 4009   | 886    | 325    | 9677   | 20509  |  |
|       | 27.36  | 19.55  | 4.32   | 1.58   | 47.18  | 100.00 |  |

Laboratory tests at the time of obtaining Table 2-6 consent, according to the presence or absence of proton-pump inhibitors

UNIVARIATE Procedure

Variables: \_PTINR (PT-INR Value)

#### Moment

Total of 7980 for N 7980 weight variable

Mean 1.97275203 total 15742.5612

Standard deviation 0.35773419 variance 0.12797375

Skewness 0.4088905 kurtosis 1.5211318

Unmodified square sum 32077.272 modified square sum 1021.10255

Coefficient of variation 18.1337636 standard error of the mean 0.0040046

#### Basic statistics

##### Positional variation

Mean 1.972752 standard deviation 0.35773

Median 1.955000 variance 0.12797

Most frequent value 2.100000 range 3.93500

Interquartile range 0.45500

##### Test for position H0: $\mu_0=0$

Test-Statistics-----p Value

Student's t-test t 492.6217 Pr > |t| <. 0001

Sign test M 3990 Pr >= |M| <. 0001

Signed rank test S 15922095 Pr >= |S| <. 0001

##### Quartile (Definition 5)

Level quantile

|            |         |
|------------|---------|
| 100% max.  | 4.43000 |
| 99%        | 2.90250 |
| 95%        | 2.55000 |
| 90%        | 2.41333 |
| 75% Q3     | 2.19500 |
| 50% median | 1.95500 |
| 25% Q1     | 1.74000 |
| 10%        | 1.54083 |
| 5%         | 1.41583 |
| 1%         | 1.14667 |
| 0% minimum | 0.49500 |

Laboratory tests at the time of obtaining Table 2-6 consent, according to the presence or absence of proton-pump inhibitors

UNIVARIATE Procedure

Variables: \_PTINR (PT-INR Value)

Extreme value

----- Minimum value-----Maximum value-----

| Value | Obs  | Value | Obs  |
|-------|------|-------|------|
| 0.495 | 1499 | 3.840 | 3659 |
| 0.900 | 2016 | 3.930 | 3467 |
| 0.950 | 2651 | 4.050 | 2785 |
| 0.970 | 4309 | 4.155 | 262  |
| 0.970 | 6031 | 4.430 | 4808 |

Missing Values

----- Percent-----

Missing Values Overall Missing Values

|     |      |        |
|-----|------|--------|
| 315 | 3.80 | 100.00 |
|-----|------|--------|

Laboratory tests at the time of obtaining Table 2-6 consent, according to the presence or absence of proton-pump inhibitors

UNIVARIATE Procedure

Variable: \_TTR

#### Moment

Total of 6948 for N 6948 weight variable

Mean 75.3186271 total 523313.821

Standard deviation 29.8772401 variance 892.649475

Skewness-1.1517603 kurtosis 0.23796649

Unmodified square sum 45616514.5 modified square sum 6201235.91

Coefficient of variation 39.667797 standard error of the mean 0.35843513

#### Basic statistics

##### Positional variation

Mean 75.3186 standard deviation 29.87724

Median 88.0268 variance 892.64948

Mode 100.0000 Range 100.00000

Interquartile range 40.87708

##### Test for position H0: $\mu_0=0$

Test-Statistics-----p Value

Student's t-test t 210.1318 Pr > |t| <. 0001

Sign test M 3314 Pr >= |M| <. 0001

Signed rank test S 10984253 Pr >= |S| <. 0001

##### Quartile (Definition 5)

Level quantile

|              |           |
|--------------|-----------|
| 100% maximum | 100.00000 |
| 99%          | 100.00000 |
| 95%          | 100.00000 |
| 90%          | 100.00000 |
| 75% Q3       | 100.00000 |
| 50% median   | 88.02676  |
| 25% Q1       | 59.12292  |
| 10%          | 26.79688  |
| 5%           | 3.69748   |
| 1%           | 0.00000   |
| 0% Minimum   | 0.00000   |



Laboratory tests at the time of obtaining Table 2-6 consent, according to the presence or absence of proton-pump inhibitors

UNIVARIATE Procedure

Variable: \_TTR

Extreme value

--- Minimum value---Maximum value---

Value Obs Value Obs

|   |      |     |      |
|---|------|-----|------|
| 0 | 8287 | 100 | 8278 |
| 0 | 8265 | 100 | 8279 |
| 0 | 8226 | 100 | 8282 |
| 0 | 8224 | 100 | 8283 |
| 0 | 8222 | 100 | 8286 |

Missing Values

----- Percent-----

Missing Values Overall Missing Values

|      |       |        |
|------|-------|--------|
| 1347 | 16.24 | 100.00 |
|------|-------|--------|

Laboratory tests at the time of obtaining Table 2-6 consent, according to the presence or absence of proton-pump inhibitors

UNIVARIATE Procedure

Variable: \_FIR

#### Moment

Total of 6994 for N 6994 weight variable

Mean 71.8651701 total 502625

Standard deviation 27.6466071 variance 764.334886

Skewness-0.8603507 kurtosis-0.0275517

Unmodified square sum 41466225 modified square sum 5344993.86

Coefficient of variation 38.470106 standard error of the mean 0.33058187

#### Basic statistics

##### Positional variation

Mean 71.8652 standard deviation 27.64661

Median 80.0000 variance 764.33489

Mode 100.0000 Range 100.00000

Interquartile range 50.00000

##### Test for position H0: $\mu_0=0$

Test-Statistics-----p Value

Student's t-test t 217.3899 Pr > |t| <. 0001

Sign test M 3363.5 Pr >= |M| <. 0001

Signed rank test S 11314814 Pr >= |S| <. 0001

##### Quartile (Definition 5)

Level quantile

|              |          |
|--------------|----------|
| 100% maximum | 100.0000 |
| 99%          | 100.0000 |
| 95%          | 100.0000 |
| 90%          | 100.0000 |
| 75% Q3       | 100.0000 |
| 50% median   | 80.0000  |
| 25% Q1       | 50.0000  |
| 10%          | 33.3333  |
| 5%           | 16.6667  |
| 1%           | 0.0000   |
| 0% Minimum   | 0.0000   |

Laboratory tests at the time of obtaining Table 2-6 consent, according to the presence or absence of proton-pump inhibitors

UNIVARIATE Procedure

Variable: \_FIR

Extreme value

--- Minimum value---Maximum value---

Value Obs Value Obs

|   |      |     |      |
|---|------|-----|------|
| 0 | 8287 | 100 | 8260 |
| 0 | 8265 | 100 | 8278 |
| 0 | 8226 | 100 | 8282 |
| 0 | 8224 | 100 | 8283 |
| 0 | 8222 | 100 | 8286 |

Missing Values

----- Percent-----

Missing Values Overall Missing Values

|      |       |        |
|------|-------|--------|
| 1301 | 15.68 | 100.00 |
|------|-------|--------|

Laboratory tests at the time of obtaining Table 2-6 consent, according to the presence or absence of proton-pump inhibitors

UNIVARIATE Procedure

Variable: HGB\_BL (Hemoglobin at Baseline)

#### Moment

Total of 28216 for N 28216 weight variable

Mean 12.8541668 total 362693.17

Standard deviation 1.71744331 variance 2.94961151

Skewness-0.1071274 kurtosis 0.2224508

Unmodified square sum 4745341.79 modified square sum 83223.2888

Coefficient of variation 13.3609851 standard error of the mean 0.01022433

#### Basic statistics

##### Positional variation

Mean 12.85417 standard deviation 1.71744

Median 12.90000 variance 2.94961

Most frequent value 13.00000 range 15.04000

Interquartile range 2.30000

##### Test for position H0: $\mu_0=0$

Test-Statistics-----p Value

Student's t-test t 1257.214 Pr > |t| <. 0001

Sign test M 14108 Pr >= |M| <. 0001

Signed rank test S 1. 9904E8 Pr >= |S| <. 0001

Quartile (Definition 5)

Level quantile

|            |       |
|------------|-------|
| 100% max.  | 19.70 |
| 99%        | 16.80 |
| 95%        | 15.60 |
| 90%        | 15.00 |
| 75% Q3     | 14.00 |
| 50% median | 12.90 |
| 25% Q1     | 11.70 |
| 10%        | 10.70 |
| 5%         | 10.00 |
| 1%         | 8.80  |
| 0% minimum | 4.66  |

Laboratory tests at the time of obtaining Table 2-6 consent, according to the presence or absence of proton-pump inhibitors

UNIVARIATE Procedure

Variable: HGB\_BL (Hemoglobin at Baseline)

Extreme value

---- Minimum value----Maximum value----

| Value | Obs   | Value | Obs   |
|-------|-------|-------|-------|
| 4.66  | 15688 | 19.3  | 19849 |
| 4.80  | 5108  | 19.4  | 7925  |
| 4.90  | 4315  | 19.4  | 17471 |
| 5.10  | 5118  | 19.6  | 22604 |
| 5.10  | 5107  | 19.7  | 9365  |

Missing Values

----- Percent-----

Missing Values Overall Missing Values

|      |       |        |
|------|-------|--------|
| 4274 | 13.15 | 100.00 |
|------|-------|--------|

Laboratory tests at the time of obtaining Table 2-6 consent, according to the presence or absence of proton-pump inhibitors

UNIVARIATE Procedure

Variable: CRE\_BL (Serum Creatinine at Baseline)

#### Moment

Total of 28573 for N 28573 weight variable

Mean 1.03049106 total 29444.221

Standard deviation 0.61617534 variance 0.37967205

Skewness 10.1779904 kurtosis 170.801461

Unmodified square sum 41189.9961 modified square sum 10847.9897

Coefficient of variation 59.794341 standard error of the mean 0.00364524

#### Basic statistics

##### Positional variation

Mean 1.030491 standard deviation 0.61618

Median 0.930000 variance 0.37967

Most frequent value 1.000000 range 17.58000

Interquartile range 0.38000

##### Test for position H0: $\mu_0=0$

Test-Statistics-----p Value

Student's t-test t 282.6948 Pr > |t| <. 0001

Sign test M 14286.5 Pr >= |M| <. 0001

Signed rank test S 2. 0411E8 Pr >= |S| <. 0001

Quartile (Definition 5)



Level quantile

|            |       |
|------------|-------|
| 100% max.  | 17.60 |
| 99%        | 2.68  |
| 95%        | 1.72  |
| 90%        | 1.45  |
| 75% Q3     | 1.14  |
| 50% median | 0.93  |
| 25% Q1     | 0.76  |
| 10%        | 0.65  |
| 5%         | 0.59  |
| 1%         | 0.49  |
| 0% minimum | 0.02  |

Laboratory tests at the time of obtaining Table 2-6 consent, according to the presence or absence of proton-pump inhibitors

UNIVARIATE Procedure

Variable: CRE\_BL (Serum Creatinine at Baseline)

Extreme value

---- Minimum value----Maximum value----

| Value | Obs   | Value | Obs   |
|-------|-------|-------|-------|
| 0.02  | 1504  | 14.6  | 597   |
| 0.07  | 29957 | 15.1  | 18238 |
| 0.07  | 13609 | 16.4  | 15659 |
| 0.08  | 17998 | 17.5  | 18958 |
| 0.10  | 7702  | 17.6  | 20466 |

Missing Values

----- Percent-----

Missing Values Overall Missing Values

|      |       |        |
|------|-------|--------|
| 3917 | 12.06 | 100.00 |
|------|-------|--------|

Laboratory tests at the time of obtaining Table 2-6 consent, according to the presence or absence of proton-pump inhibitors

UNIVARIATE Procedure

Variable: CRC\_BL (Creatinine Clearance at Baseline)

#### Moment

Total of 26374 for N 26374 weight variable

Mean 48.4324121 total 1277356.44

Standard deviation 21.7680088 variance 473.846206

Skewness 25.0255998 kurtosis 1958.11664

Unmodified square sum 74362199.2 modified square sum 12496746

Coefficient of variation 44.9451263 standard error of the mean 0.13403885

#### Basic statistics

##### Positional variation

Mean 48.43241 standard deviation 21.76801

Median 47.48845 variance 473.84621

Most frequent value 35.41667 range 1875

Interquartile range 23.37449

##### Test for position H0: $\mu_0=0$

Test-Statistics-----p Value

Student's t-test t 361.3311 Pr > |t| <. 0001

Sign test M 13187 Pr >= |M| <. 0001

Signed rank test S 1. 739E8 Pr >= |S| <. 0001

##### Quartile (Definition 5)

## Level quantile

|            |            |
|------------|------------|
| 100% max.  | 1877.08333 |
| 99%        | 93.69883   |
| 95%        | 78.31325   |
| 90%        | 70.83333   |
| 75% Q3     | 59.25684   |
| 50% median | 47.48845   |
| 25% Q1     | 35.88235   |
| 10%        | 26.54980   |
| 5%         | 21.51430   |
| 1%         | 13.50800   |
| 0% minimum | 1.66539    |

Laboratory tests at the time of obtaining Table 2-6 consent, according to the presence or absence of proton-pump inhibitors

UNIVARIATE Procedure

Variable: CRC\_BL (Creatinine Clearance at Baseline)

Extreme value

----- Minimum value-----Maximum value-----

| Value Obs |       | Value Obs |       |
|-----------|-------|-----------|-------|
| 1.66539   | 9005  | 316.271   | 7702  |
| 1.98413   | 18958 | 422.976   | 13609 |
| 2.22609   | 17844 | 488.440   | 17998 |
| 2.53133   | 15659 | 819.643   | 29957 |
| 2.63301   | 15674 | 1877.083  | 1504  |

Missing Values

----- Percent----

Missing Values Overall Missing Values

|      |       |        |
|------|-------|--------|
| 6116 | 18.82 | 100.00 |
|------|-------|--------|

Laboratory tests at the time of obtaining Table 2-6 consent, according to the presence or absence of proton-pump inhibitors

UNIVARIATE Procedure

Variables: EGFR\_BL (Estimated Glomerular Filtration Rate at Baseline)

#### Moment

Total of 28573 for N 28573 weight variable

Mean 53.9773054 total 1542293.55

Standard deviation 29.2204093 variance 853.832319

Skewness 79.0285664 kurtosis 10142.5278

Unmodified square sum 107644547 modified square sum 24395697

Coefficient of variation 54.1346203 standard error of the mean 0.17286552

#### Basic statistics

##### Positional variation

Mean 53.97731 standard deviation 29.22041

Median 53.59680 variance 853.83232

Most frequent value 62.58029 range 3862

Interquartile range 21.73622

Note: There are two most frequent values (frequency: 48). The table shows the smallest of the most common values.

Test for position H0:  $\mu_0=0$

Test-Statistics-----p Value

Student's t-test t 312.2503 Pr > |t| <. 0001

Sign test M 14286.5 Pr >= |M| <. 0001

Signed rank test S 2. 0411E8 Pr >= |S| <. 0001

## Quartile (Definition 5)

### Level quantile

|            |            |
|------------|------------|
| 100% max.  | 3863.66962 |
| 99%        | 96.80221   |
| 95%        | 81.77970   |
| 90%        | 74.76689   |
| 75% Q3     | 64.17646   |
| 50% median | 53.59680   |
| 25% Q1     | 42.44023   |
| 10%        | 32.38581   |
| 5%         | 26.61383   |

Laboratory tests at the time of obtaining Table 2-6 consent, according to the presence or absence of proton-pump inhibitors

UNIVARIATE Procedure

Variables: EGFR\_BL (Estimated Glomerular Filtration Rate at Baseline)

Quartile (Definition 5)

Level quantile

1% 16.42861

0% minimum 1.80183

Extreme value

----- Minimum value-----Maximum value-----

Value Obs Value Obs

|         |       |          |       |
|---------|-------|----------|-------|
| 1.80183 | 20466 | 500.807  | 7702  |
| 2.10676 | 18238 | 643.770  | 17998 |
| 2.13256 | 597   | 739.833  | 13609 |
| 2.32836 | 18958 | 747.691  | 29957 |
| 2.34717 | 9005  | 3863.670 | 1504  |

Missing Values

----- Percent-----

Missing Values Overall Missing Values

|      |       |        |
|------|-------|--------|
| 3917 | 12.06 | 100.00 |
|------|-------|--------|



Laboratory tests at the time of obtaining Table 2-6 consent, according to the presence or absence of proton-pump inhibitors

UNIVARIATE Procedure

Variable : HBA\_BL (Hemoglobin A 1 c at Baseline)

#### Moment

Total of 17671 for N 17671 weight variable

Mean 6.11922925 total 108132.9

Standard deviation 0.80458533 variance 0.64735755

Skewness 2.15228415 kurtosis 14.8362725

Unmodified square sum 673128.812 modified square sum 11438.8079

Coefficient of variation 13.148475 standard error of the mean 0.00605259

#### Basic statistics

##### Positional variation

Mean 6.119229 standard deviation 0.80459

Median 6.000000 variance 0.64736

Mode 5.700000 Range 19.00000

Interquartile range 0.80000

##### Test for position H0: $\mu_0=0$

Test-Statistics-----p Value

Student's t-test t 1011.009 Pr > |t| <. 0001

Sign test M 8835.5 Pr >= |M| <. 0001

Signed rank test S 78070478 Pr >= |S| <. 0001

Quartile (Definition 5)

Level quantile

100% max. 19.6

99% 8.8

95% 7.6

90% 7.1

75% Q3 6.4

50% median 6.0

25% Q1 5.6

10% 5.4

5% 5.2

1% 4.9

0% minimum 0.6

Laboratory tests at the time of obtaining Table 2-6 consent, according to the presence or absence of proton-pump inhibitors

UNIVARIATE Procedure

Variable : HBA\_BL (Hemoglobin A 1 c at Baseline)

Extreme value

---- Minimum value----Maximum value----

| Value | Obs   | Value | Obs   |
|-------|-------|-------|-------|
| 0.60  | 21409 | 14.0  | 12646 |
| 0.65  | 21635 | 14.0  | 14632 |
| 0.68  | 11459 | 14.1  | 11697 |
| 0.70  | 21589 | 16.0  | 15967 |
| 0.79  | 11692 | 19.6  | 15966 |

Missing Values

----- Percent-----

Missing Values Overall Missing Values

|       |       |        |
|-------|-------|--------|
| 14819 | 45.61 | 100.00 |
|-------|-------|--------|

Laboratory tests at the time of obtaining Table 2-6 consent, according to the presence or absence of proton-pump inhibitors

UNIVARIATE Procedure

Variables: \_PTINR (PT-INR Value)

#### Moment

Total of 2861 for N 2861 weight variable

Mean 1.95760626 total 5600.7115

Standard deviation 0.35150829 variance 0.12355808

Skewness 0.26654274 kurtosis 1.05512912

Unmodified square sum 11317.364 modified square sum 353.376113

Coefficient of variation 17.9560263 standard error of the mean 0.00657168

#### Basic statistics

##### Positional variation

Mean 1.957606 standard deviation 0.35151

Median 1.943333 variance 0.12356

Mode 2.000000 Range 2.94000

Interquartile range 0.45000

Note: There are two most frequent values (frequency: 18). The table shows the smallest of the most common values.

Test for position H0:  $\mu_0=0$

Test-Statistics-----p Value

Student's t-test t 297.885 Pr > |t| <. 0001

Sign test M 1430.5 Pr >= |M| <. 0001

Signed rank test S 2047046 Pr >= |S| <. 0001

## Quartile (Definition 5)

### Level quantile

|            |         |
|------------|---------|
| 100% max.  | 3.84000 |
| 99%        | 2.80000 |
| 95%        | 2.53000 |
| 90%        | 2.39167 |
| 75% Q3     | 2.18333 |
| 50% median | 1.94333 |
| 25% Q1     | 1.73333 |
| 10%        | 1.52667 |
| 5%         | 1.39250 |

Laboratory tests at the time of obtaining Table 2-6 consent, according to the presence or absence of proton-pump inhibitors

UNIVARIATE Procedure

Variables: \_PTINR (PT-INR Value)

Quartile (Definition 5)

Level quantile

1% 1.12000

0% minimum 0.90000

Extreme value

----- Minimum value-----Maximum value-----

| Value    | Obs  | Value | Obs  |
|----------|------|-------|------|
| 0.900000 | 2016 | 3.500 | 6657 |
| 0.950000 | 2651 | 3.510 | 3868 |
| 0.980000 | 4950 | 3.628 | 1311 |
| 0.980000 | 4120 | 3.680 | 6137 |
| 0.986667 | 4902 | 3.840 | 3659 |

Missing Values

----- Percent-----

Missing Values Overall Missing Values

94 3.18 100.00

Laboratory tests at the time of obtaining Table 2-6 consent, according to the presence or absence of proton-pump inhibitors

UNIVARIATE Procedure

Variable: \_TTR

#### Moment

Total of 2530 for N 2530 weight variable

Mean 74.5121804 total 188515.816

Standard deviation 30.2244307 variance 913.51621

Skewness-1.1033824 kurtosis 0.13395134

Unmodified square sum 16357007 modified square sum 2310282.49

Coefficient of variation 40.5630738 standard error of the mean 0.600894

#### Basic statistics

##### Positional variation

Mean 74.5122 standard deviation 30.22443

Median 86.9821 variance 913.51621

Mode 100.0000 Range 100.00000

Interquartile range 42.38095

##### Test for position H0: $\mu_0=0$

Test-Statistics-----p Value

Student's t-test t 124.0022 Pr > |t| <. 0001

Sign test M 1200.5 Pr >= |M| <. 0001

Signed rank test S 1441801 Pr >= |S| <. 0001

##### Quartile (Definition 5)

Level quantile

|              |          |
|--------------|----------|
| 100% maximum | 100.0000 |
| 99%          | 100.0000 |
| 95%          | 100.0000 |
| 90%          | 100.0000 |
| 75% Q3       | 100.0000 |
| 50% median   | 86.9821  |
| 25% Q1       | 57.6190  |
| 10%          | 25.7686  |
| 5%           | 0.0000   |
| 1%           | 0.0000   |
| 0% Minimum   | 0.0000   |



Laboratory tests at the time of obtaining Table 2-6 consent, according to the presence or absence of proton-pump inhibitors

UNIVARIATE Procedure

Variable: \_TTR

Extreme value

--- Minimum value---Maximum value---

Value Obs Value Obs

|   |      |     |      |
|---|------|-----|------|
| 0 | 8265 | 100 | 8199 |
| 0 | 8222 | 100 | 8202 |
| 0 | 8211 | 100 | 8204 |
| 0 | 8201 | 100 | 8206 |
| 0 | 8120 | 100 | 8237 |

Missing Values

----- Percent-----

Missing Values Overall Missing Values

|     |       |        |
|-----|-------|--------|
| 425 | 14.38 | 100.00 |
|-----|-------|--------|

Laboratory tests at the time of obtaining Table 2-6 consent, according to the presence or absence of proton-pump inhibitors

UNIVARIATE Procedure

Variable: \_FIR

#### Moment

Total of 2547 for N 2547 weight variable

Mean 71.060725 total 180991.667

Standard deviation 28.1543129 variance 792.665334

Skewness-0.8344667 kurtosis-0.0954633

Unmodified square sum 14879525 modified square sum 2018125.94

Coefficient of variation 39.6200755 standard error of the mean 0.55786673

#### Basic statistics

##### Positional variation

Mean 71.0607 standard deviation 28.15431

Median 75.0000 variance 792.66533

Mode 100.0000 Range 100.00000

Interquartile range 50.00000

##### Test for position H0: $\mu_0=0$

Test-Statistics-----p Value

Student's t-test t 127.3794 Pr > |t| <. 0001

Sign test M 1217 Pr >= |M| <. 0001

Signed rank test S 1481698 Pr >= |S| <. 0001

##### Quartile (Definition 5)

Level quantile

|              |          |
|--------------|----------|
| 100% maximum | 100.0000 |
| 99%          | 100.0000 |
| 95%          | 100.0000 |
| 90%          | 100.0000 |
| 75% Q3       | 100.0000 |
| 50% median   | 75.0000  |
| 25% Q1       | 50.0000  |
| 10%          | 33.3333  |
| 5%           | 16.6667  |
| 1%           | 0.0000   |
| 0% Minimum   | 0.0000   |

Laboratory tests at the time of obtaining Table 2-6 consent, according to the presence or absence of proton-pump inhibitors

UNIVARIATE Procedure

Variable: \_FIR

Extreme value

--- Minimum value---Maximum value---

Value Obs Value Obs

|   |      |     |      |
|---|------|-----|------|
| 0 | 8265 | 100 | 8199 |
| 0 | 8222 | 100 | 8202 |
| 0 | 8211 | 100 | 8204 |
| 0 | 8120 | 100 | 8206 |
| 0 | 8119 | 100 | 8237 |

Missing Values

----- Percent-----

Missing Values Overall Missing Values

|     |       |        |
|-----|-------|--------|
| 408 | 13.81 | 100.00 |
|-----|-------|--------|

Laboratory tests at the time of obtaining Table 2-6 consent, according to the presence or absence of proton-pump inhibitors

UNIVARIATE Procedure

Variable: HGB\_BL (Hemoglobin at Baseline)

#### Moment

Total of 10637 for N 10637 weight variable

Mean 12.5901476 total 133921.4

Standard deviation 1.71638695 variance 2.94598415

Skewness-0.050291 kurtosis 0.04463124

Unmodified square sum 1717423.68 modified square sum 31333.4875

Coefficient of variation 13.6327786 standard error of the mean 0.016642

#### Basic statistics

##### Positional variation

Mean 12.59015 standard deviation 1.71639

Median 12.60000 variance 2.94598

Mode 13.00000 Range 13.60000

Interquartile range 2.30000

##### Test for position H0: $\mu_0=0$

Test-Statistics-----p Value

Student's t-test t 756.5283 Pr > |t| <. 0001

Sign test M 5318.5 Pr >= |M| <. 0001

Signed rank test S 28289102 Pr >= |S| <. 0001

Quartile (Definition 5)

Level quantile

100% max. 19.3

99% 16.5

95% 15.4

90% 14.8

75% Q3 13.8

50% median 12.6

25% Q1 11.5

10% 10.4

5% 9.8

1% 8.7

0% minimum 5.7

Laboratory tests at the time of obtaining Table 2-6 consent, according to the presence or absence of proton-pump inhibitors

UNIVARIATE Procedure

Variable: HGB\_BL (Hemoglobin at Baseline)

Extreme value

---- Minimum value----Maximum value----

| Value | Obs  | Value | Obs  |
|-------|------|-------|------|
| 5.7   | 4075 | 18.1  | 2487 |
| 5.8   | 7930 | 18.2  | 1315 |
| 5.9   | 1487 | 18.2  | 2976 |
| 6.0   | 8226 | 18.8  | 2375 |
| 6.1   | 5951 | 19.3  | 6913 |

Missing Values

----- Percent-----

Missing Values Overall Missing Values

|      |       |        |
|------|-------|--------|
| 1344 | 11.22 | 100.00 |
|------|-------|--------|

Laboratory tests at the time of obtaining Table 2-6 consent, according to the presence or absence of proton-pump inhibitors

UNIVARIATE Procedure

Variable: CRE\_BL (Serum Creatinine at Baseline)

#### Moment

Total of 10775 for N 10775 weight variable

Mean 1.07720148 total 11606.846

Standard deviation 0.68842062 variance 0.47392295

Skewness 9.08226031 kurtosis 130.911008

Unmodified square sum 17608.9576 modified square sum 5106.04581

Coefficient of variation 63.9082498 standard error of the mean 0.00663201

#### Basic statistics

##### Positional variation

Mean 1.077201 standard deviation 0.68842

Median 0.960000 variance 0.47392

Most frequent value 1.000000 range 17.58000

Interquartile range 0.42000

##### Test for position H0: $\mu_0=0$

Test-Statistics-----p Value

Student's t-test t 162.4246 Pr > |t| <. 0001

Sign test M 5387.5 Pr >= |M| <. 0001

Signed rank test S 29027850 Pr >= |S| <. 0001

Quartile (Definition 5)



Level quantile

|            |       |
|------------|-------|
| 100% max.  | 17.60 |
| 99%        | 3.05  |
| 95%        | 1.81  |
| 90%        | 1.52  |
| 75% Q3     | 1.20  |
| 50% median | 0.96  |
| 25% Q1     | 0.78  |
| 10%        | 0.66  |
| 5%         | 0.60  |
| 1%         | 0.49  |
| 0% minimum | 0.02  |

Laboratory tests at the time of obtaining Table 2-6 consent, according to the presence or absence of proton-pump inhibitors

UNIVARIATE Procedure

Variable: CRE\_BL (Serum Creatinine at Baseline)

Extreme value

---- Minimum value----Maximum value----

| Value | Obs  | Value | Obs   |
|-------|------|-------|-------|
| 0.02  | 536  | 13.10 | 3096  |
| 0.15  | 9903 | 13.50 | 11235 |
| 0.33  | 6779 | 13.53 | 3144  |
| 0.34  | 4218 | 15.10 | 6343  |
| 0.36  | 5934 | 17.60 | 7107  |

Missing Values

----- Percent-----

Missing Values Overall Missing Values

|      |       |        |
|------|-------|--------|
| 1206 | 10.07 | 100.00 |
|------|-------|--------|

Laboratory tests at the time of obtaining Table 2-6 consent, according to the presence or absence of proton-pump inhibitors

UNIVARIATE Procedure

Variable: CRC\_BL (Creatinine Clearance at Baseline)

#### Moment

Total of 10018 for N 10018 weight variable

Mean 46.289101 total 463724.214

Standard deviation 25.3382551 variance 642.027174

Skewness 37.8456113 kurtosis 2720.54284

Unmodified square sum 27896563.2 modified square sum 6431186.2

Coefficient of variation 54.7391386 standard error of the mean 0.25315481

#### Basic statistics

##### Positional variation

Mean 46.28910 standard deviation 25.33826

Median 45.03191 variance 642.02717

Mode 50.00000 Range 1875

Interquartile range 23.47372

##### Test for position H0: $\mu_0=0$

Test-Statistics-----p Value

Student's t-test t 182.849 Pr > |t| <. 0001

Sign test M 5009 Pr >= |M| <. 0001

Signed rank test S 25092586 Pr >= |S| <. 0001

##### Quartile (Definition 5)

## Level quantile

|            |            |
|------------|------------|
| 100% max.  | 1877.08333 |
| 99%        | 92.21154   |
| 95%        | 76.38889   |
| 90%        | 68.96921   |
| 75% Q3     | 56.98436   |
| 50% median | 45.03191   |
| 25% Q1     | 33.51064   |
| 10%        | 24.81151   |
| 5%         | 19.92787   |
| 1%         | 12.00794   |
| 0% minimum | 1.66539    |

Laboratory tests at the time of obtaining Table 2-6 consent, according to the presence or absence of proton-pump inhibitors

UNIVARIATE Procedure

Variable: CRC\_BL (Creatinine Clearance at Baseline)

Extreme value

----- Minimum value-----Maximum value-----

| Value   | Obs  | Value    | Obs  |
|---------|------|----------|------|
| 1.66539 | 3096 | 127.099  | 9411 |
| 2.22609 | 6190 | 133.250  | 270  |
| 2.85992 | 6343 | 141.466  | 4615 |
| 2.86888 | 7107 | 219.583  | 9903 |
| 3.56275 | 1719 | 1877.083 | 536  |

Missing Values

----- Percent-----

Missing Values Overall Missing Values

|      |       |        |
|------|-------|--------|
| 1963 | 16.38 | 100.00 |
|------|-------|--------|

Laboratory tests at the time of obtaining Table 2-6 consent, according to the presence or absence of proton-pump inhibitors

UNIVARIATE Procedure

Variables: EGFR\_BL (Estimated Glomerular Filtration Rate at Baseline)

#### Moment

Total of 10775 for N 10775 weight variable

Mean 52.0240972 total 560559.647

Standard deviation 40.5829663 variance 1646.97715

Skewness 76.9622212 kurtosis 7224.00898

Unmodified square sum 46907141.4 modified square sum 17744531.9

Coefficient of variation 78.0080165 standard error of the mean 0.39096254

#### Basic statistics

##### Positional variation

Mean 52.02410 standard deviation 40.58297

Median 51.40873 variance 1647

Most frequent value 62.12143 range 3862

Interquartile range 22.52938

#### Test for position H0: $\mu_0=0$

Test-Statistics-----p Value

Student's t-test t 133.06667 Pr > |t| <. 0001

Sign test M 5387.5 Pr >= |M| <. 0001

Signed rank test S 29027850 Pr >= |S| <. 0001

#### Quartile (Definition 5)

## Level quantile

|            |            |
|------------|------------|
| 100% max.  | 3863.66962 |
| 99%        | 94.43473   |
| 95%        | 80.48916   |
| 90%        | 72.72021   |
| 75% Q3     | 62.54093   |
| 50% median | 51.40873   |
| 25% Q1     | 40.01156   |
| 10%        | 30.33524   |
| 5%         | 24.97081   |
| 1%         | 14.68337   |
| 0% minimum | 1.80183    |

Laboratory tests at the time of obtaining Table 2-6 consent, according to the presence or absence of proton-pump inhibitors

UNIVARIATE Procedure

Variables: EGFR\_BL (Estimated Glomerular Filtration Rate at Baseline)

Extreme value

----- Minimum value-----Maximum value-----

|    | Value   | Obs  | Value    | Obs  |
|----|---------|------|----------|------|
| 1. | 1.80183 | 7107 | 145.774  | 1525 |
| 2. | 2.10676 | 6343 | 149.766  | 8920 |
| 3. | 2.34717 | 3096 | 165.198  | 5934 |
| 4. | 2.79484 | 6190 | 327.168  | 9903 |
| 5. | 3.22656 | 3144 | 3863.670 | 536  |

Missing Values

----- Percent-----

Missing Values Overall Missing Values

|      |       |        |
|------|-------|--------|
| 1206 | 10.07 | 100.00 |
|------|-------|--------|



Laboratory tests at the time of obtaining Table 2-6 consent, according to the presence or absence of proton-pump inhibitors

UNIVARIATE Procedure

Variable : HBA\_BL (Hemoglobin A 1 c at Baseline)

#### Moment

Total of 6839 for N 6839 weight variable

Mean 6.16809329 total 42183.59

Standard deviation 0.80332017 variance 0.6453233

Skewness 2.03263054 kurtosis 9.70311502

Unmodified square sum 264605.039 modified square sum 4412.72074

Coefficient of variation 13.0238006 standard error of the mean 0.00971387

#### Basic statistics

##### Positional variation

Mean 6.168093 standard deviation 0.80332

Median 6.000000 variance 0.64532

Most frequent value 5.800000 range 13.20000

Interquartile range 0.80000

##### Test for position H0: $\mu_0=0$

Test-Statistics-----p Value

Student's t-test t 634.9778 Pr > |t| <. 0001

Sign test M 3419.5 Pr >= |M| <. 0001

Signed rank test S 11694690 Pr >= |S| <. 0001

Quartile (Definition 5)

Level quantile

100% max. 14.1

99% 9.0

95% 7.6

90% 7.1

75% Q3 6.5

50% median 6.0

25% Q1 5.7

10% 5.4

5% 5.3

1% 5.0

0% minimum 0.9

Laboratory tests at the time of obtaining Table 2-6 consent, according to the presence or absence of proton-pump inhibitors

UNIVARIATE Procedure

Variable : HBA\_BL (Hemoglobin A 1 c at Baseline)

Extreme value

---- Minimum value----Maximum value----

| Value | Obs   | Value | Obs  |
|-------|-------|-------|------|
| 0.9   | 7911  | 12.7  | 2807 |
| 2.1   | 2127  | 12.8  | 6406 |
| 4.0   | 9669  | 13.4  | 8394 |
| 4.2   | 1411  | 13.5  | 9404 |
| 4.4   | 10361 | 14.1  | 3949 |

Missing Values

----- Percent-----

Missing Values Overall Missing Values

|      |       |        |
|------|-------|--------|
| 5142 | 42.92 | 100.00 |
|------|-------|--------|

Laboratory tests at the time of obtaining Table 2-6 consent, according to the presence or absence of proton-pump inhibitors

UNIVARIATE Procedure

Variables: \_PTINR (PT-INR Value)

#### Moment

Total of 5119 for N 5119 weight variable

Mean 1.98121697 total 10141.8497

Standard deviation 0.36092434 variance 0.13026638

Skewness 0.47964052 kurtosis 1.73615019

Unmodified square sum 20759.908 modified square sum 666.703333

Coefficient of variation 18.2173052 standard error of the mean 0.00504456

#### Basic statistics

##### Positional variation

Mean 1.981217 standard deviation 0.36092

Median 1.960000 variance 0.13027

Most frequent value 2.100000 range 3.93500

Interquartile range 0.45500

##### Test for position H0: $\mu_0=0$

Test-Statistics-----p Value

Student's t-test t 392.743 Pr > |t| <. 0001

Sign test M 2559.5 Pr >= |M| <. 0001

Signed rank test S 6552320 Pr >= |S| <. 0001

##### Quartile (Definition 5)

## Level quantile

|            |         |
|------------|---------|
| 100% max.  | 4.43000 |
| 99%        | 2.93333 |
| 95%        | 2.56000 |
| 90%        | 2.42333 |
| 75% Q3     | 2.20000 |
| 50% median | 1.96000 |
| 25% Q1     | 1.74500 |
| 10%        | 1.55000 |
| 5%         | 1.43000 |
| 1%         | 1.16667 |
| 0% minimum | 0.49500 |

Laboratory tests at the time of obtaining Table 2-6 consent, according to the presence or absence of proton-pump inhibitors

UNIVARIATE Procedure

Variables: \_PTINR (PT-INR Value)

Extreme value

----- Minimum value-----Maximum value-----

| Value | Obs  | Value | Obs  |
|-------|------|-------|------|
| 0.495 | 1499 | 3.710 | 4245 |
| 0.970 | 4309 | 3.930 | 3467 |
| 0.970 | 6031 | 4.050 | 2785 |
| 0.980 | 2005 | 4.155 | 262  |
| 1.000 | 6483 | 4.430 | 4808 |

Missing Values

----- Percent-----

Missing Values Overall Missing Values

|     |      |        |
|-----|------|--------|
| 221 | 4.14 | 100.00 |
|-----|------|--------|

Laboratory tests at the time of obtaining Table 2-6 consent, according to the presence or absence of proton-pump inhibitors

UNIVARIATE Procedure

Variable: \_TTR

#### Moment

Total of 4418 for N 4418 weight variable

Mean 75.7804448 total 334798.005

Standard deviation 29.6701577 variance 880.318261

Skewness-1.1806134 kurtosis 0.30328144

Unmodified square sum 29259507.5 modified square sum 3888365.76

Coefficient of variation 39.1527891 standard error of the mean 0.44638233

#### Basic statistics

##### Positional variation

Mean 75.7804 standard deviation 29.67016

Median 88.4942 variance 880.31826

Mode 100.0000 Range 100.00000

Interquartile range 39.79592

##### Test for position H0: $\mu_0=0$

Test-Statistics-----p Value

Student's t-test t 169.7658 Pr > |t| <. 0001

Sign test M 2113.5 Pr >= |M| <. 0001

Signed rank test S 4467939 Pr >= |S| <. 0001

##### Quartile (Definition 5)

Level quantile

|              |           |
|--------------|-----------|
| 100% maximum | 100.00000 |
| 99%          | 100.00000 |
| 95%          | 100.00000 |
| 90%          | 100.00000 |
| 75% Q3       | 100.00000 |
| 50% median   | 88.49415  |
| 25% Q1       | 60.20408  |
| 10%          | 27.39496  |
| 5%           | 6.40244   |
| 1%           | 0.00000   |
| 0% Minimum   | 0.00000   |



Laboratory tests at the time of obtaining Table 2-6 consent, according to the presence or absence of proton-pump inhibitors

UNIVARIATE Procedure

Variable: \_TTR

Extreme value

--- Minimum value---Maximum value---

Value Obs Value Obs

|   |      |     |      |
|---|------|-----|------|
| 0 | 8287 | 100 | 8278 |
| 0 | 8226 | 100 | 8279 |
| 0 | 8224 | 100 | 8282 |
| 0 | 8218 | 100 | 8283 |
| 0 | 8213 | 100 | 8286 |

Missing Values

----- Percent-----

Missing Values Overall Missing Values

|     |       |        |
|-----|-------|--------|
| 922 | 17.27 | 100.00 |
|-----|-------|--------|

Laboratory tests at the time of obtaining Table 2-6 consent, according to the presence or absence of proton-pump inhibitors

UNIVARIATE Procedure

Variable: \_FIR

#### Moment

Total of 4447 for N 4447 weight variable

Mean 72.3259126 total 321633.333

Standard deviation 27.3441095 variance 747.700325

Skewness-0.8743905 kurtosis 0.01108941

Unmodified square sum 26586700 modified square sum 3324275.64

Coefficient of variation 37.806795 standard error of the mean 0.41004377

#### Basic statistics

##### Positional variation

Mean 72.3259 standard deviation 27.34411

Median 80.0000 variance 747.70032

Mode 100.0000 Range 100.00000

Interquartile range 50.00000

##### Test for position H0: $\mu_0=0$

Test-Statistics-----p Value

Student's t-test t 176.3858 Pr > |t| <. 0001

Sign test M 2146.5 Pr >= |M| <. 0001

Signed rank test S 4608536 Pr >= |S| <. 0001

##### Quartile (Definition 5)

Level quantile

|              |          |
|--------------|----------|
| 100% maximum | 100.0000 |
| 99%          | 100.0000 |
| 95%          | 100.0000 |
| 90%          | 100.0000 |
| 75% Q3       | 100.0000 |
| 50% median   | 80.0000  |
| 25% Q1       | 50.0000  |
| 10%          | 33.3333  |
| 5%           | 16.6667  |
| 1%           | 0.0000   |
| 0% Minimum   | 0.0000   |

Laboratory tests at the time of obtaining Table 2-6 consent, according to the presence or absence of proton-pump inhibitors

UNIVARIATE Procedure

Variable: \_FIR

Extreme value

--- Minimum value---Maximum value---

Value Obs Value Obs

|   |      |     |      |
|---|------|-----|------|
| 0 | 8287 | 100 | 8260 |
| 0 | 8226 | 100 | 8278 |
| 0 | 8224 | 100 | 8282 |
| 0 | 8218 | 100 | 8283 |
| 0 | 8213 | 100 | 8286 |

Missing Values

----- Percent-----

Missing Values Overall Missing Values

|     |       |        |
|-----|-------|--------|
| 893 | 16.72 | 100.00 |
|-----|-------|--------|

Laboratory tests at the time of obtaining Table 2-6 consent, according to the presence or absence of proton-pump inhibitors

UNIVARIATE Procedure

Variable: HGB\_BL (Hemoglobin at Baseline)

#### Moment

Total of 17579 for N 17579 weight variable

Mean 13.013924 total 228771.77

Standard deviation 1.69831356 variance 2.88426895

Skewness-0.1389585 kurtosis 0.37774995

Unmodified square sum 3027918.11 modified square sum 50699.6795

Coefficient of variation 13.0499729 standard error of the mean 0.01280916

#### Basic statistics

##### Positional variation

Mean 13.01392 standard deviation 1.69831

Median 13.00000 variance 2.88427

Most frequent value 13.00000 range 15.04000

Interquartile range 2.20000

##### Test for position H0: $\mu_0=0$

Test-Statistics-----p Value

Student's t-test t 1015.985 Pr > |t| <. 0001

Sign test M 8789.5 Pr >= |M| <. 0001

Signed rank test S 77259705 Pr >= |S| <. 0001

Quartile (Definition 5)

## Level quantile

|            |       |
|------------|-------|
| 100% max.  | 19.70 |
| 99%        | 17.00 |
| 95%        | 15.70 |
| 90%        | 15.10 |
| 75% Q3     | 14.10 |
| 50% median | 13.00 |
| 25% Q1     | 11.90 |
| 10%        | 10.90 |
| 5%         | 10.20 |
| 1%         | 8.90  |
| 0% minimum | 4.66  |

Laboratory tests at the time of obtaining Table 2-6 consent, according to the presence or absence of proton-pump inhibitors

UNIVARIATE Procedure

Variable: HGB\_BL (Hemoglobin at Baseline)

Extreme value

---- Minimum value----Maximum value----

| Value | Obs   | Value | Obs   |
|-------|-------|-------|-------|
| 4.66  | 10336 | 19.1  | 19114 |
| 4.80  | 3203  | 19.4  | 5198  |
| 4.90  | 2694  | 19.4  | 11438 |
| 5.10  | 3211  | 19.6  | 14572 |
| 5.10  | 3202  | 19.7  | 6185  |

Missing Values

----- Percent-----

Missing Values Overall Missing Values

|      |       |        |
|------|-------|--------|
| 2930 | 14.29 | 100.00 |
|------|-------|--------|

Laboratory tests at the time of obtaining Table 2-6 consent, according to the presence or absence of proton-pump inhibitors

UNIVARIATE Procedure

Variable: CRE\_BL (Serum Creatinine at Baseline)

#### Moment

Total of 17798 for N 17798 weight variable

Mean 1.00221233 total 17837.375

Standard deviation 0.56614024 variance 0.32051478

Skewness 11.1105478 kurtosis 210.284903

Unmodified square sum 23581.0386 modified square sum 5704.20148

Coefficient of variation 56.4890522 standard error of the mean 0.00424364

#### Basic statistics

##### Positional variation

Mean 1.002212 standard deviation 0.56614

Median 0.910000 variance 0.32051

Most frequent value 0.800000 range 17.43000

Interquartile range 0.36000

##### Test for position H0: $\mu_0=0$

Test-Statistics-----p Value

Student's t-test t 236.1681 Pr > |t| <. 0001

Sign test M 8899 Pr >= |M| <. 0001

Signed rank test S 79196651 Pr >= |S| <. 0001

Quartile (Definition 5)



## Level quantile

|            |       |
|------------|-------|
| 100% max.  | 17.50 |
| 99%        | 2.48  |
| 95%        | 1.66  |
| 90%        | 1.39  |
| 75% Q3     | 1.11  |
| 50% median | 0.91  |
| 25% Q1     | 0.75  |
| 10%        | 0.64  |
| 5%         | 0.58  |
| 1%         | 0.49  |
| 0% minimum | 0.07  |

Laboratory tests at the time of obtaining Table 2-6 consent, according to the presence or absence of proton-pump inhibitors

UNIVARIATE Procedure

Variable: CRE\_BL (Serum Creatinine at Baseline)

Extreme value

---- Minimum value----Maximum value----

| Value | Obs   | Value | Obs   |
|-------|-------|-------|-------|
| 0.07  | 18932 | 13.1  | 9999  |
| 0.07  | 9064  | 14.0  | 7559  |
| 0.08  | 11739 | 14.6  | 387   |
| 0.10  | 5051  | 16.4  | 10318 |
| 0.20  | 555   | 17.5  | 12365 |

Missing Values

----- Percent-----

Missing Values Overall Missing Values

|      |       |        |
|------|-------|--------|
| 2711 | 13.22 | 100.00 |
|------|-------|--------|

Laboratory tests at the time of obtaining Table 2-6 consent, according to the presence or absence of proton-pump inhibitors

UNIVARIATE Procedure

Variable: CRC\_BL (Creatinine Clearance at Baseline)

#### Moment

Total of 16356 for N 16356 weight variable

Mean 49.7451835 total 813632.222

Standard deviation 19.1397887 variance 366.33151

Skewness 5.74830253 kurtosis 188.691597

Unmodified square sum 46465636.1 modified square sum 5991351.85

Coefficient of variation 38.475662 standard error of the mean 0.14965753

#### Basic statistics

##### Positional variation

Mean 49.74518 standard deviation 19.13979

Median 48.89178 variance 366.33151

Most frequent value 35.41667 range 817.65873

Interquartile range 22.98276

Note: There are two most frequent values (frequency: 12). The table shows the smallest of the most common values.

Test for position H0:  $\mu_0=0$

Test-Statistics-----p Value

Student's t-test t 332.3934 Pr > |t| <. 0001

Sign test M 8178 Pr >= |M| <. 0001

Signed rank test S 66883773 Pr >= |S| <. 0001

## Quartile (Definition 5)

### Level quantile

|            |           |
|------------|-----------|
| 100% max.  | 819.64286 |
| 99%        | 94.83108  |
| 95%        | 79.43741  |
| 90%        | 71.68981  |
| 75% Q3     | 60.48276  |
| 50% median | 48.89178  |
| 25% Q1     | 37.50000  |
| 10%        | 27.90698  |
| 5%         | 22.68018  |

Laboratory tests at the time of obtaining Table 2-6 consent, according to the presence or absence of proton-pump inhibitors

UNIVARIATE Procedure

Variable: CRC\_BL (Creatinine Clearance at Baseline)

Quantile (Definition 5)

Level quantile

1% 14.56019

0% minimum 1.98413

Extreme value

----- Minimum value-----Maximum value-----

Value Obs Value Obs

|         |       |         |       |
|---------|-------|---------|-------|
| 1.98413 | 12365 | 220.484 | 2432  |
| 2.53133 | 10318 | 316.271 | 5051  |
| 2.63301 | 10328 | 422.976 | 9064  |
| 2.64942 | 11035 | 488.440 | 11739 |
| 3.05974 | 387   | 819.643 | 18932 |

Missing Values

----- Percent-----

Missing Values Overall Missing Values

|      |       |        |
|------|-------|--------|
| 4153 | 20.25 | 100.00 |
|------|-------|--------|

Laboratory tests at the time of obtaining Table 2-6 consent, according to the presence or absence of proton-pump inhibitors

UNIVARIATE Procedure

Variables: EGFR\_BL (Estimated Glomerular Filtration Rate at Baseline)

#### Moment

Total of 17798 for N 17798 weight variable

Mean 55.1597876 total 981733.899

Standard deviation 19.2357959 variance 370.015845

Skewness 7.89713487 kurtosis 252.531919

Unmodified square sum 60737405.4 modified square sum 6585172

Coefficient of variation 34.8728608 standard error of the mean 0.14418649

#### Basic statistics

##### Positional variation

Mean 55.15979 standard deviation 19.23580

Median 54.77718 variance 370.01585

Most frequent value 62.81551 range 745.55833

Interquartile range 20.88789

Note: There are two most frequent values (frequency: 36). The table shows the smallest of the most common values.

Test for position H0:  $\mu_0=0$

Test-Statistics-----p Value

Student's t-test t 382.5586 Pr > |t| <. 0001

Sign test M 8899 Pr >= |M| <. 0001

Signed rank test S 79196651 Pr >= |S| <. 0001

## Quartile (Definition 5)

### Level quantile

|            |           |
|------------|-----------|
| 100% max.  | 747.69089 |
| 99%        | 98.04161  |
| 95%        | 82.69342  |
| 90%        | 75.61258  |
| 75% Q3     | 65.18898  |
| 50% median | 54.77718  |
| 25% Q1     | 44.30109  |
| 10%        | 34.01569  |
| 5%         | 27.84457  |

Laboratory tests at the time of obtaining Table 2-6 consent, according to the presence or absence of proton-pump inhibitors

UNIVARIATE Procedure

Variables: EGFR\_BL (Estimated Glomerular Filtration Rate at Baseline)

Quartile (Definition 5)

Level quantile

1% 18.07305

0% minimum 2.13256

Extreme value

----- Minimum value-----Maximum value-----

Value Obs Value Obs

|         |       |         |       |
|---------|-------|---------|-------|
| 2.13256 | 387   | 313.208 | 555   |
| 2.32836 | 12365 | 500.807 | 5051  |
| 2.49183 | 10318 | 643.770 | 11739 |
| 2.53115 | 12846 | 739.833 | 9064  |
| 2.73266 | 11035 | 747.691 | 18932 |

Missing Values

----- Percent-----

Missing Values Overall Missing Values

|      |       |        |
|------|-------|--------|
| 2711 | 13.22 | 100.00 |
|------|-------|--------|



Laboratory tests at the time of obtaining Table 2-6 consent, according to the presence or absence of proton-pump inhibitors

UNIVARIATE Procedure

Variable : HBA\_BL (Hemoglobin A 1 c at Baseline)

#### Moment

Total of 10832 for N 10832 weight variable

Mean 6.08837795 total 65949.31

Standard deviation 0.80389182 variance 0.64624206

Skewness 2.24032971 kurtosis 18.2197927

Unmodified square sum 408523.773 modified square sum 6999.4478

Coefficient of variation 13.2037109 standard error of the mean 0.00772402

#### Basic statistics

##### Positional variation

Mean 6.088378 standard deviation 0.80389

Median 5.900000 variance 0.64624

Mode 5.700000 Range 19.00000

Interquartile range 0.80000

##### Test for position H0: $\mu_0=0$

Test-Statistics-----p Value

Student's t-test t 788.2397 Pr > |t| <. 0001

Sign test M 5416 Pr >= |M| <. 0001

Signed rank test S 29335764 Pr >= |S| <. 0001

Quartile (Definition 5)

Level quantile

100% max. 19.6

99% 8.7

95% 7.5

90% 7.0

75% Q3 6.4

50% median 5.9

25% Q1 5.6

10% 5.3

5% 5.2

1% 4.9

0% minimum 0.6

Laboratory tests at the time of obtaining Table 2-6 consent, according to the presence or absence of proton-pump inhibitors

UNIVARIATE Procedure

Variable : HBA\_BL (Hemoglobin A 1 c at Baseline)

Extreme value

---- Minimum value----Maximum value----

| Value | Obs   | Value | Obs   |
|-------|-------|-------|-------|
| 0.60  | 13929 | 13.7  | 10882 |
| 0.65  | 14039 | 14.0  | 8407  |
| 0.68  | 7559  | 14.0  | 9712  |
| 0.70  | 14011 | 16.0  | 10528 |
| 0.79  | 7744  | 19.6  | 10527 |

Missing Values

----- Percent-----

Missing Values Overall Missing Values

|      |       |        |
|------|-------|--------|
| 9677 | 47.18 | 100.00 |
|------|-------|--------|

Laboratory tests at the time of obtaining Table 2-6 consent, according to the presence or absence of proton-pump inhibitors

FREQ Procedure

Number of levels of variables

Number of Variables Level

GROUP1 2

f\_PTINRCT 4

Table : GROUP1 \* f\_PTINRCT

GROUP1 f\_PTINRCT

Power |

Percent |

Percent of rows

Percentage of columns | 1| 2| 3| 4| Total

|       | +     | +     | +     | +     | +      |
|-------|-------|-------|-------|-------|--------|
| 1     | 399   | 1204  | 1159  | 99    | 2861   |
|       | 5.00  | 15.09 | 14.52 | 1.24  | 35.85  |
|       | 13.95 | 42.08 | 40.51 | 3.46  |        |
|       | 37.15 | 36.86 | 34.95 | 30.56 |        |
|       | +     | +     | +     | +     | +      |
| 2     | 675   | 2062  | 2157  | 225   | 5119   |
|       | 8.46  | 25.84 | 27.03 | 2.82  | 64.15  |
|       | 13.19 | 40.28 | 42.14 | 4.40  |        |
|       | 62.85 | 63.14 | 65.05 | 69.44 |        |
|       | +     | +     | +     | +     | +      |
| Total | 1074  | 3266  | 3316  | 324   | 7980   |
|       | 13.46 | 40.93 | 41.55 | 4.06  | 100.00 |

Laboratory tests at the time of obtaining Table 2-6 consent, according to the presence or absence of proton-pump inhibitors

FREQ Procedure

Number of levels of variables

Number of Variables Level

GROUP1 2

f\_TTRCT 4

Table : GROUP1 \* f\_TTRCT

GROUP1 f\_TTRCT

Power |

Percent |

Percent of rows

Percentage of columns | 1| 2| 3| 4| Total

|       | +     | +     | +     | +     | +      |
|-------|-------|-------|-------|-------|--------|
| 1     | 385   | 297   | 443   | 1405  | 2530   |
|       | 5.54  | 4.27  | 6.38  | 20.22 | 36.41  |
|       | 15.22 | 11.74 | 17.51 | 55.53 |        |
|       | 36.91 | 40.35 | 37.99 | 35.10 |        |
|       | +     | +     | +     | +     | +      |
| 2     | 658   | 439   | 723   | 2598  | 4418   |
|       | 9.47  | 6.32  | 10.41 | 37.39 | 63.59  |
|       | 14.89 | 9.94  | 16.36 | 58.80 |        |
|       | 63.09 | 59.65 | 62.01 | 64.90 |        |
|       | +     | +     | +     | +     | +      |
| Total | 1043  | 736   | 1166  | 4003  | 6948   |
|       | 15.01 | 10.59 | 16.78 | 57.61 | 100.00 |

Laboratory tests at the time of obtaining Table 2-6 consent, according to the presence or absence of proton-pump inhibitors

FREQ Procedure

Number of levels of variables

Number of Variables Level

GROUP1 2

f\_FIRCT 4

Table : GROUP1 \* f\_FIRCT

GROUP1 f\_FIRCT

Power |

Percent |

Percent of rows

Percentage of columns | 1| 2| 3| 4| Total

|       | +     | +     | +     | +     | +      |
|-------|-------|-------|-------|-------|--------|
| 1     | 396   | 313   | 588   | 1250  | 2547   |
|       | 5.66  | 4.48  | 8.41  | 17.87 | 36.42  |
|       | 15.55 | 12.29 | 23.09 | 49.08 |        |
|       | 38.33 | 38.03 | 36.27 | 35.54 |        |
|       | +     | +     | +     | +     | +      |
| 2     | 637   | 510   | 1033  | 2267  | 4447   |
|       | 9.11  | 7.29  | 14.77 | 32.41 | 63.58  |
|       | 14.32 | 11.47 | 23.23 | 50.98 |        |
|       | 61.67 | 61.97 | 63.73 | 64.46 |        |
|       | +     | +     | +     | +     | +      |
| Total | 1033  | 823   | 1621  | 3517  | 6994   |
|       | 14.77 | 11.77 | 23.18 | 50.29 | 100.00 |

Laboratory tests at the time of obtaining Table 2-6 consent, according to the presence or absence of proton-pump inhibitors

FREQ Procedure

Number of levels of variables

Number of Variables Level

GROUP1 2

f\_crc 5

Table : GROUP1 \* f\_crc

GROUP1 f\_crc

Power |

Percent |

Percent of rows

Percentage of columns | 1| 2| 3| 4| 5| Total

|       | +     | +     | +     | +     | +     | +      | + |
|-------|-------|-------|-------|-------|-------|--------|---|
| 1     | 223   | 1626  | 4292  | 3539  | 355   | 10035  |   |
|       | 0.84  | 6.16  | 16.26 | 13.40 | 1.34  | 38.01  |   |
|       | 2.22  | 16.20 | 42.77 | 35.27 | 3.54  |        |   |
|       | 52.72 | 46.38 | 39.62 | 33.62 | 31.78 |        |   |
|       | +     | +     | +     | +     | +     | +      | + |
| 2     | 200   | 1880  | 6541  | 6986  | 762   | 16369  |   |
|       | 0.76  | 7.12  | 24.77 | 26.46 | 2.89  | 61.99  |   |
|       | 1.22  | 11.49 | 39.96 | 42.68 | 4.66  |        |   |
|       | 47.28 | 53.62 | 60.38 | 66.38 | 68.22 |        |   |
|       | +     | +     | +     | +     | +     | +      | + |
| Total | 423   | 3506  | 10833 | 10525 | 1117  | 26404  |   |
|       | 1.60  | 13.28 | 41.03 | 39.86 | 4.23  | 100.00 |   |

Laboratory tests at the time of obtaining Table 2-6 consent, according to the presence or absence of proton-pump inhibitors

FREQ Procedure

Number of levels of variables

Variables Label Level Number

GROUP1 2

EGFRC\_BL Category of Estimated Glomerular Filtration Rate at Baseline 6

Table : GROUP1 \* EGFRC\_BL

GROUP1

EGFRC\_BL(Category of Estimated Glomerular Filtration Rate at Baseline)

Power |

Percent |

Percent of rows

Percentage of column |less than 15|more than 15|more than 30|more than 30|more than 45|more than 45|more than 60|more than 60|more than 90| Total

|   | Less than 15 | more than 15 | more than 30 | more than 30 | more than 45 | more than 45 | more than 60 | more than 60 | more than 90 | Total |
|---|--------------|--------------|--------------|--------------|--------------|--------------|--------------|--------------|--------------|-------|
| 1 | 115          | 922          | 2807         | 3672         | 3083         | 176          | 10775        |              |              |       |
|   | 0.40         | 3.23         | 9.82         | 12.85        | 10.79        | 0.62         | 37.71        |              |              |       |
|   | 1.07         | 8.56         | 26.05        | 34.08        | 28.61        | 1.63         |              |              |              |       |
|   | 49.36        | 47.65        | 43.95        | 35.98        | 33.37        | 30.61        |              |              |              |       |
| 2 | 118          | 1013         | 3580         | 6533         | 6155         | 399          | 17798        |              |              |       |
|   | 0.41         | 3.55         | 12.53        | 22.86        | 21.54        | 1.40         | 62.29        |              |              |       |
|   | 0.66         | 5.69         | 20.11        | 36.71        | 34.58        | 2.24         |              |              |              |       |
|   | 50.64        | 52.35        | 56.05        | 64.02        | 66.63        | 69.39        |              |              |              |       |



Total 233 1935 6387 10205 9238 575 28573

0.82 6.77 22.35 35.72 32.33 2.01 100.00

Laboratory tests at the time of obtaining Table 2-6 consent, according to the presence or absence of proton-pump inhibitors

FREQ Procedure

Number of levels of variables

Variables Label Level Number

GROUP1 2

HBAC\_BL Category of Hemoglobin A1c at Baseline 4

Table : GROUP1 \* HBAC\_BL

GROUP1

HBAC\_BL(Category of Hemoglobin A1c at Baseline)

Power |

Percent |

Percent of rows

Percent of column |less than 6.0%|more than 6.0%|more than 7.0%|more than 8.0%|total

|| < 7.0%| < 8.0%| ||

|       | +     | +     | +     | +     | +      |
|-------|-------|-------|-------|-------|--------|
| 1     | 3184  | 2745  | 679   | 231   | 6839   |
|       | 18.02 | 15.53 | 3.84  | 1.31  | 38.70  |
|       | 46.56 | 40.14 | 9.93  | 3.38  |        |
|       | 36.20 | 40.64 | 43.39 | 41.55 |        |
|       | +     | +     | +     | +     | +      |
| 2     | 5612  | 4009  | 886   | 325   | 10832  |
|       | 31.76 | 22.69 | 5.01  | 1.84  | 61.30  |
|       | 51.81 | 37.01 | 8.18  | 3.00  |        |
|       | 63.80 | 59.36 | 56.61 | 58.45 |        |
|       | +     | +     | +     | +     | +      |
| Total | 8796  | 6754  | 1565  | 556   | 17671  |
|       | 49.78 | 38.22 | 8.86  | 3.15  | 100.00 |

Laboratory tests at the time of obtaining Table 2-6 consent, according to the presence or absence of proton-pump inhibitors

TTEST Procedure

Variable: f\_PTINR

GROUP1 N Mean Standard Deviation Standard Error Minimum Value Maximum Value

|            |         |        |         |         |        |        |
|------------|---------|--------|---------|---------|--------|--------|
| 1          | 2861    | 1.9576 | 0.3515  | 0.00657 | 0.9000 | 3.8400 |
| 2          | 5119    | 1.9812 | 0.3609  | 0.00504 | 0.4950 | 4.4300 |
| Diff (1-2) | -0.0236 | 0.3576 | 0.00835 |         |        |        |

To the mean standard deviation

GROUP1 methods Mean 95% confidence limits standard deviation 95% confidence limits

|                          |         |         |          |        |        |        |
|--------------------------|---------|---------|----------|--------|--------|--------|
| 1                        |         | 1.9576  | 1.9447   | 1.9705 | 0.3515 | 0.3426 |
|                          | 0.3609  |         |          |        |        |        |
| 2                        |         | 1.9812  | 1.9713   | 1.9911 | 0.3609 | 0.3541 |
|                          | 0.3681  |         |          |        |        |        |
| Diff (1-2) Pooled        | -0.0236 | -0.0400 | -0.00725 | 0.3576 | 0.3521 | 0.3632 |
| Diff (1-2) Satterthwaite | -0.0236 | -0.0399 | -0.00737 |        |        |        |

Technique Dispersion degrees of freedom t-value Pr > |t|

Pooled Equal 7978 -2.83 0.0047

Satterthwaite Unequal 6049.7 -2.85 0.0044

Isodispersity

Technique Degree of Freedom of Numerators Degree of Freedom of the denominator F Value Pr > F

Folded F 5118 2860 1.05 0.1109

Laboratory tests at the time of obtaining Table 2-6 consent, according to the presence or absence of proton-pump inhibitors

TTEST Procedure

Variable: f\_TTR

GROUP1 N Mean Standard Deviation Standard Error Minimum Value Maximum Value

|                                   |      |         |         |        |   |       |
|-----------------------------------|------|---------|---------|--------|---|-------|
| 1                                 | 2530 | 74.5122 | 30.2244 | 0.6009 | 0 | 100.0 |
| 2                                 | 4418 | 75.7804 | 29.6702 | 0.4464 | 0 | 100.0 |
| Diff (1-2) -1.2683 29.8732 0.7448 |      |         |         |        |   |       |

To the mean standard deviation

GROUP1 methods Mean 95% confidence limits standard deviation 95% confidence limits

|                                                                  |  |         |         |         |         |         |
|------------------------------------------------------------------|--|---------|---------|---------|---------|---------|
| 1                                                                |  | 74.5122 | 73.3339 | 75.6905 | 30.2244 | 29.4140 |
| 31.0811                                                          |  |         |         |         |         |         |
| 2                                                                |  | 75.7804 | 74.9053 | 76.6556 | 29.6702 | 29.0642 |
| 30.3021                                                          |  |         |         |         |         |         |
| Diff (1-2) Pooled -1.2683 -2.7283 0.1918 29.8732 29.3846 30.3784 |  |         |         |         |         |         |
| Diff (1-2) Satterthwaite -1.2683 -2.7357 0.1992                  |  |         |         |         |         |         |

Technique Dispersion degrees of freedom t-value Pr > |t|

Pooled Equal 6946 -1.70 0.0886

Satterthwaite Unequal 5186.1 -1.69 0.0903

Isodispersity

Technique Degree of Freedom of Numerators Degree of Freedom of the denominator F Value Pr > F

Folded F 2529 4417 1.04 0.2916

Laboratory tests at the time of obtaining Table 2-6 consent, according to the presence or absence of proton-pump inhibitors

TTEST Procedure

Variable: f\_FIR

GROUP1 N Mean Standard Deviation Standard Error Minimum Value Maximum Value

|                                   |      |         |         |        |   |       |
|-----------------------------------|------|---------|---------|--------|---|-------|
| 1                                 | 2547 | 71.0607 | 28.1543 | 0.5579 | 0 | 100.0 |
| 2                                 | 4447 | 72.3259 | 27.3441 | 0.4100 | 0 | 100.0 |
| Diff (1-2) -1.2652 27.6419 0.6869 |      |         |         |        |   |       |

To the mean standard deviation

GROUP1 methods Mean 95% confidence limits standard deviation 95% confidence limits

|                                                                  |  |         |         |         |         |         |
|------------------------------------------------------------------|--|---------|---------|---------|---------|---------|
| 1                                                                |  | 71.0607 | 69.9668 | 72.1546 | 28.1543 | 27.4019 |
| 28.9496                                                          |  |         |         |         |         |         |
| 2                                                                |  | 72.3259 | 71.5220 | 73.1298 | 27.3441 | 26.7874 |
| 27.9246                                                          |  |         |         |         |         |         |
| Diff (1-2) Pooled -1.2652 -2.6117 0.0813 27.6419 27.1913 28.1078 |  |         |         |         |         |         |
| Diff (1-2) Satterthwaite -1.2652 -2.6225 0.0921                  |  |         |         |         |         |         |

Technique Dispersion degrees of freedom t-value Pr > |t|

Pooled Equal 6992 -1.84 0.0655

Satterthwaite Unequal 5175.1 -1.83 0.0677

Isodispersity

Technique Degree of Freedom of Numerators Degree of Freedom of the denominator F Value Pr > F

Folded F 2546 4446 1.06 0.0951

Laboratory tests at the time of obtaining Table 2-6 consent, according to the presence or absence of proton-pump inhibitors

TTEST Procedure

Variable: HGB\_BL (Hemoglobin at Baseline)

GROUP1 N Mean Standard Deviation Standard Error Minimum Value Maximum Value

|            |         |         |        |        |        |         |
|------------|---------|---------|--------|--------|--------|---------|
| 1          | 10637   | 12.5901 | 1.7164 | 0.0166 | 5.7000 | 19.3000 |
| 2          | 17579   | 13.0139 | 1.6983 | 0.0128 | 4.6600 | 19.7000 |
| Diff (1-2) | -0.4238 | 1.7051  | 0.0209 |        |        |         |

To the mean standard deviation

GROUP1 methods Mean 95% confidence limits standard deviation 95% confidence limits

|                          |         |         |         |         |        |        |
|--------------------------|---------|---------|---------|---------|--------|--------|
| 1                        |         | 12.5901 | 12.5575 | 12.6228 | 1.7164 | 1.6936 |
|                          | 1.7398  |         |         |         |        |        |
| 2                        |         | 13.0139 | 12.9888 | 13.0390 | 1.6983 | 1.6807 |
|                          | 1.7163  |         |         |         |        |        |
| Diff (1-2) Pooled        | -0.4238 | -0.4648 | -0.3827 | 1.7051  | 1.6912 | 1.7193 |
| Diff (1-2) Satterthwaite | -0.4238 | -0.4649 | -0.3826 |         |        |        |

Technique Dispersion degrees of freedom t-value Pr > |t|

Pooled Equal 28214 -20.23 <. 0001

Satterthwaite Unequal 22247 -20.18 <. 0001

Isodispersity

Technique Degree of Freedom of Numerators Degree of Freedom of the denominator F Value Pr > F

Folded F 10636 17578 1.02 0.2220

Laboratory tests at the time of obtaining Table 2-6 consent, according to the presence or absence of proton-pump inhibitors

TTEST Procedure

Variable: CRE\_BL (Serum Creatinine at Baseline)

GROUP1 N Mean Standard Deviation Standard Error Minimum Value Maximum Value

|            |        |        |         |         |        |         |
|------------|--------|--------|---------|---------|--------|---------|
| 1          | 10775  | 1.0772 | 0.6884  | 0.00663 | 0.0200 | 17.6000 |
| 2          | 17798  | 1.0022 | 0.5661  | 0.00424 | 0.0700 | 17.5000 |
| Diff (1-2) | 0.0750 | 0.6151 | 0.00751 |         |        |         |

To the mean standard deviation

GROUP1 methods Mean 95% confidence limits standard deviation 95% confidence limits

|                          |        |        |        |        |        |        |
|--------------------------|--------|--------|--------|--------|--------|--------|
| 1                        |        | 1.0772 | 1.0642 | 1.0902 | 0.6884 | 0.6794 |
| 0.6977                   |        |        |        |        |        |        |
| 2                        |        | 1.0022 | 0.9939 | 1.0105 | 0.5661 | 0.5603 |
| 0.5721                   |        |        |        |        |        |        |
| Diff (1-2) Pooled        | 0.0750 | 0.0603 | 0.0897 | 0.6151 | 0.6101 | 0.6202 |
| Diff (1-2) Satterthwaite | 0.0750 | 0.0596 | 0.0904 |        |        |        |

Technique Dispersion degrees of freedom t-value Pr > |t|

Pooled Equal 28571 9.99 <. 0001

Satterthwaite Unequal 19431 9.52 <. 0001

Isodispersity

Technique Degree of Freedom of Numerators Degree of Freedom of the denominator F Value Pr > F

Folded F 10774 17797 1.48 <. 0001

Laboratory tests at the time of obtaining Table 2-6 consent, according to the presence or absence of proton-pump inhibitors

TTEST Procedure

Variable: CRC\_BL (Creatinine Clearance at Baseline)

GROUP1 N Mean Standard Deviation Standard Error Minimum Value Maximum Value

|            |         |         |         |        |        |        |
|------------|---------|---------|---------|--------|--------|--------|
| 1          | 10018   | 46.2891 | 25.3383 | 0.2532 | 1.6654 | 1877.1 |
| 2          | 16356   | 49.7452 | 19.1398 | 0.1497 | 1.9841 | 819.6  |
| Diff (1-2) | -3.4561 | 21.7037 | 0.2754  |        |        |        |

To the mean standard deviation

GROUP1 methods Mean 95% confidence limits standard deviation 95% confidence limits

|                          |         |         |         |         |         |         |
|--------------------------|---------|---------|---------|---------|---------|---------|
| 1                        |         | 46.2891 | 45.7929 | 46.7853 | 25.3383 | 24.9922 |
|                          | 25.6941 |         |         |         |         |         |
| 2                        |         | 49.7452 | 49.4518 | 50.0385 | 19.1398 | 18.9346 |
|                          | 19.3495 |         |         |         |         |         |
| Diff (1-2) Pooled        | -3.4561 | -3.9958 | -2.9164 | 21.7037 | 21.5200 | 21.8905 |
| Diff (1-2) Satterthwaite | -3.4561 | -4.0325 | -2.8796 |         |         |         |

Technique Dispersion degrees of freedom t-value Pr > |t|

Pooled Equal 26372 -12.55 <. 0001

Satterthwaite Unequal 16972 -11.75 <. 0001

Isodispersity

Technique Degree of Freedom of Numerators Degree of Freedom of the denominator F Value Pr > F

Folded F 10017 16355 1.75 <. 0001



Laboratory tests at the time of obtaining Table 2-6 consent, according to the presence or absence of proton-pump inhibitors

TTEST Procedure

Variables: EGFR\_BL (Estimated Glomerular Filtration Rate at Baseline)

GROUP1 N Mean Standard Deviation Standard Error Minimum Value Maximum Value

|            |         |         |         |        |        |        |
|------------|---------|---------|---------|--------|--------|--------|
| 1          | 10775   | 52.0241 | 40.5830 | 0.3910 | 1.8018 | 3863.7 |
| 2          | 17798   | 55.1598 | 19.2358 | 0.1442 | 2.1326 | 747.7  |
| Diff (1-2) | -3.1357 | 29.1814 | 0.3562  |        |        |        |

To the mean standard deviation

GROUP1 methods Mean 95% confidence limits standard deviation 95% confidence limits

|                          |         |         |         |         |         |         |
|--------------------------|---------|---------|---------|---------|---------|---------|
| 1                        |         | 52.0241 | 51.2577 | 52.7905 | 40.5830 | 40.0483 |
| 41.1322                  |         |         |         |         |         |         |
| 2                        |         | 55.1598 | 54.8772 | 55.4424 | 19.2358 | 19.0380 |
| 19.4377                  |         |         |         |         |         |         |
| Diff (1-2) Pooled        | -3.1357 | -3.8339 | -2.4375 | 29.1814 | 28.9441 | 29.4226 |
| Diff (1-2) Satterthwaite | -3.1357 | -3.9525 | -2.3189 |         |         |         |

Technique Dispersion degrees of freedom t-value Pr > |t|

Pooled Equal 28571 -8.80 <. 0001

Satterthwaite Unequal 13750 -7.52 <. 0001

Isodispersity

Technique Degree of Freedom of Numerators Degree of Freedom of the denominator F Value Pr > F

Folded F 10774 17797 4.45 <. 0001

Laboratory tests at the time of obtaining Table 2-6 consent, according to the presence or absence of proton-pump inhibitors

TTEST Procedure

Variable : HBA\_BL (Hemoglobin A 1 c at Baseline)

GROUP1 N Mean Standard Deviation Standard Error Minimum Value Maximum Value

|                                 |       |        |        |         |        |         |
|---------------------------------|-------|--------|--------|---------|--------|---------|
| 1                               | 6839  | 6.1681 | 0.8033 | 0.00971 | 0.9000 | 14.1000 |
| 2                               | 10832 | 6.0884 | 0.8039 | 0.00772 | 0.6000 | 19.6000 |
| Diff (1-2) 0.0797 0.8037 0.0124 |       |        |        |         |        |         |

To the mean standard deviation

GROUP1 methods Mean 95% confidence limits standard deviation 95% confidence limits

|                                                             |  |        |        |        |        |        |
|-------------------------------------------------------------|--|--------|--------|--------|--------|--------|
| 1                                                           |  | 6.1681 | 6.1491 | 6.1871 | 0.8033 | 0.7901 |
| 0.8170                                                      |  |        |        |        |        |        |
| 2                                                           |  | 6.0884 | 6.0732 | 6.1035 | 0.8039 | 0.7933 |
| 0.8147                                                      |  |        |        |        |        |        |
| Diff (1-2) Pooled 0.0797 0.0554 0.1040 0.8037 0.7954 0.8121 |  |        |        |        |        |        |
| Diff (1-2) Satterthwaite 0.0797 0.0554 0.1040               |  |        |        |        |        |        |

Technique Dispersion degrees of freedom t-value Pr > |t|

Pooled Equal 17669 6.42 <. 0001

Satterthwaite Unequal 14547 6.42 <. 0001

Isodispersity

Technique Degree of Freedom of Numerators Degree of Freedom of the denominator F Value Pr > F

Folded F 10831 6838 1.00 0.9494

Table 2-7 and other risk factors and derived variables according to the presence or absence of proton-pump inhibitors

FREQ Procedure

|   |       | Cumulative           |                  |        |
|---|-------|----------------------|------------------|--------|
|   |       | Percent of ALL power | Percent of power |        |
| 1 | 32490 | 100.00               | 32490            | 100.00 |

Table 2-7 and other risk factors and derived variables according to the presence or absence of proton-pump inhibitors

FREQ Procedure

Table: ALL \* t\_OTT

ALL t\_OTT

Power |

Percent |

Percent of rows

Percentage of columns | 0| 1| Sum

|       | 0      | 1      | Sum    |
|-------|--------|--------|--------|
| 1     | 30558  | 1932   | 32490  |
|       | 94.05  | 5.95   | 100.00 |
|       | 94.05  | 5.95   |        |
|       | 100.00 | 100.00 |        |
| Total | 30558  | 1932   | 32490  |
|       | 94.05  | 5.95   | 100.00 |

Table 2-7 and other risk factors and derived variables according to the presence or absence of proton-pump inhibitors

FREQ Procedure

|   |                      |                  | Cumulative |        |
|---|----------------------|------------------|------------|--------|
|   | Percent of ALL power | Percent of power |            |        |
| 1 | 32490                | 100.00           | 32490      | 100.00 |

Table 2-7 and other risk factors and derived variables according to the presence or absence of proton-pump inhibitors

FREQ Procedure

Table: ALL \* t\_OTT

ALL t\_OTT

Power |

Percent |

Percent of rows

Percentage of columns | 0| 1| Sum

|       | 0      | 1      | Sum    |
|-------|--------|--------|--------|
| 1     | 30558  | 1932   | 32490  |
|       | 94.05  | 5.95   | 100.00 |
|       | 94.05  | 5.95   |        |
|       | 100.00 | 100.00 |        |
| Total | 30558  | 1932   | 32490  |
|       | 94.05  | 5.95   | 100.00 |

Table 2-7 and other risk factors and derived variables according to the presence or absence of proton-pump inhibitors

FREQ Procedure

|   |       | Cumulative           |                  |        |
|---|-------|----------------------|------------------|--------|
|   |       | Percent of ALL power | Percent of power |        |
| 1 | 32490 | 100.00               | 32490            | 100.00 |

Table 2-7 and other risk factors and derived variables according to the presence or absence of proton-pump inhibitors

FREQ Procedure

Table : ALL \* CHADS2

ALL CHADS2(CHADS2 Score)

Power |

Percent |

Percent of rows

Percentage of columns | 1| 2| 3| 4| 5| 6| Total

|       | 1      | 2      | 3      | 4      | 5      | 6      | Total  |
|-------|--------|--------|--------|--------|--------|--------|--------|
|       | 2957   | 11459  | 9597   | 5197   | 2355   | 925    | 32490  |
|       | 9.10   | 35.27  | 29.54  | 16.00  | 7.25   | 2.85   | 100.00 |
|       | 9.10   | 35.27  | 29.54  | 16.00  | 7.25   | 2.85   |        |
|       | 100.00 | 100.00 | 100.00 | 100.00 | 100.00 | 100.00 |        |
| Total | 2957   | 11459  | 9597   | 5197   | 2355   | 925    | 32490  |
|       | 9.10   | 35.27  | 29.54  | 16.00  | 7.25   | 2.85   | 100.00 |



Table 2-7 and other risk factors and derived variables according to the presence or absence of proton-pump inhibitors

FREQ Procedure

|                      |       | Cumulative       |       |        |
|----------------------|-------|------------------|-------|--------|
| Percent of ALL power |       | Percent of power |       |        |
| 1                    | 32490 | 100.00           | 32490 | 100.00 |

Table 2-7 and other risk factors and derived variables according to the presence or absence of proton-pump inhibitors

FREQ Procedure

Table : ALL \* CHADS2

ALL CHADS2(CHADS2 Score)

Power |

Percent |

Percent of rows

Percentage of columns | 1| 2| 3| 4| 5| 6| Total

|       | 1      | 2      | 3      | 4      | 5      | 6      | Total  |
|-------|--------|--------|--------|--------|--------|--------|--------|
| 1     | 2957   | 11459  | 9597   | 5197   | 2355   | 925    | 32490  |
|       | 9.10   | 35.27  | 29.54  | 16.00  | 7.25   | 2.85   | 100.00 |
|       | 9.10   | 35.27  | 29.54  | 16.00  | 7.25   | 2.85   |        |
|       | 100.00 | 100.00 | 100.00 | 100.00 | 100.00 | 100.00 |        |
| Total | 2957   | 11459  | 9597   | 5197   | 2355   | 925    | 32490  |
|       | 9.10   | 35.27  | 29.54  | 16.00  | 7.25   | 2.85   | 100.00 |

Table 2-7 and other risk factors and derived variables according to the presence or absence of proton-pump inhibitors

FREQ Procedure

|                      |       | Cumulative       |       |        |
|----------------------|-------|------------------|-------|--------|
| Percent of ALL power |       | Percent of power |       |        |
| 1                    | 32490 | 100.00           | 32490 | 100.00 |

Table 2-7 and other risk factors and derived variables according to the presence or absence of proton-pump inhibitors

FREQ Procedure

Table : ALL \* CHADS2

ALL CHADS2(CHADS2 Score)

Power |

Percent |

Percent of rows

Percentage of columns | 1| 2| 3| 4| 5| 6| Total

|       | 1      | 2      | 3      | 4      | 5      | 6      | Total  |
|-------|--------|--------|--------|--------|--------|--------|--------|
| 1     | 2957   | 11459  | 9597   | 5197   | 2355   | 925    | 32490  |
|       | 9.10   | 35.27  | 29.54  | 16.00  | 7.25   | 2.85   | 100.00 |
|       | 9.10   | 35.27  | 29.54  | 16.00  | 7.25   | 2.85   |        |
|       | 100.00 | 100.00 | 100.00 | 100.00 | 100.00 | 100.00 |        |
| Total | 2957   | 11459  | 9597   | 5197   | 2355   | 925    | 32490  |
|       | 9.10   | 35.27  | 29.54  | 16.00  | 7.25   | 2.85   | 100.00 |

Table 2-7 and other risk factors and derived variables according to the presence or absence of proton-pump inhibitors

FREQ Procedure

|   |                      |                  | Cumulative |        |
|---|----------------------|------------------|------------|--------|
|   | Percent of ALL power | Percent of power |            |        |
| 1 | 32490                | 100.00           | 32490      | 100.00 |

Table 2-7 and other risk factors and derived variables according to the presence or absence of proton-pump inhibitors

FREQ Procedure

Table : ALL \* CHADS2

ALL CHADS2(CHADS2 Score)

Power |

Percent |

Percent of rows

Percentage of columns | 1| 2| 3| 4| 5| 6| Total

|       | 1      | 2      | 3      | 4      | 5      | 6      | Total  |
|-------|--------|--------|--------|--------|--------|--------|--------|
|       | 2957   | 11459  | 9597   | 5197   | 2355   | 925    | 32490  |
|       | 9.10   | 35.27  | 29.54  | 16.00  | 7.25   | 2.85   | 100.00 |
|       | 9.10   | 35.27  | 29.54  | 16.00  | 7.25   | 2.85   |        |
|       | 100.00 | 100.00 | 100.00 | 100.00 | 100.00 | 100.00 |        |
| Total | 2957   | 11459  | 9597   | 5197   | 2355   | 925    | 32490  |
|       | 9.10   | 35.27  | 29.54  | 16.00  | 7.25   | 2.85   | 100.00 |

Table 2-7 and other risk factors and derived variables according to the presence or absence of proton-pump inhibitors

FREQ Procedure

|   |                      |                  | Cumulative |        |
|---|----------------------|------------------|------------|--------|
|   | Percent of ALL power | Percent of power |            |        |
| 1 | 32490                | 100.00           | 32490      | 100.00 |

Table 2-7 and other risk factors and derived variables according to the presence or absence of proton-pump inhibitors

FREQ Procedure

Table : ALL \* CHADS2

ALL CHADS2(CHADS2 Score)

Power |

Percent |

Percent of rows

Percentage of columns | 1| 2| 3| 4| 5| 6| Total

|       | 1      | 2      | 3      | 4      | 5      | 6      | Total  |
|-------|--------|--------|--------|--------|--------|--------|--------|
|       | 2957   | 11459  | 9597   | 5197   | 2355   | 925    | 32490  |
|       | 9.10   | 35.27  | 29.54  | 16.00  | 7.25   | 2.85   | 100.00 |
|       | 9.10   | 35.27  | 29.54  | 16.00  | 7.25   | 2.85   |        |
|       | 100.00 | 100.00 | 100.00 | 100.00 | 100.00 | 100.00 |        |
| Total | 2957   | 11459  | 9597   | 5197   | 2355   | 925    | 32490  |
|       | 9.10   | 35.27  | 29.54  | 16.00  | 7.25   | 2.85   | 100.00 |



Table 2-7 and other risk factors and derived variables according to the presence or absence of proton-pump inhibitors

FREQ Procedure

|   |                      |                  | Cumulative |        |
|---|----------------------|------------------|------------|--------|
|   | Percent of ALL power | Percent of power |            |        |
| 1 | 32490                | 100.00           | 32490      | 100.00 |

Table 2-7 and other risk factors and derived variables according to the presence or absence of proton-pump inhibitors

FREQ Procedure

Table : ALL \* CHADS2

ALL CHADS2(CHADS2 Score)

Power |

Percent |

Percent of rows

Percentage of columns | 1| 2| 3| 4| 5| 6| Total

|       | 1      | 2      | 3      | 4      | 5      | 6      | Total  |
|-------|--------|--------|--------|--------|--------|--------|--------|
| 1     | 2957   | 11459  | 9597   | 5197   | 2355   | 925    | 32490  |
|       | 9.10   | 35.27  | 29.54  | 16.00  | 7.25   | 2.85   | 100.00 |
|       | 9.10   | 35.27  | 29.54  | 16.00  | 7.25   | 2.85   |        |
|       | 100.00 | 100.00 | 100.00 | 100.00 | 100.00 | 100.00 |        |
| Total | 2957   | 11459  | 9597   | 5197   | 2355   | 925    | 32490  |
|       | 9.10   | 35.27  | 29.54  | 16.00  | 7.25   | 2.85   | 100.00 |

Table 2-7 and other risk factors and derived variables according to the presence or absence of proton-pump inhibitors

FREQ Procedure

|   |                      |                  | Cumulative |        |
|---|----------------------|------------------|------------|--------|
|   | Percent of ALL power | Percent of power |            |        |
| 1 | 32490                | 100.00           | 32490      | 100.00 |

Table 2-7 and other risk factors and derived variables according to the presence or absence of proton-pump inhibitors

FREQ Procedure

Table: ALL \* t\_chads

ALL t\_chads

Power |

Percent |

Percent of rows

Percentage of columns | 1| 2| 3| Total

|       | 1      | 2      | 3      | Total  |
|-------|--------|--------|--------|--------|
| 1     | 2957   | 11459  | 18074  | 32490  |
|       | 9.10   | 35.27  | 55.63  | 100.00 |
|       | 9.10   | 35.27  | 55.63  |        |
|       | 100.00 | 100.00 | 100.00 |        |
| Total | 2957   | 11459  | 18074  | 32490  |
|       | 9.10   | 35.27  | 55.63  | 100.00 |

Table 2-7 and other risk factors and derived variables according to the presence or absence of proton-pump inhibitors

FREQ Procedure

|   |                      |                  | Cumulative |        |
|---|----------------------|------------------|------------|--------|
|   | Percent of ALL power | Percent of power |            |        |
| 1 | 32490                | 100.00           | 32490      | 100.00 |

Table 2-7 and other risk factors and derived variables according to the presence or absence of proton-pump inhibitors

FREQ Procedure

Table: ALL \* t\_chads

ALL t\_chads

Power |

Percent |

Percent of rows

Percentage of columns | 1| 2| 3| Total

|       | 1      | 2      | 3      | Total  |
|-------|--------|--------|--------|--------|
| 1     | 2957   | 11459  | 18074  | 32490  |
|       | 9.10   | 35.27  | 55.63  | 100.00 |
|       | 9.10   | 35.27  | 55.63  |        |
|       | 100.00 | 100.00 | 100.00 |        |
| Total | 2957   | 11459  | 18074  | 32490  |
|       | 9.10   | 35.27  | 55.63  | 100.00 |

Table 2-7 and other risk factors and derived variables according to the presence or absence of proton-pump inhibitors

FREQ Procedure

|                      |       | Cumulative       |       |        |
|----------------------|-------|------------------|-------|--------|
| Percent of ALL power |       | Percent of power |       |        |
| 1                    | 32490 | 100.00           | 32490 | 100.00 |

Table 2-7 and other risk factors and derived variables according to the presence or absence of proton-pump inhibitors

FREQ Procedure

Table: ALL \* t\_chads

ALL t\_chads

Power |

Percent |

Percent of rows

Percentage of columns | 1| 2| 3| Total

|       | 1      | 2      | 3      | Total  |
|-------|--------|--------|--------|--------|
| 1     | 2957   | 11459  | 18074  | 32490  |
|       | 9.10   | 35.27  | 55.63  | 100.00 |
|       | 9.10   | 35.27  | 55.63  |        |
|       | 100.00 | 100.00 | 100.00 |        |
| Total | 2957   | 11459  | 18074  | 32490  |
|       | 9.10   | 35.27  | 55.63  | 100.00 |



Table 2-7 and other risk factors and derived variables according to the presence or absence of proton-pump inhibitors

FREQ Procedure

|   |                      |                  | Cumulative |        |
|---|----------------------|------------------|------------|--------|
|   | Percent of ALL power | Percent of power |            |        |
| 1 | 32490                | 100.00           | 32490      | 100.00 |

Table 2-7 and other risk factors and derived variables according to the presence or absence of proton-pump inhibitors

FREQ Procedure

Table : ALL \* CHA 2 DS 2 V

ALL CHA2DS2V(CH A2DS2-VASc Score)

Power |

Percent |

Percent of rows

Percent | 2 | 3 | 4 | 5 | 6 | 7 | 8 | 9 | Total

|       | 2      | 3      | 4      | 5      | 6      | 7      | 8      | 9      | Total  |
|-------|--------|--------|--------|--------|--------|--------|--------|--------|--------|
| 1     | 1681   | 6737   | 9800   | 7378   | 4099   | 1995   | 710    | 90     | 32490  |
|       | 5.17   | 20.74  | 30.16  | 22.71  | 12.62  | 6.14   | 2.19   | 0.28   | 100.00 |
|       | 5.17   | 20.74  | 30.16  | 22.71  | 12.62  | 6.14   | 2.19   | 0.28   |        |
|       | 100.00 | 100.00 | 100.00 | 100.00 | 100.00 | 100.00 | 100.00 | 100.00 |        |
| Total | 1681   | 6737   | 9800   | 7378   | 4099   | 1995   | 710    | 90     | 32490  |
|       | 5.17   | 20.74  | 30.16  | 22.71  | 12.62  | 6.14   | 2.19   | 0.28   |        |
|       | 100.00 |        |        |        |        |        |        |        |        |

Table 2-7 and other risk factors and derived variables according to the presence or absence of proton-pump inhibitors

FREQ Procedure

|   |                      |                  | Cumulative |        |
|---|----------------------|------------------|------------|--------|
|   | Percent of ALL power | Percent of power |            |        |
| 1 | 32490                | 100.00           | 32490      | 100.00 |

Table 2-7 and other risk factors and derived variables according to the presence or absence of proton-pump inhibitors

FREQ Procedure

Table : ALL \* CHA 2 DS 2 V

ALL CHA2DS2V(CH A2DS2-VASc Score)

Power |

Percent |

Percent of rows

Percent | 2 | 3 | 4 | 5 | 6 | 7 | 8 | 9 | Total

|       | 2      | 3      | 4      | 5      | 6      | 7      | 8      | 9      | Total  |
|-------|--------|--------|--------|--------|--------|--------|--------|--------|--------|
| 1     | 1681   | 6737   | 9800   | 7378   | 4099   | 1995   | 710    | 90     | 32490  |
|       | 5.17   | 20.74  | 30.16  | 22.71  | 12.62  | 6.14   | 2.19   | 0.28   | 100.00 |
|       | 5.17   | 20.74  | 30.16  | 22.71  | 12.62  | 6.14   | 2.19   | 0.28   |        |
|       | 100.00 | 100.00 | 100.00 | 100.00 | 100.00 | 100.00 | 100.00 | 100.00 |        |
| Total | 1681   | 6737   | 9800   | 7378   | 4099   | 1995   | 710    | 90     | 32490  |
|       | 5.17   | 20.74  | 30.16  | 22.71  | 12.62  | 6.14   | 2.19   | 0.28   |        |
|       | 100.00 |        |        |        |        |        |        |        |        |

Table 2-7 and other risk factors and derived variables according to the presence or absence of proton-pump inhibitors

FREQ Procedure

|   |                      |                  | Cumulative |        |
|---|----------------------|------------------|------------|--------|
|   | Percent of ALL power | Percent of power |            |        |
| 1 | 32490                | 100.00           | 32490      | 100.00 |

Table 2-7 and other risk factors and derived variables according to the presence or absence of proton-pump inhibitors

FREQ Procedure

Table : ALL \* CHA 2 DS 2 V

ALL CHA2DS2V(CH A2DS2-VASc Score)

Power |

Percent |

Percent of rows

Percent | 2 | 3 | 4 | 5 | 6 | 7 | 8 | 9 | Total

|       | 2      | 3      | 4      | 5      | 6      | 7      | 8      | 9      | Total  |
|-------|--------|--------|--------|--------|--------|--------|--------|--------|--------|
| 1     | 1681   | 6737   | 9800   | 7378   | 4099   | 1995   | 710    | 90     | 32490  |
|       | 5.17   | 20.74  | 30.16  | 22.71  | 12.62  | 6.14   | 2.19   | 0.28   | 100.00 |
|       | 5.17   | 20.74  | 30.16  | 22.71  | 12.62  | 6.14   | 2.19   | 0.28   |        |
|       | 100.00 | 100.00 | 100.00 | 100.00 | 100.00 | 100.00 | 100.00 | 100.00 |        |
| Total | 1681   | 6737   | 9800   | 7378   | 4099   | 1995   | 710    | 90     | 32490  |
|       | 5.17   | 20.74  | 30.16  | 22.71  | 12.62  | 6.14   | 2.19   | 0.28   |        |
|       | 100.00 |        |        |        |        |        |        |        |        |

Table 2-7 and other risk factors and derived variables according to the presence or absence of proton-pump inhibitors

FREQ Procedure

|   |                      |                  | Cumulative |        |
|---|----------------------|------------------|------------|--------|
|   | Percent of ALL power | Percent of power |            |        |
| 1 | 32490                | 100.00           | 32490      | 100.00 |

Table 2-7 and other risk factors and derived variables according to the presence or absence of proton-pump inhibitors

FREQ Procedure

Table : ALL \* CHA 2 DS 2 V

ALL CHA2DS2V(CH A2DS2-VASc Score)

Power |

Percent |

Percent of rows

Percent | 2 | 3 | 4 | 5 | 6 | 7 | 8 | 9 | Total

|       | 2      | 3      | 4      | 5      | 6      | 7      | 8      | 9      | Total  |
|-------|--------|--------|--------|--------|--------|--------|--------|--------|--------|
| 1     | 1681   | 6737   | 9800   | 7378   | 4099   | 1995   | 710    | 90     | 32490  |
|       | 5.17   | 20.74  | 30.16  | 22.71  | 12.62  | 6.14   | 2.19   | 0.28   | 100.00 |
|       | 5.17   | 20.74  | 30.16  | 22.71  | 12.62  | 6.14   | 2.19   | 0.28   |        |
|       | 100.00 | 100.00 | 100.00 | 100.00 | 100.00 | 100.00 | 100.00 | 100.00 |        |
| Total | 1681   | 6737   | 9800   | 7378   | 4099   | 1995   | 710    | 90     | 32490  |
|       | 5.17   | 20.74  | 30.16  | 22.71  | 12.62  | 6.14   | 2.19   | 0.28   |        |
|       | 100.00 |        |        |        |        |        |        |        |        |



Table 2-7 and other risk factors and derived variables according to the presence or absence of proton-pump inhibitors

FREQ Procedure

|   |       | Cumulative           |                  |        |
|---|-------|----------------------|------------------|--------|
|   |       | Percent of ALL power | Percent of power |        |
| 1 | 32490 | 100.00               | 32490            | 100.00 |

Table 2-7 and other risk factors and derived variables according to the presence or absence of proton-pump inhibitors

FREQ Procedure

Table : ALL \* CHA 2 DS 2 V

ALL CHA2DS2V(CH A2DS2-VASc Score)

Power |

Percent |

Percent of rows

Percent | 2 | 3 | 4 | 5 | 6 | 7 | 8 | 9 | Total

|       | 2      | 3      | 4      | 5      | 6      | 7      | 8      | 9      | Total  |
|-------|--------|--------|--------|--------|--------|--------|--------|--------|--------|
| 1     | 1681   | 6737   | 9800   | 7378   | 4099   | 1995   | 710    | 90     | 32490  |
|       | 5.17   | 20.74  | 30.16  | 22.71  | 12.62  | 6.14   | 2.19   | 0.28   | 100.00 |
|       | 5.17   | 20.74  | 30.16  | 22.71  | 12.62  | 6.14   | 2.19   | 0.28   |        |
|       | 100.00 | 100.00 | 100.00 | 100.00 | 100.00 | 100.00 | 100.00 | 100.00 |        |
| Total | 1681   | 6737   | 9800   | 7378   | 4099   | 1995   | 710    | 90     | 32490  |
|       | 5.17   | 20.74  | 30.16  | 22.71  | 12.62  | 6.14   | 2.19   | 0.28   |        |
|       | 100.00 |        |        |        |        |        |        |        |        |

Table 2-7 and other risk factors and derived variables according to the presence or absence of proton-pump inhibitors

FREQ Procedure

|   |                      |                  | Cumulative |        |
|---|----------------------|------------------|------------|--------|
|   | Percent of ALL power | Percent of power |            |        |
| 1 | 32490                | 100.00           | 32490      | 100.00 |

Table 2-7 and other risk factors and derived variables according to the presence or absence of proton-pump inhibitors

FREQ Procedure

Table : ALL \* CHA 2 DS 2 V

ALL CHA2DS2V(CH A2DS2-VASc Score)

Power |

Percent |

Percent of rows

Percent | 2 | 3 | 4 | 5 | 6 | 7 | 8 | 9 | Total

|       | 2      | 3      | 4      | 5      | 6      | 7      | 8      | 9      | Total  |
|-------|--------|--------|--------|--------|--------|--------|--------|--------|--------|
| 1     | 1681   | 6737   | 9800   | 7378   | 4099   | 1995   | 710    | 90     | 32490  |
|       | 5.17   | 20.74  | 30.16  | 22.71  | 12.62  | 6.14   | 2.19   | 0.28   | 100.00 |
|       | 5.17   | 20.74  | 30.16  | 22.71  | 12.62  | 6.14   | 2.19   | 0.28   |        |
|       | 100.00 | 100.00 | 100.00 | 100.00 | 100.00 | 100.00 | 100.00 | 100.00 |        |
| Total | 1681   | 6737   | 9800   | 7378   | 4099   | 1995   | 710    | 90     | 32490  |
|       | 5.17   | 20.74  | 30.16  | 22.71  | 12.62  | 6.14   | 2.19   | 0.28   |        |
|       | 100.00 |        |        |        |        |        |        |        |        |

Table 2-7 and other risk factors and derived variables according to the presence or absence of proton-pump inhibitors

FREQ Procedure

|   |                      |                  | Cumulative |        |
|---|----------------------|------------------|------------|--------|
|   | Percent of ALL power | Percent of power |            |        |
| 1 | 32490                | 100.00           | 32490      | 100.00 |

Table 2-7 and other risk factors and derived variables according to the presence or absence of proton-pump inhibitors

FREQ Procedure

Table : ALL \* CHA 2 DS 2 V

ALL CHA2DS2V(CH A2DS2-VASc Score)

Power |

Percent |

Percent of rows

Percent | 2 | 3 | 4 | 5 | 6 | 7 | 8 | 9 | Total

|       | 2      | 3      | 4      | 5      | 6      | 7      | 8      | 9      | Total  |
|-------|--------|--------|--------|--------|--------|--------|--------|--------|--------|
| 1     | 1681   | 6737   | 9800   | 7378   | 4099   | 1995   | 710    | 90     | 32490  |
|       | 5.17   | 20.74  | 30.16  | 22.71  | 12.62  | 6.14   | 2.19   | 0.28   | 100.00 |
|       | 5.17   | 20.74  | 30.16  | 22.71  | 12.62  | 6.14   | 2.19   | 0.28   |        |
|       | 100.00 | 100.00 | 100.00 | 100.00 | 100.00 | 100.00 | 100.00 | 100.00 |        |
| Total | 1681   | 6737   | 9800   | 7378   | 4099   | 1995   | 710    | 90     | 32490  |
|       | 5.17   | 20.74  | 30.16  | 22.71  | 12.62  | 6.14   | 2.19   | 0.28   |        |
|       | 100.00 |        |        |        |        |        |        |        |        |

Table 2-7 and other risk factors and derived variables according to the presence or absence of proton-pump inhibitors

FREQ Procedure

|   |                      |                  | Cumulative |        |
|---|----------------------|------------------|------------|--------|
|   | Percent of ALL power | Percent of power |            |        |
| 1 | 32490                | 100.00           | 32490      | 100.00 |

Table 2-7 and other risk factors and derived variables according to the presence or absence of proton-pump inhibitors

FREQ Procedure

Table : ALL \* CHA 2 DS 2 V

ALL CHA2DS2V(CHA2DS2-VASc Score)

Power |

Percent |

Percent of rows

Percent | 2 | 3 | 4 | 5 | 6 | 7 | 8 | 9 | Total

|       | 2      | 3      | 4      | 5      | 6      | 7      | 8      | 9      | Total  |
|-------|--------|--------|--------|--------|--------|--------|--------|--------|--------|
| 1     | 1681   | 6737   | 9800   | 7378   | 4099   | 1995   | 710    | 90     | 32490  |
|       | 5.17   | 20.74  | 30.16  | 22.71  | 12.62  | 6.14   | 2.19   | 0.28   | 100.00 |
|       | 5.17   | 20.74  | 30.16  | 22.71  | 12.62  | 6.14   | 2.19   | 0.28   |        |
|       | 100.00 | 100.00 | 100.00 | 100.00 | 100.00 | 100.00 | 100.00 | 100.00 |        |
| Total | 1681   | 6737   | 9800   | 7378   | 4099   | 1995   | 710    | 90     | 32490  |
|       | 5.17   | 20.74  | 30.16  | 22.71  | 12.62  | 6.14   | 2.19   | 0.28   |        |
|       | 100.00 |        |        |        |        |        |        |        |        |



Table 2-7 and other risk factors and derived variables according to the presence or absence of proton-pump inhibitors

FREQ Procedure

|   |                      |                  | Cumulative |        |
|---|----------------------|------------------|------------|--------|
|   | Percent of ALL power | Percent of power |            |        |
| 1 | 32490                | 100.00           | 32490      | 100.00 |

Table 2-7 and other risk factors and derived variables according to the presence or absence of proton-pump inhibitors

FREQ Procedure

Table : ALL \* t\_ch 2 v

ALL t\_ch2v

Power |

Percent |

Percent of rows

Percentage of columns | 1| 2| 3| Total

|       | 1      | 2      | 3      | Total  |
|-------|--------|--------|--------|--------|
| 1     | 8418   | 17178  | 6894   | 32490  |
|       | 25.91  | 52.87  | 21.22  | 100.00 |
|       | 25.91  | 52.87  | 21.22  |        |
|       | 100.00 | 100.00 | 100.00 |        |
| Total | 8418   | 17178  | 6894   | 32490  |
|       | 25.91  | 52.87  | 21.22  | 100.00 |

Table 2-7 and other risk factors and derived variables according to the presence or absence of proton-pump inhibitors

FREQ Procedure

|   |                      |                  | Cumulative |        |
|---|----------------------|------------------|------------|--------|
|   | Percent of ALL power | Percent of power |            |        |
| 1 | 32490                | 100.00           | 32490      | 100.00 |

Table 2-7 and other risk factors and derived variables according to the presence or absence of proton-pump inhibitors

FREQ Procedure

Table : ALL \* t\_ch 2 v

ALL t\_ch2v

Power |

Percent |

Percent of rows

Percentage of columns | 1| 2| 3| Total

|       | 1      | 2      | 3      | Total  |
|-------|--------|--------|--------|--------|
| 1     | 8418   | 17178  | 6894   | 32490  |
|       | 25.91  | 52.87  | 21.22  | 100.00 |
|       | 25.91  | 52.87  | 21.22  |        |
|       | 100.00 | 100.00 | 100.00 |        |
| Total | 8418   | 17178  | 6894   | 32490  |
|       | 25.91  | 52.87  | 21.22  | 100.00 |

Table 2-7 and other risk factors and derived variables according to the presence or absence of proton-pump inhibitors

FREQ Procedure

|                      |       | Cumulative       |       |        |
|----------------------|-------|------------------|-------|--------|
| Percent of ALL power |       | Percent of power |       |        |
| 1                    | 32490 | 100.00           | 32490 | 100.00 |

Table 2-7 and other risk factors and derived variables according to the presence or absence of proton-pump inhibitors

FREQ Procedure

Table : ALL \* t\_ch 2 v

ALL t\_ch2v

Power |

Percent |

Percent of rows

Percentage of columns | 1| 2| 3| Total

|       | 1      | 2      | 3      | Total  |
|-------|--------|--------|--------|--------|
| 1     | 8418   | 17178  | 6894   | 32490  |
|       | 25.91  | 52.87  | 21.22  | 100.00 |
|       | 25.91  | 52.87  | 21.22  |        |
|       | 100.00 | 100.00 | 100.00 |        |
| Total | 8418   | 17178  | 6894   | 32490  |
|       | 25.91  | 52.87  | 21.22  | 100.00 |

Table 2-7 and other risk factors and derived variables according to the presence or absence of proton-pump inhibitors

FREQ Procedure

|   |                      |                  | Cumulative |        |
|---|----------------------|------------------|------------|--------|
|   | Percent of ALL power | Percent of power |            |        |
| 1 | 32490                | 100.00           | 32490      | 100.00 |

Table 2-7 and other risk factors and derived variables according to the presence or absence of proton-pump inhibitors

FREQ Procedure

Tables: ALL\* HASBLED

ALL HASBLED(HAS-BLED Score)

Power |

Percent |

Percent of rows

Percentage of columns | 1| 2| 3| 4| 5| 6| Total

|       | 1      | 2      | 3      | 4      | 5      | 6      | Total  |
|-------|--------|--------|--------|--------|--------|--------|--------|
| 1     | 12852  | 12748  | 5500   | 1264   | 121    | 5      | 32490  |
|       | 39.56  | 39.24  | 16.93  | 3.89   | 0.37   | 0.02   | 100.00 |
|       | 39.56  | 39.24  | 16.93  | 3.89   | 0.37   | 0.02   |        |
|       | 100.00 | 100.00 | 100.00 | 100.00 | 100.00 | 100.00 |        |
| Total | 12852  | 12748  | 5500   | 1264   | 121    | 5      | 32490  |
|       | 39.56  | 39.24  | 16.93  | 3.89   | 0.37   | 0.02   | 100.00 |



Table 2-7 and other risk factors and derived variables according to the presence or absence of proton-pump inhibitors

FREQ Procedure

|   |                      |                  | Cumulative |        |
|---|----------------------|------------------|------------|--------|
|   | Percent of ALL power | Percent of power |            |        |
| 1 | 32490                | 100.00           | 32490      | 100.00 |

Table 2-7 and other risk factors and derived variables according to the presence or absence of proton-pump inhibitors

FREQ Procedure

Tables: ALL\* HASBLED

ALL HASBLED(HAS-BLED Score)

Power |

Percent |

Percent of rows

Percentage of columns | 1| 2| 3| 4| 5| 6| Total

|       | 1      | 2      | 3      | 4      | 5      | 6      | Total  |
|-------|--------|--------|--------|--------|--------|--------|--------|
| 1     | 12852  | 12748  | 5500   | 1264   | 121    | 5      | 32490  |
|       | 39.56  | 39.24  | 16.93  | 3.89   | 0.37   | 0.02   | 100.00 |
|       | 39.56  | 39.24  | 16.93  | 3.89   | 0.37   | 0.02   |        |
|       | 100.00 | 100.00 | 100.00 | 100.00 | 100.00 | 100.00 |        |
| Total | 12852  | 12748  | 5500   | 1264   | 121    | 5      | 32490  |
|       | 39.56  | 39.24  | 16.93  | 3.89   | 0.37   | 0.02   | 100.00 |

Table 2-7 and other risk factors and derived variables according to the presence or absence of proton-pump inhibitors

FREQ Procedure

|   |       | Cumulative           |                  |        |
|---|-------|----------------------|------------------|--------|
|   |       | Percent of ALL power | Percent of power |        |
| 1 | 32490 | 100.00               | 32490            | 100.00 |

Table 2-7 and other risk factors and derived variables according to the presence or absence of proton-pump inhibitors

FREQ Procedure

Tables: ALL\* HASBLED

ALL HASBLED(HAS-BLED Score)

Power |

Percent |

Percent of rows

Percentage of columns | 1| 2| 3| 4| 5| 6| Total

|       | 1      | 2      | 3      | 4      | 5      | 6      | Total  |
|-------|--------|--------|--------|--------|--------|--------|--------|
| 1     | 12852  | 12748  | 5500   | 1264   | 121    | 5      | 32490  |
|       | 39.56  | 39.24  | 16.93  | 3.89   | 0.37   | 0.02   | 100.00 |
|       | 39.56  | 39.24  | 16.93  | 3.89   | 0.37   | 0.02   |        |
|       | 100.00 | 100.00 | 100.00 | 100.00 | 100.00 | 100.00 |        |
| Total | 12852  | 12748  | 5500   | 1264   | 121    | 5      | 32490  |
|       | 39.56  | 39.24  | 16.93  | 3.89   | 0.37   | 0.02   | 100.00 |

Table 2-7 and other risk factors and derived variables according to the presence or absence of proton-pump inhibitors

FREQ Procedure

|                      |       | Cumulative       |       |        |
|----------------------|-------|------------------|-------|--------|
| Percent of ALL power |       | Percent of power |       |        |
| 1                    | 32490 | 100.00           | 32490 | 100.00 |

Table 2-7 and other risk factors and derived variables according to the presence or absence of proton-pump inhibitors

FREQ Procedure

Tables: ALL\* HASBLED

ALL HASBLED(HAS-BLED Score)

Power |

Percent |

Percent of rows

Percentage of columns | 1| 2| 3| 4| 5| 6| Total

|       | 1      | 2      | 3      | 4      | 5      | 6      | Total  |
|-------|--------|--------|--------|--------|--------|--------|--------|
|       | 12852  | 12748  | 5500   | 1264   | 121    | 5      | 32490  |
|       | 39.56  | 39.24  | 16.93  | 3.89   | 0.37   | 0.02   | 100.00 |
|       | 39.56  | 39.24  | 16.93  | 3.89   | 0.37   | 0.02   |        |
|       | 100.00 | 100.00 | 100.00 | 100.00 | 100.00 | 100.00 |        |
| Total | 12852  | 12748  | 5500   | 1264   | 121    | 5      | 32490  |
|       | 39.56  | 39.24  | 16.93  | 3.89   | 0.37   | 0.02   | 100.00 |

Table 2-7 and other risk factors and derived variables according to the presence or absence of proton-pump inhibitors

FREQ Procedure

|                      |       | Cumulative       |       |        |
|----------------------|-------|------------------|-------|--------|
| Percent of ALL power |       | Percent of power |       |        |
| 1                    | 32490 | 100.00           | 32490 | 100.00 |

Table 2-7 and other risk factors and derived variables according to the presence or absence of proton-pump inhibitors

FREQ Procedure

Tables: ALL\* HASBLED

ALL HASBLED(HAS-BLED Score)

Power |

Percent |

Percent of rows

Percentage of columns | 1| 2| 3| 4| 5| 6| Total

|       | 1      | 2      | 3      | 4      | 5      | 6      | Total  |
|-------|--------|--------|--------|--------|--------|--------|--------|
| 1     | 12852  | 12748  | 5500   | 1264   | 121    | 5      | 32490  |
|       | 39.56  | 39.24  | 16.93  | 3.89   | 0.37   | 0.02   | 100.00 |
|       | 39.56  | 39.24  | 16.93  | 3.89   | 0.37   | 0.02   |        |
|       | 100.00 | 100.00 | 100.00 | 100.00 | 100.00 | 100.00 |        |
| Total | 12852  | 12748  | 5500   | 1264   | 121    | 5      | 32490  |
|       | 39.56  | 39.24  | 16.93  | 3.89   | 0.37   | 0.02   | 100.00 |



Table 2-7 and other risk factors and derived variables according to the presence or absence of proton-pump inhibitors

FREQ Procedure

|   |                      |                  | Cumulative |        |
|---|----------------------|------------------|------------|--------|
|   | Percent of ALL power | Percent of power |            |        |
| 1 | 32490                | 100.00           | 32490      | 100.00 |

Table 2-7 and other risk factors and derived variables according to the presence or absence of proton-pump inhibitors

FREQ Procedure

Tables: ALL\* HASBLED

ALL HASBLED(HAS-BLED Score)

Power |

Percent |

Percent of rows

Percentage of columns | 1| 2| 3| 4| 5| 6| Total

|       | 1      | 2      | 3      | 4      | 5      | 6      | Total  |
|-------|--------|--------|--------|--------|--------|--------|--------|
| 1     | 12852  | 12748  | 5500   | 1264   | 121    | 5      | 32490  |
|       | 39.56  | 39.24  | 16.93  | 3.89   | 0.37   | 0.02   | 100.00 |
|       | 39.56  | 39.24  | 16.93  | 3.89   | 0.37   | 0.02   |        |
|       | 100.00 | 100.00 | 100.00 | 100.00 | 100.00 | 100.00 |        |
| Total | 12852  | 12748  | 5500   | 1264   | 121    | 5      | 32490  |
|       | 39.56  | 39.24  | 16.93  | 3.89   | 0.37   | 0.02   | 100.00 |

Table 2-7 and other risk factors and derived variables according to the presence or absence of proton-pump inhibitors

FREQ Procedure

|   |                      |                  | Cumulative |        |
|---|----------------------|------------------|------------|--------|
|   | Percent of ALL power | Percent of power |            |        |
| 1 | 32490                | 100.00           | 32490      | 100.00 |

Table 2-7 and other risk factors and derived variables according to the presence or absence of proton-pump inhibitors

FREQ Procedure

Tables: ALL\* HASBLED

ALL HASBLED(HAS-BLED Score)

Power |

Percent |

Percent of rows

Percentage of columns | 1| 2| 3| 4| 5| 6| Total

|       | 1      | 2      | 3      | 4      | 5      | 6      | Total  |
|-------|--------|--------|--------|--------|--------|--------|--------|
| 1     | 12852  | 12748  | 5500   | 1264   | 121    | 5      | 32490  |
|       | 39.56  | 39.24  | 16.93  | 3.89   | 0.37   | 0.02   | 100.00 |
|       | 39.56  | 39.24  | 16.93  | 3.89   | 0.37   | 0.02   |        |
|       | 100.00 | 100.00 | 100.00 | 100.00 | 100.00 | 100.00 |        |
| Total | 12852  | 12748  | 5500   | 1264   | 121    | 5      | 32490  |
|       | 39.56  | 39.24  | 16.93  | 3.89   | 0.37   | 0.02   | 100.00 |

Table 2-7 and other risk factors and derived variables according to the presence or absence of proton-pump inhibitors

FREQ Procedure

|                      |       | Cumulative       |       |        |
|----------------------|-------|------------------|-------|--------|
| Percent of ALL power |       | Percent of power |       |        |
| 1                    | 32490 | 100.00           | 32490 | 100.00 |

Table 2-7 and other risk factors and derived variables according to the presence or absence of proton-pump inhibitors

FREQ Procedure

Tables: ALL\* HASBLED

ALL HASBLED(HAS-BLED Score)

Power |

Percent |

Percent of rows

Percentage of columns | 1| 2| 3| 4| 5| 6| Total

|       | 1      | 2      | 3      | 4      | 5      | 6      | Total  |
|-------|--------|--------|--------|--------|--------|--------|--------|
| 1     | 12852  | 12748  | 5500   | 1264   | 121    | 5      | 32490  |
|       | 39.56  | 39.24  | 16.93  | 3.89   | 0.37   | 0.02   | 100.00 |
|       | 39.56  | 39.24  | 16.93  | 3.89   | 0.37   | 0.02   |        |
|       | 100.00 | 100.00 | 100.00 | 100.00 | 100.00 | 100.00 |        |
| Total | 12852  | 12748  | 5500   | 1264   | 121    | 5      | 32490  |
|       | 39.56  | 39.24  | 16.93  | 3.89   | 0.37   | 0.02   | 100.00 |

Table 2-7 and other risk factors and derived variables according to the presence or absence of proton-pump inhibitors

FREQ Procedure

|                      |       | Cumulative       |       |        |
|----------------------|-------|------------------|-------|--------|
| Percent of ALL power |       | Percent of power |       |        |
| 1                    | 32490 | 100.00           | 32490 | 100.00 |

Table 2-7 and other risk factors and derived variables according to the presence or absence of proton-pump inhibitors

FREQ Procedure

Tables: ALL\* HASBLED

ALL HASBLED(HAS-BLED Score)

Power |

Percent |

Percent of rows

Percentage of columns | 1| 2| 3| 4| 5| 6| Total

|       | 1      | 2      | 3      | 4      | 5      | 6      | Total  |
|-------|--------|--------|--------|--------|--------|--------|--------|
| 1     | 12852  | 12748  | 5500   | 1264   | 121    | 5      | 32490  |
|       | 39.56  | 39.24  | 16.93  | 3.89   | 0.37   | 0.02   | 100.00 |
|       | 39.56  | 39.24  | 16.93  | 3.89   | 0.37   | 0.02   |        |
|       | 100.00 | 100.00 | 100.00 | 100.00 | 100.00 | 100.00 |        |
| Total | 12852  | 12748  | 5500   | 1264   | 121    | 5      | 32490  |
|       | 39.56  | 39.24  | 16.93  | 3.89   | 0.37   | 0.02   | 100.00 |



Table 2-7 and other risk factors and derived variables according to the presence or absence of proton-pump inhibitors

FREQ Procedure

|                      |       | Cumulative       |       |        |
|----------------------|-------|------------------|-------|--------|
| Percent of ALL power |       | Percent of power |       |        |
| 1                    | 32490 | 100.00           | 32490 | 100.00 |

Table 2-7 and other risk factors and derived variables according to the presence or absence of proton-pump inhibitors

FREQ Procedure

Table: ALL \* t\_has

ALL t\_has

Power |

Percent |

Percent of rows

Percentage of columns | 1| 2| Total

|       | 1      | 2      | Total  |
|-------|--------|--------|--------|
|       | 25600  | 6890   | 32490  |
|       | 78.79  | 21.21  | 100.00 |
|       | 78.79  | 21.21  |        |
|       | 100.00 | 100.00 |        |
| Total | 25600  | 6890   | 32490  |
|       | 78.79  | 21.21  | 100.00 |

Table 2-7 and other risk factors and derived variables according to the presence or absence of proton-pump inhibitors

FREQ Procedure

|   |                      |                  | Cumulative |        |
|---|----------------------|------------------|------------|--------|
|   | Percent of ALL power | Percent of power |            |        |
| 1 | 32490                | 100.00           | 32490      | 100.00 |

Table 2-7 and other risk factors and derived variables according to the presence or absence of proton-pump inhibitors

FREQ Procedure

Table: ALL \* t\_has

ALL t\_has

Power |

Percent |

Percent of rows

Percentage of columns | 1| 2| Total

|       | 1      | 2      | Total  |
|-------|--------|--------|--------|
|       | 25600  | 6890   | 32490  |
|       | 78.79  | 21.21  | 100.00 |
|       | 78.79  | 21.21  |        |
|       | 100.00 | 100.00 |        |
| Total | 25600  | 6890   | 32490  |
|       | 78.79  | 21.21  | 100.00 |

Table 2-7 and other risk factors and derived variables according to the presence or absence of proton-pump inhibitors

FREQ Procedure

|                      |       | Cumulative       |       |        |
|----------------------|-------|------------------|-------|--------|
| Percent of ALL power |       | Percent of power |       |        |
| 1                    | 11981 | 100.00           | 11981 | 100.00 |

Table 2-7 and other risk factors and derived variables according to the presence or absence of proton-pump inhibitors

FREQ Procedure

Table: ALL \* t\_OTT

ALL t\_OTT

Power |

Percent |

Percent of rows

Percentage of columns | 0 | 1 | Sum

|       | 0      | 1      | Sum    |
|-------|--------|--------|--------|
| 1     | 11129  | 852    | 11981  |
|       | 92.89  | 7.11   | 100.00 |
|       | 92.89  | 7.11   |        |
|       | 100.00 | 100.00 |        |
| Total | 11129  | 852    | 11981  |
|       | 92.89  | 7.11   | 100.00 |

Table 2-7 and other risk factors and derived variables according to the presence or absence of proton-pump inhibitors

FREQ Procedure

|   |       | Cumulative           |                  |        |
|---|-------|----------------------|------------------|--------|
|   |       | Percent of ALL power | Percent of power |        |
| 1 | 11981 | 100.00               | 11981            | 100.00 |

Table 2-7 and other risk factors and derived variables according to the presence or absence of proton-pump inhibitors

FREQ Procedure

Table: ALL \* t\_OTT

ALL t\_OTT

Power |

Percent |

Percent of rows

Percentage of columns | 0 | 1 | Sum

|       | 0      | 1      | Sum    |
|-------|--------|--------|--------|
| 1     | 11129  | 852    | 11981  |
|       | 92.89  | 7.11   | 100.00 |
|       | 92.89  | 7.11   |        |
|       | 100.00 | 100.00 |        |
| Total | 11129  | 852    | 11981  |
|       | 92.89  | 7.11   | 100.00 |



Table 2-7 and other risk factors and derived variables according to the presence or absence of proton-pump inhibitors

FREQ Procedure

|                      |       | Cumulative       |       |        |
|----------------------|-------|------------------|-------|--------|
| Percent of ALL power |       | Percent of power |       |        |
| 1                    | 11981 | 100.00           | 11981 | 100.00 |

Table 2-7 and other risk factors and derived variables according to the presence or absence of proton-pump inhibitors

FREQ Procedure

Table : ALL \* CHADS2

ALL CHADS2(CHADS2 Score)

Power |

Percent |

Percent of rows

Percentage of columns | 1| 2| 3| 4| 5| 6| Total

|       | 1      | 2      | 3      | 4      | 5      | 6      | Total  |
|-------|--------|--------|--------|--------|--------|--------|--------|
| 1     | 800    | 3918   | 3630   | 2137   | 1066   | 430    | 11981  |
|       | 6.68   | 32.70  | 30.30  | 17.84  | 8.90   | 3.59   | 100.00 |
|       | 6.68   | 32.70  | 30.30  | 17.84  | 8.90   | 3.59   |        |
|       | 100.00 | 100.00 | 100.00 | 100.00 | 100.00 | 100.00 |        |
| Total | 800    | 3918   | 3630   | 2137   | 1066   | 430    | 11981  |
|       | 6.68   | 32.70  | 30.30  | 17.84  | 8.90   | 3.59   | 100.00 |

Table 2-7 and other risk factors and derived variables according to the presence or absence of proton-pump inhibitors

FREQ Procedure

|                      |       | Cumulative       |       |        |
|----------------------|-------|------------------|-------|--------|
| Percent of ALL power |       | Percent of power |       |        |
| 1                    | 11981 | 100.00           | 11981 | 100.00 |

Table 2-7 and other risk factors and derived variables according to the presence or absence of proton-pump inhibitors

FREQ Procedure

Table : ALL \* CHADS2

ALL CHADS2(CHADS2 Score)

Power |

Percent |

Percent of rows

Percentage of columns | 1| 2| 3| 4| 5| 6| Total

|       | 1      | 2      | 3      | 4      | 5      | 6      | Total  |
|-------|--------|--------|--------|--------|--------|--------|--------|
|       | 800    | 3918   | 3630   | 2137   | 1066   | 430    | 11981  |
|       | 6.68   | 32.70  | 30.30  | 17.84  | 8.90   | 3.59   | 100.00 |
|       | 6.68   | 32.70  | 30.30  | 17.84  | 8.90   | 3.59   |        |
|       | 100.00 | 100.00 | 100.00 | 100.00 | 100.00 | 100.00 |        |
| Total | 800    | 3918   | 3630   | 2137   | 1066   | 430    | 11981  |
|       | 6.68   | 32.70  | 30.30  | 17.84  | 8.90   | 3.59   | 100.00 |

Table 2-7 and other risk factors and derived variables according to the presence or absence of proton-pump inhibitors

FREQ Procedure

|                      |       | Cumulative       |       |        |
|----------------------|-------|------------------|-------|--------|
| Percent of ALL power |       | Percent of power |       |        |
| 1                    | 11981 | 100.00           | 11981 | 100.00 |

Table 2-7 and other risk factors and derived variables according to the presence or absence of proton-pump inhibitors

FREQ Procedure

Table : ALL \* CHADS2

ALL CHADS2(CHADS2 Score)

Power |

Percent |

Percent of rows

Percentage of columns | 1| 2| 3| 4| 5| 6| Total

|       | 1      | 2      | 3      | 4      | 5      | 6      | Total  |
|-------|--------|--------|--------|--------|--------|--------|--------|
| 1     | 800    | 3918   | 3630   | 2137   | 1066   | 430    | 11981  |
|       | 6.68   | 32.70  | 30.30  | 17.84  | 8.90   | 3.59   | 100.00 |
|       | 6.68   | 32.70  | 30.30  | 17.84  | 8.90   | 3.59   |        |
|       | 100.00 | 100.00 | 100.00 | 100.00 | 100.00 | 100.00 |        |
| Total | 800    | 3918   | 3630   | 2137   | 1066   | 430    | 11981  |
|       | 6.68   | 32.70  | 30.30  | 17.84  | 8.90   | 3.59   | 100.00 |

Table 2-7 and other risk factors and derived variables according to the presence or absence of proton-pump inhibitors

FREQ Procedure

|                      |       | Cumulative       |       |        |
|----------------------|-------|------------------|-------|--------|
| Percent of ALL power |       | Percent of power |       |        |
| 1                    | 11981 | 100.00           | 11981 | 100.00 |

Table 2-7 and other risk factors and derived variables according to the presence or absence of proton-pump inhibitors

FREQ Procedure

Table : ALL \* CHADS2

ALL CHADS2(CHADS2 Score)

Power |

Percent |

Percent of rows

Percentage of columns | 1| 2| 3| 4| 5| 6| Total

|       | 1      | 2      | 3      | 4      | 5      | 6      | Total  |
|-------|--------|--------|--------|--------|--------|--------|--------|
| 1     | 800    | 3918   | 3630   | 2137   | 1066   | 430    | 11981  |
|       | 6.68   | 32.70  | 30.30  | 17.84  | 8.90   | 3.59   | 100.00 |
|       | 6.68   | 32.70  | 30.30  | 17.84  | 8.90   | 3.59   |        |
|       | 100.00 | 100.00 | 100.00 | 100.00 | 100.00 | 100.00 |        |
| Total | 800    | 3918   | 3630   | 2137   | 1066   | 430    | 11981  |
|       | 6.68   | 32.70  | 30.30  | 17.84  | 8.90   | 3.59   | 100.00 |



Table 2-7 and other risk factors and derived variables according to the presence or absence of proton-pump inhibitors

FREQ Procedure

|   |       | Cumulative           |                  |        |
|---|-------|----------------------|------------------|--------|
|   |       | Percent of ALL power | Percent of power |        |
| 1 | 11981 | 100.00               | 11981            | 100.00 |

Table 2-7 and other risk factors and derived variables according to the presence or absence of proton-pump inhibitors

FREQ Procedure

Table : ALL \* CHADS2

ALL CHADS2(CHADS2 Score)

Power |

Percent |

Percent of rows

Percentage of columns | 1| 2| 3| 4| 5| 6| Total

|       | 1      | 2      | 3      | 4      | 5      | 6      | Total  |
|-------|--------|--------|--------|--------|--------|--------|--------|
| 1     | 800    | 3918   | 3630   | 2137   | 1066   | 430    | 11981  |
|       | 6.68   | 32.70  | 30.30  | 17.84  | 8.90   | 3.59   | 100.00 |
|       | 6.68   | 32.70  | 30.30  | 17.84  | 8.90   | 3.59   |        |
|       | 100.00 | 100.00 | 100.00 | 100.00 | 100.00 | 100.00 |        |
| Total | 800    | 3918   | 3630   | 2137   | 1066   | 430    | 11981  |
|       | 6.68   | 32.70  | 30.30  | 17.84  | 8.90   | 3.59   | 100.00 |

Table 2-7 and other risk factors and derived variables according to the presence or absence of proton-pump inhibitors

FREQ Procedure

|   |       | Cumulative           |                  |        |
|---|-------|----------------------|------------------|--------|
|   |       | Percent of ALL power | Percent of power |        |
| 1 | 11981 | 100.00               | 11981            | 100.00 |

Table 2-7 and other risk factors and derived variables according to the presence or absence of proton-pump inhibitors

FREQ Procedure

Table : ALL \* CHADS2

ALL CHADS2(CHADS2 Score)

Power |

Percent |

Percent of rows

Percentage of columns | 1| 2| 3| 4| 5| 6| Total

|       | 1      | 2      | 3      | 4      | 5      | 6      | Total  |
|-------|--------|--------|--------|--------|--------|--------|--------|
| 1     | 800    | 3918   | 3630   | 2137   | 1066   | 430    | 11981  |
|       | 6.68   | 32.70  | 30.30  | 17.84  | 8.90   | 3.59   | 100.00 |
|       | 6.68   | 32.70  | 30.30  | 17.84  | 8.90   | 3.59   |        |
|       | 100.00 | 100.00 | 100.00 | 100.00 | 100.00 | 100.00 |        |
| Total | 800    | 3918   | 3630   | 2137   | 1066   | 430    | 11981  |
|       | 6.68   | 32.70  | 30.30  | 17.84  | 8.90   | 3.59   | 100.00 |

Table 2-7 and other risk factors and derived variables according to the presence or absence of proton-pump inhibitors

FREQ Procedure

|   |       | Cumulative           |                  |        |
|---|-------|----------------------|------------------|--------|
|   |       | Percent of ALL power | Percent of power |        |
| 1 | 11981 | 100.00               | 11981            | 100.00 |

Table 2-7 and other risk factors and derived variables according to the presence or absence of proton-pump inhibitors

FREQ Procedure

Table: ALL \* t\_chads

ALL t\_chads

Power |

Percent |

Percent of rows

Percentage of columns | 1| 2| 3| Total

|       | 1      | 2      | 3      | Total  |
|-------|--------|--------|--------|--------|
| 1     | 800    | 3918   | 7263   | 11981  |
|       | 6.68   | 32.70  | 60.62  | 100.00 |
|       | 6.68   | 32.70  | 60.62  |        |
|       | 100.00 | 100.00 | 100.00 |        |
| Total | 800    | 3918   | 7263   | 11981  |
|       | 6.68   | 32.70  | 60.62  | 100.00 |

Table 2-7 and other risk factors and derived variables according to the presence or absence of proton-pump inhibitors

FREQ Procedure

|                      |       | Cumulative       |       |        |
|----------------------|-------|------------------|-------|--------|
| Percent of ALL power |       | Percent of power |       |        |
| 1                    | 11981 | 100.00           | 11981 | 100.00 |

Table 2-7 and other risk factors and derived variables according to the presence or absence of proton-pump inhibitors

FREQ Procedure

Table: ALL \* t\_chads

ALL t\_chads

Power |

Percent |

Percent of rows

Percentage of columns | 1| 2| 3| Total

|       | 1      | 2      | 3      | Total  |
|-------|--------|--------|--------|--------|
| 1     | 800    | 3918   | 7263   | 11981  |
|       | 6.68   | 32.70  | 60.62  | 100.00 |
|       | 6.68   | 32.70  | 60.62  |        |
|       | 100.00 | 100.00 | 100.00 |        |
| Total | 800    | 3918   | 7263   | 11981  |
|       | 6.68   | 32.70  | 60.62  | 100.00 |



Table 2-7 and other risk factors and derived variables according to the presence or absence of proton-pump inhibitors

FREQ Procedure

|   |       | Cumulative           |                  |        |
|---|-------|----------------------|------------------|--------|
|   |       | Percent of ALL power | Percent of power |        |
| 1 | 11981 | 100.00               | 11981            | 100.00 |

Table 2-7 and other risk factors and derived variables according to the presence or absence of proton-pump inhibitors

FREQ Procedure

Table: ALL \* t\_chads

ALL t\_chads

Power |

Percent |

Percent of rows

Percentage of columns | 1| 2| 3| Total

|       | 1      | 2      | 3      | Total  |
|-------|--------|--------|--------|--------|
|       | 800    | 3918   | 7263   | 11981  |
|       | 6.68   | 32.70  | 60.62  | 100.00 |
|       | 6.68   | 32.70  | 60.62  |        |
|       | 100.00 | 100.00 | 100.00 |        |
| Total | 800    | 3918   | 7263   | 11981  |
|       | 6.68   | 32.70  | 60.62  | 100.00 |

Table 2-7 and other risk factors and derived variables according to the presence or absence of proton-pump inhibitors

FREQ Procedure

|   |       | Cumulative           |                  |        |
|---|-------|----------------------|------------------|--------|
|   |       | Percent of ALL power | Percent of power |        |
| 1 | 11981 | 100.00               | 11981            | 100.00 |

Table 2-7 and other risk factors and derived variables according to the presence or absence of proton-pump inhibitors

FREQ Procedure

Table : ALL \* CHA 2 DS 2 V

ALL CHA2DS2V(CH A2DS2-VASc Score)

Power |

Percent |

Percent of rows

Percent | 2 | 3 | 4 | 5 | 6 | 7 | 8 | 9 | Total

|       | 2      | 3      | 4      | 5      | 6      | 7      | 8      | 9      | Total  |
|-------|--------|--------|--------|--------|--------|--------|--------|--------|--------|
| 1     | 407    | 2052   | 3472   | 2912   | 1783   | 961    | 348    | 46     | 11981  |
|       | 3.40   | 17.13  | 28.98  | 24.31  | 14.88  | 8.02   | 2.90   | 0.38   | 100.00 |
|       | 3.40   | 17.13  | 28.98  | 24.31  | 14.88  | 8.02   | 2.90   | 0.38   |        |
|       | 100.00 | 100.00 | 100.00 | 100.00 | 100.00 | 100.00 | 100.00 | 100.00 |        |
| Total | 407    | 2052   | 3472   | 2912   | 1783   | 961    | 348    | 46     | 11981  |
|       | 3.40   | 17.13  | 28.98  | 24.31  | 14.88  | 8.02   | 2.90   | 0.38   |        |
|       | 100.00 |        |        |        |        |        |        |        |        |

Table 2-7 and other risk factors and derived variables according to the presence or absence of proton-pump inhibitors

FREQ Procedure

|   |       | Cumulative           |                  |        |
|---|-------|----------------------|------------------|--------|
|   |       | Percent of ALL power | Percent of power |        |
| 1 | 11981 | 100.00               | 11981            | 100.00 |

Table 2-7 and other risk factors and derived variables according to the presence or absence of proton-pump inhibitors

FREQ Procedure

Table : ALL \* CHA 2 DS 2 V

ALL CHA2DS2V(CH A2DS2-VASc Score)

Power |

Percent |

Percent of rows

Percent | 2 | 3 | 4 | 5 | 6 | 7 | 8 | 9 | Total

|       | 2      | 3      | 4      | 5      | 6      | 7      | 8      | 9      | Total  |
|-------|--------|--------|--------|--------|--------|--------|--------|--------|--------|
| 1     | 407    | 2052   | 3472   | 2912   | 1783   | 961    | 348    | 46     | 11981  |
|       | 3.40   | 17.13  | 28.98  | 24.31  | 14.88  | 8.02   | 2.90   | 0.38   | 100.00 |
|       | 3.40   | 17.13  | 28.98  | 24.31  | 14.88  | 8.02   | 2.90   | 0.38   |        |
|       | 100.00 | 100.00 | 100.00 | 100.00 | 100.00 | 100.00 | 100.00 | 100.00 |        |
| Total | 407    | 2052   | 3472   | 2912   | 1783   | 961    | 348    | 46     | 11981  |
|       | 3.40   | 17.13  | 28.98  | 24.31  | 14.88  | 8.02   | 2.90   | 0.38   |        |
|       | 100.00 |        |        |        |        |        |        |        |        |

Table 2-7 and other risk factors and derived variables according to the presence or absence of proton-pump inhibitors

FREQ Procedure

|                      |       | Cumulative       |       |        |
|----------------------|-------|------------------|-------|--------|
| Percent of ALL power |       | Percent of power |       |        |
| 1                    | 11981 | 100.00           | 11981 | 100.00 |

Table 2-7 and other risk factors and derived variables according to the presence or absence of proton-pump inhibitors

FREQ Procedure

Table : ALL \* CHA 2 DS 2 V

ALL CHA2DS2V(CH A2DS2-VASc Score)

Power |

Percent |

Percent of rows

Percent | 2 | 3 | 4 | 5 | 6 | 7 | 8 | 9 | Total

|       | 2      | 3      | 4      | 5      | 6      | 7      | 8      | 9      | Total  |
|-------|--------|--------|--------|--------|--------|--------|--------|--------|--------|
| 1     | 407    | 2052   | 3472   | 2912   | 1783   | 961    | 348    | 46     | 11981  |
|       | 3.40   | 17.13  | 28.98  | 24.31  | 14.88  | 8.02   | 2.90   | 0.38   | 100.00 |
|       | 3.40   | 17.13  | 28.98  | 24.31  | 14.88  | 8.02   | 2.90   | 0.38   |        |
|       | 100.00 | 100.00 | 100.00 | 100.00 | 100.00 | 100.00 | 100.00 | 100.00 |        |
| Total | 407    | 2052   | 3472   | 2912   | 1783   | 961    | 348    | 46     | 11981  |
|       | 3.40   | 17.13  | 28.98  | 24.31  | 14.88  | 8.02   | 2.90   | 0.38   |        |
|       | 100.00 |        |        |        |        |        |        |        |        |



Table 2-7 and other risk factors and derived variables according to the presence or absence of proton-pump inhibitors

FREQ Procedure

|                      |       | Cumulative       |       |        |
|----------------------|-------|------------------|-------|--------|
| Percent of ALL power |       | Percent of power |       |        |
| 1                    | 11981 | 100.00           | 11981 | 100.00 |

Table 2-7 and other risk factors and derived variables according to the presence or absence of proton-pump inhibitors

FREQ Procedure

Table : ALL \* CHA 2 DS 2 V

ALL CHA2DS2V(CH A2DS2-VASc Score)

Power |

Percent |

Percent of rows

Percent | 2 | 3 | 4 | 5 | 6 | 7 | 8 | 9 | Total

|       | 2      | 3      | 4      | 5      | 6      | 7      | 8      | 9      | Total  |
|-------|--------|--------|--------|--------|--------|--------|--------|--------|--------|
| 1     | 407    | 2052   | 3472   | 2912   | 1783   | 961    | 348    | 46     | 11981  |
|       | 3.40   | 17.13  | 28.98  | 24.31  | 14.88  | 8.02   | 2.90   | 0.38   | 100.00 |
|       | 3.40   | 17.13  | 28.98  | 24.31  | 14.88  | 8.02   | 2.90   | 0.38   |        |
|       | 100.00 | 100.00 | 100.00 | 100.00 | 100.00 | 100.00 | 100.00 | 100.00 |        |
| Total | 407    | 2052   | 3472   | 2912   | 1783   | 961    | 348    | 46     | 11981  |
|       | 3.40   | 17.13  | 28.98  | 24.31  | 14.88  | 8.02   | 2.90   | 0.38   |        |
|       | 100.00 |        |        |        |        |        |        |        |        |

Table 2-7 and other risk factors and derived variables according to the presence or absence of proton-pump inhibitors

FREQ Procedure

|                      |       | Cumulative       |       |        |
|----------------------|-------|------------------|-------|--------|
| Percent of ALL power |       | Percent of power |       |        |
| 1                    | 11981 | 100.00           | 11981 | 100.00 |

Table 2-7 and other risk factors and derived variables according to the presence or absence of proton-pump inhibitors

FREQ Procedure

Table : ALL \* CHA 2 DS 2 V

ALL CHA2DS2V(CH A2DS2-VASc Score)

Power |

Percent |

Percent of rows

Percent | 2 | 3 | 4 | 5 | 6 | 7 | 8 | 9 | Total

|       | 2      | 3      | 4      | 5      | 6      | 7      | 8      | 9      | Total  |
|-------|--------|--------|--------|--------|--------|--------|--------|--------|--------|
| 1     | 407    | 2052   | 3472   | 2912   | 1783   | 961    | 348    | 46     | 11981  |
|       | 3.40   | 17.13  | 28.98  | 24.31  | 14.88  | 8.02   | 2.90   | 0.38   | 100.00 |
|       | 3.40   | 17.13  | 28.98  | 24.31  | 14.88  | 8.02   | 2.90   | 0.38   |        |
|       | 100.00 | 100.00 | 100.00 | 100.00 | 100.00 | 100.00 | 100.00 | 100.00 |        |
| Total | 407    | 2052   | 3472   | 2912   | 1783   | 961    | 348    | 46     | 11981  |
|       | 3.40   | 17.13  | 28.98  | 24.31  | 14.88  | 8.02   | 2.90   | 0.38   |        |
|       | 100.00 |        |        |        |        |        |        |        |        |

Table 2-7 and other risk factors and derived variables according to the presence or absence of proton-pump inhibitors

FREQ Procedure

|   |       | Cumulative           |                  |        |
|---|-------|----------------------|------------------|--------|
|   |       | Percent of ALL power | Percent of power |        |
| 1 | 11981 | 100.00               | 11981            | 100.00 |

Table 2-7 and other risk factors and derived variables according to the presence or absence of proton-pump inhibitors

FREQ Procedure

Table : ALL \* CHA 2 DS 2 V

ALL CHA2DS2V(CH A2DS2-VASc Score)

Power |

Percent |

Percent of rows

Percent | 2 | 3 | 4 | 5 | 6 | 7 | 8 | 9 | Total

|       | 2      | 3      | 4      | 5      | 6      | 7      | 8      | 9      | Total  |
|-------|--------|--------|--------|--------|--------|--------|--------|--------|--------|
| 1     | 407    | 2052   | 3472   | 2912   | 1783   | 961    | 348    | 46     | 11981  |
|       | 3.40   | 17.13  | 28.98  | 24.31  | 14.88  | 8.02   | 2.90   | 0.38   | 100.00 |
|       | 3.40   | 17.13  | 28.98  | 24.31  | 14.88  | 8.02   | 2.90   | 0.38   |        |
|       | 100.00 | 100.00 | 100.00 | 100.00 | 100.00 | 100.00 | 100.00 | 100.00 |        |
| Total | 407    | 2052   | 3472   | 2912   | 1783   | 961    | 348    | 46     | 11981  |
|       | 3.40   | 17.13  | 28.98  | 24.31  | 14.88  | 8.02   | 2.90   | 0.38   |        |
|       | 100.00 |        |        |        |        |        |        |        |        |

Table 2-7 and other risk factors and derived variables according to the presence or absence of proton-pump inhibitors

FREQ Procedure

|                      |       | Cumulative       |       |        |
|----------------------|-------|------------------|-------|--------|
| Percent of ALL power |       | Percent of power |       |        |
| 1                    | 11981 | 100.00           | 11981 | 100.00 |

Table 2-7 and other risk factors and derived variables according to the presence or absence of proton-pump inhibitors

FREQ Procedure

Table : ALL \* CHA 2 DS 2 V

ALL CHA2DS2V(CHA2DS2-VASc Score)

Power |

Percent |

Percent of rows

Percent | 2 | 3 | 4 | 5 | 6 | 7 | 8 | 9 | Total

|       | 2      | 3      | 4      | 5      | 6      | 7      | 8      | 9      | Total  |
|-------|--------|--------|--------|--------|--------|--------|--------|--------|--------|
| 1     | 407    | 2052   | 3472   | 2912   | 1783   | 961    | 348    | 46     | 11981  |
|       | 3.40   | 17.13  | 28.98  | 24.31  | 14.88  | 8.02   | 2.90   | 0.38   | 100.00 |
|       | 3.40   | 17.13  | 28.98  | 24.31  | 14.88  | 8.02   | 2.90   | 0.38   |        |
|       | 100.00 | 100.00 | 100.00 | 100.00 | 100.00 | 100.00 | 100.00 | 100.00 |        |
| Total | 407    | 2052   | 3472   | 2912   | 1783   | 961    | 348    | 46     | 11981  |
|       | 3.40   | 17.13  | 28.98  | 24.31  | 14.88  | 8.02   | 2.90   | 0.38   |        |
|       | 100.00 |        |        |        |        |        |        |        |        |



Table 2-7 and other risk factors and derived variables according to the presence or absence of proton-pump inhibitors

FREQ Procedure

|   |       | Cumulative           |                  |        |
|---|-------|----------------------|------------------|--------|
|   |       | Percent of ALL power | Percent of power |        |
| 1 | 11981 | 100.00               | 11981            | 100.00 |

Table 2-7 and other risk factors and derived variables according to the presence or absence of proton-pump inhibitors

FREQ Procedure

Table : ALL \* CHA 2 DS 2 V

ALL CHA2DS2V(CH A2DS2-VASc Score)

Power |

Percent |

Percent of rows

Percent | 2 | 3 | 4 | 5 | 6 | 7 | 8 | 9 | Total

|       | 2      | 3      | 4      | 5      | 6      | 7      | 8      | 9      | Total  |
|-------|--------|--------|--------|--------|--------|--------|--------|--------|--------|
| 1     | 407    | 2052   | 3472   | 2912   | 1783   | 961    | 348    | 46     | 11981  |
|       | 3.40   | 17.13  | 28.98  | 24.31  | 14.88  | 8.02   | 2.90   | 0.38   | 100.00 |
|       | 3.40   | 17.13  | 28.98  | 24.31  | 14.88  | 8.02   | 2.90   | 0.38   |        |
|       | 100.00 | 100.00 | 100.00 | 100.00 | 100.00 | 100.00 | 100.00 | 100.00 |        |
| Total | 407    | 2052   | 3472   | 2912   | 1783   | 961    | 348    | 46     | 11981  |
|       | 3.40   | 17.13  | 28.98  | 24.31  | 14.88  | 8.02   | 2.90   | 0.38   |        |
|       | 100.00 |        |        |        |        |        |        |        |        |

Table 2-7 and other risk factors and derived variables according to the presence or absence of proton-pump inhibitors

FREQ Procedure

|   |       | Cumulative           |                  |        |
|---|-------|----------------------|------------------|--------|
|   |       | Percent of ALL power | Percent of power |        |
| 1 | 11981 | 100.00               | 11981            | 100.00 |

Table 2-7 and other risk factors and derived variables according to the presence or absence of proton-pump inhibitors

FREQ Procedure

Table : ALL \* t\_ch 2 v

ALL t\_ch2v

Power |

Percent |

Percent of rows

Percentage of columns | 1| 2| 3| Total

|       | 1      | 2      | 3      | Total  |
|-------|--------|--------|--------|--------|
| 1     | 2459   | 6384   | 3138   | 11981  |
|       | 20.52  | 53.28  | 26.19  | 100.00 |
|       | 20.52  | 53.28  | 26.19  |        |
|       | 100.00 | 100.00 | 100.00 |        |
| Total | 2459   | 6384   | 3138   | 11981  |
|       | 20.52  | 53.28  | 26.19  | 100.00 |

Table 2-7 and other risk factors and derived variables according to the presence or absence of proton-pump inhibitors

FREQ Procedure

|                      |       | Cumulative       |       |        |
|----------------------|-------|------------------|-------|--------|
| Percent of ALL power |       | Percent of power |       |        |
| 1                    | 11981 | 100.00           | 11981 | 100.00 |

Table 2-7 and other risk factors and derived variables according to the presence or absence of proton-pump inhibitors

FREQ Procedure

Table : ALL \* t\_ch 2 v

ALL t\_ch2v

Power |

Percent |

Percent of rows

Percentage of columns | 1| 2| 3| Total

|       | 1      | 2      | 3      | Total  |
|-------|--------|--------|--------|--------|
| 1     | 2459   | 6384   | 3138   | 11981  |
|       | 20.52  | 53.28  | 26.19  | 100.00 |
|       | 20.52  | 53.28  | 26.19  |        |
|       | 100.00 | 100.00 | 100.00 |        |
| Total | 2459   | 6384   | 3138   | 11981  |
|       | 20.52  | 53.28  | 26.19  | 100.00 |

Table 2-7 and other risk factors and derived variables according to the presence or absence of proton-pump inhibitors

FREQ Procedure

|                      |       | Cumulative       |       |        |
|----------------------|-------|------------------|-------|--------|
| Percent of ALL power |       | Percent of power |       |        |
| 1                    | 11981 | 100.00           | 11981 | 100.00 |

Table 2-7 and other risk factors and derived variables according to the presence or absence of proton-pump inhibitors

FREQ Procedure

Table : ALL \* t\_ch 2 v

ALL t\_ch2v

Power |

Percent |

Percent of rows

Percentage of columns | 1| 2| 3| Total

|       | 1      | 2      | 3      | Total  |
|-------|--------|--------|--------|--------|
| 1     | 2459   | 6384   | 3138   | 11981  |
|       | 20.52  | 53.28  | 26.19  | 100.00 |
|       | 20.52  | 53.28  | 26.19  |        |
|       | 100.00 | 100.00 | 100.00 |        |
| Total | 2459   | 6384   | 3138   | 11981  |
|       | 20.52  | 53.28  | 26.19  | 100.00 |



Table 2-7 and other risk factors and derived variables according to the presence or absence of proton-pump inhibitors

FREQ Procedure

|   |       | Cumulative           |                  |        |
|---|-------|----------------------|------------------|--------|
|   |       | Percent of ALL power | Percent of power |        |
| 1 | 11981 | 100.00               | 11981            | 100.00 |

Table 2-7 and other risk factors and derived variables according to the presence or absence of proton-pump inhibitors

FREQ Procedure

Tables: ALL\* HASBLED

ALL HASBLED(HAS-BLED Score)

Power |

Percent |

Percent of rows

Percentage of columns | 1| 2| 3| 4| 5| 6| Total

|       |        |        |        |        |        |        |        |   |
|-------|--------|--------|--------|--------|--------|--------|--------|---|
|       | +      | +      | +      | +      | +      | +      | +      | + |
| 1     | 3935   | 4835   | 2510   | 637    | 61     | 3      | 11981  |   |
|       | 32.84  | 40.36  | 20.95  | 5.32   | 0.51   | 0.03   | 100.00 |   |
|       | 32.84  | 40.36  | 20.95  | 5.32   | 0.51   | 0.03   |        |   |
|       | 100.00 | 100.00 | 100.00 | 100.00 | 100.00 | 100.00 |        |   |
|       | +      | +      | +      | +      | +      | +      | +      | + |
| Total | 3935   | 4835   | 2510   | 637    | 61     | 3      | 11981  |   |
|       | 32.84  | 40.36  | 20.95  | 5.32   | 0.51   | 0.03   | 100.00 |   |

Table 2-7 and other risk factors and derived variables according to the presence or absence of proton-pump inhibitors

FREQ Procedure

|   |       | Cumulative           |                  |        |
|---|-------|----------------------|------------------|--------|
|   |       | Percent of ALL power | Percent of power |        |
| 1 | 11981 | 100.00               | 11981            | 100.00 |

Table 2-7 and other risk factors and derived variables according to the presence or absence of proton-pump inhibitors

FREQ Procedure

Tables: ALL\* HASBLED

ALL HASBLED(HAS-BLED Score)

Power |

Percent |

Percent of rows

Percentage of columns | 1| 2| 3| 4| 5| 6| Total

|       |        |        |        |        |        |        |        |   |
|-------|--------|--------|--------|--------|--------|--------|--------|---|
|       | +      | +      | +      | +      | +      | +      | +      | + |
| 1     | 3935   | 4835   | 2510   | 637    | 61     | 3      | 11981  |   |
|       | 32.84  | 40.36  | 20.95  | 5.32   | 0.51   | 0.03   | 100.00 |   |
|       | 32.84  | 40.36  | 20.95  | 5.32   | 0.51   | 0.03   |        |   |
|       | 100.00 | 100.00 | 100.00 | 100.00 | 100.00 | 100.00 |        |   |
|       | +      | +      | +      | +      | +      | +      | +      | + |
| Total | 3935   | 4835   | 2510   | 637    | 61     | 3      | 11981  |   |
|       | 32.84  | 40.36  | 20.95  | 5.32   | 0.51   | 0.03   | 100.00 |   |

Table 2-7 and other risk factors and derived variables according to the presence or absence of proton-pump inhibitors

FREQ Procedure

|   |       | Cumulative           |                  |        |
|---|-------|----------------------|------------------|--------|
|   |       | Percent of ALL power | Percent of power |        |
| 1 | 11981 | 100.00               | 11981            | 100.00 |

Table 2-7 and other risk factors and derived variables according to the presence or absence of proton-pump inhibitors

FREQ Procedure

Tables: ALL\* HASBLED

ALL HASBLED(HAS-BLED Score)

Power |

Percent |

Percent of rows

Percentage of columns | 1| 2| 3| 4| 5| 6| Total

|       | 1      | 2      | 3      | 4      | 5      | 6      | Total  |
|-------|--------|--------|--------|--------|--------|--------|--------|
| 1     | 3935   | 4835   | 2510   | 637    | 61     | 3      | 11981  |
|       | 32.84  | 40.36  | 20.95  | 5.32   | 0.51   | 0.03   | 100.00 |
|       | 32.84  | 40.36  | 20.95  | 5.32   | 0.51   | 0.03   |        |
|       | 100.00 | 100.00 | 100.00 | 100.00 | 100.00 | 100.00 |        |
| Total | 3935   | 4835   | 2510   | 637    | 61     | 3      | 11981  |
|       | 32.84  | 40.36  | 20.95  | 5.32   | 0.51   | 0.03   | 100.00 |

Table 2-7 and other risk factors and derived variables according to the presence or absence of proton-pump inhibitors

FREQ Procedure

|                      |       | Cumulative       |       |        |
|----------------------|-------|------------------|-------|--------|
| Percent of ALL power |       | Percent of power |       |        |
| 1                    | 11981 | 100.00           | 11981 | 100.00 |

Table 2-7 and other risk factors and derived variables according to the presence or absence of proton-pump inhibitors

FREQ Procedure

Tables: ALL\* HASBLED

ALL HASBLED(HAS-BLED Score)

Power |

Percent |

Percent of rows

Percentage of columns | 1| 2| 3| 4| 5| 6| Total

|       |        |        |        |        |        |        |        |   |
|-------|--------|--------|--------|--------|--------|--------|--------|---|
|       | +      | +      | +      | +      | +      | +      | +      | + |
| 1     | 3935   | 4835   | 2510   | 637    | 61     | 3      | 11981  |   |
|       | 32.84  | 40.36  | 20.95  | 5.32   | 0.51   | 0.03   | 100.00 |   |
|       | 32.84  | 40.36  | 20.95  | 5.32   | 0.51   | 0.03   |        |   |
|       | 100.00 | 100.00 | 100.00 | 100.00 | 100.00 | 100.00 |        |   |
|       | +      | +      | +      | +      | +      | +      | +      | + |
| Total | 3935   | 4835   | 2510   | 637    | 61     | 3      | 11981  |   |
|       | 32.84  | 40.36  | 20.95  | 5.32   | 0.51   | 0.03   | 100.00 |   |



Table 2-7 and other risk factors and derived variables according to the presence or absence of proton-pump inhibitors

FREQ Procedure

|                      |       | Cumulative       |       |        |
|----------------------|-------|------------------|-------|--------|
| Percent of ALL power |       | Percent of power |       |        |
| 1                    | 11981 | 100.00           | 11981 | 100.00 |

Table 2-7 and other risk factors and derived variables according to the presence or absence of proton-pump inhibitors

FREQ Procedure

Tables: ALL\* HASBLED

ALL HASBLED(HAS-BLED Score)

Power |

Percent |

Percent of rows

Percentage of columns | 1| 2| 3| 4| 5| 6| Total

|       | 1      | 2      | 3      | 4      | 5      | 6      | Total  |
|-------|--------|--------|--------|--------|--------|--------|--------|
|       | 3935   | 4835   | 2510   | 637    | 61     | 3      | 11981  |
|       | 32.84  | 40.36  | 20.95  | 5.32   | 0.51   | 0.03   | 100.00 |
|       | 32.84  | 40.36  | 20.95  | 5.32   | 0.51   | 0.03   |        |
|       | 100.00 | 100.00 | 100.00 | 100.00 | 100.00 | 100.00 |        |
| Total | 3935   | 4835   | 2510   | 637    | 61     | 3      | 11981  |
|       | 32.84  | 40.36  | 20.95  | 5.32   | 0.51   | 0.03   | 100.00 |

Table 2-7 and other risk factors and derived variables according to the presence or absence of proton-pump inhibitors

FREQ Procedure

|                      |       | Cumulative       |       |        |
|----------------------|-------|------------------|-------|--------|
| Percent of ALL power |       | Percent of power |       |        |
| 1                    | 11981 | 100.00           | 11981 | 100.00 |

Table 2-7 and other risk factors and derived variables according to the presence or absence of proton-pump inhibitors

FREQ Procedure

Tables: ALL\* HASBLED

ALL HASBLED(HAS-BLED Score)

Power |

Percent |

Percent of rows

Percentage of columns | 1| 2| 3| 4| 5| 6| Total

|       | 1      | 2      | 3      | 4      | 5      | 6      | Total  |
|-------|--------|--------|--------|--------|--------|--------|--------|
|       | 3935   | 4835   | 2510   | 637    | 61     | 3      | 11981  |
|       | 32.84  | 40.36  | 20.95  | 5.32   | 0.51   | 0.03   | 100.00 |
|       | 32.84  | 40.36  | 20.95  | 5.32   | 0.51   | 0.03   |        |
|       | 100.00 | 100.00 | 100.00 | 100.00 | 100.00 | 100.00 |        |
| Total | 3935   | 4835   | 2510   | 637    | 61     | 3      | 11981  |
|       | 32.84  | 40.36  | 20.95  | 5.32   | 0.51   | 0.03   | 100.00 |

Table 2-7 and other risk factors and derived variables according to the presence or absence of proton-pump inhibitors

FREQ Procedure

|                      |       | Cumulative       |       |        |
|----------------------|-------|------------------|-------|--------|
| Percent of ALL power |       | Percent of power |       |        |
| 1                    | 11981 | 100.00           | 11981 | 100.00 |

Table 2-7 and other risk factors and derived variables according to the presence or absence of proton-pump inhibitors

FREQ Procedure

Tables: ALL\* HASBLED

ALL HASBLED(HAS-BLED Score)

Power |

Percent |

Percent of rows

Percentage of columns | 1| 2| 3| 4| 5| 6| Total

|       | 1      | 2      | 3      | 4      | 5      | 6      | Total  |
|-------|--------|--------|--------|--------|--------|--------|--------|
|       | 3935   | 4835   | 2510   | 637    | 61     | 3      | 11981  |
|       | 32.84  | 40.36  | 20.95  | 5.32   | 0.51   | 0.03   | 100.00 |
|       | 32.84  | 40.36  | 20.95  | 5.32   | 0.51   | 0.03   |        |
|       | 100.00 | 100.00 | 100.00 | 100.00 | 100.00 | 100.00 |        |
| Total | 3935   | 4835   | 2510   | 637    | 61     | 3      | 11981  |
|       | 32.84  | 40.36  | 20.95  | 5.32   | 0.51   | 0.03   | 100.00 |

Table 2-7 and other risk factors and derived variables according to the presence or absence of proton-pump inhibitors

FREQ Procedure

|                      |       | Cumulative       |       |        |
|----------------------|-------|------------------|-------|--------|
| Percent of ALL power |       | Percent of power |       |        |
| 1                    | 11981 | 100.00           | 11981 | 100.00 |

Table 2-7 and other risk factors and derived variables according to the presence or absence of proton-pump inhibitors

FREQ Procedure

Tables: ALL\* HASBLED

ALL HASBLED(HAS-BLED Score)

Power |

Percent |

Percent of rows

Percentage of columns | 1| 2| 3| 4| 5| 6| Total

|       | 1      | 2      | 3      | 4      | 5      | 6      | Total  |
|-------|--------|--------|--------|--------|--------|--------|--------|
| 1     | 3935   | 4835   | 2510   | 637    | 61     | 3      | 11981  |
|       | 32.84  | 40.36  | 20.95  | 5.32   | 0.51   | 0.03   | 100.00 |
|       | 32.84  | 40.36  | 20.95  | 5.32   | 0.51   | 0.03   |        |
|       | 100.00 | 100.00 | 100.00 | 100.00 | 100.00 | 100.00 |        |
| Total | 3935   | 4835   | 2510   | 637    | 61     | 3      | 11981  |
|       | 32.84  | 40.36  | 20.95  | 5.32   | 0.51   | 0.03   | 100.00 |



Table 2-7 and other risk factors and derived variables according to the presence or absence of proton-pump inhibitors

FREQ Procedure

|   |       | Cumulative           |                  |        |
|---|-------|----------------------|------------------|--------|
|   |       | Percent of ALL power | Percent of power |        |
| 1 | 11981 | 100.00               | 11981            | 100.00 |

Table 2-7 and other risk factors and derived variables according to the presence or absence of proton-pump inhibitors

FREQ Procedure

Tables: ALL\* HASBLED

ALL HASBLED(HAS-BLED Score)

Power |

Percent |

Percent of rows

Percentage of columns | 1| 2| 3| 4| 5| 6| Total

|       | 1      | 2      | 3      | 4      | 5      | 6      | Total  |
|-------|--------|--------|--------|--------|--------|--------|--------|
|       | 3935   | 4835   | 2510   | 637    | 61     | 3      | 11981  |
|       | 32.84  | 40.36  | 20.95  | 5.32   | 0.51   | 0.03   | 100.00 |
|       | 32.84  | 40.36  | 20.95  | 5.32   | 0.51   | 0.03   |        |
|       | 100.00 | 100.00 | 100.00 | 100.00 | 100.00 | 100.00 |        |
| Total | 3935   | 4835   | 2510   | 637    | 61     | 3      | 11981  |
|       | 32.84  | 40.36  | 20.95  | 5.32   | 0.51   | 0.03   | 100.00 |

Table 2-7 and other risk factors and derived variables according to the presence or absence of proton-pump inhibitors

FREQ Procedure

|                      |       | Cumulative       |       |        |
|----------------------|-------|------------------|-------|--------|
| Percent of ALL power |       | Percent of power |       |        |
| 1                    | 11981 | 100.00           | 11981 | 100.00 |

Table 2-7 and other risk factors and derived variables according to the presence or absence of proton-pump inhibitors

FREQ Procedure

Table: ALL \* t\_has

ALL t\_has

Power |

Percent |

Percent of rows

Percentage of columns | 1| 2| Total

|       | 1      | 2      | Total  |
|-------|--------|--------|--------|
| 1     | 8770   | 3211   | 11981  |
|       | 73.20  | 26.80  | 100.00 |
|       | 73.20  | 26.80  |        |
|       | 100.00 | 100.00 |        |
| Total | 8770   | 3211   | 11981  |
|       | 73.20  | 26.80  | 100.00 |

Table 2-7 and other risk factors and derived variables according to the presence or absence of proton-pump inhibitors

FREQ Procedure

|   |       | Cumulative           |                  |        |
|---|-------|----------------------|------------------|--------|
|   |       | Percent of ALL power | Percent of power |        |
| 1 | 11981 | 100.00               | 11981            | 100.00 |

Table 2-7 and other risk factors and derived variables according to the presence or absence of proton-pump inhibitors

FREQ Procedure

Table: ALL \* t\_has

ALL t\_has

Power |

Percent |

Percent of rows

Percentage of columns | 1| 2| Total

|       | 1      | 2      | Total  |
|-------|--------|--------|--------|
|       | 8770   | 3211   | 11981  |
|       | 73.20  | 26.80  | 100.00 |
|       | 73.20  | 26.80  |        |
|       | 100.00 | 100.00 |        |
| Total | 8770   | 3211   | 11981  |
|       | 73.20  | 26.80  | 100.00 |

Table 2-7 and other risk factors and derived variables according to the presence or absence of proton-pump inhibitors

FREQ Procedure

|                      |       | Cumulative       |       |        |
|----------------------|-------|------------------|-------|--------|
| Percent of ALL power |       | Percent of power |       |        |
| 1                    | 20509 | 100.00           | 20509 | 100.00 |

Table 2-7 and other risk factors and derived variables according to the presence or absence of proton-pump inhibitors

FREQ Procedure

Table: ALL \* t\_OTT

ALL t\_OTT

Power |

Percent |

Percent of rows

Percentage of columns | 0 | 1 | Sum

|       | 0      | 1      | Sum    |
|-------|--------|--------|--------|
| 1     | 19429  | 1080   | 20509  |
|       | 94.73  | 5.27   | 100.00 |
|       | 94.73  | 5.27   |        |
|       | 100.00 | 100.00 |        |
| Total | 19429  | 1080   | 20509  |
|       | 94.73  | 5.27   | 100.00 |



Table 2-7 and other risk factors and derived variables according to the presence or absence of proton-pump inhibitors

FREQ Procedure

|                      |       | Cumulative       |       |        |
|----------------------|-------|------------------|-------|--------|
| Percent of ALL power |       | Percent of power |       |        |
| 1                    | 20509 | 100.00           | 20509 | 100.00 |

Table 2-7 and other risk factors and derived variables according to the presence or absence of proton-pump inhibitors

FREQ Procedure

Table: ALL \* t\_OTT

ALL t\_OTT

Power |

Percent |

Percent of rows

Percentage of columns | 0 | 1 | Sum

|       | 0      | 1      | Sum    |
|-------|--------|--------|--------|
| 1     | 19429  | 1080   | 20509  |
|       | 94.73  | 5.27   | 100.00 |
|       | 94.73  | 5.27   |        |
|       | 100.00 | 100.00 |        |
| Total | 19429  | 1080   | 20509  |
|       | 94.73  | 5.27   | 100.00 |

Table 2-7 and other risk factors and derived variables according to the presence or absence of proton-pump inhibitors

FREQ Procedure

|                      |       | Cumulative       |       |        |
|----------------------|-------|------------------|-------|--------|
| Percent of ALL power |       | Percent of power |       |        |
| 1                    | 20509 | 100.00           | 20509 | 100.00 |

Table 2-7 and other risk factors and derived variables according to the presence or absence of proton-pump inhibitors

FREQ Procedure

Table : ALL \* CHADS2

ALL CHADS2(CHADS2 Score)

Power |

Percent |

Percent of rows

Percentage of columns | 1| 2| 3| 4| 5| 6| Total

|       | 1      | 2      | 3      | 4      | 5      | 6      | Total  |
|-------|--------|--------|--------|--------|--------|--------|--------|
| 1     | 2157   | 7541   | 5967   | 3060   | 1289   | 495    | 20509  |
|       | 10.52  | 36.77  | 29.09  | 14.92  | 6.29   | 2.41   | 100.00 |
|       | 10.52  | 36.77  | 29.09  | 14.92  | 6.29   | 2.41   |        |
|       | 100.00 | 100.00 | 100.00 | 100.00 | 100.00 | 100.00 |        |
| Total | 2157   | 7541   | 5967   | 3060   | 1289   | 495    | 20509  |
|       | 10.52  | 36.77  | 29.09  | 14.92  | 6.29   | 2.41   | 100.00 |

Table 2-7 and other risk factors and derived variables according to the presence or absence of proton-pump inhibitors

FREQ Procedure

|                      |       | Cumulative       |       |        |
|----------------------|-------|------------------|-------|--------|
| Percent of ALL power |       | Percent of power |       |        |
| 1                    | 20509 | 100.00           | 20509 | 100.00 |

Table 2-7 and other risk factors and derived variables according to the presence or absence of proton-pump inhibitors

FREQ Procedure

Table : ALL \* CHADS2

ALL CHADS2(CHADS2 Score)

Power |

Percent |

Percent of rows

Percentage of columns | 1| 2| 3| 4| 5| 6| Total

|       | 1      | 2      | 3      | 4      | 5      | 6      | Total  |
|-------|--------|--------|--------|--------|--------|--------|--------|
| 1     | 2157   | 7541   | 5967   | 3060   | 1289   | 495    | 20509  |
|       | 10.52  | 36.77  | 29.09  | 14.92  | 6.29   | 2.41   | 100.00 |
|       | 10.52  | 36.77  | 29.09  | 14.92  | 6.29   | 2.41   |        |
|       | 100.00 | 100.00 | 100.00 | 100.00 | 100.00 | 100.00 |        |
| Total | 2157   | 7541   | 5967   | 3060   | 1289   | 495    | 20509  |
|       | 10.52  | 36.77  | 29.09  | 14.92  | 6.29   | 2.41   | 100.00 |

Table 2-7 and other risk factors and derived variables according to the presence or absence of proton-pump inhibitors

FREQ Procedure

|                      |       | Cumulative       |       |        |
|----------------------|-------|------------------|-------|--------|
| Percent of ALL power |       | Percent of power |       |        |
| 1                    | 20509 | 100.00           | 20509 | 100.00 |

Table 2-7 and other risk factors and derived variables according to the presence or absence of proton-pump inhibitors

FREQ Procedure

Table : ALL \* CHADS2

ALL CHADS2(CHADS2 Score)

Power |

Percent |

Percent of rows

Percentage of columns | 1| 2| 3| 4| 5| 6| Total

|       | 1      | 2      | 3      | 4      | 5      | 6      | Total  |
|-------|--------|--------|--------|--------|--------|--------|--------|
| 1     | 2157   | 7541   | 5967   | 3060   | 1289   | 495    | 20509  |
|       | 10.52  | 36.77  | 29.09  | 14.92  | 6.29   | 2.41   | 100.00 |
|       | 10.52  | 36.77  | 29.09  | 14.92  | 6.29   | 2.41   |        |
|       | 100.00 | 100.00 | 100.00 | 100.00 | 100.00 | 100.00 |        |
| Total | 2157   | 7541   | 5967   | 3060   | 1289   | 495    | 20509  |
|       | 10.52  | 36.77  | 29.09  | 14.92  | 6.29   | 2.41   | 100.00 |



Table 2-7 and other risk factors and derived variables according to the presence or absence of proton-pump inhibitors

FREQ Procedure

|                      |       | Cumulative       |       |        |
|----------------------|-------|------------------|-------|--------|
| Percent of ALL power |       | Percent of power |       |        |
| 1                    | 20509 | 100.00           | 20509 | 100.00 |

Table 2-7 and other risk factors and derived variables according to the presence or absence of proton-pump inhibitors

FREQ Procedure

Table : ALL \* CHADS2

ALL CHADS2(CHADS2 Score)

Power |

Percent |

Percent of rows

Percentage of columns | 1| 2| 3| 4| 5| 6| Total

|       | 1      | 2      | 3      | 4      | 5      | 6      | Total  |
|-------|--------|--------|--------|--------|--------|--------|--------|
| 1     | 2157   | 7541   | 5967   | 3060   | 1289   | 495    | 20509  |
|       | 10.52  | 36.77  | 29.09  | 14.92  | 6.29   | 2.41   | 100.00 |
|       | 10.52  | 36.77  | 29.09  | 14.92  | 6.29   | 2.41   |        |
|       | 100.00 | 100.00 | 100.00 | 100.00 | 100.00 | 100.00 |        |
| Total | 2157   | 7541   | 5967   | 3060   | 1289   | 495    | 20509  |
|       | 10.52  | 36.77  | 29.09  | 14.92  | 6.29   | 2.41   | 100.00 |

Table 2-7 and other risk factors and derived variables according to the presence or absence of proton-pump inhibitors

FREQ Procedure

|                      |       | Cumulative       |       |        |
|----------------------|-------|------------------|-------|--------|
| Percent of ALL power |       | Percent of power |       |        |
| 1                    | 20509 | 100.00           | 20509 | 100.00 |

Table 2-7 and other risk factors and derived variables according to the presence or absence of proton-pump inhibitors

FREQ Procedure

Table : ALL \* CHADS2

ALL CHADS2(CHADS2 Score)

Power |

Percent |

Percent of rows

Percentage of columns | 1| 2| 3| 4| 5| 6| Total

|       | 1      | 2      | 3      | 4      | 5      | 6      | Total  |
|-------|--------|--------|--------|--------|--------|--------|--------|
| 1     | 2157   | 7541   | 5967   | 3060   | 1289   | 495    | 20509  |
|       | 10.52  | 36.77  | 29.09  | 14.92  | 6.29   | 2.41   | 100.00 |
|       | 10.52  | 36.77  | 29.09  | 14.92  | 6.29   | 2.41   |        |
|       | 100.00 | 100.00 | 100.00 | 100.00 | 100.00 | 100.00 |        |
| Total | 2157   | 7541   | 5967   | 3060   | 1289   | 495    | 20509  |
|       | 10.52  | 36.77  | 29.09  | 14.92  | 6.29   | 2.41   | 100.00 |

Table 2-7 and other risk factors and derived variables according to the presence or absence of proton-pump inhibitors

FREQ Procedure

|                      |       | Cumulative       |       |        |
|----------------------|-------|------------------|-------|--------|
| Percent of ALL power |       | Percent of power |       |        |
| 1                    | 20509 | 100.00           | 20509 | 100.00 |

Table 2-7 and other risk factors and derived variables according to the presence or absence of proton-pump inhibitors

FREQ Procedure

Table : ALL \* CHADS2

ALL CHADS2(CHADS2 Score)

Power |

Percent |

Percent of rows

Percentage of columns | 1| 2| 3| 4| 5| 6| Total

|       | 1      | 2      | 3      | 4      | 5      | 6      | Total  |
|-------|--------|--------|--------|--------|--------|--------|--------|
| 1     | 2157   | 7541   | 5967   | 3060   | 1289   | 495    | 20509  |
|       | 10.52  | 36.77  | 29.09  | 14.92  | 6.29   | 2.41   | 100.00 |
|       | 10.52  | 36.77  | 29.09  | 14.92  | 6.29   | 2.41   |        |
|       | 100.00 | 100.00 | 100.00 | 100.00 | 100.00 | 100.00 |        |
| Total | 2157   | 7541   | 5967   | 3060   | 1289   | 495    | 20509  |
|       | 10.52  | 36.77  | 29.09  | 14.92  | 6.29   | 2.41   | 100.00 |

Table 2-7 and other risk factors and derived variables according to the presence or absence of proton-pump inhibitors

FREQ Procedure

|                      |       | Cumulative       |       |        |
|----------------------|-------|------------------|-------|--------|
| Percent of ALL power |       | Percent of power |       |        |
| 1                    | 20509 | 100.00           | 20509 | 100.00 |

Table 2-7 and other risk factors and derived variables according to the presence or absence of proton-pump inhibitors

FREQ Procedure

Table: ALL \* t\_chads

ALL t\_chads

Power |

Percent |

Percent of rows

Percentage of columns | 1| 2| 3| Total

|       | 1      | 2      | 3      | Total  |
|-------|--------|--------|--------|--------|
| 1     | 2157   | 7541   | 10811  | 20509  |
|       | 10.52  | 36.77  | 52.71  | 100.00 |
|       | 10.52  | 36.77  | 52.71  |        |
|       | 100.00 | 100.00 | 100.00 |        |
| Total | 2157   | 7541   | 10811  | 20509  |
|       | 10.52  | 36.77  | 52.71  | 100.00 |



Table 2-7 and other risk factors and derived variables according to the presence or absence of proton-pump inhibitors

FREQ Procedure

|                      |       | Cumulative       |       |        |
|----------------------|-------|------------------|-------|--------|
| Percent of ALL power |       | Percent of power |       |        |
| 1                    | 20509 | 100.00           | 20509 | 100.00 |

Table 2-7 and other risk factors and derived variables according to the presence or absence of proton-pump inhibitors

FREQ Procedure

Table: ALL \* t\_chads

ALL t\_chads

Power |

Percent |

Percent of rows

Percentage of columns | 1| 2| 3| Total

|       | 1      | 2      | 3      | Total  |
|-------|--------|--------|--------|--------|
| 1     | 2157   | 7541   | 10811  | 20509  |
|       | 10.52  | 36.77  | 52.71  | 100.00 |
|       | 10.52  | 36.77  | 52.71  |        |
|       | 100.00 | 100.00 | 100.00 |        |
| Total | 2157   | 7541   | 10811  | 20509  |
|       | 10.52  | 36.77  | 52.71  | 100.00 |

Table 2-7 and other risk factors and derived variables according to the presence or absence of proton-pump inhibitors

FREQ Procedure

|                      |       | Cumulative       |       |        |
|----------------------|-------|------------------|-------|--------|
| Percent of ALL power |       | Percent of power |       |        |
| 1                    | 20509 | 100.00           | 20509 | 100.00 |

Table 2-7 and other risk factors and derived variables according to the presence or absence of proton-pump inhibitors

FREQ Procedure

Table: ALL \* t\_chads

ALL t\_chads

Power |

Percent |

Percent of rows

Percentage of columns | 1| 2| 3| Total

|       | 1      | 2      | 3      | Total  |
|-------|--------|--------|--------|--------|
| 1     | 2157   | 7541   | 10811  | 20509  |
|       | 10.52  | 36.77  | 52.71  | 100.00 |
|       | 10.52  | 36.77  | 52.71  |        |
|       | 100.00 | 100.00 | 100.00 |        |
| Total | 2157   | 7541   | 10811  | 20509  |
|       | 10.52  | 36.77  | 52.71  | 100.00 |

Table 2-7 and other risk factors and derived variables according to the presence or absence of proton-pump inhibitors

FREQ Procedure

|   |       | Cumulative           |                  |        |
|---|-------|----------------------|------------------|--------|
|   |       | Percent of ALL power | Percent of power |        |
| 1 | 20509 | 100.00               | 20509            | 100.00 |

Table 2-7 and other risk factors and derived variables according to the presence or absence of proton-pump inhibitors

FREQ Procedure

Table : ALL \* CHA 2 DS 2 V

ALL CHA2DS2V(CH A2DS2-VASc Score)

Power |

Percent |

Percent of rows

Percent | 2 | 3 | 4 | 5 | 6 | 7 | 8 | 9 | Total

|       | 2      | 3      | 4      | 5      | 6      | 7      | 8      | 9      | Total  |
|-------|--------|--------|--------|--------|--------|--------|--------|--------|--------|
| 1     | 1274   | 4685   | 6328   | 4466   | 2316   | 1034   | 362    | 44     | 20509  |
|       | 6.21   | 22.84  | 30.85  | 21.78  | 11.29  | 5.04   | 1.77   | 0.21   | 100.00 |
|       | 6.21   | 22.84  | 30.85  | 21.78  | 11.29  | 5.04   | 1.77   | 0.21   |        |
|       | 100.00 | 100.00 | 100.00 | 100.00 | 100.00 | 100.00 | 100.00 | 100.00 |        |
| Total | 1274   | 4685   | 6328   | 4466   | 2316   | 1034   | 362    | 44     | 20509  |
|       | 6.21   | 22.84  | 30.85  | 21.78  | 11.29  | 5.04   | 1.77   | 0.21   |        |
|       | 100.00 |        |        |        |        |        |        |        |        |

Table 2-7 and other risk factors and derived variables according to the presence or absence of proton-pump inhibitors

FREQ Procedure

|                      |       | Cumulative       |       |        |
|----------------------|-------|------------------|-------|--------|
| Percent of ALL power |       | Percent of power |       |        |
| 1                    | 20509 | 100.00           | 20509 | 100.00 |

Table 2-7 and other risk factors and derived variables according to the presence or absence of proton-pump inhibitors

FREQ Procedure

Table : ALL \* CHA 2 DS 2 V

ALL CHA2DS2V(CH A2DS2-VASc Score)

Power |

Percent |

Percent of rows

Percent | 2 | 3 | 4 | 5 | 6 | 7 | 8 | 9 | Total

|       | 2      | 3      | 4      | 5      | 6      | 7      | 8      | 9      | Total  |
|-------|--------|--------|--------|--------|--------|--------|--------|--------|--------|
| 1     | 1274   | 4685   | 6328   | 4466   | 2316   | 1034   | 362    | 44     | 20509  |
|       | 6.21   | 22.84  | 30.85  | 21.78  | 11.29  | 5.04   | 1.77   | 0.21   | 100.00 |
|       | 6.21   | 22.84  | 30.85  | 21.78  | 11.29  | 5.04   | 1.77   | 0.21   |        |
|       | 100.00 | 100.00 | 100.00 | 100.00 | 100.00 | 100.00 | 100.00 | 100.00 |        |
| Total | 1274   | 4685   | 6328   | 4466   | 2316   | 1034   | 362    | 44     | 20509  |
|       | 6.21   | 22.84  | 30.85  | 21.78  | 11.29  | 5.04   | 1.77   | 0.21   |        |
|       | 100.00 |        |        |        |        |        |        |        |        |



Table 2-7 and other risk factors and derived variables according to the presence or absence of proton-pump inhibitors

FREQ Procedure

|                      |       | Cumulative       |       |        |
|----------------------|-------|------------------|-------|--------|
| Percent of ALL power |       | Percent of power |       |        |
| 1                    | 20509 | 100.00           | 20509 | 100.00 |

Table 2-7 and other risk factors and derived variables according to the presence or absence of proton-pump inhibitors

FREQ Procedure

Table : ALL \* CHA 2 DS 2 V

ALL CHA2DS2V(CHA2DS2-VASc Score)

Power |

Percent |

Percent of rows

Percent | 2 | 3 | 4 | 5 | 6 | 7 | 8 | 9 | Total

|       | 2      | 3      | 4      | 5      | 6      | 7      | 8      | 9      | Total  |
|-------|--------|--------|--------|--------|--------|--------|--------|--------|--------|
| 1     | 1274   | 4685   | 6328   | 4466   | 2316   | 1034   | 362    | 44     | 20509  |
|       | 6.21   | 22.84  | 30.85  | 21.78  | 11.29  | 5.04   | 1.77   | 0.21   | 100.00 |
|       | 6.21   | 22.84  | 30.85  | 21.78  | 11.29  | 5.04   | 1.77   | 0.21   |        |
|       | 100.00 | 100.00 | 100.00 | 100.00 | 100.00 | 100.00 | 100.00 | 100.00 |        |
| Total | 1274   | 4685   | 6328   | 4466   | 2316   | 1034   | 362    | 44     | 20509  |
|       | 6.21   | 22.84  | 30.85  | 21.78  | 11.29  | 5.04   | 1.77   | 0.21   |        |
|       | 100.00 |        |        |        |        |        |        |        |        |

Table 2-7 and other risk factors and derived variables according to the presence or absence of proton-pump inhibitors

FREQ Procedure

|                      |       | Cumulative       |       |        |
|----------------------|-------|------------------|-------|--------|
| Percent of ALL power |       | Percent of power |       |        |
| 1                    | 20509 | 100.00           | 20509 | 100.00 |

Table 2-7 and other risk factors and derived variables according to the presence or absence of proton-pump inhibitors

FREQ Procedure

Table : ALL \* CHA 2 DS 2 V

ALL CHA2DS2V(CH A2DS2-VASc Score)

Power |

Percent |

Percent of rows

Percent | 2 | 3 | 4 | 5 | 6 | 7 | 8 | 9 | Total

|       | 2      | 3      | 4      | 5      | 6      | 7      | 8      | 9      | Total  |
|-------|--------|--------|--------|--------|--------|--------|--------|--------|--------|
| 1     | 1274   | 4685   | 6328   | 4466   | 2316   | 1034   | 362    | 44     | 20509  |
|       | 6.21   | 22.84  | 30.85  | 21.78  | 11.29  | 5.04   | 1.77   | 0.21   | 100.00 |
|       | 6.21   | 22.84  | 30.85  | 21.78  | 11.29  | 5.04   | 1.77   | 0.21   |        |
|       | 100.00 | 100.00 | 100.00 | 100.00 | 100.00 | 100.00 | 100.00 | 100.00 |        |
| Total | 1274   | 4685   | 6328   | 4466   | 2316   | 1034   | 362    | 44     | 20509  |
|       | 6.21   | 22.84  | 30.85  | 21.78  | 11.29  | 5.04   | 1.77   | 0.21   |        |
|       | 100.00 |        |        |        |        |        |        |        |        |

Table 2-7 and other risk factors and derived variables according to the presence or absence of proton-pump inhibitors

FREQ Procedure

|                      |       | Cumulative       |       |        |
|----------------------|-------|------------------|-------|--------|
| Percent of ALL power |       | Percent of power |       |        |
| 1                    | 20509 | 100.00           | 20509 | 100.00 |

Table 2-7 and other risk factors and derived variables according to the presence or absence of proton-pump inhibitors

FREQ Procedure

Table : ALL \* CHA 2 DS 2 V

ALL CHA2DS2V(CH A2DS2-VASc Score)

Power |

Percent |

Percent of rows

Percent | 2 | 3 | 4 | 5 | 6 | 7 | 8 | 9 | Total

|       | 2      | 3      | 4      | 5      | 6      | 7      | 8      | 9      | Total  |
|-------|--------|--------|--------|--------|--------|--------|--------|--------|--------|
| 1     | 1274   | 4685   | 6328   | 4466   | 2316   | 1034   | 362    | 44     | 20509  |
|       | 6.21   | 22.84  | 30.85  | 21.78  | 11.29  | 5.04   | 1.77   | 0.21   | 100.00 |
|       | 6.21   | 22.84  | 30.85  | 21.78  | 11.29  | 5.04   | 1.77   | 0.21   |        |
|       | 100.00 | 100.00 | 100.00 | 100.00 | 100.00 | 100.00 | 100.00 | 100.00 |        |
| Total | 1274   | 4685   | 6328   | 4466   | 2316   | 1034   | 362    | 44     | 20509  |
|       | 6.21   | 22.84  | 30.85  | 21.78  | 11.29  | 5.04   | 1.77   | 0.21   |        |
|       | 100.00 |        |        |        |        |        |        |        |        |

Table 2-7 and other risk factors and derived variables according to the presence or absence of proton-pump inhibitors

FREQ Procedure

|                      |       | Cumulative       |       |        |
|----------------------|-------|------------------|-------|--------|
| Percent of ALL power |       | Percent of power |       |        |
| 1                    | 20509 | 100.00           | 20509 | 100.00 |

Table 2-7 and other risk factors and derived variables according to the presence or absence of proton-pump inhibitors

FREQ Procedure

Table : ALL \* CHA 2 DS 2 V

ALL CHA2DS2V(CH A2DS2-VASc Score)

Power |

Percent |

Percent of rows

Percent | 2 | 3 | 4 | 5 | 6 | 7 | 8 | 9 | Total

|       | 2      | 3      | 4      | 5      | 6      | 7      | 8      | 9      | Total  |
|-------|--------|--------|--------|--------|--------|--------|--------|--------|--------|
| 1     | 1274   | 4685   | 6328   | 4466   | 2316   | 1034   | 362    | 44     | 20509  |
|       | 6.21   | 22.84  | 30.85  | 21.78  | 11.29  | 5.04   | 1.77   | 0.21   | 100.00 |
|       | 6.21   | 22.84  | 30.85  | 21.78  | 11.29  | 5.04   | 1.77   | 0.21   |        |
|       | 100.00 | 100.00 | 100.00 | 100.00 | 100.00 | 100.00 | 100.00 | 100.00 |        |
| Total | 1274   | 4685   | 6328   | 4466   | 2316   | 1034   | 362    | 44     | 20509  |
|       | 6.21   | 22.84  | 30.85  | 21.78  | 11.29  | 5.04   | 1.77   | 0.21   |        |
|       | 100.00 |        |        |        |        |        |        |        |        |



Table 2-7 and other risk factors and derived variables according to the presence or absence of proton-pump inhibitors

FREQ Procedure

|                      |       | Cumulative       |       |        |
|----------------------|-------|------------------|-------|--------|
| Percent of ALL power |       | Percent of power |       |        |
| 1                    | 20509 | 100.00           | 20509 | 100.00 |

Table 2-7 and other risk factors and derived variables according to the presence or absence of proton-pump inhibitors

FREQ Procedure

Table : ALL \* CHA 2 DS 2 V

ALL CHA2DS2V(CH A2DS2-VASc Score)

Power |

Percent |

Percent of rows

Percent | 2 | 3 | 4 | 5 | 6 | 7 | 8 | 9 | Total

|       | 2      | 3      | 4      | 5      | 6      | 7      | 8      | 9      | Total  |
|-------|--------|--------|--------|--------|--------|--------|--------|--------|--------|
| 1     | 1274   | 4685   | 6328   | 4466   | 2316   | 1034   | 362    | 44     | 20509  |
|       | 6.21   | 22.84  | 30.85  | 21.78  | 11.29  | 5.04   | 1.77   | 0.21   | 100.00 |
|       | 6.21   | 22.84  | 30.85  | 21.78  | 11.29  | 5.04   | 1.77   | 0.21   |        |
|       | 100.00 | 100.00 | 100.00 | 100.00 | 100.00 | 100.00 | 100.00 | 100.00 |        |
| Total | 1274   | 4685   | 6328   | 4466   | 2316   | 1034   | 362    | 44     | 20509  |
|       | 6.21   | 22.84  | 30.85  | 21.78  | 11.29  | 5.04   | 1.77   | 0.21   |        |
|       | 100.00 |        |        |        |        |        |        |        |        |

Table 2-7 and other risk factors and derived variables according to the presence or absence of proton-pump inhibitors

FREQ Procedure

|                      |       | Cumulative       |       |        |
|----------------------|-------|------------------|-------|--------|
| Percent of ALL power |       | Percent of power |       |        |
| 1                    | 20509 | 100.00           | 20509 | 100.00 |

Table 2-7 and other risk factors and derived variables according to the presence or absence of proton-pump inhibitors

FREQ Procedure

Table : ALL \* CHA 2 DS 2 V

ALL CHA2DS2V(CH A2DS2-VASc Score)

Power |

Percent |

Percent of rows

Percent | 2 | 3 | 4 | 5 | 6 | 7 | 8 | 9 | Total

|       | 2      | 3      | 4      | 5      | 6      | 7      | 8      | 9      | Total  |
|-------|--------|--------|--------|--------|--------|--------|--------|--------|--------|
| 1     | 1274   | 4685   | 6328   | 4466   | 2316   | 1034   | 362    | 44     | 20509  |
|       | 6.21   | 22.84  | 30.85  | 21.78  | 11.29  | 5.04   | 1.77   | 0.21   | 100.00 |
|       | 6.21   | 22.84  | 30.85  | 21.78  | 11.29  | 5.04   | 1.77   | 0.21   |        |
|       | 100.00 | 100.00 | 100.00 | 100.00 | 100.00 | 100.00 | 100.00 | 100.00 |        |
| Total | 1274   | 4685   | 6328   | 4466   | 2316   | 1034   | 362    | 44     | 20509  |
|       | 6.21   | 22.84  | 30.85  | 21.78  | 11.29  | 5.04   | 1.77   | 0.21   |        |
|       | 100.00 |        |        |        |        |        |        |        |        |

Table 2-7 and other risk factors and derived variables according to the presence or absence of proton-pump inhibitors

FREQ Procedure

|                      |       | Cumulative       |       |        |
|----------------------|-------|------------------|-------|--------|
| Percent of ALL power |       | Percent of power |       |        |
| 1                    | 20509 | 100.00           | 20509 | 100.00 |

Table 2-7 and other risk factors and derived variables according to the presence or absence of proton-pump inhibitors

FREQ Procedure

Table : ALL \* t\_ch 2 v

ALL t\_ch2v

Power |

Percent |

Percent of rows

Percentage of columns | 1| 2| 3| Total

|       | 1      | 2      | 3      | Total  |
|-------|--------|--------|--------|--------|
| 1     | 5959   | 10794  | 3756   | 20509  |
|       | 29.06  | 52.63  | 18.31  | 100.00 |
|       | 29.06  | 52.63  | 18.31  |        |
|       | 100.00 | 100.00 | 100.00 |        |
| Total | 5959   | 10794  | 3756   | 20509  |
|       | 29.06  | 52.63  | 18.31  | 100.00 |

Table 2-7 and other risk factors and derived variables according to the presence or absence of proton-pump inhibitors

FREQ Procedure

|                      |       | Cumulative       |       |        |
|----------------------|-------|------------------|-------|--------|
| Percent of ALL power |       | Percent of power |       |        |
| 1                    | 20509 | 100.00           | 20509 | 100.00 |

Table 2-7 and other risk factors and derived variables according to the presence or absence of proton-pump inhibitors

FREQ Procedure

Table : ALL \* t\_ch 2 v

ALL t\_ch2v

Power |

Percent |

Percent of rows

Percentage of columns | 1| 2| 3| Total

|       | 1      | 2      | 3      | Total  |
|-------|--------|--------|--------|--------|
| 1     | 5959   | 10794  | 3756   | 20509  |
|       | 29.06  | 52.63  | 18.31  | 100.00 |
|       | 29.06  | 52.63  | 18.31  |        |
|       | 100.00 | 100.00 | 100.00 |        |
| Total | 5959   | 10794  | 3756   | 20509  |
|       | 29.06  | 52.63  | 18.31  | 100.00 |



Table 2-7 and other risk factors and derived variables according to the presence or absence of proton-pump inhibitors

FREQ Procedure

|                      |       | Cumulative       |       |        |
|----------------------|-------|------------------|-------|--------|
| Percent of ALL power |       | Percent of power |       |        |
| 1                    | 20509 | 100.00           | 20509 | 100.00 |

Table 2-7 and other risk factors and derived variables according to the presence or absence of proton-pump inhibitors

FREQ Procedure

Table : ALL \* t\_ch 2 v

ALL t\_ch2v

Power |

Percent |

Percent of rows

Percentage of columns | 1| 2| 3| Total

|       | 1      | 2      | 3      | Total  |
|-------|--------|--------|--------|--------|
| 1     | 5959   | 10794  | 3756   | 20509  |
|       | 29.06  | 52.63  | 18.31  | 100.00 |
|       | 29.06  | 52.63  | 18.31  |        |
|       | 100.00 | 100.00 | 100.00 |        |
| Total | 5959   | 10794  | 3756   | 20509  |
|       | 29.06  | 52.63  | 18.31  | 100.00 |

Table 2-7 and other risk factors and derived variables according to the presence or absence of proton-pump inhibitors

FREQ Procedure

|                      |       | Cumulative       |       |        |
|----------------------|-------|------------------|-------|--------|
| Percent of ALL power |       | Percent of power |       |        |
| 1                    | 20509 | 100.00           | 20509 | 100.00 |

Table 2-7 and other risk factors and derived variables according to the presence or absence of proton-pump inhibitors

FREQ Procedure

Tables: ALL\* HASBLED

ALL HASBLED(HAS-BLED Score)

Power |

Percent |

Percent of rows

Percentage of columns | 1| 2| 3| 4| 5| 6| Total

|       |        |        |        |        |        |        |        |   |
|-------|--------|--------|--------|--------|--------|--------|--------|---|
|       | +      | +      | +      | +      | +      | +      | +      | + |
| 1     | 8917   | 7913   | 2990   | 627    | 60     | 2      | 20509  |   |
|       | 43.48  | 38.58  | 14.58  | 3.06   | 0.29   | 0.01   | 100.00 |   |
|       | 43.48  | 38.58  | 14.58  | 3.06   | 0.29   | 0.01   |        |   |
|       | 100.00 | 100.00 | 100.00 | 100.00 | 100.00 | 100.00 |        |   |
|       | +      | +      | +      | +      | +      | +      | +      | + |
| Total | 8917   | 7913   | 2990   | 627    | 60     | 2      | 20509  |   |
|       | 43.48  | 38.58  | 14.58  | 3.06   | 0.29   | 0.01   | 100.00 |   |

Table 2-7 and other risk factors and derived variables according to the presence or absence of proton-pump inhibitors

FREQ Procedure

|                      |       | Cumulative       |       |        |
|----------------------|-------|------------------|-------|--------|
| Percent of ALL power |       | Percent of power |       |        |
| 1                    | 20509 | 100.00           | 20509 | 100.00 |

Table 2-7 and other risk factors and derived variables according to the presence or absence of proton-pump inhibitors

FREQ Procedure

Tables: ALL\* HASBLED

ALL HASBLED(HAS-BLED Score)

Power |

Percent |

Percent of rows

Percentage of columns | 1| 2| 3| 4| 5| 6| Total

|       |        |        |        |        |        |        |        |   |   |
|-------|--------|--------|--------|--------|--------|--------|--------|---|---|
|       | +      | +      | +      | +      | +      | +      | +      | + | + |
| 1     | 8917   | 7913   | 2990   | 627    | 60     | 2      | 20509  |   |   |
|       | 43.48  | 38.58  | 14.58  | 3.06   | 0.29   | 0.01   | 100.00 |   |   |
|       | 43.48  | 38.58  | 14.58  | 3.06   | 0.29   | 0.01   |        |   |   |
|       | 100.00 | 100.00 | 100.00 | 100.00 | 100.00 | 100.00 |        |   |   |
|       | +      | +      | +      | +      | +      | +      | +      | + | + |
| Total | 8917   | 7913   | 2990   | 627    | 60     | 2      | 20509  |   |   |
|       | 43.48  | 38.58  | 14.58  | 3.06   | 0.29   | 0.01   | 100.00 |   |   |

Table 2-7 and other risk factors and derived variables according to the presence or absence of proton-pump inhibitors

FREQ Procedure

|                      |       | Cumulative       |       |        |
|----------------------|-------|------------------|-------|--------|
| Percent of ALL power |       | Percent of power |       |        |
| 1                    | 20509 | 100.00           | 20509 | 100.00 |

Table 2-7 and other risk factors and derived variables according to the presence or absence of proton-pump inhibitors

FREQ Procedure

Tables: ALL\* HASBLED

ALL HASBLED(HAS-BLED Score)

Power |

Percent |

Percent of rows

Percentage of columns | 1| 2| 3| 4| 5| 6| Total

|                       | 1      | 2      | 3      | 4      | 5      | 6      | Total  |
|-----------------------|--------|--------|--------|--------|--------|--------|--------|
| Count                 | 8917   | 7913   | 2990   | 627    | 60     | 2      | 20509  |
| Percent               | 43.48  | 38.58  | 14.58  | 3.06   | 0.29   | 0.01   | 100.00 |
| Percent of rows       | 43.48  | 38.58  | 14.58  | 3.06   | 0.29   | 0.01   |        |
| Percentage of columns | 100.00 | 100.00 | 100.00 | 100.00 | 100.00 | 100.00 |        |
| Total                 | 8917   | 7913   | 2990   | 627    | 60     | 2      | 20509  |
|                       | 43.48  | 38.58  | 14.58  | 3.06   | 0.29   | 0.01   | 100.00 |



Table 2-7 and other risk factors and derived variables according to the presence or absence of proton-pump inhibitors

FREQ Procedure

|                      |       | Cumulative       |       |        |
|----------------------|-------|------------------|-------|--------|
| Percent of ALL power |       | Percent of power |       |        |
| 1                    | 20509 | 100.00           | 20509 | 100.00 |

Table 2-7 and other risk factors and derived variables according to the presence or absence of proton-pump inhibitors

FREQ Procedure

Tables: ALL\* HASBLED

ALL HASBLED(HAS-BLED Score)

Power |

Percent |

Percent of rows

Percentage of columns | 1| 2| 3| 4| 5| 6| Total

|       |        |        |        |        |        |        |        |   |
|-------|--------|--------|--------|--------|--------|--------|--------|---|
|       | +      | +      | +      | +      | +      | +      | +      | + |
| 1     | 8917   | 7913   | 2990   | 627    | 60     | 2      | 20509  |   |
|       | 43.48  | 38.58  | 14.58  | 3.06   | 0.29   | 0.01   | 100.00 |   |
|       | 43.48  | 38.58  | 14.58  | 3.06   | 0.29   | 0.01   |        |   |
|       | 100.00 | 100.00 | 100.00 | 100.00 | 100.00 | 100.00 |        |   |
|       | +      | +      | +      | +      | +      | +      | +      | + |
| Total | 8917   | 7913   | 2990   | 627    | 60     | 2      | 20509  |   |
|       | 43.48  | 38.58  | 14.58  | 3.06   | 0.29   | 0.01   | 100.00 |   |

Table 2-7 and other risk factors and derived variables according to the presence or absence of proton-pump inhibitors

FREQ Procedure

|                      |       | Cumulative       |       |        |
|----------------------|-------|------------------|-------|--------|
| Percent of ALL power |       | Percent of power |       |        |
| 1                    | 20509 | 100.00           | 20509 | 100.00 |

Table 2-7 and other risk factors and derived variables according to the presence or absence of proton-pump inhibitors

FREQ Procedure

Tables: ALL\* HASBLED

ALL HASBLED(HAS-BLED Score)

Power |

Percent |

Percent of rows

Percentage of columns | 1| 2| 3| 4| 5| 6| Total

|       |        |        |        |        |        |        |        |   |   |
|-------|--------|--------|--------|--------|--------|--------|--------|---|---|
|       | +      | +      | +      | +      | +      | +      | +      | + | + |
| 1     | 8917   | 7913   | 2990   | 627    | 60     | 2      | 20509  |   |   |
|       | 43.48  | 38.58  | 14.58  | 3.06   | 0.29   | 0.01   | 100.00 |   |   |
|       | 43.48  | 38.58  | 14.58  | 3.06   | 0.29   | 0.01   |        |   |   |
|       | 100.00 | 100.00 | 100.00 | 100.00 | 100.00 | 100.00 |        |   |   |
|       | +      | +      | +      | +      | +      | +      | +      | + | + |
| Total | 8917   | 7913   | 2990   | 627    | 60     | 2      | 20509  |   |   |
|       | 43.48  | 38.58  | 14.58  | 3.06   | 0.29   | 0.01   | 100.00 |   |   |

Table 2-7 and other risk factors and derived variables according to the presence or absence of proton-pump inhibitors

FREQ Procedure

|                      |       | Cumulative       |       |        |
|----------------------|-------|------------------|-------|--------|
| Percent of ALL power |       | Percent of power |       |        |
| 1                    | 20509 | 100.00           | 20509 | 100.00 |

Table 2-7 and other risk factors and derived variables according to the presence or absence of proton-pump inhibitors

FREQ Procedure

Tables: ALL\* HASBLED

ALL HASBLED(HAS-BLED Score)

Power |

Percent |

Percent of rows

Percentage of columns | 1| 2| 3| 4| 5| 6| Total

|       | 1      | 2      | 3      | 4      | 5      | 6      | Total  |
|-------|--------|--------|--------|--------|--------|--------|--------|
| 1     | 8917   | 7913   | 2990   | 627    | 60     | 2      | 20509  |
|       | 43.48  | 38.58  | 14.58  | 3.06   | 0.29   | 0.01   | 100.00 |
|       | 43.48  | 38.58  | 14.58  | 3.06   | 0.29   | 0.01   |        |
|       | 100.00 | 100.00 | 100.00 | 100.00 | 100.00 | 100.00 |        |
| Total | 8917   | 7913   | 2990   | 627    | 60     | 2      | 20509  |
|       | 43.48  | 38.58  | 14.58  | 3.06   | 0.29   | 0.01   | 100.00 |

Table 2-7 and other risk factors and derived variables according to the presence or absence of proton-pump inhibitors

FREQ Procedure

|                      |       | Cumulative       |       |        |
|----------------------|-------|------------------|-------|--------|
| Percent of ALL power |       | Percent of power |       |        |
| 1                    | 20509 | 100.00           | 20509 | 100.00 |

Table 2-7 and other risk factors and derived variables according to the presence or absence of proton-pump inhibitors

FREQ Procedure

Tables: ALL\* HASBLED

ALL HASBLED(HAS-BLED Score)

Power |

Percent |

Percent of rows

Percentage of columns | 1| 2| 3| 4| 5| 6| Total

|       |        |        |        |        |        |        |        |   |
|-------|--------|--------|--------|--------|--------|--------|--------|---|
|       | +      | +      | +      | +      | +      | +      | +      | + |
| 1     | 8917   | 7913   | 2990   | 627    | 60     | 2      | 20509  |   |
|       | 43.48  | 38.58  | 14.58  | 3.06   | 0.29   | 0.01   | 100.00 |   |
|       | 43.48  | 38.58  | 14.58  | 3.06   | 0.29   | 0.01   |        |   |
|       | 100.00 | 100.00 | 100.00 | 100.00 | 100.00 | 100.00 |        |   |
|       | +      | +      | +      | +      | +      | +      | +      | + |
| Total | 8917   | 7913   | 2990   | 627    | 60     | 2      | 20509  |   |
|       | 43.48  | 38.58  | 14.58  | 3.06   | 0.29   | 0.01   | 100.00 |   |



Table 2-7 and other risk factors and derived variables according to the presence or absence of proton-pump inhibitors

FREQ Procedure

|                      |       | Cumulative       |       |        |
|----------------------|-------|------------------|-------|--------|
| Percent of ALL power |       | Percent of power |       |        |
| 1                    | 20509 | 100.00           | 20509 | 100.00 |

Table 2-7 and other risk factors and derived variables according to the presence or absence of proton-pump inhibitors

FREQ Procedure

Tables: ALL\* HASBLED

ALL HASBLED(HAS-BLED Score)

Power |

Percent |

Percent of rows

Percentage of columns | 1| 2| 3| 4| 5| 6| Total

|       |        |        |        |        |        |        |        |   |
|-------|--------|--------|--------|--------|--------|--------|--------|---|
|       | +      | +      | +      | +      | +      | +      | +      | + |
| 1     | 8917   | 7913   | 2990   | 627    | 60     | 2      | 20509  |   |
|       | 43.48  | 38.58  | 14.58  | 3.06   | 0.29   | 0.01   | 100.00 |   |
|       | 43.48  | 38.58  | 14.58  | 3.06   | 0.29   | 0.01   |        |   |
|       | 100.00 | 100.00 | 100.00 | 100.00 | 100.00 | 100.00 |        |   |
|       | +      | +      | +      | +      | +      | +      | +      | + |
| Total | 8917   | 7913   | 2990   | 627    | 60     | 2      | 20509  |   |
|       | 43.48  | 38.58  | 14.58  | 3.06   | 0.29   | 0.01   | 100.00 |   |

Table 2-7 and other risk factors and derived variables according to the presence or absence of proton-pump inhibitors

FREQ Procedure

|                      |       | Cumulative       |       |        |
|----------------------|-------|------------------|-------|--------|
| Percent of ALL power |       | Percent of power |       |        |
| 1                    | 20509 | 100.00           | 20509 | 100.00 |

Table 2-7 and other risk factors and derived variables according to the presence or absence of proton-pump inhibitors

FREQ Procedure

Tables: ALL\* HASBLED

ALL HASBLED(HAS-BLED Score)

Power |

Percent |

Percent of rows

Percentage of columns | 1| 2| 3| 4| 5| 6| Total

|       |        |        |        |        |        |        |        |   |
|-------|--------|--------|--------|--------|--------|--------|--------|---|
|       | +      | +      | +      | +      | +      | +      | +      | + |
| 1     | 8917   | 7913   | 2990   | 627    | 60     | 2      | 20509  |   |
|       | 43.48  | 38.58  | 14.58  | 3.06   | 0.29   | 0.01   | 100.00 |   |
|       | 43.48  | 38.58  | 14.58  | 3.06   | 0.29   | 0.01   |        |   |
|       | 100.00 | 100.00 | 100.00 | 100.00 | 100.00 | 100.00 |        |   |
|       | +      | +      | +      | +      | +      | +      | +      | + |
| Total | 8917   | 7913   | 2990   | 627    | 60     | 2      | 20509  |   |
|       | 43.48  | 38.58  | 14.58  | 3.06   | 0.29   | 0.01   | 100.00 |   |

Table 2-7 and other risk factors and derived variables according to the presence or absence of proton-pump inhibitors

FREQ Procedure

|                      |       | Cumulative       |       |        |
|----------------------|-------|------------------|-------|--------|
| Percent of ALL power |       | Percent of power |       |        |
| 1                    | 20509 | 100.00           | 20509 | 100.00 |

Table 2-7 and other risk factors and derived variables according to the presence or absence of proton-pump inhibitors

FREQ Procedure

Table: ALL \* t\_has

ALL t\_has

Power |

Percent |

Percent of rows

Percentage of columns | 1| 2| Total

|       | 1      | 2      | Total  |
|-------|--------|--------|--------|
| 1     | 16830  | 3679   | 20509  |
|       | 82.06  | 17.94  | 100.00 |
|       | 82.06  | 17.94  |        |
|       | 100.00 | 100.00 |        |
| Total | 16830  | 3679   | 20509  |
|       | 82.06  | 17.94  | 100.00 |

Table 2-7 and other risk factors and derived variables according to the presence or absence of proton-pump inhibitors

FREQ Procedure

|                      |       | Cumulative       |       |        |
|----------------------|-------|------------------|-------|--------|
| Percent of ALL power |       | Percent of power |       |        |
| 1                    | 20509 | 100.00           | 20509 | 100.00 |

Table 2-7 and other risk factors and derived variables according to the presence or absence of proton-pump inhibitors

FREQ Procedure

Table: ALL \* t\_has

ALL t\_has

Power |

Percent |

Percent of rows

Percentage of columns | 1| 2| Total

|       | 1      | 2      | Total  |
|-------|--------|--------|--------|
|       | 16830  | 3679   | 20509  |
|       | 82.06  | 17.94  | 100.00 |
|       | 82.06  | 17.94  |        |
|       | 100.00 | 100.00 |        |
| Total | 16830  | 3679   | 20509  |
|       | 82.06  | 17.94  | 100.00 |



Table 2-7 and other risk factors and derived variables according to the presence or absence of proton-pump inhibitors

UNIVARIATE Procedure

Variable : CHADS2 (CHADS2 Score)

#### Moment

Total of 32490 for N 32490 weight variable

Mean 2.85561711 total 92779

Standard deviation 1.18408839 variance 1.40206531

Skewness 0.62531055 kurtosis-0.0194634

Unmodified square sum 310493 modified square sum 45551.6999

Coefficient of variation 41.4652365 standard error of the mean 0.00656915

#### Basic statistics

##### Positional variation

Mean 2.855617 standard deviation 1.18409

Median 3.000000 variance 1.40207

Mode 2.000000 Range 5.00000

Interquartile range 2.00000

##### Test for position H0: Mu0=0

Test-Statistics-----p Value

Student's t-test t 434.7011 Pr > |t| <. 0001

Sign test M 16245 Pr >= |M| <. 0001

Signed rank test S 2. 6391E8 Pr >= |S| <. 0001

##### Quartile (Definition 5)

Level quantile

100% max. 6

99% 6

95% 5

90% 5

75% Q3 4

Median 50% 3

25% Q1 2

10% 2

5% 1

1% 1

0% minimum 1

Table 2-7 and other risk factors and derived variables according to the presence or absence of proton-pump inhibitors

UNIVARIATE Procedure

Variable : CHADS2 (CHADS2 Score)

Extreme value

--- Minimum value---Maximum value--

Value Obs Value Obs

|   |       |   |       |
|---|-------|---|-------|
| 1 | 32487 | 6 | 32384 |
| 1 | 32440 | 6 | 32387 |
| 1 | 32437 | 6 | 32390 |
| 1 | 32433 | 6 | 32397 |
| 1 | 32430 | 6 | 32486 |

Table 2-7 and other risk factors and derived variables according to the presence or absence of proton-pump inhibitors

UNIVARIATE Procedure

Variable : CHA 2 DS 2 V (CHA 2 DS 2-VASc Score)

#### Moment

Total of 32490 for N 32490 weight variable

Mean 4.4540474 total 144712

Standard deviation 1.38256082 variance 1.91147443

Skewness 0.49976651 kurtosis-0.0506489

Unmodified square sum 706656 modified square sum 62101.8928

Coefficient of variation 31.0405503 standard error of the mean 0.00767025

#### Basic statistics

##### Positional variation

Mean 4.454047 standard deviation 1.38256

Median 4.000000 variance 1.91147

Mode 4.000000 Range 7.00000

Interquartile range 2.00000

##### Test for position H0: $\mu_0=0$

Test-Statistics-----p Value

Student's t-test t 580.6915 Pr > |t| <. 0001

Sign test M 16245 Pr >= |M| <. 0001

Signed rank test S 2. 6391E8 Pr >= |S| <. 0001

Quartile (Definition 5)

Level quantile

100% max 9

99% 8

95% 7

90% 6

75% Q3 5

Median 50% 4

25% Q1 3

10% 3

5% 2

1% 2

0% minimum 2

Table 2-7 and other risk factors and derived variables according to the presence or absence of proton-pump inhibitors

UNIVARIATE Procedure

Variable : CHA 2 DS 2 V (CHA 2 DS 2-VASc Score)

Extreme value

--- Minimum value---Maximum value--

Value Obs Value Obs

|   |       |   |       |
|---|-------|---|-------|
| 2 | 32437 | 9 | 32353 |
| 2 | 32433 | 9 | 32363 |
| 2 | 32428 | 9 | 32376 |
| 2 | 32408 | 9 | 32396 |
| 2 | 32401 | 9 | 32397 |

Table 2-7 and other risk factors and derived variables according to the presence or absence of proton-pump inhibitors

UNIVARIATE Procedure

Variables: HASBLED (HAS-BLED Score)

#### Moment

Total of 32490 for N 32490 weight variable

Mean 1.86331179 total 60539

Standard deviation 0.85894539 variance 0.73778718

Skewness 0.78975645 kurtosis 0.15830363

Unmodified square sum 136773 modified square sum 23969.9677

Coefficient of variation 46.097781 standard error of the mean 0.0047653

#### Basic statistics

##### Positional variation

Mean 1.863312 standard deviation 0.85895

Median 2.000000 variance 0.73779

Mode 1.000000 Range 5.00000

Interquartile range 1.00000

##### Test for position H0: $\mu_0=0$

Test-Statistics-----p Value

Student's t-test t 391.0163 Pr > |t| <. 0001

Sign test M 16245 Pr >= |M| <. 0001

Signed rank test S 2. 6391E8 Pr >= |S| <. 0001

##### Quartile (Definition 5)

Level quantile

100% max. 6

99% 4

95% 3

90% 3

75% Q3 2

Median 50% 2

25% Q1 1

10% 1

5% 1

1% 1

0% minimum 1



Table 2-7 and other risk factors and derived variables according to the presence or absence of proton-pump inhibitors

UNIVARIATE Procedure

Variables: HASBLED (HAS-BLED Score)

Extreme value

--- Minimum value---Maximum value--

Value Obs Value Obs

|   |       |   |       |
|---|-------|---|-------|
| 1 | 32488 | 6 | 330   |
| 1 | 32481 | 6 | 17721 |
| 1 | 32480 | 6 | 24484 |
| 1 | 32479 | 6 | 27068 |
| 1 | 32476 | 6 | 28131 |

Table 2-7 and other risk factors and derived variables according to the presence or absence of proton-pump inhibitors

UNIVARIATE Procedure

Variable : CHADS2 (CHADS2 Score)

#### Moment

Total of 11981 for N 11981 weight variable

Mean 3.00342208 total 35984

Standard deviation 1.20477832 variance 1.45149079

Skewness 0.56232002 kurtosis-0.2030275

Unmodified square sum 125464 modified square sum 17388.8597

Coefficient of variation 40.1135199 standard error of the mean 0.01100679

#### Basic statistics

##### Positional variation

Mean 3.003422 standard deviation 1.20478

Median 3.000000 variance 1.45149

Mode 2.000000 Range 5.00000

Interquartile range 2.00000

##### Test for position H0: $\mu_0=0$

Test-Statistics-----p Value

Student's t-test t 272.87 Pr > |t| <. 0001

Sign test M 5990.5 Pr >= |M| <. 0001

Signed rank test S 35889086 Pr >= |S| <. 0001

Quartile (Definition 5)

Level quantile

100% max. 6

99% 6

95% 5

90% 5

75% Q3 4

Median 50% 3

25% Q1 2

10% 2

5% 1

1% 1

0% minimum 1

Table 2-7 and other risk factors and derived variables according to the presence or absence of proton-pump inhibitors

UNIVARIATE Procedure

Variable : CHADS2 (CHADS2 Score)

Extreme value

--- Minimum value---Maximum value--

Value Obs Value Obs

|   |       |   |       |
|---|-------|---|-------|
| 1 | 32428 | 6 | 32362 |
| 1 | 32263 | 6 | 32381 |
| 1 | 32187 | 6 | 32382 |
| 1 | 32152 | 6 | 32383 |
| 1 | 32136 | 6 | 32390 |

Table 2-7 and other risk factors and derived variables according to the presence or absence of proton-pump inhibitors

UNIVARIATE Procedure

Variable : CHA 2 DS 2 V (CHA 2 DS 2-VASc Score)

#### Moment

Total of 11981 for N 11981 weight variable

Mean 4.67748936 total 56041

Standard deviation 1.40330575 variance 1.96926702

Skewness 0.42783423 kurtosis-0.2052402

Unmodified square sum 285723 modified square sum 23591.8189

Coefficient of variation 30.0012601 standard error of the mean 0.01282052

#### Basic statistics

##### Positional variation

Mean 4.677489 standard deviation 1.40331

Median 5.000000 variance 1.96927

Mode 4.000000 Range 7.00000

Interquartile range 2.00000

##### Test for position H0: $\mu_0=0$

Test-Statistics-----p Value

Student's t-test t 364.8439 Pr > |t| <. 0001

Sign test M 5990.5 Pr >= |M| <. 0001

Signed rank test S 35889086 Pr >= |S| <. 0001

Quartile (Definition 5)

Level quantile

100% max 9

99% 8

95% 7

90% 7

75% Q3 6

Median 50% 5

25% Q1 4

10% 3

5% 3

1% 2

0% minimum 2

Table 2-7 and other risk factors and derived variables according to the presence or absence of proton-pump inhibitors

UNIVARIATE Procedure

Variable : CHA 2 DS 2 V (CHA 2 DS 2-VASc Score)

Extreme value

--- Minimum value---Maximum value--

Value Obs Value Obs

|   |       |   |       |
|---|-------|---|-------|
| 2 | 32428 | 9 | 31663 |
| 2 | 32263 | 9 | 31714 |
| 2 | 32187 | 9 | 31901 |
| 2 | 32152 | 9 | 32305 |
| 2 | 31990 | 9 | 32396 |

Table 2-7 and other risk factors and derived variables according to the presence or absence of proton-pump inhibitors

UNIVARIATE Procedure

Variables: HASBLED (HAS-BLED Score)

#### Moment

Total of 11981 for N 11981 weight variable

Mean 2.00367248 total 24006

Standard deviation 0.89469958 variance 0.80048735

Skewness 0.62998028 kurtosis-0.098796

Unmodified square sum 57690 modified square sum 9589.83841

Coefficient of variation 44.6529856 standard error of the mean 0.00817393

#### Basic statistics

##### Positional variation

Mean 2.003672 standard deviation 0.89470

Median 2.000000 variance 0.80049

Mode 2.000000 Range 5.00000

Interquartile range 2.00000

##### Test for position H0: $\mu_0=0$

Test-Statistics-----p Value

Student's t-test t 245.1298 Pr > |t| <. 0001

Sign test M 5990.5 Pr >= |M| <. 0001

Signed rank test S 35889086 Pr >= |S| <. 0001

Quartile (Definition 5)



Level quantile

100% max. 6

99% 4

95% 4

90% 3

75% Q3 3

Median 50% 2

25% Q1 1

10% 1

5% 1

1% 1

0% minimum 1

Table 2-7 and other risk factors and derived variables according to the presence or absence of proton-pump inhibitors

UNIVARIATE Procedure

Variables: HASBLED (HAS-BLED Score)

Extreme value

--- Minimum value---Maximum value--

Value Obs Value Obs

|   |       |   |       |
|---|-------|---|-------|
| 1 | 32443 | 5 | 31540 |
| 1 | 32402 | 5 | 32085 |
| 1 | 32400 | 6 | 17721 |
| 1 | 32372 | 6 | 24484 |
| 1 | 32321 | 6 | 28131 |

Table 2-7 and other risk factors and derived variables according to the presence or absence of proton-pump inhibitors

UNIVARIATE Procedure

Variable : CHADS2 (CHADS2 Score)

#### Moment

Total of 20509 for N 20509 weight variable

Mean 2.76927203 total 56795

Standard deviation 1.16320354 variance 1.35304248

Skewness 0.66304132 kurtosis 0.10771571

Unmodified square sum 185029 modified square sum 27748.1952

Coefficient of variation 42.0039466 standard error of the mean 0.00812238

#### Basic statistics

##### Positional variation

Mean 2.769272 standard deviation 1.16320

Median 3.000000 variance 1.35304

Mode 2.000000 Range 5.00000

Interquartile range 1.00000

##### Test for position H0: $\mu_0=0$

Test-Statistics-----p Value

Student's t-test t 340.9433 Pr > |t| <. 0001

Sign test M 10254.5 Pr >= |M| <. 0001

Signed rank test S 1. 0516E8 Pr >= |S| <. 0001

##### Quartile (Definition 5)

Level quantile

100% max. 6

99% 6

95% 5

90% 4

75% Q3 3

Median 50% 3

25% Q1 2

10% 1

5% 1

1% 1

0% minimum 1

Table 2-7 and other risk factors and derived variables according to the presence or absence of proton-pump inhibitors

UNIVARIATE Procedure

Variable : CHADS2 (CHADS2 Score)

Extreme value

--- Minimum value---Maximum value--

Value Obs Value Obs

|   |       |   |       |
|---|-------|---|-------|
| 1 | 32487 | 6 | 32380 |
| 1 | 32440 | 6 | 32384 |
| 1 | 32437 | 6 | 32387 |
| 1 | 32433 | 6 | 32397 |
| 1 | 32430 | 6 | 32486 |

Table 2-7 and other risk factors and derived variables according to the presence or absence of proton-pump inhibitors

UNIVARIATE Procedure

Variable : CHA 2 DS 2 V (CHA 2 DS 2-VASc Score)

#### Moment

Total of 20509 for N 20509 weight variable

Mean 4.3235165 total 88671

Standard deviation 1.35336645 variance 1.83160074

Skewness 0.54203971 kurtosis 0.06806229

Unmodified square sum 420933 modified square sum 37562.468

Coefficient of variation 31.3024466 standard error of the mean 0.00945025

#### Basic statistics

##### Positional variation

Mean 4.323517 standard deviation 1.35337

Median 4.000000 variance 1.83160

Mode 4.000000 Range 7.00000

Interquartile range 2.00000

##### Test for position H0: $\mu_0=0$

Test-Statistics-----p Value

Student's t-test t 457.503 Pr > |t| <. 0001

Sign test M 10254.5 Pr >= |M| <. 0001

Signed rank test S 1. 0516E8 Pr >= |S| <. 0001

Quartile (Definition 5)

Level quantile

100% max 9

99% 8

95% 7

90% 6

75% Q3 5

Median 50% 4

25% Q1 3

10% 3

5% 2

1% 2

0% minimum 2

Table 2-7 and other risk factors and derived variables according to the presence or absence of proton-pump inhibitors

UNIVARIATE Procedure

Variable : CHA 2 DS 2 V (CHA 2 DS 2-VASc Score)

Extreme value

--- Minimum value---Maximum value--

Value Obs Value Obs

|   |       |   |       |
|---|-------|---|-------|
| 2 | 32437 | 9 | 32319 |
| 2 | 32433 | 9 | 32353 |
| 2 | 32408 | 9 | 32363 |
| 2 | 32401 | 9 | 32376 |
| 2 | 31999 | 9 | 32397 |



Table 2-7 and other risk factors and derived variables according to the presence or absence of proton-pump inhibitors

UNIVARIATE Procedure

Variables: HASBLED (HAS-BLED Score)

#### Moment

Total of 20509 for N 20509 weight variable

Mean 1.78131552 total 36533

Standard deviation 0.8264156 variance 0.68296275

Skewness 0.88478196 kurtosis 0.36702524

Unmodified square sum 79083 modified square sum 14006.2001

Coefficient of variation 46.3935555 standard error of the mean 0.00577067

#### Basic statistics

##### Positional variation

Mean 1.781316 standard deviation 0.82642

Median 2.000000 variance 0.68296

Mode 1.000000 Range 5.00000

Interquartile range 1.00000

##### Test for position H0: $\mu_0=0$

Test-Statistics-----p Value

Student's t-test t 308.6843 Pr > |t| <. 0001

Sign test M 10254.5 Pr >= |M| <. 0001

Signed rank test S 1. 0516E8 Pr >= |S| <. 0001

Quartile (Definition 5)

Level quantile

100% max. 6

99% 4

95% 3

90% 3

75% Q3 2

Median 50% 2

25% Q1 1

10% 1

5% 1

1% 1

0% minimum 1

Table 2-7 and other risk factors and derived variables according to the presence or absence of proton-pump inhibitors

UNIVARIATE Procedure

Variables: HASBLED (HAS-BLED Score)

Extreme value

--- Minimum value---Maximum value--

Value Obs Value Obs

|   |       |   |       |
|---|-------|---|-------|
| 1 | 32488 | 5 | 31623 |
| 1 | 32481 | 5 | 32095 |
| 1 | 32480 | 5 | 32279 |
| 1 | 32479 | 6 | 330   |
| 1 | 32476 | 6 | 27068 |

Table 2-7 and other risk factors and derived variables according to the presence or absence of proton-pump inhibitors

FREQ Procedure

Number of levels of variables

Number of Variables Level

GROUP1 2

t\_OTT 2

Table : GROUP1 \* t\_OTT

GROUP1 t\_OTT

Power |

Percent |

Percent of rows

Percentage of columns | 0 | 1 | Sum

|       |       | + |       | + |        | + |
|-------|-------|---|-------|---|--------|---|
| 1     | 11129 |   | 852   |   | 11981  |   |
|       | 34.25 |   | 2.62  |   | 36.88  |   |
|       | 92.89 |   | 7.11  |   |        |   |
|       | 36.42 |   | 44.10 |   |        |   |
|       |       | + |       | + |        | + |
| 2     | 19429 |   | 1080  |   | 20509  |   |
|       | 59.80 |   | 3.32  |   | 63.12  |   |
|       | 94.73 |   | 5.27  |   |        |   |
|       | 63.58 |   | 55.90 |   |        |   |
|       |       | + |       | + |        | + |
| Total | 30558 |   | 1932  |   | 32490  |   |
|       | 94.05 |   | 5.95  |   | 100.00 |   |

Table 2-7 and other risk factors and derived variables according to the presence or absence of proton-pump inhibitors

FREQ Procedure

Number of levels of variables

Variables Label Level Number

GROUP1 2

CHADS2 CHADS2 Score 6

Table : GROUP1 \* CHADS2

GROUP1 CHADS2(CHADS2 Score)

Power |

Percent |

Percent of rows

Percentage of columns | 1| 2| 3| 4| 5| 6| Total

|       | +     | +     | +     | +     | +     | +     | +      | + |
|-------|-------|-------|-------|-------|-------|-------|--------|---|
| 1     | 800   | 3918  | 3630  | 2137  | 1066  | 430   | 11981  |   |
|       | 2.46  | 12.06 | 11.17 | 6.58  | 3.28  | 1.32  | 36.88  |   |
|       | 6.68  | 32.70 | 30.30 | 17.84 | 8.90  | 3.59  |        |   |
|       | 27.05 | 34.19 | 37.82 | 41.12 | 45.27 | 46.49 |        |   |
|       | +     | +     | +     | +     | +     | +     | +      | + |
| 2     | 2157  | 7541  | 5967  | 3060  | 1289  | 495   | 20509  |   |
|       | 6.64  | 23.21 | 18.37 | 9.42  | 3.97  | 1.52  | 63.12  |   |
|       | 10.52 | 36.77 | 29.09 | 14.92 | 6.29  | 2.41  |        |   |
|       | 72.95 | 65.81 | 62.18 | 58.88 | 54.73 | 53.51 |        |   |
|       | +     | +     | +     | +     | +     | +     | +      | + |
| Total | 2957  | 11459 | 9597  | 5197  | 2355  | 925   | 32490  |   |
|       | 9.10  | 35.27 | 29.54 | 16.00 | 7.25  | 2.85  | 100.00 |   |

Table 2-7 and other risk factors and derived variables according to the presence or absence of proton-pump inhibitors

FREQ Procedure

Number of levels of variables

Number of Variables Level

GROUP1 2

f\_chas 3

Table : GROUP1 \* f\_chas

GROUP1 f\_chas

Power |

Percent |

Percent of rows

Percentage of columns | 1| 2| 3| Total

|       | 1     | 2     | 3     | Total  |
|-------|-------|-------|-------|--------|
| 1     | 800   | 3918  | 7263  | 11981  |
|       | 2.46  | 12.06 | 22.35 | 36.88  |
|       | 6.68  | 32.70 | 60.62 |        |
|       | 27.05 | 34.19 | 40.18 |        |
| 2     | 2157  | 7541  | 10811 | 20509  |
|       | 6.64  | 23.21 | 33.27 | 63.12  |
|       | 10.52 | 36.77 | 52.71 |        |
|       | 72.95 | 65.81 | 59.82 |        |
| Total | 2957  | 11459 | 18074 | 32490  |
|       | 9.10  | 35.27 | 55.63 | 100.00 |

Table 2-7 and other risk factors and derived variables according to the presence or absence of proton-pump inhibitors

FREQ Procedure

Number of levels of variables

Variables Label Level Number

GROUP1 2

CHA2DS2V CHA2DS2-VASc Score 8

Table : GROUP 1 \* CHA 2 DS 2 V

GROUP1 CHA2DS2V(CHA2DS2-VASc Score)

Power |

Percent |

Percent of rows

Percent | 2 | 3 | 4 | 5 | 6 | 7 | 8 | 9 | Total

|       | 2     | 3     | 4     | 5     | 6     | 7     | 8     | 9     | Total |
|-------|-------|-------|-------|-------|-------|-------|-------|-------|-------|
| 1     | 407   | 2052  | 3472  | 2912  | 1783  | 961   | 348   | 46    | 11981 |
|       | 1.25  | 6.32  | 10.69 | 8.96  | 5.49  | 2.96  | 1.07  | 0.14  | 36.88 |
|       | 3.40  | 17.13 | 28.98 | 24.31 | 14.88 | 8.02  | 2.90  | 0.38  |       |
|       | 24.21 | 30.46 | 35.43 | 39.47 | 43.50 | 48.17 | 49.01 | 51.11 |       |
| 2     | 1274  | 4685  | 6328  | 4466  | 2316  | 1034  | 362   | 44    | 20509 |
|       | 3.92  | 14.42 | 19.48 | 13.75 | 7.13  | 3.18  | 1.11  | 0.14  | 63.12 |
|       | 6.21  | 22.84 | 30.85 | 21.78 | 11.29 | 5.04  | 1.77  | 0.21  |       |
|       | 75.79 | 69.54 | 64.57 | 60.53 | 56.50 | 51.83 | 50.99 | 48.89 |       |
| Total | 1681  | 6737  | 9800  | 7378  | 4099  | 1995  | 710   | 90    | 32490 |

|        |      |       |       |       |       |      |      |      |
|--------|------|-------|-------|-------|-------|------|------|------|
| 100.00 | 5.17 | 20.74 | 30.16 | 22.71 | 12.62 | 6.14 | 2.19 | 0.28 |
|--------|------|-------|-------|-------|-------|------|------|------|



Table 2-7 and other risk factors and derived variables according to the presence or absence of proton-pump inhibitors

FREQ Procedure

Number of levels of variables

Number of Variables Level

GROUP1 2

f\_cha2d 3

Table : GROUP 1 \* f\_cha 2 d

GROUP1 f\_cha2d

Power |

Percent |

Percent of rows

Percentage of columns | 1| 2| 3| Total

|       | +     | +     | +     | +      |
|-------|-------|-------|-------|--------|
| 1     | 2459  | 6384  | 3138  | 11981  |
|       | 7.57  | 19.65 | 9.66  | 36.88  |
|       | 20.52 | 53.28 | 26.19 |        |
|       | 29.21 | 37.16 | 45.52 |        |
|       | +     | +     | +     | +      |
| 2     | 5959  | 10794 | 3756  | 20509  |
|       | 18.34 | 33.22 | 11.56 | 63.12  |
|       | 29.06 | 52.63 | 18.31 |        |
|       | 70.79 | 62.84 | 54.48 |        |
|       | +     | +     | +     | +      |
| Total | 8418  | 17178 | 6894  | 32490  |
|       | 25.91 | 52.87 | 21.22 | 100.00 |

Table 2-7 and other risk factors and derived variables according to the presence or absence of proton-pump inhibitors

FREQ Procedure

Number of levels of variables

Variables Label Level Number

GROUP1 2

HASBLED HAS-BLED Score 6

Table : GROUP1 \* HASBLED

GROUP1 HASBLED(HAS-BLED Score)

Power |

Percent |

Percent of rows

Percentage of columns | 1| 2| 3| 4| 5| 6| Total

|       | +     | +     | +     | +     | +     | +     | +      | + |
|-------|-------|-------|-------|-------|-------|-------|--------|---|
| 1     | 3935  | 4835  | 2510  | 637   | 61    | 3     | 11981  |   |
|       | 12.11 | 14.88 | 7.73  | 1.96  | 0.19  | 0.01  | 36.88  |   |
|       | 32.84 | 40.36 | 20.95 | 5.32  | 0.51  | 0.03  |        |   |
|       | 30.62 | 37.93 | 45.64 | 50.40 | 50.41 | 60.00 |        |   |
|       | +     | +     | +     | +     | +     | +     | +      | + |
| 2     | 8917  | 7913  | 2990  | 627   | 60    | 2     | 20509  |   |
|       | 27.45 | 24.36 | 9.20  | 1.93  | 0.18  | 0.01  | 63.12  |   |
|       | 43.48 | 38.58 | 14.58 | 3.06  | 0.29  | 0.01  |        |   |
|       | 69.38 | 62.07 | 54.36 | 49.60 | 49.59 | 40.00 |        |   |
|       | +     | +     | +     | +     | +     | +     | +      | + |
| Total | 12852 | 12748 | 5500  | 1264  | 121   | 5     | 32490  |   |
|       | 39.56 | 39.24 | 16.93 | 3.89  | 0.37  | 0.02  | 100.00 |   |

Table 2-7 and other risk factors and derived variables according to the presence or absence of proton-pump inhibitors

FREQ Procedure

Number of levels of variables

Number of Variables Level

GROUP1 2

f\_has 2

Table : GROUP1 \* f\_has

GROUP1 f\_has

Power |

Percent |

Percent of rows

Percentage of columns | 1| 2| Total

|       | 1     | 2     | Total  |
|-------|-------|-------|--------|
| 1     | 8770  | 3211  | 11981  |
|       | 26.99 | 9.88  | 36.88  |
|       | 73.20 | 26.80 |        |
|       | 34.26 | 46.60 |        |
| 2     | 16830 | 3679  | 20509  |
|       | 51.80 | 11.32 | 63.12  |
|       | 82.06 | 17.94 |        |
|       | 65.74 | 53.40 |        |
| Total | 25600 | 6890  | 32490  |
|       | 78.79 | 21.21 | 100.00 |

Table 2-7 and other risk factors and derived variables according to the presence or absence of proton-pump inhibitors

TTEST Procedure

Variable : CHADS2 (CHADS2 Score)

GROUP1 N Mean Standard Deviation Standard Error Minimum Value Maximum Value

|            |        |        |        |         |        |        |
|------------|--------|--------|--------|---------|--------|--------|
| 1          | 11981  | 3.0034 | 1.2048 | 0.0110  | 1.0000 | 6.0000 |
| 2          | 20509  | 2.7693 | 1.1632 | 0.00812 | 1.0000 | 6.0000 |
| Diff (1-2) | 0.2342 | 1.1787 | 0.0136 |         |        |        |

To the mean standard deviation

GROUP1 methods Mean 95% confidence limits standard deviation 95% confidence limits

|                          |        |        |        |        |        |        |
|--------------------------|--------|--------|--------|--------|--------|--------|
| 1                        |        | 3.0034 | 2.9818 | 3.0250 | 1.2048 | 1.1897 |
|                          | 1.2202 |        |        |        |        |        |
| 2                        |        | 2.7693 | 2.7534 | 2.7852 | 1.1632 | 1.1521 |
|                          | 1.1746 |        |        |        |        |        |
| Diff (1-2) Pooled        | 0.2342 | 0.2076 | 0.2607 | 1.1787 | 1.1697 | 1.1878 |
| Diff (1-2) Satterthwaite | 0.2342 | 0.2073 | 0.2610 |        |        |        |

Technique Dispersion degrees of freedom t-value Pr > |t|

Pooled Equal 32488 17.28 <. 0001

Satterthwaite Unequal 24360 17.12 <. 0001

Isodispersity

Technique Degree of Freedom of Numerators Degree of Freedom of the denominator F Value Pr > F

Folded F 11980 20508 1.07 <. 0001

Table 2-7 and other risk factors and derived variables according to the presence or absence of proton-pump inhibitors

TTEST Procedure

Variable : CHA 2 DS 2 V (CHA 2 DS 2-VASc Score)

GROUP1 N Mean Standard Deviation Standard Error Minimum Value Maximum Value

|            |        |        |        |         |        |        |
|------------|--------|--------|--------|---------|--------|--------|
| 1          | 11981  | 4.6775 | 1.4033 | 0.0128  | 2.0000 | 9.0000 |
| 2          | 20509  | 4.3235 | 1.3534 | 0.00945 | 2.0000 | 9.0000 |
| Diff (1-2) | 0.3540 | 1.3720 | 0.0158 |         |        |        |

To the mean standard deviation

GROUP1 methods Mean 95% confidence limits standard deviation 95% confidence limits

|                          |        |        |        |        |        |        |
|--------------------------|--------|--------|--------|--------|--------|--------|
| 1                        |        | 4.6775 | 4.6524 | 4.7026 | 1.4033 | 1.3858 |
|                          | 1.4213 |        |        |        |        |        |
| 2                        |        | 4.3235 | 4.3050 | 4.3420 | 1.3534 | 1.3404 |
|                          | 1.3666 |        |        |        |        |        |
| Diff (1-2) Pooled        | 0.3540 | 0.3231 | 0.3849 | 1.3720 | 1.3615 | 1.3826 |
| Diff (1-2) Satterthwaite | 0.3540 | 0.3228 | 0.3852 |        |        |        |

Technique Dispersion degrees of freedom t-value Pr > |t|

Pooled Equal 32488 22.44 <. 0001

Satterthwaite Unequal 24338 22.22 <. 0001

Isodispersity

Technique Degree of Freedom of Numerators Degree of Freedom of the denominator F Value Pr > F

Folded F 11980 20508 1.08 <. 0001

Table 2-7 and other risk factors and derived variables according to the presence or absence of proton-pump inhibitors

TTEST Procedure

Variables: HASBLED (HAS-BLED Score)

GROUP1 N Mean Standard Deviation Standard Error Minimum Value Maximum Value

|            |        |        |         |         |        |        |
|------------|--------|--------|---------|---------|--------|--------|
| 1          | 11981  | 2.0037 | 0.8947  | 0.00817 | 1.0000 | 6.0000 |
| 2          | 20509  | 1.7813 | 0.8264  | 0.00577 | 1.0000 | 6.0000 |
| Diff (1-2) | 0.2224 | 0.8522 | 0.00980 |         |        |        |

To the mean standard deviation

GROUP1 methods Mean 95% confidence limits standard deviation 95% confidence limits

|                          |        |        |        |        |        |        |
|--------------------------|--------|--------|--------|--------|--------|--------|
| 1                        |        | 2.0037 | 1.9877 | 2.0197 | 0.8947 | 0.8835 |
|                          | 0.9062 |        |        |        |        |        |
| 2                        |        | 1.7813 | 1.7700 | 1.7926 | 0.8264 | 0.8185 |
|                          | 0.8345 |        |        |        |        |        |
| Diff (1-2) Pooled        | 0.2224 | 0.2031 | 0.2416 | 0.8522 | 0.8457 | 0.8588 |
| Diff (1-2) Satterthwaite | 0.2224 | 0.2027 | 0.2420 |        |        |        |

Technique Dispersion degrees of freedom t-value Pr > |t|

Pooled Equal 32488 22.69 <. 0001

Satterthwaite Unequal 23489 22.22 <. 0001

Isodispersity

Technique Degree of Freedom of Numerators Degree of Freedom of the denominator F Value Pr > F

Folded F 11980 20508 1.17 <. 0001

Distributions of Table 3-1 age, DOAC type, and dosage according to the presence or absence of proton-pump inhibitors.

FREQ Procedure

|   |       | Cumulative           |                  |        |
|---|-------|----------------------|------------------|--------|
|   |       | Percent of ALL power | Percent of power |        |
| 1 | 21606 | 100.00               | 21606            | 100.00 |

Distributions of Table 3-1 age, DOAC type, and dosage according to the presence or absence of proton-pump inhibitors.

FREQ Procedure

Tables: ALL\* AGEC

ALL

AGEC(Age Category)

Power |

Percent |

Percent of rows

Percent of column |75 years and older| Total

|Under 80 years of age|

| |

+ +

1 | 8999 | 8999

| 100.00 | 100.00

| 100.00 |

| 100.00 |

+ +

Total 8999 8999

100.00 100.00



Distributions of Table 3-1 age, DOAC type, and dosage according to the presence or absence of proton-pump inhibitors.

FREQ Procedure

|   |       | Cumulative           |                  |        |
|---|-------|----------------------|------------------|--------|
|   |       | Percent of ALL power | Percent of power |        |
| 1 | 21606 | 100.00               | 21606            | 100.00 |

Distributions of Table 3-1 age, DOAC type, and dosage according to the presence or absence of proton-pump inhibitors.

FREQ Procedure

Tables: ALL\* ACTYP

ALL ACTYP(Type of AF)

Power |

Percent |

Percent of rows

Percent of column | Dabigato| Riverro| Apixa| Edoxa| Edoxa| Total

|lan|xaban|ban|ban (OD)

||||)|

|   | Dabigato | Riverro | Apixa  | Edoxa  | Edoxa  | Total  |
|---|----------|---------|--------|--------|--------|--------|
| 1 | 1246     | 2836    | 2916   | 1977   | 24     | 8999   |
|   | 13.85    | 31.51   | 32.40  | 21.97  | 0.27   | 100.00 |
|   | 13.85    | 31.51   | 32.40  | 21.97  | 0.27   |        |
|   | 100.00   | 100.00  | 100.00 | 100.00 | 100.00 |        |

Total 1246 2836 2916 1977 24 8999

13.85 31.51 32.40 21.97 0.27 100.00

Distributions of Table 3-1 age, DOAC type, and dosage according to the presence or absence of proton-pump inhibitors.

FREQ Procedure

|   |       | Cumulative           |                  |        |
|---|-------|----------------------|------------------|--------|
|   |       | Percent of ALL power | Percent of power |        |
| 1 | 21606 | 100.00               | 21606            | 100.00 |

Distributions of Table 3-1 age, DOAC type, and dosage according to the presence or absence of proton-pump inhibitors.

FREQ Procedure

Table: ALL \* d\_DOSE

ALL d\_DOSE

Power |

Percent |

Percent of rows

Percentage of columns | 1| 2| 3| 4| 5| 9| Total

|                       | 1      | 2      | 3      | 4      | 5      | 9      | Total  |
|-----------------------|--------|--------|--------|--------|--------|--------|--------|
| Count                 | 3      | 111    | 48     | 970    | 112    | 2      | 1246   |
| Percent               | 0.24   | 8.91   | 3.85   | 77.85  | 8.99   | 0.16   | 100.00 |
| Percent of rows       | 0.24   | 8.91   | 3.85   | 77.85  | 8.99   | 0.16   |        |
| Percentage of columns | 100.00 | 100.00 | 100.00 | 100.00 | 100.00 | 100.00 |        |
| Total                 | 3      | 111    | 48     | 970    | 112    | 2      | 1246   |
|                       | 0.24   | 8.91   | 3.85   | 77.85  | 8.99   | 0.16   | 100.00 |

Degree of missing values = 7753

Distributions of Table 3-1 age, DOAC type, and dosage according to the presence or absence of proton-pump inhibitors.

FREQ Procedure

|   |       | Cumulative           |                  |        |
|---|-------|----------------------|------------------|--------|
|   |       | Percent of ALL power | Percent of power |        |
| 1 | 21606 | 100.00               | 21606            | 100.00 |

Distributions of Table 3-1 age, DOAC type, and dosage according to the presence or absence of proton-pump inhibitors.

FREQ Procedure

Table: ALL \* d\_DOSE

ALL d\_DOSE

Power |

Percent |

Percent of rows

Percentage of columns | 1| 2| 3| 4| 5| 9| Total

|                       | 1      | 2      | 3      | 4      | 5      | 9      | Total  |      |
|-----------------------|--------|--------|--------|--------|--------|--------|--------|------|
| Count                 | 1      | 3      | 111    | 48     | 970    | 112    | 2      | 1246 |
| Percent               | 0.24   | 8.91   | 3.85   | 77.85  | 8.99   | 0.16   | 100.00 |      |
| Percent of rows       | 0.24   | 8.91   | 3.85   | 77.85  | 8.99   | 0.16   |        |      |
| Percentage of columns | 100.00 | 100.00 | 100.00 | 100.00 | 100.00 | 100.00 | 100.00 |      |
| Total                 | 3      | 111    | 48     | 970    | 112    | 2      | 1246   |      |
|                       | 0.24   | 8.91   | 3.85   | 77.85  | 8.99   | 0.16   | 100.00 |      |

Degree of missing values = 7753

Distributions of Table 3-1 age, DOAC type, and dosage according to the presence or absence of proton-pump inhibitors.

FREQ Procedure

|   |       | Cumulative           |                  |        |
|---|-------|----------------------|------------------|--------|
|   |       | Percent of ALL power | Percent of power |        |
| 1 | 21606 | 100.00               | 21606            | 100.00 |

Distributions of Table 3-1 age, DOAC type, and dosage according to the presence or absence of proton-pump inhibitors.

FREQ Procedure

Table: ALL \* d\_DOSE

ALL d\_DOSE

Power |

Percent |

Percent of rows

Percentage of columns | 1| 2| 3| 4| 5| 9| Total

|                       | 1      | 2      | 3      | 4      | 5      | 9      | Total  |      |
|-----------------------|--------|--------|--------|--------|--------|--------|--------|------|
| Count                 | 1      | 3      | 111    | 48     | 970    | 112    | 2      | 1246 |
| Percent               | 0.24   | 8.91   | 3.85   | 77.85  | 8.99   | 0.16   | 100.00 |      |
| Percent of rows       | 0.24   | 8.91   | 3.85   | 77.85  | 8.99   | 0.16   |        |      |
| Percentage of columns | 100.00 | 100.00 | 100.00 | 100.00 | 100.00 | 100.00 | 100.00 |      |
| Total                 | 3      | 111    | 48     | 970    | 112    | 2      | 1246   |      |
|                       | 0.24   | 8.91   | 3.85   | 77.85  | 8.99   | 0.16   | 100.00 |      |

Degree of missing values = 7753



Distributions of Table 3-1 age, DOAC type, and dosage according to the presence or absence of proton-pump inhibitors.

FREQ Procedure

|                      |       | Cumulative       |       |        |
|----------------------|-------|------------------|-------|--------|
| Percent of ALL power |       | Percent of power |       |        |
| 1                    | 21606 | 100.00           | 21606 | 100.00 |

Distributions of Table 3-1 age, DOAC type, and dosage according to the presence or absence of proton-pump inhibitors.

FREQ Procedure

Table: ALL \* d\_DOSE

ALL d\_DOSE

Power |

Percent |

Percent of rows

Percentage of columns | 1| 2| 3| 4| 5| 9| Total

|                       | 1      | 2      | 3      | 4      | 5      | 9      | Total  |
|-----------------------|--------|--------|--------|--------|--------|--------|--------|
| Count                 | 3      | 111    | 48     | 970    | 112    | 2      | 1246   |
| Percent               | 0.24   | 8.91   | 3.85   | 77.85  | 8.99   | 0.16   | 100.00 |
| Percent of rows       | 0.24   | 8.91   | 3.85   | 77.85  | 8.99   | 0.16   |        |
| Percentage of columns | 100.00 | 100.00 | 100.00 | 100.00 | 100.00 | 100.00 |        |
| Total                 | 3      | 111    | 48     | 970    | 112    | 2      | 1246   |
|                       | 0.24   | 8.91   | 3.85   | 77.85  | 8.99   | 0.16   | 100.00 |

Degree of missing values = 7753

Distributions of Table 3-1 age, DOAC type, and dosage according to the presence or absence of proton-pump inhibitors.

FREQ Procedure

|   |       | Cumulative           |                  |        |
|---|-------|----------------------|------------------|--------|
|   |       | Percent of ALL power | Percent of power |        |
| 1 | 21606 | 100.00               | 21606            | 100.00 |

Distributions of Table 3-1 age, DOAC type, and dosage according to the presence or absence of proton-pump inhibitors.

FREQ Procedure

Table: ALL \* d\_DOSE

ALL d\_DOSE

Power |

Percent |

Percent of rows

Percentage of columns | 1| 2| 3| 4| 5| 9| Total

|                       | 1      | 2      | 3      | 4      | 5      | 9      | Total  |      |
|-----------------------|--------|--------|--------|--------|--------|--------|--------|------|
| Count                 | 1      | 3      | 111    | 48     | 970    | 112    | 2      | 1246 |
| Percent               | 0.24   | 8.91   | 3.85   | 77.85  | 8.99   | 0.16   | 100.00 |      |
| Percent of rows       | 0.24   | 8.91   | 3.85   | 77.85  | 8.99   | 0.16   |        |      |
| Percentage of columns | 100.00 | 100.00 | 100.00 | 100.00 | 100.00 | 100.00 | 100.00 |      |
| Total                 | 3      | 111    | 48     | 970    | 112    | 2      | 1246   |      |
|                       | 0.24   | 8.91   | 3.85   | 77.85  | 8.99   | 0.16   | 100.00 |      |

Degree of missing values = 7753

Distributions of Table 3-1 age, DOAC type, and dosage according to the presence or absence of proton-pump inhibitors.

FREQ Procedure

|   |       | Cumulative           |                  |        |
|---|-------|----------------------|------------------|--------|
|   |       | Percent of ALL power | Percent of power |        |
| 1 | 21606 | 100.00               | 21606            | 100.00 |

Distributions of Table 3-1 age, DOAC type, and dosage according to the presence or absence of proton-pump inhibitors.

FREQ Procedure

Table: ALL \* d\_DOSE

ALL d\_DOSE

Power |

Percent |

Percent of rows

Percentage of columns | 1| 2| 3| 4| 5| 9| Total

|                       | 1      | 2      | 3      | 4      | 5      | 9      | Total  |      |
|-----------------------|--------|--------|--------|--------|--------|--------|--------|------|
| Count                 | 1      | 3      | 111    | 48     | 970    | 112    | 2      | 1246 |
| Percent               | 0.24   | 8.91   | 3.85   | 77.85  | 8.99   | 0.16   | 100.00 |      |
| Percent of rows       | 0.24   | 8.91   | 3.85   | 77.85  | 8.99   | 0.16   |        |      |
| Percentage of columns | 100.00 | 100.00 | 100.00 | 100.00 | 100.00 | 100.00 | 100.00 |      |
| Total                 | 3      | 111    | 48     | 970    | 112    | 2      | 1246   |      |
|                       | 0.24   | 8.91   | 3.85   | 77.85  | 8.99   | 0.16   | 100.00 |      |

Degree of missing values = 7753

Distributions of Table 3-1 age, DOAC type, and dosage according to the presence or absence of proton-pump inhibitors.

FREQ Procedure

|   |       | Cumulative           |                  |        |
|---|-------|----------------------|------------------|--------|
|   |       | Percent of ALL power | Percent of power |        |
| 1 | 21606 | 100.00               | 21606            | 100.00 |

Distributions of Table 3-1 age, DOAC type, and dosage according to the presence or absence of proton-pump inhibitors.

FREQ Procedure

Tables: ALL\* ACTYP

ALL ACTYP(Type of AF)

Power |

Percent |

Percent of rows

Percent of column | Dabigato| Riverro| Apixa| Edoxa| Edoxa| Total

|lan|xaban|ban|ban (OD)|

|||)|

|       | Dabigato | Riverro | Apixa  | Edoxa  | Edoxa  | Total  |
|-------|----------|---------|--------|--------|--------|--------|
| 1     | 1246     | 2836    | 2916   | 1977   | 24     | 8999   |
|       | 13.85    | 31.51   | 32.40  | 21.97  | 0.27   | 100.00 |
|       | 13.85    | 31.51   | 32.40  | 21.97  | 0.27   |        |
|       | 100.00   | 100.00  | 100.00 | 100.00 | 100.00 |        |
| Total | 1246     | 2836    | 2916   | 1977   | 24     | 8999   |
|       | 13.85    | 31.51   | 32.40  | 21.97  | 0.27   | 100.00 |



Distributions of Table 3-1 age, DOAC type, and dosage according to the presence or absence of proton-pump inhibitors.

FREQ Procedure

|                      |       | Cumulative       |       |        |
|----------------------|-------|------------------|-------|--------|
| Percent of ALL power |       | Percent of power |       |        |
| 1                    | 21606 | 100.00           | 21606 | 100.00 |

Distributions of Table 3-1 age, DOAC type, and dosage according to the presence or absence of proton-pump inhibitors.

FREQ Procedure

Table: ALL \* r\_DOSE

ALL r\_DOSE

Power |

Percent |

Percent of rows

Percent of columns | 1| 2| 9| Total

|       | 1      | 2      | 9      | Total  |
|-------|--------|--------|--------|--------|
| 1     | 1459   | 1365   | 12     | 2836   |
|       | 51.45  | 48.13  | 0.42   | 100.00 |
|       | 51.45  | 48.13  | 0.42   |        |
|       | 100.00 | 100.00 | 100.00 |        |
| Total | 1459   | 1365   | 12     | 2836   |
|       | 51.45  | 48.13  | 0.42   | 100.00 |

Degree of missing values = 6163

Distributions of Table 3-1 age, DOAC type, and dosage according to the presence or absence of proton-pump inhibitors.

FREQ Procedure

|                      |       | Cumulative       |       |        |
|----------------------|-------|------------------|-------|--------|
| Percent of ALL power |       | Percent of power |       |        |
| 1                    | 21606 | 100.00           | 21606 | 100.00 |

Distributions of Table 3-1 age, DOAC type, and dosage according to the presence or absence of proton-pump inhibitors.

FREQ Procedure

Table: ALL \* r\_DOSE

ALL r\_DOSE

Power |

Percent |

Percent of rows

Percent of columns | 1| 2| 9| Total

|       | 1      | 2      | 9      | Total  |
|-------|--------|--------|--------|--------|
| 1     | 1459   | 1365   | 12     | 2836   |
|       | 51.45  | 48.13  | 0.42   | 100.00 |
|       | 51.45  | 48.13  | 0.42   |        |
|       | 100.00 | 100.00 | 100.00 |        |
| Total | 1459   | 1365   | 12     | 2836   |
|       | 51.45  | 48.13  | 0.42   | 100.00 |

Degree of missing values = 6163

Distributions of Table 3-1 age, DOAC type, and dosage according to the presence or absence of proton-pump inhibitors.

FREQ Procedure

|   |       | Cumulative           |                  |        |
|---|-------|----------------------|------------------|--------|
|   |       | Percent of ALL power | Percent of power |        |
| 1 | 21606 | 100.00               | 21606            | 100.00 |

Distributions of Table 3-1 age, DOAC type, and dosage according to the presence or absence of proton-pump inhibitors.

FREQ Procedure

Table: ALL \* r\_DOSE

ALL r\_DOSE

Power |

Percent |

Percent of rows

Percent of columns | 1| 2| 9| Total

|       | 1      | 2      | 9      | Total  |
|-------|--------|--------|--------|--------|
| 1     | 1459   | 1365   | 12     | 2836   |
|       | 51.45  | 48.13  | 0.42   | 100.00 |
|       | 51.45  | 48.13  | 0.42   |        |
|       | 100.00 | 100.00 | 100.00 |        |
| Total | 1459   | 1365   | 12     | 2836   |
|       | 51.45  | 48.13  | 0.42   | 100.00 |

Degree of missing values = 6163

Distributions of Table 3-1 age, DOAC type, and dosage according to the presence or absence of proton-pump inhibitors.

FREQ Procedure

|   |       | Cumulative           |                  |        |
|---|-------|----------------------|------------------|--------|
|   |       | Percent of ALL power | Percent of power |        |
| 1 | 21606 | 100.00               | 21606            | 100.00 |

Distributions of Table 3-1 age, DOAC type, and dosage according to the presence or absence of proton-pump inhibitors.

FREQ Procedure

Tables: ALL\* ACTYP

ALL ACTYP(Type of AF)

Power |

Percent |

Percent of rows

Percent of column | Dabigato| Riverro| Apixa| Edoxa| Edoxa| Total

|lan|xaban|ban|ban (OD)|

||||)|

|       | Dabigato | Riverro | Apixa  | Edoxa  | Edoxa  | Total  |
|-------|----------|---------|--------|--------|--------|--------|
| 1     | 1246     | 2836    | 2916   | 1977   | 24     | 8999   |
|       | 13.85    | 31.51   | 32.40  | 21.97  | 0.27   | 100.00 |
|       | 13.85    | 31.51   | 32.40  | 21.97  | 0.27   |        |
|       | 100.00   | 100.00  | 100.00 | 100.00 | 100.00 |        |
| Total | 1246     | 2836    | 2916   | 1977   | 24     | 8999   |
|       | 13.85    | 31.51   | 32.40  | 21.97  | 0.27   | 100.00 |



Distributions of Table 3-1 age, DOAC type, and dosage according to the presence or absence of proton-pump inhibitors.

FREQ Procedure

|   |       | Cumulative           |                  |        |
|---|-------|----------------------|------------------|--------|
|   |       | Percent of ALL power | Percent of power |        |
| 1 | 21606 | 100.00               | 21606            | 100.00 |

Distributions of Table 3-1 age, DOAC type, and dosage according to the presence or absence of proton-pump inhibitors.

FREQ Procedure

Table: ALL \* a\_DOSE

ALL a\_DOSE

Power |

Percent |

Percent of rows

Percentage of columns | 1| 2| 3| 9| Total

|       | 1      | 2      | 3      | 9      | Total  |
|-------|--------|--------|--------|--------|--------|
| 1     | 107    | 1217   | 1586   | 6      | 2916   |
|       | 3.67   | 41.74  | 54.39  | 0.21   | 100.00 |
|       | 3.67   | 41.74  | 54.39  | 0.21   |        |
|       | 100.00 | 100.00 | 100.00 | 100.00 |        |
| Total | 107    | 1217   | 1586   | 6      | 2916   |
|       | 3.67   | 41.74  | 54.39  | 0.21   | 100.00 |

Degree of missing values = 6083

Distributions of Table 3-1 age, DOAC type, and dosage according to the presence or absence of proton-pump inhibitors.

FREQ Procedure

|   |       | Cumulative           |                  |        |
|---|-------|----------------------|------------------|--------|
|   |       | Percent of ALL power | Percent of power |        |
| 1 | 21606 | 100.00               | 21606            | 100.00 |

Distributions of Table 3-1 age, DOAC type, and dosage according to the presence or absence of proton-pump inhibitors.

FREQ Procedure

Table: ALL \* a\_DOSE

ALL a\_DOSE

Power |

Percent |

Percent of rows

Percentage of columns | 1| 2| 3| 9| Total

|       | 1      | 2      | 3      | 9      | Total  |
|-------|--------|--------|--------|--------|--------|
| 1     | 107    | 1217   | 1586   | 6      | 2916   |
|       | 3.67   | 41.74  | 54.39  | 0.21   | 100.00 |
|       | 3.67   | 41.74  | 54.39  | 0.21   |        |
|       | 100.00 | 100.00 | 100.00 | 100.00 |        |
| Total | 107    | 1217   | 1586   | 6      | 2916   |
|       | 3.67   | 41.74  | 54.39  | 0.21   | 100.00 |

Degree of missing values = 6083

Distributions of Table 3-1 age, DOAC type, and dosage according to the presence or absence of proton-pump inhibitors.

FREQ Procedure

|                      |       | Cumulative       |       |        |
|----------------------|-------|------------------|-------|--------|
| Percent of ALL power |       | Percent of power |       |        |
| 1                    | 21606 | 100.00           | 21606 | 100.00 |

Distributions of Table 3-1 age, DOAC type, and dosage according to the presence or absence of proton-pump inhibitors.

FREQ Procedure

Table: ALL \* a\_DOSE

ALL a\_DOSE

Power |

Percent |

Percent of rows

Percentage of columns | 1| 2| 3| 9| Total

|       | 1      | 2      | 3      | 9      | Total  |
|-------|--------|--------|--------|--------|--------|
|       | 107    | 1217   | 1586   | 6      | 2916   |
|       | 3.67   | 41.74  | 54.39  | 0.21   | 100.00 |
|       | 3.67   | 41.74  | 54.39  | 0.21   |        |
|       | 100.00 | 100.00 | 100.00 | 100.00 |        |
| Total | 107    | 1217   | 1586   | 6      | 2916   |
|       | 3.67   | 41.74  | 54.39  | 0.21   | 100.00 |

Degree of missing values = 6083

Distributions of Table 3-1 age, DOAC type, and dosage according to the presence or absence of proton-pump inhibitors.

FREQ Procedure

|   |       | Cumulative           |                  |        |
|---|-------|----------------------|------------------|--------|
|   |       | Percent of ALL power | Percent of power |        |
| 1 | 21606 | 100.00               | 21606            | 100.00 |

Distributions of Table 3-1 age, DOAC type, and dosage according to the presence or absence of proton-pump inhibitors.

FREQ Procedure

Table: ALL \* a\_DOSE

ALL a\_DOSE

Power |

Percent |

Percent of rows

Percentage of columns | 1| 2| 3| 9| Total

|       | 1      | 2      | 3      | 9      | Total  |
|-------|--------|--------|--------|--------|--------|
|       | 107    | 1217   | 1586   | 6      | 2916   |
|       | 3.67   | 41.74  | 54.39  | 0.21   | 100.00 |
|       | 3.67   | 41.74  | 54.39  | 0.21   |        |
|       | 100.00 | 100.00 | 100.00 | 100.00 |        |
| Total | 107    | 1217   | 1586   | 6      | 2916   |
|       | 3.67   | 41.74  | 54.39  | 0.21   | 100.00 |

Degree of missing values = 6083



Distributions of Table 3-1 age, DOAC type, and dosage according to the presence or absence of proton-pump inhibitors.

FREQ Procedure

|   |       | Cumulative           |                  |        |
|---|-------|----------------------|------------------|--------|
|   |       | Percent of ALL power | Percent of power |        |
| 1 | 21606 | 100.00               | 21606            | 100.00 |

Distributions of Table 3-1 age, DOAC type, and dosage according to the presence or absence of proton-pump inhibitors.

FREQ Procedure

Table: ALL \* t\_ACT0

ALL t\_ACT0

Power |

Percent |

Percent of rows

Percentage of columns | 0 | 1 | Sum

|       | 0      | 1      | Sum    |
|-------|--------|--------|--------|
| 1     | 6998   | 2001   | 8999   |
|       | 77.76  | 22.24  | 100.00 |
|       | 77.76  | 22.24  |        |
|       | 100.00 | 100.00 |        |
| Total | 6998   | 2001   | 8999   |
|       | 77.76  | 22.24  | 100.00 |

Distributions of Table 3-1 age, DOAC type, and dosage according to the presence or absence of proton-pump inhibitors.

FREQ Procedure

|                      |       | Cumulative       |       |        |
|----------------------|-------|------------------|-------|--------|
| Percent of ALL power |       | Percent of power |       |        |
| 1                    | 21606 | 100.00           | 21606 | 100.00 |

Distributions of Table 3-1 age, DOAC type, and dosage according to the presence or absence of proton-pump inhibitors.

FREQ Procedure

Table: ALL \* e\_DOSE

ALL e\_DOSE

Power |

Percent |

Percent of rows

Percentage of columns | 1| 2| 3| 9| Total

|                       | 1      | 2      | 3      | 9      | Total  |
|-----------------------|--------|--------|--------|--------|--------|
|                       | 34     | 1570   | 395    | 2      | 2001   |
| Percent of rows       | 1.70   | 78.46  | 19.74  | 0.10   | 100.00 |
| Percentage of columns | 1.70   | 78.46  | 19.74  | 0.10   |        |
|                       | 100.00 | 100.00 | 100.00 | 100.00 |        |
| Total                 | 34     | 1570   | 395    | 2      | 2001   |
|                       | 1.70   | 78.46  | 19.74  | 0.10   | 100.00 |

Frequency of missing values = 6998

Distributions of Table 3-1 age, DOAC type, and dosage according to the presence or absence of proton-pump inhibitors.

FREQ Procedure

|   |       | Cumulative           |                  |        |
|---|-------|----------------------|------------------|--------|
|   |       | Percent of ALL power | Percent of power |        |
| 1 | 21606 | 100.00               | 21606            | 100.00 |

Distributions of Table 3-1 age, DOAC type, and dosage according to the presence or absence of proton-pump inhibitors.

FREQ Procedure

Table: ALL \* e\_DOSE

ALL e\_DOSE

Power |

Percent |

Percent of rows

Percentage of columns | 1| 2| 3| 9| Total

|                       | 1      | 2      | 3      | 9      | Total  |
|-----------------------|--------|--------|--------|--------|--------|
|                       | 34     | 1570   | 395    | 2      | 2001   |
| Percent of rows       | 1.70   | 78.46  | 19.74  | 0.10   | 100.00 |
| Percentage of columns | 1.70   | 78.46  | 19.74  | 0.10   |        |
|                       | 100.00 | 100.00 | 100.00 | 100.00 |        |
| Total                 | 34     | 1570   | 395    | 2      | 2001   |
|                       | 1.70   | 78.46  | 19.74  | 0.10   | 100.00 |

Frequency of missing values = 6998

Distributions of Table 3-1 age, DOAC type, and dosage according to the presence or absence of proton-pump inhibitors.

FREQ Procedure

|   |       | Cumulative           |                  |        |
|---|-------|----------------------|------------------|--------|
|   |       | Percent of ALL power | Percent of power |        |
| 1 | 21606 | 100.00               | 21606            | 100.00 |

Distributions of Table 3-1 age, DOAC type, and dosage according to the presence or absence of proton-pump inhibitors.

FREQ Procedure

Table: ALL \* e\_DOSE

ALL e\_DOSE

Power |

Percent |

Percent of rows

Percentage of columns | 1| 2| 3| 9| Total

|                       | 1      | 2      | 3      | 9      | Total  |
|-----------------------|--------|--------|--------|--------|--------|
|                       | 34     | 1570   | 395    | 2      | 2001   |
| Percent of rows       | 1.70   | 78.46  | 19.74  | 0.10   | 100.00 |
| Percentage of columns | 1.70   | 78.46  | 19.74  | 0.10   |        |
|                       | 100.00 | 100.00 | 100.00 | 100.00 |        |
| Total                 | 34     | 1570   | 395    | 2      | 2001   |
|                       | 1.70   | 78.46  | 19.74  | 0.10   | 100.00 |

Frequency of missing values = 6998



Distributions of Table 3-1 age, DOAC type, and dosage according to the presence or absence of proton-pump inhibitors.

FREQ Procedure

|   |       | Cumulative           |                  |        |
|---|-------|----------------------|------------------|--------|
|   |       | Percent of ALL power | Percent of power |        |
| 1 | 21606 | 100.00               | 21606            | 100.00 |

Distributions of Table 3-1 age, DOAC type, and dosage according to the presence or absence of proton-pump inhibitors.

FREQ Procedure

Table: ALL \* e\_DOSE

ALL e\_DOSE

Power |

Percent |

Percent of rows

Percentage of columns | 1| 2| 3| 9| Total

|                       | 1      | 2      | 3      | 9      | Total  |
|-----------------------|--------|--------|--------|--------|--------|
|                       | 34     | 1570   | 395    | 2      | 2001   |
| Percent of rows       | 1.70   | 78.46  | 19.74  | 0.10   | 100.00 |
| Percentage of columns | 1.70   | 78.46  | 19.74  | 0.10   |        |
|                       | 100.00 | 100.00 | 100.00 | 100.00 |        |
| Total                 | 34     | 1570   | 395    | 2      | 2001   |
|                       | 1.70   | 78.46  | 19.74  | 0.10   | 100.00 |

Frequency of missing values = 6998

Distributions of Table 3-1 age, DOAC type, and dosage according to the presence or absence of proton-pump inhibitors.

FREQ Procedure

|   |       | Cumulative           |                  |        |
|---|-------|----------------------|------------------|--------|
|   |       | Percent of ALL power | Percent of power |        |
| 1 | 21606 | 100.00               | 21606            | 100.00 |

Distributions of Table 3-1 age, DOAC type, and dosage according to the presence or absence of proton-pump inhibitors.

FREQ Procedure

Tables: ALL\* AGEC

ALL

AGEC(Age Category)

Power |

Percent |

Percent of rows

Percentage of column |80 years and older| Total

|Under 85 years of age|

| | |

+ +

1 | 7392 | 7392

| 100.00 | 100.00

| 100.00 |

| 100.00 |

+ +

Total 7392 7392

100.00 100.00

Distributions of Table 3-1 age, DOAC type, and dosage according to the presence or absence of proton-pump inhibitors.

FREQ Procedure

|   |       | Cumulative           |                  |        |
|---|-------|----------------------|------------------|--------|
|   |       | Percent of ALL power | Percent of power |        |
| 1 | 21606 | 100.00               | 21606            | 100.00 |

Distributions of Table 3-1 age, DOAC type, and dosage according to the presence or absence of proton-pump inhibitors.

FREQ Procedure

Tables: ALL\* ACTYP

ALL ACTYP(Type of AF)

Power |

Percent |

Percent of rows

Percent of column | Dabigato| Riverro| Apixa| Edoxa| Edoxa| Total

|lan|xaban|ban|ban (OD)|

||||)|

|   | Dabigato | Riverro | Apixa  | Edoxa  | Edoxa  | Total  |
|---|----------|---------|--------|--------|--------|--------|
| 1 | 767      | 2139    | 2874   | 1604   | 8      | 7392   |
|   | 10.38    | 28.94   | 38.88  | 21.70  | 0.11   | 100.00 |
|   | 10.38    | 28.94   | 38.88  | 21.70  | 0.11   |        |
|   | 100.00   | 100.00  | 100.00 | 100.00 | 100.00 |        |

Total 767 2139 2874 1604 8 7392

10.38 28.94 38.88 21.70 0.11 100.00

Distributions of Table 3-1 age, DOAC type, and dosage according to the presence or absence of proton-pump inhibitors.

FREQ Procedure

|   |       | Cumulative           |                  |        |
|---|-------|----------------------|------------------|--------|
|   |       | Percent of ALL power | Percent of power |        |
| 1 | 21606 | 100.00               | 21606            | 100.00 |

Distributions of Table 3-1 age, DOAC type, and dosage according to the presence or absence of proton-pump inhibitors.

FREQ Procedure

Table: ALL \* d\_DOSE

ALL d\_DOSE

Power |

Percent |

Percent of rows

Percentage of columns | 1| 2| 3| 4| 5| 9| Total

|       | 1      | 2      | 3      | 4      | 5      | 9      | Total  |
|-------|--------|--------|--------|--------|--------|--------|--------|
| 1     | 3      | 67     | 42     | 619    | 32     | 4      | 767    |
|       | 0.39   | 8.74   | 5.48   | 80.70  | 4.17   | 0.52   | 100.00 |
|       | 0.39   | 8.74   | 5.48   | 80.70  | 4.17   | 0.52   |        |
|       | 100.00 | 100.00 | 100.00 | 100.00 | 100.00 | 100.00 |        |
| Total | 3      | 67     | 42     | 619    | 32     | 4      | 767    |
|       | 0.39   | 8.74   | 5.48   | 80.70  | 4.17   | 0.52   | 100.00 |

Degree of missing values = 6625



Distributions of Table 3-1 age, DOAC type, and dosage according to the presence or absence of proton-pump inhibitors.

FREQ Procedure

|   |       | Cumulative           |                  |        |
|---|-------|----------------------|------------------|--------|
|   |       | Percent of ALL power | Percent of power |        |
| 1 | 21606 | 100.00               | 21606            | 100.00 |

Distributions of Table 3-1 age, DOAC type, and dosage according to the presence or absence of proton-pump inhibitors.

FREQ Procedure

Table: ALL \* d\_DOSE

ALL d\_DOSE

Power |

Percent |

Percent of rows

Percentage of columns | 1| 2| 3| 4| 5| 9| Total

|       | 1      | 2      | 3      | 4      | 5      | 9      | Total  |
|-------|--------|--------|--------|--------|--------|--------|--------|
| 1     | 3      | 67     | 42     | 619    | 32     | 4      | 767    |
|       | 0.39   | 8.74   | 5.48   | 80.70  | 4.17   | 0.52   | 100.00 |
|       | 0.39   | 8.74   | 5.48   | 80.70  | 4.17   | 0.52   |        |
|       | 100.00 | 100.00 | 100.00 | 100.00 | 100.00 | 100.00 |        |
| Total | 3      | 67     | 42     | 619    | 32     | 4      | 767    |
|       | 0.39   | 8.74   | 5.48   | 80.70  | 4.17   | 0.52   | 100.00 |

Degree of missing values = 6625

Distributions of Table 3-1 age, DOAC type, and dosage according to the presence or absence of proton-pump inhibitors.

FREQ Procedure

|   |       | Cumulative           |                  |        |
|---|-------|----------------------|------------------|--------|
|   |       | Percent of ALL power | Percent of power |        |
| 1 | 21606 | 100.00               | 21606            | 100.00 |

Distributions of Table 3-1 age, DOAC type, and dosage according to the presence or absence of proton-pump inhibitors.

FREQ Procedure

Table: ALL \* d\_DOSE

ALL d\_DOSE

Power |

Percent |

Percent of rows

Percentage of columns | 1| 2| 3| 4| 5| 9| Total

|       | 1      | 2      | 3      | 4      | 5      | 9      | Total  |
|-------|--------|--------|--------|--------|--------|--------|--------|
| 1     | 3      | 67     | 42     | 619    | 32     | 4      | 767    |
|       | 0.39   | 8.74   | 5.48   | 80.70  | 4.17   | 0.52   | 100.00 |
|       | 0.39   | 8.74   | 5.48   | 80.70  | 4.17   | 0.52   |        |
|       | 100.00 | 100.00 | 100.00 | 100.00 | 100.00 | 100.00 |        |
| Total | 3      | 67     | 42     | 619    | 32     | 4      | 767    |
|       | 0.39   | 8.74   | 5.48   | 80.70  | 4.17   | 0.52   | 100.00 |

Degree of missing values = 6625

Distributions of Table 3-1 age, DOAC type, and dosage according to the presence or absence of proton-pump inhibitors.

FREQ Procedure

|   |       | Cumulative           |                  |        |
|---|-------|----------------------|------------------|--------|
|   |       | Percent of ALL power | Percent of power |        |
| 1 | 21606 | 100.00               | 21606            | 100.00 |

Distributions of Table 3-1 age, DOAC type, and dosage according to the presence or absence of proton-pump inhibitors.

FREQ Procedure

Table: ALL \* d\_DOSE

ALL d\_DOSE

Power |

Percent |

Percent of rows

Percentage of columns | 1| 2| 3| 4| 5| 9| Total

|       | 1      | 2      | 3      | 4      | 5      | 9      | Total  |
|-------|--------|--------|--------|--------|--------|--------|--------|
| 1     | 3      | 67     | 42     | 619    | 32     | 4      | 767    |
|       | 0.39   | 8.74   | 5.48   | 80.70  | 4.17   | 0.52   | 100.00 |
|       | 0.39   | 8.74   | 5.48   | 80.70  | 4.17   | 0.52   |        |
|       | 100.00 | 100.00 | 100.00 | 100.00 | 100.00 | 100.00 |        |
| Total | 3      | 67     | 42     | 619    | 32     | 4      | 767    |
|       | 0.39   | 8.74   | 5.48   | 80.70  | 4.17   | 0.52   | 100.00 |

Degree of missing values = 6625

Distributions of Table 3-1 age, DOAC type, and dosage according to the presence or absence of proton-pump inhibitors.

FREQ Procedure

|   |       | Cumulative           |                  |        |
|---|-------|----------------------|------------------|--------|
|   |       | Percent of ALL power | Percent of power |        |
| 1 | 21606 | 100.00               | 21606            | 100.00 |

Distributions of Table 3-1 age, DOAC type, and dosage according to the presence or absence of proton-pump inhibitors.

FREQ Procedure

Table: ALL \* d\_DOSE

ALL d\_DOSE

Power |

Percent |

Percent of rows

Percentage of columns | 1| 2| 3| 4| 5| 9| Total

|       | 1      | 2      | 3      | 4      | 5      | 9      | Total  |
|-------|--------|--------|--------|--------|--------|--------|--------|
| 1     | 3      | 67     | 42     | 619    | 32     | 4      | 767    |
|       | 0.39   | 8.74   | 5.48   | 80.70  | 4.17   | 0.52   | 100.00 |
|       | 0.39   | 8.74   | 5.48   | 80.70  | 4.17   | 0.52   |        |
|       | 100.00 | 100.00 | 100.00 | 100.00 | 100.00 | 100.00 |        |
| Total | 3      | 67     | 42     | 619    | 32     | 4      | 767    |
|       | 0.39   | 8.74   | 5.48   | 80.70  | 4.17   | 0.52   | 100.00 |

Degree of missing values = 6625



Distributions of Table 3-1 age, DOAC type, and dosage according to the presence or absence of proton-pump inhibitors.

FREQ Procedure

|   |       | Cumulative           |                  |        |
|---|-------|----------------------|------------------|--------|
|   |       | Percent of ALL power | Percent of power |        |
| 1 | 21606 | 100.00               | 21606            | 100.00 |

Distributions of Table 3-1 age, DOAC type, and dosage according to the presence or absence of proton-pump inhibitors.

FREQ Procedure

Table: ALL \* d\_DOSE

ALL d\_DOSE

Power |

Percent |

Percent of rows

Percentage of columns | 1| 2| 3| 4| 5| 9| Total

|       | 1      | 2      | 3      | 4      | 5      | 9      | Total  |
|-------|--------|--------|--------|--------|--------|--------|--------|
| 1     | 3      | 67     | 42     | 619    | 32     | 4      | 767    |
|       | 0.39   | 8.74   | 5.48   | 80.70  | 4.17   | 0.52   | 100.00 |
|       | 0.39   | 8.74   | 5.48   | 80.70  | 4.17   | 0.52   |        |
|       | 100.00 | 100.00 | 100.00 | 100.00 | 100.00 | 100.00 |        |
| Total | 3      | 67     | 42     | 619    | 32     | 4      | 767    |
|       | 0.39   | 8.74   | 5.48   | 80.70  | 4.17   | 0.52   | 100.00 |

Degree of missing values = 6625

Distributions of Table 3-1 age, DOAC type, and dosage according to the presence or absence of proton-pump inhibitors.

FREQ Procedure

|   |       | Cumulative           |                  |        |
|---|-------|----------------------|------------------|--------|
|   |       | Percent of ALL power | Percent of power |        |
| 1 | 21606 | 100.00               | 21606            | 100.00 |

Distributions of Table 3-1 age, DOAC type, and dosage according to the presence or absence of proton-pump inhibitors.

FREQ Procedure

Tables: ALL\* ACTYP

ALL ACTYP(Type of AF)

Power |

Percent |

Percent of rows

Percent of column | Dabigato| Riverro| Apixa| Edoxa| Edoxa| Total

|lan|xaban|ban|ban (OD)|

|||)|

|       | Dabigato | Riverro | Apixa  | Edoxa  | Edoxa  | Total  |
|-------|----------|---------|--------|--------|--------|--------|
| 1     | 767      | 2139    | 2874   | 1604   | 8      | 7392   |
|       | 10.38    | 28.94   | 38.88  | 21.70  | 0.11   | 100.00 |
|       | 10.38    | 28.94   | 38.88  | 21.70  | 0.11   |        |
|       | 100.00   | 100.00  | 100.00 | 100.00 | 100.00 |        |
| Total | 767      | 2139    | 2874   | 1604   | 8      | 7392   |
|       | 10.38    | 28.94   | 38.88  | 21.70  | 0.11   | 100.00 |

Distributions of Table 3-1 age, DOAC type, and dosage according to the presence or absence of proton-pump inhibitors.

FREQ Procedure

|   |       | Cumulative           |                  |        |
|---|-------|----------------------|------------------|--------|
|   |       | Percent of ALL power | Percent of power |        |
| 1 | 21606 | 100.00               | 21606            | 100.00 |

Distributions of Table 3-1 age, DOAC type, and dosage according to the presence or absence of proton-pump inhibitors.

FREQ Procedure

Table: ALL \* r\_DOSE

ALL r\_DOSE

Power |

Percent |

Percent of rows

Percent of columns | 1| 2| 9| Total

|       | 1      | 2      | 9      | Total  |
|-------|--------|--------|--------|--------|
| 1     | 1553   | 581    | 5      | 2139   |
|       | 72.60  | 27.16  | 0.23   | 100.00 |
|       | 72.60  | 27.16  | 0.23   |        |
|       | 100.00 | 100.00 | 100.00 |        |
| Total | 1553   | 581    | 5      | 2139   |
|       | 72.60  | 27.16  | 0.23   | 100.00 |

Degree of missing values = 5253

Distributions of Table 3-1 age, DOAC type, and dosage according to the presence or absence of proton-pump inhibitors.

FREQ Procedure

|   |       | Cumulative           |                  |        |
|---|-------|----------------------|------------------|--------|
|   |       | Percent of ALL power | Percent of power |        |
| 1 | 21606 | 100.00               | 21606            | 100.00 |

Distributions of Table 3-1 age, DOAC type, and dosage according to the presence or absence of proton-pump inhibitors.

FREQ Procedure

Table: ALL \* r\_DOSE

ALL r\_DOSE

Power |

Percent |

Percent of rows

Percent of columns | 1| 2| 9| Total

|       | 1      | 2      | 9      | Total  |
|-------|--------|--------|--------|--------|
| 1     | 1553   | 581    | 5      | 2139   |
|       | 72.60  | 27.16  | 0.23   | 100.00 |
|       | 72.60  | 27.16  | 0.23   |        |
|       | 100.00 | 100.00 | 100.00 |        |
| Total | 1553   | 581    | 5      | 2139   |
|       | 72.60  | 27.16  | 0.23   | 100.00 |

Degree of missing values = 5253



Distributions of Table 3-1 age, DOAC type, and dosage according to the presence or absence of proton-pump inhibitors.

FREQ Procedure

|   |       | Cumulative           |                  |        |
|---|-------|----------------------|------------------|--------|
|   |       | Percent of ALL power | Percent of power |        |
| 1 | 21606 | 100.00               | 21606            | 100.00 |

Distributions of Table 3-1 age, DOAC type, and dosage according to the presence or absence of proton-pump inhibitors.

FREQ Procedure

Table: ALL \* r\_DOSE

ALL r\_DOSE

Power |

Percent |

Percent of rows

Percent of columns | 1| 2| 9| Total

|       | 1      | 2      | 9      | Total  |
|-------|--------|--------|--------|--------|
| 1     | 1553   | 581    | 5      | 2139   |
|       | 72.60  | 27.16  | 0.23   | 100.00 |
|       | 72.60  | 27.16  | 0.23   |        |
|       | 100.00 | 100.00 | 100.00 |        |
| Total | 1553   | 581    | 5      | 2139   |
|       | 72.60  | 27.16  | 0.23   | 100.00 |

Degree of missing values = 5253

Distributions of Table 3-1 age, DOAC type, and dosage according to the presence or absence of proton-pump inhibitors.

FREQ Procedure

|   |       | Cumulative           |                  |        |
|---|-------|----------------------|------------------|--------|
|   |       | Percent of ALL power | Percent of power |        |
| 1 | 21606 | 100.00               | 21606            | 100.00 |

Distributions of Table 3-1 age, DOAC type, and dosage according to the presence or absence of proton-pump inhibitors.

FREQ Procedure

Tables: ALL\* ACTYP

ALL ACTYP(Type of AF)

Power |

Percent |

Percent of rows

Percent of column | Dabigato| Riverro| Apixa| Edoxa| Edoxa| Total

|lan|xaban|ban|ban (OD)|

||||)|

|       | Dabigato | Riverro | Apixa  | Edoxa  | Edoxa  | Total  |
|-------|----------|---------|--------|--------|--------|--------|
| 1     | 767      | 2139    | 2874   | 1604   | 8      | 7392   |
|       | 10.38    | 28.94   | 38.88  | 21.70  | 0.11   | 100.00 |
|       | 10.38    | 28.94   | 38.88  | 21.70  | 0.11   |        |
|       | 100.00   | 100.00  | 100.00 | 100.00 | 100.00 |        |
| Total | 767      | 2139    | 2874   | 1604   | 8      | 7392   |
|       | 10.38    | 28.94   | 38.88  | 21.70  | 0.11   | 100.00 |

Distributions of Table 3-1 age, DOAC type, and dosage according to the presence or absence of proton-pump inhibitors.

FREQ Procedure

|   |       | Cumulative           |                  |        |
|---|-------|----------------------|------------------|--------|
|   |       | Percent of ALL power | Percent of power |        |
| 1 | 21606 | 100.00               | 21606            | 100.00 |

Distributions of Table 3-1 age, DOAC type, and dosage according to the presence or absence of proton-pump inhibitors.

FREQ Procedure

Table: ALL \* a\_DOSE

ALL a\_DOSE

Power |

Percent |

Percent of rows

Percentage of columns | 1| 2| 3| 9| Total

|                       | 1      | 2      | 3      | 9      | Total  |
|-----------------------|--------|--------|--------|--------|--------|
|                       | 181    | 2068   | 621    | 4      | 2874   |
| Percent of rows       | 6.30   | 71.96  | 21.61  | 0.14   | 100.00 |
| Percentage of columns | 6.30   | 71.96  | 21.61  | 0.14   |        |
|                       | 100.00 | 100.00 | 100.00 | 100.00 |        |
| Total                 | 181    | 2068   | 621    | 4      | 2874   |
|                       | 6.30   | 71.96  | 21.61  | 0.14   | 100.00 |

Degree of missing values = 4518

Distributions of Table 3-1 age, DOAC type, and dosage according to the presence or absence of proton-pump inhibitors.

FREQ Procedure

|                      |       | Cumulative       |       |        |
|----------------------|-------|------------------|-------|--------|
| Percent of ALL power |       | Percent of power |       |        |
| 1                    | 21606 | 100.00           | 21606 | 100.00 |

Distributions of Table 3-1 age, DOAC type, and dosage according to the presence or absence of proton-pump inhibitors.

FREQ Procedure

Table: ALL \* a\_DOSE

ALL a\_DOSE

Power |

Percent |

Percent of rows

Percentage of columns | 1| 2| 3| 9| Total

|                       | 1      | 2      | 3      | 9      | Total  |
|-----------------------|--------|--------|--------|--------|--------|
|                       | 181    | 2068   | 621    | 4      | 2874   |
| Percent of rows       | 6.30   | 71.96  | 21.61  | 0.14   | 100.00 |
| Percentage of columns | 6.30   | 71.96  | 21.61  | 0.14   |        |
|                       | 100.00 | 100.00 | 100.00 | 100.00 |        |
| Total                 | 181    | 2068   | 621    | 4      | 2874   |
|                       | 6.30   | 71.96  | 21.61  | 0.14   | 100.00 |

Degree of missing values = 4518



Distributions of Table 3-1 age, DOAC type, and dosage according to the presence or absence of proton-pump inhibitors.

FREQ Procedure

|   |       | Cumulative           |                  |        |
|---|-------|----------------------|------------------|--------|
|   |       | Percent of ALL power | Percent of power |        |
| 1 | 21606 | 100.00               | 21606            | 100.00 |

Distributions of Table 3-1 age, DOAC type, and dosage according to the presence or absence of proton-pump inhibitors.

FREQ Procedure

Table: ALL \* a\_DOSE

ALL a\_DOSE

Power |

Percent |

Percent of rows

Percentage of columns | 1| 2| 3| 9| Total

|                       | 1      | 2      | 3      | 9      | Total  |
|-----------------------|--------|--------|--------|--------|--------|
|                       | 181    | 2068   | 621    | 4      | 2874   |
| Percent of rows       | 6.30   | 71.96  | 21.61  | 0.14   | 100.00 |
| Percentage of columns | 6.30   | 71.96  | 21.61  | 0.14   |        |
|                       | 100.00 | 100.00 | 100.00 | 100.00 |        |
| Total                 | 181    | 2068   | 621    | 4      | 2874   |
|                       | 6.30   | 71.96  | 21.61  | 0.14   | 100.00 |

Degree of missing values = 4518

Distributions of Table 3-1 age, DOAC type, and dosage according to the presence or absence of proton-pump inhibitors.

FREQ Procedure

|                      |       | Cumulative       |       |        |
|----------------------|-------|------------------|-------|--------|
| Percent of ALL power |       | Percent of power |       |        |
| 1                    | 21606 | 100.00           | 21606 | 100.00 |

Distributions of Table 3-1 age, DOAC type, and dosage according to the presence or absence of proton-pump inhibitors.

FREQ Procedure

Table: ALL \* a\_DOSE

ALL a\_DOSE

Power |

Percent |

Percent of rows

Percentage of columns | 1| 2| 3| 9| Total

|                       | 1      | 2      | 3      | 9      | Total  |
|-----------------------|--------|--------|--------|--------|--------|
|                       | 181    | 2068   | 621    | 4      | 2874   |
| Percent               | 6.30   | 71.96  | 21.61  | 0.14   | 100.00 |
| Percent of rows       | 6.30   | 71.96  | 21.61  | 0.14   |        |
| Percentage of columns | 100.00 | 100.00 | 100.00 | 100.00 |        |
| Total                 | 181    | 2068   | 621    | 4      | 2874   |
|                       | 6.30   | 71.96  | 21.61  | 0.14   | 100.00 |

Degree of missing values = 4518

Distributions of Table 3-1 age, DOAC type, and dosage according to the presence or absence of proton-pump inhibitors.

FREQ Procedure

|                      |       | Cumulative       |       |        |
|----------------------|-------|------------------|-------|--------|
| Percent of ALL power |       | Percent of power |       |        |
| 1                    | 21606 | 100.00           | 21606 | 100.00 |

Distributions of Table 3-1 age, DOAC type, and dosage according to the presence or absence of proton-pump inhibitors.

FREQ Procedure

Table: ALL \* t\_ACT0

ALL t\_ACT0

Power |

Percent |

Percent of rows

Percentage of columns | 0 | 1 | Sum

|       | 0      | 1      | Sum    |
|-------|--------|--------|--------|
| 1     | 5780   | 1612   | 7392   |
|       | 78.19  | 21.81  | 100.00 |
|       | 78.19  | 21.81  |        |
|       | 100.00 | 100.00 |        |
| Total | 5780   | 1612   | 7392   |
|       | 78.19  | 21.81  | 100.00 |

Distributions of Table 3-1 age, DOAC type, and dosage according to the presence or absence of proton-pump inhibitors.

FREQ Procedure

|   |       | Cumulative           |                  |        |
|---|-------|----------------------|------------------|--------|
|   |       | Percent of ALL power | Percent of power |        |
| 1 | 21606 | 100.00               | 21606            | 100.00 |

Distributions of Table 3-1 age, DOAC type, and dosage according to the presence or absence of proton-pump inhibitors.

FREQ Procedure

Table: ALL \* e\_DOSE

ALL e\_DOSE

Power |

Percent |

Percent of rows

Percentage of columns | 1| 2| 3| 9| Total

|       | 1      | 2      | 3      | 9      | Total  |
|-------|--------|--------|--------|--------|--------|
| 1     | 74     | 1370   | 167    | 1      | 1612   |
|       | 4.59   | 84.99  | 10.36  | 0.06   | 100.00 |
|       | 4.59   | 84.99  | 10.36  | 0.06   |        |
|       | 100.00 | 100.00 | 100.00 | 100.00 |        |
| Total | 74     | 1370   | 167    | 1      | 1612   |
|       | 4.59   | 84.99  | 10.36  | 0.06   | 100.00 |

Frequency of missing values = 5780



Distributions of Table 3-1 age, DOAC type, and dosage according to the presence or absence of proton-pump inhibitors.

FREQ Procedure

|                      |       | Cumulative       |       |        |
|----------------------|-------|------------------|-------|--------|
| Percent of ALL power |       | Percent of power |       |        |
| 1                    | 21606 | 100.00           | 21606 | 100.00 |

Distributions of Table 3-1 age, DOAC type, and dosage according to the presence or absence of proton-pump inhibitors.

FREQ Procedure

Table: ALL \* e\_DOSE

ALL e\_DOSE

Power |

Percent |

Percent of rows

Percentage of columns | 1| 2| 3| 9| Total

|       | 1      | 2      | 3      | 9      | Total  |
|-------|--------|--------|--------|--------|--------|
| 1     | 74     | 1370   | 167    | 1      | 1612   |
|       | 4.59   | 84.99  | 10.36  | 0.06   | 100.00 |
|       | 4.59   | 84.99  | 10.36  | 0.06   |        |
|       | 100.00 | 100.00 | 100.00 | 100.00 |        |
| Total | 74     | 1370   | 167    | 1      | 1612   |
|       | 4.59   | 84.99  | 10.36  | 0.06   | 100.00 |

Frequency of missing values = 5780

Distributions of Table 3-1 age, DOAC type, and dosage according to the presence or absence of proton-pump inhibitors.

FREQ Procedure

|                      |       | Cumulative       |       |        |
|----------------------|-------|------------------|-------|--------|
| Percent of ALL power |       | Percent of power |       |        |
| 1                    | 21606 | 100.00           | 21606 | 100.00 |

Distributions of Table 3-1 age, DOAC type, and dosage according to the presence or absence of proton-pump inhibitors.

FREQ Procedure

Table: ALL \* e\_DOSE

ALL e\_DOSE

Power |

Percent |

Percent of rows

Percentage of columns | 1| 2| 3| 9| Total

|       | 1      | 2      | 3      | 9      | Total  |
|-------|--------|--------|--------|--------|--------|
| 1     | 74     | 1370   | 167    | 1      | 1612   |
|       | 4.59   | 84.99  | 10.36  | 0.06   | 100.00 |
|       | 4.59   | 84.99  | 10.36  | 0.06   |        |
|       | 100.00 | 100.00 | 100.00 | 100.00 |        |
| Total | 74     | 1370   | 167    | 1      | 1612   |
|       | 4.59   | 84.99  | 10.36  | 0.06   | 100.00 |

Frequency of missing values = 5780

Distributions of Table 3-1 age, DOAC type, and dosage according to the presence or absence of proton-pump inhibitors.

FREQ Procedure

|   |       | Cumulative           |                  |        |
|---|-------|----------------------|------------------|--------|
|   |       | Percent of ALL power | Percent of power |        |
| 1 | 21606 | 100.00               | 21606            | 100.00 |

Distributions of Table 3-1 age, DOAC type, and dosage according to the presence or absence of proton-pump inhibitors.

FREQ Procedure

Table: ALL \* e\_DOSE

ALL e\_DOSE

Power |

Percent |

Percent of rows

Percentage of columns | 1| 2| 3| 9| Total

|       | 1      | 2      | 3      | 9      | Total  |
|-------|--------|--------|--------|--------|--------|
| 1     | 74     | 1370   | 167    | 1      | 1612   |
|       | 4.59   | 84.99  | 10.36  | 0.06   | 100.00 |
|       | 4.59   | 84.99  | 10.36  | 0.06   |        |
|       | 100.00 | 100.00 | 100.00 | 100.00 |        |
| Total | 74     | 1370   | 167    | 1      | 1612   |
|       | 4.59   | 84.99  | 10.36  | 0.06   | 100.00 |

Frequency of missing values = 5780

Distributions of Table 3-1 age, DOAC type, and dosage according to the presence or absence of proton-pump inhibitors.

FREQ Procedure

|   |       | Cumulative           |                  |        |
|---|-------|----------------------|------------------|--------|
|   |       | Percent of ALL power | Percent of power |        |
| 1 | 21606 | 100.00               | 21606            | 100.00 |

Distributions of Table 3-1 age, DOAC type, and dosage according to the presence or absence of proton-pump inhibitors.

FREQ Procedure

Tables: ALL\* AGEC

ALL

AGEC(Age Category)

Power |

Percent |

Percent of rows

Percentage of column |85 years and older| Total

|Under 90 years of age|

| |

+ +

1 | 4004 | 4004

| 100.00 | 100.00

| 100.00 |

| 100.00 |

+ +

Total 4004 4004

100.00 100.00



Distributions of Table 3-1 age, DOAC type, and dosage according to the presence or absence of proton-pump inhibitors.

FREQ Procedure

|   |       | Cumulative           |                  |        |
|---|-------|----------------------|------------------|--------|
|   |       | Percent of ALL power | Percent of power |        |
| 1 | 21606 | 100.00               | 21606            | 100.00 |

Distributions of Table 3-1 age, DOAC type, and dosage according to the presence or absence of proton-pump inhibitors.

FREQ Procedure

Tables: ALL\* ACTYP

ALL ACTYP(Type of AF)

Power |

Percent |

Percent of rows

Percent of column | Dabigato| Riverro| Apixa| Edoxa| Edoxa| Total

|lan|xaban|ban|ban (OD)|

|||)|

|       | Dabigato | Riverro | Apixa  | Edoxa  | Edoxa  | Total  |
|-------|----------|---------|--------|--------|--------|--------|
| 1     | 271      | 1151    | 1699   | 877    | 6      | 4004   |
|       | 6.77     | 28.75   | 42.43  | 21.90  | 0.15   | 100.00 |
|       | 6.77     | 28.75   | 42.43  | 21.90  | 0.15   |        |
|       | 100.00   | 100.00  | 100.00 | 100.00 | 100.00 |        |
| Total | 271      | 1151    | 1699   | 877    | 6      | 4004   |
|       | 6.77     | 28.75   | 42.43  | 21.90  | 0.15   | 100.00 |

Distributions of Table 3-1 age, DOAC type, and dosage according to the presence or absence of proton-pump inhibitors.

FREQ Procedure

|   |       | Cumulative           |                  |        |
|---|-------|----------------------|------------------|--------|
|   |       | Percent of ALL power | Percent of power |        |
| 1 | 21606 | 100.00               | 21606            | 100.00 |

Distributions of Table 3-1 age, DOAC type, and dosage according to the presence or absence of proton-pump inhibitors.

FREQ Procedure

Table: ALL \* d\_DOSE

ALL d\_DOSE

Power |

Percent |

Percent of rows

Percentage of columns | 1| 2| 3| 4| 5| Total

|       | 1      | 2      | 3      | 4      | 5      | Total  |
|-------|--------|--------|--------|--------|--------|--------|
| 1     | 4      | 21     | 25     | 218    | 3      | 271    |
|       | 1.48   | 7.75   | 9.23   | 80.44  | 1.11   | 100.00 |
|       | 1.48   | 7.75   | 9.23   | 80.44  | 1.11   |        |
|       | 100.00 | 100.00 | 100.00 | 100.00 | 100.00 |        |
| Total | 4      | 21     | 25     | 218    | 3      | 271    |
|       | 1.48   | 7.75   | 9.23   | 80.44  | 1.11   | 100.00 |

Degree of missing values = 3733

Distributions of Table 3-1 age, DOAC type, and dosage according to the presence or absence of proton-pump inhibitors.

FREQ Procedure

|   |       | Cumulative           |                  |        |
|---|-------|----------------------|------------------|--------|
|   |       | Percent of ALL power | Percent of power |        |
| 1 | 21606 | 100.00               | 21606            | 100.00 |

Distributions of Table 3-1 age, DOAC type, and dosage according to the presence or absence of proton-pump inhibitors.

FREQ Procedure

Table: ALL \* d\_DOSE

ALL d\_DOSE

Power |

Percent |

Percent of rows

Percentage of columns | 1| 2| 3| 4| 5| Total

|       | 1      | 2      | 3      | 4      | 5      | Total  |
|-------|--------|--------|--------|--------|--------|--------|
| 1     | 4      | 21     | 25     | 218    | 3      | 271    |
|       | 1.48   | 7.75   | 9.23   | 80.44  | 1.11   | 100.00 |
|       | 1.48   | 7.75   | 9.23   | 80.44  | 1.11   |        |
|       | 100.00 | 100.00 | 100.00 | 100.00 | 100.00 |        |
| Total | 4      | 21     | 25     | 218    | 3      | 271    |
|       | 1.48   | 7.75   | 9.23   | 80.44  | 1.11   | 100.00 |

Degree of missing values = 3733

Distributions of Table 3-1 age, DOAC type, and dosage according to the presence or absence of proton-pump inhibitors.

FREQ Procedure

|   |       | Cumulative           |                  |        |
|---|-------|----------------------|------------------|--------|
|   |       | Percent of ALL power | Percent of power |        |
| 1 | 21606 | 100.00               | 21606            | 100.00 |

Distributions of Table 3-1 age, DOAC type, and dosage according to the presence or absence of proton-pump inhibitors.

FREQ Procedure

Table: ALL \* d\_DOSE

ALL d\_DOSE

Power |

Percent |

Percent of rows

Percentage of columns | 1| 2| 3| 4| 5| Total

|       | 1      | 2      | 3      | 4      | 5      | Total  |
|-------|--------|--------|--------|--------|--------|--------|
| 1     | 4      | 21     | 25     | 218    | 3      | 271    |
|       | 1.48   | 7.75   | 9.23   | 80.44  | 1.11   | 100.00 |
|       | 1.48   | 7.75   | 9.23   | 80.44  | 1.11   |        |
|       | 100.00 | 100.00 | 100.00 | 100.00 | 100.00 |        |
| Total | 4      | 21     | 25     | 218    | 3      | 271    |
|       | 1.48   | 7.75   | 9.23   | 80.44  | 1.11   | 100.00 |

Degree of missing values = 3733



Distributions of Table 3-1 age, DOAC type, and dosage according to the presence or absence of proton-pump inhibitors.

FREQ Procedure

|   |       | Cumulative           |                  |        |
|---|-------|----------------------|------------------|--------|
|   |       | Percent of ALL power | Percent of power |        |
| 1 | 21606 | 100.00               | 21606            | 100.00 |

Distributions of Table 3-1 age, DOAC type, and dosage according to the presence or absence of proton-pump inhibitors.

FREQ Procedure

Table: ALL \* d\_DOSE

ALL d\_DOSE

Power |

Percent |

Percent of rows

Percentage of columns | 1| 2| 3| 4| 5| Total

|       | 1      | 2      | 3      | 4      | 5      | Total  |
|-------|--------|--------|--------|--------|--------|--------|
| 1     | 4      | 21     | 25     | 218    | 3      | 271    |
|       | 1.48   | 7.75   | 9.23   | 80.44  | 1.11   | 100.00 |
|       | 1.48   | 7.75   | 9.23   | 80.44  | 1.11   |        |
|       | 100.00 | 100.00 | 100.00 | 100.00 | 100.00 |        |
| Total | 4      | 21     | 25     | 218    | 3      | 271    |
|       | 1.48   | 7.75   | 9.23   | 80.44  | 1.11   | 100.00 |

Degree of missing values = 3733

Distributions of Table 3-1 age, DOAC type, and dosage according to the presence or absence of proton-pump inhibitors.

FREQ Procedure

|   |       | Cumulative           |                  |        |
|---|-------|----------------------|------------------|--------|
|   |       | Percent of ALL power | Percent of power |        |
| 1 | 21606 | 100.00               | 21606            | 100.00 |

Distributions of Table 3-1 age, DOAC type, and dosage according to the presence or absence of proton-pump inhibitors.

FREQ Procedure

Table: ALL \* d\_DOSE

ALL d\_DOSE

Power |

Percent |

Percent of rows

Percentage of columns | 1| 2| 3| 4| 5| Total

|       | 1      | 2      | 3      | 4      | 5      | Total  |
|-------|--------|--------|--------|--------|--------|--------|
| 1     | 4      | 21     | 25     | 218    | 3      | 271    |
|       | 1.48   | 7.75   | 9.23   | 80.44  | 1.11   | 100.00 |
|       | 1.48   | 7.75   | 9.23   | 80.44  | 1.11   |        |
|       | 100.00 | 100.00 | 100.00 | 100.00 | 100.00 |        |
| Total | 4      | 21     | 25     | 218    | 3      | 271    |
|       | 1.48   | 7.75   | 9.23   | 80.44  | 1.11   | 100.00 |

Degree of missing values = 3733

Distributions of Table 3-1 age, DOAC type, and dosage according to the presence or absence of proton-pump inhibitors.

FREQ Procedure

|   |       | Cumulative           |                  |        |
|---|-------|----------------------|------------------|--------|
|   |       | Percent of ALL power | Percent of power |        |
| 1 | 21606 | 100.00               | 21606            | 100.00 |

Distributions of Table 3-1 age, DOAC type, and dosage according to the presence or absence of proton-pump inhibitors.

FREQ Procedure

Table: ALL \* d\_DOSE

ALL d\_DOSE

Power |

Percent |

Percent of rows

Percentage of columns | 1| 2| 3| 4| 5| Total

|       | 1      | 2      | 3      | 4      | 5      | Total  |
|-------|--------|--------|--------|--------|--------|--------|
| 1     | 4      | 21     | 25     | 218    | 3      | 271    |
|       | 1.48   | 7.75   | 9.23   | 80.44  | 1.11   | 100.00 |
|       | 1.48   | 7.75   | 9.23   | 80.44  | 1.11   |        |
|       | 100.00 | 100.00 | 100.00 | 100.00 | 100.00 |        |
| Total | 4      | 21     | 25     | 218    | 3      | 271    |
|       | 1.48   | 7.75   | 9.23   | 80.44  | 1.11   | 100.00 |

Degree of missing values = 3733

Distributions of Table 3-1 age, DOAC type, and dosage according to the presence or absence of proton-pump inhibitors.

FREQ Procedure

|   |       | Cumulative           |                  |        |
|---|-------|----------------------|------------------|--------|
|   |       | Percent of ALL power | Percent of power |        |
| 1 | 21606 | 100.00               | 21606            | 100.00 |

Distributions of Table 3-1 age, DOAC type, and dosage according to the presence or absence of proton-pump inhibitors.

FREQ Procedure

Tables: ALL\* ACTYP

ALL ACTYP(Type of AF)

Power |

Percent |

Percent of rows

Percent of column | Dabigato| Riverro| Apixa| Edoxa| Edoxa| Total

|lan|xaban|ban|ban (OD)|

|||)|

|       | Dabigato | Riverro | Apixa  | Edoxa  | Edoxa  | Total  |
|-------|----------|---------|--------|--------|--------|--------|
| 1     | 271      | 1151    | 1699   | 877    | 6      | 4004   |
|       | 6.77     | 28.75   | 42.43  | 21.90  | 0.15   | 100.00 |
|       | 6.77     | 28.75   | 42.43  | 21.90  | 0.15   |        |
|       | 100.00   | 100.00  | 100.00 | 100.00 | 100.00 |        |
| Total | 271      | 1151    | 1699   | 877    | 6      | 4004   |
|       | 6.77     | 28.75   | 42.43  | 21.90  | 0.15   | 100.00 |



Distributions of Table 3-1 age, DOAC type, and dosage according to the presence or absence of proton-pump inhibitors.

FREQ Procedure

|   |       | Cumulative           |                  |        |
|---|-------|----------------------|------------------|--------|
|   |       | Percent of ALL power | Percent of power |        |
| 1 | 21606 | 100.00               | 21606            | 100.00 |

Distributions of Table 3-1 age, DOAC type, and dosage according to the presence or absence of proton-pump inhibitors.

FREQ Procedure

Table: ALL \* r\_DOSE

ALL r\_DOSE

Power |

Percent |

Percent of rows

Percent of columns | 1| 2| 9| Total

|        | 1      | 2      | 9      | Total |
|--------|--------|--------|--------|-------|
| 1006   | 138    | 7      | 1151   |       |
| 87.40  | 11.99  | 0.61   | 100.00 |       |
| 87.40  | 11.99  | 0.61   |        |       |
| 100.00 | 100.00 | 100.00 |        |       |
| 1006   | 138    | 7      | 1151   |       |
| 87.40  | 11.99  | 0.61   | 100.00 |       |

Degree of missing values = 2853

Distributions of Table 3-1 age, DOAC type, and dosage according to the presence or absence of proton-pump inhibitors.

FREQ Procedure

|   |       | Cumulative           |                  |        |
|---|-------|----------------------|------------------|--------|
|   |       | Percent of ALL power | Percent of power |        |
| 1 | 21606 | 100.00               | 21606            | 100.00 |

Distributions of Table 3-1 age, DOAC type, and dosage according to the presence or absence of proton-pump inhibitors.

FREQ Procedure

Table: ALL \* r\_DOSE

ALL r\_DOSE

Power |

Percent |

Percent of rows

Percent of columns | 1| 2| 9| Total

|       | 1      | 2      | 9      | Total  |
|-------|--------|--------|--------|--------|
| 1     | 1006   | 138    | 7      | 1151   |
|       | 87.40  | 11.99  | 0.61   | 100.00 |
|       | 87.40  | 11.99  | 0.61   |        |
|       | 100.00 | 100.00 | 100.00 |        |
| Total | 1006   | 138    | 7      | 1151   |
|       | 87.40  | 11.99  | 0.61   | 100.00 |

Degree of missing values = 2853

Distributions of Table 3-1 age, DOAC type, and dosage according to the presence or absence of proton-pump inhibitors.

FREQ Procedure

|   |       | Cumulative           |                  |        |
|---|-------|----------------------|------------------|--------|
|   |       | Percent of ALL power | Percent of power |        |
| 1 | 21606 | 100.00               | 21606            | 100.00 |

Distributions of Table 3-1 age, DOAC type, and dosage according to the presence or absence of proton-pump inhibitors.

FREQ Procedure

Table: ALL \* r\_DOSE

ALL r\_DOSE

Power |

Percent |

Percent of rows

Percent of columns | 1| 2| 9| Total

|        | 1      | 2      | 9      | Total |
|--------|--------|--------|--------|-------|
| 1006   | 138    | 7      | 1151   |       |
| 87.40  | 11.99  | 0.61   | 100.00 |       |
| 87.40  | 11.99  | 0.61   |        |       |
| 100.00 | 100.00 | 100.00 |        |       |
| 1006   | 138    | 7      | 1151   |       |
| 87.40  | 11.99  | 0.61   | 100.00 |       |

Degree of missing values = 2853

Distributions of Table 3-1 age, DOAC type, and dosage according to the presence or absence of proton-pump inhibitors.

FREQ Procedure

|   |       | Cumulative           |                  |        |
|---|-------|----------------------|------------------|--------|
|   |       | Percent of ALL power | Percent of power |        |
| 1 | 21606 | 100.00               | 21606            | 100.00 |

Distributions of Table 3-1 age, DOAC type, and dosage according to the presence or absence of proton-pump inhibitors.

FREQ Procedure

Tables: ALL\* ACTYP

ALL ACTYP(Type of AF)

Power |

Percent |

Percent of rows

Percent of column | Dabigato| Riverro| Apixa| Edoxa| Edoxa| Total

|lan|xaban|ban|ban (OD)|

||||)|

|       | Dabigato | Riverro | Apixa  | Edoxa  | Edoxa  | Total  |
|-------|----------|---------|--------|--------|--------|--------|
| 1     | 271      | 1151    | 1699   | 877    | 6      | 4004   |
|       | 6.77     | 28.75   | 42.43  | 21.90  | 0.15   | 100.00 |
|       | 6.77     | 28.75   | 42.43  | 21.90  | 0.15   |        |
|       | 100.00   | 100.00  | 100.00 | 100.00 | 100.00 |        |
| Total | 271      | 1151    | 1699   | 877    | 6      | 4004   |
|       | 6.77     | 28.75   | 42.43  | 21.90  | 0.15   | 100.00 |



Distributions of Table 3-1 age, DOAC type, and dosage according to the presence or absence of proton-pump inhibitors.

FREQ Procedure

|   |       | Cumulative           |                  |        |
|---|-------|----------------------|------------------|--------|
|   |       | Percent of ALL power | Percent of power |        |
| 1 | 21606 | 100.00               | 21606            | 100.00 |

Distributions of Table 3-1 age, DOAC type, and dosage according to the presence or absence of proton-pump inhibitors.

FREQ Procedure

Table: ALL \* a\_DOSE

ALL a\_DOSE

Power |

Percent |

Percent of rows

Percentage of columns | 1| 2| 3| Total

|       | 1      | 2      | 3      | Total  |
|-------|--------|--------|--------|--------|
| 1     | 162    | 1400   | 137    | 1699   |
|       | 9.54   | 82.40  | 8.06   | 100.00 |
|       | 9.54   | 82.40  | 8.06   |        |
|       | 100.00 | 100.00 | 100.00 |        |
| Total | 162    | 1400   | 137    | 1699   |
|       | 9.54   | 82.40  | 8.06   | 100.00 |

Degree of missing values = 2305

Distributions of Table 3-1 age, DOAC type, and dosage according to the presence or absence of proton-pump inhibitors.

FREQ Procedure

|   |       | Cumulative           |                  |        |
|---|-------|----------------------|------------------|--------|
|   |       | Percent of ALL power | Percent of power |        |
| 1 | 21606 | 100.00               | 21606            | 100.00 |

Distributions of Table 3-1 age, DOAC type, and dosage according to the presence or absence of proton-pump inhibitors.

FREQ Procedure

Table: ALL \* a\_DOSE

ALL a\_DOSE

Power |

Percent |

Percent of rows

Percentage of columns | 1| 2| 3| Total

|       | 1      | 2      | 3      | Total  |
|-------|--------|--------|--------|--------|
| 1     | 162    | 1400   | 137    | 1699   |
|       | 9.54   | 82.40  | 8.06   | 100.00 |
|       | 9.54   | 82.40  | 8.06   |        |
|       | 100.00 | 100.00 | 100.00 |        |
| Total | 162    | 1400   | 137    | 1699   |
|       | 9.54   | 82.40  | 8.06   | 100.00 |

Degree of missing values = 2305

Distributions of Table 3-1 age, DOAC type, and dosage according to the presence or absence of proton-pump inhibitors.

FREQ Procedure

|   |       | Cumulative           |                  |        |
|---|-------|----------------------|------------------|--------|
|   |       | Percent of ALL power | Percent of power |        |
| 1 | 21606 | 100.00               | 21606            | 100.00 |

Distributions of Table 3-1 age, DOAC type, and dosage according to the presence or absence of proton-pump inhibitors.

FREQ Procedure

Table: ALL \* a\_DOSE

ALL a\_DOSE

Power |

Percent |

Percent of rows

Percentage of columns | 1| 2| 3| Total

|       | 1      | 2      | 3      | Total  |
|-------|--------|--------|--------|--------|
| 1     | 162    | 1400   | 137    | 1699   |
|       | 9.54   | 82.40  | 8.06   | 100.00 |
|       | 9.54   | 82.40  | 8.06   |        |
|       | 100.00 | 100.00 | 100.00 |        |
| Total | 162    | 1400   | 137    | 1699   |
|       | 9.54   | 82.40  | 8.06   | 100.00 |

Degree of missing values = 2305

Distributions of Table 3-1 age, DOAC type, and dosage according to the presence or absence of proton-pump inhibitors.

FREQ Procedure

|   |       | Cumulative           |                  |        |
|---|-------|----------------------|------------------|--------|
|   |       | Percent of ALL power | Percent of power |        |
| 1 | 21606 | 100.00               | 21606            | 100.00 |

Distributions of Table 3-1 age, DOAC type, and dosage according to the presence or absence of proton-pump inhibitors.

FREQ Procedure

Table: ALL \* a\_DOSE

ALL a\_DOSE

Power |

Percent |

Percent of rows

Percentage of columns | 1| 2| 3| Total

|       | 1      | 2      | 3      | Total  |
|-------|--------|--------|--------|--------|
| 1     | 162    | 1400   | 137    | 1699   |
|       | 9.54   | 82.40  | 8.06   | 100.00 |
|       | 9.54   | 82.40  | 8.06   |        |
|       | 100.00 | 100.00 | 100.00 |        |
| Total | 162    | 1400   | 137    | 1699   |
|       | 9.54   | 82.40  | 8.06   | 100.00 |

Degree of missing values = 2305



Distributions of Table 3-1 age, DOAC type, and dosage according to the presence or absence of proton-pump inhibitors.

FREQ Procedure

|   |       | Cumulative           |                  |        |
|---|-------|----------------------|------------------|--------|
|   |       | Percent of ALL power | Percent of power |        |
| 1 | 21606 | 100.00               | 21606            | 100.00 |

Distributions of Table 3-1 age, DOAC type, and dosage according to the presence or absence of proton-pump inhibitors.

FREQ Procedure

Table: ALL \* t\_ACT0

ALL t\_ACT0

Power |

Percent |

Percent of rows

Percentage of columns | 0 | 1 | Sum

|       | 0      | 1      | Sum    |
|-------|--------|--------|--------|
| 1     | 3121   | 883    | 4004   |
|       | 77.95  | 22.05  | 100.00 |
|       | 77.95  | 22.05  |        |
|       | 100.00 | 100.00 |        |
| Total | 3121   | 883    | 4004   |
|       | 77.95  | 22.05  | 100.00 |

Distributions of Table 3-1 age, DOAC type, and dosage according to the presence or absence of proton-pump inhibitors.

FREQ Procedure

|   |       | Cumulative           |                  |        |
|---|-------|----------------------|------------------|--------|
|   |       | Percent of ALL power | Percent of power |        |
| 1 | 21606 | 100.00               | 21606            | 100.00 |

Distributions of Table 3-1 age, DOAC type, and dosage according to the presence or absence of proton-pump inhibitors.

FREQ Procedure

Table: ALL \* e\_DOSE

ALL e\_DOSE

Power |

Percent |

Percent of rows

Percentage of columns | 1| 2| 3| 9| Total

|       | 1      | 2      | 3      | 9      | Total  |
|-------|--------|--------|--------|--------|--------|
|       | 1      | 87     | 759    | 36     | 1      |
|       | 9.85   | 85.96  | 4.08   | 0.11   | 100.00 |
|       | 9.85   | 85.96  | 4.08   | 0.11   |        |
|       | 100.00 | 100.00 | 100.00 | 100.00 |        |
| Total | 87     | 759    | 36     | 1      | 883    |
|       | 9.85   | 85.96  | 4.08   | 0.11   | 100.00 |

Degree of missing values = 3121

Distributions of Table 3-1 age, DOAC type, and dosage according to the presence or absence of proton-pump inhibitors.

FREQ Procedure

|   |       | Cumulative           |                  |        |
|---|-------|----------------------|------------------|--------|
|   |       | Percent of ALL power | Percent of power |        |
| 1 | 21606 | 100.00               | 21606            | 100.00 |

Distributions of Table 3-1 age, DOAC type, and dosage according to the presence or absence of proton-pump inhibitors.

FREQ Procedure

Table: ALL \* e\_DOSE

ALL e\_DOSE

Power |

Percent |

Percent of rows

Percentage of columns | 1| 2| 3| 9| Total

|       | 1      | 2      | 3      | 9      | Total  |
|-------|--------|--------|--------|--------|--------|
|       | 1      | 87     | 759    | 36     | 1      |
|       | 9.85   | 85.96  | 4.08   | 0.11   | 100.00 |
|       | 9.85   | 85.96  | 4.08   | 0.11   |        |
|       | 100.00 | 100.00 | 100.00 | 100.00 |        |
| Total | 87     | 759    | 36     | 1      | 883    |
|       | 9.85   | 85.96  | 4.08   | 0.11   | 100.00 |

Degree of missing values = 3121

Distributions of Table 3-1 age, DOAC type, and dosage according to the presence or absence of proton-pump inhibitors.

FREQ Procedure

|   |       | Cumulative           |                  |        |
|---|-------|----------------------|------------------|--------|
|   |       | Percent of ALL power | Percent of power |        |
| 1 | 21606 | 100.00               | 21606            | 100.00 |

Distributions of Table 3-1 age, DOAC type, and dosage according to the presence or absence of proton-pump inhibitors.

FREQ Procedure

Table: ALL \* e\_DOSE

ALL e\_DOSE

Power |

Percent |

Percent of rows

Percentage of columns | 1| 2| 3| 9| Total

|       | 1      | 2      | 3      | 9      | Total  |
|-------|--------|--------|--------|--------|--------|
| 1     | 87     | 759    | 36     | 1      | 883    |
|       | 9.85   | 85.96  | 4.08   | 0.11   | 100.00 |
|       | 9.85   | 85.96  | 4.08   | 0.11   |        |
|       | 100.00 | 100.00 | 100.00 | 100.00 |        |
| Total | 87     | 759    | 36     | 1      | 883    |
|       | 9.85   | 85.96  | 4.08   | 0.11   | 100.00 |

Degree of missing values = 3121



Distributions of Table 3-1 age, DOAC type, and dosage according to the presence or absence of proton-pump inhibitors.

FREQ Procedure

|                      |       | Cumulative       |       |        |
|----------------------|-------|------------------|-------|--------|
| Percent of ALL power |       | Percent of power |       |        |
| 1                    | 21606 | 100.00           | 21606 | 100.00 |

Distributions of Table 3-1 age, DOAC type, and dosage according to the presence or absence of proton-pump inhibitors.

FREQ Procedure

Table: ALL \* e\_DOSE

ALL e\_DOSE

Power |

Percent |

Percent of rows

Percentage of columns | 1| 2| 3| 9| Total

|       | 1      | 2      | 3      | 9      | Total  |
|-------|--------|--------|--------|--------|--------|
|       | 1      | 87     | 759    | 36     | 1      |
|       | 9.85   | 85.96  | 4.08   | 0.11   | 100.00 |
|       | 9.85   | 85.96  | 4.08   | 0.11   |        |
|       | 100.00 | 100.00 | 100.00 | 100.00 |        |
| Total | 87     | 759    | 36     | 1      | 883    |
|       | 9.85   | 85.96  | 4.08   | 0.11   | 100.00 |

Degree of missing values = 3121

Distributions of Table 3-1 age, DOAC type, and dosage according to the presence or absence of proton-pump inhibitors.

FREQ Procedure

|                      |       | Cumulative       |       |        |
|----------------------|-------|------------------|-------|--------|
| Percent of ALL power |       | Percent of power |       |        |
| 1                    | 21606 | 100.00           | 21606 | 100.00 |

Distributions of Table 3-1 age, DOAC type, and dosage according to the presence or absence of proton-pump inhibitors.

FREQ Procedure

Table : ALL \* \_AGE90

ALL \_AGE90

Power |

Percent |

Percent of rows

Percent of columns | 1 | Total

|        |        |        |  |
|--------|--------|--------|--|
| _____+ |        | _____+ |  |
| 1      | 1211   | 1211   |  |
|        | 100.00 | 100.00 |  |
|        | 100.00 |        |  |
|        | 100.00 |        |  |
| _____+ |        | _____+ |  |
| Total  | 1211   | 1211   |  |
|        | 100.00 | 100.00 |  |

Distributions of Table 3-1 age, DOAC type, and dosage according to the presence or absence of proton-pump inhibitors.

FREQ Procedure

|                      |       | Cumulative       |       |        |
|----------------------|-------|------------------|-------|--------|
| Percent of ALL power |       | Percent of power |       |        |
| 1                    | 21606 | 100.00           | 21606 | 100.00 |

Distributions of Table 3-1 age, DOAC type, and dosage according to the presence or absence of proton-pump inhibitors.

FREQ Procedure

Tables: ALL\* ACTYP

ALL ACTYP(Type of AF)

Power |

Percent |

Percent of rows

Percent of column | Dabigato| Riverro| Apixa| Edoxa| Edoxa| Total

|lan|xaban|ban|ban (OD)|

|||)|

|   | Dabigato | Riverro | Apixa  | Edoxa  | Edoxa  | Total  |
|---|----------|---------|--------|--------|--------|--------|
| 1 | 55       | 310     | 550    | 294    | 2      | 1211   |
|   | 4.54     | 25.60   | 45.42  | 24.28  | 0.17   | 100.00 |
|   | 4.54     | 25.60   | 45.42  | 24.28  | 0.17   |        |
|   | 100.00   | 100.00  | 100.00 | 100.00 | 100.00 |        |

Total 55 310 550 294 2 1211

4.54 25.60 45.42 24.28 0.17 100.00

Distributions of Table 3-1 age, DOAC type, and dosage according to the presence or absence of proton-pump inhibitors.

FREQ Procedure

|   |       | Cumulative           |                  |        |
|---|-------|----------------------|------------------|--------|
|   |       | Percent of ALL power | Percent of power |        |
| 1 | 21606 | 100.00               | 21606            | 100.00 |

Distributions of Table 3-1 age, DOAC type, and dosage according to the presence or absence of proton-pump inhibitors.

FREQ Procedure

Table: ALL \* d\_DOSE

ALL d\_DOSE

Power |

Percent |

Percent of rows

Percentage of columns | 1| 2| 3| 4| 5| Total

|                       | 1      | 2      | 3      | 4      | 5      | Total  |
|-----------------------|--------|--------|--------|--------|--------|--------|
| 1                     | 1      | 6      | 8      | 39     | 1      | 55     |
| Percent               | 1.82   | 10.91  | 14.55  | 70.91  | 1.82   | 100.00 |
| Percent of rows       | 1.82   | 10.91  | 14.55  | 70.91  | 1.82   |        |
| Percentage of columns | 100.00 | 100.00 | 100.00 | 100.00 | 100.00 |        |
| Total                 | 1      | 6      | 8      | 39     | 1      | 55     |
|                       | 1.82   | 10.91  | 14.55  | 70.91  | 1.82   | 100.00 |

Frequency of missing values = 1156



Distributions of Table 3-1 age, DOAC type, and dosage according to the presence or absence of proton-pump inhibitors.

FREQ Procedure

|   |       | Cumulative           |                  |        |
|---|-------|----------------------|------------------|--------|
|   |       | Percent of ALL power | Percent of power |        |
| 1 | 21606 | 100.00               | 21606            | 100.00 |

Distributions of Table 3-1 age, DOAC type, and dosage according to the presence or absence of proton-pump inhibitors.

FREQ Procedure

Table: ALL \* d\_DOSE

ALL d\_DOSE

Power |

Percent |

Percent of rows

Percentage of columns | 1| 2| 3| 4| 5| Total

|       | 1      | 2      | 3      | 4      | 5      | Total  |
|-------|--------|--------|--------|--------|--------|--------|
| 1     | 1      | 6      | 8      | 39     | 1      | 55     |
|       | 1.82   | 10.91  | 14.55  | 70.91  | 1.82   | 100.00 |
|       | 1.82   | 10.91  | 14.55  | 70.91  | 1.82   |        |
|       | 100.00 | 100.00 | 100.00 | 100.00 | 100.00 |        |
| Total | 1      | 6      | 8      | 39     | 1      | 55     |
|       | 1.82   | 10.91  | 14.55  | 70.91  | 1.82   | 100.00 |

Frequency of missing values = 1156

Distributions of Table 3-1 age, DOAC type, and dosage according to the presence or absence of proton-pump inhibitors.

FREQ Procedure

|   |       | Cumulative           |                  |        |
|---|-------|----------------------|------------------|--------|
|   |       | Percent of ALL power | Percent of power |        |
| 1 | 21606 | 100.00               | 21606            | 100.00 |

Distributions of Table 3-1 age, DOAC type, and dosage according to the presence or absence of proton-pump inhibitors.

FREQ Procedure

Table: ALL \* d\_DOSE

ALL d\_DOSE

Power |

Percent |

Percent of rows

Percentage of columns | 1| 2| 3| 4| 5| Total

|                       | 1      | 2      | 3      | 4      | 5      | Total  |
|-----------------------|--------|--------|--------|--------|--------|--------|
| 1                     | 1      | 6      | 8      | 39     | 1      | 55     |
| Percent               | 1.82   | 10.91  | 14.55  | 70.91  | 1.82   | 100.00 |
| Percent of rows       | 1.82   | 10.91  | 14.55  | 70.91  | 1.82   |        |
| Percentage of columns | 100.00 | 100.00 | 100.00 | 100.00 | 100.00 |        |
| Total                 | 1      | 6      | 8      | 39     | 1      | 55     |
|                       | 1.82   | 10.91  | 14.55  | 70.91  | 1.82   | 100.00 |

Frequency of missing values = 1156

Distributions of Table 3-1 age, DOAC type, and dosage according to the presence or absence of proton-pump inhibitors.

FREQ Procedure

|   |       | Cumulative           |                  |        |
|---|-------|----------------------|------------------|--------|
|   |       | Percent of ALL power | Percent of power |        |
| 1 | 21606 | 100.00               | 21606            | 100.00 |

Distributions of Table 3-1 age, DOAC type, and dosage according to the presence or absence of proton-pump inhibitors.

FREQ Procedure

Table: ALL \* d\_DOSE

ALL d\_DOSE

Power |

Percent |

Percent of rows

Percentage of columns | 1| 2| 3| 4| 5| Total

|                       | 1      | 2      | 3      | 4      | 5      | Total  |
|-----------------------|--------|--------|--------|--------|--------|--------|
| 1                     | 1      | 6      | 8      | 39     | 1      | 55     |
| Percent               | 1.82   | 10.91  | 14.55  | 70.91  | 1.82   | 100.00 |
| Percent of rows       | 1.82   | 10.91  | 14.55  | 70.91  | 1.82   |        |
| Percentage of columns | 100.00 | 100.00 | 100.00 | 100.00 | 100.00 |        |
| Total                 | 1      | 6      | 8      | 39     | 1      | 55     |
|                       | 1.82   | 10.91  | 14.55  | 70.91  | 1.82   | 100.00 |

Frequency of missing values = 1156

Distributions of Table 3-1 age, DOAC type, and dosage according to the presence or absence of proton-pump inhibitors.

FREQ Procedure

|   |       | Cumulative           |                  |        |
|---|-------|----------------------|------------------|--------|
|   |       | Percent of ALL power | Percent of power |        |
| 1 | 21606 | 100.00               | 21606            | 100.00 |

Distributions of Table 3-1 age, DOAC type, and dosage according to the presence or absence of proton-pump inhibitors.

FREQ Procedure

Table: ALL \* d\_DOSE

ALL d\_DOSE

Power |

Percent |

Percent of rows

Percentage of columns | 1| 2| 3| 4| 5| Total

|                       | 1      | 2      | 3      | 4      | 5      | Total  |
|-----------------------|--------|--------|--------|--------|--------|--------|
| 1                     | 1      | 6      | 8      | 39     | 1      | 55     |
| Percent               | 1.82   | 10.91  | 14.55  | 70.91  | 1.82   | 100.00 |
| Percent of rows       | 1.82   | 10.91  | 14.55  | 70.91  | 1.82   |        |
| Percentage of columns | 100.00 | 100.00 | 100.00 | 100.00 | 100.00 |        |
| Total                 | 1      | 6      | 8      | 39     | 1      | 55     |
|                       | 1.82   | 10.91  | 14.55  | 70.91  | 1.82   | 100.00 |

Frequency of missing values = 1156



Distributions of Table 3-1 age, DOAC type, and dosage according to the presence or absence of proton-pump inhibitors.

FREQ Procedure

|   |       | Cumulative           |                  |        |
|---|-------|----------------------|------------------|--------|
|   |       | Percent of ALL power | Percent of power |        |
| 1 | 21606 | 100.00               | 21606            | 100.00 |

Distributions of Table 3-1 age, DOAC type, and dosage according to the presence or absence of proton-pump inhibitors.

FREQ Procedure

Table: ALL \* d\_DOSE

ALL d\_DOSE

Power |

Percent |

Percent of rows

Percentage of columns | 1| 2| 3| 4| 5| Total

|                       | 1      | 2      | 3      | 4      | 5      | Total  |
|-----------------------|--------|--------|--------|--------|--------|--------|
| 1                     | 1      | 6      | 8      | 39     | 1      | 55     |
| Percent               | 1.82   | 10.91  | 14.55  | 70.91  | 1.82   | 100.00 |
| Percent of rows       | 1.82   | 10.91  | 14.55  | 70.91  | 1.82   |        |
| Percentage of columns | 100.00 | 100.00 | 100.00 | 100.00 | 100.00 |        |
| Total                 | 1      | 6      | 8      | 39     | 1      | 55     |
|                       | 1.82   | 10.91  | 14.55  | 70.91  | 1.82   | 100.00 |

Frequency of missing values = 1156

Distributions of Table 3-1 age, DOAC type, and dosage according to the presence or absence of proton-pump inhibitors.

FREQ Procedure

|                      |       | Cumulative       |       |        |
|----------------------|-------|------------------|-------|--------|
| Percent of ALL power |       | Percent of power |       |        |
| 1                    | 21606 | 100.00           | 21606 | 100.00 |

Distributions of Table 3-1 age, DOAC type, and dosage according to the presence or absence of proton-pump inhibitors.

FREQ Procedure

Tables: ALL\* ACTYP

ALL ACTYP(Type of AF)

Power |

Percent |

Percent of rows

Percent of column | Dabigato| Riverro| Apixa| Edoxa| Edoxa| Total

|lan|xaban|ban|ban (OD)|

|||)|

|       | Dabigato | Riverro | Apixa  | Edoxa  | Edoxa  | Total  |
|-------|----------|---------|--------|--------|--------|--------|
| 1     | 55       | 310     | 550    | 294    | 2      | 1211   |
|       | 4.54     | 25.60   | 45.42  | 24.28  | 0.17   | 100.00 |
|       | 4.54     | 25.60   | 45.42  | 24.28  | 0.17   |        |
|       | 100.00   | 100.00  | 100.00 | 100.00 | 100.00 |        |
| Total | 55       | 310     | 550    | 294    | 2      | 1211   |
|       | 4.54     | 25.60   | 45.42  | 24.28  | 0.17   | 100.00 |

Distributions of Table 3-1 age, DOAC type, and dosage according to the presence or absence of proton-pump inhibitors.

FREQ Procedure

|   |       | Cumulative           |                  |        |
|---|-------|----------------------|------------------|--------|
|   |       | Percent of ALL power | Percent of power |        |
| 1 | 21606 | 100.00               | 21606            | 100.00 |

Distributions of Table 3-1 age, DOAC type, and dosage according to the presence or absence of proton-pump inhibitors.

FREQ Procedure

Table: ALL \* r\_DOSE

ALL r\_DOSE

Power |

Percent |

Percent of rows

Percent of columns | 1| 2| 9| Total

|       | 1      | 2      | 9      | Total  |
|-------|--------|--------|--------|--------|
| 1     | 280    | 25     | 5      | 310    |
|       | 90.32  | 8.06   | 1.61   | 100.00 |
|       | 90.32  | 8.06   | 1.61   |        |
|       | 100.00 | 100.00 | 100.00 |        |
| Total | 280    | 25     | 5      | 310    |
|       | 90.32  | 8.06   | 1.61   | 100.00 |

Frequency of missing values = 901

Distributions of Table 3-1 age, DOAC type, and dosage according to the presence or absence of proton-pump inhibitors.

FREQ Procedure

|                      |       | Cumulative       |       |        |
|----------------------|-------|------------------|-------|--------|
| Percent of ALL power |       | Percent of power |       |        |
| 1                    | 21606 | 100.00           | 21606 | 100.00 |

Distributions of Table 3-1 age, DOAC type, and dosage according to the presence or absence of proton-pump inhibitors.

FREQ Procedure

Table: ALL \* r\_DOSE

ALL r\_DOSE

Power |

Percent |

Percent of rows

Percent of columns | 1| 2| 9| Total

|       | 1      | 2      | 9      | Total  |
|-------|--------|--------|--------|--------|
| 1     | 280    | 25     | 5      | 310    |
|       | 90.32  | 8.06   | 1.61   | 100.00 |
|       | 90.32  | 8.06   | 1.61   |        |
|       | 100.00 | 100.00 | 100.00 |        |
| Total | 280    | 25     | 5      | 310    |
|       | 90.32  | 8.06   | 1.61   | 100.00 |

Frequency of missing values = 901



Distributions of Table 3-1 age, DOAC type, and dosage according to the presence or absence of proton-pump inhibitors.

FREQ Procedure

|   |       | Cumulative           |                  |        |
|---|-------|----------------------|------------------|--------|
|   |       | Percent of ALL power | Percent of power |        |
| 1 | 21606 | 100.00               | 21606            | 100.00 |

Distributions of Table 3-1 age, DOAC type, and dosage according to the presence or absence of proton-pump inhibitors.

FREQ Procedure

Table: ALL \* r\_DOSE

ALL r\_DOSE

Power |

Percent |

Percent of rows

Percent of columns | 1| 2| 9| Total

|       | 1      | 2      | 9      | Total  |
|-------|--------|--------|--------|--------|
| 1     | 280    | 25     | 5      | 310    |
|       | 90.32  | 8.06   | 1.61   | 100.00 |
|       | 90.32  | 8.06   | 1.61   |        |
|       | 100.00 | 100.00 | 100.00 |        |
| Total | 280    | 25     | 5      | 310    |
|       | 90.32  | 8.06   | 1.61   | 100.00 |

Frequency of missing values = 901

Distributions of Table 3-1 age, DOAC type, and dosage according to the presence or absence of proton-pump inhibitors.

FREQ Procedure

|   |       | Cumulative           |                  |        |
|---|-------|----------------------|------------------|--------|
|   |       | Percent of ALL power | Percent of power |        |
| 1 | 21606 | 100.00               | 21606            | 100.00 |

Distributions of Table 3-1 age, DOAC type, and dosage according to the presence or absence of proton-pump inhibitors.

FREQ Procedure

Tables: ALL\* ACTYP

ALL ACTYP(Type of AF)

Power |

Percent |

Percent of rows

Percent of column | Dabigato| Riverro| Apixa| Edoxa| Edoxa| Total

|lan|xaban|ban|ban (OD)|

|||)|

|       | Dabigato | Riverro | Apixa  | Edoxa  | Edoxa  | Total  |
|-------|----------|---------|--------|--------|--------|--------|
| 1     | 55       | 310     | 550    | 294    | 2      | 1211   |
|       | 4.54     | 25.60   | 45.42  | 24.28  | 0.17   | 100.00 |
|       | 4.54     | 25.60   | 45.42  | 24.28  | 0.17   |        |
|       | 100.00   | 100.00  | 100.00 | 100.00 | 100.00 |        |
| Total | 55       | 310     | 550    | 294    | 2      | 1211   |
|       | 4.54     | 25.60   | 45.42  | 24.28  | 0.17   | 100.00 |

Distributions of Table 3-1 age, DOAC type, and dosage according to the presence or absence of proton-pump inhibitors.

FREQ Procedure

|   |       | Cumulative           |                  |        |
|---|-------|----------------------|------------------|--------|
|   |       | Percent of ALL power | Percent of power |        |
| 1 | 21606 | 100.00               | 21606            | 100.00 |

Distributions of Table 3-1 age, DOAC type, and dosage according to the presence or absence of proton-pump inhibitors.

FREQ Procedure

Table: ALL \* a\_DOSE

ALL a\_DOSE

Power |

Percent |

Percent of rows

Percentage of columns | 1| 2| 3| Total

|       | 1      | 2      | 3      | Total  |
|-------|--------|--------|--------|--------|
| 1     | 68     | 468    | 14     | 550    |
|       | 12.36  | 85.09  | 2.55   | 100.00 |
|       | 12.36  | 85.09  | 2.55   |        |
|       | 100.00 | 100.00 | 100.00 |        |
| Total | 68     | 468    | 14     | 550    |
|       | 12.36  | 85.09  | 2.55   | 100.00 |

Degree of missing values = 661

Distributions of Table 3-1 age, DOAC type, and dosage according to the presence or absence of proton-pump inhibitors.

FREQ Procedure

|   |       | Cumulative           |                  |        |
|---|-------|----------------------|------------------|--------|
|   |       | Percent of ALL power | Percent of power |        |
| 1 | 21606 | 100.00               | 21606            | 100.00 |

Distributions of Table 3-1 age, DOAC type, and dosage according to the presence or absence of proton-pump inhibitors.

FREQ Procedure

Table: ALL \* a\_DOSE

ALL a\_DOSE

Power |

Percent |

Percent of rows

Percentage of columns | 1| 2| 3| Total

|       | 1      | 2      | 3      | Total  |
|-------|--------|--------|--------|--------|
| 1     | 68     | 468    | 14     | 550    |
|       | 12.36  | 85.09  | 2.55   | 100.00 |
|       | 12.36  | 85.09  | 2.55   |        |
|       | 100.00 | 100.00 | 100.00 |        |
| Total | 68     | 468    | 14     | 550    |
|       | 12.36  | 85.09  | 2.55   | 100.00 |

Degree of missing values = 661



Distributions of Table 3-1 age, DOAC type, and dosage according to the presence or absence of proton-pump inhibitors.

FREQ Procedure

|   |       | Cumulative           |                  |        |
|---|-------|----------------------|------------------|--------|
|   |       | Percent of ALL power | Percent of power |        |
| 1 | 21606 | 100.00               | 21606            | 100.00 |

Distributions of Table 3-1 age, DOAC type, and dosage according to the presence or absence of proton-pump inhibitors.

FREQ Procedure

Table: ALL \* a\_DOSE

ALL a\_DOSE

Power |

Percent |

Percent of rows

Percentage of columns | 1| 2| 3| Total

|       | 1      | 2      | 3      | Total  |
|-------|--------|--------|--------|--------|
| 1     | 68     | 468    | 14     | 550    |
|       | 12.36  | 85.09  | 2.55   | 100.00 |
|       | 12.36  | 85.09  | 2.55   |        |
|       | 100.00 | 100.00 | 100.00 |        |
| Total | 68     | 468    | 14     | 550    |
|       | 12.36  | 85.09  | 2.55   | 100.00 |

Degree of missing values = 661

Distributions of Table 3-1 age, DOAC type, and dosage according to the presence or absence of proton-pump inhibitors.

FREQ Procedure

|   |       | Cumulative           |                  |        |
|---|-------|----------------------|------------------|--------|
|   |       | Percent of ALL power | Percent of power |        |
| 1 | 21606 | 100.00               | 21606            | 100.00 |

Distributions of Table 3-1 age, DOAC type, and dosage according to the presence or absence of proton-pump inhibitors.

FREQ Procedure

Table: ALL \* a\_DOSE

ALL a\_DOSE

Power |

Percent |

Percent of rows

Percentage of columns | 1| 2| 3| Total

|                       | 1      | 2      | 3      | Total  |
|-----------------------|--------|--------|--------|--------|
|                       | 68     | 468    | 14     | 550    |
| Percent of rows       | 12.36  | 85.09  | 2.55   | 100.00 |
| Percentage of columns | 100.00 | 100.00 | 100.00 |        |
| Total                 | 68     | 468    | 14     | 550    |
|                       | 12.36  | 85.09  | 2.55   | 100.00 |

Degree of missing values = 661

Distributions of Table 3-1 age, DOAC type, and dosage according to the presence or absence of proton-pump inhibitors.

FREQ Procedure

|   |       | Cumulative           |                  |        |
|---|-------|----------------------|------------------|--------|
|   |       | Percent of ALL power | Percent of power |        |
| 1 | 21606 | 100.00               | 21606            | 100.00 |

Distributions of Table 3-1 age, DOAC type, and dosage according to the presence or absence of proton-pump inhibitors.

FREQ Procedure

Table: ALL \* t\_ACT0

ALL t\_ACT0

Power |

Percent |

Percent of rows

Percentage of columns | 0 | 1 | Sum

|       | 0      | 1      | Sum    |
|-------|--------|--------|--------|
| 1     | 915    | 296    | 1211   |
|       | 75.56  | 24.44  | 100.00 |
|       | 75.56  | 24.44  |        |
|       | 100.00 | 100.00 |        |
| Total | 915    | 296    | 1211   |
|       | 75.56  | 24.44  | 100.00 |

Distributions of Table 3-1 age, DOAC type, and dosage according to the presence or absence of proton-pump inhibitors.

FREQ Procedure

|   |       | Cumulative           |                  |        |
|---|-------|----------------------|------------------|--------|
|   |       | Percent of ALL power | Percent of power |        |
| 1 | 21606 | 100.00               | 21606            | 100.00 |

Distributions of Table 3-1 age, DOAC type, and dosage according to the presence or absence of proton-pump inhibitors.

FREQ Procedure

Table: ALL \* e\_DOSE

ALL e\_DOSE

Power |

Percent |

Percent of rows

Percentage of columns | 1| 2| 3| Total

|                       | 1      | 2      | 3      | Total  |
|-----------------------|--------|--------|--------|--------|
|                       | 48     | 240    | 8      | 296    |
| Percent of rows       | 16.22  | 81.08  | 2.70   | 100.00 |
| Percentage of columns | 16.22  | 81.08  | 2.70   |        |
|                       | 100.00 | 100.00 | 100.00 |        |
| Total                 | 48     | 240    | 8      | 296    |
|                       | 16.22  | 81.08  | 2.70   | 100.00 |

Degree of missing values = 915



Distributions of Table 3-1 age, DOAC type, and dosage according to the presence or absence of proton-pump inhibitors.

FREQ Procedure

|   |       | Cumulative           |                  |        |
|---|-------|----------------------|------------------|--------|
|   |       | Percent of ALL power | Percent of power |        |
| 1 | 21606 | 100.00               | 21606            | 100.00 |

Distributions of Table 3-1 age, DOAC type, and dosage according to the presence or absence of proton-pump inhibitors.

FREQ Procedure

Table: ALL \* e\_DOSE

ALL e\_DOSE

Power |

Percent |

Percent of rows

Percentage of columns | 1| 2| 3| Total

|                       | 1      | 2      | 3      | Total  |
|-----------------------|--------|--------|--------|--------|
|                       | 48     | 240    | 8      | 296    |
| Percent of rows       | 16.22  | 81.08  | 2.70   | 100.00 |
| Percentage of columns | 16.22  | 81.08  | 2.70   |        |
|                       | 100.00 | 100.00 | 100.00 |        |
| Total                 | 48     | 240    | 8      | 296    |
|                       | 16.22  | 81.08  | 2.70   | 100.00 |

Degree of missing values = 915

Distributions of Table 3-1 age, DOAC type, and dosage according to the presence or absence of proton-pump inhibitors.

FREQ Procedure

|   |       | Cumulative           |                  |        |
|---|-------|----------------------|------------------|--------|
|   |       | Percent of ALL power | Percent of power |        |
| 1 | 21606 | 100.00               | 21606            | 100.00 |

Distributions of Table 3-1 age, DOAC type, and dosage according to the presence or absence of proton-pump inhibitors.

FREQ Procedure

Table: ALL \* e\_DOSE

ALL e\_DOSE

Power |

Percent |

Percent of rows

Percentage of columns | 1| 2| 3| Total

|       | 1      | 2      | 3      | Total  |
|-------|--------|--------|--------|--------|
| 1     | 48     | 240    | 8      | 296    |
|       | 16.22  | 81.08  | 2.70   | 100.00 |
|       | 16.22  | 81.08  | 2.70   |        |
|       | 100.00 | 100.00 | 100.00 |        |
| Total | 48     | 240    | 8      | 296    |
|       | 16.22  | 81.08  | 2.70   | 100.00 |

Degree of missing values = 915

Distributions of Table 3-1 age, DOAC type, and dosage according to the presence or absence of proton-pump inhibitors.

FREQ Procedure

|   |       | Cumulative           |                  |        |
|---|-------|----------------------|------------------|--------|
|   |       | Percent of ALL power | Percent of power |        |
| 1 | 21606 | 100.00               | 21606            | 100.00 |

Distributions of Table 3-1 age, DOAC type, and dosage according to the presence or absence of proton-pump inhibitors.

FREQ Procedure

Table: ALL \* e\_DOSE

ALL e\_DOSE

Power |

Percent |

Percent of rows

Percentage of columns | 1| 2| 3| Total

|                       | 1      | 2      | 3      | Total  |
|-----------------------|--------|--------|--------|--------|
|                       | 48     | 240    | 8      | 296    |
| Percent of rows       | 16.22  | 81.08  | 2.70   | 100.00 |
| Percentage of columns | 16.22  | 81.08  | 2.70   |        |
|                       | 100.00 | 100.00 | 100.00 |        |
| Total                 | 48     | 240    | 8      | 296    |
|                       | 16.22  | 81.08  | 2.70   | 100.00 |

Degree of missing values = 915

Distributions of Table 3-1 age, DOAC type, and dosage according to the presence or absence of proton-pump inhibitors.

FREQ Procedure

|   |      | Cumulative           |                  |        |
|---|------|----------------------|------------------|--------|
|   |      | Percent of ALL power | Percent of power |        |
| 1 | 8206 | 100.00               | 8206             | 100.00 |

Distributions of Table 3-1 age, DOAC type, and dosage according to the presence or absence of proton-pump inhibitors.

FREQ Procedure

Tables: ALL\* AGEC

ALL

AGEC(Age Category)

Power |

Percent |

Percent of rows

Percent of column |75 years and older| Total

|Under 80 years of age|

| |

+ +

1 | 3276 | 3276

| 100.00 | 100.00

| 100.00 |

| 100.00 |

+ +

Total 3276 3276

100.00 100.00



Distributions of Table 3-1 age, DOAC type, and dosage according to the presence or absence of proton-pump inhibitors.

FREQ Procedure

|                      |      | Cumulative       |      |        |
|----------------------|------|------------------|------|--------|
| Percent of ALL power |      | Percent of power |      |        |
| 1                    | 8206 | 100.00           | 8206 | 100.00 |

Distributions of Table 3-1 age, DOAC type, and dosage according to the presence or absence of proton-pump inhibitors.

FREQ Procedure

Tables: ALL\* ACTYP

ALL ACTYP(Type of AF)

Power |

Percent |

Percent of rows

Percent of column | Dabigato| Riverro| Apixa| Edoxa| Edoxa| Total

|lan|xaban|ban|ban (OD)|

||||)|

|       | Dabigato | Riverro | Apixa  | Edoxa  | Edoxa  | Total  |
|-------|----------|---------|--------|--------|--------|--------|
| 1     | 467      | 974     | 1134   | 690    | 11     | 3276   |
|       | 14.26    | 29.73   | 34.62  | 21.06  | 0.34   | 100.00 |
|       | 14.26    | 29.73   | 34.62  | 21.06  | 0.34   |        |
|       | 100.00   | 100.00  | 100.00 | 100.00 | 100.00 |        |
| Total | 467      | 974     | 1134   | 690    | 11     | 3276   |
|       | 14.26    | 29.73   | 34.62  | 21.06  | 0.34   | 100.00 |

Distributions of Table 3-1 age, DOAC type, and dosage according to the presence or absence of proton-pump inhibitors.

FREQ Procedure

|   |      | Cumulative           |                  |        |
|---|------|----------------------|------------------|--------|
|   |      | Percent of ALL power | Percent of power |        |
| 1 | 8206 | 100.00               | 8206             | 100.00 |

Distributions of Table 3-1 age, DOAC type, and dosage according to the presence or absence of proton-pump inhibitors.

FREQ Procedure

Table: ALL \* d\_DOSE

ALL d\_DOSE

Power |

Percent |

Percent of rows

Percentage of columns | 1| 2| 3| 4| 5| 9| Total

|       | 1      | 2      | 3      | 4      | 5      | 9      | Total  |
|-------|--------|--------|--------|--------|--------|--------|--------|
| 1     | 1      | 40     | 19     | 369    | 37     | 1      | 467    |
|       | 0.21   | 8.57   | 4.07   | 79.01  | 7.92   | 0.21   | 100.00 |
|       | 0.21   | 8.57   | 4.07   | 79.01  | 7.92   | 0.21   |        |
|       | 100.00 | 100.00 | 100.00 | 100.00 | 100.00 | 100.00 |        |
| Total | 1      | 40     | 19     | 369    | 37     | 1      | 467    |
|       | 0.21   | 8.57   | 4.07   | 79.01  | 7.92   | 0.21   | 100.00 |

Frequency of missing values = 2809

Distributions of Table 3-1 age, DOAC type, and dosage according to the presence or absence of proton-pump inhibitors.

FREQ Procedure

|   |                      |                  | Cumulative |        |
|---|----------------------|------------------|------------|--------|
|   | Percent of ALL power | Percent of power |            |        |
| 1 | 8206                 | 100.00           | 8206       | 100.00 |

Distributions of Table 3-1 age, DOAC type, and dosage according to the presence or absence of proton-pump inhibitors.

FREQ Procedure

Table: ALL \* d\_DOSE

ALL d\_DOSE

Power |

Percent |

Percent of rows

Percentage of columns | 1| 2| 3| 4| 5| 9| Total

|       | 1      | 2      | 3      | 4      | 5      | 9      | Total  |
|-------|--------|--------|--------|--------|--------|--------|--------|
| 1     | 1      | 40     | 19     | 369    | 37     | 1      | 467    |
|       | 0.21   | 8.57   | 4.07   | 79.01  | 7.92   | 0.21   | 100.00 |
|       | 0.21   | 8.57   | 4.07   | 79.01  | 7.92   | 0.21   |        |
|       | 100.00 | 100.00 | 100.00 | 100.00 | 100.00 | 100.00 |        |
| Total | 1      | 40     | 19     | 369    | 37     | 1      | 467    |
|       | 0.21   | 8.57   | 4.07   | 79.01  | 7.92   | 0.21   | 100.00 |

Frequency of missing values = 2809

Distributions of Table 3-1 age, DOAC type, and dosage according to the presence or absence of proton-pump inhibitors.

FREQ Procedure

|   |      | Cumulative           |                  |        |
|---|------|----------------------|------------------|--------|
|   |      | Percent of ALL power | Percent of power |        |
| 1 | 8206 | 100.00               | 8206             | 100.00 |

Distributions of Table 3-1 age, DOAC type, and dosage according to the presence or absence of proton-pump inhibitors.

FREQ Procedure

Table: ALL \* d\_DOSE

ALL d\_DOSE

Power |

Percent |

Percent of rows

Percentage of columns | 1| 2| 3| 4| 5| 9| Total

|       | 1      | 2      | 3      | 4      | 5      | 9      | Total  |
|-------|--------|--------|--------|--------|--------|--------|--------|
| 1     | 1      | 40     | 19     | 369    | 37     | 1      | 467    |
|       | 0.21   | 8.57   | 4.07   | 79.01  | 7.92   | 0.21   | 100.00 |
|       | 0.21   | 8.57   | 4.07   | 79.01  | 7.92   | 0.21   |        |
|       | 100.00 | 100.00 | 100.00 | 100.00 | 100.00 | 100.00 |        |
| Total | 1      | 40     | 19     | 369    | 37     | 1      | 467    |
|       | 0.21   | 8.57   | 4.07   | 79.01  | 7.92   | 0.21   | 100.00 |

Frequency of missing values = 2809



Distributions of Table 3-1 age, DOAC type, and dosage according to the presence or absence of proton-pump inhibitors.

FREQ Procedure

|   |      | Cumulative           |                  |        |
|---|------|----------------------|------------------|--------|
|   |      | Percent of ALL power | Percent of power |        |
| 1 | 8206 | 100.00               | 8206             | 100.00 |

Distributions of Table 3-1 age, DOAC type, and dosage according to the presence or absence of proton-pump inhibitors.

FREQ Procedure

Table: ALL \* d\_DOSE

ALL d\_DOSE

Power |

Percent |

Percent of rows

Percentage of columns | 1| 2| 3| 4| 5| 9| Total

|       | 1      | 2      | 3      | 4      | 5      | 9      | Total  |
|-------|--------|--------|--------|--------|--------|--------|--------|
| 1     | 1      | 40     | 19     | 369    | 37     | 1      | 467    |
|       | 0.21   | 8.57   | 4.07   | 79.01  | 7.92   | 0.21   | 100.00 |
|       | 0.21   | 8.57   | 4.07   | 79.01  | 7.92   | 0.21   |        |
|       | 100.00 | 100.00 | 100.00 | 100.00 | 100.00 | 100.00 |        |
| Total | 1      | 40     | 19     | 369    | 37     | 1      | 467    |
|       | 0.21   | 8.57   | 4.07   | 79.01  | 7.92   | 0.21   | 100.00 |

Frequency of missing values = 2809

Distributions of Table 3-1 age, DOAC type, and dosage according to the presence or absence of proton-pump inhibitors.

FREQ Procedure

|                      |      | Cumulative       |      |        |
|----------------------|------|------------------|------|--------|
| Percent of ALL power |      | Percent of power |      |        |
| 1                    | 8206 | 100.00           | 8206 | 100.00 |

Distributions of Table 3-1 age, DOAC type, and dosage according to the presence or absence of proton-pump inhibitors.

FREQ Procedure

Table: ALL \* d\_DOSE

ALL d\_DOSE

Power |

Percent |

Percent of rows

Percentage of columns | 1| 2| 3| 4| 5| 9| Total

|       | 1      | 2      | 3      | 4      | 5      | 9      | Total  |
|-------|--------|--------|--------|--------|--------|--------|--------|
| 1     | 1      | 40     | 19     | 369    | 37     | 1      | 467    |
|       | 0.21   | 8.57   | 4.07   | 79.01  | 7.92   | 0.21   | 100.00 |
|       | 0.21   | 8.57   | 4.07   | 79.01  | 7.92   | 0.21   |        |
|       | 100.00 | 100.00 | 100.00 | 100.00 | 100.00 | 100.00 |        |
| Total | 1      | 40     | 19     | 369    | 37     | 1      | 467    |
|       | 0.21   | 8.57   | 4.07   | 79.01  | 7.92   | 0.21   | 100.00 |

Frequency of missing values = 2809

Distributions of Table 3-1 age, DOAC type, and dosage according to the presence or absence of proton-pump inhibitors.

FREQ Procedure

|   |      | Cumulative           |                  |        |
|---|------|----------------------|------------------|--------|
|   |      | Percent of ALL power | Percent of power |        |
| 1 | 8206 | 100.00               | 8206             | 100.00 |

Distributions of Table 3-1 age, DOAC type, and dosage according to the presence or absence of proton-pump inhibitors.

FREQ Procedure

Table: ALL \* d\_DOSE

ALL d\_DOSE

Power |

Percent |

Percent of rows

Percentage of columns | 1| 2| 3| 4| 5| 9| Total

|       | 1      | 2      | 3      | 4      | 5      | 9      | Total  |
|-------|--------|--------|--------|--------|--------|--------|--------|
| 1     | 1      | 40     | 19     | 369    | 37     | 1      | 467    |
|       | 0.21   | 8.57   | 4.07   | 79.01  | 7.92   | 0.21   | 100.00 |
|       | 0.21   | 8.57   | 4.07   | 79.01  | 7.92   | 0.21   |        |
|       | 100.00 | 100.00 | 100.00 | 100.00 | 100.00 | 100.00 |        |
| Total | 1      | 40     | 19     | 369    | 37     | 1      | 467    |
|       | 0.21   | 8.57   | 4.07   | 79.01  | 7.92   | 0.21   | 100.00 |

Frequency of missing values = 2809

Distributions of Table 3-1 age, DOAC type, and dosage according to the presence or absence of proton-pump inhibitors.

FREQ Procedure

|   |      | Cumulative           |                  |        |
|---|------|----------------------|------------------|--------|
|   |      | Percent of ALL power | Percent of power |        |
| 1 | 8206 | 100.00               | 8206             | 100.00 |

Distributions of Table 3-1 age, DOAC type, and dosage according to the presence or absence of proton-pump inhibitors.

FREQ Procedure

Tables: ALL\* ACTYP

ALL ACTYP(Type of AF)

Power |

Percent |

Percent of rows

Percent of column | Dabigato| Riverro| Apixa| Edoxa| Edoxa| Total

|lan|xaban|ban|ban (OD)|

||||)|

|       | Dabigato | Riverro | Apixa  | Edoxa  | Edoxa  | Total  |
|-------|----------|---------|--------|--------|--------|--------|
| 1     | 467      | 974     | 1134   | 690    | 11     | 3276   |
|       | 14.26    | 29.73   | 34.62  | 21.06  | 0.34   | 100.00 |
|       | 14.26    | 29.73   | 34.62  | 21.06  | 0.34   |        |
|       | 100.00   | 100.00  | 100.00 | 100.00 | 100.00 |        |
| Total | 467      | 974     | 1134   | 690    | 11     | 3276   |
|       | 14.26    | 29.73   | 34.62  | 21.06  | 0.34   | 100.00 |



Distributions of Table 3-1 age, DOAC type, and dosage according to the presence or absence of proton-pump inhibitors.

FREQ Procedure

|   |      | Cumulative           |                  |        |
|---|------|----------------------|------------------|--------|
|   |      | Percent of ALL power | Percent of power |        |
| 1 | 8206 | 100.00               | 8206             | 100.00 |

Distributions of Table 3-1 age, DOAC type, and dosage according to the presence or absence of proton-pump inhibitors.

FREQ Procedure

Table: ALL \* r\_DOSE

ALL r\_DOSE

Power |

Percent |

Percent of rows

Percent of columns | 1| 2| 9| Total

|       | 1      | 2      | 9      | Total  |
|-------|--------|--------|--------|--------|
| 1     | 546    | 424    | 4      | 974    |
|       | 56.06  | 43.53  | 0.41   | 100.00 |
|       | 56.06  | 43.53  | 0.41   |        |
|       | 100.00 | 100.00 | 100.00 |        |
| Total | 546    | 424    | 4      | 974    |
|       | 56.06  | 43.53  | 0.41   | 100.00 |

Degree of missing values = 2302

Distributions of Table 3-1 age, DOAC type, and dosage according to the presence or absence of proton-pump inhibitors.

FREQ Procedure

|   |      | Cumulative           |                  |        |
|---|------|----------------------|------------------|--------|
|   |      | Percent of ALL power | Percent of power |        |
| 1 | 8206 | 100.00               | 8206             | 100.00 |

Distributions of Table 3-1 age, DOAC type, and dosage according to the presence or absence of proton-pump inhibitors.

FREQ Procedure

Table: ALL \* r\_DOSE

ALL r\_DOSE

Power |

Percent |

Percent of rows

Percent of columns | 1| 2| 9| Total

|                    | 1      | 2      | 9      | Total  |
|--------------------|--------|--------|--------|--------|
| Count              | 546    | 424    | 4      | 974    |
| Percent of rows    | 56.06  | 43.53  | 0.41   | 100.00 |
| Percent of columns | 56.06  | 43.53  | 0.41   |        |
| Percent of total   | 100.00 | 100.00 | 100.00 |        |
| Total              | 546    | 424    | 4      | 974    |
| Percent of total   | 56.06  | 43.53  | 0.41   | 100.00 |

Degree of missing values = 2302

Distributions of Table 3-1 age, DOAC type, and dosage according to the presence or absence of proton-pump inhibitors.

FREQ Procedure

|                      |      | Cumulative       |      |        |
|----------------------|------|------------------|------|--------|
| Percent of ALL power |      | Percent of power |      |        |
| 1                    | 8206 | 100.00           | 8206 | 100.00 |

Distributions of Table 3-1 age, DOAC type, and dosage according to the presence or absence of proton-pump inhibitors.

FREQ Procedure

Table: ALL \* r\_DOSE

ALL r\_DOSE

Power |

Percent |

Percent of rows

Percent of columns | 1| 2| 9| Total

|       | 1      | 2      | 9      | Total  |
|-------|--------|--------|--------|--------|
| 1     | 546    | 424    | 4      | 974    |
|       | 56.06  | 43.53  | 0.41   | 100.00 |
|       | 56.06  | 43.53  | 0.41   |        |
|       | 100.00 | 100.00 | 100.00 |        |
| Total | 546    | 424    | 4      | 974    |
|       | 56.06  | 43.53  | 0.41   | 100.00 |

Degree of missing values = 2302

Distributions of Table 3-1 age, DOAC type, and dosage according to the presence or absence of proton-pump inhibitors.

FREQ Procedure

|                      |      | Cumulative       |      |        |
|----------------------|------|------------------|------|--------|
| Percent of ALL power |      | Percent of power |      |        |
| 1                    | 8206 | 100.00           | 8206 | 100.00 |

Distributions of Table 3-1 age, DOAC type, and dosage according to the presence or absence of proton-pump inhibitors.

FREQ Procedure

Tables: ALL\* ACTYP

ALL ACTYP(Type of AF)

Power |

Percent |

Percent of rows

Percent of column | Dabigato| Riverro| Apixa| Edoxa| Edoxa| Total

|lan|xaban|ban|ban (OD)|

||||)|

|       | Dabigato | Riverro | Apixa  | Edoxa  | Edoxa  | Total  |
|-------|----------|---------|--------|--------|--------|--------|
| 1     | 467      | 974     | 1134   | 690    | 11     | 3276   |
|       | 14.26    | 29.73   | 34.62  | 21.06  | 0.34   | 100.00 |
|       | 14.26    | 29.73   | 34.62  | 21.06  | 0.34   |        |
|       | 100.00   | 100.00  | 100.00 | 100.00 | 100.00 |        |
| Total | 467      | 974     | 1134   | 690    | 11     | 3276   |
|       | 14.26    | 29.73   | 34.62  | 21.06  | 0.34   | 100.00 |



Distributions of Table 3-1 age, DOAC type, and dosage according to the presence or absence of proton-pump inhibitors.

FREQ Procedure

|   |      | Cumulative           |                  |        |
|---|------|----------------------|------------------|--------|
|   |      | Percent of ALL power | Percent of power |        |
| 1 | 8206 | 100.00               | 8206             | 100.00 |

Distributions of Table 3-1 age, DOAC type, and dosage according to the presence or absence of proton-pump inhibitors.

FREQ Procedure

Table: ALL \* a\_DOSE

ALL a\_DOSE

Power |

Percent |

Percent of rows

Percentage of columns | 1| 2| 3| 9| Total

|                       | 1      | 2      | 3      | 9      | Total  |
|-----------------------|--------|--------|--------|--------|--------|
|                       | 41     | 476    | 615    | 2      | 1134   |
| Percent of rows       | 3.62   | 41.98  | 54.23  | 0.18   | 100.00 |
| Percentage of columns | 3.62   | 41.98  | 54.23  | 0.18   |        |
|                       | 100.00 | 100.00 | 100.00 | 100.00 |        |
| Total                 | 41     | 476    | 615    | 2      | 1134   |
|                       | 3.62   | 41.98  | 54.23  | 0.18   | 100.00 |

Degree of missing values = 2142

Distributions of Table 3-1 age, DOAC type, and dosage according to the presence or absence of proton-pump inhibitors.

FREQ Procedure

|                      |      | Cumulative       |      |        |
|----------------------|------|------------------|------|--------|
| Percent of ALL power |      | Percent of power |      |        |
| 1                    | 8206 | 100.00           | 8206 | 100.00 |

Distributions of Table 3-1 age, DOAC type, and dosage according to the presence or absence of proton-pump inhibitors.

FREQ Procedure

Table: ALL \* a\_DOSE

ALL a\_DOSE

Power |

Percent |

Percent of rows

Percentage of columns | 1| 2| 3| 9| Total

|                       | 1      | 2      | 3      | 9      | Total  |
|-----------------------|--------|--------|--------|--------|--------|
|                       | 41     | 476    | 615    | 2      | 1134   |
| Percent of rows       | 3.62   | 41.98  | 54.23  | 0.18   | 100.00 |
| Percentage of columns | 3.62   | 41.98  | 54.23  | 0.18   |        |
|                       | 100.00 | 100.00 | 100.00 | 100.00 |        |
| Total                 | 41     | 476    | 615    | 2      | 1134   |
|                       | 3.62   | 41.98  | 54.23  | 0.18   | 100.00 |

Degree of missing values = 2142

Distributions of Table 3-1 age, DOAC type, and dosage according to the presence or absence of proton-pump inhibitors.

FREQ Procedure

|                      |      | Cumulative       |      |        |
|----------------------|------|------------------|------|--------|
| Percent of ALL power |      | Percent of power |      |        |
| 1                    | 8206 | 100.00           | 8206 | 100.00 |

Distributions of Table 3-1 age, DOAC type, and dosage according to the presence or absence of proton-pump inhibitors.

FREQ Procedure

Table: ALL \* a\_DOSE

ALL a\_DOSE

Power |

Percent |

Percent of rows

Percentage of columns | 1| 2| 3| 9| Total

|       | 1      | 2      | 3      | 9      | Total  |
|-------|--------|--------|--------|--------|--------|
|       | 41     | 476    | 615    | 2      | 1134   |
|       | 3.62   | 41.98  | 54.23  | 0.18   | 100.00 |
|       | 3.62   | 41.98  | 54.23  | 0.18   |        |
|       | 100.00 | 100.00 | 100.00 | 100.00 |        |
| Total | 41     | 476    | 615    | 2      | 1134   |
|       | 3.62   | 41.98  | 54.23  | 0.18   | 100.00 |

Degree of missing values = 2142

Distributions of Table 3-1 age, DOAC type, and dosage according to the presence or absence of proton-pump inhibitors.

FREQ Procedure

|                      |      | Cumulative       |      |        |
|----------------------|------|------------------|------|--------|
| Percent of ALL power |      | Percent of power |      |        |
| 1                    | 8206 | 100.00           | 8206 | 100.00 |

Distributions of Table 3-1 age, DOAC type, and dosage according to the presence or absence of proton-pump inhibitors.

FREQ Procedure

Table: ALL \* a\_DOSE

ALL a\_DOSE

Power |

Percent |

Percent of rows

Percentage of columns | 1| 2| 3| 9| Total

|                       | 1      | 2      | 3      | 9      | Total  |
|-----------------------|--------|--------|--------|--------|--------|
|                       | 41     | 476    | 615    | 2      | 1134   |
| Percent of rows       | 3.62   | 41.98  | 54.23  | 0.18   | 100.00 |
| Percentage of columns | 3.62   | 41.98  | 54.23  | 0.18   |        |
|                       | 100.00 | 100.00 | 100.00 | 100.00 |        |
| Total                 | 41     | 476    | 615    | 2      | 1134   |
|                       | 3.62   | 41.98  | 54.23  | 0.18   | 100.00 |

Degree of missing values = 2142



Distributions of Table 3-1 age, DOAC type, and dosage according to the presence or absence of proton-pump inhibitors.

FREQ Procedure

|   |      | Cumulative           |                  |        |
|---|------|----------------------|------------------|--------|
|   |      | Percent of ALL power | Percent of power |        |
| 1 | 8206 | 100.00               | 8206             | 100.00 |

Distributions of Table 3-1 age, DOAC type, and dosage according to the presence or absence of proton-pump inhibitors.

FREQ Procedure

Table: ALL \* t\_ACT0

ALL t\_ACT0

Power |

Percent |

Percent of rows

Percentage of columns | 0 | 1 | Sum

|       | 0      | 1      | Sum    |
|-------|--------|--------|--------|
| 1     | 2575   | 701    | 3276   |
|       | 78.60  | 21.40  | 100.00 |
|       | 78.60  | 21.40  |        |
|       | 100.00 | 100.00 |        |
| Total | 2575   | 701    | 3276   |
|       | 78.60  | 21.40  | 100.00 |

Distributions of Table 3-1 age, DOAC type, and dosage according to the presence or absence of proton-pump inhibitors.

FREQ Procedure

|   |      | Cumulative           |                  |        |
|---|------|----------------------|------------------|--------|
|   |      | Percent of ALL power | Percent of power |        |
| 1 | 8206 | 100.00               | 8206             | 100.00 |

Distributions of Table 3-1 age, DOAC type, and dosage according to the presence or absence of proton-pump inhibitors.

FREQ Procedure

Table: ALL \* e\_DOSE

ALL e\_DOSE

Power |

Percent |

Percent of rows

Percentage of columns | 1| 2| 3| Total

|       | 1      | 2      | 3      | Total  |
|-------|--------|--------|--------|--------|
| 1     | 17     | 561    | 123    | 701    |
|       | 2.43   | 80.03  | 17.55  | 100.00 |
|       | 2.43   | 80.03  | 17.55  |        |
|       | 100.00 | 100.00 | 100.00 |        |
| Total | 17     | 561    | 123    | 701    |
|       | 2.43   | 80.03  | 17.55  | 100.00 |

Degree of missing values = 2575

Distributions of Table 3-1 age, DOAC type, and dosage according to the presence or absence of proton-pump inhibitors.

FREQ Procedure

|   |      | Cumulative           |                  |        |
|---|------|----------------------|------------------|--------|
|   |      | Percent of ALL power | Percent of power |        |
| 1 | 8206 | 100.00               | 8206             | 100.00 |

Distributions of Table 3-1 age, DOAC type, and dosage according to the presence or absence of proton-pump inhibitors.

FREQ Procedure

Table: ALL \* e\_DOSE

ALL e\_DOSE

Power |

Percent |

Percent of rows

Percentage of columns | 1| 2| 3| Total

|       | 1      | 2      | 3      | Total  |
|-------|--------|--------|--------|--------|
| 1     | 17     | 561    | 123    | 701    |
|       | 2.43   | 80.03  | 17.55  | 100.00 |
|       | 2.43   | 80.03  | 17.55  |        |
|       | 100.00 | 100.00 | 100.00 |        |
| Total | 17     | 561    | 123    | 701    |
|       | 2.43   | 80.03  | 17.55  | 100.00 |

Degree of missing values = 2575

Distributions of Table 3-1 age, DOAC type, and dosage according to the presence or absence of proton-pump inhibitors.

FREQ Procedure

|   |                      |                  | Cumulative |        |
|---|----------------------|------------------|------------|--------|
|   | Percent of ALL power | Percent of power |            |        |
| 1 | 8206                 | 100.00           | 8206       | 100.00 |

Distributions of Table 3-1 age, DOAC type, and dosage according to the presence or absence of proton-pump inhibitors.

FREQ Procedure

Table: ALL \* e\_DOSE

ALL e\_DOSE

Power |

Percent |

Percent of rows

Percentage of columns | 1| 2| 3| Total

|       | 1      | 2      | 3      | Total  |
|-------|--------|--------|--------|--------|
| 1     | 17     | 561    | 123    | 701    |
|       | 2.43   | 80.03  | 17.55  | 100.00 |
|       | 2.43   | 80.03  | 17.55  |        |
|       | 100.00 | 100.00 | 100.00 |        |
| Total | 17     | 561    | 123    | 701    |
|       | 2.43   | 80.03  | 17.55  | 100.00 |

Degree of missing values = 2575



Distributions of Table 3-1 age, DOAC type, and dosage according to the presence or absence of proton-pump inhibitors.

FREQ Procedure

|   |      | Cumulative           |                  |        |
|---|------|----------------------|------------------|--------|
|   |      | Percent of ALL power | Percent of power |        |
| 1 | 8206 | 100.00               | 8206             | 100.00 |

Distributions of Table 3-1 age, DOAC type, and dosage according to the presence or absence of proton-pump inhibitors.

FREQ Procedure

Table: ALL \* e\_DOSE

ALL e\_DOSE

Power |

Percent |

Percent of rows

Percentage of columns | 1| 2| 3| Total

|       | 1      | 2      | 3      | Total  |
|-------|--------|--------|--------|--------|
| 1     | 17     | 561    | 123    | 701    |
|       | 2.43   | 80.03  | 17.55  | 100.00 |
|       | 2.43   | 80.03  | 17.55  |        |
|       | 100.00 | 100.00 | 100.00 |        |
| Total | 17     | 561    | 123    | 701    |
|       | 2.43   | 80.03  | 17.55  | 100.00 |

Degree of missing values = 2575

Distributions of Table 3-1 age, DOAC type, and dosage according to the presence or absence of proton-pump inhibitors.

FREQ Procedure

|   |                      |                  | Cumulative |        |
|---|----------------------|------------------|------------|--------|
|   | Percent of ALL power | Percent of power |            |        |
| 1 | 8206                 | 100.00           | 8206       | 100.00 |

Distributions of Table 3-1 age, DOAC type, and dosage according to the presence or absence of proton-pump inhibitors.

FREQ Procedure

Tables: ALL\* AGEC

ALL

AGEC(Age Category)

Power |

Percent |

Percent of rows

Percentage of column |80 years and older| Total

|Under 85 years of age|

| |

+ +

1 | 2768 | 2768

| 100.00 | 100.00

| 100.00 |

| 100.00 |

+ +

Total 2768 2768

100.00 100.00

Distributions of Table 3-1 age, DOAC type, and dosage according to the presence or absence of proton-pump inhibitors.

FREQ Procedure

|                      |      | Cumulative       |      |        |
|----------------------|------|------------------|------|--------|
| Percent of ALL power |      | Percent of power |      |        |
| 1                    | 8206 | 100.00           | 8206 | 100.00 |

Distributions of Table 3-1 age, DOAC type, and dosage according to the presence or absence of proton-pump inhibitors.

FREQ Procedure

Tables: ALL\* ACTYP

ALL ACTYP(Type of AF)

Power |

Percent |

Percent of rows

Percent of column | Dabigato| Riverro| Apixa| Edoxa| Edoxa| Total

|lan|xaban|ban|ban (OD)|

|||)|

|   | Dabigato | Riverro | Apixa  | Edoxa  | Edoxa  | Total  |
|---|----------|---------|--------|--------|--------|--------|
| 1 | 298      | 805     | 1091   | 571    | 3      | 2768   |
|   | 10.77    | 29.08   | 39.41  | 20.63  | 0.11   | 100.00 |
|   | 10.77    | 29.08   | 39.41  | 20.63  | 0.11   |        |
|   | 100.00   | 100.00  | 100.00 | 100.00 | 100.00 |        |

Total 298 805 1091 571 3 2768

10.77 29.08 39.41 20.63 0.11 100.00

Distributions of Table 3-1 age, DOAC type, and dosage according to the presence or absence of proton-pump inhibitors.

FREQ Procedure

|   |      | Cumulative           |                  |        |
|---|------|----------------------|------------------|--------|
|   |      | Percent of ALL power | Percent of power |        |
| 1 | 8206 | 100.00               | 8206             | 100.00 |

Distributions of Table 3-1 age, DOAC type, and dosage according to the presence or absence of proton-pump inhibitors.

FREQ Procedure

Table: ALL \* d\_DOSE

ALL d\_DOSE

Power |

Percent |

Percent of rows

Percentage of columns | 1| 2| 3| 4| 5| 9| Total

|       | 1      | 2      | 3      | 4      | 5      | 9      | Total  |
|-------|--------|--------|--------|--------|--------|--------|--------|
| 1     | 1      | 22     | 16     | 243    | 15     | 1      | 298    |
|       | 0.34   | 7.38   | 5.37   | 81.54  | 5.03   | 0.34   | 100.00 |
|       | 0.34   | 7.38   | 5.37   | 81.54  | 5.03   | 0.34   |        |
|       | 100.00 | 100.00 | 100.00 | 100.00 | 100.00 | 100.00 |        |
| Total | 1      | 22     | 16     | 243    | 15     | 1      | 298    |
|       | 0.34   | 7.38   | 5.37   | 81.54  | 5.03   | 0.34   | 100.00 |

Degree of missing values = 2470



Distributions of Table 3-1 age, DOAC type, and dosage according to the presence or absence of proton-pump inhibitors.

FREQ Procedure

|   |      | Cumulative           |                  |        |
|---|------|----------------------|------------------|--------|
|   |      | Percent of ALL power | Percent of power |        |
| 1 | 8206 | 100.00               | 8206             | 100.00 |

Distributions of Table 3-1 age, DOAC type, and dosage according to the presence or absence of proton-pump inhibitors.

FREQ Procedure

Table: ALL \* d\_DOSE

ALL d\_DOSE

Power |

Percent |

Percent of rows

Percentage of columns | 1| 2| 3| 4| 5| 9| Total

|       | 1      | 2      | 3      | 4      | 5      | 9      | Total  |
|-------|--------|--------|--------|--------|--------|--------|--------|
| 1     | 1      | 22     | 16     | 243    | 15     | 1      | 298    |
|       | 0.34   | 7.38   | 5.37   | 81.54  | 5.03   | 0.34   | 100.00 |
|       | 0.34   | 7.38   | 5.37   | 81.54  | 5.03   | 0.34   |        |
|       | 100.00 | 100.00 | 100.00 | 100.00 | 100.00 | 100.00 |        |
| Total | 1      | 22     | 16     | 243    | 15     | 1      | 298    |
|       | 0.34   | 7.38   | 5.37   | 81.54  | 5.03   | 0.34   | 100.00 |

Degree of missing values = 2470

Distributions of Table 3-1 age, DOAC type, and dosage according to the presence or absence of proton-pump inhibitors.

FREQ Procedure

|                      |      | Cumulative       |      |        |
|----------------------|------|------------------|------|--------|
| Percent of ALL power |      | Percent of power |      |        |
| 1                    | 8206 | 100.00           | 8206 | 100.00 |

Distributions of Table 3-1 age, DOAC type, and dosage according to the presence or absence of proton-pump inhibitors.

FREQ Procedure

Table: ALL \* d\_DOSE

ALL d\_DOSE

Power |

Percent |

Percent of rows

Percentage of columns | 1| 2| 3| 4| 5| 9| Total

|       | 1      | 2      | 3      | 4      | 5      | 9      | Total  |
|-------|--------|--------|--------|--------|--------|--------|--------|
| 1     | 1      | 22     | 16     | 243    | 15     | 1      | 298    |
|       | 0.34   | 7.38   | 5.37   | 81.54  | 5.03   | 0.34   | 100.00 |
|       | 0.34   | 7.38   | 5.37   | 81.54  | 5.03   | 0.34   |        |
|       | 100.00 | 100.00 | 100.00 | 100.00 | 100.00 | 100.00 |        |
| Total | 1      | 22     | 16     | 243    | 15     | 1      | 298    |
|       | 0.34   | 7.38   | 5.37   | 81.54  | 5.03   | 0.34   | 100.00 |

Degree of missing values = 2470

Distributions of Table 3-1 age, DOAC type, and dosage according to the presence or absence of proton-pump inhibitors.

FREQ Procedure

|   |                      |                  | Cumulative |        |
|---|----------------------|------------------|------------|--------|
|   | Percent of ALL power | Percent of power |            |        |
| 1 | 8206                 | 100.00           | 8206       | 100.00 |

Distributions of Table 3-1 age, DOAC type, and dosage according to the presence or absence of proton-pump inhibitors.

FREQ Procedure

Table: ALL \* d\_DOSE

ALL d\_DOSE

Power |

Percent |

Percent of rows

Percentage of columns | 1| 2| 3| 4| 5| 9| Total

|       | 1      | 2      | 3      | 4      | 5      | 9      | Total  |
|-------|--------|--------|--------|--------|--------|--------|--------|
| 1     | 1      | 22     | 16     | 243    | 15     | 1      | 298    |
|       | 0.34   | 7.38   | 5.37   | 81.54  | 5.03   | 0.34   | 100.00 |
|       | 0.34   | 7.38   | 5.37   | 81.54  | 5.03   | 0.34   |        |
|       | 100.00 | 100.00 | 100.00 | 100.00 | 100.00 | 100.00 |        |
| Total | 1      | 22     | 16     | 243    | 15     | 1      | 298    |
|       | 0.34   | 7.38   | 5.37   | 81.54  | 5.03   | 0.34   | 100.00 |

Degree of missing values = 2470

Distributions of Table 3-1 age, DOAC type, and dosage according to the presence or absence of proton-pump inhibitors.

FREQ Procedure

|                      |      | Cumulative       |      |        |
|----------------------|------|------------------|------|--------|
| Percent of ALL power |      | Percent of power |      |        |
| 1                    | 8206 | 100.00           | 8206 | 100.00 |

Distributions of Table 3-1 age, DOAC type, and dosage according to the presence or absence of proton-pump inhibitors.

FREQ Procedure

Table: ALL \* d\_DOSE

ALL d\_DOSE

Power |

Percent |

Percent of rows

Percentage of columns | 1| 2| 3| 4| 5| 9| Total

|       | 1      | 2      | 3      | 4      | 5      | 9      | Total  |
|-------|--------|--------|--------|--------|--------|--------|--------|
| 1     | 1      | 22     | 16     | 243    | 15     | 1      | 298    |
|       | 0.34   | 7.38   | 5.37   | 81.54  | 5.03   | 0.34   | 100.00 |
|       | 0.34   | 7.38   | 5.37   | 81.54  | 5.03   | 0.34   |        |
|       | 100.00 | 100.00 | 100.00 | 100.00 | 100.00 | 100.00 |        |
| Total | 1      | 22     | 16     | 243    | 15     | 1      | 298    |
|       | 0.34   | 7.38   | 5.37   | 81.54  | 5.03   | 0.34   | 100.00 |

Degree of missing values = 2470



Distributions of Table 3-1 age, DOAC type, and dosage according to the presence or absence of proton-pump inhibitors.

FREQ Procedure

|                      |      | Cumulative       |      |        |
|----------------------|------|------------------|------|--------|
| Percent of ALL power |      | Percent of power |      |        |
| 1                    | 8206 | 100.00           | 8206 | 100.00 |

Distributions of Table 3-1 age, DOAC type, and dosage according to the presence or absence of proton-pump inhibitors.

FREQ Procedure

Table: ALL \* d\_DOSE

ALL d\_DOSE

Power |

Percent |

Percent of rows

Percentage of columns | 1| 2| 3| 4| 5| 9| Total

|       | 1      | 2      | 3      | 4      | 5      | 9      | Total  |
|-------|--------|--------|--------|--------|--------|--------|--------|
| 1     | 1      | 22     | 16     | 243    | 15     | 1      | 298    |
|       | 0.34   | 7.38   | 5.37   | 81.54  | 5.03   | 0.34   | 100.00 |
|       | 0.34   | 7.38   | 5.37   | 81.54  | 5.03   | 0.34   |        |
|       | 100.00 | 100.00 | 100.00 | 100.00 | 100.00 | 100.00 |        |
| Total | 1      | 22     | 16     | 243    | 15     | 1      | 298    |
|       | 0.34   | 7.38   | 5.37   | 81.54  | 5.03   | 0.34   | 100.00 |

Degree of missing values = 2470

Distributions of Table 3-1 age, DOAC type, and dosage according to the presence or absence of proton-pump inhibitors.

FREQ Procedure

|   |      | Cumulative           |                  |        |
|---|------|----------------------|------------------|--------|
|   |      | Percent of ALL power | Percent of power |        |
| 1 | 8206 | 100.00               | 8206             | 100.00 |

Distributions of Table 3-1 age, DOAC type, and dosage according to the presence or absence of proton-pump inhibitors.

FREQ Procedure

Tables: ALL\* ACTYP

ALL ACTYP(Type of AF)

Power |

Percent |

Percent of rows

Percent of column | Dabigato| Riverro| Apixa| Edoxa| Edoxa| Total

|lan|xaban|ban|ban (OD)|

|||)|

|       | Dabigato | Riverro | Apixa  | Edoxa  | Edoxa  | Total  |
|-------|----------|---------|--------|--------|--------|--------|
| 1     | 298      | 805     | 1091   | 571    | 3      | 2768   |
|       | 10.77    | 29.08   | 39.41  | 20.63  | 0.11   | 100.00 |
|       | 10.77    | 29.08   | 39.41  | 20.63  | 0.11   |        |
|       | 100.00   | 100.00  | 100.00 | 100.00 | 100.00 |        |
| Total | 298      | 805     | 1091   | 571    | 3      | 2768   |
|       | 10.77    | 29.08   | 39.41  | 20.63  | 0.11   | 100.00 |

Distributions of Table 3-1 age, DOAC type, and dosage according to the presence or absence of proton-pump inhibitors.

FREQ Procedure

|   |                      |                  | Cumulative |        |
|---|----------------------|------------------|------------|--------|
|   | Percent of ALL power | Percent of power |            |        |
| 1 | 8206                 | 100.00           | 8206       | 100.00 |

Distributions of Table 3-1 age, DOAC type, and dosage according to the presence or absence of proton-pump inhibitors.

FREQ Procedure

Table: ALL \* r\_DOSE

ALL r\_DOSE

Power |

Percent |

Percent of rows

Percent of columns | 1| 2| 9| Total

|       | 1      | 2      | 9      | Total  |
|-------|--------|--------|--------|--------|
| 1     | 603    | 200    | 2      | 805    |
|       | 74.91  | 24.84  | 0.25   | 100.00 |
|       | 74.91  | 24.84  | 0.25   |        |
|       | 100.00 | 100.00 | 100.00 |        |
| Total | 603    | 200    | 2      | 805    |
|       | 74.91  | 24.84  | 0.25   | 100.00 |

Frequency of missing values = 1963

Distributions of Table 3-1 age, DOAC type, and dosage according to the presence or absence of proton-pump inhibitors.

FREQ Procedure

|   |      | Cumulative           |                  |        |
|---|------|----------------------|------------------|--------|
|   |      | Percent of ALL power | Percent of power |        |
| 1 | 8206 | 100.00               | 8206             | 100.00 |

Distributions of Table 3-1 age, DOAC type, and dosage according to the presence or absence of proton-pump inhibitors.

FREQ Procedure

Table: ALL \* r\_DOSE

ALL r\_DOSE

Power |

Percent |

Percent of rows

Percent of columns | 1| 2| 9| Total

|       | 1      | 2      | 9      | Total  |
|-------|--------|--------|--------|--------|
| 1     | 603    | 200    | 2      | 805    |
|       | 74.91  | 24.84  | 0.25   | 100.00 |
|       | 74.91  | 24.84  | 0.25   |        |
|       | 100.00 | 100.00 | 100.00 |        |
| Total | 603    | 200    | 2      | 805    |
|       | 74.91  | 24.84  | 0.25   | 100.00 |

Frequency of missing values = 1963



Distributions of Table 3-1 age, DOAC type, and dosage according to the presence or absence of proton-pump inhibitors.

FREQ Procedure

|   |      | Cumulative           |                  |        |
|---|------|----------------------|------------------|--------|
|   |      | Percent of ALL power | Percent of power |        |
| 1 | 8206 | 100.00               | 8206             | 100.00 |

Distributions of Table 3-1 age, DOAC type, and dosage according to the presence or absence of proton-pump inhibitors.

FREQ Procedure

Table: ALL \* r\_DOSE

ALL r\_DOSE

Power |

Percent |

Percent of rows

Percent of columns | 1| 2| 9| Total

|       | 1      | 2      | 9      | Total  |
|-------|--------|--------|--------|--------|
| 1     | 603    | 200    | 2      | 805    |
|       | 74.91  | 24.84  | 0.25   | 100.00 |
|       | 74.91  | 24.84  | 0.25   |        |
|       | 100.00 | 100.00 | 100.00 |        |
| Total | 603    | 200    | 2      | 805    |
|       | 74.91  | 24.84  | 0.25   | 100.00 |

Frequency of missing values = 1963

Distributions of Table 3-1 age, DOAC type, and dosage according to the presence or absence of proton-pump inhibitors.

FREQ Procedure

|   |      | Cumulative           |                  |        |
|---|------|----------------------|------------------|--------|
|   |      | Percent of ALL power | Percent of power |        |
| 1 | 8206 | 100.00               | 8206             | 100.00 |

Distributions of Table 3-1 age, DOAC type, and dosage according to the presence or absence of proton-pump inhibitors.

FREQ Procedure

Tables: ALL\* ACTYP

ALL ACTYP(Type of AF)

Power |

Percent |

Percent of rows

Percent of column | Dabigato| Riverro| Apixa| Edoxa| Edoxa| Total

|lan|xaban|ban|ban (OD)|

||||)|

|       | Dabigato | Riverro | Apixa  | Edoxa  | Edoxa  | Total  |
|-------|----------|---------|--------|--------|--------|--------|
| 1     | 298      | 805     | 1091   | 571    | 3      | 2768   |
|       | 10.77    | 29.08   | 39.41  | 20.63  | 0.11   | 100.00 |
|       | 10.77    | 29.08   | 39.41  | 20.63  | 0.11   |        |
|       | 100.00   | 100.00  | 100.00 | 100.00 | 100.00 |        |
| Total | 298      | 805     | 1091   | 571    | 3      | 2768   |
|       | 10.77    | 29.08   | 39.41  | 20.63  | 0.11   | 100.00 |

Distributions of Table 3-1 age, DOAC type, and dosage according to the presence or absence of proton-pump inhibitors.

FREQ Procedure

|                      |      | Cumulative       |      |        |
|----------------------|------|------------------|------|--------|
| Percent of ALL power |      | Percent of power |      |        |
| 1                    | 8206 | 100.00           | 8206 | 100.00 |

Distributions of Table 3-1 age, DOAC type, and dosage according to the presence or absence of proton-pump inhibitors.

FREQ Procedure

Table: ALL \* a\_DOSE

ALL a\_DOSE

Power |

Percent |

Percent of rows

Percentage of columns | 1| 2| 3| 9| Total

|                       | 1      | 2      | 3      | 9      | Total  |
|-----------------------|--------|--------|--------|--------|--------|
|                       | 63     | 803    | 222    | 3      | 1091   |
| Percent of rows       | 5.77   | 73.60  | 20.35  | 0.27   | 100.00 |
| Percentage of columns | 5.77   | 73.60  | 20.35  | 0.27   |        |
|                       | 100.00 | 100.00 | 100.00 | 100.00 |        |
| Total                 | 63     | 803    | 222    | 3      | 1091   |
|                       | 5.77   | 73.60  | 20.35  | 0.27   | 100.00 |

Frequency of missing values = 1677

Distributions of Table 3-1 age, DOAC type, and dosage according to the presence or absence of proton-pump inhibitors.

FREQ Procedure

|   |      | Cumulative           |                  |        |
|---|------|----------------------|------------------|--------|
|   |      | Percent of ALL power | Percent of power |        |
| 1 | 8206 | 100.00               | 8206             | 100.00 |

Distributions of Table 3-1 age, DOAC type, and dosage according to the presence or absence of proton-pump inhibitors.

FREQ Procedure

Table: ALL \* a\_DOSE

ALL a\_DOSE

Power |

Percent |

Percent of rows

Percentage of columns | 1| 2| 3| 9| Total

|                       | 1      | 2      | 3      | 9      | Total  |
|-----------------------|--------|--------|--------|--------|--------|
|                       | 63     | 803    | 222    | 3      | 1091   |
| Percent of rows       | 5.77   | 73.60  | 20.35  | 0.27   | 100.00 |
| Percentage of columns | 5.77   | 73.60  | 20.35  | 0.27   |        |
|                       | 100.00 | 100.00 | 100.00 | 100.00 |        |
| Total                 | 63     | 803    | 222    | 3      | 1091   |
|                       | 5.77   | 73.60  | 20.35  | 0.27   | 100.00 |

Frequency of missing values = 1677



Distributions of Table 3-1 age, DOAC type, and dosage according to the presence or absence of proton-pump inhibitors.

FREQ Procedure

|                      |      | Cumulative       |      |        |
|----------------------|------|------------------|------|--------|
| Percent of ALL power |      | Percent of power |      |        |
| 1                    | 8206 | 100.00           | 8206 | 100.00 |

Distributions of Table 3-1 age, DOAC type, and dosage according to the presence or absence of proton-pump inhibitors.

FREQ Procedure

Table: ALL \* a\_DOSE

ALL a\_DOSE

Power |

Percent |

Percent of rows

Percentage of columns | 1| 2| 3| 9| Total

|                       | 1      | 2      | 3      | 9      | Total  |
|-----------------------|--------|--------|--------|--------|--------|
|                       | 63     | 803    | 222    | 3      | 1091   |
| Percent of rows       | 5.77   | 73.60  | 20.35  | 0.27   | 100.00 |
| Percentage of columns | 5.77   | 73.60  | 20.35  | 0.27   |        |
|                       | 100.00 | 100.00 | 100.00 | 100.00 |        |
| Total                 | 63     | 803    | 222    | 3      | 1091   |
|                       | 5.77   | 73.60  | 20.35  | 0.27   | 100.00 |

Frequency of missing values = 1677

Distributions of Table 3-1 age, DOAC type, and dosage according to the presence or absence of proton-pump inhibitors.

FREQ Procedure

|                      |      | Cumulative       |      |        |
|----------------------|------|------------------|------|--------|
| Percent of ALL power |      | Percent of power |      |        |
| 1                    | 8206 | 100.00           | 8206 | 100.00 |

Distributions of Table 3-1 age, DOAC type, and dosage according to the presence or absence of proton-pump inhibitors.

FREQ Procedure

Table: ALL \* a\_DOSE

ALL a\_DOSE

Power |

Percent |

Percent of rows

Percentage of columns | 1| 2| 3| 9| Total

|                       | 1      | 2      | 3      | 9      | Total  |
|-----------------------|--------|--------|--------|--------|--------|
|                       | 63     | 803    | 222    | 3      | 1091   |
| Percent of rows       | 5.77   | 73.60  | 20.35  | 0.27   | 100.00 |
| Percentage of columns | 5.77   | 73.60  | 20.35  | 0.27   |        |
|                       | 100.00 | 100.00 | 100.00 | 100.00 |        |
| Total                 | 63     | 803    | 222    | 3      | 1091   |
|                       | 5.77   | 73.60  | 20.35  | 0.27   | 100.00 |

Frequency of missing values = 1677

Distributions of Table 3-1 age, DOAC type, and dosage according to the presence or absence of proton-pump inhibitors.

FREQ Procedure

|                      |      | Cumulative       |      |        |
|----------------------|------|------------------|------|--------|
| Percent of ALL power |      | Percent of power |      |        |
| 1                    | 8206 | 100.00           | 8206 | 100.00 |

Distributions of Table 3-1 age, DOAC type, and dosage according to the presence or absence of proton-pump inhibitors.

FREQ Procedure

Table: ALL \* t\_ACT0

ALL t\_ACT0

Power |

Percent |

Percent of rows

Percentage of columns | 0| 1| Sum

|       | 0      | 1      | Sum    |
|-------|--------|--------|--------|
| 1     | 2194   | 574    | 2768   |
|       | 79.26  | 20.74  | 100.00 |
|       | 79.26  | 20.74  |        |
|       | 100.00 | 100.00 |        |
| Total | 2194   | 574    | 2768   |
|       | 79.26  | 20.74  | 100.00 |

Distributions of Table 3-1 age, DOAC type, and dosage according to the presence or absence of proton-pump inhibitors.

FREQ Procedure

|   |      | Cumulative           |                  |        |
|---|------|----------------------|------------------|--------|
|   |      | Percent of ALL power | Percent of power |        |
| 1 | 8206 | 100.00               | 8206             | 100.00 |

Distributions of Table 3-1 age, DOAC type, and dosage according to the presence or absence of proton-pump inhibitors.

FREQ Procedure

Table: ALL \* e\_DOSE

ALL e\_DOSE

Power |

Percent |

Percent of rows

Percentage of columns | 1| 2| 3| Total

|       | 1      | 2      | 3      | Total  |
|-------|--------|--------|--------|--------|
| 1     | 32     | 490    | 52     | 574    |
|       | 5.57   | 85.37  | 9.06   | 100.00 |
|       | 5.57   | 85.37  | 9.06   |        |
|       | 100.00 | 100.00 | 100.00 |        |
| Total | 32     | 490    | 52     | 574    |
|       | 5.57   | 85.37  | 9.06   | 100.00 |

Degree of missing values = 2194



Distributions of Table 3-1 age, DOAC type, and dosage according to the presence or absence of proton-pump inhibitors.

FREQ Procedure

|   |      | Cumulative           |                  |        |
|---|------|----------------------|------------------|--------|
|   |      | Percent of ALL power | Percent of power |        |
| 1 | 8206 | 100.00               | 8206             | 100.00 |

Distributions of Table 3-1 age, DOAC type, and dosage according to the presence or absence of proton-pump inhibitors.

FREQ Procedure

Table: ALL \* e\_DOSE

ALL e\_DOSE

Power |

Percent |

Percent of rows

Percentage of columns | 1| 2| 3| Total

|       | 1      | 2      | 3      | Total  |
|-------|--------|--------|--------|--------|
| 1     | 32     | 490    | 52     | 574    |
|       | 5.57   | 85.37  | 9.06   | 100.00 |
|       | 5.57   | 85.37  | 9.06   |        |
|       | 100.00 | 100.00 | 100.00 |        |
| Total | 32     | 490    | 52     | 574    |
|       | 5.57   | 85.37  | 9.06   | 100.00 |

Degree of missing values = 2194

Distributions of Table 3-1 age, DOAC type, and dosage according to the presence or absence of proton-pump inhibitors.

FREQ Procedure

|   |      | Cumulative           |                  |        |
|---|------|----------------------|------------------|--------|
|   |      | Percent of ALL power | Percent of power |        |
| 1 | 8206 | 100.00               | 8206             | 100.00 |

Distributions of Table 3-1 age, DOAC type, and dosage according to the presence or absence of proton-pump inhibitors.

FREQ Procedure

Table: ALL \* e\_DOSE

ALL e\_DOSE

Power |

Percent |

Percent of rows

Percentage of columns | 1| 2| 3| Total

|                       | 1      | 2      | 3      | Total  |
|-----------------------|--------|--------|--------|--------|
| Count                 | 32     | 490    | 52     | 574    |
| Percent               | 5.57   | 85.37  | 9.06   | 100.00 |
| Percent of rows       | 5.57   | 85.37  | 9.06   |        |
| Percentage of columns | 100.00 | 100.00 | 100.00 |        |
| Total                 | 32     | 490    | 52     | 574    |
|                       | 5.57   | 85.37  | 9.06   | 100.00 |

Degree of missing values = 2194

Distributions of Table 3-1 age, DOAC type, and dosage according to the presence or absence of proton-pump inhibitors.

FREQ Procedure

|                      |      | Cumulative       |      |        |
|----------------------|------|------------------|------|--------|
| Percent of ALL power |      | Percent of power |      |        |
| 1                    | 8206 | 100.00           | 8206 | 100.00 |

Distributions of Table 3-1 age, DOAC type, and dosage according to the presence or absence of proton-pump inhibitors.

FREQ Procedure

Table: ALL \* e\_DOSE

ALL e\_DOSE

Power |

Percent |

Percent of rows

Percentage of columns | 1| 2| 3| Total

|                       | 1      | 2      | 3      | Total  |
|-----------------------|--------|--------|--------|--------|
| Count                 | 32     | 490    | 52     | 574    |
| Percent               | 5.57   | 85.37  | 9.06   | 100.00 |
| Percent of rows       | 5.57   | 85.37  | 9.06   |        |
| Percentage of columns | 100.00 | 100.00 | 100.00 |        |
| Total                 | 32     | 490    | 52     | 574    |
|                       | 5.57   | 85.37  | 9.06   | 100.00 |

Degree of missing values = 2194

Distributions of Table 3-1 age, DOAC type, and dosage according to the presence or absence of proton-pump inhibitors.

FREQ Procedure

|   |      | Cumulative           |                  |        |
|---|------|----------------------|------------------|--------|
|   |      | Percent of ALL power | Percent of power |        |
| 1 | 8206 | 100.00               | 8206             | 100.00 |

Distributions of Table 3-1 age, DOAC type, and dosage according to the presence or absence of proton-pump inhibitors.

FREQ Procedure

Tables: ALL\* AGEC

ALL

AGEC(Age Category)

Power |

Percent |

Percent of rows

Percentage of column |85 years and older| Total

|Under 90 years of age|

| | |

+ +

1 | 1639 | 1639

| 100.00 | 100.00

| 100.00 |

| 100.00 |

+ +

Total 1639 1639

100.00 100.00



Distributions of Table 3-1 age, DOAC type, and dosage according to the presence or absence of proton-pump inhibitors.

FREQ Procedure

|                      |      | Cumulative       |      |        |
|----------------------|------|------------------|------|--------|
| Percent of ALL power |      | Percent of power |      |        |
| 1                    | 8206 | 100.00           | 8206 | 100.00 |

Distributions of Table 3-1 age, DOAC type, and dosage according to the presence or absence of proton-pump inhibitors.

FREQ Procedure

Tables: ALL\* ACTYP

ALL ACTYP(Type of AF)

Power |

Percent |

Percent of rows

Percent of column | Dabigato| Riverro| Apixa| Edoxa| Edoxa| Total

|lan|xaban|ban|ban (OD)|

|||)|

|       | Dabigato | Riverro | Apixa  | Edoxa  | Edoxa  | Total  |
|-------|----------|---------|--------|--------|--------|--------|
| 1     | 111      | 472     | 722    | 329    | 5      | 1639   |
|       | 6.77     | 28.80   | 44.05  | 20.07  | 0.31   | 100.00 |
|       | 6.77     | 28.80   | 44.05  | 20.07  | 0.31   |        |
|       | 100.00   | 100.00  | 100.00 | 100.00 | 100.00 |        |
| Total | 111      | 472     | 722    | 329    | 5      | 1639   |
|       | 6.77     | 28.80   | 44.05  | 20.07  | 0.31   | 100.00 |

Distributions of Table 3-1 age, DOAC type, and dosage according to the presence or absence of proton-pump inhibitors.

FREQ Procedure

|                      |      | Cumulative       |      |        |
|----------------------|------|------------------|------|--------|
| Percent of ALL power |      | Percent of power |      |        |
| 1                    | 8206 | 100.00           | 8206 | 100.00 |

Distributions of Table 3-1 age, DOAC type, and dosage according to the presence or absence of proton-pump inhibitors.

FREQ Procedure

Table: ALL \* d\_DOSE

ALL d\_DOSE

Power |

Percent |

Percent of rows

Percentage of columns | 1| 2| 3| 4| 5| Total

|       | 1      | 2      | 3      | 4      | 5      | Total  |
|-------|--------|--------|--------|--------|--------|--------|
| 1     | 2      | 10     | 4      | 92     | 3      | 111    |
|       | 1.80   | 9.01   | 3.60   | 82.88  | 2.70   | 100.00 |
|       | 1.80   | 9.01   | 3.60   | 82.88  | 2.70   |        |
|       | 100.00 | 100.00 | 100.00 | 100.00 | 100.00 |        |
| Total | 2      | 10     | 4      | 92     | 3      | 111    |
|       | 1.80   | 9.01   | 3.60   | 82.88  | 2.70   | 100.00 |

Degree of missing values = 1528

Distributions of Table 3-1 age, DOAC type, and dosage according to the presence or absence of proton-pump inhibitors.

FREQ Procedure

|   |      | Cumulative           |                  |        |
|---|------|----------------------|------------------|--------|
|   |      | Percent of ALL power | Percent of power |        |
| 1 | 8206 | 100.00               | 8206             | 100.00 |

Distributions of Table 3-1 age, DOAC type, and dosage according to the presence or absence of proton-pump inhibitors.

FREQ Procedure

Table: ALL \* d\_DOSE

ALL d\_DOSE

Power |

Percent |

Percent of rows

Percentage of columns | 1| 2| 3| 4| 5| Total

|       | 1      | 2      | 3      | 4      | 5      | Total  |
|-------|--------|--------|--------|--------|--------|--------|
| 1     | 2      | 10     | 4      | 92     | 3      | 111    |
|       | 1.80   | 9.01   | 3.60   | 82.88  | 2.70   | 100.00 |
|       | 1.80   | 9.01   | 3.60   | 82.88  | 2.70   |        |
|       | 100.00 | 100.00 | 100.00 | 100.00 | 100.00 |        |
| Total | 2      | 10     | 4      | 92     | 3      | 111    |
|       | 1.80   | 9.01   | 3.60   | 82.88  | 2.70   | 100.00 |

Degree of missing values = 1528

Distributions of Table 3-1 age, DOAC type, and dosage according to the presence or absence of proton-pump inhibitors.

FREQ Procedure

|                      |      | Cumulative       |      |        |
|----------------------|------|------------------|------|--------|
| Percent of ALL power |      | Percent of power |      |        |
| 1                    | 8206 | 100.00           | 8206 | 100.00 |

Distributions of Table 3-1 age, DOAC type, and dosage according to the presence or absence of proton-pump inhibitors.

FREQ Procedure

Table: ALL \* d\_DOSE

ALL d\_DOSE

Power |

Percent |

Percent of rows

Percentage of columns | 1| 2| 3| 4| 5| Total

|                       | 1      | 2      | 3      | 4      | 5      | Total  |     |
|-----------------------|--------|--------|--------|--------|--------|--------|-----|
| Count                 | 1      | 2      | 10     | 4      | 92     | 3      | 111 |
| Percent               | 1.80   | 9.01   | 3.60   | 82.88  | 2.70   | 100.00 |     |
| Percent of rows       | 1.80   | 9.01   | 3.60   | 82.88  | 2.70   |        |     |
| Percentage of columns | 100.00 | 100.00 | 100.00 | 100.00 | 100.00 | 100.00 |     |
| Total                 | 2      | 10     | 4      | 92     | 3      | 111    |     |
|                       | 1.80   | 9.01   | 3.60   | 82.88  | 2.70   | 100.00 |     |

Degree of missing values = 1528



Distributions of Table 3-1 age, DOAC type, and dosage according to the presence or absence of proton-pump inhibitors.

FREQ Procedure

|                      |      | Cumulative       |      |        |
|----------------------|------|------------------|------|--------|
| Percent of ALL power |      | Percent of power |      |        |
| 1                    | 8206 | 100.00           | 8206 | 100.00 |

Distributions of Table 3-1 age, DOAC type, and dosage according to the presence or absence of proton-pump inhibitors.

FREQ Procedure

Table: ALL \* d\_DOSE

ALL d\_DOSE

Power |

Percent |

Percent of rows

Percentage of columns | 1| 2| 3| 4| 5| Total

|       | 1      | 2      | 3      | 4      | 5      | Total  |
|-------|--------|--------|--------|--------|--------|--------|
| 1     | 2      | 10     | 4      | 92     | 3      | 111    |
|       | 1.80   | 9.01   | 3.60   | 82.88  | 2.70   | 100.00 |
|       | 1.80   | 9.01   | 3.60   | 82.88  | 2.70   |        |
|       | 100.00 | 100.00 | 100.00 | 100.00 | 100.00 |        |
| Total | 2      | 10     | 4      | 92     | 3      | 111    |
|       | 1.80   | 9.01   | 3.60   | 82.88  | 2.70   | 100.00 |

Degree of missing values = 1528

Distributions of Table 3-1 age, DOAC type, and dosage according to the presence or absence of proton-pump inhibitors.

FREQ Procedure

|   |      | Cumulative           |                  |        |
|---|------|----------------------|------------------|--------|
|   |      | Percent of ALL power | Percent of power |        |
| 1 | 8206 | 100.00               | 8206             | 100.00 |

Distributions of Table 3-1 age, DOAC type, and dosage according to the presence or absence of proton-pump inhibitors.

FREQ Procedure

Table: ALL \* d\_DOSE

ALL d\_DOSE

Power |

Percent |

Percent of rows

Percentage of columns | 1| 2| 3| 4| 5| Total

|       | 1      | 2      | 3      | 4      | 5      | Total  |
|-------|--------|--------|--------|--------|--------|--------|
| 1     | 2      | 10     | 4      | 92     | 3      | 111    |
|       | 1.80   | 9.01   | 3.60   | 82.88  | 2.70   | 100.00 |
|       | 1.80   | 9.01   | 3.60   | 82.88  | 2.70   |        |
|       | 100.00 | 100.00 | 100.00 | 100.00 | 100.00 |        |
| Total | 2      | 10     | 4      | 92     | 3      | 111    |
|       | 1.80   | 9.01   | 3.60   | 82.88  | 2.70   | 100.00 |

Degree of missing values = 1528

Distributions of Table 3-1 age, DOAC type, and dosage according to the presence or absence of proton-pump inhibitors.

FREQ Procedure

|                      |      | Cumulative       |      |        |
|----------------------|------|------------------|------|--------|
| Percent of ALL power |      | Percent of power |      |        |
| 1                    | 8206 | 100.00           | 8206 | 100.00 |

Distributions of Table 3-1 age, DOAC type, and dosage according to the presence or absence of proton-pump inhibitors.

FREQ Procedure

Table: ALL \* d\_DOSE

ALL d\_DOSE

Power |

Percent |

Percent of rows

Percentage of columns | 1| 2| 3| 4| 5| Total

|                       | 1      | 2      | 3      | 4      | 5      | Total  |     |
|-----------------------|--------|--------|--------|--------|--------|--------|-----|
| Count                 | 1      | 2      | 10     | 4      | 92     | 3      | 111 |
| Percent               | 1.80   | 9.01   | 3.60   | 82.88  | 2.70   | 100.00 |     |
| Percent of rows       | 1.80   | 9.01   | 3.60   | 82.88  | 2.70   |        |     |
| Percentage of columns | 100.00 | 100.00 | 100.00 | 100.00 | 100.00 | 100.00 |     |
| Total                 | 2      | 10     | 4      | 92     | 3      | 111    |     |
|                       | 1.80   | 9.01   | 3.60   | 82.88  | 2.70   | 100.00 |     |

Degree of missing values = 1528

Distributions of Table 3-1 age, DOAC type, and dosage according to the presence or absence of proton-pump inhibitors.

FREQ Procedure

|                      |      | Cumulative       |      |        |
|----------------------|------|------------------|------|--------|
| Percent of ALL power |      | Percent of power |      |        |
| 1                    | 8206 | 100.00           | 8206 | 100.00 |

Distributions of Table 3-1 age, DOAC type, and dosage according to the presence or absence of proton-pump inhibitors.

FREQ Procedure

Tables: ALL\* ACTYP

ALL ACTYP(Type of AF)

Power |

Percent |

Percent of rows

Percent of column | Dabigato| Riverro| Apixa| Edoxa| Edoxa| Total

|lan|xaban|ban|ban (OD)|

||||)|

|   | Dabigato | Riverro | Apixa  | Edoxa  | Edoxa  | Total  |
|---|----------|---------|--------|--------|--------|--------|
| 1 | 111      | 472     | 722    | 329    | 5      | 1639   |
|   | 6.77     | 28.80   | 44.05  | 20.07  | 0.31   | 100.00 |
|   | 6.77     | 28.80   | 44.05  | 20.07  | 0.31   |        |
|   | 100.00   | 100.00  | 100.00 | 100.00 | 100.00 |        |

Total 111 472 722 329 5 1639

6.77 28.80 44.05 20.07 0.31 100.00



Distributions of Table 3-1 age, DOAC type, and dosage according to the presence or absence of proton-pump inhibitors.

FREQ Procedure

|                      |      | Cumulative       |      |        |
|----------------------|------|------------------|------|--------|
| Percent of ALL power |      | Percent of power |      |        |
| 1                    | 8206 | 100.00           | 8206 | 100.00 |

Distributions of Table 3-1 age, DOAC type, and dosage according to the presence or absence of proton-pump inhibitors.

FREQ Procedure

Table: ALL \* r\_DOSE

ALL r\_DOSE

Power |

Percent |

Percent of rows

Percent of columns | 1| 2| 9| Total

|       | 1      | 2      | 9      | Total  |
|-------|--------|--------|--------|--------|
| 1     | 420    | 47     | 5      | 472    |
|       | 88.98  | 9.96   | 1.06   | 100.00 |
|       | 88.98  | 9.96   | 1.06   |        |
|       | 100.00 | 100.00 | 100.00 |        |
| Total | 420    | 47     | 5      | 472    |
|       | 88.98  | 9.96   | 1.06   | 100.00 |

Frequency of missing values = 1167

Distributions of Table 3-1 age, DOAC type, and dosage according to the presence or absence of proton-pump inhibitors.

FREQ Procedure

|                      |      | Cumulative       |      |        |
|----------------------|------|------------------|------|--------|
| Percent of ALL power |      | Percent of power |      |        |
| 1                    | 8206 | 100.00           | 8206 | 100.00 |

Distributions of Table 3-1 age, DOAC type, and dosage according to the presence or absence of proton-pump inhibitors.

FREQ Procedure

Table: ALL \* r\_DOSE

ALL r\_DOSE

Power |

Percent |

Percent of rows

Percent of columns | 1| 2| 9| Total

|       | 1      | 2      | 9      | Total  |
|-------|--------|--------|--------|--------|
| 1     | 420    | 47     | 5      | 472    |
|       | 88.98  | 9.96   | 1.06   | 100.00 |
|       | 88.98  | 9.96   | 1.06   |        |
|       | 100.00 | 100.00 | 100.00 |        |
| Total | 420    | 47     | 5      | 472    |
|       | 88.98  | 9.96   | 1.06   | 100.00 |

Frequency of missing values = 1167

Distributions of Table 3-1 age, DOAC type, and dosage according to the presence or absence of proton-pump inhibitors.

FREQ Procedure

|   |      | Cumulative           |                  |        |
|---|------|----------------------|------------------|--------|
|   |      | Percent of ALL power | Percent of power |        |
| 1 | 8206 | 100.00               | 8206             | 100.00 |

Distributions of Table 3-1 age, DOAC type, and dosage according to the presence or absence of proton-pump inhibitors.

FREQ Procedure

Table: ALL \* r\_DOSE

ALL r\_DOSE

Power |

Percent |

Percent of rows

Percent of columns | 1| 2| 9| Total

|       | 1      | 2      | 9      | Total  |
|-------|--------|--------|--------|--------|
| 1     | 420    | 47     | 5      | 472    |
|       | 88.98  | 9.96   | 1.06   | 100.00 |
|       | 88.98  | 9.96   | 1.06   |        |
|       | 100.00 | 100.00 | 100.00 |        |
| Total | 420    | 47     | 5      | 472    |
|       | 88.98  | 9.96   | 1.06   | 100.00 |

Frequency of missing values = 1167

Distributions of Table 3-1 age, DOAC type, and dosage according to the presence or absence of proton-pump inhibitors.

FREQ Procedure

|   |                      |                  | Cumulative |        |
|---|----------------------|------------------|------------|--------|
|   | Percent of ALL power | Percent of power |            |        |
| 1 | 8206                 | 100.00           | 8206       | 100.00 |

Distributions of Table 3-1 age, DOAC type, and dosage according to the presence or absence of proton-pump inhibitors.

FREQ Procedure

Tables: ALL\* ACTYP

ALL ACTYP(Type of AF)

Power |

Percent |

Percent of rows

Percent of column | Dabigato| Riverro| Apixa| Edoxa| Edoxa| Total

|lan|xaban|ban|ban (OD)|

|||)|

|   | Dabigato | Riverro | Apixa  | Edoxa  | Edoxa  | Total  |
|---|----------|---------|--------|--------|--------|--------|
| 1 | 111      | 472     | 722    | 329    | 5      | 1639   |
|   | 6.77     | 28.80   | 44.05  | 20.07  | 0.31   | 100.00 |
|   | 6.77     | 28.80   | 44.05  | 20.07  | 0.31   |        |
|   | 100.00   | 100.00  | 100.00 | 100.00 | 100.00 |        |

Total 111 472 722 329 5 1639

6.77 28.80 44.05 20.07 0.31 100.00



Distributions of Table 3-1 age, DOAC type, and dosage according to the presence or absence of proton-pump inhibitors.

FREQ Procedure

|   |      | Cumulative           |                  |        |
|---|------|----------------------|------------------|--------|
|   |      | Percent of ALL power | Percent of power |        |
| 1 | 8206 | 100.00               | 8206             | 100.00 |

Distributions of Table 3-1 age, DOAC type, and dosage according to the presence or absence of proton-pump inhibitors.

FREQ Procedure

Table: ALL \* a\_DOSE

ALL a\_DOSE

Power |

Percent |

Percent of rows

Percentage of columns | 1| 2| 3| Total

|       | 1      | 2      | 3      | Total  |
|-------|--------|--------|--------|--------|
| 1     | 73     | 606    | 43     | 722    |
|       | 10.11  | 83.93  | 5.96   | 100.00 |
|       | 10.11  | 83.93  | 5.96   |        |
|       | 100.00 | 100.00 | 100.00 |        |
| Total | 73     | 606    | 43     | 722    |
|       | 10.11  | 83.93  | 5.96   | 100.00 |

Frequency of missing values = 917

Distributions of Table 3-1 age, DOAC type, and dosage according to the presence or absence of proton-pump inhibitors.

FREQ Procedure

|   |      | Cumulative           |                  |        |
|---|------|----------------------|------------------|--------|
|   |      | Percent of ALL power | Percent of power |        |
| 1 | 8206 | 100.00               | 8206             | 100.00 |

Distributions of Table 3-1 age, DOAC type, and dosage according to the presence or absence of proton-pump inhibitors.

FREQ Procedure

Table: ALL \* a\_DOSE

ALL a\_DOSE

Power |

Percent |

Percent of rows

Percentage of columns | 1| 2| 3| Total

|       | 1      | 2      | 3      | Total  |
|-------|--------|--------|--------|--------|
| 1     | 73     | 606    | 43     | 722    |
|       | 10.11  | 83.93  | 5.96   | 100.00 |
|       | 10.11  | 83.93  | 5.96   |        |
|       | 100.00 | 100.00 | 100.00 |        |
| Total | 73     | 606    | 43     | 722    |
|       | 10.11  | 83.93  | 5.96   | 100.00 |

Frequency of missing values = 917

Distributions of Table 3-1 age, DOAC type, and dosage according to the presence or absence of proton-pump inhibitors.

FREQ Procedure

|                      |      | Cumulative       |      |        |
|----------------------|------|------------------|------|--------|
| Percent of ALL power |      | Percent of power |      |        |
| 1                    | 8206 | 100.00           | 8206 | 100.00 |

Distributions of Table 3-1 age, DOAC type, and dosage according to the presence or absence of proton-pump inhibitors.

FREQ Procedure

Table: ALL \* a\_DOSE

ALL a\_DOSE

Power |

Percent |

Percent of rows

Percentage of columns | 1| 2| 3| Total

|       | 1      | 2      | 3      | Total  |
|-------|--------|--------|--------|--------|
| 1     | 73     | 606    | 43     | 722    |
|       | 10.11  | 83.93  | 5.96   | 100.00 |
|       | 10.11  | 83.93  | 5.96   |        |
|       | 100.00 | 100.00 | 100.00 |        |
| Total | 73     | 606    | 43     | 722    |
|       | 10.11  | 83.93  | 5.96   | 100.00 |

Frequency of missing values = 917

Distributions of Table 3-1 age, DOAC type, and dosage according to the presence or absence of proton-pump inhibitors.

FREQ Procedure

|   |      | Cumulative           |                  |        |
|---|------|----------------------|------------------|--------|
|   |      | Percent of ALL power | Percent of power |        |
| 1 | 8206 | 100.00               | 8206             | 100.00 |

Distributions of Table 3-1 age, DOAC type, and dosage according to the presence or absence of proton-pump inhibitors.

FREQ Procedure

Table: ALL \* a\_DOSE

ALL a\_DOSE

Power |

Percent |

Percent of rows

Percentage of columns | 1| 2| 3| Total

|       | 1      | 2      | 3      | Total  |
|-------|--------|--------|--------|--------|
| 1     | 73     | 606    | 43     | 722    |
|       | 10.11  | 83.93  | 5.96   | 100.00 |
|       | 10.11  | 83.93  | 5.96   |        |
|       | 100.00 | 100.00 | 100.00 |        |
| Total | 73     | 606    | 43     | 722    |
|       | 10.11  | 83.93  | 5.96   | 100.00 |

Frequency of missing values = 917



Distributions of Table 3-1 age, DOAC type, and dosage according to the presence or absence of proton-pump inhibitors.

FREQ Procedure

|                      |      | Cumulative       |      |        |
|----------------------|------|------------------|------|--------|
| Percent of ALL power |      | Percent of power |      |        |
| 1                    | 8206 | 100.00           | 8206 | 100.00 |

Distributions of Table 3-1 age, DOAC type, and dosage according to the presence or absence of proton-pump inhibitors.

FREQ Procedure

Table: ALL \* t\_ACT0

ALL t\_ACT0

Power |

Percent |

Percent of rows

Percentage of columns | 0| 1| Sum

|       | 0      | 1      | Sum    |
|-------|--------|--------|--------|
| 1     | 1305   | 334    | 1639   |
|       | 79.62  | 20.38  | 100.00 |
|       | 79.62  | 20.38  |        |
|       | 100.00 | 100.00 |        |
| Total | 1305   | 334    | 1639   |
|       | 79.62  | 20.38  | 100.00 |

Distributions of Table 3-1 age, DOAC type, and dosage according to the presence or absence of proton-pump inhibitors.

FREQ Procedure

|   |      | Cumulative           |                  |        |
|---|------|----------------------|------------------|--------|
|   |      | Percent of ALL power | Percent of power |        |
| 1 | 8206 | 100.00               | 8206             | 100.00 |

Distributions of Table 3-1 age, DOAC type, and dosage according to the presence or absence of proton-pump inhibitors.

FREQ Procedure

Table: ALL \* e\_DOSE

ALL e\_DOSE

Power |

Percent |

Percent of rows

Percentage of columns | 1| 2| 3| Total

|                       | 1      | 2      | 3      | Total  |
|-----------------------|--------|--------|--------|--------|
|                       | 34     | 289    | 11     | 334    |
| Percent of rows       | 10.18  | 86.53  | 3.29   | 100.00 |
| Percentage of columns | 10.18  | 86.53  | 3.29   |        |
|                       | 100.00 | 100.00 | 100.00 |        |
| Total                 | 34     | 289    | 11     | 334    |
|                       | 10.18  | 86.53  | 3.29   | 100.00 |

Degree of missing values = 1305

Distributions of Table 3-1 age, DOAC type, and dosage according to the presence or absence of proton-pump inhibitors.

FREQ Procedure

|   |      | Cumulative           |                  |        |
|---|------|----------------------|------------------|--------|
|   |      | Percent of ALL power | Percent of power |        |
| 1 | 8206 | 100.00               | 8206             | 100.00 |

Distributions of Table 3-1 age, DOAC type, and dosage according to the presence or absence of proton-pump inhibitors.

FREQ Procedure

Table: ALL \* e\_DOSE

ALL e\_DOSE

Power |

Percent |

Percent of rows

Percentage of columns | 1| 2| 3| Total

|                       | 1      | 2      | 3      | Total  |
|-----------------------|--------|--------|--------|--------|
|                       | 34     | 289    | 11     | 334    |
| Percent of rows       | 10.18  | 86.53  | 3.29   | 100.00 |
| Percentage of columns | 10.18  | 86.53  | 3.29   |        |
|                       | 100.00 | 100.00 | 100.00 |        |
| Total                 | 34     | 289    | 11     | 334    |
|                       | 10.18  | 86.53  | 3.29   | 100.00 |

Degree of missing values = 1305

Distributions of Table 3-1 age, DOAC type, and dosage according to the presence or absence of proton-pump inhibitors.

FREQ Procedure

|   |      | Cumulative           |                  |        |
|---|------|----------------------|------------------|--------|
|   |      | Percent of ALL power | Percent of power |        |
| 1 | 8206 | 100.00               | 8206             | 100.00 |

Distributions of Table 3-1 age, DOAC type, and dosage according to the presence or absence of proton-pump inhibitors.

FREQ Procedure

Table: ALL \* e\_DOSE

ALL e\_DOSE

Power |

Percent |

Percent of rows

Percentage of columns | 1| 2| 3| Total

|                       | 1      | 2      | 3      | Total  |
|-----------------------|--------|--------|--------|--------|
|                       | 34     | 289    | 11     | 334    |
| Percent of rows       | 10.18  | 86.53  | 3.29   | 100.00 |
| Percentage of columns | 10.18  | 86.53  | 3.29   |        |
|                       | 100.00 | 100.00 | 100.00 |        |
| Total                 | 34     | 289    | 11     | 334    |
|                       | 10.18  | 86.53  | 3.29   | 100.00 |

Degree of missing values = 1305



Distributions of Table 3-1 age, DOAC type, and dosage according to the presence or absence of proton-pump inhibitors.

FREQ Procedure

|   |      | Cumulative           |                  |        |
|---|------|----------------------|------------------|--------|
|   |      | Percent of ALL power | Percent of power |        |
| 1 | 8206 | 100.00               | 8206             | 100.00 |

Distributions of Table 3-1 age, DOAC type, and dosage according to the presence or absence of proton-pump inhibitors.

FREQ Procedure

Table: ALL \* e\_DOSE

ALL e\_DOSE

Power |

Percent |

Percent of rows

Percentage of columns | 1| 2| 3| Total

|                       | 1      | 2      | 3      | Total  |
|-----------------------|--------|--------|--------|--------|
|                       | 34     | 289    | 11     | 334    |
| Percent of rows       | 10.18  | 86.53  | 3.29   | 100.00 |
| Percentage of columns | 10.18  | 86.53  | 3.29   |        |
|                       | 100.00 | 100.00 | 100.00 |        |
| Total                 | 34     | 289    | 11     | 334    |
|                       | 10.18  | 86.53  | 3.29   | 100.00 |

Degree of missing values = 1305

Distributions of Table 3-1 age, DOAC type, and dosage according to the presence or absence of proton-pump inhibitors.

FREQ Procedure

|   |      | Cumulative           |                  |        |
|---|------|----------------------|------------------|--------|
|   |      | Percent of ALL power | Percent of power |        |
| 1 | 8206 | 100.00               | 8206             | 100.00 |

Distributions of Table 3-1 age, DOAC type, and dosage according to the presence or absence of proton-pump inhibitors.

FREQ Procedure

Table : ALL \* \_AGE90

ALL \_AGE90

Power |

Percent |

Percent of rows

Percent of columns | 1 | Total

|        |        |        |  |
|--------|--------|--------|--|
| _____+ |        | _____+ |  |
| 1      | 523    | 523    |  |
|        | 100.00 | 100.00 |  |
|        | 100.00 |        |  |
|        | 100.00 |        |  |
| _____+ |        | _____+ |  |
| Total  | 523    | 523    |  |
|        | 100.00 | 100.00 |  |

Distributions of Table 3-1 age, DOAC type, and dosage according to the presence or absence of proton-pump inhibitors.

FREQ Procedure

|   |      | Cumulative           |                  |        |
|---|------|----------------------|------------------|--------|
|   |      | Percent of ALL power | Percent of power |        |
| 1 | 8206 | 100.00               | 8206             | 100.00 |

Distributions of Table 3-1 age, DOAC type, and dosage according to the presence or absence of proton-pump inhibitors.

FREQ Procedure

Tables: ALL\* ACTYP

ALL ACTYP(Type of AF)

Power |

Percent |

Percent of rows

Percent of column | Dabigato| Riverro| Apixa| Edoxa| Edoxa| Total

|lan|xaban|ban|ban (OD)|

|||)|

|       | Dabigato | Riverro | Apixa  | Edoxa  | Edoxa  | Total  |
|-------|----------|---------|--------|--------|--------|--------|
| 1     | 30       | 137     | 227    | 128    | 1      | 523    |
|       | 5.74     | 26.20   | 43.40  | 24.47  | 0.19   | 100.00 |
|       | 5.74     | 26.20   | 43.40  | 24.47  | 0.19   |        |
|       | 100.00   | 100.00  | 100.00 | 100.00 | 100.00 |        |
| Total | 30       | 137     | 227    | 128    | 1      | 523    |
|       | 5.74     | 26.20   | 43.40  | 24.47  | 0.19   | 100.00 |

Distributions of Table 3-1 age, DOAC type, and dosage according to the presence or absence of proton-pump inhibitors.

FREQ Procedure

|   |      | Cumulative           |                  |        |
|---|------|----------------------|------------------|--------|
|   |      | Percent of ALL power | Percent of power |        |
| 1 | 8206 | 100.00               | 8206             | 100.00 |

Distributions of Table 3-1 age, DOAC type, and dosage according to the presence or absence of proton-pump inhibitors.

FREQ Procedure

Table: ALL \* d\_DOSE

ALL d\_DOSE

Power |

Percent |

Percent of rows

Percentage of columns | 1| 2| 3| 4| Total

|                       | 1      | 2      | 3      | 4      | Total  |
|-----------------------|--------|--------|--------|--------|--------|
| 1                     | 1      | 2      | 6      | 21     | 30     |
| Percent               | 3.33   | 6.67   | 20.00  | 70.00  | 100.00 |
| Percent of rows       | 3.33   | 6.67   | 20.00  | 70.00  |        |
| Percentage of columns | 100.00 | 100.00 | 100.00 | 100.00 |        |
| Total                 | 1      | 2      | 6      | 21     | 30     |
| Percent of columns    | 3.33   | 6.67   | 20.00  | 70.00  | 100.00 |

Frequency of missing values = 493



Distributions of Table 3-1 age, DOAC type, and dosage according to the presence or absence of proton-pump inhibitors.

FREQ Procedure

|                      |      | Cumulative       |      |        |
|----------------------|------|------------------|------|--------|
| Percent of ALL power |      | Percent of power |      |        |
| 1                    | 8206 | 100.00           | 8206 | 100.00 |

Distributions of Table 3-1 age, DOAC type, and dosage according to the presence or absence of proton-pump inhibitors.

FREQ Procedure

Table: ALL \* d\_DOSE

ALL d\_DOSE

Power |

Percent |

Percent of rows

Percentage of columns | 1| 2| 3| 4| Total

|       | 1      | 2      | 3      | 4      | Total  |
|-------|--------|--------|--------|--------|--------|
| 1     | 1      | 2      | 6      | 21     | 30     |
|       | 3.33   | 6.67   | 20.00  | 70.00  | 100.00 |
|       | 3.33   | 6.67   | 20.00  | 70.00  |        |
|       | 100.00 | 100.00 | 100.00 | 100.00 |        |
| Total | 3.33   | 6.67   | 20.00  | 70.00  | 100.00 |

Frequency of missing values = 493

Distributions of Table 3-1 age, DOAC type, and dosage according to the presence or absence of proton-pump inhibitors.

FREQ Procedure

|   |      | Cumulative           |                  |        |
|---|------|----------------------|------------------|--------|
|   |      | Percent of ALL power | Percent of power |        |
| 1 | 8206 | 100.00               | 8206             | 100.00 |

Distributions of Table 3-1 age, DOAC type, and dosage according to the presence or absence of proton-pump inhibitors.

FREQ Procedure

Table: ALL \* d\_DOSE

ALL d\_DOSE

Power |

Percent |

Percent of rows

Percentage of columns | 1| 2| 3| 4| Total

|       | 1      | 2      | 3      | 4      | Total  |
|-------|--------|--------|--------|--------|--------|
|       | 1      | 2      | 6      | 21     | 30     |
|       | 3.33   | 6.67   | 20.00  | 70.00  | 100.00 |
|       | 3.33   | 6.67   | 20.00  | 70.00  |        |
|       | 100.00 | 100.00 | 100.00 | 100.00 |        |
| Total | 3.33   | 6.67   | 20.00  | 70.00  | 100.00 |

Frequency of missing values = 493

Distributions of Table 3-1 age, DOAC type, and dosage according to the presence or absence of proton-pump inhibitors.

FREQ Procedure

|   |      | Cumulative           |                  |        |
|---|------|----------------------|------------------|--------|
|   |      | Percent of ALL power | Percent of power |        |
| 1 | 8206 | 100.00               | 8206             | 100.00 |

Distributions of Table 3-1 age, DOAC type, and dosage according to the presence or absence of proton-pump inhibitors.

FREQ Procedure

Table: ALL \* d\_DOSE

ALL d\_DOSE

Power |

Percent |

Percent of rows

Percentage of columns | 1| 2| 3| 4| Total

|       | 1      | 2      | 3      | 4      | Total  |
|-------|--------|--------|--------|--------|--------|
| 1     | 1      | 2      | 6      | 21     | 30     |
|       | 3.33   | 6.67   | 20.00  | 70.00  | 100.00 |
|       | 3.33   | 6.67   | 20.00  | 70.00  |        |
|       | 100.00 | 100.00 | 100.00 | 100.00 |        |
| Total | 3.33   | 6.67   | 20.00  | 70.00  | 100.00 |

Frequency of missing values = 493

Distributions of Table 3-1 age, DOAC type, and dosage according to the presence or absence of proton-pump inhibitors.

FREQ Procedure

|   |      | Cumulative           |                  |        |
|---|------|----------------------|------------------|--------|
|   |      | Percent of ALL power | Percent of power |        |
| 1 | 8206 | 100.00               | 8206             | 100.00 |

Distributions of Table 3-1 age, DOAC type, and dosage according to the presence or absence of proton-pump inhibitors.

FREQ Procedure

Table: ALL \* d\_DOSE

ALL d\_DOSE

Power |

Percent |

Percent of rows

Percentage of columns | 1| 2| 3| 4| Total

|       | 1      | 2      | 3      | 4      | Total  |
|-------|--------|--------|--------|--------|--------|
| 1     | 1      | 2      | 6      | 21     | 30     |
|       | 3.33   | 6.67   | 20.00  | 70.00  | 100.00 |
|       | 3.33   | 6.67   | 20.00  | 70.00  |        |
|       | 100.00 | 100.00 | 100.00 | 100.00 |        |
| Total | 3.33   | 6.67   | 20.00  | 70.00  | 100.00 |

Frequency of missing values = 493



Distributions of Table 3-1 age, DOAC type, and dosage according to the presence or absence of proton-pump inhibitors.

FREQ Procedure

|   |      | Cumulative           |                  |        |
|---|------|----------------------|------------------|--------|
|   |      | Percent of ALL power | Percent of power |        |
| 1 | 8206 | 100.00               | 8206             | 100.00 |

Distributions of Table 3-1 age, DOAC type, and dosage according to the presence or absence of proton-pump inhibitors.

FREQ Procedure

Table: ALL \* d\_DOSE

ALL d\_DOSE

Power |

Percent |

Percent of rows

Percentage of columns | 1| 2| 3| 4| Total

|       | 1      | 2      | 3      | 4      | Total  |
|-------|--------|--------|--------|--------|--------|
| 1     | 1      | 2      | 6      | 21     | 30     |
|       | 3.33   | 6.67   | 20.00  | 70.00  | 100.00 |
|       | 3.33   | 6.67   | 20.00  | 70.00  |        |
|       | 100.00 | 100.00 | 100.00 | 100.00 |        |
| Total | 3.33   | 6.67   | 20.00  | 70.00  | 100.00 |

Frequency of missing values = 493

Distributions of Table 3-1 age, DOAC type, and dosage according to the presence or absence of proton-pump inhibitors.

FREQ Procedure

|   |      | Cumulative           |                  |        |
|---|------|----------------------|------------------|--------|
|   |      | Percent of ALL power | Percent of power |        |
| 1 | 8206 | 100.00               | 8206             | 100.00 |

Distributions of Table 3-1 age, DOAC type, and dosage according to the presence or absence of proton-pump inhibitors.

FREQ Procedure

Tables: ALL\* ACTYP

ALL ACTYP(Type of AF)

Power |

Percent |

Percent of rows

Percent of column | Dabigato| Riverro| Apixa| Edoxa| Edoxa| Total

|lan|xaban|ban|ban (OD)|

|||)|

|       | Dabigato | Riverro | Apixa  | Edoxa  | Edoxa  | Total  |
|-------|----------|---------|--------|--------|--------|--------|
| 1     | 30       | 137     | 227    | 128    | 1      | 523    |
|       | 5.74     | 26.20   | 43.40  | 24.47  | 0.19   | 100.00 |
|       | 5.74     | 26.20   | 43.40  | 24.47  | 0.19   |        |
|       | 100.00   | 100.00  | 100.00 | 100.00 | 100.00 |        |
| Total | 30       | 137     | 227    | 128    | 1      | 523    |
|       | 5.74     | 26.20   | 43.40  | 24.47  | 0.19   | 100.00 |

Distributions of Table 3-1 age, DOAC type, and dosage according to the presence or absence of proton-pump inhibitors.

FREQ Procedure

|   |      | Cumulative           |                  |        |
|---|------|----------------------|------------------|--------|
|   |      | Percent of ALL power | Percent of power |        |
| 1 | 8206 | 100.00               | 8206             | 100.00 |

Distributions of Table 3-1 age, DOAC type, and dosage according to the presence or absence of proton-pump inhibitors.

FREQ Procedure

Table: ALL \* r\_DOSE

ALL r\_DOSE

Power |

Percent |

Percent of rows

Percent of columns | 1| 2| 9| Total

|                    | 1      | 2      | 9      | Total  |
|--------------------|--------|--------|--------|--------|
|                    | 126    | 7      | 4      | 137    |
| Percent of rows    | 91.97  | 5.11   | 2.92   | 100.00 |
| Percent of columns | 91.97  | 5.11   | 2.92   |        |
|                    | 100.00 | 100.00 | 100.00 |        |
| Total              | 126    | 7      | 4      | 137    |
|                    | 91.97  | 5.11   | 2.92   | 100.00 |

Degree of missing values = 386

Distributions of Table 3-1 age, DOAC type, and dosage according to the presence or absence of proton-pump inhibitors.

FREQ Procedure

|                      |      | Cumulative       |      |        |
|----------------------|------|------------------|------|--------|
| Percent of ALL power |      | Percent of power |      |        |
| 1                    | 8206 | 100.00           | 8206 | 100.00 |

Distributions of Table 3-1 age, DOAC type, and dosage according to the presence or absence of proton-pump inhibitors.

FREQ Procedure

Table: ALL \* r\_DOSE

ALL r\_DOSE

Power |

Percent |

Percent of rows

Percent of columns | 1| 2| 9| Total

|                    | 1      | 2      | 9      | Total  |
|--------------------|--------|--------|--------|--------|
|                    | 126    | 7      | 4      | 137    |
| Percent of rows    | 91.97  | 5.11   | 2.92   | 100.00 |
| Percent of columns | 91.97  | 5.11   | 2.92   |        |
|                    | 100.00 | 100.00 | 100.00 |        |
| Total              | 126    | 7      | 4      | 137    |
|                    | 91.97  | 5.11   | 2.92   | 100.00 |

Degree of missing values = 386



Distributions of Table 3-1 age, DOAC type, and dosage according to the presence or absence of proton-pump inhibitors.

FREQ Procedure

|   |                      |                  | Cumulative |        |
|---|----------------------|------------------|------------|--------|
|   | Percent of ALL power | Percent of power |            |        |
| 1 | 8206                 | 100.00           | 8206       | 100.00 |

Distributions of Table 3-1 age, DOAC type, and dosage according to the presence or absence of proton-pump inhibitors.

FREQ Procedure

Table: ALL \* r\_DOSE

ALL r\_DOSE

Power |

Percent |

Percent of rows

Percent of columns | 1| 2| 9| Total

|                    | 1      | 2      | 9      | Total  |
|--------------------|--------|--------|--------|--------|
|                    | 126    | 7      | 4      | 137    |
| Percent of rows    | 91.97  | 5.11   | 2.92   | 100.00 |
| Percent of columns | 91.97  | 5.11   | 2.92   |        |
|                    | 100.00 | 100.00 | 100.00 |        |
| Total              | 126    | 7      | 4      | 137    |
|                    | 91.97  | 5.11   | 2.92   | 100.00 |

Degree of missing values = 386

Distributions of Table 3-1 age, DOAC type, and dosage according to the presence or absence of proton-pump inhibitors.

FREQ Procedure

|                      |      | Cumulative       |      |        |
|----------------------|------|------------------|------|--------|
| Percent of ALL power |      | Percent of power |      |        |
| 1                    | 8206 | 100.00           | 8206 | 100.00 |

Distributions of Table 3-1 age, DOAC type, and dosage according to the presence or absence of proton-pump inhibitors.

FREQ Procedure

Tables: ALL\* ACTYP

ALL ACTYP(Type of AF)

Power |

Percent |

Percent of rows

Percent of column | Dabigato| Riverro| Apixa| Edoxa| Edoxa| Total

|lan|xaban|ban|ban (OD)|

|||)|

|       | Dabigato | Riverro | Apixa  | Edoxa  | Edoxa  | Total  |
|-------|----------|---------|--------|--------|--------|--------|
| 1     | 30       | 137     | 227    | 128    | 1      | 523    |
|       | 5.74     | 26.20   | 43.40  | 24.47  | 0.19   | 100.00 |
|       | 5.74     | 26.20   | 43.40  | 24.47  | 0.19   |        |
|       | 100.00   | 100.00  | 100.00 | 100.00 | 100.00 |        |
| Total | 30       | 137     | 227    | 128    | 1      | 523    |
|       | 5.74     | 26.20   | 43.40  | 24.47  | 0.19   | 100.00 |

Distributions of Table 3-1 age, DOAC type, and dosage according to the presence or absence of proton-pump inhibitors.

FREQ Procedure

|   |      | Cumulative           |                  |        |
|---|------|----------------------|------------------|--------|
|   |      | Percent of ALL power | Percent of power |        |
| 1 | 8206 | 100.00               | 8206             | 100.00 |

Distributions of Table 3-1 age, DOAC type, and dosage according to the presence or absence of proton-pump inhibitors.

FREQ Procedure

Table: ALL \* a\_DOSE

ALL a\_DOSE

Power |

Percent |

Percent of rows

Percentage of columns | 1| 2| 3| Total

|       | 1      | 2      | 3      | Total  |
|-------|--------|--------|--------|--------|
| 1     | 21     | 201    | 5      | 227    |
|       | 9.25   | 88.55  | 2.20   | 100.00 |
|       | 9.25   | 88.55  | 2.20   |        |
|       | 100.00 | 100.00 | 100.00 |        |
| Total | 21     | 201    | 5      | 227    |
|       | 9.25   | 88.55  | 2.20   | 100.00 |

Frequency of missing values = 296

Distributions of Table 3-1 age, DOAC type, and dosage according to the presence or absence of proton-pump inhibitors.

FREQ Procedure

|                      |      | Cumulative       |      |        |
|----------------------|------|------------------|------|--------|
| Percent of ALL power |      | Percent of power |      |        |
| 1                    | 8206 | 100.00           | 8206 | 100.00 |

Distributions of Table 3-1 age, DOAC type, and dosage according to the presence or absence of proton-pump inhibitors.

FREQ Procedure

Table: ALL \* a\_DOSE

ALL a\_DOSE

Power |

Percent |

Percent of rows

Percentage of columns | 1| 2| 3| Total

|       | 1      | 2      | 3      | Total  |
|-------|--------|--------|--------|--------|
| 1     | 21     | 201    | 5      | 227    |
|       | 9.25   | 88.55  | 2.20   | 100.00 |
|       | 9.25   | 88.55  | 2.20   |        |
|       | 100.00 | 100.00 | 100.00 |        |
| Total | 21     | 201    | 5      | 227    |
|       | 9.25   | 88.55  | 2.20   | 100.00 |

Frequency of missing values = 296



Distributions of Table 3-1 age, DOAC type, and dosage according to the presence or absence of proton-pump inhibitors.

FREQ Procedure

|                      |      | Cumulative       |      |        |
|----------------------|------|------------------|------|--------|
| Percent of ALL power |      | Percent of power |      |        |
| 1                    | 8206 | 100.00           | 8206 | 100.00 |

Distributions of Table 3-1 age, DOAC type, and dosage according to the presence or absence of proton-pump inhibitors.

FREQ Procedure

Table: ALL \* a\_DOSE

ALL a\_DOSE

Power |

Percent |

Percent of rows

Percentage of columns | 1| 2| 3| Total

|       | 1      | 2      | 3      | Total  |
|-------|--------|--------|--------|--------|
| 1     | 21     | 201    | 5      | 227    |
|       | 9.25   | 88.55  | 2.20   | 100.00 |
|       | 9.25   | 88.55  | 2.20   |        |
|       | 100.00 | 100.00 | 100.00 |        |
| Total | 21     | 201    | 5      | 227    |
|       | 9.25   | 88.55  | 2.20   | 100.00 |

Frequency of missing values = 296

Distributions of Table 3-1 age, DOAC type, and dosage according to the presence or absence of proton-pump inhibitors.

FREQ Procedure

|                      |      | Cumulative       |      |        |
|----------------------|------|------------------|------|--------|
| Percent of ALL power |      | Percent of power |      |        |
| 1                    | 8206 | 100.00           | 8206 | 100.00 |

Distributions of Table 3-1 age, DOAC type, and dosage according to the presence or absence of proton-pump inhibitors.

FREQ Procedure

Table: ALL \* a\_DOSE

ALL a\_DOSE

Power |

Percent |

Percent of rows

Percentage of columns | 1| 2| 3| Total

|       | 1      | 2      | 3      | Total  |
|-------|--------|--------|--------|--------|
| 1     | 21     | 201    | 5      | 227    |
|       | 9.25   | 88.55  | 2.20   | 100.00 |
|       | 9.25   | 88.55  | 2.20   |        |
|       | 100.00 | 100.00 | 100.00 |        |
| Total | 21     | 201    | 5      | 227    |
|       | 9.25   | 88.55  | 2.20   | 100.00 |

Frequency of missing values = 296

Distributions of Table 3-1 age, DOAC type, and dosage according to the presence or absence of proton-pump inhibitors.

FREQ Procedure

|   |                      |                  | Cumulative |        |
|---|----------------------|------------------|------------|--------|
|   | Percent of ALL power | Percent of power |            |        |
| 1 | 8206                 | 100.00           | 8206       | 100.00 |

Distributions of Table 3-1 age, DOAC type, and dosage according to the presence or absence of proton-pump inhibitors.

FREQ Procedure

Table: ALL \* t\_ACT0

ALL t\_ACT0

Power |

Percent |

Percent of rows

Percentage of columns | 0 | 1 | Sum

|       | 0      | 1      | Sum    |
|-------|--------|--------|--------|
| 1     | 394    | 129    | 523    |
|       | 75.33  | 24.67  | 100.00 |
|       | 75.33  | 24.67  |        |
|       | 100.00 | 100.00 |        |
| Total | 394    | 129    | 523    |
|       | 75.33  | 24.67  | 100.00 |

Distributions of Table 3-1 age, DOAC type, and dosage according to the presence or absence of proton-pump inhibitors.

FREQ Procedure

|                      |      | Cumulative       |      |        |
|----------------------|------|------------------|------|--------|
| Percent of ALL power |      | Percent of power |      |        |
| 1                    | 8206 | 100.00           | 8206 | 100.00 |

Distributions of Table 3-1 age, DOAC type, and dosage according to the presence or absence of proton-pump inhibitors.

FREQ Procedure

Table: ALL \* e\_DOSE

ALL e\_DOSE

Power |

Percent |

Percent of rows

Percentage of columns | 1| 2| 3| Total

|       | 1      | 2      | 3      | Total  |
|-------|--------|--------|--------|--------|
| 1     | 23     | 105    | 1      | 129    |
|       | 17.83  | 81.40  | 0.78   | 100.00 |
|       | 17.83  | 81.40  | 0.78   |        |
|       | 100.00 | 100.00 | 100.00 |        |
| Total | 23     | 105    | 1      | 129    |
|       | 17.83  | 81.40  | 0.78   | 100.00 |

Frequency of missing values = 394



Distributions of Table 3-1 age, DOAC type, and dosage according to the presence or absence of proton-pump inhibitors.

FREQ Procedure

|   |                      |                  | Cumulative |        |
|---|----------------------|------------------|------------|--------|
|   | Percent of ALL power | Percent of power |            |        |
| 1 | 8206                 | 100.00           | 8206       | 100.00 |

Distributions of Table 3-1 age, DOAC type, and dosage according to the presence or absence of proton-pump inhibitors.

FREQ Procedure

Table: ALL \* e\_DOSE

ALL e\_DOSE

Power |

Percent |

Percent of rows

Percentage of columns | 1| 2| 3| Total

|       | 1      | 2      | 3      | Total  |
|-------|--------|--------|--------|--------|
| 1     | 23     | 105    | 1      | 129    |
|       | 17.83  | 81.40  | 0.78   | 100.00 |
|       | 17.83  | 81.40  | 0.78   |        |
|       | 100.00 | 100.00 | 100.00 |        |
| Total | 23     | 105    | 1      | 129    |
|       | 17.83  | 81.40  | 0.78   | 100.00 |

Frequency of missing values = 394

Distributions of Table 3-1 age, DOAC type, and dosage according to the presence or absence of proton-pump inhibitors.

FREQ Procedure

|                      |      | Cumulative       |      |        |
|----------------------|------|------------------|------|--------|
| Percent of ALL power |      | Percent of power |      |        |
| 1                    | 8206 | 100.00           | 8206 | 100.00 |

Distributions of Table 3-1 age, DOAC type, and dosage according to the presence or absence of proton-pump inhibitors.

FREQ Procedure

Table: ALL \* e\_DOSE

ALL e\_DOSE

Power |

Percent |

Percent of rows

Percentage of columns | 1| 2| 3| Total

|       | 1      | 2      | 3      | Total  |
|-------|--------|--------|--------|--------|
| 1     | 23     | 105    | 1      | 129    |
|       | 17.83  | 81.40  | 0.78   | 100.00 |
|       | 17.83  | 81.40  | 0.78   |        |
|       | 100.00 | 100.00 | 100.00 |        |
| Total | 23     | 105    | 1      | 129    |
|       | 17.83  | 81.40  | 0.78   | 100.00 |

Frequency of missing values = 394

Distributions of Table 3-1 age, DOAC type, and dosage according to the presence or absence of proton-pump inhibitors.

FREQ Procedure

|   |      | Cumulative           |                  |        |
|---|------|----------------------|------------------|--------|
|   |      | Percent of ALL power | Percent of power |        |
| 1 | 8206 | 100.00               | 8206             | 100.00 |

Distributions of Table 3-1 age, DOAC type, and dosage according to the presence or absence of proton-pump inhibitors.

FREQ Procedure

Table: ALL \* e\_DOSE

ALL e\_DOSE

Power |

Percent |

Percent of rows

Percentage of columns | 1| 2| 3| Total

|       | 1      | 2      | 3      | Total  |
|-------|--------|--------|--------|--------|
| 1     | 23     | 105    | 1      | 129    |
|       | 17.83  | 81.40  | 0.78   | 100.00 |
|       | 17.83  | 81.40  | 0.78   |        |
|       | 100.00 | 100.00 | 100.00 |        |
| Total | 23     | 105    | 1      | 129    |
|       | 17.83  | 81.40  | 0.78   | 100.00 |

Frequency of missing values = 394

Distributions of Table 3-1 age, DOAC type, and dosage according to the presence or absence of proton-pump inhibitors.

FREQ Procedure

|                      |       | Cumulative       |       |        |
|----------------------|-------|------------------|-------|--------|
| Percent of ALL power |       | Percent of power |       |        |
| 1                    | 13400 | 100.00           | 13400 | 100.00 |

Distributions of Table 3-1 age, DOAC type, and dosage according to the presence or absence of proton-pump inhibitors.

FREQ Procedure

Tables: ALL\* AGEC

ALL

AGEC(Age Category)

Power |

Percent |

Percent of rows

Percent of column |75 years and older| Total

|Under 80 years of age|

| |

+ +

1 | 5723 | 5723

| 100.00 | 100.00

| 100.00 |

| 100.00 |

+ +

Total 5723 5723

100.00 100.00



Distributions of Table 3-1 age, DOAC type, and dosage according to the presence or absence of proton-pump inhibitors.

FREQ Procedure

|                      |       | Cumulative       |       |        |
|----------------------|-------|------------------|-------|--------|
| Percent of ALL power |       | Percent of power |       |        |
| 1                    | 13400 | 100.00           | 13400 | 100.00 |

Distributions of Table 3-1 age, DOAC type, and dosage according to the presence or absence of proton-pump inhibitors.

FREQ Procedure

Tables: ALL\* ACTYP

ALL ACTYP(Type of AF)

Power |

Percent |

Percent of rows

Percent of column | Dabigato| Riverro| Apixa| Edoxa| Edoxa| Total

|lan|xaban|ban|ban (OD)|

||||)|

|   | Dabigato | Riverro | Apixa  | Edoxa  | Edoxa  | Total  |
|---|----------|---------|--------|--------|--------|--------|
| 1 | 779      | 1862    | 1782   | 1287   | 13     | 5723   |
|   | 13.61    | 32.54   | 31.14  | 22.49  | 0.23   | 100.00 |
|   | 13.61    | 32.54   | 31.14  | 22.49  | 0.23   |        |
|   | 100.00   | 100.00  | 100.00 | 100.00 | 100.00 |        |

Total 779 1862 1782 1287 13 5723

13.61 32.54 31.14 22.49 0.23 100.00

Distributions of Table 3-1 age, DOAC type, and dosage according to the presence or absence of proton-pump inhibitors.

FREQ Procedure

|                      |       | Cumulative       |       |        |
|----------------------|-------|------------------|-------|--------|
| Percent of ALL power |       | Percent of power |       |        |
| 1                    | 13400 | 100.00           | 13400 | 100.00 |

Distributions of Table 3-1 age, DOAC type, and dosage according to the presence or absence of proton-pump inhibitors.

FREQ Procedure

Table: ALL \* d\_DOSE

ALL d\_DOSE

Power |

Percent |

Percent of rows

Percentage of columns | 1| 2| 3| 4| 5| 9| Total

|       | 1      | 2      | 3      | 4      | 5      | 9      | Total  |
|-------|--------|--------|--------|--------|--------|--------|--------|
| 1     | 2      | 71     | 29     | 601    | 75     | 1      | 779    |
|       | 0.26   | 9.11   | 3.72   | 77.15  | 9.63   | 0.13   | 100.00 |
|       | 0.26   | 9.11   | 3.72   | 77.15  | 9.63   | 0.13   |        |
|       | 100.00 | 100.00 | 100.00 | 100.00 | 100.00 | 100.00 |        |
| Total | 2      | 71     | 29     | 601    | 75     | 1      | 779    |
|       | 0.26   | 9.11   | 3.72   | 77.15  | 9.63   | 0.13   | 100.00 |

Degree of missing values = 4944

Distributions of Table 3-1 age, DOAC type, and dosage according to the presence or absence of proton-pump inhibitors.

FREQ Procedure

|                      |       | Cumulative       |       |        |
|----------------------|-------|------------------|-------|--------|
| Percent of ALL power |       | Percent of power |       |        |
| 1                    | 13400 | 100.00           | 13400 | 100.00 |

Distributions of Table 3-1 age, DOAC type, and dosage according to the presence or absence of proton-pump inhibitors.

FREQ Procedure

Table: ALL \* d\_DOSE

ALL d\_DOSE

Power |

Percent |

Percent of rows

Percentage of columns | 1| 2| 3| 4| 5| 9| Total

|                       | 1      | 2      | 3      | 4      | 5      | 9      | Total  |
|-----------------------|--------|--------|--------|--------|--------|--------|--------|
| Count                 | 1      | 2      | 71     | 29     | 601    | 75     | 779    |
| Percent               | 0.26   | 9.11   | 3.72   | 77.15  | 9.63   | 0.13   | 100.00 |
| Percent of rows       | 0.26   | 9.11   | 3.72   | 77.15  | 9.63   | 0.13   |        |
| Percentage of columns | 100.00 | 100.00 | 100.00 | 100.00 | 100.00 | 100.00 |        |
| Total                 | 2      | 71     | 29     | 601    | 75     | 1      | 779    |
|                       | 0.26   | 9.11   | 3.72   | 77.15  | 9.63   | 0.13   | 100.00 |

Degree of missing values = 4944

Distributions of Table 3-1 age, DOAC type, and dosage according to the presence or absence of proton-pump inhibitors.

FREQ Procedure

|                      |       | Cumulative       |       |        |
|----------------------|-------|------------------|-------|--------|
| Percent of ALL power |       | Percent of power |       |        |
| 1                    | 13400 | 100.00           | 13400 | 100.00 |

Distributions of Table 3-1 age, DOAC type, and dosage according to the presence or absence of proton-pump inhibitors.

FREQ Procedure

Table: ALL \* d\_DOSE

ALL d\_DOSE

Power |

Percent |

Percent of rows

Percentage of columns | 1| 2| 3| 4| 5| 9| Total

|                       | 1      | 2      | 3      | 4      | 5      | 9      | Total  |
|-----------------------|--------|--------|--------|--------|--------|--------|--------|
| Count                 | 1      | 2      | 71     | 29     | 601    | 75     | 779    |
| Percent               | 0.26   | 9.11   | 3.72   | 77.15  | 9.63   | 0.13   | 100.00 |
| Percent of rows       | 0.26   | 9.11   | 3.72   | 77.15  | 9.63   | 0.13   |        |
| Percentage of columns | 100.00 | 100.00 | 100.00 | 100.00 | 100.00 | 100.00 |        |
| Total                 | 2      | 71     | 29     | 601    | 75     | 1      | 779    |
|                       | 0.26   | 9.11   | 3.72   | 77.15  | 9.63   | 0.13   | 100.00 |

Degree of missing values = 4944



Distributions of Table 3-1 age, DOAC type, and dosage according to the presence or absence of proton-pump inhibitors.

FREQ Procedure

|                      |       | Cumulative       |       |        |
|----------------------|-------|------------------|-------|--------|
| Percent of ALL power |       | Percent of power |       |        |
| 1                    | 13400 | 100.00           | 13400 | 100.00 |

Distributions of Table 3-1 age, DOAC type, and dosage according to the presence or absence of proton-pump inhibitors.

FREQ Procedure

Table: ALL \* d\_DOSE

ALL d\_DOSE

Power |

Percent |

Percent of rows

Percentage of columns | 1| 2| 3| 4| 5| 9| Total

|                       | 1      | 2      | 3      | 4      | 5      | 9      | Total  |
|-----------------------|--------|--------|--------|--------|--------|--------|--------|
| Count                 | 1      | 2      | 71     | 29     | 601    | 75     | 779    |
| Percent               | 0.26   | 9.11   | 3.72   | 77.15  | 9.63   | 0.13   | 100.00 |
| Percent of rows       | 0.26   | 9.11   | 3.72   | 77.15  | 9.63   | 0.13   |        |
| Percentage of columns | 100.00 | 100.00 | 100.00 | 100.00 | 100.00 | 100.00 |        |
| Total                 | 2      | 71     | 29     | 601    | 75     | 1      | 779    |
|                       | 0.26   | 9.11   | 3.72   | 77.15  | 9.63   | 0.13   | 100.00 |

Degree of missing values = 4944

Distributions of Table 3-1 age, DOAC type, and dosage according to the presence or absence of proton-pump inhibitors.

FREQ Procedure

|                      |       | Cumulative       |       |        |
|----------------------|-------|------------------|-------|--------|
| Percent of ALL power |       | Percent of power |       |        |
| 1                    | 13400 | 100.00           | 13400 | 100.00 |

Distributions of Table 3-1 age, DOAC type, and dosage according to the presence or absence of proton-pump inhibitors.

FREQ Procedure

Table: ALL \* d\_DOSE

ALL d\_DOSE

Power |

Percent |

Percent of rows

Percentage of columns | 1| 2| 3| 4| 5| 9| Total

|                       | 1      | 2      | 3      | 4      | 5      | 9      | Total  |
|-----------------------|--------|--------|--------|--------|--------|--------|--------|
| Count                 | 1      | 2      | 71     | 29     | 601    | 75     | 779    |
| Percent               | 0.26   | 9.11   | 3.72   | 77.15  | 9.63   | 0.13   | 100.00 |
| Percent of rows       | 0.26   | 9.11   | 3.72   | 77.15  | 9.63   | 0.13   |        |
| Percentage of columns | 100.00 | 100.00 | 100.00 | 100.00 | 100.00 | 100.00 |        |
| Total                 | 2      | 71     | 29     | 601    | 75     | 1      | 779    |
|                       | 0.26   | 9.11   | 3.72   | 77.15  | 9.63   | 0.13   | 100.00 |

Degree of missing values = 4944

Distributions of Table 3-1 age, DOAC type, and dosage according to the presence or absence of proton-pump inhibitors.

FREQ Procedure

|                      |       | Cumulative       |       |        |
|----------------------|-------|------------------|-------|--------|
| Percent of ALL power |       | Percent of power |       |        |
| 1                    | 13400 | 100.00           | 13400 | 100.00 |

Distributions of Table 3-1 age, DOAC type, and dosage according to the presence or absence of proton-pump inhibitors.

FREQ Procedure

Table: ALL \* d\_DOSE

ALL d\_DOSE

Power |

Percent |

Percent of rows

Percentage of columns | 1| 2| 3| 4| 5| 9| Total

|                       | 1      | 2      | 3      | 4      | 5      | 9      | Total  |     |
|-----------------------|--------|--------|--------|--------|--------|--------|--------|-----|
| Count                 | 1      | 2      | 71     | 29     | 601    | 75     | 1      | 779 |
| Percent               | 0.26   | 9.11   | 3.72   | 77.15  | 9.63   | 0.13   | 100.00 |     |
| Percent of rows       | 0.26   | 9.11   | 3.72   | 77.15  | 9.63   | 0.13   |        |     |
| Percentage of columns | 100.00 | 100.00 | 100.00 | 100.00 | 100.00 | 100.00 | 100.00 |     |
| Total                 | 2      | 71     | 29     | 601    | 75     | 1      | 779    |     |
|                       | 0.26   | 9.11   | 3.72   | 77.15  | 9.63   | 0.13   | 100.00 |     |

Degree of missing values = 4944

Distributions of Table 3-1 age, DOAC type, and dosage according to the presence or absence of proton-pump inhibitors.

FREQ Procedure

|   |       | Cumulative           |                  |        |
|---|-------|----------------------|------------------|--------|
|   |       | Percent of ALL power | Percent of power |        |
| 1 | 13400 | 100.00               | 13400            | 100.00 |

Distributions of Table 3-1 age, DOAC type, and dosage according to the presence or absence of proton-pump inhibitors.

FREQ Procedure

Tables: ALL\* ACTYP

ALL ACTYP(Type of AF)

Power |

Percent |

Percent of rows

Percent of column | Dabigato| Riverro| Apixa| Edoxa| Edoxa| Total

|lan|xaban|ban|ban (OD)|

||||)|

|   | Dabigato | Riverro | Apixa  | Edoxa  | Edoxa  | Total  |
|---|----------|---------|--------|--------|--------|--------|
| 1 | 779      | 1862    | 1782   | 1287   | 13     | 5723   |
|   | 13.61    | 32.54   | 31.14  | 22.49  | 0.23   | 100.00 |
|   | 13.61    | 32.54   | 31.14  | 22.49  | 0.23   |        |
|   | 100.00   | 100.00  | 100.00 | 100.00 | 100.00 |        |

Total 779 1862 1782 1287 13 5723

13.61 32.54 31.14 22.49 0.23 100.00



Distributions of Table 3-1 age, DOAC type, and dosage according to the presence or absence of proton-pump inhibitors.

FREQ Procedure

|                      |       | Cumulative       |       |        |
|----------------------|-------|------------------|-------|--------|
| Percent of ALL power |       | Percent of power |       |        |
| 1                    | 13400 | 100.00           | 13400 | 100.00 |

Distributions of Table 3-1 age, DOAC type, and dosage according to the presence or absence of proton-pump inhibitors.

FREQ Procedure

Table: ALL \* r\_DOSE

ALL r\_DOSE

Power |

Percent |

Percent of rows

Percent of columns | 1| 2| 9| Total

|                    | 1      | 2      | 9      | Total  |
|--------------------|--------|--------|--------|--------|
|                    | 913    | 941    | 8      | 1862   |
| Percent of rows    | 49.03  | 50.54  | 0.43   | 100.00 |
| Percent of columns | 49.03  | 50.54  | 0.43   |        |
|                    | 100.00 | 100.00 | 100.00 |        |
| Total              | 913    | 941    | 8      | 1862   |
|                    | 49.03  | 50.54  | 0.43   | 100.00 |

Degree of missing values = 3861

Distributions of Table 3-1 age, DOAC type, and dosage according to the presence or absence of proton-pump inhibitors.

FREQ Procedure

|                      |       | Cumulative       |       |        |
|----------------------|-------|------------------|-------|--------|
| Percent of ALL power |       | Percent of power |       |        |
| 1                    | 13400 | 100.00           | 13400 | 100.00 |

Distributions of Table 3-1 age, DOAC type, and dosage according to the presence or absence of proton-pump inhibitors.

FREQ Procedure

Table: ALL \* r\_DOSE

ALL r\_DOSE

Power |

Percent |

Percent of rows

Percent of columns | 1| 2| 9| Total

|       | 1      | 2      | 9      | Total  |
|-------|--------|--------|--------|--------|
| 1     | 913    | 941    | 8      | 1862   |
|       | 49.03  | 50.54  | 0.43   | 100.00 |
|       | 49.03  | 50.54  | 0.43   |        |
|       | 100.00 | 100.00 | 100.00 |        |
| Total | 913    | 941    | 8      | 1862   |
|       | 49.03  | 50.54  | 0.43   | 100.00 |

Degree of missing values = 3861

Distributions of Table 3-1 age, DOAC type, and dosage according to the presence or absence of proton-pump inhibitors.

FREQ Procedure

|                      |       | Cumulative       |       |        |
|----------------------|-------|------------------|-------|--------|
| Percent of ALL power |       | Percent of power |       |        |
| 1                    | 13400 | 100.00           | 13400 | 100.00 |

Distributions of Table 3-1 age, DOAC type, and dosage according to the presence or absence of proton-pump inhibitors.

FREQ Procedure

Table: ALL \* r\_DOSE

ALL r\_DOSE

Power |

Percent |

Percent of rows

Percent of columns | 1| 2| 9| Total

|       | 1      | 2      | 9      | Total  |
|-------|--------|--------|--------|--------|
| 1     | 913    | 941    | 8      | 1862   |
|       | 49.03  | 50.54  | 0.43   | 100.00 |
|       | 49.03  | 50.54  | 0.43   |        |
|       | 100.00 | 100.00 | 100.00 |        |
| Total | 913    | 941    | 8      | 1862   |
|       | 49.03  | 50.54  | 0.43   | 100.00 |

Degree of missing values = 3861

Distributions of Table 3-1 age, DOAC type, and dosage according to the presence or absence of proton-pump inhibitors.

FREQ Procedure

|                      |       | Cumulative       |       |        |
|----------------------|-------|------------------|-------|--------|
| Percent of ALL power |       | Percent of power |       |        |
| 1                    | 13400 | 100.00           | 13400 | 100.00 |

Distributions of Table 3-1 age, DOAC type, and dosage according to the presence or absence of proton-pump inhibitors.

FREQ Procedure

Tables: ALL\* ACTYP

ALL ACTYP(Type of AF)

Power |

Percent |

Percent of rows

Percent of column | Dabigato| Riverro| Apixa| Edoxa| Edoxa| Total

|lan|xaban|ban|ban (OD)|

||||)|

|   | Dabigato | Riverro | Apixa  | Edoxa  | Edoxa  | Total  |
|---|----------|---------|--------|--------|--------|--------|
| 1 | 779      | 1862    | 1782   | 1287   | 13     | 5723   |
|   | 13.61    | 32.54   | 31.14  | 22.49  | 0.23   | 100.00 |
|   | 13.61    | 32.54   | 31.14  | 22.49  | 0.23   |        |
|   | 100.00   | 100.00  | 100.00 | 100.00 | 100.00 |        |

Total 779 1862 1782 1287 13 5723

13.61 32.54 31.14 22.49 0.23 100.00



Distributions of Table 3-1 age, DOAC type, and dosage according to the presence or absence of proton-pump inhibitors.

FREQ Procedure

|                      |       | Cumulative       |       |        |
|----------------------|-------|------------------|-------|--------|
| Percent of ALL power |       | Percent of power |       |        |
| 1                    | 13400 | 100.00           | 13400 | 100.00 |

Distributions of Table 3-1 age, DOAC type, and dosage according to the presence or absence of proton-pump inhibitors.

FREQ Procedure

Table: ALL \* a\_DOSE

ALL a\_DOSE

Power |

Percent |

Percent of rows

Percentage of columns | 1| 2| 3| 9| Total

|                       | 1      | 2      | 3      | 9      | Total  |
|-----------------------|--------|--------|--------|--------|--------|
|                       | 66     | 741    | 971    | 4      | 1782   |
| Percent of rows       | 3.70   | 41.58  | 54.49  | 0.22   | 100.00 |
| Percentage of columns | 3.70   | 41.58  | 54.49  | 0.22   |        |
|                       | 100.00 | 100.00 | 100.00 | 100.00 |        |
| Total                 | 66     | 741    | 971    | 4      | 1782   |
|                       | 3.70   | 41.58  | 54.49  | 0.22   | 100.00 |

Degree of missing values = 3941

Distributions of Table 3-1 age, DOAC type, and dosage according to the presence or absence of proton-pump inhibitors.

FREQ Procedure

|                      |       | Cumulative       |       |        |
|----------------------|-------|------------------|-------|--------|
| Percent of ALL power |       | Percent of power |       |        |
| 1                    | 13400 | 100.00           | 13400 | 100.00 |

Distributions of Table 3-1 age, DOAC type, and dosage according to the presence or absence of proton-pump inhibitors.

FREQ Procedure

Table: ALL \* a\_DOSE

ALL a\_DOSE

Power |

Percent |

Percent of rows

Percentage of columns | 1| 2| 3| 9| Total

|                       | 1      | 2      | 3      | 9      | Total  |
|-----------------------|--------|--------|--------|--------|--------|
|                       | 66     | 741    | 971    | 4      | 1782   |
| Percent of rows       | 3.70   | 41.58  | 54.49  | 0.22   | 100.00 |
| Percentage of columns | 3.70   | 41.58  | 54.49  | 0.22   |        |
|                       | 100.00 | 100.00 | 100.00 | 100.00 |        |
| Total                 | 66     | 741    | 971    | 4      | 1782   |
|                       | 3.70   | 41.58  | 54.49  | 0.22   | 100.00 |

Degree of missing values = 3941

Distributions of Table 3-1 age, DOAC type, and dosage according to the presence or absence of proton-pump inhibitors.

FREQ Procedure

|                      |       | Cumulative       |       |        |
|----------------------|-------|------------------|-------|--------|
| Percent of ALL power |       | Percent of power |       |        |
| 1                    | 13400 | 100.00           | 13400 | 100.00 |

Distributions of Table 3-1 age, DOAC type, and dosage according to the presence or absence of proton-pump inhibitors.

FREQ Procedure

Table: ALL \* a\_DOSE

ALL a\_DOSE

Power |

Percent |

Percent of rows

Percentage of columns | 1| 2| 3| 9| Total

|                       | 1      | 2      | 3      | 9      | Total  |
|-----------------------|--------|--------|--------|--------|--------|
|                       | 66     | 741    | 971    | 4      | 1782   |
| Percent               | 3.70   | 41.58  | 54.49  | 0.22   | 100.00 |
| Percent of rows       | 3.70   | 41.58  | 54.49  | 0.22   |        |
| Percentage of columns | 100.00 | 100.00 | 100.00 | 100.00 |        |
| Total                 | 66     | 741    | 971    | 4      | 1782   |
|                       | 3.70   | 41.58  | 54.49  | 0.22   | 100.00 |

Degree of missing values = 3941

Distributions of Table 3-1 age, DOAC type, and dosage according to the presence or absence of proton-pump inhibitors.

FREQ Procedure

|                      |       | Cumulative       |       |        |
|----------------------|-------|------------------|-------|--------|
| Percent of ALL power |       | Percent of power |       |        |
| 1                    | 13400 | 100.00           | 13400 | 100.00 |

Distributions of Table 3-1 age, DOAC type, and dosage according to the presence or absence of proton-pump inhibitors.

FREQ Procedure

Table: ALL \* a\_DOSE

ALL a\_DOSE

Power |

Percent |

Percent of rows

Percentage of columns | 1| 2| 3| 9| Total

|                       | 1      | 2      | 3      | 9      | Total  |
|-----------------------|--------|--------|--------|--------|--------|
|                       | 66     | 741    | 971    | 4      | 1782   |
| Percent of rows       | 3.70   | 41.58  | 54.49  | 0.22   | 100.00 |
| Percentage of columns | 3.70   | 41.58  | 54.49  | 0.22   |        |
|                       | 100.00 | 100.00 | 100.00 | 100.00 |        |
| Total                 | 66     | 741    | 971    | 4      | 1782   |
|                       | 3.70   | 41.58  | 54.49  | 0.22   | 100.00 |

Degree of missing values = 3941



Distributions of Table 3-1 age, DOAC type, and dosage according to the presence or absence of proton-pump inhibitors.

FREQ Procedure

|                      |       | Cumulative       |       |        |
|----------------------|-------|------------------|-------|--------|
| Percent of ALL power |       | Percent of power |       |        |
| 1                    | 13400 | 100.00           | 13400 | 100.00 |

Distributions of Table 3-1 age, DOAC type, and dosage according to the presence or absence of proton-pump inhibitors.

FREQ Procedure

Table: ALL \* t\_ACT0

ALL t\_ACT0

Power |

Percent |

Percent of rows

Percentage of columns | 0 | 1 | Sum

|       | 0      | 1      | Sum    |
|-------|--------|--------|--------|
| 1     | 4423   | 1300   | 5723   |
|       | 77.28  | 22.72  | 100.00 |
|       | 77.28  | 22.72  |        |
|       | 100.00 | 100.00 |        |
| Total | 4423   | 1300   | 5723   |
|       | 77.28  | 22.72  | 100.00 |

Distributions of Table 3-1 age, DOAC type, and dosage according to the presence or absence of proton-pump inhibitors.

FREQ Procedure

|                      |       | Cumulative       |       |        |
|----------------------|-------|------------------|-------|--------|
| Percent of ALL power |       | Percent of power |       |        |
| 1                    | 13400 | 100.00           | 13400 | 100.00 |

Distributions of Table 3-1 age, DOAC type, and dosage according to the presence or absence of proton-pump inhibitors.

FREQ Procedure

Table: ALL \* e\_DOSE

ALL e\_DOSE

Power |

Percent |

Percent of rows

Percentage of columns | 1| 2| 3| 9| Total

|                       | 1      | 2      | 3      | 9      | Total  |
|-----------------------|--------|--------|--------|--------|--------|
|                       | 17     | 1009   | 272    | 2      | 1300   |
| Percent of rows       | 1.31   | 77.62  | 20.92  | 0.15   | 100.00 |
| Percentage of columns | 1.31   | 77.62  | 20.92  | 0.15   |        |
|                       | 100.00 | 100.00 | 100.00 | 100.00 |        |
| Total                 | 17     | 1009   | 272    | 2      | 1300   |
|                       | 1.31   | 77.62  | 20.92  | 0.15   | 100.00 |

Degree of missing values = 4423

Distributions of Table 3-1 age, DOAC type, and dosage according to the presence or absence of proton-pump inhibitors.

FREQ Procedure

|                      |       | Cumulative       |       |        |
|----------------------|-------|------------------|-------|--------|
| Percent of ALL power |       | Percent of power |       |        |
| 1                    | 13400 | 100.00           | 13400 | 100.00 |

Distributions of Table 3-1 age, DOAC type, and dosage according to the presence or absence of proton-pump inhibitors.

FREQ Procedure

Table: ALL \* e\_DOSE

ALL e\_DOSE

Power |

Percent |

Percent of rows

Percentage of columns | 1| 2| 3| 9| Total

|                       | 1      | 2      | 3      | 9      | Total  |
|-----------------------|--------|--------|--------|--------|--------|
|                       | 17     | 1009   | 272    | 2      | 1300   |
| Percent of rows       | 1.31   | 77.62  | 20.92  | 0.15   | 100.00 |
| Percentage of columns | 1.31   | 77.62  | 20.92  | 0.15   |        |
|                       | 100.00 | 100.00 | 100.00 | 100.00 |        |
| Total                 | 17     | 1009   | 272    | 2      | 1300   |
|                       | 1.31   | 77.62  | 20.92  | 0.15   | 100.00 |

Degree of missing values = 4423

Distributions of Table 3-1 age, DOAC type, and dosage according to the presence or absence of proton-pump inhibitors.

FREQ Procedure

|                      |       | Cumulative       |       |        |
|----------------------|-------|------------------|-------|--------|
| Percent of ALL power |       | Percent of power |       |        |
| 1                    | 13400 | 100.00           | 13400 | 100.00 |

Distributions of Table 3-1 age, DOAC type, and dosage according to the presence or absence of proton-pump inhibitors.

FREQ Procedure

Table: ALL \* e\_DOSE

ALL e\_DOSE

Power |

Percent |

Percent of rows

Percentage of columns | 1| 2| 3| 9| Total

|                       | 1      | 2      | 3      | 9      | Total  |
|-----------------------|--------|--------|--------|--------|--------|
|                       | 17     | 1009   | 272    | 2      | 1300   |
| Percent               | 1.31   | 77.62  | 20.92  | 0.15   | 100.00 |
| Percent of rows       | 1.31   | 77.62  | 20.92  | 0.15   |        |
| Percentage of columns | 100.00 | 100.00 | 100.00 | 100.00 |        |
| Total                 | 17     | 1009   | 272    | 2      | 1300   |
|                       | 1.31   | 77.62  | 20.92  | 0.15   | 100.00 |

Degree of missing values = 4423



Distributions of Table 3-1 age, DOAC type, and dosage according to the presence or absence of proton-pump inhibitors.

FREQ Procedure

|                      |       | Cumulative       |       |        |
|----------------------|-------|------------------|-------|--------|
| Percent of ALL power |       | Percent of power |       |        |
| 1                    | 13400 | 100.00           | 13400 | 100.00 |

Distributions of Table 3-1 age, DOAC type, and dosage according to the presence or absence of proton-pump inhibitors.

FREQ Procedure

Table: ALL \* e\_DOSE

ALL e\_DOSE

Power |

Percent |

Percent of rows

Percentage of columns | 1| 2| 3| 9| Total

|                       | 1      | 2      | 3      | 9      | Total  |
|-----------------------|--------|--------|--------|--------|--------|
|                       | 17     | 1009   | 272    | 2      | 1300   |
| Percent of rows       | 1.31   | 77.62  | 20.92  | 0.15   | 100.00 |
| Percentage of columns | 1.31   | 77.62  | 20.92  | 0.15   |        |
|                       | 100.00 | 100.00 | 100.00 | 100.00 |        |
| Total                 | 17     | 1009   | 272    | 2      | 1300   |
|                       | 1.31   | 77.62  | 20.92  | 0.15   | 100.00 |

Degree of missing values = 4423

Distributions of Table 3-1 age, DOAC type, and dosage according to the presence or absence of proton-pump inhibitors.

FREQ Procedure

|                      |       | Cumulative       |       |        |
|----------------------|-------|------------------|-------|--------|
| Percent of ALL power |       | Percent of power |       |        |
| 1                    | 13400 | 100.00           | 13400 | 100.00 |

Distributions of Table 3-1 age, DOAC type, and dosage according to the presence or absence of proton-pump inhibitors.

FREQ Procedure

Tables: ALL\* AGEC

ALL

AGEC(Age Category)

Power |

Percent |

Percent of rows

Percentage of column |80 years and older| Total

|Under 85 years of age|

| |

+ +

1 | 4624 | 4624

| 100.00 | 100.00

| 100.00 |

| 100.00 |

+ +

Total 4624 4624

100.00 100.00

Distributions of Table 3-1 age, DOAC type, and dosage according to the presence or absence of proton-pump inhibitors.

FREQ Procedure

|                      |       | Cumulative       |       |        |
|----------------------|-------|------------------|-------|--------|
| Percent of ALL power |       | Percent of power |       |        |
| 1                    | 13400 | 100.00           | 13400 | 100.00 |

Distributions of Table 3-1 age, DOAC type, and dosage according to the presence or absence of proton-pump inhibitors.

FREQ Procedure

Tables: ALL\* ACTYP

ALL ACTYP(Type of AF)

Power |

Percent |

Percent of rows

Percent of column | Dabigato| Riverro| Apixa| Edoxa| Edoxa| Total

|lan|xaban|ban|ban (OD)|

|||)|

|       | Dabigato | Riverro | Apixa  | Edoxa  | Edoxa  | Total  |
|-------|----------|---------|--------|--------|--------|--------|
| 1     | 469      | 1334    | 1783   | 1033   | 5      | 4624   |
|       | 10.14    | 28.85   | 38.56  | 22.34  | 0.11   | 100.00 |
|       | 10.14    | 28.85   | 38.56  | 22.34  | 0.11   |        |
|       | 100.00   | 100.00  | 100.00 | 100.00 | 100.00 |        |
| Total | 469      | 1334    | 1783   | 1033   | 5      | 4624   |
|       | 10.14    | 28.85   | 38.56  | 22.34  | 0.11   | 100.00 |

Distributions of Table 3-1 age, DOAC type, and dosage according to the presence or absence of proton-pump inhibitors.

FREQ Procedure

|                      |       | Cumulative       |       |        |
|----------------------|-------|------------------|-------|--------|
| Percent of ALL power |       | Percent of power |       |        |
| 1                    | 13400 | 100.00           | 13400 | 100.00 |

Distributions of Table 3-1 age, DOAC type, and dosage according to the presence or absence of proton-pump inhibitors.

FREQ Procedure

Table: ALL \* d\_DOSE

ALL d\_DOSE

Power |

Percent |

Percent of rows

Percentage of columns | 1| 2| 3| 4| 5| 9| Total

|       | 1      | 2      | 3      | 4      | 5      | 9      | Total  |
|-------|--------|--------|--------|--------|--------|--------|--------|
| 1     | 2      | 45     | 26     | 376    | 17     | 3      | 469    |
|       | 0.43   | 9.59   | 5.54   | 80.17  | 3.62   | 0.64   | 100.00 |
|       | 0.43   | 9.59   | 5.54   | 80.17  | 3.62   | 0.64   |        |
|       | 100.00 | 100.00 | 100.00 | 100.00 | 100.00 | 100.00 |        |
| Total | 2      | 45     | 26     | 376    | 17     | 3      | 469    |
|       | 0.43   | 9.59   | 5.54   | 80.17  | 3.62   | 0.64   | 100.00 |

Degree of missing values = 4155



Distributions of Table 3-1 age, DOAC type, and dosage according to the presence or absence of proton-pump inhibitors.

FREQ Procedure

|                      |       | Cumulative       |       |        |
|----------------------|-------|------------------|-------|--------|
| Percent of ALL power |       | Percent of power |       |        |
| 1                    | 13400 | 100.00           | 13400 | 100.00 |

Distributions of Table 3-1 age, DOAC type, and dosage according to the presence or absence of proton-pump inhibitors.

FREQ Procedure

Table: ALL \* d\_DOSE

ALL d\_DOSE

Power |

Percent |

Percent of rows

Percentage of columns | 1| 2| 3| 4| 5| 9| Total

|       | 1      | 2      | 3      | 4      | 5      | 9      | Total  |
|-------|--------|--------|--------|--------|--------|--------|--------|
| 1     | 2      | 45     | 26     | 376    | 17     | 3      | 469    |
|       | 0.43   | 9.59   | 5.54   | 80.17  | 3.62   | 0.64   | 100.00 |
|       | 0.43   | 9.59   | 5.54   | 80.17  | 3.62   | 0.64   |        |
|       | 100.00 | 100.00 | 100.00 | 100.00 | 100.00 | 100.00 |        |
| Total | 2      | 45     | 26     | 376    | 17     | 3      | 469    |
|       | 0.43   | 9.59   | 5.54   | 80.17  | 3.62   | 0.64   | 100.00 |

Degree of missing values = 4155

Distributions of Table 3-1 age, DOAC type, and dosage according to the presence or absence of proton-pump inhibitors.

FREQ Procedure

|                      |       | Cumulative       |       |        |
|----------------------|-------|------------------|-------|--------|
| Percent of ALL power |       | Percent of power |       |        |
| 1                    | 13400 | 100.00           | 13400 | 100.00 |

Distributions of Table 3-1 age, DOAC type, and dosage according to the presence or absence of proton-pump inhibitors.

FREQ Procedure

Table: ALL \* d\_DOSE

ALL d\_DOSE

Power |

Percent |

Percent of rows

Percentage of columns | 1| 2| 3| 4| 5| 9| Total

|       | 1      | 2      | 3      | 4      | 5      | 9      | Total  |
|-------|--------|--------|--------|--------|--------|--------|--------|
| 1     | 2      | 45     | 26     | 376    | 17     | 3      | 469    |
|       | 0.43   | 9.59   | 5.54   | 80.17  | 3.62   | 0.64   | 100.00 |
|       | 0.43   | 9.59   | 5.54   | 80.17  | 3.62   | 0.64   |        |
|       | 100.00 | 100.00 | 100.00 | 100.00 | 100.00 | 100.00 |        |
| Total | 2      | 45     | 26     | 376    | 17     | 3      | 469    |
|       | 0.43   | 9.59   | 5.54   | 80.17  | 3.62   | 0.64   | 100.00 |

Degree of missing values = 4155

Distributions of Table 3-1 age, DOAC type, and dosage according to the presence or absence of proton-pump inhibitors.

FREQ Procedure

|                      |       | Cumulative       |       |        |
|----------------------|-------|------------------|-------|--------|
| Percent of ALL power |       | Percent of power |       |        |
| 1                    | 13400 | 100.00           | 13400 | 100.00 |

Distributions of Table 3-1 age, DOAC type, and dosage according to the presence or absence of proton-pump inhibitors.

FREQ Procedure

Table: ALL \* d\_DOSE

ALL d\_DOSE

Power |

Percent |

Percent of rows

Percentage of columns | 1| 2| 3| 4| 5| 9| Total

|       | 1      | 2      | 3      | 4      | 5      | 9      | Total  |
|-------|--------|--------|--------|--------|--------|--------|--------|
| 1     | 2      | 45     | 26     | 376    | 17     | 3      | 469    |
|       | 0.43   | 9.59   | 5.54   | 80.17  | 3.62   | 0.64   | 100.00 |
|       | 0.43   | 9.59   | 5.54   | 80.17  | 3.62   | 0.64   |        |
|       | 100.00 | 100.00 | 100.00 | 100.00 | 100.00 | 100.00 |        |
| Total | 2      | 45     | 26     | 376    | 17     | 3      | 469    |
|       | 0.43   | 9.59   | 5.54   | 80.17  | 3.62   | 0.64   | 100.00 |

Degree of missing values = 4155

Distributions of Table 3-1 age, DOAC type, and dosage according to the presence or absence of proton-pump inhibitors.

FREQ Procedure

|                      |       | Cumulative       |       |        |
|----------------------|-------|------------------|-------|--------|
| Percent of ALL power |       | Percent of power |       |        |
| 1                    | 13400 | 100.00           | 13400 | 100.00 |

Distributions of Table 3-1 age, DOAC type, and dosage according to the presence or absence of proton-pump inhibitors.

FREQ Procedure

Table: ALL \* d\_DOSE

ALL d\_DOSE

Power |

Percent |

Percent of rows

Percentage of columns | 1| 2| 3| 4| 5| 9| Total

|       | 1      | 2      | 3      | 4      | 5      | 9      | Total  |
|-------|--------|--------|--------|--------|--------|--------|--------|
| 1     | 2      | 45     | 26     | 376    | 17     | 3      | 469    |
|       | 0.43   | 9.59   | 5.54   | 80.17  | 3.62   | 0.64   | 100.00 |
|       | 0.43   | 9.59   | 5.54   | 80.17  | 3.62   | 0.64   |        |
|       | 100.00 | 100.00 | 100.00 | 100.00 | 100.00 | 100.00 |        |
| Total | 2      | 45     | 26     | 376    | 17     | 3      | 469    |
|       | 0.43   | 9.59   | 5.54   | 80.17  | 3.62   | 0.64   | 100.00 |

Degree of missing values = 4155



Distributions of Table 3-1 age, DOAC type, and dosage according to the presence or absence of proton-pump inhibitors.

FREQ Procedure

|                      |       | Cumulative       |       |        |
|----------------------|-------|------------------|-------|--------|
| Percent of ALL power |       | Percent of power |       |        |
| 1                    | 13400 | 100.00           | 13400 | 100.00 |

Distributions of Table 3-1 age, DOAC type, and dosage according to the presence or absence of proton-pump inhibitors.

FREQ Procedure

Table: ALL \* d\_DOSE

ALL d\_DOSE

Power |

Percent |

Percent of rows

Percentage of columns | 1| 2| 3| 4| 5| 9| Total

|       | 1      | 2      | 3      | 4      | 5      | 9      | Total  |
|-------|--------|--------|--------|--------|--------|--------|--------|
| 1     | 2      | 45     | 26     | 376    | 17     | 3      | 469    |
|       | 0.43   | 9.59   | 5.54   | 80.17  | 3.62   | 0.64   | 100.00 |
|       | 0.43   | 9.59   | 5.54   | 80.17  | 3.62   | 0.64   |        |
|       | 100.00 | 100.00 | 100.00 | 100.00 | 100.00 | 100.00 |        |
| Total | 2      | 45     | 26     | 376    | 17     | 3      | 469    |
|       | 0.43   | 9.59   | 5.54   | 80.17  | 3.62   | 0.64   | 100.00 |

Degree of missing values = 4155

Distributions of Table 3-1 age, DOAC type, and dosage according to the presence or absence of proton-pump inhibitors.

FREQ Procedure

|   |       | Cumulative           |                  |        |
|---|-------|----------------------|------------------|--------|
|   |       | Percent of ALL power | Percent of power |        |
| 1 | 13400 | 100.00               | 13400            | 100.00 |

Distributions of Table 3-1 age, DOAC type, and dosage according to the presence or absence of proton-pump inhibitors.

FREQ Procedure

Tables: ALL\* ACTYP

ALL ACTYP(Type of AF)

Power |

Percent |

Percent of rows

Percent of column | Dabigato| Riverro| Apixa| Edoxa| Edoxa| Total

|lan|xaban|ban|ban (OD)|

|||)|

|   | Dabigato | Riverro | Apixa  | Edoxa  | Edoxa  | Total  |
|---|----------|---------|--------|--------|--------|--------|
| 1 | 469      | 1334    | 1783   | 1033   | 5      | 4624   |
|   | 10.14    | 28.85   | 38.56  | 22.34  | 0.11   | 100.00 |
|   | 10.14    | 28.85   | 38.56  | 22.34  | 0.11   |        |
|   | 100.00   | 100.00  | 100.00 | 100.00 | 100.00 |        |

Total 469 1334 1783 1033 5 4624

10.14 28.85 38.56 22.34 0.11 100.00

Distributions of Table 3-1 age, DOAC type, and dosage according to the presence or absence of proton-pump inhibitors.

FREQ Procedure

|                      |       | Cumulative       |       |        |
|----------------------|-------|------------------|-------|--------|
| Percent of ALL power |       | Percent of power |       |        |
| 1                    | 13400 | 100.00           | 13400 | 100.00 |

Distributions of Table 3-1 age, DOAC type, and dosage according to the presence or absence of proton-pump inhibitors.

FREQ Procedure

Table: ALL \* r\_DOSE

ALL r\_DOSE

Power |

Percent |

Percent of rows

Percent of columns | 1| 2| 9| Total

|       | 1      | 2      | 9      | Total  |
|-------|--------|--------|--------|--------|
| 1     | 950    | 381    | 3      | 1334   |
|       | 71.21  | 28.56  | 0.22   | 100.00 |
|       | 71.21  | 28.56  | 0.22   |        |
|       | 100.00 | 100.00 | 100.00 |        |
| Total | 950    | 381    | 3      | 1334   |
|       | 71.21  | 28.56  | 0.22   | 100.00 |

Degree of missing values = 3290

Distributions of Table 3-1 age, DOAC type, and dosage according to the presence or absence of proton-pump inhibitors.

FREQ Procedure

|                      |       | Cumulative       |       |        |
|----------------------|-------|------------------|-------|--------|
| Percent of ALL power |       | Percent of power |       |        |
| 1                    | 13400 | 100.00           | 13400 | 100.00 |

Distributions of Table 3-1 age, DOAC type, and dosage according to the presence or absence of proton-pump inhibitors.

FREQ Procedure

Table: ALL \* r\_DOSE

ALL r\_DOSE

Power |

Percent |

Percent of rows

Percent of columns | 1| 2| 9| Total

|                    | 1      | 2      | 9      | Total  |
|--------------------|--------|--------|--------|--------|
|                    | 950    | 381    | 3      | 1334   |
| Percent of rows    | 71.21  | 28.56  | 0.22   | 100.00 |
| Percent of columns | 71.21  | 28.56  | 0.22   |        |
|                    | 100.00 | 100.00 | 100.00 |        |
| Total              | 950    | 381    | 3      | 1334   |
|                    | 71.21  | 28.56  | 0.22   | 100.00 |

Degree of missing values = 3290



Distributions of Table 3-1 age, DOAC type, and dosage according to the presence or absence of proton-pump inhibitors.

FREQ Procedure

|                      |       | Cumulative       |       |        |
|----------------------|-------|------------------|-------|--------|
| Percent of ALL power |       | Percent of power |       |        |
| 1                    | 13400 | 100.00           | 13400 | 100.00 |

Distributions of Table 3-1 age, DOAC type, and dosage according to the presence or absence of proton-pump inhibitors.

FREQ Procedure

Table: ALL \* r\_DOSE

ALL r\_DOSE

Power |

Percent |

Percent of rows

Percent of columns | 1| 2| 9| Total

|                    | 1      | 2      | 9      | Total  |
|--------------------|--------|--------|--------|--------|
|                    | 950    | 381    | 3      | 1334   |
| Percent of rows    | 71.21  | 28.56  | 0.22   | 100.00 |
| Percent of columns | 71.21  | 28.56  | 0.22   |        |
|                    | 100.00 | 100.00 | 100.00 |        |
| Total              | 950    | 381    | 3      | 1334   |
|                    | 71.21  | 28.56  | 0.22   | 100.00 |

Degree of missing values = 3290

Distributions of Table 3-1 age, DOAC type, and dosage according to the presence or absence of proton-pump inhibitors.

FREQ Procedure

|                      |       | Cumulative       |       |        |
|----------------------|-------|------------------|-------|--------|
| Percent of ALL power |       | Percent of power |       |        |
| 1                    | 13400 | 100.00           | 13400 | 100.00 |

Distributions of Table 3-1 age, DOAC type, and dosage according to the presence or absence of proton-pump inhibitors.

FREQ Procedure

Tables: ALL\* ACTYP

ALL ACTYP(Type of AF)

Power |

Percent |

Percent of rows

Percent of column | Dabigato| Riverro| Apixa| Edoxa| Edoxa| Total

|lan|xaban|ban|ban (OD)|

|||)|

|       | Dabigato | Riverro | Apixa  | Edoxa  | Edoxa  | Total  |
|-------|----------|---------|--------|--------|--------|--------|
| 1     | 469      | 1334    | 1783   | 1033   | 5      | 4624   |
|       | 10.14    | 28.85   | 38.56  | 22.34  | 0.11   | 100.00 |
|       | 10.14    | 28.85   | 38.56  | 22.34  | 0.11   |        |
|       | 100.00   | 100.00  | 100.00 | 100.00 | 100.00 |        |
| Total | 469      | 1334    | 1783   | 1033   | 5      | 4624   |
|       | 10.14    | 28.85   | 38.56  | 22.34  | 0.11   | 100.00 |

Distributions of Table 3-1 age, DOAC type, and dosage according to the presence or absence of proton-pump inhibitors.

FREQ Procedure

|                      |       | Cumulative       |       |        |
|----------------------|-------|------------------|-------|--------|
| Percent of ALL power |       | Percent of power |       |        |
| 1                    | 13400 | 100.00           | 13400 | 100.00 |

Distributions of Table 3-1 age, DOAC type, and dosage according to the presence or absence of proton-pump inhibitors.

FREQ Procedure

Table: ALL \* a\_DOSE

ALL a\_DOSE

Power |

Percent |

Percent of rows

Percentage of columns | 1| 2| 3| 9| Total

|                       | 1      | 2      | 3      | 9      | Total  |
|-----------------------|--------|--------|--------|--------|--------|
|                       | 118    | 1265   | 399    | 1      | 1783   |
| Percent of rows       | 6.62   | 70.95  | 22.38  | 0.06   | 100.00 |
| Percentage of columns | 6.62   | 70.95  | 22.38  | 0.06   |        |
|                       | 100.00 | 100.00 | 100.00 | 100.00 |        |
| Total                 | 118    | 1265   | 399    | 1      | 1783   |
|                       | 6.62   | 70.95  | 22.38  | 0.06   | 100.00 |

Degree of missing values = 2841

Distributions of Table 3-1 age, DOAC type, and dosage according to the presence or absence of proton-pump inhibitors.

FREQ Procedure

|                      |       | Cumulative       |       |        |
|----------------------|-------|------------------|-------|--------|
| Percent of ALL power |       | Percent of power |       |        |
| 1                    | 13400 | 100.00           | 13400 | 100.00 |

Distributions of Table 3-1 age, DOAC type, and dosage according to the presence or absence of proton-pump inhibitors.

FREQ Procedure

Table: ALL \* a\_DOSE

ALL a\_DOSE

Power |

Percent |

Percent of rows

Percentage of columns | 1| 2| 3| 9| Total

|       | 1      | 2      | 3      | 9      | Total  |
|-------|--------|--------|--------|--------|--------|
|       | 118    | 1265   | 399    | 1      | 1783   |
|       | 6.62   | 70.95  | 22.38  | 0.06   | 100.00 |
|       | 6.62   | 70.95  | 22.38  | 0.06   |        |
|       | 100.00 | 100.00 | 100.00 | 100.00 |        |
| Total | 118    | 1265   | 399    | 1      | 1783   |
|       | 6.62   | 70.95  | 22.38  | 0.06   | 100.00 |

Degree of missing values = 2841



Distributions of Table 3-1 age, DOAC type, and dosage according to the presence or absence of proton-pump inhibitors.

FREQ Procedure

|                      |       | Cumulative       |       |        |
|----------------------|-------|------------------|-------|--------|
| Percent of ALL power |       | Percent of power |       |        |
| 1                    | 13400 | 100.00           | 13400 | 100.00 |

Distributions of Table 3-1 age, DOAC type, and dosage according to the presence or absence of proton-pump inhibitors.

FREQ Procedure

Table: ALL \* a\_DOSE

ALL a\_DOSE

Power |

Percent |

Percent of rows

Percentage of columns | 1| 2| 3| 9| Total

|                       | 1      | 2      | 3      | 9      | Total  |
|-----------------------|--------|--------|--------|--------|--------|
|                       | 118    | 1265   | 399    | 1      | 1783   |
| Percent of rows       | 6.62   | 70.95  | 22.38  | 0.06   | 100.00 |
| Percentage of columns | 6.62   | 70.95  | 22.38  | 0.06   |        |
|                       | 100.00 | 100.00 | 100.00 | 100.00 |        |
| Total                 | 118    | 1265   | 399    | 1      | 1783   |
|                       | 6.62   | 70.95  | 22.38  | 0.06   | 100.00 |

Degree of missing values = 2841

Distributions of Table 3-1 age, DOAC type, and dosage according to the presence or absence of proton-pump inhibitors.

FREQ Procedure

|                      |       | Cumulative       |       |        |
|----------------------|-------|------------------|-------|--------|
| Percent of ALL power |       | Percent of power |       |        |
| 1                    | 13400 | 100.00           | 13400 | 100.00 |

Distributions of Table 3-1 age, DOAC type, and dosage according to the presence or absence of proton-pump inhibitors.

FREQ Procedure

Table: ALL \* a\_DOSE

ALL a\_DOSE

Power |

Percent |

Percent of rows

Percentage of columns | 1| 2| 3| 9| Total

|       | 1      | 2      | 3      | 9      | Total  |
|-------|--------|--------|--------|--------|--------|
|       | 118    | 1265   | 399    | 1      | 1783   |
|       | 6.62   | 70.95  | 22.38  | 0.06   | 100.00 |
|       | 6.62   | 70.95  | 22.38  | 0.06   |        |
|       | 100.00 | 100.00 | 100.00 | 100.00 |        |
| Total | 118    | 1265   | 399    | 1      | 1783   |
|       | 6.62   | 70.95  | 22.38  | 0.06   | 100.00 |

Degree of missing values = 2841

Distributions of Table 3-1 age, DOAC type, and dosage according to the presence or absence of proton-pump inhibitors.

FREQ Procedure

|                      |       | Cumulative       |       |        |
|----------------------|-------|------------------|-------|--------|
| Percent of ALL power |       | Percent of power |       |        |
| 1                    | 13400 | 100.00           | 13400 | 100.00 |

Distributions of Table 3-1 age, DOAC type, and dosage according to the presence or absence of proton-pump inhibitors.

FREQ Procedure

Table: ALL \* t\_ACT0

ALL t\_ACT0

Power |

Percent |

Percent of rows

Percentage of columns | 0| 1| Sum

|       | 0      | 1      | Sum    |
|-------|--------|--------|--------|
| 1     | 3586   | 1038   | 4624   |
|       | 77.55  | 22.45  | 100.00 |
|       | 77.55  | 22.45  |        |
|       | 100.00 | 100.00 |        |
| Total | 3586   | 1038   | 4624   |
|       | 77.55  | 22.45  | 100.00 |

Distributions of Table 3-1 age, DOAC type, and dosage according to the presence or absence of proton-pump inhibitors.

FREQ Procedure

|                      |       | Cumulative       |       |        |
|----------------------|-------|------------------|-------|--------|
| Percent of ALL power |       | Percent of power |       |        |
| 1                    | 13400 | 100.00           | 13400 | 100.00 |

Distributions of Table 3-1 age, DOAC type, and dosage according to the presence or absence of proton-pump inhibitors.

FREQ Procedure

Table: ALL \* e\_DOSE

ALL e\_DOSE

Power |

Percent |

Percent of rows

Percentage of columns | 1| 2| 3| 9| Total

|                       | 1      | 2      | 3      | 9      | Total  |
|-----------------------|--------|--------|--------|--------|--------|
|                       | 42     | 880    | 115    | 1      | 1038   |
| Percent of rows       | 4.05   | 84.78  | 11.08  | 0.10   | 100.00 |
| Percentage of columns | 4.05   | 84.78  | 11.08  | 0.10   |        |
|                       | 100.00 | 100.00 | 100.00 | 100.00 |        |
| Total                 | 42     | 880    | 115    | 1      | 1038   |
|                       | 4.05   | 84.78  | 11.08  | 0.10   | 100.00 |

Degree of missing values = 3586



Distributions of Table 3-1 age, DOAC type, and dosage according to the presence or absence of proton-pump inhibitors.

FREQ Procedure

|   |       | Cumulative           |                  |        |
|---|-------|----------------------|------------------|--------|
|   |       | Percent of ALL power | Percent of power |        |
| 1 | 13400 | 100.00               | 13400            | 100.00 |

Distributions of Table 3-1 age, DOAC type, and dosage according to the presence or absence of proton-pump inhibitors.

FREQ Procedure

Table: ALL \* e\_DOSE

ALL e\_DOSE

Power |

Percent |

Percent of rows

Percentage of columns | 1| 2| 3| 9| Total

|                       | 1      | 2      | 3      | 9      | Total  |
|-----------------------|--------|--------|--------|--------|--------|
|                       | 42     | 880    | 115    | 1      | 1038   |
| Percent of rows       | 4.05   | 84.78  | 11.08  | 0.10   | 100.00 |
| Percentage of columns | 4.05   | 84.78  | 11.08  | 0.10   |        |
|                       | 100.00 | 100.00 | 100.00 | 100.00 |        |
| Total                 | 42     | 880    | 115    | 1      | 1038   |
|                       | 4.05   | 84.78  | 11.08  | 0.10   | 100.00 |

Degree of missing values = 3586

Distributions of Table 3-1 age, DOAC type, and dosage according to the presence or absence of proton-pump inhibitors.

FREQ Procedure

|                      |       | Cumulative       |       |        |
|----------------------|-------|------------------|-------|--------|
| Percent of ALL power |       | Percent of power |       |        |
| 1                    | 13400 | 100.00           | 13400 | 100.00 |

Distributions of Table 3-1 age, DOAC type, and dosage according to the presence or absence of proton-pump inhibitors.

FREQ Procedure

Table: ALL \* e\_DOSE

ALL e\_DOSE

Power |

Percent |

Percent of rows

Percentage of columns | 1| 2| 3| 9| Total

|                       | 1      | 2      | 3      | 9      | Total  |
|-----------------------|--------|--------|--------|--------|--------|
| Count                 | 42     | 880    | 115    | 1      | 1038   |
| Percent               | 4.05   | 84.78  | 11.08  | 0.10   | 100.00 |
| Percent of rows       | 4.05   | 84.78  | 11.08  | 0.10   |        |
| Percentage of columns | 100.00 | 100.00 | 100.00 | 100.00 |        |
| Total                 | 42     | 880    | 115    | 1      | 1038   |
|                       | 4.05   | 84.78  | 11.08  | 0.10   | 100.00 |

Degree of missing values = 3586

Distributions of Table 3-1 age, DOAC type, and dosage according to the presence or absence of proton-pump inhibitors.

FREQ Procedure

|                      |       | Cumulative       |       |        |
|----------------------|-------|------------------|-------|--------|
| Percent of ALL power |       | Percent of power |       |        |
| 1                    | 13400 | 100.00           | 13400 | 100.00 |

Distributions of Table 3-1 age, DOAC type, and dosage according to the presence or absence of proton-pump inhibitors.

FREQ Procedure

Table: ALL \* e\_DOSE

ALL e\_DOSE

Power |

Percent |

Percent of rows

Percentage of columns | 1| 2| 3| 9| Total

|                       | 1      | 2      | 3      | 9      | Total  |
|-----------------------|--------|--------|--------|--------|--------|
|                       | 42     | 880    | 115    | 1      | 1038   |
| Percent of rows       | 4.05   | 84.78  | 11.08  | 0.10   | 100.00 |
| Percentage of columns | 4.05   | 84.78  | 11.08  | 0.10   |        |
|                       | 100.00 | 100.00 | 100.00 | 100.00 |        |
| Total                 | 42     | 880    | 115    | 1      | 1038   |
|                       | 4.05   | 84.78  | 11.08  | 0.10   | 100.00 |

Degree of missing values = 3586

Distributions of Table 3-1 age, DOAC type, and dosage according to the presence or absence of proton-pump inhibitors.

FREQ Procedure

|                      |       | Cumulative       |       |        |
|----------------------|-------|------------------|-------|--------|
| Percent of ALL power |       | Percent of power |       |        |
| 1                    | 13400 | 100.00           | 13400 | 100.00 |

Distributions of Table 3-1 age, DOAC type, and dosage according to the presence or absence of proton-pump inhibitors.

FREQ Procedure

Tables: ALL\* AGEC

ALL

AGEC(Age Category)

Power |

Percent |

Percent of rows

Percentage of column |85 years and older| Total

|Under 90 years of age|

| | |

+ +

1 | 2365 | 2365

| 100.00 | 100.00

| 100.00 |

| 100.00 |

+ +

Total 2365 2365

100.00 100.00



Distributions of Table 3-1 age, DOAC type, and dosage according to the presence or absence of proton-pump inhibitors.

FREQ Procedure

|                      |       | Cumulative       |       |        |
|----------------------|-------|------------------|-------|--------|
| Percent of ALL power |       | Percent of power |       |        |
| 1                    | 13400 | 100.00           | 13400 | 100.00 |

Distributions of Table 3-1 age, DOAC type, and dosage according to the presence or absence of proton-pump inhibitors.

FREQ Procedure

Tables: ALL\* ACTYP

ALL ACTYP(Type of AF)

Power |

Percent |

Percent of rows

Percent of column | Dabigato| Riverro| Apixa| Edoxa| Edoxa| Total

|lan|xaban|ban|ban (OD)|

|||)|

|       | Dabigato | Riverro | Apixa  | Edoxa  | Edoxa  | Total  |
|-------|----------|---------|--------|--------|--------|--------|
| 1     | 160      | 679     | 977    | 548    | 1      | 2365   |
|       | 6.77     | 28.71   | 41.31  | 23.17  | 0.04   | 100.00 |
|       | 6.77     | 28.71   | 41.31  | 23.17  | 0.04   |        |
|       | 100.00   | 100.00  | 100.00 | 100.00 | 100.00 |        |
| Total | 160      | 679     | 977    | 548    | 1      | 2365   |
|       | 6.77     | 28.71   | 41.31  | 23.17  | 0.04   | 100.00 |

Distributions of Table 3-1 age, DOAC type, and dosage according to the presence or absence of proton-pump inhibitors.

FREQ Procedure

|                      |       | Cumulative       |       |        |
|----------------------|-------|------------------|-------|--------|
| Percent of ALL power |       | Percent of power |       |        |
| 1                    | 13400 | 100.00           | 13400 | 100.00 |

Distributions of Table 3-1 age, DOAC type, and dosage according to the presence or absence of proton-pump inhibitors.

FREQ Procedure

Table: ALL \* d\_DOSE

ALL d\_DOSE

Power |

Percent |

Percent of rows

Percentage of columns | 1| 2| 3| 4| Total

|       | 1      | 2      | 3      | 4      | Total  |
|-------|--------|--------|--------|--------|--------|
|       | 1      | 2      | 11     | 21     | 126    |
|       | 1.25   | 6.88   | 13.13  | 78.75  | 100.00 |
|       | 1.25   | 6.88   | 13.13  | 78.75  |        |
|       | 100.00 | 100.00 | 100.00 | 100.00 |        |
| Total | 2      | 11     | 21     | 126    | 160    |
|       | 1.25   | 6.88   | 13.13  | 78.75  | 100.00 |

Degree of missing values = 2205

Distributions of Table 3-1 age, DOAC type, and dosage according to the presence or absence of proton-pump inhibitors.

FREQ Procedure

|                      |       | Cumulative       |       |        |
|----------------------|-------|------------------|-------|--------|
| Percent of ALL power |       | Percent of power |       |        |
| 1                    | 13400 | 100.00           | 13400 | 100.00 |

Distributions of Table 3-1 age, DOAC type, and dosage according to the presence or absence of proton-pump inhibitors.

FREQ Procedure

Table: ALL \* d\_DOSE

ALL d\_DOSE

Power |

Percent |

Percent of rows

Percentage of columns | 1| 2| 3| 4| Total

|       | 1      | 2      | 3      | 4      | Total  |
|-------|--------|--------|--------|--------|--------|
|       | 1      | 2      | 11     | 21     | 126    |
|       | 1.25   | 6.88   | 13.13  | 78.75  | 100.00 |
|       | 1.25   | 6.88   | 13.13  | 78.75  |        |
|       | 100.00 | 100.00 | 100.00 | 100.00 |        |
| Total | 2      | 11     | 21     | 126    | 160    |
|       | 1.25   | 6.88   | 13.13  | 78.75  | 100.00 |

Degree of missing values = 2205

Distributions of Table 3-1 age, DOAC type, and dosage according to the presence or absence of proton-pump inhibitors.

FREQ Procedure

|                      |       | Cumulative       |       |        |
|----------------------|-------|------------------|-------|--------|
| Percent of ALL power |       | Percent of power |       |        |
| 1                    | 13400 | 100.00           | 13400 | 100.00 |

Distributions of Table 3-1 age, DOAC type, and dosage according to the presence or absence of proton-pump inhibitors.

FREQ Procedure

Table: ALL \* d\_DOSE

ALL d\_DOSE

Power |

Percent |

Percent of rows

Percentage of columns | 1| 2| 3| 4| Total

|       | 1      | 2      | 3      | 4      | Total  |
|-------|--------|--------|--------|--------|--------|
|       | 1      | 2      | 11     | 21     | 126    |
|       | 1.25   | 6.88   | 13.13  | 78.75  | 100.00 |
|       | 1.25   | 6.88   | 13.13  | 78.75  |        |
|       | 100.00 | 100.00 | 100.00 | 100.00 |        |
| Total | 2      | 11     | 21     | 126    | 160    |
|       | 1.25   | 6.88   | 13.13  | 78.75  | 100.00 |

Degree of missing values = 2205



Distributions of Table 3-1 age, DOAC type, and dosage according to the presence or absence of proton-pump inhibitors.

FREQ Procedure

|                      |       | Cumulative       |       |        |
|----------------------|-------|------------------|-------|--------|
| Percent of ALL power |       | Percent of power |       |        |
| 1                    | 13400 | 100.00           | 13400 | 100.00 |

Distributions of Table 3-1 age, DOAC type, and dosage according to the presence or absence of proton-pump inhibitors.

FREQ Procedure

Table: ALL \* d\_DOSE

ALL d\_DOSE

Power |

Percent |

Percent of rows

Percentage of columns | 1| 2| 3| 4| Total

|       | 1      | 2      | 3      | 4      | Total  |
|-------|--------|--------|--------|--------|--------|
|       | 1      | 2      | 11     | 21     | 126    |
|       | 1.25   | 6.88   | 13.13  | 78.75  | 100.00 |
|       | 1.25   | 6.88   | 13.13  | 78.75  |        |
|       | 100.00 | 100.00 | 100.00 | 100.00 |        |
| Total | 2      | 11     | 21     | 126    | 160    |
|       | 1.25   | 6.88   | 13.13  | 78.75  | 100.00 |

Degree of missing values = 2205

Distributions of Table 3-1 age, DOAC type, and dosage according to the presence or absence of proton-pump inhibitors.

FREQ Procedure

|                      |       | Cumulative       |       |        |
|----------------------|-------|------------------|-------|--------|
| Percent of ALL power |       | Percent of power |       |        |
| 1                    | 13400 | 100.00           | 13400 | 100.00 |

Distributions of Table 3-1 age, DOAC type, and dosage according to the presence or absence of proton-pump inhibitors.

FREQ Procedure

Table: ALL \* d\_DOSE

ALL d\_DOSE

Power |

Percent |

Percent of rows

Percentage of columns | 1| 2| 3| 4| Total

|       | 1      | 2      | 3      | 4      | Total  |
|-------|--------|--------|--------|--------|--------|
|       | 1      | 2      | 11     | 21     | 126    |
|       | 1.25   | 6.88   | 13.13  | 78.75  | 100.00 |
|       | 1.25   | 6.88   | 13.13  | 78.75  |        |
|       | 100.00 | 100.00 | 100.00 | 100.00 |        |
| Total | 2      | 11     | 21     | 126    | 160    |
|       | 1.25   | 6.88   | 13.13  | 78.75  | 100.00 |

Degree of missing values = 2205

Distributions of Table 3-1 age, DOAC type, and dosage according to the presence or absence of proton-pump inhibitors.

FREQ Procedure

|                      |       | Cumulative       |       |        |
|----------------------|-------|------------------|-------|--------|
| Percent of ALL power |       | Percent of power |       |        |
| 1                    | 13400 | 100.00           | 13400 | 100.00 |

Distributions of Table 3-1 age, DOAC type, and dosage according to the presence or absence of proton-pump inhibitors.

FREQ Procedure

Table: ALL \* d\_DOSE

ALL d\_DOSE

Power |

Percent |

Percent of rows

Percentage of columns | 1| 2| 3| 4| Total

|       | 1      | 2      | 3      | 4      | Total  |
|-------|--------|--------|--------|--------|--------|
|       | 1      | 2      | 11     | 21     | 126    |
|       | 1.25   | 6.88   | 13.13  | 78.75  | 100.00 |
|       | 1.25   | 6.88   | 13.13  | 78.75  |        |
|       | 100.00 | 100.00 | 100.00 | 100.00 |        |
| Total | 2      | 11     | 21     | 126    | 160    |
|       | 1.25   | 6.88   | 13.13  | 78.75  | 100.00 |

Degree of missing values = 2205

Distributions of Table 3-1 age, DOAC type, and dosage according to the presence or absence of proton-pump inhibitors.

FREQ Procedure

|                      |       | Cumulative       |       |        |
|----------------------|-------|------------------|-------|--------|
| Percent of ALL power |       | Percent of power |       |        |
| 1                    | 13400 | 100.00           | 13400 | 100.00 |

Distributions of Table 3-1 age, DOAC type, and dosage according to the presence or absence of proton-pump inhibitors.

FREQ Procedure

Tables: ALL\* ACTYP

ALL ACTYP(Type of AF)

Power |

Percent |

Percent of rows

Percent of column | Dabigato| Riverro| Apixa| Edoxa| Edoxa| Total

|lan|xaban|ban|ban (OD)|

|||)|

|       | Dabigato | Riverro | Apixa  | Edoxa  | Edoxa  | Total  |
|-------|----------|---------|--------|--------|--------|--------|
| 1     | 160      | 679     | 977    | 548    | 1      | 2365   |
|       | 6.77     | 28.71   | 41.31  | 23.17  | 0.04   | 100.00 |
|       | 6.77     | 28.71   | 41.31  | 23.17  | 0.04   |        |
|       | 100.00   | 100.00  | 100.00 | 100.00 | 100.00 |        |
| Total | 160      | 679     | 977    | 548    | 1      | 2365   |
|       | 6.77     | 28.71   | 41.31  | 23.17  | 0.04   | 100.00 |



Distributions of Table 3-1 age, DOAC type, and dosage according to the presence or absence of proton-pump inhibitors.

FREQ Procedure

|                      |       | Cumulative       |       |        |
|----------------------|-------|------------------|-------|--------|
| Percent of ALL power |       | Percent of power |       |        |
| 1                    | 13400 | 100.00           | 13400 | 100.00 |

Distributions of Table 3-1 age, DOAC type, and dosage according to the presence or absence of proton-pump inhibitors.

FREQ Procedure

Table: ALL \* r\_DOSE

ALL r\_DOSE

Power |

Percent |

Percent of rows

Percent of columns | 1| 2| 9| Total

|       | 1      | 2      | 9      | Total  |
|-------|--------|--------|--------|--------|
| 1     | 586    | 91     | 2      | 679    |
|       | 86.30  | 13.40  | 0.29   | 100.00 |
|       | 86.30  | 13.40  | 0.29   |        |
|       | 100.00 | 100.00 | 100.00 |        |
| Total | 586    | 91     | 2      | 679    |
|       | 86.30  | 13.40  | 0.29   | 100.00 |

Degree of missing values = 1686

Distributions of Table 3-1 age, DOAC type, and dosage according to the presence or absence of proton-pump inhibitors.

FREQ Procedure

|                      |       | Cumulative       |       |        |
|----------------------|-------|------------------|-------|--------|
| Percent of ALL power |       | Percent of power |       |        |
| 1                    | 13400 | 100.00           | 13400 | 100.00 |

Distributions of Table 3-1 age, DOAC type, and dosage according to the presence or absence of proton-pump inhibitors.

FREQ Procedure

Table: ALL \* r\_DOSE

ALL r\_DOSE

Power |

Percent |

Percent of rows

Percent of columns | 1| 2| 9| Total

|       | 1      | 2      | 9      | Total  |
|-------|--------|--------|--------|--------|
| 1     | 586    | 91     | 2      | 679    |
|       | 86.30  | 13.40  | 0.29   | 100.00 |
|       | 86.30  | 13.40  | 0.29   |        |
|       | 100.00 | 100.00 | 100.00 |        |
| Total | 586    | 91     | 2      | 679    |
|       | 86.30  | 13.40  | 0.29   | 100.00 |

Degree of missing values = 1686

Distributions of Table 3-1 age, DOAC type, and dosage according to the presence or absence of proton-pump inhibitors.

FREQ Procedure

|                      |       | Cumulative       |       |        |
|----------------------|-------|------------------|-------|--------|
| Percent of ALL power |       | Percent of power |       |        |
| 1                    | 13400 | 100.00           | 13400 | 100.00 |

Distributions of Table 3-1 age, DOAC type, and dosage according to the presence or absence of proton-pump inhibitors.

FREQ Procedure

Table: ALL \* r\_DOSE

ALL r\_DOSE

Power |

Percent |

Percent of rows

Percent of columns | 1| 2| 9| Total

|       | 1      | 2      | 9      | Total  |
|-------|--------|--------|--------|--------|
| 1     | 586    | 91     | 2      | 679    |
|       | 86.30  | 13.40  | 0.29   | 100.00 |
|       | 86.30  | 13.40  | 0.29   |        |
|       | 100.00 | 100.00 | 100.00 |        |
| Total | 586    | 91     | 2      | 679    |
|       | 86.30  | 13.40  | 0.29   | 100.00 |

Degree of missing values = 1686

Distributions of Table 3-1 age, DOAC type, and dosage according to the presence or absence of proton-pump inhibitors.

FREQ Procedure

|                      |       | Cumulative       |       |        |
|----------------------|-------|------------------|-------|--------|
| Percent of ALL power |       | Percent of power |       |        |
| 1                    | 13400 | 100.00           | 13400 | 100.00 |

Distributions of Table 3-1 age, DOAC type, and dosage according to the presence or absence of proton-pump inhibitors.

FREQ Procedure

Tables: ALL\* ACTYP

ALL ACTYP(Type of AF)

Power |

Percent |

Percent of rows

Percent of column | Dabigato| Riverro| Apixa| Edoxa| Edoxa| Total

|lan|xaban|ban|ban (OD)|

|||)|

|       | Dabigato | Riverro | Apixa  | Edoxa  | Edoxa  | Total  |
|-------|----------|---------|--------|--------|--------|--------|
| 1     | 160      | 679     | 977    | 548    | 1      | 2365   |
|       | 6.77     | 28.71   | 41.31  | 23.17  | 0.04   | 100.00 |
|       | 6.77     | 28.71   | 41.31  | 23.17  | 0.04   |        |
|       | 100.00   | 100.00  | 100.00 | 100.00 | 100.00 |        |
| Total | 160      | 679     | 977    | 548    | 1      | 2365   |
|       | 6.77     | 28.71   | 41.31  | 23.17  | 0.04   | 100.00 |



Distributions of Table 3-1 age, DOAC type, and dosage according to the presence or absence of proton-pump inhibitors.

FREQ Procedure

|                      |       | Cumulative       |       |        |
|----------------------|-------|------------------|-------|--------|
| Percent of ALL power |       | Percent of power |       |        |
| 1                    | 13400 | 100.00           | 13400 | 100.00 |

Distributions of Table 3-1 age, DOAC type, and dosage according to the presence or absence of proton-pump inhibitors.

FREQ Procedure

Table: ALL \* a\_DOSE

ALL a\_DOSE

Power |

Percent |

Percent of rows

Percentage of columns | 1| 2| 3| Total

|                       | 1    | 2      | 3      | Total  |
|-----------------------|------|--------|--------|--------|
| Power                 |      |        |        |        |
| Percent               |      |        |        |        |
| Percent of rows       |      |        |        |        |
| Percentage of columns |      |        |        |        |
|                       | 1    | 89     | 794    | 94     |
|                       |      | 9.11   | 81.27  | 9.62   |
|                       |      | 9.11   | 81.27  | 9.62   |
|                       |      | 100.00 | 100.00 | 100.00 |
| Total                 | 89   | 794    | 94     | 977    |
|                       | 9.11 | 81.27  | 9.62   | 100.00 |

Frequency of missing values = 1388

Distributions of Table 3-1 age, DOAC type, and dosage according to the presence or absence of proton-pump inhibitors.

FREQ Procedure

|                      |       | Cumulative       |       |        |
|----------------------|-------|------------------|-------|--------|
| Percent of ALL power |       | Percent of power |       |        |
| 1                    | 13400 | 100.00           | 13400 | 100.00 |

Distributions of Table 3-1 age, DOAC type, and dosage according to the presence or absence of proton-pump inhibitors.

FREQ Procedure

Table: ALL \* a\_DOSE

ALL a\_DOSE

Power |

Percent |

Percent of rows

Percentage of columns | 1| 2| 3| Total

|                       | 1      | 2      | 3      | Total  |
|-----------------------|--------|--------|--------|--------|
| Count                 | 89     | 794    | 94     | 977    |
| Percent               | 9.11   | 81.27  | 9.62   | 100.00 |
| Percent of rows       | 9.11   | 81.27  | 9.62   |        |
| Percentage of columns | 100.00 | 100.00 | 100.00 |        |
| Total                 | 89     | 794    | 94     | 977    |
|                       | 9.11   | 81.27  | 9.62   | 100.00 |

Frequency of missing values = 1388

Distributions of Table 3-1 age, DOAC type, and dosage according to the presence or absence of proton-pump inhibitors.

FREQ Procedure

|                      |       | Cumulative       |       |        |
|----------------------|-------|------------------|-------|--------|
| Percent of ALL power |       | Percent of power |       |        |
| 1                    | 13400 | 100.00           | 13400 | 100.00 |

Distributions of Table 3-1 age, DOAC type, and dosage according to the presence or absence of proton-pump inhibitors.

FREQ Procedure

Table: ALL \* a\_DOSE

ALL a\_DOSE

Power |

Percent |

Percent of rows

Percentage of columns | 1| 2| 3| Total

|                       | 1      | 2      | 3      | Total  |
|-----------------------|--------|--------|--------|--------|
| Count                 | 89     | 794    | 94     | 977    |
| Percent               | 9.11   | 81.27  | 9.62   | 100.00 |
| Percent of rows       | 9.11   | 81.27  | 9.62   |        |
| Percentage of columns | 100.00 | 100.00 | 100.00 |        |
| Total                 | 89     | 794    | 94     | 977    |
|                       | 9.11   | 81.27  | 9.62   | 100.00 |

Frequency of missing values = 1388

Distributions of Table 3-1 age, DOAC type, and dosage according to the presence or absence of proton-pump inhibitors.

FREQ Procedure

|                      |       | Cumulative       |       |        |
|----------------------|-------|------------------|-------|--------|
| Percent of ALL power |       | Percent of power |       |        |
| 1                    | 13400 | 100.00           | 13400 | 100.00 |

Distributions of Table 3-1 age, DOAC type, and dosage according to the presence or absence of proton-pump inhibitors.

FREQ Procedure

Table: ALL \* a\_DOSE

ALL a\_DOSE

Power |

Percent |

Percent of rows

Percentage of columns | 1| 2| 3| Total

|                       | 1      | 2      | 3      | Total  |
|-----------------------|--------|--------|--------|--------|
|                       | 89     | 794    | 94     | 977    |
| Percent of rows       | 9.11   | 81.27  | 9.62   | 100.00 |
| Percentage of columns | 9.11   | 81.27  | 9.62   |        |
|                       | 100.00 | 100.00 | 100.00 |        |
| Total                 | 89     | 794    | 94     | 977    |
|                       | 9.11   | 81.27  | 9.62   | 100.00 |

Frequency of missing values = 1388



Distributions of Table 3-1 age, DOAC type, and dosage according to the presence or absence of proton-pump inhibitors.

FREQ Procedure

|                      |       | Cumulative       |       |        |
|----------------------|-------|------------------|-------|--------|
| Percent of ALL power |       | Percent of power |       |        |
| 1                    | 13400 | 100.00           | 13400 | 100.00 |

Distributions of Table 3-1 age, DOAC type, and dosage according to the presence or absence of proton-pump inhibitors.

FREQ Procedure

Table: ALL \* t\_ACT0

ALL t\_ACT0

Power |

Percent |

Percent of rows

Percentage of columns | 0 | 1 | Sum

|       | 0      | 1      | Sum    |
|-------|--------|--------|--------|
| 1     | 1816   | 549    | 2365   |
|       | 76.79  | 23.21  | 100.00 |
|       | 76.79  | 23.21  |        |
|       | 100.00 | 100.00 |        |
| Total | 1816   | 549    | 2365   |
|       | 76.79  | 23.21  | 100.00 |

Distributions of Table 3-1 age, DOAC type, and dosage according to the presence or absence of proton-pump inhibitors.

FREQ Procedure

|                      |       | Cumulative       |       |        |
|----------------------|-------|------------------|-------|--------|
| Percent of ALL power |       | Percent of power |       |        |
| 1                    | 13400 | 100.00           | 13400 | 100.00 |

Distributions of Table 3-1 age, DOAC type, and dosage according to the presence or absence of proton-pump inhibitors.

FREQ Procedure

Table: ALL \* e\_DOSE

ALL e\_DOSE

Power |

Percent |

Percent of rows

Percentage of columns | 1| 2| 3| 9| Total

|       | 1      | 2      | 3      | 9      | Total  |     |
|-------|--------|--------|--------|--------|--------|-----|
|       | 1      | 53     | 470    | 25     | 1      | 549 |
|       | 9.65   | 85.61  | 4.55   | 0.18   | 100.00 |     |
|       | 9.65   | 85.61  | 4.55   | 0.18   |        |     |
|       | 100.00 | 100.00 | 100.00 | 100.00 |        |     |
| Total | 53     | 470    | 25     | 1      | 549    |     |
|       | 9.65   | 85.61  | 4.55   | 0.18   | 100.00 |     |

Frequency of missing values = 1816

Distributions of Table 3-1 age, DOAC type, and dosage according to the presence or absence of proton-pump inhibitors.

FREQ Procedure

|   |       | Cumulative           |                  |        |
|---|-------|----------------------|------------------|--------|
|   |       | Percent of ALL power | Percent of power |        |
| 1 | 13400 | 100.00               | 13400            | 100.00 |

Distributions of Table 3-1 age, DOAC type, and dosage according to the presence or absence of proton-pump inhibitors.

FREQ Procedure

Table: ALL \* e\_DOSE

ALL e\_DOSE

Power |

Percent |

Percent of rows

Percentage of columns | 1| 2| 3| 9| Total

|       | 1      | 2      | 3      | 9      | Total  |
|-------|--------|--------|--------|--------|--------|
|       | 1      | 53     | 470    | 25     | 1      |
|       | 9.65   | 85.61  | 4.55   | 0.18   | 100.00 |
|       | 9.65   | 85.61  | 4.55   | 0.18   |        |
|       | 100.00 | 100.00 | 100.00 | 100.00 |        |
| Total | 53     | 470    | 25     | 1      | 549    |
|       | 9.65   | 85.61  | 4.55   | 0.18   | 100.00 |

Frequency of missing values = 1816

Distributions of Table 3-1 age, DOAC type, and dosage according to the presence or absence of proton-pump inhibitors.

FREQ Procedure

|                      |       | Cumulative       |       |        |
|----------------------|-------|------------------|-------|--------|
| Percent of ALL power |       | Percent of power |       |        |
| 1                    | 13400 | 100.00           | 13400 | 100.00 |

Distributions of Table 3-1 age, DOAC type, and dosage according to the presence or absence of proton-pump inhibitors.

FREQ Procedure

Table: ALL \* e\_DOSE

ALL e\_DOSE

Power |

Percent |

Percent of rows

Percentage of columns | 1| 2| 3| 9| Total

|       | 1      | 2      | 3      | 9      | Total  |
|-------|--------|--------|--------|--------|--------|
|       | 1      | 53     | 470    | 25     | 1      |
|       | 9.65   | 85.61  | 4.55   | 0.18   | 100.00 |
|       | 9.65   | 85.61  | 4.55   | 0.18   |        |
|       | 100.00 | 100.00 | 100.00 | 100.00 |        |
| Total | 53     | 470    | 25     | 1      | 549    |
|       | 9.65   | 85.61  | 4.55   | 0.18   | 100.00 |

Frequency of missing values = 1816



Distributions of Table 3-1 age, DOAC type, and dosage according to the presence or absence of proton-pump inhibitors.

FREQ Procedure

|                      |       | Cumulative       |       |        |
|----------------------|-------|------------------|-------|--------|
| Percent of ALL power |       | Percent of power |       |        |
| 1                    | 13400 | 100.00           | 13400 | 100.00 |

Distributions of Table 3-1 age, DOAC type, and dosage according to the presence or absence of proton-pump inhibitors.

FREQ Procedure

Table: ALL \* e\_DOSE

ALL e\_DOSE

Power |

Percent |

Percent of rows

Percentage of columns | 1| 2| 3| 9| Total

|       | 1      | 2      | 3      | 9      | Total  |
|-------|--------|--------|--------|--------|--------|
|       | 1      | 53     | 470    | 25     | 1      |
|       | 9.65   | 85.61  | 4.55   | 0.18   | 100.00 |
|       | 9.65   | 85.61  | 4.55   | 0.18   |        |
|       | 100.00 | 100.00 | 100.00 | 100.00 |        |
| Total | 53     | 470    | 25     | 1      | 549    |
|       | 9.65   | 85.61  | 4.55   | 0.18   | 100.00 |

Frequency of missing values = 1816

Distributions of Table 3-1 age, DOAC type, and dosage according to the presence or absence of proton-pump inhibitors.

FREQ Procedure

|   |       | Cumulative           |                  |        |
|---|-------|----------------------|------------------|--------|
|   |       | Percent of ALL power | Percent of power |        |
| 1 | 13400 | 100.00               | 13400            | 100.00 |

Distributions of Table 3-1 age, DOAC type, and dosage according to the presence or absence of proton-pump inhibitors.

FREQ Procedure

Table : ALL \* \_AGE90

ALL \_AGE90

Power |

Percent |

Percent of rows

Percent of columns | 1 | Total

|           |        |        |  |
|-----------|--------|--------|--|
| _____+    |        | _____+ |  |
| 1         | 688    | 688    |  |
|           | 100.00 | 100.00 |  |
|           | 100.00 |        |  |
|           | 100.00 |        |  |
| _____+    |        | _____+ |  |
| Total 688 | 688    |        |  |
|           | 100.00 | 100.00 |  |

Distributions of Table 3-1 age, DOAC type, and dosage according to the presence or absence of proton-pump inhibitors.

FREQ Procedure

|   |       | Cumulative           |                  |        |
|---|-------|----------------------|------------------|--------|
|   |       | Percent of ALL power | Percent of power |        |
| 1 | 13400 | 100.00               | 13400            | 100.00 |

Distributions of Table 3-1 age, DOAC type, and dosage according to the presence or absence of proton-pump inhibitors.

FREQ Procedure

Tables: ALL\* ACTYP

ALL ACTYP(Type of AF)

Power |

Percent |

Percent of rows

Percent of column | Dabigato| Riverro| Apixa| Edoxa| Edoxa| Total

|lan|xaban|ban|ban (OD)|

|||)|

|       | Dabigato | Riverro | Apixa  | Edoxa  | Edoxa  | Total  |
|-------|----------|---------|--------|--------|--------|--------|
| 1     | 25       | 173     | 323    | 166    | 1      | 688    |
|       | 3.63     | 25.15   | 46.95  | 24.13  | 0.15   | 100.00 |
|       | 3.63     | 25.15   | 46.95  | 24.13  | 0.15   |        |
|       | 100.00   | 100.00  | 100.00 | 100.00 | 100.00 |        |
| Total | 25       | 173     | 323    | 166    | 1      | 688    |
|       | 3.63     | 25.15   | 46.95  | 24.13  | 0.15   | 100.00 |

Distributions of Table 3-1 age, DOAC type, and dosage according to the presence or absence of proton-pump inhibitors.

FREQ Procedure

|                      |       | Cumulative       |       |        |
|----------------------|-------|------------------|-------|--------|
| Percent of ALL power |       | Percent of power |       |        |
| 1                    | 13400 | 100.00           | 13400 | 100.00 |

Distributions of Table 3-1 age, DOAC type, and dosage according to the presence or absence of proton-pump inhibitors.

FREQ Procedure

Table: ALL \* d\_DOSE

ALL d\_DOSE

Power |

Percent |

Percent of rows

Percentage of columns | 2| 3| 4| 5| Total

|       | 2      | 3      | 4      | 5      | Total  |
|-------|--------|--------|--------|--------|--------|
| 1     | 4      | 2      | 18     | 1      | 25     |
|       | 16.00  | 8.00   | 72.00  | 4.00   | 100.00 |
|       | 16.00  | 8.00   | 72.00  | 4.00   |        |
|       | 100.00 | 100.00 | 100.00 | 100.00 |        |
| Total | 4      | 2      | 18     | 1      | 25     |
|       | 16.00  | 8.00   | 72.00  | 4.00   | 100.00 |

Degree of missing values = 663



Distributions of Table 3-1 age, DOAC type, and dosage according to the presence or absence of proton-pump inhibitors.

FREQ Procedure

|                      |       | Cumulative       |       |        |
|----------------------|-------|------------------|-------|--------|
| Percent of ALL power |       | Percent of power |       |        |
| 1                    | 13400 | 100.00           | 13400 | 100.00 |

Distributions of Table 3-1 age, DOAC type, and dosage according to the presence or absence of proton-pump inhibitors.

FREQ Procedure

Table: ALL \* d\_DOSE

ALL d\_DOSE

Power |

Percent |

Percent of rows

Percentage of columns | 2| 3| 4| 5| Total

|       | 2      | 3      | 4      | 5      | Total  |
|-------|--------|--------|--------|--------|--------|
| 1     | 4      | 2      | 18     | 1      | 25     |
|       | 16.00  | 8.00   | 72.00  | 4.00   | 100.00 |
|       | 16.00  | 8.00   | 72.00  | 4.00   |        |
|       | 100.00 | 100.00 | 100.00 | 100.00 |        |
| Total | 4      | 2      | 18     | 1      | 25     |
|       | 16.00  | 8.00   | 72.00  | 4.00   | 100.00 |

Degree of missing values = 663

Distributions of Table 3-1 age, DOAC type, and dosage according to the presence or absence of proton-pump inhibitors.

FREQ Procedure

|                      |       | Cumulative       |       |        |
|----------------------|-------|------------------|-------|--------|
| Percent of ALL power |       | Percent of power |       |        |
| 1                    | 13400 | 100.00           | 13400 | 100.00 |

Distributions of Table 3-1 age, DOAC type, and dosage according to the presence or absence of proton-pump inhibitors.

FREQ Procedure

Table: ALL \* d\_DOSE

ALL d\_DOSE

Power |

Percent |

Percent of rows

Percentage of columns | 2| 3| 4| 5| Total

|       | 2      | 3      | 4      | 5      | Total  |
|-------|--------|--------|--------|--------|--------|
| 1     | 4      | 2      | 18     | 1      | 25     |
|       | 16.00  | 8.00   | 72.00  | 4.00   | 100.00 |
|       | 16.00  | 8.00   | 72.00  | 4.00   |        |
|       | 100.00 | 100.00 | 100.00 | 100.00 |        |
| Total | 4      | 2      | 18     | 1      | 25     |
|       | 16.00  | 8.00   | 72.00  | 4.00   | 100.00 |

Degree of missing values = 663

Distributions of Table 3-1 age, DOAC type, and dosage according to the presence or absence of proton-pump inhibitors.

FREQ Procedure

|                      |       | Cumulative       |       |        |
|----------------------|-------|------------------|-------|--------|
| Percent of ALL power |       | Percent of power |       |        |
| 1                    | 13400 | 100.00           | 13400 | 100.00 |

Distributions of Table 3-1 age, DOAC type, and dosage according to the presence or absence of proton-pump inhibitors.

FREQ Procedure

Table: ALL \* d\_DOSE

ALL d\_DOSE

Power |

Percent |

Percent of rows

Percentage of columns | 2| 3| 4| 5| Total

|       | 2      | 3      | 4      | 5      | Total  |
|-------|--------|--------|--------|--------|--------|
| 1     | 4      | 2      | 18     | 1      | 25     |
|       | 16.00  | 8.00   | 72.00  | 4.00   | 100.00 |
|       | 16.00  | 8.00   | 72.00  | 4.00   |        |
|       | 100.00 | 100.00 | 100.00 | 100.00 |        |
| Total | 4      | 2      | 18     | 1      | 25     |
|       | 16.00  | 8.00   | 72.00  | 4.00   | 100.00 |

Degree of missing values = 663

Distributions of Table 3-1 age, DOAC type, and dosage according to the presence or absence of proton-pump inhibitors.

FREQ Procedure

|                      |       | Cumulative       |       |        |
|----------------------|-------|------------------|-------|--------|
| Percent of ALL power |       | Percent of power |       |        |
| 1                    | 13400 | 100.00           | 13400 | 100.00 |

Distributions of Table 3-1 age, DOAC type, and dosage according to the presence or absence of proton-pump inhibitors.

FREQ Procedure

Table: ALL \* d\_DOSE

ALL d\_DOSE

Power |

Percent |

Percent of rows

Percentage of columns | 2| 3| 4| 5| Total

|       | 2      | 3      | 4      | 5      | Total  |
|-------|--------|--------|--------|--------|--------|
| 1     | 4      | 2      | 18     | 1      | 25     |
|       | 16.00  | 8.00   | 72.00  | 4.00   | 100.00 |
|       | 16.00  | 8.00   | 72.00  | 4.00   |        |
|       | 100.00 | 100.00 | 100.00 | 100.00 |        |
| Total | 4      | 2      | 18     | 1      | 25     |
|       | 16.00  | 8.00   | 72.00  | 4.00   | 100.00 |

Degree of missing values = 663



Distributions of Table 3-1 age, DOAC type, and dosage according to the presence or absence of proton-pump inhibitors.

FREQ Procedure

|   |       | Cumulative           |                  |        |
|---|-------|----------------------|------------------|--------|
|   |       | Percent of ALL power | Percent of power |        |
| 1 | 13400 | 100.00               | 13400            | 100.00 |

Distributions of Table 3-1 age, DOAC type, and dosage according to the presence or absence of proton-pump inhibitors.

FREQ Procedure

Table: ALL \* d\_DOSE

ALL d\_DOSE

Power |

Percent |

Percent of rows

Percentage of columns | 2| 3| 4| 5| Total

|       | 2      | 3      | 4      | 5      | Total  |
|-------|--------|--------|--------|--------|--------|
| 1     | 4      | 2      | 18     | 1      | 25     |
|       | 16.00  | 8.00   | 72.00  | 4.00   | 100.00 |
|       | 16.00  | 8.00   | 72.00  | 4.00   |        |
|       | 100.00 | 100.00 | 100.00 | 100.00 |        |
| Total | 4      | 2      | 18     | 1      | 25     |
|       | 16.00  | 8.00   | 72.00  | 4.00   | 100.00 |

Degree of missing values = 663

Distributions of Table 3-1 age, DOAC type, and dosage according to the presence or absence of proton-pump inhibitors.

FREQ Procedure

|                      |       | Cumulative       |       |        |
|----------------------|-------|------------------|-------|--------|
| Percent of ALL power |       | Percent of power |       |        |
| 1                    | 13400 | 100.00           | 13400 | 100.00 |

Distributions of Table 3-1 age, DOAC type, and dosage according to the presence or absence of proton-pump inhibitors.

FREQ Procedure

Tables: ALL\* ACTYP

ALL ACTYP(Type of AF)

Power |

Percent |

Percent of rows

Percent of column | Dabigato| Riverro| Apixa| Edoxa| Edoxa| Total

|lan|xaban|ban|ban (OD)|

|||)|

|       | Dabigato | Riverro | Apixa  | Edoxa  | Edoxa  | Total  |
|-------|----------|---------|--------|--------|--------|--------|
| 1     | 25       | 173     | 323    | 166    | 1      | 688    |
|       | 3.63     | 25.15   | 46.95  | 24.13  | 0.15   | 100.00 |
|       | 3.63     | 25.15   | 46.95  | 24.13  | 0.15   |        |
|       | 100.00   | 100.00  | 100.00 | 100.00 | 100.00 |        |
| Total | 25       | 173     | 323    | 166    | 1      | 688    |
|       | 3.63     | 25.15   | 46.95  | 24.13  | 0.15   | 100.00 |

Distributions of Table 3-1 age, DOAC type, and dosage according to the presence or absence of proton-pump inhibitors.

FREQ Procedure

|                      |       | Cumulative       |       |        |
|----------------------|-------|------------------|-------|--------|
| Percent of ALL power |       | Percent of power |       |        |
| 1                    | 13400 | 100.00           | 13400 | 100.00 |

Distributions of Table 3-1 age, DOAC type, and dosage according to the presence or absence of proton-pump inhibitors.

FREQ Procedure

Table: ALL \* r\_DOSE

ALL r\_DOSE

Power |

Percent |

Percent of rows

Percent of columns | 1| 2| 9| Total

|       | 1      | 2      | 9      | Total  |
|-------|--------|--------|--------|--------|
| 1     | 154    | 18     | 1      | 173    |
|       | 89.02  | 10.40  | 0.58   | 100.00 |
|       | 89.02  | 10.40  | 0.58   |        |
|       | 100.00 | 100.00 | 100.00 |        |
| Total | 154    | 18     | 1      | 173    |
|       | 89.02  | 10.40  | 0.58   | 100.00 |

Degree of missing values = 515

Distributions of Table 3-1 age, DOAC type, and dosage according to the presence or absence of proton-pump inhibitors.

FREQ Procedure

|                      |       | Cumulative       |       |        |
|----------------------|-------|------------------|-------|--------|
| Percent of ALL power |       | Percent of power |       |        |
| 1                    | 13400 | 100.00           | 13400 | 100.00 |

Distributions of Table 3-1 age, DOAC type, and dosage according to the presence or absence of proton-pump inhibitors.

FREQ Procedure

Table: ALL \* r\_DOSE

ALL r\_DOSE

Power |

Percent |

Percent of rows

Percent of columns | 1| 2| 9| Total

|       | 1      | 2      | 9      | Total  |
|-------|--------|--------|--------|--------|
| 1     | 154    | 18     | 1      | 173    |
|       | 89.02  | 10.40  | 0.58   | 100.00 |
|       | 89.02  | 10.40  | 0.58   |        |
|       | 100.00 | 100.00 | 100.00 |        |
| Total | 154    | 18     | 1      | 173    |
|       | 89.02  | 10.40  | 0.58   | 100.00 |

Degree of missing values = 515



Distributions of Table 3-1 age, DOAC type, and dosage according to the presence or absence of proton-pump inhibitors.

FREQ Procedure

|                      |       | Cumulative       |       |        |
|----------------------|-------|------------------|-------|--------|
| Percent of ALL power |       | Percent of power |       |        |
| 1                    | 13400 | 100.00           | 13400 | 100.00 |

Distributions of Table 3-1 age, DOAC type, and dosage according to the presence or absence of proton-pump inhibitors.

FREQ Procedure

Table: ALL \* r\_DOSE

ALL r\_DOSE

Power |

Percent |

Percent of rows

Percent of columns | 1| 2| 9| Total

|       | 1      | 2      | 9      | Total  |
|-------|--------|--------|--------|--------|
| 1     | 154    | 18     | 1      | 173    |
|       | 89.02  | 10.40  | 0.58   | 100.00 |
|       | 89.02  | 10.40  | 0.58   |        |
|       | 100.00 | 100.00 | 100.00 |        |
| Total | 154    | 18     | 1      | 173    |
|       | 89.02  | 10.40  | 0.58   | 100.00 |

Degree of missing values = 515

Distributions of Table 3-1 age, DOAC type, and dosage according to the presence or absence of proton-pump inhibitors.

FREQ Procedure

|                      |       | Cumulative       |       |        |
|----------------------|-------|------------------|-------|--------|
| Percent of ALL power |       | Percent of power |       |        |
| 1                    | 13400 | 100.00           | 13400 | 100.00 |

Distributions of Table 3-1 age, DOAC type, and dosage according to the presence or absence of proton-pump inhibitors.

FREQ Procedure

Tables: ALL\* ACTYP

ALL ACTYP(Type of AF)

Power |

Percent |

Percent of rows

Percent of column | Dabigato| Riverro| Apixa| Edoxa| Edoxa| Total

|lan|xaban|ban|ban (OD)|

|||)|

|       | Dabigato | Riverro | Apixa  | Edoxa  | Edoxa  | Total  |
|-------|----------|---------|--------|--------|--------|--------|
| 1     | 25       | 173     | 323    | 166    | 1      | 688    |
|       | 3.63     | 25.15   | 46.95  | 24.13  | 0.15   | 100.00 |
|       | 3.63     | 25.15   | 46.95  | 24.13  | 0.15   |        |
|       | 100.00   | 100.00  | 100.00 | 100.00 | 100.00 |        |
| Total | 25       | 173     | 323    | 166    | 1      | 688    |
|       | 3.63     | 25.15   | 46.95  | 24.13  | 0.15   | 100.00 |

Distributions of Table 3-1 age, DOAC type, and dosage according to the presence or absence of proton-pump inhibitors.

FREQ Procedure

|                      |       | Cumulative       |       |        |
|----------------------|-------|------------------|-------|--------|
| Percent of ALL power |       | Percent of power |       |        |
| 1                    | 13400 | 100.00           | 13400 | 100.00 |

Distributions of Table 3-1 age, DOAC type, and dosage according to the presence or absence of proton-pump inhibitors.

FREQ Procedure

Table: ALL \* a\_DOSE

ALL a\_DOSE

Power |

Percent |

Percent of rows

Percentage of columns | 1| 2| 3| Total

|       | 1      | 2      | 3      | Total  |
|-------|--------|--------|--------|--------|
| 1     | 47     | 267    | 9      | 323    |
|       | 14.55  | 82.66  | 2.79   | 100.00 |
|       | 14.55  | 82.66  | 2.79   |        |
|       | 100.00 | 100.00 | 100.00 |        |
| Total | 47     | 267    | 9      | 323    |
|       | 14.55  | 82.66  | 2.79   | 100.00 |

Degree of missing values = 365

Distributions of Table 3-1 age, DOAC type, and dosage according to the presence or absence of proton-pump inhibitors.

FREQ Procedure

|   |       | Cumulative           |                  |        |
|---|-------|----------------------|------------------|--------|
|   |       | Percent of ALL power | Percent of power |        |
| 1 | 13400 | 100.00               | 13400            | 100.00 |

Distributions of Table 3-1 age, DOAC type, and dosage according to the presence or absence of proton-pump inhibitors.

FREQ Procedure

Table: ALL \* a\_DOSE

ALL a\_DOSE

Power |

Percent |

Percent of rows

Percentage of columns | 1| 2| 3| Total

|                       | 1      | 2      | 3      | Total  |
|-----------------------|--------|--------|--------|--------|
|                       | 47     | 267    | 9      | 323    |
| Percent of rows       | 14.55  | 82.66  | 2.79   | 100.00 |
| Percentage of columns | 14.55  | 82.66  | 2.79   |        |
|                       | 100.00 | 100.00 | 100.00 |        |
| Total                 | 47     | 267    | 9      | 323    |
|                       | 14.55  | 82.66  | 2.79   | 100.00 |

Degree of missing values = 365



Distributions of Table 3-1 age, DOAC type, and dosage according to the presence or absence of proton-pump inhibitors.

FREQ Procedure

|                      |       | Cumulative       |       |        |
|----------------------|-------|------------------|-------|--------|
| Percent of ALL power |       | Percent of power |       |        |
| 1                    | 13400 | 100.00           | 13400 | 100.00 |

Distributions of Table 3-1 age, DOAC type, and dosage according to the presence or absence of proton-pump inhibitors.

FREQ Procedure

Table: ALL \* a\_DOSE

ALL a\_DOSE

Power |

Percent |

Percent of rows

Percentage of columns | 1| 2| 3| Total

|                       | 1      | 2      | 3      | Total  |
|-----------------------|--------|--------|--------|--------|
|                       | 47     | 267    | 9      | 323    |
| Percent of rows       | 14.55  | 82.66  | 2.79   | 100.00 |
| Percentage of columns | 14.55  | 82.66  | 2.79   |        |
|                       | 100.00 | 100.00 | 100.00 |        |
| Total                 | 47     | 267    | 9      | 323    |
|                       | 14.55  | 82.66  | 2.79   | 100.00 |

Degree of missing values = 365

Distributions of Table 3-1 age, DOAC type, and dosage according to the presence or absence of proton-pump inhibitors.

FREQ Procedure

|                      |       | Cumulative       |       |        |
|----------------------|-------|------------------|-------|--------|
| Percent of ALL power |       | Percent of power |       |        |
| 1                    | 13400 | 100.00           | 13400 | 100.00 |

Distributions of Table 3-1 age, DOAC type, and dosage according to the presence or absence of proton-pump inhibitors.

FREQ Procedure

Table: ALL \* a\_DOSE

ALL a\_DOSE

Power |

Percent |

Percent of rows

Percentage of columns | 1| 2| 3| Total

|                       | 1      | 2      | 3      | Total  |
|-----------------------|--------|--------|--------|--------|
|                       | 47     | 267    | 9      | 323    |
| Percent of rows       | 14.55  | 82.66  | 2.79   | 100.00 |
| Percentage of columns | 14.55  | 82.66  | 2.79   |        |
|                       | 100.00 | 100.00 | 100.00 |        |
| Total                 | 47     | 267    | 9      | 323    |
|                       | 14.55  | 82.66  | 2.79   | 100.00 |

Degree of missing values = 365

Distributions of Table 3-1 age, DOAC type, and dosage according to the presence or absence of proton-pump inhibitors.

FREQ Procedure

|                      |       | Cumulative       |       |        |
|----------------------|-------|------------------|-------|--------|
| Percent of ALL power |       | Percent of power |       |        |
| 1                    | 13400 | 100.00           | 13400 | 100.00 |

Distributions of Table 3-1 age, DOAC type, and dosage according to the presence or absence of proton-pump inhibitors.

FREQ Procedure

Table: ALL \* t\_ACT0

ALL t\_ACT0

Power |

Percent |

Percent of rows

Percentage of columns | 0 | 1 | Sum

|       | 0      | 1      | Sum    |
|-------|--------|--------|--------|
| 1     | 521    | 167    | 688    |
|       | 75.73  | 24.27  | 100.00 |
|       | 75.73  | 24.27  |        |
|       | 100.00 | 100.00 |        |
| Total | 521    | 167    | 688    |
|       | 75.73  | 24.27  | 100.00 |

Distributions of Table 3-1 age, DOAC type, and dosage according to the presence or absence of proton-pump inhibitors.

FREQ Procedure

|   |       | Cumulative           |                  |        |
|---|-------|----------------------|------------------|--------|
|   |       | Percent of ALL power | Percent of power |        |
| 1 | 13400 | 100.00               | 13400            | 100.00 |

Distributions of Table 3-1 age, DOAC type, and dosage according to the presence or absence of proton-pump inhibitors.

FREQ Procedure

Table: ALL \* e\_DOSE

ALL e\_DOSE

Power |

Percent |

Percent of rows

Percentage of columns | 1| 2| 3| Total

|       | 1      | 2      | 3      | Total  |
|-------|--------|--------|--------|--------|
| 1     | 25     | 135    | 7      | 167    |
|       | 14.97  | 80.84  | 4.19   | 100.00 |
|       | 14.97  | 80.84  | 4.19   |        |
|       | 100.00 | 100.00 | 100.00 |        |
| Total | 25     | 135    | 7      | 167    |
|       | 14.97  | 80.84  | 4.19   | 100.00 |

Degree of missing values = 521



Distributions of Table 3-1 age, DOAC type, and dosage according to the presence or absence of proton-pump inhibitors.

FREQ Procedure

|                      |       | Cumulative       |       |        |
|----------------------|-------|------------------|-------|--------|
| Percent of ALL power |       | Percent of power |       |        |
| 1                    | 13400 | 100.00           | 13400 | 100.00 |

Distributions of Table 3-1 age, DOAC type, and dosage according to the presence or absence of proton-pump inhibitors.

FREQ Procedure

Table: ALL \* e\_DOSE

ALL e\_DOSE

Power |

Percent |

Percent of rows

Percentage of columns | 1| 2| 3| Total

|       | 1      | 2      | 3      | Total  |
|-------|--------|--------|--------|--------|
| 1     | 25     | 135    | 7      | 167    |
|       | 14.97  | 80.84  | 4.19   | 100.00 |
|       | 14.97  | 80.84  | 4.19   |        |
|       | 100.00 | 100.00 | 100.00 |        |
| Total | 25     | 135    | 7      | 167    |
|       | 14.97  | 80.84  | 4.19   | 100.00 |

Degree of missing values = 521

Distributions of Table 3-1 age, DOAC type, and dosage according to the presence or absence of proton-pump inhibitors.

FREQ Procedure

|                      |       | Cumulative       |       |        |
|----------------------|-------|------------------|-------|--------|
| Percent of ALL power |       | Percent of power |       |        |
| 1                    | 13400 | 100.00           | 13400 | 100.00 |

Distributions of Table 3-1 age, DOAC type, and dosage according to the presence or absence of proton-pump inhibitors.

FREQ Procedure

Table: ALL \* e\_DOSE

ALL e\_DOSE

Power |

Percent |

Percent of rows

Percentage of columns | 1| 2| 3| Total

|       | 1      | 2      | 3      | Total  |
|-------|--------|--------|--------|--------|
| 1     | 25     | 135    | 7      | 167    |
|       | 14.97  | 80.84  | 4.19   | 100.00 |
|       | 14.97  | 80.84  | 4.19   |        |
|       | 100.00 | 100.00 | 100.00 |        |
| Total | 25     | 135    | 7      | 167    |
|       | 14.97  | 80.84  | 4.19   | 100.00 |

Degree of missing values = 521

Distributions of Table 3-1 age, DOAC type, and dosage according to the presence or absence of proton-pump inhibitors.

FREQ Procedure

|   |       | Cumulative           |                  |        |
|---|-------|----------------------|------------------|--------|
|   |       | Percent of ALL power | Percent of power |        |
| 1 | 13400 | 100.00               | 13400            | 100.00 |

Distributions of Table 3-1 age, DOAC type, and dosage according to the presence or absence of proton-pump inhibitors.

FREQ Procedure

Table: ALL \* e\_DOSE

ALL e\_DOSE

Power |

Percent |

Percent of rows

Percentage of columns | 1| 2| 3| Total

|       | 1      | 2      | 3      | Total  |
|-------|--------|--------|--------|--------|
| 1     | 25     | 135    | 7      | 167    |
|       | 14.97  | 80.84  | 4.19   | 100.00 |
|       | 14.97  | 80.84  | 4.19   |        |
|       | 100.00 | 100.00 | 100.00 |        |
| Total | 25     | 135    | 7      | 167    |
|       | 14.97  | 80.84  | 4.19   | 100.00 |

Degree of missing values = 521

Distributions of Table 4-1 anticoagulants and antiplatelet drugs according to the presence or absence of proton-pump inhibitors.

FREQ Procedure

Cumulative

Percent of all power Percent of power

|   | 1     | 2      | 3     | Total  |
|---|-------|--------|-------|--------|
| 1 | 32490 | 100.00 | 32490 | 100.00 |

Table : all \* fl\_YN

All fl\_YN

Power |

Percent |

Percent of rows

Percent of columns | 1 | Total

|        |        |        |  |
|--------|--------|--------|--|
| _____+ |        | _____+ |  |
| 1      | 25014  | 25014  |  |
|        | 100.00 | 100.00 |  |
|        | 100.00 |        |  |
|        | 100.00 |        |  |
| _____+ |        | _____+ |  |
| Total  | 25014  | 25014  |  |
|        | 100.00 | 100.00 |  |

Degree of missing values = 7476

Distributions of Table 4-1 anticoagulants and antiplatelet drugs according to the presence or absence of proton-pump inhibitors.

FREQ Procedure

|   |       | Cumulative           |                  |        |
|---|-------|----------------------|------------------|--------|
|   |       | Percent of all power | Percent of power |        |
| 1 | 32490 | 100.00               | 32490            | 100.00 |

Table : all \* f2\_YN

All f2\_YN

| Power                          |  |  |
|--------------------------------|--|--|
| Percent                        |  |  |
| Percent of rows                |  |  |
| Percent of columns   1   Total |  |  |
| _____ + _____ +                |  |  |
| 1   893   893                  |  |  |
| 100.00   100.00                |  |  |
| 100.00                         |  |  |
| 100.00                         |  |  |
| _____ + _____ +                |  |  |
| Total 893 893                  |  |  |
| 100.00 100.00                  |  |  |

Frequency of missing values = 31597



Distributions of Table 4-1 anticoagulants and antiplatelet drugs according to the presence or absence of proton-pump inhibitors.

FREQ Procedure

|   |       | Cumulative           |                  |        |
|---|-------|----------------------|------------------|--------|
|   |       | Percent of all power | Percent of power |        |
| 1 | 32490 | 100.00               | 32490            | 100.00 |

Table : all \* f3\_YN

All f3\_YN

| Power                          |        |        |
|--------------------------------|--------|--------|
| Percent                        |        |        |
| Percent of rows                |        |        |
| Percent of columns   1   Total |        |        |
|                                | +      | +      |
| 1                              | 4900   | 4900   |
|                                | 100.00 | 100.00 |
|                                | 100.00 |        |
|                                | 100.00 |        |
|                                | +      | +      |
| Total                          | 4900   | 4900   |
|                                | 100.00 | 100.00 |

Frequency of missing values = 27590

Distributions of Table 4-1 anticoagulants and antiplatelet drugs according to the presence or absence of proton-pump inhibitors.

FREQ Procedure

|   |       | Cumulative           |                  |        |
|---|-------|----------------------|------------------|--------|
|   |       | Percent of all power | Percent of power |        |
| 1 | 32490 | 100.00               | 32490            | 100.00 |

Table : all \* f4\_YN

All f4\_YN

| Power                          |           |        |
|--------------------------------|-----------|--------|
| Percent                        |           |        |
| Percent of rows                |           |        |
| Percent of columns   1   Total |           |        |
|                                | + _____ + |        |
| 1                              | 1683      | 1683   |
|                                | 100.00    | 100.00 |
|                                | 100.00    |        |
|                                | 100.00    |        |
|                                | + _____ + |        |
| Total                          | 1683      | 1683   |
|                                | 100.00    | 100.00 |

Frequency of missing values = 30807

Distributions of Table 4-1 anticoagulants and antiplatelet drugs according to the presence or absence of proton-pump inhibitors.

FREQ Procedure

|                      |       | Cumulative       |              |
|----------------------|-------|------------------|--------------|
| Percent of all power |       | Percent of power |              |
| 1                    | 11981 | 100.00           | 11981 100.00 |

Table : all \* fl\_YN

All fl\_YN

| Power                          |  |  |
|--------------------------------|--|--|
| Percent                        |  |  |
| Percent of rows                |  |  |
| Percent of columns   1   Total |  |  |
| _____+_____+                   |  |  |
| 1   8541   8541                |  |  |
| 100.00   100.00                |  |  |
| 100.00                         |  |  |
| 100.00                         |  |  |
| _____+_____+                   |  |  |
| Total 8541 8541                |  |  |
| 100.00 100.00                  |  |  |

Degree of missing values = 3440

Distributions of Table 4-1 anticoagulants and antiplatelet drugs according to the presence or absence of proton-pump inhibitors.

FREQ Procedure

|                      |       | Cumulative       |              |
|----------------------|-------|------------------|--------------|
| Percent of all power |       | Percent of power |              |
| 1                    | 11981 | 100.00           | 11981 100.00 |

Table : all \* f2\_YN

All f2\_YN

| Power     | Percent | Percent of rows | Percent of columns   1   Total |
|-----------|---------|-----------------|--------------------------------|
|           |         |                 | _____+_____+                   |
| 1         | 394     | 394             | 100.00   100.00                |
|           | 100.00  |                 | 100.00                         |
|           | 100.00  |                 | 100.00                         |
|           |         |                 | _____+_____+                   |
| Total 394 | 394     |                 |                                |
|           |         | 100.00          | 100.00                         |

Degree of missing values = 11587

Distributions of Table 4-1 anticoagulants and antiplatelet drugs according to the presence or absence of proton-pump inhibitors.

FREQ Procedure

|                      |       | Cumulative       |              |
|----------------------|-------|------------------|--------------|
| Percent of all power |       | Percent of power |              |
| 1                    | 11981 | 100.00           | 11981 100.00 |

Table : all \* f3\_YN

All f3\_YN

| Power        | Percent | Percent of rows | Percent of columns   1   Total |
|--------------|---------|-----------------|--------------------------------|
| _____+_____+ |         |                 |                                |
| 1            | 2622    | 2622            |                                |
|              | 100.00  | 100.00          |                                |
|              | 100.00  |                 |                                |
|              | 100.00  |                 |                                |
| _____+_____+ |         |                 |                                |
| Total        | 2622    | 2622            |                                |
|              | 100.00  | 100.00          |                                |

Frequency of missing values = 9359

Distributions of Table 4-1 anticoagulants and antiplatelet drugs according to the presence or absence of proton-pump inhibitors.

FREQ Procedure

|   |       | Cumulative           |                  |
|---|-------|----------------------|------------------|
|   |       | Percent of all power | Percent of power |
| 1 | 11981 | 100.00               | 11981 100.00     |

Table : all \* f4\_YN

All f4\_YN

| Power | Percent | Percent of rows | Percent of columns   1   Total |
|-------|---------|-----------------|--------------------------------|
|       |         |                 | _____+_____+                   |
| 1     | 424     | 424             | 100.00   100.00                |
|       | 100.00  |                 | 100.00                         |
|       | 100.00  |                 | 100.00                         |
|       |         |                 | _____+_____+                   |
| Total | 424     | 424             |                                |
|       | 100.00  | 100.00          |                                |

Degree of missing values = 11557

Distributions of Table 4-1 anticoagulants and antiplatelet drugs according to the presence or absence of proton-pump inhibitors.

FREQ Procedure

|                      |       | Cumulative       |              |
|----------------------|-------|------------------|--------------|
| Percent of all power |       | Percent of power |              |
| 1                    | 20509 | 100.00           | 20509 100.00 |

Table : all \* fl\_YN

All fl\_YN

| Power                          |           |        |
|--------------------------------|-----------|--------|
| Percent                        |           |        |
| Percent of rows                |           |        |
| Percent of columns   1   Total |           |        |
|                                | + _____ + |        |
| 1                              | 16473     | 16473  |
|                                | 100.00    | 100.00 |
|                                | 100.00    |        |
|                                | 100.00    |        |
|                                | + _____ + |        |
| Total                          | 16473     | 16473  |
|                                | 100.00    | 100.00 |

Degree of missing values = 4036

Distributions of Table 4-1 anticoagulants and antiplatelet drugs according to the presence or absence of proton-pump inhibitors.

FREQ Procedure

|                      |       | Cumulative       |              |
|----------------------|-------|------------------|--------------|
| Percent of all power |       | Percent of power |              |
| 1                    | 20509 | 100.00           | 20509 100.00 |

Table : all \* f2\_YN

All f2\_YN

| Power                          |        |        |
|--------------------------------|--------|--------|
| Percent                        |        |        |
| Percent of rows                |        |        |
| Percent of columns   1   Total |        |        |
| _____+_____+                   |        |        |
| 1   499   499                  |        |        |
| 100.00   100.00                |        |        |
| 100.00                         |        |        |
| 100.00                         |        |        |
| _____+_____+                   |        |        |
| Total 499 499                  |        |        |
|                                | 100.00 | 100.00 |

Degree of missing values = 20010



Distributions of Table 4-1 anticoagulants and antiplatelet drugs according to the presence or absence of proton-pump inhibitors.

FREQ Procedure

|                      |       | Cumulative       |              |
|----------------------|-------|------------------|--------------|
| Percent of all power |       | Percent of power |              |
| 1                    | 20509 | 100.00           | 20509 100.00 |

Table : all \* f3\_YN

All f3\_YN

| Power                          |
|--------------------------------|
| Percent                        |
| Percent of rows                |
| Percent of columns   1   Total |
| _____+_____+                   |
| 1   2278   2278                |
| 100.00   100.00                |
| 100.00                         |
| 100.00                         |
| _____+_____+                   |
| Total 2278 2278                |
| 100.00 100.00                  |

Frequency of missing values = 18231

Distributions of Table 4-1 anticoagulants and antiplatelet drugs according to the presence or absence of proton-pump inhibitors.

FREQ Procedure

|                      |       | Cumulative       |              |
|----------------------|-------|------------------|--------------|
| Percent of all power |       | Percent of power |              |
| 1                    | 20509 | 100.00           | 20509 100.00 |

Table : all \* f4\_YN

All f4\_YN

| Power                          |  |  |
|--------------------------------|--|--|
| Percent                        |  |  |
| Percent of rows                |  |  |
| Percent of columns   1   Total |  |  |
| _____+_____+                   |  |  |
| 1   1259   1259                |  |  |
| 100.00   100.00                |  |  |
| 100.00                         |  |  |
| 100.00                         |  |  |
| _____+_____+                   |  |  |
| Total 1259 1259                |  |  |
| 100.00 100.00                  |  |  |

Degree of missing values = 19250

Distributions of Table 4-1 anticoagulants and antiplatelet drugs according to the presence or absence of proton-pump inhibitors.

FREQ Procedure

Number of levels of variables

Number of Variables Level

GROUP1 2

f0\_YN 4

Table : GROUP1 \* f0\_YN

GROUP1 f0\_YN

Power |

Percent |

Percent of rows

Percentage of columns | 1| 2| 3| 4| Total

|       | 1     | 2     | 3     | 4     | Total  |
|-------|-------|-------|-------|-------|--------|
| 1     | 8541  | 394   | 2622  | 424   | 11981  |
|       | 26.29 | 1.21  | 8.07  | 1.31  | 36.88  |
|       | 71.29 | 3.29  | 21.88 | 3.54  |        |
|       | 34.14 | 44.12 | 53.51 | 25.19 |        |
| 2     | 16473 | 499   | 2278  | 1259  | 20509  |
|       | 50.70 | 1.54  | 7.01  | 3.88  | 63.12  |
|       | 80.32 | 2.43  | 11.11 | 6.14  |        |
|       | 65.86 | 55.88 | 46.49 | 74.81 |        |
| Total | 25014 | 893   | 4900  | 1683  | 32490  |
|       | 76.99 | 2.75  | 15.08 | 5.18  | 100.00 |

Distributions of proton-pump inhibitors among Table 4-2 sex, anticoagulants, and antiplatelet agents according to the presence or absence of proton-pump inhibitors.

FREQ Procedure

|   |       | Cumulative           |                  |        |
|---|-------|----------------------|------------------|--------|
|   |       | Percent of all power | Percent of power |        |
| 1 | 32490 | 100.00               | 32490            | 100.00 |

Tables : all \* SEXN

All SEXN(Sex (N))

| Power                               |        |        |        |        |
|-------------------------------------|--------|--------|--------|--------|
| Percent                             |        |        |        |        |
| Percent of rows                     |        |        |        |        |
| Percentage of columns   0   1   Sum |        |        |        |        |
|                                     |        | +      |        |        |
| 1                                   | 18601  | 13889  | 32490  |        |
|                                     | 57.25  | 42.75  | 100.00 |        |
|                                     | 57.25  | 42.75  |        |        |
|                                     | 100.00 | 100.00 |        |        |
|                                     |        | +      |        |        |
| Total                               |        | 18601  | 13889  | 32490  |
|                                     |        | 57.25  | 42.75  | 100.00 |

Table: all \* f0\_yn

All f0\_yn

| Power                          |  |
|--------------------------------|--|
| Percent                        |  |
| Percent of rows                |  |
| Percent of columns   1   Total |  |
| + +                            |  |
|                                |  |

|                        |        |        |
|------------------------|--------|--------|
| 1                      | 18601  | 18601  |
|                        | 100.00 | 100.00 |
|                        | 100.00 |        |
|                        | 100.00 |        |
| +                    + |        |        |
| Total 18601 18601      |        |        |
|                        | 100.00 | 100.00 |

Frequency of missing values = 13889

Distributions of proton-pump inhibitors among Table 4-2 sex, anticoagulants, and antiplatelet agents according to the presence or absence of proton-pump inhibitors.

FREQ Procedure

|   |       | Cumulative           |                  |        |
|---|-------|----------------------|------------------|--------|
|   |       | Percent of all power | Percent of power |        |
| 1 | 32490 | 100.00               | 32490            | 100.00 |

Tables : all \* SEXN

All SEXN(Sex (N))

| Power                               |        |        |        |   |
|-------------------------------------|--------|--------|--------|---|
| Percent                             |        |        |        |   |
| Percent of rows                     |        |        |        |   |
| Percentage of columns   0   1   Sum |        |        |        |   |
|                                     | +      | +      | +      | + |
| 1                                   | 18601  | 13889  | 32490  |   |
|                                     | 57.25  | 42.75  | 100.00 |   |
|                                     | 57.25  | 42.75  |        |   |
|                                     | 100.00 | 100.00 |        |   |
|                                     | +      | +      | +      | + |
| Total                               | 18601  | 13889  | 32490  |   |
|                                     | 57.25  | 42.75  | 100.00 |   |

Table : all \* fl\_yn

All fl\_yn

Power |  
 Percent |  
 Percent of rows

Percent of columns | 1 | Total

|        |        |        |  |
|--------|--------|--------|--|
| _____+ |        | _____+ |  |
| 1      | 13862  | 13862  |  |
|        | 100.00 | 100.00 |  |
|        | 100.00 |        |  |
|        | 100.00 |        |  |
| _____+ |        | _____+ |  |
| Total  | 13862  | 13862  |  |
|        | 100.00 | 100.00 |  |

Degree of missing values = 18628

Distributions of proton-pump inhibitors among Table 4-2 sex, anticoagulants, and antiplatelet agents according to the presence or absence of proton-pump inhibitors.

FREQ Procedure

|   |       | Cumulative           |                  |        |
|---|-------|----------------------|------------------|--------|
|   |       | Percent of all power | Percent of power |        |
| 1 | 32490 | 100.00               | 32490            | 100.00 |

Tables : all \* SEXN

All SEXN(Sex (N))

| Power                               |        |        |        |   |
|-------------------------------------|--------|--------|--------|---|
| Percent                             |        |        |        |   |
| Percent of rows                     |        |        |        |   |
| Percentage of columns   0   1   Sum |        |        |        |   |
|                                     |        | +      | +      | + |
| 1                                   | 18601  | 13889  | 32490  |   |
|                                     | 57.25  | 42.75  | 100.00 |   |
|                                     | 57.25  | 42.75  |        |   |
|                                     | 100.00 | 100.00 |        |   |
|                                     |        | +      | +      | + |
| Total 18601 13889 32490             |        |        |        |   |
|                                     | 57.25  | 42.75  | 100.00 |   |

Table : all \* f2\_yn

All f2\_yn

Power |  
 Percent |  
 Percent of rows



Percent of columns | 1 | Total

|       |        |        |   |
|-------|--------|--------|---|
| _____ | +      | _____  | + |
| 1     | 504    | 504    |   |
|       | 100.00 | 100.00 |   |
|       | 100.00 |        |   |
|       | 100.00 |        |   |
| _____ | +      | _____  | + |

Total 504 504

100.00 100.00

Degree of missing values = 31986

Distributions of proton-pump inhibitors among Table 4-2 sex, anticoagulants, and antiplatelet agents according to the presence or absence of proton-pump inhibitors.

FREQ Procedure

|   |       | Cumulative           |                  |        |
|---|-------|----------------------|------------------|--------|
|   |       | Percent of all power | Percent of power |        |
| 1 | 32490 | 100.00               | 32490            | 100.00 |

Tables : all \* SEXN

All SEXN(Sex (N))

| Power                               |        |        |        |
|-------------------------------------|--------|--------|--------|
| Percent                             |        |        |        |
| Percent of rows                     |        |        |        |
| Percentage of columns   0   1   Sum |        |        |        |
|                                     | +      | +      | +      |
| 1                                   | 18601  | 13889  | 32490  |
|                                     | 57.25  | 42.75  | 100.00 |
|                                     | 57.25  | 42.75  |        |
|                                     | 100.00 | 100.00 |        |
|                                     | +      | +      | +      |
| Total                               | 18601  | 13889  | 32490  |
|                                     | 57.25  | 42.75  | 100.00 |

Table : all \* f3\_yn

All f3\_yn

Power |  
 Percent |  
 Percent of rows

Percent of columns | 1 | Total

|        |        |        |  |
|--------|--------|--------|--|
| _____+ |        | _____+ |  |
| 1      | 3403   | 3403   |  |
|        | 100.00 | 100.00 |  |
|        | 100.00 |        |  |
|        | 100.00 |        |  |
| _____+ |        | _____+ |  |
| Total  | 3403   | 3403   |  |
|        | 100.00 | 100.00 |  |

Frequency of missing values = 29087

Distributions of proton-pump inhibitors among Table 4-2 sex, anticoagulants, and antiplatelet agents according to the presence or absence of proton-pump inhibitors.

FREQ Procedure

|   |       | Cumulative           |                  |        |
|---|-------|----------------------|------------------|--------|
|   |       | Percent of all power | Percent of power |        |
| 1 | 32490 | 100.00               | 32490            | 100.00 |

Tables : all \* SEXN

All SEXN(Sex (N))

| Power                               |       |       |        |        |
|-------------------------------------|-------|-------|--------|--------|
| Percent                             |       |       |        |        |
| Percent of rows                     |       |       |        |        |
| Percentage of columns   0   1   Sum |       |       |        |        |
|                                     |       | +     | +      | +      |
| 1                                   | 18601 |       | 13889  |        |
|                                     | 32490 |       | 57.25  |        |
|                                     |       |       | 42.75  |        |
|                                     |       |       | 57.25  |        |
|                                     |       |       | 42.75  |        |
|                                     |       |       | 100.00 |        |
|                                     |       |       | 100.00 |        |
|                                     |       | +     | +      | +      |
| Total                               |       | 18601 | 13889  | 32490  |
|                                     |       | 57.25 | 42.75  | 100.00 |

Table : all \* f4\_yn

All f4\_yn

Power |  
 Percent |  
 Percent of rows

Percent of columns | 1 | Total

|       |        |        |   |
|-------|--------|--------|---|
| _____ | +      | _____  | + |
| 1     | 832    | 832    |   |
|       | 100.00 | 100.00 |   |
|       | 100.00 |        |   |
|       | 100.00 |        |   |

|           |   |       |   |
|-----------|---|-------|---|
| _____     | + | _____ | + |
| Total 832 |   | 832   |   |

100.00 100.00

Degree of missing values = 31658

Distributions of proton-pump inhibitors among Table 4-2 sex, anticoagulants, and antiplatelet agents according to the presence or absence of proton-pump inhibitors.

FREQ Procedure

|   |       | Cumulative           |                  |        |
|---|-------|----------------------|------------------|--------|
|   |       | Percent of all power | Percent of power |        |
| 1 | 32490 | 100.00               | 32490            | 100.00 |

Tables : all \* SEXN

All SEXN(Sex (N))

| Power                               |        |        |        |
|-------------------------------------|--------|--------|--------|
| Percent                             |        |        |        |
| Percent of rows                     |        |        |        |
| Percentage of columns   0   1   Sum |        |        |        |
|                                     | +      | +      | +      |
| 1                                   | 18601  | 13889  | 32490  |
|                                     | 57.25  | 42.75  | 100.00 |
|                                     | 57.25  | 42.75  |        |
|                                     | 100.00 | 100.00 |        |
|                                     | +      | +      | +      |
| Total                               | 18601  | 13889  | 32490  |
|                                     | 57.25  | 42.75  | 100.00 |

Table : all \* f5\_yn

All f5\_yn

Power |  
 Percent |  
 Percent of rows

Percent of columns | 1 | Total

|       |   |        |        |
|-------|---|--------|--------|
| _____ | + | _____  | +      |
| 1     |   | 13889  | 13889  |
|       |   | 100.00 | 100.00 |
|       |   | 100.00 |        |
|       |   | 100.00 |        |
| _____ | + | _____  | +      |
| Total |   | 13889  | 13889  |
|       |   | 100.00 | 100.00 |

Degree of missing values = 18601

Distributions of proton-pump inhibitors among Table 4-2 sex, anticoagulants, and antiplatelet agents according to the presence or absence of proton-pump inhibitors.

FREQ Procedure

|   |       | Cumulative           |                  |        |
|---|-------|----------------------|------------------|--------|
|   |       | Percent of all power | Percent of power |        |
| 1 | 32490 | 100.00               | 32490            | 100.00 |

Tables : all \* SEXN

All SEXN(Sex (N))

| Power                               |        |        |        |   |
|-------------------------------------|--------|--------|--------|---|
| Percent                             |        |        |        |   |
| Percent of rows                     |        |        |        |   |
| Percentage of columns   0   1   Sum |        |        |        |   |
|                                     |        | +      | +      | + |
| 1                                   | 18601  | 13889  | 32490  |   |
|                                     | 57.25  | 42.75  | 100.00 |   |
|                                     | 57.25  | 42.75  |        |   |
|                                     | 100.00 | 100.00 |        |   |
|                                     |        | +      | +      | + |
| Total 18601 13889 32490             |        |        |        |   |
|                                     | 57.25  | 42.75  | 100.00 |   |

Table : all \* f6\_yn

All f6\_yn

Power |  
 Percent |  
 Percent of rows



Percent of columns | 1 | Total

|       |   |        |        |
|-------|---|--------|--------|
| _____ | + | _____  | +      |
| 1     |   | 11152  | 11152  |
|       |   | 100.00 | 100.00 |
|       |   | 100.00 |        |
|       |   | 100.00 |        |
| _____ | + | _____  | +      |
| Total |   | 11152  | 11152  |
|       |   | 100.00 | 100.00 |

Degree of missing values = 21338

Distributions of proton-pump inhibitors among Table 4-2 sex, anticoagulants, and antiplatelet agents according to the presence or absence of proton-pump inhibitors.

FREQ Procedure

|   |       | Cumulative           |                  |        |
|---|-------|----------------------|------------------|--------|
|   |       | Percent of all power | Percent of power |        |
| 1 | 32490 | 100.00               | 32490            | 100.00 |

Tables : all \* SEXN

All SEXN(Sex (N))

| Power                               |       |       |        |        |
|-------------------------------------|-------|-------|--------|--------|
| Percent                             |       |       |        |        |
| Percent of rows                     |       |       |        |        |
| Percentage of columns   0   1   Sum |       |       |        |        |
|                                     |       | +     | +      | +      |
| 1                                   | 18601 |       | 13889  |        |
|                                     | 32490 |       | 57.25  |        |
|                                     |       |       | 42.75  |        |
|                                     |       |       | 57.25  |        |
|                                     |       |       | 42.75  |        |
|                                     |       |       | 100.00 |        |
|                                     |       |       | 100.00 |        |
|                                     |       | +     | +      | +      |
| Total                               |       | 18601 | 13889  | 32490  |
|                                     |       | 57.25 | 42.75  | 100.00 |

Table : all \* f7\_yn

All f7\_yn

Power |  
 Percent |  
 Percent of rows

Percent of columns | 1 | Total

|                 |                 |
|-----------------|-----------------|
| _____ + _____ + |                 |
| 1               | 389   389       |
|                 | 100.00   100.00 |
|                 | 100.00          |
|                 | 100.00          |

|                 |     |
|-----------------|-----|
| _____ + _____ + |     |
| Total 389       | 389 |

100.00 100.00

Frequency of missing values = 32101

Distributions of proton-pump inhibitors among Table 4-2 sex, anticoagulants, and antiplatelet agents according to the presence or absence of proton-pump inhibitors.

FREQ Procedure

|   |       | Cumulative           |                  |        |
|---|-------|----------------------|------------------|--------|
|   |       | Percent of all power | Percent of power |        |
| 1 | 32490 | 100.00               | 32490            | 100.00 |

Tables : all \* SEXN

All SEXN(Sex (N))

| Power                               |        |        |        |   |
|-------------------------------------|--------|--------|--------|---|
| Percent                             |        |        |        |   |
| Percent of rows                     |        |        |        |   |
| Percentage of columns   0   1   Sum |        |        |        |   |
|                                     |        | +      | +      | + |
| 1                                   | 18601  | 13889  | 32490  |   |
|                                     | 57.25  | 42.75  | 100.00 |   |
|                                     | 57.25  | 42.75  |        |   |
|                                     | 100.00 | 100.00 |        |   |
|                                     |        | +      | +      | + |
| Total 18601 13889 32490             |        |        |        |   |
|                                     | 57.25  | 42.75  | 100.00 |   |

Table : all \* f8\_yn

All f8\_yn

Power |  
 Percent |  
 Percent of rows

Percent of columns | 1 | Total

|       | + |        | +      |
|-------|---|--------|--------|
| 1     |   | 1497   | 1497   |
|       |   | 100.00 | 100.00 |
|       |   | 100.00 |        |
|       |   | 100.00 |        |
|       | + |        | +      |
| Total |   | 1497   | 1497   |
|       |   | 100.00 | 100.00 |

Frequency of missing values = 30993

Distributions of proton-pump inhibitors among Table 4-2 sex, anticoagulants, and antiplatelet agents according to the presence or absence of proton-pump inhibitors.

FREQ Procedure

|   |       | Cumulative           |                  |        |
|---|-------|----------------------|------------------|--------|
|   |       | Percent of all power | Percent of power |        |
| 1 | 32490 | 100.00               | 32490            | 100.00 |

Tables : all \* SEXN

All SEXN(Sex (N))

| Power                               |        |       |        |        |
|-------------------------------------|--------|-------|--------|--------|
| Percent                             |        |       |        |        |
| Percent of rows                     |        |       |        |        |
| Percentage of columns   0   1   Sum |        |       |        |        |
|                                     |        | +     |        |        |
| 1                                   | 18601  |       | 13889  | 32490  |
|                                     | 57.25  |       | 42.75  | 100.00 |
|                                     | 57.25  |       | 42.75  |        |
|                                     | 100.00 |       | 100.00 |        |
|                                     |        | +     |        |        |
| Total                               |        | 18601 | 13889  | 32490  |
|                                     | 57.25  | 42.75 | 100.00 |        |

Table : all \* f9\_yn

All f9\_yn

Power |  
 Percent |  
 Percent of rows

Percent of columns | 1 | Total

|       |        |        |   |
|-------|--------|--------|---|
| _____ | +      | _____  | + |
| 1     | 851    | 851    |   |
|       | 100.00 | 100.00 |   |
|       | 100.00 |        |   |
|       | 100.00 |        |   |
| _____ | +      | _____  | + |

Total 851 851

100.00 100.00

Degree of missing values = 31639

Distributions of proton-pump inhibitors among Table 4-2 sex, anticoagulants, and antiplatelet agents according to the presence or absence of proton-pump inhibitors.

FREQ Procedure

|   |       | Cumulative           |                  |        |
|---|-------|----------------------|------------------|--------|
|   |       | Percent of all power | Percent of power |        |
| 1 | 11981 | 100.00               | 11981            | 100.00 |

Tables : all \* SEXN

All SEXN(Sex (N))

| Power                             |        |        |        |
|-----------------------------------|--------|--------|--------|
| Percent                           |        |        |        |
| Percent of rows                   |        |        |        |
| Percentage of columns   0  1  Sum |        |        |        |
|                                   | +      | +      | +      |
| 1                                 | 6561   | 5420   | 11981  |
|                                   | 54.76  | 45.24  | 100.00 |
|                                   | 54.76  | 45.24  |        |
|                                   | 100.00 | 100.00 |        |
|                                   | +      | +      | +      |
| Total                             | 6561   | 5420   | 11981  |
|                                   | 54.76  | 45.24  | 100.00 |

Table: all \* f0\_yn

All f0\_yn

Power |  
 Percent |  
 Percent of rows



Percent of columns | 1 | Total

|       | + |        | +      |
|-------|---|--------|--------|
| 1     |   | 6561   | 6561   |
|       |   | 100.00 | 100.00 |
|       |   | 100.00 |        |
|       |   | 100.00 |        |
|       | + |        | +      |
| Total |   | 6561   | 6561   |
|       |   | 100.00 | 100.00 |

Degree of missing values = 5420

Distributions of proton-pump inhibitors among Table 4-2 sex, anticoagulants, and antiplatelet agents according to the presence or absence of proton-pump inhibitors.

FREQ Procedure

|   |       | Cumulative           |                  |        |
|---|-------|----------------------|------------------|--------|
|   |       | Percent of all power | Percent of power |        |
| 1 | 11981 | 100.00               | 11981            | 100.00 |

Tables : all \* SEXN

All SEXN(Sex (N))

| Power                             |         |         |         |
|-----------------------------------|---------|---------|---------|
| Percent                           |         |         |         |
| Percent of rows                   |         |         |         |
| Percentage of columns   0  1  Sum |         |         |         |
| +_____+                           | +_____+ | +_____+ | +_____+ |
| 1                                 | 6561    | 5420    | 11981   |
|                                   | 54.76   | 45.24   | 100.00  |
|                                   | 54.76   | 45.24   |         |
|                                   | 100.00  | 100.00  |         |
| +_____+                           | +_____+ | +_____+ | +_____+ |
| Total                             | 6561    | 5420    | 11981   |
|                                   | 54.76   | 45.24   | 100.00  |

Table : all \* fl\_yn

All fl\_yn

Power |  
 Percent |  
 Percent of rows

Percent of columns | 1 | Total

|       | + |        | +      |
|-------|---|--------|--------|
| 1     |   | 4357   | 4357   |
|       |   | 100.00 | 100.00 |
|       |   | 100.00 |        |
|       |   | 100.00 |        |
|       | + |        | +      |
| Total |   | 4357   | 4357   |
|       |   | 100.00 | 100.00 |

Frequency of missing values = 7624

Distributions of proton-pump inhibitors among Table 4-2 sex, anticoagulants, and antiplatelet agents according to the presence or absence of proton-pump inhibitors.

FREQ Procedure

|                      |                  | Cumulative           |                  |
|----------------------|------------------|----------------------|------------------|
| Percent of all power | Percent of power | Percent of all power | Percent of power |
| 1                    | 11981            | 100.00               | 11981 100.00     |

Tables : all \* SEXN

All SEXN(Sex (N))

| Power                               |  |  |  |
|-------------------------------------|--|--|--|
| Percent                             |  |  |  |
| Percent of rows                     |  |  |  |
| Percentage of columns   0   1   Sum |  |  |  |
| + + + +                             |  |  |  |
| 1   6561   5420   11981             |  |  |  |
| 54.76   45.24   100.00              |  |  |  |
| 54.76   45.24                       |  |  |  |
| 100.00   100.00                     |  |  |  |
| + + + +                             |  |  |  |
| Total 6561 5420 11981               |  |  |  |
| 54.76 45.24 100.00                  |  |  |  |

Table : all \* f2\_yn

All f2\_yn

Power |  
 Percent |  
 Percent of rows

Percent of columns | 1 | Total

|       | +      |        | +      |
|-------|--------|--------|--------|
| 1     |        | 220    | 220    |
|       |        | 100.00 | 100.00 |
|       |        | 100.00 |        |
|       |        | 100.00 |        |
|       | +      |        | +      |
| Total | 220    | 220    |        |
|       | 100.00 | 100.00 |        |

Frequency of missing values = 11761

Distributions of proton-pump inhibitors among Table 4-2 sex, anticoagulants, and antiplatelet agents according to the presence or absence of proton-pump inhibitors.

FREQ Procedure

|                      |                  | Cumulative |              |
|----------------------|------------------|------------|--------------|
| Percent of all power | Percent of power |            |              |
| 1                    | 11981            | 100.00     | 11981 100.00 |

Tables : all \* SEXN

All SEXN(Sex (N))

| Power                             |       |       |        |
|-----------------------------------|-------|-------|--------|
| Percent                           |       |       |        |
| Percent of rows                   |       |       |        |
| Percentage of columns   0  1  Sum |       |       |        |
| +_____+                           |       |       |        |
| 1   6561   5420   11981           |       |       |        |
| 54.76   45.24   100.00            |       |       |        |
| 54.76   45.24                     |       |       |        |
| 100.00   100.00                   |       |       |        |
| +_____+                           |       |       |        |
| Total 6561 5420 11981             |       |       |        |
|                                   | 54.76 | 45.24 | 100.00 |

Table : all \* f3\_yn

All f3\_yn

Power |  
 Percent |  
 Percent of rows

Percent of columns | 1 | Total

|            |        |        |  |
|------------|--------|--------|--|
| _____+     |        | _____+ |  |
| 1          | 1795   | 1795   |  |
|            | 100.00 | 100.00 |  |
|            | 100.00 |        |  |
|            | 100.00 |        |  |
| _____+     |        | _____+ |  |
| Total 1795 | 1795   |        |  |
| 100.00     | 100.00 |        |  |

Degree of missing values = 10186

Distributions of proton-pump inhibitors among Table 4-2 sex, anticoagulants, and antiplatelet agents according to the presence or absence of proton-pump inhibitors.

FREQ Procedure

|   |       | Cumulative           |                  |        |
|---|-------|----------------------|------------------|--------|
|   |       | Percent of all power | Percent of power |        |
| 1 | 11981 | 100.00               | 11981            | 100.00 |

Tables : all \* SEXN

All SEXN(Sex (N))

| Power                             |        |        |        |
|-----------------------------------|--------|--------|--------|
| Percent                           |        |        |        |
| Percent of rows                   |        |        |        |
| Percentage of columns   0  1  Sum |        |        |        |
|                                   | +      | +      | +      |
| 1                                 | 6561   | 5420   | 11981  |
|                                   | 54.76  | 45.24  | 100.00 |
|                                   | 54.76  | 45.24  |        |
|                                   | 100.00 | 100.00 |        |
|                                   | +      | +      | +      |
| Total                             | 6561   | 5420   | 11981  |
|                                   | 54.76  | 45.24  | 100.00 |

Table : all \* f4\_yn

All f4\_yn

Power |  
 Percent |  
 Percent of rows



Percent of columns | 1 | Total

|        |        |        |  |
|--------|--------|--------|--|
| _____+ |        | _____+ |  |
| 1      | 189    | 189    |  |
|        | 100.00 | 100.00 |  |
|        | 100.00 |        |  |
|        | 100.00 |        |  |
| _____+ |        | _____+ |  |

Total 189 189

100.00 100.00

Frequency of missing values = 11792

Distributions of proton-pump inhibitors among Table 4-2 sex, anticoagulants, and antiplatelet agents according to the presence or absence of proton-pump inhibitors.

FREQ Procedure

|   |       | Cumulative           |                  |        |
|---|-------|----------------------|------------------|--------|
|   |       | Percent of all power | Percent of power |        |
| 1 | 11981 | 100.00               | 11981            | 100.00 |

Tables : all \* SEXN

All SEXN(Sex (N))

| Power                               |         |         |        |
|-------------------------------------|---------|---------|--------|
| Percent                             |         |         |        |
| Percent of rows                     |         |         |        |
| Percentage of columns   0   1   Sum |         |         |        |
| +_____+                             | +_____+ | +_____+ | +      |
| 1                                   | 6561    | 5420    | 11981  |
|                                     | 54.76   | 45.24   | 100.00 |
|                                     | 54.76   | 45.24   |        |
|                                     | 100.00  | 100.00  |        |
| +_____+                             | +_____+ | +_____+ | +      |
| Total                               | 6561    | 5420    | 11981  |
|                                     | 54.76   | 45.24   | 100.00 |

Table : all \* f5\_yn

All f5\_yn

| Power           |  |  |  |
|-----------------|--|--|--|
| Percent         |  |  |  |
| Percent of rows |  |  |  |

Percent of columns | 1 | Total

|       | + |        | +      |
|-------|---|--------|--------|
| 1     |   | 5420   | 5420   |
|       |   | 100.00 | 100.00 |
|       |   | 100.00 |        |
|       |   | 100.00 |        |
|       | + |        | +      |
| Total |   | 5420   | 5420   |
|       |   | 100.00 | 100.00 |

Degree of missing values = 6561

Distributions of proton-pump inhibitors among Table 4-2 sex, anticoagulants, and antiplatelet agents according to the presence or absence of proton-pump inhibitors.

FREQ Procedure

|   |       | Cumulative           |                  |        |
|---|-------|----------------------|------------------|--------|
|   |       | Percent of all power | Percent of power |        |
| 1 | 11981 | 100.00               | 11981            | 100.00 |

Tables : all \* SEXN

All SEXN(Sex (N))

| Power                               |         |        |        |
|-------------------------------------|---------|--------|--------|
| Percent                             |         |        |        |
| Percent of rows                     |         |        |        |
| Percentage of columns   0   1   Sum |         |        |        |
| + + + +                             |         |        |        |
| 1                                   | 6561    | 5420   | 11981  |
|                                     | 54.76   | 45.24  | 100.00 |
|                                     | 54.76   | 45.24  |        |
|                                     | 100.00  | 100.00 |        |
|                                     | + + + + |        |        |
| Total 6561 5420 11981               |         |        |        |
|                                     | 54.76   | 45.24  | 100.00 |

Table : all \* f6\_yn

All f6\_yn

Power |  
 Percent |  
 Percent of rows

Percent of columns | 1 | Total

|       |   |        |        |
|-------|---|--------|--------|
|       | + |        | +      |
| 1     |   | 4184   | 4184   |
|       |   | 100.00 | 100.00 |
|       |   | 100.00 |        |
|       |   | 100.00 |        |
|       | + |        | +      |
| Total |   | 4184   | 4184   |
|       |   | 100.00 | 100.00 |

Frequency of missing values = 7797

Distributions of proton-pump inhibitors among Table 4-2 sex, anticoagulants, and antiplatelet agents according to the presence or absence of proton-pump inhibitors.

FREQ Procedure

|   |       | Cumulative           |                  |        |
|---|-------|----------------------|------------------|--------|
|   |       | Percent of all power | Percent of power |        |
| 1 | 11981 | 100.00               | 11981            | 100.00 |

Tables : all \* SEXN

All SEXN(Sex (N))

| Power                             |         |         |        |
|-----------------------------------|---------|---------|--------|
| Percent                           |         |         |        |
| Percent of rows                   |         |         |        |
| Percentage of columns   0  1  Sum |         |         |        |
| +_____+                           | +_____+ | +_____+ | +      |
| 1                                 | 6561    | 5420    | 11981  |
|                                   | 54.76   | 45.24   | 100.00 |
|                                   | 54.76   | 45.24   |        |
|                                   | 100.00  | 100.00  |        |
| +_____+                           | +_____+ | +_____+ | +      |
| Total                             | 6561    | 5420    | 11981  |
|                                   | 54.76   | 45.24   | 100.00 |

Table : all \* f7\_yn

All f7\_yn

| Power           |  |  |  |
|-----------------|--|--|--|
| Percent         |  |  |  |
| Percent of rows |  |  |  |

Percent of columns | 1 | Total

|       |        |        |   |
|-------|--------|--------|---|
| _____ | +      | _____  | + |
| 1     | 174    | 174    |   |
|       | 100.00 | 100.00 |   |
|       | 100.00 |        |   |
|       | 100.00 |        |   |
| _____ | +      | _____  | + |

Total 174 174

100.00 100.00

Frequency of missing values = 11807

Distributions of proton-pump inhibitors among Table 4-2 sex, anticoagulants, and antiplatelet agents according to the presence or absence of proton-pump inhibitors.

FREQ Procedure

|   |       | Cumulative           |                  |        |
|---|-------|----------------------|------------------|--------|
|   |       | Percent of all power | Percent of power |        |
| 1 | 11981 | 100.00               | 11981            | 100.00 |

Tables : all \* SEXN

All SEXN(Sex (N))

| Power                               |        |         |        |
|-------------------------------------|--------|---------|--------|
| Percent                             |        |         |        |
| Percent of rows                     |        |         |        |
| Percentage of columns   0   1   Sum |        |         |        |
| +_____+                             |        | +_____+ |        |
| 1                                   | 6561   | 5420    | 11981  |
|                                     | 54.76  | 45.24   | 100.00 |
|                                     | 54.76  | 45.24   |        |
|                                     | 100.00 | 100.00  |        |
| +_____+                             |        | +_____+ |        |
| Total 6561 5420 11981               |        |         |        |
|                                     | 54.76  | 45.24   | 100.00 |

Table : all \* f8\_yn

All f8\_yn

Power |  
 Percent |  
 Percent of rows



Percent of columns | 1 | Total

|       |  |        |       |        |   |
|-------|--|--------|-------|--------|---|
| _____ |  | +      | _____ |        | + |
| 1     |  | 827    |       | 827    |   |
|       |  | 100.00 |       | 100.00 |   |
|       |  | 100.00 |       |        |   |
|       |  | 100.00 |       |        |   |

\_\_\_\_\_ + \_\_\_\_\_ +  
Total 827 827

100.00 100.00

Degree of missing values = 11154

Distributions of proton-pump inhibitors among Table 4-2 sex, anticoagulants, and antiplatelet agents according to the presence or absence of proton-pump inhibitors.

FREQ Procedure

|                      |                  | Cumulative |              |
|----------------------|------------------|------------|--------------|
| Percent of all power | Percent of power |            |              |
| 1                    | 11981            | 100.00     | 11981 100.00 |

Tables : all \* SEXN

All SEXN(Sex (N))

| Power                             |       |       |        |
|-----------------------------------|-------|-------|--------|
| Percent                           |       |       |        |
| Percent of rows                   |       |       |        |
| Percentage of columns   0  1  Sum |       |       |        |
| +_____+                           |       |       |        |
| 1   6561   5420   11981           |       |       |        |
| 54.76   45.24   100.00            |       |       |        |
| 54.76   45.24                     |       |       |        |
| 100.00   100.00                   |       |       |        |
| +_____+                           |       |       |        |
| Total 6561 5420 11981             |       |       |        |
|                                   | 54.76 | 45.24 | 100.00 |

Table : all \* f9\_yn

All f9\_yn

| Power           |  |  |  |
|-----------------|--|--|--|
| Percent         |  |  |  |
| Percent of rows |  |  |  |

Percent of columns | 1 | Total

|       |        |        |   |
|-------|--------|--------|---|
| _____ | +      | _____  | + |
| 1     | 235    | 235    |   |
|       | 100.00 | 100.00 |   |
|       | 100.00 |        |   |
|       | 100.00 |        |   |
| _____ | +      | _____  | + |

Total 235 235

100.00 100.00

Frequency of missing values = 11746

Distributions of proton-pump inhibitors among Table 4-2 sex, anticoagulants, and antiplatelet agents according to the presence or absence of proton-pump inhibitors.

FREQ Procedure

|   |       | Cumulative           |                  |        |
|---|-------|----------------------|------------------|--------|
|   |       | Percent of all power | Percent of power |        |
| 1 | 20509 | 100.00               | 20509            | 100.00 |

Tables : all \* SEXN

All SEXN(Sex (N))

| Power                               |        |        |        |
|-------------------------------------|--------|--------|--------|
| Percent                             |        |        |        |
| Percent of rows                     |        |        |        |
| Percentage of columns   0   1   Sum |        |        |        |
|                                     | +      | +      | +      |
| 1                                   | 12040  | 8469   | 20509  |
|                                     | 58.71  | 41.29  | 100.00 |
|                                     | 58.71  | 41.29  |        |
|                                     | 100.00 | 100.00 |        |
|                                     | +      | +      | +      |
| Total                               | 12040  | 8469   | 20509  |
|                                     | 58.71  | 41.29  | 100.00 |

Table: all \* f0\_yn

All f0\_yn

Power |  
 Percent |  
 Percent of rows

Percent of columns | 1 | Total

|       | + |        | +      |
|-------|---|--------|--------|
| 1     |   | 12040  | 12040  |
|       |   | 100.00 | 100.00 |
|       |   | 100.00 |        |
|       |   | 100.00 |        |
|       | + |        | +      |
| Total |   | 12040  | 12040  |
|       |   | 100.00 | 100.00 |

Degree of missing values = 8469

Distributions of proton-pump inhibitors among Table 4-2 sex, anticoagulants, and antiplatelet agents according to the presence or absence of proton-pump inhibitors.

FREQ Procedure

|   |       | Cumulative           |                  |        |
|---|-------|----------------------|------------------|--------|
|   |       | Percent of all power | Percent of power |        |
| 1 | 20509 | 100.00               | 20509            | 100.00 |

Tables : all \* SEXN

All SEXN(Sex (N))

| Power                               |         |         |         |
|-------------------------------------|---------|---------|---------|
| Percent                             |         |         |         |
| Percent of rows                     |         |         |         |
| Percentage of columns   0   1   Sum |         |         |         |
| +_____+                             | +_____+ | +_____+ | +_____+ |
| 1                                   | 12040   | 8469    | 20509   |
|                                     | 58.71   | 41.29   | 100.00  |
|                                     | 58.71   | 41.29   |         |
|                                     | 100.00  | 100.00  |         |
| +_____+                             | +_____+ | +_____+ | +_____+ |
| Total                               | 12040   | 8469    | 20509   |
|                                     | 58.71   | 41.29   | 100.00  |

Table : all \* fl\_yn

All fl\_yn

Power |  
 Percent |  
 Percent of rows

Percent of columns | 1 | Total

|       |   |        |        |
|-------|---|--------|--------|
| _____ | + | _____  | +      |
| 1     |   | 9505   | 9505   |
|       |   | 100.00 | 100.00 |
|       |   | 100.00 |        |
|       |   | 100.00 |        |

|       |   |        |        |
|-------|---|--------|--------|
| _____ | + | _____  | +      |
| Total |   | 9505   | 9505   |
|       |   | 100.00 | 100.00 |

Degree of missing values = 11004

Distributions of proton-pump inhibitors among Table 4-2 sex, anticoagulants, and antiplatelet agents according to the presence or absence of proton-pump inhibitors.

FREQ Procedure

|   |       | Cumulative           |                  |        |
|---|-------|----------------------|------------------|--------|
|   |       | Percent of all power | Percent of power |        |
| 1 | 20509 | 100.00               | 20509            | 100.00 |

Tables : all \* SEXN

All SEXN(Sex (N))

| Power                               |         |         |         |
|-------------------------------------|---------|---------|---------|
| Percent                             |         |         |         |
| Percent of rows                     |         |         |         |
| Percentage of columns   0   1   Sum |         |         |         |
| +_____+                             | +_____+ | +_____+ | +_____+ |
| 1                                   | 12040   | 8469    | 20509   |
|                                     | 58.71   | 41.29   | 100.00  |
|                                     | 58.71   | 41.29   |         |
|                                     | 100.00  | 100.00  |         |
| +_____+                             | +_____+ | +_____+ | +_____+ |
| Total 12040 8469 20509              |         |         |         |
| 58.71                               | 41.29   | 100.00  |         |

Table : all \* f2\_yn

All f2\_yn

Power |  
 Percent |  
 Percent of rows



Percent of columns | 1 | Total

|       |        |        |   |
|-------|--------|--------|---|
| _____ | +      | _____  | + |
| 1     | 284    | 284    |   |
|       | 100.00 | 100.00 |   |
|       | 100.00 |        |   |
|       | 100.00 |        |   |
| _____ | +      | _____  | + |

Total 284 284

100.00 100.00

Degree of missing values = 20225

Distributions of proton-pump inhibitors among Table 4-2 sex, anticoagulants, and antiplatelet agents according to the presence or absence of proton-pump inhibitors.

FREQ Procedure

|   |       | Cumulative           |                  |        |
|---|-------|----------------------|------------------|--------|
|   |       | Percent of all power | Percent of power |        |
| 1 | 20509 | 100.00               | 20509            | 100.00 |

Tables : all \* SEXN

All SEXN(Sex (N))

| Power                               |        |        |        |
|-------------------------------------|--------|--------|--------|
| Percent                             |        |        |        |
| Percent of rows                     |        |        |        |
| Percentage of columns   0   1   Sum |        |        |        |
|                                     | +      | +      | +      |
| 1                                   | 12040  | 8469   | 20509  |
|                                     | 58.71  | 41.29  | 100.00 |
|                                     | 58.71  | 41.29  |        |
|                                     | 100.00 | 100.00 |        |
|                                     | +      | +      | +      |
| Total                               | 12040  | 8469   | 20509  |
|                                     | 58.71  | 41.29  | 100.00 |

Table : all \* f3\_yn

All f3\_yn

Power |  
 Percent |  
 Percent of rows

Percent of columns | 1 | Total

|       |        |        |   |
|-------|--------|--------|---|
| _____ | +      | _____  | + |
| 1     | 1608   | 1608   |   |
|       | 100.00 | 100.00 |   |
|       | 100.00 |        |   |
|       | 100.00 |        |   |

|            |   |        |   |
|------------|---|--------|---|
| _____      | + | _____  | + |
| Total 1608 |   | 1608   |   |
| 100.00     |   | 100.00 |   |

Degree of missing values = 18901

Distributions of proton-pump inhibitors among Table 4-2 sex, anticoagulants, and antiplatelet agents according to the presence or absence of proton-pump inhibitors.

FREQ Procedure

|   |       | Cumulative           |                  |        |
|---|-------|----------------------|------------------|--------|
|   |       | Percent of all power | Percent of power |        |
| 1 | 20509 | 100.00               | 20509            | 100.00 |

Tables : all \* SEXN

All SEXN(Sex (N))

| Power                               |        |        |        |   |
|-------------------------------------|--------|--------|--------|---|
| Percent                             |        |        |        |   |
| Percent of rows                     |        |        |        |   |
| Percentage of columns   0   1   Sum |        |        |        |   |
|                                     |        | +      | +      | + |
| 1                                   | 12040  | 8469   | 20509  |   |
|                                     | 58.71  | 41.29  | 100.00 |   |
|                                     | 58.71  | 41.29  |        |   |
|                                     | 100.00 | 100.00 |        |   |
|                                     |        | +      | +      | + |
| Total 12040 8469 20509              |        |        |        |   |
|                                     | 58.71  | 41.29  | 100.00 |   |

Table : all \* f4\_yn

All f4\_yn

Power |  
 Percent |  
 Percent of rows

Percent of columns | 1 | Total

|       |        |        |   |
|-------|--------|--------|---|
| _____ | +      | _____  | + |
| 1     | 643    | 643    |   |
|       | 100.00 | 100.00 |   |
|       | 100.00 |        |   |
|       | 100.00 |        |   |
| _____ | +      | _____  | + |

Total 643 643

100.00 100.00

Degree of missing values = 19866

Distributions of proton-pump inhibitors among Table 4-2 sex, anticoagulants, and antiplatelet agents according to the presence or absence of proton-pump inhibitors.

FREQ Procedure

|                      |                  | Cumulative |              |
|----------------------|------------------|------------|--------------|
| Percent of all power | Percent of power |            |              |
| 1                    | 20509            | 100.00     | 20509 100.00 |

Tables : all \* SEXN

All SEXN(Sex (N))

| Power                               |  |  |  |
|-------------------------------------|--|--|--|
| Percent                             |  |  |  |
| Percent of rows                     |  |  |  |
| Percentage of columns   0   1   Sum |  |  |  |
| + + + +                             |  |  |  |
| 1   12040   8469   20509            |  |  |  |
| 58.71   41.29   100.00              |  |  |  |
| 58.71   41.29                       |  |  |  |
| 100.00   100.00                     |  |  |  |
| + + + +                             |  |  |  |
| Total 12040 8469 20509              |  |  |  |
| 58.71 41.29 100.00                  |  |  |  |

Table : all \* f5\_yn

All f5\_yn

Power |  
 Percent |  
 Percent of rows

Percent of columns | 1 | Total

|        |        |        |  |
|--------|--------|--------|--|
| _____+ |        | _____+ |  |
| 1      | 8469   | 8469   |  |
|        | 100.00 | 100.00 |  |
|        | 100.00 |        |  |
|        | 100.00 |        |  |
| _____+ |        | _____+ |  |
| Total  | 8469   | 8469   |  |
|        | 100.00 | 100.00 |  |

Frequency of missing values = 12040

Distributions of proton-pump inhibitors among Table 4-2 sex, anticoagulants, and antiplatelet agents according to the presence or absence of proton-pump inhibitors.

FREQ Procedure

|                      |                  | Cumulative           |                  |
|----------------------|------------------|----------------------|------------------|
| Percent of all power | Percent of power | Percent of all power | Percent of power |
| 1                    | 20509            | 100.00               | 20509 100.00     |

Tables : all \* SEXN

All SEXN(Sex (N))

| Power                               |  |  |  |
|-------------------------------------|--|--|--|
| Percent                             |  |  |  |
| Percent of rows                     |  |  |  |
| Percentage of columns   0   1   Sum |  |  |  |
| + + + +                             |  |  |  |
| 1   12040   8469   20509            |  |  |  |
| 58.71   41.29   100.00              |  |  |  |
| 58.71   41.29                       |  |  |  |
| 100.00   100.00                     |  |  |  |
| + + + +                             |  |  |  |
| Total 12040 8469 20509              |  |  |  |
| 58.71 41.29 100.00                  |  |  |  |

Table : all \* f6\_yn

All f6\_yn

Power |  
 Percent |  
 Percent of rows



Percent of columns | 1 | Total

|       |   |        |        |
|-------|---|--------|--------|
| _____ | + | _____  | +      |
| 1     |   | 6968   | 6968   |
|       |   | 100.00 | 100.00 |
|       |   | 100.00 |        |
|       |   | 100.00 |        |

|       |   |        |        |
|-------|---|--------|--------|
| _____ | + | _____  | +      |
| Total |   | 6968   | 6968   |
|       |   | 100.00 | 100.00 |

Degree of missing values = 13541

Distributions of proton-pump inhibitors among Table 4-2 sex, anticoagulants, and antiplatelet agents according to the presence or absence of proton-pump inhibitors.

FREQ Procedure

|   |       | Cumulative           |                  |        |
|---|-------|----------------------|------------------|--------|
|   |       | Percent of all power | Percent of power |        |
| 1 | 20509 | 100.00               | 20509            | 100.00 |

Tables : all \* SEXN

All SEXN(Sex (N))

| Power                               |        |        |        |   |
|-------------------------------------|--------|--------|--------|---|
| Percent                             |        |        |        |   |
| Percent of rows                     |        |        |        |   |
| Percentage of columns   0   1   Sum |        |        |        |   |
|                                     |        | +      | +      | + |
| 1                                   | 12040  | 8469   | 20509  |   |
|                                     | 58.71  | 41.29  | 100.00 |   |
|                                     | 58.71  | 41.29  |        |   |
|                                     | 100.00 | 100.00 |        |   |
|                                     | +      | +      | +      |   |
| Total 12040 8469 20509              |        |        |        |   |
|                                     | 58.71  | 41.29  | 100.00 |   |

Table : all \* f7\_yn

All f7\_yn

Power |  
 Percent |  
 Percent of rows

Percent of columns | 1 | Total

|       |        |        |   |
|-------|--------|--------|---|
| _____ | +      | _____  | + |
| 1     | 215    | 215    |   |
|       | 100.00 | 100.00 |   |
|       | 100.00 |        |   |
|       | 100.00 |        |   |
| _____ | +      | _____  | + |

Total 215 215

100.00 100.00

Degree of missing values = 20294

Distributions of proton-pump inhibitors among Table 4-2 sex, anticoagulants, and antiplatelet agents according to the presence or absence of proton-pump inhibitors.

FREQ Procedure

|   |       | Cumulative           |                  |        |
|---|-------|----------------------|------------------|--------|
|   |       | Percent of all power | Percent of power |        |
| 1 | 20509 | 100.00               | 20509            | 100.00 |

Tables : all \* SEXN

All SEXN(Sex (N))

| Power                               |        |         |        |         |
|-------------------------------------|--------|---------|--------|---------|
| Percent                             |        |         |        |         |
| Percent of rows                     |        |         |        |         |
| Percentage of columns   0   1   Sum |        |         |        |         |
| +_____+                             |        | +_____+ |        | +_____+ |
| 1                                   | 12040  | 8469    | 20509  |         |
|                                     | 58.71  | 41.29   | 100.00 |         |
|                                     | 58.71  | 41.29   |        |         |
|                                     | 100.00 | 100.00  |        |         |
| +_____+                             |        | +_____+ |        | +_____+ |
| Total 12040 8469 20509              |        |         |        |         |
|                                     | 58.71  | 41.29   | 100.00 |         |

Table : all \* f8\_yn

All f8\_yn

Power |  
 Percent |  
 Percent of rows

Percent of columns | 1 | Total

|       |        |        |   |
|-------|--------|--------|---|
| _____ | +      | _____  | + |
| 1     | 670    | 670    |   |
|       | 100.00 | 100.00 |   |
|       | 100.00 |        |   |
|       | 100.00 |        |   |

|           |   |       |   |
|-----------|---|-------|---|
| _____     | + | _____ | + |
| Total 670 |   | 670   |   |

100.00 100.00

Degree of missing values = 19839

Distributions of proton-pump inhibitors among Table 4-2 sex, anticoagulants, and antiplatelet agents according to the presence or absence of proton-pump inhibitors.

FREQ Procedure

|   |       | Cumulative           |                  |        |
|---|-------|----------------------|------------------|--------|
|   |       | Percent of all power | Percent of power |        |
| 1 | 20509 | 100.00               | 20509            | 100.00 |

Tables : all \* SEXN

All SEXN(Sex (N))

| Power                               |        |        |        |   |
|-------------------------------------|--------|--------|--------|---|
| Percent                             |        |        |        |   |
| Percent of rows                     |        |        |        |   |
| Percentage of columns   0   1   Sum |        |        |        |   |
|                                     |        | +      | +      | + |
| 1                                   | 12040  | 8469   | 20509  |   |
|                                     | 58.71  | 41.29  | 100.00 |   |
|                                     | 58.71  | 41.29  |        |   |
|                                     | 100.00 | 100.00 |        |   |
|                                     | +      | +      | +      |   |
| Total 12040 8469 20509              |        |        |        |   |
|                                     | 58.71  | 41.29  | 100.00 |   |

Table : all \* f9\_yn

All f9\_yn

Power |  
 Percent |  
 Percent of rows

Percent of columns | 1 | Total

|       |        |        |   |
|-------|--------|--------|---|
| _____ | +      | _____  | + |
| 1     | 616    | 616    |   |
|       | 100.00 | 100.00 |   |
|       | 100.00 |        |   |
|       | 100.00 |        |   |

\_\_\_\_\_ + \_\_\_\_\_ +  
Total 616 616

100.00 100.00

Degree of missing values = 19893

Distributions of proton-pump inhibitors among Table 4-2 sex, anticoagulants, and antiplatelet agents according to the presence or absence of proton-pump inhibitors.

FREQ Procedure

Number of levels of variables

Number of Variables Level

GROUP1 2

f00\_YN 4

Table : GROUP1 \* f00\_YN

GROUP1 f00\_YN

Power |

Percent |

Percent of rows

Percentage of columns | 1| 2| 3| 4| Total

|       | +     | +     | +     | +     | +      |
|-------|-------|-------|-------|-------|--------|
| 1     | 4357  | 220   | 1795  | 189   | 6561   |
|       | 23.42 | 1.18  | 9.65  | 1.02  | 35.27  |
|       | 66.41 | 3.35  | 27.36 | 2.88  |        |
|       | 31.43 | 43.65 | 52.75 | 22.72 |        |
|       | +     | +     | +     | +     | +      |
| 2     | 9505  | 284   | 1608  | 643   | 12040  |
|       | 51.10 | 1.53  | 8.64  | 3.46  | 64.73  |
|       | 78.95 | 2.36  | 13.36 | 5.34  |        |
|       | 68.57 | 56.35 | 47.25 | 77.28 |        |
|       | +     | +     | +     | +     | +      |
| Total | 13862 | 504   | 3403  | 832   | 18601  |
|       | 74.52 | 2.71  | 18.29 | 4.47  | 100.00 |



Distributions of proton-pump inhibitors among Table 4-2 sex, anticoagulants, and antiplatelet agents according to the presence or absence of proton-pump inhibitors.

FREQ Procedure

Number of levels of variables

Number of Variables Level

GROUP1 2

f01\_YN 4

Table : GROUP1 \* f01\_YN

GROUP1 f01\_YN

Power |

Percent |

Percent of rows

Percentage of columns | 1| 2| 3| 4| Total

|       | +     | +     | +     | +     | +      |
|-------|-------|-------|-------|-------|--------|
| 1     | 4184  | 174   | 827   | 235   | 5420   |
|       | 30.12 | 1.25  | 5.95  | 1.69  | 39.02  |
|       | 77.20 | 3.21  | 15.26 | 4.34  |        |
|       | 37.52 | 44.73 | 55.24 | 27.61 |        |
|       | +     | +     | +     | +     | +      |
| 2     | 6968  | 215   | 670   | 616   | 8469   |
|       | 50.17 | 1.55  | 4.82  | 4.44  | 60.98  |
|       | 82.28 | 2.54  | 7.91  | 7.27  |        |
|       | 62.48 | 55.27 | 44.76 | 72.39 |        |
|       | +     | +     | +     | +     | +      |
| Total | 11152 | 389   | 1497  | 851   | 13889  |
|       | 80.29 | 2.80  | 10.78 | 6.13  | 100.00 |

Presence or absence of Table 5-1 anticoagulants and use of proton-pump inhibitors.

FREQ Procedure

|                      |       |                  | Cumulative |        |
|----------------------|-------|------------------|------------|--------|
| Percent of all power |       | Percent of power |            |        |
| 1                    | 32490 | 100.00           | 32490      | 100.00 |

Table : all \* fl\_YN

All fl\_YN

| Power                          |        |        |
|--------------------------------|--------|--------|
| Percent                        |        |        |
| Percent of rows                |        |        |
| Percent of columns   1   Total |        |        |
|                                | +      | +      |
| 1   2576   2576                |        |        |
| 100.00   100.00                |        |        |
| 100.00                         |        |        |
| 100.00                         |        |        |
|                                | +      | +      |
| Total 2576 2576                |        |        |
|                                | 100.00 | 100.00 |

Frequency of missing values = 29914

Presence or absence of Table 5-1 anticoagulants and use of proton-pump inhibitors.

FREQ Procedure

|                      |       |                  | Cumulative |        |
|----------------------|-------|------------------|------------|--------|
| Percent of all power |       | Percent of power |            |        |
| 1                    | 32490 | 100.00           | 32490      | 100.00 |

Table : all \* f2\_YN

All f2\_YN

| Power | Percent | Percent of rows | Percent of columns   1   Total |
|-------|---------|-----------------|--------------------------------|
|       |         |                 | _____+_____+                   |
| 1     | 29914   | 29914           |                                |
|       | 100.00  | 100.00          |                                |
|       | 100.00  |                 |                                |
|       | 100.00  |                 |                                |
|       |         |                 | _____+_____+                   |
| Total | 29914   | 29914           |                                |
|       | 100.00  | 100.00          |                                |

Degree of missing values = 2576

Presence or absence of Table 5-1 anticoagulants and use of proton-pump inhibitors.

FREQ Procedure

|                      |       |                  | Cumulative |        |
|----------------------|-------|------------------|------------|--------|
| Percent of all power |       | Percent of power |            |        |
| 1                    | 32490 | 100.00           | 32490      | 100.00 |

Table : all \* f3\_YN

All f3\_YN

| Power           | Percent         | Percent of rows | Percent of columns   1   Total |
|-----------------|-----------------|-----------------|--------------------------------|
| _____ + _____ + |                 |                 |                                |
| 1   8295   8295 | 100.00   100.00 | 100.00          | 100.00                         |
| _____ + _____ + |                 |                 |                                |
| Total 8295 8295 | 100.00 100.00   |                 |                                |

Degree of missing values = 24195

Presence or absence of Table 5-1 anticoagulants and use of proton-pump inhibitors.

FREQ Procedure

|                      |       |                  | Cumulative |        |
|----------------------|-------|------------------|------------|--------|
| Percent of all power |       | Percent of power |            |        |
| 1                    | 32490 | 100.00           | 32490      | 100.00 |

Table : all \* f4\_YN

All f4\_YN

| Power             | Percent         | Percent of rows | Percent of columns   1   Total |
|-------------------|-----------------|-----------------|--------------------------------|
| _____+_____+      |                 |                 |                                |
| 1   21606   21606 | 100.00   100.00 | 100.00          | 100.00                         |
| _____+_____+      |                 |                 |                                |
| Total 21606 21606 | 100.00 100.00   |                 |                                |

Degree of missing values = 10884

Presence or absence of Table 5-1 anticoagulants and use of proton-pump inhibitors.

FREQ Procedure

|                      |                  | Cumulative |       |        |
|----------------------|------------------|------------|-------|--------|
| Percent of all power | Percent of power |            |       |        |
| 1                    | 11981            | 100.00     | 11981 | 100.00 |

Table : all \* fl\_YN

All fl\_YN

| Power                          |        |        |
|--------------------------------|--------|--------|
| Percent                        |        |        |
| Percent of rows                |        |        |
| Percent of columns   1   Total |        |        |
| _____+_____+                   |        |        |
| 1   818   818                  |        |        |
| 100.00   100.00                |        |        |
| 100.00                         |        |        |
| 100.00                         |        |        |
| _____+_____+                   |        |        |
| Total 818 818                  | 100.00 | 100.00 |

Degree of missing values = 11163

Presence or absence of Table 5-1 anticoagulants and use of proton-pump inhibitors.

FREQ Procedure

|                      |       | Cumulative       |              |
|----------------------|-------|------------------|--------------|
| Percent of all power |       | Percent of power |              |
| 1                    | 11981 | 100.00           | 11981 100.00 |

Table : all \* f2\_YN

All f2\_YN

| Power                          |        |        |
|--------------------------------|--------|--------|
| Percent                        |        |        |
| Percent of rows                |        |        |
| Percent of columns   1   Total |        |        |
|                                | +      | +      |
| 1                              | 11163  | 11163  |
|                                | 100.00 | 100.00 |
|                                | 100.00 |        |
|                                | 100.00 |        |
|                                | +      | +      |
| Total                          | 11163  | 11163  |
|                                | 100.00 | 100.00 |

Degree of missing values = 818

Presence or absence of Table 5-1 anticoagulants and use of proton-pump inhibitors.

FREQ Procedure

|                      |       | Cumulative       |              |
|----------------------|-------|------------------|--------------|
| Percent of all power |       | Percent of power |              |
| <hr/>                |       |                  |              |
| 1                    | 11981 | 100.00           | 11981 100.00 |

Table : all \* f3\_YN

All f3\_YN

| Power                          |        |        |
|--------------------------------|--------|--------|
| Percent                        |        |        |
| Percent of rows                |        |        |
| Percent of columns   1   Total |        |        |
|                                | +      | +      |
| 1                              | 2955   | 2955   |
|                                | 100.00 | 100.00 |
|                                | 100.00 |        |
|                                | 100.00 |        |
|                                | +      | +      |
| Total                          | 2955   | 2955   |
|                                | 100.00 | 100.00 |

Degree of missing values = 9026



Presence or absence of Table 5-1 anticoagulants and use of proton-pump inhibitors.

FREQ Procedure

|   |       | Cumulative           |                  |        |
|---|-------|----------------------|------------------|--------|
|   |       | Percent of all power | Percent of power |        |
| 1 | 11981 | 100.00               | 11981            | 100.00 |

Table : all \* f4\_YN

All f4\_YN

| Power                          |        |        |
|--------------------------------|--------|--------|
| Percent                        |        |        |
| Percent of rows                |        |        |
| Percent of columns   1   Total |        |        |
|                                | +      | +      |
| 1                              | 8206   | 8206   |
|                                | 100.00 | 100.00 |
|                                | 100.00 |        |
|                                | 100.00 |        |
|                                | +      | +      |
| Total                          | 8206   | 8206   |
|                                | 100.00 | 100.00 |

Degree of missing values = 3775

Presence or absence of Table 5-1 anticoagulants and use of proton-pump inhibitors.

FREQ Procedure

|                      |                  | Cumulative           |                  |
|----------------------|------------------|----------------------|------------------|
| Percent of all power | Percent of power | Percent of all power | Percent of power |
| 1                    | 20509            | 100.00               | 20509 100.00     |

Table : all \* fl\_YN

All fl\_YN

| Power      | Percent | Percent of rows | Percent of columns   1   Total |
|------------|---------|-----------------|--------------------------------|
| _____+     | _____+  |                 |                                |
| 1          | 1758    | 1758            |                                |
|            | 100.00  | 100.00          |                                |
|            | 100.00  |                 |                                |
|            | 100.00  |                 |                                |
| _____+     | _____+  |                 |                                |
| Total 1758 | 1758    |                 |                                |
|            | 100.00  | 100.00          |                                |

Degree of missing values = 18751

Presence or absence of Table 5-1 anticoagulants and use of proton-pump inhibitors.

FREQ Procedure

|                      |       | Cumulative       |              |
|----------------------|-------|------------------|--------------|
| Percent of all power |       | Percent of power |              |
| 1                    | 20509 | 100.00           | 20509 100.00 |

Table : all \* f2\_YN

All f2\_YN

| Power                          |        |        |
|--------------------------------|--------|--------|
| Percent                        |        |        |
| Percent of rows                |        |        |
| Percent of columns   1   Total |        |        |
|                                | +      | +      |
| 1                              | 18751  | 18751  |
|                                | 100.00 | 100.00 |
|                                | 100.00 |        |
|                                | 100.00 |        |
|                                | +      | +      |
| Total                          | 18751  | 18751  |
|                                | 100.00 | 100.00 |

Degree of missing values = 1758

Presence or absence of Table 5-1 anticoagulants and use of proton-pump inhibitors.

FREQ Procedure

|                      |       | Cumulative       |              |
|----------------------|-------|------------------|--------------|
| Percent of all power |       | Percent of power |              |
| 1                    | 20509 | 100.00           | 20509 100.00 |

Table : all \* f3\_YN

All f3\_YN

| Power  | Percent | Percent of rows | Percent of columns   1   Total |
|--------|---------|-----------------|--------------------------------|
| _____+ | _____+  |                 |                                |
| 1      | 5340    | 5340            |                                |
|        | 100.00  | 100.00          |                                |
|        | 100.00  |                 |                                |
|        | 100.00  |                 |                                |
| _____+ | _____+  |                 |                                |
| Total  | 5340    | 5340            |                                |
|        | 100.00  | 100.00          |                                |

Frequency of missing values = 15169

Presence or absence of Table 5-1 anticoagulants and use of proton-pump inhibitors.

FREQ Procedure

|   |       | Cumulative           |                  |        |
|---|-------|----------------------|------------------|--------|
|   |       | Percent of all power | Percent of power |        |
| 1 | 20509 | 100.00               | 20509            | 100.00 |

Table : all \* f4\_YN

All f4\_YN

| Power                          |           |        |
|--------------------------------|-----------|--------|
| Percent                        |           |        |
| Percent of rows                |           |        |
| Percent of columns   1   Total |           |        |
|                                | + _____ + |        |
| 1                              | 13400     | 13400  |
|                                | 100.00    | 100.00 |
|                                | 100.00    |        |
|                                | 100.00    |        |
|                                | + _____ + |        |
| Total                          | 13400     | 13400  |
|                                | 100.00    | 100.00 |

Degree of missing values = 7109

Presence or absence of Table 5-1 anticoagulants and use of proton-pump inhibitors.

FREQ Procedure

Table: Y\_vs\_N \* PPI

Y\_vs\_N PPI

Power |

Percent of rows

Percent of columns | +|-| Total

|       |   |       |       |       |       |       |
|-------|---|-------|-------|-------|-------|-------|
|       | + | +     | +     | +     |       |       |
| 1     |   | 11163 |       | 18751 |       | 29914 |
|       |   |       | 37.32 |       | 62.68 |       |
|       |   |       | 93.17 |       | 91.43 |       |
|       | + | +     | +     | +     |       |       |
| 2     |   | 818   |       | 1758  |       | 2576  |
|       |   |       | 31.75 |       | 68.25 |       |
|       |   |       | 6.83  |       | 8.57  |       |
|       | + | +     | +     | +     |       |       |
| Total |   | 11981 |       | 20509 |       | 32490 |

Y\_vs\_N \* PPI statistic

Statistics Degree of Freedom p-value

---

Chi-square value 1 31.5242 <. 0001

Likelihood ratio chi-square value 1 32.1543 <. 0001

Continuity corrected chi-square 1 31.2857 <. 0001

Mantel-Haenszel chi square 1 31.5232 <. 0001

Phi factor 0.0311

Concordance factor 0.0311

Cramer's V statistic 0.0311

Fisher's exact test

---

Cell (1,1) power (F) 11163

Left side Pr  $\leq$  F 1.0000

Right side Pr  $\geq$  F <. 0001

Probability of table (P) <. 0001

Both sides Pr  $\leq$  P <. 0001

Presence or absence of Table 5-1 anticoagulants and use of proton-pump inhibitors.

FREQ Procedure

Y\_vs\_N \* PPI statistic

Column 1 Risk Estimates

(asymptotic) 95% (accurate) 95%

Risk ASE confidence interval confidence limits

---

Row 1 0.3732 0.0028 0.3677 0.3787 0.3677 0.3787

Line 2 0.3175 0.0092 0.2996 0.3355 0.2996 0.3359

Total 0.3688 0.0027 0.3635 0.3740 0.3635 0.3740

Difference 0.0556 0.0096 0.0368 0.0744

Row 1-Row 2 Differences

Column 2 Risk estimates

(asymptotic) 95% (accurate) 95%

Risk ASE confidence interval confidence limits

---

Row 1 0.6268 0.0028 0.6213 0.6323 0.6213 0.6323

Line 2 0.6825 0.0092 0.6645 0.7004 0.6641 0.7004

Total 0.6312 0.0027 0.6260 0.6365 0.6260 0.6365

Difference-0.0556 0.0096-0.0744-0.0368

Row 1-Row 2 Differences

Sample size = 32490



Presence or absence of Table 5-1 anticoagulants and use of proton-pump inhibitors.

FREQ Procedure

Table: WF\_vs\_N \* PPI

WF\_vs\_N PPI

Power |

Percent of rows

Percent of columns | +|-| Total

|       |   |       |   |       |   |       |
|-------|---|-------|---|-------|---|-------|
|       | + |       | + |       | + |       |
| 1     |   | 2955  |   | 5340  |   | 8295  |
|       |   | 35.62 |   | 64.38 |   |       |
|       |   | 78.32 |   | 75.23 |   |       |
|       | + |       | + |       | + |       |
| 2     |   | 818   |   | 1758  |   | 2576  |
|       |   | 31.75 |   | 68.25 |   |       |
|       |   | 21.68 |   | 24.77 |   |       |
|       | + |       | + |       | + |       |
| Total |   | 3773  |   | 7098  |   | 10871 |

WF\_vs\_N \* PPI statistic

Statistics Degree of Freedom p-value

---

Chi-square value 1 12.9854 0.0003

Likelihood ratio chi-square value 1 13.1139 0.0003

Continuity corrected chi-square 1 12.8152 0.0003

Chi-square of Mantel-Haenszel 1 12.9842 0.0003

Phi factor 0.0346

Concordance factor 0.0345

Cramer's V statistic 0.0346

Fisher's exact test

---

Cell (1,1) power (F) 2955

Left side Pr  $\leq$  F 0.9999

Right side Pr  $\geq$  F 0.0002

Probability of table (P)  $<$ . 0001

Two-tailed Pr  $\leq$  P 0.0003

Presence or absence of Table 5-1 anticoagulants and use of proton-pump inhibitors.

FREQ Procedure

WF\_vs\_N \* PPI statistic

Column 1 Risk Estimates

(asymptotic) 95% (accurate) 95%

Risk ASE confidence interval confidence limits

---

Row 1 0.3562 0.0053 0.3459 0.3665 0.3459 0.3667

Line 2 0.3175 0.0092 0.2996 0.3355 0.2996 0.3359

Total 0.3471 0.0046 0.3381 0.3560 0.3381 0.3561

Difference 0.0387 0.0106 0.0180 0.0594

Row 1-Row 2 Differences

Column 2 Risk estimates

(asymptotic) 95% (accurate) 95%

Risk ASE confidence interval confidence limits

---

Row 1 0.6438 0.0053 0.6335 0.6541 0.6333 0.6541

Line 2 0.6825 0.0092 0.6645 0.7004 0.6641 0.7004

Total 0.6529 0.0046 0.6440 0.6619 0.6439 0.6619

Difference-0.0387 0.0106-0.0594-0.0180

Row 1-Row 2 Differences

Sample size = 10871

Presence or absence of Table 5-1 anticoagulants and use of proton-pump inhibitors.

FREQ Procedure

Tables: DOACs\_vs\_N\* PPIs

DOACs\_vs\_N PPI

Power |

Percent of rows

Percent of columns | +|-| Total

|       | +     | +     | +     |
|-------|-------|-------|-------|
| 1     | 8206  | 13400 | 21606 |
|       | 37.98 | 62.02 |       |
|       | 90.94 | 88.40 |       |
| 2     | 818   | 1758  | 2576  |
|       | 31.75 | 68.25 |       |
|       | 9.06  | 11.60 |       |
| Total | 9024  | 15158 | 24182 |

Statistics for PPI of DOACs\_vs\_N \*

Statistics Degree of Freedom p-value

---

Chi-square value 1 38.1351 <. 0001

Likelihood ratio chi-square value 1 38.9134 <. 0001

Continuity corrected chi-square 1 37.8694 <. 0001

Mantel-Haenszel chi square 1 38.1335 <. 0001

Phi factor 0.0397

Concordance factor 0.0397

Cramer's V statistic 0.0397

Fisher's exact test

---

Cell (1,1) power (F) 8206

Left side Pr  $\leq$  F 1.0000

Right side Pr  $\geq$  F <. 0001

Probability of table (P) <. 0001

Both sides Pr  $\leq$  P <. 0001

Presence or absence of Table 5-1 anticoagulants and use of proton-pump inhibitors.

FREQ Procedure

Statistics for PPI of DOACs\_vs\_N \*

Column 1 Risk Estimates

(asymptotic) 95% (accurate) 95%

Risk ASE confidence interval confidence limits

---

Row 1 0.3798 0.0033 0.3733 0.3863 0.3733 0.3863

Line 2 0.3175 0.0092 0.2996 0.3355 0.2996 0.3359

Total 0.3732 0.0031 0.3671 0.3793 0.3671 0.3793

Difference 0.0623 0.0097 0.0431 0.0814

Row 1-Row 2 Differences

Column 2 Risk estimates

(asymptotic) 95% (accurate) 95%

Risk ASE confidence interval confidence limits

---

Row 1 0.6202 0.0033 0.6137 0.6267 0.6137 0.6267

Line 2 0.6825 0.0092 0.6645 0.7004 0.6641 0.7004

Total 0.6268 0.0031 0.6207 0.6329 0.6207 0.6329

Difference-0.0623 0.0097-0.0814-0.0431

Row 1-Row 2 Differences

Sample size = 24182

Status of proton-pump inhibitor use by Table 5-2 anticoagulant (DOAC).

FREQ Procedure

|                      |                  |        | Cumulative |        |
|----------------------|------------------|--------|------------|--------|
| Percent of all power | Percent of power |        |            |        |
| 1                    | 32490            | 100.00 | 32490      | 100.00 |

Table : all \* fl\_YN

All fl\_YN

| Power | Percent      | Percent of rows | Percent of columns   1   Total |
|-------|--------------|-----------------|--------------------------------|
|       |              |                 | _____+_____+                   |
| 1     | 21606        | 21606           |                                |
|       | 100.00       | 100.00          |                                |
|       | 100.00       |                 |                                |
|       | 100.00       |                 |                                |
|       | _____+_____+ |                 |                                |
| Total | 21606        | 21606           |                                |
|       | 100.00       | 100.00          |                                |

Degree of missing values = 10884

Status of proton-pump inhibitor use by Table 5-2 anticoagulant (DOAC).

FREQ Procedure

|                      |       |                  | Cumulative |        |
|----------------------|-------|------------------|------------|--------|
| Percent of all power |       | Percent of power |            |        |
| 1                    | 32490 | 100.00           | 32490      | 100.00 |

Table : all \* f2\_YN

All f2\_YN

| Power | Percent      | Percent of rows | Percent of columns   1   Total |
|-------|--------------|-----------------|--------------------------------|
|       |              |                 | _____+_____+                   |
| 1     | 2339         | 2339            |                                |
|       | 100.00       | 100.00          |                                |
|       | 100.00       |                 |                                |
|       | 100.00       |                 |                                |
|       | _____+_____+ |                 |                                |
| Total | 2339         | 2339            |                                |
|       | 100.00       | 100.00          |                                |

Degree of missing values = 30151



Status of proton-pump inhibitor use by Table 5-2 anticoagulant (DOAC).

FREQ Procedure

|                      |                  |        | Cumulative       |        |
|----------------------|------------------|--------|------------------|--------|
| Percent of all power | Percent of power |        | Percent of power |        |
| 1                    | 32490            | 100.00 | 32490            | 100.00 |

Table : all \* f3\_YN

All f3\_YN

| Power | Percent      | Percent of rows | Percent of columns   1   Total |
|-------|--------------|-----------------|--------------------------------|
|       |              |                 | _____+_____+                   |
| 1     | 6436         | 6436            |                                |
|       | 100.00       | 100.00          |                                |
|       | 100.00       |                 |                                |
|       | 100.00       |                 |                                |
|       | _____+_____+ |                 |                                |
| Total | 6436         | 6436            |                                |
|       | 100.00       | 100.00          |                                |

Degree of missing values = 26054

Status of proton-pump inhibitor use by Table 5-2 anticoagulant (DOAC).

FREQ Procedure

|                      |       |                  | Cumulative |        |
|----------------------|-------|------------------|------------|--------|
| Percent of all power |       | Percent of power |            |        |
| 1                    | 32490 | 100.00           | 32490      | 100.00 |

Table : all \* f4\_YN

All f4\_YN

| Power | Percent      | Percent of rows | Percent of columns   1   Total |
|-------|--------------|-----------------|--------------------------------|
|       |              |                 | _____+_____+                   |
| 1     | 8039         | 8039            |                                |
|       | 100.00       | 100.00          |                                |
|       | 100.00       |                 |                                |
|       | 100.00       |                 |                                |
|       | _____+_____+ |                 |                                |
| Total | 8039         | 8039            |                                |
|       | 100.00       | 100.00          |                                |

Degree of missing values = 24451

Status of proton-pump inhibitor use by Table 5-2 anticoagulant (DOAC).

FREQ Procedure

|                      |       |                  | Cumulative |        |
|----------------------|-------|------------------|------------|--------|
| Percent of all power |       | Percent of power |            |        |
| 1                    | 32490 | 100.00           | 32490      | 100.00 |

Table : all \* f5\_YN

All f5\_YN

| Power | Percent      | Percent of rows | Percent of columns   1   Total |
|-------|--------------|-----------------|--------------------------------|
|       |              |                 | _____+_____+                   |
| 1     | 4792         | 4792            |                                |
|       | 100.00       | 100.00          |                                |
|       | 100.00       |                 |                                |
|       | 100.00       |                 |                                |
|       | _____+_____+ |                 |                                |
| Total | 4792         | 4792            |                                |
|       | 100.00       | 100.00          |                                |

Frequency of missing values = 27698

Status of proton-pump inhibitor use by Table 5-2 anticoagulant (DOAC).

FREQ Procedure

|                      |       | Cumulative       |              |
|----------------------|-------|------------------|--------------|
| Percent of all power |       | Percent of power |              |
| 1                    | 11981 | 100.00           | 11981 100.00 |

Table : all \* f1\_YN

All f1\_YN

| Power | Percent      | Percent of rows | Percent of columns   1   Total |
|-------|--------------|-----------------|--------------------------------|
|       |              |                 | _____+_____+                   |
| 1     | 8206         | 8206            |                                |
|       | 100.00       | 100.00          |                                |
|       | 100.00       |                 |                                |
|       | 100.00       |                 |                                |
|       | _____+_____+ |                 |                                |
| Total | 8206         | 8206            |                                |
|       | 100.00       | 100.00          |                                |

Degree of missing values = 3775

Status of proton-pump inhibitor use by Table 5-2 anticoagulant (DOAC).

FREQ Procedure

|                      |       | Cumulative       |              |
|----------------------|-------|------------------|--------------|
| Percent of all power |       | Percent of power |              |
| 1                    | 11981 | 100.00           | 11981 100.00 |

Table : all \* f2\_YN

All f2\_YN

| Power | Percent | Percent of rows | Percent of columns   1   Total |
|-------|---------|-----------------|--------------------------------|
|       |         |                 | _____+_____+                   |
| 1     | 906     | 906             | 100.00   100.00                |
|       | 100.00  |                 | 100.00                         |
|       | 100.00  |                 | 100.00                         |
|       |         |                 | _____+_____+                   |
| Total | 906     | 906             |                                |
|       |         |                 | 100.00 100.00                  |

Degree of missing values = 11075

Status of proton-pump inhibitor use by Table 5-2 anticoagulant (DOAC).

FREQ Procedure

|                      |                  | Cumulative           |                  |
|----------------------|------------------|----------------------|------------------|
| Percent of all power | Percent of power | Percent of all power | Percent of power |
| 1                    | 11981            | 100.00               | 11981 100.00     |

Table : all \* f3\_YN

All f3\_YN

| Power | Percent      | Percent of rows | Percent of columns   1   Total |
|-------|--------------|-----------------|--------------------------------|
|       |              |                 | _____+_____+                   |
| 1     | 2388         | 2388            |                                |
|       | 100.00       | 100.00          |                                |
|       | 100.00       |                 |                                |
|       | 100.00       |                 |                                |
|       | _____+_____+ |                 |                                |
| Total | 2388         | 2388            |                                |
|       | 100.00       | 100.00          |                                |

Degree of missing values = 9593

Status of proton-pump inhibitor use by Table 5-2 anticoagulant (DOAC).

FREQ Procedure

|                      |                  | Cumulative           |                  |
|----------------------|------------------|----------------------|------------------|
| Percent of all power | Percent of power | Percent of all power | Percent of power |
| 1                    | 11981            | 100.00               | 11981 100.00     |

Table : all \* f4\_YN

All f4\_YN

| Power | Percent      | Percent of rows | Percent of columns   1   Total |
|-------|--------------|-----------------|--------------------------------|
|       |              |                 | _____+_____+                   |
| 1     | 3174         | 3174            |                                |
|       | 100.00       | 100.00          |                                |
|       | 100.00       |                 |                                |
|       | 100.00       |                 |                                |
|       | _____+_____+ |                 |                                |
| Total | 3174         | 3174            |                                |
|       | 100.00       | 100.00          |                                |

Frequency of missing values = 8807

Status of proton-pump inhibitor use by Table 5-2 anticoagulant (DOAC).

FREQ Procedure

|                      |                  | Cumulative           |                  |
|----------------------|------------------|----------------------|------------------|
| Percent of all power | Percent of power | Percent of all power | Percent of power |
| 1                    | 11981            | 100.00               | 11981 100.00     |

Table : all \* f5\_YN

All f5\_YN

| Power           | Percent         | Percent of rows | Percent of columns   1   Total |
|-----------------|-----------------|-----------------|--------------------------------|
| _____ + _____ + |                 |                 |                                |
| 1   1738   1738 | 100.00   100.00 | 100.00          | 100.00                         |
| _____ + _____ + |                 |                 |                                |
| Total 1738 1738 | 100.00 100.00   |                 |                                |

Frequency of missing values = 10243



Status of proton-pump inhibitor use by Table 5-2 anticoagulant (DOAC).

FREQ Procedure

|                      |       |                  | Cumulative |        |
|----------------------|-------|------------------|------------|--------|
| Percent of all power |       | Percent of power |            |        |
| 1                    | 20509 | 100.00           | 20509      | 100.00 |

Table : all \* fl\_YN

All fl\_YN

| Power | Percent | Percent of rows | Percent of columns   1   Total |
|-------|---------|-----------------|--------------------------------|
|       |         |                 | _____+_____+                   |
| 1     | 13400   | 13400           |                                |
|       | 100.00  | 100.00          |                                |
|       | 100.00  |                 |                                |
|       | 100.00  |                 |                                |
|       |         |                 | _____+_____+                   |
| Total | 13400   | 13400           |                                |
|       |         |                 | 100.00 100.00                  |

Degree of missing values = 7109

Status of proton-pump inhibitor use by Table 5-2 anticoagulant (DOAC).

FREQ Procedure

|                      |                  | Cumulative           |                  |
|----------------------|------------------|----------------------|------------------|
| Percent of all power | Percent of power | Percent of all power | Percent of power |
| 1                    | 20509            | 100.00               | 20509 100.00     |

Table : all \* f2\_YN

All f2\_YN

| Power      | Percent | Percent of rows | Percent of columns   1   Total |
|------------|---------|-----------------|--------------------------------|
| _____+     | _____+  |                 |                                |
| 1          | 1433    | 1433            |                                |
|            | 100.00  | 100.00          |                                |
|            | 100.00  |                 |                                |
|            | 100.00  |                 |                                |
| _____+     | _____+  |                 |                                |
| Total 1433 | 1433    |                 |                                |
|            | 100.00  | 100.00          |                                |

Degree of missing values = 19076

Status of proton-pump inhibitor use by Table 5-2 anticoagulant (DOAC).

FREQ Procedure

|                      |       | Cumulative       |              |
|----------------------|-------|------------------|--------------|
| Percent of all power |       | Percent of power |              |
| 1                    | 20509 | 100.00           | 20509 100.00 |

Table : all \* f3\_YN

All f3\_YN

| Power                          |        |        |
|--------------------------------|--------|--------|
| Percent                        |        |        |
| Percent of rows                |        |        |
| Percent of columns   1   Total |        |        |
|                                | +      | +      |
| 1                              | 4048   | 4048   |
|                                | 100.00 | 100.00 |
|                                | 100.00 |        |
|                                | 100.00 |        |
|                                | +      | +      |
| Total                          | 4048   | 4048   |
|                                | 100.00 | 100.00 |

Frequency of missing values = 16461

Status of proton-pump inhibitor use by Table 5-2 anticoagulant (DOAC).

FREQ Procedure

|                      |                  | Cumulative           |                  |
|----------------------|------------------|----------------------|------------------|
| Percent of all power | Percent of power | Percent of all power | Percent of power |
| 1                    | 20509            | 100.00               | 20509 100.00     |

Table : all \* f4\_YN

All f4\_YN

| Power | Percent      | Percent of rows | Percent of columns   1   Total |
|-------|--------------|-----------------|--------------------------------|
|       |              |                 | _____+_____+                   |
| 1     | 4865         | 4865            | 100.00   100.00                |
|       | 100.00       |                 | 100.00                         |
|       | 100.00       |                 | 100.00                         |
|       | _____+_____+ |                 |                                |
| Total | 4865         | 4865            |                                |
|       | 100.00       | 100.00          |                                |

Frequency of missing values = 15644

Status of proton-pump inhibitor use by Table 5-2 anticoagulant (DOAC).

FREQ Procedure

|                      |       | Cumulative       |              |
|----------------------|-------|------------------|--------------|
| Percent of all power |       | Percent of power |              |
| 1                    | 20509 | 100.00           | 20509 100.00 |

Table : all \* f5\_YN

All f5\_YN

| Power                          |           |        |
|--------------------------------|-----------|--------|
| Percent                        |           |        |
| Percent of rows                |           |        |
| Percent of columns   1   Total |           |        |
|                                | + _____ + |        |
| 1                              | 3054      | 3054   |
|                                | 100.00    | 100.00 |
|                                | 100.00    |        |
|                                | 100.00    |        |
|                                | + _____ + |        |
| Total                          | 3054      | 3054   |
|                                | 100.00    | 100.00 |

Degree of missing values = 17455

Status of proton-pump inhibitor use by Table 5-2 anticoagulant (DOAC).

FREQ Procedure

Tables: Rivaro\_vs\_Dabi\* PPIs

Rivaro\_vs\_Dabi PPI

Power |

Percent of rows

Percent of columns | +|-| Total

|       | +     | +     | +    |
|-------|-------|-------|------|
| 1     | 2388  | 4048  | 6436 |
|       | 37.10 | 62.90 |      |
|       | 72.50 | 73.86 |      |
| 2     | 906   | 1433  | 2339 |
|       | 38.73 | 61.27 |      |
|       | 27.50 | 26.14 |      |
| Total | 3294  | 5481  | 8775 |

Statistics for PPI of Rivaro\_vs\_Dabi \*

Statistics Degree of Freedom p-value

---

Chi-square value 1 1.9456 0.1631

Likelihood ratio chi-square value 1 1.9406 0.1636

Continuity corrected chi-square 1 1.8767 0.1707

Chi-square of Mantel-Haenszel 1 1.9454 0.1631

Phi factor-0.0149

Concordance factor 0.0149

Cramer's V statistic-0.0149

Fisher's exact test

---

Cell (1,1) power (F) 2388

Left side Pr  $\leq$  F 0.0855

Right side Pr  $\geq$  F 0.9220

Probability of table (P) 0.0075

Two-sided Pr  $\leq$  P 0.1703

Status of proton-pump inhibitor use by Table 5-2 anticoagulant (DOAC).

FREQ Procedure

Statistics for PPI of Rivaro\_vs\_Dabi \*

Column 1 Risk Estimates

(asymptotic) 95% (accurate) 95%

Risk ASE confidence interval confidence limits

---

|        |        |        |        |        |        |        |
|--------|--------|--------|--------|--------|--------|--------|
| Row 1  | 0.3710 | 0.0060 | 0.3592 | 0.3828 | 0.3592 | 0.3830 |
| Line 2 | 0.3873 | 0.0101 | 0.3676 | 0.4071 | 0.3675 | 0.4074 |
| Total  | 0.3754 | 0.0052 | 0.3653 | 0.3855 | 0.3652 | 0.3856 |

Difference-0.0163 0.0117-0.0393 0.0067

Row 1-Row 2 Differences

Column 2 Risk estimates

(asymptotic) 95% (accurate) 95%

Risk ASE confidence interval confidence limits

---

|        |        |        |        |        |        |        |
|--------|--------|--------|--------|--------|--------|--------|
| Row 1  | 0.6290 | 0.0060 | 0.6172 | 0.6408 | 0.6170 | 0.6408 |
| Line 2 | 0.6127 | 0.0101 | 0.5929 | 0.6324 | 0.5926 | 0.6325 |
| Total  | 0.6246 | 0.0052 | 0.6145 | 0.6347 | 0.6144 | 0.6348 |

Difference 0.0163 0.0117-0.0067 0.0393

Row 1-Row 2 Differences

Sample size = 8775



Status of proton-pump inhibitor use by Table 5-2 anticoagulant (DOAC).

FREQ Procedure

Tables: Api\_vs\_Dabi\* PPIs

Api\_vs\_Dabi PPI

Power |

Percent of rows

Percent of columns | +|-| Total

|       | +     | -     | Total |
|-------|-------|-------|-------|
| 1     | 3174  | 4865  | 8039  |
|       | 39.48 | 60.52 |       |
|       | 77.79 | 77.25 |       |
| 2     | 906   | 1433  | 2339  |
|       | 38.73 | 61.27 |       |
|       | 22.21 | 22.75 |       |
| Total | 4080  | 6298  | 10378 |

Statistics for PPI of Api\_vs\_Dabi \*

Statistics Degree of Freedom p-value

---

|                                   |   |        |        |
|-----------------------------------|---|--------|--------|
| Chi-square value                  | 1 | 0.4249 | 0.5145 |
| Likelihood ratio chi-square value | 1 | 0.4255 | 0.5142 |
| Continuity corrected chi-square   | 1 | 0.3941 | 0.5301 |
| Chi-square of Mantel-Haenszel     | 1 | 0.4249 | 0.5145 |
| Phi factor                        |   | 0.0064 |        |
| Concordance factor                |   | 0.0064 |        |
| Cramer's V statistic              |   | 0.0064 |        |

Fisher's exact test

---

Cell (1,1) power (F) 3174

Left side Pr  $\leq$  F 0.7503

Right side Pr  $\geq$  F 0.2653

Probability of table (P) 0.0155

Two-sided Pr  $\leq$  P 0.5163

Status of proton-pump inhibitor use by Table 5-2 anticoagulant (DOAC).

FREQ Procedure

Statistics for PPI of Api\_vs\_Dabi \*

Column 1 Risk Estimates

(asymptotic) 95% (accurate) 95%

Risk ASE confidence interval confidence limits

---

|        |        |        |        |        |        |        |
|--------|--------|--------|--------|--------|--------|--------|
| Row 1  | 0.3948 | 0.0055 | 0.3841 | 0.4055 | 0.3841 | 0.4056 |
| Line 2 | 0.3873 | 0.0101 | 0.3676 | 0.4071 | 0.3675 | 0.4074 |
| Total  | 0.3931 | 0.0048 | 0.3837 | 0.4025 | 0.3837 | 0.4026 |

Difference 0.0075 0.0115-0.0150 0.0299

Row 1-Row 2 Differences

Column 2 Risk estimates

(asymptotic) 95% (accurate) 95%

Risk ASE confidence interval confidence limits

---

|        |        |        |        |        |        |        |
|--------|--------|--------|--------|--------|--------|--------|
| Row 1  | 0.6052 | 0.0055 | 0.5945 | 0.6159 | 0.5944 | 0.6159 |
| Line 2 | 0.6127 | 0.0101 | 0.5929 | 0.6324 | 0.5926 | 0.6325 |
| Total  | 0.6069 | 0.0048 | 0.5975 | 0.6163 | 0.5974 | 0.6163 |

Difference-0.0075 0.0115-0.0299 0.0150

Row 1-Row 2 Differences

Sample size = 10378

Status of proton-pump inhibitor use by Table 5-2 anticoagulant (DOAC).

FREQ Procedure

Tables: Edo\_vs\_Dabi\* PPIs

Edo\_vs\_Dabi PPI

Power |

Percent of rows

Percent of columns | +|-| Total

|       |   |       |   |       |   |      |
|-------|---|-------|---|-------|---|------|
|       | + |       | + |       | + |      |
| 1     |   | 1738  |   | 3054  |   | 4792 |
|       |   | 36.27 |   | 63.73 |   |      |
|       |   | 65.73 |   | 68.06 |   |      |
|       | + |       | + |       | + |      |
| 2     |   | 906   |   | 1433  |   | 2339 |
|       |   | 38.73 |   | 61.27 |   |      |
|       |   | 34.27 |   | 31.94 |   |      |
|       | + |       | + |       | + |      |
| Total |   | 2644  |   | 4487  |   | 7131 |

Statistics for PPI of Edo\_vs\_Dabi \*

Statistics Degree of Freedom p-value

---

Chi-square value 1 4.0961 0.0430

Likelihood ratio chi-square value 1 4.0840 0.0433

Continuity corrected chi-square 1 3.9911 0.0457

Chi-square of Mantel-Haenszel 1 4.0955 0.0430

Phi factor-0.0240

Concordance factor 0.0240

Cramer's V statistic-0.0240

Fisher's exact test

---

Cell (1,1) power (F) 1738

Left side Pr  $\leq$  F 0.0230

Right side Pr  $\geq$  F 0.9797

Probability of table (P) 0.0027

Two-tailed Pr  $\leq$  P 0.0444

Status of proton-pump inhibitor use by Table 5-2 anticoagulant (DOAC).

FREQ Procedure

Statistics for PPI of Edo\_vs\_Dabi \*

Column 1 Risk Estimates

(asymptotic) 95% (accurate) 95%

Risk ASE confidence interval confidence limits

---

|        |        |        |        |        |        |        |
|--------|--------|--------|--------|--------|--------|--------|
| Row 1  | 0.3627 | 0.0069 | 0.3491 | 0.3763 | 0.3491 | 0.3765 |
| Line 2 | 0.3873 | 0.0101 | 0.3676 | 0.4071 | 0.3675 | 0.4074 |
| Total  | 0.3708 | 0.0057 | 0.3596 | 0.3820 | 0.3595 | 0.3821 |

Difference-0.0247 0.0122-0.0486-0.0007

Row 1-Row 2 Differences

Column 2 Risk estimates

(asymptotic) 95% (accurate) 95%

Risk ASE confidence interval confidence limits

---

|        |        |        |        |        |        |        |
|--------|--------|--------|--------|--------|--------|--------|
| Row 1  | 0.6373 | 0.0069 | 0.6237 | 0.6509 | 0.6235 | 0.6509 |
| Line 2 | 0.6127 | 0.0101 | 0.5929 | 0.6324 | 0.5926 | 0.6325 |
| Total  | 0.6292 | 0.0057 | 0.6180 | 0.6404 | 0.6179 | 0.6405 |

Difference 0.0247 0.0122 0.0007 0.0486

Row 1-Row 2 Differences

Sample size = 7131

Use of concomitant Table 5-3 anticoagulants and antiplatelet agents and proton-pump inhibitors

FREQ Procedure

|                      |                  |        | Cumulative |        |
|----------------------|------------------|--------|------------|--------|
| Percent of all power | Percent of power |        |            |        |
| 1                    | 32490            | 100.00 | 32490      | 100.00 |

Table : all \* fl\_YN

All fl\_YN

| Power | Percent      | Percent of rows | Percent of columns   1   Total |
|-------|--------------|-----------------|--------------------------------|
|       |              |                 | _____+_____+                   |
| 1     | 1683         | 1683            |                                |
|       | 100.00       | 100.00          |                                |
|       | 100.00       |                 |                                |
|       | 100.00       |                 |                                |
|       | _____+_____+ |                 |                                |
| Total | 1683         | 1683            |                                |
|       | 100.00       | 100.00          |                                |

Frequency of missing values = 30807

Use of concomitant Table 5-3 anticoagulants and antiplatelet agents and proton-pump inhibitors

FREQ Procedure

|                      |       |                  | Cumulative |        |
|----------------------|-------|------------------|------------|--------|
| Percent of all power |       | Percent of power |            |        |
| 1                    | 32490 | 100.00           | 32490      | 100.00 |

Table : all \* f2\_YN

All f2\_YN

| Power | Percent | Percent of rows | Percent of columns   1   Total |
|-------|---------|-----------------|--------------------------------|
|       |         |                 | _____+_____+                   |
| 1     | 25014   | 25014           |                                |
|       | 100.00  | 100.00          |                                |
|       | 100.00  |                 |                                |
|       | 100.00  |                 |                                |
|       |         |                 | _____+_____+                   |
| Total | 25014   | 25014           |                                |
|       | 100.00  | 100.00          |                                |

Degree of missing values = 7476



Use of concomitant Table 5-3 anticoagulants and antiplatelet agents and proton-pump inhibitors

FREQ Procedure

|                      |                  | Cumulative           |                  |
|----------------------|------------------|----------------------|------------------|
| Percent of all power | Percent of power | Percent of all power | Percent of power |
| 1                    | 32490            | 100.00               | 32490 100.00     |

Table : all \* f3\_YN

All f3\_YN

| Power           | Percent         | Percent of rows | Percent of columns   1   Total |
|-----------------|-----------------|-----------------|--------------------------------|
| _____ + _____ + |                 |                 |                                |
| 1   893   893   | 100.00   100.00 |                 |                                |
|                 | 100.00          |                 |                                |
|                 | 100.00          |                 |                                |
| _____ + _____ + |                 |                 |                                |
| Total 893 893   |                 |                 |                                |
|                 | 100.00 100.00   |                 |                                |

Frequency of missing values = 31597

Use of concomitant Table 5-3 anticoagulants and antiplatelet agents and proton-pump inhibitors

FREQ Procedure

|                      |       |                  | Cumulative |        |
|----------------------|-------|------------------|------------|--------|
| Percent of all power |       | Percent of power |            |        |
| 1                    | 32490 | 100.00           | 32490      | 100.00 |

Table : all \* f4\_YN

All f4\_YN

| Power                          |        |        |
|--------------------------------|--------|--------|
| Percent                        |        |        |
| Percent of rows                |        |        |
| Percent of columns   1   Total |        |        |
|                                | +      | +      |
| 1                              | 4900   | 4900   |
|                                | 100.00 | 100.00 |
|                                | 100.00 |        |
|                                | 100.00 |        |
|                                | +      | +      |
| Total                          | 4900   | 4900   |
|                                | 100.00 | 100.00 |

Frequency of missing values = 27590

Use of concomitant Table 5-3 anticoagulants and antiplatelet agents and proton-pump inhibitors

FREQ Procedure

|                      |                  | Cumulative           |                  |
|----------------------|------------------|----------------------|------------------|
| Percent of all power | Percent of power | Percent of all power | Percent of power |
| 1                    | 11981            | 100.00               | 11981 100.00     |

Table : all \* fl\_YN

All fl\_YN

| Power  | Percent | Percent of rows | Percent of columns   1   Total |
|--------|---------|-----------------|--------------------------------|
| _____+ | _____+  |                 |                                |
| 1      | 424     | 424             |                                |
|        | 100.00  | 100.00          |                                |
|        | 100.00  |                 |                                |
|        | 100.00  |                 |                                |
| _____+ | _____+  |                 |                                |
| Total  | 424     | 424             |                                |
|        | 100.00  | 100.00          |                                |

Degree of missing values = 11557

Use of concomitant Table 5-3 anticoagulants and antiplatelet agents and proton-pump inhibitors

FREQ Procedure

|                      |       | Cumulative       |              |
|----------------------|-------|------------------|--------------|
| Percent of all power |       | Percent of power |              |
| 1                    | 11981 | 100.00           | 11981 100.00 |

Table : all \* f2\_YN

All f2\_YN

| Power                          |        |        |
|--------------------------------|--------|--------|
| Percent                        |        |        |
| Percent of rows                |        |        |
| Percent of columns   1   Total |        |        |
|                                | +      | +      |
| 1                              | 8541   | 8541   |
|                                | 100.00 | 100.00 |
|                                | 100.00 |        |
|                                | 100.00 |        |
|                                | +      | +      |
| Total                          | 8541   | 8541   |
|                                | 100.00 | 100.00 |

Degree of missing values = 3440

Use of concomitant Table 5-3 anticoagulants and antiplatelet agents and proton-pump inhibitors

FREQ Procedure

|                      |       | Cumulative       |              |
|----------------------|-------|------------------|--------------|
| Percent of all power |       | Percent of power |              |
| 1                    | 11981 | 100.00           | 11981 100.00 |

Table : all \* f3\_YN

All f3\_YN

| Power                          |        |        |
|--------------------------------|--------|--------|
| Percent                        |        |        |
| Percent of rows                |        |        |
| Percent of columns   1   Total |        |        |
|                                | +      | +      |
| 1                              | 394    | 394    |
|                                | 100.00 | 100.00 |
|                                | 100.00 |        |
|                                | 100.00 |        |
|                                | +      | +      |
| Total 394                      | 394    |        |
|                                | 100.00 | 100.00 |

Degree of missing values = 11587

Use of concomitant Table 5-3 anticoagulants and antiplatelet agents and proton-pump inhibitors

FREQ Procedure

|                      |                  | Cumulative           |                  |
|----------------------|------------------|----------------------|------------------|
| Percent of all power | Percent of power | Percent of all power | Percent of power |
| 1                    | 11981            | 100.00               | 11981 100.00     |

Table : all \* f4\_YN

All f4\_YN

| Power      | Percent | Percent of rows | Percent of columns   1   Total |
|------------|---------|-----------------|--------------------------------|
| _____+     | _____+  |                 |                                |
| 1          | 2622    | 2622            |                                |
|            | 100.00  | 100.00          |                                |
|            | 100.00  |                 |                                |
|            | 100.00  |                 |                                |
| _____+     | _____+  |                 |                                |
| Total 2622 | 2622    |                 |                                |
|            | 100.00  | 100.00          |                                |

Frequency of missing values = 9359

Use of concomitant Table 5-3 anticoagulants and antiplatelet agents and proton-pump inhibitors

FREQ Procedure

|                      |       | Cumulative       |              |
|----------------------|-------|------------------|--------------|
| Percent of all power |       | Percent of power |              |
| 1                    | 20509 | 100.00           | 20509 100.00 |

Table : all \* fl\_YN

All fl\_YN

| Power  | Percent | Percent of rows | Percent of columns   1   Total |
|--------|---------|-----------------|--------------------------------|
| _____+ | _____+  |                 |                                |
| 1      | 1259    | 1259            |                                |
|        | 100.00  | 100.00          |                                |
|        | 100.00  |                 |                                |
|        | 100.00  |                 |                                |
| _____+ | _____+  |                 |                                |
| Total  | 1259    | 1259            |                                |
|        | 100.00  | 100.00          |                                |

Degree of missing values = 19250

Use of concomitant Table 5-3 anticoagulants and antiplatelet agents and proton-pump inhibitors

FREQ Procedure

|                      |                  | Cumulative           |                  |
|----------------------|------------------|----------------------|------------------|
| Percent of all power | Percent of power | Percent of all power | Percent of power |
| 1                    | 20509            | 100.00               | 20509 100.00     |

Table : all \* f2\_YN

All f2\_YN

| Power             | Percent         | Percent of rows | Percent of columns   1   Total |
|-------------------|-----------------|-----------------|--------------------------------|
| _____+_____+      |                 |                 |                                |
| 1   16473   16473 | 100.00   100.00 | 100.00          | 100.00                         |
| _____+_____+      |                 |                 |                                |
| Total 16473 16473 | 100.00 100.00   |                 |                                |

Degree of missing values = 4036



Use of concomitant Table 5-3 anticoagulants and antiplatelet agents and proton-pump inhibitors

FREQ Procedure

|                      |       | Cumulative       |              |
|----------------------|-------|------------------|--------------|
| Percent of all power |       | Percent of power |              |
| 1                    | 20509 | 100.00           | 20509 100.00 |

Table : all \* f3\_YN

All f3\_YN

| Power                          |        |        |
|--------------------------------|--------|--------|
| Percent                        |        |        |
| Percent of rows                |        |        |
| Percent of columns   1   Total |        |        |
|                                | +      | +      |
| 1                              | 499    | 499    |
|                                | 100.00 | 100.00 |
|                                | 100.00 |        |
|                                | 100.00 |        |
|                                | +      | +      |
| Total 499                      | 499    |        |
|                                | 100.00 | 100.00 |

Degree of missing values = 20010

Use of concomitant Table 5-3 anticoagulants and antiplatelet agents and proton-pump inhibitors

FREQ Procedure

|                      |       | Cumulative       |              |
|----------------------|-------|------------------|--------------|
| Percent of all power |       | Percent of power |              |
| 1                    | 20509 | 100.00           | 20509 100.00 |

Table : all \* f4\_YN

All f4\_YN

| Power                          |        |        |
|--------------------------------|--------|--------|
| Percent                        |        |        |
| Percent of rows                |        |        |
| Percent of columns   1   Total |        |        |
|                                | +      | +      |
| 1                              | 2278   | 2278   |
|                                | 100.00 | 100.00 |
|                                | 100.00 |        |
|                                | 100.00 |        |
|                                | +      | +      |
| Total                          | 2278   | 2278   |
|                                | 100.00 | 100.00 |

Frequency of missing values = 18231

Use of concomitant Table 5-3 anticoagulants and antiplatelet agents and proton-pump inhibitors

FREQ Procedure

Table: AD\_vs\_N \* PPI

AD\_vs\_N PPI

Power |

Percent of rows

Percent of columns | +|-| Total

|       | +     | -     | Total |
|-------|-------|-------|-------|
| 1     | 8541  | 16473 | 25014 |
|       | 34.14 | 65.86 |       |
|       | 95.27 | 92.90 |       |
| 2     | 424   | 1259  | 1683  |
|       | 25.19 | 74.81 |       |
|       | 4.73  | 7.10  |       |
| Total | 8965  | 17732 | 26697 |

AD\_vs\_N \* PPI statistic

Statistics Degree of Freedom p-value

Chi-square value 1 56.6552 <. 0001

Likelihood ratio chi-square value 1 59.3073 <. 0001

Continuity corrected chi-square 1 56.2545 <. 0001

Mantel-Haenszel chi square 1 56.6531 <. 0001

Phi factor 0.0461

Concordance factor 0.0460

Cramer's V statistic 0.0461

Fisher's exact test

---

Cell (1,1) power (F) 8541

Left side Pr  $\leq$  F 1.0000

Right side Pr  $\geq$  F <. 0001

Probability of table (P) <. 0001

Both sides Pr  $\leq$  P <. 0001

Use of concomitant Table 5-3 anticoagulants and antiplatelet agents and proton-pump inhibitors

FREQ Procedure

AD\_vs\_N \* PPI statistic

Column 1 Risk Estimates

(asymptotic) 95% (accurate) 95%

Risk ASE confidence interval confidence limits

---

|        |        |        |        |        |        |        |
|--------|--------|--------|--------|--------|--------|--------|
| Row 1  | 0.3414 | 0.0030 | 0.3356 | 0.3473 | 0.3356 | 0.3474 |
| Line 2 | 0.2519 | 0.0106 | 0.2312 | 0.2727 | 0.2313 | 0.2734 |
| Total  | 0.3358 | 0.0029 | 0.3301 | 0.3415 | 0.3301 | 0.3415 |

Difference 0.0895 0.0110 0.0680 0.1111

Row 1-Row 2 Differences

Column 2 Risk estimates

(asymptotic) 95% (accurate) 95%

Risk ASE confidence interval confidence limits

---

|        |        |        |        |        |        |        |
|--------|--------|--------|--------|--------|--------|--------|
| Row 1  | 0.6586 | 0.0030 | 0.6527 | 0.6644 | 0.6526 | 0.6644 |
| Line 2 | 0.7481 | 0.0106 | 0.7273 | 0.7688 | 0.7266 | 0.7687 |
| Total  | 0.6642 | 0.0029 | 0.6585 | 0.6699 | 0.6585 | 0.6699 |

Difference-0.0895 0.0110-0.1111-0.0680

Row 1-Row 2 Differences

Sample size = 26697

Use of concomitant Table 5-3 anticoagulants and antiplatelet agents and proton-pump inhibitors

FREQ Procedure

Table: AP\_vs\_N \* PPI

AP\_vs\_N PPI

Power |

Percent of rows

Percent of columns | +|-| Total

|       | +     | -     | Total |
|-------|-------|-------|-------|
| 1     | 394   | 499   | 893   |
|       | 44.12 | 55.88 |       |
|       | 48.17 | 28.38 |       |
| 2     | 424   | 1259  | 1683  |
|       | 25.19 | 74.81 |       |
|       | 51.83 | 71.62 |       |
| Total | 818   | 1758  | 2576  |

AP\_vs\_N \* PPI statistic

Statistics Degree of Freedom p-value

Chi-square value 1 96.4520 <. 0001

Likelihood ratio chi-square value 1 94.5185 <. 0001

Continuity corrected chi-square 1 95.5805 <. 0001

Mantel-Haenszel chi square 1 96.4145 <. 0001

Phi factor 0.1935

Concordance factor 0.1900

Cramer's V statistic 0.1935

Fisher's exact test

---

Cell (1,1) power (F) 394

Left side Pr  $\leq$  F 1.0000

Right side Pr  $\geq$  F <. 0001

Probability of table (P) <. 0001

Both sides Pr  $\leq$  P <. 0001

Use of concomitant Table 5-3 anticoagulants and antiplatelet agents and proton-pump inhibitors

FREQ Procedure

AP\_vs\_N \* PPI statistic

Column 1 Risk Estimates

(asymptotic) 95% (accurate) 95%

Risk ASE confidence interval confidence limits

---

|        |        |        |        |        |        |        |
|--------|--------|--------|--------|--------|--------|--------|
| Row 1  | 0.4412 | 0.0166 | 0.4086 | 0.4738 | 0.4083 | 0.4745 |
| Line 2 | 0.2519 | 0.0106 | 0.2312 | 0.2727 | 0.2313 | 0.2734 |
| Total  | 0.3175 | 0.0092 | 0.2996 | 0.3355 | 0.2996 | 0.3359 |

Difference 0.1893 0.0197 0.1507 0.2279

Row 1-Row 2 Differences

Column 2 Risk estimates

(asymptotic) 95% (accurate) 95%

Risk ASE confidence interval confidence limits

---

|        |        |        |        |        |        |        |
|--------|--------|--------|--------|--------|--------|--------|
| Row 1  | 0.5588 | 0.0166 | 0.5262 | 0.5914 | 0.5255 | 0.5917 |
| Line 2 | 0.7481 | 0.0106 | 0.7273 | 0.7688 | 0.7266 | 0.7687 |
| Total  | 0.6825 | 0.0092 | 0.6645 | 0.7004 | 0.6641 | 0.7004 |

Difference-0.1893 0.0197-0.2279-0.1507

Row 1-Row 2 Differences

Sample size = 2576



Use of concomitant Table 5-3 anticoagulants and antiplatelet agents and proton-pump inhibitors

FREQ Procedure

Tables: ADAP\_vs\_NADAP\* PPIs

ADAP\_vs\_NADAP PPI

Power |

Percent of rows

Percent of columns | +|-| Total

|       | +     | -     | Total |
|-------|-------|-------|-------|
| 1     | 2622  | 2278  | 4900  |
|       | 53.51 | 46.49 |       |
|       | 86.08 | 64.40 |       |
| 2     | 424   | 1259  | 1683  |
|       | 25.19 | 74.81 |       |
|       | 13.92 | 35.60 |       |
| Total | 3046  | 3537  | 6583  |

ADAP\_vs\_NADAP \* PPI statistic

Statistics Degree of Freedom p-value

Chi-square value 1 404.0513 <. 0001

Likelihood ratio chi-square value 1 420.7200 <. 0001

Continuity corrected chi-square 1 402.9131 <. 0001

Mantel-Haenszel chi square 1 403.9899 <. 0001

Phi factor 0.2477

Concordance factor 0.2405

Cramer's V statistic 0.2477

Fisher's exact test

---

Cell (1,1) power (F) 2622

Left side Pr  $\leq$  F 1.0000

Right side Pr  $\geq$  F <. 0001

Probability of table (P) <. 0001

Both sides Pr  $\leq$  P <. 0001

Use of concomitant Table 5-3 anticoagulants and antiplatelet agents and proton-pump inhibitors

FREQ Procedure

ADAP\_vs\_NADAP \* PPI statistic

Column 1 Risk Estimates

(asymptotic) 95% (accurate) 95%

Risk ASE confidence interval confidence limits

---

|        |        |        |        |        |        |        |
|--------|--------|--------|--------|--------|--------|--------|
| Row 1  | 0.5351 | 0.0071 | 0.5211 | 0.5491 | 0.5210 | 0.5491 |
| Line 2 | 0.2519 | 0.0106 | 0.2312 | 0.2727 | 0.2313 | 0.2734 |
| Total  | 0.4627 | 0.0061 | 0.4507 | 0.4748 | 0.4506 | 0.4748 |

Difference 0.2832 0.0128 0.2582 0.3082

Row 1-Row 2 Differences

Column 2 Risk estimates

(asymptotic) 95% (accurate) 95%

Risk ASE confidence interval confidence limits

---

|        |        |        |        |        |        |        |
|--------|--------|--------|--------|--------|--------|--------|
| Row 1  | 0.4649 | 0.0071 | 0.4509 | 0.4789 | 0.4509 | 0.4790 |
| Line 2 | 0.7481 | 0.0106 | 0.7273 | 0.7688 | 0.7266 | 0.7687 |
| Total  | 0.5373 | 0.0061 | 0.5252 | 0.5493 | 0.5252 | 0.5494 |

Difference-0.2832 0.0128-0.3082-0.2582

Row 1-Row 2 Differences

Sample size = 6583
