# Supplementary material for: Current status of proton pump inhibitor use in Japanese elderly patients with non-valvular atrial fibrillation: A subanalysis of the ANAFIE Registry
Source: PubMed Central journal article supplement (PMC7644054; doi:10.1371/journal.pone.0240859), 2020-11-05
Supplement: pone.0240859.s006.pdf [file pone.0240859.s006.pdf]

Case composition diagram from the entire Figure 1-1 population to the enrolled population and the analysis population by the presence or absence of proton-pump inhibitors

FREQ Procedure

|       |       | Cumulative           |                  |        |
|-------|-------|----------------------|------------------|--------|
|       |       | Percent of ALL power | Percent of power |        |
| <hr/> |       |                      |                  |        |
| 1     | 33278 | 100.00               | 33278            | 100.00 |

Case composition diagram from the entire Figure 1-1 population to the enrolled population and the analysis population by the presence or absence of proton-pump inhibitors

FREQ Procedure

Table : ALL \* C345

ALL C345

Power |

Percent |

Percent of rows

Percentage of columns | 0 | 1 | Sum

|       | 0      | 1      | Sum    |
|-------|--------|--------|--------|
| 1     | 33115  | 163    | 33278  |
|       | 99.51  | 0.49   | 100.00 |
|       | 99.51  | 0.49   |        |
|       | 100.00 | 100.00 |        |
| Total | 33115  | 163    | 33278  |
|       | 99.51  | 0.49   | 100.00 |

Case composition diagram from the entire Figure 1-1 population to the enrolled population and the analysis population by the presence or absence of proton-pump inhibitors

FREQ Procedure

Table : ALL \* C3

ALL C3(Other Criteria 3)

Power |

Percent |

Percent of rows

Percent of columns | None | With | Total

|       | None   | With   | Total  |
|-------|--------|--------|--------|
| 1     | 33202  | 76     | 33278  |
|       | 99.77  | 0.23   | 100.00 |
|       | 99.77  | 0.23   |        |
|       | 100.00 | 100.00 |        |
| Total | 33202  | 76     | 33278  |
|       | 99.77  | 0.23   | 100.00 |

Case composition diagram from the entire Figure 1-1 population to the enrolled population and the analysis population by the presence or absence of proton-pump inhibitors

FREQ Procedure

Table : ALL \* C4

ALL C4(Other Criteria 4)

Power |

Percent |

Percent of rows

Percent of columns | None | With | Total

|       | None   | With   | Total  |
|-------|--------|--------|--------|
| 1     | 33193  | 85     | 33278  |
|       | 99.74  | 0.26   | 100.00 |
|       | 99.74  | 0.26   |        |
|       | 100.00 | 100.00 |        |
| Total | 33193  | 85     | 33278  |
|       | 99.74  | 0.26   | 100.00 |

Case composition diagram from the entire Figure 1-1 population to the enrolled population and the analysis population by the presence or absence of proton-pump inhibitors

FREQ Procedure

Table : ALL \* C5

ALL C5(Other Criteria 5)

Power |

Percent |

Percent of rows

Percent of columns | None | With | Total

|       | None   | With   | Total  |
|-------|--------|--------|--------|
| 1     | 33276  | 2      | 33278  |
|       | 99.99  | 0.01   | 100.00 |
|       | 99.99  | 0.01   |        |
|       | 100.00 | 100.00 |        |
| Total | 33276  | 2      | 33278  |
|       | 99.99  | 0.01   | 100.00 |

Case composition diagram from the entire Figure 1-1 population to the enrolled population and the analysis population by the presence or absence of proton-pump inhibitors

FREQ Procedure

Table: ALL \* \_AD\_FLAG

ALL \_AD\_FLAG

Power |

Percent |

Percent of rows

Percent of columns | 1 | Total

|           |        |        |  |
|-----------|--------|--------|--|
| _____+    |        | _____+ |  |
| 1         | 389    | 389    |  |
|           | 100.00 | 100.00 |  |
|           | 100.00 |        |  |
|           | 100.00 |        |  |
| _____+    |        | _____+ |  |
| Total 389 | 389    |        |  |
|           | 100.00 | 100.00 |  |

Frequency of missing values = 32726

Case composition diagram from the entire Figure 1-1 population to the enrolled population and the analysis population by the presence or absence of proton-pump inhibitors

FREQ Procedure

Table : ALL \* A1

ALL A1(Inclusion Criteria 1)

Power |

Percent |

Percent of rows

Percent of columns | None | With | Total

|       | None   | With   | Total  |
|-------|--------|--------|--------|
| 1     | 33088  | 27     | 33115  |
|       | 99.92  | 0.08   | 100.00 |
|       | 99.92  | 0.08   |        |
|       | 100.00 | 100.00 |        |
| Total | 33088  | 27     | 33115  |
|       | 99.92  | 0.08   | 100.00 |

Case composition diagram from the entire Figure 1-1 population to the enrolled population and the analysis population by the presence or absence of proton-pump inhibitors

FREQ Procedure

Table : ALL \* A2

ALL

A2(Inclusion Criteria 2)

Power |

Percent |

Percent of rows

Percent of columns | None | Total

|       |       | +      |        | + |
|-------|-------|--------|--------|---|
|       | 1     | 33115  | 33115  |   |
|       |       | 100.00 | 100.00 |   |
|       |       | 100.00 |        |   |
|       |       | 100.00 |        |   |
|       |       | +      |        | + |
| Total | 33115 | 33115  |        |   |
|       |       | 100.00 | 100.00 |   |



Case composition diagram from the entire Figure 1-1 population to the enrolled population and the analysis population by the presence or absence of proton-pump inhibitors

FREQ Procedure

Table : ALL \* A3

ALL A3(Inclusion Criteria 3)

Power |

Percent |

Percent of rows

Percent of columns | None | With | Total

|       | None   | With   | Total  |
|-------|--------|--------|--------|
| 1     | 33105  | 10     | 33115  |
|       | 99.97  | 0.03   | 100.00 |
|       | 99.97  | 0.03   |        |
|       | 100.00 | 100.00 |        |
| Total | 33105  | 10     | 33115  |
|       | 99.97  | 0.03   | 100.00 |

Case composition diagram from the entire Figure 1-1 population to the enrolled population and the analysis population by the presence or absence of proton-pump inhibitors

FREQ Procedure

Table : ALL \* A4

ALL A4(Inclusion Criteria 4)

Power |

Percent |

Percent of rows

Percent of columns | None | With | Total

|       | None   | With   | Total  |
|-------|--------|--------|--------|
| 1     | 33044  | 71     | 33115  |
|       | 99.79  | 0.21   | 100.00 |
|       | 99.79  | 0.21   |        |
|       | 100.00 | 100.00 |        |
| Total | 33044  | 71     | 33115  |
|       | 99.79  | 0.21   | 100.00 |

Case composition diagram from the entire Figure 1-1 population to the enrolled population and the analysis population by the presence or absence of proton-pump inhibitors

FREQ Procedure

Table : ALL \* B1

ALL B1(Exclusion Criteria 1)

Power |

Percent |

Percent of rows

Percent of columns | None | With | Total

|       | None   | With   | Total  |
|-------|--------|--------|--------|
| 1     | 33104  | 11     | 33115  |
|       | 99.97  | 0.03   | 100.00 |
|       | 99.97  | 0.03   |        |
|       | 100.00 | 100.00 |        |
| Total | 33104  | 11     | 33115  |
|       | 99.97  | 0.03   | 100.00 |

Case composition diagram from the entire Figure 1-1 population to the enrolled population and the analysis population by the presence or absence of proton-pump inhibitors

FREQ Procedure

Table : ALL \* B2

ALL B2(Exclusion Criteria 2)

Power |

Percent |

Percent of rows

Percent of columns | None | With | Total

|       | None   | With   | Total  |
|-------|--------|--------|--------|
| 1     | 33111  | 4      | 33115  |
|       | 99.99  | 0.01   | 100.00 |
|       | 99.99  | 0.01   |        |
|       | 100.00 | 100.00 |        |
| Total | 33111  | 4      | 33115  |
|       | 99.99  | 0.01   | 100.00 |

Case composition diagram from the entire Figure 1-1 population to the enrolled population and the analysis population by the presence or absence of proton-pump inhibitors

FREQ Procedure

Table : ALL \* B3

ALL B3(Exclusion Criteria 3)

Power |

Percent |

Percent of rows

Percent of columns | None | With | Total

|       | None   | With   | Total  |
|-------|--------|--------|--------|
| 1     | 33098  | 17     | 33115  |
|       | 99.95  | 0.05   | 100.00 |
|       | 99.95  | 0.05   |        |
|       | 100.00 | 100.00 |        |
| Total | 33098  | 17     | 33115  |
|       | 99.95  | 0.05   | 100.00 |

Case composition diagram from the entire Figure 1-1 population to the enrolled population and the analysis population by the presence or absence of proton-pump inhibitors

FREQ Procedure

Table : ALL \* B4

ALL B4(Exclusion Criteria 4)

Power |

Percent |

Percent of rows

Percent of columns | None | With | Total

|       | None   | With   | Total  |
|-------|--------|--------|--------|
| 1     | 33112  | 3      | 33115  |
|       | 99.99  | 0.01   | 100.00 |
|       | 99.99  | 0.01   |        |
|       | 100.00 | 100.00 |        |
| Total | 33112  | 3      | 33115  |
|       | 99.99  | 0.01   | 100.00 |

Case composition diagram from the entire Figure 1-1 population to the enrolled population and the analysis population by the presence or absence of proton-pump inhibitors

FREQ Procedure

Table : ALL \* B5

ALL B5(Exclusion Criteria 5)

Power |

Percent |

Percent of rows

Percent of columns | None | With | Total

|       | None   | With   | Total  |
|-------|--------|--------|--------|
| 1     | 33114  | 1      | 33115  |
|       | 100.00 | 0.00   | 100.00 |
|       | 100.00 | 0.00   |        |
|       | 100.00 | 100.00 |        |
| Total | 33114  | 1      | 33115  |
|       | 100.00 | 0.00   | 100.00 |

Case composition diagram from the entire Figure 1-1 population to the enrolled population and the analysis population by the presence or absence of proton-pump inhibitors

FREQ Procedure

Table : ALL \* B6

ALL B6(Exclusion Criteria 6)

Power |

Percent |

Percent of rows

Percent of columns | None | With | Total

|       | None   | With   | Total  |
|-------|--------|--------|--------|
| 1     | 33102  | 13     | 33115  |
|       | 99.96  | 0.04   | 100.00 |
|       | 99.96  | 0.04   |        |
|       | 100.00 | 100.00 |        |
| Total | 33102  | 13     | 33115  |
|       | 99.96  | 0.04   | 100.00 |



Case composition diagram from the entire Figure 1-1 population to the enrolled population and the analysis population by the presence or absence of proton-pump inhibitors

FREQ Procedure

Table : ALL \* C1

ALL C1(Other Criteria 1)

Power |

Percent |

Percent of rows

Percent of columns | None | With | Total

|       | None   | With   | Total  |
|-------|--------|--------|--------|
| 1     | 32883  | 232    | 33115  |
|       | 99.30  | 0.70   | 100.00 |
|       | 99.30  | 0.70   |        |
|       | 100.00 | 100.00 |        |
| Total | 32883  | 232    | 33115  |
|       | 99.30  | 0.70   | 100.00 |

Case composition diagram from the entire Figure 1-1 population to the enrolled population and the analysis population by the presence or absence of proton-pump inhibitors

FREQ Procedure

Table : ALL \* C2

ALL

C2(Other Criteria 2)

Power |

Percent |

Percent of rows

Percent of columns | None | Total

|       |       | +      |        | + |
|-------|-------|--------|--------|---|
|       | 1     | 33115  | 33115  |   |
|       |       | 100.00 | 100.00 |   |
|       |       | 100.00 |        |   |
|       |       | 100.00 |        |   |
|       |       | +      |        | + |
| Total | 33115 | 33115  |        |   |
|       |       | 100.00 | 100.00 |   |

Case composition diagram from the entire Figure 1-1 population to the enrolled population and the analysis population by the presence or absence of proton-pump inhibitors

FREQ Procedure

Table : ALL \* fl

ALL fl

Power |

Percent |

Percent of rows

Percent of columns | 1 | Total

|       |        |        |
|-------|--------|--------|
|       | +      | +      |
| 1     | 32726  | 32726  |
|       | 100.00 | 100.00 |
|       | 100.00 |        |
|       | 100.00 |        |
|       | +      | +      |
| Total | 32726  | 32726  |
|       | 100.00 | 100.00 |

Frequency of missing values = 552

Case composition diagram from the entire Figure 1-1 population to the enrolled population and the analysis population by the presence or absence of proton-pump inhibitors

FREQ Procedure

Table : ALL \* p1

ALL p1

Power |

Percent |

Percent of rows

Percentage of columns | 0| 1| Sum

|       | 0      | 1      | Sum    |
|-------|--------|--------|--------|
| 1     | 20745  | 11981  | 32726  |
|       | 63.39  | 36.61  | 100.00 |
|       | 63.39  | 36.61  |        |
|       | 100.00 | 100.00 |        |
| Total | 20745  | 11981  | 32726  |
|       | 63.39  | 36.61  | 100.00 |

Case composition diagram from the entire Figure 1-1 population to the enrolled population and the analysis population by the presence or absence of proton-pump inhibitors

FREQ Procedure

Table : ALL \* p2

ALL p2

Power |

Percent |

Percent of rows

Percentage of columns | 0| 1| Sum

|       | 0      | 1      | Sum    |
|-------|--------|--------|--------|
| 1     | 12217  | 20509  | 32726  |
|       | 37.33  | 62.67  | 100.00 |
|       | 37.33  | 62.67  |        |
|       | 100.00 | 100.00 |        |
| Total | 12217  | 20509  | 32726  |
|       | 37.33  | 62.67  | 100.00 |

Case composition diagram from the entire Figure 1-1 population to the enrolled population and the analysis population by the presence or absence of proton-pump inhibitors

FREQ Procedure

Table : ALL \* p3

ALL p3

Power |

Percent |

Percent of rows

Percentage of columns | 0| 1| Sum

|       | 0      | 1      | Sum    |
|-------|--------|--------|--------|
| 1     | 32490  | 236    | 32726  |
|       | 99.28  | 0.72   | 100.00 |
|       | 99.28  | 0.72   |        |
|       | 100.00 | 100.00 |        |
| Total | 32490  | 236    | 32726  |
|       | 99.28  | 0.72   | 100.00 |

Distributions of patients with and without Table 1-2 proton-pump inhibitors

FREQ Procedure

Cumulative

Percent of ALL power Percent of power

|   | ALL power | Percent of power | Cumulative ALL power | Cumulative Percent of power |
|---|-----------|------------------|----------------------|-----------------------------|
| 1 | 33278     | 100.00           | 33278                | 100.00                      |

Distributions of patients with and without Table 1-2 proton-pump inhibitors

FREQ Procedure

Table : ALL \* fl

ALL fl

Power |

Percent |

Percent of rows

Percent of columns | 1 | Total

|                    | 1      | Total  |
|--------------------|--------|--------|
| Percent of rows    | 100.00 | 100.00 |
| Percent of columns | 100.00 | 100.00 |
| Total              | 32726  | 32726  |

Frequency of missing values = 552

Distributions of patients with and without Table 1-2 proton-pump inhibitors

FREQ Procedure

Table : ALL \* p1

ALL p1

Power |

Percent |

Percent of rows

Percentage of columns | 0 | 1 | Sum

|       | 0      | 1      | Sum    |
|-------|--------|--------|--------|
| 1     | 20745  | 11981  | 32726  |
|       | 63.39  | 36.61  | 100.00 |
|       | 63.39  | 36.61  |        |
|       | 100.00 | 100.00 |        |
| Total | 20745  | 11981  | 32726  |
|       | 63.39  | 36.61  | 100.00 |



Distributions of patients with and without Table 1-2 proton-pump inhibitors

FREQ Procedure

Table : ALL \* p2

ALL p2

Power |

Percent |

Percent of rows

Percentage of columns | 0 | 1 | Sum

|       | 0      | 1      | Sum    |
|-------|--------|--------|--------|
| 1     | 12217  | 20509  | 32726  |
|       | 37.33  | 62.67  | 100.00 |
|       | 37.33  | 62.67  |        |
|       | 100.00 | 100.00 |        |
| Total | 12217  | 20509  | 32726  |
|       | 37.33  | 62.67  | 100.00 |

Distributions of patients with and without Table 1-2 proton-pump inhibitors

FREQ Procedure

Table : ALL \* p3

ALL p3

Power |

Percent |

Percent of rows

Percentage of columns | 0| 1| Sum

|       |   |        |   |        |   |        |
|-------|---|--------|---|--------|---|--------|
|       | + |        | + |        | + |        |
| 1     |   | 32490  |   | 236    |   | 32726  |
|       |   | 99.28  |   | 0.72   |   | 100.00 |
|       |   | 99.28  |   | 0.72   |   |        |
|       |   | 100.00 |   | 100.00 |   |        |
|       | + |        | + |        | + |        |
| Total |   | 32490  |   | 236    |   | 32726  |
|       |   | 99.28  |   | 0.72   |   | 100.00 |

Table 2-1 demographics according to the presence or absence of proton-pump inhibitors

FREQ Procedure

Cumulative

Percent of ALL power Percent of power

|   |       |        |       |        |
|---|-------|--------|-------|--------|
| 1 | 32490 | 100.00 | 32490 | 100.00 |
|---|-------|--------|-------|--------|

Tables: ALL\* SEXN

ALL SEXN(Sex (N))

Power |

Percent |

Percent of rows

Percentage of columns | 0 | 1 | Sum

|       |   |        |   |        |   |        |
|-------|---|--------|---|--------|---|--------|
|       | + |        | + |        | + |        |
| 1     |   | 18601  |   | 13889  |   | 32490  |
|       |   | 57.25  |   | 42.75  |   | 100.00 |
|       |   | 57.25  |   | 42.75  |   |        |
|       |   | 100.00 |   | 100.00 |   |        |
|       | + |        | + |        | + |        |
| Total |   | 18601  |   | 13889  |   | 32490  |
|       |   | 57.25  |   | 42.75  |   | 100.00 |

Table 2-1 demographics according to the presence or absence of proton-pump inhibitors

FREQ Procedure

|                      |       |                  | Cumulative |        |
|----------------------|-------|------------------|------------|--------|
| Percent of ALL power |       | Percent of power |            |        |
| 1                    | 32490 | 100.00           | 32490      | 100.00 |

Tables: ALL\* AGECC

ALL AGECC(Age Category)

Power |

Percent |

Percent of rows

Percentage of column |75 years and older |80 years and older |85 years and older |90 years and older |95 years and older | 100 years and older |Total

|Ages under 80|Ages under 85|Ages under 90|Ages under 95|Ages under 100 Ages under |Above|

|||| Full ||||

|       | +      | +      | +      | +      | +      | +      | +      | + |
|-------|--------|--------|--------|--------|--------|--------|--------|---|
| 1     | 12967  | 11022  | 6352   | 1864   | 274    | 11     | 32490  |   |
|       | 39.91  | 33.92  | 19.55  | 5.74   | 0.84   | 0.03   | 100.00 |   |
|       | 39.91  | 33.92  | 19.55  | 5.74   | 0.84   | 0.03   |        |   |
|       | 100.00 | 100.00 | 100.00 | 100.00 | 100.00 | 100.00 |        |   |
|       | +      | +      | +      | +      | +      | +      | +      | + |
| Total | 12967  | 11022  | 6352   | 1864   | 274    | 11     | 32490  |   |
|       | 39.91  | 33.92  | 19.55  | 5.74   | 0.84   | 0.03   | 100.00 |   |

Table 2-1 demographics according to the presence or absence of proton-pump inhibitors

FREQ Procedure

|                      |       | Cumulative       |              |
|----------------------|-------|------------------|--------------|
| Percent of ALL power |       | Percent of power |              |
| 1                    | 32490 | 100.00           | 32490 100.00 |

Table: ALL \* WGTC\_BL

ALL

WGTC\_BL(Weight Category at Informed Conccent)

Power |

Percent |

Percent of rows

Percent of column |less than 60 kg|more than 60 kg|unknown|total

|                                  |
|----------------------------------|
| +_____+_____+_____+              |
| 1   17005   12638   2847   32490 |
| 52.34   38.90   8.76   100.00    |
| 52.34   38.90   8.76             |
| 100.00   100.00   100.00         |
| +_____+_____+_____+              |
| Total 17005 12638 2847 32490     |
| 52.34 38.90 8.76 100.00          |

Table 2-1 demographics according to the presence or absence of proton-pump inhibitors

FREQ Procedure

|                      |       |                  | Cumulative |        |
|----------------------|-------|------------------|------------|--------|
| Percent of ALL power |       | Percent of power |            |        |
| 1                    | 32490 | 100.00           | 32490      | 100.00 |

Table : ALL \* BMIC\_BL

ALL BMIC\_BL(BMI Category at Informed Consent)

| Power           |          |          |          |        |        |
|-----------------|----------|----------|----------|--------|--------|
| Percent         |          |          |          |        |        |
| Percent of rows |          |          |          |        |        |
| Column percent  | 18.5kg/m | 18.5kg/m | 25.0kg/m | 9      | Total  |
| <2  □2> 25.2    |          |          |          |        |        |
| 0 kg/m2 un      |          |          |          |        |        |
| Full            |          |          |          |        |        |
|                 | +        | +        | +        | +      | +      |
| 1               | 2077     | 17747    | 8120     | 4546   | 32490  |
|                 | 6.39     | 54.62    | 24.99    | 13.99  | 100.00 |
|                 | 6.39     | 54.62    | 24.99    | 13.99  |        |
|                 | 100.00   | 100.00   | 100.00   | 100.00 |        |
|                 | +        | +        | +        | +      | +      |
| Total           | 2077     | 17747    | 8120     | 4546   | 32490  |
|                 | 6.39     | 54.62    | 24.99    | 13.99  | 100.00 |

Table 2-1 demographics according to the presence or absence of proton-pump inhibitors

FREQ Procedure

|                      |       |                  | Cumulative |        |
|----------------------|-------|------------------|------------|--------|
| Percent of ALL power |       | Percent of power |            |        |
| 1                    | 32490 | 100.00           | 32490      | 100.00 |

Table : ALL \* SMK1

ALL SMK1(Smoking Status Part 1)

| Power             |         |         |        |         |        |
|-------------------|---------|---------|--------|---------|--------|
| Percent           |         |         |        |         |        |
| Percent of rows   |         |         |        |         |        |
| Percent of column | Smoking | Stopped | Smoked | Unknown | Total  |
|                   | No      |         |        |         |        |
|                   | +       | +       | +      | +       | +      |
| 1                 | 16252   | 9963    | 1244   | 5031    | 32490  |
|                   | 50.02   | 30.66   | 3.83   | 15.48   | 100.00 |
|                   | 50.02   | 30.66   | 3.83   | 15.48   |        |
|                   | 100.00  | 100.00  | 100.00 | 100.00  |        |
|                   | +       | +       | +      | +       | +      |
| Total             | 16252   | 9963    | 1244   | 5031    | 32490  |
|                   | 50.02   | 30.66   | 3.83   | 15.48   | 100.00 |

Table 2-1 demographics according to the presence or absence of proton-pump inhibitors

FREQ Procedure

|                      |       | Cumulative       |              |
|----------------------|-------|------------------|--------------|
| Percent of ALL power |       | Percent of power |              |
| 1                    | 32490 | 100.00           | 32490 100.00 |

Table: ALL \* DRK

ALL DRK(Drinking Habit)

| Power                 |           |              |              |         |        |
|-----------------------|-----------|--------------|--------------|---------|--------|
| Percent               |           |              |              |         |        |
| Percent of rows       |           |              |              |         |        |
| Percentage of columns | routinely | occasionally | completely   | unknown | total  |
|                       | Drink     | Drink        | Do not drink |         |        |
|                       | +         | +            | +            | +       | +      |
| 1                     | 5804      | 5902         | 15369        | 5415    | 32490  |
|                       | 17.86     | 18.17        | 47.30        | 16.67   | 100.00 |
|                       | 17.86     | 18.17        | 47.30        | 16.67   |        |
|                       | 100.00    | 100.00       | 100.00       | 100.00  |        |
|                       | +         | +            | +            | +       | +      |
| Total                 | 5804      | 5902         | 15369        | 5415    | 32490  |
|                       | 17.86     | 18.17        | 47.30        | 16.67   | 100.00 |



Table 2-1 demographics according to the presence or absence of proton-pump inhibitors

FREQ Procedure

|                      |       | Cumulative       |              |
|----------------------|-------|------------------|--------------|
| Percent of ALL power |       | Percent of power |              |
| 1                    | 11981 | 100.00           | 11981 100.00 |

Tables: ALL\* SEXN

ALL SEXN(Sex (N))

| Power                               |        |        |        |
|-------------------------------------|--------|--------|--------|
| Percent                             |        |        |        |
| Percent of rows                     |        |        |        |
| Percentage of columns   0   1   Sum |        |        |        |
|                                     | +      | +      | +      |
| 1                                   | 6561   | 5420   | 11981  |
|                                     | 54.76  | 45.24  | 100.00 |
|                                     | 54.76  | 45.24  |        |
|                                     | 100.00 | 100.00 |        |
|                                     | +      | +      | +      |
| Total                               | 6561   | 5420   | 11981  |
|                                     | 54.76  | 45.24  | 100.00 |

Table 2-1 demographics according to the presence or absence of proton-pump inhibitors

FREQ Procedure

|   |       | Cumulative           |                  |        |
|---|-------|----------------------|------------------|--------|
|   |       | Percent of ALL power | Percent of power |        |
| 1 | 11981 | 100.00               | 11981            | 100.00 |

Tables: ALL\* AGECC

ALL AGECC(Age Category)

Power |

Percent |

Percent of rows

Percentage of column |75 years and older |80 years and older |85 years and older |90 years and older |95 years and older | 100 years and older |Total

|Ages under 80|Ages under 85|Ages under 90|Ages under 95|Ages under 100 Ages under |Above|

| Full  |        |        |        |        |        |        |        |   |
|-------|--------|--------|--------|--------|--------|--------|--------|---|
|       | +      | +      | +      | +      | +      | +      | +      | + |
| 1     | 4559   | 4061   | 2481   | 767    | 110    | 3      | 11981  |   |
|       | 38.05  | 33.90  | 20.71  | 6.40   | 0.92   | 0.03   | 100.00 |   |
|       | 38.05  | 33.90  | 20.71  | 6.40   | 0.92   | 0.03   |        |   |
|       | 100.00 | 100.00 | 100.00 | 100.00 | 100.00 | 100.00 |        |   |
| Total | 4559   | 4061   | 2481   | 767    | 110    | 3      | 11981  |   |
|       | 38.05  | 33.90  | 20.71  | 6.40   | 0.92   | 0.03   | 100.00 |   |

Table 2-1 demographics according to the presence or absence of proton-pump inhibitors

FREQ Procedure

|                      |       | Cumulative       |              |
|----------------------|-------|------------------|--------------|
| Percent of ALL power |       | Percent of power |              |
| 1                    | 11981 | 100.00           | 11981 100.00 |

Table: ALL \* WGTC\_BL

ALL

WGTC\_BL(Weight Category at Informed Conccent)

Power |

Percent |

Percent of rows

Percent of column |less than 60 kg|more than 60 kg|unknown|total

|       |        |        |        |        |  |
|-------|--------|--------|--------|--------|--|
|       | +      | +      | +      | +      |  |
| 1     | 6543   | 4503   | 935    | 11981  |  |
|       | 54.61  | 37.58  | 7.80   | 100.00 |  |
|       | 54.61  | 37.58  | 7.80   |        |  |
|       | 100.00 | 100.00 | 100.00 |        |  |
|       | +      | +      | +      | +      |  |
| Total | 6543   | 4503   | 935    | 11981  |  |
|       | 54.61  | 37.58  | 7.80   | 100.00 |  |

Table 2-1 demographics according to the presence or absence of proton-pump inhibitors

FREQ Procedure

|                      |       |                  | Cumulative |        |
|----------------------|-------|------------------|------------|--------|
| Percent of ALL power |       | Percent of power |            |        |
| 1                    | 11981 | 100.00           | 11981      | 100.00 |

Table : ALL \* BMIC\_BL

ALL BMIC\_BL(BMI Category at Informed Consent)

| Power           |          |          |          |        |        |
|-----------------|----------|----------|----------|--------|--------|
| Percent         |          |          |          |        |        |
| Percent of rows |          |          |          |        |        |
| Column percent  | 18.5kg/m | 18.5kg/m | 25.0kg/m | 9      | Total  |
| <2  □2>         | 25.2     |          |          |        |        |
| 0 kg/m2 un      |          |          |          |        |        |
| Full            |          |          |          |        |        |
|                 | +        | +        | +        | +      | +      |
| 1               | 805      | 6659     | 3046     | 1471   | 11981  |
|                 | 6.72     | 55.58    | 25.42    | 12.28  | 100.00 |
|                 | 6.72     | 55.58    | 25.42    | 12.28  |        |
|                 | 100.00   | 100.00   | 100.00   | 100.00 |        |
|                 | +        | +        | +        | +      | +      |
| Total           | 805      | 6659     | 3046     | 1471   | 11981  |
|                 | 6.72     | 55.58    | 25.42    | 12.28  | 100.00 |

Table 2-1 demographics according to the presence or absence of proton-pump inhibitors

FREQ Procedure

|                      |       |                  | Cumulative |        |
|----------------------|-------|------------------|------------|--------|
| Percent of ALL power |       | Percent of power |            |        |
| 1                    | 11981 | 100.00           | 11981      | 100.00 |

Table : ALL \* SMK1

ALL SMK1(Smoking Status Part 1)

| Power             |         |         |        |         |        |
|-------------------|---------|---------|--------|---------|--------|
| Percent           |         |         |        |         |        |
| Percent of rows   |         |         |        |         |        |
| Percent of column | Smoking | Stopped | Smoked | Unknown | Total  |
|                   | No      |         |        |         |        |
|                   | +       | +       | +      | +       | +      |
| 1                 | 6084    | 3802    | 452    | 1643    | 11981  |
|                   | 50.78   | 31.73   | 3.77   | 13.71   | 100.00 |
|                   | 50.78   | 31.73   | 3.77   | 13.71   |        |
|                   | 100.00  | 100.00  | 100.00 | 100.00  |        |
|                   | +       | +       | +      | +       | +      |
| Total             | 6084    | 3802    | 452    | 1643    | 11981  |
|                   | 50.78   | 31.73   | 3.77   | 13.71   | 100.00 |

Table 2-1 demographics according to the presence or absence of proton-pump inhibitors

FREQ Procedure

|   |       | Cumulative           |                  |        |
|---|-------|----------------------|------------------|--------|
|   |       | Percent of ALL power | Percent of power |        |
| 1 | 11981 | 100.00               | 11981            | 100.00 |

Table: ALL \* DRK

ALL DRK(Drinking Habit)

| Power                 |           |              |              |         |        |
|-----------------------|-----------|--------------|--------------|---------|--------|
| Percent               |           |              |              |         |        |
| Percent of rows       |           |              |              |         |        |
| Percentage of columns | routinely | occasionally | completely   | unknown | total  |
|                       | Drink     | Drink        | Do not drink |         |        |
|                       | +         | +            | +            | +       | +      |
| 1                     | 1979      | 2067         | 6131         | 1804    | 11981  |
|                       | 16.52     | 17.25        | 51.17        | 15.06   | 100.00 |
|                       | 16.52     | 17.25        | 51.17        | 15.06   |        |
|                       | 100.00    | 100.00       | 100.00       | 100.00  |        |
|                       | +         | +            | +            | +       | +      |
| Total                 | 1979      | 2067         | 6131         | 1804    | 11981  |
|                       | 16.52     | 17.25        | 51.17        | 15.06   | 100.00 |

Table 2-1 demographics according to the presence or absence of proton-pump inhibitors

FREQ Procedure

|                      |       |                  | Cumulative |        |
|----------------------|-------|------------------|------------|--------|
| Percent of ALL power |       | Percent of power |            |        |
| 1                    | 20509 | 100.00           | 20509      | 100.00 |

Tables: ALL\* SEXN

ALL SEXN(Sex (N))

| Power                               |        |        |        |
|-------------------------------------|--------|--------|--------|
| Percent                             |        |        |        |
| Percent of rows                     |        |        |        |
| Percentage of columns   0   1   Sum |        |        |        |
|                                     | +      | +      | +      |
| 1                                   | 12040  | 8469   | 20509  |
|                                     | 58.71  | 41.29  | 100.00 |
|                                     | 58.71  | 41.29  |        |
|                                     | 100.00 | 100.00 |        |
|                                     | +      | +      | +      |
| Total                               | 12040  | 8469   | 20509  |
|                                     | 58.71  | 41.29  | 100.00 |

Table 2-1 demographics according to the presence or absence of proton-pump inhibitors

FREQ Procedure

|                      |       | Cumulative       |              |
|----------------------|-------|------------------|--------------|
| Percent of ALL power |       | Percent of power |              |
| 1                    | 20509 | 100.00           | 20509 100.00 |

Tables: ALL\* AGE C

ALL AGE C(Age Category)

Power |

Percent |

Percent of rows

Percentage of column |75 years and older |80 years and older |85 years and older |90 years and older |95 years and older | 100 years and older |Total

|Ages under 80|Ages under 85|Ages under 90|Ages under 95|Ages under 100 Ages under |Above|

| Full            |        |        |        |        |        |        |        |
|-----------------|--------|--------|--------|--------|--------|--------|--------|
| + + + + + + + + |        |        |        |        |        |        |        |
| 1               | 8408   | 6961   | 3871   | 1097   | 164    | 8      | 20509  |
|                 | 41.00  | 33.94  | 18.87  | 5.35   | 0.80   | 0.04   | 100.00 |
|                 | 41.00  | 33.94  | 18.87  | 5.35   | 0.80   | 0.04   |        |
|                 | 100.00 | 100.00 | 100.00 | 100.00 | 100.00 | 100.00 |        |
| + + + + + + + + |        |        |        |        |        |        |        |
| Total           | 8408   | 6961   | 3871   | 1097   | 164    | 8      | 20509  |
|                 | 41.00  | 33.94  | 18.87  | 5.35   | 0.80   | 0.04   | 100.00 |



Table 2-1 demographics according to the presence or absence of proton-pump inhibitors

FREQ Procedure

|                      |       | Cumulative       |              |
|----------------------|-------|------------------|--------------|
| Percent of ALL power |       | Percent of power |              |
| 1                    | 20509 | 100.00           | 20509 100.00 |

Table: ALL \* WGTC\_BL

ALL

WGTC\_BL(Weight Category at Informed Conccent)

Power |

Percent |

Percent of rows

Percent of column |less than 60 kg|more than 60 kg|unknown|total

|                                 |         |         |         |
|---------------------------------|---------|---------|---------|
| +_____+                         | +_____+ | +_____+ | +_____+ |
| 1   10462   8135   1912   20509 |         |         |         |
| 51.01   39.67   9.32   100.00   |         |         |         |
| 51.01   39.67   9.32            |         |         |         |
| 100.00   100.00   100.00        |         |         |         |
| +_____+                         | +_____+ | +_____+ | +_____+ |
| Total 10462 8135 1912 20509     |         |         |         |
| 51.01 39.67 9.32 100.00         |         |         |         |

Table 2-1 demographics according to the presence or absence of proton-pump inhibitors

FREQ Procedure

|   |       | Cumulative           |                  |        |
|---|-------|----------------------|------------------|--------|
|   |       | Percent of ALL power | Percent of power |        |
| 1 | 20509 | 100.00               | 20509            | 100.00 |

Table : ALL \* BMIC\_BL

ALL BMIC\_BL(BMI Category at Informed Consent)

| Power           |          |          |          |                |
|-----------------|----------|----------|----------|----------------|
| Percent         |          |          |          |                |
| Percent of rows |          |          |          |                |
| Column percent  | 18.5kg/m | 18.5kg/m | 25.0kg/m | 9  Total       |
| < 2  □2> 25. 2  |          |          |          |                |
| 0 kg/m2 un      |          |          |          |                |
| Full            |          |          |          |                |
|                 | +        | +        | +        | +              |
| 1               | 1272     | 11088    | 5074     | 3075   20509   |
|                 | 6.20     | 54.06    | 24.74    | 14.99   100.00 |
|                 | 6.20     | 54.06    | 24.74    | 14.99          |
|                 | 100.00   | 100.00   | 100.00   | 100.00         |
|                 | +        | +        | +        | +              |
| Total           | 1272     | 11088    | 5074     | 3075 20509     |
|                 | 6.20     | 54.06    | 24.74    | 14.99 100.00   |

Table 2-1 demographics according to the presence or absence of proton-pump inhibitors

FREQ Procedure

|   |       | Cumulative           |                  |
|---|-------|----------------------|------------------|
|   |       | Percent of ALL power | Percent of power |
| 1 | 20509 | 100.00               | 20509 100.00     |

Table : ALL \* SMK1

ALL SMK1(Smoking Status Part 1)

| Power             |         |         |        |         |        |
|-------------------|---------|---------|--------|---------|--------|
| Percent           |         |         |        |         |        |
| Percent of rows   |         |         |        |         |        |
| Percent of column | Smoking | Stopped | Smoked | Unknown | Total  |
|                   | No      |         |        |         |        |
|                   | +       | +       | +      | +       | +      |
| 1                 | 10168   | 6161    | 792    | 3388    | 20509  |
|                   | 49.58   | 30.04   | 3.86   | 16.52   | 100.00 |
|                   | 49.58   | 30.04   | 3.86   | 16.52   |        |
|                   | 100.00  | 100.00  | 100.00 | 100.00  |        |
|                   | +       | +       | +      | +       | +      |
| Total             | 10168   | 6161    | 792    | 3388    | 20509  |
|                   | 49.58   | 30.04   | 3.86   | 16.52   | 100.00 |

Table 2-1 demographics according to the presence or absence of proton-pump inhibitors

FREQ Procedure

|                      |       | Cumulative       |              |
|----------------------|-------|------------------|--------------|
| Percent of ALL power |       | Percent of power |              |
| 1                    | 20509 | 100.00           | 20509 100.00 |

Table: ALL \* DRK

ALL DRK(Drinking Habit)

Power |

Percent |

Percent of rows

Percentage of columns | routinely | occasionally | completely | unknown | total

|       | Drink  | Drink  | Do not drink |        |        |
|-------|--------|--------|--------------|--------|--------|
|       | +      | +      | +            | +      | +      |
| 1     | 3825   | 3835   | 9238         | 3611   | 20509  |
|       | 18.65  | 18.70  | 45.04        | 17.61  | 100.00 |
|       | 18.65  | 18.70  | 45.04        | 17.61  |        |
|       | 100.00 | 100.00 | 100.00       | 100.00 |        |
|       | +      | +      | +            | +      | +      |
| Total | 3825   | 3835   | 9238         | 3611   | 20509  |
|       | 18.65  | 18.70  | 45.04        | 17.61  | 100.00 |

Table 2-1 demographics according to the presence or absence of proton-pump inhibitors

UNIVARIATE Procedure

Variable: AGEs (Age at First Drug Intake)

Moment

Total of 32490 for N 32490 weight variable

Mean 81.472607 total 2647045

Standard deviation 4.82078117 variance 23.2399311

Skewness 0.64098604 kurtosis-0.1355405

Unmodified square sum 216416699 modified square sum 755042.12

Coefficient of variation 5.9170577 standard error of the mean 0.026745

Basic statistics

Positional variation

Mean 81.47261 standard deviation 4.82078

Median 81.00000 variance 23.23993

Mode 75.00000 Range 28.00000

Interquartile range 8.00000

Test for position H0:  $\mu_0=0$

Test-Statistics-----p Value

Student's t-test t 3046.275 Pr > |t| <. 0001

Sign test M 16245 Pr >= |M| <. 0001

Signed rank test S 2. 6391E8 Pr >= |S| <. 0001

Quartile (Definition 5)

Level quantile

100% max. 103

99% 94

95% 90

90% 88

75% Q3 85

50% median 81

25% Q1 77

10% 76

5% 75

1% 75

0% minimum 75

Table 2-1 demographics according to the presence or absence of proton-pump inhibitors

UNIVARIATE Procedure

Variable: AGEs (Age at First Drug Intake)

Extreme value

--- Minimum value---Maximum value---

Value Obs Value Obs

|    |       |     |       |
|----|-------|-----|-------|
| 75 | 32490 | 101 | 5225  |
| 75 | 32470 | 101 | 23819 |
| 75 | 32456 | 102 | 5655  |
| 75 | 32444 | 102 | 29497 |
| 75 | 32443 | 103 | 7812  |

Table 2-1 demographics according to the presence or absence of proton-pump inhibitors

UNIVARIATE Procedure

Variable: HGT\_BL (Height at Informed Consent)

Moment

Total of 28210 for N 28210 weight variable

Mean 157.226389 total 4435356.43

Standard deviation 9.50007446 variance 90.2514148

Skewness-0.1810018 kurtosis-0.3935688

Unmodified square sum 699900977 modified square sum 2545902.16

Coefficient of variation 6.04229006 standard error of the mean 0.05656209

Basic statistics

Positional variation

Mean 157.2264 standard deviation 9.50007

Median 158.0000 variance 90.25141

Mode 160.0000 Range 99.90000

Interquartile range 14.60000

Test for position H0:  $\mu_0=0$

Test-Statistics-----p Value

Student's t-test t 2779.713 Pr > |t| <. 0001

Sign test M 14105 Pr >= |M| <. 0001

Signed rank test S 1. 9896E8 Pr >= |S| <. 0001

Quartile (Definition 5)



## Level quantile

|            |       |
|------------|-------|
| 100% max.  | 195.9 |
| 99%        | 176.3 |
| 95%        | 172.0 |
| 90%        | 169.0 |
| 75% Q3     | 164.6 |
| 50% median | 158.0 |
| 25% Q1     | 150.0 |
| 10%        | 145.0 |
| 5%         | 141.5 |
| 1%         | 135.7 |
| 0% minimum | 96.0  |

Table 2-1 demographics according to the presence or absence of proton-pump inhibitors

UNIVARIATE Procedure

Variable: HGT\_BL (Height at Informed Consent)

Extreme value

---- Minimum value----Maximum value----

Value Obs Value Obs

|     |       |       |       |
|-----|-------|-------|-------|
| 96  | 2035  | 184.6 | 702   |
| 120 | 29891 | 185.5 | 31487 |
| 120 | 23794 | 188.0 | 29308 |
| 120 | 23497 | 193.0 | 15473 |
| 120 | 12920 | 195.9 | 24973 |

Table 2-1 demographics according to the presence or absence of proton-pump inhibitors

UNIVARIATE Procedure

Variable: WGT\_BL (Weight at Informed Consent)

Moment

Total of 29643 for N 29643 weight variable

Mean 57.804885 total 1713510.31

Standard deviation 11.1616947 variance 124.583428

Skewness 0.30021343 kurtosis 0.2312245

Unmodified square sum 102742174 modified square sum 3692901.96

Coefficient of variation 19.3092573 standard error of the mean 0.06482896

Basic statistics

Positional variation

Mean 57.80489 standard deviation 11.16169

Median 57.60000 variance 124.58343

Most frequent value 60.00000 range 122.60000

Interquartile range 15.00000

Test for position H0:  $\mu_0=0$

Test-Statistics-----p Value

Student's t-test t 891.6522 Pr > |t| <. 0001

Sign test M 14821.5 Pr >= |M| <. 0001

Signed rank test S 2. 1968E8 Pr >= |S| <. 0001

Quartile (Definition 5)

## Level quantile

100% max. 149.0

99% 85.7

95% 76.3

90% 72.0

75% Q3 65.0

50% median 57.6

25% Q1 50.0

10% 43.5

5% 40.0

1% 35.0

0% minimum 26.4

Table 2-1 demographics according to the presence or absence of proton-pump inhibitors

UNIVARIATE Procedure

Variable: WGT\_BL (Weight at Informed Consent)

Extreme value

---- Minimum value----Maximum value----

| Value Obs |       | Value Obs |       |
|-----------|-------|-----------|-------|
| 26.4      | 17111 | 110.0     | 21562 |
| 27.0      | 20372 | 113.0     | 27031 |
| 27.4      | 12654 | 116.0     | 4265  |
| 27.7      | 4530  | 118.6     | 702   |
| 28.1      | 22941 | 149.0     | 27363 |

Table 2-1 demographics according to the presence or absence of proton-pump inhibitors

UNIVARIATE Procedure

Variables: BMI\_BL (BMI at Informed Consent)

Moment

Total of 27944 for N 27944 weight variable

Mean 23.3235796 total 651754.109

Standard deviation 3.55682834 variance 12.6510279

Skewness 0.54074056 kurtosis 1.30857061

Unmodified square sum 15554746.5 modified square sum 353507.672

Coefficient of variation 15.2499248 standard error of the mean 0.0212774

Basic statistics

Positional variation

Mean 23.32358 standard deviation 3.55683

Median 23.14050 variance 12.65103

Most frequent value 22.22222 range 36.95231

Interquartile range 4.52852

Note: There are two most frequent values (frequency: 49). The table shows the smallest of the most common values.

Test for position H0:  $\mu_0=0$

Test-Statistics-----p Value

Student's t-test t 1096.167 Pr > |t| <. 0001

Sign test M 13972 Pr >= |M| <. 0001

Signed rank test S 1. 9522E8 Pr >= |S| <. 0001

## Quartile (Definition 5)

### Level quantile

|            |         |
|------------|---------|
| 100% max.  | 47.7828 |
| 99%        | 33.1646 |
| 95%        | 29.3748 |
| 90%        | 27.7671 |
| 75% Q3     | 25.4651 |
| 50% median | 23.1405 |
| 25% Q1     | 20.9366 |
| 10%        | 18.9903 |
| 5%         | 17.8571 |

Table 2-1 demographics according to the presence or absence of proton-pump inhibitors

UNIVARIATE Procedure

Variables: BMI\_BL (BMI at Informed Consent)

Quartile (Definition 5)

Level quantile

1% 15.9170

0% minimum 10.8304

Extreme value

----- Minimum value-----Maximum value-----

Value Obs Value Obs

|         |       |         |       |
|---------|-------|---------|-------|
| 10.8304 | 24083 | 46.4669 | 4265  |
| 11.7539 | 29923 | 46.5212 | 19571 |
| 12.1123 | 14615 | 47.0615 | 12554 |
| 12.2474 | 7548  | 47.1137 | 3292  |
| 12.3555 | 31962 | 47.7828 | 19258 |



Table 2-1 demographics according to the presence or absence of proton-pump inhibitors

UNIVARIATE Procedure

Variable: SBP\_BL (Systolic Blood Pressure at Informed Consent)

Moment

Total of 29915 for N 29915 weight variable

Mean 127.335684 total 3809247

Standard deviation 17.0193514 variance 289.658322

Skewness 0.25480656 kurtosis 0.65335071

Unmodified square sum 493717913 modified square sum 8664839.06

Coefficient of variation 13.365736 standard error of the mean 0.09840077

Basic statistics

Positional variation

Mean 127.3357 standard deviation 17.01935

Median 127.0000 variance 289.65832

Mode 130.0000 Range 158.00000

Interquartile range 22.00000

Test for position H0:  $\mu_0=0$

Test-Statistics-----p Value

Student's t-test t 1294.052 Pr > |t| <. 0001

Sign test M 14957.5 Pr >= |M| <. 0001

Signed rank test S 2. 2373E8 Pr >= |S| <. 0001

Quartile (Definition 5)

Level quantile

100% max. 224

99% 172

95% 156

90% 148

75% Q3 138

50% median 127

25% Q1 116

10% 106

5% 100

1% 89

0% minimum 66

Table 2-1 demographics according to the presence or absence of proton-pump inhibitors

UNIVARIATE Procedure

Variable: SBP\_BL (Systolic Blood Pressure at Informed Consent)

Extreme value

--- Minimum value---Maximum value---

Value Obs Value Obs

|    |       |     |       |
|----|-------|-----|-------|
| 66 | 22326 | 210 | 7806  |
| 66 | 19535 | 210 | 7813  |
| 67 | 17540 | 211 | 21426 |
| 68 | 26217 | 214 | 18497 |
| 70 | 22563 | 224 | 32115 |

Table 2-1 demographics according to the presence or absence of proton-pump inhibitors

UNIVARIATE Procedure

Variable: DBP\_BL (Diastolic Blood Pressure at Informed Consent)

Moment

Total of 29915 for N 29915 weight variable

Mean 70.6440247 total 2113316

Standard deviation 11.6239152 variance 135.115405

Skewness 0.25007232 kurtosis 0.62914099

Unmodified square sum 153334990 modified square sum 4041842.22

Coefficient of variation 16.4542086 standard error of the mean 0.06720598

Basic statistics

Positional variation

Mean 70.64402 standard deviation 11.62392

Median 70.00000 variance 135.11540

Mode 70.00000 Range 126.00000

Interquartile range 16.00000

Test for position H0:  $\mu_0=0$

Test-Statistics-----p Value

Student's t-test t 1051.157 Pr > |t| <. 0001

Sign test M 14957.5 Pr >= |M| <. 0001

Signed rank test S 2. 2373E8 Pr >= |S| <. 0001

Quartile (Definition 5)

Level quantile

100% max. 139

99% 100

95% 90

90% 85

75% Q3 78

50% median 70

25% Q1 62

10% 56

5% 52

1% 44

0% minimum 13

Table 2-1 demographics according to the presence or absence of proton-pump inhibitors

UNIVARIATE Procedure

Variable: DBP\_BL (Diastolic Blood Pressure at Informed Consent)

Extreme value

--- Minimum value---Maximum value---

Value Obs Value Obs

|    |       |     |       |
|----|-------|-----|-------|
| 13 | 25699 | 130 | 31090 |
| 20 | 26670 | 131 | 15323 |
| 22 | 10698 | 131 | 28505 |
| 24 | 18950 | 133 | 24388 |
| 24 | 7652  | 139 | 22464 |

Table 2-1 demographics according to the presence or absence of proton-pump inhibitors

UNIVARIATE Procedure

Variable: AGEs (Age at First Drug Intake)

Moment

Total of 11981 for N 11981 weight variable

Mean 81.7248143 total 979145

Standard deviation 4.86749047 variance 23.6924635

Skewness 0.58315188 kurtosis-0.2678585

Unmodified square sum 80304279 modified square sum 283835.713

Coefficient of variation 5.95595171 standard error of the mean 0.04446912

Basic statistics

Positional variation

Mean 81.72481 standard deviation 4.86749

Median 81.00000 variance 23.69246

Mode 75.00000 Range 25.00000

Interquartile range 7.00000

Test for position H0:  $\mu_0=0$

Test-Statistics-----p Value

Student's t-test t 1837.788 Pr > |t| <. 0001

Sign test M 5990.5 Pr >= |M| <. 0001

Signed rank test S 35889086 Pr >= |S| <. 0001

Quartile (Definition 5)

Level quantile

100% max. 100

99% 94

95% 91

90% 89

75% Q3 85

50% median 81

25% Q1 78

10% 76

5% 75

1% 75

0% minimum 75



Table 2-1 demographics according to the presence or absence of proton-pump inhibitors

UNIVARIATE Procedure

Variable: AGEs (Age at First Drug Intake)

Extreme value

--- Minimum value---Maximum value---

Value Obs Value Obs

|    |       |     |       |
|----|-------|-----|-------|
| 75 | 32490 | 99  | 12659 |
| 75 | 32443 | 99  | 23804 |
| 75 | 32378 | 100 | 4681  |
| 75 | 32310 | 100 | 10523 |
| 75 | 32256 | 100 | 12680 |

Table 2-1 demographics according to the presence or absence of proton-pump inhibitors

UNIVARIATE Procedure

Variable: HGT\_BL (Height at Informed Consent)

Moment

Total of 10606 for N 10606 weight variable

Mean 156.564613 total 1660524.29

Standard deviation 9.60591131 variance 92.273532

Skewness-0.1527824 kurtosis-0.3446183

Unmodified square sum 260957904 modified square sum 978560.807

Coefficient of variation 6.13542939 standard error of the mean 0.09327446

Basic statistics

Positional variation

Mean 156.5646 standard deviation 9.60591

Median 157.0000 variance 92.27353

Mode 160.0000 Range 97.00000

Interquartile range 14.50000

Test for position H0:  $\mu_0=0$

Test-Statistics-----p Value

Student's t-test t 1678.537 Pr > |t| <. 0001

Sign test M 5303 Pr  $\geq$  |M| <. 0001

Signed rank test S 28124461 Pr  $\geq$  |S| <. 0001

Quartile (Definition 5)

## Level quantile

|            |       |
|------------|-------|
| 100% max.  | 193.0 |
| 99%        | 176.0 |
| 95%        | 171.3 |
| 90%        | 169.0 |
| 75% Q3     | 164.0 |
| 50% median | 157.0 |
| 25% Q1     | 149.5 |
| 10%        | 144.0 |
| 5%         | 140.5 |
| 1%         | 135.0 |
| 0% minimum | 96.0  |

Table 2-1 demographics according to the presence or absence of proton-pump inhibitors

UNIVARIATE Procedure

Variable: HGT\_BL (Height at Informed Consent)

Extreme value

---- Minimum value----Maximum value----

Value Obs Value Obs

|     |       |       |       |
|-----|-------|-------|-------|
| 96  | 2035  | 184.0 | 6024  |
| 120 | 29891 | 184.0 | 6921  |
| 120 | 12920 | 185.5 | 31487 |
| 123 | 14613 | 188.0 | 29308 |
| 125 | 17227 | 193.0 | 15473 |

Table 2-1 demographics according to the presence or absence of proton-pump inhibitors

UNIVARIATE Procedure

Variable: WGT\_BL (Weight at Informed Consent)

Moment

Total of 11046 for N 11046 weight variable

Mean 57.2802671 total 632717.83

Standard deviation 11.1711529 variance 124.794657

Skewness 0.2778062 kurtosis-0.0154519

Unmodified square sum 37620603.3 modified square sum 1378356.99

Coefficient of variation 19.5026201 standard error of the mean 0.10629075

Basic statistics

Positional variation

Mean 57.28027 standard deviation 11.17115

Median 57.00000 variance 124.79466

Mode 60.00000 Range 82.60000

Interquartile range 16.00000

Test for position H0:  $\mu_0=0$

Test-Statistics-----p Value

Student's t-test t 538.9017 Pr > |t| <. 0001

Sign test M 5523 Pr  $\geq$  |M| <. 0001

Signed rank test S 30506291 Pr  $\geq$  |S| <. 0001

Quartile (Definition 5)

## Level quantile

100% max. 110.0

99% 85.0

95% 76.0

90% 72.0

75% Q3 65.0

50% median 57.0

25% Q1 49.0

10% 43.0

5% 40.0

1% 34.8

0% minimum 27.4

Table 2-1 demographics according to the presence or absence of proton-pump inhibitors

UNIVARIATE Procedure

Variable: WGT\_BL (Weight at Informed Concent)

Extreme value

---- Minimum value----Maximum value----

| Value Obs |       | Value Obs |       |
|-----------|-------|-----------|-------|
| 27.4      | 12654 | 102.2     | 5693  |
| 28.1      | 20038 | 102.5     | 2266  |
| 28.5      | 25995 | 107.0     | 96    |
| 29.0      | 2035  | 110.0     | 11271 |
| 29.2      | 15206 | 110.0     | 21562 |

Table 2-1 demographics according to the presence or absence of proton-pump inhibitors

UNIVARIATE Procedure

Variables: BMI\_BL (BMI at Informed Consent)

Moment

Total of 10510 for N 10510 weight variable

Mean 23.3148454 total 245039.025

Standard deviation 3.62336868 variance 13.1288006

Skewness 0.5704506 kurtosis 1.26153856

Unmodified square sum 5851017.55 modified square sum 137970.565

Coefficient of variation 15.5410367 standard error of the mean 0.03534363

Basic statistics

Positional variation

Mean 23.31485 standard deviation 3.62337

Median 23.10439 variance 13.12880

Most frequent value 21.48438 range 33.94461

Interquartile range 4.62234

Test for position H0:  $\mu_0=0$

Test-Statistics-----p Value

Student's t-test t 659.6619 Pr > |t| <. 0001

Sign test M 5255 Pr >= |M| <. 0001

Signed rank test S 27617653 Pr >= |S| <. 0001

Quartile (Definition 5)



## Level quantile

|            |         |
|------------|---------|
| 100% max.  | 46.5212 |
| 99%        | 33.4692 |
| 95%        | 29.5226 |
| 90%        | 27.8488 |
| 75% Q3     | 25.4933 |
| 50% median | 23.1044 |
| 25% Q1     | 20.8709 |
| 10%        | 18.9189 |
| 5%         | 17.8329 |
| 1%         | 15.9131 |
| 0% minimum | 12.5766 |

Table 2-1 demographics according to the presence or absence of proton-pump inhibitors

UNIVARIATE Procedure

Variables: BMI\_BL (BMI at Informed Consent)

Extreme value

----- Minimum value-----Maximum value-----

| Value   | Obs   | Value   | Obs   |
|---------|-------|---------|-------|
| 12.5766 | 12924 | 42.6909 | 12079 |
| 13.0131 | 257   | 43.1349 | 23172 |
| 13.0143 | 28211 | 43.8892 | 14613 |
| 13.1618 | 22008 | 44.2585 | 19336 |
| 13.2511 | 30646 | 46.5212 | 19571 |

Table 2-1 demographics according to the presence or absence of proton-pump inhibitors

UNIVARIATE Procedure

Variable: SBP\_BL (Systolic Blood Pressure at Informed Consent)

Moment

Total of 10942 for N 10942 weight variable

Mean 126.866295 total 1388171

Standard deviation 17.3752684 variance 301.899953

Skewness 0.29135138 kurtosis 0.72811297

Unmodified square sum 179415199 modified square sum 3303087.39

Coefficient of variation 13.6957325 standard error of the mean 0.16610518

Basic statistics

Positional variation

Mean 126.8663 standard deviation 17.37527

Median 126.0000 variance 301.89995

Mode 120.0000 Range 158.00000

Interquartile range 21.00000

Test for position H0:  $\mu_0=0$

Test-Statistics-----p Value

Student's t-test t 763.7709 Pr > |t| <. 0001

Sign test M 5471 Pr  $\geq$  |M| <. 0001

Signed rank test S 29934577 Pr  $\geq$  |S| <. 0001

Quartile (Definition 5)

Level quantile

100% max. 224

99% 173

95% 157

90% 149

75% Q3 137

50% median 126

25% Q1 116

10% 105

5% 100

1% 88

0% minimum 66

Table 2-1 demographics according to the presence or absence of proton-pump inhibitors

UNIVARIATE Procedure

Variable: SBP\_BL (Systolic Blood Pressure at Informed Consent)

Extreme value

--- Minimum value---Maximum value---

Value Obs Value Obs

|    |       |     |       |
|----|-------|-----|-------|
| 66 | 22326 | 204 | 13790 |
| 66 | 19535 | 208 | 10107 |
| 70 | 11019 | 211 | 21426 |
| 71 | 13585 | 214 | 18497 |
| 71 | 179   | 224 | 32115 |

Table 2-1 demographics according to the presence or absence of proton-pump inhibitors

UNIVARIATE Procedure

Variable: DBP\_BL (Diastolic Blood Pressure at Informed Consent)

Moment

Total of 10942 for N 10942 weight variable

Mean 70.1461342 total 767539

Standard deviation 11.7787208 variance 138.738263

Skewness 0.31581935 kurtosis 0.7429483

Unmodified square sum 55357829 modified square sum 1517935.33

Coefficient of variation 16.7916891 standard error of the mean 0.11260295

Basic statistics

Positional variation

Mean 70.14613 standard deviation 11.77872

Median 70.00000 variance 138.73826

Mode 70.00000 Range 117.00000

Interquartile range 16.00000

Test for position H0:  $\mu_0=0$

Test-Statistics-----p Value

Student's t-test t 622.9511 Pr > |t| <. 0001

Sign test M 5471 Pr  $\geq$  |M| <. 0001

Signed rank test S 29934577 Pr  $\geq$  |S| <. 0001

Quartile (Definition 5)

Level quantile

100% max. 139

99% 100

95% 90

90% 85

75% Q3 78

50% median 70

25% Q1 62

10% 56

5% 52

1% 44

0% minimum 22

Table 2-1 demographics according to the presence or absence of proton-pump inhibitors

UNIVARIATE Procedure

Variable: DBP\_BL (Diastolic Blood Pressure at Informed Consent)

Extreme value

--- Minimum value---Maximum value---

Value Obs Value Obs

|    |       |     |       |
|----|-------|-----|-------|
| 22 | 10698 | 124 | 15335 |
| 24 | 7652  | 130 | 3039  |
| 31 | 23196 | 131 | 15323 |
| 34 | 29954 | 133 | 24388 |
| 34 | 29221 | 139 | 22464 |



Table 2-1 demographics according to the presence or absence of proton-pump inhibitors

UNIVARIATE Procedure

Variable: AGEs (Age at First Drug Intake)

Moment

Total of 20509 for N 20509 weight variable

Mean 81.3252718 total 1667900

Standard deviation 4.78725834 variance 22.9178424

Skewness 0.67575565 kurtosis-0.0469797

Unmodified square sum 136112420 modified square sum 469999.112

Coefficient of variation 5.88655682 standard error of the mean 0.03342833

Basic statistics

Positional variation

Mean 81.32527 standard deviation 4.78726

Median 81.00000 variance 22.91784

Mode 75.00000 Range 28.00000

Interquartile range 8.00000

Test for position H0:  $\mu_0=0$

Test-Statistics-----p Value

Student's t-test t 2432.825 Pr > |t| <. 0001

Sign test M 10254.5 Pr >= |M| <. 0001

Signed rank test S 1. 0516E8 Pr >= |S| <. 0001

Quartile (Definition 5)

Level quantile

100% max. 103

99% 94

95% 90

90% 88

75% Q3 85

50% median 81

25% Q1 77

10% 76

5% 75

1% 75

0% minimum 75

Table 2-1 demographics according to the presence or absence of proton-pump inhibitors

UNIVARIATE Procedure

Variable: AGEs (Age at First Drug Intake)

Extreme value

--- Minimum value---Maximum value---

Value Obs Value Obs

|    |       |     |       |
|----|-------|-----|-------|
| 75 | 32470 | 101 | 5225  |
| 75 | 32456 | 101 | 23819 |
| 75 | 32444 | 102 | 5655  |
| 75 | 32432 | 102 | 29497 |
| 75 | 32431 | 103 | 7812  |

Table 2-1 demographics according to the presence or absence of proton-pump inhibitors

UNIVARIATE Procedure

Variable: HGT\_BL (Height at Informed Consent)

Moment

Total of 17604 for N 17604 weight variable

Mean 157.625093 total 2774832.14

Standard deviation 9.41357887 variance 88.6154671

Skewness-0.1949703 kurtosis-0.425521

Unmodified square sum 438943073 modified square sum 1559898.07

Coefficient of variation 5.97213215 standard error of the mean 0.07094946

Basic statistics

Positional variation

Mean 157.6251 standard deviation 9.41358

Median 158.0000 variance 88.61547

Most frequent value 160.0000 range 75.90000

Interquartile range 14.70000

Test for position H0:  $\mu_0=0$

Test-Statistics-----p Value

Student's t-test t 2221.653 Pr > |t| <. 0001

Sign test M 8802 Pr  $\geq$  |M| <. 0001

Signed rank test S 77479605 Pr  $\geq$  |S| <. 0001

Quartile (Definition 5)

## Level quantile

|            |       |
|------------|-------|
| 100% max.  | 195.9 |
| 99%        | 176.5 |
| 95%        | 172.0 |
| 90%        | 169.5 |
| 75% Q3     | 165.0 |
| 50% median | 158.0 |
| 25% Q1     | 150.3 |
| 10%        | 145.0 |
| 5%         | 142.0 |
| 1%         | 136.4 |
| 0% minimum | 120.0 |

Table 2-1 demographics according to the presence or absence of proton-pump inhibitors

UNIVARIATE Procedure

Variable: HGT\_BL (Height at Informed Consent)

Extreme value

----- Minimum value-----Maximum value-----

| Value | Obs   | Value | Obs   |
|-------|-------|-------|-------|
| 120.0 | 23794 | 183.0 | 27283 |
| 120.0 | 23497 | 183.0 | 28042 |
| 120.0 | 11830 | 184.0 | 25870 |
| 121.5 | 27679 | 184.6 | 702   |
| 122.0 | 7115  | 195.9 | 24973 |

Table 2-1 demographics according to the presence or absence of proton-pump inhibitors

UNIVARIATE Procedure

Variable: WGT\_BL (Weight at Informed Consent)

Moment

Total of 18597 for N 18597 weight variable

Mean 58.1164962 total 1080792.48

Standard deviation 11.1446884 variance 124.204079

Skewness 0.31502141 kurtosis 0.37647788

Unmodified square sum 65121571.1 modified square sum 2309699.05

Coefficient of variation 19.176463 standard error of the mean 0.08172341

Basic statistics

Positional variation

Mean 58.11650 standard deviation 11.14469

Median 58.00000 variance 124.20408

Most frequent value 60.00000 range 122.60000

Interquartile range 15.20000

Test for position H0:  $\mu_0=0$

Test-Statistics-----p Value

Student's t-test t 711.1365 Pr > |t| <. 0001

Sign test M 9298.5 Pr >= |M| <. 0001

Signed rank test S 86466752 Pr >= |S| <. 0001

Quartile (Definition 5)

Level quantile

|            |       |
|------------|-------|
| 100% max.  | 149.0 |
| 99%        | 86.0  |
| 95%        | 76.6  |
| 90%        | 72.4  |
| 75% Q3     | 65.2  |
| 50% median | 58.0  |
| 25% Q1     | 50.0  |
| 10%        | 44.0  |
| 5%         | 40.5  |
| 1%         | 35.1  |
| 0% minimum | 26.4  |



Table 2-1 demographics according to the presence or absence of proton-pump inhibitors

UNIVARIATE Procedure

Variable: WGT\_BL (Weight at Informed Consent)

Extreme value

---- Minimum value----Maximum value----

| Value Obs |       | Value Obs |       |
|-----------|-------|-----------|-------|
| 26.4      | 17111 | 108.0     | 22896 |
| 27.0      | 20372 | 113.0     | 27031 |
| 27.7      | 4530  | 116.0     | 4265  |
| 28.1      | 22941 | 118.6     | 702   |
| 28.5      | 4172  | 149.0     | 27363 |

Table 2-1 demographics according to the presence or absence of proton-pump inhibitors

UNIVARIATE Procedure

Variables: BMI\_BL (BMI at Informed Consent)

Moment

Total of 17434 for N 17434 weight variable

Mean 23.328845 total 406715.084

Standard deviation 3.51620077 variance 12.3636678

Skewness 0.5211885 kurtosis 1.33574282

Unmodified square sum 9703728.98 modified square sum 215535.821

Coefficient of variation 15.0723311 standard error of the mean 0.02663024

Basic statistics

Positional variation

Mean 23.32885 standard deviation 3.51620

Median 23.15765 variance 12.36367

Most frequent value 22.22222 range 36.95231

Interquartile range 4.49371

Test for position H0:  $\mu_0=0$

Test-Statistics-----p Value

Student's t-test t 876.0282 Pr > |t| <. 0001

Sign test M 8717 Pr  $\geq$  |M| <. 0001

Signed rank test S 75990448 Pr  $\geq$  |S| <. 0001

Quartile (Definition 5)

## Level quantile

|            |         |
|------------|---------|
| 100% max.  | 47.7828 |
| 99%        | 32.8731 |
| 95%        | 29.3199 |
| 90%        | 27.7344 |
| 75% Q3     | 25.4581 |
| 50% median | 23.1576 |
| 25% Q1     | 20.9644 |
| 10%        | 19.0274 |
| 5%         | 17.8980 |
| 1%         | 15.9194 |
| 0% minimum | 10.8304 |

Table 2-1 demographics according to the presence or absence of proton-pump inhibitors

UNIVARIATE Procedure

Variables: BMI\_BL (BMI at Informed Consent)

Extreme value

----- Minimum value-----Maximum value-----

| Value Obs |       | Value Obs |       |
|-----------|-------|-----------|-------|
| 10.8304   | 24083 | 42.3666   | 20570 |
| 11.7539   | 29923 | 46.4669   | 4265  |
| 12.1123   | 14615 | 47.0615   | 12554 |
| 12.2474   | 7548  | 47.1137   | 3292  |
| 12.3555   | 31962 | 47.7828   | 19258 |

Table 2-1 demographics according to the presence or absence of proton-pump inhibitors

UNIVARIATE Procedure

Variable: SBP\_BL (Systolic Blood Pressure at Informed Consent)

Moment

Total of 18973 for N 18973 weight variable

Mean 127.606388 total 2421076

Standard deviation 16.8051654 variance 282.413583

Skewness 0.23498835 kurtosis 0.60474821

Unmodified square sum 314302714 modified square sum 5357950.51

Coefficient of variation 13.169533 standard error of the mean 0.1220042

Basic statistics

Positional variation

Mean 127.6064 standard deviation 16.80517

Median 128.0000 variance 282.41358

Mode 130.0000 Range 143.00000

Interquartile range 21.00000

Test for position H0:  $\mu_0=0$

Test-Statistics-----p Value

Student's t-test t 1045.918 Pr > |t| <. 0001

Sign test M 9486.5 Pr >= |M| <. 0001

Signed rank test S 89998426 Pr >= |S| <. 0001

Quartile (Definition 5)

Level quantile

100% max. 210

99% 172

95% 156

90% 148

75% Q3 138

50% median 128

25% Q1 117

10% 106

5% 100

1% 90

0% minimum 67

Table 2-1 demographics according to the presence or absence of proton-pump inhibitors

UNIVARIATE Procedure

Variable: SBP\_BL (Systolic Blood Pressure at Informed Consent)

Extreme value

--- Minimum value---Maximum value---

Value Obs Value Obs

|    |       |     |       |
|----|-------|-----|-------|
| 67 | 17540 | 205 | 7600  |
| 68 | 26217 | 205 | 20799 |
| 70 | 22563 | 207 | 27937 |
| 70 | 18755 | 210 | 7806  |
| 74 | 27610 | 210 | 7813  |

Table 2-1 demographics according to the presence or absence of proton-pump inhibitors

UNIVARIATE Procedure

Variable: DBP\_BL (Diastolic Blood Pressure at Informed Consent)

Moment

Total of 18973 for N 18973 weight variable

Mean 70.9311653 total 1345777

Standard deviation 11.5242278 variance 132.807827

Skewness 0.21355319 kurtosis 0.56977604

Unmodified square sum 97977161 modified square sum 2519630.1

Coefficient of variation 16.2470584 standard error of the mean 0.083665

Basic statistics

Positional variation

Mean 70.93117 standard deviation 11.52423

Median 70.00000 variance 132.80783

Mode 70.00000 Range 118.00000

Interquartile range 16.00000

Test for position H0:  $\mu_0=0$

Test-Statistics-----p Value

Student's t-test t 847.7997 Pr > |t| <. 0001

Sign test M 9486.5 Pr >= |M| <. 0001

Signed rank test S 89998426 Pr >= |S| <. 0001

Quartile (Definition 5)



Level quantile

100% max. 131

99% 100

95% 90

90% 85

75% Q3 79

50% median 70

25% Q1 63

10% 57

5% 52

1% 45

0% minimum 13

Table 2-1 demographics according to the presence or absence of proton-pump inhibitors

UNIVARIATE Procedure

Variable: DBP\_BL (Diastolic Blood Pressure at Informed Consent)

Extreme value

--- Minimum value---Maximum value---

Value Obs Value Obs

|    |       |     |       |
|----|-------|-----|-------|
| 13 | 25699 | 123 | 3096  |
| 20 | 26670 | 123 | 19480 |
| 24 | 18950 | 124 | 17556 |
| 26 | 17540 | 130 | 31090 |
| 27 | 31091 | 131 | 28505 |

Table 2-1 demographics according to the presence or absence of proton-pump inhibitors

FREQ Procedure

Height at Informed Consent

Cumulative

HGT\_BL Frequency Percentage

---

|     |      |        |      |        |
|-----|------|--------|------|--------|
| 999 | 4280 | 100.00 | 4280 | 100.00 |
|-----|------|--------|------|--------|

Table 2-1 demographics according to the presence or absence of proton-pump inhibitors

FREQ Procedure

Weight at Informed Consent

Cumulative

WGT\_BL Frequency Percentage

---

|     |      |        |      |        |
|-----|------|--------|------|--------|
| 999 | 2847 | 100.00 | 2847 | 100.00 |
|-----|------|--------|------|--------|

Table 2-1 demographics according to the presence or absence of proton-pump inhibitors

FREQ Procedure

BMI at Informed Consent

Cumulative

BMI\_BL Frequency Percentage

---

|     |      |        |      |        |
|-----|------|--------|------|--------|
| 999 | 4546 | 100.00 | 4546 | 100.00 |
|-----|------|--------|------|--------|

Table 2-1 demographics according to the presence or absence of proton-pump inhibitors

FREQ Procedure

Systolic Blood Pressure at Informed Consent

| SBP_BL Frequency Percentage |      |        | Cumulative |        |
|-----------------------------|------|--------|------------|--------|
| 999                         | 2575 | 100.00 | 2575       | 100.00 |

Table 2-1 demographics according to the presence or absence of proton-pump inhibitors

FREQ Procedure

Diastolic Blood Pressure at Informed Consent

| DBP_BL Frequency Percentage |      |        | Cumulative |        |
|-----------------------------|------|--------|------------|--------|
| 999                         | 2575 | 100.00 | 2575       | 100.00 |

Table 2-1 demographics according to the presence or absence of proton-pump inhibitors

FREQ Procedure

Height at Informed Consent

Cumulative

HGT\_BL Frequency Percentage

---

|     |      |        |      |        |
|-----|------|--------|------|--------|
| 999 | 1375 | 100.00 | 1375 | 100.00 |
|-----|------|--------|------|--------|



Table 2-1 demographics according to the presence or absence of proton-pump inhibitors

FREQ Procedure

Weight at Informed Consent

Cumulative

WGT\_BL Frequency Percentage

---

|     |     |        |     |        |
|-----|-----|--------|-----|--------|
| 999 | 935 | 100.00 | 935 | 100.00 |
|-----|-----|--------|-----|--------|

Table 2-1 demographics according to the presence or absence of proton-pump inhibitors

FREQ Procedure

BMI at Informed Consent

Cumulative

BMI\_BL Frequency Percentage

---

|     |      |        |      |        |
|-----|------|--------|------|--------|
| 999 | 1471 | 100.00 | 1471 | 100.00 |
|-----|------|--------|------|--------|

Table 2-1 demographics according to the presence or absence of proton-pump inhibitors

FREQ Procedure

Systolic Blood Pressure at Informed Consent

| SBP_BL Frequency Percentage |      |        | Cumulative |        |
|-----------------------------|------|--------|------------|--------|
| 999                         | 1039 | 100.00 | 1039       | 100.00 |

Table 2-1 demographics according to the presence or absence of proton-pump inhibitors

FREQ Procedure

Diastolic Blood Pressure at Informed Consent

Cumulative

DBP\_BL Frequency Percentage

---

|     |      |        |      |        |
|-----|------|--------|------|--------|
| 999 | 1039 | 100.00 | 1039 | 100.00 |
|-----|------|--------|------|--------|

Table 2-1 demographics according to the presence or absence of proton-pump inhibitors

FREQ Procedure

Height at Informed Consent

Cumulative

HGT\_BL Frequency Percentage

---

|     |      |        |      |        |
|-----|------|--------|------|--------|
| 999 | 2905 | 100.00 | 2905 | 100.00 |
|-----|------|--------|------|--------|

Table 2-1 demographics according to the presence or absence of proton-pump inhibitors

FREQ Procedure

Weight at Informed Consent

Cumulative

WGT\_BL Frequency Percentage

---

|     |      |        |      |        |
|-----|------|--------|------|--------|
| 999 | 1912 | 100.00 | 1912 | 100.00 |
|-----|------|--------|------|--------|

Table 2-1 demographics according to the presence or absence of proton-pump inhibitors

FREQ Procedure

BMI at Informed Consent

Cumulative

BMI\_BL Frequency Percentage

---

|     |      |        |      |        |
|-----|------|--------|------|--------|
| 999 | 3075 | 100.00 | 3075 | 100.00 |
|-----|------|--------|------|--------|

Table 2-1 demographics according to the presence or absence of proton-pump inhibitors

FREQ Procedure

Systolic Blood Pressure at Informed Consent

| SBP_BL Frequency Percentage |      |        | Cumulative |        |
|-----------------------------|------|--------|------------|--------|
| 999                         | 1536 | 100.00 | 1536       | 100.00 |



Table 2-1 demographics according to the presence or absence of proton-pump inhibitors

FREQ Procedure

Diastolic Blood Pressure at Informed Consent

| DBP_BL Frequency Percentage |      |        | Cumulative |        |
|-----------------------------|------|--------|------------|--------|
| 999                         | 1536 | 100.00 | 1536       | 100.00 |

Table 2-1 demographics according to the presence or absence of proton-pump inhibitors

FREQ Procedure

Number of levels of variables

Variables Label Level Number

GROUP1 2

SEXN Sex (N) 2

Table : GROUP1 \* SEXN

GROUP1 SEXN(Sex (N))

Power |

Percent |

Percent of rows

Percentage of columns | 0 | 1 | Sum

|       | +     | +     | +      |
|-------|-------|-------|--------|
| 1     | 6561  | 5420  | 11981  |
|       | 20.19 | 16.68 | 36.88  |
|       | 54.76 | 45.24 |        |
|       | 35.27 | 39.02 |        |
|       | +     | +     | +      |
| 2     | 12040 | 8469  | 20509  |
|       | 37.06 | 26.07 | 63.12  |
|       | 58.71 | 41.29 |        |
|       | 64.73 | 60.98 |        |
|       | +     | +     | +      |
| Total | 18601 | 13889 | 32490  |
|       | 57.25 | 42.75 | 100.00 |

Table 2-1 demographics according to the presence or absence of proton-pump inhibitors

FREQ Procedure

Number of levels of variables

Variables Label Level Number

GROUP1 2

AGEC Age Category 6

Table : GROUP1 \* AGEC

GROUP1 AGEC(Age Category)

Power |

Percent |

Percent of rows

Percentage of column |75 years and older |80 years and older |85 years and older |90 years and older |95 years and older | 100 years and older |Total

|Ages under 80|Ages under 85|Ages under 90|Ages under 95|Ages under 100 Ages under |Above|

|||| Full ||||

|       | +     | +     | +     | +     | +     | +     | +     |
|-------|-------|-------|-------|-------|-------|-------|-------|
| 1     | 4559  | 4061  | 2481  | 767   | 110   | 3     | 11981 |
|       | 14.03 | 12.50 | 7.64  | 2.36  | 0.34  | 0.01  | 36.88 |
|       | 38.05 | 33.90 | 20.71 | 6.40  | 0.92  | 0.03  |       |
|       | 35.16 | 36.84 | 39.06 | 41.15 | 40.15 | 27.27 |       |
|       | +     | +     | +     | +     | +     | +     | +     |
| 2     | 8408  | 6961  | 3871  | 1097  | 164   | 8     | 20509 |
|       | 25.88 | 21.43 | 11.91 | 3.38  | 0.50  | 0.02  | 63.12 |
|       | 41.00 | 33.94 | 18.87 | 5.35  | 0.80  | 0.04  |       |
|       | 64.84 | 63.16 | 60.94 | 58.85 | 59.85 | 72.73 |       |
|       | +     | +     | +     | +     | +     | +     | +     |
| Total | 12967 | 11022 | 6352  | 1864  | 274   | 11    | 32490 |

39.91 33.92 19.55 5.74 0.84 0.03 100.00

Table 2-1 demographics according to the presence or absence of proton-pump inhibitors

FREQ Procedure

Number of levels of variables

Variables Label Level Number

GROUP1 2

WGTC\_BL Weight Category at Informed Concent 2

Table : GROUP1 \* WGTC\_BL

GROUP1

WGTC\_BL(Weight Category at Informed Concent)

Power |

Percent |

Percent of rows

Percent of column |less than 60 kg|more than 60 kg| Total

|       | +     | +     | +      |
|-------|-------|-------|--------|
| 1     | 6543  | 4503  | 11046  |
|       | 22.07 | 15.19 | 37.26  |
|       | 59.23 | 40.77 |        |
|       | 38.48 | 35.63 |        |
|       | +     | +     | +      |
| 2     | 10462 | 8135  | 18597  |
|       | 35.29 | 27.44 | 62.74  |
|       | 56.26 | 43.74 |        |
|       | 61.52 | 64.37 |        |
|       | +     | +     | +      |
| Total | 17005 | 12638 | 29643  |
|       | 57.37 | 42.63 | 100.00 |

Table 2-1 demographics according to the presence or absence of proton-pump inhibitors

FREQ Procedure

Number of levels of variables

Variables Label Level Number

GROUP1 2

BMIC\_BL BMI Category at Informed Consent 3

Table : GROUP1 \* BMIC\_BL

GROUP1

BMIC\_BL(BMI Category at Informed Consent)

Power |

Percent |

Percent of rows

Percent of column |18.5kg/m|18.5kg/m|25.0kg/m| Total

|<2| >2| >25| >2| |

| | 0 kg/m2 un| |

| | Full| |

|       | +     | +     | +     | +     |
|-------|-------|-------|-------|-------|
| 1     | 805   | 6659  | 3046  | 10510 |
|       | 2.88  | 23.83 | 10.90 | 37.61 |
|       | 7.66  | 63.36 | 28.98 |       |
|       | 38.76 | 37.52 | 37.51 |       |
|       | +     | +     | +     | +     |
| 2     | 1272  | 11088 | 5074  | 17434 |
|       | 4.55  | 39.68 | 18.16 | 62.39 |
|       | 7.30  | 63.60 | 29.10 |       |
|       | 61.24 | 62.48 | 62.49 |       |
|       | +     | +     | +     | +     |
| Total | 2077  | 17747 | 8120  | 27944 |

7.43 63.51 29.06 100.00

Table 2-1 demographics according to the presence or absence of proton-pump inhibitors

FREQ Procedure

Number of levels of variables

Variables Label Level Number

GROUP1 2

SMK1 Smoking Status Part 1 3

Table : GROUP1 \* SMK1

GROUP1 SMK1(Smoking Status Part 1)

Power |

Percent |

Percent of rows

Percent of column |Smoking|Stopped|Smoked|Total

|       | no    | no    |       |        |
|-------|-------|-------|-------|--------|
|       | +     | +     | +     | +      |
| 1     | 6084  | 3802  | 452   | 10338  |
|       | 22.16 | 13.85 | 1.65  | 37.65  |
|       | 58.85 | 36.78 | 4.37  |        |
|       | 37.44 | 38.16 | 36.33 |        |
|       | +     | +     | +     | +      |
| 2     | 10168 | 6161  | 792   | 17121  |
|       | 37.03 | 22.44 | 2.88  | 62.35  |
|       | 59.39 | 35.99 | 4.63  |        |
|       | 62.56 | 61.84 | 63.67 |        |
|       | +     | +     | +     | +      |
| Total | 16252 | 9963  | 1244  | 27459  |
|       | 59.19 | 36.28 | 4.53  | 100.00 |



Table 2-1 demographics according to the presence or absence of proton-pump inhibitors

FREQ Procedure

Number of levels of variables

Variables Label Level Number

GROUP1 2

DRK Drinking Habit 3

Table : GROUP1 \* DRK

GROUP1 DRK(Drinking Habit)

Power |

Percent |

Percent of rows

Percentage of columns | routinely | occasionally | at all | total

|Drink|Drink|Do not drink|

|       | +     | +     | +     | +      |
|-------|-------|-------|-------|--------|
| 1     | 1979  | 2067  | 6131  | 10177  |
|       | 7.31  | 7.63  | 22.64 | 37.59  |
|       | 19.45 | 20.31 | 60.24 |        |
|       | 34.10 | 35.02 | 39.89 |        |
|       | +     | +     | +     | +      |
| 2     | 3825  | 3835  | 9238  | 16898  |
|       | 14.13 | 14.16 | 34.12 | 62.41  |
|       | 22.64 | 22.69 | 54.67 |        |
|       | 65.90 | 64.98 | 60.11 |        |
|       | +     | +     | +     | +      |
| Total | 5804  | 5902  | 15369 | 27075  |
|       | 21.44 | 21.80 | 56.76 | 100.00 |

Table 2-1 demographics according to the presence or absence of proton-pump inhibitors

TTEST Procedure

Variable: AGEs (Age at First Drug Intake)

GROUP1 N Mean Standard Deviation Standard Error Minimum Value Maximum Value

|            |       |         |        |        |         |       |
|------------|-------|---------|--------|--------|---------|-------|
| 1          | 11981 | 81.7248 | 4.8675 | 0.0445 | 75.0000 | 100.0 |
| 2          | 20509 | 81.3253 | 4.7873 | 0.0334 | 75.0000 | 103.0 |
| Diff (1-2) |       | 0.3995  | 4.8170 | 0.0554 |         |       |

To the mean standard deviation

GROUP1 methods Mean 95% confidence limits standard deviation 95% confidence limits

|                          |  |         |         |         |        |        |
|--------------------------|--|---------|---------|---------|--------|--------|
| 1                        |  | 81.7248 | 81.6376 | 81.8120 | 4.8675 | 4.8066 |
| 4.9299                   |  |         |         |         |        |        |
| 2                        |  | 81.3253 | 81.2597 | 81.3908 | 4.7873 | 4.7414 |
| 4.8340                   |  |         |         |         |        |        |
| Diff (1-2) Pooled        |  | 0.3995  | 0.2910  | 0.5081  | 4.8170 | 4.7802 |
| Diff (1-2) Satterthwaite |  | 0.3995  | 0.2905  | 0.5086  |        |        |

Technique Dispersion degrees of freedom t-value Pr > |t|

Pooled Equal 32488 7.21 <. 0001

Satterthwaite Unequal 24732 7.18 <. 0001

Isodispersity

Technique Degree of Freedom of Numerators Degree of Freedom of the denominator F Value Pr > F

Folded F 11980 20508 1.03 0.0405

Table 2-1 demographics according to the presence or absence of proton-pump inhibitors

TTEST Procedure

Variable: HGT\_BL (Height at Informed Concent)

GROUP1 N Mean Standard Deviation Standard Error Minimum Value Maximum Value

|                                  |       |       |        |        |         |       |
|----------------------------------|-------|-------|--------|--------|---------|-------|
| 1                                | 10606 | 156.6 | 9.6059 | 0.0933 | 96.0000 | 193.0 |
| 2                                | 17604 | 157.6 | 9.4136 | 0.0709 | 120.0   | 195.9 |
| Diff (1-2) -1.0605 9.4863 0.1166 |       |       |        |        |         |       |

To the mean standard deviation

GROUP1 methods Mean 95% confidence limits standard deviation 95% confidence limits

|                                                                |  |       |       |       |        |        |
|----------------------------------------------------------------|--|-------|-------|-------|--------|--------|
| 1                                                              |  | 156.6 | 156.4 | 156.7 | 9.6059 | 9.4784 |
| 9.7370                                                         |  |       |       |       |        |        |
| 2                                                              |  | 157.6 | 157.5 | 157.8 | 9.4136 | 9.3163 |
| 9.5130                                                         |  |       |       |       |        |        |
| Diff (1-2) Pooled -1.0605 -1.2890 -0.8319 9.4863 9.4087 9.5653 |  |       |       |       |        |        |
| Diff (1-2) Satterthwaite -1.0605 -1.2902 -0.8308               |  |       |       |       |        |        |

Technique Dispersion degrees of freedom t-value Pr > |t|

Pooled Equal 28208 -9.09 <. 0001

Satterthwaite Unequal 21992 -9.05 <. 0001

Isodispersity

Technique Degree of Freedom of Numerators Degree of Freedom of the denominator F Value Pr > F

Folded F 10605 17603 1.04 0.0197

Table 2-1 demographics according to the presence or absence of proton-pump inhibitors

TTEST Procedure

Variable: WGT\_BL (Weight at Informed Concent)

GROUP1 N Mean Standard Deviation Standard Error Minimum Value Maximum Value

|            |         |         |         |        |         |       |
|------------|---------|---------|---------|--------|---------|-------|
| 1          | 11046   | 57.2803 | 11.1712 | 0.1063 | 27.4000 | 110.0 |
| 2          | 18597   | 58.1165 | 11.1447 | 0.0817 | 26.4000 | 149.0 |
| Diff (1-2) | -0.8362 | 11.1546 | 0.1340  |        |         |       |

To the mean standard deviation

GROUP1 methods Mean 95% confidence limits standard deviation 95% confidence limits

|                          |         |         |         |         |         |         |
|--------------------------|---------|---------|---------|---------|---------|---------|
| 1                        |         | 57.2803 | 57.0719 | 57.4886 | 11.1712 | 11.0258 |
|                          | 11.3204 |         |         |         |         |         |
| 2                        |         | 58.1165 | 57.9563 | 58.2767 | 11.1447 | 11.0326 |
|                          | 11.2591 |         |         |         |         |         |
| Diff (1-2) Pooled        | -0.8362 | -1.0989 | -0.5736 | 11.1546 | 11.0655 | 11.2451 |
| Diff (1-2) Satterthwaite | -0.8362 | -1.0990 | -0.5734 |         |         |         |

Technique Dispersion degrees of freedom t-value Pr > |t|

Pooled Equal 29641 -6.24 <. 0001

Satterthwaite Unequal 23157 -6.24 <. 0001

Isodispersity

Technique Degree of Freedom of Moleculars Degree of Freedom of the denominator F Value Pr > F

Folded F 11045 18596 1.00 0.7789

Table 2-1 demographics according to the presence or absence of proton-pump inhibitors

TTEST Procedure

Variables: BMI\_BL (BMI at Informed Consent)

GROUP1 N Mean Standard Deviation Standard Error Minimum Value Maximum Value

|            |         |         |        |        |         |         |
|------------|---------|---------|--------|--------|---------|---------|
| 1          | 10510   | 23.3148 | 3.6234 | 0.0353 | 12.5766 | 46.5212 |
| 2          | 17434   | 23.3288 | 3.5162 | 0.0266 | 10.8304 | 47.7828 |
| Diff (1-2) | -0.0140 | 3.5569  | 0.0439 |        |         |         |

To the mean standard deviation

GROUP1 methods Mean 95% confidence limits standard deviation 95% confidence limits

|                          |         |         |         |         |        |        |
|--------------------------|---------|---------|---------|---------|--------|--------|
| 1                        |         | 23.3148 | 23.2456 | 23.3841 | 3.6234 | 3.5750 |
|                          | 3.6730  |         |         |         |        |        |
| 2                        |         | 23.3288 | 23.2766 | 23.3810 | 3.5162 | 3.4797 |
|                          | 3.5535  |         |         |         |        |        |
| Diff (1-2) Pooled        | -0.0140 | -0.1001 | 0.0721  | 3.5569  | 3.5276 | 3.5866 |
| Diff (1-2) Satterthwaite | -0.0140 | -0.1007 | 0.0727  |         |        |        |

Technique Dispersion degrees of freedom t-value Pr > |t|

Pooled Equal 27942 -0.32 0.7499

Satterthwaite Unequal 21626 -0.32 0.7517

Isodispersity

Technique Degree of Freedom of Numerators Degree of Freedom of the denominator F Value Pr > F

Folded F 10509 17433 1.06 0.0006

Table 2-1 demographics according to the presence or absence of proton-pump inhibitors

TTEST Procedure

Variable: SBP\_BL (Systolic Blood Pressure at Informed Consent)

GROUP1 N Mean Standard Deviation Standard Error Minimum Value Maximum Value

|            |       |         |         |        |         |       |
|------------|-------|---------|---------|--------|---------|-------|
| 1          | 10942 | 126.9   | 17.3753 | 0.1661 | 66.0000 | 224.0 |
| 2          | 18973 | 127.6   | 16.8052 | 0.1220 | 67.0000 | 210.0 |
| Diff (1-2) |       | -0.7401 | 17.0159 | 0.2043 |         |       |

To the mean standard deviation

GROUP1 methods Mean 95% confidence limits standard deviation 95% confidence limits

|                          |         |         |         |         |         |         |
|--------------------------|---------|---------|---------|---------|---------|---------|
| 1                        |         | 126.9   | 126.5   | 127.2   | 17.3753 | 17.1481 |
|                          | 17.6086 |         |         |         |         |         |
| 2                        |         | 127.6   | 127.4   | 127.8   | 16.8052 | 16.6378 |
|                          | 16.9760 |         |         |         |         |         |
| Diff (1-2) Pooled        |         | -0.7401 | -1.1405 | -0.3397 | 17.0159 | 16.8806 |
| Diff (1-2) Satterthwaite |         | -0.7401 | -1.1441 | -0.3361 |         |         |

Technique Dispersion degrees of freedom t-value Pr > |t|

Pooled Equal 29913 -3.62 0.0003

Satterthwaite Unequal 22204 -3.59 0.0003

Isodispersity

Technique Degree of Freedom of Numerators Degree of Freedom of the denominator F Value Pr > F

Folded F 10941 18972 1.07 <. 0001

Table 2-1 demographics according to the presence or absence of proton-pump inhibitors

TTEST Procedure

Variable: DBP\_BL (Diastolic Blood Pressure at Informed Consent)

GROUP1 N Mean Standard Deviation Standard Error Minimum Value Maximum Value

|            |         |         |         |        |         |       |
|------------|---------|---------|---------|--------|---------|-------|
| 1          | 10942   | 70.1461 | 11.7787 | 0.1126 | 22.0000 | 139.0 |
| 2          | 18973   | 70.9312 | 11.5242 | 0.0837 | 13.0000 | 131.0 |
| Diff (1-2) | -0.7850 | 11.6180 | 0.1395  |        |         |       |

To the mean standard deviation

GROUP1 methods Mean 95% confidence limits standard deviation 95% confidence limits

|                          |         |         |         |         |         |         |
|--------------------------|---------|---------|---------|---------|---------|---------|
| 1                        |         | 70.1461 | 69.9254 | 70.3669 | 11.7787 | 11.6247 |
|                          | 11.9369 |         |         |         |         |         |
| 2                        |         | 70.9312 | 70.7672 | 71.0952 | 11.5242 | 11.4094 |
|                          | 11.6414 |         |         |         |         |         |
| Diff (1-2) Pooled        | -0.7850 | -1.0584 | -0.5117 | 11.6180 | 11.5256 | 11.7118 |
| Diff (1-2) Satterthwaite | -0.7850 | -1.0600 | -0.5101 |         |         |         |

Technique Dispersion degrees of freedom t-value Pr > |t|

Pooled Equal 29913 -5.63 <. 0001

Satterthwaite Unequal 22416 -5.60 <. 0001

Isodispersity

Technique Degree of Freedom of Numerators Degree of Freedom of the denominator F Value Pr > F

Folded F 10941 18972 1.04 0.0099

Treatment history at the time of obtaining Table 2-2 consent according to the presence or absence of proton-pump inhibitors

FREQ Procedure

|                      |       | Cumulative       |       |        |
|----------------------|-------|------------------|-------|--------|
| Percent of ALL power |       | Percent of power |       |        |
| 1                    | 32490 | 100.00           | 32490 | 100.00 |

Tables: ALL\* HISAF

ALL

HISAF(History of Major Surgery for non-AF)

Power |

Percent |

Percent of rows

Percent of column |immediate 3 months |immediate 3 months |unknown |total

) within |Month within |Month| |

|Major surgery|Major surgery| |

Lip/lip | |

|   |        |        |        |        |
|---|--------|--------|--------|--------|
|   | +      | +      | +      | +      |
| 1 | 336    | 31690  | 464    | 32490  |
|   | 1.03   | 97.54  | 1.43   | 100.00 |
|   | 1.03   | 97.54  | 1.43   |        |
|   | 100.00 | 100.00 | 100.00 |        |
|   | +      | +      | +      | +      |

Total 336 31690 464 32490

1.03 97.54 1.43 100.00



Treatment history at the time of obtaining Table 2-2 consent according to the presence or absence of proton-pump inhibitors

FREQ Procedure

|                      |       |                  | Cumulative |        |
|----------------------|-------|------------------|------------|--------|
| Percent of ALL power |       | Percent of power |            |        |
| 1                    | 32490 | 100.00           | 32490      | 100.00 |

Tables: ALL\* HISAF

ALL

HISAF(History of Major Surgery for non-AF)

Power |

Percent |

Percent of rows

Percent of column |immediate 3 months |immediate 3 months |unknown |total

) within |Month within |Month| |

|Major surgery|Major surgery| |

Lip/lip | |

|       |        |        |        |        |   |  |   |
|-------|--------|--------|--------|--------|---|--|---|
|       | +      |        | +      |        | + |  | + |
| 1     | 336    | 31690  | 464    | 32490  |   |  |   |
|       | 1.03   | 97.54  | 1.43   | 100.00 |   |  |   |
|       | 1.03   | 97.54  | 1.43   |        |   |  |   |
|       | 100.00 | 100.00 | 100.00 |        |   |  |   |
|       | +      |        | +      |        | + |  | + |
| Total | 336    | 31690  | 464    | 32490  |   |  |   |
|       | 1.03   | 97.54  | 1.43   | 100.00 |   |  |   |

Treatment history at the time of obtaining Table 2-2 consent according to the presence or absence of proton-pump inhibitors

FREQ Procedure

|                      |       |                  | Cumulative |        |
|----------------------|-------|------------------|------------|--------|
| Percent of ALL power |       | Percent of power |            |        |
| 1                    | 32490 | 100.00           | 32490      | 100.00 |

Tables: ALL\* HISAF

ALL

HISAF(History of Major Surgery for non-AF)

Power |

Percent |

Percent of rows

Percent of column |immediate 3 months |immediate 3 months |unknown |total

) within |Month within |Month| |

|Major surgery|Major surgery| |

Lip/lip | |

|       |        |        |        |        |   |  |   |
|-------|--------|--------|--------|--------|---|--|---|
|       | +      |        | +      |        | + |  | + |
| 1     | 336    | 31690  | 464    | 32490  |   |  |   |
|       | 1.03   | 97.54  | 1.43   | 100.00 |   |  |   |
|       | 1.03   | 97.54  | 1.43   |        |   |  |   |
|       | 100.00 | 100.00 | 100.00 |        |   |  |   |
|       | +      |        | +      |        | + |  | + |
| Total | 336    | 31690  | 464    | 32490  |   |  |   |
|       | 1.03   | 97.54  | 1.43   | 100.00 |   |  |   |

Treatment history at the time of obtaining Table 2-2 consent according to the presence or absence of proton-pump inhibitors

FREQ Procedure

|   |       | Cumulative           |                  |        |
|---|-------|----------------------|------------------|--------|
|   |       | Percent of ALL power | Percent of power |        |
| 1 | 32490 | 100.00               | 32490            | 100.00 |

Tables: ALL\* HISBDYN

ALL

HISBDYN(History of Major Beeding)

| Power              |         |         |        |
|--------------------|---------|---------|--------|
| Percent            |         |         |        |
| Percent of rows    |         |         |        |
| Percent of columns | None    | With    | Total  |
| +_____+            | +_____+ | +_____+ | +      |
| 1                  | 31229   | 1261    | 32490  |
|                    | 96.12   | 3.88    | 100.00 |
|                    | 96.12   | 3.88    |        |
|                    | 100.00  | 100.00  |        |
| +_____+            | +_____+ | +_____+ | +      |
| Total              | 31229   | 1261    | 32490  |
|                    | 96.12   | 3.88    | 100.00 |

Treatment history at the time of obtaining Table 2-2 consent according to the presence or absence of proton-pump inhibitors

FREQ Procedure

|   |                      |        | Cumulative       |        |
|---|----------------------|--------|------------------|--------|
|   | Percent of ALL power |        | Percent of power |        |
| 1 | 32490                | 100.00 | 32490            | 100.00 |

Tables: ALL\* HISBDYN

ALL

HISBDYN(History of Major Beeding)

| Power                   |        |        |        |
|-------------------------|--------|--------|--------|
| Percent                 |        |        |        |
| Percent of rows         |        |        |        |
| Percent of columns      | None   | With   | Total  |
| _____ + _____ + _____ + |        |        |        |
| 1                       | 31229  | 1261   | 32490  |
|                         | 96.12  | 3.88   | 100.00 |
|                         | 96.12  | 3.88   |        |
|                         | 100.00 | 100.00 |        |
| _____ + _____ + _____ + |        |        |        |
| Total                   | 31229  | 1261   | 32490  |
|                         | 96.12  | 3.88   | 100.00 |

Treatment history at the time of obtaining Table 2-2 consent according to the presence or absence of proton-pump inhibitors

FREQ Procedure

|   |       | Cumulative           |                  |        |
|---|-------|----------------------|------------------|--------|
|   |       | Percent of ALL power | Percent of power |        |
| 1 | 32490 | 100.00               | 32490            | 100.00 |

Table : ALL \* HISBD1

ALL

HISBD1(Intracranial Hemorrhage)

| Power                   |        |        |        |  |
|-------------------------|--------|--------|--------|--|
| Percent                 |        |        |        |  |
| Percent of rows         |        |        |        |  |
| Percent of columns      | None   | With   | Total  |  |
| _____ + _____ + _____ + |        |        |        |  |
| 1                       | 31841  | 649    | 32490  |  |
|                         | 98.00  | 2.00   | 100.00 |  |
|                         | 98.00  | 2.00   |        |  |
|                         | 100.00 | 100.00 |        |  |
| _____ + _____ + _____ + |        |        |        |  |
| Total                   | 31841  | 649    | 32490  |  |
|                         | 98.00  | 2.00   | 100.00 |  |

Treatment history at the time of obtaining Table 2-2 consent according to the presence or absence of proton-pump inhibitors

FREQ Procedure

|   |       | Cumulative           |                  |        |
|---|-------|----------------------|------------------|--------|
|   |       | Percent of ALL power | Percent of power |        |
| 1 | 32490 | 100.00               | 32490            | 100.00 |

Table : ALL \* HISBD1

ALL

HISBD1(Intracranial Hemorrhage)

| Power              |        |        |        |  |
|--------------------|--------|--------|--------|--|
| Percent            |        |        |        |  |
| Percent of rows    |        |        |        |  |
| Percent of columns | None   | With   | Total  |  |
| _____              | +      | +      | +      |  |
| 1                  | 31841  | 649    | 32490  |  |
|                    | 98.00  | 2.00   | 100.00 |  |
|                    | 98.00  | 2.00   |        |  |
|                    | 100.00 | 100.00 |        |  |
| _____              | +      | +      | +      |  |
| Total              | 31841  | 649    | 32490  |  |
|                    | 98.00  | 2.00   | 100.00 |  |

Treatment history at the time of obtaining Table 2-2 consent according to the presence or absence of proton-pump inhibitors

FREQ Procedure

|   |                      |                  | Cumulative           |                  |
|---|----------------------|------------------|----------------------|------------------|
|   | Percent of ALL power | Percent of power | Percent of ALL power | Percent of power |
| 1 | 32490                | 100.00           | 32490                | 100.00           |

Table : ALL \* HISBD2

ALL

HISBD2(Upper Gastrointestinal Bleeding)

| Power              |        |        |        |
|--------------------|--------|--------|--------|
| Percent            |        |        |        |
| Percent of rows    |        |        |        |
| Percent of columns | None   | With   | Total  |
|                    | +      | +      | +      |
| 1                  | 32216  | 274    | 32490  |
|                    | 99.16  | 0.84   | 100.00 |
|                    | 99.16  | 0.84   |        |
|                    | 100.00 | 100.00 |        |
|                    | +      | +      | +      |
| Total              | 32216  | 274    | 32490  |
|                    | 99.16  | 0.84   | 100.00 |

Treatment history at the time of obtaining Table 2-2 consent according to the presence or absence of proton-pump inhibitors

FREQ Procedure

|   |                      |        | Cumulative       |        |
|---|----------------------|--------|------------------|--------|
|   | Percent of ALL power |        | Percent of power |        |
| 1 | 32490                | 100.00 | 32490            | 100.00 |

Table : ALL \* HISBD2

ALL

HISBD2(Upper Gastrointestinal Bleeding)

| Power              |        |        |        |
|--------------------|--------|--------|--------|
| Percent            |        |        |        |
| Percent of rows    |        |        |        |
| Percent of columns | None   | With   | Total  |
|                    | +      | +      | +      |
| 1                  | 32216  | 274    | 32490  |
|                    | 99.16  | 0.84   | 100.00 |
|                    | 99.16  | 0.84   |        |
|                    | 100.00 | 100.00 |        |
|                    | +      | +      | +      |
| Total              | 32216  | 274    | 32490  |
|                    | 99.16  | 0.84   | 100.00 |



Treatment history at the time of obtaining Table 2-2 consent according to the presence or absence of proton-pump inhibitors

FREQ Procedure

|   |       | Cumulative           |                  |        |
|---|-------|----------------------|------------------|--------|
|   |       | Percent of ALL power | Percent of power |        |
| 1 | 32490 | 100.00               | 32490            | 100.00 |

Table : ALL \* HISBD3

ALL

HISBD3(Lower Gastrointestinal Bleeding)

| Power                   |        |        |        |  |
|-------------------------|--------|--------|--------|--|
| Percent                 |        |        |        |  |
| Percent of rows         |        |        |        |  |
| Percent of columns      | None   | With   | Total  |  |
| _____ + _____ + _____ + |        |        |        |  |
| 1                       | 32182  | 308    | 32490  |  |
|                         | 99.05  | 0.95   | 100.00 |  |
|                         | 99.05  | 0.95   |        |  |
|                         | 100.00 | 100.00 |        |  |
| _____ + _____ + _____ + |        |        |        |  |
| Total                   | 32182  | 308    | 32490  |  |
|                         | 99.05  | 0.95   | 100.00 |  |

Treatment history at the time of obtaining Table 2-2 consent according to the presence or absence of proton-pump inhibitors

FREQ Procedure

|   |                      |        | Cumulative       |        |
|---|----------------------|--------|------------------|--------|
|   | Percent of ALL power |        | Percent of power |        |
| 1 | 32490                | 100.00 | 32490            | 100.00 |

Table : ALL \* HISBD3

ALL

HISBD3(Lower Gastrointestinal Bleeding)

Power |

Percent |

Percent of rows

Percent of columns | None | With | Total

|       |        |        |        |  |   |
|-------|--------|--------|--------|--|---|
|       | +      |        | +      |  | + |
| 1     | 32182  | 308    | 32490  |  |   |
|       | 99.05  | 0.95   | 100.00 |  |   |
|       | 99.05  | 0.95   |        |  |   |
|       | 100.00 | 100.00 |        |  |   |
|       | +      |        | +      |  | + |
| Total | 32182  | 308    | 32490  |  |   |
|       | 99.05  | 0.95   | 100.00 |  |   |

Treatment history at the time of obtaining Table 2-2 consent according to the presence or absence of proton-pump inhibitors

FREQ Procedure

|   |                      |                  | Cumulative           |                  |
|---|----------------------|------------------|----------------------|------------------|
|   | Percent of ALL power | Percent of power | Percent of ALL power | Percent of power |
| 1 | 32490                | 100.00           | 32490                | 100.00           |

Table : ALL \* HISBD4

ALL HISBD4(Other Beeding)

| Power              |        |        |        |
|--------------------|--------|--------|--------|
| Percent            |        |        |        |
| Percent of rows    |        |        |        |
| Percent of columns | None   | With   | Total  |
|                    | +      | +      | +      |
| 1                  | 32242  | 248    | 32490  |
|                    | 99.24  | 0.76   | 100.00 |
|                    | 99.24  | 0.76   |        |
|                    | 100.00 | 100.00 |        |
|                    | +      | +      | +      |
| Total              | 32242  | 248    | 32490  |
|                    | 99.24  | 0.76   | 100.00 |

Treatment history at the time of obtaining Table 2-2 consent according to the presence or absence of proton-pump inhibitors

FREQ Procedure

|   |                      |                  | Cumulative           |                  |
|---|----------------------|------------------|----------------------|------------------|
|   | Percent of ALL power | Percent of power | Percent of ALL power | Percent of power |
| 1 | 32490                | 100.00           | 32490                | 100.00           |

Table : ALL \* HISBD4

ALL HISBD4(Other Beeding)

| Power              |           |           |           |
|--------------------|-----------|-----------|-----------|
| Percent            |           |           |           |
| Percent of rows    |           |           |           |
| Percent of columns | None      | With      | Total     |
|                    | + _____ + | + _____ + | + _____ + |
| 1                  | 32242     | 248       | 32490     |
|                    | 99.24     | 0.76      | 100.00    |
|                    | 99.24     | 0.76      |           |
|                    | 100.00    | 100.00    |           |
|                    | + _____ + | + _____ + | + _____ + |
| Total              | 32242     | 248       | 32490     |
|                    | 99.24     | 0.76      | 100.00    |

Treatment history at the time of obtaining Table 2-2 consent according to the presence or absence of proton-pump inhibitors

FREQ Procedure

|   |       | Cumulative           |                  |        |
|---|-------|----------------------|------------------|--------|
|   |       | Percent of ALL power | Percent of power |        |
| 1 | 32490 | 100.00               | 32490            | 100.00 |

Tables: ALL\* HISAL

ALL

HISAL(History of Drug Allergy)

| Power                   |        |        |        |
|-------------------------|--------|--------|--------|
| Percent                 |        |        |        |
| Percent of rows         |        |        |        |
| Percent of columns      | None   | With   | Total  |
| _____ + _____ + _____ + |        |        |        |
| 1                       | 30277  | 2213   | 32490  |
|                         | 93.19  | 6.81   | 100.00 |
|                         | 93.19  | 6.81   |        |
|                         | 100.00 | 100.00 |        |
| _____ + _____ + _____ + |        |        |        |
| Total                   | 30277  | 2213   | 32490  |
|                         | 93.19  | 6.81   | 100.00 |

Treatment history at the time of obtaining Table 2-2 consent according to the presence or absence of proton-pump inhibitors

FREQ Procedure

|   |                      |        | Cumulative       |        |
|---|----------------------|--------|------------------|--------|
|   | Percent of ALL power |        | Percent of power |        |
| 1 | 32490                | 100.00 | 32490            | 100.00 |

Tables: ALL\* HISAL

ALL

HISAL(History of Drug Allergy)

| Power              |        |        |        |
|--------------------|--------|--------|--------|
| Percent            |        |        |        |
| Percent of rows    |        |        |        |
| Percent of columns | None   | With   | Total  |
|                    | +      | +      | +      |
| 1                  | 30277  | 2213   | 32490  |
|                    | 93.19  | 6.81   | 100.00 |
|                    | 93.19  | 6.81   |        |
|                    | 100.00 | 100.00 |        |
|                    | +      | +      | +      |
| Total              | 30277  | 2213   | 32490  |
|                    | 93.19  | 6.81   | 100.00 |

Treatment history at the time of obtaining Table 2-2 consent according to the presence or absence of proton-pump inhibitors

FREQ Procedure

|   |       | Cumulative           |                  |        |
|---|-------|----------------------|------------------|--------|
|   |       | Percent of ALL power | Percent of power |        |
| 1 | 32490 | 100.00               | 32490            | 100.00 |

Tables: ALL\* AFTYP

ALL AFTYP(Type of AF)

| Power                     |          |            |              |            |        |
|---------------------------|----------|------------|--------------|------------|--------|
| Percent                   |          |            |              |            |        |
| Percent of rows           |          |            |              |            |        |
| Percent of columns        | Episodic | Persistent | Long lasting | Persistent | Total  |
| sex                       |          |            |              |            |        |
| +_____+_____+_____+_____+ |          |            |              |            |        |
| 1                         | 13639    | 5381       | 4399         | 9071       | 32490  |
|                           | 41.98    | 16.56      | 13.54        | 27.92      | 100.00 |
|                           | 41.98    | 16.56      | 13.54        | 27.92      |        |
|                           | 100.00   | 100.00     | 100.00       | 100.00     |        |
| +_____+_____+_____+_____+ |          |            |              |            |        |
| Total                     | 13639    | 5381       | 4399         | 9071       | 32490  |
|                           | 41.98    | 16.56      | 13.54        | 27.92      | 100.00 |

Treatment history at the time of obtaining Table 2-2 consent according to the presence or absence of proton-pump inhibitors

FREQ Procedure

|   |       | Cumulative           |                  |        |
|---|-------|----------------------|------------------|--------|
|   |       | Percent of ALL power | Percent of power |        |
| 1 | 32490 | 100.00               | 32490            | 100.00 |

Tables: ALL\* AFTYP

ALL AFTYP(Type of AF)

| Power                     |          |            |              |            |        |
|---------------------------|----------|------------|--------------|------------|--------|
| Percent                   |          |            |              |            |        |
| Percent of rows           |          |            |              |            |        |
| Percent of columns        | Episodic | Persistent | Long lasting | Persistent | Total  |
| sex                       |          |            |              |            |        |
| +_____+_____+_____+_____+ |          |            |              |            |        |
| 1                         | 13639    | 5381       | 4399         | 9071       | 32490  |
|                           | 41.98    | 16.56      | 13.54        | 27.92      | 100.00 |
|                           | 41.98    | 16.56      | 13.54        | 27.92      |        |
|                           | 100.00   | 100.00     | 100.00       | 100.00     |        |
| +_____+_____+_____+_____+ |          |            |              |            |        |
| Total                     | 13639    | 5381       | 4399         | 9071       | 32490  |
|                           | 41.98    | 16.56      | 13.54        | 27.92      | 100.00 |



Treatment history at the time of obtaining Table 2-2 consent according to the presence or absence of proton-pump inhibitors

FREQ Procedure

|   |       | Cumulative           |                  |        |
|---|-------|----------------------|------------------|--------|
|   |       | Percent of ALL power | Percent of power |        |
| 1 | 32490 | 100.00               | 32490            | 100.00 |

Tables: ALL\* AFTYP

ALL AFTYP(Type of AF)

| Power                     |          |            |              |            |        |
|---------------------------|----------|------------|--------------|------------|--------|
| Percent                   |          |            |              |            |        |
| Percent of rows           |          |            |              |            |        |
| Percent of columns        | Episodic | Persistent | Long lasting | Persistent | Total  |
| sex                       |          |            |              |            |        |
| +_____+_____+_____+_____+ |          |            |              |            |        |
| 1                         | 13639    | 5381       | 4399         | 9071       | 32490  |
|                           | 41.98    | 16.56      | 13.54        | 27.92      | 100.00 |
|                           | 41.98    | 16.56      | 13.54        | 27.92      |        |
|                           | 100.00   | 100.00     | 100.00       | 100.00     |        |
| +_____+_____+_____+_____+ |          |            |              |            |        |
| Total                     | 13639    | 5381       | 4399         | 9071       | 32490  |
|                           | 41.98    | 16.56      | 13.54        | 27.92      | 100.00 |

Treatment history at the time of obtaining Table 2-2 consent according to the presence or absence of proton-pump inhibitors

FREQ Procedure

|   |       | Cumulative           |                  |        |
|---|-------|----------------------|------------------|--------|
|   |       | Percent of ALL power | Percent of power |        |
| 1 | 32490 | 100.00               | 32490            | 100.00 |

Tables: ALL\* AFTYP

ALL AFTYP(Type of AF)

| Power                     |          |            |              |            |        |
|---------------------------|----------|------------|--------------|------------|--------|
| Percent                   |          |            |              |            |        |
| Percent of rows           |          |            |              |            |        |
| Percent of columns        | Episodic | Persistent | Long lasting | Persistent | Total  |
| sex                       |          |            |              |            |        |
| +_____+_____+_____+_____+ |          |            |              |            |        |
| 1                         | 13639    | 5381       | 4399         | 9071       | 32490  |
|                           | 41.98    | 16.56      | 13.54        | 27.92      | 100.00 |
|                           | 41.98    | 16.56      | 13.54        | 27.92      |        |
|                           | 100.00   | 100.00     | 100.00       | 100.00     |        |
| +_____+_____+_____+_____+ |          |            |              |            |        |
| Total                     | 13639    | 5381       | 4399         | 9071       | 32490  |
|                           | 41.98    | 16.56      | 13.54        | 27.92      | 100.00 |

Treatment history at the time of obtaining Table 2-2 consent according to the presence or absence of proton-pump inhibitors

FREQ Procedure

|   |       | Cumulative           |                  |        |
|---|-------|----------------------|------------------|--------|
|   |       | Percent of ALL power | Percent of power |        |
| 1 | 32490 | 100.00               | 32490            | 100.00 |

Tables: ALL\* AFTYP

ALL AFTYP(Type of AF)

| Power                     |          |            |              |            |        |
|---------------------------|----------|------------|--------------|------------|--------|
| Percent                   |          |            |              |            |        |
| Percent of rows           |          |            |              |            |        |
| Percent of columns        | Episodic | Persistent | Long lasting | Persistent | Total  |
| sex                       |          |            |              |            |        |
| +_____+_____+_____+_____+ |          |            |              |            |        |
| 1                         | 13639    | 5381       | 4399         | 9071       | 32490  |
|                           | 41.98    | 16.56      | 13.54        | 27.92      | 100.00 |
|                           | 41.98    | 16.56      | 13.54        | 27.92      |        |
|                           | 100.00   | 100.00     | 100.00       | 100.00     |        |
| +_____+_____+_____+_____+ |          |            |              |            |        |
| Total                     | 13639    | 5381       | 4399         | 9071       | 32490  |
|                           | 41.98    | 16.56      | 13.54        | 27.92      | 100.00 |

Treatment history at the time of obtaining Table 2-2 consent according to the presence or absence of proton-pump inhibitors

FREQ Procedure

|                      |       | Cumulative       |       |        |
|----------------------|-------|------------------|-------|--------|
| Percent of ALL power |       | Percent of power |       |        |
| 1                    | 32490 | 100.00           | 32490 | 100.00 |

Tables: ALL\* AFTYPN

ALL AFTYPN

| Power                            |  |  |
|----------------------------------|--|--|
| Percent                          |  |  |
| Percent of rows                  |  |  |
| Percentage of columns   5  Total |  |  |
| _____+_____+                     |  |  |
| 1   9780   9780                  |  |  |
| 100.00   100.00                  |  |  |
| 100.00                           |  |  |
| 100.00                           |  |  |
| _____+_____+                     |  |  |
| Total 9780 9780                  |  |  |
| 100.00 100.00                    |  |  |

Degree of missing values = 22710

Treatment history at the time of obtaining Table 2-2 consent according to the presence or absence of proton-pump inhibitors

FREQ Procedure

|   |       | Cumulative           |                  |        |
|---|-------|----------------------|------------------|--------|
|   |       | Percent of ALL power | Percent of power |        |
| 1 | 32490 | 100.00               | 32490            | 100.00 |

Tables: ALL\* AFTYP

ALL AFTYP(Type of AF)

| Power                     |          |            |              |            |        |
|---------------------------|----------|------------|--------------|------------|--------|
| Percent                   |          |            |              |            |        |
| Percent of rows           |          |            |              |            |        |
| Percent of columns        | Episodic | Persistent | Long lasting | Persistent | Total  |
| sex                       |          |            |              |            |        |
| +_____+_____+_____+_____+ |          |            |              |            |        |
| 1                         | 13639    | 5381       | 4399         | 9071       | 32490  |
|                           | 41.98    | 16.56      | 13.54        | 27.92      | 100.00 |
|                           | 41.98    | 16.56      | 13.54        | 27.92      |        |
|                           | 100.00   | 100.00     | 100.00       | 100.00     |        |
| +_____+_____+_____+_____+ |          |            |              |            |        |
| Total                     | 13639    | 5381       | 4399         | 9071       | 32490  |
|                           | 41.98    | 16.56      | 13.54        | 27.92      | 100.00 |

Treatment history at the time of obtaining Table 2-2 consent according to the presence or absence of proton-pump inhibitors

FREQ Procedure

|   |                      |        | Cumulative       |        |
|---|----------------------|--------|------------------|--------|
|   | Percent of ALL power |        | Percent of power |        |
| 1 | 32490                | 100.00 | 32490            | 100.00 |

Tables: ALL\* AFTHSPE

ALL

AFTHSPE(Non-drug Therapy for AF)

| Power              |        |        |        |
|--------------------|--------|--------|--------|
| Percent            |        |        |        |
| Percent of rows    |        |        |        |
| Percent of columns | None   | With   | Total  |
|                    | +      | +      | +      |
| 1                  | 26863  | 5627   | 32490  |
|                    | 82.68  | 17.32  | 100.00 |
|                    | 82.68  | 17.32  |        |
|                    | 100.00 | 100.00 |        |
|                    | +      | +      | +      |
| Total              | 26863  | 5627   | 32490  |
|                    | 82.68  | 17.32  | 100.00 |

Treatment history at the time of obtaining Table 2-2 consent according to the presence or absence of proton-pump inhibitors

FREQ Procedure

|   |                      |        | Cumulative       |        |
|---|----------------------|--------|------------------|--------|
|   | Percent of ALL power |        | Percent of power |        |
| 1 | 32490                | 100.00 | 32490            | 100.00 |

Tables: ALL\* AFTHSPE

ALL

AFTHSPE(Non-drug Therapy for AF)

| Power              |        |        |        |
|--------------------|--------|--------|--------|
| Percent            |        |        |        |
| Percent of rows    |        |        |        |
| Percent of columns | None   | With   | Total  |
|                    | +      | +      | +      |
| 1                  | 26863  | 5627   | 32490  |
|                    | 82.68  | 17.32  | 100.00 |
|                    | 82.68  | 17.32  |        |
|                    | 100.00 | 100.00 |        |
|                    | +      | +      | +      |
| Total              | 26863  | 5627   | 32490  |
|                    | 82.68  | 17.32  | 100.00 |

Treatment history at the time of obtaining Table 2-2 consent according to the presence or absence of proton-pump inhibitors

FREQ Procedure

|                      |       |                  | Cumulative |        |
|----------------------|-------|------------------|------------|--------|
| Percent of ALL power |       | Percent of power |            |        |
| 1                    | 32490 | 100.00           | 32490      | 100.00 |

Table : ALL \* AFTHSPE1

ALL

AFTHSPE1(Catheter Ablation)

| Power              |        |        |        |
|--------------------|--------|--------|--------|
| Percent            |        |        |        |
| Percent of rows    |        |        |        |
| Percent of columns | None   | With   | Total  |
|                    | +      | +      | +      |
| 1                  | 29542  | 2948   | 32490  |
|                    | 90.93  | 9.07   | 100.00 |
|                    | 90.93  | 9.07   |        |
|                    | 100.00 | 100.00 |        |
|                    | +      | +      | +      |
| Total              | 29542  | 2948   | 32490  |
|                    | 90.93  | 9.07   | 100.00 |



Treatment history at the time of obtaining Table 2-2 consent according to the presence or absence of proton-pump inhibitors

FREQ Procedure

|   |                      |        | Cumulative       |        |
|---|----------------------|--------|------------------|--------|
|   | Percent of ALL power |        | Percent of power |        |
| 1 | 32490                | 100.00 | 32490            | 100.00 |

Table : ALL \* AFTHSPE1

ALL

AFTHSPE1(Catheter Ablation)

| Power              |        |        |        |
|--------------------|--------|--------|--------|
| Percent            |        |        |        |
| Percent of rows    |        |        |        |
| Percent of columns | None   | With   | Total  |
|                    | +      | +      | +      |
| 1                  | 29542  | 2948   | 32490  |
|                    | 90.93  | 9.07   | 100.00 |
|                    | 90.93  | 9.07   |        |
|                    | 100.00 | 100.00 |        |
|                    | +      | +      | +      |
| Total              | 29542  | 2948   | 32490  |
|                    | 90.93  | 9.07   | 100.00 |

Treatment history at the time of obtaining Table 2-2 consent according to the presence or absence of proton-pump inhibitors

FREQ Procedure

|   |                      |        | Cumulative       |        |
|---|----------------------|--------|------------------|--------|
|   | Percent of ALL power |        | Percent of power |        |
| 1 | 32490                | 100.00 | 32490            | 100.00 |

Table : ALL \* AFTHSPE2

ALL AFTHSPE2(Cardioversion)

| Power              |        |        |        |
|--------------------|--------|--------|--------|
| Percent            |        |        |        |
| Percent of rows    |        |        |        |
| Percent of columns | None   | With   | Total  |
|                    | +      | +      | +      |
| 1                  | 31779  | 711    | 32490  |
|                    | 97.81  | 2.19   | 100.00 |
|                    | 97.81  | 2.19   |        |
|                    | 100.00 | 100.00 |        |
|                    | +      | +      | +      |
| Total              | 31779  | 711    | 32490  |
|                    | 97.81  | 2.19   | 100.00 |

Treatment history at the time of obtaining Table 2-2 consent according to the presence or absence of proton-pump inhibitors

FREQ Procedure

|   |                      |        | Cumulative       |        |
|---|----------------------|--------|------------------|--------|
|   | Percent of ALL power |        | Percent of power |        |
| 1 | 32490                | 100.00 | 32490            | 100.00 |

Table : ALL \* AFTHSPE2

ALL AFTHSPE2(Cardioversion)

| Power              |        |        |        |
|--------------------|--------|--------|--------|
| Percent            |        |        |        |
| Percent of rows    |        |        |        |
| Percent of columns | None   | With   | Total  |
|                    | +      | +      | +      |
| 1                  | 31779  | 711    | 32490  |
|                    | 97.81  | 2.19   | 100.00 |
|                    | 97.81  | 2.19   |        |
|                    | 100.00 | 100.00 |        |
|                    | +      | +      | +      |
| Total              | 31779  | 711    | 32490  |
|                    | 97.81  | 2.19   | 100.00 |

Treatment history at the time of obtaining Table 2-2 consent according to the presence or absence of proton-pump inhibitors

FREQ Procedure

|   |       | Cumulative           |                  |        |
|---|-------|----------------------|------------------|--------|
|   |       | Percent of ALL power | Percent of power |        |
| 1 | 32490 | 100.00               | 32490            | 100.00 |

Table : ALL \* AFTHSPE3

ALL AFTHSPE3(ICD)

| Power                   |        |        |        |  |
|-------------------------|--------|--------|--------|--|
| Percent                 |        |        |        |  |
| Percent of rows         |        |        |        |  |
| Percent of columns      | None   | With   | Total  |  |
| _____ + _____ + _____ + |        |        |        |  |
| 1                       | 32337  | 153    | 32490  |  |
|                         | 99.53  | 0.47   | 100.00 |  |
|                         | 99.53  | 0.47   |        |  |
|                         | 100.00 | 100.00 |        |  |
| _____ + _____ + _____ + |        |        |        |  |
| Total                   | 32337  | 153    | 32490  |  |
|                         | 99.53  | 0.47   | 100.00 |  |

Treatment history at the time of obtaining Table 2-2 consent according to the presence or absence of proton-pump inhibitors

FREQ Procedure

|   |                      |        | Cumulative       |        |
|---|----------------------|--------|------------------|--------|
|   | Percent of ALL power |        | Percent of power |        |
| 1 | 32490                | 100.00 | 32490            | 100.00 |

Table : ALL \* AFTHSPE3

ALL AFTHSPE3(ICD)

| Power              |           |           |           |
|--------------------|-----------|-----------|-----------|
| Percent            |           |           |           |
| Percent of rows    |           |           |           |
| Percent of columns | None      | With      | Total     |
|                    | + _____ + | + _____ + | + _____ + |
| 1                  | 32337     | 153       | 32490     |
|                    | 99.53     | 0.47      | 100.00    |
|                    | 99.53     | 0.47      |           |
|                    | 100.00    | 100.00    |           |
|                    | + _____ + | + _____ + | + _____ + |
| Total              | 32337     | 153       | 32490     |
|                    | 99.53     | 0.47      | 100.00    |

Treatment history at the time of obtaining Table 2-2 consent according to the presence or absence of proton-pump inhibitors

FREQ Procedure

|   |       | Cumulative           |                  |        |
|---|-------|----------------------|------------------|--------|
|   |       | Percent of ALL power | Percent of power |        |
| 1 | 32490 | 100.00               | 32490            | 100.00 |

Table : ALL \* AFTHSPE4

ALL

AFTHSPE4(Pacemaker Implantation)

Power |

Percent |

Percent of rows

Percent of columns | None | With | Total

|             |        |        |        |  |   |
|-------------|--------|--------|--------|--|---|
|             | +      |        | +      |  | + |
| 1           | 30168  | 2322   | 32490  |  |   |
|             | 92.85  | 7.15   | 100.00 |  |   |
|             | 92.85  | 7.15   |        |  |   |
|             | 100.00 | 100.00 |        |  |   |
|             | +      |        | +      |  | + |
| Total 30168 | 2322   | 32490  |        |  |   |
|             | 92.85  | 7.15   | 100.00 |  |   |

Treatment history at the time of obtaining Table 2-2 consent according to the presence or absence of proton-pump inhibitors

FREQ Procedure

|   |       | Cumulative           |                  |        |
|---|-------|----------------------|------------------|--------|
|   |       | Percent of ALL power | Percent of power |        |
| 1 | 32490 | 100.00               | 32490            | 100.00 |

Table : ALL \* AFTHSPE4

ALL

AFTHSPE4(Pacemaker Implantation)

Power |

Percent |

Percent of rows

Percent of columns | None | With | Total

|         |         |         |        |
|---------|---------|---------|--------|
| +_____+ | +_____+ | +_____+ |        |
| 1       | 30168   | 2322    | 32490  |
|         | 92.85   | 7.15    | 100.00 |
|         | 92.85   | 7.15    |        |
|         | 100.00  | 100.00  |        |
| +_____+ | +_____+ | +_____+ |        |
| Total   | 30168   | 2322    | 32490  |
|         | 92.85   | 7.15    | 100.00 |

Treatment history at the time of obtaining Table 2-2 consent according to the presence or absence of proton-pump inhibitors

FREQ Procedure

|   |       | Cumulative           |                  |        |
|---|-------|----------------------|------------------|--------|
|   |       | Percent of ALL power | Percent of power |        |
| 1 | 32490 | 100.00               | 32490            | 100.00 |

Table : ALL \* AFTHSPE5

ALL

AFTHSPE5(Other Non-drug Therapy)

| Power                   |        |        |        |  |
|-------------------------|--------|--------|--------|--|
| Percent                 |        |        |        |  |
| Percent of rows         |        |        |        |  |
| Percent of columns      | None   | With   | Total  |  |
| _____ + _____ + _____ + |        |        |        |  |
| 1                       | 32377  | 113    | 32490  |  |
|                         | 99.65  | 0.35   | 100.00 |  |
|                         | 99.65  | 0.35   |        |  |
|                         | 100.00 | 100.00 |        |  |
| _____ + _____ + _____ + |        |        |        |  |
| Total                   | 32377  | 113    | 32490  |  |
|                         | 99.65  | 0.35   | 100.00 |  |



Treatment history at the time of obtaining Table 2-2 consent according to the presence or absence of proton-pump inhibitors

FREQ Procedure

|   |                      |        | Cumulative       |        |
|---|----------------------|--------|------------------|--------|
|   | Percent of ALL power |        | Percent of power |        |
| 1 | 32490                | 100.00 | 32490            | 100.00 |

Table : ALL \* AFTHSPE5

ALL

AFTHSPE5(Other Non-drug Therapy)

| Power              |        |        |        |
|--------------------|--------|--------|--------|
| Percent            |        |        |        |
| Percent of rows    |        |        |        |
| Percent of columns | None   | With   | Total  |
|                    | +      | +      | +      |
| 1                  | 32377  | 113    | 32490  |
|                    | 99.65  | 0.35   | 100.00 |
|                    | 99.65  | 0.35   |        |
|                    | 100.00 | 100.00 |        |
|                    | +      | +      | +      |
| Total              | 32377  | 113    | 32490  |
|                    | 99.65  | 0.35   | 100.00 |

Treatment history at the time of obtaining Table 2-2 consent according to the presence or absence of proton-pump inhibitors

FREQ Procedure

|                      |       |                  | Cumulative |        |
|----------------------|-------|------------------|------------|--------|
| Percent of ALL power |       | Percent of power |            |        |
| 1                    | 11981 | 100.00           | 11981      | 100.00 |

Tables: ALL\* HISAF

ALL

HISAF(History of Major Surgery for non-AF)

Power |

Percent |

Percent of rows

Percent of column |immediate 3 months |immediate 3 months |unknown |total

) within |Month within |Month| |

|Major surgery|Major surgery| |

Lip/lip | |

|       |        |        |        |        |   |  |   |
|-------|--------|--------|--------|--------|---|--|---|
|       | +      |        | +      |        | + |  | + |
| 1     | 149    | 11683  | 149    | 11981  |   |  |   |
|       | 1.24   | 97.51  | 1.24   | 100.00 |   |  |   |
|       | 1.24   | 97.51  | 1.24   |        |   |  |   |
|       | 100.00 | 100.00 | 100.00 |        |   |  |   |
|       | +      |        | +      |        | + |  | + |
| Total | 149    | 11683  | 149    | 11981  |   |  |   |
|       | 1.24   | 97.51  | 1.24   | 100.00 |   |  |   |

Treatment history at the time of obtaining Table 2-2 consent according to the presence or absence of proton-pump inhibitors

FREQ Procedure

|                      |       |                  | Cumulative |        |
|----------------------|-------|------------------|------------|--------|
| Percent of ALL power |       | Percent of power |            |        |
| 1                    | 11981 | 100.00           | 11981      | 100.00 |

Tables: ALL\* HISAF

ALL

HISAF(History of Major Surgery for non-AF)

Power |

Percent |

Percent of rows

Percent of column |immediate 3 months |immediate 3 months |unknown |total

) within |Month within |Month| |

|Major surgery|Major surgery| |

Lip/lip | |

|       |        |        |        |        |   |  |   |
|-------|--------|--------|--------|--------|---|--|---|
|       | +      |        | +      |        | + |  | + |
| 1     | 149    | 11683  | 149    | 11981  |   |  |   |
|       | 1.24   | 97.51  | 1.24   | 100.00 |   |  |   |
|       | 1.24   | 97.51  | 1.24   |        |   |  |   |
|       | 100.00 | 100.00 | 100.00 |        |   |  |   |
|       | +      |        | +      |        | + |  | + |
| Total | 149    | 11683  | 149    | 11981  |   |  |   |
|       | 1.24   | 97.51  | 1.24   | 100.00 |   |  |   |

Treatment history at the time of obtaining Table 2-2 consent according to the presence or absence of proton-pump inhibitors

FREQ Procedure

|                      |       |                  | Cumulative |        |
|----------------------|-------|------------------|------------|--------|
| Percent of ALL power |       | Percent of power |            |        |
| 1                    | 11981 | 100.00           | 11981      | 100.00 |

Tables: ALL\* HISAF

ALL

HISAF(History of Major Surgery for non-AF)

Power |

Percent |

Percent of rows

Percent of column |immediate 3 months |immediate 3 months |unknown |total

) within |Month within |Month| |

|Major surgery|Major surgery| |

Lip/lip | |

|       |        |        |        |        |   |  |   |
|-------|--------|--------|--------|--------|---|--|---|
|       | +      |        | +      |        | + |  | + |
| 1     | 149    | 11683  | 149    | 11981  |   |  |   |
|       | 1.24   | 97.51  | 1.24   | 100.00 |   |  |   |
|       | 1.24   | 97.51  | 1.24   |        |   |  |   |
|       | 100.00 | 100.00 | 100.00 |        |   |  |   |
|       | +      |        | +      |        | + |  | + |
| Total | 149    | 11683  | 149    | 11981  |   |  |   |
|       | 1.24   | 97.51  | 1.24   | 100.00 |   |  |   |

Treatment history at the time of obtaining Table 2-2 consent according to the presence or absence of proton-pump inhibitors

FREQ Procedure

|   |       | Cumulative           |                  |        |
|---|-------|----------------------|------------------|--------|
|   |       | Percent of ALL power | Percent of power |        |
| 1 | 11981 | 100.00               | 11981            | 100.00 |

Tables: ALL\* HISBDYN

ALL

HISBDYN(History of Major Beeding)

| Power                   |        |        |        |  |
|-------------------------|--------|--------|--------|--|
| Percent                 |        |        |        |  |
| Percent of rows         |        |        |        |  |
| Percent of columns      | None   | With   | Total  |  |
| _____ + _____ + _____ + |        |        |        |  |
| 1                       | 11385  | 596    | 11981  |  |
|                         | 95.03  | 4.97   | 100.00 |  |
|                         | 95.03  | 4.97   |        |  |
|                         | 100.00 | 100.00 |        |  |
| _____ + _____ + _____ + |        |        |        |  |
| Total                   | 11385  | 596    | 11981  |  |
|                         | 95.03  | 4.97   | 100.00 |  |

Treatment history at the time of obtaining Table 2-2 consent according to the presence or absence of proton-pump inhibitors

FREQ Procedure

|   |       | Cumulative           |                  |        |
|---|-------|----------------------|------------------|--------|
|   |       | Percent of ALL power | Percent of power |        |
| 1 | 11981 | 100.00               | 11981            | 100.00 |

Tables: ALL\* HISBDYN

ALL

HISBDYN(History of Major Beeding)

| Power                   |        |        |        |  |
|-------------------------|--------|--------|--------|--|
| Percent                 |        |        |        |  |
| Percent of rows         |        |        |        |  |
| Percent of columns      | None   | With   | Total  |  |
| _____ + _____ + _____ + |        |        |        |  |
| 1                       | 11385  | 596    | 11981  |  |
|                         | 95.03  | 4.97   | 100.00 |  |
|                         | 95.03  | 4.97   |        |  |
|                         | 100.00 | 100.00 |        |  |
| _____ + _____ + _____ + |        |        |        |  |
| Total                   | 11385  | 596    | 11981  |  |
|                         | 95.03  | 4.97   | 100.00 |  |

Treatment history at the time of obtaining Table 2-2 consent according to the presence or absence of proton-pump inhibitors

FREQ Procedure

|   |       | Cumulative           |                  |        |
|---|-------|----------------------|------------------|--------|
|   |       | Percent of ALL power | Percent of power |        |
| 1 | 11981 | 100.00               | 11981            | 100.00 |

Table : ALL \* HISBD1

ALL

HISBD1(Intracranial Hemorrhage)

Power |

Percent |

Percent of rows

Percent of columns | None | With | Total

|   |        |        |        |  |   |
|---|--------|--------|--------|--|---|
|   | +      |        | +      |  | + |
| 1 | 11704  | 277    | 11981  |  |   |
|   | 97.69  | 2.31   | 100.00 |  |   |
|   | 97.69  | 2.31   |        |  |   |
|   | 100.00 | 100.00 |        |  |   |
|   | +      |        | +      |  | + |

Total 11704 277 11981

97.69      2.31      100.00

Treatment history at the time of obtaining Table 2-2 consent according to the presence or absence of proton-pump inhibitors

FREQ Procedure

|   |       | Cumulative           |                  |        |
|---|-------|----------------------|------------------|--------|
|   |       | Percent of ALL power | Percent of power |        |
| 1 | 11981 | 100.00               | 11981            | 100.00 |

Table : ALL \* HISBD1

ALL

HISBD1(Intracranial Hemorrhage)

| Power                   |        |        |        |
|-------------------------|--------|--------|--------|
| Percent                 |        |        |        |
| Percent of rows         |        |        |        |
| Percent of columns      | None   | With   | Total  |
| _____ + _____ + _____ + |        |        |        |
| 1                       | 11704  | 277    | 11981  |
|                         | 97.69  | 2.31   | 100.00 |
|                         | 97.69  | 2.31   |        |
|                         | 100.00 | 100.00 |        |
| _____ + _____ + _____ + |        |        |        |
| Total                   | 11704  | 277    | 11981  |
|                         | 97.69  | 2.31   | 100.00 |



Treatment history at the time of obtaining Table 2-2 consent according to the presence or absence of proton-pump inhibitors

FREQ Procedure

|   |       | Cumulative           |                  |        |
|---|-------|----------------------|------------------|--------|
|   |       | Percent of ALL power | Percent of power |        |
| 1 | 11981 | 100.00               | 11981            | 100.00 |

Table : ALL \* HISBD2

ALL

HISBD2(Upper Gastrointestinal Bleeding)

| Power                   |        |        |        |  |
|-------------------------|--------|--------|--------|--|
| Percent                 |        |        |        |  |
| Percent of rows         |        |        |        |  |
| Percent of columns      | None   | With   | Total  |  |
| _____ + _____ + _____ + |        |        |        |  |
| 1                       | 11813  | 168    | 11981  |  |
|                         | 98.60  | 1.40   | 100.00 |  |
|                         | 98.60  | 1.40   |        |  |
|                         | 100.00 | 100.00 |        |  |
| _____ + _____ + _____ + |        |        |        |  |
| Total                   | 11813  | 168    | 11981  |  |
|                         | 98.60  | 1.40   | 100.00 |  |

Treatment history at the time of obtaining Table 2-2 consent according to the presence or absence of proton-pump inhibitors

FREQ Procedure

|   |       | Cumulative           |                  |        |
|---|-------|----------------------|------------------|--------|
|   |       | Percent of ALL power | Percent of power |        |
| 1 | 11981 | 100.00               | 11981            | 100.00 |

Table : ALL \* HISBD2

ALL

HISBD2(Upper Gastrointestinal Bleeding)

| Power              |        |        |        |   |
|--------------------|--------|--------|--------|---|
| Percent            |        |        |        |   |
| Percent of rows    |        |        |        |   |
| Percent of columns | None   | With   | Total  |   |
| _____              | +      | +      | _____  | + |
| 1                  | 11813  | 168    | 11981  |   |
|                    | 98.60  | 1.40   | 100.00 |   |
|                    | 98.60  | 1.40   |        |   |
|                    | 100.00 | 100.00 |        |   |
| _____              | +      | +      | _____  | + |
| Total              | 11813  | 168    | 11981  |   |
|                    | 98.60  | 1.40   | 100.00 |   |

Treatment history at the time of obtaining Table 2-2 consent according to the presence or absence of proton-pump inhibitors

FREQ Procedure

|   |                      |        | Cumulative       |        |
|---|----------------------|--------|------------------|--------|
|   | Percent of ALL power |        | Percent of power |        |
| 1 | 11981                | 100.00 | 11981            | 100.00 |

Table : ALL \* HISBD3

ALL

HISBD3(Lower Gastrointestinal Bleeding)

| Power                   |        |        |        |
|-------------------------|--------|--------|--------|
| Percent                 |        |        |        |
| Percent of rows         |        |        |        |
| Percent of columns      | None   | With   | Total  |
| _____ + _____ + _____ + |        |        |        |
| 1                       | 11831  | 150    | 11981  |
|                         | 98.75  | 1.25   | 100.00 |
|                         | 98.75  | 1.25   |        |
|                         | 100.00 | 100.00 |        |
| _____ + _____ + _____ + |        |        |        |
| Total                   | 11831  | 150    | 11981  |
|                         | 98.75  | 1.25   | 100.00 |

Treatment history at the time of obtaining Table 2-2 consent according to the presence or absence of proton-pump inhibitors

FREQ Procedure

|   |       | Cumulative           |                  |        |
|---|-------|----------------------|------------------|--------|
|   |       | Percent of ALL power | Percent of power |        |
| 1 | 11981 | 100.00               | 11981            | 100.00 |

Table : ALL \* HISBD3

ALL

HISBD3(Lower Gastrointestinal Bleeding)

| Power                   |        |        |        |  |
|-------------------------|--------|--------|--------|--|
| Percent                 |        |        |        |  |
| Percent of rows         |        |        |        |  |
| Percent of columns      | None   | With   | Total  |  |
| _____ + _____ + _____ + |        |        |        |  |
| 1                       | 11831  | 150    | 11981  |  |
|                         | 98.75  | 1.25   | 100.00 |  |
|                         | 98.75  | 1.25   |        |  |
|                         | 100.00 | 100.00 |        |  |
| _____ + _____ + _____ + |        |        |        |  |
| Total                   | 11831  | 150    | 11981  |  |
|                         | 98.75  | 1.25   | 100.00 |  |

Treatment history at the time of obtaining Table 2-2 consent according to the presence or absence of proton-pump inhibitors

FREQ Procedure

|                      |                  | Cumulative           |                  |
|----------------------|------------------|----------------------|------------------|
| Percent of ALL power | Percent of power | Percent of ALL power | Percent of power |
| 1                    | 11981            | 100.00               | 11981 100.00     |

Table : ALL \* HISBD4

ALL HISBD4(Other Beeding)

| Power              |         |         |        |
|--------------------|---------|---------|--------|
| Percent            |         |         |        |
| Percent of rows    |         |         |        |
| Percent of columns | None    | With    | Total  |
| +_____+            | +_____+ | +_____+ | +      |
| 1                  | 11874   | 107     | 11981  |
|                    | 99.11   | 0.89    | 100.00 |
|                    | 99.11   | 0.89    |        |
|                    | 100.00  | 100.00  |        |
| +_____+            | +_____+ | +_____+ | +      |
| Total              | 11874   | 107     | 11981  |
|                    | 99.11   | 0.89    | 100.00 |

Treatment history at the time of obtaining Table 2-2 consent according to the presence or absence of proton-pump inhibitors

FREQ Procedure

|                      |       | Cumulative       |              |
|----------------------|-------|------------------|--------------|
| Percent of ALL power |       | Percent of power |              |
| 1                    | 11981 | 100.00           | 11981 100.00 |

Table : ALL \* HISBD4

ALL HISBD4(Other Beeding)

| Power              |         |         |        |
|--------------------|---------|---------|--------|
| Percent            |         |         |        |
| Percent of rows    |         |         |        |
| Percent of columns | None    | With    | Total  |
| +_____+            | +_____+ | +_____+ | +      |
| 1                  | 11874   | 107     | 11981  |
|                    | 99.11   | 0.89    | 100.00 |
|                    | 99.11   | 0.89    |        |
|                    | 100.00  | 100.00  |        |
| +_____+            | +_____+ | +_____+ | +      |
| Total              | 11874   | 107     | 11981  |
|                    | 99.11   | 0.89    | 100.00 |

Treatment history at the time of obtaining Table 2-2 consent according to the presence or absence of proton-pump inhibitors

FREQ Procedure

|                      |       |                  | Cumulative |        |
|----------------------|-------|------------------|------------|--------|
| Percent of ALL power |       | Percent of power |            |        |
| 1                    | 11981 | 100.00           | 11981      | 100.00 |

Tables: ALL\* HISAL

ALL

HISAL(History of Drug Allergy)

Power |

Percent |

Percent of rows

Percent of columns | None | With | Total

|       |        |        |        |  |   |
|-------|--------|--------|--------|--|---|
|       | +      |        | +      |  | + |
| 1     | 11073  | 908    | 11981  |  |   |
|       | 92.42  | 7.58   | 100.00 |  |   |
|       | 92.42  | 7.58   |        |  |   |
|       | 100.00 | 100.00 |        |  |   |
|       | +      |        | +      |  | + |
| Total | 11073  | 908    | 11981  |  |   |
|       | 92.42  | 7.58   | 100.00 |  |   |

Treatment history at the time of obtaining Table 2-2 consent according to the presence or absence of proton-pump inhibitors

FREQ Procedure

|                      |       |                  | Cumulative |        |
|----------------------|-------|------------------|------------|--------|
| Percent of ALL power |       | Percent of power |            |        |
| 1                    | 11981 | 100.00           | 11981      | 100.00 |

Tables: ALL\* HISAL

ALL

HISAL(History of Drug Allergy)

Power |

Percent |

Percent of rows

Percent of columns | None | With | Total

|       |        |        |        |  |   |
|-------|--------|--------|--------|--|---|
|       | +      |        | +      |  | + |
| 1     | 11073  | 908    | 11981  |  |   |
|       | 92.42  | 7.58   | 100.00 |  |   |
|       | 92.42  | 7.58   |        |  |   |
|       | 100.00 | 100.00 |        |  |   |
|       | +      |        | +      |  | + |
| Total | 11073  | 908    | 11981  |  |   |
|       | 92.42  | 7.58   | 100.00 |  |   |



Treatment history at the time of obtaining Table 2-2 consent according to the presence or absence of proton-pump inhibitors

FREQ Procedure

|                      |                  | Cumulative |              |
|----------------------|------------------|------------|--------------|
| Percent of ALL power | Percent of power |            |              |
| 1                    | 11981            | 100.00     | 11981 100.00 |

Tables: ALL\* AFTYP

ALL AFTYP(Type of AF)

| Power                     |          |            |              |            |        |
|---------------------------|----------|------------|--------------|------------|--------|
| Percent                   |          |            |              |            |        |
| Percent of rows           |          |            |              |            |        |
| Percent of columns        | Episodic | Persistent | Long lasting | Persistent | Total  |
| sex                       |          |            |              |            |        |
| +-----+-----+-----+-----+ |          |            |              |            |        |
| 1                         | 5351     | 1899       | 1486         | 3245       | 11981  |
|                           | 44.66    | 15.85      | 12.40        | 27.08      | 100.00 |
|                           | 44.66    | 15.85      | 12.40        | 27.08      |        |
|                           | 100.00   | 100.00     | 100.00       | 100.00     |        |
| +-----+-----+-----+-----+ |          |            |              |            |        |
| Total                     | 5351     | 1899       | 1486         | 3245       | 11981  |
|                           | 44.66    | 15.85      | 12.40        | 27.08      | 100.00 |

Treatment history at the time of obtaining Table 2-2 consent according to the presence or absence of proton-pump inhibitors

FREQ Procedure

|   |       | Cumulative           |                  |        |
|---|-------|----------------------|------------------|--------|
|   |       | Percent of ALL power | Percent of power |        |
| 1 | 11981 | 100.00               | 11981            | 100.00 |

Tables: ALL\* AFTYP

ALL AFTYP(Type of AF)

| Power                     |          |            |              |            |        |
|---------------------------|----------|------------|--------------|------------|--------|
| Percent                   |          |            |              |            |        |
| Percent of rows           |          |            |              |            |        |
| Percent of columns        | Episodic | Persistent | Long lasting | Persistent | Total  |
| sex                       |          |            |              |            |        |
| +_____+_____+_____+_____+ |          |            |              |            |        |
| 1                         | 5351     | 1899       | 1486         | 3245       | 11981  |
|                           | 44.66    | 15.85      | 12.40        | 27.08      | 100.00 |
|                           | 44.66    | 15.85      | 12.40        | 27.08      |        |
|                           | 100.00   | 100.00     | 100.00       | 100.00     |        |
| +_____+_____+_____+_____+ |          |            |              |            |        |
| Total                     | 5351     | 1899       | 1486         | 3245       | 11981  |
|                           | 44.66    | 15.85      | 12.40        | 27.08      | 100.00 |

Treatment history at the time of obtaining Table 2-2 consent according to the presence or absence of proton-pump inhibitors

FREQ Procedure

|   |       | Cumulative           |                  |        |
|---|-------|----------------------|------------------|--------|
|   |       | Percent of ALL power | Percent of power |        |
| 1 | 11981 | 100.00               | 11981            | 100.00 |

Tables: ALL\* AFTYP

ALL AFTYP(Type of AF)

| Power                     |          |            |              |            |        |
|---------------------------|----------|------------|--------------|------------|--------|
| Percent                   |          |            |              |            |        |
| Percent of rows           |          |            |              |            |        |
| Percent of columns        | Episodic | Persistent | Long lasting | Persistent | Total  |
| sex                       |          |            |              |            |        |
| +_____+_____+_____+_____+ |          |            |              |            |        |
| 1                         | 5351     | 1899       | 1486         | 3245       | 11981  |
|                           | 44.66    | 15.85      | 12.40        | 27.08      | 100.00 |
|                           | 44.66    | 15.85      | 12.40        | 27.08      |        |
|                           | 100.00   | 100.00     | 100.00       | 100.00     |        |
| +_____+_____+_____+_____+ |          |            |              |            |        |
| Total                     | 5351     | 1899       | 1486         | 3245       | 11981  |
|                           | 44.66    | 15.85      | 12.40        | 27.08      | 100.00 |

Treatment history at the time of obtaining Table 2-2 consent according to the presence or absence of proton-pump inhibitors

FREQ Procedure

|   |       | Cumulative           |                  |        |
|---|-------|----------------------|------------------|--------|
|   |       | Percent of ALL power | Percent of power |        |
| 1 | 11981 | 100.00               | 11981            | 100.00 |

Tables: ALL\* AFTYP

ALL AFTYP(Type of AF)

| Power              |          |            |              |            |        |
|--------------------|----------|------------|--------------|------------|--------|
| Percent            |          |            |              |            |        |
| Percent of rows    |          |            |              |            |        |
| Percent of columns | Episodic | Persistent | Long lasting | Persistent | Total  |
| sex                |          |            |              |            |        |
| _____+             | _____+   | _____+     | _____+       | _____+     | _____+ |
| 1                  | 5351     | 1899       | 1486         | 3245       | 11981  |
|                    | 44.66    | 15.85      | 12.40        | 27.08      | 100.00 |
|                    | 44.66    | 15.85      | 12.40        | 27.08      |        |
|                    | 100.00   | 100.00     | 100.00       | 100.00     |        |
| _____+             | _____+   | _____+     | _____+       | _____+     | _____+ |
| Total              | 5351     | 1899       | 1486         | 3245       | 11981  |
|                    | 44.66    | 15.85      | 12.40        | 27.08      | 100.00 |

Treatment history at the time of obtaining Table 2-2 consent according to the presence or absence of proton-pump inhibitors

FREQ Procedure

|   |       | Cumulative           |                  |        |
|---|-------|----------------------|------------------|--------|
|   |       | Percent of ALL power | Percent of power |        |
| 1 | 11981 | 100.00               | 11981            | 100.00 |

Tables: ALL\* AFTYP

ALL AFTYP(Type of AF)

| Power                     |          |            |              |            |        |
|---------------------------|----------|------------|--------------|------------|--------|
| Percent                   |          |            |              |            |        |
| Percent of rows           |          |            |              |            |        |
| Percent of columns        | Episodic | Persistent | Long lasting | Persistent | Total  |
| sex                       |          |            |              |            |        |
| +_____+_____+_____+_____+ |          |            |              |            |        |
| 1                         | 5351     | 1899       | 1486         | 3245       | 11981  |
|                           | 44.66    | 15.85      | 12.40        | 27.08      | 100.00 |
|                           | 44.66    | 15.85      | 12.40        | 27.08      |        |
|                           | 100.00   | 100.00     | 100.00       | 100.00     |        |
| +_____+_____+_____+_____+ |          |            |              |            |        |
| Total                     | 5351     | 1899       | 1486         | 3245       | 11981  |
|                           | 44.66    | 15.85      | 12.40        | 27.08      | 100.00 |

Treatment history at the time of obtaining Table 2-2 consent according to the presence or absence of proton-pump inhibitors

FREQ Procedure

|                      |       | Cumulative       |              |
|----------------------|-------|------------------|--------------|
| Percent of ALL power |       | Percent of power |              |
| 1                    | 11981 | 100.00           | 11981 100.00 |

Tables: ALL\* AFTYPN

ALL AFTYPN

| Power                            |        |        |
|----------------------------------|--------|--------|
| Percent                          |        |        |
| Percent of rows                  |        |        |
| Percentage of columns   5  Total |        |        |
|                                  | +      | +      |
| 1                                | 3385   | 3385   |
|                                  | 100.00 | 100.00 |
|                                  | 100.00 |        |
|                                  | 100.00 |        |
|                                  | +      | +      |
| Total 3385                       | 3385   |        |
|                                  | 100.00 | 100.00 |

Degree of missing values = 8596

Treatment history at the time of obtaining Table 2-2 consent according to the presence or absence of proton-pump inhibitors

FREQ Procedure

|   |       | Cumulative           |                  |        |
|---|-------|----------------------|------------------|--------|
|   |       | Percent of ALL power | Percent of power |        |
| 1 | 11981 | 100.00               | 11981            | 100.00 |

Tables: ALL\* AFTYP

ALL AFTYP(Type of AF)

| Power              |          |            |              |            |        |
|--------------------|----------|------------|--------------|------------|--------|
| Percent            |          |            |              |            |        |
| Percent of rows    |          |            |              |            |        |
| Percent of columns | Episodic | Persistent | Long lasting | Persistent | Total  |
| sex                |          |            |              |            |        |
| _____+             | _____+   | _____+     | _____+       | _____+     | _____+ |
| 1                  | 5351     | 1899       | 1486         | 3245       | 11981  |
|                    | 44.66    | 15.85      | 12.40        | 27.08      | 100.00 |
|                    | 44.66    | 15.85      | 12.40        | 27.08      |        |
|                    | 100.00   | 100.00     | 100.00       | 100.00     |        |
| _____+             | _____+   | _____+     | _____+       | _____+     | _____+ |
| Total              | 5351     | 1899       | 1486         | 3245       | 11981  |
|                    | 44.66    | 15.85      | 12.40        | 27.08      | 100.00 |

Treatment history at the time of obtaining Table 2-2 consent according to the presence or absence of proton-pump inhibitors

FREQ Procedure

|   |                      |        | Cumulative       |        |
|---|----------------------|--------|------------------|--------|
|   | Percent of ALL power |        | Percent of power |        |
| 1 | 11981                | 100.00 | 11981            | 100.00 |

Tables: ALL\* AFTHSPE

ALL

AFTHSPE(Non-drug Therapy for AF)

| Power              |        |        |        |
|--------------------|--------|--------|--------|
| Percent            |        |        |        |
| Percent of rows    |        |        |        |
| Percent of columns | None   | With   | Total  |
|                    | +      | +      | +      |
| 1                  | 9409   | 2572   | 11981  |
|                    | 78.53  | 21.47  | 100.00 |
|                    | 78.53  | 21.47  |        |
|                    | 100.00 | 100.00 |        |
|                    | +      | +      | +      |
| Total              | 9409   | 2572   | 11981  |
|                    | 78.53  | 21.47  | 100.00 |



Treatment history at the time of obtaining Table 2-2 consent according to the presence or absence of proton-pump inhibitors

FREQ Procedure

|   |                      |        | Cumulative       |        |
|---|----------------------|--------|------------------|--------|
|   | Percent of ALL power |        | Percent of power |        |
| 1 | 11981                | 100.00 | 11981            | 100.00 |

Tables: ALL\* AFTHSPE

ALL

AFTHSPE(Non-drug Therapy for AF)

| Power              |        |        |        |
|--------------------|--------|--------|--------|
| Percent            |        |        |        |
| Percent of rows    |        |        |        |
| Percent of columns | None   | With   | Total  |
|                    | +      | +      | +      |
| 1                  | 9409   | 2572   | 11981  |
|                    | 78.53  | 21.47  | 100.00 |
|                    | 78.53  | 21.47  |        |
|                    | 100.00 | 100.00 |        |
|                    | +      | +      | +      |
| Total              | 9409   | 2572   | 11981  |
|                    | 78.53  | 21.47  | 100.00 |

Treatment history at the time of obtaining Table 2-2 consent according to the presence or absence of proton-pump inhibitors

FREQ Procedure

|   |                      |        | Cumulative       |        |
|---|----------------------|--------|------------------|--------|
|   | Percent of ALL power |        | Percent of power |        |
| 1 | 11981                | 100.00 | 11981            | 100.00 |

Table : ALL \* AFTHSPE1

ALL

AFTHSPE1(Catheter Ablation)

| Power                   |        |        |        |
|-------------------------|--------|--------|--------|
| Percent                 |        |        |        |
| Percent of rows         |        |        |        |
| Percent of columns      | None   | With   | Total  |
| _____ + _____ + _____ + |        |        |        |
| 1                       | 10578  | 1403   | 11981  |
|                         | 88.29  | 11.71  | 100.00 |
|                         | 88.29  | 11.71  |        |
|                         | 100.00 | 100.00 |        |
| _____ + _____ + _____ + |        |        |        |
| Total                   | 10578  | 1403   | 11981  |
|                         | 88.29  | 11.71  | 100.00 |

Treatment history at the time of obtaining Table 2-2 consent according to the presence or absence of proton-pump inhibitors

FREQ Procedure

|   |                      |        | Cumulative       |        |
|---|----------------------|--------|------------------|--------|
|   | Percent of ALL power |        | Percent of power |        |
| 1 | 11981                | 100.00 | 11981            | 100.00 |

Table : ALL \* AFTHSPE1

ALL

AFTHSPE1(Catheter Ablation)

| Power              |        |        |        |
|--------------------|--------|--------|--------|
| Percent            |        |        |        |
| Percent of rows    |        |        |        |
| Percent of columns | None   | With   | Total  |
|                    | +      | +      | +      |
| 1                  | 10578  | 1403   | 11981  |
|                    | 88.29  | 11.71  | 100.00 |
|                    | 88.29  | 11.71  |        |
|                    | 100.00 | 100.00 |        |
|                    | +      | +      | +      |
| Total              | 10578  | 1403   | 11981  |
|                    | 88.29  | 11.71  | 100.00 |

Treatment history at the time of obtaining Table 2-2 consent according to the presence or absence of proton-pump inhibitors

FREQ Procedure

|                      |       |                  | Cumulative |        |
|----------------------|-------|------------------|------------|--------|
| Percent of ALL power |       | Percent of power |            |        |
| 1                    | 11981 | 100.00           | 11981      | 100.00 |

Table : ALL \* AFTHSPE2

ALL AFTHSPE2(Cardioversion)

| Power              |           |           |           |
|--------------------|-----------|-----------|-----------|
| Percent            |           |           |           |
| Percent of rows    |           |           |           |
| Percent of columns | None      | With      | Total     |
|                    | + _____ + | + _____ + | + _____ + |
| 1                  | 11683     | 298       | 11981     |
|                    | 97.51     | 2.49      | 100.00    |
|                    | 97.51     | 2.49      |           |
|                    | 100.00    | 100.00    |           |
|                    | + _____ + | + _____ + | + _____ + |
| Total              | 11683     | 298       | 11981     |
|                    | 97.51     | 2.49      | 100.00    |

Treatment history at the time of obtaining Table 2-2 consent according to the presence or absence of proton-pump inhibitors

FREQ Procedure

|                      |       |                  | Cumulative |        |
|----------------------|-------|------------------|------------|--------|
| Percent of ALL power |       | Percent of power |            |        |
| 1                    | 11981 | 100.00           | 11981      | 100.00 |

Table : ALL \* AFTHSPE2

ALL AFTHSPE2(Cardioversion)

| Power              |           |           |           |
|--------------------|-----------|-----------|-----------|
| Percent            |           |           |           |
| Percent of rows    |           |           |           |
| Percent of columns | None      | With      | Total     |
|                    | + _____ + | + _____ + | + _____ + |
| 1                  | 11683     | 298       | 11981     |
|                    | 97.51     | 2.49      | 100.00    |
|                    | 97.51     | 2.49      |           |
|                    | 100.00    | 100.00    |           |
|                    | + _____ + | + _____ + | + _____ + |
| Total              | 11683     | 298       | 11981     |
|                    | 97.51     | 2.49      | 100.00    |

Treatment history at the time of obtaining Table 2-2 consent according to the presence or absence of proton-pump inhibitors

FREQ Procedure

|                      |       | Cumulative       |              |
|----------------------|-------|------------------|--------------|
| Percent of ALL power |       | Percent of power |              |
| 1                    | 11981 | 100.00           | 11981 100.00 |

Table : ALL \* AFTHSPE3

ALL AFTHSPE3(ICD)

| Power              |          |         |        |
|--------------------|----------|---------|--------|
| Percent            |          |         |        |
| Percent of rows    |          |         |        |
| Percent of columns | None     | With    | Total  |
| +_____+            | +_____+  | +_____+ | +      |
| 1                  | 11905    | 76      | 11981  |
|                    | 99.37    | 0.63    | 100.00 |
|                    | 99.37    | 0.63    |        |
|                    | 100.00   | 100.00  |        |
| +_____+            | +_____+  | +_____+ | +      |
| Total              | 11905 76 | 11981   |        |
|                    | 99.37    | 0.63    | 100.00 |

Treatment history at the time of obtaining Table 2-2 consent according to the presence or absence of proton-pump inhibitors

FREQ Procedure

|                      |       | Cumulative       |              |
|----------------------|-------|------------------|--------------|
| Percent of ALL power |       | Percent of power |              |
| 1                    | 11981 | 100.00           | 11981 100.00 |

Table : ALL \* AFTHSPE3

ALL AFTHSPE3(ICD)

| Power              |          |        |        |
|--------------------|----------|--------|--------|
| Percent            |          |        |        |
| Percent of rows    |          |        |        |
| Percent of columns | None     | With   | Total  |
|                    | +        | +      | +      |
| 1                  | 11905    | 76     | 11981  |
|                    | 99.37    | 0.63   | 100.00 |
|                    | 99.37    | 0.63   |        |
|                    | 100.00   | 100.00 |        |
|                    | +        | +      | +      |
| Total              | 11905 76 | 11981  |        |
|                    | 99.37    | 0.63   | 100.00 |

Treatment history at the time of obtaining Table 2-2 consent according to the presence or absence of proton-pump inhibitors

FREQ Procedure

|   |       | Cumulative           |                  |        |
|---|-------|----------------------|------------------|--------|
|   |       | Percent of ALL power | Percent of power |        |
| 1 | 11981 | 100.00               | 11981            | 100.00 |

Table : ALL \* AFTHSPE4

ALL

AFTHSPE4(Pacemaker Implantation)

| Power                   |        |        |        |  |
|-------------------------|--------|--------|--------|--|
| Percent                 |        |        |        |  |
| Percent of rows         |        |        |        |  |
| Percent of columns      | None   | With   | Total  |  |
| _____ + _____ + _____ + |        |        |        |  |
| 1                       | 10926  | 1055   | 11981  |  |
|                         | 91.19  | 8.81   | 100.00 |  |
|                         | 91.19  | 8.81   |        |  |
|                         | 100.00 | 100.00 |        |  |
| _____ + _____ + _____ + |        |        |        |  |
| Total                   | 10926  | 1055   | 11981  |  |
|                         | 91.19  | 8.81   | 100.00 |  |



Treatment history at the time of obtaining Table 2-2 consent according to the presence or absence of proton-pump inhibitors

FREQ Procedure

|   |       | Cumulative           |                  |        |
|---|-------|----------------------|------------------|--------|
|   |       | Percent of ALL power | Percent of power |        |
| 1 | 11981 | 100.00               | 11981            | 100.00 |

Table : ALL \* AFTHSPE4

ALL

AFTHSPE4(Pacemaker Implantation)

| Power                   |        |        |        |  |
|-------------------------|--------|--------|--------|--|
| Percent                 |        |        |        |  |
| Percent of rows         |        |        |        |  |
| Percent of columns      | None   | With   | Total  |  |
| _____ + _____ + _____ + |        |        |        |  |
| 1                       | 10926  | 1055   | 11981  |  |
|                         | 91.19  | 8.81   | 100.00 |  |
|                         | 91.19  | 8.81   |        |  |
|                         | 100.00 | 100.00 |        |  |
| _____ + _____ + _____ + |        |        |        |  |
| Total                   | 10926  | 1055   | 11981  |  |
|                         | 91.19  | 8.81   | 100.00 |  |

Treatment history at the time of obtaining Table 2-2 consent according to the presence or absence of proton-pump inhibitors

FREQ Procedure

|   |       | Cumulative           |                  |        |
|---|-------|----------------------|------------------|--------|
|   |       | Percent of ALL power | Percent of power |        |
| 1 | 11981 | 100.00               | 11981            | 100.00 |

Table : ALL \* AFTHSPE5

ALL

AFTHSPE5(Other Non-drug Therapy)

| Power                   |        |        |        |  |
|-------------------------|--------|--------|--------|--|
| Percent                 |        |        |        |  |
| Percent of rows         |        |        |        |  |
| Percent of columns      | None   | With   | Total  |  |
| _____ + _____ + _____ + |        |        |        |  |
| 1                       | 11925  | 56     | 11981  |  |
|                         | 99.53  | 0.47   | 100.00 |  |
|                         | 99.53  | 0.47   |        |  |
|                         | 100.00 | 100.00 |        |  |
| _____ + _____ + _____ + |        |        |        |  |
| Total                   | 11925  | 56     | 11981  |  |
|                         | 99.53  | 0.47   | 100.00 |  |

Treatment history at the time of obtaining Table 2-2 consent according to the presence or absence of proton-pump inhibitors

FREQ Procedure

|   |       | Cumulative           |                  |        |
|---|-------|----------------------|------------------|--------|
|   |       | Percent of ALL power | Percent of power |        |
| 1 | 11981 | 100.00               | 11981            | 100.00 |

Table : ALL \* AFTHSPE5

ALL

AFTHSPE5(Other Non-drug Therapy)

| Power                   |        |        |        |  |
|-------------------------|--------|--------|--------|--|
| Percent                 |        |        |        |  |
| Percent of rows         |        |        |        |  |
| Percent of columns      | None   | With   | Total  |  |
| _____ + _____ + _____ + |        |        |        |  |
| 1                       | 11925  | 56     | 11981  |  |
|                         | 99.53  | 0.47   | 100.00 |  |
|                         | 99.53  | 0.47   |        |  |
|                         | 100.00 | 100.00 |        |  |
| _____ + _____ + _____ + |        |        |        |  |
| Total                   | 11925  | 56     | 11981  |  |
|                         | 99.53  | 0.47   | 100.00 |  |

Treatment history at the time of obtaining Table 2-2 consent according to the presence or absence of proton-pump inhibitors

FREQ Procedure

|                      |       | Cumulative       |              |
|----------------------|-------|------------------|--------------|
| Percent of ALL power |       | Percent of power |              |
| 1                    | 20509 | 100.00           | 20509 100.00 |

Tables: ALL\* HISAF

ALL

HISAF(History of Major Surgery for non-AF)

Power |

Percent |

Percent of rows

Percent of column |immediate 3 months |immediate 3 months |unknown |total

) within |Month within |Month| |

|Major surgery|Major surgery| |

Lip/lip | |

|       |        |        |        |        |   |  |   |
|-------|--------|--------|--------|--------|---|--|---|
|       | +      |        | +      |        | + |  | + |
| 1     | 187    | 20007  | 315    | 20509  |   |  |   |
|       | 0.91   | 97.55  | 1.54   | 100.00 |   |  |   |
|       | 0.91   | 97.55  | 1.54   |        |   |  |   |
|       | 100.00 | 100.00 | 100.00 |        |   |  |   |
|       | +      |        | +      |        | + |  | + |
| Total | 187    | 20007  | 315    | 20509  |   |  |   |
|       | 0.91   | 97.55  | 1.54   | 100.00 |   |  |   |

Treatment history at the time of obtaining Table 2-2 consent according to the presence or absence of proton-pump inhibitors

FREQ Procedure

|                      |       | Cumulative       |              |
|----------------------|-------|------------------|--------------|
| Percent of ALL power |       | Percent of power |              |
| 1                    | 20509 | 100.00           | 20509 100.00 |

Tables: ALL\* HISAF

ALL

HISAF(History of Major Surgery for non-AF)

Power |

Percent |

Percent of rows

Percent of column |immediate 3 months |immediate 3 months |unknown |total

) within |Month within |Month| |

|Major surgery|Major surgery| |

Lip/lip | |

|       |        |        |        |        |   |  |   |
|-------|--------|--------|--------|--------|---|--|---|
|       | +      |        | +      |        | + |  | + |
| 1     | 187    | 20007  | 315    | 20509  |   |  |   |
|       | 0.91   | 97.55  | 1.54   | 100.00 |   |  |   |
|       | 0.91   | 97.55  | 1.54   |        |   |  |   |
|       | 100.00 | 100.00 | 100.00 |        |   |  |   |
|       | +      |        | +      |        | + |  | + |
| Total | 187    | 20007  | 315    | 20509  |   |  |   |
|       | 0.91   | 97.55  | 1.54   | 100.00 |   |  |   |

Treatment history at the time of obtaining Table 2-2 consent according to the presence or absence of proton-pump inhibitors

FREQ Procedure

|                      |       | Cumulative       |              |
|----------------------|-------|------------------|--------------|
| Percent of ALL power |       | Percent of power |              |
| 1                    | 20509 | 100.00           | 20509 100.00 |

Tables: ALL\* HISAF

ALL

HISAF(History of Major Surgery for non-AF)

Power |

Percent |

Percent of rows

Percent of column |immediate 3 months |immediate 3 months |unknown |total

) within |Month within |Month| |

|Major surgery|Major surgery| |

Lip/lip | |

|       |        |        |        |        |   |  |   |
|-------|--------|--------|--------|--------|---|--|---|
|       | +      |        | +      |        | + |  | + |
| 1     | 187    | 20007  | 315    | 20509  |   |  |   |
|       | 0.91   | 97.55  | 1.54   | 100.00 |   |  |   |
|       | 0.91   | 97.55  | 1.54   |        |   |  |   |
|       | 100.00 | 100.00 | 100.00 |        |   |  |   |
|       | +      |        | +      |        | + |  | + |
| Total | 187    | 20007  | 315    | 20509  |   |  |   |
|       | 0.91   | 97.55  | 1.54   | 100.00 |   |  |   |

Treatment history at the time of obtaining Table 2-2 consent according to the presence or absence of proton-pump inhibitors

FREQ Procedure

|                      |                  | Cumulative           |                  |
|----------------------|------------------|----------------------|------------------|
| Percent of ALL power | Percent of power | Percent of ALL power | Percent of power |
| 1                    | 20509            | 100.00               | 20509 100.00     |

Tables: ALL\* HISBDYN

ALL

HISBDYN(History of Major Beeding)

| Power              |         |         |        |
|--------------------|---------|---------|--------|
| Percent            |         |         |        |
| Percent of rows    |         |         |        |
| Percent of columns | None    | With    | Total  |
| +_____+            | +_____+ | +_____+ | +      |
| 1                  | 19844   | 665     | 20509  |
|                    | 96.76   | 3.24    | 100.00 |
|                    | 96.76   | 3.24    |        |
|                    | 100.00  | 100.00  |        |
| +_____+            | +_____+ | +_____+ | +      |
| Total              | 19844   | 665     | 20509  |
|                    | 96.76   | 3.24    | 100.00 |

Treatment history at the time of obtaining Table 2-2 consent according to the presence or absence of proton-pump inhibitors

FREQ Procedure

|                      |       |                  | Cumulative |        |
|----------------------|-------|------------------|------------|--------|
| Percent of ALL power |       | Percent of power |            |        |
| 1                    | 20509 | 100.00           | 20509      | 100.00 |

Tables: ALL\* HISBDYN

ALL

HISBDYN(History of Major Beeding)

| Power                   |        |        |        |
|-------------------------|--------|--------|--------|
| Percent                 |        |        |        |
| Percent of rows         |        |        |        |
| Percent of columns      | None   | With   | Total  |
| _____ + _____ + _____ + |        |        |        |
| 1                       | 19844  | 665    | 20509  |
|                         | 96.76  | 3.24   | 100.00 |
|                         | 96.76  | 3.24   |        |
|                         | 100.00 | 100.00 |        |
| _____ + _____ + _____ + |        |        |        |
| Total                   | 19844  | 665    | 20509  |
|                         | 96.76  | 3.24   | 100.00 |



Treatment history at the time of obtaining Table 2-2 consent according to the presence or absence of proton-pump inhibitors

FREQ Procedure

|   |       | Cumulative           |                  |        |
|---|-------|----------------------|------------------|--------|
|   |       | Percent of ALL power | Percent of power |        |
| 1 | 20509 | 100.00               | 20509            | 100.00 |

Table : ALL \* HISBD1

ALL

HISBD1(Intracranial Hemorrhage)

Power |

Percent |

Percent of rows

Percent of columns | None | With | Total

|         |         |         |        |
|---------|---------|---------|--------|
| +_____+ | +_____+ | +_____+ |        |
| 1       | 20137   | 372     | 20509  |
|         | 98.19   | 1.81    | 100.00 |
|         | 98.19   | 1.81    |        |
|         | 100.00  | 100.00  |        |
| +_____+ | +_____+ | +_____+ |        |
| Total   | 20137   | 372     | 20509  |
|         | 98.19   | 1.81    | 100.00 |

Treatment history at the time of obtaining Table 2-2 consent according to the presence or absence of proton-pump inhibitors

FREQ Procedure

|   |       | Cumulative           |                  |        |
|---|-------|----------------------|------------------|--------|
|   |       | Percent of ALL power | Percent of power |        |
| 1 | 20509 | 100.00               | 20509            | 100.00 |

Table : ALL \* HISBD1

ALL

HISBD1(Intracranial Hemorrhage)

| Power                   |        |        |        |  |
|-------------------------|--------|--------|--------|--|
| Percent                 |        |        |        |  |
| Percent of rows         |        |        |        |  |
| Percent of columns      | None   | With   | Total  |  |
| _____ + _____ + _____ + |        |        |        |  |
| 1                       | 20137  | 372    | 20509  |  |
|                         | 98.19  | 1.81   | 100.00 |  |
|                         | 98.19  | 1.81   |        |  |
|                         | 100.00 | 100.00 |        |  |
| _____ + _____ + _____ + |        |        |        |  |
| Total                   | 20137  | 372    | 20509  |  |
|                         | 98.19  | 1.81   | 100.00 |  |

Treatment history at the time of obtaining Table 2-2 consent according to the presence or absence of proton-pump inhibitors

FREQ Procedure

|   |       | Cumulative           |                  |        |
|---|-------|----------------------|------------------|--------|
|   |       | Percent of ALL power | Percent of power |        |
| 1 | 20509 | 100.00               | 20509            | 100.00 |

Table : ALL \* HISBD2

ALL

HISBD2(Upper Gastrointestinal Bleeding)

| Power                   |        |        |        |  |
|-------------------------|--------|--------|--------|--|
| Percent                 |        |        |        |  |
| Percent of rows         |        |        |        |  |
| Percent of columns      | None   | With   | Total  |  |
| _____ + _____ + _____ + |        |        |        |  |
| 1                       | 20403  | 106    | 20509  |  |
|                         | 99.48  | 0.52   | 100.00 |  |
|                         | 99.48  | 0.52   |        |  |
|                         | 100.00 | 100.00 |        |  |
| _____ + _____ + _____ + |        |        |        |  |
| Total                   | 20403  | 106    | 20509  |  |
|                         | 99.48  | 0.52   | 100.00 |  |

Treatment history at the time of obtaining Table 2-2 consent according to the presence or absence of proton-pump inhibitors

FREQ Procedure

|   |                      |        | Cumulative       |        |
|---|----------------------|--------|------------------|--------|
|   | Percent of ALL power |        | Percent of power |        |
| 1 | 20509                | 100.00 | 20509            | 100.00 |

Table : ALL \* HISBD2

ALL

HISBD2(Upper Gastrointestinal Bleeding)

| Power              |        |        |        |
|--------------------|--------|--------|--------|
| Percent            |        |        |        |
| Percent of rows    |        |        |        |
| Percent of columns | None   | With   | Total  |
|                    | +      | +      | +      |
| 1                  | 20403  | 106    | 20509  |
|                    | 99.48  | 0.52   | 100.00 |
|                    | 99.48  | 0.52   |        |
|                    | 100.00 | 100.00 |        |
|                    | +      | +      | +      |
| Total              | 20403  | 106    | 20509  |
|                    | 99.48  | 0.52   | 100.00 |

Treatment history at the time of obtaining Table 2-2 consent according to the presence or absence of proton-pump inhibitors

FREQ Procedure

|   |       | Cumulative           |                  |        |
|---|-------|----------------------|------------------|--------|
|   |       | Percent of ALL power | Percent of power |        |
| 1 | 20509 | 100.00               | 20509            | 100.00 |

Table : ALL \* HISBD3

ALL

HISBD3(Lower Gastrointestinal Bleeding)

| Power                   |        |        |        |  |
|-------------------------|--------|--------|--------|--|
| Percent                 |        |        |        |  |
| Percent of rows         |        |        |        |  |
| Percent of columns      | None   | With   | Total  |  |
| _____ + _____ + _____ + |        |        |        |  |
| 1                       | 20351  | 158    | 20509  |  |
|                         | 99.23  | 0.77   | 100.00 |  |
|                         | 99.23  | 0.77   |        |  |
|                         | 100.00 | 100.00 |        |  |
| _____ + _____ + _____ + |        |        |        |  |
| Total                   | 20351  | 158    | 20509  |  |
|                         | 99.23  | 0.77   | 100.00 |  |

Treatment history at the time of obtaining Table 2-2 consent according to the presence or absence of proton-pump inhibitors

FREQ Procedure

|                      |                  | Cumulative           |                  |
|----------------------|------------------|----------------------|------------------|
| Percent of ALL power | Percent of power | Percent of ALL power | Percent of power |
| 1                    | 20509            | 100.00               | 20509 100.00     |

Table : ALL \* HISBD3

ALL

HISBD3(Lower Gastrointestinal Bleeding)

| Power                   |        |        |       |
|-------------------------|--------|--------|-------|
| Percent                 |        |        |       |
| Percent of rows         |        |        |       |
| Percent of columns      | None   | With   | Total |
| _____ + _____ + _____ + |        |        |       |
| 1                       | 20351  | 158    | 20509 |
| 99.23                   | 0.77   | 100.00 |       |
| 99.23                   | 0.77   |        |       |
| 100.00                  | 100.00 |        |       |
| _____ + _____ + _____ + |        |        |       |
| Total 20351             | 158    | 20509  |       |
| 99.23                   | 0.77   | 100.00 |       |

Treatment history at the time of obtaining Table 2-2 consent according to the presence or absence of proton-pump inhibitors

FREQ Procedure

|                      |                  | Cumulative           |                  |
|----------------------|------------------|----------------------|------------------|
| Percent of ALL power | Percent of power | Percent of ALL power | Percent of power |
| 1                    | 20509            | 100.00               | 20509 100.00     |

Table : ALL \* HISBD4

ALL HISBD4(Other Beeding)

| Power              |         |         |        |
|--------------------|---------|---------|--------|
| Percent            |         |         |        |
| Percent of rows    |         |         |        |
| Percent of columns | None    | With    | Total  |
| +_____+            | +_____+ | +_____+ | +      |
| 1                  | 20368   | 141     | 20509  |
|                    | 99.31   | 0.69    | 100.00 |
|                    | 99.31   | 0.69    |        |
|                    | 100.00  | 100.00  |        |
| +_____+            | +_____+ | +_____+ | +      |
| Total              | 20368   | 141     | 20509  |
|                    | 99.31   | 0.69    | 100.00 |

Treatment history at the time of obtaining Table 2-2 consent according to the presence or absence of proton-pump inhibitors

FREQ Procedure

|                      |       | Cumulative       |              |
|----------------------|-------|------------------|--------------|
| Percent of ALL power |       | Percent of power |              |
| 1                    | 20509 | 100.00           | 20509 100.00 |

Table : ALL \* HISBD4

ALL HISBD4(Other Beeding)

| Power              |        |        |        |
|--------------------|--------|--------|--------|
| Percent            |        |        |        |
| Percent of rows    |        |        |        |
| Percent of columns | None   | With   | Total  |
|                    | +      | +      | +      |
| 1                  | 20368  | 141    | 20509  |
|                    | 99.31  | 0.69   | 100.00 |
|                    | 99.31  | 0.69   |        |
|                    | 100.00 | 100.00 |        |
|                    | +      | +      | +      |
| Total              | 20368  | 141    | 20509  |
|                    | 99.31  | 0.69   | 100.00 |



Treatment history at the time of obtaining Table 2-2 consent according to the presence or absence of proton-pump inhibitors

FREQ Procedure

|   |       | Cumulative           |                  |        |
|---|-------|----------------------|------------------|--------|
|   |       | Percent of ALL power | Percent of power |        |
| 1 | 20509 | 100.00               | 20509            | 100.00 |

Tables: ALL\* HISAL

ALL

HISAL(History of Drug Allergy)

Power |

Percent |

Percent of rows

Percent of columns | None | With | Total

|         |         |         |         |
|---------|---------|---------|---------|
| +_____+ | +_____+ | +_____+ | +_____+ |
| 1       | 19204   | 1305    | 20509   |
|         | 93.64   | 6.36    | 100.00  |
|         | 93.64   | 6.36    |         |
|         | 100.00  | 100.00  |         |
| +_____+ | +_____+ | +_____+ | +_____+ |
| Total   | 19204   | 1305    | 20509   |
|         | 93.64   | 6.36    | 100.00  |

Treatment history at the time of obtaining Table 2-2 consent according to the presence or absence of proton-pump inhibitors

FREQ Procedure

|                      |       |                  | Cumulative |        |
|----------------------|-------|------------------|------------|--------|
| Percent of ALL power |       | Percent of power |            |        |
| 1                    | 20509 | 100.00           | 20509      | 100.00 |

Tables: ALL\* HISAL

ALL

HISAL(History of Drug Allergy)

Power |

Percent |

Percent of rows

Percent of columns | None | With | Total

|       |        |        |        |  |   |
|-------|--------|--------|--------|--|---|
|       | +      |        | +      |  | + |
| 1     | 19204  | 1305   | 20509  |  |   |
|       | 93.64  | 6.36   | 100.00 |  |   |
|       | 93.64  | 6.36   |        |  |   |
|       | 100.00 | 100.00 |        |  |   |
|       | +      |        | +      |  | + |
| Total | 19204  | 1305   | 20509  |  |   |
|       | 93.64  | 6.36   | 100.00 |  |   |

Treatment history at the time of obtaining Table 2-2 consent according to the presence or absence of proton-pump inhibitors

FREQ Procedure

|   |       | Cumulative           |                  |        |
|---|-------|----------------------|------------------|--------|
|   |       | Percent of ALL power | Percent of power |        |
| 1 | 20509 | 100.00               | 20509            | 100.00 |

Tables: ALL\* AFTYP

ALL AFTYP(Type of AF)

| Power                     |          |            |              |            |        |
|---------------------------|----------|------------|--------------|------------|--------|
| Percent                   |          |            |              |            |        |
| Percent of rows           |          |            |              |            |        |
| Percent of columns        | Episodic | Persistent | Long lasting | Persistent | Total  |
| sex                       |          |            |              |            |        |
| +_____+_____+_____+_____+ |          |            |              |            |        |
| 1                         | 8288     | 3482       | 2913         | 5826       | 20509  |
|                           | 40.41    | 16.98      | 14.20        | 28.41      | 100.00 |
|                           | 40.41    | 16.98      | 14.20        | 28.41      |        |
|                           | 100.00   | 100.00     | 100.00       | 100.00     |        |
| +_____+_____+_____+_____+ |          |            |              |            |        |
| Total                     | 8288     | 3482       | 2913         | 5826       | 20509  |
|                           | 40.41    | 16.98      | 14.20        | 28.41      | 100.00 |

Treatment history at the time of obtaining Table 2-2 consent according to the presence or absence of proton-pump inhibitors

FREQ Procedure

|   |       | Cumulative           |                  |        |
|---|-------|----------------------|------------------|--------|
|   |       | Percent of ALL power | Percent of power |        |
| 1 | 20509 | 100.00               | 20509            | 100.00 |

Tables: ALL\* AFTYP

ALL AFTYP(Type of AF)

| Power                     |          |            |              |            |        |
|---------------------------|----------|------------|--------------|------------|--------|
| Percent                   |          |            |              |            |        |
| Percent of rows           |          |            |              |            |        |
| Percent of columns        | Episodic | Persistent | Long lasting | Persistent | Total  |
| sex                       |          |            |              |            |        |
| +_____+_____+_____+_____+ |          |            |              |            |        |
| 1                         | 8288     | 3482       | 2913         | 5826       | 20509  |
|                           | 40.41    | 16.98      | 14.20        | 28.41      | 100.00 |
|                           | 40.41    | 16.98      | 14.20        | 28.41      |        |
|                           | 100.00   | 100.00     | 100.00       | 100.00     |        |
| +_____+_____+_____+_____+ |          |            |              |            |        |
| Total                     | 8288     | 3482       | 2913         | 5826       | 20509  |
|                           | 40.41    | 16.98      | 14.20        | 28.41      | 100.00 |

Treatment history at the time of obtaining Table 2-2 consent according to the presence or absence of proton-pump inhibitors

FREQ Procedure

|   |       | Cumulative           |                  |        |
|---|-------|----------------------|------------------|--------|
|   |       | Percent of ALL power | Percent of power |        |
| 1 | 20509 | 100.00               | 20509            | 100.00 |

Tables: ALL\* AFTYP

ALL AFTYP(Type of AF)

| Power                     |          |            |              |            |        |
|---------------------------|----------|------------|--------------|------------|--------|
| Percent                   |          |            |              |            |        |
| Percent of rows           |          |            |              |            |        |
| Percent of columns        | Episodic | Persistent | Long lasting | Persistent | Total  |
| sex                       |          |            |              |            |        |
| +_____+_____+_____+_____+ |          |            |              |            |        |
| 1                         | 8288     | 3482       | 2913         | 5826       | 20509  |
|                           | 40.41    | 16.98      | 14.20        | 28.41      | 100.00 |
|                           | 40.41    | 16.98      | 14.20        | 28.41      |        |
|                           | 100.00   | 100.00     | 100.00       | 100.00     |        |
| +_____+_____+_____+_____+ |          |            |              |            |        |
| Total                     | 8288     | 3482       | 2913         | 5826       | 20509  |
|                           | 40.41    | 16.98      | 14.20        | 28.41      | 100.00 |

Treatment history at the time of obtaining Table 2-2 consent according to the presence or absence of proton-pump inhibitors

FREQ Procedure

|   |       | Cumulative           |                  |        |
|---|-------|----------------------|------------------|--------|
|   |       | Percent of ALL power | Percent of power |        |
| 1 | 20509 | 100.00               | 20509            | 100.00 |

Tables: ALL\* AFTYP

ALL AFTYP(Type of AF)

| Power                     |          |            |              |            |        |
|---------------------------|----------|------------|--------------|------------|--------|
| Percent                   |          |            |              |            |        |
| Percent of rows           |          |            |              |            |        |
| Percent of columns        | Episodic | Persistent | Long lasting | Persistent | Total  |
| sex                       |          |            |              |            |        |
| +_____+_____+_____+_____+ |          |            |              |            |        |
| 1                         | 8288     | 3482       | 2913         | 5826       | 20509  |
|                           | 40.41    | 16.98      | 14.20        | 28.41      | 100.00 |
|                           | 40.41    | 16.98      | 14.20        | 28.41      |        |
|                           | 100.00   | 100.00     | 100.00       | 100.00     |        |
| +_____+_____+_____+_____+ |          |            |              |            |        |
| Total                     | 8288     | 3482       | 2913         | 5826       | 20509  |
|                           | 40.41    | 16.98      | 14.20        | 28.41      | 100.00 |

Treatment history at the time of obtaining Table 2-2 consent according to the presence or absence of proton-pump inhibitors

FREQ Procedure

|   |                      |                  | Cumulative |        |
|---|----------------------|------------------|------------|--------|
|   | Percent of ALL power | Percent of power |            |        |
| 1 | 20509                | 100.00           | 20509      | 100.00 |

Tables: ALL\* AFTYP

ALL AFTYP(Type of AF)

| Power                     |          |            |              |            |        |
|---------------------------|----------|------------|--------------|------------|--------|
| Percent                   |          |            |              |            |        |
| Percent of rows           |          |            |              |            |        |
| Percent of columns        | Episodic | Persistent | Long lasting | Persistent | Total  |
| sex                       |          |            |              |            |        |
| +-----+-----+-----+-----+ |          |            |              |            |        |
| 1                         | 8288     | 3482       | 2913         | 5826       | 20509  |
|                           | 40.41    | 16.98      | 14.20        | 28.41      | 100.00 |
|                           | 40.41    | 16.98      | 14.20        | 28.41      |        |
|                           | 100.00   | 100.00     | 100.00       | 100.00     |        |
| +-----+-----+-----+-----+ |          |            |              |            |        |
| Total                     | 8288     | 3482       | 2913         | 5826       | 20509  |
|                           | 40.41    | 16.98      | 14.20        | 28.41      | 100.00 |

Treatment history at the time of obtaining Table 2-2 consent according to the presence or absence of proton-pump inhibitors

FREQ Procedure

|                      |       | Cumulative       |              |
|----------------------|-------|------------------|--------------|
| Percent of ALL power |       | Percent of power |              |
| <hr/>                |       |                  |              |
| 1                    | 20509 | 100.00           | 20509 100.00 |

Tables: ALL\* AFTYPN

ALL AFTYPN

| Power                            |        |        |
|----------------------------------|--------|--------|
| Percent                          |        |        |
| Percent of rows                  |        |        |
| Percentage of columns   5  Total |        |        |
| <hr/>                            | +      | <hr/>  |
| 1                                | 6395   | 6395   |
|                                  | 100.00 | 100.00 |
|                                  | 100.00 |        |
|                                  | 100.00 |        |
| <hr/>                            | +      | <hr/>  |
| Total 6395                       | 6395   |        |
|                                  | 100.00 | 100.00 |

Degree of missing values = 14114



Treatment history at the time of obtaining Table 2-2 consent according to the presence or absence of proton-pump inhibitors

FREQ Procedure

|   |       | Cumulative           |                  |        |
|---|-------|----------------------|------------------|--------|
|   |       | Percent of ALL power | Percent of power |        |
| 1 | 20509 | 100.00               | 20509            | 100.00 |

Tables: ALL\* AFTYP

ALL AFTYP(Type of AF)

| Power                     |          |            |              |            |        |
|---------------------------|----------|------------|--------------|------------|--------|
| Percent                   |          |            |              |            |        |
| Percent of rows           |          |            |              |            |        |
| Percent of columns        | Episodic | Persistent | Long lasting | Persistent | Total  |
| sex                       |          |            |              |            |        |
| +_____+_____+_____+_____+ |          |            |              |            |        |
| 1                         | 8288     | 3482       | 2913         | 5826       | 20509  |
|                           | 40.41    | 16.98      | 14.20        | 28.41      | 100.00 |
|                           | 40.41    | 16.98      | 14.20        | 28.41      |        |
|                           | 100.00   | 100.00     | 100.00       | 100.00     |        |
| +_____+_____+_____+_____+ |          |            |              |            |        |
| Total                     | 8288     | 3482       | 2913         | 5826       | 20509  |
|                           | 40.41    | 16.98      | 14.20        | 28.41      | 100.00 |

Treatment history at the time of obtaining Table 2-2 consent according to the presence or absence of proton-pump inhibitors

FREQ Procedure

|   |       | Cumulative           |                  |        |
|---|-------|----------------------|------------------|--------|
|   |       | Percent of ALL power | Percent of power |        |
| 1 | 20509 | 100.00               | 20509            | 100.00 |

Tables: ALL\* AFTHSPE

ALL

AFTHSPE(Non-drug Therapy for AF)

| Power              |         |         |        |
|--------------------|---------|---------|--------|
| Percent            |         |         |        |
| Percent of rows    |         |         |        |
| Percent of columns | None    | With    | Total  |
| +_____+            | +_____+ | +_____+ | +      |
| 1                  | 17454   | 3055    | 20509  |
|                    | 85.10   | 14.90   | 100.00 |
|                    | 85.10   | 14.90   |        |
|                    | 100.00  | 100.00  |        |
| +_____+            | +_____+ | +_____+ | +      |
| Total              | 17454   | 3055    | 20509  |
|                    | 85.10   | 14.90   | 100.00 |

Treatment history at the time of obtaining Table 2-2 consent according to the presence or absence of proton-pump inhibitors

FREQ Procedure

|   |                      |        | Cumulative       |        |
|---|----------------------|--------|------------------|--------|
|   | Percent of ALL power |        | Percent of power |        |
| 1 | 20509                | 100.00 | 20509            | 100.00 |

Tables: ALL\* AFTHSPE

ALL

AFTHSPE(Non-drug Therapy for AF)

| Power                   |        |        |        |
|-------------------------|--------|--------|--------|
| Percent                 |        |        |        |
| Percent of rows         |        |        |        |
| Percent of columns      | None   | With   | Total  |
| _____ + _____ + _____ + |        |        |        |
| 1                       | 17454  | 3055   | 20509  |
|                         | 85.10  | 14.90  | 100.00 |
|                         | 85.10  | 14.90  |        |
|                         | 100.00 | 100.00 |        |
| _____ + _____ + _____ + |        |        |        |
| Total                   | 17454  | 3055   | 20509  |
|                         | 85.10  | 14.90  | 100.00 |

Treatment history at the time of obtaining Table 2-2 consent according to the presence or absence of proton-pump inhibitors

FREQ Procedure

|   |       | Cumulative           |                  |        |
|---|-------|----------------------|------------------|--------|
|   |       | Percent of ALL power | Percent of power |        |
| 1 | 20509 | 100.00               | 20509            | 100.00 |

Table : ALL \* AFTHSPE1

ALL

AFTHSPE1(Catheter Ablation)

| Power                   |        |        |        |  |
|-------------------------|--------|--------|--------|--|
| Percent                 |        |        |        |  |
| Percent of rows         |        |        |        |  |
| Percent of columns      | None   | With   | Total  |  |
| _____ + _____ + _____ + |        |        |        |  |
| 1                       | 18964  | 1545   | 20509  |  |
|                         | 92.47  | 7.53   | 100.00 |  |
|                         | 92.47  | 7.53   |        |  |
|                         | 100.00 | 100.00 |        |  |
| _____ + _____ + _____ + |        |        |        |  |
| Total                   | 18964  | 1545   | 20509  |  |
|                         | 92.47  | 7.53   | 100.00 |  |

Treatment history at the time of obtaining Table 2-2 consent according to the presence or absence of proton-pump inhibitors

FREQ Procedure

|   |       | Cumulative           |                  |        |
|---|-------|----------------------|------------------|--------|
|   |       | Percent of ALL power | Percent of power |        |
| 1 | 20509 | 100.00               | 20509            | 100.00 |

Table : ALL \* AFTHSPE1

ALL

AFTHSPE1(Catheter Ablation)

| Power                   |        |        |        |  |
|-------------------------|--------|--------|--------|--|
| Percent                 |        |        |        |  |
| Percent of rows         |        |        |        |  |
| Percent of columns      | None   | With   | Total  |  |
| _____ + _____ + _____ + |        |        |        |  |
| 1                       | 18964  | 1545   | 20509  |  |
|                         | 92.47  | 7.53   | 100.00 |  |
|                         | 92.47  | 7.53   |        |  |
|                         | 100.00 | 100.00 |        |  |
| _____ + _____ + _____ + |        |        |        |  |
| Total                   | 18964  | 1545   | 20509  |  |
|                         | 92.47  | 7.53   | 100.00 |  |

Treatment history at the time of obtaining Table 2-2 consent according to the presence or absence of proton-pump inhibitors

FREQ Procedure

|                      |       | Cumulative       |              |
|----------------------|-------|------------------|--------------|
| Percent of ALL power |       | Percent of power |              |
| 1                    | 20509 | 100.00           | 20509 100.00 |

Table : ALL \* AFTHSPE2

ALL AFTHSPE2(Cardioversion)

| Power              |         |         |        |
|--------------------|---------|---------|--------|
| Percent            |         |         |        |
| Percent of rows    |         |         |        |
| Percent of columns | None    | With    | Total  |
| +_____+            | +_____+ | +_____+ | +      |
| 1                  | 20096   | 413     | 20509  |
|                    | 97.99   | 2.01    | 100.00 |
|                    | 97.99   | 2.01    |        |
|                    | 100.00  | 100.00  |        |
| +_____+            | +_____+ | +_____+ | +      |
| Total              | 20096   | 413     | 20509  |
|                    | 97.99   | 2.01    | 100.00 |

Treatment history at the time of obtaining Table 2-2 consent according to the presence or absence of proton-pump inhibitors

FREQ Procedure

|   |       | Cumulative           |                  |        |
|---|-------|----------------------|------------------|--------|
|   |       | Percent of ALL power | Percent of power |        |
| 1 | 20509 | 100.00               | 20509            | 100.00 |

Table : ALL \* AFTHSPE2

ALL AFTHSPE2(Cardioversion)

| Power              |        |        |        |
|--------------------|--------|--------|--------|
| Percent            |        |        |        |
| Percent of rows    |        |        |        |
| Percent of columns | None   | With   | Total  |
|                    | +      | +      | +      |
| 1                  | 20096  | 413    | 20509  |
|                    | 97.99  | 2.01   | 100.00 |
|                    | 97.99  | 2.01   |        |
|                    | 100.00 | 100.00 |        |
|                    | +      | +      | +      |
| Total              | 20096  | 413    | 20509  |
|                    | 97.99  | 2.01   | 100.00 |

Treatment history at the time of obtaining Table 2-2 consent according to the presence or absence of proton-pump inhibitors

FREQ Procedure

|                      |       | Cumulative       |              |
|----------------------|-------|------------------|--------------|
| Percent of ALL power |       | Percent of power |              |
| 1                    | 20509 | 100.00           | 20509 100.00 |

Table : ALL \* AFTHSPE3

ALL AFTHSPE3(ICD)

| Power              |           |           |           |
|--------------------|-----------|-----------|-----------|
| Percent            |           |           |           |
| Percent of rows    |           |           |           |
| Percent of columns | None      | With      | Total     |
|                    | + _____ + | + _____ + | + _____ + |
| 1                  | 20432     | 77        | 20509     |
|                    | 99.62     | 0.38      | 100.00    |
|                    | 99.62     | 0.38      |           |
|                    | 100.00    | 100.00    |           |
|                    | + _____ + | + _____ + | + _____ + |
| Total              | 20432 77  | 20509     |           |
|                    | 99.62     | 0.38      | 100.00    |



Treatment history at the time of obtaining Table 2-2 consent according to the presence or absence of proton-pump inhibitors

FREQ Procedure

|                      |       | Cumulative       |              |
|----------------------|-------|------------------|--------------|
| Percent of ALL power |       | Percent of power |              |
| 1                    | 20509 | 100.00           | 20509 100.00 |

Table : ALL \* AFTHSPE3

ALL AFTHSPE3(ICD)

| Power              |        |        |        |
|--------------------|--------|--------|--------|
| Percent            |        |        |        |
| Percent of rows    |        |        |        |
| Percent of columns | None   | With   | Total  |
|                    | +      | +      | +      |
| 1                  | 20432  | 77     | 20509  |
|                    | 99.62  | 0.38   | 100.00 |
|                    | 99.62  | 0.38   |        |
|                    | 100.00 | 100.00 |        |
|                    | +      | +      | +      |
| Total              | 20432  | 77     | 20509  |
|                    | 99.62  | 0.38   | 100.00 |

Treatment history at the time of obtaining Table 2-2 consent according to the presence or absence of proton-pump inhibitors

FREQ Procedure

|   |       | Cumulative           |                  |        |
|---|-------|----------------------|------------------|--------|
|   |       | Percent of ALL power | Percent of power |        |
| 1 | 20509 | 100.00               | 20509            | 100.00 |

Table : ALL \* AFTHSPE4

ALL

AFTHSPE4(Pacemaker Implantation)

| Power                   |        |        |        |
|-------------------------|--------|--------|--------|
| Percent                 |        |        |        |
| Percent of rows         |        |        |        |
| Percent of columns      | None   | With   | Total  |
| _____ + _____ + _____ + |        |        |        |
| 1                       | 19242  | 1267   | 20509  |
|                         | 93.82  | 6.18   | 100.00 |
|                         | 93.82  | 6.18   |        |
|                         | 100.00 | 100.00 |        |
| _____ + _____ + _____ + |        |        |        |
| Total                   | 19242  | 1267   | 20509  |
|                         | 93.82  | 6.18   | 100.00 |

Treatment history at the time of obtaining Table 2-2 consent according to the presence or absence of proton-pump inhibitors

FREQ Procedure

|   |       | Cumulative           |                  |        |
|---|-------|----------------------|------------------|--------|
|   |       | Percent of ALL power | Percent of power |        |
| 1 | 20509 | 100.00               | 20509            | 100.00 |

Table : ALL \* AFTHSPE4

ALL

AFTHSPE4(Pacemaker Implantation)

| Power                   |        |        |        |
|-------------------------|--------|--------|--------|
| Percent                 |        |        |        |
| Percent of rows         |        |        |        |
| Percent of columns      | None   | With   | Total  |
| _____ + _____ + _____ + |        |        |        |
| 1                       | 19242  | 1267   | 20509  |
|                         | 93.82  | 6.18   | 100.00 |
|                         | 93.82  | 6.18   |        |
|                         | 100.00 | 100.00 |        |
| _____ + _____ + _____ + |        |        |        |
| Total                   | 19242  | 1267   | 20509  |
|                         | 93.82  | 6.18   | 100.00 |

Treatment history at the time of obtaining Table 2-2 consent according to the presence or absence of proton-pump inhibitors

FREQ Procedure

|   |                      |        | Cumulative       |        |
|---|----------------------|--------|------------------|--------|
|   | Percent of ALL power |        | Percent of power |        |
| 1 | 20509                | 100.00 | 20509            | 100.00 |

Table : ALL \* AFTHSPE5

ALL

AFTHSPE5(Other Non-drug Therapy)

| Power              |        |        |        |
|--------------------|--------|--------|--------|
| Percent            |        |        |        |
| Percent of rows    |        |        |        |
| Percent of columns | None   | With   | Total  |
|                    | +      | +      | +      |
| 1                  | 20452  | 57     | 20509  |
|                    | 99.72  | 0.28   | 100.00 |
|                    | 99.72  | 0.28   |        |
|                    | 100.00 | 100.00 |        |
|                    | +      | +      | +      |
| Total              | 20452  | 57     | 20509  |
|                    | 99.72  | 0.28   | 100.00 |

Treatment history at the time of obtaining Table 2-2 consent according to the presence or absence of proton-pump inhibitors

FREQ Procedure

|                      |       |                  | Cumulative |        |
|----------------------|-------|------------------|------------|--------|
| Percent of ALL power |       | Percent of power |            |        |
| 1                    | 20509 | 100.00           | 20509      | 100.00 |

Table : ALL \* AFTHSPE5

ALL

AFTHSPE5(Other Non-drug Therapy)

| Power              |        |        |        |
|--------------------|--------|--------|--------|
| Percent            |        |        |        |
| Percent of rows    |        |        |        |
| Percent of columns | None   | With   | Total  |
|                    | +      | +      | +      |
| 1                  | 20452  | 57     | 20509  |
|                    | 99.72  | 0.28   | 100.00 |
|                    | 99.72  | 0.28   |        |
|                    | 100.00 | 100.00 |        |
|                    | +      | +      | +      |
| Total              | 20452  | 57     | 20509  |
|                    | 99.72  | 0.28   | 100.00 |

Treatment history at the time of obtaining Table 2-2 consent according to the presence or absence of proton-pump inhibitors

FREQ Procedure

Number of levels of variables

Variables Label Level Number

---

GROUP1 2

HISAF History of Major Surgery for non-AF 2

Table : GROUP1 \* HISAF

GROUP1

HISAF(History of Major Surgery for non-AF)

Power |

Percent |

Percent of rows

Percent of column |immediate 3 months |immediate 3 months | total

|Within month|Within month|

|Major surgery|Major surgery|

Lines |

|   | +     | +     | +     |
|---|-------|-------|-------|
| 1 | 149   | 11683 | 11832 |
|   | 0.47  | 36.48 | 36.94 |
|   | 1.26  | 98.74 |       |
|   | 44.35 | 36.87 |       |
|   | +     | +     | +     |
| 2 | 187   | 20007 | 20194 |
|   | 0.58  | 62.47 | 63.06 |
|   | 0.93  | 99.07 |       |
|   | 55.65 | 63.13 |       |
|   | +     | +     | +     |

Total 336 31690 32026

1.05 98.95 100.00

Treatment history at the time of obtaining Table 2-2 consent according to the presence or absence of proton-pump inhibitors

FREQ Procedure

Number of levels of variables

Variables Label Level Number

GROUP1 2

HISBDYN History of Major Beeding 2

Table : GROUP1 \* HISBDYN

GROUP1

HISBDYN(History of Major Beeding)

Power |

Percent |

Percent of rows

Percent of columns | None | With | Total

|       | +     | +     | +      |
|-------|-------|-------|--------|
| 1     | 11385 | 596   | 11981  |
|       | 35.04 | 1.83  | 36.88  |
|       | 95.03 | 4.97  |        |
|       | 36.46 | 47.26 |        |
|       | +     | +     | +      |
| 2     | 19844 | 665   | 20509  |
|       | 61.08 | 2.05  | 63.12  |
|       | 96.76 | 3.24  |        |
|       | 63.54 | 52.74 |        |
|       | +     | +     | +      |
| Total | 31229 | 1261  | 32490  |
|       | 96.12 | 3.88  | 100.00 |



Treatment history at the time of obtaining Table 2-2 consent according to the presence or absence of proton-pump inhibitors

FREQ Procedure

Number of levels of variables

Variables Label Level Number

GROUP1 2

HISBD1 Intracranial Hemorrhage 2

Table : GROUP1 \* HISBD1

GROUP1

HISBD1(Intracranial Hemorrhage)

Power |

Percent |

Percent of rows

Percent of columns | None | With | Total

|       | +     | +     | +      |
|-------|-------|-------|--------|
| 1     | 11704 | 277   | 11981  |
|       | 36.02 | 0.85  | 36.88  |
|       | 97.69 | 2.31  |        |
|       | 36.76 | 42.68 |        |
|       | +     | +     | +      |
| 2     | 20137 | 372   | 20509  |
|       | 61.98 | 1.14  | 63.12  |
|       | 98.19 | 1.81  |        |
|       | 63.24 | 57.32 |        |
|       | +     | +     | +      |
| Total | 31841 | 649   | 32490  |
|       | 98.00 | 2.00  | 100.00 |

Treatment history at the time of obtaining Table 2-2 consent according to the presence or absence of proton-pump inhibitors

FREQ Procedure

Number of levels of variables

Variables Label Level Number

---

GROUP1 2

HISBD2 Upper Gastrointestinal Bleeding 2

Table : GROUP1 \* HISBD2

GROUP1

HISBD2(Upper Gastrointestinal Bleeding)

Power |

Percent |

Percent of rows

Percent of columns | None | With | Total

|       | +     | +     | +      |
|-------|-------|-------|--------|
| 1     | 11813 | 168   | 11981  |
|       | 36.36 | 0.52  | 36.88  |
|       | 98.60 | 1.40  |        |
|       | 36.67 | 61.31 |        |
| 2     | 20403 | 106   | 20509  |
|       | 62.80 | 0.33  | 63.12  |
|       | 99.48 | 0.52  |        |
|       | 63.33 | 38.69 |        |
| Total | 32216 | 274   | 32490  |
|       | 99.16 | 0.84  | 100.00 |

Treatment history at the time of obtaining Table 2-2 consent according to the presence or absence of proton-pump inhibitors

FREQ Procedure

Number of levels of variables

Variables Label Level Number

GROUP1 2

HISBD3 Lower Gastrointestinal Bleeding 2

Table : GROUP1 \* HISBD3

GROUP1

HISBD3(Lower Gastrointestinal Bleeding)

Power |

Percent |

Percent of rows

Percent of columns | None | With | Total

|       | +         | +     | +      |
|-------|-----------|-------|--------|
| 1     | 11831     | 150   | 11981  |
|       | 36.41     | 0.46  | 36.88  |
|       | 98.75     | 1.25  |        |
|       | 36.76     | 48.70 |        |
|       | +         | +     | +      |
| 2     | 20351     | 158   | 20509  |
|       | 62.64     | 0.49  | 63.12  |
|       | 99.23     | 0.77  |        |
|       | 63.24     | 51.30 |        |
|       | +         | +     | +      |
| Total | 32182 308 | 32490 |        |
|       | 99.05     | 0.95  | 100.00 |

Treatment history at the time of obtaining Table 2-2 consent according to the presence or absence of proton-pump inhibitors

FREQ Procedure

Number of levels of variables

Variable Label Level Count

GROUP1 2

HISBD4 Other Beeding 2

Table : GROUP1 \* HISBD4

GROUP1 HISBD4(Other Beeding)

Power |

Percent |

Percent of rows

Percent of columns | None | With | Total

|       | +     | +     | +      |
|-------|-------|-------|--------|
| 1     | 11874 | 107   | 11981  |
|       | 36.55 | 0.33  | 36.88  |
|       | 99.11 | 0.89  |        |
|       | 36.83 | 43.15 |        |
|       | +     | +     | +      |
| 2     | 20368 | 141   | 20509  |
|       | 62.69 | 0.43  | 63.12  |
|       | 99.31 | 0.69  |        |
|       | 63.17 | 56.85 |        |
|       | +     | +     | +      |
| Total | 32242 | 248   | 32490  |
|       | 99.24 | 0.76  | 100.00 |

Treatment history at the time of obtaining Table 2-2 consent according to the presence or absence of proton-pump inhibitors

FREQ Procedure

Number of levels of variables

Variables Label Level Number

---

GROUP1 2

HISAL History of Drug Allergy 2

Table : GROUP1 \* HISAL

GROUP1

HISAL(History of Drug Allergy)

Power |

Percent |

Percent of rows

Percent of columns | None | With | Total

|       | +     | +     | +      |
|-------|-------|-------|--------|
| 1     | 11073 | 908   | 11981  |
|       | 34.08 | 2.79  | 36.88  |
|       | 92.42 | 7.58  |        |
|       | 36.57 | 41.03 |        |
|       | +     | +     | +      |
| 2     | 19204 | 1305  | 20509  |
|       | 59.11 | 4.02  | 63.12  |
|       | 93.64 | 6.36  |        |
|       | 63.43 | 58.97 |        |
|       | +     | +     | +      |
| Total | 30277 | 2213  | 32490  |
|       | 93.19 | 6.81  | 100.00 |

Treatment history at the time of obtaining Table 2-2 consent according to the presence or absence of proton-pump inhibitors

FREQ Procedure

Number of levels of variables

Variables Label Level Number

GROUP1 2

AFTYP Type of AF 4

Table : GROUP1 \* AFTYP

GROUP1 AFTYP(Type of AF)

Power |

Percent |

Percent of rows

Percent of columns | Episodic | Persistent | Long lasting | Persistent | Total

|| sex||

|       | +     | +     | +     | +     | +      |
|-------|-------|-------|-------|-------|--------|
| 1     | 5351  | 1899  | 1486  | 3245  | 11981  |
|       | 16.47 | 5.84  | 4.57  | 9.99  | 36.88  |
|       | 44.66 | 15.85 | 12.40 | 27.08 |        |
|       | 39.23 | 35.29 | 33.78 | 35.77 |        |
|       | +     | +     | +     | +     | +      |
| 2     | 8288  | 3482  | 2913  | 5826  | 20509  |
|       | 25.51 | 10.72 | 8.97  | 17.93 | 63.12  |
|       | 40.41 | 16.98 | 14.20 | 28.41 |        |
|       | 60.77 | 64.71 | 66.22 | 64.23 |        |
|       | +     | +     | +     | +     | +      |
| Total | 13639 | 5381  | 4399  | 9071  | 32490  |
|       | 41.98 | 16.56 | 13.54 | 27.92 | 100.00 |

Treatment history at the time of obtaining Table 2-2 consent according to the presence or absence of proton-pump inhibitors

FREQ Procedure

Number of levels of variables

Number of Variables Level

GROUP1 2

Af\_typ 3

Table : GROUP1 \* af\_typ

GROUP1 af\_typ

Power |

Percent |

Percent of rows

Percentage of columns | 1| 2| 3| Total

|       | 1     | 2     | 3     | Total  |
|-------|-------|-------|-------|--------|
| 1     | 5351  | 3385  | 3245  | 11981  |
|       | 16.47 | 10.42 | 9.99  | 36.88  |
|       | 44.66 | 28.25 | 27.08 |        |
|       | 39.23 | 34.61 | 35.77 |        |
| 2     | 8288  | 6395  | 5826  | 20509  |
|       | 25.51 | 19.68 | 17.93 | 63.12  |
|       | 40.41 | 31.18 | 28.41 |        |
|       | 60.77 | 65.39 | 64.23 |        |
| Total | 13639 | 9780  | 9071  | 32490  |
|       | 41.98 | 30.10 | 27.92 | 100.00 |

Treatment history at the time of obtaining Table 2-2 consent according to the presence or absence of proton-pump inhibitors

FREQ Procedure

Number of levels of variables

Variable Label Level Count

---

GROUP1 2

AFTHSPE Non-drug Therapy for AF 2

Table : GROUP1 \* AFTHSPE

GROUP1

AFTHSPE(Non-drug Therapy for AF)

Power |

Percent |

Percent of rows

Percent of columns | None | With | Total

|       | +     | +     | +      |
|-------|-------|-------|--------|
| 1     | 9409  | 2572  | 11981  |
|       | 28.96 | 7.92  | 36.88  |
|       | 78.53 | 21.47 |        |
|       | 35.03 | 45.71 |        |
| 2     | 17454 | 3055  | 20509  |
|       | 53.72 | 9.40  | 63.12  |
|       | 85.10 | 14.90 |        |
|       | 64.97 | 54.29 |        |
| Total | 26863 | 5627  | 32490  |
|       | 82.68 | 17.32 | 100.00 |



Treatment history at the time of obtaining Table 2-2 consent according to the presence or absence of proton-pump inhibitors

FREQ Procedure

Number of levels of variables

Variables Label Level Number

GROUP1 2

AFTHSPE1 Catheter Ablation 2

Table : GROUP1 \* AFTHSPE1

GROUP1

AFTHSPE1(Catheter Ablation)

Power |

Percent |

Percent of rows

Percent of columns | None | With | Total

|       | +     | +     | +      |
|-------|-------|-------|--------|
| 1     | 10578 | 1403  | 11981  |
|       | 32.56 | 4.32  | 36.88  |
|       | 88.29 | 11.71 |        |
|       | 35.81 | 47.59 |        |
|       | +     | +     | +      |
| 2     | 18964 | 1545  | 20509  |
|       | 58.37 | 4.76  | 63.12  |
|       | 92.47 | 7.53  |        |
|       | 64.19 | 52.41 |        |
|       | +     | +     | +      |
| Total | 29542 | 2948  | 32490  |
|       | 90.93 | 9.07  | 100.00 |

Treatment history at the time of obtaining Table 2-2 consent according to the presence or absence of proton-pump inhibitors

FREQ Procedure

Number of levels of variables

Variable Label Level Count

---

GROUP1 2

AFTHSPE2 Cardioversion 2

Table : GROUP1 \* AFTHSPE2

GROUP1 AFTHSPE2(Cardioversion)

Power |

Percent |

Percent of rows

Percent of columns | None | With | Total

|       | +     | +     | +      |
|-------|-------|-------|--------|
| 1     | 11683 | 298   | 11981  |
|       | 35.96 | 0.92  | 36.88  |
|       | 97.51 | 2.49  |        |
|       | 36.76 | 41.91 |        |
|       | +     | +     | +      |
| 2     | 20096 | 413   | 20509  |
|       | 61.85 | 1.27  | 63.12  |
|       | 97.99 | 2.01  |        |
|       | 63.24 | 58.09 |        |
|       | +     | +     | +      |
| Total | 31779 | 711   | 32490  |
|       | 97.81 | 2.19  | 100.00 |

Treatment history at the time of obtaining Table 2-2 consent according to the presence or absence of proton-pump inhibitors

FREQ Procedure

Number of levels of variables

Variables Label Level Number

GROUP1 2  
AFTHSPE3 ICD 2

Table : GROUP1 \* AFTHSPE3

GROUP1 AFTHSPE3(ICD)

Power |

Percent |

Percent of rows

Percent of columns | None | With | Total

|       | +     | +     | +      |
|-------|-------|-------|--------|
| 1     | 11905 | 76    | 11981  |
|       | 36.64 | 0.23  | 36.88  |
|       | 99.37 | 0.63  |        |
|       | 36.82 | 49.67 |        |
|       | +     | +     | +      |
| 2     | 20432 | 77    | 20509  |
|       | 62.89 | 0.24  | 63.12  |
|       | 99.62 | 0.38  |        |
|       | 63.18 | 50.33 |        |
|       | +     | +     | +      |
| Total | 32337 | 153   | 32490  |
|       | 99.53 | 0.47  | 100.00 |

Treatment history at the time of obtaining Table 2-2 consent according to the presence or absence of proton-pump inhibitors

FREQ Procedure

Number of levels of variables

Variables Label Level Number

GROUP1 2

AFTHSPE4 Pacemaker Implantation 2

Table : GROUP1 \* AFTHSPE4

GROUP1

AFTHSPE4(Pacemaker Implantation)

Power |

Percent |

Percent of rows

Percent of columns | None | With | Total

|       | +     | +     | +      |
|-------|-------|-------|--------|
| 1     | 10926 | 1055  | 11981  |
|       | 33.63 | 3.25  | 36.88  |
|       | 91.19 | 8.81  |        |
|       | 36.22 | 45.43 |        |
| 2     | 19242 | 1267  | 20509  |
|       | 59.22 | 3.90  | 63.12  |
|       | 93.82 | 6.18  |        |
|       | 63.78 | 54.57 |        |
| Total | 30168 | 2322  | 32490  |
|       | 92.85 | 7.15  | 100.00 |

Treatment history at the time of obtaining Table 2-2 consent according to the presence or absence of proton-pump inhibitors

FREQ Procedure

Number of levels of variables

Variables Label Level Number

GROUP1 2

AFTHSPE5 Other Non-drug Therapy 2

Table : GROUP1 \* AFTHSPE5

GROUP1

AFTHSPE5(Other Non-drug Therapy)

Power |

Percent |

Percent of rows

Percent of columns | None | With | Total

|       | +     | +     | +      |
|-------|-------|-------|--------|
| 1     | 11925 | 56    | 11981  |
|       | 36.70 | 0.17  | 36.88  |
|       | 99.53 | 0.47  |        |
|       | 36.83 | 49.56 |        |
|       | +     | +     | +      |
| 2     | 20452 | 57    | 20509  |
|       | 62.95 | 0.18  | 63.12  |
|       | 99.72 | 0.28  |        |
|       | 63.17 | 50.44 |        |
|       | +     | +     | +      |
| Total | 32377 | 113   | 32490  |
|       | 99.65 | 0.35  | 100.00 |

Complications and medical history at the time of obtaining Table 2-3 informed consent by the

presence or absence of proton-pump inhibitors

FREQ Procedure

|   |                      |                  | Cumulative |        |
|---|----------------------|------------------|------------|--------|
|   | Percent of ALL power | Percent of power |            |        |
| 1 | 32490                | 100.00           | 32490      | 100.00 |

Tables: ALL \* MHYN

ALL MHYN(Medical History)

| Power              |        |        |        |   |
|--------------------|--------|--------|--------|---|
| Percent            |        |        |        |   |
| Percent of rows    |        |        |        |   |
| Percent of columns | None   | With   | Total  |   |
|                    | +      | +      | +      | + |
| 1                  | 884    | 31606  | 32490  |   |
|                    | 2.72   | 97.28  | 100.00 |   |
|                    | 2.72   | 97.28  |        |   |
|                    | 100.00 | 100.00 |        |   |
|                    | +      | +      | +      | + |
| Total              | 884    | 31606  | 32490  |   |
|                    | 2.72   | 97.28  | 100.00 |   |

Complications and medical history at the time of obtaining Table 2-3 informed consent by the presence or absence of proton-pump inhibitors

FREQ Procedure

|                      |       |                  | Cumulative |        |
|----------------------|-------|------------------|------------|--------|
| Percent of ALL power |       | Percent of power |            |        |
| 1                    | 32490 | 100.00           | 32490      | 100.00 |

Tables: ALL \* MHYN

ALL MHYN(Medical History)

| Power              |        |        |        |
|--------------------|--------|--------|--------|
| Percent            |        |        |        |
| Percent of rows    |        |        |        |
| Percent of columns | None   | With   | Total  |
|                    | +      | +      | +      |
| 1                  | 884    | 31606  | 32490  |
|                    | 2.72   | 97.28  | 100.00 |
|                    | 2.72   | 97.28  |        |
|                    | 100.00 | 100.00 |        |
|                    | +      | +      | +      |
| Total              | 884    | 31606  | 32490  |
|                    | 2.72   | 97.28  | 100.00 |

Complications and medical history at the time of obtaining Table 2-3 informed consent by the presence or absence of proton-pump inhibitors

FREQ Procedure

|   |                      |        | Cumulative       |        |
|---|----------------------|--------|------------------|--------|
|   | Percent of ALL power |        | Percent of power |        |
| 1 | 32490                | 100.00 | 32490            | 100.00 |

Tables: ALL\* HBPYN

ALL

HBPYN(High Blood Pressure)

| Power                   |        |        |        |
|-------------------------|--------|--------|--------|
| Percent                 |        |        |        |
| Percent of rows         |        |        |        |
| Percent of columns      | None   | With   | Total  |
| _____ + _____ + _____ + |        |        |        |
| 1                       | 8015   | 24475  | 32490  |
|                         | 24.67  | 75.33  | 100.00 |
|                         | 24.67  | 75.33  |        |
|                         | 100.00 | 100.00 |        |
| _____ + _____ + _____ + |        |        |        |
| Total                   | 8015   | 24475  | 32490  |
|                         | 24.67  | 75.33  | 100.00 |



Complications and medical history at the time of obtaining Table 2-3 informed consent by the presence or absence of proton-pump inhibitors

FREQ Procedure

|   |                      |        | Cumulative       |        |
|---|----------------------|--------|------------------|--------|
|   | Percent of ALL power |        | Percent of power |        |
| 1 | 32490                | 100.00 | 32490            | 100.00 |

Tables: ALL\* HBPYN

ALL

HBPYN(High Blood Pressure)

| Power                   |        |        |        |
|-------------------------|--------|--------|--------|
| Percent                 |        |        |        |
| Percent of rows         |        |        |        |
| Percent of columns      | None   | With   | Total  |
| _____ + _____ + _____ + |        |        |        |
| 1                       | 8015   | 24475  | 32490  |
|                         | 24.67  | 75.33  | 100.00 |
|                         | 24.67  | 75.33  |        |
|                         | 100.00 | 100.00 |        |
| _____ + _____ + _____ + |        |        |        |
| Total                   | 8015   | 24475  | 32490  |
|                         | 24.67  | 75.33  | 100.00 |

Complications and medical history at the time of obtaining Table 2-3 informed consent by the presence or absence of proton-pump inhibitors

FREQ Procedure

|   |                      |                  | Cumulative           |                  |
|---|----------------------|------------------|----------------------|------------------|
|   | Percent of ALL power | Percent of power | Percent of ALL power | Percent of power |
| 1 | 32490                | 100.00           | 32490                | 100.00           |

Tables: ALL \* DBYN

ALL DBYN(Diabetes)

| Power              |        |        |        |
|--------------------|--------|--------|--------|
| Percent            |        |        |        |
| Percent of rows    |        |        |        |
| Percent of columns | None   | With   | Total  |
|                    | +      | +      | +      |
| 1                  | 23740  | 8750   | 32490  |
|                    | 73.07  | 26.93  | 100.00 |
|                    | 73.07  | 26.93  |        |
|                    | 100.00 | 100.00 |        |
|                    | +      | +      | +      |
| Total              | 23740  | 8750   | 32490  |
|                    | 73.07  | 26.93  | 100.00 |

Complications and medical history at the time of obtaining Table 2-3 informed consent by the presence or absence of proton-pump inhibitors

FREQ Procedure

|   |                      |                  | Cumulative           |                  |
|---|----------------------|------------------|----------------------|------------------|
|   | Percent of ALL power | Percent of power | Percent of ALL power | Percent of power |
| 1 | 32490                | 100.00           | 32490                | 100.00           |

Tables: ALL \* DBYN

ALL DBYN(Diabetes)

| Power              |        |        |        |
|--------------------|--------|--------|--------|
| Percent            |        |        |        |
| Percent of rows    |        |        |        |
| Percent of columns | None   | With   | Total  |
|                    | +      | +      | +      |
| 1                  | 23740  | 8750   | 32490  |
|                    | 73.07  | 26.93  | 100.00 |
|                    | 73.07  | 26.93  |        |
|                    | 100.00 | 100.00 |        |
|                    | +      | +      | +      |
| Total              | 23740  | 8750   | 32490  |
|                    | 73.07  | 26.93  | 100.00 |

Complications and medical history at the time of obtaining Table 2-3 informed consent by the presence or absence of proton-pump inhibitors

FREQ Procedure

|                      |       |                  | Cumulative |        |
|----------------------|-------|------------------|------------|--------|
| Percent of ALL power |       | Percent of power |            |        |
| 1                    | 32490 | 100.00           | 32490      | 100.00 |

Table: ALL \* t\_DB

ALL t\_DB

| Power | Percent            | Percent of rows | Percentage of columns   0   1   Sum |
|-------|--------------------|-----------------|-------------------------------------|
|       |                    |                 | _____+_____+_____+                  |
| 1     | 30830              | 1660            | 32490                               |
|       | 94.89              | 5.11            | 100.00                              |
|       | 94.89              | 5.11            |                                     |
|       | 100.00             | 100.00          |                                     |
|       | _____+_____+_____+ |                 |                                     |
| Total | 30830              | 1660            | 32490                               |
|       | 94.89              | 5.11            | 100.00                              |

Complications and medical history at the time of obtaining Table 2-3 informed consent by the presence or absence of proton-pump inhibitors

FREQ Procedure

|                      |       | Cumulative       |       |        |
|----------------------|-------|------------------|-------|--------|
| Percent of ALL power |       | Percent of power |       |        |
| 1                    | 32490 | 100.00           | 32490 | 100.00 |

Table: ALL \* t\_DB

ALL t\_DB

| Power                               |        |        |        |
|-------------------------------------|--------|--------|--------|
| Percent                             |        |        |        |
| Percent of rows                     |        |        |        |
| Percentage of columns   0   1   Sum |        |        |        |
| +                                   | +      | +      | +      |
| 1                                   | 30830  | 1660   | 32490  |
|                                     | 94.89  | 5.11   | 100.00 |
|                                     | 94.89  | 5.11   |        |
|                                     | 100.00 | 100.00 |        |
| +                                   | +      | +      | +      |
| Total 30830 1660 32490              |        |        |        |
|                                     | 94.89  | 5.11   | 100.00 |

Complications and medical history at the time of obtaining Table 2-3 informed consent by the presence or absence of proton-pump inhibitors

FREQ Procedure

|   |                      |        | Cumulative       |        |
|---|----------------------|--------|------------------|--------|
|   | Percent of ALL power |        | Percent of power |        |
| 1 | 32490                | 100.00 | 32490            | 100.00 |

Table : ALL \* DB 1 YN

ALL

DB1YN(Diabetic Retinopathy)

Power |

Percent |

Percent of rows

Percent of columns | None | With | Total

|       | +      | +      | +      |
|-------|--------|--------|--------|
| 1     | 31984  | 506    | 32490  |
|       | 98.44  | 1.56   | 100.00 |
|       | 98.44  | 1.56   |        |
|       | 100.00 | 100.00 |        |
|       | +      | +      | +      |
| Total | 31984  | 506    | 32490  |
|       | 98.44  | 1.56   | 100.00 |

Complications and medical history at the time of obtaining Table 2-3 informed consent by the presence or absence of proton-pump inhibitors

FREQ Procedure

|   |       | Cumulative           |                  |        |
|---|-------|----------------------|------------------|--------|
|   |       | Percent of ALL power | Percent of power |        |
| 1 | 32490 | 100.00               | 32490            | 100.00 |

Table : ALL \* DB 1 YN

ALL

DB1YN(Diabetic Retinopathy)

Power |

Percent |

Percent of rows

Percent of columns | None | With | Total

|       |        |        |        |
|-------|--------|--------|--------|
|       | +      | +      | +      |
| 1     | 31984  | 506    | 32490  |
|       | 98.44  | 1.56   | 100.00 |
|       | 98.44  | 1.56   |        |
|       | 100.00 | 100.00 |        |
|       | +      | +      | +      |
| Total | 31984  | 506    | 32490  |
|       | 98.44  | 1.56   | 100.00 |

Complications and medical history at the time of obtaining Table 2-3 informed consent by the presence or absence of proton-pump inhibitors

FREQ Procedure

|                      |       |                  | Cumulative |        |
|----------------------|-------|------------------|------------|--------|
| Percent of ALL power |       | Percent of power |            |        |
| 1                    | 32490 | 100.00           | 32490      | 100.00 |

Table : ALL \* DB 2 YN

ALL

DB2YN(Diabetic Nephropathy)

Power |

Percent |

Percent of rows

Percent of columns | None | With | Total

|       |        |        |        |   |
|-------|--------|--------|--------|---|
|       | +      | +      | +      | + |
| 1     | 31287  | 1203   | 32490  |   |
|       | 96.30  | 3.70   | 100.00 |   |
|       | 96.30  | 3.70   |        |   |
|       | 100.00 | 100.00 |        |   |
|       | +      | +      | +      |   |
| Total | 31287  | 1203   | 32490  |   |
|       | 96.30  | 3.70   | 100.00 |   |



Complications and medical history at the time of obtaining Table 2-3 informed consent by the presence or absence of proton-pump inhibitors

FREQ Procedure

|                      |       |                  | Cumulative |        |
|----------------------|-------|------------------|------------|--------|
| Percent of ALL power |       | Percent of power |            |        |
| 1                    | 32490 | 100.00           | 32490      | 100.00 |

Table : ALL \* DB 2 YN

ALL

DB2YN(Diabetic Nephropathy)

Power |

Percent |

Percent of rows

Percent of columns | None | With | Total

|       |        |        |        |  |
|-------|--------|--------|--------|--|
|       | +      | +      | +      |  |
| 1     | 31287  | 1203   | 32490  |  |
|       | 96.30  | 3.70   | 100.00 |  |
|       | 96.30  | 3.70   |        |  |
|       | 100.00 | 100.00 |        |  |
|       | +      | +      | +      |  |
| Total | 31287  | 1203   | 32490  |  |
|       | 96.30  | 3.70   | 100.00 |  |

Complications and medical history at the time of obtaining Table 2-3 informed consent by the presence or absence of proton-pump inhibitors

FREQ Procedure

|                      |       |                  | Cumulative |        |
|----------------------|-------|------------------|------------|--------|
| Percent of ALL power |       | Percent of power |            |        |
| 1                    | 32490 | 100.00           | 32490      | 100.00 |

Table : ALL \* DB 3 YN

ALL

DB3YN(Diabetic Neuropathy)

Power |

Percent |

Percent of rows

Percent of columns | None | With | Total

|       |        |        |        |   |
|-------|--------|--------|--------|---|
|       | +      | +      | +      | + |
| 1     | 32166  | 324    | 32490  |   |
|       | 99.00  | 1.00   | 100.00 |   |
|       | 99.00  | 1.00   |        |   |
|       | 100.00 | 100.00 |        |   |
|       | +      | +      | +      |   |
| Total | 32166  | 324    | 32490  |   |
|       | 99.00  | 1.00   | 100.00 |   |

Complications and medical history at the time of obtaining Table 2-3 informed consent by the presence or absence of proton-pump inhibitors

FREQ Procedure

|   |       | Cumulative           |                  |        |
|---|-------|----------------------|------------------|--------|
|   |       | Percent of ALL power | Percent of power |        |
| 1 | 32490 | 100.00               | 32490            | 100.00 |

Table : ALL \* DB 3 YN

ALL

DB3YN(Diabetic Neuropathy)

Power |

Percent |

Percent of rows

Percent of columns | None | With | Total

|       |        |        |        |   |
|-------|--------|--------|--------|---|
|       | +      | +      | +      | + |
| 1     | 32166  | 324    | 32490  |   |
|       | 99.00  | 1.00   | 100.00 |   |
|       | 99.00  | 1.00   |        |   |
|       | 100.00 | 100.00 |        |   |
|       | +      | +      | +      | + |
| Total | 32166  | 324    | 32490  |   |
|       | 99.00  | 1.00   | 100.00 |   |

Complications and medical history at the time of obtaining Table 2-3 informed consent by the presence or absence of proton-pump inhibitors

FREQ Procedure

|   |                      |                  | Cumulative |        |
|---|----------------------|------------------|------------|--------|
|   | Percent of ALL power | Percent of power |            |        |
| 1 | 32490                | 100.00           | 32490      | 100.00 |

Tables: ALL\* LMDYN

ALL

LMDYN(Lipid metabolism disorders)

| Power                   |        |        |        |
|-------------------------|--------|--------|--------|
| Percent                 |        |        |        |
| Percent of rows         |        |        |        |
| Percent of columns      | None   | With   | Total  |
| _____ + _____ + _____ + |        |        |        |
| 1                       | 18675  | 13815  | 32490  |
|                         | 57.48  | 42.52  | 100.00 |
|                         | 57.48  | 42.52  |        |
|                         | 100.00 | 100.00 |        |
| _____ + _____ + _____ + |        |        |        |
| Total                   | 18675  | 13815  | 32490  |
|                         | 57.48  | 42.52  | 100.00 |

Complications and medical history at the time of obtaining Table 2-3 informed consent by the presence or absence of proton-pump inhibitors

FREQ Procedure

|                      |       | Cumulative       |       |        |
|----------------------|-------|------------------|-------|--------|
| Percent of ALL power |       | Percent of power |       |        |
| 1                    | 32490 | 100.00           | 32490 | 100.00 |

Tables: ALL\* LMDYN

ALL

LMDYN(Lipid metabolism disorders)

Power |

Percent |

Percent of rows

Percent of columns | None | With | Total

|         |         |         |         |
|---------|---------|---------|---------|
| +_____+ | +_____+ | +_____+ | +_____+ |
| 1       | 18675   | 13815   | 32490   |
|         | 57.48   | 42.52   | 100.00  |
|         | 57.48   | 42.52   |         |
|         | 100.00  | 100.00  |         |
| +_____+ | +_____+ | +_____+ | +_____+ |
| Total   | 18675   | 13815   | 32490   |
|         | 57.48   | 42.52   | 100.00  |

Complications and medical history at the time of obtaining Table 2-3 informed consent by the presence or absence of proton-pump inhibitors

FREQ Procedure

|   |                      |        | Cumulative       |        |
|---|----------------------|--------|------------------|--------|
|   | Percent of ALL power |        | Percent of power |        |
| 1 | 32490                | 100.00 | 32490            | 100.00 |

Tables: ALL \* HYPURNYN

ALL HYPURNYN(Hyperuricemia)

| Power              |           |           |           |
|--------------------|-----------|-----------|-----------|
| Percent            |           |           |           |
| Percent of rows    |           |           |           |
| Percent of columns | None      | With      | Total     |
|                    | + _____ + | + _____ + | + _____ + |
| 1                  | 25112     | 7378      | 32490     |
|                    | 77.29     | 22.71     | 100.00    |
|                    | 77.29     | 22.71     |           |
|                    | 100.00    | 100.00    |           |
|                    | + _____ + | + _____ + | + _____ + |
| Total              | 25112     | 7378      | 32490     |
|                    | 77.29     | 22.71     | 100.00    |

Complications and medical history at the time of obtaining Table 2-3 informed consent by the presence or absence of proton-pump inhibitors

FREQ Procedure

|                      |       |                  | Cumulative |        |
|----------------------|-------|------------------|------------|--------|
| Percent of ALL power |       | Percent of power |            |        |
| 1                    | 32490 | 100.00           | 32490      | 100.00 |

Tables: ALL \* HYPURNYN

ALL HYPURNYN(Hyperuricemia)

| Power              |           |         |         |
|--------------------|-----------|---------|---------|
| Percent            |           |         |         |
| Percent of rows    |           |         |         |
| Percent of columns | None      | With    | Total   |
|                    | + _____ + | _____ + | _____ + |
| 1                  | 25112     | 7378    | 32490   |
|                    | 77.29     | 22.71   | 100.00  |
|                    | 77.29     | 22.71   |         |
|                    | 100.00    | 100.00  |         |
|                    | + _____ + | _____ + | _____ + |
| Total              | 25112     | 7378    | 32490   |
|                    | 77.29     | 22.71   | 100.00  |

Complications and medical history at the time of obtaining Table 2-3 informed consent by the presence or absence of proton-pump inhibitors

FREQ Procedure

|   |                      |        | Cumulative       |        |
|---|----------------------|--------|------------------|--------|
|   | Percent of ALL power |        | Percent of power |        |
| 1 | 32490                | 100.00 | 32490            | 100.00 |

Tables: ALL \* KDDSYN

ALL KDDSYN(Kidney Disease)

| Power              |           |           |           |
|--------------------|-----------|-----------|-----------|
| Percent            |           |           |           |
| Percent of rows    |           |           |           |
| Percent of columns | None      | With      | Total     |
|                    | + _____ + | + _____ + | + _____ + |
| 1                  | 24883     | 7607      | 32490     |
|                    | 76.59     | 23.41     | 100.00    |
|                    | 76.59     | 23.41     |           |
|                    | 100.00    | 100.00    |           |
|                    | + _____ + | + _____ + | + _____ + |
| Total              | 24883     | 7607      | 32490     |
|                    | 76.59     | 23.41     | 100.00    |



Complications and medical history at the time of obtaining Table 2-3 informed consent by the presence or absence of proton-pump inhibitors

FREQ Procedure

|   |                      |                  | Cumulative           |                  |
|---|----------------------|------------------|----------------------|------------------|
|   | Percent of ALL power | Percent of power | Percent of ALL power | Percent of power |
| 1 | 32490                | 100.00           | 32490                | 100.00           |

Tables: ALL \* KDDSYN

ALL KDDSYN(Kidney Disease)

| Power              |           |           |           |
|--------------------|-----------|-----------|-----------|
| Percent            |           |           |           |
| Percent of rows    |           |           |           |
| Percent of columns | None      | With      | Total     |
|                    | + _____ + | + _____ + | + _____ + |
| 1                  | 24883     | 7607      | 32490     |
|                    | 76.59     | 23.41     | 100.00    |
|                    | 76.59     | 23.41     |           |
|                    | 100.00    | 100.00    |           |
|                    | + _____ + | + _____ + | + _____ + |
| Total              | 24883     | 7607      | 32490     |
|                    | 76.59     | 23.41     | 100.00    |

Complications and medical history at the time of obtaining Table 2-3 informed consent by the presence or absence of proton-pump inhibitors

FREQ Procedure

|                      |       |                  | Cumulative |        |
|----------------------|-------|------------------|------------|--------|
| Percent of ALL power |       | Percent of power |            |        |
| 1                    | 32490 | 100.00           | 32490      | 100.00 |

Table : ALL \* KDDS 1 YN

ALL

KDDS1YN(Chronic Kidney Disease)

| Power              |         |         |         |
|--------------------|---------|---------|---------|
| Percent            |         |         |         |
| Percent of rows    |         |         |         |
| Percent of columns | None    | With    | Total   |
|                    | +_____+ | +_____+ | +_____+ |
| 1                  | 25732   | 6758    | 32490   |
|                    | 79.20   | 20.80   | 100.00  |
|                    | 79.20   | 20.80   |         |
|                    | 100.00  | 100.00  |         |
|                    | +_____+ | +_____+ | +_____+ |
| Total              | 25732   | 6758    | 32490   |
|                    | 79.20   | 20.80   | 100.00  |

Complications and medical history at the time of obtaining Table 2-3 informed consent by the presence or absence of proton-pump inhibitors

FREQ Procedure

|                      |       |                  | Cumulative |        |
|----------------------|-------|------------------|------------|--------|
| Percent of ALL power |       | Percent of power |            |        |
| 1                    | 32490 | 100.00           | 32490      | 100.00 |

Table : ALL \* KDDS 1 YN

ALL

KDDS1YN(Chronic Kidney Disease)

| Power              |        |        |        |
|--------------------|--------|--------|--------|
| Percent            |        |        |        |
| Percent of rows    |        |        |        |
| Percent of columns | None   | With   | Total  |
|                    | +      | +      | +      |
| 1                  | 25732  | 6758   | 32490  |
|                    | 79.20  | 20.80  | 100.00 |
|                    | 79.20  | 20.80  |        |
|                    | 100.00 | 100.00 |        |
|                    | +      | +      | +      |
| Total              | 25732  | 6758   | 32490  |
|                    | 79.20  | 20.80  | 100.00 |

Complications and medical history at the time of obtaining Table 2-3 informed consent by the presence or absence of proton-pump inhibitors

FREQ Procedure

|   |                      |        | Cumulative       |        |
|---|----------------------|--------|------------------|--------|
|   | Percent of ALL power |        | Percent of power |        |
| 1 | 32490                | 100.00 | 32490            | 100.00 |

Table : ALL \* KDDS 2 YN

ALL

KDDS2YN(Advanced Renal Dysfunction without Dialysis)

| Power              |        |        |        |
|--------------------|--------|--------|--------|
| Percent            |        |        |        |
| Percent of rows    |        |        |        |
| Percent of columns | None   | With   | Total  |
|                    | +      | +      | +      |
| 1                  | 32018  | 472    | 32490  |
|                    | 98.55  | 1.45   | 100.00 |
|                    | 98.55  | 1.45   |        |
|                    | 100.00 | 100.00 |        |
|                    | +      | +      | +      |
| Total              | 32018  | 472    | 32490  |
|                    | 98.55  | 1.45   | 100.00 |

Complications and medical history at the time of obtaining Table 2-3 informed consent by the presence or absence of proton-pump inhibitors

FREQ Procedure

|                      |       |                  | Cumulative |        |
|----------------------|-------|------------------|------------|--------|
| Percent of ALL power |       | Percent of power |            |        |
| 1                    | 32490 | 100.00           | 32490      | 100.00 |

Table : ALL \* KDDS 2 YN

ALL

KDDS2YN(Advanced Renal Dysfunction without Dialysis)

| Power              |        |        |        |
|--------------------|--------|--------|--------|
| Percent            |        |        |        |
| Percent of rows    |        |        |        |
| Percent of columns | None   | With   | Total  |
|                    | +      | +      | +      |
| 1                  | 32018  | 472    | 32490  |
|                    | 98.55  | 1.45   | 100.00 |
|                    | 98.55  | 1.45   |        |
|                    | 100.00 | 100.00 |        |
|                    | +      | +      | +      |
| Total              | 32018  | 472    | 32490  |
|                    | 98.55  | 1.45   | 100.00 |

Complications and medical history at the time of obtaining Table 2-3 informed consent by the presence or absence of proton-pump inhibitors

FREQ Procedure

|                      |       |                  | Cumulative |        |
|----------------------|-------|------------------|------------|--------|
| Percent of ALL power |       | Percent of power |            |        |
| 1                    | 32490 | 100.00           | 32490      | 100.00 |

Table : ALL \* KDDS 3 YN

ALL

KDDS3YN(Advanced Renal Dysfunction with Dialysis)

| Power                 | Percent | Percent of rows | Percent of columns | None  | With | Total  |
|-----------------------|---------|-----------------|--------------------|-------|------|--------|
|                       |         | +_____+_____+   |                    |       |      |        |
| 1                     | 32372   | 118             | 32490              |       |      |        |
|                       | 99.64   | 0.36            | 100.00             |       |      |        |
|                       | 99.64   | 0.36            |                    |       |      |        |
|                       | 100.00  | 100.00          |                    |       |      |        |
|                       |         |                 | +_____+_____+      |       |      |        |
| Total 32372 118 32490 |         |                 |                    | 99.64 | 0.36 | 100.00 |

Complications and medical history at the time of obtaining Table 2-3 informed consent by the presence or absence of proton-pump inhibitors

FREQ Procedure

|   |       | Cumulative           |                  |        |
|---|-------|----------------------|------------------|--------|
|   |       | Percent of ALL power | Percent of power |        |
| 1 | 32490 | 100.00               | 32490            | 100.00 |

Table : ALL \* KDDS 3 YN

ALL

KDDS3YN(Advanced Renal Dysfunction with Dialysis)

| Power                   |        |        |        |
|-------------------------|--------|--------|--------|
| Percent                 |        |        |        |
| Percent of rows         |        |        |        |
| Percent of columns      | None   | With   | Total  |
| _____ + _____ + _____ + |        |        |        |
| 1                       | 32372  | 118    | 32490  |
|                         | 99.64  | 0.36   | 100.00 |
|                         | 99.64  | 0.36   |        |
|                         | 100.00 | 100.00 |        |
| _____ + _____ + _____ + |        |        |        |
| Total                   | 32372  | 118    | 32490  |
|                         | 99.64  | 0.36   | 100.00 |

Complications and medical history at the time of obtaining Table 2-3 informed consent by the presence or absence of proton-pump inhibitors

FREQ Procedure

|                      |       | Cumulative       |       |        |
|----------------------|-------|------------------|-------|--------|
| Percent of ALL power |       | Percent of power |       |        |
| 1                    | 32490 | 100.00           | 32490 | 100.00 |

Tables: ALL \* SLVDYN

ALL

SLVDYN(Severe Liver Dysfunction)

Power |

Percent |

Percent of rows

Percent of columns | None | With | Total

|             |        |        |       |
|-------------|--------|--------|-------|
| 1           | 32191  | 299    | 32490 |
| 99.08       | 0.92   | 100.00 |       |
| 99.08       | 0.92   |        |       |
| 100.00      | 100.00 |        |       |
| + +         | + +    | + +    |       |
| Total 32191 | 299    | 32490  |       |
| 99.08       | 0.92   | 100.00 |       |



Complications and medical history at the time of obtaining Table 2-3 informed consent by the presence or absence of proton-pump inhibitors

FREQ Procedure

|   |                      |        | Cumulative       |        |
|---|----------------------|--------|------------------|--------|
|   | Percent of ALL power |        | Percent of power |        |
| 1 | 32490                | 100.00 | 32490            | 100.00 |

Tables: ALL \* SLVDYN

ALL

SLVDYN(Severe Liver Dysfunction)

| Power                   |        |        |        |
|-------------------------|--------|--------|--------|
| Percent                 |        |        |        |
| Percent of rows         |        |        |        |
| Percent of columns      | None   | With   | Total  |
| _____ + _____ + _____ + |        |        |        |
| 1                       | 32191  | 299    | 32490  |
|                         | 99.08  | 0.92   | 100.00 |
|                         | 99.08  | 0.92   |        |
|                         | 100.00 | 100.00 |        |
| _____ + _____ + _____ + |        |        |        |
| Total                   | 32191  | 299    | 32490  |
|                         | 99.08  | 0.92   | 100.00 |

Complications and medical history at the time of obtaining Table 2-3 informed consent by the presence or absence of proton-pump inhibitors

FREQ Procedure

|   |                      |        | Cumulative       |        |
|---|----------------------|--------|------------------|--------|
|   | Percent of ALL power |        | Percent of power |        |
| 1 | 32490                | 100.00 | 32490            | 100.00 |

Tables: ALL\* RESDYN

ALL

RESDYN(Respiratory Disease)

Power |

Percent |

Percent of rows

Percent of columns | None | With | Total

|       |        |        |        |  |   |
|-------|--------|--------|--------|--|---|
|       | +      |        | +      |  | + |
| 1     | 28326  | 4164   | 32490  |  |   |
|       | 87.18  | 12.82  | 100.00 |  |   |
|       | 87.18  | 12.82  |        |  |   |
|       | 100.00 | 100.00 |        |  |   |
|       | +      |        | +      |  | + |
| Total | 28326  | 4164   | 32490  |  |   |
|       | 87.18  | 12.82  | 100.00 |  |   |

Complications and medical history at the time of obtaining Table 2-3 informed consent by the presence or absence of proton-pump inhibitors

FREQ Procedure

|   |                      |                  | Cumulative       |                  |
|---|----------------------|------------------|------------------|------------------|
|   | Percent of ALL power | Percent of power | Percent of power | Percent of power |
| 1 | 32490                | 100.00           | 32490            | 100.00           |

Tables: ALL\* RESDYN

ALL

RESDYN(Respiratory Disease)

Power |

Percent |

Percent of rows

Percent of columns | None | With | Total

|       |   |        |   |        |   |        |
|-------|---|--------|---|--------|---|--------|
|       | + |        | + |        | + |        |
| 1     |   | 28326  |   | 4164   |   | 32490  |
|       |   | 87.18  |   | 12.82  |   | 100.00 |
|       |   | 87.18  |   | 12.82  |   |        |
|       |   | 100.00 |   | 100.00 |   |        |
|       | + |        | + |        | + |        |
| Total |   | 28326  |   | 4164   |   | 32490  |
|       |   | 87.18  |   | 12.82  |   | 100.00 |

Complications and medical history at the time of obtaining Table 2-3 informed consent by the presence or absence of proton-pump inhibitors

FREQ Procedure

|   |                      |                  | Cumulative           |                  |
|---|----------------------|------------------|----------------------|------------------|
|   | Percent of ALL power | Percent of power | Percent of ALL power | Percent of power |
| 1 | 32490                | 100.00           | 32490                | 100.00           |

Tables: ALL\* HTDYN

ALL HTDYN(Heart Disease)

| Power              |        |        |        |
|--------------------|--------|--------|--------|
| Percent            |        |        |        |
| Percent of rows    |        |        |        |
| Percent of columns | None   | With   | Total  |
|                    | +      | +      | +      |
| 1                  | 13379  | 19111  | 32490  |
|                    | 41.18  | 58.82  | 100.00 |
|                    | 41.18  | 58.82  |        |
|                    | 100.00 | 100.00 |        |
|                    | +      | +      | +      |
| Total              | 13379  | 19111  | 32490  |
|                    | 41.18  | 58.82  | 100.00 |

Complications and medical history at the time of obtaining Table 2-3 informed consent by the presence or absence of proton-pump inhibitors

FREQ Procedure

|   |                      |                  | Cumulative           |                  |
|---|----------------------|------------------|----------------------|------------------|
|   | Percent of ALL power | Percent of power | Percent of ALL power | Percent of power |
| 1 | 32490                | 100.00           | 32490                | 100.00           |

Tables: ALL\* HTDYN

ALL HTDYN(Heart Disease)

| Power              |        |        |        |
|--------------------|--------|--------|--------|
| Percent            |        |        |        |
| Percent of rows    |        |        |        |
| Percent of columns | None   | With   | Total  |
|                    | +      | +      | +      |
| 1                  | 13379  | 19111  | 32490  |
|                    | 41.18  | 58.82  | 100.00 |
|                    | 41.18  | 58.82  |        |
|                    | 100.00 | 100.00 |        |
|                    | +      | +      | +      |
| Total              | 13379  | 19111  | 32490  |
|                    | 41.18  | 58.82  | 100.00 |

Complications and medical history at the time of obtaining Table 2-3 informed consent by the presence or absence of proton-pump inhibitors

FREQ Procedure

|   |       | Cumulative           |                  |        |
|---|-------|----------------------|------------------|--------|
|   |       | Percent of ALL power | Percent of power |        |
| 1 | 32490 | 100.00               | 32490            | 100.00 |

Table : ALL \* HTD 1 YN

ALL

HTD1YN(Myocardial Infarction)

Power |

Percent |

Percent of rows

Percent of columns | None | With | Total

|         |         |         |        |
|---------|---------|---------|--------|
| +_____+ | +_____+ | +_____+ |        |
| 1       | 30628   | 1862    | 32490  |
|         | 94.27   | 5.73    | 100.00 |
|         | 94.27   | 5.73    |        |
|         | 100.00  | 100.00  |        |
| +_____+ | +_____+ | +_____+ |        |
| Total   | 30628   | 1862    | 32490  |
|         | 94.27   | 5.73    | 100.00 |

Complications and medical history at the time of obtaining Table 2-3 informed consent by the presence or absence of proton-pump inhibitors

FREQ Procedure

|   |                      |        | Cumulative       |        |
|---|----------------------|--------|------------------|--------|
|   | Percent of ALL power |        | Percent of power |        |
| 1 | 32490                | 100.00 | 32490            | 100.00 |

Table : ALL \* HTD 1 YN

ALL

HTD1YN(Myocardial Infarction)

Power |

Percent |

Percent of rows

Percent of columns | None | With | Total

|       |        |        |        |  |   |
|-------|--------|--------|--------|--|---|
|       | +      |        | +      |  | + |
| 1     | 30628  | 1862   | 32490  |  |   |
|       | 94.27  | 5.73   | 100.00 |  |   |
|       | 94.27  | 5.73   |        |  |   |
|       | 100.00 | 100.00 |        |  |   |
|       | +      |        | +      |  | + |
| Total | 30628  | 1862   | 32490  |  |   |
|       | 94.27  | 5.73   | 100.00 |  |   |

Complications and medical history at the time of obtaining Table 2-3 informed consent by the presence or absence of proton-pump inhibitors

FREQ Procedure

|   |                      |                  | Cumulative           |                  |
|---|----------------------|------------------|----------------------|------------------|
|   | Percent of ALL power | Percent of power | Percent of ALL power | Percent of power |
| 1 | 32490                | 100.00           | 32490                | 100.00           |

Table : ALL \* HTD 2 YN

ALL HTD2YN(Angina Pectoris)

| Power              |        |        |        |
|--------------------|--------|--------|--------|
| Percent            |        |        |        |
| Percent of rows    |        |        |        |
| Percent of columns | None   | With   | Total  |
|                    | +      | +      | +      |
| 1                  | 26938  | 5552   | 32490  |
|                    | 82.91  | 17.09  | 100.00 |
|                    | 82.91  | 17.09  |        |
|                    | 100.00 | 100.00 |        |
|                    | +      | +      | +      |
| Total              | 26938  | 5552   | 32490  |
|                    | 82.91  | 17.09  | 100.00 |



Complications and medical history at the time of obtaining Table 2-3 informed consent by the presence or absence of proton-pump inhibitors

FREQ Procedure

|   |                      |                  | Cumulative           |                  |
|---|----------------------|------------------|----------------------|------------------|
|   | Percent of ALL power | Percent of power | Percent of ALL power | Percent of power |
| 1 | 32490                | 100.00           | 32490                | 100.00           |

Table : ALL \* HTD 2 YN

ALL HTD2YN(Angina Pectoris)

| Power              |        |        |        |
|--------------------|--------|--------|--------|
| Percent            |        |        |        |
| Percent of rows    |        |        |        |
| Percent of columns | None   | With   | Total  |
|                    | +      | +      | +      |
| 1                  | 26938  | 5552   | 32490  |
|                    | 82.91  | 17.09  | 100.00 |
|                    | 82.91  | 17.09  |        |
|                    | 100.00 | 100.00 |        |
|                    | +      | +      | +      |
| Total              | 26938  | 5552   | 32490  |
|                    | 82.91  | 17.09  | 100.00 |

Complications and medical history at the time of obtaining Table 2-3 informed consent by the presence or absence of proton-pump inhibitors

FREQ Procedure

|                      |       |                  | Cumulative |        |
|----------------------|-------|------------------|------------|--------|
| Percent of ALL power |       | Percent of power |            |        |
| 1                    | 32490 | 100.00           | 32490      | 100.00 |

Table: ALL \* t\_HTD0

ALL t\_HTD0

| Power | Percent            | Percent of rows | Percentage of columns   0   1   Sum |
|-------|--------------------|-----------------|-------------------------------------|
|       |                    |                 | _____+_____+_____+                  |
| 1     | 25739              | 6751            | 32490                               |
|       | 79.22              | 20.78           | 100.00                              |
|       | 79.22              | 20.78           |                                     |
|       | 100.00             | 100.00          |                                     |
|       | _____+_____+_____+ |                 |                                     |
| Total | 25739              | 6751            | 32490                               |
|       | 79.22              | 20.78           | 100.00                              |

Complications and medical history at the time of obtaining Table 2-3 informed consent by the presence or absence of proton-pump inhibitors

FREQ Procedure

|   |       | Cumulative           |                  |        |
|---|-------|----------------------|------------------|--------|
|   |       | Percent of ALL power | Percent of power |        |
| 1 | 32490 | 100.00               | 32490            | 100.00 |

Table: ALL \* t\_HTD0

ALL t\_HTD0

| Power                               |        |        |        |
|-------------------------------------|--------|--------|--------|
| Percent                             |        |        |        |
| Percent of rows                     |        |        |        |
| Percentage of columns   0   1   Sum |        |        |        |
| + + + +                             |        |        |        |
| 1                                   | 25739  | 6751   | 32490  |
|                                     | 79.22  | 20.78  | 100.00 |
|                                     | 79.22  | 20.78  |        |
|                                     | 100.00 | 100.00 |        |
| + + + +                             |        |        |        |
| Total 25739 6751 32490              |        |        |        |
|                                     | 79.22  | 20.78  | 100.00 |

Complications and medical history at the time of obtaining Table 2-3 informed consent by the presence or absence of proton-pump inhibitors

FREQ Procedure

|                      |       |                  | Cumulative |        |
|----------------------|-------|------------------|------------|--------|
| Percent of ALL power |       | Percent of power |            |        |
| 1                    | 32490 | 100.00           | 32490      | 100.00 |

Table : ALL \* HTD 3 YN

ALL HTD3YN(Heart Failure)

| Power | Percent   | Percent of rows | Percent of columns | None | With | Total |
|-------|-----------|-----------------|--------------------|------|------|-------|
|       | + _____ + |                 | + _____ +          |      |      |       |
| 1     | 20302     | 12188           | 32490              |      |      |       |
|       | 62.49     | 37.51           | 100.00             |      |      |       |
|       | 62.49     | 37.51           |                    |      |      |       |
|       | 100.00    | 100.00          |                    |      |      |       |
|       | + _____ + |                 | + _____ +          |      |      |       |
| Total | 20302     | 12188           | 32490              |      |      |       |
|       | 62.49     | 37.51           | 100.00             |      |      |       |

Complications and medical history at the time of obtaining Table 2-3 informed consent by the presence or absence of proton-pump inhibitors

FREQ Procedure

|                      |       |                  | Cumulative |        |
|----------------------|-------|------------------|------------|--------|
| Percent of ALL power |       | Percent of power |            |        |
| 1                    | 32490 | 100.00           | 32490      | 100.00 |

Table : ALL \* HTD 3 YN

ALL HTD3YN(Heart Failure)

| Power              |        |        |        |
|--------------------|--------|--------|--------|
| Percent            |        |        |        |
| Percent of rows    |        |        |        |
| Percent of columns | None   | With   | Total  |
|                    | +      | +      | +      |
| 1                  | 20302  | 12188  | 32490  |
|                    | 62.49  | 37.51  | 100.00 |
|                    | 62.49  | 37.51  |        |
|                    | 100.00 | 100.00 |        |
|                    | +      | +      | +      |
| Total              | 20302  | 12188  | 32490  |
|                    | 62.49  | 37.51  | 100.00 |

Complications and medical history at the time of obtaining Table 2-3 informed consent by the presence or absence of proton-pump inhibitors

FREQ Procedure

|   |       | Cumulative           |                  |        |
|---|-------|----------------------|------------------|--------|
|   |       | Percent of ALL power | Percent of power |        |
| 1 | 32490 | 100.00               | 32490            | 100.00 |

Table : ALL \* HTD 4 YN

ALL

HTD4YN(Left Ventricular Systolic Dysfunction)

Power |

Percent |

Percent of rows

Percent of columns | None | With | Total

|                       |        |        |        |  |   |
|-----------------------|--------|--------|--------|--|---|
|                       | +      |        | +      |  | + |
| 1                     | 31801  | 689    | 32490  |  |   |
|                       | 97.88  | 2.12   | 100.00 |  |   |
|                       | 97.88  | 2.12   |        |  |   |
|                       | 100.00 | 100.00 |        |  |   |
|                       | +      |        | +      |  | + |
| Total 31801 689 32490 |        |        |        |  |   |
|                       | 97.88  | 2.12   | 100.00 |  |   |

Complications and medical history at the time of obtaining Table 2-3 informed consent by the presence or absence of proton-pump inhibitors

FREQ Procedure

|   |                      |        | Cumulative       |        |
|---|----------------------|--------|------------------|--------|
|   | Percent of ALL power |        | Percent of power |        |
| 1 | 32490                | 100.00 | 32490            | 100.00 |

Table : ALL \* HTD 4 YN

ALL

HTD4YN(Left Ventricular Systolic Dysfunction)

Power |

Percent |

Percent of rows

Percent of columns | None | With | Total

|       | +      | +      | +      |
|-------|--------|--------|--------|
| 1     | 31801  | 689    | 32490  |
|       | 97.88  | 2.12   | 100.00 |
|       | 97.88  | 2.12   |        |
|       | 100.00 | 100.00 |        |
|       | +      | +      | +      |
| Total | 31801  | 689    | 32490  |
|       | 97.88  | 2.12   | 100.00 |

Complications and medical history at the time of obtaining Table 2-3 informed consent by the presence or absence of proton-pump inhibitors

FREQ Procedure

|   |       | Cumulative           |                  |        |
|---|-------|----------------------|------------------|--------|
|   |       | Percent of ALL power | Percent of power |        |
| 1 | 32490 | 100.00               | 32490            | 100.00 |

Table: ALL \* t\_HTD

ALL t\_HTD

| Power                             |       |       |        |
|-----------------------------------|-------|-------|--------|
| Percent                           |       |       |        |
| Percent of rows                   |       |       |        |
| Percentage of columns   0  1  Sum |       |       |        |
| +_____+_____+                     |       |       |        |
| 1   20140   12350   32490         |       |       |        |
| 61.99   38.01   100.00            |       |       |        |
| 61.99   38.01                     |       |       |        |
| 100.00   100.00                   |       |       |        |
| +_____+_____+                     |       |       |        |
| Total 20140 12350 32490           | 61.99 | 38.01 | 100.00 |



Complications and medical history at the time of obtaining Table 2-3 informed consent by the presence or absence of proton-pump inhibitors

FREQ Procedure

|   |       | Cumulative           |                  |        |
|---|-------|----------------------|------------------|--------|
|   |       | Percent of ALL power | Percent of power |        |
| 1 | 32490 | 100.00               | 32490            | 100.00 |

Table: ALL \* t\_HTD

ALL t\_HTD

| Power                             |        |        |        |
|-----------------------------------|--------|--------|--------|
| Percent                           |        |        |        |
| Percent of rows                   |        |        |        |
| Percentage of columns   0  1  Sum |        |        |        |
|                                   | +      | +      | +      |
| 1                                 | 20140  | 12350  | 32490  |
|                                   | 61.99  | 38.01  | 100.00 |
|                                   | 61.99  | 38.01  |        |
|                                   | 100.00 | 100.00 |        |
|                                   | +      | +      | +      |
| Total                             | 20140  | 12350  | 32490  |
|                                   | 61.99  | 38.01  | 100.00 |

Complications and medical history at the time of obtaining Table 2-3 informed consent by the presence or absence of proton-pump inhibitors

FREQ Procedure

|                      |       |                  | Cumulative |        |
|----------------------|-------|------------------|------------|--------|
| Percent of ALL power |       | Percent of power |            |        |
| 1                    | 32490 | 100.00           | 32490      | 100.00 |

Table : ALL \* HTD 5 YN

ALL HTD5YN(Valvular Disease)

| Power              |           |           |           |
|--------------------|-----------|-----------|-----------|
| Percent            |           |           |           |
| Percent of rows    |           |           |           |
| Percent of columns | None      | With      | Total     |
|                    | + _____ + | + _____ + | + _____ + |
| 1                  | 28515     | 3975      | 32490     |
|                    | 87.77     | 12.23     | 100.00    |
|                    | 87.77     | 12.23     |           |
|                    | 100.00    | 100.00    |           |
|                    | + _____ + | + _____ + | + _____ + |
| Total              | 28515     | 3975      | 32490     |
|                    | 87.77     | 12.23     | 100.00    |

Complications and medical history at the time of obtaining Table 2-3 informed consent by the presence or absence of proton-pump inhibitors

FREQ Procedure

|                      |       |                  | Cumulative |        |
|----------------------|-------|------------------|------------|--------|
| Percent of ALL power |       | Percent of power |            |        |
| 1                    | 32490 | 100.00           | 32490      | 100.00 |

Table : ALL \* HTD 5 YN

ALL HTD5YN(Valvular Disease)

| Power              |        |        |        |
|--------------------|--------|--------|--------|
| Percent            |        |        |        |
| Percent of rows    |        |        |        |
| Percent of columns | None   | With   | Total  |
|                    | +      | +      | +      |
| 1                  | 28515  | 3975   | 32490  |
|                    | 87.77  | 12.23  | 100.00 |
|                    | 87.77  | 12.23  |        |
|                    | 100.00 | 100.00 |        |
|                    | +      | +      | +      |
| Total              | 28515  | 3975   | 32490  |
|                    | 87.77  | 12.23  | 100.00 |

Complications and medical history at the time of obtaining Table 2-3 informed consent by the presence or absence of proton-pump inhibitors

FREQ Procedure

|                      |       |                  | Cumulative |        |
|----------------------|-------|------------------|------------|--------|
| Percent of ALL power |       | Percent of power |            |        |
| 1                    | 32490 | 100.00           | 32490      | 100.00 |

Table : ALL \* HTD 6 YN

ALL HTD6YN(Cardiomypathy)

| Power              |           |           |           |
|--------------------|-----------|-----------|-----------|
| Percent            |           |           |           |
| Percent of rows    |           |           |           |
| Percent of columns | None      | With      | Total     |
|                    | + _____ + | + _____ + | + _____ + |
| 1                  | 31291     | 1199      | 32490     |
|                    | 96.31     | 3.69      | 100.00    |
|                    | 96.31     | 3.69      |           |
|                    | 100.00    | 100.00    |           |
|                    | + _____ + | + _____ + | + _____ + |
| Total              | 31291     | 1199      | 32490     |
|                    | 96.31     | 3.69      | 100.00    |

Complications and medical history at the time of obtaining Table 2-3 informed consent by the presence or absence of proton-pump inhibitors

FREQ Procedure

|                      |       |                  | Cumulative |        |
|----------------------|-------|------------------|------------|--------|
| Percent of ALL power |       | Percent of power |            |        |
| 1                    | 32490 | 100.00           | 32490      | 100.00 |

Table : ALL \* HTD 6 YN

ALL HTD6YN(Cardiomypathy)

| Power                  | Percent | Percent of rows | Percent of columns | None | With | Total |
|------------------------|---------|-----------------|--------------------|------|------|-------|
|                        | +_____+ |                 | +_____+            |      |      |       |
| 1                      | 31291   | 1199            | 32490              |      |      |       |
|                        | 96.31   | 3.69            | 100.00             |      |      |       |
|                        | 96.31   | 3.69            |                    |      |      |       |
|                        | 100.00  | 100.00          |                    |      |      |       |
|                        | +_____+ |                 | +_____+            |      |      |       |
| Total 31291 1199 32490 |         |                 |                    |      |      |       |
|                        | 96.31   | 3.69            | 100.00             |      |      |       |

Complications and medical history at the time of obtaining Table 2-3 informed consent by the presence or absence of proton-pump inhibitors

FREQ Procedure

|                      |       | Cumulative       |       |        |
|----------------------|-------|------------------|-------|--------|
| Percent of ALL power |       | Percent of power |       |        |
| 1                    | 32490 | 100.00           | 32490 | 100.00 |

Table : ALL \* HTD 7 YN

ALL

HTD7YN(Hypertensive Heart Disease)

Power |

Percent |

Percent of rows

Percent of columns | None | With | Total

|                          |         |         |  |
|--------------------------|---------|---------|--|
| +_____+                  | +_____+ | +_____+ |  |
| 1   31427   1063   32490 |         |         |  |
| 96.73   3.27   100.00    |         |         |  |
| 96.73   3.27             |         |         |  |
| 100.00   100.00          |         |         |  |
| +_____+                  | +_____+ | +_____+ |  |
| Total 31427 1063 32490   |         |         |  |
| 96.73                    | 3.27    | 100.00  |  |

Complications and medical history at the time of obtaining Table 2-3 informed consent by the presence or absence of proton-pump inhibitors

FREQ Procedure

|   |       | Cumulative           |                  |        |
|---|-------|----------------------|------------------|--------|
|   |       | Percent of ALL power | Percent of power |        |
| 1 | 32490 | 100.00               | 32490            | 100.00 |

Table : ALL \* HTD 7 YN

ALL

HTD7YN(Hypertensive Heart Disease)

Power |

Percent |

Percent of rows

Percent of columns | None | With | Total

|         |         |         |        |
|---------|---------|---------|--------|
| +_____+ | +_____+ | +_____+ |        |
| 1       | 31427   | 1063    | 32490  |
|         | 96.73   | 3.27    | 100.00 |
|         | 96.73   | 3.27    |        |
|         | 100.00  | 100.00  |        |
| +_____+ | +_____+ | +_____+ |        |
| Total   | 31427   | 1063    | 32490  |
|         | 96.73   | 3.27    | 100.00 |

Complications and medical history at the time of obtaining Table 2-3 informed consent by the presence or absence of proton-pump inhibitors

FREQ Procedure

|   |                      |        | Cumulative       |        |
|---|----------------------|--------|------------------|--------|
|   | Percent of ALL power |        | Percent of power |        |
| 1 | 32490                | 100.00 | 32490            | 100.00 |

Table : ALL \* HTD 8 YN

ALL

HTD8YN(Congenital Heart Disease)

Power |

Percent |

Percent of rows

Percent of columns | None | With | Total

|       |        |        |        |  |   |
|-------|--------|--------|--------|--|---|
|       | +      |        | +      |  | + |
| 1     | 32305  | 185    | 32490  |  |   |
|       | 99.43  | 0.57   | 100.00 |  |   |
|       | 99.43  | 0.57   |        |  |   |
|       | 100.00 | 100.00 |        |  |   |
|       | +      |        | +      |  | + |
| Total | 32305  | 185    | 32490  |  |   |
|       | 99.43  | 0.57   | 100.00 |  |   |



Complications and medical history at the time of obtaining Table 2-3 informed consent by the presence or absence of proton-pump inhibitors

FREQ Procedure

|   |       | Cumulative           |                  |        |
|---|-------|----------------------|------------------|--------|
|   |       | Percent of ALL power | Percent of power |        |
| 1 | 32490 | 100.00               | 32490            | 100.00 |

Table : ALL \* HTD 8 YN

ALL

HTD8YN(Congenital Heart Disease)

Power |

Percent |

Percent of rows

Percent of columns | None | With | Total

|             |         |         |  |
|-------------|---------|---------|--|
| +_____+     | +_____+ | +_____+ |  |
| 1   32305   | 185     | 32490   |  |
| 99.43       | 0.57    | 100.00  |  |
| 99.43       | 0.57    |         |  |
| 100.00      | 100.00  |         |  |
| +_____+     | +_____+ | +_____+ |  |
| Total 32305 | 185     | 32490   |  |
| 99.43       | 0.57    | 100.00  |  |

Complications and medical history at the time of obtaining Table 2-3 informed consent by the presence or absence of proton-pump inhibitors

FREQ Procedure

|                      |       |                  | Cumulative |        |
|----------------------|-------|------------------|------------|--------|
| Percent of ALL power |       | Percent of power |            |        |
| 1                    | 32490 | 100.00           | 32490      | 100.00 |

Table : ALL \* HTD 9 YN

ALL

HTD9YN(Other Heart Disease)

Power |

Percent |

Percent of rows

Percent of columns | None | With | Total

|       |        |        |        |  |   |
|-------|--------|--------|--------|--|---|
|       | +      |        | +      |  | + |
| 1     | 29797  | 2693   | 32490  |  |   |
|       | 91.71  | 8.29   | 100.00 |  |   |
|       | 91.71  | 8.29   |        |  |   |
|       | 100.00 | 100.00 |        |  |   |
|       | +      |        | +      |  | + |
| Total | 29797  | 2693   | 32490  |  |   |
|       | 91.71  | 8.29   | 100.00 |  |   |

Complications and medical history at the time of obtaining Table 2-3 informed consent by the presence or absence of proton-pump inhibitors

FREQ Procedure

|                      |       |                  | Cumulative |        |
|----------------------|-------|------------------|------------|--------|
| Percent of ALL power |       | Percent of power |            |        |
| 1                    | 32490 | 100.00           | 32490      | 100.00 |

Table : ALL \* HTD 9 YN

ALL

HTD9YN(Other Heart Disease)

Power |

Percent |

Percent of rows

Percent of columns | None | With | Total

|       |        |        |        |  |   |
|-------|--------|--------|--------|--|---|
|       | +      |        | +      |  | + |
| 1     | 29797  | 2693   | 32490  |  |   |
|       | 91.71  | 8.29   | 100.00 |  |   |
|       | 91.71  | 8.29   |        |  |   |
|       | 100.00 | 100.00 |        |  |   |
|       | +      |        | +      |  | + |
| Total | 29797  | 2693   | 32490  |  |   |
|       | 91.71  | 8.29   | 100.00 |  |   |

Complications and medical history at the time of obtaining Table 2-3 informed consent by the presence or absence of proton-pump inhibitors

FREQ Procedure

|                      |       |                  | Cumulative |        |
|----------------------|-------|------------------|------------|--------|
| Percent of ALL power |       | Percent of power |            |        |
| 1                    | 32490 | 100.00           | 32490      | 100.00 |

Tables: ALL\* CVACYN

ALL

CVACYN(Cerebrovascular Accident)

Power |

Percent |

Percent of rows

Percent of columns | None | With | Total

|       |        |        |        |  |   |
|-------|--------|--------|--------|--|---|
|       | +      |        | +      |  | + |
| 1     | 25133  | 7357   | 32490  |  |   |
|       | 77.36  | 22.64  | 100.00 |  |   |
|       | 77.36  | 22.64  |        |  |   |
|       | 100.00 | 100.00 |        |  |   |
|       | +      |        | +      |  | + |
| Total | 25133  | 7357   | 32490  |  |   |
|       | 77.36  | 22.64  | 100.00 |  |   |

Complications and medical history at the time of obtaining Table 2-3 informed consent by the presence or absence of proton-pump inhibitors

FREQ Procedure

|                      |       |                  | Cumulative |        |
|----------------------|-------|------------------|------------|--------|
| Percent of ALL power |       | Percent of power |            |        |
| 1                    | 32490 | 100.00           | 32490      | 100.00 |

Tables: ALL\* CVACYN

ALL

CVACYN(Cerebrovascular Accident)

Power |

Percent |

Percent of rows

Percent of columns | None | With | Total

|       |        |        |        |  |   |
|-------|--------|--------|--------|--|---|
|       | +      |        | +      |  | + |
| 1     | 25133  | 7357   | 32490  |  |   |
|       | 77.36  | 22.64  | 100.00 |  |   |
|       | 77.36  | 22.64  |        |  |   |
|       | 100.00 | 100.00 |        |  |   |
|       | +      |        | +      |  | + |
| Total | 25133  | 7357   | 32490  |  |   |
|       | 77.36  | 22.64  | 100.00 |  |   |

Complications and medical history at the time of obtaining Table 2-3 informed consent by the presence or absence of proton-pump inhibitors

FREQ Procedure

|                      |       |                  | Cumulative |        |
|----------------------|-------|------------------|------------|--------|
| Percent of ALL power |       | Percent of power |            |        |
| 1                    | 32490 | 100.00           | 32490      | 100.00 |

Table : ALL \* CVAC 1 YN

ALL

CVAC1YN(Atherosclerotic Cerebral Infarction)

| Power              |        |        |        |
|--------------------|--------|--------|--------|
| Percent            |        |        |        |
| Percent of rows    |        |        |        |
| Percent of columns | None   | With   | Total  |
|                    | +      | +      | +      |
| 1                  | 31819  | 671    | 32490  |
|                    | 97.93  | 2.07   | 100.00 |
|                    | 97.93  | 2.07   |        |
|                    | 100.00 | 100.00 |        |
|                    | +      | +      | +      |
| Total              | 31819  | 671    | 32490  |
|                    | 97.93  | 2.07   | 100.00 |

Complications and medical history at the time of obtaining Table 2-3 informed consent by the presence or absence of proton-pump inhibitors

FREQ Procedure

|   |       | Cumulative           |                  |        |
|---|-------|----------------------|------------------|--------|
|   |       | Percent of ALL power | Percent of power |        |
| 1 | 32490 | 100.00               | 32490            | 100.00 |

Table : ALL \* CVAC 1 YN

ALL

CVAC1YN(Atherosclerotic Cerebral Infarction)

| Power              |         |         |        |
|--------------------|---------|---------|--------|
| Percent            |         |         |        |
| Percent of rows    |         |         |        |
| Percent of columns | None    | With    | Total  |
| +_____+            | +_____+ | +_____+ | +      |
| 1                  | 31819   | 671     | 32490  |
|                    | 97.93   | 2.07    | 100.00 |
|                    | 97.93   | 2.07    |        |
|                    | 100.00  | 100.00  |        |
| +_____+            | +_____+ | +_____+ | +      |
| Total              | 31819   | 671     | 32490  |
|                    | 97.93   | 2.07    | 100.00 |

Complications and medical history at the time of obtaining Table 2-3 informed consent by the presence or absence of proton-pump inhibitors

FREQ Procedure

|   |                      |        | Cumulative       |        |
|---|----------------------|--------|------------------|--------|
|   | Percent of ALL power |        | Percent of power |        |
| 1 | 32490                | 100.00 | 32490            | 100.00 |

Table : ALL \* CVAC 2 YN

ALL

CVAC2YN(Cardiogetic Cerebral Infarction)

Power |

Percent |

Percent of rows

Percent of columns | None | With | Total

|       |        |        |        |  |   |
|-------|--------|--------|--------|--|---|
|       | +      |        | +      |  | + |
| 1     | 30096  | 2394   | 32490  |  |   |
|       | 92.63  | 7.37   | 100.00 |  |   |
|       | 92.63  | 7.37   |        |  |   |
|       | 100.00 | 100.00 |        |  |   |
|       | +      |        | +      |  | + |
| Total | 30096  | 2394   | 32490  |  |   |
|       | 92.63  | 7.37   | 100.00 |  |   |



Complications and medical history at the time of obtaining Table 2-3 informed consent by the presence or absence of proton-pump inhibitors

FREQ Procedure

|                      |       | Cumulative       |       |        |
|----------------------|-------|------------------|-------|--------|
| Percent of ALL power |       | Percent of power |       |        |
| 1                    | 32490 | 100.00           | 32490 | 100.00 |

Table : ALL \* CVAC 2 YN

ALL

CVAC2YN(Cardiogetic Cerebral Infarction)

Power |

Percent |

Percent of rows

Percent of columns | None | With | Total

|       |        |        |        |  |   |
|-------|--------|--------|--------|--|---|
|       | +      |        | +      |  | + |
| 1     | 30096  | 2394   | 32490  |  |   |
|       | 92.63  | 7.37   | 100.00 |  |   |
|       | 92.63  | 7.37   |        |  |   |
|       | 100.00 | 100.00 |        |  |   |
|       | +      |        | +      |  | + |
| Total | 30096  | 2394   | 32490  |  |   |
|       | 92.63  | 7.37   | 100.00 |  |   |

Complications and medical history at the time of obtaining Table 2-3 informed consent by the presence or absence of proton-pump inhibitors

FREQ Procedure

|   |       | Cumulative           |                  |        |
|---|-------|----------------------|------------------|--------|
|   |       | Percent of ALL power | Percent of power |        |
| 1 | 32490 | 100.00               | 32490            | 100.00 |

Table : ALL \* CVAC 3 YN

ALL

CVAC3YN(Lacunar Cerebral Infarction)

Power |

Percent |

Percent of rows

Percent of columns | None | With | Total

|             |         |         |  |
|-------------|---------|---------|--|
| +_____+     | +_____+ | +_____+ |  |
| 1   31043   | 1447    | 32490   |  |
| 95.55       | 4.45    | 100.00  |  |
| 95.55       | 4.45    |         |  |
| 100.00      | 100.00  |         |  |
| +_____+     | +_____+ | +_____+ |  |
| Total 31043 | 1447    | 32490   |  |
| 95.55       | 4.45    | 100.00  |  |

Complications and medical history at the time of obtaining Table 2-3 informed consent by the presence or absence of proton-pump inhibitors

FREQ Procedure

|                      |       |                  | Cumulative |        |
|----------------------|-------|------------------|------------|--------|
| Percent of ALL power |       | Percent of power |            |        |
| 1                    | 32490 | 100.00           | 32490      | 100.00 |

Table : ALL \* CVAC 3 YN

ALL

CVAC3YN(Lacunar Cerebral Infarction)

Power |

Percent |

Percent of rows

Percent of columns | None | With | Total

|       |        |        |        |  |
|-------|--------|--------|--------|--|
|       | +      | +      | +      |  |
| 1     | 31043  | 1447   | 32490  |  |
|       | 95.55  | 4.45   | 100.00 |  |
|       | 95.55  | 4.45   |        |  |
|       | 100.00 | 100.00 |        |  |
|       | +      | +      | +      |  |
| Total | 31043  | 1447   | 32490  |  |
|       | 95.55  | 4.45   | 100.00 |  |

Complications and medical history at the time of obtaining Table 2-3 informed consent by the presence or absence of proton-pump inhibitors

FREQ Procedure

|   |       | Cumulative           |                  |        |
|---|-------|----------------------|------------------|--------|
|   |       | Percent of ALL power | Percent of power |        |
| 1 | 32490 | 100.00               | 32490            | 100.00 |

Table : ALL \* CVAC 4 YN

ALL

CVAC4YN(Hemorrhagic Stroke)

Power |

Percent |

Percent of rows

Percent of columns | None | With | Total

|             |         |         |  |
|-------------|---------|---------|--|
| +_____+     | +_____+ | +_____+ |  |
| 1   32120   | 370     | 32490   |  |
| 98.86       | 1.14    | 100.00  |  |
| 98.86       | 1.14    |         |  |
| 100.00      | 100.00  |         |  |
| +_____+     | +_____+ | +_____+ |  |
| Total 32120 | 370     | 32490   |  |
| 98.86       | 1.14    | 100.00  |  |

Complications and medical history at the time of obtaining Table 2-3 informed consent by the presence or absence of proton-pump inhibitors

FREQ Procedure

|                      |       |                  | Cumulative |        |
|----------------------|-------|------------------|------------|--------|
| Percent of ALL power |       | Percent of power |            |        |
| 1                    | 32490 | 100.00           | 32490      | 100.00 |

Table : ALL \* CVAC 4 YN

ALL

CVAC4YN(Hemorrhagic Stroke)

Power |

Percent |

Percent of rows

Percent of columns | None | With | Total

|   |        |        |        |   |
|---|--------|--------|--------|---|
|   | +      | +      | +      | + |
| 1 | 32120  | 370    | 32490  |   |
|   | 98.86  | 1.14   | 100.00 |   |
|   | 98.86  | 1.14   |        |   |
|   | 100.00 | 100.00 |        |   |

Total 32120 370 32490

98.86      1.14      100.00

Complications and medical history at the time of obtaining Table 2-3 informed consent by the presence or absence of proton-pump inhibitors

FREQ Procedure

|                      |       | Cumulative       |       |        |
|----------------------|-------|------------------|-------|--------|
| Percent of ALL power |       | Percent of power |       |        |
| 1                    | 32490 | 100.00           | 32490 | 100.00 |

Table : ALL \* CVAC 5 YN

ALL

CVAC5YN(Unclassified/Unknown Cerebral Infarction)

| Power              |         |         |        |
|--------------------|---------|---------|--------|
| Percent            |         |         |        |
| Percent of rows    |         |         |        |
| Percent of columns | None    | With    | Total  |
| +_____+            | +_____+ | +_____+ | +      |
| 1                  | 30728   | 1762    | 32490  |
|                    | 94.58   | 5.42    | 100.00 |
|                    | 94.58   | 5.42    |        |
|                    | 100.00  | 100.00  |        |
| +_____+            | +_____+ | +_____+ | +      |
| Total              | 30728   | 1762    | 32490  |
|                    | 94.58   | 5.42    | 100.00 |

Complications and medical history at the time of obtaining Table 2-3 informed consent by the presence or absence of proton-pump inhibitors

FREQ Procedure

|   |                      |        | Cumulative       |        |
|---|----------------------|--------|------------------|--------|
|   | Percent of ALL power |        | Percent of power |        |
| 1 | 32490                | 100.00 | 32490            | 100.00 |

Table : ALL \* CVAC 5 YN

ALL

CVAC5YN(Unclassified/Unknown Cerebral Infarction)

| Power              |        |        |        |
|--------------------|--------|--------|--------|
| Percent            |        |        |        |
| Percent of rows    |        |        |        |
| Percent of columns | None   | With   | Total  |
|                    | +      | +      | +      |
| 1                  | 30728  | 1762   | 32490  |
|                    | 94.58  | 5.42   | 100.00 |
|                    | 94.58  | 5.42   |        |
|                    | 100.00 | 100.00 |        |
|                    | +      | +      | +      |
| Total              | 30728  | 1762   | 32490  |
|                    | 94.58  | 5.42   | 100.00 |

Complications and medical history at the time of obtaining Table 2-3 informed consent by the presence or absence of proton-pump inhibitors

FREQ Procedure

|                      |       |                  | Cumulative |        |
|----------------------|-------|------------------|------------|--------|
| Percent of ALL power |       | Percent of power |            |        |
| 1                    | 32490 | 100.00           | 32490      | 100.00 |

Table : ALL \* CVAC 6 YN

ALL

CVAC6YN(Transient Ischemic Attacks)

| Power              |        |        |        |
|--------------------|--------|--------|--------|
| Percent            |        |        |        |
| Percent of rows    |        |        |        |
| Percent of columns | None   | With   | Total  |
|                    | +      | +      | +      |
| 1                  | 31971  | 519    | 32490  |
|                    | 98.40  | 1.60   | 100.00 |
|                    | 98.40  | 1.60   |        |
|                    | 100.00 | 100.00 |        |
|                    | +      | +      | +      |
| Total              | 31971  | 519    | 32490  |
|                    | 98.40  | 1.60   | 100.00 |



Complications and medical history at the time of obtaining Table 2-3 informed consent by the presence or absence of proton-pump inhibitors

FREQ Procedure

|   |       | Cumulative           |                  |        |
|---|-------|----------------------|------------------|--------|
|   |       | Percent of ALL power | Percent of power |        |
| 1 | 32490 | 100.00               | 32490            | 100.00 |

Table : ALL \* CVAC 6 YN

ALL

CVAC6YN(Transient Ischemic Attacks)

| Power                   |        |        |        |
|-------------------------|--------|--------|--------|
| Percent                 |        |        |        |
| Percent of rows         |        |        |        |
| Percent of columns      | None   | With   | Total  |
| _____ + _____ + _____ + |        |        |        |
| 1                       | 31971  | 519    | 32490  |
|                         | 98.40  | 1.60   | 100.00 |
|                         | 98.40  | 1.60   |        |
|                         | 100.00 | 100.00 |        |
| _____ + _____ + _____ + |        |        |        |
| Total                   | 31971  | 519    | 32490  |
|                         | 98.40  | 1.60   | 100.00 |

Complications and medical history at the time of obtaining Table 2-3 informed consent by the presence or absence of proton-pump inhibitors

FREQ Procedure

|   |                      |        | Cumulative       |        |
|---|----------------------|--------|------------------|--------|
|   | Percent of ALL power |        | Percent of power |        |
| 1 | 32490                | 100.00 | 32490            | 100.00 |

Table : ALL \* CVAC 7 YN

ALL

CVAC7YN(Other Cerebrovascular Accident)

| Power              |        |        |        |
|--------------------|--------|--------|--------|
| Percent            |        |        |        |
| Percent of rows    |        |        |        |
| Percent of columns | None   | With   | Total  |
|                    | +      | +      | +      |
| 1                  | 31681  | 809    | 32490  |
|                    | 97.51  | 2.49   | 100.00 |
|                    | 97.51  | 2.49   |        |
|                    | 100.00 | 100.00 |        |
|                    | +      | +      | +      |
| Total              | 31681  | 809    | 32490  |
|                    | 97.51  | 2.49   | 100.00 |

Complications and medical history at the time of obtaining Table 2-3 informed consent by the presence or absence of proton-pump inhibitors

FREQ Procedure

|   |                      |        | Cumulative       |        |
|---|----------------------|--------|------------------|--------|
|   | Percent of ALL power |        | Percent of power |        |
| 1 | 32490                | 100.00 | 32490            | 100.00 |

Table : ALL \* CVAC 7 YN

ALL

CVAC7YN(Other Cerebrovascular Accident)

Power |

Percent |

Percent of rows

Percent of columns | None | With | Total

|       |        |        |        |  |   |
|-------|--------|--------|--------|--|---|
|       | +      |        | +      |  | + |
| 1     | 31681  | 809    | 32490  |  |   |
|       | 97.51  | 2.49   | 100.00 |  |   |
|       | 97.51  | 2.49   |        |  |   |
|       | 100.00 | 100.00 |        |  |   |
|       | +      |        | +      |  | + |
| Total | 31681  | 809    | 32490  |  |   |
|       | 97.51  | 2.49   | 100.00 |  |   |

Complications and medical history at the time of obtaining Table 2-3 informed consent by the presence or absence of proton-pump inhibitors

FREQ Procedure

|   |                      |        | Cumulative       |        |
|---|----------------------|--------|------------------|--------|
|   | Percent of ALL power |        | Percent of power |        |
| 1 | 32490                | 100.00 | 32490            | 100.00 |

Tables: ALL \* OTVDYN

ALL

OTVDYN(Other Vascular Disease)

| Power              |        |        |        |
|--------------------|--------|--------|--------|
| Percent            |        |        |        |
| Percent of rows    |        |        |        |
| Percent of columns | None   | With   | Total  |
|                    | +      | +      | +      |
| 1                  | 30760  | 1730   | 32490  |
|                    | 94.68  | 5.32   | 100.00 |
|                    | 94.68  | 5.32   |        |
|                    | 100.00 | 100.00 |        |
|                    | +      | +      | +      |
| Total              | 30760  | 1730   | 32490  |
|                    | 94.68  | 5.32   | 100.00 |

Complications and medical history at the time of obtaining Table 2-3 informed consent by the presence or absence of proton-pump inhibitors

FREQ Procedure

|   |                      |        | Cumulative       |        |
|---|----------------------|--------|------------------|--------|
|   | Percent of ALL power |        | Percent of power |        |
| 1 | 32490                | 100.00 | 32490            | 100.00 |

Tables: ALL \* OTVDYN

ALL

OTVDYN(Other Vascular Disease)

Power |

Percent |

Percent of rows

Percent of columns | None | With | Total

|       |        |        |        |  |   |
|-------|--------|--------|--------|--|---|
|       | +      |        | +      |  | + |
| 1     | 30760  | 1730   | 32490  |  |   |
|       | 94.68  | 5.32   | 100.00 |  |   |
|       | 94.68  | 5.32   |        |  |   |
|       | 100.00 | 100.00 |        |  |   |
|       | +      |        | +      |  | + |
| Total | 30760  | 1730   | 32490  |  |   |
|       | 94.68  | 5.32   | 100.00 |  |   |

Complications and medical history at the time of obtaining Table 2-3 informed consent by the presence or absence of proton-pump inhibitors

FREQ Procedure

|                      |       |                  | Cumulative |        |
|----------------------|-------|------------------|------------|--------|
| Percent of ALL power |       | Percent of power |            |        |
| 1                    | 32490 | 100.00           | 32490      | 100.00 |

Table : ALL \* OTVD 1 YN

ALL

OTVD1YN(Peripheral Vascular Disease)

| Power                   |        |        |        |
|-------------------------|--------|--------|--------|
| Percent                 |        |        |        |
| Percent of rows         |        |        |        |
| Percent of columns      | None   | With   | Total  |
| _____ + _____ + _____ + |        |        |        |
| 1                       | 31990  | 500    | 32490  |
|                         | 98.46  | 1.54   | 100.00 |
|                         | 98.46  | 1.54   |        |
|                         | 100.00 | 100.00 |        |
| _____ + _____ + _____ + |        |        |        |
| Total                   | 31990  | 500    | 32490  |
|                         | 98.46  | 1.54   | 100.00 |

Complications and medical history at the time of obtaining Table 2-3 informed consent by the presence or absence of proton-pump inhibitors

FREQ Procedure

|   |       | Cumulative           |                  |        |
|---|-------|----------------------|------------------|--------|
|   |       | Percent of ALL power | Percent of power |        |
| 1 | 32490 | 100.00               | 32490            | 100.00 |

Table : ALL \* OTVD 1 YN

ALL

OTVD1YN(Peripheral Vascular Disease)

| Power              |         |         |        |
|--------------------|---------|---------|--------|
| Percent            |         |         |        |
| Percent of rows    |         |         |        |
| Percent of columns | None    | With    | Total  |
| +_____+            | +_____+ | +_____+ | +      |
| 1                  | 31990   | 500     | 32490  |
|                    | 98.46   | 1.54    | 100.00 |
|                    | 98.46   | 1.54    |        |
|                    | 100.00  | 100.00  |        |
| +_____+            | +_____+ | +_____+ | +      |
| Total              | 31990   | 500     | 32490  |
|                    | 98.46   | 1.54    | 100.00 |

Complications and medical history at the time of obtaining Table 2-3 informed consent by the presence or absence of proton-pump inhibitors

FREQ Procedure

|   |                      |                  | Cumulative |        |
|---|----------------------|------------------|------------|--------|
|   | Percent of ALL power | Percent of power |            |        |
| 1 | 32490                | 100.00           | 32490      | 100.00 |

Table : ALL \* OTVD 2 YN

ALL OTVD2YN(Aortic Plaque)

|       | Power  | Percent | Percent of rows | Percent of columns | None  | With | Total  |
|-------|--------|---------|-----------------|--------------------|-------|------|--------|
|       |        |         |                 |                    |       |      |        |
|       | +      | +       | +               | +                  |       |      |        |
| 1     | 32249  | 99.26   | 99.26           | 100.00             | 241   | 0.74 | 100.00 |
|       |        |         |                 |                    |       |      |        |
|       | 100.00 | 100.00  |                 |                    |       |      |        |
|       | +      | +       | +               | +                  |       |      |        |
| Total | 32249  | 241     | 32490           |                    | 99.26 | 0.74 | 100.00 |



Complications and medical history at the time of obtaining Table 2-3 informed consent by the presence or absence of proton-pump inhibitors

FREQ Procedure

|   |                      |        | Cumulative       |        |
|---|----------------------|--------|------------------|--------|
|   | Percent of ALL power |        | Percent of power |        |
| 1 | 32490                | 100.00 | 32490            | 100.00 |

Table : ALL \* OTVD 2 YN

ALL OTVD2YN(Aortic Plaque)

| Power              |        |        |        |
|--------------------|--------|--------|--------|
| Percent            |        |        |        |
| Percent of rows    |        |        |        |
| Percent of columns | None   | With   | Total  |
|                    | +      | +      | +      |
| 1                  | 32249  | 241    | 32490  |
|                    | 99.26  | 0.74   | 100.00 |
|                    | 99.26  | 0.74   |        |
|                    | 100.00 | 100.00 |        |
|                    | +      | +      | +      |
| Total              | 32249  | 241    | 32490  |
|                    | 99.26  | 0.74   | 100.00 |

Complications and medical history at the time of obtaining Table 2-3 informed consent by the presence or absence of proton-pump inhibitors

FREQ Procedure

|                      |       |                  | Cumulative |        |
|----------------------|-------|------------------|------------|--------|
| Percent of ALL power |       | Percent of power |            |        |
| 1                    | 32490 | 100.00           | 32490      | 100.00 |

Table : ALL \* TED 3 YN

ALL

TED3YN(Internal Carotid Artery Stenosis)

Power |

Percent |

Percent of rows

Percent of columns | None | With | Total

|       |        |        |        |   |
|-------|--------|--------|--------|---|
|       | +      | +      | +      | + |
| 1     | 31733  | 757    | 32490  |   |
|       | 97.67  | 2.33   | 100.00 |   |
|       | 97.67  | 2.33   |        |   |
|       | 100.00 | 100.00 |        |   |
|       | +      | +      | +      | + |
| Total | 31733  | 757    | 32490  |   |
|       | 97.67  | 2.33   | 100.00 |   |

Complications and medical history at the time of obtaining Table 2-3 informed consent by the presence or absence of proton-pump inhibitors

FREQ Procedure

|                      |       |                  | Cumulative |        |
|----------------------|-------|------------------|------------|--------|
| Percent of ALL power |       | Percent of power |            |        |
| 1                    | 32490 | 100.00           | 32490      | 100.00 |

Table : ALL \* TED 3 YN

ALL

TED3YN(Internal Carotid Artery Stenosis)

Power |

Percent |

Percent of rows

Percent of columns | None | With | Total

|       |        |        |        |  |
|-------|--------|--------|--------|--|
|       | +      | +      | +      |  |
| 1     | 31733  | 757    | 32490  |  |
|       | 97.67  | 2.33   | 100.00 |  |
|       | 97.67  | 2.33   |        |  |
|       | 100.00 | 100.00 |        |  |
|       | +      | +      | +      |  |
| Total | 31733  | 757    | 32490  |  |
|       | 97.67  | 2.33   | 100.00 |  |

Complications and medical history at the time of obtaining Table 2-3 informed consent by the presence or absence of proton-pump inhibitors

FREQ Procedure

|                      |       | Cumulative       |       |        |
|----------------------|-------|------------------|-------|--------|
| Percent of ALL power |       | Percent of power |       |        |
| 1                    | 32490 | 100.00           | 32490 | 100.00 |

Table : ALL \* TED 4 YN

ALL

TED4YN(Arteriosclerosis Obliterans)

Power |

Percent |

Percent of rows

Percent of columns | None | With | Total

|       |        |        |        |  |   |
|-------|--------|--------|--------|--|---|
|       | +      |        | +      |  | + |
| 1     | 31372  | 1118   | 32490  |  |   |
|       | 96.56  | 3.44   | 100.00 |  |   |
|       | 96.56  | 3.44   |        |  |   |
|       | 100.00 | 100.00 |        |  |   |
|       | +      |        | +      |  | + |
| Total | 31372  | 1118   | 32490  |  |   |
|       | 96.56  | 3.44   | 100.00 |  |   |

Complications and medical history at the time of obtaining Table 2-3 informed consent by the presence or absence of proton-pump inhibitors

FREQ Procedure

|                      |       | Cumulative       |       |        |
|----------------------|-------|------------------|-------|--------|
| Percent of ALL power |       | Percent of power |       |        |
| 1                    | 32490 | 100.00           | 32490 | 100.00 |

Table : ALL \* TED 4 YN

ALL

TED4YN(Arteriosclerosis Obliterans)

Power |

Percent |

Percent of rows

Percent of columns | None | With | Total

|       |        |        |        |  |
|-------|--------|--------|--------|--|
|       | +      | +      | +      |  |
| 1     | 31372  | 1118   | 32490  |  |
|       | 96.56  | 3.44   | 100.00 |  |
|       | 96.56  | 3.44   |        |  |
|       | 100.00 | 100.00 |        |  |
|       | +      | +      | +      |  |
| Total | 31372  | 1118   | 32490  |  |
|       | 96.56  | 3.44   | 100.00 |  |

Complications and medical history at the time of obtaining Table 2-3 informed consent by the presence or absence of proton-pump inhibitors

FREQ Procedure

|   |                      |        | Cumulative       |        |
|---|----------------------|--------|------------------|--------|
|   | Percent of ALL power |        | Percent of power |        |
| 1 | 32490                | 100.00 | 32490            | 100.00 |

Table : ALL \* OTVD 3 YN

ALL

OTVD3YN(Other Vascular Disease: Other)

| Power              |        |        |        |
|--------------------|--------|--------|--------|
| Percent            |        |        |        |
| Percent of rows    |        |        |        |
| Percent of columns | None   | With   | Total  |
|                    | +      | +      | +      |
| 1                  | 31451  | 1039   | 32490  |
|                    | 96.80  | 3.20   | 100.00 |
|                    | 96.80  | 3.20   |        |
|                    | 100.00 | 100.00 |        |
|                    | +      | +      | +      |
| Total              | 31451  | 1039   | 32490  |
|                    | 96.80  | 3.20   | 100.00 |

Complications and medical history at the time of obtaining Table 2-3 informed consent by the presence or absence of proton-pump inhibitors

FREQ Procedure

|                      |       |                  | Cumulative |        |
|----------------------|-------|------------------|------------|--------|
| Percent of ALL power |       | Percent of power |            |        |
| 1                    | 32490 | 100.00           | 32490      | 100.00 |

Table : ALL \* OTVD 3 YN

ALL

OTVD3YN(Other Vascular Disease: Other)

Power |

Percent |

Percent of rows

Percent of columns | None | With | Total

|       |        |        |        |  |
|-------|--------|--------|--------|--|
|       | +      | +      | +      |  |
| 1     | 31451  | 1039   | 32490  |  |
|       | 96.80  | 3.20   | 100.00 |  |
|       | 96.80  | 3.20   |        |  |
|       | 100.00 | 100.00 |        |  |
|       | +      | +      | +      |  |
| Total | 31451  | 1039   | 32490  |  |
|       | 96.80  | 3.20   | 100.00 |  |

Complications and medical history at the time of obtaining Table 2-3 informed consent by the presence or absence of proton-pump inhibitors

FREQ Procedure

|   |                      |        | Cumulative       |        |
|---|----------------------|--------|------------------|--------|
|   | Percent of ALL power |        | Percent of power |        |
| 1 | 32490                | 100.00 | 32490            | 100.00 |

Tables: ALL \* TEDYN

ALL

TEDYN(Thrombosis/Embolism-Related Disease)

Power |

Percent |

Percent of rows

Percent of columns | None | With | Total

|       |        |        |        |  |   |
|-------|--------|--------|--------|--|---|
|       | +      |        | +      |  | + |
| 1     | 29709  | 2781   | 32490  |  |   |
|       | 91.44  | 8.56   | 100.00 |  |   |
|       | 91.44  | 8.56   |        |  |   |
|       | 100.00 | 100.00 |        |  |   |
|       | +      |        | +      |  | + |
| Total | 29709  | 2781   | 32490  |  |   |
|       | 91.44  | 8.56   | 100.00 |  |   |



Complications and medical history at the time of obtaining Table 2-3 informed consent by the presence or absence of proton-pump inhibitors

FREQ Procedure

|   |                      |        | Cumulative       |        |
|---|----------------------|--------|------------------|--------|
|   | Percent of ALL power |        | Percent of power |        |
| 1 | 32490                | 100.00 | 32490            | 100.00 |

Tables: ALL \* TEDYN

ALL

TEDYN(Thrombosis/Embolism-Related Disease)

| Power                   |        |        |        |
|-------------------------|--------|--------|--------|
| Percent                 |        |        |        |
| Percent of rows         |        |        |        |
| Percent of columns      | None   | With   | Total  |
| _____ + _____ + _____ + |        |        |        |
| 1                       | 29709  | 2781   | 32490  |
|                         | 91.44  | 8.56   | 100.00 |
|                         | 91.44  | 8.56   |        |
|                         | 100.00 | 100.00 |        |
| _____ + _____ + _____ + |        |        |        |
| Total                   | 29709  | 2781   | 32490  |
|                         | 91.44  | 8.56   | 100.00 |

Complications and medical history at the time of obtaining Table 2-3 informed consent by the presence or absence of proton-pump inhibitors

FREQ Procedure

|   |                      |        | Cumulative       |        |
|---|----------------------|--------|------------------|--------|
|   | Percent of ALL power |        | Percent of power |        |
| 1 | 32490                | 100.00 | 32490            | 100.00 |

Table: ALL \* t\_TED

ALL t\_TED

| Power | Percent            | Percent of rows | Percentage of columns   0   1   Sum |
|-------|--------------------|-----------------|-------------------------------------|
|       |                    |                 | _____+_____+_____+                  |
| 1     | 32077              | 413             | 32490                               |
|       | 98.73              | 1.27            | 100.00                              |
|       | 98.73              | 1.27            |                                     |
|       | 100.00             | 100.00          |                                     |
|       | _____+_____+_____+ |                 |                                     |
| Total | 32077              | 413             | 32490                               |
|       | 98.73              | 1.27            | 100.00                              |

Complications and medical history at the time of obtaining Table 2-3 informed consent by the presence or absence of proton-pump inhibitors

FREQ Procedure

|   |                      |        | Cumulative       |        |
|---|----------------------|--------|------------------|--------|
|   | Percent of ALL power |        | Percent of power |        |
| 1 | 32490                | 100.00 | 32490            | 100.00 |

Table: ALL \* t\_TED

ALL t\_TED

| Power | Percent            | Percent of rows | Percentage of columns   0   1   Sum |
|-------|--------------------|-----------------|-------------------------------------|
|       |                    |                 | _____+_____+_____+                  |
| 1     | 32077              | 413             | 32490                               |
|       | 98.73              | 1.27            | 100.00                              |
|       | 98.73              | 1.27            |                                     |
|       | 100.00             | 100.00          |                                     |
|       | _____+_____+_____+ |                 |                                     |
| Total | 32077              | 413             | 32490                               |
|       | 98.73              | 1.27            | 100.00                              |

Complications and medical history at the time of obtaining Table 2-3 informed consent by the presence or absence of proton-pump inhibitors

FREQ Procedure

|                      |       |                  | Cumulative |        |
|----------------------|-------|------------------|------------|--------|
| Percent of ALL power |       | Percent of power |            |        |
| 1                    | 32490 | 100.00           | 32490      | 100.00 |

Table : ALL \* TED 1 YN

ALL

TED1YN(Pulmonary Embolism)

Power |

Percent |

Percent of rows

Percent of columns | None | With | Total

|       |   |        |   |        |   |        |
|-------|---|--------|---|--------|---|--------|
|       | + |        | + |        | + |        |
| 1     |   | 32375  |   | 115    |   | 32490  |
|       |   | 99.65  |   | 0.35   |   | 100.00 |
|       |   | 99.65  |   | 0.35   |   |        |
|       |   | 100.00 |   | 100.00 |   |        |
|       | + |        | + |        | + |        |
| Total |   | 32375  |   | 115    |   | 32490  |
|       |   | 99.65  |   | 0.35   |   | 100.00 |

Complications and medical history at the time of obtaining Table 2-3 informed consent by the presence or absence of proton-pump inhibitors

FREQ Procedure

|   |                      |        | Cumulative       |        |
|---|----------------------|--------|------------------|--------|
|   | Percent of ALL power |        | Percent of power |        |
| 1 | 32490                | 100.00 | 32490            | 100.00 |

Table : ALL \* TED 1 YN

ALL

TED1YN(Pulmonary Embolism)

Power |

Percent |

Percent of rows

Percent of columns | None | With | Total

|       |        |        |        |  |   |
|-------|--------|--------|--------|--|---|
|       | +      |        | +      |  | + |
| 1     | 32375  | 115    | 32490  |  |   |
|       | 99.65  | 0.35   | 100.00 |  |   |
|       | 99.65  | 0.35   |        |  |   |
|       | 100.00 | 100.00 |        |  |   |
|       | +      |        | +      |  | + |
| Total | 32375  | 115    | 32490  |  |   |
|       | 99.65  | 0.35   | 100.00 |  |   |

Complications and medical history at the time of obtaining Table 2-3 informed consent by the presence or absence of proton-pump inhibitors

FREQ Procedure

|   |                      |        | Cumulative       |        |
|---|----------------------|--------|------------------|--------|
|   | Percent of ALL power |        | Percent of power |        |
| 1 | 32490                | 100.00 | 32490            | 100.00 |

Table : ALL \* TED 2 YN

ALL

TED2YN(Deep Vein Thrombosis)

| Power              |        |        |        |
|--------------------|--------|--------|--------|
| Percent            |        |        |        |
| Percent of rows    |        |        |        |
| Percent of columns | None   | With   | Total  |
|                    | +      | +      | +      |
| 1                  | 32153  | 337    | 32490  |
|                    | 98.96  | 1.04   | 100.00 |
|                    | 98.96  | 1.04   |        |
|                    | 100.00 | 100.00 |        |
|                    | +      | +      | +      |
| Total              | 32153  | 337    | 32490  |
|                    | 98.96  | 1.04   | 100.00 |

Complications and medical history at the time of obtaining Table 2-3 informed consent by the presence or absence of proton-pump inhibitors

FREQ Procedure

|                      |       |                  | Cumulative |        |
|----------------------|-------|------------------|------------|--------|
| Percent of ALL power |       | Percent of power |            |        |
| 1                    | 32490 | 100.00           | 32490      | 100.00 |

Table : ALL \* TED 2 YN

ALL

TED2YN(Deep Vein Thrombosis)

Power |

Percent |

Percent of rows

Percent of columns | None | With | Total

|       |        |        |        |  |   |
|-------|--------|--------|--------|--|---|
|       | +      |        | +      |  | + |
| 1     | 32153  | 337    | 32490  |  |   |
|       | 98.96  | 1.04   | 100.00 |  |   |
|       | 98.96  | 1.04   |        |  |   |
|       | 100.00 | 100.00 |        |  |   |
|       | +      |        | +      |  | + |
| Total | 32153  | 337    | 32490  |  |   |
|       | 98.96  | 1.04   | 100.00 |  |   |

Complications and medical history at the time of obtaining Table 2-3 informed consent by the presence or absence of proton-pump inhibitors

FREQ Procedure

|   |                      |        | Cumulative       |        |
|---|----------------------|--------|------------------|--------|
|   | Percent of ALL power |        | Percent of power |        |
| 1 | 32490                | 100.00 | 32490            | 100.00 |

Table : ALL \* TED 5 YN

ALL

TED5YN(Other Thrombosis/Embolism-Related Disease)

| Power                   |        |        |        |
|-------------------------|--------|--------|--------|
| Percent                 |        |        |        |
| Percent of rows         |        |        |        |
| Percent of columns      | None   | With   | Total  |
| _____ + _____ + _____ + |        |        |        |
| 1                       | 31689  | 801    | 32490  |
|                         | 97.53  | 2.47   | 100.00 |
|                         | 97.53  | 2.47   |        |
|                         | 100.00 | 100.00 |        |
| _____ + _____ + _____ + |        |        |        |
| Total                   | 31689  | 801    | 32490  |
|                         | 97.53  | 2.47   | 100.00 |



Complications and medical history at the time of obtaining Table 2-3 informed consent by the presence or absence of proton-pump inhibitors

FREQ Procedure

|                      |       |                  | Cumulative |        |
|----------------------|-------|------------------|------------|--------|
| Percent of ALL power |       | Percent of power |            |        |
| 1                    | 32490 | 100.00           | 32490      | 100.00 |

Table : ALL \* TED 5 YN

ALL

TED5YN(Other Thrombosis/Embolism-Related Disease)

| Power              |        |        |        |
|--------------------|--------|--------|--------|
| Percent            |        |        |        |
| Percent of rows    |        |        |        |
| Percent of columns | None   | With   | Total  |
|                    | +      | +      | +      |
| 1                  | 31689  | 801    | 32490  |
|                    | 97.53  | 2.47   | 100.00 |
|                    | 97.53  | 2.47   |        |
|                    | 100.00 | 100.00 |        |
|                    | +      | +      | +      |
| Total              | 31689  | 801    | 32490  |
|                    | 97.53  | 2.47   | 100.00 |

Complications and medical history at the time of obtaining Table 2-3 informed consent by the presence or absence of proton-pump inhibitors

FREQ Procedure

|   |                      |        | Cumulative       |        |
|---|----------------------|--------|------------------|--------|
|   | Percent of ALL power |        | Percent of power |        |
| 1 | 32490                | 100.00 | 32490            | 100.00 |

Tables: ALL \* HTDMYN

ALL HTDMYN(Hyperthyroidism)

| Power              |           |           |           |
|--------------------|-----------|-----------|-----------|
| Percent            |           |           |           |
| Percent of rows    |           |           |           |
| Percent of columns | None      | With      | Total     |
|                    | + _____ + | + _____ + | + _____ + |
| 1                  | 32009     | 481       | 32490     |
|                    | 98.52     | 1.48      | 100.00    |
|                    | 98.52     | 1.48      |           |
|                    | 100.00    | 100.00    |           |
|                    | + _____ + | + _____ + | + _____ + |
| Total              | 32009     | 481       | 32490     |
|                    | 98.52     | 1.48      | 100.00    |

Complications and medical history at the time of obtaining Table 2-3 informed consent by the presence or absence of proton-pump inhibitors

FREQ Procedure

|   |                      |        | Cumulative       |        |
|---|----------------------|--------|------------------|--------|
|   | Percent of ALL power |        | Percent of power |        |
| 1 | 32490                | 100.00 | 32490            | 100.00 |

Tables: ALL \* HTDMYN

ALL HTDMYN(Hyperthyroidism)

| Power              |        |        |        |
|--------------------|--------|--------|--------|
| Percent            |        |        |        |
| Percent of rows    |        |        |        |
| Percent of columns | None   | With   | Total  |
|                    | +      | +      | +      |
| 1                  | 32009  | 481    | 32490  |
|                    | 98.52  | 1.48   | 100.00 |
|                    | 98.52  | 1.48   |        |
|                    | 100.00 | 100.00 |        |
|                    | +      | +      | +      |
| Total              | 32009  | 481    | 32490  |
|                    | 98.52  | 1.48   | 100.00 |

Complications and medical history at the time of obtaining Table 2-3 informed consent by the presence or absence of proton-pump inhibitors

FREQ Procedure

|   |                      |        | Cumulative       |        |
|---|----------------------|--------|------------------|--------|
|   | Percent of ALL power |        | Percent of power |        |
| 1 | 32490                | 100.00 | 32490            | 100.00 |

Tables: ALL \* GASDYN

ALL

GASDYN(Gastrointestinal Disease)

| Power              |        |        |        |
|--------------------|--------|--------|--------|
| Percent            |        |        |        |
| Percent of rows    |        |        |        |
| Percent of columns | None   | With   | Total  |
|                    | +      | +      | +      |
| 1                  | 22966  | 9524   | 32490  |
|                    | 70.69  | 29.31  | 100.00 |
|                    | 70.69  | 29.31  |        |
|                    | 100.00 | 100.00 |        |
|                    | +      | +      | +      |
| Total              | 22966  | 9524   | 32490  |
|                    | 70.69  | 29.31  | 100.00 |

Complications and medical history at the time of obtaining Table 2-3 informed consent by the presence or absence of proton-pump inhibitors

FREQ Procedure

|   |                      |        | Cumulative       |        |
|---|----------------------|--------|------------------|--------|
|   | Percent of ALL power |        | Percent of power |        |
| 1 | 32490                | 100.00 | 32490            | 100.00 |

Tables: ALL \* GASDYN

ALL

GASDYN(Gastrointestinal Disease)

| Power              |        |        |        |
|--------------------|--------|--------|--------|
| Percent            |        |        |        |
| Percent of rows    |        |        |        |
| Percent of columns | None   | With   | Total  |
|                    | +      | +      | +      |
| 1                  | 22966  | 9524   | 32490  |
|                    | 70.69  | 29.31  | 100.00 |
|                    | 70.69  | 29.31  |        |
|                    | 100.00 | 100.00 |        |
|                    | +      | +      | +      |
| Total              | 22966  | 9524   | 32490  |
|                    | 70.69  | 29.31  | 100.00 |

Complications and medical history at the time of obtaining Table 2-3 informed consent by the presence or absence of proton-pump inhibitors

FREQ Procedure

|                      |       |                  | Cumulative |        |
|----------------------|-------|------------------|------------|--------|
| Percent of ALL power |       | Percent of power |            |        |
| 1                    | 32490 | 100.00           | 32490      | 100.00 |

Table : ALL \* GASD 1 YN

ALL

GASD1YN(Upper Gastrointestinal Tract)

| Power              |        |        |        |
|--------------------|--------|--------|--------|
| Percent            |        |        |        |
| Percent of rows    |        |        |        |
| Percent of columns | None   | With   | Total  |
|                    | +      | +      | +      |
| 1                  | 31774  | 716    | 32490  |
|                    | 97.80  | 2.20   | 100.00 |
|                    | 97.80  | 2.20   |        |
|                    | 100.00 | 100.00 |        |
|                    | +      | +      | +      |
| Total              | 31774  | 716    | 32490  |
|                    | 97.80  | 2.20   | 100.00 |

Complications and medical history at the time of obtaining Table 2-3 informed consent by the presence or absence of proton-pump inhibitors

FREQ Procedure

|   |       | Cumulative           |                  |        |
|---|-------|----------------------|------------------|--------|
|   |       | Percent of ALL power | Percent of power |        |
| 1 | 32490 | 100.00               | 32490            | 100.00 |

Table : ALL \* GASD 1 YN

ALL

GASD1YN(Upper Gastrointestinal Tract)

| Power                   |        |        |        |
|-------------------------|--------|--------|--------|
| Percent                 |        |        |        |
| Percent of rows         |        |        |        |
| Percent of columns      | None   | With   | Total  |
| _____ + _____ + _____ + |        |        |        |
| 1                       | 31774  | 716    | 32490  |
|                         | 97.80  | 2.20   | 100.00 |
|                         | 97.80  | 2.20   |        |
|                         | 100.00 | 100.00 |        |
| _____ + _____ + _____ + |        |        |        |
| Total                   | 31774  | 716    | 32490  |
|                         | 97.80  | 2.20   | 100.00 |

Complications and medical history at the time of obtaining Table 2-3 informed consent by the presence or absence of proton-pump inhibitors

FREQ Procedure

|                      |       | Cumulative       |       |        |
|----------------------|-------|------------------|-------|--------|
| Percent of ALL power |       | Percent of power |       |        |
| 1                    | 32490 | 100.00           | 32490 | 100.00 |

Table : ALL \* GASD 2 YN

ALL

GASD2YN(Lower Gastrointestinal Tract)

| Power              |         |         |        |
|--------------------|---------|---------|--------|
| Percent            |         |         |        |
| Percent of rows    |         |         |        |
| Percent of columns | None    | With    | Total  |
| +_____+            | +_____+ | +_____+ | +      |
| 1                  | 31764   | 726     | 32490  |
|                    | 97.77   | 2.23    | 100.00 |
|                    | 97.77   | 2.23    |        |
|                    | 100.00  | 100.00  |        |
| +_____+            | +_____+ | +_____+ | +      |
| Total              | 31764   | 726     | 32490  |
|                    | 97.77   | 2.23    | 100.00 |



Complications and medical history at the time of obtaining Table 2-3 informed consent by the presence or absence of proton-pump inhibitors

FREQ Procedure

|                      |       | Cumulative       |       |        |
|----------------------|-------|------------------|-------|--------|
| Percent of ALL power |       | Percent of power |       |        |
| 1                    | 32490 | 100.00           | 32490 | 100.00 |

Table : ALL \* GASD 2 YN

ALL

GASD2YN(Lower Gastrointestinal Tract)

Power |

Percent |

Percent of rows

Percent of columns | None | With | Total

|                         |                       |              |                 |
|-------------------------|-----------------------|--------------|-----------------|
| +_____+                 | +_____+               | +_____+      | +_____+         |
| 1   31764   726   32490 | 97.77   2.23   100.00 | 97.77   2.23 | 100.00   100.00 |
| +_____+                 | +_____+               | +_____+      | +_____+         |
| Total 31764 726 32490   | 97.77 2.23 100.00     |              |                 |

Complications and medical history at the time of obtaining Table 2-3 informed consent by the presence or absence of proton-pump inhibitors

FREQ Procedure

|                      |       |                  | Cumulative |        |
|----------------------|-------|------------------|------------|--------|
| Percent of ALL power |       | Percent of power |            |        |
| 1                    | 32490 | 100.00           | 32490      | 100.00 |

Table : ALL \* GASD 3 YN

ALL

GASD3YN(Reflux esophagitis)

Power |

Percent |

Percent of rows

Percent of columns | None | With | Total

|       |        |        |        |  |   |
|-------|--------|--------|--------|--|---|
|       | +      |        | +      |  | + |
| 1     | 27371  | 5119   | 32490  |  |   |
|       | 84.24  | 15.76  | 100.00 |  |   |
|       | 84.24  | 15.76  |        |  |   |
|       | 100.00 | 100.00 |        |  |   |
|       | +      |        | +      |  | + |
| Total | 27371  | 5119   | 32490  |  |   |
|       | 84.24  | 15.76  | 100.00 |  |   |

Complications and medical history at the time of obtaining Table 2-3 informed consent by the presence or absence of proton-pump inhibitors

FREQ Procedure

|                      |       |                  | Cumulative |        |
|----------------------|-------|------------------|------------|--------|
| Percent of ALL power |       | Percent of power |            |        |
| 1                    | 32490 | 100.00           | 32490      | 100.00 |

Table : ALL \* GASD 3 YN

ALL

GASD3YN(Reflux esophagitis)

Power |

Percent |

Percent of rows

Percent of columns | None | With | Total

|       |   |        |   |        |   |        |
|-------|---|--------|---|--------|---|--------|
|       | + |        | + |        | + |        |
| 1     |   | 27371  |   | 5119   |   | 32490  |
|       |   | 84.24  |   | 15.76  |   | 100.00 |
|       |   | 84.24  |   | 15.76  |   |        |
|       |   | 100.00 |   | 100.00 |   |        |
|       | + |        | + |        | + |        |
| Total |   | 27371  |   | 5119   |   | 32490  |
|       |   | 84.24  |   | 15.76  |   | 100.00 |

Complications and medical history at the time of obtaining Table 2-3 informed consent by the presence or absence of proton-pump inhibitors

FREQ Procedure

|   |                      |        | Cumulative       |        |
|---|----------------------|--------|------------------|--------|
|   | Percent of ALL power |        | Percent of power |        |
| 1 | 32490                | 100.00 | 32490            | 100.00 |

Table : ALL \* GASD 4 YN

ALL

GASD4YN(Other Gastrointestinal Disease)

| Power              |        |        |        |
|--------------------|--------|--------|--------|
| Percent            |        |        |        |
| Percent of rows    |        |        |        |
| Percent of columns | None   | With   | Total  |
|                    | +      | +      | +      |
| 1                  | 28069  | 4421   | 32490  |
|                    | 86.39  | 13.61  | 100.00 |
|                    | 86.39  | 13.61  |        |
|                    | 100.00 | 100.00 |        |
|                    | +      | +      | +      |
| Total              | 28069  | 4421   | 32490  |
|                    | 86.39  | 13.61  | 100.00 |

Complications and medical history at the time of obtaining Table 2-3 informed consent by the presence or absence of proton-pump inhibitors

FREQ Procedure

|   |                      |        | Cumulative       |        |
|---|----------------------|--------|------------------|--------|
|   | Percent of ALL power |        | Percent of power |        |
| 1 | 32490                | 100.00 | 32490            | 100.00 |

Table : ALL \* GASD 4 YN

ALL

GASD4YN(Other Gastrointestinal Disease)

| Power              |        |        |        |
|--------------------|--------|--------|--------|
| Percent            |        |        |        |
| Percent of rows    |        |        |        |
| Percent of columns | None   | With   | Total  |
|                    | +      | +      | +      |
| 1                  | 28069  | 4421   | 32490  |
|                    | 86.39  | 13.61  | 100.00 |
|                    | 86.39  | 13.61  |        |
|                    | 100.00 | 100.00 |        |
|                    | +      | +      | +      |
| Total              | 28069  | 4421   | 32490  |
|                    | 86.39  | 13.61  | 100.00 |

Complications and medical history at the time of obtaining Table 2-3 informed consent by the presence or absence of proton-pump inhibitors

FREQ Procedure

|   |                      |                  | Cumulative           |                  |
|---|----------------------|------------------|----------------------|------------------|
|   | Percent of ALL power | Percent of power | Percent of ALL power | Percent of power |
| 1 | 32490                | 100.00           | 32490                | 100.00           |

Tables: ALL\* MGTYN

ALL MGTYN(Malignant Tumor)

| Power              |        |        |        |
|--------------------|--------|--------|--------|
| Percent            |        |        |        |
| Percent of rows    |        |        |        |
| Percent of columns | None   | With   | Total  |
|                    | +      | +      | +      |
| 1                  | 28931  | 3559   | 32490  |
|                    | 89.05  | 10.95  | 100.00 |
|                    | 89.05  | 10.95  |        |
|                    | 100.00 | 100.00 |        |
|                    | +      | +      | +      |
| Total              | 28931  | 3559   | 32490  |
|                    | 89.05  | 10.95  | 100.00 |

Complications and medical history at the time of obtaining Table 2-3 informed consent by the presence or absence of proton-pump inhibitors

FREQ Procedure

|   |                      |                  | Cumulative |        |
|---|----------------------|------------------|------------|--------|
|   | Percent of ALL power | Percent of power |            |        |
| 1 | 32490                | 100.00           | 32490      | 100.00 |

Tables: ALL\* MGTYN

ALL MGTYN(Malignant Tumor)

| Power              |           |           |           |
|--------------------|-----------|-----------|-----------|
| Percent            |           |           |           |
| Percent of rows    |           |           |           |
| Percent of columns | None      | With      | Total     |
|                    | + _____ + | + _____ + | + _____ + |
| 1                  | 28931     | 3559      | 32490     |
|                    | 89.05     | 10.95     | 100.00    |
|                    | 89.05     | 10.95     |           |
|                    | 100.00    | 100.00    |           |
|                    | + _____ + | + _____ + | + _____ + |
| Total              | 28931     | 3559      | 32490     |
|                    | 89.05     | 10.95     | 100.00    |

Complications and medical history at the time of obtaining Table 2-3 informed consent by the presence or absence of proton-pump inhibitors

FREQ Procedure

|                      |       |                  | Cumulative |        |
|----------------------|-------|------------------|------------|--------|
| Percent of ALL power |       | Percent of power |            |        |
| 1                    | 32490 | 100.00           | 32490      | 100.00 |

Table : ALL \* MGT 1 YN

ALL MGT1YN(Gastric Cancer)

| Power              |        |        |        |
|--------------------|--------|--------|--------|
| Percent            |        |        |        |
| Percent of rows    |        |        |        |
| Percent of columns | None   | With   | Total  |
|                    | +      | +      | +      |
| 1                  | 31755  | 735    | 32490  |
|                    | 97.74  | 2.26   | 100.00 |
|                    | 97.74  | 2.26   |        |
|                    | 100.00 | 100.00 |        |
|                    | +      | +      | +      |
| Total              | 31755  | 735    | 32490  |
|                    | 97.74  | 2.26   | 100.00 |



Complications and medical history at the time of obtaining Table 2-3 informed consent by the presence or absence of proton-pump inhibitors

FREQ Procedure

|   |                      |        | Cumulative       |        |
|---|----------------------|--------|------------------|--------|
|   | Percent of ALL power |        | Percent of power |        |
| 1 | 32490                | 100.00 | 32490            | 100.00 |

Table : ALL \* MGT 1 YN

ALL MGT1YN(Gastric Cancer)

| Power              |        |        |        |
|--------------------|--------|--------|--------|
| Percent            |        |        |        |
| Percent of rows    |        |        |        |
| Percent of columns | None   | With   | Total  |
|                    | +      | +      | +      |
| 1                  | 31755  | 735    | 32490  |
|                    | 97.74  | 2.26   | 100.00 |
|                    | 97.74  | 2.26   |        |
|                    | 100.00 | 100.00 |        |
|                    | +      | +      | +      |
| Total              | 31755  | 735    | 32490  |
|                    | 97.74  | 2.26   | 100.00 |

Complications and medical history at the time of obtaining Table 2-3 informed consent by the presence or absence of proton-pump inhibitors

FREQ Procedure

|   |                      |        | Cumulative       |        |
|---|----------------------|--------|------------------|--------|
|   | Percent of ALL power |        | Percent of power |        |
| 1 | 32490                | 100.00 | 32490            | 100.00 |

Table : ALL \* MGT 2 YN

ALL MGT2YN(Colorectal Cancer)

| Power              |        |        |        |
|--------------------|--------|--------|--------|
| Percent            |        |        |        |
| Percent of rows    |        |        |        |
| Percent of columns | None   | With   | Total  |
|                    | +      | +      | +      |
| 1                  | 31752  | 738    | 32490  |
|                    | 97.73  | 2.27   | 100.00 |
|                    | 97.73  | 2.27   |        |
|                    | 100.00 | 100.00 |        |
|                    | +      | +      | +      |
| Total              | 31752  | 738    | 32490  |
|                    | 97.73  | 2.27   | 100.00 |

Complications and medical history at the time of obtaining Table 2-3 informed consent by the presence or absence of proton-pump inhibitors

FREQ Procedure

|   |                      |                  | Cumulative           |                  |
|---|----------------------|------------------|----------------------|------------------|
|   | Percent of ALL power | Percent of power | Percent of ALL power | Percent of power |
| 1 | 32490                | 100.00           | 32490                | 100.00           |

Table : ALL \* MGT 2 YN

ALL MGT2YN(Colorectal Cancer)

| Power              |        |        |        |
|--------------------|--------|--------|--------|
| Percent            |        |        |        |
| Percent of rows    |        |        |        |
| Percent of columns | None   | With   | Total  |
|                    | +      | +      | +      |
| 1                  | 31752  | 738    | 32490  |
|                    | 97.73  | 2.27   | 100.00 |
|                    | 97.73  | 2.27   |        |
|                    | 100.00 | 100.00 |        |
|                    | +      | +      | +      |
| Total              | 31752  | 738    | 32490  |
|                    | 97.73  | 2.27   | 100.00 |

Complications and medical history at the time of obtaining Table 2-3 informed consent by the presence or absence of proton-pump inhibitors

FREQ Procedure

|                      |       |                  | Cumulative |        |
|----------------------|-------|------------------|------------|--------|
| Percent of ALL power |       | Percent of power |            |        |
| 1                    | 32490 | 100.00           | 32490      | 100.00 |

Table : ALL \* MGT 3 YN

ALL MGT3YN(Lung Cancer)

| Power              |           |           |           |
|--------------------|-----------|-----------|-----------|
| Percent            |           |           |           |
| Percent of rows    |           |           |           |
| Percent of columns | None      | With      | Total     |
|                    | + _____ + | + _____ + | + _____ + |
| 1                  | 32124     | 366       | 32490     |
|                    | 98.87     | 1.13      | 100.00    |
|                    | 98.87     | 1.13      |           |
|                    | 100.00    | 100.00    |           |
|                    | + _____ + | + _____ + | + _____ + |
| Total              | 32124     | 366       | 32490     |
|                    | 98.87     | 1.13      | 100.00    |

Complications and medical history at the time of obtaining Table 2-3 informed consent by the presence or absence of proton-pump inhibitors

FREQ Procedure

|                      |       |                  | Cumulative |        |
|----------------------|-------|------------------|------------|--------|
| Percent of ALL power |       | Percent of power |            |        |
| 1                    | 32490 | 100.00           | 32490      | 100.00 |

Table : ALL \* MGT 3 YN

ALL MGT3YN(Lung Cancer)

| Power              |        |        |        |
|--------------------|--------|--------|--------|
| Percent            |        |        |        |
| Percent of rows    |        |        |        |
| Percent of columns | None   | With   | Total  |
|                    | +      | +      | +      |
| 1                  | 32124  | 366    | 32490  |
|                    | 98.87  | 1.13   | 100.00 |
|                    | 98.87  | 1.13   |        |
|                    | 100.00 | 100.00 |        |
|                    | +      | +      | +      |
| Total              | 32124  | 366    | 32490  |
|                    | 98.87  | 1.13   | 100.00 |

Complications and medical history at the time of obtaining Table 2-3 informed consent by the presence or absence of proton-pump inhibitors

FREQ Procedure

|   |                      |        | Cumulative       |        |
|---|----------------------|--------|------------------|--------|
|   | Percent of ALL power |        | Percent of power |        |
| 1 | 32490                | 100.00 | 32490            | 100.00 |

Table : ALL \* MGT 4 YN

ALL MGT4YN(Brest Cancer)

| Power              |           |           |           |
|--------------------|-----------|-----------|-----------|
| Percent            |           |           |           |
| Percent of rows    |           |           |           |
| Percent of columns | None      | With      | Total     |
|                    | + _____ + | + _____ + | + _____ + |
| 1                  | 32254     | 236       | 32490     |
|                    | 99.27     | 0.73      | 100.00    |
|                    | 99.27     | 0.73      |           |
|                    | 100.00    | 100.00    |           |
|                    | + _____ + | + _____ + | + _____ + |
| Total              | 32254     | 236       | 32490     |
|                    | 99.27     | 0.73      | 100.00    |

Complications and medical history at the time of obtaining Table 2-3 informed consent by the presence or absence of proton-pump inhibitors

FREQ Procedure

|   |                      |                  | Cumulative       |                  |
|---|----------------------|------------------|------------------|------------------|
|   | Percent of ALL power | Percent of power | Percent of power | Percent of power |
| 1 | 32490                | 100.00           | 32490            | 100.00           |

Table : ALL \* MGT 4 YN

ALL MGT4YN(Brest Cancer)

| Power              |        |        |        |
|--------------------|--------|--------|--------|
| Percent            |        |        |        |
| Percent of rows    |        |        |        |
| Percent of columns | None   | With   | Total  |
|                    | +      | +      | +      |
| 1                  | 32254  | 236    | 32490  |
|                    | 99.27  | 0.73   | 100.00 |
|                    | 99.27  | 0.73   |        |
|                    | 100.00 | 100.00 |        |
|                    | +      | +      | +      |
| Total              | 32254  | 236    | 32490  |
|                    | 99.27  | 0.73   | 100.00 |

Complications and medical history at the time of obtaining Table 2-3 informed consent by the presence or absence of proton-pump inhibitors

FREQ Procedure

|   |                      |        | Cumulative       |        |
|---|----------------------|--------|------------------|--------|
|   | Percent of ALL power |        | Percent of power |        |
| 1 | 32490                | 100.00 | 32490            | 100.00 |

Table : ALL \* MGT 5 YN

ALL

MGT5YN(Uterus/Ovarian Cancer)

Power |

Percent |

Percent of rows

Percent of columns | None | With | Total

|       |        |        |        |  |   |
|-------|--------|--------|--------|--|---|
|       | +      |        | +      |  | + |
| 1     | 32397  | 93     | 32490  |  |   |
|       | 99.71  | 0.29   | 100.00 |  |   |
|       | 99.71  | 0.29   |        |  |   |
|       | 100.00 | 100.00 |        |  |   |
|       | +      |        | +      |  | + |
| Total | 32397  | 93     | 32490  |  |   |
|       | 99.71  | 0.29   | 100.00 |  |   |



Complications and medical history at the time of obtaining Table 2-3 informed consent by the presence or absence of proton-pump inhibitors

FREQ Procedure

|   |                      |        | Cumulative       |        |
|---|----------------------|--------|------------------|--------|
|   | Percent of ALL power |        | Percent of power |        |
| 1 | 32490                | 100.00 | 32490            | 100.00 |

Table : ALL \* MGT 5 YN

ALL

MGT5YN(Uterus/Ovarian Cancer)

| Power              |        |        |        |
|--------------------|--------|--------|--------|
| Percent            |        |        |        |
| Percent of rows    |        |        |        |
| Percent of columns | None   | With   | Total  |
|                    | +      | +      | +      |
| 1                  | 32397  | 93     | 32490  |
|                    | 99.71  | 0.29   | 100.00 |
|                    | 99.71  | 0.29   |        |
|                    | 100.00 | 100.00 |        |
|                    | +      | +      | +      |
| Total              | 32397  | 93     | 32490  |
|                    | 99.71  | 0.29   | 100.00 |

Complications and medical history at the time of obtaining Table 2-3 informed consent by the presence or absence of proton-pump inhibitors

FREQ Procedure

|   |                      |                  | Cumulative           |                  |
|---|----------------------|------------------|----------------------|------------------|
|   | Percent of ALL power | Percent of power | Percent of ALL power | Percent of power |
| 1 | 32490                | 100.00           | 32490                | 100.00           |

Table : ALL \* MGT 6 YN

ALL MGT6YN(Pancreatic Cancer)

| Power              |        |        |        |
|--------------------|--------|--------|--------|
| Percent            |        |        |        |
| Percent of rows    |        |        |        |
| Percent of columns | None   | With   | Total  |
|                    | +      | +      | +      |
| 1                  | 32456  | 34     | 32490  |
|                    | 99.90  | 0.10   | 100.00 |
|                    | 99.90  | 0.10   |        |
|                    | 100.00 | 100.00 |        |
|                    | +      | +      | +      |
| Total              | 32456  | 34     | 32490  |
|                    | 99.90  | 0.10   | 100.00 |

Complications and medical history at the time of obtaining Table 2-3 informed consent by the presence or absence of proton-pump inhibitors

FREQ Procedure

|   |                      |        | Cumulative       |        |
|---|----------------------|--------|------------------|--------|
|   | Percent of ALL power |        | Percent of power |        |
| 1 | 32490                | 100.00 | 32490            | 100.00 |

Table : ALL \* MGT 6 YN

ALL MGT6YN(Pancreatic Cancer)

| Power              |        |        |        |
|--------------------|--------|--------|--------|
| Percent            |        |        |        |
| Percent of rows    |        |        |        |
| Percent of columns | None   | With   | Total  |
|                    | +      | +      | +      |
| 1                  | 32456  | 34     | 32490  |
|                    | 99.90  | 0.10   | 100.00 |
|                    | 99.90  | 0.10   |        |
|                    | 100.00 | 100.00 |        |
|                    | +      | +      | +      |
| Total              | 32456  | 34     | 32490  |
|                    | 99.90  | 0.10   | 100.00 |

Complications and medical history at the time of obtaining Table 2-3 informed consent by the presence or absence of proton-pump inhibitors

FREQ Procedure

|   |       | Cumulative           |                  |        |
|---|-------|----------------------|------------------|--------|
|   |       | Percent of ALL power | Percent of power |        |
| 1 | 32490 | 100.00               | 32490            | 100.00 |

Table : ALL \* MGT 7 YN

ALL

MGT7YN(Other Malignant Tumor)

Power |

Percent |

Percent of rows

Percent of columns | None | With | Total

|         |         |         |        |
|---------|---------|---------|--------|
| +_____+ | +_____+ | +_____+ |        |
| 1       | 30756   | 1734    | 32490  |
|         | 94.66   | 5.34    | 100.00 |
|         | 94.66   | 5.34    |        |
|         | 100.00  | 100.00  |        |
| +_____+ | +_____+ | +_____+ |        |
| Total   | 30756   | 1734    | 32490  |
|         | 94.66   | 5.34    | 100.00 |

Complications and medical history at the time of obtaining Table 2-3 informed consent by the presence or absence of proton-pump inhibitors

FREQ Procedure

|   |                      |        | Cumulative       |        |
|---|----------------------|--------|------------------|--------|
|   | Percent of ALL power |        | Percent of power |        |
| 1 | 32490                | 100.00 | 32490            | 100.00 |

Table : ALL \* MGT 7 YN

ALL

MGT7YN(Other Malignant Tumor)

Power |

Percent |

Percent of rows

Percent of columns | None | With | Total

|       |        |        |        |  |   |
|-------|--------|--------|--------|--|---|
|       | +      |        | +      |  | + |
| 1     | 30756  | 1734   | 32490  |  |   |
|       | 94.66  | 5.34   | 100.00 |  |   |
|       | 94.66  | 5.34   |        |  |   |
|       | 100.00 | 100.00 |        |  |   |
|       | +      |        | +      |  | + |
| Total | 30756  | 1734   | 32490  |  |   |
|       | 94.66  | 5.34   | 100.00 |  |   |



Complications and medical history at the time of obtaining Table 2-3 informed consent by the presence or absence of proton-pump inhibitors

FREQ Procedure

|                      |       |                  | Cumulative |        |
|----------------------|-------|------------------|------------|--------|
| Percent of ALL power |       | Percent of power |            |        |
| 1                    | 32490 | 100.00           | 32490      | 100.00 |

Tables: ALL\* ALZHYN

ALL ALZHYN(Alzheimer)

| Power              |           |           |           |
|--------------------|-----------|-----------|-----------|
| Percent            |           |           |           |
| Percent of rows    |           |           |           |
| Percent of columns | None      | With      | Total     |
|                    | + _____ + | + _____ + | + _____ + |
| 1                  | 29937     | 2553      | 32490     |
|                    | 92.14     | 7.86      | 100.00    |
|                    | 92.14     | 7.86      |           |
|                    | 100.00    | 100.00    |           |
|                    | + _____ + | + _____ + | + _____ + |
| Total              | 29937     | 2553      | 32490     |
|                    | 92.14     | 7.86      | 100.00    |

Complications and medical history at the time of obtaining Table 2-3 informed consent by the presence or absence of proton-pump inhibitors

FREQ Procedure

|                      |       |                  | Cumulative |        |
|----------------------|-------|------------------|------------|--------|
| Percent of ALL power |       | Percent of power |            |        |
| 1                    | 32490 | 100.00           | 32490      | 100.00 |

Tables: ALL \* OHCPYN

ALL

OHCPYN(Other Complications)

| Power                   |        |        |        |
|-------------------------|--------|--------|--------|
| Percent                 |        |        |        |
| Percent of rows         |        |        |        |
| Percent of columns      | None   | With   | Total  |
| _____ + _____ + _____ + |        |        |        |
| 1                       | 21955  | 10535  | 32490  |
|                         | 67.57  | 32.43  | 100.00 |
|                         | 67.57  | 32.43  |        |
|                         | 100.00 | 100.00 |        |
| _____ + _____ + _____ + |        |        |        |
| Total                   | 21955  | 10535  | 32490  |
|                         | 67.57  | 32.43  | 100.00 |



Complications and medical history at the time of obtaining Table 2-3 informed consent by the presence or absence of proton-pump inhibitors

FREQ Procedure

|                      |       |                  | Cumulative |        |
|----------------------|-------|------------------|------------|--------|
| Percent of ALL power |       | Percent of power |            |        |
| 1                    | 32490 | 100.00           | 32490      | 100.00 |

Tables: ALL \* OHCPYN

ALL

OHCPYN(Other Complications)

| Power                   |        |        |        |
|-------------------------|--------|--------|--------|
| Percent                 |        |        |        |
| Percent of rows         |        |        |        |
| Percent of columns      | None   | With   | Total  |
| _____ + _____ + _____ + |        |        |        |
| 1                       | 21955  | 10535  | 32490  |
|                         | 67.57  | 32.43  | 100.00 |
|                         | 67.57  | 32.43  |        |
|                         | 100.00 | 100.00 |        |
| _____ + _____ + _____ + |        |        |        |
| Total                   | 21955  | 10535  | 32490  |
|                         | 67.57  | 32.43  | 100.00 |

Complications and medical history at the time of obtaining Table 2-3 informed consent by the presence or absence of proton-pump inhibitors

FREQ Procedure

|                      |       |                  | Cumulative |        |
|----------------------|-------|------------------|------------|--------|
| Percent of ALL power |       | Percent of power |            |        |
| 1                    | 32490 | 100.00           | 32490      | 100.00 |

Tables: ALL \* IMGYN

ALL IMGYN(Brain Imaging Test)

| Power                 |        |         |        |        |
|-----------------------|--------|---------|--------|--------|
| Percent               |        |         |        |        |
| Percent of rows       |        |         |        |        |
| Percentage of columns | None   | Unknown | Total  |        |
|                       | +      | +       | +      | +      |
| 1                     | 28921  | 2852    | 717    | 32490  |
|                       | 89.02  | 8.78    | 2.21   | 100.00 |
|                       | 89.02  | 8.78    | 2.21   |        |
|                       | 100.00 | 100.00  | 100.00 |        |
|                       | +      | +       | +      | +      |
| Total                 | 28921  | 2852    | 717    | 32490  |
|                       | 89.02  | 8.78    | 2.21   | 100.00 |

Complications and medical history at the time of obtaining Table 2-3 informed consent by the presence or absence of proton-pump inhibitors

FREQ Procedure

|   |                      |                  | Cumulative |        |
|---|----------------------|------------------|------------|--------|
|   | Percent of ALL power | Percent of power |            |        |
| 1 | 32490                | 100.00           | 32490      | 100.00 |

Tables: ALL \* IMGYN

ALL IMGYN(Brain Imaging Test)

| Power                 |        |         |        |        |
|-----------------------|--------|---------|--------|--------|
| Percent               |        |         |        |        |
| Percent of rows       |        |         |        |        |
| Percentage of columns | None   | Unknown | Total  |        |
|                       | +      | +       | +      | +      |
| 1                     | 28921  | 2852    | 717    | 32490  |
|                       | 89.02  | 8.78    | 2.21   | 100.00 |
|                       | 89.02  | 8.78    | 2.21   |        |
|                       | 100.00 | 100.00  | 100.00 |        |
|                       | +      | +       | +      | +      |
| Total                 | 28921  | 2852    | 717    | 32490  |
|                       | 89.02  | 8.78    | 2.21   | 100.00 |

Complications and medical history at the time of obtaining Table 2-3 informed consent by the presence or absence of proton-pump inhibitors

FREQ Procedure

|   |                      |                  | Cumulative |        |
|---|----------------------|------------------|------------|--------|
|   | Percent of ALL power | Percent of power |            |        |
| 1 | 32490                | 100.00           | 32490      | 100.00 |

Tables: ALL \* IMGYN

ALL IMGYN(Brain Imaging Test)

| Power                 |        |         |        |        |
|-----------------------|--------|---------|--------|--------|
| Percent               |        |         |        |        |
| Percent of rows       |        |         |        |        |
| Percentage of columns | None   | Unknown | Total  |        |
|                       | +      | +       | +      | +      |
| 1                     | 28921  | 2852    | 717    | 32490  |
|                       | 89.02  | 8.78    | 2.21   | 100.00 |
|                       | 89.02  | 8.78    | 2.21   |        |
|                       | 100.00 | 100.00  | 100.00 |        |
|                       | +      | +       | +      | +      |
| Total                 | 28921  | 2852    | 717    | 32490  |
|                       | 89.02  | 8.78    | 2.21   | 100.00 |

Complications and medical history at the time of obtaining Table 2-3 informed consent by the presence or absence of proton-pump inhibitors

FREQ Procedure

|                      |       |                  | Cumulative |        |
|----------------------|-------|------------------|------------|--------|
| Percent of ALL power |       | Percent of power |            |        |
| 1                    | 32490 | 100.00           | 32490      | 100.00 |

Tables: ALL\* FALYN

ALL FALYN(Fall Down within one year)

| Power                 |        |         |        |        |
|-----------------------|--------|---------|--------|--------|
| Percent               |        |         |        |        |
| Percent of rows       |        |         |        |        |
| Percentage of columns | None   | Unknown | Total  |        |
|                       | +      | +       | +      | +      |
| 1                     | 26525  | 2369    | 3596   | 32490  |
|                       | 81.64  | 7.29    | 11.07  | 100.00 |
|                       | 81.64  | 7.29    | 11.07  |        |
|                       | 100.00 | 100.00  | 100.00 |        |
|                       | +      | +       | +      | +      |
| Total                 | 26525  | 2369    | 3596   | 32490  |
|                       | 81.64  | 7.29    | 11.07  | 100.00 |

Complications and medical history at the time of obtaining Table 2-3 informed consent by the presence or absence of proton-pump inhibitors

FREQ Procedure

|                      |       |                  | Cumulative |        |
|----------------------|-------|------------------|------------|--------|
| Percent of ALL power |       | Percent of power |            |        |
| 1                    | 32490 | 100.00           | 32490      | 100.00 |

Tables: ALL\* FALYN

ALL FALYN(Fall Down within one year)

| Power                 |        |         |        |        |
|-----------------------|--------|---------|--------|--------|
| Percent               |        |         |        |        |
| Percent of rows       |        |         |        |        |
| Percentage of columns | None   | Unknown | Total  |        |
|                       | +      | +       | +      | +      |
| 1                     | 26525  | 2369    | 3596   | 32490  |
|                       | 81.64  | 7.29    | 11.07  | 100.00 |
|                       | 81.64  | 7.29    | 11.07  |        |
|                       | 100.00 | 100.00  | 100.00 |        |
|                       | +      | +       | +      | +      |
| Total                 | 26525  | 2369    | 3596   | 32490  |
|                       | 81.64  | 7.29    | 11.07  | 100.00 |

Complications and medical history at the time of obtaining Table 2-3 informed consent by the presence or absence of proton-pump inhibitors

FREQ Procedure

|                      |       |                  | Cumulative |        |
|----------------------|-------|------------------|------------|--------|
| Percent of ALL power |       | Percent of power |            |        |
| 1                    | 32490 | 100.00           | 32490      | 100.00 |

Tables: ALL\* FALYN

ALL FALYN(Fall Down within one year)

| Power                 |        |         |        |        |
|-----------------------|--------|---------|--------|--------|
| Percent               |        |         |        |        |
| Percent of rows       |        |         |        |        |
| Percentage of columns | None   | Unknown | Total  |        |
|                       | +      | +       | +      | +      |
| 1                     | 26525  | 2369    | 3596   | 32490  |
|                       | 81.64  | 7.29    | 11.07  | 100.00 |
|                       | 81.64  | 7.29    | 11.07  |        |
|                       | 100.00 | 100.00  | 100.00 |        |
|                       | +      | +       | +      | +      |
| Total                 | 26525  | 2369    | 3596   | 32490  |
|                       | 81.64  | 7.29    | 11.07  | 100.00 |

Complications and medical history at the time of obtaining Table 2-3 informed consent by the presence or absence of proton-pump inhibitors

FREQ Procedure

Tables: ALL \* FNDYN

ALL FNDYN(Brain Imaging Result)

Power |

Percent |

Percent of rows

Percentage of columns |None| |Unknown| | Total

|       | None   | Unknown | Total  |
|-------|--------|---------|--------|
| 1     | 1329   | 1413    | 2852   |
|       | 46.60  | 49.54   | 100.00 |
|       | 46.60  | 49.54   | 3.86   |
|       | 100.00 | 100.00  | 100.00 |
| Total | 1329   | 1413    | 110    |
|       | 46.60  | 49.54   | 3.86   |
|       |        |         | 100.00 |

Degree of missing values = 29638



Complications and medical history at the time of obtaining Table 2-3 informed consent by the presence or absence of proton-pump inhibitors

FREQ Procedure

Tables: ALL \* FNDYN

ALL FNDYN(Brain Imaging Result)

Power |

Percent |

Percent of rows

Percentage of columns |None| |Unknown| | Total

|       | None   | Unknown | Total  |
|-------|--------|---------|--------|
| 1     | 1329   | 1413    | 2852   |
|       | 46.60  | 49.54   | 100.00 |
|       | 46.60  | 49.54   | 3.86   |
|       | 100.00 | 100.00  | 100.00 |
| Total | 1329   | 1413    | 110    |
|       | 46.60  | 49.54   | 3.86   |
|       |        |         | 100.00 |

Degree of missing values = 29638

Complications and medical history at the time of obtaining Table 2-3 informed consent by the presence or absence of proton-pump inhibitors

FREQ Procedure

Tables: ALL \* FNDYN

ALL FNDYN(Brain Imaging Result)

Power |

Percent |

Percent of rows

Percentage of columns |None| |Unknown| | Total

|       | None   | Unknown | Total  |
|-------|--------|---------|--------|
| 1     | 1329   | 1413    | 2852   |
|       | 46.60  | 49.54   | 100.00 |
|       | 46.60  | 49.54   | 3.86   |
|       | 100.00 | 100.00  | 100.00 |
| Total | 1329   | 1413    | 110    |
|       | 46.60  | 49.54   | 3.86   |
|       |        |         | 100.00 |

Degree of missing values = 29638

Complications and medical history at the time of obtaining Table 2-3 informed consent by the presence or absence of proton-pump inhibitors

FREQ Procedure

|                      |       |                  | Cumulative |        |
|----------------------|-------|------------------|------------|--------|
| Percent of ALL power |       | Percent of power |            |        |
| 1                    | 11981 | 100.00           | 11981      | 100.00 |

Tables: ALL \* MHYN

ALL MHYN(Medical History)

| Power              |           |           |           |
|--------------------|-----------|-----------|-----------|
| Percent            |           |           |           |
| Percent of rows    |           |           |           |
| Percent of columns | None      | With      | Total     |
|                    | + _____ + | + _____ + | + _____ + |
| 1                  | 179       | 11802     | 11981     |
|                    | 1.49      | 98.51     | 100.00    |
|                    | 1.49      | 98.51     |           |
|                    | 100.00    | 100.00    |           |
|                    | + _____ + | + _____ + | + _____ + |
| Total              | 179       | 11802     | 11981     |
|                    | 1.49      | 98.51     | 100.00    |

Complications and medical history at the time of obtaining Table 2-3 informed consent by the presence or absence of proton-pump inhibitors

FREQ Procedure

|                      |       |                  | Cumulative |        |
|----------------------|-------|------------------|------------|--------|
| Percent of ALL power |       | Percent of power |            |        |
| 1                    | 11981 | 100.00           | 11981      | 100.00 |

Tables: ALL \* MHYN

ALL MHYN(Medical History)

| Power              |        |        |        |  |
|--------------------|--------|--------|--------|--|
| Percent            |        |        |        |  |
| Percent of rows    |        |        |        |  |
| Percent of columns | None   | With   | Total  |  |
| _____+             | _____+ | _____+ | _____+ |  |
| 1                  | 179    | 11802  | 11981  |  |
|                    | 1.49   | 98.51  | 100.00 |  |
|                    | 1.49   | 98.51  |        |  |
|                    | 100.00 | 100.00 |        |  |
| _____+             | _____+ | _____+ | _____+ |  |
| Total 179          | 11802  | 11981  |        |  |
|                    | 1.49   | 98.51  | 100.00 |  |

Complications and medical history at the time of obtaining Table 2-3 informed consent by the presence or absence of proton-pump inhibitors

FREQ Procedure

|                      |       |                  | Cumulative |        |
|----------------------|-------|------------------|------------|--------|
| Percent of ALL power |       | Percent of power |            |        |
| 1                    | 11981 | 100.00           | 11981      | 100.00 |

Tables: ALL\* HBPYN

ALL

HBPYN(High Blood Pressure)

| Power                   |        |        |        |
|-------------------------|--------|--------|--------|
| Percent                 |        |        |        |
| Percent of rows         |        |        |        |
| Percent of columns      | None   | With   | Total  |
| _____ + _____ + _____ + |        |        |        |
| 1                       | 2641   | 9340   | 11981  |
|                         | 22.04  | 77.96  | 100.00 |
|                         | 22.04  | 77.96  |        |
|                         | 100.00 | 100.00 |        |
| _____ + _____ + _____ + |        |        |        |
| Total                   | 2641   | 9340   | 11981  |
|                         | 22.04  | 77.96  | 100.00 |

Complications and medical history at the time of obtaining Table 2-3 informed consent by the presence or absence of proton-pump inhibitors

FREQ Procedure

|                      |       |                  | Cumulative |        |
|----------------------|-------|------------------|------------|--------|
| Percent of ALL power |       | Percent of power |            |        |
| 1                    | 11981 | 100.00           | 11981      | 100.00 |

Tables: ALL\* HBPYN

ALL

HBPYN(High Blood Pressure)

| Power                   |        |        |        |
|-------------------------|--------|--------|--------|
| Percent                 |        |        |        |
| Percent of rows         |        |        |        |
| Percent of columns      | None   | With   | Total  |
| _____ + _____ + _____ + |        |        |        |
| 1                       | 2641   | 9340   | 11981  |
|                         | 22.04  | 77.96  | 100.00 |
|                         | 22.04  | 77.96  |        |
|                         | 100.00 | 100.00 |        |
| _____ + _____ + _____ + |        |        |        |
| Total                   | 2641   | 9340   | 11981  |
|                         | 22.04  | 77.96  | 100.00 |

Complications and medical history at the time of obtaining Table 2-3 informed consent by the presence or absence of proton-pump inhibitors

FREQ Procedure

|   |       | Cumulative           |                  |        |
|---|-------|----------------------|------------------|--------|
|   |       | Percent of ALL power | Percent of power |        |
| 1 | 11981 | 100.00               | 11981            | 100.00 |

Tables: ALL \* DBYN

ALL DBYN(Diabetes)

| Power              |        |        |        |
|--------------------|--------|--------|--------|
| Percent            |        |        |        |
| Percent of rows    |        |        |        |
| Percent of columns | None   | With   | Total  |
|                    | +      | +      | +      |
| 1                  | 8497   | 3484   | 11981  |
|                    | 70.92  | 29.08  | 100.00 |
|                    | 70.92  | 29.08  |        |
|                    | 100.00 | 100.00 |        |
|                    | +      | +      | +      |
| Total              | 8497   | 3484   | 11981  |
|                    | 70.92  | 29.08  | 100.00 |

Complications and medical history at the time of obtaining Table 2-3 informed consent by the presence or absence of proton-pump inhibitors

FREQ Procedure

|                      |       |                  | Cumulative |        |
|----------------------|-------|------------------|------------|--------|
| Percent of ALL power |       | Percent of power |            |        |
| 1                    | 11981 | 100.00           | 11981      | 100.00 |

Tables: ALL \* DBYN

ALL DBYN(Diabetes)

| Power              |           |           |           |
|--------------------|-----------|-----------|-----------|
| Percent            |           |           |           |
| Percent of rows    |           |           |           |
| Percent of columns | None      | With      | Total     |
|                    | + _____ + | + _____ + | + _____ + |
| 1                  | 8497      | 3484      | 11981     |
|                    | 70.92     | 29.08     | 100.00    |
|                    | 70.92     | 29.08     |           |
|                    | 100.00    | 100.00    |           |
|                    | + _____ + | + _____ + | + _____ + |
| Total              | 8497      | 3484      | 11981     |
|                    | 70.92     | 29.08     | 100.00    |



Complications and medical history at the time of obtaining Table 2-3 informed consent by the presence or absence of proton-pump inhibitors

FREQ Procedure

|                      |       |                  | Cumulative |        |
|----------------------|-------|------------------|------------|--------|
| Percent of ALL power |       | Percent of power |            |        |
| 1                    | 11981 | 100.00           | 11981      | 100.00 |

Table: ALL \* t\_DB

ALL t\_DB

| Power | Percent            | Percent of rows | Percentage of columns   0   1   Sum |
|-------|--------------------|-----------------|-------------------------------------|
|       |                    |                 | _____+_____+_____+                  |
| 1     | 11220              | 761             | 11981                               |
|       | 93.65              | 6.35            | 100.00                              |
|       | 93.65              | 6.35            |                                     |
|       | 100.00             | 100.00          |                                     |
|       | _____+_____+_____+ |                 |                                     |
| Total | 11220              | 761             | 11981                               |
|       | 93.65              | 6.35            | 100.00                              |

Complications and medical history at the time of obtaining Table 2-3 informed consent by the presence or absence of proton-pump inhibitors

FREQ Procedure

|                      |       |                  | Cumulative |        |
|----------------------|-------|------------------|------------|--------|
| Percent of ALL power |       | Percent of power |            |        |
| 1                    | 11981 | 100.00           | 11981      | 100.00 |

Table: ALL \* t\_DB

ALL t\_DB

| Power | Percent            | Percent of rows | Percentage of columns   0   1   Sum |
|-------|--------------------|-----------------|-------------------------------------|
|       |                    |                 | _____+_____+_____+                  |
| 1     | 11220              | 761             | 11981                               |
|       | 93.65              | 6.35            | 100.00                              |
|       | 93.65              | 6.35            |                                     |
|       | 100.00             | 100.00          |                                     |
|       | _____+_____+_____+ |                 |                                     |
| Total | 11220              | 761             | 11981                               |
|       | 93.65              | 6.35            | 100.00                              |

Complications and medical history at the time of obtaining Table 2-3 informed consent by the presence or absence of proton-pump inhibitors

FREQ Procedure

|                      |       |                  | Cumulative |        |
|----------------------|-------|------------------|------------|--------|
| Percent of ALL power |       | Percent of power |            |        |
| 1                    | 11981 | 100.00           | 11981      | 100.00 |

Table : ALL \* DB 1 YN

ALL

DB1YN(Diabetic Retinopathy)

Power |

Percent |

Percent of rows

Percent of columns | None | With | Total

|   |        |        |        |
|---|--------|--------|--------|
|   | +      | +      | +      |
| 1 | 11753  | 228    | 11981  |
|   | 98.10  | 1.90   | 100.00 |
|   | 98.10  | 1.90   |        |
|   | 100.00 | 100.00 |        |
|   | +      | +      | +      |

Total 11753 228 11981

98.10      1.90      100.00

Complications and medical history at the time of obtaining Table 2-3 informed consent by the presence or absence of proton-pump inhibitors

FREQ Procedure

|                      |       |                  | Cumulative |        |
|----------------------|-------|------------------|------------|--------|
| Percent of ALL power |       | Percent of power |            |        |
| 1                    | 11981 | 100.00           | 11981      | 100.00 |

Table : ALL \* DB 1 YN

ALL

DB1YN(Diabetic Retinopathy)

Power |

Percent |

Percent of rows

Percent of columns | None | With | Total

|   |        |        |        |  |   |
|---|--------|--------|--------|--|---|
|   | +      |        | +      |  | + |
| 1 | 11753  | 228    | 11981  |  |   |
|   | 98.10  | 1.90   | 100.00 |  |   |
|   | 98.10  | 1.90   |        |  |   |
|   | 100.00 | 100.00 |        |  |   |
|   | +      |        | +      |  | + |

Total 11753 228 11981

98.10 1.90 100.00

Complications and medical history at the time of obtaining Table 2-3 informed consent by the presence or absence of proton-pump inhibitors

FREQ Procedure

|                      |       |                  | Cumulative |        |
|----------------------|-------|------------------|------------|--------|
| Percent of ALL power |       | Percent of power |            |        |
| 1                    | 11981 | 100.00           | 11981      | 100.00 |

Table : ALL \* DB 2 YN

ALL

DB2YN(Diabetic Nephropathy)

Power |

Percent |

Percent of rows

Percent of columns | None | With | Total

|       |        |        |        |  |   |
|-------|--------|--------|--------|--|---|
|       | +      |        | +      |  | + |
| 1     | 11403  | 578    | 11981  |  |   |
|       | 95.18  | 4.82   | 100.00 |  |   |
|       | 95.18  | 4.82   |        |  |   |
|       | 100.00 | 100.00 |        |  |   |
|       | +      |        | +      |  | + |
| Total | 11403  | 578    | 11981  |  |   |
|       | 95.18  | 4.82   | 100.00 |  |   |

Complications and medical history at the time of obtaining Table 2-3 informed consent by the presence or absence of proton-pump inhibitors

FREQ Procedure

|   |       | Cumulative           |                  |        |
|---|-------|----------------------|------------------|--------|
|   |       | Percent of ALL power | Percent of power |        |
| 1 | 11981 | 100.00               | 11981            | 100.00 |

Table : ALL \* DB 2 YN

ALL

DB2YN(Diabetic Nephropathy)

Power |

Percent |

Percent of rows

Percent of columns | None | With | Total

|   |        |        |        |  |   |
|---|--------|--------|--------|--|---|
|   | +      |        | +      |  | + |
| 1 | 11403  | 578    | 11981  |  |   |
|   | 95.18  | 4.82   | 100.00 |  |   |
|   | 95.18  | 4.82   |        |  |   |
|   | 100.00 | 100.00 |        |  |   |
|   | +      |        | +      |  | + |

Total 11403 578 11981

95.18      4.82      100.00

Complications and medical history at the time of obtaining Table 2-3 informed consent by the presence or absence of proton-pump inhibitors

FREQ Procedure

|                      |       |                  | Cumulative |        |
|----------------------|-------|------------------|------------|--------|
| Percent of ALL power |       | Percent of power |            |        |
| 1                    | 11981 | 100.00           | 11981      | 100.00 |

Table : ALL \* DB 3 YN

ALL

DB3YN(Diabetic Neuropathy)

| Power              |           |           |           |
|--------------------|-----------|-----------|-----------|
| Percent            |           |           |           |
| Percent of rows    |           |           |           |
| Percent of columns | None      | With      | Total     |
|                    | + _____ + | + _____ + | + _____ + |
| 1                  | 11839     | 142       | 11981     |
|                    | 98.81     | 1.19      | 100.00    |
|                    | 98.81     | 1.19      |           |
|                    | 100.00    | 100.00    |           |
|                    | + _____ + | + _____ + | + _____ + |
| Total              | 11839     | 142       | 11981     |
|                    | 98.81     | 1.19      | 100.00    |

Complications and medical history at the time of obtaining Table 2-3 informed consent by the presence or absence of proton-pump inhibitors

FREQ Procedure

|                      |       |                  | Cumulative |        |
|----------------------|-------|------------------|------------|--------|
| Percent of ALL power |       | Percent of power |            |        |
| 1                    | 11981 | 100.00           | 11981      | 100.00 |

Table : ALL \* DB 3 YN

ALL

DB3YN(Diabetic Neuropathy)

| Power              |        |        |        |   |
|--------------------|--------|--------|--------|---|
| Percent            |        |        |        |   |
| Percent of rows    |        |        |        |   |
| Percent of columns | None   | With   | Total  |   |
|                    | +      | +      |        | + |
| 1                  | 11839  | 142    | 11981  |   |
|                    | 98.81  | 1.19   | 100.00 |   |
|                    | 98.81  | 1.19   |        |   |
|                    | 100.00 | 100.00 |        |   |
|                    | +      | +      |        | + |
| Total              | 11839  | 142    | 11981  |   |
|                    | 98.81  | 1.19   | 100.00 |   |



Complications and medical history at the time of obtaining Table 2-3 informed consent by the presence or absence of proton-pump inhibitors

FREQ Procedure

|                      |       |                  | Cumulative |        |
|----------------------|-------|------------------|------------|--------|
| Percent of ALL power |       | Percent of power |            |        |
| 1                    | 11981 | 100.00           | 11981      | 100.00 |

Tables: ALL\* LMDYN

ALL

LMDYN(Lipid metabolism disorders)

| Power                   |        |        |        |
|-------------------------|--------|--------|--------|
| Percent                 |        |        |        |
| Percent of rows         |        |        |        |
| Percent of columns      | None   | With   | Total  |
| _____ + _____ + _____ + |        |        |        |
| 1                       | 6154   | 5827   | 11981  |
|                         | 51.36  | 48.64  | 100.00 |
|                         | 51.36  | 48.64  |        |
|                         | 100.00 | 100.00 |        |
| _____ + _____ + _____ + |        |        |        |
| Total                   | 6154   | 5827   | 11981  |
|                         | 51.36  | 48.64  | 100.00 |

Complications and medical history at the time of obtaining Table 2-3 informed consent by the presence or absence of proton-pump inhibitors

FREQ Procedure

|                      |       |                  | Cumulative |        |
|----------------------|-------|------------------|------------|--------|
| Percent of ALL power |       | Percent of power |            |        |
| 1                    | 11981 | 100.00           | 11981      | 100.00 |

Tables: ALL\* LMDYN

ALL

LMDYN(Lipid metabolism disorders)

Power |

Percent |

Percent of rows

Percent of columns | None | With | Total

|       |        |        |        |  |   |
|-------|--------|--------|--------|--|---|
|       | +      |        | +      |  | + |
| 1     | 6154   | 5827   | 11981  |  |   |
|       | 51.36  | 48.64  | 100.00 |  |   |
|       | 51.36  | 48.64  |        |  |   |
|       | 100.00 | 100.00 |        |  |   |
|       | +      |        | +      |  | + |
| Total | 6154   | 5827   | 11981  |  |   |
|       | 51.36  | 48.64  | 100.00 |  |   |

Complications and medical history at the time of obtaining Table 2-3 informed consent by the presence or absence of proton-pump inhibitors

FREQ Procedure

|                      |       |                  | Cumulative |        |
|----------------------|-------|------------------|------------|--------|
| Percent of ALL power |       | Percent of power |            |        |
| 1                    | 11981 | 100.00           | 11981      | 100.00 |

Tables: ALL \* HYPURNYN

ALL HYPURNYN(Hyperuricemia)

| Power              |           |           |           |
|--------------------|-----------|-----------|-----------|
| Percent            |           |           |           |
| Percent of rows    |           |           |           |
| Percent of columns | None      | With      | Total     |
|                    | + _____ + | + _____ + | + _____ + |
| 1                  | 8972      | 3009      | 11981     |
|                    | 74.89     | 25.11     | 100.00    |
|                    | 74.89     | 25.11     |           |
|                    | 100.00    | 100.00    |           |
|                    | + _____ + | + _____ + | + _____ + |
| Total              | 8972      | 3009      | 11981     |
|                    | 74.89     | 25.11     | 100.00    |

Complications and medical history at the time of obtaining Table 2-3 informed consent by the presence or absence of proton-pump inhibitors

FREQ Procedure

|                      |       |                  | Cumulative |        |
|----------------------|-------|------------------|------------|--------|
| Percent of ALL power |       | Percent of power |            |        |
| 1                    | 11981 | 100.00           | 11981      | 100.00 |

Tables: ALL \* HYPURNYN

ALL HYPURNYN(Hyperuricemia)

| Power              |           |           |           |
|--------------------|-----------|-----------|-----------|
| Percent            |           |           |           |
| Percent of rows    |           |           |           |
| Percent of columns | None      | With      | Total     |
|                    | + _____ + | + _____ + | + _____ + |
| 1                  | 8972      | 3009      | 11981     |
|                    | 74.89     | 25.11     | 100.00    |
|                    | 74.89     | 25.11     |           |
|                    | 100.00    | 100.00    |           |
|                    | + _____ + | + _____ + | + _____ + |
| Total              | 8972      | 3009      | 11981     |
|                    | 74.89     | 25.11     | 100.00    |

Complications and medical history at the time of obtaining Table 2-3 informed consent by the presence or absence of proton-pump inhibitors

FREQ Procedure

|                      |       |                  | Cumulative |        |
|----------------------|-------|------------------|------------|--------|
| Percent of ALL power |       | Percent of power |            |        |
| 1                    | 11981 | 100.00           | 11981      | 100.00 |

Tables: ALL \* KDDSYN

ALL KDDSYN(Kidney Disease)

| Power              |           |           |           |
|--------------------|-----------|-----------|-----------|
| Percent            |           |           |           |
| Percent of rows    |           |           |           |
| Percent of columns | None      | With      | Total     |
|                    | + _____ + | + _____ + | + _____ + |
| 1                  | 8596      | 3385      | 11981     |
|                    | 71.75     | 28.25     | 100.00    |
|                    | 71.75     | 28.25     |           |
|                    | 100.00    | 100.00    |           |
|                    | + _____ + | + _____ + | + _____ + |
| Total              | 8596      | 3385      | 11981     |
|                    | 71.75     | 28.25     | 100.00    |

Complications and medical history at the time of obtaining Table 2-3 informed consent by the presence or absence of proton-pump inhibitors

FREQ Procedure

|                      |       |                  | Cumulative |        |
|----------------------|-------|------------------|------------|--------|
| Percent of ALL power |       | Percent of power |            |        |
| 1                    | 11981 | 100.00           | 11981      | 100.00 |

Tables: ALL \* KDDSYN

ALL KDDSYN(Kidney Disease)

| Power              |           |           |           |
|--------------------|-----------|-----------|-----------|
| Percent            |           |           |           |
| Percent of rows    |           |           |           |
| Percent of columns | None      | With      | Total     |
|                    | + _____ + | + _____ + | + _____ + |
| 1                  | 8596      | 3385      | 11981     |
|                    | 71.75     | 28.25     | 100.00    |
|                    | 71.75     | 28.25     |           |
|                    | 100.00    | 100.00    |           |
|                    | + _____ + | + _____ + | + _____ + |
| Total              | 8596      | 3385      | 11981     |
|                    | 71.75     | 28.25     | 100.00    |

Complications and medical history at the time of obtaining Table 2-3 informed consent by the presence or absence of proton-pump inhibitors

FREQ Procedure

|                      |       |                  | Cumulative |        |
|----------------------|-------|------------------|------------|--------|
| Percent of ALL power |       | Percent of power |            |        |
| 1                    | 11981 | 100.00           | 11981      | 100.00 |

Table : ALL \* KDDS 1 YN

ALL

KDDS1YN(Chronic Kidney Disease)

Power |

Percent |

Percent of rows

Percent of columns | None | With | Total

|       |        |        |        |  |   |
|-------|--------|--------|--------|--|---|
|       | +      |        | +      |  | + |
| 1     | 9001   | 2980   | 11981  |  |   |
|       | 75.13  | 24.87  | 100.00 |  |   |
|       | 75.13  | 24.87  |        |  |   |
|       | 100.00 | 100.00 |        |  |   |
|       | +      |        | +      |  | + |
| Total | 9001   | 2980   | 11981  |  |   |
|       | 75.13  | 24.87  | 100.00 |  |   |

Complications and medical history at the time of obtaining Table 2-3 informed consent by the presence or absence of proton-pump inhibitors

FREQ Procedure

|                      |       |                  | Cumulative |        |
|----------------------|-------|------------------|------------|--------|
| Percent of ALL power |       | Percent of power |            |        |
| 1                    | 11981 | 100.00           | 11981      | 100.00 |

Table : ALL \* KDDS 1 YN

ALL

KDDS1YN(Chronic Kidney Disease)

| Power                   |        |        |        |
|-------------------------|--------|--------|--------|
| Percent                 |        |        |        |
| Percent of rows         |        |        |        |
| Percent of columns      | None   | With   | Total  |
| _____ + _____ + _____ + |        |        |        |
| 1                       | 9001   | 2980   | 11981  |
|                         | 75.13  | 24.87  | 100.00 |
|                         | 75.13  | 24.87  |        |
|                         | 100.00 | 100.00 |        |
| _____ + _____ + _____ + |        |        |        |
| Total                   | 9001   | 2980   | 11981  |
|                         | 75.13  | 24.87  | 100.00 |



Complications and medical history at the time of obtaining Table 2-3 informed consent by the presence or absence of proton-pump inhibitors

FREQ Procedure

|                      |       |                  | Cumulative |        |
|----------------------|-------|------------------|------------|--------|
| Percent of ALL power |       | Percent of power |            |        |
| 1                    | 11981 | 100.00           | 11981      | 100.00 |

Table : ALL \* KDDS 2 YN

ALL

KDDS2YN(Advanced Renal Dysfunction without Dialysis)

| Power              |        |        |        |
|--------------------|--------|--------|--------|
| Percent            |        |        |        |
| Percent of rows    |        |        |        |
| Percent of columns | None   | With   | Total  |
|                    | +      | +      | +      |
| 1                  | 11747  | 234    | 11981  |
|                    | 98.05  | 1.95   | 100.00 |
|                    | 98.05  | 1.95   |        |
|                    | 100.00 | 100.00 |        |
|                    | +      | +      | +      |
| Total              | 11747  | 234    | 11981  |
|                    | 98.05  | 1.95   | 100.00 |

Complications and medical history at the time of obtaining Table 2-3 informed consent by the presence or absence of proton-pump inhibitors

FREQ Procedure

|                      |       |                  | Cumulative |        |
|----------------------|-------|------------------|------------|--------|
| Percent of ALL power |       | Percent of power |            |        |
| 1                    | 11981 | 100.00           | 11981      | 100.00 |

Table : ALL \* KDDS 2 YN

ALL

KDDS2YN(Advanced Renal Dysfunction without Dialysis)

| Power              |        |        |        |
|--------------------|--------|--------|--------|
| Percent            |        |        |        |
| Percent of rows    |        |        |        |
| Percent of columns | None   | With   | Total  |
|                    | +      | +      | +      |
| 1                  | 11747  | 234    | 11981  |
|                    | 98.05  | 1.95   | 100.00 |
|                    | 98.05  | 1.95   |        |
|                    | 100.00 | 100.00 |        |
|                    | +      | +      | +      |
| Total              | 11747  | 234    | 11981  |
|                    | 98.05  | 1.95   | 100.00 |

Complications and medical history at the time of obtaining Table 2-3 informed consent by the presence or absence of proton-pump inhibitors

FREQ Procedure

|                      |       |                  | Cumulative |        |
|----------------------|-------|------------------|------------|--------|
| Percent of ALL power |       | Percent of power |            |        |
| 1                    | 11981 | 100.00           | 11981      | 100.00 |

Table : ALL \* KDDS 3 YN

ALL

KDDS3YN(Advanced Renal Dysfunction with Dialysis)

| Power              |           |           |           |
|--------------------|-----------|-----------|-----------|
| Percent            |           |           |           |
| Percent of rows    |           |           |           |
| Percent of columns | None      | With      | Total     |
|                    | + _____ + | + _____ + | + _____ + |
| 1                  | 11919     | 62        | 11981     |
|                    | 99.48     | 0.52      | 100.00    |
|                    | 99.48     | 0.52      |           |
|                    | 100.00    | 100.00    |           |
|                    | + _____ + | + _____ + | + _____ + |
| Total              | 11919 62  | 11981     |           |
|                    | 99.48     | 0.52      | 100.00    |

Complications and medical history at the time of obtaining Table 2-3 informed consent by the presence or absence of proton-pump inhibitors

FREQ Procedure

|                      |       |                  | Cumulative |        |
|----------------------|-------|------------------|------------|--------|
| Percent of ALL power |       | Percent of power |            |        |
| 1                    | 11981 | 100.00           | 11981      | 100.00 |

Table : ALL \* KDDS 3 YN

ALL

KDDS3YN(Advanced Renal Dysfunction with Dialysis)

| Power              |          |        |        |
|--------------------|----------|--------|--------|
| Percent            |          |        |        |
| Percent of rows    |          |        |        |
| Percent of columns | None     | With   | Total  |
| + + +              | + + +    | + + +  | + + +  |
| 1                  | 11919    | 62     | 11981  |
|                    | 99.48    | 0.52   | 100.00 |
|                    | 99.48    | 0.52   |        |
|                    | 100.00   | 100.00 |        |
| + + +              | + + +    | + + +  | + + +  |
| Total              | 11919 62 | 11981  |        |
|                    | 99.48    | 0.52   | 100.00 |

Complications and medical history at the time of obtaining Table 2-3 informed consent by the presence or absence of proton-pump inhibitors

FREQ Procedure

|                      |       |                  | Cumulative |        |
|----------------------|-------|------------------|------------|--------|
| Percent of ALL power |       | Percent of power |            |        |
| 1                    | 11981 | 100.00           | 11981      | 100.00 |

Tables: ALL \* SLVDYN

ALL

SLVDYN(Severe Liver Dysfunction)

| Power                   |        |        |        |
|-------------------------|--------|--------|--------|
| Percent                 |        |        |        |
| Percent of rows         |        |        |        |
| Percent of columns      | None   | With   | Total  |
| _____ + _____ + _____ + |        |        |        |
| 1                       | 11852  | 129    | 11981  |
|                         | 98.92  | 1.08   | 100.00 |
|                         | 98.92  | 1.08   |        |
|                         | 100.00 | 100.00 |        |
| _____ + _____ + _____ + |        |        |        |
| Total                   | 11852  | 129    | 11981  |
|                         | 98.92  | 1.08   | 100.00 |

Complications and medical history at the time of obtaining Table 2-3 informed consent by the presence or absence of proton-pump inhibitors

FREQ Procedure

|                      |       |                  | Cumulative |        |
|----------------------|-------|------------------|------------|--------|
| Percent of ALL power |       | Percent of power |            |        |
| 1                    | 11981 | 100.00           | 11981      | 100.00 |

Tables: ALL \* SLVDYN

ALL

SLVDYN(Severe Liver Dysfunction)

| Power              |        |        |        |
|--------------------|--------|--------|--------|
| Percent            |        |        |        |
| Percent of rows    |        |        |        |
| Percent of columns | None   | With   | Total  |
|                    | +      | +      | +      |
| 1                  | 11852  | 129    | 11981  |
|                    | 98.92  | 1.08   | 100.00 |
|                    | 98.92  | 1.08   |        |
|                    | 100.00 | 100.00 |        |
|                    | +      | +      | +      |
| Total              | 11852  | 129    | 11981  |
|                    | 98.92  | 1.08   | 100.00 |

Complications and medical history at the time of obtaining Table 2-3 informed consent by the presence or absence of proton-pump inhibitors

FREQ Procedure

|                      |       |                  | Cumulative |        |
|----------------------|-------|------------------|------------|--------|
| Percent of ALL power |       | Percent of power |            |        |
| 1                    | 11981 | 100.00           | 11981      | 100.00 |

Tables: ALL\* RESDYN

ALL

RESDYN(Respiratory Disease)

Power |

Percent |

Percent of rows

Percent of columns | None | With | Total

|       |        |        |        |   |
|-------|--------|--------|--------|---|
|       | +      | +      | +      | + |
| 1     | 10183  | 1798   | 11981  |   |
|       | 84.99  | 15.01  | 100.00 |   |
|       | 84.99  | 15.01  |        |   |
|       | 100.00 | 100.00 |        |   |
|       | +      | +      | +      | + |
| Total | 10183  | 1798   | 11981  |   |
|       | 84.99  | 15.01  | 100.00 |   |

Complications and medical history at the time of obtaining Table 2-3 informed consent by the presence or absence of proton-pump inhibitors

FREQ Procedure

|                      |       |                  | Cumulative |        |
|----------------------|-------|------------------|------------|--------|
| Percent of ALL power |       | Percent of power |            |        |
| 1                    | 11981 | 100.00           | 11981      | 100.00 |

Tables: ALL\* RESDYN

ALL

RESDYN(Respiratory Disease)

Power |

Percent |

Percent of rows

Percent of columns | None | With | Total

|       |   |        |   |        |   |        |
|-------|---|--------|---|--------|---|--------|
|       | + |        | + |        | + |        |
| 1     |   | 10183  |   | 1798   |   | 11981  |
|       |   | 84.99  |   | 15.01  |   | 100.00 |
|       |   | 84.99  |   | 15.01  |   |        |
|       |   | 100.00 |   | 100.00 |   |        |
|       | + |        | + |        | + |        |
| Total |   | 10183  |   | 1798   |   | 11981  |
|       |   | 84.99  |   | 15.01  |   | 100.00 |



Complications and medical history at the time of obtaining Table 2-3 informed consent by the presence or absence of proton-pump inhibitors

FREQ Procedure

|                      |       |                  | Cumulative |        |
|----------------------|-------|------------------|------------|--------|
| Percent of ALL power |       | Percent of power |            |        |
| 1                    | 11981 | 100.00           | 11981      | 100.00 |

Tables: ALL\* HTDYN

ALL HTDYN(Heart Disease)

| Power              |           |           |           |
|--------------------|-----------|-----------|-----------|
| Percent            |           |           |           |
| Percent of rows    |           |           |           |
| Percent of columns | None      | With      | Total     |
|                    | + _____ + | + _____ + | + _____ + |
| 1                  | 4172      | 7809      | 11981     |
|                    | 34.82     | 65.18     | 100.00    |
|                    | 34.82     | 65.18     |           |
|                    | 100.00    | 100.00    |           |
|                    | + _____ + | + _____ + | + _____ + |
| Total              | 4172      | 7809      | 11981     |
|                    | 34.82     | 65.18     | 100.00    |

Complications and medical history at the time of obtaining Table 2-3 informed consent by the presence or absence of proton-pump inhibitors

FREQ Procedure

|                      |       |                  | Cumulative |        |
|----------------------|-------|------------------|------------|--------|
| Percent of ALL power |       | Percent of power |            |        |
| 1                    | 11981 | 100.00           | 11981      | 100.00 |

Tables: ALL\* HTDYN

ALL HTDYN(Heart Disease)

| Power              |           |           |           |
|--------------------|-----------|-----------|-----------|
| Percent            |           |           |           |
| Percent of rows    |           |           |           |
| Percent of columns | None      | With      | Total     |
|                    | + _____ + | + _____ + | + _____ + |
| 1                  | 4172      | 7809      | 11981     |
|                    | 34.82     | 65.18     | 100.00    |
|                    | 34.82     | 65.18     |           |
|                    | 100.00    | 100.00    |           |
|                    | + _____ + | + _____ + | + _____ + |
| Total              | 4172      | 7809      | 11981     |
|                    | 34.82     | 65.18     | 100.00    |

Complications and medical history at the time of obtaining Table 2-3 informed consent by the presence or absence of proton-pump inhibitors

FREQ Procedure

|                      |       |                  | Cumulative |        |
|----------------------|-------|------------------|------------|--------|
| Percent of ALL power |       | Percent of power |            |        |
| 1                    | 11981 | 100.00           | 11981      | 100.00 |

Table : ALL \* HTD 1 YN

ALL

HTD1YN(Myocardial Infarction)

Power |

Percent |

Percent of rows

Percent of columns | None | With | Total

|       |        |        |        |  |   |
|-------|--------|--------|--------|--|---|
|       | +      |        | +      |  | + |
| 1     | 10924  | 1057   | 11981  |  |   |
|       | 91.18  | 8.82   | 100.00 |  |   |
|       | 91.18  | 8.82   |        |  |   |
|       | 100.00 | 100.00 |        |  |   |
|       | +      |        | +      |  | + |
| Total | 10924  | 1057   | 11981  |  |   |
|       | 91.18  | 8.82   | 100.00 |  |   |

Complications and medical history at the time of obtaining Table 2-3 informed consent by the presence or absence of proton-pump inhibitors

FREQ Procedure

|   |       | Cumulative           |                  |        |
|---|-------|----------------------|------------------|--------|
|   |       | Percent of ALL power | Percent of power |        |
| 1 | 11981 | 100.00               | 11981            | 100.00 |

Table : ALL \* HTD 1 YN

ALL

HTD1YN(Myocardial Infarction)

Power |

Percent |

Percent of rows

Percent of columns | None | With | Total

|       |        |        |        |
|-------|--------|--------|--------|
|       | +      | +      | +      |
| 1     | 10924  | 1057   | 11981  |
|       | 91.18  | 8.82   | 100.00 |
|       | 91.18  | 8.82   |        |
|       | 100.00 | 100.00 |        |
| +     | +      | +      |        |
| Total | 10924  | 1057   | 11981  |
|       | 91.18  | 8.82   | 100.00 |

Complications and medical history at the time of obtaining Table 2-3 informed consent by the presence or absence of proton-pump inhibitors

FREQ Procedure

|                      |       |                  | Cumulative |        |
|----------------------|-------|------------------|------------|--------|
| Percent of ALL power |       | Percent of power |            |        |
| 1                    | 11981 | 100.00           | 11981      | 100.00 |

Table : ALL \* HTD 2 YN

ALL HTD2YN(Angina Pectoris)

| Power              |        |        |        |
|--------------------|--------|--------|--------|
| Percent            |        |        |        |
| Percent of rows    |        |        |        |
| Percent of columns | None   | With   | Total  |
|                    | +      | +      | +      |
| 1                  | 9362   | 2619   | 11981  |
|                    | 78.14  | 21.86  | 100.00 |
|                    | 78.14  | 21.86  |        |
|                    | 100.00 | 100.00 |        |
|                    | +      | +      | +      |
| Total              | 9362   | 2619   | 11981  |
|                    | 78.14  | 21.86  | 100.00 |

Complications and medical history at the time of obtaining Table 2-3 informed consent by the presence or absence of proton-pump inhibitors

FREQ Procedure

|                      |       |                  | Cumulative |        |
|----------------------|-------|------------------|------------|--------|
| Percent of ALL power |       | Percent of power |            |        |
| 1                    | 11981 | 100.00           | 11981      | 100.00 |

Table : ALL \* HTD 2 YN

ALL HTD2YN(Angina Pectoris)

| Power              |        |        |        |
|--------------------|--------|--------|--------|
| Percent            |        |        |        |
| Percent of rows    |        |        |        |
| Percent of columns | None   | With   | Total  |
|                    | +      | +      | +      |
| 1                  | 9362   | 2619   | 11981  |
|                    | 78.14  | 21.86  | 100.00 |
|                    | 78.14  | 21.86  |        |
|                    | 100.00 | 100.00 |        |
|                    | +      | +      | +      |
| Total              | 9362   | 2619   | 11981  |
|                    | 78.14  | 21.86  | 100.00 |

Complications and medical history at the time of obtaining Table 2-3 informed consent by the presence or absence of proton-pump inhibitors

FREQ Procedure

|                      |       |                  | Cumulative |        |
|----------------------|-------|------------------|------------|--------|
| Percent of ALL power |       | Percent of power |            |        |
| 1                    | 11981 | 100.00           | 11981      | 100.00 |

Table: ALL \* t\_HTD0

ALL t\_HTD0

| Power | Percent            | Percent of rows | Percentage of columns   0   1   Sum |
|-------|--------------------|-----------------|-------------------------------------|
|       |                    |                 | _____+_____+_____+                  |
| 1     | 8693               | 3288            | 11981                               |
|       | 72.56              | 27.44           | 100.00                              |
|       | 72.56              | 27.44           |                                     |
|       | 100.00             | 100.00          |                                     |
|       | _____+_____+_____+ |                 |                                     |
| Total | 8693               | 3288            | 11981                               |
|       | 72.56              | 27.44           | 100.00                              |

Complications and medical history at the time of obtaining Table 2-3 informed consent by the presence or absence of proton-pump inhibitors

FREQ Procedure

|                      |       |                  | Cumulative |        |
|----------------------|-------|------------------|------------|--------|
| Percent of ALL power |       | Percent of power |            |        |
| 1                    | 11981 | 100.00           | 11981      | 100.00 |

Table: ALL \* t\_HTD0

ALL t\_HTD0

| Power | Percent            | Percent of rows | Percentage of columns   0   1   Sum |
|-------|--------------------|-----------------|-------------------------------------|
|       |                    |                 | _____+_____+_____+                  |
| 1     | 8693               | 3288            | 11981                               |
|       | 72.56              | 27.44           | 100.00                              |
|       | 72.56              | 27.44           |                                     |
|       | 100.00             | 100.00          |                                     |
|       | _____+_____+_____+ |                 |                                     |
| Total | 8693               | 3288            | 11981                               |
|       | 72.56              | 27.44           | 100.00                              |



Complications and medical history at the time of obtaining Table 2-3 informed consent by the presence or absence of proton-pump inhibitors

FREQ Procedure

|                      |       |                  | Cumulative |        |
|----------------------|-------|------------------|------------|--------|
| Percent of ALL power |       | Percent of power |            |        |
| 1                    | 11981 | 100.00           | 11981      | 100.00 |

Table : ALL \* HTD 3 YN

ALL HTD3YN(Heart Failure)

| Power              |           |           |           |
|--------------------|-----------|-----------|-----------|
| Percent            |           |           |           |
| Percent of rows    |           |           |           |
| Percent of columns | None      | With      | Total     |
|                    | + _____ + | + _____ + | + _____ + |
| 1                  | 7035      | 4946      | 11981     |
|                    | 58.72     | 41.28     | 100.00    |
|                    | 58.72     | 41.28     |           |
|                    | 100.00    | 100.00    |           |
|                    | + _____ + | + _____ + | + _____ + |
| Total              | 7035      | 4946      | 11981     |
|                    | 58.72     | 41.28     | 100.00    |

Complications and medical history at the time of obtaining Table 2-3 informed consent by the presence or absence of proton-pump inhibitors

FREQ Procedure

|                      |       |                  | Cumulative |        |
|----------------------|-------|------------------|------------|--------|
| Percent of ALL power |       | Percent of power |            |        |
| 1                    | 11981 | 100.00           | 11981      | 100.00 |

Table : ALL \* HTD 3 YN

ALL HTD3YN(Heart Failure)

| Power              |           |           |           |
|--------------------|-----------|-----------|-----------|
| Percent            |           |           |           |
| Percent of rows    |           |           |           |
| Percent of columns | None      | With      | Total     |
|                    | + _____ + | + _____ + | + _____ + |
| 1                  | 7035      | 4946      | 11981     |
|                    | 58.72     | 41.28     | 100.00    |
|                    | 58.72     | 41.28     |           |
|                    | 100.00    | 100.00    |           |
|                    | + _____ + | + _____ + | + _____ + |
| Total              | 7035      | 4946      | 11981     |
|                    | 58.72     | 41.28     | 100.00    |

Complications and medical history at the time of obtaining Table 2-3 informed consent by the presence or absence of proton-pump inhibitors

FREQ Procedure

|   |       | Cumulative           |                  |        |
|---|-------|----------------------|------------------|--------|
|   |       | Percent of ALL power | Percent of power |        |
| 1 | 11981 | 100.00               | 11981            | 100.00 |

Table : ALL \* HTD 4 YN

ALL

HTD4YN(Left Ventricular Systolic Dysfunction)

| Power                   |        |        |        |
|-------------------------|--------|--------|--------|
| Percent                 |        |        |        |
| Percent of rows         |        |        |        |
| Percent of columns      | None   | With   | Total  |
| _____ + _____ + _____ + |        |        |        |
| 1                       | 11635  | 346    | 11981  |
|                         | 97.11  | 2.89   | 100.00 |
|                         | 97.11  | 2.89   |        |
|                         | 100.00 | 100.00 |        |
| _____ + _____ + _____ + |        |        |        |
| Total                   | 11635  | 346    | 11981  |
|                         | 97.11  | 2.89   | 100.00 |

Complications and medical history at the time of obtaining Table 2-3 informed consent by the presence or absence of proton-pump inhibitors

FREQ Procedure

|   |       | Cumulative           |                  |        |
|---|-------|----------------------|------------------|--------|
|   |       | Percent of ALL power | Percent of power |        |
| 1 | 11981 | 100.00               | 11981            | 100.00 |

Table : ALL \* HTD 4 YN

ALL

HTD4YN(Left Ventricular Systolic Dysfunction)

| Power                   |        |        |        |
|-------------------------|--------|--------|--------|
| Percent                 |        |        |        |
| Percent of rows         |        |        |        |
| Percent of columns      | None   | With   | Total  |
| _____ + _____ + _____ + |        |        |        |
| 1                       | 11635  | 346    | 11981  |
|                         | 97.11  | 2.89   | 100.00 |
|                         | 97.11  | 2.89   |        |
|                         | 100.00 | 100.00 |        |
| _____ + _____ + _____ + |        |        |        |
| Total                   | 11635  | 346    | 11981  |
|                         | 97.11  | 2.89   | 100.00 |

Complications and medical history at the time of obtaining Table 2-3 informed consent by the presence or absence of proton-pump inhibitors

FREQ Procedure

|                      |       |                  | Cumulative |        |
|----------------------|-------|------------------|------------|--------|
| Percent of ALL power |       | Percent of power |            |        |
| 1                    | 11981 | 100.00           | 11981      | 100.00 |

Table: ALL \* t\_HTD

ALL t\_HTD

| Power | Percent            | Percent of rows | Percentage of columns   0   1   Sum |
|-------|--------------------|-----------------|-------------------------------------|
|       |                    |                 | _____+_____+_____+                  |
| 1     | 6951               | 5030            | 11981                               |
|       | 58.02              | 41.98           | 100.00                              |
|       | 58.02              | 41.98           |                                     |
|       | 100.00             | 100.00          |                                     |
|       | _____+_____+_____+ |                 |                                     |
| Total | 6951               | 5030            | 11981                               |
|       | 58.02              | 41.98           | 100.00                              |

Complications and medical history at the time of obtaining Table 2-3 informed consent by the presence or absence of proton-pump inhibitors

FREQ Procedure

|                      |       |                  | Cumulative |        |
|----------------------|-------|------------------|------------|--------|
| Percent of ALL power |       | Percent of power |            |        |
| 1                    | 11981 | 100.00           | 11981      | 100.00 |

Table: ALL \* t\_HTD

ALL t\_HTD

| Power                               |        |        |        |
|-------------------------------------|--------|--------|--------|
| Percent                             |        |        |        |
| Percent of rows                     |        |        |        |
| Percentage of columns   0   1   Sum |        |        |        |
|                                     | +      | +      | +      |
| 1                                   | 6951   | 5030   | 11981  |
|                                     | 58.02  | 41.98  | 100.00 |
|                                     | 58.02  | 41.98  |        |
|                                     | 100.00 | 100.00 |        |
|                                     | +      | +      | +      |
| Total                               | 6951   | 5030   | 11981  |
|                                     | 58.02  | 41.98  | 100.00 |

Complications and medical history at the time of obtaining Table 2-3 informed consent by the presence or absence of proton-pump inhibitors

FREQ Procedure

|                      |       |                  | Cumulative |        |
|----------------------|-------|------------------|------------|--------|
| Percent of ALL power |       | Percent of power |            |        |
| 1                    | 11981 | 100.00           | 11981      | 100.00 |

Table : ALL \* HTD 5 YN

ALL HTD5YN(Valvular Disease)

| Power              |           |           |           |
|--------------------|-----------|-----------|-----------|
| Percent            |           |           |           |
| Percent of rows    |           |           |           |
| Percent of columns | None      | With      | Total     |
|                    | + _____ + | + _____ + | + _____ + |
| 1                  | 10415     | 1566      | 11981     |
|                    | 86.93     | 13.07     | 100.00    |
|                    | 86.93     | 13.07     |           |
|                    | 100.00    | 100.00    |           |
|                    | + _____ + | + _____ + | + _____ + |
| Total              | 10415     | 1566      | 11981     |
|                    | 86.93     | 13.07     | 100.00    |

Complications and medical history at the time of obtaining Table 2-3 informed consent by the presence or absence of proton-pump inhibitors

FREQ Procedure

|                      |       |                  | Cumulative |        |
|----------------------|-------|------------------|------------|--------|
| Percent of ALL power |       | Percent of power |            |        |
| 1                    | 11981 | 100.00           | 11981      | 100.00 |

Table : ALL \* HTD 5 YN

ALL HTD5YN(Valvular Disease)

| Power              |           |           |           |
|--------------------|-----------|-----------|-----------|
| Percent            |           |           |           |
| Percent of rows    |           |           |           |
| Percent of columns | None      | With      | Total     |
|                    | + _____ + | + _____ + | + _____ + |
| 1                  | 10415     | 1566      | 11981     |
|                    | 86.93     | 13.07     | 100.00    |
|                    | 86.93     | 13.07     |           |
|                    | 100.00    | 100.00    |           |
|                    | + _____ + | + _____ + | + _____ + |
| Total              | 10415     | 1566      | 11981     |
|                    | 86.93     | 13.07     | 100.00    |



Complications and medical history at the time of obtaining Table 2-3 informed consent by the presence or absence of proton-pump inhibitors

FREQ Procedure

|   |       | Cumulative           |                  |        |
|---|-------|----------------------|------------------|--------|
|   |       | Percent of ALL power | Percent of power |        |
| 1 | 11981 | 100.00               | 11981            | 100.00 |

Table : ALL \* HTD 6 YN

ALL HTD6YN(Cardiomypathy)

| Power              |        |        |        |
|--------------------|--------|--------|--------|
| Percent            |        |        |        |
| Percent of rows    |        |        |        |
| Percent of columns | None   | With   | Total  |
|                    | +      | +      | +      |
| 1                  | 11510  | 471    | 11981  |
|                    | 96.07  | 3.93   | 100.00 |
|                    | 96.07  | 3.93   |        |
|                    | 100.00 | 100.00 |        |
|                    | +      | +      | +      |
| Total              | 11510  | 471    | 11981  |
|                    | 96.07  | 3.93   | 100.00 |

Complications and medical history at the time of obtaining Table 2-3 informed consent by the presence or absence of proton-pump inhibitors

FREQ Procedure

|   |       | Cumulative           |                  |        |
|---|-------|----------------------|------------------|--------|
|   |       | Percent of ALL power | Percent of power |        |
| 1 | 11981 | 100.00               | 11981            | 100.00 |

Table : ALL \* HTD 6 YN

ALL HTD6YN(Cardiomypathy)

| Power              |        |        |        |
|--------------------|--------|--------|--------|
| Percent            |        |        |        |
| Percent of rows    |        |        |        |
| Percent of columns | None   | With   | Total  |
|                    | +      | +      | +      |
| 1                  | 11510  | 471    | 11981  |
|                    | 96.07  | 3.93   | 100.00 |
|                    | 96.07  | 3.93   |        |
|                    | 100.00 | 100.00 |        |
|                    | +      | +      | +      |
| Total              | 11510  | 471    | 11981  |
|                    | 96.07  | 3.93   | 100.00 |

Complications and medical history at the time of obtaining Table 2-3 informed consent by the presence or absence of proton-pump inhibitors

FREQ Procedure

|                      |       |                  | Cumulative |        |
|----------------------|-------|------------------|------------|--------|
| Percent of ALL power |       | Percent of power |            |        |
| 1                    | 11981 | 100.00           | 11981      | 100.00 |

Table : ALL \* HTD 7 YN

ALL

HTD7YN(Hypertensive Heart Disease)

| Power              |        |        |        |
|--------------------|--------|--------|--------|
| Percent            |        |        |        |
| Percent of rows    |        |        |        |
| Percent of columns | None   | With   | Total  |
|                    | +      | +      | +      |
| 1                  | 11604  | 377    | 11981  |
|                    | 96.85  | 3.15   | 100.00 |
|                    | 96.85  | 3.15   |        |
|                    | 100.00 | 100.00 |        |
|                    | +      | +      | +      |
| Total              | 11604  | 377    | 11981  |
|                    | 96.85  | 3.15   | 100.00 |

Complications and medical history at the time of obtaining Table 2-3 informed consent by the presence or absence of proton-pump inhibitors

FREQ Procedure

|                      |       |                  | Cumulative |        |
|----------------------|-------|------------------|------------|--------|
| Percent of ALL power |       | Percent of power |            |        |
| 1                    | 11981 | 100.00           | 11981      | 100.00 |

Table : ALL \* HTD 7 YN

ALL

HTD7YN(Hypertensive Heart Disease)

Power |

Percent |

Percent of rows

Percent of columns | None | With | Total

|       |        |        |        |  |
|-------|--------|--------|--------|--|
|       | +      | +      | +      |  |
| 1     | 11604  | 377    | 11981  |  |
|       | 96.85  | 3.15   | 100.00 |  |
|       | 96.85  | 3.15   |        |  |
|       | 100.00 | 100.00 |        |  |
|       | +      | +      | +      |  |
| Total | 11604  | 377    | 11981  |  |
|       | 96.85  | 3.15   | 100.00 |  |

Complications and medical history at the time of obtaining Table 2-3 informed consent by the presence or absence of proton-pump inhibitors

FREQ Procedure

|                      |       |                  | Cumulative |        |
|----------------------|-------|------------------|------------|--------|
| Percent of ALL power |       | Percent of power |            |        |
| 1                    | 11981 | 100.00           | 11981      | 100.00 |

Table : ALL \* HTD 8 YN

ALL

HTD8YN(Congenital Heart Disease)

Power |

Percent |

Percent of rows

Percent of columns | None | With | Total

|       |        |        |        |  |   |
|-------|--------|--------|--------|--|---|
|       | +      |        | +      |  | + |
| 1     | 11902  | 79     | 11981  |  |   |
|       | 99.34  | 0.66   | 100.00 |  |   |
|       | 99.34  | 0.66   |        |  |   |
|       | 100.00 | 100.00 |        |  |   |
|       | +      |        | +      |  | + |
| Total | 11902  | 79     | 11981  |  |   |
|       | 99.34  | 0.66   | 100.00 |  |   |

Complications and medical history at the time of obtaining Table 2-3 informed consent by the presence or absence of proton-pump inhibitors

FREQ Procedure

|   |       | Cumulative           |                  |        |
|---|-------|----------------------|------------------|--------|
|   |       | Percent of ALL power | Percent of power |        |
| 1 | 11981 | 100.00               | 11981            | 100.00 |

Table : ALL \* HTD 8 YN

ALL

HTD8YN(Congenital Heart Disease)

| Power                   |        |        |        |  |
|-------------------------|--------|--------|--------|--|
| Percent                 |        |        |        |  |
| Percent of rows         |        |        |        |  |
| Percent of columns      | None   | With   | Total  |  |
| _____ + _____ + _____ + |        |        |        |  |
| 1                       | 11902  | 79     | 11981  |  |
|                         | 99.34  | 0.66   | 100.00 |  |
|                         | 99.34  | 0.66   |        |  |
|                         | 100.00 | 100.00 |        |  |
| _____ + _____ + _____ + |        |        |        |  |
| Total                   | 11902  | 79     | 11981  |  |
|                         | 99.34  | 0.66   | 100.00 |  |

Complications and medical history at the time of obtaining Table 2-3 informed consent by the presence or absence of proton-pump inhibitors

FREQ Procedure

|                      |       |                  | Cumulative |        |
|----------------------|-------|------------------|------------|--------|
| Percent of ALL power |       | Percent of power |            |        |
| 1                    | 11981 | 100.00           | 11981      | 100.00 |

Table : ALL \* HTD 9 YN

ALL

HTD9YN(Other Heart Disease)

Power |

Percent |

Percent of rows

Percent of columns | None | With | Total

|       |        |        |        |  |   |
|-------|--------|--------|--------|--|---|
|       | +      |        | +      |  | + |
| 1     | 10900  | 1081   | 11981  |  |   |
|       | 90.98  | 9.02   | 100.00 |  |   |
|       | 90.98  | 9.02   |        |  |   |
|       | 100.00 | 100.00 |        |  |   |
|       | +      |        | +      |  | + |
| Total | 10900  | 1081   | 11981  |  |   |
|       | 90.98  | 9.02   | 100.00 |  |   |

Complications and medical history at the time of obtaining Table 2-3 informed consent by the presence or absence of proton-pump inhibitors

FREQ Procedure

|                      |       |                  | Cumulative |        |
|----------------------|-------|------------------|------------|--------|
| Percent of ALL power |       | Percent of power |            |        |
| 1                    | 11981 | 100.00           | 11981      | 100.00 |

Table : ALL \* HTD 9 YN

ALL

HTD9YN(Other Heart Disease)

Power |

Percent |

Percent of rows

Percent of columns | None | With | Total

|       |        |        |        |  |   |
|-------|--------|--------|--------|--|---|
|       | +      |        | +      |  | + |
| 1     | 10900  | 1081   | 11981  |  |   |
|       | 90.98  | 9.02   | 100.00 |  |   |
|       | 90.98  | 9.02   |        |  |   |
|       | 100.00 | 100.00 |        |  |   |
|       | +      |        | +      |  | + |
| Total | 10900  | 1081   | 11981  |  |   |
|       | 90.98  | 9.02   | 100.00 |  |   |



Complications and medical history at the time of obtaining Table 2-3 informed consent by the presence or absence of proton-pump inhibitors

FREQ Procedure

|                      |       |                  | Cumulative |        |
|----------------------|-------|------------------|------------|--------|
| Percent of ALL power |       | Percent of power |            |        |
| 1                    | 11981 | 100.00           | 11981      | 100.00 |

Tables: ALL\* CVACYN

ALL

CVACYN(Cerebrovascular Accident)

| Power                   |        |        |        |
|-------------------------|--------|--------|--------|
| Percent                 |        |        |        |
| Percent of rows         |        |        |        |
| Percent of columns      | None   | With   | Total  |
| _____ + _____ + _____ + |        |        |        |
| 1                       | 8856   | 3125   | 11981  |
|                         | 73.92  | 26.08  | 100.00 |
|                         | 73.92  | 26.08  |        |
|                         | 100.00 | 100.00 |        |
| _____ + _____ + _____ + |        |        |        |
| Total                   | 8856   | 3125   | 11981  |
|                         | 73.92  | 26.08  | 100.00 |

Complications and medical history at the time of obtaining Table 2-3 informed consent by the presence or absence of proton-pump inhibitors

FREQ Procedure

|                      |       |                  | Cumulative |        |
|----------------------|-------|------------------|------------|--------|
| Percent of ALL power |       | Percent of power |            |        |
| 1                    | 11981 | 100.00           | 11981      | 100.00 |

Tables: ALL\* CVACYN

ALL

CVACYN(Cerebrovascular Accident)

| Power                   |        |        |        |
|-------------------------|--------|--------|--------|
| Percent                 |        |        |        |
| Percent of rows         |        |        |        |
| Percent of columns      | None   | With   | Total  |
| _____ + _____ + _____ + |        |        |        |
| 1                       | 8856   | 3125   | 11981  |
|                         | 73.92  | 26.08  | 100.00 |
|                         | 73.92  | 26.08  |        |
|                         | 100.00 | 100.00 |        |
| _____ + _____ + _____ + |        |        |        |
| Total                   | 8856   | 3125   | 11981  |
|                         | 73.92  | 26.08  | 100.00 |

Complications and medical history at the time of obtaining Table 2-3 informed consent by the presence or absence of proton-pump inhibitors

FREQ Procedure

|   |       | Cumulative           |                  |        |
|---|-------|----------------------|------------------|--------|
|   |       | Percent of ALL power | Percent of power |        |
| 1 | 11981 | 100.00               | 11981            | 100.00 |

Table : ALL \* CVAC 1 YN

ALL

CVAC1YN(Atherosclerotic Cerebral Infarction)

| Power              |         |         |        |
|--------------------|---------|---------|--------|
| Percent            |         |         |        |
| Percent of rows    |         |         |        |
| Percent of columns | None    | With    | Total  |
| +_____+            | +_____+ | +_____+ | +      |
| 1                  | 11679   | 302     | 11981  |
|                    | 97.48   | 2.52    | 100.00 |
|                    | 97.48   | 2.52    |        |
|                    | 100.00  | 100.00  |        |
| +_____+            | +_____+ | +_____+ | +      |
| Total              | 11679   | 302     | 11981  |
|                    | 97.48   | 2.52    | 100.00 |

Complications and medical history at the time of obtaining Table 2-3 informed consent by the presence or absence of proton-pump inhibitors

FREQ Procedure

|   |       | Cumulative           |                  |        |
|---|-------|----------------------|------------------|--------|
|   |       | Percent of ALL power | Percent of power |        |
| 1 | 11981 | 100.00               | 11981            | 100.00 |

Table : ALL \* CVAC 1 YN

ALL

CVAC1YN(Atherosclerotic Cerebral Infarction)

| Power              |         |         |        |
|--------------------|---------|---------|--------|
| Percent            |         |         |        |
| Percent of rows    |         |         |        |
| Percent of columns | None    | With    | Total  |
| +_____+            | +_____+ | +_____+ | +      |
| 1                  | 11679   | 302     | 11981  |
|                    | 97.48   | 2.52    | 100.00 |
|                    | 97.48   | 2.52    |        |
|                    | 100.00  | 100.00  |        |
| +_____+            | +_____+ | +_____+ | +      |
| Total              | 11679   | 302     | 11981  |
|                    | 97.48   | 2.52    | 100.00 |

Complications and medical history at the time of obtaining Table 2-3 informed consent by the presence or absence of proton-pump inhibitors

FREQ Procedure

|                      |       |                  | Cumulative |        |
|----------------------|-------|------------------|------------|--------|
| Percent of ALL power |       | Percent of power |            |        |
| 1                    | 11981 | 100.00           | 11981      | 100.00 |

Table : ALL \* CVAC 2 YN

ALL

CVAC2YN(Cardiogenic Cerebral Infarction)

Power |

Percent |

Percent of rows

Percent of columns | None | With | Total

|       |   |        |   |        |   |        |
|-------|---|--------|---|--------|---|--------|
|       | + |        | + |        | + |        |
| 1     |   | 10983  |   | 998    |   | 11981  |
|       |   | 91.67  |   | 8.33   |   | 100.00 |
|       |   | 91.67  |   | 8.33   |   |        |
|       |   | 100.00 |   | 100.00 |   |        |
|       | + |        | + |        | + |        |
| Total |   | 10983  |   | 998    |   | 11981  |
|       |   | 91.67  |   | 8.33   |   | 100.00 |

Complications and medical history at the time of obtaining Table 2-3 informed consent by the presence or absence of proton-pump inhibitors

FREQ Procedure

|                      |       |                  | Cumulative |        |
|----------------------|-------|------------------|------------|--------|
| Percent of ALL power |       | Percent of power |            |        |
| 1                    | 11981 | 100.00           | 11981      | 100.00 |

Table : ALL \* CVAC 2 YN

ALL

CVAC2YN(Cardiogetic Cerebral Infarction)

Power |

Percent |

Percent of rows

Percent of columns | None | With | Total

|       |        |        |        |  |   |
|-------|--------|--------|--------|--|---|
|       | +      |        | +      |  | + |
| 1     | 10983  | 998    | 11981  |  |   |
|       | 91.67  | 8.33   | 100.00 |  |   |
|       | 91.67  | 8.33   |        |  |   |
|       | 100.00 | 100.00 |        |  |   |
|       | +      |        | +      |  | + |
| Total | 10983  | 998    | 11981  |  |   |
|       | 91.67  | 8.33   | 100.00 |  |   |

Complications and medical history at the time of obtaining Table 2-3 informed consent by the presence or absence of proton-pump inhibitors

FREQ Procedure

|                      |       |                  | Cumulative |        |
|----------------------|-------|------------------|------------|--------|
| Percent of ALL power |       | Percent of power |            |        |
| 1                    | 11981 | 100.00           | 11981      | 100.00 |

Table : ALL \* CVAC 3 YN

ALL

CVAC3YN(Lacunar Cerebral Infarction)

| Power              |        |        |        |
|--------------------|--------|--------|--------|
| Percent            |        |        |        |
| Percent of rows    |        |        |        |
| Percent of columns | None   | With   | Total  |
|                    | +      | +      | +      |
| 1                  | 11362  | 619    | 11981  |
|                    | 94.83  | 5.17   | 100.00 |
|                    | 94.83  | 5.17   |        |
|                    | 100.00 | 100.00 |        |
|                    | +      | +      | +      |
| Total              | 11362  | 619    | 11981  |
|                    | 94.83  | 5.17   | 100.00 |

Complications and medical history at the time of obtaining Table 2-3 informed consent by the presence or absence of proton-pump inhibitors

FREQ Procedure

|                      |       |                  | Cumulative |        |
|----------------------|-------|------------------|------------|--------|
| Percent of ALL power |       | Percent of power |            |        |
| 1                    | 11981 | 100.00           | 11981      | 100.00 |

Table : ALL \* CVAC 3 YN

ALL

CVAC3YN(Lacunar Cerebral Infarction)

| Power              |        |        |        |
|--------------------|--------|--------|--------|
| Percent            |        |        |        |
| Percent of rows    |        |        |        |
| Percent of columns | None   | With   | Total  |
|                    | +      | +      | +      |
| 1                  | 11362  | 619    | 11981  |
|                    | 94.83  | 5.17   | 100.00 |
|                    | 94.83  | 5.17   |        |
|                    | 100.00 | 100.00 |        |
|                    | +      | +      | +      |
| Total              | 11362  | 619    | 11981  |
|                    | 94.83  | 5.17   | 100.00 |



Complications and medical history at the time of obtaining Table 2-3 informed consent by the presence or absence of proton-pump inhibitors

FREQ Procedure

|                      |       |                  | Cumulative |        |
|----------------------|-------|------------------|------------|--------|
| Percent of ALL power |       | Percent of power |            |        |
| 1                    | 11981 | 100.00           | 11981      | 100.00 |

Table : ALL \* CVAC 4 YN

ALL

CVAC4YN(Hemorrhagic Stroke)

Power |

Percent |

Percent of rows

Percent of columns | None | With | Total

|   |        |        |        |  |
|---|--------|--------|--------|--|
|   | +      | +      | +      |  |
| 1 | 11816  | 165    | 11981  |  |
|   | 98.62  | 1.38   | 100.00 |  |
|   | 98.62  | 1.38   |        |  |
|   | 100.00 | 100.00 |        |  |
|   | +      | +      | +      |  |

Total 11816 165 11981

98.62      1.38      100.00

Complications and medical history at the time of obtaining Table 2-3 informed consent by the presence or absence of proton-pump inhibitors

FREQ Procedure

|   |       | Cumulative           |                  |        |
|---|-------|----------------------|------------------|--------|
|   |       | Percent of ALL power | Percent of power |        |
| 1 | 11981 | 100.00               | 11981            | 100.00 |

Table : ALL \* CVAC 4 YN

ALL

CVAC4YN(Hemorrhagic Stroke)

Power |

Percent |

Percent of rows

Percent of columns | None | With | Total

|   |        |        |        |  |   |
|---|--------|--------|--------|--|---|
|   | +      |        | +      |  | + |
| 1 | 11816  | 165    | 11981  |  |   |
|   | 98.62  | 1.38   | 100.00 |  |   |
|   | 98.62  | 1.38   |        |  |   |
|   | 100.00 | 100.00 |        |  |   |
|   | +      |        | +      |  | + |

Total 11816 165 11981

98.62      1.38      100.00

Complications and medical history at the time of obtaining Table 2-3 informed consent by the presence or absence of proton-pump inhibitors

FREQ Procedure

|   |       | Cumulative           |                  |        |
|---|-------|----------------------|------------------|--------|
|   |       | Percent of ALL power | Percent of power |        |
| 1 | 11981 | 100.00               | 11981            | 100.00 |

Table : ALL \* CVAC 5 YN

ALL

CVAC5YN(Unclassified/Unknown Cerebral Infarction)

| Power              |         |         |        |
|--------------------|---------|---------|--------|
| Percent            |         |         |        |
| Percent of rows    |         |         |        |
| Percent of columns | None    | With    | Total  |
| +_____+            | +_____+ | +_____+ | +      |
| 1                  | 11249   | 732     | 11981  |
|                    | 93.89   | 6.11    | 100.00 |
|                    | 93.89   | 6.11    |        |
|                    | 100.00  | 100.00  |        |
| +_____+            | +_____+ | +_____+ | +      |
| Total              | 11249   | 732     | 11981  |
|                    | 93.89   | 6.11    | 100.00 |

Complications and medical history at the time of obtaining Table 2-3 informed consent by the presence or absence of proton-pump inhibitors

FREQ Procedure

|                      |       |                  | Cumulative |        |
|----------------------|-------|------------------|------------|--------|
| Percent of ALL power |       | Percent of power |            |        |
| 1                    | 11981 | 100.00           | 11981      | 100.00 |

Table : ALL \* CVAC 5 YN

ALL

CVAC5YN(Unclassified/Unknown Cerebral Infarction)

| Power              |           |           |           |
|--------------------|-----------|-----------|-----------|
| Percent            |           |           |           |
| Percent of rows    |           |           |           |
| Percent of columns | None      | With      | Total     |
|                    | + _____ + | + _____ + | + _____ + |
| 1                  | 11249     | 732       | 11981     |
|                    | 93.89     | 6.11      | 100.00    |
|                    | 93.89     | 6.11      |           |
|                    | 100.00    | 100.00    |           |
|                    | + _____ + | + _____ + | + _____ + |
| Total              | 11249     | 732       | 11981     |
|                    | 93.89     | 6.11      | 100.00    |

Complications and medical history at the time of obtaining Table 2-3 informed consent by the presence or absence of proton-pump inhibitors

FREQ Procedure

|                      |       |                  | Cumulative |        |
|----------------------|-------|------------------|------------|--------|
| Percent of ALL power |       | Percent of power |            |        |
| 1                    | 11981 | 100.00           | 11981      | 100.00 |

Table : ALL \* CVAC 6 YN

ALL

CVAC6YN(Transient Ischemic Attacks)

| Power | Percent | Percent of rows | Percent of columns | None | With | Total |
|-------|---------|-----------------|--------------------|------|------|-------|
|       | +       | +               | +                  |      |      |       |
| 1     | 11753   | 228             | 11981              |      |      |       |
|       | 98.10   | 1.90            | 100.00             |      |      |       |
|       | 98.10   | 1.90            |                    |      |      |       |
|       | 100.00  | 100.00          |                    |      |      |       |
|       | +       | +               | +                  |      |      |       |
| Total | 11753   | 228             | 11981              |      |      |       |
|       | 98.10   | 1.90            | 100.00             |      |      |       |

Complications and medical history at the time of obtaining Table 2-3 informed consent by the presence or absence of proton-pump inhibitors

FREQ Procedure

|   |       | Cumulative           |                  |        |
|---|-------|----------------------|------------------|--------|
|   |       | Percent of ALL power | Percent of power |        |
| 1 | 11981 | 100.00               | 11981            | 100.00 |

Table : ALL \* CVAC 6 YN

ALL

CVAC6YN(Transient Ischemic Attacks)

| Power                   |        |        |        |
|-------------------------|--------|--------|--------|
| Percent                 |        |        |        |
| Percent of rows         |        |        |        |
| Percent of columns      | None   | With   | Total  |
| _____ + _____ + _____ + |        |        |        |
| 1                       | 11753  | 228    | 11981  |
|                         | 98.10  | 1.90   | 100.00 |
|                         | 98.10  | 1.90   |        |
|                         | 100.00 | 100.00 |        |
| _____ + _____ + _____ + |        |        |        |
| Total                   | 11753  | 228    | 11981  |
|                         | 98.10  | 1.90   | 100.00 |

Complications and medical history at the time of obtaining Table 2-3 informed consent by the presence or absence of proton-pump inhibitors

FREQ Procedure

|                      |       |                  | Cumulative |        |
|----------------------|-------|------------------|------------|--------|
| Percent of ALL power |       | Percent of power |            |        |
| 1                    | 11981 | 100.00           | 11981      | 100.00 |

Table : ALL \* CVAC 7 YN

ALL

CVAC7YN(Other Cerebrovascular Accident)

Power |

Percent |

Percent of rows

Percent of columns | None | With | Total

|       |        |        |        |  |   |
|-------|--------|--------|--------|--|---|
|       | +      |        | +      |  | + |
| 1     | 11631  | 350    | 11981  |  |   |
|       | 97.08  | 2.92   | 100.00 |  |   |
|       | 97.08  | 2.92   |        |  |   |
|       | 100.00 | 100.00 |        |  |   |
|       | +      |        | +      |  | + |
| Total | 11631  | 350    | 11981  |  |   |
|       | 97.08  | 2.92   | 100.00 |  |   |

Complications and medical history at the time of obtaining Table 2-3 informed consent by the presence or absence of proton-pump inhibitors

FREQ Procedure

|                      |       |                  | Cumulative |        |
|----------------------|-------|------------------|------------|--------|
| Percent of ALL power |       | Percent of power |            |        |
| 1                    | 11981 | 100.00           | 11981      | 100.00 |

Table : ALL \* CVAC 7 YN

ALL

CVAC7YN(Other Cerebrovascular Accident)

| Power              |        |        |        |  |
|--------------------|--------|--------|--------|--|
| Percent            |        |        |        |  |
| Percent of rows    |        |        |        |  |
| Percent of columns | None   | With   | Total  |  |
|                    | +      | +      | +      |  |
| 1                  | 11631  | 350    | 11981  |  |
|                    | 97.08  | 2.92   | 100.00 |  |
|                    | 97.08  | 2.92   |        |  |
|                    | 100.00 | 100.00 |        |  |
|                    | +      | +      | +      |  |
| Total              | 11631  | 350    | 11981  |  |
|                    | 97.08  | 2.92   | 100.00 |  |



Complications and medical history at the time of obtaining Table 2-3 informed consent by the presence or absence of proton-pump inhibitors

FREQ Procedure

|                      |       |                  | Cumulative |        |
|----------------------|-------|------------------|------------|--------|
| Percent of ALL power |       | Percent of power |            |        |
| 1                    | 11981 | 100.00           | 11981      | 100.00 |

Tables: ALL \* OTVDYN

ALL

OTVDYN(Other Vascular Disease)

Power |

Percent |

Percent of rows

Percent of columns | None | With | Total

|       |        |        |        |  |   |
|-------|--------|--------|--------|--|---|
|       | +      |        | +      |  | + |
| 1     | 11174  | 807    | 11981  |  |   |
|       | 93.26  | 6.74   | 100.00 |  |   |
|       | 93.26  | 6.74   |        |  |   |
|       | 100.00 | 100.00 |        |  |   |
|       | +      |        | +      |  | + |
| Total | 11174  | 807    | 11981  |  |   |
|       | 93.26  | 6.74   | 100.00 |  |   |

Complications and medical history at the time of obtaining Table 2-3 informed consent by the presence or absence of proton-pump inhibitors

FREQ Procedure

|                      |       |                  | Cumulative |        |
|----------------------|-------|------------------|------------|--------|
| Percent of ALL power |       | Percent of power |            |        |
| 1                    | 11981 | 100.00           | 11981      | 100.00 |

Tables: ALL \* OTVDYN

ALL

OTVDYN(Other Vascular Disease)

| Power                   |        |        |        |
|-------------------------|--------|--------|--------|
| Percent                 |        |        |        |
| Percent of rows         |        |        |        |
| Percent of columns      | None   | With   | Total  |
| _____ + _____ + _____ + |        |        |        |
| 1                       | 11174  | 807    | 11981  |
|                         | 93.26  | 6.74   | 100.00 |
|                         | 93.26  | 6.74   |        |
|                         | 100.00 | 100.00 |        |
| _____ + _____ + _____ + |        |        |        |
| Total                   | 11174  | 807    | 11981  |
|                         | 93.26  | 6.74   | 100.00 |

Complications and medical history at the time of obtaining Table 2-3 informed consent by the presence or absence of proton-pump inhibitors

FREQ Procedure

|                      |       |                  | Cumulative |        |
|----------------------|-------|------------------|------------|--------|
| Percent of ALL power |       | Percent of power |            |        |
| 1                    | 11981 | 100.00           | 11981      | 100.00 |

Table : ALL \* OTVD 1 YN

ALL

OTVD1YN(Peripheral Vascular Disease)

| Power              |        |        |        |
|--------------------|--------|--------|--------|
| Percent            |        |        |        |
| Percent of rows    |        |        |        |
| Percent of columns | None   | With   | Total  |
|                    | +      | +      | +      |
| 1                  | 11740  | 241    | 11981  |
|                    | 97.99  | 2.01   | 100.00 |
|                    | 97.99  | 2.01   |        |
|                    | 100.00 | 100.00 |        |
|                    | +      | +      | +      |
| Total              | 11740  | 241    | 11981  |
|                    | 97.99  | 2.01   | 100.00 |

Complications and medical history at the time of obtaining Table 2-3 informed consent by the presence or absence of proton-pump inhibitors

FREQ Procedure

|                      |       |                  | Cumulative |        |
|----------------------|-------|------------------|------------|--------|
| Percent of ALL power |       | Percent of power |            |        |
| 1                    | 11981 | 100.00           | 11981      | 100.00 |

Table : ALL \* OTVD 1 YN

ALL

OTVD1YN(Peripheral Vascular Disease)

| Power              |        |        |        |
|--------------------|--------|--------|--------|
| Percent            |        |        |        |
| Percent of rows    |        |        |        |
| Percent of columns | None   | With   | Total  |
|                    | +      | +      | +      |
| 1                  | 11740  | 241    | 11981  |
|                    | 97.99  | 2.01   | 100.00 |
|                    | 97.99  | 2.01   |        |
|                    | 100.00 | 100.00 |        |
|                    | +      | +      | +      |
| Total              | 11740  | 241    | 11981  |
|                    | 97.99  | 2.01   | 100.00 |

Complications and medical history at the time of obtaining Table 2-3 informed consent by the presence or absence of proton-pump inhibitors

FREQ Procedure

|                      |       |                  | Cumulative |        |
|----------------------|-------|------------------|------------|--------|
| Percent of ALL power |       | Percent of power |            |        |
| 1                    | 11981 | 100.00           | 11981      | 100.00 |

Table : ALL \* OTVD 2 YN

ALL OTVD2YN(Aortic Plaque)

| Power              |        |        |        |
|--------------------|--------|--------|--------|
| Percent            |        |        |        |
| Percent of rows    |        |        |        |
| Percent of columns | None   | With   | Total  |
|                    | +      | +      | +      |
| 1                  | 11893  | 88     | 11981  |
|                    | 99.27  | 0.73   | 100.00 |
|                    | 99.27  | 0.73   |        |
|                    | 100.00 | 100.00 |        |
|                    | +      | +      | +      |
| Total              | 11893  | 88     | 11981  |
|                    | 99.27  | 0.73   | 100.00 |

Complications and medical history at the time of obtaining Table 2-3 informed consent by the presence or absence of proton-pump inhibitors

FREQ Procedure

|                      |       |                  | Cumulative |        |
|----------------------|-------|------------------|------------|--------|
| Percent of ALL power |       | Percent of power |            |        |
| 1                    | 11981 | 100.00           | 11981      | 100.00 |

Table : ALL \* OTVD 2 YN

ALL OTVD2YN(Aortic Plaque)

| Power              |        |        |        |   |
|--------------------|--------|--------|--------|---|
| Percent            |        |        |        |   |
| Percent of rows    |        |        |        |   |
| Percent of columns | None   | With   | Total  |   |
|                    | +      | +      | +      | + |
| 1                  | 11893  | 88     | 11981  |   |
|                    | 99.27  | 0.73   | 100.00 |   |
|                    | 99.27  | 0.73   |        |   |
|                    | 100.00 | 100.00 |        |   |
|                    | +      | +      | +      | + |
| Total              | 11893  | 88     | 11981  |   |
|                    | 99.27  | 0.73   | 100.00 |   |

Complications and medical history at the time of obtaining Table 2-3 informed consent by the presence or absence of proton-pump inhibitors

FREQ Procedure

|   |       | Cumulative           |                  |        |
|---|-------|----------------------|------------------|--------|
|   |       | Percent of ALL power | Percent of power |        |
| 1 | 11981 | 100.00               | 11981            | 100.00 |

Table : ALL \* TED 3 YN

ALL

TED3YN(Internal Carotid Artery Stenosis)

| Power                   |        |        |        |
|-------------------------|--------|--------|--------|
| Percent                 |        |        |        |
| Percent of rows         |        |        |        |
| Percent of columns      | None   | With   | Total  |
| _____ + _____ + _____ + |        |        |        |
| 1                       | 11630  | 351    | 11981  |
|                         | 97.07  | 2.93   | 100.00 |
|                         | 97.07  | 2.93   |        |
|                         | 100.00 | 100.00 |        |
| _____ + _____ + _____ + |        |        |        |
| Total                   | 11630  | 351    | 11981  |
|                         | 97.07  | 2.93   | 100.00 |

Complications and medical history at the time of obtaining Table 2-3 informed consent by the presence or absence of proton-pump inhibitors

FREQ Procedure

|   |       | Cumulative           |                  |        |
|---|-------|----------------------|------------------|--------|
|   |       | Percent of ALL power | Percent of power |        |
| 1 | 11981 | 100.00               | 11981            | 100.00 |

Table : ALL \* TED 3 YN

ALL

TED3YN(Internal Carotid Artery Stenosis)

Power |

Percent |

Percent of rows

Percent of columns | None | With | Total

|   |        |        |        |  |
|---|--------|--------|--------|--|
|   | +      | +      | +      |  |
| 1 | 11630  | 351    | 11981  |  |
|   | 97.07  | 2.93   | 100.00 |  |
|   | 97.07  | 2.93   |        |  |
|   | 100.00 | 100.00 |        |  |
|   | +      | +      | +      |  |

Total 11630 351 11981

97.07      2.93      100.00



Complications and medical history at the time of obtaining Table 2-3 informed consent by the presence or absence of proton-pump inhibitors

FREQ Procedure

|   |       | Cumulative           |                  |        |
|---|-------|----------------------|------------------|--------|
|   |       | Percent of ALL power | Percent of power |        |
| 1 | 11981 | 100.00               | 11981            | 100.00 |

Table : ALL \* TED 4 YN

ALL

TED4YN(Arteriosclerosis Obliterans)

| Power              |         |         |        |
|--------------------|---------|---------|--------|
| Percent            |         |         |        |
| Percent of rows    |         |         |        |
| Percent of columns | None    | With    | Total  |
| +_____+            | +_____+ | +_____+ | +      |
| 1                  | 11472   | 509     | 11981  |
|                    | 95.75   | 4.25    | 100.00 |
|                    | 95.75   | 4.25    |        |
|                    | 100.00  | 100.00  |        |
| +_____+            | +_____+ | +_____+ | +      |
| Total              | 11472   | 509     | 11981  |
|                    | 95.75   | 4.25    | 100.00 |

Complications and medical history at the time of obtaining Table 2-3 informed consent by the presence or absence of proton-pump inhibitors

FREQ Procedure

|                      |       |                  | Cumulative |        |
|----------------------|-------|------------------|------------|--------|
| Percent of ALL power |       | Percent of power |            |        |
| 1                    | 11981 | 100.00           | 11981      | 100.00 |

Table : ALL \* TED 4 YN

ALL

TED4YN(Arteriosclerosis Obliterans)

Power |

Percent |

Percent of rows

Percent of columns | None | With | Total

|       |        |        |        |  |
|-------|--------|--------|--------|--|
|       | +      | +      | +      |  |
| 1     | 11472  | 509    | 11981  |  |
|       | 95.75  | 4.25   | 100.00 |  |
|       | 95.75  | 4.25   |        |  |
|       | 100.00 | 100.00 |        |  |
|       | +      | +      | +      |  |
| Total | 11472  | 509    | 11981  |  |
|       | 95.75  | 4.25   | 100.00 |  |

Complications and medical history at the time of obtaining Table 2-3 informed consent by the presence or absence of proton-pump inhibitors

FREQ Procedure

|                      |       |                  | Cumulative |        |
|----------------------|-------|------------------|------------|--------|
| Percent of ALL power |       | Percent of power |            |        |
| 1                    | 11981 | 100.00           | 11981      | 100.00 |

Table : ALL \* OTVD 3 YN

ALL

OTVD3YN(Other Vascular Disease: Other)

| Power              |        |        |        |
|--------------------|--------|--------|--------|
| Percent            |        |        |        |
| Percent of rows    |        |        |        |
| Percent of columns | None   | With   | Total  |
|                    | +      | +      | +      |
| 1                  | 11483  | 498    | 11981  |
|                    | 95.84  | 4.16   | 100.00 |
|                    | 95.84  | 4.16   |        |
|                    | 100.00 | 100.00 |        |
|                    | +      | +      | +      |
| Total              | 11483  | 498    | 11981  |
|                    | 95.84  | 4.16   | 100.00 |

Complications and medical history at the time of obtaining Table 2-3 informed consent by the presence or absence of proton-pump inhibitors

FREQ Procedure

|                      |       |                  | Cumulative |        |
|----------------------|-------|------------------|------------|--------|
| Percent of ALL power |       | Percent of power |            |        |
| 1                    | 11981 | 100.00           | 11981      | 100.00 |

Table : ALL \* OTVD 3 YN

ALL

OTVD3YN(Other Vascular Disease: Other)

| Power              |         |         |         |
|--------------------|---------|---------|---------|
| Percent            |         |         |         |
| Percent of rows    |         |         |         |
| Percent of columns | None    | With    | Total   |
|                    | + _____ | + _____ | + _____ |
| 1                  | 11483   | 498     | 11981   |
|                    | 95.84   | 4.16    | 100.00  |
|                    | 95.84   | 4.16    |         |
|                    | 100.00  | 100.00  |         |
|                    | + _____ | + _____ | + _____ |
| Total              | 11483   | 498     | 11981   |
|                    | 95.84   | 4.16    | 100.00  |

Complications and medical history at the time of obtaining Table 2-3 informed consent by the presence or absence of proton-pump inhibitors

FREQ Procedure

|                      |       |                  | Cumulative |        |
|----------------------|-------|------------------|------------|--------|
| Percent of ALL power |       | Percent of power |            |        |
| 1                    | 11981 | 100.00           | 11981      | 100.00 |

Tables: ALL \* TEDYN

ALL

TEDYN(Thrombosis/Embolism-Related Disease)

| Power              |           |           |        |  |
|--------------------|-----------|-----------|--------|--|
| Percent            |           |           |        |  |
| Percent of rows    |           |           |        |  |
| Percent of columns | None      | With      | Total  |  |
|                    | + _____ + | + _____ + |        |  |
| 1                  | 10756     | 1225      | 11981  |  |
|                    | 89.78     | 10.22     | 100.00 |  |
|                    | 89.78     | 10.22     |        |  |
|                    | 100.00    | 100.00    |        |  |
|                    | + _____ + | + _____ + |        |  |
| Total              | 10756     | 1225      | 11981  |  |
|                    | 89.78     | 10.22     | 100.00 |  |

Complications and medical history at the time of obtaining Table 2-3 informed consent by the presence or absence of proton-pump inhibitors

FREQ Procedure

|                      |       |                  | Cumulative |        |
|----------------------|-------|------------------|------------|--------|
| Percent of ALL power |       | Percent of power |            |        |
| 1                    | 11981 | 100.00           | 11981      | 100.00 |

Tables: ALL \* TEDYN

ALL

TEDYN(Thrombosis/Embolism-Related Disease)

| Power                   |        |        |        |
|-------------------------|--------|--------|--------|
| Percent                 |        |        |        |
| Percent of rows         |        |        |        |
| Percent of columns      | None   | With   | Total  |
| _____ + _____ + _____ + |        |        |        |
| 1                       | 10756  | 1225   | 11981  |
|                         | 89.78  | 10.22  | 100.00 |
|                         | 89.78  | 10.22  |        |
|                         | 100.00 | 100.00 |        |
| _____ + _____ + _____ + |        |        |        |
| Total                   | 10756  | 1225   | 11981  |
|                         | 89.78  | 10.22  | 100.00 |

Complications and medical history at the time of obtaining Table 2-3 informed consent by the presence or absence of proton-pump inhibitors

FREQ Procedure

|                      |       |                  | Cumulative |        |
|----------------------|-------|------------------|------------|--------|
| Percent of ALL power |       | Percent of power |            |        |
| 1                    | 11981 | 100.00           | 11981      | 100.00 |

Table: ALL \* t\_TED

ALL t\_TED

| Power | Percent            | Percent of rows | Percentage of columns   0  1  Sum |
|-------|--------------------|-----------------|-----------------------------------|
|       |                    |                 | _____+_____+_____+                |
| 1     | 11793              | 188             | 11981                             |
|       | 98.43              | 1.57            | 100.00                            |
|       | 98.43              | 1.57            |                                   |
|       | 100.00             | 100.00          |                                   |
|       | _____+_____+_____+ |                 |                                   |
| Total | 11793              | 188             | 11981                             |
|       | 98.43              | 1.57            | 100.00                            |

Complications and medical history at the time of obtaining Table 2-3 informed consent by the presence or absence of proton-pump inhibitors

FREQ Procedure

|                      |       |                  | Cumulative |        |
|----------------------|-------|------------------|------------|--------|
| Percent of ALL power |       | Percent of power |            |        |
| 1                    | 11981 | 100.00           | 11981      | 100.00 |

Table: ALL \* t\_TED

ALL t\_TED

| Power | Percent            | Percent of rows | Percentage of columns   0   1   Sum |
|-------|--------------------|-----------------|-------------------------------------|
|       |                    |                 | _____+_____+_____+                  |
| 1     | 11793              | 188             | 11981                               |
|       | 98.43              | 1.57            | 100.00                              |
|       | 98.43              | 1.57            |                                     |
|       | 100.00             | 100.00          |                                     |
|       | _____+_____+_____+ |                 |                                     |
| Total | 11793              | 188             | 11981                               |
|       | 98.43              | 1.57            | 100.00                              |



Complications and medical history at the time of obtaining Table 2-3 informed consent by the presence or absence of proton-pump inhibitors

FREQ Procedure

|                      |       |                  | Cumulative |        |
|----------------------|-------|------------------|------------|--------|
| Percent of ALL power |       | Percent of power |            |        |
| 1                    | 11981 | 100.00           | 11981      | 100.00 |

Table : ALL \* TED 1 YN

ALL

TED1YN(Pulmonary Embolism)

Power |

Percent |

Percent of rows

Percent of columns | None | With | Total

|   |        |        |        |  |   |
|---|--------|--------|--------|--|---|
|   | +      |        | +      |  | + |
| 1 | 11929  | 52     | 11981  |  |   |
|   | 99.57  | 0.43   | 100.00 |  |   |
|   | 99.57  | 0.43   |        |  |   |
|   | 100.00 | 100.00 |        |  |   |
|   | +      |        | +      |  | + |

Total 11929 52 11981

99.57 0.43 100.00

Complications and medical history at the time of obtaining Table 2-3 informed consent by the presence or absence of proton-pump inhibitors

FREQ Procedure

|                      |       |                  | Cumulative |        |
|----------------------|-------|------------------|------------|--------|
| Percent of ALL power |       | Percent of power |            |        |
| 1                    | 11981 | 100.00           | 11981      | 100.00 |

Table : ALL \* TED 1 YN

ALL

TED1YN(Pulmonary Embolism)

Power |

Percent |

Percent of rows

Percent of columns | None | With | Total

|   | +      |        | +      |  | + |
|---|--------|--------|--------|--|---|
| 1 | 11929  | 52     | 11981  |  |   |
|   | 99.57  | 0.43   | 100.00 |  |   |
|   | 99.57  | 0.43   |        |  |   |
|   | 100.00 | 100.00 |        |  |   |
|   | +      |        | +      |  | + |

Total 11929 52 11981

99.57 0.43 100.00

Complications and medical history at the time of obtaining Table 2-3 informed consent by the presence or absence of proton-pump inhibitors

FREQ Procedure

|   |       | Cumulative           |                  |        |
|---|-------|----------------------|------------------|--------|
|   |       | Percent of ALL power | Percent of power |        |
| 1 | 11981 | 100.00               | 11981            | 100.00 |

Table : ALL \* TED 2 YN

ALL

TED2YN(Deep Vein Thrombosis)

| Power              |         |         |        |
|--------------------|---------|---------|--------|
| Percent            |         |         |        |
| Percent of rows    |         |         |        |
| Percent of columns | None    | With    | Total  |
| +_____+            | +_____+ | +_____+ | +      |
| 1                  | 11829   | 152     | 11981  |
|                    | 98.73   | 1.27    | 100.00 |
|                    | 98.73   | 1.27    |        |
|                    | 100.00  | 100.00  |        |
| +_____+            | +_____+ | +_____+ | +      |
| Total              | 11829   | 152     | 11981  |
|                    | 98.73   | 1.27    | 100.00 |

Complications and medical history at the time of obtaining Table 2-3 informed consent by the presence or absence of proton-pump inhibitors

FREQ Procedure

|                      |       |                  | Cumulative |        |
|----------------------|-------|------------------|------------|--------|
| Percent of ALL power |       | Percent of power |            |        |
| 1                    | 11981 | 100.00           | 11981      | 100.00 |

Table : ALL \* TED 2 YN

ALL

TED2YN(Deep Vein Thrombosis)

| Power              |        |        |        |
|--------------------|--------|--------|--------|
| Percent            |        |        |        |
| Percent of rows    |        |        |        |
| Percent of columns | None   | With   | Total  |
|                    | +      | +      | +      |
| 1                  | 11829  | 152    | 11981  |
|                    | 98.73  | 1.27   | 100.00 |
|                    | 98.73  | 1.27   |        |
|                    | 100.00 | 100.00 |        |
|                    | +      | +      | +      |
| Total              | 11829  | 152    | 11981  |
|                    | 98.73  | 1.27   | 100.00 |

Complications and medical history at the time of obtaining Table 2-3 informed consent by the presence or absence of proton-pump inhibitors

FREQ Procedure

|                      |       |                  | Cumulative |        |
|----------------------|-------|------------------|------------|--------|
| Percent of ALL power |       | Percent of power |            |        |
| 1                    | 11981 | 100.00           | 11981      | 100.00 |

Table : ALL \* TED 5 YN

ALL

TED5YN(Other Thrombosis/Embolism-Related Disease)

| Power              |        |        |        |
|--------------------|--------|--------|--------|
| Percent            |        |        |        |
| Percent of rows    |        |        |        |
| Percent of columns | None   | With   | Total  |
|                    | +      | +      | +      |
| 1                  | 11646  | 335    | 11981  |
|                    | 97.20  | 2.80   | 100.00 |
|                    | 97.20  | 2.80   |        |
|                    | 100.00 | 100.00 |        |
|                    | +      | +      | +      |
| Total              | 11646  | 335    | 11981  |
|                    | 97.20  | 2.80   | 100.00 |

Complications and medical history at the time of obtaining Table 2-3 informed consent by the presence or absence of proton-pump inhibitors

FREQ Procedure

|                      |       |                  | Cumulative |        |
|----------------------|-------|------------------|------------|--------|
| Percent of ALL power |       | Percent of power |            |        |
| 1                    | 11981 | 100.00           | 11981      | 100.00 |

Table : ALL \* TED 5 YN

ALL

TED5YN(Other Thrombosis/Embolism-Related Disease)

| Power              |        |        |        |
|--------------------|--------|--------|--------|
| Percent            |        |        |        |
| Percent of rows    |        |        |        |
| Percent of columns | None   | With   | Total  |
|                    | +      | +      | +      |
| 1                  | 11646  | 335    | 11981  |
|                    | 97.20  | 2.80   | 100.00 |
|                    | 97.20  | 2.80   |        |
|                    | 100.00 | 100.00 |        |
|                    | +      | +      | +      |
| Total              | 11646  | 335    | 11981  |
|                    | 97.20  | 2.80   | 100.00 |

Complications and medical history at the time of obtaining Table 2-3 informed consent by the presence or absence of proton-pump inhibitors

FREQ Procedure

|                      |       |                  | Cumulative |        |
|----------------------|-------|------------------|------------|--------|
| Percent of ALL power |       | Percent of power |            |        |
| 1                    | 11981 | 100.00           | 11981      | 100.00 |

Tables: ALL \* HTDMYN

ALL HTDMYN(Hyperthyroidism)

| Power              |           |           |           |
|--------------------|-----------|-----------|-----------|
| Percent            |           |           |           |
| Percent of rows    |           |           |           |
| Percent of columns | None      | With      | Total     |
|                    | + _____ + | + _____ + | + _____ + |
| 1                  | 11800     | 181       | 11981     |
|                    | 98.49     | 1.51      | 100.00    |
|                    | 98.49     | 1.51      |           |
|                    | 100.00    | 100.00    |           |
|                    | + _____ + | + _____ + | + _____ + |
| Total              | 11800     | 181       | 11981     |
|                    | 98.49     | 1.51      | 100.00    |

Complications and medical history at the time of obtaining Table 2-3 informed consent by the presence or absence of proton-pump inhibitors

FREQ Procedure

|                      |       |                  | Cumulative |        |
|----------------------|-------|------------------|------------|--------|
| Percent of ALL power |       | Percent of power |            |        |
| 1                    | 11981 | 100.00           | 11981      | 100.00 |

Tables: ALL \* HTDMYN

ALL HTDMYN(Hyperthyroidism)

| Power              |           |           |           |
|--------------------|-----------|-----------|-----------|
| Percent            |           |           |           |
| Percent of rows    |           |           |           |
| Percent of columns | None      | With      | Total     |
|                    | + _____ + | + _____ + | + _____ + |
| 1                  | 11800     | 181       | 11981     |
|                    | 98.49     | 1.51      | 100.00    |
|                    | 98.49     | 1.51      |           |
|                    | 100.00    | 100.00    |           |
|                    | + _____ + | + _____ + | + _____ + |
| Total              | 11800     | 181       | 11981     |
|                    | 98.49     | 1.51      | 100.00    |



Complications and medical history at the time of obtaining Table 2-3 informed consent by the presence or absence of proton-pump inhibitors

FREQ Procedure

|                      |       |                  | Cumulative |        |
|----------------------|-------|------------------|------------|--------|
| Percent of ALL power |       | Percent of power |            |        |
| 1                    | 11981 | 100.00           | 11981      | 100.00 |

Tables: ALL \* GASDYN

ALL

GASDYN(Gastrointestinal Disease)

| Power                   |        |        |        |
|-------------------------|--------|--------|--------|
| Percent                 |        |        |        |
| Percent of rows         |        |        |        |
| Percent of columns      | None   | With   | Total  |
| _____ + _____ + _____ + |        |        |        |
| 1                       | 6541   | 5440   | 11981  |
|                         | 54.59  | 45.41  | 100.00 |
|                         | 54.59  | 45.41  |        |
|                         | 100.00 | 100.00 |        |
| _____ + _____ + _____ + |        |        |        |
| Total                   | 6541   | 5440   | 11981  |
|                         | 54.59  | 45.41  | 100.00 |

Complications and medical history at the time of obtaining Table 2-3 informed consent by the presence or absence of proton-pump inhibitors

FREQ Procedure

|                      |       |                  | Cumulative |        |
|----------------------|-------|------------------|------------|--------|
| Percent of ALL power |       | Percent of power |            |        |
| 1                    | 11981 | 100.00           | 11981      | 100.00 |

Tables: ALL \* GASDYN

ALL

GASDYN(Gastrointestinal Disease)

Power |

Percent |

Percent of rows

Percent of columns | None | With | Total

|       |        |        |        |  |   |
|-------|--------|--------|--------|--|---|
|       | +      |        | +      |  | + |
| 1     | 6541   | 5440   | 11981  |  |   |
|       | 54.59  | 45.41  | 100.00 |  |   |
|       | 54.59  | 45.41  |        |  |   |
|       | 100.00 | 100.00 |        |  |   |
|       | +      |        | +      |  | + |
| Total | 6541   | 5440   | 11981  |  |   |
|       | 54.59  | 45.41  | 100.00 |  |   |

Complications and medical history at the time of obtaining Table 2-3 informed consent by the presence or absence of proton-pump inhibitors

FREQ Procedure

|   |       | Cumulative           |                  |        |
|---|-------|----------------------|------------------|--------|
|   |       | Percent of ALL power | Percent of power |        |
| 1 | 11981 | 100.00               | 11981            | 100.00 |

Table : ALL \* GASD 1 YN

ALL

GASD1YN(Upper Gastrointestinal Tract)

| Power              |         |         |        |
|--------------------|---------|---------|--------|
| Percent            |         |         |        |
| Percent of rows    |         |         |        |
| Percent of columns | None    | With    | Total  |
| +_____+            | +_____+ | +_____+ | +      |
| 1                  | 11678   | 303     | 11981  |
|                    | 97.47   | 2.53    | 100.00 |
|                    | 97.47   | 2.53    |        |
|                    | 100.00  | 100.00  |        |
| +_____+            | +_____+ | +_____+ | +      |
| Total              | 11678   | 303     | 11981  |
|                    | 97.47   | 2.53    | 100.00 |

Complications and medical history at the time of obtaining Table 2-3 informed consent by the presence or absence of proton-pump inhibitors

FREQ Procedure

|   |       | Cumulative           |                  |        |
|---|-------|----------------------|------------------|--------|
|   |       | Percent of ALL power | Percent of power |        |
| 1 | 11981 | 100.00               | 11981            | 100.00 |

Table : ALL \* GASD 1 YN

ALL

GASD1YN(Upper Gastrointestinal Tract)

| Power                   |        |        |        |
|-------------------------|--------|--------|--------|
| Percent                 |        |        |        |
| Percent of rows         |        |        |        |
| Percent of columns      | None   | With   | Total  |
| _____ + _____ + _____ + |        |        |        |
| 1                       | 11678  | 303    | 11981  |
|                         | 97.47  | 2.53   | 100.00 |
|                         | 97.47  | 2.53   |        |
|                         | 100.00 | 100.00 |        |
| _____ + _____ + _____ + |        |        |        |
| Total                   | 11678  | 303    | 11981  |
|                         | 97.47  | 2.53   | 100.00 |

Complications and medical history at the time of obtaining Table 2-3 informed consent by the presence or absence of proton-pump inhibitors

FREQ Procedure

|   |       | Cumulative           |                  |        |
|---|-------|----------------------|------------------|--------|
|   |       | Percent of ALL power | Percent of power |        |
| 1 | 11981 | 100.00               | 11981            | 100.00 |

Table : ALL \* GASD 2 YN

ALL

GASD2YN(Lower Gastrointestinal Tract)

| Power                   |        |        |        |
|-------------------------|--------|--------|--------|
| Percent                 |        |        |        |
| Percent of rows         |        |        |        |
| Percent of columns      | None   | With   | Total  |
| _____ + _____ + _____ + |        |        |        |
| 1                       | 11680  | 301    | 11981  |
|                         | 97.49  | 2.51   | 100.00 |
|                         | 97.49  | 2.51   |        |
|                         | 100.00 | 100.00 |        |
| _____ + _____ + _____ + |        |        |        |
| Total                   | 11680  | 301    | 11981  |
|                         | 97.49  | 2.51   | 100.00 |

Complications and medical history at the time of obtaining Table 2-3 informed consent by the presence or absence of proton-pump inhibitors

FREQ Procedure

|                      |       |                  | Cumulative |        |
|----------------------|-------|------------------|------------|--------|
| Percent of ALL power |       | Percent of power |            |        |
| 1                    | 11981 | 100.00           | 11981      | 100.00 |

Table : ALL \* GASD 2 YN

ALL

GASD2YN(Lower Gastrointestinal Tract)

| Power              |        |        |        |
|--------------------|--------|--------|--------|
| Percent            |        |        |        |
| Percent of rows    |        |        |        |
| Percent of columns | None   | With   | Total  |
|                    | +      | +      | +      |
| 1                  | 11680  | 301    | 11981  |
|                    | 97.49  | 2.51   | 100.00 |
|                    | 97.49  | 2.51   |        |
|                    | 100.00 | 100.00 |        |
|                    | +      | +      | +      |
| Total              | 11680  | 301    | 11981  |
|                    | 97.49  | 2.51   | 100.00 |

Complications and medical history at the time of obtaining Table 2-3 informed consent by the presence or absence of proton-pump inhibitors

FREQ Procedure

|                      |       |                  | Cumulative |        |
|----------------------|-------|------------------|------------|--------|
| Percent of ALL power |       | Percent of power |            |        |
| 1                    | 11981 | 100.00           | 11981      | 100.00 |

Table : ALL \* GASD 3 YN

ALL

GASD3YN(Reflux esophagitis)

Power |

Percent |

Percent of rows

Percent of columns | None | With | Total

|       |        |        |        |  |   |
|-------|--------|--------|--------|--|---|
|       | +      |        | +      |  | + |
| 1     | 8140   | 3841   | 11981  |  |   |
|       | 67.94  | 32.06  | 100.00 |  |   |
|       | 67.94  | 32.06  |        |  |   |
|       | 100.00 | 100.00 |        |  |   |
|       | +      |        | +      |  | + |
| Total | 8140   | 3841   | 11981  |  |   |
|       | 67.94  | 32.06  | 100.00 |  |   |

Complications and medical history at the time of obtaining Table 2-3 informed consent by the presence or absence of proton-pump inhibitors

FREQ Procedure

|                      |       |                  | Cumulative |        |
|----------------------|-------|------------------|------------|--------|
| Percent of ALL power |       | Percent of power |            |        |
| 1                    | 11981 | 100.00           | 11981      | 100.00 |

Table : ALL \* GASD 3 YN

ALL

GASD3YN(Reflux esophagitis)

Power |

Percent |

Percent of rows

Percent of columns | None | With | Total

|       |        |        |        |  |
|-------|--------|--------|--------|--|
|       | +      | +      | +      |  |
| 1     | 8140   | 3841   | 11981  |  |
|       | 67.94  | 32.06  | 100.00 |  |
|       | 67.94  | 32.06  |        |  |
|       | 100.00 | 100.00 |        |  |
|       | +      | +      | +      |  |
| Total | 8140   | 3841   | 11981  |  |
|       | 67.94  | 32.06  | 100.00 |  |



Complications and medical history at the time of obtaining Table 2-3 informed consent by the presence or absence of proton-pump inhibitors

FREQ Procedure

|                      |       |                  | Cumulative |        |
|----------------------|-------|------------------|------------|--------|
| Percent of ALL power |       | Percent of power |            |        |
| 1                    | 11981 | 100.00           | 11981      | 100.00 |

Table : ALL \* GASD 4 YN

ALL

GASD4YN(Other Gastrointestinal Disease)

| Power              |        |        |        |
|--------------------|--------|--------|--------|
| Percent            |        |        |        |
| Percent of rows    |        |        |        |
| Percent of columns | None   | With   | Total  |
|                    | +      | +      | +      |
| 1                  | 10043  | 1938   | 11981  |
|                    | 83.82  | 16.18  | 100.00 |
|                    | 83.82  | 16.18  |        |
|                    | 100.00 | 100.00 |        |
|                    | +      | +      | +      |
| Total              | 10043  | 1938   | 11981  |
|                    | 83.82  | 16.18  | 100.00 |

Complications and medical history at the time of obtaining Table 2-3 informed consent by the presence or absence of proton-pump inhibitors

FREQ Procedure

|                      |       |                  | Cumulative |        |
|----------------------|-------|------------------|------------|--------|
| Percent of ALL power |       | Percent of power |            |        |
| 1                    | 11981 | 100.00           | 11981      | 100.00 |

Table : ALL \* GASD 4 YN

ALL

GASD4YN(Other Gastrointestinal Disease)

| Power                   |        |        |        |
|-------------------------|--------|--------|--------|
| Percent                 |        |        |        |
| Percent of rows         |        |        |        |
| Percent of columns      | None   | With   | Total  |
| _____ + _____ + _____ + |        |        |        |
| 1                       | 10043  | 1938   | 11981  |
|                         | 83.82  | 16.18  | 100.00 |
|                         | 83.82  | 16.18  |        |
|                         | 100.00 | 100.00 |        |
| _____ + _____ + _____ + |        |        |        |
| Total                   | 10043  | 1938   | 11981  |
|                         | 83.82  | 16.18  | 100.00 |

Complications and medical history at the time of obtaining Table 2-3 informed consent by the presence or absence of proton-pump inhibitors

FREQ Procedure

|                      |       |                  | Cumulative |        |
|----------------------|-------|------------------|------------|--------|
| Percent of ALL power |       | Percent of power |            |        |
| 1                    | 11981 | 100.00           | 11981      | 100.00 |

Tables: ALL\* MGTYN

ALL MGTYN(Malignant Tumor)

| Power              |        |        |        |   |
|--------------------|--------|--------|--------|---|
| Percent            |        |        |        |   |
| Percent of rows    |        |        |        |   |
| Percent of columns | None   | With   | Total  |   |
|                    | +      | +      | +      | + |
| 1                  | 10618  | 1363   | 11981  |   |
|                    | 88.62  | 11.38  | 100.00 |   |
|                    | 88.62  | 11.38  |        |   |
|                    | 100.00 | 100.00 |        |   |
|                    | +      | +      | +      | + |
| Total              | 10618  | 1363   | 11981  |   |
|                    | 88.62  | 11.38  | 100.00 |   |

Complications and medical history at the time of obtaining Table 2-3 informed consent by the presence or absence of proton-pump inhibitors

FREQ Procedure

|                      |       |                  | Cumulative |        |
|----------------------|-------|------------------|------------|--------|
| Percent of ALL power |       | Percent of power |            |        |
| 1                    | 11981 | 100.00           | 11981      | 100.00 |

Tables: ALL\* MGTYN

ALL MGTYN(Malignant Tumor)

| Power              |           |           |           |
|--------------------|-----------|-----------|-----------|
| Percent            |           |           |           |
| Percent of rows    |           |           |           |
| Percent of columns | None      | With      | Total     |
|                    | + _____ + | + _____ + | + _____ + |
| 1                  | 10618     | 1363      | 11981     |
|                    | 88.62     | 11.38     | 100.00    |
|                    | 88.62     | 11.38     |           |
|                    | 100.00    | 100.00    |           |
|                    | + _____ + | + _____ + | + _____ + |
| Total              | 10618     | 1363      | 11981     |
|                    | 88.62     | 11.38     | 100.00    |

Complications and medical history at the time of obtaining Table 2-3 informed consent by the presence or absence of proton-pump inhibitors

FREQ Procedure

|                      |       |                  | Cumulative |        |
|----------------------|-------|------------------|------------|--------|
| Percent of ALL power |       | Percent of power |            |        |
| 1                    | 11981 | 100.00           | 11981      | 100.00 |

Table : ALL \* MGT 1 YN

ALL MGT1YN(Gastric Cancer)

| Power              |           |           |           |
|--------------------|-----------|-----------|-----------|
| Percent            |           |           |           |
| Percent of rows    |           |           |           |
| Percent of columns | None      | With      | Total     |
|                    | + _____ + | + _____ + | + _____ + |
| 1                  | 11688     | 293       | 11981     |
|                    | 97.55     | 2.45      | 100.00    |
|                    | 97.55     | 2.45      |           |
|                    | 100.00    | 100.00    |           |
|                    | + _____ + | + _____ + | + _____ + |
| Total              | 11688     | 293       | 11981     |
|                    | 97.55     | 2.45      | 100.00    |

Complications and medical history at the time of obtaining Table 2-3 informed consent by the presence or absence of proton-pump inhibitors

FREQ Procedure

|                      |       |                  | Cumulative |        |
|----------------------|-------|------------------|------------|--------|
| Percent of ALL power |       | Percent of power |            |        |
| 1                    | 11981 | 100.00           | 11981      | 100.00 |

Table : ALL \* MGT 1 YN

ALL MGT1YN(Gastric Cancer)

| Power              |        |        |        |
|--------------------|--------|--------|--------|
| Percent            |        |        |        |
| Percent of rows    |        |        |        |
| Percent of columns | None   | With   | Total  |
|                    | +      | +      | +      |
| 1                  | 11688  | 293    | 11981  |
|                    | 97.55  | 2.45   | 100.00 |
|                    | 97.55  | 2.45   |        |
|                    | 100.00 | 100.00 |        |
|                    | +      | +      | +      |
| Total              | 11688  | 293    | 11981  |
|                    | 97.55  | 2.45   | 100.00 |

Complications and medical history at the time of obtaining Table 2-3 informed consent by the presence or absence of proton-pump inhibitors

FREQ Procedure

|                      |       |                  | Cumulative |        |
|----------------------|-------|------------------|------------|--------|
| Percent of ALL power |       | Percent of power |            |        |
| 1                    | 11981 | 100.00           | 11981      | 100.00 |

Table : ALL \* MGT 2 YN

ALL MGT2YN(Colorectal Cancer)

| Power              |           |           |           |
|--------------------|-----------|-----------|-----------|
| Percent            |           |           |           |
| Percent of rows    |           |           |           |
| Percent of columns | None      | With      | Total     |
|                    | + _____ + | + _____ + | + _____ + |
| 1                  | 11700     | 281       | 11981     |
|                    | 97.65     | 2.35      | 100.00    |
|                    | 97.65     | 2.35      |           |
|                    | 100.00    | 100.00    |           |
|                    | + _____ + | + _____ + | + _____ + |
| Total              | 11700     | 281       | 11981     |
|                    | 97.65     | 2.35      | 100.00    |

Complications and medical history at the time of obtaining Table 2-3 informed consent by the presence or absence of proton-pump inhibitors

FREQ Procedure

|                      |       |                  | Cumulative |        |
|----------------------|-------|------------------|------------|--------|
| Percent of ALL power |       | Percent of power |            |        |
| 1                    | 11981 | 100.00           | 11981      | 100.00 |

Table : ALL \* MGT 2 YN

ALL MGT2YN(Colorectal Cancer)

| Power              |           |           |           |
|--------------------|-----------|-----------|-----------|
| Percent            |           |           |           |
| Percent of rows    |           |           |           |
| Percent of columns | None      | With      | Total     |
|                    | + _____ + | + _____ + | + _____ + |
| 1                  | 11700     | 281       | 11981     |
|                    | 97.65     | 2.35      | 100.00    |
|                    | 97.65     | 2.35      |           |
|                    | 100.00    | 100.00    |           |
|                    | + _____ + | + _____ + | + _____ + |
| Total              | 11700     | 281       | 11981     |
|                    | 97.65     | 2.35      | 100.00    |



Complications and medical history at the time of obtaining Table 2-3 informed consent by the presence or absence of proton-pump inhibitors

FREQ Procedure

|                      |       |                  | Cumulative |        |
|----------------------|-------|------------------|------------|--------|
| Percent of ALL power |       | Percent of power |            |        |
| 1                    | 11981 | 100.00           | 11981      | 100.00 |

Table : ALL \* MGT 3 YN

ALL MGT3YN(Lung Cancer)

| Power              |           |           |           |
|--------------------|-----------|-----------|-----------|
| Percent            |           |           |           |
| Percent of rows    |           |           |           |
| Percent of columns | None      | With      | Total     |
|                    | + _____ + | + _____ + | + _____ + |
| 1                  | 11837     | 144       | 11981     |
|                    | 98.80     | 1.20      | 100.00    |
|                    | 98.80     | 1.20      |           |
|                    | 100.00    | 100.00    |           |
|                    | + _____ + | + _____ + | + _____ + |
| Total              | 11837     | 144       | 11981     |
|                    | 98.80     | 1.20      | 100.00    |

Complications and medical history at the time of obtaining Table 2-3 informed consent by the presence or absence of proton-pump inhibitors

FREQ Procedure

|                      |       |                  | Cumulative |        |
|----------------------|-------|------------------|------------|--------|
| Percent of ALL power |       | Percent of power |            |        |
| 1                    | 11981 | 100.00           | 11981      | 100.00 |

Table : ALL \* MGT 3 YN

ALL MGT3YN(Lung Cancer)

| Power              |        |        |        |
|--------------------|--------|--------|--------|
| Percent            |        |        |        |
| Percent of rows    |        |        |        |
| Percent of columns | None   | With   | Total  |
|                    | +      | +      | +      |
| 1                  | 11837  | 144    | 11981  |
|                    | 98.80  | 1.20   | 100.00 |
|                    | 98.80  | 1.20   |        |
|                    | 100.00 | 100.00 |        |
|                    | +      | +      | +      |
| Total              | 11837  | 144    | 11981  |
|                    | 98.80  | 1.20   | 100.00 |

Complications and medical history at the time of obtaining Table 2-3 informed consent by the presence or absence of proton-pump inhibitors

FREQ Procedure

|                      |       |                  | Cumulative |        |
|----------------------|-------|------------------|------------|--------|
| Percent of ALL power |       | Percent of power |            |        |
| 1                    | 11981 | 100.00           | 11981      | 100.00 |

Table : ALL \* MGT 4 YN

ALL MGT4YN(Brest Cancer)

| Power              |        |        |        |   |
|--------------------|--------|--------|--------|---|
| Percent            |        |        |        |   |
| Percent of rows    |        |        |        |   |
| Percent of columns | None   | With   | Total  |   |
|                    | +      | +      |        | + |
| 1                  | 11895  | 86     | 11981  |   |
|                    | 99.28  | 0.72   | 100.00 |   |
|                    | 99.28  | 0.72   |        |   |
|                    | 100.00 | 100.00 |        |   |
|                    | +      | +      |        | + |
| Total              | 11895  | 86     | 11981  |   |
|                    | 99.28  | 0.72   | 100.00 |   |

Complications and medical history at the time of obtaining Table 2-3 informed consent by the presence or absence of proton-pump inhibitors

FREQ Procedure

|                      |       |                  | Cumulative |        |
|----------------------|-------|------------------|------------|--------|
| Percent of ALL power |       | Percent of power |            |        |
| 1                    | 11981 | 100.00           | 11981      | 100.00 |

Table : ALL \* MGT 4 YN

ALL MGT4YN(Brest Cancer)

| Power              |        |        |        |
|--------------------|--------|--------|--------|
| Percent            |        |        |        |
| Percent of rows    |        |        |        |
| Percent of columns | None   | With   | Total  |
|                    | +      | +      | +      |
| 1                  | 11895  | 86     | 11981  |
|                    | 99.28  | 0.72   | 100.00 |
|                    | 99.28  | 0.72   |        |
|                    | 100.00 | 100.00 |        |
|                    | +      | +      | +      |
| Total              | 11895  | 86     | 11981  |
|                    | 99.28  | 0.72   | 100.00 |

Complications and medical history at the time of obtaining Table 2-3 informed consent by the presence or absence of proton-pump inhibitors

FREQ Procedure

|                      |       |                  | Cumulative |        |
|----------------------|-------|------------------|------------|--------|
| Percent of ALL power |       | Percent of power |            |        |
| 1                    | 11981 | 100.00           | 11981      | 100.00 |

Table : ALL \* MGT 5 YN

ALL

MGT5YN(Uterus/Ovarian Cancer)

| Power              |        |        |        |
|--------------------|--------|--------|--------|
| Percent            |        |        |        |
| Percent of rows    |        |        |        |
| Percent of columns | None   | With   | Total  |
|                    | +      | +      | +      |
| 1                  | 11942  | 39     | 11981  |
|                    | 99.67  | 0.33   | 100.00 |
|                    | 99.67  | 0.33   |        |
|                    | 100.00 | 100.00 |        |
|                    | +      | +      | +      |
| Total              | 11942  | 39     | 11981  |
|                    | 99.67  | 0.33   | 100.00 |

Complications and medical history at the time of obtaining Table 2-3 informed consent by the presence or absence of proton-pump inhibitors

FREQ Procedure

|                      |       |                  | Cumulative |        |
|----------------------|-------|------------------|------------|--------|
| Percent of ALL power |       | Percent of power |            |        |
| 1                    | 11981 | 100.00           | 11981      | 100.00 |

Table : ALL \* MGT 5 YN

ALL

MGT5YN(Uterus/Ovarian Cancer)

| Power              |           |           |           |
|--------------------|-----------|-----------|-----------|
| Percent            |           |           |           |
| Percent of rows    |           |           |           |
| Percent of columns | None      | With      | Total     |
|                    | + _____ + | + _____ + | + _____ + |
| 1                  | 11942     | 39        | 11981     |
|                    | 99.67     | 0.33      | 100.00    |
|                    | 99.67     | 0.33      |           |
|                    | 100.00    | 100.00    |           |
|                    | + _____ + | + _____ + | + _____ + |
| Total              | 11942     | 39        | 11981     |
|                    | 99.67     | 0.33      | 100.00    |

Complications and medical history at the time of obtaining Table 2-3 informed consent by the presence or absence of proton-pump inhibitors

FREQ Procedure

|                      |       |                  | Cumulative |        |
|----------------------|-------|------------------|------------|--------|
| Percent of ALL power |       | Percent of power |            |        |
| 1                    | 11981 | 100.00           | 11981      | 100.00 |

Table : ALL \* MGT 6 YN

ALL MGT6YN(Pancreatic Cancer)

| Power              |           |           |           |
|--------------------|-----------|-----------|-----------|
| Percent            |           |           |           |
| Percent of rows    |           |           |           |
| Percent of columns | None      | With      | Total     |
|                    | + _____ + | + _____ + | + _____ + |
| 1                  | 11968     | 13        | 11981     |
|                    | 99.89     | 0.11      | 100.00    |
|                    | 99.89     | 0.11      |           |
|                    | 100.00    | 100.00    |           |
|                    | + _____ + | + _____ + | + _____ + |
| Total              | 11968     | 13        | 11981     |
|                    | 99.89     | 0.11      | 100.00    |

Complications and medical history at the time of obtaining Table 2-3 informed consent by the presence or absence of proton-pump inhibitors

FREQ Procedure

|                      |       |                  | Cumulative |        |
|----------------------|-------|------------------|------------|--------|
| Percent of ALL power |       | Percent of power |            |        |
| 1                    | 11981 | 100.00           | 11981      | 100.00 |

Table : ALL \* MGT 6 YN

ALL MGT6YN(Pancreatic Cancer)

| Power              |           |           |           |
|--------------------|-----------|-----------|-----------|
| Percent            |           |           |           |
| Percent of rows    |           |           |           |
| Percent of columns | None      | With      | Total     |
|                    | + _____ + | + _____ + | + _____ + |
| 1                  | 11968     | 13        | 11981     |
|                    | 99.89     | 0.11      | 100.00    |
|                    | 99.89     | 0.11      |           |
|                    | 100.00    | 100.00    |           |
|                    | + _____ + | + _____ + | + _____ + |
| Total              | 11968     | 13        | 11981     |
|                    | 99.89     | 0.11      | 100.00    |



Complications and medical history at the time of obtaining Table 2-3 informed consent by the presence or absence of proton-pump inhibitors

FREQ Procedure

|   |       | Cumulative           |                  |        |
|---|-------|----------------------|------------------|--------|
|   |       | Percent of ALL power | Percent of power |        |
| 1 | 11981 | 100.00               | 11981            | 100.00 |

Table : ALL \* MGT 7 YN

ALL

MGT7YN(Other Malignant Tumor)

Power |

Percent |

Percent of rows

Percent of columns | None | With | Total

|         |         |         |        |
|---------|---------|---------|--------|
| +_____+ | +_____+ | +_____+ |        |
| 1       | 11331   | 650     | 11981  |
|         | 94.57   | 5.43    | 100.00 |
|         | 94.57   | 5.43    |        |
|         | 100.00  | 100.00  |        |
| +_____+ | +_____+ | +_____+ |        |
| Total   | 11331   | 650     | 11981  |
|         | 94.57   | 5.43    | 100.00 |

Complications and medical history at the time of obtaining Table 2-3 informed consent by the presence or absence of proton-pump inhibitors

FREQ Procedure

|                      |       |                  | Cumulative |        |
|----------------------|-------|------------------|------------|--------|
| Percent of ALL power |       | Percent of power |            |        |
| 1                    | 11981 | 100.00           | 11981      | 100.00 |

Table : ALL \* MGT 7 YN

ALL

MGT7YN(Other Malignant Tumor)

Power |

Percent |

Percent of rows

Percent of columns | None | With | Total

|       |        |        |        |  |   |
|-------|--------|--------|--------|--|---|
|       | +      |        | +      |  | + |
| 1     | 11331  | 650    | 11981  |  |   |
|       | 94.57  | 5.43   | 100.00 |  |   |
|       | 94.57  | 5.43   |        |  |   |
|       | 100.00 | 100.00 |        |  |   |
|       | +      |        | +      |  | + |
| Total | 11331  | 650    | 11981  |  |   |
|       | 94.57  | 5.43   | 100.00 |  |   |

Complications and medical history at the time of obtaining Table 2-3 informed consent by the presence or absence of proton-pump inhibitors

FREQ Procedure

|                      |       |                  | Cumulative |        |
|----------------------|-------|------------------|------------|--------|
| Percent of ALL power |       | Percent of power |            |        |
| 1                    | 11981 | 100.00           | 11981      | 100.00 |

Tables: ALL\* ALZHYN

ALL ALZHYN(Alzheimer)

| Power              |           |           |           |
|--------------------|-----------|-----------|-----------|
| Percent            |           |           |           |
| Percent of rows    |           |           |           |
| Percent of columns | None      | With      | Total     |
|                    | + _____ + | + _____ + | + _____ + |
| 1                  | 10995     | 986       | 11981     |
|                    | 91.77     | 8.23      | 100.00    |
|                    | 91.77     | 8.23      |           |
|                    | 100.00    | 100.00    |           |
|                    | + _____ + | + _____ + | + _____ + |
| Total              | 10995     | 986       | 11981     |
|                    | 91.77     | 8.23      | 100.00    |

Complications and medical history at the time of obtaining Table 2-3 informed consent by the presence or absence of proton-pump inhibitors

FREQ Procedure

|                      |       |                  | Cumulative |        |
|----------------------|-------|------------------|------------|--------|
| Percent of ALL power |       | Percent of power |            |        |
| 1                    | 11981 | 100.00           | 11981      | 100.00 |

Tables: ALL\* ALZHYN

ALL ALZHYN(Alzheimer)

| Power              |           |           |           |
|--------------------|-----------|-----------|-----------|
| Percent            |           |           |           |
| Percent of rows    |           |           |           |
| Percent of columns | None      | With      | Total     |
|                    | + _____ + | + _____ + | + _____ + |
| 1                  | 10995     | 986       | 11981     |
|                    | 91.77     | 8.23      | 100.00    |
|                    | 91.77     | 8.23      |           |
|                    | 100.00    | 100.00    |           |
|                    | + _____ + | + _____ + | + _____ + |
| Total              | 10995     | 986       | 11981     |
|                    | 91.77     | 8.23      | 100.00    |

Complications and medical history at the time of obtaining Table 2-3 informed consent by the presence or absence of proton-pump inhibitors

FREQ Procedure

|                      |       |                  | Cumulative |        |
|----------------------|-------|------------------|------------|--------|
| Percent of ALL power |       | Percent of power |            |        |
| 1                    | 11981 | 100.00           | 11981      | 100.00 |

Tables: ALL \* OHCPYN

ALL

OHCPYN(Other Complications)

| Power                   |        |        |        |
|-------------------------|--------|--------|--------|
| Percent                 |        |        |        |
| Percent of rows         |        |        |        |
| Percent of columns      | None   | With   | Total  |
| _____ + _____ + _____ + |        |        |        |
| 1                       | 7822   | 4159   | 11981  |
|                         | 65.29  | 34.71  | 100.00 |
|                         | 65.29  | 34.71  |        |
|                         | 100.00 | 100.00 |        |
| _____ + _____ + _____ + |        |        |        |
| Total                   | 7822   | 4159   | 11981  |
|                         | 65.29  | 34.71  | 100.00 |

Complications and medical history at the time of obtaining Table 2-3 informed consent by the presence or absence of proton-pump inhibitors

FREQ Procedure

|                      |       |                  | Cumulative |        |
|----------------------|-------|------------------|------------|--------|
| Percent of ALL power |       | Percent of power |            |        |
| 1                    | 11981 | 100.00           | 11981      | 100.00 |

Tables: ALL \* OHCPYN

ALL

OHCPYN(Other Complications)

| Power                   |        |        |        |
|-------------------------|--------|--------|--------|
| Percent                 |        |        |        |
| Percent of rows         |        |        |        |
| Percent of columns      | None   | With   | Total  |
| _____ + _____ + _____ + |        |        |        |
| 1                       | 7822   | 4159   | 11981  |
|                         | 65.29  | 34.71  | 100.00 |
|                         | 65.29  | 34.71  |        |
|                         | 100.00 | 100.00 |        |
| _____ + _____ + _____ + |        |        |        |
| Total                   | 7822   | 4159   | 11981  |
|                         | 65.29  | 34.71  | 100.00 |

Complications and medical history at the time of obtaining Table 2-3 informed consent by the presence or absence of proton-pump inhibitors

FREQ Procedure

|   |                      |                  | Cumulative |        |
|---|----------------------|------------------|------------|--------|
|   | Percent of ALL power | Percent of power |            |        |
| 1 | 11981                | 100.00           | 11981      | 100.00 |

Tables: ALL \* IMGYN

ALL IMGYN(Brain Imaging Test)

| Power | Percent | Percent of rows | Percentage of columns  None   Unknown    Total |        |
|-------|---------|-----------------|------------------------------------------------|--------|
|       |         |                 | +_____+_____+_____+                            |        |
| 1     | 10487   | 1232            | 262                                            | 11981  |
|       | 87.53   | 10.28           | 2.19                                           | 100.00 |
|       | 87.53   | 10.28           | 2.19                                           |        |
|       | 100.00  | 100.00          | 100.00                                         |        |
|       |         |                 | +_____+_____+_____+                            |        |
| Total | 10487   | 1232            | 262                                            | 11981  |
|       | 87.53   | 10.28           | 2.19                                           | 100.00 |

Complications and medical history at the time of obtaining Table 2-3 informed consent by the presence or absence of proton-pump inhibitors

FREQ Procedure

|                      |       |                  | Cumulative |        |
|----------------------|-------|------------------|------------|--------|
| Percent of ALL power |       | Percent of power |            |        |
| 1                    | 11981 | 100.00           | 11981      | 100.00 |

Tables: ALL \* IMGYN

ALL IMGYN(Brain Imaging Test)

| Power                 |        |         |        |        |
|-----------------------|--------|---------|--------|--------|
| Percent               |        |         |        |        |
| Percent of rows       |        |         |        |        |
| Percentage of columns | None   | Unknown | Total  |        |
|                       | +      | +       | +      | +      |
| 1                     | 10487  | 1232    | 262    | 11981  |
|                       | 87.53  | 10.28   | 2.19   | 100.00 |
|                       | 87.53  | 10.28   | 2.19   |        |
|                       | 100.00 | 100.00  | 100.00 |        |
|                       | +      | +       | +      | +      |
| Total                 | 10487  | 1232    | 262    | 11981  |
|                       | 87.53  | 10.28   | 2.19   | 100.00 |



Complications and medical history at the time of obtaining Table 2-3 informed consent by the presence or absence of proton-pump inhibitors

FREQ Procedure

|   |                      |                  | Cumulative |        |
|---|----------------------|------------------|------------|--------|
|   | Percent of ALL power | Percent of power |            |        |
| 1 | 11981                | 100.00           | 11981      | 100.00 |

Tables: ALL \* IMGYN

ALL IMGYN(Brain Imaging Test)

| Power | Percent | Percent of rows | Percentage of columns  None   Unknown    Total |        |
|-------|---------|-----------------|------------------------------------------------|--------|
|       |         |                 |                                                |        |
|       |         |                 |                                                |        |
| 1     | 10487   | 1232            | 262                                            | 11981  |
|       | 87.53   | 10.28           | 2.19                                           | 100.00 |
|       | 87.53   | 10.28           | 2.19                                           |        |
|       | 100.00  | 100.00          | 100.00                                         |        |
|       |         |                 |                                                |        |
| Total | 10487   | 1232            | 262                                            | 11981  |
|       | 87.53   | 10.28           | 2.19                                           | 100.00 |

Complications and medical history at the time of obtaining Table 2-3 informed consent by the presence or absence of proton-pump inhibitors

FREQ Procedure

|   |       | Cumulative           |                  |        |
|---|-------|----------------------|------------------|--------|
|   |       | Percent of ALL power | Percent of power |        |
| 1 | 11981 | 100.00               | 11981            | 100.00 |

Tables: ALL\* FALYN

ALL FALYN(Fall Down within one year)

| Power                                          |        |        |        |        |
|------------------------------------------------|--------|--------|--------|--------|
| Percent                                        |        |        |        |        |
| Percent of rows                                |        |        |        |        |
| Percentage of columns  None   Unknown    Total |        |        |        |        |
| +_____+_____+_____+                            |        |        |        |        |
| 1                                              | 9638   | 999    | 1344   | 11981  |
|                                                | 80.44  | 8.34   | 11.22  | 100.00 |
|                                                | 80.44  | 8.34   | 11.22  |        |
|                                                | 100.00 | 100.00 | 100.00 |        |
| +_____+_____+_____+                            |        |        |        |        |
| Total                                          | 9638   | 999    | 1344   | 11981  |
|                                                | 80.44  | 8.34   | 11.22  | 100.00 |

Complications and medical history at the time of obtaining Table 2-3 informed consent by the presence or absence of proton-pump inhibitors

FREQ Procedure

|   |       | Cumulative           |                  |        |
|---|-------|----------------------|------------------|--------|
|   |       | Percent of ALL power | Percent of power |        |
| 1 | 11981 | 100.00               | 11981            | 100.00 |

Tables: ALL\* FALYN

ALL FALYN(Fall Down within one year)

| Power                 |        |         |        |        |
|-----------------------|--------|---------|--------|--------|
| Percent               |        |         |        |        |
| Percent of rows       |        |         |        |        |
| Percentage of columns | None   | Unknown | Total  |        |
|                       | +      | +       | +      | +      |
| 1                     | 9638   | 999     | 1344   | 11981  |
|                       | 80.44  | 8.34    | 11.22  | 100.00 |
|                       | 80.44  | 8.34    | 11.22  |        |
|                       | 100.00 | 100.00  | 100.00 |        |
|                       | +      | +       | +      | +      |
| Total                 | 9638   | 999     | 1344   | 11981  |
|                       | 80.44  | 8.34    | 11.22  | 100.00 |

Complications and medical history at the time of obtaining Table 2-3 informed consent by the presence or absence of proton-pump inhibitors

FREQ Procedure

|                      |                  | Cumulative           |                  |
|----------------------|------------------|----------------------|------------------|
| Percent of ALL power | Percent of power | Percent of ALL power | Percent of power |
| 1                    | 11981            | 100.00               | 11981 100.00     |

Tables: ALL\* FALYN

ALL FALYN(Fall Down within one year)

| Power                 |         |         |         |         |
|-----------------------|---------|---------|---------|---------|
| Percent               |         |         |         |         |
| Percent of rows       |         |         |         |         |
| Percentage of columns | None    | Unknown | Total   |         |
| +_____+               | +_____+ | +_____+ | +_____+ | +_____+ |
| 1                     | 9638    | 999     | 1344    | 11981   |
|                       | 80.44   | 8.34    | 11.22   | 100.00  |
|                       | 80.44   | 8.34    | 11.22   |         |
|                       | 100.00  | 100.00  | 100.00  |         |
| +_____+               | +_____+ | +_____+ | +_____+ | +_____+ |
| Total                 | 9638    | 999     | 1344    | 11981   |
|                       | 80.44   | 8.34    | 11.22   | 100.00  |

Complications and medical history at the time of obtaining Table 2-3 informed consent by the presence or absence of proton-pump inhibitors

FREQ Procedure

Tables: ALL \* FNDYN

ALL FNDYN(Brain Imaging Result)

Power |

Percent |

Percent of rows

Percentage of columns |None| |Unknown| | Total

|       | None   | Unknown | Total  |
|-------|--------|---------|--------|
| 1     | 562    | 625     | 1232   |
|       | 45.62  | 50.73   | 100.00 |
|       | 45.62  | 50.73   | 3.65   |
|       | 100.00 | 100.00  | 100.00 |
| Total | 562    | 625     | 1232   |
|       | 45.62  | 50.73   | 3.65   |
|       |        |         | 100.00 |

Degree of missing values = 10749

Complications and medical history at the time of obtaining Table 2-3 informed consent by the presence or absence of proton-pump inhibitors

FREQ Procedure

Tables: ALL \* FNDYN

ALL FNDYN(Brain Imaging Result)

Power |

Percent |

Percent of rows

Percentage of columns |None| |Unknown| | Total

|       | None   | Unknown | Total  |
|-------|--------|---------|--------|
| 1     | 562    | 625     | 1232   |
|       | 45.62  | 50.73   | 100.00 |
|       | 45.62  | 50.73   | 3.65   |
|       | 100.00 | 100.00  | 100.00 |
| Total | 562    | 625     | 1232   |
|       | 45.62  | 50.73   | 3.65   |
|       |        |         | 100.00 |

Degree of missing values = 10749

Complications and medical history at the time of obtaining Table 2-3 informed consent by the presence or absence of proton-pump inhibitors

FREQ Procedure

Tables: ALL \* FNDYN

ALL FNDYN(Brain Imaging Result)

Power |

Percent |

Percent of rows

Percentage of columns |None| |Unknown| | Total

|       | None   | Unknown | Total  |
|-------|--------|---------|--------|
| 1     | 562    | 625     | 1232   |
|       | 45.62  | 50.73   | 100.00 |
|       | 45.62  | 50.73   | 3.65   |
|       | 100.00 | 100.00  | 100.00 |
| Total | 562    | 625     | 1232   |
|       | 45.62  | 50.73   | 3.65   |
|       |        |         | 100.00 |

Degree of missing values = 10749

Complications and medical history at the time of obtaining Table 2-3 informed consent by the presence or absence of proton-pump inhibitors

FREQ Procedure

|                      |       |                  | Cumulative |        |
|----------------------|-------|------------------|------------|--------|
| Percent of ALL power |       | Percent of power |            |        |
| 1                    | 20509 | 100.00           | 20509      | 100.00 |

Tables: ALL \* MHYN

ALL MHYN(Medical History)

| Power              |        |        |        |   |
|--------------------|--------|--------|--------|---|
| Percent            |        |        |        |   |
| Percent of rows    |        |        |        |   |
| Percent of columns | None   | With   | Total  |   |
|                    | +      | +      | +      | + |
| 1                  | 705    | 19804  | 20509  |   |
|                    | 3.44   | 96.56  | 100.00 |   |
|                    | 3.44   | 96.56  |        |   |
|                    | 100.00 | 100.00 |        |   |
|                    | +      | +      | +      | + |
| Total              | 705    | 19804  | 20509  |   |
|                    | 3.44   | 96.56  | 100.00 |   |



Complications and medical history at the time of obtaining Table 2-3 informed consent by the presence or absence of proton-pump inhibitors

FREQ Procedure

|                      |       |                  | Cumulative |        |
|----------------------|-------|------------------|------------|--------|
| Percent of ALL power |       | Percent of power |            |        |
| 1                    | 20509 | 100.00           | 20509      | 100.00 |

Tables: ALL \* MHYN

ALL MHYN(Medical History)

| Power                   |        |        |        |  |
|-------------------------|--------|--------|--------|--|
| Percent                 |        |        |        |  |
| Percent of rows         |        |        |        |  |
| Percent of columns      | None   | With   | Total  |  |
| _____ + _____ + _____ + |        |        |        |  |
| 1                       | 705    | 19804  | 20509  |  |
|                         | 3.44   | 96.56  | 100.00 |  |
|                         | 3.44   | 96.56  |        |  |
|                         | 100.00 | 100.00 |        |  |
| _____ + _____ + _____ + |        |        |        |  |
| Total                   | 705    | 19804  | 20509  |  |
|                         | 3.44   | 96.56  | 100.00 |  |

Complications and medical history at the time of obtaining Table 2-3 informed consent by the presence or absence of proton-pump inhibitors

FREQ Procedure

|                      |       |                  | Cumulative |        |
|----------------------|-------|------------------|------------|--------|
| Percent of ALL power |       | Percent of power |            |        |
| 1                    | 20509 | 100.00           | 20509      | 100.00 |

Tables: ALL\* HBPYN

ALL

HBPYN(High Blood Pressure)

| Power                   |        |        |        |
|-------------------------|--------|--------|--------|
| Percent                 |        |        |        |
| Percent of rows         |        |        |        |
| Percent of columns      | None   | With   | Total  |
| _____ + _____ + _____ + |        |        |        |
| 1                       | 5374   | 15135  | 20509  |
|                         | 26.20  | 73.80  | 100.00 |
|                         | 26.20  | 73.80  |        |
|                         | 100.00 | 100.00 |        |
| _____ + _____ + _____ + |        |        |        |
| Total                   | 5374   | 15135  | 20509  |
|                         | 26.20  | 73.80  | 100.00 |

Complications and medical history at the time of obtaining Table 2-3 informed consent by the presence or absence of proton-pump inhibitors

FREQ Procedure

|                      |       |                  | Cumulative |        |
|----------------------|-------|------------------|------------|--------|
| Percent of ALL power |       | Percent of power |            |        |
| 1                    | 20509 | 100.00           | 20509      | 100.00 |

Tables: ALL\* HBPYN

ALL

HBPYN(High Blood Pressure)

| Power                   |        |        |        |
|-------------------------|--------|--------|--------|
| Percent                 |        |        |        |
| Percent of rows         |        |        |        |
| Percent of columns      | None   | With   | Total  |
| _____ + _____ + _____ + |        |        |        |
| 1                       | 5374   | 15135  | 20509  |
|                         | 26.20  | 73.80  | 100.00 |
|                         | 26.20  | 73.80  |        |
|                         | 100.00 | 100.00 |        |
| _____ + _____ + _____ + |        |        |        |
| Total                   | 5374   | 15135  | 20509  |
|                         | 26.20  | 73.80  | 100.00 |

Complications and medical history at the time of obtaining Table 2-3 informed consent by the presence or absence of proton-pump inhibitors

FREQ Procedure

|   |       | Cumulative           |                  |        |
|---|-------|----------------------|------------------|--------|
|   |       | Percent of ALL power | Percent of power |        |
| 1 | 20509 | 100.00               | 20509            | 100.00 |

Tables: ALL \* DBYN

ALL DBYN(Diabetes)

| Power              |           |           |           |
|--------------------|-----------|-----------|-----------|
| Percent            |           |           |           |
| Percent of rows    |           |           |           |
| Percent of columns | None      | With      | Total     |
|                    | + _____ + | + _____ + | + _____ + |
| 1                  | 15243     | 5266      | 20509     |
|                    | 74.32     | 25.68     | 100.00    |
|                    | 74.32     | 25.68     |           |
|                    | 100.00    | 100.00    |           |
|                    | + _____ + | + _____ + | + _____ + |
| Total              | 15243     | 5266      | 20509     |
|                    | 74.32     | 25.68     | 100.00    |

Complications and medical history at the time of obtaining Table 2-3 informed consent by the presence or absence of proton-pump inhibitors

FREQ Procedure

|                      |       | Cumulative       |              |
|----------------------|-------|------------------|--------------|
| Percent of ALL power |       | Percent of power |              |
| 1                    | 20509 | 100.00           | 20509 100.00 |

Tables: ALL \* DBYN

ALL DBYN(Diabetes)

| Power              |         |         |        |
|--------------------|---------|---------|--------|
| Percent            |         |         |        |
| Percent of rows    |         |         |        |
| Percent of columns | None    | With    | Total  |
| +_____+            | +_____+ | +_____+ | +      |
| 1                  | 15243   | 5266    | 20509  |
|                    | 74.32   | 25.68   | 100.00 |
|                    | 74.32   | 25.68   |        |
|                    | 100.00  | 100.00  |        |
| +_____+            | +_____+ | +_____+ | +      |
| Total              | 15243   | 5266    | 20509  |
|                    | 74.32   | 25.68   | 100.00 |

Complications and medical history at the time of obtaining Table 2-3 informed consent by the presence or absence of proton-pump inhibitors

FREQ Procedure

|   |       | Cumulative           |                  |        |
|---|-------|----------------------|------------------|--------|
|   |       | Percent of ALL power | Percent of power |        |
| 1 | 20509 | 100.00               | 20509            | 100.00 |

Table: ALL \* t\_DB

ALL t\_DB

| Power                               |        |        |        |
|-------------------------------------|--------|--------|--------|
| Percent                             |        |        |        |
| Percent of rows                     |        |        |        |
| Percentage of columns   0   1   Sum |        |        |        |
| +                                   |        | +      |        |
| _____                               |        | _____  |        |
| 1                                   | 19610  | 899    | 20509  |
|                                     | 95.62  | 4.38   | 100.00 |
|                                     | 95.62  | 4.38   |        |
|                                     | 100.00 | 100.00 |        |
| +                                   |        | +      |        |
| _____                               |        | _____  |        |
| Total 19610 899 20509               |        |        |        |
|                                     | 95.62  | 4.38   | 100.00 |

Complications and medical history at the time of obtaining Table 2-3 informed consent by the presence or absence of proton-pump inhibitors

FREQ Procedure

|                      |                  | Cumulative           |                  |
|----------------------|------------------|----------------------|------------------|
| Percent of ALL power | Percent of power | Percent of ALL power | Percent of power |
| 1                    | 20509            | 100.00               | 20509 100.00     |

Table: ALL \* t\_DB

ALL t\_DB

| Power | Percent | Percent of rows | Percentage of columns   0   1   Sum |
|-------|---------|-----------------|-------------------------------------|
| 1     | 19610   | 899             | 20509                               |
|       | 95.62   | 4.38            | 100.00                              |
|       | 95.62   | 4.38            |                                     |
|       | 100.00  | 100.00          |                                     |
| Total | 19610   | 899             | 20509                               |
|       | 95.62   | 4.38            | 100.00                              |

Complications and medical history at the time of obtaining Table 2-3 informed consent by the presence or absence of proton-pump inhibitors

FREQ Procedure

|                      |       |                  | Cumulative |        |
|----------------------|-------|------------------|------------|--------|
| Percent of ALL power |       | Percent of power |            |        |
| 1                    | 20509 | 100.00           | 20509      | 100.00 |

Table : ALL \* DB 1 YN

ALL

DB1YN(Diabetic Retinopathy)

Power |

Percent |

Percent of rows

Percent of columns | None | With | Total

|       |        |        |        |  |   |
|-------|--------|--------|--------|--|---|
|       | +      |        | +      |  | + |
| 1     | 20231  | 278    | 20509  |  |   |
|       | 98.64  | 1.36   | 100.00 |  |   |
|       | 98.64  | 1.36   |        |  |   |
|       | 100.00 | 100.00 |        |  |   |
|       | +      |        | +      |  | + |
| Total | 20231  | 278    | 20509  |  |   |
|       | 98.64  | 1.36   | 100.00 |  |   |



Complications and medical history at the time of obtaining Table 2-3 informed consent by the presence or absence of proton-pump inhibitors

FREQ Procedure

|                      |       |                  | Cumulative |        |
|----------------------|-------|------------------|------------|--------|
| Percent of ALL power |       | Percent of power |            |        |
| 1                    | 20509 | 100.00           | 20509      | 100.00 |

Table : ALL \* DB 1 YN

ALL

DB1YN(Diabetic Retinopathy)

Power |

Percent |

Percent of rows

Percent of columns | None | With | Total

|   |        |        |        |  |   |
|---|--------|--------|--------|--|---|
|   | +      |        | +      |  | + |
| 1 | 20231  | 278    | 20509  |  |   |
|   | 98.64  | 1.36   | 100.00 |  |   |
|   | 98.64  | 1.36   |        |  |   |
|   | 100.00 | 100.00 |        |  |   |
|   | +      |        | +      |  | + |

Total 20231 278 20509

98.64 1.36 100.00

Complications and medical history at the time of obtaining Table 2-3 informed consent by the presence or absence of proton-pump inhibitors

FREQ Procedure

|   |       | Cumulative           |                  |        |
|---|-------|----------------------|------------------|--------|
|   |       | Percent of ALL power | Percent of power |        |
| 1 | 20509 | 100.00               | 20509            | 100.00 |

Table : ALL \* DB 2 YN

ALL

DB2YN(Diabetic Nephropathy)

Power |

Percent |

Percent of rows

Percent of columns | None | With | Total

|             |         |         |        |
|-------------|---------|---------|--------|
| +_____+     | +_____+ | +_____+ |        |
| 1   19884   | 625     | 20509   |        |
| 96.95       | 3.05    | 100.00  |        |
| 96.95       | 3.05    |         |        |
| 100.00      | 100.00  |         |        |
| +_____+     | +_____+ | +_____+ |        |
| Total 19884 | 625     | 20509   |        |
|             | 96.95   | 3.05    | 100.00 |

Complications and medical history at the time of obtaining Table 2-3 informed consent by the presence or absence of proton-pump inhibitors

FREQ Procedure

|   |       | Cumulative           |                  |        |
|---|-------|----------------------|------------------|--------|
|   |       | Percent of ALL power | Percent of power |        |
| 1 | 20509 | 100.00               | 20509            | 100.00 |

Table : ALL \* DB 2 YN

ALL

DB2YN(Diabetic Nephropathy)

Power |

Percent |

Percent of rows

Percent of columns | None | With | Total

|       |        |        |        |
|-------|--------|--------|--------|
| 1     | 19884  | 625    | 20509  |
|       | 96.95  | 3.05   | 100.00 |
|       | 96.95  | 3.05   |        |
|       | 100.00 | 100.00 |        |
| Total | 19884  | 625    | 20509  |
|       | 96.95  | 3.05   | 100.00 |

Complications and medical history at the time of obtaining Table 2-3 informed consent by the presence or absence of proton-pump inhibitors

FREQ Procedure

|                      |       |                  | Cumulative |        |
|----------------------|-------|------------------|------------|--------|
| Percent of ALL power |       | Percent of power |            |        |
| 1                    | 20509 | 100.00           | 20509      | 100.00 |

Table : ALL \* DB 3 YN

ALL

DB3YN(Diabetic Neuropathy)

| Power              |        |        |        |   |
|--------------------|--------|--------|--------|---|
| Percent            |        |        |        |   |
| Percent of rows    |        |        |        |   |
| Percent of columns | None   | With   | Total  |   |
|                    | +      | +      |        | + |
| 1                  | 20327  | 182    | 20509  |   |
|                    | 99.11  | 0.89   | 100.00 |   |
|                    | 99.11  | 0.89   |        |   |
|                    | 100.00 | 100.00 |        |   |
|                    | +      | +      |        | + |
| Total              | 20327  | 182    | 20509  |   |
|                    | 99.11  | 0.89   | 100.00 |   |

Complications and medical history at the time of obtaining Table 2-3 informed consent by the presence or absence of proton-pump inhibitors

FREQ Procedure

|                      |       |                  | Cumulative |        |
|----------------------|-------|------------------|------------|--------|
| Percent of ALL power |       | Percent of power |            |        |
| 1                    | 20509 | 100.00           | 20509      | 100.00 |

Table : ALL \* DB 3 YN

ALL

DB3YN(Diabetic Neuropathy)

Power |

Percent |

Percent of rows

Percent of columns | None | With | Total

|       |        |        |        |  |   |
|-------|--------|--------|--------|--|---|
|       | +      |        | +      |  | + |
| 1     | 20327  | 182    | 20509  |  |   |
|       | 99.11  | 0.89   | 100.00 |  |   |
|       | 99.11  | 0.89   |        |  |   |
|       | 100.00 | 100.00 |        |  |   |
|       | +      |        | +      |  | + |
| Total | 20327  | 182    | 20509  |  |   |
|       | 99.11  | 0.89   | 100.00 |  |   |

Complications and medical history at the time of obtaining Table 2-3 informed consent by the presence or absence of proton-pump inhibitors

FREQ Procedure

|                      |       |                  | Cumulative |        |
|----------------------|-------|------------------|------------|--------|
| Percent of ALL power |       | Percent of power |            |        |
| 1                    | 20509 | 100.00           | 20509      | 100.00 |

Tables: ALL\* LMDYN

ALL

LMDYN(Lipid metabolism disorders)

Power |

Percent |

Percent of rows

Percent of columns | None | With | Total

|       |        |        |        |  |
|-------|--------|--------|--------|--|
|       | +      | +      | +      |  |
| 1     | 12521  | 7988   | 20509  |  |
|       | 61.05  | 38.95  | 100.00 |  |
|       | 61.05  | 38.95  |        |  |
|       | 100.00 | 100.00 |        |  |
|       | +      | +      | +      |  |
| Total | 12521  | 7988   | 20509  |  |
|       | 61.05  | 38.95  | 100.00 |  |

Complications and medical history at the time of obtaining Table 2-3 informed consent by the presence or absence of proton-pump inhibitors

FREQ Procedure

|   |                      |        | Cumulative       |        |
|---|----------------------|--------|------------------|--------|
|   | Percent of ALL power |        | Percent of power |        |
| 1 | 20509                | 100.00 | 20509            | 100.00 |

Tables: ALL\* LMDYN

ALL

LMDYN(Lipid metabolism disorders)

| Power                   |        |        |        |
|-------------------------|--------|--------|--------|
| Percent                 |        |        |        |
| Percent of rows         |        |        |        |
| Percent of columns      | None   | With   | Total  |
| _____ + _____ + _____ + |        |        |        |
| 1                       | 12521  | 7988   | 20509  |
|                         | 61.05  | 38.95  | 100.00 |
|                         | 61.05  | 38.95  |        |
|                         | 100.00 | 100.00 |        |
| _____ + _____ + _____ + |        |        |        |
| Total                   | 12521  | 7988   | 20509  |
|                         | 61.05  | 38.95  | 100.00 |

Complications and medical history at the time of obtaining Table 2-3 informed consent by the presence or absence of proton-pump inhibitors

FREQ Procedure

|                      |       |                  | Cumulative |        |
|----------------------|-------|------------------|------------|--------|
| Percent of ALL power |       | Percent of power |            |        |
| 1                    | 20509 | 100.00           | 20509      | 100.00 |

Tables: ALL \* HYPURNYN

ALL HYPURNYN(Hyperuricemia)

| Power              |        |        |        |
|--------------------|--------|--------|--------|
| Percent            |        |        |        |
| Percent of rows    |        |        |        |
| Percent of columns | None   | With   | Total  |
|                    | +      | +      | +      |
| 1                  | 16140  | 4369   | 20509  |
|                    | 78.70  | 21.30  | 100.00 |
|                    | 78.70  | 21.30  |        |
|                    | 100.00 | 100.00 |        |
|                    | +      | +      | +      |
| Total              | 16140  | 4369   | 20509  |
|                    | 78.70  | 21.30  | 100.00 |



Complications and medical history at the time of obtaining Table 2-3 informed consent by the presence or absence of proton-pump inhibitors

FREQ Procedure

|                      |       |                  | Cumulative |        |
|----------------------|-------|------------------|------------|--------|
| Percent of ALL power |       | Percent of power |            |        |
| 1                    | 20509 | 100.00           | 20509      | 100.00 |

Tables: ALL \* HYPURNYN

ALL HYPURNYN(Hyperuricemia)

| Power              |           |           |           |
|--------------------|-----------|-----------|-----------|
| Percent            |           |           |           |
| Percent of rows    |           |           |           |
| Percent of columns | None      | With      | Total     |
|                    | + _____ + | + _____ + | + _____ + |
| 1                  | 16140     | 4369      | 20509     |
|                    | 78.70     | 21.30     | 100.00    |
|                    | 78.70     | 21.30     |           |
|                    | 100.00    | 100.00    |           |
|                    | + _____ + | + _____ + | + _____ + |
| Total              | 16140     | 4369      | 20509     |
|                    | 78.70     | 21.30     | 100.00    |

Complications and medical history at the time of obtaining Table 2-3 informed consent by the presence or absence of proton-pump inhibitors

FREQ Procedure

|                      |       |                  | Cumulative |        |
|----------------------|-------|------------------|------------|--------|
| Percent of ALL power |       | Percent of power |            |        |
| 1                    | 20509 | 100.00           | 20509      | 100.00 |

Tables: ALL \* KDDSYN

ALL KDDSYN(Kidney Disease)

| Power              |           |           |           |
|--------------------|-----------|-----------|-----------|
| Percent            |           |           |           |
| Percent of rows    |           |           |           |
| Percent of columns | None      | With      | Total     |
|                    | + _____ + | + _____ + | + _____ + |
| 1                  | 16287     | 4222      | 20509     |
|                    | 79.41     | 20.59     | 100.00    |
|                    | 79.41     | 20.59     |           |
|                    | 100.00    | 100.00    |           |
|                    | + _____ + | + _____ + | + _____ + |
| Total              | 16287     | 4222      | 20509     |
|                    | 79.41     | 20.59     | 100.00    |

Complications and medical history at the time of obtaining Table 2-3 informed consent by the presence or absence of proton-pump inhibitors

FREQ Procedure

|                      |       |                  | Cumulative |        |
|----------------------|-------|------------------|------------|--------|
| Percent of ALL power |       | Percent of power |            |        |
| 1                    | 20509 | 100.00           | 20509      | 100.00 |

Tables: ALL \* KDDSYN

ALL KDDSYN(Kidney Disease)

| Power              |           |           |           |
|--------------------|-----------|-----------|-----------|
| Percent            |           |           |           |
| Percent of rows    |           |           |           |
| Percent of columns | None      | With      | Total     |
|                    | + _____ + | + _____ + | + _____ + |
| 1                  | 16287     | 4222      | 20509     |
|                    | 79.41     | 20.59     | 100.00    |
|                    | 79.41     | 20.59     |           |
|                    | 100.00    | 100.00    |           |
|                    | + _____ + | + _____ + | + _____ + |
| Total              | 16287     | 4222      | 20509     |
|                    | 79.41     | 20.59     | 100.00    |

Complications and medical history at the time of obtaining Table 2-3 informed consent by the presence or absence of proton-pump inhibitors

FREQ Procedure

|   |                      |        | Cumulative       |        |
|---|----------------------|--------|------------------|--------|
|   | Percent of ALL power |        | Percent of power |        |
| 1 | 20509                | 100.00 | 20509            | 100.00 |

Table : ALL \* KDDS 1 YN

ALL

KDDS1YN(Chronic Kidney Disease)

Power |

Percent |

Percent of rows

Percent of columns | None | With | Total

|       |        |        |        |  |   |
|-------|--------|--------|--------|--|---|
|       | +      |        | +      |  | + |
| 1     | 16731  | 3778   | 20509  |  |   |
|       | 81.58  | 18.42  | 100.00 |  |   |
|       | 81.58  | 18.42  |        |  |   |
|       | 100.00 | 100.00 |        |  |   |
|       | +      |        | +      |  | + |
| Total | 16731  | 3778   | 20509  |  |   |
|       | 81.58  | 18.42  | 100.00 |  |   |

Complications and medical history at the time of obtaining Table 2-3 informed consent by the presence or absence of proton-pump inhibitors

FREQ Procedure

|   |                      |        | Cumulative       |        |
|---|----------------------|--------|------------------|--------|
|   | Percent of ALL power |        | Percent of power |        |
| 1 | 20509                | 100.00 | 20509            | 100.00 |

Table : ALL \* KDDS 1 YN

ALL

KDDS1YN(Chronic Kidney Disease)

Power |

Percent |

Percent of rows

Percent of columns | None | With | Total

|       |        |        |        |  |   |
|-------|--------|--------|--------|--|---|
|       | +      |        | +      |  | + |
| 1     | 16731  | 3778   | 20509  |  |   |
|       | 81.58  | 18.42  | 100.00 |  |   |
|       | 81.58  | 18.42  |        |  |   |
|       | 100.00 | 100.00 |        |  |   |
|       | +      |        | +      |  | + |
| Total | 16731  | 3778   | 20509  |  |   |
|       | 81.58  | 18.42  | 100.00 |  |   |

Complications and medical history at the time of obtaining Table 2-3 informed consent by the presence or absence of proton-pump inhibitors

FREQ Procedure

|                      |       |                  | Cumulative |        |
|----------------------|-------|------------------|------------|--------|
| Percent of ALL power |       | Percent of power |            |        |
| 1                    | 20509 | 100.00           | 20509      | 100.00 |

Table : ALL \* KDDS 2 YN

ALL

KDDS2YN(Advanced Renal Dysfunction without Dialysis)

| Power              |        |        |        |
|--------------------|--------|--------|--------|
| Percent            |        |        |        |
| Percent of rows    |        |        |        |
| Percent of columns | None   | With   | Total  |
|                    | +      | +      | +      |
| 1                  | 20271  | 238    | 20509  |
|                    | 98.84  | 1.16   | 100.00 |
|                    | 98.84  | 1.16   |        |
|                    | 100.00 | 100.00 |        |
|                    | +      | +      | +      |
| Total              | 20271  | 238    | 20509  |
|                    | 98.84  | 1.16   | 100.00 |

Complications and medical history at the time of obtaining Table 2-3 informed consent by the presence or absence of proton-pump inhibitors

FREQ Procedure

|                      |       |                  | Cumulative |        |
|----------------------|-------|------------------|------------|--------|
| Percent of ALL power |       | Percent of power |            |        |
| 1                    | 20509 | 100.00           | 20509      | 100.00 |

Table : ALL \* KDDS 2 YN

ALL

KDDS2YN(Advanced Renal Dysfunction without Dialysis)

| Power | Percent            | Percent of rows | Percent of columns   None   With   Total |
|-------|--------------------|-----------------|------------------------------------------|
|       |                    |                 | _____+_____+_____+                       |
| 1     | 20271              | 238             | 20509                                    |
|       | 98.84              | 1.16            | 100.00                                   |
|       | 98.84              | 1.16            |                                          |
|       | 100.00             | 100.00          |                                          |
|       | _____+_____+_____+ |                 |                                          |
| Total | 20271              | 238             | 20509                                    |
|       | 98.84              | 1.16            | 100.00                                   |

Complications and medical history at the time of obtaining Table 2-3 informed consent by the presence or absence of proton-pump inhibitors

FREQ Procedure

|   |       | Cumulative           |                  |        |
|---|-------|----------------------|------------------|--------|
|   |       | Percent of ALL power | Percent of power |        |
| 1 | 20509 | 100.00               | 20509            | 100.00 |

Table : ALL \* KDDS 3 YN

ALL

KDDS3YN(Advanced Renal Dysfunction with Dialysis)

| Power              |        |        |        |
|--------------------|--------|--------|--------|
| Percent            |        |        |        |
| Percent of rows    |        |        |        |
| Percent of columns | None   | With   | Total  |
|                    | +      | +      | +      |
| 1                  | 20453  | 56     | 20509  |
|                    | 99.73  | 0.27   | 100.00 |
|                    | 99.73  | 0.27   |        |
|                    | 100.00 | 100.00 |        |
|                    | +      | +      | +      |
| Total              | 20453  | 56     | 20509  |
|                    | 99.73  | 0.27   | 100.00 |



Complications and medical history at the time of obtaining Table 2-3 informed consent by the presence or absence of proton-pump inhibitors

FREQ Procedure

|   |       | Cumulative           |                  |        |
|---|-------|----------------------|------------------|--------|
|   |       | Percent of ALL power | Percent of power |        |
| 1 | 20509 | 100.00               | 20509            | 100.00 |

Table : ALL \* KDDS 3 YN

ALL

KDDS3YN(Advanced Renal Dysfunction with Dialysis)

| Power                                    |        |   |        |        |
|------------------------------------------|--------|---|--------|--------|
| Percent                                  |        |   |        |        |
| Percent of rows                          |        |   |        |        |
| Percent of columns   None   With   Total |        |   |        |        |
|                                          |        | + |        |        |
| 1                                        | 20453  |   | 56     | 20509  |
|                                          | 99.73  |   | 0.27   | 100.00 |
|                                          | 99.73  |   | 0.27   |        |
|                                          | 100.00 |   | 100.00 |        |
|                                          |        | + |        |        |
| Total 20453 56 20509                     |        |   |        |        |
|                                          | 99.73  |   | 0.27   | 100.00 |

Complications and medical history at the time of obtaining Table 2-3 informed consent by the presence or absence of proton-pump inhibitors

FREQ Procedure

|                      |       |                  | Cumulative |        |
|----------------------|-------|------------------|------------|--------|
| Percent of ALL power |       | Percent of power |            |        |
| 1                    | 20509 | 100.00           | 20509      | 100.00 |

Tables: ALL \* SLVDYN

ALL

SLVDYN(Severe Liver Dysfunction)

| Power | Percent | Percent of rows | Percent of columns | None | With | Total |
|-------|---------|-----------------|--------------------|------|------|-------|
|       | +       | +               | +                  |      |      |       |
| 1     | 20339   | 170             | 20509              |      |      |       |
|       | 99.17   | 0.83            | 100.00             |      |      |       |
|       | 99.17   | 0.83            |                    |      |      |       |
|       | 100.00  | 100.00          |                    |      |      |       |
|       | +       | +               | +                  |      |      |       |
| Total | 20339   | 170             | 20509              |      |      |       |
|       | 99.17   | 0.83            | 100.00             |      |      |       |

Complications and medical history at the time of obtaining Table 2-3 informed consent by the presence or absence of proton-pump inhibitors

FREQ Procedure

|                      |       |                  | Cumulative |        |
|----------------------|-------|------------------|------------|--------|
| Percent of ALL power |       | Percent of power |            |        |
| 1                    | 20509 | 100.00           | 20509      | 100.00 |

Tables: ALL \* SLVDYN

ALL

SLVDYN(Severe Liver Dysfunction)

| Power                   |        |        |        |
|-------------------------|--------|--------|--------|
| Percent                 |        |        |        |
| Percent of rows         |        |        |        |
| Percent of columns      | None   | With   | Total  |
| _____ + _____ + _____ + |        |        |        |
| 1                       | 20339  | 170    | 20509  |
|                         | 99.17  | 0.83   | 100.00 |
|                         | 99.17  | 0.83   |        |
|                         | 100.00 | 100.00 |        |
| _____ + _____ + _____ + |        |        |        |
| Total                   | 20339  | 170    | 20509  |
|                         | 99.17  | 0.83   | 100.00 |

Complications and medical history at the time of obtaining Table 2-3 informed consent by the presence or absence of proton-pump inhibitors

FREQ Procedure

|                      |       |                  | Cumulative |        |
|----------------------|-------|------------------|------------|--------|
| Percent of ALL power |       | Percent of power |            |        |
| 1                    | 20509 | 100.00           | 20509      | 100.00 |

Tables: ALL\* RESDYN

ALL

RESDYN(Respiratory Disease)

Power |

Percent |

Percent of rows

Percent of columns | None | With | Total

|       |        |        |        |  |   |
|-------|--------|--------|--------|--|---|
|       | +      |        | +      |  | + |
| 1     | 18143  | 2366   | 20509  |  |   |
|       | 88.46  | 11.54  | 100.00 |  |   |
|       | 88.46  | 11.54  |        |  |   |
|       | 100.00 | 100.00 |        |  |   |
|       | +      |        | +      |  | + |
| Total | 18143  | 2366   | 20509  |  |   |
|       | 88.46  | 11.54  | 100.00 |  |   |

Complications and medical history at the time of obtaining Table 2-3 informed consent by the presence or absence of proton-pump inhibitors

FREQ Procedure

|                      |       |                  | Cumulative |        |
|----------------------|-------|------------------|------------|--------|
| Percent of ALL power |       | Percent of power |            |        |
| 1                    | 20509 | 100.00           | 20509      | 100.00 |

Tables: ALL\* RESDYN

ALL

RESDYN(Respiratory Disease)

Power |

Percent |

Percent of rows

Percent of columns | None | With | Total

|       |        |        |        |  |
|-------|--------|--------|--------|--|
|       | +      | +      | +      |  |
| 1     | 18143  | 2366   | 20509  |  |
|       | 88.46  | 11.54  | 100.00 |  |
|       | 88.46  | 11.54  |        |  |
|       | 100.00 | 100.00 |        |  |
|       | +      | +      | +      |  |
| Total | 18143  | 2366   | 20509  |  |
|       | 88.46  | 11.54  | 100.00 |  |

Complications and medical history at the time of obtaining Table 2-3 informed consent by the presence or absence of proton-pump inhibitors

FREQ Procedure

|   |                      |                  | Cumulative       |                  |
|---|----------------------|------------------|------------------|------------------|
|   | Percent of ALL power | Percent of power | Percent of power | Percent of power |
| 1 | 20509                | 100.00           | 20509            | 100.00           |

Tables: ALL\* HTDYN

ALL HTDYN(Heart Disease)

| Power              |           |           |           |
|--------------------|-----------|-----------|-----------|
| Percent            |           |           |           |
| Percent of rows    |           |           |           |
| Percent of columns | None      | With      | Total     |
|                    | + _____ + | + _____ + | + _____ + |
| 1                  | 9207      | 11302     | 20509     |
|                    | 44.89     | 55.11     | 100.00    |
|                    | 44.89     | 55.11     |           |
|                    | 100.00    | 100.00    |           |
|                    | + _____ + | + _____ + | + _____ + |
| Total              | 9207      | 11302     | 20509     |
|                    | 44.89     | 55.11     | 100.00    |

Complications and medical history at the time of obtaining Table 2-3 informed consent by the presence or absence of proton-pump inhibitors

FREQ Procedure

|                      |       |                  | Cumulative |        |
|----------------------|-------|------------------|------------|--------|
| Percent of ALL power |       | Percent of power |            |        |
| 1                    | 20509 | 100.00           | 20509      | 100.00 |

Tables: ALL\* HTDYN

ALL HTDYN(Heart Disease)

| Power              |           |           |           |
|--------------------|-----------|-----------|-----------|
| Percent            |           |           |           |
| Percent of rows    |           |           |           |
| Percent of columns | None      | With      | Total     |
|                    | + _____ + | + _____ + | + _____ + |
| 1                  | 9207      | 11302     | 20509     |
|                    | 44.89     | 55.11     | 100.00    |
|                    | 44.89     | 55.11     |           |
|                    | 100.00    | 100.00    |           |
|                    | + _____ + | + _____ + | + _____ + |
| Total              | 9207      | 11302     | 20509     |
|                    | 44.89     | 55.11     | 100.00    |

Complications and medical history at the time of obtaining Table 2-3 informed consent by the presence or absence of proton-pump inhibitors

FREQ Procedure

|                      |       | Cumulative       |       |        |
|----------------------|-------|------------------|-------|--------|
| Percent of ALL power |       | Percent of power |       |        |
| 1                    | 20509 | 100.00           | 20509 | 100.00 |

Table : ALL \* HTD 1 YN

ALL

HTD1YN(Myocardial Infarction)

| Power              |         |         |        |
|--------------------|---------|---------|--------|
| Percent            |         |         |        |
| Percent of rows    |         |         |        |
| Percent of columns | None    | With    | Total  |
| +_____+            | +_____+ | +_____+ | +      |
| 1                  | 19704   | 805     | 20509  |
|                    | 96.07   | 3.93    | 100.00 |
|                    | 96.07   | 3.93    |        |
|                    | 100.00  | 100.00  |        |
| +_____+            | +_____+ | +_____+ | +      |
| Total              | 19704   | 805     | 20509  |
|                    | 96.07   | 3.93    | 100.00 |



Complications and medical history at the time of obtaining Table 2-3 informed consent by the presence or absence of proton-pump inhibitors

FREQ Procedure

|                      |       |                  | Cumulative |        |
|----------------------|-------|------------------|------------|--------|
| Percent of ALL power |       | Percent of power |            |        |
| 1                    | 20509 | 100.00           | 20509      | 100.00 |

Table : ALL \* HTD 1 YN

ALL

HTD1YN(Myocardial Infarction)

| Power              |        |        |        |
|--------------------|--------|--------|--------|
| Percent            |        |        |        |
| Percent of rows    |        |        |        |
| Percent of columns | None   | With   | Total  |
|                    | +      | +      | +      |
| 1                  | 19704  | 805    | 20509  |
|                    | 96.07  | 3.93   | 100.00 |
|                    | 96.07  | 3.93   |        |
|                    | 100.00 | 100.00 |        |
|                    | +      | +      | +      |
| Total              | 19704  | 805    | 20509  |
|                    | 96.07  | 3.93   | 100.00 |

Complications and medical history at the time of obtaining Table 2-3 informed consent by the presence or absence of proton-pump inhibitors

FREQ Procedure

|   |       | Cumulative           |                  |        |
|---|-------|----------------------|------------------|--------|
|   |       | Percent of ALL power | Percent of power |        |
| 1 | 20509 | 100.00               | 20509            | 100.00 |

Table : ALL \* HTD 2 YN

ALL HTD2YN(Angina Pectoris)

| Power              |         |         |        |
|--------------------|---------|---------|--------|
| Percent            |         |         |        |
| Percent of rows    |         |         |        |
| Percent of columns | None    | With    | Total  |
| +_____+            | +_____+ | +_____+ | +      |
| 1                  | 17576   | 2933    | 20509  |
|                    | 85.70   | 14.30   | 100.00 |
|                    | 85.70   | 14.30   |        |
|                    | 100.00  | 100.00  |        |
| +_____+            | +_____+ | +_____+ | +      |
| Total              | 17576   | 2933    | 20509  |
|                    | 85.70   | 14.30   | 100.00 |

Complications and medical history at the time of obtaining Table 2-3 informed consent by the presence or absence of proton-pump inhibitors

FREQ Procedure

|                      |       |                  | Cumulative |        |
|----------------------|-------|------------------|------------|--------|
| Percent of ALL power |       | Percent of power |            |        |
| 1                    | 20509 | 100.00           | 20509      | 100.00 |

Table : ALL \* HTD 2 YN

ALL HTD2YN(Angina Pectoris)

| Power                  | Percent | Percent of rows | Percent of columns | None | With | Total |
|------------------------|---------|-----------------|--------------------|------|------|-------|
|                        | +       | +               | +                  |      |      |       |
| 1                      | 17576   | 2933            | 20509              |      |      |       |
|                        | 85.70   | 14.30           | 100.00             |      |      |       |
|                        | 85.70   | 14.30           |                    |      |      |       |
|                        | 100.00  | 100.00          |                    |      |      |       |
|                        | +       | +               | +                  |      |      |       |
| Total 17576 2933 20509 |         |                 |                    |      |      |       |
|                        | 85.70   | 14.30           | 100.00             |      |      |       |

Complications and medical history at the time of obtaining Table 2-3 informed consent by the presence or absence of proton-pump inhibitors

FREQ Procedure

|                      |       |                  | Cumulative |        |
|----------------------|-------|------------------|------------|--------|
| Percent of ALL power |       | Percent of power |            |        |
| 1                    | 20509 | 100.00           | 20509      | 100.00 |

Table: ALL \* t\_HTD0

ALL t\_HTD0

| Power | Percent            | Percent of rows | Percentage of columns   0   1   Sum |
|-------|--------------------|-----------------|-------------------------------------|
|       |                    |                 | _____+_____+_____+                  |
| 1     | 17046              | 3463            | 20509                               |
|       | 83.11              | 16.89           | 100.00                              |
|       | 83.11              | 16.89           |                                     |
|       | 100.00             | 100.00          |                                     |
|       | _____+_____+_____+ |                 |                                     |
| Total | 17046              | 3463            | 20509                               |
|       | 83.11              | 16.89           | 100.00                              |

Complications and medical history at the time of obtaining Table 2-3 informed consent by the presence or absence of proton-pump inhibitors

FREQ Procedure

|                      |       | Cumulative       |       |        |
|----------------------|-------|------------------|-------|--------|
| Percent of ALL power |       | Percent of power |       |        |
| 1                    | 20509 | 100.00           | 20509 | 100.00 |

Table: ALL \* t\_HTD0

ALL t\_HTD0

| Power                               |        |        |        |
|-------------------------------------|--------|--------|--------|
| Percent                             |        |        |        |
| Percent of rows                     |        |        |        |
| Percentage of columns   0   1   Sum |        |        |        |
|                                     | +      | +      | +      |
| 1                                   | 17046  | 3463   | 20509  |
|                                     | 83.11  | 16.89  | 100.00 |
|                                     | 83.11  | 16.89  |        |
|                                     | 100.00 | 100.00 |        |
|                                     | +      | +      | +      |
| Total                               | 17046  | 3463   | 20509  |
|                                     | 83.11  | 16.89  | 100.00 |

Complications and medical history at the time of obtaining Table 2-3 informed consent by the presence or absence of proton-pump inhibitors

FREQ Procedure

|   |       | Cumulative           |                  |        |
|---|-------|----------------------|------------------|--------|
|   |       | Percent of ALL power | Percent of power |        |
| 1 | 20509 | 100.00               | 20509            | 100.00 |

Table : ALL \* HTD 3 YN

ALL HTD3YN(Heart Failure)

| Power              |           |           |           |
|--------------------|-----------|-----------|-----------|
| Percent            |           |           |           |
| Percent of rows    |           |           |           |
| Percent of columns | None      | With      | Total     |
|                    | + _____ + | + _____ + | + _____ + |
| 1                  | 13267     | 7242      | 20509     |
|                    | 64.69     | 35.31     | 100.00    |
|                    | 64.69     | 35.31     |           |
|                    | 100.00    | 100.00    |           |
|                    | + _____ + | + _____ + | + _____ + |
| Total              | 13267     | 7242      | 20509     |
|                    | 64.69     | 35.31     | 100.00    |

Complications and medical history at the time of obtaining Table 2-3 informed consent by the presence or absence of proton-pump inhibitors

FREQ Procedure

|                      |       |                  | Cumulative |        |
|----------------------|-------|------------------|------------|--------|
| Percent of ALL power |       | Percent of power |            |        |
| 1                    | 20509 | 100.00           | 20509      | 100.00 |

Table : ALL \* HTD 3 YN

ALL HTD3YN(Heart Failure)

| Power              |           |           |           |
|--------------------|-----------|-----------|-----------|
| Percent            |           |           |           |
| Percent of rows    |           |           |           |
| Percent of columns | None      | With      | Total     |
|                    | + _____ + | + _____ + | + _____ + |
| 1                  | 13267     | 7242      | 20509     |
|                    | 64.69     | 35.31     | 100.00    |
|                    | 64.69     | 35.31     |           |
|                    | 100.00    | 100.00    |           |
|                    | + _____ + | + _____ + | + _____ + |
| Total              | 13267     | 7242      | 20509     |
|                    | 64.69     | 35.31     | 100.00    |

Complications and medical history at the time of obtaining Table 2-3 informed consent by the presence or absence of proton-pump inhibitors

FREQ Procedure

|   |                      |        | Cumulative       |        |
|---|----------------------|--------|------------------|--------|
|   | Percent of ALL power |        | Percent of power |        |
| 1 | 20509                | 100.00 | 20509            | 100.00 |

Table : ALL \* HTD 4 YN

ALL

HTD4YN(Left Ventricular Systolic Dysfunction)

| Power              |        |        |        |
|--------------------|--------|--------|--------|
| Percent            |        |        |        |
| Percent of rows    |        |        |        |
| Percent of columns | None   | With   | Total  |
|                    | +      | +      | +      |
| 1                  | 20166  | 343    | 20509  |
|                    | 98.33  | 1.67   | 100.00 |
|                    | 98.33  | 1.67   |        |
|                    | 100.00 | 100.00 |        |
|                    | +      | +      | +      |
| Total              | 20166  | 343    | 20509  |
|                    | 98.33  | 1.67   | 100.00 |



Complications and medical history at the time of obtaining Table 2-3 informed consent by the presence or absence of proton-pump inhibitors

FREQ Procedure

|   |       | Cumulative           |                  |        |
|---|-------|----------------------|------------------|--------|
|   |       | Percent of ALL power | Percent of power |        |
| 1 | 20509 | 100.00               | 20509            | 100.00 |

Table : ALL \* HTD 4 YN

ALL

HTD4YN(Left Ventricular Systolic Dysfunction)

| Power                   |        |        |        |  |
|-------------------------|--------|--------|--------|--|
| Percent                 |        |        |        |  |
| Percent of rows         |        |        |        |  |
| Percent of columns      | None   | With   | Total  |  |
| _____ + _____ + _____ + |        |        |        |  |
| 1                       | 20166  | 343    | 20509  |  |
|                         | 98.33  | 1.67   | 100.00 |  |
|                         | 98.33  | 1.67   |        |  |
|                         | 100.00 | 100.00 |        |  |
| _____ + _____ + _____ + |        |        |        |  |
| Total                   | 20166  | 343    | 20509  |  |
|                         | 98.33  | 1.67   | 100.00 |  |

Complications and medical history at the time of obtaining Table 2-3 informed consent by the presence or absence of proton-pump inhibitors

FREQ Procedure

|                      |       |                  | Cumulative |        |
|----------------------|-------|------------------|------------|--------|
| Percent of ALL power |       | Percent of power |            |        |
| 1                    | 20509 | 100.00           | 20509      | 100.00 |

Table: ALL \* t\_HTD

ALL t\_HTD

| Power | Percent            | Percent of rows | Percentage of columns   0   1   Sum |
|-------|--------------------|-----------------|-------------------------------------|
|       |                    |                 | _____+_____+_____+                  |
| 1     | 13189              | 7320            | 20509                               |
|       | 64.31              | 35.69           | 100.00                              |
|       | 64.31              | 35.69           |                                     |
|       | 100.00             | 100.00          |                                     |
|       | _____+_____+_____+ |                 |                                     |
| Total | 13189              | 7320            | 20509                               |
|       | 64.31              | 35.69           | 100.00                              |

Complications and medical history at the time of obtaining Table 2-3 informed consent by the presence or absence of proton-pump inhibitors

FREQ Procedure

|                      |       | Cumulative       |              |
|----------------------|-------|------------------|--------------|
| Percent of ALL power |       | Percent of power |              |
| 1                    | 20509 | 100.00           | 20509 100.00 |

Table: ALL \* t\_HTD

ALL t\_HTD

| Power                               |         |         |        |
|-------------------------------------|---------|---------|--------|
| Percent                             |         |         |        |
| Percent of rows                     |         |         |        |
| Percentage of columns   0   1   Sum |         |         |        |
| +_____+                             | +_____+ | +_____+ | +      |
| 1                                   | 13189   | 7320    | 20509  |
|                                     | 64.31   | 35.69   | 100.00 |
|                                     | 64.31   | 35.69   |        |
|                                     | 100.00  | 100.00  |        |
| +_____+                             | +_____+ | +_____+ | +      |
| Total 13189 7320 20509              |         |         |        |
|                                     | 64.31   | 35.69   | 100.00 |

Complications and medical history at the time of obtaining Table 2-3 informed consent by the presence or absence of proton-pump inhibitors

FREQ Procedure

|                      |       |                  | Cumulative |        |
|----------------------|-------|------------------|------------|--------|
| Percent of ALL power |       | Percent of power |            |        |
| 1                    | 20509 | 100.00           | 20509      | 100.00 |

Table : ALL \* HTD 5 YN

ALL HTD5YN(Valvular Disease)

| Power              |           |           |           |
|--------------------|-----------|-----------|-----------|
| Percent            |           |           |           |
| Percent of rows    |           |           |           |
| Percent of columns | None      | With      | Total     |
|                    | + _____ + | + _____ + | + _____ + |
| 1                  | 18100     | 2409      | 20509     |
|                    | 88.25     | 11.75     | 100.00    |
|                    | 88.25     | 11.75     |           |
|                    | 100.00    | 100.00    |           |
|                    | + _____ + | + _____ + | + _____ + |
| Total              | 18100     | 2409      | 20509     |
|                    | 88.25     | 11.75     | 100.00    |

Complications and medical history at the time of obtaining Table 2-3 informed consent by the presence or absence of proton-pump inhibitors

FREQ Procedure

|                      |       |                  | Cumulative |        |
|----------------------|-------|------------------|------------|--------|
| Percent of ALL power |       | Percent of power |            |        |
| 1                    | 20509 | 100.00           | 20509      | 100.00 |

Table : ALL \* HTD 5 YN

ALL HTD5YN(Valvular Disease)

| Power              |        |        |        |
|--------------------|--------|--------|--------|
| Percent            |        |        |        |
| Percent of rows    |        |        |        |
| Percent of columns | None   | With   | Total  |
|                    | +      | +      | +      |
| 1                  | 18100  | 2409   | 20509  |
|                    | 88.25  | 11.75  | 100.00 |
|                    | 88.25  | 11.75  |        |
|                    | 100.00 | 100.00 |        |
|                    | +      | +      | +      |
| Total              | 18100  | 2409   | 20509  |
|                    | 88.25  | 11.75  | 100.00 |

Complications and medical history at the time of obtaining Table 2-3 informed consent by the presence or absence of proton-pump inhibitors

FREQ Procedure

|   |       | Cumulative           |                  |        |
|---|-------|----------------------|------------------|--------|
|   |       | Percent of ALL power | Percent of power |        |
| 1 | 20509 | 100.00               | 20509            | 100.00 |

Table : ALL \* HTD 6 YN

ALL HTD6YN(Cardiomypathy)

| Power              |        |        |        |
|--------------------|--------|--------|--------|
| Percent            |        |        |        |
| Percent of rows    |        |        |        |
| Percent of columns | None   | With   | Total  |
|                    | +      | +      | +      |
| 1                  | 19781  | 728    | 20509  |
|                    | 96.45  | 3.55   | 100.00 |
|                    | 96.45  | 3.55   |        |
|                    | 100.00 | 100.00 |        |
|                    | +      | +      | +      |
| Total              | 19781  | 728    | 20509  |
|                    | 96.45  | 3.55   | 100.00 |

Complications and medical history at the time of obtaining Table 2-3 informed consent by the presence or absence of proton-pump inhibitors

FREQ Procedure

|                      |       |                  | Cumulative |        |
|----------------------|-------|------------------|------------|--------|
| Percent of ALL power |       | Percent of power |            |        |
| 1                    | 20509 | 100.00           | 20509      | 100.00 |

Table : ALL \* HTD 6 YN

ALL HTD6YN(Cardiomypathy)

| Power              |           |           |           |
|--------------------|-----------|-----------|-----------|
| Percent            |           |           |           |
| Percent of rows    |           |           |           |
| Percent of columns | None      | With      | Total     |
|                    | + _____ + | + _____ + | + _____ + |
| 1                  | 19781     | 728       | 20509     |
|                    | 96.45     | 3.55      | 100.00    |
|                    | 96.45     | 3.55      |           |
|                    | 100.00    | 100.00    |           |
|                    | + _____ + | + _____ + | + _____ + |
| Total              | 19781     | 728       | 20509     |
|                    | 96.45     | 3.55      | 100.00    |

Complications and medical history at the time of obtaining Table 2-3 informed consent by the presence or absence of proton-pump inhibitors

FREQ Procedure

|   |       | Cumulative           |                  |        |
|---|-------|----------------------|------------------|--------|
|   |       | Percent of ALL power | Percent of power |        |
| 1 | 20509 | 100.00               | 20509            | 100.00 |

Table : ALL \* HTD 7 YN

ALL

HTD7YN(Hypertensive Heart Disease)

Power |

Percent |

Percent of rows

Percent of columns | None | With | Total

|       |        |        |        |  |   |
|-------|--------|--------|--------|--|---|
|       | +      |        | +      |  | + |
| 1     | 19823  | 686    | 20509  |  |   |
|       | 96.66  | 3.34   | 100.00 |  |   |
|       | 96.66  | 3.34   |        |  |   |
|       | 100.00 | 100.00 |        |  |   |
|       | +      | +      | +      |  |   |
| Total | 19823  | 686    | 20509  |  |   |
|       | 96.66  | 3.34   | 100.00 |  |   |



Complications and medical history at the time of obtaining Table 2-3 informed consent by the presence or absence of proton-pump inhibitors

FREQ Procedure

|                      |       |                  | Cumulative |        |
|----------------------|-------|------------------|------------|--------|
| Percent of ALL power |       | Percent of power |            |        |
| 1                    | 20509 | 100.00           | 20509      | 100.00 |

Table : ALL \* HTD 7 YN

ALL

HTD7YN(Hypertensive Heart Disease)

Power |

Percent |

Percent of rows

Percent of columns | None | With | Total

|       |        |        |        |  |   |
|-------|--------|--------|--------|--|---|
|       | +      |        | +      |  | + |
| 1     | 19823  | 686    | 20509  |  |   |
|       | 96.66  | 3.34   | 100.00 |  |   |
|       | 96.66  | 3.34   |        |  |   |
|       | 100.00 | 100.00 |        |  |   |
|       | +      | +      | +      |  |   |
| Total | 19823  | 686    | 20509  |  |   |
|       | 96.66  | 3.34   | 100.00 |  |   |

Complications and medical history at the time of obtaining Table 2-3 informed consent by the presence or absence of proton-pump inhibitors

FREQ Procedure

|                      |       |                  | Cumulative |        |
|----------------------|-------|------------------|------------|--------|
| Percent of ALL power |       | Percent of power |            |        |
| 1                    | 20509 | 100.00           | 20509      | 100.00 |

Table : ALL \* HTD 7 YN

ALL

HTD7YN(Hypertensive Heart Disease)

Power |

Percent |

Percent of rows

Percent of columns | None | With | Total

|       |        |        |        |  |   |
|-------|--------|--------|--------|--|---|
|       | +      |        | +      |  | + |
| 1     | 19823  | 686    | 20509  |  |   |
|       | 96.66  | 3.34   | 100.00 |  |   |
|       | 96.66  | 3.34   |        |  |   |
|       | 100.00 | 100.00 |        |  |   |
|       | +      |        | +      |  | + |
| Total | 19823  | 686    | 20509  |  |   |
|       | 96.66  | 3.34   | 100.00 |  |   |

Complications and medical history at the time of obtaining Table 2-3 informed consent by the presence or absence of proton-pump inhibitors

FREQ Procedure

|                      |       |                  | Cumulative |        |
|----------------------|-------|------------------|------------|--------|
| Percent of ALL power |       | Percent of power |            |        |
| 1                    | 20509 | 100.00           | 20509      | 100.00 |

Table : ALL \* HTD 8 YN

ALL

HTD8YN(Congenital Heart Disease)

Power |

Percent |

Percent of rows

Percent of columns | None | With | Total

|       |        |        |        |  |   |
|-------|--------|--------|--------|--|---|
|       | +      |        | +      |  | + |
| 1     | 20403  | 106    | 20509  |  |   |
|       | 99.48  | 0.52   | 100.00 |  |   |
|       | 99.48  | 0.52   |        |  |   |
|       | 100.00 | 100.00 |        |  |   |
|       | +      |        | +      |  | + |
| Total | 20403  | 106    | 20509  |  |   |
|       | 99.48  | 0.52   | 100.00 |  |   |

Complications and medical history at the time of obtaining Table 2-3 informed consent by the presence or absence of proton-pump inhibitors

FREQ Procedure

|                      |       |                  | Cumulative |        |
|----------------------|-------|------------------|------------|--------|
| Percent of ALL power |       | Percent of power |            |        |
| 1                    | 20509 | 100.00           | 20509      | 100.00 |

Table : ALL \* HTD 8 YN

ALL

HTD8YN(Congenital Heart Disease)

| Power                   |        |        |        |
|-------------------------|--------|--------|--------|
| Percent                 |        |        |        |
| Percent of rows         |        |        |        |
| Percent of columns      | None   | With   | Total  |
| _____ + _____ + _____ + |        |        |        |
| 1                       | 20403  | 106    | 20509  |
|                         | 99.48  | 0.52   | 100.00 |
|                         | 99.48  | 0.52   |        |
|                         | 100.00 | 100.00 |        |
| _____ + _____ + _____ + |        |        |        |
| Total                   | 20403  | 106    | 20509  |
|                         | 99.48  | 0.52   | 100.00 |

Complications and medical history at the time of obtaining Table 2-3 informed consent by the presence or absence of proton-pump inhibitors

FREQ Procedure

|                      |       |                  | Cumulative |        |
|----------------------|-------|------------------|------------|--------|
| Percent of ALL power |       | Percent of power |            |        |
| 1                    | 20509 | 100.00           | 20509      | 100.00 |

Table : ALL \* HTD 9 YN

ALL

HTD9YN(Other Heart Disease)

Power |

Percent |

Percent of rows

Percent of columns | None | With | Total

|       |        |        |        |  |   |
|-------|--------|--------|--------|--|---|
|       | +      |        | +      |  | + |
| 1     | 18897  | 1612   | 20509  |  |   |
|       | 92.14  | 7.86   | 100.00 |  |   |
|       | 92.14  | 7.86   |        |  |   |
|       | 100.00 | 100.00 |        |  |   |
|       | +      |        | +      |  | + |
| Total | 18897  | 1612   | 20509  |  |   |
|       | 92.14  | 7.86   | 100.00 |  |   |

Complications and medical history at the time of obtaining Table 2-3 informed consent by the presence or absence of proton-pump inhibitors

FREQ Procedure

|                      |       |                  | Cumulative |        |
|----------------------|-------|------------------|------------|--------|
| Percent of ALL power |       | Percent of power |            |        |
| 1                    | 20509 | 100.00           | 20509      | 100.00 |

Table : ALL \* HTD 9 YN

ALL

HTD9YN(Other Heart Disease)

Power |

Percent |

Percent of rows

Percent of columns | None | With | Total

|       |        |        |        |  |   |
|-------|--------|--------|--------|--|---|
|       | +      |        | +      |  | + |
| 1     | 18897  | 1612   | 20509  |  |   |
|       | 92.14  | 7.86   | 100.00 |  |   |
|       | 92.14  | 7.86   |        |  |   |
|       | 100.00 | 100.00 |        |  |   |
|       | +      |        | +      |  | + |
| Total | 18897  | 1612   | 20509  |  |   |
|       | 92.14  | 7.86   | 100.00 |  |   |

Complications and medical history at the time of obtaining Table 2-3 informed consent by the presence or absence of proton-pump inhibitors

FREQ Procedure

|                      |       |                  | Cumulative |        |
|----------------------|-------|------------------|------------|--------|
| Percent of ALL power |       | Percent of power |            |        |
| 1                    | 20509 | 100.00           | 20509      | 100.00 |

Tables: ALL\* CVACYN

ALL

CVACYN(Cerebrovascular Accident)

Power |

Percent |

Percent of rows

Percent of columns | None | With | Total

|       |        |        |        |  |   |
|-------|--------|--------|--------|--|---|
|       | +      |        | +      |  | + |
| 1     | 16277  | 4232   | 20509  |  |   |
|       | 79.37  | 20.63  | 100.00 |  |   |
|       | 79.37  | 20.63  |        |  |   |
|       | 100.00 | 100.00 |        |  |   |
|       | +      |        | +      |  | + |
| Total | 16277  | 4232   | 20509  |  |   |
|       | 79.37  | 20.63  | 100.00 |  |   |

Complications and medical history at the time of obtaining Table 2-3 informed consent by the presence or absence of proton-pump inhibitors

FREQ Procedure

|                      |       |                  | Cumulative |        |
|----------------------|-------|------------------|------------|--------|
| Percent of ALL power |       | Percent of power |            |        |
| 1                    | 20509 | 100.00           | 20509      | 100.00 |

Tables: ALL\* CVACYN

ALL

CVACYN(Cerebrovascular Accident)

Power |

Percent |

Percent of rows

Percent of columns | None | With | Total

|       |        |        |        |  |   |
|-------|--------|--------|--------|--|---|
|       | +      |        | +      |  | + |
| 1     | 16277  | 4232   | 20509  |  |   |
|       | 79.37  | 20.63  | 100.00 |  |   |
|       | 79.37  | 20.63  |        |  |   |
|       | 100.00 | 100.00 |        |  |   |
|       | +      |        | +      |  | + |
| Total | 16277  | 4232   | 20509  |  |   |
|       | 79.37  | 20.63  | 100.00 |  |   |



Complications and medical history at the time of obtaining Table 2-3 informed consent by the presence or absence of proton-pump inhibitors

FREQ Procedure

|                      |       | Cumulative       |       |        |
|----------------------|-------|------------------|-------|--------|
| Percent of ALL power |       | Percent of power |       |        |
| 1                    | 20509 | 100.00           | 20509 | 100.00 |

Table : ALL \* CVAC 1 YN

ALL

CVAC1YN(Atherosclerotic Cerebral Infarction)

| Power              |         |         |        |
|--------------------|---------|---------|--------|
| Percent            |         |         |        |
| Percent of rows    |         |         |        |
| Percent of columns | None    | With    | Total  |
| +_____+            | +_____+ | +_____+ | +      |
| 1                  | 20140   | 369     | 20509  |
|                    | 98.20   | 1.80    | 100.00 |
|                    | 98.20   | 1.80    |        |
|                    | 100.00  | 100.00  |        |
| +_____+            | +_____+ | +_____+ | +      |
| Total              | 20140   | 369     | 20509  |
|                    | 98.20   | 1.80    | 100.00 |

Complications and medical history at the time of obtaining Table 2-3 informed consent by the presence or absence of proton-pump inhibitors

FREQ Procedure

|                      |       |                  | Cumulative |        |
|----------------------|-------|------------------|------------|--------|
| Percent of ALL power |       | Percent of power |            |        |
| 1                    | 20509 | 100.00           | 20509      | 100.00 |

Table : ALL \* CVAC 1 YN

ALL

CVAC1YN(Atherosclerotic Cerebral Infarction)

| Power              |        |        |        |
|--------------------|--------|--------|--------|
| Percent            |        |        |        |
| Percent of rows    |        |        |        |
| Percent of columns | None   | With   | Total  |
|                    | +      | +      | +      |
| 1                  | 20140  | 369    | 20509  |
|                    | 98.20  | 1.80   | 100.00 |
|                    | 98.20  | 1.80   |        |
|                    | 100.00 | 100.00 |        |
|                    | +      | +      | +      |
| Total              | 20140  | 369    | 20509  |
|                    | 98.20  | 1.80   | 100.00 |

Complications and medical history at the time of obtaining Table 2-3 informed consent by the presence or absence of proton-pump inhibitors

FREQ Procedure

|                      |       |                  | Cumulative |        |
|----------------------|-------|------------------|------------|--------|
| Percent of ALL power |       | Percent of power |            |        |
| 1                    | 20509 | 100.00           | 20509      | 100.00 |

Table : ALL \* CVAC 2 YN

ALL

CVAC2YN(Cardiogetic Cerebral Infarction)

Power |

Percent |

Percent of rows

Percent of columns | None | With | Total

|       |        |        |        |
|-------|--------|--------|--------|
|       | +      | +      | +      |
| 1     | 19113  | 1396   | 20509  |
|       | 93.19  | 6.81   | 100.00 |
|       | 93.19  | 6.81   |        |
|       | 100.00 | 100.00 |        |
| +     | +      | +      |        |
| Total | 19113  | 1396   | 20509  |
|       | 93.19  | 6.81   | 100.00 |

Complications and medical history at the time of obtaining Table 2-3 informed consent by the presence or absence of proton-pump inhibitors

FREQ Procedure

|   |       | Cumulative           |                  |        |
|---|-------|----------------------|------------------|--------|
|   |       | Percent of ALL power | Percent of power |        |
| 1 | 20509 | 100.00               | 20509            | 100.00 |

Table : ALL \* CVAC 2 YN

ALL

CVAC2YN(Cardiogetic Cerebral Infarction)

Power |

Percent |

Percent of rows

Percent of columns | None | With | Total

|         |         |         |         |
|---------|---------|---------|---------|
| +_____+ | +_____+ | +_____+ | +_____+ |
| 1       | 19113   | 1396    | 20509   |
|         | 93.19   | 6.81    | 100.00  |
|         | 93.19   | 6.81    |         |
|         | 100.00  | 100.00  |         |
| +_____+ | +_____+ | +_____+ | +_____+ |
| Total   | 19113   | 1396    | 20509   |
|         | 93.19   | 6.81    | 100.00  |

Complications and medical history at the time of obtaining Table 2-3 informed consent by the presence or absence of proton-pump inhibitors

FREQ Procedure

|                      |       |                  | Cumulative |        |
|----------------------|-------|------------------|------------|--------|
| Percent of ALL power |       | Percent of power |            |        |
| 1                    | 20509 | 100.00           | 20509      | 100.00 |

Table : ALL \* CVAC 3 YN

ALL

CVAC3YN(Lacunar Cerebral Infarction)

Power |

Percent |

Percent of rows

Percent of columns | None | With | Total

|       |        |        |        |  |   |
|-------|--------|--------|--------|--|---|
|       | +      |        | +      |  | + |
| 1     | 19681  | 828    | 20509  |  |   |
|       | 95.96  | 4.04   | 100.00 |  |   |
|       | 95.96  | 4.04   |        |  |   |
|       | 100.00 | 100.00 |        |  |   |
|       | +      |        | +      |  | + |
| Total | 19681  | 828    | 20509  |  |   |
|       | 95.96  | 4.04   | 100.00 |  |   |

Complications and medical history at the time of obtaining Table 2-3 informed consent by the presence or absence of proton-pump inhibitors

FREQ Procedure

|                      |       |                  | Cumulative |        |
|----------------------|-------|------------------|------------|--------|
| Percent of ALL power |       | Percent of power |            |        |
| 1                    | 20509 | 100.00           | 20509      | 100.00 |

Table : ALL \* CVAC 3 YN

ALL

CVAC3YN(Lacunar Cerebral Infarction)

Power |

Percent |

Percent of rows

Percent of columns | None | With | Total

|       |        |        |        |  |   |
|-------|--------|--------|--------|--|---|
|       | +      |        | +      |  | + |
| 1     | 19681  | 828    | 20509  |  |   |
|       | 95.96  | 4.04   | 100.00 |  |   |
|       | 95.96  | 4.04   |        |  |   |
|       | 100.00 | 100.00 |        |  |   |
|       | +      |        | +      |  | + |
| Total | 19681  | 828    | 20509  |  |   |
|       | 95.96  | 4.04   | 100.00 |  |   |

Complications and medical history at the time of obtaining Table 2-3 informed consent by the presence or absence of proton-pump inhibitors

FREQ Procedure

|   |       | Cumulative           |                  |        |
|---|-------|----------------------|------------------|--------|
|   |       | Percent of ALL power | Percent of power |        |
| 1 | 20509 | 100.00               | 20509            | 100.00 |

Table : ALL \* CVAC 4 YN

ALL

CVAC4YN(Hemorrhagic Stroke)

| Power                   |        |        |        |  |
|-------------------------|--------|--------|--------|--|
| Percent                 |        |        |        |  |
| Percent of rows         |        |        |        |  |
| Percent of columns      | None   | With   | Total  |  |
| _____ + _____ + _____ + |        |        |        |  |
| 1                       | 20304  | 205    | 20509  |  |
|                         | 99.00  | 1.00   | 100.00 |  |
|                         | 99.00  | 1.00   |        |  |
|                         | 100.00 | 100.00 |        |  |
| _____ + _____ + _____ + |        |        |        |  |
| Total                   | 20304  | 205    | 20509  |  |
|                         | 99.00  | 1.00   | 100.00 |  |

Complications and medical history at the time of obtaining Table 2-3 informed consent by the presence or absence of proton-pump inhibitors

FREQ Procedure

|   |       | Cumulative           |                  |        |
|---|-------|----------------------|------------------|--------|
|   |       | Percent of ALL power | Percent of power |        |
| 1 | 20509 | 100.00               | 20509            | 100.00 |

Table : ALL \* CVAC 4 YN

ALL

CVAC4YN(Hemorrhagic Stroke)

Power |

Percent |

Percent of rows

Percent of columns | None | With | Total

|             |               |         |
|-------------|---------------|---------|
| +_____+     | +_____+       | +_____+ |
| 1   20304   | 205   20509   |         |
| 99.00       | 1.00   100.00 |         |
| 99.00       | 1.00          |         |
| 100.00      | 100.00        |         |
| +_____+     | +_____+       | +_____+ |
| Total 20304 | 205 20509     |         |
| 99.00       | 1.00          | 100.00  |



Complications and medical history at the time of obtaining Table 2-3 informed consent by the presence or absence of proton-pump inhibitors

FREQ Procedure

|                      |       | Cumulative       |       |        |
|----------------------|-------|------------------|-------|--------|
| Percent of ALL power |       | Percent of power |       |        |
| 1                    | 20509 | 100.00           | 20509 | 100.00 |

Table : ALL \* CVAC 5 YN

ALL

CVAC5YN(Unclassified/Unknown Cerebral Infarction)

| Power              |         |         |        |
|--------------------|---------|---------|--------|
| Percent            |         |         |        |
| Percent of rows    |         |         |        |
| Percent of columns | None    | With    | Total  |
| +_____+            | +_____+ | +_____+ | +      |
| 1                  | 19479   | 1030    | 20509  |
|                    | 94.98   | 5.02    | 100.00 |
|                    | 94.98   | 5.02    |        |
|                    | 100.00  | 100.00  |        |
| +_____+            | +_____+ | +_____+ | +      |
| Total              | 19479   | 1030    | 20509  |
|                    | 94.98   | 5.02    | 100.00 |

Complications and medical history at the time of obtaining Table 2-3 informed consent by the presence or absence of proton-pump inhibitors

FREQ Procedure

|   |       | Cumulative           |                  |        |
|---|-------|----------------------|------------------|--------|
|   |       | Percent of ALL power | Percent of power |        |
| 1 | 20509 | 100.00               | 20509            | 100.00 |

Table : ALL \* CVAC 5 YN

ALL

CVAC5YN(Unclassified/Unknown Cerebral Infarction)

| Power                   |        |        |        |
|-------------------------|--------|--------|--------|
| Percent                 |        |        |        |
| Percent of rows         |        |        |        |
| Percent of columns      | None   | With   | Total  |
| _____ + _____ + _____ + |        |        |        |
| 1                       | 19479  | 1030   | 20509  |
|                         | 94.98  | 5.02   | 100.00 |
|                         | 94.98  | 5.02   |        |
|                         | 100.00 | 100.00 |        |
| _____ + _____ + _____ + |        |        |        |
| Total                   | 19479  | 1030   | 20509  |
|                         | 94.98  | 5.02   | 100.00 |

Complications and medical history at the time of obtaining Table 2-3 informed consent by the presence or absence of proton-pump inhibitors

FREQ Procedure

|                      |       | Cumulative       |       |        |
|----------------------|-------|------------------|-------|--------|
| Percent of ALL power |       | Percent of power |       |        |
| 1                    | 20509 | 100.00           | 20509 | 100.00 |

Table : ALL \* CVAC 6 YN

ALL

CVAC6YN(Transient Ischemic Attacks)

| Power              |         |         |        |
|--------------------|---------|---------|--------|
| Percent            |         |         |        |
| Percent of rows    |         |         |        |
| Percent of columns | None    | With    | Total  |
| +_____+            | +_____+ | +_____+ | +      |
| 1                  | 20218   | 291     | 20509  |
|                    | 98.58   | 1.42    | 100.00 |
|                    | 98.58   | 1.42    |        |
|                    | 100.00  | 100.00  |        |
| +_____+            | +_____+ | +_____+ | +      |
| Total              | 20218   | 291     | 20509  |
|                    | 98.58   | 1.42    | 100.00 |

Complications and medical history at the time of obtaining Table 2-3 informed consent by the presence or absence of proton-pump inhibitors

FREQ Procedure

|                      |       |                  | Cumulative |        |
|----------------------|-------|------------------|------------|--------|
| Percent of ALL power |       | Percent of power |            |        |
| 1                    | 20509 | 100.00           | 20509      | 100.00 |

Table : ALL \* CVAC 6 YN

ALL

CVAC6YN(Transient Ischemic Attacks)

| Power              |        |        |        |
|--------------------|--------|--------|--------|
| Percent            |        |        |        |
| Percent of rows    |        |        |        |
| Percent of columns | None   | With   | Total  |
|                    | +      | +      | +      |
| 1                  | 20218  | 291    | 20509  |
|                    | 98.58  | 1.42   | 100.00 |
|                    | 98.58  | 1.42   |        |
|                    | 100.00 | 100.00 |        |
|                    | +      | +      | +      |
| Total              | 20218  | 291    | 20509  |
|                    | 98.58  | 1.42   | 100.00 |

Complications and medical history at the time of obtaining Table 2-3 informed consent by the presence or absence of proton-pump inhibitors

FREQ Procedure

|                      |       |                  | Cumulative |        |
|----------------------|-------|------------------|------------|--------|
| Percent of ALL power |       | Percent of power |            |        |
| 1                    | 20509 | 100.00           | 20509      | 100.00 |

Table : ALL \* CVAC 7 YN

ALL

CVAC7YN(Other Cerebrovascular Accident)

| Power              |        |        |        |
|--------------------|--------|--------|--------|
| Percent            |        |        |        |
| Percent of rows    |        |        |        |
| Percent of columns | None   | With   | Total  |
|                    | +      | +      | +      |
| 1                  | 20050  | 459    | 20509  |
|                    | 97.76  | 2.24   | 100.00 |
|                    | 97.76  | 2.24   |        |
|                    | 100.00 | 100.00 |        |
|                    | +      | +      | +      |
| Total              | 20050  | 459    | 20509  |
|                    | 97.76  | 2.24   | 100.00 |

Complications and medical history at the time of obtaining Table 2-3 informed consent by the presence or absence of proton-pump inhibitors

FREQ Procedure

|                      |       |                  | Cumulative |        |
|----------------------|-------|------------------|------------|--------|
| Percent of ALL power |       | Percent of power |            |        |
| 1                    | 20509 | 100.00           | 20509      | 100.00 |

Table : ALL \* CVAC 7 YN

ALL

CVAC7YN(Other Cerebrovascular Accident)

| Power              |        |        |        |
|--------------------|--------|--------|--------|
| Percent            |        |        |        |
| Percent of rows    |        |        |        |
| Percent of columns | None   | With   | Total  |
|                    | +      | +      | +      |
| 1                  | 20050  | 459    | 20509  |
|                    | 97.76  | 2.24   | 100.00 |
|                    | 97.76  | 2.24   |        |
|                    | 100.00 | 100.00 |        |
|                    | +      | +      | +      |
| Total              | 20050  | 459    | 20509  |
|                    | 97.76  | 2.24   | 100.00 |

Complications and medical history at the time of obtaining Table 2-3 informed consent by the presence or absence of proton-pump inhibitors

FREQ Procedure

|                      |       |                  | Cumulative |        |
|----------------------|-------|------------------|------------|--------|
| Percent of ALL power |       | Percent of power |            |        |
| 1                    | 20509 | 100.00           | 20509      | 100.00 |

Tables: ALL \* OTVDYN

ALL

OTVDYN(Other Vascular Disease)

| Power              |        |        |        |
|--------------------|--------|--------|--------|
| Percent            |        |        |        |
| Percent of rows    |        |        |        |
| Percent of columns | None   | With   | Total  |
|                    | +      | +      | +      |
| 1                  | 19586  | 923    | 20509  |
|                    | 95.50  | 4.50   | 100.00 |
|                    | 95.50  | 4.50   |        |
|                    | 100.00 | 100.00 |        |
|                    | +      | +      | +      |
| Total              | 19586  | 923    | 20509  |
|                    | 95.50  | 4.50   | 100.00 |

Complications and medical history at the time of obtaining Table 2-3 informed consent by the presence or absence of proton-pump inhibitors

FREQ Procedure

|   |       | Cumulative           |                  |        |
|---|-------|----------------------|------------------|--------|
|   |       | Percent of ALL power | Percent of power |        |
| 1 | 20509 | 100.00               | 20509            | 100.00 |

Tables: ALL \* OTVDYN

ALL

OTVDYN(Other Vascular Disease)

| Power                   |        |        |        |
|-------------------------|--------|--------|--------|
| Percent                 |        |        |        |
| Percent of rows         |        |        |        |
| Percent of columns      | None   | With   | Total  |
| _____ + _____ + _____ + |        |        |        |
| 1                       | 19586  | 923    | 20509  |
|                         | 95.50  | 4.50   | 100.00 |
|                         | 95.50  | 4.50   |        |
|                         | 100.00 | 100.00 |        |
| _____ + _____ + _____ + |        |        |        |
| Total                   | 19586  | 923    | 20509  |
|                         | 95.50  | 4.50   | 100.00 |



Complications and medical history at the time of obtaining Table 2-3 informed consent by the presence or absence of proton-pump inhibitors

FREQ Procedure

|                      |       |                  | Cumulative |        |
|----------------------|-------|------------------|------------|--------|
| Percent of ALL power |       | Percent of power |            |        |
| 1                    | 20509 | 100.00           | 20509      | 100.00 |

Table : ALL \* OTVD 1 YN

ALL

OTVD1YN(Peripheral Vascular Disease)

| Power              |           |           |           |
|--------------------|-----------|-----------|-----------|
| Percent            |           |           |           |
| Percent of rows    |           |           |           |
| Percent of columns | None      | With      | Total     |
|                    | + _____ + | + _____ + | + _____ + |
| 1                  | 20250     | 259       | 20509     |
|                    | 98.74     | 1.26      | 100.00    |
|                    | 98.74     | 1.26      |           |
|                    | 100.00    | 100.00    |           |
|                    | + _____ + | + _____ + | + _____ + |
| Total              | 20250     | 259       | 20509     |
|                    | 98.74     | 1.26      | 100.00    |

Complications and medical history at the time of obtaining Table 2-3 informed consent by the presence or absence of proton-pump inhibitors

FREQ Procedure

|   |       | Cumulative           |                  |        |
|---|-------|----------------------|------------------|--------|
|   |       | Percent of ALL power | Percent of power |        |
| 1 | 20509 | 100.00               | 20509            | 100.00 |

Table : ALL \* OTVD 1 YN

ALL

OTVD1YN(Peripheral Vascular Disease)

| Power                   |        |        |        |  |
|-------------------------|--------|--------|--------|--|
| Percent                 |        |        |        |  |
| Percent of rows         |        |        |        |  |
| Percent of columns      | None   | With   | Total  |  |
| _____ + _____ + _____ + |        |        |        |  |
| 1                       | 20250  | 259    | 20509  |  |
|                         | 98.74  | 1.26   | 100.00 |  |
|                         | 98.74  | 1.26   |        |  |
|                         | 100.00 | 100.00 |        |  |
| _____ + _____ + _____ + |        |        |        |  |
| Total                   | 20250  | 259    | 20509  |  |
|                         | 98.74  | 1.26   | 100.00 |  |

Complications and medical history at the time of obtaining Table 2-3 informed consent by the presence or absence of proton-pump inhibitors

FREQ Procedure

|                      |                  | Cumulative           |                  |
|----------------------|------------------|----------------------|------------------|
| Percent of ALL power | Percent of power | Percent of ALL power | Percent of power |
| 1                    | 20509            | 100.00               | 20509 100.00     |

Table : ALL \* OTVD 2 YN

ALL OTVD2YN(Aortic Plaque)

| Power              |         |         |        |
|--------------------|---------|---------|--------|
| Percent            |         |         |        |
| Percent of rows    |         |         |        |
| Percent of columns | None    | With    | Total  |
| +_____+            | +_____+ | +_____+ | +      |
| 1                  | 20356   | 153     | 20509  |
|                    | 99.25   | 0.75    | 100.00 |
|                    | 99.25   | 0.75    |        |
|                    | 100.00  | 100.00  |        |
| +_____+            | +_____+ | +_____+ | +      |
| Total              | 20356   | 153     | 20509  |
|                    | 99.25   | 0.75    | 100.00 |

Complications and medical history at the time of obtaining Table 2-3 informed consent by the presence or absence of proton-pump inhibitors

FREQ Procedure

|   |                      |                  | Cumulative |        |
|---|----------------------|------------------|------------|--------|
|   | Percent of ALL power | Percent of power |            |        |
| 1 | 20509                | 100.00           | 20509      | 100.00 |

Table : ALL \* OTVD 2 YN

ALL OTVD2YN(Aortic Plaque)

|       | Power  | Percent | Percent of rows | Percent of columns | None | With | Total |
|-------|--------|---------|-----------------|--------------------|------|------|-------|
|       | +      | +       | +               | +                  |      |      |       |
| 1     | 20356  | 153     | 20509           |                    |      |      |       |
|       | 99.25  | 0.75    | 100.00          |                    |      |      |       |
|       | 99.25  | 0.75    |                 |                    |      |      |       |
|       | 100.00 | 100.00  |                 |                    |      |      |       |
|       | +      | +       | +               | +                  |      |      |       |
| Total | 20356  | 153     | 20509           |                    |      |      |       |
|       | 99.25  | 0.75    | 100.00          |                    |      |      |       |

Complications and medical history at the time of obtaining Table 2-3 informed consent by the presence or absence of proton-pump inhibitors

FREQ Procedure

|                      |       |                  | Cumulative |        |
|----------------------|-------|------------------|------------|--------|
| Percent of ALL power |       | Percent of power |            |        |
| 1                    | 20509 | 100.00           | 20509      | 100.00 |

Table : ALL \* TED 3 YN

ALL

TED3YN(Internal Carotid Artery Stenosis)

| Power | Percent | Percent of rows | Percent of columns | None | With | Total |
|-------|---------|-----------------|--------------------|------|------|-------|
|       | +       | +               | +                  |      |      |       |
| 1     | 20103   | 406             | 20509              |      |      |       |
|       | 98.02   | 1.98            | 100.00             |      |      |       |
|       | 98.02   | 1.98            |                    |      |      |       |
|       | 100.00  | 100.00          |                    |      |      |       |
|       | +       | +               | +                  |      |      |       |
| Total | 20103   | 406             | 20509              |      |      |       |
|       | 98.02   | 1.98            | 100.00             |      |      |       |

Complications and medical history at the time of obtaining Table 2-3 informed consent by the presence or absence of proton-pump inhibitors

FREQ Procedure

|   |       | Cumulative           |                  |        |
|---|-------|----------------------|------------------|--------|
|   |       | Percent of ALL power | Percent of power |        |
| 1 | 20509 | 100.00               | 20509            | 100.00 |

Table : ALL \* TED 3 YN

ALL

TED3YN(Internal Carotid Artery Stenosis)

Power |

Percent |

Percent of rows

Percent of columns | None | With | Total

|                         |                       |              |
|-------------------------|-----------------------|--------------|
| +_____+                 | +_____+               | +_____+      |
| 1   20103   406   20509 | 98.02   1.98   100.00 | 98.02   1.98 |
| 100.00   100.00         |                       |              |
| +_____+                 | +_____+               | +_____+      |
| Total 20103 406 20509   | 98.02                 | 1.98 100.00  |

Complications and medical history at the time of obtaining Table 2-3 informed consent by the presence or absence of proton-pump inhibitors

FREQ Procedure

|   |       | Cumulative           |                  |        |
|---|-------|----------------------|------------------|--------|
|   |       | Percent of ALL power | Percent of power |        |
| 1 | 20509 | 100.00               | 20509            | 100.00 |

Table : ALL \* TED 4 YN

ALL

TED4YN(Arteriosclerosis Obliterans)

Power |

Percent |

Percent of rows

Percent of columns | None | With | Total

|         |         |         |        |
|---------|---------|---------|--------|
| +_____+ | +_____+ | +_____+ |        |
| 1       | 19900   | 609     | 20509  |
|         | 97.03   | 2.97    | 100.00 |
|         | 97.03   | 2.97    |        |
|         | 100.00  | 100.00  |        |
| +_____+ | +_____+ | +_____+ |        |
| Total   | 19900   | 609     | 20509  |
|         | 97.03   | 2.97    | 100.00 |

Complications and medical history at the time of obtaining Table 2-3 informed consent by the presence or absence of proton-pump inhibitors

FREQ Procedure

|   |       | Cumulative           |                  |        |
|---|-------|----------------------|------------------|--------|
|   |       | Percent of ALL power | Percent of power |        |
| 1 | 20509 | 100.00               | 20509            | 100.00 |

Table : ALL \* TED 4 YN

ALL

TED4YN(Arteriosclerosis Obliterans)

Power |

Percent |

Percent of rows

Percent of columns | None | With | Total

|                         |                       |              |
|-------------------------|-----------------------|--------------|
| +_____+                 | +_____+               | +_____+      |
| 1   19900   609   20509 | 97.03   2.97   100.00 | 97.03   2.97 |
| 100.00   100.00         |                       |              |
| +_____+                 | +_____+               | +_____+      |
| Total 19900 609 20509   | 97.03 2.97 100.00     |              |



Complications and medical history at the time of obtaining Table 2-3 informed consent by the presence or absence of proton-pump inhibitors

FREQ Procedure

|                      |       |                  | Cumulative |        |
|----------------------|-------|------------------|------------|--------|
| Percent of ALL power |       | Percent of power |            |        |
| 1                    | 20509 | 100.00           | 20509      | 100.00 |

Table : ALL \* OTVD 3 YN

ALL

OTVD3YN(Other Vascular Disease: Other)

Power |

Percent |

Percent of rows

Percent of columns | None | With | Total

|       |        |        |        |  |   |
|-------|--------|--------|--------|--|---|
|       | +      |        | +      |  | + |
| 1     | 19968  | 541    | 20509  |  |   |
|       | 97.36  | 2.64   | 100.00 |  |   |
|       | 97.36  | 2.64   |        |  |   |
|       | 100.00 | 100.00 |        |  |   |
| +     | +      | +      | +      |  |   |
| Total | 19968  | 541    | 20509  |  |   |
|       | 97.36  | 2.64   | 100.00 |  |   |

Complications and medical history at the time of obtaining Table 2-3 informed consent by the presence or absence of proton-pump inhibitors

FREQ Procedure

|                      |       |                  | Cumulative |        |
|----------------------|-------|------------------|------------|--------|
| Percent of ALL power |       | Percent of power |            |        |
| 1                    | 20509 | 100.00           | 20509      | 100.00 |

Table : ALL \* OTVD 3 YN

ALL

OTVD3YN(Other Vascular Disease: Other)

Power |

Percent |

Percent of rows

Percent of columns | None | With | Total

|       |        |        |        |  |   |
|-------|--------|--------|--------|--|---|
|       | +      |        | +      |  | + |
| 1     | 19968  | 541    | 20509  |  |   |
|       | 97.36  | 2.64   | 100.00 |  |   |
|       | 97.36  | 2.64   |        |  |   |
|       | 100.00 | 100.00 |        |  |   |
|       | +      |        | +      |  | + |
| Total | 19968  | 541    | 20509  |  |   |
|       | 97.36  | 2.64   | 100.00 |  |   |

Complications and medical history at the time of obtaining Table 2-3 informed consent by the presence or absence of proton-pump inhibitors

FREQ Procedure

|   |                      |        | Cumulative       |        |
|---|----------------------|--------|------------------|--------|
|   | Percent of ALL power |        | Percent of power |        |
| 1 | 20509                | 100.00 | 20509            | 100.00 |

Tables: ALL \* TEDYN

ALL

TEDYN(Thrombosis/Embolism-Related Disease)

| Power              |        |        |        |
|--------------------|--------|--------|--------|
| Percent            |        |        |        |
| Percent of rows    |        |        |        |
| Percent of columns | None   | With   | Total  |
|                    | +      | +      | +      |
| 1                  | 18953  | 1556   | 20509  |
|                    | 92.41  | 7.59   | 100.00 |
|                    | 92.41  | 7.59   |        |
|                    | 100.00 | 100.00 |        |
|                    | +      | +      | +      |
| Total              | 18953  | 1556   | 20509  |
|                    | 92.41  | 7.59   | 100.00 |

Complications and medical history at the time of obtaining Table 2-3 informed consent by the presence or absence of proton-pump inhibitors

FREQ Procedure

|   |                      |        | Cumulative       |        |
|---|----------------------|--------|------------------|--------|
|   | Percent of ALL power |        | Percent of power |        |
| 1 | 20509                | 100.00 | 20509            | 100.00 |

Tables: ALL \* TEDYN

ALL

TEDYN(Thrombosis/Embolism-Related Disease)

| Power              |        |        |        |
|--------------------|--------|--------|--------|
| Percent            |        |        |        |
| Percent of rows    |        |        |        |
| Percent of columns | None   | With   | Total  |
|                    | +      | +      | +      |
| 1                  | 18953  | 1556   | 20509  |
|                    | 92.41  | 7.59   | 100.00 |
|                    | 92.41  | 7.59   |        |
|                    | 100.00 | 100.00 |        |
|                    | +      | +      | +      |
| Total              | 18953  | 1556   | 20509  |
|                    | 92.41  | 7.59   | 100.00 |

Complications and medical history at the time of obtaining Table 2-3 informed consent by the presence or absence of proton-pump inhibitors

FREQ Procedure

|                      |       |                  | Cumulative |        |
|----------------------|-------|------------------|------------|--------|
| Percent of ALL power |       | Percent of power |            |        |
| 1                    | 20509 | 100.00           | 20509      | 100.00 |

Table: ALL \* t\_TED

ALL t\_TED

| Power | Percent            | Percent of rows | Percentage of columns   0   1   Sum |
|-------|--------------------|-----------------|-------------------------------------|
|       |                    |                 | _____+_____+_____+                  |
| 1     | 20284              | 225             | 20509                               |
|       | 98.90              | 1.10            | 100.00                              |
|       | 98.90              | 1.10            |                                     |
|       | 100.00             | 100.00          |                                     |
|       | _____+_____+_____+ |                 |                                     |
| Total | 20284              | 225             | 20509                               |
|       | 98.90              | 1.10            | 100.00                              |

Complications and medical history at the time of obtaining Table 2-3 informed consent by the presence or absence of proton-pump inhibitors

FREQ Procedure

|                      |       | Cumulative       |              |
|----------------------|-------|------------------|--------------|
| Percent of ALL power |       | Percent of power |              |
| 1                    | 20509 | 100.00           | 20509 100.00 |

Table: ALL \* t\_TED

ALL t\_TED

| Power                             |         |         |         |
|-----------------------------------|---------|---------|---------|
| Percent                           |         |         |         |
| Percent of rows                   |         |         |         |
| Percentage of columns   0  1  Sum |         |         |         |
| +_____+                           | +_____+ | +_____+ | +_____+ |
| 1                                 | 20284   | 225     | 20509   |
|                                   | 98.90   | 1.10    | 100.00  |
|                                   | 98.90   | 1.10    |         |
|                                   | 100.00  | 100.00  |         |
| +_____+                           | +_____+ | +_____+ | +_____+ |
| Total                             | 20284   | 225     | 20509   |
|                                   | 98.90   | 1.10    | 100.00  |

Complications and medical history at the time of obtaining Table 2-3 informed consent by the presence or absence of proton-pump inhibitors

FREQ Procedure

|   |       | Cumulative           |                  |        |
|---|-------|----------------------|------------------|--------|
|   |       | Percent of ALL power | Percent of power |        |
| 1 | 20509 | 100.00               | 20509            | 100.00 |

Table : ALL \* TED 1 YN

ALL

TED1YN(Pulmonary Embolism)

Power |

Percent |

Percent of rows

Percent of columns | None | With | Total

|             |               |         |  |
|-------------|---------------|---------|--|
| +_____+     | +_____+       | +_____+ |  |
| 1   20446   | 63   20509    |         |  |
| 99.69       | 0.31   100.00 |         |  |
| 99.69       | 0.31          |         |  |
| 100.00      | 100.00        |         |  |
| +_____+     | +_____+       | +_____+ |  |
| Total 20446 | 63            | 20509   |  |
| 99.69       | 0.31          | 100.00  |  |

Complications and medical history at the time of obtaining Table 2-3 informed consent by the presence or absence of proton-pump inhibitors

FREQ Procedure

|   |       | Cumulative           |                  |        |
|---|-------|----------------------|------------------|--------|
|   |       | Percent of ALL power | Percent of power |        |
| 1 | 20509 | 100.00               | 20509            | 100.00 |

Table : ALL \* TED 1 YN

ALL

TED1YN(Pulmonary Embolism)

Power |

Percent |

Percent of rows

Percent of columns | None | With | Total

|   |        |        |        |  |   |
|---|--------|--------|--------|--|---|
|   | +      |        | +      |  | + |
| 1 | 20446  | 63     | 20509  |  |   |
|   | 99.69  | 0.31   | 100.00 |  |   |
|   | 99.69  | 0.31   |        |  |   |
|   | 100.00 | 100.00 |        |  |   |

|  |   |  |   |  |   |
|--|---|--|---|--|---|
|  | + |  | + |  | + |
|--|---|--|---|--|---|

Total 20446 63 20509

99.69      0.31      100.00



Complications and medical history at the time of obtaining Table 2-3 informed consent by the presence or absence of proton-pump inhibitors

FREQ Procedure

|   |       | Cumulative           |                  |        |
|---|-------|----------------------|------------------|--------|
|   |       | Percent of ALL power | Percent of power |        |
| 1 | 20509 | 100.00               | 20509            | 100.00 |

Table : ALL \* TED 2 YN

ALL

TED2YN(Deep Vein Thrombosis)

Power |

Percent |

Percent of rows

Percent of columns | None | With | Total

|   |        |        |        |  |   |
|---|--------|--------|--------|--|---|
|   | +      |        | +      |  | + |
| 1 | 20324  | 185    | 20509  |  |   |
|   | 99.10  | 0.90   | 100.00 |  |   |
|   | 99.10  | 0.90   |        |  |   |
|   | 100.00 | 100.00 |        |  |   |
|   | +      | +      | +      |  |   |

Total 20324 185 20509

99.10      0.90      100.00

Complications and medical history at the time of obtaining Table 2-3 informed consent by the presence or absence of proton-pump inhibitors

FREQ Procedure

|   |       | Cumulative           |                  |        |
|---|-------|----------------------|------------------|--------|
|   |       | Percent of ALL power | Percent of power |        |
| 1 | 20509 | 100.00               | 20509            | 100.00 |

Table : ALL \* TED 2 YN

ALL

TED2YN(Deep Vein Thrombosis)

| Power                   |        |        |        |  |
|-------------------------|--------|--------|--------|--|
| Percent                 |        |        |        |  |
| Percent of rows         |        |        |        |  |
| Percent of columns      | None   | With   | Total  |  |
| _____ + _____ + _____ + |        |        |        |  |
| 1                       | 20324  | 185    | 20509  |  |
|                         | 99.10  | 0.90   | 100.00 |  |
|                         | 99.10  | 0.90   |        |  |
|                         | 100.00 | 100.00 |        |  |
| _____ + _____ + _____ + |        |        |        |  |
| Total                   | 20324  | 185    | 20509  |  |
|                         | 99.10  | 0.90   | 100.00 |  |

Complications and medical history at the time of obtaining Table 2-3 informed consent by the presence or absence of proton-pump inhibitors

FREQ Procedure

|   |                      |        | Cumulative       |        |
|---|----------------------|--------|------------------|--------|
|   | Percent of ALL power |        | Percent of power |        |
| 1 | 20509                | 100.00 | 20509            | 100.00 |

Table : ALL \* TED 5 YN

ALL

TED5YN(Other Thrombosis/Embolism-Related Disease)

| Power              |        |        |        |
|--------------------|--------|--------|--------|
| Percent            |        |        |        |
| Percent of rows    |        |        |        |
| Percent of columns | None   | With   | Total  |
|                    | +      | +      | +      |
| 1                  | 20043  | 466    | 20509  |
|                    | 97.73  | 2.27   | 100.00 |
|                    | 97.73  | 2.27   |        |
|                    | 100.00 | 100.00 |        |
|                    | +      | +      | +      |
| Total              | 20043  | 466    | 20509  |
|                    | 97.73  | 2.27   | 100.00 |

Complications and medical history at the time of obtaining Table 2-3 informed consent by the presence or absence of proton-pump inhibitors

FREQ Procedure

|   |                      |        | Cumulative       |        |
|---|----------------------|--------|------------------|--------|
|   | Percent of ALL power |        | Percent of power |        |
| 1 | 20509                | 100.00 | 20509            | 100.00 |

Table : ALL \* TED 5 YN

ALL

TED5YN(Other Thrombosis/Embolism-Related Disease)

| Power              |        |        |        |
|--------------------|--------|--------|--------|
| Percent            |        |        |        |
| Percent of rows    |        |        |        |
| Percent of columns | None   | With   | Total  |
|                    | +      | +      | +      |
| 1                  | 20043  | 466    | 20509  |
|                    | 97.73  | 2.27   | 100.00 |
|                    | 97.73  | 2.27   |        |
|                    | 100.00 | 100.00 |        |
|                    | +      | +      | +      |
| Total              | 20043  | 466    | 20509  |
|                    | 97.73  | 2.27   | 100.00 |

Complications and medical history at the time of obtaining Table 2-3 informed consent by the presence or absence of proton-pump inhibitors

FREQ Procedure

|                      |       |                  | Cumulative |        |
|----------------------|-------|------------------|------------|--------|
| Percent of ALL power |       | Percent of power |            |        |
| 1                    | 20509 | 100.00           | 20509      | 100.00 |

Tables: ALL \* HTDMYN

ALL HTDMYN(Hyperthyroidism)

| Power              |        |        |        |   |
|--------------------|--------|--------|--------|---|
| Percent            |        |        |        |   |
| Percent of rows    |        |        |        |   |
| Percent of columns | None   | With   | Total  |   |
|                    | +      | +      | +      | + |
| 1                  | 20209  | 300    | 20509  |   |
|                    | 98.54  | 1.46   | 100.00 |   |
|                    | 98.54  | 1.46   |        |   |
|                    | 100.00 | 100.00 |        |   |
|                    | +      | +      | +      | + |
| Total              | 20209  | 300    | 20509  |   |
|                    | 98.54  | 1.46   | 100.00 |   |

Complications and medical history at the time of obtaining Table 2-3 informed consent by the presence or absence of proton-pump inhibitors

FREQ Procedure

|                      |       |                  | Cumulative |        |
|----------------------|-------|------------------|------------|--------|
| Percent of ALL power |       | Percent of power |            |        |
| 1                    | 20509 | 100.00           | 20509      | 100.00 |

Tables: ALL \* HTDMYN

ALL HTDMYN(Hyperthyroidism)

| Power              |           |           |           |
|--------------------|-----------|-----------|-----------|
| Percent            |           |           |           |
| Percent of rows    |           |           |           |
| Percent of columns | None      | With      | Total     |
|                    | + _____ + | + _____ + | + _____ + |
| 1                  | 20209     | 300       | 20509     |
|                    | 98.54     | 1.46      | 100.00    |
|                    | 98.54     | 1.46      |           |
|                    | 100.00    | 100.00    |           |
|                    | + _____ + | + _____ + | + _____ + |
| Total              | 20209     | 300       | 20509     |
|                    | 98.54     | 1.46      | 100.00    |

Complications and medical history at the time of obtaining Table 2-3 informed consent by the presence or absence of proton-pump inhibitors

FREQ Procedure

|   |                      |        | Cumulative       |        |
|---|----------------------|--------|------------------|--------|
|   | Percent of ALL power |        | Percent of power |        |
| 1 | 20509                | 100.00 | 20509            | 100.00 |

Tables: ALL \* GASDYN

ALL

GASDYN(Gastrointestinal Disease)

| Power              |        |        |        |
|--------------------|--------|--------|--------|
| Percent            |        |        |        |
| Percent of rows    |        |        |        |
| Percent of columns | None   | With   | Total  |
|                    | +      | +      | +      |
| 1                  | 16425  | 4084   | 20509  |
|                    | 80.09  | 19.91  | 100.00 |
|                    | 80.09  | 19.91  |        |
|                    | 100.00 | 100.00 |        |
|                    | +      | +      | +      |
| Total              | 16425  | 4084   | 20509  |
|                    | 80.09  | 19.91  | 100.00 |

Complications and medical history at the time of obtaining Table 2-3 informed consent by the presence or absence of proton-pump inhibitors

FREQ Procedure

|   |                      |        | Cumulative       |        |
|---|----------------------|--------|------------------|--------|
|   | Percent of ALL power |        | Percent of power |        |
| 1 | 20509                | 100.00 | 20509            | 100.00 |

Tables: ALL \* GASDYN

ALL

GASDYN(Gastrointestinal Disease)

| Power              |        |        |        |
|--------------------|--------|--------|--------|
| Percent            |        |        |        |
| Percent of rows    |        |        |        |
| Percent of columns | None   | With   | Total  |
|                    | +      | +      | +      |
| 1                  | 16425  | 4084   | 20509  |
|                    | 80.09  | 19.91  | 100.00 |
|                    | 80.09  | 19.91  |        |
|                    | 100.00 | 100.00 |        |
|                    | +      | +      | +      |
| Total              | 16425  | 4084   | 20509  |
|                    | 80.09  | 19.91  | 100.00 |



Complications and medical history at the time of obtaining Table 2-3 informed consent by the presence or absence of proton-pump inhibitors

FREQ Procedure

|   |       | Cumulative           |                  |        |
|---|-------|----------------------|------------------|--------|
|   |       | Percent of ALL power | Percent of power |        |
| 1 | 20509 | 100.00               | 20509            | 100.00 |

Table : ALL \* GASD 1 YN

ALL

GASD1YN(Upper Gastrointestinal Tract)

| Power                   |        |        |        |
|-------------------------|--------|--------|--------|
| Percent                 |        |        |        |
| Percent of rows         |        |        |        |
| Percent of columns      | None   | With   | Total  |
| _____ + _____ + _____ + |        |        |        |
| 1                       | 20096  | 413    | 20509  |
|                         | 97.99  | 2.01   | 100.00 |
|                         | 97.99  | 2.01   |        |
|                         | 100.00 | 100.00 |        |
| _____ + _____ + _____ + |        |        |        |
| Total                   | 20096  | 413    | 20509  |
|                         | 97.99  | 2.01   | 100.00 |

Complications and medical history at the time of obtaining Table 2-3 informed consent by the presence or absence of proton-pump inhibitors

FREQ Procedure

|   |                      |        | Cumulative       |        |
|---|----------------------|--------|------------------|--------|
|   | Percent of ALL power |        | Percent of power |        |
| 1 | 20509                | 100.00 | 20509            | 100.00 |

Table : ALL \* GASD 1 YN

ALL

GASD1YN(Upper Gastrointestinal Tract)

| Power              |        |        |        |
|--------------------|--------|--------|--------|
| Percent            |        |        |        |
| Percent of rows    |        |        |        |
| Percent of columns | None   | With   | Total  |
|                    | +      | +      | +      |
| 1                  | 20096  | 413    | 20509  |
|                    | 97.99  | 2.01   | 100.00 |
|                    | 97.99  | 2.01   |        |
|                    | 100.00 | 100.00 |        |
|                    | +      | +      | +      |
| Total              | 20096  | 413    | 20509  |
|                    | 97.99  | 2.01   | 100.00 |

Complications and medical history at the time of obtaining Table 2-3 informed consent by the presence or absence of proton-pump inhibitors

FREQ Procedure

|   |       | Cumulative           |                  |        |
|---|-------|----------------------|------------------|--------|
|   |       | Percent of ALL power | Percent of power |        |
| 1 | 20509 | 100.00               | 20509            | 100.00 |

Table : ALL \* GASD 2 YN

ALL

GASD2YN(Lower Gastrointestinal Tract)

| Power              |         |         |        |
|--------------------|---------|---------|--------|
| Percent            |         |         |        |
| Percent of rows    |         |         |        |
| Percent of columns | None    | With    | Total  |
| +_____+            | +_____+ | +_____+ | +      |
| 1                  | 20084   | 425     | 20509  |
|                    | 97.93   | 2.07    | 100.00 |
|                    | 97.93   | 2.07    |        |
|                    | 100.00  | 100.00  |        |
| +_____+            | +_____+ | +_____+ | +      |
| Total              | 20084   | 425     | 20509  |
|                    | 97.93   | 2.07    | 100.00 |

Complications and medical history at the time of obtaining Table 2-3 informed consent by the presence or absence of proton-pump inhibitors

FREQ Procedure

|                      |       |                  | Cumulative |        |
|----------------------|-------|------------------|------------|--------|
| Percent of ALL power |       | Percent of power |            |        |
| 1                    | 20509 | 100.00           | 20509      | 100.00 |

Table : ALL \* GASD 2 YN

ALL

GASD2YN(Lower Gastrointestinal Tract)

| Power              |        |        |        |
|--------------------|--------|--------|--------|
| Percent            |        |        |        |
| Percent of rows    |        |        |        |
| Percent of columns | None   | With   | Total  |
|                    | +      | +      | +      |
| 1                  | 20084  | 425    | 20509  |
|                    | 97.93  | 2.07   | 100.00 |
|                    | 97.93  | 2.07   |        |
|                    | 100.00 | 100.00 |        |
|                    | +      | +      | +      |
| Total              | 20084  | 425    | 20509  |
|                    | 97.93  | 2.07   | 100.00 |

Complications and medical history at the time of obtaining Table 2-3 informed consent by the presence or absence of proton-pump inhibitors

FREQ Procedure

|                      |       |                  | Cumulative |        |
|----------------------|-------|------------------|------------|--------|
| Percent of ALL power |       | Percent of power |            |        |
| 1                    | 20509 | 100.00           | 20509      | 100.00 |

Table : ALL \* GASD 3 YN

ALL

GASD3YN(Reflux esophagitis)

Power |

Percent |

Percent of rows

Percent of columns | None | With | Total

|       |        |        |        |  |   |
|-------|--------|--------|--------|--|---|
|       | +      |        | +      |  | + |
| 1     | 19231  | 1278   | 20509  |  |   |
|       | 93.77  | 6.23   | 100.00 |  |   |
|       | 93.77  | 6.23   |        |  |   |
|       | 100.00 | 100.00 |        |  |   |
|       | +      |        | +      |  | + |
| Total | 19231  | 1278   | 20509  |  |   |
|       | 93.77  | 6.23   | 100.00 |  |   |

Complications and medical history at the time of obtaining Table 2-3 informed consent by the presence or absence of proton-pump inhibitors

FREQ Procedure

|   |       | Cumulative           |                  |        |
|---|-------|----------------------|------------------|--------|
|   |       | Percent of ALL power | Percent of power |        |
| 1 | 20509 | 100.00               | 20509            | 100.00 |

Table : ALL \* GASD 3 YN

ALL

GASD3YN(Reflux esophagitis)

Power |

Percent |

Percent of rows

Percent of columns | None | With | Total

|         |         |         |        |
|---------|---------|---------|--------|
| +_____+ | +_____+ | +_____+ |        |
| 1       | 19231   | 1278    | 20509  |
|         | 93.77   | 6.23    | 100.00 |
|         | 93.77   | 6.23    |        |
|         | 100.00  | 100.00  |        |
| +_____+ | +_____+ | +_____+ |        |
| Total   | 19231   | 1278    | 20509  |
|         | 93.77   | 6.23    | 100.00 |

Complications and medical history at the time of obtaining Table 2-3 informed consent by the presence or absence of proton-pump inhibitors

FREQ Procedure

|                      |       |                  | Cumulative |        |
|----------------------|-------|------------------|------------|--------|
| Percent of ALL power |       | Percent of power |            |        |
| 1                    | 20509 | 100.00           | 20509      | 100.00 |

Table : ALL \* GASD 4 YN

ALL

GASD4YN(Other Gastrointestinal Disease)

| Power                   |        |        |        |
|-------------------------|--------|--------|--------|
| Percent                 |        |        |        |
| Percent of rows         |        |        |        |
| Percent of columns      | None   | With   | Total  |
| _____ + _____ + _____ + |        |        |        |
| 1                       | 18026  | 2483   | 20509  |
|                         | 87.89  | 12.11  | 100.00 |
|                         | 87.89  | 12.11  |        |
|                         | 100.00 | 100.00 |        |
| _____ + _____ + _____ + |        |        |        |
| Total                   | 18026  | 2483   | 20509  |
|                         | 87.89  | 12.11  | 100.00 |

Complications and medical history at the time of obtaining Table 2-3 informed consent by the presence or absence of proton-pump inhibitors

FREQ Procedure

|                      |       |                  | Cumulative |        |
|----------------------|-------|------------------|------------|--------|
| Percent of ALL power |       | Percent of power |            |        |
| 1                    | 20509 | 100.00           | 20509      | 100.00 |

Table : ALL \* GASD 4 YN

ALL

GASD4YN(Other Gastrointestinal Disease)

| Power                   |        |        |        |
|-------------------------|--------|--------|--------|
| Percent                 |        |        |        |
| Percent of rows         |        |        |        |
| Percent of columns      | None   | With   | Total  |
| _____ + _____ + _____ + |        |        |        |
| 1                       | 18026  | 2483   | 20509  |
|                         | 87.89  | 12.11  | 100.00 |
|                         | 87.89  | 12.11  |        |
|                         | 100.00 | 100.00 |        |
| _____ + _____ + _____ + |        |        |        |
| Total                   | 18026  | 2483   | 20509  |
|                         | 87.89  | 12.11  | 100.00 |



Complications and medical history at the time of obtaining Table 2-3 informed consent by the presence or absence of proton-pump inhibitors

FREQ Procedure

|                      |       |                  | Cumulative |        |
|----------------------|-------|------------------|------------|--------|
| Percent of ALL power |       | Percent of power |            |        |
| 1                    | 20509 | 100.00           | 20509      | 100.00 |

Tables: ALL\* MGTYN

ALL MGTYN(Malignant Tumor)

| Power              |        |        |        |   |
|--------------------|--------|--------|--------|---|
| Percent            |        |        |        |   |
| Percent of rows    |        |        |        |   |
| Percent of columns | None   | With   | Total  |   |
|                    | +      | +      | +      | + |
| 1                  | 18313  | 2196   | 20509  |   |
|                    | 89.29  | 10.71  | 100.00 |   |
|                    | 89.29  | 10.71  |        |   |
|                    | 100.00 | 100.00 |        |   |
|                    | +      | +      | +      | + |
| Total              | 18313  | 2196   | 20509  |   |
|                    | 89.29  | 10.71  | 100.00 |   |

Complications and medical history at the time of obtaining Table 2-3 informed consent by the presence or absence of proton-pump inhibitors

FREQ Procedure

|                      |       |                  | Cumulative |        |
|----------------------|-------|------------------|------------|--------|
| Percent of ALL power |       | Percent of power |            |        |
| 1                    | 20509 | 100.00           | 20509      | 100.00 |

Tables: ALL\* MGTYN

ALL MGTYN(Malignant Tumor)

| Power              |        |        |        |   |
|--------------------|--------|--------|--------|---|
| Percent            |        |        |        |   |
| Percent of rows    |        |        |        |   |
| Percent of columns | None   | With   | Total  |   |
|                    | +      | +      | +      | + |
| 1                  | 18313  | 2196   | 20509  |   |
|                    | 89.29  | 10.71  | 100.00 |   |
|                    | 89.29  | 10.71  |        |   |
|                    | 100.00 | 100.00 |        |   |
|                    | +      | +      | +      | + |
| Total              | 18313  | 2196   | 20509  |   |
|                    | 89.29  | 10.71  | 100.00 |   |

Complications and medical history at the time of obtaining Table 2-3 informed consent by the presence or absence of proton-pump inhibitors

FREQ Procedure

|                      |       |                  | Cumulative |        |
|----------------------|-------|------------------|------------|--------|
| Percent of ALL power |       | Percent of power |            |        |
| 1                    | 20509 | 100.00           | 20509      | 100.00 |

Table : ALL \* MGT 1 YN

ALL MGT1YN(Gastric Cancer)

| Power              |           |           |           |
|--------------------|-----------|-----------|-----------|
| Percent            |           |           |           |
| Percent of rows    |           |           |           |
| Percent of columns | None      | With      | Total     |
|                    | + _____ + | + _____ + | + _____ + |
| 1                  | 20067     | 442       | 20509     |
|                    | 97.84     | 2.16      | 100.00    |
|                    | 97.84     | 2.16      |           |
|                    | 100.00    | 100.00    |           |
|                    | + _____ + | + _____ + | + _____ + |
| Total              | 20067     | 442       | 20509     |
|                    | 97.84     | 2.16      | 100.00    |

Complications and medical history at the time of obtaining Table 2-3 informed consent by the presence or absence of proton-pump inhibitors

FREQ Procedure

|                      |       |                  | Cumulative |        |
|----------------------|-------|------------------|------------|--------|
| Percent of ALL power |       | Percent of power |            |        |
| 1                    | 20509 | 100.00           | 20509      | 100.00 |

Table : ALL \* MGT 1 YN

ALL MGT1YN(Gastric Cancer)

| Power              |        |        |        |
|--------------------|--------|--------|--------|
| Percent            |        |        |        |
| Percent of rows    |        |        |        |
| Percent of columns | None   | With   | Total  |
|                    | +      | +      | +      |
| 1                  | 20067  | 442    | 20509  |
|                    | 97.84  | 2.16   | 100.00 |
|                    | 97.84  | 2.16   |        |
|                    | 100.00 | 100.00 |        |
|                    | +      | +      | +      |
| Total              | 20067  | 442    | 20509  |
|                    | 97.84  | 2.16   | 100.00 |

Complications and medical history at the time of obtaining Table 2-3 informed consent by the presence or absence of proton-pump inhibitors

FREQ Procedure

|                      |       |                  | Cumulative |        |
|----------------------|-------|------------------|------------|--------|
| Percent of ALL power |       | Percent of power |            |        |
| 1                    | 20509 | 100.00           | 20509      | 100.00 |

Table : ALL \* MGT 2 YN

ALL MGT2YN(Colorectal Cancer)

| Power              |           |           |           |
|--------------------|-----------|-----------|-----------|
| Percent            |           |           |           |
| Percent of rows    |           |           |           |
| Percent of columns | None      | With      | Total     |
|                    | + _____ + | + _____ + | + _____ + |
| 1                  | 20052     | 457       | 20509     |
|                    | 97.77     | 2.23      | 100.00    |
|                    | 97.77     | 2.23      |           |
|                    | 100.00    | 100.00    |           |
|                    | + _____ + | + _____ + | + _____ + |
| Total              | 20052     | 457       | 20509     |
|                    | 97.77     | 2.23      | 100.00    |

Complications and medical history at the time of obtaining Table 2-3 informed consent by the presence or absence of proton-pump inhibitors

FREQ Procedure

|                      |       |                  | Cumulative |        |
|----------------------|-------|------------------|------------|--------|
| Percent of ALL power |       | Percent of power |            |        |
| 1                    | 20509 | 100.00           | 20509      | 100.00 |

Table : ALL \* MGT 2 YN

ALL MGT2YN(Colorectal Cancer)

| Power              |           |           |           |
|--------------------|-----------|-----------|-----------|
| Percent            |           |           |           |
| Percent of rows    |           |           |           |
| Percent of columns | None      | With      | Total     |
|                    | + _____ + | + _____ + | + _____ + |
| 1                  | 20052     | 457       | 20509     |
|                    | 97.77     | 2.23      | 100.00    |
|                    | 97.77     | 2.23      |           |
|                    | 100.00    | 100.00    |           |
|                    | + _____ + | + _____ + | + _____ + |
| Total              | 20052     | 457       | 20509     |
|                    | 97.77     | 2.23      | 100.00    |

Complications and medical history at the time of obtaining Table 2-3 informed consent by the presence or absence of proton-pump inhibitors

FREQ Procedure

|                      |       |                  | Cumulative |        |
|----------------------|-------|------------------|------------|--------|
| Percent of ALL power |       | Percent of power |            |        |
| 1                    | 20509 | 100.00           | 20509      | 100.00 |

Table : ALL \* MGT 3 YN

ALL MGT3YN(Lung Cancer)

| Power              |        |        |        |
|--------------------|--------|--------|--------|
| Percent            |        |        |        |
| Percent of rows    |        |        |        |
| Percent of columns | None   | With   | Total  |
|                    | +      | +      | +      |
| 1                  | 20287  | 222    | 20509  |
|                    | 98.92  | 1.08   | 100.00 |
|                    | 98.92  | 1.08   |        |
|                    | 100.00 | 100.00 |        |
|                    | +      | +      | +      |
| Total              | 20287  | 222    | 20509  |
|                    | 98.92  | 1.08   | 100.00 |

Complications and medical history at the time of obtaining Table 2-3 informed consent by the presence or absence of proton-pump inhibitors

FREQ Procedure

|                      |       |                  | Cumulative |        |
|----------------------|-------|------------------|------------|--------|
| Percent of ALL power |       | Percent of power |            |        |
| 1                    | 20509 | 100.00           | 20509      | 100.00 |

Table : ALL \* MGT 3 YN

ALL MGT3YN(Lung Cancer)

| Power              |        |        |        |   |
|--------------------|--------|--------|--------|---|
| Percent            |        |        |        |   |
| Percent of rows    |        |        |        |   |
| Percent of columns | None   | With   | Total  |   |
|                    | +      | +      | +      | + |
| 1                  | 20287  | 222    | 20509  |   |
|                    | 98.92  | 1.08   | 100.00 |   |
|                    | 98.92  | 1.08   |        |   |
|                    | 100.00 | 100.00 |        |   |
|                    | +      | +      | +      | + |
| Total              | 20287  | 222    | 20509  |   |
|                    | 98.92  | 1.08   | 100.00 |   |



Complications and medical history at the time of obtaining Table 2-3 informed consent by the presence or absence of proton-pump inhibitors

FREQ Procedure

|                      |       |                  | Cumulative |        |
|----------------------|-------|------------------|------------|--------|
| Percent of ALL power |       | Percent of power |            |        |
| 1                    | 20509 | 100.00           | 20509      | 100.00 |

Table : ALL \* MGT 4 YN

ALL MGT4YN(Brest Cancer)

| Power              |        |        |        |   |
|--------------------|--------|--------|--------|---|
| Percent            |        |        |        |   |
| Percent of rows    |        |        |        |   |
| Percent of columns | None   | With   | Total  |   |
|                    | +      | +      | +      | + |
| 1                  | 20359  | 150    | 20509  |   |
|                    | 99.27  | 0.73   | 100.00 |   |
|                    | 99.27  | 0.73   |        |   |
|                    | 100.00 | 100.00 |        |   |
|                    | +      | +      | +      | + |
| Total              | 20359  | 150    | 20509  |   |
|                    | 99.27  | 0.73   | 100.00 |   |

Complications and medical history at the time of obtaining Table 2-3 informed consent by the presence or absence of proton-pump inhibitors

FREQ Procedure

|                      |       |                  | Cumulative |        |
|----------------------|-------|------------------|------------|--------|
| Percent of ALL power |       | Percent of power |            |        |
| 1                    | 20509 | 100.00           | 20509      | 100.00 |

Table : ALL \* MGT 4 YN

ALL MGT4YN(Brest Cancer)

| Power              |        |        |        |
|--------------------|--------|--------|--------|
| Percent            |        |        |        |
| Percent of rows    |        |        |        |
| Percent of columns | None   | With   | Total  |
|                    | +      | +      | +      |
| 1                  | 20359  | 150    | 20509  |
|                    | 99.27  | 0.73   | 100.00 |
|                    | 99.27  | 0.73   |        |
|                    | 100.00 | 100.00 |        |
|                    | +      | +      | +      |
| Total              | 20359  | 150    | 20509  |
|                    | 99.27  | 0.73   | 100.00 |

Complications and medical history at the time of obtaining Table 2-3 informed consent by the presence or absence of proton-pump inhibitors

FREQ Procedure

|                      |       |                  | Cumulative |        |
|----------------------|-------|------------------|------------|--------|
| Percent of ALL power |       | Percent of power |            |        |
| 1                    | 20509 | 100.00           | 20509      | 100.00 |

Table : ALL \* MGT 5 YN

ALL

MGT5YN(Uterus/Ovarian Cancer)

| Power              |        |        |        |
|--------------------|--------|--------|--------|
| Percent            |        |        |        |
| Percent of rows    |        |        |        |
| Percent of columns | None   | With   | Total  |
|                    | +      | +      | +      |
| 1                  | 20455  | 54     | 20509  |
|                    | 99.74  | 0.26   | 100.00 |
|                    | 99.74  | 0.26   |        |
|                    | 100.00 | 100.00 |        |
|                    | +      | +      | +      |
| Total              | 20455  | 54     | 20509  |
|                    | 99.74  | 0.26   | 100.00 |

Complications and medical history at the time of obtaining Table 2-3 informed consent by the presence or absence of proton-pump inhibitors

FREQ Procedure

|                      |       |                  | Cumulative |        |
|----------------------|-------|------------------|------------|--------|
| Percent of ALL power |       | Percent of power |            |        |
| 1                    | 20509 | 100.00           | 20509      | 100.00 |

Table : ALL \* MGT 5 YN

ALL

MGT5YN(Uterus/Ovarian Cancer)

| Power              |        |        |        |
|--------------------|--------|--------|--------|
| Percent            |        |        |        |
| Percent of rows    |        |        |        |
| Percent of columns | None   | With   | Total  |
|                    | +      | +      | +      |
| 1                  | 20455  | 54     | 20509  |
|                    | 99.74  | 0.26   | 100.00 |
|                    | 99.74  | 0.26   |        |
|                    | 100.00 | 100.00 |        |
|                    | +      | +      | +      |
| Total              | 20455  | 54     | 20509  |
|                    | 99.74  | 0.26   | 100.00 |

Complications and medical history at the time of obtaining Table 2-3 informed consent by the presence or absence of proton-pump inhibitors

FREQ Procedure

|                      |       |                  | Cumulative |        |
|----------------------|-------|------------------|------------|--------|
| Percent of ALL power |       | Percent of power |            |        |
| 1                    | 20509 | 100.00           | 20509      | 100.00 |

Table : ALL \* MGT 6 YN

ALL MGT6YN(Pancreatic Cancer)

| Power              |        |        |        |   |
|--------------------|--------|--------|--------|---|
| Percent            |        |        |        |   |
| Percent of rows    |        |        |        |   |
| Percent of columns | None   | With   | Total  |   |
|                    | +      | +      | +      | + |
| 1                  | 20488  | 21     | 20509  |   |
|                    | 99.90  | 0.10   | 100.00 |   |
|                    | 99.90  | 0.10   |        |   |
|                    | 100.00 | 100.00 |        |   |
|                    | +      | +      | +      | + |
| Total              | 20488  | 21     | 20509  |   |
|                    | 99.90  | 0.10   | 100.00 |   |

Complications and medical history at the time of obtaining Table 2-3 informed consent by the presence or absence of proton-pump inhibitors

FREQ Procedure

|                      |       |                  | Cumulative |        |
|----------------------|-------|------------------|------------|--------|
| Percent of ALL power |       | Percent of power |            |        |
| 1                    | 20509 | 100.00           | 20509      | 100.00 |

Table : ALL \* MGT 6 YN

ALL MGT6YN(Pancreatic Cancer)

| Power              |        |        |        |
|--------------------|--------|--------|--------|
| Percent            |        |        |        |
| Percent of rows    |        |        |        |
| Percent of columns | None   | With   | Total  |
|                    | +      | +      | +      |
| 1                  | 20488  | 21     | 20509  |
|                    | 99.90  | 0.10   | 100.00 |
|                    | 99.90  | 0.10   |        |
|                    | 100.00 | 100.00 |        |
|                    | +      | +      | +      |
| Total              | 20488  | 21     | 20509  |
|                    | 99.90  | 0.10   | 100.00 |

Complications and medical history at the time of obtaining Table 2-3 informed consent by the presence or absence of proton-pump inhibitors

FREQ Procedure

|   |       | Cumulative           |                  |        |
|---|-------|----------------------|------------------|--------|
|   |       | Percent of ALL power | Percent of power |        |
| 1 | 20509 | 100.00               | 20509            | 100.00 |

Table : ALL \* MGT 7 YN

ALL

MGT7YN(Other Malignant Tumor)

Power |

Percent |

Percent of rows

Percent of columns | None | With | Total

|         |         |         |        |
|---------|---------|---------|--------|
| +_____+ | +_____+ | +_____+ |        |
| 1       | 19425   | 1084    | 20509  |
|         | 94.71   | 5.29    | 100.00 |
|         | 94.71   | 5.29    |        |
|         | 100.00  | 100.00  |        |
| +_____+ | +_____+ | +_____+ |        |
| Total   | 19425   | 1084    | 20509  |
|         | 94.71   | 5.29    | 100.00 |

Complications and medical history at the time of obtaining Table 2-3 informed consent by the presence or absence of proton-pump inhibitors

FREQ Procedure

|   |       | Cumulative           |                  |        |
|---|-------|----------------------|------------------|--------|
|   |       | Percent of ALL power | Percent of power |        |
| 1 | 20509 | 100.00               | 20509            | 100.00 |

Table : ALL \* MGT 7 YN

ALL

MGT7YN(Other Malignant Tumor)

Power |

Percent |

Percent of rows

Percent of columns | None | With | Total

|         |         |         |        |
|---------|---------|---------|--------|
| +_____+ | +_____+ | +_____+ |        |
| 1       | 19425   | 1084    | 20509  |
|         | 94.71   | 5.29    | 100.00 |
|         | 94.71   | 5.29    |        |
|         | 100.00  | 100.00  |        |
| +_____+ | +_____+ | +_____+ |        |
| Total   | 19425   | 1084    | 20509  |
|         | 94.71   | 5.29    | 100.00 |



Complications and medical history at the time of obtaining Table 2-3 informed consent by the presence or absence of proton-pump inhibitors

FREQ Procedure

|                      |       |                  | Cumulative |        |
|----------------------|-------|------------------|------------|--------|
| Percent of ALL power |       | Percent of power |            |        |
| 1                    | 20509 | 100.00           | 20509      | 100.00 |

Tables: ALL\* ALZHYN

ALL ALZHYN(Alzheimer)

| Power | Percent | Percent of rows | Percent of columns | None | With | Total |
|-------|---------|-----------------|--------------------|------|------|-------|
|       |         |                 | +                  | +    | +    | +     |
| 1     | 18942   | 1567            | 20509              |      |      |       |
|       | 92.36   | 7.64            | 100.00             |      |      |       |
|       | 92.36   | 7.64            |                    |      |      |       |
|       | 100.00  | 100.00          |                    |      |      |       |
|       |         |                 | +                  | +    | +    | +     |
| Total | 18942   | 1567            | 20509              |      |      |       |
|       | 92.36   | 7.64            | 100.00             |      |      |       |

Complications and medical history at the time of obtaining Table 2-3 informed consent by the presence or absence of proton-pump inhibitors

FREQ Procedure

|                      |       |                  | Cumulative |        |
|----------------------|-------|------------------|------------|--------|
| Percent of ALL power |       | Percent of power |            |        |
| 1                    | 20509 | 100.00           | 20509      | 100.00 |

Tables: ALL\* ALZHYN

ALL ALZHYN(Alzheimer)

| Power              |        |        |        |   |
|--------------------|--------|--------|--------|---|
| Percent            |        |        |        |   |
| Percent of rows    |        |        |        |   |
| Percent of columns | None   | With   | Total  |   |
|                    | +      | +      | +      | + |
| 1                  | 18942  | 1567   | 20509  |   |
|                    | 92.36  | 7.64   | 100.00 |   |
|                    | 92.36  | 7.64   |        |   |
|                    | 100.00 | 100.00 |        |   |
|                    | +      | +      | +      | + |
| Total              | 18942  | 1567   | 20509  |   |
|                    | 92.36  | 7.64   | 100.00 |   |

Complications and medical history at the time of obtaining Table 2-3 informed consent by the presence or absence of proton-pump inhibitors

FREQ Procedure

|                      |       |                  | Cumulative |        |
|----------------------|-------|------------------|------------|--------|
| Percent of ALL power |       | Percent of power |            |        |
| 1                    | 20509 | 100.00           | 20509      | 100.00 |

Tables: ALL \* OHCPYN

ALL

OHCPYN(Other Complications)

Power |

Percent |

Percent of rows

Percent of columns | None | With | Total

|       |   |        |   |        |   |        |
|-------|---|--------|---|--------|---|--------|
|       | + |        | + |        | + |        |
| 1     |   | 14133  |   | 6376   |   | 20509  |
|       |   | 68.91  |   | 31.09  |   | 100.00 |
|       |   | 68.91  |   | 31.09  |   |        |
|       |   | 100.00 |   | 100.00 |   |        |
|       | + |        | + |        | + |        |
| Total |   | 14133  |   | 6376   |   | 20509  |
|       |   | 68.91  |   | 31.09  |   | 100.00 |

Complications and medical history at the time of obtaining Table 2-3 informed consent by the presence or absence of proton-pump inhibitors

FREQ Procedure

|                      |       |                  | Cumulative |        |
|----------------------|-------|------------------|------------|--------|
| Percent of ALL power |       | Percent of power |            |        |
| 1                    | 20509 | 100.00           | 20509      | 100.00 |

Tables: ALL \* OHCPYN

ALL

OHCPYN(Other Complications)

Power |

Percent |

Percent of rows

Percent of columns | None | With | Total

|       |   |        |   |        |   |        |
|-------|---|--------|---|--------|---|--------|
|       | + |        | + |        | + |        |
| 1     |   | 14133  |   | 6376   |   | 20509  |
|       |   | 68.91  |   | 31.09  |   | 100.00 |
|       |   | 68.91  |   | 31.09  |   |        |
|       |   | 100.00 |   | 100.00 |   |        |
|       | + |        | + |        | + |        |
| Total |   | 14133  |   | 6376   |   | 20509  |
|       |   | 68.91  |   | 31.09  |   | 100.00 |

Complications and medical history at the time of obtaining Table 2-3 informed consent by the presence or absence of proton-pump inhibitors

FREQ Procedure

|                      |                  | Cumulative           |                  |
|----------------------|------------------|----------------------|------------------|
| Percent of ALL power | Percent of power | Percent of ALL power | Percent of power |
| 1                    | 20509            | 100.00               | 20509 100.00     |

Tables: ALL \* IMGYN

ALL IMGYN(Brain Imaging Test)

| Power                 |         |         |         |         |
|-----------------------|---------|---------|---------|---------|
| Percent               |         |         |         |         |
| Percent of rows       |         |         |         |         |
| Percentage of columns | None    | Unknown | Total   |         |
| +_____+               | +_____+ | +_____+ | +_____+ | +_____+ |
| 1                     | 18434   | 1620    | 455     | 20509   |
|                       | 89.88   | 7.90    | 2.22    | 100.00  |
|                       | 89.88   | 7.90    | 2.22    |         |
|                       | 100.00  | 100.00  | 100.00  |         |
| +_____+               | +_____+ | +_____+ | +_____+ | +_____+ |
| Total                 | 18434   | 1620    | 455     | 20509   |
|                       | 89.88   | 7.90    | 2.22    | 100.00  |

Complications and medical history at the time of obtaining Table 2-3 informed consent by the presence or absence of proton-pump inhibitors

FREQ Procedure

|                      |       |                  | Cumulative |        |
|----------------------|-------|------------------|------------|--------|
| Percent of ALL power |       | Percent of power |            |        |
| 1                    | 20509 | 100.00           | 20509      | 100.00 |

Tables: ALL \* IMGYN

ALL IMGYN(Brain Imaging Test)

| Power                 |        |         |        |        |
|-----------------------|--------|---------|--------|--------|
| Percent               |        |         |        |        |
| Percent of rows       |        |         |        |        |
| Percentage of columns | None   | Unknown | Total  |        |
|                       | +      | +       | +      | +      |
| 1                     | 18434  | 1620    | 455    | 20509  |
|                       | 89.88  | 7.90    | 2.22   | 100.00 |
|                       | 89.88  | 7.90    | 2.22   |        |
|                       | 100.00 | 100.00  | 100.00 |        |
|                       | +      | +       | +      | +      |
| Total                 | 18434  | 1620    | 455    | 20509  |
|                       | 89.88  | 7.90    | 2.22   | 100.00 |

Complications and medical history at the time of obtaining Table 2-3 informed consent by the presence or absence of proton-pump inhibitors

FREQ Procedure

|                      |       |                  | Cumulative |        |
|----------------------|-------|------------------|------------|--------|
| Percent of ALL power |       | Percent of power |            |        |
| 1                    | 20509 | 100.00           | 20509      | 100.00 |

Tables: ALL \* IMGYN

ALL IMGYN(Brain Imaging Test)

| Power                 |        |         |        |        |
|-----------------------|--------|---------|--------|--------|
| Percent               |        |         |        |        |
| Percent of rows       |        |         |        |        |
| Percentage of columns | None   | Unknown | Total  |        |
|                       | +      | +       | +      | +      |
| 1                     | 18434  | 1620    | 455    | 20509  |
|                       | 89.88  | 7.90    | 2.22   | 100.00 |
|                       | 89.88  | 7.90    | 2.22   |        |
|                       | 100.00 | 100.00  | 100.00 |        |
|                       | +      | +       | +      | +      |
| Total                 | 18434  | 1620    | 455    | 20509  |
|                       | 89.88  | 7.90    | 2.22   | 100.00 |

Complications and medical history at the time of obtaining Table 2-3 informed consent by the presence or absence of proton-pump inhibitors

FREQ Procedure

|   |       | Cumulative           |                  |        |
|---|-------|----------------------|------------------|--------|
|   |       | Percent of ALL power | Percent of power |        |
| 1 | 20509 | 100.00               | 20509            | 100.00 |

Tables: ALL\* FALYN

ALL FALYN(Fall Down within one year)

| Power                                          |        |        |        |        |
|------------------------------------------------|--------|--------|--------|--------|
| Percent                                        |        |        |        |        |
| Percent of rows                                |        |        |        |        |
| Percentage of columns  None   Unknown    Total |        |        |        |        |
| +_____+_____+_____+                            |        |        |        |        |
| 1                                              | 16887  | 1370   | 2252   | 20509  |
|                                                | 82.34  | 6.68   | 10.98  | 100.00 |
|                                                | 82.34  | 6.68   | 10.98  |        |
|                                                | 100.00 | 100.00 | 100.00 |        |
| +_____+_____+_____+                            |        |        |        |        |
| Total                                          | 16887  | 1370   | 2252   | 20509  |
|                                                | 82.34  | 6.68   | 10.98  | 100.00 |



Complications and medical history at the time of obtaining Table 2-3 informed consent by the presence or absence of proton-pump inhibitors

FREQ Procedure

|                      |       |                  | Cumulative |        |
|----------------------|-------|------------------|------------|--------|
| Percent of ALL power |       | Percent of power |            |        |
| 1                    | 20509 | 100.00           | 20509      | 100.00 |

Tables: ALL\* FALYN

ALL FALYN(Fall Down within one year)

| Power                 |        |         |        |        |
|-----------------------|--------|---------|--------|--------|
| Percent               |        |         |        |        |
| Percent of rows       |        |         |        |        |
| Percentage of columns | None   | Unknown | Total  |        |
|                       | +      | +       | +      | +      |
| 1                     | 16887  | 1370    | 2252   | 20509  |
|                       | 82.34  | 6.68    | 10.98  | 100.00 |
|                       | 82.34  | 6.68    | 10.98  |        |
|                       | 100.00 | 100.00  | 100.00 |        |
|                       | +      | +       | +      | +      |
| Total                 | 16887  | 1370    | 2252   | 20509  |
|                       | 82.34  | 6.68    | 10.98  | 100.00 |

Complications and medical history at the time of obtaining Table 2-3 informed consent by the presence or absence of proton-pump inhibitors

FREQ Procedure

|                      |       |                  | Cumulative |        |
|----------------------|-------|------------------|------------|--------|
| Percent of ALL power |       | Percent of power |            |        |
| 1                    | 20509 | 100.00           | 20509      | 100.00 |

Tables: ALL\* FALYN

ALL FALYN(Fall Down within one year)

| Power                 |        |         |        |        |
|-----------------------|--------|---------|--------|--------|
| Percent               |        |         |        |        |
| Percent of rows       |        |         |        |        |
| Percentage of columns | None   | Unknown | Total  |        |
|                       | +      | +       | +      | +      |
| 1                     | 16887  | 1370    | 2252   | 20509  |
|                       | 82.34  | 6.68    | 10.98  | 100.00 |
|                       | 82.34  | 6.68    | 10.98  |        |
|                       | 100.00 | 100.00  | 100.00 |        |
|                       | +      | +       | +      | +      |
| Total                 | 16887  | 1370    | 2252   | 20509  |
|                       | 82.34  | 6.68    | 10.98  | 100.00 |

Complications and medical history at the time of obtaining Table 2-3 informed consent by the presence or absence of proton-pump inhibitors

FREQ Procedure

Tables: ALL \* FNDYN

ALL FNDYN(Brain Imaging Result)

Power |

Percent |

Percent of rows

Percentage of columns |None| |Unknown| | Total

|       | None   | Unknown | Total  |
|-------|--------|---------|--------|
| 1     | 767    | 788     | 1620   |
|       | 47.35  | 48.64   | 100.00 |
|       | 47.35  | 48.64   | 4.01   |
|       | 100.00 | 100.00  | 100.00 |
| Total | 767    | 788     | 1620   |
|       | 47.35  | 48.64   | 4.01   |
|       |        |         | 100.00 |

Degree of missing values = 18889

Complications and medical history at the time of obtaining Table 2-3 informed consent by the presence or absence of proton-pump inhibitors

FREQ Procedure

Tables: ALL \* FNDYN

ALL FNDYN(Brain Imaging Result)

Power |

Percent |

Percent of rows

Percentage of columns |None| |Unknown| | Total

|       | None   | Unknown | Total  |
|-------|--------|---------|--------|
| 1     | 767    | 788     | 1620   |
|       | 47.35  | 48.64   | 100.00 |
|       | 47.35  | 48.64   | 4.01   |
|       | 100.00 | 100.00  | 100.00 |
| Total | 767    | 788     | 1620   |
|       | 47.35  | 48.64   | 4.01   |
|       |        |         | 100.00 |

Degree of missing values = 18889

Complications and medical history at the time of obtaining Table 2-3 informed consent by the presence or absence of proton-pump inhibitors

FREQ Procedure

Tables: ALL \* FNDYN

ALL FNDYN(Brain Imaging Result)

Power |

Percent |

Percent of rows

Percentage of columns |None| |Unknown| | Total

|       | None   | Unknown | Total  |
|-------|--------|---------|--------|
| 1     | 767    | 788     | 1620   |
|       | 47.35  | 48.64   | 100.00 |
|       | 47.35  | 48.64   | 4.01   |
|       | 100.00 | 100.00  | 100.00 |
| Total | 767    | 788     | 1620   |
|       | 47.35  | 48.64   | 4.01   |
|       |        |         | 100.00 |

Degree of missing values = 18889

Complications and medical history at the time of obtaining Table 2-3 informed consent by the presence or absence of proton-pump inhibitors

FREQ Procedure

Number of levels of variables

Variable Label Level Count

---

GROUP1 2

MHYN Medical History 2

Table : GROUP1 \* MHYN

GROUP1 MHYN(Medical History)

Power |

Percent |

Percent of rows

Percent of columns | None | With | Total

|       | +     | +     | +      |
|-------|-------|-------|--------|
| 1     | 179   | 11802 | 11981  |
|       | 0.55  | 36.33 | 36.88  |
|       | 1.49  | 98.51 |        |
|       | 20.25 | 37.34 |        |
|       | +     | +     | +      |
| 2     | 705   | 19804 | 20509  |
|       | 2.17  | 60.95 | 63.12  |
|       | 3.44  | 96.56 |        |
|       | 79.75 | 62.66 |        |
|       | +     | +     | +      |
| Total | 884   | 31606 | 32490  |
|       | 2.72  | 97.28 | 100.00 |

Complications and medical history at the time of obtaining Table 2-3 informed consent by the presence or absence of proton-pump inhibitors

FREQ Procedure

Number of levels of variables

Variables Label Level Number

---

GROUP1 2

HBPYN High Blood Pressure 2

Table : GROUP1 \* HBPYN

GROUP1

HBPYN(High Blood Pressure)

Power |

Percent |

Percent of rows

Percent of columns | None | With | Total

|       | +     | +     | +      |
|-------|-------|-------|--------|
| 1     | 2641  | 9340  | 11981  |
|       | 8.13  | 28.75 | 36.88  |
|       | 22.04 | 77.96 |        |
|       | 32.95 | 38.16 |        |
|       | +     | +     | +      |
| 2     | 5374  | 15135 | 20509  |
|       | 16.54 | 46.58 | 63.12  |
|       | 26.20 | 73.80 |        |
|       | 67.05 | 61.84 |        |
|       | +     | +     | +      |
| Total | 8015  | 24475 | 32490  |
|       | 24.67 | 75.33 | 100.00 |

Complications and medical history at the time of obtaining Table 2-3 informed consent by the presence or absence of proton-pump inhibitors

FREQ Procedure

Number of levels of variables

Variables Label Level Number

GROUP1 2

DBYN Diabetes 2

Table : GROUP1 \* DBYN

GROUP1 DBYN(Diabetes)

Power |

Percent |

Percent of rows

Percent of columns | None | With | Total

|       | +     | +     | +      |
|-------|-------|-------|--------|
| 1     | 8497  | 3484  | 11981  |
|       | 26.15 | 10.72 | 36.88  |
|       | 70.92 | 29.08 |        |
|       | 35.79 | 39.82 |        |
|       | +     | +     | +      |
| 2     | 15243 | 5266  | 20509  |
|       | 46.92 | 16.21 | 63.12  |
|       | 74.32 | 25.68 |        |
|       | 64.21 | 60.18 |        |
|       | +     | +     | +      |
| Total | 23740 | 8750  | 32490  |
|       | 73.07 | 26.93 | 100.00 |



Complications and medical history at the time of obtaining Table 2-3 informed consent by the presence or absence of proton-pump inhibitors

FREQ Procedure

Number of levels of variables

Number of Variables Level

GROUP1 2

t\_DB 2

Table : GROUP1 \* t\_DB

GROUP1 t\_DB

Power |

Percent |

Percent of rows

Percentage of columns | 0 | 1 | Sum

|       |       | +    |       | + |        | + |
|-------|-------|------|-------|---|--------|---|
| 1     | 11220 |      | 761   |   | 11981  |   |
|       | 34.53 |      | 2.34  |   | 36.88  |   |
|       | 93.65 |      | 6.35  |   |        |   |
|       | 36.39 |      | 45.84 |   |        |   |
|       |       | +    |       | + |        | + |
| 2     | 19610 |      | 899   |   | 20509  |   |
|       | 60.36 |      | 2.77  |   | 63.12  |   |
|       | 95.62 |      | 4.38  |   |        |   |
|       | 63.61 |      | 54.16 |   |        |   |
|       |       | +    |       | + |        | + |
| Total | 30830 | 1660 | 32490 |   |        |   |
|       | 94.89 |      | 5.11  |   | 100.00 |   |

Complications and medical history at the time of obtaining Table 2-3 informed consent by the presence or absence of proton-pump inhibitors

FREQ Procedure

Number of levels of variables

Variables Label Level Number

---

GROUP1 2

DB1YN Diabetic Retinopathy 2

Table : GROUP 1 \* DB 1 YN

GROUP1

DB1YN(Diabetic Retinopathy)

Power |

Percent |

Percent of rows

Percent of columns | None | With | Total

|       | +     | +     | +      |
|-------|-------|-------|--------|
| 1     | 11753 | 228   | 11981  |
|       | 36.17 | 0.70  | 36.88  |
|       | 98.10 | 1.90  |        |
|       | 36.75 | 45.06 |        |
|       | +     | +     | +      |
| 2     | 20231 | 278   | 20509  |
|       | 62.27 | 0.86  | 63.12  |
|       | 98.64 | 1.36  |        |
|       | 63.25 | 54.94 |        |
|       | +     | +     | +      |
| Total | 31984 | 506   | 32490  |
|       | 98.44 | 1.56  | 100.00 |

Complications and medical history at the time of obtaining Table 2-3 informed consent by the presence or absence of proton-pump inhibitors

FREQ Procedure

Number of levels of variables

Variables Label Level Number

GROUP1 2

DB2YN Diabetic Nephropathy 2

Table : GROUP 1 \* DB 2 YN

GROUP1

DB2YN(Diabetic Nephropathy)

Power |

Percent |

Percent of rows

Percent of columns | None | With | Total

|       | +     | +     | +      |
|-------|-------|-------|--------|
| 1     | 11403 | 578   | 11981  |
|       | 35.10 | 1.78  | 36.88  |
|       | 95.18 | 4.82  |        |
|       | 36.45 | 48.05 |        |
| 2     | 19884 | 625   | 20509  |
|       | 61.20 | 1.92  | 63.12  |
|       | 96.95 | 3.05  |        |
|       | 63.55 | 51.95 |        |
| Total | 31287 | 1203  | 32490  |
|       | 96.30 | 3.70  | 100.00 |

Complications and medical history at the time of obtaining Table 2-3 informed consent by the presence or absence of proton-pump inhibitors

FREQ Procedure

Number of levels of variables

Variables Label Level Number

---

GROUP1 2

DB3YN Diabetic Neuropathy 2

Table : GROUP 1 \* DB 3 YN

GROUP1

DB3YN(Diabetic Neuropathy)

Power |

Percent |

Percent of rows

Percent of columns | None | With | Total

|       | +     | +     | +      |
|-------|-------|-------|--------|
| 1     | 11839 | 142   | 11981  |
|       | 36.44 | 0.44  | 36.88  |
|       | 98.81 | 1.19  |        |
|       | 36.81 | 43.83 |        |
|       | +     | +     | +      |
| 2     | 20327 | 182   | 20509  |
|       | 62.56 | 0.56  | 63.12  |
|       | 99.11 | 0.89  |        |
|       | 63.19 | 56.17 |        |
|       | +     | +     | +      |
| Total | 32166 | 324   | 32490  |
|       | 99.00 | 1.00  | 100.00 |

Complications and medical history at the time of obtaining Table 2-3 informed consent by the presence or absence of proton-pump inhibitors

FREQ Procedure

Number of levels of variables

Variables Label Level Number

---

GROUP1 2

LMDYN Lipid metabolism disorders 2

Table : GROUP1 \* LMDYN

GROUP1

LMDYN(Lipid metabolism disorders)

Power |

Percent |

Percent of rows

Percent of columns | None | With | Total

|       | +     | +     | +      |
|-------|-------|-------|--------|
| 1     | 6154  | 5827  | 11981  |
|       | 18.94 | 17.93 | 36.88  |
|       | 51.36 | 48.64 |        |
|       | 32.95 | 42.18 |        |
|       | +     | +     | +      |
| 2     | 12521 | 7988  | 20509  |
|       | 38.54 | 24.59 | 63.12  |
|       | 61.05 | 38.95 |        |
|       | 67.05 | 57.82 |        |
|       | +     | +     | +      |
| Total | 18675 | 13815 | 32490  |
|       | 57.48 | 42.52 | 100.00 |

Complications and medical history at the time of obtaining Table 2-3 informed consent by the presence or absence of proton-pump inhibitors

FREQ Procedure

Number of levels of variables

Variable Label Level Count

---

GROUP1 2

HYPURNYN Hyperuricemia 2

Table : GROUP1 \* HYPURNYN

GROUP1 HYPURNYN(Hyperuricemia)

Power |

Percent |

Percent of rows

Percent of columns | None | With | Total

|       | +     | +     | +      |
|-------|-------|-------|--------|
| 1     | 8972  | 3009  | 11981  |
|       | 27.61 | 9.26  | 36.88  |
|       | 74.89 | 25.11 |        |
|       | 35.73 | 40.78 |        |
|       | +     | +     | +      |
| 2     | 16140 | 4369  | 20509  |
|       | 49.68 | 13.45 | 63.12  |
|       | 78.70 | 21.30 |        |
|       | 64.27 | 59.22 |        |
|       | +     | +     | +      |
| Total | 25112 | 7378  | 32490  |
|       | 77.29 | 22.71 | 100.00 |

Complications and medical history at the time of obtaining Table 2-3 informed consent by the presence or absence of proton-pump inhibitors

FREQ Procedure

Number of levels of variables

Variables Label Level Number

---

GROUP1 2

KDDSYN Kidney Disease 2

Table : GROUP1 \* KDDSYN

GROUP1 KDDSYN(Kidney Disease)

Power |

Percent |

Percent of rows

Percent of columns | None | With | Total

|       |       | +     |        | + |       | + |
|-------|-------|-------|--------|---|-------|---|
| 1     | 8596  |       | 3385   |   | 11981 |   |
|       | 26.46 |       | 10.42  |   | 36.88 |   |
|       | 71.75 |       | 28.25  |   |       |   |
|       | 34.55 |       | 44.50  |   |       |   |
|       |       | +     |        | + |       | + |
| 2     | 16287 |       | 4222   |   | 20509 |   |
|       | 50.13 |       | 12.99  |   | 63.12 |   |
|       | 79.41 |       | 20.59  |   |       |   |
|       | 65.45 |       | 55.50  |   |       |   |
|       |       | +     |        | + |       | + |
| Total | 24883 | 7607  | 32490  |   |       |   |
|       | 76.59 | 23.41 | 100.00 |   |       |   |

Complications and medical history at the time of obtaining Table 2-3 informed consent by the presence or absence of proton-pump inhibitors

FREQ Procedure

Number of levels of variables

Variables Label Level Number

---

GROUP1 2

KDDS1YN Chronic Kidney Disease 2

Table : GROUP 1 \* KDDS 1 YN

GROUP1

KDDS1YN(Chronic Kidney Disease)

Power |

Percent |

Percent of rows

Percent of columns | None | With | Total

|       | +     | +     | +      |
|-------|-------|-------|--------|
| 1     | 9001  | 2980  | 11981  |
|       | 27.70 | 9.17  | 36.88  |
|       | 75.13 | 24.87 |        |
|       | 34.98 | 44.10 |        |
|       | +     | +     | +      |
| 2     | 16731 | 3778  | 20509  |
|       | 51.50 | 11.63 | 63.12  |
|       | 81.58 | 18.42 |        |
|       | 65.02 | 55.90 |        |
|       | +     | +     | +      |
| Total | 25732 | 6758  | 32490  |
|       | 79.20 | 20.80 | 100.00 |



Complications and medical history at the time of obtaining Table 2-3 informed consent by the presence or absence of proton-pump inhibitors

FREQ Procedure

Number of levels of variables

Variables Label Level Number

GROUP1 2

KDDS2YN Advanced Renal Dysfunction without Dialysis 2

Table : GROUP 1 \* KDDS 2 YN

GROUP1

KDDS2YN(Advanced Renal Dysfunction without Dialysis)

Power |

Percent |

Percent of rows

Percent of columns | None | With | Total

|       | +         | +     | +      |
|-------|-----------|-------|--------|
| 1     | 11747     | 234   | 11981  |
|       | 36.16     | 0.72  | 36.88  |
|       | 98.05     | 1.95  |        |
|       | 36.69     | 49.58 |        |
|       | +         | +     | +      |
| 2     | 20271     | 238   | 20509  |
|       | 62.39     | 0.73  | 63.12  |
|       | 98.84     | 1.16  |        |
|       | 63.31     | 50.42 |        |
|       | +         | +     | +      |
| Total | 32018 472 | 32490 |        |
|       | 98.55     | 1.45  | 100.00 |

Complications and medical history at the time of obtaining Table 2-3 informed consent by the presence or absence of proton-pump inhibitors

FREQ Procedure

Number of levels of variables

Variables Label Level Number

GROUP1 2

KDDS3YN Advanced Renal Dysfunction with Dialysis 2

Table : GROUP 1 \* KDDS 3 YN

GROUP1

KDDS3YN(Advanced Renal Dysfunction with Dialysis)

Power |

Percent |

Percent of rows

Percent of columns | None | With | Total

|       | +     | +     | +      |
|-------|-------|-------|--------|
| 1     | 11919 | 62    | 11981  |
|       | 36.69 | 0.19  | 36.88  |
|       | 99.48 | 0.52  |        |
|       | 36.82 | 52.54 |        |
|       | +     | +     | +      |
| 2     | 20453 | 56    | 20509  |
|       | 62.95 | 0.17  | 63.12  |
|       | 99.73 | 0.27  |        |
|       | 63.18 | 47.46 |        |
|       | +     | +     | +      |
| Total | 32372 | 118   | 32490  |
|       | 99.64 | 0.36  | 100.00 |

Complications and medical history at the time of obtaining Table 2-3 informed consent by the presence or absence of proton-pump inhibitors

FREQ Procedure

Number of levels of variables

Variables Label Level Number

---

GROUP1 2

SLVDYN Severe Liver Dysfunction 2

Table : GROUP1 \* SLVDYN

GROUP1

SLVDYN(Severe Liver Dysfunction)

Power |

Percent |

Percent of rows

Percent of columns | None | With | Total

|       | +     | +     | +      |
|-------|-------|-------|--------|
| 1     | 11852 | 129   | 11981  |
|       | 36.48 | 0.40  | 36.88  |
|       | 98.92 | 1.08  |        |
|       | 36.82 | 43.14 |        |
|       | +     | +     | +      |
| 2     | 20339 | 170   | 20509  |
|       | 62.60 | 0.52  | 63.12  |
|       | 99.17 | 0.83  |        |
|       | 63.18 | 56.86 |        |
|       | +     | +     | +      |
| Total | 32191 | 299   | 32490  |
|       | 99.08 | 0.92  | 100.00 |

Complications and medical history at the time of obtaining Table 2-3 informed consent by the presence or absence of proton-pump inhibitors

FREQ Procedure

Number of levels of variables

Variables Label Level Number

---

GROUP1 2

RESHDYN Respiratory Disease 2

Table : GROUP1 \* RESHDYN

GROUP1

RESHDYN(Respiratory Disease)

Power |

Percent |

Percent of rows

Percent of columns | None | With | Total

|       | +     | +     | +      |
|-------|-------|-------|--------|
| 1     | 10183 | 1798  | 11981  |
|       | 31.34 | 5.53  | 36.88  |
|       | 84.99 | 15.01 |        |
|       | 35.95 | 43.18 |        |
| 2     | 18143 | 2366  | 20509  |
|       | 55.84 | 7.28  | 63.12  |
|       | 88.46 | 11.54 |        |
|       | 64.05 | 56.82 |        |
| Total | 28326 | 4164  | 32490  |
|       | 87.18 | 12.82 | 100.00 |

Complications and medical history at the time of obtaining Table 2-3 informed consent by the presence or absence of proton-pump inhibitors

FREQ Procedure

Number of levels of variables

Variable Label Level Count

---

GROUP1 2

HTDYN Heart Disease 2

Table : GROUP1 \* HTDYN

GROUP1 HTDYN(Heart Disease)

Power |

Percent |

Percent of rows

Percent of columns | None | With | Total

|       | +     | +     | +      |
|-------|-------|-------|--------|
| 1     | 4172  | 7809  | 11981  |
|       | 12.84 | 24.04 | 36.88  |
|       | 34.82 | 65.18 |        |
|       | 31.18 | 40.86 |        |
|       | +     | +     | +      |
| 2     | 9207  | 11302 | 20509  |
|       | 28.34 | 34.79 | 63.12  |
|       | 44.89 | 55.11 |        |
|       | 68.82 | 59.14 |        |
|       | +     | +     | +      |
| Total | 13379 | 19111 | 32490  |
|       | 41.18 | 58.82 | 100.00 |

Complications and medical history at the time of obtaining Table 2-3 informed consent by the presence or absence of proton-pump inhibitors

FREQ Procedure

Number of levels of variables

Variables Label Level Number

GROUP1 2

HTD1YN Myocardial Infarction 2

Table : GROUP 1 \* HTD 1 YN

GROUP1

HTD1YN(Myocardial Infarction)

Power |

Percent |

Percent of rows

Percent of columns | None | With | Total

|       | +     | +     | +      |
|-------|-------|-------|--------|
| 1     | 10924 | 1057  | 11981  |
|       | 33.62 | 3.25  | 36.88  |
|       | 91.18 | 8.82  |        |
|       | 35.67 | 56.77 |        |
| 2     | 19704 | 805   | 20509  |
|       | 60.65 | 2.48  | 63.12  |
|       | 96.07 | 3.93  |        |
|       | 64.33 | 43.23 |        |
| Total | 30628 | 1862  | 32490  |
|       | 94.27 | 5.73  | 100.00 |

Complications and medical history at the time of obtaining Table 2-3 informed consent by the presence or absence of proton-pump inhibitors

FREQ Procedure

Number of levels of variables

Variable Label Level Count

---

GROUP1 2

HTD2YN Angina Pectoris 2

Table : GROUP 1 \* HTD 2 YN

GROUP1 HTD2YN(Angina Pectoris)

Power |

Percent |

Percent of rows

Percent of columns | None | With | Total

|       | +     | +     | +      |
|-------|-------|-------|--------|
| 1     | 9362  | 2619  | 11981  |
|       | 28.82 | 8.06  | 36.88  |
|       | 78.14 | 21.86 |        |
|       | 34.75 | 47.17 |        |
|       | +     | +     | +      |
| 2     | 17576 | 2933  | 20509  |
|       | 54.10 | 9.03  | 63.12  |
|       | 85.70 | 14.30 |        |
|       | 65.25 | 52.83 |        |
|       | +     | +     | +      |
| Total | 26938 | 5552  | 32490  |
|       | 82.91 | 17.09 | 100.00 |

Complications and medical history at the time of obtaining Table 2-3 informed consent by the presence or absence of proton-pump inhibitors

FREQ Procedure

Number of levels of variables

Number of Variables Level

GROUP1 2

t\_HTD0 2

Table : GROUP1 \* t\_HTD0

GROUP1 t\_HTD0

Power |

Percent |

Percent of rows

Percentage of columns | 0| 1| Sum

|       |       | +     |        | + |       | + |
|-------|-------|-------|--------|---|-------|---|
| 1     | 8693  |       | 3288   |   | 11981 |   |
|       | 26.76 |       | 10.12  |   | 36.88 |   |
|       | 72.56 |       | 27.44  |   |       |   |
|       | 33.77 |       | 48.70  |   |       |   |
|       | +     |       | +      |   | +     |   |
| 2     | 17046 |       | 3463   |   | 20509 |   |
|       | 52.47 |       | 10.66  |   | 63.12 |   |
|       | 83.11 |       | 16.89  |   |       |   |
|       | 66.23 |       | 51.30  |   |       |   |
|       | +     |       | +      |   | +     |   |
| Total | 25739 | 6751  | 32490  |   |       |   |
|       | 79.22 | 20.78 | 100.00 |   |       |   |



Complications and medical history at the time of obtaining Table 2-3 informed consent by the presence or absence of proton-pump inhibitors

FREQ Procedure

Number of levels of variables

Variable Label Level Count

---

GROUP1 2

HTD3YN Heart Failure 2

Table : GROUP 1 \* HTD 3 YN

GROUP1 HTD3YN(Heart Failure)

Power |

Percent |

Percent of rows

Percent of columns | None | With | Total

|       | +     | +     | +      |
|-------|-------|-------|--------|
| 1     | 7035  | 4946  | 11981  |
|       | 21.65 | 15.22 | 36.88  |
|       | 58.72 | 41.28 |        |
|       | 34.65 | 40.58 |        |
|       | +     | +     | +      |
| 2     | 13267 | 7242  | 20509  |
|       | 40.83 | 22.29 | 63.12  |
|       | 64.69 | 35.31 |        |
|       | 65.35 | 59.42 |        |
|       | +     | +     | +      |
| Total | 20302 | 12188 | 32490  |
|       | 62.49 | 37.51 | 100.00 |

Complications and medical history at the time of obtaining Table 2-3 informed consent by the presence or absence of proton-pump inhibitors

FREQ Procedure

Number of levels of variables

Variables Label Level Number

---

GROUP1 2

HTD4YN Left Ventricular Systolic Dysfunction 2

Table : GROUP 1 \* HTD 4 YN

GROUP1

HTD4YN(Left Ventricular Systolic Dysfunction)

Power |

Percent |

Percent of rows

Percent of columns | None | With | Total

|       | +         | +     | +      |
|-------|-----------|-------|--------|
| 1     | 11635     | 346   | 11981  |
|       | 35.81     | 1.06  | 36.88  |
|       | 97.11     | 2.89  |        |
|       | 36.59     | 50.22 |        |
|       | +         | +     | +      |
| 2     | 20166     | 343   | 20509  |
|       | 62.07     | 1.06  | 63.12  |
|       | 98.33     | 1.67  |        |
|       | 63.41     | 49.78 |        |
|       | +         | +     | +      |
| Total | 31801 689 | 32490 |        |
|       | 97.88     | 2.12  | 100.00 |

Complications and medical history at the time of obtaining Table 2-3 informed consent by the presence or absence of proton-pump inhibitors

FREQ Procedure

Number of levels of variables

Number of Variables Level

GROUP1 2

t\_HTD 2

Table : GROUP1 \* t\_HTD

GROUP1 t\_HTD

Power |

Percent |

Percent of rows

Percentage of columns | 0 | 1 | Sum

|       |       | + |       | + |        | + |
|-------|-------|---|-------|---|--------|---|
| 1     | 6951  |   | 5030  |   | 11981  |   |
|       | 21.39 |   | 15.48 |   | 36.88  |   |
|       | 58.02 |   | 41.98 |   |        |   |
|       | 34.51 |   | 40.73 |   |        |   |
|       |       | + |       | + |        |   |
| 2     | 13189 |   | 7320  |   | 20509  |   |
|       | 40.59 |   | 22.53 |   | 63.12  |   |
|       | 64.31 |   | 35.69 |   |        |   |
|       | 65.49 |   | 59.27 |   |        |   |
|       |       | + |       | + |        |   |
| Total | 20140 |   | 12350 |   | 32490  |   |
|       | 61.99 |   | 38.01 |   | 100.00 |   |

Complications and medical history at the time of obtaining Table 2-3 informed consent by the presence or absence of proton-pump inhibitors

FREQ Procedure

Number of levels of variables

Variables Label Level Number

GROUP1 2

HTD5YN Valvular Disease 2

Table : GROUP 1 \* HTD 5 YN

GROUP1 HTD5YN(Valvular Disease)

Power |

Percent |

Percent of rows

Percent of columns | None | With | Total

|       | +     | +     | +      |
|-------|-------|-------|--------|
| 1     | 10415 | 1566  | 11981  |
|       | 32.06 | 4.82  | 36.88  |
|       | 86.93 | 13.07 |        |
|       | 36.52 | 39.40 |        |
|       | +     | +     | +      |
| 2     | 18100 | 2409  | 20509  |
|       | 55.71 | 7.41  | 63.12  |
|       | 88.25 | 11.75 |        |
|       | 63.48 | 60.60 |        |
|       | +     | +     | +      |
| Total | 28515 | 3975  | 32490  |
|       | 87.77 | 12.23 | 100.00 |

Complications and medical history at the time of obtaining Table 2-3 informed consent by the presence or absence of proton-pump inhibitors

FREQ Procedure

Number of levels of variables

Variables Label Level Number

GROUP1 2

HTD6YN Cardiomyopathy 2

Table : GROUP 1 \* HTD 6 YN

GROUP1 HTD6YN(Cardiomyopathy)

Power |

Percent |

Percent of rows

Percent of columns | None | With | Total

|       | +     | +     | +      |
|-------|-------|-------|--------|
| 1     | 11510 | 471   | 11981  |
|       | 35.43 | 1.45  | 36.88  |
|       | 96.07 | 3.93  |        |
|       | 36.78 | 39.28 |        |
|       | +     | +     | +      |
| 2     | 19781 | 728   | 20509  |
|       | 60.88 | 2.24  | 63.12  |
|       | 96.45 | 3.55  |        |
|       | 63.22 | 60.72 |        |
|       | +     | +     | +      |
| Total | 31291 | 1199  | 32490  |
|       | 96.31 | 3.69  | 100.00 |

Complications and medical history at the time of obtaining Table 2-3 informed consent by the presence or absence of proton-pump inhibitors

FREQ Procedure

Number of levels of variables

Variables Label Level Number

---

GROUP1 2

HTD7YN Hypertensive Heart Disease 2

Table : GROUP 1 \* HTD 7 YN

GROUP1

HTD7YN(Hypertensive Heart Disease)

Power |

Percent |

Percent of rows

Percent of columns | None | With | Total

|       | +     | +     | +      |
|-------|-------|-------|--------|
| 1     | 11604 | 377   | 11981  |
|       | 35.72 | 1.16  | 36.88  |
|       | 96.85 | 3.15  |        |
|       | 36.92 | 35.47 |        |
| 2     | 19823 | 686   | 20509  |
|       | 61.01 | 2.11  | 63.12  |
|       | 96.66 | 3.34  |        |
|       | 63.08 | 64.53 |        |
| Total | 31427 | 1063  | 32490  |
|       | 96.73 | 3.27  | 100.00 |

Complications and medical history at the time of obtaining Table 2-3 informed consent by the presence or absence of proton-pump inhibitors

FREQ Procedure

Number of levels of variables

Variables Label Level Number

---

GROUP1 2

HTD8YN Congenital Heart Disease 2

Table : GROUP 1 \* HTD 8 YN

GROUP1

HTD8YN(Congenital Heart Disease)

Power |

Percent |

Percent of rows

Percent of columns | None | With | Total

|       | +     | +     | +      |
|-------|-------|-------|--------|
| 1     | 11902 | 79    | 11981  |
|       | 36.63 | 0.24  | 36.88  |
|       | 99.34 | 0.66  |        |
|       | 36.84 | 42.70 |        |
|       | +     | +     | +      |
| 2     | 20403 | 106   | 20509  |
|       | 62.80 | 0.33  | 63.12  |
|       | 99.48 | 0.52  |        |
|       | 63.16 | 57.30 |        |
|       | +     | +     | +      |
| Total | 32305 | 185   | 32490  |
|       | 99.43 | 0.57  | 100.00 |

Complications and medical history at the time of obtaining Table 2-3 informed consent by the presence or absence of proton-pump inhibitors

FREQ Procedure

Number of levels of variables

Variables Label Level Number

---

GROUP1 2

HTD9YN Other Heart Disease 2

Table : GROUP 1 \* HTD 9 YN

GROUP1

HTD9YN(Other Heart Disease)

Power |

Percent |

Percent of rows

Percent of columns | None | With | Total

|       | +     | +     | +      |
|-------|-------|-------|--------|
| 1     | 10900 | 1081  | 11981  |
|       | 33.55 | 3.33  | 36.88  |
|       | 90.98 | 9.02  |        |
|       | 36.58 | 40.14 |        |
| 2     | 18897 | 1612  | 20509  |
|       | 58.16 | 4.96  | 63.12  |
|       | 92.14 | 7.86  |        |
|       | 63.42 | 59.86 |        |
| Total | 29797 | 2693  | 32490  |
|       | 91.71 | 8.29  | 100.00 |



Complications and medical history at the time of obtaining Table 2-3 informed consent by the presence or absence of proton-pump inhibitors

FREQ Procedure

Number of levels of variables

Variables Label Level Number

---

GROUP1 2

CVACYN Cerebrovascular Accident 2

Table : GROUP1 \* CVACYN

GROUP1

CVACYN(Cerebrovascular Accident)

Power |

Percent |

Percent of rows

Percent of columns | None | With | Total

|       | +     | +     | +      |
|-------|-------|-------|--------|
| 1     | 8856  | 3125  | 11981  |
|       | 27.26 | 9.62  | 36.88  |
|       | 73.92 | 26.08 |        |
|       | 35.24 | 42.48 |        |
|       | +     | +     | +      |
| 2     | 16277 | 4232  | 20509  |
|       | 50.10 | 13.03 | 63.12  |
|       | 79.37 | 20.63 |        |
|       | 64.76 | 57.52 |        |
|       | +     | +     | +      |
| Total | 25133 | 7357  | 32490  |
|       | 77.36 | 22.64 | 100.00 |

Complications and medical history at the time of obtaining Table 2-3 informed consent by the presence or absence of proton-pump inhibitors

FREQ Procedure

Number of levels of variables

Variables Label Level Number

---

GROUP1 2

CVAC1YN Atherosclerotic Cerebral Infarction 2

Table : GROUP 1 \* CVAC 1 YN

GROUP1

CVAC1YN(Atherosclerotic Cerebral Infarction)

Power |

Percent |

Percent of rows

Percent of columns | None | With | Total

|       | +     | +     | +      |
|-------|-------|-------|--------|
| 1     | 11679 | 302   | 11981  |
|       | 35.95 | 0.93  | 36.88  |
|       | 97.48 | 2.52  |        |
|       | 36.70 | 45.01 |        |
|       | +     | +     | +      |
| 2     | 20140 | 369   | 20509  |
|       | 61.99 | 1.14  | 63.12  |
|       | 98.20 | 1.80  |        |
|       | 63.30 | 54.99 |        |
|       | +     | +     | +      |
| Total | 31819 | 671   | 32490  |
|       | 97.93 | 2.07  | 100.00 |

Complications and medical history at the time of obtaining Table 2-3 informed consent by the presence or absence of proton-pump inhibitors

FREQ Procedure

Number of levels of variables

Variables Label Level Number

---

GROUP1 2

CVAC2YN Cardiogenic Cerebral Infarction 2

Table : GROUP 1 \* CVAC 2 YN

GROUP1

CVAC2YN(Cardiogenic Cerebral Infarction)

Power |

Percent |

Percent of rows

Percent of columns | None | With | Total

|       | +     | +     | +      |
|-------|-------|-------|--------|
| 1     | 10983 | 998   | 11981  |
|       | 33.80 | 3.07  | 36.88  |
|       | 91.67 | 8.33  |        |
|       | 36.49 | 41.69 |        |
|       | +     | +     | +      |
| 2     | 19113 | 1396  | 20509  |
|       | 58.83 | 4.30  | 63.12  |
|       | 93.19 | 6.81  |        |
|       | 63.51 | 58.31 |        |
|       | +     | +     | +      |
| Total | 30096 | 2394  | 32490  |
|       | 92.63 | 7.37  | 100.00 |

Complications and medical history at the time of obtaining Table 2-3 informed consent by the presence or absence of proton-pump inhibitors

FREQ Procedure

Number of levels of variables

Variables Label Level Number

GROUP1 2

CVAC3YN Lacunar Cerebral Infarction 2

Table : GROUP 1 \* CVAC 3 YN

GROUP1

CVAC3YN(Lacunar Cerebral Infarction)

Power |

Percent |

Percent of rows

Percent of columns | None | With | Total

|       | +     | +     | +      |
|-------|-------|-------|--------|
| 1     | 11362 | 619   | 11981  |
|       | 34.97 | 1.91  | 36.88  |
|       | 94.83 | 5.17  |        |
|       | 36.60 | 42.78 |        |
|       | +     | +     | +      |
| 2     | 19681 | 828   | 20509  |
|       | 60.58 | 2.55  | 63.12  |
|       | 95.96 | 4.04  |        |
|       | 63.40 | 57.22 |        |
|       | +     | +     | +      |
| Total | 31043 | 1447  | 32490  |
|       | 95.55 | 4.45  | 100.00 |

Complications and medical history at the time of obtaining Table 2-3 informed consent by the presence or absence of proton-pump inhibitors

FREQ Procedure

Number of levels of variables

Variables Label Level Number

GROUP1 2

CVAC4YN Hemorrhagic Stroke 2

Table : GROUP 1 \* CVAC 4 YN

GROUP1

CVAC4YN(Hemorrhagic Stroke)

Power |

Percent |

Percent of rows

Percent of columns | None | With | Total

|       | +         | +     | +      |
|-------|-----------|-------|--------|
| 1     | 11816     | 165   | 11981  |
|       | 36.37     | 0.51  | 36.88  |
|       | 98.62     | 1.38  |        |
|       | 36.79     | 44.59 |        |
|       | +         | +     | +      |
| 2     | 20304     | 205   | 20509  |
|       | 62.49     | 0.63  | 63.12  |
|       | 99.00     | 1.00  |        |
|       | 63.21     | 55.41 |        |
|       | +         | +     | +      |
| Total | 32120 370 | 32490 |        |
|       | 98.86     | 1.14  | 100.00 |

Complications and medical history at the time of obtaining Table 2-3 informed consent by the presence or absence of proton-pump inhibitors

FREQ Procedure

Number of levels of variables

Variables Label Level Number

GROUP1 2

CVAC5YN Unclassified/Unknown Cerebral Infarction 2

Table : GROUP 1 \* CVAC 5 YN

GROUP1

CVAC5YN(Unclassified/Unknown Cerebral Infarction)

Power |

Percent |

Percent of rows

Percent of columns | None | With | Total

|       | +     | +     | +      |
|-------|-------|-------|--------|
| 1     | 11249 | 732   | 11981  |
|       | 34.62 | 2.25  | 36.88  |
|       | 93.89 | 6.11  |        |
|       | 36.61 | 41.54 |        |
|       | +     | +     | +      |
| 2     | 19479 | 1030  | 20509  |
|       | 59.95 | 3.17  | 63.12  |
|       | 94.98 | 5.02  |        |
|       | 63.39 | 58.46 |        |
|       | +     | +     | +      |
| Total | 30728 | 1762  | 32490  |
|       | 94.58 | 5.42  | 100.00 |

Complications and medical history at the time of obtaining Table 2-3 informed consent by the presence or absence of proton-pump inhibitors

FREQ Procedure

Number of levels of variables

Variables Label Level Number

---

GROUP1 2

CVAC6YN Transient Ischemic Attacks 2

Table : GROUP 1 \* CVAC 6 YN

GROUP1

CVAC6YN(Transient Ischemic Attacks)

Power |

Percent |

Percent of rows

Percent of columns | None | With | Total

|       | +     | +     | +      |
|-------|-------|-------|--------|
| 1     | 11753 | 228   | 11981  |
|       | 36.17 | 0.70  | 36.88  |
|       | 98.10 | 1.90  |        |
|       | 36.76 | 43.93 |        |
| 2     | 20218 | 291   | 20509  |
|       | 62.23 | 0.90  | 63.12  |
|       | 98.58 | 1.42  |        |
|       | 63.24 | 56.07 |        |
| Total | 31971 | 519   | 32490  |
|       | 98.40 | 1.60  | 100.00 |

Complications and medical history at the time of obtaining Table 2-3 informed consent by the presence or absence of proton-pump inhibitors

FREQ Procedure

Number of levels of variables

Variables Label Level Number

---

GROUP1 2

CVAC7YN Other Cerebrovascular Accident 2

Table : GROUP 1 \* CVAC 7 YN

GROUP1

CVAC7YN(Other Cerebrovascular Accident)

Power |

Percent |

Percent of rows

Percent of columns | None | With | Total

|       | +     | +     | +      |
|-------|-------|-------|--------|
| 1     | 11631 | 350   | 11981  |
|       | 35.80 | 1.08  | 36.88  |
|       | 97.08 | 2.92  |        |
|       | 36.71 | 43.26 |        |
| 2     | 20050 | 459   | 20509  |
|       | 61.71 | 1.41  | 63.12  |
|       | 97.76 | 2.24  |        |
|       | 63.29 | 56.74 |        |
| Total | 31681 | 809   | 32490  |
|       | 97.51 | 2.49  | 100.00 |



Complications and medical history at the time of obtaining Table 2-3 informed consent by the presence or absence of proton-pump inhibitors

FREQ Procedure

Number of levels of variables

Variables Label Level Number

GROUP1 2

OTVDYN Other Vascular Disease 2

Table : GROUP1 \* OTVDYN

GROUP1

OTVDYN(Other Vascular Disease)

Power |

Percent |

Percent of rows

Percent of columns | None | With | Total

|       | +     | +     | +      |
|-------|-------|-------|--------|
| 1     | 11174 | 807   | 11981  |
|       | 34.39 | 2.48  | 36.88  |
|       | 93.26 | 6.74  |        |
|       | 36.33 | 46.65 |        |
|       | +     | +     | +      |
| 2     | 19586 | 923   | 20509  |
|       | 60.28 | 2.84  | 63.12  |
|       | 95.50 | 4.50  |        |
|       | 63.67 | 53.35 |        |
|       | +     | +     | +      |
| Total | 30760 | 1730  | 32490  |
|       | 94.68 | 5.32  | 100.00 |

Complications and medical history at the time of obtaining Table 2-3 informed consent by the presence or absence of proton-pump inhibitors

FREQ Procedure

Number of levels of variables

Variables Label Level Number

GROUP1 2

OTVD1YN Peripheral Vascular Disease 2

Table : GROUP 1 \* OTVD 1 YN

GROUP1

OTVD1YN(Peripheral Vascular Disease)

Power |

Percent |

Percent of rows

Percent of columns | None | With | Total

|       | +     | +     | +      |
|-------|-------|-------|--------|
| 1     | 11740 | 241   | 11981  |
|       | 36.13 | 0.74  | 36.88  |
|       | 97.99 | 2.01  |        |
|       | 36.70 | 48.20 |        |
|       | +     | +     | +      |
| 2     | 20250 | 259   | 20509  |
|       | 62.33 | 0.80  | 63.12  |
|       | 98.74 | 1.26  |        |
|       | 63.30 | 51.80 |        |
|       | +     | +     | +      |
| Total | 31990 | 500   | 32490  |
|       | 98.46 | 1.54  | 100.00 |

Complications and medical history at the time of obtaining Table 2-3 informed consent by the presence or absence of proton-pump inhibitors

FREQ Procedure

Number of levels of variables

Variable Label Level Count

---

GROUP1 2

OTVD2YN Aortic Plaque 2

Table : GROUP 1 \* OTVD 2 YN

GROUP1 OTVD2YN(Aortic Plaque)

Power |

Percent |

Percent of rows

Percent of columns | None | With | Total

|       | +     | +     | +      |
|-------|-------|-------|--------|
| 1     | 11893 | 88    | 11981  |
|       | 36.61 | 0.27  | 36.88  |
|       | 99.27 | 0.73  |        |
|       | 36.88 | 36.51 |        |
|       | +     | +     | +      |
| 2     | 20356 | 153   | 20509  |
|       | 62.65 | 0.47  | 63.12  |
|       | 99.25 | 0.75  |        |
|       | 63.12 | 63.49 |        |
|       | +     | +     | +      |
| Total | 32249 | 241   | 32490  |
|       | 99.26 | 0.74  | 100.00 |

Complications and medical history at the time of obtaining Table 2-3 informed consent by the presence or absence of proton-pump inhibitors

FREQ Procedure

Number of levels of variables

Variables Label Level Number

---

GROUP1 2

TED3YN Internal Carotid Artery Stenosis 2

Table : GROUP 1 \* TED 3 YN

GROUP1

TED3YN(Internal Carotid Artery Stenosis)

Power |

Percent |

Percent of rows

Percent of columns | None | With | Total

|       | +     | +     | +      |
|-------|-------|-------|--------|
| 1     | 11630 | 351   | 11981  |
|       | 35.80 | 1.08  | 36.88  |
|       | 97.07 | 2.93  |        |
|       | 36.65 | 46.37 |        |
|       | +     | +     | +      |
| 2     | 20103 | 406   | 20509  |
|       | 61.87 | 1.25  | 63.12  |
|       | 98.02 | 1.98  |        |
|       | 63.35 | 53.63 |        |
|       | +     | +     | +      |
| Total | 31733 | 757   | 32490  |
|       | 97.67 | 2.33  | 100.00 |

Complications and medical history at the time of obtaining Table 2-3 informed consent by the presence or absence of proton-pump inhibitors

FREQ Procedure

Number of levels of variables

Variables Label Level Number

---

GROUP1 2

TED4YN Arteriosclerosis Obliterans 2

Table : GROUP 1 \* TED 4 YN

GROUP1

TED4YN(Arteriosclerosis Obliterans)

Power |

Percent |

Percent of rows

Percent of columns | None | With | Total

|       | +     | +     | +      |
|-------|-------|-------|--------|
| 1     | 11472 | 509   | 11981  |
|       | 35.31 | 1.57  | 36.88  |
|       | 95.75 | 4.25  |        |
|       | 36.57 | 45.53 |        |
|       | +     | +     | +      |
| 2     | 19900 | 609   | 20509  |
|       | 61.25 | 1.87  | 63.12  |
|       | 97.03 | 2.97  |        |
|       | 63.43 | 54.47 |        |
|       | +     | +     | +      |
| Total | 31372 | 1118  | 32490  |
|       | 96.56 | 3.44  | 100.00 |

Complications and medical history at the time of obtaining Table 2-3 informed consent by the presence or absence of proton-pump inhibitors

FREQ Procedure

Number of levels of variables

Variables Label Level Number

GROUP1 2

OTVD3YN Other Vascular Disease: Other 2

Table : GROUP 1 \* OTVD 3 YN

GROUP1

OTVD3YN(Other Vascular Disease: Other)

Power |

Percent |

Percent of rows

Percent of columns | None | With | Total

|       | +     | +     | +      |
|-------|-------|-------|--------|
| 1     | 11483 | 498   | 11981  |
|       | 35.34 | 1.53  | 36.88  |
|       | 95.84 | 4.16  |        |
|       | 36.51 | 47.93 |        |
|       | +     | +     | +      |
| 2     | 19968 | 541   | 20509  |
|       | 61.46 | 1.67  | 63.12  |
|       | 97.36 | 2.64  |        |
|       | 63.49 | 52.07 |        |
|       | +     | +     | +      |
| Total | 31451 | 1039  | 32490  |
|       | 96.80 | 3.20  | 100.00 |

Complications and medical history at the time of obtaining Table 2-3 informed consent by the presence or absence of proton-pump inhibitors

FREQ Procedure

Number of levels of variables

Variables Label Level Number

---

GROUP1 2

TEDYN Thrombosis/Embolism-Related Disease 2

Table : GROUP1 \* TEDYN

GROUP1

TEDYN(Thrombosis/Embolism-Related Disease)

Power |

Percent |

Percent of rows

Percent of columns | None | With | Total

|       | +     | +     | +      |
|-------|-------|-------|--------|
| 1     | 10756 | 1225  | 11981  |
|       | 33.11 | 3.77  | 36.88  |
|       | 89.78 | 10.22 |        |
|       | 36.20 | 44.05 |        |
|       | +     | +     | +      |
| 2     | 18953 | 1556  | 20509  |
|       | 58.33 | 4.79  | 63.12  |
|       | 92.41 | 7.59  |        |
|       | 63.80 | 55.95 |        |
|       | +     | +     | +      |
| Total | 29709 | 2781  | 32490  |
|       | 91.44 | 8.56  | 100.00 |

Complications and medical history at the time of obtaining Table 2-3 informed consent by the presence or absence of proton-pump inhibitors

FREQ Procedure

Number of levels of variables

Number of Variables Level

GROUP1 2

t\_TED 2

Table : GROUP1 \* t\_TED

GROUP1 t\_TED

Power |

Percent |

Percent of rows

Percentage of columns | 0| 1| Sum

|       | 0     | 1     | Sum    |
|-------|-------|-------|--------|
| 1     | 11793 | 188   | 11981  |
|       | 36.30 | 0.58  | 36.88  |
|       | 98.43 | 1.57  |        |
|       | 36.76 | 45.52 |        |
| 2     | 20284 | 225   | 20509  |
|       | 62.43 | 0.69  | 63.12  |
|       | 98.90 | 1.10  |        |
|       | 63.24 | 54.48 |        |
| Total | 32077 | 413   | 32490  |
|       | 98.73 | 1.27  | 100.00 |



Complications and medical history at the time of obtaining Table 2-3 informed consent by the presence or absence of proton-pump inhibitors

FREQ Procedure

Number of levels of variables

Variables Label Level Number

GROUP1 2

TED1YN Pulmonary Embolism 2

Table : GROUP 1 \* TED 1 YN

GROUP1

TED1YN(Pulmonary Embolism)

Power |

Percent |

Percent of rows

Percent of columns | None | With | Total

|       | +     | +     | +      |
|-------|-------|-------|--------|
| 1     | 11929 | 52    | 11981  |
|       | 36.72 | 0.16  | 36.88  |
|       | 99.57 | 0.43  |        |
|       | 36.85 | 45.22 |        |
|       | +     | +     | +      |
| 2     | 20446 | 63    | 20509  |
|       | 62.93 | 0.19  | 63.12  |
|       | 99.69 | 0.31  |        |
|       | 63.15 | 54.78 |        |
|       | +     | +     | +      |
| Total | 32375 | 115   | 32490  |
|       | 99.65 | 0.35  | 100.00 |

Complications and medical history at the time of obtaining Table 2-3 informed consent by the presence or absence of proton-pump inhibitors

FREQ Procedure

Number of levels of variables

Variables Label Level Number

GROUP1 2

TED2YN Deep Vein Thrombosis 2

Table : GROUP 1 \* TED 2 YN

GROUP1

TED2YN(Deep Vein Thrombosis)

Power |

Percent |

Percent of rows

Percent of columns | None | With | Total

|       | +     | +     | +      |
|-------|-------|-------|--------|
| 1     | 11829 | 152   | 11981  |
|       | 36.41 | 0.47  | 36.88  |
|       | 98.73 | 1.27  |        |
|       | 36.79 | 45.10 |        |
|       | +     | +     | +      |
| 2     | 20324 | 185   | 20509  |
|       | 62.55 | 0.57  | 63.12  |
|       | 99.10 | 0.90  |        |
|       | 63.21 | 54.90 |        |
|       | +     | +     | +      |
| Total | 32153 | 337   | 32490  |
|       | 98.96 | 1.04  | 100.00 |

Complications and medical history at the time of obtaining Table 2-3 informed consent by the presence or absence of proton-pump inhibitors

FREQ Procedure

Number of levels of variables

Variables Label Level Number

GROUP1 2

TED5YN Other Thrombosis/Embolism-Related Disease 2

Table : GROUP 1 \* TED 5 YN

GROUP1

TED5YN(Other Thrombosis/Embolism-Related Disease)

Power |

Percent |

Percent of rows

Percent of columns | None | With | Total

|       | +     | +     | +      |
|-------|-------|-------|--------|
| 1     | 11646 | 335   | 11981  |
|       | 35.84 | 1.03  | 36.88  |
|       | 97.20 | 2.80  |        |
|       | 36.75 | 41.82 |        |
| 2     | 20043 | 466   | 20509  |
|       | 61.69 | 1.43  | 63.12  |
|       | 97.73 | 2.27  |        |
|       | 63.25 | 58.18 |        |
| Total | 31689 | 801   | 32490  |
|       | 97.53 | 2.47  | 100.00 |

Complications and medical history at the time of obtaining Table 2-3 informed consent by the presence or absence of proton-pump inhibitors

FREQ Procedure

Number of levels of variables

Variable Label Level Count

---

GROUP1 2

HTDMYN Hyperthyroidism 2

Table : GROUP1 \* HTDMYN

GROUP1 HTDMYN(Hyperthyroidism)

Power |

Percent |

Percent of rows

Percent of columns | None | With | Total

|       | +     | +     | +      |
|-------|-------|-------|--------|
| 1     | 11800 | 181   | 11981  |
|       | 36.32 | 0.56  | 36.88  |
|       | 98.49 | 1.51  |        |
|       | 36.86 | 37.63 |        |
|       | +     | +     | +      |
| 2     | 20209 | 300   | 20509  |
|       | 62.20 | 0.92  | 63.12  |
|       | 98.54 | 1.46  |        |
|       | 63.14 | 62.37 |        |
|       | +     | +     | +      |
| Total | 32009 | 481   | 32490  |
|       | 98.52 | 1.48  | 100.00 |

Complications and medical history at the time of obtaining Table 2-3 informed consent by the presence or absence of proton-pump inhibitors

FREQ Procedure

Number of levels of variables

Variables Label Level Number

---

GROUP1 2

GASDYN Gastrointestinal Disease 2

Table : GROUP1 \* GASDYN

GROUP1

GASDYN(Gastrointestinal Disease)

Power |

Percent |

Percent of rows

Percent of columns | None | With | Total

|       | +     | +     | +      |
|-------|-------|-------|--------|
| 1     | 6541  | 5440  | 11981  |
|       | 20.13 | 16.74 | 36.88  |
|       | 54.59 | 45.41 |        |
|       | 28.48 | 57.12 |        |
|       | +     | +     | +      |
| 2     | 16425 | 4084  | 20509  |
|       | 50.55 | 12.57 | 63.12  |
|       | 80.09 | 19.91 |        |
|       | 71.52 | 42.88 |        |
|       | +     | +     | +      |
| Total | 22966 | 9524  | 32490  |
|       | 70.69 | 29.31 | 100.00 |

Complications and medical history at the time of obtaining Table 2-3 informed consent by the presence or absence of proton-pump inhibitors

FREQ Procedure

Number of levels of variables

Variables Label Level Number

---

GROUP1 2

GASD1YN Upper Gastrointestinal Tract 2

Table : GROUP 1 \* GASD 1 YN

GROUP1

GASD1YN(Upper Gastrointestinal Tract)

Power |

Percent |

Percent of rows

Percent of columns | None | With | Total

|       | +     | +     | +      |
|-------|-------|-------|--------|
| 1     | 11678 | 303   | 11981  |
|       | 35.94 | 0.93  | 36.88  |
|       | 97.47 | 2.53  |        |
|       | 36.75 | 42.32 |        |
|       | +     | +     | +      |
| 2     | 20096 | 413   | 20509  |
|       | 61.85 | 1.27  | 63.12  |
|       | 97.99 | 2.01  |        |
|       | 63.25 | 57.68 |        |
|       | +     | +     | +      |
| Total | 31774 | 716   | 32490  |
|       | 97.80 | 2.20  | 100.00 |

Complications and medical history at the time of obtaining Table 2-3 informed consent by the presence or absence of proton-pump inhibitors

FREQ Procedure

Number of levels of variables

Variables Label Level Number

---

GROUP1 2

GASD2YN Lower Gastrointestinal Tract 2

Table : GROUP 1 \* GASD 2 YN

GROUP1

GASD2YN(Lower Gastrointestinal Tract)

Power |

Percent |

Percent of rows

Percent of columns | None | With | Total

|       | +     | +     | +      |
|-------|-------|-------|--------|
| 1     | 11680 | 301   | 11981  |
|       | 35.95 | 0.93  | 36.88  |
|       | 97.49 | 2.51  |        |
|       | 36.77 | 41.46 |        |
|       | +     | +     | +      |
| 2     | 20084 | 425   | 20509  |
|       | 61.82 | 1.31  | 63.12  |
|       | 97.93 | 2.07  |        |
|       | 63.23 | 58.54 |        |
|       | +     | +     | +      |
| Total | 31764 | 726   | 32490  |
|       | 97.77 | 2.23  | 100.00 |

Complications and medical history at the time of obtaining Table 2-3 informed consent by the presence or absence of proton-pump inhibitors

FREQ Procedure

Number of levels of variables

Variables Label Level Number

---

GROUP1 2

GASD3YN Reflux esophagitis 2

Table : GROUP 1 \* GASD 3 YN

GROUP1

GASD3YN(Reflux esophagitis)

Power |

Percent |

Percent of rows

Percent of columns | None | With | Total

|       | +     | +     | +      |
|-------|-------|-------|--------|
| 1     | 8140  | 3841  | 11981  |
|       | 25.05 | 11.82 | 36.88  |
|       | 67.94 | 32.06 |        |
|       | 29.74 | 75.03 |        |
|       | +     | +     | +      |
| 2     | 19231 | 1278  | 20509  |
|       | 59.19 | 3.93  | 63.12  |
|       | 93.77 | 6.23  |        |
|       | 70.26 | 24.97 |        |
|       | +     | +     | +      |
| Total | 27371 | 5119  | 32490  |
|       | 84.24 | 15.76 | 100.00 |



Complications and medical history at the time of obtaining Table 2-3 informed consent by the presence or absence of proton-pump inhibitors

FREQ Procedure

Number of levels of variables

Variables Label Level Number

---

GROUP1 2

GASD4YN Other Gastrointestinal Disease 2

Table : GROUP 1 \* GASD 4 YN

GROUP1

GASD4YN(Other Gastrointestinal Disease)

Power |

Percent |

Percent of rows

Percent of columns | None | With | Total

|       | +     | +     | +      |
|-------|-------|-------|--------|
| 1     | 10043 | 1938  | 11981  |
|       | 30.91 | 5.96  | 36.88  |
|       | 83.82 | 16.18 |        |
|       | 35.78 | 43.84 |        |
| 2     | 18026 | 2483  | 20509  |
|       | 55.48 | 7.64  | 63.12  |
|       | 87.89 | 12.11 |        |
|       | 64.22 | 56.16 |        |
| Total | 28069 | 4421  | 32490  |
|       | 86.39 | 13.61 | 100.00 |

Complications and medical history at the time of obtaining Table 2-3 informed consent by the presence or absence of proton-pump inhibitors

FREQ Procedure

Number of levels of variables

Variable Label Level Count

---

GROUP1 2

MGTYN Malignant Tumor 2

Table : GROUP1 \* MGTYN

GROUP1 MGTYN(Malignant Tumor)

Power |

Percent |

Percent of rows

Percent of columns | None | With | Total

|       | +     | +     | +      |
|-------|-------|-------|--------|
| 1     | 10618 | 1363  | 11981  |
|       | 32.68 | 4.20  | 36.88  |
|       | 88.62 | 11.38 |        |
|       | 36.70 | 38.30 |        |
| 2     | 18313 | 2196  | 20509  |
|       | 56.37 | 6.76  | 63.12  |
|       | 89.29 | 10.71 |        |
|       | 63.30 | 61.70 |        |
| Total | 28931 | 3559  | 32490  |
|       | 89.05 | 10.95 | 100.00 |

Complications and medical history at the time of obtaining Table 2-3 informed consent by the presence or absence of proton-pump inhibitors

FREQ Procedure

Number of levels of variables

Variables Label Level Number

GROUP1 2

MGT1YN Gastric Cancer 2

Table : GROUP 1 \* MGT 1 YN

GROUP1 MGT1YN(Gastric Cancer)

Power |

Percent |

Percent of rows

Percent of columns | None | With | Total

|       | +     | +     | +      |
|-------|-------|-------|--------|
| 1     | 11688 | 293   | 11981  |
|       | 35.97 | 0.90  | 36.88  |
|       | 97.55 | 2.45  |        |
|       | 36.81 | 39.86 |        |
|       | +     | +     | +      |
| 2     | 20067 | 442   | 20509  |
|       | 61.76 | 1.36  | 63.12  |
|       | 97.84 | 2.16  |        |
|       | 63.19 | 60.14 |        |
|       | +     | +     | +      |
| Total | 31755 | 735   | 32490  |
|       | 97.74 | 2.26  | 100.00 |

Complications and medical history at the time of obtaining Table 2-3 informed consent by the presence or absence of proton-pump inhibitors

FREQ Procedure

Number of levels of variables

Variables Label Level Number

---

GROUP1 2

MGT2YN Colorectal Cancer 2

Table : GROUP 1 \* MGT 2 YN

GROUP1 MGT2YN(Colorectal Cancer)

Power |

Percent |

Percent of rows

Percent of columns | None | With | Total

|       | +     | +     | +      |
|-------|-------|-------|--------|
| 1     | 11700 | 281   | 11981  |
|       | 36.01 | 0.86  | 36.88  |
|       | 97.65 | 2.35  |        |
|       | 36.85 | 38.08 |        |
|       | +     | +     | +      |
| 2     | 20052 | 457   | 20509  |
|       | 61.72 | 1.41  | 63.12  |
|       | 97.77 | 2.23  |        |
|       | 63.15 | 61.92 |        |
|       | +     | +     | +      |
| Total | 31752 | 738   | 32490  |
|       | 97.73 | 2.27  | 100.00 |

Complications and medical history at the time of obtaining Table 2-3 informed consent by the presence or absence of proton-pump inhibitors

FREQ Procedure

Number of levels of variables

Variable Label Level Count

---

GROUP1 2

MGT3YN Lung Cancer 2

Table : GROUP 1 \* MGT 3 YN

GROUP1 MGT3YN(Lung Cancer)

Power |

Percent |

Percent of rows

Percent of columns | None | With | Total

|       | +     | +     | +      |
|-------|-------|-------|--------|
| 1     | 11837 | 144   | 11981  |
|       | 36.43 | 0.44  | 36.88  |
|       | 98.80 | 1.20  |        |
|       | 36.85 | 39.34 |        |
|       | +     | +     | +      |
| 2     | 20287 | 222   | 20509  |
|       | 62.44 | 0.68  | 63.12  |
|       | 98.92 | 1.08  |        |
|       | 63.15 | 60.66 |        |
|       | +     | +     | +      |
| Total | 32124 | 366   | 32490  |
|       | 98.87 | 1.13  | 100.00 |

Complications and medical history at the time of obtaining Table 2-3 informed consent by the presence or absence of proton-pump inhibitors

FREQ Procedure

Number of levels of variables

Variables Label Level Number

GROUP1 2

MGT4YN Brest Cancer 2

Table : GROUP 1 \* MGT 4 YN

GROUP1 MGT4YN(Brest Cancer)

Power |

Percent |

Percent of rows

Percent of columns | None | With | Total

|       |  | +     |  | +     |  | +      |
|-------|--|-------|--|-------|--|--------|
| 1     |  | 11895 |  | 86    |  | 11981  |
|       |  | 36.61 |  | 0.26  |  | 36.88  |
|       |  | 99.28 |  | 0.72  |  |        |
|       |  | 36.88 |  | 36.44 |  |        |
|       |  | +     |  | +     |  | +      |
| 2     |  | 20359 |  | 150   |  | 20509  |
|       |  | 62.66 |  | 0.46  |  | 63.12  |
|       |  | 99.27 |  | 0.73  |  |        |
|       |  | 63.12 |  | 63.56 |  |        |
|       |  | +     |  | +     |  | +      |
| Total |  | 32254 |  | 236   |  | 32490  |
|       |  | 99.27 |  | 0.73  |  | 100.00 |

Complications and medical history at the time of obtaining Table 2-3 informed consent by the presence or absence of proton-pump inhibitors

FREQ Procedure

Number of levels of variables

Variables Label Level Number

GROUP1 2

MGT5YN Uterus/Ovarian Cancer 2

Table : GROUP 1 \* MGT 5 YN

GROUP1

MGT5YN(Uterus/Ovarian Cancer)

Power |

Percent |

Percent of rows

Percent of columns | None | With | Total

|       | +     | +     | +      |
|-------|-------|-------|--------|
| 1     | 11942 | 39    | 11981  |
|       | 36.76 | 0.12  | 36.88  |
|       | 99.67 | 0.33  |        |
|       | 36.86 | 41.94 |        |
|       | +     | +     | +      |
| 2     | 20455 | 54    | 20509  |
|       | 62.96 | 0.17  | 63.12  |
|       | 99.74 | 0.26  |        |
|       | 63.14 | 58.06 |        |
|       | +     | +     | +      |
| Total | 32397 | 93    | 32490  |
|       | 99.71 | 0.29  | 100.00 |

Complications and medical history at the time of obtaining Table 2-3 informed consent by the presence or absence of proton-pump inhibitors

FREQ Procedure

Number of levels of variables

Variables Label Level Number

GROUP1 2

MGT6YN Pancreatic Cancer 2

Table : GROUP 1 \* MGT 6 YN

GROUP1 MGT6YN(Pancreatic Cancer)

Power |

Percent |

Percent of rows

Percent of columns | None | With | Total

|       | +     | +     | +      |
|-------|-------|-------|--------|
| 1     | 11968 | 13    | 11981  |
|       | 36.84 | 0.04  | 36.88  |
|       | 99.89 | 0.11  |        |
|       | 36.87 | 38.24 |        |
|       | +     | +     | +      |
| 2     | 20488 | 21    | 20509  |
|       | 63.06 | 0.06  | 63.12  |
|       | 99.90 | 0.10  |        |
|       | 63.13 | 61.76 |        |
|       | +     | +     | +      |
| Total | 32456 | 34    | 32490  |
|       | 99.90 | 0.10  | 100.00 |



Complications and medical history at the time of obtaining Table 2-3 informed consent by the presence or absence of proton-pump inhibitors

FREQ Procedure

Number of levels of variables

Variables Label Level Number

GROUP1 2

MGT7YN Other Malignant Tumor 2

Table : GROUP 1 \* MGT 7 YN

GROUP1

MGT7YN(Other Malignant Tumor)

Power |

Percent |

Percent of rows

Percent of columns | None | With | Total

|       | +     | +     | +      |
|-------|-------|-------|--------|
| 1     | 11331 | 650   | 11981  |
|       | 34.88 | 2.00  | 36.88  |
|       | 94.57 | 5.43  |        |
|       | 36.84 | 37.49 |        |
|       | +     | +     | +      |
| 2     | 19425 | 1084  | 20509  |
|       | 59.79 | 3.34  | 63.12  |
|       | 94.71 | 5.29  |        |
|       | 63.16 | 62.51 |        |
|       | +     | +     | +      |
| Total | 30756 | 1734  | 32490  |
|       | 94.66 | 5.34  | 100.00 |

Complications and medical history at the time of obtaining Table 2-3 informed consent by the presence or absence of proton-pump inhibitors

FREQ Procedure

Number of levels of variables

Variable Label Level Count

---

GROUP1 2

ALZHYN Alzheimer 2

Table : GROUP1 \* ALZHYN

GROUP1 ALZHYN(Alzheimer)

Power |

Percent |

Percent of rows

Percent of columns | None | With | Total

|       | +     | +     | +      |
|-------|-------|-------|--------|
| 1     | 10995 | 986   | 11981  |
|       | 33.84 | 3.03  | 36.88  |
|       | 91.77 | 8.23  |        |
|       | 36.73 | 38.62 |        |
|       | +     | +     | +      |
| 2     | 18942 | 1567  | 20509  |
|       | 58.30 | 4.82  | 63.12  |
|       | 92.36 | 7.64  |        |
|       | 63.27 | 61.38 |        |
|       | +     | +     | +      |
| Total | 29937 | 2553  | 32490  |
|       | 92.14 | 7.86  | 100.00 |

Complications and medical history at the time of obtaining Table 2-3 informed consent by the presence or absence of proton-pump inhibitors

FREQ Procedure

Number of levels of variables

Variables Label Level Number

---

GROUP1 2

OHCPYN Other Complications 2

Table : GROUP1 \* OHCPYN

GROUP1

OHCPYN(Other Complications)

Power |

Percent |

Percent of rows

Percent of columns | None | With | Total

|       | +     | +     | +      |
|-------|-------|-------|--------|
| 1     | 7822  | 4159  | 11981  |
|       | 24.08 | 12.80 | 36.88  |
|       | 65.29 | 34.71 |        |
|       | 35.63 | 39.48 |        |
|       | +     | +     | +      |
| 2     | 14133 | 6376  | 20509  |
|       | 43.50 | 19.62 | 63.12  |
|       | 68.91 | 31.09 |        |
|       | 64.37 | 60.52 |        |
|       | +     | +     | +      |
| Total | 21955 | 10535 | 32490  |
|       | 67.57 | 32.43 | 100.00 |

Complications and medical history at the time of obtaining Table 2-3 informed consent by the presence or absence of proton-pump inhibitors

FREQ Procedure

Number of levels of variables

Variables Label Level Number

---

GROUP1 2

IMGYN Brain Imaging Test 2

Table : GROUP1 \* IMGYN

GROUP1 IMGYN(Brain Imaging Test)

Power |

Percent |

Percent of rows

Percent of columns | None | With | Total

|       | +     | +     | +      |
|-------|-------|-------|--------|
| 1     | 10487 | 1232  | 11719  |
|       | 33.01 | 3.88  | 36.88  |
|       | 89.49 | 10.51 |        |
|       | 36.26 | 43.20 |        |
|       | +     | +     | +      |
| 2     | 18434 | 1620  | 20054  |
|       | 58.02 | 5.10  | 63.12  |
|       | 91.92 | 8.08  |        |
|       | 63.74 | 56.80 |        |
|       | +     | +     | +      |
| Total | 28921 | 2852  | 31773  |
|       | 91.02 | 8.98  | 100.00 |

Complications and medical history at the time of obtaining Table 2-3 informed consent by the presence or absence of proton-pump inhibitors

FREQ Procedure

Number of levels of variables

Variables Label Level Number

---

GROUP1 2

FNDYN Brain Imaging Result 2

Table : GROUP1 \* FNDYN

GROUP1

FNDYN(Brain Imaging Result)

Power |

Percent |

Percent of rows

Percent of columns | None | With | Total

|       | +     | +     | +      |
|-------|-------|-------|--------|
| 1     | 562   | 625   | 1187   |
|       | 20.50 | 22.79 | 43.29  |
|       | 47.35 | 52.65 |        |
|       | 42.29 | 44.23 |        |
|       | +     | +     | +      |
| 2     | 767   | 788   | 1555   |
|       | 27.97 | 28.74 | 56.71  |
|       | 49.32 | 50.68 |        |
|       | 57.71 | 55.77 |        |
|       | +     | +     | +      |
| Total | 1329  | 1413  | 2742   |
|       | 48.47 | 51.53 | 100.00 |

Complications and medical history at the time of obtaining Table 2-3 informed consent by the presence or absence of proton-pump inhibitors

FREQ Procedure

Number of levels of variables

Variables Label Level Number

---

GROUP1 2

FALYN Fall Down within one year 2

Table : GROUP1 \* FALYN

GROUP1

FALYN(Fall Down within one year)

Power |

Percent |

Percent of rows

Percent of columns | None | With | Total

|       | +     | +     | +      |
|-------|-------|-------|--------|
| 1     | 9638  | 999   | 10637  |
|       | 33.36 | 3.46  | 36.81  |
|       | 90.61 | 9.39  |        |
|       | 36.34 | 42.17 |        |
|       | +     | +     | +      |
| 2     | 16887 | 1370  | 18257  |
|       | 58.44 | 4.74  | 63.19  |
|       | 92.50 | 7.50  |        |
|       | 63.66 | 57.83 |        |
|       | +     | +     | +      |
| Total | 26525 | 2369  | 28894  |
|       | 91.80 | 8.20  | 100.00 |

Administration of anticoagulants at the time of obtaining Table 2-4 consent, according to the

presence or absence of proton-pump inhibitors

FREQ Procedure

|                      |       | Cumulative       |       |        |
|----------------------|-------|------------------|-------|--------|
| Percent of ALL power |       | Percent of power |       |        |
| 1                    | 32490 | 100.00           | 32490 | 100.00 |

Tables: ALL \* ADYN

ALL

ADYN(Administration of Anticoagulant)

Power |

Percent |

Percent of rows

Percentage of columns | with | total

|        |        |        |  |
|--------|--------|--------|--|
| _____+ |        | _____+ |  |
| 1      | 29914  | 29914  |  |
|        | 100.00 | 100.00 |  |
|        | 100.00 |        |  |
|        | 100.00 |        |  |
| _____+ |        | _____+ |  |
| Total  | 29914  | 29914  |  |
|        | 100.00 | 100.00 |  |

Degree of missing values = 2576

Administration of anticoagulants at the time of obtaining Table 2-4 consent, according to the presence or absence of proton-pump inhibitors

FREQ Procedure

Table 1 : ADYN \* ACTYP

Stratification variable : ALL=1

ADYN(Administration of Anticoagulant) ACTYP(Type of AF)

Power |

Percent |

Percent of rows

Percent of column | Warfa| Dabigat| Riverro| Apixa| Edoxa| Parenteral Anti| Edoxa| Total

|phosphate|run|xaban|ban|ban|coagulant|ban (OD)|

|||||)|

\_\_\_\_\_+\_\_\_\_\_+\_\_\_\_\_+\_\_\_\_\_+\_\_\_\_\_+\_\_\_\_\_+\_\_\_\_\_+\_\_\_\_\_

\_+

Present | 8295 | 2339 | 6436 | 8039 | 4752 | 13 | 40 | 29914

| 27.73 | 7.82 | 21.52 | 26.87 | 15.89 | 0.04 | 0.13 | 100.00

| 27.73 | 7.82 | 21.52 | 26.87 | 15.89 | 0.04 | 0.13 |

| 100.00 | 100.00 | 100.00 | 100.00 | 100.00 | 100.00 | 100.00 |

\_\_\_\_\_+\_\_\_\_\_+\_\_\_\_\_+\_\_\_\_\_+\_\_\_\_\_+\_\_\_\_\_+\_\_\_\_\_+\_\_\_\_\_

\_+

Total 8295 2339 6436 8039 4752 13 40 29914

27.73 7.82 21.52 26.87 15.89 0.04 0.13 100.00

Degree of missing values = 2576

Table 1 : ADYN \* ACTYP

Stratification variable : ALL=1

ADYN(Administration of Anticoagulant) ACTYP(Type of AF)

Power |



Percent |

Percent of rows

Percent of column | Warfa| Dabigat| Riverro| Apixa| Edoxa| Parenteral Anti| Edoxa| Total

|phosphate|run|xaban|ban|ban|coagulant|ban (OD)|

|||||D|

\_\_\_\_\_+\_\_\_\_\_+\_\_\_\_\_+\_\_\_\_\_+\_\_\_\_\_+\_\_\_\_\_+\_\_\_\_\_+\_\_\_\_\_+\_\_\_\_\_

\_  
\_+

Present | 8295 | 2339 | 6436 | 8039 | 4752 | 13 | 40 | 29914

| 27.73 | 7.82 | 21.52 | 26.87 | 15.89 | 0.04 | 0.13 | 100.00

| 27.73 | 7.82 | 21.52 | 26.87 | 15.89 | 0.04 | 0.13 |

| 100.00 | 100.00 | 100.00 | 100.00 | 100.00 | 100.00 | 100.00 |

\_\_\_\_\_+\_\_\_\_\_+\_\_\_\_\_+\_\_\_\_\_+\_\_\_\_\_+\_\_\_\_\_+\_\_\_\_\_+\_\_\_\_\_+\_\_\_\_\_

\_  
\_+

Total 8295 2339 6436 8039 4752 13 40 29914

27.73 7.82 21.52 26.87 15.89 0.04 0.13 100.00

Degree of missing values = 2576

Administration of anticoagulants at the time of obtaining Table 2-4 consent, according to the presence or absence of proton-pump inhibitors

FREQ Procedure

Table 1 : ADYN \* ACTYP

Stratification variable : ALL=1

ADYN(Administration of Anticoagulant) ACTYP(Type of AF)

Power |

Percent |

Percent of rows

Percent of column | Warfa| Dabigat| Riverro| Apixa| Edoxa| Parenteral Anti| Edoxa| Total

|phosphate|run|xaban|ban|ban|coagulant|ban (OD)|

|||||)|

\_\_\_\_\_+\_\_\_\_\_+\_\_\_\_\_+\_\_\_\_\_+\_\_\_\_\_+\_\_\_\_\_+\_\_\_\_\_+\_\_\_\_\_

\_+

Present | 8295 | 2339 | 6436 | 8039 | 4752 | 13 | 40 | 29914

| 27.73 | 7.82 | 21.52 | 26.87 | 15.89 | 0.04 | 0.13 | 100.00

| 27.73 | 7.82 | 21.52 | 26.87 | 15.89 | 0.04 | 0.13 |

| 100.00 | 100.00 | 100.00 | 100.00 | 100.00 | 100.00 | 100.00 |

\_\_\_\_\_+\_\_\_\_\_+\_\_\_\_\_+\_\_\_\_\_+\_\_\_\_\_+\_\_\_\_\_+\_\_\_\_\_+\_\_\_\_\_

\_+

Total 8295 2339 6436 8039 4752 13 40 29914

27.73 7.82 21.52 26.87 15.89 0.04 0.13 100.00

Degree of missing values = 2576

Table 1 : ADYN \* ACTYP

Stratification variable : ALL=1

ADYN(Administration of Anticoagulant) ACTYP(Type of AF)

Power |

Percent |

Percent of rows

Percent of column | Warfa| Dabigat| Riverro| Apixa| Edoxa| Parenteral Anti| Edoxa| Total

|phosphate|run|xaban|ban|ban|coagulant|ban (OD)|

|||||D|

\_\_\_\_\_+\_\_\_\_\_+\_\_\_\_\_+\_\_\_\_\_+\_\_\_\_\_+\_\_\_\_\_+\_\_\_\_\_+\_\_\_\_\_+\_\_\_\_\_

\_  
\_+

Present | 8295 | 2339 | 6436 | 8039 | 4752 | 13 | 40 | 29914

| 27.73 | 7.82 | 21.52 | 26.87 | 15.89 | 0.04 | 0.13 | 100.00

| 27.73 | 7.82 | 21.52 | 26.87 | 15.89 | 0.04 | 0.13 |

| 100.00 | 100.00 | 100.00 | 100.00 | 100.00 | 100.00 | 100.00 |

\_\_\_\_\_+\_\_\_\_\_+\_\_\_\_\_+\_\_\_\_\_+\_\_\_\_\_+\_\_\_\_\_+\_\_\_\_\_+\_\_\_\_\_+\_\_\_\_\_

\_  
\_+

Total 8295 2339 6436 8039 4752 13 40 29914

27.73 7.82 21.52 26.87 15.89 0.04 0.13 100.00

Degree of missing values = 2576

Administration of anticoagulants at the time of obtaining Table 2-4 consent, according to the presence or absence of proton-pump inhibitors

FREQ Procedure

Table 1 : ADYN \* ACTYP

Stratification variable : ALL=1

ADYN(Administration of Anticoagulant) ACTYP(Type of AF)

Power |

Percent |

Percent of rows

Percent of column | Warfa| Dabigat| Riverro| Apixa| Edoxa| Parenteral Anti| Edoxa| Total

|phosphate|run|xaban|ban|ban|coagulant|ban (OD)|

|||||)|

\_\_\_\_\_+\_\_\_\_\_+\_\_\_\_\_+\_\_\_\_\_+\_\_\_\_\_+\_\_\_\_\_+\_\_\_\_\_+\_\_\_\_\_

\_+

Present | 8295 | 2339 | 6436 | 8039 | 4752 | 13 | 40 | 29914

| 27.73 | 7.82 | 21.52 | 26.87 | 15.89 | 0.04 | 0.13 | 100.00

| 27.73 | 7.82 | 21.52 | 26.87 | 15.89 | 0.04 | 0.13 |

| 100.00 | 100.00 | 100.00 | 100.00 | 100.00 | 100.00 | 100.00 |

\_\_\_\_\_+\_\_\_\_\_+\_\_\_\_\_+\_\_\_\_\_+\_\_\_\_\_+\_\_\_\_\_+\_\_\_\_\_+\_\_\_\_\_

\_+

Total 8295 2339 6436 8039 4752 13 40 29914

27.73 7.82 21.52 26.87 15.89 0.04 0.13 100.00

Degree of missing values = 2576

Table 1 : ADYN \* ACTYP

Stratification variable : ALL=1

ADYN(Administration of Anticoagulant) ACTYP(Type of AF)

Power |

Percent |

Percent of rows

Percent of column | Warfa| Dabigat| Riverro| Apixa| Edoxa| Parenteral Anti| Edoxa| Total

|phosphate|run|xaban|ban|ban|coagulant|ban (OD)|

|||||D|

\_\_\_\_\_+\_\_\_\_\_+\_\_\_\_\_+\_\_\_\_\_+\_\_\_\_\_+\_\_\_\_\_+\_\_\_\_\_+\_\_\_\_\_+\_\_\_\_\_

\_  
\_+

Present | 8295 | 2339 | 6436 | 8039 | 4752 | 13 | 40 | 29914

| 27.73 | 7.82 | 21.52 | 26.87 | 15.89 | 0.04 | 0.13 | 100.00

| 27.73 | 7.82 | 21.52 | 26.87 | 15.89 | 0.04 | 0.13 |

| 100.00 | 100.00 | 100.00 | 100.00 | 100.00 | 100.00 | 100.00 |

\_\_\_\_\_+\_\_\_\_\_+\_\_\_\_\_+\_\_\_\_\_+\_\_\_\_\_+\_\_\_\_\_+\_\_\_\_\_+\_\_\_\_\_+\_\_\_\_\_

\_  
\_+

Total 8295 2339 6436 8039 4752 13 40 29914

27.73 7.82 21.52 26.87 15.89 0.04 0.13 100.00

Degree of missing values = 2576

Administration of anticoagulants at the time of obtaining Table 2-4 consent, according to the presence or absence of proton-pump inhibitors

FREQ Procedure

Table 1 : ADYN \* ACTYP

Stratification variable : ALL=1

ADYN(Administration of Anticoagulant) ACTYP(Type of AF)

Power |

Percent |

Percent of rows

Percent of column | Warfa| Dabigat| Riverro| Apixa| Edoxa| Parenteral Anti| Edoxa| Total

|phosphate|run|xaban|ban|ban|coagulant|ban (OD)|

|||||)|

\_\_\_\_\_+\_\_\_\_\_+\_\_\_\_\_+\_\_\_\_\_+\_\_\_\_\_+\_\_\_\_\_+\_\_\_\_\_+\_\_\_\_\_

\_+

Present | 8295 | 2339 | 6436 | 8039 | 4752 | 13 | 40 | 29914

| 27.73 | 7.82 | 21.52 | 26.87 | 15.89 | 0.04 | 0.13 | 100.00

| 27.73 | 7.82 | 21.52 | 26.87 | 15.89 | 0.04 | 0.13 |

| 100.00 | 100.00 | 100.00 | 100.00 | 100.00 | 100.00 | 100.00 |

\_\_\_\_\_+\_\_\_\_\_+\_\_\_\_\_+\_\_\_\_\_+\_\_\_\_\_+\_\_\_\_\_+\_\_\_\_\_+\_\_\_\_\_

\_+

Total 8295 2339 6436 8039 4752 13 40 29914

27.73 7.82 21.52 26.87 15.89 0.04 0.13 100.00

Degree of missing values = 2576

Table 1 : ADYN \* t\_ACT0

Stratification variable : ALL=1

ADYN(Administration of Anticoagulant)

t\_ACT0

|                                     |        |        |        |
|-------------------------------------|--------|--------|--------|
| Power                               |        |        |        |
| Percent                             |        |        |        |
| Percent of rows                     |        |        |        |
| Percentage of columns   0   1   Sum |        |        |        |
| _____ + _____ + _____ +             |        |        |        |
| Present   25122   4792   29914      |        |        |        |
|                                     | 83.98  | 16.02  | 100.00 |
|                                     | 83.98  | 16.02  |        |
|                                     | 100.00 | 100.00 |        |
| _____ + _____ + _____ +             |        |        |        |
| Total 25122 4792 29914              |        |        |        |
|                                     | 83.98  | 16.02  | 100.00 |

Degree of missing values = 2576

Administration of anticoagulants at the time of obtaining Table 2-4 consent, according to the presence or absence of proton-pump inhibitors

FREQ Procedure

Table: ALL \* t\_ADYN

ALL t\_ADYN

Power |

Percent |

Percent of rows

Percentage of columns | 0| 1| Sum

|       | 0      | 1      | Sum    |
|-------|--------|--------|--------|
| 1     | 2576   | 29914  | 32490  |
|       | 7.93   | 92.07  | 100.00 |
|       | 7.93   | 92.07  |        |
|       | 100.00 | 100.00 |        |
| Total | 2576   | 29914  | 32490  |
|       | 7.93   | 92.07  | 100.00 |



Administration of anticoagulants at the time of obtaining Table 2-4 consent, according to the presence or absence of proton-pump inhibitors

FREQ Procedure

|                      |       |                  | Cumulative |        |
|----------------------|-------|------------------|------------|--------|
| Percent of ALL power |       | Percent of power |            |        |
| 1                    | 32490 | 100.00           | 32490      | 100.00 |

Tables: ALL \* ADYN

ALL

ADYN(Administration of Anticoagulant)

| Power                                |        |        |   |
|--------------------------------------|--------|--------|---|
| Percent                              |        |        |   |
| Percent of rows                      |        |        |   |
| Percentage of columns   with   total |        |        |   |
|                                      | +      |        | + |
| 1                                    | 29914  | 29914  |   |
|                                      | 100.00 | 100.00 |   |
|                                      | 100.00 |        |   |
|                                      | 100.00 |        |   |
|                                      | +      |        | + |
| Total                                | 29914  | 29914  |   |
|                                      | 100.00 | 100.00 |   |

Degree of missing values = 2576

Administration of anticoagulants at the time of obtaining Table 2-4 consent, according to the presence or absence of proton-pump inhibitors

FREQ Procedure

Table 1 : ADYN \* ACTYP

Stratification variable : ALL=1

ADYN(Administration of Anticoagulant) ACTYP(Type of AF)

Power |

Percent |

Percent of rows

Percent of column | Warfa| Dabigat| Riverro| Apixa| Edoxa| Parenteral Anti| Edoxa| Total

|phosphate|run|xaban|ban|ban|coagulant|ban (OD)|

|||||)|

\_\_\_\_\_+\_\_\_\_\_+\_\_\_\_\_+\_\_\_\_\_+\_\_\_\_\_+\_\_\_\_\_+\_\_\_\_\_+\_\_\_\_\_

\_+

Present | 8295 | 2339 | 6436 | 8039 | 4752 | 13 | 40 | 29914

| 27.73 | 7.82 | 21.52 | 26.87 | 15.89 | 0.04 | 0.13 | 100.00

| 27.73 | 7.82 | 21.52 | 26.87 | 15.89 | 0.04 | 0.13 |

| 100.00 | 100.00 | 100.00 | 100.00 | 100.00 | 100.00 | 100.00 |

\_\_\_\_\_+\_\_\_\_\_+\_\_\_\_\_+\_\_\_\_\_+\_\_\_\_\_+\_\_\_\_\_+\_\_\_\_\_+\_\_\_\_\_

\_+

Total 8295 2339 6436 8039 4752 13 40 29914

27.73 7.82 21.52 26.87 15.89 0.04 0.13 100.00

Degree of missing values = 2576

Table 1 : ADYN \* ACTYP

Stratification variable : ALL=1

ADYN(Administration of Anticoagulant) ACTYP(Type of AF)

Power |

Percent |

Percent of rows

Percent of column | Warfa| Dabigat| Riverro| Apixa| Edoxa| Parenteral Anti| Edoxa| Total

|phosphate|run|xaban|ban|ban|coagulant|ban (OD)|

|||||D|

\_\_\_\_\_+\_\_\_\_\_+\_\_\_\_\_+\_\_\_\_\_+\_\_\_\_\_+\_\_\_\_\_+\_\_\_\_\_+\_\_\_\_\_+\_\_\_\_\_

\_  
\_+

Present | 8295 | 2339 | 6436 | 8039 | 4752 | 13 | 40 | 29914

| 27.73 | 7.82 | 21.52 | 26.87 | 15.89 | 0.04 | 0.13 | 100.00

| 27.73 | 7.82 | 21.52 | 26.87 | 15.89 | 0.04 | 0.13 |

| 100.00 | 100.00 | 100.00 | 100.00 | 100.00 | 100.00 | 100.00 |

\_\_\_\_\_+\_\_\_\_\_+\_\_\_\_\_+\_\_\_\_\_+\_\_\_\_\_+\_\_\_\_\_+\_\_\_\_\_+\_\_\_\_\_+\_\_\_\_\_

\_  
\_+

Total 8295 2339 6436 8039 4752 13 40 29914

27.73 7.82 21.52 26.87 15.89 0.04 0.13 100.00

Degree of missing values = 2576

Administration of anticoagulants at the time of obtaining Table 2-4 consent, according to the presence or absence of proton-pump inhibitors

FREQ Procedure

Table 1 : ADYN \* ACTYP

Stratification variable : ALL=1

ADYN(Administration of Anticoagulant) ACTYP(Type of AF)

Power |

Percent |

Percent of rows

Percent of column | Warfa| Dabigat| Riverro| Apixa| Edoxa| Parenteral Anti| Edoxa| Total

|phosphate|run|xaban|ban|ban|coagulant|ban (OD)|

|||||)|

\_\_\_\_\_+\_\_\_\_\_+\_\_\_\_\_+\_\_\_\_\_+\_\_\_\_\_+\_\_\_\_\_+\_\_\_\_\_+\_\_\_\_\_

\_+

Present | 8295 | 2339 | 6436 | 8039 | 4752 | 13 | 40 | 29914

| 27.73 | 7.82 | 21.52 | 26.87 | 15.89 | 0.04 | 0.13 | 100.00

| 27.73 | 7.82 | 21.52 | 26.87 | 15.89 | 0.04 | 0.13 |

| 100.00 | 100.00 | 100.00 | 100.00 | 100.00 | 100.00 | 100.00 |

\_\_\_\_\_+\_\_\_\_\_+\_\_\_\_\_+\_\_\_\_\_+\_\_\_\_\_+\_\_\_\_\_+\_\_\_\_\_+\_\_\_\_\_

\_+

Total 8295 2339 6436 8039 4752 13 40 29914

27.73 7.82 21.52 26.87 15.89 0.04 0.13 100.00

Degree of missing values = 2576

Table 1 : ADYN \* ACTYP

Stratification variable : ALL=1

ADYN(Administration of Anticoagulant) ACTYP(Type of AF)

Power |

Percent |

Percent of rows

Percent of column | Warfa| Dabigat| Riverro| Apixa| Edoxa| Parenteral Anti| Edoxa| Total

|phosphate|run|xaban|ban|ban|coagulant|ban (OD)|

|||||D|

\_\_\_\_\_+\_\_\_\_\_+\_\_\_\_\_+\_\_\_\_\_+\_\_\_\_\_+\_\_\_\_\_+\_\_\_\_\_+\_\_\_\_\_+\_\_\_\_\_

\_  
+

Present | 8295 | 2339 | 6436 | 8039 | 4752 | 13 | 40 | 29914

| 27.73 | 7.82 | 21.52 | 26.87 | 15.89 | 0.04 | 0.13 | 100.00

| 27.73 | 7.82 | 21.52 | 26.87 | 15.89 | 0.04 | 0.13 |

| 100.00 | 100.00 | 100.00 | 100.00 | 100.00 | 100.00 | 100.00 |

\_\_\_\_\_+\_\_\_\_\_+\_\_\_\_\_+\_\_\_\_\_+\_\_\_\_\_+\_\_\_\_\_+\_\_\_\_\_+\_\_\_\_\_+\_\_\_\_\_

\_  
+

Total 8295 2339 6436 8039 4752 13 40 29914

27.73 7.82 21.52 26.87 15.89 0.04 0.13 100.00

Degree of missing values = 2576

Administration of anticoagulants at the time of obtaining Table 2-4 consent, according to the presence or absence of proton-pump inhibitors

FREQ Procedure

Table 1 : ADYN \* ACTYP

Stratification variable : ALL=1

ADYN(Administration of Anticoagulant) ACTYP(Type of AF)

Power |

Percent |

Percent of rows

Percent of column | Warfa| Dabigat| Riverro| Apixa| Edoxa| Parenteral Anti| Edoxa| Total

|phosphate|run|xaban|ban|ban|coagulant|ban (OD)|

|||||)|

\_\_\_\_\_+\_\_\_\_\_+\_\_\_\_\_+\_\_\_\_\_+\_\_\_\_\_+\_\_\_\_\_+\_\_\_\_\_+\_\_\_\_\_

\_+

Present | 8295 | 2339 | 6436 | 8039 | 4752 | 13 | 40 | 29914

| 27.73 | 7.82 | 21.52 | 26.87 | 15.89 | 0.04 | 0.13 | 100.00

| 27.73 | 7.82 | 21.52 | 26.87 | 15.89 | 0.04 | 0.13 |

| 100.00 | 100.00 | 100.00 | 100.00 | 100.00 | 100.00 | 100.00 |

\_\_\_\_\_+\_\_\_\_\_+\_\_\_\_\_+\_\_\_\_\_+\_\_\_\_\_+\_\_\_\_\_+\_\_\_\_\_+\_\_\_\_\_

\_+

Total 8295 2339 6436 8039 4752 13 40 29914

27.73 7.82 21.52 26.87 15.89 0.04 0.13 100.00

Degree of missing values = 2576

Table 1 : ADYN \* ACTYP

Stratification variable : ALL=1

ADYN(Administration of Anticoagulant) ACTYP(Type of AF)

Power |

Percent |

Percent of rows

Percent of column | Warfa| Dabigat| Riverro| Apixa| Edoxa| Parenteral Anti| Edoxa| Total

|phosphate|run|xaban|ban|ban|coagulant|ban (OD)|

|||||D|

\_\_\_\_\_+\_\_\_\_\_+\_\_\_\_\_+\_\_\_\_\_+\_\_\_\_\_+\_\_\_\_\_+\_\_\_\_\_+\_\_\_\_\_+\_\_\_\_\_

\_  
\_+

Present | 8295 | 2339 | 6436 | 8039 | 4752 | 13 | 40 | 29914

| 27.73 | 7.82 | 21.52 | 26.87 | 15.89 | 0.04 | 0.13 | 100.00

| 27.73 | 7.82 | 21.52 | 26.87 | 15.89 | 0.04 | 0.13 |

| 100.00 | 100.00 | 100.00 | 100.00 | 100.00 | 100.00 | 100.00 |

\_\_\_\_\_+\_\_\_\_\_+\_\_\_\_\_+\_\_\_\_\_+\_\_\_\_\_+\_\_\_\_\_+\_\_\_\_\_+\_\_\_\_\_+\_\_\_\_\_

\_  
\_+

Total 8295 2339 6436 8039 4752 13 40 29914

27.73 7.82 21.52 26.87 15.89 0.04 0.13 100.00

Degree of missing values = 2576

Administration of anticoagulants at the time of obtaining Table 2-4 consent, according to the presence or absence of proton-pump inhibitors

FREQ Procedure

Table 1 : ADYN \* ACTYP

Stratification variable : ALL=1

ADYN(Administration of Anticoagulant) ACTYP(Type of AF)

Power |

Percent |

Percent of rows

Percent of column | Warfa| Dabigat| Riverro| Apixa| Edoxa| Parenteral Anti| Edoxa| Total

|phosphate|run|xaban|ban|ban|coagulant|ban (OD)|

|||||)|

\_\_\_\_\_ + \_\_\_\_\_ + \_\_\_\_\_ + \_\_\_\_\_ + \_\_\_\_\_ + \_\_\_\_\_ + \_\_\_\_\_ + \_\_\_\_\_

\_+

Present | 8295 | 2339 | 6436 | 8039 | 4752 | 13 | 40 | 29914

| 27.73 | 7.82 | 21.52 | 26.87 | 15.89 | 0.04 | 0.13 | 100.00

| 27.73 | 7.82 | 21.52 | 26.87 | 15.89 | 0.04 | 0.13 |

| 100.00 | 100.00 | 100.00 | 100.00 | 100.00 | 100.00 | 100.00 |

\_\_\_\_\_ + \_\_\_\_\_ + \_\_\_\_\_ + \_\_\_\_\_ + \_\_\_\_\_ + \_\_\_\_\_ + \_\_\_\_\_ + \_\_\_\_\_

\_+

Total 8295 2339 6436 8039 4752 13 40 29914

27.73 7.82 21.52 26.87 15.89 0.04 0.13 100.00

Degree of missing values = 2576

Table 1 : ADYN \* t\_ACT0

Stratification variable : ALL=1

ADYN(Administration of Anticoagulant)

t\_ACT0



|                                     |        |        |        |
|-------------------------------------|--------|--------|--------|
| Power                               |        |        |        |
| Percent                             |        |        |        |
| Percent of rows                     |        |        |        |
| Percentage of columns   0   1   Sum |        |        |        |
| _____ + _____ + _____ +             |        |        |        |
| Present   25122   4792   29914      |        |        |        |
|                                     | 83.98  | 16.02  | 100.00 |
|                                     | 83.98  | 16.02  |        |
|                                     | 100.00 | 100.00 |        |
| _____ + _____ + _____ +             |        |        |        |
| Total 25122 4792 29914              |        |        |        |
|                                     | 83.98  | 16.02  | 100.00 |

Degree of missing values = 2576

Administration of anticoagulants at the time of obtaining Table 2-4 consent, according to the presence or absence of proton-pump inhibitors

FREQ Procedure

Table: ALL \* t\_ADYN

ALL t\_ADYN

Power |

Percent |

Percent of rows

Percentage of columns | 0 | 1 | Sum

|       | 0      | 1      | Sum    |
|-------|--------|--------|--------|
| 1     | 2576   | 29914  | 32490  |
|       | 7.93   | 92.07  | 100.00 |
|       | 7.93   | 92.07  |        |
|       | 100.00 | 100.00 |        |
| Total | 2576   | 29914  | 32490  |
|       | 7.93   | 92.07  | 100.00 |

Administration of anticoagulants at the time of obtaining Table 2-4 consent, according to the presence or absence of proton-pump inhibitors

FREQ Procedure

Tables: ALL\* ACTYP

ALL ACTYP(Type of AF)

Power |

Percent |

Percent of rows

Percent of column | Warfa| Dabigat| Riverro| Apixa| Edoxa| Parenteral Anti| Edoxa| Total

|phosphate|run|xaban|ban|ban|coagulant|ban (OD)|

|||||)|

\_\_\_\_\_+\_\_\_\_\_+\_\_\_\_\_+\_\_\_\_\_+\_\_\_\_\_+\_\_\_\_\_+\_\_\_\_\_+\_\_\_\_\_+

\_\_+

|   |        |        |        |        |        |        |        |        |
|---|--------|--------|--------|--------|--------|--------|--------|--------|
| 1 | 8295   | 2339   | 6436   | 8039   | 4752   | 13     | 40     | 29914  |
|   | 27.73  | 7.82   | 21.52  | 26.87  | 15.89  | 0.04   | 0.13   | 100.00 |
|   | 27.73  | 7.82   | 21.52  | 26.87  | 15.89  | 0.04   | 0.13   |        |
|   | 100.00 | 100.00 | 100.00 | 100.00 | 100.00 | 100.00 | 100.00 |        |

\_\_\_\_\_+\_\_\_\_\_+\_\_\_\_\_+\_\_\_\_\_+\_\_\_\_\_+\_\_\_\_\_+\_\_\_\_\_+\_\_\_\_\_+

\_\_+

Total 8295 2339 6436 8039 4752 13 40 29914

27.73 7.82 21.52 26.87 15.89 0.04 0.13 100.00

Administration of anticoagulants at the time of obtaining Table 2-4 consent, according to the presence or absence of proton-pump inhibitors

FREQ Procedure

Table : ALL \* n\_ACT1

ALL n\_ACT1

Power |

Percent |

Percent of rows

Percent of columns | 1 | Total

|        |        |        |  |
|--------|--------|--------|--|
| _____+ |        | _____+ |  |
| 1      | 21619  | 21619  |  |
|        | 100.00 | 100.00 |  |
|        | 100.00 |        |  |
|        | 100.00 |        |  |
| _____+ |        | _____+ |  |
| Total  | 21619  | 21619  |  |
|        | 100.00 | 100.00 |  |

Degree of missing values = 8295

Administration of anticoagulants at the time of obtaining Table 2-4 consent, according to the presence or absence of proton-pump inhibitors

FREQ Procedure

Tables: ALL\* ACTYP

ALL ACTYP(Type of AF)

Power |

Percent |

Percent of rows

Percent of column | Warfa| Dabigat| Riverro| Apixa| Edoxa| Parenteral Anti| Edoxa| Total

|phosphate|run|xaban|ban|ban|coagulant|ban (OD)|

|||||)|

\_\_\_\_\_+\_\_\_\_\_+\_\_\_\_\_+\_\_\_\_\_+\_\_\_\_\_+\_\_\_\_\_+\_\_\_\_\_+\_\_\_\_\_+

\_  
\_+

|   |        |        |        |        |        |        |        |        |
|---|--------|--------|--------|--------|--------|--------|--------|--------|
| 1 | 8295   | 2339   | 6436   | 8039   | 4752   | 13     | 40     | 29914  |
|   | 27.73  | 7.82   | 21.52  | 26.87  | 15.89  | 0.04   | 0.13   | 100.00 |
|   | 27.73  | 7.82   | 21.52  | 26.87  | 15.89  | 0.04   | 0.13   |        |
|   | 100.00 | 100.00 | 100.00 | 100.00 | 100.00 | 100.00 | 100.00 |        |

\_\_\_\_\_+\_\_\_\_\_+\_\_\_\_\_+\_\_\_\_\_+\_\_\_\_\_+\_\_\_\_\_+\_\_\_\_\_+\_\_\_\_\_+

\_  
\_+

Total 8295 2339 6436 8039 4752 13 40 29914

27.73 7.82 21.52 26.87 15.89 0.04 0.13 100.00

Administration of anticoagulants at the time of obtaining Table 2-4 consent, according to the presence or absence of proton-pump inhibitors

FREQ Procedure

Table : ALL \* n\_ACT2

ALL n\_ACT2

Power |

Percent |

Percent of rows

Percent of columns | 1 | Total

|       |        |        |
|-------|--------|--------|
|       | +      | +      |
| 1     | 27575  | 27575  |
|       | 100.00 | 100.00 |
|       | 100.00 |        |
|       | 100.00 |        |
|       | +      | +      |
| Total | 27575  | 27575  |
|       | 100.00 | 100.00 |

Frequency of missing values = 2339

Administration of anticoagulants at the time of obtaining Table 2-4 consent, according to the presence or absence of proton-pump inhibitors

FREQ Procedure

Tables: ALL\* ACTYP

ALL ACTYP(Type of AF)

Power |

Percent |

Percent of rows

Percent of column | Warfa| Dabigat| Riverro| Apixa| Edoxa| Parenteral Anti| Edoxa| Total

|phosphate|run|xaban|ban|ban|coagulant|ban (OD)|

|||||)|

\_\_\_\_\_+\_\_\_\_\_+\_\_\_\_\_+\_\_\_\_\_+\_\_\_\_\_+\_\_\_\_\_+\_\_\_\_\_+\_\_\_\_\_+

\_  
\_+

|   |        |        |        |        |        |        |        |        |
|---|--------|--------|--------|--------|--------|--------|--------|--------|
| 1 | 8295   | 2339   | 6436   | 8039   | 4752   | 13     | 40     | 29914  |
|   | 27.73  | 7.82   | 21.52  | 26.87  | 15.89  | 0.04   | 0.13   | 100.00 |
|   | 27.73  | 7.82   | 21.52  | 26.87  | 15.89  | 0.04   | 0.13   |        |
|   | 100.00 | 100.00 | 100.00 | 100.00 | 100.00 | 100.00 | 100.00 |        |

\_\_\_\_\_+\_\_\_\_\_+\_\_\_\_\_+\_\_\_\_\_+\_\_\_\_\_+\_\_\_\_\_+\_\_\_\_\_+\_\_\_\_\_+

\_  
\_+

Total 8295 2339 6436 8039 4752 13 40 29914

27.73 7.82 21.52 26.87 15.89 0.04 0.13 100.00

Administration of anticoagulants at the time of obtaining Table 2-4 consent, according to the presence or absence of proton-pump inhibitors

FREQ Procedure

Table : ALL \* n\_ACT3

ALL n\_ACT3

Power |

Percent |

Percent of rows

Percent of columns | 1 | Total

|        |        |        |  |
|--------|--------|--------|--|
| _____+ |        | _____+ |  |
| 1      | 23478  | 23478  |  |
|        | 100.00 | 100.00 |  |
|        | 100.00 |        |  |
|        | 100.00 |        |  |
| _____+ |        | _____+ |  |
| Total  | 23478  | 23478  |  |
|        | 100.00 | 100.00 |  |

Frequency of missing values = 6436



Administration of anticoagulants at the time of obtaining Table 2-4 consent, according to the presence or absence of proton-pump inhibitors

FREQ Procedure

Tables: ALL\* ACTYP

ALL ACTYP(Type of AF)

Power |

Percent |

Percent of rows

Percent of column | Warfa| Dabigat| Riverro| Apixa| Edoxa| Parenteral Anti| Edoxa| Total

|phosphate|run|xaban|ban|ban|coagulant|ban (OD)|

|||||)|

\_\_\_\_\_+\_\_\_\_\_+\_\_\_\_\_+\_\_\_\_\_+\_\_\_\_\_+\_\_\_\_\_+\_\_\_\_\_+\_\_\_\_\_+

\_  
\_+

|   |        |        |        |        |        |        |        |        |
|---|--------|--------|--------|--------|--------|--------|--------|--------|
| 1 | 8295   | 2339   | 6436   | 8039   | 4752   | 13     | 40     | 29914  |
|   | 27.73  | 7.82   | 21.52  | 26.87  | 15.89  | 0.04   | 0.13   | 100.00 |
|   | 27.73  | 7.82   | 21.52  | 26.87  | 15.89  | 0.04   | 0.13   |        |
|   | 100.00 | 100.00 | 100.00 | 100.00 | 100.00 | 100.00 | 100.00 |        |

\_\_\_\_\_+\_\_\_\_\_+\_\_\_\_\_+\_\_\_\_\_+\_\_\_\_\_+\_\_\_\_\_+\_\_\_\_\_+\_\_\_\_\_+

\_  
\_+

Total 8295 2339 6436 8039 4752 13 40 29914

27.73 7.82 21.52 26.87 15.89 0.04 0.13 100.00

Administration of anticoagulants at the time of obtaining Table 2-4 consent, according to the presence or absence of proton-pump inhibitors

FREQ Procedure

Table : ALL \* n\_ACT4

ALL n\_ACT4

Power |

Percent |

Percent of rows

Percent of columns | 1 | Total

|        |        |        |  |
|--------|--------|--------|--|
| _____+ |        | _____+ |  |
| 1      | 21875  | 21875  |  |
|        | 100.00 | 100.00 |  |
|        | 100.00 |        |  |
|        | 100.00 |        |  |
| _____+ |        | _____+ |  |
| Total  | 21875  | 21875  |  |
|        | 100.00 | 100.00 |  |

Frequency of missing values = 8039

Administration of anticoagulants at the time of obtaining Table 2-4 consent, according to the presence or absence of proton-pump inhibitors

FREQ Procedure

Table: ALL \* t\_ACT0

ALL t\_ACT0

Power |

Percent |

Percent of rows

Percentage of columns | 0| 1| Sum

|       | 0      | 1      | Sum    |
|-------|--------|--------|--------|
| 1     | 25122  | 4792   | 29914  |
|       | 83.98  | 16.02  | 100.00 |
|       | 83.98  | 16.02  |        |
|       | 100.00 | 100.00 |        |
| Total | 25122  | 4792   | 29914  |
|       | 83.98  | 16.02  | 100.00 |

Administration of anticoagulants at the time of obtaining Table 2-4 consent, according to the presence or absence of proton-pump inhibitors

FREQ Procedure

Table: ALL \* t\_ACT0

ALL t\_ACT0

Power |

Percent |

Percent of rows

Percentage of columns | 0| 1| Sum

|       | 0      | 1      | Sum    |
|-------|--------|--------|--------|
| 1     | 25122  | 4792   | 29914  |
|       | 83.98  | 16.02  | 100.00 |
|       | 83.98  | 16.02  |        |
|       | 100.00 | 100.00 |        |
| Total | 25122  | 4792   | 29914  |
|       | 83.98  | 16.02  | 100.00 |

Administration of anticoagulants at the time of obtaining Table 2-4 consent, according to the presence or absence of proton-pump inhibitors

FREQ Procedure

Tables: ALL\* ACTYP

ALL ACTYP(Type of AF)

Power |

Percent |

Percent of rows

Percent of column | Warfa| Dabigat| Riverro| Apixa| Edoxa| Parenteral Anti| Edoxa| Total

|phosphate|run|xaban|ban|ban|coagulant|ban (OD)|

|||||)|

\_\_\_\_\_+\_\_\_\_\_+\_\_\_\_\_+\_\_\_\_\_+\_\_\_\_\_+\_\_\_\_\_+\_\_\_\_\_+\_\_\_\_\_+

\_  
\_+

|   |        |        |        |        |        |        |        |        |
|---|--------|--------|--------|--------|--------|--------|--------|--------|
| 1 | 8295   | 2339   | 6436   | 8039   | 4752   | 13     | 40     | 29914  |
|   | 27.73  | 7.82   | 21.52  | 26.87  | 15.89  | 0.04   | 0.13   | 100.00 |
|   | 27.73  | 7.82   | 21.52  | 26.87  | 15.89  | 0.04   | 0.13   |        |
|   | 100.00 | 100.00 | 100.00 | 100.00 | 100.00 | 100.00 | 100.00 |        |

\_\_\_\_\_+\_\_\_\_\_+\_\_\_\_\_+\_\_\_\_\_+\_\_\_\_\_+\_\_\_\_\_+\_\_\_\_\_+\_\_\_\_\_+

\_  
\_+

Total 8295 2339 6436 8039 4752 13 40 29914

27.73 7.82 21.52 26.87 15.89 0.04 0.13 100.00

Administration of anticoagulants at the time of obtaining Table 2-4 consent, according to the presence or absence of proton-pump inhibitors

FREQ Procedure

Table : ALL \* n\_ACT5

ALL n\_ACT5

Power |

Percent |

Percent of rows

Percent of columns | 1 | Total

|        |        |        |  |
|--------|--------|--------|--|
| _____+ |        | _____+ |  |
| 1      | 25162  | 25162  |  |
|        | 100.00 | 100.00 |  |
|        | 100.00 |        |  |
|        | 100.00 |        |  |
| _____+ |        | _____+ |  |
| Total  | 25162  | 25162  |  |
|        | 100.00 | 100.00 |  |

Degree of missing values = 4752

Administration of anticoagulants at the time of obtaining Table 2-4 consent, according to the presence or absence of proton-pump inhibitors

FREQ Procedure

Tables: ALL\* ACTYP

ALL ACTYP(Type of AF)

Power |

Percent |

Percent of rows

Percent of column | Warfa| Dabigat| Riverro| Apixa| Edoxa| Parenteral Anti| Edoxa| Total

|phosphate|run|xaban|ban|ban|coagulant|ban (OD)|

|||||D|

\_\_\_\_\_+\_\_\_\_\_+\_\_\_\_\_+\_\_\_\_\_+\_\_\_\_\_+\_\_\_\_\_+\_\_\_\_\_+\_\_\_\_\_+

\_\_+

|   |        |        |        |        |        |        |        |        |
|---|--------|--------|--------|--------|--------|--------|--------|--------|
| 1 | 8295   | 2339   | 6436   | 8039   | 4752   | 13     | 40     | 29914  |
|   | 27.73  | 7.82   | 21.52  | 26.87  | 15.89  | 0.04   | 0.13   | 100.00 |
|   | 27.73  | 7.82   | 21.52  | 26.87  | 15.89  | 0.04   | 0.13   |        |
|   | 100.00 | 100.00 | 100.00 | 100.00 | 100.00 | 100.00 | 100.00 |        |

\_\_\_\_\_+\_\_\_\_\_+\_\_\_\_\_+\_\_\_\_\_+\_\_\_\_\_+\_\_\_\_\_+\_\_\_\_\_+\_\_\_\_\_+

\_\_+

Total 8295 2339 6436 8039 4752 13 40 29914

27.73 7.82 21.52 26.87 15.89 0.04 0.13 100.00

Administration of anticoagulants at the time of obtaining Table 2-4 consent, according to the presence or absence of proton-pump inhibitors

FREQ Procedure

Table : ALL \* n\_ACT7

ALL n\_ACT7

Power |

Percent |

Percent of rows

Percent of columns | 1| Total

|        |        |        |  |
|--------|--------|--------|--|
| _____+ |        | _____+ |  |
| 1      | 29874  | 29874  |  |
|        | 100.00 | 100.00 |  |
|        | 100.00 |        |  |
|        | 100.00 |        |  |
| _____+ |        | _____+ |  |
| Total  | 29874  | 29874  |  |
|        | 100.00 | 100.00 |  |

Degree of missing values = 40



Administration of anticoagulants at the time of obtaining Table 2-4 consent, according to the presence or absence of proton-pump inhibitors

FREQ Procedure

Tables: ALL\* ACTYP

ALL ACTYP(Type of AF)

Power |

Percent |

Percent of rows

Percent of column | Warfa| Dabigat| Riverro| Apixa| Edoxa| Parenteral Anti| Edoxa| Total

|phosphate|run|xaban|ban|ban|coagulant|ban (OD)|

|||||)|

\_\_\_\_\_+\_\_\_\_\_+\_\_\_\_\_+\_\_\_\_\_+\_\_\_\_\_+\_\_\_\_\_+\_\_\_\_\_+\_\_\_\_\_+

\_\_+

|   |        |        |        |        |        |        |        |        |
|---|--------|--------|--------|--------|--------|--------|--------|--------|
| 1 | 8295   | 2339   | 6436   | 8039   | 4752   | 13     | 40     | 29914  |
|   | 27.73  | 7.82   | 21.52  | 26.87  | 15.89  | 0.04   | 0.13   | 100.00 |
|   | 27.73  | 7.82   | 21.52  | 26.87  | 15.89  | 0.04   | 0.13   |        |
|   | 100.00 | 100.00 | 100.00 | 100.00 | 100.00 | 100.00 | 100.00 |        |

\_\_\_\_\_+\_\_\_\_\_+\_\_\_\_\_+\_\_\_\_\_+\_\_\_\_\_+\_\_\_\_\_+\_\_\_\_\_+\_\_\_\_\_+

\_\_+

Total 8295 2339 6436 8039 4752 13 40 29914

27.73 7.82 21.52 26.87 15.89 0.04 0.13 100.00

Administration of anticoagulants at the time of obtaining Table 2-4 consent, according to the presence or absence of proton-pump inhibitors

FREQ Procedure

Table : ALL \* n\_ACT6

ALL n\_ACT6

Power |

Percent |

Percent of rows

Percent of columns | 1 | Total

|       | 1      | Total  |
|-------|--------|--------|
| 1     | 29901  | 29901  |
|       | 100.00 | 100.00 |
|       | 100.00 |        |
|       | 100.00 |        |
| Total | 29901  | 29901  |
|       | 100.00 | 100.00 |

Degree of missing values = 13

Administration of anticoagulants at the time of obtaining Table 2-4 consent, according to the presence or absence of proton-pump inhibitors

FREQ Procedure

Table : ALL \* t\_ACT1

ALL t\_ACT1

Power |

Percent |

Percent of rows

Percentage of columns | 0| 1| Sum

|       | 0      | 1      | Sum    |
|-------|--------|--------|--------|
| 1     | 13     | 29901  | 29914  |
|       | 0.04   | 99.96  | 100.00 |
|       | 0.04   | 99.96  |        |
|       | 100.00 | 100.00 |        |
| Total | 13     | 29901  | 29914  |
|       | 0.04   | 99.96  | 100.00 |

Administration of anticoagulants at the time of obtaining Table 2-4 consent, according to the presence or absence of proton-pump inhibitors

FREQ Procedure

Table : ALL \* t\_ACT1

ALL t\_ACT1

Power |

Percent |

Percent of rows

Percentage of columns | 0| 1| Sum

|       | 0      | 1      | Sum    |
|-------|--------|--------|--------|
| 1     | 13     | 29901  | 29914  |
|       | 0.04   | 99.96  | 100.00 |
|       | 0.04   | 99.96  |        |
|       | 100.00 | 100.00 |        |
| Total | 13     | 29901  | 29914  |
|       | 0.04   | 99.96  | 100.00 |

Administration of anticoagulants at the time of obtaining Table 2-4 consent, according to the presence or absence of proton-pump inhibitors

FREQ Procedure

Table : ALL \* t\_ACT2

ALL t\_ACT2

Power |

Percent |

Percent of rows

Percentage of columns | 0| 1| Sum

|       | 0      | 1      | Sum    |
|-------|--------|--------|--------|
| 1     | 8308   | 21606  | 29914  |
|       | 27.77  | 72.23  | 100.00 |
|       | 27.77  | 72.23  |        |
|       | 100.00 | 100.00 |        |
| Total | 8308   | 21606  | 29914  |
|       | 27.77  | 72.23  | 100.00 |

Administration of anticoagulants at the time of obtaining Table 2-4 consent, according to the presence or absence of proton-pump inhibitors

FREQ Procedure

Table : ALL \* t\_ACT2

ALL t\_ACT2

Power |

Percent |

Percent of rows

Percentage of columns | 0| 1| Sum

|       | 0      | 1      | Sum    |
|-------|--------|--------|--------|
| 1     | 8308   | 21606  | 29914  |
|       | 27.77  | 72.23  | 100.00 |
|       | 27.77  | 72.23  |        |
|       | 100.00 | 100.00 |        |
| Total | 8308   | 21606  | 29914  |
|       | 27.77  | 72.23  | 100.00 |

Administration of anticoagulants at the time of obtaining Table 2-4 consent, according to the presence or absence of proton-pump inhibitors

FREQ Procedure

Table : ALL \* t\_ACT3

ALL t\_ACT3

Power |

Percent |

Percent of rows

Percentage of columns | 0| 1| Sum

|       | 0      | 1      | Sum    |
|-------|--------|--------|--------|
| 1     | 10647  | 19267  | 29914  |
|       | 35.59  | 64.41  | 100.00 |
|       | 35.59  | 64.41  |        |
|       | 100.00 | 100.00 |        |
| Total | 10647  | 19267  | 29914  |
|       | 35.59  | 64.41  | 100.00 |

Administration of anticoagulants at the time of obtaining Table 2-4 consent, according to the presence or absence of proton-pump inhibitors

FREQ Procedure

Table : ALL \* t\_ACT3

ALL t\_ACT3

Power |

Percent |

Percent of rows

Percentage of columns | 0| 1| Sum

|       | 0      | 1      | Sum    |
|-------|--------|--------|--------|
| 1     | 10647  | 19267  | 29914  |
|       | 35.59  | 64.41  | 100.00 |
|       | 35.59  | 64.41  |        |
|       | 100.00 | 100.00 |        |
| Total | 10647  | 19267  | 29914  |
|       | 35.59  | 64.41  | 100.00 |



Administration of anticoagulants at the time of obtaining Table 2-4 consent, according to the presence or absence of proton-pump inhibitors

FREQ Procedure

Tables: ALL\* VISITAD

ALL VISITAD(Visit and Drug Administration)

Power |

Percent |

Percent of rows

Percent of column |Month |Month |Month |First dose |Unknown | Total

Within | | |

|       | Month  | Month  | Month  | First dose | Unknown | Total |
|-------|--------|--------|--------|------------|---------|-------|
| 1     | 8172   | 28     | 23     | 72         | 8295    |       |
|       | 98.52  | 0.34   | 0.28   | 0.87       | 100.00  |       |
|       | 98.52  | 0.34   | 0.28   | 0.87       |         |       |
|       | 100.00 | 100.00 | 100.00 | 100.00     |         |       |
| Total | 8172   | 28     | 23     | 72         | 8295    |       |
|       | 98.52  | 0.34   | 0.28   | 0.87       | 100.00  |       |

Administration of anticoagulants at the time of obtaining Table 2-4 consent, according to the presence or absence of proton-pump inhibitors

FREQ Procedure

Tables: ALL\* VISITAD

ALL VISITAD(Visit and Drug Administration)

Power |

Percent |

Percent of rows

Percent of column |Month |Month |Month |First dose |Unknown | Total

Within | | |

|       | +      | +      | +      | +      | +      |
|-------|--------|--------|--------|--------|--------|
| 1     | 8172   | 28     | 23     | 72     | 8295   |
|       | 98.52  | 0.34   | 0.28   | 0.87   | 100.00 |
|       | 98.52  | 0.34   | 0.28   | 0.87   |        |
|       | 100.00 | 100.00 | 100.00 | 100.00 |        |
|       | +      | +      | +      | +      | +      |
| Total | 8172   | 28     | 23     | 72     | 8295   |
|       | 98.52  | 0.34   | 0.28   | 0.87   | 100.00 |

Administration of anticoagulants at the time of obtaining Table 2-4 consent, according to the presence or absence of proton-pump inhibitors

FREQ Procedure

Tables: ALL\* VISITAD

ALL VISITAD(Visit and Drug Administration)

Power |

Percent |

Percent of rows

Percent of column |Month |Month |Month |First dose |Unknown | Total

Within | | |

|       | +      | +      | +      | +      | +      |
|-------|--------|--------|--------|--------|--------|
| 1     | 8172   | 28     | 23     | 72     | 8295   |
|       | 98.52  | 0.34   | 0.28   | 0.87   | 100.00 |
|       | 98.52  | 0.34   | 0.28   | 0.87   |        |
|       | 100.00 | 100.00 | 100.00 | 100.00 |        |
|       | +      | +      | +      | +      | +      |
| Total | 8172   | 28     | 23     | 72     | 8295   |
|       | 98.52  | 0.34   | 0.28   | 0.87   | 100.00 |

Administration of anticoagulants at the time of obtaining Table 2-4 consent, according to the presence or absence of proton-pump inhibitors

FREQ Procedure

Tables: ALL\* VISITAD

ALL VISITAD(Visit and Drug Administration)

Power |

Percent |

Percent of rows

Percent of column |Month |Month |Month |First dose |Unknown | Total

Within | | |

|       | +      | +      | +      | +      | +      |
|-------|--------|--------|--------|--------|--------|
| 1     | 8172   | 28     | 23     | 72     | 8295   |
|       | 98.52  | 0.34   | 0.28   | 0.87   | 100.00 |
|       | 98.52  | 0.34   | 0.28   | 0.87   |        |
|       | 100.00 | 100.00 | 100.00 | 100.00 |        |
|       | +      | +      | +      | +      | +      |
| Total | 8172   | 28     | 23     | 72     | 8295   |
|       | 98.52  | 0.34   | 0.28   | 0.87   | 100.00 |

Administration of anticoagulants at the time of obtaining Table 2-4 consent, according to the presence or absence of proton-pump inhibitors

FREQ Procedure

Tables: ALL\* VISITAD

ALL VISITAD(Visit and Drug Administration)

Power |

Percent |

Percent of rows

Percent of column |Month |Month |Month |First dose |Unknown | Total

Within | | |

|       | Month  | Month  | Month  | First dose | Unknown | Total |
|-------|--------|--------|--------|------------|---------|-------|
| 1     | 2266   | 23     | 18     | 32         | 2339    |       |
|       | 96.88  | 0.98   | 0.77   | 1.37       | 100.00  |       |
|       | 96.88  | 0.98   | 0.77   | 1.37       |         |       |
|       | 100.00 | 100.00 | 100.00 | 100.00     |         |       |
| Total | 2266   | 23     | 18     | 32         | 2339    |       |
|       | 96.88  | 0.98   | 0.77   | 1.37       | 100.00  |       |

Administration of anticoagulants at the time of obtaining Table 2-4 consent, according to the presence or absence of proton-pump inhibitors

FREQ Procedure

Tables: ALL\* VISITAD

ALL VISITAD(Visit and Drug Administration)

Power |

Percent |

Percent of rows

Percent of column |Month |Month |Month |First dose |Unknown | Total

Within | | |

|       | +      | +      | +      | +      | +      |
|-------|--------|--------|--------|--------|--------|
| 1     | 2266   | 23     | 18     | 32     | 2339   |
|       | 96.88  | 0.98   | 0.77   | 1.37   | 100.00 |
|       | 96.88  | 0.98   | 0.77   | 1.37   |        |
|       | 100.00 | 100.00 | 100.00 | 100.00 |        |
|       | +      | +      | +      | +      | +      |
| Total | 2266   | 23     | 18     | 32     | 2339   |
|       | 96.88  | 0.98   | 0.77   | 1.37   | 100.00 |

Administration of anticoagulants at the time of obtaining Table 2-4 consent, according to the presence or absence of proton-pump inhibitors

FREQ Procedure

Tables: ALL\* VISITAD

ALL VISITAD(Visit and Drug Administration)

Power |

Percent |

Percent of rows

Percent of column |Month |Month |Month |First dose |Unknown | Total

Within | | |

|       | +      | +      | +      | +      | +      |
|-------|--------|--------|--------|--------|--------|
| 1     | 2266   | 23     | 18     | 32     | 2339   |
|       | 96.88  | 0.98   | 0.77   | 1.37   | 100.00 |
|       | 96.88  | 0.98   | 0.77   | 1.37   |        |
|       | 100.00 | 100.00 | 100.00 | 100.00 |        |
|       | +      | +      | +      | +      | +      |
| Total | 2266   | 23     | 18     | 32     | 2339   |
|       | 96.88  | 0.98   | 0.77   | 1.37   | 100.00 |

Administration of anticoagulants at the time of obtaining Table 2-4 consent, according to the presence or absence of proton-pump inhibitors

FREQ Procedure

Tables: ALL\* VISITAD

ALL VISITAD(Visit and Drug Administration)

Power |

Percent |

Percent of rows

Percent of column |Month |Month |Month |First dose |Unknown | Total

Within | | |

|       | +      | +      | +      | +      | +      |
|-------|--------|--------|--------|--------|--------|
| 1     | 2266   | 23     | 18     | 32     | 2339   |
|       | 96.88  | 0.98   | 0.77   | 1.37   | 100.00 |
|       | 96.88  | 0.98   | 0.77   | 1.37   |        |
|       | 100.00 | 100.00 | 100.00 | 100.00 |        |
|       | +      | +      | +      | +      | +      |
| Total | 2266   | 23     | 18     | 32     | 2339   |
|       | 96.88  | 0.98   | 0.77   | 1.37   | 100.00 |



Administration of anticoagulants at the time of obtaining Table 2-4 consent, according to the presence or absence of proton-pump inhibitors

FREQ Procedure

Tables: ALL\* VISITAD

ALL VISITAD(Visit and Drug Administration)

Power |

Percent |

Percent of rows

Percent of column |Month |Month |Month |First dose |Unknown | Total

Within | | |

|       | Month  | Month  | Month  | First dose | Unknown | Total |
|-------|--------|--------|--------|------------|---------|-------|
| 1     | 6162   | 109    | 110    | 55         | 6436    |       |
|       | 95.74  | 1.69   | 1.71   | 0.85       | 100.00  |       |
|       | 95.74  | 1.69   | 1.71   | 0.85       |         |       |
|       | 100.00 | 100.00 | 100.00 | 100.00     |         |       |
| Total | 6162   | 109    | 110    | 55         | 6436    |       |
|       | 95.74  | 1.69   | 1.71   | 0.85       | 100.00  |       |

Administration of anticoagulants at the time of obtaining Table 2-4 consent, according to the presence or absence of proton-pump inhibitors

FREQ Procedure

Tables: ALL\* VISITAD

ALL VISITAD(Visit and Drug Administration)

Power |

Percent |

Percent of rows

Percent of column |Month |Month |Month |First dose |Unknown | Total

Within | | |

|       | +      | +      | +      | +      | +      |
|-------|--------|--------|--------|--------|--------|
| 1     | 6162   | 109    | 110    | 55     | 6436   |
|       | 95.74  | 1.69   | 1.71   | 0.85   | 100.00 |
|       | 95.74  | 1.69   | 1.71   | 0.85   |        |
|       | 100.00 | 100.00 | 100.00 | 100.00 |        |
|       | +      | +      | +      | +      | +      |
| Total | 6162   | 109    | 110    | 55     | 6436   |
|       | 95.74  | 1.69   | 1.71   | 0.85   | 100.00 |

Administration of anticoagulants at the time of obtaining Table 2-4 consent, according to the presence or absence of proton-pump inhibitors

FREQ Procedure

Tables: ALL\* VISITAD

ALL VISITAD(Visit and Drug Administration)

Power |

Percent |

Percent of rows

Percent of column |Month |Month |Month |First dose |Unknown | Total

Within | | |

|       | Month  | Month  | Month  | First dose | Unknown | Total |
|-------|--------|--------|--------|------------|---------|-------|
| 1     | 6162   | 109    | 110    | 55         | 6436    |       |
|       | 95.74  | 1.69   | 1.71   | 0.85       | 100.00  |       |
|       | 95.74  | 1.69   | 1.71   | 0.85       |         |       |
|       | 100.00 | 100.00 | 100.00 | 100.00     |         |       |
| Total | 6162   | 109    | 110    | 55         | 6436    |       |
|       | 95.74  | 1.69   | 1.71   | 0.85       | 100.00  |       |

Administration of anticoagulants at the time of obtaining Table 2-4 consent, according to the presence or absence of proton-pump inhibitors

FREQ Procedure

Tables: ALL\* VISITAD

ALL VISITAD(Visit and Drug Administration)

Power |

Percent |

Percent of rows

Percent of column |Month |Month |Month |First dose |Unknown | Total

Within | | |

|       | +      | +      | +      | +      | +      |
|-------|--------|--------|--------|--------|--------|
| 1     | 6162   | 109    | 110    | 55     | 6436   |
|       | 95.74  | 1.69   | 1.71   | 0.85   | 100.00 |
|       | 95.74  | 1.69   | 1.71   | 0.85   |        |
|       | 100.00 | 100.00 | 100.00 | 100.00 |        |
|       | +      | +      | +      | +      | +      |
| Total | 6162   | 109    | 110    | 55     | 6436   |
|       | 95.74  | 1.69   | 1.71   | 0.85   | 100.00 |

Administration of anticoagulants at the time of obtaining Table 2-4 consent, according to the presence or absence of proton-pump inhibitors

FREQ Procedure

Tables: ALL\* VISITAD

ALL VISITAD(Visit and Drug Administration)

Power |

Percent |

Percent of rows

Percent of column |Month |Month |Month |First dose |Unknown | Total

Within | | |

|       | Month  | Month  | Month  | First dose | Unknown | Total |
|-------|--------|--------|--------|------------|---------|-------|
| 1     | 7747   | 128    | 130    | 34         | 8039    |       |
|       | 96.37  | 1.59   | 1.62   | 0.42       | 100.00  |       |
|       | 96.37  | 1.59   | 1.62   | 0.42       |         |       |
|       | 100.00 | 100.00 | 100.00 | 100.00     |         |       |
| Total | 7747   | 128    | 130    | 34         | 8039    |       |
|       | 96.37  | 1.59   | 1.62   | 0.42       | 100.00  |       |

Administration of anticoagulants at the time of obtaining Table 2-4 consent, according to the presence or absence of proton-pump inhibitors

FREQ Procedure

Tables: ALL\* VISITAD

ALL VISITAD(Visit and Drug Administration)

Power |

Percent |

Percent of rows

Percent of column |Month |Month |Month |First dose |Unknown | Total

Within | | |

|       | +      | +      | +      | +      | +      |
|-------|--------|--------|--------|--------|--------|
| 1     | 7747   | 128    | 130    | 34     | 8039   |
|       | 96.37  | 1.59   | 1.62   | 0.42   | 100.00 |
|       | 96.37  | 1.59   | 1.62   | 0.42   |        |
|       | 100.00 | 100.00 | 100.00 | 100.00 |        |
|       | +      | +      | +      | +      | +      |
| Total | 7747   | 128    | 130    | 34     | 8039   |
|       | 96.37  | 1.59   | 1.62   | 0.42   | 100.00 |

Administration of anticoagulants at the time of obtaining Table 2-4 consent, according to the presence or absence of proton-pump inhibitors

FREQ Procedure

Tables: ALL\* VISITAD

ALL VISITAD(Visit and Drug Administration)

Power |

Percent |

Percent of rows

Percent of column |Month |Month |Month |First dose |Unknown | Total

Within | | |

|       | +      | +      | +      | +      | +      |
|-------|--------|--------|--------|--------|--------|
| 1     | 7747   | 128    | 130    | 34     | 8039   |
|       | 96.37  | 1.59   | 1.62   | 0.42   | 100.00 |
|       | 96.37  | 1.59   | 1.62   | 0.42   |        |
|       | 100.00 | 100.00 | 100.00 | 100.00 |        |
|       | +      | +      | +      | +      | +      |
| Total | 7747   | 128    | 130    | 34     | 8039   |
|       | 96.37  | 1.59   | 1.62   | 0.42   | 100.00 |

Administration of anticoagulants at the time of obtaining Table 2-4 consent, according to the presence or absence of proton-pump inhibitors

FREQ Procedure

Tables: ALL\* VISITAD

ALL VISITAD(Visit and Drug Administration)

Power |

Percent |

Percent of rows

Percent of column |Month |Month |Month |First dose |Unknown | Total

Within | | |

|       | +      | +      | +      | +      | +      |
|-------|--------|--------|--------|--------|--------|
| 1     | 7747   | 128    | 130    | 34     | 8039   |
|       | 96.37  | 1.59   | 1.62   | 0.42   | 100.00 |
|       | 96.37  | 1.59   | 1.62   | 0.42   |        |
|       | 100.00 | 100.00 | 100.00 | 100.00 |        |
|       | +      | +      | +      | +      | +      |
| Total | 7747   | 128    | 130    | 34     | 8039   |
|       | 96.37  | 1.59   | 1.62   | 0.42   | 100.00 |



Administration of anticoagulants at the time of obtaining Table 2-4 consent, according to the presence or absence of proton-pump inhibitors

FREQ Procedure

Tables: ALL\* VISITAD

ALL VISITAD(Visit and Drug Administration)

Power |

Percent |

Percent of rows

Percent of column |Month |Month |Month |First dose |Unknown | Total

Within | | |

|       | Month  | Month  | Month  | First dose | Unknown | Total |
|-------|--------|--------|--------|------------|---------|-------|
| 1     | 4141   | 226    | 400    | 25         | 4792    |       |
|       | 86.41  | 4.72   | 8.35   | 0.52       | 100.00  |       |
|       | 86.41  | 4.72   | 8.35   | 0.52       |         |       |
|       | 100.00 | 100.00 | 100.00 | 100.00     |         |       |
| Total | 4141   | 226    | 400    | 25         | 4792    |       |
|       | 86.41  | 4.72   | 8.35   | 0.52       | 100.00  |       |

Administration of anticoagulants at the time of obtaining Table 2-4 consent, according to the presence or absence of proton-pump inhibitors

FREQ Procedure

Tables: ALL\* VISITAD

ALL VISITAD(Visit and Drug Administration)

Power |

Percent |

Percent of rows

Percent of column |Month |Month |Month |First dose |Unknown | Total

Within | | |

|       | +      | +      | +      | +      | +      |
|-------|--------|--------|--------|--------|--------|
| 1     | 4141   | 226    | 400    | 25     | 4792   |
|       | 86.41  | 4.72   | 8.35   | 0.52   | 100.00 |
|       | 86.41  | 4.72   | 8.35   | 0.52   |        |
|       | 100.00 | 100.00 | 100.00 | 100.00 |        |
|       | +      | +      | +      | +      | +      |
| Total | 4141   | 226    | 400    | 25     | 4792   |
|       | 86.41  | 4.72   | 8.35   | 0.52   | 100.00 |

Administration of anticoagulants at the time of obtaining Table 2-4 consent, according to the presence or absence of proton-pump inhibitors

FREQ Procedure

Tables: ALL\* VISITAD

ALL VISITAD(Visit and Drug Administration)

Power |

Percent |

Percent of rows

Percent of column |Month |Month |Month |First dose |Unknown | Total

Within | | |

|       | +      | +      | +      | +      | +      |
|-------|--------|--------|--------|--------|--------|
| 1     | 4141   | 226    | 400    | 25     | 4792   |
|       | 86.41  | 4.72   | 8.35   | 0.52   | 100.00 |
|       | 86.41  | 4.72   | 8.35   | 0.52   |        |
|       | 100.00 | 100.00 | 100.00 | 100.00 |        |
|       | +      | +      | +      | +      | +      |
| Total | 4141   | 226    | 400    | 25     | 4792   |
|       | 86.41  | 4.72   | 8.35   | 0.52   | 100.00 |

Administration of anticoagulants at the time of obtaining Table 2-4 consent, according to the presence or absence of proton-pump inhibitors

FREQ Procedure

Tables: ALL\* VISITAD

ALL VISITAD(Visit and Drug Administration)

Power |

Percent |

Percent of rows

Percent of column |Month |Month |Month |First dose |Unknown | Total

Within | | |

|       | +      | +      | +      | +      | +      |
|-------|--------|--------|--------|--------|--------|
| 1     | 4141   | 226    | 400    | 25     | 4792   |
|       | 86.41  | 4.72   | 8.35   | 0.52   | 100.00 |
|       | 86.41  | 4.72   | 8.35   | 0.52   |        |
|       | 100.00 | 100.00 | 100.00 | 100.00 |        |
|       | +      | +      | +      | +      | +      |
| Total | 4141   | 226    | 400    | 25     | 4792   |
|       | 86.41  | 4.72   | 8.35   | 0.52   | 100.00 |

Administration of anticoagulants at the time of obtaining Table 2-4 consent, according to the presence or absence of proton-pump inhibitors

FREQ Procedure

Tables: ALL\* VISITAD

ALL VISITAD(Visit and Drug Administration)

Power |

Percent |

Percent of rows

Percent of column |Month |Month |Month |First dose |Unknown | Total

Within | | |

|       | Month  | Month  | Month  | First dose | Unknown | Total |
|-------|--------|--------|--------|------------|---------|-------|
| 1     | 4105   | 225    | 397    | 25         | 4752    |       |
|       | 86.38  | 4.73   | 8.35   | 0.53       | 100.00  |       |
|       | 86.38  | 4.73   | 8.35   | 0.53       |         |       |
|       | 100.00 | 100.00 | 100.00 | 100.00     |         |       |
| Total | 4105   | 225    | 397    | 25         | 4752    |       |
|       | 86.38  | 4.73   | 8.35   | 0.53       | 100.00  |       |

Administration of anticoagulants at the time of obtaining Table 2-4 consent, according to the presence or absence of proton-pump inhibitors

FREQ Procedure

Tables: ALL\* VISITAD

ALL VISITAD(Visit and Drug Administration)

Power |

Percent |

Percent of rows

Percent of column |Month |Month |Month |First dose |Unknown | Total

Within | | |

|       | +      | +      | +      | +      | +      |
|-------|--------|--------|--------|--------|--------|
| 1     | 4105   | 225    | 397    | 25     | 4752   |
|       | 86.38  | 4.73   | 8.35   | 0.53   | 100.00 |
|       | 86.38  | 4.73   | 8.35   | 0.53   |        |
|       | 100.00 | 100.00 | 100.00 | 100.00 |        |
|       | +      | +      | +      | +      | +      |
| Total | 4105   | 225    | 397    | 25     | 4752   |
|       | 86.38  | 4.73   | 8.35   | 0.53   | 100.00 |

Administration of anticoagulants at the time of obtaining Table 2-4 consent, according to the presence or absence of proton-pump inhibitors

FREQ Procedure

Tables: ALL\* VISITAD

ALL VISITAD(Visit and Drug Administration)

Power |

Percent |

Percent of rows

Percent of column |Month |Month |Month |First dose |Unknown | Total

Within | | |

|       | +      | +      | +      | +      | +      |
|-------|--------|--------|--------|--------|--------|
| 1     | 4105   | 225    | 397    | 25     | 4752   |
|       | 86.38  | 4.73   | 8.35   | 0.53   | 100.00 |
|       | 86.38  | 4.73   | 8.35   | 0.53   |        |
|       | 100.00 | 100.00 | 100.00 | 100.00 |        |
|       | +      | +      | +      | +      | +      |
| Total | 4105   | 225    | 397    | 25     | 4752   |
|       | 86.38  | 4.73   | 8.35   | 0.53   | 100.00 |

Administration of anticoagulants at the time of obtaining Table 2-4 consent, according to the presence or absence of proton-pump inhibitors

FREQ Procedure

Tables: ALL\* VISITAD

ALL VISITAD(Visit and Drug Administration)

Power |

Percent |

Percent of rows

Percent of column |Month |Month |Month |First dose |Unknown | Total

Within | | |

|       | Month  | Month  | Month  | First dose | Unknown | Total |
|-------|--------|--------|--------|------------|---------|-------|
| 1     | 4105   | 225    | 397    | 25         | 4752    |       |
|       | 86.38  | 4.73   | 8.35   | 0.53       | 100.00  |       |
|       | 86.38  | 4.73   | 8.35   | 0.53       |         |       |
|       | 100.00 | 100.00 | 100.00 | 100.00     |         |       |
| Total | 4105   | 225    | 397    | 25         | 4752    |       |
|       | 86.38  | 4.73   | 8.35   | 0.53       | 100.00  |       |



Administration of anticoagulants at the time of obtaining Table 2-4 consent, according to the presence or absence of proton-pump inhibitors

FREQ Procedure

Tables: ALL\* VISITAD

ALL

VISITAD(Visit and Drug Administration)

Power |

Percent |

Percent of rows

Percent of column |Month |Month |Month |First dose |Total

Within | |

|       | Month  | Month  | Month  | First dose | Total |
|-------|--------|--------|--------|------------|-------|
| 1     | 36     | 1      | 3      | 40         |       |
|       | 90.00  | 2.50   | 7.50   | 100.00     |       |
|       | 90.00  | 2.50   | 7.50   |            |       |
|       | 100.00 | 100.00 | 100.00 |            |       |
| Total | 36     | 1      | 3      | 40         |       |
|       | 90.00  | 2.50   | 7.50   | 100.00     |       |

Administration of anticoagulants at the time of obtaining Table 2-4 consent, according to the presence or absence of proton-pump inhibitors

FREQ Procedure

Tables: ALL\* VISITAD

ALL

VISITAD(Visit and Drug Administration)

Power |

Percent |

Percent of rows

Percent of column |Month |Month |Month |First dose |Total

Within | |

|       | Month  | Month  | Month  | First dose | Total |
|-------|--------|--------|--------|------------|-------|
| 1     | 36     | 1      | 3      | 40         |       |
|       | 90.00  | 2.50   | 7.50   | 100.00     |       |
|       | 90.00  | 2.50   | 7.50   |            |       |
|       | 100.00 | 100.00 | 100.00 |            |       |
| Total | 36     | 1      | 3      | 40         |       |
|       | 90.00  | 2.50   | 7.50   | 100.00     |       |

Administration of anticoagulants at the time of obtaining Table 2-4 consent, according to the presence or absence of proton-pump inhibitors

FREQ Procedure

Tables: ALL\* VISITAD

ALL

VISITAD(Visit and Drug Administration)

Power |

Percent |

Percent of rows

Percent of column |Month |Month |Month |First dose |Total

Within | |

|       | Month  | Month  | Month  | First dose | Total |
|-------|--------|--------|--------|------------|-------|
| 1     | 36     | 1      | 3      | 40         |       |
|       | 90.00  | 2.50   | 7.50   | 100.00     |       |
|       | 90.00  | 2.50   | 7.50   |            |       |
|       | 100.00 | 100.00 | 100.00 |            |       |
| Total | 36     | 1      | 3      | 40         |       |
|       | 90.00  | 2.50   | 7.50   | 100.00     |       |

Administration of anticoagulants at the time of obtaining Table 2-4 consent, according to the presence or absence of proton-pump inhibitors

FREQ Procedure

Tables: ALL\* VISITAD

ALL

VISITAD(Visit and Drug Administration)

Power |

Percent |

Percent of rows

Percent of column |Month |Month |Month |First dose |Total

Within | |

|       | Month  | Month  | Month  | First dose | Total |
|-------|--------|--------|--------|------------|-------|
| 1     | 36     | 1      | 3      | 40         |       |
|       | 90.00  | 2.50   | 7.50   | 100.00     |       |
|       | 90.00  | 2.50   | 7.50   |            |       |
|       | 100.00 | 100.00 | 100.00 |            |       |
| Total | 36     | 1      | 3      | 40         |       |
|       | 90.00  | 2.50   | 7.50   | 100.00     |       |

Administration of anticoagulants at the time of obtaining Table 2-4 consent, according to the presence or absence of proton-pump inhibitors

FREQ Procedure

Tables: ALL\* VISITAD

ALL

VISITAD(Visit and Drug Administration)

Power |

Percent |

Percent of rows

Percent of column |Month | Unknown | Total

) in front | |

|       | Month  | Unknown | Total  |
|-------|--------|---------|--------|
| 1     | 11     | 2       | 13     |
|       | 84.62  | 15.38   | 100.00 |
|       | 84.62  | 15.38   |        |
|       | 100.00 | 100.00  |        |
| Total | 11     | 2       | 13     |
|       | 84.62  | 15.38   | 100.00 |

Administration of anticoagulants at the time of obtaining Table 2-4 consent, according to the presence or absence of proton-pump inhibitors

FREQ Procedure

Tables: ALL\* VISITAD

ALL

VISITAD(Visit and Drug Administration)

Power |

Percent |

Percent of rows

Percent of column |Month | Unknown | Total

) in front | |

|        |        |        |    |  |   |
|--------|--------|--------|----|--|---|
|        | +      |        | +  |  | + |
| 1      | 11     | 2      | 13 |  |   |
| 84.62  | 15.38  | 100.00 |    |  |   |
| 84.62  | 15.38  | 100.00 |    |  |   |
| 100.00 | 100.00 |        |    |  |   |

|               |   |  |   |  |   |
|---------------|---|--|---|--|---|
|               | + |  | + |  | + |
| Total 11 2 13 |   |  |   |  |   |

|  |       |       |        |  |  |
|--|-------|-------|--------|--|--|
|  | 84.62 | 15.38 | 100.00 |  |  |
|--|-------|-------|--------|--|--|

Administration of anticoagulants at the time of obtaining Table 2-4 consent, according to the presence or absence of proton-pump inhibitors

FREQ Procedure

Tables: ALL\* VISITAD

ALL

VISITAD(Visit and Drug Administration)

Power |

Percent |

Percent of rows

Percent of column |Month | Unknown | Total

) in front | |

|               |        |        |       |  |        |
|---------------|--------|--------|-------|--|--------|
|               | +      |        | +     |  | +      |
| 1             | 11     | 2      | 13    |  |        |
| 84.62         | 15.38  | 100.00 |       |  |        |
| 84.62         | 15.38  | 100.00 |       |  |        |
| 100.00        | 100.00 |        |       |  |        |
|               | +      |        | +     |  | +      |
| Total 11 2 13 |        |        |       |  |        |
|               | 84.62  |        | 15.38 |  | 100.00 |

Administration of anticoagulants at the time of obtaining Table 2-4 consent, according to the presence or absence of proton-pump inhibitors

FREQ Procedure

Tables: ALL\* VISITAD

ALL

VISITAD(Visit and Drug Administration)

Power |

Percent |

Percent of rows

Percent of column |Month | Unknown | Total

) in front | |

|        |        |        |    |  |   |
|--------|--------|--------|----|--|---|
|        | +      |        | +  |  | + |
| 1      | 11     | 2      | 13 |  |   |
| 84.62  | 15.38  | 100.00 |    |  |   |
| 84.62  | 15.38  | 100.00 |    |  |   |
| 100.00 | 100.00 |        |    |  |   |

|               |   |  |   |  |   |
|---------------|---|--|---|--|---|
|               | + |  | + |  | + |
| Total 11 2 13 |   |  |   |  |   |

|  |       |       |        |  |  |
|--|-------|-------|--------|--|--|
|  | 84.62 | 15.38 | 100.00 |  |  |
|--|-------|-------|--------|--|--|



Administration of anticoagulants at the time of obtaining Table 2-4 consent, according to the presence or absence of proton-pump inhibitors

FREQ Procedure

Tables: ALL \* DOSE

ALL DOSE(Dose per day for DOAC only)

Power |

Percent |

Percent of rows

Column percent | 0| 50| 75| 110| 150| 185| 220| 300| Total

|       | 0      | 50     | 75     | 110    | 150    | 185    | 220    | 300    | Total  |
|-------|--------|--------|--------|--------|--------|--------|--------|--------|--------|
| 1     | 2      | 1      | 11     | 205    | 123    | 3      | 1846   | 148    | 2339   |
|       | 0.09   | 0.04   | 0.47   | 8.76   | 5.26   | 0.13   | 78.92  | 6.33   | 100.00 |
|       | 0.09   | 0.04   | 0.47   | 8.76   | 5.26   | 0.13   | 78.92  | 6.33   |        |
|       | 100.00 | 100.00 | 100.00 | 100.00 | 100.00 | 100.00 | 100.00 | 100.00 |        |
| Total | 2      | 1      | 11     | 205    | 123    | 3      | 1846   | 148    | 2339   |
|       | 0.09   | 0.04   | 0.47   | 8.76   | 5.26   | 0.13   | 78.92  | 6.33   |        |
|       | 100.00 |        |        |        |        |        |        |        |        |

Administration of anticoagulants at the time of obtaining Table 2-4 consent, according to the presence or absence of proton-pump inhibitors

FREQ Procedure

Tables: ALL \* DOSE

ALL DOSE(Dose per day for DOAC only)

Power |

Percent |

Percent of rows

Column percent | 0| 50| 75| 110| 150| 185| 220| 300| Total

|       | 0      | 50     | 75     | 110    | 150    | 185    | 220    | 300    | Total  |
|-------|--------|--------|--------|--------|--------|--------|--------|--------|--------|
| 1     | 2      | 1      | 11     | 205    | 123    | 3      | 1846   | 148    | 2339   |
|       | 0.09   | 0.04   | 0.47   | 8.76   | 5.26   | 0.13   | 78.92  | 6.33   | 100.00 |
|       | 0.09   | 0.04   | 0.47   | 8.76   | 5.26   | 0.13   | 78.92  | 6.33   |        |
|       | 100.00 | 100.00 | 100.00 | 100.00 | 100.00 | 100.00 | 100.00 | 100.00 |        |
| Total | 2      | 1      | 11     | 205    | 123    | 3      | 1846   | 148    | 2339   |
|       | 0.09   | 0.04   | 0.47   | 8.76   | 5.26   | 0.13   | 78.92  | 6.33   |        |
|       | 100.00 |        |        |        |        |        |        |        |        |

Administration of anticoagulants at the time of obtaining Table 2-4 consent, according to the presence or absence of proton-pump inhibitors

FREQ Procedure

Tables: ALL \* DOSE

ALL DOSE(Dose per day for DOAC only)

Power |

Percent |

Percent of rows

Column percent | 0| 50| 75| 110| 150| 185| 220| 300| Total

|       | 0      | 50     | 75     | 110    | 150    | 185    | 220    | 300    | Total  |
|-------|--------|--------|--------|--------|--------|--------|--------|--------|--------|
| 1     | 2      | 1      | 11     | 205    | 123    | 3      | 1846   | 148    | 2339   |
|       | 0.09   | 0.04   | 0.47   | 8.76   | 5.26   | 0.13   | 78.92  | 6.33   | 100.00 |
|       | 0.09   | 0.04   | 0.47   | 8.76   | 5.26   | 0.13   | 78.92  | 6.33   |        |
|       | 100.00 | 100.00 | 100.00 | 100.00 | 100.00 | 100.00 | 100.00 | 100.00 |        |
| Total | 2      | 1      | 11     | 205    | 123    | 3      | 1846   | 148    | 2339   |
|       | 0.09   | 0.04   | 0.47   | 8.76   | 5.26   | 0.13   | 78.92  | 6.33   |        |
|       | 100.00 |        |        |        |        |        |        |        |        |

Administration of anticoagulants at the time of obtaining Table 2-4 consent, according to the presence or absence of proton-pump inhibitors

FREQ Procedure

Tables: ALL \* DOSE

ALL DOSE(Dose per day for DOAC only)

Power |

Percent |

Percent of rows

Column percent | 0| 50| 75| 110| 150| 185| 220| 300| Total

|       | 0      | 50     | 75     | 110    | 150    | 185    | 220    | 300    | Total  |
|-------|--------|--------|--------|--------|--------|--------|--------|--------|--------|
| 1     | 2      | 1      | 11     | 205    | 123    | 3      | 1846   | 148    | 2339   |
|       | 0.09   | 0.04   | 0.47   | 8.76   | 5.26   | 0.13   | 78.92  | 6.33   | 100.00 |
|       | 0.09   | 0.04   | 0.47   | 8.76   | 5.26   | 0.13   | 78.92  | 6.33   |        |
|       | 100.00 | 100.00 | 100.00 | 100.00 | 100.00 | 100.00 | 100.00 | 100.00 |        |
| Total | 2      | 1      | 11     | 205    | 123    | 3      | 1846   | 148    | 2339   |
|       | 0.09   | 0.04   | 0.47   | 8.76   | 5.26   | 0.13   | 78.92  | 6.33   |        |
|       | 100.00 |        |        |        |        |        |        |        |        |

Administration of anticoagulants at the time of obtaining Table 2-4 consent, according to the presence or absence of proton-pump inhibitors

FREQ Procedure

Tables: ALL \* DOSE

ALL DOSE(Dose per day for DOAC only)

Power |

Percent |

Percent of rows

Column percent | 0| 50| 75| 110| 150| 185| 220| 300| Total

|       | 0      | 50     | 75     | 110    | 150    | 185    | 220    | 300    | Total  |
|-------|--------|--------|--------|--------|--------|--------|--------|--------|--------|
| 1     | 2      | 1      | 11     | 205    | 123    | 3      | 1846   | 148    | 2339   |
|       | 0.09   | 0.04   | 0.47   | 8.76   | 5.26   | 0.13   | 78.92  | 6.33   | 100.00 |
|       | 0.09   | 0.04   | 0.47   | 8.76   | 5.26   | 0.13   | 78.92  | 6.33   |        |
|       | 100.00 | 100.00 | 100.00 | 100.00 | 100.00 | 100.00 | 100.00 | 100.00 |        |
| Total | 2      | 1      | 11     | 205    | 123    | 3      | 1846   | 148    | 2339   |
|       | 0.09   | 0.04   | 0.47   | 8.76   | 5.26   | 0.13   | 78.92  | 6.33   |        |
|       | 100.00 |        |        |        |        |        |        |        |        |

Administration of anticoagulants at the time of obtaining Table 2-4 consent, according to the presence or absence of proton-pump inhibitors

FREQ Procedure

Table : ALL \* f\_d2

ALL f\_d2

Power |

Percent |

Percent of rows

Percent of columns | 1 | Total

|         |        |        |
|---------|--------|--------|
|         | +      | +      |
| 1       | 6      | 6      |
| 100.00  | 100.00 | 100.00 |
| 100.00  |        |        |
| 100.00  |        |        |
| +       | +      |        |
| Total 6 | 6      |        |
| 100.00  | 100.00 |        |

Degree of missing values = 2333

Administration of anticoagulants at the time of obtaining Table 2-4 consent, according to the presence or absence of proton-pump inhibitors

FREQ Procedure

Tables: ALL \* DOSE

ALL DOSE(Dose per day for DOAC only)

Power |

Percent |

Percent of rows

Column percent | 0| 2.5| 5| 7.5| 10| 15| 30| 60| Total

|       | 0      | 2.5    | 5      | 7.5    | 10     | 15     | 30     | 60     | Total  |
|-------|--------|--------|--------|--------|--------|--------|--------|--------|--------|
| 1     | 2      | 1      | 12     | 6      | 4298   | 2109   | 7      | 1      | 6436   |
|       | 0.03   | 0.02   | 0.19   | 0.09   | 66.78  | 32.77  | 0.11   | 0.02   | 100.00 |
|       | 0.03   | 0.02   | 0.19   | 0.09   | 66.78  | 32.77  | 0.11   | 0.02   |        |
|       | 100.00 | 100.00 | 100.00 | 100.00 | 100.00 | 100.00 | 100.00 | 100.00 |        |
| Total | 2      | 1      | 12     | 6      | 4298   | 2109   | 7      | 1      | 6436   |
|       | 0.03   | 0.02   | 0.19   | 0.09   | 66.78  | 32.77  | 0.11   | 0.02   |        |
|       | 100.00 |        |        |        |        |        |        |        |        |

Administration of anticoagulants at the time of obtaining Table 2-4 consent, according to the presence or absence of proton-pump inhibitors

FREQ Procedure

Tables: ALL \* DOSE

ALL DOSE(Dose per day for DOAC only)

Power |

Percent |

Percent of rows

Column percent | 0| 2.5| 5| 7.5| 10| 15| 30| 60| Total

|       | 0      | 2.5    | 5      | 7.5    | 10     | 15     | 30     | 60     | Total  |
|-------|--------|--------|--------|--------|--------|--------|--------|--------|--------|
| 1     | 2      | 1      | 12     | 6      | 4298   | 2109   | 7      | 1      | 6436   |
|       | 0.03   | 0.02   | 0.19   | 0.09   | 66.78  | 32.77  | 0.11   | 0.02   | 100.00 |
|       | 0.03   | 0.02   | 0.19   | 0.09   | 66.78  | 32.77  | 0.11   | 0.02   |        |
|       | 100.00 | 100.00 | 100.00 | 100.00 | 100.00 | 100.00 | 100.00 | 100.00 |        |
| Total | 2      | 1      | 12     | 6      | 4298   | 2109   | 7      | 1      | 6436   |
|       | 0.03   | 0.02   | 0.19   | 0.09   | 66.78  | 32.77  | 0.11   | 0.02   |        |
|       | 100.00 |        |        |        |        |        |        |        |        |



Administration of anticoagulants at the time of obtaining Table 2-4 consent, according to the presence or absence of proton-pump inhibitors

FREQ Procedure

Table : ALL \* f\_d3

ALL f\_d3

Power |

Percent |

Percent of rows

Percent of columns | 1 | Total

|                    | 1      | Total  |
|--------------------|--------|--------|
| Power              |        |        |
| Percent            |        |        |
| Percent of rows    |        |        |
| Percent of columns |        |        |
|                    | 1      | 29     |
|                    | 100.00 | 100.00 |
|                    | 100.00 |        |
|                    | 100.00 |        |
| Total              | 29     | 29     |
|                    | 100.00 | 100.00 |

Frequency of missing values = 6407

Administration of anticoagulants at the time of obtaining Table 2-4 consent, according to the presence or absence of proton-pump inhibitors

FREQ Procedure

Tables: ALL \* DOSE

ALL DOSE(Dose per day for DOAC only)

Power |

Percent |

Percent of rows

Column percent | 0 | 1.25 | 2.5 | 5 | 7.5 | 10 | 15 | 30 | Total

|       | 0      | 1.25   | 2.5    | 5      | 7.5    | 10     | 15     | 30     | Total  |      |
|-------|--------|--------|--------|--------|--------|--------|--------|--------|--------|------|
|       | 1      | 2      | 1      | 518    | 5153   | 5      | 2358   | 1      | 1      | 8039 |
|       | 0.02   | 0.01   | 6.44   | 64.10  | 0.06   | 29.33  | 0.01   | 0.01   | 100.00 |      |
|       | 0.02   | 0.01   | 6.44   | 64.10  | 0.06   | 29.33  | 0.01   | 0.01   |        |      |
|       | 100.00 | 100.00 | 100.00 | 100.00 | 100.00 | 100.00 | 100.00 | 100.00 |        |      |
| Total | 2      | 1      | 518    | 5153   | 5      | 2358   | 1      | 1      | 8039   |      |
|       | 0.02   | 0.01   | 6.44   | 64.10  | 0.06   | 29.33  | 0.01   | 0.01   | 100.00 |      |

Administration of anticoagulants at the time of obtaining Table 2-4 consent, according to the presence or absence of proton-pump inhibitors

FREQ Procedure

Tables: ALL \* DOSE

ALL DOSE(Dose per day for DOAC only)

Power |

Percent |

Percent of rows

Column percent | 0 | 1.25 | 2.5 | 5 | 7.5 | 10 | 15 | 30 | Total

|       | 0      | 1.25   | 2.5    | 5      | 7.5    | 10     | 15     | 30     | Total  |      |
|-------|--------|--------|--------|--------|--------|--------|--------|--------|--------|------|
|       | 1      | 2      | 1      | 518    | 5153   | 5      | 2358   | 1      | 1      | 8039 |
|       | 0.02   | 0.01   | 6.44   | 64.10  | 0.06   | 29.33  | 0.01   | 0.01   | 100.00 |      |
|       | 0.02   | 0.01   | 6.44   | 64.10  | 0.06   | 29.33  | 0.01   | 0.01   |        |      |
|       | 100.00 | 100.00 | 100.00 | 100.00 | 100.00 | 100.00 | 100.00 | 100.00 |        |      |
| Total | 2      | 1      | 518    | 5153   | 5      | 2358   | 1      | 1      | 8039   |      |
|       | 0.02   | 0.01   | 6.44   | 64.10  | 0.06   | 29.33  | 0.01   | 0.01   | 100.00 |      |

Administration of anticoagulants at the time of obtaining Table 2-4 consent, according to the presence or absence of proton-pump inhibitors

FREQ Procedure

Tables: ALL \* DOSE

ALL DOSE(Dose per day for DOAC only)

Power |

Percent |

Percent of rows

Column percent | 0 | 1.25 | 2.5 | 5 | 7.5 | 10 | 15 | 30 | Total

|       | 0      | 1.25   | 2.5    | 5      | 7.5    | 10     | 15     | 30     | Total  |
|-------|--------|--------|--------|--------|--------|--------|--------|--------|--------|
| 1     | 2      | 1      | 518    | 5153   | 5      | 2358   | 1      | 1      | 8039   |
|       | 0.02   | 0.01   | 6.44   | 64.10  | 0.06   | 29.33  | 0.01   | 0.01   | 100.00 |
|       | 0.02   | 0.01   | 6.44   | 64.10  | 0.06   | 29.33  | 0.01   | 0.01   |        |
|       | 100.00 | 100.00 | 100.00 | 100.00 | 100.00 | 100.00 | 100.00 | 100.00 |        |
| Total | 2      | 1      | 518    | 5153   | 5      | 2358   | 1      | 1      | 8039   |
|       | 0.02   | 0.01   | 6.44   | 64.10  | 0.06   | 29.33  | 0.01   | 0.01   |        |
|       | 100.00 |        |        |        |        |        |        |        |        |

Administration of anticoagulants at the time of obtaining Table 2-4 consent, according to the presence or absence of proton-pump inhibitors

FREQ Procedure

Table : ALL \* f\_d4

ALL f\_d4

Power |

Percent |

Percent of rows

Percent of columns | 1 | Total

|       | 1      | Total  |
|-------|--------|--------|
| 1     | 10     | 10     |
|       | 100.00 | 100.00 |
|       | 100.00 |        |
|       | 100.00 |        |
| Total | 10     | 10     |
|       | 100.00 | 100.00 |

Frequency of missing values = 8029

Administration of anticoagulants at the time of obtaining Table 2-4 consent, according to the presence or absence of proton-pump inhibitors

FREQ Procedure

Tables: ALL \* DOSE

ALL DOSE(Dose per day for DOAC only)

Power |

Percent |

Percent of rows

Percentage of columns | 5| 7.5| 10| 15| 30| 60| Total

|       | 5      | 7.5    | 10     | 15     | 30     | 60     | Total  |
|-------|--------|--------|--------|--------|--------|--------|--------|
| 1     | 2      | 1      | 1      | 243    | 3939   | 606    | 4792   |
|       | 0.04   | 0.02   | 0.02   | 5.07   | 82.20  | 12.65  | 100.00 |
|       | 0.04   | 0.02   | 0.02   | 5.07   | 82.20  | 12.65  |        |
|       | 100.00 | 100.00 | 100.00 | 100.00 | 100.00 | 100.00 |        |
| Total | 2      | 1      | 1      | 243    | 3939   | 606    | 4792   |
|       | 0.04   | 0.02   | 0.02   | 5.07   | 82.20  | 12.65  | 100.00 |

Administration of anticoagulants at the time of obtaining Table 2-4 consent, according to the presence or absence of proton-pump inhibitors

FREQ Procedure

Tables: ALL \* DOSE

ALL DOSE(Dose per day for DOAC only)

Power |

Percent |

Percent of rows

Percentage of columns | 5| 7.5| 10| 15| 30| 60| Total

|       | 5      | 7.5    | 10     | 15     | 30     | 60     | Total  |
|-------|--------|--------|--------|--------|--------|--------|--------|
| 1     | 2      | 1      | 1      | 243    | 3939   | 606    | 4792   |
|       | 0.04   | 0.02   | 0.02   | 5.07   | 82.20  | 12.65  | 100.00 |
|       | 0.04   | 0.02   | 0.02   | 5.07   | 82.20  | 12.65  |        |
|       | 100.00 | 100.00 | 100.00 | 100.00 | 100.00 | 100.00 |        |
| Total | 2      | 1      | 1      | 243    | 3939   | 606    | 4792   |
|       | 0.04   | 0.02   | 0.02   | 5.07   | 82.20  | 12.65  | 100.00 |

Administration of anticoagulants at the time of obtaining Table 2-4 consent, according to the presence or absence of proton-pump inhibitors

FREQ Procedure

Tables: ALL \* DOSE

ALL DOSE(Dose per day for DOAC only)

Power |

Percent |

Percent of rows

Percentage of columns | 5| 7.5| 10| 15| 30| 60| Total

|       | 5      | 7.5    | 10     | 15     | 30     | 60     | Total  |
|-------|--------|--------|--------|--------|--------|--------|--------|
| 1     | 2      | 1      | 1      | 243    | 3939   | 606    | 4792   |
|       | 0.04   | 0.02   | 0.02   | 5.07   | 82.20  | 12.65  | 100.00 |
|       | 0.04   | 0.02   | 0.02   | 5.07   | 82.20  | 12.65  |        |
|       | 100.00 | 100.00 | 100.00 | 100.00 | 100.00 | 100.00 |        |
| Total | 2      | 1      | 1      | 243    | 3939   | 606    | 4792   |
|       | 0.04   | 0.02   | 0.02   | 5.07   | 82.20  | 12.65  | 100.00 |



Administration of anticoagulants at the time of obtaining Table 2-4 consent, according to the presence or absence of proton-pump inhibitors

FREQ Procedure

Table: ALL \* f\_d0

ALL f\_d0

Power |

Percent |

Percent of rows

Percent of columns | 1 | Total

|           |  | +      |        | +      |  |
|-----------|--|--------|--------|--------|--|
|           |  | 1      | 4      | 4      |  |
|           |  | 100.00 | 100.00 | 100.00 |  |
|           |  | 100.00 |        |        |  |
|           |  | 100.00 |        |        |  |
|           |  | +      |        | +      |  |
| Total 4 4 |  | 100.00 | 100.00 |        |  |

Degree of missing values = 4788

Administration of anticoagulants at the time of obtaining Table 2-4 consent, according to the presence or absence of proton-pump inhibitors

FREQ Procedure

Tables: ALL \* DOSE

ALL DOSE(Dose per day for DOAC only)

Power |

Percent |

Percent of rows

Percentage of columns | 5| 7.5| 10| 15| 30| 60| Total

|       | 5      | 7.5    | 10     | 15     | 30     | 60     | Total  |
|-------|--------|--------|--------|--------|--------|--------|--------|
| 1     | 2      | 1      | 1      | 242    | 3911   | 595    | 4752   |
|       | 0.04   | 0.02   | 0.02   | 5.09   | 82.30  | 12.52  | 100.00 |
|       | 0.04   | 0.02   | 0.02   | 5.09   | 82.30  | 12.52  |        |
|       | 100.00 | 100.00 | 100.00 | 100.00 | 100.00 | 100.00 |        |
| Total | 2      | 1      | 1      | 242    | 3911   | 595    | 4752   |
|       | 0.04   | 0.02   | 0.02   | 5.09   | 82.30  | 12.52  | 100.00 |

Administration of anticoagulants at the time of obtaining Table 2-4 consent, according to the presence or absence of proton-pump inhibitors

FREQ Procedure

Tables: ALL \* DOSE

ALL DOSE(Dose per day for DOAC only)

Power |

Percent |

Percent of rows

Percentage of columns | 5| 7.5| 10| 15| 30| 60| Total

|       | 5      | 7.5    | 10     | 15     | 30     | 60     | Total  |
|-------|--------|--------|--------|--------|--------|--------|--------|
| 1     | 2      | 1      | 1      | 242    | 3911   | 595    | 4752   |
|       | 0.04   | 0.02   | 0.02   | 5.09   | 82.30  | 12.52  | 100.00 |
|       | 0.04   | 0.02   | 0.02   | 5.09   | 82.30  | 12.52  |        |
|       | 100.00 | 100.00 | 100.00 | 100.00 | 100.00 | 100.00 |        |
| Total | 2      | 1      | 1      | 242    | 3911   | 595    | 4752   |
|       | 0.04   | 0.02   | 0.02   | 5.09   | 82.30  | 12.52  | 100.00 |

Administration of anticoagulants at the time of obtaining Table 2-4 consent, according to the presence or absence of proton-pump inhibitors

FREQ Procedure

Tables: ALL \* DOSE

ALL DOSE(Dose per day for DOAC only)

Power |

Percent |

Percent of rows

Percentage of columns | 5| 7.5| 10| 15| 30| 60| Total

|       | 5      | 7.5    | 10     | 15     | 30     | 60     | Total  |
|-------|--------|--------|--------|--------|--------|--------|--------|
| 1     | 2      | 1      | 1      | 242    | 3911   | 595    | 4752   |
|       | 0.04   | 0.02   | 0.02   | 5.09   | 82.30  | 12.52  | 100.00 |
|       | 0.04   | 0.02   | 0.02   | 5.09   | 82.30  | 12.52  |        |
|       | 100.00 | 100.00 | 100.00 | 100.00 | 100.00 | 100.00 |        |
| Total | 2      | 1      | 1      | 242    | 3911   | 595    | 4752   |
|       | 0.04   | 0.02   | 0.02   | 5.09   | 82.30  | 12.52  | 100.00 |

Administration of anticoagulants at the time of obtaining Table 2-4 consent, according to the presence or absence of proton-pump inhibitors

FREQ Procedure

Table : ALL \* f\_d5

ALL f\_d5

Power |

Percent |

Percent of rows

Percent of columns | 1 | Total

|         |        |        |  |
|---------|--------|--------|--|
| _____+  |        | _____+ |  |
| 1       | 4      | 4      |  |
| 100.00  | 100.00 |        |  |
| 100.00  |        |        |  |
| 100.00  |        |        |  |
| _____+  |        | _____+ |  |
| Total 4 | 4      |        |  |
|         | 100.00 | 100.00 |  |

Degree of missing values = 4748

Administration of anticoagulants at the time of obtaining Table 2-4 consent, according to the presence or absence of proton-pump inhibitors

FREQ Procedure

Tables: ALL \* DOSE

ALL DOSE(Dose per day for DOAC only)

Power |

Percent |

Percent of rows

Percentage of columns | 15| 30| 60| Total

|                       | 15     | 30     | 60     | Total  |
|-----------------------|--------|--------|--------|--------|
| Power                 | 1      | 1      | 28     | 11     |
| Percent               | 2.50   | 70.00  | 27.50  | 100.00 |
| Percent of rows       | 2.50   | 70.00  | 27.50  |        |
| Percentage of columns | 100.00 | 100.00 | 100.00 |        |
| Total                 | 1      | 28     | 11     | 40     |

Administration of anticoagulants at the time of obtaining Table 2-4 consent, according to the presence or absence of proton-pump inhibitors

FREQ Procedure

Tables: ALL \* DOSE

ALL DOSE(Dose per day for DOAC only)

Power |

Percent |

Percent of rows

Percentage of columns | 15| 30| 60| Total

|                  |        |        |        |        |   |  |   |
|------------------|--------|--------|--------|--------|---|--|---|
|                  | +      |        | +      |        | + |  | + |
| 1                | 1      | 28     | 11     | 40     |   |  |   |
|                  | 2.50   | 70.00  | 27.50  | 100.00 |   |  |   |
|                  | 2.50   | 70.00  | 27.50  |        |   |  |   |
|                  | 100.00 | 100.00 | 100.00 |        |   |  |   |
|                  | +      |        | +      |        | + |  | + |
| Total 1 28 11 40 |        |        |        |        |   |  |   |
|                  | 2.50   | 70.00  | 27.50  | 100.00 |   |  |   |

Administration of anticoagulants at the time of obtaining Table 2-4 consent, according to the presence or absence of proton-pump inhibitors

FREQ Procedure

Tables: ALL \* DOSE

ALL DOSE(Dose per day for DOAC only)

Power |

Percent |

Percent of rows

Percentage of columns | 15| 30| 60| Total

|                  |        |        |        |        |   |  |   |
|------------------|--------|--------|--------|--------|---|--|---|
|                  | +      |        | +      |        | + |  | + |
| 1                | 1      | 28     | 11     | 40     |   |  |   |
|                  | 2.50   | 70.00  | 27.50  | 100.00 |   |  |   |
|                  | 2.50   | 70.00  | 27.50  |        |   |  |   |
|                  | 100.00 | 100.00 | 100.00 |        |   |  |   |
|                  | +      |        | +      |        | + |  | + |
| Total 1 28 11 40 |        |        |        |        |   |  |   |
|                  | 2.50   | 70.00  | 27.50  | 100.00 |   |  |   |



Administration of anticoagulants at the time of obtaining Table 2-4 consent, according to the presence or absence of proton-pump inhibitors

FREQ Procedure

For ALL \* f\_d7,

Because all levels of the variable f\_d7 are missing,

There is no data.

Administration of anticoagulants at the time of obtaining Table 2-4 consent, according to the presence or absence of proton-pump inhibitors

FREQ Procedure

Tables: ALL \* DOSECNT

ALL

DOSECNT(Dose per 1time for DOAC only)

Power |

Percent |

Percent of rows

Percentage of columns | 0| 1| 2| Sum

|       | 0      | 1      | 2      | Sum    |
|-------|--------|--------|--------|--------|
| 1     | 2      | 15     | 2322   | 2339   |
|       | 0.09   | 0.64   | 99.27  | 100.00 |
|       | 0.09   | 0.64   | 99.27  |        |
|       | 100.00 | 100.00 | 100.00 |        |
| Total | 2      | 15     | 2322   | 2339   |
|       | 0.09   | 0.64   | 99.27  | 100.00 |

Administration of anticoagulants at the time of obtaining Table 2-4 consent, according to the presence or absence of proton-pump inhibitors

FREQ Procedure

Tables: ALL \* DOSECNT

ALL

DOSECNT(Dose per 1time for DOAC only)

Power |

Percent |

Percent of rows

Percentage of columns | 0| 1| 2| Sum

|       | 0      | 1      | 2      | Sum    |
|-------|--------|--------|--------|--------|
| 1     | 2      | 15     | 2322   | 2339   |
|       | 0.09   | 0.64   | 99.27  | 100.00 |
|       | 0.09   | 0.64   | 99.27  |        |
|       | 100.00 | 100.00 | 100.00 |        |
| Total | 2      | 15     | 2322   | 2339   |
|       | 0.09   | 0.64   | 99.27  | 100.00 |

Administration of anticoagulants at the time of obtaining Table 2-4 consent, according to the presence or absence of proton-pump inhibitors

FREQ Procedure

Table : ALL \* t\_dc2

ALL t\_dc2

Power |

Percent |

Percent of rows

Percent of columns | 1 | Total

|        | 1      | 2      | Total  |
|--------|--------|--------|--------|
| 100.00 | 100.00 |        | 100.00 |
| 100.00 |        |        | 100.00 |
| 100.00 |        |        | 100.00 |
| Total  | 100.00 | 100.00 |        |

Frequency of missing values = 2337

Administration of anticoagulants at the time of obtaining Table 2-4 consent, according to the presence or absence of proton-pump inhibitors

FREQ Procedure

Tables: ALL \* DOSECNT

ALL

DOSECNT(Dose per 1time for DOAC only)

Power |

Percent |

Percent of rows

Percentage of columns | 0| 1| 2| Sum

|       | 0      | 1      | 2      | Sum    |
|-------|--------|--------|--------|--------|
| 1     | 2      | 6428   | 6      | 6436   |
|       | 0.03   | 99.88  | 0.09   | 100.00 |
|       | 0.03   | 99.88  | 0.09   |        |
|       | 100.00 | 100.00 | 100.00 |        |
| Total | 2      | 6428   | 6      | 6436   |
|       | 0.03   | 99.88  | 0.09   | 100.00 |

Administration of anticoagulants at the time of obtaining Table 2-4 consent, according to the presence or absence of proton-pump inhibitors

FREQ Procedure

Tables: ALL \* DOSECNT

ALL

DOSECNT(Dose per 1time for DOAC only)

Power |

Percent |

Percent of rows

Percentage of columns | 0| 1| 2| Sum

|       | 0      | 1      | 2      | Sum    |
|-------|--------|--------|--------|--------|
| 1     | 2      | 6428   | 6      | 6436   |
|       | 0.03   | 99.88  | 0.09   | 100.00 |
|       | 0.03   | 99.88  | 0.09   |        |
|       | 100.00 | 100.00 | 100.00 |        |
| Total | 2      | 6428   | 6      | 6436   |
|       | 0.03   | 99.88  | 0.09   | 100.00 |

Administration of anticoagulants at the time of obtaining Table 2-4 consent, according to the presence or absence of proton-pump inhibitors

FREQ Procedure

Table : ALL \* t\_dc3

ALL t\_dc3

Power |

Percent |

Percent of rows

Percent of columns | 1 | Total

|        | 1      | 2      | Total  |
|--------|--------|--------|--------|
| 100.00 | 100.00 |        | 100.00 |
| 100.00 |        |        | 100.00 |
| 100.00 |        |        | 100.00 |
| Total  | 100.00 | 100.00 |        |

Frequency of missing values = 6434

Administration of anticoagulants at the time of obtaining Table 2-4 consent, according to the presence or absence of proton-pump inhibitors

FREQ Procedure

Tables: ALL \* DOSECNT

ALL DOSECNT(Dose per 1time for DOAC only)

Power |

Percent |

Percent of rows

Column Percent | 0| 0.5| 1| 2| 3| Sum

|       | 0      | 0.5    | 1      | 2      | 3      | Sum    |
|-------|--------|--------|--------|--------|--------|--------|
| 1     | 2      | 1      | 64     | 7971   | 1      | 8039   |
|       | 0.02   | 0.01   | 0.80   | 99.15  | 0.01   | 100.00 |
|       | 0.02   | 0.01   | 0.80   | 99.15  | 0.01   |        |
|       | 100.00 | 100.00 | 100.00 | 100.00 | 100.00 |        |
| Total | 2      | 1      | 64     | 7971   | 1      | 8039   |
|       | 0.02   | 0.01   | 0.80   | 99.15  | 0.01   | 100.00 |



Administration of anticoagulants at the time of obtaining Table 2-4 consent, according to the presence or absence of proton-pump inhibitors

FREQ Procedure

Tables: ALL \* DOSECNT

ALL DOSECNT(Dose per 1time for DOAC only)

Power |

Percent |

Percent of rows

Column Percent | 0| 0.5| 1| 2| 3| Sum

|       | 0      | 0.5    | 1      | 2      | 3      | Sum    |
|-------|--------|--------|--------|--------|--------|--------|
| 1     | 2      | 1      | 64     | 7971   | 1      | 8039   |
|       | 0.02   | 0.01   | 0.80   | 99.15  | 0.01   | 100.00 |
|       | 0.02   | 0.01   | 0.80   | 99.15  | 0.01   |        |
|       | 100.00 | 100.00 | 100.00 | 100.00 | 100.00 |        |
| Total | 2      | 1      | 64     | 7971   | 1      | 8039   |
|       | 0.02   | 0.01   | 0.80   | 99.15  | 0.01   | 100.00 |

Administration of anticoagulants at the time of obtaining Table 2-4 consent, according to the presence or absence of proton-pump inhibitors

FREQ Procedure

Table : ALL \* t\_dc4

ALL t\_dc4

Power |

Percent |

Percent of rows

Percent of columns | 1 | Total

|        | 1      | 4      | Total |
|--------|--------|--------|-------|
| 100.00 | 100.00 |        |       |
| 100.00 |        |        |       |
| 100.00 |        |        |       |
| Total  | 4      | 4      | 8     |
|        | 100.00 | 100.00 |       |

Frequency of missing values = 8035

Administration of anticoagulants at the time of obtaining Table 2-4 consent, according to the presence or absence of proton-pump inhibitors

FREQ Procedure

Tables: ALL \* DOSECNT

ALL

DOSECNT(Dose per 1time for DOAC only)

Power |

Percent |

Percent of rows

Percentage of columns | 0.5| 1| 2| Sum

|       | 0.5    | 1      | 2      | Sum    |
|-------|--------|--------|--------|--------|
| 1     | 1      | 4786   | 5      | 4792   |
|       | 0.02   | 99.87  | 0.10   | 100.00 |
|       | 0.02   | 99.87  | 0.10   |        |
|       | 100.00 | 100.00 | 100.00 |        |
| Total | 1      | 4786   | 5      | 4792   |
|       | 0.02   | 99.87  | 0.10   | 100.00 |

Administration of anticoagulants at the time of obtaining Table 2-4 consent, according to the presence or absence of proton-pump inhibitors

FREQ Procedure

Tables: ALL \* DOSECNT

ALL

DOSECNT(Dose per 1time for DOAC only)

Power |

Percent |

Percent of rows

Percentage of columns | 0.5| 1| 2| Sum

|       | 0.5    | 1      | 2      | Sum    |
|-------|--------|--------|--------|--------|
| 1     | 1      | 4786   | 5      | 4792   |
|       | 0.02   | 99.87  | 0.10   | 100.00 |
|       | 0.02   | 99.87  | 0.10   |        |
|       | 100.00 | 100.00 | 100.00 |        |
| Total | 1      | 4786   | 5      | 4792   |
|       | 0.02   | 99.87  | 0.10   | 100.00 |

Administration of anticoagulants at the time of obtaining Table 2-4 consent, according to the presence or absence of proton-pump inhibitors

FREQ Procedure

Table: ALL \* t\_dc0

ALL t\_dc0

Power |

Percent |

Percent of rows

Percent of columns | 1 | Total

|           |        |        |
|-----------|--------|--------|
|           | +      | +      |
| 1         | 1      | 1      |
| 100.00    | 100.00 | 100.00 |
| 100.00    |        |        |
| 100.00    |        |        |
|           | +      | +      |
| Total 1 1 | 100.00 | 100.00 |

Degree of missing values = 4791

Administration of anticoagulants at the time of obtaining Table 2-4 consent, according to the presence or absence of proton-pump inhibitors

FREQ Procedure

Tables: ALL \* DOSECNT

ALL

DOSECNT(Dose per 1time for DOAC only)

Power |

Percent |

Percent of rows

Percentage of columns | 0.5| 1| 2| Sum

|       | 0.5    | 1      | 2      | Sum    |
|-------|--------|--------|--------|--------|
| 1     | 1      | 4747   | 4      | 4752   |
|       | 0.02   | 99.89  | 0.08   | 100.00 |
|       | 0.02   | 99.89  | 0.08   |        |
|       | 100.00 | 100.00 | 100.00 |        |
| Total | 1      | 4747   | 4      | 4752   |
|       | 0.02   | 99.89  | 0.08   | 100.00 |

Administration of anticoagulants at the time of obtaining Table 2-4 consent, according to the presence or absence of proton-pump inhibitors

FREQ Procedure

Tables: ALL \* DOSECNT

ALL

DOSECNT(Dose per 1time for DOAC only)

Power |

Percent |

Percent of rows

Percentage of columns | 0.5| 1| 2| Sum

|       |  | 0.5    | 1      | 2      | Sum    |
|-------|--|--------|--------|--------|--------|
|       |  | 1      | 1      | 4747   | 4      |
|       |  | 0.02   | 99.89  | 0.08   | 100.00 |
|       |  | 0.02   | 99.89  | 0.08   |        |
|       |  | 100.00 | 100.00 | 100.00 |        |
| Total |  | 1      | 4747   | 4      | 4752   |
|       |  | 0.02   | 99.89  | 0.08   | 100.00 |

Administration of anticoagulants at the time of obtaining Table 2-4 consent, according to the presence or absence of proton-pump inhibitors

FREQ Procedure

Table : ALL \* t\_dc5

ALL t\_dc5

Power |

Percent |

Percent of rows

Percent of columns | 1 | Total

|       |  | +      |        | +      |        |   |
|-------|--|--------|--------|--------|--------|---|
|       |  | 1      |        | 1      |        | 1 |
|       |  |        | 100.00 |        | 100.00 |   |
|       |  |        | 100.00 |        |        |   |
|       |  |        | 100.00 |        |        |   |
|       |  | +      |        | +      |        |   |
| Total |  | 1      |        | 1      |        |   |
|       |  | 100.00 |        | 100.00 |        |   |

Degree of missing values = 4751



Administration of anticoagulants at the time of obtaining Table 2-4 consent, according to the presence or absence of proton-pump inhibitors

FREQ Procedure

Tables: ALL \* DOSECNT

ALL

DOSECNT(Dose per 1time for DOAC only)

Power |

Percent |

Percent of rows

Percentage of columns | 1| 2| Total

|          |        |        |        |  |   |
|----------|--------|--------|--------|--|---|
|          | +      |        | +      |  | + |
| 1        | 39     | 1      | 40     |  |   |
|          | 97.50  | 2.50   | 100.00 |  |   |
|          | 97.50  | 2.50   |        |  |   |
|          | 100.00 | 100.00 |        |  |   |
|          | +      |        | +      |  | + |
| Total 39 | 1      | 40     |        |  |   |
|          | 97.50  | 2.50   | 100.00 |  |   |

Administration of anticoagulants at the time of obtaining Table 2-4 consent, according to the presence or absence of proton-pump inhibitors

FREQ Procedure

Tables: ALL \* DOSECNT

ALL

DOSECNT(Dose per 1time for DOAC only)

Power |

Percent |

Percent of rows

Percentage of columns | 1| 2| Total

|          |        |        |        |  |   |
|----------|--------|--------|--------|--|---|
|          | +      |        | +      |  | + |
| 1        | 39     | 1      | 40     |  |   |
|          | 97.50  | 2.50   | 100.00 |  |   |
|          | 97.50  | 2.50   |        |  |   |
|          | 100.00 | 100.00 |        |  |   |
|          | +      |        | +      |  | + |
| Total 39 | 1      | 40     |        |  |   |
|          | 97.50  | 2.50   | 100.00 |  |   |

Administration of anticoagulants at the time of obtaining Table 2-4 consent, according to the presence or absence of proton-pump inhibitors

FREQ Procedure

For ALL \* t\_dc7,

Because all levels of variable t\_dc7 are missing,

There is no data.

Administration of anticoagulants at the time of obtaining Table 2-4 consent, according to the presence or absence of proton-pump inhibitors

FREQ Procedure

|   |       | Cumulative           |                  |        |
|---|-------|----------------------|------------------|--------|
|   |       | Percent of ALL power | Percent of power |        |
| 1 | 11981 | 100.00               | 11981            | 100.00 |

Tables: ALL \* ADYN

ALL

ADYN(Administration of Anticoagulant)

| Power                                |  |  |
|--------------------------------------|--|--|
| Percent                              |  |  |
| Percent of rows                      |  |  |
| Percentage of columns   with   total |  |  |
| _____+_____+                         |  |  |
| 1   11163   11163                    |  |  |
| 100.00   100.00                      |  |  |
| 100.00                               |  |  |
| 100.00                               |  |  |
| _____+_____+                         |  |  |
| Total 11163 11163                    |  |  |
| 100.00 100.00                        |  |  |

Degree of missing values = 818

Administration of anticoagulants at the time of obtaining Table 2-4 consent, according to the presence or absence of proton-pump inhibitors

FREQ Procedure

Table 1 : ADYN \* ACTYP

Stratification variable : ALL=1

ADYN(Administration of Anticoagulant) ACTYP(Type of AF)

Power |

Percent |

Percent of rows

Percent of column | Warfa| Dabigat| Riverro| Apixa| Edoxa| Parenteral Anti| Edoxa| Total

|phosphate|run|xaban|ban|ban|coagulant|ban (OD)|

|||||)|

\_\_\_\_\_+\_\_\_\_\_+\_\_\_\_\_+\_\_\_\_\_+\_\_\_\_\_+\_\_\_\_\_+\_\_\_\_\_+\_\_\_\_\_

\_+

Present | 2955 | 906 | 2388 | 3174 | 1718 | 2 | 20 | 11163

| 26.47 | 8.12 | 21.39 | 28.43 | 15.39 | 0.02 | 0.18 | 100.00

| 26.47 | 8.12 | 21.39 | 28.43 | 15.39 | 0.02 | 0.18 |

| 100.00 | 100.00 | 100.00 | 100.00 | 100.00 | 100.00 | 100.00 |

\_\_\_\_\_+\_\_\_\_\_+\_\_\_\_\_+\_\_\_\_\_+\_\_\_\_\_+\_\_\_\_\_+\_\_\_\_\_+\_\_\_\_\_

\_+

Total 2955 906 2388 3174 1718 2 20 11163

26.47 8.12 21.39 28.43 15.39 0.02 0.18 100.00

Degree of missing values = 818

Table 1 : ADYN \* ACTYP

Stratification variable : ALL=1

ADYN(Administration of Anticoagulant) ACTYP(Type of AF)

Power |

Percent |

Percent of rows

Percent of column | Warfa| Dabigat| Riverro| Apixa| Edoxa| Parenteral Anti| Edoxa| Total

|phosphate|run|xaban|ban|ban|coagulant|ban (OD)|

|||||D|

\_\_\_\_\_+\_\_\_\_\_+\_\_\_\_\_+\_\_\_\_\_+\_\_\_\_\_+\_\_\_\_\_+\_\_\_\_\_+\_\_\_\_\_+\_\_\_\_\_

\_  
+

Present | 2955 | 906 | 2388 | 3174 | 1718 | 2 | 20 | 11163

| 26.47 | 8.12 | 21.39 | 28.43 | 15.39 | 0.02 | 0.18 | 100.00

| 26.47 | 8.12 | 21.39 | 28.43 | 15.39 | 0.02 | 0.18 |

| 100.00 | 100.00 | 100.00 | 100.00 | 100.00 | 100.00 | 100.00 |

\_\_\_\_\_+\_\_\_\_\_+\_\_\_\_\_+\_\_\_\_\_+\_\_\_\_\_+\_\_\_\_\_+\_\_\_\_\_+\_\_\_\_\_+\_\_\_\_\_

\_  
+

Total 2955 906 2388 3174 1718 2 20 11163

26.47 8.12 21.39 28.43 15.39 0.02 0.18 100.00

Degree of missing values = 818

Administration of anticoagulants at the time of obtaining Table 2-4 consent, according to the presence or absence of proton-pump inhibitors

FREQ Procedure

Table 1 : ADYN \* ACTYP

Stratification variable : ALL=1

ADYN(Administration of Anticoagulant) ACTYP(Type of AF)

Power |

Percent |

Percent of rows

Percent of column | Warfa| Dabigat| Riverro| Apixa| Edoxa| Parenteral Anti| Edoxa| Total

|phosphate|run|xaban|ban|ban|coagulant|ban (OD)|

|||||)|

\_\_\_\_\_+\_\_\_\_\_+\_\_\_\_\_+\_\_\_\_\_+\_\_\_\_\_+\_\_\_\_\_+\_\_\_\_\_+\_\_\_\_\_

\_\_+

Present | 2955 | 906 | 2388 | 3174 | 1718 | 2 | 20 | 11163

| 26.47 | 8.12 | 21.39 | 28.43 | 15.39 | 0.02 | 0.18 | 100.00

| 26.47 | 8.12 | 21.39 | 28.43 | 15.39 | 0.02 | 0.18 |

| 100.00 | 100.00 | 100.00 | 100.00 | 100.00 | 100.00 | 100.00 |

\_\_\_\_\_+\_\_\_\_\_+\_\_\_\_\_+\_\_\_\_\_+\_\_\_\_\_+\_\_\_\_\_+\_\_\_\_\_+\_\_\_\_\_

\_\_+

Total 2955 906 2388 3174 1718 2 20 11163

26.47 8.12 21.39 28.43 15.39 0.02 0.18 100.00

Degree of missing values = 818

Table 1 : ADYN \* ACTYP

Stratification variable : ALL=1

ADYN(Administration of Anticoagulant) ACTYP(Type of AF)

Power |

Percent |

Percent of rows

Percent of column | Warfa| Dabigat| Riverro| Apixa| Edoxa| Parenteral Anti| Edoxa| Total

|phosphate|run|xaban|ban|ban|coagulant|ban (OD)|

|||||||)|

\_\_\_\_\_+\_\_\_\_\_+\_\_\_\_\_+\_\_\_\_\_+\_\_\_\_\_+\_\_\_\_\_+\_\_\_\_\_+\_\_\_\_\_+\_\_\_\_\_

\_  
\_+

Present | 2955 | 906 | 2388 | 3174 | 1718 | 2 | 20 | 11163

| 26.47 | 8.12 | 21.39 | 28.43 | 15.39 | 0.02 | 0.18 | 100.00

| 26.47 | 8.12 | 21.39 | 28.43 | 15.39 | 0.02 | 0.18 |

| 100.00 | 100.00 | 100.00 | 100.00 | 100.00 | 100.00 | 100.00 |

\_\_\_\_\_+\_\_\_\_\_+\_\_\_\_\_+\_\_\_\_\_+\_\_\_\_\_+\_\_\_\_\_+\_\_\_\_\_+\_\_\_\_\_+\_\_\_\_\_

\_  
\_+

Total 2955 906 2388 3174 1718 2 20 11163

26.47 8.12 21.39 28.43 15.39 0.02 0.18 100.00

Degree of missing values = 818



Administration of anticoagulants at the time of obtaining Table 2-4 consent, according to the presence or absence of proton-pump inhibitors

FREQ Procedure

Table 1 : ADYN \* ACTYP

Stratification variable : ALL=1

ADYN(Administration of Anticoagulant) ACTYP(Type of AF)

Power |

Percent |

Percent of rows

Percent of column | Warfa| Dabigat| Riverro| Apixa| Edoxa| Parenteral Anti| Edoxa| Total

|phosphate|run|xaban|ban|ban|coagulant|ban (OD)|

|||||)|

\_\_\_\_\_+\_\_\_\_\_+\_\_\_\_\_+\_\_\_\_\_+\_\_\_\_\_+\_\_\_\_\_+\_\_\_\_\_+\_\_\_\_\_

\_+

Present | 2955 | 906 | 2388 | 3174 | 1718 | 2 | 20 | 11163

| 26.47 | 8.12 | 21.39 | 28.43 | 15.39 | 0.02 | 0.18 | 100.00

| 26.47 | 8.12 | 21.39 | 28.43 | 15.39 | 0.02 | 0.18 |

| 100.00 | 100.00 | 100.00 | 100.00 | 100.00 | 100.00 | 100.00 |

\_\_\_\_\_+\_\_\_\_\_+\_\_\_\_\_+\_\_\_\_\_+\_\_\_\_\_+\_\_\_\_\_+\_\_\_\_\_+\_\_\_\_\_

\_+

Total 2955 906 2388 3174 1718 2 20 11163

26.47 8.12 21.39 28.43 15.39 0.02 0.18 100.00

Degree of missing values = 818

Table 1 : ADYN \* ACTYP

Stratification variable : ALL=1

ADYN(Administration of Anticoagulant) ACTYP(Type of AF)

Power |

Percent |

Percent of rows

Percent of column | Warfa| Dabigat| Riverro| Apixa| Edoxa| Parenteral Anti| Edoxa| Total

|phosphate|run|xaban|ban|ban|coagulant|ban (OD)|

|||||D|

\_\_\_\_\_+\_\_\_\_\_+\_\_\_\_\_+\_\_\_\_\_+\_\_\_\_\_+\_\_\_\_\_+\_\_\_\_\_+\_\_\_\_\_+\_\_\_\_\_

\_  
\_+

Present | 2955 | 906 | 2388 | 3174 | 1718 | 2 | 20 | 11163

| 26.47 | 8.12 | 21.39 | 28.43 | 15.39 | 0.02 | 0.18 | 100.00

| 26.47 | 8.12 | 21.39 | 28.43 | 15.39 | 0.02 | 0.18 |

| 100.00 | 100.00 | 100.00 | 100.00 | 100.00 | 100.00 | 100.00 |

\_\_\_\_\_+\_\_\_\_\_+\_\_\_\_\_+\_\_\_\_\_+\_\_\_\_\_+\_\_\_\_\_+\_\_\_\_\_+\_\_\_\_\_+\_\_\_\_\_

\_  
\_+

Total 2955 906 2388 3174 1718 2 20 11163

26.47 8.12 21.39 28.43 15.39 0.02 0.18 100.00

Degree of missing values = 818

Administration of anticoagulants at the time of obtaining Table 2-4 consent, according to the presence or absence of proton-pump inhibitors

FREQ Procedure

Table 1 : ADYN \* ACTYP

Stratification variable : ALL=1

ADYN(Administration of Anticoagulant) ACTYP(Type of AF)

Power |

Percent |

Percent of rows

Percent of column | Warfa| Dabigat| Riverro| Apixa| Edoxa| Parenteral Anti| Edoxa| Total

|phosphate|run|xaban|ban|ban|coagulant|ban (OD)|

|||||)|

\_\_\_\_\_+\_\_\_\_\_+\_\_\_\_\_+\_\_\_\_\_+\_\_\_\_\_+\_\_\_\_\_+\_\_\_\_\_+\_\_\_\_\_

\_+

Present | 2955 | 906 | 2388 | 3174 | 1718 | 2 | 20 | 11163

| 26.47 | 8.12 | 21.39 | 28.43 | 15.39 | 0.02 | 0.18 | 100.00

| 26.47 | 8.12 | 21.39 | 28.43 | 15.39 | 0.02 | 0.18 |

| 100.00 | 100.00 | 100.00 | 100.00 | 100.00 | 100.00 | 100.00 |

\_\_\_\_\_+\_\_\_\_\_+\_\_\_\_\_+\_\_\_\_\_+\_\_\_\_\_+\_\_\_\_\_+\_\_\_\_\_+\_\_\_\_\_

\_+

Total 2955 906 2388 3174 1718 2 20 11163

26.47 8.12 21.39 28.43 15.39 0.02 0.18 100.00

Degree of missing values = 818

Table 1 : ADYN \* t\_ACT0

Stratification variable : ALL=1

ADYN(Administration of Anticoagulant)

t\_ACT0

|                                     |        |        |        |
|-------------------------------------|--------|--------|--------|
| Power                               |        |        |        |
| Percent                             |        |        |        |
| Percent of rows                     |        |        |        |
| Percentage of columns   0   1   Sum |        |        |        |
| _____ + _____ + _____ +             |        |        |        |
| Present   9425   1738   11163       |        |        |        |
|                                     | 84.43  | 15.57  | 100.00 |
|                                     | 84.43  | 15.57  |        |
|                                     | 100.00 | 100.00 |        |
| _____ + _____ + _____ +             |        |        |        |
| Total 9425 1738 11163               |        |        |        |
|                                     | 84.43  | 15.57  | 100.00 |

Degree of missing values = 818

Administration of anticoagulants at the time of obtaining Table 2-4 consent, according to the presence or absence of proton-pump inhibitors

FREQ Procedure

Table: ALL \* t\_ADYN

ALL t\_ADYN

Power |

Percent |

Percent of rows

Percentage of columns | 0| 1| Sum

|       | 0      | 1      | Sum    |
|-------|--------|--------|--------|
| 1     | 818    | 11163  | 11981  |
|       | 6.83   | 93.17  | 100.00 |
|       | 6.83   | 93.17  |        |
|       | 100.00 | 100.00 |        |
| Total | 818    | 11163  | 11981  |
|       | 6.83   | 93.17  | 100.00 |

Administration of anticoagulants at the time of obtaining Table 2-4 consent, according to the presence or absence of proton-pump inhibitors

FREQ Procedure

|   |       | Cumulative           |                  |        |
|---|-------|----------------------|------------------|--------|
|   |       | Percent of ALL power | Percent of power |        |
| 1 | 11981 | 100.00               | 11981            | 100.00 |

Tables: ALL \* ADYN

ALL

ADYN(Administration of Anticoagulant)

| Power                                |           |           |
|--------------------------------------|-----------|-----------|
| Percent                              |           |           |
| Percent of rows                      |           |           |
| Percentage of columns   with   total | + _____ + | + _____ + |
| 1                                    | 11163     | 11163     |
|                                      | 100.00    | 100.00    |
|                                      | 100.00    |           |
|                                      | 100.00    |           |
| + _____ +                            | + _____ + |           |
| Total 11163                          | 11163     |           |
|                                      | 100.00    | 100.00    |

Degree of missing values = 818

Administration of anticoagulants at the time of obtaining Table 2-4 consent, according to the presence or absence of proton-pump inhibitors

FREQ Procedure

Table 1 : ADYN \* ACTYP

Stratification variable : ALL=1

ADYN(Administration of Anticoagulant) ACTYP(Type of AF)

Power |

Percent |

Percent of rows

Percent of column | Warfa| Dabigat| Riverro| Apixa| Edoxa| Parenteral Anti| Edoxa| Total

|phosphate|run|xaban|ban|ban|coagulant|ban (OD)|

|||||)|

\_\_\_\_\_+\_\_\_\_\_+\_\_\_\_\_+\_\_\_\_\_+\_\_\_\_\_+\_\_\_\_\_+\_\_\_\_\_+\_\_\_\_\_

\_+

Present | 2955 | 906 | 2388 | 3174 | 1718 | 2 | 20 | 11163

| 26.47 | 8.12 | 21.39 | 28.43 | 15.39 | 0.02 | 0.18 | 100.00

| 26.47 | 8.12 | 21.39 | 28.43 | 15.39 | 0.02 | 0.18 |

| 100.00 | 100.00 | 100.00 | 100.00 | 100.00 | 100.00 | 100.00 |

\_\_\_\_\_+\_\_\_\_\_+\_\_\_\_\_+\_\_\_\_\_+\_\_\_\_\_+\_\_\_\_\_+\_\_\_\_\_+\_\_\_\_\_

\_+

Total 2955 906 2388 3174 1718 2 20 11163

26.47 8.12 21.39 28.43 15.39 0.02 0.18 100.00

Degree of missing values = 818

Table 1 : ADYN \* ACTYP

Stratification variable : ALL=1

ADYN(Administration of Anticoagulant) ACTYP(Type of AF)

Power |

Percent |

Percent of rows

Percent of column | Warfa| Dabigat| Riverro| Apixa| Edoxa| Parenteral Anti| Edoxa| Total

|phosphate|run|xaban|ban|ban|coagulant|ban (OD)|

|||||D|

\_\_\_\_\_+\_\_\_\_\_+\_\_\_\_\_+\_\_\_\_\_+\_\_\_\_\_+\_\_\_\_\_+\_\_\_\_\_+\_\_\_\_\_+\_\_\_\_\_

\_  
\_+

Present | 2955 | 906 | 2388 | 3174 | 1718 | 2 | 20 | 11163

| 26.47 | 8.12 | 21.39 | 28.43 | 15.39 | 0.02 | 0.18 | 100.00

| 26.47 | 8.12 | 21.39 | 28.43 | 15.39 | 0.02 | 0.18 |

| 100.00 | 100.00 | 100.00 | 100.00 | 100.00 | 100.00 | 100.00 |

\_\_\_\_\_+\_\_\_\_\_+\_\_\_\_\_+\_\_\_\_\_+\_\_\_\_\_+\_\_\_\_\_+\_\_\_\_\_+\_\_\_\_\_+\_\_\_\_\_

\_  
\_+

Total 2955 906 2388 3174 1718 2 20 11163

26.47 8.12 21.39 28.43 15.39 0.02 0.18 100.00

Degree of missing values = 818



Administration of anticoagulants at the time of obtaining Table 2-4 consent, according to the presence or absence of proton-pump inhibitors

FREQ Procedure

Table 1 : ADYN \* ACTYP

Stratification variable : ALL=1

ADYN(Administration of Anticoagulant) ACTYP(Type of AF)

Power |

Percent |

Percent of rows

Percent of column | Warfa| Dabigat| Riverro| Apixa| Edoxa| Parenteral Anti| Edoxa| Total

|phosphate|run|xaban|ban|ban|coagulant|ban (OD)|

|||||)|

\_\_\_\_\_+\_\_\_\_\_+\_\_\_\_\_+\_\_\_\_\_+\_\_\_\_\_+\_\_\_\_\_+\_\_\_\_\_+\_\_\_\_\_

\_+

Present | 2955 | 906 | 2388 | 3174 | 1718 | 2 | 20 | 11163

| 26.47 | 8.12 | 21.39 | 28.43 | 15.39 | 0.02 | 0.18 | 100.00

| 26.47 | 8.12 | 21.39 | 28.43 | 15.39 | 0.02 | 0.18 |

| 100.00 | 100.00 | 100.00 | 100.00 | 100.00 | 100.00 | 100.00 |

\_\_\_\_\_+\_\_\_\_\_+\_\_\_\_\_+\_\_\_\_\_+\_\_\_\_\_+\_\_\_\_\_+\_\_\_\_\_+\_\_\_\_\_

\_+

Total 2955 906 2388 3174 1718 2 20 11163

26.47 8.12 21.39 28.43 15.39 0.02 0.18 100.00

Degree of missing values = 818

Table 1 : ADYN \* ACTYP

Stratification variable : ALL=1

ADYN(Administration of Anticoagulant) ACTYP(Type of AF)

Power |

Percent |

Percent of rows

Percent of column | Warfa| Dabigat| Riverro| Apixa| Edoxa| Parenteral Anti| Edoxa| Total

|phosphate|run|xaban|ban|ban|coagulant|ban (OD)|

|||||D|

\_\_\_\_\_+\_\_\_\_\_+\_\_\_\_\_+\_\_\_\_\_+\_\_\_\_\_+\_\_\_\_\_+\_\_\_\_\_+\_\_\_\_\_+\_\_\_\_\_

\_  
\_+

Present | 2955 | 906 | 2388 | 3174 | 1718 | 2 | 20 | 11163

| 26.47 | 8.12 | 21.39 | 28.43 | 15.39 | 0.02 | 0.18 | 100.00

| 26.47 | 8.12 | 21.39 | 28.43 | 15.39 | 0.02 | 0.18 |

| 100.00 | 100.00 | 100.00 | 100.00 | 100.00 | 100.00 | 100.00 |

\_\_\_\_\_+\_\_\_\_\_+\_\_\_\_\_+\_\_\_\_\_+\_\_\_\_\_+\_\_\_\_\_+\_\_\_\_\_+\_\_\_\_\_+\_\_\_\_\_

\_  
\_+

Total 2955 906 2388 3174 1718 2 20 11163

26.47 8.12 21.39 28.43 15.39 0.02 0.18 100.00

Degree of missing values = 818

Administration of anticoagulants at the time of obtaining Table 2-4 consent, according to the presence or absence of proton-pump inhibitors

FREQ Procedure

Table 1 : ADYN \* ACTYP

Stratification variable : ALL=1

ADYN(Administration of Anticoagulant) ACTYP(Type of AF)

Power |

Percent |

Percent of rows

Percent of column | Warfa| Dabigat| Riverro| Apixa| Edoxa| Parenteral Anti| Edoxa| Total

|phosphate|run|xaban|ban|ban|coagulant|ban (OD)|

|||||)|

\_\_\_\_\_+\_\_\_\_\_+\_\_\_\_\_+\_\_\_\_\_+\_\_\_\_\_+\_\_\_\_\_+\_\_\_\_\_+\_\_\_\_\_

\_+

Present | 2955 | 906 | 2388 | 3174 | 1718 | 2 | 20 | 11163

| 26.47 | 8.12 | 21.39 | 28.43 | 15.39 | 0.02 | 0.18 | 100.00

| 26.47 | 8.12 | 21.39 | 28.43 | 15.39 | 0.02 | 0.18 |

| 100.00 | 100.00 | 100.00 | 100.00 | 100.00 | 100.00 | 100.00 |

\_\_\_\_\_+\_\_\_\_\_+\_\_\_\_\_+\_\_\_\_\_+\_\_\_\_\_+\_\_\_\_\_+\_\_\_\_\_+\_\_\_\_\_

\_+

Total 2955 906 2388 3174 1718 2 20 11163

26.47 8.12 21.39 28.43 15.39 0.02 0.18 100.00

Degree of missing values = 818

Table 1 : ADYN \* ACTYP

Stratification variable : ALL=1

ADYN(Administration of Anticoagulant) ACTYP(Type of AF)

Power |

Percent |

Percent of rows

Percent of column | Warfa| Dabigat| Riverro| Apixa| Edoxa| Parenteral Anti| Edoxa| Total

|phosphate|run|xaban|ban|ban|coagulant|ban (OD)|

|||||D|

\_\_\_\_\_+\_\_\_\_\_+\_\_\_\_\_+\_\_\_\_\_+\_\_\_\_\_+\_\_\_\_\_+\_\_\_\_\_+\_\_\_\_\_

\_  
\_+

Present | 2955 | 906 | 2388 | 3174 | 1718 | 2 | 20 | 11163

| 26.47 | 8.12 | 21.39 | 28.43 | 15.39 | 0.02 | 0.18 | 100.00

| 26.47 | 8.12 | 21.39 | 28.43 | 15.39 | 0.02 | 0.18 |

| 100.00 | 100.00 | 100.00 | 100.00 | 100.00 | 100.00 | 100.00 |

\_\_\_\_\_+\_\_\_\_\_+\_\_\_\_\_+\_\_\_\_\_+\_\_\_\_\_+\_\_\_\_\_+\_\_\_\_\_+\_\_\_\_\_

\_  
\_+

Total 2955 906 2388 3174 1718 2 20 11163

26.47 8.12 21.39 28.43 15.39 0.02 0.18 100.00

Degree of missing values = 818

Administration of anticoagulants at the time of obtaining Table 2-4 consent, according to the presence or absence of proton-pump inhibitors

FREQ Procedure

Table 1 : ADYN \* ACTYP

Stratification variable : ALL=1

ADYN(Administration of Anticoagulant) ACTYP(Type of AF)

Power |

Percent |

Percent of rows

Percent of column | Warfa| Dabigat| Riverro| Apixa| Edoxa| Parenteral Anti| Edoxa| Total

|phosphate|run|xaban|ban|ban|coagulant|ban (OD)|

|||||)|

\_\_\_\_\_+\_\_\_\_\_+\_\_\_\_\_+\_\_\_\_\_+\_\_\_\_\_+\_\_\_\_\_+\_\_\_\_\_+\_\_\_\_\_

\_+

Present | 2955 | 906 | 2388 | 3174 | 1718 | 2 | 20 | 11163

| 26.47 | 8.12 | 21.39 | 28.43 | 15.39 | 0.02 | 0.18 | 100.00

| 26.47 | 8.12 | 21.39 | 28.43 | 15.39 | 0.02 | 0.18 |

| 100.00 | 100.00 | 100.00 | 100.00 | 100.00 | 100.00 | 100.00 |

\_\_\_\_\_+\_\_\_\_\_+\_\_\_\_\_+\_\_\_\_\_+\_\_\_\_\_+\_\_\_\_\_+\_\_\_\_\_+\_\_\_\_\_

\_+

Total 2955 906 2388 3174 1718 2 20 11163

26.47 8.12 21.39 28.43 15.39 0.02 0.18 100.00

Degree of missing values = 818

Table 1 : ADYN \* t\_ACT0

Stratification variable : ALL=1

ADYN(Administration of Anticoagulant)

t\_ACT0

|                                     |        |        |        |
|-------------------------------------|--------|--------|--------|
| Power                               |        |        |        |
| Percent                             |        |        |        |
| Percent of rows                     |        |        |        |
| Percentage of columns   0   1   Sum |        |        |        |
| _____ + _____ + _____ +             |        |        |        |
| Present   9425   1738   11163       |        |        |        |
|                                     | 84.43  | 15.57  | 100.00 |
|                                     | 84.43  | 15.57  |        |
|                                     | 100.00 | 100.00 |        |
| _____ + _____ + _____ +             |        |        |        |
| Total 9425 1738 11163               |        |        |        |
|                                     | 84.43  | 15.57  | 100.00 |

Degree of missing values = 818

Administration of anticoagulants at the time of obtaining Table 2-4 consent, according to the presence or absence of proton-pump inhibitors

FREQ Procedure

Table: ALL \* t\_ADYN

ALL t\_ADYN

Power |

Percent |

Percent of rows

Percentage of columns | 0| 1| Sum

|       | 0      | 1      | Sum    |
|-------|--------|--------|--------|
| 1     | 818    | 11163  | 11981  |
|       | 6.83   | 93.17  | 100.00 |
|       | 6.83   | 93.17  |        |
|       | 100.00 | 100.00 |        |
| Total | 818    | 11163  | 11981  |
|       | 6.83   | 93.17  | 100.00 |

Administration of anticoagulants at the time of obtaining Table 2-4 consent, according to the presence or absence of proton-pump inhibitors

FREQ Procedure

Tables: ALL\* ACTYP

ALL ACTYP(Type of AF)

Power |

Percent |

Percent of rows

Percent of column | Warfa| Dabigat| Riverro| Apixa| Edoxa| Parenteral Anti| Edoxa| Total

|phosphate|run|xaban|ban|ban|coagulant|ban (OD)|

|||||)|

\_\_\_\_\_+\_\_\_\_\_+\_\_\_\_\_+\_\_\_\_\_+\_\_\_\_\_+\_\_\_\_\_+\_\_\_\_\_+\_\_\_\_\_+

\_  
\_+

|   |        |        |        |        |        |        |        |        |
|---|--------|--------|--------|--------|--------|--------|--------|--------|
| 1 | 2955   | 906    | 2388   | 3174   | 1718   | 2      | 20     | 11163  |
|   | 26.47  | 8.12   | 21.39  | 28.43  | 15.39  | 0.02   | 0.18   | 100.00 |
|   | 26.47  | 8.12   | 21.39  | 28.43  | 15.39  | 0.02   | 0.18   |        |
|   | 100.00 | 100.00 | 100.00 | 100.00 | 100.00 | 100.00 | 100.00 |        |

\_\_\_\_\_+\_\_\_\_\_+\_\_\_\_\_+\_\_\_\_\_+\_\_\_\_\_+\_\_\_\_\_+\_\_\_\_\_+\_\_\_\_\_+

\_  
\_+

Total 2955 906 2388 3174 1718 2 20 11163

26.47 8.12 21.39 28.43 15.39 0.02 0.18 100.00



Administration of anticoagulants at the time of obtaining Table 2-4 consent, according to the presence or absence of proton-pump inhibitors

FREQ Procedure

Table : ALL \* n\_ACT1

ALL n\_ACT1

Power |

Percent |

Percent of rows

Percent of columns | 1 | Total

|                    | 1      | Total  |
|--------------------|--------|--------|
| Power              |        |        |
| Percent            |        |        |
| Percent of rows    |        |        |
| Percent of columns |        |        |
|                    | 8208   | 8208   |
|                    | 100.00 | 100.00 |
|                    | 100.00 |        |
|                    | 100.00 |        |
| Total              | 8208   | 8208   |
|                    | 100.00 | 100.00 |

Degree of missing values = 2955

Administration of anticoagulants at the time of obtaining Table 2-4 consent, according to the presence or absence of proton-pump inhibitors

FREQ Procedure

Tables: ALL\* ACTYP

ALL ACTYP(Type of AF)

Power |

Percent |

Percent of rows

Percent of column | Warfa| Dabigat| Riverro| Apixa| Edoxa| Parenteral Anti| Edoxa| Total

|phosphate|run|xaban|ban|ban|coagulant|ban (OD)|

|||||)|

\_\_\_\_\_+\_\_\_\_\_+\_\_\_\_\_+\_\_\_\_\_+\_\_\_\_\_+\_\_\_\_\_+\_\_\_\_\_+\_\_\_\_\_+

\_  
\_+

|   |        |        |        |        |        |        |        |        |
|---|--------|--------|--------|--------|--------|--------|--------|--------|
| 1 | 2955   | 906    | 2388   | 3174   | 1718   | 2      | 20     | 11163  |
|   | 26.47  | 8.12   | 21.39  | 28.43  | 15.39  | 0.02   | 0.18   | 100.00 |
|   | 26.47  | 8.12   | 21.39  | 28.43  | 15.39  | 0.02   | 0.18   |        |
|   | 100.00 | 100.00 | 100.00 | 100.00 | 100.00 | 100.00 | 100.00 |        |

\_\_\_\_\_+\_\_\_\_\_+\_\_\_\_\_+\_\_\_\_\_+\_\_\_\_\_+\_\_\_\_\_+\_\_\_\_\_+\_\_\_\_\_+

\_  
\_+

Total 2955 906 2388 3174 1718 2 20 11163

26.47 8.12 21.39 28.43 15.39 0.02 0.18 100.00

Administration of anticoagulants at the time of obtaining Table 2-4 consent, according to the presence or absence of proton-pump inhibitors

FREQ Procedure

Table : ALL \* n\_ACT2

ALL n\_ACT2

Power |

Percent |

Percent of rows

Percent of columns | 1 | Total

|        |        |        |  |
|--------|--------|--------|--|
| _____+ |        | _____+ |  |
| 1      | 10257  | 10257  |  |
|        | 100.00 | 100.00 |  |
|        | 100.00 |        |  |
|        | 100.00 |        |  |
| _____+ |        | _____+ |  |
| Total  | 10257  | 10257  |  |
|        | 100.00 | 100.00 |  |

Frequency of missing values = 906

Administration of anticoagulants at the time of obtaining Table 2-4 consent, according to the presence or absence of proton-pump inhibitors

FREQ Procedure

Tables: ALL\* ACTYP

ALL ACTYP(Type of AF)

Power |

Percent |

Percent of rows

Percent of column | Warfa| Dabigat| Riverro| Apixa| Edoxa| Parenteral Anti| Edoxa| Total

|phosphate|run|xaban|ban|ban|coagulant|ban (OD)|

|||||)|

\_\_\_\_\_+\_\_\_\_\_+\_\_\_\_\_+\_\_\_\_\_+\_\_\_\_\_+\_\_\_\_\_+\_\_\_\_\_+\_\_\_\_\_+

\_  
\_+

|   |        |        |        |        |        |        |        |        |
|---|--------|--------|--------|--------|--------|--------|--------|--------|
| 1 | 2955   | 906    | 2388   | 3174   | 1718   | 2      | 20     | 11163  |
|   | 26.47  | 8.12   | 21.39  | 28.43  | 15.39  | 0.02   | 0.18   | 100.00 |
|   | 26.47  | 8.12   | 21.39  | 28.43  | 15.39  | 0.02   | 0.18   |        |
|   | 100.00 | 100.00 | 100.00 | 100.00 | 100.00 | 100.00 | 100.00 |        |

\_\_\_\_\_+\_\_\_\_\_+\_\_\_\_\_+\_\_\_\_\_+\_\_\_\_\_+\_\_\_\_\_+\_\_\_\_\_+\_\_\_\_\_+

\_  
\_+

Total 2955 906 2388 3174 1718 2 20 11163

26.47 8.12 21.39 28.43 15.39 0.02 0.18 100.00

Administration of anticoagulants at the time of obtaining Table 2-4 consent, according to the presence or absence of proton-pump inhibitors

FREQ Procedure

Table : ALL \* n\_ACT3

ALL n\_ACT3

Power |

Percent |

Percent of rows

Percent of columns | 1 | Total

|        |        |        |  |
|--------|--------|--------|--|
| _____+ |        | _____+ |  |
| 1      | 8775   | 8775   |  |
|        | 100.00 | 100.00 |  |
|        | 100.00 |        |  |
|        | 100.00 |        |  |
| _____+ |        | _____+ |  |
| Total  | 8775   | 8775   |  |
|        | 100.00 | 100.00 |  |

Frequency of missing values = 2388

Administration of anticoagulants at the time of obtaining Table 2-4 consent, according to the presence or absence of proton-pump inhibitors

FREQ Procedure

Tables: ALL\* ACTYP

ALL ACTYP(Type of AF)

Power |

Percent |

Percent of rows

Percent of column | Warfa| Dabigat| Riverro| Apixa| Edoxa| Parenteral Anti| Edoxa| Total

|phosphate|run|xaban|ban|ban|coagulant|ban (OD)|

|||||)|

\_\_\_\_\_+\_\_\_\_\_+\_\_\_\_\_+\_\_\_\_\_+\_\_\_\_\_+\_\_\_\_\_+\_\_\_\_\_+\_\_\_\_\_+

\_  
\_+

|   |        |        |        |        |        |        |        |        |
|---|--------|--------|--------|--------|--------|--------|--------|--------|
| 1 | 2955   | 906    | 2388   | 3174   | 1718   | 2      | 20     | 11163  |
|   | 26.47  | 8.12   | 21.39  | 28.43  | 15.39  | 0.02   | 0.18   | 100.00 |
|   | 26.47  | 8.12   | 21.39  | 28.43  | 15.39  | 0.02   | 0.18   |        |
|   | 100.00 | 100.00 | 100.00 | 100.00 | 100.00 | 100.00 | 100.00 |        |

\_\_\_\_\_+\_\_\_\_\_+\_\_\_\_\_+\_\_\_\_\_+\_\_\_\_\_+\_\_\_\_\_+\_\_\_\_\_+\_\_\_\_\_+

\_  
\_+

Total 2955 906 2388 3174 1718 2 20 11163

26.47 8.12 21.39 28.43 15.39 0.02 0.18 100.00

Administration of anticoagulants at the time of obtaining Table 2-4 consent, according to the presence or absence of proton-pump inhibitors

FREQ Procedure

Table : ALL \* n\_ACT4

ALL n\_ACT4

Power |

Percent |

Percent of rows

Percent of columns | 1| Total

|        |        |        |  |
|--------|--------|--------|--|
| _____+ |        | _____+ |  |
| 1      | 7989   | 7989   |  |
|        | 100.00 | 100.00 |  |
|        | 100.00 |        |  |
|        | 100.00 |        |  |
| _____+ |        | _____+ |  |
| Total  | 7989   | 7989   |  |
|        | 100.00 | 100.00 |  |

Degree of missing values = 3174

Administration of anticoagulants at the time of obtaining Table 2-4 consent, according to the presence or absence of proton-pump inhibitors

FREQ Procedure

Table: ALL \* t\_ACT0

ALL t\_ACT0

Power |

Percent |

Percent of rows

Percentage of columns | 0| 1| Sum

|       | 0      | 1      | Sum    |
|-------|--------|--------|--------|
| 1     | 9425   | 1738   | 11163  |
|       | 84.43  | 15.57  | 100.00 |
|       | 84.43  | 15.57  |        |
|       | 100.00 | 100.00 |        |
| Total | 9425   | 1738   | 11163  |
|       | 84.43  | 15.57  | 100.00 |



Administration of anticoagulants at the time of obtaining Table 2-4 consent, according to the presence or absence of proton-pump inhibitors

FREQ Procedure

Table: ALL \* t\_ACT0

ALL t\_ACT0

Power |

Percent |

Percent of rows

Percentage of columns | 0| 1| Sum

|       | 0      | 1      | Sum    |
|-------|--------|--------|--------|
| 1     | 9425   | 1738   | 11163  |
|       | 84.43  | 15.57  | 100.00 |
|       | 84.43  | 15.57  |        |
|       | 100.00 | 100.00 |        |
| Total | 9425   | 1738   | 11163  |
|       | 84.43  | 15.57  | 100.00 |

Administration of anticoagulants at the time of obtaining Table 2-4 consent, according to the presence or absence of proton-pump inhibitors

FREQ Procedure

Tables: ALL\* ACTYP

ALL ACTYP(Type of AF)

Power |

Percent |

Percent of rows

Percent of column | Warfa| Dabigat| Riverro| Apixa| Edoxa| Parenteral Anti| Edoxa| Total

|phosphate|run|xaban|ban|ban|coagulant|ban (OD)|

|||||)|

\_\_\_\_\_+\_\_\_\_\_+\_\_\_\_\_+\_\_\_\_\_+\_\_\_\_\_+\_\_\_\_\_+\_\_\_\_\_+\_\_\_\_\_+

\_  
\_+

|   |        |        |        |        |        |        |        |        |
|---|--------|--------|--------|--------|--------|--------|--------|--------|
| 1 | 2955   | 906    | 2388   | 3174   | 1718   | 2      | 20     | 11163  |
|   | 26.47  | 8.12   | 21.39  | 28.43  | 15.39  | 0.02   | 0.18   | 100.00 |
|   | 26.47  | 8.12   | 21.39  | 28.43  | 15.39  | 0.02   | 0.18   |        |
|   | 100.00 | 100.00 | 100.00 | 100.00 | 100.00 | 100.00 | 100.00 |        |

\_\_\_\_\_+\_\_\_\_\_+\_\_\_\_\_+\_\_\_\_\_+\_\_\_\_\_+\_\_\_\_\_+\_\_\_\_\_+\_\_\_\_\_+

\_  
\_+

Total 2955 906 2388 3174 1718 2 20 11163

26.47 8.12 21.39 28.43 15.39 0.02 0.18 100.00

Administration of anticoagulants at the time of obtaining Table 2-4 consent, according to the presence or absence of proton-pump inhibitors

FREQ Procedure

Table : ALL \* n\_ACT5

ALL n\_ACT5

Power |

Percent |

Percent of rows

Percent of columns | 1| Total

|       | 1      | Total  |
|-------|--------|--------|
| 1     | 9445   | 9445   |
|       | 100.00 | 100.00 |
|       | 100.00 |        |
|       | 100.00 |        |
| Total | 9445   | 9445   |
|       | 100.00 | 100.00 |

Degree of missing values = 1718

Administration of anticoagulants at the time of obtaining Table 2-4 consent, according to the presence or absence of proton-pump inhibitors

FREQ Procedure

Tables: ALL\* ACTYP

ALL ACTYP(Type of AF)

Power |

Percent |

Percent of rows

Percent of column | Warfa| Dabigat| Riverro| Apixa| Edoxa| Parenteral Anti| Edoxa| Total

|phosphate|run|xaban|ban|ban|coagulant|ban (OD)|

|||||)|

\_\_\_\_\_+\_\_\_\_\_+\_\_\_\_\_+\_\_\_\_\_+\_\_\_\_\_+\_\_\_\_\_+\_\_\_\_\_+\_\_\_\_\_+

\_  
\_+

|   |        |        |        |        |        |        |        |        |
|---|--------|--------|--------|--------|--------|--------|--------|--------|
| 1 | 2955   | 906    | 2388   | 3174   | 1718   | 2      | 20     | 11163  |
|   | 26.47  | 8.12   | 21.39  | 28.43  | 15.39  | 0.02   | 0.18   | 100.00 |
|   | 26.47  | 8.12   | 21.39  | 28.43  | 15.39  | 0.02   | 0.18   |        |
|   | 100.00 | 100.00 | 100.00 | 100.00 | 100.00 | 100.00 | 100.00 |        |

\_\_\_\_\_+\_\_\_\_\_+\_\_\_\_\_+\_\_\_\_\_+\_\_\_\_\_+\_\_\_\_\_+\_\_\_\_\_+\_\_\_\_\_+

\_  
\_+

Total 2955 906 2388 3174 1718 2 20 11163

26.47 8.12 21.39 28.43 15.39 0.02 0.18 100.00

Administration of anticoagulants at the time of obtaining Table 2-4 consent, according to the presence or absence of proton-pump inhibitors

FREQ Procedure

Table : ALL \* n\_ACT7

ALL n\_ACT7

Power |

Percent |

Percent of rows

Percent of columns | 1 | Total

|       | 1      | Total  |
|-------|--------|--------|
| 1     | 11143  | 11143  |
|       | 100.00 | 100.00 |
|       | 100.00 |        |
|       | 100.00 |        |
| Total | 11143  | 11143  |
|       | 100.00 | 100.00 |

Degree of missing values = 20

Administration of anticoagulants at the time of obtaining Table 2-4 consent, according to the presence or absence of proton-pump inhibitors

FREQ Procedure

Tables: ALL\* ACTYP

ALL ACTYP(Type of AF)

Power |

Percent |

Percent of rows

Percent of column | Warfa| Dabigat| Riverro| Apixa| Edoxa| Parenteral Anti| Edoxa| Total

|phosphate|run|xaban|ban|ban|coagulant|ban (OD)|

|||||)|

\_\_\_\_\_+\_\_\_\_\_+\_\_\_\_\_+\_\_\_\_\_+\_\_\_\_\_+\_\_\_\_\_+\_\_\_\_\_+\_\_\_\_\_+

\_  
\_+

|   |        |        |        |        |        |        |        |        |
|---|--------|--------|--------|--------|--------|--------|--------|--------|
| 1 | 2955   | 906    | 2388   | 3174   | 1718   | 2      | 20     | 11163  |
|   | 26.47  | 8.12   | 21.39  | 28.43  | 15.39  | 0.02   | 0.18   | 100.00 |
|   | 26.47  | 8.12   | 21.39  | 28.43  | 15.39  | 0.02   | 0.18   |        |
|   | 100.00 | 100.00 | 100.00 | 100.00 | 100.00 | 100.00 | 100.00 |        |

\_\_\_\_\_+\_\_\_\_\_+\_\_\_\_\_+\_\_\_\_\_+\_\_\_\_\_+\_\_\_\_\_+\_\_\_\_\_+\_\_\_\_\_+

\_  
\_+

Total 2955 906 2388 3174 1718 2 20 11163

26.47 8.12 21.39 28.43 15.39 0.02 0.18 100.00

Administration of anticoagulants at the time of obtaining Table 2-4 consent, according to the presence or absence of proton-pump inhibitors

FREQ Procedure

Table : ALL \* n\_ACT6

ALL n\_ACT6

Power |

Percent |

Percent of rows

Percent of columns | 1 | Total

|       | 1      | Total  |
|-------|--------|--------|
| 1     | 11161  | 11161  |
|       | 100.00 | 100.00 |
|       | 100.00 |        |
|       | 100.00 |        |
| Total | 11161  | 11161  |
|       | 100.00 | 100.00 |

Degree of missing values = 2

Administration of anticoagulants at the time of obtaining Table 2-4 consent, according to the presence or absence of proton-pump inhibitors

FREQ Procedure

Table : ALL \* t\_ACT1

ALL t\_ACT1

Power |

Percent |

Percent of rows

Percentage of columns | 0| 1| Sum

|         |   | 0      | 1      | Sum    |
|---------|---|--------|--------|--------|
| 1       | 2 | 11161  | 11163  |        |
|         |   | 0.02   | 99.98  | 100.00 |
|         |   | 0.02   | 99.98  |        |
|         |   | 100.00 | 100.00 |        |
| Total 2 |   | 11161  | 11163  |        |
|         |   | 0.02   | 99.98  | 100.00 |



Administration of anticoagulants at the time of obtaining Table 2-4 consent, according to the presence or absence of proton-pump inhibitors

FREQ Procedure

Table : ALL \* t\_ACT1

ALL t\_ACT1

Power |

Percent |

Percent of rows

Percentage of columns | 0| 1| Sum

|         |   | 0      | 1      | Sum    |
|---------|---|--------|--------|--------|
| 1       | 2 | 11161  | 11163  |        |
|         |   | 0.02   | 99.98  | 100.00 |
|         |   | 0.02   | 99.98  |        |
|         |   | 100.00 | 100.00 |        |
| Total 2 |   | 11161  | 11163  |        |
|         |   | 0.02   | 99.98  | 100.00 |

Administration of anticoagulants at the time of obtaining Table 2-4 consent, according to the presence or absence of proton-pump inhibitors

FREQ Procedure

Table : ALL \* t\_ACT2

ALL t\_ACT2

Power |

Percent |

Percent of rows

Percentage of columns | 0| 1| Sum

|       | 0      | 1      | Sum    |
|-------|--------|--------|--------|
| 1     | 2957   | 8206   | 11163  |
|       | 26.49  | 73.51  | 100.00 |
|       | 26.49  | 73.51  |        |
|       | 100.00 | 100.00 |        |
| Total | 2957   | 8206   | 11163  |
|       | 26.49  | 73.51  | 100.00 |

Administration of anticoagulants at the time of obtaining Table 2-4 consent, according to the presence or absence of proton-pump inhibitors

FREQ Procedure

Table : ALL \* t\_ACT2

ALL t\_ACT2

Power |

Percent |

Percent of rows

Percentage of columns | 0| 1| Sum

|       | 0      | 1      | Sum    |
|-------|--------|--------|--------|
| 1     | 2957   | 8206   | 11163  |
|       | 26.49  | 73.51  | 100.00 |
|       | 26.49  | 73.51  |        |
|       | 100.00 | 100.00 |        |
| Total | 2957   | 8206   | 11163  |
|       | 26.49  | 73.51  | 100.00 |

Administration of anticoagulants at the time of obtaining Table 2-4 consent, according to the presence or absence of proton-pump inhibitors

FREQ Procedure

Table : ALL \* t\_ACT3

ALL t\_ACT3

Power |

Percent |

Percent of rows

Percentage of columns | 0| 1| Sum

|       | 0      | 1      | Sum    |
|-------|--------|--------|--------|
| 1     | 3863   | 7300   | 11163  |
|       | 34.61  | 65.39  | 100.00 |
|       | 34.61  | 65.39  |        |
|       | 100.00 | 100.00 |        |
| Total | 3863   | 7300   | 11163  |
|       | 34.61  | 65.39  | 100.00 |

Administration of anticoagulants at the time of obtaining Table 2-4 consent, according to the presence or absence of proton-pump inhibitors

FREQ Procedure

Table : ALL \* t\_ACT3

ALL t\_ACT3

Power |

Percent |

Percent of rows

Percentage of columns | 0| 1| Sum

|       | 0      | 1      | Sum    |
|-------|--------|--------|--------|
| 1     | 3863   | 7300   | 11163  |
|       | 34.61  | 65.39  | 100.00 |
|       | 34.61  | 65.39  |        |
|       | 100.00 | 100.00 |        |
| Total | 3863   | 7300   | 11163  |
|       | 34.61  | 65.39  | 100.00 |

Administration of anticoagulants at the time of obtaining Table 2-4 consent, according to the presence or absence of proton-pump inhibitors

FREQ Procedure

Tables: ALL\* VISITAD

ALL VISITAD(Visit and Drug Administration)

Power |

Percent |

Percent of rows

Percent of column |Month |Month |Month |First dose |Unknown | Total

Within | | |

|       | Month  | Month  | Month  | First dose | Unknown | Total |
|-------|--------|--------|--------|------------|---------|-------|
| 1     | 2914   | 8      | 8      | 25         | 2955    |       |
|       | 98.61  | 0.27   | 0.27   | 0.85       | 100.00  |       |
|       | 98.61  | 0.27   | 0.27   | 0.85       |         |       |
|       | 100.00 | 100.00 | 100.00 | 100.00     |         |       |
| Total | 2914   | 8      | 8      | 25         | 2955    |       |
|       | 98.61  | 0.27   | 0.27   | 0.85       | 100.00  |       |

Administration of anticoagulants at the time of obtaining Table 2-4 consent, according to the presence or absence of proton-pump inhibitors

FREQ Procedure

Tables: ALL\* VISITAD

ALL VISITAD(Visit and Drug Administration)

Power |

Percent |

Percent of rows

Percent of column |Month |Month |Month |First dose |Unknown | Total

Within | | |

|       | Month  | Month  | Month  | First dose | Unknown | Total |
|-------|--------|--------|--------|------------|---------|-------|
| 1     | 2914   | 8      | 8      | 25         | 2955    |       |
|       | 98.61  | 0.27   | 0.27   | 0.85       | 100.00  |       |
|       | 98.61  | 0.27   | 0.27   | 0.85       |         |       |
|       | 100.00 | 100.00 | 100.00 | 100.00     |         |       |
| Total | 2914   | 8      | 8      | 25         | 2955    |       |
|       | 98.61  | 0.27   | 0.27   | 0.85       | 100.00  |       |

Administration of anticoagulants at the time of obtaining Table 2-4 consent, according to the presence or absence of proton-pump inhibitors

FREQ Procedure

Tables: ALL\* VISITAD

ALL VISITAD(Visit and Drug Administration)

Power |

Percent |

Percent of rows

Percent of column |Month |Month |Month |First dose |Unknown | Total

Within | | |

|       | Month  | Month  | Month  | First dose | Unknown | Total |
|-------|--------|--------|--------|------------|---------|-------|
| 1     | 2914   | 8      | 8      | 25         | 2955    |       |
|       | 98.61  | 0.27   | 0.27   | 0.85       | 100.00  |       |
|       | 98.61  | 0.27   | 0.27   | 0.85       |         |       |
|       | 100.00 | 100.00 | 100.00 | 100.00     |         |       |
| Total | 2914   | 8      | 8      | 25         | 2955    |       |
|       | 98.61  | 0.27   | 0.27   | 0.85       | 100.00  |       |



Administration of anticoagulants at the time of obtaining Table 2-4 consent, according to the presence or absence of proton-pump inhibitors

FREQ Procedure

Tables: ALL\* VISITAD

ALL VISITAD(Visit and Drug Administration)

Power |

Percent |

Percent of rows

Percent of column |Month |Month |Month |First dose |Unknown | Total

Within | | |

|       | Month  | Month  | Month  | First dose | Unknown | Total |
|-------|--------|--------|--------|------------|---------|-------|
| 1     | 2914   | 8      | 8      | 25         | 2955    |       |
|       | 98.61  | 0.27   | 0.27   | 0.85       | 100.00  |       |
|       | 98.61  | 0.27   | 0.27   | 0.85       |         |       |
|       | 100.00 | 100.00 | 100.00 | 100.00     |         |       |
| Total | 2914   | 8      | 8      | 25         | 2955    |       |
|       | 98.61  | 0.27   | 0.27   | 0.85       | 100.00  |       |

Administration of anticoagulants at the time of obtaining Table 2-4 consent, according to the presence or absence of proton-pump inhibitors

FREQ Procedure

Tables: ALL\* VISITAD

ALL VISITAD(Visit and Drug Administration)

Power |

Percent |

Percent of rows

Percent of column |Month |Month |Month |First dose |Unknown | Total

Within | | |

|       | Month  | Month  | Month  | First dose | Unknown | Total |
|-------|--------|--------|--------|------------|---------|-------|
| 1     | 875    | 9      | 8      | 14         | 906     |       |
|       | 96.58  | 0.99   | 0.88   | 1.55       | 100.00  |       |
|       | 96.58  | 0.99   | 0.88   | 1.55       |         |       |
|       | 100.00 | 100.00 | 100.00 | 100.00     |         |       |
| Total | 875    | 9      | 8      | 14         | 906     |       |
|       | 96.58  | 0.99   | 0.88   | 1.55       | 100.00  |       |

Administration of anticoagulants at the time of obtaining Table 2-4 consent, according to the presence or absence of proton-pump inhibitors

FREQ Procedure

Tables: ALL\* VISITAD

ALL VISITAD(Visit and Drug Administration)

Power |

Percent |

Percent of rows

Percent of column |Month |Month |Month |First dose |Unknown | Total

Within | | |

|       | Month  | Month  | Month  | First dose | Unknown | Total |
|-------|--------|--------|--------|------------|---------|-------|
| 1     | 875    | 9      | 8      | 14         | 906     |       |
|       | 96.58  | 0.99   | 0.88   | 1.55       | 100.00  |       |
|       | 96.58  | 0.99   | 0.88   | 1.55       |         |       |
|       | 100.00 | 100.00 | 100.00 | 100.00     |         |       |
| Total | 875    | 9      | 8      | 14         | 906     |       |
|       | 96.58  | 0.99   | 0.88   | 1.55       | 100.00  |       |

Administration of anticoagulants at the time of obtaining Table 2-4 consent, according to the presence or absence of proton-pump inhibitors

FREQ Procedure

Tables: ALL\* VISITAD

ALL VISITAD(Visit and Drug Administration)

Power |

Percent |

Percent of rows

Percent of column |Month |Month |Month |First dose |Unknown | Total

Within | | |

|       | Month  | Month  | Month  | First dose | Unknown | Total |
|-------|--------|--------|--------|------------|---------|-------|
| 1     | 875    | 9      | 8      | 14         | 906     |       |
|       | 96.58  | 0.99   | 0.88   | 1.55       | 100.00  |       |
|       | 96.58  | 0.99   | 0.88   | 1.55       |         |       |
|       | 100.00 | 100.00 | 100.00 | 100.00     |         |       |
| Total | 875    | 9      | 8      | 14         | 906     |       |
|       | 96.58  | 0.99   | 0.88   | 1.55       | 100.00  |       |

Administration of anticoagulants at the time of obtaining Table 2-4 consent, according to the presence or absence of proton-pump inhibitors

FREQ Procedure

Tables: ALL\* VISITAD

ALL VISITAD(Visit and Drug Administration)

Power |

Percent |

Percent of rows

Percent of column |Month |Month |Month |First dose |Unknown | Total

Within | | |

|       | Month  | Month  | Month  | First dose | Unknown | Total |
|-------|--------|--------|--------|------------|---------|-------|
| 1     | 875    | 9      | 8      | 14         | 906     |       |
|       | 96.58  | 0.99   | 0.88   | 1.55       | 100.00  |       |
|       | 96.58  | 0.99   | 0.88   | 1.55       |         |       |
|       | 100.00 | 100.00 | 100.00 | 100.00     |         |       |
| Total | 875    | 9      | 8      | 14         | 906     |       |
|       | 96.58  | 0.99   | 0.88   | 1.55       | 100.00  |       |

Administration of anticoagulants at the time of obtaining Table 2-4 consent, according to the presence or absence of proton-pump inhibitors

FREQ Procedure

Tables: ALL\* VISITAD

ALL VISITAD(Visit and Drug Administration)

Power |

Percent |

Percent of rows

Percent of column |Month |Month |Month |First dose |Unknown | Total

Within | | |

|       | +      | +      | +      | +      | +      |
|-------|--------|--------|--------|--------|--------|
| 1     | 2297   | 38     | 29     | 24     | 2388   |
|       | 96.19  | 1.59   | 1.21   | 1.01   | 100.00 |
|       | 96.19  | 1.59   | 1.21   | 1.01   |        |
|       | 100.00 | 100.00 | 100.00 | 100.00 |        |
|       | +      | +      | +      | +      | +      |
| Total | 2297   | 38     | 29     | 24     | 2388   |
|       | 96.19  | 1.59   | 1.21   | 1.01   | 100.00 |

Administration of anticoagulants at the time of obtaining Table 2-4 consent, according to the presence or absence of proton-pump inhibitors

FREQ Procedure

Tables: ALL\* VISITAD

ALL VISITAD(Visit and Drug Administration)

Power |

Percent |

Percent of rows

Percent of column |Month |Month |Month |First dose |Unknown | Total

Within | | |

|       | +      | +      | +      | +      | +      |
|-------|--------|--------|--------|--------|--------|
| 1     | 2297   | 38     | 29     | 24     | 2388   |
|       | 96.19  | 1.59   | 1.21   | 1.01   | 100.00 |
|       | 96.19  | 1.59   | 1.21   | 1.01   |        |
|       | 100.00 | 100.00 | 100.00 | 100.00 |        |
|       | +      | +      | +      | +      | +      |
| Total | 2297   | 38     | 29     | 24     | 2388   |
|       | 96.19  | 1.59   | 1.21   | 1.01   | 100.00 |

Administration of anticoagulants at the time of obtaining Table 2-4 consent, according to the presence or absence of proton-pump inhibitors

FREQ Procedure

Tables: ALL\* VISITAD

ALL VISITAD(Visit and Drug Administration)

Power |

Percent |

Percent of rows

Percent of column |Month |Month |Month |First dose |Unknown | Total

Within | | |

|       | +      | +      | +      | +      | +      |
|-------|--------|--------|--------|--------|--------|
| 1     | 2297   | 38     | 29     | 24     | 2388   |
|       | 96.19  | 1.59   | 1.21   | 1.01   | 100.00 |
|       | 96.19  | 1.59   | 1.21   | 1.01   |        |
|       | 100.00 | 100.00 | 100.00 | 100.00 |        |
|       | +      | +      | +      | +      | +      |
| Total | 2297   | 38     | 29     | 24     | 2388   |
|       | 96.19  | 1.59   | 1.21   | 1.01   | 100.00 |



Administration of anticoagulants at the time of obtaining Table 2-4 consent, according to the presence or absence of proton-pump inhibitors

FREQ Procedure

Tables: ALL\* VISITAD

ALL VISITAD(Visit and Drug Administration)

Power |

Percent |

Percent of rows

Percent of column |Month |Month |Month |First dose |Unknown | Total

Within | | |

|       | +      | +      | +      | +      | +      |
|-------|--------|--------|--------|--------|--------|
| 1     | 2297   | 38     | 29     | 24     | 2388   |
|       | 96.19  | 1.59   | 1.21   | 1.01   | 100.00 |
|       | 96.19  | 1.59   | 1.21   | 1.01   |        |
|       | 100.00 | 100.00 | 100.00 | 100.00 |        |
|       | +      | +      | +      | +      | +      |
| Total | 2297   | 38     | 29     | 24     | 2388   |
|       | 96.19  | 1.59   | 1.21   | 1.01   | 100.00 |

Administration of anticoagulants at the time of obtaining Table 2-4 consent, according to the presence or absence of proton-pump inhibitors

FREQ Procedure

Tables: ALL\* VISITAD

ALL VISITAD(Visit and Drug Administration)

Power |

Percent |

Percent of rows

Percent of column |Month |Month |Month |First dose |Unknown | Total

Within | | |

|       | +      | +      | +      | +      | +      |
|-------|--------|--------|--------|--------|--------|
| 1     | 3062   | 54     | 43     | 15     | 3174   |
|       | 96.47  | 1.70   | 1.35   | 0.47   | 100.00 |
|       | 96.47  | 1.70   | 1.35   | 0.47   |        |
|       | 100.00 | 100.00 | 100.00 | 100.00 |        |
|       | +      | +      | +      | +      | +      |
| Total | 3062   | 54     | 43     | 15     | 3174   |
|       | 96.47  | 1.70   | 1.35   | 0.47   | 100.00 |

Administration of anticoagulants at the time of obtaining Table 2-4 consent, according to the presence or absence of proton-pump inhibitors

FREQ Procedure

Tables: ALL\* VISITAD

ALL VISITAD(Visit and Drug Administration)

Power |

Percent |

Percent of rows

Percent of column |Month |Month |Month |First dose |Unknown | Total

Within | | |

|       | +      | +      | +      | +      | +      |
|-------|--------|--------|--------|--------|--------|
| 1     | 3062   | 54     | 43     | 15     | 3174   |
|       | 96.47  | 1.70   | 1.35   | 0.47   | 100.00 |
|       | 96.47  | 1.70   | 1.35   | 0.47   |        |
|       | 100.00 | 100.00 | 100.00 | 100.00 |        |
|       | +      | +      | +      | +      | +      |
| Total | 3062   | 54     | 43     | 15     | 3174   |
|       | 96.47  | 1.70   | 1.35   | 0.47   | 100.00 |

Administration of anticoagulants at the time of obtaining Table 2-4 consent, according to the presence or absence of proton-pump inhibitors

FREQ Procedure

Tables: ALL\* VISITAD

ALL VISITAD(Visit and Drug Administration)

Power |

Percent |

Percent of rows

Percent of column |Month |Month |Month |First dose |Unknown | Total

Within | | |

|       | +      | +      | +      | +      | +      |
|-------|--------|--------|--------|--------|--------|
| 1     | 3062   | 54     | 43     | 15     | 3174   |
|       | 96.47  | 1.70   | 1.35   | 0.47   | 100.00 |
|       | 96.47  | 1.70   | 1.35   | 0.47   |        |
|       | 100.00 | 100.00 | 100.00 | 100.00 |        |
|       | +      | +      | +      | +      | +      |
| Total | 3062   | 54     | 43     | 15     | 3174   |
|       | 96.47  | 1.70   | 1.35   | 0.47   | 100.00 |

Administration of anticoagulants at the time of obtaining Table 2-4 consent, according to the presence or absence of proton-pump inhibitors

FREQ Procedure

Tables: ALL\* VISITAD

ALL VISITAD(Visit and Drug Administration)

Power |

Percent |

Percent of rows

Percent of column |Month |Month |Month |First dose |Unknown | Total

Within | | |

|       | +      | +      | +      | +      | +      |
|-------|--------|--------|--------|--------|--------|
| 1     | 3062   | 54     | 43     | 15     | 3174   |
|       | 96.47  | 1.70   | 1.35   | 0.47   | 100.00 |
|       | 96.47  | 1.70   | 1.35   | 0.47   |        |
|       | 100.00 | 100.00 | 100.00 | 100.00 |        |
|       | +      | +      | +      | +      | +      |
| Total | 3062   | 54     | 43     | 15     | 3174   |
|       | 96.47  | 1.70   | 1.35   | 0.47   | 100.00 |

Administration of anticoagulants at the time of obtaining Table 2-4 consent, according to the presence or absence of proton-pump inhibitors

FREQ Procedure

Tables: ALL\* VISITAD

ALL VISITAD(Visit and Drug Administration)

Power |

Percent |

Percent of rows

Percent of column |Month |Month |Month |First dose |Unknown | Total

Within | | |

|       | Month  | Month  | Month  | First dose | Unknown | Total |
|-------|--------|--------|--------|------------|---------|-------|
| 1     | 1528   | 65     | 135    | 10         | 1738    |       |
|       | 87.92  | 3.74   | 7.77   | 0.58       | 100.00  |       |
|       | 87.92  | 3.74   | 7.77   | 0.58       |         |       |
|       | 100.00 | 100.00 | 100.00 | 100.00     |         |       |
| Total | 1528   | 65     | 135    | 10         | 1738    |       |
|       | 87.92  | 3.74   | 7.77   | 0.58       | 100.00  |       |

Administration of anticoagulants at the time of obtaining Table 2-4 consent, according to the presence or absence of proton-pump inhibitors

FREQ Procedure

Tables: ALL\* VISITAD

ALL VISITAD(Visit and Drug Administration)

Power |

Percent |

Percent of rows

Percent of column |Month |Month |Month |First dose |Unknown | Total

Within | | |

|       | Month  | Month  | Month  | First dose | Unknown | Total |
|-------|--------|--------|--------|------------|---------|-------|
| 1     | 1528   | 65     | 135    | 10         | 1738    |       |
|       | 87.92  | 3.74   | 7.77   | 0.58       | 100.00  |       |
|       | 87.92  | 3.74   | 7.77   | 0.58       |         |       |
|       | 100.00 | 100.00 | 100.00 | 100.00     |         |       |
| Total | 1528   | 65     | 135    | 10         | 1738    |       |
|       | 87.92  | 3.74   | 7.77   | 0.58       | 100.00  |       |

Administration of anticoagulants at the time of obtaining Table 2-4 consent, according to the presence or absence of proton-pump inhibitors

FREQ Procedure

Tables: ALL\* VISITAD

ALL VISITAD(Visit and Drug Administration)

Power |

Percent |

Percent of rows

Percent of column |Month |Month |Month |First dose |Unknown | Total

Within | | |

|       | Month  | Month  | Month  | First dose | Unknown | Total |
|-------|--------|--------|--------|------------|---------|-------|
| 1     | 1528   | 65     | 135    | 10         | 1738    |       |
|       | 87.92  | 3.74   | 7.77   | 0.58       | 100.00  |       |
|       | 87.92  | 3.74   | 7.77   | 0.58       |         |       |
|       | 100.00 | 100.00 | 100.00 | 100.00     |         |       |
| Total | 1528   | 65     | 135    | 10         | 1738    |       |
|       | 87.92  | 3.74   | 7.77   | 0.58       | 100.00  |       |



Administration of anticoagulants at the time of obtaining Table 2-4 consent, according to the presence or absence of proton-pump inhibitors

FREQ Procedure

Tables: ALL\* VISITAD

ALL VISITAD(Visit and Drug Administration)

Power |

Percent |

Percent of rows

Percent of column |Month |Month |Month |First dose |Unknown | Total

Within | | |

|       | Month  | Month  | Month  | First dose | Unknown | Total |
|-------|--------|--------|--------|------------|---------|-------|
| 1     | 1528   | 65     | 135    | 10         | 1738    |       |
|       | 87.92  | 3.74   | 7.77   | 0.58       | 100.00  |       |
|       | 87.92  | 3.74   | 7.77   | 0.58       |         |       |
|       | 100.00 | 100.00 | 100.00 | 100.00     |         |       |
| Total | 1528   | 65     | 135    | 10         | 1738    |       |
|       | 87.92  | 3.74   | 7.77   | 0.58       | 100.00  |       |

Administration of anticoagulants at the time of obtaining Table 2-4 consent, according to the presence or absence of proton-pump inhibitors

FREQ Procedure

Tables: ALL\* VISITAD

ALL VISITAD(Visit and Drug Administration)

Power |

Percent |

Percent of rows

Percent of column |Month |Month |Month |First dose |Unknown | Total

Within | | |

|       | Month  | Month  | Month  | First dose | Unknown | Total |
|-------|--------|--------|--------|------------|---------|-------|
| 1     | 1508   | 65     | 135    | 10         | 1718    |       |
|       | 87.78  | 3.78   | 7.86   | 0.58       | 100.00  |       |
|       | 87.78  | 3.78   | 7.86   | 0.58       |         |       |
|       | 100.00 | 100.00 | 100.00 | 100.00     |         |       |
| Total | 1508   | 65     | 135    | 10         | 1718    |       |
|       | 87.78  | 3.78   | 7.86   | 0.58       | 100.00  |       |

Administration of anticoagulants at the time of obtaining Table 2-4 consent, according to the presence or absence of proton-pump inhibitors

FREQ Procedure

Tables: ALL\* VISITAD

ALL VISITAD(Visit and Drug Administration)

Power |

Percent |

Percent of rows

Percent of column |Month |Month |Month |First dose |Unknown | Total

Within | | |

|       | Month  | Month  | Month  | First dose | Unknown | Total |
|-------|--------|--------|--------|------------|---------|-------|
| 1     | 1508   | 65     | 135    | 10         | 1718    |       |
|       | 87.78  | 3.78   | 7.86   | 0.58       | 100.00  |       |
|       | 87.78  | 3.78   | 7.86   | 0.58       |         |       |
|       | 100.00 | 100.00 | 100.00 | 100.00     |         |       |
| Total | 1508   | 65     | 135    | 10         | 1718    |       |
|       | 87.78  | 3.78   | 7.86   | 0.58       | 100.00  |       |

Administration of anticoagulants at the time of obtaining Table 2-4 consent, according to the presence or absence of proton-pump inhibitors

FREQ Procedure

Tables: ALL\* VISITAD

ALL VISITAD(Visit and Drug Administration)

Power |

Percent |

Percent of rows

Percent of column |Month |Month |Month |First dose |Unknown | Total

Within | | |

|       | Month  | Month  | Month  | First dose | Unknown | Total |
|-------|--------|--------|--------|------------|---------|-------|
| 1     | 1508   | 65     | 135    | 10         | 1718    |       |
|       | 87.78  | 3.78   | 7.86   | 0.58       | 100.00  |       |
|       | 87.78  | 3.78   | 7.86   | 0.58       |         |       |
|       | 100.00 | 100.00 | 100.00 | 100.00     |         |       |
| Total | 1508   | 65     | 135    | 10         | 1718    |       |
|       | 87.78  | 3.78   | 7.86   | 0.58       | 100.00  |       |

Administration of anticoagulants at the time of obtaining Table 2-4 consent, according to the presence or absence of proton-pump inhibitors

FREQ Procedure

Tables: ALL\* VISITAD

ALL VISITAD(Visit and Drug Administration)

Power |

Percent |

Percent of rows

Percent of column |Month |Month |Month |First dose |Unknown | Total

Within | | |

|       | Month  | Month  | Month  | First dose | Unknown | Total |
|-------|--------|--------|--------|------------|---------|-------|
| 1     | 1508   | 65     | 135    | 10         | 1718    |       |
|       | 87.78  | 3.78   | 7.86   | 0.58       | 100.00  |       |
|       | 87.78  | 3.78   | 7.86   | 0.58       |         |       |
|       | 100.00 | 100.00 | 100.00 | 100.00     |         |       |
| Total | 1508   | 65     | 135    | 10         | 1718    |       |
|       | 87.78  | 3.78   | 7.86   | 0.58       | 100.00  |       |

Administration of anticoagulants at the time of obtaining Table 2-4 consent, according to the presence or absence of proton-pump inhibitors

FREQ Procedure

Tables: ALL\* VISITAD

ALL

VISITAD(Visit and Drug Administration)

Power |

Percent |

Percent of rows

Percent of column |Month | Total

Breakforward |

\_\_\_\_\_+\_\_\_\_\_+

1 | 20 | 20

| 100.00 | 100.00

| 100.00 |

| 100.00 |

\_\_\_\_\_+\_\_\_\_\_+

Total 20 20

100.00 100.00

Administration of anticoagulants at the time of obtaining Table 2-4 consent, according to the presence or absence of proton-pump inhibitors

FREQ Procedure

Tables: ALL\* VISITAD

ALL

VISITAD(Visit and Drug Administration)

Power |

Percent |

Percent of rows

Percent of column |Month | Total

Breakforward |

\_\_\_\_\_ + \_\_\_\_\_ +

1 | 20 | 20

| 100.00 | 100.00

| 100.00 |

| 100.00 |

\_\_\_\_\_ + \_\_\_\_\_ +

Total 20 20

100.00 100.00

Administration of anticoagulants at the time of obtaining Table 2-4 consent, according to the presence or absence of proton-pump inhibitors

FREQ Procedure

Tables: ALL\* VISITAD

ALL

VISITAD(Visit and Drug Administration)

Power |

Percent |

Percent of rows

Percent of column |Month | Total

Breakforward |

\_\_\_\_\_ + \_\_\_\_\_ +

1 | 20 | 20

| 100.00 | 100.00

| 100.00 |

| 100.00 |

\_\_\_\_\_ + \_\_\_\_\_ +

Total 20 20

100.00 100.00



Administration of anticoagulants at the time of obtaining Table 2-4 consent, according to the presence or absence of proton-pump inhibitors

FREQ Procedure

Tables: ALL\* VISITAD

ALL

VISITAD(Visit and Drug Administration)

Power |

Percent |

Percent of rows

Percent of column |Month | Total

Breakforward |

\_\_\_\_\_ + \_\_\_\_\_ +

1 | 20 | 20

| 100.00 | 100.00

| 100.00 |

| 100.00 |

\_\_\_\_\_ + \_\_\_\_\_ +

Total 20 20

100.00 100.00

Administration of anticoagulants at the time of obtaining Table 2-4 consent, according to the presence or absence of proton-pump inhibitors

FREQ Procedure

Tables: ALL\* VISITAD

ALL

VISITAD(Visit and Drug Administration)

Power |

Percent |

Percent of rows

Percent of column |Month | Unknown | Total

) in front | |

|             | +      | +      | +      | + |
|-------------|--------|--------|--------|---|
| 1           | 1      | 1      | 2      |   |
| 50.00       | 50.00  | 100.00 |        |   |
| 50.00       | 50.00  |        |        |   |
| 100.00      | 100.00 |        |        |   |
| +           | +      | +      | +      |   |
| Total 1 1 2 | 50.00  | 50.00  | 100.00 |   |

Administration of anticoagulants at the time of obtaining Table 2-4 consent, according to the presence or absence of proton-pump inhibitors

FREQ Procedure

Tables: ALL\* VISITAD

ALL

VISITAD(Visit and Drug Administration)

Power |

Percent |

Percent of rows

Percent of column |Month | Unknown | Total

) in front | |

|             | +      | +      | +      | + |
|-------------|--------|--------|--------|---|
| 1           | 1      | 1      | 2      |   |
| 50.00       | 50.00  | 100.00 |        |   |
| 50.00       | 50.00  |        |        |   |
| 100.00      | 100.00 |        |        |   |
| +           | +      | +      | +      |   |
| Total 1 1 2 | 50.00  | 50.00  | 100.00 |   |

Administration of anticoagulants at the time of obtaining Table 2-4 consent, according to the presence or absence of proton-pump inhibitors

FREQ Procedure

Tables: ALL\* VISITAD

ALL

VISITAD(Visit and Drug Administration)

Power |

Percent |

Percent of rows

Percent of column |Month | Unknown | Total

) in front | |

|             |        |        |        |   |
|-------------|--------|--------|--------|---|
|             | +      | +      | +      | + |
| 1           | 1      | 1      | 2      |   |
| 50.00       | 50.00  | 100.00 |        |   |
| 50.00       | 50.00  |        |        |   |
| 100.00      | 100.00 |        |        |   |
|             | +      | +      | +      | + |
| Total 1 1 2 | 50.00  | 50.00  | 100.00 |   |

Administration of anticoagulants at the time of obtaining Table 2-4 consent, according to the presence or absence of proton-pump inhibitors

FREQ Procedure

Tables: ALL\* VISITAD

ALL

VISITAD(Visit and Drug Administration)

Power |

Percent |

Percent of rows

Percent of column |Month | Unknown | Total

) in front | |

|             |        |        |        |   |
|-------------|--------|--------|--------|---|
|             | +      | +      | +      | + |
| 1           | 1      | 1      | 2      |   |
| 50.00       | 50.00  | 100.00 |        |   |
| 50.00       | 50.00  |        |        |   |
| 100.00      | 100.00 |        |        |   |
|             | +      | +      | +      | + |
| Total 1 1 2 | 50.00  | 50.00  | 100.00 |   |

Administration of anticoagulants at the time of obtaining Table 2-4 consent, according to the presence or absence of proton-pump inhibitors

FREQ Procedure

Tables: ALL \* DOSE

ALL DOSE(Dose per day for DOAC only)

Power |

Percent |

Percent of rows

Column percent | 50| 75| 110| 150| 185| 220| 300| Total

|       | 50     | 75     | 110    | 150    | 185    | 220    | 300    | Total  |     |
|-------|--------|--------|--------|--------|--------|--------|--------|--------|-----|
|       | 1      | 1      | 5      | 74     | 45     | 1      | 725    | 55     | 906 |
|       | 0.11   | 0.55   | 8.17   | 4.97   | 0.11   | 80.02  | 6.07   | 100.00 |     |
|       | 0.11   | 0.55   | 8.17   | 4.97   | 0.11   | 80.02  | 6.07   |        |     |
|       | 100.00 | 100.00 | 100.00 | 100.00 | 100.00 | 100.00 | 100.00 |        |     |
| Total | 1      | 5      | 74     | 45     | 1      | 725    | 55     | 906    |     |
|       | 0.11   | 0.55   | 8.17   | 4.97   | 0.11   | 80.02  | 6.07   | 100.00 |     |

Administration of anticoagulants at the time of obtaining Table 2-4 consent, according to the presence or absence of proton-pump inhibitors

FREQ Procedure

Tables: ALL \* DOSE

ALL DOSE(Dose per day for DOAC only)

Power |

Percent |

Percent of rows

Column percent | 50| 75| 110| 150| 185| 220| 300| Total

|       | 50     | 75     | 110    | 150    | 185    | 220    | 300    | Total  |
|-------|--------|--------|--------|--------|--------|--------|--------|--------|
| 1     | 1      | 5      | 74     | 45     | 1      | 725    | 55     | 906    |
|       | 0.11   | 0.55   | 8.17   | 4.97   | 0.11   | 80.02  | 6.07   | 100.00 |
|       | 0.11   | 0.55   | 8.17   | 4.97   | 0.11   | 80.02  | 6.07   |        |
|       | 100.00 | 100.00 | 100.00 | 100.00 | 100.00 | 100.00 | 100.00 |        |
| Total | 1      | 5      | 74     | 45     | 1      | 725    | 55     | 906    |
|       | 0.11   | 0.55   | 8.17   | 4.97   | 0.11   | 80.02  | 6.07   | 100.00 |

Administration of anticoagulants at the time of obtaining Table 2-4 consent, according to the presence or absence of proton-pump inhibitors

FREQ Procedure

Tables: ALL \* DOSE

ALL DOSE(Dose per day for DOAC only)

Power |

Percent |

Percent of rows

Column percent | 50| 75| 110| 150| 185| 220| 300| Total

|       | 50     | 75     | 110    | 150    | 185    | 220    | 300    | Total  |     |
|-------|--------|--------|--------|--------|--------|--------|--------|--------|-----|
|       | 1      | 1      | 5      | 74     | 45     | 1      | 725    | 55     | 906 |
|       | 0.11   | 0.55   | 8.17   | 4.97   | 0.11   | 80.02  | 6.07   | 100.00 |     |
|       | 0.11   | 0.55   | 8.17   | 4.97   | 0.11   | 80.02  | 6.07   |        |     |
|       | 100.00 | 100.00 | 100.00 | 100.00 | 100.00 | 100.00 | 100.00 |        |     |
| Total | 1      | 5      | 74     | 45     | 1      | 725    | 55     | 906    |     |
|       | 0.11   | 0.55   | 8.17   | 4.97   | 0.11   | 80.02  | 6.07   | 100.00 |     |



Administration of anticoagulants at the time of obtaining Table 2-4 consent, according to the presence or absence of proton-pump inhibitors

FREQ Procedure

Tables: ALL \* DOSE

ALL DOSE(Dose per day for DOAC only)

Power |

Percent |

Percent of rows

Column percent | 50| 75| 110| 150| 185| 220| 300| Total

|       | 50     | 75     | 110    | 150    | 185    | 220    | 300    | Total  |     |
|-------|--------|--------|--------|--------|--------|--------|--------|--------|-----|
|       | 1      | 1      | 5      | 74     | 45     | 1      | 725    | 55     | 906 |
|       | 0.11   | 0.55   | 8.17   | 4.97   | 0.11   | 80.02  | 6.07   | 100.00 |     |
|       | 0.11   | 0.55   | 8.17   | 4.97   | 0.11   | 80.02  | 6.07   |        |     |
|       | 100.00 | 100.00 | 100.00 | 100.00 | 100.00 | 100.00 | 100.00 |        |     |
| Total | 1      | 5      | 74     | 45     | 1      | 725    | 55     | 906    |     |
|       | 0.11   | 0.55   | 8.17   | 4.97   | 0.11   | 80.02  | 6.07   | 100.00 |     |

Administration of anticoagulants at the time of obtaining Table 2-4 consent, according to the presence or absence of proton-pump inhibitors

FREQ Procedure

Tables: ALL \* DOSE

ALL DOSE(Dose per day for DOAC only)

Power |

Percent |

Percent of rows

Column percent | 50| 75| 110| 150| 185| 220| 300| Total

|       | 50     | 75     | 110    | 150    | 185    | 220    | 300    | Total  |
|-------|--------|--------|--------|--------|--------|--------|--------|--------|
| 1     | 1      | 5      | 74     | 45     | 1      | 725    | 55     | 906    |
|       | 0.11   | 0.55   | 8.17   | 4.97   | 0.11   | 80.02  | 6.07   | 100.00 |
|       | 0.11   | 0.55   | 8.17   | 4.97   | 0.11   | 80.02  | 6.07   |        |
|       | 100.00 | 100.00 | 100.00 | 100.00 | 100.00 | 100.00 | 100.00 |        |
| Total | 1      | 5      | 74     | 45     | 1      | 725    | 55     | 906    |
|       | 0.11   | 0.55   | 8.17   | 4.97   | 0.11   | 80.02  | 6.07   | 100.00 |

Administration of anticoagulants at the time of obtaining Table 2-4 consent, according to the presence or absence of proton-pump inhibitors

FREQ Procedure

Table : ALL \* f\_d2

ALL f\_d2

Power |

Percent |

Percent of rows

Percent of columns | 1 | Total

|       |        | +      |   | + |  |
|-------|--------|--------|---|---|--|
|       | 1      | 2      | 2 |   |  |
|       | 100.00 | 100.00 |   |   |  |
|       | 100.00 |        |   |   |  |
|       | 100.00 |        |   |   |  |
|       |        | +      |   | + |  |
| Total | 2      | 2      |   |   |  |
|       | 100.00 | 100.00 |   |   |  |

Frequency of missing values = 904

Administration of anticoagulants at the time of obtaining Table 2-4 consent, according to the presence or absence of proton-pump inhibitors

FREQ Procedure

Tables: ALL \* DOSE

ALL DOSE(Dose per day for DOAC only)

Power |

Percent |

Percent of rows

Column percent | 0| 2.5| 5| 7.5| 10| 15| 30| Total

|       | 0      | 2.5    | 5      | 7.5    | 10     | 15     | 30     | Total  |
|-------|--------|--------|--------|--------|--------|--------|--------|--------|
| 1     | 1      | 1      | 8      | 3      | 1695   | 678    | 2      | 2388   |
|       | 0.04   | 0.04   | 0.34   | 0.13   | 70.98  | 28.39  | 0.08   | 100.00 |
|       | 0.04   | 0.04   | 0.34   | 0.13   | 70.98  | 28.39  | 0.08   |        |
|       | 100.00 | 100.00 | 100.00 | 100.00 | 100.00 | 100.00 | 100.00 |        |
| Total | 1      | 1      | 8      | 3      | 1695   | 678    | 2      | 2388   |
|       | 0.04   | 0.04   | 0.34   | 0.13   | 70.98  | 28.39  | 0.08   | 100.00 |

Administration of anticoagulants at the time of obtaining Table 2-4 consent, according to the presence or absence of proton-pump inhibitors

FREQ Procedure

Tables: ALL \* DOSE

ALL DOSE(Dose per day for DOAC only)

Power |

Percent |

Percent of rows

Column percent | 0| 2.5| 5| 7.5| 10| 15| 30| Total

|       | 0      | 2.5    | 5      | 7.5    | 10     | 15     | 30     | Total  |
|-------|--------|--------|--------|--------|--------|--------|--------|--------|
| 1     | 1      | 1      | 8      | 3      | 1695   | 678    | 2      | 2388   |
|       | 0.04   | 0.04   | 0.34   | 0.13   | 70.98  | 28.39  | 0.08   | 100.00 |
|       | 0.04   | 0.04   | 0.34   | 0.13   | 70.98  | 28.39  | 0.08   |        |
|       | 100.00 | 100.00 | 100.00 | 100.00 | 100.00 | 100.00 | 100.00 |        |
| Total | 1      | 1      | 8      | 3      | 1695   | 678    | 2      | 2388   |
|       | 0.04   | 0.04   | 0.34   | 0.13   | 70.98  | 28.39  | 0.08   | 100.00 |

Administration of anticoagulants at the time of obtaining Table 2-4 consent, according to the presence or absence of proton-pump inhibitors

FREQ Procedure

Table : ALL \* f\_d3

ALL f\_d3

Power |

Percent |

Percent of rows

Percent of columns | 1 | Total

|       |    | +      |  | +      |  |
|-------|----|--------|--|--------|--|
|       | 1  | 15     |  | 15     |  |
|       |    | 100.00 |  | 100.00 |  |
|       |    | 100.00 |  |        |  |
|       |    | 100.00 |  |        |  |
|       |    | +      |  | +      |  |
| Total | 15 | 15     |  |        |  |
|       |    | 100.00 |  | 100.00 |  |

Frequency of missing values = 2373

Administration of anticoagulants at the time of obtaining Table 2-4 consent, according to the presence or absence of proton-pump inhibitors

FREQ Procedure

Tables: ALL \* DOSE

ALL DOSE(Dose per day for DOAC only)

Power |

Percent |

Percent of rows

Column percent | 0| 2.5| 5| 7.5| 10| 30| Total

|       | 0      | 2.5    | 5      | 7.5    | 10     | 30     | Total  |
|-------|--------|--------|--------|--------|--------|--------|--------|
|       | 1      | 1      | 198    | 2086   | 3      | 885    | 1      |
|       | 0.03   | 6.24   | 65.72  | 0.09   | 27.88  | 0.03   | 100.00 |
|       | 0.03   | 6.24   | 65.72  | 0.09   | 27.88  | 0.03   |        |
|       | 100.00 | 100.00 | 100.00 | 100.00 | 100.00 | 100.00 |        |
| Total | 1      | 198    | 2086   | 3      | 885    | 1      | 3174   |
|       | 0.03   | 6.24   | 65.72  | 0.09   | 27.88  | 0.03   | 100.00 |

Administration of anticoagulants at the time of obtaining Table 2-4 consent, according to the presence or absence of proton-pump inhibitors

FREQ Procedure

Tables: ALL \* DOSE

ALL DOSE(Dose per day for DOAC only)

Power |

Percent |

Percent of rows

Column percent | 0| 2.5| 5| 7.5| 10| 30| Total

|       | 0      | 2.5    | 5      | 7.5    | 10     | 30     | Total  |
|-------|--------|--------|--------|--------|--------|--------|--------|
|       | 1      | 1      | 198    | 2086   | 3      | 885    | 1      |
|       | 0.03   | 6.24   | 65.72  | 0.09   | 27.88  | 0.03   | 100.00 |
|       | 0.03   | 6.24   | 65.72  | 0.09   | 27.88  | 0.03   |        |
|       | 100.00 | 100.00 | 100.00 | 100.00 | 100.00 | 100.00 |        |
| Total | 1      | 198    | 2086   | 3      | 885    | 1      | 3174   |
|       | 0.03   | 6.24   | 65.72  | 0.09   | 27.88  | 0.03   | 100.00 |



Administration of anticoagulants at the time of obtaining Table 2-4 consent, according to the presence or absence of proton-pump inhibitors

FREQ Procedure

Tables: ALL \* DOSE

ALL DOSE(Dose per day for DOAC only)

Power |

Percent |

Percent of rows

Column percent | 0| 2.5| 5| 7.5| 10| 30| Total

|       | 0      | 2.5    | 5      | 7.5    | 10     | 30     | Total  |
|-------|--------|--------|--------|--------|--------|--------|--------|
|       | 1      | 1      | 198    | 2086   | 3      | 885    | 1      |
|       | 0.03   | 6.24   | 65.72  | 0.09   | 27.88  | 0.03   | 100.00 |
|       | 0.03   | 6.24   | 65.72  | 0.09   | 27.88  | 0.03   |        |
|       | 100.00 | 100.00 | 100.00 | 100.00 | 100.00 | 100.00 |        |
| Total | 1      | 198    | 2086   | 3      | 885    | 1      | 3174   |
|       | 0.03   | 6.24   | 65.72  | 0.09   | 27.88  | 0.03   | 100.00 |

Administration of anticoagulants at the time of obtaining Table 2-4 consent, according to the presence or absence of proton-pump inhibitors

FREQ Procedure

Table : ALL \* f\_d4

ALL f\_d4

Power |

Percent |

Percent of rows

Percent of columns | 1 | Total

|         |        |        |  |
|---------|--------|--------|--|
| _____+  |        | _____+ |  |
| 1       | 5      | 5      |  |
|         | 100.00 | 100.00 |  |
|         | 100.00 |        |  |
|         | 100.00 |        |  |
| _____+  |        | _____+ |  |
| Total 5 | 5      |        |  |
|         | 100.00 | 100.00 |  |

Degree of missing values = 3169

Administration of anticoagulants at the time of obtaining Table 2-4 consent, according to the presence or absence of proton-pump inhibitors

FREQ Procedure

Tables: ALL \* DOSE

ALL DOSE(Dose per day for DOAC only)

Power |

Percent |

Percent of rows

Percentage of columns | 15| 30| 60| Total

|       | 15     | 30     | 60     | Total  |
|-------|--------|--------|--------|--------|
| 1     | 106    | 1445   | 187    | 1738   |
|       | 6.10   | 83.14  | 10.76  | 100.00 |
|       | 6.10   | 83.14  | 10.76  |        |
|       | 100.00 | 100.00 | 100.00 |        |
| Total | 106    | 1445   | 187    | 1738   |
|       | 6.10   | 83.14  | 10.76  | 100.00 |

Administration of anticoagulants at the time of obtaining Table 2-4 consent, according to the presence or absence of proton-pump inhibitors

FREQ Procedure

Tables: ALL \* DOSE

ALL DOSE(Dose per day for DOAC only)

Power |

Percent |

Percent of rows

Percentage of columns | 15| 30| 60| Total

|       | 15     | 30     | 60     | Total  |
|-------|--------|--------|--------|--------|
| 1     | 106    | 1445   | 187    | 1738   |
|       | 6.10   | 83.14  | 10.76  | 100.00 |
|       | 6.10   | 83.14  | 10.76  |        |
|       | 100.00 | 100.00 | 100.00 |        |
| Total | 106    | 1445   | 187    | 1738   |
|       | 6.10   | 83.14  | 10.76  | 100.00 |

Administration of anticoagulants at the time of obtaining Table 2-4 consent, according to the presence or absence of proton-pump inhibitors

FREQ Procedure

Tables: ALL \* DOSE

ALL DOSE(Dose per day for DOAC only)

Power |

Percent |

Percent of rows

Percentage of columns | 15| 30| 60| Total

|       | 15     | 30     | 60     | Total  |
|-------|--------|--------|--------|--------|
| 1     | 106    | 1445   | 187    | 1738   |
|       | 6.10   | 83.14  | 10.76  | 100.00 |
|       | 6.10   | 83.14  | 10.76  |        |
|       | 100.00 | 100.00 | 100.00 |        |
| Total | 106    | 1445   | 187    | 1738   |
|       | 6.10   | 83.14  | 10.76  | 100.00 |

Administration of anticoagulants at the time of obtaining Table 2-4 consent, according to the presence or absence of proton-pump inhibitors

FREQ Procedure

For ALL \* f\_d0,

Because all levels of the variable f\_d0 are missing,

There is no data.

Administration of anticoagulants at the time of obtaining Table 2-4 consent, according to the presence or absence of proton-pump inhibitors

FREQ Procedure

Tables: ALL \* DOSE

ALL DOSE(Dose per day for DOAC only)

Power |

Percent |

Percent of rows

Percentage of columns | 15| 30| 60| Total

|       | 15     | 30     | 60     | Total  |
|-------|--------|--------|--------|--------|
| 1     | 105    | 1429   | 184    | 1718   |
|       | 6.11   | 83.18  | 10.71  | 100.00 |
|       | 6.11   | 83.18  | 10.71  |        |
|       | 100.00 | 100.00 | 100.00 |        |
| Total | 105    | 1429   | 184    | 1718   |
|       | 6.11   | 83.18  | 10.71  | 100.00 |

Administration of anticoagulants at the time of obtaining Table 2-4 consent, according to the presence or absence of proton-pump inhibitors

FREQ Procedure

Tables: ALL \* DOSE

ALL DOSE(Dose per day for DOAC only)

Power |

Percent |

Percent of rows

Percentage of columns | 15| 30| 60| Total

|       | 15     | 30     | 60     | Total  |
|-------|--------|--------|--------|--------|
| 1     | 105    | 1429   | 184    | 1718   |
|       | 6.11   | 83.18  | 10.71  | 100.00 |
|       | 6.11   | 83.18  | 10.71  |        |
|       | 100.00 | 100.00 | 100.00 |        |
| Total | 105    | 1429   | 184    | 1718   |
|       | 6.11   | 83.18  | 10.71  | 100.00 |



Administration of anticoagulants at the time of obtaining Table 2-4 consent, according to the presence or absence of proton-pump inhibitors

FREQ Procedure

Tables: ALL \* DOSE

ALL DOSE(Dose per day for DOAC only)

Power |

Percent |

Percent of rows

Percentage of columns | 15| 30| 60| Total

|       | 15     | 30     | 60     | Total  |
|-------|--------|--------|--------|--------|
| 1     | 105    | 1429   | 184    | 1718   |
|       | 6.11   | 83.18  | 10.71  | 100.00 |
|       | 6.11   | 83.18  | 10.71  |        |
|       | 100.00 | 100.00 | 100.00 |        |
| Total | 105    | 1429   | 184    | 1718   |
|       | 6.11   | 83.18  | 10.71  | 100.00 |

Administration of anticoagulants at the time of obtaining Table 2-4 consent, according to the presence or absence of proton-pump inhibitors

FREQ Procedure

For ALL \* f\_d5,

Because all levels of the variable f\_d5 are missing,

There is no data.

Administration of anticoagulants at the time of obtaining Table 2-4 consent, according to the presence or absence of proton-pump inhibitors

FREQ Procedure

Tables: ALL \* DOSE

ALL DOSE(Dose per day for DOAC only)

Power |

Percent |

Percent of rows

Percentage of columns | 15| 30| 60| Total

|                       | 15     | 30     | 60     | Total  |
|-----------------------|--------|--------|--------|--------|
| Power                 | 1      | 1      | 16     | 3      |
| Percent               | 5.00   | 80.00  | 15.00  | 100.00 |
| Percent of rows       | 5.00   | 80.00  | 15.00  |        |
| Percentage of columns | 100.00 | 100.00 | 100.00 |        |
| Total                 | 1      | 16     | 3      | 20     |
|                       | 5.00   | 80.00  | 15.00  | 100.00 |

Administration of anticoagulants at the time of obtaining Table 2-4 consent, according to the presence or absence of proton-pump inhibitors

FREQ Procedure

Tables: ALL \* DOSE

ALL DOSE(Dose per day for DOAC only)

Power |

Percent |

Percent of rows

Percentage of columns | 15| 30| 60| Total

|                       | 15     | 30     | 60     | Total  |
|-----------------------|--------|--------|--------|--------|
| Power                 | 1      | 1      | 16     | 3      |
| Percent               | 5.00   | 80.00  | 15.00  | 100.00 |
| Percent of rows       | 5.00   | 80.00  | 15.00  |        |
| Percentage of columns | 100.00 | 100.00 | 100.00 |        |
| Total                 | 1      | 16     | 3      | 20     |
|                       | 5.00   | 80.00  | 15.00  | 100.00 |

Administration of anticoagulants at the time of obtaining Table 2-4 consent, according to the presence or absence of proton-pump inhibitors

FREQ Procedure

Tables: ALL \* DOSE

ALL DOSE(Dose per day for DOAC only)

Power |

Percent |

Percent of rows

Percentage of columns | 15| 30| 60| Total

|                       | 15     | 30     | 60     | Total  |
|-----------------------|--------|--------|--------|--------|
| Power                 | 1      | 1      | 16     | 3      |
| Percent               | 5.00   | 80.00  | 15.00  | 100.00 |
| Percent of rows       | 5.00   | 80.00  | 15.00  |        |
| Percentage of columns | 100.00 | 100.00 | 100.00 |        |
| Total                 | 1      | 16     | 3      | 20     |
|                       | 5.00   | 80.00  | 15.00  | 100.00 |

Administration of anticoagulants at the time of obtaining Table 2-4 consent, according to the presence or absence of proton-pump inhibitors

FREQ Procedure

For ALL \* f\_d7,

Because all levels of the variable f\_d7 are missing,

There is no data.

Administration of anticoagulants at the time of obtaining Table 2-4 consent, according to the presence or absence of proton-pump inhibitors

FREQ Procedure

Tables: ALL \* DOSECNT

ALL

DOSECNT(Dose per 1time for DOAC only)

Power |

Percent |

Percent of rows

Percentage of columns | 1| 2| Total

|                    |        |        |        |
|--------------------|--------|--------|--------|
| _____+_____+_____+ |        |        |        |
| 1                  | 5      | 901    | 906    |
|                    | 0.55   | 99.45  | 100.00 |
|                    | 0.55   | 99.45  |        |
|                    | 100.00 | 100.00 |        |
| _____+_____+_____+ |        |        |        |
| Total 5            | 901    | 906    |        |
|                    | 0.55   | 99.45  | 100.00 |

Administration of anticoagulants at the time of obtaining Table 2-4 consent, according to the presence or absence of proton-pump inhibitors

FREQ Procedure

Tables: ALL \* DOSECNT

ALL

DOSECNT(Dose per 1time for DOAC only)

Power |

Percent |

Percent of rows

Percentage of columns | 1| 2| Total

|                 |   |        |   |        |        |
|-----------------|---|--------|---|--------|--------|
|                 | + |        | + |        | +      |
| 1               |   | 5      |   | 901    | 906    |
|                 |   | 0.55   |   | 99.45  | 100.00 |
|                 |   | 0.55   |   | 99.45  |        |
|                 |   | 100.00 |   | 100.00 |        |
|                 | + |        | + |        | +      |
| Total 5 901 906 |   | 0.55   |   | 99.45  | 100.00 |



Administration of anticoagulants at the time of obtaining Table 2-4 consent, according to the presence or absence of proton-pump inhibitors

FREQ Procedure

For ALL \* t\_dc2,

Because all levels of variable t\_dc2 are missing,

There is no data.

Administration of anticoagulants at the time of obtaining Table 2-4 consent, according to the presence or absence of proton-pump inhibitors

FREQ Procedure

Tables: ALL \* DOSECNT

ALL

DOSECNT(Dose per 1time for DOAC only)

Power |

Percent |

Percent of rows

Percentage of columns | 0| 1| 2| Sum

|       | 0      | 1      | 2      | Sum    |
|-------|--------|--------|--------|--------|
| 1     | 1      | 2384   | 3      | 2388   |
|       | 0.04   | 99.83  | 0.13   | 100.00 |
|       | 0.04   | 99.83  | 0.13   |        |
|       | 100.00 | 100.00 | 100.00 |        |
| Total | 1      | 2384   | 3      | 2388   |
|       | 0.04   | 99.83  | 0.13   | 100.00 |

Administration of anticoagulants at the time of obtaining Table 2-4 consent, according to the presence or absence of proton-pump inhibitors

FREQ Procedure

Tables: ALL \* DOSECNT

ALL

DOSECNT(Dose per 1time for DOAC only)

Power |

Percent |

Percent of rows

Percentage of columns | 0| 1| 2| Sum

|       | 0      | 1      | 2      | Sum    |
|-------|--------|--------|--------|--------|
| 1     | 1      | 2384   | 3      | 2388   |
|       | 0.04   | 99.83  | 0.13   | 100.00 |
|       | 0.04   | 99.83  | 0.13   |        |
|       | 100.00 | 100.00 | 100.00 |        |
| Total | 1      | 2384   | 3      | 2388   |
|       | 0.04   | 99.83  | 0.13   | 100.00 |

Administration of anticoagulants at the time of obtaining Table 2-4 consent, according to the presence or absence of proton-pump inhibitors

FREQ Procedure

Table : ALL \* t\_dc3

ALL t\_dc3

Power |

Percent |

Percent of rows

Percent of columns | 1 | Total

|       |  | +      |        | +      |        |   |
|-------|--|--------|--------|--------|--------|---|
|       |  | 1      |        | 1      |        | 1 |
|       |  |        | 100.00 |        | 100.00 |   |
|       |  |        | 100.00 |        |        |   |
|       |  |        | 100.00 |        |        |   |
|       |  | +      |        | +      |        |   |
| Total |  | 1      |        | 1      |        |   |
|       |  | 100.00 |        | 100.00 |        |   |

Degree of missing values = 2387

Administration of anticoagulants at the time of obtaining Table 2-4 consent, according to the presence or absence of proton-pump inhibitors

FREQ Procedure

Tables: ALL \* DOSECNT

ALL DOSECNT(Dose per 1time for DOAC only)

Power |

Percent |

Percent of rows

Percentage of columns | 0| 1| 2| 3| Total

|                        |        |        |        |        |        |  |   |  |   |
|------------------------|--------|--------|--------|--------|--------|--|---|--|---|
|                        | +      |        | +      |        | +      |  | + |  | + |
| 1                      | 1      | 26     | 3146   | 1      | 3174   |  |   |  |   |
|                        | 0.03   | 0.82   | 99.12  | 0.03   | 100.00 |  |   |  |   |
|                        | 0.03   | 0.82   | 99.12  | 0.03   |        |  |   |  |   |
|                        | 100.00 | 100.00 | 100.00 | 100.00 |        |  |   |  |   |
|                        | +      |        | +      |        | +      |  | + |  | + |
| Total 1 26 3146 1 3174 |        |        |        |        |        |  |   |  |   |
|                        | 0.03   | 0.82   | 99.12  | 0.03   | 100.00 |  |   |  |   |

Administration of anticoagulants at the time of obtaining Table 2-4 consent, according to the presence or absence of proton-pump inhibitors

FREQ Procedure

Tables: ALL \* DOSECNT

ALL DOSECNT(Dose per 1time for DOAC only)

Power |

Percent |

Percent of rows

Percentage of columns | 0| 1| 2| 3| Total

|                        |        |        |        |        |        |  |   |  |   |
|------------------------|--------|--------|--------|--------|--------|--|---|--|---|
|                        | +      |        | +      |        | +      |  | + |  | + |
| 1                      | 1      | 26     | 3146   | 1      | 3174   |  |   |  |   |
|                        | 0.03   | 0.82   | 99.12  | 0.03   | 100.00 |  |   |  |   |
|                        | 0.03   | 0.82   | 99.12  | 0.03   |        |  |   |  |   |
|                        | 100.00 | 100.00 | 100.00 | 100.00 |        |  |   |  |   |
|                        | +      |        | +      |        | +      |  | + |  | + |
| Total 1 26 3146 1 3174 |        |        |        |        |        |  |   |  |   |
|                        | 0.03   | 0.82   | 99.12  | 0.03   | 100.00 |  |   |  |   |

Administration of anticoagulants at the time of obtaining Table 2-4 consent, according to the presence or absence of proton-pump inhibitors

FREQ Procedure

Table : ALL \* t\_dc4

ALL t\_dc4

Power |

Percent |

Percent of rows

Percent of columns | 1 | Total

|           |  | +      |        | + |  |
|-----------|--|--------|--------|---|--|
|           |  | 1      | 2      | 2 |  |
|           |  | 100.00 | 100.00 |   |  |
|           |  | 100.00 |        |   |  |
|           |  | 100.00 |        |   |  |
|           |  | +      |        | + |  |
| Total 2 2 |  | 100.00 | 100.00 |   |  |

Degree of missing values = 3172

Administration of anticoagulants at the time of obtaining Table 2-4 consent, according to the presence or absence of proton-pump inhibitors

FREQ Procedure

Tables: ALL \* DOSECNT

ALL

DOSECNT(Dose per 1time for DOAC only)

Power |

Percent |

Percent of rows

Percentage of columns | 1| 2| Total

|        |        |        |        |        |  |
|--------|--------|--------|--------|--------|--|
| _____+ |        | _____+ |        | _____+ |  |
| 1      | 1736   | 2      | 1738   |        |  |
|        | 99.88  | 0.12   | 100.00 |        |  |
|        | 99.88  | 0.12   |        |        |  |
|        | 100.00 | 100.00 |        |        |  |
| _____+ |        | _____+ |        | _____+ |  |
| Total  | 1736   | 2      | 1738   |        |  |
|        | 99.88  | 0.12   | 100.00 |        |  |



Administration of anticoagulants at the time of obtaining Table 2-4 consent, according to the presence or absence of proton-pump inhibitors

FREQ Procedure

Tables: ALL \* DOSECNT

ALL

DOSECNT(Dose per 1time for DOAC only)

Power |

Percent |

Percent of rows

Percentage of columns | 1| 2| Total

|        | 1      | 2      | Total |
|--------|--------|--------|-------|
| 1736   | 1738   |        |       |
| 99.88  | 0.12   | 100.00 |       |
| 99.88  | 0.12   |        |       |
| 100.00 | 100.00 |        |       |
| 1736   | 1738   |        |       |
| 99.88  | 0.12   | 100.00 |       |

Administration of anticoagulants at the time of obtaining Table 2-4 consent, according to the presence or absence of proton-pump inhibitors

FREQ Procedure

For ALL \* t\_dc0,

Because all levels of variable t\_dc0 are missing,

There is no data.

Administration of anticoagulants at the time of obtaining Table 2-4 consent, according to the presence or absence of proton-pump inhibitors

FREQ Procedure

Tables: ALL \* DOSECNT

ALL

DOSECNT(Dose per 1time for DOAC only)

Power |

Percent |

Percent of rows

Percentage of columns | 1| 2| Total

|            |        |        |        |  |   |
|------------|--------|--------|--------|--|---|
|            | +      |        | +      |  | + |
| 1          | 1717   | 1      | 1718   |  |   |
|            | 99.94  | 0.06   | 100.00 |  |   |
|            | 99.94  | 0.06   |        |  |   |
|            | 100.00 | 100.00 |        |  |   |
|            | +      |        | +      |  | + |
| Total 1717 | 1      | 1718   |        |  |   |
|            | 99.94  | 0.06   | 100.00 |  |   |

Administration of anticoagulants at the time of obtaining Table 2-4 consent, according to the presence or absence of proton-pump inhibitors

FREQ Procedure

Tables: ALL \* DOSECNT

ALL

DOSECNT(Dose per 1time for DOAC only)

Power |

Percent |

Percent of rows

Percentage of columns | 1| 2| Total

|       |        |        |        |  |   |
|-------|--------|--------|--------|--|---|
|       | +      |        | +      |  | + |
| 1     | 1717   | 1      | 1718   |  |   |
|       | 99.94  | 0.06   | 100.00 |  |   |
|       | 99.94  | 0.06   |        |  |   |
|       | 100.00 | 100.00 |        |  |   |
|       | +      |        | +      |  | + |
| Total | 1717   | 1      | 1718   |  |   |
|       | 99.94  | 0.06   | 100.00 |  |   |

Administration of anticoagulants at the time of obtaining Table 2-4 consent, according to the presence or absence of proton-pump inhibitors

FREQ Procedure

For ALL \* t\_dc5,

Because all levels of variable t\_dc5 are missing,

There is no data.

Administration of anticoagulants at the time of obtaining Table 2-4 consent, according to the presence or absence of proton-pump inhibitors

FREQ Procedure

Tables: ALL \* DOSECNT

ALL

DOSECNT(Dose per 1time for DOAC only)

Power |

Percent |

Percent of rows

Percentage of columns | 1| 2| Total

|          |        |        |        |  |   |
|----------|--------|--------|--------|--|---|
|          | +      |        | +      |  | + |
| 1        | 19     | 1      | 20     |  |   |
|          | 95.00  | 5.00   | 100.00 |  |   |
|          | 95.00  | 5.00   |        |  |   |
|          | 100.00 | 100.00 |        |  |   |
|          | +      |        | +      |  | + |
| Total 19 | 1      | 20     |        |  |   |
|          | 95.00  | 5.00   | 100.00 |  |   |

Administration of anticoagulants at the time of obtaining Table 2-4 consent, according to the presence or absence of proton-pump inhibitors

FREQ Procedure

Tables: ALL \* DOSECNT

ALL

DOSECNT(Dose per 1time for DOAC only)

Power |

Percent |

Percent of rows

Percentage of columns | 1| 2| Total

|          |        |        |    |  |   |
|----------|--------|--------|----|--|---|
|          | +      |        | +  |  | + |
| 1        | 19     | 1      | 20 |  |   |
| 95.00    | 5.00   | 100.00 |    |  |   |
| 95.00    | 5.00   |        |    |  |   |
| 100.00   | 100.00 |        |    |  |   |
|          | +      |        | +  |  | + |
| Total 19 | 1      | 20     |    |  |   |
| 95.00    | 5.00   | 100.00 |    |  |   |

Administration of anticoagulants at the time of obtaining Table 2-4 consent, according to the presence or absence of proton-pump inhibitors

FREQ Procedure

For ALL \* t\_dc7,

Because all levels of variable t\_dc7 are missing,

There is no data.



Administration of anticoagulants at the time of obtaining Table 2-4 consent, according to the presence or absence of proton-pump inhibitors

FREQ Procedure

|   |       | Cumulative           |                  |        |
|---|-------|----------------------|------------------|--------|
|   |       | Percent of ALL power | Percent of power |        |
| 1 | 20509 | 100.00               | 20509            | 100.00 |

Tables: ALL \* ADYN

ALL

ADYN(Administration of Anticoagulant)

Power |

Percent |

Percent of rows

Percentage of columns | with | total

|             |        |        |   |
|-------------|--------|--------|---|
| _____       | +      | _____  | + |
| 1           | 18751  | 18751  |   |
|             | 100.00 | 100.00 |   |
|             | 100.00 |        |   |
|             | 100.00 |        |   |
| _____       | +      | _____  | + |
| Total 18751 |        | 18751  |   |
|             | 100.00 | 100.00 |   |

Degree of missing values = 1758

Administration of anticoagulants at the time of obtaining Table 2-4 consent, according to the presence or absence of proton-pump inhibitors

FREQ Procedure

Table 1 : ADYN \* ACTYP

Stratification variable : ALL=1

ADYN(Administration of Anticoagulant) ACTYP(Type of AF)

Power |

Percent |

Percent of rows

Percent of column | Warfa| Dabigat| Riverro| Apixa| Edoxa| Parenteral Anti| Edoxa| Total

|phosphate|run|xaban|ban|ban|coagulant|ban (OD)|

|||||)|

\_\_\_\_\_+\_\_\_\_\_+\_\_\_\_\_+\_\_\_\_\_+\_\_\_\_\_+\_\_\_\_\_+\_\_\_\_\_+\_\_\_\_\_

\_+

Present | 5340 | 1433 | 4048 | 4865 | 3034 | 11 | 20 | 18751

| 28.48 | 7.64 | 21.59 | 25.95 | 16.18 | 0.06 | 0.11 | 100.00

| 28.48 | 7.64 | 21.59 | 25.95 | 16.18 | 0.06 | 0.11 |

| 100.00 | 100.00 | 100.00 | 100.00 | 100.00 | 100.00 | 100.00 |

\_\_\_\_\_+\_\_\_\_\_+\_\_\_\_\_+\_\_\_\_\_+\_\_\_\_\_+\_\_\_\_\_+\_\_\_\_\_+\_\_\_\_\_

\_+

Total 5340 1433 4048 4865 3034 11 20 18751

28.48 7.64 21.59 25.95 16.18 0.06 0.11 100.00

Degree of missing values = 1758

Table 1 : ADYN \* ACTYP

Stratification variable : ALL=1

ADYN(Administration of Anticoagulant) ACTYP(Type of AF)

Power |

Percent |

Percent of rows

Percent of column | Warfa| Dabigat| Riverro| Apixa| Edoxa| Parenteral Anti| Edoxa| Total

|phosphate|run|xaban|ban|ban|coagulant|ban (OD)|

|||||D|

\_\_\_\_\_+\_\_\_\_\_+\_\_\_\_\_+\_\_\_\_\_+\_\_\_\_\_+\_\_\_\_\_+\_\_\_\_\_+\_\_\_\_\_+\_\_\_\_\_

\_  
\_+

Present | 5340 | 1433 | 4048 | 4865 | 3034 | 11 | 20 | 18751

| 28.48 | 7.64 | 21.59 | 25.95 | 16.18 | 0.06 | 0.11 | 100.00

| 28.48 | 7.64 | 21.59 | 25.95 | 16.18 | 0.06 | 0.11 |

| 100.00 | 100.00 | 100.00 | 100.00 | 100.00 | 100.00 | 100.00 |

\_\_\_\_\_+\_\_\_\_\_+\_\_\_\_\_+\_\_\_\_\_+\_\_\_\_\_+\_\_\_\_\_+\_\_\_\_\_+\_\_\_\_\_+\_\_\_\_\_

\_  
\_+

Total 5340 1433 4048 4865 3034 11 20 18751

28.48 7.64 21.59 25.95 16.18 0.06 0.11 100.00

Degree of missing values = 1758

Administration of anticoagulants at the time of obtaining Table 2-4 consent, according to the presence or absence of proton-pump inhibitors

FREQ Procedure

Table 1 : ADYN \* ACTYP

Stratification variable : ALL=1

ADYN(Administration of Anticoagulant) ACTYP(Type of AF)

Power |

Percent |

Percent of rows

Percent of column | Warfa| Dabigat| Riverro| Apixa| Edoxa| Parenteral Anti| Edoxa| Total

|phosphate|run|xaban|ban|ban|coagulant|ban (OD)|

|||||)|

\_\_\_\_\_+\_\_\_\_\_+\_\_\_\_\_+\_\_\_\_\_+\_\_\_\_\_+\_\_\_\_\_+\_\_\_\_\_+\_\_\_\_\_

\_+

Present | 5340 | 1433 | 4048 | 4865 | 3034 | 11 | 20 | 18751

| 28.48 | 7.64 | 21.59 | 25.95 | 16.18 | 0.06 | 0.11 | 100.00

| 28.48 | 7.64 | 21.59 | 25.95 | 16.18 | 0.06 | 0.11 |

| 100.00 | 100.00 | 100.00 | 100.00 | 100.00 | 100.00 | 100.00 |

\_\_\_\_\_+\_\_\_\_\_+\_\_\_\_\_+\_\_\_\_\_+\_\_\_\_\_+\_\_\_\_\_+\_\_\_\_\_+\_\_\_\_\_

\_+

Total 5340 1433 4048 4865 3034 11 20 18751

28.48 7.64 21.59 25.95 16.18 0.06 0.11 100.00

Degree of missing values = 1758

Table 1 : ADYN \* ACTYP

Stratification variable : ALL=1

ADYN(Administration of Anticoagulant) ACTYP(Type of AF)

Power |

Percent |

Percent of rows

Percent of column | Warfa| Dabigat| Riverro| Apixa| Edoxa| Parenteral Anti| Edoxa| Total

|phosphate|run|xaban|ban|ban|coagulant|ban (OD)|

|||||D|

\_\_\_\_\_+\_\_\_\_\_+\_\_\_\_\_+\_\_\_\_\_+\_\_\_\_\_+\_\_\_\_\_+\_\_\_\_\_+\_\_\_\_\_+\_\_\_\_\_

\_  
\_+

Present | 5340 | 1433 | 4048 | 4865 | 3034 | 11 | 20 | 18751

| 28.48 | 7.64 | 21.59 | 25.95 | 16.18 | 0.06 | 0.11 | 100.00

| 28.48 | 7.64 | 21.59 | 25.95 | 16.18 | 0.06 | 0.11 |

| 100.00 | 100.00 | 100.00 | 100.00 | 100.00 | 100.00 | 100.00 |

\_\_\_\_\_+\_\_\_\_\_+\_\_\_\_\_+\_\_\_\_\_+\_\_\_\_\_+\_\_\_\_\_+\_\_\_\_\_+\_\_\_\_\_+\_\_\_\_\_

\_  
\_+

Total 5340 1433 4048 4865 3034 11 20 18751

28.48 7.64 21.59 25.95 16.18 0.06 0.11 100.00

Degree of missing values = 1758

Administration of anticoagulants at the time of obtaining Table 2-4 consent, according to the presence or absence of proton-pump inhibitors

FREQ Procedure

Table 1 : ADYN \* ACTYP

Stratification variable : ALL=1

ADYN(Administration of Anticoagulant) ACTYP(Type of AF)

Power |

Percent |

Percent of rows

Percent of column | Warfa| Dabigat| Riverro| Apixa| Edoxa| Parenteral Anti| Edoxa| Total

|phosphate|run|xaban|ban|ban|coagulant|ban (OD)|

|||||)|

\_\_\_\_\_+\_\_\_\_\_+\_\_\_\_\_+\_\_\_\_\_+\_\_\_\_\_+\_\_\_\_\_+\_\_\_\_\_+\_\_\_\_\_

\_+

Present | 5340 | 1433 | 4048 | 4865 | 3034 | 11 | 20 | 18751

| 28.48 | 7.64 | 21.59 | 25.95 | 16.18 | 0.06 | 0.11 | 100.00

| 28.48 | 7.64 | 21.59 | 25.95 | 16.18 | 0.06 | 0.11 |

| 100.00 | 100.00 | 100.00 | 100.00 | 100.00 | 100.00 | 100.00 |

\_\_\_\_\_+\_\_\_\_\_+\_\_\_\_\_+\_\_\_\_\_+\_\_\_\_\_+\_\_\_\_\_+\_\_\_\_\_+\_\_\_\_\_

\_+

Total 5340 1433 4048 4865 3034 11 20 18751

28.48 7.64 21.59 25.95 16.18 0.06 0.11 100.00

Degree of missing values = 1758

Table 1 : ADYN \* ACTYP

Stratification variable : ALL=1

ADYN(Administration of Anticoagulant) ACTYP(Type of AF)

Power |

Percent |

Percent of rows

Percent of column | Warfa| Dabigat| Riverro| Apixa| Edoxa| Parenteral Anti| Edoxa| Total

|phosphate|run|xaban|ban|ban|coagulant|ban (OD)|

|||||D|

\_\_\_\_\_+\_\_\_\_\_+\_\_\_\_\_+\_\_\_\_\_+\_\_\_\_\_+\_\_\_\_\_+\_\_\_\_\_+\_\_\_\_\_+\_\_\_\_\_

\_  
\_+

Present | 5340 | 1433 | 4048 | 4865 | 3034 | 11 | 20 | 18751

| 28.48 | 7.64 | 21.59 | 25.95 | 16.18 | 0.06 | 0.11 | 100.00

| 28.48 | 7.64 | 21.59 | 25.95 | 16.18 | 0.06 | 0.11 |

| 100.00 | 100.00 | 100.00 | 100.00 | 100.00 | 100.00 | 100.00 |

\_\_\_\_\_+\_\_\_\_\_+\_\_\_\_\_+\_\_\_\_\_+\_\_\_\_\_+\_\_\_\_\_+\_\_\_\_\_+\_\_\_\_\_+\_\_\_\_\_

\_  
\_+

Total 5340 1433 4048 4865 3034 11 20 18751

28.48 7.64 21.59 25.95 16.18 0.06 0.11 100.00

Degree of missing values = 1758

Administration of anticoagulants at the time of obtaining Table 2-4 consent, according to the presence or absence of proton-pump inhibitors

FREQ Procedure

Table 1 : ADYN \* ACTYP

Stratification variable : ALL=1

ADYN(Administration of Anticoagulant) ACTYP(Type of AF)

Power |

Percent |

Percent of rows

Percent of column | Warfa| Dabigat| Riverro| Apixa| Edoxa| Parenteral Anti| Edoxa| Total

|phosphate|run|xaban|ban|ban|coagulant|ban (OD)|

|||||)|

\_\_\_\_\_+\_\_\_\_\_+\_\_\_\_\_+\_\_\_\_\_+\_\_\_\_\_+\_\_\_\_\_+\_\_\_\_\_+\_\_\_\_\_

\_+

Present | 5340 | 1433 | 4048 | 4865 | 3034 | 11 | 20 | 18751

| 28.48 | 7.64 | 21.59 | 25.95 | 16.18 | 0.06 | 0.11 | 100.00

| 28.48 | 7.64 | 21.59 | 25.95 | 16.18 | 0.06 | 0.11 |

| 100.00 | 100.00 | 100.00 | 100.00 | 100.00 | 100.00 | 100.00 |

\_\_\_\_\_+\_\_\_\_\_+\_\_\_\_\_+\_\_\_\_\_+\_\_\_\_\_+\_\_\_\_\_+\_\_\_\_\_+\_\_\_\_\_

\_+

Total 5340 1433 4048 4865 3034 11 20 18751

28.48 7.64 21.59 25.95 16.18 0.06 0.11 100.00

Degree of missing values = 1758

Table 1 : ADYN \* t\_ACT0

Stratification variable : ALL=1

ADYN(Administration of Anticoagulant)

t\_ACT0



|                                     |        |        |        |
|-------------------------------------|--------|--------|--------|
| Power                               |        |        |        |
| Percent                             |        |        |        |
| Percent of rows                     |        |        |        |
| Percentage of columns   0   1   Sum |        |        |        |
| _____ + _____ + _____ +             |        |        |        |
| Present   15697   3054   18751      |        |        |        |
|                                     | 83.71  | 16.29  | 100.00 |
|                                     | 83.71  | 16.29  |        |
|                                     | 100.00 | 100.00 |        |
| _____ + _____ + _____ +             |        |        |        |
| Total 15697 3054 18751              |        |        |        |
|                                     | 83.71  | 16.29  | 100.00 |

Degree of missing values = 1758

Administration of anticoagulants at the time of obtaining Table 2-4 consent, according to the presence or absence of proton-pump inhibitors

FREQ Procedure

Table: ALL \* t\_ADYN

ALL t\_ADYN

Power |

Percent |

Percent of rows

Percentage of columns | 0| 1| Sum

|       | 0      | 1      | Sum    |
|-------|--------|--------|--------|
| 1     | 1758   | 18751  | 20509  |
|       | 8.57   | 91.43  | 100.00 |
|       | 8.57   | 91.43  |        |
|       | 100.00 | 100.00 |        |
| Total | 1758   | 18751  | 20509  |
|       | 8.57   | 91.43  | 100.00 |

Administration of anticoagulants at the time of obtaining Table 2-4 consent, according to the presence or absence of proton-pump inhibitors

FREQ Procedure

|                      |       | Cumulative       |       |        |
|----------------------|-------|------------------|-------|--------|
| Percent of ALL power |       | Percent of power |       |        |
| 1                    | 20509 | 100.00           | 20509 | 100.00 |

Tables: ALL \* ADYN

ALL

ADYN(Administration of Anticoagulant)

| Power                                |           |        |
|--------------------------------------|-----------|--------|
| Percent                              |           |        |
| Percent of rows                      |           |        |
| Percentage of columns   with   total |           |        |
|                                      | + _____ + |        |
| 1                                    | 18751     | 18751  |
|                                      | 100.00    | 100.00 |
|                                      | 100.00    |        |
|                                      | 100.00    |        |
|                                      | + _____ + |        |
| Total                                | 18751     | 18751  |
|                                      | 100.00    | 100.00 |

Degree of missing values = 1758

Administration of anticoagulants at the time of obtaining Table 2-4 consent, according to the presence or absence of proton-pump inhibitors

FREQ Procedure

Table 1 : ADYN \* ACTYP

Stratification variable : ALL=1

ADYN(Administration of Anticoagulant) ACTYP(Type of AF)

Power |

Percent |

Percent of rows

Percent of column | Warfa| Dabigat| Riverro| Apixa| Edoxa| Parenteral Anti| Edoxa| Total

|phosphate|run|xaban|ban|ban|coagulant|ban (OD)|

|||||)|

\_\_\_\_\_+\_\_\_\_\_+\_\_\_\_\_+\_\_\_\_\_+\_\_\_\_\_+\_\_\_\_\_+\_\_\_\_\_+\_\_\_\_\_

\_+

Present | 5340 | 1433 | 4048 | 4865 | 3034 | 11 | 20 | 18751

| 28.48 | 7.64 | 21.59 | 25.95 | 16.18 | 0.06 | 0.11 | 100.00

| 28.48 | 7.64 | 21.59 | 25.95 | 16.18 | 0.06 | 0.11 |

| 100.00 | 100.00 | 100.00 | 100.00 | 100.00 | 100.00 | 100.00 |

\_\_\_\_\_+\_\_\_\_\_+\_\_\_\_\_+\_\_\_\_\_+\_\_\_\_\_+\_\_\_\_\_+\_\_\_\_\_+\_\_\_\_\_

\_+

Total 5340 1433 4048 4865 3034 11 20 18751

28.48 7.64 21.59 25.95 16.18 0.06 0.11 100.00

Degree of missing values = 1758

Table 1 : ADYN \* ACTYP

Stratification variable : ALL=1

ADYN(Administration of Anticoagulant) ACTYP(Type of AF)

Power |

Percent |

Percent of rows

Percent of column | Warfa| Dabigat| Riverro| Apixa| Edoxa| Parenteral Anti| Edoxa| Total

|phosphate|run|xaban|ban|ban|coagulant|ban (OD)|

|||||D|

\_\_\_\_\_+\_\_\_\_\_+\_\_\_\_\_+\_\_\_\_\_+\_\_\_\_\_+\_\_\_\_\_+\_\_\_\_\_+\_\_\_\_\_+\_\_\_\_\_

\_  
\_+

Present | 5340 | 1433 | 4048 | 4865 | 3034 | 11 | 20 | 18751

| 28.48 | 7.64 | 21.59 | 25.95 | 16.18 | 0.06 | 0.11 | 100.00

| 28.48 | 7.64 | 21.59 | 25.95 | 16.18 | 0.06 | 0.11 |

| 100.00 | 100.00 | 100.00 | 100.00 | 100.00 | 100.00 | 100.00 |

\_\_\_\_\_+\_\_\_\_\_+\_\_\_\_\_+\_\_\_\_\_+\_\_\_\_\_+\_\_\_\_\_+\_\_\_\_\_+\_\_\_\_\_+\_\_\_\_\_

\_  
\_+

Total 5340 1433 4048 4865 3034 11 20 18751

28.48 7.64 21.59 25.95 16.18 0.06 0.11 100.00

Degree of missing values = 1758

Administration of anticoagulants at the time of obtaining Table 2-4 consent, according to the presence or absence of proton-pump inhibitors

FREQ Procedure

Table 1 : ADYN \* ACTYP

Stratification variable : ALL=1

ADYN(Administration of Anticoagulant) ACTYP(Type of AF)

Power |

Percent |

Percent of rows

Percent of column | Warfa| Dabigat| Riverro| Apixa| Edoxa| Parenteral Anti| Edoxa| Total

|phosphate|run|xaban|ban|ban|coagulant|ban (OD)|

|||||)|

\_\_\_\_\_+\_\_\_\_\_+\_\_\_\_\_+\_\_\_\_\_+\_\_\_\_\_+\_\_\_\_\_+\_\_\_\_\_+\_\_\_\_\_

\_+

Present | 5340 | 1433 | 4048 | 4865 | 3034 | 11 | 20 | 18751

| 28.48 | 7.64 | 21.59 | 25.95 | 16.18 | 0.06 | 0.11 | 100.00

| 28.48 | 7.64 | 21.59 | 25.95 | 16.18 | 0.06 | 0.11 |

| 100.00 | 100.00 | 100.00 | 100.00 | 100.00 | 100.00 | 100.00 |

\_\_\_\_\_+\_\_\_\_\_+\_\_\_\_\_+\_\_\_\_\_+\_\_\_\_\_+\_\_\_\_\_+\_\_\_\_\_+\_\_\_\_\_

\_+

Total 5340 1433 4048 4865 3034 11 20 18751

28.48 7.64 21.59 25.95 16.18 0.06 0.11 100.00

Degree of missing values = 1758

Table 1 : ADYN \* ACTYP

Stratification variable : ALL=1

ADYN(Administration of Anticoagulant) ACTYP(Type of AF)

Power |

Percent |

Percent of rows

Percent of column | Warfa| Dabigat| Riverro| Apixa| Edoxa| Parenteral Anti| Edoxa| Total

|phosphate|run|xaban|ban|ban|coagulant|ban (OD)|

|||||D|

\_\_\_\_\_+\_\_\_\_\_+\_\_\_\_\_+\_\_\_\_\_+\_\_\_\_\_+\_\_\_\_\_+\_\_\_\_\_+\_\_\_\_\_+\_\_\_\_\_

\_  
\_+

Present | 5340 | 1433 | 4048 | 4865 | 3034 | 11 | 20 | 18751

| 28.48 | 7.64 | 21.59 | 25.95 | 16.18 | 0.06 | 0.11 | 100.00

| 28.48 | 7.64 | 21.59 | 25.95 | 16.18 | 0.06 | 0.11 |

| 100.00 | 100.00 | 100.00 | 100.00 | 100.00 | 100.00 | 100.00 |

\_\_\_\_\_+\_\_\_\_\_+\_\_\_\_\_+\_\_\_\_\_+\_\_\_\_\_+\_\_\_\_\_+\_\_\_\_\_+\_\_\_\_\_+\_\_\_\_\_

\_  
\_+

Total 5340 1433 4048 4865 3034 11 20 18751

28.48 7.64 21.59 25.95 16.18 0.06 0.11 100.00

Degree of missing values = 1758

Administration of anticoagulants at the time of obtaining Table 2-4 consent, according to the presence or absence of proton-pump inhibitors

FREQ Procedure

Table 1 : ADYN \* ACTYP

Stratification variable : ALL=1

ADYN(Administration of Anticoagulant) ACTYP(Type of AF)

Power |

Percent |

Percent of rows

Percent of column | Warfa| Dabigat| Riverro| Apixa| Edoxa| Parenteral Anti| Edoxa| Total

|phosphate|run|xaban|ban|ban|coagulant|ban (OD)|

|||||)|

\_\_\_\_\_+\_\_\_\_\_+\_\_\_\_\_+\_\_\_\_\_+\_\_\_\_\_+\_\_\_\_\_+\_\_\_\_\_+\_\_\_\_\_

\_+

Present | 5340 | 1433 | 4048 | 4865 | 3034 | 11 | 20 | 18751

| 28.48 | 7.64 | 21.59 | 25.95 | 16.18 | 0.06 | 0.11 | 100.00

| 28.48 | 7.64 | 21.59 | 25.95 | 16.18 | 0.06 | 0.11 |

| 100.00 | 100.00 | 100.00 | 100.00 | 100.00 | 100.00 | 100.00 |

\_\_\_\_\_+\_\_\_\_\_+\_\_\_\_\_+\_\_\_\_\_+\_\_\_\_\_+\_\_\_\_\_+\_\_\_\_\_+\_\_\_\_\_

\_+

Total 5340 1433 4048 4865 3034 11 20 18751

28.48 7.64 21.59 25.95 16.18 0.06 0.11 100.00

Degree of missing values = 1758

Table 1 : ADYN \* ACTYP

Stratification variable : ALL=1

ADYN(Administration of Anticoagulant) ACTYP(Type of AF)

Power |



Percent |

Percent of rows

Percent of column | Warfa| Dabigat| Riverro| Apixa| Edoxa| Parenteral Anti| Edoxa| Total

|phosphate|run|xaban|ban|ban|coagulant|ban (OD)|

|||||D|

\_\_\_\_\_+\_\_\_\_\_+\_\_\_\_\_+\_\_\_\_\_+\_\_\_\_\_+\_\_\_\_\_+\_\_\_\_\_+\_\_\_\_\_+\_\_\_\_\_

\_  
\_+

Present | 5340 | 1433 | 4048 | 4865 | 3034 | 11 | 20 | 18751

| 28.48 | 7.64 | 21.59 | 25.95 | 16.18 | 0.06 | 0.11 | 100.00

| 28.48 | 7.64 | 21.59 | 25.95 | 16.18 | 0.06 | 0.11 |

| 100.00 | 100.00 | 100.00 | 100.00 | 100.00 | 100.00 | 100.00 |

\_\_\_\_\_+\_\_\_\_\_+\_\_\_\_\_+\_\_\_\_\_+\_\_\_\_\_+\_\_\_\_\_+\_\_\_\_\_+\_\_\_\_\_+\_\_\_\_\_

\_  
\_+

Total 5340 1433 4048 4865 3034 11 20 18751

28.48 7.64 21.59 25.95 16.18 0.06 0.11 100.00

Degree of missing values = 1758

Administration of anticoagulants at the time of obtaining Table 2-4 consent, according to the presence or absence of proton-pump inhibitors

FREQ Procedure

Table 1 : ADYN \* ACTYP

Stratification variable : ALL=1

ADYN(Administration of Anticoagulant) ACTYP(Type of AF)

Power |

Percent |

Percent of rows

Percent of column | Warfa| Dabigat| Riverro| Apixa| Edoxa| Parenteral Anti| Edoxa| Total

|phosphate|run|xaban|ban|ban|coagulant|ban (OD)|

|||||)|

\_\_\_\_\_+\_\_\_\_\_+\_\_\_\_\_+\_\_\_\_\_+\_\_\_\_\_+\_\_\_\_\_+\_\_\_\_\_+\_\_\_\_\_

\_+

Present | 5340 | 1433 | 4048 | 4865 | 3034 | 11 | 20 | 18751

| 28.48 | 7.64 | 21.59 | 25.95 | 16.18 | 0.06 | 0.11 | 100.00

| 28.48 | 7.64 | 21.59 | 25.95 | 16.18 | 0.06 | 0.11 |

| 100.00 | 100.00 | 100.00 | 100.00 | 100.00 | 100.00 | 100.00 |

\_\_\_\_\_+\_\_\_\_\_+\_\_\_\_\_+\_\_\_\_\_+\_\_\_\_\_+\_\_\_\_\_+\_\_\_\_\_+\_\_\_\_\_

\_+

Total 5340 1433 4048 4865 3034 11 20 18751

28.48 7.64 21.59 25.95 16.18 0.06 0.11 100.00

Degree of missing values = 1758

Table 1 : ADYN \* t\_ACT0

Stratification variable : ALL=1

ADYN(Administration of Anticoagulant)

t\_ACT0

|                                     |        |        |        |
|-------------------------------------|--------|--------|--------|
| Power                               |        |        |        |
| Percent                             |        |        |        |
| Percent of rows                     |        |        |        |
| Percentage of columns   0   1   Sum |        |        |        |
| _____ + _____ + _____ +             |        |        |        |
| Present   15697   3054   18751      |        |        |        |
|                                     | 83.71  | 16.29  | 100.00 |
|                                     | 83.71  | 16.29  |        |
|                                     | 100.00 | 100.00 |        |
| _____ + _____ + _____ +             |        |        |        |
| Total 15697 3054 18751              |        |        |        |
|                                     | 83.71  | 16.29  | 100.00 |

Degree of missing values = 1758

Administration of anticoagulants at the time of obtaining Table 2-4 consent, according to the presence or absence of proton-pump inhibitors

FREQ Procedure

Table: ALL \* t\_ADYN

ALL t\_ADYN

Power |

Percent |

Percent of rows

Percentage of columns | 0| 1| Sum

|       | 0      | 1      | Sum    |
|-------|--------|--------|--------|
| 1     | 1758   | 18751  | 20509  |
|       | 8.57   | 91.43  | 100.00 |
|       | 8.57   | 91.43  |        |
|       | 100.00 | 100.00 |        |
| Total | 1758   | 18751  | 20509  |
|       | 8.57   | 91.43  | 100.00 |

Administration of anticoagulants at the time of obtaining Table 2-4 consent, according to the presence or absence of proton-pump inhibitors

FREQ Procedure

Tables: ALL\* ACTYP

ALL ACTYP(Type of AF)

Power |

Percent |

Percent of rows

Percent of column | Warfa| Dabigat| Riverro| Apixa| Edoxa| Parenteral Anti| Edoxa| Total

|phosphate|run|xaban|ban|ban|coagulant|ban (OD)|

|||||)|

\_\_\_\_\_+\_\_\_\_\_+\_\_\_\_\_+\_\_\_\_\_+\_\_\_\_\_+\_\_\_\_\_+\_\_\_\_\_+\_\_\_\_\_+

\_  
\_+

|   |        |        |        |        |        |        |        |        |
|---|--------|--------|--------|--------|--------|--------|--------|--------|
| 1 | 5340   | 1433   | 4048   | 4865   | 3034   | 11     | 20     | 18751  |
|   | 28.48  | 7.64   | 21.59  | 25.95  | 16.18  | 0.06   | 0.11   | 100.00 |
|   | 28.48  | 7.64   | 21.59  | 25.95  | 16.18  | 0.06   | 0.11   |        |
|   | 100.00 | 100.00 | 100.00 | 100.00 | 100.00 | 100.00 | 100.00 |        |

\_\_\_\_\_+\_\_\_\_\_+\_\_\_\_\_+\_\_\_\_\_+\_\_\_\_\_+\_\_\_\_\_+\_\_\_\_\_+\_\_\_\_\_+

\_  
\_+

Total 5340 1433 4048 4865 3034 11 20 18751

28.48 7.64 21.59 25.95 16.18 0.06 0.11 100.00

Administration of anticoagulants at the time of obtaining Table 2-4 consent, according to the presence or absence of proton-pump inhibitors

FREQ Procedure

Table : ALL \* n\_ACT1

ALL n\_ACT1

Power |

Percent |

Percent of rows

Percent of columns | 1 | Total

|        |        |        |  |
|--------|--------|--------|--|
| _____+ |        | _____+ |  |
| 1      | 13411  | 13411  |  |
|        | 100.00 | 100.00 |  |
|        | 100.00 |        |  |
|        | 100.00 |        |  |
| _____+ |        | _____+ |  |
| Total  | 13411  | 13411  |  |
|        | 100.00 | 100.00 |  |

Frequency of missing values = 5340

Administration of anticoagulants at the time of obtaining Table 2-4 consent, according to the presence or absence of proton-pump inhibitors

FREQ Procedure

Tables: ALL\* ACTYP

ALL ACTYP(Type of AF)

Power |

Percent |

Percent of rows

Percent of column | Warfa| Dabigat| Riverro| Apixa| Edoxa| Parenteral Anti| Edoxa| Total

|phosphate|run|xaban|ban|ban|coagulant|ban (OD)|

|||||)|

\_\_\_\_\_+\_\_\_\_\_+\_\_\_\_\_+\_\_\_\_\_+\_\_\_\_\_+\_\_\_\_\_+\_\_\_\_\_+\_\_\_\_\_+

\_\_+

|   |        |        |        |        |        |        |        |        |
|---|--------|--------|--------|--------|--------|--------|--------|--------|
| 1 | 5340   | 1433   | 4048   | 4865   | 3034   | 11     | 20     | 18751  |
|   | 28.48  | 7.64   | 21.59  | 25.95  | 16.18  | 0.06   | 0.11   | 100.00 |
|   | 28.48  | 7.64   | 21.59  | 25.95  | 16.18  | 0.06   | 0.11   |        |
|   | 100.00 | 100.00 | 100.00 | 100.00 | 100.00 | 100.00 | 100.00 |        |

\_\_\_\_\_+\_\_\_\_\_+\_\_\_\_\_+\_\_\_\_\_+\_\_\_\_\_+\_\_\_\_\_+\_\_\_\_\_+\_\_\_\_\_+

\_\_+

Total 5340 1433 4048 4865 3034 11 20 18751

28.48 7.64 21.59 25.95 16.18 0.06 0.11 100.00

Administration of anticoagulants at the time of obtaining Table 2-4 consent, according to the presence or absence of proton-pump inhibitors

FREQ Procedure

Table : ALL \* n\_ACT2

ALL n\_ACT2

Power |

Percent |

Percent of rows

Percent of columns | 1 | Total

|        |        |        |  |
|--------|--------|--------|--|
| _____+ |        | _____+ |  |
| 1      | 17318  | 17318  |  |
|        | 100.00 | 100.00 |  |
|        | 100.00 |        |  |
|        | 100.00 |        |  |
| _____+ |        | _____+ |  |
| Total  | 17318  | 17318  |  |
|        | 100.00 | 100.00 |  |

Degree of missing values = 1433



Administration of anticoagulants at the time of obtaining Table 2-4 consent, according to the presence or absence of proton-pump inhibitors

FREQ Procedure

Tables: ALL\* ACTYP

ALL ACTYP(Type of AF)

Power |

Percent |

Percent of rows

Percent of column | Warfa| Dabigat| Riverro| Apixa| Edoxa| Parenteral Anti| Edoxa| Total

|phosphate|run|xaban|ban|ban|coagulant|ban (OD)|

|||||)|

\_\_\_\_\_+\_\_\_\_\_+\_\_\_\_\_+\_\_\_\_\_+\_\_\_\_\_+\_\_\_\_\_+\_\_\_\_\_+\_\_\_\_\_+

\_\_+

|   |        |        |        |        |        |        |        |        |
|---|--------|--------|--------|--------|--------|--------|--------|--------|
| 1 | 5340   | 1433   | 4048   | 4865   | 3034   | 11     | 20     | 18751  |
|   | 28.48  | 7.64   | 21.59  | 25.95  | 16.18  | 0.06   | 0.11   | 100.00 |
|   | 28.48  | 7.64   | 21.59  | 25.95  | 16.18  | 0.06   | 0.11   |        |
|   | 100.00 | 100.00 | 100.00 | 100.00 | 100.00 | 100.00 | 100.00 |        |

\_\_\_\_\_+\_\_\_\_\_+\_\_\_\_\_+\_\_\_\_\_+\_\_\_\_\_+\_\_\_\_\_+\_\_\_\_\_+\_\_\_\_\_+

\_\_+

Total 5340 1433 4048 4865 3034 11 20 18751

28.48 7.64 21.59 25.95 16.18 0.06 0.11 100.00

Administration of anticoagulants at the time of obtaining Table 2-4 consent, according to the presence or absence of proton-pump inhibitors

FREQ Procedure

Table : ALL \* n\_ACT3

ALL n\_ACT3

Power |

Percent |

Percent of rows

Percent of columns | 1 | Total

|       | 1      | Total  |
|-------|--------|--------|
| 1     | 14703  | 14703  |
|       | 100.00 | 100.00 |
|       | 100.00 |        |
|       | 100.00 |        |
| Total | 14703  | 14703  |
|       | 100.00 | 100.00 |

Degree of missing values = 4048

Administration of anticoagulants at the time of obtaining Table 2-4 consent, according to the presence or absence of proton-pump inhibitors

FREQ Procedure

Tables: ALL\* ACTYP

ALL ACTYP(Type of AF)

Power |

Percent |

Percent of rows

Percent of column | Warfa| Dabigat| Riverro| Apixa| Edoxa| Parenteral Anti| Edoxa| Total

|phosphate|run|xaban|ban|ban|coagulant|ban (OD)|

|||||)|

\_\_\_\_\_+\_\_\_\_\_+\_\_\_\_\_+\_\_\_\_\_+\_\_\_\_\_+\_\_\_\_\_+\_\_\_\_\_+\_\_\_\_\_+

\_  
\_+

|   |        |        |        |        |        |        |        |        |
|---|--------|--------|--------|--------|--------|--------|--------|--------|
| 1 | 5340   | 1433   | 4048   | 4865   | 3034   | 11     | 20     | 18751  |
|   | 28.48  | 7.64   | 21.59  | 25.95  | 16.18  | 0.06   | 0.11   | 100.00 |
|   | 28.48  | 7.64   | 21.59  | 25.95  | 16.18  | 0.06   | 0.11   |        |
|   | 100.00 | 100.00 | 100.00 | 100.00 | 100.00 | 100.00 | 100.00 |        |

\_\_\_\_\_+\_\_\_\_\_+\_\_\_\_\_+\_\_\_\_\_+\_\_\_\_\_+\_\_\_\_\_+\_\_\_\_\_+\_\_\_\_\_+

\_  
\_+

Total 5340 1433 4048 4865 3034 11 20 18751

28.48 7.64 21.59 25.95 16.18 0.06 0.11 100.00

Administration of anticoagulants at the time of obtaining Table 2-4 consent, according to the presence or absence of proton-pump inhibitors

FREQ Procedure

Table : ALL \* n\_ACT4

ALL n\_ACT4

Power |

Percent |

Percent of rows

Percent of columns | 1 | Total

|        |        |        |  |
|--------|--------|--------|--|
| _____+ |        | _____+ |  |
| 1      | 13886  | 13886  |  |
|        | 100.00 | 100.00 |  |
|        | 100.00 |        |  |
|        | 100.00 |        |  |
| _____+ |        | _____+ |  |
| Total  | 13886  | 13886  |  |
|        | 100.00 | 100.00 |  |

Degree of missing values = 4865

Administration of anticoagulants at the time of obtaining Table 2-4 consent, according to the presence or absence of proton-pump inhibitors

FREQ Procedure

Table: ALL \* t\_ACT0

ALL t\_ACT0

Power |

Percent |

Percent of rows

Percentage of columns | 0| 1| Sum

|       | 0      | 1      | Sum    |
|-------|--------|--------|--------|
| 1     | 15697  | 3054   | 18751  |
|       | 83.71  | 16.29  | 100.00 |
|       | 83.71  | 16.29  |        |
|       | 100.00 | 100.00 |        |
| Total | 15697  | 3054   | 18751  |
|       | 83.71  | 16.29  | 100.00 |

Administration of anticoagulants at the time of obtaining Table 2-4 consent, according to the presence or absence of proton-pump inhibitors

FREQ Procedure

Table: ALL \* t\_ACT0

ALL t\_ACT0

Power |

Percent |

Percent of rows

Percentage of columns | 0| 1| Sum

|       | 0      | 1      | Sum    |
|-------|--------|--------|--------|
| 1     | 15697  | 3054   | 18751  |
|       | 83.71  | 16.29  | 100.00 |
|       | 83.71  | 16.29  |        |
|       | 100.00 | 100.00 |        |
| Total | 15697  | 3054   | 18751  |
|       | 83.71  | 16.29  | 100.00 |

Administration of anticoagulants at the time of obtaining Table 2-4 consent, according to the presence or absence of proton-pump inhibitors

FREQ Procedure

Tables: ALL\* ACTYP

ALL ACTYP(Type of AF)

Power |

Percent |

Percent of rows

Percent of column | Warfa| Dabigat| Riverro| Apixa| Edoxa| Parenteral Anti| Edoxa| Total

|phosphate|run|xaban|ban|ban|coagulant|ban (OD)|

|||||)|

\_\_\_\_\_+\_\_\_\_\_+\_\_\_\_\_+\_\_\_\_\_+\_\_\_\_\_+\_\_\_\_\_+\_\_\_\_\_+\_\_\_\_\_+

\_\_+

|   |        |        |        |        |        |        |        |        |
|---|--------|--------|--------|--------|--------|--------|--------|--------|
| 1 | 5340   | 1433   | 4048   | 4865   | 3034   | 11     | 20     | 18751  |
|   | 28.48  | 7.64   | 21.59  | 25.95  | 16.18  | 0.06   | 0.11   | 100.00 |
|   | 28.48  | 7.64   | 21.59  | 25.95  | 16.18  | 0.06   | 0.11   |        |
|   | 100.00 | 100.00 | 100.00 | 100.00 | 100.00 | 100.00 | 100.00 |        |

\_\_\_\_\_+\_\_\_\_\_+\_\_\_\_\_+\_\_\_\_\_+\_\_\_\_\_+\_\_\_\_\_+\_\_\_\_\_+\_\_\_\_\_+

\_\_+

Total 5340 1433 4048 4865 3034 11 20 18751

28.48 7.64 21.59 25.95 16.18 0.06 0.11 100.00

Administration of anticoagulants at the time of obtaining Table 2-4 consent, according to the presence or absence of proton-pump inhibitors

FREQ Procedure

Table : ALL \* n\_ACT5

ALL n\_ACT5

Power |

Percent |

Percent of rows

Percent of columns | 1 | Total

|        |        |        |  |
|--------|--------|--------|--|
| _____+ |        | _____+ |  |
| 1      | 15717  | 15717  |  |
|        | 100.00 | 100.00 |  |
|        | 100.00 |        |  |
|        | 100.00 |        |  |
| _____+ |        | _____+ |  |
| Total  | 15717  | 15717  |  |
|        | 100.00 | 100.00 |  |

Degree of missing values = 3034



Administration of anticoagulants at the time of obtaining Table 2-4 consent, according to the presence or absence of proton-pump inhibitors

FREQ Procedure

Tables: ALL\* ACTYP

ALL ACTYP(Type of AF)

Power |

Percent |

Percent of rows

Percent of column | Warfa| Dabigat| Riverro| Apixa| Edoxa| Parenteral Anti| Edoxa| Total

|phosphate|run|xaban|ban|ban|coagulant|ban (OD)|

|||||)|

\_\_\_\_\_+\_\_\_\_\_+\_\_\_\_\_+\_\_\_\_\_+\_\_\_\_\_+\_\_\_\_\_+\_\_\_\_\_+\_\_\_\_\_+

\_\_+

|   |        |        |        |        |        |        |        |        |
|---|--------|--------|--------|--------|--------|--------|--------|--------|
| 1 | 5340   | 1433   | 4048   | 4865   | 3034   | 11     | 20     | 18751  |
|   | 28.48  | 7.64   | 21.59  | 25.95  | 16.18  | 0.06   | 0.11   | 100.00 |
|   | 28.48  | 7.64   | 21.59  | 25.95  | 16.18  | 0.06   | 0.11   |        |
|   | 100.00 | 100.00 | 100.00 | 100.00 | 100.00 | 100.00 | 100.00 |        |

\_\_\_\_\_+\_\_\_\_\_+\_\_\_\_\_+\_\_\_\_\_+\_\_\_\_\_+\_\_\_\_\_+\_\_\_\_\_+\_\_\_\_\_+

\_\_+

Total 5340 1433 4048 4865 3034 11 20 18751

28.48 7.64 21.59 25.95 16.18 0.06 0.11 100.00

Administration of anticoagulants at the time of obtaining Table 2-4 consent, according to the presence or absence of proton-pump inhibitors

FREQ Procedure

Table : ALL \* n\_ACT7

ALL n\_ACT7

Power |

Percent |

Percent of rows

Percent of columns | 1 | Total

|       |        |        |
|-------|--------|--------|
|       | +      | +      |
| 1     | 18731  | 18731  |
|       | 100.00 | 100.00 |
|       | 100.00 |        |
|       | 100.00 |        |
|       | +      | +      |
| Total | 18731  | 18731  |
|       | 100.00 | 100.00 |

Degree of missing values = 20

Administration of anticoagulants at the time of obtaining Table 2-4 consent, according to the presence or absence of proton-pump inhibitors

FREQ Procedure

Tables: ALL\* ACTYP

ALL ACTYP(Type of AF)

Power |

Percent |

Percent of rows

Percent of column | Warfa| Dabigat| Riverro| Apixa| Edoxa| Parenteral Anti| Edoxa| Total

|phosphate|run|xaban|ban|ban|coagulant|ban (OD)|

|||||)|

\_\_\_\_\_+\_\_\_\_\_+\_\_\_\_\_+\_\_\_\_\_+\_\_\_\_\_+\_\_\_\_\_+\_\_\_\_\_+\_\_\_\_\_+

\_\_+

|   |        |        |        |        |        |        |        |        |
|---|--------|--------|--------|--------|--------|--------|--------|--------|
| 1 | 5340   | 1433   | 4048   | 4865   | 3034   | 11     | 20     | 18751  |
|   | 28.48  | 7.64   | 21.59  | 25.95  | 16.18  | 0.06   | 0.11   | 100.00 |
|   | 28.48  | 7.64   | 21.59  | 25.95  | 16.18  | 0.06   | 0.11   |        |
|   | 100.00 | 100.00 | 100.00 | 100.00 | 100.00 | 100.00 | 100.00 |        |

\_\_\_\_\_+\_\_\_\_\_+\_\_\_\_\_+\_\_\_\_\_+\_\_\_\_\_+\_\_\_\_\_+\_\_\_\_\_+\_\_\_\_\_+

\_\_+

Total 5340 1433 4048 4865 3034 11 20 18751

28.48 7.64 21.59 25.95 16.18 0.06 0.11 100.00

Administration of anticoagulants at the time of obtaining Table 2-4 consent, according to the presence or absence of proton-pump inhibitors

FREQ Procedure

Table : ALL \* n\_ACT6

ALL n\_ACT6

Power |

Percent |

Percent of rows

Percent of columns | 1 | Total

|       |        |        |   |
|-------|--------|--------|---|
|       | +      |        | + |
| 1     | 18740  | 18740  |   |
|       | 100.00 | 100.00 |   |
|       | 100.00 |        |   |
|       | 100.00 |        |   |
|       | +      |        | + |
| Total | 18740  | 18740  |   |
|       | 100.00 | 100.00 |   |

Degree of missing values = 11

Administration of anticoagulants at the time of obtaining Table 2-4 consent, according to the presence or absence of proton-pump inhibitors

FREQ Procedure

Table : ALL \* t\_ACT1

ALL t\_ACT1

Power |

Percent |

Percent of rows

Percentage of columns | 0| 1| Sum

|       | 0      | 1      | Sum    |
|-------|--------|--------|--------|
| 1     | 11     | 18740  | 18751  |
|       | 0.06   | 99.94  | 100.00 |
|       | 0.06   | 99.94  |        |
|       | 100.00 | 100.00 |        |
| Total | 11     | 18740  | 18751  |
|       | 0.06   | 99.94  | 100.00 |

Administration of anticoagulants at the time of obtaining Table 2-4 consent, according to the presence or absence of proton-pump inhibitors

FREQ Procedure

Table : ALL \* t\_ACT1

ALL t\_ACT1

Power |

Percent |

Percent of rows

Percentage of columns | 0| 1| Sum

|       | 0      | 1      | Sum    |
|-------|--------|--------|--------|
| 1     | 11     | 18740  | 18751  |
|       | 0.06   | 99.94  | 100.00 |
|       | 0.06   | 99.94  |        |
|       | 100.00 | 100.00 |        |
| Total | 11     | 18740  | 18751  |
|       | 0.06   | 99.94  | 100.00 |

Administration of anticoagulants at the time of obtaining Table 2-4 consent, according to the presence or absence of proton-pump inhibitors

FREQ Procedure

Table : ALL \* t\_ACT2

ALL t\_ACT2

Power |

Percent |

Percent of rows

Percentage of columns | 0| 1| Sum

|       | 0      | 1      | Sum    |
|-------|--------|--------|--------|
| 1     | 5351   | 13400  | 18751  |
|       | 28.54  | 71.46  | 100.00 |
|       | 28.54  | 71.46  |        |
|       | 100.00 | 100.00 |        |
| Total | 5351   | 13400  | 18751  |
|       | 28.54  | 71.46  | 100.00 |

Administration of anticoagulants at the time of obtaining Table 2-4 consent, according to the presence or absence of proton-pump inhibitors

FREQ Procedure

Table : ALL \* t\_ACT2

ALL t\_ACT2

Power |

Percent |

Percent of rows

Percentage of columns | 0| 1| Sum

|       | 0      | 1      | Sum    |
|-------|--------|--------|--------|
| 1     | 5351   | 13400  | 18751  |
|       | 28.54  | 71.46  | 100.00 |
|       | 28.54  | 71.46  |        |
|       | 100.00 | 100.00 |        |
| Total | 5351   | 13400  | 18751  |
|       | 28.54  | 71.46  | 100.00 |



Administration of anticoagulants at the time of obtaining Table 2-4 consent, according to the presence or absence of proton-pump inhibitors

FREQ Procedure

Table : ALL \* t\_ACT3

ALL t\_ACT3

Power |

Percent |

Percent of rows

Percentage of columns | 0| 1| Sum

|       | 0      | 1      | Sum    |
|-------|--------|--------|--------|
| 1     | 6784   | 11967  | 18751  |
|       | 36.18  | 63.82  | 100.00 |
|       | 36.18  | 63.82  |        |
|       | 100.00 | 100.00 |        |
| Total | 6784   | 11967  | 18751  |
|       | 36.18  | 63.82  | 100.00 |

Administration of anticoagulants at the time of obtaining Table 2-4 consent, according to the presence or absence of proton-pump inhibitors

FREQ Procedure

Table : ALL \* t\_ACT3

ALL t\_ACT3

Power |

Percent |

Percent of rows

Percentage of columns | 0| 1| Sum

|       | 0      | 1      | Sum    |
|-------|--------|--------|--------|
| 1     | 6784   | 11967  | 18751  |
|       | 36.18  | 63.82  | 100.00 |
|       | 36.18  | 63.82  |        |
|       | 100.00 | 100.00 |        |
| Total | 6784   | 11967  | 18751  |
|       | 36.18  | 63.82  | 100.00 |

Administration of anticoagulants at the time of obtaining Table 2-4 consent, according to the presence or absence of proton-pump inhibitors

FREQ Procedure

Tables: ALL\* VISITAD

ALL VISITAD(Visit and Drug Administration)

Power |

Percent |

Percent of rows

Percent of column |Month |Month |Month |First dose |Unknown | Total

Within | | |

|       | Month  | Month  | Month  | First dose | Unknown | Total |
|-------|--------|--------|--------|------------|---------|-------|
| 1     | 5258   | 20     | 15     | 47         | 5340    |       |
|       | 98.46  | 0.37   | 0.28   | 0.88       | 100.00  |       |
|       | 98.46  | 0.37   | 0.28   | 0.88       |         |       |
|       | 100.00 | 100.00 | 100.00 | 100.00     |         |       |
| Total | 5258   | 20     | 15     | 47         | 5340    |       |
|       | 98.46  | 0.37   | 0.28   | 0.88       | 100.00  |       |

Administration of anticoagulants at the time of obtaining Table 2-4 consent, according to the presence or absence of proton-pump inhibitors

FREQ Procedure

Tables: ALL\* VISITAD

ALL VISITAD(Visit and Drug Administration)

Power |

Percent |

Percent of rows

Percent of column |Month |Month |Month |First dose |Unknown | Total

Within | | |

|       | +      | +      | +      | +      | +      |
|-------|--------|--------|--------|--------|--------|
| 1     | 5258   | 20     | 15     | 47     | 5340   |
|       | 98.46  | 0.37   | 0.28   | 0.88   | 100.00 |
|       | 98.46  | 0.37   | 0.28   | 0.88   |        |
|       | 100.00 | 100.00 | 100.00 | 100.00 |        |
|       | +      | +      | +      | +      | +      |
| Total | 5258   | 20     | 15     | 47     | 5340   |
|       | 98.46  | 0.37   | 0.28   | 0.88   | 100.00 |

Administration of anticoagulants at the time of obtaining Table 2-4 consent, according to the presence or absence of proton-pump inhibitors

FREQ Procedure

Tables: ALL\* VISITAD

ALL VISITAD(Visit and Drug Administration)

Power |

Percent |

Percent of rows

Percent of column |Month |Month |Month |First dose |Unknown | Total

Within | | |

|       | +      | +      | +      | +      | +      |
|-------|--------|--------|--------|--------|--------|
| 1     | 5258   | 20     | 15     | 47     | 5340   |
|       | 98.46  | 0.37   | 0.28   | 0.88   | 100.00 |
|       | 98.46  | 0.37   | 0.28   | 0.88   |        |
|       | 100.00 | 100.00 | 100.00 | 100.00 |        |
|       | +      | +      | +      | +      | +      |
| Total | 5258   | 20     | 15     | 47     | 5340   |
|       | 98.46  | 0.37   | 0.28   | 0.88   | 100.00 |

Administration of anticoagulants at the time of obtaining Table 2-4 consent, according to the presence or absence of proton-pump inhibitors

FREQ Procedure

Tables: ALL\* VISITAD

ALL VISITAD(Visit and Drug Administration)

Power |

Percent |

Percent of rows

Percent of column |Month |Month |Month |First dose |Unknown | Total

Within | | |

|       | +      | +      | +      | +      | +      |
|-------|--------|--------|--------|--------|--------|
| 1     | 5258   | 20     | 15     | 47     | 5340   |
|       | 98.46  | 0.37   | 0.28   | 0.88   | 100.00 |
|       | 98.46  | 0.37   | 0.28   | 0.88   |        |
|       | 100.00 | 100.00 | 100.00 | 100.00 |        |
|       | +      | +      | +      | +      | +      |
| Total | 5258   | 20     | 15     | 47     | 5340   |
|       | 98.46  | 0.37   | 0.28   | 0.88   | 100.00 |

Administration of anticoagulants at the time of obtaining Table 2-4 consent, according to the presence or absence of proton-pump inhibitors

FREQ Procedure

Tables: ALL\* VISITAD

ALL VISITAD(Visit and Drug Administration)

Power |

Percent |

Percent of rows

Percent of column |Month |Month |Month |First dose |Unknown | Total

Within | | |

|       | Month  | Month  | Month  | First dose | Unknown | Total |
|-------|--------|--------|--------|------------|---------|-------|
| 1     | 1391   | 14     | 10     | 18         | 1433    |       |
|       | 97.07  | 0.98   | 0.70   | 1.26       | 100.00  |       |
|       | 97.07  | 0.98   | 0.70   | 1.26       |         |       |
|       | 100.00 | 100.00 | 100.00 | 100.00     |         |       |
| Total | 1391   | 14     | 10     | 18         | 1433    |       |
|       | 97.07  | 0.98   | 0.70   | 1.26       | 100.00  |       |

Administration of anticoagulants at the time of obtaining Table 2-4 consent, according to the presence or absence of proton-pump inhibitors

FREQ Procedure

Tables: ALL\* VISITAD

ALL VISITAD(Visit and Drug Administration)

Power |

Percent |

Percent of rows

Percent of column |Month |Month |Month |First dose |Unknown | Total

Within | | |

|       | Month  | Month  | Month  | First dose | Unknown | Total |
|-------|--------|--------|--------|------------|---------|-------|
| 1     | 1391   | 14     | 10     | 18         | 1433    |       |
|       | 97.07  | 0.98   | 0.70   | 1.26       | 100.00  |       |
|       | 97.07  | 0.98   | 0.70   | 1.26       |         |       |
|       | 100.00 | 100.00 | 100.00 | 100.00     |         |       |
| Total | 1391   | 14     | 10     | 18         | 1433    |       |
|       | 97.07  | 0.98   | 0.70   | 1.26       | 100.00  |       |



Administration of anticoagulants at the time of obtaining Table 2-4 consent, according to the presence or absence of proton-pump inhibitors

FREQ Procedure

Tables: ALL\* VISITAD

ALL VISITAD(Visit and Drug Administration)

Power |

Percent |

Percent of rows

Percent of column |Month |Month |Month |First dose |Unknown | Total

Within | | |

|       | Month  | Month  | Month  | First dose | Unknown | Total |
|-------|--------|--------|--------|------------|---------|-------|
| 1     | 1391   | 14     | 10     | 18         | 1433    |       |
|       | 97.07  | 0.98   | 0.70   | 1.26       | 100.00  |       |
|       | 97.07  | 0.98   | 0.70   | 1.26       |         |       |
|       | 100.00 | 100.00 | 100.00 | 100.00     |         |       |
| Total | 1391   | 14     | 10     | 18         | 1433    |       |
|       | 97.07  | 0.98   | 0.70   | 1.26       | 100.00  |       |

Administration of anticoagulants at the time of obtaining Table 2-4 consent, according to the presence or absence of proton-pump inhibitors

FREQ Procedure

Tables: ALL\* VISITAD

ALL VISITAD(Visit and Drug Administration)

Power |

Percent |

Percent of rows

Percent of column |Month |Month |Month |First dose |Unknown | Total

Within | | |

|       | Month  | Month  | Month  | First dose | Unknown | Total |
|-------|--------|--------|--------|------------|---------|-------|
| 1     | 1391   | 14     | 10     | 18         | 1433    |       |
|       | 97.07  | 0.98   | 0.70   | 1.26       | 100.00  |       |
|       | 97.07  | 0.98   | 0.70   | 1.26       |         |       |
|       | 100.00 | 100.00 | 100.00 | 100.00     |         |       |
| Total | 1391   | 14     | 10     | 18         | 1433    |       |
|       | 97.07  | 0.98   | 0.70   | 1.26       | 100.00  |       |

Administration of anticoagulants at the time of obtaining Table 2-4 consent, according to the presence or absence of proton-pump inhibitors

FREQ Procedure

Tables: ALL\* VISITAD

ALL VISITAD(Visit and Drug Administration)

Power |

Percent |

Percent of rows

Percent of column |Month |Month |Month |First dose |Unknown | Total

Within | | |

|       | +      | +      | +      | +      | +      |
|-------|--------|--------|--------|--------|--------|
| 1     | 3865   | 71     | 81     | 31     | 4048   |
|       | 95.48  | 1.75   | 2.00   | 0.77   | 100.00 |
|       | 95.48  | 1.75   | 2.00   | 0.77   |        |
|       | 100.00 | 100.00 | 100.00 | 100.00 |        |
|       | +      | +      | +      | +      | +      |
| Total | 3865   | 71     | 81     | 31     | 4048   |
|       | 95.48  | 1.75   | 2.00   | 0.77   | 100.00 |

Administration of anticoagulants at the time of obtaining Table 2-4 consent, according to the presence or absence of proton-pump inhibitors

FREQ Procedure

Tables: ALL\* VISITAD

ALL VISITAD(Visit and Drug Administration)

Power |

Percent |

Percent of rows

Percent of column |Month |Month |Month |First dose |Unknown | Total

Within | | |

|       | +      | +      | +      | +      | +      |
|-------|--------|--------|--------|--------|--------|
| 1     | 3865   | 71     | 81     | 31     | 4048   |
|       | 95.48  | 1.75   | 2.00   | 0.77   | 100.00 |
|       | 95.48  | 1.75   | 2.00   | 0.77   |        |
|       | 100.00 | 100.00 | 100.00 | 100.00 |        |
|       | +      | +      | +      | +      | +      |
| Total | 3865   | 71     | 81     | 31     | 4048   |
|       | 95.48  | 1.75   | 2.00   | 0.77   | 100.00 |

Administration of anticoagulants at the time of obtaining Table 2-4 consent, according to the presence or absence of proton-pump inhibitors

FREQ Procedure

Tables: ALL\* VISITAD

ALL VISITAD(Visit and Drug Administration)

Power |

Percent |

Percent of rows

Percent of column |Month |Month |Month |First dose |Unknown | Total

Within | | |

|       | +      | +      | +      | +      | +      |
|-------|--------|--------|--------|--------|--------|
| 1     | 3865   | 71     | 81     | 31     | 4048   |
|       | 95.48  | 1.75   | 2.00   | 0.77   | 100.00 |
|       | 95.48  | 1.75   | 2.00   | 0.77   |        |
|       | 100.00 | 100.00 | 100.00 | 100.00 |        |
|       | +      | +      | +      | +      | +      |
| Total | 3865   | 71     | 81     | 31     | 4048   |
|       | 95.48  | 1.75   | 2.00   | 0.77   | 100.00 |

Administration of anticoagulants at the time of obtaining Table 2-4 consent, according to the presence or absence of proton-pump inhibitors

FREQ Procedure

Tables: ALL\* VISITAD

ALL VISITAD(Visit and Drug Administration)

Power |

Percent |

Percent of rows

Percent of column |Month |Month |Month |First dose |Unknown | Total

Within | | |

|       | +      | +      | +      | +      | +      |
|-------|--------|--------|--------|--------|--------|
| 1     | 3865   | 71     | 81     | 31     | 4048   |
|       | 95.48  | 1.75   | 2.00   | 0.77   | 100.00 |
|       | 95.48  | 1.75   | 2.00   | 0.77   |        |
|       | 100.00 | 100.00 | 100.00 | 100.00 |        |
|       | +      | +      | +      | +      | +      |
| Total | 3865   | 71     | 81     | 31     | 4048   |
|       | 95.48  | 1.75   | 2.00   | 0.77   | 100.00 |

Administration of anticoagulants at the time of obtaining Table 2-4 consent, according to the presence or absence of proton-pump inhibitors

FREQ Procedure

Tables: ALL\* VISITAD

ALL VISITAD(Visit and Drug Administration)

Power |

Percent |

Percent of rows

Percent of column |Month |Month |Month |First dose |Unknown | Total

Within | | |

|       | +      | +      | +      | +      | +      |
|-------|--------|--------|--------|--------|--------|
| 1     | 4685   | 74     | 87     | 19     | 4865   |
|       | 96.30  | 1.52   | 1.79   | 0.39   | 100.00 |
|       | 96.30  | 1.52   | 1.79   | 0.39   |        |
|       | 100.00 | 100.00 | 100.00 | 100.00 |        |
|       | +      | +      | +      | +      | +      |
| Total | 4685   | 74     | 87     | 19     | 4865   |
|       | 96.30  | 1.52   | 1.79   | 0.39   | 100.00 |

Administration of anticoagulants at the time of obtaining Table 2-4 consent, according to the presence or absence of proton-pump inhibitors

FREQ Procedure

Tables: ALL\* VISITAD

ALL VISITAD(Visit and Drug Administration)

Power |

Percent |

Percent of rows

Percent of column |Month |Month |Month |First dose |Unknown | Total

Within | | |

|       | +      | +      | +      | +      | +      |
|-------|--------|--------|--------|--------|--------|
| 1     | 4685   | 74     | 87     | 19     | 4865   |
|       | 96.30  | 1.52   | 1.79   | 0.39   | 100.00 |
|       | 96.30  | 1.52   | 1.79   | 0.39   |        |
|       | 100.00 | 100.00 | 100.00 | 100.00 |        |
|       | +      | +      | +      | +      | +      |
| Total | 4685   | 74     | 87     | 19     | 4865   |
|       | 96.30  | 1.52   | 1.79   | 0.39   | 100.00 |



Administration of anticoagulants at the time of obtaining Table 2-4 consent, according to the presence or absence of proton-pump inhibitors

FREQ Procedure

Tables: ALL\* VISITAD

ALL VISITAD(Visit and Drug Administration)

Power |

Percent |

Percent of rows

Percent of column |Month |Month |Month |First dose |Unknown | Total

Within | | |

|       | +      | +      | +      | +      | +      |
|-------|--------|--------|--------|--------|--------|
| 1     | 4685   | 74     | 87     | 19     | 4865   |
|       | 96.30  | 1.52   | 1.79   | 0.39   | 100.00 |
|       | 96.30  | 1.52   | 1.79   | 0.39   |        |
|       | 100.00 | 100.00 | 100.00 | 100.00 |        |
|       | +      | +      | +      | +      | +      |
| Total | 4685   | 74     | 87     | 19     | 4865   |
|       | 96.30  | 1.52   | 1.79   | 0.39   | 100.00 |

Administration of anticoagulants at the time of obtaining Table 2-4 consent, according to the presence or absence of proton-pump inhibitors

FREQ Procedure

Tables: ALL\* VISITAD

ALL VISITAD(Visit and Drug Administration)

Power |

Percent |

Percent of rows

Percent of column |Month |Month |Month |First dose |Unknown | Total

Within | | |

|       | +      | +      | +      | +      | +      |
|-------|--------|--------|--------|--------|--------|
| 1     | 4685   | 74     | 87     | 19     | 4865   |
|       | 96.30  | 1.52   | 1.79   | 0.39   | 100.00 |
|       | 96.30  | 1.52   | 1.79   | 0.39   |        |
|       | 100.00 | 100.00 | 100.00 | 100.00 |        |
|       | +      | +      | +      | +      | +      |
| Total | 4685   | 74     | 87     | 19     | 4865   |
|       | 96.30  | 1.52   | 1.79   | 0.39   | 100.00 |

Administration of anticoagulants at the time of obtaining Table 2-4 consent, according to the presence or absence of proton-pump inhibitors

FREQ Procedure

Tables: ALL\* VISITAD

ALL VISITAD(Visit and Drug Administration)

Power |

Percent |

Percent of rows

Percent of column |Month |Month |Month |First dose |Unknown | Total

Within | | |

|       | Month  | Month  | Month  | First dose | Unknown | Total |
|-------|--------|--------|--------|------------|---------|-------|
| 1     | 2613   | 161    | 265    | 15         | 3054    |       |
|       | 85.56  | 5.27   | 8.68   | 0.49       | 100.00  |       |
|       | 85.56  | 5.27   | 8.68   | 0.49       |         |       |
|       | 100.00 | 100.00 | 100.00 | 100.00     |         |       |
| Total | 2613   | 161    | 265    | 15         | 3054    |       |
|       | 85.56  | 5.27   | 8.68   | 0.49       | 100.00  |       |

Administration of anticoagulants at the time of obtaining Table 2-4 consent, according to the presence or absence of proton-pump inhibitors

FREQ Procedure

Tables: ALL\* VISITAD

ALL VISITAD(Visit and Drug Administration)

Power |

Percent |

Percent of rows

Percent of column |Month |Month |Month |First dose |Unknown | Total

Within | | |

|       | Month  | Month  | Month  | First dose | Unknown | Total |
|-------|--------|--------|--------|------------|---------|-------|
| 1     | 2613   | 161    | 265    | 15         | 3054    |       |
|       | 85.56  | 5.27   | 8.68   | 0.49       | 100.00  |       |
|       | 85.56  | 5.27   | 8.68   | 0.49       |         |       |
|       | 100.00 | 100.00 | 100.00 | 100.00     |         |       |
| Total | 2613   | 161    | 265    | 15         | 3054    |       |
|       | 85.56  | 5.27   | 8.68   | 0.49       | 100.00  |       |

Administration of anticoagulants at the time of obtaining Table 2-4 consent, according to the presence or absence of proton-pump inhibitors

FREQ Procedure

Tables: ALL\* VISITAD

ALL VISITAD(Visit and Drug Administration)

Power |

Percent |

Percent of rows

Percent of column |Month |Month |Month |First dose |Unknown | Total

Within | | |

|       | Month  | Month  | Month  | First dose | Unknown | Total |
|-------|--------|--------|--------|------------|---------|-------|
| 1     | 2613   | 161    | 265    | 15         | 3054    |       |
|       | 85.56  | 5.27   | 8.68   | 0.49       | 100.00  |       |
|       | 85.56  | 5.27   | 8.68   | 0.49       |         |       |
|       | 100.00 | 100.00 | 100.00 | 100.00     |         |       |
| Total | 2613   | 161    | 265    | 15         | 3054    |       |
|       | 85.56  | 5.27   | 8.68   | 0.49       | 100.00  |       |

Administration of anticoagulants at the time of obtaining Table 2-4 consent, according to the presence or absence of proton-pump inhibitors

FREQ Procedure

Tables: ALL\* VISITAD

ALL VISITAD(Visit and Drug Administration)

Power |

Percent |

Percent of rows

Percent of column |Month |Month |Month |First dose |Unknown | Total

Within | | |

|       | Month  | Month  | Month  | First dose | Unknown | Total |
|-------|--------|--------|--------|------------|---------|-------|
| 1     | 2613   | 161    | 265    | 15         | 3054    |       |
|       | 85.56  | 5.27   | 8.68   | 0.49       | 100.00  |       |
|       | 85.56  | 5.27   | 8.68   | 0.49       |         |       |
|       | 100.00 | 100.00 | 100.00 | 100.00     |         |       |
| Total | 2613   | 161    | 265    | 15         | 3054    |       |
|       | 85.56  | 5.27   | 8.68   | 0.49       | 100.00  |       |

Administration of anticoagulants at the time of obtaining Table 2-4 consent, according to the presence or absence of proton-pump inhibitors

FREQ Procedure

Tables: ALL\* VISITAD

ALL VISITAD(Visit and Drug Administration)

Power |

Percent |

Percent of rows

Percent of column |Month |Month |Month |First dose |Unknown | Total

Within | | |

|       | Month  | Month  | Month  | First dose | Unknown | Total |
|-------|--------|--------|--------|------------|---------|-------|
| 1     | 2597   | 160    | 262    | 15         | 3034    |       |
|       | 85.60  | 5.27   | 8.64   | 0.49       | 100.00  |       |
|       | 85.60  | 5.27   | 8.64   | 0.49       |         |       |
|       | 100.00 | 100.00 | 100.00 | 100.00     |         |       |
| Total | 2597   | 160    | 262    | 15         | 3034    |       |
|       | 85.60  | 5.27   | 8.64   | 0.49       | 100.00  |       |

Administration of anticoagulants at the time of obtaining Table 2-4 consent, according to the presence or absence of proton-pump inhibitors

FREQ Procedure

Tables: ALL\* VISITAD

ALL VISITAD(Visit and Drug Administration)

Power |

Percent |

Percent of rows

Percent of column |Month |Month |Month |First dose |Unknown | Total

Within | | |

|       | Month  | Month  | Month  | First dose | Unknown | Total |
|-------|--------|--------|--------|------------|---------|-------|
| 1     | 2597   | 160    | 262    | 15         | 3034    |       |
|       | 85.60  | 5.27   | 8.64   | 0.49       | 100.00  |       |
|       | 85.60  | 5.27   | 8.64   | 0.49       |         |       |
|       | 100.00 | 100.00 | 100.00 | 100.00     |         |       |
| Total | 2597   | 160    | 262    | 15         | 3034    |       |
|       | 85.60  | 5.27   | 8.64   | 0.49       | 100.00  |       |



Administration of anticoagulants at the time of obtaining Table 2-4 consent, according to the presence or absence of proton-pump inhibitors

FREQ Procedure

Tables: ALL\* VISITAD

ALL VISITAD(Visit and Drug Administration)

Power |

Percent |

Percent of rows

Percent of column |Month |Month |Month |First dose |Unknown | Total

Within | | |

|       | Month  | Month  | Month  | First dose | Unknown | Total |
|-------|--------|--------|--------|------------|---------|-------|
| 1     | 2597   | 160    | 262    | 15         | 3034    |       |
|       | 85.60  | 5.27   | 8.64   | 0.49       | 100.00  |       |
|       | 85.60  | 5.27   | 8.64   | 0.49       |         |       |
|       | 100.00 | 100.00 | 100.00 | 100.00     |         |       |
| Total | 2597   | 160    | 262    | 15         | 3034    |       |
|       | 85.60  | 5.27   | 8.64   | 0.49       | 100.00  |       |

Administration of anticoagulants at the time of obtaining Table 2-4 consent, according to the presence or absence of proton-pump inhibitors

FREQ Procedure

Tables: ALL\* VISITAD

ALL VISITAD(Visit and Drug Administration)

Power |

Percent |

Percent of rows

Percent of column |Month |Month |Month |First dose |Unknown | Total

Within | | |

|       | Month  | Month  | Month  | First dose | Unknown | Total |
|-------|--------|--------|--------|------------|---------|-------|
| 1     | 2597   | 160    | 262    | 15         | 3034    |       |
|       | 85.60  | 5.27   | 8.64   | 0.49       | 100.00  |       |
|       | 85.60  | 5.27   | 8.64   | 0.49       |         |       |
|       | 100.00 | 100.00 | 100.00 | 100.00     |         |       |
| Total | 2597   | 160    | 262    | 15         | 3034    |       |
|       | 85.60  | 5.27   | 8.64   | 0.49       | 100.00  |       |

Administration of anticoagulants at the time of obtaining Table 2-4 consent, according to the presence or absence of proton-pump inhibitors

FREQ Procedure

Tables: ALL\* VISITAD

ALL

VISITAD(Visit and Drug Administration)

Power |

Percent |

Percent of rows

Percent of column |Month |Month |Month |First dose |Total

Within | |

|       | Month  | Month  | Month  | First dose | Total |
|-------|--------|--------|--------|------------|-------|
| 1     | 16     | 1      | 3      | 20         |       |
|       | 80.00  | 5.00   | 15.00  | 100.00     |       |
|       | 80.00  | 5.00   | 15.00  |            |       |
|       | 100.00 | 100.00 | 100.00 |            |       |
| Total | 16     | 1      | 3      | 20         |       |
|       | 80.00  | 5.00   | 15.00  | 100.00     |       |

Administration of anticoagulants at the time of obtaining Table 2-4 consent, according to the presence or absence of proton-pump inhibitors

FREQ Procedure

Tables: ALL\* VISITAD

ALL

VISITAD(Visit and Drug Administration)

Power |

Percent |

Percent of rows

Percent of column |Month |Month |Month |First dose |Total

Within | |

|       | Month  | Month  | Month  | First dose | Total |
|-------|--------|--------|--------|------------|-------|
| 1     | 16     | 1      | 3      | 20         |       |
|       | 80.00  | 5.00   | 15.00  | 100.00     |       |
|       | 80.00  | 5.00   | 15.00  |            |       |
|       | 100.00 | 100.00 | 100.00 |            |       |
| Total | 16     | 1      | 3      | 20         |       |
|       | 80.00  | 5.00   | 15.00  | 100.00     |       |

Administration of anticoagulants at the time of obtaining Table 2-4 consent, according to the presence or absence of proton-pump inhibitors

FREQ Procedure

Tables: ALL\* VISITAD

ALL

VISITAD(Visit and Drug Administration)

Power |

Percent |

Percent of rows

Percent of column |Month |Month |Month |First dose |Total

Within | |

|       | Month  | Month  | Month  | First dose | Total |
|-------|--------|--------|--------|------------|-------|
| 1     | 16     | 1      | 3      | 20         |       |
|       | 80.00  | 5.00   | 15.00  | 100.00     |       |
|       | 80.00  | 5.00   | 15.00  |            |       |
|       | 100.00 | 100.00 | 100.00 |            |       |
| Total | 16     | 1      | 3      | 20         |       |
|       | 80.00  | 5.00   | 15.00  | 100.00     |       |

Administration of anticoagulants at the time of obtaining Table 2-4 consent, according to the presence or absence of proton-pump inhibitors

FREQ Procedure

Tables: ALL\* VISITAD

ALL

VISITAD(Visit and Drug Administration)

Power |

Percent |

Percent of rows

Percent of column |Month |Month |Month |First dose |Total

Within | |

|       | Month  | Month  | Month  | First dose | Total |
|-------|--------|--------|--------|------------|-------|
| 1     | 16     | 1      | 3      | 20         |       |
|       | 80.00  | 5.00   | 15.00  | 100.00     |       |
|       | 80.00  | 5.00   | 15.00  |            |       |
|       | 100.00 | 100.00 | 100.00 |            |       |
| Total | 16     | 1      | 3      | 20         |       |
|       | 80.00  | 5.00   | 15.00  | 100.00     |       |

Administration of anticoagulants at the time of obtaining Table 2-4 consent, according to the presence or absence of proton-pump inhibitors

FREQ Procedure

Tables: ALL\* VISITAD

ALL

VISITAD(Visit and Drug Administration)

Power |

Percent |

Percent of rows

Percent of column |Month | Unknown | Total

) in front | |

|       | Month  | Unknown | Total  |
|-------|--------|---------|--------|
| 1     | 10     | 1       | 11     |
|       | 90.91  | 9.09    | 100.00 |
|       | 90.91  | 9.09    |        |
|       | 100.00 | 100.00  |        |
| Total | 10     | 1       | 11     |
|       | 90.91  | 9.09    | 100.00 |

Administration of anticoagulants at the time of obtaining Table 2-4 consent, according to the presence or absence of proton-pump inhibitors

FREQ Procedure

Tables: ALL\* VISITAD

ALL

VISITAD(Visit and Drug Administration)

Power |

Percent |

Percent of rows

Percent of column |Month | Unknown | Total

) in front | |

|       | Month  | Unknown | Total  |
|-------|--------|---------|--------|
| 1     | 10     | 1       | 11     |
|       | 90.91  | 9.09    | 100.00 |
|       | 90.91  | 9.09    |        |
|       | 100.00 | 100.00  |        |
| Total | 10     | 1       | 11     |
|       | 90.91  | 9.09    | 100.00 |



Administration of anticoagulants at the time of obtaining Table 2-4 consent, according to the presence or absence of proton-pump inhibitors

FREQ Procedure

Tables: ALL\* VISITAD

ALL

VISITAD(Visit and Drug Administration)

Power |

Percent |

Percent of rows

Percent of column |Month | Unknown | Total

) in front | |

|          |        |        |    |  |   |
|----------|--------|--------|----|--|---|
|          | +      |        | +  |  | + |
| 1        | 10     | 1      | 11 |  |   |
| 90.91    | 9.09   | 100.00 |    |  |   |
| 90.91    | 9.09   |        |    |  |   |
| 100.00   | 100.00 |        |    |  |   |
|          | +      |        | +  |  | + |
| Total 10 | 1      | 11     |    |  |   |
| 90.91    | 9.09   | 100.00 |    |  |   |

Administration of anticoagulants at the time of obtaining Table 2-4 consent, according to the presence or absence of proton-pump inhibitors

FREQ Procedure

Tables: ALL\* VISITAD

ALL

VISITAD(Visit and Drug Administration)

Power |

Percent |

Percent of rows

Percent of column |Month | Unknown | Total

) in front | |

|       | Month  | Unknown | Total  |
|-------|--------|---------|--------|
| 1     | 10     | 1       | 11     |
|       | 90.91  | 9.09    | 100.00 |
|       | 90.91  | 9.09    |        |
|       | 100.00 | 100.00  |        |
| Total | 10     | 1       | 11     |
|       | 90.91  | 9.09    | 100.00 |

Administration of anticoagulants at the time of obtaining Table 2-4 consent, according to the presence or absence of proton-pump inhibitors

FREQ Procedure

Tables: ALL \* DOSE

ALL DOSE(Dose per day for DOAC only)

Power |

Percent |

Percent of rows

Column percent | 0| 75| 110| 150| 185| 220| 300| Total

|       | 0      | 75     | 110    | 150    | 185    | 220    | 300    | Total  |
|-------|--------|--------|--------|--------|--------|--------|--------|--------|
| 1     | 2      | 6      | 131    | 78     | 2      | 1121   | 93     | 1433   |
|       | 0.14   | 0.42   | 9.14   | 5.44   | 0.14   | 78.23  | 6.49   | 100.00 |
|       | 0.14   | 0.42   | 9.14   | 5.44   | 0.14   | 78.23  | 6.49   |        |
|       | 100.00 | 100.00 | 100.00 | 100.00 | 100.00 | 100.00 | 100.00 |        |
| Total | 2      | 6      | 131    | 78     | 2      | 1121   | 93     | 1433   |
|       | 0.14   | 0.42   | 9.14   | 5.44   | 0.14   | 78.23  | 6.49   | 100.00 |

Administration of anticoagulants at the time of obtaining Table 2-4 consent, according to the presence or absence of proton-pump inhibitors

FREQ Procedure

Tables: ALL \* DOSE

ALL DOSE(Dose per day for DOAC only)

Power |

Percent |

Percent of rows

Column percent | 0| 75| 110| 150| 185| 220| 300| Total

|       | 0      | 75     | 110    | 150    | 185    | 220    | 300    | Total  |
|-------|--------|--------|--------|--------|--------|--------|--------|--------|
| 1     | 2      | 6      | 131    | 78     | 2      | 1121   | 93     | 1433   |
|       | 0.14   | 0.42   | 9.14   | 5.44   | 0.14   | 78.23  | 6.49   | 100.00 |
|       | 0.14   | 0.42   | 9.14   | 5.44   | 0.14   | 78.23  | 6.49   |        |
|       | 100.00 | 100.00 | 100.00 | 100.00 | 100.00 | 100.00 | 100.00 |        |
| Total | 2      | 6      | 131    | 78     | 2      | 1121   | 93     | 1433   |
|       | 0.14   | 0.42   | 9.14   | 5.44   | 0.14   | 78.23  | 6.49   | 100.00 |

Administration of anticoagulants at the time of obtaining Table 2-4 consent, according to the presence or absence of proton-pump inhibitors

FREQ Procedure

Tables: ALL \* DOSE

ALL DOSE(Dose per day for DOAC only)

Power |

Percent |

Percent of rows

Column percent | 0| 75| 110| 150| 185| 220| 300| Total

|       | 0      | 75     | 110    | 150    | 185    | 220    | 300    | Total  |
|-------|--------|--------|--------|--------|--------|--------|--------|--------|
| 1     | 2      | 6      | 131    | 78     | 2      | 1121   | 93     | 1433   |
|       | 0.14   | 0.42   | 9.14   | 5.44   | 0.14   | 78.23  | 6.49   | 100.00 |
|       | 0.14   | 0.42   | 9.14   | 5.44   | 0.14   | 78.23  | 6.49   |        |
|       | 100.00 | 100.00 | 100.00 | 100.00 | 100.00 | 100.00 | 100.00 |        |
| Total | 2      | 6      | 131    | 78     | 2      | 1121   | 93     | 1433   |
|       | 0.14   | 0.42   | 9.14   | 5.44   | 0.14   | 78.23  | 6.49   | 100.00 |

Administration of anticoagulants at the time of obtaining Table 2-4 consent, according to the presence or absence of proton-pump inhibitors

FREQ Procedure

Tables: ALL \* DOSE

ALL DOSE(Dose per day for DOAC only)

Power |

Percent |

Percent of rows

Column percent | 0| 75| 110| 150| 185| 220| 300| Total

|       | 0      | 75     | 110    | 150    | 185    | 220    | 300    | Total  |
|-------|--------|--------|--------|--------|--------|--------|--------|--------|
| 1     | 2      | 6      | 131    | 78     | 2      | 1121   | 93     | 1433   |
|       | 0.14   | 0.42   | 9.14   | 5.44   | 0.14   | 78.23  | 6.49   | 100.00 |
|       | 0.14   | 0.42   | 9.14   | 5.44   | 0.14   | 78.23  | 6.49   |        |
|       | 100.00 | 100.00 | 100.00 | 100.00 | 100.00 | 100.00 | 100.00 |        |
| Total | 2      | 6      | 131    | 78     | 2      | 1121   | 93     | 1433   |
|       | 0.14   | 0.42   | 9.14   | 5.44   | 0.14   | 78.23  | 6.49   | 100.00 |

Administration of anticoagulants at the time of obtaining Table 2-4 consent, according to the presence or absence of proton-pump inhibitors

FREQ Procedure

Tables: ALL \* DOSE

ALL DOSE(Dose per day for DOAC only)

Power |

Percent |

Percent of rows

Column percent | 0| 75| 110| 150| 185| 220| 300| Total

|       | 0      | 75     | 110    | 150    | 185    | 220    | 300    | Total  |
|-------|--------|--------|--------|--------|--------|--------|--------|--------|
| 1     | 2      | 6      | 131    | 78     | 2      | 1121   | 93     | 1433   |
|       | 0.14   | 0.42   | 9.14   | 5.44   | 0.14   | 78.23  | 6.49   | 100.00 |
|       | 0.14   | 0.42   | 9.14   | 5.44   | 0.14   | 78.23  | 6.49   |        |
|       | 100.00 | 100.00 | 100.00 | 100.00 | 100.00 | 100.00 | 100.00 |        |
| Total | 2      | 6      | 131    | 78     | 2      | 1121   | 93     | 1433   |
|       | 0.14   | 0.42   | 9.14   | 5.44   | 0.14   | 78.23  | 6.49   | 100.00 |

Administration of anticoagulants at the time of obtaining Table 2-4 consent, according to the presence or absence of proton-pump inhibitors

FREQ Procedure

Table : ALL \* f\_d2

ALL f\_d2

Power |

Percent |

Percent of rows

Percent of columns | 1 | Total

|                    | 1      | 4      | Total |
|--------------------|--------|--------|-------|
| Power              |        |        |       |
| Percent            |        |        |       |
| Percent of rows    |        |        |       |
| Percent of columns | 100.00 | 100.00 |       |
|                    | 100.00 |        |       |
|                    | 100.00 |        |       |
| Total              | 4      | 4      | 8     |
|                    | 100.00 | 100.00 |       |

Frequency of missing values = 1429



Administration of anticoagulants at the time of obtaining Table 2-4 consent, according to the presence or absence of proton-pump inhibitors

FREQ Procedure

Tables: ALL \* DOSE

ALL DOSE(Dose per day for DOAC only)

Power |

Percent |

Percent of rows

Column percent | 0| 5| 7.5| 10| 15| 30| 60| Total

|       | 0      | 5      | 7.5    | 10     | 15     | 30     | 60     | Total  |
|-------|--------|--------|--------|--------|--------|--------|--------|--------|
| 1     | 1      | 4      | 3      | 2603   | 1431   | 5      | 1      | 4048   |
|       | 0.02   | 0.10   | 0.07   | 64.30  | 35.35  | 0.12   | 0.02   | 100.00 |
|       | 0.02   | 0.10   | 0.07   | 64.30  | 35.35  | 0.12   | 0.02   |        |
|       | 100.00 | 100.00 | 100.00 | 100.00 | 100.00 | 100.00 | 100.00 |        |
| Total | 1      | 4      | 3      | 2603   | 1431   | 5      | 1      | 4048   |
|       | 0.02   | 0.10   | 0.07   | 64.30  | 35.35  | 0.12   | 0.02   | 100.00 |

Administration of anticoagulants at the time of obtaining Table 2-4 consent, according to the presence or absence of proton-pump inhibitors

FREQ Procedure

Tables: ALL \* DOSE

ALL DOSE(Dose per day for DOAC only)

Power |

Percent |

Percent of rows

Column percent | 0| 5| 7.5| 10| 15| 30| 60| Total

|       | 0      | 5      | 7.5    | 10     | 15     | 30     | 60     | Total  |
|-------|--------|--------|--------|--------|--------|--------|--------|--------|
| 1     | 1      | 4      | 3      | 2603   | 1431   | 5      | 1      | 4048   |
|       | 0.02   | 0.10   | 0.07   | 64.30  | 35.35  | 0.12   | 0.02   | 100.00 |
|       | 0.02   | 0.10   | 0.07   | 64.30  | 35.35  | 0.12   | 0.02   |        |
|       | 100.00 | 100.00 | 100.00 | 100.00 | 100.00 | 100.00 | 100.00 |        |
| Total | 1      | 4      | 3      | 2603   | 1431   | 5      | 1      | 4048   |
|       | 0.02   | 0.10   | 0.07   | 64.30  | 35.35  | 0.12   | 0.02   | 100.00 |

Administration of anticoagulants at the time of obtaining Table 2-4 consent, according to the presence or absence of proton-pump inhibitors

FREQ Procedure

Table : ALL \* f\_d3

ALL f\_d3

Power |

Percent |

Percent of rows

Percent of columns | 1 | Total

|          |        |        |
|----------|--------|--------|
| _____+   |        | _____+ |
| 1        | 14     | 14     |
|          | 100.00 | 100.00 |
|          | 100.00 |        |
|          | 100.00 |        |
| _____+   |        | _____+ |
| Total 14 | 14     |        |
|          | 100.00 | 100.00 |

Degree of missing values = 4034

Administration of anticoagulants at the time of obtaining Table 2-4 consent, according to the presence or absence of proton-pump inhibitors

FREQ Procedure

Tables: ALL \* DOSE

ALL DOSE(Dose per day for DOAC only)

Power |

Percent |

Percent of rows

Column percent | 0 | 1.25 | 2.5 | 5 | 7.5 | 10 | 15 | Total

|       | 0      | 1.25   | 2.5    | 5      | 7.5    | 10     | 15     | Total  |
|-------|--------|--------|--------|--------|--------|--------|--------|--------|
| 1     | 1      | 1      | 320    | 3067   | 2      | 1473   | 1      | 4865   |
|       | 0.02   | 0.02   | 6.58   | 63.04  | 0.04   | 30.28  | 0.02   | 100.00 |
|       | 0.02   | 0.02   | 6.58   | 63.04  | 0.04   | 30.28  | 0.02   |        |
|       | 100.00 | 100.00 | 100.00 | 100.00 | 100.00 | 100.00 | 100.00 |        |
| Total | 1      | 1      | 320    | 3067   | 2      | 1473   | 1      | 4865   |
|       | 0.02   | 0.02   | 6.58   | 63.04  | 0.04   | 30.28  | 0.02   | 100.00 |

Administration of anticoagulants at the time of obtaining Table 2-4 consent, according to the presence or absence of proton-pump inhibitors

FREQ Procedure

Tables: ALL \* DOSE

ALL DOSE(Dose per day for DOAC only)

Power |

Percent |

Percent of rows

Column percent | 0 | 1.25 | 2.5 | 5 | 7.5 | 10 | 15 | Total

|       | 0      | 1.25   | 2.5    | 5      | 7.5    | 10     | 15     | Total  |
|-------|--------|--------|--------|--------|--------|--------|--------|--------|
| 1     | 1      | 1      | 320    | 3067   | 2      | 1473   | 1      | 4865   |
|       | 0.02   | 0.02   | 6.58   | 63.04  | 0.04   | 30.28  | 0.02   | 100.00 |
|       | 0.02   | 0.02   | 6.58   | 63.04  | 0.04   | 30.28  | 0.02   |        |
|       | 100.00 | 100.00 | 100.00 | 100.00 | 100.00 | 100.00 | 100.00 |        |
| Total | 1      | 1      | 320    | 3067   | 2      | 1473   | 1      | 4865   |
|       | 0.02   | 0.02   | 6.58   | 63.04  | 0.04   | 30.28  | 0.02   | 100.00 |

Administration of anticoagulants at the time of obtaining Table 2-4 consent, according to the presence or absence of proton-pump inhibitors

FREQ Procedure

Tables: ALL \* DOSE

ALL DOSE(Dose per day for DOAC only)

Power |

Percent |

Percent of rows

Column percent | 0 | 1.25 | 2.5 | 5 | 7.5 | 10 | 15 | Total

|       | 0      | 1.25   | 2.5    | 5      | 7.5    | 10     | 15     | Total  |
|-------|--------|--------|--------|--------|--------|--------|--------|--------|
| 1     | 1      | 1      | 320    | 3067   | 2      | 1473   | 1      | 4865   |
|       | 0.02   | 0.02   | 6.58   | 63.04  | 0.04   | 30.28  | 0.02   | 100.00 |
|       | 0.02   | 0.02   | 6.58   | 63.04  | 0.04   | 30.28  | 0.02   |        |
|       | 100.00 | 100.00 | 100.00 | 100.00 | 100.00 | 100.00 | 100.00 |        |
| Total | 1      | 1      | 320    | 3067   | 2      | 1473   | 1      | 4865   |
|       | 0.02   | 0.02   | 6.58   | 63.04  | 0.04   | 30.28  | 0.02   | 100.00 |

Administration of anticoagulants at the time of obtaining Table 2-4 consent, according to the presence or absence of proton-pump inhibitors

FREQ Procedure

Table : ALL \* f\_d4

ALL f\_d4

Power |

Percent |

Percent of rows

Percent of columns | 1 | Total

|         |        |        |
|---------|--------|--------|
|         | +      | +      |
| 1       | 5      | 5      |
| 100.00  | 100.00 | 100.00 |
| 100.00  |        |        |
| 100.00  |        |        |
| +       | +      |        |
| Total 5 | 5      |        |
| 100.00  | 100.00 |        |

Degree of missing values = 4860

Administration of anticoagulants at the time of obtaining Table 2-4 consent, according to the presence or absence of proton-pump inhibitors

FREQ Procedure

Tables: ALL \* DOSE

ALL DOSE(Dose per day for DOAC only)

Power |

Percent |

Percent of rows

Percentage of columns | 5| 7.5| 10| 15| 30| 60| Total

|       | 5      | 7.5    | 10     | 15     | 30     | 60     | Total  |
|-------|--------|--------|--------|--------|--------|--------|--------|
| 1     | 2      | 1      | 1      | 137    | 2494   | 419    | 3054   |
|       | 0.07   | 0.03   | 0.03   | 4.49   | 81.66  | 13.72  | 100.00 |
|       | 0.07   | 0.03   | 0.03   | 4.49   | 81.66  | 13.72  |        |
|       | 100.00 | 100.00 | 100.00 | 100.00 | 100.00 | 100.00 |        |
| Total | 2      | 1      | 1      | 137    | 2494   | 419    | 3054   |
|       | 0.07   | 0.03   | 0.03   | 4.49   | 81.66  | 13.72  | 100.00 |



Administration of anticoagulants at the time of obtaining Table 2-4 consent, according to the presence or absence of proton-pump inhibitors

FREQ Procedure

Tables: ALL \* DOSE

ALL DOSE(Dose per day for DOAC only)

Power |

Percent |

Percent of rows

Percentage of columns | 5| 7.5| 10| 15| 30| 60| Total

|       | 5      | 7.5    | 10     | 15     | 30     | 60     | Total  |
|-------|--------|--------|--------|--------|--------|--------|--------|
| 1     | 2      | 1      | 1      | 137    | 2494   | 419    | 3054   |
|       | 0.07   | 0.03   | 0.03   | 4.49   | 81.66  | 13.72  | 100.00 |
|       | 0.07   | 0.03   | 0.03   | 4.49   | 81.66  | 13.72  |        |
|       | 100.00 | 100.00 | 100.00 | 100.00 | 100.00 | 100.00 |        |
| Total | 2      | 1      | 1      | 137    | 2494   | 419    | 3054   |
|       | 0.07   | 0.03   | 0.03   | 4.49   | 81.66  | 13.72  | 100.00 |

Administration of anticoagulants at the time of obtaining Table 2-4 consent, according to the presence or absence of proton-pump inhibitors

FREQ Procedure

Tables: ALL \* DOSE

ALL DOSE(Dose per day for DOAC only)

Power |

Percent |

Percent of rows

Percentage of columns | 5| 7.5| 10| 15| 30| 60| Total

|       | 5      | 7.5    | 10     | 15     | 30     | 60     | Total  |
|-------|--------|--------|--------|--------|--------|--------|--------|
| 1     | 2      | 1      | 1      | 137    | 2494   | 419    | 3054   |
|       | 0.07   | 0.03   | 0.03   | 4.49   | 81.66  | 13.72  | 100.00 |
|       | 0.07   | 0.03   | 0.03   | 4.49   | 81.66  | 13.72  |        |
|       | 100.00 | 100.00 | 100.00 | 100.00 | 100.00 | 100.00 |        |
| Total | 2      | 1      | 1      | 137    | 2494   | 419    | 3054   |
|       | 0.07   | 0.03   | 0.03   | 4.49   | 81.66  | 13.72  | 100.00 |

Administration of anticoagulants at the time of obtaining Table 2-4 consent, according to the presence or absence of proton-pump inhibitors

FREQ Procedure

Table: ALL \* f\_d0

ALL f\_d0

Power |

Percent |

Percent of rows

Percent of columns | 1 | Total

|           |  | +      |        | +      |  |
|-----------|--|--------|--------|--------|--|
|           |  | 1      | 4      | 4      |  |
|           |  | 100.00 | 100.00 | 100.00 |  |
|           |  | 100.00 |        |        |  |
|           |  | 100.00 |        |        |  |
|           |  | +      |        | +      |  |
| Total 4 4 |  | 100.00 | 100.00 |        |  |

Degree of missing values = 3050

Administration of anticoagulants at the time of obtaining Table 2-4 consent, according to the presence or absence of proton-pump inhibitors

FREQ Procedure

Tables: ALL \* DOSE

ALL DOSE(Dose per day for DOAC only)

Power |

Percent |

Percent of rows

Percentage of columns | 5| 7.5| 10| 15| 30| 60| Total

|       | 5      | 7.5    | 10     | 15     | 30     | 60     | Total  |
|-------|--------|--------|--------|--------|--------|--------|--------|
| 1     | 2      | 1      | 1      | 137    | 2482   | 411    | 3034   |
|       | 0.07   | 0.03   | 0.03   | 4.52   | 81.81  | 13.55  | 100.00 |
|       | 0.07   | 0.03   | 0.03   | 4.52   | 81.81  | 13.55  |        |
|       | 100.00 | 100.00 | 100.00 | 100.00 | 100.00 | 100.00 |        |
| Total | 2      | 1      | 1      | 137    | 2482   | 411    | 3034   |
|       | 0.07   | 0.03   | 0.03   | 4.52   | 81.81  | 13.55  | 100.00 |

Administration of anticoagulants at the time of obtaining Table 2-4 consent, according to the presence or absence of proton-pump inhibitors

FREQ Procedure

Tables: ALL \* DOSE

ALL DOSE(Dose per day for DOAC only)

Power |

Percent |

Percent of rows

Percentage of columns | 5| 7.5| 10| 15| 30| 60| Total

|       | 5      | 7.5    | 10     | 15     | 30     | 60     | Total  |
|-------|--------|--------|--------|--------|--------|--------|--------|
| 1     | 2      | 1      | 1      | 137    | 2482   | 411    | 3034   |
|       | 0.07   | 0.03   | 0.03   | 4.52   | 81.81  | 13.55  | 100.00 |
|       | 0.07   | 0.03   | 0.03   | 4.52   | 81.81  | 13.55  |        |
|       | 100.00 | 100.00 | 100.00 | 100.00 | 100.00 | 100.00 |        |
| Total | 2      | 1      | 1      | 137    | 2482   | 411    | 3034   |
|       | 0.07   | 0.03   | 0.03   | 4.52   | 81.81  | 13.55  | 100.00 |

Administration of anticoagulants at the time of obtaining Table 2-4 consent, according to the presence or absence of proton-pump inhibitors

FREQ Procedure

Tables: ALL \* DOSE

ALL DOSE(Dose per day for DOAC only)

Power |

Percent |

Percent of rows

Percentage of columns | 5| 7.5| 10| 15| 30| 60| Total

|       | 5      | 7.5    | 10     | 15     | 30     | 60     | Total  |
|-------|--------|--------|--------|--------|--------|--------|--------|
| 1     | 2      | 1      | 1      | 137    | 2482   | 411    | 3034   |
|       | 0.07   | 0.03   | 0.03   | 4.52   | 81.81  | 13.55  | 100.00 |
|       | 0.07   | 0.03   | 0.03   | 4.52   | 81.81  | 13.55  |        |
|       | 100.00 | 100.00 | 100.00 | 100.00 | 100.00 | 100.00 |        |
| Total | 2      | 1      | 1      | 137    | 2482   | 411    | 3034   |
|       | 0.07   | 0.03   | 0.03   | 4.52   | 81.81  | 13.55  | 100.00 |

Administration of anticoagulants at the time of obtaining Table 2-4 consent, according to the presence or absence of proton-pump inhibitors

FREQ Procedure

Table : ALL \* f\_d5

ALL f\_d5

Power |

Percent |

Percent of rows

Percent of columns | 1 | Total

|       | 1      | 4      | Total  |
|-------|--------|--------|--------|
| 1     | 100.00 | 100.00 | 100.00 |
| 4     | 100.00 | 100.00 | 100.00 |
| Total | 100.00 | 100.00 | 100.00 |

Degree of missing values = 3030

Administration of anticoagulants at the time of obtaining Table 2-4 consent, according to the presence or absence of proton-pump inhibitors

FREQ Procedure

Tables: ALL \* DOSE

ALL

DOSE(Dose per day for DOAC only)

Power |

Percent |

Percent of rows

Percentage of columns | 30| 60| Total

|               |        |        |        |  |   |
|---------------|--------|--------|--------|--|---|
|               | +      |        | +      |  | + |
| 1             | 12     | 8      | 20     |  |   |
|               | 60.00  | 40.00  | 100.00 |  |   |
|               | 60.00  | 40.00  |        |  |   |
|               | 100.00 | 100.00 |        |  |   |
|               | +      |        | +      |  | + |
| Total 12 8 20 |        |        |        |  |   |
|               | 60.00  | 40.00  | 100.00 |  |   |



Administration of anticoagulants at the time of obtaining Table 2-4 consent, according to the presence or absence of proton-pump inhibitors

FREQ Procedure

Tables: ALL \* DOSE

ALL

DOSE(Dose per day for DOAC only)

Power |

Percent |

Percent of rows

Percentage of columns | 30| 60| Total

|               |        |        |        |  |   |
|---------------|--------|--------|--------|--|---|
|               | +      |        | +      |  | + |
| 1             | 12     | 8      | 20     |  |   |
|               | 60.00  | 40.00  | 100.00 |  |   |
|               | 60.00  | 40.00  |        |  |   |
|               | 100.00 | 100.00 |        |  |   |
|               | +      |        | +      |  | + |
| Total 12 8 20 |        |        |        |  |   |
|               | 60.00  | 40.00  | 100.00 |  |   |

Administration of anticoagulants at the time of obtaining Table 2-4 consent, according to the presence or absence of proton-pump inhibitors

FREQ Procedure

Tables: ALL \* DOSE

ALL

DOSE(Dose per day for DOAC only)

Power |

Percent |

Percent of rows

Percentage of columns | 30| 60| Total

|               |        |        |        |
|---------------|--------|--------|--------|
| _____+        |        |        |        |
| 1             | 12     | 8      | 20     |
|               | 60.00  | 40.00  | 100.00 |
|               | 60.00  | 40.00  |        |
|               | 100.00 | 100.00 |        |
| _____+        |        |        |        |
| Total 12 8 20 |        |        |        |
|               | 60.00  | 40.00  | 100.00 |

Administration of anticoagulants at the time of obtaining Table 2-4 consent, according to the presence or absence of proton-pump inhibitors

FREQ Procedure

For ALL \* f\_d7,

Because all levels of the variable f\_d7 are missing,

There is no data.

Administration of anticoagulants at the time of obtaining Table 2-4 consent, according to the presence or absence of proton-pump inhibitors

FREQ Procedure

Tables: ALL \* DOSECNT

ALL

DOSECNT(Dose per 1time for DOAC only)

Power |

Percent |

Percent of rows

Percentage of columns | 0| 1| 2| Sum

|       | 0      | 1      | 2      | Sum    |
|-------|--------|--------|--------|--------|
| 1     | 2      | 10     | 1421   | 1433   |
|       | 0.14   | 0.70   | 99.16  | 100.00 |
|       | 0.14   | 0.70   | 99.16  |        |
|       | 100.00 | 100.00 | 100.00 |        |
| Total | 2      | 10     | 1421   | 1433   |
|       | 0.14   | 0.70   | 99.16  | 100.00 |

Administration of anticoagulants at the time of obtaining Table 2-4 consent, according to the presence or absence of proton-pump inhibitors

FREQ Procedure

Tables: ALL \* DOSECNT

ALL

DOSECNT(Dose per 1time for DOAC only)

Power |

Percent |

Percent of rows

Percentage of columns | 0| 1| 2| Sum

|       | 0      | 1      | 2      | Sum    |
|-------|--------|--------|--------|--------|
| 1     | 2      | 10     | 1421   | 1433   |
|       | 0.14   | 0.70   | 99.16  | 100.00 |
|       | 0.14   | 0.70   | 99.16  |        |
|       | 100.00 | 100.00 | 100.00 |        |
| Total | 2      | 10     | 1421   | 1433   |
|       | 0.14   | 0.70   | 99.16  | 100.00 |

Administration of anticoagulants at the time of obtaining Table 2-4 consent, according to the presence or absence of proton-pump inhibitors

FREQ Procedure

Table : ALL \* t\_dc2

ALL t\_dc2

Power |

Percent |

Percent of rows

Percent of columns | 1 | Total

|        | 1      | 2      | Total  |
|--------|--------|--------|--------|
| 100.00 | 100.00 |        | 100.00 |
| 100.00 |        |        | 100.00 |
| 100.00 |        |        | 100.00 |
| Total  | 100.00 | 100.00 |        |

Frequency of missing values = 1431

Administration of anticoagulants at the time of obtaining Table 2-4 consent, according to the presence or absence of proton-pump inhibitors

FREQ Procedure

Tables: ALL \* DOSECNT

ALL

DOSECNT(Dose per 1time for DOAC only)

Power |

Percent |

Percent of rows

Percentage of columns | 0| 1| 2| Sum

|       | 0      | 1      | 2      | Sum    |
|-------|--------|--------|--------|--------|
| 1     | 1      | 4044   | 3      | 4048   |
|       | 0.02   | 99.90  | 0.07   | 100.00 |
|       | 0.02   | 99.90  | 0.07   |        |
|       | 100.00 | 100.00 | 100.00 |        |
| Total | 1      | 4044   | 3      | 4048   |
|       | 0.02   | 99.90  | 0.07   | 100.00 |

Administration of anticoagulants at the time of obtaining Table 2-4 consent, according to the presence or absence of proton-pump inhibitors

FREQ Procedure

Tables: ALL \* DOSECNT

ALL

DOSECNT(Dose per 1time for DOAC only)

Power |

Percent |

Percent of rows

Percentage of columns | 0| 1| 2| Sum

|       | 0      | 1      | 2      | Sum    |
|-------|--------|--------|--------|--------|
| 1     | 1      | 4044   | 3      | 4048   |
|       | 0.02   | 99.90  | 0.07   | 100.00 |
|       | 0.02   | 99.90  | 0.07   |        |
|       | 100.00 | 100.00 | 100.00 |        |
| Total | 1      | 4044   | 3      | 4048   |
|       | 0.02   | 99.90  | 0.07   | 100.00 |



Administration of anticoagulants at the time of obtaining Table 2-4 consent, according to the presence or absence of proton-pump inhibitors

FREQ Procedure

Table : ALL \* t\_dc3

ALL t\_dc3

Power |

Percent |

Percent of rows

Percent of columns | 1 | Total

|       | 1      | Total  |
|-------|--------|--------|
| 1     | 100.00 | 100.00 |
| Total | 100.00 | 100.00 |

Degree of missing values = 4047

Administration of anticoagulants at the time of obtaining Table 2-4 consent, according to the presence or absence of proton-pump inhibitors

FREQ Procedure

Tables: ALL \* DOSECNT

ALL DOSECNT(Dose per 1time for DOAC only)

Power |

Percent |

Percent of rows

Percentage of columns | 0| 0.5| 1| 2| Sum

|       | 0      | 0.5    | 1      | 2      | Sum    |
|-------|--------|--------|--------|--------|--------|
| 1     | 1      | 1      | 38     | 4825   | 4865   |
|       | 0.02   | 0.02   | 0.78   | 99.18  | 100.00 |
|       | 0.02   | 0.02   | 0.78   | 99.18  |        |
|       | 100.00 | 100.00 | 100.00 | 100.00 |        |
| Total | 1      | 1      | 38     | 4825   | 4865   |
|       | 0.02   | 0.02   | 0.78   | 99.18  | 100.00 |

Administration of anticoagulants at the time of obtaining Table 2-4 consent, according to the presence or absence of proton-pump inhibitors

FREQ Procedure

Tables: ALL \* DOSECNT

ALL DOSECNT(Dose per 1time for DOAC only)

Power |

Percent |

Percent of rows

Percentage of columns | 0| 0.5| 1| 2| Sum

|                        |        |        |        |        |        |  |   |  |   |
|------------------------|--------|--------|--------|--------|--------|--|---|--|---|
|                        | +      |        | +      |        | +      |  | + |  | + |
| 1                      | 1      | 1      | 38     | 4825   | 4865   |  |   |  |   |
|                        | 0.02   | 0.02   | 0.78   | 99.18  | 100.00 |  |   |  |   |
|                        | 0.02   | 0.02   | 0.78   | 99.18  |        |  |   |  |   |
|                        | 100.00 | 100.00 | 100.00 | 100.00 |        |  |   |  |   |
|                        | +      |        | +      |        | +      |  | + |  | + |
| Total 1 1 38 4825 4865 |        |        |        |        |        |  |   |  |   |
|                        | 0.02   | 0.02   | 0.78   | 99.18  | 100.00 |  |   |  |   |

Administration of anticoagulants at the time of obtaining Table 2-4 consent, according to the presence or absence of proton-pump inhibitors

FREQ Procedure

Table : ALL \* t\_dc4

ALL t\_dc4

Power |

Percent |

Percent of rows

Percent of columns | 1 | Total

|        | 1      | 2      | Total  |
|--------|--------|--------|--------|
| 100.00 | 100.00 |        | 100.00 |
| 100.00 |        |        | 100.00 |
| 100.00 |        |        | 100.00 |
| Total  | 100.00 | 100.00 |        |

Degree of missing values = 4863

Administration of anticoagulants at the time of obtaining Table 2-4 consent, according to the presence or absence of proton-pump inhibitors

FREQ Procedure

Tables: ALL \* DOSECNT

ALL

DOSECNT(Dose per 1time for DOAC only)

Power |

Percent |

Percent of rows

Percentage of columns | 0.5| 1| 2| Sum

|       | 0.5    | 1      | 2      | Sum    |
|-------|--------|--------|--------|--------|
| 1     | 1      | 3050   | 3      | 3054   |
|       | 0.03   | 99.87  | 0.10   | 100.00 |
|       | 0.03   | 99.87  | 0.10   |        |
|       | 100.00 | 100.00 | 100.00 |        |
| Total | 1      | 3050   | 3      | 3054   |
|       | 0.03   | 99.87  | 0.10   | 100.00 |

Administration of anticoagulants at the time of obtaining Table 2-4 consent, according to the presence or absence of proton-pump inhibitors

FREQ Procedure

Tables: ALL \* DOSECNT

ALL

DOSECNT(Dose per 1time for DOAC only)

Power |

Percent |

Percent of rows

Percentage of columns | 0.5| 1| 2| Sum

|       | 0.5    | 1      | 2      | Sum    |
|-------|--------|--------|--------|--------|
| 1     | 1      | 3050   | 3      | 3054   |
|       | 0.03   | 99.87  | 0.10   | 100.00 |
|       | 0.03   | 99.87  | 0.10   |        |
|       | 100.00 | 100.00 | 100.00 |        |
| Total | 1      | 3050   | 3      | 3054   |
|       | 0.03   | 99.87  | 0.10   | 100.00 |

Administration of anticoagulants at the time of obtaining Table 2-4 consent, according to the presence or absence of proton-pump inhibitors

FREQ Procedure

Table: ALL \* t\_dc0

ALL t\_dc0

Power |

Percent |

Percent of rows

Percent of columns | 1 | Total

|       |  | +      |        | + |       |
|-------|--|--------|--------|---|-------|
|       |  | 1      | 1      | 1 | Total |
|       |  | 100.00 | 100.00 |   |       |
|       |  | 100.00 |        |   |       |
|       |  | 100.00 |        |   |       |
|       |  | +      |        | + |       |
| Total |  | 100.00 | 100.00 |   |       |

Degree of missing values = 3053

Administration of anticoagulants at the time of obtaining Table 2-4 consent, according to the presence or absence of proton-pump inhibitors

FREQ Procedure

Tables: ALL \* DOSECNT

ALL

DOSECNT(Dose per 1time for DOAC only)

Power |

Percent |

Percent of rows

Percentage of columns | 0.5| 1| 2| Sum

|       | 0.5    | 1      | 2      | Sum    |
|-------|--------|--------|--------|--------|
| 1     | 1      | 3030   | 3      | 3034   |
|       | 0.03   | 99.87  | 0.10   | 100.00 |
|       | 0.03   | 99.87  | 0.10   |        |
|       | 100.00 | 100.00 | 100.00 |        |
| Total | 1      | 3030   | 3      | 3034   |
|       | 0.03   | 99.87  | 0.10   | 100.00 |



Administration of anticoagulants at the time of obtaining Table 2-4 consent, according to the presence or absence of proton-pump inhibitors

FREQ Procedure

Tables: ALL \* DOSECNT

ALL

DOSECNT(Dose per 1time for DOAC only)

Power |

Percent |

Percent of rows

Percentage of columns | 0.5| 1| 2| Sum

|       | 0.5    | 1      | 2      | Sum    |
|-------|--------|--------|--------|--------|
| 1     | 1      | 3030   | 3      | 3034   |
|       | 0.03   | 99.87  | 0.10   | 100.00 |
|       | 0.03   | 99.87  | 0.10   |        |
|       | 100.00 | 100.00 | 100.00 |        |
| Total | 1      | 3030   | 3      | 3034   |
|       | 0.03   | 99.87  | 0.10   | 100.00 |

Administration of anticoagulants at the time of obtaining Table 2-4 consent, according to the presence or absence of proton-pump inhibitors

FREQ Procedure

Table : ALL \* t\_dc5

ALL t\_dc5

Power |

Percent |

Percent of rows

Percent of columns | 1 | Total

|       | 1      | Total  |
|-------|--------|--------|
| 1     | 100.00 | 100.00 |
| Total | 100.00 | 100.00 |

Degree of missing values = 3033

Administration of anticoagulants at the time of obtaining Table 2-4 consent, according to the presence or absence of proton-pump inhibitors

FREQ Procedure

Tables: ALL \* DOSECNT

ALL

DOSECNT(Dose per 1time for DOAC only)

Power |

Percent |

Percent of rows

Percent of columns | 1 | Total

|        |        |        |  |
|--------|--------|--------|--|
| _____+ |        | _____+ |  |
| 1      | 20     | 20     |  |
|        | 100.00 | 100.00 |  |
|        | 100.00 |        |  |
|        | 100.00 |        |  |
| _____+ |        | _____+ |  |
| Total  | 20     | 20     |  |
|        | 100.00 | 100.00 |  |

Administration of anticoagulants at the time of obtaining Table 2-4 consent, according to the presence or absence of proton-pump inhibitors

FREQ Procedure

Tables: ALL \* DOSECNT

ALL

DOSECNT(Dose per 1time for DOAC only)

Power |

Percent |

Percent of rows

Percent of columns | 1 | Total

|          |        |        |  |
|----------|--------|--------|--|
| _____+   |        | _____+ |  |
| 1        | 20     | 20     |  |
|          | 100.00 | 100.00 |  |
|          | 100.00 |        |  |
|          | 100.00 |        |  |
| _____+   |        | _____+ |  |
| Total 20 | 20     |        |  |
|          | 100.00 | 100.00 |  |

Administration of anticoagulants at the time of obtaining Table 2-4 consent, according to the presence or absence of proton-pump inhibitors

FREQ Procedure

For ALL \* t\_dc7,

Because all levels of variable t\_dc7 are missing,

There is no data.

Administration of anticoagulants at the time of obtaining Table 2-4 consent, according to the presence or absence of proton-pump inhibitors

UNIVARIATE Procedure

Variable: DOSE (Dose per day for DOAC only)

#### Moment

Total of 2339 for N 2339 weight variable

Mean 210.752458 total 492950

Standard deviation 42.3387378 variance 1792.56872

Skewness-1.0210372 kurtosis 2.40797329

Unmodified square sum 108081450 modified square sum 4191025.67

Coefficient of variation 20.089321 standard error of the mean 0.87543276

#### Basic statistics

##### Positional variation

Mean 210.7525 standard deviation 42.33874

Median 220.0000 variance 1793

Mode 220.0000 Range 300.00000

Interquartile range 0

##### Test for position H0: $\mu_0=0$

Test-Statistics-----p Value

Student's t-test t 240.7409 Pr > |t| <. 0001

Sign test M 1168.5 Pr >= |M| <. 0001

Signed rank test S 1365977 Pr >= |S| <. 0001

Quartile (Definition 5)

Level quantile

100% max. 300

99% 300

95% 300

90% 220

75% Q3 220

50% median 220

25% Q1 220

10% 150

5% 110

1% 110

0% minimum 0

Administration of anticoagulants at the time of obtaining Table 2-4 consent, according to the presence or absence of proton-pump inhibitors

UNIVARIATE Procedure

Variable: DOSE (Dose per day for DOAC only)

Extreme value

--- Minimum value---Maximum value---

Value Obs Value Obs

|    |       |     |       |
|----|-------|-----|-------|
| 0  | 16400 | 300 | 29307 |
| 0  | 16399 | 300 | 29710 |
| 50 | 15254 | 300 | 30753 |
| 75 | 31507 | 300 | 31236 |
| 75 | 30747 | 300 | 31382 |



Administration of anticoagulants at the time of obtaining Table 2-4 consent, according to the presence or absence of proton-pump inhibitors

UNIVARIATE Procedure

Variable: DOSE (Dose per day for DOAC only)

#### Moment

Total of 6436 for N 6436 weight variable

Mean 11.6520354 total 74992.5

Standard deviation 2.5258103 variance 6.37971769

Skewness 2.00774957 kurtosis 22.3114367

Unmodified square sum 914868.75 modified square sum 41053.4833

Coefficient of variation 21.6769879 standard error of the mean 0.0314842

#### Basic statistics

##### Positional variation

Mean 11.65204 standard deviation 2.52581

Median 10.00000 variance 6.37972

Mode 10.00000 Range 60.00000

Interquartile range 5.00000

##### Test for position H0: $\mu_0=0$

Test-Statistics-----p Value

Student's t-test t 370.0915 Pr > |t| <. 0001

Sign test M 3217 Pr >= |M| <. 0001

Signed rank test S 10350698 Pr >= |S| <. 0001

Quartile (Definition 5)

Level quantile

100% max 60

99% 15

95% 15

90% 15

75% Q3 15

50% median 10

25% Q1 10

10% 10

5% 10

1% 10

0% minimum 0

Administration of anticoagulants at the time of obtaining Table 2-4 consent, according to the presence or absence of proton-pump inhibitors

UNIVARIATE Procedure

Variable: DOSE (Dose per day for DOAC only)

Extreme value

---- Minimum value--Maximum value----

| Value | Obs   | Value | Obs   |
|-------|-------|-------|-------|
| 0.0   | 21132 | 30    | 7339  |
| 0.0   | 21127 | 30    | 16123 |
| 2.5   | 24892 | 30    | 20502 |
| 5.0   | 25751 | 30    | 30152 |
| 5.0   | 25736 | 60    | 8437  |

Administration of anticoagulants at the time of obtaining Table 2-4 consent, according to the presence or absence of proton-pump inhibitors

UNIVARIATE Procedure

Variable: DOSE (Dose per day for DOAC only)

#### Moment

Total of 8039 for N 8039 weight variable

Mean 6.30970892 total 50723.75

Standard deviation 2.47450837 variance 6.12319168

Skewness 0.7523919 kurtosis-0.0586932

Unmodified square sum 369270.313 modified square sum 49218.2147

Coefficient of variation 39.2174727 standard error of the mean 0.02759865

#### Basic statistics

##### Positional variation

Mean 6.309709 standard deviation 2.47451

Median 5.000000 variance 6.12319

Mode 5.000000 Range 30.00000

Interquartile range 5.00000

##### Test for position H0: $\mu_0=0$

Test-Statistics-----p Value

Student's t-test t 228.6238 Pr > |t| <. 0001

Sign test M 4018.5 Pr >= |M| <. 0001

Signed rank test S 16150352 Pr >= |S| <. 0001

Quartile (Definition 5)

Level quantile

100% max. 30.0

99% 10.0

95% 10.0

90% 10.0

75% Q3 10.0

50% median 5.0

25% Q1 5.0

10% 5.0

5% 2.5

1% 2.5

0% minimum 0.0

Administration of anticoagulants at the time of obtaining Table 2-4 consent, according to the presence or absence of proton-pump inhibitors

UNIVARIATE Procedure

Variable: DOSE (Dose per day for DOAC only)

Extreme value

---- Minimum value----Maximum value----

| Value | Obs   | Value | Obs   |
|-------|-------|-------|-------|
| 0.00  | 21138 | 10    | 32436 |
| 0.00  | 21126 | 10    | 32445 |
| 1.25  | 20710 | 10    | 32478 |
| 2.50  | 32242 | 15    | 4367  |
| 2.50  | 32240 | 30    | 21384 |

Administration of anticoagulants at the time of obtaining Table 2-4 consent, according to the presence or absence of proton-pump inhibitors

UNIVARIATE Procedure

Variable: DOSE (Dose per day for DOAC only)

#### Moment

Total of 4792 for N 4792 weight variable

Mean 33.0138773 total 158202.5

Standard deviation 10.7988509 variance 116.61518

Skewness 1.70929156 kurtosis 2.36512876

Unmodified square sum 5781581.25 modified square sum 558703.327

Coefficient of variation 32.7100351 standard error of the mean 0.15599804

#### Basic statistics

##### Positional variation

Mean 33.01388 standard deviation 10.79885

Median 30.00000 variance 116.61518

Mode 30.00000 Range 55.00000

Interquartile range 0

Test for position H0:  $\mu_0=0$

Test-Statistics-----p Value

Student's t-test t 211.6301 Pr > |t| <. 0001

Sign test M 2396 Pr >= |M| <. 0001

Signed rank test S 5742014 Pr >= |S| <. 0001

Quartile (Definition 5)

Level quantile

100% max 60

99% 60

95% 60

90% 60

75% Q3 30

50% median 30

25% Q1 30

10% 30

5% 15

1% 15

0% minimum 5



Administration of anticoagulants at the time of obtaining Table 2-4 consent, according to the presence or absence of proton-pump inhibitors

UNIVARIATE Procedure

Variable: DOSE (Dose per day for DOAC only)

Extreme value

---- Minimum value----Maximum value----

| Value | Obs   | Value | Obs   |
|-------|-------|-------|-------|
| 5.0   | 20709 | 60    | 32152 |
| 5.0   | 14343 | 60    | 32202 |
| 7.5   | 1331  | 60    | 32253 |
| 10.0  | 14342 | 60    | 32416 |
| 15.0  | 32442 | 60    | 32489 |

Administration of anticoagulants at the time of obtaining Table 2-4 consent, according to the presence or absence of proton-pump inhibitors

UNIVARIATE Procedure

Variable: DOSE (Dose per day for DOAC only)

#### Moment

Total of 4752 for N 4752 weight variable

Mean 32.9729588 total 156687.5

Standard deviation 10.7604538 variance 115.787366

Skewness 1.71820116 kurtosis 2.42069509

Unmodified square sum 5716556.25 modified square sum 550105.775

Coefficient of variation 32.6341772 standard error of the mean 0.15609621

#### Basic statistics

##### Positional variation

Mean 32.97296 standard deviation 10.76045

Median 30.00000 variance 115.78737

Mode 30.00000 Range 55.00000

Interquartile range 0

##### Test for position H0: $\mu_0=0$

Test-Statistics-----p Value

Student's t-test t 211.2348 Pr > |t| <. 0001

Sign test M 2376 Pr >= |M| <. 0001

Signed rank test S 5646564 Pr >= |S| <. 0001

Quartile (Definition 5)

Level quantile

100% max 60

99% 60

95% 60

90% 60

75% Q3 30

50% median 30

25% Q1 30

10% 30

5% 15

1% 15

0% minimum 5

Administration of anticoagulants at the time of obtaining Table 2-4 consent, according to the presence or absence of proton-pump inhibitors

UNIVARIATE Procedure

Variable: DOSE (Dose per day for DOAC only)

Extreme value

---- Minimum value----Maximum value----

| Value | Obs   | Value | Obs   |
|-------|-------|-------|-------|
| 5.0   | 20709 | 60    | 32149 |
| 5.0   | 14343 | 60    | 32152 |
| 7.5   | 1331  | 60    | 32202 |
| 10.0  | 14342 | 60    | 32416 |
| 15.0  | 32442 | 60    | 32489 |

Administration of anticoagulants at the time of obtaining Table 2-4 consent, according to the presence or absence of proton-pump inhibitors

UNIVARIATE Procedure

Variable: DOSE (Dose per day for DOAC only)

#### Moment

Sum of 40 N 40 weight variables

Mean 37.875 total 1515

Standard deviation 14.0003434 variance 196.009615

Skewness 0.91953628 kurtosis-0.8964563

Unmodified square sum 65025 modified square sum 7644.375

Coefficient of variation 36.964603 standard error of the mean 2.21364866

#### Basic statistics

##### Positional variation

Mean 37.87500 standard deviation 14.00034

Median 30.00000 variance 196.00962

Mode 30.00000 Range 45.00000

Interquartile range 30.00000

##### Test for position H0: $\mu_0=0$

Test-Statistics-----p Value

Student's t-test t 17.10976 Pr > |t| <. 0001

Sign test M 20 Pr >= |M| <. 0001

Signed rank test S 410 Pr >= |S| <. 0001

Quartile (Definition 5)

Level quantile

100% max 60

99% 60

95% 60

90% 60

75% Q3 60

50% median 30

25% Q1 30

10% 30

5% 30

1% 15

0% minimum 15

Administration of anticoagulants at the time of obtaining Table 2-4 consent, according to the presence or absence of proton-pump inhibitors

UNIVARIATE Procedure

Variable: DOSE (Dose per day for DOAC only)

Extreme value

--- Minimum value--Maximum value----

Value Obs Value Obs

|    |       |    |       |
|----|-------|----|-------|
| 15 | 18632 | 60 | 23574 |
| 30 | 31156 | 60 | 26685 |
| 30 | 30986 | 60 | 30154 |
| 30 | 30251 | 60 | 30474 |
| 30 | 28756 | 60 | 32253 |

Administration of anticoagulants at the time of obtaining Table 2-4 consent, according to the presence or absence of proton-pump inhibitors

UNIVARIATE Procedure

Variable: DOSE (Dose per day for DOAC only)

#### Moment

Total of 906 for N 906 weight variable

Mean 211.368653 total 191500

Standard deviation 41.1928877 variance 1696.854

Skewness-1.0396528 kurtosis 2.49791488

Unmodified square sum 42012750 modified square sum 1535652.87

Coefficient of variation 19.4886456 standard error of the mean 1.36854203

#### Basic statistics

##### Positional variation

Mean 211.3687 standard deviation 41.19289

Median 220.0000 variance 1697

Mode 220.0000 Range 250.00000

Interquartile range 0

##### Test for position H0: $\mu_0=0$

Test-Statistics-----p Value

Student's t-test t 154.4481 Pr > |t| <. 0001

Sign test M 453 Pr >= |M| <. 0001

Signed rank test S 205435.5 Pr >= |S| <. 0001

Quartile (Definition 5)



Level quantile

100% max. 300

99% 300

95% 300

90% 220

75% Q3 220

50% median 220

25% Q1 220

10% 150

5% 110

1% 110

0% minimum 50

Administration of anticoagulants at the time of obtaining Table 2-4 consent, according to the presence or absence of proton-pump inhibitors

UNIVARIATE Procedure

Variable: DOSE (Dose per day for DOAC only)

Extreme value

--- Minimum value---Maximum value---

Value Obs Value Obs

|    |       |     |       |
|----|-------|-----|-------|
| 50 | 15254 | 300 | 28039 |
| 75 | 31507 | 300 | 29256 |
| 75 | 30747 | 300 | 29710 |
| 75 | 26708 | 300 | 31236 |
| 75 | 26699 | 300 | 31382 |

Administration of anticoagulants at the time of obtaining Table 2-4 consent, according to the presence or absence of proton-pump inhibitors

UNIVARIATE Procedure

Variable: DOSE (Dose per day for DOAC only)

#### Moment

Total of 2388 for N 2388 weight variable

Mean 11.409129 total 27245

Standard deviation 2.36785492 variance 5.6067369

Skewness 1.10612099 kurtosis 2.28373271

Unmodified square sum 324225 modified square sum 13383.281

Coefficient of variation 20.7540376 standard error of the mean 0.04845493

#### Basic statistics

##### Positional variation

Mean 11.40913 standard deviation 2.36785

Median 10.00000 variance 5.60674

Mode 10.00000 Range 30.00000

Interquartile range 5.00000

##### Test for position H0: $\mu_0=0$

Test-Statistics-----p Value

Student's t-test t 235.4586 Pr > |t| <. 0001

Sign test M 1193.5 Pr >= |M| <. 0001

Signed rank test S 1425039 Pr >= |S| <. 0001

##### Quartile (Definition 5)

Level quantile

100% max. 30

99% 15

95% 15

90% 15

75% Q3 15

50% median 10

25% Q1 10

10% 10

5% 10

1% 10

0% minimum 0

Administration of anticoagulants at the time of obtaining Table 2-4 consent, according to the presence or absence of proton-pump inhibitors

UNIVARIATE Procedure

Variable: DOSE (Dose per day for DOAC only)

Extreme value

---- Minimum value--Maximum value----

| Value | Obs   | Value | Obs   |
|-------|-------|-------|-------|
| 0.0   | 21132 | 15    | 32268 |
| 2.5   | 24892 | 15    | 32303 |
| 5.0   | 25751 | 15    | 32409 |
| 5.0   | 24889 | 30    | 2441  |
| 5.0   | 24299 | 30    | 2443  |

Administration of anticoagulants at the time of obtaining Table 2-4 consent, according to the presence or absence of proton-pump inhibitors

UNIVARIATE Procedure

Variable: DOSE (Dose per day for DOAC only)

#### Moment

Total of 3174 for N 3174 weight variable

Mean 6.2468494 total 19827.5

Standard deviation 2.45327232 variance 6.01854507

Skewness 0.97165249 kurtosis 1.70027487

Unmodified square sum 142956.25 modified square sum 19096.8435

Coefficient of variation 39.272154 standard error of the mean 0.0435454

#### Basic statistics

##### Positional variation

Mean 6.246849 standard deviation 2.45327

Median 5.000000 variance 6.01855

Mode 5.000000 Range 30.00000

Interquartile range 5.00000

##### Test for position H0: $\mu_0=0$

Test-Statistics-----p Value

Student's t-test t 143.456 Pr > |t| <. 0001

Sign test M 1586.5 Pr >= |M| <. 0001

Signed rank test S 2517776 Pr >= |S| <. 0001

Quartile (Definition 5)

Level quantile

100% max. 30.0

99% 10.0

95% 10.0

90% 10.0

75% Q3 10.0

50% median 5.0

25% Q1 5.0

10% 5.0

5% 2.5

1% 2.5

0% minimum 0.0

Administration of anticoagulants at the time of obtaining Table 2-4 consent, according to the presence or absence of proton-pump inhibitors

UNIVARIATE Procedure

Variable: DOSE (Dose per day for DOAC only)

Extreme value

---- Minimum value--Maximum value----

| Value | Obs   | Value | Obs   |
|-------|-------|-------|-------|
| 0.0   | 21126 | 10    | 32297 |
| 2.5   | 32242 | 10    | 32390 |
| 2.5   | 32240 | 10    | 32436 |
| 2.5   | 31611 | 10    | 32445 |
| 2.5   | 31419 | 30    | 21384 |



Administration of anticoagulants at the time of obtaining Table 2-4 consent, according to the presence or absence of proton-pump inhibitors

UNIVARIATE Procedure

Variable: DOSE (Dose per day for DOAC only)

#### Moment

Total of 1738 for N 1738 weight variable

Mean 32.3130035 total 56160

Standard deviation 10.2600534 variance 105.268697

Skewness 1.8148864 kurtosis 3.22202087

Unmodified square sum 1997550 modified square sum 182851.726

Coefficient of variation 31.7520885 standard error of the mean 0.24610744

#### Basic statistics

##### Positional variation

Mean 32.31300 standard deviation 10.26005

Median 30.00000 variance 105.26870

Mode 30.00000 Range 45.00000

Interquartile range 0

##### Test for position H0: $\mu_0=0$

Test-Statistics-----p Value

Student's t-test t 131.2963 Pr > |t| <. 0001

Sign test M 869 Pr >= |M| <. 0001

Signed rank test S 755595.5 Pr >= |S| <. 0001

##### Quartile (Definition 5)

Level quantile

100% max 60

99% 60

95% 60

90% 60

75% Q3 30

50% median 30

25% Q1 30

10% 30

5% 15

1% 15

0% minimum 15

Administration of anticoagulants at the time of obtaining Table 2-4 consent, according to the presence or absence of proton-pump inhibitors

UNIVARIATE Procedure

Variable: DOSE (Dose per day for DOAC only)

Extreme value

--- Minimum value--Maximum value----

Value Obs Value Obs

|    |       |    |       |
|----|-------|----|-------|
| 15 | 32442 | 60 | 30944 |
| 15 | 32382 | 60 | 31501 |
| 15 | 32372 | 60 | 32130 |
| 15 | 32278 | 60 | 32149 |
| 15 | 31783 | 60 | 32152 |

Administration of anticoagulants at the time of obtaining Table 2-4 consent, according to the presence or absence of proton-pump inhibitors

UNIVARIATE Procedure

Variable: DOSE (Dose per day for DOAC only)

#### Moment

Total of 1718 for N 1718 weight variable

Mean 32.2962747 total 55485

Standard deviation 10.243574 variance 104.930807

Skewness 1.81821374 kurtosis 3.24890777

Unmodified square sum 1972125 modified square sum 180166.196

Coefficient of variation 31.7175093 standard error of the mean 0.24713823

#### Basic statistics

##### Positional variation

Mean 32.29627 standard deviation 10.24357

Median 30.00000 variance 104.93081

Mode 30.00000 Range 45.00000

Interquartile range 0

##### Test for position H0: $\mu_0=0$

Test-Statistics-----p Value

Student's t-test t 130.681 Pr > |t| <. 0001

Sign test M 859 Pr >= |M| <. 0001

Signed rank test S 738310.5 Pr >= |S| <. 0001

Quartile (Definition 5)

Level quantile

100% max 60

99% 60

95% 60

90% 60

75% Q3 30

50% median 30

25% Q1 30

10% 30

5% 15

1% 15

0% minimum 15

Administration of anticoagulants at the time of obtaining Table 2-4 consent, according to the presence or absence of proton-pump inhibitors

UNIVARIATE Procedure

Variable: DOSE (Dose per day for DOAC only)

Extreme value

--- Minimum value--Maximum value----

Value Obs Value Obs

|    |       |    |       |
|----|-------|----|-------|
| 15 | 32442 | 60 | 30944 |
| 15 | 32382 | 60 | 31501 |
| 15 | 32372 | 60 | 32130 |
| 15 | 32278 | 60 | 32149 |
| 15 | 31783 | 60 | 32152 |

Administration of anticoagulants at the time of obtaining Table 2-4 consent, according to the presence or absence of proton-pump inhibitors

UNIVARIATE Procedure

Variable: DOSE (Dose per day for DOAC only)

#### Moment

Sum of 20 N 20 weight variables

Mean 33.75 total 675

Standard deviation 11.7959627 variance 139.144737

Skewness 1.66843958 kurtosis 2.24844886

Unmodified square sum 25425 modified square sum 2643.75

Coefficient of variation 34.9510007 standard error of the mean 2.63765745

#### Basic statistics

##### Positional variation

Mean 33.75000 standard deviation 11.79596

Median 30.00000 variance 139.14474

Mode 30.00000 Range 45.00000

Interquartile range 0

##### Test for position H0: $\mu_0=0$

Test-Statistics-----p Value

Student's t-test t 12.79544 Pr > |t| <. 0001

Sign test M 10 Pr >= |M| <. 0001

Signed rank test S 105 Pr >= |S| <. 0001

Quartile (Definition 5)

## Level quantile

|            |      |
|------------|------|
| 100% max.  | 60.0 |
| 99%        | 60.0 |
| 95%        | 60.0 |
| 90%        | 60.0 |
| 75% Q3     | 30.0 |
| 50% median | 30.0 |
| 25% Q1     | 30.0 |
| 10%        | 30.0 |
| 5%         | 22.5 |
| 1%         | 15.0 |
| 0% minimum | 15.0 |



Administration of anticoagulants at the time of obtaining Table 2-4 consent, according to the presence or absence of proton-pump inhibitors

UNIVARIATE Procedure

Variable: DOSE (Dose per day for DOAC only)

Extreme value

--- Minimum value--Maximum value----

Value Obs Value Obs

|    |       |    |       |
|----|-------|----|-------|
| 15 | 18632 | 30 | 30251 |
| 30 | 31156 | 30 | 31156 |
| 30 | 30251 | 60 | 23222 |
| 30 | 28756 | 60 | 23564 |
| 30 | 26684 | 60 | 23574 |

Administration of anticoagulants at the time of obtaining Table 2-4 consent, according to the presence or absence of proton-pump inhibitors

UNIVARIATE Procedure

Variable: DOSE (Dose per day for DOAC only)

#### Moment

Total of 1433 for N 1433 weight variable

Mean 210.362875 total 301450

Standard deviation 43.057154 variance 1853.91851

Skewness-1.0086429 kurtosis 2.35402754

Unmodified square sum 66068700 modified square sum 2654811.3

Coefficient of variation 20.4680384 standard error of the mean 1.13742357

#### Basic statistics

##### Positional variation

Mean 210.3629 standard deviation 43.05715

Median 220.0000 variance 1854

Mode 220.0000 Range 300.00000

Interquartile range 0

##### Test for position H0: $\mu_0=0$

Test-Statistics-----p Value

Student's t-test t 184.9468 Pr > |t| <. 0001

Sign test M 715.5 Pr >= |M| <. 0001

Signed rank test S 512298 Pr >= |S| <. 0001

Quartile (Definition 5)

Level quantile

100% max. 300

99% 300

95% 300

90% 220

75% Q3 220

50% median 220

25% Q1 220

10% 150

5% 110

1% 110

0% minimum 0

Administration of anticoagulants at the time of obtaining Table 2-4 consent, according to the presence or absence of proton-pump inhibitors

UNIVARIATE Procedure

Variable: DOSE (Dose per day for DOAC only)

Extreme value

--- Minimum value---Maximum value---

Value Obs Value Obs

|    |       |     |       |
|----|-------|-----|-------|
| 0  | 16400 | 300 | 28293 |
| 0  | 16399 | 300 | 28505 |
| 75 | 26696 | 300 | 29009 |
| 75 | 25847 | 300 | 29307 |
| 75 | 19451 | 300 | 30753 |

Administration of anticoagulants at the time of obtaining Table 2-4 consent, according to the presence or absence of proton-pump inhibitors

UNIVARIATE Procedure

Variable: DOSE (Dose per day for DOAC only)

#### Moment

Total of 4048 for N 4048 weight variable

Mean 11.795331 total 47747.5

Standard deviation 2.60420018 variance 6.7818586

Skewness 2.39471424 kurtosis 30.1171418

Unmodified square sum 590643.75 modified square sum 27446.1818

Coefficient of variation 22.0782289 standard error of the mean 0.04093117

#### Basic statistics

##### Positional variation

Mean 11.79533 standard deviation 2.60420

Median 10.00000 variance 6.78186

Mode 10.00000 Range 60.00000

Interquartile range 5.00000

##### Test for position H0: $\mu_0=0$

Test-Statistics-----p Value

Student's t-test t 288.1748 Pr > |t| <. 0001

Sign test M 2023.5 Pr >= |M| <. 0001

Signed rank test S 4095564 Pr >= |S| <. 0001

Quartile (Definition 5)

Level quantile

100% max 60

99% 15

95% 15

90% 15

75% Q3 15

50% median 10

25% Q1 10

10% 10

5% 10

1% 10

0% minimum 0

Administration of anticoagulants at the time of obtaining Table 2-4 consent, according to the presence or absence of proton-pump inhibitors

UNIVARIATE Procedure

Variable: DOSE (Dose per day for DOAC only)

Extreme value

--- Minimum value--Maximum value----

Value Obs Value Obs

|   |       |    |       |
|---|-------|----|-------|
| 0 | 21127 | 30 | 7339  |
| 5 | 25736 | 30 | 16123 |
| 5 | 24894 | 30 | 20502 |
| 5 | 19094 | 30 | 30152 |
| 5 | 7666  | 60 | 8437  |

Administration of anticoagulants at the time of obtaining Table 2-4 consent, according to the presence or absence of proton-pump inhibitors

UNIVARIATE Procedure

Variable: DOSE (Dose per day for DOAC only)

#### Moment

Total of 4865 for N 4865 weight variable

Mean 6.35071942 total 30896.25

Standard deviation 2.48766065 variance 6.18845549

Skewness 0.61479516 kurtosis-1.1221838

Unmodified square sum 226314.063 modified square sum 30100.6475

Coefficient of variation 39.1713203 standard error of the mean 0.03566561

#### Basic statistics

##### Positional variation

Mean 6.350719 standard deviation 2.48766

Median 5.000000 variance 6.18846

Mode 5.000000 Range 15.00000

Interquartile range 5.00000

##### Test for position H0: $\mu_0=0$

Test-Statistics-----p Value

Student's t-test t 178.0628 Pr > |t| <. 0001

Sign test M 2432 Pr >= |M| <. 0001

Signed rank test S 5915840 Pr >= |S| <. 0001

Quartile (Definition 5)



Level quantile

100% max. 15.0

99% 10.0

95% 10.0

90% 10.0

75% Q3 10.0

50% median 5.0

25% Q1 5.0

10% 5.0

5% 2.5

1% 2.5

0% minimum 0.0

Administration of anticoagulants at the time of obtaining Table 2-4 consent, according to the presence or absence of proton-pump inhibitors

UNIVARIATE Procedure

Variable: DOSE (Dose per day for DOAC only)

Extreme value

---- Minimum value----Maximum value----

| Value | Obs   | Value | Obs   |
|-------|-------|-------|-------|
| 0.00  | 21138 | 10    | 32377 |
| 1.25  | 20710 | 10    | 32380 |
| 2.50  | 31908 | 10    | 32405 |
| 2.50  | 31907 | 10    | 32478 |
| 2.50  | 31787 | 15    | 4367  |

Administration of anticoagulants at the time of obtaining Table 2-4 consent, according to the presence or absence of proton-pump inhibitors

UNIVARIATE Procedure

Variable: DOSE (Dose per day for DOAC only)

#### Moment

Total of 3054 for N 3054 weight variable

Mean 33.4127374 total 102042.5

Standard deviation 11.0756561 variance 122.670159

Skewness 1.65110986 kurtosis 1.95890114

Unmodified square sum 3784031.25 modified square sum 374511.995

Coefficient of variation 33.1480058 standard error of the mean 0.20041718

#### Basic statistics

##### Positional variation

Mean 33.41274 standard deviation 11.07566

Median 30.00000 variance 122.67016

Mode 30.00000 Range 55.00000

Interquartile range 0

Test for position H0:  $\mu_0=0$

Test-Statistics-----p Value

Student's t-test t 166.7159 Pr > |t| <. 0001

Sign test M 1527 Pr >= |M| <. 0001

Signed rank test S 2332493 Pr >= |S| <. 0001

Quartile (Definition 5)

Level quantile

100% max 60

99% 60

95% 60

90% 60

75% Q3 30

50% median 30

25% Q1 30

10% 30

5% 30

1% 15

0% minimum 5

Administration of anticoagulants at the time of obtaining Table 2-4 consent, according to the presence or absence of proton-pump inhibitors

UNIVARIATE Procedure

Variable: DOSE (Dose per day for DOAC only)

Extreme value

---- Minimum value----Maximum value----

| Value | Obs   | Value | Obs   |
|-------|-------|-------|-------|
| 5.0   | 20709 | 60    | 32123 |
| 5.0   | 14343 | 60    | 32202 |
| 7.5   | 1331  | 60    | 32253 |
| 10.0  | 14342 | 60    | 32416 |
| 15.0  | 32374 | 60    | 32489 |

Administration of anticoagulants at the time of obtaining Table 2-4 consent, according to the presence or absence of proton-pump inhibitors

UNIVARIATE Procedure

Variable: DOSE (Dose per day for DOAC only)

#### Moment

Total of 3034 for N 3034 weight variable

Mean 33.3561305 total 101202.5

Standard deviation 11.025664 variance 121.565266

Skewness 1.66323547 kurtosis 2.02751468

Unmodified square sum 3744431.25 modified square sum 368707.451

Coefficient of variation 33.0543855 standard error of the mean 0.20016907

#### Basic statistics

##### Positional variation

Mean 33.35613 standard deviation 11.02566

Median 30.00000 variance 121.56527

Mode 30.00000 Range 55.00000

Interquartile range 0

##### Test for position H0: $\mu_0=0$

Test-Statistics-----p Value

Student's t-test t 166.6398 Pr > |t| <. 0001

Sign test M 1517 Pr >= |M| <. 0001

Signed rank test S 2302048 Pr >= |S| <. 0001

Quartile (Definition 5)

Level quantile

100% max 60

99% 60

95% 60

90% 60

75% Q3 30

50% median 30

25% Q1 30

10% 30

5% 30

1% 15

0% minimum 5

Administration of anticoagulants at the time of obtaining Table 2-4 consent, according to the presence or absence of proton-pump inhibitors

UNIVARIATE Procedure

Variable: DOSE (Dose per day for DOAC only)

Extreme value

---- Minimum value----Maximum value----

| Value | Obs   | Value | Obs   |
|-------|-------|-------|-------|
| 5.0   | 20709 | 60    | 32082 |
| 5.0   | 14343 | 60    | 32123 |
| 7.5   | 1331  | 60    | 32202 |
| 10.0  | 14342 | 60    | 32416 |
| 15.0  | 32374 | 60    | 32489 |



Administration of anticoagulants at the time of obtaining Table 2-4 consent, according to the presence or absence of proton-pump inhibitors

UNIVARIATE Procedure

Variable: DOSE (Dose per day for DOAC only)

#### Moment

Sum of 20 N 20 weight variables

Mean 42.840 total

Standard deviation 15.0787407 variance 227.368421

Skewness 0.44212357 kurtosis -2.0179739

Modified Square 39600 Modified Square Sum 4320

Coefficient of variation 35.9017636 standard error of the mean 3.37170892

#### Basic statistics

##### Positional variation

Mean 42.00000 standard deviation 15.07874

Median 30.00000 variance 227.36842

Mode 30.00000 Range 30.00000

Interquartile range 30.00000

##### Test for position H0: $\mu_0=0$

Test-Statistics-----p Value

Student's t-test t 12.45659 Pr > |t| <. 0001

Sign test M 10 Pr >= |M| <. 0001

Signed rank test S 105 Pr >= |S| <. 0001

Quartile (Definition 5)

Level quantile

100% max 60

99% 60

95% 60

90% 60

75% Q3 60

50% median 30

25% Q1 30

10% 30

5% 30

1% 30

0% minimum 30

Administration of anticoagulants at the time of obtaining Table 2-4 consent, according to the presence or absence of proton-pump inhibitors

UNIVARIATE Procedure

Variable: DOSE (Dose per day for DOAC only)

Extreme value

--- Minimum value--Maximum value----

Value Obs Value Obs

|    |       |    |       |
|----|-------|----|-------|
| 30 | 30986 | 60 | 23562 |
| 30 | 27075 | 60 | 26685 |
| 30 | 23579 | 60 | 30154 |
| 30 | 17268 | 60 | 30474 |
| 30 | 16290 | 60 | 32253 |

Administration of anticoagulants at the time of obtaining Table 2-4 consent, according to the presence or absence of proton-pump inhibitors

FREQ Procedure

|      | Cumulative           |
|------|----------------------|
| t_d2 | Frequency Percentage |

---

Frequency of missing values = 32490

Administration of anticoagulants at the time of obtaining Table 2-4 consent, according to the presence or absence of proton-pump inhibitors

FREQ Procedure

Cumulative  
t\_d3 Frequency Percentage

---

Frequency of missing values = 32490

Administration of anticoagulants at the time of obtaining Table 2-4 consent, according to the presence or absence of proton-pump inhibitors

FREQ Procedure

Cumulative  
t\_d4 Frequency Percentage

---

Frequency of missing values = 32490

Administration of anticoagulants at the time of obtaining Table 2-4 consent, according to the presence or absence of proton-pump inhibitors

FREQ Procedure

Cumulative  
t\_d0 Frequency Percentage

---

Frequency of missing values = 32490

Administration of anticoagulants at the time of obtaining Table 2-4 consent, according to the presence or absence of proton-pump inhibitors

FREQ Procedure

Cumulative

t\_d5 Frequency Percentage

---

Frequency of missing values = 32490



Administration of anticoagulants at the time of obtaining Table 2-4 consent, according to the presence or absence of proton-pump inhibitors

FREQ Procedure

Cumulative  
t\_d7 Frequency Percentage

---

Frequency of missing values = 32490

Administration of anticoagulants at the time of obtaining Table 2-4 consent, according to the presence or absence of proton-pump inhibitors

FREQ Procedure

Cumulative  
t\_d2 Frequency Percentage

---

Frequency of missing values = 11981

Administration of anticoagulants at the time of obtaining Table 2-4 consent, according to the presence or absence of proton-pump inhibitors

FREQ Procedure

Cumulative

t\_d3 Frequency Percentage

---

Frequency of missing values = 11981

Administration of anticoagulants at the time of obtaining Table 2-4 consent, according to the presence or absence of proton-pump inhibitors

FREQ Procedure

Cumulative  
t\_d4 Frequency Percentage

---

Frequency of missing values = 11981

Administration of anticoagulants at the time of obtaining Table 2-4 consent, according to the presence or absence of proton-pump inhibitors

FREQ Procedure

Cumulative  
t\_d0 Frequency Percentage

---

Frequency of missing values = 11981

Administration of anticoagulants at the time of obtaining Table 2-4 consent, according to the presence or absence of proton-pump inhibitors

FREQ Procedure

Cumulative  
t\_d5 Frequency Percentage

---

Frequency of missing values = 11981

Administration of anticoagulants at the time of obtaining Table 2-4 consent, according to the presence or absence of proton-pump inhibitors

FREQ Procedure

Cumulative  
t\_d7 Frequency Percentage

---

Frequency of missing values = 11981

Administration of anticoagulants at the time of obtaining Table 2-4 consent, according to the presence or absence of proton-pump inhibitors

FREQ Procedure

Cumulative  
t\_d2 Frequency Percentage

---

Degree of missing values = 20509



Administration of anticoagulants at the time of obtaining Table 2-4 consent, according to the presence or absence of proton-pump inhibitors

FREQ Procedure

Cumulative

t\_d3 Frequency Percentage

---

Degree of missing values = 20509

Administration of anticoagulants at the time of obtaining Table 2-4 consent, according to the presence or absence of proton-pump inhibitors

FREQ Procedure

Cumulative

t\_d4 Frequency Percentage

---

Degree of missing values = 20509

Administration of anticoagulants at the time of obtaining Table 2-4 consent, according to the presence or absence of proton-pump inhibitors

FREQ Procedure

Cumulative  
t\_d0 Frequency Percentage

---

Degree of missing values = 20509

Administration of anticoagulants at the time of obtaining Table 2-4 consent, according to the presence or absence of proton-pump inhibitors

FREQ Procedure

Cumulative  
t\_d5 Frequency Percentage

---

Degree of missing values = 20509

Administration of anticoagulants at the time of obtaining Table 2-4 consent, according to the presence or absence of proton-pump inhibitors

FREQ Procedure

Cumulative  
t\_d7 Frequency Percentage

---

Degree of missing values = 20509

Administration of anticoagulants at the time of obtaining Table 2-4 consent, according to the presence or absence of proton-pump inhibitors

FREQ Procedure

Number of levels of variables

Number of Variables Level

GROUP1 2

t\_ADYN 2

Table : GROUP1 \* t\_ADYN

GROUP1 t\_ADYN

Power |

Percent |

Percent of rows

Percentage of columns | 0| 1| Sum

|       | 0     | 1     | Sum    |
|-------|-------|-------|--------|
| 1     | 818   | 11163 | 11981  |
|       | 2.52  | 34.36 | 36.88  |
|       | 6.83  | 93.17 |        |
|       | 31.75 | 37.32 |        |
| 2     | 1758  | 18751 | 20509  |
|       | 5.41  | 57.71 | 63.12  |
|       | 8.57  | 91.43 |        |
|       | 68.25 | 62.68 |        |
| Total | 2576  | 29914 | 32490  |
|       | 7.93  | 92.07 | 100.00 |

Administration of anticoagulants at the time of obtaining Table 2-4 consent, according to the presence or absence of proton-pump inhibitors

FREQ Procedure

Number of levels of variables

Number of Variables Level

GROUP1 2

Tf\_ACT1 2

Table : GROUP1 \* tf\_ACT1

GROUP1 tf\_ACT1

Power |

Percent |

Percent of rows

Percentage of columns | 0 | 1 | Sum

|       |       | + |       | + |        | + |
|-------|-------|---|-------|---|--------|---|
| 1     | 8208  |   | 2955  |   | 11163  |   |
|       | 27.44 |   | 9.88  |   | 37.32  |   |
|       | 73.53 |   | 26.47 |   |        |   |
|       | 37.97 |   | 35.62 |   |        |   |
|       |       | + |       | + |        | + |
| 2     | 13411 |   | 5340  |   | 18751  |   |
|       | 44.83 |   | 17.85 |   | 62.68  |   |
|       | 71.52 |   | 28.48 |   |        |   |
|       | 62.03 |   | 64.38 |   |        |   |
|       |       | + |       | + |        | + |
| Total | 21619 |   | 8295  |   | 29914  |   |
|       | 72.27 |   | 27.73 |   | 100.00 |   |

Administration of anticoagulants at the time of obtaining Table 2-4 consent, according to the presence or absence of proton-pump inhibitors

FREQ Procedure

Number of levels of variables

Number of Variables Level

GROUP1 2

Tf\_ACT2 2

Table : GROUP1 \* tf\_ACT2

GROUP1 tf\_ACT2

Power |

Percent |

Percent of rows

Percentage of columns | 0 | 1 | Sum

|       |       | + |       | + |        | + |
|-------|-------|---|-------|---|--------|---|
| 1     | 10257 |   | 906   |   | 11163  |   |
|       | 34.29 |   | 3.03  |   | 37.32  |   |
|       | 91.88 |   | 8.12  |   |        |   |
|       | 37.20 |   | 38.73 |   |        |   |
|       |       | + |       | + |        | + |
| 2     | 17318 |   | 1433  |   | 18751  |   |
|       | 57.89 |   | 4.79  |   | 62.68  |   |
|       | 92.36 |   | 7.64  |   |        |   |
|       | 62.80 |   | 61.27 |   |        |   |
|       |       | + |       | + |        | + |
| Total | 27575 |   | 2339  |   | 29914  |   |
|       | 92.18 |   | 7.82  |   | 100.00 |   |



Administration of anticoagulants at the time of obtaining Table 2-4 consent, according to the presence or absence of proton-pump inhibitors

FREQ Procedure

Number of levels of variables

Number of Variables Level

GROUP1 2

Tf\_ACT3 2

Table : GROUP1 \* tf\_ACT3

GROUP1 tf\_ACT3

Power |

Percent |

Percent of rows

Percentage of columns | 0| 1| Sum

|       |       | + |       | + |        | + |
|-------|-------|---|-------|---|--------|---|
| 1     | 8775  |   | 2388  |   | 11163  |   |
|       | 29.33 |   | 7.98  |   | 37.32  |   |
|       | 78.61 |   | 21.39 |   |        |   |
|       | 37.38 |   | 37.10 |   |        |   |
|       | +     |   | +     |   | +      |   |
| 2     | 14703 |   | 4048  |   | 18751  |   |
|       | 49.15 |   | 13.53 |   | 62.68  |   |
|       | 78.41 |   | 21.59 |   |        |   |
|       | 62.62 |   | 62.90 |   |        |   |
|       | +     |   | +     |   | +      |   |
| Total | 23478 |   | 6436  |   | 29914  |   |
|       | 78.48 |   | 21.52 |   | 100.00 |   |

Administration of anticoagulants at the time of obtaining Table 2-4 consent, according to the presence or absence of proton-pump inhibitors

FREQ Procedure

Number of levels of variables

Number of Variables Level

GROUP1 2

Tf\_ACT4 2

Table : GROUP1 \* tf\_ACT4

GROUP1 tf\_ACT4

Power |

Percent |

Percent of rows

Percentage of columns | 0 | 1 | Sum

|       |       | + |       | + |        | + |
|-------|-------|---|-------|---|--------|---|
| 1     | 7989  |   | 3174  |   | 11163  |   |
|       | 26.71 |   | 10.61 |   | 37.32  |   |
|       | 71.57 |   | 28.43 |   |        |   |
|       | 36.52 |   | 39.48 |   |        |   |
| 2     | 13886 |   | 4865  |   | 18751  |   |
|       | 46.42 |   | 16.26 |   | 62.68  |   |
|       | 74.05 |   | 25.95 |   |        |   |
|       | 63.48 |   | 60.52 |   |        |   |
| Total | 21875 |   | 8039  |   | 29914  |   |
|       | 73.13 |   | 26.87 |   | 100.00 |   |

Administration of anticoagulants at the time of obtaining Table 2-4 consent, according to the presence or absence of proton-pump inhibitors

FREQ Procedure

Number of levels of variables

Number of Variables Level

GROUP1 2

t\_ACT0 2

Table : GROUP1 \* t\_ACT0

GROUP1 t\_ACT0

Power |

Percent |

Percent of rows

Percentage of columns | 0 | 1 | Sum

|       |  | +     |  | +     |  | +      |
|-------|--|-------|--|-------|--|--------|
| 1     |  | 9425  |  | 1738  |  | 11163  |
|       |  | 31.51 |  | 5.81  |  | 37.32  |
|       |  | 84.43 |  | 15.57 |  |        |
|       |  | 37.52 |  | 36.27 |  |        |
|       |  | +     |  | +     |  | +      |
| 2     |  | 15697 |  | 3054  |  | 18751  |
|       |  | 52.47 |  | 10.21 |  | 62.68  |
|       |  | 83.71 |  | 16.29 |  |        |
|       |  | 62.48 |  | 63.73 |  |        |
|       |  | +     |  | +     |  | +      |
| Total |  | 25122 |  | 4792  |  | 29914  |
|       |  | 83.98 |  | 16.02 |  | 100.00 |

Administration of anticoagulants at the time of obtaining Table 2-4 consent, according to the presence or absence of proton-pump inhibitors

FREQ Procedure

Number of levels of variables

Number of Variables Level

GROUP1 2

Tf\_ACT5 2

Table : GROUP1 \* tf\_ACT5

GROUP1 tf\_ACT5

Power |

Percent |

Percent of rows

Percentage of columns | 0| 1| Sum

|       |       | +     |        | + |       | + |
|-------|-------|-------|--------|---|-------|---|
| 1     | 9445  |       | 1718   |   | 11163 |   |
|       | 31.57 |       | 5.74   |   | 37.32 |   |
|       | 84.61 |       | 15.39  |   |       |   |
|       | 37.54 |       | 36.15  |   |       |   |
|       | +     |       | +      |   | +     |   |
| 2     | 15717 |       | 3034   |   | 18751 |   |
|       | 52.54 |       | 10.14  |   | 62.68 |   |
|       | 83.82 |       | 16.18  |   |       |   |
|       | 62.46 |       | 63.85  |   |       |   |
|       | +     |       | +      |   | +     |   |
| Total | 25162 | 4752  | 29914  |   |       |   |
|       | 84.11 | 15.89 | 100.00 |   |       |   |

Administration of anticoagulants at the time of obtaining Table 2-4 consent, according to the presence or absence of proton-pump inhibitors

FREQ Procedure

Number of levels of variables

Number of Variables Level

GROUP1 2

Tf\_ACT7 2

Table : GROUP1 \* tf\_ACT7

GROUP1 tf\_ACT7

Power |

Percent |

Percent of rows

Percentage of columns | 0 | 1 | Sum

|       |       | + |       | + |        | + |
|-------|-------|---|-------|---|--------|---|
| 1     | 11143 |   | 20    |   | 11163  |   |
|       | 37.25 |   | 0.07  |   | 37.32  |   |
|       | 99.82 |   | 0.18  |   |        |   |
|       | 37.30 |   | 50.00 |   |        |   |
|       |       | + |       | + |        |   |
| 2     | 18731 |   | 20    |   | 18751  |   |
|       | 62.62 |   | 0.07  |   | 62.68  |   |
|       | 99.89 |   | 0.11  |   |        |   |
|       | 62.70 |   | 50.00 |   |        |   |
|       |       | + |       | + |        |   |
| Total | 29874 |   | 40    |   | 29914  |   |
|       | 99.87 |   | 0.13  |   | 100.00 |   |

Administration of anticoagulants at the time of obtaining Table 2-4 consent, according to the presence or absence of proton-pump inhibitors

FREQ Procedure

Number of levels of variables

Number of Variables Level

GROUP1 2

Tf\_ACT6 2

Table : GROUP1 \* tf\_ACT6

GROUP1 tf\_ACT6

Power |

Percent |

Percent of rows

Percentage of columns | 0| 1| Sum

|       |       | +     |       | +     |       | +      |
|-------|-------|-------|-------|-------|-------|--------|
|       | 1     | 11161 |       | 2     | 11163 |        |
|       |       | 37.31 |       | 0.01  | 37.32 |        |
|       |       | 99.98 |       | 0.02  |       |        |
|       |       | 37.33 |       | 15.38 |       |        |
|       |       | +     |       | +     |       | +      |
|       | 2     | 18740 |       | 11    | 18751 |        |
|       |       | 62.65 |       | 0.04  | 62.68 |        |
|       |       | 99.94 |       | 0.06  |       |        |
|       |       | 62.67 |       | 84.62 |       |        |
|       |       | +     |       | +     |       | +      |
| Total | 29901 | 13    | 29914 |       |       |        |
|       |       | 99.96 |       | 0.04  |       | 100.00 |

Administration of anticoagulants at the time of obtaining Table 2-4 consent, according to the presence or absence of proton-pump inhibitors

FREQ Procedure

Number of levels of variables

Number of Variables Level

GROUP1 2

t\_ACT1 2

Table : GROUP1 \* t\_ACT1

GROUP1 t\_ACT1

Power |

Percent |

Percent of rows

Percentage of columns | 0| 1| Sum

|       |    | +     | +     | +      |
|-------|----|-------|-------|--------|
| 1     | 2  | 11161 | 11163 |        |
|       |    | 0.01  | 37.31 | 37.32  |
|       |    | 0.02  | 99.98 |        |
|       |    | 15.38 | 37.33 |        |
|       |    | +     | +     | +      |
| 2     | 11 | 18740 | 18751 |        |
|       |    | 0.04  | 62.65 | 62.68  |
|       |    | 0.06  | 99.94 |        |
|       |    | 84.62 | 62.67 |        |
|       |    | +     | +     | +      |
| Total | 13 | 29901 | 29914 |        |
|       |    | 0.04  | 99.96 | 100.00 |

Administration of anticoagulants at the time of obtaining Table 2-4 consent, according to the presence or absence of proton-pump inhibitors

FREQ Procedure

Number of levels of variables

Number of Variables Level

GROUP1 2

t\_ACT2 2

Table : GROUP1 \* t\_ACT2

GROUP1 t\_ACT2

Power |

Percent |

Percent of rows

Percentage of columns | 0| 1| Sum

|       |       | + |       | + |        | + |
|-------|-------|---|-------|---|--------|---|
| 1     | 2957  |   | 8206  |   | 11163  |   |
|       | 9.89  |   | 27.43 |   | 37.32  |   |
|       | 26.49 |   | 73.51 |   |        |   |
|       | 35.59 |   | 37.98 |   |        |   |
|       | +     |   | +     |   | +      |   |
| 2     | 5351  |   | 13400 |   | 18751  |   |
|       | 17.89 |   | 44.80 |   | 62.68  |   |
|       | 28.54 |   | 71.46 |   |        |   |
|       | 64.41 |   | 62.02 |   |        |   |
|       | +     |   | +     |   | +      |   |
| Total | 8308  |   | 21606 |   | 29914  |   |
|       | 27.77 |   | 72.23 |   | 100.00 |   |



Administration of anticoagulants at the time of obtaining Table 2-4 consent, according to the presence or absence of proton-pump inhibitors

FREQ Procedure

Number of levels of variables

Number of Variables Level

GROUP1 2

t\_ACT3 2

Table : GROUP1 \* t\_ACT3

GROUP1 t\_ACT3

Power |

Percent |

Percent of rows

Percentage of columns | 0| 1| Sum

|       | +     | +     | +      |
|-------|-------|-------|--------|
| 1     | 3863  | 7300  | 11163  |
|       | 12.91 | 24.40 | 37.32  |
|       | 34.61 | 65.39 |        |
|       | 36.28 | 37.89 |        |
|       | +     | +     | +      |
| 2     | 6784  | 11967 | 18751  |
|       | 22.68 | 40.00 | 62.68  |
|       | 36.18 | 63.82 |        |
|       | 63.72 | 62.11 |        |
|       | +     | +     | +      |
| Total | 10647 | 19267 | 29914  |
|       | 35.59 | 64.41 | 100.00 |

Administration of anticoagulants at the time of obtaining Table 2-4 consent, according to the presence or absence of proton-pump inhibitors

FREQ Procedure

Number of levels of variables

Variables Label Level Number

GROUP1 2

VISITAD Visit and Drug Administration 3

Table : GROUP1 \* VISITAD

GROUP1

VISITAD(Visit and Drug Administration)

Power |

Percent |

Percent of rows

Percent of column |Month |Month |Month |First dose |Total

Within | |

|       | +     | +     | +     | +      |
|-------|-------|-------|-------|--------|
| 1     | 2914  | 8     | 8     | 2930   |
|       | 35.44 | 0.10  | 0.10  | 35.63  |
|       | 99.45 | 0.27  | 0.27  |        |
|       | 35.66 | 28.57 | 34.78 |        |
|       | +     | +     | +     | +      |
| 2     | 5258  | 20    | 15    | 5293   |
|       | 63.94 | 0.24  | 0.18  | 64.37  |
|       | 99.34 | 0.38  | 0.28  |        |
|       | 64.34 | 71.43 | 65.22 |        |
|       | +     | +     | +     | +      |
| Total | 8172  | 28    | 23    | 8223   |
|       | 99.38 | 0.34  | 0.28  | 100.00 |

Administration of anticoagulants at the time of obtaining Table 2-4 consent, according to the presence or absence of proton-pump inhibitors

FREQ Procedure

Number of levels of variables

Variables Label Level Number

GROUP1 2

VISITAD Visit and Drug Administration 3

Table : GROUP1 \* VISITAD

GROUP1

VISITAD(Visit and Drug Administration)

Power |

Percent |

Percent of rows

Percent of column |Month |Month |Month |First dose |Total

Within | |

|       | +     | +     | +     | +      |
|-------|-------|-------|-------|--------|
| 1     | 875   | 9     | 8     | 892    |
|       | 37.93 | 0.39  | 0.35  | 38.66  |
|       | 98.09 | 1.01  | 0.90  |        |
|       | 38.61 | 39.13 | 44.44 |        |
|       | +     | +     | +     | +      |
| 2     | 1391  | 14    | 10    | 1415   |
|       | 60.29 | 0.61  | 0.43  | 61.34  |
|       | 98.30 | 0.99  | 0.71  |        |
|       | 61.39 | 60.87 | 55.56 |        |
|       | +     | +     | +     | +      |
| Total | 2266  | 23    | 18    | 2307   |
|       | 98.22 | 1.00  | 0.78  | 100.00 |

Administration of anticoagulants at the time of obtaining Table 2-4 consent, according to the presence or absence of proton-pump inhibitors

FREQ Procedure

Number of levels of variables

Variables Label Level Number

GROUP1 2

VISITAD Visit and Drug Administration 3

Table : GROUP1 \* VISITAD

GROUP1

VISITAD(Visit and Drug Administration)

Power |

Percent |

Percent of rows

Percent of column |Month |Month |Month |First dose |Total

Within | |

|       | +     | +     | +     | +      |
|-------|-------|-------|-------|--------|
| 1     | 2297  | 38    | 29    | 2364   |
|       | 36.00 | 0.60  | 0.45  | 37.05  |
|       | 97.17 | 1.61  | 1.23  |        |
|       | 37.28 | 34.86 | 26.36 |        |
|       | +     | +     | +     | +      |
| 2     | 3865  | 71    | 81    | 4017   |
|       | 60.57 | 1.11  | 1.27  | 62.95  |
|       | 96.22 | 1.77  | 2.02  |        |
|       | 62.72 | 65.14 | 73.64 |        |
|       | +     | +     | +     | +      |
| Total | 6162  | 109   | 110   | 6381   |
|       | 96.57 | 1.71  | 1.72  | 100.00 |

Administration of anticoagulants at the time of obtaining Table 2-4 consent, according to the presence or absence of proton-pump inhibitors

FREQ Procedure

Number of levels of variables

Variables Label Level Number

GROUP1 2

VISITAD Visit and Drug Administration 3

Table : GROUP1 \* VISITAD

GROUP1

VISITAD(Visit and Drug Administration)

Power |

Percent |

Percent of rows

Percent of column |Month |Month |Month |First dose |Total

Within | |

|       | +     | +     | +     | +      |
|-------|-------|-------|-------|--------|
| 1     | 3062  | 54    | 43    | 3159   |
|       | 38.25 | 0.67  | 0.54  | 39.46  |
|       | 96.93 | 1.71  | 1.36  |        |
|       | 39.52 | 42.19 | 33.08 |        |
|       | +     | +     | +     | +      |
| 2     | 4685  | 74    | 87    | 4846   |
|       | 58.53 | 0.92  | 1.09  | 60.54  |
|       | 96.68 | 1.53  | 1.80  |        |
|       | 60.48 | 57.81 | 66.92 |        |
|       | +     | +     | +     | +      |
| Total | 7747  | 128   | 130   | 8005   |
|       | 96.78 | 1.60  | 1.62  | 100.00 |

Administration of anticoagulants at the time of obtaining Table 2-4 consent, according to the presence or absence of proton-pump inhibitors

FREQ Procedure

Number of levels of variables

Variables Label Level Number

GROUP1 2

VISITAD Visit and Drug Administration 3

Table : GROUP1 \* VISITAD

GROUP1

VISITAD(Visit and Drug Administration)

Power |

Percent |

Percent of rows

Percent of column |Month |Month |Month |First dose |Total

Within | |

|       | +     | +     | +     | +      |
|-------|-------|-------|-------|--------|
| 1     | 1528  | 65    | 135   | 1728   |
|       | 32.05 | 1.36  | 2.83  | 36.25  |
|       | 88.43 | 3.76  | 7.81  |        |
|       | 36.90 | 28.76 | 33.75 |        |
|       | +     | +     | +     | +      |
| 2     | 2613  | 161   | 265   | 3039   |
|       | 54.81 | 3.38  | 5.56  | 63.75  |
|       | 85.98 | 5.30  | 8.72  |        |
|       | 63.10 | 71.24 | 66.25 |        |
|       | +     | +     | +     | +      |
| Total | 4141  | 226   | 400   | 4767   |
|       | 86.87 | 4.74  | 8.39  | 100.00 |

Administration of anticoagulants at the time of obtaining Table 2-4 consent, according to the presence or absence of proton-pump inhibitors

FREQ Procedure

Number of levels of variables

Variables Label Level Number

GROUP1 2

VISITAD Visit and Drug Administration 3

Table : GROUP1 \* VISITAD

GROUP1

VISITAD(Visit and Drug Administration)

Power |

Percent |

Percent of rows

Percent of column |Month |Month |Month |First dose |Total

Within | |

|       | +     | +     | +     | +      |
|-------|-------|-------|-------|--------|
| 1     | 1508  | 65    | 135   | 1708   |
|       | 31.90 | 1.38  | 2.86  | 36.13  |
|       | 88.29 | 3.81  | 7.90  |        |
|       | 36.74 | 28.89 | 34.01 |        |
|       | +     | +     | +     | +      |
| 2     | 2597  | 160   | 262   | 3019   |
|       | 54.94 | 3.38  | 5.54  | 63.87  |
|       | 86.02 | 5.30  | 8.68  |        |
|       | 63.26 | 71.11 | 65.99 |        |
|       | +     | +     | +     | +      |
| Total | 4105  | 225   | 397   | 4727   |
|       | 86.84 | 4.76  | 8.40  | 100.00 |

Administration of anticoagulants at the time of obtaining Table 2-4 consent, according to the presence or absence of proton-pump inhibitors

FREQ Procedure

Number of levels of variables

Variables Label Level Number

GROUP1 2

VISITAD Visit and Drug Administration 3

Table : GROUP1 \* VISITAD

GROUP1

VISITAD(Visit and Drug Administration)

Power |

Percent |

Percent of rows

Percent of column |Month |Month |Month |First dose |Total

Within | |

|                 | +      | +      | +      | +      |
|-----------------|--------|--------|--------|--------|
| 1               | 20     | 0      | 0      | 20     |
|                 | 50.00  | 0.00   | 0.00   | 50.00  |
|                 | 100.00 | 0.00   | 0.00   |        |
|                 | 55.56  | 0.00   | 0.00   |        |
|                 | +      | +      | +      | +      |
| 2               | 16     | 1      | 3      | 20     |
|                 | 40.00  | 2.50   | 7.50   | 50.00  |
|                 | 80.00  | 5.00   | 15.00  |        |
|                 | 44.44  | 100.00 | 100.00 |        |
|                 | +      | +      | +      | +      |
| Total 36 1 3 40 | 90.00  | 2.50   | 7.50   | 100.00 |



Administration of anticoagulants at the time of obtaining Table 2-4 consent, according to the presence or absence of proton-pump inhibitors

FREQ Procedure

Number of levels of variables

Variables Label Level Number

---

GROUP1 2

VISITAD Visit and Drug Administration 1

Table : GROUP1 \* VISITAD

GROUP1

VISITAD(Visit and Drug Administration)

Power |

Percent |

Percent of rows

Percent of column |Month | Total

Breakforward |

|             | +      | +      |
|-------------|--------|--------|
| 1           | 1      | 1      |
|             | 9.09   | 9.09   |
|             | 100.00 |        |
|             | 9.09   |        |
| +           | +      |        |
| 2           | 10     | 10     |
|             | 90.91  | 90.91  |
|             | 100.00 |        |
|             | 90.91  |        |
| +           | +      |        |
| Total 11 11 |        |        |
|             | 100.00 | 100.00 |

Administration of anticoagulants at the time of obtaining Table 2-4 consent, according to the presence or absence of proton-pump inhibitors

FREQ Procedure

Number of levels of variables

Variables Label Level Number

GROUP1 2

DOSE Dose per day for DOAC only 5

Table : GROUP1 \* DOSE

GROUP1 DOSE(Dose per day for DOAC only)

Power |

Percent |

Percent of rows

Column percent| 75| 110| 150| 220| 300| Total

|       | 75    | 110   | 150   | 220   | 300   | Total  |
|-------|-------|-------|-------|-------|-------|--------|
| 1     | 5     | 74    | 45    | 725   | 55    | 904    |
|       | 0.21  | 3.17  | 1.93  | 31.08 | 2.36  | 38.75  |
|       | 0.55  | 8.19  | 4.98  | 80.20 | 6.08  |        |
|       | 45.45 | 36.10 | 36.59 | 39.27 | 37.16 |        |
| 2     | 6     | 131   | 78    | 1121  | 93    | 1429   |
|       | 0.26  | 5.62  | 3.34  | 48.05 | 3.99  | 61.25  |
|       | 0.42  | 9.17  | 5.46  | 78.45 | 6.51  |        |
|       | 54.55 | 63.90 | 63.41 | 60.73 | 62.84 |        |
| Total | 11    | 205   | 123   | 1846  | 148   | 2333   |
|       | 0.47  | 8.79  | 5.27  | 79.13 | 6.34  | 100.00 |

Administration of anticoagulants at the time of obtaining Table 2-4 consent, according to the presence or absence of proton-pump inhibitors

FREQ Procedure

Number of levels of variables

Variables Label Level Number

---

GROUP1 2

DOSE Dose per day for DOAC only 2

Table : GROUP1 \* DOSE

GROUP1

DOSE(Dose per day for DOAC only)

Power |

Percent |

Percent of rows

Percentage of columns | 10| 15| Total

|       | +     | +     | +      |
|-------|-------|-------|--------|
| 1     | 1695  | 678   | 2373   |
|       | 26.46 | 10.58 | 37.04  |
|       | 71.43 | 28.57 |        |
|       | 39.44 | 32.15 |        |
|       | +     | +     | +      |
| 2     | 2603  | 1431  | 4034   |
|       | 40.63 | 22.33 | 62.96  |
|       | 64.53 | 35.47 |        |
|       | 60.56 | 67.85 |        |
|       | +     | +     | +      |
| Total | 4298  | 2109  | 6407   |
|       | 67.08 | 32.92 | 100.00 |

Administration of anticoagulants at the time of obtaining Table 2-4 consent, according to the presence or absence of proton-pump inhibitors

FREQ Procedure

Number of levels of variables

Variables Label Level Number

---

GROUP1 2

DOSE Dose per day for DOAC only 3

Table : GROUP1 \* DOSE

GROUP1 DOSE(Dose per day for DOAC only)

Power |

Percent |

Percent of rows

Percent of columns | 2.5| 5| 10| Total

|       |       |       |       |        |   |  |   |
|-------|-------|-------|-------|--------|---|--|---|
|       | +     |       | +     |        | + |  | + |
| 1     | 198   | 2086  | 885   | 3169   |   |  |   |
|       | 2.47  | 25.98 | 11.02 | 39.47  |   |  |   |
|       | 6.25  | 65.83 | 27.93 |        |   |  |   |
|       | 38.22 | 40.48 | 37.53 |        |   |  |   |
|       | +     |       | +     |        | + |  | + |
| 2     | 320   | 3067  | 1473  | 4860   |   |  |   |
|       | 3.99  | 38.20 | 18.35 | 60.53  |   |  |   |
|       | 6.58  | 63.11 | 30.31 |        |   |  |   |
|       | 61.78 | 59.52 | 62.47 |        |   |  |   |
|       | +     |       | +     |        | + |  | + |
| Total | 518   | 5153  | 2358  | 8029   |   |  |   |
|       | 6.45  | 64.18 | 29.37 | 100.00 |   |  |   |

Administration of anticoagulants at the time of obtaining Table 2-4 consent, according to the presence or absence of proton-pump inhibitors

FREQ Procedure

Number of levels of variables

Variables Label Level Number

---

GROUP1 2

DOSE Dose per day for DOAC only 3

Table : GROUP1 \* DOSE

GROUP1 DOSE(Dose per day for DOAC only)

Power |

Percent |

Percent of rows

Percentage of columns | 15| 30| 60| Total

|       | 15    | 30    | 60    | Total  |
|-------|-------|-------|-------|--------|
| 1     | 106   | 1445  | 187   | 1738   |
|       | 2.21  | 30.18 | 3.91  | 36.30  |
|       | 6.10  | 83.14 | 10.76 |        |
|       | 43.62 | 36.68 | 30.86 |        |
| 2     | 137   | 2494  | 419   | 3050   |
|       | 2.86  | 52.09 | 8.75  | 63.70  |
|       | 4.49  | 81.77 | 13.74 |        |
|       | 56.38 | 63.32 | 69.14 |        |
| Total | 243   | 3939  | 606   | 4788   |
|       | 5.08  | 82.27 | 12.66 | 100.00 |

Administration of anticoagulants at the time of obtaining Table 2-4 consent, according to the presence or absence of proton-pump inhibitors

FREQ Procedure

Number of levels of variables

Variables Label Level Number

GROUP1 2

DOSE Dose per day for DOAC only 3

Table : GROUP1 \* DOSE

GROUP1 DOSE(Dose per day for DOAC only)

Power |

Percent |

Percent of rows

Percentage of columns | 15| 30| 60| Total

|       | 15    | 30    | 60    | Total  |
|-------|-------|-------|-------|--------|
| 1     | 105   | 1429  | 184   | 1718   |
|       | 2.21  | 30.10 | 3.88  | 36.18  |
|       | 6.11  | 83.18 | 10.71 |        |
|       | 43.39 | 36.54 | 30.92 |        |
| 2     | 137   | 2482  | 411   | 3030   |
|       | 2.89  | 52.27 | 8.66  | 63.82  |
|       | 4.52  | 81.91 | 13.56 |        |
|       | 56.61 | 63.46 | 69.08 |        |
| Total | 242   | 3911  | 595   | 4748   |
|       | 5.10  | 82.37 | 12.53 | 100.00 |

Administration of anticoagulants at the time of obtaining Table 2-4 consent, according to the presence or absence of proton-pump inhibitors

FREQ Procedure

Number of levels of variables

Variables Label Level Number

GROUP1 2

DOSE Dose per day for DOAC only 3

Table : GROUP1 \* DOSE

GROUP1 DOSE(Dose per day for DOAC only)

Power |

Percent |

Percent of rows

Percentage of columns | 15| 30| 60| Total

|       | 15     | 30    | 60    | Total  |
|-------|--------|-------|-------|--------|
| 1     | 1      | 16    | 3     | 20     |
|       | 2.50   | 40.00 | 7.50  | 50.00  |
|       | 5.00   | 80.00 | 15.00 |        |
|       | 100.00 | 57.14 | 27.27 |        |
| 2     | 0      | 12    | 8     | 20     |
|       | 0.00   | 30.00 | 20.00 | 50.00  |
|       | 0.00   | 60.00 | 40.00 |        |
|       | 0.00   | 42.86 | 72.73 |        |
| Total | 1      | 28    | 11    | 40     |
|       | 2.50   | 70.00 | 27.50 | 100.00 |

Administration of anticoagulants at the time of obtaining Table 2-4 consent, according to the presence or absence of proton-pump inhibitors

FREQ Procedure

Number of levels of variables

Variables Label Level Number

---

GROUP1 2

DOSECNT Dose per 1time for DOAC only 2

Table : GROUP1 \* DOSECNT

GROUP1

DOSECNT(Dose per 1time for DOAC only)

Power |

Percent |

Percent of rows

Percentage of columns | 1| 2| Total

|          | +     | +     | +      |
|----------|-------|-------|--------|
| 1        | 5     | 901   | 906    |
|          | 0.21  | 38.55 | 38.77  |
|          | 0.55  | 99.45 |        |
|          | 33.33 | 38.80 |        |
|          | +     | +     | +      |
| 2        | 10    | 1421  | 1431   |
|          | 0.43  | 60.80 | 61.23  |
|          | 0.70  | 99.30 |        |
|          | 66.67 | 61.20 |        |
|          | +     | +     | +      |
| Total 15 | 2322  | 2337  |        |
|          | 0.64  | 99.36 | 100.00 |



Administration of anticoagulants at the time of obtaining Table 2-4 consent, according to the presence or absence of proton-pump inhibitors

FREQ Procedure

Number of levels of variables

Variables Label Level Number

---

GROUP1 2

DOSECNT Dose per 1time for DOAC only 2

Table : GROUP1 \* DOSECNT

GROUP1

DOSECNT(Dose per 1time for DOAC only)

Power |

Percent |

Percent of rows

Percentage of columns | 1| 2| Total

|       | +           | +     | +      |
|-------|-------------|-------|--------|
| 1     | 2384        | 3     | 2387   |
|       | 37.05       | 0.05  | 37.10  |
|       | 99.87       | 0.13  |        |
|       | 37.09       | 50.00 |        |
|       | +           | +     | +      |
| 2     | 4044        | 3     | 4047   |
|       | 62.85       | 0.05  | 62.90  |
|       | 99.93       | 0.07  |        |
|       | 62.91       | 50.00 |        |
|       | +           | +     | +      |
| Total | 6428 6 6434 |       |        |
|       | 99.91       | 0.09  | 100.00 |

Administration of anticoagulants at the time of obtaining Table 2-4 consent, according to the presence or absence of proton-pump inhibitors

FREQ Procedure

Number of levels of variables

Variables Label Level Number

---

GROUP1 2

DOSECNT Dose per 1time for DOAC only 2

Table : GROUP1 \* DOSECNT

GROUP1

DOSECNT(Dose per 1time for DOAC only)

Power |

Percent |

Percent of rows

Percentage of columns | 1| 2| Total

|       | +     | +     | +      |
|-------|-------|-------|--------|
| 1     | 26    | 3146  | 3172   |
|       | 0.32  | 39.15 | 39.48  |
|       | 0.82  | 99.18 |        |
|       | 40.63 | 39.47 |        |
|       | +     | +     | +      |
| 2     | 38    | 4825  | 4863   |
|       | 0.47  | 60.05 | 60.52  |
|       | 0.78  | 99.22 |        |
|       | 59.38 | 60.53 |        |
|       | +     | +     | +      |
| Total | 64    | 7971  | 8035   |
|       | 0.80  | 99.20 | 100.00 |

Administration of anticoagulants at the time of obtaining Table 2-4 consent, according to the presence or absence of proton-pump inhibitors

FREQ Procedure

Number of levels of variables

Variables Label Level Number

---

GROUP1 2

DOSECNT Dose per 1time for DOAC only 2

Table : GROUP1 \* DOSECNT

GROUP1

DOSECNT(Dose per 1time for DOAC only)

Power |

Percent |

Percent of rows

Percentage of columns | 1| 2| Total

|       | +     |       | +      |  | + |
|-------|-------|-------|--------|--|---|
| 1     | 1736  | 2     | 1738   |  |   |
|       | 36.23 | 0.04  | 36.28  |  |   |
|       | 99.88 | 0.12  |        |  |   |
|       | 36.27 | 40.00 |        |  |   |
|       | +     |       | +      |  | + |
| 2     | 3050  | 3     | 3053   |  |   |
|       | 63.66 | 0.06  | 63.72  |  |   |
|       | 99.90 | 0.10  |        |  |   |
|       | 63.73 | 60.00 |        |  |   |
|       | +     |       | +      |  | + |
| Total | 4786  | 5     | 4791   |  |   |
|       | 99.90 | 0.10  | 100.00 |  |   |

Administration of anticoagulants at the time of obtaining Table 2-4 consent, according to the presence or absence of proton-pump inhibitors

FREQ Procedure

Number of levels of variables

Variables Label Level Number

---

GROUP1 2

DOSECNT Dose per 1time for DOAC only 2

Table : GROUP1 \* DOSECNT

GROUP1

DOSECNT(Dose per 1time for DOAC only)

Power |

Percent |

Percent of rows

Percentage of columns | 1| 2| Total

|       | +     | +     | +      |
|-------|-------|-------|--------|
| 1     | 1717  | 1     | 1718   |
|       | 36.14 | 0.02  | 36.16  |
|       | 99.94 | 0.06  |        |
|       | 36.17 | 25.00 |        |
|       | +     | +     | +      |
| 2     | 3030  | 3     | 3033   |
|       | 63.78 | 0.06  | 63.84  |
|       | 99.90 | 0.10  |        |
|       | 63.83 | 75.00 |        |
|       | +     | +     | +      |
| Total | 4747  | 4     | 4751   |
|       | 99.92 | 0.08  | 100.00 |

Administration of anticoagulants at the time of obtaining Table 2-4 consent, according to the presence or absence of proton-pump inhibitors

FREQ Procedure

Number of levels of variables

Variables Label Level Number

---

GROUP1 2

DOSECNT Dose per 1time for DOAC only 2

Table : GROUP1 \* DOSECNT

GROUP1

DOSECNT(Dose per 1time for DOAC only)

Power |

Percent |

Percent of rows

Percentage of columns | 1| 2| Total

|               | +      | +      | +      |
|---------------|--------|--------|--------|
| 1             | 19     | 1      | 20     |
|               | 47.50  | 2.50   | 50.00  |
|               | 95.00  | 5.00   |        |
|               | 48.72  | 100.00 |        |
| +             | +      | +      | +      |
| 2             | 20     | 0      | 20     |
|               | 50.00  | 0.00   | 50.00  |
|               | 100.00 | 0.00   |        |
|               | 51.28  | 0.00   |        |
| +             | +      | +      | +      |
| Total 39 1 40 | 97.50  | 2.50   | 100.00 |

Administration of anticoagulants at the time of obtaining Table 2-4 consent, according to the presence or absence of proton-pump inhibitors

TTEST Procedure

Variable: DOSE (Dose per day for DOAC only)

GROUP1 N Mean Standard Deviation Standard Error Minimum Value Maximum Value

|            |        |         |         |        |         |       |
|------------|--------|---------|---------|--------|---------|-------|
| 1          | 906    | 211.4   | 41.1929 | 1.3685 | 50.0000 | 300.0 |
| 2          | 1433   | 210.4   | 43.0572 | 1.1374 | 0       | 300.0 |
| Diff (1-2) | 1.0058 | 42.3450 | 1.7973  |        |         |       |

To the mean standard deviation

GROUP1 methods Mean 95% confidence limits standard deviation 95% confidence limits

|                          |         |         |        |         |         |         |
|--------------------------|---------|---------|--------|---------|---------|---------|
| 1                        |         | 211.4   | 208.7  | 214.1   | 41.1929 | 39.3796 |
|                          | 43.1825 |         |        |         |         |         |
| 2                        |         | 210.4   | 208.1  | 212.6   | 43.0572 | 41.5365 |
|                          | 44.6942 |         |        |         |         |         |
| Diff (1-2) Pooled        | 1.0058  | -2.5188 | 4.5303 | 42.3450 | 41.1651 | 43.5949 |
| Diff (1-2) Satterthwaite | 1.0058  | -2.4841 | 4.4957 |         |         |         |

Technique Dispersion degrees of freedom t-value Pr > |t|

Pooled Equal 2337 0.56 0.5758

Satterthwaite Unequal 1987.7 0.57 0.5720

Isodispersity

Technique Degree of Freedom of Numerators Degree of Freedom of the denominator F Value Pr > F

Folded F 1432 905 1.09 0.1432

Administration of anticoagulants at the time of obtaining Table 2-4 consent, according to the presence or absence of proton-pump inhibitors

TTEST Procedure

Variable: DOSE (Dose per day for DOAC only)

GROUP1 N Mean Standard Deviation Standard Error Minimum Value Maximum Value

|            |         |         |        |        |   |         |
|------------|---------|---------|--------|--------|---|---------|
| 1          | 2388    | 11.4091 | 2.3679 | 0.0485 | 0 | 30.0000 |
| 2          | 4048    | 11.7953 | 2.6042 | 0.0409 | 0 | 60.0000 |
| Diff (1-2) | -0.3862 | 2.5191  | 0.0650 |        |   |         |

To the mean standard deviation

GROUP1 methods Mean 95% confidence limits standard deviation 95% confidence limits

|                          |         |         |         |         |        |        |
|--------------------------|---------|---------|---------|---------|--------|--------|
| 1                        |         | 11.4091 | 11.3141 | 11.5041 | 2.3679 | 2.3026 |
| 2.4370                   |         |         |         |         |        |        |
| 2                        |         | 11.7953 | 11.7151 | 11.8756 | 2.6042 | 2.5487 |
| 2.6622                   |         |         |         |         |        |        |
| Diff (1-2) Pooled        | -0.3862 | -0.5136 | -0.2588 | 2.5191  | 2.4763 | 2.5634 |
| Diff (1-2) Satterthwaite | -0.3862 | -0.5105 | -0.2619 |         |        |        |

Technique Dispersion degrees of freedom t-value Pr > |t|

Pooled Equal 6434 -5.94 <. 0001

Satterthwaite Unequal 5390.2 -6.09 <. 0001

Isodispersity

Technique Degree of Freedom of Numerators Degree of Freedom of the denominator F Value Pr > F

Folded F 4047 2387 1.21 <. 0001

Administration of anticoagulants at the time of obtaining Table 2-4 consent, according to the presence or absence of proton-pump inhibitors

TTEST Procedure

Variable: DOSE (Dose per day for DOAC only)

GROUP1 N Mean Standard Deviation Standard Error Minimum Value Maximum Value

|            |         |        |        |        |   |         |
|------------|---------|--------|--------|--------|---|---------|
| 1          | 3174    | 6.2468 | 2.4533 | 0.0435 | 0 | 30.0000 |
| 2          | 4865    | 6.3507 | 2.4877 | 0.0357 | 0 | 15.0000 |
| Diff (1-2) | -0.1039 | 2.4741 | 0.0565 |        |   |         |

To the mean standard deviation

GROUP1 methods Mean 95% confidence limits standard deviation 95% confidence limits

|                          |         |         |         |        |        |        |
|--------------------------|---------|---------|---------|--------|--------|--------|
| 1                        |         | 6.2468  | 6.1615  | 6.3322 | 2.4533 | 2.3944 |
| 2.5152                   |         |         |         |        |        |        |
| 2                        |         | 6.3507  | 6.2808  | 6.4206 | 2.4877 | 2.4392 |
| 2.5381                   |         |         |         |        |        |        |
| Diff (1-2) Pooled        | -0.1039 | -0.2145 | 0.00679 | 2.4741 | 2.4365 | 2.5130 |
| Diff (1-2) Satterthwaite | -0.1039 | -0.2142 | 0.00647 |        |        |        |

Technique Dispersion degrees of freedom t-value Pr > |t|

Pooled Equal 8037 -1.84 0.0658

Satterthwaite Unequal 6847.7 -1.85 0.0650

Isodispersity

Technique Degree of Freedom of Numerators Degree of Freedom of the denominator F Value Pr > F

Folded F 4864 3173 1.03 0.3901



Administration of anticoagulants at the time of obtaining Table 2-4 consent, according to the presence or absence of proton-pump inhibitors

TTEST Procedure

Variable: DOSE (Dose per day for DOAC only)

GROUP1 N Mean Standard Deviation Standard Error Minimum Value Maximum Value

|                                   |      |         |         |        |         |         |
|-----------------------------------|------|---------|---------|--------|---------|---------|
| 1                                 | 1738 | 32.3130 | 10.2601 | 0.2461 | 15.0000 | 60.0000 |
| 2                                 | 3054 | 33.4127 | 11.0757 | 0.2004 | 5.0000  | 60.0000 |
| Diff (1-2) -1.0997 10.7870 0.3241 |      |         |         |        |         |         |

To the mean standard deviation

GROUP1 methods Mean 95% confidence limits standard deviation 95% confidence limits

|                                                                   |  |         |         |         |         |         |
|-------------------------------------------------------------------|--|---------|---------|---------|---------|---------|
| 1                                                                 |  | 32.3130 | 31.8303 | 32.7957 | 10.2601 | 9.9300  |
| 10.6130                                                           |  |         |         |         |         |         |
| 2                                                                 |  | 33.4127 | 33.0198 | 33.8057 | 11.0757 | 10.8047 |
| 11.3606                                                           |  |         |         |         |         |         |
| Diff (1-2) Pooled -1.0997 -1.7352 -0.4643 10.7870 10.5753 11.0075 |  |         |         |         |         |         |
| Diff (1-2) Satterthwaite -1.0997 -1.7220 -0.4775                  |  |         |         |         |         |         |

Technique Dispersion degrees of freedom t-value Pr > |t|

Pooled Equal 4790 -3.39 0.0007

Satterthwaite Unequal 3843.1 -3.46 0.0005

Isodispersity

Technique Degree of Freedom of Numerators Degree of Freedom of the denominator F Value Pr > F

Folded F 3053 1737 1.17 0.0004

Administration of anticoagulants at the time of obtaining Table 2-4 consent, according to the presence or absence of proton-pump inhibitors

TTEST Procedure

Variable: DOSE (Dose per day for DOAC only)

GROUP1 N Mean Standard Deviation Standard Error Minimum Value Maximum Value

|                                   |      |         |         |        |         |         |
|-----------------------------------|------|---------|---------|--------|---------|---------|
| 1                                 | 1718 | 32.2963 | 10.2436 | 0.2471 | 15.0000 | 60.0000 |
| 2                                 | 3034 | 33.3561 | 11.0257 | 0.2002 | 5.0000  | 60.0000 |
| Diff (1-2) -1.0599 10.7495 0.3246 |      |         |         |        |         |         |

To the mean standard deviation

GROUP1 methods Mean 95% confidence limits standard deviation 95% confidence limits

|                                                                   |  |         |         |         |         |         |
|-------------------------------------------------------------------|--|---------|---------|---------|---------|---------|
| 1                                                                 |  | 32.2963 | 31.8116 | 32.7810 | 10.2436 | 9.9122  |
| 10.5981                                                           |  |         |         |         |         |         |
| 2                                                                 |  | 33.3561 | 32.9636 | 33.7486 | 11.0257 | 10.7551 |
| 11.3103                                                           |  |         |         |         |         |         |
| Diff (1-2) Pooled -1.0599 -1.6962 -0.4235 10.7495 10.5377 10.9701 |  |         |         |         |         |         |
| Diff (1-2) Satterthwaite -1.0599 -1.6834 -0.4363                  |  |         |         |         |         |         |

Technique Dispersion degrees of freedom t-value Pr > |t|

Pooled Equal 4750 -3.27 0.0011

Satterthwaite Unequal 3786.2 -3.33 0.0009

Isodispersity

Technique Degree of Freedom of Numerators Degree of Freedom of the denominator F Value Pr > F

Folded F 3033 1717 1.16 0.0006

Administration of anticoagulants at the time of obtaining Table 2-4 consent, according to the presence or absence of proton-pump inhibitors

TTEST Procedure

Variable: DOSE (Dose per day for DOAC only)

GROUP1 N Mean Standard Deviation Standard Error Minimum Value Maximum Value

|                                   |    |         |         |        |         |         |
|-----------------------------------|----|---------|---------|--------|---------|---------|
| 1                                 | 20 | 33.7500 | 11.7960 | 2.6377 | 15.0000 | 60.0000 |
| 2                                 | 20 | 42.0000 | 15.0787 | 3.3717 | 30.0000 | 60.0000 |
| Diff (1-2) -8.2500 13.5372 4.2808 |    |         |         |        |         |         |

To the mean standard deviation

GROUP1 methods Mean 95% confidence limits standard deviation 95% confidence limits

|                                                                   |  |         |         |         |         |         |
|-------------------------------------------------------------------|--|---------|---------|---------|---------|---------|
| 1                                                                 |  | 33.7500 | 28.2293 | 39.2707 | 11.7960 | 8.9707  |
| 17.2288                                                           |  |         |         |         |         |         |
| 2                                                                 |  | 42.0000 | 34.9429 | 49.0571 | 15.0787 | 11.4672 |
| 22.0236                                                           |  |         |         |         |         |         |
| Diff (1-2) Pooled -8.2500 -16.9161 0.4161 13.5372 11.0632 17.4465 |  |         |         |         |         |         |
| Diff (1-2) Satterthwaite -8.2500 -16.9326 0.4326                  |  |         |         |         |         |         |

Technique Dispersion degrees of freedom t-value Pr > |t|

Pooled Equal 38 -1.93 0.0615

Satterthwaite Unequal 35.919 -1.93 0.0619

Isodispersity

Technique Degree of Freedom of Numerators Degree of Freedom of the denominator F Value Pr > F

Folded F 19 19 1.63 0.2932

Concomitant medications other than anticoagulants at the time of obtaining Table 2-5 consent, according to the presence or absence of proton-pump inhibitors

FREQ Procedure

|   |       | Cumulative           |                  |        |
|---|-------|----------------------|------------------|--------|
|   |       | Percent of ALL power | Percent of power |        |
| 1 | 32490 | 100.00               | 32490            | 100.00 |

Tables: ALL \* CMYN

ALL

CMYN(Administration of Concomitant Drug)

| Power                   |        |        |        |
|-------------------------|--------|--------|--------|
| Percent                 |        |        |        |
| Percent of rows         |        |        |        |
| Percent of columns      | None   | With   | Total  |
| _____ + _____ + _____ + |        |        |        |
| 1                       | 1445   | 31045  | 32490  |
|                         | 4.45   | 95.55  | 100.00 |
|                         | 4.45   | 95.55  |        |
|                         | 100.00 | 100.00 |        |
| _____ + _____ + _____ + |        |        |        |
| Total                   | 1445   | 31045  | 32490  |
|                         | 4.45   | 95.55  | 100.00 |

Concomitant medications other than anticoagulants at the time of obtaining Table 2-5 consent, according to the presence or absence of proton-pump inhibitors

FREQ Procedure

Tables: ALL \* CMYN

ALL

CMYN(Administration of Concomitant Drug)

Power |

Percent |

Percent of rows

Percent of columns | None | With | Total

|       | None   | With   | Total  |
|-------|--------|--------|--------|
| 1     | 1445   | 31045  | 32490  |
|       | 4.45   | 95.55  | 100.00 |
|       | 4.45   | 95.55  |        |
|       | 100.00 | 100.00 |        |
| Total | 1445   | 31045  | 32490  |
|       | 4.45   | 95.55  | 100.00 |

Concomitant medications other than anticoagulants at the time of obtaining Table 2-5 consent, according to the presence or absence of proton-pump inhibitors

FREQ Procedure

|   |       | Cumulative           |                  |        |
|---|-------|----------------------|------------------|--------|
|   |       | Percent of ALL power | Percent of power |        |
| 1 | 32490 | 100.00               | 32490            | 100.00 |

Tables: ALL \* CMYN

ALL

CMYN(Administration of Concomitant Drug)

| Power                   |        |        |        |  |
|-------------------------|--------|--------|--------|--|
| Percent                 |        |        |        |  |
| Percent of rows         |        |        |        |  |
| Percent of columns      | None   | With   | Total  |  |
| _____ + _____ + _____ + |        |        |        |  |
| 1                       | 1445   | 31045  | 32490  |  |
|                         | 4.45   | 95.55  | 100.00 |  |
|                         | 4.45   | 95.55  |        |  |
|                         | 100.00 | 100.00 |        |  |
| _____ + _____ + _____ + |        |        |        |  |
| Total                   | 1445   | 31045  | 32490  |  |
|                         | 4.45   | 95.55  | 100.00 |  |

Concomitant medications other than anticoagulants at the time of obtaining Table 2-5 consent, according to the presence or absence of proton-pump inhibitors

FREQ Procedure

Tables: ALL \* CMYN

ALL

CMYN(Administration of Concomitant Drug)

Power |

Percent |

Percent of rows

Percent of columns | None | With | Total

|       | None   | With   | Total  |
|-------|--------|--------|--------|
| 1     | 1445   | 31045  | 32490  |
|       | 4.45   | 95.55  | 100.00 |
|       | 4.45   | 95.55  |        |
|       | 100.00 | 100.00 |        |
| Total | 1445   | 31045  | 32490  |
|       | 4.45   | 95.55  | 100.00 |

Concomitant medications other than anticoagulants at the time of obtaining Table 2-5 consent, according to the presence or absence of proton-pump inhibitors

FREQ Procedure

|                      |       | Cumulative       |       |        |
|----------------------|-------|------------------|-------|--------|
| Percent of ALL power |       | Percent of power |       |        |
| 1                    | 32490 | 100.00           | 32490 | 100.00 |

Tables: ALL \* CMYN

ALL

CMYN(Administration of Concomitant Drug)

| Power                   |        |        |        |
|-------------------------|--------|--------|--------|
| Percent                 |        |        |        |
| Percent of rows         |        |        |        |
| Percent of columns      | None   | With   | Total  |
| _____ + _____ + _____ + |        |        |        |
| 1                       | 1445   | 31045  | 32490  |
|                         | 4.45   | 95.55  | 100.00 |
|                         | 4.45   | 95.55  |        |
|                         | 100.00 | 100.00 |        |
| _____ + _____ + _____ + |        |        |        |
| Total                   | 1445   | 31045  | 32490  |
|                         | 4.45   | 95.55  | 100.00 |



Concomitant medications other than anticoagulants at the time of obtaining Table 2-5 consent, according to the presence or absence of proton-pump inhibitors

FREQ Procedure

Tables: ALL \* CMYN

ALL

CMYN(Administration of Concomitant Drug)

Power |

Percent |

Percent of rows

Percent of columns | None | With | Total

|       | None   | With   | Total  |
|-------|--------|--------|--------|
| 1     | 1445   | 31045  | 32490  |
|       | 4.45   | 95.55  | 100.00 |
|       | 4.45   | 95.55  |        |
|       | 100.00 | 100.00 |        |
| Total | 1445   | 31045  | 32490  |
|       | 4.45   | 95.55  | 100.00 |

Concomitant medications other than anticoagulants at the time of obtaining Table 2-5 consent, according to the presence or absence of proton-pump inhibitors

FREQ Procedure

|                      |       |                  | Cumulative |        |
|----------------------|-------|------------------|------------|--------|
| Percent of ALL power |       | Percent of power |            |        |
| 1                    | 32490 | 100.00           | 32490      | 100.00 |

Tables: ALL \* CMYN

ALL

CMYN(Administration of Concomitant Drug)

| Power                   |        |        |        |
|-------------------------|--------|--------|--------|
| Percent                 |        |        |        |
| Percent of rows         |        |        |        |
| Percent of columns      | None   | With   | Total  |
| _____ + _____ + _____ + |        |        |        |
| 1                       | 1445   | 31045  | 32490  |
|                         | 4.45   | 95.55  | 100.00 |
|                         | 4.45   | 95.55  |        |
|                         | 100.00 | 100.00 |        |
| _____ + _____ + _____ + |        |        |        |
| Total                   | 1445   | 31045  | 32490  |
|                         | 4.45   | 95.55  | 100.00 |

Concomitant medications other than anticoagulants at the time of obtaining Table 2-5 consent, according to the presence or absence of proton-pump inhibitors

FREQ Procedure

Tables: ALL\* ARTD

ALL ARTD(Arrhythmic Drugs)

Power |

Percent |

Percent of rows

Percent of columns | None | With | Total

|       | None   | With   | Total  |
|-------|--------|--------|--------|
| 1     | 12671  | 18374  | 31045  |
|       | 40.81  | 59.19  | 100.00 |
|       | 40.81  | 59.19  |        |
|       | 100.00 | 100.00 |        |
| Total | 12671  | 18374  | 31045  |
|       | 40.81  | 59.19  | 100.00 |

Concomitant medications other than anticoagulants at the time of obtaining Table 2-5 consent, according to the presence or absence of proton-pump inhibitors

FREQ Procedure

|   |       | Cumulative           |                  |        |
|---|-------|----------------------|------------------|--------|
|   |       | Percent of ALL power | Percent of power |        |
| 1 | 32490 | 100.00               | 32490            | 100.00 |

Tables: ALL \* CMYN

ALL

CMYN(Administration of Concomitant Drug)

| Power                   |        |        |        |  |
|-------------------------|--------|--------|--------|--|
| Percent                 |        |        |        |  |
| Percent of rows         |        |        |        |  |
| Percent of columns      | None   | With   | Total  |  |
| _____ + _____ + _____ + |        |        |        |  |
| 1                       | 1445   | 31045  | 32490  |  |
|                         | 4.45   | 95.55  | 100.00 |  |
|                         | 4.45   | 95.55  |        |  |
|                         | 100.00 | 100.00 |        |  |
| _____ + _____ + _____ + |        |        |        |  |
| Total                   | 1445   | 31045  | 32490  |  |
|                         | 4.45   | 95.55  | 100.00 |  |

Concomitant medications other than anticoagulants at the time of obtaining Table 2-5 consent, according to the presence or absence of proton-pump inhibitors

FREQ Procedure

Tables: ALL\* ARTD

ALL ARTD(Arrhythmic Drugs)

Power |

Percent |

Percent of rows

Percent of columns | None | With | Total

|       | +      | +      | +      |
|-------|--------|--------|--------|
| 1     | 12671  | 18374  | 31045  |
|       | 40.81  | 59.19  | 100.00 |
|       | 40.81  | 59.19  |        |
|       | 100.00 | 100.00 |        |
|       | +      | +      | +      |
| Total | 12671  | 18374  | 31045  |
|       | 40.81  | 59.19  | 100.00 |

Concomitant medications other than anticoagulants at the time of obtaining Table 2-5 consent, according to the presence or absence of proton-pump inhibitors

FREQ Procedure

|   |                      |        | Cumulative       |        |
|---|----------------------|--------|------------------|--------|
|   | Percent of ALL power |        | Percent of power |        |
| 1 | 32490                | 100.00 | 32490            | 100.00 |

Tables: ALL \* CMYN

ALL

CMYN(Administration of Concomitant Drug)

Power |

Percent |

Percent of rows

Percent of columns | None | With | Total

|       |        |        |        |  |   |
|-------|--------|--------|--------|--|---|
|       | +      |        | +      |  | + |
| 1     | 1445   | 31045  | 32490  |  |   |
|       | 4.45   | 95.55  | 100.00 |  |   |
|       | 4.45   | 95.55  |        |  |   |
|       | 100.00 | 100.00 |        |  |   |
|       | +      |        | +      |  | + |
| Total | 1445   | 31045  | 32490  |  |   |
|       | 4.45   | 95.55  | 100.00 |  |   |

Concomitant medications other than anticoagulants at the time of obtaining Table 2-5 consent, according to the presence or absence of proton-pump inhibitors

FREQ Procedure

Table : ALL \* ARTD1

ALL ARTD1(Rhythm Control)

Power |

Percent |

Percent of rows

Percent of columns | None | With | Total

|       | None   | With   | Total  |
|-------|--------|--------|--------|
| 1     | 24676  | 6369   | 31045  |
|       | 79.48  | 20.52  | 100.00 |
|       | 79.48  | 20.52  |        |
|       | 100.00 | 100.00 |        |
| Total | 24676  | 6369   | 31045  |
|       | 79.48  | 20.52  | 100.00 |

Concomitant medications other than anticoagulants at the time of obtaining Table 2-5 consent, according to the presence or absence of proton-pump inhibitors

FREQ Procedure

|   |       | Cumulative           |                  |        |
|---|-------|----------------------|------------------|--------|
|   |       | Percent of ALL power | Percent of power |        |
| 1 | 32490 | 100.00               | 32490            | 100.00 |

Tables: ALL \* CMYN

ALL

CMYN(Administration of Concomitant Drug)

| Power                   |        |        |        |
|-------------------------|--------|--------|--------|
| Percent                 |        |        |        |
| Percent of rows         |        |        |        |
| Percent of columns      | None   | With   | Total  |
| _____ + _____ + _____ + |        |        |        |
| 1                       | 1445   | 31045  | 32490  |
|                         | 4.45   | 95.55  | 100.00 |
|                         | 4.45   | 95.55  |        |
|                         | 100.00 | 100.00 |        |
| _____ + _____ + _____ + |        |        |        |
| Total                   | 1445   | 31045  | 32490  |
|                         | 4.45   | 95.55  | 100.00 |



Concomitant medications other than anticoagulants at the time of obtaining Table 2-5 consent, according to the presence or absence of proton-pump inhibitors

FREQ Procedure

Table : ALL \* ARTD1

ALL ARTD1(Rhythm Control)

Power |

Percent |

Percent of rows

Percent of columns | None | With | Total

|       | None   | With   | Total  |
|-------|--------|--------|--------|
| 1     | 24676  | 6369   | 31045  |
|       | 79.48  | 20.52  | 100.00 |
|       | 79.48  | 20.52  |        |
|       | 100.00 | 100.00 |        |
| Total | 24676  | 6369   | 31045  |
|       | 79.48  | 20.52  | 100.00 |

Concomitant medications other than anticoagulants at the time of obtaining Table 2-5 consent, according to the presence or absence of proton-pump inhibitors

FREQ Procedure

|                      |       |                  | Cumulative |        |
|----------------------|-------|------------------|------------|--------|
| Percent of ALL power |       | Percent of power |            |        |
| 1                    | 32490 | 100.00           | 32490      | 100.00 |

Tables: ALL \* CMYN

ALL

CMYN(Administration of Concomitant Drug)

| Power              |           |         |         |
|--------------------|-----------|---------|---------|
| Percent            |           |         |         |
| Percent of rows    |           |         |         |
| Percent of columns | None      | With    | Total   |
|                    | + _____ + | _____ + | _____ + |
| 1                  | 1445      | 31045   | 32490   |
|                    | 4.45      | 95.55   | 100.00  |
|                    | 4.45      | 95.55   |         |
|                    | 100.00    | 100.00  |         |
|                    | + _____ + | _____ + | _____ + |
| Total              | 1445      | 31045   | 32490   |
|                    | 4.45      | 95.55   | 100.00  |

Concomitant medications other than anticoagulants at the time of obtaining Table 2-5 consent, according to the presence or absence of proton-pump inhibitors

FREQ Procedure

Table : ALL \* ARTD2

ALL ARTD2(Rate Control)

Power |

Percent |

Percent of rows

Percent of columns | None | With | Total

|       | None   | With   | Total  |
|-------|--------|--------|--------|
| 1     | 17579  | 13466  | 31045  |
|       | 56.62  | 43.38  | 100.00 |
|       | 56.62  | 43.38  |        |
|       | 100.00 | 100.00 |        |
| Total | 17579  | 13466  | 31045  |
|       | 56.62  | 43.38  | 100.00 |

Concomitant medications other than anticoagulants at the time of obtaining Table 2-5 consent, according to the presence or absence of proton-pump inhibitors

FREQ Procedure

|   |                      |        | Cumulative       |        |
|---|----------------------|--------|------------------|--------|
|   | Percent of ALL power |        | Percent of power |        |
| 1 | 32490                | 100.00 | 32490            | 100.00 |

Tables: ALL \* CMYN

ALL

CMYN(Administration of Concomitant Drug)

| Power                   |        |        |        |
|-------------------------|--------|--------|--------|
| Percent                 |        |        |        |
| Percent of rows         |        |        |        |
| Percent of columns      | None   | With   | Total  |
| _____ + _____ + _____ + |        |        |        |
| 1                       | 1445   | 31045  | 32490  |
|                         | 4.45   | 95.55  | 100.00 |
|                         | 4.45   | 95.55  |        |
|                         | 100.00 | 100.00 |        |
| _____ + _____ + _____ + |        |        |        |
| Total                   | 1445   | 31045  | 32490  |
|                         | 4.45   | 95.55  | 100.00 |

Concomitant medications other than anticoagulants at the time of obtaining Table 2-5 consent, according to the presence or absence of proton-pump inhibitors

FREQ Procedure

Table : ALL \* ARTD2

ALL ARTD2(Rate Control)

Power |

Percent |

Percent of rows

Percent of columns | None | With | Total

|       | None   | With   | Total  |
|-------|--------|--------|--------|
| 1     | 17579  | 13466  | 31045  |
|       | 56.62  | 43.38  | 100.00 |
|       | 56.62  | 43.38  |        |
|       | 100.00 | 100.00 |        |
| Total | 17579  | 13466  | 31045  |
|       | 56.62  | 43.38  | 100.00 |

Concomitant medications other than anticoagulants at the time of obtaining Table 2-5 consent, according to the presence or absence of proton-pump inhibitors

FREQ Procedure

|   |       | Cumulative           |                  |        |
|---|-------|----------------------|------------------|--------|
|   |       | Percent of ALL power | Percent of power |        |
| 1 | 32490 | 100.00               | 32490            | 100.00 |

Tables: ALL \* CMYN

ALL

CMYN(Administration of Concomitant Drug)

Power |

Percent |

Percent of rows

Percent of columns | None | With | Total

|            |        |        |        |  |   |
|------------|--------|--------|--------|--|---|
|            | +      |        | +      |  | + |
| 1          | 1445   | 31045  | 32490  |  |   |
|            | 4.45   | 95.55  | 100.00 |  |   |
|            | 4.45   | 95.55  |        |  |   |
|            | 100.00 | 100.00 |        |  |   |
|            | +      |        | +      |  | + |
| Total 1445 | 31045  | 32490  |        |  |   |
|            | 4.45   | 95.55  | 100.00 |  |   |

Concomitant medications other than anticoagulants at the time of obtaining Table 2-5 consent, according to the presence or absence of proton-pump inhibitors

FREQ Procedure

Tables: ALL\* APLD

ALL APLD(Anti-Platelet Drugs)

Power |

Percent |

Percent of rows

Percent of columns | None | With | Total

|       | +      | +      | +      |
|-------|--------|--------|--------|
| 1     | 25252  | 5793   | 31045  |
|       | 81.34  | 18.66  | 100.00 |
|       | 81.34  | 18.66  |        |
|       | 100.00 | 100.00 |        |
|       | +      | +      | +      |
| Total | 25252  | 5793   | 31045  |
|       | 81.34  | 18.66  | 100.00 |

Concomitant medications other than anticoagulants at the time of obtaining Table 2-5 consent, according to the presence or absence of proton-pump inhibitors

FREQ Procedure

|                      |       | Cumulative       |       |        |
|----------------------|-------|------------------|-------|--------|
| Percent of ALL power |       | Percent of power |       |        |
| 1                    | 32490 | 100.00           | 32490 | 100.00 |

Tables: ALL \* CMYN

ALL

CMYN(Administration of Concomitant Drug)

| Power                   |        |        |        |
|-------------------------|--------|--------|--------|
| Percent                 |        |        |        |
| Percent of rows         |        |        |        |
| Percent of columns      | None   | With   | Total  |
| _____ + _____ + _____ + |        |        |        |
| 1                       | 1445   | 31045  | 32490  |
|                         | 4.45   | 95.55  | 100.00 |
|                         | 4.45   | 95.55  |        |
|                         | 100.00 | 100.00 |        |
| _____ + _____ + _____ + |        |        |        |
| Total                   | 1445   | 31045  | 32490  |
|                         | 4.45   | 95.55  | 100.00 |



Concomitant medications other than anticoagulants at the time of obtaining Table 2-5 consent, according to the presence or absence of proton-pump inhibitors

FREQ Procedure

Tables: ALL\* APLD

ALL APLD(Anti-Platelet Drugs)

Power |

Percent |

Percent of rows

Percent of columns | None | With | Total

|       | None   | With   | Total  |
|-------|--------|--------|--------|
| 1     | 25252  | 5793   | 31045  |
|       | 81.34  | 18.66  | 100.00 |
|       | 81.34  | 18.66  |        |
|       | 100.00 | 100.00 |        |
| Total | 25252  | 5793   | 31045  |
|       | 81.34  | 18.66  | 100.00 |

Concomitant medications other than anticoagulants at the time of obtaining Table 2-5 consent, according to the presence or absence of proton-pump inhibitors

FREQ Procedure

|   |       | Cumulative           |                  |        |
|---|-------|----------------------|------------------|--------|
|   |       | Percent of ALL power | Percent of power |        |
| 1 | 32490 | 100.00               | 32490            | 100.00 |

Tables: ALL \* CMYN

ALL

CMYN(Administration of Concomitant Drug)

| Power                   |        |        |        |
|-------------------------|--------|--------|--------|
| Percent                 |        |        |        |
| Percent of rows         |        |        |        |
| Percent of columns      | None   | With   | Total  |
| _____ + _____ + _____ + |        |        |        |
| 1                       | 1445   | 31045  | 32490  |
|                         | 4.45   | 95.55  | 100.00 |
|                         | 4.45   | 95.55  |        |
|                         | 100.00 | 100.00 |        |
| _____ + _____ + _____ + |        |        |        |
| Total                   | 1445   | 31045  | 32490  |
|                         | 4.45   | 95.55  | 100.00 |

Concomitant medications other than anticoagulants at the time of obtaining Table 2-5 consent, according to the presence or absence of proton-pump inhibitors

FREQ Procedure

Table: ALL \* t\_AP

ALL t\_AP

Power |

Percent |

Percent of rows

Percentage of columns | 0| 1| Sum

|       | 0      | 1      | Sum    |
|-------|--------|--------|--------|
| 1     | 30802  | 243    | 31045  |
|       | 99.22  | 0.78   | 100.00 |
|       | 99.22  | 0.78   |        |
|       | 100.00 | 100.00 |        |
| Total | 30802  | 243    | 31045  |
|       | 99.22  | 0.78   | 100.00 |

Concomitant medications other than anticoagulants at the time of obtaining Table 2-5 consent, according to the presence or absence of proton-pump inhibitors

FREQ Procedure

|   |       | Cumulative           |                  |        |
|---|-------|----------------------|------------------|--------|
|   |       | Percent of ALL power | Percent of power |        |
| 1 | 32490 | 100.00               | 32490            | 100.00 |

Tables: ALL \* CMYN

ALL

CMYN(Administration of Concomitant Drug)

| Power                   |        |        |        |
|-------------------------|--------|--------|--------|
| Percent                 |        |        |        |
| Percent of rows         |        |        |        |
| Percent of columns      | None   | With   | Total  |
| _____ + _____ + _____ + |        |        |        |
| 1                       | 1445   | 31045  | 32490  |
|                         | 4.45   | 95.55  | 100.00 |
|                         | 4.45   | 95.55  |        |
|                         | 100.00 | 100.00 |        |
| _____ + _____ + _____ + |        |        |        |
| Total                   | 1445   | 31045  | 32490  |
|                         | 4.45   | 95.55  | 100.00 |

Concomitant medications other than anticoagulants at the time of obtaining Table 2-5 consent, according to the presence or absence of proton-pump inhibitors

FREQ Procedure

Table: ALL \* t\_AP

ALL t\_AP

Power |

Percent |

Percent of rows

Percentage of columns | 0| 1| Sum

|       | 0      | 1      | Sum    |
|-------|--------|--------|--------|
| 1     | 30802  | 243    | 31045  |
|       | 99.22  | 0.78   | 100.00 |
|       | 99.22  | 0.78   |        |
|       | 100.00 | 100.00 |        |
| Total | 30802  | 243    | 31045  |
|       | 99.22  | 0.78   | 100.00 |

Concomitant medications other than anticoagulants at the time of obtaining Table 2-5 consent, according to the presence or absence of proton-pump inhibitors

FREQ Procedure

|   |       | Cumulative           |                  |        |
|---|-------|----------------------|------------------|--------|
|   |       | Percent of ALL power | Percent of power |        |
| 1 | 32490 | 100.00               | 32490            | 100.00 |

Tables: ALL \* CMYN

ALL

CMYN(Administration of Concomitant Drug)

Power |

Percent |

Percent of rows

Percent of columns | None | With | Total

|            |        |        |        |       |   |
|------------|--------|--------|--------|-------|---|
| _____      | +      | _____  | +      | _____ | + |
| 1          | 1445   | 31045  | 32490  |       |   |
|            | 4.45   | 95.55  | 100.00 |       |   |
|            | 4.45   | 95.55  |        |       |   |
|            | 100.00 | 100.00 |        |       |   |
| _____      | +      | _____  | +      | _____ | + |
| Total 1445 | 31045  | 32490  |        |       |   |
|            | 4.45   | 95.55  | 100.00 |       |   |

Concomitant medications other than anticoagulants at the time of obtaining Table 2-5 consent, according to the presence or absence of proton-pump inhibitors

FREQ Procedure

Table : ALL \* APLD1

ALL APLD1(ASA)

Power |

Percent |

Percent of rows

Percent of columns | None | With | Total

|       | None   | With   | Total  |
|-------|--------|--------|--------|
| 1     | 27508  | 3537   | 31045  |
|       | 88.61  | 11.39  | 100.00 |
|       | 88.61  | 11.39  |        |
|       | 100.00 | 100.00 |        |
| Total | 27508  | 3537   | 31045  |
|       | 88.61  | 11.39  | 100.00 |

Concomitant medications other than anticoagulants at the time of obtaining Table 2-5 consent, according to the presence or absence of proton-pump inhibitors

FREQ Procedure

|                      |       |                  | Cumulative |        |
|----------------------|-------|------------------|------------|--------|
| Percent of ALL power |       | Percent of power |            |        |
| 1                    | 32490 | 100.00           | 32490      | 100.00 |

Tables: ALL \* CMYN

ALL

CMYN(Administration of Concomitant Drug)

| Power                   |        |        |        |
|-------------------------|--------|--------|--------|
| Percent                 |        |        |        |
| Percent of rows         |        |        |        |
| Percent of columns      | None   | With   | Total  |
| _____ + _____ + _____ + |        |        |        |
| 1                       | 1445   | 31045  | 32490  |
|                         | 4.45   | 95.55  | 100.00 |
|                         | 4.45   | 95.55  |        |
|                         | 100.00 | 100.00 |        |
| _____ + _____ + _____ + |        |        |        |
| Total                   | 1445   | 31045  | 32490  |
|                         | 4.45   | 95.55  | 100.00 |



Concomitant medications other than anticoagulants at the time of obtaining Table 2-5 consent, according to the presence or absence of proton-pump inhibitors

FREQ Procedure

Table : ALL \* APLD1

ALL APLD1(ASA)

Power |

Percent |

Percent of rows

Percent of columns | None | With | Total

|       | None   | With   | Total  |
|-------|--------|--------|--------|
| 1     | 27508  | 3537   | 31045  |
|       | 88.61  | 11.39  | 100.00 |
|       | 88.61  | 11.39  |        |
|       | 100.00 | 100.00 |        |
| Total | 27508  | 3537   | 31045  |
|       | 88.61  | 11.39  | 100.00 |

Concomitant medications other than anticoagulants at the time of obtaining Table 2-5 consent, according to the presence or absence of proton-pump inhibitors

FREQ Procedure

|   |                      |        | Cumulative       |        |
|---|----------------------|--------|------------------|--------|
|   | Percent of ALL power |        | Percent of power |        |
| 1 | 32490                | 100.00 | 32490            | 100.00 |

Tables: ALL \* CMYN

ALL

CMYN(Administration of Concomitant Drug)

| Power                   |        |        |        |
|-------------------------|--------|--------|--------|
| Percent                 |        |        |        |
| Percent of rows         |        |        |        |
| Percent of columns      | None   | With   | Total  |
| _____ + _____ + _____ + |        |        |        |
| 1                       | 1445   | 31045  | 32490  |
|                         | 4.45   | 95.55  | 100.00 |
|                         | 4.45   | 95.55  |        |
|                         | 100.00 | 100.00 |        |
| _____ + _____ + _____ + |        |        |        |
| Total                   | 1445   | 31045  | 32490  |
|                         | 4.45   | 95.55  | 100.00 |

Concomitant medications other than anticoagulants at the time of obtaining Table 2-5 consent, according to the presence or absence of proton-pump inhibitors

FREQ Procedure

Table : ALL \* APLD2

ALL APLD2(P2Y12-I)

Power |

Percent |

Percent of rows

Percent of columns | None | With | Total

|       | None   | With   | Total  |
|-------|--------|--------|--------|
| 1     | 29650  | 1395   | 31045  |
|       | 95.51  | 4.49   | 100.00 |
|       | 95.51  | 4.49   |        |
|       | 100.00 | 100.00 |        |
| Total | 29650  | 1395   | 31045  |
|       | 95.51  | 4.49   | 100.00 |

Concomitant medications other than anticoagulants at the time of obtaining Table 2-5 consent, according to the presence or absence of proton-pump inhibitors

FREQ Procedure

|   |       | Cumulative           |                  |        |
|---|-------|----------------------|------------------|--------|
|   |       | Percent of ALL power | Percent of power |        |
| 1 | 32490 | 100.00               | 32490            | 100.00 |

Tables: ALL \* CMYN

ALL

CMYN(Administration of Concomitant Drug)

| Power              |         |         |         |
|--------------------|---------|---------|---------|
| Percent            |         |         |         |
| Percent of rows    |         |         |         |
| Percent of columns | None    | With    | Total   |
| +_____+            | +_____+ | +_____+ | +_____+ |
| 1                  | 1445    | 31045   | 32490   |
|                    | 4.45    | 95.55   | 100.00  |
|                    | 4.45    | 95.55   |         |
|                    | 100.00  | 100.00  |         |
| +_____+            | +_____+ | +_____+ | +_____+ |
| Total              | 1445    | 31045   | 32490   |
|                    | 4.45    | 95.55   | 100.00  |

Concomitant medications other than anticoagulants at the time of obtaining Table 2-5 consent, according to the presence or absence of proton-pump inhibitors

FREQ Procedure

Table : ALL \* APLD2

ALL APLD2(P2Y12-I)

Power |

Percent |

Percent of rows

Percent of columns | None | With | Total

|       | None   | With   | Total  |
|-------|--------|--------|--------|
| 1     | 29650  | 1395   | 31045  |
|       | 95.51  | 4.49   | 100.00 |
|       | 95.51  | 4.49   |        |
|       | 100.00 | 100.00 |        |
| Total | 29650  | 1395   | 31045  |
|       | 95.51  | 4.49   | 100.00 |

Concomitant medications other than anticoagulants at the time of obtaining Table 2-5 consent, according to the presence or absence of proton-pump inhibitors

FREQ Procedure

|                      |       | Cumulative       |       |        |
|----------------------|-------|------------------|-------|--------|
| Percent of ALL power |       | Percent of power |       |        |
| 1                    | 32490 | 100.00           | 32490 | 100.00 |

Tables: ALL \* CMYN

ALL

CMYN(Administration of Concomitant Drug)

| Power                   |        |        |        |
|-------------------------|--------|--------|--------|
| Percent                 |        |        |        |
| Percent of rows         |        |        |        |
| Percent of columns      | None   | With   | Total  |
| _____ + _____ + _____ + |        |        |        |
| 1                       | 1445   | 31045  | 32490  |
|                         | 4.45   | 95.55  | 100.00 |
|                         | 4.45   | 95.55  |        |
|                         | 100.00 | 100.00 |        |
| _____ + _____ + _____ + |        |        |        |
| Total                   | 1445   | 31045  | 32490  |
|                         | 4.45   | 95.55  | 100.00 |

Concomitant medications other than anticoagulants at the time of obtaining Table 2-5 consent, according to the presence or absence of proton-pump inhibitors

FREQ Procedure

Table : ALL \* APLD3

ALL

APLD3(Other Anti-Platelet Drugs)

Power |

Percent |

Percent of rows

Percent of columns | None | With | Total

|       | +      | +      | +      |
|-------|--------|--------|--------|
| 1     | 29743  | 1302   | 31045  |
|       | 95.81  | 4.19   | 100.00 |
|       | 95.81  | 4.19   |        |
|       | 100.00 | 100.00 |        |
|       | +      | +      | +      |
| Total | 29743  | 1302   | 31045  |
|       | 95.81  | 4.19   | 100.00 |

Concomitant medications other than anticoagulants at the time of obtaining Table 2-5 consent, according to the presence or absence of proton-pump inhibitors

FREQ Procedure

|                      |       | Cumulative       |       |        |
|----------------------|-------|------------------|-------|--------|
| Percent of ALL power |       | Percent of power |       |        |
| 1                    | 32490 | 100.00           | 32490 | 100.00 |

Tables: ALL \* CMYN

ALL

CMYN(Administration of Concomitant Drug)

| Power              |        |        |        |
|--------------------|--------|--------|--------|
| Percent            |        |        |        |
| Percent of rows    |        |        |        |
| Percent of columns | None   | With   | Total  |
|                    | +      | +      | +      |
| 1                  | 1445   | 31045  | 32490  |
|                    | 4.45   | 95.55  | 100.00 |
|                    | 4.45   | 95.55  |        |
|                    | 100.00 | 100.00 |        |
|                    | +      | +      | +      |
| Total              | 1445   | 31045  | 32490  |
|                    | 4.45   | 95.55  | 100.00 |



Concomitant medications other than anticoagulants at the time of obtaining Table 2-5 consent, according to the presence or absence of proton-pump inhibitors

FREQ Procedure

Table : ALL \* APLD3

ALL

APLD3(Other Anti-Platelet Drugs)

Power |

Percent |

Percent of rows

Percent of columns | None | With | Total

|       | +      | +      | +      |
|-------|--------|--------|--------|
| 1     | 29743  | 1302   | 31045  |
|       | 95.81  | 4.19   | 100.00 |
|       | 95.81  | 4.19   |        |
|       | 100.00 | 100.00 |        |
|       | +      | +      | +      |
| Total | 29743  | 1302   | 31045  |
|       | 95.81  | 4.19   | 100.00 |

Concomitant medications other than anticoagulants at the time of obtaining Table 2-5 consent, according to the presence or absence of proton-pump inhibitors

FREQ Procedure

|                      |       | Cumulative       |       |        |
|----------------------|-------|------------------|-------|--------|
| Percent of ALL power |       | Percent of power |       |        |
| 1                    | 32490 | 100.00           | 32490 | 100.00 |

Tables: ALL \* CMYN

ALL

CMYN(Administration of Concomitant Drug)

| Power                   |        |        |        |
|-------------------------|--------|--------|--------|
| Percent                 |        |        |        |
| Percent of rows         |        |        |        |
| Percent of columns      | None   | With   | Total  |
| _____ + _____ + _____ + |        |        |        |
| 1                       | 1445   | 31045  | 32490  |
|                         | 4.45   | 95.55  | 100.00 |
|                         | 4.45   | 95.55  |        |
|                         | 100.00 | 100.00 |        |
| _____ + _____ + _____ + |        |        |        |
| Total                   | 1445   | 31045  | 32490  |
|                         | 4.45   | 95.55  | 100.00 |

Concomitant medications other than anticoagulants at the time of obtaining Table 2-5 consent, according to the presence or absence of proton-pump inhibitors

FREQ Procedure

Tables: ALL \* AHPD

ALL

AHPD(Antihypertensive Drugs)

Power |

Percent |

Percent of rows

Percent of columns | None | With | Total

|       | None   | With   | Total  |
|-------|--------|--------|--------|
| 1     | 7865   | 23180  | 31045  |
|       | 25.33  | 74.67  | 100.00 |
|       | 25.33  | 74.67  |        |
|       | 100.00 | 100.00 |        |
| Total | 7865   | 23180  | 31045  |
|       | 25.33  | 74.67  | 100.00 |

Concomitant medications other than anticoagulants at the time of obtaining Table 2-5 consent, according to the presence or absence of proton-pump inhibitors

FREQ Procedure

|                      |       | Cumulative       |       |        |
|----------------------|-------|------------------|-------|--------|
| Percent of ALL power |       | Percent of power |       |        |
| 1                    | 32490 | 100.00           | 32490 | 100.00 |

Tables: ALL \* CMYN

ALL

CMYN(Administration of Concomitant Drug)

| Power              |        |        |        |
|--------------------|--------|--------|--------|
| Percent            |        |        |        |
| Percent of rows    |        |        |        |
| Percent of columns | None   | With   | Total  |
| _____              | +      | _____  | +      |
| 1                  | 1445   | 31045  | 32490  |
|                    | 4.45   | 95.55  | 100.00 |
|                    | 4.45   | 95.55  |        |
|                    | 100.00 | 100.00 |        |
| _____              | +      | _____  | +      |
| Total 1445         | 31045  | 32490  |        |
|                    | 4.45   | 95.55  | 100.00 |

Concomitant medications other than anticoagulants at the time of obtaining Table 2-5 consent, according to the presence or absence of proton-pump inhibitors

FREQ Procedure

Tables: ALL \* AHPD

ALL

AHPD(Antihypertensive Drugs)

Power |

Percent |

Percent of rows

Percent of columns | None | With | Total

|       | None   | With   | Total  |
|-------|--------|--------|--------|
| 1     | 7865   | 23180  | 31045  |
|       | 25.33  | 74.67  | 100.00 |
|       | 25.33  | 74.67  |        |
|       | 100.00 | 100.00 |        |
| Total | 7865   | 23180  | 31045  |
|       | 25.33  | 74.67  | 100.00 |

Concomitant medications other than anticoagulants at the time of obtaining Table 2-5 consent, according to the presence or absence of proton-pump inhibitors

FREQ Procedure

|   |       | Cumulative           |                  |        |
|---|-------|----------------------|------------------|--------|
|   |       | Percent of ALL power | Percent of power |        |
| 1 | 32490 | 100.00               | 32490            | 100.00 |

Tables: ALL \* CMYN

ALL

CMYN(Administration of Concomitant Drug)

| Power                   |        |        |        |
|-------------------------|--------|--------|--------|
| Percent                 |        |        |        |
| Percent of rows         |        |        |        |
| Percent of columns      | None   | With   | Total  |
| _____ + _____ + _____ + |        |        |        |
| 1                       | 1445   | 31045  | 32490  |
|                         | 4.45   | 95.55  | 100.00 |
|                         | 4.45   | 95.55  |        |
|                         | 100.00 | 100.00 |        |
| _____ + _____ + _____ + |        |        |        |
| Total                   | 1445   | 31045  | 32490  |
|                         | 4.45   | 95.55  | 100.00 |

Concomitant medications other than anticoagulants at the time of obtaining Table 2-5 consent, according to the presence or absence of proton-pump inhibitors

FREQ Procedure

Table: ALL \* LTD

ALL LTD(Lipid Therapy)

Power |

Percent |

Percent of rows

Percent of columns | None | With | Total

|       | None   | With   | Total  |
|-------|--------|--------|--------|
| 1     | 18916  | 12129  | 31045  |
|       | 60.93  | 39.07  | 100.00 |
|       | 60.93  | 39.07  |        |
|       | 100.00 | 100.00 |        |
| Total | 18916  | 12129  | 31045  |
|       | 60.93  | 39.07  | 100.00 |

Concomitant medications other than anticoagulants at the time of obtaining Table 2-5 consent, according to the presence or absence of proton-pump inhibitors

FREQ Procedure

|   |       | Cumulative           |                  |        |
|---|-------|----------------------|------------------|--------|
|   |       | Percent of ALL power | Percent of power |        |
| 1 | 32490 | 100.00               | 32490            | 100.00 |

Tables: ALL \* CMYN

ALL

CMYN(Administration of Concomitant Drug)

| Power                   |        |        |        |
|-------------------------|--------|--------|--------|
| Percent                 |        |        |        |
| Percent of rows         |        |        |        |
| Percent of columns      | None   | With   | Total  |
| _____ + _____ + _____ + |        |        |        |
| 1                       | 1445   | 31045  | 32490  |
|                         | 4.45   | 95.55  | 100.00 |
|                         | 4.45   | 95.55  |        |
|                         | 100.00 | 100.00 |        |
| _____ + _____ + _____ + |        |        |        |
| Total                   | 1445   | 31045  | 32490  |
|                         | 4.45   | 95.55  | 100.00 |



Concomitant medications other than anticoagulants at the time of obtaining Table 2-5 consent, according to the presence or absence of proton-pump inhibitors

FREQ Procedure

Table: ALL \* LTD

ALL LTD(Lipid Therapy)

Power |

Percent |

Percent of rows

Percent of columns | None | With | Total

|       | None   | With   | Total  |
|-------|--------|--------|--------|
| 1     | 18916  | 12129  | 31045  |
|       | 60.93  | 39.07  | 100.00 |
|       | 60.93  | 39.07  |        |
|       | 100.00 | 100.00 |        |
| Total | 18916  | 12129  | 31045  |
|       | 60.93  | 39.07  | 100.00 |

Concomitant medications other than anticoagulants at the time of obtaining Table 2-5 consent, according to the presence or absence of proton-pump inhibitors

FREQ Procedure

|                      |       | Cumulative       |       |        |
|----------------------|-------|------------------|-------|--------|
| Percent of ALL power |       | Percent of power |       |        |
| 1                    | 32490 | 100.00           | 32490 | 100.00 |

Tables: ALL \* CMYN

ALL

CMYN(Administration of Concomitant Drug)

| Power                   |        |        |        |
|-------------------------|--------|--------|--------|
| Percent                 |        |        |        |
| Percent of rows         |        |        |        |
| Percent of columns      | None   | With   | Total  |
| _____ + _____ + _____ + |        |        |        |
| 1                       | 1445   | 31045  | 32490  |
|                         | 4.45   | 95.55  | 100.00 |
|                         | 4.45   | 95.55  |        |
|                         | 100.00 | 100.00 |        |
| _____ + _____ + _____ + |        |        |        |
| Total                   | 1445   | 31045  | 32490  |
|                         | 4.45   | 95.55  | 100.00 |

Concomitant medications other than anticoagulants at the time of obtaining Table 2-5 consent, according to the presence or absence of proton-pump inhibitors

FREQ Procedure

Table : ALL \* LTD1

ALL LTD1(Statins)

Power |

Percent |

Percent of rows

Percent of columns | None | With | Total

|       | None   | With   | Total  |
|-------|--------|--------|--------|
| 1     | 20182  | 10863  | 31045  |
|       | 65.01  | 34.99  | 100.00 |
|       | 65.01  | 34.99  |        |
|       | 100.00 | 100.00 |        |
| Total | 20182  | 10863  | 31045  |
|       | 65.01  | 34.99  | 100.00 |

Concomitant medications other than anticoagulants at the time of obtaining Table 2-5 consent, according to the presence or absence of proton-pump inhibitors

FREQ Procedure

|   |       | Cumulative           |                  |        |
|---|-------|----------------------|------------------|--------|
|   |       | Percent of ALL power | Percent of power |        |
| 1 | 32490 | 100.00               | 32490            | 100.00 |

Tables: ALL \* CMYN

ALL

CMYN(Administration of Concomitant Drug)

| Power                   |        |        |        |
|-------------------------|--------|--------|--------|
| Percent                 |        |        |        |
| Percent of rows         |        |        |        |
| Percent of columns      | None   | With   | Total  |
| _____ + _____ + _____ + |        |        |        |
| 1                       | 1445   | 31045  | 32490  |
|                         | 4.45   | 95.55  | 100.00 |
|                         | 4.45   | 95.55  |        |
|                         | 100.00 | 100.00 |        |
| _____ + _____ + _____ + |        |        |        |
| Total                   | 1445   | 31045  | 32490  |
|                         | 4.45   | 95.55  | 100.00 |

Concomitant medications other than anticoagulants at the time of obtaining Table 2-5 consent, according to the presence or absence of proton-pump inhibitors

FREQ Procedure

Table : ALL \* LTD1

ALL LTD1(Statins)

Power |

Percent |

Percent of rows

Percent of columns | None | With | Total

|       | None   | With   | Total  |
|-------|--------|--------|--------|
| 1     | 20182  | 10863  | 31045  |
|       | 65.01  | 34.99  | 100.00 |
|       | 65.01  | 34.99  |        |
|       | 100.00 | 100.00 |        |
| Total | 20182  | 10863  | 31045  |
|       | 65.01  | 34.99  | 100.00 |

Concomitant medications other than anticoagulants at the time of obtaining Table 2-5 consent, according to the presence or absence of proton-pump inhibitors

FREQ Procedure

|                      |       |                  | Cumulative |        |
|----------------------|-------|------------------|------------|--------|
| Percent of ALL power |       | Percent of power |            |        |
| 1                    | 32490 | 100.00           | 32490      | 100.00 |

Tables: ALL \* CMYN

ALL

CMYN(Administration of Concomitant Drug)

| Power                   |        |        |        |
|-------------------------|--------|--------|--------|
| Percent                 |        |        |        |
| Percent of rows         |        |        |        |
| Percent of columns      | None   | With   | Total  |
| _____ + _____ + _____ + |        |        |        |
| 1                       | 1445   | 31045  | 32490  |
|                         | 4.45   | 95.55  | 100.00 |
|                         | 4.45   | 95.55  |        |
|                         | 100.00 | 100.00 |        |
| _____ + _____ + _____ + |        |        |        |
| Total                   | 1445   | 31045  | 32490  |
|                         | 4.45   | 95.55  | 100.00 |

Concomitant medications other than anticoagulants at the time of obtaining Table 2-5 consent, according to the presence or absence of proton-pump inhibitors

FREQ Procedure

Table : ALL \* LTD2

ALL LTD2(Other Than Statins)

Power |

Percent |

Percent of rows

Percent of columns | None | With | Total

|       | None   | With   | Total  |
|-------|--------|--------|--------|
| 1     | 29323  | 1722   | 31045  |
|       | 94.45  | 5.55   | 100.00 |
|       | 94.45  | 5.55   |        |
|       | 100.00 | 100.00 |        |
| Total | 29323  | 1722   | 31045  |
|       | 94.45  | 5.55   | 100.00 |

Concomitant medications other than anticoagulants at the time of obtaining Table 2-5 consent, according to the presence or absence of proton-pump inhibitors

FREQ Procedure

|   |       | Cumulative           |                  |        |
|---|-------|----------------------|------------------|--------|
|   |       | Percent of ALL power | Percent of power |        |
| 1 | 32490 | 100.00               | 32490            | 100.00 |

Tables: ALL \* CMYN

ALL

CMYN(Administration of Concomitant Drug)

| Power                   |        |        |        |
|-------------------------|--------|--------|--------|
| Percent                 |        |        |        |
| Percent of rows         |        |        |        |
| Percent of columns      | None   | With   | Total  |
| _____ + _____ + _____ + |        |        |        |
| 1                       | 1445   | 31045  | 32490  |
|                         | 4.45   | 95.55  | 100.00 |
|                         | 4.45   | 95.55  |        |
|                         | 100.00 | 100.00 |        |
| _____ + _____ + _____ + |        |        |        |
| Total                   | 1445   | 31045  | 32490  |
|                         | 4.45   | 95.55  | 100.00 |



Concomitant medications other than anticoagulants at the time of obtaining Table 2-5 consent, according to the presence or absence of proton-pump inhibitors

FREQ Procedure

Table : ALL \* LTD2

ALL LTD2(Other Than Statins)

Power |

Percent |

Percent of rows

Percent of columns | None | With | Total

|       | None   | With   | Total  |
|-------|--------|--------|--------|
| 1     | 29323  | 1722   | 31045  |
|       | 94.45  | 5.55   | 100.00 |
|       | 94.45  | 5.55   |        |
|       | 100.00 | 100.00 |        |
| Total | 29323  | 1722   | 31045  |
|       | 94.45  | 5.55   | 100.00 |

Concomitant medications other than anticoagulants at the time of obtaining Table 2-5 consent, according to the presence or absence of proton-pump inhibitors

FREQ Procedure

|   |       | Cumulative           |                  |        |
|---|-------|----------------------|------------------|--------|
|   |       | Percent of ALL power | Percent of power |        |
| 1 | 32490 | 100.00               | 32490            | 100.00 |

Tables: ALL \* CMYN

ALL

CMYN(Administration of Concomitant Drug)

| Power              |         |         |         |
|--------------------|---------|---------|---------|
| Percent            |         |         |         |
| Percent of rows    |         |         |         |
| Percent of columns | None    | With    | Total   |
| +_____+            | +_____+ | +_____+ | +_____+ |
| 1                  | 1445    | 31045   | 32490   |
|                    | 4.45    | 95.55   | 100.00  |
|                    | 4.45    | 95.55   |         |
|                    | 100.00  | 100.00  |         |
| +_____+            | +_____+ | +_____+ | +_____+ |
| Total              | 1445    | 31045   | 32490   |
|                    | 4.45    | 95.55   | 100.00  |

Concomitant medications other than anticoagulants at the time of obtaining Table 2-5 consent, according to the presence or absence of proton-pump inhibitors

FREQ Procedure

Tables: ALL \* DBTD

ALL DBTD(Diabetes Drugs)

Power |

Percent |

Percent of rows

Percent of columns | None | With | Total

|       | None   | With   | Total  |
|-------|--------|--------|--------|
| 1     | 25814  | 5231   | 31045  |
|       | 83.15  | 16.85  | 100.00 |
|       | 83.15  | 16.85  |        |
|       | 100.00 | 100.00 |        |
| Total | 25814  | 5231   | 31045  |
|       | 83.15  | 16.85  | 100.00 |

Concomitant medications other than anticoagulants at the time of obtaining Table 2-5 consent, according to the presence or absence of proton-pump inhibitors

FREQ Procedure

|   |       | Cumulative           |                  |        |
|---|-------|----------------------|------------------|--------|
|   |       | Percent of ALL power | Percent of power |        |
| 1 | 32490 | 100.00               | 32490            | 100.00 |

Tables: ALL \* CMYN

ALL

CMYN(Administration of Concomitant Drug)

| Power                   |        |        |        |
|-------------------------|--------|--------|--------|
| Percent                 |        |        |        |
| Percent of rows         |        |        |        |
| Percent of columns      | None   | With   | Total  |
| _____ + _____ + _____ + |        |        |        |
| 1                       | 1445   | 31045  | 32490  |
|                         | 4.45   | 95.55  | 100.00 |
|                         | 4.45   | 95.55  |        |
|                         | 100.00 | 100.00 |        |
| _____ + _____ + _____ + |        |        |        |
| Total                   | 1445   | 31045  | 32490  |
|                         | 4.45   | 95.55  | 100.00 |

Concomitant medications other than anticoagulants at the time of obtaining Table 2-5 consent, according to the presence or absence of proton-pump inhibitors

FREQ Procedure

Tables: ALL \* DBTD

ALL DBTD(Diabetes Drugs)

Power |

Percent |

Percent of rows

Percent of columns | None | With | Total

|       | +      | +      | +      |
|-------|--------|--------|--------|
| 1     | 25814  | 5231   | 31045  |
|       | 83.15  | 16.85  | 100.00 |
|       | 83.15  | 16.85  |        |
|       | 100.00 | 100.00 |        |
|       | +      | +      | +      |
| Total | 25814  | 5231   | 31045  |
|       | 83.15  | 16.85  | 100.00 |

Concomitant medications other than anticoagulants at the time of obtaining Table 2-5 consent, according to the presence or absence of proton-pump inhibitors

FREQ Procedure

|                      |       | Cumulative       |       |        |
|----------------------|-------|------------------|-------|--------|
| Percent of ALL power |       | Percent of power |       |        |
| 1                    | 32490 | 100.00           | 32490 | 100.00 |

Tables: ALL \* CMYN

ALL

CMYN(Administration of Concomitant Drug)

| Power              |        |        |        |
|--------------------|--------|--------|--------|
| Percent            |        |        |        |
| Percent of rows    |        |        |        |
| Percent of columns | None   | With   | Total  |
|                    | +      | +      | +      |
| 1                  | 1445   | 31045  | 32490  |
|                    | 4.45   | 95.55  | 100.00 |
|                    | 4.45   | 95.55  |        |
|                    | 100.00 | 100.00 |        |
|                    | +      | +      | +      |
| Total              | 1445   | 31045  | 32490  |
|                    | 4.45   | 95.55  | 100.00 |

Concomitant medications other than anticoagulants at the time of obtaining Table 2-5 consent, according to the presence or absence of proton-pump inhibitors

FREQ Procedure

Table: ALL \* t\_DBT

ALL t\_DBT

Power |

Percent |

Percent of rows

Percentage of columns | 0| 1| Sum

|       | 0      | 1      | Sum    |
|-------|--------|--------|--------|
| 1     | 26081  | 4964   | 31045  |
|       | 84.01  | 15.99  | 100.00 |
|       | 84.01  | 15.99  |        |
|       | 100.00 | 100.00 |        |
| Total | 26081  | 4964   | 31045  |
|       | 84.01  | 15.99  | 100.00 |

Concomitant medications other than anticoagulants at the time of obtaining Table 2-5 consent, according to the presence or absence of proton-pump inhibitors

FREQ Procedure

|   |       | Cumulative           |                  |        |
|---|-------|----------------------|------------------|--------|
|   |       | Percent of ALL power | Percent of power |        |
| 1 | 32490 | 100.00               | 32490            | 100.00 |

Tables: ALL \* CMYN

ALL

CMYN(Administration of Concomitant Drug)

| Power                   |        |        |        |  |
|-------------------------|--------|--------|--------|--|
| Percent                 |        |        |        |  |
| Percent of rows         |        |        |        |  |
| Percent of columns      | None   | With   | Total  |  |
| _____ + _____ + _____ + |        |        |        |  |
| 1                       | 1445   | 31045  | 32490  |  |
|                         | 4.45   | 95.55  | 100.00 |  |
|                         | 4.45   | 95.55  |        |  |
|                         | 100.00 | 100.00 |        |  |
| _____ + _____ + _____ + |        |        |        |  |
| Total                   | 1445   | 31045  | 32490  |  |
|                         | 4.45   | 95.55  | 100.00 |  |



Concomitant medications other than anticoagulants at the time of obtaining Table 2-5 consent, according to the presence or absence of proton-pump inhibitors

FREQ Procedure

Table: ALL \* t\_DBT

ALL t\_DBT

Power |

Percent |

Percent of rows

Percentage of columns | 0| 1| Sum

|       | 0      | 1      | Sum    |
|-------|--------|--------|--------|
| 1     | 26081  | 4964   | 31045  |
|       | 84.01  | 15.99  | 100.00 |
|       | 84.01  | 15.99  |        |
|       | 100.00 | 100.00 |        |
| Total | 26081  | 4964   | 31045  |
|       | 84.01  | 15.99  | 100.00 |

Concomitant medications other than anticoagulants at the time of obtaining Table 2-5 consent, according to the presence or absence of proton-pump inhibitors

FREQ Procedure

|   |                      |        | Cumulative       |        |
|---|----------------------|--------|------------------|--------|
|   | Percent of ALL power |        | Percent of power |        |
| 1 | 32490                | 100.00 | 32490            | 100.00 |

Tables: ALL \* CMYN

ALL

CMYN(Administration of Concomitant Drug)

| Power                   |        |        |        |
|-------------------------|--------|--------|--------|
| Percent                 |        |        |        |
| Percent of rows         |        |        |        |
| Percent of columns      | None   | With   | Total  |
| _____ + _____ + _____ + |        |        |        |
| 1                       | 1445   | 31045  | 32490  |
|                         | 4.45   | 95.55  | 100.00 |
|                         | 4.45   | 95.55  |        |
|                         | 100.00 | 100.00 |        |
| _____ + _____ + _____ + |        |        |        |
| Total                   | 1445   | 31045  | 32490  |
|                         | 4.45   | 95.55  | 100.00 |

Concomitant medications other than anticoagulants at the time of obtaining Table 2-5 consent, according to the presence or absence of proton-pump inhibitors

FREQ Procedure

Table : ALL \* DBTD1

ALL DBTD1(Sulfonylurea Drugs)

Power |

Percent |

Percent of rows

Percent of columns | None | With | Total

|       | +      | +      | +      |
|-------|--------|--------|--------|
| 1     | 29824  | 1221   | 31045  |
|       | 96.07  | 3.93   | 100.00 |
|       | 96.07  | 3.93   |        |
|       | 100.00 | 100.00 |        |
|       | +      | +      | +      |
| Total | 29824  | 1221   | 31045  |
|       | 96.07  | 3.93   | 100.00 |

Concomitant medications other than anticoagulants at the time of obtaining Table 2-5 consent, according to the presence or absence of proton-pump inhibitors

FREQ Procedure

|   |       | Cumulative           |                  |        |
|---|-------|----------------------|------------------|--------|
|   |       | Percent of ALL power | Percent of power |        |
| 1 | 32490 | 100.00               | 32490            | 100.00 |

Tables: ALL \* CMYN

ALL

CMYN(Administration of Concomitant Drug)

Power |

Percent |

Percent of rows

Percent of columns | None | With | Total

|            |        |        |        |  |   |
|------------|--------|--------|--------|--|---|
|            | +      |        | +      |  | + |
| 1          | 1445   | 31045  | 32490  |  |   |
|            | 4.45   | 95.55  | 100.00 |  |   |
|            | 4.45   | 95.55  |        |  |   |
|            | 100.00 | 100.00 |        |  |   |
|            | +      |        | +      |  | + |
| Total 1445 | 31045  | 32490  |        |  |   |
|            | 4.45   | 95.55  | 100.00 |  |   |

Concomitant medications other than anticoagulants at the time of obtaining Table 2-5 consent, according to the presence or absence of proton-pump inhibitors

FREQ Procedure

Table : ALL \* DBTD1

ALL DBTD1(Sulfonylurea Drugs)

Power |

Percent |

Percent of rows

Percent of columns | None | With | Total

|       | +      | +      | +      |
|-------|--------|--------|--------|
| 1     | 29824  | 1221   | 31045  |
|       | 96.07  | 3.93   | 100.00 |
|       | 96.07  | 3.93   |        |
|       | 100.00 | 100.00 |        |
|       | +      | +      | +      |
| Total | 29824  | 1221   | 31045  |
|       | 96.07  | 3.93   | 100.00 |

Concomitant medications other than anticoagulants at the time of obtaining Table 2-5 consent, according to the presence or absence of proton-pump inhibitors

FREQ Procedure

|                      |       |                  | Cumulative |        |
|----------------------|-------|------------------|------------|--------|
| Percent of ALL power |       | Percent of power |            |        |
| 1                    | 32490 | 100.00           | 32490      | 100.00 |

Tables: ALL \* CMYN

ALL

CMYN(Administration of Concomitant Drug)

| Power                   |        |        |        |
|-------------------------|--------|--------|--------|
| Percent                 |        |        |        |
| Percent of rows         |        |        |        |
| Percent of columns      | None   | With   | Total  |
| _____ + _____ + _____ + |        |        |        |
| 1                       | 1445   | 31045  | 32490  |
|                         | 4.45   | 95.55  | 100.00 |
|                         | 4.45   | 95.55  |        |
|                         | 100.00 | 100.00 |        |
| _____ + _____ + _____ + |        |        |        |
| Total                   | 1445   | 31045  | 32490  |
|                         | 4.45   | 95.55  | 100.00 |

Concomitant medications other than anticoagulants at the time of obtaining Table 2-5 consent, according to the presence or absence of proton-pump inhibitors

FREQ Procedure

Table : ALL \* DBTD2

ALL

DBTD2( $\alpha$ -Glucosidase Inhibitor)

Power |

Percent |

Percent of rows

Percent of columns | None | With | Total

|       | +      | +      | +      |
|-------|--------|--------|--------|
| 1     | 30061  | 984    | 31045  |
|       | 96.83  | 3.17   | 100.00 |
|       | 96.83  | 3.17   |        |
|       | 100.00 | 100.00 |        |
|       | +      | +      | +      |
| Total | 30061  | 984    | 31045  |
|       | 96.83  | 3.17   | 100.00 |

Concomitant medications other than anticoagulants at the time of obtaining Table 2-5 consent, according to the presence or absence of proton-pump inhibitors

FREQ Procedure

|                      |       | Cumulative       |       |        |
|----------------------|-------|------------------|-------|--------|
| Percent of ALL power |       | Percent of power |       |        |
| 1                    | 32490 | 100.00           | 32490 | 100.00 |

Tables: ALL \* CMYN

ALL

CMYN(Administration of Concomitant Drug)

| Power                   |        |        |        |
|-------------------------|--------|--------|--------|
| Percent                 |        |        |        |
| Percent of rows         |        |        |        |
| Percent of columns      | None   | With   | Total  |
| _____ + _____ + _____ + |        |        |        |
| 1                       | 1445   | 31045  | 32490  |
|                         | 4.45   | 95.55  | 100.00 |
|                         | 4.45   | 95.55  |        |
|                         | 100.00 | 100.00 |        |
| _____ + _____ + _____ + |        |        |        |
| Total                   | 1445   | 31045  | 32490  |
|                         | 4.45   | 95.55  | 100.00 |



Concomitant medications other than anticoagulants at the time of obtaining Table 2-5 consent, according to the presence or absence of proton-pump inhibitors

FREQ Procedure

Table : ALL \* DBTD2

ALL

DBTD2( $\alpha$ -Glucosidase Inhibitor)

Power |

Percent |

Percent of rows

Percent of columns | None | With | Total

|       | +      | +      | +      |
|-------|--------|--------|--------|
| 1     | 30061  | 984    | 31045  |
|       | 96.83  | 3.17   | 100.00 |
|       | 96.83  | 3.17   |        |
|       | 100.00 | 100.00 |        |
|       | +      | +      | +      |
| Total | 30061  | 984    | 31045  |
|       | 96.83  | 3.17   | 100.00 |

Concomitant medications other than anticoagulants at the time of obtaining Table 2-5 consent, according to the presence or absence of proton-pump inhibitors

FREQ Procedure

|   |       | Cumulative           |                  |        |
|---|-------|----------------------|------------------|--------|
|   |       | Percent of ALL power | Percent of power |        |
| 1 | 32490 | 100.00               | 32490            | 100.00 |

Tables: ALL \* CMYN

ALL

CMYN(Administration of Concomitant Drug)

| Power                   |        |        |        |
|-------------------------|--------|--------|--------|
| Percent                 |        |        |        |
| Percent of rows         |        |        |        |
| Percent of columns      | None   | With   | Total  |
| _____ + _____ + _____ + |        |        |        |
| 1                       | 1445   | 31045  | 32490  |
|                         | 4.45   | 95.55  | 100.00 |
|                         | 4.45   | 95.55  |        |
|                         | 100.00 | 100.00 |        |
| _____ + _____ + _____ + |        |        |        |
| Total                   | 1445   | 31045  | 32490  |
|                         | 4.45   | 95.55  | 100.00 |

Concomitant medications other than anticoagulants at the time of obtaining Table 2-5 consent, according to the presence or absence of proton-pump inhibitors

FREQ Procedure

Table : ALL \* DBTD3

ALL DBTD3(Thiazolidine)

Power |

Percent |

Percent of rows

Percent of columns | None | With | Total

|       | None   | With   | Total  |
|-------|--------|--------|--------|
| 1     | 30674  | 371    | 31045  |
|       | 98.80  | 1.20   | 100.00 |
|       | 98.80  | 1.20   |        |
|       | 100.00 | 100.00 |        |
| Total | 30674  | 371    | 31045  |
|       | 98.80  | 1.20   | 100.00 |

Concomitant medications other than anticoagulants at the time of obtaining Table 2-5 consent, according to the presence or absence of proton-pump inhibitors

FREQ Procedure

|   |       | Cumulative           |                  |        |
|---|-------|----------------------|------------------|--------|
|   |       | Percent of ALL power | Percent of power |        |
| 1 | 32490 | 100.00               | 32490            | 100.00 |

Tables: ALL \* CMYN

ALL

CMYN(Administration of Concomitant Drug)

| Power                   |        |        |        |
|-------------------------|--------|--------|--------|
| Percent                 |        |        |        |
| Percent of rows         |        |        |        |
| Percent of columns      | None   | With   | Total  |
| _____ + _____ + _____ + |        |        |        |
| 1                       | 1445   | 31045  | 32490  |
|                         | 4.45   | 95.55  | 100.00 |
|                         | 4.45   | 95.55  |        |
|                         | 100.00 | 100.00 |        |
| _____ + _____ + _____ + |        |        |        |
| Total                   | 1445   | 31045  | 32490  |
|                         | 4.45   | 95.55  | 100.00 |

Concomitant medications other than anticoagulants at the time of obtaining Table 2-5 consent, according to the presence or absence of proton-pump inhibitors

FREQ Procedure

Table : ALL \* DBTD3

ALL DBTD3(Thiazolidine)

Power |

Percent |

Percent of rows

Percent of columns | None | With | Total

|       | None   | With   | Total  |
|-------|--------|--------|--------|
| 1     | 30674  | 371    | 31045  |
|       | 98.80  | 1.20   | 100.00 |
|       | 98.80  | 1.20   |        |
|       | 100.00 | 100.00 |        |
| Total | 30674  | 371    | 31045  |
|       | 98.80  | 1.20   | 100.00 |

Concomitant medications other than anticoagulants at the time of obtaining Table 2-5 consent, according to the presence or absence of proton-pump inhibitors

FREQ Procedure

|                      |       |                  | Cumulative |        |
|----------------------|-------|------------------|------------|--------|
| Percent of ALL power |       | Percent of power |            |        |
| 1                    | 32490 | 100.00           | 32490      | 100.00 |

Tables: ALL \* CMYN

ALL

CMYN(Administration of Concomitant Drug)

| Power                   |        |        |        |
|-------------------------|--------|--------|--------|
| Percent                 |        |        |        |
| Percent of rows         |        |        |        |
| Percent of columns      | None   | With   | Total  |
| _____ + _____ + _____ + |        |        |        |
| 1                       | 1445   | 31045  | 32490  |
|                         | 4.45   | 95.55  | 100.00 |
|                         | 4.45   | 95.55  |        |
|                         | 100.00 | 100.00 |        |
| _____ + _____ + _____ + |        |        |        |
| Total                   | 1445   | 31045  | 32490  |
|                         | 4.45   | 95.55  | 100.00 |

Concomitant medications other than anticoagulants at the time of obtaining Table 2-5 consent, according to the presence or absence of proton-pump inhibitors

FREQ Procedure

Table : ALL \* DBTD4

ALL DBTD4(DPP-4 Inhabitators)

Power |

Percent |

Percent of rows

Percent of columns | None | With | Total

|       | None   | With   | Total  |
|-------|--------|--------|--------|
| 1     | 27220  | 3825   | 31045  |
|       | 87.68  | 12.32  | 100.00 |
|       | 87.68  | 12.32  |        |
|       | 100.00 | 100.00 |        |
| Total | 27220  | 3825   | 31045  |
|       | 87.68  | 12.32  | 100.00 |

Concomitant medications other than anticoagulants at the time of obtaining Table 2-5 consent, according to the presence or absence of proton-pump inhibitors

FREQ Procedure

|                      |       | Cumulative       |       |        |
|----------------------|-------|------------------|-------|--------|
| Percent of ALL power |       | Percent of power |       |        |
| 1                    | 32490 | 100.00           | 32490 | 100.00 |

Tables: ALL \* CMYN

ALL

CMYN(Administration of Concomitant Drug)

| Power                   |        |        |        |
|-------------------------|--------|--------|--------|
| Percent                 |        |        |        |
| Percent of rows         |        |        |        |
| Percent of columns      | None   | With   | Total  |
| _____ + _____ + _____ + |        |        |        |
| 1                       | 1445   | 31045  | 32490  |
|                         | 4.45   | 95.55  | 100.00 |
|                         | 4.45   | 95.55  |        |
|                         | 100.00 | 100.00 |        |
| _____ + _____ + _____ + |        |        |        |
| Total                   | 1445   | 31045  | 32490  |
|                         | 4.45   | 95.55  | 100.00 |



Concomitant medications other than anticoagulants at the time of obtaining Table 2-5 consent, according to the presence or absence of proton-pump inhibitors

FREQ Procedure

Table : ALL \* DBTD4

ALL DBTD4(DPP-4 Inhabitators)

Power |

Percent |

Percent of rows

Percent of columns | None | With | Total

|       | None   | With   | Total  |
|-------|--------|--------|--------|
| 1     | 27220  | 3825   | 31045  |
|       | 87.68  | 12.32  | 100.00 |
|       | 87.68  | 12.32  |        |
|       | 100.00 | 100.00 |        |
| Total | 27220  | 3825   | 31045  |
|       | 87.68  | 12.32  | 100.00 |

Concomitant medications other than anticoagulants at the time of obtaining Table 2-5 consent, according to the presence or absence of proton-pump inhibitors

FREQ Procedure

|                      |       |                  | Cumulative |        |
|----------------------|-------|------------------|------------|--------|
| Percent of ALL power |       | Percent of power |            |        |
| 1                    | 32490 | 100.00           | 32490      | 100.00 |

Tables: ALL \* CMYN

ALL

CMYN(Administration of Concomitant Drug)

| Power                   |        |        |        |
|-------------------------|--------|--------|--------|
| Percent                 |        |        |        |
| Percent of rows         |        |        |        |
| Percent of columns      | None   | With   | Total  |
| _____ + _____ + _____ + |        |        |        |
| 1                       | 1445   | 31045  | 32490  |
|                         | 4.45   | 95.55  | 100.00 |
|                         | 4.45   | 95.55  |        |
|                         | 100.00 | 100.00 |        |
| _____ + _____ + _____ + |        |        |        |
| Total                   | 1445   | 31045  | 32490  |
|                         | 4.45   | 95.55  | 100.00 |

Concomitant medications other than anticoagulants at the time of obtaining Table 2-5 consent, according to the presence or absence of proton-pump inhibitors

FREQ Procedure

Table : ALL \* DBTD5

ALL DBTD5(GLP-1 Inhabitators)

Power |

Percent |

Percent of rows

Percent of columns | None | With | Total

|       | +      | +      | +      |
|-------|--------|--------|--------|
| 1     | 30968  | 77     | 31045  |
|       | 99.75  | 0.25   | 100.00 |
|       | 99.75  | 0.25   |        |
|       | 100.00 | 100.00 |        |
|       | +      | +      | +      |
| Total | 30968  | 77     | 31045  |
|       | 99.75  | 0.25   | 100.00 |

Concomitant medications other than anticoagulants at the time of obtaining Table 2-5 consent, according to the presence or absence of proton-pump inhibitors

FREQ Procedure

|   |       | Cumulative           |                  |        |
|---|-------|----------------------|------------------|--------|
|   |       | Percent of ALL power | Percent of power |        |
| 1 | 32490 | 100.00               | 32490            | 100.00 |

Tables: ALL \* CMYN

ALL

CMYN(Administration of Concomitant Drug)

| Power                   |        |        |        |
|-------------------------|--------|--------|--------|
| Percent                 |        |        |        |
| Percent of rows         |        |        |        |
| Percent of columns      | None   | With   | Total  |
| _____ + _____ + _____ + |        |        |        |
| 1                       | 1445   | 31045  | 32490  |
|                         | 4.45   | 95.55  | 100.00 |
|                         | 4.45   | 95.55  |        |
|                         | 100.00 | 100.00 |        |
| _____ + _____ + _____ + |        |        |        |
| Total                   | 1445   | 31045  | 32490  |
|                         | 4.45   | 95.55  | 100.00 |

Concomitant medications other than anticoagulants at the time of obtaining Table 2-5 consent, according to the presence or absence of proton-pump inhibitors

FREQ Procedure

Table : ALL \* DBTD5

ALL DBTD5(GLP-1 Inhabitators)

Power |

Percent |

Percent of rows

Percent of columns | None | With | Total

|       | None   | With   | Total  |
|-------|--------|--------|--------|
| 1     | 30968  | 77     | 31045  |
|       | 99.75  | 0.25   | 100.00 |
|       | 99.75  | 0.25   |        |
|       | 100.00 | 100.00 |        |
| Total | 30968  | 77     | 31045  |
|       | 99.75  | 0.25   | 100.00 |

Concomitant medications other than anticoagulants at the time of obtaining Table 2-5 consent, according to the presence or absence of proton-pump inhibitors

FREQ Procedure

|   |       | Cumulative           |                  |        |
|---|-------|----------------------|------------------|--------|
|   |       | Percent of ALL power | Percent of power |        |
| 1 | 32490 | 100.00               | 32490            | 100.00 |

Tables: ALL \* CMYN

ALL

CMYN(Administration of Concomitant Drug)

| Power                   |        |        |        |
|-------------------------|--------|--------|--------|
| Percent                 |        |        |        |
| Percent of rows         |        |        |        |
| Percent of columns      | None   | With   | Total  |
| _____ + _____ + _____ + |        |        |        |
| 1                       | 1445   | 31045  | 32490  |
|                         | 4.45   | 95.55  | 100.00 |
|                         | 4.45   | 95.55  |        |
|                         | 100.00 | 100.00 |        |
| _____ + _____ + _____ + |        |        |        |
| Total 1445 31045 32490  | 4.45   | 95.55  | 100.00 |

Concomitant medications other than anticoagulants at the time of obtaining Table 2-5 consent, according to the presence or absence of proton-pump inhibitors

FREQ Procedure

Table : ALL \* DBTD6

ALL DBTD6(SGLT2 Inhabitores)

Power |

Percent |

Percent of rows

Percent of columns | None | With | Total

|       | +      | +      | +      |
|-------|--------|--------|--------|
| 1     | 30638  | 407    | 31045  |
|       | 98.69  | 1.31   | 100.00 |
|       | 98.69  | 1.31   |        |
|       | 100.00 | 100.00 |        |
|       | +      | +      | +      |
| Total | 30638  | 407    | 31045  |
|       | 98.69  | 1.31   | 100.00 |

Concomitant medications other than anticoagulants at the time of obtaining Table 2-5 consent, according to the presence or absence of proton-pump inhibitors

FREQ Procedure

|                      |       | Cumulative       |       |        |
|----------------------|-------|------------------|-------|--------|
| Percent of ALL power |       | Percent of power |       |        |
| 1                    | 32490 | 100.00           | 32490 | 100.00 |

Tables: ALL \* CMYN

ALL

CMYN(Administration of Concomitant Drug)

| Power                   |        |        |        |
|-------------------------|--------|--------|--------|
| Percent                 |        |        |        |
| Percent of rows         |        |        |        |
| Percent of columns      | None   | With   | Total  |
| _____ + _____ + _____ + |        |        |        |
| 1                       | 1445   | 31045  | 32490  |
|                         | 4.45   | 95.55  | 100.00 |
|                         | 4.45   | 95.55  |        |
|                         | 100.00 | 100.00 |        |
| _____ + _____ + _____ + |        |        |        |
| Total                   | 1445   | 31045  | 32490  |
|                         | 4.45   | 95.55  | 100.00 |



Concomitant medications other than anticoagulants at the time of obtaining Table 2-5 consent, according to the presence or absence of proton-pump inhibitors

FREQ Procedure

Table : ALL \* DBTD6

ALL DBTD6(SGLT2 Inhabitators)

Power |

Percent |

Percent of rows

Percent of columns | None | With | Total

|       | None   | With   | Total  |
|-------|--------|--------|--------|
| 1     | 30638  | 407    | 31045  |
|       | 98.69  | 1.31   | 100.00 |
|       | 98.69  | 1.31   |        |
|       | 100.00 | 100.00 |        |
| Total | 30638  | 407    | 31045  |
|       | 98.69  | 1.31   | 100.00 |

Concomitant medications other than anticoagulants at the time of obtaining Table 2-5 consent, according to the presence or absence of proton-pump inhibitors

FREQ Procedure

|                      |       | Cumulative       |       |        |
|----------------------|-------|------------------|-------|--------|
| Percent of ALL power |       | Percent of power |       |        |
| 1                    | 32490 | 100.00           | 32490 | 100.00 |

Tables: ALL \* CMYN

ALL

CMYN(Administration of Concomitant Drug)

| Power              |        |        |        |
|--------------------|--------|--------|--------|
| Percent            |        |        |        |
| Percent of rows    |        |        |        |
| Percent of columns | None   | With   | Total  |
|                    | +      | +      | +      |
| 1                  | 1445   | 31045  | 32490  |
|                    | 4.45   | 95.55  | 100.00 |
|                    | 4.45   | 95.55  |        |
|                    | 100.00 | 100.00 |        |
|                    | +      | +      | +      |
| Total 1445         | 31045  | 32490  |        |
|                    | 4.45   | 95.55  | 100.00 |

Concomitant medications other than anticoagulants at the time of obtaining Table 2-5 consent, according to the presence or absence of proton-pump inhibitors

FREQ Procedure

Table : ALL \* DBTD7

ALL DBTD7(Insuline Related)

Power |

Percent |

Percent of rows

Percent of columns | None | With | Total

|       | None   | With   | Total  |
|-------|--------|--------|--------|
| 1     | 30406  | 639    | 31045  |
|       | 97.94  | 2.06   | 100.00 |
|       | 97.94  | 2.06   |        |
|       | 100.00 | 100.00 |        |
| Total | 30406  | 639    | 31045  |
|       | 97.94  | 2.06   | 100.00 |

Concomitant medications other than anticoagulants at the time of obtaining Table 2-5 consent, according to the presence or absence of proton-pump inhibitors

FREQ Procedure

|                      |       | Cumulative       |       |        |
|----------------------|-------|------------------|-------|--------|
| Percent of ALL power |       | Percent of power |       |        |
| 1                    | 32490 | 100.00           | 32490 | 100.00 |

Tables: ALL \* CMYN

ALL

CMYN(Administration of Concomitant Drug)

| Power                   |        |        |        |
|-------------------------|--------|--------|--------|
| Percent                 |        |        |        |
| Percent of rows         |        |        |        |
| Percent of columns      | None   | With   | Total  |
| _____ + _____ + _____ + |        |        |        |
| 1                       | 1445   | 31045  | 32490  |
|                         | 4.45   | 95.55  | 100.00 |
|                         | 4.45   | 95.55  |        |
|                         | 100.00 | 100.00 |        |
| _____ + _____ + _____ + |        |        |        |
| Total                   | 1445   | 31045  | 32490  |
|                         | 4.45   | 95.55  | 100.00 |

Concomitant medications other than anticoagulants at the time of obtaining Table 2-5 consent, according to the presence or absence of proton-pump inhibitors

FREQ Procedure

Table : ALL \* DBTD7

ALL DBTD7(Insuline Related)

Power |

Percent |

Percent of rows

Percent of columns | None | With | Total

|       | None   | With   | Total  |
|-------|--------|--------|--------|
| 1     | 30406  | 639    | 31045  |
|       | 97.94  | 2.06   | 100.00 |
|       | 97.94  | 2.06   |        |
|       | 100.00 | 100.00 |        |
| Total | 30406  | 639    | 31045  |
|       | 97.94  | 2.06   | 100.00 |

Concomitant medications other than anticoagulants at the time of obtaining Table 2-5 consent, according to the presence or absence of proton-pump inhibitors

FREQ Procedure

|   |       | Cumulative           |                  |        |
|---|-------|----------------------|------------------|--------|
|   |       | Percent of ALL power | Percent of power |        |
| 1 | 32490 | 100.00               | 32490            | 100.00 |

Tables: ALL \* CMYN

ALL

CMYN(Administration of Concomitant Drug)

| Power                   |        |        |        |
|-------------------------|--------|--------|--------|
| Percent                 |        |        |        |
| Percent of rows         |        |        |        |
| Percent of columns      | None   | With   | Total  |
| _____ + _____ + _____ + |        |        |        |
| 1                       | 1445   | 31045  | 32490  |
|                         | 4.45   | 95.55  | 100.00 |
|                         | 4.45   | 95.55  |        |
|                         | 100.00 | 100.00 |        |
| _____ + _____ + _____ + |        |        |        |
| Total                   | 1445   | 31045  | 32490  |
|                         | 4.45   | 95.55  | 100.00 |

Concomitant medications other than anticoagulants at the time of obtaining Table 2-5 consent, according to the presence or absence of proton-pump inhibitors

FREQ Procedure

Table : ALL \* DBTD8

ALL

DBTD8(Other Diabetes Drugs)

Power |

Percent |

Percent of rows

Percent of columns | None | With | Total

|       | +      | +      | +      |
|-------|--------|--------|--------|
| 1     | 30059  | 986    | 31045  |
|       | 96.82  | 3.18   | 100.00 |
|       | 96.82  | 3.18   |        |
|       | 100.00 | 100.00 |        |
|       | +      | +      | +      |
| Total | 30059  | 986    | 31045  |
|       | 96.82  | 3.18   | 100.00 |

Concomitant medications other than anticoagulants at the time of obtaining Table 2-5 consent, according to the presence or absence of proton-pump inhibitors

FREQ Procedure

|                      |       | Cumulative       |       |        |
|----------------------|-------|------------------|-------|--------|
| Percent of ALL power |       | Percent of power |       |        |
| 1                    | 32490 | 100.00           | 32490 | 100.00 |

Tables: ALL \* CMYN

ALL

CMYN(Administration of Concomitant Drug)

| Power                   |        |        |        |
|-------------------------|--------|--------|--------|
| Percent                 |        |        |        |
| Percent of rows         |        |        |        |
| Percent of columns      | None   | With   | Total  |
| _____ + _____ + _____ + |        |        |        |
| 1                       | 1445   | 31045  | 32490  |
|                         | 4.45   | 95.55  | 100.00 |
|                         | 4.45   | 95.55  |        |
|                         | 100.00 | 100.00 |        |
| _____ + _____ + _____ + |        |        |        |
| Total                   | 1445   | 31045  | 32490  |
|                         | 4.45   | 95.55  | 100.00 |



Concomitant medications other than anticoagulants at the time of obtaining Table 2-5 consent, according to the presence or absence of proton-pump inhibitors

FREQ Procedure

Table : ALL \* DBTD8

ALL

DBTD8(Other Diabetes Drugs)

Power |

Percent |

Percent of rows

Percent of columns | None | With | Total

|       | +      | +      | +      |
|-------|--------|--------|--------|
| 1     | 30059  | 986    | 31045  |
|       | 96.82  | 3.18   | 100.00 |
|       | 96.82  | 3.18   |        |
|       | 100.00 | 100.00 |        |
|       | +      | +      | +      |
| Total | 30059  | 986    | 31045  |
|       | 96.82  | 3.18   | 100.00 |

Concomitant medications other than anticoagulants at the time of obtaining Table 2-5 consent, according to the presence or absence of proton-pump inhibitors

FREQ Procedure

|   |       | Cumulative           |                  |        |
|---|-------|----------------------|------------------|--------|
|   |       | Percent of ALL power | Percent of power |        |
| 1 | 32490 | 100.00               | 32490            | 100.00 |

Tables: ALL \* CMYN

ALL

CMYN(Administration of Concomitant Drug)

Power |

Percent |

Percent of rows

Percent of columns | None | With | Total

|            |        |        |        |  |   |
|------------|--------|--------|--------|--|---|
|            | +      |        | +      |  | + |
| 1          | 1445   | 31045  | 32490  |  |   |
|            | 4.45   | 95.55  | 100.00 |  |   |
|            | 4.45   | 95.55  |        |  |   |
|            | 100.00 | 100.00 |        |  |   |
|            | +      |        | +      |  | + |
| Total 1445 | 31045  | 32490  |        |  |   |
|            | 4.45   | 95.55  | 100.00 |  |   |

Concomitant medications other than anticoagulants at the time of obtaining Table 2-5 consent, according to the presence or absence of proton-pump inhibitors

FREQ Procedure

Table: ALL \* DMM

ALL DMM(Dementia Medications)

Power |

Percent |

Percent of rows

Percent of columns | None | With | Total

|       | None   | With   | Total  |
|-------|--------|--------|--------|
| 1     | 29842  | 1203   | 31045  |
|       | 96.12  | 3.88   | 100.00 |
|       | 96.12  | 3.88   |        |
|       | 100.00 | 100.00 |        |
| Total | 29842  | 1203   | 31045  |
|       | 96.12  | 3.88   | 100.00 |

Concomitant medications other than anticoagulants at the time of obtaining Table 2-5 consent, according to the presence or absence of proton-pump inhibitors

FREQ Procedure

|   |                      |        | Cumulative       |        |
|---|----------------------|--------|------------------|--------|
|   | Percent of ALL power |        | Percent of power |        |
| 1 | 32490                | 100.00 | 32490            | 100.00 |

Tables: ALL \* CMYN

ALL

CMYN(Administration of Concomitant Drug)

| Power                   |        |        |        |
|-------------------------|--------|--------|--------|
| Percent                 |        |        |        |
| Percent of rows         |        |        |        |
| Percent of columns      | None   | With   | Total  |
| _____ + _____ + _____ + |        |        |        |
| 1                       | 1445   | 31045  | 32490  |
|                         | 4.45   | 95.55  | 100.00 |
|                         | 4.45   | 95.55  |        |
|                         | 100.00 | 100.00 |        |
| _____ + _____ + _____ + |        |        |        |
| Total                   | 1445   | 31045  | 32490  |
|                         | 4.45   | 95.55  | 100.00 |

Concomitant medications other than anticoagulants at the time of obtaining Table 2-5 consent, according to the presence or absence of proton-pump inhibitors

FREQ Procedure

Table: ALL \* DMM

ALL DMM(Dementia Medications)

Power |

Percent |

Percent of rows

Percent of columns | None | With | Total

|       | None   | With   | Total  |
|-------|--------|--------|--------|
| 1     | 29842  | 1203   | 31045  |
|       | 96.12  | 3.88   | 100.00 |
|       | 96.12  | 3.88   |        |
|       | 100.00 | 100.00 |        |
| Total | 29842  | 1203   | 31045  |
|       | 96.12  | 3.88   | 100.00 |

Concomitant medications other than anticoagulants at the time of obtaining Table 2-5 consent, according to the presence or absence of proton-pump inhibitors

FREQ Procedure

|   |       | Cumulative           |                  |        |
|---|-------|----------------------|------------------|--------|
|   |       | Percent of ALL power | Percent of power |        |
| 1 | 32490 | 100.00               | 32490            | 100.00 |

Tables: ALL \* CMYN

ALL

CMYN(Administration of Concomitant Drug)

| Power                   |        |        |        |
|-------------------------|--------|--------|--------|
| Percent                 |        |        |        |
| Percent of rows         |        |        |        |
| Percent of columns      | None   | With   | Total  |
| _____ + _____ + _____ + |        |        |        |
| 1                       | 1445   | 31045  | 32490  |
|                         | 4.45   | 95.55  | 100.00 |
|                         | 4.45   | 95.55  |        |
|                         | 100.00 | 100.00 |        |
| _____ + _____ + _____ + |        |        |        |
| Total                   | 1445   | 31045  | 32490  |
|                         | 4.45   | 95.55  | 100.00 |

Concomitant medications other than anticoagulants at the time of obtaining Table 2-5 consent, according to the presence or absence of proton-pump inhibitors

FREQ Procedure

Tables: ALL\* ACNA

ALL ACNA(Anti-Cancer Agent)

Power |

Percent |

Percent of rows

Percent of columns | None | With | Total

|       | None   | With   | Total  |
|-------|--------|--------|--------|
| 1     | 30756  | 289    | 31045  |
|       | 99.07  | 0.93   | 100.00 |
|       | 99.07  | 0.93   |        |
|       | 100.00 | 100.00 |        |
| Total | 30756  | 289    | 31045  |
|       | 99.07  | 0.93   | 100.00 |

Concomitant medications other than anticoagulants at the time of obtaining Table 2-5 consent, according to the presence or absence of proton-pump inhibitors

FREQ Procedure

|   |       | Cumulative           |                  |        |
|---|-------|----------------------|------------------|--------|
|   |       | Percent of ALL power | Percent of power |        |
| 1 | 32490 | 100.00               | 32490            | 100.00 |

Tables: ALL \* CMYN

ALL

CMYN(Administration of Concomitant Drug)

| Power                   |        |        |        |  |
|-------------------------|--------|--------|--------|--|
| Percent                 |        |        |        |  |
| Percent of rows         |        |        |        |  |
| Percent of columns      | None   | With   | Total  |  |
| _____ + _____ + _____ + |        |        |        |  |
| 1                       | 1445   | 31045  | 32490  |  |
|                         | 4.45   | 95.55  | 100.00 |  |
|                         | 4.45   | 95.55  |        |  |
|                         | 100.00 | 100.00 |        |  |
| _____ + _____ + _____ + |        |        |        |  |
| Total                   | 1445   | 31045  | 32490  |  |
|                         | 4.45   | 95.55  | 100.00 |  |



Concomitant medications other than anticoagulants at the time of obtaining Table 2-5 consent, according to the presence or absence of proton-pump inhibitors

FREQ Procedure

Tables: ALL\* ACNA

ALL ACNA(Anti-Cancer Agent)

Power |

Percent |

Percent of rows

Percent of columns | None | With | Total

|       | +      | +      | +      |
|-------|--------|--------|--------|
| 1     | 30756  | 289    | 31045  |
|       | 99.07  | 0.93   | 100.00 |
|       | 99.07  | 0.93   |        |
|       | 100.00 | 100.00 |        |
|       | +      | +      | +      |
| Total | 30756  | 289    | 31045  |
|       | 99.07  | 0.93   | 100.00 |

Concomitant medications other than anticoagulants at the time of obtaining Table 2-5 consent, according to the presence or absence of proton-pump inhibitors

FREQ Procedure

|   |       | Cumulative           |                  |        |
|---|-------|----------------------|------------------|--------|
|   |       | Percent of ALL power | Percent of power |        |
| 1 | 32490 | 100.00               | 32490            | 100.00 |

Tables: ALL \* CMYN

ALL

CMYN(Administration of Concomitant Drug)

| Power                   |        |        |        |
|-------------------------|--------|--------|--------|
| Percent                 |        |        |        |
| Percent of rows         |        |        |        |
| Percent of columns      | None   | With   | Total  |
| _____ + _____ + _____ + |        |        |        |
| 1                       | 1445   | 31045  | 32490  |
|                         | 4.45   | 95.55  | 100.00 |
|                         | 4.45   | 95.55  |        |
|                         | 100.00 | 100.00 |        |
| _____ + _____ + _____ + |        |        |        |
| Total                   | 1445   | 31045  | 32490  |
|                         | 4.45   | 95.55  | 100.00 |

Concomitant medications other than anticoagulants at the time of obtaining Table 2-5 consent, according to the presence or absence of proton-pump inhibitors

FREQ Procedure

Tables: ALL\* COPD

ALL COPD(COPD)

Power |

Percent |

Percent of rows

Percent of columns | None | With | Total

|       | +      | +      | +      |
|-------|--------|--------|--------|
| 1     | 30206  | 839    | 31045  |
|       | 97.30  | 2.70   | 100.00 |
|       | 97.30  | 2.70   |        |
|       | 100.00 | 100.00 |        |
|       | +      | +      | +      |
| Total | 30206  | 839    | 31045  |
|       | 97.30  | 2.70   | 100.00 |

Concomitant medications other than anticoagulants at the time of obtaining Table 2-5 consent, according to the presence or absence of proton-pump inhibitors

FREQ Procedure

|   |       | Cumulative           |                  |        |
|---|-------|----------------------|------------------|--------|
|   |       | Percent of ALL power | Percent of power |        |
| 1 | 32490 | 100.00               | 32490            | 100.00 |

Tables: ALL \* CMYN

ALL

CMYN(Administration of Concomitant Drug)

| Power                   |        |        |        |
|-------------------------|--------|--------|--------|
| Percent                 |        |        |        |
| Percent of rows         |        |        |        |
| Percent of columns      | None   | With   | Total  |
| _____ + _____ + _____ + |        |        |        |
| 1                       | 1445   | 31045  | 32490  |
|                         | 4.45   | 95.55  | 100.00 |
|                         | 4.45   | 95.55  |        |
|                         | 100.00 | 100.00 |        |
| _____ + _____ + _____ + |        |        |        |
| Total                   | 1445   | 31045  | 32490  |
|                         | 4.45   | 95.55  | 100.00 |

Concomitant medications other than anticoagulants at the time of obtaining Table 2-5 consent, according to the presence or absence of proton-pump inhibitors

FREQ Procedure

Tables: ALL\* COPD

ALL COPD(COPD)

Power |

Percent |

Percent of rows

Percent of columns | None | With | Total

|       | +      | +      | +      |
|-------|--------|--------|--------|
| 1     | 30206  | 839    | 31045  |
|       | 97.30  | 2.70   | 100.00 |
|       | 97.30  | 2.70   |        |
|       | 100.00 | 100.00 |        |
|       | +      | +      | +      |
| Total | 30206  | 839    | 31045  |
|       | 97.30  | 2.70   | 100.00 |

Concomitant medications other than anticoagulants at the time of obtaining Table 2-5 consent, according to the presence or absence of proton-pump inhibitors

FREQ Procedure

|   |       | Cumulative           |                  |        |
|---|-------|----------------------|------------------|--------|
|   |       | Percent of ALL power | Percent of power |        |
| 1 | 32490 | 100.00               | 32490            | 100.00 |

Tables: ALL \* CMYN

ALL

CMYN(Administration of Concomitant Drug)

| Power                   |        |        |        |  |
|-------------------------|--------|--------|--------|--|
| Percent                 |        |        |        |  |
| Percent of rows         |        |        |        |  |
| Percent of columns      | None   | With   | Total  |  |
| _____ + _____ + _____ + |        |        |        |  |
| 1                       | 1445   | 31045  | 32490  |  |
|                         | 4.45   | 95.55  | 100.00 |  |
|                         | 4.45   | 95.55  |        |  |
|                         | 100.00 | 100.00 |        |  |
| _____ + _____ + _____ + |        |        |        |  |
| Total                   | 1445   | 31045  | 32490  |  |
|                         | 4.45   | 95.55  | 100.00 |  |

Concomitant medications other than anticoagulants at the time of obtaining Table 2-5 consent, according to the presence or absence of proton-pump inhibitors

FREQ Procedure

Tables: ALL \* PSYD

ALL PSYD(Psychotropic Drugs)

Power |

Percent |

Percent of rows

Percent of columns | None | With | Total

|       | None   | With   | Total  |
|-------|--------|--------|--------|
| 1     | 28522  | 2523   | 31045  |
|       | 91.87  | 8.13   | 100.00 |
|       | 91.87  | 8.13   |        |
|       | 100.00 | 100.00 |        |
| Total | 28522  | 2523   | 31045  |
|       | 91.87  | 8.13   | 100.00 |

Concomitant medications other than anticoagulants at the time of obtaining Table 2-5 consent, according to the presence or absence of proton-pump inhibitors

FREQ Procedure

|   |       | Cumulative           |                  |        |
|---|-------|----------------------|------------------|--------|
|   |       | Percent of ALL power | Percent of power |        |
| 1 | 32490 | 100.00               | 32490            | 100.00 |

Tables: ALL \* CMYN

ALL

CMYN(Administration of Concomitant Drug)

| Power                   |        |        |        |
|-------------------------|--------|--------|--------|
| Percent                 |        |        |        |
| Percent of rows         |        |        |        |
| Percent of columns      | None   | With   | Total  |
| _____ + _____ + _____ + |        |        |        |
| 1                       | 1445   | 31045  | 32490  |
|                         | 4.45   | 95.55  | 100.00 |
|                         | 4.45   | 95.55  |        |
|                         | 100.00 | 100.00 |        |
| _____ + _____ + _____ + |        |        |        |
| Total                   | 1445   | 31045  | 32490  |
|                         | 4.45   | 95.55  | 100.00 |



Concomitant medications other than anticoagulants at the time of obtaining Table 2-5 consent, according to the presence or absence of proton-pump inhibitors

FREQ Procedure

Tables: ALL \* PSYD

ALL PSYD(Psychotropic Drugs)

Power |

Percent |

Percent of rows

Percent of columns | None | With | Total

|       | +      | +      | +      |
|-------|--------|--------|--------|
| 1     | 28522  | 2523   | 31045  |
|       | 91.87  | 8.13   | 100.00 |
|       | 91.87  | 8.13   |        |
|       | 100.00 | 100.00 |        |
|       | +      | +      | +      |
| Total | 28522  | 2523   | 31045  |
|       | 91.87  | 8.13   | 100.00 |

Concomitant medications other than anticoagulants at the time of obtaining Table 2-5 consent, according to the presence or absence of proton-pump inhibitors

FREQ Procedure

|   |       | Cumulative           |                  |        |
|---|-------|----------------------|------------------|--------|
|   |       | Percent of ALL power | Percent of power |        |
| 1 | 32490 | 100.00               | 32490            | 100.00 |

Tables: ALL \* CMYN

ALL

CMYN(Administration of Concomitant Drug)

| Power                   |        |        |        |
|-------------------------|--------|--------|--------|
| Percent                 |        |        |        |
| Percent of rows         |        |        |        |
| Percent of columns      | None   | With   | Total  |
| _____ + _____ + _____ + |        |        |        |
| 1                       | 1445   | 31045  | 32490  |
|                         | 4.45   | 95.55  | 100.00 |
|                         | 4.45   | 95.55  |        |
|                         | 100.00 | 100.00 |        |
| _____ + _____ + _____ + |        |        |        |
| Total                   | 1445   | 31045  | 32490  |
|                         | 4.45   | 95.55  | 100.00 |

Concomitant medications other than anticoagulants at the time of obtaining Table 2-5 consent, according to the presence or absence of proton-pump inhibitors

FREQ Procedure

Tables: ALL\* PRPI

ALL

PRPI(Proton Pump Inhabitants)

Power |

Percent |

Percent of rows

Percent of columns | None | With | Total

|       | None   | With   | Total  |
|-------|--------|--------|--------|
| 1     | 19064  | 11981  | 31045  |
|       | 61.41  | 38.59  | 100.00 |
|       | 61.41  | 38.59  |        |
|       | 100.00 | 100.00 |        |
| Total | 19064  | 11981  | 31045  |
|       | 61.41  | 38.59  | 100.00 |

Concomitant medications other than anticoagulants at the time of obtaining Table 2-5 consent, according to the presence or absence of proton-pump inhibitors

FREQ Procedure

|                      |       | Cumulative       |       |        |
|----------------------|-------|------------------|-------|--------|
| Percent of ALL power |       | Percent of power |       |        |
| 1                    | 32490 | 100.00           | 32490 | 100.00 |

Tables: ALL \* CMYN

ALL

CMYN(Administration of Concomitant Drug)

| Power                   |        |        |        |
|-------------------------|--------|--------|--------|
| Percent                 |        |        |        |
| Percent of rows         |        |        |        |
| Percent of columns      | None   | With   | Total  |
| _____ + _____ + _____ + |        |        |        |
| 1                       | 1445   | 31045  | 32490  |
|                         | 4.45   | 95.55  | 100.00 |
|                         | 4.45   | 95.55  |        |
|                         | 100.00 | 100.00 |        |
| _____ + _____ + _____ + |        |        |        |
| Total                   | 1445   | 31045  | 32490  |
|                         | 4.45   | 95.55  | 100.00 |

Concomitant medications other than anticoagulants at the time of obtaining Table 2-5 consent, according to the presence or absence of proton-pump inhibitors

FREQ Procedure

Tables: ALL\* PRPI

ALL

PRPI(Proton Pump Inhabititors)

Power |

Percent |

Percent of rows

Percent of columns | None | With | Total

|       | None   | With   | Total  |
|-------|--------|--------|--------|
| 1     | 19064  | 11981  | 31045  |
|       | 61.41  | 38.59  | 100.00 |
|       | 61.41  | 38.59  |        |
|       | 100.00 | 100.00 |        |
| Total | 19064  | 11981  | 31045  |
|       | 61.41  | 38.59  | 100.00 |

Concomitant medications other than anticoagulants at the time of obtaining Table 2-5 consent, according to the presence or absence of proton-pump inhibitors

FREQ Procedure

|   |       | Cumulative           |                  |        |
|---|-------|----------------------|------------------|--------|
|   |       | Percent of ALL power | Percent of power |        |
| 1 | 32490 | 100.00               | 32490            | 100.00 |

Tables: ALL \* CMYN

ALL

CMYN(Administration of Concomitant Drug)

| Power                   |        |        |        |
|-------------------------|--------|--------|--------|
| Percent                 |        |        |        |
| Percent of rows         |        |        |        |
| Percent of columns      | None   | With   | Total  |
| _____ + _____ + _____ + |        |        |        |
| 1                       | 1445   | 31045  | 32490  |
|                         | 4.45   | 95.55  | 100.00 |
|                         | 4.45   | 95.55  |        |
|                         | 100.00 | 100.00 |        |
| _____ + _____ + _____ + |        |        |        |
| Total                   | 1445   | 31045  | 32490  |
|                         | 4.45   | 95.55  | 100.00 |

Concomitant medications other than anticoagulants at the time of obtaining Table 2-5 consent, according to the presence or absence of proton-pump inhibitors

FREQ Procedure

Tables: ALL\* PGPI

ALL PGPI(P-gp Inhibitors)

Power |

Percent |

Percent of rows

Percent of columns | None | With | Total

|       | +      | +      | +      |
|-------|--------|--------|--------|
| 1     | 30503  | 542    | 31045  |
|       | 98.25  | 1.75   | 100.00 |
|       | 98.25  | 1.75   |        |
|       | 100.00 | 100.00 |        |
|       | +      | +      | +      |
| Total | 30503  | 542    | 31045  |
|       | 98.25  | 1.75   | 100.00 |

Concomitant medications other than anticoagulants at the time of obtaining Table 2-5 consent, according to the presence or absence of proton-pump inhibitors

FREQ Procedure

|   |       | Cumulative           |                  |        |
|---|-------|----------------------|------------------|--------|
|   |       | Percent of ALL power | Percent of power |        |
| 1 | 32490 | 100.00               | 32490            | 100.00 |

Tables: ALL \* CMYN

ALL

CMYN(Administration of Concomitant Drug)

| Power                   |        |        |        |
|-------------------------|--------|--------|--------|
| Percent                 |        |        |        |
| Percent of rows         |        |        |        |
| Percent of columns      | None   | With   | Total  |
| _____ + _____ + _____ + |        |        |        |
| 1                       | 1445   | 31045  | 32490  |
|                         | 4.45   | 95.55  | 100.00 |
|                         | 4.45   | 95.55  |        |
|                         | 100.00 | 100.00 |        |
| _____ + _____ + _____ + |        |        |        |
| Total                   | 1445   | 31045  | 32490  |
|                         | 4.45   | 95.55  | 100.00 |



Concomitant medications other than anticoagulants at the time of obtaining Table 2-5 consent, according to the presence or absence of proton-pump inhibitors

FREQ Procedure

Tables: ALL\* PGPI

ALL PGPI(P-gp Inhibitors)

Power |

Percent |

Percent of rows

Percent of columns | None | With | Total

|       | +      | +      | +      |
|-------|--------|--------|--------|
| 1     | 30503  | 542    | 31045  |
|       | 98.25  | 1.75   | 100.00 |
|       | 98.25  | 1.75   |        |
|       | 100.00 | 100.00 |        |
|       | +      | +      | +      |
| Total | 30503  | 542    | 31045  |
|       | 98.25  | 1.75   | 100.00 |

Concomitant medications other than anticoagulants at the time of obtaining Table 2-5 consent, according to the presence or absence of proton-pump inhibitors

FREQ Procedure

|   |       | Cumulative           |                  |        |
|---|-------|----------------------|------------------|--------|
|   |       | Percent of ALL power | Percent of power |        |
| 1 | 32490 | 100.00               | 32490            | 100.00 |

Tables: ALL \* CMYN

ALL

CMYN(Administration of Concomitant Drug)

| Power                   |        |        |        |
|-------------------------|--------|--------|--------|
| Percent                 |        |        |        |
| Percent of rows         |        |        |        |
| Percent of columns      | None   | With   | Total  |
| _____ + _____ + _____ + |        |        |        |
| 1                       | 1445   | 31045  | 32490  |
|                         | 4.45   | 95.55  | 100.00 |
|                         | 4.45   | 95.55  |        |
|                         | 100.00 | 100.00 |        |
| _____ + _____ + _____ + |        |        |        |
| Total                   | 1445   | 31045  | 32490  |
|                         | 4.45   | 95.55  | 100.00 |

Concomitant medications other than anticoagulants at the time of obtaining Table 2-5 consent, according to the presence or absence of proton-pump inhibitors

FREQ Procedure

Tables: ALL \* TCMCNT

ALL TCMCNT(Total Number of Drugs Other than Anticoagulant)

Power |

Percent |

Percent of rows

Percent|0|1|2|3|4|5|6|7|8|9| Total

|       | 0      | 1      | 2      | 3      | 4      | 5      | 6      | 7      | 8      | 9      | Total        |
|-------|--------|--------|--------|--------|--------|--------|--------|--------|--------|--------|--------------|
|       | 1      | 52     | 688    | 1602   | 2622   | 3597   | 4105   | 4171   | 3747   | 3187   | 2516   31831 |
|       | 0.16   | 2.16   | 5.03   | 8.24   | 11.30  | 12.90  | 13.10  | 11.77  | 10.01  | 7.90   | 100.00       |
|       | 100.00 | 100.00 | 100.00 | 100.00 | 100.00 | 100.00 | 100.00 | 100.00 | 100.00 | 100.00 | 100.00       |
| Total | 52     | 688    | 1602   | 2622   | 3597   | 4105   | 4171   | 3747   | 3187   | 2516   | 31831        |
|       | 0.16   | 2.16   | 5.03   | 8.24   | 11.30  | 12.90  | 13.10  | 11.77  | 10.01  | 7.90   | 100.00       |

(continued)

Tables: ALL \* TCMCNT

ALL TCMCNT(Total Number of Drugs Other than Anticoagulant)

Power |

Percent |

Percent of rows

Percent |10|11|12|13|14|15|16|17|18|19|Total

|       | 10     | 11     | 12     | 13     | 14     | 15     | 16     | 17     | 18     | 19     | Total  |
|-------|--------|--------|--------|--------|--------|--------|--------|--------|--------|--------|--------|
|       | 1      | 1825   | 1360   | 881    | 598    | 366    | 206    | 121    | 79     | 47     | 31831  |
|       | 5.73   | 4.27   | 2.77   | 1.88   | 1.15   | 0.65   | 0.38   | 0.25   | 0.15   | 0.08   | 100.00 |
|       | 5.73   | 4.27   | 2.77   | 1.88   | 1.15   | 0.65   | 0.38   | 0.25   | 0.15   | 0.08   | 100.00 |
|       | 100.00 | 100.00 | 100.00 | 100.00 | 100.00 | 100.00 | 100.00 | 100.00 | 100.00 | 100.00 | 100.00 |
| Total | 1825   | 1360   | 881    | 598    | 366    | 206    | 121    | 79     | 47     | 24     | 31831  |
|       | 5.73   | 4.27   | 2.77   | 1.88   | 1.15   | 0.65   | 0.38   | 0.25   | 0.15   | 0.08   | 100.00 |

(continued)

Concomitant medications other than anticoagulants at the time of obtaining Table 2-5 consent, according to the presence or absence of proton-pump inhibitors

FREQ Procedure

Tables: ALL \* TCMCNT

ALL TCMCNT(Total Number of Drugs Other than Anticoagulant)

Power |

Percent |

Percent of rows

Percent | 20| 21| 22| 23| 24| 25| 26| 27| Total

|       | 20     | 21     | 22     | 23     | 24     | 25     | 26     | 27     | Total  |        |
|-------|--------|--------|--------|--------|--------|--------|--------|--------|--------|--------|
| 1     | 1      | 19     | 6      | 2      | 5      | 1      | 1      | 2      | 1      | 31831  |
|       | 0.06   | 0.06   | 0.02   | 0.01   | 0.02   | 0.00   | 0.00   | 0.01   | 0.00   | 100.00 |
|       | 100.00 | 100.00 | 100.00 | 100.00 | 100.00 | 100.00 | 100.00 | 100.00 | 100.00 |        |
| Total | 19     | 6      | 2      | 5      | 1      | 1      | 2      | 1      | 31831  |        |
|       | 0.06   | 0.02   | 0.01   | 0.02   | 0.00   | 0.00   | 0.01   | 0.00   |        | 0.00   |
|       | 100.00 |        |        |        |        |        |        |        |        |        |

Degree of missing values = 659

Concomitant medications other than anticoagulants at the time of obtaining Table 2-5 consent, according to the presence or absence of proton-pump inhibitors

FREQ Procedure

|   |       | Cumulative           |                  |        |
|---|-------|----------------------|------------------|--------|
|   |       | Percent of ALL power | Percent of power |        |
| 1 | 32490 | 100.00               | 32490            | 100.00 |

Tables: ALL \* CMYN

ALL

CMYN(Administration of Concomitant Drug)

| Power                   |        |        |        |  |
|-------------------------|--------|--------|--------|--|
| Percent                 |        |        |        |  |
| Percent of rows         |        |        |        |  |
| Percent of columns      | None   | With   | Total  |  |
| _____ + _____ + _____ + |        |        |        |  |
| 1                       | 1445   | 31045  | 32490  |  |
|                         | 4.45   | 95.55  | 100.00 |  |
|                         | 4.45   | 95.55  |        |  |
|                         | 100.00 | 100.00 |        |  |
| _____ + _____ + _____ + |        |        |        |  |
| Total                   | 1445   | 31045  | 32490  |  |
|                         | 4.45   | 95.55  | 100.00 |  |

Concomitant medications other than anticoagulants at the time of obtaining Table 2-5 consent, according to the presence or absence of proton-pump inhibitors

FREQ Procedure

Tables: ALL \* TCMCNT

ALL TCMCNT(Total Number of Drugs Other than Anticoagulant)

Power |

Percent |

Percent of rows

Percent|0|1|2|3|4|5|6|7|8|9| Total

|       | 0      | 1      | 2      | 3      | 4      | 5      | 6      | 7      | 8      | 9      | Total        |
|-------|--------|--------|--------|--------|--------|--------|--------|--------|--------|--------|--------------|
|       | 1      | 52     | 688    | 1602   | 2622   | 3597   | 4105   | 4171   | 3747   | 3187   | 2516   31831 |
|       | 0.16   | 2.16   | 5.03   | 8.24   | 11.30  | 12.90  | 13.10  | 11.77  | 10.01  | 7.90   | 100.00       |
|       | 100.00 | 100.00 | 100.00 | 100.00 | 100.00 | 100.00 | 100.00 | 100.00 | 100.00 | 100.00 | 100.00       |
| Total | 52     | 688    | 1602   | 2622   | 3597   | 4105   | 4171   | 3747   | 3187   | 2516   | 31831        |
|       | 0.16   | 2.16   | 5.03   | 8.24   | 11.30  | 12.90  | 13.10  | 11.77  | 10.01  | 7.90   | 100.00       |

(continued)

Tables: ALL \* TCMCNT

ALL TCMCNT(Total Number of Drugs Other than Anticoagulant)

Power |

Percent |

Percent of rows

Percent |10|11|12|13|14|15|16|17|18|19|Total

|  | 10     | 11     | 12     | 13     | 14     | 15     | 16     | 17     | 18     | 19     | Total  |
|--|--------|--------|--------|--------|--------|--------|--------|--------|--------|--------|--------|
|  | 1      | 1825   | 1360   | 881    | 598    | 366    | 206    | 121    | 79     | 47     | 31831  |
|  | 5.73   | 4.27   | 2.77   | 1.88   | 1.15   | 0.65   | 0.38   | 0.25   | 0.15   | 0.08   | 100.00 |
|  | 5.73   | 4.27   | 2.77   | 1.88   | 1.15   | 0.65   | 0.38   | 0.25   | 0.15   | 0.08   | 100.00 |
|  | 100.00 | 100.00 | 100.00 | 100.00 | 100.00 | 100.00 | 100.00 | 100.00 | 100.00 | 100.00 | 100.00 |

|       | 10   | 11   | 12   | 13   | 14   | 15   | 16   | 17   | 18   | 19   | Total  |
|-------|------|------|------|------|------|------|------|------|------|------|--------|
| Total | 1825 | 1360 | 881  | 598  | 366  | 206  | 121  | 79   | 47   | 24   | 31831  |
|       | 5.73 | 4.27 | 2.77 | 1.88 | 1.15 | 0.65 | 0.38 | 0.25 | 0.15 | 0.08 | 100.00 |

(continued)



Concomitant medications other than anticoagulants at the time of obtaining Table 2-5 consent, according to the presence or absence of proton-pump inhibitors

FREQ Procedure

Tables: ALL \* TCMCNT

ALL TCMCNT(Total Number of Drugs Other than Anticoagulant)

Power |

Percent |

Percent of rows

Percent | 20| 21| 22| 23| 24| 25| 26| 27| Total

|       | 20     | 21     | 22     | 23     | 24     | 25     | 26     | 27     | Total  |        |
|-------|--------|--------|--------|--------|--------|--------|--------|--------|--------|--------|
| 1     | 1      | 19     | 6      | 2      | 5      | 1      | 1      | 2      | 1      | 31831  |
|       | 0.06   | 0.06   | 0.02   | 0.01   | 0.02   | 0.00   | 0.00   | 0.01   | 0.00   | 100.00 |
|       | 100.00 | 100.00 | 100.00 | 100.00 | 100.00 | 100.00 | 100.00 | 100.00 | 100.00 |        |
| Total | 19     | 6      | 2      | 5      | 1      | 1      | 2      | 1      | 31831  |        |
|       | 0.06   | 0.02   | 0.01   | 0.02   | 0.00   | 0.00   | 0.01   | 0.00   |        | 0.00   |
|       | 100.00 |        |        |        |        |        |        |        |        |        |

Degree of missing values = 659

Concomitant medications other than anticoagulants at the time of obtaining Table 2-5 consent, according to the presence or absence of proton-pump inhibitors

FREQ Procedure

|   |       | Cumulative           |                  |        |
|---|-------|----------------------|------------------|--------|
|   |       | Percent of ALL power | Percent of power |        |
| 1 | 32490 | 100.00               | 32490            | 100.00 |

Tables: ALL \* CMYN

ALL

CMYN(Administration of Concomitant Drug)

| Power                   |        |        |        |
|-------------------------|--------|--------|--------|
| Percent                 |        |        |        |
| Percent of rows         |        |        |        |
| Percent of columns      | None   | With   | Total  |
| _____ + _____ + _____ + |        |        |        |
| 1                       | 1445   | 31045  | 32490  |
|                         | 4.45   | 95.55  | 100.00 |
|                         | 4.45   | 95.55  |        |
|                         | 100.00 | 100.00 |        |
| _____ + _____ + _____ + |        |        |        |
| Total                   | 1445   | 31045  | 32490  |
|                         | 4.45   | 95.55  | 100.00 |

Concomitant medications other than anticoagulants at the time of obtaining Table 2-5 consent, according to the presence or absence of proton-pump inhibitors

FREQ Procedure

Tables: ALL \* TCMCNT

ALL TCMCNT(Total Number of Drugs Other than Anticoagulant)

Power |

Percent |

Percent of rows

Percent|0|1|2|3|4|5|6|7|8|9| Total

|        | +      | +      | +      | +      | +      | +      | +      | +      | +      | +           |
|--------|--------|--------|--------|--------|--------|--------|--------|--------|--------|-------------|
| -      | +      | +      | +      | +      |        |        |        |        |        |             |
|        | 1      | 52     | 688    | 1602   | 2622   | 3597   | 4105   | 4171   | 3747   | 3187        |
| 2516   |        |        |        |        |        |        |        |        |        | 31831       |
|        | 0.16   | 2.16   | 5.03   | 8.24   | 11.30  | 12.90  | 13.10  | 11.77  | 10.01  |             |
| 7.90   | 100.00 |        |        |        |        |        |        |        |        |             |
|        | 0.16   | 2.16   | 5.03   | 8.24   | 11.30  | 12.90  | 13.10  | 11.77  | 10.01  |             |
| 7.90   |        |        |        |        |        |        |        |        |        |             |
|        | 100.00 | 100.00 | 100.00 | 100.00 | 100.00 | 100.00 | 100.00 | 100.00 | 100.00 | 100.00      |
| 100.00 |        |        |        |        |        |        |        |        |        |             |
|        | +      | +      | +      | +      | +      | +      | +      | +      | +      | +           |
| -      | +      | +      | +      | +      |        |        |        |        |        |             |
| Total  | 52     | 688    | 1602   | 2622   | 3597   | 4105   | 4171   | 3747   | 3187   | 2516 31831  |
|        | 0.16   | 2.16   | 5.03   | 8.24   | 11.30  | 12.90  | 13.10  | 11.77  | 10.01  | 7.90 100.00 |

(continued)

Tables: ALL \* TCMCNT

ALL TCMCNT(Total Number of Drugs Other than Anticoagulant)

Power |

Percent |

Percent of rows

Percent |10|11|12|13|14|15|16|17|18|19|Total

|       | 10     | 11     | 12     | 13     | 14     | 15     | 16     | 17     | 18     | 19     | Total  |
|-------|--------|--------|--------|--------|--------|--------|--------|--------|--------|--------|--------|
|       | 1      | 1825   | 1360   | 881    | 598    | 366    | 206    | 121    | 79     | 47     | 31831  |
|       | 5.73   | 4.27   | 2.77   | 1.88   | 1.15   | 0.65   | 0.38   | 0.25   | 0.15   | 0.08   | 100.00 |
|       | 5.73   | 4.27   | 2.77   | 1.88   | 1.15   | 0.65   | 0.38   | 0.25   | 0.15   | 0.08   | 100.00 |
|       | 100.00 | 100.00 | 100.00 | 100.00 | 100.00 | 100.00 | 100.00 | 100.00 | 100.00 | 100.00 | 100.00 |
| Total | 1825   | 1360   | 881    | 598    | 366    | 206    | 121    | 79     | 47     | 24     | 31831  |
|       | 5.73   | 4.27   | 2.77   | 1.88   | 1.15   | 0.65   | 0.38   | 0.25   | 0.15   | 0.08   | 100.00 |

(continued)

Concomitant medications other than anticoagulants at the time of obtaining Table 2-5 consent, according to the presence or absence of proton-pump inhibitors

FREQ Procedure

Tables: ALL \* TCMCNT

ALL TCMCNT(Total Number of Drugs Other than Anticoagulant)

Power |

Percent |

Percent of rows

Percent | 20| 21| 22| 23| 24| 25| 26| 27| Total

|       | 20     | 21     | 22     | 23     | 24     | 25     | 26     | 27     | Total  |
|-------|--------|--------|--------|--------|--------|--------|--------|--------|--------|
|       | 1      | 19     | 6      | 2      | 5      | 1      | 1      | 2      | 1      |
|       | 0.06   | 0.06   | 0.02   | 0.01   | 0.02   | 0.00   | 0.00   | 0.01   | 0.00   |
|       | 100.00 | 100.00 | 100.00 | 100.00 | 100.00 | 100.00 | 100.00 | 100.00 | 100.00 |
| Total | 19     | 6      | 2      | 5      | 1      | 1      | 2      | 1      | 31831  |
|       | 0.06   | 0.02   | 0.01   | 0.02   | 0.00   | 0.00   | 0.01   | 0.00   | 0.00   |
|       | 100.00 |        |        |        |        |        |        |        |        |

Degree of missing values = 659

Concomitant medications other than anticoagulants at the time of obtaining Table 2-5 consent, according to the presence or absence of proton-pump inhibitors

FREQ Procedure

|                      |       | Cumulative       |       |        |
|----------------------|-------|------------------|-------|--------|
| Percent of ALL power |       | Percent of power |       |        |
| 1                    | 32490 | 100.00           | 32490 | 100.00 |

Tables: ALL \* CMYN

ALL

CMYN(Administration of Concomitant Drug)

Power |

Percent |

Percent of rows

Percent of columns | None | With | Total

|            |        |        |        |       |   |
|------------|--------|--------|--------|-------|---|
| _____      | +      | _____  | +      | _____ | + |
| 1          | 1445   | 31045  | 32490  |       |   |
|            | 4.45   | 95.55  | 100.00 |       |   |
|            | 4.45   | 95.55  |        |       |   |
|            | 100.00 | 100.00 |        |       |   |
| _____      | +      | _____  | +      | _____ | + |
| Total 1445 | 31045  | 32490  |        |       |   |
|            | 4.45   | 95.55  | 100.00 |       |   |

Concomitant medications other than anticoagulants at the time of obtaining Table 2-5 consent, according to the presence or absence of proton-pump inhibitors

FREQ Procedure

Tables: ALL \* TCMCNT

ALL TCMCNT(Total Number of Drugs Other than Anticoagulant)

Power |  
Percent |  
Percent of rows

| Percent | 0      | 1      | 2      | 3      | 4      | 5      | 6      | 7      | 8      | 9      | Total  |        |
|---------|--------|--------|--------|--------|--------|--------|--------|--------|--------|--------|--------|--------|
|         | 1      | 52     | 688    | 1602   | 2622   | 3597   | 4105   | 4171   | 3747   | 3187   | 2516   | 31831  |
|         | 0.16   | 2.16   | 5.03   | 8.24   | 11.30  | 12.90  | 13.10  | 11.77  | 10.01  | 7.90   | 100.00 | 100.00 |
|         | 100.00 | 100.00 | 100.00 | 100.00 | 100.00 | 100.00 | 100.00 | 100.00 | 100.00 | 100.00 | 100.00 | 100.00 |

Total 52 688 1602 2622 3597 4105 4171 3747 3187 2516 31831

0.16 2.16 5.03 8.24 11.30 12.90 13.10 11.77  
10.01 7.90 100.00

(continued)

Tables: ALL \* TCMCNT

ALL TCMCNT(Total Number of Drugs Other than Anticoagulant)

Power |  
Percent |

Percent of rows

Percent |10|11|12|13|14|15|16|17|18|19|Total

|       | 10     | 11     | 12     | 13     | 14     | 15     | 16     | 17     | 18     | 19     | Total  |
|-------|--------|--------|--------|--------|--------|--------|--------|--------|--------|--------|--------|
|       | 1      | 1825   | 1360   | 881    | 598    | 366    | 206    | 121    | 79     | 47     | 31831  |
|       | 5.73   | 4.27   | 2.77   | 1.88   | 1.15   | 0.65   | 0.38   | 0.25   | 0.15   | 0.08   | 100.00 |
|       | 5.73   | 4.27   | 2.77   | 1.88   | 1.15   | 0.65   | 0.38   | 0.25   | 0.15   | 0.08   | 100.00 |
|       | 100.00 | 100.00 | 100.00 | 100.00 | 100.00 | 100.00 | 100.00 | 100.00 | 100.00 | 100.00 | 100.00 |
| Total | 1825   | 1360   | 881    | 598    | 366    | 206    | 121    | 79     | 47     | 24     | 31831  |
|       | 5.73   | 4.27   | 2.77   | 1.88   | 1.15   | 0.65   | 0.38   | 0.25   | 0.15   | 0.08   | 100.00 |

(continued)



Concomitant medications other than anticoagulants at the time of obtaining Table 2-5 consent, according to the presence or absence of proton-pump inhibitors

FREQ Procedure

Tables: ALL \* TCMCNT

ALL TCMCNT(Total Number of Drugs Other than Anticoagulant)

Power |

Percent |

Percent of rows

Percent | 20| 21| 22| 23| 24| 25| 26| 27| Total

|       | 20     | 21     | 22     | 23     | 24     | 25     | 26     | 27     | Total  |        |
|-------|--------|--------|--------|--------|--------|--------|--------|--------|--------|--------|
| 1     | 1      | 19     | 6      | 2      | 5      | 1      | 1      | 2      | 1      | 31831  |
|       | 0.06   | 0.06   | 0.02   | 0.01   | 0.02   | 0.00   | 0.00   | 0.01   | 0.00   | 100.00 |
|       | 100.00 | 100.00 | 100.00 | 100.00 | 100.00 | 100.00 | 100.00 | 100.00 | 100.00 |        |
| Total | 19     | 6      | 2      | 5      | 1      | 1      | 2      | 1      | 31831  |        |
|       | 0.06   | 0.02   | 0.01   | 0.02   | 0.00   | 0.00   | 0.01   | 0.00   |        | 0.00   |
|       | 100.00 |        |        |        |        |        |        |        |        |        |

Degree of missing values = 659

Concomitant medications other than anticoagulants at the time of obtaining Table 2-5 consent, according to the presence or absence of proton-pump inhibitors

FREQ Procedure

|                      |       |                  | Cumulative |        |
|----------------------|-------|------------------|------------|--------|
| Percent of ALL power |       | Percent of power |            |        |
| 1                    | 32490 | 100.00           | 32490      | 100.00 |

Tables: ALL \* CMYN

ALL

CMYN(Administration of Concomitant Drug)

| Power                   |        |        |        |
|-------------------------|--------|--------|--------|
| Percent                 |        |        |        |
| Percent of rows         |        |        |        |
| Percent of columns      | None   | With   | Total  |
| _____ + _____ + _____ + |        |        |        |
| 1                       | 1445   | 31045  | 32490  |
|                         | 4.45   | 95.55  | 100.00 |
|                         | 4.45   | 95.55  |        |
|                         | 100.00 | 100.00 |        |
| _____ + _____ + _____ + |        |        |        |
| Total                   | 1445   | 31045  | 32490  |
|                         | 4.45   | 95.55  | 100.00 |

Concomitant medications other than anticoagulants at the time of obtaining Table 2-5 consent, according to the presence or absence of proton-pump inhibitors

FREQ Procedure

Tables: ALL \* TCMCNT

ALL TCMCNT(Total Number of Drugs Other than Anticoagulant)

Power |

Percent |

Percent of rows

Percent|0|1|2|3|4|5|6|7|8|9| Total

|       | 0      | 1      | 2      | 3      | 4      | 5      | 6      | 7      | 8      | 9      | Total  |
|-------|--------|--------|--------|--------|--------|--------|--------|--------|--------|--------|--------|
|       | 1      | 52     | 688    | 1602   | 2622   | 3597   | 4105   | 4171   | 3747   | 3187   | 2516   |
|       | 0.16   | 2.16   | 5.03   | 8.24   | 11.30  | 12.90  | 13.10  | 11.77  | 10.01  | 7.90   | 100.00 |
|       | 100.00 | 100.00 | 100.00 | 100.00 | 100.00 | 100.00 | 100.00 | 100.00 | 100.00 | 100.00 | 100.00 |
| Total | 52     | 688    | 1602   | 2622   | 3597   | 4105   | 4171   | 3747   | 3187   | 2516   | 31831  |
|       | 0.16   | 2.16   | 5.03   | 8.24   | 11.30  | 12.90  | 13.10  | 11.77  | 10.01  | 7.90   | 100.00 |

(continued)

Tables: ALL \* TCMCNT

ALL TCMCNT(Total Number of Drugs Other than Anticoagulant)

Power |

Percent |

Percent of rows

Percent |10|11|12|13|14|15|16|17|18|19|Total

|  | 10     | 11     | 12     | 13     | 14     | 15     | 16     | 17     | 18     | 19     | Total  |
|--|--------|--------|--------|--------|--------|--------|--------|--------|--------|--------|--------|
|  | 1      | 1825   | 1360   | 881    | 598    | 366    | 206    | 121    | 79     | 47     | 31831  |
|  | 5.73   | 4.27   | 2.77   | 1.88   | 1.15   | 0.65   | 0.38   | 0.25   | 0.15   | 0.08   | 100.00 |
|  | 100.00 | 100.00 | 100.00 | 100.00 | 100.00 | 100.00 | 100.00 | 100.00 | 100.00 | 100.00 | 100.00 |

|       | 10   | 11   | 12   | 13   | 14   | 15   | 16   | 17   | 18   | 19   | Total  |
|-------|------|------|------|------|------|------|------|------|------|------|--------|
| Total | 1825 | 1360 | 881  | 598  | 366  | 206  | 121  | 79   | 47   | 24   | 31831  |
|       | 5.73 | 4.27 | 2.77 | 1.88 | 1.15 | 0.65 | 0.38 | 0.25 | 0.15 | 0.08 | 100.00 |

(continued)

Concomitant medications other than anticoagulants at the time of obtaining Table 2-5 consent, according to the presence or absence of proton-pump inhibitors

FREQ Procedure

Tables: ALL \* TCMCNT

ALL TCMCNT(Total Number of Drugs Other than Anticoagulant)

Power |

Percent |

Percent of rows

Percent | 20| 21| 22| 23| 24| 25| 26| 27| Total

|       | 20     | 21     | 22     | 23     | 24     | 25     | 26     | 27     | Total  |        |
|-------|--------|--------|--------|--------|--------|--------|--------|--------|--------|--------|
| 1     | 1      | 19     | 6      | 2      | 5      | 1      | 1      | 2      | 1      | 31831  |
|       | 0.06   | 0.06   | 0.02   | 0.01   | 0.02   | 0.00   | 0.00   | 0.01   | 0.00   | 100.00 |
|       | 100.00 | 100.00 | 100.00 | 100.00 | 100.00 | 100.00 | 100.00 | 100.00 | 100.00 |        |
| Total | 19     | 6      | 2      | 5      | 1      | 1      | 2      | 1      | 31831  |        |
|       | 0.06   | 0.02   | 0.01   | 0.02   | 0.00   | 0.00   | 0.01   | 0.00   |        | 0.00   |
|       | 100.00 |        |        |        |        |        |        |        |        |        |

Degree of missing values = 659

Concomitant medications other than anticoagulants at the time of obtaining Table 2-5 consent, according to the presence or absence of proton-pump inhibitors

FREQ Procedure

|                      |       |                  | Cumulative |        |
|----------------------|-------|------------------|------------|--------|
| Percent of ALL power |       | Percent of power |            |        |
| 1                    | 32490 | 100.00           | 32490      | 100.00 |

Tables: ALL \* CMYN

ALL

CMYN(Administration of Concomitant Drug)

| Power              |           |         |         |
|--------------------|-----------|---------|---------|
| Percent            |           |         |         |
| Percent of rows    |           |         |         |
| Percent of columns | None      | With    | Total   |
|                    | + _____ + | _____ + | _____ + |
| 1                  | 1445      | 31045   | 32490   |
|                    | 4.45      | 95.55   | 100.00  |
|                    | 4.45      | 95.55   |         |
|                    | 100.00    | 100.00  |         |
|                    | + _____ + | _____ + | _____ + |
| Total              | 1445      | 31045   | 32490   |
|                    | 4.45      | 95.55   | 100.00  |

Concomitant medications other than anticoagulants at the time of obtaining Table 2-5 consent, according to the presence or absence of proton-pump inhibitors

FREQ Procedure

Tables: ALL \* TCMCNT

ALL TCMCNT(Total Number of Drugs Other than Anticoagulant)

Power |

Percent |

Percent of rows

Percent|0|1|2|3|4|5|6|7|8|9| Total

|  | 0      | 1      | 2      | 3      | 4      | 5      | 6      | 7      | 8      | 9      | Total        |
|--|--------|--------|--------|--------|--------|--------|--------|--------|--------|--------|--------------|
|  | 1      | 52     | 688    | 1602   | 2622   | 3597   | 4105   | 4171   | 3747   | 3187   | 2516   31831 |
|  | 0.16   | 2.16   | 5.03   | 8.24   | 11.30  | 12.90  | 13.10  | 11.77  | 10.01  | 7.90   | 100.00       |
|  | 100.00 | 100.00 | 100.00 | 100.00 | 100.00 | 100.00 | 100.00 | 100.00 | 100.00 | 100.00 | 100.00       |
|  | 52     | 688    | 1602   | 2622   | 3597   | 4105   | 4171   | 3747   | 3187   | 2516   | 31831        |
|  | 0.16   | 2.16   | 5.03   | 8.24   | 11.30  | 12.90  | 13.10  | 11.77  | 10.01  | 7.90   | 100.00       |

(continued)

Tables: ALL \* TCMCNT

ALL TCMCNT(Total Number of Drugs Other than Anticoagulant)

Power |

Percent |

Percent of rows

Percent |10|11|12|13|14|15|16|17|18|19|Total

|  | 10     | 11     | 12     | 13     | 14     | 15     | 16     | 17     | 18     | 19     | Total  |
|--|--------|--------|--------|--------|--------|--------|--------|--------|--------|--------|--------|
|  | 1      | 1825   | 1360   | 881    | 598    | 366    | 206    | 121    | 79     | 47     | 31831  |
|  | 5.73   | 4.27   | 2.77   | 1.88   | 1.15   | 0.65   | 0.38   | 0.25   | 0.15   | 0.08   | 100.00 |
|  | 100.00 | 100.00 | 100.00 | 100.00 | 100.00 | 100.00 | 100.00 | 100.00 | 100.00 | 100.00 | 100.00 |

|       | 10   | 11   | 12   | 13   | 14   | 15   | 16   | 17   | 18   | 19   | Total  |
|-------|------|------|------|------|------|------|------|------|------|------|--------|
| Total | 1825 | 1360 | 881  | 598  | 366  | 206  | 121  | 79   | 47   | 24   | 31831  |
|       | 5.73 | 4.27 | 2.77 | 1.88 | 1.15 | 0.65 | 0.38 | 0.25 | 0.15 | 0.08 | 100.00 |

(continued)



Concomitant medications other than anticoagulants at the time of obtaining Table 2-5 consent, according to the presence or absence of proton-pump inhibitors

FREQ Procedure

Tables: ALL \* TCMCNT

ALL TCMCNT(Total Number of Drugs Other than Anticoagulant)

Power |

Percent |

Percent of rows

Percent | 20| 21| 22| 23| 24| 25| 26| 27| Total

|       | 20     | 21     | 22     | 23     | 24     | 25     | 26     | 27     | Total  |        |
|-------|--------|--------|--------|--------|--------|--------|--------|--------|--------|--------|
| 1     | 1      | 19     | 6      | 2      | 5      | 1      | 1      | 2      | 1      | 31831  |
|       | 0.06   | 0.06   | 0.02   | 0.01   | 0.02   | 0.00   | 0.00   | 0.01   | 0.00   | 100.00 |
|       | 100.00 | 100.00 | 100.00 | 100.00 | 100.00 | 100.00 | 100.00 | 100.00 | 100.00 |        |
| Total | 19     | 6      | 2      | 5      | 1      | 1      | 2      | 1      | 31831  |        |
|       | 0.06   | 0.02   | 0.01   | 0.02   | 0.00   | 0.00   | 0.01   | 0.00   |        | 0.00   |
|       | 100.00 |        |        |        |        |        |        |        |        |        |

Degree of missing values = 659

Concomitant medications other than anticoagulants at the time of obtaining Table 2-5 consent, according to the presence or absence of proton-pump inhibitors

FREQ Procedure

|   |       | Cumulative           |                  |        |
|---|-------|----------------------|------------------|--------|
|   |       | Percent of ALL power | Percent of power |        |
| 1 | 32490 | 100.00               | 32490            | 100.00 |

Tables: ALL \* CMYN

ALL

CMYN(Administration of Concomitant Drug)

| Power                   |        |        |        |
|-------------------------|--------|--------|--------|
| Percent                 |        |        |        |
| Percent of rows         |        |        |        |
| Percent of columns      | None   | With   | Total  |
| _____ + _____ + _____ + |        |        |        |
| 1                       | 1445   | 31045  | 32490  |
|                         | 4.45   | 95.55  | 100.00 |
|                         | 4.45   | 95.55  |        |
|                         | 100.00 | 100.00 |        |
| _____ + _____ + _____ + |        |        |        |
| Total                   | 1445   | 31045  | 32490  |
|                         | 4.45   | 95.55  | 100.00 |

Concomitant medications other than anticoagulants at the time of obtaining Table 2-5 consent, according to the presence or absence of proton-pump inhibitors

FREQ Procedure

Tables: ALL \* TCMCNT

ALL TCMCNT(Total Number of Drugs Other than Anticoagulant)

Power |

Percent |

Percent of rows

Percent|0|1|2|3|4|5|6|7|8|9| Total

|       | 0      | 1      | 2      | 3      | 4      | 5      | 6      | 7      | 8      | 9      | Total  |
|-------|--------|--------|--------|--------|--------|--------|--------|--------|--------|--------|--------|
|       | 1      | 52     | 688    | 1602   | 2622   | 3597   | 4105   | 4171   | 3747   | 3187   | 2516   |
|       | 0.16   | 2.16   | 5.03   | 8.24   | 11.30  | 12.90  | 13.10  | 11.77  | 10.01  | 7.90   | 100.00 |
|       | 100.00 | 100.00 | 100.00 | 100.00 | 100.00 | 100.00 | 100.00 | 100.00 | 100.00 | 100.00 | 100.00 |
| Total | 52     | 688    | 1602   | 2622   | 3597   | 4105   | 4171   | 3747   | 3187   | 2516   | 31831  |
|       | 0.16   | 2.16   | 5.03   | 8.24   | 11.30  | 12.90  | 13.10  | 11.77  | 10.01  | 7.90   | 100.00 |

(continued)

Tables: ALL \* TCMCNT

ALL TCMCNT(Total Number of Drugs Other than Anticoagulant)

Power |

Percent |

Percent of rows

Percent |10|11|12|13|14|15|16|17|18|19|Total

|       | 10     | 11     | 12     | 13     | 14     | 15     | 16     | 17     | 18     | 19     | Total  |
|-------|--------|--------|--------|--------|--------|--------|--------|--------|--------|--------|--------|
|       | 1      | 1825   | 1360   | 881    | 598    | 366    | 206    | 121    | 79     | 47     | 31831  |
|       | 5.73   | 4.27   | 2.77   | 1.88   | 1.15   | 0.65   | 0.38   | 0.25   | 0.15   | 0.08   | 100.00 |
|       | 5.73   | 4.27   | 2.77   | 1.88   | 1.15   | 0.65   | 0.38   | 0.25   | 0.15   | 0.08   | 100.00 |
|       | 100.00 | 100.00 | 100.00 | 100.00 | 100.00 | 100.00 | 100.00 | 100.00 | 100.00 | 100.00 | 100.00 |
| Total | 1825   | 1360   | 881    | 598    | 366    | 206    | 121    | 79     | 47     | 24     | 31831  |
|       | 5.73   | 4.27   | 2.77   | 1.88   | 1.15   | 0.65   | 0.38   | 0.25   | 0.15   | 0.08   | 100.00 |

(continued)

Concomitant medications other than anticoagulants at the time of obtaining Table 2-5 consent, according to the presence or absence of proton-pump inhibitors

FREQ Procedure

Tables: ALL \* TCMCNT

ALL TCMCNT(Total Number of Drugs Other than Anticoagulant)

Power |

Percent |

Percent of rows

Percent | 20| 21| 22| 23| 24| 25| 26| 27| Total

|       | 20     | 21     | 22     | 23     | 24     | 25     | 26     | 27     | Total  |        |
|-------|--------|--------|--------|--------|--------|--------|--------|--------|--------|--------|
| 1     | 1      | 19     | 6      | 2      | 5      | 1      | 1      | 2      | 1      | 31831  |
|       | 0.06   | 0.06   | 0.02   | 0.01   | 0.02   | 0.00   | 0.00   | 0.01   | 0.00   | 100.00 |
|       | 100.00 | 100.00 | 100.00 | 100.00 | 100.00 | 100.00 | 100.00 | 100.00 | 100.00 |        |
| Total | 19     | 6      | 2      | 5      | 1      | 1      | 2      | 1      | 31831  |        |
|       | 0.06   | 0.02   | 0.01   | 0.02   | 0.00   | 0.00   | 0.01   | 0.00   |        | 0.00   |
|       | 100.00 |        |        |        |        |        |        |        |        |        |

Degree of missing values = 659

Concomitant medications other than anticoagulants at the time of obtaining Table 2-5 consent, according to the presence or absence of proton-pump inhibitors

FREQ Procedure

|                      |       | Cumulative       |       |        |
|----------------------|-------|------------------|-------|--------|
| Percent of ALL power |       | Percent of power |       |        |
| 1                    | 32490 | 100.00           | 32490 | 100.00 |

Tables: ALL \* CMYN

ALL

CMYN(Administration of Concomitant Drug)

| Power              |        |        |        |
|--------------------|--------|--------|--------|
| Percent            |        |        |        |
| Percent of rows    |        |        |        |
| Percent of columns | None   | With   | Total  |
|                    | +      | +      | +      |
| 1                  | 1445   | 31045  | 32490  |
|                    | 4.45   | 95.55  | 100.00 |
|                    | 4.45   | 95.55  |        |
|                    | 100.00 | 100.00 |        |
|                    | +      | +      | +      |
| Total              | 1445   | 31045  | 32490  |
|                    | 4.45   | 95.55  | 100.00 |

Concomitant medications other than anticoagulants at the time of obtaining Table 2-5 consent, according to the presence or absence of proton-pump inhibitors

FREQ Procedure

Tables: ALL \* TCMCNT

ALL TCMCNT(Total Number of Drugs Other than Anticoagulant)

Power |

Percent |

Percent of rows

Percent|0|1|2|3|4|5|6|7|8|9| Total

|  | 0      | 1      | 2      | 3      | 4      | 5      | 6      | 7      | 8      | 9      | Total        |
|--|--------|--------|--------|--------|--------|--------|--------|--------|--------|--------|--------------|
|  | 1      | 52     | 688    | 1602   | 2622   | 3597   | 4105   | 4171   | 3747   | 3187   | 2516   31831 |
|  | 0.16   | 2.16   | 5.03   | 8.24   | 11.30  | 12.90  | 13.10  | 11.77  | 10.01  | 7.90   | 100.00       |
|  | 100.00 | 100.00 | 100.00 | 100.00 | 100.00 | 100.00 | 100.00 | 100.00 | 100.00 | 100.00 | 100.00       |
|  | 0.16   | 2.16   | 5.03   | 8.24   | 11.30  | 12.90  | 13.10  | 11.77  | 10.01  | 7.90   | 100.00       |
|  | 100.00 | 100.00 | 100.00 | 100.00 | 100.00 | 100.00 | 100.00 | 100.00 | 100.00 | 100.00 | 100.00       |
|  | 0.16   | 2.16   | 5.03   | 8.24   | 11.30  | 12.90  | 13.10  | 11.77  | 10.01  | 7.90   | 100.00       |
|  | 100.00 | 100.00 | 100.00 | 100.00 | 100.00 | 100.00 | 100.00 | 100.00 | 100.00 | 100.00 | 100.00       |
|  | 0.16   | 2.16   | 5.03   | 8.24   | 11.30  | 12.90  | 13.10  | 11.77  | 10.01  | 7.90   | 100.00       |
|  | 100.00 | 100.00 | 100.00 | 100.00 | 100.00 | 100.00 | 100.00 | 100.00 | 100.00 | 100.00 | 100.00       |
|  | 0.16   | 2.16   | 5.03   | 8.24   | 11.30  | 12.90  | 13.10  | 11.77  | 10.01  | 7.90   | 100.00       |
|  | 100.00 | 100.00 | 100.00 | 100.00 | 100.00 | 100.00 | 100.00 | 100.00 | 100.00 | 100.00 | 100.00       |
|  | 0.16   | 2.16   | 5.03   | 8.24   | 11.30  | 12.90  | 13.10  | 11.77  | 10.01  | 7.90   | 100.00       |
|  | 100.00 | 100.00 | 100.00 | 100.00 | 100.00 | 100.00 | 100.00 | 100.00 | 100.00 | 100.00 | 100.00       |

(continued)

Tables: ALL \* TCMCNT

ALL TCMCNT(Total Number of Drugs Other than Anticoagulant)

Power |

Percent |

Percent of rows

Percent |10|11|12|13|14|15|16|17|18|19|Total

|       | 10     | 11     | 12     | 13     | 14     | 15     | 16     | 17     | 18     | 19     | Total  |
|-------|--------|--------|--------|--------|--------|--------|--------|--------|--------|--------|--------|
|       | 1      | 1825   | 1360   | 881    | 598    | 366    | 206    | 121    | 79     | 47     | 31831  |
|       | 5.73   | 4.27   | 2.77   | 1.88   | 1.15   | 0.65   | 0.38   | 0.25   | 0.15   | 0.08   | 100.00 |
|       | 5.73   | 4.27   | 2.77   | 1.88   | 1.15   | 0.65   | 0.38   | 0.25   | 0.15   | 0.08   | 100.00 |
|       | 100.00 | 100.00 | 100.00 | 100.00 | 100.00 | 100.00 | 100.00 | 100.00 | 100.00 | 100.00 | 100.00 |
| Total | 1825   | 1360   | 881    | 598    | 366    | 206    | 121    | 79     | 47     | 24     | 31831  |
|       | 5.73   | 4.27   | 2.77   | 1.88   | 1.15   | 0.65   | 0.38   | 0.25   | 0.15   | 0.08   | 100.00 |

(continued)



Concomitant medications other than anticoagulants at the time of obtaining Table 2-5 consent, according to the presence or absence of proton-pump inhibitors

FREQ Procedure

Tables: ALL \* TCMCNT

ALL TCMCNT(Total Number of Drugs Other than Anticoagulant)

Power |

Percent |

Percent of rows

Percent | 20| 21| 22| 23| 24| 25| 26| 27| Total

|       | 20     | 21     | 22     | 23     | 24     | 25     | 26     | 27     | Total  |        |
|-------|--------|--------|--------|--------|--------|--------|--------|--------|--------|--------|
| 1     | 1      | 19     | 6      | 2      | 5      | 1      | 1      | 2      | 1      | 31831  |
|       | 0.06   | 0.06   | 0.02   | 0.01   | 0.02   | 0.00   | 0.00   | 0.01   | 0.00   | 100.00 |
|       | 100.00 | 100.00 | 100.00 | 100.00 | 100.00 | 100.00 | 100.00 | 100.00 | 100.00 |        |
| Total | 19     | 6      | 2      | 5      | 1      | 1      | 2      | 1      | 31831  |        |
|       | 0.06   | 0.02   | 0.01   | 0.02   | 0.00   | 0.00   | 0.01   | 0.00   |        | 0.00   |
|       | 100.00 |        |        |        |        |        |        |        |        |        |

Degree of missing values = 659

Concomitant medications other than anticoagulants at the time of obtaining Table 2-5 consent, according to the presence or absence of proton-pump inhibitors

FREQ Procedure

|   |       | Cumulative           |                  |        |
|---|-------|----------------------|------------------|--------|
|   |       | Percent of ALL power | Percent of power |        |
| 1 | 32490 | 100.00               | 32490            | 100.00 |

Tables: ALL \* CMYN

ALL

CMYN(Administration of Concomitant Drug)

| Power                   |        |        |        |
|-------------------------|--------|--------|--------|
| Percent                 |        |        |        |
| Percent of rows         |        |        |        |
| Percent of columns      | None   | With   | Total  |
| _____ + _____ + _____ + |        |        |        |
| 1                       | 1445   | 31045  | 32490  |
|                         | 4.45   | 95.55  | 100.00 |
|                         | 4.45   | 95.55  |        |
|                         | 100.00 | 100.00 |        |
| _____ + _____ + _____ + |        |        |        |
| Total 1445 31045 32490  | 4.45   | 95.55  | 100.00 |

Concomitant medications other than anticoagulants at the time of obtaining Table 2-5 consent, according to the presence or absence of proton-pump inhibitors

FREQ Procedure

Tables: ALL \* TCMCNT

ALL TCMCNT(Total Number of Drugs Other than Anticoagulant)

Power |

Percent |

Percent of rows

Percent|0|1|2|3|4|5|6|7|8|9| Total

|       | 0      | 1      | 2      | 3      | 4      | 5      | 6      | 7      | 8      | 9      | Total  |
|-------|--------|--------|--------|--------|--------|--------|--------|--------|--------|--------|--------|
| 1     | 52     | 688    | 1602   | 2622   | 3597   | 4105   | 4171   | 3747   | 3187   | 2516   | 31831  |
|       | 0.16   | 2.16   | 5.03   | 8.24   | 11.30  | 12.90  | 13.10  | 11.77  | 10.01  | 7.90   | 100.00 |
|       | 100.00 | 100.00 | 100.00 | 100.00 | 100.00 | 100.00 | 100.00 | 100.00 | 100.00 | 100.00 | 100.00 |
| Total | 52     | 688    | 1602   | 2622   | 3597   | 4105   | 4171   | 3747   | 3187   | 2516   | 31831  |
|       | 0.16   | 2.16   | 5.03   | 8.24   | 11.30  | 12.90  | 13.10  | 11.77  | 10.01  | 7.90   | 100.00 |

(continued)

Tables: ALL \* TCMCNT

ALL TCMCNT(Total Number of Drugs Other than Anticoagulant)

Power |

Percent |

Percent of rows

Percent |10|11|12|13|14|15|16|17|18|19|Total

|       | 10     | 11     | 12     | 13     | 14     | 15     | 16     | 17     | 18     | 19     | Total  |
|-------|--------|--------|--------|--------|--------|--------|--------|--------|--------|--------|--------|
|       | 1      | 1825   | 1360   | 881    | 598    | 366    | 206    | 121    | 79     | 47     | 31831  |
|       | 5.73   | 4.27   | 2.77   | 1.88   | 1.15   | 0.65   | 0.38   | 0.25   | 0.15   | 0.08   | 100.00 |
|       | 5.73   | 4.27   | 2.77   | 1.88   | 1.15   | 0.65   | 0.38   | 0.25   | 0.15   | 0.08   | 100.00 |
|       | 100.00 | 100.00 | 100.00 | 100.00 | 100.00 | 100.00 | 100.00 | 100.00 | 100.00 | 100.00 | 100.00 |
| Total | 1825   | 1360   | 881    | 598    | 366    | 206    | 121    | 79     | 47     | 24     | 31831  |
|       | 5.73   | 4.27   | 2.77   | 1.88   | 1.15   | 0.65   | 0.38   | 0.25   | 0.15   | 0.08   | 100.00 |

(continued)

Concomitant medications other than anticoagulants at the time of obtaining Table 2-5 consent, according to the presence or absence of proton-pump inhibitors

FREQ Procedure

Tables: ALL \* TCMCNT

ALL TCMCNT(Total Number of Drugs Other than Anticoagulant)

Power |

Percent |

Percent of rows

Percent | 20| 21| 22| 23| 24| 25| 26| 27| Total

|       | 20     | 21     | 22     | 23     | 24     | 25     | 26     | 27     | Total  |        |
|-------|--------|--------|--------|--------|--------|--------|--------|--------|--------|--------|
| 1     | 1      | 19     | 6      | 2      | 5      | 1      | 1      | 2      | 1      | 31831  |
|       | 0.06   | 0.06   | 0.02   | 0.01   | 0.02   | 0.00   | 0.00   | 0.01   | 0.00   | 100.00 |
|       | 100.00 | 100.00 | 100.00 | 100.00 | 100.00 | 100.00 | 100.00 | 100.00 | 100.00 |        |
| Total | 19     | 6      | 2      | 5      | 1      | 1      | 2      | 1      | 31831  |        |
|       | 0.06   | 0.02   | 0.01   | 0.02   | 0.00   | 0.00   | 0.01   | 0.00   |        | 0.00   |
|       | 100.00 |        |        |        |        |        |        |        |        |        |

Degree of missing values = 659

Concomitant medications other than anticoagulants at the time of obtaining Table 2-5 consent, according to the presence or absence of proton-pump inhibitors

FREQ Procedure

|   |       | Cumulative           |                  |        |
|---|-------|----------------------|------------------|--------|
|   |       | Percent of ALL power | Percent of power |        |
| 1 | 32490 | 100.00               | 32490            | 100.00 |

Tables: ALL \* CMYN

ALL

CMYN(Administration of Concomitant Drug)

| Power                   |        |        |        |
|-------------------------|--------|--------|--------|
| Percent                 |        |        |        |
| Percent of rows         |        |        |        |
| Percent of columns      | None   | With   | Total  |
| _____ + _____ + _____ + |        |        |        |
| 1                       | 1445   | 31045  | 32490  |
|                         | 4.45   | 95.55  | 100.00 |
|                         | 4.45   | 95.55  |        |
|                         | 100.00 | 100.00 |        |
| _____ + _____ + _____ + |        |        |        |
| Total                   | 1445   | 31045  | 32490  |
|                         | 4.45   | 95.55  | 100.00 |

Concomitant medications other than anticoagulants at the time of obtaining Table 2-5 consent, according to the presence or absence of proton-pump inhibitors

FREQ Procedure

Tables: ALL \* TCMCNT

ALL TCMCNT(Total Number of Drugs Other than Anticoagulant)

Power |

Percent |

Percent of rows

Percent|0|1|2|3|4|5|6|7|8|9| Total

|  | 0      | 1      | 2      | 3      | 4      | 5      | 6      | 7      | 8      | 9      | Total        |
|--|--------|--------|--------|--------|--------|--------|--------|--------|--------|--------|--------------|
|  | 1      | 52     | 688    | 1602   | 2622   | 3597   | 4105   | 4171   | 3747   | 3187   | 2516   31831 |
|  | 0.16   | 2.16   | 5.03   | 8.24   | 11.30  | 12.90  | 13.10  | 11.77  | 10.01  | 7.90   | 100.00       |
|  | 100.00 | 100.00 | 100.00 | 100.00 | 100.00 | 100.00 | 100.00 | 100.00 | 100.00 | 100.00 | 100.00       |
|  | 52     | 688    | 1602   | 2622   | 3597   | 4105   | 4171   | 3747   | 3187   | 2516   | 31831        |
|  | 0.16   | 2.16   | 5.03   | 8.24   | 11.30  | 12.90  | 13.10  | 11.77  | 10.01  | 7.90   | 100.00       |

(continued)

Tables: ALL \* TCMCNT

ALL TCMCNT(Total Number of Drugs Other than Anticoagulant)

Power |

Percent |

Percent of rows

Percent |10|11|12|13|14|15|16|17|18|19|Total

|  | 10     | 11     | 12     | 13     | 14     | 15     | 16     | 17     | 18     | 19     | Total  |
|--|--------|--------|--------|--------|--------|--------|--------|--------|--------|--------|--------|
|  | 1      | 1825   | 1360   | 881    | 598    | 366    | 206    | 121    | 79     | 47     | 31831  |
|  | 5.73   | 4.27   | 2.77   | 1.88   | 1.15   | 0.65   | 0.38   | 0.25   | 0.15   | 0.08   | 100.00 |
|  | 100.00 | 100.00 | 100.00 | 100.00 | 100.00 | 100.00 | 100.00 | 100.00 | 100.00 | 100.00 | 100.00 |

|       | 10   | 11   | 12   | 13   | 14   | 15   | 16   | 17   | 18   | 19   | Total  |
|-------|------|------|------|------|------|------|------|------|------|------|--------|
| Total | 1825 | 1360 | 881  | 598  | 366  | 206  | 121  | 79   | 47   | 24   | 31831  |
|       | 5.73 | 4.27 | 2.77 | 1.88 | 1.15 | 0.65 | 0.38 | 0.25 | 0.15 | 0.08 | 100.00 |

(continued)



Concomitant medications other than anticoagulants at the time of obtaining Table 2-5 consent, according to the presence or absence of proton-pump inhibitors

FREQ Procedure

Tables: ALL \* TCMCNT

ALL TCMCNT(Total Number of Drugs Other than Anticoagulant)

Power |

Percent |

Percent of rows

Percent | 20| 21| 22| 23| 24| 25| 26| 27| Total

|       | 20     | 21     | 22     | 23     | 24     | 25     | 26     | 27     | Total  |        |
|-------|--------|--------|--------|--------|--------|--------|--------|--------|--------|--------|
| 1     | 1      | 19     | 6      | 2      | 5      | 1      | 1      | 2      | 1      | 31831  |
|       | 0.06   | 0.06   | 0.02   | 0.01   | 0.02   | 0.00   | 0.00   | 0.01   | 0.00   | 100.00 |
|       | 100.00 | 100.00 | 100.00 | 100.00 | 100.00 | 100.00 | 100.00 | 100.00 | 100.00 |        |
| Total | 19     | 6      | 2      | 5      | 1      | 1      | 2      | 1      | 31831  |        |
|       | 0.06   | 0.02   | 0.01   | 0.02   | 0.00   | 0.00   | 0.01   | 0.00   |        | 0.00   |
|       | 100.00 |        |        |        |        |        |        |        |        |        |

Degree of missing values = 659

Concomitant medications other than anticoagulants at the time of obtaining Table 2-5 consent, according to the presence or absence of proton-pump inhibitors

FREQ Procedure

|   |       | Cumulative           |                  |        |
|---|-------|----------------------|------------------|--------|
|   |       | Percent of ALL power | Percent of power |        |
| 1 | 32490 | 100.00               | 32490            | 100.00 |

Tables: ALL \* CMYN

ALL

CMYN(Administration of Concomitant Drug)

| Power                   |        |        |        |
|-------------------------|--------|--------|--------|
| Percent                 |        |        |        |
| Percent of rows         |        |        |        |
| Percent of columns      | None   | With   | Total  |
| _____ + _____ + _____ + |        |        |        |
| 1                       | 1445   | 31045  | 32490  |
|                         | 4.45   | 95.55  | 100.00 |
|                         | 4.45   | 95.55  |        |
|                         | 100.00 | 100.00 |        |
| _____ + _____ + _____ + |        |        |        |
| Total                   | 1445   | 31045  | 32490  |
|                         | 4.45   | 95.55  | 100.00 |

Concomitant medications other than anticoagulants at the time of obtaining Table 2-5 consent, according to the presence or absence of proton-pump inhibitors

FREQ Procedure

Tables: ALL \* TCMCNT

ALL TCMCNT(Total Number of Drugs Other than Anticoagulant)

Power |

Percent |

Percent of rows

Percent|0|1|2|3|4|5|6|7|8|9| Total

|       | 0      | 1      | 2      | 3      | 4      | 5      | 6      | 7      | 8      | 9      | Total        |
|-------|--------|--------|--------|--------|--------|--------|--------|--------|--------|--------|--------------|
|       | 1      | 52     | 688    | 1602   | 2622   | 3597   | 4105   | 4171   | 3747   | 3187   | 2516   31831 |
|       | 0.16   | 2.16   | 5.03   | 8.24   | 11.30  | 12.90  | 13.10  | 11.77  | 10.01  | 7.90   | 100.00       |
|       | 100.00 | 100.00 | 100.00 | 100.00 | 100.00 | 100.00 | 100.00 | 100.00 | 100.00 | 100.00 | 100.00       |
| Total | 52     | 688    | 1602   | 2622   | 3597   | 4105   | 4171   | 3747   | 3187   | 2516   | 31831        |
|       | 0.16   | 2.16   | 5.03   | 8.24   | 11.30  | 12.90  | 13.10  | 11.77  | 10.01  | 7.90   | 100.00       |

(continued)

Tables: ALL \* TCMCNT

ALL TCMCNT(Total Number of Drugs Other than Anticoagulant)

Power |

Percent |

Percent of rows

Percent |10|11|12|13|14|15|16|17|18|19|Total

|  | 10     | 11     | 12     | 13     | 14     | 15     | 16     | 17     | 18     | 19     | Total  |
|--|--------|--------|--------|--------|--------|--------|--------|--------|--------|--------|--------|
|  | 1      | 1825   | 1360   | 881    | 598    | 366    | 206    | 121    | 79     | 47     | 31831  |
|  | 5.73   | 4.27   | 2.77   | 1.88   | 1.15   | 0.65   | 0.38   | 0.25   | 0.15   | 0.08   | 100.00 |
|  | 5.73   | 4.27   | 2.77   | 1.88   | 1.15   | 0.65   | 0.38   | 0.25   | 0.15   | 0.08   | 100.00 |
|  | 100.00 | 100.00 | 100.00 | 100.00 | 100.00 | 100.00 | 100.00 | 100.00 | 100.00 | 100.00 | 100.00 |
|  | 1825   | 1360   | 881    | 598    | 366    | 206    | 121    | 79     | 47     | 24     | 31831  |
|  | 5.73   | 4.27   | 2.77   | 1.88   | 1.15   | 0.65   | 0.38   | 0.25   | 0.15   | 0.08   | 100.00 |

(continued)

Concomitant medications other than anticoagulants at the time of obtaining Table 2-5 consent, according to the presence or absence of proton-pump inhibitors

FREQ Procedure

Tables: ALL \* TCMCNT

ALL TCMCNT(Total Number of Drugs Other than Anticoagulant)

Power |

Percent |

Percent of rows

Percent | 20| 21| 22| 23| 24| 25| 26| 27| Total

|       | 20     | 21     | 22     | 23     | 24     | 25     | 26     | 27     | Total  |        |
|-------|--------|--------|--------|--------|--------|--------|--------|--------|--------|--------|
| 1     | 1      | 19     | 6      | 2      | 5      | 1      | 1      | 2      | 1      | 31831  |
|       | 0.06   | 0.06   | 0.02   | 0.01   | 0.02   | 0.00   | 0.00   | 0.01   | 0.00   | 100.00 |
|       | 100.00 | 100.00 | 100.00 | 100.00 | 100.00 | 100.00 | 100.00 | 100.00 | 100.00 |        |
| Total | 19     | 6      | 2      | 5      | 1      | 1      | 2      | 1      | 31831  |        |
|       | 0.06   | 0.02   | 0.01   | 0.02   | 0.00   | 0.00   | 0.01   | 0.00   |        | 0.00   |
|       | 100.00 |        |        |        |        |        |        |        |        |        |

Degree of missing values = 659

Concomitant medications other than anticoagulants at the time of obtaining Table 2-5 consent, according to the presence or absence of proton-pump inhibitors

FREQ Procedure

|   |       | Cumulative           |                  |        |
|---|-------|----------------------|------------------|--------|
|   |       | Percent of ALL power | Percent of power |        |
| 1 | 32490 | 100.00               | 32490            | 100.00 |

Tables: ALL \* CMYN

ALL

CMYN(Administration of Concomitant Drug)

| Power                   |        |        |        |
|-------------------------|--------|--------|--------|
| Percent                 |        |        |        |
| Percent of rows         |        |        |        |
| Percent of columns      | None   | With   | Total  |
| _____ + _____ + _____ + |        |        |        |
| 1                       | 1445   | 31045  | 32490  |
|                         | 4.45   | 95.55  | 100.00 |
|                         | 4.45   | 95.55  |        |
|                         | 100.00 | 100.00 |        |
| _____ + _____ + _____ + |        |        |        |
| Total                   | 1445   | 31045  | 32490  |
|                         | 4.45   | 95.55  | 100.00 |

Concomitant medications other than anticoagulants at the time of obtaining Table 2-5 consent, according to the presence or absence of proton-pump inhibitors

FREQ Procedure

Tables: ALL \* TCMCNT

ALL TCMCNT(Total Number of Drugs Other than Anticoagulant)

| Power                                                                 |        |        |        |        |        |        |        |        |        |        |       |
|-----------------------------------------------------------------------|--------|--------|--------|--------|--------|--------|--------|--------|--------|--------|-------|
| Percent                                                               |        |        |        |        |        |        |        |        |        |        |       |
| Percent of rows                                                       |        |        |        |        |        |        |        |        |        |        |       |
| Percent                                                               | 0      | 1      | 2      | 3      | 4      | 5      | 6      | 7      | 8      | 9      | Total |
| _____ + _____ + _____ + _____ + _____ + _____ + _____ + _____ + _____ |        |        |        |        |        |        |        |        |        |        |       |
| - + _____ + _____ + _____ + _____                                     |        |        |        |        |        |        |        |        |        |        |       |
|                                                                       | 1      | 52     | 688    | 1602   | 2622   | 3597   | 4105   | 4171   | 3747   | 3187   |       |
| 2516   31831                                                          |        |        |        |        |        |        |        |        |        |        |       |
|                                                                       | 0.16   | 2.16   | 5.03   | 8.24   | 11.30  | 12.90  | 13.10  | 11.77  | 10.01  |        |       |
| 7.90   100.00                                                         |        |        |        |        |        |        |        |        |        |        |       |
|                                                                       | 0.16   | 2.16   | 5.03   | 8.24   | 11.30  | 12.90  | 13.10  | 11.77  | 10.01  |        |       |
| 7.90                                                                  |        |        |        |        |        |        |        |        |        |        |       |
|                                                                       | 100.00 | 100.00 | 100.00 | 100.00 | 100.00 | 100.00 | 100.00 | 100.00 | 100.00 | 100.00 |       |
| 100.00                                                                |        |        |        |        |        |        |        |        |        |        |       |
| _____ + _____ + _____ + _____ + _____ + _____ + _____ + _____ + _____ |        |        |        |        |        |        |        |        |        |        |       |
| - + _____ + _____ + _____ + _____                                     |        |        |        |        |        |        |        |        |        |        |       |
| Total                                                                 | 52     | 688    | 1602   | 2622   | 3597   | 4105   | 4171   | 3747   | 3187   | 2516   | 31831 |
|                                                                       | 0.16   | 2.16   | 5.03   | 8.24   | 11.30  | 12.90  | 13.10  | 11.77  |        |        |       |
| 10.01                                                                 | 7.90   | 100.00 |        |        |        |        |        |        |        |        |       |

(continued)

Tables: ALL \* TCMCNT

ALL TCMCNT(Total Number of Drugs Other than Anticoagulant)

Power |

Percent |

Percent of rows

Percent |10|11|12|13|14|15|16|17|18|19|Total

|  | 10     | 11     | 12     | 13     | 14     | 15     | 16     | 17     | 18     | 19     | Total  |
|--|--------|--------|--------|--------|--------|--------|--------|--------|--------|--------|--------|
|  | 1      | 1825   | 1360   | 881    | 598    | 366    | 206    | 121    | 79     | 47     | 31831  |
|  | 5.73   | 4.27   | 2.77   | 1.88   | 1.15   | 0.65   | 0.38   | 0.25   | 0.15   | 0.08   | 100.00 |
|  | 100.00 | 100.00 | 100.00 | 100.00 | 100.00 | 100.00 | 100.00 | 100.00 | 100.00 | 100.00 | 100.00 |

|       | 10   | 11   | 12   | 13   | 14   | 15   | 16   | 17   | 18   | 19   | Total  |
|-------|------|------|------|------|------|------|------|------|------|------|--------|
| Total | 1825 | 1360 | 881  | 598  | 366  | 206  | 121  | 79   | 47   | 24   | 31831  |
|       | 5.73 | 4.27 | 2.77 | 1.88 | 1.15 | 0.65 | 0.38 | 0.25 | 0.15 | 0.08 | 100.00 |

(continued)



Concomitant medications other than anticoagulants at the time of obtaining Table 2-5 consent, according to the presence or absence of proton-pump inhibitors

FREQ Procedure

Tables: ALL \* TCMCNT

ALL TCMCNT(Total Number of Drugs Other than Anticoagulant)

Power |

Percent |

Percent of rows

Percent | 20| 21| 22| 23| 24| 25| 26| 27| Total

|       | 20     | 21     | 22     | 23     | 24     | 25     | 26     | 27     | Total  |        |
|-------|--------|--------|--------|--------|--------|--------|--------|--------|--------|--------|
| 1     | 1      | 19     | 6      | 2      | 5      | 1      | 1      | 2      | 1      | 31831  |
|       | 0.06   | 0.06   | 0.02   | 0.01   | 0.02   | 0.00   | 0.00   | 0.01   | 0.00   | 100.00 |
|       | 100.00 | 100.00 | 100.00 | 100.00 | 100.00 | 100.00 | 100.00 | 100.00 | 100.00 |        |
| Total | 19     | 6      | 2      | 5      | 1      | 1      | 2      | 1      | 31831  |        |
|       | 0.06   | 0.02   | 0.01   | 0.02   | 0.00   | 0.00   | 0.01   | 0.00   |        | 0.00   |
|       | 100.00 |        |        |        |        |        |        |        |        |        |

Degree of missing values = 659

Concomitant medications other than anticoagulants at the time of obtaining Table 2-5 consent, according to the presence or absence of proton-pump inhibitors

FREQ Procedure

|   |       | Cumulative           |                  |        |
|---|-------|----------------------|------------------|--------|
|   |       | Percent of ALL power | Percent of power |        |
| 1 | 32490 | 100.00               | 32490            | 100.00 |

Tables: ALL \* CMYN

ALL

CMYN(Administration of Concomitant Drug)

| Power                   |        |        |        |
|-------------------------|--------|--------|--------|
| Percent                 |        |        |        |
| Percent of rows         |        |        |        |
| Percent of columns      | None   | With   | Total  |
| _____ + _____ + _____ + |        |        |        |
| 1                       | 1445   | 31045  | 32490  |
|                         | 4.45   | 95.55  | 100.00 |
|                         | 4.45   | 95.55  |        |
|                         | 100.00 | 100.00 |        |
| _____ + _____ + _____ + |        |        |        |
| Total                   | 1445   | 31045  | 32490  |
|                         | 4.45   | 95.55  | 100.00 |

Concomitant medications other than anticoagulants at the time of obtaining Table 2-5 consent, according to the presence or absence of proton-pump inhibitors

FREQ Procedure

Tables: ALL \* TCMCNT

ALL TCMCNT(Total Number of Drugs Other than Anticoagulant)

| Power           |        |        |        |        |        |        |        |        |        |        |       |        |
|-----------------|--------|--------|--------|--------|--------|--------|--------|--------|--------|--------|-------|--------|
| Percent         |        |        |        |        |        |        |        |        |        |        |       |        |
| Percent of rows |        |        |        |        |        |        |        |        |        |        |       |        |
| Percent         | 0      | 1      | 2      | 3      | 4      | 5      | 6      | 7      | 8      | 9      | Total |        |
|                 | 1      | 52     | 688    | 1602   | 2622   | 3597   | 4105   | 4171   | 3747   | 3187   |       |        |
| 2516            | 31831  |        |        |        |        |        |        |        |        |        |       |        |
|                 | 0.16   | 2.16   | 5.03   | 8.24   | 11.30  | 12.90  | 13.10  | 11.77  | 10.01  |        |       |        |
| 7.90            | 100.00 |        |        |        |        |        |        |        |        |        |       |        |
|                 | 0.16   | 2.16   | 5.03   | 8.24   | 11.30  | 12.90  | 13.10  | 11.77  | 10.01  |        |       |        |
| 7.90            |        |        |        |        |        |        |        |        |        |        |       |        |
|                 | 100.00 | 100.00 | 100.00 | 100.00 | 100.00 | 100.00 | 100.00 | 100.00 | 100.00 | 100.00 |       |        |
| 100.00          |        |        |        |        |        |        |        |        |        |        |       |        |
|                 | Total  | 52     | 688    | 1602   | 2622   | 3597   | 4105   | 4171   | 3747   | 3187   | 2516  | 31831  |
|                 |        | 0.16   | 2.16   | 5.03   | 8.24   | 11.30  | 12.90  | 13.10  | 11.77  | 10.01  | 7.90  | 100.00 |

(continued)

Tables: ALL \* TCMCNT

ALL TCMCNT(Total Number of Drugs Other than Anticoagulant)

Power |

Percent |

Percent of rows

Percent |10|11|12|13|14|15|16|17|18|19|Total

|  | 10     | 11     | 12     | 13     | 14     | 15     | 16     | 17     | 18     | 19     | Total  |
|--|--------|--------|--------|--------|--------|--------|--------|--------|--------|--------|--------|
|  | 1      | 1825   | 1360   | 881    | 598    | 366    | 206    | 121    | 79     | 47     | 31831  |
|  | 5.73   | 4.27   | 2.77   | 1.88   | 1.15   | 0.65   | 0.38   | 0.25   | 0.15   | 0.08   | 100.00 |
|  | 100.00 | 100.00 | 100.00 | 100.00 | 100.00 | 100.00 | 100.00 | 100.00 | 100.00 | 100.00 | 100.00 |

|       | 10   | 11   | 12   | 13   | 14   | 15   | 16   | 17   | 18   | 19   | Total  |
|-------|------|------|------|------|------|------|------|------|------|------|--------|
| Total | 1825 | 1360 | 881  | 598  | 366  | 206  | 121  | 79   | 47   | 24   | 31831  |
|       | 5.73 | 4.27 | 2.77 | 1.88 | 1.15 | 0.65 | 0.38 | 0.25 | 0.15 | 0.08 | 100.00 |

(continued)

Concomitant medications other than anticoagulants at the time of obtaining Table 2-5 consent, according to the presence or absence of proton-pump inhibitors

FREQ Procedure

Tables: ALL \* TCMCNT

ALL TCMCNT(Total Number of Drugs Other than Anticoagulant)

Power |

Percent |

Percent of rows

Percent | 20| 21| 22| 23| 24| 25| 26| 27| Total

|       | 20     | 21     | 22     | 23     | 24     | 25     | 26     | 27     | Total  |        |
|-------|--------|--------|--------|--------|--------|--------|--------|--------|--------|--------|
| 1     | 1      | 19     | 6      | 2      | 5      | 1      | 1      | 2      | 1      | 31831  |
|       | 0.06   | 0.06   | 0.02   | 0.01   | 0.02   | 0.00   | 0.00   | 0.01   | 0.00   | 100.00 |
|       | 100.00 | 100.00 | 100.00 | 100.00 | 100.00 | 100.00 | 100.00 | 100.00 | 100.00 |        |
| Total | 19     | 6      | 2      | 5      | 1      | 1      | 2      | 1      | 31831  |        |
|       | 0.06   | 0.02   | 0.01   | 0.02   | 0.00   | 0.00   | 0.01   | 0.00   |        | 0.00   |
|       | 100.00 |        |        |        |        |        |        |        |        |        |

Degree of missing values = 659

Concomitant medications other than anticoagulants at the time of obtaining Table 2-5 consent, according to the presence or absence of proton-pump inhibitors

FREQ Procedure

|   |       | Cumulative           |                  |        |
|---|-------|----------------------|------------------|--------|
|   |       | Percent of ALL power | Percent of power |        |
| 1 | 32490 | 100.00               | 32490            | 100.00 |

Tables: ALL \* CMYN

ALL

CMYN(Administration of Concomitant Drug)

| Power                   |        |        |        |
|-------------------------|--------|--------|--------|
| Percent                 |        |        |        |
| Percent of rows         |        |        |        |
| Percent of columns      | None   | With   | Total  |
| _____ + _____ + _____ + |        |        |        |
| 1                       | 1445   | 31045  | 32490  |
|                         | 4.45   | 95.55  | 100.00 |
|                         | 4.45   | 95.55  |        |
|                         | 100.00 | 100.00 |        |
| _____ + _____ + _____ + |        |        |        |
| Total                   | 1445   | 31045  | 32490  |
|                         | 4.45   | 95.55  | 100.00 |

Concomitant medications other than anticoagulants at the time of obtaining Table 2-5 consent, according to the presence or absence of proton-pump inhibitors

FREQ Procedure

Tables: ALL \* TCMCNT

ALL TCMCNT(Total Number of Drugs Other than Anticoagulant)

| Power           |        |        |        |        |        |        |        |        |        |        |       |
|-----------------|--------|--------|--------|--------|--------|--------|--------|--------|--------|--------|-------|
| Percent         |        |        |        |        |        |        |        |        |        |        |       |
| Percent of rows |        |        |        |        |        |        |        |        |        |        |       |
| Percent         | 0      | 1      | 2      | 3      | 4      | 5      | 6      | 7      | 8      | 9      | Total |
|                 | 1      | 52     | 688    | 1602   | 2622   | 3597   | 4105   | 4171   | 3747   | 3187   |       |
| 2516   31831    |        |        |        |        |        |        |        |        |        |        |       |
|                 | 0.16   | 2.16   | 5.03   | 8.24   | 11.30  | 12.90  | 13.10  | 11.77  | 10.01  |        |       |
| 7.90   100.00   |        |        |        |        |        |        |        |        |        |        |       |
|                 | 0.16   | 2.16   | 5.03   | 8.24   | 11.30  | 12.90  | 13.10  | 11.77  | 10.01  |        |       |
| 7.90            |        |        |        |        |        |        |        |        |        |        |       |
|                 | 100.00 | 100.00 | 100.00 | 100.00 | 100.00 | 100.00 | 100.00 | 100.00 | 100.00 | 100.00 |       |
| 100.00          |        |        |        |        |        |        |        |        |        |        |       |
|                 | 52     | 688    | 1602   | 2622   | 3597   | 4105   | 4171   | 3747   | 3187   | 2516   | 31831 |
|                 | 0.16   | 2.16   | 5.03   | 8.24   | 11.30  | 12.90  | 13.10  | 11.77  |        |        |       |
| 10.01           | 7.90   | 100.00 |        |        |        |        |        |        |        |        |       |

(continued)

Tables: ALL \* TCMCNT

ALL TCMCNT(Total Number of Drugs Other than Anticoagulant)

Power |

Percent |

Percent of rows

Percent |10|11|12|13|14|15|16|17|18|19|Total

|  | 10     | 11     | 12     | 13     | 14     | 15     | 16     | 17     | 18     | 19     | Total  |
|--|--------|--------|--------|--------|--------|--------|--------|--------|--------|--------|--------|
|  | 1      | 1825   | 1360   | 881    | 598    | 366    | 206    | 121    | 79     | 47     | 31831  |
|  | 5.73   | 4.27   | 2.77   | 1.88   | 1.15   | 0.65   | 0.38   | 0.25   | 0.15   | 0.08   | 100.00 |
|  | 100.00 | 100.00 | 100.00 | 100.00 | 100.00 | 100.00 | 100.00 | 100.00 | 100.00 | 100.00 | 100.00 |

|       | 10   | 11   | 12   | 13   | 14   | 15   | 16   | 17   | 18   | 19   | Total  |
|-------|------|------|------|------|------|------|------|------|------|------|--------|
| Total | 1825 | 1360 | 881  | 598  | 366  | 206  | 121  | 79   | 47   | 24   | 31831  |
|       | 5.73 | 4.27 | 2.77 | 1.88 | 1.15 | 0.65 | 0.38 | 0.25 | 0.15 | 0.08 | 100.00 |

(continued)



Concomitant medications other than anticoagulants at the time of obtaining Table 2-5 consent, according to the presence or absence of proton-pump inhibitors

FREQ Procedure

Tables: ALL \* TCMCNT

ALL TCMCNT(Total Number of Drugs Other than Anticoagulant)

Power |

Percent |

Percent of rows

Percent | 20| 21| 22| 23| 24| 25| 26| 27| Total

|       | 20     | 21     | 22     | 23     | 24     | 25     | 26     | 27     | Total  |        |
|-------|--------|--------|--------|--------|--------|--------|--------|--------|--------|--------|
| 1     | 1      | 19     | 6      | 2      | 5      | 1      | 1      | 2      | 1      | 31831  |
|       | 0.06   | 0.06   | 0.02   | 0.01   | 0.02   | 0.00   | 0.00   | 0.01   | 0.00   | 100.00 |
|       | 100.00 | 100.00 | 100.00 | 100.00 | 100.00 | 100.00 | 100.00 | 100.00 | 100.00 |        |
| Total | 19     | 6      | 2      | 5      | 1      | 1      | 2      | 1      | 31831  |        |
|       | 0.06   | 0.02   | 0.01   | 0.02   | 0.00   | 0.00   | 0.01   | 0.00   |        | 0.00   |
|       | 100.00 |        |        |        |        |        |        |        |        |        |

Degree of missing values = 659

Concomitant medications other than anticoagulants at the time of obtaining Table 2-5 consent, according to the presence or absence of proton-pump inhibitors

FREQ Procedure

|   |       | Cumulative           |                  |        |
|---|-------|----------------------|------------------|--------|
|   |       | Percent of ALL power | Percent of power |        |
| 1 | 32490 | 100.00               | 32490            | 100.00 |

Tables: ALL \* CMYN

ALL

CMYN(Administration of Concomitant Drug)

| Power                   |        |        |        |
|-------------------------|--------|--------|--------|
| Percent                 |        |        |        |
| Percent of rows         |        |        |        |
| Percent of columns      | None   | With   | Total  |
| _____ + _____ + _____ + |        |        |        |
| 1                       | 1445   | 31045  | 32490  |
|                         | 4.45   | 95.55  | 100.00 |
|                         | 4.45   | 95.55  |        |
|                         | 100.00 | 100.00 |        |
| _____ + _____ + _____ + |        |        |        |
| Total                   | 1445   | 31045  | 32490  |
|                         | 4.45   | 95.55  | 100.00 |

Concomitant medications other than anticoagulants at the time of obtaining Table 2-5 consent, according to the presence or absence of proton-pump inhibitors

FREQ Procedure

Tables: ALL \* TCMCNT

ALL TCMCNT(Total Number of Drugs Other than Anticoagulant)

Power |

Percent |

Percent of rows

Percent|0|1|2|3|4|5|6|7|8|9| Total

|       | 0      | 1      | 2      | 3      | 4      | 5      | 6      | 7      | 8      | 9      | Total  |
|-------|--------|--------|--------|--------|--------|--------|--------|--------|--------|--------|--------|
|       | 1      | 52     | 688    | 1602   | 2622   | 3597   | 4105   | 4171   | 3747   | 3187   | 2516   |
|       | 0.16   | 2.16   | 5.03   | 8.24   | 11.30  | 12.90  | 13.10  | 11.77  | 10.01  | 7.90   | 100.00 |
|       | 100.00 | 100.00 | 100.00 | 100.00 | 100.00 | 100.00 | 100.00 | 100.00 | 100.00 | 100.00 | 100.00 |
| Total | 52     | 688    | 1602   | 2622   | 3597   | 4105   | 4171   | 3747   | 3187   | 2516   | 31831  |
|       | 0.16   | 2.16   | 5.03   | 8.24   | 11.30  | 12.90  | 13.10  | 11.77  | 10.01  | 7.90   | 100.00 |

(continued)

Tables: ALL \* TCMCNT

ALL TCMCNT(Total Number of Drugs Other than Anticoagulant)

Power |

Percent |

Percent of rows

Percent |10|11|12|13|14|15|16|17|18|19|Total

|       | 10     | 11     | 12     | 13     | 14     | 15     | 16     | 17     | 18     | 19     | Total  |
|-------|--------|--------|--------|--------|--------|--------|--------|--------|--------|--------|--------|
|       | 1      | 1825   | 1360   | 881    | 598    | 366    | 206    | 121    | 79     | 47     | 31831  |
|       | 0.08   | 5.73   | 4.27   | 2.77   | 1.88   | 1.15   | 0.65   | 0.38   | 0.25   | 0.15   | 100.00 |
|       | 0.08   | 5.73   | 4.27   | 2.77   | 1.88   | 1.15   | 0.65   | 0.38   | 0.25   | 0.15   | 100.00 |
|       | 100.00 | 100.00 | 100.00 | 100.00 | 100.00 | 100.00 | 100.00 | 100.00 | 100.00 | 100.00 | 100.00 |
| Total | 1825   | 1360   | 881    | 598    | 366    | 206    | 121    | 79     | 47     | 24     | 31831  |
|       | 0.15   | 5.73   | 4.27   | 2.77   | 1.88   | 1.15   | 0.65   | 0.38   | 0.25   | 0.08   | 100.00 |

(continued)

Concomitant medications other than anticoagulants at the time of obtaining Table 2-5 consent, according to the presence or absence of proton-pump inhibitors

FREQ Procedure

Tables: ALL \* TCMCNT

ALL TCMCNT(Total Number of Drugs Other than Anticoagulant)

Power |

Percent |

Percent of rows

Percent | 20| 21| 22| 23| 24| 25| 26| 27| Total

|       | 20     | 21     | 22     | 23     | 24     | 25     | 26     | 27     | Total  |        |
|-------|--------|--------|--------|--------|--------|--------|--------|--------|--------|--------|
| 1     | 1      | 19     | 6      | 2      | 5      | 1      | 1      | 2      | 1      | 31831  |
|       | 0.06   | 0.06   | 0.02   | 0.01   | 0.02   | 0.00   | 0.00   | 0.01   | 0.00   | 100.00 |
|       | 100.00 | 100.00 | 100.00 | 100.00 | 100.00 | 100.00 | 100.00 | 100.00 | 100.00 |        |
| Total | 19     | 6      | 2      | 5      | 1      | 1      | 2      | 1      | 31831  |        |
|       | 0.06   | 0.02   | 0.01   | 0.02   | 0.00   | 0.00   | 0.01   | 0.00   |        | 100.00 |

Degree of missing values = 659

Concomitant medications other than anticoagulants at the time of obtaining Table 2-5 consent, according to the presence or absence of proton-pump inhibitors

FREQ Procedure

|   |       | Cumulative           |                  |        |
|---|-------|----------------------|------------------|--------|
|   |       | Percent of ALL power | Percent of power |        |
| 1 | 32490 | 100.00               | 32490            | 100.00 |

Tables: ALL \* CMYN

ALL

CMYN(Administration of Concomitant Drug)

| Power                   |        |        |        |
|-------------------------|--------|--------|--------|
| Percent                 |        |        |        |
| Percent of rows         |        |        |        |
| Percent of columns      | None   | With   | Total  |
| _____ + _____ + _____ + |        |        |        |
| 1                       | 1445   | 31045  | 32490  |
|                         | 4.45   | 95.55  | 100.00 |
|                         | 4.45   | 95.55  |        |
|                         | 100.00 | 100.00 |        |
| _____ + _____ + _____ + |        |        |        |
| Total                   | 1445   | 31045  | 32490  |
|                         | 4.45   | 95.55  | 100.00 |

Concomitant medications other than anticoagulants at the time of obtaining Table 2-5 consent, according to the presence or absence of proton-pump inhibitors

FREQ Procedure

Tables: ALL \* TCMCNT

ALL TCMCNT(Total Number of Drugs Other than Anticoagulant)

|                                                                                |
|--------------------------------------------------------------------------------|
| Power                                                                          |
| Percent                                                                        |
| Percent of rows                                                                |
| Percent                                                                        |
| 0 1 2 3 4 5 6 7 8 9  Total                                                     |
| _____+_____+_____+_____+_____+_____+_____+_____+_____+_____                    |
| ____+_____+_____+_____+_____                                                   |
| 1   52   688   1602   2622   3597   4105   4171   3747   3187                  |
| 2516   31831                                                                   |
| 0.16   2.16   5.03   8.24   11.30   12.90   13.10   11.77   10.01              |
| 7.90   100.00                                                                  |
| 0.16   2.16   5.03   8.24   11.30   12.90   13.10   11.77   10.01              |
| 7.90                                                                           |
| 100.00   100.00   100.00   100.00   100.00   100.00   100.00   100.00   100.00 |
| 100.00                                                                         |
| _____+_____+_____+_____+_____+_____+_____+_____+_____                          |
| ____+_____+_____+_____+_____                                                   |
| Total 52 688 1602 2622 3597 4105 4171 3747 3187 2516 31831                     |
| 0.16 2.16 5.03 8.24 11.30 12.90 13.10 11.77                                    |
| 10.01 7.90 100.00                                                              |
| (continued)                                                                    |

Tables: ALL \* TCMCNT

ALL TCMCNT(Total Number of Drugs Other than Anticoagulant)

Power |

Percent |

Percent of rows

Percent |10|11|12|13|14|15|16|17|18|19|Total

|       | 10     | 11     | 12     | 13     | 14     | 15     | 16     | 17     | 18     | 19     | Total  |
|-------|--------|--------|--------|--------|--------|--------|--------|--------|--------|--------|--------|
|       | 1      | 1825   | 1360   | 881    | 598    | 366    | 206    | 121    | 79     | 47     | 31831  |
|       | 5.73   | 4.27   | 2.77   | 1.88   | 1.15   | 0.65   | 0.38   | 0.25   | 0.15   | 0.08   | 100.00 |
|       | 5.73   | 4.27   | 2.77   | 1.88   | 1.15   | 0.65   | 0.38   | 0.25   | 0.15   | 0.08   | 100.00 |
|       | 100.00 | 100.00 | 100.00 | 100.00 | 100.00 | 100.00 | 100.00 | 100.00 | 100.00 | 100.00 | 100.00 |
| Total | 1825   | 1360   | 881    | 598    | 366    | 206    | 121    | 79     | 47     | 24     | 31831  |
|       | 5.73   | 4.27   | 2.77   | 1.88   | 1.15   | 0.65   | 0.38   | 0.25   | 0.15   | 0.08   | 100.00 |

(continued)



Concomitant medications other than anticoagulants at the time of obtaining Table 2-5 consent, according to the presence or absence of proton-pump inhibitors

FREQ Procedure

Tables: ALL \* TCMCNT

ALL TCMCNT(Total Number of Drugs Other than Anticoagulant)

Power |

Percent |

Percent of rows

Percent | 20| 21| 22| 23| 24| 25| 26| 27| Total

|       | 20     | 21     | 22     | 23     | 24     | 25     | 26     | 27     | Total  |        |
|-------|--------|--------|--------|--------|--------|--------|--------|--------|--------|--------|
| 1     | 1      | 19     | 6      | 2      | 5      | 1      | 1      | 2      | 1      | 31831  |
|       | 0.06   | 0.06   | 0.02   | 0.01   | 0.02   | 0.00   | 0.00   | 0.01   | 0.00   | 100.00 |
|       | 100.00 | 100.00 | 100.00 | 100.00 | 100.00 | 100.00 | 100.00 | 100.00 | 100.00 |        |
| Total | 19     | 6      | 2      | 5      | 1      | 1      | 2      | 1      | 31831  |        |
|       | 0.06   | 0.02   | 0.01   | 0.02   | 0.00   | 0.00   | 0.01   | 0.00   |        | 0.00   |
|       | 100.00 |        |        |        |        |        |        |        |        |        |

Degree of missing values = 659

Concomitant medications other than anticoagulants at the time of obtaining Table 2-5 consent, according to the presence or absence of proton-pump inhibitors

FREQ Procedure

|   |                      |        | Cumulative       |        |
|---|----------------------|--------|------------------|--------|
|   | Percent of ALL power |        | Percent of power |        |
| 1 | 32490                | 100.00 | 32490            | 100.00 |

Tables: ALL \* CMYN

ALL

CMYN(Administration of Concomitant Drug)

| Power                   |        |        |        |
|-------------------------|--------|--------|--------|
| Percent                 |        |        |        |
| Percent of rows         |        |        |        |
| Percent of columns      | None   | With   | Total  |
| _____ + _____ + _____ + |        |        |        |
| 1                       | 1445   | 31045  | 32490  |
|                         | 4.45   | 95.55  | 100.00 |
|                         | 4.45   | 95.55  |        |
|                         | 100.00 | 100.00 |        |
| _____ + _____ + _____ + |        |        |        |
| Total                   | 1445   | 31045  | 32490  |
|                         | 4.45   | 95.55  | 100.00 |

Concomitant medications other than anticoagulants at the time of obtaining Table 2-5 consent, according to the presence or absence of proton-pump inhibitors

FREQ Procedure

Tables: ALL \* TCMCNT

ALL TCMCNT(Total Number of Drugs Other than Anticoagulant)

Power |

Percent |

Percent of rows

Percent|0|1|2|3|4|5|6|7|8|9| Total

|       | 0      | 1      | 2      | 3      | 4      | 5      | 6      | 7      | 8      | 9      | Total        |
|-------|--------|--------|--------|--------|--------|--------|--------|--------|--------|--------|--------------|
|       | 1      | 52     | 688    | 1602   | 2622   | 3597   | 4105   | 4171   | 3747   | 3187   | 2516   31831 |
|       | 0.16   | 2.16   | 5.03   | 8.24   | 11.30  | 12.90  | 13.10  | 11.77  | 10.01  | 7.90   | 100.00       |
|       | 100.00 | 100.00 | 100.00 | 100.00 | 100.00 | 100.00 | 100.00 | 100.00 | 100.00 | 100.00 | 100.00       |
| Total | 52     | 688    | 1602   | 2622   | 3597   | 4105   | 4171   | 3747   | 3187   | 2516   | 31831        |
|       | 0.16   | 2.16   | 5.03   | 8.24   | 11.30  | 12.90  | 13.10  | 11.77  | 10.01  | 7.90   | 100.00       |

(continued)

Tables: ALL \* TCMCNT

ALL TCMCNT(Total Number of Drugs Other than Anticoagulant)

Power |

Percent |

Percent of rows

Percent |10|11|12|13|14|15|16|17|18|19|Total

|       | 10     | 11     | 12     | 13     | 14     | 15     | 16     | 17     | 18     | 19     | Total  |
|-------|--------|--------|--------|--------|--------|--------|--------|--------|--------|--------|--------|
|       | 1      | 1825   | 1360   | 881    | 598    | 366    | 206    | 121    | 79     | 47     | 31831  |
|       | 5.73   | 4.27   | 2.77   | 1.88   | 1.15   | 0.65   | 0.38   | 0.25   | 0.15   | 0.08   | 100.00 |
|       | 5.73   | 4.27   | 2.77   | 1.88   | 1.15   | 0.65   | 0.38   | 0.25   | 0.15   | 0.08   | 100.00 |
|       | 100.00 | 100.00 | 100.00 | 100.00 | 100.00 | 100.00 | 100.00 | 100.00 | 100.00 | 100.00 | 100.00 |
| Total | 1825   | 1360   | 881    | 598    | 366    | 206    | 121    | 79     | 47     | 24     | 31831  |
|       | 5.73   | 4.27   | 2.77   | 1.88   | 1.15   | 0.65   | 0.38   | 0.25   | 0.15   | 0.08   | 100.00 |

(continued)

Concomitant medications other than anticoagulants at the time of obtaining Table 2-5 consent, according to the presence or absence of proton-pump inhibitors

FREQ Procedure

Tables: ALL \* TCMCNT

ALL TCMCNT(Total Number of Drugs Other than Anticoagulant)

Power |

Percent |

Percent of rows

Percent | 20| 21| 22| 23| 24| 25| 26| 27| Total

|       | 20     | 21     | 22     | 23     | 24     | 25     | 26     | 27     | Total  |        |
|-------|--------|--------|--------|--------|--------|--------|--------|--------|--------|--------|
| 1     | 1      | 19     | 6      | 2      | 5      | 1      | 1      | 2      | 1      | 31831  |
|       | 0.06   | 0.06   | 0.02   | 0.01   | 0.02   | 0.00   | 0.00   | 0.01   | 0.00   | 100.00 |
|       | 100.00 | 100.00 | 100.00 | 100.00 | 100.00 | 100.00 | 100.00 | 100.00 | 100.00 |        |
| Total | 19     | 6      | 2      | 5      | 1      | 1      | 2      | 1      | 31831  |        |
|       | 0.06   | 0.02   | 0.01   | 0.02   | 0.00   | 0.00   | 0.01   | 0.00   |        | 0.00   |
|       | 100.00 |        |        |        |        |        |        |        |        |        |

Degree of missing values = 659

Concomitant medications other than anticoagulants at the time of obtaining Table 2-5 consent, according to the presence or absence of proton-pump inhibitors

FREQ Procedure

|                      |       | Cumulative       |       |        |
|----------------------|-------|------------------|-------|--------|
| Percent of ALL power |       | Percent of power |       |        |
| 1                    | 32490 | 100.00           | 32490 | 100.00 |

Tables: ALL \* CMYN

ALL

CMYN(Administration of Concomitant Drug)

| Power                   |        |        |        |
|-------------------------|--------|--------|--------|
| Percent                 |        |        |        |
| Percent of rows         |        |        |        |
| Percent of columns      | None   | With   | Total  |
| _____ + _____ + _____ + |        |        |        |
| 1                       | 1445   | 31045  | 32490  |
|                         | 4.45   | 95.55  | 100.00 |
|                         | 4.45   | 95.55  |        |
|                         | 100.00 | 100.00 |        |
| _____ + _____ + _____ + |        |        |        |
| Total                   | 1445   | 31045  | 32490  |
|                         | 4.45   | 95.55  | 100.00 |

Concomitant medications other than anticoagulants at the time of obtaining Table 2-5 consent, according to the presence or absence of proton-pump inhibitors

FREQ Procedure

Tables: ALL \* TCMCNT

ALL TCMCNT(Total Number of Drugs Other than Anticoagulant)

Power |

Percent |

Percent of rows

Percent|0|1|2|3|4|5|6|7|8|9| Total

|       | 0      | 1      | 2      | 3      | 4      | 5      | 6      | 7      | 8      | 9      | Total  |
|-------|--------|--------|--------|--------|--------|--------|--------|--------|--------|--------|--------|
|       | 1      | 52     | 688    | 1602   | 2622   | 3597   | 4105   | 4171   | 3747   | 3187   | 2516   |
|       | 0.16   | 2.16   | 5.03   | 8.24   | 11.30  | 12.90  | 13.10  | 11.77  | 10.01  | 7.90   | 100.00 |
|       | 100.00 | 100.00 | 100.00 | 100.00 | 100.00 | 100.00 | 100.00 | 100.00 | 100.00 | 100.00 | 100.00 |
| Total | 52     | 688    | 1602   | 2622   | 3597   | 4105   | 4171   | 3747   | 3187   | 2516   | 31831  |
|       | 0.16   | 2.16   | 5.03   | 8.24   | 11.30  | 12.90  | 13.10  | 11.77  | 10.01  | 7.90   | 100.00 |

(continued)

Tables: ALL \* TCMCNT

ALL TCMCNT(Total Number of Drugs Other than Anticoagulant)

Power |

Percent |

Percent of rows

Percent |10|11|12|13|14|15|16|17|18|19|Total

|       | 10     | 11     | 12     | 13     | 14     | 15     | 16     | 17     | 18     | 19     | Total  |
|-------|--------|--------|--------|--------|--------|--------|--------|--------|--------|--------|--------|
|       | 1      | 1825   | 1360   | 881    | 598    | 366    | 206    | 121    | 79     | 47     | 31831  |
|       | 5.73   | 4.27   | 2.77   | 1.88   | 1.15   | 0.65   | 0.38   | 0.25   | 0.15   | 0.08   | 100.00 |
|       | 5.73   | 4.27   | 2.77   | 1.88   | 1.15   | 0.65   | 0.38   | 0.25   | 0.15   | 0.08   | 100.00 |
|       | 100.00 | 100.00 | 100.00 | 100.00 | 100.00 | 100.00 | 100.00 | 100.00 | 100.00 | 100.00 | 100.00 |
| Total | 1825   | 1360   | 881    | 598    | 366    | 206    | 121    | 79     | 47     | 24     | 31831  |
|       | 5.73   | 4.27   | 2.77   | 1.88   | 1.15   | 0.65   | 0.38   | 0.25   | 0.15   | 0.08   | 100.00 |

(continued)



Concomitant medications other than anticoagulants at the time of obtaining Table 2-5 consent, according to the presence or absence of proton-pump inhibitors

FREQ Procedure

Tables: ALL \* TCMCNT

ALL TCMCNT(Total Number of Drugs Other than Anticoagulant)

Power |

Percent |

Percent of rows

Percent | 20| 21| 22| 23| 24| 25| 26| 27| Total

|       | 20     | 21     | 22     | 23     | 24     | 25     | 26     | 27     | Total  |        |
|-------|--------|--------|--------|--------|--------|--------|--------|--------|--------|--------|
| 1     | 1      | 19     | 6      | 2      | 5      | 1      | 1      | 2      | 1      | 31831  |
|       | 0.06   | 0.06   | 0.02   | 0.01   | 0.02   | 0.00   | 0.00   | 0.01   | 0.00   | 100.00 |
|       | 100.00 | 100.00 | 100.00 | 100.00 | 100.00 | 100.00 | 100.00 | 100.00 | 100.00 |        |
| Total | 19     | 6      | 2      | 5      | 1      | 1      | 2      | 1      | 31831  |        |
|       | 0.06   | 0.02   | 0.01   | 0.02   | 0.00   | 0.00   | 0.01   | 0.00   |        | 0.00   |
|       | 100.00 |        |        |        |        |        |        |        |        |        |

Degree of missing values = 659

Concomitant medications other than anticoagulants at the time of obtaining Table 2-5 consent, according to the presence or absence of proton-pump inhibitors

FREQ Procedure

|   |       | Cumulative           |                  |        |
|---|-------|----------------------|------------------|--------|
|   |       | Percent of ALL power | Percent of power |        |
| 1 | 32490 | 100.00               | 32490            | 100.00 |

Tables: ALL \* CMYN

ALL

CMYN(Administration of Concomitant Drug)

| Power                   |        |        |        |
|-------------------------|--------|--------|--------|
| Percent                 |        |        |        |
| Percent of rows         |        |        |        |
| Percent of columns      | None   | With   | Total  |
| _____ + _____ + _____ + |        |        |        |
| 1                       | 1445   | 31045  | 32490  |
|                         | 4.45   | 95.55  | 100.00 |
|                         | 4.45   | 95.55  |        |
|                         | 100.00 | 100.00 |        |
| _____ + _____ + _____ + |        |        |        |
| Total                   | 1445   | 31045  | 32490  |
|                         | 4.45   | 95.55  | 100.00 |

Concomitant medications other than anticoagulants at the time of obtaining Table 2-5 consent, according to the presence or absence of proton-pump inhibitors

FREQ Procedure

Tables: ALL \* TCMCNT

ALL TCMCNT(Total Number of Drugs Other than Anticoagulant)

| Power           |        |        |        |        |        |        |        |        |        |        |       |
|-----------------|--------|--------|--------|--------|--------|--------|--------|--------|--------|--------|-------|
| Percent         |        |        |        |        |        |        |        |        |        |        |       |
| Percent of rows |        |        |        |        |        |        |        |        |        |        |       |
| Percent         | 0      | 1      | 2      | 3      | 4      | 5      | 6      | 7      | 8      | 9      | Total |
|                 | 1      | 52     | 688    | 1602   | 2622   | 3597   | 4105   | 4171   | 3747   | 3187   |       |
| 2516   31831    |        |        |        |        |        |        |        |        |        |        |       |
|                 | 0.16   | 2.16   | 5.03   | 8.24   | 11.30  | 12.90  | 13.10  | 11.77  | 10.01  |        |       |
| 7.90   100.00   |        |        |        |        |        |        |        |        |        |        |       |
|                 | 0.16   | 2.16   | 5.03   | 8.24   | 11.30  | 12.90  | 13.10  | 11.77  | 10.01  |        |       |
| 7.90            |        |        |        |        |        |        |        |        |        |        |       |
|                 | 100.00 | 100.00 | 100.00 | 100.00 | 100.00 | 100.00 | 100.00 | 100.00 | 100.00 | 100.00 |       |
| 100.00          |        |        |        |        |        |        |        |        |        |        |       |
|                 | 52     | 688    | 1602   | 2622   | 3597   | 4105   | 4171   | 3747   | 3187   | 2516   | 31831 |
|                 | 0.16   | 2.16   | 5.03   | 8.24   | 11.30  | 12.90  | 13.10  | 11.77  |        |        |       |
| 10.01           | 7.90   | 100.00 |        |        |        |        |        |        |        |        |       |

(continued)

Tables: ALL \* TCMCNT

ALL TCMCNT(Total Number of Drugs Other than Anticoagulant)

Power |

Percent |

Percent of rows

Percent |10|11|12|13|14|15|16|17|18|19|Total

|  | 10     | 11     | 12     | 13     | 14     | 15     | 16     | 17     | 18     | 19     | Total  |
|--|--------|--------|--------|--------|--------|--------|--------|--------|--------|--------|--------|
|  | 1      | 1825   | 1360   | 881    | 598    | 366    | 206    | 121    | 79     | 47     | 31831  |
|  | 5.73   | 4.27   | 2.77   | 1.88   | 1.15   | 0.65   | 0.38   | 0.25   | 0.15   | 0.08   | 100.00 |
|  | 100.00 | 100.00 | 100.00 | 100.00 | 100.00 | 100.00 | 100.00 | 100.00 | 100.00 | 100.00 | 100.00 |

|       | 10   | 11   | 12   | 13   | 14   | 15   | 16   | 17   | 18   | 19   | Total  |
|-------|------|------|------|------|------|------|------|------|------|------|--------|
| Total | 1825 | 1360 | 881  | 598  | 366  | 206  | 121  | 79   | 47   | 24   | 31831  |
|       | 5.73 | 4.27 | 2.77 | 1.88 | 1.15 | 0.65 | 0.38 | 0.25 | 0.15 | 0.08 | 100.00 |

(continued)

Concomitant medications other than anticoagulants at the time of obtaining Table 2-5 consent, according to the presence or absence of proton-pump inhibitors

FREQ Procedure

Tables: ALL \* TCMCNT

ALL TCMCNT(Total Number of Drugs Other than Anticoagulant)

Power |

Percent |

Percent of rows

Percent | 20| 21| 22| 23| 24| 25| 26| 27| Total

|       | 20     | 21     | 22     | 23     | 24     | 25     | 26     | 27     | Total  |        |
|-------|--------|--------|--------|--------|--------|--------|--------|--------|--------|--------|
| 1     | 1      | 19     | 6      | 2      | 5      | 1      | 1      | 2      | 1      | 31831  |
|       | 0.06   | 0.06   | 0.02   | 0.01   | 0.02   | 0.00   | 0.00   | 0.01   | 0.00   | 100.00 |
|       | 100.00 | 100.00 | 100.00 | 100.00 | 100.00 | 100.00 | 100.00 | 100.00 | 100.00 |        |
| Total | 19     | 6      | 2      | 5      | 1      | 1      | 2      | 1      | 31831  |        |
|       | 0.06   | 0.02   | 0.01   | 0.02   | 0.00   | 0.00   | 0.01   | 0.00   |        | 0.00   |
|       | 100.00 |        |        |        |        |        |        |        |        |        |

Degree of missing values = 659

Concomitant medications other than anticoagulants at the time of obtaining Table 2-5 consent, according to the presence or absence of proton-pump inhibitors

FREQ Procedure

|   |       | Cumulative           |                  |        |
|---|-------|----------------------|------------------|--------|
|   |       | Percent of ALL power | Percent of power |        |
| 1 | 32490 | 100.00               | 32490            | 100.00 |

Tables: ALL \* CMYN

ALL

CMYN(Administration of Concomitant Drug)

| Power                   |        |        |        |
|-------------------------|--------|--------|--------|
| Percent                 |        |        |        |
| Percent of rows         |        |        |        |
| Percent of columns      | None   | With   | Total  |
| _____ + _____ + _____ + |        |        |        |
| 1                       | 1445   | 31045  | 32490  |
|                         | 4.45   | 95.55  | 100.00 |
|                         | 4.45   | 95.55  |        |
|                         | 100.00 | 100.00 |        |
| _____ + _____ + _____ + |        |        |        |
| Total                   | 1445   | 31045  | 32490  |
|                         | 4.45   | 95.55  | 100.00 |

Concomitant medications other than anticoagulants at the time of obtaining Table 2-5 consent, according to the presence or absence of proton-pump inhibitors

FREQ Procedure

Tables: ALL \* TCMCNT

ALL TCMCNT(Total Number of Drugs Other than Anticoagulant)

Power |

Percent |

Percent of rows

Percent|0|1|2|3|4|5|6|7|8|9| Total

|       | +      | +      | +      | +      | +      | +      | +      | +      | +      | +      | +      |
|-------|--------|--------|--------|--------|--------|--------|--------|--------|--------|--------|--------|
| +     | +      | +      | +      | +      | +      | +      | +      | +      | +      | +      | +      |
| 1     | 52     | 688    | 1602   | 2622   | 3597   | 4105   | 4171   | 3747   | 3187   | 2516   | 31831  |
|       | 0.16   | 2.16   | 5.03   | 8.24   | 11.30  | 12.90  | 13.10  | 11.77  | 10.01  | 7.90   | 100.00 |
|       | 0.16   | 2.16   | 5.03   | 8.24   | 11.30  | 12.90  | 13.10  | 11.77  | 10.01  | 7.90   | 100.00 |
|       | 100.00 | 100.00 | 100.00 | 100.00 | 100.00 | 100.00 | 100.00 | 100.00 | 100.00 | 100.00 | 100.00 |
|       | +      | +      | +      | +      | +      | +      | +      | +      | +      | +      | +      |
|       | +      | +      | +      | +      | +      | +      | +      | +      | +      | +      | +      |
| Total | 52     | 688    | 1602   | 2622   | 3597   | 4105   | 4171   | 3747   | 3187   | 2516   | 31831  |
|       | 0.16   | 2.16   | 5.03   | 8.24   | 11.30  | 12.90  | 13.10  | 11.77  | 10.01  | 7.90   | 100.00 |

(continued)

Tables: ALL \* TCMCNT

ALL TCMCNT(Total Number of Drugs Other than Anticoagulant)

Power |

Percent |

Percent of rows

Percent |10|11|12|13|14|15|16|17|18|19|Total

|  | 10     | 11     | 12     | 13     | 14     | 15     | 16     | 17     | 18     | 19     | Total  |
|--|--------|--------|--------|--------|--------|--------|--------|--------|--------|--------|--------|
|  | 1      | 1825   | 1360   | 881    | 598    | 366    | 206    | 121    | 79     | 47     | 31831  |
|  | 5.73   | 4.27   | 2.77   | 1.88   | 1.15   | 0.65   | 0.38   | 0.25   | 0.15   | 0.08   | 100.00 |
|  | 100.00 | 100.00 | 100.00 | 100.00 | 100.00 | 100.00 | 100.00 | 100.00 | 100.00 | 100.00 | 100.00 |

|       | 10   | 11   | 12   | 13   | 14   | 15   | 16   | 17   | 18   | 19   | Total  |
|-------|------|------|------|------|------|------|------|------|------|------|--------|
| Total | 1825 | 1360 | 881  | 598  | 366  | 206  | 121  | 79   | 47   | 24   | 31831  |
|       | 5.73 | 4.27 | 2.77 | 1.88 | 1.15 | 0.65 | 0.38 | 0.25 | 0.15 | 0.08 | 100.00 |

(continued)



Concomitant medications other than anticoagulants at the time of obtaining Table 2-5 consent, according to the presence or absence of proton-pump inhibitors

FREQ Procedure

Tables: ALL \* TCMCNT

ALL TCMCNT(Total Number of Drugs Other than Anticoagulant)

Power |

Percent |

Percent of rows

Percent | 20| 21| 22| 23| 24| 25| 26| 27| Total

|       | 20     | 21     | 22     | 23     | 24     | 25     | 26     | 27     | Total  |        |
|-------|--------|--------|--------|--------|--------|--------|--------|--------|--------|--------|
| 1     | 1      | 19     | 6      | 2      | 5      | 1      | 1      | 2      | 1      | 31831  |
|       | 0.06   | 0.06   | 0.02   | 0.01   | 0.02   | 0.00   | 0.00   | 0.01   | 0.00   | 100.00 |
|       | 100.00 | 100.00 | 100.00 | 100.00 | 100.00 | 100.00 | 100.00 | 100.00 | 100.00 |        |
| Total | 19     | 6      | 2      | 5      | 1      | 1      | 2      | 1      | 31831  |        |
|       | 0.06   | 0.02   | 0.01   | 0.02   | 0.00   | 0.00   | 0.01   | 0.00   |        | 0.00   |
|       | 100.00 |        |        |        |        |        |        |        |        |        |

Degree of missing values = 659

Concomitant medications other than anticoagulants at the time of obtaining Table 2-5 consent, according to the presence or absence of proton-pump inhibitors

FREQ Procedure

|                      |       |                  | Cumulative |        |
|----------------------|-------|------------------|------------|--------|
| Percent of ALL power |       | Percent of power |            |        |
| 1                    | 32490 | 100.00           | 32490      | 100.00 |

Tables: ALL \* CMYN

ALL

CMYN(Administration of Concomitant Drug)

| Power                   |        |        |        |
|-------------------------|--------|--------|--------|
| Percent                 |        |        |        |
| Percent of rows         |        |        |        |
| Percent of columns      | None   | With   | Total  |
| _____ + _____ + _____ + |        |        |        |
| 1                       | 1445   | 31045  | 32490  |
|                         | 4.45   | 95.55  | 100.00 |
|                         | 4.45   | 95.55  |        |
|                         | 100.00 | 100.00 |        |
| _____ + _____ + _____ + |        |        |        |
| Total                   | 1445   | 31045  | 32490  |
|                         | 4.45   | 95.55  | 100.00 |

Concomitant medications other than anticoagulants at the time of obtaining Table 2-5 consent, according to the presence or absence of proton-pump inhibitors

FREQ Procedure

Table: ALL \* t\_cm

ALL t\_cm

Power |

Percent |

Percent of rows

Percent of columns | 1 | Total

|          |        |        |  |
|----------|--------|--------|--|
| _____+   |        | _____+ |  |
| 1        | 37     | 37     |  |
|          | 100.00 | 100.00 |  |
|          | 100.00 |        |  |
|          | 100.00 |        |  |
| _____+   |        | _____+ |  |
| Total 37 | 37     |        |  |
|          | 100.00 | 100.00 |  |

Frequency of missing values = 32453

Concomitant medications other than anticoagulants at the time of obtaining Table 2-5 consent, according to the presence or absence of proton-pump inhibitors

FREQ Procedure

|   |       | Cumulative           |                  |        |
|---|-------|----------------------|------------------|--------|
|   |       | Percent of ALL power | Percent of power |        |
| 1 | 32490 | 100.00               | 32490            | 100.00 |

Tables: ALL \* CMYN

ALL

CMYN(Administration of Concomitant Drug)

| Power              |         |         |        |
|--------------------|---------|---------|--------|
| Percent            |         |         |        |
| Percent of rows    |         |         |        |
| Percent of columns | None    | With    | Total  |
| +_____+            | +_____+ | +_____+ | +      |
| 1                  | 1445    | 31045   | 32490  |
|                    | 4.45    | 95.55   | 100.00 |
|                    | 4.45    | 95.55   |        |
|                    | 100.00  | 100.00  |        |
| +_____+            | +_____+ | +_____+ | +      |
| Total              | 1445    | 31045   | 32490  |
|                    | 4.45    | 95.55   | 100.00 |

Concomitant medications other than anticoagulants at the time of obtaining Table 2-5 consent, according to the presence or absence of proton-pump inhibitors

FREQ Procedure

Table: ALL \* t\_TCMCNT

ALL t\_TCMCNT

Power |

Percent |

Percent of rows

Percent of columns | 9| Total

|           |        |        |
|-----------|--------|--------|
| _____+    |        | _____+ |
| 1         | 659    | 659    |
|           | 100.00 | 100.00 |
|           | 100.00 |        |
|           | 100.00 |        |
| _____+    |        | _____+ |
| Total 659 | 659    |        |
|           | 100.00 | 100.00 |

Degree of missing values = 31831

Concomitant medications other than anticoagulants at the time of obtaining Table 2-5 consent, according to the presence or absence of proton-pump inhibitors

FREQ Procedure

|                      |       | Cumulative       |       |        |
|----------------------|-------|------------------|-------|--------|
| Percent of ALL power |       | Percent of power |       |        |
| 1                    | 32490 | 100.00           | 32490 | 100.00 |

Tables: ALL \* CMYN

ALL

CMYN(Administration of Concomitant Drug)

| Power                   |        |        |        |
|-------------------------|--------|--------|--------|
| Percent                 |        |        |        |
| Percent of rows         |        |        |        |
| Percent of columns      | None   | With   | Total  |
| _____ + _____ + _____ + |        |        |        |
| 1                       | 1445   | 31045  | 32490  |
|                         | 4.45   | 95.55  | 100.00 |
|                         | 4.45   | 95.55  |        |
|                         | 100.00 | 100.00 |        |
| _____ + _____ + _____ + |        |        |        |
| Total                   | 1445   | 31045  | 32490  |
|                         | 4.45   | 95.55  | 100.00 |

Concomitant medications other than anticoagulants at the time of obtaining Table 2-5 consent, according to the presence or absence of proton-pump inhibitors

FREQ Procedure

Tables: ALL\* TCMCNTCT

ALL

TCMCNTCT(Category for Total Number of Drugs Other than Anticoagulant)

Power |

Percent |

Percent of rows

Percentage of column |0 to 4 or more|5 to 9 or more|10 or more|unknown|total

|Bottom|Bottom | | |

|       | 0 to 4 or more | 5 to 9 or more | 10 or more | unknown | total  |
|-------|----------------|----------------|------------|---------|--------|
| 1     | 8561           | 17726          | 5544       | 659     | 32490  |
|       | 26.35          | 54.56          | 17.06      | 2.03    | 100.00 |
|       | 26.35          | 54.56          | 17.06      | 2.03    |        |
|       | 100.00         | 100.00         | 100.00     | 100.00  |        |
| Total | 8561           | 17726          | 5544       | 659     | 32490  |
|       | 26.35          | 54.56          | 17.06      | 2.03    | 100.00 |

Concomitant medications other than anticoagulants at the time of obtaining Table 2-5 consent, according to the presence or absence of proton-pump inhibitors

FREQ Procedure

|   |       | Cumulative           |                  |        |
|---|-------|----------------------|------------------|--------|
|   |       | Percent of ALL power | Percent of power |        |
| 1 | 32490 | 100.00               | 32490            | 100.00 |

Tables: ALL \* CMYN

ALL

CMYN(Administration of Concomitant Drug)

| Power                   |        |        |        |
|-------------------------|--------|--------|--------|
| Percent                 |        |        |        |
| Percent of rows         |        |        |        |
| Percent of columns      | None   | With   | Total  |
| _____ + _____ + _____ + |        |        |        |
| 1                       | 1445   | 31045  | 32490  |
|                         | 4.45   | 95.55  | 100.00 |
|                         | 4.45   | 95.55  |        |
|                         | 100.00 | 100.00 |        |
| _____ + _____ + _____ + |        |        |        |
| Total 1445 31045 32490  | 4.45   | 95.55  | 100.00 |



Concomitant medications other than anticoagulants at the time of obtaining Table 2-5 consent, according to the presence or absence of proton-pump inhibitors

FREQ Procedure

Tables: ALL\* TCMCNTCT

ALL

TCMCNTCT(Category for Total Number of Drugs Other than Anticoagulant)

Power |

Percent |

Percent of rows

Percentage of column |0 to 4 or more|5 to 9 or more|10 or more|unknown|total

|Bottom|Bottom | | |

|       | 0 to 4 or more | 5 to 9 or more | 10 or more | unknown | total  |
|-------|----------------|----------------|------------|---------|--------|
| 1     | 8561           | 17726          | 5544       | 659     | 32490  |
|       | 26.35          | 54.56          | 17.06      | 2.03    | 100.00 |
|       | 26.35          | 54.56          | 17.06      | 2.03    |        |
|       | 100.00         | 100.00         | 100.00     | 100.00  |        |
| Total | 8561           | 17726          | 5544       | 659     | 32490  |
|       | 26.35          | 54.56          | 17.06      | 2.03    | 100.00 |

Concomitant medications other than anticoagulants at the time of obtaining Table 2-5 consent, according to the presence or absence of proton-pump inhibitors

FREQ Procedure

|                      |       | Cumulative       |       |        |
|----------------------|-------|------------------|-------|--------|
| Percent of ALL power |       | Percent of power |       |        |
| 1                    | 32490 | 100.00           | 32490 | 100.00 |

Tables: ALL \* CMYN

ALL

CMYN(Administration of Concomitant Drug)

| Power                   |        |        |        |
|-------------------------|--------|--------|--------|
| Percent                 |        |        |        |
| Percent of rows         |        |        |        |
| Percent of columns      | None   | With   | Total  |
| _____ + _____ + _____ + |        |        |        |
| 1                       | 1445   | 31045  | 32490  |
|                         | 4.45   | 95.55  | 100.00 |
|                         | 4.45   | 95.55  |        |
|                         | 100.00 | 100.00 |        |
| _____ + _____ + _____ + |        |        |        |
| Total                   | 1445   | 31045  | 32490  |
|                         | 4.45   | 95.55  | 100.00 |

Concomitant medications other than anticoagulants at the time of obtaining Table 2-5 consent, according to the presence or absence of proton-pump inhibitors

FREQ Procedure

Tables: ALL\* TCMCNTCT

ALL

TCMCNTCT(Category for Total Number of Drugs Other than Anticoagulant)

Power |

Percent |

Percent of rows

Percentage of column |0 to 4 or more|5 to 9 or more|10 or more|unknown|total

|       | Bottom | Bottom |        |        |        |
|-------|--------|--------|--------|--------|--------|
|       | +      | +      | +      | +      | +      |
| 1     | 8561   | 17726  | 5544   | 659    | 32490  |
|       | 26.35  | 54.56  | 17.06  | 2.03   | 100.00 |
|       | 26.35  | 54.56  | 17.06  | 2.03   |        |
|       | 100.00 | 100.00 | 100.00 | 100.00 |        |
|       | +      | +      | +      | +      | +      |
| Total | 8561   | 17726  | 5544   | 659    | 32490  |
|       | 26.35  | 54.56  | 17.06  | 2.03   | 100.00 |

Concomitant medications other than anticoagulants at the time of obtaining Table 2-5 consent, according to the presence or absence of proton-pump inhibitors

FREQ Procedure

|                      |       | Cumulative       |       |        |
|----------------------|-------|------------------|-------|--------|
| Percent of ALL power |       | Percent of power |       |        |
| 1                    | 32490 | 100.00           | 32490 | 100.00 |

Tables: ALL \* CMYN

ALL

CMYN(Administration of Concomitant Drug)

| Power                   |        |        |        |
|-------------------------|--------|--------|--------|
| Percent                 |        |        |        |
| Percent of rows         |        |        |        |
| Percent of columns      | None   | With   | Total  |
| _____ + _____ + _____ + |        |        |        |
| 1                       | 1445   | 31045  | 32490  |
|                         | 4.45   | 95.55  | 100.00 |
|                         | 4.45   | 95.55  |        |
|                         | 100.00 | 100.00 |        |
| _____ + _____ + _____ + |        |        |        |
| Total                   | 1445   | 31045  | 32490  |
|                         | 4.45   | 95.55  | 100.00 |

Concomitant medications other than anticoagulants at the time of obtaining Table 2-5 consent, according to the presence or absence of proton-pump inhibitors

FREQ Procedure

Tables: ALL\* TCMCNTCT

ALL

TCMCNTCT(Category for Total Number of Drugs Other than Anticoagulant)

Power |

Percent |

Percent of rows

Percentage of column |0 to 4 or more|5 to 9 or more|10 or more|unknown|total

|       | Bottom | Bottom |        |        |        |
|-------|--------|--------|--------|--------|--------|
|       | +      | +      | +      | +      | +      |
| 1     | 8561   | 17726  | 5544   | 659    | 32490  |
|       | 26.35  | 54.56  | 17.06  | 2.03   | 100.00 |
|       | 26.35  | 54.56  | 17.06  | 2.03   |        |
|       | 100.00 | 100.00 | 100.00 | 100.00 |        |
|       | +      | +      | +      | +      | +      |
| Total | 8561   | 17726  | 5544   | 659    | 32490  |
|       | 26.35  | 54.56  | 17.06  | 2.03   | 100.00 |

Concomitant medications other than anticoagulants at the time of obtaining Table 2-5 consent, according to the presence or absence of proton-pump inhibitors

FREQ Procedure

|                      |       | Cumulative       |       |        |
|----------------------|-------|------------------|-------|--------|
| Percent of ALL power |       | Percent of power |       |        |
| 1                    | 11981 | 100.00           | 11981 | 100.00 |

Tables: ALL \* CMYN

ALL

CMYN(Administration of Concomitant Drug)

Power |

Percent |

Percent of rows

Percentage of columns | with | total

|             |        |        |   |
|-------------|--------|--------|---|
| _____       | +      | _____  | + |
| 1           | 11981  | 11981  |   |
|             | 100.00 | 100.00 |   |
|             | 100.00 |        |   |
|             | 100.00 |        |   |
| _____       | +      | _____  | + |
| Total 11981 | 11981  |        |   |
|             | 100.00 | 100.00 |   |

Concomitant medications other than anticoagulants at the time of obtaining Table 2-5 consent, according to the presence or absence of proton-pump inhibitors

FREQ Procedure

Tables: ALL \* CMYN

ALL

CMYN(Administration of Concomitant Drug)

Power |

Percent |

Percent of rows

Percentage of columns | with | total

|       |   |        |   |        |
|-------|---|--------|---|--------|
| _____ | + | _____  | + |        |
| 1     |   | 11981  |   | 11981  |
|       |   | 100.00 |   | 100.00 |
|       |   | 100.00 |   |        |
|       |   | 100.00 |   |        |
| _____ | + | _____  | + |        |
| Total |   | 11981  |   | 11981  |
|       |   | 100.00 |   | 100.00 |

Concomitant medications other than anticoagulants at the time of obtaining Table 2-5 consent, according to the presence or absence of proton-pump inhibitors

FREQ Procedure

|                      |       | Cumulative       |       |        |
|----------------------|-------|------------------|-------|--------|
| Percent of ALL power |       | Percent of power |       |        |
| 1                    | 11981 | 100.00           | 11981 | 100.00 |

Tables: ALL \* CMYN

ALL

CMYN(Administration of Concomitant Drug)

Power |

Percent |

Percent of rows

Percentage of columns | with | total

|             |        |        |   |
|-------------|--------|--------|---|
| _____       | +      | _____  | + |
| 1           | 11981  | 11981  |   |
|             | 100.00 | 100.00 |   |
|             | 100.00 |        |   |
|             | 100.00 |        |   |
| _____       | +      | _____  | + |
| Total 11981 | 11981  |        |   |
|             | 100.00 | 100.00 |   |



Concomitant medications other than anticoagulants at the time of obtaining Table 2-5 consent, according to the presence or absence of proton-pump inhibitors

FREQ Procedure

Tables: ALL \* CMYN

ALL

CMYN(Administration of Concomitant Drug)

Power |

Percent |

Percent of rows

Percentage of columns | with | total

|       |   |        |   |        |
|-------|---|--------|---|--------|
| _____ | + | _____  | + |        |
| 1     |   | 11981  |   | 11981  |
|       |   | 100.00 |   | 100.00 |
|       |   | 100.00 |   |        |
|       |   | 100.00 |   |        |
| _____ | + | _____  | + |        |
| Total |   | 11981  |   | 11981  |
|       |   | 100.00 |   | 100.00 |

Concomitant medications other than anticoagulants at the time of obtaining Table 2-5 consent, according to the presence or absence of proton-pump inhibitors

FREQ Procedure

|                      |       | Cumulative       |       |        |
|----------------------|-------|------------------|-------|--------|
| Percent of ALL power |       | Percent of power |       |        |
| 1                    | 11981 | 100.00           | 11981 | 100.00 |

Tables: ALL \* CMYN

ALL

CMYN(Administration of Concomitant Drug)

Power |

Percent |

Percent of rows

Percentage of columns | with | total

|             |        |        |   |
|-------------|--------|--------|---|
| _____       | +      | _____  | + |
| 1           | 11981  | 11981  |   |
|             | 100.00 | 100.00 |   |
|             | 100.00 |        |   |
|             | 100.00 |        |   |
| _____       | +      | _____  | + |
| Total 11981 | 11981  |        |   |
|             | 100.00 | 100.00 |   |

Concomitant medications other than anticoagulants at the time of obtaining Table 2-5 consent, according to the presence or absence of proton-pump inhibitors

FREQ Procedure

Tables: ALL \* CMYN

ALL

CMYN(Administration of Concomitant Drug)

Power |

Percent |

Percent of rows

Percentage of columns | with | total

|       |   |        |   |        |
|-------|---|--------|---|--------|
| _____ | + | _____  | + |        |
| 1     |   | 11981  |   | 11981  |
|       |   | 100.00 |   | 100.00 |
|       |   | 100.00 |   |        |
|       |   | 100.00 |   |        |
| _____ | + | _____  | + |        |
| Total |   | 11981  |   | 11981  |
|       |   | 100.00 |   | 100.00 |

Concomitant medications other than anticoagulants at the time of obtaining Table 2-5 consent, according to the presence or absence of proton-pump inhibitors

FREQ Procedure

|   |       | Cumulative           |                  |        |
|---|-------|----------------------|------------------|--------|
|   |       | Percent of ALL power | Percent of power |        |
| 1 | 11981 | 100.00               | 11981            | 100.00 |

Tables: ALL \* CMYN

ALL

CMYN(Administration of Concomitant Drug)

Power |

Percent |

Percent of rows

Percentage of columns | with | total

|             |        |        |   |
|-------------|--------|--------|---|
| _____       | +      | _____  | + |
| 1           | 11981  | 11981  |   |
|             | 100.00 | 100.00 |   |
|             | 100.00 |        |   |
|             | 100.00 |        |   |
| _____       | +      | _____  | + |
| Total 11981 | 11981  |        |   |
|             | 100.00 | 100.00 |   |

Concomitant medications other than anticoagulants at the time of obtaining Table 2-5 consent, according to the presence or absence of proton-pump inhibitors

FREQ Procedure

Tables: ALL\* ARTD

ALL ARTD(Arrhythmic Drugs)

Power |

Percent |

Percent of rows

Percent of columns | None | With | Total

|       | None   | With   | Total  |
|-------|--------|--------|--------|
| 1     | 4835   | 7146   | 11981  |
|       | 40.36  | 59.64  | 100.00 |
|       | 40.36  | 59.64  |        |
|       | 100.00 | 100.00 |        |
| Total | 4835   | 7146   | 11981  |
|       | 40.36  | 59.64  | 100.00 |

Concomitant medications other than anticoagulants at the time of obtaining Table 2-5 consent, according to the presence or absence of proton-pump inhibitors

FREQ Procedure

|   |       | Cumulative           |                  |        |
|---|-------|----------------------|------------------|--------|
|   |       | Percent of ALL power | Percent of power |        |
| 1 | 11981 | 100.00               | 11981            | 100.00 |

Tables: ALL \* CMYN

ALL

CMYN(Administration of Concomitant Drug)

Power |

Percent |

Percent of rows

Percentage of columns | with | total

|             |        |        |   |
|-------------|--------|--------|---|
| _____       | +      | _____  | + |
| 1           | 11981  | 11981  |   |
|             | 100.00 | 100.00 |   |
|             | 100.00 |        |   |
|             | 100.00 |        |   |
| _____       | +      | _____  | + |
| Total 11981 | 11981  |        |   |
|             | 100.00 | 100.00 |   |

Concomitant medications other than anticoagulants at the time of obtaining Table 2-5 consent, according to the presence or absence of proton-pump inhibitors

FREQ Procedure

Tables: ALL\* ARTD

ALL ARTD(Arrhythmic Drugs)

Power |

Percent |

Percent of rows

Percent of columns | None | With | Total

|       | None   | With   | Total  |
|-------|--------|--------|--------|
| 1     | 4835   | 7146   | 11981  |
|       | 40.36  | 59.64  | 100.00 |
|       | 40.36  | 59.64  |        |
|       | 100.00 | 100.00 |        |
| Total | 4835   | 7146   | 11981  |
|       | 40.36  | 59.64  | 100.00 |

Concomitant medications other than anticoagulants at the time of obtaining Table 2-5 consent, according to the presence or absence of proton-pump inhibitors

FREQ Procedure

|   |       | Cumulative           |                  |        |
|---|-------|----------------------|------------------|--------|
|   |       | Percent of ALL power | Percent of power |        |
| 1 | 11981 | 100.00               | 11981            | 100.00 |

Tables: ALL \* CMYN

ALL

CMYN(Administration of Concomitant Drug)

Power |

Percent |

Percent of rows

Percentage of columns | with | total

|             |        |        |   |
|-------------|--------|--------|---|
| _____       | +      | _____  | + |
| 1           | 11981  | 11981  |   |
|             | 100.00 | 100.00 |   |
|             | 100.00 |        |   |
|             | 100.00 |        |   |
| _____       | +      | _____  | + |
| Total 11981 |        | 11981  |   |
|             | 100.00 | 100.00 |   |



Concomitant medications other than anticoagulants at the time of obtaining Table 2-5 consent, according to the presence or absence of proton-pump inhibitors

FREQ Procedure

Table : ALL \* ARTD1

ALL ARTD1(Rhythm Control)

Power |

Percent |

Percent of rows

Percent of columns | None | With | Total

|       | None   | With   | Total  |
|-------|--------|--------|--------|
| 1     | 9496   | 2485   | 11981  |
|       | 79.26  | 20.74  | 100.00 |
|       | 79.26  | 20.74  |        |
|       | 100.00 | 100.00 |        |
| Total | 9496   | 2485   | 11981  |
|       | 79.26  | 20.74  | 100.00 |

Concomitant medications other than anticoagulants at the time of obtaining Table 2-5 consent, according to the presence or absence of proton-pump inhibitors

FREQ Procedure

|                      |       | Cumulative       |       |        |
|----------------------|-------|------------------|-------|--------|
| Percent of ALL power |       | Percent of power |       |        |
| 1                    | 11981 | 100.00           | 11981 | 100.00 |

Tables: ALL \* CMYN

ALL

CMYN(Administration of Concomitant Drug)

Power |

Percent |

Percent of rows

Percentage of columns | with | total

|             |        |        |   |
|-------------|--------|--------|---|
| _____       | +      | _____  | + |
| 1           | 11981  | 11981  |   |
|             | 100.00 | 100.00 |   |
|             | 100.00 |        |   |
|             | 100.00 |        |   |
| _____       | +      | _____  | + |
| Total 11981 | 11981  |        |   |
|             | 100.00 | 100.00 |   |

Concomitant medications other than anticoagulants at the time of obtaining Table 2-5 consent, according to the presence or absence of proton-pump inhibitors

FREQ Procedure

Table : ALL \* ARTD1

ALL ARTD1(Rhythm Control)

Power |

Percent |

Percent of rows

Percent of columns | None | With | Total

|       | None   | With   | Total  |
|-------|--------|--------|--------|
| 1     | 9496   | 2485   | 11981  |
|       | 79.26  | 20.74  | 100.00 |
|       | 79.26  | 20.74  |        |
|       | 100.00 | 100.00 |        |
| Total | 9496   | 2485   | 11981  |
|       | 79.26  | 20.74  | 100.00 |

Concomitant medications other than anticoagulants at the time of obtaining Table 2-5 consent, according to the presence or absence of proton-pump inhibitors

FREQ Procedure

|   |       | Cumulative           |                  |        |
|---|-------|----------------------|------------------|--------|
|   |       | Percent of ALL power | Percent of power |        |
| 1 | 11981 | 100.00               | 11981            | 100.00 |

Tables: ALL \* CMYN

ALL

CMYN(Administration of Concomitant Drug)

| Power                                |  |  |
|--------------------------------------|--|--|
| Percent                              |  |  |
| Percent of rows                      |  |  |
| Percentage of columns   with   total |  |  |
| _____+_____+                         |  |  |
| 1   11981   11981                    |  |  |
| 100.00   100.00                      |  |  |
| 100.00                               |  |  |
| 100.00                               |  |  |
| _____+_____+                         |  |  |
| Total 11981 11981                    |  |  |
| 100.00 100.00                        |  |  |

Concomitant medications other than anticoagulants at the time of obtaining Table 2-5 consent, according to the presence or absence of proton-pump inhibitors

FREQ Procedure

Table : ALL \* ARTD2

ALL ARTD2(Rate Control)

Power |

Percent |

Percent of rows

Percent of columns | None | With | Total

|       | None   | With   | Total  |
|-------|--------|--------|--------|
| 1     | 6708   | 5273   | 11981  |
|       | 55.99  | 44.01  | 100.00 |
|       | 55.99  | 44.01  |        |
|       | 100.00 | 100.00 |        |
| Total | 6708   | 5273   | 11981  |
|       | 55.99  | 44.01  | 100.00 |

Concomitant medications other than anticoagulants at the time of obtaining Table 2-5 consent, according to the presence or absence of proton-pump inhibitors

FREQ Procedure

|                      |       | Cumulative       |       |        |
|----------------------|-------|------------------|-------|--------|
| Percent of ALL power |       | Percent of power |       |        |
| 1                    | 11981 | 100.00           | 11981 | 100.00 |

Tables: ALL \* CMYN

ALL

CMYN(Administration of Concomitant Drug)

Power |

Percent |

Percent of rows

Percentage of columns | with | total

|             |        |        |   |
|-------------|--------|--------|---|
| _____       | +      | _____  | + |
| 1           | 11981  | 11981  |   |
|             | 100.00 | 100.00 |   |
|             | 100.00 |        |   |
|             | 100.00 |        |   |
| _____       | +      | _____  | + |
| Total 11981 | 11981  |        |   |
|             | 100.00 | 100.00 |   |

Concomitant medications other than anticoagulants at the time of obtaining Table 2-5 consent, according to the presence or absence of proton-pump inhibitors

FREQ Procedure

Table : ALL \* ARTD2

ALL ARTD2(Rate Control)

Power |

Percent |

Percent of rows

Percent of columns | None | With | Total

|       | None   | With   | Total  |
|-------|--------|--------|--------|
| 1     | 6708   | 5273   | 11981  |
|       | 55.99  | 44.01  | 100.00 |
|       | 55.99  | 44.01  |        |
|       | 100.00 | 100.00 |        |
| Total | 6708   | 5273   | 11981  |
|       | 55.99  | 44.01  | 100.00 |

Concomitant medications other than anticoagulants at the time of obtaining Table 2-5 consent, according to the presence or absence of proton-pump inhibitors

FREQ Procedure

|                      |       | Cumulative       |       |        |
|----------------------|-------|------------------|-------|--------|
| Percent of ALL power |       | Percent of power |       |        |
| 1                    | 11981 | 100.00           | 11981 | 100.00 |

Tables: ALL \* CMYN

ALL

CMYN(Administration of Concomitant Drug)

Power |

Percent |

Percent of rows

Percentage of columns | with | total

|             |        |        |   |
|-------------|--------|--------|---|
| _____       | +      | _____  | + |
| 1           | 11981  | 11981  |   |
|             | 100.00 | 100.00 |   |
|             | 100.00 |        |   |
|             | 100.00 |        |   |
| _____       | +      | _____  | + |
| Total 11981 |        | 11981  |   |
|             | 100.00 | 100.00 |   |



Concomitant medications other than anticoagulants at the time of obtaining Table 2-5 consent, according to the presence or absence of proton-pump inhibitors

FREQ Procedure

Tables: ALL\* APLD

ALL APLD(Anti-Platelet Drugs)

Power |

Percent |

Percent of rows

Percent of columns | None | With | Total

|       | None   | With   | Total  |
|-------|--------|--------|--------|
| 1     | 8965   | 3016   | 11981  |
|       | 74.83  | 25.17  | 100.00 |
|       | 74.83  | 25.17  |        |
|       | 100.00 | 100.00 |        |
| Total | 8965   | 3016   | 11981  |
|       | 74.83  | 25.17  | 100.00 |

Concomitant medications other than anticoagulants at the time of obtaining Table 2-5 consent, according to the presence or absence of proton-pump inhibitors

FREQ Procedure

|                      |       | Cumulative       |       |        |
|----------------------|-------|------------------|-------|--------|
| Percent of ALL power |       | Percent of power |       |        |
| 1                    | 11981 | 100.00           | 11981 | 100.00 |

Tables: ALL \* CMYN

ALL

CMYN(Administration of Concomitant Drug)

Power |

Percent |

Percent of rows

Percentage of columns | with | total

|             |        |        |   |
|-------------|--------|--------|---|
| _____       | +      | _____  | + |
| 1           | 11981  | 11981  |   |
|             | 100.00 | 100.00 |   |
|             | 100.00 |        |   |
|             | 100.00 |        |   |
| _____       | +      | _____  | + |
| Total 11981 | 11981  |        |   |
|             | 100.00 | 100.00 |   |

Concomitant medications other than anticoagulants at the time of obtaining Table 2-5 consent, according to the presence or absence of proton-pump inhibitors

FREQ Procedure

Tables: ALL\* APLD

ALL APLD(Anti-Platelet Drugs)

Power |

Percent |

Percent of rows

Percent of columns | None | With | Total

|       | None   | With   | Total  |
|-------|--------|--------|--------|
| 1     | 8965   | 3016   | 11981  |
|       | 74.83  | 25.17  | 100.00 |
|       | 74.83  | 25.17  |        |
|       | 100.00 | 100.00 |        |
| Total | 8965   | 3016   | 11981  |
|       | 74.83  | 25.17  | 100.00 |

Concomitant medications other than anticoagulants at the time of obtaining Table 2-5 consent, according to the presence or absence of proton-pump inhibitors

FREQ Procedure

|                      |       | Cumulative       |       |        |
|----------------------|-------|------------------|-------|--------|
| Percent of ALL power |       | Percent of power |       |        |
| 1                    | 11981 | 100.00           | 11981 | 100.00 |

Tables: ALL \* CMYN

ALL

CMYN(Administration of Concomitant Drug)

Power |

Percent |

Percent of rows

Percentage of columns | with | total

|             |        |        |   |
|-------------|--------|--------|---|
| _____       | +      | _____  | + |
| 1           | 11981  | 11981  |   |
|             | 100.00 | 100.00 |   |
|             | 100.00 |        |   |
|             | 100.00 |        |   |
| _____       | +      | _____  | + |
| Total 11981 | 11981  |        |   |
|             | 100.00 | 100.00 |   |

Concomitant medications other than anticoagulants at the time of obtaining Table 2-5 consent, according to the presence or absence of proton-pump inhibitors

FREQ Procedure

Table: ALL \* t\_AP

ALL t\_AP

Power |

Percent |

Percent of rows

Percentage of columns | 0 | 1 | Sum

|       | 0      | 1      | Sum    |
|-------|--------|--------|--------|
| 1     | 11824  | 157    | 11981  |
|       | 98.69  | 1.31   | 100.00 |
|       | 98.69  | 1.31   |        |
|       | 100.00 | 100.00 |        |
| Total | 11824  | 157    | 11981  |
|       | 98.69  | 1.31   | 100.00 |

Concomitant medications other than anticoagulants at the time of obtaining Table 2-5 consent, according to the presence or absence of proton-pump inhibitors

FREQ Procedure

|                      |       | Cumulative       |       |        |
|----------------------|-------|------------------|-------|--------|
| Percent of ALL power |       | Percent of power |       |        |
| 1                    | 11981 | 100.00           | 11981 | 100.00 |

Tables: ALL \* CMYN

ALL

CMYN(Administration of Concomitant Drug)

Power |

Percent |

Percent of rows

Percentage of columns | with | total

|             |        |        |   |
|-------------|--------|--------|---|
| _____       | +      | _____  | + |
| 1           | 11981  | 11981  |   |
|             | 100.00 | 100.00 |   |
|             | 100.00 |        |   |
|             | 100.00 |        |   |
| _____       | +      | _____  | + |
| Total 11981 | 11981  |        |   |
|             | 100.00 | 100.00 |   |

Concomitant medications other than anticoagulants at the time of obtaining Table 2-5 consent, according to the presence or absence of proton-pump inhibitors

FREQ Procedure

Table: ALL \* t\_AP

ALL t\_AP

Power |

Percent |

Percent of rows

Percentage of columns | 0| 1| Sum

|       | 0      | 1      | Sum    |
|-------|--------|--------|--------|
| 1     | 11824  | 157    | 11981  |
|       | 98.69  | 1.31   | 100.00 |
|       | 98.69  | 1.31   |        |
|       | 100.00 | 100.00 |        |
| Total | 11824  | 157    | 11981  |
|       | 98.69  | 1.31   | 100.00 |

Concomitant medications other than anticoagulants at the time of obtaining Table 2-5 consent, according to the presence or absence of proton-pump inhibitors

FREQ Procedure

|                      |       | Cumulative       |       |        |
|----------------------|-------|------------------|-------|--------|
| Percent of ALL power |       | Percent of power |       |        |
| 1                    | 11981 | 100.00           | 11981 | 100.00 |

Tables: ALL \* CMYN

ALL

CMYN(Administration of Concomitant Drug)

Power |

Percent |

Percent of rows

Percentage of columns | with | total

|             |        |        |   |
|-------------|--------|--------|---|
|             | +      |        | + |
| 1           | 11981  | 11981  |   |
|             | 100.00 | 100.00 |   |
|             | 100.00 |        |   |
|             | 100.00 |        |   |
|             | +      |        | + |
| Total 11981 | 11981  |        |   |
|             | 100.00 | 100.00 |   |



Concomitant medications other than anticoagulants at the time of obtaining Table 2-5 consent, according to the presence or absence of proton-pump inhibitors

FREQ Procedure

Table : ALL \* APLD1

ALL APLD1(ASA)

Power |

Percent |

Percent of rows

Percent of columns | None | With | Total

|       | None   | With   | Total  |
|-------|--------|--------|--------|
| 1     | 10026  | 1955   | 11981  |
|       | 83.68  | 16.32  | 100.00 |
|       | 83.68  | 16.32  |        |
|       | 100.00 | 100.00 |        |
| Total | 10026  | 1955   | 11981  |
|       | 83.68  | 16.32  | 100.00 |

Concomitant medications other than anticoagulants at the time of obtaining Table 2-5 consent, according to the presence or absence of proton-pump inhibitors

FREQ Procedure

|   |       | Cumulative           |                  |        |
|---|-------|----------------------|------------------|--------|
|   |       | Percent of ALL power | Percent of power |        |
| 1 | 11981 | 100.00               | 11981            | 100.00 |

Tables: ALL \* CMYN

ALL

CMYN(Administration of Concomitant Drug)

Power |

Percent |

Percent of rows

Percentage of columns | with | total

|             |        |        |   |
|-------------|--------|--------|---|
| _____       | +      | _____  | + |
| 1           | 11981  | 11981  |   |
|             | 100.00 | 100.00 |   |
|             | 100.00 |        |   |
|             | 100.00 |        |   |
| _____       | +      | _____  | + |
| Total 11981 | 11981  |        |   |
|             | 100.00 | 100.00 |   |

Concomitant medications other than anticoagulants at the time of obtaining Table 2-5 consent, according to the presence or absence of proton-pump inhibitors

FREQ Procedure

Table : ALL \* APLD1

ALL APLD1(ASA)

Power |

Percent |

Percent of rows

Percent of columns | None | With | Total

|       | None   | With   | Total  |
|-------|--------|--------|--------|
| 1     | 10026  | 1955   | 11981  |
|       | 83.68  | 16.32  | 100.00 |
|       | 83.68  | 16.32  |        |
|       | 100.00 | 100.00 |        |
| Total | 10026  | 1955   | 11981  |
|       | 83.68  | 16.32  | 100.00 |

Concomitant medications other than anticoagulants at the time of obtaining Table 2-5 consent, according to the presence or absence of proton-pump inhibitors

FREQ Procedure

|   |       | Cumulative           |                  |        |
|---|-------|----------------------|------------------|--------|
|   |       | Percent of ALL power | Percent of power |        |
| 1 | 11981 | 100.00               | 11981            | 100.00 |

Tables: ALL \* CMYN

ALL

CMYN(Administration of Concomitant Drug)

Power |

Percent |

Percent of rows

Percentage of columns | with | total

|             |        |        |   |
|-------------|--------|--------|---|
| _____       | +      | _____  | + |
| 1           | 11981  | 11981  |   |
|             | 100.00 | 100.00 |   |
|             | 100.00 |        |   |
|             | 100.00 |        |   |
| _____       | +      | _____  | + |
| Total 11981 | 11981  |        |   |
|             | 100.00 | 100.00 |   |

Concomitant medications other than anticoagulants at the time of obtaining Table 2-5 consent, according to the presence or absence of proton-pump inhibitors

FREQ Procedure

Table : ALL \* APLD2

ALL APLD2(P2Y12-I)

Power |

Percent |

Percent of rows

Percent of columns | None | With | Total

|       | None   | With   | Total  |
|-------|--------|--------|--------|
| 1     | 11206  | 775    | 11981  |
|       | 93.53  | 6.47   | 100.00 |
|       | 93.53  | 6.47   |        |
|       | 100.00 | 100.00 |        |
| Total | 11206  | 775    | 11981  |
|       | 93.53  | 6.47   | 100.00 |

Concomitant medications other than anticoagulants at the time of obtaining Table 2-5 consent, according to the presence or absence of proton-pump inhibitors

FREQ Procedure

|                      |       | Cumulative       |       |        |
|----------------------|-------|------------------|-------|--------|
| Percent of ALL power |       | Percent of power |       |        |
| 1                    | 11981 | 100.00           | 11981 | 100.00 |

Tables: ALL \* CMYN

ALL

CMYN(Administration of Concomitant Drug)

|                                      |        |        |  |  |
|--------------------------------------|--------|--------|--|--|
| Power                                |        |        |  |  |
| Percent                              |        |        |  |  |
| Percent of rows                      |        |        |  |  |
| Percentage of columns   with   total |        |        |  |  |
| _____+_____+                         |        |        |  |  |
| 1   11981   11981                    |        |        |  |  |
| 100.00   100.00                      |        |        |  |  |
| 100.00                               |        |        |  |  |
| 100.00                               |        |        |  |  |
| _____+_____+                         |        |        |  |  |
| Total 11981 11981                    | 100.00 | 100.00 |  |  |

Concomitant medications other than anticoagulants at the time of obtaining Table 2-5 consent, according to the presence or absence of proton-pump inhibitors

FREQ Procedure

Table : ALL \* APLD2

ALL APLD2(P2Y12-I)

Power |

Percent |

Percent of rows

Percent of columns | None | With | Total

|       | None   | With   | Total  |
|-------|--------|--------|--------|
| 1     | 11206  | 775    | 11981  |
|       | 93.53  | 6.47   | 100.00 |
|       | 93.53  | 6.47   |        |
|       | 100.00 | 100.00 |        |
| Total | 11206  | 775    | 11981  |
|       | 93.53  | 6.47   | 100.00 |

Concomitant medications other than anticoagulants at the time of obtaining Table 2-5 consent, according to the presence or absence of proton-pump inhibitors

FREQ Procedure

|   |       | Cumulative           |                  |        |
|---|-------|----------------------|------------------|--------|
|   |       | Percent of ALL power | Percent of power |        |
| 1 | 11981 | 100.00               | 11981            | 100.00 |

Tables: ALL \* CMYN

ALL

CMYN(Administration of Concomitant Drug)

Power |

Percent |

Percent of rows

Percentage of columns | with | total

|             |        |        |   |
|-------------|--------|--------|---|
| _____       | +      | _____  | + |
| 1           | 11981  | 11981  |   |
|             | 100.00 | 100.00 |   |
|             | 100.00 |        |   |
|             | 100.00 |        |   |
| _____       | +      | _____  | + |
| Total 11981 | 11981  |        |   |
|             | 100.00 | 100.00 |   |



Concomitant medications other than anticoagulants at the time of obtaining Table 2-5 consent, according to the presence or absence of proton-pump inhibitors

FREQ Procedure

Table : ALL \* APLD3

ALL

APLD3(Other Anti-Platelet Drugs)

Power |

Percent |

Percent of rows

Percent of columns | None | With | Total

|       | None   | With   | Total  |
|-------|--------|--------|--------|
| 1     | 11421  | 560    | 11981  |
|       | 95.33  | 4.67   | 100.00 |
|       | 95.33  | 4.67   |        |
|       | 100.00 | 100.00 |        |
| Total | 11421  | 560    | 11981  |
|       | 95.33  | 4.67   | 100.00 |

Concomitant medications other than anticoagulants at the time of obtaining Table 2-5 consent, according to the presence or absence of proton-pump inhibitors

FREQ Procedure

|                      |       | Cumulative       |       |        |
|----------------------|-------|------------------|-------|--------|
| Percent of ALL power |       | Percent of power |       |        |
| 1                    | 11981 | 100.00           | 11981 | 100.00 |

Tables: ALL \* CMYN

ALL

CMYN(Administration of Concomitant Drug)

Power |

Percent |

Percent of rows

Percentage of columns | with | total

|             |        |        |   |
|-------------|--------|--------|---|
| _____       | +      | _____  | + |
| 1           | 11981  | 11981  |   |
|             | 100.00 | 100.00 |   |
|             | 100.00 |        |   |
|             | 100.00 |        |   |
| _____       | +      | _____  | + |
| Total 11981 | 11981  |        |   |
|             | 100.00 | 100.00 |   |

Concomitant medications other than anticoagulants at the time of obtaining Table 2-5 consent, according to the presence or absence of proton-pump inhibitors

FREQ Procedure

Table : ALL \* APLD3

ALL

APLD3(Other Anti-Platelet Drugs)

Power |

Percent |

Percent of rows

Percent of columns | None | With | Total

|       | None   | With   | Total  |
|-------|--------|--------|--------|
| 1     | 11421  | 560    | 11981  |
|       | 95.33  | 4.67   | 100.00 |
|       | 95.33  | 4.67   |        |
|       | 100.00 | 100.00 |        |
| Total | 11421  | 560    | 11981  |
|       | 95.33  | 4.67   | 100.00 |

Concomitant medications other than anticoagulants at the time of obtaining Table 2-5 consent, according to the presence or absence of proton-pump inhibitors

FREQ Procedure

|   |       | Cumulative           |                  |        |
|---|-------|----------------------|------------------|--------|
|   |       | Percent of ALL power | Percent of power |        |
| 1 | 11981 | 100.00               | 11981            | 100.00 |

Tables: ALL \* CMYN

ALL

CMYN(Administration of Concomitant Drug)

Power |

Percent |

Percent of rows

Percentage of columns | with | total

|             |        |        |   |
|-------------|--------|--------|---|
| _____       | +      | _____  | + |
| 1           | 11981  | 11981  |   |
|             | 100.00 | 100.00 |   |
|             | 100.00 |        |   |
|             | 100.00 |        |   |
| _____       | +      | _____  | + |
| Total 11981 |        | 11981  |   |
|             | 100.00 | 100.00 |   |

Concomitant medications other than anticoagulants at the time of obtaining Table 2-5 consent, according to the presence or absence of proton-pump inhibitors

FREQ Procedure

Tables: ALL \* AHPD

ALL

AHPD(Antihypertensive Drugs)

Power |

Percent |

Percent of rows

Percent of columns | None | With | Total

|       | +      | +      | +      |
|-------|--------|--------|--------|
| 1     | 3096   | 8885   | 11981  |
|       | 25.84  | 74.16  | 100.00 |
|       | 25.84  | 74.16  |        |
|       | 100.00 | 100.00 |        |
|       | +      | +      | +      |
| Total | 3096   | 8885   | 11981  |
|       | 25.84  | 74.16  | 100.00 |

Concomitant medications other than anticoagulants at the time of obtaining Table 2-5 consent, according to the presence or absence of proton-pump inhibitors

FREQ Procedure

|                      |       | Cumulative       |       |        |
|----------------------|-------|------------------|-------|--------|
| Percent of ALL power |       | Percent of power |       |        |
| 1                    | 11981 | 100.00           | 11981 | 100.00 |

Tables: ALL \* CMYN

ALL

CMYN(Administration of Concomitant Drug)

Power |

Percent |

Percent of rows

Percentage of columns | with | total

|             |        |        |   |
|-------------|--------|--------|---|
| _____       | +      | _____  | + |
| 1           | 11981  | 11981  |   |
|             | 100.00 | 100.00 |   |
|             | 100.00 |        |   |
|             | 100.00 |        |   |
| _____       | +      | _____  | + |
| Total 11981 | 11981  |        |   |
|             | 100.00 | 100.00 |   |

Concomitant medications other than anticoagulants at the time of obtaining Table 2-5 consent, according to the presence or absence of proton-pump inhibitors

FREQ Procedure

Tables: ALL \* AHPD

ALL

AHPD(Antihypertensive Drugs)

Power |

Percent |

Percent of rows

Percent of columns | None | With | Total

|       | +      | +      | +      |
|-------|--------|--------|--------|
| 1     | 3096   | 8885   | 11981  |
|       | 25.84  | 74.16  | 100.00 |
|       | 25.84  | 74.16  |        |
|       | 100.00 | 100.00 |        |
|       | +      | +      | +      |
| Total | 3096   | 8885   | 11981  |
|       | 25.84  | 74.16  | 100.00 |

Concomitant medications other than anticoagulants at the time of obtaining Table 2-5 consent, according to the presence or absence of proton-pump inhibitors

FREQ Procedure

|                      |       | Cumulative       |       |        |
|----------------------|-------|------------------|-------|--------|
| Percent of ALL power |       | Percent of power |       |        |
| 1                    | 11981 | 100.00           | 11981 | 100.00 |

Tables: ALL \* CMYN

ALL

CMYN(Administration of Concomitant Drug)

Power |

Percent |

Percent of rows

Percentage of columns | with | total

|             |        |        |   |
|-------------|--------|--------|---|
|             | +      |        | + |
| 1           | 11981  | 11981  |   |
|             | 100.00 | 100.00 |   |
|             | 100.00 |        |   |
|             | 100.00 |        |   |
|             | +      |        | + |
| Total 11981 | 11981  |        |   |
|             | 100.00 | 100.00 |   |



Concomitant medications other than anticoagulants at the time of obtaining Table 2-5 consent, according to the presence or absence of proton-pump inhibitors

FREQ Procedure

Table: ALL \* LTD

ALL LTD(Lipid Therapy)

Power |

Percent |

Percent of rows

Percent of columns | None | With | Total

|       | None   | With   | Total  |
|-------|--------|--------|--------|
| 1     | 6650   | 5331   | 11981  |
|       | 55.50  | 44.50  | 100.00 |
|       | 55.50  | 44.50  |        |
|       | 100.00 | 100.00 |        |
| Total | 6650   | 5331   | 11981  |
|       | 55.50  | 44.50  | 100.00 |

Concomitant medications other than anticoagulants at the time of obtaining Table 2-5 consent, according to the presence or absence of proton-pump inhibitors

FREQ Procedure

|                      |       | Cumulative       |       |        |
|----------------------|-------|------------------|-------|--------|
| Percent of ALL power |       | Percent of power |       |        |
| 1                    | 11981 | 100.00           | 11981 | 100.00 |

Tables: ALL \* CMYN

ALL

CMYN(Administration of Concomitant Drug)

Power |

Percent |

Percent of rows

Percentage of columns | with | total

|             |        |        |   |
|-------------|--------|--------|---|
| _____       | +      | _____  | + |
| 1           | 11981  | 11981  |   |
|             | 100.00 | 100.00 |   |
|             | 100.00 |        |   |
|             | 100.00 |        |   |
| _____       | +      | _____  | + |
| Total 11981 | 11981  |        |   |
|             | 100.00 | 100.00 |   |

Concomitant medications other than anticoagulants at the time of obtaining Table 2-5 consent, according to the presence or absence of proton-pump inhibitors

FREQ Procedure

Table: ALL \* LTD

ALL LTD(Lipid Therapy)

Power |

Percent |

Percent of rows

Percent of columns | None | With | Total

|       | +      | +      | +      |
|-------|--------|--------|--------|
| 1     | 6650   | 5331   | 11981  |
|       | 55.50  | 44.50  | 100.00 |
|       | 55.50  | 44.50  |        |
|       | 100.00 | 100.00 |        |
|       | +      | +      | +      |
| Total | 6650   | 5331   | 11981  |
|       | 55.50  | 44.50  | 100.00 |

Concomitant medications other than anticoagulants at the time of obtaining Table 2-5 consent, according to the presence or absence of proton-pump inhibitors

FREQ Procedure

|                      |       | Cumulative       |       |        |
|----------------------|-------|------------------|-------|--------|
| Percent of ALL power |       | Percent of power |       |        |
| 1                    | 11981 | 100.00           | 11981 | 100.00 |

Tables: ALL \* CMYN

ALL

CMYN(Administration of Concomitant Drug)

Power |

Percent |

Percent of rows

Percentage of columns | with | total

|             |        |        |   |
|-------------|--------|--------|---|
|             | +      |        | + |
| 1           | 11981  | 11981  |   |
|             | 100.00 | 100.00 |   |
|             | 100.00 |        |   |
|             | 100.00 |        |   |
|             | +      |        | + |
| Total 11981 | 11981  |        |   |
|             | 100.00 | 100.00 |   |

Concomitant medications other than anticoagulants at the time of obtaining Table 2-5 consent, according to the presence or absence of proton-pump inhibitors

FREQ Procedure

Table : ALL \* LTD1

ALL LTD1(Statins)

Power |

Percent |

Percent of rows

Percent of columns | None | With | Total

|       | None   | With   | Total  |
|-------|--------|--------|--------|
| 1     | 7179   | 4802   | 11981  |
|       | 59.92  | 40.08  | 100.00 |
|       | 59.92  | 40.08  |        |
|       | 100.00 | 100.00 |        |
| Total | 7179   | 4802   | 11981  |
|       | 59.92  | 40.08  | 100.00 |

Concomitant medications other than anticoagulants at the time of obtaining Table 2-5 consent, according to the presence or absence of proton-pump inhibitors

FREQ Procedure

|   |       | Cumulative           |                  |        |
|---|-------|----------------------|------------------|--------|
|   |       | Percent of ALL power | Percent of power |        |
| 1 | 11981 | 100.00               | 11981            | 100.00 |

Tables: ALL \* CMYN

ALL

CMYN(Administration of Concomitant Drug)

Power |

Percent |

Percent of rows

Percentage of columns | with | total

|             |        |        |   |
|-------------|--------|--------|---|
| _____       | +      | _____  | + |
| 1           | 11981  | 11981  |   |
|             | 100.00 | 100.00 |   |
|             | 100.00 |        |   |
|             | 100.00 |        |   |
| _____       | +      | _____  | + |
| Total 11981 |        | 11981  |   |
|             | 100.00 | 100.00 |   |

Concomitant medications other than anticoagulants at the time of obtaining Table 2-5 consent, according to the presence or absence of proton-pump inhibitors

FREQ Procedure

Table : ALL \* LTD1

ALL LTD1(Statins)

Power |

Percent |

Percent of rows

Percent of columns | None | With | Total

|       | None   | With   | Total  |
|-------|--------|--------|--------|
| 1     | 7179   | 4802   | 11981  |
|       | 59.92  | 40.08  | 100.00 |
|       | 59.92  | 40.08  |        |
|       | 100.00 | 100.00 |        |
| Total | 7179   | 4802   | 11981  |
|       | 59.92  | 40.08  | 100.00 |

Concomitant medications other than anticoagulants at the time of obtaining Table 2-5 consent, according to the presence or absence of proton-pump inhibitors

FREQ Procedure

|                      |       | Cumulative       |       |        |
|----------------------|-------|------------------|-------|--------|
| Percent of ALL power |       | Percent of power |       |        |
| 1                    | 11981 | 100.00           | 11981 | 100.00 |

Tables: ALL \* CMYN

ALL

CMYN(Administration of Concomitant Drug)

Power |

Percent |

Percent of rows

Percentage of columns | with | total

|             |        |        |   |
|-------------|--------|--------|---|
| _____       | +      | _____  | + |
| 1           | 11981  | 11981  |   |
|             | 100.00 | 100.00 |   |
|             | 100.00 |        |   |
|             | 100.00 |        |   |
| _____       | +      | _____  | + |
| Total 11981 | 11981  |        |   |
|             | 100.00 | 100.00 |   |



Concomitant medications other than anticoagulants at the time of obtaining Table 2-5 consent, according to the presence or absence of proton-pump inhibitors

FREQ Procedure

Table : ALL \* LTD2

ALL LTD2(Other Than Statins)

Power |

Percent |

Percent of rows

Percent of columns | None | With | Total

|       | +      | +      | +      |
|-------|--------|--------|--------|
| 1     | 11227  | 754    | 11981  |
|       | 93.71  | 6.29   | 100.00 |
|       | 93.71  | 6.29   |        |
|       | 100.00 | 100.00 |        |
|       | +      | +      | +      |
| Total | 11227  | 754    | 11981  |
|       | 93.71  | 6.29   | 100.00 |

Concomitant medications other than anticoagulants at the time of obtaining Table 2-5 consent, according to the presence or absence of proton-pump inhibitors

FREQ Procedure

|                      |       | Cumulative       |       |        |
|----------------------|-------|------------------|-------|--------|
| Percent of ALL power |       | Percent of power |       |        |
| 1                    | 11981 | 100.00           | 11981 | 100.00 |

Tables: ALL \* CMYN

ALL

CMYN(Administration of Concomitant Drug)

Power |

Percent |

Percent of rows

Percentage of columns | with | total

|             |        |        |   |
|-------------|--------|--------|---|
| _____       | +      | _____  | + |
| 1           | 11981  | 11981  |   |
|             | 100.00 | 100.00 |   |
|             | 100.00 |        |   |
|             | 100.00 |        |   |
| _____       | +      | _____  | + |
| Total 11981 | 11981  |        |   |
|             | 100.00 | 100.00 |   |

Concomitant medications other than anticoagulants at the time of obtaining Table 2-5 consent, according to the presence or absence of proton-pump inhibitors

FREQ Procedure

Table : ALL \* LTD2

ALL LTD2(Other Than Statins)

Power |

Percent |

Percent of rows

Percent of columns | None | With | Total

|       | +      | +      | +      |
|-------|--------|--------|--------|
| 1     | 11227  | 754    | 11981  |
|       | 93.71  | 6.29   | 100.00 |
|       | 93.71  | 6.29   |        |
|       | 100.00 | 100.00 |        |
|       | +      | +      | +      |
| Total | 11227  | 754    | 11981  |
|       | 93.71  | 6.29   | 100.00 |

Concomitant medications other than anticoagulants at the time of obtaining Table 2-5 consent, according to the presence or absence of proton-pump inhibitors

FREQ Procedure

|                      |       | Cumulative       |       |        |
|----------------------|-------|------------------|-------|--------|
| Percent of ALL power |       | Percent of power |       |        |
| 1                    | 11981 | 100.00           | 11981 | 100.00 |

Tables: ALL \* CMYN

ALL

CMYN(Administration of Concomitant Drug)

Power |

Percent |

Percent of rows

Percentage of columns | with | total

|             |        |        |   |
|-------------|--------|--------|---|
| _____       | +      | _____  | + |
| 1           | 11981  | 11981  |   |
|             | 100.00 | 100.00 |   |
|             | 100.00 |        |   |
|             | 100.00 |        |   |
| _____       | +      | _____  | + |
| Total 11981 | 11981  |        |   |
|             | 100.00 | 100.00 |   |

Concomitant medications other than anticoagulants at the time of obtaining Table 2-5 consent, according to the presence or absence of proton-pump inhibitors

FREQ Procedure

Tables: ALL \* DBTD

ALL DBTD(Diabetes Drugs)

Power |

Percent |

Percent of rows

Percent of columns | None | With | Total

|       | +      | +      | +      |
|-------|--------|--------|--------|
| 1     | 9802   | 2179   | 11981  |
|       | 81.81  | 18.19  | 100.00 |
|       | 81.81  | 18.19  |        |
|       | 100.00 | 100.00 |        |
|       | +      | +      | +      |
| Total | 9802   | 2179   | 11981  |
|       | 81.81  | 18.19  | 100.00 |

Concomitant medications other than anticoagulants at the time of obtaining Table 2-5 consent, according to the presence or absence of proton-pump inhibitors

FREQ Procedure

|                      |       | Cumulative       |       |        |
|----------------------|-------|------------------|-------|--------|
| Percent of ALL power |       | Percent of power |       |        |
| 1                    | 11981 | 100.00           | 11981 | 100.00 |

Tables: ALL \* CMYN

ALL

CMYN(Administration of Concomitant Drug)

Power |

Percent |

Percent of rows

Percentage of columns | with | total

|             |        |        |   |
|-------------|--------|--------|---|
| _____       | +      | _____  | + |
| 1           | 11981  | 11981  |   |
|             | 100.00 | 100.00 |   |
|             | 100.00 |        |   |
|             | 100.00 |        |   |
| _____       | +      | _____  | + |
| Total 11981 |        | 11981  |   |
|             | 100.00 | 100.00 |   |

Concomitant medications other than anticoagulants at the time of obtaining Table 2-5 consent, according to the presence or absence of proton-pump inhibitors

FREQ Procedure

Tables: ALL \* DBTD

ALL DBTD(Diabetes Drugs)

Power |

Percent |

Percent of rows

Percent of columns | None | With | Total

|       | +      | +      | +      |
|-------|--------|--------|--------|
| 1     | 9802   | 2179   | 11981  |
|       | 81.81  | 18.19  | 100.00 |
|       | 81.81  | 18.19  |        |
|       | 100.00 | 100.00 |        |
|       | +      | +      | +      |
| Total | 9802   | 2179   | 11981  |
|       | 81.81  | 18.19  | 100.00 |

Concomitant medications other than anticoagulants at the time of obtaining Table 2-5 consent, according to the presence or absence of proton-pump inhibitors

FREQ Procedure

|   |       | Cumulative           |                  |        |
|---|-------|----------------------|------------------|--------|
|   |       | Percent of ALL power | Percent of power |        |
| 1 | 11981 | 100.00               | 11981            | 100.00 |

Tables: ALL \* CMYN

ALL

CMYN(Administration of Concomitant Drug)

Power |

Percent |

Percent of rows

Percentage of columns | with | total

|             |        |        |   |
|-------------|--------|--------|---|
| _____       | +      | _____  | + |
| 1           | 11981  | 11981  |   |
|             | 100.00 | 100.00 |   |
|             | 100.00 |        |   |
|             | 100.00 |        |   |
| _____       | +      | _____  | + |
| Total 11981 | 11981  |        |   |
|             | 100.00 | 100.00 |   |



Concomitant medications other than anticoagulants at the time of obtaining Table 2-5 consent, according to the presence or absence of proton-pump inhibitors

FREQ Procedure

Table: ALL \* t\_DBT

ALL t\_DBT

Power |

Percent |

Percent of rows

Percentage of columns | 0| 1| Sum

|       | 0      | 1      | Sum    |
|-------|--------|--------|--------|
| 1     | 9919   | 2062   | 11981  |
|       | 82.79  | 17.21  | 100.00 |
|       | 82.79  | 17.21  |        |
|       | 100.00 | 100.00 |        |
| Total | 9919   | 2062   | 11981  |
|       | 82.79  | 17.21  | 100.00 |

Concomitant medications other than anticoagulants at the time of obtaining Table 2-5 consent, according to the presence or absence of proton-pump inhibitors

FREQ Procedure

|                      |       | Cumulative       |       |        |
|----------------------|-------|------------------|-------|--------|
| Percent of ALL power |       | Percent of power |       |        |
| 1                    | 11981 | 100.00           | 11981 | 100.00 |

Tables: ALL \* CMYN

ALL

CMYN(Administration of Concomitant Drug)

Power |

Percent |

Percent of rows

Percentage of columns | with | total

|             |        |        |   |
|-------------|--------|--------|---|
| _____       | +      | _____  | + |
| 1           | 11981  | 11981  |   |
|             | 100.00 | 100.00 |   |
|             | 100.00 |        |   |
|             | 100.00 |        |   |
| _____       | +      | _____  | + |
| Total 11981 | 11981  |        |   |
|             | 100.00 | 100.00 |   |

Concomitant medications other than anticoagulants at the time of obtaining Table 2-5 consent, according to the presence or absence of proton-pump inhibitors

FREQ Procedure

Table: ALL \* t\_DBT

ALL t\_DBT

Power |

Percent |

Percent of rows

Percentage of columns | 0| 1| Sum

|       | 0      | 1      | Sum    |
|-------|--------|--------|--------|
| 1     | 9919   | 2062   | 11981  |
|       | 82.79  | 17.21  | 100.00 |
|       | 82.79  | 17.21  |        |
|       | 100.00 | 100.00 |        |
| Total | 9919   | 2062   | 11981  |
|       | 82.79  | 17.21  | 100.00 |

Concomitant medications other than anticoagulants at the time of obtaining Table 2-5 consent, according to the presence or absence of proton-pump inhibitors

FREQ Procedure

|   |       | Cumulative           |                  |        |
|---|-------|----------------------|------------------|--------|
|   |       | Percent of ALL power | Percent of power |        |
| 1 | 11981 | 100.00               | 11981            | 100.00 |

Tables: ALL \* CMYN

ALL

CMYN(Administration of Concomitant Drug)

Power |

Percent |

Percent of rows

Percentage of columns | with | total

|             |        |        |   |
|-------------|--------|--------|---|
| _____       | +      | _____  | + |
| 1           | 11981  | 11981  |   |
|             | 100.00 | 100.00 |   |
|             | 100.00 |        |   |
|             | 100.00 |        |   |
| _____       | +      | _____  | + |
| Total 11981 |        | 11981  |   |
|             | 100.00 | 100.00 |   |

Concomitant medications other than anticoagulants at the time of obtaining Table 2-5 consent, according to the presence or absence of proton-pump inhibitors

FREQ Procedure

Table : ALL \* DBTD1

ALL DBTD1(Sulfonylurea Drugs)

Power |

Percent |

Percent of rows

Percent of columns | None | With | Total

|       | None   | With   | Total  |
|-------|--------|--------|--------|
| 1     | 11508  | 473    | 11981  |
|       | 96.05  | 3.95   | 100.00 |
|       | 96.05  | 3.95   |        |
|       | 100.00 | 100.00 |        |
| Total | 11508  | 473    | 11981  |
|       | 96.05  | 3.95   | 100.00 |

Concomitant medications other than anticoagulants at the time of obtaining Table 2-5 consent, according to the presence or absence of proton-pump inhibitors

FREQ Procedure

|                      |       | Cumulative       |       |        |
|----------------------|-------|------------------|-------|--------|
| Percent of ALL power |       | Percent of power |       |        |
| 1                    | 11981 | 100.00           | 11981 | 100.00 |

Tables: ALL \* CMYN

ALL

CMYN(Administration of Concomitant Drug)

Power |

Percent |

Percent of rows

Percentage of columns | with | total

|             |        |        |   |
|-------------|--------|--------|---|
| _____       | +      | _____  | + |
| 1           | 11981  | 11981  |   |
|             | 100.00 | 100.00 |   |
|             | 100.00 |        |   |
|             | 100.00 |        |   |
| _____       | +      | _____  | + |
| Total 11981 | 11981  |        |   |
|             | 100.00 | 100.00 |   |

Concomitant medications other than anticoagulants at the time of obtaining Table 2-5 consent, according to the presence or absence of proton-pump inhibitors

FREQ Procedure

Table : ALL \* DBTD1

ALL DBTD1(Sulfonylurea Drugs)

Power |

Percent |

Percent of rows

Percent of columns | None | With | Total

|       | None   | With   | Total  |
|-------|--------|--------|--------|
| 1     | 11508  | 473    | 11981  |
|       | 96.05  | 3.95   | 100.00 |
|       | 96.05  | 3.95   |        |
|       | 100.00 | 100.00 |        |
| Total | 11508  | 473    | 11981  |
|       | 96.05  | 3.95   | 100.00 |

Concomitant medications other than anticoagulants at the time of obtaining Table 2-5 consent, according to the presence or absence of proton-pump inhibitors

FREQ Procedure

|                      |       | Cumulative       |       |        |
|----------------------|-------|------------------|-------|--------|
| Percent of ALL power |       | Percent of power |       |        |
| 1                    | 11981 | 100.00           | 11981 | 100.00 |

Tables: ALL \* CMYN

ALL

CMYN(Administration of Concomitant Drug)

Power |

Percent |

Percent of rows

Percentage of columns | with | total

|             |        |        |   |
|-------------|--------|--------|---|
| _____       | +      | _____  | + |
| 1           | 11981  | 11981  |   |
|             | 100.00 | 100.00 |   |
|             | 100.00 |        |   |
|             | 100.00 |        |   |
| _____       | +      | _____  | + |
| Total 11981 | 11981  |        |   |
|             | 100.00 | 100.00 |   |



Concomitant medications other than anticoagulants at the time of obtaining Table 2-5 consent, according to the presence or absence of proton-pump inhibitors

FREQ Procedure

Table : ALL \* DBTD2

ALL

DBTD2( $\alpha$ -Glucosidase Inhibitor)

Power |

Percent |

Percent of rows

Percent of columns | None | With | Total

|       | None   | With   | Total  |
|-------|--------|--------|--------|
| 1     | 11592  | 389    | 11981  |
|       | 96.75  | 3.25   | 100.00 |
|       | 96.75  | 3.25   |        |
|       | 100.00 | 100.00 |        |
| Total | 11592  | 389    | 11981  |
|       | 96.75  | 3.25   | 100.00 |

Concomitant medications other than anticoagulants at the time of obtaining Table 2-5 consent, according to the presence or absence of proton-pump inhibitors

FREQ Procedure

|                      |       | Cumulative       |       |        |
|----------------------|-------|------------------|-------|--------|
| Percent of ALL power |       | Percent of power |       |        |
| 1                    | 11981 | 100.00           | 11981 | 100.00 |

Tables: ALL \* CMYN

ALL

CMYN(Administration of Concomitant Drug)

Power |

Percent |

Percent of rows

Percentage of columns | with | total

|             |        |        |   |
|-------------|--------|--------|---|
| _____       | +      | _____  | + |
| 1           | 11981  | 11981  |   |
|             | 100.00 | 100.00 |   |
|             | 100.00 |        |   |
|             | 100.00 |        |   |
| _____       | +      | _____  | + |
| Total 11981 | 11981  |        |   |
|             | 100.00 | 100.00 |   |

Concomitant medications other than anticoagulants at the time of obtaining Table 2-5 consent, according to the presence or absence of proton-pump inhibitors

FREQ Procedure

Table : ALL \* DBTD2

ALL

DBTD2( $\alpha$ -Glucosidase Inhibitor)

Power |

Percent |

Percent of rows

Percent of columns | None | With | Total

|       | +      | +      | +      |
|-------|--------|--------|--------|
| 1     | 11592  | 389    | 11981  |
|       | 96.75  | 3.25   | 100.00 |
|       | 96.75  | 3.25   |        |
|       | 100.00 | 100.00 |        |
|       | +      | +      | +      |
| Total | 11592  | 389    | 11981  |
|       | 96.75  | 3.25   | 100.00 |

Concomitant medications other than anticoagulants at the time of obtaining Table 2-5 consent, according to the presence or absence of proton-pump inhibitors

FREQ Procedure

|                      |       | Cumulative       |       |        |
|----------------------|-------|------------------|-------|--------|
| Percent of ALL power |       | Percent of power |       |        |
| 1                    | 11981 | 100.00           | 11981 | 100.00 |

Tables: ALL \* CMYN

ALL

CMYN(Administration of Concomitant Drug)

Power |

Percent |

Percent of rows

Percentage of columns | with | total

|             |        |        |   |
|-------------|--------|--------|---|
| _____       | +      | _____  | + |
| 1           | 11981  | 11981  |   |
|             | 100.00 | 100.00 |   |
|             | 100.00 |        |   |
|             | 100.00 |        |   |
| _____       | +      | _____  | + |
| Total 11981 | 11981  |        |   |
|             | 100.00 | 100.00 |   |

Concomitant medications other than anticoagulants at the time of obtaining Table 2-5 consent, according to the presence or absence of proton-pump inhibitors

FREQ Procedure

Table : ALL \* DBTD3

ALL DBTD3(Thiazolidine)

Power |

Percent |

Percent of rows

Percent of columns | None | With | Total

|       | None   | With   | Total  |
|-------|--------|--------|--------|
| 1     | 11856  | 125    | 11981  |
|       | 98.96  | 1.04   | 100.00 |
|       | 98.96  | 1.04   |        |
|       | 100.00 | 100.00 |        |
| Total | 11856  | 125    | 11981  |
|       | 98.96  | 1.04   | 100.00 |

Concomitant medications other than anticoagulants at the time of obtaining Table 2-5 consent, according to the presence or absence of proton-pump inhibitors

FREQ Procedure

|                      |       | Cumulative       |       |        |
|----------------------|-------|------------------|-------|--------|
| Percent of ALL power |       | Percent of power |       |        |
| 1                    | 11981 | 100.00           | 11981 | 100.00 |

Tables: ALL \* CMYN

ALL

CMYN(Administration of Concomitant Drug)

Power |

Percent |

Percent of rows

Percentage of columns | with | total

|             |        |        |   |
|-------------|--------|--------|---|
| _____       | +      | _____  | + |
| 1           | 11981  | 11981  |   |
|             | 100.00 | 100.00 |   |
|             | 100.00 |        |   |
|             | 100.00 |        |   |
| _____       | +      | _____  | + |
| Total 11981 | 11981  |        |   |
|             | 100.00 | 100.00 |   |

Concomitant medications other than anticoagulants at the time of obtaining Table 2-5 consent, according to the presence or absence of proton-pump inhibitors

FREQ Procedure

Table : ALL \* DBTD3

ALL DBTD3(Thiazolidine)

Power |

Percent |

Percent of rows

Percent of columns | None | With | Total

|       | None   | With   | Total  |
|-------|--------|--------|--------|
| 1     | 11856  | 125    | 11981  |
|       | 98.96  | 1.04   | 100.00 |
|       | 98.96  | 1.04   |        |
|       | 100.00 | 100.00 |        |
| Total | 11856  | 125    | 11981  |
|       | 98.96  | 1.04   | 100.00 |

Concomitant medications other than anticoagulants at the time of obtaining Table 2-5 consent, according to the presence or absence of proton-pump inhibitors

FREQ Procedure

|                      |       | Cumulative       |       |        |
|----------------------|-------|------------------|-------|--------|
| Percent of ALL power |       | Percent of power |       |        |
| 1                    | 11981 | 100.00           | 11981 | 100.00 |

Tables: ALL \* CMYN

ALL

CMYN(Administration of Concomitant Drug)

Power |

Percent |

Percent of rows

Percentage of columns | with | total

|             |        |        |   |
|-------------|--------|--------|---|
| _____       | +      | _____  | + |
| 1           | 11981  | 11981  |   |
|             | 100.00 | 100.00 |   |
|             | 100.00 |        |   |
|             | 100.00 |        |   |
| _____       | +      | _____  | + |
| Total 11981 | 11981  |        |   |
|             | 100.00 | 100.00 |   |



Concomitant medications other than anticoagulants at the time of obtaining Table 2-5 consent, according to the presence or absence of proton-pump inhibitors

FREQ Procedure

Table : ALL \* DBTD4

ALL DBTD4(DPP-4 Inhibitors)

Power |

Percent |

Percent of rows

Percent of columns | None | With | Total

|       | None   | With   | Total  |
|-------|--------|--------|--------|
| 1     | 10310  | 1671   | 11981  |
|       | 86.05  | 13.95  | 100.00 |
|       | 86.05  | 13.95  |        |
|       | 100.00 | 100.00 |        |
| Total | 10310  | 1671   | 11981  |
|       | 86.05  | 13.95  | 100.00 |

Concomitant medications other than anticoagulants at the time of obtaining Table 2-5 consent, according to the presence or absence of proton-pump inhibitors

FREQ Procedure

|                      |       | Cumulative       |       |        |
|----------------------|-------|------------------|-------|--------|
| Percent of ALL power |       | Percent of power |       |        |
| 1                    | 11981 | 100.00           | 11981 | 100.00 |

Tables: ALL \* CMYN

ALL

CMYN(Administration of Concomitant Drug)

Power |

Percent |

Percent of rows

Percentage of columns | with | total

|             |        |        |   |
|-------------|--------|--------|---|
| _____       | +      | _____  | + |
| 1           | 11981  | 11981  |   |
|             | 100.00 | 100.00 |   |
|             | 100.00 |        |   |
|             | 100.00 |        |   |
| _____       | +      | _____  | + |
| Total 11981 | 11981  |        |   |
|             | 100.00 | 100.00 |   |

Concomitant medications other than anticoagulants at the time of obtaining Table 2-5 consent, according to the presence or absence of proton-pump inhibitors

FREQ Procedure

Table : ALL \* DBTD4

ALL DBTD4(DPP-4 Inhabitants)

Power |

Percent |

Percent of rows

Percent of columns | None | With | Total

|       | None   | With   | Total  |
|-------|--------|--------|--------|
| 1     | 10310  | 1671   | 11981  |
|       | 86.05  | 13.95  | 100.00 |
|       | 86.05  | 13.95  |        |
|       | 100.00 | 100.00 |        |
| Total | 10310  | 1671   | 11981  |
|       | 86.05  | 13.95  | 100.00 |

Concomitant medications other than anticoagulants at the time of obtaining Table 2-5 consent, according to the presence or absence of proton-pump inhibitors

FREQ Procedure

|                      |       | Cumulative       |       |        |
|----------------------|-------|------------------|-------|--------|
| Percent of ALL power |       | Percent of power |       |        |
| 1                    | 11981 | 100.00           | 11981 | 100.00 |

Tables: ALL \* CMYN

ALL

CMYN(Administration of Concomitant Drug)

Power |

Percent |

Percent of rows

Percentage of columns | with | total

|             |        |        |   |
|-------------|--------|--------|---|
| _____       | +      | _____  | + |
| 1           | 11981  | 11981  |   |
|             | 100.00 | 100.00 |   |
|             | 100.00 |        |   |
|             | 100.00 |        |   |
| _____       | +      | _____  | + |
| Total 11981 |        | 11981  |   |
|             | 100.00 | 100.00 |   |

Concomitant medications other than anticoagulants at the time of obtaining Table 2-5 consent, according to the presence or absence of proton-pump inhibitors

FREQ Procedure

Table : ALL \* DBTD5

ALL DBTD5(GLP-1 Inhabitators)

Power |

Percent |

Percent of rows

Percent of columns | None | With | Total

|       | None   | With   | Total  |
|-------|--------|--------|--------|
| 1     | 11943  | 38     | 11981  |
|       | 99.68  | 0.32   | 100.00 |
|       | 99.68  | 0.32   |        |
|       | 100.00 | 100.00 |        |
| Total | 11943  | 38     | 11981  |
|       | 99.68  | 0.32   | 100.00 |

Concomitant medications other than anticoagulants at the time of obtaining Table 2-5 consent, according to the presence or absence of proton-pump inhibitors

FREQ Procedure

|                      |       | Cumulative       |       |        |
|----------------------|-------|------------------|-------|--------|
| Percent of ALL power |       | Percent of power |       |        |
| 1                    | 11981 | 100.00           | 11981 | 100.00 |

Tables: ALL \* CMYN

ALL

CMYN(Administration of Concomitant Drug)

Power |

Percent |

Percent of rows

Percentage of columns | with | total

|             |        |        |   |
|-------------|--------|--------|---|
| _____       | +      | _____  | + |
| 1           | 11981  | 11981  |   |
|             | 100.00 | 100.00 |   |
|             | 100.00 |        |   |
|             | 100.00 |        |   |
| _____       | +      | _____  | + |
| Total 11981 | 11981  |        |   |
|             | 100.00 | 100.00 |   |

Concomitant medications other than anticoagulants at the time of obtaining Table 2-5 consent, according to the presence or absence of proton-pump inhibitors

FREQ Procedure

Table : ALL \* DBTD5

ALL DBTD5(GLP-1 Inhabitators)

Power |

Percent |

Percent of rows

Percent of columns | None | With | Total

|       | +      | +      | +      |
|-------|--------|--------|--------|
| 1     | 11943  | 38     | 11981  |
|       | 99.68  | 0.32   | 100.00 |
|       | 99.68  | 0.32   |        |
|       | 100.00 | 100.00 |        |
|       | +      | +      | +      |
| Total | 11943  | 38     | 11981  |
|       | 99.68  | 0.32   | 100.00 |

Concomitant medications other than anticoagulants at the time of obtaining Table 2-5 consent, according to the presence or absence of proton-pump inhibitors

FREQ Procedure

|   |       | Cumulative           |                  |        |
|---|-------|----------------------|------------------|--------|
|   |       | Percent of ALL power | Percent of power |        |
| 1 | 11981 | 100.00               | 11981            | 100.00 |

Tables: ALL \* CMYN

ALL

CMYN(Administration of Concomitant Drug)

Power |

Percent |

Percent of rows

Percentage of columns | with | total

|             |        |        |   |
|-------------|--------|--------|---|
| _____       | +      | _____  | + |
| 1           | 11981  | 11981  |   |
|             | 100.00 | 100.00 |   |
|             | 100.00 |        |   |
|             | 100.00 |        |   |
| _____       | +      | _____  | + |
| Total 11981 | 11981  |        |   |
|             | 100.00 | 100.00 |   |



Concomitant medications other than anticoagulants at the time of obtaining Table 2-5 consent, according to the presence or absence of proton-pump inhibitors

FREQ Procedure

Table : ALL \* DBTD6

ALL DBTD6(SGLT2 Inhabitators)

Power |

Percent |

Percent of rows

Percent of columns | None | With | Total

|       | None   | With   | Total  |
|-------|--------|--------|--------|
| 1     | 11799  | 182    | 11981  |
|       | 98.48  | 1.52   | 100.00 |
|       | 98.48  | 1.52   |        |
|       | 100.00 | 100.00 |        |
| Total | 11799  | 182    | 11981  |
|       | 98.48  | 1.52   | 100.00 |

Concomitant medications other than anticoagulants at the time of obtaining Table 2-5 consent, according to the presence or absence of proton-pump inhibitors

FREQ Procedure

|                      |       | Cumulative       |       |        |
|----------------------|-------|------------------|-------|--------|
| Percent of ALL power |       | Percent of power |       |        |
| 1                    | 11981 | 100.00           | 11981 | 100.00 |

Tables: ALL \* CMYN

ALL

CMYN(Administration of Concomitant Drug)

|                                      |        |        |  |
|--------------------------------------|--------|--------|--|
| Power                                |        |        |  |
| Percent                              |        |        |  |
| Percent of rows                      |        |        |  |
| Percentage of columns   with   total |        |        |  |
| _____+_____+                         |        |        |  |
| 1   11981   11981                    |        |        |  |
| 100.00   100.00                      |        |        |  |
| 100.00                               |        |        |  |
| 100.00                               |        |        |  |
| _____+_____+                         |        |        |  |
| Total 11981 11981                    | 100.00 | 100.00 |  |

Concomitant medications other than anticoagulants at the time of obtaining Table 2-5 consent, according to the presence or absence of proton-pump inhibitors

FREQ Procedure

Table : ALL \* DBTD6

ALL DBTD6(SGLT2 Inhabitators)

Power |

Percent |

Percent of rows

Percent of columns | None | With | Total

|       | None   | With   | Total  |
|-------|--------|--------|--------|
| 1     | 11799  | 182    | 11981  |
|       | 98.48  | 1.52   | 100.00 |
|       | 98.48  | 1.52   |        |
|       | 100.00 | 100.00 |        |
| Total | 11799  | 182    | 11981  |
|       | 98.48  | 1.52   | 100.00 |

Concomitant medications other than anticoagulants at the time of obtaining Table 2-5 consent, according to the presence or absence of proton-pump inhibitors

FREQ Procedure

|                      |       | Cumulative       |       |        |
|----------------------|-------|------------------|-------|--------|
| Percent of ALL power |       | Percent of power |       |        |
| 1                    | 11981 | 100.00           | 11981 | 100.00 |

Tables: ALL \* CMYN

ALL

CMYN(Administration of Concomitant Drug)

|                                      |        |        |  |
|--------------------------------------|--------|--------|--|
| Power                                |        |        |  |
| Percent                              |        |        |  |
| Percent of rows                      |        |        |  |
| Percentage of columns   with   total |        |        |  |
| _____+_____+                         |        |        |  |
| 1   11981   11981                    |        |        |  |
| 100.00   100.00                      |        |        |  |
| 100.00                               |        |        |  |
| 100.00                               |        |        |  |
| _____+_____+                         |        |        |  |
| Total 11981 11981                    | 100.00 | 100.00 |  |

Concomitant medications other than anticoagulants at the time of obtaining Table 2-5 consent, according to the presence or absence of proton-pump inhibitors

FREQ Procedure

Table : ALL \* DBTD7

ALL DBTD7(Insuline Related)

Power |

Percent |

Percent of rows

Percent of columns | None | With | Total

|       | None   | With   | Total  |
|-------|--------|--------|--------|
| 1     | 11706  | 275    | 11981  |
|       | 97.70  | 2.30   | 100.00 |
|       | 97.70  | 2.30   |        |
|       | 100.00 | 100.00 |        |
| Total | 11706  | 275    | 11981  |
|       | 97.70  | 2.30   | 100.00 |

Concomitant medications other than anticoagulants at the time of obtaining Table 2-5 consent, according to the presence or absence of proton-pump inhibitors

FREQ Procedure

|                      |       | Cumulative       |       |        |
|----------------------|-------|------------------|-------|--------|
| Percent of ALL power |       | Percent of power |       |        |
| 1                    | 11981 | 100.00           | 11981 | 100.00 |

Tables: ALL \* CMYN

ALL

CMYN(Administration of Concomitant Drug)

Power |

Percent |

Percent of rows

Percentage of columns | with | total

|             |        |        |   |
|-------------|--------|--------|---|
| _____       | +      | _____  | + |
| 1           | 11981  | 11981  |   |
|             | 100.00 | 100.00 |   |
|             | 100.00 |        |   |
|             | 100.00 |        |   |
| _____       | +      | _____  | + |
| Total 11981 | 11981  |        |   |
|             | 100.00 | 100.00 |   |

Concomitant medications other than anticoagulants at the time of obtaining Table 2-5 consent, according to the presence or absence of proton-pump inhibitors

FREQ Procedure

Table : ALL \* DBTD7

ALL DBTD7(Insuline Related)

Power |

Percent |

Percent of rows

Percent of columns | None | With | Total

|       | None   | With   | Total  |
|-------|--------|--------|--------|
| 1     | 11706  | 275    | 11981  |
|       | 97.70  | 2.30   | 100.00 |
|       | 97.70  | 2.30   |        |
|       | 100.00 | 100.00 |        |
| Total | 11706  | 275    | 11981  |
|       | 97.70  | 2.30   | 100.00 |

Concomitant medications other than anticoagulants at the time of obtaining Table 2-5 consent, according to the presence or absence of proton-pump inhibitors

FREQ Procedure

|                      |       | Cumulative       |       |        |
|----------------------|-------|------------------|-------|--------|
| Percent of ALL power |       | Percent of power |       |        |
| 1                    | 11981 | 100.00           | 11981 | 100.00 |

Tables: ALL \* CMYN

ALL

CMYN(Administration of Concomitant Drug)

Power |

Percent |

Percent of rows

Percentage of columns | with | total

|             |        |        |   |
|-------------|--------|--------|---|
| _____       | +      | _____  | + |
| 1           | 11981  | 11981  |   |
|             | 100.00 | 100.00 |   |
|             | 100.00 |        |   |
|             | 100.00 |        |   |
| _____       | +      | _____  | + |
| Total 11981 |        | 11981  |   |
|             | 100.00 | 100.00 |   |



Concomitant medications other than anticoagulants at the time of obtaining Table 2-5 consent, according to the presence or absence of proton-pump inhibitors

FREQ Procedure

Table : ALL \* DBTD8

ALL

DBTD8(Other Diabetes Drugs)

Power |

Percent |

Percent of rows

Percent of columns | None | With | Total

|       | +      | +      | +      |
|-------|--------|--------|--------|
| 1     | 11613  | 368    | 11981  |
|       | 96.93  | 3.07   | 100.00 |
|       | 96.93  | 3.07   |        |
|       | 100.00 | 100.00 |        |
|       | +      | +      | +      |
| Total | 11613  | 368    | 11981  |
|       | 96.93  | 3.07   | 100.00 |

Concomitant medications other than anticoagulants at the time of obtaining Table 2-5 consent, according to the presence or absence of proton-pump inhibitors

FREQ Procedure

|                      |       | Cumulative       |       |        |
|----------------------|-------|------------------|-------|--------|
| Percent of ALL power |       | Percent of power |       |        |
| 1                    | 11981 | 100.00           | 11981 | 100.00 |

Tables: ALL \* CMYN

ALL

CMYN(Administration of Concomitant Drug)

Power |

Percent |

Percent of rows

Percentage of columns | with | total

|             |        |        |   |
|-------------|--------|--------|---|
| _____       | +      | _____  | + |
| 1           | 11981  | 11981  |   |
|             | 100.00 | 100.00 |   |
|             | 100.00 |        |   |
|             | 100.00 |        |   |
| _____       | +      | _____  | + |
| Total 11981 | 11981  |        |   |
|             | 100.00 | 100.00 |   |

Concomitant medications other than anticoagulants at the time of obtaining Table 2-5 consent, according to the presence or absence of proton-pump inhibitors

FREQ Procedure

Table : ALL \* DBTD8

ALL

DBTD8(Other Diabetes Drugs)

Power |

Percent |

Percent of rows

Percent of columns | None | With | Total

|       | None   | With   | Total  |
|-------|--------|--------|--------|
| 1     | 11613  | 368    | 11981  |
|       | 96.93  | 3.07   | 100.00 |
|       | 96.93  | 3.07   |        |
|       | 100.00 | 100.00 |        |
| Total | 11613  | 368    | 11981  |
|       | 96.93  | 3.07   | 100.00 |

Concomitant medications other than anticoagulants at the time of obtaining Table 2-5 consent, according to the presence or absence of proton-pump inhibitors

FREQ Procedure

|                      |       | Cumulative       |       |        |
|----------------------|-------|------------------|-------|--------|
| Percent of ALL power |       | Percent of power |       |        |
| 1                    | 11981 | 100.00           | 11981 | 100.00 |

Tables: ALL \* CMYN

ALL

CMYN(Administration of Concomitant Drug)

|                                      |        |        |  |  |
|--------------------------------------|--------|--------|--|--|
| Power                                |        |        |  |  |
| Percent                              |        |        |  |  |
| Percent of rows                      |        |        |  |  |
| Percentage of columns   with   total |        |        |  |  |
| _____+_____+                         |        |        |  |  |
| 1   11981   11981                    |        |        |  |  |
| 100.00   100.00                      |        |        |  |  |
| 100.00                               |        |        |  |  |
| 100.00                               |        |        |  |  |
| _____+_____+                         |        |        |  |  |
| Total 11981 11981                    | 100.00 | 100.00 |  |  |

Concomitant medications other than anticoagulants at the time of obtaining Table 2-5 consent, according to the presence or absence of proton-pump inhibitors

FREQ Procedure

Table: ALL \* DMM

ALL DMM(Dementia Medications)

Power |

Percent |

Percent of rows

Percent of columns | None | With | Total

|       | None   | With   | Total  |
|-------|--------|--------|--------|
| 1     | 11538  | 443    | 11981  |
|       | 96.30  | 3.70   | 100.00 |
|       | 96.30  | 3.70   |        |
|       | 100.00 | 100.00 |        |
| Total | 11538  | 443    | 11981  |
|       | 96.30  | 3.70   | 100.00 |

Concomitant medications other than anticoagulants at the time of obtaining Table 2-5 consent, according to the presence or absence of proton-pump inhibitors

FREQ Procedure

|                      |       | Cumulative       |       |        |
|----------------------|-------|------------------|-------|--------|
| Percent of ALL power |       | Percent of power |       |        |
| 1                    | 11981 | 100.00           | 11981 | 100.00 |

Tables: ALL \* CMYN

ALL

CMYN(Administration of Concomitant Drug)

Power |

Percent |

Percent of rows

Percentage of columns | with | total

|             |        |        |   |
|-------------|--------|--------|---|
| _____       | +      | _____  | + |
| 1           | 11981  | 11981  |   |
|             | 100.00 | 100.00 |   |
|             | 100.00 |        |   |
|             | 100.00 |        |   |
| _____       | +      | _____  | + |
| Total 11981 | 11981  |        |   |
|             | 100.00 | 100.00 |   |

Concomitant medications other than anticoagulants at the time of obtaining Table 2-5 consent, according to the presence or absence of proton-pump inhibitors

FREQ Procedure

Table: ALL \* DMM

ALL DMM(Dementia Medications)

Power |

Percent |

Percent of rows

Percent of columns | None | With | Total

|       | None   | With   | Total  |
|-------|--------|--------|--------|
| 1     | 11538  | 443    | 11981  |
|       | 96.30  | 3.70   | 100.00 |
|       | 96.30  | 3.70   |        |
|       | 100.00 | 100.00 |        |
| Total | 11538  | 443    | 11981  |
|       | 96.30  | 3.70   | 100.00 |

Concomitant medications other than anticoagulants at the time of obtaining Table 2-5 consent, according to the presence or absence of proton-pump inhibitors

FREQ Procedure

|                      |       | Cumulative       |       |        |
|----------------------|-------|------------------|-------|--------|
| Percent of ALL power |       | Percent of power |       |        |
| 1                    | 11981 | 100.00           | 11981 | 100.00 |

Tables: ALL \* CMYN

ALL

CMYN(Administration of Concomitant Drug)

Power |

Percent |

Percent of rows

Percentage of columns | with | total

|             |        |        |   |
|-------------|--------|--------|---|
| _____       | +      | _____  | + |
| 1           | 11981  | 11981  |   |
|             | 100.00 | 100.00 |   |
|             | 100.00 |        |   |
|             | 100.00 |        |   |
| _____       | +      | _____  | + |
| Total 11981 | 11981  |        |   |
|             | 100.00 | 100.00 |   |



Concomitant medications other than anticoagulants at the time of obtaining Table 2-5 consent, according to the presence or absence of proton-pump inhibitors

FREQ Procedure

Tables: ALL\* ACNA

ALL ACNA(Anti-Cancer Agent)

Power |

Percent |

Percent of rows

Percent of columns | None | With | Total

|       | +      | +      | +      |
|-------|--------|--------|--------|
| 1     | 11871  | 110    | 11981  |
|       | 99.08  | 0.92   | 100.00 |
|       | 99.08  | 0.92   |        |
|       | 100.00 | 100.00 |        |
|       | +      | +      | +      |
| Total | 11871  | 110    | 11981  |
|       | 99.08  | 0.92   | 100.00 |

Concomitant medications other than anticoagulants at the time of obtaining Table 2-5 consent, according to the presence or absence of proton-pump inhibitors

FREQ Procedure

|                      |       | Cumulative       |       |        |
|----------------------|-------|------------------|-------|--------|
| Percent of ALL power |       | Percent of power |       |        |
| 1                    | 11981 | 100.00           | 11981 | 100.00 |

Tables: ALL \* CMYN

ALL

CMYN(Administration of Concomitant Drug)

Power |

Percent |

Percent of rows

Percentage of columns | with | total

|             |        |        |   |
|-------------|--------|--------|---|
| _____       | +      | _____  | + |
| 1           | 11981  | 11981  |   |
|             | 100.00 | 100.00 |   |
|             | 100.00 |        |   |
|             | 100.00 |        |   |
| _____       | +      | _____  | + |
| Total 11981 | 11981  |        |   |
|             | 100.00 | 100.00 |   |

Concomitant medications other than anticoagulants at the time of obtaining Table 2-5 consent, according to the presence or absence of proton-pump inhibitors

FREQ Procedure

Tables: ALL\* ACNA

ALL ACNA(Anti-Cancer Agent)

Power |

Percent |

Percent of rows

Percent of columns | None | With | Total

|       | +      | +      | +      |
|-------|--------|--------|--------|
| 1     | 11871  | 110    | 11981  |
|       | 99.08  | 0.92   | 100.00 |
|       | 99.08  | 0.92   |        |
|       | 100.00 | 100.00 |        |
|       | +      | +      | +      |
| Total | 11871  | 110    | 11981  |
|       | 99.08  | 0.92   | 100.00 |

Concomitant medications other than anticoagulants at the time of obtaining Table 2-5 consent, according to the presence or absence of proton-pump inhibitors

FREQ Procedure

|   |       | Cumulative           |                  |        |
|---|-------|----------------------|------------------|--------|
|   |       | Percent of ALL power | Percent of power |        |
| 1 | 11981 | 100.00               | 11981            | 100.00 |

Tables: ALL \* CMYN

ALL

CMYN(Administration of Concomitant Drug)

Power |

Percent |

Percent of rows

Percentage of columns | with | total

|             |        |        |   |
|-------------|--------|--------|---|
| _____       | +      | _____  | + |
| 1           | 11981  | 11981  |   |
|             | 100.00 | 100.00 |   |
|             | 100.00 |        |   |
|             | 100.00 |        |   |
| _____       | +      | _____  | + |
| Total 11981 | 11981  |        |   |
|             | 100.00 | 100.00 |   |

Concomitant medications other than anticoagulants at the time of obtaining Table 2-5 consent, according to the presence or absence of proton-pump inhibitors

FREQ Procedure

Tables: ALL\* COPD

ALL COPD(COPD)

Power |

Percent |

Percent of rows

Percent of columns | None | With | Total

|       | None   | With   | Total  |
|-------|--------|--------|--------|
| 1     | 11601  | 380    | 11981  |
|       | 96.83  | 3.17   | 100.00 |
|       | 96.83  | 3.17   |        |
|       | 100.00 | 100.00 |        |
| Total | 11601  | 380    | 11981  |
|       | 96.83  | 3.17   | 100.00 |

Concomitant medications other than anticoagulants at the time of obtaining Table 2-5 consent, according to the presence or absence of proton-pump inhibitors

FREQ Procedure

|   |       | Cumulative           |                  |        |
|---|-------|----------------------|------------------|--------|
|   |       | Percent of ALL power | Percent of power |        |
| 1 | 11981 | 100.00               | 11981            | 100.00 |

Tables: ALL \* CMYN

ALL

CMYN(Administration of Concomitant Drug)

Power |

Percent |

Percent of rows

Percentage of columns | with | total

|             |        |        |   |
|-------------|--------|--------|---|
| _____       | +      | _____  | + |
| 1           | 11981  | 11981  |   |
|             | 100.00 | 100.00 |   |
|             | 100.00 |        |   |
|             | 100.00 |        |   |
| _____       | +      | _____  | + |
| Total 11981 | 11981  |        |   |
|             | 100.00 | 100.00 |   |

Concomitant medications other than anticoagulants at the time of obtaining Table 2-5 consent, according to the presence or absence of proton-pump inhibitors

FREQ Procedure

Tables: ALL\* COPD

ALL COPD(COPD)

Power |

Percent |

Percent of rows

Percent of columns | None | With | Total

|       | None   | With   | Total  |
|-------|--------|--------|--------|
| 1     | 11601  | 380    | 11981  |
|       | 96.83  | 3.17   | 100.00 |
|       | 96.83  | 3.17   |        |
|       | 100.00 | 100.00 |        |
| Total | 11601  | 380    | 11981  |
|       | 96.83  | 3.17   | 100.00 |

Concomitant medications other than anticoagulants at the time of obtaining Table 2-5 consent, according to the presence or absence of proton-pump inhibitors

FREQ Procedure

|                      |       | Cumulative       |       |        |
|----------------------|-------|------------------|-------|--------|
| Percent of ALL power |       | Percent of power |       |        |
| 1                    | 11981 | 100.00           | 11981 | 100.00 |

Tables: ALL \* CMYN

ALL

CMYN(Administration of Concomitant Drug)

Power |

Percent |

Percent of rows

Percentage of columns | with | total

|             |        |        |   |
|-------------|--------|--------|---|
| _____       | +      | _____  | + |
| 1           | 11981  | 11981  |   |
|             | 100.00 | 100.00 |   |
|             | 100.00 |        |   |
|             | 100.00 |        |   |
| _____       | +      | _____  | + |
| Total 11981 | 11981  |        |   |
|             | 100.00 | 100.00 |   |



Concomitant medications other than anticoagulants at the time of obtaining Table 2-5 consent, according to the presence or absence of proton-pump inhibitors

FREQ Procedure

Tables: ALL \* PSYD

ALL PSYD(Psychotropic Drugs)

Power |

Percent |

Percent of rows

Percent of columns | None | With | Total

|       | None   | With   | Total  |
|-------|--------|--------|--------|
| 1     | 10834  | 1147   | 11981  |
|       | 90.43  | 9.57   | 100.00 |
|       | 90.43  | 9.57   |        |
|       | 100.00 | 100.00 |        |
| Total | 10834  | 1147   | 11981  |
|       | 90.43  | 9.57   | 100.00 |

Concomitant medications other than anticoagulants at the time of obtaining Table 2-5 consent, according to the presence or absence of proton-pump inhibitors

FREQ Procedure

|                      |       | Cumulative       |       |        |
|----------------------|-------|------------------|-------|--------|
| Percent of ALL power |       | Percent of power |       |        |
| 1                    | 11981 | 100.00           | 11981 | 100.00 |

Tables: ALL \* CMYN

ALL

CMYN(Administration of Concomitant Drug)

Power |

Percent |

Percent of rows

Percentage of columns | with | total

|             |        |        |   |
|-------------|--------|--------|---|
| _____       | +      | _____  | + |
| 1           | 11981  | 11981  |   |
|             | 100.00 | 100.00 |   |
|             | 100.00 |        |   |
|             | 100.00 |        |   |
| _____       | +      | _____  | + |
| Total 11981 | 11981  |        |   |
|             | 100.00 | 100.00 |   |

Concomitant medications other than anticoagulants at the time of obtaining Table 2-5 consent, according to the presence or absence of proton-pump inhibitors

FREQ Procedure

Tables: ALL \* PSYD

ALL PSYD(Psychotropic Drugs)

Power |

Percent |

Percent of rows

Percent of columns | None | With | Total

|       | +      | +      | +      |
|-------|--------|--------|--------|
| 1     | 10834  | 1147   | 11981  |
|       | 90.43  | 9.57   | 100.00 |
|       | 90.43  | 9.57   |        |
|       | 100.00 | 100.00 |        |
|       | +      | +      | +      |
| Total | 10834  | 1147   | 11981  |
|       | 90.43  | 9.57   | 100.00 |

Concomitant medications other than anticoagulants at the time of obtaining Table 2-5 consent, according to the presence or absence of proton-pump inhibitors

FREQ Procedure

|                      |       | Cumulative       |       |        |
|----------------------|-------|------------------|-------|--------|
| Percent of ALL power |       | Percent of power |       |        |
| 1                    | 11981 | 100.00           | 11981 | 100.00 |

Tables: ALL \* CMYN

ALL

CMYN(Administration of Concomitant Drug)

Power |

Percent |

Percent of rows

Percentage of columns | with | total

|             |        |        |   |
|-------------|--------|--------|---|
| _____       | +      | _____  | + |
| 1           | 11981  | 11981  |   |
|             | 100.00 | 100.00 |   |
|             | 100.00 |        |   |
|             | 100.00 |        |   |
| _____       | +      | _____  | + |
| Total 11981 | 11981  |        |   |
|             | 100.00 | 100.00 |   |

Concomitant medications other than anticoagulants at the time of obtaining Table 2-5 consent, according to the presence or absence of proton-pump inhibitors

FREQ Procedure

Tables: ALL\* PRPI

ALL

PRPI(Proton Pump Inhabitants)

Power |

Percent |

Percent of rows

Percentage of columns | with | total

|       |   |        |   |        |
|-------|---|--------|---|--------|
| _____ | + | _____  | + |        |
| 1     |   | 11981  |   | 11981  |
|       |   | 100.00 |   | 100.00 |
|       |   | 100.00 |   |        |
|       |   | 100.00 |   |        |
| _____ | + | _____  | + |        |
| Total |   | 11981  |   | 11981  |
|       |   | 100.00 |   | 100.00 |

Concomitant medications other than anticoagulants at the time of obtaining Table 2-5 consent, according to the presence or absence of proton-pump inhibitors

FREQ Procedure

|   |       | Cumulative           |                  |        |
|---|-------|----------------------|------------------|--------|
|   |       | Percent of ALL power | Percent of power |        |
| 1 | 11981 | 100.00               | 11981            | 100.00 |

Tables: ALL \* CMYN

ALL

CMYN(Administration of Concomitant Drug)

Power |

Percent |

Percent of rows

Percentage of columns | with | total

|             |        |        |   |
|-------------|--------|--------|---|
| _____       | +      | _____  | + |
| 1           | 11981  | 11981  |   |
|             | 100.00 | 100.00 |   |
|             | 100.00 |        |   |
|             | 100.00 |        |   |
| _____       | +      | _____  | + |
| Total 11981 |        | 11981  |   |
|             | 100.00 | 100.00 |   |

Concomitant medications other than anticoagulants at the time of obtaining Table 2-5 consent, according to the presence or absence of proton-pump inhibitors

FREQ Procedure

Tables: ALL\* PRPI

ALL

PRPI(Proton Pump Inhabititors)

Power |

Percent |

Percent of rows

Percentage of columns | with | total

|       |   |        |   |        |
|-------|---|--------|---|--------|
| _____ | + | _____  | + |        |
| 1     |   | 11981  |   | 11981  |
|       |   | 100.00 |   | 100.00 |
|       |   | 100.00 |   |        |
|       |   | 100.00 |   |        |
| _____ | + | _____  | + |        |
| Total |   | 11981  |   | 11981  |
|       |   | 100.00 |   | 100.00 |

Concomitant medications other than anticoagulants at the time of obtaining Table 2-5 consent, according to the presence or absence of proton-pump inhibitors

FREQ Procedure

|                      |       | Cumulative       |       |        |
|----------------------|-------|------------------|-------|--------|
| Percent of ALL power |       | Percent of power |       |        |
| 1                    | 11981 | 100.00           | 11981 | 100.00 |

Tables: ALL \* CMYN

ALL

CMYN(Administration of Concomitant Drug)

Power |

Percent |

Percent of rows

Percentage of columns | with | total

|             |        |        |   |
|-------------|--------|--------|---|
| _____       | +      | _____  | + |
| 1           | 11981  | 11981  |   |
|             | 100.00 | 100.00 |   |
|             | 100.00 |        |   |
|             | 100.00 |        |   |
| _____       | +      | _____  | + |
| Total 11981 | 11981  |        |   |
|             | 100.00 | 100.00 |   |



Concomitant medications other than anticoagulants at the time of obtaining Table 2-5 consent, according to the presence or absence of proton-pump inhibitors

FREQ Procedure

Tables: ALL\* PGPI

ALL PGPI(P-gp Inhibitors)

Power |

Percent |

Percent of rows

Percent of columns | None | With | Total

|       | None   | With   | Total  |
|-------|--------|--------|--------|
| 1     | 11741  | 240    | 11981  |
|       | 98.00  | 2.00   | 100.00 |
|       | 98.00  | 2.00   |        |
|       | 100.00 | 100.00 |        |
| Total | 11741  | 240    | 11981  |
|       | 98.00  | 2.00   | 100.00 |

Concomitant medications other than anticoagulants at the time of obtaining Table 2-5 consent, according to the presence or absence of proton-pump inhibitors

FREQ Procedure

|                      |       | Cumulative       |       |        |
|----------------------|-------|------------------|-------|--------|
| Percent of ALL power |       | Percent of power |       |        |
| 1                    | 11981 | 100.00           | 11981 | 100.00 |

Tables: ALL \* CMYN

ALL

CMYN(Administration of Concomitant Drug)

Power |

Percent |

Percent of rows

Percentage of columns | with | total

|             |        |        |   |
|-------------|--------|--------|---|
| _____       | +      | _____  | + |
| 1           | 11981  | 11981  |   |
|             | 100.00 | 100.00 |   |
|             | 100.00 |        |   |
|             | 100.00 |        |   |
| _____       | +      | _____  | + |
| Total 11981 | 11981  |        |   |
|             | 100.00 | 100.00 |   |

Concomitant medications other than anticoagulants at the time of obtaining Table 2-5 consent, according to the presence or absence of proton-pump inhibitors

FREQ Procedure

Tables: ALL\* PGPI

ALL PGPI(P-gp Inhibitors)

Power |

Percent |

Percent of rows

Percent of columns | None | With | Total

|       | +      | +      | +      | + |
|-------|--------|--------|--------|---|
| 1     | 11741  | 240    | 11981  |   |
|       | 98.00  | 2.00   | 100.00 |   |
|       | 98.00  | 2.00   |        |   |
|       | 100.00 | 100.00 |        |   |
|       | +      | +      | +      | + |
| Total | 11741  | 240    | 11981  |   |
|       | 98.00  | 2.00   | 100.00 |   |

Concomitant medications other than anticoagulants at the time of obtaining Table 2-5 consent, according to the presence or absence of proton-pump inhibitors

FREQ Procedure

|   |       | Cumulative           |                  |        |
|---|-------|----------------------|------------------|--------|
|   |       | Percent of ALL power | Percent of power |        |
| 1 | 11981 | 100.00               | 11981            | 100.00 |

Tables: ALL \* CMYN

ALL

CMYN(Administration of Concomitant Drug)

| Power                                |  |  |
|--------------------------------------|--|--|
| Percent                              |  |  |
| Percent of rows                      |  |  |
| Percentage of columns   with   total |  |  |
| _____ + _____ +                      |  |  |
| 1   11981   11981                    |  |  |
| 100.00   100.00                      |  |  |
| 100.00                               |  |  |
| 100.00                               |  |  |
| _____ + _____ +                      |  |  |
| Total 11981 11981                    |  |  |
| 100.00 100.00                        |  |  |

Concomitant medications other than anticoagulants at the time of obtaining Table 2-5 consent, according to the presence or absence of proton-pump inhibitors

FREQ Procedure

Tables: ALL \* TCMCNT

ALL TCMCNT(Total Number of Drugs Other than Anticoagulant)

Power |

Percent |

Percent of rows

Percent | 1| 2| 3| 4| 5| 6| 7| 8| 9| 10| 11| 12| Total

|  | 1      | 2      | 3      | 4      | 5      | 6      | 7      | 8      | 9      | 10     | 11     | 12     | Total  |       |
|--|--------|--------|--------|--------|--------|--------|--------|--------|--------|--------|--------|--------|--------|-------|
|  | 1      | 28     | 165    | 420    | 794    | 1257   | 1528   | 1604   | 1495   | 1265   | 996    | 777    | 516    | 11795 |
|  | 0.24   | 1.40   | 3.56   | 6.73   | 10.66  | 12.95  | 13.60  | 12.67  | 10.72  | 8.44   | 6.59   | 4.37   | 100.00 |       |
|  | 0.24   | 1.40   | 3.56   | 6.73   | 10.66  | 12.95  | 13.60  | 12.67  | 10.72  | 8.44   | 6.59   | 4.37   | 100.00 |       |
|  | 100.00 | 100.00 | 100.00 | 100.00 | 100.00 | 100.00 | 100.00 | 100.00 | 100.00 | 100.00 | 100.00 | 100.00 | 100.00 |       |
|  | 100.00 | 100.00 | 100.00 |        |        |        |        |        |        |        |        |        |        |       |
|  | 28     | 165    | 420    | 794    | 1257   | 1528   | 1604   | 1495   | 1265   | 996    | 777    | 516    | 11795  |       |
|  | 0.24   | 1.40   | 3.56   | 6.73   | 10.66  | 12.95  | 13.60  | 12.67  | 10.72  | 8.44   | 6.59   | 4.37   | 100.00 |       |

(continued)

Tables: ALL \* TCMCNT

ALL TCMCNT(Total Number of Drugs Other than Anticoagulant)

Power |

Percent |

Percent of rows

Percent | 13| 14| 15| 16| 17| 18| 19| 20| 21| 22| 24| 26| Total

|        | 13     | 14     | 15     | 16     | 17     | 18     | 19     | 20     | 21     | 22     | 24     | 26     | Total  |
|--------|--------|--------|--------|--------|--------|--------|--------|--------|--------|--------|--------|--------|--------|
| 1      | 373    | 248    | 128    | 77     | 54     | 29     | 20     | 12     | 5      |        |        |        | 11795  |
| 2      | 1      |        |        |        |        |        |        |        |        |        |        |        |        |
|        | 3.16   | 2.10   | 1.09   | 0.65   | 0.46   | 0.25   | 0.17   | 0.10   | 0.04   |        |        |        |        |
| 0.02   | 0.01   | 0.01   | 100.00 |        |        |        |        |        |        |        |        |        |        |
|        | 3.16   | 2.10   | 1.09   | 0.65   | 0.46   | 0.25   | 0.17   | 0.10   | 0.04   |        |        |        |        |
| 0.02   | 0.01   | 0.01   |        |        |        |        |        |        |        |        |        |        |        |
|        | 100.00 | 100.00 | 100.00 | 100.00 | 100.00 | 100.00 | 100.00 | 100.00 | 100.00 | 100.00 | 100.00 | 100.00 | 100.00 |
| 100.00 | 100.00 | 100.00 |        |        |        |        |        |        |        |        |        |        |        |
| Total  | 373    | 248    | 128    | 77     | 54     | 29     | 20     | 12     | 5      | 2      | 1      | 1      | 11795  |
|        | 3.16   | 2.10   | 1.09   | 0.65   | 0.46   | 0.25   | 0.17   | 0.10   |        |        |        |        |        |
| 0.04   | 0.02   | 0.01   | 0.01   | 100.00 |        |        |        |        |        |        |        |        |        |

Degree of missing values = 186

Concomitant medications other than anticoagulants at the time of obtaining Table 2-5 consent, according to the presence or absence of proton-pump inhibitors

FREQ Procedure

|                      |       | Cumulative       |       |        |
|----------------------|-------|------------------|-------|--------|
| Percent of ALL power |       | Percent of power |       |        |
| 1                    | 11981 | 100.00           | 11981 | 100.00 |

Tables: ALL \* CMYN

ALL

CMYN(Administration of Concomitant Drug)

Power |

Percent |

Percent of rows

Percentage of columns | with | total

|             |        |        |   |
|-------------|--------|--------|---|
| _____       | +      | _____  | + |
| 1           | 11981  | 11981  |   |
|             | 100.00 | 100.00 |   |
|             | 100.00 |        |   |
|             | 100.00 |        |   |
| _____       | +      | _____  | + |
| Total 11981 | 11981  |        |   |
|             | 100.00 | 100.00 |   |

Concomitant medications other than anticoagulants at the time of obtaining Table 2-5 consent, according to the presence or absence of proton-pump inhibitors

FREQ Procedure

Tables: ALL \* TCMCNT

ALL TCMCNT(Total Number of Drugs Other than Anticoagulant)

Power |

Percent |

Percent of rows

Percent | 1| 2| 3| 4| 5| 6| 7| 8| 9| 10| 11| 12| Total

|  | 1      | 2      | 3      | 4      | 5      | 6      | 7      | 8      | 9      | 10     | 11     | 12     | Total  |       |
|--|--------|--------|--------|--------|--------|--------|--------|--------|--------|--------|--------|--------|--------|-------|
|  | 1      | 28     | 165    | 420    | 794    | 1257   | 1528   | 1604   | 1495   | 1265   | 996    | 777    | 516    | 11795 |
|  | 0.24   | 1.40   | 3.56   | 6.73   | 10.66  | 12.95  | 13.60  | 12.67  | 10.72  | 8.44   | 6.59   | 4.37   | 100.00 |       |
|  | 0.24   | 1.40   | 3.56   | 6.73   | 10.66  | 12.95  | 13.60  | 12.67  | 10.72  | 8.44   | 6.59   | 4.37   | 100.00 |       |
|  | 100.00 | 100.00 | 100.00 | 100.00 | 100.00 | 100.00 | 100.00 | 100.00 | 100.00 | 100.00 | 100.00 | 100.00 | 100.00 |       |
|  | 100.00 | 100.00 | 100.00 |        |        |        |        |        |        |        |        |        |        |       |
|  | 28     | 165    | 420    | 794    | 1257   | 1528   | 1604   | 1495   | 1265   | 996    | 777    | 516    | 11795  |       |
|  | 0.24   | 1.40   | 3.56   | 6.73   | 10.66  | 12.95  | 13.60  | 12.67  | 10.72  | 8.44   | 6.59   | 4.37   | 100.00 |       |

(continued)

Tables: ALL \* TCMCNT

ALL TCMCNT(Total Number of Drugs Other than Anticoagulant)

Power |

Percent |



Percent of rows

Percent | 13| 14| 15| 16| 17| 18| 19| 20| 21| 22| 24| 26| Total

|        | 13     | 14     | 15     | 16     | 17     | 18     | 19     | 20     | 21     | 22     | 24     | 26     | Total  |
|--------|--------|--------|--------|--------|--------|--------|--------|--------|--------|--------|--------|--------|--------|
| 1      | 373    | 248    | 128    | 77     | 54     | 29     | 20     | 12     | 5      |        |        |        |        |
| 2      | 1      | 1      | 11795  |        |        |        |        |        |        |        |        |        |        |
|        | 3.16   | 2.10   | 1.09   | 0.65   | 0.46   | 0.25   | 0.17   | 0.10   | 0.04   |        |        |        |        |
| 0.02   | 0.01   | 0.01   | 100.00 |        |        |        |        |        |        |        |        |        |        |
|        | 3.16   | 2.10   | 1.09   | 0.65   | 0.46   | 0.25   | 0.17   | 0.10   | 0.04   |        |        |        |        |
| 0.02   | 0.01   | 0.01   |        |        |        |        |        |        |        |        |        |        |        |
|        | 100.00 | 100.00 | 100.00 | 100.00 | 100.00 | 100.00 | 100.00 | 100.00 | 100.00 | 100.00 | 100.00 | 100.00 | 100.00 |
| 100.00 | 100.00 | 100.00 |        |        |        |        |        |        |        |        |        |        |        |
|        |        |        |        |        |        |        |        |        |        |        |        |        |        |
| Total  | 373    | 248    | 128    | 77     | 54     | 29     | 20     | 12     | 5      | 2      | 1      | 1      | 11795  |
|        | 3.16   | 2.10   | 1.09   | 0.65   | 0.46   | 0.25   | 0.17   | 0.10   |        |        |        |        |        |
| 0.04   | 0.02   | 0.01   | 0.01   | 100.00 |        |        |        |        |        |        |        |        |        |

Degree of missing values = 186

Concomitant medications other than anticoagulants at the time of obtaining Table 2-5 consent, according to the presence or absence of proton-pump inhibitors

FREQ Procedure

|                      |       | Cumulative       |       |        |
|----------------------|-------|------------------|-------|--------|
| Percent of ALL power |       | Percent of power |       |        |
| 1                    | 11981 | 100.00           | 11981 | 100.00 |

Tables: ALL \* CMYN

ALL

CMYN(Administration of Concomitant Drug)

Power |

Percent |

Percent of rows

Percentage of columns | with | total

|             |        |        |   |
|-------------|--------|--------|---|
| _____       | +      | _____  | + |
| 1           | 11981  | 11981  |   |
|             | 100.00 | 100.00 |   |
|             | 100.00 |        |   |
|             | 100.00 |        |   |
| _____       | +      | _____  | + |
| Total 11981 | 11981  |        |   |
|             | 100.00 | 100.00 |   |

Concomitant medications other than anticoagulants at the time of obtaining Table 2-5 consent, according to the presence or absence of proton-pump inhibitors

FREQ Procedure

Tables: ALL \* TCMCNT

ALL TCMCNT(Total Number of Drugs Other than Anticoagulant)

Power |

Percent |

Percent of rows

Percent | 1| 2| 3| 4| 5| 6| 7| 8| 9| 10| 11| 12| Total

|  | 1      | 2      | 3      | 4      | 5      | 6      | 7      | 8      | 9      | 10     | 11     | 12     | Total  |       |
|--|--------|--------|--------|--------|--------|--------|--------|--------|--------|--------|--------|--------|--------|-------|
|  | 1      | 28     | 165    | 420    | 794    | 1257   | 1528   | 1604   | 1495   | 1265   | 996    | 777    | 516    | 11795 |
|  | 0.24   | 1.40   | 3.56   | 6.73   | 10.66  | 12.95  | 13.60  | 12.67  | 10.72  | 8.44   | 6.59   | 4.37   | 100.00 |       |
|  | 0.24   | 1.40   | 3.56   | 6.73   | 10.66  | 12.95  | 13.60  | 12.67  | 10.72  | 8.44   | 6.59   | 4.37   | 100.00 |       |
|  | 100.00 | 100.00 | 100.00 | 100.00 | 100.00 | 100.00 | 100.00 | 100.00 | 100.00 | 100.00 | 100.00 | 100.00 | 100.00 |       |
|  | 100.00 | 100.00 | 100.00 |        |        |        |        |        |        |        |        |        |        |       |
|  | 28     | 165    | 420    | 794    | 1257   | 1528   | 1604   | 1495   | 1265   | 996    | 777    | 516    | 11795  |       |
|  | 0.24   | 1.40   | 3.56   | 6.73   | 10.66  | 12.95  | 13.60  | 12.67  | 10.72  | 8.44   | 6.59   | 4.37   | 100.00 |       |

(continued)

Tables: ALL \* TCMCNT

ALL TCMCNT(Total Number of Drugs Other than Anticoagulant)

Power |

Percent |

Percent of rows

Percent | 13| 14| 15| 16| 17| 18| 19| 20| 21| 22| 24| 26| Total

|       | 13     | 14     | 15     | 16     | 17     | 18     | 19     | 20     | 21     | 22     | 24     | 26     | Total  |
|-------|--------|--------|--------|--------|--------|--------|--------|--------|--------|--------|--------|--------|--------|
| 1     | 1      | 373    | 248    | 128    | 77     | 54     | 29     | 20     | 12     | 5      |        |        | 11795  |
| 2     | 1      | 3.16   | 2.10   | 1.09   | 0.65   | 0.46   | 0.25   | 0.17   | 0.10   | 0.04   |        |        | 100.00 |
|       | 0.02   | 0.01   | 0.01   | 100.00 |        |        |        |        |        |        |        |        |        |
|       |        | 3.16   | 2.10   | 1.09   | 0.65   | 0.46   | 0.25   | 0.17   | 0.10   | 0.04   |        |        |        |
|       | 0.02   | 0.01   | 0.01   |        |        |        |        |        |        |        |        |        |        |
|       |        | 100.00 | 100.00 | 100.00 | 100.00 | 100.00 | 100.00 | 100.00 | 100.00 | 100.00 | 100.00 | 100.00 | 100.00 |
|       | 100.00 | 100.00 | 100.00 |        |        |        |        |        |        |        |        |        |        |
|       |        |        |        |        |        |        |        |        |        |        |        |        |        |
| Total | 373    | 248    | 128    | 77     | 54     | 29     | 20     | 12     | 5      | 2      | 1      | 1      | 11795  |
|       |        | 3.16   | 2.10   | 1.09   | 0.65   | 0.46   | 0.25   | 0.17   | 0.10   |        |        |        |        |
|       | 0.04   | 0.02   | 0.01   | 0.01   | 100.00 |        |        |        |        |        |        |        |        |

Degree of missing values = 186

Concomitant medications other than anticoagulants at the time of obtaining Table 2-5 consent, according to the presence or absence of proton-pump inhibitors

FREQ Procedure

|                      |       | Cumulative       |       |        |
|----------------------|-------|------------------|-------|--------|
| Percent of ALL power |       | Percent of power |       |        |
| 1                    | 11981 | 100.00           | 11981 | 100.00 |

Tables: ALL \* CMYN

ALL

CMYN(Administration of Concomitant Drug)

Power |

Percent |

Percent of rows

Percentage of columns | with | total

|             |        |        |   |
|-------------|--------|--------|---|
| _____       | +      | _____  | + |
| 1           | 11981  | 11981  |   |
|             | 100.00 | 100.00 |   |
|             | 100.00 |        |   |
|             | 100.00 |        |   |
| _____       | +      | _____  | + |
| Total 11981 | 11981  |        |   |
|             | 100.00 | 100.00 |   |

Concomitant medications other than anticoagulants at the time of obtaining Table 2-5 consent, according to the presence or absence of proton-pump inhibitors

FREQ Procedure

Tables: ALL \* TCMCNT

ALL TCMCNT(Total Number of Drugs Other than Anticoagulant)

Power |

Percent |

Percent of rows

Percent | 1| 2| 3| 4| 5| 6| 7| 8| 9| 10| 11| 12| Total

|  | 1      | 2      | 3      | 4      | 5      | 6      | 7      | 8      | 9      | 10     | 11     | 12     | Total  |       |
|--|--------|--------|--------|--------|--------|--------|--------|--------|--------|--------|--------|--------|--------|-------|
|  | 1      | 28     | 165    | 420    | 794    | 1257   | 1528   | 1604   | 1495   | 1265   | 996    | 777    | 516    | 11795 |
|  | 0.24   | 1.40   | 3.56   | 6.73   | 10.66  | 12.95  | 13.60  | 12.67  | 10.72  | 8.44   | 6.59   | 4.37   | 100.00 |       |
|  | 0.24   | 1.40   | 3.56   | 6.73   | 10.66  | 12.95  | 13.60  | 12.67  | 10.72  | 8.44   | 6.59   | 4.37   | 100.00 |       |
|  | 100.00 | 100.00 | 100.00 | 100.00 | 100.00 | 100.00 | 100.00 | 100.00 | 100.00 | 100.00 | 100.00 | 100.00 | 100.00 |       |
|  | 100.00 | 100.00 | 100.00 |        |        |        |        |        |        |        |        |        |        |       |
|  | 28     | 165    | 420    | 794    | 1257   | 1528   | 1604   | 1495   | 1265   | 996    | 777    | 516    | 11795  |       |
|  | 0.24   | 1.40   | 3.56   | 6.73   | 10.66  | 12.95  | 13.60  | 12.67  | 10.72  | 8.44   | 6.59   | 4.37   | 100.00 |       |

(continued)

Tables: ALL \* TCMCNT

ALL TCMCNT(Total Number of Drugs Other than Anticoagulant)

Power |

Percent |

Percent of rows

Percent | 13| 14| 15| 16| 17| 18| 19| 20| 21| 22| 24| 26| Total

|        | 13     | 14     | 15     | 16     | 17     | 18     | 19     | 20     | 21     | 22     | 24     | 26     | Total  |
|--------|--------|--------|--------|--------|--------|--------|--------|--------|--------|--------|--------|--------|--------|
| 1      | 1      | 373    | 248    | 128    | 77     | 54     | 29     | 20     | 12     | 5      |        |        |        |
| 2      | 1      | 1      | 11795  |        |        |        |        |        |        |        |        |        |        |
|        |        | 3.16   | 2.10   | 1.09   | 0.65   | 0.46   | 0.25   | 0.17   | 0.10   | 0.04   |        |        |        |
| 0.02   | 0.01   | 0.01   | 100.00 |        |        |        |        |        |        |        |        |        |        |
|        |        | 3.16   | 2.10   | 1.09   | 0.65   | 0.46   | 0.25   | 0.17   | 0.10   | 0.04   |        |        |        |
| 0.02   | 0.01   | 0.01   |        |        |        |        |        |        |        |        |        |        |        |
|        |        | 100.00 | 100.00 | 100.00 | 100.00 | 100.00 | 100.00 | 100.00 | 100.00 | 100.00 | 100.00 | 100.00 | 100.00 |
| 100.00 | 100.00 | 100.00 |        |        |        |        |        |        |        |        |        |        |        |
| Total  | 373    | 248    | 128    | 77     | 54     | 29     | 20     | 12     | 5      | 2      | 1      | 1      | 11795  |
|        |        | 3.16   | 2.10   | 1.09   | 0.65   | 0.46   | 0.25   | 0.17   | 0.10   |        |        |        |        |
| 0.04   | 0.02   | 0.01   | 0.01   | 100.00 |        |        |        |        |        |        |        |        |        |

Degree of missing values = 186

Concomitant medications other than anticoagulants at the time of obtaining Table 2-5 consent, according to the presence or absence of proton-pump inhibitors

FREQ Procedure

|                      |       | Cumulative       |       |        |
|----------------------|-------|------------------|-------|--------|
| Percent of ALL power |       | Percent of power |       |        |
| 1                    | 11981 | 100.00           | 11981 | 100.00 |

Tables: ALL \* CMYN

ALL

CMYN(Administration of Concomitant Drug)

Power |

Percent |

Percent of rows

Percentage of columns | with | total

|             |        |        |   |
|-------------|--------|--------|---|
| _____       | +      | _____  | + |
| 1           | 11981  | 11981  |   |
|             | 100.00 | 100.00 |   |
|             | 100.00 |        |   |
|             | 100.00 |        |   |
| _____       | +      | _____  | + |
| Total 11981 |        | 11981  |   |
|             | 100.00 | 100.00 |   |



Concomitant medications other than anticoagulants at the time of obtaining Table 2-5 consent, according to the presence or absence of proton-pump inhibitors

FREQ Procedure

Tables: ALL \* TCMCNT

ALL TCMCNT(Total Number of Drugs Other than Anticoagulant)

Power |

Percent |

Percent of rows

Percent | 1| 2| 3| 4| 5| 6| 7| 8| 9| 10| 11| 12| Total

|  | 1      | 2      | 3      | 4      | 5      | 6      | 7      | 8      | 9      | 10     | 11     | 12     | Total  |       |
|--|--------|--------|--------|--------|--------|--------|--------|--------|--------|--------|--------|--------|--------|-------|
|  | 1      | 28     | 165    | 420    | 794    | 1257   | 1528   | 1604   | 1495   | 1265   | 996    | 777    | 516    | 11795 |
|  | 0.24   | 1.40   | 3.56   | 6.73   | 10.66  | 12.95  | 13.60  | 12.67  | 10.72  | 8.44   | 6.59   | 4.37   | 100.00 |       |
|  | 0.24   | 1.40   | 3.56   | 6.73   | 10.66  | 12.95  | 13.60  | 12.67  | 10.72  | 8.44   | 6.59   | 4.37   | 100.00 |       |
|  | 100.00 | 100.00 | 100.00 | 100.00 | 100.00 | 100.00 | 100.00 | 100.00 | 100.00 | 100.00 | 100.00 | 100.00 | 100.00 |       |
|  | 100.00 | 100.00 | 100.00 |        |        |        |        |        |        |        |        |        |        |       |
|  | 28     | 165    | 420    | 794    | 1257   | 1528   | 1604   | 1495   | 1265   | 996    | 777    | 516    | 11795  |       |
|  | 0.24   | 1.40   | 3.56   | 6.73   | 10.66  | 12.95  | 13.60  | 12.67  | 10.72  | 8.44   | 6.59   | 4.37   | 100.00 |       |

(continued)

Tables: ALL \* TCMCNT

ALL TCMCNT(Total Number of Drugs Other than Anticoagulant)

Power |

Percent |

Percent of rows

Percent | 13| 14| 15| 16| 17| 18| 19| 20| 21| 22| 24| 26| Total

|        | 13     | 14     | 15     | 16     | 17     | 18     | 19     | 20     | 21     | 22     | 24     | 26     | Total  |
|--------|--------|--------|--------|--------|--------|--------|--------|--------|--------|--------|--------|--------|--------|
| 1      | 1      | 373    | 248    | 128    | 77     | 54     | 29     | 20     | 12     | 5      |        |        |        |
| 2      | 1      | 1      | 11795  |        |        |        |        |        |        |        |        |        |        |
|        |        | 3.16   | 2.10   | 1.09   | 0.65   | 0.46   | 0.25   | 0.17   | 0.10   | 0.04   |        |        |        |
| 0.02   | 0.01   | 0.01   | 100.00 |        |        |        |        |        |        |        |        |        |        |
|        |        | 3.16   | 2.10   | 1.09   | 0.65   | 0.46   | 0.25   | 0.17   | 0.10   | 0.04   |        |        |        |
| 0.02   | 0.01   | 0.01   |        |        |        |        |        |        |        |        |        |        |        |
|        |        | 100.00 | 100.00 | 100.00 | 100.00 | 100.00 | 100.00 | 100.00 | 100.00 | 100.00 | 100.00 | 100.00 | 100.00 |
| 100.00 | 100.00 | 100.00 |        |        |        |        |        |        |        |        |        |        |        |
|        |        |        |        |        |        |        |        |        |        |        |        |        |        |
| Total  | 373    | 248    | 128    | 77     | 54     | 29     | 20     | 12     | 5      | 2      | 1      | 1      | 11795  |
|        |        | 3.16   | 2.10   | 1.09   | 0.65   | 0.46   | 0.25   | 0.17   | 0.10   |        |        |        |        |
| 0.04   | 0.02   | 0.01   | 0.01   | 100.00 |        |        |        |        |        |        |        |        |        |

Degree of missing values = 186

Concomitant medications other than anticoagulants at the time of obtaining Table 2-5 consent, according to the presence or absence of proton-pump inhibitors

FREQ Procedure

|   |       | Cumulative           |                  |        |
|---|-------|----------------------|------------------|--------|
|   |       | Percent of ALL power | Percent of power |        |
| 1 | 11981 | 100.00               | 11981            | 100.00 |

Tables: ALL \* CMYN

ALL

CMYN(Administration of Concomitant Drug)

Power |

Percent |

Percent of rows

Percentage of columns | with | total

|             |        |        |   |
|-------------|--------|--------|---|
| _____       | +      | _____  | + |
| 1           | 11981  | 11981  |   |
|             | 100.00 | 100.00 |   |
|             | 100.00 |        |   |
|             | 100.00 |        |   |
| _____       | +      | _____  | + |
| Total 11981 | 11981  |        |   |
|             | 100.00 | 100.00 |   |

Concomitant medications other than anticoagulants at the time of obtaining Table 2-5 consent, according to the presence or absence of proton-pump inhibitors

FREQ Procedure

Tables: ALL \* TCMCNT

ALL TCMCNT(Total Number of Drugs Other than Anticoagulant)

Power |

Percent |

Percent of rows

Percent | 1| 2| 3| 4| 5| 6| 7| 8| 9| 10| 11| 12| Total

|  | 1      | 2      | 3      | 4      | 5      | 6      | 7      | 8      | 9      | 10     | 11     | 12     | Total  |       |
|--|--------|--------|--------|--------|--------|--------|--------|--------|--------|--------|--------|--------|--------|-------|
|  | 1      | 28     | 165    | 420    | 794    | 1257   | 1528   | 1604   | 1495   | 1265   | 996    | 777    | 516    | 11795 |
|  | 0.24   | 1.40   | 3.56   | 6.73   | 10.66  | 12.95  | 13.60  | 12.67  | 10.72  | 8.44   | 6.59   | 4.37   | 100.00 |       |
|  | 0.24   | 1.40   | 3.56   | 6.73   | 10.66  | 12.95  | 13.60  | 12.67  | 10.72  | 8.44   | 6.59   | 4.37   | 100.00 |       |
|  | 100.00 | 100.00 | 100.00 | 100.00 | 100.00 | 100.00 | 100.00 | 100.00 | 100.00 | 100.00 | 100.00 | 100.00 | 100.00 |       |
|  | 100.00 | 100.00 | 100.00 |        |        |        |        |        |        |        |        |        |        |       |
|  | 28     | 165    | 420    | 794    | 1257   | 1528   | 1604   | 1495   | 1265   | 996    | 777    | 516    | 11795  |       |
|  | 0.24   | 1.40   | 3.56   | 6.73   | 10.66  | 12.95  | 13.60  | 12.67  | 10.72  | 8.44   | 6.59   | 4.37   | 100.00 |       |

(continued)

Tables: ALL \* TCMCNT

ALL TCMCNT(Total Number of Drugs Other than Anticoagulant)

Power |

Percent |

Percent of rows

Percent | 13| 14| 15| 16| 17| 18| 19| 20| 21| 22| 24| 26| Total

|        | 13     | 14     | 15     | 16     | 17     | 18     | 19     | 20     | 21     | 22     | 24     | 26     | Total  |
|--------|--------|--------|--------|--------|--------|--------|--------|--------|--------|--------|--------|--------|--------|
| 1      | 1      | 373    | 248    | 128    | 77     | 54     | 29     | 20     | 12     | 5      |        |        |        |
| 2      | 1      | 1      | 11795  |        |        |        |        |        |        |        |        |        |        |
|        |        | 3.16   | 2.10   | 1.09   | 0.65   | 0.46   | 0.25   | 0.17   | 0.10   | 0.04   |        |        |        |
| 0.02   | 0.01   | 0.01   | 100.00 |        |        |        |        |        |        |        |        |        |        |
|        |        | 3.16   | 2.10   | 1.09   | 0.65   | 0.46   | 0.25   | 0.17   | 0.10   | 0.04   |        |        |        |
| 0.02   | 0.01   | 0.01   |        |        |        |        |        |        |        |        |        |        |        |
|        |        | 100.00 | 100.00 | 100.00 | 100.00 | 100.00 | 100.00 | 100.00 | 100.00 | 100.00 | 100.00 | 100.00 | 100.00 |
| 100.00 | 100.00 | 100.00 |        |        |        |        |        |        |        |        |        |        |        |
| Total  | 373    | 248    | 128    | 77     | 54     | 29     | 20     | 12     | 5      | 2      | 1      | 1      | 11795  |
|        |        | 3.16   | 2.10   | 1.09   | 0.65   | 0.46   | 0.25   | 0.17   | 0.10   |        |        |        |        |
| 0.04   | 0.02   | 0.01   | 0.01   | 100.00 |        |        |        |        |        |        |        |        |        |

Degree of missing values = 186

Concomitant medications other than anticoagulants at the time of obtaining Table 2-5 consent, according to the presence or absence of proton-pump inhibitors

FREQ Procedure

|                      |       | Cumulative       |       |        |
|----------------------|-------|------------------|-------|--------|
| Percent of ALL power |       | Percent of power |       |        |
| 1                    | 11981 | 100.00           | 11981 | 100.00 |

Tables: ALL \* CMYN

ALL

CMYN(Administration of Concomitant Drug)

Power |

Percent |

Percent of rows

Percentage of columns | with | total

|             |        |        |   |
|-------------|--------|--------|---|
| _____       | +      | _____  | + |
| 1           | 11981  | 11981  |   |
|             | 100.00 | 100.00 |   |
|             | 100.00 |        |   |
|             | 100.00 |        |   |
| _____       | +      | _____  | + |
| Total 11981 | 11981  |        |   |
|             | 100.00 | 100.00 |   |

Concomitant medications other than anticoagulants at the time of obtaining Table 2-5 consent, according to the presence or absence of proton-pump inhibitors

FREQ Procedure

Tables: ALL \* TCMCNT

ALL TCMCNT(Total Number of Drugs Other than Anticoagulant)

Power |

Percent |

Percent of rows

Percent | 1| 2| 3| 4| 5| 6| 7| 8| 9| 10| 11| 12| Total

|  | 1      | 2      | 3      | 4      | 5      | 6      | 7      | 8      | 9      | 10     | 11     | 12     | Total  |       |
|--|--------|--------|--------|--------|--------|--------|--------|--------|--------|--------|--------|--------|--------|-------|
|  | 1      | 28     | 165    | 420    | 794    | 1257   | 1528   | 1604   | 1495   | 1265   | 996    | 777    | 516    | 11795 |
|  | 0.24   | 1.40   | 3.56   | 6.73   | 10.66  | 12.95  | 13.60  | 12.67  | 10.72  | 8.44   | 6.59   | 4.37   | 100.00 |       |
|  | 0.24   | 1.40   | 3.56   | 6.73   | 10.66  | 12.95  | 13.60  | 12.67  | 10.72  | 8.44   | 6.59   | 4.37   | 100.00 |       |
|  | 100.00 | 100.00 | 100.00 | 100.00 | 100.00 | 100.00 | 100.00 | 100.00 | 100.00 | 100.00 | 100.00 | 100.00 | 100.00 |       |
|  | 100.00 | 100.00 | 100.00 |        |        |        |        |        |        |        |        |        |        |       |
|  | 28     | 165    | 420    | 794    | 1257   | 1528   | 1604   | 1495   | 1265   | 996    | 777    | 516    | 11795  |       |
|  | 0.24   | 1.40   | 3.56   | 6.73   | 10.66  | 12.95  | 13.60  | 12.67  | 10.72  | 8.44   | 6.59   | 4.37   | 100.00 |       |

(continued)

Tables: ALL \* TCMCNT

ALL TCMCNT(Total Number of Drugs Other than Anticoagulant)

Power |

Percent |

Percent of rows

Percent | 13| 14| 15| 16| 17| 18| 19| 20| 21| 22| 24| 26| Total

|        | 13     | 14     | 15     | 16     | 17     | 18     | 19     | 20     | 21     | 22     | 24     | 26     | Total  |
|--------|--------|--------|--------|--------|--------|--------|--------|--------|--------|--------|--------|--------|--------|
| 1      | 1      | 373    | 248    | 128    | 77     | 54     | 29     | 20     | 12     | 5      |        |        |        |
| 2      | 1      | 1      | 11795  |        |        |        |        |        |        |        |        |        |        |
|        | 3.16   | 2.10   | 1.09   | 0.65   | 0.46   | 0.25   | 0.17   | 0.10   | 0.04   |        |        |        |        |
| 0.02   | 0.01   | 0.01   | 100.00 |        |        |        |        |        |        |        |        |        |        |
|        | 3.16   | 2.10   | 1.09   | 0.65   | 0.46   | 0.25   | 0.17   | 0.10   | 0.04   |        |        |        |        |
| 0.02   | 0.01   | 0.01   |        |        |        |        |        |        |        |        |        |        |        |
|        | 100.00 | 100.00 | 100.00 | 100.00 | 100.00 | 100.00 | 100.00 | 100.00 | 100.00 | 100.00 | 100.00 | 100.00 | 100.00 |
| 100.00 | 100.00 | 100.00 |        |        |        |        |        |        |        |        |        |        |        |
| Total  | 373    | 248    | 128    | 77     | 54     | 29     | 20     | 12     | 5      | 2      | 1      | 1      | 11795  |
|        | 3.16   | 2.10   | 1.09   | 0.65   | 0.46   | 0.25   | 0.17   | 0.10   |        |        |        |        |        |
| 0.04   | 0.02   | 0.01   | 0.01   | 100.00 |        |        |        |        |        |        |        |        |        |

Degree of missing values = 186



Concomitant medications other than anticoagulants at the time of obtaining Table 2-5 consent, according to the presence or absence of proton-pump inhibitors

FREQ Procedure

|                      |       | Cumulative       |       |        |
|----------------------|-------|------------------|-------|--------|
| Percent of ALL power |       | Percent of power |       |        |
| 1                    | 11981 | 100.00           | 11981 | 100.00 |

Tables: ALL \* CMYN

ALL

CMYN(Administration of Concomitant Drug)

|                                      |        |        |   |
|--------------------------------------|--------|--------|---|
| Power                                |        |        |   |
| Percent                              |        |        |   |
| Percent of rows                      |        |        |   |
| Percentage of columns   with   total |        |        |   |
|                                      | +      |        | + |
| 1                                    | 11981  | 11981  |   |
|                                      | 100.00 | 100.00 |   |
|                                      | 100.00 |        |   |
|                                      | 100.00 |        |   |
|                                      | +      |        | + |
| Total 11981                          | 11981  |        |   |
|                                      | 100.00 | 100.00 |   |

Concomitant medications other than anticoagulants at the time of obtaining Table 2-5 consent, according to the presence or absence of proton-pump inhibitors

FREQ Procedure

Tables: ALL \* TCMCNT

ALL TCMCNT(Total Number of Drugs Other than Anticoagulant)

Power |

Percent |

Percent of rows

Percent | 1| 2| 3| 4| 5| 6| 7| 8| 9| 10| 11| 12| Total

|  | 1      | 2      | 3      | 4      | 5      | 6      | 7      | 8      | 9      | 10     | 11     | 12     | Total  |       |
|--|--------|--------|--------|--------|--------|--------|--------|--------|--------|--------|--------|--------|--------|-------|
|  | 1      | 28     | 165    | 420    | 794    | 1257   | 1528   | 1604   | 1495   | 1265   | 996    | 777    | 516    | 11795 |
|  | 0.24   | 1.40   | 3.56   | 6.73   | 10.66  | 12.95  | 13.60  | 12.67  | 10.72  | 8.44   | 6.59   | 4.37   | 100.00 |       |
|  | 0.24   | 1.40   | 3.56   | 6.73   | 10.66  | 12.95  | 13.60  | 12.67  | 10.72  | 8.44   | 6.59   | 4.37   | 100.00 |       |
|  | 100.00 | 100.00 | 100.00 | 100.00 | 100.00 | 100.00 | 100.00 | 100.00 | 100.00 | 100.00 | 100.00 | 100.00 | 100.00 |       |
|  | 100.00 | 100.00 | 100.00 |        |        |        |        |        |        |        |        |        |        |       |
|  | 28     | 165    | 420    | 794    | 1257   | 1528   | 1604   | 1495   | 1265   | 996    | 777    | 516    | 11795  |       |
|  | 0.24   | 1.40   | 3.56   | 6.73   | 10.66  | 12.95  | 13.60  | 12.67  | 10.72  | 8.44   | 6.59   | 4.37   | 100.00 |       |

(continued)

Tables: ALL \* TCMCNT

ALL TCMCNT(Total Number of Drugs Other than Anticoagulant)

Power |

Percent |

Percent of rows

Percent | 13| 14| 15| 16| 17| 18| 19| 20| 21| 22| 24| 26| Total

|        | 13     | 14     | 15     | 16     | 17     | 18     | 19     | 20     | 21     | 22     | 24     | 26     | Total  |
|--------|--------|--------|--------|--------|--------|--------|--------|--------|--------|--------|--------|--------|--------|
| 1      | 373    | 248    | 128    | 77     | 54     | 29     | 20     | 12     | 5      |        |        |        |        |
| 2      | 1      | 1      | 11795  |        |        |        |        |        |        |        |        |        |        |
|        | 3.16   | 2.10   | 1.09   | 0.65   | 0.46   | 0.25   | 0.17   | 0.10   | 0.04   |        |        |        |        |
| 0.02   | 0.01   | 0.01   | 100.00 |        |        |        |        |        |        |        |        |        |        |
|        | 3.16   | 2.10   | 1.09   | 0.65   | 0.46   | 0.25   | 0.17   | 0.10   | 0.04   |        |        |        |        |
| 0.02   | 0.01   | 0.01   |        |        |        |        |        |        |        |        |        |        |        |
|        | 100.00 | 100.00 | 100.00 | 100.00 | 100.00 | 100.00 | 100.00 | 100.00 | 100.00 | 100.00 | 100.00 | 100.00 | 100.00 |
| 100.00 | 100.00 | 100.00 |        |        |        |        |        |        |        |        |        |        |        |
|        |        |        |        |        |        |        |        |        |        |        |        |        |        |
| Total  | 373    | 248    | 128    | 77     | 54     | 29     | 20     | 12     | 5      | 2      | 1      | 1      | 11795  |
|        | 3.16   | 2.10   | 1.09   | 0.65   | 0.46   | 0.25   | 0.17   | 0.10   |        |        |        |        |        |
| 0.04   | 0.02   | 0.01   | 0.01   | 100.00 |        |        |        |        |        |        |        |        |        |

Degree of missing values = 186

Concomitant medications other than anticoagulants at the time of obtaining Table 2-5 consent, according to the presence or absence of proton-pump inhibitors

FREQ Procedure

|   |       | Cumulative           |                  |        |
|---|-------|----------------------|------------------|--------|
|   |       | Percent of ALL power | Percent of power |        |
| 1 | 11981 | 100.00               | 11981            | 100.00 |

Tables: ALL \* CMYN

ALL

CMYN(Administration of Concomitant Drug)

Power |

Percent |

Percent of rows

Percentage of columns | with | total

|             |        |        |   |
|-------------|--------|--------|---|
| _____       | +      | _____  | + |
| 1           | 11981  | 11981  |   |
|             | 100.00 | 100.00 |   |
|             | 100.00 |        |   |
|             | 100.00 |        |   |
| _____       | +      | _____  | + |
| Total 11981 | 11981  |        |   |
|             | 100.00 | 100.00 |   |

Concomitant medications other than anticoagulants at the time of obtaining Table 2-5 consent, according to the presence or absence of proton-pump inhibitors

FREQ Procedure

Tables: ALL \* TCMCNT

ALL TCMCNT(Total Number of Drugs Other than Anticoagulant)

Power |

Percent |

Percent of rows

Percent | 1| 2| 3| 4| 5| 6| 7| 8| 9| 10| 11| 12| Total

|  | 1      | 2      | 3      | 4      | 5      | 6      | 7      | 8      | 9      | 10     | 11     | 12     | Total  |       |
|--|--------|--------|--------|--------|--------|--------|--------|--------|--------|--------|--------|--------|--------|-------|
|  | 1      | 28     | 165    | 420    | 794    | 1257   | 1528   | 1604   | 1495   | 1265   | 996    | 777    | 516    | 11795 |
|  | 0.24   | 1.40   | 3.56   | 6.73   | 10.66  | 12.95  | 13.60  | 12.67  | 10.72  | 8.44   | 6.59   | 4.37   | 100.00 |       |
|  | 0.24   | 1.40   | 3.56   | 6.73   | 10.66  | 12.95  | 13.60  | 12.67  | 10.72  | 8.44   | 6.59   | 4.37   | 100.00 |       |
|  | 100.00 | 100.00 | 100.00 | 100.00 | 100.00 | 100.00 | 100.00 | 100.00 | 100.00 | 100.00 | 100.00 | 100.00 | 100.00 |       |
|  | 100.00 | 100.00 | 100.00 |        |        |        |        |        |        |        |        |        |        |       |
|  | 28     | 165    | 420    | 794    | 1257   | 1528   | 1604   | 1495   | 1265   | 996    | 777    | 516    | 11795  |       |
|  | 0.24   | 1.40   | 3.56   | 6.73   | 10.66  | 12.95  | 13.60  | 12.67  | 10.72  | 8.44   | 6.59   | 4.37   | 100.00 |       |

(continued)

Tables: ALL \* TCMCNT

ALL TCMCNT(Total Number of Drugs Other than Anticoagulant)

Power |

Percent |

Percent of rows

Percent | 13| 14| 15| 16| 17| 18| 19| 20| 21| 22| 24| 26| Total

|        | 13     | 14     | 15     | 16     | 17     | 18     | 19     | 20     | 21     | 22     | 24     | 26     | Total  |
|--------|--------|--------|--------|--------|--------|--------|--------|--------|--------|--------|--------|--------|--------|
| 1      | 1      | 373    | 248    | 128    | 77     | 54     | 29     | 20     | 12     | 5      |        |        |        |
| 2      | 1      | 1      | 11795  |        |        |        |        |        |        |        |        |        |        |
|        |        | 3.16   | 2.10   | 1.09   | 0.65   | 0.46   | 0.25   | 0.17   | 0.10   | 0.04   |        |        |        |
| 0.02   | 0.01   | 0.01   | 100.00 |        |        |        |        |        |        |        |        |        |        |
|        |        | 3.16   | 2.10   | 1.09   | 0.65   | 0.46   | 0.25   | 0.17   | 0.10   | 0.04   |        |        |        |
| 0.02   | 0.01   | 0.01   |        |        |        |        |        |        |        |        |        |        |        |
|        |        | 100.00 | 100.00 | 100.00 | 100.00 | 100.00 | 100.00 | 100.00 | 100.00 | 100.00 | 100.00 | 100.00 | 100.00 |
| 100.00 | 100.00 | 100.00 |        |        |        |        |        |        |        |        |        |        |        |
| Total  | 373    | 248    | 128    | 77     | 54     | 29     | 20     | 12     | 5      | 2      | 1      | 1      | 11795  |
|        |        | 3.16   | 2.10   | 1.09   | 0.65   | 0.46   | 0.25   | 0.17   | 0.10   |        |        |        |        |
| 0.04   | 0.02   | 0.01   | 0.01   | 100.00 |        |        |        |        |        |        |        |        |        |

Degree of missing values = 186

Concomitant medications other than anticoagulants at the time of obtaining Table 2-5 consent, according to the presence or absence of proton-pump inhibitors

FREQ Procedure

|                      |       | Cumulative       |       |        |
|----------------------|-------|------------------|-------|--------|
| Percent of ALL power |       | Percent of power |       |        |
| 1                    | 11981 | 100.00           | 11981 | 100.00 |

Tables: ALL \* CMYN

ALL

CMYN(Administration of Concomitant Drug)

Power |

Percent |

Percent of rows

Percentage of columns | with | total

|             |        |        |   |
|-------------|--------|--------|---|
| _____       | +      | _____  | + |
| 1           | 11981  | 11981  |   |
|             | 100.00 | 100.00 |   |
|             | 100.00 |        |   |
|             | 100.00 |        |   |
| _____       | +      | _____  | + |
| Total 11981 | 11981  |        |   |
|             | 100.00 | 100.00 |   |

Concomitant medications other than anticoagulants at the time of obtaining Table 2-5 consent, according to the presence or absence of proton-pump inhibitors

FREQ Procedure

Tables: ALL \* TCMCNT

ALL TCMCNT(Total Number of Drugs Other than Anticoagulant)

Power |

Percent |

Percent of rows

Percent | 1| 2| 3| 4| 5| 6| 7| 8| 9| 10| 11| 12| Total

|  | 1      | 2      | 3      | 4      | 5      | 6      | 7      | 8      | 9      | 10     | 11     | 12     | Total  |       |
|--|--------|--------|--------|--------|--------|--------|--------|--------|--------|--------|--------|--------|--------|-------|
|  | 1      | 28     | 165    | 420    | 794    | 1257   | 1528   | 1604   | 1495   | 1265   | 996    | 777    | 516    | 11795 |
|  | 0.24   | 1.40   | 3.56   | 6.73   | 10.66  | 12.95  | 13.60  | 12.67  | 10.72  | 8.44   | 6.59   | 4.37   | 100.00 |       |
|  | 0.24   | 1.40   | 3.56   | 6.73   | 10.66  | 12.95  | 13.60  | 12.67  | 10.72  | 8.44   | 6.59   | 4.37   | 100.00 |       |
|  | 100.00 | 100.00 | 100.00 | 100.00 | 100.00 | 100.00 | 100.00 | 100.00 | 100.00 | 100.00 | 100.00 | 100.00 | 100.00 |       |
|  | 100.00 | 100.00 | 100.00 |        |        |        |        |        |        |        |        |        |        |       |
|  | 28     | 165    | 420    | 794    | 1257   | 1528   | 1604   | 1495   | 1265   | 996    | 777    | 516    | 11795  |       |
|  | 0.24   | 1.40   | 3.56   | 6.73   | 10.66  | 12.95  | 13.60  | 12.67  | 10.72  | 8.44   | 6.59   | 4.37   | 100.00 |       |

(continued)

Tables: ALL \* TCMCNT

ALL TCMCNT(Total Number of Drugs Other than Anticoagulant)

Power |

Percent |



Percent of rows

Percent | 13| 14| 15| 16| 17| 18| 19| 20| 21| 22| 24| 26| Total

|        | 13     | 14     | 15     | 16     | 17     | 18     | 19     | 20     | 21     | 22     | 24     | 26     | Total  |
|--------|--------|--------|--------|--------|--------|--------|--------|--------|--------|--------|--------|--------|--------|
| 1      | 1      | 373    | 248    | 128    | 77     | 54     | 29     | 20     | 12     | 5      |        |        |        |
| 2      | 1      | 1      | 11795  |        |        |        |        |        |        |        |        |        |        |
|        |        | 3.16   | 2.10   | 1.09   | 0.65   | 0.46   | 0.25   | 0.17   | 0.10   | 0.04   |        |        |        |
| 0.02   | 0.01   | 0.01   | 100.00 |        |        |        |        |        |        |        |        |        |        |
|        |        | 3.16   | 2.10   | 1.09   | 0.65   | 0.46   | 0.25   | 0.17   | 0.10   | 0.04   |        |        |        |
| 0.02   | 0.01   | 0.01   |        |        |        |        |        |        |        |        |        |        |        |
|        |        | 100.00 | 100.00 | 100.00 | 100.00 | 100.00 | 100.00 | 100.00 | 100.00 | 100.00 | 100.00 | 100.00 | 100.00 |
| 100.00 | 100.00 | 100.00 |        |        |        |        |        |        |        |        |        |        |        |
|        |        |        |        |        |        |        |        |        |        |        |        |        |        |
| Total  | 373    | 248    | 128    | 77     | 54     | 29     | 20     | 12     | 5      | 2      | 1      | 1      | 11795  |
|        |        | 3.16   | 2.10   | 1.09   | 0.65   | 0.46   | 0.25   | 0.17   | 0.10   |        |        |        |        |
| 0.04   | 0.02   | 0.01   | 0.01   | 100.00 |        |        |        |        |        |        |        |        |        |

Degree of missing values = 186

Concomitant medications other than anticoagulants at the time of obtaining Table 2-5 consent, according to the presence or absence of proton-pump inhibitors

FREQ Procedure

|   |       | Cumulative           |                  |        |
|---|-------|----------------------|------------------|--------|
|   |       | Percent of ALL power | Percent of power |        |
| 1 | 11981 | 100.00               | 11981            | 100.00 |

Tables: ALL \* CMYN

ALL

CMYN(Administration of Concomitant Drug)

Power |

Percent |

Percent of rows

Percentage of columns | with | total

|             |        |        |   |
|-------------|--------|--------|---|
| _____       | +      | _____  | + |
| 1           | 11981  | 11981  |   |
|             | 100.00 | 100.00 |   |
|             | 100.00 |        |   |
|             | 100.00 |        |   |
| _____       | +      | _____  | + |
| Total 11981 | 11981  |        |   |
|             | 100.00 | 100.00 |   |

Concomitant medications other than anticoagulants at the time of obtaining Table 2-5 consent, according to the presence or absence of proton-pump inhibitors

FREQ Procedure

Tables: ALL \* TCMCNT

ALL TCMCNT(Total Number of Drugs Other than Anticoagulant)

Power |

Percent |

Percent of rows

Percent | 1| 2| 3| 4| 5| 6| 7| 8| 9| 10| 11| 12| Total

|  | 1      | 2      | 3      | 4      | 5      | 6      | 7      | 8      | 9      | 10     | 11     | 12     | Total  |       |
|--|--------|--------|--------|--------|--------|--------|--------|--------|--------|--------|--------|--------|--------|-------|
|  | 1      | 28     | 165    | 420    | 794    | 1257   | 1528   | 1604   | 1495   | 1265   | 996    | 777    | 516    | 11795 |
|  | 0.24   | 1.40   | 3.56   | 6.73   | 10.66  | 12.95  | 13.60  | 12.67  | 10.72  | 8.44   | 6.59   | 4.37   | 100.00 |       |
|  | 0.24   | 1.40   | 3.56   | 6.73   | 10.66  | 12.95  | 13.60  | 12.67  | 10.72  | 8.44   | 6.59   | 4.37   | 100.00 |       |
|  | 100.00 | 100.00 | 100.00 | 100.00 | 100.00 | 100.00 | 100.00 | 100.00 | 100.00 | 100.00 | 100.00 | 100.00 | 100.00 |       |
|  | 100.00 | 100.00 | 100.00 |        |        |        |        |        |        |        |        |        |        |       |
|  | 28     | 165    | 420    | 794    | 1257   | 1528   | 1604   | 1495   | 1265   | 996    | 777    | 516    | 11795  |       |
|  | 0.24   | 1.40   | 3.56   | 6.73   | 10.66  | 12.95  | 13.60  | 12.67  | 10.72  | 8.44   | 6.59   | 4.37   | 100.00 |       |

(continued)

Tables: ALL \* TCMCNT

ALL TCMCNT(Total Number of Drugs Other than Anticoagulant)

Power |

Percent |

Percent of rows

Percent | 13| 14| 15| 16| 17| 18| 19| 20| 21| 22| 24| 26| Total

|       | 13     | 14     | 15     | 16     | 17     | 18     | 19     | 20     | 21     | 22     | 24     | 26     | Total  |
|-------|--------|--------|--------|--------|--------|--------|--------|--------|--------|--------|--------|--------|--------|
| 1     | 1      | 373    | 248    | 128    | 77     | 54     | 29     | 20     | 12     | 5      |        |        | 11795  |
| 2     | 1      |        |        |        |        |        |        |        |        |        |        |        |        |
|       |        | 3.16   | 2.10   | 1.09   | 0.65   | 0.46   | 0.25   | 0.17   | 0.10   | 0.04   |        |        |        |
|       | 0.02   | 0.01   | 0.01   | 100.00 |        |        |        |        |        |        |        |        |        |
|       |        | 3.16   | 2.10   | 1.09   | 0.65   | 0.46   | 0.25   | 0.17   | 0.10   | 0.04   |        |        |        |
|       | 0.02   | 0.01   | 0.01   |        |        |        |        |        |        |        |        |        |        |
|       |        | 100.00 | 100.00 | 100.00 | 100.00 | 100.00 | 100.00 | 100.00 | 100.00 | 100.00 | 100.00 | 100.00 | 100.00 |
|       | 100.00 | 100.00 | 100.00 |        |        |        |        |        |        |        |        |        |        |
| Total | 373    | 248    | 128    | 77     | 54     | 29     | 20     | 12     | 5      | 2      | 1      | 1      | 11795  |
|       |        | 3.16   | 2.10   | 1.09   | 0.65   | 0.46   | 0.25   | 0.17   | 0.10   |        |        |        |        |
|       | 0.04   | 0.02   | 0.01   | 0.01   | 100.00 |        |        |        |        |        |        |        |        |

Degree of missing values = 186

Concomitant medications other than anticoagulants at the time of obtaining Table 2-5 consent, according to the presence or absence of proton-pump inhibitors

FREQ Procedure

|                      |       | Cumulative       |       |        |
|----------------------|-------|------------------|-------|--------|
| Percent of ALL power |       | Percent of power |       |        |
| 1                    | 11981 | 100.00           | 11981 | 100.00 |

Tables: ALL \* CMYN

ALL

CMYN(Administration of Concomitant Drug)

Power |

Percent |

Percent of rows

Percentage of columns | with | total

|             |        |        |   |
|-------------|--------|--------|---|
| _____       | +      | _____  | + |
| 1           | 11981  | 11981  |   |
|             | 100.00 | 100.00 |   |
|             | 100.00 |        |   |
|             | 100.00 |        |   |
| _____       | +      | _____  | + |
| Total 11981 |        | 11981  |   |
|             | 100.00 | 100.00 |   |

Concomitant medications other than anticoagulants at the time of obtaining Table 2-5 consent, according to the presence or absence of proton-pump inhibitors

FREQ Procedure

Tables: ALL \* TCMCNT

ALL TCMCNT(Total Number of Drugs Other than Anticoagulant)

Power |

Percent |

Percent of rows

Percent | 1| 2| 3| 4| 5| 6| 7| 8| 9| 10| 11| 12| Total

|  | 1      | 2      | 3      | 4      | 5      | 6      | 7      | 8      | 9      | 10     | 11     | 12     | Total  |       |
|--|--------|--------|--------|--------|--------|--------|--------|--------|--------|--------|--------|--------|--------|-------|
|  | 1      | 28     | 165    | 420    | 794    | 1257   | 1528   | 1604   | 1495   | 1265   | 996    | 777    | 516    | 11795 |
|  | 0.24   | 1.40   | 3.56   | 6.73   | 10.66  | 12.95  | 13.60  | 12.67  | 10.72  | 8.44   | 6.59   | 4.37   | 100.00 |       |
|  | 0.24   | 1.40   | 3.56   | 6.73   | 10.66  | 12.95  | 13.60  | 12.67  | 10.72  | 8.44   | 6.59   | 4.37   | 100.00 |       |
|  | 100.00 | 100.00 | 100.00 | 100.00 | 100.00 | 100.00 | 100.00 | 100.00 | 100.00 | 100.00 | 100.00 | 100.00 | 100.00 |       |
|  | 100.00 | 100.00 | 100.00 |        |        |        |        |        |        |        |        |        |        |       |
|  | 28     | 165    | 420    | 794    | 1257   | 1528   | 1604   | 1495   | 1265   | 996    | 777    | 516    | 11795  |       |
|  | 0.24   | 1.40   | 3.56   | 6.73   | 10.66  | 12.95  | 13.60  | 12.67  | 10.72  | 8.44   | 6.59   | 4.37   | 100.00 |       |

(continued)

Tables: ALL \* TCMCNT

ALL TCMCNT(Total Number of Drugs Other than Anticoagulant)

Power |

Percent |

Percent of rows

Percent | 13| 14| 15| 16| 17| 18| 19| 20| 21| 22| 24| 26| Total

|        | 13     | 14     | 15     | 16     | 17     | 18     | 19     | 20     | 21     | 22     | 24     | 26     | Total  |
|--------|--------|--------|--------|--------|--------|--------|--------|--------|--------|--------|--------|--------|--------|
| 1      | 373    | 248    | 128    | 77     | 54     | 29     | 20     | 12     | 5      |        |        |        |        |
| 2      | 1      | 1      | 11795  |        |        |        |        |        |        |        |        |        |        |
|        | 3.16   | 2.10   | 1.09   | 0.65   | 0.46   | 0.25   | 0.17   | 0.10   | 0.04   |        |        |        |        |
| 0.02   | 0.01   | 0.01   | 100.00 |        |        |        |        |        |        |        |        |        |        |
|        | 3.16   | 2.10   | 1.09   | 0.65   | 0.46   | 0.25   | 0.17   | 0.10   | 0.04   |        |        |        |        |
| 0.02   | 0.01   | 0.01   |        |        |        |        |        |        |        |        |        |        |        |
|        | 100.00 | 100.00 | 100.00 | 100.00 | 100.00 | 100.00 | 100.00 | 100.00 | 100.00 | 100.00 | 100.00 | 100.00 | 100.00 |
| 100.00 | 100.00 | 100.00 |        |        |        |        |        |        |        |        |        |        |        |
|        |        |        |        |        |        |        |        |        |        |        |        |        |        |
| Total  | 373    | 248    | 128    | 77     | 54     | 29     | 20     | 12     | 5      | 2      | 1      | 1      | 11795  |
|        | 3.16   | 2.10   | 1.09   | 0.65   | 0.46   | 0.25   | 0.17   | 0.10   |        |        |        |        |        |
| 0.04   | 0.02   | 0.01   | 0.01   | 100.00 |        |        |        |        |        |        |        |        |        |

Degree of missing values = 186

Concomitant medications other than anticoagulants at the time of obtaining Table 2-5 consent, according to the presence or absence of proton-pump inhibitors

FREQ Procedure

|   |       | Cumulative           |                  |        |
|---|-------|----------------------|------------------|--------|
|   |       | Percent of ALL power | Percent of power |        |
| 1 | 11981 | 100.00               | 11981            | 100.00 |

Tables: ALL \* CMYN

ALL

CMYN(Administration of Concomitant Drug)

Power |

Percent |

Percent of rows

Percentage of columns | with | total

|             |        |        |   |
|-------------|--------|--------|---|
| _____       | +      | _____  | + |
| 1           | 11981  | 11981  |   |
|             | 100.00 | 100.00 |   |
|             | 100.00 |        |   |
|             | 100.00 |        |   |
| _____       | +      | _____  | + |
| Total 11981 | 11981  |        |   |
|             | 100.00 | 100.00 |   |



Concomitant medications other than anticoagulants at the time of obtaining Table 2-5 consent, according to the presence or absence of proton-pump inhibitors

FREQ Procedure

Tables: ALL \* TCMCNT

ALL TCMCNT(Total Number of Drugs Other than Anticoagulant)

Power |

Percent |

Percent of rows

Percent | 1| 2| 3| 4| 5| 6| 7| 8| 9| 10| 11| 12| Total

|  | 1      | 2      | 3      | 4      | 5      | 6      | 7      | 8      | 9      | 10     | 11     | 12     | Total  |       |
|--|--------|--------|--------|--------|--------|--------|--------|--------|--------|--------|--------|--------|--------|-------|
|  | 1      | 28     | 165    | 420    | 794    | 1257   | 1528   | 1604   | 1495   | 1265   | 996    | 777    | 516    | 11795 |
|  | 0.24   | 1.40   | 3.56   | 6.73   | 10.66  | 12.95  | 13.60  | 12.67  | 10.72  | 8.44   | 6.59   | 4.37   | 100.00 |       |
|  | 0.24   | 1.40   | 3.56   | 6.73   | 10.66  | 12.95  | 13.60  | 12.67  | 10.72  | 8.44   | 6.59   | 4.37   | 100.00 |       |
|  | 100.00 | 100.00 | 100.00 | 100.00 | 100.00 | 100.00 | 100.00 | 100.00 | 100.00 | 100.00 | 100.00 | 100.00 | 100.00 |       |
|  | 100.00 | 100.00 | 100.00 |        |        |        |        |        |        |        |        |        |        |       |
|  | 28     | 165    | 420    | 794    | 1257   | 1528   | 1604   | 1495   | 1265   | 996    | 777    | 516    | 11795  |       |
|  | 0.24   | 1.40   | 3.56   | 6.73   | 10.66  | 12.95  | 13.60  | 12.67  | 10.72  | 8.44   | 6.59   | 4.37   | 100.00 |       |

(continued)

Tables: ALL \* TCMCNT

ALL TCMCNT(Total Number of Drugs Other than Anticoagulant)

Power |

Percent |

Percent of rows

Percent | 13| 14| 15| 16| 17| 18| 19| 20| 21| 22| 24| 26| Total

|        | 13     | 14     | 15     | 16     | 17     | 18     | 19     | 20     | 21     | 22     | 24     | 26     | Total  |
|--------|--------|--------|--------|--------|--------|--------|--------|--------|--------|--------|--------|--------|--------|
| 1      | 1      | 373    | 248    | 128    | 77     | 54     | 29     | 20     | 12     | 5      |        |        |        |
| 2      | 1      | 1      | 11795  |        |        |        |        |        |        |        |        |        |        |
|        |        | 3.16   | 2.10   | 1.09   | 0.65   | 0.46   | 0.25   | 0.17   | 0.10   | 0.04   |        |        |        |
| 0.02   | 0.01   | 0.01   | 100.00 |        |        |        |        |        |        |        |        |        |        |
|        |        | 3.16   | 2.10   | 1.09   | 0.65   | 0.46   | 0.25   | 0.17   | 0.10   | 0.04   |        |        |        |
| 0.02   | 0.01   | 0.01   |        |        |        |        |        |        |        |        |        |        |        |
|        |        | 100.00 | 100.00 | 100.00 | 100.00 | 100.00 | 100.00 | 100.00 | 100.00 | 100.00 | 100.00 | 100.00 | 100.00 |
| 100.00 | 100.00 | 100.00 |        |        |        |        |        |        |        |        |        |        |        |
| Total  | 373    | 248    | 128    | 77     | 54     | 29     | 20     | 12     | 5      | 2      | 1      | 1      | 11795  |
|        |        | 3.16   | 2.10   | 1.09   | 0.65   | 0.46   | 0.25   | 0.17   | 0.10   |        |        |        |        |
| 0.04   | 0.02   | 0.01   | 0.01   | 100.00 |        |        |        |        |        |        |        |        |        |

Degree of missing values = 186

Concomitant medications other than anticoagulants at the time of obtaining Table 2-5 consent, according to the presence or absence of proton-pump inhibitors

FREQ Procedure

|                      |       | Cumulative       |       |        |
|----------------------|-------|------------------|-------|--------|
| Percent of ALL power |       | Percent of power |       |        |
| 1                    | 11981 | 100.00           | 11981 | 100.00 |

Tables: ALL \* CMYN

ALL

CMYN(Administration of Concomitant Drug)

Power |

Percent |

Percent of rows

Percentage of columns | with | total

|             |        |        |   |
|-------------|--------|--------|---|
| _____       | +      | _____  | + |
| 1           | 11981  | 11981  |   |
|             | 100.00 | 100.00 |   |
|             | 100.00 |        |   |
|             | 100.00 |        |   |
| _____       | +      | _____  | + |
| Total 11981 | 11981  |        |   |
|             | 100.00 | 100.00 |   |

Concomitant medications other than anticoagulants at the time of obtaining Table 2-5 consent, according to the presence or absence of proton-pump inhibitors

FREQ Procedure

Tables: ALL \* TCMCNT

ALL TCMCNT(Total Number of Drugs Other than Anticoagulant)

Power |

Percent |

Percent of rows

Percent | 1| 2| 3| 4| 5| 6| 7| 8| 9| 10| 11| 12| Total

|  | 1      | 2      | 3      | 4      | 5      | 6      | 7      | 8      | 9      | 10     | 11     | 12     | Total  |       |
|--|--------|--------|--------|--------|--------|--------|--------|--------|--------|--------|--------|--------|--------|-------|
|  | 1      | 28     | 165    | 420    | 794    | 1257   | 1528   | 1604   | 1495   | 1265   | 996    | 777    | 516    | 11795 |
|  | 0.24   | 1.40   | 3.56   | 6.73   | 10.66  | 12.95  | 13.60  | 12.67  | 10.72  | 8.44   | 6.59   | 4.37   | 100.00 |       |
|  | 0.24   | 1.40   | 3.56   | 6.73   | 10.66  | 12.95  | 13.60  | 12.67  | 10.72  | 8.44   | 6.59   | 4.37   | 100.00 |       |
|  | 100.00 | 100.00 | 100.00 | 100.00 | 100.00 | 100.00 | 100.00 | 100.00 | 100.00 | 100.00 | 100.00 | 100.00 | 100.00 |       |
|  | 100.00 | 100.00 | 100.00 |        |        |        |        |        |        |        |        |        |        |       |
|  | 28     | 165    | 420    | 794    | 1257   | 1528   | 1604   | 1495   | 1265   | 996    | 777    | 516    | 11795  |       |
|  | 0.24   | 1.40   | 3.56   | 6.73   | 10.66  | 12.95  | 13.60  | 12.67  | 10.72  | 8.44   | 6.59   | 4.37   | 100.00 |       |

(continued)

Tables: ALL \* TCMCNT

ALL TCMCNT(Total Number of Drugs Other than Anticoagulant)

Power |

Percent |

Percent of rows

Percent | 13| 14| 15| 16| 17| 18| 19| 20| 21| 22| 24| 26| Total

|        | 13     | 14     | 15     | 16     | 17     | 18     | 19     | 20     | 21     | 22     | 24     | 26     | Total  |
|--------|--------|--------|--------|--------|--------|--------|--------|--------|--------|--------|--------|--------|--------|
| 1      | 1      | 373    | 248    | 128    | 77     | 54     | 29     | 20     | 12     | 5      |        |        |        |
| 2      | 1      | 1      | 11795  |        |        |        |        |        |        |        |        |        |        |
|        |        | 3.16   | 2.10   | 1.09   | 0.65   | 0.46   | 0.25   | 0.17   | 0.10   | 0.04   |        |        |        |
| 0.02   | 0.01   | 0.01   | 100.00 |        |        |        |        |        |        |        |        |        |        |
|        |        | 3.16   | 2.10   | 1.09   | 0.65   | 0.46   | 0.25   | 0.17   | 0.10   | 0.04   |        |        |        |
| 0.02   | 0.01   | 0.01   |        |        |        |        |        |        |        |        |        |        |        |
|        |        | 100.00 | 100.00 | 100.00 | 100.00 | 100.00 | 100.00 | 100.00 | 100.00 | 100.00 | 100.00 | 100.00 | 100.00 |
| 100.00 | 100.00 | 100.00 |        |        |        |        |        |        |        |        |        |        |        |
|        |        |        |        |        |        |        |        |        |        |        |        |        |        |
| Total  | 373    | 248    | 128    | 77     | 54     | 29     | 20     | 12     | 5      | 2      | 1      | 1      | 11795  |
|        |        | 3.16   | 2.10   | 1.09   | 0.65   | 0.46   | 0.25   | 0.17   | 0.10   |        |        |        |        |
| 0.04   | 0.02   | 0.01   | 0.01   | 100.00 |        |        |        |        |        |        |        |        |        |

Degree of missing values = 186

Concomitant medications other than anticoagulants at the time of obtaining Table 2-5 consent, according to the presence or absence of proton-pump inhibitors

FREQ Procedure

|                      |       | Cumulative       |       |        |
|----------------------|-------|------------------|-------|--------|
| Percent of ALL power |       | Percent of power |       |        |
| 1                    | 11981 | 100.00           | 11981 | 100.00 |

Tables: ALL \* CMYN

ALL

CMYN(Administration of Concomitant Drug)

Power |

Percent |

Percent of rows

Percentage of columns | with | total

|             |        |        |   |
|-------------|--------|--------|---|
| _____       | +      | _____  | + |
| 1           | 11981  | 11981  |   |
|             | 100.00 | 100.00 |   |
|             | 100.00 |        |   |
|             | 100.00 |        |   |
| _____       | +      | _____  | + |
| Total 11981 |        | 11981  |   |
|             | 100.00 | 100.00 |   |

Concomitant medications other than anticoagulants at the time of obtaining Table 2-5 consent, according to the presence or absence of proton-pump inhibitors

FREQ Procedure

Tables: ALL \* TCMCNT

ALL TCMCNT(Total Number of Drugs Other than Anticoagulant)

Power |

Percent |

Percent of rows

Percent | 1| 2| 3| 4| 5| 6| 7| 8| 9| 10| 11| 12| Total

|  | 1      | 2      | 3      | 4      | 5      | 6      | 7      | 8      | 9      | 10     | 11     | 12     | Total  |       |
|--|--------|--------|--------|--------|--------|--------|--------|--------|--------|--------|--------|--------|--------|-------|
|  | 1      | 28     | 165    | 420    | 794    | 1257   | 1528   | 1604   | 1495   | 1265   | 996    | 777    | 516    | 11795 |
|  | 0.24   | 1.40   | 3.56   | 6.73   | 10.66  | 12.95  | 13.60  | 12.67  | 10.72  | 8.44   | 6.59   | 4.37   | 100.00 |       |
|  | 0.24   | 1.40   | 3.56   | 6.73   | 10.66  | 12.95  | 13.60  | 12.67  | 10.72  | 8.44   | 6.59   | 4.37   | 100.00 |       |
|  | 100.00 | 100.00 | 100.00 | 100.00 | 100.00 | 100.00 | 100.00 | 100.00 | 100.00 | 100.00 | 100.00 | 100.00 | 100.00 |       |
|  | 100.00 | 100.00 | 100.00 |        |        |        |        |        |        |        |        |        |        |       |
|  | 28     | 165    | 420    | 794    | 1257   | 1528   | 1604   | 1495   | 1265   | 996    | 777    | 516    | 11795  |       |
|  | 0.24   | 1.40   | 3.56   | 6.73   | 10.66  | 12.95  | 13.60  | 12.67  | 10.72  | 8.44   | 6.59   | 4.37   | 100.00 |       |

(continued)

Tables: ALL \* TCMCNT

ALL TCMCNT(Total Number of Drugs Other than Anticoagulant)

Power |

Percent |

Percent of rows

Percent | 13| 14| 15| 16| 17| 18| 19| 20| 21| 22| 24| 26| Total

|        | 13     | 14     | 15     | 16     | 17     | 18     | 19     | 20     | 21     | 22     | 24     | 26     | Total  |
|--------|--------|--------|--------|--------|--------|--------|--------|--------|--------|--------|--------|--------|--------|
| 1      | 1      | 373    | 248    | 128    | 77     | 54     | 29     | 20     | 12     | 5      |        |        |        |
| 2      | 1      | 1      | 11795  |        |        |        |        |        |        |        |        |        |        |
|        |        | 3.16   | 2.10   | 1.09   | 0.65   | 0.46   | 0.25   | 0.17   | 0.10   | 0.04   |        |        |        |
| 0.02   | 0.01   | 0.01   | 100.00 |        |        |        |        |        |        |        |        |        |        |
|        |        | 3.16   | 2.10   | 1.09   | 0.65   | 0.46   | 0.25   | 0.17   | 0.10   | 0.04   |        |        |        |
| 0.02   | 0.01   | 0.01   |        |        |        |        |        |        |        |        |        |        |        |
|        |        | 100.00 | 100.00 | 100.00 | 100.00 | 100.00 | 100.00 | 100.00 | 100.00 | 100.00 | 100.00 | 100.00 | 100.00 |
| 100.00 | 100.00 | 100.00 |        |        |        |        |        |        |        |        |        |        |        |

|       | 13   | 14   | 15   | 16     | 17   | 18   | 19   | 20   | 21   | 22 | 24 | 26 | Total |
|-------|------|------|------|--------|------|------|------|------|------|----|----|----|-------|
| Total | 373  | 248  | 128  | 77     | 54   | 29   | 20   | 12   | 5    | 2  | 1  | 1  | 11795 |
|       |      | 3.16 | 2.10 | 1.09   | 0.65 | 0.46 | 0.25 | 0.17 | 0.10 |    |    |    |       |
| 0.04  | 0.02 | 0.01 | 0.01 | 100.00 |      |      |      |      |      |    |    |    |       |

Degree of missing values = 186



Concomitant medications other than anticoagulants at the time of obtaining Table 2-5 consent, according to the presence or absence of proton-pump inhibitors

FREQ Procedure

|                      |       | Cumulative       |       |        |
|----------------------|-------|------------------|-------|--------|
| Percent of ALL power |       | Percent of power |       |        |
| 1                    | 11981 | 100.00           | 11981 | 100.00 |

Tables: ALL \* CMYN

ALL

CMYN(Administration of Concomitant Drug)

Power |

Percent |

Percent of rows

Percentage of columns | with | total

|             |        |        |   |
|-------------|--------|--------|---|
| _____       | +      | _____  | + |
| 1           | 11981  | 11981  |   |
|             | 100.00 | 100.00 |   |
|             | 100.00 |        |   |
|             | 100.00 |        |   |
| _____       | +      | _____  | + |
| Total 11981 | 11981  |        |   |
|             | 100.00 | 100.00 |   |

Concomitant medications other than anticoagulants at the time of obtaining Table 2-5 consent, according to the presence or absence of proton-pump inhibitors

FREQ Procedure

Tables: ALL \* TCMCNT

ALL TCMCNT(Total Number of Drugs Other than Anticoagulant)

Power |

Percent |

Percent of rows

Percent | 1| 2| 3| 4| 5| 6| 7| 8| 9| 10| 11| 12| Total

|  | 1      | 2      | 3      | 4      | 5      | 6      | 7      | 8      | 9      | 10     | 11     | 12     | Total  |       |
|--|--------|--------|--------|--------|--------|--------|--------|--------|--------|--------|--------|--------|--------|-------|
|  | 1      | 28     | 165    | 420    | 794    | 1257   | 1528   | 1604   | 1495   | 1265   | 996    | 777    | 516    | 11795 |
|  | 0.24   | 1.40   | 3.56   | 6.73   | 10.66  | 12.95  | 13.60  | 12.67  | 10.72  | 8.44   | 6.59   | 4.37   | 100.00 |       |
|  | 0.24   | 1.40   | 3.56   | 6.73   | 10.66  | 12.95  | 13.60  | 12.67  | 10.72  | 8.44   | 6.59   | 4.37   | 100.00 |       |
|  | 100.00 | 100.00 | 100.00 | 100.00 | 100.00 | 100.00 | 100.00 | 100.00 | 100.00 | 100.00 | 100.00 | 100.00 | 100.00 |       |
|  | 100.00 | 100.00 | 100.00 |        |        |        |        |        |        |        |        |        |        |       |
|  | 28     | 165    | 420    | 794    | 1257   | 1528   | 1604   | 1495   | 1265   | 996    | 777    | 516    | 11795  |       |
|  | 0.24   | 1.40   | 3.56   | 6.73   | 10.66  | 12.95  | 13.60  | 12.67  | 10.72  | 8.44   | 6.59   | 4.37   | 100.00 |       |

(continued)

Tables: ALL \* TCMCNT

ALL TCMCNT(Total Number of Drugs Other than Anticoagulant)

Power |

Percent |

Percent of rows

Percent | 13| 14| 15| 16| 17| 18| 19| 20| 21| 22| 24| 26| Total

|        | 13     | 14     | 15     | 16     | 17     | 18     | 19     | 20     | 21     | 22     | 24     | 26     | Total  |
|--------|--------|--------|--------|--------|--------|--------|--------|--------|--------|--------|--------|--------|--------|
| 1      | 1      | 373    | 248    | 128    | 77     | 54     | 29     | 20     | 12     | 5      |        |        |        |
| 2      | 1      | 1      | 11795  |        |        |        |        |        |        |        |        |        |        |
|        |        | 3.16   | 2.10   | 1.09   | 0.65   | 0.46   | 0.25   | 0.17   | 0.10   | 0.04   |        |        |        |
| 0.02   | 0.01   | 0.01   | 100.00 |        |        |        |        |        |        |        |        |        |        |
|        |        | 3.16   | 2.10   | 1.09   | 0.65   | 0.46   | 0.25   | 0.17   | 0.10   | 0.04   |        |        |        |
| 0.02   | 0.01   | 0.01   |        |        |        |        |        |        |        |        |        |        |        |
|        |        | 100.00 | 100.00 | 100.00 | 100.00 | 100.00 | 100.00 | 100.00 | 100.00 | 100.00 | 100.00 | 100.00 | 100.00 |
| 100.00 | 100.00 | 100.00 |        |        |        |        |        |        |        |        |        |        |        |
|        |        |        |        |        |        |        |        |        |        |        |        |        |        |
| Total  | 373    | 248    | 128    | 77     | 54     | 29     | 20     | 12     | 5      | 2      | 1      | 1      | 11795  |
|        |        | 3.16   | 2.10   | 1.09   | 0.65   | 0.46   | 0.25   | 0.17   | 0.10   |        |        |        |        |
| 0.04   | 0.02   | 0.01   | 0.01   | 100.00 |        |        |        |        |        |        |        |        |        |

Degree of missing values = 186

Concomitant medications other than anticoagulants at the time of obtaining Table 2-5 consent, according to the presence or absence of proton-pump inhibitors

FREQ Procedure

|                      |       | Cumulative       |       |        |
|----------------------|-------|------------------|-------|--------|
| Percent of ALL power |       | Percent of power |       |        |
| 1                    | 11981 | 100.00           | 11981 | 100.00 |

Tables: ALL \* CMYN

ALL

CMYN(Administration of Concomitant Drug)

Power |

Percent |

Percent of rows

Percentage of columns | with | total

|             |        |        |   |
|-------------|--------|--------|---|
| _____       | +      | _____  | + |
| 1           | 11981  | 11981  |   |
|             | 100.00 | 100.00 |   |
|             | 100.00 |        |   |
|             | 100.00 |        |   |
| _____       | +      | _____  | + |
| Total 11981 | 11981  |        |   |
|             | 100.00 | 100.00 |   |

Concomitant medications other than anticoagulants at the time of obtaining Table 2-5 consent, according to the presence or absence of proton-pump inhibitors

FREQ Procedure

Tables: ALL \* TCMCNT

ALL TCMCNT(Total Number of Drugs Other than Anticoagulant)

Power |

Percent |

Percent of rows

Percent | 1| 2| 3| 4| 5| 6| 7| 8| 9| 10| 11| 12| Total

|  | 1      | 2      | 3      | 4      | 5      | 6      | 7      | 8      | 9      | 10     | 11     | 12     | Total  |       |
|--|--------|--------|--------|--------|--------|--------|--------|--------|--------|--------|--------|--------|--------|-------|
|  | 1      | 28     | 165    | 420    | 794    | 1257   | 1528   | 1604   | 1495   | 1265   | 996    | 777    | 516    | 11795 |
|  | 0.24   | 1.40   | 3.56   | 6.73   | 10.66  | 12.95  | 13.60  | 12.67  | 10.72  | 8.44   | 6.59   | 4.37   | 100.00 |       |
|  | 0.24   | 1.40   | 3.56   | 6.73   | 10.66  | 12.95  | 13.60  | 12.67  | 10.72  | 8.44   | 6.59   | 4.37   | 100.00 |       |
|  | 100.00 | 100.00 | 100.00 | 100.00 | 100.00 | 100.00 | 100.00 | 100.00 | 100.00 | 100.00 | 100.00 | 100.00 | 100.00 |       |
|  | 100.00 | 100.00 | 100.00 |        |        |        |        |        |        |        |        |        |        |       |
|  | 28     | 165    | 420    | 794    | 1257   | 1528   | 1604   | 1495   | 1265   | 996    | 777    | 516    | 11795  |       |
|  | 0.24   | 1.40   | 3.56   | 6.73   | 10.66  | 12.95  | 13.60  | 12.67  | 10.72  | 8.44   | 6.59   | 4.37   | 100.00 |       |

(continued)

Tables: ALL \* TCMCNT

ALL TCMCNT(Total Number of Drugs Other than Anticoagulant)

Power |

Percent |

Percent of rows

Percent | 13| 14| 15| 16| 17| 18| 19| 20| 21| 22| 24| 26| Total

|        | 13     | 14     | 15     | 16     | 17     | 18     | 19     | 20     | 21     | 22     | 24     | 26     | Total  |
|--------|--------|--------|--------|--------|--------|--------|--------|--------|--------|--------|--------|--------|--------|
| 1      | 1      | 373    | 248    | 128    | 77     | 54     | 29     | 20     | 12     | 5      |        |        |        |
| 2      | 1      | 1      | 11795  |        |        |        |        |        |        |        |        |        |        |
|        |        | 3.16   | 2.10   | 1.09   | 0.65   | 0.46   | 0.25   | 0.17   | 0.10   | 0.04   |        |        |        |
| 0.02   | 0.01   | 0.01   | 100.00 |        |        |        |        |        |        |        |        |        |        |
|        |        | 3.16   | 2.10   | 1.09   | 0.65   | 0.46   | 0.25   | 0.17   | 0.10   | 0.04   |        |        |        |
| 0.02   | 0.01   | 0.01   |        |        |        |        |        |        |        |        |        |        |        |
|        |        | 100.00 | 100.00 | 100.00 | 100.00 | 100.00 | 100.00 | 100.00 | 100.00 | 100.00 | 100.00 | 100.00 | 100.00 |
| 100.00 | 100.00 | 100.00 |        |        |        |        |        |        |        |        |        |        |        |
|        |        |        |        |        |        |        |        |        |        |        |        |        |        |
| Total  | 373    | 248    | 128    | 77     | 54     | 29     | 20     | 12     | 5      | 2      | 1      | 1      | 11795  |
|        |        | 3.16   | 2.10   | 1.09   | 0.65   | 0.46   | 0.25   | 0.17   | 0.10   |        |        |        |        |
| 0.04   | 0.02   | 0.01   | 0.01   | 100.00 |        |        |        |        |        |        |        |        |        |

Degree of missing values = 186

Concomitant medications other than anticoagulants at the time of obtaining Table 2-5 consent, according to the presence or absence of proton-pump inhibitors

FREQ Procedure

|   |       | Cumulative           |                  |        |
|---|-------|----------------------|------------------|--------|
|   |       | Percent of ALL power | Percent of power |        |
| 1 | 11981 | 100.00               | 11981            | 100.00 |

Tables: ALL \* CMYN

ALL

CMYN(Administration of Concomitant Drug)

|                                      |        |        |  |  |
|--------------------------------------|--------|--------|--|--|
| Power                                |        |        |  |  |
| Percent                              |        |        |  |  |
| Percent of rows                      |        |        |  |  |
| Percentage of columns   with   total |        |        |  |  |
| _____+_____+                         |        |        |  |  |
| 1   11981   11981                    |        |        |  |  |
| 100.00   100.00                      |        |        |  |  |
| 100.00                               |        |        |  |  |
| 100.00                               |        |        |  |  |
| _____+_____+                         |        |        |  |  |
| Total 11981 11981                    | 100.00 | 100.00 |  |  |

Concomitant medications other than anticoagulants at the time of obtaining Table 2-5 consent, according to the presence or absence of proton-pump inhibitors

FREQ Procedure

Tables: ALL \* TCMCNT

ALL TCMCNT(Total Number of Drugs Other than Anticoagulant)

Power |

Percent |

Percent of rows

Percent | 1| 2| 3| 4| 5| 6| 7| 8| 9| 10| 11| 12| Total

|  | 1      | 2      | 3      | 4      | 5      | 6      | 7      | 8      | 9      | 10     | 11     | 12     | Total  |       |
|--|--------|--------|--------|--------|--------|--------|--------|--------|--------|--------|--------|--------|--------|-------|
|  | 1      | 28     | 165    | 420    | 794    | 1257   | 1528   | 1604   | 1495   | 1265   | 996    | 777    | 516    | 11795 |
|  | 0.24   | 1.40   | 3.56   | 6.73   | 10.66  | 12.95  | 13.60  | 12.67  | 10.72  | 8.44   | 6.59   | 4.37   | 100.00 |       |
|  | 0.24   | 1.40   | 3.56   | 6.73   | 10.66  | 12.95  | 13.60  | 12.67  | 10.72  | 8.44   | 6.59   | 4.37   | 100.00 |       |
|  | 100.00 | 100.00 | 100.00 | 100.00 | 100.00 | 100.00 | 100.00 | 100.00 | 100.00 | 100.00 | 100.00 | 100.00 | 100.00 |       |
|  | 100.00 | 100.00 | 100.00 |        |        |        |        |        |        |        |        |        |        |       |
|  | 28     | 165    | 420    | 794    | 1257   | 1528   | 1604   | 1495   | 1265   | 996    | 777    | 516    | 11795  |       |
|  | 0.24   | 1.40   | 3.56   | 6.73   | 10.66  | 12.95  | 13.60  | 12.67  | 10.72  | 8.44   | 6.59   | 4.37   | 100.00 |       |

(continued)

Tables: ALL \* TCMCNT

ALL TCMCNT(Total Number of Drugs Other than Anticoagulant)

Power |

Percent |



Percent of rows

Percent | 13| 14| 15| 16| 17| 18| 19| 20| 21| 22| 24| 26| Total

|        | 13     | 14     | 15     | 16     | 17     | 18     | 19     | 20     | 21     | 22     | 24     | 26     | Total  |
|--------|--------|--------|--------|--------|--------|--------|--------|--------|--------|--------|--------|--------|--------|
| 1      | 373    | 248    | 128    | 77     | 54     | 29     | 20     | 12     | 5      |        |        |        |        |
| 2      | 1      | 1      | 11795  |        |        |        |        |        |        |        |        |        |        |
|        | 3.16   | 2.10   | 1.09   | 0.65   | 0.46   | 0.25   | 0.17   | 0.10   | 0.04   |        |        |        |        |
| 0.02   | 0.01   | 0.01   | 100.00 |        |        |        |        |        |        |        |        |        |        |
|        | 3.16   | 2.10   | 1.09   | 0.65   | 0.46   | 0.25   | 0.17   | 0.10   | 0.04   |        |        |        |        |
| 0.02   | 0.01   | 0.01   |        |        |        |        |        |        |        |        |        |        |        |
|        | 100.00 | 100.00 | 100.00 | 100.00 | 100.00 | 100.00 | 100.00 | 100.00 | 100.00 | 100.00 | 100.00 | 100.00 | 100.00 |
| 100.00 | 100.00 | 100.00 |        |        |        |        |        |        |        |        |        |        |        |
|        |        |        |        |        |        |        |        |        |        |        |        |        |        |
| Total  | 373    | 248    | 128    | 77     | 54     | 29     | 20     | 12     | 5      | 2      | 1      | 1      | 11795  |
|        | 3.16   | 2.10   | 1.09   | 0.65   | 0.46   | 0.25   | 0.17   | 0.10   |        |        |        |        |        |
| 0.04   | 0.02   | 0.01   | 0.01   | 100.00 |        |        |        |        |        |        |        |        |        |

Degree of missing values = 186

Concomitant medications other than anticoagulants at the time of obtaining Table 2-5 consent, according to the presence or absence of proton-pump inhibitors

FREQ Procedure

|                      |       | Cumulative       |       |        |
|----------------------|-------|------------------|-------|--------|
| Percent of ALL power |       | Percent of power |       |        |
| 1                    | 11981 | 100.00           | 11981 | 100.00 |

Tables: ALL \* CMYN

ALL

CMYN(Administration of Concomitant Drug)

Power |

Percent |

Percent of rows

Percentage of columns | with | total

|             |        |        |   |
|-------------|--------|--------|---|
| _____       | +      | _____  | + |
| 1           | 11981  | 11981  |   |
|             | 100.00 | 100.00 |   |
|             | 100.00 |        |   |
|             | 100.00 |        |   |
| _____       | +      | _____  | + |
| Total 11981 | 11981  |        |   |
|             | 100.00 | 100.00 |   |

Concomitant medications other than anticoagulants at the time of obtaining Table 2-5 consent, according to the presence or absence of proton-pump inhibitors

FREQ Procedure

Tables: ALL \* TCMCNT

ALL TCMCNT(Total Number of Drugs Other than Anticoagulant)

Power |

Percent |

Percent of rows

Percent | 1| 2| 3| 4| 5| 6| 7| 8| 9| 10| 11| 12| Total

|  | 1      | 2      | 3      | 4      | 5      | 6      | 7      | 8      | 9      | 10     | 11     | 12     | Total  |       |
|--|--------|--------|--------|--------|--------|--------|--------|--------|--------|--------|--------|--------|--------|-------|
|  | 1      | 28     | 165    | 420    | 794    | 1257   | 1528   | 1604   | 1495   | 1265   | 996    | 777    | 516    | 11795 |
|  | 0.24   | 1.40   | 3.56   | 6.73   | 10.66  | 12.95  | 13.60  | 12.67  | 10.72  | 8.44   | 6.59   | 4.37   | 100.00 |       |
|  | 0.24   | 1.40   | 3.56   | 6.73   | 10.66  | 12.95  | 13.60  | 12.67  | 10.72  | 8.44   | 6.59   | 4.37   | 100.00 |       |
|  | 100.00 | 100.00 | 100.00 | 100.00 | 100.00 | 100.00 | 100.00 | 100.00 | 100.00 | 100.00 | 100.00 | 100.00 | 100.00 |       |
|  | 100.00 | 100.00 | 100.00 |        |        |        |        |        |        |        |        |        |        |       |
|  | 28     | 165    | 420    | 794    | 1257   | 1528   | 1604   | 1495   | 1265   | 996    | 777    | 516    | 11795  |       |
|  | 0.24   | 1.40   | 3.56   | 6.73   | 10.66  | 12.95  | 13.60  | 12.67  | 10.72  | 8.44   | 6.59   | 4.37   | 100.00 |       |

(continued)

Tables: ALL \* TCMCNT

ALL TCMCNT(Total Number of Drugs Other than Anticoagulant)

Power |

Percent |

Percent of rows

Percent | 13| 14| 15| 16| 17| 18| 19| 20| 21| 22| 24| 26| Total

|        | 13     | 14     | 15     | 16     | 17     | 18     | 19     | 20     | 21     | 22     | 24     | 26     | Total  |
|--------|--------|--------|--------|--------|--------|--------|--------|--------|--------|--------|--------|--------|--------|
| 1      | 1      | 373    | 248    | 128    | 77     | 54     | 29     | 20     | 12     | 5      |        |        |        |
| 2      | 1      | 1      | 11795  |        |        |        |        |        |        |        |        |        |        |
|        |        | 3.16   | 2.10   | 1.09   | 0.65   | 0.46   | 0.25   | 0.17   | 0.10   | 0.04   |        |        |        |
| 0.02   | 0.01   | 0.01   | 100.00 |        |        |        |        |        |        |        |        |        |        |
|        |        | 3.16   | 2.10   | 1.09   | 0.65   | 0.46   | 0.25   | 0.17   | 0.10   | 0.04   |        |        |        |
| 0.02   | 0.01   | 0.01   |        |        |        |        |        |        |        |        |        |        |        |
|        |        | 100.00 | 100.00 | 100.00 | 100.00 | 100.00 | 100.00 | 100.00 | 100.00 | 100.00 | 100.00 | 100.00 | 100.00 |
| 100.00 | 100.00 | 100.00 |        |        |        |        |        |        |        |        |        |        |        |
|        |        |        |        |        |        |        |        |        |        |        |        |        |        |
| Total  | 373    | 248    | 128    | 77     | 54     | 29     | 20     | 12     | 5      | 2      | 1      | 1      | 11795  |
|        |        | 3.16   | 2.10   | 1.09   | 0.65   | 0.46   | 0.25   | 0.17   | 0.10   |        |        |        |        |
| 0.04   | 0.02   | 0.01   | 0.01   | 100.00 |        |        |        |        |        |        |        |        |        |

Degree of missing values = 186

Concomitant medications other than anticoagulants at the time of obtaining Table 2-5 consent, according to the presence or absence of proton-pump inhibitors

FREQ Procedure

|                      |       | Cumulative       |       |        |
|----------------------|-------|------------------|-------|--------|
| Percent of ALL power |       | Percent of power |       |        |
| 1                    | 11981 | 100.00           | 11981 | 100.00 |

Tables: ALL \* CMYN

ALL

CMYN(Administration of Concomitant Drug)

Power |

Percent |

Percent of rows

Percentage of columns | with | total

|             |        |        |   |
|-------------|--------|--------|---|
| _____       | +      | _____  | + |
| 1           | 11981  | 11981  |   |
|             | 100.00 | 100.00 |   |
|             | 100.00 |        |   |
|             | 100.00 |        |   |
| _____       | +      | _____  | + |
| Total 11981 | 11981  |        |   |
|             | 100.00 | 100.00 |   |

Concomitant medications other than anticoagulants at the time of obtaining Table 2-5 consent, according to the presence or absence of proton-pump inhibitors

FREQ Procedure

Tables: ALL \* TCMCNT

ALL TCMCNT(Total Number of Drugs Other than Anticoagulant)

Power |

Percent |

Percent of rows

Percent | 1| 2| 3| 4| 5| 6| 7| 8| 9| 10| 11| 12| Total

|  | 1      | 2      | 3      | 4      | 5      | 6      | 7      | 8      | 9      | 10     | 11     | 12     | Total  |       |
|--|--------|--------|--------|--------|--------|--------|--------|--------|--------|--------|--------|--------|--------|-------|
|  | 1      | 28     | 165    | 420    | 794    | 1257   | 1528   | 1604   | 1495   | 1265   | 996    | 777    | 516    | 11795 |
|  | 0.24   | 1.40   | 3.56   | 6.73   | 10.66  | 12.95  | 13.60  | 12.67  | 10.72  | 8.44   | 6.59   | 4.37   | 100.00 |       |
|  | 0.24   | 1.40   | 3.56   | 6.73   | 10.66  | 12.95  | 13.60  | 12.67  | 10.72  | 8.44   | 6.59   | 4.37   | 100.00 |       |
|  | 100.00 | 100.00 | 100.00 | 100.00 | 100.00 | 100.00 | 100.00 | 100.00 | 100.00 | 100.00 | 100.00 | 100.00 | 100.00 |       |
|  | 100.00 | 100.00 | 100.00 |        |        |        |        |        |        |        |        |        |        |       |
|  | 28     | 165    | 420    | 794    | 1257   | 1528   | 1604   | 1495   | 1265   | 996    | 777    | 516    | 11795  |       |
|  | 0.24   | 1.40   | 3.56   | 6.73   | 10.66  | 12.95  | 13.60  | 12.67  | 10.72  | 8.44   | 6.59   | 4.37   | 100.00 |       |

(continued)

Tables: ALL \* TCMCNT

ALL TCMCNT(Total Number of Drugs Other than Anticoagulant)

Power |

Percent |

Percent of rows

Percent | 13| 14| 15| 16| 17| 18| 19| 20| 21| 22| 24| 26| Total

|        | 13     | 14     | 15     | 16     | 17     | 18     | 19     | 20     | 21     | 22     | 24     | 26     | Total  |
|--------|--------|--------|--------|--------|--------|--------|--------|--------|--------|--------|--------|--------|--------|
| 1      | 373    | 248    | 128    | 77     | 54     | 29     | 20     | 12     | 5      |        |        |        |        |
| 2      | 1      | 1      | 11795  |        |        |        |        |        |        |        |        |        |        |
|        | 3.16   | 2.10   | 1.09   | 0.65   | 0.46   | 0.25   | 0.17   | 0.10   | 0.04   |        |        |        |        |
| 0.02   | 0.01   | 0.01   | 100.00 |        |        |        |        |        |        |        |        |        |        |
|        | 3.16   | 2.10   | 1.09   | 0.65   | 0.46   | 0.25   | 0.17   | 0.10   | 0.04   |        |        |        |        |
| 0.02   | 0.01   | 0.01   |        |        |        |        |        |        |        |        |        |        |        |
|        | 100.00 | 100.00 | 100.00 | 100.00 | 100.00 | 100.00 | 100.00 | 100.00 | 100.00 | 100.00 | 100.00 | 100.00 | 100.00 |
| 100.00 | 100.00 | 100.00 |        |        |        |        |        |        |        |        |        |        |        |
|        |        |        |        |        |        |        |        |        |        |        |        |        |        |
| Total  | 373    | 248    | 128    | 77     | 54     | 29     | 20     | 12     | 5      | 2      | 1      | 1      | 11795  |
|        | 3.16   | 2.10   | 1.09   | 0.65   | 0.46   | 0.25   | 0.17   | 0.10   |        |        |        |        |        |
| 0.04   | 0.02   | 0.01   | 0.01   | 100.00 |        |        |        |        |        |        |        |        |        |

Degree of missing values = 186

Concomitant medications other than anticoagulants at the time of obtaining Table 2-5 consent, according to the presence or absence of proton-pump inhibitors

FREQ Procedure

|                      |       | Cumulative       |       |        |
|----------------------|-------|------------------|-------|--------|
| Percent of ALL power |       | Percent of power |       |        |
| 1                    | 11981 | 100.00           | 11981 | 100.00 |

Tables: ALL \* CMYN

ALL

CMYN(Administration of Concomitant Drug)

Power |

Percent |

Percent of rows

Percentage of columns | with | total

|             |        |        |   |
|-------------|--------|--------|---|
| _____       | +      | _____  | + |
| 1           | 11981  | 11981  |   |
|             | 100.00 | 100.00 |   |
|             | 100.00 |        |   |
|             | 100.00 |        |   |
| _____       | +      | _____  | + |
| Total 11981 | 11981  |        |   |
|             | 100.00 | 100.00 |   |



Concomitant medications other than anticoagulants at the time of obtaining Table 2-5 consent, according to the presence or absence of proton-pump inhibitors

FREQ Procedure

Table: ALL \* t\_cm

ALL t\_cm

Power |

Percent |

Percent of rows

Percent of columns | 1 | Total

|          |        |        |  |
|----------|--------|--------|--|
| _____+   |        | _____+ |  |
| 1        | 21     | 21     |  |
|          | 100.00 | 100.00 |  |
|          | 100.00 |        |  |
|          | 100.00 |        |  |
| _____+   |        | _____+ |  |
| Total 21 | 21     |        |  |
|          | 100.00 | 100.00 |  |

Frequency of missing values = 11960

Concomitant medications other than anticoagulants at the time of obtaining Table 2-5 consent, according to the presence or absence of proton-pump inhibitors

FREQ Procedure

|                      |       | Cumulative       |       |        |
|----------------------|-------|------------------|-------|--------|
| Percent of ALL power |       | Percent of power |       |        |
| 1                    | 11981 | 100.00           | 11981 | 100.00 |

Tables: ALL \* CMYN

ALL

CMYN(Administration of Concomitant Drug)

Power |

Percent |

Percent of rows

Percentage of columns | with | total

|             |        |        |   |
|-------------|--------|--------|---|
| _____       | +      | _____  | + |
| 1           | 11981  | 11981  |   |
|             | 100.00 | 100.00 |   |
|             | 100.00 |        |   |
|             | 100.00 |        |   |
| _____       | +      | _____  | + |
| Total 11981 | 11981  |        |   |
|             | 100.00 | 100.00 |   |

Concomitant medications other than anticoagulants at the time of obtaining Table 2-5 consent, according to the presence or absence of proton-pump inhibitors

FREQ Procedure

Table: ALL \* t\_TCMCNT

ALL t\_TCMCNT

Power |

Percent |

Percent of rows

Percent of columns | 9| Total

|           |        |        |  |
|-----------|--------|--------|--|
| _____+    |        | _____+ |  |
| 1         | 186    | 186    |  |
|           | 100.00 | 100.00 |  |
|           | 100.00 |        |  |
|           | 100.00 |        |  |
| _____+    |        | _____+ |  |
| Total 186 | 186    |        |  |
|           | 100.00 | 100.00 |  |

Frequency of missing values = 11795

Concomitant medications other than anticoagulants at the time of obtaining Table 2-5 consent, according to the presence or absence of proton-pump inhibitors

FREQ Procedure

|                      |       | Cumulative       |       |        |
|----------------------|-------|------------------|-------|--------|
| Percent of ALL power |       | Percent of power |       |        |
| 1                    | 11981 | 100.00           | 11981 | 100.00 |

Tables: ALL \* CMYN

ALL

CMYN(Administration of Concomitant Drug)

Power |

Percent |

Percent of rows

Percentage of columns | with | total

|             |        |        |   |
|-------------|--------|--------|---|
| _____       | +      | _____  | + |
| 1           | 11981  | 11981  |   |
|             | 100.00 | 100.00 |   |
|             | 100.00 |        |   |
|             | 100.00 |        |   |
| _____       | +      | _____  | + |
| Total 11981 | 11981  |        |   |
|             | 100.00 | 100.00 |   |

Concomitant medications other than anticoagulants at the time of obtaining Table 2-5 consent, according to the presence or absence of proton-pump inhibitors

FREQ Procedure

Tables: ALL\* TCMCNTCT

ALL

TCMCNTCT(Category for Total Number of Drugs Other than Anticoagulant)

Power |

Percent |

Percent of rows

Percentage of column |0 to 4 or more|5 to 9 or more|10 or more|unknown|total

|Bottom|Bottom | | |

|       | 0 to 4 or more | 5 to 9 or more | 10 or more | unknown | total  |
|-------|----------------|----------------|------------|---------|--------|
| 1     | 1407           | 7149           | 3239       | 186     | 11981  |
|       | 11.74          | 59.67          | 27.03      | 1.55    | 100.00 |
|       | 11.74          | 59.67          | 27.03      | 1.55    |        |
|       | 100.00         | 100.00         | 100.00     | 100.00  |        |
| Total | 1407           | 7149           | 3239       | 186     | 11981  |
|       | 11.74          | 59.67          | 27.03      | 1.55    | 100.00 |

Concomitant medications other than anticoagulants at the time of obtaining Table 2-5 consent, according to the presence or absence of proton-pump inhibitors

FREQ Procedure

|   |       | Cumulative           |                  |        |
|---|-------|----------------------|------------------|--------|
|   |       | Percent of ALL power | Percent of power |        |
| 1 | 11981 | 100.00               | 11981            | 100.00 |

Tables: ALL \* CMYN

ALL

CMYN(Administration of Concomitant Drug)

Power |

Percent |

Percent of rows

Percentage of columns | with | total

|             |        |        |   |
|-------------|--------|--------|---|
| _____       | +      | _____  | + |
| 1           | 11981  | 11981  |   |
|             | 100.00 | 100.00 |   |
|             | 100.00 |        |   |
|             | 100.00 |        |   |
| _____       | +      | _____  | + |
| Total 11981 | 11981  |        |   |
|             | 100.00 | 100.00 |   |

Concomitant medications other than anticoagulants at the time of obtaining Table 2-5 consent, according to the presence or absence of proton-pump inhibitors

FREQ Procedure

Tables: ALL\* TCMCNTCT

ALL

TCMCNTCT(Category for Total Number of Drugs Other than Anticoagulant)

Power |

Percent |

Percent of rows

Percentage of column |0 to 4 or more|5 to 9 or more|10 or more|unknown|total

|Bottom|Bottom | | |

|       | +      | +      | +      | +      | +      |
|-------|--------|--------|--------|--------|--------|
| 1     | 1407   | 7149   | 3239   | 186    | 11981  |
|       | 11.74  | 59.67  | 27.03  | 1.55   | 100.00 |
|       | 11.74  | 59.67  | 27.03  | 1.55   |        |
|       | 100.00 | 100.00 | 100.00 | 100.00 |        |
|       | +      | +      | +      | +      | +      |
| Total | 1407   | 7149   | 3239   | 186    | 11981  |
|       | 11.74  | 59.67  | 27.03  | 1.55   | 100.00 |

Concomitant medications other than anticoagulants at the time of obtaining Table 2-5 consent, according to the presence or absence of proton-pump inhibitors

FREQ Procedure

|   |       | Cumulative           |                  |        |
|---|-------|----------------------|------------------|--------|
|   |       | Percent of ALL power | Percent of power |        |
| 1 | 11981 | 100.00               | 11981            | 100.00 |

Tables: ALL \* CMYN

ALL

CMYN(Administration of Concomitant Drug)

Power |

Percent |

Percent of rows

Percentage of columns | with | total

|             |        |        |   |
|-------------|--------|--------|---|
| _____       | +      | _____  | + |
| 1           | 11981  | 11981  |   |
|             | 100.00 | 100.00 |   |
|             | 100.00 |        |   |
|             | 100.00 |        |   |
| _____       | +      | _____  | + |
| Total 11981 | 11981  |        |   |
|             | 100.00 | 100.00 |   |



Concomitant medications other than anticoagulants at the time of obtaining Table 2-5 consent, according to the presence or absence of proton-pump inhibitors

FREQ Procedure

Tables: ALL\* TCMCNTCT

ALL

TCMCNTCT(Category for Total Number of Drugs Other than Anticoagulant)

Power |

Percent |

Percent of rows

Percentage of column |0 to 4 or more|5 to 9 or more|10 or more|unknown|total

|Bottom|Bottom | | |

\_\_\_\_\_ + \_\_\_\_\_ + \_\_\_\_\_ + \_\_\_\_\_ + \_\_\_\_\_ +

1 | 1407 | 7149 | 3239 | 186 | 11981

| 11.74 | 59.67 | 27.03 | 1.55 | 100.00

| 11.74 | 59.67 | 27.03 | 1.55 |

| 100.00 | 100.00 | 100.00 | 100.00 |

\_\_\_\_\_ + \_\_\_\_\_ + \_\_\_\_\_ + \_\_\_\_\_ + \_\_\_\_\_ +

Total 1407 7149 3239 186 11981

11.74 59.67 27.03 1.55 100.00

Concomitant medications other than anticoagulants at the time of obtaining Table 2-5 consent, according to the presence or absence of proton-pump inhibitors

FREQ Procedure

|                      |       | Cumulative       |       |        |
|----------------------|-------|------------------|-------|--------|
| Percent of ALL power |       | Percent of power |       |        |
| 1                    | 11981 | 100.00           | 11981 | 100.00 |

Tables: ALL \* CMYN

ALL

CMYN(Administration of Concomitant Drug)

Power |

Percent |

Percent of rows

Percentage of columns | with | total

|             |        |        |   |
|-------------|--------|--------|---|
| _____       | +      | _____  | + |
| 1           | 11981  | 11981  |   |
|             | 100.00 | 100.00 |   |
|             | 100.00 |        |   |
|             | 100.00 |        |   |
| _____       | +      | _____  | + |
| Total 11981 | 11981  |        |   |
|             | 100.00 | 100.00 |   |

Concomitant medications other than anticoagulants at the time of obtaining Table 2-5 consent, according to the presence or absence of proton-pump inhibitors

FREQ Procedure

Tables: ALL\* TCMCNTCT

ALL

TCMCNTCT(Category for Total Number of Drugs Other than Anticoagulant)

Power |

Percent |

Percent of rows

Percentage of column |0 to 4 or more|5 to 9 or more|10 or more|unknown|total

|Bottom|Bottom | | |

|       | +      | +      | +      | +      | +      |
|-------|--------|--------|--------|--------|--------|
| 1     | 1407   | 7149   | 3239   | 186    | 11981  |
|       | 11.74  | 59.67  | 27.03  | 1.55   | 100.00 |
|       | 11.74  | 59.67  | 27.03  | 1.55   |        |
|       | 100.00 | 100.00 | 100.00 | 100.00 |        |
|       | +      | +      | +      | +      | +      |
| Total | 1407   | 7149   | 3239   | 186    | 11981  |
|       | 11.74  | 59.67  | 27.03  | 1.55   | 100.00 |

Concomitant medications other than anticoagulants at the time of obtaining Table 2-5 consent, according to the presence or absence of proton-pump inhibitors

FREQ Procedure

|                      |       | Cumulative       |       |        |
|----------------------|-------|------------------|-------|--------|
| Percent of ALL power |       | Percent of power |       |        |
| 1                    | 20509 | 100.00           | 20509 | 100.00 |

Tables: ALL \* CMYN

ALL

CMYN(Administration of Concomitant Drug)

| Power                   |        |        |        |
|-------------------------|--------|--------|--------|
| Percent                 |        |        |        |
| Percent of rows         |        |        |        |
| Percent of columns      | None   | With   | Total  |
| _____ + _____ + _____ + |        |        |        |
| 1                       | 1445   | 19064  | 20509  |
|                         | 7.05   | 92.95  | 100.00 |
|                         | 7.05   | 92.95  |        |
|                         | 100.00 | 100.00 |        |
| _____ + _____ + _____ + |        |        |        |
| Total                   | 1445   | 19064  | 20509  |
|                         | 7.05   | 92.95  | 100.00 |

Concomitant medications other than anticoagulants at the time of obtaining Table 2-5 consent, according to the presence or absence of proton-pump inhibitors

FREQ Procedure

Tables: ALL \* CMYN

ALL

CMYN(Administration of Concomitant Drug)

Power |

Percent |

Percent of rows

Percent of columns | None | With | Total

|            |        |        |        |  |   |
|------------|--------|--------|--------|--|---|
|            | +      |        | +      |  | + |
| 1          | 1445   | 19064  | 20509  |  |   |
|            | 7.05   | 92.95  | 100.00 |  |   |
|            | 7.05   | 92.95  |        |  |   |
|            | 100.00 | 100.00 |        |  |   |
|            | +      |        | +      |  | + |
| Total 1445 |        | 19064  | 20509  |  |   |
|            | 7.05   | 92.95  | 100.00 |  |   |

Concomitant medications other than anticoagulants at the time of obtaining Table 2-5 consent, according to the presence or absence of proton-pump inhibitors

FREQ Procedure

|                      |       | Cumulative       |       |        |
|----------------------|-------|------------------|-------|--------|
| Percent of ALL power |       | Percent of power |       |        |
| 1                    | 20509 | 100.00           | 20509 | 100.00 |

Tables: ALL \* CMYN

ALL

CMYN(Administration of Concomitant Drug)

| Power                   |        |        |        |
|-------------------------|--------|--------|--------|
| Percent                 |        |        |        |
| Percent of rows         |        |        |        |
| Percent of columns      | None   | With   | Total  |
| _____ + _____ + _____ + |        |        |        |
| 1                       | 1445   | 19064  | 20509  |
|                         | 7.05   | 92.95  | 100.00 |
|                         | 7.05   | 92.95  |        |
|                         | 100.00 | 100.00 |        |
| _____ + _____ + _____ + |        |        |        |
| Total                   | 1445   | 19064  | 20509  |
|                         | 7.05   | 92.95  | 100.00 |

Concomitant medications other than anticoagulants at the time of obtaining Table 2-5 consent, according to the presence or absence of proton-pump inhibitors

FREQ Procedure

Tables: ALL \* CMYN

ALL

CMYN(Administration of Concomitant Drug)

Power |

Percent |

Percent of rows

Percent of columns | None | With | Total

|       | +      | +      | +      |
|-------|--------|--------|--------|
| 1     | 1445   | 19064  | 20509  |
|       | 7.05   | 92.95  | 100.00 |
|       | 7.05   | 92.95  |        |
|       | 100.00 | 100.00 |        |
|       | +      | +      | +      |
| Total | 1445   | 19064  | 20509  |
|       | 7.05   | 92.95  | 100.00 |

Concomitant medications other than anticoagulants at the time of obtaining Table 2-5 consent, according to the presence or absence of proton-pump inhibitors

FREQ Procedure

|   |       | Cumulative           |                  |        |
|---|-------|----------------------|------------------|--------|
|   |       | Percent of ALL power | Percent of power |        |
| 1 | 20509 | 100.00               | 20509            | 100.00 |

Tables: ALL \* CMYN

ALL

CMYN(Administration of Concomitant Drug)

| Power                   |        |        |        |
|-------------------------|--------|--------|--------|
| Percent                 |        |        |        |
| Percent of rows         |        |        |        |
| Percent of columns      | None   | With   | Total  |
| _____ + _____ + _____ + |        |        |        |
| 1                       | 1445   | 19064  | 20509  |
|                         | 7.05   | 92.95  | 100.00 |
|                         | 7.05   | 92.95  |        |
|                         | 100.00 | 100.00 |        |
| _____ + _____ + _____ + |        |        |        |
| Total 1445              | 19064  | 20509  |        |
|                         | 7.05   | 92.95  | 100.00 |



Concomitant medications other than anticoagulants at the time of obtaining Table 2-5 consent, according to the presence or absence of proton-pump inhibitors

FREQ Procedure

Tables: ALL \* CMYN

ALL

CMYN(Administration of Concomitant Drug)

Power |

Percent |

Percent of rows

Percent of columns | None | With | Total

|       | None   | With   | Total  |
|-------|--------|--------|--------|
| 1     | 1445   | 19064  | 20509  |
|       | 7.05   | 92.95  | 100.00 |
|       | 7.05   | 92.95  |        |
|       | 100.00 | 100.00 |        |
| Total | 1445   | 19064  | 20509  |
|       | 7.05   | 92.95  | 100.00 |

Concomitant medications other than anticoagulants at the time of obtaining Table 2-5 consent, according to the presence or absence of proton-pump inhibitors

FREQ Procedure

|   |       | Cumulative           |                  |        |
|---|-------|----------------------|------------------|--------|
|   |       | Percent of ALL power | Percent of power |        |
| 1 | 20509 | 100.00               | 20509            | 100.00 |

Tables: ALL \* CMYN

ALL

CMYN(Administration of Concomitant Drug)

| Power                   |        |        |        |
|-------------------------|--------|--------|--------|
| Percent                 |        |        |        |
| Percent of rows         |        |        |        |
| Percent of columns      | None   | With   | Total  |
| _____ + _____ + _____ + |        |        |        |
| 1                       | 1445   | 19064  | 20509  |
|                         | 7.05   | 92.95  | 100.00 |
|                         | 7.05   | 92.95  |        |
|                         | 100.00 | 100.00 |        |
| _____ + _____ + _____ + |        |        |        |
| Total                   | 1445   | 19064  | 20509  |
|                         | 7.05   | 92.95  | 100.00 |

Concomitant medications other than anticoagulants at the time of obtaining Table 2-5 consent, according to the presence or absence of proton-pump inhibitors

FREQ Procedure

Tables: ALL\* ARTD

ALL ARTD(Arrhythmic Drugs)

Power |

Percent |

Percent of rows

Percent of columns | None | With | Total

|       | None   | With   | Total  |
|-------|--------|--------|--------|
| 1     | 7836   | 11228  | 19064  |
|       | 41.10  | 58.90  | 100.00 |
|       | 41.10  | 58.90  |        |
|       | 100.00 | 100.00 |        |
| Total | 7836   | 11228  | 19064  |
|       | 41.10  | 58.90  | 100.00 |

Concomitant medications other than anticoagulants at the time of obtaining Table 2-5 consent, according to the presence or absence of proton-pump inhibitors

FREQ Procedure

|   |       | Cumulative           |                  |        |
|---|-------|----------------------|------------------|--------|
|   |       | Percent of ALL power | Percent of power |        |
| 1 | 20509 | 100.00               | 20509            | 100.00 |

Tables: ALL \* CMYN

ALL

CMYN(Administration of Concomitant Drug)

| Power                   |        |        |        |
|-------------------------|--------|--------|--------|
| Percent                 |        |        |        |
| Percent of rows         |        |        |        |
| Percent of columns      | None   | With   | Total  |
| _____ + _____ + _____ + |        |        |        |
| 1                       | 1445   | 19064  | 20509  |
|                         | 7.05   | 92.95  | 100.00 |
|                         | 7.05   | 92.95  |        |
|                         | 100.00 | 100.00 |        |
| _____ + _____ + _____ + |        |        |        |
| Total                   | 1445   | 19064  | 20509  |
|                         | 7.05   | 92.95  | 100.00 |

Concomitant medications other than anticoagulants at the time of obtaining Table 2-5 consent, according to the presence or absence of proton-pump inhibitors

FREQ Procedure

Tables: ALL\* ARTD

ALL ARTD(Arrhythmic Drugs)

Power |

Percent |

Percent of rows

Percent of columns | None | With | Total

|       | None   | With   | Total  |
|-------|--------|--------|--------|
| 1     | 7836   | 11228  | 19064  |
|       | 41.10  | 58.90  | 100.00 |
|       | 41.10  | 58.90  |        |
|       | 100.00 | 100.00 |        |
| Total | 7836   | 11228  | 19064  |
|       | 41.10  | 58.90  | 100.00 |

Concomitant medications other than anticoagulants at the time of obtaining Table 2-5 consent, according to the presence or absence of proton-pump inhibitors

FREQ Procedure

|                      |       | Cumulative       |       |        |
|----------------------|-------|------------------|-------|--------|
| Percent of ALL power |       | Percent of power |       |        |
| 1                    | 20509 | 100.00           | 20509 | 100.00 |

Tables: ALL \* CMYN

ALL

CMYN(Administration of Concomitant Drug)

| Power                   |        |        |        |
|-------------------------|--------|--------|--------|
| Percent                 |        |        |        |
| Percent of rows         |        |        |        |
| Percent of columns      | None   | With   | Total  |
| _____ + _____ + _____ + |        |        |        |
| 1                       | 1445   | 19064  | 20509  |
|                         | 7.05   | 92.95  | 100.00 |
|                         | 7.05   | 92.95  |        |
|                         | 100.00 | 100.00 |        |
| _____ + _____ + _____ + |        |        |        |
| Total 1445              | 19064  | 20509  |        |
|                         | 7.05   | 92.95  | 100.00 |

Concomitant medications other than anticoagulants at the time of obtaining Table 2-5 consent, according to the presence or absence of proton-pump inhibitors

FREQ Procedure

Table : ALL \* ARTD1

ALL ARTD1(Rhythm Control)

Power |

Percent |

Percent of rows

Percent of columns | None | With | Total

|       | None   | With   | Total  |
|-------|--------|--------|--------|
| 1     | 15180  | 3884   | 19064  |
|       | 79.63  | 20.37  | 100.00 |
|       | 79.63  | 20.37  |        |
|       | 100.00 | 100.00 |        |
| Total | 15180  | 3884   | 19064  |
|       | 79.63  | 20.37  | 100.00 |

Concomitant medications other than anticoagulants at the time of obtaining Table 2-5 consent, according to the presence or absence of proton-pump inhibitors

FREQ Procedure

|                      |       | Cumulative       |       |        |
|----------------------|-------|------------------|-------|--------|
| Percent of ALL power |       | Percent of power |       |        |
| 1                    | 20509 | 100.00           | 20509 | 100.00 |

Tables: ALL \* CMYN

ALL

CMYN(Administration of Concomitant Drug)

Power |

Percent |

Percent of rows

Percent of columns | None | With | Total

|       |        |        |        |  |   |
|-------|--------|--------|--------|--|---|
|       | +      |        | +      |  | + |
| 1     | 1445   | 19064  | 20509  |  |   |
|       | 7.05   | 92.95  | 100.00 |  |   |
|       | 7.05   | 92.95  |        |  |   |
|       | 100.00 | 100.00 |        |  |   |
|       | +      |        | +      |  | + |
| Total | 1445   | 19064  | 20509  |  |   |
|       | 7.05   | 92.95  | 100.00 |  |   |



Concomitant medications other than anticoagulants at the time of obtaining Table 2-5 consent, according to the presence or absence of proton-pump inhibitors

FREQ Procedure

Table : ALL \* ARTD1

ALL ARTD1(Rhythm Control)

Power |

Percent |

Percent of rows

Percent of columns | None | With | Total

|       | None   | With   | Total  |
|-------|--------|--------|--------|
| 1     | 15180  | 3884   | 19064  |
|       | 79.63  | 20.37  | 100.00 |
|       | 79.63  | 20.37  |        |
|       | 100.00 | 100.00 |        |
| Total | 15180  | 3884   | 19064  |
|       | 79.63  | 20.37  | 100.00 |

Concomitant medications other than anticoagulants at the time of obtaining Table 2-5 consent, according to the presence or absence of proton-pump inhibitors

FREQ Procedure

|   |       | Cumulative           |                  |        |
|---|-------|----------------------|------------------|--------|
|   |       | Percent of ALL power | Percent of power |        |
| 1 | 20509 | 100.00               | 20509            | 100.00 |

Tables: ALL \* CMYN

ALL

CMYN(Administration of Concomitant Drug)

| Power                   |        |        |        |
|-------------------------|--------|--------|--------|
| Percent                 |        |        |        |
| Percent of rows         |        |        |        |
| Percent of columns      | None   | With   | Total  |
| _____ + _____ + _____ + |        |        |        |
| 1                       | 1445   | 19064  | 20509  |
|                         | 7.05   | 92.95  | 100.00 |
|                         | 7.05   | 92.95  |        |
|                         | 100.00 | 100.00 |        |
| _____ + _____ + _____ + |        |        |        |
| Total                   | 1445   | 19064  | 20509  |
|                         | 7.05   | 92.95  | 100.00 |

Concomitant medications other than anticoagulants at the time of obtaining Table 2-5 consent, according to the presence or absence of proton-pump inhibitors

FREQ Procedure

Table : ALL \* ARTD2

ALL ARTD2(Rate Control)

Power |

Percent |

Percent of rows

Percent of columns | None | With | Total

|       | None   | With   | Total  |
|-------|--------|--------|--------|
| 1     | 10871  | 8193   | 19064  |
|       | 57.02  | 42.98  | 100.00 |
|       | 57.02  | 42.98  |        |
|       | 100.00 | 100.00 |        |
| Total | 10871  | 8193   | 19064  |
|       | 57.02  | 42.98  | 100.00 |

Concomitant medications other than anticoagulants at the time of obtaining Table 2-5 consent, according to the presence or absence of proton-pump inhibitors

FREQ Procedure

|                      |       | Cumulative       |       |        |
|----------------------|-------|------------------|-------|--------|
| Percent of ALL power |       | Percent of power |       |        |
| 1                    | 20509 | 100.00           | 20509 | 100.00 |

Tables: ALL \* CMYN

ALL

CMYN(Administration of Concomitant Drug)

| Power                   |        |        |        |
|-------------------------|--------|--------|--------|
| Percent                 |        |        |        |
| Percent of rows         |        |        |        |
| Percent of columns      | None   | With   | Total  |
| _____ + _____ + _____ + |        |        |        |
| 1                       | 1445   | 19064  | 20509  |
|                         | 7.05   | 92.95  | 100.00 |
|                         | 7.05   | 92.95  |        |
|                         | 100.00 | 100.00 |        |
| _____ + _____ + _____ + |        |        |        |
| Total 1445              | 19064  | 20509  |        |
|                         | 7.05   | 92.95  | 100.00 |

Concomitant medications other than anticoagulants at the time of obtaining Table 2-5 consent, according to the presence or absence of proton-pump inhibitors

FREQ Procedure

Table : ALL \* ARTD2

ALL ARTD2(Rate Control)

Power |

Percent |

Percent of rows

Percent of columns | None | With | Total

|       | None   | With   | Total  |
|-------|--------|--------|--------|
| 1     | 10871  | 8193   | 19064  |
|       | 57.02  | 42.98  | 100.00 |
|       | 57.02  | 42.98  |        |
|       | 100.00 | 100.00 |        |
| Total | 10871  | 8193   | 19064  |
|       | 57.02  | 42.98  | 100.00 |

Concomitant medications other than anticoagulants at the time of obtaining Table 2-5 consent, according to the presence or absence of proton-pump inhibitors

FREQ Procedure

|                      |       | Cumulative       |       |        |
|----------------------|-------|------------------|-------|--------|
| Percent of ALL power |       | Percent of power |       |        |
| 1                    | 20509 | 100.00           | 20509 | 100.00 |

Tables: ALL \* CMYN

ALL

CMYN(Administration of Concomitant Drug)

| Power                   |        |        |        |
|-------------------------|--------|--------|--------|
| Percent                 |        |        |        |
| Percent of rows         |        |        |        |
| Percent of columns      | None   | With   | Total  |
| _____ + _____ + _____ + |        |        |        |
| 1                       | 1445   | 19064  | 20509  |
|                         | 7.05   | 92.95  | 100.00 |
|                         | 7.05   | 92.95  |        |
|                         | 100.00 | 100.00 |        |
| _____ + _____ + _____ + |        |        |        |
| Total 1445              | 19064  | 20509  |        |
|                         | 7.05   | 92.95  | 100.00 |

Concomitant medications other than anticoagulants at the time of obtaining Table 2-5 consent, according to the presence or absence of proton-pump inhibitors

FREQ Procedure

Tables: ALL\* APLD

ALL APLD(Anti-Platelet Drugs)

Power |

Percent |

Percent of rows

Percent of columns | None | With | Total

|       | None   | With   | Total  |
|-------|--------|--------|--------|
| 1     | 16287  | 2777   | 19064  |
|       | 85.43  | 14.57  | 100.00 |
|       | 85.43  | 14.57  |        |
|       | 100.00 | 100.00 |        |
| Total | 16287  | 2777   | 19064  |
|       | 85.43  | 14.57  | 100.00 |

Concomitant medications other than anticoagulants at the time of obtaining Table 2-5 consent, according to the presence or absence of proton-pump inhibitors

FREQ Procedure

|   |       | Cumulative           |                  |        |
|---|-------|----------------------|------------------|--------|
|   |       | Percent of ALL power | Percent of power |        |
| 1 | 20509 | 100.00               | 20509            | 100.00 |

Tables: ALL \* CMYN

ALL

CMYN(Administration of Concomitant Drug)

| Power                   |        |        |        |
|-------------------------|--------|--------|--------|
| Percent                 |        |        |        |
| Percent of rows         |        |        |        |
| Percent of columns      | None   | With   | Total  |
| _____ + _____ + _____ + |        |        |        |
| 1                       | 1445   | 19064  | 20509  |
|                         | 7.05   | 92.95  | 100.00 |
|                         | 7.05   | 92.95  |        |
|                         | 100.00 | 100.00 |        |
| _____ + _____ + _____ + |        |        |        |
| Total 1445              | 19064  | 20509  |        |
|                         | 7.05   | 92.95  | 100.00 |



Concomitant medications other than anticoagulants at the time of obtaining Table 2-5 consent, according to the presence or absence of proton-pump inhibitors

FREQ Procedure

Tables: ALL\* APLD

ALL APLD(Anti-Platelet Drugs)

Power |

Percent |

Percent of rows

Percent of columns | None | With | Total

|       | None   | With   | Total  |
|-------|--------|--------|--------|
| 1     | 16287  | 2777   | 19064  |
|       | 85.43  | 14.57  | 100.00 |
|       | 85.43  | 14.57  |        |
|       | 100.00 | 100.00 |        |
| Total | 16287  | 2777   | 19064  |
|       | 85.43  | 14.57  | 100.00 |

Concomitant medications other than anticoagulants at the time of obtaining Table 2-5 consent, according to the presence or absence of proton-pump inhibitors

FREQ Procedure

|   |       | Cumulative           |                  |        |
|---|-------|----------------------|------------------|--------|
|   |       | Percent of ALL power | Percent of power |        |
| 1 | 20509 | 100.00               | 20509            | 100.00 |

Tables: ALL \* CMYN

ALL

CMYN(Administration of Concomitant Drug)

| Power                   |        |        |        |
|-------------------------|--------|--------|--------|
| Percent                 |        |        |        |
| Percent of rows         |        |        |        |
| Percent of columns      | None   | With   | Total  |
| _____ + _____ + _____ + |        |        |        |
| 1                       | 1445   | 19064  | 20509  |
|                         | 7.05   | 92.95  | 100.00 |
|                         | 7.05   | 92.95  |        |
|                         | 100.00 | 100.00 |        |
| _____ + _____ + _____ + |        |        |        |
| Total                   | 1445   | 19064  | 20509  |
|                         | 7.05   | 92.95  | 100.00 |

Concomitant medications other than anticoagulants at the time of obtaining Table 2-5 consent, according to the presence or absence of proton-pump inhibitors

FREQ Procedure

Table: ALL \* t\_AP

ALL t\_AP

Power |

Percent |

Percent of rows

Percentage of columns | 0 | 1 | Sum

|       | 0      | 1      | Sum    |
|-------|--------|--------|--------|
| 1     | 18978  | 86     | 19064  |
|       | 99.55  | 0.45   | 100.00 |
|       | 99.55  | 0.45   |        |
|       | 100.00 | 100.00 |        |
| Total | 18978  | 86     | 19064  |
|       | 99.55  | 0.45   | 100.00 |

Concomitant medications other than anticoagulants at the time of obtaining Table 2-5 consent, according to the presence or absence of proton-pump inhibitors

FREQ Procedure

|   |       | Cumulative           |                  |        |
|---|-------|----------------------|------------------|--------|
|   |       | Percent of ALL power | Percent of power |        |
| 1 | 20509 | 100.00               | 20509            | 100.00 |

Tables: ALL \* CMYN

ALL

CMYN(Administration of Concomitant Drug)

| Power                   |        |        |        |
|-------------------------|--------|--------|--------|
| Percent                 |        |        |        |
| Percent of rows         |        |        |        |
| Percent of columns      | None   | With   | Total  |
| _____ + _____ + _____ + |        |        |        |
| 1                       | 1445   | 19064  | 20509  |
|                         | 7.05   | 92.95  | 100.00 |
|                         | 7.05   | 92.95  |        |
|                         | 100.00 | 100.00 |        |
| _____ + _____ + _____ + |        |        |        |
| Total 1445              | 19064  | 20509  |        |
|                         | 7.05   | 92.95  | 100.00 |

Concomitant medications other than anticoagulants at the time of obtaining Table 2-5 consent, according to the presence or absence of proton-pump inhibitors

FREQ Procedure

Table: ALL \* t\_AP

ALL t\_AP

Power |

Percent |

Percent of rows

Percentage of columns | 0 | 1 | Sum

|       | 0      | 1      | Sum    |
|-------|--------|--------|--------|
| 1     | 18978  | 86     | 19064  |
|       | 99.55  | 0.45   | 100.00 |
|       | 99.55  | 0.45   |        |
|       | 100.00 | 100.00 |        |
| Total | 18978  | 86     | 19064  |
|       | 99.55  | 0.45   | 100.00 |

Concomitant medications other than anticoagulants at the time of obtaining Table 2-5 consent, according to the presence or absence of proton-pump inhibitors

FREQ Procedure

|                      |       | Cumulative       |       |        |
|----------------------|-------|------------------|-------|--------|
| Percent of ALL power |       | Percent of power |       |        |
| 1                    | 20509 | 100.00           | 20509 | 100.00 |

Tables: ALL \* CMYN

ALL

CMYN(Administration of Concomitant Drug)

| Power                   |        |        |        |
|-------------------------|--------|--------|--------|
| Percent                 |        |        |        |
| Percent of rows         |        |        |        |
| Percent of columns      | None   | With   | Total  |
| _____ + _____ + _____ + |        |        |        |
| 1                       | 1445   | 19064  | 20509  |
|                         | 7.05   | 92.95  | 100.00 |
|                         | 7.05   | 92.95  |        |
|                         | 100.00 | 100.00 |        |
| _____ + _____ + _____ + |        |        |        |
| Total 1445              | 19064  | 20509  |        |
|                         | 7.05   | 92.95  | 100.00 |

Concomitant medications other than anticoagulants at the time of obtaining Table 2-5 consent, according to the presence or absence of proton-pump inhibitors

FREQ Procedure

Table : ALL \* APLD1

ALL APLD1(ASA)

Power |

Percent |

Percent of rows

Percent of columns | None | With | Total

|       | None   | With   | Total  |
|-------|--------|--------|--------|
| 1     | 17482  | 1582   | 19064  |
|       | 91.70  | 8.30   | 100.00 |
|       | 91.70  | 8.30   |        |
|       | 100.00 | 100.00 |        |
| Total | 17482  | 1582   | 19064  |
|       | 91.70  | 8.30   | 100.00 |

Concomitant medications other than anticoagulants at the time of obtaining Table 2-5 consent, according to the presence or absence of proton-pump inhibitors

FREQ Procedure

|   |       | Cumulative           |                  |        |
|---|-------|----------------------|------------------|--------|
|   |       | Percent of ALL power | Percent of power |        |
| 1 | 20509 | 100.00               | 20509            | 100.00 |

Tables: ALL \* CMYN

ALL

CMYN(Administration of Concomitant Drug)

| Power                   |        |        |        |
|-------------------------|--------|--------|--------|
| Percent                 |        |        |        |
| Percent of rows         |        |        |        |
| Percent of columns      | None   | With   | Total  |
| _____ + _____ + _____ + |        |        |        |
| 1                       | 1445   | 19064  | 20509  |
|                         | 7.05   | 92.95  | 100.00 |
|                         | 7.05   | 92.95  |        |
|                         | 100.00 | 100.00 |        |
| _____ + _____ + _____ + |        |        |        |
| Total 1445              | 19064  | 20509  |        |
|                         | 7.05   | 92.95  | 100.00 |



Concomitant medications other than anticoagulants at the time of obtaining Table 2-5 consent, according to the presence or absence of proton-pump inhibitors

FREQ Procedure

Table : ALL \* APLD1

ALL APLD1(ASA)

Power |

Percent |

Percent of rows

Percent of columns | None | With | Total

|       | None   | With   | Total  |
|-------|--------|--------|--------|
| 1     | 17482  | 1582   | 19064  |
|       | 91.70  | 8.30   | 100.00 |
|       | 91.70  | 8.30   |        |
|       | 100.00 | 100.00 |        |
| Total | 17482  | 1582   | 19064  |
|       | 91.70  | 8.30   | 100.00 |

Concomitant medications other than anticoagulants at the time of obtaining Table 2-5 consent, according to the presence or absence of proton-pump inhibitors

FREQ Procedure

|                      |       | Cumulative       |       |        |
|----------------------|-------|------------------|-------|--------|
| Percent of ALL power |       | Percent of power |       |        |
| 1                    | 20509 | 100.00           | 20509 | 100.00 |

Tables: ALL \* CMYN

ALL

CMYN(Administration of Concomitant Drug)

| Power                   |        |        |        |
|-------------------------|--------|--------|--------|
| Percent                 |        |        |        |
| Percent of rows         |        |        |        |
| Percent of columns      | None   | With   | Total  |
| _____ + _____ + _____ + |        |        |        |
| 1                       | 1445   | 19064  | 20509  |
|                         | 7.05   | 92.95  | 100.00 |
|                         | 7.05   | 92.95  |        |
|                         | 100.00 | 100.00 |        |
| _____ + _____ + _____ + |        |        |        |
| Total 1445              | 19064  | 20509  |        |
|                         | 7.05   | 92.95  | 100.00 |

Concomitant medications other than anticoagulants at the time of obtaining Table 2-5 consent, according to the presence or absence of proton-pump inhibitors

FREQ Procedure

Table : ALL \* APLD2

ALL APLD2(P2Y12-I)

Power |

Percent |

Percent of rows

Percent of columns | None | With | Total

|       | None   | With   | Total  |
|-------|--------|--------|--------|
| 1     | 18444  | 620    | 19064  |
|       | 96.75  | 3.25   | 100.00 |
|       | 96.75  | 3.25   |        |
|       | 100.00 | 100.00 |        |
| Total | 18444  | 620    | 19064  |
|       | 96.75  | 3.25   | 100.00 |

Concomitant medications other than anticoagulants at the time of obtaining Table 2-5 consent, according to the presence or absence of proton-pump inhibitors

FREQ Procedure

|                      |       | Cumulative       |       |        |
|----------------------|-------|------------------|-------|--------|
| Percent of ALL power |       | Percent of power |       |        |
| 1                    | 20509 | 100.00           | 20509 | 100.00 |

Tables: ALL \* CMYN

ALL

CMYN(Administration of Concomitant Drug)

| Power                   |        |        |        |
|-------------------------|--------|--------|--------|
| Percent                 |        |        |        |
| Percent of rows         |        |        |        |
| Percent of columns      | None   | With   | Total  |
| _____ + _____ + _____ + |        |        |        |
| 1                       | 1445   | 19064  | 20509  |
|                         | 7.05   | 92.95  | 100.00 |
|                         | 7.05   | 92.95  |        |
|                         | 100.00 | 100.00 |        |
| _____ + _____ + _____ + |        |        |        |
| Total 1445              | 19064  | 20509  |        |
|                         | 7.05   | 92.95  | 100.00 |

Concomitant medications other than anticoagulants at the time of obtaining Table 2-5 consent, according to the presence or absence of proton-pump inhibitors

FREQ Procedure

Table : ALL \* APLD2

ALL APLD2(P2Y12-I)

Power |

Percent |

Percent of rows

Percent of columns | None | With | Total

|       | None   | With   | Total  |
|-------|--------|--------|--------|
| 1     | 18444  | 620    | 19064  |
|       | 96.75  | 3.25   | 100.00 |
|       | 96.75  | 3.25   |        |
|       | 100.00 | 100.00 |        |
| Total | 18444  | 620    | 19064  |
|       | 96.75  | 3.25   | 100.00 |

Concomitant medications other than anticoagulants at the time of obtaining Table 2-5 consent, according to the presence or absence of proton-pump inhibitors

FREQ Procedure

|   |       | Cumulative           |                  |        |
|---|-------|----------------------|------------------|--------|
|   |       | Percent of ALL power | Percent of power |        |
| 1 | 20509 | 100.00               | 20509            | 100.00 |

Tables: ALL \* CMYN

ALL

CMYN(Administration of Concomitant Drug)

| Power                   |        |        |        |
|-------------------------|--------|--------|--------|
| Percent                 |        |        |        |
| Percent of rows         |        |        |        |
| Percent of columns      | None   | With   | Total  |
| _____ + _____ + _____ + |        |        |        |
| 1                       | 1445   | 19064  | 20509  |
|                         | 7.05   | 92.95  | 100.00 |
|                         | 7.05   | 92.95  |        |
|                         | 100.00 | 100.00 |        |
| _____ + _____ + _____ + |        |        |        |
| Total                   | 1445   | 19064  | 20509  |
|                         | 7.05   | 92.95  | 100.00 |

Concomitant medications other than anticoagulants at the time of obtaining Table 2-5 consent, according to the presence or absence of proton-pump inhibitors

FREQ Procedure

Table : ALL \* APLD3

ALL

APLD3(Other Anti-Platelet Drugs)

Power |

Percent |

Percent of rows

Percent of columns | None | With | Total

|       | +      | +      | +      |
|-------|--------|--------|--------|
| 1     | 18322  | 742    | 19064  |
|       | 96.11  | 3.89   | 100.00 |
|       | 96.11  | 3.89   |        |
|       | 100.00 | 100.00 |        |
|       | +      | +      | +      |
| Total | 18322  | 742    | 19064  |
|       | 96.11  | 3.89   | 100.00 |

Concomitant medications other than anticoagulants at the time of obtaining Table 2-5 consent, according to the presence or absence of proton-pump inhibitors

FREQ Procedure

|   |       | Cumulative           |                  |        |
|---|-------|----------------------|------------------|--------|
|   |       | Percent of ALL power | Percent of power |        |
| 1 | 20509 | 100.00               | 20509            | 100.00 |

Tables: ALL \* CMYN

ALL

CMYN(Administration of Concomitant Drug)

| Power                   |        |        |        |
|-------------------------|--------|--------|--------|
| Percent                 |        |        |        |
| Percent of rows         |        |        |        |
| Percent of columns      | None   | With   | Total  |
| _____ + _____ + _____ + |        |        |        |
| 1                       | 1445   | 19064  | 20509  |
|                         | 7.05   | 92.95  | 100.00 |
|                         | 7.05   | 92.95  |        |
|                         | 100.00 | 100.00 |        |
| _____ + _____ + _____ + |        |        |        |
| Total                   | 1445   | 19064  | 20509  |
|                         | 7.05   | 92.95  | 100.00 |



Concomitant medications other than anticoagulants at the time of obtaining Table 2-5 consent, according to the presence or absence of proton-pump inhibitors

FREQ Procedure

Table : ALL \* APLD3

ALL

APLD3(Other Anti-Platelet Drugs)

Power |

Percent |

Percent of rows

Percent of columns | None | With | Total

|       | +      | +      | +      |
|-------|--------|--------|--------|
| 1     | 18322  | 742    | 19064  |
|       | 96.11  | 3.89   | 100.00 |
|       | 96.11  | 3.89   |        |
|       | 100.00 | 100.00 |        |
|       | +      | +      | +      |
| Total | 18322  | 742    | 19064  |
|       | 96.11  | 3.89   | 100.00 |

Concomitant medications other than anticoagulants at the time of obtaining Table 2-5 consent, according to the presence or absence of proton-pump inhibitors

FREQ Procedure

|   |       | Cumulative           |                  |        |
|---|-------|----------------------|------------------|--------|
|   |       | Percent of ALL power | Percent of power |        |
| 1 | 20509 | 100.00               | 20509            | 100.00 |

Tables: ALL \* CMYN

ALL

CMYN(Administration of Concomitant Drug)

| Power                   |        |        |        |
|-------------------------|--------|--------|--------|
| Percent                 |        |        |        |
| Percent of rows         |        |        |        |
| Percent of columns      | None   | With   | Total  |
| _____ + _____ + _____ + |        |        |        |
| 1                       | 1445   | 19064  | 20509  |
|                         | 7.05   | 92.95  | 100.00 |
|                         | 7.05   | 92.95  |        |
|                         | 100.00 | 100.00 |        |
| _____ + _____ + _____ + |        |        |        |
| Total                   | 1445   | 19064  | 20509  |
|                         | 7.05   | 92.95  | 100.00 |

Concomitant medications other than anticoagulants at the time of obtaining Table 2-5 consent, according to the presence or absence of proton-pump inhibitors

FREQ Procedure

Tables: ALL \* AHPD

ALL

AHPD(Antihypertensive Drugs)

Power |

Percent |

Percent of rows

Percent of columns | None | With | Total

|       | +      | +      | +      |
|-------|--------|--------|--------|
| 1     | 4769   | 14295  | 19064  |
|       | 25.02  | 74.98  | 100.00 |
|       | 25.02  | 74.98  |        |
|       | 100.00 | 100.00 |        |
|       | +      | +      | +      |
| Total | 4769   | 14295  | 19064  |
|       | 25.02  | 74.98  | 100.00 |

Concomitant medications other than anticoagulants at the time of obtaining Table 2-5 consent, according to the presence or absence of proton-pump inhibitors

FREQ Procedure

|                      |       | Cumulative       |       |        |
|----------------------|-------|------------------|-------|--------|
| Percent of ALL power |       | Percent of power |       |        |
| 1                    | 20509 | 100.00           | 20509 | 100.00 |

Tables: ALL \* CMYN

ALL

CMYN(Administration of Concomitant Drug)

| Power                   |        |        |        |
|-------------------------|--------|--------|--------|
| Percent                 |        |        |        |
| Percent of rows         |        |        |        |
| Percent of columns      | None   | With   | Total  |
| _____ + _____ + _____ + |        |        |        |
| 1                       | 1445   | 19064  | 20509  |
|                         | 7.05   | 92.95  | 100.00 |
|                         | 7.05   | 92.95  |        |
|                         | 100.00 | 100.00 |        |
| _____ + _____ + _____ + |        |        |        |
| Total                   | 1445   | 19064  | 20509  |
|                         | 7.05   | 92.95  | 100.00 |

Concomitant medications other than anticoagulants at the time of obtaining Table 2-5 consent, according to the presence or absence of proton-pump inhibitors

FREQ Procedure

Tables: ALL \* AHPD

ALL

AHPD(Antihypertensive Drugs)

Power |

Percent |

Percent of rows

Percent of columns | None | With | Total

|       | +      | +      | +      |
|-------|--------|--------|--------|
| 1     | 4769   | 14295  | 19064  |
|       | 25.02  | 74.98  | 100.00 |
|       | 25.02  | 74.98  |        |
|       | 100.00 | 100.00 |        |
|       | +      | +      | +      |
| Total | 4769   | 14295  | 19064  |
|       | 25.02  | 74.98  | 100.00 |

Concomitant medications other than anticoagulants at the time of obtaining Table 2-5 consent, according to the presence or absence of proton-pump inhibitors

FREQ Procedure

|   |       | Cumulative           |                  |        |
|---|-------|----------------------|------------------|--------|
|   |       | Percent of ALL power | Percent of power |        |
| 1 | 20509 | 100.00               | 20509            | 100.00 |

Tables: ALL \* CMYN

ALL

CMYN(Administration of Concomitant Drug)

| Power              |        |        |        |
|--------------------|--------|--------|--------|
| Percent            |        |        |        |
| Percent of rows    |        |        |        |
| Percent of columns | None   | With   | Total  |
| _____              | +      | _____  | +      |
| 1                  | 1445   | 19064  | 20509  |
|                    | 7.05   | 92.95  | 100.00 |
|                    | 7.05   | 92.95  |        |
|                    | 100.00 | 100.00 |        |
| _____              | +      | _____  | +      |
| Total 1445         | 19064  | 20509  |        |
|                    | 7.05   | 92.95  | 100.00 |

Concomitant medications other than anticoagulants at the time of obtaining Table 2-5 consent, according to the presence or absence of proton-pump inhibitors

FREQ Procedure

Table: ALL \* LTD

ALL LTD(Lipid Therapy)

Power |

Percent |

Percent of rows

Percent of columns | None | With | Total

|       | None   | With   | Total  |
|-------|--------|--------|--------|
| 1     | 12266  | 6798   | 19064  |
|       | 64.34  | 35.66  | 100.00 |
|       | 64.34  | 35.66  |        |
|       | 100.00 | 100.00 |        |
| Total | 12266  | 6798   | 19064  |
|       | 64.34  | 35.66  | 100.00 |

Concomitant medications other than anticoagulants at the time of obtaining Table 2-5 consent, according to the presence or absence of proton-pump inhibitors

FREQ Procedure

|   |       | Cumulative           |                  |        |
|---|-------|----------------------|------------------|--------|
|   |       | Percent of ALL power | Percent of power |        |
| 1 | 20509 | 100.00               | 20509            | 100.00 |

Tables: ALL \* CMYN

ALL

CMYN(Administration of Concomitant Drug)

| Power                   |        |        |        |
|-------------------------|--------|--------|--------|
| Percent                 |        |        |        |
| Percent of rows         |        |        |        |
| Percent of columns      | None   | With   | Total  |
| _____ + _____ + _____ + |        |        |        |
| 1                       | 1445   | 19064  | 20509  |
|                         | 7.05   | 92.95  | 100.00 |
|                         | 7.05   | 92.95  |        |
|                         | 100.00 | 100.00 |        |
| _____ + _____ + _____ + |        |        |        |
| Total                   | 1445   | 19064  | 20509  |
|                         | 7.05   | 92.95  | 100.00 |



Concomitant medications other than anticoagulants at the time of obtaining Table 2-5 consent, according to the presence or absence of proton-pump inhibitors

FREQ Procedure

Table: ALL \* LTD

ALL LTD(Lipid Therapy)

Power |

Percent |

Percent of rows

Percent of columns | None | With | Total

|       | +      | +      | +      |
|-------|--------|--------|--------|
| 1     | 12266  | 6798   | 19064  |
|       | 64.34  | 35.66  | 100.00 |
|       | 64.34  | 35.66  |        |
|       | 100.00 | 100.00 |        |
|       | +      | +      | +      |
| Total | 12266  | 6798   | 19064  |
|       | 64.34  | 35.66  | 100.00 |

Concomitant medications other than anticoagulants at the time of obtaining Table 2-5 consent, according to the presence or absence of proton-pump inhibitors

FREQ Procedure

|                      |       | Cumulative       |       |        |
|----------------------|-------|------------------|-------|--------|
| Percent of ALL power |       | Percent of power |       |        |
| 1                    | 20509 | 100.00           | 20509 | 100.00 |

Tables: ALL \* CMYN

ALL

CMYN(Administration of Concomitant Drug)

| Power                   |        |        |        |
|-------------------------|--------|--------|--------|
| Percent                 |        |        |        |
| Percent of rows         |        |        |        |
| Percent of columns      | None   | With   | Total  |
| _____ + _____ + _____ + |        |        |        |
| 1                       | 1445   | 19064  | 20509  |
|                         | 7.05   | 92.95  | 100.00 |
|                         | 7.05   | 92.95  |        |
|                         | 100.00 | 100.00 |        |
| _____ + _____ + _____ + |        |        |        |
| Total 1445              | 19064  | 20509  |        |
|                         | 7.05   | 92.95  | 100.00 |

Concomitant medications other than anticoagulants at the time of obtaining Table 2-5 consent, according to the presence or absence of proton-pump inhibitors

FREQ Procedure

Table : ALL \* LTD1

ALL LTD1(Statins)

Power |

Percent |

Percent of rows

Percent of columns | None | With | Total

|       | None   | With   | Total  |
|-------|--------|--------|--------|
| 1     | 13003  | 6061   | 19064  |
|       | 68.21  | 31.79  | 100.00 |
|       | 68.21  | 31.79  |        |
|       | 100.00 | 100.00 |        |
| Total | 13003  | 6061   | 19064  |
|       | 68.21  | 31.79  | 100.00 |

Concomitant medications other than anticoagulants at the time of obtaining Table 2-5 consent, according to the presence or absence of proton-pump inhibitors

FREQ Procedure

|   |       | Cumulative           |                  |        |
|---|-------|----------------------|------------------|--------|
|   |       | Percent of ALL power | Percent of power |        |
| 1 | 20509 | 100.00               | 20509            | 100.00 |

Tables: ALL \* CMYN

ALL

CMYN(Administration of Concomitant Drug)

| Power                   |        |        |        |
|-------------------------|--------|--------|--------|
| Percent                 |        |        |        |
| Percent of rows         |        |        |        |
| Percent of columns      | None   | With   | Total  |
| _____ + _____ + _____ + |        |        |        |
| 1                       | 1445   | 19064  | 20509  |
|                         | 7.05   | 92.95  | 100.00 |
|                         | 7.05   | 92.95  |        |
|                         | 100.00 | 100.00 |        |
| _____ + _____ + _____ + |        |        |        |
| Total                   | 1445   | 19064  | 20509  |
|                         | 7.05   | 92.95  | 100.00 |

Concomitant medications other than anticoagulants at the time of obtaining Table 2-5 consent, according to the presence or absence of proton-pump inhibitors

FREQ Procedure

Table : ALL \* LTD1

ALL LTD1(Statins)

Power |

Percent |

Percent of rows

Percent of columns | None | With | Total

|       | None   | With   | Total  |
|-------|--------|--------|--------|
| 1     | 13003  | 6061   | 19064  |
|       | 68.21  | 31.79  | 100.00 |
|       | 68.21  | 31.79  |        |
|       | 100.00 | 100.00 |        |
| Total | 13003  | 6061   | 19064  |
|       | 68.21  | 31.79  | 100.00 |

Concomitant medications other than anticoagulants at the time of obtaining Table 2-5 consent, according to the presence or absence of proton-pump inhibitors

FREQ Procedure

|                      |       | Cumulative       |       |        |
|----------------------|-------|------------------|-------|--------|
| Percent of ALL power |       | Percent of power |       |        |
| 1                    | 20509 | 100.00           | 20509 | 100.00 |

Tables: ALL \* CMYN

ALL

CMYN(Administration of Concomitant Drug)

| Power                   |        |        |        |
|-------------------------|--------|--------|--------|
| Percent                 |        |        |        |
| Percent of rows         |        |        |        |
| Percent of columns      | None   | With   | Total  |
| _____ + _____ + _____ + |        |        |        |
| 1                       | 1445   | 19064  | 20509  |
|                         | 7.05   | 92.95  | 100.00 |
|                         | 7.05   | 92.95  |        |
|                         | 100.00 | 100.00 |        |
| _____ + _____ + _____ + |        |        |        |
| Total 1445              | 19064  | 20509  |        |
|                         | 7.05   | 92.95  | 100.00 |

Concomitant medications other than anticoagulants at the time of obtaining Table 2-5 consent, according to the presence or absence of proton-pump inhibitors

FREQ Procedure

Table : ALL \* LTD2

ALL LTD2(Other Than Statins)

Power |

Percent |

Percent of rows

Percent of columns | None | With | Total

|       | +      | +      | +      |
|-------|--------|--------|--------|
| 1     | 18096  | 968    | 19064  |
|       | 94.92  | 5.08   | 100.00 |
|       | 94.92  | 5.08   |        |
|       | 100.00 | 100.00 |        |
|       | +      | +      | +      |
| Total | 18096  | 968    | 19064  |
|       | 94.92  | 5.08   | 100.00 |

Concomitant medications other than anticoagulants at the time of obtaining Table 2-5 consent, according to the presence or absence of proton-pump inhibitors

FREQ Procedure

|                      |       | Cumulative       |       |        |
|----------------------|-------|------------------|-------|--------|
| Percent of ALL power |       | Percent of power |       |        |
| 1                    | 20509 | 100.00           | 20509 | 100.00 |

Tables: ALL \* CMYN

ALL

CMYN(Administration of Concomitant Drug)

| Power                   |        |        |        |
|-------------------------|--------|--------|--------|
| Percent                 |        |        |        |
| Percent of rows         |        |        |        |
| Percent of columns      | None   | With   | Total  |
| _____ + _____ + _____ + |        |        |        |
| 1                       | 1445   | 19064  | 20509  |
|                         | 7.05   | 92.95  | 100.00 |
|                         | 7.05   | 92.95  |        |
|                         | 100.00 | 100.00 |        |
| _____ + _____ + _____ + |        |        |        |
| Total                   | 1445   | 19064  | 20509  |
|                         | 7.05   | 92.95  | 100.00 |



Concomitant medications other than anticoagulants at the time of obtaining Table 2-5 consent, according to the presence or absence of proton-pump inhibitors

FREQ Procedure

Table : ALL \* LTD2

ALL LTD2(Other Than Statins)

Power |

Percent |

Percent of rows

Percent of columns | None | With | Total

|       | +      | +      | +      |
|-------|--------|--------|--------|
| 1     | 18096  | 968    | 19064  |
|       | 94.92  | 5.08   | 100.00 |
|       | 94.92  | 5.08   |        |
|       | 100.00 | 100.00 |        |
|       | +      | +      | +      |
| Total | 18096  | 968    | 19064  |
|       | 94.92  | 5.08   | 100.00 |

Concomitant medications other than anticoagulants at the time of obtaining Table 2-5 consent, according to the presence or absence of proton-pump inhibitors

FREQ Procedure

|   |       | Cumulative           |                  |        |
|---|-------|----------------------|------------------|--------|
|   |       | Percent of ALL power | Percent of power |        |
| 1 | 20509 | 100.00               | 20509            | 100.00 |

Tables: ALL \* CMYN

ALL

CMYN(Administration of Concomitant Drug)

| Power                   |        |        |        |
|-------------------------|--------|--------|--------|
| Percent                 |        |        |        |
| Percent of rows         |        |        |        |
| Percent of columns      | None   | With   | Total  |
| _____ + _____ + _____ + |        |        |        |
| 1                       | 1445   | 19064  | 20509  |
|                         | 7.05   | 92.95  | 100.00 |
|                         | 7.05   | 92.95  |        |
|                         | 100.00 | 100.00 |        |
| _____ + _____ + _____ + |        |        |        |
| Total                   | 1445   | 19064  | 20509  |
|                         | 7.05   | 92.95  | 100.00 |

Concomitant medications other than anticoagulants at the time of obtaining Table 2-5 consent, according to the presence or absence of proton-pump inhibitors

FREQ Procedure

Tables: ALL \* DBTD

ALL DBTD(Diabetes Drugs)

Power |

Percent |

Percent of rows

Percent of columns | None | With | Total

|       | +      | +      | +      |
|-------|--------|--------|--------|
| 1     | 16012  | 3052   | 19064  |
|       | 83.99  | 16.01  | 100.00 |
|       | 83.99  | 16.01  |        |
|       | 100.00 | 100.00 |        |
|       | +      | +      | +      |
| Total | 16012  | 3052   | 19064  |
|       | 83.99  | 16.01  | 100.00 |

Concomitant medications other than anticoagulants at the time of obtaining Table 2-5 consent, according to the presence or absence of proton-pump inhibitors

FREQ Procedure

|   |       | Cumulative           |                  |        |
|---|-------|----------------------|------------------|--------|
|   |       | Percent of ALL power | Percent of power |        |
| 1 | 20509 | 100.00               | 20509            | 100.00 |

Tables: ALL \* CMYN

ALL

CMYN(Administration of Concomitant Drug)

| Power                   |        |        |        |
|-------------------------|--------|--------|--------|
| Percent                 |        |        |        |
| Percent of rows         |        |        |        |
| Percent of columns      | None   | With   | Total  |
| _____ + _____ + _____ + |        |        |        |
| 1                       | 1445   | 19064  | 20509  |
|                         | 7.05   | 92.95  | 100.00 |
|                         | 7.05   | 92.95  |        |
|                         | 100.00 | 100.00 |        |
| _____ + _____ + _____ + |        |        |        |
| Total                   | 1445   | 19064  | 20509  |
|                         | 7.05   | 92.95  | 100.00 |

Concomitant medications other than anticoagulants at the time of obtaining Table 2-5 consent, according to the presence or absence of proton-pump inhibitors

FREQ Procedure

Tables: ALL \* DBTD

ALL DBTD(Diabetes Drugs)

Power |

Percent |

Percent of rows

Percent of columns | None | With | Total

|       | None   | With   | Total  |
|-------|--------|--------|--------|
| 1     | 16012  | 3052   | 19064  |
|       | 83.99  | 16.01  | 100.00 |
|       | 83.99  | 16.01  |        |
|       | 100.00 | 100.00 |        |
| Total | 16012  | 3052   | 19064  |
|       | 83.99  | 16.01  | 100.00 |

Concomitant medications other than anticoagulants at the time of obtaining Table 2-5 consent, according to the presence or absence of proton-pump inhibitors

FREQ Procedure

|   |       | Cumulative           |                  |        |
|---|-------|----------------------|------------------|--------|
|   |       | Percent of ALL power | Percent of power |        |
| 1 | 20509 | 100.00               | 20509            | 100.00 |

Tables: ALL \* CMYN

ALL

CMYN(Administration of Concomitant Drug)

| Power                   |        |        |        |
|-------------------------|--------|--------|--------|
| Percent                 |        |        |        |
| Percent of rows         |        |        |        |
| Percent of columns      | None   | With   | Total  |
| _____ + _____ + _____ + |        |        |        |
| 1                       | 1445   | 19064  | 20509  |
|                         | 7.05   | 92.95  | 100.00 |
|                         | 7.05   | 92.95  |        |
|                         | 100.00 | 100.00 |        |
| _____ + _____ + _____ + |        |        |        |
| Total                   | 1445   | 19064  | 20509  |
|                         | 7.05   | 92.95  | 100.00 |

Concomitant medications other than anticoagulants at the time of obtaining Table 2-5 consent, according to the presence or absence of proton-pump inhibitors

FREQ Procedure

Table: ALL \* t\_DBT

ALL t\_DBT

Power |

Percent |

Percent of rows

Percentage of columns | 0| 1| Sum

|       | 0      | 1      | Sum    |
|-------|--------|--------|--------|
| 1     | 16162  | 2902   | 19064  |
|       | 84.78  | 15.22  | 100.00 |
|       | 84.78  | 15.22  |        |
|       | 100.00 | 100.00 |        |
| Total | 16162  | 2902   | 19064  |
|       | 84.78  | 15.22  | 100.00 |

Concomitant medications other than anticoagulants at the time of obtaining Table 2-5 consent, according to the presence or absence of proton-pump inhibitors

FREQ Procedure

|                      |       | Cumulative       |       |        |
|----------------------|-------|------------------|-------|--------|
| Percent of ALL power |       | Percent of power |       |        |
| 1                    | 20509 | 100.00           | 20509 | 100.00 |

Tables: ALL \* CMYN

ALL

CMYN(Administration of Concomitant Drug)

| Power                   |        |        |        |
|-------------------------|--------|--------|--------|
| Percent                 |        |        |        |
| Percent of rows         |        |        |        |
| Percent of columns      | None   | With   | Total  |
| _____ + _____ + _____ + |        |        |        |
| 1                       | 1445   | 19064  | 20509  |
|                         | 7.05   | 92.95  | 100.00 |
|                         | 7.05   | 92.95  |        |
|                         | 100.00 | 100.00 |        |
| _____ + _____ + _____ + |        |        |        |
| Total                   | 1445   | 19064  | 20509  |
|                         | 7.05   | 92.95  | 100.00 |



Concomitant medications other than anticoagulants at the time of obtaining Table 2-5 consent, according to the presence or absence of proton-pump inhibitors

FREQ Procedure

Table: ALL \* t\_DBT

ALL t\_DBT

Power |

Percent |

Percent of rows

Percentage of columns | 0| 1| Sum

|       | 0      | 1      | Sum    |
|-------|--------|--------|--------|
| 1     | 16162  | 2902   | 19064  |
|       | 84.78  | 15.22  | 100.00 |
|       | 84.78  | 15.22  |        |
|       | 100.00 | 100.00 |        |
| Total | 16162  | 2902   | 19064  |
|       | 84.78  | 15.22  | 100.00 |

Concomitant medications other than anticoagulants at the time of obtaining Table 2-5 consent, according to the presence or absence of proton-pump inhibitors

FREQ Procedure

|                      |       | Cumulative       |       |        |
|----------------------|-------|------------------|-------|--------|
| Percent of ALL power |       | Percent of power |       |        |
| 1                    | 20509 | 100.00           | 20509 | 100.00 |

Tables: ALL \* CMYN

ALL

CMYN(Administration of Concomitant Drug)

| Power                   |        |        |        |
|-------------------------|--------|--------|--------|
| Percent                 |        |        |        |
| Percent of rows         |        |        |        |
| Percent of columns      | None   | With   | Total  |
| _____ + _____ + _____ + |        |        |        |
| 1                       | 1445   | 19064  | 20509  |
|                         | 7.05   | 92.95  | 100.00 |
|                         | 7.05   | 92.95  |        |
|                         | 100.00 | 100.00 |        |
| _____ + _____ + _____ + |        |        |        |
| Total 1445              | 19064  | 20509  |        |
|                         | 7.05   | 92.95  | 100.00 |

Concomitant medications other than anticoagulants at the time of obtaining Table 2-5 consent, according to the presence or absence of proton-pump inhibitors

FREQ Procedure

Table : ALL \* DBTD1

ALL DBTD1(Sulfonylurea Drugs)

Power |

Percent |

Percent of rows

Percent of columns | None | With | Total

|       | +      | +      | +      |
|-------|--------|--------|--------|
| 1     | 18316  | 748    | 19064  |
|       | 96.08  | 3.92   | 100.00 |
|       | 96.08  | 3.92   |        |
|       | 100.00 | 100.00 |        |
|       | +      | +      | +      |
| Total | 18316  | 748    | 19064  |
|       | 96.08  | 3.92   | 100.00 |

Concomitant medications other than anticoagulants at the time of obtaining Table 2-5 consent, according to the presence or absence of proton-pump inhibitors

FREQ Procedure

|   |       | Cumulative           |                  |        |
|---|-------|----------------------|------------------|--------|
|   |       | Percent of ALL power | Percent of power |        |
| 1 | 20509 | 100.00               | 20509            | 100.00 |

Tables: ALL \* CMYN

ALL

CMYN(Administration of Concomitant Drug)

| Power                   |        |        |        |
|-------------------------|--------|--------|--------|
| Percent                 |        |        |        |
| Percent of rows         |        |        |        |
| Percent of columns      | None   | With   | Total  |
| _____ + _____ + _____ + |        |        |        |
| 1                       | 1445   | 19064  | 20509  |
|                         | 7.05   | 92.95  | 100.00 |
|                         | 7.05   | 92.95  |        |
|                         | 100.00 | 100.00 |        |
| _____ + _____ + _____ + |        |        |        |
| Total 1445              | 19064  | 20509  |        |
|                         | 7.05   | 92.95  | 100.00 |

Concomitant medications other than anticoagulants at the time of obtaining Table 2-5 consent, according to the presence or absence of proton-pump inhibitors

FREQ Procedure

Table : ALL \* DBTD1

ALL DBTD1(Sulfonylurea Drugs)

Power |

Percent |

Percent of rows

Percent of columns | None | With | Total

|       | +      | +      | +      |
|-------|--------|--------|--------|
| 1     | 18316  | 748    | 19064  |
|       | 96.08  | 3.92   | 100.00 |
|       | 96.08  | 3.92   |        |
|       | 100.00 | 100.00 |        |
|       | +      | +      | +      |
| Total | 18316  | 748    | 19064  |
|       | 96.08  | 3.92   | 100.00 |

Concomitant medications other than anticoagulants at the time of obtaining Table 2-5 consent, according to the presence or absence of proton-pump inhibitors

FREQ Procedure

|   |       | Cumulative           |                  |        |
|---|-------|----------------------|------------------|--------|
|   |       | Percent of ALL power | Percent of power |        |
| 1 | 20509 | 100.00               | 20509            | 100.00 |

Tables: ALL \* CMYN

ALL

CMYN(Administration of Concomitant Drug)

| Power                   |        |        |        |
|-------------------------|--------|--------|--------|
| Percent                 |        |        |        |
| Percent of rows         |        |        |        |
| Percent of columns      | None   | With   | Total  |
| _____ + _____ + _____ + |        |        |        |
| 1                       | 1445   | 19064  | 20509  |
|                         | 7.05   | 92.95  | 100.00 |
|                         | 7.05   | 92.95  |        |
|                         | 100.00 | 100.00 |        |
| _____ + _____ + _____ + |        |        |        |
| Total 1445              | 19064  | 20509  |        |
|                         | 7.05   | 92.95  | 100.00 |

Concomitant medications other than anticoagulants at the time of obtaining Table 2-5 consent, according to the presence or absence of proton-pump inhibitors

FREQ Procedure

Table : ALL \* DBTD2

ALL

DBTD2( $\alpha$ -Glucosidase Inhibitor)

Power |

Percent |

Percent of rows

Percent of columns | None | With | Total

|       | +      | +      | +      |
|-------|--------|--------|--------|
| 1     | 18469  | 595    | 19064  |
|       | 96.88  | 3.12   | 100.00 |
|       | 96.88  | 3.12   |        |
|       | 100.00 | 100.00 |        |
|       | +      | +      | +      |
| Total | 18469  | 595    | 19064  |
|       | 96.88  | 3.12   | 100.00 |

Concomitant medications other than anticoagulants at the time of obtaining Table 2-5 consent, according to the presence or absence of proton-pump inhibitors

FREQ Procedure

|                      |       | Cumulative       |       |        |
|----------------------|-------|------------------|-------|--------|
| Percent of ALL power |       | Percent of power |       |        |
| 1                    | 20509 | 100.00           | 20509 | 100.00 |

Tables: ALL \* CMYN

ALL

CMYN(Administration of Concomitant Drug)

| Power                   |        |        |        |
|-------------------------|--------|--------|--------|
| Percent                 |        |        |        |
| Percent of rows         |        |        |        |
| Percent of columns      | None   | With   | Total  |
| _____ + _____ + _____ + |        |        |        |
| 1                       | 1445   | 19064  | 20509  |
|                         | 7.05   | 92.95  | 100.00 |
|                         | 7.05   | 92.95  |        |
|                         | 100.00 | 100.00 |        |
| _____ + _____ + _____ + |        |        |        |
| Total 1445              | 19064  | 20509  |        |
|                         | 7.05   | 92.95  | 100.00 |



Concomitant medications other than anticoagulants at the time of obtaining Table 2-5 consent, according to the presence or absence of proton-pump inhibitors

FREQ Procedure

Table : ALL \* DBTD2

ALL

DBTD2( $\alpha$ -Glucosidase Inhibitor)

Power |

Percent |

Percent of rows

Percent of columns | None | With | Total

|       | +      | +      | +      |
|-------|--------|--------|--------|
| 1     | 18469  | 595    | 19064  |
|       | 96.88  | 3.12   | 100.00 |
|       | 96.88  | 3.12   |        |
|       | 100.00 | 100.00 |        |
|       | +      | +      | +      |
| Total | 18469  | 595    | 19064  |
|       | 96.88  | 3.12   | 100.00 |

Concomitant medications other than anticoagulants at the time of obtaining Table 2-5 consent, according to the presence or absence of proton-pump inhibitors

FREQ Procedure

|                      |       | Cumulative       |       |        |
|----------------------|-------|------------------|-------|--------|
| Percent of ALL power |       | Percent of power |       |        |
| 1                    | 20509 | 100.00           | 20509 | 100.00 |

Tables: ALL \* CMYN

ALL

CMYN(Administration of Concomitant Drug)

| Power              |        |        |        |
|--------------------|--------|--------|--------|
| Percent            |        |        |        |
| Percent of rows    |        |        |        |
| Percent of columns | None   | With   | Total  |
|                    | +      | +      | +      |
| 1                  | 1445   | 19064  | 20509  |
|                    | 7.05   | 92.95  | 100.00 |
|                    | 7.05   | 92.95  |        |
|                    | 100.00 | 100.00 |        |
|                    | +      | +      | +      |
| Total 1445         | 19064  | 20509  |        |
|                    | 7.05   | 92.95  | 100.00 |

Concomitant medications other than anticoagulants at the time of obtaining Table 2-5 consent, according to the presence or absence of proton-pump inhibitors

FREQ Procedure

Table : ALL \* DBTD3

ALL DBTD3(Thiazolidine)

Power |

Percent |

Percent of rows

Percent of columns | None | With | Total

|       | None   | With   | Total  |
|-------|--------|--------|--------|
| 1     | 18818  | 246    | 19064  |
|       | 98.71  | 1.29   | 100.00 |
|       | 98.71  | 1.29   |        |
|       | 100.00 | 100.00 |        |
| Total | 18818  | 246    | 19064  |
|       | 98.71  | 1.29   | 100.00 |

Concomitant medications other than anticoagulants at the time of obtaining Table 2-5 consent, according to the presence or absence of proton-pump inhibitors

FREQ Procedure

|                      |       | Cumulative       |       |        |
|----------------------|-------|------------------|-------|--------|
| Percent of ALL power |       | Percent of power |       |        |
| 1                    | 20509 | 100.00           | 20509 | 100.00 |

Tables: ALL \* CMYN

ALL

CMYN(Administration of Concomitant Drug)

| Power                   |        |        |        |
|-------------------------|--------|--------|--------|
| Percent                 |        |        |        |
| Percent of rows         |        |        |        |
| Percent of columns      | None   | With   | Total  |
| _____ + _____ + _____ + |        |        |        |
| 1                       | 1445   | 19064  | 20509  |
|                         | 7.05   | 92.95  | 100.00 |
|                         | 7.05   | 92.95  |        |
|                         | 100.00 | 100.00 |        |
| _____ + _____ + _____ + |        |        |        |
| Total                   | 1445   | 19064  | 20509  |
|                         | 7.05   | 92.95  | 100.00 |

Concomitant medications other than anticoagulants at the time of obtaining Table 2-5 consent, according to the presence or absence of proton-pump inhibitors

FREQ Procedure

Table : ALL \* DBTD3

ALL DBTD3(Thiazolidine)

Power |

Percent |

Percent of rows

Percent of columns | None | With | Total

|       | None   | With   | Total  |
|-------|--------|--------|--------|
| 1     | 18818  | 246    | 19064  |
|       | 98.71  | 1.29   | 100.00 |
|       | 98.71  | 1.29   |        |
|       | 100.00 | 100.00 |        |
| Total | 18818  | 246    | 19064  |
|       | 98.71  | 1.29   | 100.00 |

Concomitant medications other than anticoagulants at the time of obtaining Table 2-5 consent, according to the presence or absence of proton-pump inhibitors

FREQ Procedure

|                      |       | Cumulative       |       |        |
|----------------------|-------|------------------|-------|--------|
| Percent of ALL power |       | Percent of power |       |        |
| 1                    | 20509 | 100.00           | 20509 | 100.00 |

Tables: ALL \* CMYN

ALL

CMYN(Administration of Concomitant Drug)

| Power                   |        |        |        |
|-------------------------|--------|--------|--------|
| Percent                 |        |        |        |
| Percent of rows         |        |        |        |
| Percent of columns      | None   | With   | Total  |
| _____ + _____ + _____ + |        |        |        |
| 1                       | 1445   | 19064  | 20509  |
|                         | 7.05   | 92.95  | 100.00 |
|                         | 7.05   | 92.95  |        |
|                         | 100.00 | 100.00 |        |
| _____ + _____ + _____ + |        |        |        |
| Total 1445              | 19064  | 20509  |        |
|                         | 7.05   | 92.95  | 100.00 |

Concomitant medications other than anticoagulants at the time of obtaining Table 2-5 consent, according to the presence or absence of proton-pump inhibitors

FREQ Procedure

Table : ALL \* DBTD4

ALL DBTD4(DPP-4 Inhabitators)

Power |

Percent |

Percent of rows

Percent of columns | None | With | Total

|       | None   | With   | Total  |
|-------|--------|--------|--------|
| 1     | 16910  | 2154   | 19064  |
|       | 88.70  | 11.30  | 100.00 |
|       | 88.70  | 11.30  |        |
|       | 100.00 | 100.00 |        |
| Total | 16910  | 2154   | 19064  |
|       | 88.70  | 11.30  | 100.00 |

Concomitant medications other than anticoagulants at the time of obtaining Table 2-5 consent, according to the presence or absence of proton-pump inhibitors

FREQ Procedure

|                      |       | Cumulative       |       |        |
|----------------------|-------|------------------|-------|--------|
| Percent of ALL power |       | Percent of power |       |        |
| 1                    | 20509 | 100.00           | 20509 | 100.00 |

Tables: ALL \* CMYN

ALL

CMYN(Administration of Concomitant Drug)

| Power                   |        |        |        |
|-------------------------|--------|--------|--------|
| Percent                 |        |        |        |
| Percent of rows         |        |        |        |
| Percent of columns      | None   | With   | Total  |
| _____ + _____ + _____ + |        |        |        |
| 1                       | 1445   | 19064  | 20509  |
|                         | 7.05   | 92.95  | 100.00 |
|                         | 7.05   | 92.95  |        |
|                         | 100.00 | 100.00 |        |
| _____ + _____ + _____ + |        |        |        |
| Total                   | 1445   | 19064  | 20509  |
|                         | 7.05   | 92.95  | 100.00 |



Concomitant medications other than anticoagulants at the time of obtaining Table 2-5 consent, according to the presence or absence of proton-pump inhibitors

FREQ Procedure

Table : ALL \* DBTD4

ALL DBTD4(DPP-4 Inhabitators)

Power |

Percent |

Percent of rows

Percent of columns | None | With | Total

|       | None   | With   | Total  |
|-------|--------|--------|--------|
| 1     | 16910  | 2154   | 19064  |
|       | 88.70  | 11.30  | 100.00 |
|       | 88.70  | 11.30  |        |
|       | 100.00 | 100.00 |        |
| Total | 16910  | 2154   | 19064  |
|       | 88.70  | 11.30  | 100.00 |

Concomitant medications other than anticoagulants at the time of obtaining Table 2-5 consent, according to the presence or absence of proton-pump inhibitors

FREQ Procedure

|                      |       | Cumulative       |       |        |
|----------------------|-------|------------------|-------|--------|
| Percent of ALL power |       | Percent of power |       |        |
| 1                    | 20509 | 100.00           | 20509 | 100.00 |

Tables: ALL \* CMYN

ALL

CMYN(Administration of Concomitant Drug)

| Power                   |        |        |        |
|-------------------------|--------|--------|--------|
| Percent                 |        |        |        |
| Percent of rows         |        |        |        |
| Percent of columns      | None   | With   | Total  |
| _____ + _____ + _____ + |        |        |        |
| 1                       | 1445   | 19064  | 20509  |
|                         | 7.05   | 92.95  | 100.00 |
|                         | 7.05   | 92.95  |        |
|                         | 100.00 | 100.00 |        |
| _____ + _____ + _____ + |        |        |        |
| Total 1445              | 19064  | 20509  |        |
|                         | 7.05   | 92.95  | 100.00 |

Concomitant medications other than anticoagulants at the time of obtaining Table 2-5 consent, according to the presence or absence of proton-pump inhibitors

FREQ Procedure

Table : ALL \* DBTD5

ALL DBTD5(GLP-1 Inhabitators)

Power |

Percent |

Percent of rows

Percent of columns | None | With | Total

|       | None   | With   | Total  |
|-------|--------|--------|--------|
| 1     | 19025  | 39     | 19064  |
|       | 99.80  | 0.20   | 100.00 |
|       | 99.80  | 0.20   |        |
|       | 100.00 | 100.00 |        |
| Total | 19025  | 39     | 19064  |
|       | 99.80  | 0.20   | 100.00 |

Concomitant medications other than anticoagulants at the time of obtaining Table 2-5 consent, according to the presence or absence of proton-pump inhibitors

FREQ Procedure

|   |       | Cumulative           |                  |        |
|---|-------|----------------------|------------------|--------|
|   |       | Percent of ALL power | Percent of power |        |
| 1 | 20509 | 100.00               | 20509            | 100.00 |

Tables: ALL \* CMYN

ALL

CMYN(Administration of Concomitant Drug)

| Power                   |        |        |        |
|-------------------------|--------|--------|--------|
| Percent                 |        |        |        |
| Percent of rows         |        |        |        |
| Percent of columns      | None   | With   | Total  |
| _____ + _____ + _____ + |        |        |        |
| 1                       | 1445   | 19064  | 20509  |
|                         | 7.05   | 92.95  | 100.00 |
|                         | 7.05   | 92.95  |        |
|                         | 100.00 | 100.00 |        |
| _____ + _____ + _____ + |        |        |        |
| Total                   | 1445   | 19064  | 20509  |
|                         | 7.05   | 92.95  | 100.00 |

Concomitant medications other than anticoagulants at the time of obtaining Table 2-5 consent, according to the presence or absence of proton-pump inhibitors

FREQ Procedure

Table : ALL \* DBTD5

ALL DBTD5(GLP-1 Inhabitators)

Power |

Percent |

Percent of rows

Percent of columns | None | With | Total

|       | None   | With   | Total  |
|-------|--------|--------|--------|
| 1     | 19025  | 39     | 19064  |
|       | 99.80  | 0.20   | 100.00 |
|       | 99.80  | 0.20   |        |
|       | 100.00 | 100.00 |        |
| Total | 19025  | 39     | 19064  |
|       | 99.80  | 0.20   | 100.00 |

Concomitant medications other than anticoagulants at the time of obtaining Table 2-5 consent, according to the presence or absence of proton-pump inhibitors

FREQ Procedure

|   |       | Cumulative           |                  |        |
|---|-------|----------------------|------------------|--------|
|   |       | Percent of ALL power | Percent of power |        |
| 1 | 20509 | 100.00               | 20509            | 100.00 |

Tables: ALL \* CMYN

ALL

CMYN(Administration of Concomitant Drug)

| Power                   |        |        |        |
|-------------------------|--------|--------|--------|
| Percent                 |        |        |        |
| Percent of rows         |        |        |        |
| Percent of columns      | None   | With   | Total  |
| _____ + _____ + _____ + |        |        |        |
| 1                       | 1445   | 19064  | 20509  |
|                         | 7.05   | 92.95  | 100.00 |
|                         | 7.05   | 92.95  |        |
|                         | 100.00 | 100.00 |        |
| _____ + _____ + _____ + |        |        |        |
| Total                   | 1445   | 19064  | 20509  |
|                         | 7.05   | 92.95  | 100.00 |

Concomitant medications other than anticoagulants at the time of obtaining Table 2-5 consent, according to the presence or absence of proton-pump inhibitors

FREQ Procedure

Table : ALL \* DBTD6

ALL DBTD6(SGLT2 Inhabitators)

Power |

Percent |

Percent of rows

Percent of columns | None | With | Total

|       | None   | With   | Total  |
|-------|--------|--------|--------|
| 1     | 18839  | 225    | 19064  |
|       | 98.82  | 1.18   | 100.00 |
|       | 98.82  | 1.18   |        |
|       | 100.00 | 100.00 |        |
| Total | 18839  | 225    | 19064  |
|       | 98.82  | 1.18   | 100.00 |

Concomitant medications other than anticoagulants at the time of obtaining Table 2-5 consent, according to the presence or absence of proton-pump inhibitors

FREQ Procedure

|                      |       | Cumulative       |       |        |
|----------------------|-------|------------------|-------|--------|
| Percent of ALL power |       | Percent of power |       |        |
| 1                    | 20509 | 100.00           | 20509 | 100.00 |

Tables: ALL \* CMYN

ALL

CMYN(Administration of Concomitant Drug)

| Power                   |        |        |        |
|-------------------------|--------|--------|--------|
| Percent                 |        |        |        |
| Percent of rows         |        |        |        |
| Percent of columns      | None   | With   | Total  |
| _____ + _____ + _____ + |        |        |        |
| 1                       | 1445   | 19064  | 20509  |
|                         | 7.05   | 92.95  | 100.00 |
|                         | 7.05   | 92.95  |        |
|                         | 100.00 | 100.00 |        |
| _____ + _____ + _____ + |        |        |        |
| Total 1445              | 19064  | 20509  |        |
|                         | 7.05   | 92.95  | 100.00 |



Concomitant medications other than anticoagulants at the time of obtaining Table 2-5 consent, according to the presence or absence of proton-pump inhibitors

FREQ Procedure

Table : ALL \* DBTD6

ALL DBTD6(SGLT2 Inhabitators)

Power |

Percent |

Percent of rows

Percent of columns | None | With | Total

|       | None   | With   | Total  |
|-------|--------|--------|--------|
| 1     | 18839  | 225    | 19064  |
|       | 98.82  | 1.18   | 100.00 |
|       | 98.82  | 1.18   |        |
|       | 100.00 | 100.00 |        |
| Total | 18839  | 225    | 19064  |
|       | 98.82  | 1.18   | 100.00 |

Concomitant medications other than anticoagulants at the time of obtaining Table 2-5 consent, according to the presence or absence of proton-pump inhibitors

FREQ Procedure

|                      |       | Cumulative       |       |        |
|----------------------|-------|------------------|-------|--------|
| Percent of ALL power |       | Percent of power |       |        |
| 1                    | 20509 | 100.00           | 20509 | 100.00 |

Tables: ALL \* CMYN

ALL

CMYN(Administration of Concomitant Drug)

| Power              |        |        |        |
|--------------------|--------|--------|--------|
| Percent            |        |        |        |
| Percent of rows    |        |        |        |
| Percent of columns | None   | With   | Total  |
|                    | +      | +      | +      |
| 1                  | 1445   | 19064  | 20509  |
|                    | 7.05   | 92.95  | 100.00 |
|                    | 7.05   | 92.95  |        |
|                    | 100.00 | 100.00 |        |
|                    | +      | +      | +      |
| Total 1445         | 19064  | 20509  |        |
|                    | 7.05   | 92.95  | 100.00 |

Concomitant medications other than anticoagulants at the time of obtaining Table 2-5 consent, according to the presence or absence of proton-pump inhibitors

FREQ Procedure

Table : ALL \* DBTD7

ALL DBTD7(Insuline Related)

Power |

Percent |

Percent of rows

Percent of columns | None | With | Total

|       | +      | +      | +      |
|-------|--------|--------|--------|
| 1     | 18700  | 364    | 19064  |
|       | 98.09  | 1.91   | 100.00 |
|       | 98.09  | 1.91   |        |
|       | 100.00 | 100.00 |        |
|       | +      | +      | +      |
| Total | 18700  | 364    | 19064  |
|       | 98.09  | 1.91   | 100.00 |

Concomitant medications other than anticoagulants at the time of obtaining Table 2-5 consent, according to the presence or absence of proton-pump inhibitors

FREQ Procedure

|                      |       | Cumulative       |       |        |
|----------------------|-------|------------------|-------|--------|
| Percent of ALL power |       | Percent of power |       |        |
| 1                    | 20509 | 100.00           | 20509 | 100.00 |

Tables: ALL \* CMYN

ALL

CMYN(Administration of Concomitant Drug)

| Power                   |        |        |        |
|-------------------------|--------|--------|--------|
| Percent                 |        |        |        |
| Percent of rows         |        |        |        |
| Percent of columns      | None   | With   | Total  |
| _____ + _____ + _____ + |        |        |        |
| 1                       | 1445   | 19064  | 20509  |
|                         | 7.05   | 92.95  | 100.00 |
|                         | 7.05   | 92.95  |        |
|                         | 100.00 | 100.00 |        |
| _____ + _____ + _____ + |        |        |        |
| Total 1445              | 19064  | 20509  |        |
|                         | 7.05   | 92.95  | 100.00 |

Concomitant medications other than anticoagulants at the time of obtaining Table 2-5 consent, according to the presence or absence of proton-pump inhibitors

FREQ Procedure

Table : ALL \* DBTD7

ALL DBTD7(Insuline Related)

Power |

Percent |

Percent of rows

Percent of columns | None | With | Total

|       | None   | With   | Total  |
|-------|--------|--------|--------|
| 1     | 18700  | 364    | 19064  |
|       | 98.09  | 1.91   | 100.00 |
|       | 98.09  | 1.91   |        |
|       | 100.00 | 100.00 |        |
| Total | 18700  | 364    | 19064  |
|       | 98.09  | 1.91   | 100.00 |

Concomitant medications other than anticoagulants at the time of obtaining Table 2-5 consent, according to the presence or absence of proton-pump inhibitors

FREQ Procedure

|                      |       | Cumulative       |       |        |
|----------------------|-------|------------------|-------|--------|
| Percent of ALL power |       | Percent of power |       |        |
| 1                    | 20509 | 100.00           | 20509 | 100.00 |

Tables: ALL \* CMYN

ALL

CMYN(Administration of Concomitant Drug)

| Power                   |        |        |        |
|-------------------------|--------|--------|--------|
| Percent                 |        |        |        |
| Percent of rows         |        |        |        |
| Percent of columns      | None   | With   | Total  |
| _____ + _____ + _____ + |        |        |        |
| 1                       | 1445   | 19064  | 20509  |
|                         | 7.05   | 92.95  | 100.00 |
|                         | 7.05   | 92.95  |        |
|                         | 100.00 | 100.00 |        |
| _____ + _____ + _____ + |        |        |        |
| Total 1445              | 19064  | 20509  |        |
|                         | 7.05   | 92.95  | 100.00 |

Concomitant medications other than anticoagulants at the time of obtaining Table 2-5 consent, according to the presence or absence of proton-pump inhibitors

FREQ Procedure

Table : ALL \* DBTD8

ALL

DBTD8(Other Diabetes Drugs)

Power |

Percent |

Percent of rows

Percent of columns | None | With | Total

|       | +      | +      | +      |
|-------|--------|--------|--------|
| 1     | 18446  | 618    | 19064  |
|       | 96.76  | 3.24   | 100.00 |
|       | 96.76  | 3.24   |        |
|       | 100.00 | 100.00 |        |
|       | +      | +      | +      |
| Total | 18446  | 618    | 19064  |
|       | 96.76  | 3.24   | 100.00 |

Concomitant medications other than anticoagulants at the time of obtaining Table 2-5 consent, according to the presence or absence of proton-pump inhibitors

FREQ Procedure

|                      |       | Cumulative       |       |        |
|----------------------|-------|------------------|-------|--------|
| Percent of ALL power |       | Percent of power |       |        |
| 1                    | 20509 | 100.00           | 20509 | 100.00 |

Tables: ALL \* CMYN

ALL

CMYN(Administration of Concomitant Drug)

| Power                   |        |        |        |
|-------------------------|--------|--------|--------|
| Percent                 |        |        |        |
| Percent of rows         |        |        |        |
| Percent of columns      | None   | With   | Total  |
| _____ + _____ + _____ + |        |        |        |
| 1                       | 1445   | 19064  | 20509  |
|                         | 7.05   | 92.95  | 100.00 |
|                         | 7.05   | 92.95  |        |
|                         | 100.00 | 100.00 |        |
| _____ + _____ + _____ + |        |        |        |
| Total 1445              | 19064  | 20509  |        |
|                         | 7.05   | 92.95  | 100.00 |



Concomitant medications other than anticoagulants at the time of obtaining Table 2-5 consent, according to the presence or absence of proton-pump inhibitors

FREQ Procedure

Table : ALL \* DBTD8

ALL

DBTD8(Other Diabetes Drugs)

Power |

Percent |

Percent of rows

Percent of columns | None | With | Total

|       | +      | +      | +      |
|-------|--------|--------|--------|
| 1     | 18446  | 618    | 19064  |
|       | 96.76  | 3.24   | 100.00 |
|       | 96.76  | 3.24   |        |
|       | 100.00 | 100.00 |        |
|       | +      | +      | +      |
| Total | 18446  | 618    | 19064  |
|       | 96.76  | 3.24   | 100.00 |

Concomitant medications other than anticoagulants at the time of obtaining Table 2-5 consent, according to the presence or absence of proton-pump inhibitors

FREQ Procedure

|                      |       | Cumulative       |       |        |
|----------------------|-------|------------------|-------|--------|
| Percent of ALL power |       | Percent of power |       |        |
| 1                    | 20509 | 100.00           | 20509 | 100.00 |

Tables: ALL \* CMYN

ALL

CMYN(Administration of Concomitant Drug)

| Power                   |        |        |        |
|-------------------------|--------|--------|--------|
| Percent                 |        |        |        |
| Percent of rows         |        |        |        |
| Percent of columns      | None   | With   | Total  |
| _____ + _____ + _____ + |        |        |        |
| 1                       | 1445   | 19064  | 20509  |
|                         | 7.05   | 92.95  | 100.00 |
|                         | 7.05   | 92.95  |        |
|                         | 100.00 | 100.00 |        |
| _____ + _____ + _____ + |        |        |        |
| Total 1445              | 19064  | 20509  |        |
|                         | 7.05   | 92.95  | 100.00 |

Concomitant medications other than anticoagulants at the time of obtaining Table 2-5 consent, according to the presence or absence of proton-pump inhibitors

FREQ Procedure

Table: ALL \* DMM

ALL DMM(Dementia Medications)

Power |

Percent |

Percent of rows

Percent of columns | None | With | Total

|       | +      | +      | +      |
|-------|--------|--------|--------|
| 1     | 18304  | 760    | 19064  |
|       | 96.01  | 3.99   | 100.00 |
|       | 96.01  | 3.99   |        |
|       | 100.00 | 100.00 |        |
|       | +      | +      | +      |
| Total | 18304  | 760    | 19064  |
|       | 96.01  | 3.99   | 100.00 |

Concomitant medications other than anticoagulants at the time of obtaining Table 2-5 consent, according to the presence or absence of proton-pump inhibitors

FREQ Procedure

|   |       | Cumulative           |                  |        |
|---|-------|----------------------|------------------|--------|
|   |       | Percent of ALL power | Percent of power |        |
| 1 | 20509 | 100.00               | 20509            | 100.00 |

Tables: ALL \* CMYN

ALL

CMYN(Administration of Concomitant Drug)

| Power                   |        |        |        |
|-------------------------|--------|--------|--------|
| Percent                 |        |        |        |
| Percent of rows         |        |        |        |
| Percent of columns      | None   | With   | Total  |
| _____ + _____ + _____ + |        |        |        |
| 1                       | 1445   | 19064  | 20509  |
|                         | 7.05   | 92.95  | 100.00 |
|                         | 7.05   | 92.95  |        |
|                         | 100.00 | 100.00 |        |
| _____ + _____ + _____ + |        |        |        |
| Total 1445              | 19064  | 20509  |        |
|                         | 7.05   | 92.95  | 100.00 |

Concomitant medications other than anticoagulants at the time of obtaining Table 2-5 consent, according to the presence or absence of proton-pump inhibitors

FREQ Procedure

Table: ALL \* DMM

ALL DMM(Dementia Medications)

Power |

Percent |

Percent of rows

Percent of columns | None | With | Total

|       | None   | With   | Total  |
|-------|--------|--------|--------|
| 1     | 18304  | 760    | 19064  |
|       | 96.01  | 3.99   | 100.00 |
|       | 96.01  | 3.99   |        |
|       | 100.00 | 100.00 |        |
| Total | 18304  | 760    | 19064  |
|       | 96.01  | 3.99   | 100.00 |

Concomitant medications other than anticoagulants at the time of obtaining Table 2-5 consent, according to the presence or absence of proton-pump inhibitors

FREQ Procedure

|                      |       | Cumulative       |       |        |
|----------------------|-------|------------------|-------|--------|
| Percent of ALL power |       | Percent of power |       |        |
| 1                    | 20509 | 100.00           | 20509 | 100.00 |

Tables: ALL \* CMYN

ALL

CMYN(Administration of Concomitant Drug)

| Power                   |        |        |        |
|-------------------------|--------|--------|--------|
| Percent                 |        |        |        |
| Percent of rows         |        |        |        |
| Percent of columns      | None   | With   | Total  |
| _____ + _____ + _____ + |        |        |        |
| 1                       | 1445   | 19064  | 20509  |
|                         | 7.05   | 92.95  | 100.00 |
|                         | 7.05   | 92.95  |        |
|                         | 100.00 | 100.00 |        |
| _____ + _____ + _____ + |        |        |        |
| Total 1445              | 19064  | 20509  |        |
|                         | 7.05   | 92.95  | 100.00 |

Concomitant medications other than anticoagulants at the time of obtaining Table 2-5 consent, according to the presence or absence of proton-pump inhibitors

FREQ Procedure

Tables: ALL\* ACNA

ALL ACNA(Anti-Cancer Agent)

Power |

Percent |

Percent of rows

Percent of columns | None | With | Total

|       | +      | +      | +      |
|-------|--------|--------|--------|
| 1     | 18885  | 179    | 19064  |
|       | 99.06  | 0.94   | 100.00 |
|       | 99.06  | 0.94   |        |
|       | 100.00 | 100.00 |        |
|       | +      | +      | +      |
| Total | 18885  | 179    | 19064  |
|       | 99.06  | 0.94   | 100.00 |

Concomitant medications other than anticoagulants at the time of obtaining Table 2-5 consent, according to the presence or absence of proton-pump inhibitors

FREQ Procedure

|   |       | Cumulative           |                  |        |
|---|-------|----------------------|------------------|--------|
|   |       | Percent of ALL power | Percent of power |        |
| 1 | 20509 | 100.00               | 20509            | 100.00 |

Tables: ALL \* CMYN

ALL

CMYN(Administration of Concomitant Drug)

| Power                   |        |        |        |
|-------------------------|--------|--------|--------|
| Percent                 |        |        |        |
| Percent of rows         |        |        |        |
| Percent of columns      | None   | With   | Total  |
| _____ + _____ + _____ + |        |        |        |
| 1                       | 1445   | 19064  | 20509  |
|                         | 7.05   | 92.95  | 100.00 |
|                         | 7.05   | 92.95  |        |
|                         | 100.00 | 100.00 |        |
| _____ + _____ + _____ + |        |        |        |
| Total 1445              | 19064  | 20509  |        |
|                         | 7.05   | 92.95  | 100.00 |



Concomitant medications other than anticoagulants at the time of obtaining Table 2-5 consent, according to the presence or absence of proton-pump inhibitors

FREQ Procedure

Tables: ALL\* ACNA

ALL ACNA(Anti-Cancer Agent)

Power |

Percent |

Percent of rows

Percent of columns | None | With | Total

|       | +      | +      | +      |
|-------|--------|--------|--------|
| 1     | 18885  | 179    | 19064  |
|       | 99.06  | 0.94   | 100.00 |
|       | 99.06  | 0.94   |        |
|       | 100.00 | 100.00 |        |
|       | +      | +      | +      |
| Total | 18885  | 179    | 19064  |
|       | 99.06  | 0.94   | 100.00 |

Concomitant medications other than anticoagulants at the time of obtaining Table 2-5 consent, according to the presence or absence of proton-pump inhibitors

FREQ Procedure

|                      |       | Cumulative       |       |        |
|----------------------|-------|------------------|-------|--------|
| Percent of ALL power |       | Percent of power |       |        |
| 1                    | 20509 | 100.00           | 20509 | 100.00 |

Tables: ALL \* CMYN

ALL

CMYN(Administration of Concomitant Drug)

| Power                   |        |        |        |
|-------------------------|--------|--------|--------|
| Percent                 |        |        |        |
| Percent of rows         |        |        |        |
| Percent of columns      | None   | With   | Total  |
| _____ + _____ + _____ + |        |        |        |
| 1                       | 1445   | 19064  | 20509  |
|                         | 7.05   | 92.95  | 100.00 |
|                         | 7.05   | 92.95  |        |
|                         | 100.00 | 100.00 |        |
| _____ + _____ + _____ + |        |        |        |
| Total                   | 1445   | 19064  | 20509  |
|                         | 7.05   | 92.95  | 100.00 |

Concomitant medications other than anticoagulants at the time of obtaining Table 2-5 consent, according to the presence or absence of proton-pump inhibitors

FREQ Procedure

Tables: ALL\* COPD

ALL COPD(COPD)

Power |

Percent |

Percent of rows

Percent of columns | None | With | Total

|       | +      | +      | +      |
|-------|--------|--------|--------|
| 1     | 18605  | 459    | 19064  |
|       | 97.59  | 2.41   | 100.00 |
|       | 97.59  | 2.41   |        |
|       | 100.00 | 100.00 |        |
|       | +      | +      | +      |
| Total | 18605  | 459    | 19064  |
|       | 97.59  | 2.41   | 100.00 |

Concomitant medications other than anticoagulants at the time of obtaining Table 2-5 consent, according to the presence or absence of proton-pump inhibitors

FREQ Procedure

|                      |       | Cumulative       |       |        |
|----------------------|-------|------------------|-------|--------|
| Percent of ALL power |       | Percent of power |       |        |
| 1                    | 20509 | 100.00           | 20509 | 100.00 |

Tables: ALL \* CMYN

ALL

CMYN(Administration of Concomitant Drug)

| Power                   |        |        |        |
|-------------------------|--------|--------|--------|
| Percent                 |        |        |        |
| Percent of rows         |        |        |        |
| Percent of columns      | None   | With   | Total  |
| _____ + _____ + _____ + |        |        |        |
| 1                       | 1445   | 19064  | 20509  |
|                         | 7.05   | 92.95  | 100.00 |
|                         | 7.05   | 92.95  |        |
|                         | 100.00 | 100.00 |        |
| _____ + _____ + _____ + |        |        |        |
| Total 1445              | 19064  | 20509  |        |
|                         | 7.05   | 92.95  | 100.00 |

Concomitant medications other than anticoagulants at the time of obtaining Table 2-5 consent, according to the presence or absence of proton-pump inhibitors

FREQ Procedure

Tables: ALL\* COPD

ALL COPD(COPD)

Power |

Percent |

Percent of rows

Percent of columns | None | With | Total

|       | None   | With   | Total  |
|-------|--------|--------|--------|
| 1     | 18605  | 459    | 19064  |
|       | 97.59  | 2.41   | 100.00 |
|       | 97.59  | 2.41   |        |
|       | 100.00 | 100.00 |        |
| Total | 18605  | 459    | 19064  |
|       | 97.59  | 2.41   | 100.00 |

Concomitant medications other than anticoagulants at the time of obtaining Table 2-5 consent, according to the presence or absence of proton-pump inhibitors

FREQ Procedure

|   |       | Cumulative           |                  |        |
|---|-------|----------------------|------------------|--------|
|   |       | Percent of ALL power | Percent of power |        |
| 1 | 20509 | 100.00               | 20509            | 100.00 |

Tables: ALL \* CMYN

ALL

CMYN(Administration of Concomitant Drug)

| Power                   |        |        |        |
|-------------------------|--------|--------|--------|
| Percent                 |        |        |        |
| Percent of rows         |        |        |        |
| Percent of columns      | None   | With   | Total  |
| _____ + _____ + _____ + |        |        |        |
| 1                       | 1445   | 19064  | 20509  |
|                         | 7.05   | 92.95  | 100.00 |
|                         | 7.05   | 92.95  |        |
|                         | 100.00 | 100.00 |        |
| _____ + _____ + _____ + |        |        |        |
| Total 1445              | 19064  | 20509  |        |
|                         | 7.05   | 92.95  | 100.00 |

Concomitant medications other than anticoagulants at the time of obtaining Table 2-5 consent, according to the presence or absence of proton-pump inhibitors

FREQ Procedure

Tables: ALL \* PSYD

ALL PSYD(Psychotropic Drugs)

Power |

Percent |

Percent of rows

Percent of columns | None | With | Total

|       | None   | With   | Total  |
|-------|--------|--------|--------|
| 1     | 17688  | 1376   | 19064  |
|       | 92.78  | 7.22   | 100.00 |
|       | 92.78  | 7.22   |        |
|       | 100.00 | 100.00 |        |
| Total | 17688  | 1376   | 19064  |
|       | 92.78  | 7.22   | 100.00 |

Concomitant medications other than anticoagulants at the time of obtaining Table 2-5 consent, according to the presence or absence of proton-pump inhibitors

FREQ Procedure

|                      |       | Cumulative       |       |        |
|----------------------|-------|------------------|-------|--------|
| Percent of ALL power |       | Percent of power |       |        |
| 1                    | 20509 | 100.00           | 20509 | 100.00 |

Tables: ALL \* CMYN

ALL

CMYN(Administration of Concomitant Drug)

| Power                   |        |        |        |
|-------------------------|--------|--------|--------|
| Percent                 |        |        |        |
| Percent of rows         |        |        |        |
| Percent of columns      | None   | With   | Total  |
| _____ + _____ + _____ + |        |        |        |
| 1                       | 1445   | 19064  | 20509  |
|                         | 7.05   | 92.95  | 100.00 |
|                         | 7.05   | 92.95  |        |
|                         | 100.00 | 100.00 |        |
| _____ + _____ + _____ + |        |        |        |
| Total 1445              | 19064  | 20509  |        |
|                         | 7.05   | 92.95  | 100.00 |



Concomitant medications other than anticoagulants at the time of obtaining Table 2-5 consent, according to the presence or absence of proton-pump inhibitors

FREQ Procedure

Tables: ALL \* PSYD

ALL PSYD(Psychotropic Drugs)

Power |

Percent |

Percent of rows

Percent of columns | None | With | Total

|       | None   | With   | Total  |
|-------|--------|--------|--------|
| 1     | 17688  | 1376   | 19064  |
|       | 92.78  | 7.22   | 100.00 |
|       | 92.78  | 7.22   |        |
|       | 100.00 | 100.00 |        |
| Total | 17688  | 1376   | 19064  |
|       | 92.78  | 7.22   | 100.00 |

Concomitant medications other than anticoagulants at the time of obtaining Table 2-5 consent, according to the presence or absence of proton-pump inhibitors

FREQ Procedure

|                      |       | Cumulative       |       |        |
|----------------------|-------|------------------|-------|--------|
| Percent of ALL power |       | Percent of power |       |        |
| 1                    | 20509 | 100.00           | 20509 | 100.00 |

Tables: ALL \* CMYN

ALL

CMYN(Administration of Concomitant Drug)

| Power                   |        |        |        |
|-------------------------|--------|--------|--------|
| Percent                 |        |        |        |
| Percent of rows         |        |        |        |
| Percent of columns      | None   | With   | Total  |
| _____ + _____ + _____ + |        |        |        |
| 1                       | 1445   | 19064  | 20509  |
|                         | 7.05   | 92.95  | 100.00 |
|                         | 7.05   | 92.95  |        |
|                         | 100.00 | 100.00 |        |
| _____ + _____ + _____ + |        |        |        |
| Total 1445              | 19064  | 20509  |        |
|                         | 7.05   | 92.95  | 100.00 |

Concomitant medications other than anticoagulants at the time of obtaining Table 2-5 consent, according to the presence or absence of proton-pump inhibitors

FREQ Procedure

Tables: ALL\* PRPI

ALL

PRPI(Proton Pump Inhabititors)

Power |

Percent |

Percent of rows

Percent of columns | None | Total

|       |        |        |   |
|-------|--------|--------|---|
|       | +      |        | + |
| 1     | 19064  | 19064  |   |
|       | 100.00 | 100.00 |   |
|       | 100.00 |        |   |
|       | 100.00 |        |   |
|       | +      |        | + |
| Total | 19064  | 19064  |   |
|       | 100.00 | 100.00 |   |

Concomitant medications other than anticoagulants at the time of obtaining Table 2-5 consent, according to the presence or absence of proton-pump inhibitors

FREQ Procedure

|                      |       | Cumulative       |       |        |
|----------------------|-------|------------------|-------|--------|
| Percent of ALL power |       | Percent of power |       |        |
| 1                    | 20509 | 100.00           | 20509 | 100.00 |

Tables: ALL \* CMYN

ALL

CMYN(Administration of Concomitant Drug)

| Power                   |        |        |        |
|-------------------------|--------|--------|--------|
| Percent                 |        |        |        |
| Percent of rows         |        |        |        |
| Percent of columns      | None   | With   | Total  |
| _____ + _____ + _____ + |        |        |        |
| 1                       | 1445   | 19064  | 20509  |
|                         | 7.05   | 92.95  | 100.00 |
|                         | 7.05   | 92.95  |        |
|                         | 100.00 | 100.00 |        |
| _____ + _____ + _____ + |        |        |        |
| Total                   | 1445   | 19064  | 20509  |
|                         | 7.05   | 92.95  | 100.00 |

Concomitant medications other than anticoagulants at the time of obtaining Table 2-5 consent, according to the presence or absence of proton-pump inhibitors

FREQ Procedure

Tables: ALL\* PRPI

ALL

PRPI(Proton Pump Inhabititors)

Power |

Percent |

Percent of rows

Percent of columns | None | Total

|       |        |        |   |
|-------|--------|--------|---|
|       | +      |        | + |
| 1     | 19064  | 19064  |   |
|       | 100.00 | 100.00 |   |
|       | 100.00 |        |   |
|       | 100.00 |        |   |
|       | +      |        | + |
| Total | 19064  | 19064  |   |
|       | 100.00 | 100.00 |   |

Concomitant medications other than anticoagulants at the time of obtaining Table 2-5 consent, according to the presence or absence of proton-pump inhibitors

FREQ Procedure

|   |       | Cumulative           |                  |        |
|---|-------|----------------------|------------------|--------|
|   |       | Percent of ALL power | Percent of power |        |
| 1 | 20509 | 100.00               | 20509            | 100.00 |

Tables: ALL \* CMYN

ALL

CMYN(Administration of Concomitant Drug)

| Power                   |        |        |        |
|-------------------------|--------|--------|--------|
| Percent                 |        |        |        |
| Percent of rows         |        |        |        |
| Percent of columns      | None   | With   | Total  |
| _____ + _____ + _____ + |        |        |        |
| 1                       | 1445   | 19064  | 20509  |
|                         | 7.05   | 92.95  | 100.00 |
|                         | 7.05   | 92.95  |        |
|                         | 100.00 | 100.00 |        |
| _____ + _____ + _____ + |        |        |        |
| Total                   | 1445   | 19064  | 20509  |
|                         | 7.05   | 92.95  | 100.00 |

Concomitant medications other than anticoagulants at the time of obtaining Table 2-5 consent, according to the presence or absence of proton-pump inhibitors

FREQ Procedure

Tables: ALL\* PGPI

ALL PGPI(P-gp Inhibitors)

Power |

Percent |

Percent of rows

Percent of columns | None | With | Total

|       | None   | With   | Total  |
|-------|--------|--------|--------|
| 1     | 18762  | 302    | 19064  |
|       | 98.42  | 1.58   | 100.00 |
|       | 98.42  | 1.58   |        |
|       | 100.00 | 100.00 |        |
| Total | 18762  | 302    | 19064  |
|       | 98.42  | 1.58   | 100.00 |

Concomitant medications other than anticoagulants at the time of obtaining Table 2-5 consent, according to the presence or absence of proton-pump inhibitors

FREQ Procedure

|   |       | Cumulative           |                  |        |
|---|-------|----------------------|------------------|--------|
|   |       | Percent of ALL power | Percent of power |        |
| 1 | 20509 | 100.00               | 20509            | 100.00 |

Tables: ALL \* CMYN

ALL

CMYN(Administration of Concomitant Drug)

| Power                   |        |        |        |
|-------------------------|--------|--------|--------|
| Percent                 |        |        |        |
| Percent of rows         |        |        |        |
| Percent of columns      | None   | With   | Total  |
| _____ + _____ + _____ + |        |        |        |
| 1                       | 1445   | 19064  | 20509  |
|                         | 7.05   | 92.95  | 100.00 |
|                         | 7.05   | 92.95  |        |
|                         | 100.00 | 100.00 |        |
| _____ + _____ + _____ + |        |        |        |
| Total                   | 1445   | 19064  | 20509  |
|                         | 7.05   | 92.95  | 100.00 |



Concomitant medications other than anticoagulants at the time of obtaining Table 2-5 consent, according to the presence or absence of proton-pump inhibitors

FREQ Procedure

Tables: ALL\* PGPI

ALL PGPI(P-gp Inhibitors)

Power |

Percent |

Percent of rows

Percent of columns | None | With | Total

|       | None   | With   | Total  |
|-------|--------|--------|--------|
| 1     | 18762  | 302    | 19064  |
|       | 98.42  | 1.58   | 100.00 |
|       | 98.42  | 1.58   |        |
|       | 100.00 | 100.00 |        |
| Total | 18762  | 302    | 19064  |
|       | 98.42  | 1.58   | 100.00 |

Concomitant medications other than anticoagulants at the time of obtaining Table 2-5 consent, according to the presence or absence of proton-pump inhibitors

FREQ Procedure

|                      |       | Cumulative       |       |        |
|----------------------|-------|------------------|-------|--------|
| Percent of ALL power |       | Percent of power |       |        |
| 1                    | 20509 | 100.00           | 20509 | 100.00 |

Tables: ALL \* CMYN

ALL

CMYN(Administration of Concomitant Drug)

| Power                   |        |        |        |
|-------------------------|--------|--------|--------|
| Percent                 |        |        |        |
| Percent of rows         |        |        |        |
| Percent of columns      | None   | With   | Total  |
| _____ + _____ + _____ + |        |        |        |
| 1                       | 1445   | 19064  | 20509  |
|                         | 7.05   | 92.95  | 100.00 |
|                         | 7.05   | 92.95  |        |
|                         | 100.00 | 100.00 |        |
| _____ + _____ + _____ + |        |        |        |
| Total 1445              | 19064  | 20509  |        |
|                         | 7.05   | 92.95  | 100.00 |

Concomitant medications other than anticoagulants at the time of obtaining Table 2-5 consent, according to the presence or absence of proton-pump inhibitors

FREQ Procedure

Tables: ALL \* TCMCNT

ALL TCMCNT(Total Number of Drugs Other than Anticoagulant)

Power |

Percent |

Percent of rows

Percent|0|1|2|3|4|5|6|7|8|9|10|11|12| Total

|       | 0      | 1      | 2      | 3      | 4      | 5      | 6      | 7      | 8      | 9      | 10     | 11     | 12     | Total  |       |
|-------|--------|--------|--------|--------|--------|--------|--------|--------|--------|--------|--------|--------|--------|--------|-------|
|       | 1      | 52     | 660    | 1437   | 2202   | 2803   | 2848   | 2643   | 2143   | 1692   | 1251   | 829    | 583    | 365    | 20036 |
|       | 6.24   | 4.14   | 2.91   | 1.82   | 100.00 | 0.26   | 3.29   | 7.17   | 10.99  | 13.99  | 14.21  | 13.19  | 10.70  | 8.44   |       |
|       | 100.00 | 100.00 | 100.00 | 100.00 | 100.00 | 100.00 | 100.00 | 100.00 | 100.00 | 100.00 | 100.00 | 100.00 | 100.00 | 100.00 |       |
|       | 100.00 | 100.00 | 100.00 | 100.00 |        |        |        |        |        |        |        |        |        |        |       |
| Total | 52     | 660    | 1437   | 2202   | 2803   | 2848   | 2643   | 2143   | 1692   | 1251   | 829    | 583    | 365    | 20036  |       |
|       | 8.44   | 6.24   | 4.14   | 2.91   | 1.82   | 100.00 | 0.26   | 3.29   | 7.17   | 10.99  | 13.99  | 14.21  | 13.19  | 10.70  |       |

(continued)

Tables: ALL \* TCMCNT

ALL TCMCNT(Total Number of Drugs Other than Anticoagulant)

Power |

Percent |

Percent of rows

|13|14|15|16|17|18|19|20|21|23|25|26|27|Total

|          | 13     | 14     | 15     | 16     | 17     | 18     | 19     | 20     | 21     | 23     | 25     | 26     | 27     | Total  |
|----------|--------|--------|--------|--------|--------|--------|--------|--------|--------|--------|--------|--------|--------|--------|
| Count    | 1      | 225    | 118    | 78     | 44     | 25     | 18     | 4      | 7      | 1      |        |        |        | 20036  |
| Percent  | 0.00   | 1.12   | 0.59   | 0.39   | 0.22   | 0.12   | 0.09   | 0.02   | 0.03   | 0.00   |        |        |        | 100.00 |
| Row 5    | 1      | 1      | 1      | 1      | 1      | 1      | 1      | 1      | 1      | 1      | 1      | 1      | 1      | 1      |
| Percent  | 0.02   | 0.00   | 0.00   | 0.00   | 0.00   | 0.00   | 0.00   | 0.00   | 0.00   | 0.00   | 0.00   | 0.00   | 0.00   | 0.00   |
| Row 100  | 100.00 | 100.00 | 100.00 | 100.00 | 100.00 | 100.00 | 100.00 | 100.00 | 100.00 | 100.00 | 100.00 | 100.00 | 100.00 | 100.00 |
| Row 1000 | 100.00 | 100.00 | 100.00 | 100.00 | 100.00 | 100.00 | 100.00 | 100.00 | 100.00 | 100.00 | 100.00 | 100.00 | 100.00 | 100.00 |
| Total    | 225    | 118    | 78     | 44     | 25     | 18     | 4      | 7      | 1      | 1      | 1      | 1      | 1      | 20036  |
| Percent  | 1.12   | 0.59   | 0.39   | 0.22   | 0.12   | 0.09   | 0.02   | 0.03   | 0.00   |        |        |        |        | 100.00 |

Degree of missing values = 473

Concomitant medications other than anticoagulants at the time of obtaining Table 2-5 consent, according to the presence or absence of proton-pump inhibitors

FREQ Procedure

|                      |       | Cumulative       |       |        |
|----------------------|-------|------------------|-------|--------|
| Percent of ALL power |       | Percent of power |       |        |
| 1                    | 20509 | 100.00           | 20509 | 100.00 |

Tables: ALL \* CMYN

ALL

CMYN(Administration of Concomitant Drug)

| Power                   |        |        |        |
|-------------------------|--------|--------|--------|
| Percent                 |        |        |        |
| Percent of rows         |        |        |        |
| Percent of columns      | None   | With   | Total  |
| _____ + _____ + _____ + |        |        |        |
| 1                       | 1445   | 19064  | 20509  |
|                         | 7.05   | 92.95  | 100.00 |
|                         | 7.05   | 92.95  |        |
|                         | 100.00 | 100.00 |        |
| _____ + _____ + _____ + |        |        |        |
| Total                   | 1445   | 19064  | 20509  |
|                         | 7.05   | 92.95  | 100.00 |

Concomitant medications other than anticoagulants at the time of obtaining Table 2-5 consent, according to the presence or absence of proton-pump inhibitors

FREQ Procedure

Tables: ALL \* TCMCNT

ALL TCMCNT(Total Number of Drugs Other than Anticoagulant)

Power |

Percent |

Percent of rows

Percent|0|1|2|3|4|5|6|7|8|9|10|11|12| Total

|       | 0      | 1      | 2      | 3      | 4      | 5      | 6      | 7      | 8      | 9      | 10     | 11     | 12     | Total  |        |
|-------|--------|--------|--------|--------|--------|--------|--------|--------|--------|--------|--------|--------|--------|--------|--------|
|       | 1      | 52     | 660    | 1437   | 2202   | 2803   | 2848   | 2643   | 2143   | 1692   | 1251   | 829    | 583    | 365    | 20036  |
|       |        | 0.26   | 3.29   | 7.17   | 10.99  | 13.99  | 14.21  | 13.19  | 10.70  | 8.44   | 6.24   | 4.14   | 2.91   | 1.82   | 100.00 |
|       |        | 0.26   | 3.29   | 7.17   | 10.99  | 13.99  | 14.21  | 13.19  | 10.70  | 8.44   | 6.24   | 4.14   | 2.91   | 1.82   |        |
|       |        | 100.00 | 100.00 | 100.00 | 100.00 | 100.00 | 100.00 | 100.00 | 100.00 | 100.00 | 100.00 | 100.00 | 100.00 | 100.00 | 100.00 |
|       | 100.00 | 100.00 | 100.00 | 100.00 |        |        |        |        |        |        |        |        |        |        |        |
| Total | 52     | 660    | 1437   | 2202   | 2803   | 2848   | 2643   | 2143   | 1692   | 1251   | 829    | 583    | 365    | 20036  |        |
|       |        | 0.26   | 3.29   | 7.17   | 10.99  | 13.99  | 14.21  | 13.19  | 10.70  | 8.44   | 6.24   | 4.14   | 2.91   | 1.82   | 100.00 |

(continued)

Tables: ALL \* TCMCNT

ALL TCMCNT(Total Number of Drugs Other than Anticoagulant)

Power |

Percent |

Percent of rows

|13|14|15|16|17|18|19|20|21|23|25|26|27|Total

|                          | 13   | 14   | 15   | 16    | 17     | 18     | 19     | 20     | 21     | 23     | 25     | 26     | 27     | Total  |
|--------------------------|------|------|------|-------|--------|--------|--------|--------|--------|--------|--------|--------|--------|--------|
| Count                    | 1    | 225  | 118  | 78    | 44     | 25     | 18     | 4      | 7      | 1      |        |        |        | 20036  |
| Percent                  | 0.00 | 1.12 | 0.59 | 0.39  | 0.22   | 0.12   | 0.09   | 0.02   | 0.03   | 0.00   |        |        |        | 100.00 |
| Row 5                    | 1    | 1    | 1    | 20036 |        |        |        |        |        |        |        |        |        |        |
| Row 5 Percent            | 0.02 | 0.00 | 0.00 | 0.00  | 100.00 |        |        |        |        |        |        |        |        |        |
| Row 5 Percent (Detailed) | 0.02 | 0.00 | 0.00 | 0.00  | 100.00 | 100.00 | 100.00 | 100.00 | 100.00 | 100.00 | 100.00 | 100.00 | 100.00 | 100.00 |
| Total                    | 225  | 118  | 78   | 44    | 25     | 18     | 4      | 7      | 1      | 1      | 1      | 1      | 1      | 20036  |
| Total Percent            | 0.00 | 1.12 | 0.59 | 0.39  | 0.22   | 0.12   | 0.09   | 0.02   | 0.03   | 0.00   |        |        |        | 100.00 |

Degree of missing values = 473

Concomitant medications other than anticoagulants at the time of obtaining Table 2-5 consent, according to the presence or absence of proton-pump inhibitors

FREQ Procedure

|   |       | Cumulative           |                  |        |
|---|-------|----------------------|------------------|--------|
|   |       | Percent of ALL power | Percent of power |        |
| 1 | 20509 | 100.00               | 20509            | 100.00 |

Tables: ALL \* CMYN

ALL

CMYN(Administration of Concomitant Drug)

| Power                   |        |        |        |
|-------------------------|--------|--------|--------|
| Percent                 |        |        |        |
| Percent of rows         |        |        |        |
| Percent of columns      | None   | With   | Total  |
| _____ + _____ + _____ + |        |        |        |
| 1                       | 1445   | 19064  | 20509  |
|                         | 7.05   | 92.95  | 100.00 |
|                         | 7.05   | 92.95  |        |
|                         | 100.00 | 100.00 |        |
| _____ + _____ + _____ + |        |        |        |
| Total                   | 1445   | 19064  | 20509  |
|                         | 7.05   | 92.95  | 100.00 |



Concomitant medications other than anticoagulants at the time of obtaining Table 2-5 consent, according to the presence or absence of proton-pump inhibitors

FREQ Procedure

Tables: ALL \* TCMCNT

ALL TCMCNT(Total Number of Drugs Other than Anticoagulant)

Power |

Percent |

Percent of rows

Percent|0|1|2|3|4|5|6|7|8|9|10|11|12| Total

|  | 0    | 1      | 2      | 3      | 4      | 5      | 6      | 7      | 8      | 9      | 10     | 11     | 12     | Total  |        |
|--|------|--------|--------|--------|--------|--------|--------|--------|--------|--------|--------|--------|--------|--------|--------|
|  | 1    | 52     | 660    | 1437   | 2202   | 2803   | 2848   | 2643   | 2143   | 1692   | 1251   | 829    | 583    | 365    | 20036  |
|  |      | 0.26   | 3.29   | 7.17   | 10.99  | 13.99  | 14.21  | 13.19  | 10.70  | 8.44   | 6.24   | 4.14   | 2.91   | 1.82   | 100.00 |
|  |      | 0.26   | 3.29   | 7.17   | 10.99  | 13.99  | 14.21  | 13.19  | 10.70  | 8.44   | 6.24   | 4.14   | 2.91   | 1.82   |        |
|  |      | 100.00 | 100.00 | 100.00 | 100.00 | 100.00 | 100.00 | 100.00 | 100.00 | 100.00 | 100.00 | 100.00 | 100.00 | 100.00 | 100.00 |
|  |      | 100.00 | 100.00 | 100.00 | 100.00 | 100.00 | 100.00 | 100.00 | 100.00 | 100.00 | 100.00 | 100.00 | 100.00 | 100.00 | 100.00 |
|  |      | 0.26   | 3.29   | 7.17   | 10.99  | 13.99  | 14.21  | 13.19  | 10.70  | 8.44   | 6.24   | 4.14   | 2.91   | 1.82   | 100.00 |
|  | 8.44 | 6.24   | 4.14   | 2.91   | 1.82   | 100.00 |        |        |        |        |        |        |        |        |        |

(continued)

Tables: ALL \* TCMCNT

ALL TCMCNT(Total Number of Drugs Other than Anticoagulant)

Power |

Percent |

Percent of rows

|13|14|15|16|17|18|19|20|21|23|25|26|27|Total

|                             | 13     | 14     | 15     | 16     | 17     | 18     | 19     | 20     | 21     | 23     | 25     | 26     | 27     | Total  |
|-----------------------------|--------|--------|--------|--------|--------|--------|--------|--------|--------|--------|--------|--------|--------|--------|
| Count                       | 1      | 225    | 118    | 78     | 44     | 25     | 18     | 4      | 7      | 1      |        |        |        | 20036  |
| Percent                     | 0.00   | 1.12   | 0.59   | 0.39   | 0.22   | 0.12   | 0.09   | 0.02   | 0.03   | 0.00   |        |        |        | 100.00 |
| Percent of Total            | 0.00   | 0.02   | 0.00   | 0.00   | 0.00   | 0.00   | 0.00   | 0.00   | 0.00   | 0.00   | 0.00   | 0.00   | 0.00   | 100.00 |
| Percent of Count            | 100.00 | 100.00 | 100.00 | 100.00 | 100.00 | 100.00 | 100.00 | 100.00 | 100.00 | 100.00 | 100.00 | 100.00 | 100.00 | 100.00 |
| Total                       | 225    | 118    | 78     | 44     | 25     | 18     | 4      | 7      | 1      | 1      | 1      | 1      | 1      | 20036  |
| Percent of Total (repeated) | 0.00   | 1.12   | 0.59   | 0.39   | 0.22   | 0.12   | 0.09   | 0.02   | 0.03   | 0.00   |        |        |        | 100.00 |

Degree of missing values = 473

Concomitant medications other than anticoagulants at the time of obtaining Table 2-5 consent, according to the presence or absence of proton-pump inhibitors

FREQ Procedure

|                      |       | Cumulative       |       |        |
|----------------------|-------|------------------|-------|--------|
| Percent of ALL power |       | Percent of power |       |        |
| 1                    | 20509 | 100.00           | 20509 | 100.00 |

Tables: ALL \* CMYN

ALL

CMYN(Administration of Concomitant Drug)

| Power                   |        |        |        |
|-------------------------|--------|--------|--------|
| Percent                 |        |        |        |
| Percent of rows         |        |        |        |
| Percent of columns      | None   | With   | Total  |
| _____ + _____ + _____ + |        |        |        |
| 1                       | 1445   | 19064  | 20509  |
|                         | 7.05   | 92.95  | 100.00 |
|                         | 7.05   | 92.95  |        |
|                         | 100.00 | 100.00 |        |
| _____ + _____ + _____ + |        |        |        |
| Total 1445              | 19064  | 20509  |        |
|                         | 7.05   | 92.95  | 100.00 |

Concomitant medications other than anticoagulants at the time of obtaining Table 2-5 consent, according to the presence or absence of proton-pump inhibitors

FREQ Procedure

Tables: ALL \* TCMCNT

ALL TCMCNT(Total Number of Drugs Other than Anticoagulant)

Power |

Percent |

Percent of rows

Percent|0|1|2|3|4|5|6|7|8|9|10|11|12| Total

|       | 0  | 1      | 2      | 3      | 4      | 5      | 6      | 7      | 8      | 9      | 10     | 11     | 12     | Total  |        |
|-------|----|--------|--------|--------|--------|--------|--------|--------|--------|--------|--------|--------|--------|--------|--------|
|       | 1  | 52     | 660    | 1437   | 2202   | 2803   | 2848   | 2643   | 2143   | 1692   | 1251   | 829    | 583    | 365    | 20036  |
|       |    | 0.26   | 3.29   | 7.17   | 10.99  | 13.99  | 14.21  | 13.19  | 10.70  | 8.44   | 6.24   | 4.14   | 2.91   | 1.82   | 100.00 |
|       |    | 0.26   | 3.29   | 7.17   | 10.99  | 13.99  | 14.21  | 13.19  | 10.70  | 8.44   | 6.24   | 4.14   | 2.91   | 1.82   |        |
|       |    | 100.00 | 100.00 | 100.00 | 100.00 | 100.00 | 100.00 | 100.00 | 100.00 | 100.00 | 100.00 | 100.00 | 100.00 | 100.00 | 100.00 |
|       |    | 100.00 | 100.00 | 100.00 | 100.00 | 100.00 | 100.00 | 100.00 | 100.00 | 100.00 | 100.00 | 100.00 | 100.00 | 100.00 |        |
| Total | 52 | 660    | 1437   | 2202   | 2803   | 2848   | 2643   | 2143   | 1692   | 1251   | 829    | 583    | 365    | 20036  |        |
|       |    | 0.26   | 3.29   | 7.17   | 10.99  | 13.99  | 14.21  | 13.19  | 10.70  | 8.44   | 6.24   | 4.14   | 2.91   | 1.82   | 100.00 |

(continued)

Tables: ALL \* TCMCNT

ALL TCMCNT(Total Number of Drugs Other than Anticoagulant)

Power |

Percent |

Percent of rows

|13|14|15|16|17|18|19|20|21|23|25|26|27|Total

|                          | 13   | 14   | 15   | 16    | 17     | 18     | 19     | 20     | 21     | 23     | 25     | 26     | 27     | Total  |
|--------------------------|------|------|------|-------|--------|--------|--------|--------|--------|--------|--------|--------|--------|--------|
| Count                    | 1    | 225  | 118  | 78    | 44     | 25     | 18     | 4      | 7      | 1      |        |        |        | 20036  |
| Percent                  | 0.00 | 1.12 | 0.59 | 0.39  | 0.22   | 0.12   | 0.09   | 0.02   | 0.03   | 0.00   |        |        |        | 100.00 |
| Row 5                    | 1    | 1    | 1    | 20036 |        |        |        |        |        |        |        |        |        |        |
| Row 5 Percent            | 0.02 | 0.00 | 0.00 | 0.00  | 100.00 |        |        |        |        |        |        |        |        |        |
| Row 5 Percent (Detailed) | 0.02 | 0.00 | 0.00 | 0.00  | 100.00 | 100.00 | 100.00 | 100.00 | 100.00 | 100.00 | 100.00 | 100.00 | 100.00 | 100.00 |
| Total                    | 225  | 118  | 78   | 44    | 25     | 18     | 4      | 7      | 1      | 1      | 1      | 1      | 1      | 20036  |
| Total Percent            | 0.00 | 1.12 | 0.59 | 0.39  | 0.22   | 0.12   | 0.09   | 0.02   | 0.03   | 0.00   |        |        |        | 100.00 |

Degree of missing values = 473

Concomitant medications other than anticoagulants at the time of obtaining Table 2-5 consent, according to the presence or absence of proton-pump inhibitors

FREQ Procedure

|                      |       | Cumulative       |       |        |
|----------------------|-------|------------------|-------|--------|
| Percent of ALL power |       | Percent of power |       |        |
| 1                    | 20509 | 100.00           | 20509 | 100.00 |

Tables: ALL \* CMYN

ALL

CMYN(Administration of Concomitant Drug)

| Power                   |        |        |        |
|-------------------------|--------|--------|--------|
| Percent                 |        |        |        |
| Percent of rows         |        |        |        |
| Percent of columns      | None   | With   | Total  |
| _____ + _____ + _____ + |        |        |        |
| 1                       | 1445   | 19064  | 20509  |
|                         | 7.05   | 92.95  | 100.00 |
|                         | 7.05   | 92.95  |        |
|                         | 100.00 | 100.00 |        |
| _____ + _____ + _____ + |        |        |        |
| Total                   | 1445   | 19064  | 20509  |
|                         | 7.05   | 92.95  | 100.00 |

Concomitant medications other than anticoagulants at the time of obtaining Table 2-5 consent, according to the presence or absence of proton-pump inhibitors

FREQ Procedure

Tables: ALL \* TCMCNT

ALL TCMCNT(Total Number of Drugs Other than Anticoagulant)

Power |

Percent |

Percent of rows

Percent|0|1|2|3|4|5|6|7|8|9|10|11|12| Total

|  | 0      | 1      | 2      | 3      | 4      | 5      | 6      | 7      | 8      | 9      | 10     | 11     | 12     | Total  |        |
|--|--------|--------|--------|--------|--------|--------|--------|--------|--------|--------|--------|--------|--------|--------|--------|
|  | 1      | 52     | 660    | 1437   | 2202   | 2803   | 2848   | 2643   | 2143   | 1692   | 1251   | 829    | 583    | 365    | 20036  |
|  |        | 0.26   | 3.29   | 7.17   | 10.99  | 13.99  | 14.21  | 13.19  | 10.70  | 8.44   | 6.24   | 4.14   | 2.91   | 1.82   | 100.00 |
|  |        | 0.26   | 3.29   | 7.17   | 10.99  | 13.99  | 14.21  | 13.19  | 10.70  | 8.44   | 6.24   | 4.14   | 2.91   | 1.82   |        |
|  |        | 100.00 | 100.00 | 100.00 | 100.00 | 100.00 | 100.00 | 100.00 | 100.00 | 100.00 | 100.00 | 100.00 | 100.00 | 100.00 | 100.00 |
|  | 100.00 | 100.00 | 100.00 | 100.00 | 100.00 | 100.00 | 100.00 | 100.00 | 100.00 | 100.00 | 100.00 | 100.00 | 100.00 | 100.00 | 100.00 |
|  |        | 0.26   | 3.29   | 7.17   | 10.99  | 13.99  | 14.21  | 13.19  | 10.70  | 8.44   | 6.24   | 4.14   | 2.91   | 1.82   | 100.00 |
|  | 8.44   | 6.24   | 4.14   | 2.91   | 1.82   | 100.00 |        |        |        |        |        |        |        |        |        |

(continued)

Tables: ALL \* TCMCNT

ALL TCMCNT(Total Number of Drugs Other than Anticoagulant)

Power |

Percent |

Percent of rows

|13|14|15|16|17|18|19|20|21|23|25|26|27|Total

|                  | 13     | 14     | 15     | 16     | 17     | 18     | 19     | 20     | 21     | 23     | 25     | 26     | 27     | Total  |
|------------------|--------|--------|--------|--------|--------|--------|--------|--------|--------|--------|--------|--------|--------|--------|
| Count            | 1      | 225    | 118    | 78     | 44     | 25     | 18     | 4      | 7      | 1      |        |        |        | 20036  |
| Percent          | 1.12   | 0.59   | 0.39   | 0.22   | 0.12   | 0.09   | 0.02   | 0.03   | 0.00   | 0.02   | 0.00   | 0.00   | 0.00   | 100.00 |
| Percent of Total | 100.00 | 100.00 | 100.00 | 100.00 | 100.00 | 100.00 | 100.00 | 100.00 | 100.00 | 100.00 | 100.00 | 100.00 | 100.00 | 100.00 |
| Total            | 225    | 118    | 78     | 44     | 25     | 18     | 4      | 7      | 1      | 1      | 1      | 1      | 1      | 20036  |
| Percent of Total | 1.12   | 0.59   | 0.39   | 0.22   | 0.12   | 0.09   | 0.02   | 0.03   | 0.00   | 0.02   | 0.00   | 0.00   | 0.00   | 100.00 |

Degree of missing values = 473



Concomitant medications other than anticoagulants at the time of obtaining Table 2-5 consent, according to the presence or absence of proton-pump inhibitors

FREQ Procedure

|   |       | Cumulative           |                  |        |
|---|-------|----------------------|------------------|--------|
|   |       | Percent of ALL power | Percent of power |        |
| 1 | 20509 | 100.00               | 20509            | 100.00 |

Tables: ALL \* CMYN

ALL

CMYN(Administration of Concomitant Drug)

| Power                   |        |        |        |
|-------------------------|--------|--------|--------|
| Percent                 |        |        |        |
| Percent of rows         |        |        |        |
| Percent of columns      | None   | With   | Total  |
| _____ + _____ + _____ + |        |        |        |
| 1                       | 1445   | 19064  | 20509  |
|                         | 7.05   | 92.95  | 100.00 |
|                         | 7.05   | 92.95  |        |
|                         | 100.00 | 100.00 |        |
| _____ + _____ + _____ + |        |        |        |
| Total                   | 1445   | 19064  | 20509  |
|                         | 7.05   | 92.95  | 100.00 |

Concomitant medications other than anticoagulants at the time of obtaining Table 2-5 consent, according to the presence or absence of proton-pump inhibitors

FREQ Procedure

Tables: ALL \* TCMCNT

ALL TCMCNT(Total Number of Drugs Other than Anticoagulant)

Power |

Percent |

Percent of rows

Percent|0|1|2|3|4|5|6|7|8|9|10|11|12| Total

|  | 0      | 1      | 2      | 3      | 4      | 5      | 6      | 7      | 8      | 9      | 10     | 11     | 12     | Total  |        |
|--|--------|--------|--------|--------|--------|--------|--------|--------|--------|--------|--------|--------|--------|--------|--------|
|  | 1      | 52     | 660    | 1437   | 2202   | 2803   | 2848   | 2643   | 2143   | 1692   | 1251   | 829    | 583    | 365    | 20036  |
|  | 6.24   | 4.14   | 2.91   | 1.82   | 100.00 | 0.26   | 3.29   | 7.17   | 10.99  | 13.99  | 14.21  | 13.19  | 10.70  | 8.44   |        |
|  | 100.00 | 100.00 | 100.00 | 100.00 | 100.00 | 100.00 | 100.00 | 100.00 | 100.00 | 100.00 | 100.00 | 100.00 | 100.00 | 100.00 | 100.00 |
|  | 100.00 | 100.00 | 100.00 | 100.00 |        |        |        |        |        |        |        |        |        |        |        |
|  | 8.44   | 6.24   | 4.14   | 2.91   | 1.82   | 100.00 | 0.26   | 3.29   | 7.17   | 10.99  | 13.99  | 14.21  | 13.19  | 10.70  |        |

(continued)

Tables: ALL \* TCMCNT

ALL TCMCNT(Total Number of Drugs Other than Anticoagulant)

Power |

Percent |

Percent of rows

|13|14|15|16|17|18|19|20|21|23|25|26|27|Total

|         | 13     | 14     | 15     | 16     | 17     | 18     | 19     | 20     | 21     | 23     | 25     | 26     | 27     | Total  |
|---------|--------|--------|--------|--------|--------|--------|--------|--------|--------|--------|--------|--------|--------|--------|
| Count   | 1      | 225    | 118    | 78     | 44     | 25     | 18     | 4      | 7      | 1      |        |        |        | 20036  |
| Percent | 0.00   | 1.12   | 0.59   | 0.39   | 0.22   | 0.12   | 0.09   | 0.02   | 0.03   | 0.00   |        |        |        | 100.00 |
| Row 5   | 1      | 1      | 1      | 1      | 1      | 1      | 1      | 1      | 1      | 1      | 1      | 1      | 1      | 1      |
| Percent | 0.02   | 0.00   | 0.00   | 0.00   | 0.00   | 0.00   | 0.00   | 0.00   | 0.00   | 0.00   | 0.00   | 0.00   | 0.00   | 100.00 |
| Row 100 | 100.00 | 100.00 | 100.00 | 100.00 | 100.00 | 100.00 | 100.00 | 100.00 | 100.00 | 100.00 | 100.00 | 100.00 | 100.00 | 100.00 |
| Row 200 | 100.00 | 100.00 | 100.00 | 100.00 | 100.00 | 100.00 | 100.00 | 100.00 | 100.00 | 100.00 | 100.00 | 100.00 | 100.00 | 100.00 |
| Total   | 225    | 118    | 78     | 44     | 25     | 18     | 4      | 7      | 1      | 1      | 1      | 1      | 1      | 20036  |
| Percent | 1.12   | 0.59   | 0.39   | 0.22   | 0.12   | 0.09   | 0.02   | 0.03   | 0.00   |        |        |        |        | 100.00 |
| Row 200 | 0.00   | 0.02   | 0.00   | 0.00   | 0.00   | 0.00   | 0.00   | 0.00   | 0.00   | 0.00   | 0.00   | 0.00   | 0.00   | 100.00 |

Degree of missing values = 473

Concomitant medications other than anticoagulants at the time of obtaining Table 2-5 consent, according to the presence or absence of proton-pump inhibitors

FREQ Procedure

|   |       | Cumulative           |                  |        |
|---|-------|----------------------|------------------|--------|
|   |       | Percent of ALL power | Percent of power |        |
| 1 | 20509 | 100.00               | 20509            | 100.00 |

Tables: ALL \* CMYN

ALL

CMYN(Administration of Concomitant Drug)

| Power                   |        |        |        |
|-------------------------|--------|--------|--------|
| Percent                 |        |        |        |
| Percent of rows         |        |        |        |
| Percent of columns      | None   | With   | Total  |
| _____ + _____ + _____ + |        |        |        |
| 1                       | 1445   | 19064  | 20509  |
|                         | 7.05   | 92.95  | 100.00 |
|                         | 7.05   | 92.95  |        |
|                         | 100.00 | 100.00 |        |
| _____ + _____ + _____ + |        |        |        |
| Total                   | 1445   | 19064  | 20509  |
|                         | 7.05   | 92.95  | 100.00 |

Concomitant medications other than anticoagulants at the time of obtaining Table 2-5 consent, according to the presence or absence of proton-pump inhibitors

FREQ Procedure

Tables: ALL \* TCMCNT

ALL TCMCNT(Total Number of Drugs Other than Anticoagulant)

Power |

Percent |

Percent of rows

Percent|0|1|2|3|4|5|6|7|8|9|10|11|12| Total

|       | 0      | 1      | 2      | 3      | 4      | 5      | 6      | 7      | 8      | 9      | 10     | 11     | 12     | Total  |       |
|-------|--------|--------|--------|--------|--------|--------|--------|--------|--------|--------|--------|--------|--------|--------|-------|
|       | 1      | 52     | 660    | 1437   | 2202   | 2803   | 2848   | 2643   | 2143   | 1692   | 1251   | 829    | 583    | 365    | 20036 |
|       | 6.24   | 4.14   | 2.91   | 1.82   | 100.00 | 0.26   | 3.29   | 7.17   | 10.99  | 13.99  | 14.21  | 13.19  | 10.70  | 8.44   |       |
|       | 100.00 | 100.00 | 100.00 | 100.00 | 100.00 | 100.00 | 100.00 | 100.00 | 100.00 | 100.00 | 100.00 | 100.00 | 100.00 | 100.00 |       |
|       | 100.00 | 100.00 | 100.00 | 100.00 |        |        |        |        |        |        |        |        |        |        |       |
| Total | 52     | 660    | 1437   | 2202   | 2803   | 2848   | 2643   | 2143   | 1692   | 1251   | 829    | 583    | 365    | 20036  |       |
|       | 8.44   | 6.24   | 4.14   | 2.91   | 1.82   | 100.00 | 0.26   | 3.29   | 7.17   | 10.99  | 13.99  | 14.21  | 13.19  | 10.70  |       |

(continued)

Tables: ALL \* TCMCNT

ALL TCMCNT(Total Number of Drugs Other than Anticoagulant)

Power |

Percent |

Percent of rows

|13|14|15|16|17|18|19|20|21|23|25|26|27|Total

|         | 13     | 14     | 15     | 16     | 17     | 18     | 19     | 20     | 21     | 23     | 25     | 26     | 27     | Total  |
|---------|--------|--------|--------|--------|--------|--------|--------|--------|--------|--------|--------|--------|--------|--------|
| Count   | 1      | 225    | 118    | 78     | 44     | 25     | 18     | 4      | 7      | 1      |        |        |        | 20036  |
| Percent | 1.12   | 0.59   | 0.39   | 0.22   | 0.12   | 0.09   | 0.02   | 0.03   | 0.00   | 0.02   | 0.00   | 0.00   | 0.00   | 100.00 |
| Row 5   | 1      | 1      | 1      |        |        |        |        |        |        |        |        |        |        |        |
| Row 100 | 100.00 | 100.00 | 100.00 | 100.00 | 100.00 | 100.00 | 100.00 | 100.00 | 100.00 | 100.00 | 100.00 | 100.00 | 100.00 | 100.00 |
| Row 200 | 100.00 | 100.00 | 100.00 | 100.00 | 100.00 | 100.00 | 100.00 | 100.00 | 100.00 | 100.00 | 100.00 | 100.00 | 100.00 | 100.00 |
| Row 300 | 1.12   | 0.59   | 0.39   | 0.22   | 0.12   | 0.09   | 0.02   | 0.03   | 0.00   | 0.02   | 0.00   | 0.00   | 0.00   | 100.00 |
| Row 400 | 0.00   | 0.02   | 0.00   | 0.00   | 0.00   | 0.00   | 100.00 |        |        |        |        |        |        |        |
| Total   | 225    | 118    | 78     | 44     | 25     | 18     | 4      | 7      | 1      | 1      | 1      | 1      | 1      | 20036  |
| Percent | 1.12   | 0.59   | 0.39   | 0.22   | 0.12   | 0.09   | 0.02   | 0.03   | 0.00   | 0.02   | 0.00   | 0.00   | 0.00   | 100.00 |

Degree of missing values = 473

Concomitant medications other than anticoagulants at the time of obtaining Table 2-5 consent, according to the presence or absence of proton-pump inhibitors

FREQ Procedure

|                      |       | Cumulative       |       |        |
|----------------------|-------|------------------|-------|--------|
| Percent of ALL power |       | Percent of power |       |        |
| 1                    | 20509 | 100.00           | 20509 | 100.00 |

Tables: ALL \* CMYN

ALL

CMYN(Administration of Concomitant Drug)

| Power                   |        |        |        |
|-------------------------|--------|--------|--------|
| Percent                 |        |        |        |
| Percent of rows         |        |        |        |
| Percent of columns      | None   | With   | Total  |
| _____ + _____ + _____ + |        |        |        |
| 1                       | 1445   | 19064  | 20509  |
|                         | 7.05   | 92.95  | 100.00 |
|                         | 7.05   | 92.95  |        |
|                         | 100.00 | 100.00 |        |
| _____ + _____ + _____ + |        |        |        |
| Total                   | 1445   | 19064  | 20509  |
|                         | 7.05   | 92.95  | 100.00 |

Concomitant medications other than anticoagulants at the time of obtaining Table 2-5 consent, according to the presence or absence of proton-pump inhibitors

FREQ Procedure

Tables: ALL \* TCMCNT

ALL TCMCNT(Total Number of Drugs Other than Anticoagulant)

Power |

Percent |

Percent of rows

Percent|0|1|2|3|4|5|6|7|8|9|10|11|12| Total

|  | 0      | 1      | 2      | 3      | 4      | 5      | 6      | 7      | 8      | 9      | 10     | 11     | 12     | Total  |       |
|--|--------|--------|--------|--------|--------|--------|--------|--------|--------|--------|--------|--------|--------|--------|-------|
|  | 1      | 52     | 660    | 1437   | 2202   | 2803   | 2848   | 2643   | 2143   | 1692   | 1251   | 829    | 583    | 365    | 20036 |
|  | 6.24   | 4.14   | 2.91   | 1.82   | 100.00 | 0.26   | 3.29   | 7.17   | 10.99  | 13.99  | 14.21  | 13.19  | 10.70  | 8.44   |       |
|  | 100.00 | 100.00 | 100.00 | 100.00 | 100.00 | 100.00 | 100.00 | 100.00 | 100.00 | 100.00 | 100.00 | 100.00 | 100.00 | 100.00 |       |
|  | 100.00 | 100.00 | 100.00 | 100.00 |        |        |        |        |        |        |        |        |        |        |       |
|  | 8.44   | 6.24   | 4.14   | 2.91   | 1.82   | 100.00 | 0.26   | 3.29   | 7.17   | 10.99  | 13.99  | 14.21  | 13.19  | 10.70  |       |

(continued)

Tables: ALL \* TCMCNT

ALL TCMCNT(Total Number of Drugs Other than Anticoagulant)

Power |

Percent |



Percent of rows

|13|14|15|16|17|18|19|20|21|23|25|26|27|Total

|            | 13     | 14     | 15     | 16     | 17     | 18     | 19     | 20     | 21     | 23     | 25     | 26     | 27     | Total  |
|------------|--------|--------|--------|--------|--------|--------|--------|--------|--------|--------|--------|--------|--------|--------|
| Count      | 1      | 225    | 118    | 78     | 44     | 25     | 18     | 4      | 7      | 1      |        |        |        | 20036  |
| Percent    | 0.00   | 1.12   | 0.59   | 0.39   | 0.22   | 0.12   | 0.09   | 0.02   | 0.03   | 0.00   |        |        |        | 100.00 |
| Row 5      | 1      | 1      | 1      | 1      | 1      | 1      | 1      | 1      | 1      | 1      | 1      | 1      | 1      | 1      |
| Row 100    | 0.02   | 0.00   | 0.00   | 0.00   | 0.00   | 0.00   | 0.00   | 0.00   | 0.00   | 0.00   | 0.00   | 0.00   | 0.00   | 0.00   |
| Row 1000   | 0.02   | 0.00   | 0.00   | 0.00   | 0.00   | 0.00   | 0.00   | 0.00   | 0.00   | 0.00   | 0.00   | 0.00   | 0.00   | 0.00   |
| Row 10000  | 100.00 | 100.00 | 100.00 | 100.00 | 100.00 | 100.00 | 100.00 | 100.00 | 100.00 | 100.00 | 100.00 | 100.00 | 100.00 | 100.00 |
| Row 100000 | 100.00 | 100.00 | 100.00 | 100.00 | 100.00 | 100.00 | 100.00 | 100.00 | 100.00 | 100.00 | 100.00 | 100.00 | 100.00 | 100.00 |
| Total      | 225    | 118    | 78     | 44     | 25     | 18     | 4      | 7      | 1      | 1      | 1      | 1      | 1      | 20036  |
| Percent    | 1.12   | 0.59   | 0.39   | 0.22   | 0.12   | 0.09   | 0.02   | 0.03   | 0.00   |        |        |        |        | 100.00 |

Degree of missing values = 473

Concomitant medications other than anticoagulants at the time of obtaining Table 2-5 consent, according to the presence or absence of proton-pump inhibitors

FREQ Procedure

|                      |       | Cumulative       |       |        |
|----------------------|-------|------------------|-------|--------|
| Percent of ALL power |       | Percent of power |       |        |
| 1                    | 20509 | 100.00           | 20509 | 100.00 |

Tables: ALL \* CMYN

ALL

CMYN(Administration of Concomitant Drug)

| Power                   |        |        |        |
|-------------------------|--------|--------|--------|
| Percent                 |        |        |        |
| Percent of rows         |        |        |        |
| Percent of columns      | None   | With   | Total  |
| _____ + _____ + _____ + |        |        |        |
| 1                       | 1445   | 19064  | 20509  |
|                         | 7.05   | 92.95  | 100.00 |
|                         | 7.05   | 92.95  |        |
|                         | 100.00 | 100.00 |        |
| _____ + _____ + _____ + |        |        |        |
| Total                   | 1445   | 19064  | 20509  |
|                         | 7.05   | 92.95  | 100.00 |

Concomitant medications other than anticoagulants at the time of obtaining Table 2-5 consent, according to the presence or absence of proton-pump inhibitors

FREQ Procedure

Tables: ALL \* TCMCNT

ALL TCMCNT(Total Number of Drugs Other than Anticoagulant)

Power |

Percent |

Percent of rows

Percent|0|1|2|3|4|5|6|7|8|9|10|11|12| Total

|       | 0      | 1      | 2      | 3      | 4      | 5      | 6      | 7      | 8      | 9      | 10     | 11     | 12     | Total  |        |
|-------|--------|--------|--------|--------|--------|--------|--------|--------|--------|--------|--------|--------|--------|--------|--------|
|       | 1      | 52     | 660    | 1437   | 2202   | 2803   | 2848   | 2643   | 2143   | 1692   | 1251   | 829    | 583    | 365    | 20036  |
|       |        | 0.26   | 3.29   | 7.17   | 10.99  | 13.99  | 14.21  | 13.19  | 10.70  | 8.44   | 6.24   | 4.14   | 2.91   | 1.82   | 100.00 |
|       |        | 0.26   | 3.29   | 7.17   | 10.99  | 13.99  | 14.21  | 13.19  | 10.70  | 8.44   | 6.24   | 4.14   | 2.91   | 1.82   |        |
|       |        | 100.00 | 100.00 | 100.00 | 100.00 | 100.00 | 100.00 | 100.00 | 100.00 | 100.00 | 100.00 | 100.00 | 100.00 | 100.00 | 100.00 |
|       | 100.00 | 100.00 | 100.00 | 100.00 |        |        |        |        |        |        |        |        |        |        |        |
| Total | 52     | 660    | 1437   | 2202   | 2803   | 2848   | 2643   | 2143   | 1692   | 1251   | 829    | 583    | 365    | 20036  |        |
|       |        | 0.26   | 3.29   | 7.17   | 10.99  | 13.99  | 14.21  | 13.19  | 10.70  | 8.44   | 6.24   | 4.14   | 2.91   | 1.82   | 100.00 |

(continued)

Tables: ALL \* TCMCNT

ALL TCMCNT(Total Number of Drugs Other than Anticoagulant)

Power |

Percent |

Percent of rows

|13|14|15|16|17|18|19|20|21|23|25|26|27|Total

|          | 13     | 14     | 15     | 16     | 17     | 18     | 19     | 20     | 21     | 23     | 25     | 26     | 27     | Total  |
|----------|--------|--------|--------|--------|--------|--------|--------|--------|--------|--------|--------|--------|--------|--------|
| Count    | 1      | 225    | 118    | 78     | 44     | 25     | 18     | 4      | 7      | 1      |        |        |        | 20036  |
| Percent  | 0.00   | 1.12   | 0.59   | 0.39   | 0.22   | 0.12   | 0.09   | 0.02   | 0.03   | 0.00   |        |        |        | 100.00 |
| Row 5    | 1      | 1      | 1      | 1      | 1      | 1      | 1      | 1      | 1      | 1      | 1      | 1      | 1      | 1      |
| Percent  | 0.02   | 0.00   | 0.00   | 0.00   | 0.00   | 0.00   | 0.00   | 0.00   | 0.00   | 0.00   | 0.00   | 0.00   | 0.00   | 100.00 |
| Row 100  | 100.00 | 100.00 | 100.00 | 100.00 | 100.00 | 100.00 | 100.00 | 100.00 | 100.00 | 100.00 | 100.00 | 100.00 | 100.00 | 100.00 |
| Row 1000 | 100.00 | 100.00 | 100.00 | 100.00 | 100.00 | 100.00 | 100.00 | 100.00 | 100.00 | 100.00 | 100.00 | 100.00 | 100.00 | 100.00 |
| Total    | 225    | 118    | 78     | 44     | 25     | 18     | 4      | 7      | 1      | 1      | 1      | 1      | 1      | 20036  |
| Percent  | 1.12   | 0.59   | 0.39   | 0.22   | 0.12   | 0.09   | 0.02   | 0.03   | 0.00   | 0.00   | 0.00   | 0.00   | 0.00   | 100.00 |

Degree of missing values = 473

Concomitant medications other than anticoagulants at the time of obtaining Table 2-5 consent, according to the presence or absence of proton-pump inhibitors

FREQ Procedure

|                      |       | Cumulative       |       |        |
|----------------------|-------|------------------|-------|--------|
| Percent of ALL power |       | Percent of power |       |        |
| 1                    | 20509 | 100.00           | 20509 | 100.00 |

Tables: ALL \* CMYN

ALL

CMYN(Administration of Concomitant Drug)

| Power                   |        |        |        |
|-------------------------|--------|--------|--------|
| Percent                 |        |        |        |
| Percent of rows         |        |        |        |
| Percent of columns      | None   | With   | Total  |
| _____ + _____ + _____ + |        |        |        |
| 1                       | 1445   | 19064  | 20509  |
|                         | 7.05   | 92.95  | 100.00 |
|                         | 7.05   | 92.95  |        |
|                         | 100.00 | 100.00 |        |
| _____ + _____ + _____ + |        |        |        |
| Total 1445              | 19064  | 20509  |        |
|                         | 7.05   | 92.95  | 100.00 |

Concomitant medications other than anticoagulants at the time of obtaining Table 2-5 consent, according to the presence or absence of proton-pump inhibitors

FREQ Procedure

Tables: ALL \* TCMCNT

ALL TCMCNT(Total Number of Drugs Other than Anticoagulant)

Power |

Percent |

Percent of rows

Percent|0|1|2|3|4|5|6|7|8|9|10|11|12| Total

|       | 0      | 1      | 2      | 3      | 4      | 5      | 6      | 7      | 8      | 9      | 10     | 11     | 12     | Total  |        |
|-------|--------|--------|--------|--------|--------|--------|--------|--------|--------|--------|--------|--------|--------|--------|--------|
|       | 1      | 52     | 660    | 1437   | 2202   | 2803   | 2848   | 2643   | 2143   | 1692   | 1251   | 829    | 583    | 365    | 20036  |
|       | 6.24   | 4.14   | 2.91   | 1.82   | 100.00 | 0.26   | 3.29   | 7.17   | 10.99  | 13.99  | 14.21  | 13.19  | 10.70  | 8.44   |        |
|       | 100.00 | 100.00 | 100.00 | 100.00 | 100.00 | 100.00 | 100.00 | 100.00 | 100.00 | 100.00 | 100.00 | 100.00 | 100.00 | 100.00 | 100.00 |
|       | 100.00 | 100.00 | 100.00 | 100.00 |        |        |        |        |        |        |        |        |        |        |        |
| Total | 52     | 660    | 1437   | 2202   | 2803   | 2848   | 2643   | 2143   | 1692   | 1251   | 829    | 583    | 365    | 20036  |        |
|       | 8.44   | 6.24   | 4.14   | 2.91   | 1.82   | 100.00 | 0.26   | 3.29   | 7.17   | 10.99  | 13.99  | 14.21  | 13.19  | 10.70  |        |

(continued)

Tables: ALL \* TCMCNT

ALL TCMCNT(Total Number of Drugs Other than Anticoagulant)

Power |

Percent |

Percent of rows

|13|14|15|16|17|18|19|20|21|23|25|26|27|Total

|         | 13     | 14     | 15     | 16     | 17     | 18     | 19     | 20     | 21     | 23     | 25     | 26     | 27     | Total  |
|---------|--------|--------|--------|--------|--------|--------|--------|--------|--------|--------|--------|--------|--------|--------|
| Count   | 1      | 225    | 118    | 78     | 44     | 25     | 18     | 4      | 7      | 1      |        |        |        | 20036  |
| Percent | 0.00   | 1.12   | 0.59   | 0.39   | 0.22   | 0.12   | 0.09   | 0.02   | 0.03   | 0.00   |        |        |        | 100.00 |
| Row 5   | 1      | 1      | 1      | 1      | 1      | 1      | 1      | 1      | 1      | 1      | 1      | 1      | 1      | 1      |
| Percent | 0.02   | 0.00   | 0.00   | 0.00   | 0.00   | 0.00   | 0.00   | 0.00   | 0.00   | 0.00   | 0.00   | 0.00   | 0.00   | 0.00   |
| Row 100 | 100.00 | 100.00 | 100.00 | 100.00 | 100.00 | 100.00 | 100.00 | 100.00 | 100.00 | 100.00 | 100.00 | 100.00 | 100.00 | 100.00 |
| Row 200 | 100.00 | 100.00 | 100.00 | 100.00 | 100.00 | 100.00 | 100.00 | 100.00 | 100.00 | 100.00 | 100.00 | 100.00 | 100.00 | 100.00 |
| Total   | 225    | 118    | 78     | 44     | 25     | 18     | 4      | 7      | 1      | 1      | 1      | 1      | 1      | 20036  |
| Percent | 1.12   | 0.59   | 0.39   | 0.22   | 0.12   | 0.09   | 0.02   | 0.03   | 0.00   | 0.00   | 0.00   | 0.00   | 0.00   | 100.00 |

Degree of missing values = 473

Concomitant medications other than anticoagulants at the time of obtaining Table 2-5 consent, according to the presence or absence of proton-pump inhibitors

FREQ Procedure

|                      |       | Cumulative       |       |        |
|----------------------|-------|------------------|-------|--------|
| Percent of ALL power |       | Percent of power |       |        |
| 1                    | 20509 | 100.00           | 20509 | 100.00 |

Tables: ALL \* CMYN

ALL

CMYN(Administration of Concomitant Drug)

| Power                   |        |        |        |
|-------------------------|--------|--------|--------|
| Percent                 |        |        |        |
| Percent of rows         |        |        |        |
| Percent of columns      | None   | With   | Total  |
| _____ + _____ + _____ + |        |        |        |
| 1                       | 1445   | 19064  | 20509  |
|                         | 7.05   | 92.95  | 100.00 |
|                         | 7.05   | 92.95  |        |
|                         | 100.00 | 100.00 |        |
| _____ + _____ + _____ + |        |        |        |
| Total 1445              | 19064  | 20509  |        |
|                         | 7.05   | 92.95  | 100.00 |



Concomitant medications other than anticoagulants at the time of obtaining Table 2-5 consent, according to the presence or absence of proton-pump inhibitors

FREQ Procedure

Tables: ALL \* TCMCNT

ALL TCMCNT(Total Number of Drugs Other than Anticoagulant)

Power |

Percent |

Percent of rows

Percent|0|1|2|3|4|5|6|7|8|9|10|11|12| Total

|       | 0      | 1      | 2      | 3      | 4      | 5      | 6      | 7      | 8      | 9      | 10     | 11     | 12     | Total  |        |
|-------|--------|--------|--------|--------|--------|--------|--------|--------|--------|--------|--------|--------|--------|--------|--------|
|       | 1      | 52     | 660    | 1437   | 2202   | 2803   | 2848   | 2643   | 2143   | 1692   | 1251   | 829    | 583    | 365    | 20036  |
|       | 6.24   | 4.14   | 2.91   | 1.82   | 100.00 | 0.26   | 3.29   | 7.17   | 10.99  | 13.99  | 14.21  | 13.19  | 10.70  | 8.44   |        |
|       | 100.00 | 100.00 | 100.00 | 100.00 | 100.00 | 100.00 | 100.00 | 100.00 | 100.00 | 100.00 | 100.00 | 100.00 | 100.00 | 100.00 | 100.00 |
|       | 100.00 | 100.00 | 100.00 | 100.00 |        |        |        |        |        |        |        |        |        |        |        |
| Total | 52     | 660    | 1437   | 2202   | 2803   | 2848   | 2643   | 2143   | 1692   | 1251   | 829    | 583    | 365    | 20036  |        |
|       | 0.26   | 3.29   | 7.17   | 10.99  | 13.99  | 14.21  | 13.19  | 10.70  | 8.44   | 6.24   | 4.14   | 2.91   | 1.82   | 100.00 |        |

(continued)

Tables: ALL \* TCMCNT

ALL TCMCNT(Total Number of Drugs Other than Anticoagulant)

Power |

Percent |

Percent of rows

|13|14|15|16|17|18|19|20|21|23|25|26|27|Total

|         | 13     | 14     | 15     | 16     | 17     | 18     | 19     | 20     | 21     | 23     | 25     | 26     | 27     | Total  |
|---------|--------|--------|--------|--------|--------|--------|--------|--------|--------|--------|--------|--------|--------|--------|
| Count   | 1      | 225    | 118    | 78     | 44     | 25     | 18     | 4      | 7      | 1      | 5      | 1      | 1      | 20036  |
| Percent | 1.12   | 0.59   | 0.39   | 0.22   | 0.12   | 0.09   | 0.02   | 0.03   | 0.00   | 0.02   | 0.00   | 0.00   | 0.00   | 100.00 |
| Row 2   | 1.12   | 0.59   | 0.39   | 0.22   | 0.12   | 0.09   | 0.02   | 0.03   | 0.00   | 0.02   | 0.00   | 0.00   | 0.00   | 100.00 |
| Row 3   | 100.00 | 100.00 | 100.00 | 100.00 | 100.00 | 100.00 | 100.00 | 100.00 | 100.00 | 100.00 | 100.00 | 100.00 | 100.00 | 100.00 |
| Row 4   | 100.00 | 100.00 | 100.00 | 100.00 |        |        |        |        |        |        |        |        |        |        |
| Total   | 225    | 118    | 78     | 44     | 25     | 18     | 4      | 7      | 1      | 5      | 1      | 1      | 1      | 20036  |
| Percent | 1.12   | 0.59   | 0.39   | 0.22   | 0.12   | 0.09   | 0.02   | 0.03   | 0.00   | 0.02   | 0.00   | 0.00   | 0.00   | 100.00 |

Degree of missing values = 473

Concomitant medications other than anticoagulants at the time of obtaining Table 2-5 consent, according to the presence or absence of proton-pump inhibitors

FREQ Procedure

|                      |       | Cumulative       |       |        |
|----------------------|-------|------------------|-------|--------|
| Percent of ALL power |       | Percent of power |       |        |
| 1                    | 20509 | 100.00           | 20509 | 100.00 |

Tables: ALL \* CMYN

ALL

CMYN(Administration of Concomitant Drug)

Power |

Percent |

Percent of rows

Percent of columns | None | With | Total

|            |        |        |        |  |   |
|------------|--------|--------|--------|--|---|
|            | +      |        | +      |  | + |
| 1          | 1445   | 19064  | 20509  |  |   |
|            | 7.05   | 92.95  | 100.00 |  |   |
|            | 7.05   | 92.95  |        |  |   |
|            | 100.00 | 100.00 |        |  |   |
|            | +      |        | +      |  | + |
| Total 1445 | 19064  | 20509  |        |  |   |
|            | 7.05   | 92.95  | 100.00 |  |   |

Concomitant medications other than anticoagulants at the time of obtaining Table 2-5 consent, according to the presence or absence of proton-pump inhibitors

FREQ Procedure

Tables: ALL \* TCMCNT

ALL TCMCNT(Total Number of Drugs Other than Anticoagulant)

Power |

Percent |

Percent of rows

Percent|0|1|2|3|4|5|6|7|8|9|10|11|12| Total

|  | 0      | 1      | 2      | 3      | 4      | 5      | 6      | 7      | 8      | 9      | 10     | 11     | 12     | Total  |       |
|--|--------|--------|--------|--------|--------|--------|--------|--------|--------|--------|--------|--------|--------|--------|-------|
|  | 1      | 52     | 660    | 1437   | 2202   | 2803   | 2848   | 2643   | 2143   | 1692   | 1251   | 829    | 583    | 365    | 20036 |
|  | 6.24   | 4.14   | 2.91   | 1.82   | 100.00 | 0.26   | 3.29   | 7.17   | 10.99  | 13.99  | 14.21  | 13.19  | 10.70  | 8.44   |       |
|  | 100.00 | 100.00 | 100.00 | 100.00 | 100.00 | 100.00 | 100.00 | 100.00 | 100.00 | 100.00 | 100.00 | 100.00 | 100.00 | 100.00 |       |
|  | 100.00 | 100.00 | 100.00 | 100.00 |        |        |        |        |        |        |        |        |        |        |       |
|  | 8.44   | 6.24   | 4.14   | 2.91   | 1.82   | 100.00 | 0.26   | 3.29   | 7.17   | 10.99  | 13.99  | 14.21  | 13.19  | 10.70  |       |

(continued)

Tables: ALL \* TCMCNT

ALL TCMCNT(Total Number of Drugs Other than Anticoagulant)

Power |

Percent |

Percent of rows

|13|14|15|16|17|18|19|20|21|23|25|26|27|Total

|                          | 13   | 14   | 15   | 16    | 17     | 18     | 19     | 20     | 21     | 23     | 25     | 26     | 27     | Total  |
|--------------------------|------|------|------|-------|--------|--------|--------|--------|--------|--------|--------|--------|--------|--------|
| Count                    | 1    | 225  | 118  | 78    | 44     | 25     | 18     | 4      | 7      | 1      |        |        |        | 20036  |
| Percent                  | 0.00 | 1.12 | 0.59 | 0.39  | 0.22   | 0.12   | 0.09   | 0.02   | 0.03   | 0.00   |        |        |        | 100.00 |
| Row 5                    | 1    | 1    | 1    | 20036 |        |        |        |        |        |        |        |        |        |        |
| Row 5 Percent            | 0.02 | 0.00 | 0.00 | 0.00  | 100.00 |        |        |        |        |        |        |        |        |        |
| Row 5 Percent (Detailed) | 0.02 | 0.00 | 0.00 | 0.00  | 100.00 | 100.00 | 100.00 | 100.00 | 100.00 | 100.00 | 100.00 | 100.00 | 100.00 | 100.00 |
| Total                    | 225  | 118  | 78   | 44    | 25     | 18     | 4      | 7      | 1      | 1      | 1      | 1      | 1      | 20036  |
| Total Percent            | 0.00 | 1.12 | 0.59 | 0.39  | 0.22   | 0.12   | 0.09   | 0.02   | 0.03   | 0.00   |        |        |        | 100.00 |

Degree of missing values = 473

Concomitant medications other than anticoagulants at the time of obtaining Table 2-5 consent, according to the presence or absence of proton-pump inhibitors

FREQ Procedure

|                      |       | Cumulative       |       |        |
|----------------------|-------|------------------|-------|--------|
| Percent of ALL power |       | Percent of power |       |        |
| 1                    | 20509 | 100.00           | 20509 | 100.00 |

Tables: ALL \* CMYN

ALL

CMYN(Administration of Concomitant Drug)

| Power                   |        |        |        |
|-------------------------|--------|--------|--------|
| Percent                 |        |        |        |
| Percent of rows         |        |        |        |
| Percent of columns      | None   | With   | Total  |
| _____ + _____ + _____ + |        |        |        |
| 1                       | 1445   | 19064  | 20509  |
|                         | 7.05   | 92.95  | 100.00 |
|                         | 7.05   | 92.95  |        |
|                         | 100.00 | 100.00 |        |
| _____ + _____ + _____ + |        |        |        |
| Total                   | 1445   | 19064  | 20509  |
|                         | 7.05   | 92.95  | 100.00 |

Concomitant medications other than anticoagulants at the time of obtaining Table 2-5 consent, according to the presence or absence of proton-pump inhibitors

FREQ Procedure

Tables: ALL \* TCMCNT

ALL TCMCNT(Total Number of Drugs Other than Anticoagulant)

Power |

Percent |

Percent of rows

Percent|0|1|2|3|4|5|6|7|8|9|10|11|12| Total

|  | 0    | 1      | 2      | 3      | 4      | 5      | 6      | 7      | 8      | 9      | 10     | 11     | 12     | Total  |        |
|--|------|--------|--------|--------|--------|--------|--------|--------|--------|--------|--------|--------|--------|--------|--------|
|  | 1    | 52     | 660    | 1437   | 2202   | 2803   | 2848   | 2643   | 2143   | 1692   | 1251   | 829    | 583    | 365    | 20036  |
|  |      | 0.26   | 3.29   | 7.17   | 10.99  | 13.99  | 14.21  | 13.19  | 10.70  | 8.44   | 6.24   | 4.14   | 2.91   | 1.82   | 100.00 |
|  |      | 0.26   | 3.29   | 7.17   | 10.99  | 13.99  | 14.21  | 13.19  | 10.70  | 8.44   | 6.24   | 4.14   | 2.91   | 1.82   |        |
|  |      | 100.00 | 100.00 | 100.00 | 100.00 | 100.00 | 100.00 | 100.00 | 100.00 | 100.00 | 100.00 | 100.00 | 100.00 | 100.00 | 100.00 |
|  |      | 100.00 | 100.00 | 100.00 | 100.00 | 100.00 | 100.00 | 100.00 | 100.00 | 100.00 | 100.00 | 100.00 | 100.00 | 100.00 | 100.00 |
|  |      | 0.26   | 3.29   | 7.17   | 10.99  | 13.99  | 14.21  | 13.19  | 10.70  | 8.44   | 6.24   | 4.14   | 2.91   | 1.82   | 100.00 |
|  | 8.44 | 6.24   | 4.14   | 2.91   | 1.82   | 100.00 |        |        |        |        |        |        |        |        |        |

(continued)

Tables: ALL \* TCMCNT

ALL TCMCNT(Total Number of Drugs Other than Anticoagulant)

Power |

Percent |

Percent of rows

|13|14|15|16|17|18|19|20|21|23|25|26|27|Total

|            | 13   | 14   | 15   | 16   | 17   | 18     | 19   | 20   | 21   | 23   | 25   | 26   | 27   | Total  |
|------------|------|------|------|------|------|--------|------|------|------|------|------|------|------|--------|
| Count      | 1    | 225  | 118  | 78   | 44   | 25     | 18   | 4    | 7    | 1    |      |      |      | 20036  |
| Percent    | 0.00 | 1.12 | 0.59 | 0.39 | 0.22 | 0.12   | 0.09 | 0.02 | 0.03 | 0.00 |      |      |      | 100.00 |
| Cumulative | 0.00 | 1.12 | 1.71 | 2.10 | 2.32 | 2.44   | 2.53 | 2.57 | 2.60 | 2.61 | 2.61 | 2.61 | 2.61 | 2.61   |
| Row        |      |      |      |      |      |        |      |      |      |      |      |      |      |        |
| Total      | 225  | 118  | 78   | 44   | 25   | 18     | 4    | 7    | 1    | 1    | 1    | 1    | 1    | 20036  |
| Percent    | 1.12 | 0.59 | 0.39 | 0.22 | 0.12 | 0.09   | 0.02 | 0.03 | 0.00 |      |      |      |      |        |
| Cumulative | 0.00 | 0.02 | 0.00 | 0.00 | 0.00 | 100.00 |      |      |      |      |      |      |      |        |

Degree of missing values = 473



Concomitant medications other than anticoagulants at the time of obtaining Table 2-5 consent, according to the presence or absence of proton-pump inhibitors

FREQ Procedure

|   |       | Cumulative           |                  |        |
|---|-------|----------------------|------------------|--------|
|   |       | Percent of ALL power | Percent of power |        |
| 1 | 20509 | 100.00               | 20509            | 100.00 |

Tables: ALL \* CMYN

ALL

CMYN(Administration of Concomitant Drug)

| Power                   |        |        |        |  |
|-------------------------|--------|--------|--------|--|
| Percent                 |        |        |        |  |
| Percent of rows         |        |        |        |  |
| Percent of columns      | None   | With   | Total  |  |
| _____ + _____ + _____ + |        |        |        |  |
| 1                       | 1445   | 19064  | 20509  |  |
|                         | 7.05   | 92.95  | 100.00 |  |
|                         | 7.05   | 92.95  |        |  |
|                         | 100.00 | 100.00 |        |  |
| _____ + _____ + _____ + |        |        |        |  |
| Total 1445              | 19064  | 20509  |        |  |
|                         | 7.05   | 92.95  | 100.00 |  |

Concomitant medications other than anticoagulants at the time of obtaining Table 2-5 consent, according to the presence or absence of proton-pump inhibitors

FREQ Procedure

Tables: ALL \* TCMCNT

ALL TCMCNT(Total Number of Drugs Other than Anticoagulant)

Power |

Percent |

Percent of rows

Percent|0|1|2|3|4|5|6|7|8|9|10|11|12| Total

|       | 0      | 1      | 2      | 3      | 4      | 5      | 6      | 7      | 8      | 9      | 10     | 11     | 12     | Total  |       |
|-------|--------|--------|--------|--------|--------|--------|--------|--------|--------|--------|--------|--------|--------|--------|-------|
|       | 1      | 52     | 660    | 1437   | 2202   | 2803   | 2848   | 2643   | 2143   | 1692   | 1251   | 829    | 583    | 365    | 20036 |
|       | 6.24   | 4.14   | 2.91   | 1.82   | 100.00 | 0.26   | 3.29   | 7.17   | 10.99  | 13.99  | 14.21  | 13.19  | 10.70  | 8.44   |       |
|       | 100.00 | 100.00 | 100.00 | 100.00 | 100.00 | 100.00 | 100.00 | 100.00 | 100.00 | 100.00 | 100.00 | 100.00 | 100.00 | 100.00 |       |
|       | 100.00 | 100.00 | 100.00 | 100.00 |        |        |        |        |        |        |        |        |        |        |       |
| Total | 52     | 660    | 1437   | 2202   | 2803   | 2848   | 2643   | 2143   | 1692   | 1251   | 829    | 583    | 365    | 20036  |       |
|       | 8.44   | 6.24   | 4.14   | 2.91   | 1.82   | 100.00 | 0.26   | 3.29   | 7.17   | 10.99  | 13.99  | 14.21  | 13.19  | 10.70  |       |

(continued)

Tables: ALL \* TCMCNT

ALL TCMCNT(Total Number of Drugs Other than Anticoagulant)

Power |

Percent |

Percent of rows

|13|14|15|16|17|18|19|20|21|23|25|26|27|Total

|         | 13     | 14     | 15     | 16     | 17     | 18     | 19     | 20     | 21     | 23     | 25     | 26     | 27     | Total  |
|---------|--------|--------|--------|--------|--------|--------|--------|--------|--------|--------|--------|--------|--------|--------|
| Count   | 1      | 225    | 118    | 78     | 44     | 25     | 18     | 4      | 7      | 1      | 5      | 1      | 1      | 20036  |
| Percent | 1.12   | 0.59   | 0.39   | 0.22   | 0.12   | 0.09   | 0.02   | 0.03   | 0.00   | 0.02   | 0.00   | 0.00   | 0.00   | 100.00 |
| Row 2   | 1.12   | 0.59   | 0.39   | 0.22   | 0.12   | 0.09   | 0.02   | 0.03   | 0.00   | 0.02   | 0.00   | 0.00   | 0.00   | 100.00 |
| Row 3   | 100.00 | 100.00 | 100.00 | 100.00 | 100.00 | 100.00 | 100.00 | 100.00 | 100.00 | 100.00 | 100.00 | 100.00 | 100.00 | 100.00 |
| Row 4   | 100.00 | 100.00 | 100.00 | 100.00 |        |        |        |        |        |        |        |        |        |        |
| Total   | 225    | 118    | 78     | 44     | 25     | 18     | 4      | 7      | 1      | 5      | 1      | 1      | 1      | 20036  |
| Percent | 1.12   | 0.59   | 0.39   | 0.22   | 0.12   | 0.09   | 0.02   | 0.03   | 0.00   | 0.02   | 0.00   | 0.00   | 0.00   | 100.00 |

Degree of missing values = 473

Concomitant medications other than anticoagulants at the time of obtaining Table 2-5 consent, according to the presence or absence of proton-pump inhibitors

FREQ Procedure

|                      |       | Cumulative       |       |        |
|----------------------|-------|------------------|-------|--------|
| Percent of ALL power |       | Percent of power |       |        |
| 1                    | 20509 | 100.00           | 20509 | 100.00 |

Tables: ALL \* CMYN

ALL

CMYN(Administration of Concomitant Drug)

| Power                   |        |        |        |
|-------------------------|--------|--------|--------|
| Percent                 |        |        |        |
| Percent of rows         |        |        |        |
| Percent of columns      | None   | With   | Total  |
| _____ + _____ + _____ + |        |        |        |
| 1                       | 1445   | 19064  | 20509  |
|                         | 7.05   | 92.95  | 100.00 |
|                         | 7.05   | 92.95  |        |
|                         | 100.00 | 100.00 |        |
| _____ + _____ + _____ + |        |        |        |
| Total                   | 1445   | 19064  | 20509  |
|                         | 7.05   | 92.95  | 100.00 |

Concomitant medications other than anticoagulants at the time of obtaining Table 2-5 consent, according to the presence or absence of proton-pump inhibitors

FREQ Procedure

Tables: ALL \* TCMCNT

ALL TCMCNT(Total Number of Drugs Other than Anticoagulant)

Power |

Percent |

Percent of rows

Percent|0|1|2|3|4|5|6|7|8|9|10|11|12| Total

|  | 0      | 1      | 2      | 3      | 4      | 5      | 6      | 7      | 8      | 9      | 10     | 11     | 12     | Total  |        |
|--|--------|--------|--------|--------|--------|--------|--------|--------|--------|--------|--------|--------|--------|--------|--------|
|  | 1      | 52     | 660    | 1437   | 2202   | 2803   | 2848   | 2643   | 2143   | 1692   | 1251   | 829    | 583    | 365    | 20036  |
|  | 6.24   | 4.14   | 2.91   | 1.82   | 100.00 | 0.26   | 3.29   | 7.17   | 10.99  | 13.99  | 14.21  | 13.19  | 10.70  | 8.44   |        |
|  | 100.00 | 100.00 | 100.00 | 100.00 | 100.00 | 100.00 | 100.00 | 100.00 | 100.00 | 100.00 | 100.00 | 100.00 | 100.00 | 100.00 | 100.00 |
|  | 100.00 | 100.00 | 100.00 | 100.00 |        |        |        |        |        |        |        |        |        |        |        |
|  | 8.44   | 6.24   | 4.14   | 2.91   | 1.82   | 100.00 | 0.26   | 3.29   | 7.17   | 10.99  | 13.99  | 14.21  | 13.19  | 10.70  |        |

(continued)

Tables: ALL \* TCMCNT

ALL TCMCNT(Total Number of Drugs Other than Anticoagulant)

Power |

Percent |

Percent of rows

|13|14|15|16|17|18|19|20|21|23|25|26|27|Total

|         | 13     | 14     | 15     | 16     | 17     | 18     | 19     | 20     | 21     | 23     | 25     | 26     | 27     | Total  |
|---------|--------|--------|--------|--------|--------|--------|--------|--------|--------|--------|--------|--------|--------|--------|
| Count   | 1      | 225    | 118    | 78     | 44     | 25     | 18     | 4      | 7      | 1      |        |        |        | 20036  |
| Percent | 0.00   | 1.12   | 0.59   | 0.39   | 0.22   | 0.12   | 0.09   | 0.02   | 0.03   | 0.00   |        |        |        | 100.00 |
| Row 5   | 1      | 1      | 1      | 1      | 1      | 1      | 1      | 1      | 1      | 1      | 1      | 1      | 1      | 1      |
| Percent | 0.02   | 0.00   | 0.00   | 0.00   | 0.00   | 0.00   | 0.00   | 0.00   | 0.00   | 0.00   | 0.00   | 0.00   | 0.00   | 100.00 |
| Row 100 | 100.00 | 100.00 | 100.00 | 100.00 | 100.00 | 100.00 | 100.00 | 100.00 | 100.00 | 100.00 | 100.00 | 100.00 | 100.00 | 100.00 |
| Row 200 | 100.00 | 100.00 | 100.00 | 100.00 | 100.00 | 100.00 | 100.00 | 100.00 | 100.00 | 100.00 | 100.00 | 100.00 | 100.00 | 100.00 |
| Total   | 225    | 118    | 78     | 44     | 25     | 18     | 4      | 7      | 1      | 1      | 1      | 1      | 1      | 20036  |
| Percent | 1.12   | 0.59   | 0.39   | 0.22   | 0.12   | 0.09   | 0.02   | 0.03   | 0.00   |        |        |        |        | 100.00 |
| Row 200 | 0.00   | 0.02   | 0.00   | 0.00   | 0.00   | 0.00   | 0.00   | 0.00   | 0.00   | 0.00   | 0.00   | 0.00   | 0.00   | 100.00 |

Degree of missing values = 473

Concomitant medications other than anticoagulants at the time of obtaining Table 2-5 consent, according to the presence or absence of proton-pump inhibitors

FREQ Procedure

|                      |       | Cumulative       |       |        |
|----------------------|-------|------------------|-------|--------|
| Percent of ALL power |       | Percent of power |       |        |
| 1                    | 20509 | 100.00           | 20509 | 100.00 |

Tables: ALL \* CMYN

ALL

CMYN(Administration of Concomitant Drug)

| Power                   |        |        |        |
|-------------------------|--------|--------|--------|
| Percent                 |        |        |        |
| Percent of rows         |        |        |        |
| Percent of columns      | None   | With   | Total  |
| _____ + _____ + _____ + |        |        |        |
| 1                       | 1445   | 19064  | 20509  |
|                         | 7.05   | 92.95  | 100.00 |
|                         | 7.05   | 92.95  |        |
|                         | 100.00 | 100.00 |        |
| _____ + _____ + _____ + |        |        |        |
| Total 1445              | 19064  | 20509  |        |
|                         | 7.05   | 92.95  | 100.00 |

Concomitant medications other than anticoagulants at the time of obtaining Table 2-5 consent, according to the presence or absence of proton-pump inhibitors

FREQ Procedure

Tables: ALL \* TCMCNT

ALL TCMCNT(Total Number of Drugs Other than Anticoagulant)

Power |

Percent |

Percent of rows

Percent|0|1|2|3|4|5|6|7|8|9|10|11|12| Total

|  | 0      | 1      | 2      | 3      | 4      | 5      | 6      | 7      | 8      | 9      | 10     | 11     | 12     | Total  |        |
|--|--------|--------|--------|--------|--------|--------|--------|--------|--------|--------|--------|--------|--------|--------|--------|
|  | 1      | 52     | 660    | 1437   | 2202   | 2803   | 2848   | 2643   | 2143   | 1692   | 1251   | 829    | 583    | 365    | 20036  |
|  | 6.24   | 4.14   | 2.91   | 1.82   | 100.00 | 0.26   | 3.29   | 7.17   | 10.99  | 13.99  | 14.21  | 13.19  | 10.70  | 8.44   |        |
|  | 100.00 | 100.00 | 100.00 | 100.00 | 100.00 | 100.00 | 100.00 | 100.00 | 100.00 | 100.00 | 100.00 | 100.00 | 100.00 | 100.00 | 100.00 |
|  | 100.00 | 100.00 | 100.00 | 100.00 |        |        |        |        |        |        |        |        |        |        |        |
|  | 8.44   | 6.24   | 4.14   | 2.91   | 1.82   | 100.00 | 0.26   | 3.29   | 7.17   | 10.99  | 13.99  | 14.21  | 13.19  | 10.70  |        |

(continued)

Tables: ALL \* TCMCNT

ALL TCMCNT(Total Number of Drugs Other than Anticoagulant)

Power |

Percent |



Percent of rows

|13|14|15|16|17|18|19|20|21|23|25|26|27|Total

|       | 13     | 14     | 15     | 16     | 17     | 18     | 19     | 20     | 21     | 23     | 25     | 26     | 27     | Total  |
|-------|--------|--------|--------|--------|--------|--------|--------|--------|--------|--------|--------|--------|--------|--------|
| 5     | 1      | 1      | 1      | 1      | 20036  |        |        |        |        |        |        |        |        |        |
|       | 1.12   | 0.59   | 0.39   | 0.22   | 0.12   | 0.09   | 0.02   | 0.03   | 0.00   |        |        |        |        |        |
|       | 0.02   | 0.00   | 0.00   | 0.00   | 100.00 |        |        |        |        |        |        |        |        |        |
|       | 1.12   | 0.59   | 0.39   | 0.22   | 0.12   | 0.09   | 0.02   | 0.03   | 0.00   |        |        |        |        |        |
|       | 0.02   | 0.00   | 0.00   | 0.00   |        |        |        |        |        |        |        |        |        |        |
|       | 100.00 | 100.00 | 100.00 | 100.00 | 100.00 | 100.00 | 100.00 | 100.00 | 100.00 | 100.00 | 100.00 | 100.00 | 100.00 | 100.00 |
|       | 100.00 | 100.00 | 100.00 | 100.00 |        |        |        |        |        |        |        |        |        |        |
| Total | 225    | 118    | 78     | 44     | 25     | 18     | 4      | 7      | 1      | 5      | 1      | 1      | 1      | 20036  |
|       | 1.12   | 0.59   | 0.39   | 0.22   | 0.12   | 0.09   | 0.02   | 0.03   |        |        |        |        |        |        |
|       | 0.00   | 0.02   | 0.00   | 0.00   | 0.00   | 100.00 |        |        |        |        |        |        |        |        |

Degree of missing values = 473

Concomitant medications other than anticoagulants at the time of obtaining Table 2-5 consent, according to the presence or absence of proton-pump inhibitors

FREQ Procedure

|   |       | Cumulative           |                  |        |
|---|-------|----------------------|------------------|--------|
|   |       | Percent of ALL power | Percent of power |        |
| 1 | 20509 | 100.00               | 20509            | 100.00 |

Tables: ALL \* CMYN

ALL

CMYN(Administration of Concomitant Drug)

| Power                   |        |        |        |
|-------------------------|--------|--------|--------|
| Percent                 |        |        |        |
| Percent of rows         |        |        |        |
| Percent of columns      | None   | With   | Total  |
| _____ + _____ + _____ + |        |        |        |
| 1                       | 1445   | 19064  | 20509  |
|                         | 7.05   | 92.95  | 100.00 |
|                         | 7.05   | 92.95  |        |
|                         | 100.00 | 100.00 |        |
| _____ + _____ + _____ + |        |        |        |
| Total                   | 1445   | 19064  | 20509  |
|                         | 7.05   | 92.95  | 100.00 |

Concomitant medications other than anticoagulants at the time of obtaining Table 2-5 consent, according to the presence or absence of proton-pump inhibitors

FREQ Procedure

Tables: ALL \* TCMCNT

ALL TCMCNT(Total Number of Drugs Other than Anticoagulant)

Power |

Percent |

Percent of rows

Percent|0|1|2|3|4|5|6|7|8|9|10|11|12| Total

|  | 0      | 1      | 2      | 3      | 4      | 5      | 6      | 7      | 8      | 9      | 10     | 11     | 12     | Total  |       |
|--|--------|--------|--------|--------|--------|--------|--------|--------|--------|--------|--------|--------|--------|--------|-------|
|  | 1      | 52     | 660    | 1437   | 2202   | 2803   | 2848   | 2643   | 2143   | 1692   | 1251   | 829    | 583    | 365    | 20036 |
|  | 6.24   | 4.14   | 2.91   | 1.82   | 100.00 | 0.26   | 3.29   | 7.17   | 10.99  | 13.99  | 14.21  | 13.19  | 10.70  | 8.44   |       |
|  | 100.00 | 100.00 | 100.00 | 100.00 | 100.00 | 100.00 | 100.00 | 100.00 | 100.00 | 100.00 | 100.00 | 100.00 | 100.00 | 100.00 |       |
|  | 100.00 | 100.00 | 100.00 | 100.00 |        |        |        |        |        |        |        |        |        |        |       |
|  | 8.44   | 6.24   | 4.14   | 2.91   | 1.82   | 100.00 | 0.26   | 3.29   | 7.17   | 10.99  | 13.99  | 14.21  | 13.19  | 10.70  |       |

(continued)

Tables: ALL \* TCMCNT

ALL TCMCNT(Total Number of Drugs Other than Anticoagulant)

Power |

Percent |

Percent of rows

|13|14|15|16|17|18|19|20|21|23|25|26|27|Total

|                          | 13   | 14   | 15   | 16    | 17     | 18     | 19     | 20     | 21     | 23     | 25     | 26     | 27     | Total  |
|--------------------------|------|------|------|-------|--------|--------|--------|--------|--------|--------|--------|--------|--------|--------|
| Count                    | 1    | 225  | 118  | 78    | 44     | 25     | 18     | 4      | 7      | 1      |        |        |        | 20036  |
| Percent                  | 0.00 | 1.12 | 0.59 | 0.39  | 0.22   | 0.12   | 0.09   | 0.02   | 0.03   | 0.00   |        |        |        | 100.00 |
| Row 5                    | 1    | 1    | 1    | 20036 |        |        |        |        |        |        |        |        |        |        |
| Row 5 Percent            | 0.02 | 0.00 | 0.00 | 0.00  | 100.00 |        |        |        |        |        |        |        |        |        |
| Row 5 Percent (Detailed) | 0.02 | 0.00 | 0.00 | 0.00  | 100.00 | 100.00 | 100.00 | 100.00 | 100.00 | 100.00 | 100.00 | 100.00 | 100.00 | 100.00 |
| Total                    | 225  | 118  | 78   | 44    | 25     | 18     | 4      | 7      | 1      | 1      | 1      | 1      | 1      | 20036  |
| Total Percent            | 0.00 | 0.02 | 0.00 | 0.00  | 0.00   | 0.00   | 0.00   | 100.00 |        |        |        |        |        |        |
| Total Percent (Detailed) |      | 1.12 | 0.59 | 0.39  | 0.22   | 0.12   | 0.09   | 0.02   | 0.03   |        |        |        |        |        |

Degree of missing values = 473

Concomitant medications other than anticoagulants at the time of obtaining Table 2-5 consent, according to the presence or absence of proton-pump inhibitors

FREQ Procedure

|                      |       | Cumulative       |       |        |
|----------------------|-------|------------------|-------|--------|
| Percent of ALL power |       | Percent of power |       |        |
| 1                    | 20509 | 100.00           | 20509 | 100.00 |

Tables: ALL \* CMYN

ALL

CMYN(Administration of Concomitant Drug)

| Power                   |        |        |        |
|-------------------------|--------|--------|--------|
| Percent                 |        |        |        |
| Percent of rows         |        |        |        |
| Percent of columns      | None   | With   | Total  |
| _____ + _____ + _____ + |        |        |        |
| 1                       | 1445   | 19064  | 20509  |
|                         | 7.05   | 92.95  | 100.00 |
|                         | 7.05   | 92.95  |        |
|                         | 100.00 | 100.00 |        |
| _____ + _____ + _____ + |        |        |        |
| Total                   | 1445   | 19064  | 20509  |
|                         | 7.05   | 92.95  | 100.00 |

Concomitant medications other than anticoagulants at the time of obtaining Table 2-5 consent, according to the presence or absence of proton-pump inhibitors

FREQ Procedure

Tables: ALL \* TCMCNT

ALL TCMCNT(Total Number of Drugs Other than Anticoagulant)

Power |

Percent |

Percent of rows

Percent|0|1|2|3|4|5|6|7|8|9|10|11|12| Total

|  | 0      | 1      | 2      | 3      | 4      | 5      | 6      | 7      | 8      | 9      | 10     | 11     | 12     | Total  |        |
|--|--------|--------|--------|--------|--------|--------|--------|--------|--------|--------|--------|--------|--------|--------|--------|
|  | 1      | 52     | 660    | 1437   | 2202   | 2803   | 2848   | 2643   | 2143   | 1692   | 1251   | 829    | 583    | 365    | 20036  |
|  | 6.24   | 4.14   | 2.91   | 1.82   | 100.00 | 0.26   | 3.29   | 7.17   | 10.99  | 13.99  | 14.21  | 13.19  | 10.70  | 8.44   |        |
|  | 100.00 | 100.00 | 100.00 | 100.00 | 100.00 | 100.00 | 100.00 | 100.00 | 100.00 | 100.00 | 100.00 | 100.00 | 100.00 | 100.00 | 100.00 |
|  | 100.00 | 100.00 | 100.00 | 100.00 |        |        |        |        |        |        |        |        |        |        |        |
|  | 8.44   | 6.24   | 4.14   | 2.91   | 1.82   | 100.00 | 0.26   | 3.29   | 7.17   | 10.99  | 13.99  | 14.21  | 13.19  | 10.70  |        |

(continued)

Tables: ALL \* TCMCNT

ALL TCMCNT(Total Number of Drugs Other than Anticoagulant)

Power |

Percent |

Percent of rows

|13|14|15|16|17|18|19|20|21|23|25|26|27|Total

|         | 13     | 14     | 15     | 16     | 17     | 18     | 19     | 20     | 21     | 23     | 25     | 26     | 27     | Total  |
|---------|--------|--------|--------|--------|--------|--------|--------|--------|--------|--------|--------|--------|--------|--------|
| Count   | 1      | 225    | 118    | 78     | 44     | 25     | 18     | 4      | 7      | 1      |        |        |        | 20036  |
| Percent | 0.00   | 1.12   | 0.59   | 0.39   | 0.22   | 0.12   | 0.09   | 0.02   | 0.03   | 0.00   |        |        |        | 100.00 |
| Row 5   | 1      | 1      | 1      | 1      | 1      | 1      | 1      | 1      | 1      | 1      | 1      | 1      | 1      | 1      |
| Percent | 0.02   | 0.00   | 0.00   | 0.00   | 0.00   | 0.00   | 0.00   | 0.00   | 0.00   | 0.00   | 0.00   | 0.00   | 0.00   | 0.00   |
| Row 100 | 100.00 | 100.00 | 100.00 | 100.00 | 100.00 | 100.00 | 100.00 | 100.00 | 100.00 | 100.00 | 100.00 | 100.00 | 100.00 | 100.00 |
| Row 200 | 100.00 | 100.00 | 100.00 | 100.00 | 100.00 | 100.00 | 100.00 | 100.00 | 100.00 | 100.00 | 100.00 | 100.00 | 100.00 | 100.00 |
| Total   | 225    | 118    | 78     | 44     | 25     | 18     | 4      | 7      | 1      | 1      | 1      | 1      | 1      | 20036  |
| Percent | 1.12   | 0.59   | 0.39   | 0.22   | 0.12   | 0.09   | 0.02   | 0.03   | 0.00   |        |        |        |        | 100.00 |
| Row 200 | 0.00   | 0.02   | 0.00   | 0.00   | 0.00   | 0.00   | 0.00   | 0.00   | 0.00   | 0.00   | 0.00   | 0.00   | 0.00   | 0.00   |

Degree of missing values = 473

Concomitant medications other than anticoagulants at the time of obtaining Table 2-5 consent, according to the presence or absence of proton-pump inhibitors

FREQ Procedure

|                      |       | Cumulative       |       |        |
|----------------------|-------|------------------|-------|--------|
| Percent of ALL power |       | Percent of power |       |        |
| 1                    | 20509 | 100.00           | 20509 | 100.00 |

Tables: ALL \* CMYN

ALL

CMYN(Administration of Concomitant Drug)

| Power                   |        |        |        |
|-------------------------|--------|--------|--------|
| Percent                 |        |        |        |
| Percent of rows         |        |        |        |
| Percent of columns      | None   | With   | Total  |
| _____ + _____ + _____ + |        |        |        |
| 1                       | 1445   | 19064  | 20509  |
|                         | 7.05   | 92.95  | 100.00 |
|                         | 7.05   | 92.95  |        |
|                         | 100.00 | 100.00 |        |
| _____ + _____ + _____ + |        |        |        |
| Total 1445              | 19064  | 20509  |        |
|                         | 7.05   | 92.95  | 100.00 |



Concomitant medications other than anticoagulants at the time of obtaining Table 2-5 consent, according to the presence or absence of proton-pump inhibitors

FREQ Procedure

Tables: ALL \* TCMCNT

ALL TCMCNT(Total Number of Drugs Other than Anticoagulant)

Power |

Percent |

Percent of rows

Percent|0|1|2|3|4|5|6|7|8|9|10|11|12| Total

|  | 0      | 1      | 2      | 3      | 4      | 5      | 6      | 7      | 8      | 9      | 10     | 11     | 12     | Total  |        |
|--|--------|--------|--------|--------|--------|--------|--------|--------|--------|--------|--------|--------|--------|--------|--------|
|  | 1      | 52     | 660    | 1437   | 2202   | 2803   | 2848   | 2643   | 2143   | 1692   | 1251   | 829    | 583    | 365    | 20036  |
|  | 6.24   | 4.14   | 2.91   | 1.82   | 100.00 | 0.26   | 3.29   | 7.17   | 10.99  | 13.99  | 14.21  | 13.19  | 10.70  | 8.44   |        |
|  | 100.00 | 100.00 | 100.00 | 100.00 | 100.00 | 100.00 | 100.00 | 100.00 | 100.00 | 100.00 | 100.00 | 100.00 | 100.00 | 100.00 | 100.00 |
|  | 100.00 | 100.00 | 100.00 | 100.00 |        |        |        |        |        |        |        |        |        |        |        |
|  | 8.44   | 6.24   | 4.14   | 2.91   | 1.82   | 100.00 | 0.26   | 3.29   | 7.17   | 10.99  | 13.99  | 14.21  | 13.19  | 10.70  |        |

(continued)

Tables: ALL \* TCMCNT

ALL TCMCNT(Total Number of Drugs Other than Anticoagulant)

Power |

Percent |

Percent of rows

|13|14|15|16|17|18|19|20|21|23|25|26|27|Total

|         | 13     | 14     | 15     | 16     | 17     | 18     | 19     | 20     | 21     | 23     | 25     | 26     | 27     | Total  |
|---------|--------|--------|--------|--------|--------|--------|--------|--------|--------|--------|--------|--------|--------|--------|
| Count   | 1      | 225    | 118    | 78     | 44     | 25     | 18     | 4      | 7      | 1      | 5      | 1      | 1      | 20036  |
| Percent | 1.12   | 0.59   | 0.39   | 0.22   | 0.12   | 0.09   | 0.02   | 0.03   | 0.00   | 0.02   | 0.00   | 0.00   | 0.00   | 100.00 |
| Row 2   | 1.12   | 0.59   | 0.39   | 0.22   | 0.12   | 0.09   | 0.02   | 0.03   | 0.00   | 0.02   | 0.00   | 0.00   | 0.00   | 100.00 |
| Row 3   | 100.00 | 100.00 | 100.00 | 100.00 | 100.00 | 100.00 | 100.00 | 100.00 | 100.00 | 100.00 | 100.00 | 100.00 | 100.00 | 100.00 |
| Row 4   | 100.00 | 100.00 | 100.00 | 100.00 |        |        |        |        |        |        |        |        |        |        |
| Total   | 225    | 118    | 78     | 44     | 25     | 18     | 4      | 7      | 1      | 5      | 1      | 1      | 1      | 20036  |
| Percent | 1.12   | 0.59   | 0.39   | 0.22   | 0.12   | 0.09   | 0.02   | 0.03   | 0.00   | 0.02   | 0.00   | 0.00   | 0.00   | 100.00 |

Degree of missing values = 473

Concomitant medications other than anticoagulants at the time of obtaining Table 2-5 consent, according to the presence or absence of proton-pump inhibitors

FREQ Procedure

|                      |       | Cumulative       |       |        |
|----------------------|-------|------------------|-------|--------|
| Percent of ALL power |       | Percent of power |       |        |
| 1                    | 20509 | 100.00           | 20509 | 100.00 |

Tables: ALL \* CMYN

ALL

CMYN(Administration of Concomitant Drug)

| Power                   |        |        |        |
|-------------------------|--------|--------|--------|
| Percent                 |        |        |        |
| Percent of rows         |        |        |        |
| Percent of columns      | None   | With   | Total  |
| _____ + _____ + _____ + |        |        |        |
| 1                       | 1445   | 19064  | 20509  |
|                         | 7.05   | 92.95  | 100.00 |
|                         | 7.05   | 92.95  |        |
|                         | 100.00 | 100.00 |        |
| _____ + _____ + _____ + |        |        |        |
| Total 1445              | 19064  | 20509  |        |
|                         | 7.05   | 92.95  | 100.00 |

Concomitant medications other than anticoagulants at the time of obtaining Table 2-5 consent, according to the presence or absence of proton-pump inhibitors

FREQ Procedure

Tables: ALL \* TCMCNT

ALL TCMCNT(Total Number of Drugs Other than Anticoagulant)

Power |

Percent |

Percent of rows

Percent|0|1|2|3|4|5|6|7|8|9|10|11|12| Total

|  | 0    | 1      | 2      | 3      | 4      | 5      | 6      | 7      | 8      | 9      | 10     | 11     | 12     | Total  |        |
|--|------|--------|--------|--------|--------|--------|--------|--------|--------|--------|--------|--------|--------|--------|--------|
|  | 1    | 52     | 660    | 1437   | 2202   | 2803   | 2848   | 2643   | 2143   | 1692   | 1251   | 829    | 583    | 365    | 20036  |
|  |      | 0.26   | 3.29   | 7.17   | 10.99  | 13.99  | 14.21  | 13.19  | 10.70  | 8.44   | 6.24   | 4.14   | 2.91   | 1.82   | 100.00 |
|  |      | 0.26   | 3.29   | 7.17   | 10.99  | 13.99  | 14.21  | 13.19  | 10.70  | 8.44   | 6.24   | 4.14   | 2.91   | 1.82   |        |
|  |      | 100.00 | 100.00 | 100.00 | 100.00 | 100.00 | 100.00 | 100.00 | 100.00 | 100.00 | 100.00 | 100.00 | 100.00 | 100.00 | 100.00 |
|  |      | 100.00 | 100.00 | 100.00 | 100.00 | 100.00 | 100.00 | 100.00 | 100.00 | 100.00 | 100.00 | 100.00 | 100.00 | 100.00 | 100.00 |
|  |      | 0.26   | 3.29   | 7.17   | 10.99  | 13.99  | 14.21  | 13.19  | 10.70  | 8.44   | 6.24   | 4.14   | 2.91   | 1.82   | 100.00 |
|  | 8.44 | 6.24   | 4.14   | 2.91   | 1.82   | 100.00 |        |        |        |        |        |        |        |        |        |

(continued)

Tables: ALL \* TCMCNT

ALL TCMCNT(Total Number of Drugs Other than Anticoagulant)

Power |

Percent |

Percent of rows

|13|14|15|16|17|18|19|20|21|23|25|26|27|Total

|           | 13     | 14     | 15     | 16     | 17     | 18     | 19     | 20     | 21     | 23     | 25     | 26     | 27     | Total  |
|-----------|--------|--------|--------|--------|--------|--------|--------|--------|--------|--------|--------|--------|--------|--------|
| Count     | 1      | 225    | 118    | 78     | 44     | 25     | 18     | 4      | 7      | 1      |        |        |        | 20036  |
| Percent   | 0.00   | 1.12   | 0.59   | 0.39   | 0.22   | 0.12   | 0.09   | 0.02   | 0.03   | 0.00   |        |        |        | 100.00 |
| Row 5     | 1      | 1      | 1      | 1      | 1      | 1      | 1      | 1      | 1      | 1      | 1      | 1      | 1      | 1      |
| Percent   | 0.02   | 0.00   | 0.00   | 0.00   | 0.00   | 0.00   | 0.00   | 0.00   | 0.00   | 0.00   | 0.00   | 0.00   | 0.00   | 0.00   |
| Row 100   | 100.00 | 100.00 | 100.00 | 100.00 | 100.00 | 100.00 | 100.00 | 100.00 | 100.00 | 100.00 | 100.00 | 100.00 | 100.00 | 100.00 |
| Row 1000  | 100.00 | 100.00 | 100.00 | 100.00 | 100.00 | 100.00 | 100.00 | 100.00 | 100.00 | 100.00 | 100.00 | 100.00 | 100.00 | 100.00 |
| Total     | 225    | 118    | 78     | 44     | 25     | 18     | 4      | 7      | 1      | 1      | 1      | 1      | 1      | 20036  |
| Percent   | 1.12   | 0.59   | 0.39   | 0.22   | 0.12   | 0.09   | 0.02   | 0.03   | 0.00   |        |        |        |        |        |
| Row 10000 | 0.00   | 0.02   | 0.00   | 0.00   | 0.00   | 0.00   | 0.00   | 0.00   | 0.00   | 0.00   | 0.00   | 0.00   | 0.00   | 0.00   |

Degree of missing values = 473

Concomitant medications other than anticoagulants at the time of obtaining Table 2-5 consent, according to the presence or absence of proton-pump inhibitors

FREQ Procedure

|                      |       | Cumulative       |       |        |
|----------------------|-------|------------------|-------|--------|
| Percent of ALL power |       | Percent of power |       |        |
| 1                    | 20509 | 100.00           | 20509 | 100.00 |

Tables: ALL \* CMYN

ALL

CMYN(Administration of Concomitant Drug)

| Power                   |        |        |        |
|-------------------------|--------|--------|--------|
| Percent                 |        |        |        |
| Percent of rows         |        |        |        |
| Percent of columns      | None   | With   | Total  |
| _____ + _____ + _____ + |        |        |        |
| 1                       | 1445   | 19064  | 20509  |
|                         | 7.05   | 92.95  | 100.00 |
|                         | 7.05   | 92.95  |        |
|                         | 100.00 | 100.00 |        |
| _____ + _____ + _____ + |        |        |        |
| Total                   | 1445   | 19064  | 20509  |
|                         | 7.05   | 92.95  | 100.00 |

Concomitant medications other than anticoagulants at the time of obtaining Table 2-5 consent, according to the presence or absence of proton-pump inhibitors

FREQ Procedure

Table: ALL \* t\_cm

ALL t\_cm

Power |

Percent |

Percent of rows

Percent of columns | 1 | Total

|          |        |        |  |
|----------|--------|--------|--|
| _____+   |        | _____+ |  |
| 1        | 16     | 16     |  |
|          | 100.00 | 100.00 |  |
|          | 100.00 |        |  |
|          | 100.00 |        |  |
| _____+   |        | _____+ |  |
| Total 16 | 16     |        |  |
|          | 100.00 | 100.00 |  |

Degree of missing values = 20493

Concomitant medications other than anticoagulants at the time of obtaining Table 2-5 consent, according to the presence or absence of proton-pump inhibitors

FREQ Procedure

|                      |       | Cumulative       |       |        |
|----------------------|-------|------------------|-------|--------|
| Percent of ALL power |       | Percent of power |       |        |
| 1                    | 20509 | 100.00           | 20509 | 100.00 |

Tables: ALL \* CMYN

ALL

CMYN(Administration of Concomitant Drug)

| Power                   |        |        |        |
|-------------------------|--------|--------|--------|
| Percent                 |        |        |        |
| Percent of rows         |        |        |        |
| Percent of columns      | None   | With   | Total  |
| _____ + _____ + _____ + |        |        |        |
| 1                       | 1445   | 19064  | 20509  |
|                         | 7.05   | 92.95  | 100.00 |
|                         | 7.05   | 92.95  |        |
|                         | 100.00 | 100.00 |        |
| _____ + _____ + _____ + |        |        |        |
| Total 1445              | 19064  | 20509  |        |
|                         | 7.05   | 92.95  | 100.00 |



Concomitant medications other than anticoagulants at the time of obtaining Table 2-5 consent, according to the presence or absence of proton-pump inhibitors

FREQ Procedure

Table: ALL \* t\_TCMCNT

ALL t\_TCMCNT

Power |

Percent |

Percent of rows

Percent of columns | 9 | Total

|        |        |        |
|--------|--------|--------|
| _____+ |        | _____+ |
| 1      | 473    | 473    |
|        | 100.00 | 100.00 |
|        | 100.00 |        |
|        | 100.00 |        |
| _____+ |        | _____+ |
| Total  | 473    | 473    |
|        | 100.00 | 100.00 |

Degree of missing values = 20036

Concomitant medications other than anticoagulants at the time of obtaining Table 2-5 consent, according to the presence or absence of proton-pump inhibitors

FREQ Procedure

|   |       | Cumulative           |                  |        |
|---|-------|----------------------|------------------|--------|
|   |       | Percent of ALL power | Percent of power |        |
| 1 | 20509 | 100.00               | 20509            | 100.00 |

Tables: ALL \* CMYN

ALL

CMYN(Administration of Concomitant Drug)

| Power                   |        |        |        |
|-------------------------|--------|--------|--------|
| Percent                 |        |        |        |
| Percent of rows         |        |        |        |
| Percent of columns      | None   | With   | Total  |
| _____ + _____ + _____ + |        |        |        |
| 1                       | 1445   | 19064  | 20509  |
|                         | 7.05   | 92.95  | 100.00 |
|                         | 7.05   | 92.95  |        |
|                         | 100.00 | 100.00 |        |
| _____ + _____ + _____ + |        |        |        |
| Total                   | 1445   | 19064  | 20509  |
|                         | 7.05   | 92.95  | 100.00 |

Concomitant medications other than anticoagulants at the time of obtaining Table 2-5 consent, according to the presence or absence of proton-pump inhibitors

FREQ Procedure

Tables: ALL\* TCMCNTCT

ALL

TCMCNTCT(Category for Total Number of Drugs Other than Anticoagulant)

Power |

Percent |

Percent of rows

Percentage of column |0 to 4 or more|5 to 9 or more|10 or more|unknown|total

|       | 0 to 4 or more | 5 to 9 or more | 10 or more | unknown | total  |
|-------|----------------|----------------|------------|---------|--------|
| 1     | 7154           | 10577          | 2305       | 473     | 20509  |
|       | 34.88          | 51.57          | 11.24      | 2.31    | 100.00 |
|       | 34.88          | 51.57          | 11.24      | 2.31    |        |
|       | 100.00         | 100.00         | 100.00     | 100.00  |        |
| Total | 7154           | 10577          | 2305       | 473     | 20509  |
|       | 34.88          | 51.57          | 11.24      | 2.31    | 100.00 |

Concomitant medications other than anticoagulants at the time of obtaining Table 2-5 consent, according to the presence or absence of proton-pump inhibitors

FREQ Procedure

|                      |       | Cumulative       |       |        |
|----------------------|-------|------------------|-------|--------|
| Percent of ALL power |       | Percent of power |       |        |
| 1                    | 20509 | 100.00           | 20509 | 100.00 |

Tables: ALL \* CMYN

ALL

CMYN(Administration of Concomitant Drug)

| Power                   |        |        |        |
|-------------------------|--------|--------|--------|
| Percent                 |        |        |        |
| Percent of rows         |        |        |        |
| Percent of columns      | None   | With   | Total  |
| _____ + _____ + _____ + |        |        |        |
| 1                       | 1445   | 19064  | 20509  |
|                         | 7.05   | 92.95  | 100.00 |
|                         | 7.05   | 92.95  |        |
|                         | 100.00 | 100.00 |        |
| _____ + _____ + _____ + |        |        |        |
| Total 1445              | 19064  | 20509  |        |
|                         | 7.05   | 92.95  | 100.00 |

Concomitant medications other than anticoagulants at the time of obtaining Table 2-5 consent, according to the presence or absence of proton-pump inhibitors

FREQ Procedure

Tables: ALL\* TCMCNTCT

ALL

TCMCNTCT(Category for Total Number of Drugs Other than Anticoagulant)

Power |

Percent |

Percent of rows

Percentage of column |0 to 4 or more|5 to 9 or more|10 or more|unknown|total

|       | 0 to 4 or more | 5 to 9 or more | 10 or more | unknown | total  |
|-------|----------------|----------------|------------|---------|--------|
| 1     | 7154           | 10577          | 2305       | 473     | 20509  |
|       | 34.88          | 51.57          | 11.24      | 2.31    | 100.00 |
|       | 34.88          | 51.57          | 11.24      | 2.31    |        |
|       | 100.00         | 100.00         | 100.00     | 100.00  |        |
| Total | 7154           | 10577          | 2305       | 473     | 20509  |
|       | 34.88          | 51.57          | 11.24      | 2.31    | 100.00 |

Concomitant medications other than anticoagulants at the time of obtaining Table 2-5 consent, according to the presence or absence of proton-pump inhibitors

FREQ Procedure

|                      |       | Cumulative       |       |        |
|----------------------|-------|------------------|-------|--------|
| Percent of ALL power |       | Percent of power |       |        |
| 1                    | 20509 | 100.00           | 20509 | 100.00 |

Tables: ALL \* CMYN

ALL

CMYN(Administration of Concomitant Drug)

| Power                   |        |        |        |
|-------------------------|--------|--------|--------|
| Percent                 |        |        |        |
| Percent of rows         |        |        |        |
| Percent of columns      | None   | With   | Total  |
| _____ + _____ + _____ + |        |        |        |
| 1                       | 1445   | 19064  | 20509  |
|                         | 7.05   | 92.95  | 100.00 |
|                         | 7.05   | 92.95  |        |
|                         | 100.00 | 100.00 |        |
| _____ + _____ + _____ + |        |        |        |
| Total                   | 1445   | 19064  | 20509  |
|                         | 7.05   | 92.95  | 100.00 |

Concomitant medications other than anticoagulants at the time of obtaining Table 2-5 consent, according to the presence or absence of proton-pump inhibitors

FREQ Procedure

Tables: ALL\* TCMCNTCT

ALL

TCMCNTCT(Category for Total Number of Drugs Other than Anticoagulant)

Power |

Percent |

Percent of rows

Percentage of column |0 to 4 or more|5 to 9 or more|10 or more|unknown|total

|Bottom|Bottom | | |

|       | +      | +      | +      | +      | +      |
|-------|--------|--------|--------|--------|--------|
| 1     | 7154   | 10577  | 2305   | 473    | 20509  |
|       | 34.88  | 51.57  | 11.24  | 2.31   | 100.00 |
|       | 34.88  | 51.57  | 11.24  | 2.31   |        |
|       | 100.00 | 100.00 | 100.00 | 100.00 |        |
|       | +      | +      | +      | +      | +      |
| Total | 7154   | 10577  | 2305   | 473    | 20509  |
|       | 34.88  | 51.57  | 11.24  | 2.31   | 100.00 |

Concomitant medications other than anticoagulants at the time of obtaining Table 2-5 consent, according to the presence or absence of proton-pump inhibitors

FREQ Procedure

|                      |       | Cumulative       |       |        |
|----------------------|-------|------------------|-------|--------|
| Percent of ALL power |       | Percent of power |       |        |
| 1                    | 20509 | 100.00           | 20509 | 100.00 |

Tables: ALL \* CMYN

ALL

CMYN(Administration of Concomitant Drug)

| Power                   |        |        |        |
|-------------------------|--------|--------|--------|
| Percent                 |        |        |        |
| Percent of rows         |        |        |        |
| Percent of columns      | None   | With   | Total  |
| _____ + _____ + _____ + |        |        |        |
| 1                       | 1445   | 19064  | 20509  |
|                         | 7.05   | 92.95  | 100.00 |
|                         | 7.05   | 92.95  |        |
|                         | 100.00 | 100.00 |        |
| _____ + _____ + _____ + |        |        |        |
| Total 1445              | 19064  | 20509  |        |
|                         | 7.05   | 92.95  | 100.00 |



Concomitant medications other than anticoagulants at the time of obtaining Table 2-5 consent, according to the presence or absence of proton-pump inhibitors

FREQ Procedure

Tables: ALL\* TCMCNTCT

ALL

TCMCNTCT(Category for Total Number of Drugs Other than Anticoagulant)

Power |

Percent |

Percent of rows

Percentage of column |0 to 4 or more|5 to 9 or more|10 or more|unknown|total

|Bottom|Bottom | | |

|       | 0 to 4 or more | 5 to 9 or more | 10 or more | unknown | total  |
|-------|----------------|----------------|------------|---------|--------|
| 1     | 7154           | 10577          | 2305       | 473     | 20509  |
|       | 34.88          | 51.57          | 11.24      | 2.31    | 100.00 |
|       | 34.88          | 51.57          | 11.24      | 2.31    |        |
|       | 100.00         | 100.00         | 100.00     | 100.00  |        |
| Total | 7154           | 10577          | 2305       | 473     | 20509  |
|       | 34.88          | 51.57          | 11.24      | 2.31    | 100.00 |

Concomitant medications other than anticoagulants at the time of obtaining Table 2-5 consent, according to the presence or absence of proton-pump inhibitors

UNIVARIATE Procedure

Variables: TCMCNT (Total Number of Drugs Other than Anticoagulant)

#### Moment

Total of 31831 for N 31831 weight variable

Mean 6.63535547 total 211210

Standard deviation 3.16502134 variance 10.0173601

Skewness 0.69445812 kurtosis 0.75298246

Unmodified square sum 1720306 modified square sum 318852.571

Coefficient of variation 47.6993486 standard error of the mean 0.01773991

#### Basic statistics

##### Positional variation

Mean 6.635355 standard deviation 3.16502

Median 6.000000 variance 10.01736

Mode 6.000000 Range 27.00000

Interquartile range 5.00000

##### Test for position H0: $\mu_0=0$

Test-Statistics-----p Value

Student's t-test t 374.0354 Pr > |t| <. 0001

Sign test M 15889.5 Pr >= |M| <. 0001

Signed rank test S 2. 5248E8 Pr >= |S| <. 0001

##### Quartile (Definition 5)

Level quantile

100% max 27

99% 15

95% 12

90% 11

75% Q3 9

Median 50% 6

25% Q1 4

10% 3

5% 2

1% 1

0% minimum 0

Concomitant medications other than anticoagulants at the time of obtaining Table 2-5 consent, according to the presence or absence of proton-pump inhibitors

UNIVARIATE Procedure

Variables: TCMCNT (Total Number of Drugs Other than Anticoagulant)

Extreme value

--- Minimum value--Maximum value----

Value Obs Value Obs

|   |       |    |       |
|---|-------|----|-------|
| 0 | 31987 | 24 | 11360 |
| 0 | 31978 | 25 | 11392 |
| 0 | 31891 | 26 | 23911 |
| 0 | 31640 | 26 | 28331 |
| 0 | 31625 | 27 | 23233 |

Missing Values

----- Percent-----

Missing Values Overall Missing Values

|     |      |        |
|-----|------|--------|
| 659 | 2.03 | 100.00 |
|-----|------|--------|

Concomitant medications other than anticoagulants at the time of obtaining Table 2-5 consent, according to the presence or absence of proton-pump inhibitors

UNIVARIATE Procedure

Variables: TCMCNT (Total Number of Drugs Other than Anticoagulant)

#### Moment

Total of 11795 for N 11795 weight variable

Mean 7.90597711 total 93251

Standard deviation 3.09028038 variance 9.54983285

Skewness 0.64463054 kurtosis 0.64432289

Unmodified square sum 849871 modified square sum 112630.729

Coefficient of variation 39.0878995 standard error of the mean 0.02845437

#### Basic statistics

##### Positional variation

Mean 7.905977 standard deviation 3.09028

Median 8.000000 variance 9.54983

Mode 7.000000 Range 25.00000

Interquartile range 4.00000

##### Test for position H0: $\mu_0=0$

Test-Statistics-----p Value

Student's t-test t 277.8476 Pr > |t| <. 0001

Sign test M 5897.5 Pr >= |M| <. 0001

Signed rank test S 34783455 Pr >= |S| <. 0001

Quartile (Definition 5)

Level quantile

100% max. 26

99% 17

95% 13

90% 12

75% Q3 10

Median 50% 8

25% Q1 6

10% 4

5% 3

1% 2

0% minimum 1

Concomitant medications other than anticoagulants at the time of obtaining Table 2-5 consent, according to the presence or absence of proton-pump inhibitors

UNIVARIATE Procedure

Variables: TCMCNT (Total Number of Drugs Other than Anticoagulant)

Extreme value

--- Minimum value--Maximum value----

Value Obs Value Obs

|   |       |    |       |
|---|-------|----|-------|
| 1 | 11837 | 21 | 10673 |
| 1 | 11210 | 22 | 5310  |
| 1 | 10063 | 22 | 6199  |
| 1 | 9459  | 24 | 3864  |
| 1 | 9284  | 26 | 8576  |

Missing Values

----- Percent-----

Missing Values Overall Missing Values

|     |      |        |
|-----|------|--------|
| 186 | 1.55 | 100.00 |
|-----|------|--------|

Concomitant medications other than anticoagulants at the time of obtaining Table 2-5 consent, according to the presence or absence of proton-pump inhibitors

UNIVARIATE Procedure

Variables: TCMCNT (Total Number of Drugs Other than Anticoagulant)

#### Moment

Total of 20036 for N 20036 weight variable

Mean 5.88735277 total 117959

Standard deviation 2.96362403 variance 8.78306739

Skewness 0.81730219 kurtosis 1.19570963

Unmodified square sum 870435 modified square sum 175968.755

Coefficient of variation 50.338822 standard error of the mean 0.02093715

#### Basic statistics

##### Positional variation

Mean 5.887353 standard deviation 2.96362

Median 6.000000 variance 8.78307

Mode 5.000000 Range 27.00000

Interquartile range 4.00000

##### Test for position H0: $\mu_0=0$

Test-Statistics-----p Value

Student's t-test t 281.1917 Pr > |t| <.0001

Sign test M 9992 Pr >= |M| <.0001

Signed rank test S 99845060 Pr >= |S| <.0001

##### Quartile (Definition 5)



Level quantile

100% max 27

99% 14

95% 11

90% 10

75% Q3 8

Median 50% 6

25% Q1 4

10% 2

5% 2

1% 1

0% minimum 0

Concomitant medications other than anticoagulants at the time of obtaining Table 2-5 consent, according to the presence or absence of proton-pump inhibitors

UNIVARIATE Procedure

Variables: TCMCNT (Total Number of Drugs Other than Anticoagulant)

Extreme value

--- Minimum value--Maximum value----

Value Obs Value Obs

|   |       |    |       |
|---|-------|----|-------|
| 0 | 20199 | 23 | 14042 |
| 0 | 20193 | 23 | 15129 |
| 0 | 20129 | 25 | 7515  |
| 0 | 19954 | 26 | 18014 |
| 0 | 19946 | 27 | 14915 |

Missing Values

----- Percent-----

Missing Values Overall Missing Values

|     |      |        |
|-----|------|--------|
| 473 | 2.31 | 100.00 |
|-----|------|--------|

Concomitant medications other than anticoagulants at the time of obtaining Table 2-5 consent, according to the presence or absence of proton-pump inhibitors

FREQ Procedure

Number of levels of variables

Variables Label Level Number

---

GROUP1 2

CMYN Administration of Concomitant Drug 2

Table : GROUP1 \* CMYN

GROUP1

CMYN(Administration of Concomitant Drug)

Power |

Percent |

Percent of rows

Percent of columns | None | With | Total

|       | +      | +      | +      | + |
|-------|--------|--------|--------|---|
| 1     | 0      | 11981  | 11981  |   |
|       | 0.00   | 36.88  | 36.88  |   |
|       | 0.00   | 100.00 |        |   |
|       | 0.00   | 38.59  |        |   |
|       | +      | +      | +      | + |
| 2     | 1445   | 19064  | 20509  |   |
|       | 4.45   | 58.68  | 63.12  |   |
|       | 7.05   | 92.95  |        |   |
|       | 100.00 | 61.41  |        |   |
|       | +      | +      | +      | + |
| Total | 1445   | 31045  | 32490  |   |
|       | 4.45   | 95.55  | 100.00 |   |

Concomitant medications other than anticoagulants at the time of obtaining Table 2-5 consent, according to the presence or absence of proton-pump inhibitors

FREQ Procedure

Number of levels of variables

Variables Label Level Number

GROUP1 2

ARTD Arrhythmic Drugs 2

Table : GROUP1 \* ARTD

GROUP1 ARTD(Arrhythmic Drugs)

Power |

Percent |

Percent of rows

Percent of columns | None | With | Total

|       | +     | +     | +      |
|-------|-------|-------|--------|
| 1     | 4835  | 7146  | 11981  |
|       | 15.57 | 23.02 | 38.59  |
|       | 40.36 | 59.64 |        |
|       | 38.16 | 38.89 |        |
|       | +     | +     | +      |
| 2     | 7836  | 11228 | 19064  |
|       | 25.24 | 36.17 | 61.41  |
|       | 41.10 | 58.90 |        |
|       | 61.84 | 61.11 |        |
|       | +     | +     | +      |
| Total | 12671 | 18374 | 31045  |
|       | 40.81 | 59.19 | 100.00 |

Concomitant medications other than anticoagulants at the time of obtaining Table 2-5 consent, according to the presence or absence of proton-pump inhibitors

FREQ Procedure

Number of levels of variables

Variables Label Level Number

GROUP1 2

ARTD1 Rhythm Control 2

Table : GROUP1 \* ARTD1

GROUP1 ARTD1(Rhythm Control)

Power |

Percent |

Percent of rows

Percent of columns | None | With | Total

|       | +     | +     | +      |
|-------|-------|-------|--------|
| 1     | 9496  | 2485  | 11981  |
|       | 30.59 | 8.00  | 38.59  |
|       | 79.26 | 20.74 |        |
|       | 38.48 | 39.02 |        |
|       | +     | +     | +      |
| 2     | 15180 | 3884  | 19064  |
|       | 48.90 | 12.51 | 61.41  |
|       | 79.63 | 20.37 |        |
|       | 61.52 | 60.98 |        |
|       | +     | +     | +      |
| Total | 24676 | 6369  | 31045  |
|       | 79.48 | 20.52 | 100.00 |

Concomitant medications other than anticoagulants at the time of obtaining Table 2-5 consent, according to the presence or absence of proton-pump inhibitors

FREQ Procedure

Number of levels of variables

Variables Label Level Number

GROUP1 2

ARTD2 Rate Control 2

Table : GROUP1 \* ARTD2

GROUP1 ARTD2(Rate Control)

Power |

Percent |

Percent of rows

Percent of columns | None | With | Total

|       | +     | +     | +      |
|-------|-------|-------|--------|
| 1     | 6708  | 5273  | 11981  |
|       | 21.61 | 16.99 | 38.59  |
|       | 55.99 | 44.01 |        |
|       | 38.16 | 39.16 |        |
|       | +     | +     | +      |
| 2     | 10871 | 8193  | 19064  |
|       | 35.02 | 26.39 | 61.41  |
|       | 57.02 | 42.98 |        |
|       | 61.84 | 60.84 |        |
|       | +     | +     | +      |
| Total | 17579 | 13466 | 31045  |
|       | 56.62 | 43.38 | 100.00 |

Concomitant medications other than anticoagulants at the time of obtaining Table 2-5 consent, according to the presence or absence of proton-pump inhibitors

FREQ Procedure

Number of levels of variables

Variables Label Level Number

---

GROUP1 2

APLD Anti-Platelet Drugs 2

Table : GROUP1 \* APLD

GROUP1 APLD(Anti-Platelet Drugs)

Power |

Percent |

Percent of rows

Percent of columns | None | With | Total

|       | +     | +     | +      |
|-------|-------|-------|--------|
| 1     | 8965  | 3016  | 11981  |
|       | 28.88 | 9.71  | 38.59  |
|       | 74.83 | 25.17 |        |
|       | 35.50 | 52.06 |        |
| 2     | 16287 | 2777  | 19064  |
|       | 52.46 | 8.95  | 61.41  |
|       | 85.43 | 14.57 |        |
|       | 64.50 | 47.94 |        |
| Total | 25252 | 5793  | 31045  |
|       | 81.34 | 18.66 | 100.00 |

Concomitant medications other than anticoagulants at the time of obtaining Table 2-5 consent, according to the presence or absence of proton-pump inhibitors

FREQ Procedure

Number of levels of variables

Number of Variables Level

GROUP1 2

t\_AP 2

Table : GROUP1 \* t\_AP

GROUP1 t\_AP

Power |

Percent |

Percent of rows

Percentage of columns | 0 | 1 | Sum

|       |       | + |       | + |        | + |
|-------|-------|---|-------|---|--------|---|
| 1     | 11824 |   | 157   |   | 11981  |   |
|       | 38.09 |   | 0.51  |   | 38.59  |   |
|       | 98.69 |   | 1.31  |   |        |   |
|       | 38.39 |   | 64.61 |   |        |   |
|       |       | + |       | + |        | + |
| 2     | 18978 |   | 86    |   | 19064  |   |
|       | 61.13 |   | 0.28  |   | 61.41  |   |
|       | 99.55 |   | 0.45  |   |        |   |
|       | 61.61 |   | 35.39 |   |        |   |
|       |       | + |       | + |        | + |
| Total | 30802 |   | 243   |   | 31045  |   |
|       | 99.22 |   | 0.78  |   | 100.00 |   |



Concomitant medications other than anticoagulants at the time of obtaining Table 2-5 consent, according to the presence or absence of proton-pump inhibitors

FREQ Procedure

Number of levels of variables

Variables Label Level Number

GROUP1 2

APLD1 ASA 2

Table : GROUP1 \* APLD1

GROUP1 APLD1(ASA)

Power |

Percent |

Percent of rows

Percent of columns | None | With | Total

|       | +     | +     | +      |
|-------|-------|-------|--------|
| 1     | 10026 | 1955  | 11981  |
|       | 32.30 | 6.30  | 38.59  |
|       | 83.68 | 16.32 |        |
|       | 36.45 | 55.27 |        |
|       | +     | +     | +      |
| 2     | 17482 | 1582  | 19064  |
|       | 56.31 | 5.10  | 61.41  |
|       | 91.70 | 8.30  |        |
|       | 63.55 | 44.73 |        |
|       | +     | +     | +      |
| Total | 27508 | 3537  | 31045  |
|       | 88.61 | 11.39 | 100.00 |

Concomitant medications other than anticoagulants at the time of obtaining Table 2-5 consent, according to the presence or absence of proton-pump inhibitors

FREQ Procedure

Number of levels of variables

Variables Label Level Number

GROUP1 2  
APLD2 P2Y12-I 2

Table : GROUP1 \* APDL2

GROUP1 APDL2(P2Y12-I)

Power |

Percent |

Percent of rows

Percent of columns | None | With | Total

|       | +     | +     | +      |
|-------|-------|-------|--------|
| 1     | 11206 | 775   | 11981  |
|       | 36.10 | 2.50  | 38.59  |
|       | 93.53 | 6.47  |        |
|       | 37.79 | 55.56 |        |
|       | +     | +     | +      |
| 2     | 18444 | 620   | 19064  |
|       | 59.41 | 2.00  | 61.41  |
|       | 96.75 | 3.25  |        |
|       | 62.21 | 44.44 |        |
|       | +     | +     | +      |
| Total | 29650 | 1395  | 31045  |
|       | 95.51 | 4.49  | 100.00 |

Concomitant medications other than anticoagulants at the time of obtaining Table 2-5 consent, according to the presence or absence of proton-pump inhibitors

FREQ Procedure

Number of levels of variables

Variables Label Level Number

GROUP1 2

APLD3 Other Anti-Platelet Drugs 2

Table : GROUP1 \* APDL3

GROUP1

APLD3(Other Anti-Platelet Drugs)

Power |

Percent |

Percent of rows

Percent of columns | None | With | Total

|       | +     | +     | +      |
|-------|-------|-------|--------|
| 1     | 11421 | 560   | 11981  |
|       | 36.79 | 1.80  | 38.59  |
|       | 95.33 | 4.67  |        |
|       | 38.40 | 43.01 |        |
| 2     | 18322 | 742   | 19064  |
|       | 59.02 | 2.39  | 61.41  |
|       | 96.11 | 3.89  |        |
|       | 61.60 | 56.99 |        |
| Total | 29743 | 1302  | 31045  |
|       | 95.81 | 4.19  | 100.00 |

Concomitant medications other than anticoagulants at the time of obtaining Table 2-5 consent, according to the presence or absence of proton-pump inhibitors

FREQ Procedure

Number of levels of variables

Variables Label Level Number

GROUP1 2

AHPD Antihypertensive Drugs 2

Table : GROUP1 \* AHPD

GROUP1

AHPD(Antihypertensive Drugs)

Power |

Percent |

Percent of rows

Percent of columns | None | With | Total

|       | +     | +     | +      |
|-------|-------|-------|--------|
| 1     | 3096  | 8885  | 11981  |
|       | 9.97  | 28.62 | 38.59  |
|       | 25.84 | 74.16 |        |
|       | 39.36 | 38.33 |        |
|       | +     | +     | +      |
| 2     | 4769  | 14295 | 19064  |
|       | 15.36 | 46.05 | 61.41  |
|       | 25.02 | 74.98 |        |
|       | 60.64 | 61.67 |        |
|       | +     | +     | +      |
| Total | 7865  | 23180 | 31045  |
|       | 25.33 | 74.67 | 100.00 |

Concomitant medications other than anticoagulants at the time of obtaining Table 2-5 consent, according to the presence or absence of proton-pump inhibitors

FREQ Procedure

Number of levels of variables

Variable Label Level Count

---

GROUP1 2

LTD Lipid Therapy 2

Table : GROUP1 \* LTD

GROUP1 LTD(Lipid Therapy)

Power |

Percent |

Percent of rows

Percent of columns | None | With | Total

|       | +     | +     | +      |
|-------|-------|-------|--------|
| 1     | 6650  | 5331  | 11981  |
|       | 21.42 | 17.17 | 38.59  |
|       | 55.50 | 44.50 |        |
|       | 35.16 | 43.95 |        |
|       | +     | +     | +      |
| 2     | 12266 | 6798  | 19064  |
|       | 39.51 | 21.90 | 61.41  |
|       | 64.34 | 35.66 |        |
|       | 64.84 | 56.05 |        |
|       | +     | +     | +      |
| Total | 18916 | 12129 | 31045  |
|       | 60.93 | 39.07 | 100.00 |

Concomitant medications other than anticoagulants at the time of obtaining Table 2-5 consent, according to the presence or absence of proton-pump inhibitors

FREQ Procedure

Number of levels of variables

Variables Label Level Number

GROUP1 2

LTD1 Statins 2

Table : GROUP1 \* LTD1

GROUP1 LTD1(Statins)

Power |

Percent |

Percent of rows

Percent of columns | None | With | Total

|       | +     | +     | +      |
|-------|-------|-------|--------|
| 1     | 7179  | 4802  | 11981  |
|       | 23.12 | 15.47 | 38.59  |
|       | 59.92 | 40.08 |        |
|       | 35.57 | 44.21 |        |
|       | +     | +     | +      |
| 2     | 13003 | 6061  | 19064  |
|       | 41.88 | 19.52 | 61.41  |
|       | 68.21 | 31.79 |        |
|       | 64.43 | 55.79 |        |
|       | +     | +     | +      |
| Total | 20182 | 10863 | 31045  |
|       | 65.01 | 34.99 | 100.00 |

Concomitant medications other than anticoagulants at the time of obtaining Table 2-5 consent, according to the presence or absence of proton-pump inhibitors

FREQ Procedure

Number of levels of variables

Variables Label Level Number

GROUP1 2

LTD2 Other Than Statins 2

Table : GROUP1 \* LTD2

GROUP1 LTD2(Other Than Statins)

Power |

Percent |

Percent of rows

Percent of columns | None | With | Total

|       | +     | +     | +      |
|-------|-------|-------|--------|
| 1     | 11227 | 754   | 11981  |
|       | 36.16 | 2.43  | 38.59  |
|       | 93.71 | 6.29  |        |
|       | 38.29 | 43.79 |        |
|       | +     | +     | +      |
| 2     | 18096 | 968   | 19064  |
|       | 58.29 | 3.12  | 61.41  |
|       | 94.92 | 5.08  |        |
|       | 61.71 | 56.21 |        |
|       | +     | +     | +      |
| Total | 29323 | 1722  | 31045  |
|       | 94.45 | 5.55  | 100.00 |

Concomitant medications other than anticoagulants at the time of obtaining Table 2-5 consent, according to the presence or absence of proton-pump inhibitors

FREQ Procedure

Number of levels of variables

Variables Label Level Number

---

GROUP1 2

DBTD Diabetes Drugs 2

Table : GROUP1 \* DBTD

GROUP1 DBTD(Diabetes Drugs)

Power |

Percent |

Percent of rows

Percent of columns | None | With | Total

|       | +     | +     | +      |
|-------|-------|-------|--------|
| 1     | 9802  | 2179  | 11981  |
|       | 31.57 | 7.02  | 38.59  |
|       | 81.81 | 18.19 |        |
|       | 37.97 | 41.66 |        |
|       | +     | +     | +      |
| 2     | 16012 | 3052  | 19064  |
|       | 51.58 | 9.83  | 61.41  |
|       | 83.99 | 16.01 |        |
|       | 62.03 | 58.34 |        |
|       | +     | +     | +      |
| Total | 25814 | 5231  | 31045  |
|       | 83.15 | 16.85 | 100.00 |



Concomitant medications other than anticoagulants at the time of obtaining Table 2-5 consent, according to the presence or absence of proton-pump inhibitors

FREQ Procedure

Number of levels of variables

Number of Variables Level

GROUP1 2

t\_DBT 2

Table : GROUP1 \* t\_DBT

GROUP1 t\_DBT

Power |

Percent |

Percent of rows

Percentage of columns | 0 | 1 | Sum

|       |  | +     |  | +     |  | +      |
|-------|--|-------|--|-------|--|--------|
| 1     |  | 9919  |  | 2062  |  | 11981  |
|       |  | 31.95 |  | 6.64  |  | 38.59  |
|       |  | 82.79 |  | 17.21 |  |        |
|       |  | 38.03 |  | 41.54 |  |        |
|       |  | +     |  | +     |  | +      |
| 2     |  | 16162 |  | 2902  |  | 19064  |
|       |  | 52.06 |  | 9.35  |  | 61.41  |
|       |  | 84.78 |  | 15.22 |  |        |
|       |  | 61.97 |  | 58.46 |  |        |
|       |  | +     |  | +     |  | +      |
| Total |  | 26081 |  | 4964  |  | 31045  |
|       |  | 84.01 |  | 15.99 |  | 100.00 |

Concomitant medications other than anticoagulants at the time of obtaining Table 2-5 consent, according to the presence or absence of proton-pump inhibitors

FREQ Procedure

Number of levels of variables

Variables Label Level Number

---

GROUP1 2

DBTD1 Sulfonylurea Drugs 2

Table : GROUP1 \* DBTD1

GROUP1 DBTD1(Sulfonylurea Drugs)

Power |

Percent |

Percent of rows

Percent of columns | None | With | Total

|       | +     | +     | +      |
|-------|-------|-------|--------|
| 1     | 11508 | 473   | 11981  |
|       | 37.07 | 1.52  | 38.59  |
|       | 96.05 | 3.95  |        |
|       | 38.59 | 38.74 |        |
|       | +     | +     | +      |
| 2     | 18316 | 748   | 19064  |
|       | 59.00 | 2.41  | 61.41  |
|       | 96.08 | 3.92  |        |
|       | 61.41 | 61.26 |        |
|       | +     | +     | +      |
| Total | 29824 | 1221  | 31045  |
|       | 96.07 | 3.93  | 100.00 |

Concomitant medications other than anticoagulants at the time of obtaining Table 2-5 consent, according to the presence or absence of proton-pump inhibitors

FREQ Procedure

Number of levels of variables

Variables Label Level Number

GROUP1 2

DBTD2  $\alpha$ -Glucosidase Inhibitor 2

Table : GROUP1 \* DBTD2

GROUP1

DBTD2( $\alpha$ -Glucosidase Inhibitor)

Power |

Percent |

Percent of rows

Percent of columns | None | With | Total

|       | +     | +     | +      |
|-------|-------|-------|--------|
| 1     | 11592 | 389   | 11981  |
|       | 37.34 | 1.25  | 38.59  |
|       | 96.75 | 3.25  |        |
|       | 38.56 | 39.53 |        |
| 2     | 18469 | 595   | 19064  |
|       | 59.49 | 1.92  | 61.41  |
|       | 96.88 | 3.12  |        |
|       | 61.44 | 60.47 |        |
| Total | 30061 | 984   | 31045  |
|       | 96.83 | 3.17  | 100.00 |

Concomitant medications other than anticoagulants at the time of obtaining Table 2-5 consent, according to the presence or absence of proton-pump inhibitors

FREQ Procedure

Number of levels of variables

Variables Label Level Number

GROUP1 2

DBTD3 Thiazolidine 2

Table : GROUP1 \* DBTD3

GROUP1 DBTD3(Thiazolidine)

Power |

Percent |

Percent of rows

Percent of columns | None | With | Total

|       | +     | +     | +      |
|-------|-------|-------|--------|
| 1     | 11856 | 125   | 11981  |
|       | 38.19 | 0.40  | 38.59  |
|       | 98.96 | 1.04  |        |
|       | 38.65 | 33.69 |        |
|       | +     | +     | +      |
| 2     | 18818 | 246   | 19064  |
|       | 60.62 | 0.79  | 61.41  |
|       | 98.71 | 1.29  |        |
|       | 61.35 | 66.31 |        |
|       | +     | +     | +      |
| Total | 30674 | 371   | 31045  |
|       | 98.80 | 1.20  | 100.00 |

Concomitant medications other than anticoagulants at the time of obtaining Table 2-5 consent, according to the presence or absence of proton-pump inhibitors

FREQ Procedure

Number of levels of variables

Variables Label Level Number

---

GROUP1 2

DBTD4 DPP-4 Inhabitants 2

Table : GROUP1 \* DBTD4

GROUP1 DBTD4(DPP-4 Inhabitants)

Power |

Percent |

Percent of rows

Percent of columns | None | With | Total

|       |       | + |       | + |        | + |
|-------|-------|---|-------|---|--------|---|
| 1     | 10310 |   | 1671  |   | 11981  |   |
|       | 33.21 |   | 5.38  |   | 38.59  |   |
|       | 86.05 |   | 13.95 |   |        |   |
|       | 37.88 |   | 43.69 |   |        |   |
|       |       | + |       | + |        |   |
| 2     | 16910 |   | 2154  |   | 19064  |   |
|       | 54.47 |   | 6.94  |   | 61.41  |   |
|       | 88.70 |   | 11.30 |   |        |   |
|       | 62.12 |   | 56.31 |   |        |   |
|       |       | + |       | + |        |   |
| Total | 27220 |   | 3825  |   | 31045  |   |
|       | 87.68 |   | 12.32 |   | 100.00 |   |

Concomitant medications other than anticoagulants at the time of obtaining Table 2-5 consent, according to the presence or absence of proton-pump inhibitors

FREQ Procedure

Number of levels of variables

Variables Label Level Number

---

GROUP1 2

DBTD5 GLP-1 Inhabitants 2

Table : GROUP1 \* DBTD5

GROUP1 DBTD5(GLP-1 Inhabitants)

Power |

Percent |

Percent of rows

Percent of columns | None | With | Total

|       | +     | +     | +      |
|-------|-------|-------|--------|
| 1     | 11943 | 38    | 11981  |
|       | 38.47 | 0.12  | 38.59  |
|       | 99.68 | 0.32  |        |
|       | 38.57 | 49.35 |        |
|       | +     | +     | +      |
| 2     | 19025 | 39    | 19064  |
|       | 61.28 | 0.13  | 61.41  |
|       | 99.80 | 0.20  |        |
|       | 61.43 | 50.65 |        |
|       | +     | +     | +      |
| Total | 30968 | 77    | 31045  |
|       | 99.75 | 0.25  | 100.00 |

Concomitant medications other than anticoagulants at the time of obtaining Table 2-5 consent, according to the presence or absence of proton-pump inhibitors

FREQ Procedure

Number of levels of variables

Variables Label Level Number

GROUP1 2

DBTD6 SGLT2 Inhabitants 2

Table : GROUP1 \* DBTD6

GROUP1 DBTD6(SGLT2 Inhabitants)

Power |

Percent |

Percent of rows

Percent of columns | None | With | Total

|       | +     | +     | +      |
|-------|-------|-------|--------|
| 1     | 11799 | 182   | 11981  |
|       | 38.01 | 0.59  | 38.59  |
|       | 98.48 | 1.52  |        |
|       | 38.51 | 44.72 |        |
|       | +     | +     | +      |
| 2     | 18839 | 225   | 19064  |
|       | 60.68 | 0.72  | 61.41  |
|       | 98.82 | 1.18  |        |
|       | 61.49 | 55.28 |        |
|       | +     | +     | +      |
| Total | 30638 | 407   | 31045  |
|       | 98.69 | 1.31  | 100.00 |

Concomitant medications other than anticoagulants at the time of obtaining Table 2-5 consent, according to the presence or absence of proton-pump inhibitors

FREQ Procedure

Number of levels of variables

Variables Label Level Number

---

GROUP1 2

DBTD7 Insuline Related 2

Table : GROUP1 \* DBTD7

GROUP1 DBTD7(Insuline Related)

Power |

Percent |

Percent of rows

Percent of columns | None | With | Total

|       | +     | +     | +      |
|-------|-------|-------|--------|
| 1     | 11706 | 275   | 11981  |
|       | 37.71 | 0.89  | 38.59  |
|       | 97.70 | 2.30  |        |
|       | 38.50 | 43.04 |        |
|       | +     | +     | +      |
| 2     | 18700 | 364   | 19064  |
|       | 60.24 | 1.17  | 61.41  |
|       | 98.09 | 1.91  |        |
|       | 61.50 | 56.96 |        |
|       | +     | +     | +      |
| Total | 30406 | 639   | 31045  |
|       | 97.94 | 2.06  | 100.00 |



Concomitant medications other than anticoagulants at the time of obtaining Table 2-5 consent, according to the presence or absence of proton-pump inhibitors

FREQ Procedure

Number of levels of variables

Variables Label Level Number

GROUP1 2

DBTD8 Other Diabetes Drugs 2

Table : GROUP1 \* DBTD8

GROUP1

DBTD8(Other Diabetes Drugs)

Power |

Percent |

Percent of rows

Percent of columns | None | With | Total

|       | +     | +     | +      |
|-------|-------|-------|--------|
| 1     | 11613 | 368   | 11981  |
|       | 37.41 | 1.19  | 38.59  |
|       | 96.93 | 3.07  |        |
|       | 38.63 | 37.32 |        |
| 2     | 18446 | 618   | 19064  |
|       | 59.42 | 1.99  | 61.41  |
|       | 96.76 | 3.24  |        |
|       | 61.37 | 62.68 |        |
| Total | 30059 | 986   | 31045  |
|       | 96.82 | 3.18  | 100.00 |

Concomitant medications other than anticoagulants at the time of obtaining Table 2-5 consent, according to the presence or absence of proton-pump inhibitors

FREQ Procedure

Number of levels of variables

Variables Label Level Number

---

GROUP1 2

DMM Dementia Medications 2

Table : GROUP1 \* DMM

GROUP1 DMM(Dementia Medications)

Power |

Percent |

Percent of rows

Percent of columns | None | With | Total

|       | +     | +     | +      |
|-------|-------|-------|--------|
| 1     | 11538 | 443   | 11981  |
|       | 37.17 | 1.43  | 38.59  |
|       | 96.30 | 3.70  |        |
|       | 38.66 | 36.82 |        |
|       | +     | +     | +      |
| 2     | 18304 | 760   | 19064  |
|       | 58.96 | 2.45  | 61.41  |
|       | 96.01 | 3.99  |        |
|       | 61.34 | 63.18 |        |
|       | +     | +     | +      |
| Total | 29842 | 1203  | 31045  |
|       | 96.12 | 3.88  | 100.00 |

Concomitant medications other than anticoagulants at the time of obtaining Table 2-5 consent, according to the presence or absence of proton-pump inhibitors

FREQ Procedure

Number of levels of variables

Variables Label Level Number

GROUP1 2

ACNA Anti-Cancer Agent 2

Table : GROUP1 \* ACNA

GROUP1 ACNA(Anti-Cancer Agent)

Power |

Percent |

Percent of rows

Percent of columns | None | With | Total

|       | +     | +     | +      |
|-------|-------|-------|--------|
| 1     | 11871 | 110   | 11981  |
|       | 38.24 | 0.35  | 38.59  |
|       | 99.08 | 0.92  |        |
|       | 38.60 | 38.06 |        |
|       | +     | +     | +      |
| 2     | 18885 | 179   | 19064  |
|       | 60.83 | 0.58  | 61.41  |
|       | 99.06 | 0.94  |        |
|       | 61.40 | 61.94 |        |
|       | +     | +     | +      |
| Total | 30756 | 289   | 31045  |
|       | 99.07 | 0.93  | 100.00 |

Concomitant medications other than anticoagulants at the time of obtaining Table 2-5 consent, according to the presence or absence of proton-pump inhibitors

FREQ Procedure

Number of levels of variables

Variables Label Level Number

GROUP1 2  
COPD COPD 2

Table : GROUP1 \* COPD

GROUP1 COPD(COPD)

|       | None  | With  | Total  |
|-------|-------|-------|--------|
| 1     | 11601 | 380   | 11981  |
|       | 37.37 | 1.22  | 38.59  |
|       | 96.83 | 3.17  |        |
|       | 38.41 | 45.29 |        |
| 2     | 18605 | 459   | 19064  |
|       | 59.93 | 1.48  | 61.41  |
|       | 97.59 | 2.41  |        |
|       | 61.59 | 54.71 |        |
| Total | 30206 | 839   | 31045  |
|       | 97.30 | 2.70  | 100.00 |

Concomitant medications other than anticoagulants at the time of obtaining Table 2-5 consent, according to the presence or absence of proton-pump inhibitors

FREQ Procedure

Number of levels of variables

Variables Label Level Number

GROUP1 2

PSYD Psychotropic Drugs 2

Table : GROUP1 \* PSYD

GROUP1 PSYD(Psychotropic Drugs)

Power |

Percent |

Percent of rows

Percent of columns | None | With | Total

|       | +     | +     | +      |
|-------|-------|-------|--------|
| 1     | 10834 | 1147  | 11981  |
|       | 34.90 | 3.69  | 38.59  |
|       | 90.43 | 9.57  |        |
|       | 37.98 | 45.46 |        |
|       | +     | +     | +      |
| 2     | 17688 | 1376  | 19064  |
|       | 56.98 | 4.43  | 61.41  |
|       | 92.78 | 7.22  |        |
|       | 62.02 | 54.54 |        |
|       | +     | +     | +      |
| Total | 28522 | 2523  | 31045  |
|       | 91.87 | 8.13  | 100.00 |

Concomitant medications other than anticoagulants at the time of obtaining Table 2-5 consent, according to the presence or absence of proton-pump inhibitors

FREQ Procedure

Number of levels of variables

Variables Label Level Number

---

GROUP1 2

PRPI Proton Pump Inhibitors 2

Table : GROUP1 \* PRPI

GROUP1

PRPI(Proton Pump Inhibitors)

Power |

Percent |

Percent of rows

Percent of columns | None | With | Total

|       | +      | +      | +      |
|-------|--------|--------|--------|
| 1     | 0      | 11981  | 11981  |
|       | 0.00   | 38.59  | 38.59  |
|       | 0.00   | 100.00 |        |
|       | 0.00   | 100.00 |        |
|       | +      | +      | +      |
| 2     | 19064  | 0      | 19064  |
|       | 61.41  | 0.00   | 61.41  |
|       | 100.00 | 0.00   |        |
|       | 100.00 | 0.00   |        |
|       | +      | +      | +      |
| Total | 19064  | 11981  | 31045  |
|       | 61.41  | 38.59  | 100.00 |

Concomitant medications other than anticoagulants at the time of obtaining Table 2-5 consent, according to the presence or absence of proton-pump inhibitors

FREQ Procedure

Number of levels of variables

Variable Label Level Count

---

GROUP1 2

PGPI P-gp Inhabitants 2

Table : GROUP1 \* PGPI

GROUP1 PGPI(P-gp Inhabitants)

Power |

Percent |

Percent of rows

Percent of columns | None | With | Total

|       | +     | +     | +      |
|-------|-------|-------|--------|
| 1     | 11741 | 240   | 11981  |
|       | 37.82 | 0.77  | 38.59  |
|       | 98.00 | 2.00  |        |
|       | 38.49 | 44.28 |        |
|       | +     | +     | +      |
| 2     | 18762 | 302   | 19064  |
|       | 60.43 | 0.97  | 61.41  |
|       | 98.42 | 1.58  |        |
|       | 61.51 | 55.72 |        |
|       | +     | +     | +      |
| Total | 30503 | 542   | 31045  |
|       | 98.25 | 1.75  | 100.00 |

Concomitant medications other than anticoagulants at the time of obtaining Table 2-5 consent, according to the presence or absence of proton-pump inhibitors

FREQ Procedure

Number of levels of variables

Number of Variables Level

GROUP1 2  
f\_cmcnt1 21

Table : GROUP1 \* f\_cmcnt1

GROUP1 f\_cmcnt1

Power |

Percent |

Percent of rows

Percent0|1|2|3|4|5|6|7|8|9|10| Total

|   | 0    | 1    | 2     | 3     | 4     | 5     | 6     | 7     | 8     | 9     | 10    | Total |       |
|---|------|------|-------|-------|-------|-------|-------|-------|-------|-------|-------|-------|-------|
| 1 | 1    | 0    | 28    | 165   | 420   | 794   | 1257  | 1528  | 1604  | 1495  | 1265  | 996   | 11795 |
|   | 0.00 | 0.09 | 0.52  | 1.32  | 2.49  | 3.95  | 4.80  | 5.04  | 4.70  | 3.97  | 3.13  | 37.06 |       |
|   | 0.00 | 0.24 | 1.40  | 3.56  | 6.73  | 10.66 | 12.95 | 13.60 | 12.67 | 10.72 | 8.44  |       |       |
|   | 0.00 | 4.07 | 10.30 | 16.02 | 22.07 | 30.62 | 36.63 | 42.81 | 46.91 | 50.28 | 54.58 |       |       |
| 2 | 2    | 52   | 660   | 1437  | 2202  | 2803  | 2848  | 2643  | 2143  | 1692  | 1251  | 829   | 20036 |
|   | 0.16 | 2.07 | 4.51  | 6.92  | 8.81  | 8.95  | 8.30  | 6.73  | 5.32  |       |       |       |       |



|                                                                 |  |       |        |       |       |        |       |      |       |      |       |       |       |       |       |       |       |       |       |  |
|-----------------------------------------------------------------|--|-------|--------|-------|-------|--------|-------|------|-------|------|-------|-------|-------|-------|-------|-------|-------|-------|-------|--|
| 3.93                                                            |  | 2.60  |        | 62.94 |       |        |       |      |       |      |       |       |       |       |       |       |       |       |       |  |
|                                                                 |  |       | 0.26   |       | 3.29  |        | 7.17  |      | 10.99 |      | 13.99 |       | 14.21 |       | 13.19 |       | 10.70 |       | 8.44  |  |
| 6.24                                                            |  | 4.14  |        |       |       |        |       |      |       |      |       |       |       |       |       |       |       |       |       |  |
|                                                                 |  |       | 100.00 |       | 95.93 |        | 89.70 |      | 83.98 |      | 77.93 |       | 69.38 |       | 63.37 |       | 57.19 |       | 53.09 |  |
| 49.72                                                           |  | 45.42 |        |       |       |        |       |      |       |      |       |       |       |       |       |       |       |       |       |  |
| _____ + _____ + _____ + _____ + _____ + _____ + _____ + _____   |  |       |        |       |       |        |       |      |       |      |       |       |       |       |       |       |       |       |       |  |
| _ + _____ + _____ + _____ + _____ +                             |  |       |        |       |       |        |       |      |       |      |       |       |       |       |       |       |       |       |       |  |
| Total 52 688 1602 2622 3597 4105 4171 3747 3187 2516 1825 31831 |  |       |        |       |       |        |       |      |       |      |       |       |       |       |       |       |       |       |       |  |
|                                                                 |  |       |        | 0.16  |       | 2.16   |       | 5.03 |       | 8.24 |       | 11.30 |       | 12.90 |       | 13.10 |       | 11.77 |       |  |
| 10.01                                                           |  | 7.90  |        | 5.73  |       | 100.00 |       |      |       |      |       |       |       |       |       |       |       |       |       |  |

(continued)

Concomitant medications other than anticoagulants at the time of obtaining Table 2-5 consent, according to the presence or absence of proton-pump inhibitors

FREQ Procedure

Table : GROUP1 \* f\_cmcnt1

GROUP1 f\_cmcnt1

Power |

Percent |

Percent of rows

Percent |11|12|13|14|15|16|17|18|19|20| Total

|       | 1     | 2     | 3     | 4     | 5     | 6     | 7     | 8     | 9     | 10    | Total |
|-------|-------|-------|-------|-------|-------|-------|-------|-------|-------|-------|-------|
| 1     | 777   | 516   | 373   | 248   | 128   | 77    | 54    | 29    | 20    | 21    | 11795 |
|       | 2.44  | 1.62  | 1.17  | 0.78  | 0.40  | 0.24  | 0.17  | 0.09  | 0.06  | 0.07  | 37.06 |
|       | 6.59  | 4.37  | 3.16  | 2.10  | 1.09  | 0.65  | 0.46  | 0.25  | 0.17  | 0.18  | 56.76 |
|       | 57.13 | 58.57 | 62.37 | 67.76 | 62.14 | 63.64 | 68.35 | 61.70 | 83.33 | 56.76 |       |
| 2     | 583   | 365   | 225   | 118   | 78    | 44    | 25    | 18    | 4     | 16    | 20036 |
|       | 1.83  | 1.15  | 0.71  | 0.37  | 0.25  | 0.14  | 0.08  | 0.06  | 0.01  | 0.05  | 62.94 |
|       | 2.91  | 1.82  | 1.12  | 0.59  | 0.39  | 0.22  | 0.12  | 0.09  | 0.02  | 0.08  | 43.24 |
|       | 42.87 | 41.43 | 37.63 | 32.24 | 37.86 | 36.36 | 31.65 | 38.30 | 16.67 | 43.24 |       |
| Total | 1360  | 881   | 598   | 366   | 206   | 121   | 79    | 47    | 24    | 37    | 31831 |

|      |      |        |      |      |      |      |      |      |      |
|------|------|--------|------|------|------|------|------|------|------|
|      |      | 4.27   | 2.77 | 1.88 | 1.15 | 0.65 | 0.38 | 0.25 | 0.15 |
| 0.08 | 0.12 | 100.00 |      |      |      |      |      |      |      |

Concomitant medications other than anticoagulants at the time of obtaining Table 2-5 consent, according to the presence or absence of proton-pump inhibitors

FREQ Procedure

Number of levels of variables

Variables Label Level Number

GROUP1 2

TCMCNTCT Category for Total Number of Drugs Other than Anticoagulant 3

Table : GROUP1 \* TCMCNTCT

GROUP1

TCMCNTCT(Category for Total Number of Drugs Other than Anticoagulant)

Power |

Percent |

Percent of rows

Percentage of column |0 to 4 or more|5 to 9 or more|10 or more|Total

|       | Bottom | Bottom |       |       |
|-------|--------|--------|-------|-------|
|       | +      | +      | +     | +     |
| 1     | 1407   | 7149   | 3239  | 11795 |
|       | 4.42   | 22.46  | 10.18 | 37.06 |
|       | 11.93  | 60.61  | 27.46 |       |
|       | 16.43  | 40.33  | 58.42 |       |
|       | +      | +      | +     | +     |
| 2     | 7154   | 10577  | 2305  | 20036 |
|       | 22.47  | 33.23  | 7.24  | 62.94 |
|       | 35.71  | 52.79  | 11.50 |       |
|       | 83.57  | 59.67  | 41.58 |       |
|       | +      | +      | +     | +     |
| Total | 8561   | 17726  | 5544  | 31831 |

26.90 55.69 17.42 100.00

Concomitant medications other than anticoagulants at the time of obtaining Table 2-5 consent, according to the presence or absence of proton-pump inhibitors

TTEST Procedure

Variables: TCMCNT (Total Number of Drugs Other than Anticoagulant)

GROUP1 N Mean Standard Deviation Standard Error Minimum Value Maximum Value

|            |        |        |        |        |        |         |
|------------|--------|--------|--------|--------|--------|---------|
| 1          | 11795  | 7.9060 | 3.0903 | 0.0285 | 1.0000 | 26.0000 |
| 2          | 20036  | 5.8874 | 2.9636 | 0.0209 | 0      | 27.0000 |
| Diff (1-2) | 2.0186 | 3.0112 | 0.0349 |        |        |         |

To the mean standard deviation

GROUP1 methods Mean 95% confidence limits standard deviation 95% confidence limits

|                          |        |        |        |        |        |        |
|--------------------------|--------|--------|--------|--------|--------|--------|
| 1                        |        | 7.9060 | 7.8502 | 7.9618 | 3.0903 | 3.0513 |
| 3.1302                   |        |        |        |        |        |        |
| 2                        |        | 5.8874 | 5.8463 | 5.9284 | 2.9636 | 2.9349 |
| 2.9929                   |        |        |        |        |        |        |
| Diff (1-2) Pooled        | 2.0186 | 1.9501 | 2.0871 | 3.0112 | 2.9880 | 3.0348 |
| Diff (1-2) Satterthwaite | 2.0186 | 1.9494 | 2.0879 |        |        |        |

Technique Dispersion degrees of freedom t-value Pr > |t|

Pooled Equal 31829 57.76 <. 0001

Satterthwaite Unequal 23898 57.14 <. 0001

Isodispersity

Technique Degree of Freedom of Numerators Degree of Freedom of the denominator F Value Pr > F

Folded F 11794 20035 1.09 <. 0001

Laboratory tests at the time of obtaining Table 2-6 consent, according to the presence or absence of proton-pump inhibitors

FREQ Procedure

|   |       | Cumulative           |                  |        |
|---|-------|----------------------|------------------|--------|
|   |       | Percent of ALL power | Percent of power |        |
| 1 | 32490 | 100.00               | 32490            | 100.00 |

Laboratory tests at the time of obtaining Table 2-6 consent, according to the presence or absence of proton-pump inhibitors

FREQ Procedure

Tables: ALL\* ACTYP

ALL

ACTYP(Type of AF)

Power |

Percent |

Percent of rows

Percent of column|Warfa| Total

|Phosphate|

| | |

+ +

1 | 8295 | 8295

| 100.00 | 100.00

| 100.00 |

| 100.00 |

+ +

Total 8295 8295

100.00 100.00



Laboratory tests at the time of obtaining Table 2-6 consent, according to the presence or absence of proton-pump inhibitors

Unique Subject Identifier=0001110010-0003

MEANS Procedure

Assay variable : PTINR\_VAL1 PT-INR Value

| N | Mean      | Standard Deviation | Minimum   | Maximum   |
|---|-----------|--------------------|-----------|-----------|
| 3 | 2.0366667 | 0.2542309          | 1.7600000 | 2.2600000 |

Unique Subject Identifier=0001110010-0004

Assay variable : PTINR\_VAL1 PT-INR Value

| N | Mean      | Standard Deviation | Minimum   | Maximum   |
|---|-----------|--------------------|-----------|-----------|
| 4 | 2.7500000 | 0.3389199          | 2.3000000 | 3.0700000 |

Unique Subject Identifier=0001110010-0005

Assay variable : PTINR\_VAL1 PT-INR Value

| N | Mean      | Standard Deviation | Minimum   | Maximum   |
|---|-----------|--------------------|-----------|-----------|
| 5 | 2.1760000 | 0.2298478          | 2.0100000 | 2.5600000 |

Unique Subject Identifier=0001110010-0015

Assay variable : PTINR\_VAL1 PT-INR Value

N Mean Standard Deviation Minimum Maximum

---

|   |           |           |           |           |
|---|-----------|-----------|-----------|-----------|
| 3 | 2.0866667 | 0.1006645 | 1.9800000 | 2.1800000 |
|---|-----------|-----------|-----------|-----------|

---

Laboratory tests at the time of obtaining Table 2-6 consent, according to the presence or absence of proton-pump inhibitors

Unique Subject Identifier=0001110010-0018

MEANS Procedure

Assay variable : PTINR\_VAL1 PT-INR Value

N Mean Standard Deviation Minimum Maximum

---

|   |           |           |           |           |
|---|-----------|-----------|-----------|-----------|
| 4 | 2.7475000 | 0.4163632 | 2.4500000 | 3.3500000 |
|---|-----------|-----------|-----------|-----------|

---

Unique Subject Identifier=0001110010-0027

Assay variable : PTINR\_VAL1 PT-INR Value

N Mean Standard Deviation Minimum Maximum

---

|   |           |           |           |           |
|---|-----------|-----------|-----------|-----------|
| 4 | 2.2725000 | 0.0665207 | 2.1900000 | 2.3400000 |
|---|-----------|-----------|-----------|-----------|

---

Unique Subject Identifier=0001110010-0032

Assay variable : PTINR\_VAL1 PT-INR Value

N Mean Standard Deviation Minimum Maximum

---

|   |           |           |           |           |
|---|-----------|-----------|-----------|-----------|
| 4 | 2.3300000 | 0.4302712 | 1.8600000 | 2.7700000 |
|---|-----------|-----------|-----------|-----------|

---

Unique Subject Identifier=0004110010-0007

Assay variable : PTINR\_VAL1 PT-INR Value

N Mean Standard Deviation Minimum Maximum

---

|   |           |           |           |           |
|---|-----------|-----------|-----------|-----------|
| 5 | 1.7880000 | 0.1658915 | 1.5600000 | 1.9300000 |
|---|-----------|-----------|-----------|-----------|

---

Laboratory tests at the time of obtaining Table 2-6 consent, according to the presence or absence of proton-pump inhibitors

Unique Subject Identifier=0004110010-0008

MEANS Procedure

Assay variable : PTINR\_VAL1 PT-INR Value

| N | Mean      | Standard Deviation | Minimum   | Maximum   |
|---|-----------|--------------------|-----------|-----------|
| 2 | 1.6800000 | 0.3535534          | 1.4300000 | 1.9300000 |

Unique Subject Identifier=0004110010-0009

Assay variable : PTINR\_VAL1 PT-INR Value

| N | Mean      | Standard Deviation | Minimum   | Maximum   |
|---|-----------|--------------------|-----------|-----------|
| 6 | 2.1000000 | 0.4030385          | 1.7400000 | 2.8000000 |

Unique Subject Identifier=0004110010-0010

Assay variable : PTINR\_VAL1 PT-INR Value

| N | Mean      | Standard Deviation | Minimum   | Maximum   |
|---|-----------|--------------------|-----------|-----------|
| 6 | 1.8166667 | 0.2108712          | 1.5500000 | 2.0100000 |

Unique Subject Identifier=0004110010-0011

Assay variable : PTINR\_VAL1 PT-INR Value

N Mean Standard Deviation Minimum Maximum

---

|   |           |           |           |           |
|---|-----------|-----------|-----------|-----------|
| 4 | 2.0425000 | 0.1662077 | 1.8600000 | 2.2200000 |
|---|-----------|-----------|-----------|-----------|

---

Laboratory tests at the time of obtaining Table 2-6 consent, according to the presence or absence of proton-pump inhibitors

Unique Subject Identifier=0004110010-0017

MEANS Procedure

Assay variable : PTINR\_VAL1 PT-INR Value

| N | Mean      | Standard Deviation | Minimum   | Maximum   |
|---|-----------|--------------------|-----------|-----------|
| 5 | 1.9240000 | 0.8984320          | 1.3900000 | 3.5100000 |

Unique Subject Identifier=0004110010-0021

Assay variable : PTINR\_VAL1 PT-INR Value

| N | Mean      | Standard Deviation | Minimum   | Maximum   |
|---|-----------|--------------------|-----------|-----------|
| 3 | 1.8900000 | 0.2233831          | 1.7100000 | 2.1400000 |

Unique Subject Identifier=0004110010-0022

Assay variable : PTINR\_VAL1 PT-INR Value

| N | Mean      | Standard Deviation | Minimum   | Maximum   |
|---|-----------|--------------------|-----------|-----------|
| 4 | 1.6350000 | 0.3158586          | 1.2900000 | 2.0100000 |

Unique Subject Identifier=0004110010-0026

Assay variable : PTINR\_VAL1 PT-INR Value

N Mean Standard Deviation Minimum Maximum

---

|   |           |           |           |           |
|---|-----------|-----------|-----------|-----------|
| 6 | 1.8650000 | 0.2438647 | 1.4900000 | 2.1800000 |
|---|-----------|-----------|-----------|-----------|

---



Laboratory tests at the time of obtaining Table 2-6 consent, according to the presence or absence of proton-pump inhibitors

Unique Subject Identifier=0004110010-0029

MEANS Procedure

Assay variable : PTINR\_VAL1 PT-INR Value

N Mean Standard Deviation Minimum Maximum

---

|   |           |           |           |           |
|---|-----------|-----------|-----------|-----------|
| 4 | 2.0075000 | 0.2956772 | 1.5900000 | 2.2800000 |
|---|-----------|-----------|-----------|-----------|

---

Unique Subject Identifier=0004110010-0031

Assay variable : PTINR\_VAL1 PT-INR Value

N Mean Standard Deviation Minimum Maximum

---

|   |           |           |           |           |
|---|-----------|-----------|-----------|-----------|
| 4 | 2.1100000 | 0.1602082 | 1.9300000 | 2.3000000 |
|---|-----------|-----------|-----------|-----------|

---

Unique Subject Identifier=0004110010-0032

Assay variable : PTINR\_VAL1 PT-INR Value

N Mean Standard Deviation Minimum Maximum

---

|   |           |           |           |           |
|---|-----------|-----------|-----------|-----------|
| 3 | 2.2100000 | 0.1900000 | 2.0200000 | 2.4000000 |
|---|-----------|-----------|-----------|-----------|

---

Unique Subject Identifier=0004110010-0033

Assay variable : PTINR\_VAL1 PT-INR Value

N Mean Standard Deviation Minimum Maximum

---

|   |          |           |          |          |
|---|----------|-----------|----------|----------|
| 4 | 2.140000 | 0.1019804 | 2.000000 | 2.240000 |
|---|----------|-----------|----------|----------|

---

Laboratory tests at the time of obtaining Table 2-6 consent, according to the presence or absence of proton-pump inhibitors

Unique Subject Identifier=0004110010-0034

MEANS Procedure

Assay variable : PTINR\_VAL1 PT-INR Value

N Mean Standard Deviation Minimum Maximum

---

|   |           |           |           |           |
|---|-----------|-----------|-----------|-----------|
| 4 | 1.9650000 | 0.1391642 | 1.8000000 | 2.1400000 |
|---|-----------|-----------|-----------|-----------|

---

Unique Subject Identifier=0004110010-0037

Assay variable : PTINR\_VAL1 PT-INR Value

N Mean Standard Deviation Minimum Maximum

---

|   |           |           |           |           |
|---|-----------|-----------|-----------|-----------|
| 3 | 2.4966667 | 0.5108163 | 2.0900000 | 3.0700000 |
|---|-----------|-----------|-----------|-----------|

---

Unique Subject Identifier=0004110010-0040

Assay variable : PTINR\_VAL1 PT-INR Value

N Mean Standard Deviation Minimum Maximum

---

|   |           |           |           |           |
|---|-----------|-----------|-----------|-----------|
| 4 | 2.3200000 | 0.2684524 | 1.9700000 | 2.6200000 |
|---|-----------|-----------|-----------|-----------|

---

Unique Subject Identifier=0004110010-0042

Assay variable : PTINR\_VAL1 PT-INR Value

N Mean Standard Deviation Minimum Maximum

---

|   |           |           |           |           |
|---|-----------|-----------|-----------|-----------|
| 4 | 1.7100000 | 0.1927001 | 1.4800000 | 1.9100000 |
|---|-----------|-----------|-----------|-----------|

---

Laboratory tests at the time of obtaining Table 2-6 consent, according to the presence or absence of proton-pump inhibitors

Unique Subject Identifier=0004110010-0043

MEANS Procedure

Assay variable : PTINR\_VAL1 PT-INR Value

N Mean Standard Deviation Minimum Maximum

---

|   |           |           |           |           |
|---|-----------|-----------|-----------|-----------|
| 3 | 2.5533333 | 0.0776745 | 2.4900000 | 2.6400000 |
|---|-----------|-----------|-----------|-----------|

---

Unique Subject Identifier=0004110010-0044

Assay variable : PTINR\_VAL1 PT-INR Value

N Mean Standard Deviation Minimum Maximum

---

|   |           |           |           |           |
|---|-----------|-----------|-----------|-----------|
| 3 | 2.5333333 | 0.1386843 | 2.3800000 | 2.6500000 |
|---|-----------|-----------|-----------|-----------|

---

Unique Subject Identifier=0004110010-0046

Assay variable : PTINR\_VAL1 PT-INR Value

N Mean Standard Deviation Minimum Maximum

---

|   |           |           |           |           |
|---|-----------|-----------|-----------|-----------|
| 3 | 2.4433333 | 0.5312564 | 1.8300000 | 2.7600000 |
|---|-----------|-----------|-----------|-----------|

---

Unique Subject Identifier=0004110010-0047

Assay variable : PTINR\_VAL1 PT-INR Value

N Mean Standard Deviation Minimum Maximum

---

|   |          |           |          |          |
|---|----------|-----------|----------|----------|
| 3 | 1.850000 | 0.3874274 | 1.490000 | 2.260000 |
|---|----------|-----------|----------|----------|

---

Laboratory tests at the time of obtaining Table 2-6 consent, according to the presence or absence of proton-pump inhibitors

Unique Subject Identifier=0004110010-0048

MEANS Procedure

Assay variable : PTINR\_VAL1 PT-INR Value

N Mean Standard Deviation Minimum Maximum

---

|   |           |           |           |           |
|---|-----------|-----------|-----------|-----------|
| 4 | 1.7050000 | 0.2266422 | 1.5400000 | 2.0400000 |
|---|-----------|-----------|-----------|-----------|

---

Unique Subject Identifier=0004110010-0049

Assay variable : PTINR\_VAL1 PT-INR Value

N Mean Standard Deviation Minimum Maximum

---

|   |           |           |           |           |
|---|-----------|-----------|-----------|-----------|
| 4 | 2.3000000 | 0.2121320 | 2.0500000 | 2.5000000 |
|---|-----------|-----------|-----------|-----------|

---

Unique Subject Identifier=0004110010-0051

Assay variable : PTINR\_VAL1 PT-INR Value

N Mean Standard Deviation Minimum Maximum

---

|   |           |           |           |           |
|---|-----------|-----------|-----------|-----------|
| 6 | 2.4366667 | 0.3922074 | 1.8300000 | 2.9100000 |
|---|-----------|-----------|-----------|-----------|

---

Unique Subject Identifier=0004110010-0052

Assay variable : PTINR\_VAL1 PT-INR Value

N Mean Standard Deviation Minimum Maximum

---

|   |           |           |           |           |
|---|-----------|-----------|-----------|-----------|
| 6 | 2.1983333 | 0.2008399 | 1.9600000 | 2.4600000 |
|---|-----------|-----------|-----------|-----------|

---



Laboratory tests at the time of obtaining Table 2-6 consent, according to the presence or absence of proton-pump inhibitors

Unique Subject Identifier=0004110010-0053

MEANS Procedure

Assay variable : PTINR\_VAL1 PT-INR Value

N Mean Standard Deviation Minimum Maximum

---

|   |           |           |           |           |
|---|-----------|-----------|-----------|-----------|
| 6 | 2.4883333 | 0.3756816 | 2.2400000 | 3.1700000 |
|---|-----------|-----------|-----------|-----------|

---

Unique Subject Identifier=0005010000-0003

Assay variable : PTINR\_VAL1 PT-INR Value

N Mean Standard Deviation Minimum Maximum

---

|   |           |           |           |           |
|---|-----------|-----------|-----------|-----------|
| 6 | 1.9066667 | 0.4583739 | 1.3500000 | 2.6800000 |
|---|-----------|-----------|-----------|-----------|

---

Unique Subject Identifier=0005010000-0007

Assay variable : PTINR\_VAL1 PT-INR Value

N Mean Standard Deviation Minimum Maximum

---

|   |           |           |           |           |
|---|-----------|-----------|-----------|-----------|
| 3 | 1.9800000 | 0.4900000 | 1.4900000 | 2.4700000 |
|---|-----------|-----------|-----------|-----------|

---

Unique Subject Identifier=0005010000-0012

Assay variable : PTINR\_VAL1 PT-INR Value

N Mean Standard Deviation Minimum Maximum

---

|   |           |           |           |           |
|---|-----------|-----------|-----------|-----------|
| 6 | 2.6266667 | 0.3273327 | 2.1800000 | 3.1700000 |
|---|-----------|-----------|-----------|-----------|

---

Laboratory tests at the time of obtaining Table 2-6 consent, according to the presence or absence of proton-pump inhibitors

Unique Subject Identifier=0005010000-0020

MEANS Procedure

Assay variable : PTINR\_VAL1 PT-INR Value

N Mean Standard Deviation Minimum Maximum

---

|   |           |           |           |           |
|---|-----------|-----------|-----------|-----------|
| 3 | 1.8400000 | 0.1216553 | 1.7000000 | 1.9200000 |
|---|-----------|-----------|-----------|-----------|

---

Unique Subject Identifier=0005010000-0022

Assay variable : PTINR\_VAL1 PT-INR Value

N Mean Standard Deviation Minimum Maximum

---

|   |           |           |           |           |
|---|-----------|-----------|-----------|-----------|
| 6 | 2.2233333 | 0.7559012 | 1.6600000 | 3.6100000 |
|---|-----------|-----------|-----------|-----------|

---

Unique Subject Identifier=0005010000-0028

Assay variable : PTINR\_VAL1 PT-INR Value

N Mean Standard Deviation Minimum Maximum

---

|   |           |           |           |           |
|---|-----------|-----------|-----------|-----------|
| 3 | 1.9700000 | 0.6065476 | 1.6000000 | 2.6700000 |
|---|-----------|-----------|-----------|-----------|

---

Unique Subject Identifier=0005010000-0034

Assay variable : PTINR\_VAL1 PT-INR Value

N Mean Standard Deviation Minimum Maximum

---

|   |           |           |           |           |
|---|-----------|-----------|-----------|-----------|
| 6 | 1.2433333 | 0.0997330 | 1.1400000 | 1.4000000 |
|---|-----------|-----------|-----------|-----------|

---

Laboratory tests at the time of obtaining Table 2-6 consent, according to the presence or absence of proton-pump inhibitors

Unique Subject Identifier=0005010000-0036

MEANS Procedure

Assay variable : PTINR\_VAL1 PT-INR Value

| N | Mean      | Standard Deviation | Minimum   | Maximum   |
|---|-----------|--------------------|-----------|-----------|
| 3 | 2.1866667 | 0.1721434          | 1.9900000 | 2.3100000 |

Unique Subject Identifier=0005010000-0045

Assay variable : PTINR\_VAL1 PT-INR Value

| N | Mean      | Standard Deviation | Minimum   | Maximum   |
|---|-----------|--------------------|-----------|-----------|
| 4 | 1.8525000 | 0.2305609          | 1.5800000 | 2.1400000 |

Unique Subject Identifier=0005010000-0050

Assay variable : PTINR\_VAL1 PT-INR Value

| N | Mean      | Standard Deviation | Minimum   | Maximum   |
|---|-----------|--------------------|-----------|-----------|
| 6 | 1.7866667 | 0.2182353          | 1.5600000 | 2.1200000 |

Unique Subject Identifier=0005010000-0052

Assay variable : PTINR\_VAL1 PT-INR Value

N Mean Standard Deviation Minimum Maximum

---

|   |           |           |           |           |
|---|-----------|-----------|-----------|-----------|
| 2 | 1.0900000 | 0.0707107 | 1.0400000 | 1.1400000 |
|---|-----------|-----------|-----------|-----------|

---

Laboratory tests at the time of obtaining Table 2-6 consent, according to the presence or absence of proton-pump inhibitors

Unique Subject Identifier=0005010000-0053

MEANS Procedure

Assay variable : PTINR\_VAL1 PT-INR Value

N Mean Standard Deviation Minimum Maximum

---

|   |           |           |           |           |
|---|-----------|-----------|-----------|-----------|
| 6 | 1.9983333 | 0.3748822 | 1.4700000 | 2.5400000 |
|---|-----------|-----------|-----------|-----------|

---

Unique Subject Identifier=0005010000-0058

Assay variable : PTINR\_VAL1 PT-INR Value

N Mean Standard Deviation Minimum Maximum

---

|   |           |           |           |           |
|---|-----------|-----------|-----------|-----------|
| 2 | 1.6950000 | 0.1484924 | 1.5900000 | 1.8000000 |
|---|-----------|-----------|-----------|-----------|

---

Unique Subject Identifier=0006100000-0006

Assay variable : PTINR\_VAL1 PT-INR Value

N Mean Standard Deviation Minimum Maximum

---

|   |           |           |           |           |
|---|-----------|-----------|-----------|-----------|
| 3 | 2.3633333 | 0.2098412 | 2.2000000 | 2.6000000 |
|---|-----------|-----------|-----------|-----------|

---

Unique Subject Identifier=0006100000-0012

Assay variable : PTINR\_VAL1 PT-INR Value

N Mean Standard Deviation Minimum Maximum

---

|   |           |           |           |           |
|---|-----------|-----------|-----------|-----------|
| 2 | 1.9450000 | 0.3181981 | 1.7200000 | 2.1700000 |
|---|-----------|-----------|-----------|-----------|

---



Laboratory tests at the time of obtaining Table 2-6 consent, according to the presence or absence of proton-pump inhibitors

Unique Subject Identifier=0006100000-0014

MEANS Procedure

Assay variable : PTINR\_VAL1 PT-INR Value

N Mean Standard Deviation Minimum Maximum

---

|   |           |           |           |           |
|---|-----------|-----------|-----------|-----------|
| 4 | 2.1925000 | 0.0713559 | 2.1300000 | 2.2900000 |
|---|-----------|-----------|-----------|-----------|

---

Unique Subject Identifier=0006100000-0016

Assay variable : PTINR\_VAL1 PT-INR Value

N Mean Standard Deviation Minimum Maximum

---

|   |           |           |           |           |
|---|-----------|-----------|-----------|-----------|
| 3 | 1.9400000 | 1.0544667 | 1.0900000 | 3.1200000 |
|---|-----------|-----------|-----------|-----------|

---

Unique Subject Identifier=0006100000-0021

Assay variable : PTINR\_VAL1 PT-INR Value

N Mean Standard Deviation Minimum Maximum

---

|   |           |  |           |           |
|---|-----------|--|-----------|-----------|
| 1 | 1.5100000 |  | 1.5100000 | 1.5100000 |
|---|-----------|--|-----------|-----------|

---

Unique Subject Identifier=0006100000-0032

Assay variable : PTINR\_VAL1 PT-INR Value

N Mean Standard Deviation Minimum Maximum

---

|   |           |           |           |           |
|---|-----------|-----------|-----------|-----------|
| 6 | 2.3083333 | 0.3635611 | 1.8600000 | 2.7700000 |
|---|-----------|-----------|-----------|-----------|

---

Laboratory tests at the time of obtaining Table 2-6 consent, according to the presence or absence of proton-pump inhibitors

Unique Subject Identifier=0006100000-0034

MEANS Procedure

Assay variable : PTINR\_VAL1 PT-INR Value

| N | Mean      | Standard Deviation | Minimum   | Maximum   |
|---|-----------|--------------------|-----------|-----------|
| 1 | 2.8900000 |                    | 2.8900000 | 2.8900000 |

Unique Subject Identifier=0006100000-0036

Assay variable : PTINR\_VAL1 PT-INR Value

| N | Mean      | Standard Deviation | Minimum   | Maximum   |
|---|-----------|--------------------|-----------|-----------|
| 3 | 1.7233333 | 0.6992377          | 1.2900000 | 2.5300000 |

Unique Subject Identifier=0006100000-0050

Assay variable : PTINR\_VAL1 PT-INR Value

| N | Mean      | Standard Deviation | Minimum   | Maximum   |
|---|-----------|--------------------|-----------|-----------|
| 4 | 2.6000000 | 0.2682039          | 2.3800000 | 2.9500000 |

Unique Subject Identifier=0006100000-0054

Assay variable : PTINR\_VAL1 PT-INR Value

N Mean Standard Deviation Minimum Maximum

---

|   |           |           |           |           |
|---|-----------|-----------|-----------|-----------|
| 5 | 1.7740000 | 0.1986957 | 1.5800000 | 2.0200000 |
|---|-----------|-----------|-----------|-----------|

---

Laboratory tests at the time of obtaining Table 2-6 consent, according to the presence or absence of proton-pump inhibitors

Unique Subject Identifier=0006100000-0055

MEANS Procedure

Assay variable : PTINR\_VAL1 PT-INR Value

N Mean Standard Deviation Minimum Maximum

---

|   |           |           |           |           |
|---|-----------|-----------|-----------|-----------|
| 4 | 1.8725000 | 0.1350000 | 1.6800000 | 1.9800000 |
|---|-----------|-----------|-----------|-----------|

---

Unique Subject Identifier=0006100000-0056

Assay variable : PTINR\_VAL1 PT-INR Value

N Mean Standard Deviation Minimum Maximum

---

|   |           |           |           |           |
|---|-----------|-----------|-----------|-----------|
| 3 | 1.7166667 | 0.0986577 | 1.6500000 | 1.8300000 |
|---|-----------|-----------|-----------|-----------|

---

Unique Subject Identifier=0006100000-0057

Assay variable : PTINR\_VAL1 PT-INR Value

N Mean Standard Deviation Minimum Maximum

---

|   |           |           |           |           |
|---|-----------|-----------|-----------|-----------|
| 3 | 2.4100000 | 0.2206808 | 2.2000000 | 2.6400000 |
|---|-----------|-----------|-----------|-----------|

---

Unique Subject Identifier=0006100000-0062

Assay variable : PTINR\_VAL1 PT-INR Value

N Mean Standard Deviation Minimum Maximum

---

|   |           |           |           |           |
|---|-----------|-----------|-----------|-----------|
| 6 | 1.9066667 | 0.3507516 | 1.7100000 | 2.6200000 |
|---|-----------|-----------|-----------|-----------|

---

Laboratory tests at the time of obtaining Table 2-6 consent, according to the presence or absence of proton-pump inhibitors

Unique Subject Identifier=0006100000-0064

MEANS Procedure

Assay variable : PTINR\_VAL1 PT-INR Value

N Mean Standard Deviation Minimum Maximum

---

|   |           |           |           |           |
|---|-----------|-----------|-----------|-----------|
| 4 | 1.7800000 | 0.1888562 | 1.5600000 | 1.9700000 |
|---|-----------|-----------|-----------|-----------|

---

Unique Subject Identifier=0006100000-0065

Assay variable : PTINR\_VAL1 PT-INR Value

N Mean Standard Deviation Minimum Maximum

---

|   |           |           |           |           |
|---|-----------|-----------|-----------|-----------|
| 6 | 1.8983333 | 1.0817470 | 1.2700000 | 4.0900000 |
|---|-----------|-----------|-----------|-----------|

---

Unique Subject Identifier=0006100000-0068

Assay variable : PTINR\_VAL1 PT-INR Value

N Mean Standard Deviation Minimum Maximum

---

|   |           |  |           |           |
|---|-----------|--|-----------|-----------|
| 1 | 1.7700000 |  | 1.7700000 | 1.7700000 |
|---|-----------|--|-----------|-----------|

---

Unique Subject Identifier=0006100000-0069

Assay variable : PTINR\_VAL1 PT-INR Value

N Mean Standard Deviation Minimum Maximum

---

|   |           |           |           |           |
|---|-----------|-----------|-----------|-----------|
| 4 | 2.0075000 | 0.4908751 | 1.7100000 | 2.7400000 |
|---|-----------|-----------|-----------|-----------|

---



Laboratory tests at the time of obtaining Table 2-6 consent, according to the presence or absence of proton-pump inhibitors

Unique Subject Identifier=0007011000-0001

MEANS Procedure

Assay variable : PTINR\_VAL1 PT-INR Value

N Mean Standard Deviation Minimum Maximum

---

|   |           |           |           |           |
|---|-----------|-----------|-----------|-----------|
| 3 | 1.8966667 | 0.2950141 | 1.6000000 | 2.1900000 |
|---|-----------|-----------|-----------|-----------|

---

Unique Subject Identifier=0007011000-0002

Assay variable : PTINR\_VAL1 PT-INR Value

N Mean Standard Deviation Minimum Maximum

---

|   |           |           |           |           |
|---|-----------|-----------|-----------|-----------|
| 3 | 1.9133333 | 0.8891194 | 1.4000000 | 2.9400000 |
|---|-----------|-----------|-----------|-----------|

---

Unique Subject Identifier=0007011000-0004

Assay variable : PTINR\_VAL1 PT-INR Value

N Mean Standard Deviation Minimum Maximum

---

|   |           |           |           |           |
|---|-----------|-----------|-----------|-----------|
| 4 | 1.8250000 | 0.2629956 | 1.6000000 | 2.1000000 |
|---|-----------|-----------|-----------|-----------|

---

Unique Subject Identifier=0007011000-0005

Assay variable : PTINR\_VAL1 PT-INR Value

N Mean Standard Deviation Minimum Maximum

---

|   |          |           |          |          |
|---|----------|-----------|----------|----------|
| 5 | 2.090000 | 0.3537655 | 1.730000 | 2.470000 |
|---|----------|-----------|----------|----------|

---

Laboratory tests at the time of obtaining Table 2-6 consent, according to the presence or absence of proton-pump inhibitors

Unique Subject Identifier=0007011000-0011

MEANS Procedure

Assay variable : PTINR\_VAL1 PT-INR Value

| N | Mean      | Standard Deviation | Minimum   | Maximum   |
|---|-----------|--------------------|-----------|-----------|
| 3 | 2.5433333 | 0.1193035          | 2.4600000 | 2.6800000 |

Unique Subject Identifier=0007011000-0012

Assay variable : PTINR\_VAL1 PT-INR Value

| N | Mean      | Standard Deviation | Minimum   | Maximum   |
|---|-----------|--------------------|-----------|-----------|
| 5 | 1.7060000 | 0.0861974          | 1.6100000 | 1.8200000 |

Unique Subject Identifier=0007011000-0014

Assay variable : PTINR\_VAL1 PT-INR Value

| N | Mean      | Standard Deviation | Minimum   | Maximum   |
|---|-----------|--------------------|-----------|-----------|
| 3 | 1.8666667 | 0.0404145          | 1.8200000 | 1.8900000 |

Unique Subject Identifier=0007011000-0022

Assay variable : PTINR\_VAL1 PT-INR Value

N Mean Standard Deviation Minimum Maximum

---

|   |           |           |           |           |
|---|-----------|-----------|-----------|-----------|
| 6 | 2.0483333 | 0.5314665 | 1.3000000 | 2.8300000 |
|---|-----------|-----------|-----------|-----------|

---

Laboratory tests at the time of obtaining Table 2-6 consent, according to the presence or absence of proton-pump inhibitors

Unique Subject Identifier=0007011000-0028

MEANS Procedure

Assay variable : PTINR\_VAL1 PT-INR Value

| N | Mean      | Standard Deviation | Minimum   | Maximum   |
|---|-----------|--------------------|-----------|-----------|
| 3 | 2.0833333 | 0.5838093          | 1.4500000 | 2.6000000 |

Unique Subject Identifier=0007011000-0031

Assay variable : PTINR\_VAL1 PT-INR Value

| N | Mean      | Standard Deviation | Minimum   | Maximum   |
|---|-----------|--------------------|-----------|-----------|
| 3 | 1.9800000 | 0.4073082          | 1.5500000 | 2.3600000 |

Unique Subject Identifier=0007011000-0034

Assay variable : PTINR\_VAL1 PT-INR Value

| N | Mean      | Standard Deviation | Minimum   | Maximum   |
|---|-----------|--------------------|-----------|-----------|
| 4 | 1.7350000 | 0.2042058          | 1.5700000 | 2.0100000 |

Unique Subject Identifier=0007011000-0037

Assay variable : PTINR\_VAL1 PT-INR Value

N Mean Standard Deviation Minimum Maximum

---

|   |           |           |           |           |
|---|-----------|-----------|-----------|-----------|
| 3 | 2.2366667 | 0.6185736 | 1.5300000 | 2.6800000 |
|---|-----------|-----------|-----------|-----------|

---

Laboratory tests at the time of obtaining Table 2-6 consent, according to the presence or absence of proton-pump inhibitors

Unique Subject Identifier=0007011000-0042

MEANS Procedure

Assay variable : PTINR\_VAL1 PT-INR Value

| N | Mean      | Standard Deviation | Minimum   | Maximum   |
|---|-----------|--------------------|-----------|-----------|
| 1 | 1.7900000 |                    | 1.7900000 | 1.7900000 |

Unique Subject Identifier=0007011000-0043

Assay variable : PTINR\_VAL1 PT-INR Value

| N | Mean      | Standard Deviation | Minimum   | Maximum   |
|---|-----------|--------------------|-----------|-----------|
| 3 | 1.6100000 | 0.1014889          | 1.5000000 | 1.7000000 |

Unique Subject Identifier=0007011000-0048

Assay variable : PTINR\_VAL1 PT-INR Value

| N | Mean      | Standard Deviation | Minimum   | Maximum   |
|---|-----------|--------------------|-----------|-----------|
| 3 | 1.7733333 | 0.0945163          | 1.7000000 | 1.8800000 |

Unique Subject Identifier=0007011000-0053

Assay variable : PTINR\_VAL1 PT-INR Value

N Mean Standard Deviation Minimum Maximum

---

|   |           |           |           |           |
|---|-----------|-----------|-----------|-----------|
| 3 | 1.8866667 | 0.0230940 | 1.8600000 | 1.9000000 |
|---|-----------|-----------|-----------|-----------|

---



Laboratory tests at the time of obtaining Table 2-6 consent, according to the presence or absence of proton-pump inhibitors

Unique Subject Identifier=0007011000-0057

MEANS Procedure

Assay variable : PTINR\_VAL1 PT-INR Value

N Mean Standard Deviation Minimum Maximum

---

|   |           |           |           |           |
|---|-----------|-----------|-----------|-----------|
| 4 | 2.0075000 | 0.1024288 | 1.9400000 | 2.1600000 |
|---|-----------|-----------|-----------|-----------|

---

Unique Subject Identifier=0007011000-0058

Assay variable : PTINR\_VAL1 PT-INR Value

N Mean Standard Deviation Minimum Maximum

---

|   |           |           |           |           |
|---|-----------|-----------|-----------|-----------|
| 4 | 2.1775000 | 0.2439091 | 1.8400000 | 2.4000000 |
|---|-----------|-----------|-----------|-----------|

---

Unique Subject Identifier=0007011000-0067

Assay variable : PTINR\_VAL1 PT-INR Value

N Mean Standard Deviation Minimum Maximum

---

|   |           |  |           |           |
|---|-----------|--|-----------|-----------|
| 1 | 1.2900000 |  | 1.2900000 | 1.2900000 |
|---|-----------|--|-----------|-----------|

---

Unique Subject Identifier=0007011000-0070

Assay variable : PTINR\_VAL1 PT-INR Value

N Mean Standard Deviation Minimum Maximum

---

|   |           |           |           |           |
|---|-----------|-----------|-----------|-----------|
| 2 | 3.1950000 | 1.1101576 | 2.4100000 | 3.9800000 |
|---|-----------|-----------|-----------|-----------|

---

Laboratory tests at the time of obtaining Table 2-6 consent, according to the presence or absence of proton-pump inhibitors

Unique Subject Identifier=0007011000-0072

MEANS Procedure

Assay variable : PTINR\_VAL1 PT-INR Value

| N | Mean      | Standard Deviation | Minimum   | Maximum   |
|---|-----------|--------------------|-----------|-----------|
| 2 | 2.2050000 | 0.4454773          | 1.8900000 | 2.5200000 |

Unique Subject Identifier=0007011000-0075

Assay variable : PTINR\_VAL1 PT-INR Value

| N | Mean      | Standard Deviation | Minimum   | Maximum   |
|---|-----------|--------------------|-----------|-----------|
| 6 | 1.9633333 | 0.6006219          | 1.4100000 | 2.8300000 |

Unique Subject Identifier=0007011000-0078

Assay variable : PTINR\_VAL1 PT-INR Value

| N | Mean      | Standard Deviation | Minimum   | Maximum   |
|---|-----------|--------------------|-----------|-----------|
| 4 | 1.7925000 | 0.1004573          | 1.7000000 | 1.9300000 |

Unique Subject Identifier=0007011000-0079

Assay variable : PTINR\_VAL1 PT-INR Value

N Mean Standard Deviation Minimum Maximum

---

|   |           |           |           |           |
|---|-----------|-----------|-----------|-----------|
| 2 | 2.2000000 | 0.4242641 | 1.9000000 | 2.5000000 |
|---|-----------|-----------|-----------|-----------|

---

Laboratory tests at the time of obtaining Table 2-6 consent, according to the presence or absence of proton-pump inhibitors

Unique Subject Identifier=0007011000-0094

MEANS Procedure

Assay variable : PTINR\_VAL1 PT-INR Value

N Mean Standard Deviation Minimum Maximum

---

|   |           |           |           |           |
|---|-----------|-----------|-----------|-----------|
| 4 | 1.6375000 | 0.4458980 | 1.0400000 | 2.1200000 |
|---|-----------|-----------|-----------|-----------|

---

Unique Subject Identifier=0007011000-0095

Assay variable : PTINR\_VAL1 PT-INR Value

N Mean Standard Deviation Minimum Maximum

---

|   |           |           |           |           |
|---|-----------|-----------|-----------|-----------|
| 5 | 1.1160000 | 0.0545894 | 1.0500000 | 1.1800000 |
|---|-----------|-----------|-----------|-----------|

---

Unique Subject Identifier=0007011000-0097

Assay variable : PTINR\_VAL1 PT-INR Value

N Mean Standard Deviation Minimum Maximum

---

|   |           |           |           |           |
|---|-----------|-----------|-----------|-----------|
| 6 | 1.6150000 | 0.1943965 | 1.3700000 | 1.9600000 |
|---|-----------|-----------|-----------|-----------|

---

Unique Subject Identifier=0007011000-0100

Assay variable : PTINR\_VAL1 PT-INR Value

N Mean Standard Deviation Minimum Maximum

---

|   |           |           |           |           |
|---|-----------|-----------|-----------|-----------|
| 4 | 2.0300000 | 0.6737457 | 1.3000000 | 2.7700000 |
|---|-----------|-----------|-----------|-----------|

---

Laboratory tests at the time of obtaining Table 2-6 consent, according to the presence or absence of proton-pump inhibitors

Unique Subject Identifier=0007011000-0102

MEANS Procedure

Assay variable : PTINR\_VAL1 PT-INR Value

N Mean Standard Deviation Minimum Maximum

---

|   |           |  |           |           |
|---|-----------|--|-----------|-----------|
| 1 | 1.6600000 |  | 1.6600000 | 1.6600000 |
|---|-----------|--|-----------|-----------|

---

Unique Subject Identifier=0007011000-0112

Assay variable : PTINR\_VAL1 PT-INR Value

N Mean Standard Deviation Minimum Maximum

---

|   |           |           |           |           |
|---|-----------|-----------|-----------|-----------|
| 3 | 2.1133333 | 0.5084617 | 1.8000000 | 2.7000000 |
|---|-----------|-----------|-----------|-----------|

---

Unique Subject Identifier=0007011000-0116

Assay variable : PTINR\_VAL1 PT-INR Value

N Mean Standard Deviation Minimum Maximum

---

|   |           |           |           |           |
|---|-----------|-----------|-----------|-----------|
| 3 | 2.0733333 | 0.5900282 | 1.4000000 | 2.5000000 |
|---|-----------|-----------|-----------|-----------|

---

Unique Subject Identifier=0007011000-0118

Assay variable : PTINR\_VAL1 PT-INR Value

N Mean Standard Deviation Minimum Maximum

---

|   |           |           |           |           |
|---|-----------|-----------|-----------|-----------|
| 3 | 1.5900000 | 0.3000000 | 1.2900000 | 1.8900000 |
|---|-----------|-----------|-----------|-----------|

---



Laboratory tests at the time of obtaining Table 2-6 consent, according to the presence or absence of proton-pump inhibitors

Unique Subject Identifier=0007011000-0120

MEANS Procedure

Assay variable : PTINR\_VAL1 PT-INR Value

| N | Mean      | Standard Deviation | Minimum   | Maximum   |
|---|-----------|--------------------|-----------|-----------|
| 3 | 1.9666667 | 0.1527525          | 1.8000000 | 2.1000000 |

Unique Subject Identifier=0007011000-0121

Assay variable : PTINR\_VAL1 PT-INR Value

| N | Mean      | Standard Deviation | Minimum   | Maximum   |
|---|-----------|--------------------|-----------|-----------|
| 3 | 2.1766667 | 0.5600298          | 1.5300000 | 2.5000000 |

Unique Subject Identifier=0007011000-0122

Assay variable : PTINR\_VAL1 PT-INR Value

| N | Mean      | Standard Deviation | Minimum   | Maximum   |
|---|-----------|--------------------|-----------|-----------|
| 6 | 1.7816667 | 0.3644402          | 1.2000000 | 2.2000000 |

Unique Subject Identifier=0007011000-0130

Assay variable : PTINR\_VAL1 PT-INR Value

N Mean Standard Deviation Minimum Maximum

---

|   |           |  |           |           |
|---|-----------|--|-----------|-----------|
| 1 | 1.7600000 |  | 1.7600000 | 1.7600000 |
|---|-----------|--|-----------|-----------|

---

Laboratory tests at the time of obtaining Table 2-6 consent, according to the presence or absence of proton-pump inhibitors

Unique Subject Identifier=0007011000-0135

MEANS Procedure

Assay variable : PTINR\_VAL1 PT-INR Value

N Mean Standard Deviation Minimum Maximum

---

|   |           |           |           |           |
|---|-----------|-----------|-----------|-----------|
| 5 | 2.1000000 | 0.4484417 | 1.5700000 | 2.8100000 |
|---|-----------|-----------|-----------|-----------|

---

Unique Subject Identifier=0007011000-0137

Assay variable : PTINR\_VAL1 PT-INR Value

N Mean Standard Deviation Minimum Maximum

---

|   |           |           |           |           |
|---|-----------|-----------|-----------|-----------|
| 3 | 1.3900000 | 0.0781025 | 1.3400000 | 1.4800000 |
|---|-----------|-----------|-----------|-----------|

---

Unique Subject Identifier=0007011000-0139

Assay variable : PTINR\_VAL1 PT-INR Value

N Mean Standard Deviation Minimum Maximum

---

|   |           |           |           |           |
|---|-----------|-----------|-----------|-----------|
| 3 | 2.9266667 | 0.2052641 | 2.7000000 | 3.1000000 |
|---|-----------|-----------|-----------|-----------|

---

Unique Subject Identifier=0008000110-0001

Assay variable : PTINR\_VAL1 PT-INR Value

N Mean Standard Deviation Minimum Maximum

---

|   |          |  |          |          |
|---|----------|--|----------|----------|
| 1 | 2.280000 |  | 2.280000 | 2.280000 |
|---|----------|--|----------|----------|

---

Laboratory tests at the time of obtaining Table 2-6 consent, according to the presence or absence of proton-pump inhibitors

Unique Subject Identifier=0008000110-0007

MEANS Procedure

Assay variable : PTINR\_VAL1 PT-INR Value

N Mean Standard Deviation Minimum Maximum

---

|   |           |           |           |           |
|---|-----------|-----------|-----------|-----------|
| 6 | 1.9166667 | 0.3415650 | 1.3700000 | 2.3000000 |
|---|-----------|-----------|-----------|-----------|

---

Unique Subject Identifier=0008000110-0016

Assay variable : PTINR\_VAL1 PT-INR Value

N Mean Standard Deviation Minimum Maximum

---

|   |           |           |           |           |
|---|-----------|-----------|-----------|-----------|
| 4 | 1.8175000 | 0.2196019 | 1.5600000 | 2.0100000 |
|---|-----------|-----------|-----------|-----------|

---

Unique Subject Identifier=0009010000-0002

Assay variable : PTINR\_VAL1 PT-INR Value

N Mean Standard Deviation Minimum Maximum

---

|   |           |           |           |           |
|---|-----------|-----------|-----------|-----------|
| 4 | 2.0575000 | 0.1802544 | 1.8400000 | 2.2700000 |
|---|-----------|-----------|-----------|-----------|

---

Unique Subject Identifier=0009010000-0004

Assay variable : PTINR\_VAL1 PT-INR Value

N Mean Standard Deviation Minimum Maximum

---

|   |           |           |           |           |
|---|-----------|-----------|-----------|-----------|
| 3 | 2.0366667 | 0.1985783 | 1.8800000 | 2.2600000 |
|---|-----------|-----------|-----------|-----------|

---

Laboratory tests at the time of obtaining Table 2-6 consent, according to the presence or absence of proton-pump inhibitors

Unique Subject Identifier=0009010000-0006

MEANS Procedure

Assay variable : PTINR\_VAL1 PT-INR Value

N Mean Standard Deviation Minimum Maximum

---

|   |           |           |           |           |
|---|-----------|-----------|-----------|-----------|
| 6 | 1.6366667 | 0.0915787 | 1.5500000 | 1.7500000 |
|---|-----------|-----------|-----------|-----------|

---

Unique Subject Identifier=0009010000-0008

Assay variable : PTINR\_VAL1 PT-INR Value

N Mean Standard Deviation Minimum Maximum

---

|   |           |           |           |           |
|---|-----------|-----------|-----------|-----------|
| 2 | 2.4600000 | 0.1131371 | 2.3800000 | 2.5400000 |
|---|-----------|-----------|-----------|-----------|

---

Unique Subject Identifier=0009010000-0010

Assay variable : PTINR\_VAL1 PT-INR Value

N Mean Standard Deviation Minimum Maximum

---

|   |           |           |           |           |
|---|-----------|-----------|-----------|-----------|
| 2 | 2.1800000 | 0.0282843 | 2.1600000 | 2.2000000 |
|---|-----------|-----------|-----------|-----------|

---

Unique Subject Identifier=0009010000-0013

Assay variable : PTINR\_VAL1 PT-INR Value

N Mean Standard Deviation Minimum Maximum

---

|   |           |           |           |           |
|---|-----------|-----------|-----------|-----------|
| 3 | 2.4933333 | 0.3326159 | 2.2400000 | 2.8700000 |
|---|-----------|-----------|-----------|-----------|

---



Laboratory tests at the time of obtaining Table 2-6 consent, according to the presence or absence of proton-pump inhibitors

Unique Subject Identifier=0009010000-0018

MEANS Procedure

Assay variable : PTINR\_VAL1 PT-INR Value

N Mean Standard Deviation Minimum Maximum

---

|   |           |           |           |           |
|---|-----------|-----------|-----------|-----------|
| 6 | 2.0583333 | 0.2135806 | 1.7500000 | 2.3100000 |
|---|-----------|-----------|-----------|-----------|

---

Unique Subject Identifier=0009010000-0019

Assay variable : PTINR\_VAL1 PT-INR Value

N Mean Standard Deviation Minimum Maximum

---

|   |           |           |           |           |
|---|-----------|-----------|-----------|-----------|
| 5 | 2.4300000 | 0.5772781 | 1.9300000 | 3.4200000 |
|---|-----------|-----------|-----------|-----------|

---

Unique Subject Identifier=0009010000-0021

Assay variable : PTINR\_VAL1 PT-INR Value

N Mean Standard Deviation Minimum Maximum

---

|   |           |           |           |           |
|---|-----------|-----------|-----------|-----------|
| 6 | 1.8750000 | 0.5326443 | 1.1600000 | 2.7900000 |
|---|-----------|-----------|-----------|-----------|

---

Unique Subject Identifier=0009010000-0024

Assay variable : PTINR\_VAL1 PT-INR Value

N Mean Standard Deviation Minimum Maximum

---

|   |          |          |          |          |
|---|----------|----------|----------|----------|
| 6 | 2.060000 | 0.193083 | 1.710000 | 2.270000 |
|---|----------|----------|----------|----------|

---

Laboratory tests at the time of obtaining Table 2-6 consent, according to the presence or absence of proton-pump inhibitors

Unique Subject Identifier=0009010000-0029

MEANS Procedure

Assay variable : PTINR\_VAL1 PT-INR Value

| N | Mean      | Standard Deviation | Minimum   | Maximum   |
|---|-----------|--------------------|-----------|-----------|
| 5 | 2.8740000 | 0.5623433          | 2.3800000 | 3.5500000 |

Unique Subject Identifier=0009010000-0032

Assay variable : PTINR\_VAL1 PT-INR Value

| N | Mean      | Standard Deviation | Minimum   | Maximum   |
|---|-----------|--------------------|-----------|-----------|
| 4 | 1.7675000 | 0.1362290          | 1.6300000 | 1.9500000 |

Unique Subject Identifier=0009010000-0033

Assay variable : PTINR\_VAL1 PT-INR Value

| N | Mean      | Standard Deviation | Minimum   | Maximum   |
|---|-----------|--------------------|-----------|-----------|
| 3 | 2.3200000 | 0.0264575          | 2.2900000 | 2.3400000 |

Unique Subject Identifier=0009010000-0036

Assay variable : PTINR\_VAL1 PT-INR Value

N Mean Standard Deviation Minimum Maximum

---

|   |           |           |           |           |
|---|-----------|-----------|-----------|-----------|
| 3 | 2.3766667 | 0.4796179 | 1.9400000 | 2.8900000 |
|---|-----------|-----------|-----------|-----------|

---

Laboratory tests at the time of obtaining Table 2-6 consent, according to the presence or absence of proton-pump inhibitors

Unique Subject Identifier=0009010000-0037

MEANS Procedure

Assay variable : PTINR\_VAL1 PT-INR Value

N Mean Standard Deviation Minimum Maximum

---

|   |           |           |           |           |
|---|-----------|-----------|-----------|-----------|
| 3 | 1.6200000 | 0.1664332 | 1.4300000 | 1.7400000 |
|---|-----------|-----------|-----------|-----------|

---

Unique Subject Identifier=0009010000-0039

Assay variable : PTINR\_VAL1 PT-INR Value

N Mean Standard Deviation Minimum Maximum

---

|   |           |           |           |           |
|---|-----------|-----------|-----------|-----------|
| 3 | 1.7366667 | 0.1357694 | 1.5800000 | 1.8200000 |
|---|-----------|-----------|-----------|-----------|

---

Unique Subject Identifier=0009010000-0041

Assay variable : PTINR\_VAL1 PT-INR Value

N Mean Standard Deviation Minimum Maximum

---

|   |           |           |           |           |
|---|-----------|-----------|-----------|-----------|
| 3 | 1.5933333 | 0.0723418 | 1.5100000 | 1.6400000 |
|---|-----------|-----------|-----------|-----------|

---

Unique Subject Identifier=0009010000-0043

Assay variable : PTINR\_VAL1 PT-INR Value

N Mean Standard Deviation Minimum Maximum

---

|   |           |           |           |           |
|---|-----------|-----------|-----------|-----------|
| 2 | 2.5200000 | 0.4525483 | 2.2000000 | 2.8400000 |
|---|-----------|-----------|-----------|-----------|

---

Laboratory tests at the time of obtaining Table 2-6 consent, according to the presence or absence of proton-pump inhibitors

Unique Subject Identifier=0009010000-0044

MEANS Procedure

Assay variable : PTINR\_VAL1 PT-INR Value

N Mean Standard Deviation Minimum Maximum

---

|   |           |           |           |           |
|---|-----------|-----------|-----------|-----------|
| 2 | 2.7550000 | 0.4737615 | 2.4200000 | 3.0900000 |
|---|-----------|-----------|-----------|-----------|

---

Unique Subject Identifier=0009010000-0046

Assay variable : PTINR\_VAL1 PT-INR Value

N Mean Standard Deviation Minimum Maximum

---

|   |           |           |           |           |
|---|-----------|-----------|-----------|-----------|
| 3 | 2.1500000 | 0.4313931 | 1.7000000 | 2.5600000 |
|---|-----------|-----------|-----------|-----------|

---

Unique Subject Identifier=0009010000-0047

Assay variable : PTINR\_VAL1 PT-INR Value

N Mean Standard Deviation Minimum Maximum

---

|   |           |           |           |           |
|---|-----------|-----------|-----------|-----------|
| 3 | 2.0633333 | 0.7159143 | 1.6500000 | 2.8900000 |
|---|-----------|-----------|-----------|-----------|

---

Unique Subject Identifier=0009010000-0048

Assay variable : PTINR\_VAL1 PT-INR Value

N Mean Standard Deviation Minimum Maximum

---

|   |           |           |           |           |
|---|-----------|-----------|-----------|-----------|
| 3 | 1.9066667 | 0.3288363 | 1.6600000 | 2.2800000 |
|---|-----------|-----------|-----------|-----------|

---



Laboratory tests at the time of obtaining Table 2-6 consent, according to the presence or absence of proton-pump inhibitors

Unique Subject Identifier=0009010000-0050

MEANS Procedure

Assay variable : PTINR\_VAL1 PT-INR Value

| N | Mean      | Standard Deviation | Minimum   | Maximum   |
|---|-----------|--------------------|-----------|-----------|
| 3 | 2.1800000 | 0.1300000          | 2.1000000 | 2.3300000 |

Unique Subject Identifier=0009010000-0061

Assay variable : PTINR\_VAL1 PT-INR Value

| N | Mean      | Standard Deviation | Minimum   | Maximum   |
|---|-----------|--------------------|-----------|-----------|
| 2 | 2.2950000 | 0.5161880          | 1.9300000 | 2.6600000 |

Unique Subject Identifier=0009010000-0062

Assay variable : PTINR\_VAL1 PT-INR Value

| N | Mean      | Standard Deviation | Minimum   | Maximum   |
|---|-----------|--------------------|-----------|-----------|
| 3 | 2.0800000 | 0.2690725          | 1.7800000 | 2.3000000 |

Unique Subject Identifier=0009010000-0072

Assay variable : PTINR\_VAL1 PT-INR Value

N Mean Standard Deviation Minimum Maximum

---

|   |           |           |           |           |
|---|-----------|-----------|-----------|-----------|
| 6 | 2.0783333 | 0.4169612 | 1.6500000 | 2.8700000 |
|---|-----------|-----------|-----------|-----------|

---

Laboratory tests at the time of obtaining Table 2-6 consent, according to the presence or absence of proton-pump inhibitors

Unique Subject Identifier=0009010000-0078

MEANS Procedure

Assay variable : PTINR\_VAL1 PT-INR Value

| N | Mean      | Standard Deviation | Minimum   | Maximum   |
|---|-----------|--------------------|-----------|-----------|
| 3 | 1.9533333 | 0.1517674          | 1.7900000 | 2.0900000 |

Unique Subject Identifier=0009010000-0079

Assay variable : PTINR\_VAL1 PT-INR Value

| N | Mean      | Standard Deviation | Minimum   | Maximum   |
|---|-----------|--------------------|-----------|-----------|
| 4 | 2.4000000 | 0.3892728          | 1.9700000 | 2.8400000 |

Unique Subject Identifier=0009010000-0084

Assay variable : PTINR\_VAL1 PT-INR Value

| N | Mean      | Standard Deviation | Minimum   | Maximum   |
|---|-----------|--------------------|-----------|-----------|
| 5 | 1.9940000 | 0.1761533          | 1.8200000 | 2.2600000 |

Unique Subject Identifier=0009010000-0085

Assay variable : PTINR\_VAL1 PT-INR Value

N Mean Standard Deviation Minimum Maximum

---

|   |           |           |           |           |
|---|-----------|-----------|-----------|-----------|
| 3 | 2.0700000 | 0.2946184 | 1.8100000 | 2.3900000 |
|---|-----------|-----------|-----------|-----------|

---

Laboratory tests at the time of obtaining Table 2-6 consent, according to the presence or absence of proton-pump inhibitors

Unique Subject Identifier=0009010000-0087

MEANS Procedure

Assay variable : PTINR\_VAL1 PT-INR Value

| N | Mean     | Standard Deviation | Minimum  | Maximum  |
|---|----------|--------------------|----------|----------|
| 5 | 1.480000 | 0.0930054          | 1.380000 | 1.610000 |

Unique Subject Identifier=0009010000-0089

Assay variable : PTINR\_VAL1 PT-INR Value

| N | Mean     | Standard Deviation | Minimum  | Maximum  |
|---|----------|--------------------|----------|----------|
| 3 | 2.463333 | 0.5451911          | 1.880000 | 2.960000 |

Unique Subject Identifier=0009010000-0090

Assay variable : PTINR\_VAL1 PT-INR Value

| N | Mean     | Standard Deviation | Minimum  | Maximum  |
|---|----------|--------------------|----------|----------|
| 5 | 1.886000 | 0.4982269          | 1.290000 | 2.570000 |

Unique Subject Identifier=0009010000-0093

Assay variable : PTINR\_VAL1 PT-INR Value

N Mean Standard Deviation Minimum Maximum

---

|   |          |           |          |          |
|---|----------|-----------|----------|----------|
| 6 | 2.110000 | 0.2913417 | 1.750000 | 2.460000 |
|---|----------|-----------|----------|----------|

---

Laboratory tests at the time of obtaining Table 2-6 consent, according to the presence or absence of proton-pump inhibitors

Unique Subject Identifier=0009010000-0097

MEANS Procedure

Assay variable : PTINR\_VAL1 PT-INR Value

N Mean Standard Deviation Minimum Maximum

---

|   |          |           |          |          |
|---|----------|-----------|----------|----------|
| 3 | 2.340000 | 0.2594224 | 2.130000 | 2.630000 |
|---|----------|-----------|----------|----------|

---

Unique Subject Identifier=0009010000-0099

Assay variable : PTINR\_VAL1 PT-INR Value

N Mean Standard Deviation Minimum Maximum

---

|   |          |           |          |          |
|---|----------|-----------|----------|----------|
| 3 | 2.726667 | 0.6957250 | 2.320000 | 3.530000 |
|---|----------|-----------|----------|----------|

---

Unique Subject Identifier=0009010000-0102

Assay variable : PTINR\_VAL1 PT-INR Value

N Mean Standard Deviation Minimum Maximum

---

|   |          |           |          |          |
|---|----------|-----------|----------|----------|
| 3 | 1.626667 | 0.3937427 | 1.370000 | 2.080000 |
|---|----------|-----------|----------|----------|

---

Unique Subject Identifier=0009010000-0104

Assay variable : PTINR\_VAL1 PT-INR Value

N Mean Standard Deviation Minimum Maximum

---

|   |          |           |          |          |
|---|----------|-----------|----------|----------|
| 6 | 2.108333 | 0.6375395 | 1.330000 | 3.000000 |
|---|----------|-----------|----------|----------|

---



Laboratory tests at the time of obtaining Table 2-6 consent, according to the presence or absence of proton-pump inhibitors

Unique Subject Identifier=0009010000-0106

MEANS Procedure

Assay variable : PTINR\_VAL1 PT-INR Value

N Mean Standard Deviation Minimum Maximum

---

|   |           |           |           |           |
|---|-----------|-----------|-----------|-----------|
| 3 | 1.9833333 | 0.3879863 | 1.7300000 | 2.4300000 |
|---|-----------|-----------|-----------|-----------|

---

Unique Subject Identifier=0009010000-0107

Assay variable : PTINR\_VAL1 PT-INR Value

N Mean Standard Deviation Minimum Maximum

---

|   |           |           |           |           |
|---|-----------|-----------|-----------|-----------|
| 3 | 2.2800000 | 0.3174902 | 2.0400000 | 2.6400000 |
|---|-----------|-----------|-----------|-----------|

---

Unique Subject Identifier=0009010000-0108

Assay variable : PTINR\_VAL1 PT-INR Value

N Mean Standard Deviation Minimum Maximum

---

|   |           |           |           |           |
|---|-----------|-----------|-----------|-----------|
| 3 | 1.9233333 | 0.0568624 | 1.8600000 | 1.9700000 |
|---|-----------|-----------|-----------|-----------|

---

Unique Subject Identifier=0009010000-0109

Assay variable : PTINR\_VAL1 PT-INR Value

N Mean Standard Deviation Minimum Maximum

---

|   |          |           |          |          |
|---|----------|-----------|----------|----------|
| 4 | 2.400000 | 0.2871701 | 2.030000 | 2.700000 |
|---|----------|-----------|----------|----------|

---

Laboratory tests at the time of obtaining Table 2-6 consent, according to the presence or absence of proton-pump inhibitors

Unique Subject Identifier=0009010000-0112

MEANS Procedure

Assay variable : PTINR\_VAL1 PT-INR Value

N Mean Standard Deviation Minimum Maximum

---

|   |           |           |           |           |
|---|-----------|-----------|-----------|-----------|
| 3 | 1.8366667 | 0.5005330 | 1.3500000 | 2.3500000 |
|---|-----------|-----------|-----------|-----------|

---

Unique Subject Identifier=0009010000-0114

Assay variable : PTINR\_VAL1 PT-INR Value

N Mean Standard Deviation Minimum Maximum

---

|   |           |           |           |           |
|---|-----------|-----------|-----------|-----------|
| 3 | 2.2966667 | 0.6668083 | 1.6600000 | 2.9900000 |
|---|-----------|-----------|-----------|-----------|

---

Unique Subject Identifier=0009010000-0117

Assay variable : PTINR\_VAL1 PT-INR Value

N Mean Standard Deviation Minimum Maximum

---

|   |           |           |           |           |
|---|-----------|-----------|-----------|-----------|
| 3 | 2.1800000 | 0.0435890 | 2.1500000 | 2.2300000 |
|---|-----------|-----------|-----------|-----------|

---

Unique Subject Identifier=0009010000-0130

Assay variable : PTINR\_VAL1 PT-INR Value

N Mean Standard Deviation Minimum Maximum

---

|   |           |           |           |           |
|---|-----------|-----------|-----------|-----------|
| 4 | 1.2725000 | 0.2150000 | 1.0400000 | 1.5600000 |
|---|-----------|-----------|-----------|-----------|

---

Laboratory tests at the time of obtaining Table 2-6 consent, according to the presence or absence of proton-pump inhibitors

Unique Subject Identifier=0009010000-0137

MEANS Procedure

Assay variable : PTINR\_VAL1 PT-INR Value

| N | Mean      | Standard Deviation | Minimum   | Maximum   |
|---|-----------|--------------------|-----------|-----------|
| 5 | 1.6860000 | 0.3005495          | 1.2200000 | 1.9700000 |

Unique Subject Identifier=0009010000-0139

Assay variable : PTINR\_VAL1 PT-INR Value

| N | Mean      | Standard Deviation | Minimum   | Maximum   |
|---|-----------|--------------------|-----------|-----------|
| 3 | 2.1466667 | 0.6335877          | 1.6900000 | 2.8700000 |

Unique Subject Identifier=0009010000-0141

Assay variable : PTINR\_VAL1 PT-INR Value

| N | Mean      | Standard Deviation | Minimum   | Maximum   |
|---|-----------|--------------------|-----------|-----------|
| 4 | 2.4450000 | 0.3221283          | 2.0300000 | 2.7000000 |

Unique Subject Identifier=0009010000-0142

Assay variable : PTINR\_VAL1 PT-INR Value

N Mean Standard Deviation Minimum Maximum

---

|   |          |           |          |          |
|---|----------|-----------|----------|----------|
| 4 | 2.050000 | 0.2815434 | 1.720000 | 2.380000 |
|---|----------|-----------|----------|----------|

---

Laboratory tests at the time of obtaining Table 2-6 consent, according to the presence or absence of proton-pump inhibitors

Unique Subject Identifier=0009010000-0143

MEANS Procedure

Assay variable : PTINR\_VAL1 PT-INR Value

| N | Mean      | Standard Deviation | Minimum   | Maximum   |
|---|-----------|--------------------|-----------|-----------|
| 2 | 1.8850000 | 0.2474874          | 1.7100000 | 2.0600000 |

Unique Subject Identifier=0009010000-0147

Assay variable : PTINR\_VAL1 PT-INR Value

| N | Mean      | Standard Deviation | Minimum   | Maximum   |
|---|-----------|--------------------|-----------|-----------|
| 4 | 1.7300000 | 0.1726268          | 1.5900000 | 1.9700000 |

Unique Subject Identifier=0009010000-0149

Assay variable : PTINR\_VAL1 PT-INR Value

| N | Mean      | Standard Deviation | Minimum   | Maximum   |
|---|-----------|--------------------|-----------|-----------|
| 4 | 2.3825000 | 0.2696139          | 2.0200000 | 2.6600000 |

Unique Subject Identifier=0009010000-0150

Assay variable : PTINR\_VAL1 PT-INR Value

N Mean Standard Deviation Minimum Maximum

---

|   |           |           |           |           |
|---|-----------|-----------|-----------|-----------|
| 2 | 1.8450000 | 0.2050610 | 1.7000000 | 1.9900000 |
|---|-----------|-----------|-----------|-----------|

---



Laboratory tests at the time of obtaining Table 2-6 consent, according to the presence or absence of proton-pump inhibitors

Unique Subject Identifier=0009010000-0151

MEANS Procedure

Assay variable : PTINR\_VAL1 PT-INR Value

| N | Mean      | Standard Deviation | Minimum   | Maximum   |
|---|-----------|--------------------|-----------|-----------|
| 3 | 1.5366667 | 0.1504438          | 1.4400000 | 1.7100000 |

Unique Subject Identifier=0009010000-0153

Assay variable : PTINR\_VAL1 PT-INR Value

| N | Mean      | Standard Deviation | Minimum   | Maximum   |
|---|-----------|--------------------|-----------|-----------|
| 4 | 2.2850000 | 0.2056696          | 2.0300000 | 2.5300000 |

Unique Subject Identifier=0009010000-0154

Assay variable : PTINR\_VAL1 PT-INR Value

| N | Mean      | Standard Deviation | Minimum   | Maximum   |
|---|-----------|--------------------|-----------|-----------|
| 5 | 2.0180000 | 0.3054832          | 1.7100000 | 2.3700000 |

Unique Subject Identifier=0009010000-0156

Assay variable : PTINR\_VAL1 PT-INR Value

N Mean Standard Deviation Minimum Maximum

---

|   |           |           |           |           |
|---|-----------|-----------|-----------|-----------|
| 3 | 2.3700000 | 0.1345362 | 2.2200000 | 2.4800000 |
|---|-----------|-----------|-----------|-----------|

---

Laboratory tests at the time of obtaining Table 2-6 consent, according to the presence or absence of proton-pump inhibitors

Unique Subject Identifier=0009010000-0162

MEANS Procedure

Assay variable : PTINR\_VAL1 PT-INR Value

N Mean Standard Deviation Minimum Maximum

---

|   |           |           |           |           |
|---|-----------|-----------|-----------|-----------|
| 3 | 1.6933333 | 0.1205543 | 1.5800000 | 1.8200000 |
|---|-----------|-----------|-----------|-----------|

---

Unique Subject Identifier=0009010000-0163

Assay variable : PTINR\_VAL1 PT-INR Value

N Mean Standard Deviation Minimum Maximum

---

|   |           |           |           |           |
|---|-----------|-----------|-----------|-----------|
| 3 | 2.2966667 | 0.1677299 | 2.1900000 | 2.4900000 |
|---|-----------|-----------|-----------|-----------|

---

Unique Subject Identifier=0009010000-0166

Assay variable : PTINR\_VAL1 PT-INR Value

N Mean Standard Deviation Minimum Maximum

---

|   |           |           |           |           |
|---|-----------|-----------|-----------|-----------|
| 3 | 1.8800000 | 0.1479865 | 1.7100000 | 1.9800000 |
|---|-----------|-----------|-----------|-----------|

---

Unique Subject Identifier=0009010000-0167

Assay variable : PTINR\_VAL1 PT-INR Value

N Mean Standard Deviation Minimum Maximum

---

|   |           |           |           |           |
|---|-----------|-----------|-----------|-----------|
| 3 | 2.0033333 | 0.3251666 | 1.7500000 | 2.3700000 |
|---|-----------|-----------|-----------|-----------|

---

Laboratory tests at the time of obtaining Table 2-6 consent, according to the presence or absence of proton-pump inhibitors

Unique Subject Identifier=0009010000-0168

MEANS Procedure

Assay variable : PTINR\_VAL1 PT-INR Value

| N | Mean      | Standard Deviation | Minimum   | Maximum   |
|---|-----------|--------------------|-----------|-----------|
| 3 | 2.2400000 | 0.0400000          | 2.2000000 | 2.2800000 |

Unique Subject Identifier=0009010000-0178

Assay variable : PTINR\_VAL1 PT-INR Value

| N | Mean      | Standard Deviation | Minimum   | Maximum   |
|---|-----------|--------------------|-----------|-----------|
| 2 | 1.9800000 | 0.3959798          | 1.7000000 | 2.2600000 |

Unique Subject Identifier=0009010000-0180

Assay variable : PTINR\_VAL1 PT-INR Value

| N | Mean      | Standard Deviation | Minimum   | Maximum   |
|---|-----------|--------------------|-----------|-----------|
| 3 | 2.2466667 | 0.0585947          | 2.1800000 | 2.2900000 |

Unique Subject Identifier=0009010000-0197

Assay variable : PTINR\_VAL1 PT-INR Value

N Mean Standard Deviation Minimum Maximum

---

|   |           |           |           |           |
|---|-----------|-----------|-----------|-----------|
| 3 | 1.8233333 | 0.0351188 | 1.7900000 | 1.8600000 |
|---|-----------|-----------|-----------|-----------|

---

Laboratory tests at the time of obtaining Table 2-6 consent, according to the presence or absence of proton-pump inhibitors

Unique Subject Identifier=0009010000-0198

MEANS Procedure

Assay variable : PTINR\_VAL1 PT-INR Value

N Mean Standard Deviation Minimum Maximum

---

|   |           |           |           |           |
|---|-----------|-----------|-----------|-----------|
| 6 | 1.5600000 | 0.1628496 | 1.3500000 | 1.8200000 |
|---|-----------|-----------|-----------|-----------|

---

Unique Subject Identifier=0009010000-0200

Assay variable : PTINR\_VAL1 PT-INR Value

N Mean Standard Deviation Minimum Maximum

---

|   |           |           |           |           |
|---|-----------|-----------|-----------|-----------|
| 2 | 2.3700000 | 0.1131371 | 2.2900000 | 2.4500000 |
|---|-----------|-----------|-----------|-----------|

---

Unique Subject Identifier=0009010000-0204

Assay variable : PTINR\_VAL1 PT-INR Value

N Mean Standard Deviation Minimum Maximum

---

|   |           |           |           |           |
|---|-----------|-----------|-----------|-----------|
| 5 | 2.2680000 | 0.1293058 | 2.1400000 | 2.4400000 |
|---|-----------|-----------|-----------|-----------|

---

Unique Subject Identifier=0009010000-0217

Assay variable : PTINR\_VAL1 PT-INR Value

N Mean Standard Deviation Minimum Maximum

---

|   |           |           |           |           |
|---|-----------|-----------|-----------|-----------|
| 6 | 1.3750000 | 0.0768765 | 1.2500000 | 1.4700000 |
|---|-----------|-----------|-----------|-----------|

---



Laboratory tests at the time of obtaining Table 2-6 consent, according to the presence or absence of proton-pump inhibitors

Unique Subject Identifier=0009010000-0220

MEANS Procedure

Assay variable : PTINR\_VAL1 PT-INR Value

N Mean Standard Deviation Minimum Maximum

---

|   |           |           |           |           |
|---|-----------|-----------|-----------|-----------|
| 6 | 2.0316667 | 0.0970395 | 1.8700000 | 2.1300000 |
|---|-----------|-----------|-----------|-----------|

---

Unique Subject Identifier=0009010000-0222

Assay variable : PTINR\_VAL1 PT-INR Value

N Mean Standard Deviation Minimum Maximum

---

|   |           |           |           |           |
|---|-----------|-----------|-----------|-----------|
| 6 | 1.7883333 | 0.1853016 | 1.5200000 | 2.0600000 |
|---|-----------|-----------|-----------|-----------|

---

Unique Subject Identifier=0009010000-0223

Assay variable : PTINR\_VAL1 PT-INR Value

N Mean Standard Deviation Minimum Maximum

---

|   |           |           |           |           |
|---|-----------|-----------|-----------|-----------|
| 6 | 2.1433333 | 0.2331237 | 1.8100000 | 2.4600000 |
|---|-----------|-----------|-----------|-----------|

---

Unique Subject Identifier=0009010000-0224

Assay variable : PTINR\_VAL1 PT-INR Value

N Mean Standard Deviation Minimum Maximum

---

|   |           |           |           |           |
|---|-----------|-----------|-----------|-----------|
| 5 | 2.2180000 | 0.0772658 | 2.1000000 | 2.3100000 |
|---|-----------|-----------|-----------|-----------|

---

Laboratory tests at the time of obtaining Table 2-6 consent, according to the presence or absence of proton-pump inhibitors

Unique Subject Identifier=0009010000-0229

MEANS Procedure

Assay variable : PTINR\_VAL1 PT-INR Value

| N | Mean      | Standard Deviation | Minimum   | Maximum   |
|---|-----------|--------------------|-----------|-----------|
| 3 | 1.8700000 | 0.1307670          | 1.7800000 | 2.0200000 |

Unique Subject Identifier=0009010000-0234

Assay variable : PTINR\_VAL1 PT-INR Value

| N | Mean      | Standard Deviation | Minimum   | Maximum   |
|---|-----------|--------------------|-----------|-----------|
| 1 | 2.7500000 |                    | 2.7500000 | 2.7500000 |

Unique Subject Identifier=0009010000-0235

Assay variable : PTINR\_VAL1 PT-INR Value

| N | Mean      | Standard Deviation | Minimum   | Maximum   |
|---|-----------|--------------------|-----------|-----------|
| 6 | 1.5416667 | 0.1703428          | 1.3300000 | 1.7400000 |

Unique Subject Identifier=0009010000-0238

Assay variable : PTINR\_VAL1 PT-INR Value

N Mean Standard Deviation Minimum Maximum

---

|   |          |           |          |          |
|---|----------|-----------|----------|----------|
| 3 | 2.210000 | 0.5456189 | 1.890000 | 2.840000 |
|---|----------|-----------|----------|----------|

---

Laboratory tests at the time of obtaining Table 2-6 consent, according to the presence or absence of proton-pump inhibitors

Unique Subject Identifier=0009010000-0239

MEANS Procedure

Assay variable : PTINR\_VAL1 PT-INR Value

N Mean Standard Deviation Minimum Maximum

---

|   |           |           |           |           |
|---|-----------|-----------|-----------|-----------|
| 3 | 1.6366667 | 0.0493288 | 1.5800000 | 1.6700000 |
|---|-----------|-----------|-----------|-----------|

---

Unique Subject Identifier=0009010000-0244

Assay variable : PTINR\_VAL1 PT-INR Value

N Mean Standard Deviation Minimum Maximum

---

|   |           |           |           |           |
|---|-----------|-----------|-----------|-----------|
| 4 | 2.1200000 | 0.6906519 | 1.5500000 | 3.0400000 |
|---|-----------|-----------|-----------|-----------|

---

Unique Subject Identifier=0009010000-0246

Assay variable : PTINR\_VAL1 PT-INR Value

N Mean Standard Deviation Minimum Maximum

---

|   |           |           |           |           |
|---|-----------|-----------|-----------|-----------|
| 4 | 2.5500000 | 0.3987480 | 1.9700000 | 2.8800000 |
|---|-----------|-----------|-----------|-----------|

---

Unique Subject Identifier=0009010000-0247

Assay variable : PTINR\_VAL1 PT-INR Value

N Mean Standard Deviation Minimum Maximum

---

|   |           |           |           |           |
|---|-----------|-----------|-----------|-----------|
| 3 | 1.6566667 | 0.3817504 | 1.3700000 | 2.0900000 |
|---|-----------|-----------|-----------|-----------|

---

Laboratory tests at the time of obtaining Table 2-6 consent, according to the presence or absence of proton-pump inhibitors

Unique Subject Identifier=0009010000-0254

MEANS Procedure

Assay variable : PTINR\_VAL1 PT-INR Value

| N | Mean     | Standard Deviation | Minimum  | Maximum  |
|---|----------|--------------------|----------|----------|
| 2 | 1.340000 | 0.1131371          | 1.260000 | 1.420000 |

Unique Subject Identifier=0013011100-0002

Assay variable : PTINR\_VAL1 PT-INR Value

| N | Mean     | Standard Deviation | Minimum  | Maximum  |
|---|----------|--------------------|----------|----------|
| 5 | 2.156000 | 0.0944987          | 2.030000 | 2.280000 |

Unique Subject Identifier=0013011100-0008

Assay variable : PTINR\_VAL1 PT-INR Value

| N | Mean     | Standard Deviation | Minimum  | Maximum  |
|---|----------|--------------------|----------|----------|
| 6 | 1.891667 | 0.1126795          | 1.770000 | 2.070000 |

Unique Subject Identifier=0013011100-0016

Assay variable : PTINR\_VAL1 PT-INR Value

N Mean Standard Deviation Minimum Maximum

---

|   |           |           |           |           |
|---|-----------|-----------|-----------|-----------|
| 4 | 1.9625000 | 0.1768945 | 1.7600000 | 2.1700000 |
|---|-----------|-----------|-----------|-----------|

---



Laboratory tests at the time of obtaining Table 2-6 consent, according to the presence or absence of proton-pump inhibitors

Unique Subject Identifier=0013011100-0022

MEANS Procedure

Assay variable : PTINR\_VAL1 PT-INR Value

N Mean Standard Deviation Minimum Maximum

---

|   |           |           |           |           |
|---|-----------|-----------|-----------|-----------|
| 3 | 1.4700000 | 0.2351595 | 1.2000000 | 1.6300000 |
|---|-----------|-----------|-----------|-----------|

---

Unique Subject Identifier=0013011100-0027

Assay variable : PTINR\_VAL1 PT-INR Value

N Mean Standard Deviation Minimum Maximum

---

|   |           |           |           |           |
|---|-----------|-----------|-----------|-----------|
| 3 | 2.4366667 | 0.3259346 | 2.1700000 | 2.8000000 |
|---|-----------|-----------|-----------|-----------|

---

Unique Subject Identifier=0014010000-0001

Assay variable : PTINR\_VAL1 PT-INR Value

N Mean Standard Deviation Minimum Maximum

---

|   |           |           |           |           |
|---|-----------|-----------|-----------|-----------|
| 4 | 2.2700000 | 0.2674572 | 2.1100000 | 2.6700000 |
|---|-----------|-----------|-----------|-----------|

---

Unique Subject Identifier=0014010000-0004

Assay variable : PTINR\_VAL1 PT-INR Value

N Mean Standard Deviation Minimum Maximum

---

|   |           |           |           |           |
|---|-----------|-----------|-----------|-----------|
| 6 | 1.5366667 | 0.3691432 | 1.2200000 | 2.2400000 |
|---|-----------|-----------|-----------|-----------|

---

Laboratory tests at the time of obtaining Table 2-6 consent, according to the presence or absence of proton-pump inhibitors

Unique Subject Identifier=0016011100-0001

MEANS Procedure

Assay variable : PTINR\_VAL1 PT-INR Value

N Mean Standard Deviation Minimum Maximum

---

|   |           |           |           |           |
|---|-----------|-----------|-----------|-----------|
| 2 | 2.2550000 | 0.0070711 | 2.2500000 | 2.2600000 |
|---|-----------|-----------|-----------|-----------|

---

Unique Subject Identifier=0017010000-0001

Assay variable : PTINR\_VAL1 PT-INR Value

N Mean Standard Deviation Minimum Maximum

---

|   |           |           |           |           |
|---|-----------|-----------|-----------|-----------|
| 3 | 1.7100000 | 0.1969772 | 1.5500000 | 1.9300000 |
|---|-----------|-----------|-----------|-----------|

---

Unique Subject Identifier=0017010000-0003

Assay variable : PTINR\_VAL1 PT-INR Value

N Mean Standard Deviation Minimum Maximum

---

|   |           |           |           |           |
|---|-----------|-----------|-----------|-----------|
| 4 | 2.1775000 | 0.1350000 | 1.9900000 | 2.2900000 |
|---|-----------|-----------|-----------|-----------|

---

Unique Subject Identifier=0017010000-0007

Assay variable : PTINR\_VAL1 PT-INR Value

N Mean Standard Deviation Minimum Maximum

---

|   |          |           |          |          |
|---|----------|-----------|----------|----------|
| 2 | 2.155000 | 0.2192031 | 2.000000 | 2.310000 |
|---|----------|-----------|----------|----------|

---

Laboratory tests at the time of obtaining Table 2-6 consent, according to the presence or absence of proton-pump inhibitors

Unique Subject Identifier=0017010000-0014

MEANS Procedure

Assay variable : PTINR\_VAL1 PT-INR Value

N Mean Standard Deviation Minimum Maximum

---

|   |           |           |           |           |
|---|-----------|-----------|-----------|-----------|
| 6 | 2.1916667 | 0.2579470 | 1.9200000 | 2.5500000 |
|---|-----------|-----------|-----------|-----------|

---

Unique Subject Identifier=0017010000-0015

Assay variable : PTINR\_VAL1 PT-INR Value

N Mean Standard Deviation Minimum Maximum

---

|   |           |           |           |           |
|---|-----------|-----------|-----------|-----------|
| 4 | 2.0900000 | 0.2738613 | 1.8500000 | 2.4600000 |
|---|-----------|-----------|-----------|-----------|

---

Unique Subject Identifier=0017010000-0017

Assay variable : PTINR\_VAL1 PT-INR Value

N Mean Standard Deviation Minimum Maximum

---

|   |           |           |           |           |
|---|-----------|-----------|-----------|-----------|
| 3 | 2.1833333 | 0.2482606 | 2.0400000 | 2.4700000 |
|---|-----------|-----------|-----------|-----------|

---

Unique Subject Identifier=0017010000-0020

Assay variable : PTINR\_VAL1 PT-INR Value

N Mean Standard Deviation Minimum Maximum

---

|   |          |           |          |          |
|---|----------|-----------|----------|----------|
| 3 | 1.950000 | 0.1228821 | 1.810000 | 2.040000 |
|---|----------|-----------|----------|----------|

---

Laboratory tests at the time of obtaining Table 2-6 consent, according to the presence or absence of proton-pump inhibitors

Unique Subject Identifier=0017010000-0024

MEANS Procedure

Assay variable : PTINR\_VAL1 PT-INR Value

| N | Mean      | Standard Deviation | Minimum   | Maximum   |
|---|-----------|--------------------|-----------|-----------|
| 3 | 2.0533333 | 0.0208167          | 2.0300000 | 2.0700000 |

Unique Subject Identifier=0017010000-0028

Assay variable : PTINR\_VAL1 PT-INR Value

| N | Mean      | Standard Deviation | Minimum   | Maximum   |
|---|-----------|--------------------|-----------|-----------|
| 4 | 2.5500000 | 0.5575542          | 1.7700000 | 3.0400000 |

Unique Subject Identifier=0017010000-0029

Assay variable : PTINR\_VAL1 PT-INR Value

| N | Mean      | Standard Deviation | Minimum   | Maximum   |
|---|-----------|--------------------|-----------|-----------|
| 4 | 2.6250000 | 0.7736709          | 1.8500000 | 3.6000000 |

Unique Subject Identifier=0017010000-0031

Assay variable : PTINR\_VAL1 PT-INR Value

N Mean Standard Deviation Minimum Maximum

---

|   |           |           |           |           |
|---|-----------|-----------|-----------|-----------|
| 2 | 2.3350000 | 0.0070711 | 2.3300000 | 2.3400000 |
|---|-----------|-----------|-----------|-----------|

---



Laboratory tests at the time of obtaining Table 2-6 consent, according to the presence or absence of proton-pump inhibitors

Unique Subject Identifier=0017010000-0032

MEANS Procedure

Assay variable : PTINR\_VAL1 PT-INR Value

| N | Mean      | Standard Deviation | Minimum   | Maximum   |
|---|-----------|--------------------|-----------|-----------|
| 2 | 2.0100000 | 0.1131371          | 1.9300000 | 2.0900000 |

Unique Subject Identifier=0017010000-0035

Assay variable : PTINR\_VAL1 PT-INR Value

| N | Mean      | Standard Deviation | Minimum   | Maximum   |
|---|-----------|--------------------|-----------|-----------|
| 2 | 1.8100000 | 0.5232590          | 1.4400000 | 2.1800000 |

Unique Subject Identifier=0017010000-0038

Assay variable : PTINR\_VAL1 PT-INR Value

| N | Mean      | Standard Deviation | Minimum   | Maximum   |
|---|-----------|--------------------|-----------|-----------|
| 3 | 2.1200000 | 0.1228821          | 1.9800000 | 2.2100000 |

Unique Subject Identifier=0017010000-0039

Assay variable : PTINR\_VAL1 PT-INR Value

N Mean Standard Deviation Minimum Maximum

---

|   |          |           |          |          |
|---|----------|-----------|----------|----------|
| 4 | 1.760000 | 0.1032796 | 1.640000 | 1.880000 |
|---|----------|-----------|----------|----------|

---

Laboratory tests at the time of obtaining Table 2-6 consent, according to the presence or absence of proton-pump inhibitors

Unique Subject Identifier=0017010000-0040

MEANS Procedure

Assay variable : PTINR\_VAL1 PT-INR Value

| N | Mean      | Standard Deviation | Minimum   | Maximum   |
|---|-----------|--------------------|-----------|-----------|
| 3 | 1.6533333 | 0.2050203          | 1.4500000 | 1.8600000 |

Unique Subject Identifier=0017010000-0042

Assay variable : PTINR\_VAL1 PT-INR Value

| N | Mean      | Standard Deviation | Minimum   | Maximum   |
|---|-----------|--------------------|-----------|-----------|
| 3 | 2.2000000 | 0.0888819          | 2.1300000 | 2.3000000 |

Unique Subject Identifier=0017010000-0044

Assay variable : PTINR\_VAL1 PT-INR Value

| N | Mean      | Standard Deviation | Minimum   | Maximum   |
|---|-----------|--------------------|-----------|-----------|
| 5 | 1.9300000 | 0.1246996          | 1.7900000 | 2.1300000 |

Unique Subject Identifier=0017010000-0056

Assay variable : PTINR\_VAL1 PT-INR Value

N Mean Standard Deviation Minimum Maximum

---

|   |           |           |           |           |
|---|-----------|-----------|-----------|-----------|
| 3 | 1.9366667 | 0.5896892 | 1.2700000 | 2.3900000 |
|---|-----------|-----------|-----------|-----------|

---

Laboratory tests at the time of obtaining Table 2-6 consent, according to the presence or absence of proton-pump inhibitors

Unique Subject Identifier=0017010000-0060

MEANS Procedure

Assay variable : PTINR\_VAL1 PT-INR Value

N Mean Standard Deviation Minimum Maximum

---

|   |           |           |           |           |
|---|-----------|-----------|-----------|-----------|
| 3 | 2.2133333 | 0.6601767 | 1.6300000 | 2.9300000 |
|---|-----------|-----------|-----------|-----------|

---

Unique Subject Identifier=0017010000-0069

Assay variable : PTINR\_VAL1 PT-INR Value

N Mean Standard Deviation Minimum Maximum

---

|   |           |           |           |           |
|---|-----------|-----------|-----------|-----------|
| 3 | 1.7033333 | 0.2052641 | 1.5300000 | 1.9300000 |
|---|-----------|-----------|-----------|-----------|

---

Unique Subject Identifier=0017010000-0071

Assay variable : PTINR\_VAL1 PT-INR Value

N Mean Standard Deviation Minimum Maximum

---

|   |           |           |           |           |
|---|-----------|-----------|-----------|-----------|
| 3 | 1.9066667 | 0.0472582 | 1.8700000 | 1.9600000 |
|---|-----------|-----------|-----------|-----------|

---

Unique Subject Identifier=0017010000-0076

Assay variable : PTINR\_VAL1 PT-INR Value

N Mean Standard Deviation Minimum Maximum

---

|   |           |           |           |           |
|---|-----------|-----------|-----------|-----------|
| 3 | 2.5266667 | 0.2640707 | 2.2400000 | 2.7600000 |
|---|-----------|-----------|-----------|-----------|

---

Laboratory tests at the time of obtaining Table 2-6 consent, according to the presence or absence of proton-pump inhibitors

Unique Subject Identifier=0017010000-0082

MEANS Procedure

Assay variable : PTINR\_VAL1 PT-INR Value

| N | Mean     | Standard Deviation | Minimum  | Maximum  |
|---|----------|--------------------|----------|----------|
| 3 | 2.380000 | 0.7171471          | 1.770000 | 3.170000 |

Unique Subject Identifier=0017010000-0084

Assay variable : PTINR\_VAL1 PT-INR Value

| N | Mean     | Standard Deviation | Minimum  | Maximum  |
|---|----------|--------------------|----------|----------|
| 3 | 1.836667 | 0.1965536          | 1.610000 | 1.960000 |

Unique Subject Identifier=0019010000-0003

Assay variable : PTINR\_VAL1 PT-INR Value

| N | Mean     | Standard Deviation | Minimum  | Maximum  |
|---|----------|--------------------|----------|----------|
| 3 | 1.896667 | 0.4006661          | 1.510000 | 2.310000 |

Unique Subject Identifier=0019010000-0010

Assay variable : PTINR\_VAL1 PT-INR Value

N Mean Standard Deviation Minimum Maximum

---

|   |           |           |           |           |
|---|-----------|-----------|-----------|-----------|
| 2 | 1.8950000 | 0.0777817 | 1.8400000 | 1.9500000 |
|---|-----------|-----------|-----------|-----------|

---



Laboratory tests at the time of obtaining Table 2-6 consent, according to the presence or absence of proton-pump inhibitors

Unique Subject Identifier=0019010000-0012

MEANS Procedure

Assay variable : PTINR\_VAL1 PT-INR Value

N Mean Standard Deviation Minimum Maximum

---

|   |           |           |           |           |
|---|-----------|-----------|-----------|-----------|
| 6 | 1.8150000 | 0.3632492 | 1.3100000 | 2.3500000 |
|---|-----------|-----------|-----------|-----------|

---

Unique Subject Identifier=0019010000-0017

Assay variable : PTINR\_VAL1 PT-INR Value

N Mean Standard Deviation Minimum Maximum

---

|   |           |           |           |           |
|---|-----------|-----------|-----------|-----------|
| 6 | 1.9300000 | 0.4606083 | 1.0600000 | 2.3900000 |
|---|-----------|-----------|-----------|-----------|

---

Unique Subject Identifier=0019010000-0026

Assay variable : PTINR\_VAL1 PT-INR Value

N Mean Standard Deviation Minimum Maximum

---

|   |           |           |           |           |
|---|-----------|-----------|-----------|-----------|
| 4 | 1.8475000 | 0.2385197 | 1.5600000 | 2.1400000 |
|---|-----------|-----------|-----------|-----------|

---

Unique Subject Identifier=0019010000-0031

Assay variable : PTINR\_VAL1 PT-INR Value

N Mean Standard Deviation Minimum Maximum

---

|   |           |           |           |           |
|---|-----------|-----------|-----------|-----------|
| 2 | 1.6300000 | 0.0989949 | 1.5600000 | 1.7000000 |
|---|-----------|-----------|-----------|-----------|

---

Laboratory tests at the time of obtaining Table 2-6 consent, according to the presence or absence of proton-pump inhibitors

Unique Subject Identifier=0019010000-0035

MEANS Procedure

Assay variable : PTINR\_VAL1 PT-INR Value

| N | Mean      | Standard Deviation | Minimum   | Maximum   |
|---|-----------|--------------------|-----------|-----------|
| 3 | 1.9733333 | 0.2138535          | 1.7400000 | 2.1600000 |

Unique Subject Identifier=0019010000-0038

Assay variable : PTINR\_VAL1 PT-INR Value

| N | Mean      | Standard Deviation | Minimum   | Maximum   |
|---|-----------|--------------------|-----------|-----------|
| 3 | 1.3966667 | 0.2657693          | 1.1200000 | 1.6500000 |

Unique Subject Identifier=0019010000-0039

Assay variable : PTINR\_VAL1 PT-INR Value

| N | Mean      | Standard Deviation | Minimum   | Maximum   |
|---|-----------|--------------------|-----------|-----------|
| 2 | 2.0800000 | 0.2121320          | 1.9300000 | 2.2300000 |

Unique Subject Identifier=0019010000-0041

Assay variable : PTINR\_VAL1 PT-INR Value

N Mean Standard Deviation Minimum Maximum

---

|   |           |           |           |           |
|---|-----------|-----------|-----------|-----------|
| 3 | 2.2533333 | 0.2742870 | 1.9400000 | 2.4500000 |
|---|-----------|-----------|-----------|-----------|

---

Laboratory tests at the time of obtaining Table 2-6 consent, according to the presence or absence of proton-pump inhibitors

Unique Subject Identifier=0019010000-0043

MEANS Procedure

Assay variable : PTINR\_VAL1 PT-INR Value

N Mean Standard Deviation Minimum Maximum

---

|   |           |           |           |           |
|---|-----------|-----------|-----------|-----------|
| 2 | 2.2850000 | 0.0636396 | 2.2400000 | 2.3300000 |
|---|-----------|-----------|-----------|-----------|

---

Unique Subject Identifier=0019010000-0045

Assay variable : PTINR\_VAL1 PT-INR Value

N Mean Standard Deviation Minimum Maximum

---

|   |           |           |           |           |
|---|-----------|-----------|-----------|-----------|
| 4 | 1.8050000 | 0.3639139 | 1.6000000 | 2.3500000 |
|---|-----------|-----------|-----------|-----------|

---

Unique Subject Identifier=0019010000-0056

Assay variable : PTINR\_VAL1 PT-INR Value

N Mean Standard Deviation Minimum Maximum

---

|   |           |           |           |           |
|---|-----------|-----------|-----------|-----------|
| 4 | 2.4125000 | 0.4027716 | 1.8800000 | 2.7800000 |
|---|-----------|-----------|-----------|-----------|

---

Unique Subject Identifier=0019010000-0057

Assay variable : PTINR\_VAL1 PT-INR Value

N Mean Standard Deviation Minimum Maximum

---

|   |           |           |           |           |
|---|-----------|-----------|-----------|-----------|
| 3 | 1.8700000 | 0.0173205 | 1.8600000 | 1.8900000 |
|---|-----------|-----------|-----------|-----------|

---

Laboratory tests at the time of obtaining Table 2-6 consent, according to the presence or absence of proton-pump inhibitors

Unique Subject Identifier=0019010000-0065

MEANS Procedure

Assay variable : PTINR\_VAL1 PT-INR Value

N Mean Standard Deviation Minimum Maximum

---

|   |           |           |           |           |
|---|-----------|-----------|-----------|-----------|
| 4 | 1.4900000 | 0.2083267 | 1.2400000 | 1.6900000 |
|---|-----------|-----------|-----------|-----------|

---

Unique Subject Identifier=0019010000-0070

Assay variable : PTINR\_VAL1 PT-INR Value

N Mean Standard Deviation Minimum Maximum

---

|   |           |           |           |           |
|---|-----------|-----------|-----------|-----------|
| 2 | 2.1300000 | 0.2545584 | 1.9500000 | 2.3100000 |
|---|-----------|-----------|-----------|-----------|

---

Unique Subject Identifier=0019010000-0086

Assay variable : PTINR\_VAL1 PT-INR Value

N Mean Standard Deviation Minimum Maximum

---

|   |           |           |           |           |
|---|-----------|-----------|-----------|-----------|
| 3 | 2.5833333 | 0.4772141 | 2.0500000 | 2.9700000 |
|---|-----------|-----------|-----------|-----------|

---

Unique Subject Identifier=0019010000-0092

Assay variable : PTINR\_VAL1 PT-INR Value

N Mean Standard Deviation Minimum Maximum

---

|   |           |           |           |           |
|---|-----------|-----------|-----------|-----------|
| 2 | 2.0850000 | 0.2192031 | 1.9300000 | 2.2400000 |
|---|-----------|-----------|-----------|-----------|

---



Laboratory tests at the time of obtaining Table 2-6 consent, according to the presence or absence of proton-pump inhibitors

Unique Subject Identifier=0019010000-0094

MEANS Procedure

Assay variable : PTINR\_VAL1 PT-INR Value

| N | Mean      | Standard Deviation | Minimum   | Maximum   |
|---|-----------|--------------------|-----------|-----------|
| 3 | 1.4366667 | 0.1680278          | 1.2900000 | 1.6200000 |

Unique Subject Identifier=0019010000-0096

Assay variable : PTINR\_VAL1 PT-INR Value

| N | Mean      | Standard Deviation | Minimum   | Maximum   |
|---|-----------|--------------------|-----------|-----------|
| 2 | 1.8300000 | 0.4101219          | 1.5400000 | 2.1200000 |

Unique Subject Identifier=0019010000-0097

Assay variable : PTINR\_VAL1 PT-INR Value

| N | Mean      | Standard Deviation | Minimum   | Maximum   |
|---|-----------|--------------------|-----------|-----------|
| 3 | 2.3900000 | 0.0888819          | 2.3200000 | 2.4900000 |

Unique Subject Identifier=0019010000-0098

Assay variable : PTINR\_VAL1 PT-INR Value

N Mean Standard Deviation Minimum Maximum

---

|   |           |           |           |           |
|---|-----------|-----------|-----------|-----------|
| 2 | 2.0450000 | 0.0070711 | 2.0400000 | 2.0500000 |
|---|-----------|-----------|-----------|-----------|

---

Laboratory tests at the time of obtaining Table 2-6 consent, according to the presence or absence of proton-pump inhibitors

Unique Subject Identifier=0019010000-0112

MEANS Procedure

Assay variable : PTINR\_VAL1 PT-INR Value

| N | Mean      | Standard Deviation | Minimum   | Maximum   |
|---|-----------|--------------------|-----------|-----------|
| 3 | 2.9333333 | 1.3891124          | 1.4100000 | 4.1300000 |

Unique Subject Identifier=0019010000-0114

Assay variable : PTINR\_VAL1 PT-INR Value

| N | Mean      | Standard Deviation | Minimum   | Maximum   |
|---|-----------|--------------------|-----------|-----------|
| 5 | 2.1180000 | 0.2438647          | 1.9400000 | 2.5400000 |

Unique Subject Identifier=0019010000-0118

Assay variable : PTINR\_VAL1 PT-INR Value

| N | Mean      | Standard Deviation | Minimum   | Maximum   |
|---|-----------|--------------------|-----------|-----------|
| 3 | 1.8733333 | 0.3617089          | 1.6400000 | 2.2900000 |

Unique Subject Identifier=0021000000-0008

Assay variable : PTINR\_VAL1 PT-INR Value

N Mean Standard Deviation Minimum Maximum

---

|   |           |           |           |           |
|---|-----------|-----------|-----------|-----------|
| 6 | 1.9783333 | 0.5227013 | 1.6500000 | 3.0300000 |
|---|-----------|-----------|-----------|-----------|

---

Laboratory tests at the time of obtaining Table 2-6 consent, according to the presence or absence of proton-pump inhibitors

Unique Subject Identifier=0021000000-0009

MEANS Procedure

Assay variable : PTINR\_VAL1 PT-INR Value

N Mean Standard Deviation Minimum Maximum

---

|   |           |           |           |           |
|---|-----------|-----------|-----------|-----------|
| 6 | 2.1216667 | 0.1859480 | 1.9100000 | 2.3800000 |
|---|-----------|-----------|-----------|-----------|

---

Unique Subject Identifier=0021000000-0012

Assay variable : PTINR\_VAL1 PT-INR Value

N Mean Standard Deviation Minimum Maximum

---

|   |           |           |           |           |
|---|-----------|-----------|-----------|-----------|
| 3 | 1.7833333 | 0.1365040 | 1.6900000 | 1.9400000 |
|---|-----------|-----------|-----------|-----------|

---

Unique Subject Identifier=0021000000-0017

Assay variable : PTINR\_VAL1 PT-INR Value

N Mean Standard Deviation Minimum Maximum

---

|   |           |           |           |           |
|---|-----------|-----------|-----------|-----------|
| 6 | 1.6866667 | 0.1303329 | 1.6000000 | 1.9500000 |
|---|-----------|-----------|-----------|-----------|

---

Unique Subject Identifier=0021000000-0027

Assay variable : PTINR\_VAL1 PT-INR Value

N Mean Standard Deviation Minimum Maximum

---

|   |           |           |           |           |
|---|-----------|-----------|-----------|-----------|
| 5 | 2.2300000 | 0.2109502 | 1.9200000 | 2.4600000 |
|---|-----------|-----------|-----------|-----------|

---

Laboratory tests at the time of obtaining Table 2-6 consent, according to the presence or absence of proton-pump inhibitors

Unique Subject Identifier=0024010000-0001

MEANS Procedure

Assay variable : PTINR\_VAL1 PT-INR Value

N Mean Standard Deviation Minimum Maximum

---

|   |           |           |           |           |
|---|-----------|-----------|-----------|-----------|
| 6 | 2.1833333 | 0.1940790 | 1.9000000 | 2.4000000 |
|---|-----------|-----------|-----------|-----------|

---

Unique Subject Identifier=0027000000-0001

Assay variable : PTINR\_VAL1 PT-INR Value

N Mean Standard Deviation Minimum Maximum

---

|   |           |           |           |           |
|---|-----------|-----------|-----------|-----------|
| 4 | 4.1550000 | 1.3986779 | 2.1300000 | 5.1600000 |
|---|-----------|-----------|-----------|-----------|

---

Unique Subject Identifier=0027000000-0012

Assay variable : PTINR\_VAL1 PT-INR Value

N Mean Standard Deviation Minimum Maximum

---

|   |           |           |           |           |
|---|-----------|-----------|-----------|-----------|
| 6 | 1.9250000 | 0.4174087 | 1.2100000 | 2.4200000 |
|---|-----------|-----------|-----------|-----------|

---

Unique Subject Identifier=0027000000-0018

Assay variable : PTINR\_VAL1 PT-INR Value

N Mean Standard Deviation Minimum Maximum

---

|   |           |           |           |           |
|---|-----------|-----------|-----------|-----------|
| 6 | 2.2250000 | 0.6775470 | 1.0600000 | 3.0800000 |
|---|-----------|-----------|-----------|-----------|

---



Laboratory tests at the time of obtaining Table 2-6 consent, according to the presence or absence of proton-pump inhibitors

Unique Subject Identifier=0027000000-0022

MEANS Procedure

Assay variable : PTINR\_VAL1 PT-INR Value

| N | Mean      | Standard Deviation | Minimum   | Maximum   |
|---|-----------|--------------------|-----------|-----------|
| 3 | 1.9033333 | 0.1656301          | 1.7300000 | 2.0600000 |

Unique Subject Identifier=0027000000-0027

Assay variable : PTINR\_VAL1 PT-INR Value

| N | Mean      | Standard Deviation | Minimum   | Maximum   |
|---|-----------|--------------------|-----------|-----------|
| 2 | 2.9300000 | 0.2262742          | 2.7700000 | 3.0900000 |

Unique Subject Identifier=0027000000-0028

Assay variable : PTINR\_VAL1 PT-INR Value

| N | Mean      | Standard Deviation | Minimum   | Maximum   |
|---|-----------|--------------------|-----------|-----------|
| 6 | 2.0700000 | 0.1446375          | 1.9100000 | 2.2700000 |

Unique Subject Identifier=0027000000-0029

Assay variable : PTINR\_VAL1 PT-INR Value

N Mean Standard Deviation Minimum Maximum

---

|   |           |           |           |           |
|---|-----------|-----------|-----------|-----------|
| 2 | 2.5500000 | 0.2545584 | 2.3700000 | 2.7300000 |
|---|-----------|-----------|-----------|-----------|

---

Laboratory tests at the time of obtaining Table 2-6 consent, according to the presence or absence of proton-pump inhibitors

Unique Subject Identifier=0030010010-0001

MEANS Procedure

Assay variable : PTINR\_VAL1 PT-INR Value

N Mean Standard Deviation Minimum Maximum

---

|   |           |           |           |           |
|---|-----------|-----------|-----------|-----------|
| 3 | 1.7333333 | 0.3326159 | 1.4800000 | 2.1100000 |
|---|-----------|-----------|-----------|-----------|

---

Unique Subject Identifier=0030010010-0005

Assay variable : PTINR\_VAL1 PT-INR Value

N Mean Standard Deviation Minimum Maximum

---

|   |           |           |           |           |
|---|-----------|-----------|-----------|-----------|
| 3 | 2.1000000 | 0.1442221 | 1.9400000 | 2.2200000 |
|---|-----------|-----------|-----------|-----------|

---

Unique Subject Identifier=0030010010-0007

Assay variable : PTINR\_VAL1 PT-INR Value

N Mean Standard Deviation Minimum Maximum

---

|   |           |           |           |           |
|---|-----------|-----------|-----------|-----------|
| 6 | 1.8966667 | 0.4332974 | 1.5100000 | 2.4700000 |
|---|-----------|-----------|-----------|-----------|

---

Unique Subject Identifier=0030010010-0011

Assay variable : PTINR\_VAL1 PT-INR Value

N Mean Standard Deviation Minimum Maximum

---

|   |          |           |          |          |
|---|----------|-----------|----------|----------|
| 3 | 2.463333 | 0.5852635 | 1.790000 | 2.850000 |
|---|----------|-----------|----------|----------|

---

Laboratory tests at the time of obtaining Table 2-6 consent, according to the presence or absence of proton-pump inhibitors

Unique Subject Identifier=0030010010-0012

MEANS Procedure

Assay variable : PTINR\_VAL1 PT-INR Value

N Mean Standard Deviation Minimum Maximum

---

|   |           |           |           |           |
|---|-----------|-----------|-----------|-----------|
| 6 | 1.7750000 | 0.1925357 | 1.4900000 | 2.0500000 |
|---|-----------|-----------|-----------|-----------|

---

Unique Subject Identifier=0031110001-0005

Assay variable : PTINR\_VAL1 PT-INR Value

N Mean Standard Deviation Minimum Maximum

---

|   |           |           |           |           |
|---|-----------|-----------|-----------|-----------|
| 5 | 2.1180000 | 0.4717203 | 1.7100000 | 2.8900000 |
|---|-----------|-----------|-----------|-----------|

---

Unique Subject Identifier=0031110001-0007

Assay variable : PTINR\_VAL1 PT-INR Value

N Mean Standard Deviation Minimum Maximum

---

|   |           |           |           |           |
|---|-----------|-----------|-----------|-----------|
| 3 | 2.6366667 | 0.3496188 | 2.4200000 | 3.0400000 |
|---|-----------|-----------|-----------|-----------|

---

Unique Subject Identifier=0031110001-0008

Assay variable : PTINR\_VAL1 PT-INR Value

N Mean Standard Deviation Minimum Maximum

---

|   |          |           |          |          |
|---|----------|-----------|----------|----------|
| 2 | 2.340000 | 0.3535534 | 2.090000 | 2.590000 |
|---|----------|-----------|----------|----------|

---

Laboratory tests at the time of obtaining Table 2-6 consent, according to the presence or absence of proton-pump inhibitors

Unique Subject Identifier=0031110001-0016

MEANS Procedure

Assay variable : PTINR\_VAL1 PT-INR Value

| N | Mean      | Standard Deviation | Minimum   | Maximum   |
|---|-----------|--------------------|-----------|-----------|
| 3 | 2.0766667 | 0.2354428          | 1.8500000 | 2.3200000 |

Unique Subject Identifier=0031110001-0018

Assay variable : PTINR\_VAL1 PT-INR Value

| N | Mean      | Standard Deviation | Minimum   | Maximum   |
|---|-----------|--------------------|-----------|-----------|
| 5 | 2.0640000 | 0.4643598          | 1.3600000 | 2.5100000 |

Unique Subject Identifier=0031110001-0020

Assay variable : PTINR\_VAL1 PT-INR Value

| N | Mean      | Standard Deviation | Minimum   | Maximum   |
|---|-----------|--------------------|-----------|-----------|
| 3 | 2.9833333 | 0.1939931          | 2.7600000 | 3.1100000 |

Unique Subject Identifier=0031110001-0023

Assay variable : PTINR\_VAL1 PT-INR Value

N Mean Standard Deviation Minimum Maximum

---

|   |          |           |          |          |
|---|----------|-----------|----------|----------|
| 3 | 2.160000 | 0.0781025 | 2.070000 | 2.210000 |
|---|----------|-----------|----------|----------|

---



Laboratory tests at the time of obtaining Table 2-6 consent, according to the presence or absence of proton-pump inhibitors

Unique Subject Identifier=0031110001-0025

MEANS Procedure

Assay variable : PTINR\_VAL1 PT-INR Value

N Mean Standard Deviation Minimum Maximum

---

|   |           |           |           |           |
|---|-----------|-----------|-----------|-----------|
| 3 | 2.2066667 | 0.2615977 | 1.9300000 | 2.4500000 |
|---|-----------|-----------|-----------|-----------|

---

Unique Subject Identifier=0031110001-0026

Assay variable : PTINR\_VAL1 PT-INR Value

N Mean Standard Deviation Minimum Maximum

---

|   |           |           |           |           |
|---|-----------|-----------|-----------|-----------|
| 4 | 1.6300000 | 0.3492850 | 1.1600000 | 2.0000000 |
|---|-----------|-----------|-----------|-----------|

---

Unique Subject Identifier=0032110000-0004

Assay variable : PTINR\_VAL1 PT-INR Value

N Mean Standard Deviation Minimum Maximum

---

|   |           |           |           |           |
|---|-----------|-----------|-----------|-----------|
| 4 | 1.6025000 | 0.1512999 | 1.4900000 | 1.8200000 |
|---|-----------|-----------|-----------|-----------|

---

Unique Subject Identifier=0032110000-0007

Assay variable : PTINR\_VAL1 PT-INR Value

N Mean Standard Deviation Minimum Maximum

---

|   |           |           |           |           |
|---|-----------|-----------|-----------|-----------|
| 4 | 2.0075000 | 0.2425387 | 1.7700000 | 2.3100000 |
|---|-----------|-----------|-----------|-----------|

---

Laboratory tests at the time of obtaining Table 2-6 consent, according to the presence or absence of proton-pump inhibitors

Unique Subject Identifier=0032110000-0008

MEANS Procedure

Assay variable : PTINR\_VAL1 PT-INR Value

N Mean Standard Deviation Minimum Maximum

---

|   |           |           |           |           |
|---|-----------|-----------|-----------|-----------|
| 6 | 1.3133333 | 0.1148332 | 1.1300000 | 1.4200000 |
|---|-----------|-----------|-----------|-----------|

---

Unique Subject Identifier=0032110000-0009

Assay variable : PTINR\_VAL1 PT-INR Value

N Mean Standard Deviation Minimum Maximum

---

|   |           |           |           |           |
|---|-----------|-----------|-----------|-----------|
| 6 | 1.5466667 | 0.1057670 | 1.4200000 | 1.6900000 |
|---|-----------|-----------|-----------|-----------|

---

Unique Subject Identifier=0038111111-0002

Assay variable : PTINR\_VAL1 PT-INR Value

N Mean Standard Deviation Minimum Maximum

---

|   |           |           |           |           |
|---|-----------|-----------|-----------|-----------|
| 5 | 1.7800000 | 0.1973575 | 1.5500000 | 1.9800000 |
|---|-----------|-----------|-----------|-----------|

---

Unique Subject Identifier=0038111111-0008

Assay variable : PTINR\_VAL1 PT-INR Value

N Mean Standard Deviation Minimum Maximum

---

|   |           |           |           |           |
|---|-----------|-----------|-----------|-----------|
| 5 | 2.3140000 | 0.2132604 | 1.9600000 | 2.4800000 |
|---|-----------|-----------|-----------|-----------|

---

Laboratory tests at the time of obtaining Table 2-6 consent, according to the presence or absence of proton-pump inhibitors

Unique Subject Identifier=0038111111-0011

MEANS Procedure

Assay variable : PTINR\_VAL1 PT-INR Value

N Mean Standard Deviation Minimum Maximum

---

|   |           |           |           |           |
|---|-----------|-----------|-----------|-----------|
| 6 | 1.5683333 | 0.1190658 | 1.4300000 | 1.7500000 |
|---|-----------|-----------|-----------|-----------|

---

Unique Subject Identifier=0038111111-0019

Assay variable : PTINR\_VAL1 PT-INR Value

N Mean Standard Deviation Minimum Maximum

---

|   |           |           |           |           |
|---|-----------|-----------|-----------|-----------|
| 5 | 2.0840000 | 0.3230015 | 1.7300000 | 2.4800000 |
|---|-----------|-----------|-----------|-----------|

---

Unique Subject Identifier=0038111111-0022

Assay variable : PTINR\_VAL1 PT-INR Value

N Mean Standard Deviation Minimum Maximum

---

|   |           |           |           |           |
|---|-----------|-----------|-----------|-----------|
| 6 | 2.3133333 | 0.6361027 | 1.2200000 | 3.1000000 |
|---|-----------|-----------|-----------|-----------|

---

Unique Subject Identifier=0038111111-0023

Assay variable : PTINR\_VAL1 PT-INR Value

N Mean Standard Deviation Minimum Maximum

---

|   |           |           |           |           |
|---|-----------|-----------|-----------|-----------|
| 5 | 2.2580000 | 0.6187649 | 1.3000000 | 2.8500000 |
|---|-----------|-----------|-----------|-----------|

---

Laboratory tests at the time of obtaining Table 2-6 consent, according to the presence or absence of proton-pump inhibitors

Unique Subject Identifier=0041110000-0002

MEANS Procedure

Assay variable : PTINR\_VAL1 PT-INR Value

N Mean Standard Deviation Minimum Maximum

---

|   |           |           |           |           |
|---|-----------|-----------|-----------|-----------|
| 6 | 1.9350000 | 0.4455895 | 1.5400000 | 2.7500000 |
|---|-----------|-----------|-----------|-----------|

---

Unique Subject Identifier=0041110000-0003

Assay variable : PTINR\_VAL1 PT-INR Value

N Mean Standard Deviation Minimum Maximum

---

|   |           |           |           |           |
|---|-----------|-----------|-----------|-----------|
| 3 | 2.1166667 | 0.0611010 | 2.0500000 | 2.1700000 |
|---|-----------|-----------|-----------|-----------|

---

Unique Subject Identifier=0041110000-0011

Assay variable : PTINR\_VAL1 PT-INR Value

N Mean Standard Deviation Minimum Maximum

---

|   |           |           |           |           |
|---|-----------|-----------|-----------|-----------|
| 2 | 1.9750000 | 0.3889087 | 1.7000000 | 2.2500000 |
|---|-----------|-----------|-----------|-----------|

---

Unique Subject Identifier=0041110000-0017

Assay variable : PTINR\_VAL1 PT-INR Value

N Mean Standard Deviation Minimum Maximum

---

|   |          |           |          |          |
|---|----------|-----------|----------|----------|
| 2 | 2.200000 | 0.1838478 | 2.070000 | 2.330000 |
|---|----------|-----------|----------|----------|

---



Laboratory tests at the time of obtaining Table 2-6 consent, according to the presence or absence of proton-pump inhibitors

Unique Subject Identifier=0041110000-0018

MEANS Procedure

Assay variable : PTINR\_VAL1 PT-INR Value

N Mean Standard Deviation Minimum Maximum

---

|   |           |           |           |           |
|---|-----------|-----------|-----------|-----------|
| 4 | 1.6275000 | 0.5288588 | 1.1700000 | 2.1800000 |
|---|-----------|-----------|-----------|-----------|

---

Unique Subject Identifier=0041110000-0020

Assay variable : PTINR\_VAL1 PT-INR Value

N Mean Standard Deviation Minimum Maximum

---

|   |           |           |           |           |
|---|-----------|-----------|-----------|-----------|
| 3 | 2.0300000 | 0.5715768 | 1.3700000 | 2.3600000 |
|---|-----------|-----------|-----------|-----------|

---

Unique Subject Identifier=0041110000-0022

Assay variable : PTINR\_VAL1 PT-INR Value

N Mean Standard Deviation Minimum Maximum

---

|   |           |           |           |           |
|---|-----------|-----------|-----------|-----------|
| 4 | 1.6175000 | 0.2218671 | 1.3100000 | 1.7800000 |
|---|-----------|-----------|-----------|-----------|

---

Unique Subject Identifier=0042100010-0001

Assay variable : PTINR\_VAL1 PT-INR Value

N Mean Standard Deviation Minimum Maximum

---

|   |           |           |           |           |
|---|-----------|-----------|-----------|-----------|
| 4 | 2.0150000 | 0.7527948 | 1.3900000 | 3.1000000 |
|---|-----------|-----------|-----------|-----------|

---

Laboratory tests at the time of obtaining Table 2-6 consent, according to the presence or absence of proton-pump inhibitors

Unique Subject Identifier=0042100010-0002

MEANS Procedure

Assay variable : PTINR\_VAL1 PT-INR Value

| N | Mean      | Standard Deviation | Minimum   | Maximum   |
|---|-----------|--------------------|-----------|-----------|
| 3 | 1.7866667 | 0.3384277          | 1.5000000 | 2.1600000 |

Unique Subject Identifier=0042100010-0003

Assay variable : PTINR\_VAL1 PT-INR Value

| N | Mean      | Standard Deviation | Minimum   | Maximum   |
|---|-----------|--------------------|-----------|-----------|
| 5 | 1.8320000 | 0.2375289          | 1.5900000 | 2.1300000 |

Unique Subject Identifier=0042100010-0004

Assay variable : PTINR\_VAL1 PT-INR Value

| N | Mean      | Standard Deviation | Minimum   | Maximum   |
|---|-----------|--------------------|-----------|-----------|
| 5 | 1.9240000 | 0.0756968          | 1.8200000 | 2.0200000 |

Unique Subject Identifier=0042100010-0006

Assay variable : PTINR\_VAL1 PT-INR Value

N Mean Standard Deviation Minimum Maximum

---

|   |           |           |           |           |
|---|-----------|-----------|-----------|-----------|
| 6 | 2.2916667 | 0.3726884 | 1.9300000 | 2.8300000 |
|---|-----------|-----------|-----------|-----------|

---

Laboratory tests at the time of obtaining Table 2-6 consent, according to the presence or absence of proton-pump inhibitors

Unique Subject Identifier=0043010010-0001

MEANS Procedure

Assay variable : PTINR\_VAL1 PT-INR Value

N Mean Standard Deviation Minimum Maximum

---

|   |           |           |           |           |
|---|-----------|-----------|-----------|-----------|
| 4 | 1.8025000 | 0.2833578 | 1.4100000 | 2.0200000 |
|---|-----------|-----------|-----------|-----------|

---

Unique Subject Identifier=0043010010-0003

Assay variable : PTINR\_VAL1 PT-INR Value

N Mean Standard Deviation Minimum Maximum

---

|   |           |           |           |           |
|---|-----------|-----------|-----------|-----------|
| 2 | 1.4700000 | 0.0565685 | 1.4300000 | 1.5100000 |
|---|-----------|-----------|-----------|-----------|

---

Unique Subject Identifier=0043010010-0005

Assay variable : PTINR\_VAL1 PT-INR Value

N Mean Standard Deviation Minimum Maximum

---

|   |           |           |           |           |
|---|-----------|-----------|-----------|-----------|
| 3 | 1.7700000 | 0.1587451 | 1.6500000 | 1.9500000 |
|---|-----------|-----------|-----------|-----------|

---

Unique Subject Identifier=0043010010-0007

Assay variable : PTINR\_VAL1 PT-INR Value

N Mean Standard Deviation Minimum Maximum

---

|   |           |           |           |           |
|---|-----------|-----------|-----------|-----------|
| 5 | 2.0780000 | 0.7081102 | 1.4600000 | 3.2300000 |
|---|-----------|-----------|-----------|-----------|

---

Laboratory tests at the time of obtaining Table 2-6 consent, according to the presence or absence of proton-pump inhibitors

Unique Subject Identifier=0043010010-0009

MEANS Procedure

Assay variable : PTINR\_VAL1 PT-INR Value

N Mean Standard Deviation Minimum Maximum

---

|   |           |           |           |           |
|---|-----------|-----------|-----------|-----------|
| 3 | 2.5600000 | 0.1824829 | 2.3500000 | 2.6800000 |
|---|-----------|-----------|-----------|-----------|

---

Unique Subject Identifier=0044110000-0014

Assay variable : PTINR\_VAL1 PT-INR Value

N Mean Standard Deviation Minimum Maximum

---

|   |           |           |           |           |
|---|-----------|-----------|-----------|-----------|
| 3 | 1.6800000 | 0.2605763 | 1.3800000 | 1.8500000 |
|---|-----------|-----------|-----------|-----------|

---

Unique Subject Identifier=0046100001-0002

Assay variable : PTINR\_VAL1 PT-INR Value

N Mean Standard Deviation Minimum Maximum

---

|   |           |           |           |           |
|---|-----------|-----------|-----------|-----------|
| 6 | 2.2733333 | 0.2268627 | 2.0200000 | 2.6100000 |
|---|-----------|-----------|-----------|-----------|

---

Unique Subject Identifier=0046100001-0003

Assay variable : PTINR\_VAL1 PT-INR Value

N Mean Standard Deviation Minimum Maximum

---

|   |           |           |           |           |
|---|-----------|-----------|-----------|-----------|
| 4 | 2.0625000 | 0.3096638 | 1.7700000 | 2.3400000 |
|---|-----------|-----------|-----------|-----------|

---



Laboratory tests at the time of obtaining Table 2-6 consent, according to the presence or absence of proton-pump inhibitors

Unique Subject Identifier=0046100001-0011

MEANS Procedure

Assay variable : PTINR\_VAL1 PT-INR Value

N Mean Standard Deviation Minimum Maximum

---

|   |           |           |           |           |
|---|-----------|-----------|-----------|-----------|
| 6 | 1.7933333 | 0.5809877 | 1.1400000 | 2.7400000 |
|---|-----------|-----------|-----------|-----------|

---

Unique Subject Identifier=0046100001-0015

Assay variable : PTINR\_VAL1 PT-INR Value

N Mean Standard Deviation Minimum Maximum

---

|   |           |           |           |           |
|---|-----------|-----------|-----------|-----------|
| 2 | 1.5500000 | 0.0707107 | 1.5000000 | 1.6000000 |
|---|-----------|-----------|-----------|-----------|

---

Unique Subject Identifier=0046100001-0018

Assay variable : PTINR\_VAL1 PT-INR Value

N Mean Standard Deviation Minimum Maximum

---

|   |           |           |           |           |
|---|-----------|-----------|-----------|-----------|
| 3 | 2.1766667 | 0.5727419 | 1.5300000 | 2.6200000 |
|---|-----------|-----------|-----------|-----------|

---

Unique Subject Identifier=0046100001-0022

Assay variable : PTINR\_VAL1 PT-INR Value

N Mean Standard Deviation Minimum Maximum

---

|   |           |           |           |           |
|---|-----------|-----------|-----------|-----------|
| 6 | 3.1633333 | 1.9392335 | 1.1800000 | 6.4300000 |
|---|-----------|-----------|-----------|-----------|

---

Laboratory tests at the time of obtaining Table 2-6 consent, according to the presence or absence of proton-pump inhibitors

Unique Subject Identifier=0046100001-0027

MEANS Procedure

Assay variable : PTINR\_VAL1 PT-INR Value

N Mean Standard Deviation Minimum Maximum

---

|   |           |           |           |           |
|---|-----------|-----------|-----------|-----------|
| 6 | 1.8350000 | 0.4404884 | 1.3100000 | 2.4700000 |
|---|-----------|-----------|-----------|-----------|

---

Unique Subject Identifier=0046100001-0047

Assay variable : PTINR\_VAL1 PT-INR Value

N Mean Standard Deviation Minimum Maximum

---

|   |           |           |           |           |
|---|-----------|-----------|-----------|-----------|
| 3 | 1.6033333 | 0.1365040 | 1.4800000 | 1.7500000 |
|---|-----------|-----------|-----------|-----------|

---

Unique Subject Identifier=0046100001-0049

Assay variable : PTINR\_VAL1 PT-INR Value

N Mean Standard Deviation Minimum Maximum

---

|   |           |           |           |           |
|---|-----------|-----------|-----------|-----------|
| 3 | 1.7633333 | 0.3695042 | 1.5500000 | 2.1900000 |
|---|-----------|-----------|-----------|-----------|

---

Unique Subject Identifier=0046100001-0051

Assay variable : PTINR\_VAL1 PT-INR Value

N Mean Standard Deviation Minimum Maximum

---

|   |          |          |          |          |
|---|----------|----------|----------|----------|
| 2 | 1.600000 | 0.311127 | 1.380000 | 1.820000 |
|---|----------|----------|----------|----------|

---

Laboratory tests at the time of obtaining Table 2-6 consent, according to the presence or absence of proton-pump inhibitors

Unique Subject Identifier=0046100001-0065

MEANS Procedure

Assay variable : PTINR\_VAL1 PT-INR Value

| N | Mean      | Standard Deviation | Minimum   | Maximum   |
|---|-----------|--------------------|-----------|-----------|
| 1 | 1.9200000 |                    | 1.9200000 | 1.9200000 |

Unique Subject Identifier=0046100001-0066

Assay variable : PTINR\_VAL1 PT-INR Value

| N | Mean      | Standard Deviation | Minimum   | Maximum   |
|---|-----------|--------------------|-----------|-----------|
| 2 | 2.2950000 | 0.4879037          | 1.9500000 | 2.6400000 |

Unique Subject Identifier=0046100001-0073

Assay variable : PTINR\_VAL1 PT-INR Value

| N | Mean      | Standard Deviation | Minimum   | Maximum   |
|---|-----------|--------------------|-----------|-----------|
| 4 | 1.2925000 | 0.0750000          | 1.2300000 | 1.3800000 |

Unique Subject Identifier=0046100001-0079

Assay variable : PTINR\_VAL1 PT-INR Value

N Mean Standard Deviation Minimum Maximum

---

|   |           |           |           |           |
|---|-----------|-----------|-----------|-----------|
| 5 | 2.0460000 | 0.8770006 | 1.3100000 | 3.4600000 |
|---|-----------|-----------|-----------|-----------|

---

Laboratory tests at the time of obtaining Table 2-6 consent, according to the presence or absence of proton-pump inhibitors

Unique Subject Identifier=0046100001-0082

MEANS Procedure

Assay variable : PTINR\_VAL1 PT-INR Value

N Mean Standard Deviation Minimum Maximum

---

|   |           |  |           |           |
|---|-----------|--|-----------|-----------|
| 1 | 2.3100000 |  | 2.3100000 | 2.3100000 |
|---|-----------|--|-----------|-----------|

---

Unique Subject Identifier=0048000010-0002

Assay variable : PTINR\_VAL1 PT-INR Value

N Mean Standard Deviation Minimum Maximum

---

|   |           |           |           |           |
|---|-----------|-----------|-----------|-----------|
| 3 | 2.1433333 | 0.7721615 | 1.2600000 | 2.6900000 |
|---|-----------|-----------|-----------|-----------|

---

Unique Subject Identifier=0048000010-0003

Assay variable : PTINR\_VAL1 PT-INR Value

N Mean Standard Deviation Minimum Maximum

---

|   |           |           |           |           |
|---|-----------|-----------|-----------|-----------|
| 3 | 1.6566667 | 0.2050203 | 1.4500000 | 1.8600000 |
|---|-----------|-----------|-----------|-----------|

---

Unique Subject Identifier=0048000010-0004

Assay variable : PTINR\_VAL1 PT-INR Value

N Mean Standard Deviation Minimum Maximum

---

|   |          |           |          |          |
|---|----------|-----------|----------|----------|
| 5 | 2.200000 | 0.0984886 | 2.030000 | 2.270000 |
|---|----------|-----------|----------|----------|

---



Laboratory tests at the time of obtaining Table 2-6 consent, according to the presence or absence of proton-pump inhibitors

Unique Subject Identifier=0048000010-0010

MEANS Procedure

Assay variable : PTINR\_VAL1 PT-INR Value

N Mean Standard Deviation Minimum Maximum

---

|   |           |  |           |           |
|---|-----------|--|-----------|-----------|
| 1 | 1.7300000 |  | 1.7300000 | 1.7300000 |
|---|-----------|--|-----------|-----------|

---

Unique Subject Identifier=0049000010-0002

Assay variable : PTINR\_VAL1 PT-INR Value

N Mean Standard Deviation Minimum Maximum

---

|   |           |           |           |           |
|---|-----------|-----------|-----------|-----------|
| 6 | 1.8866667 | 0.2731056 | 1.5600000 | 2.3300000 |
|---|-----------|-----------|-----------|-----------|

---

Unique Subject Identifier=0049000010-0004

Assay variable : PTINR\_VAL1 PT-INR Value

N Mean Standard Deviation Minimum Maximum

---

|   |           |           |           |           |
|---|-----------|-----------|-----------|-----------|
| 6 | 1.9850000 | 0.1707337 | 1.7600000 | 2.1700000 |
|---|-----------|-----------|-----------|-----------|

---

Unique Subject Identifier=0049000010-0005

Assay variable : PTINR\_VAL1 PT-INR Value

N Mean Standard Deviation Minimum Maximum

---

|   |           |           |           |           |
|---|-----------|-----------|-----------|-----------|
| 6 | 2.2850000 | 0.2167718 | 2.0400000 | 2.5900000 |
|---|-----------|-----------|-----------|-----------|

---

Laboratory tests at the time of obtaining Table 2-6 consent, according to the presence or absence of proton-pump inhibitors

Unique Subject Identifier=0049000010-0006

MEANS Procedure

Assay variable : PTINR\_VAL1 PT-INR Value

N Mean Standard Deviation Minimum Maximum

---

|   |           |           |           |           |
|---|-----------|-----------|-----------|-----------|
| 5 | 1.9750000 | 0.6737025 | 1.3400000 | 3.1000000 |
|---|-----------|-----------|-----------|-----------|

---

Unique Subject Identifier=0049000010-0008

Assay variable : PTINR\_VAL1 PT-INR Value

N Mean Standard Deviation Minimum Maximum

---

|   |           |           |           |           |
|---|-----------|-----------|-----------|-----------|
| 5 | 1.9020000 | 0.0957601 | 1.7700000 | 2.0200000 |
|---|-----------|-----------|-----------|-----------|

---

Unique Subject Identifier=0049000010-0011

Assay variable : PTINR\_VAL1 PT-INR Value

N Mean Standard Deviation Minimum Maximum

---

|   |           |           |           |           |
|---|-----------|-----------|-----------|-----------|
| 4 | 1.8350000 | 0.2335951 | 1.6200000 | 2.1200000 |
|---|-----------|-----------|-----------|-----------|

---

Unique Subject Identifier=0049000010-0015

Assay variable : PTINR\_VAL1 PT-INR Value

N Mean Standard Deviation Minimum Maximum

---

|   |           |           |           |           |
|---|-----------|-----------|-----------|-----------|
| 6 | 1.8416667 | 0.4710166 | 1.4100000 | 2.7300000 |
|---|-----------|-----------|-----------|-----------|

---

Laboratory tests at the time of obtaining Table 2-6 consent, according to the presence or absence of proton-pump inhibitors

Unique Subject Identifier=0049000010-0029

MEANS Procedure

Assay variable : PTINR\_VAL1 PT-INR Value

N Mean Standard Deviation Minimum Maximum

---

|   |           |           |           |           |
|---|-----------|-----------|-----------|-----------|
| 6 | 1.9883333 | 0.2657380 | 1.6800000 | 2.2900000 |
|---|-----------|-----------|-----------|-----------|

---

Unique Subject Identifier=0049000010-0031

Assay variable : PTINR\_VAL1 PT-INR Value

N Mean Standard Deviation Minimum Maximum

---

|   |           |           |           |           |
|---|-----------|-----------|-----------|-----------|
| 6 | 1.9050000 | 0.2059854 | 1.5900000 | 2.1400000 |
|---|-----------|-----------|-----------|-----------|

---

Unique Subject Identifier=0049000010-0036

Assay variable : PTINR\_VAL1 PT-INR Value

N Mean Standard Deviation Minimum Maximum

---

|   |           |           |           |           |
|---|-----------|-----------|-----------|-----------|
| 6 | 2.2200000 | 0.4799167 | 1.7700000 | 3.0900000 |
|---|-----------|-----------|-----------|-----------|

---

Unique Subject Identifier=0049000010-0037

Assay variable : PTINR\_VAL1 PT-INR Value

N Mean Standard Deviation Minimum Maximum

---

|   |          |           |          |          |
|---|----------|-----------|----------|----------|
| 6 | 2.540000 | 0.3212476 | 2.140000 | 2.940000 |
|---|----------|-----------|----------|----------|

---

Laboratory tests at the time of obtaining Table 2-6 consent, according to the presence or absence of proton-pump inhibitors

Unique Subject Identifier=0052000000-0001

MEANS Procedure

Assay variable : PTINR\_VAL1 PT-INR Value

N Mean Standard Deviation Minimum Maximum

---

|   |           |           |           |           |
|---|-----------|-----------|-----------|-----------|
| 5 | 2.0080000 | 0.6680344 | 1.0900000 | 2.6800000 |
|---|-----------|-----------|-----------|-----------|

---

Unique Subject Identifier=0052000000-0003

Assay variable : PTINR\_VAL1 PT-INR Value

N Mean Standard Deviation Minimum Maximum

---

|   |           |           |           |           |
|---|-----------|-----------|-----------|-----------|
| 6 | 1.7916667 | 0.1185608 | 1.6900000 | 2.0000000 |
|---|-----------|-----------|-----------|-----------|

---

Unique Subject Identifier=0052000000-0004

Assay variable : PTINR\_VAL1 PT-INR Value

N Mean Standard Deviation Minimum Maximum

---

|   |           |           |           |           |
|---|-----------|-----------|-----------|-----------|
| 6 | 1.9250000 | 0.1330789 | 1.6900000 | 2.0600000 |
|---|-----------|-----------|-----------|-----------|

---

Unique Subject Identifier=0054010000-0004

Assay variable : PTINR\_VAL1 PT-INR Value

N Mean Standard Deviation Minimum Maximum

---

|   |          |           |          |          |
|---|----------|-----------|----------|----------|
| 3 | 2.430000 | 0.6701492 | 1.890000 | 3.180000 |
|---|----------|-----------|----------|----------|

---



Laboratory tests at the time of obtaining Table 2-6 consent, according to the presence or absence of proton-pump inhibitors

Unique Subject Identifier=0054010000-0005

MEANS Procedure

Assay variable : PTINR\_VAL1 PT-INR Value

N Mean Standard Deviation Minimum Maximum

---

|   |           |           |           |           |
|---|-----------|-----------|-----------|-----------|
| 5 | 2.2800000 | 0.1093161 | 2.1800000 | 2.4300000 |
|---|-----------|-----------|-----------|-----------|

---

Unique Subject Identifier=0054010000-0007

Assay variable : PTINR\_VAL1 PT-INR Value

N Mean Standard Deviation Minimum Maximum

---

|   |           |           |           |           |
|---|-----------|-----------|-----------|-----------|
| 3 | 2.1000000 | 0.1931321 | 1.9300000 | 2.3100000 |
|---|-----------|-----------|-----------|-----------|

---

Unique Subject Identifier=0054010000-0017

Assay variable : PTINR\_VAL1 PT-INR Value

N Mean Standard Deviation Minimum Maximum

---

|   |           |           |           |           |
|---|-----------|-----------|-----------|-----------|
| 4 | 1.8950000 | 0.3164912 | 1.6100000 | 2.3400000 |
|---|-----------|-----------|-----------|-----------|

---

Unique Subject Identifier=0054010000-0020

Assay variable : PTINR\_VAL1 PT-INR Value

N Mean Standard Deviation Minimum Maximum

---

|   |           |  |           |           |
|---|-----------|--|-----------|-----------|
| 1 | 2.2300000 |  | 2.2300000 | 2.2300000 |
|---|-----------|--|-----------|-----------|

---

Laboratory tests at the time of obtaining Table 2-6 consent, according to the presence or absence of proton-pump inhibitors

Unique Subject Identifier=0054010000-0022

MEANS Procedure

Assay variable : PTINR\_VAL1 PT-INR Value

N Mean Standard Deviation Minimum Maximum

---

|   |           |           |           |           |
|---|-----------|-----------|-----------|-----------|
| 6 | 1.3066667 | 0.1929421 | 1.1300000 | 1.6700000 |
|---|-----------|-----------|-----------|-----------|

---

Unique Subject Identifier=0054010000-0026

Assay variable : PTINR\_VAL1 PT-INR Value

N Mean Standard Deviation Minimum Maximum

---

|   |           |           |           |           |
|---|-----------|-----------|-----------|-----------|
| 3 | 1.6966667 | 0.3189566 | 1.4300000 | 2.0500000 |
|---|-----------|-----------|-----------|-----------|

---

Unique Subject Identifier=0054010000-0027

Assay variable : PTINR\_VAL1 PT-INR Value

N Mean Standard Deviation Minimum Maximum

---

|   |           |           |           |           |
|---|-----------|-----------|-----------|-----------|
| 3 | 1.7700000 | 0.1646208 | 1.6700000 | 1.9600000 |
|---|-----------|-----------|-----------|-----------|

---

Unique Subject Identifier=0054010000-0028

Assay variable : PTINR\_VAL1 PT-INR Value

N Mean Standard Deviation Minimum Maximum

---

|   |           |           |           |           |
|---|-----------|-----------|-----------|-----------|
| 5 | 2.3900000 | 0.2317326 | 2.0800000 | 2.7100000 |
|---|-----------|-----------|-----------|-----------|

---

Laboratory tests at the time of obtaining Table 2-6 consent, according to the presence or absence of proton-pump inhibitors

Unique Subject Identifier=0054010000-0029

MEANS Procedure

Assay variable : PTINR\_VAL1 PT-INR Value

N Mean Standard Deviation Minimum Maximum

---

|   |          |           |          |          |
|---|----------|-----------|----------|----------|
| 3 | 2.420000 | 0.2351595 | 2.260000 | 2.690000 |
|---|----------|-----------|----------|----------|

---

Unique Subject Identifier=0054010000-0033

Assay variable : PTINR\_VAL1 PT-INR Value

N Mean Standard Deviation Minimum Maximum

---

|   |           |           |          |          |
|---|-----------|-----------|----------|----------|
| 3 | 2.5566667 | 0.1266228 | 2.460000 | 2.700000 |
|---|-----------|-----------|----------|----------|

---

Unique Subject Identifier=0055100000-0001

Assay variable : PTINR\_VAL1 PT-INR Value

N Mean Standard Deviation Minimum Maximum

---

|   |          |           |          |          |
|---|----------|-----------|----------|----------|
| 4 | 1.817500 | 0.0754431 | 1.770000 | 1.930000 |
|---|----------|-----------|----------|----------|

---

Unique Subject Identifier=0058000100-0007

Assay variable : PTINR\_VAL1 PT-INR Value

N Mean Standard Deviation Minimum Maximum

---

|   |           |           |           |           |
|---|-----------|-----------|-----------|-----------|
| 2 | 1.6900000 | 0.8343860 | 1.1000000 | 2.2800000 |
|---|-----------|-----------|-----------|-----------|

---

Laboratory tests at the time of obtaining Table 2-6 consent, according to the presence or absence of proton-pump inhibitors

Unique Subject Identifier=0059100000-0001

MEANS Procedure

Assay variable : PTINR\_VAL1 PT-INR Value

| N | Mean     | Standard Deviation | Minimum  | Maximum  |
|---|----------|--------------------|----------|----------|
| 3 | 1.600000 | 0.0953939          | 1.500000 | 1.690000 |

Unique Subject Identifier=0059100000-0002

Assay variable : PTINR\_VAL1 PT-INR Value

| N | Mean     | Standard Deviation | Minimum  | Maximum  |
|---|----------|--------------------|----------|----------|
| 5 | 1.564000 | 0.1342758          | 1.360000 | 1.730000 |

Unique Subject Identifier=0059100000-0003

Assay variable : PTINR\_VAL1 PT-INR Value

| N | Mean      | Standard Deviation | Minimum  | Maximum  |
|---|-----------|--------------------|----------|----------|
| 6 | 1.7716667 | 0.1251266          | 1.640000 | 1.970000 |

Unique Subject Identifier=0059100000-0005

Assay variable : PTINR\_VAL1 PT-INR Value

N Mean Standard Deviation Minimum Maximum

---

|   |           |           |           |           |
|---|-----------|-----------|-----------|-----------|
| 5 | 1.5380000 | 0.2161481 | 1.3400000 | 1.8400000 |
|---|-----------|-----------|-----------|-----------|

---



Laboratory tests at the time of obtaining Table 2-6 consent, according to the presence or absence of proton-pump inhibitors

Unique Subject Identifier=0061000000-0001

MEANS Procedure

Assay variable : PTINR\_VAL1 PT-INR Value

N Mean Standard Deviation Minimum Maximum

---

|   |           |           |           |           |
|---|-----------|-----------|-----------|-----------|
| 3 | 1.9800000 | 0.2170253 | 1.8400000 | 2.2300000 |
|---|-----------|-----------|-----------|-----------|

---

Unique Subject Identifier=0061000000-0005

Assay variable : PTINR\_VAL1 PT-INR Value

N Mean Standard Deviation Minimum Maximum

---

|   |           |           |           |           |
|---|-----------|-----------|-----------|-----------|
| 3 | 2.1266667 | 0.4099187 | 1.8900000 | 2.6000000 |
|---|-----------|-----------|-----------|-----------|

---

Unique Subject Identifier=0061000000-0006

Assay variable : PTINR\_VAL1 PT-INR Value

N Mean Standard Deviation Minimum Maximum

---

|   |           |           |           |           |
|---|-----------|-----------|-----------|-----------|
| 2 | 2.2100000 | 0.2828427 | 2.0100000 | 2.4100000 |
|---|-----------|-----------|-----------|-----------|

---

Unique Subject Identifier=0061000000-0010

Assay variable : PTINR\_VAL1 PT-INR Value

N Mean Standard Deviation Minimum Maximum

---

|   |           |           |           |           |
|---|-----------|-----------|-----------|-----------|
| 4 | 2.0625000 | 0.4855495 | 1.6000000 | 2.7400000 |
|---|-----------|-----------|-----------|-----------|

---

Laboratory tests at the time of obtaining Table 2-6 consent, according to the presence or absence of proton-pump inhibitors

Unique Subject Identifier=0061000000-0018

MEANS Procedure

Assay variable : PTINR\_VAL1 PT-INR Value

N Mean Standard Deviation Minimum Maximum

---

|   |           |  |           |           |
|---|-----------|--|-----------|-----------|
| 1 | 1.0800000 |  | 1.0800000 | 1.0800000 |
|---|-----------|--|-----------|-----------|

---

Unique Subject Identifier=0061000000-0019

Assay variable : PTINR\_VAL1 PT-INR Value

N Mean Standard Deviation Minimum Maximum

---

|   |           |           |           |           |
|---|-----------|-----------|-----------|-----------|
| 2 | 2.4500000 | 0.9616652 | 1.7700000 | 3.1300000 |
|---|-----------|-----------|-----------|-----------|

---

Unique Subject Identifier=0061000000-0021

Assay variable : PTINR\_VAL1 PT-INR Value

N Mean Standard Deviation Minimum Maximum

---

|   |           |           |           |           |
|---|-----------|-----------|-----------|-----------|
| 6 | 1.9633333 | 0.6763333 | 1.2700000 | 3.1700000 |
|---|-----------|-----------|-----------|-----------|

---

Unique Subject Identifier=0063010000-0012

Assay variable : PTINR\_VAL1 PT-INR Value

N Mean Standard Deviation Minimum Maximum

---

|   |           |           |           |           |
|---|-----------|-----------|-----------|-----------|
| 3 | 1.6033333 | 0.0757188 | 1.5500000 | 1.6900000 |
|---|-----------|-----------|-----------|-----------|

---

Laboratory tests at the time of obtaining Table 2-6 consent, according to the presence or absence of proton-pump inhibitors

Unique Subject Identifier=0063010000-0013

MEANS Procedure

Assay variable : PTINR\_VAL1 PT-INR Value

N Mean Standard Deviation Minimum Maximum

---

|   |           |  |           |           |
|---|-----------|--|-----------|-----------|
| 1 | 2.7000000 |  | 2.7000000 | 2.7000000 |
|---|-----------|--|-----------|-----------|

---

Unique Subject Identifier=0063010000-0015

Assay variable : PTINR\_VAL1 PT-INR Value

N Mean Standard Deviation Minimum Maximum

---

|   |           |           |           |           |
|---|-----------|-----------|-----------|-----------|
| 2 | 1.5100000 | 0.0707107 | 1.4600000 | 1.5600000 |
|---|-----------|-----------|-----------|-----------|

---

Unique Subject Identifier=0063010000-0016

Assay variable : PTINR\_VAL1 PT-INR Value

N Mean Standard Deviation Minimum Maximum

---

|   |           |           |           |           |
|---|-----------|-----------|-----------|-----------|
| 3 | 1.5333333 | 0.1761628 | 1.3700000 | 1.7200000 |
|---|-----------|-----------|-----------|-----------|

---

Unique Subject Identifier=0063010000-0018

Assay variable : PTINR\_VAL1 PT-INR Value

N Mean Standard Deviation Minimum Maximum

---

|   |           |           |           |           |
|---|-----------|-----------|-----------|-----------|
| 4 | 1.9150000 | 0.4522905 | 1.5300000 | 2.5700000 |
|---|-----------|-----------|-----------|-----------|

---

Laboratory tests at the time of obtaining Table 2-6 consent, according to the presence or absence of proton-pump inhibitors

Unique Subject Identifier=0063010000-0024

MEANS Procedure

Assay variable : PTINR\_VAL1 PT-INR Value

N Mean Standard Deviation Minimum Maximum

---

|   |           |           |           |           |
|---|-----------|-----------|-----------|-----------|
| 6 | 2.0466667 | 0.4078071 | 1.6100000 | 2.6000000 |
|---|-----------|-----------|-----------|-----------|

---

Unique Subject Identifier=0063010000-0029

Assay variable : PTINR\_VAL1 PT-INR Value

N Mean Standard Deviation Minimum Maximum

---

|   |           |           |           |           |
|---|-----------|-----------|-----------|-----------|
| 3 | 1.9566667 | 0.2571640 | 1.7700000 | 2.2500000 |
|---|-----------|-----------|-----------|-----------|

---

Unique Subject Identifier=0063010000-0030

Assay variable : PTINR\_VAL1 PT-INR Value

N Mean Standard Deviation Minimum Maximum

---

|   |           |           |           |           |
|---|-----------|-----------|-----------|-----------|
| 3 | 1.9133333 | 0.2902298 | 1.6300000 | 2.2100000 |
|---|-----------|-----------|-----------|-----------|

---

Unique Subject Identifier=0063010000-0033

Assay variable : PTINR\_VAL1 PT-INR Value

N Mean Standard Deviation Minimum Maximum

---

|   |           |           |           |           |
|---|-----------|-----------|-----------|-----------|
| 3 | 1.7900000 | 0.3328663 | 1.5500000 | 2.1700000 |
|---|-----------|-----------|-----------|-----------|

---



Laboratory tests at the time of obtaining Table 2-6 consent, according to the presence or absence of proton-pump inhibitors

Unique Subject Identifier=0063010000-0036

MEANS Procedure

Assay variable : PTINR\_VAL1 PT-INR Value

N Mean Standard Deviation Minimum Maximum

---

|   |           |           |           |           |
|---|-----------|-----------|-----------|-----------|
| 3 | 2.0900000 | 0.1509967 | 1.9300000 | 2.2300000 |
|---|-----------|-----------|-----------|-----------|

---

Unique Subject Identifier=0063010000-0041

Assay variable : PTINR\_VAL1 PT-INR Value

N Mean Standard Deviation Minimum Maximum

---

|   |           |           |           |           |
|---|-----------|-----------|-----------|-----------|
| 2 | 1.7050000 | 0.5586144 | 1.3100000 | 2.1000000 |
|---|-----------|-----------|-----------|-----------|

---

Unique Subject Identifier=0063010000-0044

Assay variable : PTINR\_VAL1 PT-INR Value

N Mean Standard Deviation Minimum Maximum

---

|   |           |           |           |           |
|---|-----------|-----------|-----------|-----------|
| 3 | 2.4366667 | 0.3066486 | 2.1900000 | 2.7800000 |
|---|-----------|-----------|-----------|-----------|

---

Unique Subject Identifier=0063110000-0004

Assay variable : PTINR\_VAL1 PT-INR Value

N Mean Standard Deviation Minimum Maximum

---

|   |           |           |           |           |
|---|-----------|-----------|-----------|-----------|
| 6 | 1.8750000 | 0.0531977 | 1.8300000 | 1.9800000 |
|---|-----------|-----------|-----------|-----------|

---

Laboratory tests at the time of obtaining Table 2-6 consent, according to the presence or absence of proton-pump inhibitors

Unique Subject Identifier=0063110000-0005

MEANS Procedure

Assay variable : PTINR\_VAL1 PT-INR Value

N Mean Standard Deviation Minimum Maximum

---

|   |           |           |           |           |
|---|-----------|-----------|-----------|-----------|
| 5 | 2.7820000 | 0.5848248 | 1.9100000 | 3.3800000 |
|---|-----------|-----------|-----------|-----------|

---

Unique Subject Identifier=0063110000-0007

Assay variable : PTINR\_VAL1 PT-INR Value

N Mean Standard Deviation Minimum Maximum

---

|   |           |           |           |           |
|---|-----------|-----------|-----------|-----------|
| 2 | 1.8050000 | 0.0919239 | 1.7400000 | 1.8700000 |
|---|-----------|-----------|-----------|-----------|

---

Unique Subject Identifier=0063110000-0012

Assay variable : PTINR\_VAL1 PT-INR Value

N Mean Standard Deviation Minimum Maximum

---

|   |           |           |           |           |
|---|-----------|-----------|-----------|-----------|
| 5 | 1.9900000 | 0.9109336 | 1.2200000 | 3.5600000 |
|---|-----------|-----------|-----------|-----------|

---

Unique Subject Identifier=0063110000-0015

Assay variable : PTINR\_VAL1 PT-INR Value

N Mean Standard Deviation Minimum Maximum

---

|   |           |           |           |           |
|---|-----------|-----------|-----------|-----------|
| 4 | 2.0775000 | 1.0203717 | 1.3600000 | 3.5900000 |
|---|-----------|-----------|-----------|-----------|

---

Laboratory tests at the time of obtaining Table 2-6 consent, according to the presence or absence of proton-pump inhibitors

Unique Subject Identifier=0064010110-0003

MEANS Procedure

Assay variable : PTINR\_VAL1 PT-INR Value

N Mean Standard Deviation Minimum Maximum

---

|   |           |           |           |           |
|---|-----------|-----------|-----------|-----------|
| 6 | 2.4583333 | 0.1922932 | 2.2600000 | 2.7800000 |
|---|-----------|-----------|-----------|-----------|

---

Unique Subject Identifier=0064010110-0011

Assay variable : PTINR\_VAL1 PT-INR Value

N Mean Standard Deviation Minimum Maximum

---

|   |           |           |           |           |
|---|-----------|-----------|-----------|-----------|
| 6 | 1.7750000 | 0.1013410 | 1.6100000 | 1.9100000 |
|---|-----------|-----------|-----------|-----------|

---

Unique Subject Identifier=0064010110-0012

Assay variable : PTINR\_VAL1 PT-INR Value

N Mean Standard Deviation Minimum Maximum

---

|   |           |           |           |           |
|---|-----------|-----------|-----------|-----------|
| 3 | 1.5666667 | 0.3768731 | 1.1700000 | 1.9200000 |
|---|-----------|-----------|-----------|-----------|

---

Unique Subject Identifier=0064010110-0014

Assay variable : PTINR\_VAL1 PT-INR Value

N Mean Standard Deviation Minimum Maximum

---

|   |           |           |           |           |
|---|-----------|-----------|-----------|-----------|
| 6 | 1.8866667 | 0.1789600 | 1.7200000 | 2.1100000 |
|---|-----------|-----------|-----------|-----------|

---

Laboratory tests at the time of obtaining Table 2-6 consent, according to the presence or absence of proton-pump inhibitors

Unique Subject Identifier=0064010110-0015

MEANS Procedure

Assay variable : PTINR\_VAL1 PT-INR Value

N Mean Standard Deviation Minimum Maximum

---

|   |           |           |           |           |
|---|-----------|-----------|-----------|-----------|
| 5 | 1.6900000 | 0.3061862 | 1.4100000 | 2.1700000 |
|---|-----------|-----------|-----------|-----------|

---

Unique Subject Identifier=0069000000-0003

Assay variable : PTINR\_VAL1 PT-INR Value

N Mean Standard Deviation Minimum Maximum

---

|   |           |           |           |           |
|---|-----------|-----------|-----------|-----------|
| 6 | 1.8816667 | 0.5136698 | 1.5700000 | 2.9000000 |
|---|-----------|-----------|-----------|-----------|

---

Unique Subject Identifier=0069000000-0014

Assay variable : PTINR\_VAL1 PT-INR Value

N Mean Standard Deviation Minimum Maximum

---

|   |           |           |           |           |
|---|-----------|-----------|-----------|-----------|
| 6 | 3.1800000 | 2.1056116 | 1.4200000 | 6.8400000 |
|---|-----------|-----------|-----------|-----------|

---

Unique Subject Identifier=0070000000-0003

Assay variable : PTINR\_VAL1 PT-INR Value

N Mean Standard Deviation Minimum Maximum

---

|   |          |           |          |          |
|---|----------|-----------|----------|----------|
| 6 | 2.000000 | 0.3207491 | 1.730000 | 2.470000 |
|---|----------|-----------|----------|----------|

---



Laboratory tests at the time of obtaining Table 2-6 consent, according to the presence or absence of proton-pump inhibitors

Unique Subject Identifier=0070000000-0005

MEANS Procedure

Assay variable : PTINR\_VAL1 PT-INR Value

N Mean Standard Deviation Minimum Maximum

---

|   |           |           |           |           |
|---|-----------|-----------|-----------|-----------|
| 3 | 1.8533333 | 0.4343194 | 1.4800000 | 2.3300000 |
|---|-----------|-----------|-----------|-----------|

---

Unique Subject Identifier=0070000000-0008

Assay variable : PTINR\_VAL1 PT-INR Value

N Mean Standard Deviation Minimum Maximum

---

|   |           |           |           |           |
|---|-----------|-----------|-----------|-----------|
| 4 | 2.2175000 | 0.1260622 | 2.0600000 | 2.3600000 |
|---|-----------|-----------|-----------|-----------|

---

Unique Subject Identifier=0070000000-0009

Assay variable : PTINR\_VAL1 PT-INR Value

N Mean Standard Deviation Minimum Maximum

---

|   |           |           |           |           |
|---|-----------|-----------|-----------|-----------|
| 5 | 2.0500000 | 0.6826419 | 1.4600000 | 3.0000000 |
|---|-----------|-----------|-----------|-----------|

---

Unique Subject Identifier=0070000000-0013

Assay variable : PTINR\_VAL1 PT-INR Value

N Mean Standard Deviation Minimum Maximum

---

|   |           |           |           |           |
|---|-----------|-----------|-----------|-----------|
| 3 | 2.1933333 | 0.2554082 | 1.9900000 | 2.4800000 |
|---|-----------|-----------|-----------|-----------|

---

Laboratory tests at the time of obtaining Table 2-6 consent, according to the presence or absence of proton-pump inhibitors

Unique Subject Identifier=0070000000-0016

MEANS Procedure

Assay variable : PTINR\_VAL1 PT-INR Value

N Mean Standard Deviation Minimum Maximum

---

|   |           |           |           |           |
|---|-----------|-----------|-----------|-----------|
| 5 | 2.7660000 | 0.8777984 | 1.9700000 | 4.2300000 |
|---|-----------|-----------|-----------|-----------|

---

Unique Subject Identifier=0070000000-0018

Assay variable : PTINR\_VAL1 PT-INR Value

N Mean Standard Deviation Minimum Maximum

---

|   |           |           |           |           |
|---|-----------|-----------|-----------|-----------|
| 5 | 1.5540000 | 0.3332867 | 1.0600000 | 1.8600000 |
|---|-----------|-----------|-----------|-----------|

---

Unique Subject Identifier=0070000000-0022

Assay variable : PTINR\_VAL1 PT-INR Value

N Mean Standard Deviation Minimum Maximum

---

|   |           |           |           |           |
|---|-----------|-----------|-----------|-----------|
| 4 | 2.1075000 | 0.3629853 | 1.7900000 | 2.5300000 |
|---|-----------|-----------|-----------|-----------|

---

Unique Subject Identifier=0070000000-0026

Assay variable : PTINR\_VAL1 PT-INR Value

N Mean Standard Deviation Minimum Maximum

---

|   |           |           |           |           |
|---|-----------|-----------|-----------|-----------|
| 6 | 2.6550000 | 0.1619568 | 2.4700000 | 2.8500000 |
|---|-----------|-----------|-----------|-----------|

---

Laboratory tests at the time of obtaining Table 2-6 consent, according to the presence or absence of proton-pump inhibitors

Unique Subject Identifier=0070000000-0028

MEANS Procedure

Assay variable : PTINR\_VAL1 PT-INR Value

N Mean Standard Deviation Minimum Maximum

---

|   |           |           |           |           |
|---|-----------|-----------|-----------|-----------|
| 3 | 1.8166667 | 0.2800595 | 1.6500000 | 2.1400000 |
|---|-----------|-----------|-----------|-----------|

---

Unique Subject Identifier=0070000000-0029

Assay variable : PTINR\_VAL1 PT-INR Value

N Mean Standard Deviation Minimum Maximum

---

|   |           |           |           |           |
|---|-----------|-----------|-----------|-----------|
| 4 | 2.5775000 | 0.5146763 | 2.1100000 | 3.2100000 |
|---|-----------|-----------|-----------|-----------|

---

Unique Subject Identifier=0070000000-0030

Assay variable : PTINR\_VAL1 PT-INR Value

N Mean Standard Deviation Minimum Maximum

---

|   |           |           |           |           |
|---|-----------|-----------|-----------|-----------|
| 3 | 1.9400000 | 0.3465545 | 1.7300000 | 2.3400000 |
|---|-----------|-----------|-----------|-----------|

---

Unique Subject Identifier=0070000000-0031

Assay variable : PTINR\_VAL1 PT-INR Value

N Mean Standard Deviation Minimum Maximum

---

|   |          |           |          |          |
|---|----------|-----------|----------|----------|
| 3 | 1.740000 | 0.1967232 | 1.530000 | 1.920000 |
|---|----------|-----------|----------|----------|

---

Laboratory tests at the time of obtaining Table 2-6 consent, according to the presence or absence of proton-pump inhibitors

Unique Subject Identifier=0070000000-0032

MEANS Procedure

Assay variable : PTINR\_VAL1 PT-INR Value

N Mean Standard Deviation Minimum Maximum

---

|   |           |           |           |           |
|---|-----------|-----------|-----------|-----------|
| 3 | 2.1766667 | 0.1250333 | 2.0900000 | 2.3200000 |
|---|-----------|-----------|-----------|-----------|

---

Unique Subject Identifier=0070000000-0033

Assay variable : PTINR\_VAL1 PT-INR Value

N Mean Standard Deviation Minimum Maximum

---

|   |           |           |           |           |
|---|-----------|-----------|-----------|-----------|
| 3 | 1.8100000 | 0.0655744 | 1.7500000 | 1.8800000 |
|---|-----------|-----------|-----------|-----------|

---

Unique Subject Identifier=0070000000-0035

Assay variable : PTINR\_VAL1 PT-INR Value

N Mean Standard Deviation Minimum Maximum

---

|   |           |           |           |           |
|---|-----------|-----------|-----------|-----------|
| 3 | 1.6000000 | 0.1000000 | 1.5000000 | 1.7000000 |
|---|-----------|-----------|-----------|-----------|

---

Unique Subject Identifier=0070000000-0039

Assay variable : PTINR\_VAL1 PT-INR Value

N Mean Standard Deviation Minimum Maximum

---

|   |          |           |          |          |
|---|----------|-----------|----------|----------|
| 4 | 1.550000 | 0.4002499 | 1.130000 | 2.070000 |
|---|----------|-----------|----------|----------|

---



Laboratory tests at the time of obtaining Table 2-6 consent, according to the presence or absence of proton-pump inhibitors

Unique Subject Identifier=0070000000-0041

MEANS Procedure

Assay variable : PTINR\_VAL1 PT-INR Value

| N | Mean     | Standard Deviation | Minimum  | Maximum  |
|---|----------|--------------------|----------|----------|
| 4 | 2.180000 | 0.2409703          | 1.820000 | 2.330000 |

Unique Subject Identifier=0070000000-0043

Assay variable : PTINR\_VAL1 PT-INR Value

| N | Mean     | Standard Deviation | Minimum  | Maximum  |
|---|----------|--------------------|----------|----------|
| 4 | 1.782500 | 0.1664081          | 1.570000 | 1.970000 |

Unique Subject Identifier=0070000000-0046

Assay variable : PTINR\_VAL1 PT-INR Value

| N | Mean     | Standard Deviation | Minimum  | Maximum  |
|---|----------|--------------------|----------|----------|
| 3 | 2.086667 | 0.1504438          | 1.930000 | 2.230000 |

Unique Subject Identifier=0070000000-0048

Assay variable : PTINR\_VAL1 PT-INR Value

N Mean Standard Deviation Minimum Maximum

---

|   |           |           |           |           |
|---|-----------|-----------|-----------|-----------|
| 4 | 1.8150000 | 0.1554563 | 1.6800000 | 2.0200000 |
|---|-----------|-----------|-----------|-----------|

---

Laboratory tests at the time of obtaining Table 2-6 consent, according to the presence or absence of proton-pump inhibitors

Unique Subject Identifier=0070000000-0049

MEANS Procedure

Assay variable : PTINR\_VAL1 PT-INR Value

N Mean Standard Deviation Minimum Maximum

---

|   |           |           |           |           |
|---|-----------|-----------|-----------|-----------|
| 5 | 2.0280000 | 0.4447134 | 1.5700000 | 2.6600000 |
|---|-----------|-----------|-----------|-----------|

---

Unique Subject Identifier=0070000000-0050

Assay variable : PTINR\_VAL1 PT-INR Value

N Mean Standard Deviation Minimum Maximum

---

|   |           |           |           |           |
|---|-----------|-----------|-----------|-----------|
| 6 | 2.2550000 | 1.2352935 | 1.4300000 | 4.7300000 |
|---|-----------|-----------|-----------|-----------|

---

Unique Subject Identifier=0070000000-0053

Assay variable : PTINR\_VAL1 PT-INR Value

N Mean Standard Deviation Minimum Maximum

---

|   |           |           |           |           |
|---|-----------|-----------|-----------|-----------|
| 3 | 1.7166667 | 0.1001665 | 1.6400000 | 1.8300000 |
|---|-----------|-----------|-----------|-----------|

---

Unique Subject Identifier=0070000000-0054

Assay variable : PTINR\_VAL1 PT-INR Value

N Mean Standard Deviation Minimum Maximum

---

|   |          |           |          |          |
|---|----------|-----------|----------|----------|
| 5 | 2.260000 | 0.3611094 | 1.890000 | 2.690000 |
|---|----------|-----------|----------|----------|

---

Laboratory tests at the time of obtaining Table 2-6 consent, according to the presence or absence of proton-pump inhibitors

Unique Subject Identifier=0070000000-0056

MEANS Procedure

Assay variable : PTINR\_VAL1 PT-INR Value

N Mean Standard Deviation Minimum Maximum

---

|   |           |           |           |           |
|---|-----------|-----------|-----------|-----------|
| 3 | 2.4266667 | 0.7861510 | 1.5900000 | 3.1500000 |
|---|-----------|-----------|-----------|-----------|

---

Unique Subject Identifier=0070000000-0058

Assay variable : PTINR\_VAL1 PT-INR Value

N Mean Standard Deviation Minimum Maximum

---

|   |           |           |           |           |
|---|-----------|-----------|-----------|-----------|
| 3 | 2.2500000 | 0.3811824 | 2.0200000 | 2.6900000 |
|---|-----------|-----------|-----------|-----------|

---

Unique Subject Identifier=0070000000-0061

Assay variable : PTINR\_VAL1 PT-INR Value

N Mean Standard Deviation Minimum Maximum

---

|   |           |           |           |           |
|---|-----------|-----------|-----------|-----------|
| 5 | 1.8480000 | 0.3226763 | 1.3500000 | 2.2100000 |
|---|-----------|-----------|-----------|-----------|

---

Unique Subject Identifier=0070000000-0063

Assay variable : PTINR\_VAL1 PT-INR Value

N Mean Standard Deviation Minimum Maximum

---

|   |           |           |           |           |
|---|-----------|-----------|-----------|-----------|
| 3 | 1.5533333 | 0.0838650 | 1.5000000 | 1.6500000 |
|---|-----------|-----------|-----------|-----------|

---

Laboratory tests at the time of obtaining Table 2-6 consent, according to the presence or absence of proton-pump inhibitors

Unique Subject Identifier=0070000000-0064

MEANS Procedure

Assay variable : PTINR\_VAL1 PT-INR Value

N Mean Standard Deviation Minimum Maximum

---

|   |           |           |           |           |
|---|-----------|-----------|-----------|-----------|
| 3 | 2.1933333 | 0.3875994 | 1.8900000 | 2.6300000 |
|---|-----------|-----------|-----------|-----------|

---

Unique Subject Identifier=0070000000-0066

Assay variable : PTINR\_VAL1 PT-INR Value

N Mean Standard Deviation Minimum Maximum

---

|   |           |           |           |           |
|---|-----------|-----------|-----------|-----------|
| 3 | 1.8166667 | 0.1484363 | 1.6900000 | 1.9800000 |
|---|-----------|-----------|-----------|-----------|

---

Unique Subject Identifier=0070000000-0067

Assay variable : PTINR\_VAL1 PT-INR Value

N Mean Standard Deviation Minimum Maximum

---

|   |           |           |           |           |
|---|-----------|-----------|-----------|-----------|
| 4 | 2.3400000 | 0.0496655 | 2.2900000 | 2.4000000 |
|---|-----------|-----------|-----------|-----------|

---

Unique Subject Identifier=0070000000-0070

Assay variable : PTINR\_VAL1 PT-INR Value

N Mean Standard Deviation Minimum Maximum

---

|   |          |          |          |          |
|---|----------|----------|----------|----------|
| 4 | 2.260000 | 0.617252 | 1.620000 | 3.040000 |
|---|----------|----------|----------|----------|

---



Laboratory tests at the time of obtaining Table 2-6 consent, according to the presence or absence of proton-pump inhibitors

Unique Subject Identifier=0070000000-0071

MEANS Procedure

Assay variable : PTINR\_VAL1 PT-INR Value

N Mean Standard Deviation Minimum Maximum

---

|   |           |           |           |           |
|---|-----------|-----------|-----------|-----------|
| 3 | 1.9133333 | 0.2454248 | 1.6600000 | 2.1500000 |
|---|-----------|-----------|-----------|-----------|

---

Unique Subject Identifier=0070000000-0073

Assay variable : PTINR\_VAL1 PT-INR Value

N Mean Standard Deviation Minimum Maximum

---

|   |           |           |           |           |
|---|-----------|-----------|-----------|-----------|
| 5 | 1.8960000 | 0.4698191 | 1.4000000 | 2.4600000 |
|---|-----------|-----------|-----------|-----------|

---

Unique Subject Identifier=0070000000-0074

Assay variable : PTINR\_VAL1 PT-INR Value

N Mean Standard Deviation Minimum Maximum

---

|   |           |           |           |           |
|---|-----------|-----------|-----------|-----------|
| 4 | 1.7525000 | 0.0991211 | 1.6100000 | 1.8200000 |
|---|-----------|-----------|-----------|-----------|

---

Unique Subject Identifier=0071000000-0001

Assay variable : PTINR\_VAL1 PT-INR Value

N Mean Standard Deviation Minimum Maximum

---

|   |           |           |           |           |
|---|-----------|-----------|-----------|-----------|
| 4 | 1.6275000 | 0.1065755 | 1.4900000 | 1.7300000 |
|---|-----------|-----------|-----------|-----------|

---

Laboratory tests at the time of obtaining Table 2-6 consent, according to the presence or absence of proton-pump inhibitors

Unique Subject Identifier=0071000000-0002

MEANS Procedure

Assay variable : PTINR\_VAL1 PT-INR Value

N Mean Standard Deviation Minimum Maximum

---

|   |           |  |           |           |
|---|-----------|--|-----------|-----------|
| 1 | 2.1300000 |  | 2.1300000 | 2.1300000 |
|---|-----------|--|-----------|-----------|

---

Unique Subject Identifier=0071000000-0003

Assay variable : PTINR\_VAL1 PT-INR Value

N Mean Standard Deviation Minimum Maximum

---

|   |           |           |           |           |
|---|-----------|-----------|-----------|-----------|
| 4 | 2.5250000 | 0.7388505 | 1.9500000 | 3.5600000 |
|---|-----------|-----------|-----------|-----------|

---

Unique Subject Identifier=0071000000-0004

Assay variable : PTINR\_VAL1 PT-INR Value

N Mean Standard Deviation Minimum Maximum

---

|   |           |           |           |           |
|---|-----------|-----------|-----------|-----------|
| 4 | 2.1550000 | 0.2315887 | 1.9500000 | 2.4800000 |
|---|-----------|-----------|-----------|-----------|

---

Unique Subject Identifier=0071000000-0005

Assay variable : PTINR\_VAL1 PT-INR Value

N Mean Standard Deviation Minimum Maximum

---

|   |           |           |           |           |
|---|-----------|-----------|-----------|-----------|
| 6 | 1.9083333 | 0.1915637 | 1.7200000 | 2.2000000 |
|---|-----------|-----------|-----------|-----------|

---

Laboratory tests at the time of obtaining Table 2-6 consent, according to the presence or absence of proton-pump inhibitors

Unique Subject Identifier=0071000000-0006

MEANS Procedure

Assay variable : PTINR\_VAL1 PT-INR Value

| N | Mean      | Standard Deviation | Minimum   | Maximum   |
|---|-----------|--------------------|-----------|-----------|
| 3 | 1.8133333 | 0.4452340          | 1.3600000 | 2.2500000 |

Unique Subject Identifier=0071000000-0007

Assay variable : PTINR\_VAL1 PT-INR Value

| N | Mean      | Standard Deviation | Minimum   | Maximum   |
|---|-----------|--------------------|-----------|-----------|
| 6 | 1.8166667 | 0.3808762          | 1.4000000 | 2.3400000 |

Unique Subject Identifier=0071000000-0008

Assay variable : PTINR\_VAL1 PT-INR Value

| N | Mean      | Standard Deviation | Minimum   | Maximum   |
|---|-----------|--------------------|-----------|-----------|
| 3 | 1.7433333 | 0.1556706          | 1.5800000 | 1.8900000 |

Unique Subject Identifier=0071000000-0009

Assay variable : PTINR\_VAL1 PT-INR Value

N Mean Standard Deviation Minimum Maximum

---

|   |           |           |           |           |
|---|-----------|-----------|-----------|-----------|
| 4 | 1.7650000 | 0.1239624 | 1.6100000 | 1.8700000 |
|---|-----------|-----------|-----------|-----------|

---

Laboratory tests at the time of obtaining Table 2-6 consent, according to the presence or absence of proton-pump inhibitors

Unique Subject Identifier=0071000000-0010

MEANS Procedure

Assay variable : PTINR\_VAL1 PT-INR Value

N Mean Standard Deviation Minimum Maximum

---

|   |           |           |           |           |
|---|-----------|-----------|-----------|-----------|
| 4 | 1.8125000 | 0.2233644 | 1.5500000 | 2.0700000 |
|---|-----------|-----------|-----------|-----------|

---

Unique Subject Identifier=0071000000-0013

Assay variable : PTINR\_VAL1 PT-INR Value

N Mean Standard Deviation Minimum Maximum

---

|   |           |           |           |           |
|---|-----------|-----------|-----------|-----------|
| 4 | 2.0150000 | 0.1584298 | 1.9200000 | 2.2500000 |
|---|-----------|-----------|-----------|-----------|

---

Unique Subject Identifier=0071000000-0015

Assay variable : PTINR\_VAL1 PT-INR Value

N Mean Standard Deviation Minimum Maximum

---

|   |           |           |           |           |
|---|-----------|-----------|-----------|-----------|
| 4 | 1.8825000 | 0.1547848 | 1.7500000 | 2.0900000 |
|---|-----------|-----------|-----------|-----------|

---

Unique Subject Identifier=0071000000-0016

Assay variable : PTINR\_VAL1 PT-INR Value

N Mean Standard Deviation Minimum Maximum

---

|   |           |  |           |           |
|---|-----------|--|-----------|-----------|
| 1 | 2.0500000 |  | 2.0500000 | 2.0500000 |
|---|-----------|--|-----------|-----------|

---



Laboratory tests at the time of obtaining Table 2-6 consent, according to the presence or absence of proton-pump inhibitors

Unique Subject Identifier=0071000000-0018

MEANS Procedure

Assay variable : PTINR\_VAL1 PT-INR Value

| N | Mean      | Standard Deviation | Minimum   | Maximum   |
|---|-----------|--------------------|-----------|-----------|
| 3 | 1.8100000 | 0.2343075          | 1.6600000 | 2.0800000 |

Unique Subject Identifier=0071000000-0019

Assay variable : PTINR\_VAL1 PT-INR Value

| N | Mean      | Standard Deviation | Minimum   | Maximum   |
|---|-----------|--------------------|-----------|-----------|
| 5 | 1.9220000 | 0.0683374          | 1.8700000 | 2.0400000 |

Unique Subject Identifier=0071000000-0020

Assay variable : PTINR\_VAL1 PT-INR Value

| N | Mean      | Standard Deviation | Minimum   | Maximum   |
|---|-----------|--------------------|-----------|-----------|
| 4 | 2.4150000 | 0.4956813          | 2.0700000 | 3.1500000 |

Unique Subject Identifier=0071000000-0021

Assay variable : PTINR\_VAL1 PT-INR Value

N Mean Standard Deviation Minimum Maximum

---

|   |           |           |           |           |
|---|-----------|-----------|-----------|-----------|
| 5 | 1.9080000 | 0.2037646 | 1.7200000 | 2.1900000 |
|---|-----------|-----------|-----------|-----------|

---

Laboratory tests at the time of obtaining Table 2-6 consent, according to the presence or absence of proton-pump inhibitors

Unique Subject Identifier=0071000000-0022

MEANS Procedure

Assay variable : PTINR\_VAL1 PT-INR Value

N Mean Standard Deviation Minimum Maximum

---

|   |           |           |           |           |
|---|-----------|-----------|-----------|-----------|
| 5 | 1.9380000 | 0.1781011 | 1.7000000 | 2.2000000 |
|---|-----------|-----------|-----------|-----------|

---

Unique Subject Identifier=0071000000-0025

Assay variable : PTINR\_VAL1 PT-INR Value

N Mean Standard Deviation Minimum Maximum

---

|   |           |           |           |           |
|---|-----------|-----------|-----------|-----------|
| 3 | 1.4066667 | 0.2466441 | 1.2400000 | 1.6900000 |
|---|-----------|-----------|-----------|-----------|

---

Unique Subject Identifier=0071000000-0027

Assay variable : PTINR\_VAL1 PT-INR Value

N Mean Standard Deviation Minimum Maximum

---

|   |           |           |           |           |
|---|-----------|-----------|-----------|-----------|
| 4 | 1.5950000 | 0.3139533 | 1.2600000 | 1.9100000 |
|---|-----------|-----------|-----------|-----------|

---

Unique Subject Identifier=0071000000-0028

Assay variable : PTINR\_VAL1 PT-INR Value

N Mean Standard Deviation Minimum Maximum

---

|   |           |           |           |           |
|---|-----------|-----------|-----------|-----------|
| 3 | 2.1533333 | 0.6351640 | 1.4200000 | 2.5300000 |
|---|-----------|-----------|-----------|-----------|

---

Laboratory tests at the time of obtaining Table 2-6 consent, according to the presence or absence of proton-pump inhibitors

Unique Subject Identifier=0071000000-0030

MEANS Procedure

Assay variable : PTINR\_VAL1 PT-INR Value

N Mean Standard Deviation Minimum Maximum

---

|   |           |           |           |           |
|---|-----------|-----------|-----------|-----------|
| 3 | 2.5500000 | 0.3465545 | 2.3400000 | 2.9500000 |
|---|-----------|-----------|-----------|-----------|

---

Unique Subject Identifier=0072000000-0004

Assay variable : PTINR\_VAL1 PT-INR Value

N Mean Standard Deviation Minimum Maximum

---

|   |           |           |           |           |
|---|-----------|-----------|-----------|-----------|
| 6 | 1.8583333 | 0.3816499 | 1.4300000 | 2.2900000 |
|---|-----------|-----------|-----------|-----------|

---

Unique Subject Identifier=0072000000-0006

Assay variable : PTINR\_VAL1 PT-INR Value

N Mean Standard Deviation Minimum Maximum

---

|   |           |           |           |           |
|---|-----------|-----------|-----------|-----------|
| 5 | 2.2060000 | 0.1829754 | 2.0400000 | 2.5200000 |
|---|-----------|-----------|-----------|-----------|

---

Unique Subject Identifier=0072000000-0010

Assay variable : PTINR\_VAL1 PT-INR Value

N Mean Standard Deviation Minimum Maximum

---

|   |           |           |           |           |
|---|-----------|-----------|-----------|-----------|
| 6 | 2.3000000 | 0.4325737 | 1.6100000 | 2.7300000 |
|---|-----------|-----------|-----------|-----------|

---

Laboratory tests at the time of obtaining Table 2-6 consent, according to the presence or absence of proton-pump inhibitors

Unique Subject Identifier=0072000000-0011

MEANS Procedure

Assay variable : PTINR\_VAL1 PT-INR Value

N Mean Standard Deviation Minimum Maximum

---

|   |           |           |           |           |
|---|-----------|-----------|-----------|-----------|
| 6 | 1.6583333 | 0.2003414 | 1.4000000 | 2.0200000 |
|---|-----------|-----------|-----------|-----------|

---

Unique Subject Identifier=0073000000-0003

Assay variable : PTINR\_VAL1 PT-INR Value

N Mean Standard Deviation Minimum Maximum

---

|   |           |           |           |           |
|---|-----------|-----------|-----------|-----------|
| 5 | 1.8840000 | 0.3686190 | 1.3200000 | 2.3000000 |
|---|-----------|-----------|-----------|-----------|

---

Unique Subject Identifier=0073000000-0022

Assay variable : PTINR\_VAL1 PT-INR Value

N Mean Standard Deviation Minimum Maximum

---

|   |           |           |           |           |
|---|-----------|-----------|-----------|-----------|
| 6 | 1.4116667 | 0.5947577 | 1.0300000 | 2.5800000 |
|---|-----------|-----------|-----------|-----------|

---

Unique Subject Identifier=0073000000-0035

Assay variable : PTINR\_VAL1 PT-INR Value

N Mean Standard Deviation Minimum Maximum

---

|   |           |           |           |           |
|---|-----------|-----------|-----------|-----------|
| 3 | 2.1766667 | 0.1150362 | 2.0600000 | 2.2900000 |
|---|-----------|-----------|-----------|-----------|

---



Laboratory tests at the time of obtaining Table 2-6 consent, according to the presence or absence of proton-pump inhibitors

Unique Subject Identifier=0076011000-0003

MEANS Procedure

Assay variable : PTINR\_VAL1 PT-INR Value

N Mean Standard Deviation Minimum Maximum

---

|   |           |  |           |           |
|---|-----------|--|-----------|-----------|
| 1 | 1.5300000 |  | 1.5300000 | 1.5300000 |
|---|-----------|--|-----------|-----------|

---

Unique Subject Identifier=0076011000-0004

Assay variable : PTINR\_VAL1 PT-INR Value

N Mean Standard Deviation Minimum Maximum

---

|   |           |  |           |           |
|---|-----------|--|-----------|-----------|
| 1 | 1.6900000 |  | 1.6900000 | 1.6900000 |
|---|-----------|--|-----------|-----------|

---

Unique Subject Identifier=0076011000-0005

Assay variable : PTINR\_VAL1 PT-INR Value

N Mean Standard Deviation Minimum Maximum

---

|   |           |           |           |           |
|---|-----------|-----------|-----------|-----------|
| 5 | 1.8240000 | 1.0294319 | 1.0100000 | 3.5100000 |
|---|-----------|-----------|-----------|-----------|

---

Unique Subject Identifier=0076011000-0008

Assay variable : PTINR\_VAL1 PT-INR Value

N Mean Standard Deviation Minimum Maximum

---

|   |          |           |          |          |
|---|----------|-----------|----------|----------|
| 6 | 1.443333 | 0.3104620 | 1.200000 | 1.980000 |
|---|----------|-----------|----------|----------|

---

Laboratory tests at the time of obtaining Table 2-6 consent, according to the presence or absence of proton-pump inhibitors

Unique Subject Identifier=0076011000-0009

MEANS Procedure

Assay variable : PTINR\_VAL1 PT-INR Value

| N | Mean      | Standard Deviation | Minimum   | Maximum   |
|---|-----------|--------------------|-----------|-----------|
| 1 | 1.2100000 |                    | 1.2100000 | 1.2100000 |

Unique Subject Identifier=0076011000-0015

Assay variable : PTINR\_VAL1 PT-INR Value

| N | Mean      | Standard Deviation | Minimum   | Maximum   |
|---|-----------|--------------------|-----------|-----------|
| 2 | 1.8200000 | 0.1131371          | 1.7400000 | 1.9000000 |

Unique Subject Identifier=0076011000-0017

Assay variable : PTINR\_VAL1 PT-INR Value

| N | Mean      | Standard Deviation | Minimum   | Maximum   |
|---|-----------|--------------------|-----------|-----------|
| 4 | 1.2225000 | 0.0330404          | 1.2000000 | 1.2700000 |

Unique Subject Identifier=0076011000-0020

Assay variable : PTINR\_VAL1 PT-INR Value

N Mean Standard Deviation Minimum Maximum

---

|   |           |           |           |           |
|---|-----------|-----------|-----------|-----------|
| 2 | 2.1250000 | 0.2757716 | 1.9300000 | 2.3200000 |
|---|-----------|-----------|-----------|-----------|

---

Laboratory tests at the time of obtaining Table 2-6 consent, according to the presence or absence of proton-pump inhibitors

Unique Subject Identifier=0076011000-0024

MEANS Procedure

Assay variable : PTINR\_VAL1 PT-INR Value

N Mean Standard Deviation Minimum Maximum

---

|   |           |  |           |           |
|---|-----------|--|-----------|-----------|
| 1 | 2.0300000 |  | 2.0300000 | 2.0300000 |
|---|-----------|--|-----------|-----------|

---

Unique Subject Identifier=0076011000-0025

Assay variable : PTINR\_VAL1 PT-INR Value

N Mean Standard Deviation Minimum Maximum

---

|   |           |           |           |           |
|---|-----------|-----------|-----------|-----------|
| 2 | 2.0250000 | 0.6858936 | 1.5400000 | 2.5100000 |
|---|-----------|-----------|-----------|-----------|

---

Unique Subject Identifier=0077000000-0004

Assay variable : PTINR\_VAL1 PT-INR Value

N Mean Standard Deviation Minimum Maximum

---

|   |           |           |           |           |
|---|-----------|-----------|-----------|-----------|
| 4 | 2.1100000 | 1.0274564 | 1.0300000 | 3.4900000 |
|---|-----------|-----------|-----------|-----------|

---

Unique Subject Identifier=0077000000-0005

Assay variable : PTINR\_VAL1 PT-INR Value

N Mean Standard Deviation Minimum Maximum

---

|   |           |  |           |           |
|---|-----------|--|-----------|-----------|
| 1 | 1.6400000 |  | 1.6400000 | 1.6400000 |
|---|-----------|--|-----------|-----------|

---

Laboratory tests at the time of obtaining Table 2-6 consent, according to the presence or absence of proton-pump inhibitors

Unique Subject Identifier=0077000000-0010

MEANS Procedure

Assay variable : PTINR\_VAL1 PT-INR Value

N Mean Standard Deviation Minimum Maximum

---

|   |           |           |           |           |
|---|-----------|-----------|-----------|-----------|
| 3 | 2.1966667 | 0.7328256 | 1.4100000 | 2.8600000 |
|---|-----------|-----------|-----------|-----------|

---

Unique Subject Identifier=0078001000-0001

Assay variable : PTINR\_VAL1 PT-INR Value

N Mean Standard Deviation Minimum Maximum

---

|   |           |           |           |           |
|---|-----------|-----------|-----------|-----------|
| 6 | 2.1783333 | 0.1894642 | 1.8300000 | 2.3400000 |
|---|-----------|-----------|-----------|-----------|

---

Unique Subject Identifier=0078001000-0003

Assay variable : PTINR\_VAL1 PT-INR Value

N Mean Standard Deviation Minimum Maximum

---

|   |           |           |           |           |
|---|-----------|-----------|-----------|-----------|
| 3 | 2.0466667 | 0.5746593 | 1.7000000 | 2.7100000 |
|---|-----------|-----------|-----------|-----------|

---

Unique Subject Identifier=0078001000-0004

Assay variable : PTINR\_VAL1 PT-INR Value

N Mean Standard Deviation Minimum Maximum

---

|   |           |           |           |           |
|---|-----------|-----------|-----------|-----------|
| 4 | 1.8150000 | 0.1748333 | 1.5900000 | 2.0000000 |
|---|-----------|-----------|-----------|-----------|

---



Laboratory tests at the time of obtaining Table 2-6 consent, according to the presence or absence of proton-pump inhibitors

Unique Subject Identifier=0078001000-0005

MEANS Procedure

Assay variable : PTINR\_VAL1 PT-INR Value

| N | Mean      | Standard Deviation | Minimum   | Maximum   |
|---|-----------|--------------------|-----------|-----------|
| 3 | 2.1133333 | 0.2804164          | 1.8700000 | 2.4200000 |

Unique Subject Identifier=0078001000-0007

Assay variable : PTINR\_VAL1 PT-INR Value

| N | Mean      | Standard Deviation | Minimum   | Maximum   |
|---|-----------|--------------------|-----------|-----------|
| 3 | 1.6066667 | 0.0321455          | 1.5700000 | 1.6300000 |

Unique Subject Identifier=0078001000-0008

Assay variable : PTINR\_VAL1 PT-INR Value

| N | Mean      | Standard Deviation | Minimum   | Maximum   |
|---|-----------|--------------------|-----------|-----------|
| 5 | 2.1140000 | 0.3263893          | 1.7700000 | 2.5100000 |

Unique Subject Identifier=0078001000-0010

Assay variable : PTINR\_VAL1 PT-INR Value

N Mean Standard Deviation Minimum Maximum

---

|   |           |           |           |           |
|---|-----------|-----------|-----------|-----------|
| 3 | 1.8933333 | 0.0251661 | 1.8700000 | 1.9200000 |
|---|-----------|-----------|-----------|-----------|

---

Laboratory tests at the time of obtaining Table 2-6 consent, according to the presence or absence of proton-pump inhibitors

Unique Subject Identifier=0078001000-0011

MEANS Procedure

Assay variable : PTINR\_VAL1 PT-INR Value

N Mean Standard Deviation Minimum Maximum

---

|   |          |           |          |          |
|---|----------|-----------|----------|----------|
| 3 | 2.160000 | 0.3551056 | 1.750000 | 2.370000 |
|---|----------|-----------|----------|----------|

---

Unique Subject Identifier=0078001000-0012

Assay variable : PTINR\_VAL1 PT-INR Value

N Mean Standard Deviation Minimum Maximum

---

|   |          |           |          |          |
|---|----------|-----------|----------|----------|
| 3 | 1.940000 | 0.1212436 | 1.870000 | 2.080000 |
|---|----------|-----------|----------|----------|

---

Unique Subject Identifier=0078001000-0013

Assay variable : PTINR\_VAL1 PT-INR Value

N Mean Standard Deviation Minimum Maximum

---

|   |          |           |          |          |
|---|----------|-----------|----------|----------|
| 3 | 1.960000 | 0.0964365 | 1.890000 | 2.070000 |
|---|----------|-----------|----------|----------|

---

Unique Subject Identifier=0078001000-0016

Assay variable : PTINR\_VAL1 PT-INR Value

N Mean Standard Deviation Minimum Maximum

---

|   |           |           |           |           |
|---|-----------|-----------|-----------|-----------|
| 4 | 2.2425000 | 1.1359101 | 1.5000000 | 3.9200000 |
|---|-----------|-----------|-----------|-----------|

---

Laboratory tests at the time of obtaining Table 2-6 consent, according to the presence or absence of proton-pump inhibitors

Unique Subject Identifier=0079000000-0001

MEANS Procedure

Assay variable : PTINR\_VAL1 PT-INR Value

N Mean Standard Deviation Minimum Maximum

---

|   |           |           |           |           |
|---|-----------|-----------|-----------|-----------|
| 4 | 2.3750000 | 0.5081666 | 1.9000000 | 3.0600000 |
|---|-----------|-----------|-----------|-----------|

---

Unique Subject Identifier=0079000000-0002

Assay variable : PTINR\_VAL1 PT-INR Value

N Mean Standard Deviation Minimum Maximum

---

|   |           |           |           |           |
|---|-----------|-----------|-----------|-----------|
| 3 | 1.9466667 | 0.2103172 | 1.7300000 | 2.1500000 |
|---|-----------|-----------|-----------|-----------|

---

Unique Subject Identifier=0079000000-0003

Assay variable : PTINR\_VAL1 PT-INR Value

N Mean Standard Deviation Minimum Maximum

---

|   |           |           |           |           |
|---|-----------|-----------|-----------|-----------|
| 4 | 1.7800000 | 0.1219289 | 1.6900000 | 1.9600000 |
|---|-----------|-----------|-----------|-----------|

---

Unique Subject Identifier=0079000000-0009

Assay variable : PTINR\_VAL1 PT-INR Value

N Mean Standard Deviation Minimum Maximum

---

|   |           |           |           |           |
|---|-----------|-----------|-----------|-----------|
| 3 | 1.7866667 | 0.0850490 | 1.6900000 | 1.8500000 |
|---|-----------|-----------|-----------|-----------|

---

Laboratory tests at the time of obtaining Table 2-6 consent, according to the presence or absence of proton-pump inhibitors

Unique Subject Identifier=0079000000-0020

MEANS Procedure

Assay variable : PTINR\_VAL1 PT-INR Value

N Mean Standard Deviation Minimum Maximum

---

|   |           |           |           |           |
|---|-----------|-----------|-----------|-----------|
| 4 | 1.8125000 | 0.2628529 | 1.4700000 | 2.0600000 |
|---|-----------|-----------|-----------|-----------|

---

Unique Subject Identifier=0079000000-0021

Assay variable : PTINR\_VAL1 PT-INR Value

N Mean Standard Deviation Minimum Maximum

---

|   |           |           |           |           |
|---|-----------|-----------|-----------|-----------|
| 3 | 1.7900000 | 0.0300000 | 1.7600000 | 1.8200000 |
|---|-----------|-----------|-----------|-----------|

---

Unique Subject Identifier=0079000000-0022

Assay variable : PTINR\_VAL1 PT-INR Value

N Mean Standard Deviation Minimum Maximum

---

|   |           |           |           |           |
|---|-----------|-----------|-----------|-----------|
| 2 | 2.1400000 | 0.5939697 | 1.7200000 | 2.5600000 |
|---|-----------|-----------|-----------|-----------|

---

Unique Subject Identifier=0079000000-0023

Assay variable : PTINR\_VAL1 PT-INR Value

N Mean Standard Deviation Minimum Maximum

---

|   |          |           |          |          |
|---|----------|-----------|----------|----------|
| 3 | 1.600000 | 0.2007486 | 1.460000 | 1.830000 |
|---|----------|-----------|----------|----------|

---



Laboratory tests at the time of obtaining Table 2-6 consent, according to the presence or absence of proton-pump inhibitors

Unique Subject Identifier=0079000000-0026

MEANS Procedure

Assay variable : PTINR\_VAL1 PT-INR Value

N Mean Standard Deviation Minimum Maximum

---

|   |           |  |           |           |
|---|-----------|--|-----------|-----------|
| 1 | 1.4000000 |  | 1.4000000 | 1.4000000 |
|---|-----------|--|-----------|-----------|

---

Unique Subject Identifier=0079000000-0028

Assay variable : PTINR\_VAL1 PT-INR Value

N Mean Standard Deviation Minimum Maximum

---

|   |           |           |           |           |
|---|-----------|-----------|-----------|-----------|
| 3 | 1.8666667 | 0.7486877 | 1.3200000 | 2.7200000 |
|---|-----------|-----------|-----------|-----------|

---

Unique Subject Identifier=0079000000-0029

Assay variable : PTINR\_VAL1 PT-INR Value

N Mean Standard Deviation Minimum Maximum

---

|   |           |           |           |           |
|---|-----------|-----------|-----------|-----------|
| 3 | 1.9366667 | 0.5179125 | 1.3400000 | 2.2700000 |
|---|-----------|-----------|-----------|-----------|

---

Unique Subject Identifier=0079000000-0030

Assay variable : PTINR\_VAL1 PT-INR Value

N Mean Standard Deviation Minimum Maximum

---

|   |          |           |          |          |
|---|----------|-----------|----------|----------|
| 3 | 2.160000 | 1.1421033 | 1.060000 | 3.340000 |
|---|----------|-----------|----------|----------|

---

Laboratory tests at the time of obtaining Table 2-6 consent, according to the presence or absence of proton-pump inhibitors

Unique Subject Identifier=0081000000-0005

MEANS Procedure

Assay variable : PTINR\_VAL1 PT-INR Value

N Mean Standard Deviation Minimum Maximum

---

|   |           |           |           |           |
|---|-----------|-----------|-----------|-----------|
| 4 | 1.6250000 | 0.2651415 | 1.3800000 | 2.0000000 |
|---|-----------|-----------|-----------|-----------|

---

Unique Subject Identifier=0081000000-0006

Assay variable : PTINR\_VAL1 PT-INR Value

N Mean Standard Deviation Minimum Maximum

---

|   |           |           |           |           |
|---|-----------|-----------|-----------|-----------|
| 3 | 1.6066667 | 0.2400694 | 1.4300000 | 1.8800000 |
|---|-----------|-----------|-----------|-----------|

---

Unique Subject Identifier=0081000000-0010

Assay variable : PTINR\_VAL1 PT-INR Value

N Mean Standard Deviation Minimum Maximum

---

|   |           |           |           |           |
|---|-----------|-----------|-----------|-----------|
| 4 | 2.0850000 | 0.1552417 | 1.8900000 | 2.2700000 |
|---|-----------|-----------|-----------|-----------|

---

Unique Subject Identifier=0081000000-0011

Assay variable : PTINR\_VAL1 PT-INR Value

N Mean Standard Deviation Minimum Maximum

---

|   |           |           |           |           |
|---|-----------|-----------|-----------|-----------|
| 6 | 2.3900000 | 0.7361522 | 1.3800000 | 3.6200000 |
|---|-----------|-----------|-----------|-----------|

---

Laboratory tests at the time of obtaining Table 2-6 consent, according to the presence or absence of proton-pump inhibitors

Unique Subject Identifier=0085000000-0004

MEANS Procedure

Assay variable : PTINR\_VAL1 PT-INR Value

N Mean Standard Deviation Minimum Maximum

---

|   |           |           |           |           |
|---|-----------|-----------|-----------|-----------|
| 6 | 2.0100000 | 0.1941134 | 1.7200000 | 2.3100000 |
|---|-----------|-----------|-----------|-----------|

---

Unique Subject Identifier=0085000000-0007

Assay variable : PTINR\_VAL1 PT-INR Value

N Mean Standard Deviation Minimum Maximum

---

|   |           |           |           |           |
|---|-----------|-----------|-----------|-----------|
| 6 | 1.8800000 | 0.5933633 | 1.2700000 | 2.9200000 |
|---|-----------|-----------|-----------|-----------|

---

Unique Subject Identifier=0086100000-0005

Assay variable : PTINR\_VAL1 PT-INR Value

N Mean Standard Deviation Minimum Maximum

---

|   |           |  |           |           |
|---|-----------|--|-----------|-----------|
| 1 | 1.4700000 |  | 1.4700000 | 1.4700000 |
|---|-----------|--|-----------|-----------|

---

Unique Subject Identifier=0086100000-0010

Assay variable : PTINR\_VAL1 PT-INR Value

N Mean Standard Deviation Minimum Maximum

---

|   |           |  |           |           |
|---|-----------|--|-----------|-----------|
| 1 | 2.5800000 |  | 2.5800000 | 2.5800000 |
|---|-----------|--|-----------|-----------|

---

Laboratory tests at the time of obtaining Table 2-6 consent, according to the presence or absence of proton-pump inhibitors

Unique Subject Identifier=0086100000-0011

MEANS Procedure

Assay variable : PTINR\_VAL1 PT-INR Value

N Mean Standard Deviation Minimum Maximum

---

|   |           |  |           |           |
|---|-----------|--|-----------|-----------|
| 1 | 1.7600000 |  | 1.7600000 | 1.7600000 |
|---|-----------|--|-----------|-----------|

---

Unique Subject Identifier=0086100000-0019

Assay variable : PTINR\_VAL1 PT-INR Value

N Mean Standard Deviation Minimum Maximum

---

|   |           |           |           |           |
|---|-----------|-----------|-----------|-----------|
| 4 | 1.6750000 | 0.2030599 | 1.4400000 | 1.8900000 |
|---|-----------|-----------|-----------|-----------|

---

Unique Subject Identifier=0094001000-0012

Assay variable : PTINR\_VAL1 PT-INR Value

N Mean Standard Deviation Minimum Maximum

---

|   |           |           |           |           |
|---|-----------|-----------|-----------|-----------|
| 4 | 2.2625000 | 0.3564992 | 1.8800000 | 2.7400000 |
|---|-----------|-----------|-----------|-----------|

---

Unique Subject Identifier=0094001000-0016

Assay variable : PTINR\_VAL1 PT-INR Value

N Mean Standard Deviation Minimum Maximum

---

|   |           |           |           |           |
|---|-----------|-----------|-----------|-----------|
| 4 | 1.5175000 | 0.2064582 | 1.2500000 | 1.6900000 |
|---|-----------|-----------|-----------|-----------|

---



Laboratory tests at the time of obtaining Table 2-6 consent, according to the presence or absence of proton-pump inhibitors

Unique Subject Identifier=0094001000-0018

MEANS Procedure

Assay variable : PTINR\_VAL1 PT-INR Value

N Mean Standard Deviation Minimum Maximum

---

|   |           |           |           |           |
|---|-----------|-----------|-----------|-----------|
| 3 | 2.0966667 | 0.1850225 | 1.9800000 | 2.3100000 |
|---|-----------|-----------|-----------|-----------|

---

Unique Subject Identifier=0094001000-0023

Assay variable : PTINR\_VAL1 PT-INR Value

N Mean Standard Deviation Minimum Maximum

---

|   |           |           |           |           |
|---|-----------|-----------|-----------|-----------|
| 3 | 1.9300000 | 0.0818535 | 1.8600000 | 2.0200000 |
|---|-----------|-----------|-----------|-----------|

---

Unique Subject Identifier=0094001000-0026

Assay variable : PTINR\_VAL1 PT-INR Value

N Mean Standard Deviation Minimum Maximum

---

|   |           |           |           |           |
|---|-----------|-----------|-----------|-----------|
| 4 | 1.7525000 | 0.1004573 | 1.6400000 | 1.8600000 |
|---|-----------|-----------|-----------|-----------|

---

Unique Subject Identifier=0094001000-0028

Assay variable : PTINR\_VAL1 PT-INR Value

N Mean Standard Deviation Minimum Maximum

---

|   |           |           |           |           |
|---|-----------|-----------|-----------|-----------|
| 3 | 1.9366667 | 0.1721434 | 1.8000000 | 2.1300000 |
|---|-----------|-----------|-----------|-----------|

---

Laboratory tests at the time of obtaining Table 2-6 consent, according to the presence or absence of proton-pump inhibitors

Unique Subject Identifier=0094001000-0038

MEANS Procedure

Assay variable : PTINR\_VAL1 PT-INR Value

N Mean Standard Deviation Minimum Maximum

---

|   |           |           |           |           |
|---|-----------|-----------|-----------|-----------|
| 4 | 1.5600000 | 0.1336663 | 1.4200000 | 1.7400000 |
|---|-----------|-----------|-----------|-----------|

---

Unique Subject Identifier=0094001000-0047

Assay variable : PTINR\_VAL1 PT-INR Value

N Mean Standard Deviation Minimum Maximum

---

|   |           |           |           |           |
|---|-----------|-----------|-----------|-----------|
| 4 | 2.0950000 | 0.1156143 | 1.9600000 | 2.2400000 |
|---|-----------|-----------|-----------|-----------|

---

Unique Subject Identifier=0094001000-0049

Assay variable : PTINR\_VAL1 PT-INR Value

N Mean Standard Deviation Minimum Maximum

---

|   |           |           |           |           |
|---|-----------|-----------|-----------|-----------|
| 4 | 1.9250000 | 0.4018706 | 1.4100000 | 2.3400000 |
|---|-----------|-----------|-----------|-----------|

---

Unique Subject Identifier=0094001000-0050

Assay variable : PTINR\_VAL1 PT-INR Value

N Mean Standard Deviation Minimum Maximum

---

|   |          |           |          |          |
|---|----------|-----------|----------|----------|
| 3 | 1.583333 | 0.1069268 | 1.490000 | 1.700000 |
|---|----------|-----------|----------|----------|

---

Laboratory tests at the time of obtaining Table 2-6 consent, according to the presence or absence of proton-pump inhibitors

Unique Subject Identifier=0098000000-0001

MEANS Procedure

Assay variable : PTINR\_VAL1 PT-INR Value

N Mean Standard Deviation Minimum Maximum

---

|   |           |           |           |           |
|---|-----------|-----------|-----------|-----------|
| 5 | 1.9820000 | 0.1485598 | 1.7700000 | 2.0900000 |
|---|-----------|-----------|-----------|-----------|

---

Unique Subject Identifier=0098000000-0002

Assay variable : PTINR\_VAL1 PT-INR Value

N Mean Standard Deviation Minimum Maximum

---

|   |           |           |           |           |
|---|-----------|-----------|-----------|-----------|
| 6 | 1.9750000 | 0.3007158 | 1.5600000 | 2.4900000 |
|---|-----------|-----------|-----------|-----------|

---

Unique Subject Identifier=0098000000-0006

Assay variable : PTINR\_VAL1 PT-INR Value

N Mean Standard Deviation Minimum Maximum

---

|   |           |           |           |           |
|---|-----------|-----------|-----------|-----------|
| 4 | 2.7275000 | 0.7020150 | 2.0900000 | 3.7300000 |
|---|-----------|-----------|-----------|-----------|

---

Unique Subject Identifier=0098000000-0007

Assay variable : PTINR\_VAL1 PT-INR Value

N Mean Standard Deviation Minimum Maximum

---

|   |           |           |           |           |
|---|-----------|-----------|-----------|-----------|
| 5 | 1.9360000 | 0.3231563 | 1.5900000 | 2.4600000 |
|---|-----------|-----------|-----------|-----------|

---

Laboratory tests at the time of obtaining Table 2-6 consent, according to the presence or absence of proton-pump inhibitors

Unique Subject Identifier=0098000000-0008

MEANS Procedure

Assay variable : PTINR\_VAL1 PT-INR Value

N Mean Standard Deviation Minimum Maximum

---

|   |           |           |           |           |
|---|-----------|-----------|-----------|-----------|
| 6 | 2.4516667 | 1.3166232 | 0.9800000 | 4.0900000 |
|---|-----------|-----------|-----------|-----------|

---

Unique Subject Identifier=0098000000-0009

Assay variable : PTINR\_VAL1 PT-INR Value

N Mean Standard Deviation Minimum Maximum

---

|   |           |           |           |           |
|---|-----------|-----------|-----------|-----------|
| 6 | 1.6316667 | 0.3060338 | 1.4500000 | 2.2300000 |
|---|-----------|-----------|-----------|-----------|

---

Unique Subject Identifier=0098000000-0011

Assay variable : PTINR\_VAL1 PT-INR Value

N Mean Standard Deviation Minimum Maximum

---

|   |           |           |           |           |
|---|-----------|-----------|-----------|-----------|
| 3 | 2.3533333 | 0.2119748 | 2.1600000 | 2.5800000 |
|---|-----------|-----------|-----------|-----------|

---

Unique Subject Identifier=0098000000-0012

Assay variable : PTINR\_VAL1 PT-INR Value

N Mean Standard Deviation Minimum Maximum

---

|   |           |           |           |           |
|---|-----------|-----------|-----------|-----------|
| 6 | 2.0800000 | 0.2728369 | 1.8000000 | 2.4900000 |
|---|-----------|-----------|-----------|-----------|

---



Laboratory tests at the time of obtaining Table 2-6 consent, according to the presence or absence of proton-pump inhibitors

Unique Subject Identifier=0098000000-0013

MEANS Procedure

Assay variable : PTINR\_VAL1 PT-INR Value

N Mean Standard Deviation Minimum Maximum

---

|   |           |           |           |           |
|---|-----------|-----------|-----------|-----------|
| 6 | 1.4966667 | 0.3375599 | 1.2000000 | 1.9700000 |
|---|-----------|-----------|-----------|-----------|

---

Unique Subject Identifier=0098000000-0014

Assay variable : PTINR\_VAL1 PT-INR Value

N Mean Standard Deviation Minimum Maximum

---

|   |           |           |           |           |
|---|-----------|-----------|-----------|-----------|
| 5 | 1.9940000 | 0.2743720 | 1.6700000 | 2.3200000 |
|---|-----------|-----------|-----------|-----------|

---

Unique Subject Identifier=0098000000-0016

Assay variable : PTINR\_VAL1 PT-INR Value

N Mean Standard Deviation Minimum Maximum

---

|   |           |           |           |           |
|---|-----------|-----------|-----------|-----------|
| 6 | 2.1116667 | 0.4949108 | 1.5200000 | 2.9500000 |
|---|-----------|-----------|-----------|-----------|

---

Unique Subject Identifier=0098000000-0017

Assay variable : PTINR\_VAL1 PT-INR Value

N Mean Standard Deviation Minimum Maximum

---

|   |           |           |           |           |
|---|-----------|-----------|-----------|-----------|
| 6 | 1.5916667 | 0.2320704 | 1.1500000 | 1.8100000 |
|---|-----------|-----------|-----------|-----------|

---

Laboratory tests at the time of obtaining Table 2-6 consent, according to the presence or absence of proton-pump inhibitors

Unique Subject Identifier=0102000000-0002

MEANS Procedure

Assay variable : PTINR\_VAL1 PT-INR Value

N Mean Standard Deviation Minimum Maximum

---

|   |           |           |           |           |
|---|-----------|-----------|-----------|-----------|
| 6 | 1.5333333 | 0.1966384 | 1.2000000 | 1.7000000 |
|---|-----------|-----------|-----------|-----------|

---

Unique Subject Identifier=0102000000-0003

Assay variable : PTINR\_VAL1 PT-INR Value

N Mean Standard Deviation Minimum Maximum

---

|   |           |           |           |           |
|---|-----------|-----------|-----------|-----------|
| 6 | 1.6333333 | 0.3881580 | 1.1000000 | 2.2000000 |
|---|-----------|-----------|-----------|-----------|

---

Unique Subject Identifier=0102000000-0004

Assay variable : PTINR\_VAL1 PT-INR Value

N Mean Standard Deviation Minimum Maximum

---

|   |           |           |           |           |
|---|-----------|-----------|-----------|-----------|
| 6 | 1.5000000 | 0.2097618 | 1.2000000 | 1.7000000 |
|---|-----------|-----------|-----------|-----------|

---

Unique Subject Identifier=0102000000-0006

Assay variable : PTINR\_VAL1 PT-INR Value

N Mean Standard Deviation Minimum Maximum

---

|   |           |           |           |           |
|---|-----------|-----------|-----------|-----------|
| 5 | 1.8800000 | 0.2683282 | 1.6000000 | 2.3000000 |
|---|-----------|-----------|-----------|-----------|

---

Laboratory tests at the time of obtaining Table 2-6 consent, according to the presence or absence of proton-pump inhibitors

Unique Subject Identifier=0102000000-0007

MEANS Procedure

Assay variable : PTINR\_VAL1 PT-INR Value

N Mean Standard Deviation Minimum Maximum

---

|   |          |           |          |          |
|---|----------|-----------|----------|----------|
| 6 | 2.150000 | 0.2073644 | 1.900000 | 2.400000 |
|---|----------|-----------|----------|----------|

---

Unique Subject Identifier=0102000000-0008

Assay variable : PTINR\_VAL1 PT-INR Value

N Mean Standard Deviation Minimum Maximum

---

|   |          |           |          |          |
|---|----------|-----------|----------|----------|
| 6 | 1.883333 | 0.8035339 | 1.200000 | 3.200000 |
|---|----------|-----------|----------|----------|

---

Unique Subject Identifier=0102000000-0009

Assay variable : PTINR\_VAL1 PT-INR Value

N Mean Standard Deviation Minimum Maximum

---

|   |          |           |          |          |
|---|----------|-----------|----------|----------|
| 6 | 1.716667 | 0.3188521 | 1.400000 | 2.300000 |
|---|----------|-----------|----------|----------|

---

Unique Subject Identifier=0102000000-0010

Assay variable : PTINR\_VAL1 PT-INR Value

N Mean Standard Deviation Minimum Maximum

---

|   |           |           |           |           |
|---|-----------|-----------|-----------|-----------|
| 5 | 1.9400000 | 0.4159327 | 1.4000000 | 2.3000000 |
|---|-----------|-----------|-----------|-----------|

---

Laboratory tests at the time of obtaining Table 2-6 consent, according to the presence or absence of proton-pump inhibitors

Unique Subject Identifier=0103000000-0006

MEANS Procedure

Assay variable : PTINR\_VAL1 PT-INR Value

N Mean Standard Deviation Minimum Maximum

---

|   |           |           |           |           |
|---|-----------|-----------|-----------|-----------|
| 6 | 1.7466667 | 0.8857690 | 1.0800000 | 3.3600000 |
|---|-----------|-----------|-----------|-----------|

---

Unique Subject Identifier=0103000000-0007

Assay variable : PTINR\_VAL1 PT-INR Value

N Mean Standard Deviation Minimum Maximum

---

|   |           |           |           |           |
|---|-----------|-----------|-----------|-----------|
| 6 | 2.1916667 | 0.9971443 | 1.3500000 | 4.0400000 |
|---|-----------|-----------|-----------|-----------|

---

Unique Subject Identifier=0103000000-0008

Assay variable : PTINR\_VAL1 PT-INR Value

N Mean Standard Deviation Minimum Maximum

---

|   |           |           |           |           |
|---|-----------|-----------|-----------|-----------|
| 3 | 1.9300000 | 0.3304542 | 1.5900000 | 2.2500000 |
|---|-----------|-----------|-----------|-----------|

---

Unique Subject Identifier=0103000000-0009

Assay variable : PTINR\_VAL1 PT-INR Value

N Mean Standard Deviation Minimum Maximum

---

|   |           |           |           |           |
|---|-----------|-----------|-----------|-----------|
| 6 | 1.8450000 | 0.2712748 | 1.5500000 | 2.3300000 |
|---|-----------|-----------|-----------|-----------|

---



Laboratory tests at the time of obtaining Table 2-6 consent, according to the presence or absence of proton-pump inhibitors

Unique Subject Identifier=0103000000-0010

MEANS Procedure

Assay variable : PTINR\_VAL1 PT-INR Value

N Mean Standard Deviation Minimum Maximum

---

|   |           |           |           |           |
|---|-----------|-----------|-----------|-----------|
| 4 | 1.8375000 | 0.3439356 | 1.4400000 | 2.2100000 |
|---|-----------|-----------|-----------|-----------|

---

Unique Subject Identifier=0103000000-0013

Assay variable : PTINR\_VAL1 PT-INR Value

N Mean Standard Deviation Minimum Maximum

---

|   |           |           |           |           |
|---|-----------|-----------|-----------|-----------|
| 4 | 2.0525000 | 0.3345021 | 1.7700000 | 2.5100000 |
|---|-----------|-----------|-----------|-----------|

---

Unique Subject Identifier=0103000000-0014

Assay variable : PTINR\_VAL1 PT-INR Value

N Mean Standard Deviation Minimum Maximum

---

|   |           |           |           |           |
|---|-----------|-----------|-----------|-----------|
| 5 | 1.8040000 | 0.2051341 | 1.6200000 | 2.1200000 |
|---|-----------|-----------|-----------|-----------|

---

Unique Subject Identifier=0103000000-0015

Assay variable : PTINR\_VAL1 PT-INR Value

N Mean Standard Deviation Minimum Maximum

---

|   |           |           |           |           |
|---|-----------|-----------|-----------|-----------|
| 6 | 1.8083333 | 0.1024532 | 1.6900000 | 1.9800000 |
|---|-----------|-----------|-----------|-----------|

---

Laboratory tests at the time of obtaining Table 2-6 consent, according to the presence or absence of proton-pump inhibitors

Unique Subject Identifier=0103000000-0017

MEANS Procedure

Assay variable : PTINR\_VAL1 PT-INR Value

N Mean Standard Deviation Minimum Maximum

---

|   |           |           |           |           |
|---|-----------|-----------|-----------|-----------|
| 4 | 2.3025000 | 0.2242580 | 1.9800000 | 2.5000000 |
|---|-----------|-----------|-----------|-----------|

---

Unique Subject Identifier=0103000000-0018

Assay variable : PTINR\_VAL1 PT-INR Value

N Mean Standard Deviation Minimum Maximum

---

|   |           |           |           |           |
|---|-----------|-----------|-----------|-----------|
| 4 | 1.8650000 | 0.2754995 | 1.5000000 | 2.1600000 |
|---|-----------|-----------|-----------|-----------|

---

Unique Subject Identifier=0103000000-0019

Assay variable : PTINR\_VAL1 PT-INR Value

N Mean Standard Deviation Minimum Maximum

---

|   |           |           |           |           |
|---|-----------|-----------|-----------|-----------|
| 4 | 1.7175000 | 0.1768945 | 1.5600000 | 1.9700000 |
|---|-----------|-----------|-----------|-----------|

---

Unique Subject Identifier=0103000000-0022

Assay variable : PTINR\_VAL1 PT-INR Value

N Mean Standard Deviation Minimum Maximum

---

|   |           |           |           |           |
|---|-----------|-----------|-----------|-----------|
| 4 | 2.2825000 | 0.4733128 | 1.6600000 | 2.6800000 |
|---|-----------|-----------|-----------|-----------|

---

Laboratory tests at the time of obtaining Table 2-6 consent, according to the presence or absence of proton-pump inhibitors

Unique Subject Identifier=0116000000-0001

MEANS Procedure

Assay variable : PTINR\_VAL1 PT-INR Value

| N | Mean      | Standard Deviation | Minimum   | Maximum   |
|---|-----------|--------------------|-----------|-----------|
| 3 | 2.3666667 | 0.5357549          | 1.9900000 | 2.9800000 |

Unique Subject Identifier=0120000000-0002

Assay variable : PTINR\_VAL1 PT-INR Value

| N | Mean      | Standard Deviation | Minimum   | Maximum   |
|---|-----------|--------------------|-----------|-----------|
| 1 | 1.4800000 |                    | 1.4800000 | 1.4800000 |

Unique Subject Identifier=0120000000-0003

Assay variable : PTINR\_VAL1 PT-INR Value

| N | Mean      | Standard Deviation | Minimum   | Maximum   |
|---|-----------|--------------------|-----------|-----------|
| 2 | 2.0250000 | 0.3323402          | 1.7900000 | 2.2600000 |

Unique Subject Identifier=0120000000-0004

Assay variable : PTINR\_VAL1 PT-INR Value

N Mean Standard Deviation Minimum Maximum

---

|   |           |           |           |           |
|---|-----------|-----------|-----------|-----------|
| 3 | 1.7433333 | 0.2494661 | 1.4600000 | 1.9300000 |
|---|-----------|-----------|-----------|-----------|

---

Laboratory tests at the time of obtaining Table 2-6 consent, according to the presence or absence of proton-pump inhibitors

Unique Subject Identifier=0120000000-0007

MEANS Procedure

Assay variable : PTINR\_VAL1 PT-INR Value

N Mean Standard Deviation Minimum Maximum

---

|   |           |  |           |           |
|---|-----------|--|-----------|-----------|
| 1 | 1.7100000 |  | 1.7100000 | 1.7100000 |
|---|-----------|--|-----------|-----------|

---

Unique Subject Identifier=0121010000-0001

Assay variable : PTINR\_VAL1 PT-INR Value

N Mean Standard Deviation Minimum Maximum

---

|   |           |           |           |           |
|---|-----------|-----------|-----------|-----------|
| 4 | 2.1250000 | 0.2753785 | 1.8000000 | 2.4000000 |
|---|-----------|-----------|-----------|-----------|

---

Unique Subject Identifier=0121010000-0002

Assay variable : PTINR\_VAL1 PT-INR Value

N Mean Standard Deviation Minimum Maximum

---

|   |           |           |           |           |
|---|-----------|-----------|-----------|-----------|
| 4 | 1.6250000 | 0.0500000 | 1.6000000 | 1.7000000 |
|---|-----------|-----------|-----------|-----------|

---

Unique Subject Identifier=0121010000-0005

Assay variable : PTINR\_VAL1 PT-INR Value

N Mean Standard Deviation Minimum Maximum

---

|   |           |           |           |           |
|---|-----------|-----------|-----------|-----------|
| 6 | 1.9666667 | 0.2250926 | 1.6000000 | 2.3000000 |
|---|-----------|-----------|-----------|-----------|

---



Laboratory tests at the time of obtaining Table 2-6 consent, according to the presence or absence of proton-pump inhibitors

Unique Subject Identifier=0121010000-0006

MEANS Procedure

Assay variable : PTINR\_VAL1 PT-INR Value

N Mean Standard Deviation Minimum Maximum

---

|   |           |           |           |           |
|---|-----------|-----------|-----------|-----------|
| 6 | 2.2166667 | 0.2562551 | 1.9000000 | 2.6000000 |
|---|-----------|-----------|-----------|-----------|

---

Unique Subject Identifier=0121010000-0012

Assay variable : PTINR\_VAL1 PT-INR Value

N Mean Standard Deviation Minimum Maximum

---

|   |           |           |           |           |
|---|-----------|-----------|-----------|-----------|
| 6 | 2.2166667 | 0.2857738 | 1.8000000 | 2.6000000 |
|---|-----------|-----------|-----------|-----------|

---

Unique Subject Identifier=0121010000-0014

Assay variable : PTINR\_VAL1 PT-INR Value

N Mean Standard Deviation Minimum Maximum

---

|   |           |           |           |           |
|---|-----------|-----------|-----------|-----------|
| 6 | 2.1500000 | 0.1048809 | 2.0000000 | 2.3000000 |
|---|-----------|-----------|-----------|-----------|

---

Unique Subject Identifier=0121010000-0016

Assay variable : PTINR\_VAL1 PT-INR Value

N Mean Standard Deviation Minimum Maximum

---

|   |           |           |           |           |
|---|-----------|-----------|-----------|-----------|
| 5 | 1.6800000 | 0.2949576 | 1.3000000 | 2.1000000 |
|---|-----------|-----------|-----------|-----------|

---

Laboratory tests at the time of obtaining Table 2-6 consent, according to the presence or absence of proton-pump inhibitors

Unique Subject Identifier=0121010000-0018

MEANS Procedure

Assay variable : PTINR\_VAL1 PT-INR Value

N Mean Standard Deviation Minimum Maximum

---

|   |          |           |          |          |
|---|----------|-----------|----------|----------|
| 5 | 2.640000 | 0.4722288 | 2.000000 | 3.200000 |
|---|----------|-----------|----------|----------|

---

Unique Subject Identifier=0121010000-0020

Assay variable : PTINR\_VAL1 PT-INR Value

N Mean Standard Deviation Minimum Maximum

---

|   |          |           |          |          |
|---|----------|-----------|----------|----------|
| 4 | 2.275000 | 0.0957427 | 2.200000 | 2.400000 |
|---|----------|-----------|----------|----------|

---

Unique Subject Identifier=0121010000-0021

Assay variable : PTINR\_VAL1 PT-INR Value

N Mean Standard Deviation Minimum Maximum

---

|   |          |           |          |          |
|---|----------|-----------|----------|----------|
| 4 | 1.650000 | 0.2645751 | 1.300000 | 1.900000 |
|---|----------|-----------|----------|----------|

---

Unique Subject Identifier=0121010000-0023

Assay variable : PTINR\_VAL1 PT-INR Value

N Mean Standard Deviation Minimum Maximum

---

|   |          |           |          |          |
|---|----------|-----------|----------|----------|
| 6 | 2.150000 | 0.6379655 | 1.600000 | 3.400000 |
|---|----------|-----------|----------|----------|

---

Laboratory tests at the time of obtaining Table 2-6 consent, according to the presence or absence of proton-pump inhibitors

Unique Subject Identifier=0121010000-0028

MEANS Procedure

Assay variable : PTINR\_VAL1 PT-INR Value

N Mean Standard Deviation Minimum Maximum

---

|   |           |           |           |           |
|---|-----------|-----------|-----------|-----------|
| 6 | 2.3500000 | 0.6833740 | 1.9000000 | 3.7000000 |
|---|-----------|-----------|-----------|-----------|

---

Unique Subject Identifier=0122010000-0001

Assay variable : PTINR\_VAL1 PT-INR Value

N Mean Standard Deviation Minimum Maximum

---

|   |           |           |           |           |
|---|-----------|-----------|-----------|-----------|
| 4 | 1.6000000 | 0.3741657 | 1.1000000 | 2.0000000 |
|---|-----------|-----------|-----------|-----------|

---

Unique Subject Identifier=0122010000-0002

Assay variable : PTINR\_VAL1 PT-INR Value

N Mean Standard Deviation Minimum Maximum

---

|   |           |           |           |           |
|---|-----------|-----------|-----------|-----------|
| 6 | 1.8666667 | 0.5819507 | 1.1000000 | 2.9000000 |
|---|-----------|-----------|-----------|-----------|

---

Unique Subject Identifier=0124010000-0010

Assay variable : PTINR\_VAL1 PT-INR Value

N Mean Standard Deviation Minimum Maximum

---

|   |           |           |           |           |
|---|-----------|-----------|-----------|-----------|
| 2 | 2.7000000 | 0.4242641 | 2.4000000 | 3.0000000 |
|---|-----------|-----------|-----------|-----------|

---

Laboratory tests at the time of obtaining Table 2-6 consent, according to the presence or absence of proton-pump inhibitors

Unique Subject Identifier=0124010000-0012

MEANS Procedure

Assay variable : PTINR\_VAL1 PT-INR Value

| N | Mean      | Standard Deviation | Minimum   | Maximum   |
|---|-----------|--------------------|-----------|-----------|
| 3 | 1.6666667 | 0.0577350          | 1.6000000 | 1.7000000 |

Unique Subject Identifier=0124010000-0021

Assay variable : PTINR\_VAL1 PT-INR Value

| N | Mean      | Standard Deviation | Minimum   | Maximum   |
|---|-----------|--------------------|-----------|-----------|
| 2 | 2.1000000 | 0.1414214          | 2.0000000 | 2.2000000 |

Unique Subject Identifier=0132000000-0003

Assay variable : PTINR\_VAL1 PT-INR Value

| N | Mean      | Standard Deviation | Minimum   | Maximum   |
|---|-----------|--------------------|-----------|-----------|
| 2 | 2.4950000 | 0.1909188          | 2.3600000 | 2.6300000 |

Unique Subject Identifier=0132000000-0005

Assay variable : PTINR\_VAL1 PT-INR Value

N Mean Standard Deviation Minimum Maximum

---

|   |          |           |          |          |
|---|----------|-----------|----------|----------|
| 3 | 1.590000 | 0.3132092 | 1.230000 | 1.800000 |
|---|----------|-----------|----------|----------|

---



Laboratory tests at the time of obtaining Table 2-6 consent, according to the presence or absence of proton-pump inhibitors

Unique Subject Identifier=0132000000-0009

MEANS Procedure

Assay variable : PTINR\_VAL1 PT-INR Value

N Mean Standard Deviation Minimum Maximum

---

|   |           |           |           |           |
|---|-----------|-----------|-----------|-----------|
| 4 | 1.6600000 | 0.3465064 | 1.1700000 | 1.9100000 |
|---|-----------|-----------|-----------|-----------|

---

Unique Subject Identifier=0132000000-0012

Assay variable : PTINR\_VAL1 PT-INR Value

N Mean Standard Deviation Minimum Maximum

---

|   |           |           |           |           |
|---|-----------|-----------|-----------|-----------|
| 3 | 1.5266667 | 0.3661056 | 1.1200000 | 1.8300000 |
|---|-----------|-----------|-----------|-----------|

---

Unique Subject Identifier=0133000000-0001

Assay variable : PTINR\_VAL1 PT-INR Value

N Mean Standard Deviation Minimum Maximum

---

|   |           |           |           |           |
|---|-----------|-----------|-----------|-----------|
| 4 | 1.3675000 | 0.2090255 | 1.0800000 | 1.5800000 |
|---|-----------|-----------|-----------|-----------|

---

Unique Subject Identifier=0133000000-0003

Assay variable : PTINR\_VAL1 PT-INR Value

N Mean Standard Deviation Minimum Maximum

---

|   |           |           |           |           |
|---|-----------|-----------|-----------|-----------|
| 4 | 1.4125000 | 0.3732180 | 1.1300000 | 1.9600000 |
|---|-----------|-----------|-----------|-----------|

---

Laboratory tests at the time of obtaining Table 2-6 consent, according to the presence or absence of proton-pump inhibitors

Unique Subject Identifier=0133000000-0005

MEANS Procedure

Assay variable : PTINR\_VAL1 PT-INR Value

N Mean Standard Deviation Minimum Maximum

---

|   |           |           |           |           |
|---|-----------|-----------|-----------|-----------|
| 3 | 1.8500000 | 0.0556776 | 1.7900000 | 1.9000000 |
|---|-----------|-----------|-----------|-----------|

---

Unique Subject Identifier=0133000000-0010

Assay variable : PTINR\_VAL1 PT-INR Value

N Mean Standard Deviation Minimum Maximum

---

|   |           |           |           |           |
|---|-----------|-----------|-----------|-----------|
| 3 | 2.2966667 | 0.6230837 | 1.7600000 | 2.9800000 |
|---|-----------|-----------|-----------|-----------|

---

Unique Subject Identifier=0133000000-0011

Assay variable : PTINR\_VAL1 PT-INR Value

N Mean Standard Deviation Minimum Maximum

---

|   |           |           |           |           |
|---|-----------|-----------|-----------|-----------|
| 5 | 1.7120000 | 0.1485598 | 1.5300000 | 1.9300000 |
|---|-----------|-----------|-----------|-----------|

---

Unique Subject Identifier=0133000000-0012

Assay variable : PTINR\_VAL1 PT-INR Value

N Mean Standard Deviation Minimum Maximum

---

|   |           |           |           |           |
|---|-----------|-----------|-----------|-----------|
| 3 | 1.5366667 | 0.0288675 | 1.5200000 | 1.5700000 |
|---|-----------|-----------|-----------|-----------|

---

Laboratory tests at the time of obtaining Table 2-6 consent, according to the presence or absence of proton-pump inhibitors

Unique Subject Identifier=0133000000-0013

MEANS Procedure

Assay variable : PTINR\_VAL1 PT-INR Value

| N | Mean      | Standard Deviation | Minimum   | Maximum   |
|---|-----------|--------------------|-----------|-----------|
| 2 | 1.4750000 | 0.0494975          | 1.4400000 | 1.5100000 |

Unique Subject Identifier=0133000000-0015

Assay variable : PTINR\_VAL1 PT-INR Value

| N | Mean      | Standard Deviation | Minimum   | Maximum   |
|---|-----------|--------------------|-----------|-----------|
| 1 | 2.0400000 |                    | 2.0400000 | 2.0400000 |

Unique Subject Identifier=0133000000-0020

Assay variable : PTINR\_VAL1 PT-INR Value

| N | Mean      | Standard Deviation | Minimum   | Maximum   |
|---|-----------|--------------------|-----------|-----------|
| 2 | 1.9950000 | 0.1202082          | 1.9100000 | 2.0800000 |

Unique Subject Identifier=0133000000-0037

Assay variable : PTINR\_VAL1 PT-INR Value

N Mean Standard Deviation Minimum Maximum

---

|   |           |           |           |           |
|---|-----------|-----------|-----------|-----------|
| 2 | 1.9100000 | 0.0141421 | 1.9000000 | 1.9200000 |
|---|-----------|-----------|-----------|-----------|

---

Laboratory tests at the time of obtaining Table 2-6 consent, according to the presence or absence of proton-pump inhibitors

Unique Subject Identifier=0133000000-0038

MEANS Procedure

Assay variable : PTINR\_VAL1 PT-INR Value

| N | Mean      | Standard Deviation | Minimum   | Maximum   |
|---|-----------|--------------------|-----------|-----------|
| 2 | 1.9850000 | 0.0212132          | 1.9700000 | 2.0000000 |

Unique Subject Identifier=0133000000-0045

Assay variable : PTINR\_VAL1 PT-INR Value

| N | Mean      | Standard Deviation | Minimum   | Maximum   |
|---|-----------|--------------------|-----------|-----------|
| 3 | 2.2766667 | 0.7092484          | 1.5000000 | 2.8900000 |

Unique Subject Identifier=0133000000-0052

Assay variable : PTINR\_VAL1 PT-INR Value

| N | Mean      | Standard Deviation | Minimum   | Maximum   |
|---|-----------|--------------------|-----------|-----------|
| 4 | 1.6150000 | 0.0974679          | 1.5200000 | 1.7500000 |

Unique Subject Identifier=0133000000-0061

Assay variable : PTINR\_VAL1 PT-INR Value

N Mean Standard Deviation Minimum Maximum

---

|   |           |           |           |           |
|---|-----------|-----------|-----------|-----------|
| 3 | 1.8633333 | 0.3716629 | 1.4500000 | 2.1700000 |
|---|-----------|-----------|-----------|-----------|

---



Laboratory tests at the time of obtaining Table 2-6 consent, according to the presence or absence of proton-pump inhibitors

Unique Subject Identifier=0133000000-0068

MEANS Procedure

Assay variable : PTINR\_VAL1 PT-INR Value

N Mean Standard Deviation Minimum Maximum

---

|   |           |           |           |           |
|---|-----------|-----------|-----------|-----------|
| 3 | 1.7433333 | 0.3837100 | 1.4600000 | 2.1800000 |
|---|-----------|-----------|-----------|-----------|

---

Unique Subject Identifier=0134100000-0001

Assay variable : PTINR\_VAL1 PT-INR Value

N Mean Standard Deviation Minimum Maximum

---

|   |           |           |           |           |
|---|-----------|-----------|-----------|-----------|
| 2 | 1.8950000 | 0.0353553 | 1.8700000 | 1.9200000 |
|---|-----------|-----------|-----------|-----------|

---

Unique Subject Identifier=0134100000-0002

Assay variable : PTINR\_VAL1 PT-INR Value

N Mean Standard Deviation Minimum Maximum

---

|   |           |           |           |           |
|---|-----------|-----------|-----------|-----------|
| 3 | 2.0033333 | 0.5802011 | 1.5600000 | 2.6600000 |
|---|-----------|-----------|-----------|-----------|

---

Unique Subject Identifier=0134100000-0009

Assay variable : PTINR\_VAL1 PT-INR Value

N Mean Standard Deviation Minimum Maximum

---

|   |           |           |           |           |
|---|-----------|-----------|-----------|-----------|
| 3 | 1.6433333 | 0.1159023 | 1.5100000 | 1.7200000 |
|---|-----------|-----------|-----------|-----------|

---

Laboratory tests at the time of obtaining Table 2-6 consent, according to the presence or absence of proton-pump inhibitors

Unique Subject Identifier=0134100000-0010

MEANS Procedure

Assay variable : PTINR\_VAL1 PT-INR Value

N Mean Standard Deviation Minimum Maximum

---

|   |           |           |           |           |
|---|-----------|-----------|-----------|-----------|
| 3 | 2.5700000 | 0.2007486 | 2.3800000 | 2.7800000 |
|---|-----------|-----------|-----------|-----------|

---

Unique Subject Identifier=0134100000-0012

Assay variable : PTINR\_VAL1 PT-INR Value

N Mean Standard Deviation Minimum Maximum

---

|   |           |           |           |           |
|---|-----------|-----------|-----------|-----------|
| 4 | 1.6850000 | 0.2500000 | 1.5000000 | 2.0400000 |
|---|-----------|-----------|-----------|-----------|

---

Unique Subject Identifier=0134100000-0014

Assay variable : PTINR\_VAL1 PT-INR Value

N Mean Standard Deviation Minimum Maximum

---

|   |           |           |           |           |
|---|-----------|-----------|-----------|-----------|
| 6 | 2.4033333 | 1.2899716 | 1.0400000 | 4.2300000 |
|---|-----------|-----------|-----------|-----------|

---

Unique Subject Identifier=0134100000-0016

Assay variable : PTINR\_VAL1 PT-INR Value

N Mean Standard Deviation Minimum Maximum

---

|   |           |           |           |           |
|---|-----------|-----------|-----------|-----------|
| 4 | 1.9800000 | 0.7144228 | 1.4800000 | 3.0400000 |
|---|-----------|-----------|-----------|-----------|

---

Laboratory tests at the time of obtaining Table 2-6 consent, according to the presence or absence of proton-pump inhibitors

Unique Subject Identifier=0134100000-0019

MEANS Procedure

Assay variable : PTINR\_VAL1 PT-INR Value

N Mean Standard Deviation Minimum Maximum

---

|   |           |           |           |           |
|---|-----------|-----------|-----------|-----------|
| 3 | 1.8800000 | 0.3500000 | 1.5300000 | 2.2300000 |
|---|-----------|-----------|-----------|-----------|

---

Unique Subject Identifier=0134100000-0021

Assay variable : PTINR\_VAL1 PT-INR Value

N Mean Standard Deviation Minimum Maximum

---

|   |           |           |           |           |
|---|-----------|-----------|-----------|-----------|
| 4 | 1.8950000 | 0.2353012 | 1.6400000 | 2.1000000 |
|---|-----------|-----------|-----------|-----------|

---

Unique Subject Identifier=0134100000-0023

Assay variable : PTINR\_VAL1 PT-INR Value

N Mean Standard Deviation Minimum Maximum

---

|   |           |           |           |           |
|---|-----------|-----------|-----------|-----------|
| 4 | 2.0275000 | 0.2627261 | 1.7000000 | 2.2900000 |
|---|-----------|-----------|-----------|-----------|

---

Unique Subject Identifier=0135000000-0002

Assay variable : PTINR\_VAL1 PT-INR Value

N Mean Standard Deviation Minimum Maximum

---

|   |          |           |          |          |
|---|----------|-----------|----------|----------|
| 3 | 1.740000 | 0.1571623 | 1.600000 | 1.910000 |
|---|----------|-----------|----------|----------|

---

Laboratory tests at the time of obtaining Table 2-6 consent, according to the presence or absence of proton-pump inhibitors

Unique Subject Identifier=0135000000-0006

MEANS Procedure

Assay variable : PTINR\_VAL1 PT-INR Value

| N | Mean      | Standard Deviation | Minimum   | Maximum   |
|---|-----------|--------------------|-----------|-----------|
| 3 | 1.9733333 | 0.7523519          | 1.4200000 | 2.8300000 |

Unique Subject Identifier=0135000000-0008

Assay variable : PTINR\_VAL1 PT-INR Value

| N | Mean      | Standard Deviation | Minimum   | Maximum   |
|---|-----------|--------------------|-----------|-----------|
| 4 | 1.7050000 | 0.3637307          | 1.2800000 | 2.1500000 |

Unique Subject Identifier=0135000000-0009

Assay variable : PTINR\_VAL1 PT-INR Value

| N | Mean      | Standard Deviation | Minimum   | Maximum   |
|---|-----------|--------------------|-----------|-----------|
| 5 | 1.7160000 | 0.3756062          | 1.2000000 | 2.0600000 |

Unique Subject Identifier=0135000000-0010

Assay variable : PTINR\_VAL1 PT-INR Value

N Mean Standard Deviation Minimum Maximum

---

|   |           |           |           |           |
|---|-----------|-----------|-----------|-----------|
| 3 | 1.6866667 | 0.0378594 | 1.6600000 | 1.7300000 |
|---|-----------|-----------|-----------|-----------|

---



Laboratory tests at the time of obtaining Table 2-6 consent, according to the presence or absence of proton-pump inhibitors

Unique Subject Identifier=0135000000-0013

MEANS Procedure

Assay variable : PTINR\_VAL1 PT-INR Value

N Mean Standard Deviation Minimum Maximum

---

|   |           |           |           |           |
|---|-----------|-----------|-----------|-----------|
| 3 | 1.5833333 | 0.0873689 | 1.5100000 | 1.6800000 |
|---|-----------|-----------|-----------|-----------|

---

Unique Subject Identifier=0135000000-0020

Assay variable : PTINR\_VAL1 PT-INR Value

N Mean Standard Deviation Minimum Maximum

---

|   |           |           |           |           |
|---|-----------|-----------|-----------|-----------|
| 3 | 1.7466667 | 0.1101514 | 1.6400000 | 1.8600000 |
|---|-----------|-----------|-----------|-----------|

---

Unique Subject Identifier=0135000000-0024

Assay variable : PTINR\_VAL1 PT-INR Value

N Mean Standard Deviation Minimum Maximum

---

|   |           |           |           |           |
|---|-----------|-----------|-----------|-----------|
| 4 | 2.3400000 | 0.2906315 | 2.1100000 | 2.7600000 |
|---|-----------|-----------|-----------|-----------|

---

Unique Subject Identifier=0135000000-0026

Assay variable : PTINR\_VAL1 PT-INR Value

N Mean Standard Deviation Minimum Maximum

---

|   |           |           |           |           |
|---|-----------|-----------|-----------|-----------|
| 3 | 1.6366667 | 0.1436431 | 1.5300000 | 1.8000000 |
|---|-----------|-----------|-----------|-----------|

---

Laboratory tests at the time of obtaining Table 2-6 consent, according to the presence or absence of proton-pump inhibitors

Unique Subject Identifier=0135000000-0028

MEANS Procedure

Assay variable : PTINR\_VAL1 PT-INR Value

N Mean Standard Deviation Minimum Maximum

---

|   |           |           |           |           |
|---|-----------|-----------|-----------|-----------|
| 4 | 2.0575000 | 0.2653771 | 1.7000000 | 2.3000000 |
|---|-----------|-----------|-----------|-----------|

---

Unique Subject Identifier=0136000010-0002

Assay variable : PTINR\_VAL1 PT-INR Value

N Mean Standard Deviation Minimum Maximum

---

|   |           |           |           |           |
|---|-----------|-----------|-----------|-----------|
| 6 | 2.0766667 | 0.2477633 | 1.7400000 | 2.5000000 |
|---|-----------|-----------|-----------|-----------|

---

Unique Subject Identifier=0136000010-0003

Assay variable : PTINR\_VAL1 PT-INR Value

N Mean Standard Deviation Minimum Maximum

---

|   |           |           |           |           |
|---|-----------|-----------|-----------|-----------|
| 6 | 2.1200000 | 0.4215211 | 1.3000000 | 2.4500000 |
|---|-----------|-----------|-----------|-----------|

---

Unique Subject Identifier=0138000010-0001

Assay variable : PTINR\_VAL1 PT-INR Value

N Mean Standard Deviation Minimum Maximum

---

|   |           |           |           |           |
|---|-----------|-----------|-----------|-----------|
| 6 | 1.6950000 | 0.2682350 | 1.4500000 | 2.0600000 |
|---|-----------|-----------|-----------|-----------|

---

Laboratory tests at the time of obtaining Table 2-6 consent, according to the presence or absence of proton-pump inhibitors

Unique Subject Identifier=0138000010-0002

MEANS Procedure

Assay variable : PTINR\_VAL1 PT-INR Value

| N | Mean      | Standard Deviation | Minimum   | Maximum   |
|---|-----------|--------------------|-----------|-----------|
| 6 | 1.7716667 | 0.3066214          | 1.3300000 | 2.1600000 |

Unique Subject Identifier=0138000010-0003

Assay variable : PTINR\_VAL1 PT-INR Value

| N | Mean      | Standard Deviation | Minimum   | Maximum   |
|---|-----------|--------------------|-----------|-----------|
| 3 | 1.9933333 | 0.4215843          | 1.6400000 | 2.4600000 |

Unique Subject Identifier=0138000010-0004

Assay variable : PTINR\_VAL1 PT-INR Value

| N | Mean      | Standard Deviation | Minimum   | Maximum   |
|---|-----------|--------------------|-----------|-----------|
| 3 | 1.8566667 | 0.1096966          | 1.7300000 | 1.9200000 |

Unique Subject Identifier=0138000010-0009

Assay variable : PTINR\_VAL1 PT-INR Value

N Mean Standard Deviation Minimum Maximum

---

|   |           |           |           |           |
|---|-----------|-----------|-----------|-----------|
| 4 | 1.9200000 | 0.5023279 | 1.4800000 | 2.6000000 |
|---|-----------|-----------|-----------|-----------|

---

Laboratory tests at the time of obtaining Table 2-6 consent, according to the presence or absence of proton-pump inhibitors

Unique Subject Identifier=0138000010-0014

MEANS Procedure

Assay variable : PTINR\_VAL1 PT-INR Value

N Mean Standard Deviation Minimum Maximum

---

|   |           |           |           |           |
|---|-----------|-----------|-----------|-----------|
| 4 | 1.8300000 | 0.4009988 | 1.3500000 | 2.1900000 |
|---|-----------|-----------|-----------|-----------|

---

Unique Subject Identifier=0138000010-0015

Assay variable : PTINR\_VAL1 PT-INR Value

N Mean Standard Deviation Minimum Maximum

---

|   |           |           |           |           |
|---|-----------|-----------|-----------|-----------|
| 3 | 2.1300000 | 0.0953939 | 2.0400000 | 2.2300000 |
|---|-----------|-----------|-----------|-----------|

---

Unique Subject Identifier=0138000010-0016

Assay variable : PTINR\_VAL1 PT-INR Value

N Mean Standard Deviation Minimum Maximum

---

|   |           |           |           |           |
|---|-----------|-----------|-----------|-----------|
| 3 | 1.2733333 | 0.0288675 | 1.2400000 | 1.2900000 |
|---|-----------|-----------|-----------|-----------|

---

Unique Subject Identifier=0138000010-0022

Assay variable : PTINR\_VAL1 PT-INR Value

N Mean Standard Deviation Minimum Maximum

---

|   |           |           |           |           |
|---|-----------|-----------|-----------|-----------|
| 2 | 1.7550000 | 0.1202082 | 1.6700000 | 1.8400000 |
|---|-----------|-----------|-----------|-----------|

---



Laboratory tests at the time of obtaining Table 2-6 consent, according to the presence or absence of proton-pump inhibitors

Unique Subject Identifier=0138000010-0024

MEANS Procedure

Assay variable : PTINR\_VAL1 PT-INR Value

| N | Mean      | Standard Deviation | Minimum   | Maximum   |
|---|-----------|--------------------|-----------|-----------|
| 6 | 1.7050000 | 0.2649340          | 1.3000000 | 2.0100000 |

Unique Subject Identifier=0138000010-0027

Assay variable : PTINR\_VAL1 PT-INR Value

| N | Mean      | Standard Deviation | Minimum   | Maximum   |
|---|-----------|--------------------|-----------|-----------|
| 2 | 2.2700000 | 0.0424264          | 2.2400000 | 2.3000000 |

Unique Subject Identifier=0138000010-0029

Assay variable : PTINR\_VAL1 PT-INR Value

| N | Mean      | Standard Deviation | Minimum   | Maximum   |
|---|-----------|--------------------|-----------|-----------|
| 2 | 1.7550000 | 0.0353553          | 1.7300000 | 1.7800000 |

Unique Subject Identifier=0138000010-0031

Assay variable : PTINR\_VAL1 PT-INR Value

N Mean Standard Deviation Minimum Maximum

---

|   |           |           |           |           |
|---|-----------|-----------|-----------|-----------|
| 3 | 1.5700000 | 0.1500000 | 1.4200000 | 1.7200000 |
|---|-----------|-----------|-----------|-----------|

---

Laboratory tests at the time of obtaining Table 2-6 consent, according to the presence or absence of proton-pump inhibitors

Unique Subject Identifier=0138000010-0033

MEANS Procedure

Assay variable : PTINR\_VAL1 PT-INR Value

| N | Mean      | Standard Deviation | Minimum   | Maximum   |
|---|-----------|--------------------|-----------|-----------|
| 3 | 1.9066667 | 0.2657693          | 1.6300000 | 2.1600000 |

Unique Subject Identifier=0138000010-0035

Assay variable : PTINR\_VAL1 PT-INR Value

| N | Mean      | Standard Deviation | Minimum   | Maximum   |
|---|-----------|--------------------|-----------|-----------|
| 2 | 1.5750000 | 0.2192031          | 1.4200000 | 1.7300000 |

Unique Subject Identifier=0138000010-0036

Assay variable : PTINR\_VAL1 PT-INR Value

| N | Mean      | Standard Deviation | Minimum   | Maximum   |
|---|-----------|--------------------|-----------|-----------|
| 3 | 1.8566667 | 0.1501111          | 1.7700000 | 2.0300000 |

Unique Subject Identifier=0138000010-0037

Assay variable : PTINR\_VAL1 PT-INR Value

N Mean Standard Deviation Minimum Maximum

---

|   |           |           |           |           |
|---|-----------|-----------|-----------|-----------|
| 3 | 1.8733333 | 0.1285820 | 1.7800000 | 2.0200000 |
|---|-----------|-----------|-----------|-----------|

---

Laboratory tests at the time of obtaining Table 2-6 consent, according to the presence or absence of proton-pump inhibitors

Unique Subject Identifier=0138000010-0039

MEANS Procedure

Assay variable : PTINR\_VAL1 PT-INR Value

N Mean Standard Deviation Minimum Maximum

---

|   |           |           |           |           |
|---|-----------|-----------|-----------|-----------|
| 6 | 2.1250000 | 0.7332598 | 1.3000000 | 3.2100000 |
|---|-----------|-----------|-----------|-----------|

---

Unique Subject Identifier=0138000010-0042

Assay variable : PTINR\_VAL1 PT-INR Value

N Mean Standard Deviation Minimum Maximum

---

|   |           |           |           |           |
|---|-----------|-----------|-----------|-----------|
| 4 | 1.7075000 | 0.3138338 | 1.3800000 | 2.1200000 |
|---|-----------|-----------|-----------|-----------|

---

Unique Subject Identifier=0138000010-0043

Assay variable : PTINR\_VAL1 PT-INR Value

N Mean Standard Deviation Minimum Maximum

---

|   |           |           |           |           |
|---|-----------|-----------|-----------|-----------|
| 5 | 1.8960000 | 0.3864324 | 1.3100000 | 2.2800000 |
|---|-----------|-----------|-----------|-----------|

---

Unique Subject Identifier=0138000010-0050

Assay variable : PTINR\_VAL1 PT-INR Value

N Mean Standard Deviation Minimum Maximum

---

|   |           |  |           |           |
|---|-----------|--|-----------|-----------|
| 1 | 1.0700000 |  | 1.0700000 | 1.0700000 |
|---|-----------|--|-----------|-----------|

---

Laboratory tests at the time of obtaining Table 2-6 consent, according to the presence or absence of proton-pump inhibitors

Unique Subject Identifier=0139000010-0001

MEANS Procedure

Assay variable : PTINR\_VAL1 PT-INR Value

N Mean Standard Deviation Minimum Maximum

---

|   |           |           |           |           |
|---|-----------|-----------|-----------|-----------|
| 5 | 1.5100000 | 0.2919760 | 1.1000000 | 1.8800000 |
|---|-----------|-----------|-----------|-----------|

---

Unique Subject Identifier=0139000010-0003

Assay variable : PTINR\_VAL1 PT-INR Value

N Mean Standard Deviation Minimum Maximum

---

|   |           |           |           |           |
|---|-----------|-----------|-----------|-----------|
| 6 | 1.4283333 | 0.2696232 | 1.1800000 | 1.9300000 |
|---|-----------|-----------|-----------|-----------|

---

Unique Subject Identifier=0139000010-0008

Assay variable : PTINR\_VAL1 PT-INR Value

N Mean Standard Deviation Minimum Maximum

---

|   |           |           |           |           |
|---|-----------|-----------|-----------|-----------|
| 6 | 2.1450000 | 0.5838750 | 1.4600000 | 2.9500000 |
|---|-----------|-----------|-----------|-----------|

---

Unique Subject Identifier=0139000010-0009

Assay variable : PTINR\_VAL1 PT-INR Value

N Mean Standard Deviation Minimum Maximum

---

|   |           |           |           |           |
|---|-----------|-----------|-----------|-----------|
| 6 | 1.5516667 | 0.3399068 | 1.2000000 | 2.1900000 |
|---|-----------|-----------|-----------|-----------|

---



Laboratory tests at the time of obtaining Table 2-6 consent, according to the presence or absence of proton-pump inhibitors

Unique Subject Identifier=0139000010-0010

MEANS Procedure

Assay variable : PTINR\_VAL1 PT-INR Value

N Mean Standard Deviation Minimum Maximum

---

|   |           |           |           |           |
|---|-----------|-----------|-----------|-----------|
| 6 | 2.3816667 | 0.2837898 | 2.0400000 | 2.7900000 |
|---|-----------|-----------|-----------|-----------|

---

Unique Subject Identifier=0139000010-0017

Assay variable : PTINR\_VAL1 PT-INR Value

N Mean Standard Deviation Minimum Maximum

---

|   |           |           |           |           |
|---|-----------|-----------|-----------|-----------|
| 2 | 1.4250000 | 0.5020458 | 1.0700000 | 1.7800000 |
|---|-----------|-----------|-----------|-----------|

---

Unique Subject Identifier=0140000010-0002

Assay variable : PTINR\_VAL1 PT-INR Value

N Mean Standard Deviation Minimum Maximum

---

|   |           |           |           |           |
|---|-----------|-----------|-----------|-----------|
| 6 | 2.2400000 | 0.5415903 | 1.3400000 | 2.8500000 |
|---|-----------|-----------|-----------|-----------|

---

Unique Subject Identifier=0140000010-0003

Assay variable : PTINR\_VAL1 PT-INR Value

N Mean Standard Deviation Minimum Maximum

---

|   |           |           |           |           |
|---|-----------|-----------|-----------|-----------|
| 4 | 2.2525000 | 0.9731863 | 1.5100000 | 3.6400000 |
|---|-----------|-----------|-----------|-----------|

---

Laboratory tests at the time of obtaining Table 2-6 consent, according to the presence or absence of proton-pump inhibitors

Unique Subject Identifier=0140000010-0008

MEANS Procedure

Assay variable : PTINR\_VAL1 PT-INR Value

N Mean Standard Deviation Minimum Maximum

---

|   |           |           |           |           |
|---|-----------|-----------|-----------|-----------|
| 4 | 2.3675000 | 0.2835930 | 2.0100000 | 2.6100000 |
|---|-----------|-----------|-----------|-----------|

---

Unique Subject Identifier=0140000010-0011

Assay variable : PTINR\_VAL1 PT-INR Value

N Mean Standard Deviation Minimum Maximum

---

|   |           |           |           |           |
|---|-----------|-----------|-----------|-----------|
| 4 | 2.1425000 | 0.2451360 | 1.9700000 | 2.4900000 |
|---|-----------|-----------|-----------|-----------|

---

Unique Subject Identifier=0140000010-0016

Assay variable : PTINR\_VAL1 PT-INR Value

N Mean Standard Deviation Minimum Maximum

---

|   |           |           |           |           |
|---|-----------|-----------|-----------|-----------|
| 4 | 1.7725000 | 0.6115758 | 1.3100000 | 2.6000000 |
|---|-----------|-----------|-----------|-----------|

---

Unique Subject Identifier=0140000010-0017

Assay variable : PTINR\_VAL1 PT-INR Value

N Mean Standard Deviation Minimum Maximum

---

|   |          |          |          |          |
|---|----------|----------|----------|----------|
| 6 | 1.860000 | 0.762608 | 1.420000 | 3.400000 |
|---|----------|----------|----------|----------|

---

Laboratory tests at the time of obtaining Table 2-6 consent, according to the presence or absence of proton-pump inhibitors

Unique Subject Identifier=0140000010-0018

MEANS Procedure

Assay variable : PTINR\_VAL1 PT-INR Value

N Mean Standard Deviation Minimum Maximum

---

|   |           |           |           |           |
|---|-----------|-----------|-----------|-----------|
| 3 | 2.1766667 | 0.1078579 | 2.1000000 | 2.3000000 |
|---|-----------|-----------|-----------|-----------|

---

Unique Subject Identifier=0140000010-0024

Assay variable : PTINR\_VAL1 PT-INR Value

N Mean Standard Deviation Minimum Maximum

---

|   |           |           |           |           |
|---|-----------|-----------|-----------|-----------|
| 3 | 2.3200000 | 0.9263369 | 1.5100000 | 3.3300000 |
|---|-----------|-----------|-----------|-----------|

---

Unique Subject Identifier=0140000010-0025

Assay variable : PTINR\_VAL1 PT-INR Value

N Mean Standard Deviation Minimum Maximum

---

|   |           |           |           |           |
|---|-----------|-----------|-----------|-----------|
| 3 | 1.4900000 | 0.0624500 | 1.4200000 | 1.5400000 |
|---|-----------|-----------|-----------|-----------|

---

Unique Subject Identifier=0140000010-0026

Assay variable : PTINR\_VAL1 PT-INR Value

N Mean Standard Deviation Minimum Maximum

---

|   |           |           |           |           |
|---|-----------|-----------|-----------|-----------|
| 4 | 2.6675000 | 0.5993538 | 2.0600000 | 3.4300000 |
|---|-----------|-----------|-----------|-----------|

---

Laboratory tests at the time of obtaining Table 2-6 consent, according to the presence or absence of proton-pump inhibitors

Unique Subject Identifier=0141000000-0002

MEANS Procedure

Assay variable : PTINR\_VAL1 PT-INR Value

N Mean Standard Deviation Minimum Maximum

---

|   |           |           |           |           |
|---|-----------|-----------|-----------|-----------|
| 4 | 1.9500000 | 0.1732051 | 1.7200000 | 2.1400000 |
|---|-----------|-----------|-----------|-----------|

---

Unique Subject Identifier=0142000000-0001

Assay variable : PTINR\_VAL1 PT-INR Value

N Mean Standard Deviation Minimum Maximum

---

|   |           |           |           |           |
|---|-----------|-----------|-----------|-----------|
| 6 | 2.0316667 | 0.2256029 | 1.7500000 | 2.3700000 |
|---|-----------|-----------|-----------|-----------|

---

Unique Subject Identifier=0143010000-0002

Assay variable : PTINR\_VAL1 PT-INR Value

N Mean Standard Deviation Minimum Maximum

---

|   |           |           |           |           |
|---|-----------|-----------|-----------|-----------|
| 5 | 2.1980000 | 0.6462739 | 1.5900000 | 3.1700000 |
|---|-----------|-----------|-----------|-----------|

---

Unique Subject Identifier=0143010000-0003

Assay variable : PTINR\_VAL1 PT-INR Value

N Mean Standard Deviation Minimum Maximum

---

|   |           |           |           |           |
|---|-----------|-----------|-----------|-----------|
| 6 | 2.1150000 | 0.3043518 | 1.8500000 | 2.5100000 |
|---|-----------|-----------|-----------|-----------|

---



Laboratory tests at the time of obtaining Table 2-6 consent, according to the presence or absence of proton-pump inhibitors

Unique Subject Identifier=0143010000-0004

MEANS Procedure

Assay variable : PTINR\_VAL1 PT-INR Value

| N | Mean      | Standard Deviation | Minimum   | Maximum   |
|---|-----------|--------------------|-----------|-----------|
| 3 | 1.1233333 | 0.0602771          | 1.0600000 | 1.1800000 |

Unique Subject Identifier=0143010000-0011

Assay variable : PTINR\_VAL1 PT-INR Value

| N | Mean      | Standard Deviation | Minimum   | Maximum   |
|---|-----------|--------------------|-----------|-----------|
| 5 | 2.3660000 | 0.6961537          | 1.5700000 | 3.4500000 |

Unique Subject Identifier=0143010000-0012

Assay variable : PTINR\_VAL1 PT-INR Value

| N | Mean      | Standard Deviation | Minimum   | Maximum   |
|---|-----------|--------------------|-----------|-----------|
| 6 | 1.6550000 | 0.1595932          | 1.5100000 | 1.9200000 |

Unique Subject Identifier=0143010000-0015

Assay variable : PTINR\_VAL1 PT-INR Value

N Mean Standard Deviation Minimum Maximum

---

|   |           |           |           |           |
|---|-----------|-----------|-----------|-----------|
| 2 | 1.6050000 | 0.0353553 | 1.5800000 | 1.6300000 |
|---|-----------|-----------|-----------|-----------|

---

Laboratory tests at the time of obtaining Table 2-6 consent, according to the presence or absence of proton-pump inhibitors

Unique Subject Identifier=0143010000-0018

MEANS Procedure

Assay variable : PTINR\_VAL1 PT-INR Value

N Mean Standard Deviation Minimum Maximum

---

|   |           |           |           |           |
|---|-----------|-----------|-----------|-----------|
| 6 | 2.2983333 | 0.1756607 | 2.1500000 | 2.5500000 |
|---|-----------|-----------|-----------|-----------|

---

Unique Subject Identifier=0143010000-0030

Assay variable : PTINR\_VAL1 PT-INR Value

N Mean Standard Deviation Minimum Maximum

---

|   |           |           |           |           |
|---|-----------|-----------|-----------|-----------|
| 6 | 1.8116667 | 0.0953764 | 1.7000000 | 1.9600000 |
|---|-----------|-----------|-----------|-----------|

---

Unique Subject Identifier=0143010000-0031

Assay variable : PTINR\_VAL1 PT-INR Value

N Mean Standard Deviation Minimum Maximum

---

|   |           |           |           |           |
|---|-----------|-----------|-----------|-----------|
| 6 | 2.4433333 | 0.3251256 | 1.8200000 | 2.7800000 |
|---|-----------|-----------|-----------|-----------|

---

Unique Subject Identifier=0143010000-0032

Assay variable : PTINR\_VAL1 PT-INR Value

N Mean Standard Deviation Minimum Maximum

---

|   |          |          |          |          |
|---|----------|----------|----------|----------|
| 3 | 1.990000 | 0.170000 | 1.820000 | 2.160000 |
|---|----------|----------|----------|----------|

---

Laboratory tests at the time of obtaining Table 2-6 consent, according to the presence or absence of proton-pump inhibitors

Unique Subject Identifier=0143010000-0034

MEANS Procedure

Assay variable : PTINR\_VAL1 PT-INR Value

N Mean Standard Deviation Minimum Maximum

---

|   |           |           |           |           |
|---|-----------|-----------|-----------|-----------|
| 6 | 1.9183333 | 0.2634704 | 1.6700000 | 2.4300000 |
|---|-----------|-----------|-----------|-----------|

---

Unique Subject Identifier=0143010000-0036

Assay variable : PTINR\_VAL1 PT-INR Value

N Mean Standard Deviation Minimum Maximum

---

|   |           |           |           |           |
|---|-----------|-----------|-----------|-----------|
| 6 | 1.8383333 | 0.1904118 | 1.5600000 | 2.0500000 |
|---|-----------|-----------|-----------|-----------|

---

Unique Subject Identifier=0143010000-0038

Assay variable : PTINR\_VAL1 PT-INR Value

N Mean Standard Deviation Minimum Maximum

---

|   |           |           |           |           |
|---|-----------|-----------|-----------|-----------|
| 6 | 2.1483333 | 0.2359167 | 1.8900000 | 2.5300000 |
|---|-----------|-----------|-----------|-----------|

---

Unique Subject Identifier=0143010000-0039

Assay variable : PTINR\_VAL1 PT-INR Value

N Mean Standard Deviation Minimum Maximum

---

|   |           |           |           |           |
|---|-----------|-----------|-----------|-----------|
| 6 | 1.9333333 | 0.5831524 | 1.2100000 | 2.6100000 |
|---|-----------|-----------|-----------|-----------|

---

Laboratory tests at the time of obtaining Table 2-6 consent, according to the presence or absence of proton-pump inhibitors

Unique Subject Identifier=0143010000-0043

MEANS Procedure

Assay variable : PTINR\_VAL1 PT-INR Value

N Mean Standard Deviation Minimum Maximum

---

|   |           |           |           |           |
|---|-----------|-----------|-----------|-----------|
| 6 | 1.7733333 | 0.3512074 | 1.4200000 | 2.2500000 |
|---|-----------|-----------|-----------|-----------|

---

Unique Subject Identifier=0143010000-0044

Assay variable : PTINR\_VAL1 PT-INR Value

N Mean Standard Deviation Minimum Maximum

---

|   |           |           |           |           |
|---|-----------|-----------|-----------|-----------|
| 6 | 1.7583333 | 0.2982225 | 1.3700000 | 1.9800000 |
|---|-----------|-----------|-----------|-----------|

---

Unique Subject Identifier=0143010000-0056

Assay variable : PTINR\_VAL1 PT-INR Value

N Mean Standard Deviation Minimum Maximum

---

|   |           |           |           |           |
|---|-----------|-----------|-----------|-----------|
| 4 | 2.0625000 | 0.3895617 | 1.7200000 | 2.6200000 |
|---|-----------|-----------|-----------|-----------|

---

Unique Subject Identifier=0143010000-0064

Assay variable : PTINR\_VAL1 PT-INR Value

N Mean Standard Deviation Minimum Maximum

---

|   |           |           |           |           |
|---|-----------|-----------|-----------|-----------|
| 6 | 2.2883333 | 0.3831144 | 1.9200000 | 2.8400000 |
|---|-----------|-----------|-----------|-----------|

---



Laboratory tests at the time of obtaining Table 2-6 consent, according to the presence or absence of proton-pump inhibitors

Unique Subject Identifier=0143010000-0069

MEANS Procedure

Assay variable : PTINR\_VAL1 PT-INR Value

N Mean Standard Deviation Minimum Maximum

---

|   |           |           |           |           |
|---|-----------|-----------|-----------|-----------|
| 6 | 2.2150000 | 0.4219360 | 1.5000000 | 2.6700000 |
|---|-----------|-----------|-----------|-----------|

---

Unique Subject Identifier=0143010000-0070

Assay variable : PTINR\_VAL1 PT-INR Value

N Mean Standard Deviation Minimum Maximum

---

|   |           |           |           |           |
|---|-----------|-----------|-----------|-----------|
| 6 | 1.5666667 | 0.2264214 | 1.3200000 | 1.8800000 |
|---|-----------|-----------|-----------|-----------|

---

Unique Subject Identifier=0143010000-0072

Assay variable : PTINR\_VAL1 PT-INR Value

N Mean Standard Deviation Minimum Maximum

---

|   |           |           |           |           |
|---|-----------|-----------|-----------|-----------|
| 6 | 2.1366667 | 0.6937915 | 1.4600000 | 3.3900000 |
|---|-----------|-----------|-----------|-----------|

---

Unique Subject Identifier=0143010000-0073

Assay variable : PTINR\_VAL1 PT-INR Value

N Mean Standard Deviation Minimum Maximum

---

|   |           |           |           |           |
|---|-----------|-----------|-----------|-----------|
| 6 | 2.0133333 | 0.2307957 | 1.7300000 | 2.2800000 |
|---|-----------|-----------|-----------|-----------|

---

Laboratory tests at the time of obtaining Table 2-6 consent, according to the presence or absence of proton-pump inhibitors

Unique Subject Identifier=0143010000-0075

MEANS Procedure

Assay variable : PTINR\_VAL1 PT-INR Value

N Mean Standard Deviation Minimum Maximum

---

|   |           |           |           |           |
|---|-----------|-----------|-----------|-----------|
| 6 | 2.1666667 | 0.2559427 | 1.8800000 | 2.6100000 |
|---|-----------|-----------|-----------|-----------|

---

Unique Subject Identifier=0143010000-0076

Assay variable : PTINR\_VAL1 PT-INR Value

N Mean Standard Deviation Minimum Maximum

---

|   |           |           |           |           |
|---|-----------|-----------|-----------|-----------|
| 6 | 1.9283333 | 0.3119241 | 1.5600000 | 2.4000000 |
|---|-----------|-----------|-----------|-----------|

---

Unique Subject Identifier=0143010000-0079

Assay variable : PTINR\_VAL1 PT-INR Value

N Mean Standard Deviation Minimum Maximum

---

|   |           |           |           |           |
|---|-----------|-----------|-----------|-----------|
| 3 | 2.4166667 | 0.2302897 | 2.1800000 | 2.6400000 |
|---|-----------|-----------|-----------|-----------|

---

Unique Subject Identifier=0143010000-0084

Assay variable : PTINR\_VAL1 PT-INR Value

N Mean Standard Deviation Minimum Maximum

---

|   |           |           |           |           |
|---|-----------|-----------|-----------|-----------|
| 3 | 1.6266667 | 0.2218859 | 1.3900000 | 1.8300000 |
|---|-----------|-----------|-----------|-----------|

---

Laboratory tests at the time of obtaining Table 2-6 consent, according to the presence or absence of proton-pump inhibitors

Unique Subject Identifier=0143010000-0093

MEANS Procedure

Assay variable : PTINR\_VAL1 PT-INR Value

| N | Mean      | Standard Deviation | Minimum   | Maximum   |
|---|-----------|--------------------|-----------|-----------|
| 5 | 2.0500000 | 0.4650269          | 1.6700000 | 2.6900000 |

Unique Subject Identifier=0143010000-0095

Assay variable : PTINR\_VAL1 PT-INR Value

| N | Mean      | Standard Deviation | Minimum   | Maximum   |
|---|-----------|--------------------|-----------|-----------|
| 6 | 1.6300000 | 0.0651153          | 1.5700000 | 1.7200000 |

Unique Subject Identifier=0143010000-0099

Assay variable : PTINR\_VAL1 PT-INR Value

| N | Mean      | Standard Deviation | Minimum   | Maximum   |
|---|-----------|--------------------|-----------|-----------|
| 6 | 2.2566667 | 0.2694934          | 1.8800000 | 2.6700000 |

Unique Subject Identifier=0143010000-0100

Assay variable : PTINR\_VAL1 PT-INR Value

N Mean Standard Deviation Minimum Maximum

---

|   |          |          |          |          |
|---|----------|----------|----------|----------|
| 6 | 2.023333 | 0.510948 | 1.210000 | 2.690000 |
|---|----------|----------|----------|----------|

---

Laboratory tests at the time of obtaining Table 2-6 consent, according to the presence or absence of proton-pump inhibitors

Unique Subject Identifier=0143010000-0106

MEANS Procedure

Assay variable : PTINR\_VAL1 PT-INR Value

N Mean Standard Deviation Minimum Maximum

---

|   |           |           |           |           |
|---|-----------|-----------|-----------|-----------|
| 6 | 2.1100000 | 0.3531572 | 1.5500000 | 2.5600000 |
|---|-----------|-----------|-----------|-----------|

---

Unique Subject Identifier=0143010000-0108

Assay variable : PTINR\_VAL1 PT-INR Value

N Mean Standard Deviation Minimum Maximum

---

|   |           |           |           |           |
|---|-----------|-----------|-----------|-----------|
| 6 | 2.1850000 | 0.6755664 | 1.8200000 | 3.5600000 |
|---|-----------|-----------|-----------|-----------|

---

Unique Subject Identifier=0143010000-0111

Assay variable : PTINR\_VAL1 PT-INR Value

N Mean Standard Deviation Minimum Maximum

---

|   |           |           |           |           |
|---|-----------|-----------|-----------|-----------|
| 5 | 1.7480000 | 0.1564289 | 1.5800000 | 1.9800000 |
|---|-----------|-----------|-----------|-----------|

---

Unique Subject Identifier=0143010000-0112

Assay variable : PTINR\_VAL1 PT-INR Value

N Mean Standard Deviation Minimum Maximum

---

|   |           |           |           |           |
|---|-----------|-----------|-----------|-----------|
| 6 | 1.8850000 | 0.1078425 | 1.7700000 | 2.0600000 |
|---|-----------|-----------|-----------|-----------|

---



Laboratory tests at the time of obtaining Table 2-6 consent, according to the presence or absence of proton-pump inhibitors

Unique Subject Identifier=0143010000-0118

MEANS Procedure

Assay variable : PTINR\_VAL1 PT-INR Value

N Mean Standard Deviation Minimum Maximum

---

|   |           |           |           |           |
|---|-----------|-----------|-----------|-----------|
| 6 | 1.7116667 | 0.3252332 | 1.4400000 | 2.3400000 |
|---|-----------|-----------|-----------|-----------|

---

Unique Subject Identifier=0143010000-0128

Assay variable : PTINR\_VAL1 PT-INR Value

N Mean Standard Deviation Minimum Maximum

---

|   |           |           |           |           |
|---|-----------|-----------|-----------|-----------|
| 4 | 1.8725000 | 0.2088660 | 1.6900000 | 2.1700000 |
|---|-----------|-----------|-----------|-----------|

---

Unique Subject Identifier=0143010000-0129

Assay variable : PTINR\_VAL1 PT-INR Value

N Mean Standard Deviation Minimum Maximum

---

|   |           |           |           |           |
|---|-----------|-----------|-----------|-----------|
| 4 | 2.1300000 | 0.1134313 | 1.9800000 | 2.2500000 |
|---|-----------|-----------|-----------|-----------|

---

Unique Subject Identifier=0143010000-0132

Assay variable : PTINR\_VAL1 PT-INR Value

N Mean Standard Deviation Minimum Maximum

---

|   |          |           |          |          |
|---|----------|-----------|----------|----------|
| 4 | 1.360000 | 0.5643285 | 1.000000 | 2.200000 |
|---|----------|-----------|----------|----------|

---

Laboratory tests at the time of obtaining Table 2-6 consent, according to the presence or absence of proton-pump inhibitors

Unique Subject Identifier=0143010000-0141

MEANS Procedure

Assay variable : PTINR\_VAL1 PT-INR Value

N Mean Standard Deviation Minimum Maximum

---

|   |           |           |           |           |
|---|-----------|-----------|-----------|-----------|
| 4 | 2.1150000 | 0.1844813 | 2.0000000 | 2.3900000 |
|---|-----------|-----------|-----------|-----------|

---

Unique Subject Identifier=0143010000-0144

Assay variable : PTINR\_VAL1 PT-INR Value

N Mean Standard Deviation Minimum Maximum

---

|   |           |           |           |           |
|---|-----------|-----------|-----------|-----------|
| 3 | 2.1100000 | 0.0721110 | 2.0300000 | 2.1700000 |
|---|-----------|-----------|-----------|-----------|

---

Unique Subject Identifier=0143010000-0153

Assay variable : PTINR\_VAL1 PT-INR Value

N Mean Standard Deviation Minimum Maximum

---

|   |           |           |           |           |
|---|-----------|-----------|-----------|-----------|
| 6 | 1.9733333 | 0.4101544 | 1.4300000 | 2.5900000 |
|---|-----------|-----------|-----------|-----------|

---

Unique Subject Identifier=0143010000-0154

Assay variable : PTINR\_VAL1 PT-INR Value

N Mean Standard Deviation Minimum Maximum

---

|   |           |           |           |           |
|---|-----------|-----------|-----------|-----------|
| 6 | 2.0316667 | 0.6977798 | 1.1400000 | 2.8200000 |
|---|-----------|-----------|-----------|-----------|

---

Laboratory tests at the time of obtaining Table 2-6 consent, according to the presence or absence of proton-pump inhibitors

Unique Subject Identifier=0143010000-0155

MEANS Procedure

Assay variable : PTINR\_VAL1 PT-INR Value

| N | Mean      | Standard Deviation | Minimum   | Maximum   |
|---|-----------|--------------------|-----------|-----------|
| 6 | 2.3250000 | 0.2429609          | 1.9500000 | 2.6100000 |

Unique Subject Identifier=0143010000-0158

Assay variable : PTINR\_VAL1 PT-INR Value

| N | Mean      | Standard Deviation | Minimum   | Maximum   |
|---|-----------|--------------------|-----------|-----------|
| 3 | 2.9500000 | 0.3026549          | 2.6100000 | 3.1900000 |

Unique Subject Identifier=0143010000-0163

Assay variable : PTINR\_VAL1 PT-INR Value

| N | Mean      | Standard Deviation | Minimum   | Maximum   |
|---|-----------|--------------------|-----------|-----------|
| 5 | 1.9640000 | 0.1141490          | 1.7900000 | 2.0800000 |

Unique Subject Identifier=0143010000-0164

Assay variable : PTINR\_VAL1 PT-INR Value

N Mean Standard Deviation Minimum Maximum

---

|   |          |           |          |          |
|---|----------|-----------|----------|----------|
| 6 | 2.410000 | 0.2503597 | 2.090000 | 2.780000 |
|---|----------|-----------|----------|----------|

---

Laboratory tests at the time of obtaining Table 2-6 consent, according to the presence or absence of proton-pump inhibitors

Unique Subject Identifier=0143010000-0166

MEANS Procedure

Assay variable : PTINR\_VAL1 PT-INR Value

N Mean Standard Deviation Minimum Maximum

---

|   |           |           |           |           |
|---|-----------|-----------|-----------|-----------|
| 6 | 1.9800000 | 0.2815670 | 1.5700000 | 2.3400000 |
|---|-----------|-----------|-----------|-----------|

---

Unique Subject Identifier=0143010000-0167

Assay variable : PTINR\_VAL1 PT-INR Value

N Mean Standard Deviation Minimum Maximum

---

|   |           |           |           |           |
|---|-----------|-----------|-----------|-----------|
| 6 | 1.8383333 | 0.5036434 | 1.3600000 | 2.7100000 |
|---|-----------|-----------|-----------|-----------|

---

Unique Subject Identifier=0143010000-0173

Assay variable : PTINR\_VAL1 PT-INR Value

N Mean Standard Deviation Minimum Maximum

---

|   |           |           |           |           |
|---|-----------|-----------|-----------|-----------|
| 6 | 2.3616667 | 0.3055105 | 1.8700000 | 2.8200000 |
|---|-----------|-----------|-----------|-----------|

---

Unique Subject Identifier=0143010000-0175

Assay variable : PTINR\_VAL1 PT-INR Value

N Mean Standard Deviation Minimum Maximum

---

|   |           |           |           |           |
|---|-----------|-----------|-----------|-----------|
| 2 | 1.8800000 | 0.2828427 | 1.6800000 | 2.0800000 |
|---|-----------|-----------|-----------|-----------|

---



Laboratory tests at the time of obtaining Table 2-6 consent, according to the presence or absence of proton-pump inhibitors

Unique Subject Identifier=0143010000-0182

MEANS Procedure

Assay variable : PTINR\_VAL1 PT-INR Value

N Mean Standard Deviation Minimum Maximum

---

|   |           |           |           |           |
|---|-----------|-----------|-----------|-----------|
| 6 | 2.0133333 | 0.7044336 | 1.6300000 | 3.4200000 |
|---|-----------|-----------|-----------|-----------|

---

Unique Subject Identifier=0143010000-0188

Assay variable : PTINR\_VAL1 PT-INR Value

N Mean Standard Deviation Minimum Maximum

---

|   |           |  |           |           |
|---|-----------|--|-----------|-----------|
| 1 | 1.6400000 |  | 1.6400000 | 1.6400000 |
|---|-----------|--|-----------|-----------|

---

Unique Subject Identifier=0143010000-0196

Assay variable : PTINR\_VAL1 PT-INR Value

N Mean Standard Deviation Minimum Maximum

---

|   |           |           |           |           |
|---|-----------|-----------|-----------|-----------|
| 2 | 1.8900000 | 0.0141421 | 1.8800000 | 1.9000000 |
|---|-----------|-----------|-----------|-----------|

---

Unique Subject Identifier=0143010000-0197

Assay variable : PTINR\_VAL1 PT-INR Value

N Mean Standard Deviation Minimum Maximum

---

|   |          |           |          |          |
|---|----------|-----------|----------|----------|
| 3 | 2.280000 | 0.3119295 | 1.990000 | 2.610000 |
|---|----------|-----------|----------|----------|

---

Laboratory tests at the time of obtaining Table 2-6 consent, according to the presence or absence of proton-pump inhibitors

Unique Subject Identifier=0143010000-0203

MEANS Procedure

Assay variable : PTINR\_VAL1 PT-INR Value

N Mean Standard Deviation Minimum Maximum

---

|   |           |  |           |           |
|---|-----------|--|-----------|-----------|
| 1 | 1.9600000 |  | 1.9600000 | 1.9600000 |
|---|-----------|--|-----------|-----------|

---

Unique Subject Identifier=0144000000-0006

Assay variable : PTINR\_VAL1 PT-INR Value

N Mean Standard Deviation Minimum Maximum

---

|   |           |           |           |           |
|---|-----------|-----------|-----------|-----------|
| 6 | 1.9683333 | 0.2527779 | 1.6300000 | 2.4100000 |
|---|-----------|-----------|-----------|-----------|

---

Unique Subject Identifier=0144000000-0008

Assay variable : PTINR\_VAL1 PT-INR Value

N Mean Standard Deviation Minimum Maximum

---

|   |           |  |           |           |
|---|-----------|--|-----------|-----------|
| 1 | 1.4700000 |  | 1.4700000 | 1.4700000 |
|---|-----------|--|-----------|-----------|

---

Unique Subject Identifier=0144000000-0009

Assay variable : PTINR\_VAL1 PT-INR Value

N Mean Standard Deviation Minimum Maximum

---

|   |           |  |           |           |
|---|-----------|--|-----------|-----------|
| 1 | 1.7900000 |  | 1.7900000 | 1.7900000 |
|---|-----------|--|-----------|-----------|

---

Laboratory tests at the time of obtaining Table 2-6 consent, according to the presence or absence of proton-pump inhibitors

Unique Subject Identifier=0144000000-0014

MEANS Procedure

Assay variable : PTINR\_VAL1 PT-INR Value

N Mean Standard Deviation Minimum Maximum

---

|   |           |           |           |           |
|---|-----------|-----------|-----------|-----------|
| 2 | 1.2000000 | 0.1555635 | 1.0900000 | 1.3100000 |
|---|-----------|-----------|-----------|-----------|

---

Unique Subject Identifier=0145000000-0005

Assay variable : PTINR\_VAL1 PT-INR Value

N Mean Standard Deviation Minimum Maximum

---

|   |           |           |           |           |
|---|-----------|-----------|-----------|-----------|
| 4 | 2.6175000 | 0.3463500 | 2.2700000 | 3.0100000 |
|---|-----------|-----------|-----------|-----------|

---

Unique Subject Identifier=0145000000-0008

Assay variable : PTINR\_VAL1 PT-INR Value

N Mean Standard Deviation Minimum Maximum

---

|   |           |           |           |           |
|---|-----------|-----------|-----------|-----------|
| 2 | 2.4200000 | 0.5232590 | 2.0500000 | 2.7900000 |
|---|-----------|-----------|-----------|-----------|

---

Unique Subject Identifier=0145000000-0010

Assay variable : PTINR\_VAL1 PT-INR Value

N Mean Standard Deviation Minimum Maximum

---

|   |           |           |           |           |
|---|-----------|-----------|-----------|-----------|
| 3 | 2.2833333 | 0.6672581 | 1.5300000 | 2.8000000 |
|---|-----------|-----------|-----------|-----------|

---

Laboratory tests at the time of obtaining Table 2-6 consent, according to the presence or absence of proton-pump inhibitors

Unique Subject Identifier=0145000000-0014

MEANS Procedure

Assay variable : PTINR\_VAL1 PT-INR Value

N Mean Standard Deviation Minimum Maximum

---

|   |           |           |           |           |
|---|-----------|-----------|-----------|-----------|
| 3 | 2.2100000 | 0.2861818 | 2.0300000 | 2.5400000 |
|---|-----------|-----------|-----------|-----------|

---

Unique Subject Identifier=0145000000-0015

Assay variable : PTINR\_VAL1 PT-INR Value

N Mean Standard Deviation Minimum Maximum

---

|   |           |           |           |           |
|---|-----------|-----------|-----------|-----------|
| 4 | 1.7450000 | 0.0974679 | 1.6100000 | 1.8300000 |
|---|-----------|-----------|-----------|-----------|

---

Unique Subject Identifier=0145000000-0016

Assay variable : PTINR\_VAL1 PT-INR Value

N Mean Standard Deviation Minimum Maximum

---

|   |           |           |           |           |
|---|-----------|-----------|-----------|-----------|
| 6 | 2.7600000 | 0.4118738 | 2.1800000 | 3.3000000 |
|---|-----------|-----------|-----------|-----------|

---

Unique Subject Identifier=0145000000-0022

Assay variable : PTINR\_VAL1 PT-INR Value

N Mean Standard Deviation Minimum Maximum

---

|   |           |           |           |           |
|---|-----------|-----------|-----------|-----------|
| 6 | 1.5066667 | 0.2136040 | 1.2900000 | 1.7600000 |
|---|-----------|-----------|-----------|-----------|

---



Laboratory tests at the time of obtaining Table 2-6 consent, according to the presence or absence of proton-pump inhibitors

Unique Subject Identifier=014600000-0007

MEANS Procedure

Assay variable : PTINR\_VAL1 PT-INR Value

N Mean Standard Deviation Minimum Maximum

---

|   |           |           |           |           |
|---|-----------|-----------|-----------|-----------|
| 3 | 2.2566667 | 0.2608320 | 1.9600000 | 2.4500000 |
|---|-----------|-----------|-----------|-----------|

---

Unique Subject Identifier=014600000-0008

Assay variable : PTINR\_VAL1 PT-INR Value

N Mean Standard Deviation Minimum Maximum

---

|   |           |           |           |           |
|---|-----------|-----------|-----------|-----------|
| 3 | 3.1033333 | 0.5450076 | 2.5000000 | 3.5600000 |
|---|-----------|-----------|-----------|-----------|

---

Unique Subject Identifier=014600000-0009

Assay variable : PTINR\_VAL1 PT-INR Value

N Mean Standard Deviation Minimum Maximum

---

|   |           |           |           |           |
|---|-----------|-----------|-----------|-----------|
| 3 | 1.8233333 | 0.1700980 | 1.6300000 | 1.9500000 |
|---|-----------|-----------|-----------|-----------|

---

Unique Subject Identifier=014600000-0015

Assay variable : PTINR\_VAL1 PT-INR Value

N Mean Standard Deviation Minimum Maximum

---

|   |           |           |           |           |
|---|-----------|-----------|-----------|-----------|
| 4 | 2.3250000 | 0.3706301 | 1.8300000 | 2.7200000 |
|---|-----------|-----------|-----------|-----------|

---

Laboratory tests at the time of obtaining Table 2-6 consent, according to the presence or absence of proton-pump inhibitors

Unique Subject Identifier=014600000-0016

MEANS Procedure

Assay variable : PTINR\_VAL1 PT-INR Value

N Mean Standard Deviation Minimum Maximum

---

|   |          |           |          |          |
|---|----------|-----------|----------|----------|
| 4 | 2.140000 | 0.5618422 | 1.460000 | 2.830000 |
|---|----------|-----------|----------|----------|

---

Unique Subject Identifier=014600000-0021

Assay variable : PTINR\_VAL1 PT-INR Value

N Mean Standard Deviation Minimum Maximum

---

|   |          |           |          |          |
|---|----------|-----------|----------|----------|
| 2 | 2.105000 | 0.0212132 | 2.090000 | 2.120000 |
|---|----------|-----------|----------|----------|

---

Unique Subject Identifier=014700000-0002

Assay variable : PTINR\_VAL1 PT-INR Value

N Mean Standard Deviation Minimum Maximum

---

|   |          |           |          |          |
|---|----------|-----------|----------|----------|
| 3 | 1.876667 | 0.0642910 | 1.830000 | 1.950000 |
|---|----------|-----------|----------|----------|

---

Unique Subject Identifier=014700000-0003

Assay variable : PTINR\_VAL1 PT-INR Value

N Mean Standard Deviation Minimum Maximum

---

|   |          |           |          |          |
|---|----------|-----------|----------|----------|
| 4 | 2.100000 | 0.3108054 | 1.790000 | 2.520000 |
|---|----------|-----------|----------|----------|

---

Laboratory tests at the time of obtaining Table 2-6 consent, according to the presence or absence of proton-pump inhibitors

Unique Subject Identifier=0147000000-0005

MEANS Procedure

Assay variable : PTINR\_VAL1 PT-INR Value

N Mean Standard Deviation Minimum Maximum

---

|   |           |           |           |           |
|---|-----------|-----------|-----------|-----------|
| 3 | 2.2733333 | 0.1803700 | 2.1000000 | 2.4600000 |
|---|-----------|-----------|-----------|-----------|

---

Unique Subject Identifier=0147000000-0009

Assay variable : PTINR\_VAL1 PT-INR Value

N Mean Standard Deviation Minimum Maximum

---

|   |           |           |           |           |
|---|-----------|-----------|-----------|-----------|
| 3 | 1.8133333 | 0.0152753 | 1.8000000 | 1.8300000 |
|---|-----------|-----------|-----------|-----------|

---

Unique Subject Identifier=0147000000-0013

Assay variable : PTINR\_VAL1 PT-INR Value

N Mean Standard Deviation Minimum Maximum

---

|   |           |           |           |           |
|---|-----------|-----------|-----------|-----------|
| 4 | 1.9850000 | 0.5911853 | 1.6500000 | 2.8700000 |
|---|-----------|-----------|-----------|-----------|

---

Unique Subject Identifier=0147000000-0016

Assay variable : PTINR\_VAL1 PT-INR Value

N Mean Standard Deviation Minimum Maximum

---

|   |           |           |           |           |
|---|-----------|-----------|-----------|-----------|
| 3 | 1.7900000 | 0.4853864 | 1.2300000 | 2.0900000 |
|---|-----------|-----------|-----------|-----------|

---

Laboratory tests at the time of obtaining Table 2-6 consent, according to the presence or absence of proton-pump inhibitors

Unique Subject Identifier=0154010000-0018

MEANS Procedure

Assay variable : PTINR\_VAL1 PT-INR Value

| N | Mean      | Standard Deviation | Minimum   | Maximum   |
|---|-----------|--------------------|-----------|-----------|
| 5 | 1.7200000 | 0.3033150          | 1.4000000 | 2.2000000 |

Unique Subject Identifier=0155010000-0002

Assay variable : PTINR\_VAL1 PT-INR Value

| N | Mean      | Standard Deviation | Minimum   | Maximum   |
|---|-----------|--------------------|-----------|-----------|
| 3 | 2.5333333 | 0.3511885          | 2.2000000 | 2.9000000 |

Unique Subject Identifier=0155010000-0004

Assay variable : PTINR\_VAL1 PT-INR Value

| N | Mean      | Standard Deviation | Minimum   | Maximum   |
|---|-----------|--------------------|-----------|-----------|
| 3 | 2.1666667 | 0.1154701          | 2.1000000 | 2.3000000 |

Unique Subject Identifier=0155010000-0006

Assay variable : PTINR\_VAL1 PT-INR Value

N Mean Standard Deviation Minimum Maximum

---

|   |          |           |          |          |
|---|----------|-----------|----------|----------|
| 4 | 2.125000 | 0.2872281 | 1.700000 | 2.300000 |
|---|----------|-----------|----------|----------|

---



Laboratory tests at the time of obtaining Table 2-6 consent, according to the presence or absence of proton-pump inhibitors

Unique Subject Identifier=0155010000-0007

MEANS Procedure

Assay variable : PTINR\_VAL1 PT-INR Value

| N | Mean      | Standard Deviation | Minimum   | Maximum   |
|---|-----------|--------------------|-----------|-----------|
| 3 | 1.9333333 | 0.1154701          | 1.8000000 | 2.0000000 |

Unique Subject Identifier=0155010000-0008

Assay variable : PTINR\_VAL1 PT-INR Value

| N | Mean      | Standard Deviation | Minimum   | Maximum   |
|---|-----------|--------------------|-----------|-----------|
| 4 | 2.7000000 | 0.4760952          | 2.2000000 | 3.2000000 |

Unique Subject Identifier=0155010000-0009

Assay variable : PTINR\_VAL1 PT-INR Value

| N | Mean      | Standard Deviation | Minimum   | Maximum   |
|---|-----------|--------------------|-----------|-----------|
| 4 | 1.7750000 | 0.1500000          | 1.6000000 | 1.9000000 |

Unique Subject Identifier=0155010000-0010

Assay variable : PTINR\_VAL1 PT-INR Value

N Mean Standard Deviation Minimum Maximum

---

|   |           |           |           |           |
|---|-----------|-----------|-----------|-----------|
| 4 | 2.2000000 | 0.2943920 | 1.9000000 | 2.5000000 |
|---|-----------|-----------|-----------|-----------|

---

Laboratory tests at the time of obtaining Table 2-6 consent, according to the presence or absence of proton-pump inhibitors

Unique Subject Identifier=0161000000-0007

MEANS Procedure

Assay variable : PTINR\_VAL1 PT-INR Value

N Mean Standard Deviation Minimum Maximum

---

|   |           |           |           |           |
|---|-----------|-----------|-----------|-----------|
| 5 | 2.3540000 | 0.2361779 | 2.1000000 | 2.7000000 |
|---|-----------|-----------|-----------|-----------|

---

Unique Subject Identifier=0161000000-0009

Assay variable : PTINR\_VAL1 PT-INR Value

N Mean Standard Deviation Minimum Maximum

---

|   |           |           |           |           |
|---|-----------|-----------|-----------|-----------|
| 6 | 2.1766667 | 0.1732820 | 2.0000000 | 2.4800000 |
|---|-----------|-----------|-----------|-----------|

---

Unique Subject Identifier=0161000000-0010

Assay variable : PTINR\_VAL1 PT-INR Value

N Mean Standard Deviation Minimum Maximum

---

|   |           |           |           |           |
|---|-----------|-----------|-----------|-----------|
| 6 | 2.3066667 | 0.1711919 | 2.1300000 | 2.6000000 |
|---|-----------|-----------|-----------|-----------|

---

Unique Subject Identifier=0161000000-0011

Assay variable : PTINR\_VAL1 PT-INR Value

N Mean Standard Deviation Minimum Maximum

---

|   |           |           |           |           |
|---|-----------|-----------|-----------|-----------|
| 6 | 2.0733333 | 0.3310992 | 1.5700000 | 2.5900000 |
|---|-----------|-----------|-----------|-----------|

---

Laboratory tests at the time of obtaining Table 2-6 consent, according to the presence or absence of proton-pump inhibitors

Unique Subject Identifier=0161000000-0014

MEANS Procedure

Assay variable : PTINR\_VAL1 PT-INR Value

N Mean Standard Deviation Minimum Maximum

---

|   |           |           |           |           |
|---|-----------|-----------|-----------|-----------|
| 6 | 2.1716667 | 0.2199470 | 1.8400000 | 2.3700000 |
|---|-----------|-----------|-----------|-----------|

---

Unique Subject Identifier=0161000000-0017

Assay variable : PTINR\_VAL1 PT-INR Value

N Mean Standard Deviation Minimum Maximum

---

|   |           |           |           |           |
|---|-----------|-----------|-----------|-----------|
| 6 | 1.8400000 | 0.3245921 | 1.3300000 | 2.2500000 |
|---|-----------|-----------|-----------|-----------|

---

Unique Subject Identifier=0162000000-0002

Assay variable : PTINR\_VAL1 PT-INR Value

N Mean Standard Deviation Minimum Maximum

---

|   |           |           |           |           |
|---|-----------|-----------|-----------|-----------|
| 4 | 1.4850000 | 0.3445287 | 1.0400000 | 1.8800000 |
|---|-----------|-----------|-----------|-----------|

---

Unique Subject Identifier=0165000000-0005

Assay variable : PTINR\_VAL1 PT-INR Value

N Mean Standard Deviation Minimum Maximum

---

|   |           |           |           |           |
|---|-----------|-----------|-----------|-----------|
| 4 | 1.9300000 | 0.1540563 | 1.7700000 | 2.0900000 |
|---|-----------|-----------|-----------|-----------|

---

Laboratory tests at the time of obtaining Table 2-6 consent, according to the presence or absence of proton-pump inhibitors

Unique Subject Identifier=0165000000-0012

MEANS Procedure

Assay variable : PTINR\_VAL1 PT-INR Value

| N | Mean      | Standard Deviation | Minimum   | Maximum   |
|---|-----------|--------------------|-----------|-----------|
| 5 | 2.2620000 | 0.5316672          | 1.6800000 | 3.1300000 |

Unique Subject Identifier=0165000000-0013

Assay variable : PTINR\_VAL1 PT-INR Value

| N | Mean      | Standard Deviation | Minimum   | Maximum   |
|---|-----------|--------------------|-----------|-----------|
| 5 | 2.2620000 | 0.5316672          | 1.6800000 | 3.1300000 |

Unique Subject Identifier=0165000000-0015

Assay variable : PTINR\_VAL1 PT-INR Value

| N | Mean      | Standard Deviation | Minimum   | Maximum   |
|---|-----------|--------------------|-----------|-----------|
| 3 | 2.6666667 | 0.8590887          | 1.9800000 | 3.6300000 |

Unique Subject Identifier=0165000000-0017

Assay variable : PTINR\_VAL1 PT-INR Value

N Mean Standard Deviation Minimum Maximum

---

|   |           |           |           |           |
|---|-----------|-----------|-----------|-----------|
| 6 | 1.7750000 | 0.1590912 | 1.5600000 | 2.0400000 |
|---|-----------|-----------|-----------|-----------|

---



Laboratory tests at the time of obtaining Table 2-6 consent, according to the presence or absence of proton-pump inhibitors

Unique Subject Identifier=016600000-0009

MEANS Procedure

Assay variable : PTINR\_VAL1 PT-INR Value

N Mean Standard Deviation Minimum Maximum

---

|   |           |           |           |           |
|---|-----------|-----------|-----------|-----------|
| 2 | 2.1050000 | 0.1060660 | 2.0300000 | 2.1800000 |
|---|-----------|-----------|-----------|-----------|

---

Unique Subject Identifier=016600000-0017

Assay variable : PTINR\_VAL1 PT-INR Value

N Mean Standard Deviation Minimum Maximum

---

|   |           |           |           |           |
|---|-----------|-----------|-----------|-----------|
| 6 | 1.1783333 | 0.1292156 | 1.0700000 | 1.4300000 |
|---|-----------|-----------|-----------|-----------|

---

Unique Subject Identifier=016600000-0021

Assay variable : PTINR\_VAL1 PT-INR Value

N Mean Standard Deviation Minimum Maximum

---

|   |           |           |           |           |
|---|-----------|-----------|-----------|-----------|
| 2 | 2.6400000 | 0.3394113 | 2.4000000 | 2.8800000 |
|---|-----------|-----------|-----------|-----------|

---

Unique Subject Identifier=016600000-0023

Assay variable : PTINR\_VAL1 PT-INR Value

N Mean Standard Deviation Minimum Maximum

---

|   |           |  |           |           |
|---|-----------|--|-----------|-----------|
| 1 | 1.6900000 |  | 1.6900000 | 1.6900000 |
|---|-----------|--|-----------|-----------|

---

Laboratory tests at the time of obtaining Table 2-6 consent, according to the presence or absence of proton-pump inhibitors

Unique Subject Identifier=016600000-0027

MEANS Procedure

Assay variable : PTINR\_VAL1 PT-INR Value

N Mean Standard Deviation Minimum Maximum

---

|   |           |           |           |           |
|---|-----------|-----------|-----------|-----------|
| 3 | 2.1666667 | 0.4495924 | 1.7800000 | 2.6600000 |
|---|-----------|-----------|-----------|-----------|

---

Unique Subject Identifier=016600000-0031

Assay variable : PTINR\_VAL1 PT-INR Value

N Mean Standard Deviation Minimum Maximum

---

|   |           |           |           |           |
|---|-----------|-----------|-----------|-----------|
| 3 | 2.0333333 | 0.3536005 | 1.6300000 | 2.2900000 |
|---|-----------|-----------|-----------|-----------|

---

Unique Subject Identifier=016600000-0035

Assay variable : PTINR\_VAL1 PT-INR Value

N Mean Standard Deviation Minimum Maximum

---

|   |           |           |           |           |
|---|-----------|-----------|-----------|-----------|
| 2 | 1.8450000 | 0.2474874 | 1.6700000 | 2.0200000 |
|---|-----------|-----------|-----------|-----------|

---

Unique Subject Identifier=016600000-0036

Assay variable : PTINR\_VAL1 PT-INR Value

N Mean Standard Deviation Minimum Maximum

---

|   |           |           |           |           |
|---|-----------|-----------|-----------|-----------|
| 2 | 1.8350000 | 0.5020458 | 1.4800000 | 2.1900000 |
|---|-----------|-----------|-----------|-----------|

---

Laboratory tests at the time of obtaining Table 2-6 consent, according to the presence or absence of proton-pump inhibitors

Unique Subject Identifier=0166000000-0039

MEANS Procedure

Assay variable : PTINR\_VAL1 PT-INR Value

N Mean Standard Deviation Minimum Maximum

---

|   |           |           |           |           |
|---|-----------|-----------|-----------|-----------|
| 3 | 2.1466667 | 0.1357694 | 1.9900000 | 2.2300000 |
|---|-----------|-----------|-----------|-----------|

---

Unique Subject Identifier=0166000000-0040

Assay variable : PTINR\_VAL1 PT-INR Value

N Mean Standard Deviation Minimum Maximum

---

|   |           |           |           |           |
|---|-----------|-----------|-----------|-----------|
| 3 | 2.2566667 | 0.2030599 | 2.1200000 | 2.4900000 |
|---|-----------|-----------|-----------|-----------|

---

Unique Subject Identifier=0166000000-0043

Assay variable : PTINR\_VAL1 PT-INR Value

N Mean Standard Deviation Minimum Maximum

---

|   |           |           |           |           |
|---|-----------|-----------|-----------|-----------|
| 2 | 2.3600000 | 0.8485281 | 1.7600000 | 2.9600000 |
|---|-----------|-----------|-----------|-----------|

---

Unique Subject Identifier=0166000000-0047

Assay variable : PTINR\_VAL1 PT-INR Value

N Mean Standard Deviation Minimum Maximum

---

|   |           |           |           |           |
|---|-----------|-----------|-----------|-----------|
| 2 | 2.1550000 | 0.0212132 | 2.1400000 | 2.1700000 |
|---|-----------|-----------|-----------|-----------|

---

Laboratory tests at the time of obtaining Table 2-6 consent, according to the presence or absence of proton-pump inhibitors

Unique Subject Identifier=0166000000-0053

MEANS Procedure

Assay variable : PTINR\_VAL1 PT-INR Value

| N | Mean     | Standard Deviation | Minimum  | Maximum  |
|---|----------|--------------------|----------|----------|
| 6 | 2.400000 | 0.3407052          | 2.140000 | 3.010000 |

Unique Subject Identifier=0166000000-0054

Assay variable : PTINR\_VAL1 PT-INR Value

| N | Mean     | Standard Deviation | Minimum  | Maximum  |
|---|----------|--------------------|----------|----------|
| 2 | 1.825000 | 0.0353553          | 1.800000 | 1.850000 |

Unique Subject Identifier=0166000000-0056

Assay variable : PTINR\_VAL1 PT-INR Value

| N | Mean     | Standard Deviation | Minimum  | Maximum  |
|---|----------|--------------------|----------|----------|
| 5 | 1.776000 | 0.3803682          | 1.430000 | 2.390000 |

Unique Subject Identifier=0166000000-0059

Assay variable : PTINR\_VAL1 PT-INR Value

N Mean Standard Deviation Minimum Maximum

---

|   |           |           |           |           |
|---|-----------|-----------|-----------|-----------|
| 2 | 1.5550000 | 0.0212132 | 1.5400000 | 1.5700000 |
|---|-----------|-----------|-----------|-----------|

---



Laboratory tests at the time of obtaining Table 2-6 consent, according to the presence or absence of proton-pump inhibitors

Unique Subject Identifier=0166000000-0062

MEANS Procedure

Assay variable : PTINR\_VAL1 PT-INR Value

| N | Mean      | Standard Deviation | Minimum   | Maximum   |
|---|-----------|--------------------|-----------|-----------|
| 2 | 2.0200000 | 0.2969848          | 1.8100000 | 2.2300000 |

Unique Subject Identifier=0166000000-0063

Assay variable : PTINR\_VAL1 PT-INR Value

| N | Mean      | Standard Deviation | Minimum   | Maximum   |
|---|-----------|--------------------|-----------|-----------|
| 2 | 2.6200000 | 0.3959798          | 2.3400000 | 2.9000000 |

Unique Subject Identifier=0168000000-0004

Assay variable : PTINR\_VAL1 PT-INR Value

| N | Mean      | Standard Deviation | Minimum   | Maximum   |
|---|-----------|--------------------|-----------|-----------|
| 1 | 1.6600000 |                    | 1.6600000 | 1.6600000 |

Unique Subject Identifier=0170000000-0001

Assay variable : PTINR\_VAL1 PT-INR Value

N Mean Standard Deviation Minimum Maximum

---

|   |           |           |           |           |
|---|-----------|-----------|-----------|-----------|
| 5 | 2.0320000 | 0.1811629 | 1.8300000 | 2.3100000 |
|---|-----------|-----------|-----------|-----------|

---

Laboratory tests at the time of obtaining Table 2-6 consent, according to the presence or absence of proton-pump inhibitors

Unique Subject Identifier=0170000000-0003

MEANS Procedure

Assay variable : PTINR\_VAL1 PT-INR Value

| N | Mean      | Standard Deviation | Minimum   | Maximum   |
|---|-----------|--------------------|-----------|-----------|
| 3 | 1.7100000 | 0.0435890          | 1.6800000 | 1.7600000 |

Unique Subject Identifier=0170000000-0004

Assay variable : PTINR\_VAL1 PT-INR Value

| N | Mean      | Standard Deviation | Minimum   | Maximum   |
|---|-----------|--------------------|-----------|-----------|
| 6 | 1.9316667 | 0.1543265          | 1.6500000 | 2.1000000 |

Unique Subject Identifier=0170000000-0005

Assay variable : PTINR\_VAL1 PT-INR Value

| N | Mean      | Standard Deviation | Minimum   | Maximum   |
|---|-----------|--------------------|-----------|-----------|
| 5 | 1.6840000 | 0.2586117          | 1.2900000 | 1.9700000 |

Unique Subject Identifier=0170000000-0007

Assay variable : PTINR\_VAL1 PT-INR Value

N Mean Standard Deviation Minimum Maximum

---

|   |           |           |           |           |
|---|-----------|-----------|-----------|-----------|
| 6 | 2.0150000 | 0.7322773 | 1.3900000 | 3.4300000 |
|---|-----------|-----------|-----------|-----------|

---

Laboratory tests at the time of obtaining Table 2-6 consent, according to the presence or absence of proton-pump inhibitors

Unique Subject Identifier=0170000000-0008

MEANS Procedure

Assay variable : PTINR\_VAL1 PT-INR Value

N Mean Standard Deviation Minimum Maximum

---

|   |           |           |           |           |
|---|-----------|-----------|-----------|-----------|
| 4 | 1.6825000 | 0.2304163 | 1.4600000 | 1.9600000 |
|---|-----------|-----------|-----------|-----------|

---

Unique Subject Identifier=0170000000-0011

Assay variable : PTINR\_VAL1 PT-INR Value

N Mean Standard Deviation Minimum Maximum

---

|   |           |           |           |           |
|---|-----------|-----------|-----------|-----------|
| 6 | 1.8316667 | 0.2192183 | 1.5300000 | 2.1700000 |
|---|-----------|-----------|-----------|-----------|

---

Unique Subject Identifier=0170000000-0013

Assay variable : PTINR\_VAL1 PT-INR Value

N Mean Standard Deviation Minimum Maximum

---

|   |           |           |           |           |
|---|-----------|-----------|-----------|-----------|
| 3 | 1.7366667 | 0.0986577 | 1.6700000 | 1.8500000 |
|---|-----------|-----------|-----------|-----------|

---

Unique Subject Identifier=0170000000-0017

Assay variable : PTINR\_VAL1 PT-INR Value

N Mean Standard Deviation Minimum Maximum

---

|   |           |           |           |           |
|---|-----------|-----------|-----------|-----------|
| 2 | 1.5650000 | 0.1626346 | 1.4500000 | 1.6800000 |
|---|-----------|-----------|-----------|-----------|

---

Laboratory tests at the time of obtaining Table 2-6 consent, according to the presence or absence of proton-pump inhibitors

Unique Subject Identifier=0170000000-0018

MEANS Procedure

Assay variable : PTINR\_VAL1 PT-INR Value

| N | Mean      | Standard Deviation | Minimum   | Maximum   |
|---|-----------|--------------------|-----------|-----------|
| 3 | 1.5433333 | 0.2145538          | 1.4000000 | 1.7900000 |

Unique Subject Identifier=0170000000-0020

Assay variable : PTINR\_VAL1 PT-INR Value

| N | Mean      | Standard Deviation | Minimum   | Maximum   |
|---|-----------|--------------------|-----------|-----------|
| 3 | 1.7366667 | 0.1457166          | 1.5700000 | 1.8400000 |

Unique Subject Identifier=0173000000-0001

Assay variable : PTINR\_VAL1 PT-INR Value

| N | Mean      | Standard Deviation | Minimum   | Maximum   |
|---|-----------|--------------------|-----------|-----------|
| 4 | 1.6525000 | 0.1883923          | 1.4300000 | 1.8900000 |

Unique Subject Identifier=0177100000-0004

Assay variable : PTINR\_VAL1 PT-INR Value

N Mean Standard Deviation Minimum Maximum

---

|   |           |           |           |           |
|---|-----------|-----------|-----------|-----------|
| 4 | 1.6575000 | 0.3102015 | 1.2300000 | 1.9500000 |
|---|-----------|-----------|-----------|-----------|

---



Laboratory tests at the time of obtaining Table 2-6 consent, according to the presence or absence of proton-pump inhibitors

Unique Subject Identifier=0177100000-0005

MEANS Procedure

Assay variable : PTINR\_VAL1 PT-INR Value

N Mean Standard Deviation Minimum Maximum

---

|   |           |           |           |           |
|---|-----------|-----------|-----------|-----------|
| 3 | 2.6233333 | 1.0400641 | 1.8700000 | 3.8100000 |
|---|-----------|-----------|-----------|-----------|

---

Unique Subject Identifier=0177100000-0006

Assay variable : PTINR\_VAL1 PT-INR Value

N Mean Standard Deviation Minimum Maximum

---

|   |           |           |           |           |
|---|-----------|-----------|-----------|-----------|
| 2 | 2.0950000 | 0.0636396 | 2.0500000 | 2.1400000 |
|---|-----------|-----------|-----------|-----------|

---

Unique Subject Identifier=0177100000-0007

Assay variable : PTINR\_VAL1 PT-INR Value

N Mean Standard Deviation Minimum Maximum

---

|   |           |           |           |           |
|---|-----------|-----------|-----------|-----------|
| 5 | 1.8680000 | 0.4621904 | 1.5500000 | 2.6700000 |
|---|-----------|-----------|-----------|-----------|

---

Unique Subject Identifier=0177100000-0008

Assay variable : PTINR\_VAL1 PT-INR Value

N Mean Standard Deviation Minimum Maximum

---

|   |           |           |           |           |
|---|-----------|-----------|-----------|-----------|
| 5 | 1.5720000 | 0.5142665 | 1.1600000 | 2.4600000 |
|---|-----------|-----------|-----------|-----------|

---

Laboratory tests at the time of obtaining Table 2-6 consent, according to the presence or absence of proton-pump inhibitors

Unique Subject Identifier=0177100000-0021

MEANS Procedure

Assay variable : PTINR\_VAL1 PT-INR Value

N Mean Standard Deviation Minimum Maximum

---

|   |           |           |           |           |
|---|-----------|-----------|-----------|-----------|
| 6 | 1.7683333 | 0.1376106 | 1.5300000 | 1.8700000 |
|---|-----------|-----------|-----------|-----------|

---

Unique Subject Identifier=0177100000-0046

Assay variable : PTINR\_VAL1 PT-INR Value

N Mean Standard Deviation Minimum Maximum

---

|   |           |           |           |           |
|---|-----------|-----------|-----------|-----------|
| 5 | 1.7960000 | 0.2356480 | 1.5000000 | 2.1600000 |
|---|-----------|-----------|-----------|-----------|

---

Unique Subject Identifier=0177100000-0047

Assay variable : PTINR\_VAL1 PT-INR Value

N Mean Standard Deviation Minimum Maximum

---

|   |           |           |           |           |
|---|-----------|-----------|-----------|-----------|
| 4 | 2.0475000 | 0.7650000 | 1.2600000 | 3.0900000 |
|---|-----------|-----------|-----------|-----------|

---

Unique Subject Identifier=0177100000-0049

Assay variable : PTINR\_VAL1 PT-INR Value

N Mean Standard Deviation Minimum Maximum

---

|   |           |           |           |           |
|---|-----------|-----------|-----------|-----------|
| 6 | 2.1883333 | 1.2622427 | 1.2800000 | 4.5700000 |
|---|-----------|-----------|-----------|-----------|

---

Laboratory tests at the time of obtaining Table 2-6 consent, according to the presence or absence of proton-pump inhibitors

Unique Subject Identifier=0177100000-0059

MEANS Procedure

Assay variable : PTINR\_VAL1 PT-INR Value

N Mean Standard Deviation Minimum Maximum

---

|   |          |           |          |          |
|---|----------|-----------|----------|----------|
| 4 | 2.150000 | 0.5255473 | 1.620000 | 2.700000 |
|---|----------|-----------|----------|----------|

---

Unique Subject Identifier=0177100000-0065

Assay variable : PTINR\_VAL1 PT-INR Value

N Mean Standard Deviation Minimum Maximum

---

|   |          |           |          |          |
|---|----------|-----------|----------|----------|
| 4 | 2.382500 | 0.4011130 | 1.970000 | 2.850000 |
|---|----------|-----------|----------|----------|

---

Unique Subject Identifier=0178100000-0002

Assay variable : PTINR\_VAL1 PT-INR Value

N Mean Standard Deviation Minimum Maximum

---

|   |          |           |          |          |
|---|----------|-----------|----------|----------|
| 2 | 2.425000 | 0.1767767 | 2.300000 | 2.550000 |
|---|----------|-----------|----------|----------|

---

Unique Subject Identifier=0178100000-0004

Assay variable : PTINR\_VAL1 PT-INR Value

N Mean Standard Deviation Minimum Maximum

---

|   |           |           |           |           |
|---|-----------|-----------|-----------|-----------|
| 4 | 2.2875000 | 0.1978846 | 2.1200000 | 2.5400000 |
|---|-----------|-----------|-----------|-----------|

---

Laboratory tests at the time of obtaining Table 2-6 consent, according to the presence or absence of proton-pump inhibitors

Unique Subject Identifier=0178100000-0005

MEANS Procedure

Assay variable : PTINR\_VAL1 PT-INR Value

N Mean Standard Deviation Minimum Maximum

---

|   |           |           |           |           |
|---|-----------|-----------|-----------|-----------|
| 4 | 1.8325000 | 0.1774589 | 1.6000000 | 1.9900000 |
|---|-----------|-----------|-----------|-----------|

---

Unique Subject Identifier=0178100000-0007

Assay variable : PTINR\_VAL1 PT-INR Value

N Mean Standard Deviation Minimum Maximum

---

|   |           |           |           |           |
|---|-----------|-----------|-----------|-----------|
| 5 | 2.1760000 | 0.5141790 | 1.7100000 | 2.9900000 |
|---|-----------|-----------|-----------|-----------|

---

Unique Subject Identifier=0178100000-0011

Assay variable : PTINR\_VAL1 PT-INR Value

N Mean Standard Deviation Minimum Maximum

---

|   |           |           |           |           |
|---|-----------|-----------|-----------|-----------|
| 5 | 1.6000000 | 0.1048809 | 1.4400000 | 1.7200000 |
|---|-----------|-----------|-----------|-----------|

---

Unique Subject Identifier=0178100000-0013

Assay variable : PTINR\_VAL1 PT-INR Value

N Mean Standard Deviation Minimum Maximum

---

|   |          |           |          |          |
|---|----------|-----------|----------|----------|
| 4 | 2.200000 | 0.0898146 | 2.110000 | 2.320000 |
|---|----------|-----------|----------|----------|

---



Laboratory tests at the time of obtaining Table 2-6 consent, according to the presence or absence of proton-pump inhibitors

Unique Subject Identifier=0178100000-0016

MEANS Procedure

Assay variable : PTINR\_VAL1 PT-INR Value

N Mean Standard Deviation Minimum Maximum

---

|   |          |           |          |          |
|---|----------|-----------|----------|----------|
| 4 | 2.140000 | 0.3703152 | 1.680000 | 2.570000 |
|---|----------|-----------|----------|----------|

---

Unique Subject Identifier=0178100000-0017

Assay variable : PTINR\_VAL1 PT-INR Value

N Mean Standard Deviation Minimum Maximum

---

|   |          |           |          |          |
|---|----------|-----------|----------|----------|
| 6 | 2.033333 | 0.2592811 | 1.580000 | 2.260000 |
|---|----------|-----------|----------|----------|

---

Unique Subject Identifier=0178100000-0018

Assay variable : PTINR\_VAL1 PT-INR Value

N Mean Standard Deviation Minimum Maximum

---

|   |          |           |          |          |
|---|----------|-----------|----------|----------|
| 5 | 1.942000 | 0.3721156 | 1.290000 | 2.210000 |
|---|----------|-----------|----------|----------|

---

Unique Subject Identifier=0178100000-0020

Assay variable : PTINR\_VAL1 PT-INR Value

N Mean Standard Deviation Minimum Maximum

---

|   |           |           |           |           |
|---|-----------|-----------|-----------|-----------|
| 3 | 1.9466667 | 0.3900427 | 1.5000000 | 2.2200000 |
|---|-----------|-----------|-----------|-----------|

---

Laboratory tests at the time of obtaining Table 2-6 consent, according to the presence or absence of proton-pump inhibitors

Unique Subject Identifier=0178100000-0022

MEANS Procedure

Assay variable : PTINR\_VAL1 PT-INR Value

N Mean Standard Deviation Minimum Maximum

---

|   |           |           |           |           |
|---|-----------|-----------|-----------|-----------|
| 4 | 2.1325000 | 0.2404683 | 1.9200000 | 2.4600000 |
|---|-----------|-----------|-----------|-----------|

---

Unique Subject Identifier=0178100000-0024

Assay variable : PTINR\_VAL1 PT-INR Value

N Mean Standard Deviation Minimum Maximum

---

|   |           |           |           |           |
|---|-----------|-----------|-----------|-----------|
| 5 | 1.6500000 | 0.2331309 | 1.2500000 | 1.8600000 |
|---|-----------|-----------|-----------|-----------|

---

Unique Subject Identifier=0178100000-0025

Assay variable : PTINR\_VAL1 PT-INR Value

N Mean Standard Deviation Minimum Maximum

---

|   |           |           |           |           |
|---|-----------|-----------|-----------|-----------|
| 4 | 2.5775000 | 0.5395291 | 2.0200000 | 3.1800000 |
|---|-----------|-----------|-----------|-----------|

---

Unique Subject Identifier=0178100000-0026

Assay variable : PTINR\_VAL1 PT-INR Value

N Mean Standard Deviation Minimum Maximum

---

|   |           |           |           |           |
|---|-----------|-----------|-----------|-----------|
| 4 | 2.2275000 | 0.2595348 | 2.0500000 | 2.6000000 |
|---|-----------|-----------|-----------|-----------|

---

Laboratory tests at the time of obtaining Table 2-6 consent, according to the presence or absence of proton-pump inhibitors

Unique Subject Identifier=0178100000-0028

MEANS Procedure

Assay variable : PTINR\_VAL1 PT-INR Value

N Mean Standard Deviation Minimum Maximum

---

|   |          |           |          |          |
|---|----------|-----------|----------|----------|
| 4 | 2.470000 | 0.6106281 | 1.990000 | 3.350000 |
|---|----------|-----------|----------|----------|

---

Unique Subject Identifier=0178100000-0032

Assay variable : PTINR\_VAL1 PT-INR Value

N Mean Standard Deviation Minimum Maximum

---

|   |          |           |          |          |
|---|----------|-----------|----------|----------|
| 4 | 2.375000 | 0.1332917 | 2.230000 | 2.520000 |
|---|----------|-----------|----------|----------|

---

Unique Subject Identifier=0178100000-0034

Assay variable : PTINR\_VAL1 PT-INR Value

N Mean Standard Deviation Minimum Maximum

---

|   |          |           |          |          |
|---|----------|-----------|----------|----------|
| 4 | 2.145000 | 0.3443351 | 1.860000 | 2.570000 |
|---|----------|-----------|----------|----------|

---

Unique Subject Identifier=0178100000-0035

Assay variable : PTINR\_VAL1 PT-INR Value

N Mean Standard Deviation Minimum Maximum

---

|   |           |           |           |           |
|---|-----------|-----------|-----------|-----------|
| 4 | 1.8975000 | 0.1925920 | 1.6400000 | 2.0500000 |
|---|-----------|-----------|-----------|-----------|

---

Laboratory tests at the time of obtaining Table 2-6 consent, according to the presence or absence of proton-pump inhibitors

Unique Subject Identifier=0178100000-0036

MEANS Procedure

Assay variable : PTINR\_VAL1 PT-INR Value

N Mean Standard Deviation Minimum Maximum

---

|   |           |           |           |           |
|---|-----------|-----------|-----------|-----------|
| 4 | 2.1075000 | 0.1736615 | 1.9400000 | 2.3500000 |
|---|-----------|-----------|-----------|-----------|

---

Unique Subject Identifier=0178100000-0037

Assay variable : PTINR\_VAL1 PT-INR Value

N Mean Standard Deviation Minimum Maximum

---

|   |           |           |           |           |
|---|-----------|-----------|-----------|-----------|
| 4 | 2.4725000 | 0.1510794 | 2.2600000 | 2.5900000 |
|---|-----------|-----------|-----------|-----------|

---

Unique Subject Identifier=0178100000-0041

Assay variable : PTINR\_VAL1 PT-INR Value

N Mean Standard Deviation Minimum Maximum

---

|   |           |           |           |           |
|---|-----------|-----------|-----------|-----------|
| 3 | 1.9866667 | 0.2354428 | 1.7600000 | 2.2300000 |
|---|-----------|-----------|-----------|-----------|

---

Unique Subject Identifier=0178100000-0042

Assay variable : PTINR\_VAL1 PT-INR Value

N Mean Standard Deviation Minimum Maximum

---

|   |           |           |           |           |
|---|-----------|-----------|-----------|-----------|
| 4 | 1.9625000 | 0.1602862 | 1.8500000 | 2.1900000 |
|---|-----------|-----------|-----------|-----------|

---



Laboratory tests at the time of obtaining Table 2-6 consent, according to the presence or absence of proton-pump inhibitors

Unique Subject Identifier=0178100000-0052

MEANS Procedure

Assay variable : PTINR\_VAL1 PT-INR Value

N Mean Standard Deviation Minimum Maximum

---

|   |           |           |           |           |
|---|-----------|-----------|-----------|-----------|
| 4 | 1.8575000 | 0.1530523 | 1.7100000 | 2.0700000 |
|---|-----------|-----------|-----------|-----------|

---

Unique Subject Identifier=0178100000-0053

Assay variable : PTINR\_VAL1 PT-INR Value

N Mean Standard Deviation Minimum Maximum

---

|   |           |           |           |           |
|---|-----------|-----------|-----------|-----------|
| 6 | 1.8166667 | 0.3120684 | 1.5200000 | 2.4000000 |
|---|-----------|-----------|-----------|-----------|

---

Unique Subject Identifier=0178100000-0055

Assay variable : PTINR\_VAL1 PT-INR Value

N Mean Standard Deviation Minimum Maximum

---

|   |           |           |           |           |
|---|-----------|-----------|-----------|-----------|
| 5 | 1.5840000 | 0.3295907 | 1.1900000 | 1.8600000 |
|---|-----------|-----------|-----------|-----------|

---

Unique Subject Identifier=0178100000-0057

Assay variable : PTINR\_VAL1 PT-INR Value

N Mean Standard Deviation Minimum Maximum

---

|   |          |           |          |          |
|---|----------|-----------|----------|----------|
| 2 | 1.850000 | 0.1131371 | 1.770000 | 1.930000 |
|---|----------|-----------|----------|----------|

---

Laboratory tests at the time of obtaining Table 2-6 consent, according to the presence or absence of proton-pump inhibitors

Unique Subject Identifier=0178100000-0058

MEANS Procedure

Assay variable : PTINR\_VAL1 PT-INR Value

N Mean Standard Deviation Minimum Maximum

---

|   |           |           |           |           |
|---|-----------|-----------|-----------|-----------|
| 4 | 2.0675000 | 0.3244868 | 1.7600000 | 2.5200000 |
|---|-----------|-----------|-----------|-----------|

---

Unique Subject Identifier=0178100000-0059

Assay variable : PTINR\_VAL1 PT-INR Value

N Mean Standard Deviation Minimum Maximum

---

|   |           |           |           |           |
|---|-----------|-----------|-----------|-----------|
| 4 | 2.3575000 | 0.3051093 | 2.0200000 | 2.7500000 |
|---|-----------|-----------|-----------|-----------|

---

Unique Subject Identifier=0178100000-0063

Assay variable : PTINR\_VAL1 PT-INR Value

N Mean Standard Deviation Minimum Maximum

---

|   |           |           |           |           |
|---|-----------|-----------|-----------|-----------|
| 5 | 2.3440000 | 0.5912106 | 1.7400000 | 3.3100000 |
|---|-----------|-----------|-----------|-----------|

---

Unique Subject Identifier=0178100000-0065

Assay variable : PTINR\_VAL1 PT-INR Value

N Mean Standard Deviation Minimum Maximum

---

|   |           |           |           |           |
|---|-----------|-----------|-----------|-----------|
| 4 | 2.3025000 | 0.7097124 | 1.5900000 | 3.2800000 |
|---|-----------|-----------|-----------|-----------|

---

Laboratory tests at the time of obtaining Table 2-6 consent, according to the presence or absence of proton-pump inhibitors

Unique Subject Identifier=0178100000-0066

MEANS Procedure

Assay variable : PTINR\_VAL1 PT-INR Value

N Mean Standard Deviation Minimum Maximum

---

|   |           |           |           |           |
|---|-----------|-----------|-----------|-----------|
| 4 | 1.4700000 | 0.0983192 | 1.3800000 | 1.6000000 |
|---|-----------|-----------|-----------|-----------|

---

Unique Subject Identifier=0178100000-0069

Assay variable : PTINR\_VAL1 PT-INR Value

N Mean Standard Deviation Minimum Maximum

---

|   |           |           |           |           |
|---|-----------|-----------|-----------|-----------|
| 3 | 2.0066667 | 0.1504438 | 1.9100000 | 2.1800000 |
|---|-----------|-----------|-----------|-----------|

---

Unique Subject Identifier=0180000000-0001

Assay variable : PTINR\_VAL1 PT-INR Value

N Mean Standard Deviation Minimum Maximum

---

|   |           |           |           |           |
|---|-----------|-----------|-----------|-----------|
| 5 | 1.7280000 | 0.2413918 | 1.4800000 | 1.9900000 |
|---|-----------|-----------|-----------|-----------|

---

Unique Subject Identifier=0180000000-0004

Assay variable : PTINR\_VAL1 PT-INR Value

N Mean Standard Deviation Minimum Maximum

---

|   |           |           |           |           |
|---|-----------|-----------|-----------|-----------|
| 6 | 2.2966667 | 0.1778389 | 2.1000000 | 2.5200000 |
|---|-----------|-----------|-----------|-----------|

---

Laboratory tests at the time of obtaining Table 2-6 consent, according to the presence or absence of proton-pump inhibitors

Unique Subject Identifier=0180000000-0006

MEANS Procedure

Assay variable : PTINR\_VAL1 PT-INR Value

N Mean Standard Deviation Minimum Maximum

---

|   |           |           |           |           |
|---|-----------|-----------|-----------|-----------|
| 5 | 2.1520000 | 0.3898333 | 1.9200000 | 2.8400000 |
|---|-----------|-----------|-----------|-----------|

---

Unique Subject Identifier=0180000000-0007

Assay variable : PTINR\_VAL1 PT-INR Value

N Mean Standard Deviation Minimum Maximum

---

|   |           |           |           |           |
|---|-----------|-----------|-----------|-----------|
| 3 | 1.8466667 | 0.7490216 | 1.3700000 | 2.7100000 |
|---|-----------|-----------|-----------|-----------|

---

Unique Subject Identifier=0180000000-0011

Assay variable : PTINR\_VAL1 PT-INR Value

N Mean Standard Deviation Minimum Maximum

---

|   |           |           |           |           |
|---|-----------|-----------|-----------|-----------|
| 6 | 2.2966667 | 0.5308358 | 1.5600000 | 2.9700000 |
|---|-----------|-----------|-----------|-----------|

---

Unique Subject Identifier=0180000000-0015

Assay variable : PTINR\_VAL1 PT-INR Value

N Mean Standard Deviation Minimum Maximum

---

|   |           |           |           |           |
|---|-----------|-----------|-----------|-----------|
| 4 | 1.9575000 | 0.2581182 | 1.6300000 | 2.2600000 |
|---|-----------|-----------|-----------|-----------|

---



Laboratory tests at the time of obtaining Table 2-6 consent, according to the presence or absence of proton-pump inhibitors

Unique Subject Identifier=018000000-0024

MEANS Procedure

Assay variable : PTINR\_VAL1 PT-INR Value

| N | Mean      | Standard Deviation | Minimum   | Maximum   |
|---|-----------|--------------------|-----------|-----------|
| 2 | 1.8900000 | 0.0282843          | 1.8700000 | 1.9100000 |

Unique Subject Identifier=018000000-0026

Assay variable : PTINR\_VAL1 PT-INR Value

| N | Mean      | Standard Deviation | Minimum   | Maximum   |
|---|-----------|--------------------|-----------|-----------|
| 6 | 2.2150000 | 0.4043637          | 1.7900000 | 2.9400000 |

Unique Subject Identifier=018100000-0002

Assay variable : PTINR\_VAL1 PT-INR Value

| N | Mean      | Standard Deviation | Minimum   | Maximum   |
|---|-----------|--------------------|-----------|-----------|
| 5 | 2.0420000 | 0.6430163          | 1.2100000 | 2.9700000 |

Unique Subject Identifier=018100000-0003

Assay variable : PTINR\_VAL1 PT-INR Value

N Mean Standard Deviation Minimum Maximum

---

|   |           |           |           |           |
|---|-----------|-----------|-----------|-----------|
| 2 | 1.8150000 | 0.2757716 | 1.6200000 | 2.0100000 |
|---|-----------|-----------|-----------|-----------|

---

Laboratory tests at the time of obtaining Table 2-6 consent, according to the presence or absence of proton-pump inhibitors

Unique Subject Identifier=0181000000-0005

MEANS Procedure

Assay variable : PTINR\_VAL1 PT-INR Value

N Mean Standard Deviation Minimum Maximum

---

|   |           |           |           |           |
|---|-----------|-----------|-----------|-----------|
| 6 | 1.9800000 | 0.3001333 | 1.6100000 | 2.3100000 |
|---|-----------|-----------|-----------|-----------|

---

Unique Subject Identifier=0189000000-0012

Assay variable : PTINR\_VAL1 PT-INR Value

N Mean Standard Deviation Minimum Maximum

---

|   |           |           |           |           |
|---|-----------|-----------|-----------|-----------|
| 3 | 1.8700000 | 0.1400000 | 1.7300000 | 2.0100000 |
|---|-----------|-----------|-----------|-----------|

---

Unique Subject Identifier=0189000000-0013

Assay variable : PTINR\_VAL1 PT-INR Value

N Mean Standard Deviation Minimum Maximum

---

|   |           |           |           |           |
|---|-----------|-----------|-----------|-----------|
| 6 | 2.1350000 | 0.3800395 | 1.7000000 | 2.7400000 |
|---|-----------|-----------|-----------|-----------|

---

Unique Subject Identifier=0189000000-0020

Assay variable : PTINR\_VAL1 PT-INR Value

N Mean Standard Deviation Minimum Maximum

---

|   |           |           |           |           |
|---|-----------|-----------|-----------|-----------|
| 3 | 2.4733333 | 0.6214767 | 1.9100000 | 3.1400000 |
|---|-----------|-----------|-----------|-----------|

---

Laboratory tests at the time of obtaining Table 2-6 consent, according to the presence or absence of proton-pump inhibitors

Unique Subject Identifier=0189000000-0026

MEANS Procedure

Assay variable : PTINR\_VAL1 PT-INR Value

| N | Mean      | Standard Deviation | Minimum   | Maximum   |
|---|-----------|--------------------|-----------|-----------|
| 2 | 2.0650000 | 0.2192031          | 1.9100000 | 2.2200000 |

Unique Subject Identifier=0189000000-0030

Assay variable : PTINR\_VAL1 PT-INR Value

| N | Mean      | Standard Deviation | Minimum   | Maximum   |
|---|-----------|--------------------|-----------|-----------|
| 4 | 1.8200000 | 0.0743864          | 1.7100000 | 1.8700000 |

Unique Subject Identifier=0189000000-0033

Assay variable : PTINR\_VAL1 PT-INR Value

| N | Mean      | Standard Deviation | Minimum   | Maximum   |
|---|-----------|--------------------|-----------|-----------|
| 3 | 1.9033333 | 0.2003331          | 1.7100000 | 2.1100000 |

Unique Subject Identifier=0189000000-0035

Assay variable : PTINR\_VAL1 PT-INR Value

N Mean Standard Deviation Minimum Maximum

---

|   |           |           |           |           |
|---|-----------|-----------|-----------|-----------|
| 3 | 1.7900000 | 0.3850974 | 1.4100000 | 2.1800000 |
|---|-----------|-----------|-----------|-----------|

---

Laboratory tests at the time of obtaining Table 2-6 consent, according to the presence or absence of proton-pump inhibitors

Unique Subject Identifier=0189000000-0043

MEANS Procedure

Assay variable : PTINR\_VAL1 PT-INR Value

N Mean Standard Deviation Minimum Maximum

---

|   |           |           |           |           |
|---|-----------|-----------|-----------|-----------|
| 4 | 1.6900000 | 0.1845716 | 1.5400000 | 1.9300000 |
|---|-----------|-----------|-----------|-----------|

---

Unique Subject Identifier=0189000000-0046

Assay variable : PTINR\_VAL1 PT-INR Value

N Mean Standard Deviation Minimum Maximum

---

|   |           |           |           |           |
|---|-----------|-----------|-----------|-----------|
| 3 | 2.6200000 | 0.4150904 | 2.2100000 | 3.0400000 |
|---|-----------|-----------|-----------|-----------|

---

Unique Subject Identifier=0195011000-0016

Assay variable : PTINR\_VAL1 PT-INR Value

N Mean Standard Deviation Minimum Maximum

---

|   |           |           |           |           |
|---|-----------|-----------|-----------|-----------|
| 3 | 1.7366667 | 0.1305118 | 1.6000000 | 1.8600000 |
|---|-----------|-----------|-----------|-----------|

---

Unique Subject Identifier=0201000000-0006

Assay variable : PTINR\_VAL1 PT-INR Value

N Mean Standard Deviation Minimum Maximum

---

|   |           |           |           |           |
|---|-----------|-----------|-----------|-----------|
| 3 | 2.2900000 | 0.5406478 | 1.8700000 | 2.9000000 |
|---|-----------|-----------|-----------|-----------|

---



Laboratory tests at the time of obtaining Table 2-6 consent, according to the presence or absence of proton-pump inhibitors

Unique Subject Identifier=0205100000-0001

MEANS Procedure

Assay variable : PTINR\_VAL1 PT-INR Value

N Mean Standard Deviation Minimum Maximum

---

|   |           |           |           |           |
|---|-----------|-----------|-----------|-----------|
| 3 | 1.8133333 | 0.1703917 | 1.7100000 | 2.0100000 |
|---|-----------|-----------|-----------|-----------|

---

Unique Subject Identifier=0205100000-0002

Assay variable : PTINR\_VAL1 PT-INR Value

N Mean Standard Deviation Minimum Maximum

---

|   |           |           |           |           |
|---|-----------|-----------|-----------|-----------|
| 4 | 2.2575000 | 0.2478407 | 2.0300000 | 2.5700000 |
|---|-----------|-----------|-----------|-----------|

---

Unique Subject Identifier=0205100000-0006

Assay variable : PTINR\_VAL1 PT-INR Value

N Mean Standard Deviation Minimum Maximum

---

|   |           |           |           |           |
|---|-----------|-----------|-----------|-----------|
| 3 | 1.8000000 | 0.3700000 | 1.4000000 | 2.1300000 |
|---|-----------|-----------|-----------|-----------|

---

Unique Subject Identifier=0205100000-0013

Assay variable : PTINR\_VAL1 PT-INR Value

N Mean Standard Deviation Minimum Maximum

---

|   |          |           |          |          |
|---|----------|-----------|----------|----------|
| 2 | 2.660000 | 0.0989949 | 2.590000 | 2.730000 |
|---|----------|-----------|----------|----------|

---

Laboratory tests at the time of obtaining Table 2-6 consent, according to the presence or absence of proton-pump inhibitors

Unique Subject Identifier=0206100000-0004

MEANS Procedure

Assay variable : PTINR\_VAL1 PT-INR Value

N Mean Standard Deviation Minimum Maximum

---

|   |           |           |           |           |
|---|-----------|-----------|-----------|-----------|
| 6 | 2.1800000 | 0.3240988 | 1.8500000 | 2.5700000 |
|---|-----------|-----------|-----------|-----------|

---

Unique Subject Identifier=0206100000-0005

Assay variable : PTINR\_VAL1 PT-INR Value

N Mean Standard Deviation Minimum Maximum

---

|   |           |           |           |           |
|---|-----------|-----------|-----------|-----------|
| 5 | 1.7040000 | 0.3691612 | 1.3300000 | 2.2300000 |
|---|-----------|-----------|-----------|-----------|

---

Unique Subject Identifier=0206100000-0006

Assay variable : PTINR\_VAL1 PT-INR Value

N Mean Standard Deviation Minimum Maximum

---

|   |           |           |           |           |
|---|-----------|-----------|-----------|-----------|
| 6 | 1.8666667 | 0.3144307 | 1.3600000 | 2.2400000 |
|---|-----------|-----------|-----------|-----------|

---

Unique Subject Identifier=0207100000-0002

Assay variable : PTINR\_VAL1 PT-INR Value

N Mean Standard Deviation Minimum Maximum

---

|   |           |           |           |           |
|---|-----------|-----------|-----------|-----------|
| 6 | 1.9150000 | 0.3571414 | 1.6400000 | 2.6100000 |
|---|-----------|-----------|-----------|-----------|

---

Laboratory tests at the time of obtaining Table 2-6 consent, according to the presence or absence of proton-pump inhibitors

Unique Subject Identifier=0207100000-0005

MEANS Procedure

Assay variable : PTINR\_VAL1 PT-INR Value

N Mean Standard Deviation Minimum Maximum

---

|   |           |           |           |
|---|-----------|-----------|-----------|
| 1 | 2.0600000 | 2.0600000 | 2.0600000 |
|---|-----------|-----------|-----------|

---

Unique Subject Identifier=0207100000-0008

Assay variable : PTINR\_VAL1 PT-INR Value

N Mean Standard Deviation Minimum Maximum

---

|   |           |           |           |
|---|-----------|-----------|-----------|
| 1 | 1.6500000 | 1.6500000 | 1.6500000 |
|---|-----------|-----------|-----------|

---

Unique Subject Identifier=0207100000-0011

Assay variable : PTINR\_VAL1 PT-INR Value

N Mean Standard Deviation Minimum Maximum

---

|   |           |           |           |
|---|-----------|-----------|-----------|
| 1 | 1.9000000 | 1.9000000 | 1.9000000 |
|---|-----------|-----------|-----------|

---

Unique Subject Identifier=0207100000-0013

Assay variable : PTINR\_VAL1 PT-INR Value

N Mean Standard Deviation Minimum Maximum

---

|   |           |           |           |           |
|---|-----------|-----------|-----------|-----------|
| 3 | 1.7533333 | 0.1193035 | 1.6700000 | 1.8900000 |
|---|-----------|-----------|-----------|-----------|

---

Laboratory tests at the time of obtaining Table 2-6 consent, according to the presence or absence of proton-pump inhibitors

Unique Subject Identifier=0207100000-0015

MEANS Procedure

Assay variable : PTINR\_VAL1 PT-INR Value

| N | Mean      | Standard Deviation | Minimum   | Maximum   |
|---|-----------|--------------------|-----------|-----------|
| 2 | 3.0850000 | 0.1060660          | 3.0100000 | 3.1600000 |

Unique Subject Identifier=0207100000-0017

Assay variable : PTINR\_VAL1 PT-INR Value

| N | Mean      | Standard Deviation | Minimum   | Maximum   |
|---|-----------|--------------------|-----------|-----------|
| 3 | 2.2733333 | 0.4908496          | 1.9800000 | 2.8400000 |

Unique Subject Identifier=0210000000-0003

Assay variable : PTINR\_VAL1 PT-INR Value

| N | Mean      | Standard Deviation | Minimum   | Maximum   |
|---|-----------|--------------------|-----------|-----------|
| 6 | 2.4666667 | 0.5715476          | 1.7000000 | 3.3000000 |

Unique Subject Identifier=0210000000-0006

Assay variable : PTINR\_VAL1 PT-INR Value

N Mean Standard Deviation Minimum Maximum

---

|   |          |           |          |          |
|---|----------|-----------|----------|----------|
| 5 | 2.500000 | 0.3316625 | 2.200000 | 2.900000 |
|---|----------|-----------|----------|----------|

---



Laboratory tests at the time of obtaining Table 2-6 consent, according to the presence or absence of proton-pump inhibitors

Unique Subject Identifier=021000000-0011

MEANS Procedure

Assay variable : PTINR\_VAL1 PT-INR Value

N Mean Standard Deviation Minimum Maximum

---

|   |           |           |           |           |
|---|-----------|-----------|-----------|-----------|
| 5 | 2.0400000 | 0.2966479 | 1.7000000 | 2.4000000 |
|---|-----------|-----------|-----------|-----------|

---

Unique Subject Identifier=021000000-0017

Assay variable : PTINR\_VAL1 PT-INR Value

N Mean Standard Deviation Minimum Maximum

---

|   |           |           |           |           |
|---|-----------|-----------|-----------|-----------|
| 5 | 1.7600000 | 0.1140175 | 1.6000000 | 1.9000000 |
|---|-----------|-----------|-----------|-----------|

---

Unique Subject Identifier=021100000-0001

Assay variable : PTINR\_VAL1 PT-INR Value

N Mean Standard Deviation Minimum Maximum

---

|   |           |           |           |           |
|---|-----------|-----------|-----------|-----------|
| 6 | 1.7983333 | 0.0679461 | 1.7100000 | 1.8800000 |
|---|-----------|-----------|-----------|-----------|

---

Unique Subject Identifier=021300000-0001

Assay variable : PTINR\_VAL1 PT-INR Value

N Mean Standard Deviation Minimum Maximum

---

|   |           |           |           |           |
|---|-----------|-----------|-----------|-----------|
| 6 | 2.1350000 | 0.1533297 | 1.9100000 | 2.3700000 |
|---|-----------|-----------|-----------|-----------|

---

Laboratory tests at the time of obtaining Table 2-6 consent, according to the presence or absence of proton-pump inhibitors

Unique Subject Identifier=0214000000-0003

MEANS Procedure

Assay variable : PTINR\_VAL1 PT-INR Value

N Mean Standard Deviation Minimum Maximum

---

|   |           |           |           |           |
|---|-----------|-----------|-----------|-----------|
| 4 | 1.9250000 | 0.1642153 | 1.7800000 | 2.1500000 |
|---|-----------|-----------|-----------|-----------|

---

Unique Subject Identifier=0214000000-0011

Assay variable : PTINR\_VAL1 PT-INR Value

N Mean Standard Deviation Minimum Maximum

---

|   |           |           |           |           |
|---|-----------|-----------|-----------|-----------|
| 6 | 1.6166667 | 0.2517671 | 1.2900000 | 1.9000000 |
|---|-----------|-----------|-----------|-----------|

---

Unique Subject Identifier=0217000000-0004

Assay variable : PTINR\_VAL1 PT-INR Value

N Mean Standard Deviation Minimum Maximum

---

|   |           |           |           |           |
|---|-----------|-----------|-----------|-----------|
| 6 | 1.7750000 | 0.2757354 | 1.5000000 | 2.2200000 |
|---|-----------|-----------|-----------|-----------|

---

Unique Subject Identifier=0217000000-0006

Assay variable : PTINR\_VAL1 PT-INR Value

N Mean Standard Deviation Minimum Maximum

---

|   |           |  |           |           |
|---|-----------|--|-----------|-----------|
| 1 | 1.6500000 |  | 1.6500000 | 1.6500000 |
|---|-----------|--|-----------|-----------|

---

Laboratory tests at the time of obtaining Table 2-6 consent, according to the presence or absence of proton-pump inhibitors

Unique Subject Identifier=0218000000-0005

MEANS Procedure

Assay variable : PTINR\_VAL1 PT-INR Value

N Mean Standard Deviation Minimum Maximum

---

|   |           |           |           |           |
|---|-----------|-----------|-----------|-----------|
| 5 | 1.7120000 | 0.0970567 | 1.6100000 | 1.8500000 |
|---|-----------|-----------|-----------|-----------|

---

Unique Subject Identifier=0218000000-0006

Assay variable : PTINR\_VAL1 PT-INR Value

N Mean Standard Deviation Minimum Maximum

---

|   |           |           |           |           |
|---|-----------|-----------|-----------|-----------|
| 6 | 1.9866667 | 0.2605123 | 1.5900000 | 2.3100000 |
|---|-----------|-----------|-----------|-----------|

---

Unique Subject Identifier=0220000000-0001

Assay variable : PTINR\_VAL1 PT-INR Value

N Mean Standard Deviation Minimum Maximum

---

|   |           |           |           |           |
|---|-----------|-----------|-----------|-----------|
| 3 | 1.4300000 | 0.2553429 | 1.2100000 | 1.7100000 |
|---|-----------|-----------|-----------|-----------|

---

Unique Subject Identifier=0220000000-0003

Assay variable : PTINR\_VAL1 PT-INR Value

N Mean Standard Deviation Minimum Maximum

---

|   |           |           |           |           |
|---|-----------|-----------|-----------|-----------|
| 6 | 2.2166667 | 0.3910328 | 1.5100000 | 2.6300000 |
|---|-----------|-----------|-----------|-----------|

---

Laboratory tests at the time of obtaining Table 2-6 consent, according to the presence or absence of proton-pump inhibitors

Unique Subject Identifier=0220000000-0004

MEANS Procedure

Assay variable : PTINR\_VAL1 PT-INR Value

N Mean Standard Deviation Minimum Maximum

---

|   |           |           |           |           |
|---|-----------|-----------|-----------|-----------|
| 5 | 2.3160000 | 0.4197976 | 1.9700000 | 2.9400000 |
|---|-----------|-----------|-----------|-----------|

---

Unique Subject Identifier=0220000000-0005

Assay variable : PTINR\_VAL1 PT-INR Value

N Mean Standard Deviation Minimum Maximum

---

|   |           |           |           |           |
|---|-----------|-----------|-----------|-----------|
| 5 | 2.5600000 | 0.7336212 | 1.8100000 | 3.7900000 |
|---|-----------|-----------|-----------|-----------|

---

Unique Subject Identifier=0220000000-0007

Assay variable : PTINR\_VAL1 PT-INR Value

N Mean Standard Deviation Minimum Maximum

---

|   |           |           |           |           |
|---|-----------|-----------|-----------|-----------|
| 6 | 1.9116667 | 0.0919601 | 1.8000000 | 2.0800000 |
|---|-----------|-----------|-----------|-----------|

---

Unique Subject Identifier=0220000000-0008

Assay variable : PTINR\_VAL1 PT-INR Value

N Mean Standard Deviation Minimum Maximum

---

|   |          |           |          |          |
|---|----------|-----------|----------|----------|
| 4 | 2.210000 | 0.4927474 | 1.780000 | 2.920000 |
|---|----------|-----------|----------|----------|

---



Laboratory tests at the time of obtaining Table 2-6 consent, according to the presence or absence of proton-pump inhibitors

Unique Subject Identifier=0220000000-0010

MEANS Procedure

Assay variable : PTINR\_VAL1 PT-INR Value

N Mean Standard Deviation Minimum Maximum

---

|   |           |           |           |           |
|---|-----------|-----------|-----------|-----------|
| 4 | 2.0350000 | 0.1047219 | 1.9300000 | 2.1700000 |
|---|-----------|-----------|-----------|-----------|

---

Unique Subject Identifier=0220000000-0011

Assay variable : PTINR\_VAL1 PT-INR Value

N Mean Standard Deviation Minimum Maximum

---

|   |           |           |           |           |
|---|-----------|-----------|-----------|-----------|
| 4 | 2.2225000 | 0.2317146 | 1.9700000 | 2.5000000 |
|---|-----------|-----------|-----------|-----------|

---

Unique Subject Identifier=0220000000-0013

Assay variable : PTINR\_VAL1 PT-INR Value

N Mean Standard Deviation Minimum Maximum

---

|   |           |           |           |           |
|---|-----------|-----------|-----------|-----------|
| 6 | 2.1783333 | 0.2587212 | 1.9100000 | 2.4800000 |
|---|-----------|-----------|-----------|-----------|

---

Unique Subject Identifier=0220000000-0014

Assay variable : PTINR\_VAL1 PT-INR Value

N Mean Standard Deviation Minimum Maximum

---

|   |          |           |          |          |
|---|----------|-----------|----------|----------|
| 3 | 2.160000 | 0.0556776 | 2.100000 | 2.210000 |
|---|----------|-----------|----------|----------|

---

Laboratory tests at the time of obtaining Table 2-6 consent, according to the presence or absence of proton-pump inhibitors

Unique Subject Identifier=0220000000-0015

MEANS Procedure

Assay variable : PTINR\_VAL1 PT-INR Value

N Mean Standard Deviation Minimum Maximum

---

|   |           |           |           |           |
|---|-----------|-----------|-----------|-----------|
| 4 | 1.6975000 | 0.4239792 | 1.1300000 | 2.0600000 |
|---|-----------|-----------|-----------|-----------|

---

Unique Subject Identifier=0220000000-0016

Assay variable : PTINR\_VAL1 PT-INR Value

N Mean Standard Deviation Minimum Maximum

---

|   |           |           |           |           |
|---|-----------|-----------|-----------|-----------|
| 5 | 2.1600000 | 0.4509989 | 1.6400000 | 2.6600000 |
|---|-----------|-----------|-----------|-----------|

---

Unique Subject Identifier=0220000000-0018

Assay variable : PTINR\_VAL1 PT-INR Value

N Mean Standard Deviation Minimum Maximum

---

|   |           |           |           |           |
|---|-----------|-----------|-----------|-----------|
| 4 | 2.2825000 | 0.3902456 | 2.0400000 | 2.8600000 |
|---|-----------|-----------|-----------|-----------|

---

Unique Subject Identifier=0220000000-0020

Assay variable : PTINR\_VAL1 PT-INR Value

N Mean Standard Deviation Minimum Maximum

---

|   |           |           |           |           |
|---|-----------|-----------|-----------|-----------|
| 4 | 1.9100000 | 0.2201515 | 1.7300000 | 2.2300000 |
|---|-----------|-----------|-----------|-----------|

---

Laboratory tests at the time of obtaining Table 2-6 consent, according to the presence or absence of proton-pump inhibitors

Unique Subject Identifier=0220000000-0022

MEANS Procedure

Assay variable : PTINR\_VAL1 PT-INR Value

N Mean Standard Deviation Minimum Maximum

---

|   |           |           |           |           |
|---|-----------|-----------|-----------|-----------|
| 4 | 1.8825000 | 0.1030776 | 1.7300000 | 1.9500000 |
|---|-----------|-----------|-----------|-----------|

---

Unique Subject Identifier=0220000000-0024

Assay variable : PTINR\_VAL1 PT-INR Value

N Mean Standard Deviation Minimum Maximum

---

|   |           |           |           |           |
|---|-----------|-----------|-----------|-----------|
| 3 | 2.1566667 | 0.2196209 | 2.0200000 | 2.4100000 |
|---|-----------|-----------|-----------|-----------|

---

Unique Subject Identifier=0220000000-0025

Assay variable : PTINR\_VAL1 PT-INR Value

N Mean Standard Deviation Minimum Maximum

---

|   |           |           |           |           |
|---|-----------|-----------|-----------|-----------|
| 4 | 2.1150000 | 0.4969574 | 1.6500000 | 2.6600000 |
|---|-----------|-----------|-----------|-----------|

---

Unique Subject Identifier=0220000000-0026

Assay variable : PTINR\_VAL1 PT-INR Value

N Mean Standard Deviation Minimum Maximum

---

|   |           |           |           |           |
|---|-----------|-----------|-----------|-----------|
| 4 | 2.6825000 | 0.3057641 | 2.3900000 | 3.1000000 |
|---|-----------|-----------|-----------|-----------|

---

Laboratory tests at the time of obtaining Table 2-6 consent, according to the presence or absence of proton-pump inhibitors

Unique Subject Identifier=0220000000-0028

MEANS Procedure

Assay variable : PTINR\_VAL1 PT-INR Value

| N | Mean      | Standard Deviation | Minimum   | Maximum   |
|---|-----------|--------------------|-----------|-----------|
| 3 | 1.9566667 | 0.2973774          | 1.6400000 | 2.2300000 |

Unique Subject Identifier=0220000000-0029

Assay variable : PTINR\_VAL1 PT-INR Value

| N | Mean      | Standard Deviation | Minimum   | Maximum   |
|---|-----------|--------------------|-----------|-----------|
| 4 | 2.4250000 | 0.4878183          | 1.8000000 | 2.9800000 |

Unique Subject Identifier=0220000000-0030

Assay variable : PTINR\_VAL1 PT-INR Value

| N | Mean      | Standard Deviation | Minimum   | Maximum   |
|---|-----------|--------------------|-----------|-----------|
| 5 | 2.3060000 | 0.2898793          | 2.0400000 | 2.7900000 |

Unique Subject Identifier=0220000000-0032

Assay variable : PTINR\_VAL1 PT-INR Value

N Mean Standard Deviation Minimum Maximum

---

|   |           |           |           |           |
|---|-----------|-----------|-----------|-----------|
| 3 | 2.6033333 | 0.2802380 | 2.3300000 | 2.8900000 |
|---|-----------|-----------|-----------|-----------|

---



Laboratory tests at the time of obtaining Table 2-6 consent, according to the presence or absence of proton-pump inhibitors

Unique Subject Identifier=0220000000-0034

MEANS Procedure

Assay variable : PTINR\_VAL1 PT-INR Value

| N | Mean      | Standard Deviation | Minimum   | Maximum   |
|---|-----------|--------------------|-----------|-----------|
| 3 | 2.1133333 | 0.3843609          | 1.7000000 | 2.4600000 |

Unique Subject Identifier=0220000000-0035

Assay variable : PTINR\_VAL1 PT-INR Value

| N | Mean      | Standard Deviation | Minimum   | Maximum   |
|---|-----------|--------------------|-----------|-----------|
| 5 | 2.1000000 | 0.6643041          | 1.4600000 | 2.9700000 |

Unique Subject Identifier=0222011000-0001

Assay variable : PTINR\_VAL1 PT-INR Value

| N | Mean      | Standard Deviation | Minimum   | Maximum   |
|---|-----------|--------------------|-----------|-----------|
| 6 | 1.9800000 | 0.3700811          | 1.5700000 | 2.3900000 |

Unique Subject Identifier=0222011000-0005

Assay variable : PTINR\_VAL1 PT-INR Value

N Mean Standard Deviation Minimum Maximum

---

|   |           |           |           |           |
|---|-----------|-----------|-----------|-----------|
| 5 | 2.0880000 | 0.2135884 | 1.8900000 | 2.4000000 |
|---|-----------|-----------|-----------|-----------|

---

Laboratory tests at the time of obtaining Table 2-6 consent, according to the presence or absence of proton-pump inhibitors

Unique Subject Identifier=0222011000-0009

MEANS Procedure

Assay variable : PTINR\_VAL1 PT-INR Value

N Mean Standard Deviation Minimum Maximum

---

|   |           |           |           |           |
|---|-----------|-----------|-----------|-----------|
| 4 | 2.0425000 | 0.2069420 | 1.8600000 | 2.3400000 |
|---|-----------|-----------|-----------|-----------|

---

Unique Subject Identifier=0222011000-0010

Assay variable : PTINR\_VAL1 PT-INR Value

N Mean Standard Deviation Minimum Maximum

---

|   |           |           |           |           |
|---|-----------|-----------|-----------|-----------|
| 5 | 2.4220000 | 0.7858562 | 1.8800000 | 3.8100000 |
|---|-----------|-----------|-----------|-----------|

---

Unique Subject Identifier=0222011000-0011

Assay variable : PTINR\_VAL1 PT-INR Value

N Mean Standard Deviation Minimum Maximum

---

|   |           |           |           |           |
|---|-----------|-----------|-----------|-----------|
| 5 | 1.9480000 | 0.2641401 | 1.5600000 | 2.2100000 |
|---|-----------|-----------|-----------|-----------|

---

Unique Subject Identifier=0222011000-0012

Assay variable : PTINR\_VAL1 PT-INR Value

N Mean Standard Deviation Minimum Maximum

---

|   |           |           |           |           |
|---|-----------|-----------|-----------|-----------|
| 6 | 2.0866667 | 0.3141125 | 1.5900000 | 2.4900000 |
|---|-----------|-----------|-----------|-----------|

---

Laboratory tests at the time of obtaining Table 2-6 consent, according to the presence or absence of proton-pump inhibitors

Unique Subject Identifier=0222011000-0013

MEANS Procedure

Assay variable : PTINR\_VAL1 PT-INR Value

N Mean Standard Deviation Minimum Maximum

---

|   |           |           |           |           |
|---|-----------|-----------|-----------|-----------|
| 5 | 2.3140000 | 0.1659217 | 2.0500000 | 2.4600000 |
|---|-----------|-----------|-----------|-----------|

---

Unique Subject Identifier=0222011000-0014

Assay variable : PTINR\_VAL1 PT-INR Value

N Mean Standard Deviation Minimum Maximum

---

|   |           |           |           |           |
|---|-----------|-----------|-----------|-----------|
| 5 | 2.2420000 | 0.3429577 | 1.8000000 | 2.6400000 |
|---|-----------|-----------|-----------|-----------|

---

Unique Subject Identifier=0222011000-0015

Assay variable : PTINR\_VAL1 PT-INR Value

N Mean Standard Deviation Minimum Maximum

---

|   |           |           |           |           |
|---|-----------|-----------|-----------|-----------|
| 6 | 2.5283333 | 0.7471658 | 1.5500000 | 3.7500000 |
|---|-----------|-----------|-----------|-----------|

---

Unique Subject Identifier=0222011000-0016

Assay variable : PTINR\_VAL1 PT-INR Value

N Mean Standard Deviation Minimum Maximum

---

|   |           |           |           |           |
|---|-----------|-----------|-----------|-----------|
| 6 | 2.2533333 | 0.3077445 | 1.9000000 | 2.8200000 |
|---|-----------|-----------|-----------|-----------|

---

Laboratory tests at the time of obtaining Table 2-6 consent, according to the presence or absence of proton-pump inhibitors

Unique Subject Identifier=0225001000-0001

MEANS Procedure

Assay variable : PTINR\_VAL1 PT-INR Value

N Mean Standard Deviation Minimum Maximum

---

|   |           |           |           |           |
|---|-----------|-----------|-----------|-----------|
| 3 | 1.8900000 | 0.0692820 | 1.8500000 | 1.9700000 |
|---|-----------|-----------|-----------|-----------|

---

Unique Subject Identifier=0226010000-0001

Assay variable : PTINR\_VAL1 PT-INR Value

N Mean Standard Deviation Minimum Maximum

---

|   |           |           |           |           |
|---|-----------|-----------|-----------|-----------|
| 2 | 1.3250000 | 0.1060660 | 1.2500000 | 1.4000000 |
|---|-----------|-----------|-----------|-----------|

---

Unique Subject Identifier=0226010000-0014

Assay variable : PTINR\_VAL1 PT-INR Value

N Mean Standard Deviation Minimum Maximum

---

|   |           |           |           |           |
|---|-----------|-----------|-----------|-----------|
| 3 | 2.1166667 | 0.6819335 | 1.5200000 | 2.8600000 |
|---|-----------|-----------|-----------|-----------|

---

Unique Subject Identifier=0228100000-0012

Assay variable : PTINR\_VAL1 PT-INR Value

N Mean Standard Deviation Minimum Maximum

---

|   |           |           |           |           |
|---|-----------|-----------|-----------|-----------|
| 6 | 1.3550000 | 0.1380942 | 1.1200000 | 1.5100000 |
|---|-----------|-----------|-----------|-----------|

---



Laboratory tests at the time of obtaining Table 2-6 consent, according to the presence or absence of proton-pump inhibitors

Unique Subject Identifier=0228100000-0014

MEANS Procedure

Assay variable : PTINR\_VAL1 PT-INR Value

N Mean Standard Deviation Minimum Maximum

---

|   |           |           |           |           |
|---|-----------|-----------|-----------|-----------|
| 6 | 2.0833333 | 0.2852134 | 1.8300000 | 2.6200000 |
|---|-----------|-----------|-----------|-----------|

---

Unique Subject Identifier=0228100000-0016

Assay variable : PTINR\_VAL1 PT-INR Value

N Mean Standard Deviation Minimum Maximum

---

|   |           |           |           |           |
|---|-----------|-----------|-----------|-----------|
| 5 | 2.2440000 | 0.6254838 | 1.5400000 | 2.8200000 |
|---|-----------|-----------|-----------|-----------|

---

Unique Subject Identifier=0228100000-0027

Assay variable : PTINR\_VAL1 PT-INR Value

N Mean Standard Deviation Minimum Maximum

---

|   |           |  |           |           |
|---|-----------|--|-----------|-----------|
| 1 | 1.9100000 |  | 1.9100000 | 1.9100000 |
|---|-----------|--|-----------|-----------|

---

Unique Subject Identifier=0228100000-0030

Assay variable : PTINR\_VAL1 PT-INR Value

N Mean Standard Deviation Minimum Maximum

---

|   |           |           |           |           |
|---|-----------|-----------|-----------|-----------|
| 2 | 2.0750000 | 0.4596194 | 1.7500000 | 2.4000000 |
|---|-----------|-----------|-----------|-----------|

---

Laboratory tests at the time of obtaining Table 2-6 consent, according to the presence or absence of proton-pump inhibitors

Unique Subject Identifier=0228100000-0042

MEANS Procedure

Assay variable : PTINR\_VAL1 PT-INR Value

| N | Mean      | Standard Deviation | Minimum   | Maximum   |
|---|-----------|--------------------|-----------|-----------|
| 3 | 1.8566667 | 0.1415392          | 1.7700000 | 2.0200000 |

Unique Subject Identifier=0228100000-0052

Assay variable : PTINR\_VAL1 PT-INR Value

| N | Mean      | Standard Deviation | Minimum   | Maximum   |
|---|-----------|--------------------|-----------|-----------|
| 1 | 1.8000000 |                    | 1.8000000 | 1.8000000 |

Unique Subject Identifier=0229100000-0001

Assay variable : PTINR\_VAL1 PT-INR Value

| N | Mean      | Standard Deviation | Minimum   | Maximum   |
|---|-----------|--------------------|-----------|-----------|
| 4 | 1.7550000 | 0.1178983          | 1.6400000 | 1.8800000 |

Unique Subject Identifier=0229100000-0002

Assay variable : PTINR\_VAL1 PT-INR Value

N Mean Standard Deviation Minimum Maximum

---

|   |           |           |           |           |
|---|-----------|-----------|-----------|-----------|
| 5 | 1.6040000 | 0.2085186 | 1.4300000 | 1.9500000 |
|---|-----------|-----------|-----------|-----------|

---

Laboratory tests at the time of obtaining Table 2-6 consent, according to the presence or absence of proton-pump inhibitors

Unique Subject Identifier=0229100000-0004

MEANS Procedure

Assay variable : PTINR\_VAL1 PT-INR Value

N Mean Standard Deviation Minimum Maximum

---

|   |           |           |           |           |
|---|-----------|-----------|-----------|-----------|
| 6 | 1.5983333 | 0.4860213 | 1.1700000 | 2.4600000 |
|---|-----------|-----------|-----------|-----------|

---

Unique Subject Identifier=0229100000-0010

Assay variable : PTINR\_VAL1 PT-INR Value

N Mean Standard Deviation Minimum Maximum

---

|   |           |           |           |           |
|---|-----------|-----------|-----------|-----------|
| 6 | 2.0566667 | 0.2180520 | 1.6600000 | 2.3200000 |
|---|-----------|-----------|-----------|-----------|

---

Unique Subject Identifier=0229100000-0016

Assay variable : PTINR\_VAL1 PT-INR Value

N Mean Standard Deviation Minimum Maximum

---

|   |           |           |           |           |
|---|-----------|-----------|-----------|-----------|
| 3 | 2.2333333 | 0.1553491 | 2.0600000 | 2.3600000 |
|---|-----------|-----------|-----------|-----------|

---

Unique Subject Identifier=0229100000-0018

Assay variable : PTINR\_VAL1 PT-INR Value

N Mean Standard Deviation Minimum Maximum

---

|   |           |           |           |           |
|---|-----------|-----------|-----------|-----------|
| 6 | 1.9466667 | 0.1880071 | 1.7800000 | 2.2800000 |
|---|-----------|-----------|-----------|-----------|

---

Laboratory tests at the time of obtaining Table 2-6 consent, according to the presence or absence of proton-pump inhibitors

Unique Subject Identifier=0229100000-0021

MEANS Procedure

Assay variable : PTINR\_VAL1 PT-INR Value

N Mean Standard Deviation Minimum Maximum

---

|   |           |           |           |           |
|---|-----------|-----------|-----------|-----------|
| 3 | 2.0766667 | 0.2193931 | 1.8300000 | 2.2500000 |
|---|-----------|-----------|-----------|-----------|

---

Unique Subject Identifier=0229100000-0029

Assay variable : PTINR\_VAL1 PT-INR Value

N Mean Standard Deviation Minimum Maximum

---

|   |           |           |           |           |
|---|-----------|-----------|-----------|-----------|
| 6 | 2.1550000 | 0.2954827 | 1.7900000 | 2.5900000 |
|---|-----------|-----------|-----------|-----------|

---

Unique Subject Identifier=0229100000-0030

Assay variable : PTINR\_VAL1 PT-INR Value

N Mean Standard Deviation Minimum Maximum

---

|   |           |           |           |           |
|---|-----------|-----------|-----------|-----------|
| 4 | 2.0775000 | 0.1252664 | 1.9500000 | 2.1900000 |
|---|-----------|-----------|-----------|-----------|

---

Unique Subject Identifier=0230100000-0003

Assay variable : PTINR\_VAL1 PT-INR Value

N Mean Standard Deviation Minimum Maximum

---

|   |           |           |           |           |
|---|-----------|-----------|-----------|-----------|
| 5 | 2.2280000 | 0.1807484 | 1.9500000 | 2.4000000 |
|---|-----------|-----------|-----------|-----------|

---



Laboratory tests at the time of obtaining Table 2-6 consent, according to the presence or absence of proton-pump inhibitors

Unique Subject Identifier=0230100000-0004

MEANS Procedure

Assay variable : PTINR\_VAL1 PT-INR Value

N Mean Standard Deviation Minimum Maximum

---

|   |           |           |           |           |
|---|-----------|-----------|-----------|-----------|
| 5 | 2.4640000 | 0.3543021 | 2.0000000 | 2.8100000 |
|---|-----------|-----------|-----------|-----------|

---

Unique Subject Identifier=0231100000-0008

Assay variable : PTINR\_VAL1 PT-INR Value

N Mean Standard Deviation Minimum Maximum

---

|   |           |           |           |           |
|---|-----------|-----------|-----------|-----------|
| 5 | 1.7260000 | 0.2921986 | 1.2700000 | 2.0600000 |
|---|-----------|-----------|-----------|-----------|

---

Unique Subject Identifier=0231100000-0011

Assay variable : PTINR\_VAL1 PT-INR Value

N Mean Standard Deviation Minimum Maximum

---

|   |           |           |           |           |
|---|-----------|-----------|-----------|-----------|
| 4 | 2.4275000 | 0.2596632 | 2.1300000 | 2.7000000 |
|---|-----------|-----------|-----------|-----------|

---

Unique Subject Identifier=0231100000-0013

Assay variable : PTINR\_VAL1 PT-INR Value

N Mean Standard Deviation Minimum Maximum

---

|   |           |           |           |           |
|---|-----------|-----------|-----------|-----------|
| 4 | 1.8125000 | 0.2224672 | 1.4900000 | 1.9700000 |
|---|-----------|-----------|-----------|-----------|

---

Laboratory tests at the time of obtaining Table 2-6 consent, according to the presence or absence of proton-pump inhibitors

Unique Subject Identifier=0231100000-0016

MEANS Procedure

Assay variable : PTINR\_VAL1 PT-INR Value

N Mean Standard Deviation Minimum Maximum

---

|   |           |           |           |           |
|---|-----------|-----------|-----------|-----------|
| 6 | 1.5616667 | 0.7512234 | 0.9600000 | 2.9800000 |
|---|-----------|-----------|-----------|-----------|

---

Unique Subject Identifier=0231100000-0017

Assay variable : PTINR\_VAL1 PT-INR Value

N Mean Standard Deviation Minimum Maximum

---

|   |           |           |           |           |
|---|-----------|-----------|-----------|-----------|
| 2 | 1.3900000 | 0.0282843 | 1.3700000 | 1.4100000 |
|---|-----------|-----------|-----------|-----------|

---

Unique Subject Identifier=0231100000-0018

Assay variable : PTINR\_VAL1 PT-INR Value

N Mean Standard Deviation Minimum Maximum

---

|   |           |           |           |           |
|---|-----------|-----------|-----------|-----------|
| 3 | 2.4833333 | 0.5810622 | 1.8600000 | 3.0100000 |
|---|-----------|-----------|-----------|-----------|

---

Unique Subject Identifier=0231100000-0019

Assay variable : PTINR\_VAL1 PT-INR Value

N Mean Standard Deviation Minimum Maximum

---

|   |           |           |           |           |
|---|-----------|-----------|-----------|-----------|
| 5 | 1.7680000 | 0.3922627 | 1.4200000 | 2.3500000 |
|---|-----------|-----------|-----------|-----------|

---

Laboratory tests at the time of obtaining Table 2-6 consent, according to the presence or absence of proton-pump inhibitors

Unique Subject Identifier=0231100000-0031

MEANS Procedure

Assay variable : PTINR\_VAL1 PT-INR Value

N Mean Standard Deviation Minimum Maximum

---

|   |           |           |           |           |
|---|-----------|-----------|-----------|-----------|
| 4 | 2.6050000 | 0.2838427 | 2.3500000 | 2.9400000 |
|---|-----------|-----------|-----------|-----------|

---

Unique Subject Identifier=0231100000-0036

Assay variable : PTINR\_VAL1 PT-INR Value

N Mean Standard Deviation Minimum Maximum

---

|   |           |           |           |           |
|---|-----------|-----------|-----------|-----------|
| 3 | 2.3133333 | 0.3952636 | 1.9800000 | 2.7500000 |
|---|-----------|-----------|-----------|-----------|

---

Unique Subject Identifier=0231100000-0038

Assay variable : PTINR\_VAL1 PT-INR Value

N Mean Standard Deviation Minimum Maximum

---

|   |           |           |           |           |
|---|-----------|-----------|-----------|-----------|
| 4 | 2.0575000 | 0.2807579 | 1.7800000 | 2.3800000 |
|---|-----------|-----------|-----------|-----------|

---

Unique Subject Identifier=0231100000-0046

Assay variable : PTINR\_VAL1 PT-INR Value

N Mean Standard Deviation Minimum Maximum

---

|   |           |           |           |           |
|---|-----------|-----------|-----------|-----------|
| 6 | 2.1883333 | 0.1718623 | 1.8800000 | 2.4000000 |
|---|-----------|-----------|-----------|-----------|

---

Laboratory tests at the time of obtaining Table 2-6 consent, according to the presence or absence of proton-pump inhibitors

Unique Subject Identifier=1003000000-0001

MEANS Procedure

Assay variable : PTINR\_VAL1 PT-INR Value

N Mean Standard Deviation Minimum Maximum

---

|   |           |           |           |           |
|---|-----------|-----------|-----------|-----------|
| 5 | 2.1320000 | 0.3756594 | 1.6700000 | 2.6500000 |
|---|-----------|-----------|-----------|-----------|

---

Unique Subject Identifier=1003000000-0005

Assay variable : PTINR\_VAL1 PT-INR Value

N Mean Standard Deviation Minimum Maximum

---

|   |           |           |           |           |
|---|-----------|-----------|-----------|-----------|
| 5 | 1.9140000 | 0.3326860 | 1.6400000 | 2.3800000 |
|---|-----------|-----------|-----------|-----------|

---

Unique Subject Identifier=1003000000-0010

Assay variable : PTINR\_VAL1 PT-INR Value

N Mean Standard Deviation Minimum Maximum

---

|   |           |           |           |           |
|---|-----------|-----------|-----------|-----------|
| 5 | 2.2020000 | 0.2882187 | 1.8400000 | 2.5900000 |
|---|-----------|-----------|-----------|-----------|

---

Unique Subject Identifier=1003000000-0015

Assay variable : PTINR\_VAL1 PT-INR Value

N Mean Standard Deviation Minimum Maximum

---

|   |           |           |           |           |
|---|-----------|-----------|-----------|-----------|
| 5 | 2.0080000 | 0.1275539 | 1.9200000 | 2.2100000 |
|---|-----------|-----------|-----------|-----------|

---



Laboratory tests at the time of obtaining Table 2-6 consent, according to the presence or absence of proton-pump inhibitors

Unique Subject Identifier=1004000000-0003

MEANS Procedure

Assay variable : PTINR\_VAL1 PT-INR Value

N Mean Standard Deviation Minimum Maximum

---

|   |           |           |           |           |
|---|-----------|-----------|-----------|-----------|
| 6 | 1.7833333 | 0.5741661 | 1.2000000 | 2.6000000 |
|---|-----------|-----------|-----------|-----------|

---

Unique Subject Identifier=1005000000-0003

Assay variable : PTINR\_VAL1 PT-INR Value

N Mean Standard Deviation Minimum Maximum

---

|   |           |           |           |           |
|---|-----------|-----------|-----------|-----------|
| 5 | 1.7580000 | 0.0813634 | 1.6800000 | 1.8800000 |
|---|-----------|-----------|-----------|-----------|

---

Unique Subject Identifier=1005000000-0007

Assay variable : PTINR\_VAL1 PT-INR Value

N Mean Standard Deviation Minimum Maximum

---

|   |           |           |           |           |
|---|-----------|-----------|-----------|-----------|
| 5 | 2.0040000 | 0.1986957 | 1.6600000 | 2.1600000 |
|---|-----------|-----------|-----------|-----------|

---

Unique Subject Identifier=1005000000-0010

Assay variable : PTINR\_VAL1 PT-INR Value

N Mean Standard Deviation Minimum Maximum

---

|   |          |           |          |          |
|---|----------|-----------|----------|----------|
| 6 | 1.520000 | 0.0850882 | 1.420000 | 1.670000 |
|---|----------|-----------|----------|----------|

---

Laboratory tests at the time of obtaining Table 2-6 consent, according to the presence or absence of proton-pump inhibitors

Unique Subject Identifier=1005000000-0015

MEANS Procedure

Assay variable : PTINR\_VAL1 PT-INR Value

N Mean Standard Deviation Minimum Maximum

---

|   |           |           |           |           |
|---|-----------|-----------|-----------|-----------|
| 6 | 1.8366667 | 0.1015218 | 1.6900000 | 1.9400000 |
|---|-----------|-----------|-----------|-----------|

---

Unique Subject Identifier=1006010010-0003

Assay variable : PTINR\_VAL1 PT-INR Value

N Mean Standard Deviation Minimum Maximum

---

|   |           |           |           |           |
|---|-----------|-----------|-----------|-----------|
| 6 | 2.0116667 | 0.2691778 | 1.7100000 | 2.4600000 |
|---|-----------|-----------|-----------|-----------|

---

Unique Subject Identifier=1006010010-0005

Assay variable : PTINR\_VAL1 PT-INR Value

N Mean Standard Deviation Minimum Maximum

---

|   |           |           |           |           |
|---|-----------|-----------|-----------|-----------|
| 4 | 2.2850000 | 0.1613485 | 2.1400000 | 2.4700000 |
|---|-----------|-----------|-----------|-----------|

---

Unique Subject Identifier=1006010010-0013

Assay variable : PTINR\_VAL1 PT-INR Value

N Mean Standard Deviation Minimum Maximum

---

|   |          |           |          |          |
|---|----------|-----------|----------|----------|
| 4 | 2.350000 | 0.1602082 | 2.260000 | 2.590000 |
|---|----------|-----------|----------|----------|

---

Laboratory tests at the time of obtaining Table 2-6 consent, according to the presence or absence of proton-pump inhibitors

Unique Subject Identifier=1009010010-0003

MEANS Procedure

Assay variable : PTINR\_VAL1 PT-INR Value

| N | Mean      | Standard Deviation | Minimum   | Maximum   |
|---|-----------|--------------------|-----------|-----------|
| 2 | 2.0650000 | 0.1767767          | 1.9400000 | 2.1900000 |

Unique Subject Identifier=1009010010-0007

Assay variable : PTINR\_VAL1 PT-INR Value

| N | Mean      | Standard Deviation | Minimum   | Maximum   |
|---|-----------|--------------------|-----------|-----------|
| 3 | 2.3333333 | 0.2309401          | 2.2000000 | 2.6000000 |

Unique Subject Identifier=1009010010-0012

Assay variable : PTINR\_VAL1 PT-INR Value

| N | Mean      | Standard Deviation | Minimum   | Maximum   |
|---|-----------|--------------------|-----------|-----------|
| 6 | 2.2833333 | 0.3868678          | 1.9000000 | 2.9000000 |

Unique Subject Identifier=1009010010-0013

Assay variable : PTINR\_VAL1 PT-INR Value

N Mean Standard Deviation Minimum Maximum

---

|   |           |           |           |           |
|---|-----------|-----------|-----------|-----------|
| 6 | 2.5333333 | 0.1966384 | 2.3000000 | 2.8000000 |
|---|-----------|-----------|-----------|-----------|

---

Laboratory tests at the time of obtaining Table 2-6 consent, according to the presence or absence of proton-pump inhibitors

Unique Subject Identifier=1009010010-0014

MEANS Procedure

Assay variable : PTINR\_VAL1 PT-INR Value

N Mean Standard Deviation Minimum Maximum

---

|   |           |           |           |           |
|---|-----------|-----------|-----------|-----------|
| 6 | 2.3833333 | 0.6080022 | 1.9000000 | 3.5000000 |
|---|-----------|-----------|-----------|-----------|

---

Unique Subject Identifier=1009010010-0025

Assay variable : PTINR\_VAL1 PT-INR Value

N Mean Standard Deviation Minimum Maximum

---

|   |           |           |           |           |
|---|-----------|-----------|-----------|-----------|
| 6 | 1.8500000 | 0.2880972 | 1.5000000 | 2.3000000 |
|---|-----------|-----------|-----------|-----------|

---

Unique Subject Identifier=1009010010-0027

Assay variable : PTINR\_VAL1 PT-INR Value

N Mean Standard Deviation Minimum Maximum

---

|   |           |           |           |           |
|---|-----------|-----------|-----------|-----------|
| 6 | 2.1166667 | 0.7250287 | 1.6000000 | 3.5000000 |
|---|-----------|-----------|-----------|-----------|

---

Unique Subject Identifier=1010010000-0003

Assay variable : PTINR\_VAL1 PT-INR Value

N Mean Standard Deviation Minimum Maximum

---

|   |           |           |           |           |
|---|-----------|-----------|-----------|-----------|
| 6 | 1.7833333 | 0.1329160 | 1.6000000 | 2.0000000 |
|---|-----------|-----------|-----------|-----------|

---



Laboratory tests at the time of obtaining Table 2-6 consent, according to the presence or absence of proton-pump inhibitors

Unique Subject Identifier=1010010000-0005

MEANS Procedure

Assay variable : PTINR\_VAL1 PT-INR Value

N Mean Standard Deviation Minimum Maximum

---

|   |           |  |           |           |
|---|-----------|--|-----------|-----------|
| 1 | 2.0000000 |  | 2.0000000 | 2.0000000 |
|---|-----------|--|-----------|-----------|

---

Unique Subject Identifier=1011000000-0004

Assay variable : PTINR\_VAL1 PT-INR Value

N Mean Standard Deviation Minimum Maximum

---

|   |           |           |           |           |
|---|-----------|-----------|-----------|-----------|
| 4 | 2.1750000 | 0.3304038 | 1.7000000 | 2.4000000 |
|---|-----------|-----------|-----------|-----------|

---

Unique Subject Identifier=1013010110-0006

Assay variable : PTINR\_VAL1 PT-INR Value

N Mean Standard Deviation Minimum Maximum

---

|   |           |           |           |           |
|---|-----------|-----------|-----------|-----------|
| 6 | 1.9666667 | 0.2160247 | 1.6000000 | 2.2000000 |
|---|-----------|-----------|-----------|-----------|

---

Unique Subject Identifier=1013010110-0010

Assay variable : PTINR\_VAL1 PT-INR Value

N Mean Standard Deviation Minimum Maximum

---

|   |           |           |           |           |
|---|-----------|-----------|-----------|-----------|
| 5 | 2.7000000 | 0.7035624 | 1.9000000 | 3.7000000 |
|---|-----------|-----------|-----------|-----------|

---

Laboratory tests at the time of obtaining Table 2-6 consent, according to the presence or absence of proton-pump inhibitors

Unique Subject Identifier=1018000000-0001

MEANS Procedure

Assay variable : PTINR\_VAL1 PT-INR Value

N Mean Standard Deviation Minimum Maximum

---

|   |           |           |           |           |
|---|-----------|-----------|-----------|-----------|
| 3 | 2.2666667 | 0.1527525 | 2.1000000 | 2.4000000 |
|---|-----------|-----------|-----------|-----------|

---

Unique Subject Identifier=1019010100-0001

Assay variable : PTINR\_VAL1 PT-INR Value

N Mean Standard Deviation Minimum Maximum

---

|   |           |           |           |           |
|---|-----------|-----------|-----------|-----------|
| 4 | 1.4700000 | 0.1834848 | 1.2600000 | 1.6900000 |
|---|-----------|-----------|-----------|-----------|

---

Unique Subject Identifier=1019010100-0005

Assay variable : PTINR\_VAL1 PT-INR Value

N Mean Standard Deviation Minimum Maximum

---

|   |           |           |           |           |
|---|-----------|-----------|-----------|-----------|
| 5 | 1.4920000 | 0.2501400 | 1.1800000 | 1.8200000 |
|---|-----------|-----------|-----------|-----------|

---

Unique Subject Identifier=1019010100-0009

Assay variable : PTINR\_VAL1 PT-INR Value

N Mean Standard Deviation Minimum Maximum

---

|   |           |           |           |           |
|---|-----------|-----------|-----------|-----------|
| 6 | 3.2066667 | 1.1550180 | 1.7200000 | 4.9100000 |
|---|-----------|-----------|-----------|-----------|

---

Laboratory tests at the time of obtaining Table 2-6 consent, according to the presence or absence of proton-pump inhibitors

Unique Subject Identifier=1019010100-0013

MEANS Procedure

Assay variable : PTINR\_VAL1 PT-INR Value

N Mean Standard Deviation Minimum Maximum

---

|   |           |           |           |           |
|---|-----------|-----------|-----------|-----------|
| 5 | 1.6940000 | 0.3864324 | 1.2700000 | 2.1700000 |
|---|-----------|-----------|-----------|-----------|

---

Unique Subject Identifier=1024011100-0009

Assay variable : PTINR\_VAL1 PT-INR Value

N Mean Standard Deviation Minimum Maximum

---

|   |           |           |           |           |
|---|-----------|-----------|-----------|-----------|
| 5 | 1.9780000 | 0.2764417 | 1.5000000 | 2.2000000 |
|---|-----------|-----------|-----------|-----------|

---

Unique Subject Identifier=1026011000-0006

Assay variable : PTINR\_VAL1 PT-INR Value

N Mean Standard Deviation Minimum Maximum

---

|   |           |           |           |           |
|---|-----------|-----------|-----------|-----------|
| 4 | 1.9250000 | 0.3590265 | 1.5400000 | 2.2600000 |
|---|-----------|-----------|-----------|-----------|

---

Unique Subject Identifier=1026011000-0024

Assay variable : PTINR\_VAL1 PT-INR Value

N Mean Standard Deviation Minimum Maximum

---

|   |           |           |           |           |
|---|-----------|-----------|-----------|-----------|
| 4 | 1.3275000 | 0.0505800 | 1.2700000 | 1.3900000 |
|---|-----------|-----------|-----------|-----------|

---

Laboratory tests at the time of obtaining Table 2-6 consent, according to the presence or absence of proton-pump inhibitors

Unique Subject Identifier=1028000000-0019

MEANS Procedure

Assay variable : PTINR\_VAL1 PT-INR Value

| N | Mean      | Standard Deviation | Minimum   | Maximum   |
|---|-----------|--------------------|-----------|-----------|
| 2 | 1.9950000 | 0.0212132          | 1.9800000 | 2.0100000 |

Unique Subject Identifier=1031010000-0037

Assay variable : PTINR\_VAL1 PT-INR Value

| N | Mean      | Standard Deviation | Minimum   | Maximum   |
|---|-----------|--------------------|-----------|-----------|
| 6 | 2.5666667 | 0.1144844          | 2.4400000 | 2.7700000 |

Unique Subject Identifier=1031010000-0111

Assay variable : PTINR\_VAL1 PT-INR Value

| N | Mean      | Standard Deviation | Minimum   | Maximum   |
|---|-----------|--------------------|-----------|-----------|
| 6 | 1.7900000 | 0.2429815          | 1.5900000 | 2.2300000 |

Unique Subject Identifier=1031010000-0120

Assay variable : PTINR\_VAL1 PT-INR Value

N Mean Standard Deviation Minimum Maximum

---

|   |          |           |          |          |
|---|----------|-----------|----------|----------|
| 2 | 1.740000 | 0.3535534 | 1.490000 | 1.990000 |
|---|----------|-----------|----------|----------|

---



Laboratory tests at the time of obtaining Table 2-6 consent, according to the presence or absence of proton-pump inhibitors

Unique Subject Identifier=1031010000-0127

MEANS Procedure

Assay variable : PTINR\_VAL1 PT-INR Value

N Mean Standard Deviation Minimum Maximum

---

|   |           |  |           |           |
|---|-----------|--|-----------|-----------|
| 1 | 3.2000000 |  | 3.2000000 | 3.2000000 |
|---|-----------|--|-----------|-----------|

---

Unique Subject Identifier=1031010000-0134

Assay variable : PTINR\_VAL1 PT-INR Value

N Mean Standard Deviation Minimum Maximum

---

|   |           |           |           |           |
|---|-----------|-----------|-----------|-----------|
| 3 | 2.4400000 | 0.3157531 | 2.0800000 | 2.6700000 |
|---|-----------|-----------|-----------|-----------|

---

Unique Subject Identifier=1031010000-0155

Assay variable : PTINR\_VAL1 PT-INR Value

N Mean Standard Deviation Minimum Maximum

---

|   |           |           |           |           |
|---|-----------|-----------|-----------|-----------|
| 3 | 2.5033333 | 0.4366158 | 2.0100000 | 2.8400000 |
|---|-----------|-----------|-----------|-----------|

---

Unique Subject Identifier=1032000000-0001

Assay variable : PTINR\_VAL1 PT-INR Value

N Mean Standard Deviation Minimum Maximum

---

|   |           |           |           |           |
|---|-----------|-----------|-----------|-----------|
| 3 | 1.6900000 | 0.0300000 | 1.6600000 | 1.7200000 |
|---|-----------|-----------|-----------|-----------|

---

Laboratory tests at the time of obtaining Table 2-6 consent, according to the presence or absence of proton-pump inhibitors

Unique Subject Identifier=1032000000-0002

MEANS Procedure

Assay variable : PTINR\_VAL1 PT-INR Value

N Mean Standard Deviation Minimum Maximum

---

|   |           |           |           |           |
|---|-----------|-----------|-----------|-----------|
| 6 | 1.6216667 | 0.1612968 | 1.3900000 | 1.8500000 |
|---|-----------|-----------|-----------|-----------|

---

Unique Subject Identifier=1032000000-0003

Assay variable : PTINR\_VAL1 PT-INR Value

N Mean Standard Deviation Minimum Maximum

---

|   |           |           |           |           |
|---|-----------|-----------|-----------|-----------|
| 6 | 1.9133333 | 0.2606658 | 1.6200000 | 2.3700000 |
|---|-----------|-----------|-----------|-----------|

---

Unique Subject Identifier=1032000000-0004

Assay variable : PTINR\_VAL1 PT-INR Value

N Mean Standard Deviation Minimum Maximum

---

|   |           |           |           |           |
|---|-----------|-----------|-----------|-----------|
| 3 | 2.0666667 | 0.5291818 | 1.4900000 | 2.5300000 |
|---|-----------|-----------|-----------|-----------|

---

Unique Subject Identifier=1032000000-0006

Assay variable : PTINR\_VAL1 PT-INR Value

N Mean Standard Deviation Minimum Maximum

---

|   |           |           |           |           |
|---|-----------|-----------|-----------|-----------|
| 6 | 1.7933333 | 0.4071200 | 1.4600000 | 2.5000000 |
|---|-----------|-----------|-----------|-----------|

---

Laboratory tests at the time of obtaining Table 2-6 consent, according to the presence or absence of proton-pump inhibitors

Unique Subject Identifier=1032000000-0007

MEANS Procedure

Assay variable : PTINR\_VAL1 PT-INR Value

N Mean Standard Deviation Minimum Maximum

---

|   |           |           |           |           |
|---|-----------|-----------|-----------|-----------|
| 6 | 2.4366667 | 0.6166252 | 1.6900000 | 3.1000000 |
|---|-----------|-----------|-----------|-----------|

---

Unique Subject Identifier=1032000000-0008

Assay variable : PTINR\_VAL1 PT-INR Value

N Mean Standard Deviation Minimum Maximum

---

|   |           |           |           |           |
|---|-----------|-----------|-----------|-----------|
| 6 | 1.6883333 | 0.5840348 | 1.2900000 | 2.5600000 |
|---|-----------|-----------|-----------|-----------|

---

Unique Subject Identifier=1032000000-0010

Assay variable : PTINR\_VAL1 PT-INR Value

N Mean Standard Deviation Minimum Maximum

---

|   |           |           |           |           |
|---|-----------|-----------|-----------|-----------|
| 6 | 2.2250000 | 0.2714959 | 1.8800000 | 2.6200000 |
|---|-----------|-----------|-----------|-----------|

---

Unique Subject Identifier=1032000000-0011

Assay variable : PTINR\_VAL1 PT-INR Value

N Mean Standard Deviation Minimum Maximum

---

|   |          |           |          |          |
|---|----------|-----------|----------|----------|
| 6 | 2.160000 | 0.1288410 | 1.920000 | 2.290000 |
|---|----------|-----------|----------|----------|

---

Laboratory tests at the time of obtaining Table 2-6 consent, according to the presence or absence of proton-pump inhibitors

Unique Subject Identifier=1032000000-0012

MEANS Procedure

Assay variable : PTINR\_VAL1 PT-INR Value

N Mean Standard Deviation Minimum Maximum

---

|   |           |           |           |           |
|---|-----------|-----------|-----------|-----------|
| 6 | 1.5000000 | 0.1784377 | 1.3700000 | 1.8400000 |
|---|-----------|-----------|-----------|-----------|

---

Unique Subject Identifier=1032000000-0013

Assay variable : PTINR\_VAL1 PT-INR Value

N Mean Standard Deviation Minimum Maximum

---

|   |           |           |           |           |
|---|-----------|-----------|-----------|-----------|
| 6 | 1.9833333 | 0.4921653 | 1.6500000 | 2.9300000 |
|---|-----------|-----------|-----------|-----------|

---

Unique Subject Identifier=1032000000-0017

Assay variable : PTINR\_VAL1 PT-INR Value

N Mean Standard Deviation Minimum Maximum

---

|   |           |           |           |           |
|---|-----------|-----------|-----------|-----------|
| 6 | 2.1833333 | 0.3101398 | 1.7600000 | 2.7000000 |
|---|-----------|-----------|-----------|-----------|

---

Unique Subject Identifier=1032000000-0018

Assay variable : PTINR\_VAL1 PT-INR Value

N Mean Standard Deviation Minimum Maximum

---

|   |           |           |           |           |
|---|-----------|-----------|-----------|-----------|
| 6 | 1.9116667 | 0.3806529 | 1.4900000 | 2.5500000 |
|---|-----------|-----------|-----------|-----------|

---



Laboratory tests at the time of obtaining Table 2-6 consent, according to the presence or absence of proton-pump inhibitors

Unique Subject Identifier=1032000000-0019

MEANS Procedure

Assay variable : PTINR\_VAL1 PT-INR Value

N Mean Standard Deviation Minimum Maximum

---

|   |           |           |           |           |
|---|-----------|-----------|-----------|-----------|
| 6 | 1.6533333 | 0.1123684 | 1.4600000 | 1.7600000 |
|---|-----------|-----------|-----------|-----------|

---

Unique Subject Identifier=1032000000-0020

Assay variable : PTINR\_VAL1 PT-INR Value

N Mean Standard Deviation Minimum Maximum

---

|   |           |           |           |           |
|---|-----------|-----------|-----------|-----------|
| 6 | 2.0083333 | 0.3642206 | 1.4100000 | 2.5200000 |
|---|-----------|-----------|-----------|-----------|

---

Unique Subject Identifier=1032000000-0021

Assay variable : PTINR\_VAL1 PT-INR Value

N Mean Standard Deviation Minimum Maximum

---

|   |           |           |           |           |
|---|-----------|-----------|-----------|-----------|
| 6 | 1.8950000 | 0.1712016 | 1.6500000 | 2.0500000 |
|---|-----------|-----------|-----------|-----------|

---

Unique Subject Identifier=1032000000-0022

Assay variable : PTINR\_VAL1 PT-INR Value

N Mean Standard Deviation Minimum Maximum

---

|   |          |           |          |          |
|---|----------|-----------|----------|----------|
| 6 | 2.420000 | 0.3159747 | 2.100000 | 2.920000 |
|---|----------|-----------|----------|----------|

---

Laboratory tests at the time of obtaining Table 2-6 consent, according to the presence or absence of proton-pump inhibitors

Unique Subject Identifier=1032000000-0023

MEANS Procedure

Assay variable : PTINR\_VAL1 PT-INR Value

| N | Mean      | Standard Deviation | Minimum   | Maximum   |
|---|-----------|--------------------|-----------|-----------|
| 6 | 1.5783333 | 0.3328914          | 1.1900000 | 2.0600000 |

Unique Subject Identifier=1032000000-0025

Assay variable : PTINR\_VAL1 PT-INR Value

| N | Mean      | Standard Deviation | Minimum   | Maximum   |
|---|-----------|--------------------|-----------|-----------|
| 6 | 1.5883333 | 0.3950907          | 1.2800000 | 2.3500000 |

Unique Subject Identifier=1032000000-0026

Assay variable : PTINR\_VAL1 PT-INR Value

| N | Mean      | Standard Deviation | Minimum   | Maximum   |
|---|-----------|--------------------|-----------|-----------|
| 6 | 2.1383333 | 0.3119241          | 1.6300000 | 2.4500000 |

Unique Subject Identifier=1032000000-0028

Assay variable : PTINR\_VAL1 PT-INR Value

N Mean Standard Deviation Minimum Maximum

---

|   |           |           |           |           |
|---|-----------|-----------|-----------|-----------|
| 6 | 2.3250000 | 0.2562616 | 1.9800000 | 2.7200000 |
|---|-----------|-----------|-----------|-----------|

---

Laboratory tests at the time of obtaining Table 2-6 consent, according to the presence or absence of proton-pump inhibitors

Unique Subject Identifier=1032000000-0029

MEANS Procedure

Assay variable : PTINR\_VAL1 PT-INR Value

N Mean Standard Deviation Minimum Maximum

---

|   |           |           |           |           |
|---|-----------|-----------|-----------|-----------|
| 5 | 2.3460000 | 0.5855169 | 1.4400000 | 3.0100000 |
|---|-----------|-----------|-----------|-----------|

---

Unique Subject Identifier=1032000000-0030

Assay variable : PTINR\_VAL1 PT-INR Value

N Mean Standard Deviation Minimum Maximum

---

|   |           |           |           |           |
|---|-----------|-----------|-----------|-----------|
| 6 | 1.7050000 | 0.0939681 | 1.5900000 | 1.8300000 |
|---|-----------|-----------|-----------|-----------|

---

Unique Subject Identifier=1034000000-0002

Assay variable : PTINR\_VAL1 PT-INR Value

N Mean Standard Deviation Minimum Maximum

---

|   |           |           |           |           |
|---|-----------|-----------|-----------|-----------|
| 3 | 2.0666667 | 0.3511885 | 1.7000000 | 2.4000000 |
|---|-----------|-----------|-----------|-----------|

---

Unique Subject Identifier=1034000000-0006

Assay variable : PTINR\_VAL1 PT-INR Value

N Mean Standard Deviation Minimum Maximum

---

|   |           |           |           |           |
|---|-----------|-----------|-----------|-----------|
| 4 | 2.5250000 | 0.4112988 | 2.0000000 | 2.9000000 |
|---|-----------|-----------|-----------|-----------|

---

Laboratory tests at the time of obtaining Table 2-6 consent, according to the presence or absence of proton-pump inhibitors

Unique Subject Identifier=1034000000-0009

MEANS Procedure

Assay variable : PTINR\_VAL1 PT-INR Value

| N | Mean      | Standard Deviation | Minimum   | Maximum   |
|---|-----------|--------------------|-----------|-----------|
| 1 | 1.2000000 |                    | 1.2000000 | 1.2000000 |

Unique Subject Identifier=1035000000-0013

Assay variable : PTINR\_VAL1 PT-INR Value

| N | Mean      | Standard Deviation | Minimum   | Maximum   |
|---|-----------|--------------------|-----------|-----------|
| 5 | 2.0740000 | 0.1984439          | 1.8000000 | 2.3300000 |

Unique Subject Identifier=1035000000-0017

Assay variable : PTINR\_VAL1 PT-INR Value

| N | Mean      | Standard Deviation | Minimum   | Maximum   |
|---|-----------|--------------------|-----------|-----------|
| 4 | 1.8325000 | 0.3057641          | 1.5400000 | 2.2500000 |

Unique Subject Identifier=1038000000-0002

Assay variable : PTINR\_VAL1 PT-INR Value

N Mean Standard Deviation Minimum Maximum

---

|   |           |           |           |           |
|---|-----------|-----------|-----------|-----------|
| 6 | 2.7833333 | 0.3600926 | 2.3000000 | 3.3000000 |
|---|-----------|-----------|-----------|-----------|

---



Laboratory tests at the time of obtaining Table 2-6 consent, according to the presence or absence of proton-pump inhibitors

Unique Subject Identifier=1038000000-0004

MEANS Procedure

Assay variable : PTINR\_VAL1 PT-INR Value

N Mean Standard Deviation Minimum Maximum

---

|   |           |           |           |           |
|---|-----------|-----------|-----------|-----------|
| 6 | 2.0833333 | 0.1722401 | 1.9000000 | 2.3000000 |
|---|-----------|-----------|-----------|-----------|

---

Unique Subject Identifier=1038000000-0005

Assay variable : PTINR\_VAL1 PT-INR Value

N Mean Standard Deviation Minimum Maximum

---

|   |           |           |           |           |
|---|-----------|-----------|-----------|-----------|
| 6 | 1.8000000 | 0.2966479 | 1.3000000 | 2.1000000 |
|---|-----------|-----------|-----------|-----------|

---

Unique Subject Identifier=1038000000-0006

Assay variable : PTINR\_VAL1 PT-INR Value

N Mean Standard Deviation Minimum Maximum

---

|   |           |           |           |           |
|---|-----------|-----------|-----------|-----------|
| 4 | 1.8250000 | 0.1500000 | 1.7000000 | 2.0000000 |
|---|-----------|-----------|-----------|-----------|

---

Unique Subject Identifier=1038000000-0007

Assay variable : PTINR\_VAL1 PT-INR Value

N Mean Standard Deviation Minimum Maximum

---

|   |           |           |           |           |
|---|-----------|-----------|-----------|-----------|
| 6 | 1.9000000 | 0.4939636 | 1.4000000 | 2.8000000 |
|---|-----------|-----------|-----------|-----------|

---

Laboratory tests at the time of obtaining Table 2-6 consent, according to the presence or absence of proton-pump inhibitors

Unique Subject Identifier=1038000000-0008

MEANS Procedure

Assay variable : PTINR\_VAL1 PT-INR Value

N Mean Standard Deviation Minimum Maximum

---

|   |           |           |           |           |
|---|-----------|-----------|-----------|-----------|
| 6 | 2.1333333 | 0.5537749 | 1.5000000 | 3.0000000 |
|---|-----------|-----------|-----------|-----------|

---

Unique Subject Identifier=1041011110-0003

Assay variable : PTINR\_VAL1 PT-INR Value

N Mean Standard Deviation Minimum Maximum

---

|   |           |           |           |           |
|---|-----------|-----------|-----------|-----------|
| 5 | 1.7000000 | 0.1581139 | 1.5000000 | 1.9000000 |
|---|-----------|-----------|-----------|-----------|

---

Unique Subject Identifier=1041011110-0004

Assay variable : PTINR\_VAL1 PT-INR Value

N Mean Standard Deviation Minimum Maximum

---

|   |           |           |           |           |
|---|-----------|-----------|-----------|-----------|
| 6 | 1.9833333 | 0.1471960 | 1.8000000 | 2.2000000 |
|---|-----------|-----------|-----------|-----------|

---

Unique Subject Identifier=1041011110-0005

Assay variable : PTINR\_VAL1 PT-INR Value

N Mean Standard Deviation Minimum Maximum

---

|   |           |           |           |           |
|---|-----------|-----------|-----------|-----------|
| 6 | 1.9333333 | 0.2338090 | 1.7000000 | 2.3000000 |
|---|-----------|-----------|-----------|-----------|

---

Laboratory tests at the time of obtaining Table 2-6 consent, according to the presence or absence of proton-pump inhibitors

Unique Subject Identifier=1041011110-0011

MEANS Procedure

Assay variable : PTINR\_VAL1 PT-INR Value

N Mean Standard Deviation Minimum Maximum

---

|   |           |           |           |           |
|---|-----------|-----------|-----------|-----------|
| 6 | 2.2166667 | 0.3763863 | 1.8000000 | 2.9000000 |
|---|-----------|-----------|-----------|-----------|

---

Unique Subject Identifier=1041011110-0024

Assay variable : PTINR\_VAL1 PT-INR Value

N Mean Standard Deviation Minimum Maximum

---

|   |           |           |           |           |
|---|-----------|-----------|-----------|-----------|
| 5 | 1.8600000 | 0.2701851 | 1.5000000 | 2.2000000 |
|---|-----------|-----------|-----------|-----------|

---

Unique Subject Identifier=1041011110-0026

Assay variable : PTINR\_VAL1 PT-INR Value

N Mean Standard Deviation Minimum Maximum

---

|   |           |           |           |           |
|---|-----------|-----------|-----------|-----------|
| 6 | 1.8000000 | 0.2097618 | 1.6000000 | 2.1000000 |
|---|-----------|-----------|-----------|-----------|

---

Unique Subject Identifier=1041011110-0029

Assay variable : PTINR\_VAL1 PT-INR Value

N Mean Standard Deviation Minimum Maximum

---

|   |           |           |           |           |
|---|-----------|-----------|-----------|-----------|
| 6 | 2.2666667 | 0.5202563 | 1.7000000 | 3.1000000 |
|---|-----------|-----------|-----------|-----------|

---

Laboratory tests at the time of obtaining Table 2-6 consent, according to the presence or absence of proton-pump inhibitors

Unique Subject Identifier=1041011110-0033

MEANS Procedure

Assay variable : PTINR\_VAL1 PT-INR Value

N Mean Standard Deviation Minimum Maximum

---

|   |           |           |           |           |
|---|-----------|-----------|-----------|-----------|
| 6 | 1.9833333 | 0.1471960 | 1.8000000 | 2.2000000 |
|---|-----------|-----------|-----------|-----------|

---

Unique Subject Identifier=1041011110-0034

Assay variable : PTINR\_VAL1 PT-INR Value

N Mean Standard Deviation Minimum Maximum

---

|   |           |           |           |           |
|---|-----------|-----------|-----------|-----------|
| 3 | 1.6666667 | 0.3511885 | 1.3000000 | 2.0000000 |
|---|-----------|-----------|-----------|-----------|

---

Unique Subject Identifier=1041011110-0035

Assay variable : PTINR\_VAL1 PT-INR Value

N Mean Standard Deviation Minimum Maximum

---

|   |           |           |           |           |
|---|-----------|-----------|-----------|-----------|
| 6 | 2.2500000 | 0.1870829 | 2.1000000 | 2.6000000 |
|---|-----------|-----------|-----------|-----------|

---

Unique Subject Identifier=1041011110-0036

Assay variable : PTINR\_VAL1 PT-INR Value

N Mean Standard Deviation Minimum Maximum

---

|   |           |           |           |           |
|---|-----------|-----------|-----------|-----------|
| 6 | 2.2666667 | 0.6186006 | 1.2000000 | 2.9000000 |
|---|-----------|-----------|-----------|-----------|

---



Laboratory tests at the time of obtaining Table 2-6 consent, according to the presence or absence of proton-pump inhibitors

Unique Subject Identifier=1041011110-0043

MEANS Procedure

Assay variable : PTINR\_VAL1 PT-INR Value

N Mean Standard Deviation Minimum Maximum

---

|   |           |           |           |           |
|---|-----------|-----------|-----------|-----------|
| 5 | 1.7200000 | 0.1303840 | 1.6000000 | 1.9000000 |
|---|-----------|-----------|-----------|-----------|

---

Unique Subject Identifier=1049000000-0001

Assay variable : PTINR\_VAL1 PT-INR Value

N Mean Standard Deviation Minimum Maximum

---

|   |           |           |           |           |
|---|-----------|-----------|-----------|-----------|
| 4 | 1.6150000 | 0.0967815 | 1.5300000 | 1.7300000 |
|---|-----------|-----------|-----------|-----------|

---

Unique Subject Identifier=1049000000-0003

Assay variable : PTINR\_VAL1 PT-INR Value

N Mean Standard Deviation Minimum Maximum

---

|   |           |           |           |           |
|---|-----------|-----------|-----------|-----------|
| 5 | 1.9400000 | 0.1164045 | 1.8400000 | 2.1400000 |
|---|-----------|-----------|-----------|-----------|

---

Unique Subject Identifier=1049000000-0004

Assay variable : PTINR\_VAL1 PT-INR Value

N Mean Standard Deviation Minimum Maximum

---

|   |          |           |          |          |
|---|----------|-----------|----------|----------|
| 3 | 1.940000 | 0.4309292 | 1.620000 | 2.430000 |
|---|----------|-----------|----------|----------|

---

Laboratory tests at the time of obtaining Table 2-6 consent, according to the presence or absence of proton-pump inhibitors

Unique Subject Identifier=1052000000-0003

MEANS Procedure

Assay variable : PTINR\_VAL1 PT-INR Value

N Mean Standard Deviation Minimum Maximum

---

|   |           |           |           |           |
|---|-----------|-----------|-----------|-----------|
| 5 | 1.7960000 | 0.1668233 | 1.6300000 | 2.0000000 |
|---|-----------|-----------|-----------|-----------|

---

Unique Subject Identifier=1055000000-0015

Assay variable : PTINR\_VAL1 PT-INR Value

N Mean Standard Deviation Minimum Maximum

---

|   |           |           |           |           |
|---|-----------|-----------|-----------|-----------|
| 3 | 1.9600000 | 0.2749545 | 1.7200000 | 2.2600000 |
|---|-----------|-----------|-----------|-----------|

---

Unique Subject Identifier=1055000000-0021

Assay variable : PTINR\_VAL1 PT-INR Value

N Mean Standard Deviation Minimum Maximum

---

|   |           |           |           |           |
|---|-----------|-----------|-----------|-----------|
| 2 | 2.5300000 | 0.1131371 | 2.4500000 | 2.6100000 |
|---|-----------|-----------|-----------|-----------|

---

Unique Subject Identifier=1055000000-0030

Assay variable : PTINR\_VAL1 PT-INR Value

N Mean Standard Deviation Minimum Maximum

---

|   |          |  |          |          |
|---|----------|--|----------|----------|
| 1 | 2.160000 |  | 2.160000 | 2.160000 |
|---|----------|--|----------|----------|

---

Laboratory tests at the time of obtaining Table 2-6 consent, according to the presence or absence of proton-pump inhibitors

Unique Subject Identifier=1058011111-0002

MEANS Procedure

Assay variable : PTINR\_VAL1 PT-INR Value

N Mean Standard Deviation Minimum Maximum

---

|   |           |           |           |           |
|---|-----------|-----------|-----------|-----------|
| 6 | 1.4233333 | 0.1148332 | 1.3000000 | 1.6300000 |
|---|-----------|-----------|-----------|-----------|

---

Unique Subject Identifier=1058011111-0004

Assay variable : PTINR\_VAL1 PT-INR Value

N Mean Standard Deviation Minimum Maximum

---

|   |           |           |           |           |
|---|-----------|-----------|-----------|-----------|
| 6 | 1.8550000 | 0.2703146 | 1.5800000 | 2.1900000 |
|---|-----------|-----------|-----------|-----------|

---

Unique Subject Identifier=1060000000-0007

Assay variable : PTINR\_VAL1 PT-INR Value

N Mean Standard Deviation Minimum Maximum

---

|   |           |           |           |           |
|---|-----------|-----------|-----------|-----------|
| 2 | 1.5200000 | 0.3252691 | 1.2900000 | 1.7500000 |
|---|-----------|-----------|-----------|-----------|

---

Unique Subject Identifier=1060000000-0010

Assay variable : PTINR\_VAL1 PT-INR Value

N Mean Standard Deviation Minimum Maximum

---

|   |           |           |           |           |
|---|-----------|-----------|-----------|-----------|
| 6 | 1.9666667 | 0.2771041 | 1.6800000 | 2.3600000 |
|---|-----------|-----------|-----------|-----------|

---

Laboratory tests at the time of obtaining Table 2-6 consent, according to the presence or absence of proton-pump inhibitors

Unique Subject Identifier=1060000000-0013

MEANS Procedure

Assay variable : PTINR\_VAL1 PT-INR Value

N Mean Standard Deviation Minimum Maximum

---

|   |           |           |           |           |
|---|-----------|-----------|-----------|-----------|
| 3 | 1.7833333 | 0.3274650 | 1.5200000 | 2.1500000 |
|---|-----------|-----------|-----------|-----------|

---

Unique Subject Identifier=1060000000-0022

Assay variable : PTINR\_VAL1 PT-INR Value

N Mean Standard Deviation Minimum Maximum

---

|   |           |           |           |           |
|---|-----------|-----------|-----------|-----------|
| 4 | 1.8100000 | 0.1570563 | 1.6200000 | 2.0000000 |
|---|-----------|-----------|-----------|-----------|

---

Unique Subject Identifier=1060000000-0027

Assay variable : PTINR\_VAL1 PT-INR Value

N Mean Standard Deviation Minimum Maximum

---

|   |           |           |           |           |
|---|-----------|-----------|-----------|-----------|
| 2 | 1.7750000 | 0.1060660 | 1.7000000 | 1.8500000 |
|---|-----------|-----------|-----------|-----------|

---

Unique Subject Identifier=1060000000-0043

Assay variable : PTINR\_VAL1 PT-INR Value

N Mean Standard Deviation Minimum Maximum

---

|   |           |           |           |           |
|---|-----------|-----------|-----------|-----------|
| 2 | 1.8950000 | 0.2899138 | 1.6900000 | 2.1000000 |
|---|-----------|-----------|-----------|-----------|

---



Laboratory tests at the time of obtaining Table 2-6 consent, according to the presence or absence of proton-pump inhibitors

Unique Subject Identifier=1061000000-0001

MEANS Procedure

Assay variable : PTINR\_VAL1 PT-INR Value

N Mean Standard Deviation Minimum Maximum

---

|   |           |           |           |           |
|---|-----------|-----------|-----------|-----------|
| 6 | 2.0333333 | 0.2338090 | 1.7000000 | 2.4000000 |
|---|-----------|-----------|-----------|-----------|

---

Unique Subject Identifier=1061000000-0022

Assay variable : PTINR\_VAL1 PT-INR Value

N Mean Standard Deviation Minimum Maximum

---

|   |           |           |           |           |
|---|-----------|-----------|-----------|-----------|
| 6 | 1.9000000 | 0.1897367 | 1.7000000 | 2.2000000 |
|---|-----------|-----------|-----------|-----------|

---

Unique Subject Identifier=1065010011-0005

Assay variable : PTINR\_VAL1 PT-INR Value

N Mean Standard Deviation Minimum Maximum

---

|   |           |           |           |           |
|---|-----------|-----------|-----------|-----------|
| 6 | 1.7666667 | 0.3011091 | 1.4000000 | 2.1000000 |
|---|-----------|-----------|-----------|-----------|

---

Unique Subject Identifier=1065010011-0006

Assay variable : PTINR\_VAL1 PT-INR Value

N Mean Standard Deviation Minimum Maximum

---

|   |           |           |           |           |
|---|-----------|-----------|-----------|-----------|
| 6 | 2.0333333 | 0.3011091 | 1.6000000 | 2.4000000 |
|---|-----------|-----------|-----------|-----------|

---

Laboratory tests at the time of obtaining Table 2-6 consent, according to the presence or absence of proton-pump inhibitors

Unique Subject Identifier=1065010011-0007

MEANS Procedure

Assay variable : PTINR\_VAL1 PT-INR Value

N Mean Standard Deviation Minimum Maximum

---

|   |           |           |           |           |
|---|-----------|-----------|-----------|-----------|
| 6 | 2.3000000 | 0.3898718 | 1.8000000 | 2.8000000 |
|---|-----------|-----------|-----------|-----------|

---

Unique Subject Identifier=1065010011-0008

Assay variable : PTINR\_VAL1 PT-INR Value

N Mean Standard Deviation Minimum Maximum

---

|   |           |           |           |           |
|---|-----------|-----------|-----------|-----------|
| 6 | 2.4666667 | 0.5163978 | 1.6000000 | 3.0000000 |
|---|-----------|-----------|-----------|-----------|

---

Unique Subject Identifier=1065010011-0012

Assay variable : PTINR\_VAL1 PT-INR Value

N Mean Standard Deviation Minimum Maximum

---

|   |           |           |           |           |
|---|-----------|-----------|-----------|-----------|
| 6 | 2.2333333 | 0.7580677 | 1.5000000 | 3.4000000 |
|---|-----------|-----------|-----------|-----------|

---

Unique Subject Identifier=1065010011-0014

Assay variable : PTINR\_VAL1 PT-INR Value

N Mean Standard Deviation Minimum Maximum

---

|   |          |           |          |          |
|---|----------|-----------|----------|----------|
| 6 | 2.433333 | 0.2581989 | 2.100000 | 2.800000 |
|---|----------|-----------|----------|----------|

---

Laboratory tests at the time of obtaining Table 2-6 consent, according to the presence or absence of proton-pump inhibitors

Unique Subject Identifier=1065010011-0017

MEANS Procedure

Assay variable : PTINR\_VAL1 PT-INR Value

N Mean Standard Deviation Minimum Maximum

---

|   |           |           |           |           |
|---|-----------|-----------|-----------|-----------|
| 6 | 1.9666667 | 0.7229569 | 1.1000000 | 2.9000000 |
|---|-----------|-----------|-----------|-----------|

---

Unique Subject Identifier=1065010011-0019

Assay variable : PTINR\_VAL1 PT-INR Value

N Mean Standard Deviation Minimum Maximum

---

|   |           |           |           |           |
|---|-----------|-----------|-----------|-----------|
| 4 | 1.6750000 | 0.0957427 | 1.6000000 | 1.8000000 |
|---|-----------|-----------|-----------|-----------|

---

Unique Subject Identifier=1065010011-0026

Assay variable : PTINR\_VAL1 PT-INR Value

N Mean Standard Deviation Minimum Maximum

---

|   |           |           |           |           |
|---|-----------|-----------|-----------|-----------|
| 6 | 2.2666667 | 0.6713171 | 1.7000000 | 3.5000000 |
|---|-----------|-----------|-----------|-----------|

---

Unique Subject Identifier=1065010011-0031

Assay variable : PTINR\_VAL1 PT-INR Value

N Mean Standard Deviation Minimum Maximum

---

|   |           |           |           |           |
|---|-----------|-----------|-----------|-----------|
| 6 | 1.9666667 | 0.4082483 | 1.6000000 | 2.7000000 |
|---|-----------|-----------|-----------|-----------|

---

Laboratory tests at the time of obtaining Table 2-6 consent, according to the presence or absence of proton-pump inhibitors

Unique Subject Identifier=1065010011-0032

MEANS Procedure

Assay variable : PTINR\_VAL1 PT-INR Value

N Mean Standard Deviation Minimum Maximum

---

|   |           |           |           |           |
|---|-----------|-----------|-----------|-----------|
| 6 | 2.1833333 | 0.5706721 | 1.4000000 | 3.1000000 |
|---|-----------|-----------|-----------|-----------|

---

Unique Subject Identifier=1065010011-0037

Assay variable : PTINR\_VAL1 PT-INR Value

N Mean Standard Deviation Minimum Maximum

---

|   |           |           |           |           |
|---|-----------|-----------|-----------|-----------|
| 3 | 1.6000000 | 0.3605551 | 1.2000000 | 1.9000000 |
|---|-----------|-----------|-----------|-----------|

---

Unique Subject Identifier=1065010011-0041

Assay variable : PTINR\_VAL1 PT-INR Value

N Mean Standard Deviation Minimum Maximum

---

|   |           |           |           |           |
|---|-----------|-----------|-----------|-----------|
| 6 | 2.6500000 | 0.7395945 | 1.6000000 | 3.6000000 |
|---|-----------|-----------|-----------|-----------|

---

Unique Subject Identifier=1065010011-0044

Assay variable : PTINR\_VAL1 PT-INR Value

N Mean Standard Deviation Minimum Maximum

---

|   |           |           |           |           |
|---|-----------|-----------|-----------|-----------|
| 6 | 2.0666667 | 0.7711463 | 1.3000000 | 3.4000000 |
|---|-----------|-----------|-----------|-----------|

---



Laboratory tests at the time of obtaining Table 2-6 consent, according to the presence or absence of proton-pump inhibitors

Unique Subject Identifier=1065010011-0048

MEANS Procedure

Assay variable : PTINR\_VAL1 PT-INR Value

| N | Mean      | Standard Deviation | Minimum   | Maximum   |
|---|-----------|--------------------|-----------|-----------|
| 6 | 1.7500000 | 0.2345208          | 1.6000000 | 2.1000000 |

Unique Subject Identifier=1065010011-0054

Assay variable : PTINR\_VAL1 PT-INR Value

| N | Mean      | Standard Deviation | Minimum   | Maximum   |
|---|-----------|--------------------|-----------|-----------|
| 6 | 1.9000000 | 0.4195235          | 1.5000000 | 2.6000000 |

Unique Subject Identifier=1065010011-0058

Assay variable : PTINR\_VAL1 PT-INR Value

| N | Mean      | Standard Deviation | Minimum   | Maximum   |
|---|-----------|--------------------|-----------|-----------|
| 6 | 2.2500000 | 0.1643168          | 2.1000000 | 2.5000000 |

Unique Subject Identifier=1065010011-0059

Assay variable : PTINR\_VAL1 PT-INR Value

N Mean Standard Deviation Minimum Maximum

---

|   |           |           |           |           |
|---|-----------|-----------|-----------|-----------|
| 6 | 1.8333333 | 0.4633213 | 1.4000000 | 2.6000000 |
|---|-----------|-----------|-----------|-----------|

---

Laboratory tests at the time of obtaining Table 2-6 consent, according to the presence or absence of proton-pump inhibitors

Unique Subject Identifier=1065010011-0067

MEANS Procedure

Assay variable : PTINR\_VAL1 PT-INR Value

N Mean Standard Deviation Minimum Maximum

---

|   |           |           |           |           |
|---|-----------|-----------|-----------|-----------|
| 6 | 2.4333333 | 0.8286535 | 1.5000000 | 3.5000000 |
|---|-----------|-----------|-----------|-----------|

---

Unique Subject Identifier=1065010011-0072

Assay variable : PTINR\_VAL1 PT-INR Value

N Mean Standard Deviation Minimum Maximum

---

|   |           |           |           |           |
|---|-----------|-----------|-----------|-----------|
| 6 | 1.6500000 | 0.2509980 | 1.2000000 | 1.9000000 |
|---|-----------|-----------|-----------|-----------|

---

Unique Subject Identifier=1068010111-0003

Assay variable : PTINR\_VAL1 PT-INR Value

N Mean Standard Deviation Minimum Maximum

---

|   |           |           |           |           |
|---|-----------|-----------|-----------|-----------|
| 2 | 2.2000000 | 0.5232590 | 1.8300000 | 2.5700000 |
|---|-----------|-----------|-----------|-----------|

---

Unique Subject Identifier=1068010111-0006

Assay variable : PTINR\_VAL1 PT-INR Value

N Mean Standard Deviation Minimum Maximum

---

|   |           |           |           |           |
|---|-----------|-----------|-----------|-----------|
| 3 | 1.9266667 | 0.1331666 | 1.7800000 | 2.0400000 |
|---|-----------|-----------|-----------|-----------|

---

Laboratory tests at the time of obtaining Table 2-6 consent, according to the presence or absence of proton-pump inhibitors

Unique Subject Identifier=1068010111-0008

MEANS Procedure

Assay variable : PTINR\_VAL1 PT-INR Value

| N | Mean      | Standard Deviation | Minimum   | Maximum   |
|---|-----------|--------------------|-----------|-----------|
| 3 | 1.8300000 | 0.3034798          | 1.6400000 | 2.1800000 |

Unique Subject Identifier=1068010111-0009

Assay variable : PTINR\_VAL1 PT-INR Value

| N | Mean      | Standard Deviation | Minimum   | Maximum   |
|---|-----------|--------------------|-----------|-----------|
| 3 | 1.8366667 | 0.0513160          | 1.7800000 | 1.8800000 |

Unique Subject Identifier=1068010111-0013

Assay variable : PTINR\_VAL1 PT-INR Value

| N | Mean      | Standard Deviation | Minimum   | Maximum   |
|---|-----------|--------------------|-----------|-----------|
| 6 | 1.3250000 | 0.1399643          | 1.2000000 | 1.5900000 |

Unique Subject Identifier=1068010111-0017

Assay variable : PTINR\_VAL1 PT-INR Value

N Mean Standard Deviation Minimum Maximum

---

|   |           |           |           |           |
|---|-----------|-----------|-----------|-----------|
| 4 | 1.7875000 | 0.2692428 | 1.5400000 | 2.1200000 |
|---|-----------|-----------|-----------|-----------|

---

Laboratory tests at the time of obtaining Table 2-6 consent, according to the presence or absence of proton-pump inhibitors

Unique Subject Identifier=1068010111-0026

MEANS Procedure

Assay variable : PTINR\_VAL1 PT-INR Value

N Mean Standard Deviation Minimum Maximum

---

|   |           |           |           |           |
|---|-----------|-----------|-----------|-----------|
| 5 | 2.1220000 | 0.7623451 | 1.4100000 | 3.2600000 |
|---|-----------|-----------|-----------|-----------|

---

Unique Subject Identifier=1068010111-0035

Assay variable : PTINR\_VAL1 PT-INR Value

N Mean Standard Deviation Minimum Maximum

---

|   |           |           |           |           |
|---|-----------|-----------|-----------|-----------|
| 4 | 1.9750000 | 0.3275668 | 1.6200000 | 2.4000000 |
|---|-----------|-----------|-----------|-----------|

---

Unique Subject Identifier=1068010111-0060

Assay variable : PTINR\_VAL1 PT-INR Value

N Mean Standard Deviation Minimum Maximum

---

|   |           |           |           |           |
|---|-----------|-----------|-----------|-----------|
| 6 | 1.4650000 | 0.4579847 | 0.9700000 | 2.1600000 |
|---|-----------|-----------|-----------|-----------|

---

Unique Subject Identifier=1070000000-0002

Assay variable : PTINR\_VAL1 PT-INR Value

N Mean Standard Deviation Minimum Maximum

---

|   |           |           |           |           |
|---|-----------|-----------|-----------|-----------|
| 6 | 2.0833333 | 0.4875107 | 1.6000000 | 2.9000000 |
|---|-----------|-----------|-----------|-----------|

---



Laboratory tests at the time of obtaining Table 2-6 consent, according to the presence or absence of proton-pump inhibitors

Unique Subject Identifier=1070000000-0003

MEANS Procedure

Assay variable : PTINR\_VAL1 PT-INR Value

N Mean Standard Deviation Minimum Maximum

---

|   |           |           |           |           |
|---|-----------|-----------|-----------|-----------|
| 6 | 2.1500000 | 0.5319774 | 1.6000000 | 3.1000000 |
|---|-----------|-----------|-----------|-----------|

---

Unique Subject Identifier=1071000000-0003

Assay variable : PTINR\_VAL1 PT-INR Value

N Mean Standard Deviation Minimum Maximum

---

|   |           |  |           |           |
|---|-----------|--|-----------|-----------|
| 1 | 1.0400000 |  | 1.0400000 | 1.0400000 |
|---|-----------|--|-----------|-----------|

---

Unique Subject Identifier=1071000000-0006

Assay variable : PTINR\_VAL1 PT-INR Value

N Mean Standard Deviation Minimum Maximum

---

|   |           |  |           |           |
|---|-----------|--|-----------|-----------|
| 1 | 1.8400000 |  | 1.8400000 | 1.8400000 |
|---|-----------|--|-----------|-----------|

---

Unique Subject Identifier=1072000000-0022

Assay variable : PTINR\_VAL1 PT-INR Value

N Mean Standard Deviation Minimum Maximum

---

|   |           |           |           |           |
|---|-----------|-----------|-----------|-----------|
| 6 | 1.7950000 | 0.1415274 | 1.6500000 | 2.0600000 |
|---|-----------|-----------|-----------|-----------|

---

Laboratory tests at the time of obtaining Table 2-6 consent, according to the presence or absence of proton-pump inhibitors

Unique Subject Identifier=1072000000-0026

MEANS Procedure

Assay variable : PTINR\_VAL1 PT-INR Value

| N | Mean      | Standard Deviation | Minimum   | Maximum   |
|---|-----------|--------------------|-----------|-----------|
| 6 | 1.7383333 | 0.1383353          | 1.6100000 | 1.8900000 |

Unique Subject Identifier=1072000000-0029

Assay variable : PTINR\_VAL1 PT-INR Value

| N | Mean      | Standard Deviation | Minimum   | Maximum   |
|---|-----------|--------------------|-----------|-----------|
| 5 | 1.6960000 | 0.2785319          | 1.4300000 | 2.1700000 |

Unique Subject Identifier=1072000000-0033

Assay variable : PTINR\_VAL1 PT-INR Value

| N | Mean      | Standard Deviation | Minimum   | Maximum   |
|---|-----------|--------------------|-----------|-----------|
| 6 | 1.8366667 | 0.1885382          | 1.5900000 | 2.1000000 |

Unique Subject Identifier=1072000000-0034

Assay variable : PTINR\_VAL1 PT-INR Value

N Mean Standard Deviation Minimum Maximum

---

|   |           |           |           |           |
|---|-----------|-----------|-----------|-----------|
| 6 | 1.9483333 | 0.1212298 | 1.7300000 | 2.0400000 |
|---|-----------|-----------|-----------|-----------|

---

Laboratory tests at the time of obtaining Table 2-6 consent, according to the presence or absence of proton-pump inhibitors

Unique Subject Identifier=1074011010-0002

MEANS Procedure

Assay variable : PTINR\_VAL1 PT-INR Value

| N | Mean      | Standard Deviation | Minimum   | Maximum   |
|---|-----------|--------------------|-----------|-----------|
| 5 | 2.3260000 | 0.6975529          | 1.7600000 | 3.5000000 |

Unique Subject Identifier=1074011010-0005

Assay variable : PTINR\_VAL1 PT-INR Value

| N | Mean      | Standard Deviation | Minimum   | Maximum   |
|---|-----------|--------------------|-----------|-----------|
| 6 | 1.9383333 | 0.4533174          | 1.4500000 | 2.5200000 |

Unique Subject Identifier=1074011010-0010

Assay variable : PTINR\_VAL1 PT-INR Value

| N | Mean      | Standard Deviation | Minimum   | Maximum   |
|---|-----------|--------------------|-----------|-----------|
| 5 | 1.7600000 | 0.2302173          | 1.5100000 | 2.1000000 |

Unique Subject Identifier=1079000000-0003

Assay variable : PTINR\_VAL1 PT-INR Value

N Mean Standard Deviation Minimum Maximum

---

|   |           |           |           |           |
|---|-----------|-----------|-----------|-----------|
| 3 | 1.8433333 | 0.2300725 | 1.6100000 | 2.0700000 |
|---|-----------|-----------|-----------|-----------|

---

Laboratory tests at the time of obtaining Table 2-6 consent, according to the presence or absence of proton-pump inhibitors

Unique Subject Identifier=1079000000-0004

MEANS Procedure

Assay variable : PTINR\_VAL1 PT-INR Value

| N | Mean      | Standard Deviation | Minimum   | Maximum   |
|---|-----------|--------------------|-----------|-----------|
| 3 | 1.4633333 | 0.1738774          | 1.3300000 | 1.6600000 |

Unique Subject Identifier=1080000000-0001

Assay variable : PTINR\_VAL1 PT-INR Value

| N | Mean      | Standard Deviation | Minimum   | Maximum   |
|---|-----------|--------------------|-----------|-----------|
| 6 | 2.1783333 | 0.2145150          | 1.9600000 | 2.4400000 |

Unique Subject Identifier=1080000000-0002

Assay variable : PTINR\_VAL1 PT-INR Value

| N | Mean      | Standard Deviation | Minimum   | Maximum   |
|---|-----------|--------------------|-----------|-----------|
| 6 | 2.3483333 | 0.4951532          | 1.5200000 | 2.9300000 |

Unique Subject Identifier=1080000000-0003

Assay variable : PTINR\_VAL1 PT-INR Value

N Mean Standard Deviation Minimum Maximum

---

|   |           |           |           |           |
|---|-----------|-----------|-----------|-----------|
| 6 | 2.1516667 | 0.2041976 | 1.8200000 | 2.4400000 |
|---|-----------|-----------|-----------|-----------|

---



Laboratory tests at the time of obtaining Table 2-6 consent, according to the presence or absence of proton-pump inhibitors

Unique Subject Identifier=1080000000-0005

MEANS Procedure

Assay variable : PTINR\_VAL1 PT-INR Value

N Mean Standard Deviation Minimum Maximum

---

|   |           |           |           |           |
|---|-----------|-----------|-----------|-----------|
| 6 | 2.1616667 | 0.4302286 | 1.6900000 | 2.8600000 |
|---|-----------|-----------|-----------|-----------|

---

Unique Subject Identifier=1080000000-0007

Assay variable : PTINR\_VAL1 PT-INR Value

N Mean Standard Deviation Minimum Maximum

---

|   |           |           |           |           |
|---|-----------|-----------|-----------|-----------|
| 6 | 2.5350000 | 0.1775106 | 2.2700000 | 2.7300000 |
|---|-----------|-----------|-----------|-----------|

---

Unique Subject Identifier=1085000000-0001

Assay variable : PTINR\_VAL1 PT-INR Value

N Mean Standard Deviation Minimum Maximum

---

|   |           |  |           |           |
|---|-----------|--|-----------|-----------|
| 1 | 2.4700000 |  | 2.4700000 | 2.4700000 |
|---|-----------|--|-----------|-----------|

---

Unique Subject Identifier=1085000000-0004

Assay variable : PTINR\_VAL1 PT-INR Value

N Mean Standard Deviation Minimum Maximum

---

|   |          |           |          |          |
|---|----------|-----------|----------|----------|
| 2 | 1.560000 | 0.3535534 | 1.310000 | 1.810000 |
|---|----------|-----------|----------|----------|

---

Laboratory tests at the time of obtaining Table 2-6 consent, according to the presence or absence of proton-pump inhibitors

Unique Subject Identifier=1085000000-0007

MEANS Procedure

Assay variable : PTINR\_VAL1 PT-INR Value

N Mean Standard Deviation Minimum Maximum

---

|   |           |  |           |           |
|---|-----------|--|-----------|-----------|
| 1 | 1.6200000 |  | 1.6200000 | 1.6200000 |
|---|-----------|--|-----------|-----------|

---

Unique Subject Identifier=1085000000-0009

Assay variable : PTINR\_VAL1 PT-INR Value

N Mean Standard Deviation Minimum Maximum

---

|   |           |  |           |           |
|---|-----------|--|-----------|-----------|
| 1 | 2.4900000 |  | 2.4900000 | 2.4900000 |
|---|-----------|--|-----------|-----------|

---

Unique Subject Identifier=1085000000-0012

Assay variable : PTINR\_VAL1 PT-INR Value

N Mean Standard Deviation Minimum Maximum

---

|   |           |           |           |           |
|---|-----------|-----------|-----------|-----------|
| 2 | 1.8250000 | 0.1060660 | 1.7500000 | 1.9000000 |
|---|-----------|-----------|-----------|-----------|

---

Unique Subject Identifier=1087000000-0003

Assay variable : PTINR\_VAL1 PT-INR Value

N Mean Standard Deviation Minimum Maximum

---

|   |           |           |           |           |
|---|-----------|-----------|-----------|-----------|
| 3 | 1.9000000 | 0.1646208 | 1.7100000 | 2.0000000 |
|---|-----------|-----------|-----------|-----------|

---

Laboratory tests at the time of obtaining Table 2-6 consent, according to the presence or absence of proton-pump inhibitors

Unique Subject Identifier=1087000000-0004

MEANS Procedure

Assay variable : PTINR\_VAL1 PT-INR Value

N Mean Standard Deviation Minimum Maximum

---

|   |           |           |           |           |
|---|-----------|-----------|-----------|-----------|
| 6 | 1.9983333 | 0.4471875 | 1.5400000 | 2.5400000 |
|---|-----------|-----------|-----------|-----------|

---

Unique Subject Identifier=1087000000-0006

Assay variable : PTINR\_VAL1 PT-INR Value

N Mean Standard Deviation Minimum Maximum

---

|   |           |           |           |           |
|---|-----------|-----------|-----------|-----------|
| 4 | 2.3725000 | 0.2224672 | 2.0500000 | 2.5500000 |
|---|-----------|-----------|-----------|-----------|

---

Unique Subject Identifier=1090001110-0011

Assay variable : PTINR\_VAL1 PT-INR Value

N Mean Standard Deviation Minimum Maximum

---

|   |           |           |           |           |
|---|-----------|-----------|-----------|-----------|
| 6 | 2.4000000 | 0.3098387 | 1.9000000 | 2.8000000 |
|---|-----------|-----------|-----------|-----------|

---

Unique Subject Identifier=1090001110-0012

Assay variable : PTINR\_VAL1 PT-INR Value

N Mean Standard Deviation Minimum Maximum

---

|   |           |           |           |           |
|---|-----------|-----------|-----------|-----------|
| 6 | 1.8666667 | 0.2732520 | 1.5000000 | 2.3000000 |
|---|-----------|-----------|-----------|-----------|

---

Laboratory tests at the time of obtaining Table 2-6 consent, according to the presence or absence of proton-pump inhibitors

Unique Subject Identifier=1091010000-0007

MEANS Procedure

Assay variable : PTINR\_VAL1 PT-INR Value

N Mean Standard Deviation Minimum Maximum

---

|   |           |           |           |           |
|---|-----------|-----------|-----------|-----------|
| 6 | 2.3666667 | 0.5046451 | 1.6000000 | 3.1000000 |
|---|-----------|-----------|-----------|-----------|

---

Unique Subject Identifier=1091010000-0008

Assay variable : PTINR\_VAL1 PT-INR Value

N Mean Standard Deviation Minimum Maximum

---

|   |           |           |           |           |
|---|-----------|-----------|-----------|-----------|
| 6 | 1.6833333 | 0.2401388 | 1.3000000 | 1.9000000 |
|---|-----------|-----------|-----------|-----------|

---

Unique Subject Identifier=1091010000-0010

Assay variable : PTINR\_VAL1 PT-INR Value

N Mean Standard Deviation Minimum Maximum

---

|   |           |           |           |           |
|---|-----------|-----------|-----------|-----------|
| 6 | 2.0500000 | 0.2073644 | 1.8000000 | 2.4000000 |
|---|-----------|-----------|-----------|-----------|

---

Unique Subject Identifier=1091010000-0024

Assay variable : PTINR\_VAL1 PT-INR Value

N Mean Standard Deviation Minimum Maximum

---

|   |          |           |          |          |
|---|----------|-----------|----------|----------|
| 6 | 1.650000 | 0.2880972 | 1.400000 | 2.100000 |
|---|----------|-----------|----------|----------|

---



Laboratory tests at the time of obtaining Table 2-6 consent, according to the presence or absence of proton-pump inhibitors

Unique Subject Identifier=1091010000-0028

MEANS Procedure

Assay variable : PTINR\_VAL1 PT-INR Value

N Mean Standard Deviation Minimum Maximum

---

|   |           |           |           |           |
|---|-----------|-----------|-----------|-----------|
| 5 | 2.1800000 | 0.8043631 | 1.4000000 | 3.3000000 |
|---|-----------|-----------|-----------|-----------|

---

Unique Subject Identifier=1091010000-0030

Assay variable : PTINR\_VAL1 PT-INR Value

N Mean Standard Deviation Minimum Maximum

---

|   |           |           |           |           |
|---|-----------|-----------|-----------|-----------|
| 6 | 1.7000000 | 0.2000000 | 1.5000000 | 2.0000000 |
|---|-----------|-----------|-----------|-----------|

---

Unique Subject Identifier=1091010000-0038

Assay variable : PTINR\_VAL1 PT-INR Value

N Mean Standard Deviation Minimum Maximum

---

|   |           |           |           |           |
|---|-----------|-----------|-----------|-----------|
| 6 | 1.8666667 | 0.2065591 | 1.7000000 | 2.2000000 |
|---|-----------|-----------|-----------|-----------|

---

Unique Subject Identifier=1091010000-0042

Assay variable : PTINR\_VAL1 PT-INR Value

N Mean Standard Deviation Minimum Maximum

---

|   |           |           |           |           |
|---|-----------|-----------|-----------|-----------|
| 6 | 1.8833333 | 0.2401388 | 1.6000000 | 2.3000000 |
|---|-----------|-----------|-----------|-----------|

---

Laboratory tests at the time of obtaining Table 2-6 consent, according to the presence or absence of proton-pump inhibitors

Unique Subject Identifier=1091010000-0046

MEANS Procedure

Assay variable : PTINR\_VAL1 PT-INR Value

N Mean Standard Deviation Minimum Maximum

---

|   |           |           |           |           |
|---|-----------|-----------|-----------|-----------|
| 6 | 1.7666667 | 0.3011091 | 1.3000000 | 2.0000000 |
|---|-----------|-----------|-----------|-----------|

---

Unique Subject Identifier=1091010000-0063

Assay variable : PTINR\_VAL1 PT-INR Value

N Mean Standard Deviation Minimum Maximum

---

|   |           |           |           |           |
|---|-----------|-----------|-----------|-----------|
| 6 | 2.9333333 | 1.1639015 | 1.9000000 | 5.0000000 |
|---|-----------|-----------|-----------|-----------|

---

Unique Subject Identifier=1094000000-0003

Assay variable : PTINR\_VAL1 PT-INR Value

N Mean Standard Deviation Minimum Maximum

---

|   |           |           |           |           |
|---|-----------|-----------|-----------|-----------|
| 6 | 1.5350000 | 0.0736885 | 1.4400000 | 1.6300000 |
|---|-----------|-----------|-----------|-----------|

---

Unique Subject Identifier=1094000000-0004

Assay variable : PTINR\_VAL1 PT-INR Value

N Mean Standard Deviation Minimum Maximum

---

|   |          |          |          |          |
|---|----------|----------|----------|----------|
| 5 | 1.820000 | 0.170147 | 1.580000 | 1.980000 |
|---|----------|----------|----------|----------|

---

Laboratory tests at the time of obtaining Table 2-6 consent, according to the presence or absence of proton-pump inhibitors

Unique Subject Identifier=1094000000-0005

MEANS Procedure

Assay variable : PTINR\_VAL1 PT-INR Value

N Mean Standard Deviation Minimum Maximum

---

|   |          |           |          |          |
|---|----------|-----------|----------|----------|
| 5 | 2.500000 | 0.4803644 | 2.120000 | 3.300000 |
|---|----------|-----------|----------|----------|

---

Unique Subject Identifier=1094000000-0008

Assay variable : PTINR\_VAL1 PT-INR Value

N Mean Standard Deviation Minimum Maximum

---

|   |          |           |          |          |
|---|----------|-----------|----------|----------|
| 6 | 2.155000 | 0.3011810 | 1.810000 | 2.630000 |
|---|----------|-----------|----------|----------|

---

Unique Subject Identifier=1095000000-0025

Assay variable : PTINR\_VAL1 PT-INR Value

N Mean Standard Deviation Minimum Maximum

---

|   |          |           |          |          |
|---|----------|-----------|----------|----------|
| 6 | 2.066667 | 0.3204164 | 1.800000 | 2.600000 |
|---|----------|-----------|----------|----------|

---

Unique Subject Identifier=1095000000-0029

Assay variable : PTINR\_VAL1 PT-INR Value

N Mean Standard Deviation Minimum Maximum

---

|   |          |          |          |          |
|---|----------|----------|----------|----------|
| 6 | 2.300000 | 0.200000 | 2.200000 | 2.700000 |
|---|----------|----------|----------|----------|

---

Laboratory tests at the time of obtaining Table 2-6 consent, according to the presence or absence of proton-pump inhibitors

Unique Subject Identifier=1095000000-0034

MEANS Procedure

Assay variable : PTINR\_VAL1 PT-INR Value

N Mean Standard Deviation Minimum Maximum

---

|   |           |           |           |           |
|---|-----------|-----------|-----------|-----------|
| 5 | 1.8600000 | 0.7469940 | 1.2000000 | 2.8000000 |
|---|-----------|-----------|-----------|-----------|

---

Unique Subject Identifier=1096000000-0001

Assay variable : PTINR\_VAL1 PT-INR Value

N Mean Standard Deviation Minimum Maximum

---

|   |           |  |           |           |
|---|-----------|--|-----------|-----------|
| 1 | 2.0600000 |  | 2.0600000 | 2.0600000 |
|---|-----------|--|-----------|-----------|

---

Unique Subject Identifier=1096000000-0018

Assay variable : PTINR\_VAL1 PT-INR Value

N Mean Standard Deviation Minimum Maximum

---

|   |           |           |           |           |
|---|-----------|-----------|-----------|-----------|
| 3 | 1.5666667 | 0.2516611 | 1.3000000 | 1.8000000 |
|---|-----------|-----------|-----------|-----------|

---

Unique Subject Identifier=1099000000-0002

Assay variable : PTINR\_VAL1 PT-INR Value

N Mean Standard Deviation Minimum Maximum

---

|   |          |          |          |          |
|---|----------|----------|----------|----------|
| 3 | 1.430000 | 0.130000 | 1.350000 | 1.580000 |
|---|----------|----------|----------|----------|

---



Laboratory tests at the time of obtaining Table 2-6 consent, according to the presence or absence of proton-pump inhibitors

Unique Subject Identifier=1099000000-0004

MEANS Procedure

Assay variable : PTINR\_VAL1 PT-INR Value

N Mean Standard Deviation Minimum Maximum

---

|   |           |  |           |           |
|---|-----------|--|-----------|-----------|
| 1 | 1.6400000 |  | 1.6400000 | 1.6400000 |
|---|-----------|--|-----------|-----------|

---

Unique Subject Identifier=1102000000-0005

Assay variable : PTINR\_VAL1 PT-INR Value

N Mean Standard Deviation Minimum Maximum

---

|   |           |           |           |           |
|---|-----------|-----------|-----------|-----------|
| 2 | 1.7000000 | 0.1272792 | 1.6100000 | 1.7900000 |
|---|-----------|-----------|-----------|-----------|

---

Unique Subject Identifier=1102000000-0008

Assay variable : PTINR\_VAL1 PT-INR Value

N Mean Standard Deviation Minimum Maximum

---

|   |           |           |           |           |
|---|-----------|-----------|-----------|-----------|
| 2 | 1.5700000 | 0.1131371 | 1.4900000 | 1.6500000 |
|---|-----------|-----------|-----------|-----------|

---

Unique Subject Identifier=1102000000-0010

Assay variable : PTINR\_VAL1 PT-INR Value

N Mean Standard Deviation Minimum Maximum

---

|   |           |  |           |           |
|---|-----------|--|-----------|-----------|
| 1 | 2.1700000 |  | 2.1700000 | 2.1700000 |
|---|-----------|--|-----------|-----------|

---

Laboratory tests at the time of obtaining Table 2-6 consent, according to the presence or absence of proton-pump inhibitors

Unique Subject Identifier=1102000000-0013

MEANS Procedure

Assay variable : PTINR\_VAL1 PT-INR Value

N Mean Standard Deviation Minimum Maximum

---

|   |           |           |           |           |
|---|-----------|-----------|-----------|-----------|
| 2 | 1.6300000 | 0.0989949 | 1.5600000 | 1.7000000 |
|---|-----------|-----------|-----------|-----------|

---

Unique Subject Identifier=1102000000-0021

Assay variable : PTINR\_VAL1 PT-INR Value

N Mean Standard Deviation Minimum Maximum

---

|   |           |           |           |           |
|---|-----------|-----------|-----------|-----------|
| 2 | 1.7950000 | 0.0353553 | 1.7700000 | 1.8200000 |
|---|-----------|-----------|-----------|-----------|

---

Unique Subject Identifier=1102000000-0022

Assay variable : PTINR\_VAL1 PT-INR Value

N Mean Standard Deviation Minimum Maximum

---

|   |           |           |           |           |
|---|-----------|-----------|-----------|-----------|
| 3 | 2.0666667 | 0.4441096 | 1.5800000 | 2.4500000 |
|---|-----------|-----------|-----------|-----------|

---

Unique Subject Identifier=1102000000-0036

Assay variable : PTINR\_VAL1 PT-INR Value

N Mean Standard Deviation Minimum Maximum

---

|   |          |           |          |          |
|---|----------|-----------|----------|----------|
| 3 | 1.650000 | 0.2475884 | 1.370000 | 1.840000 |
|---|----------|-----------|----------|----------|

---

Laboratory tests at the time of obtaining Table 2-6 consent, according to the presence or absence of proton-pump inhibitors

Unique Subject Identifier=1103001000-0011

MEANS Procedure

Assay variable : PTINR\_VAL1 PT-INR Value

N Mean Standard Deviation Minimum Maximum

---

|   |          |           |          |          |
|---|----------|-----------|----------|----------|
| 2 | 1.560000 | 0.2545584 | 1.380000 | 1.740000 |
|---|----------|-----------|----------|----------|

---

Unique Subject Identifier=1107011010-0001

Assay variable : PTINR\_VAL1 PT-INR Value

N Mean Standard Deviation Minimum Maximum

---

|   |          |           |          |          |
|---|----------|-----------|----------|----------|
| 4 | 2.025000 | 0.3545420 | 1.770000 | 2.550000 |
|---|----------|-----------|----------|----------|

---

Unique Subject Identifier=1107011010-0002

Assay variable : PTINR\_VAL1 PT-INR Value

N Mean Standard Deviation Minimum Maximum

---

|   |           |           |          |          |
|---|-----------|-----------|----------|----------|
| 6 | 1.8416667 | 0.1804901 | 1.650000 | 2.150000 |
|---|-----------|-----------|----------|----------|

---

Unique Subject Identifier=1107011010-0005

Assay variable : PTINR\_VAL1 PT-INR Value

N Mean Standard Deviation Minimum Maximum

---

|   |           |           |           |           |
|---|-----------|-----------|-----------|-----------|
| 5 | 1.9100000 | 0.9907321 | 0.9700000 | 3.5100000 |
|---|-----------|-----------|-----------|-----------|

---

Laboratory tests at the time of obtaining Table 2-6 consent, according to the presence or absence of proton-pump inhibitors

Unique Subject Identifier=1107011010-0006

MEANS Procedure

Assay variable : PTINR\_VAL1 PT-INR Value

N Mean Standard Deviation Minimum Maximum

---

|   |           |           |           |           |
|---|-----------|-----------|-----------|-----------|
| 4 | 1.8075000 | 0.3854327 | 1.2700000 | 2.1200000 |
|---|-----------|-----------|-----------|-----------|

---

Unique Subject Identifier=1107011010-0007

Assay variable : PTINR\_VAL1 PT-INR Value

N Mean Standard Deviation Minimum Maximum

---

|   |           |           |           |           |
|---|-----------|-----------|-----------|-----------|
| 6 | 1.6666667 | 0.0886942 | 1.5600000 | 1.7700000 |
|---|-----------|-----------|-----------|-----------|

---

Unique Subject Identifier=1107011010-0011

Assay variable : PTINR\_VAL1 PT-INR Value

N Mean Standard Deviation Minimum Maximum

---

|   |           |           |           |           |
|---|-----------|-----------|-----------|-----------|
| 6 | 1.7083333 | 0.2064380 | 1.4600000 | 1.9900000 |
|---|-----------|-----------|-----------|-----------|

---

Unique Subject Identifier=1110000000-0002

Assay variable : PTINR\_VAL1 PT-INR Value

N Mean Standard Deviation Minimum Maximum

---

|   |          |           |          |          |
|---|----------|-----------|----------|----------|
| 5 | 2.100000 | 0.1581139 | 1.900000 | 2.300000 |
|---|----------|-----------|----------|----------|

---



Laboratory tests at the time of obtaining Table 2-6 consent, according to the presence or absence of proton-pump inhibitors

Unique Subject Identifier=111000000-0013

MEANS Procedure

Assay variable : PTINR\_VAL1 PT-INR Value

N Mean Standard Deviation Minimum Maximum

---

|   |          |           |          |          |
|---|----------|-----------|----------|----------|
| 5 | 1.780000 | 0.2588436 | 1.500000 | 2.200000 |
|---|----------|-----------|----------|----------|

---

Unique Subject Identifier=111000000-0016

Assay variable : PTINR\_VAL1 PT-INR Value

N Mean Standard Deviation Minimum Maximum

---

|   |          |          |          |          |
|---|----------|----------|----------|----------|
| 4 | 2.225000 | 0.150000 | 2.100000 | 2.400000 |
|---|----------|----------|----------|----------|

---

Unique Subject Identifier=111000000-0017

Assay variable : PTINR\_VAL1 PT-INR Value

N Mean Standard Deviation Minimum Maximum

---

|   |          |           |          |          |
|---|----------|-----------|----------|----------|
| 4 | 1.925000 | 0.4573474 | 1.400000 | 2.400000 |
|---|----------|-----------|----------|----------|

---

Unique Subject Identifier=111000000-0019

Assay variable : PTINR\_VAL1 PT-INR Value

N Mean Standard Deviation Minimum Maximum

---

|   |           |  |           |           |
|---|-----------|--|-----------|-----------|
| 1 | 1.7200000 |  | 1.7200000 | 1.7200000 |
|---|-----------|--|-----------|-----------|

---

Laboratory tests at the time of obtaining Table 2-6 consent, according to the presence or absence of proton-pump inhibitors

Unique Subject Identifier=111000000-0020

MEANS Procedure

Assay variable : PTINR\_VAL1 PT-INR Value

N Mean Standard Deviation Minimum Maximum

---

|   |           |           |           |           |
|---|-----------|-----------|-----------|-----------|
| 6 | 1.7000000 | 0.1788854 | 1.5000000 | 2.0000000 |
|---|-----------|-----------|-----------|-----------|

---

Unique Subject Identifier=111000000-0022

Assay variable : PTINR\_VAL1 PT-INR Value

N Mean Standard Deviation Minimum Maximum

---

|   |           |           |           |           |
|---|-----------|-----------|-----------|-----------|
| 5 | 1.7600000 | 0.1516575 | 1.6000000 | 2.0000000 |
|---|-----------|-----------|-----------|-----------|

---

Unique Subject Identifier=111100000-0005

Assay variable : PTINR\_VAL1 PT-INR Value

N Mean Standard Deviation Minimum Maximum

---

|   |           |           |           |           |
|---|-----------|-----------|-----------|-----------|
| 6 | 1.5600000 | 0.1181524 | 1.4800000 | 1.7800000 |
|---|-----------|-----------|-----------|-----------|

---

Unique Subject Identifier=111100000-0012

Assay variable : PTINR\_VAL1 PT-INR Value

N Mean Standard Deviation Minimum Maximum

---

|   |           |           |           |           |
|---|-----------|-----------|-----------|-----------|
| 2 | 2.1050000 | 0.1484924 | 2.0000000 | 2.2100000 |
|---|-----------|-----------|-----------|-----------|

---

Laboratory tests at the time of obtaining Table 2-6 consent, according to the presence or absence of proton-pump inhibitors

Unique Subject Identifier=1111000000-0017

MEANS Procedure

Assay variable : PTINR\_VAL1 PT-INR Value

N Mean Standard Deviation Minimum Maximum

---

|   |           |           |           |           |
|---|-----------|-----------|-----------|-----------|
| 3 | 1.7166667 | 0.1050397 | 1.6100000 | 1.8200000 |
|---|-----------|-----------|-----------|-----------|

---

Unique Subject Identifier=1111000000-0021

Assay variable : PTINR\_VAL1 PT-INR Value

N Mean Standard Deviation Minimum Maximum

---

|   |           |           |           |           |
|---|-----------|-----------|-----------|-----------|
| 6 | 1.8016667 | 0.2604931 | 1.4300000 | 2.1700000 |
|---|-----------|-----------|-----------|-----------|

---

Unique Subject Identifier=1112000000-0002

Assay variable : PTINR\_VAL1 PT-INR Value

N Mean Standard Deviation Minimum Maximum

---

|   |           |           |           |           |
|---|-----------|-----------|-----------|-----------|
| 6 | 1.8966667 | 0.5702865 | 1.3100000 | 2.7600000 |
|---|-----------|-----------|-----------|-----------|

---

Unique Subject Identifier=1112000000-0003

Assay variable : PTINR\_VAL1 PT-INR Value

N Mean Standard Deviation Minimum Maximum

---

|   |           |           |           |           |
|---|-----------|-----------|-----------|-----------|
| 5 | 1.7200000 | 0.2181742 | 1.5100000 | 2.0700000 |
|---|-----------|-----------|-----------|-----------|

---

Laboratory tests at the time of obtaining Table 2-6 consent, according to the presence or absence of proton-pump inhibitors

Unique Subject Identifier=1112000000-0009

MEANS Procedure

Assay variable : PTINR\_VAL1 PT-INR Value

N Mean Standard Deviation Minimum Maximum

---

|   |          |           |          |          |
|---|----------|-----------|----------|----------|
| 6 | 2.500000 | 1.1120611 | 1.400000 | 4.290000 |
|---|----------|-----------|----------|----------|

---

Unique Subject Identifier=1112000000-0013

Assay variable : PTINR\_VAL1 PT-INR Value

N Mean Standard Deviation Minimum Maximum

---

|   |          |           |          |          |
|---|----------|-----------|----------|----------|
| 4 | 2.147500 | 0.4944610 | 1.780000 | 2.860000 |
|---|----------|-----------|----------|----------|

---

Unique Subject Identifier=1112000000-0015

Assay variable : PTINR\_VAL1 PT-INR Value

N Mean Standard Deviation Minimum Maximum

---

|   |          |           |          |          |
|---|----------|-----------|----------|----------|
| 6 | 2.183333 | 0.6064212 | 1.550000 | 3.190000 |
|---|----------|-----------|----------|----------|

---

Unique Subject Identifier=1118011000-0002

Assay variable : PTINR\_VAL1 PT-INR Value

N Mean Standard Deviation Minimum Maximum

---

|   |          |           |          |          |
|---|----------|-----------|----------|----------|
| 5 | 2.100000 | 0.2549510 | 1.800000 | 2.400000 |
|---|----------|-----------|----------|----------|

---



Laboratory tests at the time of obtaining Table 2-6 consent, according to the presence or absence of proton-pump inhibitors

Unique Subject Identifier=1118011000-0005

MEANS Procedure

Assay variable : PTINR\_VAL1 PT-INR Value

N Mean Standard Deviation Minimum Maximum

---

|   |          |           |          |          |
|---|----------|-----------|----------|----------|
| 5 | 2.420000 | 0.3033150 | 2.000000 | 2.800000 |
|---|----------|-----------|----------|----------|

---

Unique Subject Identifier=1118011000-0006

Assay variable : PTINR\_VAL1 PT-INR Value

N Mean Standard Deviation Minimum Maximum

---

|   |          |           |          |          |
|---|----------|-----------|----------|----------|
| 6 | 2.183333 | 0.5307228 | 1.600000 | 3.000000 |
|---|----------|-----------|----------|----------|

---

Unique Subject Identifier=1118011000-0007

Assay variable : PTINR\_VAL1 PT-INR Value

N Mean Standard Deviation Minimum Maximum

---

|   |          |           |          |          |
|---|----------|-----------|----------|----------|
| 4 | 1.475000 | 0.0957427 | 1.400000 | 1.600000 |
|---|----------|-----------|----------|----------|

---

Unique Subject Identifier=1118011000-0008

Assay variable : PTINR\_VAL1 PT-INR Value

N Mean Standard Deviation Minimum Maximum

---

|   |           |           |           |           |
|---|-----------|-----------|-----------|-----------|
| 6 | 2.1666667 | 0.5354126 | 1.8000000 | 3.2000000 |
|---|-----------|-----------|-----------|-----------|

---

Laboratory tests at the time of obtaining Table 2-6 consent, according to the presence or absence of proton-pump inhibitors

Unique Subject Identifier=1118011000-0009

MEANS Procedure

Assay variable : PTINR\_VAL1 PT-INR Value

N Mean Standard Deviation Minimum Maximum

---

|   |           |           |           |           |
|---|-----------|-----------|-----------|-----------|
| 6 | 1.9666667 | 0.2503331 | 1.7000000 | 2.3000000 |
|---|-----------|-----------|-----------|-----------|

---

Unique Subject Identifier=1118011000-0012

Assay variable : PTINR\_VAL1 PT-INR Value

N Mean Standard Deviation Minimum Maximum

---

|   |           |           |           |           |
|---|-----------|-----------|-----------|-----------|
| 5 | 1.5000000 | 0.2549510 | 1.3000000 | 1.9000000 |
|---|-----------|-----------|-----------|-----------|

---

Unique Subject Identifier=1118011000-0014

Assay variable : PTINR\_VAL1 PT-INR Value

N Mean Standard Deviation Minimum Maximum

---

|   |           |           |           |           |
|---|-----------|-----------|-----------|-----------|
| 5 | 2.0000000 | 0.0707107 | 1.9000000 | 2.1000000 |
|---|-----------|-----------|-----------|-----------|

---

Unique Subject Identifier=1118011000-0018

Assay variable : PTINR\_VAL1 PT-INR Value

N Mean Standard Deviation Minimum Maximum

---

|   |           |           |           |           |
|---|-----------|-----------|-----------|-----------|
| 5 | 2.3000000 | 0.6324555 | 1.3000000 | 3.0000000 |
|---|-----------|-----------|-----------|-----------|

---

Laboratory tests at the time of obtaining Table 2-6 consent, according to the presence or absence of proton-pump inhibitors

Unique Subject Identifier=1118011000-0019

MEANS Procedure

Assay variable : PTINR\_VAL1 PT-INR Value

N Mean Standard Deviation Minimum Maximum

---

|   |           |           |           |           |
|---|-----------|-----------|-----------|-----------|
| 6 | 2.0166667 | 0.2994439 | 1.7000000 | 2.5000000 |
|---|-----------|-----------|-----------|-----------|

---

Unique Subject Identifier=1118011000-0021

Assay variable : PTINR\_VAL1 PT-INR Value

N Mean Standard Deviation Minimum Maximum

---

|   |           |           |           |           |
|---|-----------|-----------|-----------|-----------|
| 5 | 1.5600000 | 0.1140175 | 1.4000000 | 1.7000000 |
|---|-----------|-----------|-----------|-----------|

---

Unique Subject Identifier=1118011000-0023

Assay variable : PTINR\_VAL1 PT-INR Value

N Mean Standard Deviation Minimum Maximum

---

|   |           |           |           |           |
|---|-----------|-----------|-----------|-----------|
| 6 | 2.0000000 | 0.5513620 | 1.5000000 | 2.8000000 |
|---|-----------|-----------|-----------|-----------|

---

Unique Subject Identifier=1118011000-0024

Assay variable : PTINR\_VAL1 PT-INR Value

N Mean Standard Deviation Minimum Maximum

---

|   |           |           |           |           |
|---|-----------|-----------|-----------|-----------|
| 4 | 1.4750000 | 0.2629956 | 1.1000000 | 1.7000000 |
|---|-----------|-----------|-----------|-----------|

---

Laboratory tests at the time of obtaining Table 2-6 consent, according to the presence or absence of proton-pump inhibitors

Unique Subject Identifier=1118011000-0027

MEANS Procedure

Assay variable : PTINR\_VAL1 PT-INR Value

| N | Mean      | Standard Deviation | Minimum   | Maximum   |
|---|-----------|--------------------|-----------|-----------|
| 5 | 2.0800000 | 0.4549725          | 1.6000000 | 2.8000000 |

Unique Subject Identifier=1118011000-0030

Assay variable : PTINR\_VAL1 PT-INR Value

| N | Mean      | Standard Deviation | Minimum   | Maximum   |
|---|-----------|--------------------|-----------|-----------|
| 5 | 1.9600000 | 0.2792848          | 1.5000000 | 2.2000000 |

Unique Subject Identifier=1118011000-0032

Assay variable : PTINR\_VAL1 PT-INR Value

| N | Mean      | Standard Deviation | Minimum   | Maximum   |
|---|-----------|--------------------|-----------|-----------|
| 5 | 1.9800000 | 0.3114482          | 1.7000000 | 2.4000000 |

Unique Subject Identifier=1118011000-0035

Assay variable : PTINR\_VAL1 PT-INR Value

N Mean Standard Deviation Minimum Maximum

---

|   |          |           |          |          |
|---|----------|-----------|----------|----------|
| 5 | 2.100000 | 0.4358899 | 1.600000 | 2.800000 |
|---|----------|-----------|----------|----------|

---



Laboratory tests at the time of obtaining Table 2-6 consent, according to the presence or absence of proton-pump inhibitors

Unique Subject Identifier=1118011000-0038

MEANS Procedure

Assay variable : PTINR\_VAL1 PT-INR Value

N Mean Standard Deviation Minimum Maximum

---

|   |           |           |           |           |
|---|-----------|-----------|-----------|-----------|
| 6 | 2.1166667 | 0.1722401 | 1.9000000 | 2.4000000 |
|---|-----------|-----------|-----------|-----------|

---

Unique Subject Identifier=1118011000-0041

Assay variable : PTINR\_VAL1 PT-INR Value

N Mean Standard Deviation Minimum Maximum

---

|   |           |           |           |           |
|---|-----------|-----------|-----------|-----------|
| 6 | 2.6000000 | 0.3521363 | 2.2000000 | 3.2000000 |
|---|-----------|-----------|-----------|-----------|

---

Unique Subject Identifier=1118011000-0045

Assay variable : PTINR\_VAL1 PT-INR Value

N Mean Standard Deviation Minimum Maximum

---

|   |           |           |           |           |
|---|-----------|-----------|-----------|-----------|
| 6 | 1.8833333 | 0.1169045 | 1.7000000 | 2.0000000 |
|---|-----------|-----------|-----------|-----------|

---

Unique Subject Identifier=1118011000-0048

Assay variable : PTINR\_VAL1 PT-INR Value

N Mean Standard Deviation Minimum Maximum

---

|   |          |          |          |          |
|---|----------|----------|----------|----------|
| 6 | 1.600000 | 0.200000 | 1.400000 | 1.900000 |
|---|----------|----------|----------|----------|

---

Laboratory tests at the time of obtaining Table 2-6 consent, according to the presence or absence of proton-pump inhibitors

Unique Subject Identifier=1118011000-0049

MEANS Procedure

Assay variable : PTINR\_VAL1 PT-INR Value

N Mean Standard Deviation Minimum Maximum

---

|   |           |           |           |           |
|---|-----------|-----------|-----------|-----------|
| 6 | 2.2166667 | 0.2994439 | 1.8000000 | 2.6000000 |
|---|-----------|-----------|-----------|-----------|

---

Unique Subject Identifier=1118011000-0051

Assay variable : PTINR\_VAL1 PT-INR Value

N Mean Standard Deviation Minimum Maximum

---

|   |           |           |           |           |
|---|-----------|-----------|-----------|-----------|
| 5 | 1.7400000 | 0.3714835 | 1.2000000 | 2.2000000 |
|---|-----------|-----------|-----------|-----------|

---

Unique Subject Identifier=1118011000-0057

Assay variable : PTINR\_VAL1 PT-INR Value

N Mean Standard Deviation Minimum Maximum

---

|   |           |           |           |           |
|---|-----------|-----------|-----------|-----------|
| 6 | 1.6166667 | 0.1471960 | 1.5000000 | 1.8000000 |
|---|-----------|-----------|-----------|-----------|

---

Unique Subject Identifier=1118011000-0060

Assay variable : PTINR\_VAL1 PT-INR Value

N Mean Standard Deviation Minimum Maximum

---

|   |          |           |          |          |
|---|----------|-----------|----------|----------|
| 4 | 1.500000 | 0.2828427 | 1.100000 | 1.700000 |
|---|----------|-----------|----------|----------|

---

Laboratory tests at the time of obtaining Table 2-6 consent, according to the presence or absence of proton-pump inhibitors

Unique Subject Identifier=1118011000-0062

MEANS Procedure

Assay variable : PTINR\_VAL1 PT-INR Value

N Mean Standard Deviation Minimum Maximum

---

|   |           |           |           |           |
|---|-----------|-----------|-----------|-----------|
| 6 | 2.1500000 | 0.4324350 | 1.3000000 | 2.5000000 |
|---|-----------|-----------|-----------|-----------|

---

Unique Subject Identifier=1118011000-0064

Assay variable : PTINR\_VAL1 PT-INR Value

N Mean Standard Deviation Minimum Maximum

---

|   |           |           |           |           |
|---|-----------|-----------|-----------|-----------|
| 6 | 2.7500000 | 0.4415880 | 2.0000000 | 3.3000000 |
|---|-----------|-----------|-----------|-----------|

---

Unique Subject Identifier=1118011000-0067

Assay variable : PTINR\_VAL1 PT-INR Value

N Mean Standard Deviation Minimum Maximum

---

|   |           |           |           |           |
|---|-----------|-----------|-----------|-----------|
| 4 | 1.8250000 | 0.1707825 | 1.6000000 | 2.0000000 |
|---|-----------|-----------|-----------|-----------|

---

Unique Subject Identifier=1118011000-0068

Assay variable : PTINR\_VAL1 PT-INR Value

N Mean Standard Deviation Minimum Maximum

---

|   |           |           |           |           |
|---|-----------|-----------|-----------|-----------|
| 6 | 1.6833333 | 0.2041241 | 1.4000000 | 1.9000000 |
|---|-----------|-----------|-----------|-----------|

---

Laboratory tests at the time of obtaining Table 2-6 consent, according to the presence or absence of proton-pump inhibitors

Unique Subject Identifier=1118011000-0069

MEANS Procedure

Assay variable : PTINR\_VAL1 PT-INR Value

N Mean Standard Deviation Minimum Maximum

---

|   |           |           |           |           |
|---|-----------|-----------|-----------|-----------|
| 6 | 1.8166667 | 0.2401388 | 1.6000000 | 2.2000000 |
|---|-----------|-----------|-----------|-----------|

---

Unique Subject Identifier=1118011000-0070

Assay variable : PTINR\_VAL1 PT-INR Value

N Mean Standard Deviation Minimum Maximum

---

|   |           |           |           |           |
|---|-----------|-----------|-----------|-----------|
| 4 | 1.8000000 | 0.2160247 | 1.6000000 | 2.1000000 |
|---|-----------|-----------|-----------|-----------|

---

Unique Subject Identifier=1118011000-0072

Assay variable : PTINR\_VAL1 PT-INR Value

N Mean Standard Deviation Minimum Maximum

---

|   |           |           |           |           |
|---|-----------|-----------|-----------|-----------|
| 6 | 2.0333333 | 0.1861899 | 1.8000000 | 2.3000000 |
|---|-----------|-----------|-----------|-----------|

---

Unique Subject Identifier=1118011000-0078

Assay variable : PTINR\_VAL1 PT-INR Value

N Mean Standard Deviation Minimum Maximum

---

|   |          |           |          |          |
|---|----------|-----------|----------|----------|
| 5 | 1.960000 | 0.5504544 | 1.400000 | 2.600000 |
|---|----------|-----------|----------|----------|

---



Laboratory tests at the time of obtaining Table 2-6 consent, according to the presence or absence of proton-pump inhibitors

Unique Subject Identifier=1118011000-0079

MEANS Procedure

Assay variable : PTINR\_VAL1 PT-INR Value

N Mean Standard Deviation Minimum Maximum

---

|   |           |           |           |           |
|---|-----------|-----------|-----------|-----------|
| 5 | 2.2800000 | 0.6534524 | 1.7000000 | 3.4000000 |
|---|-----------|-----------|-----------|-----------|

---

Unique Subject Identifier=1118011000-0082

Assay variable : PTINR\_VAL1 PT-INR Value

N Mean Standard Deviation Minimum Maximum

---

|   |           |           |           |           |
|---|-----------|-----------|-----------|-----------|
| 6 | 1.3833333 | 0.3250641 | 1.0000000 | 1.9000000 |
|---|-----------|-----------|-----------|-----------|

---

Unique Subject Identifier=1118011000-0083

Assay variable : PTINR\_VAL1 PT-INR Value

N Mean Standard Deviation Minimum Maximum

---

|   |           |           |           |           |
|---|-----------|-----------|-----------|-----------|
| 6 | 2.2833333 | 0.4792355 | 1.9000000 | 2.9000000 |
|---|-----------|-----------|-----------|-----------|

---

Unique Subject Identifier=1118011000-0086

Assay variable : PTINR\_VAL1 PT-INR Value

N Mean Standard Deviation Minimum Maximum

---

|   |          |           |          |          |
|---|----------|-----------|----------|----------|
| 5 | 2.020000 | 0.5449771 | 1.300000 | 2.800000 |
|---|----------|-----------|----------|----------|

---

Laboratory tests at the time of obtaining Table 2-6 consent, according to the presence or absence of proton-pump inhibitors

Unique Subject Identifier=1118011000-0087

MEANS Procedure

Assay variable : PTINR\_VAL1 PT-INR Value

| N | Mean      | Standard Deviation | Minimum   | Maximum   |
|---|-----------|--------------------|-----------|-----------|
| 5 | 1.8000000 | 0.3000000          | 1.5000000 | 2.1000000 |

Unique Subject Identifier=1118011000-0089

Assay variable : PTINR\_VAL1 PT-INR Value

| N | Mean      | Standard Deviation | Minimum   | Maximum   |
|---|-----------|--------------------|-----------|-----------|
| 5 | 1.8600000 | 0.1949359          | 1.6000000 | 2.1000000 |

Unique Subject Identifier=1118011000-0090

Assay variable : PTINR\_VAL1 PT-INR Value

| N | Mean      | Standard Deviation | Minimum   | Maximum   |
|---|-----------|--------------------|-----------|-----------|
| 6 | 2.5833333 | 0.2483277          | 2.3000000 | 2.9000000 |

Unique Subject Identifier=1118011000-0091

Assay variable : PTINR\_VAL1 PT-INR Value

N Mean Standard Deviation Minimum Maximum

---

|   |           |           |           |           |
|---|-----------|-----------|-----------|-----------|
| 6 | 2.0833333 | 0.5231316 | 1.5000000 | 2.9000000 |
|---|-----------|-----------|-----------|-----------|

---

Laboratory tests at the time of obtaining Table 2-6 consent, according to the presence or absence of proton-pump inhibitors

Unique Subject Identifier=1118011000-0093

MEANS Procedure

Assay variable : PTINR\_VAL1 PT-INR Value

N Mean Standard Deviation Minimum Maximum

---

|   |           |           |           |           |
|---|-----------|-----------|-----------|-----------|
| 6 | 2.1000000 | 0.3794733 | 1.7000000 | 2.7000000 |
|---|-----------|-----------|-----------|-----------|

---

Unique Subject Identifier=1118011000-0099

Assay variable : PTINR\_VAL1 PT-INR Value

N Mean Standard Deviation Minimum Maximum

---

|   |           |           |           |           |
|---|-----------|-----------|-----------|-----------|
| 6 | 1.4333333 | 0.1505545 | 1.3000000 | 1.7000000 |
|---|-----------|-----------|-----------|-----------|

---

Unique Subject Identifier=1118011000-0101

Assay variable : PTINR\_VAL1 PT-INR Value

N Mean Standard Deviation Minimum Maximum

---

|   |           |           |           |           |
|---|-----------|-----------|-----------|-----------|
| 6 | 2.0333333 | 0.2658320 | 1.6000000 | 2.3000000 |
|---|-----------|-----------|-----------|-----------|

---

Unique Subject Identifier=1118011000-0102

Assay variable : PTINR\_VAL1 PT-INR Value

N Mean Standard Deviation Minimum Maximum

---

|   |           |           |           |           |
|---|-----------|-----------|-----------|-----------|
| 6 | 1.9000000 | 0.3521363 | 1.7000000 | 2.6000000 |
|---|-----------|-----------|-----------|-----------|

---

Laboratory tests at the time of obtaining Table 2-6 consent, according to the presence or absence of proton-pump inhibitors

Unique Subject Identifier=1118011000-0105

MEANS Procedure

Assay variable : PTINR\_VAL1 PT-INR Value

N Mean Standard Deviation Minimum Maximum

---

|   |           |           |           |           |
|---|-----------|-----------|-----------|-----------|
| 4 | 1.7750000 | 0.2753785 | 1.5000000 | 2.1000000 |
|---|-----------|-----------|-----------|-----------|

---

Unique Subject Identifier=1118011000-0109

Assay variable : PTINR\_VAL1 PT-INR Value

N Mean Standard Deviation Minimum Maximum

---

|   |           |           |           |           |
|---|-----------|-----------|-----------|-----------|
| 5 | 2.2200000 | 0.2774887 | 1.8000000 | 2.5000000 |
|---|-----------|-----------|-----------|-----------|

---

Unique Subject Identifier=1118011000-0113

Assay variable : PTINR\_VAL1 PT-INR Value

N Mean Standard Deviation Minimum Maximum

---

|   |           |           |           |           |
|---|-----------|-----------|-----------|-----------|
| 3 | 1.7666667 | 0.2516611 | 1.5000000 | 2.0000000 |
|---|-----------|-----------|-----------|-----------|

---

Unique Subject Identifier=1118011000-0116

Assay variable : PTINR\_VAL1 PT-INR Value

N Mean Standard Deviation Minimum Maximum

---

|   |           |           |           |           |
|---|-----------|-----------|-----------|-----------|
| 3 | 1.6333333 | 0.3214550 | 1.4000000 | 2.0000000 |
|---|-----------|-----------|-----------|-----------|

---



Laboratory tests at the time of obtaining Table 2-6 consent, according to the presence or absence of proton-pump inhibitors

Unique Subject Identifier=1118011000-0118

MEANS Procedure

Assay variable : PTINR\_VAL1 PT-INR Value

N Mean Standard Deviation Minimum Maximum

---

|   |           |           |           |           |
|---|-----------|-----------|-----------|-----------|
| 4 | 1.6000000 | 0.2828427 | 1.4000000 | 2.0000000 |
|---|-----------|-----------|-----------|-----------|

---

Unique Subject Identifier=1118011000-0120

Assay variable : PTINR\_VAL1 PT-INR Value

N Mean Standard Deviation Minimum Maximum

---

|   |           |           |           |           |
|---|-----------|-----------|-----------|-----------|
| 6 | 1.8166667 | 0.2136976 | 1.6000000 | 2.2000000 |
|---|-----------|-----------|-----------|-----------|

---

Unique Subject Identifier=1119000000-0001

Assay variable : PTINR\_VAL1 PT-INR Value

N Mean Standard Deviation Minimum Maximum

---

|   |           |           |           |           |
|---|-----------|-----------|-----------|-----------|
| 6 | 1.6500000 | 0.1649242 | 1.4400000 | 1.9100000 |
|---|-----------|-----------|-----------|-----------|

---

Unique Subject Identifier=1119000000-0005

Assay variable : PTINR\_VAL1 PT-INR Value

N Mean Standard Deviation Minimum Maximum

---

|   |           |  |           |           |
|---|-----------|--|-----------|-----------|
| 1 | 1.6300000 |  | 1.6300000 | 1.6300000 |
|---|-----------|--|-----------|-----------|

---

Laboratory tests at the time of obtaining Table 2-6 consent, according to the presence or absence of proton-pump inhibitors

Unique Subject Identifier=1119000000-0010

MEANS Procedure

Assay variable : PTINR\_VAL1 PT-INR Value

N Mean Standard Deviation Minimum Maximum

---

|   |           |           |           |           |
|---|-----------|-----------|-----------|-----------|
| 3 | 2.8000000 | 0.4358899 | 2.5000000 | 3.3000000 |
|---|-----------|-----------|-----------|-----------|

---

Unique Subject Identifier=1119000000-0016

Assay variable : PTINR\_VAL1 PT-INR Value

N Mean Standard Deviation Minimum Maximum

---

|   |           |           |           |           |
|---|-----------|-----------|-----------|-----------|
| 2 | 1.9800000 | 0.0282843 | 1.9600000 | 2.0000000 |
|---|-----------|-----------|-----------|-----------|

---

Unique Subject Identifier=1119000000-0019

Assay variable : PTINR\_VAL1 PT-INR Value

N Mean Standard Deviation Minimum Maximum

---

|   |           |           |           |           |
|---|-----------|-----------|-----------|-----------|
| 6 | 2.1466667 | 0.3225937 | 1.9000000 | 2.7400000 |
|---|-----------|-----------|-----------|-----------|

---

Unique Subject Identifier=1119000000-0022

Assay variable : PTINR\_VAL1 PT-INR Value

N Mean Standard Deviation Minimum Maximum

---

|   |           |           |           |           |
|---|-----------|-----------|-----------|-----------|
| 6 | 2.1466667 | 0.3819249 | 1.7800000 | 2.8000000 |
|---|-----------|-----------|-----------|-----------|

---

Laboratory tests at the time of obtaining Table 2-6 consent, according to the presence or absence of proton-pump inhibitors

Unique Subject Identifier=1119000000-0025

MEANS Procedure

Assay variable : PTINR\_VAL1 PT-INR Value

N Mean Standard Deviation Minimum Maximum

---

|   |           |           |           |           |
|---|-----------|-----------|-----------|-----------|
| 6 | 2.2500000 | 0.5244044 | 1.8000000 | 3.2000000 |
|---|-----------|-----------|-----------|-----------|

---

Unique Subject Identifier=1119000000-0030

Assay variable : PTINR\_VAL1 PT-INR Value

N Mean Standard Deviation Minimum Maximum

---

|   |           |           |           |           |
|---|-----------|-----------|-----------|-----------|
| 4 | 2.4500000 | 0.2380476 | 2.3000000 | 2.8000000 |
|---|-----------|-----------|-----------|-----------|

---

Unique Subject Identifier=1119000000-0031

Assay variable : PTINR\_VAL1 PT-INR Value

N Mean Standard Deviation Minimum Maximum

---

|   |           |           |           |           |
|---|-----------|-----------|-----------|-----------|
| 3 | 3.4333333 | 0.7505553 | 2.7000000 | 4.2000000 |
|---|-----------|-----------|-----------|-----------|

---

Unique Subject Identifier=1119000000-0036

Assay variable : PTINR\_VAL1 PT-INR Value

N Mean Standard Deviation Minimum Maximum

---

|   |           |           |           |           |
|---|-----------|-----------|-----------|-----------|
| 5 | 2.7260000 | 0.2380756 | 2.4900000 | 3.0600000 |
|---|-----------|-----------|-----------|-----------|

---

Laboratory tests at the time of obtaining Table 2-6 consent, according to the presence or absence of proton-pump inhibitors

Unique Subject Identifier=1119000000-0039

MEANS Procedure

Assay variable : PTINR\_VAL1 PT-INR Value

N Mean Standard Deviation Minimum Maximum

---

|   |           |           |           |           |
|---|-----------|-----------|-----------|-----------|
| 5 | 2.0000000 | 0.3605551 | 1.6000000 | 2.5000000 |
|---|-----------|-----------|-----------|-----------|

---

Unique Subject Identifier=1119000000-0041

Assay variable : PTINR\_VAL1 PT-INR Value

N Mean Standard Deviation Minimum Maximum

---

|   |           |           |           |           |
|---|-----------|-----------|-----------|-----------|
| 6 | 2.1833333 | 0.5231316 | 1.5000000 | 2.9000000 |
|---|-----------|-----------|-----------|-----------|

---

Unique Subject Identifier=1119000000-0044

Assay variable : PTINR\_VAL1 PT-INR Value

N Mean Standard Deviation Minimum Maximum

---

|   |           |           |           |           |
|---|-----------|-----------|-----------|-----------|
| 5 | 1.8400000 | 0.2966479 | 1.5000000 | 2.3000000 |
|---|-----------|-----------|-----------|-----------|

---

Unique Subject Identifier=1119000000-0055

Assay variable : PTINR\_VAL1 PT-INR Value

N Mean Standard Deviation Minimum Maximum

---

|   |           |  |           |           |
|---|-----------|--|-----------|-----------|
| 1 | 2.9000000 |  | 2.9000000 | 2.9000000 |
|---|-----------|--|-----------|-----------|

---



Laboratory tests at the time of obtaining Table 2-6 consent, according to the presence or absence of proton-pump inhibitors

Unique Subject Identifier=1119000000-0060

MEANS Procedure

Assay variable : PTINR\_VAL1 PT-INR Value

| N | Mean      | Standard Deviation | Minimum   | Maximum   |
|---|-----------|--------------------|-----------|-----------|
| 2 | 3.0350000 | 0.0212132          | 3.0200000 | 3.0500000 |

Unique Subject Identifier=1122001010-0014

Assay variable : PTINR\_VAL1 PT-INR Value

| N | Mean      | Standard Deviation | Minimum   | Maximum   |
|---|-----------|--------------------|-----------|-----------|
| 6 | 1.4283333 | 0.1697547          | 1.2700000 | 1.7000000 |

Unique Subject Identifier=1122001010-0018

Assay variable : PTINR\_VAL1 PT-INR Value

| N | Mean      | Standard Deviation | Minimum   | Maximum   |
|---|-----------|--------------------|-----------|-----------|
| 1 | 1.6400000 |                    | 1.6400000 | 1.6400000 |

Unique Subject Identifier=1122001010-0031

Assay variable : PTINR\_VAL1 PT-INR Value

N Mean Standard Deviation Minimum Maximum

---

|   |           |           |           |           |
|---|-----------|-----------|-----------|-----------|
| 6 | 2.4833333 | 0.4684727 | 1.7500000 | 2.9500000 |
|---|-----------|-----------|-----------|-----------|

---

Laboratory tests at the time of obtaining Table 2-6 consent, according to the presence or absence of proton-pump inhibitors

Unique Subject Identifier=1122001010-0032

MEANS Procedure

Assay variable : PTINR\_VAL1 PT-INR Value

N Mean Standard Deviation Minimum Maximum

---

|   |           |           |           |           |
|---|-----------|-----------|-----------|-----------|
| 6 | 1.8566667 | 0.2010638 | 1.6200000 | 2.1600000 |
|---|-----------|-----------|-----------|-----------|

---

Unique Subject Identifier=1122001010-0033

Assay variable : PTINR\_VAL1 PT-INR Value

N Mean Standard Deviation Minimum Maximum

---

|   |           |           |           |           |
|---|-----------|-----------|-----------|-----------|
| 6 | 2.1500000 | 0.5616761 | 1.1100000 | 2.6100000 |
|---|-----------|-----------|-----------|-----------|

---

Unique Subject Identifier=1122001010-0034

Assay variable : PTINR\_VAL1 PT-INR Value

N Mean Standard Deviation Minimum Maximum

---

|   |           |           |           |           |
|---|-----------|-----------|-----------|-----------|
| 6 | 2.6000000 | 1.0848594 | 1.1100000 | 4.3800000 |
|---|-----------|-----------|-----------|-----------|

---

Unique Subject Identifier=1122001010-0037

Assay variable : PTINR\_VAL1 PT-INR Value

N Mean Standard Deviation Minimum Maximum

---

|   |           |           |           |           |
|---|-----------|-----------|-----------|-----------|
| 6 | 1.7116667 | 0.2398680 | 1.4300000 | 2.1300000 |
|---|-----------|-----------|-----------|-----------|

---

Laboratory tests at the time of obtaining Table 2-6 consent, according to the presence or absence of proton-pump inhibitors

Unique Subject Identifier=1122001010-0038

MEANS Procedure

Assay variable : PTINR\_VAL1 PT-INR Value

N Mean Standard Deviation Minimum Maximum

---

|   |           |           |           |           |
|---|-----------|-----------|-----------|-----------|
| 6 | 2.0683333 | 0.1979310 | 1.8600000 | 2.3300000 |
|---|-----------|-----------|-----------|-----------|

---

Unique Subject Identifier=1122001010-0039

Assay variable : PTINR\_VAL1 PT-INR Value

N Mean Standard Deviation Minimum Maximum

---

|   |           |  |           |           |
|---|-----------|--|-----------|-----------|
| 1 | 2.0600000 |  | 2.0600000 | 2.0600000 |
|---|-----------|--|-----------|-----------|

---

Unique Subject Identifier=1122001010-0041

Assay variable : PTINR\_VAL1 PT-INR Value

N Mean Standard Deviation Minimum Maximum

---

|   |           |           |           |           |
|---|-----------|-----------|-----------|-----------|
| 6 | 2.0583333 | 0.1683350 | 1.8300000 | 2.3300000 |
|---|-----------|-----------|-----------|-----------|

---

Unique Subject Identifier=1122001010-0045

Assay variable : PTINR\_VAL1 PT-INR Value

N Mean Standard Deviation Minimum Maximum

---

|   |           |           |           |           |
|---|-----------|-----------|-----------|-----------|
| 6 | 1.5966667 | 0.2299275 | 1.3100000 | 1.9900000 |
|---|-----------|-----------|-----------|-----------|

---

Laboratory tests at the time of obtaining Table 2-6 consent, according to the presence or absence of proton-pump inhibitors

Unique Subject Identifier=1122001010-0046

MEANS Procedure

Assay variable : PTINR\_VAL1 PT-INR Value

N Mean Standard Deviation Minimum Maximum

---

|   |           |           |           |           |
|---|-----------|-----------|-----------|-----------|
| 6 | 2.5183333 | 1.0548823 | 1.3100000 | 3.7600000 |
|---|-----------|-----------|-----------|-----------|

---

Unique Subject Identifier=1122001010-0047

Assay variable : PTINR\_VAL1 PT-INR Value

N Mean Standard Deviation Minimum Maximum

---

|   |           |           |           |           |
|---|-----------|-----------|-----------|-----------|
| 6 | 2.1283333 | 0.3985181 | 1.5500000 | 2.5300000 |
|---|-----------|-----------|-----------|-----------|

---

Unique Subject Identifier=1122001010-0048

Assay variable : PTINR\_VAL1 PT-INR Value

N Mean Standard Deviation Minimum Maximum

---

|   |           |           |           |           |
|---|-----------|-----------|-----------|-----------|
| 6 | 2.4100000 | 0.4795832 | 1.6800000 | 3.1200000 |
|---|-----------|-----------|-----------|-----------|

---

Unique Subject Identifier=1122001010-0050

Assay variable : PTINR\_VAL1 PT-INR Value

N Mean Standard Deviation Minimum Maximum

---

|   |           |           |           |           |
|---|-----------|-----------|-----------|-----------|
| 6 | 1.7233333 | 0.3512074 | 1.4100000 | 2.3800000 |
|---|-----------|-----------|-----------|-----------|

---



Laboratory tests at the time of obtaining Table 2-6 consent, according to the presence or absence of proton-pump inhibitors

Unique Subject Identifier=1122001010-0052

MEANS Procedure

Assay variable : PTINR\_VAL1 PT-INR Value

N Mean Standard Deviation Minimum Maximum

---

|   |           |           |           |           |
|---|-----------|-----------|-----------|-----------|
| 6 | 1.9266667 | 0.1954141 | 1.6200000 | 2.1300000 |
|---|-----------|-----------|-----------|-----------|

---

Unique Subject Identifier=1122001010-0053

Assay variable : PTINR\_VAL1 PT-INR Value

N Mean Standard Deviation Minimum Maximum

---

|   |           |           |           |           |
|---|-----------|-----------|-----------|-----------|
| 6 | 2.6066667 | 0.4033691 | 2.0400000 | 3.1200000 |
|---|-----------|-----------|-----------|-----------|

---

Unique Subject Identifier=1122001010-0054

Assay variable : PTINR\_VAL1 PT-INR Value

N Mean Standard Deviation Minimum Maximum

---

|   |           |           |           |           |
|---|-----------|-----------|-----------|-----------|
| 6 | 2.3033333 | 1.1264221 | 1.1600000 | 4.3800000 |
|---|-----------|-----------|-----------|-----------|

---

Unique Subject Identifier=1122001010-0055

Assay variable : PTINR\_VAL1 PT-INR Value

N Mean Standard Deviation Minimum Maximum

---

|   |           |           |           |           |
|---|-----------|-----------|-----------|-----------|
| 6 | 1.7900000 | 0.1943193 | 1.6000000 | 2.1300000 |
|---|-----------|-----------|-----------|-----------|

---

Laboratory tests at the time of obtaining Table 2-6 consent, according to the presence or absence of proton-pump inhibitors

Unique Subject Identifier=1122001010-0056

MEANS Procedure

Assay variable : PTINR\_VAL1 PT-INR Value

N Mean Standard Deviation Minimum Maximum

---

|   |           |           |           |           |
|---|-----------|-----------|-----------|-----------|
| 5 | 2.4940000 | 0.3922754 | 2.1100000 | 2.9300000 |
|---|-----------|-----------|-----------|-----------|

---

Unique Subject Identifier=1122001010-0057

Assay variable : PTINR\_VAL1 PT-INR Value

N Mean Standard Deviation Minimum Maximum

---

|   |           |           |           |           |
|---|-----------|-----------|-----------|-----------|
| 6 | 1.9350000 | 0.3984344 | 1.5500000 | 2.6400000 |
|---|-----------|-----------|-----------|-----------|

---

Unique Subject Identifier=1122001010-0059

Assay variable : PTINR\_VAL1 PT-INR Value

N Mean Standard Deviation Minimum Maximum

---

|   |           |           |           |           |
|---|-----------|-----------|-----------|-----------|
| 6 | 2.1800000 | 0.4648010 | 1.8600000 | 3.0600000 |
|---|-----------|-----------|-----------|-----------|

---

Unique Subject Identifier=1122001010-0060

Assay variable : PTINR\_VAL1 PT-INR Value

N Mean Standard Deviation Minimum Maximum

---

|   |           |           |           |           |
|---|-----------|-----------|-----------|-----------|
| 6 | 1.7200000 | 0.7457882 | 1.1800000 | 3.1800000 |
|---|-----------|-----------|-----------|-----------|

---

Laboratory tests at the time of obtaining Table 2-6 consent, according to the presence or absence of proton-pump inhibitors

Unique Subject Identifier=1122001010-0061

MEANS Procedure

Assay variable : PTINR\_VAL1 PT-INR Value

N Mean Standard Deviation Minimum Maximum

---

|   |           |           |           |           |
|---|-----------|-----------|-----------|-----------|
| 6 | 2.4133333 | 0.2000667 | 2.1300000 | 2.7100000 |
|---|-----------|-----------|-----------|-----------|

---

Unique Subject Identifier=1122001010-0062

Assay variable : PTINR\_VAL1 PT-INR Value

N Mean Standard Deviation Minimum Maximum

---

|   |           |           |           |           |
|---|-----------|-----------|-----------|-----------|
| 6 | 2.4733333 | 0.5971153 | 1.5500000 | 3.2000000 |
|---|-----------|-----------|-----------|-----------|

---

Unique Subject Identifier=1122001010-0063

Assay variable : PTINR\_VAL1 PT-INR Value

N Mean Standard Deviation Minimum Maximum

---

|   |           |           |           |           |
|---|-----------|-----------|-----------|-----------|
| 6 | 2.2633333 | 0.2497732 | 1.8100000 | 2.5600000 |
|---|-----------|-----------|-----------|-----------|

---

Unique Subject Identifier=1122001010-0064

Assay variable : PTINR\_VAL1 PT-INR Value

N Mean Standard Deviation Minimum Maximum

---

|   |           |           |           |           |
|---|-----------|-----------|-----------|-----------|
| 6 | 2.0216667 | 0.4163372 | 1.4500000 | 2.5600000 |
|---|-----------|-----------|-----------|-----------|

---

Laboratory tests at the time of obtaining Table 2-6 consent, according to the presence or absence of proton-pump inhibitors

Unique Subject Identifier=1122001010-0065

MEANS Procedure

Assay variable : PTINR\_VAL1 PT-INR Value

N Mean Standard Deviation Minimum Maximum

---

|   |           |           |           |           |
|---|-----------|-----------|-----------|-----------|
| 6 | 1.7000000 | 0.3573234 | 1.3100000 | 2.3300000 |
|---|-----------|-----------|-----------|-----------|

---

Unique Subject Identifier=1122001010-0066

Assay variable : PTINR\_VAL1 PT-INR Value

N Mean Standard Deviation Minimum Maximum

---

|   |           |           |           |           |
|---|-----------|-----------|-----------|-----------|
| 6 | 2.0233333 | 0.2823945 | 1.6200000 | 2.3800000 |
|---|-----------|-----------|-----------|-----------|

---

Unique Subject Identifier=1122001010-0069

Assay variable : PTINR\_VAL1 PT-INR Value

N Mean Standard Deviation Minimum Maximum

---

|   |           |           |           |           |
|---|-----------|-----------|-----------|-----------|
| 6 | 1.7300000 | 0.1856879 | 1.5500000 | 2.0600000 |
|---|-----------|-----------|-----------|-----------|

---

Unique Subject Identifier=1122001010-0072

Assay variable : PTINR\_VAL1 PT-INR Value

N Mean Standard Deviation Minimum Maximum

---

|   |           |           |           |           |
|---|-----------|-----------|-----------|-----------|
| 3 | 1.6566667 | 0.4454586 | 1.2000000 | 2.0900000 |
|---|-----------|-----------|-----------|-----------|

---



Laboratory tests at the time of obtaining Table 2-6 consent, according to the presence or absence of proton-pump inhibitors

Unique Subject Identifier=1122001010-0073

MEANS Procedure

Assay variable : PTINR\_VAL1 PT-INR Value

N Mean Standard Deviation Minimum Maximum

---

|   |           |           |           |           |
|---|-----------|-----------|-----------|-----------|
| 6 | 1.7566667 | 0.2808321 | 1.4700000 | 2.2500000 |
|---|-----------|-----------|-----------|-----------|

---

Unique Subject Identifier=1122001010-0074

Assay variable : PTINR\_VAL1 PT-INR Value

N Mean Standard Deviation Minimum Maximum

---

|   |           |           |           |           |
|---|-----------|-----------|-----------|-----------|
| 3 | 2.4233333 | 0.2294196 | 2.1600000 | 2.5800000 |
|---|-----------|-----------|-----------|-----------|

---

Unique Subject Identifier=1126011000-0002

Assay variable : PTINR\_VAL1 PT-INR Value

N Mean Standard Deviation Minimum Maximum

---

|   |           |           |           |           |
|---|-----------|-----------|-----------|-----------|
| 6 | 1.5816667 | 0.3057722 | 1.2700000 | 2.0500000 |
|---|-----------|-----------|-----------|-----------|

---

Unique Subject Identifier=1126011000-0004

Assay variable : PTINR\_VAL1 PT-INR Value

N Mean Standard Deviation Minimum Maximum

---

|   |           |           |           |           |
|---|-----------|-----------|-----------|-----------|
| 4 | 1.5700000 | 0.5963221 | 1.0600000 | 2.3400000 |
|---|-----------|-----------|-----------|-----------|

---

Laboratory tests at the time of obtaining Table 2-6 consent, according to the presence or absence of proton-pump inhibitors

Unique Subject Identifier=1126011000-0010

MEANS Procedure

Assay variable : PTINR\_VAL1 PT-INR Value

N Mean Standard Deviation Minimum Maximum

---

|   |           |           |           |           |
|---|-----------|-----------|-----------|-----------|
| 6 | 1.9316667 | 0.3364174 | 1.5900000 | 2.5300000 |
|---|-----------|-----------|-----------|-----------|

---

Unique Subject Identifier=1126011000-0011

Assay variable : PTINR\_VAL1 PT-INR Value

N Mean Standard Deviation Minimum Maximum

---

|   |           |           |           |           |
|---|-----------|-----------|-----------|-----------|
| 5 | 2.0320000 | 0.3856423 | 1.5500000 | 2.4900000 |
|---|-----------|-----------|-----------|-----------|

---

Unique Subject Identifier=1126011000-0013

Assay variable : PTINR\_VAL1 PT-INR Value

N Mean Standard Deviation Minimum Maximum

---

|   |           |           |           |           |
|---|-----------|-----------|-----------|-----------|
| 6 | 1.7583333 | 0.2245366 | 1.6000000 | 2.2000000 |
|---|-----------|-----------|-----------|-----------|

---

Unique Subject Identifier=1126011000-0014

Assay variable : PTINR\_VAL1 PT-INR Value

N Mean Standard Deviation Minimum Maximum

---

|   |           |           |           |           |
|---|-----------|-----------|-----------|-----------|
| 5 | 1.6700000 | 0.6279729 | 1.1000000 | 2.7300000 |
|---|-----------|-----------|-----------|-----------|

---

Laboratory tests at the time of obtaining Table 2-6 consent, according to the presence or absence of proton-pump inhibitors

Unique Subject Identifier=1126011000-0015

MEANS Procedure

Assay variable : PTINR\_VAL1 PT-INR Value

N Mean Standard Deviation Minimum Maximum

---

|   |           |           |           |           |
|---|-----------|-----------|-----------|-----------|
| 6 | 1.9166667 | 0.4128276 | 1.4500000 | 2.4900000 |
|---|-----------|-----------|-----------|-----------|

---

Unique Subject Identifier=1127010000-0001

Assay variable : PTINR\_VAL1 PT-INR Value

N Mean Standard Deviation Minimum Maximum

---

|   |           |           |           |           |
|---|-----------|-----------|-----------|-----------|
| 6 | 1.6833333 | 0.1834848 | 1.4000000 | 1.9000000 |
|---|-----------|-----------|-----------|-----------|

---

Unique Subject Identifier=1127010000-0002

Assay variable : PTINR\_VAL1 PT-INR Value

N Mean Standard Deviation Minimum Maximum

---

|   |           |           |           |           |
|---|-----------|-----------|-----------|-----------|
| 4 | 1.4500000 | 0.0577350 | 1.4000000 | 1.5000000 |
|---|-----------|-----------|-----------|-----------|

---

Unique Subject Identifier=1127010000-0003

Assay variable : PTINR\_VAL1 PT-INR Value

N Mean Standard Deviation Minimum Maximum

---

|   |          |          |          |          |
|---|----------|----------|----------|----------|
| 5 | 2.180000 | 0.148324 | 2.000000 | 2.400000 |
|---|----------|----------|----------|----------|

---

Laboratory tests at the time of obtaining Table 2-6 consent, according to the presence or absence of proton-pump inhibitors

Unique Subject Identifier=1127010000-0005

MEANS Procedure

Assay variable : PTINR\_VAL1 PT-INR Value

N Mean Standard Deviation Minimum Maximum

---

|   |           |  |           |           |
|---|-----------|--|-----------|-----------|
| 1 | 1.1000000 |  | 1.1000000 | 1.1000000 |
|---|-----------|--|-----------|-----------|

---

Unique Subject Identifier=1128011000-0002

Assay variable : PTINR\_VAL1 PT-INR Value

N Mean Standard Deviation Minimum Maximum

---

|   |           |           |           |           |
|---|-----------|-----------|-----------|-----------|
| 6 | 1.9333333 | 0.3265986 | 1.6000000 | 2.5000000 |
|---|-----------|-----------|-----------|-----------|

---

Unique Subject Identifier=1128011000-0003

Assay variable : PTINR\_VAL1 PT-INR Value

N Mean Standard Deviation Minimum Maximum

---

|   |           |           |           |           |
|---|-----------|-----------|-----------|-----------|
| 6 | 1.8666667 | 0.1032796 | 1.7000000 | 2.0000000 |
|---|-----------|-----------|-----------|-----------|

---

Unique Subject Identifier=1128011000-0004

Assay variable : PTINR\_VAL1 PT-INR Value

N Mean Standard Deviation Minimum Maximum

---

|   |          |           |          |          |
|---|----------|-----------|----------|----------|
| 5 | 1.860000 | 0.1516575 | 1.700000 | 2.100000 |
|---|----------|-----------|----------|----------|

---



Laboratory tests at the time of obtaining Table 2-6 consent, according to the presence or absence of proton-pump inhibitors

Unique Subject Identifier=1128011000-0005

MEANS Procedure

Assay variable : PTINR\_VAL1 PT-INR Value

N Mean Standard Deviation Minimum Maximum

---

|   |           |           |           |           |
|---|-----------|-----------|-----------|-----------|
| 6 | 2.0666667 | 0.3983298 | 1.6000000 | 2.6000000 |
|---|-----------|-----------|-----------|-----------|

---

Unique Subject Identifier=1128011000-0009

Assay variable : PTINR\_VAL1 PT-INR Value

N Mean Standard Deviation Minimum Maximum

---

|   |           |           |           |           |
|---|-----------|-----------|-----------|-----------|
| 4 | 2.2000000 | 0.2943920 | 1.9000000 | 2.6000000 |
|---|-----------|-----------|-----------|-----------|

---

Unique Subject Identifier=1128011000-0010

Assay variable : PTINR\_VAL1 PT-INR Value

N Mean Standard Deviation Minimum Maximum

---

|   |           |           |           |           |
|---|-----------|-----------|-----------|-----------|
| 5 | 2.2400000 | 0.8988882 | 1.0000000 | 3.3000000 |
|---|-----------|-----------|-----------|-----------|

---

Unique Subject Identifier=1131000000-0001

Assay variable : PTINR\_VAL1 PT-INR Value

N Mean Standard Deviation Minimum Maximum

---

|   |           |           |           |           |
|---|-----------|-----------|-----------|-----------|
| 6 | 1.5016667 | 0.3225161 | 1.1300000 | 1.8700000 |
|---|-----------|-----------|-----------|-----------|

---

Laboratory tests at the time of obtaining Table 2-6 consent, according to the presence or absence of proton-pump inhibitors

Unique Subject Identifier=1131000000-0002

MEANS Procedure

Assay variable : PTINR\_VAL1 PT-INR Value

| N | Mean      | Standard Deviation | Minimum   | Maximum   |
|---|-----------|--------------------|-----------|-----------|
| 5 | 1.3300000 | 0.2933428          | 1.0500000 | 1.7900000 |

Unique Subject Identifier=1131000000-0003

Assay variable : PTINR\_VAL1 PT-INR Value

| N | Mean      | Standard Deviation | Minimum   | Maximum   |
|---|-----------|--------------------|-----------|-----------|
| 6 | 2.0800000 | 0.2337520          | 1.7300000 | 2.3300000 |

Unique Subject Identifier=1131000000-0004

Assay variable : PTINR\_VAL1 PT-INR Value

| N | Mean      | Standard Deviation | Minimum   | Maximum   |
|---|-----------|--------------------|-----------|-----------|
| 6 | 1.4550000 | 0.4079583          | 1.0800000 | 2.2300000 |

Unique Subject Identifier=1131000000-0005

Assay variable : PTINR\_VAL1 PT-INR Value

N Mean Standard Deviation Minimum Maximum

---

|   |           |           |           |           |
|---|-----------|-----------|-----------|-----------|
| 6 | 2.2650000 | 0.4269309 | 1.8500000 | 2.8000000 |
|---|-----------|-----------|-----------|-----------|

---

Laboratory tests at the time of obtaining Table 2-6 consent, according to the presence or absence of proton-pump inhibitors

Unique Subject Identifier=1131000000-0006

MEANS Procedure

Assay variable : PTINR\_VAL1 PT-INR Value

N Mean Standard Deviation Minimum Maximum

---

|   |           |           |           |           |
|---|-----------|-----------|-----------|-----------|
| 6 | 1.6383333 | 0.2778789 | 1.3600000 | 2.1700000 |
|---|-----------|-----------|-----------|-----------|

---

Unique Subject Identifier=1131000000-0007

Assay variable : PTINR\_VAL1 PT-INR Value

N Mean Standard Deviation Minimum Maximum

---

|   |           |           |           |           |
|---|-----------|-----------|-----------|-----------|
| 6 | 2.1600000 | 0.6108355 | 1.6500000 | 3.1100000 |
|---|-----------|-----------|-----------|-----------|

---

Unique Subject Identifier=1131000000-0008

Assay variable : PTINR\_VAL1 PT-INR Value

N Mean Standard Deviation Minimum Maximum

---

|   |           |           |           |           |
|---|-----------|-----------|-----------|-----------|
| 5 | 1.5220000 | 0.3168122 | 1.2400000 | 1.9700000 |
|---|-----------|-----------|-----------|-----------|

---

Unique Subject Identifier=1131000000-0009

Assay variable : PTINR\_VAL1 PT-INR Value

N Mean Standard Deviation Minimum Maximum

---

|   |          |           |          |          |
|---|----------|-----------|----------|----------|
| 3 | 1.940000 | 0.2107131 | 1.720000 | 2.140000 |
|---|----------|-----------|----------|----------|

---

Laboratory tests at the time of obtaining Table 2-6 consent, according to the presence or absence of proton-pump inhibitors

Unique Subject Identifier=1137000000-0007

MEANS Procedure

Assay variable : PTINR\_VAL1 PT-INR Value

| N | Mean      | Standard Deviation | Minimum   | Maximum   |
|---|-----------|--------------------|-----------|-----------|
| 3 | 1.0366667 | 0.0208167          | 1.0200000 | 1.0600000 |

Unique Subject Identifier=1137000000-0032

Assay variable : PTINR\_VAL1 PT-INR Value

| N | Mean      | Standard Deviation | Minimum   | Maximum   |
|---|-----------|--------------------|-----------|-----------|
| 2 | 1.0400000 | 0.0989949          | 0.9700000 | 1.1100000 |

Unique Subject Identifier=1141000000-0002

Assay variable : PTINR\_VAL1 PT-INR Value

| N | Mean      | Standard Deviation | Minimum   | Maximum   |
|---|-----------|--------------------|-----------|-----------|
| 1 | 1.6800000 |                    | 1.6800000 | 1.6800000 |

Unique Subject Identifier=1141000000-0005

Assay variable : PTINR\_VAL1 PT-INR Value

N Mean Standard Deviation Minimum Maximum

---

|   |          |  |          |          |
|---|----------|--|----------|----------|
| 1 | 1.200000 |  | 1.200000 | 1.200000 |
|---|----------|--|----------|----------|

---



Laboratory tests at the time of obtaining Table 2-6 consent, according to the presence or absence of proton-pump inhibitors

Unique Subject Identifier=1146011000-0001

MEANS Procedure

Assay variable : PTINR\_VAL1 PT-INR Value

N Mean Standard Deviation Minimum Maximum

---

|   |           |           |           |           |
|---|-----------|-----------|-----------|-----------|
| 4 | 2.2750000 | 0.4607602 | 1.9800000 | 2.9500000 |
|---|-----------|-----------|-----------|-----------|

---

Unique Subject Identifier=1146011000-0002

Assay variable : PTINR\_VAL1 PT-INR Value

N Mean Standard Deviation Minimum Maximum

---

|   |           |           |           |           |
|---|-----------|-----------|-----------|-----------|
| 3 | 2.0566667 | 0.6293118 | 1.5800000 | 2.7700000 |
|---|-----------|-----------|-----------|-----------|

---

Unique Subject Identifier=1146011000-0003

Assay variable : PTINR\_VAL1 PT-INR Value

N Mean Standard Deviation Minimum Maximum

---

|   |           |           |           |           |
|---|-----------|-----------|-----------|-----------|
| 2 | 1.8400000 | 0.2969848 | 1.6300000 | 2.0500000 |
|---|-----------|-----------|-----------|-----------|

---

Unique Subject Identifier=1149000000-0001

Assay variable : PTINR\_VAL1 PT-INR Value

N Mean Standard Deviation Minimum Maximum

---

|   |           |           |           |           |
|---|-----------|-----------|-----------|-----------|
| 6 | 1.7333333 | 0.2581989 | 1.4000000 | 2.1000000 |
|---|-----------|-----------|-----------|-----------|

---

Laboratory tests at the time of obtaining Table 2-6 consent, according to the presence or absence of proton-pump inhibitors

Unique Subject Identifier=1149000000-0002

MEANS Procedure

Assay variable : PTINR\_VAL1 PT-INR Value

N Mean Standard Deviation Minimum Maximum

---

|   |           |           |           |           |
|---|-----------|-----------|-----------|-----------|
| 6 | 1.8500000 | 0.4135215 | 1.4000000 | 2.6000000 |
|---|-----------|-----------|-----------|-----------|

---

Unique Subject Identifier=1149000000-0003

Assay variable : PTINR\_VAL1 PT-INR Value

N Mean Standard Deviation Minimum Maximum

---

|   |           |           |           |           |
|---|-----------|-----------|-----------|-----------|
| 6 | 2.2000000 | 0.0894427 | 2.1000000 | 2.3000000 |
|---|-----------|-----------|-----------|-----------|

---

Unique Subject Identifier=1149000000-0004

Assay variable : PTINR\_VAL1 PT-INR Value

N Mean Standard Deviation Minimum Maximum

---

|   |           |           |           |           |
|---|-----------|-----------|-----------|-----------|
| 6 | 1.8666667 | 0.2804758 | 1.6000000 | 2.2000000 |
|---|-----------|-----------|-----------|-----------|

---

Unique Subject Identifier=1149000000-0005

Assay variable : PTINR\_VAL1 PT-INR Value

N Mean Standard Deviation Minimum Maximum

---

|   |          |           |          |          |
|---|----------|-----------|----------|----------|
| 6 | 2.133333 | 0.6186006 | 1.400000 | 3.200000 |
|---|----------|-----------|----------|----------|

---

Laboratory tests at the time of obtaining Table 2-6 consent, according to the presence or absence of proton-pump inhibitors

Unique Subject Identifier=1149000000-0006

MEANS Procedure

Assay variable : PTINR\_VAL1 PT-INR Value

N Mean Standard Deviation Minimum Maximum

---

|   |           |           |           |           |
|---|-----------|-----------|-----------|-----------|
| 6 | 1.7166667 | 0.2041241 | 1.5000000 | 1.9000000 |
|---|-----------|-----------|-----------|-----------|

---

Unique Subject Identifier=1149000000-0007

Assay variable : PTINR\_VAL1 PT-INR Value

N Mean Standard Deviation Minimum Maximum

---

|   |           |           |           |           |
|---|-----------|-----------|-----------|-----------|
| 6 | 1.8666667 | 0.4676181 | 1.0000000 | 2.4000000 |
|---|-----------|-----------|-----------|-----------|

---

Unique Subject Identifier=1154000000-0006

Assay variable : PTINR\_VAL1 PT-INR Value

N Mean Standard Deviation Minimum Maximum

---

|   |           |           |           |           |
|---|-----------|-----------|-----------|-----------|
| 5 | 1.5900000 | 0.1168332 | 1.4500000 | 1.7200000 |
|---|-----------|-----------|-----------|-----------|

---

Unique Subject Identifier=1156000000-0001

Assay variable : PTINR\_VAL1 PT-INR Value

N Mean Standard Deviation Minimum Maximum

---

|   |           |           |           |           |
|---|-----------|-----------|-----------|-----------|
| 6 | 1.4766667 | 0.0945868 | 1.3600000 | 1.6100000 |
|---|-----------|-----------|-----------|-----------|

---

Laboratory tests at the time of obtaining Table 2-6 consent, according to the presence or absence of proton-pump inhibitors

Unique Subject Identifier=115600000-0002

MEANS Procedure

Assay variable : PTINR\_VAL1 PT-INR Value

N Mean Standard Deviation Minimum Maximum

---

|   |           |           |           |           |
|---|-----------|-----------|-----------|-----------|
| 5 | 1.7920000 | 0.4152349 | 1.3900000 | 2.2500000 |
|---|-----------|-----------|-----------|-----------|

---

Unique Subject Identifier=115600000-0003

Assay variable : PTINR\_VAL1 PT-INR Value

N Mean Standard Deviation Minimum Maximum

---

|   |           |           |           |           |
|---|-----------|-----------|-----------|-----------|
| 6 | 1.1816667 | 0.2081746 | 0.9600000 | 1.4500000 |
|---|-----------|-----------|-----------|-----------|

---

Unique Subject Identifier=115600000-0004

Assay variable : PTINR\_VAL1 PT-INR Value

N Mean Standard Deviation Minimum Maximum

---

|   |           |           |           |           |
|---|-----------|-----------|-----------|-----------|
| 5 | 2.2100000 | 0.6031998 | 1.6600000 | 2.9700000 |
|---|-----------|-----------|-----------|-----------|

---

Unique Subject Identifier=115600000-0005

Assay variable : PTINR\_VAL1 PT-INR Value

N Mean Standard Deviation Minimum Maximum

---

|   |          |  |          |          |
|---|----------|--|----------|----------|
| 1 | 1.410000 |  | 1.410000 | 1.410000 |
|---|----------|--|----------|----------|

---



Laboratory tests at the time of obtaining Table 2-6 consent, according to the presence or absence of proton-pump inhibitors

Unique Subject Identifier=115600000-0006

MEANS Procedure

Assay variable : PTINR\_VAL1 PT-INR Value

N Mean Standard Deviation Minimum Maximum

---

|   |           |           |           |           |
|---|-----------|-----------|-----------|-----------|
| 5 | 2.6020000 | 0.5514708 | 2.0500000 | 3.4700000 |
|---|-----------|-----------|-----------|-----------|

---

Unique Subject Identifier=115600000-0007

Assay variable : PTINR\_VAL1 PT-INR Value

N Mean Standard Deviation Minimum Maximum

---

|   |           |           |           |           |
|---|-----------|-----------|-----------|-----------|
| 5 | 3.6280000 | 2.4042400 | 1.6800000 | 7.8100000 |
|---|-----------|-----------|-----------|-----------|

---

Unique Subject Identifier=115600000-0008

Assay variable : PTINR\_VAL1 PT-INR Value

N Mean Standard Deviation Minimum Maximum

---

|   |           |           |           |           |
|---|-----------|-----------|-----------|-----------|
| 6 | 2.1600000 | 0.5060040 | 1.7400000 | 3.1300000 |
|---|-----------|-----------|-----------|-----------|

---

Unique Subject Identifier=115600000-0009

Assay variable : PTINR\_VAL1 PT-INR Value

N Mean Standard Deviation Minimum Maximum

---

|   |           |           |           |           |
|---|-----------|-----------|-----------|-----------|
| 6 | 1.8250000 | 0.3733497 | 1.4200000 | 2.5000000 |
|---|-----------|-----------|-----------|-----------|

---

Laboratory tests at the time of obtaining Table 2-6 consent, according to the presence or absence of proton-pump inhibitors

Unique Subject Identifier=1156000000-0010

MEANS Procedure

Assay variable : PTINR\_VAL1 PT-INR Value

N Mean Standard Deviation Minimum Maximum

---

|   |           |           |           |           |
|---|-----------|-----------|-----------|-----------|
| 6 | 1.6116667 | 0.2249815 | 1.3200000 | 1.8600000 |
|---|-----------|-----------|-----------|-----------|

---

Unique Subject Identifier=1156000000-0011

Assay variable : PTINR\_VAL1 PT-INR Value

N Mean Standard Deviation Minimum Maximum

---

|   |           |           |           |           |
|---|-----------|-----------|-----------|-----------|
| 4 | 2.6725000 | 0.2568235 | 2.4200000 | 3.0300000 |
|---|-----------|-----------|-----------|-----------|

---

Unique Subject Identifier=1156000000-0012

Assay variable : PTINR\_VAL1 PT-INR Value

N Mean Standard Deviation Minimum Maximum

---

|   |           |           |           |           |
|---|-----------|-----------|-----------|-----------|
| 5 | 1.4780000 | 0.2141728 | 1.3100000 | 1.8400000 |
|---|-----------|-----------|-----------|-----------|

---

Unique Subject Identifier=1156000000-0014

Assay variable : PTINR\_VAL1 PT-INR Value

N Mean Standard Deviation Minimum Maximum

---

|   |           |           |           |           |
|---|-----------|-----------|-----------|-----------|
| 6 | 1.3700000 | 0.1842824 | 1.2100000 | 1.6200000 |
|---|-----------|-----------|-----------|-----------|

---

Laboratory tests at the time of obtaining Table 2-6 consent, according to the presence or absence of proton-pump inhibitors

Unique Subject Identifier=115600000-0015

MEANS Procedure

Assay variable : PTINR\_VAL1 PT-INR Value

N Mean Standard Deviation Minimum Maximum

---

|   |           |           |           |           |
|---|-----------|-----------|-----------|-----------|
| 6 | 2.3333333 | 0.3844303 | 1.8600000 | 2.9400000 |
|---|-----------|-----------|-----------|-----------|

---

Unique Subject Identifier=115600000-0018

Assay variable : PTINR\_VAL1 PT-INR Value

N Mean Standard Deviation Minimum Maximum

---

|   |           |           |           |           |
|---|-----------|-----------|-----------|-----------|
| 6 | 1.3150000 | 0.1224337 | 1.1700000 | 1.4600000 |
|---|-----------|-----------|-----------|-----------|

---

Unique Subject Identifier=115600000-0021

Assay variable : PTINR\_VAL1 PT-INR Value

N Mean Standard Deviation Minimum Maximum

---

|   |           |           |           |           |
|---|-----------|-----------|-----------|-----------|
| 2 | 1.2700000 | 0.3394113 | 1.0300000 | 1.5100000 |
|---|-----------|-----------|-----------|-----------|

---

Unique Subject Identifier=115600000-0022

Assay variable : PTINR\_VAL1 PT-INR Value

N Mean Standard Deviation Minimum Maximum

---

|   |           |           |           |           |
|---|-----------|-----------|-----------|-----------|
| 5 | 1.7720000 | 0.3772532 | 1.2000000 | 2.0900000 |
|---|-----------|-----------|-----------|-----------|

---

Laboratory tests at the time of obtaining Table 2-6 consent, according to the presence or absence of proton-pump inhibitors

Unique Subject Identifier=115600000-0023

MEANS Procedure

Assay variable : PTINR\_VAL1 PT-INR Value

N Mean Standard Deviation Minimum Maximum

---

|   |           |           |           |           |
|---|-----------|-----------|-----------|-----------|
| 5 | 1.8680000 | 0.4928184 | 0.9900000 | 2.1400000 |
|---|-----------|-----------|-----------|-----------|

---

Unique Subject Identifier=115600000-0056

Assay variable : PTINR\_VAL1 PT-INR Value

N Mean Standard Deviation Minimum Maximum

---

|   |           |           |           |           |
|---|-----------|-----------|-----------|-----------|
| 5 | 1.8560000 | 0.1073778 | 1.7100000 | 1.9700000 |
|---|-----------|-----------|-----------|-----------|

---

Unique Subject Identifier=115600000-0057

Assay variable : PTINR\_VAL1 PT-INR Value

N Mean Standard Deviation Minimum Maximum

---

|   |           |           |           |           |
|---|-----------|-----------|-----------|-----------|
| 2 | 1.2900000 | 0.0707107 | 1.2400000 | 1.3400000 |
|---|-----------|-----------|-----------|-----------|

---

Unique Subject Identifier=115600000-0059

Assay variable : PTINR\_VAL1 PT-INR Value

N Mean Standard Deviation Minimum Maximum

---

|   |           |           |           |           |
|---|-----------|-----------|-----------|-----------|
| 6 | 1.6850000 | 0.2930358 | 1.2700000 | 1.9800000 |
|---|-----------|-----------|-----------|-----------|

---



Laboratory tests at the time of obtaining Table 2-6 consent, according to the presence or absence of proton-pump inhibitors

Unique Subject Identifier=1156000000-0062

MEANS Procedure

Assay variable : PTINR\_VAL1 PT-INR Value

N Mean Standard Deviation Minimum Maximum

---

|   |           |           |           |           |
|---|-----------|-----------|-----------|-----------|
| 6 | 1.3416667 | 0.0584523 | 1.2500000 | 1.4000000 |
|---|-----------|-----------|-----------|-----------|

---

Unique Subject Identifier=1157000000-0002

Assay variable : PTINR\_VAL1 PT-INR Value

N Mean Standard Deviation Minimum Maximum

---

|   |           |           |           |           |
|---|-----------|-----------|-----------|-----------|
| 6 | 2.5000000 | 0.5099020 | 1.7000000 | 3.1000000 |
|---|-----------|-----------|-----------|-----------|

---

Unique Subject Identifier=1157000000-0003

Assay variable : PTINR\_VAL1 PT-INR Value

N Mean Standard Deviation Minimum Maximum

---

|   |           |           |           |           |
|---|-----------|-----------|-----------|-----------|
| 6 | 2.1333333 | 0.4760952 | 1.5000000 | 2.9000000 |
|---|-----------|-----------|-----------|-----------|

---

Unique Subject Identifier=1157000000-0006

Assay variable : PTINR\_VAL1 PT-INR Value

N Mean Standard Deviation Minimum Maximum

---

|   |           |           |           |           |
|---|-----------|-----------|-----------|-----------|
| 6 | 2.0016667 | 0.4574021 | 1.5000000 | 2.7000000 |
|---|-----------|-----------|-----------|-----------|

---

Laboratory tests at the time of obtaining Table 2-6 consent, according to the presence or absence of proton-pump inhibitors

Unique Subject Identifier=1157000000-0011

MEANS Procedure

Assay variable : PTINR\_VAL1 PT-INR Value

N Mean Standard Deviation Minimum Maximum

---

|   |           |           |           |           |
|---|-----------|-----------|-----------|-----------|
| 6 | 1.8666667 | 0.2732520 | 1.7000000 | 2.4000000 |
|---|-----------|-----------|-----------|-----------|

---

Unique Subject Identifier=1157000000-0013

Assay variable : PTINR\_VAL1 PT-INR Value

N Mean Standard Deviation Minimum Maximum

---

|   |           |           |           |           |
|---|-----------|-----------|-----------|-----------|
| 4 | 2.3000000 | 0.4546061 | 1.8000000 | 2.9000000 |
|---|-----------|-----------|-----------|-----------|

---

Unique Subject Identifier=1157000000-0014

Assay variable : PTINR\_VAL1 PT-INR Value

N Mean Standard Deviation Minimum Maximum

---

|   |           |           |           |           |
|---|-----------|-----------|-----------|-----------|
| 6 | 2.2783333 | 0.4660651 | 1.8000000 | 3.0000000 |
|---|-----------|-----------|-----------|-----------|

---

Unique Subject Identifier=1157000000-0028

Assay variable : PTINR\_VAL1 PT-INR Value

N Mean Standard Deviation Minimum Maximum

---

|   |           |           |           |           |
|---|-----------|-----------|-----------|-----------|
| 6 | 1.6500000 | 0.2509980 | 1.5000000 | 2.1000000 |
|---|-----------|-----------|-----------|-----------|

---

Laboratory tests at the time of obtaining Table 2-6 consent, according to the presence or absence of proton-pump inhibitors

Unique Subject Identifier=1157000000-0029

MEANS Procedure

Assay variable : PTINR\_VAL1 PT-INR Value

N Mean Standard Deviation Minimum Maximum

---

|   |           |           |           |           |
|---|-----------|-----------|-----------|-----------|
| 6 | 2.1000000 | 0.4560702 | 1.5000000 | 2.8000000 |
|---|-----------|-----------|-----------|-----------|

---

Unique Subject Identifier=1157000000-0033

Assay variable : PTINR\_VAL1 PT-INR Value

N Mean Standard Deviation Minimum Maximum

---

|   |           |           |           |           |
|---|-----------|-----------|-----------|-----------|
| 6 | 1.8666667 | 0.3076795 | 1.6000000 | 2.4000000 |
|---|-----------|-----------|-----------|-----------|

---

Unique Subject Identifier=1157000000-0034

Assay variable : PTINR\_VAL1 PT-INR Value

N Mean Standard Deviation Minimum Maximum

---

|   |           |           |           |           |
|---|-----------|-----------|-----------|-----------|
| 6 | 2.1333333 | 0.1751190 | 1.9000000 | 2.4000000 |
|---|-----------|-----------|-----------|-----------|

---

Unique Subject Identifier=1158010000-0010

Assay variable : PTINR\_VAL1 PT-INR Value

N Mean Standard Deviation Minimum Maximum

---

|   |           |           |           |           |
|---|-----------|-----------|-----------|-----------|
| 6 | 2.1350000 | 0.4554887 | 1.6400000 | 2.9800000 |
|---|-----------|-----------|-----------|-----------|

---

Laboratory tests at the time of obtaining Table 2-6 consent, according to the presence or absence of proton-pump inhibitors

Unique Subject Identifier=1158010000-0015

MEANS Procedure

Assay variable : PTINR\_VAL1 PT-INR Value

N Mean Standard Deviation Minimum Maximum

---

|   |           |           |           |           |
|---|-----------|-----------|-----------|-----------|
| 6 | 2.4800000 | 0.4456905 | 1.8800000 | 2.8700000 |
|---|-----------|-----------|-----------|-----------|

---

Unique Subject Identifier=1158010000-0022

Assay variable : PTINR\_VAL1 PT-INR Value

N Mean Standard Deviation Minimum Maximum

---

|   |           |           |           |           |
|---|-----------|-----------|-----------|-----------|
| 6 | 1.9133333 | 0.1423610 | 1.7700000 | 2.1300000 |
|---|-----------|-----------|-----------|-----------|

---

Unique Subject Identifier=1158010000-0023

Assay variable : PTINR\_VAL1 PT-INR Value

N Mean Standard Deviation Minimum Maximum

---

|   |           |           |           |           |
|---|-----------|-----------|-----------|-----------|
| 6 | 1.8900000 | 0.4136665 | 1.6000000 | 2.7100000 |
|---|-----------|-----------|-----------|-----------|

---

Unique Subject Identifier=1158010000-0026

Assay variable : PTINR\_VAL1 PT-INR Value

N Mean Standard Deviation Minimum Maximum

---

|   |          |           |          |          |
|---|----------|-----------|----------|----------|
| 6 | 2.000000 | 0.3034469 | 1.470000 | 2.330000 |
|---|----------|-----------|----------|----------|

---



Laboratory tests at the time of obtaining Table 2-6 consent, according to the presence or absence of proton-pump inhibitors

Unique Subject Identifier=1158010000-0027

MEANS Procedure

Assay variable : PTINR\_VAL1 PT-INR Value

N Mean Standard Deviation Minimum Maximum

---

|   |           |           |           |           |
|---|-----------|-----------|-----------|-----------|
| 6 | 1.8600000 | 0.3269251 | 1.4300000 | 2.2500000 |
|---|-----------|-----------|-----------|-----------|

---

Unique Subject Identifier=1158010000-0031

Assay variable : PTINR\_VAL1 PT-INR Value

N Mean Standard Deviation Minimum Maximum

---

|   |           |           |           |           |
|---|-----------|-----------|-----------|-----------|
| 6 | 2.3666667 | 0.3695763 | 1.9000000 | 3.0100000 |
|---|-----------|-----------|-----------|-----------|

---

Unique Subject Identifier=1158010000-0035

Assay variable : PTINR\_VAL1 PT-INR Value

N Mean Standard Deviation Minimum Maximum

---

|   |           |           |           |           |
|---|-----------|-----------|-----------|-----------|
| 6 | 2.3366667 | 0.5368302 | 1.6800000 | 3.2300000 |
|---|-----------|-----------|-----------|-----------|

---

Unique Subject Identifier=1158010000-0042

Assay variable : PTINR\_VAL1 PT-INR Value

N Mean Standard Deviation Minimum Maximum

---

|   |           |           |           |           |
|---|-----------|-----------|-----------|-----------|
| 6 | 2.0683333 | 0.3535770 | 1.6400000 | 2.5000000 |
|---|-----------|-----------|-----------|-----------|

---

Laboratory tests at the time of obtaining Table 2-6 consent, according to the presence or absence of proton-pump inhibitors

Unique Subject Identifier=1158010000-0043

MEANS Procedure

Assay variable : PTINR\_VAL1 PT-INR Value

N Mean Standard Deviation Minimum Maximum

---

|   |           |           |           |           |
|---|-----------|-----------|-----------|-----------|
| 6 | 2.3216667 | 0.2634704 | 1.8300000 | 2.6300000 |
|---|-----------|-----------|-----------|-----------|

---

Unique Subject Identifier=1158010000-0045

Assay variable : PTINR\_VAL1 PT-INR Value

N Mean Standard Deviation Minimum Maximum

---

|   |           |           |           |           |
|---|-----------|-----------|-----------|-----------|
| 6 | 1.9533333 | 0.5908525 | 1.4700000 | 3.1200000 |
|---|-----------|-----------|-----------|-----------|

---

Unique Subject Identifier=1158010000-0055

Assay variable : PTINR\_VAL1 PT-INR Value

N Mean Standard Deviation Minimum Maximum

---

|   |           |           |           |           |
|---|-----------|-----------|-----------|-----------|
| 6 | 2.1183333 | 0.1340771 | 1.9900000 | 2.3500000 |
|---|-----------|-----------|-----------|-----------|

---

Unique Subject Identifier=1158010000-0058

Assay variable : PTINR\_VAL1 PT-INR Value

N Mean Standard Deviation Minimum Maximum

---

|   |           |           |           |           |
|---|-----------|-----------|-----------|-----------|
| 6 | 1.9850000 | 0.1488288 | 1.8800000 | 2.2800000 |
|---|-----------|-----------|-----------|-----------|

---

Laboratory tests at the time of obtaining Table 2-6 consent, according to the presence or absence of proton-pump inhibitors

Unique Subject Identifier=1158010000-0065

MEANS Procedure

Assay variable : PTINR\_VAL1 PT-INR Value

N Mean Standard Deviation Minimum Maximum

---

|   |           |           |           |           |
|---|-----------|-----------|-----------|-----------|
| 6 | 2.0816667 | 0.3621832 | 1.4700000 | 2.4500000 |
|---|-----------|-----------|-----------|-----------|

---

Unique Subject Identifier=1158010000-0067

Assay variable : PTINR\_VAL1 PT-INR Value

N Mean Standard Deviation Minimum Maximum

---

|   |           |           |           |           |
|---|-----------|-----------|-----------|-----------|
| 6 | 2.2433333 | 0.6172412 | 1.4900000 | 3.2600000 |
|---|-----------|-----------|-----------|-----------|

---

Unique Subject Identifier=1158010000-0071

Assay variable : PTINR\_VAL1 PT-INR Value

N Mean Standard Deviation Minimum Maximum

---

|   |           |           |           |           |
|---|-----------|-----------|-----------|-----------|
| 6 | 2.4450000 | 0.6404295 | 1.4800000 | 3.2000000 |
|---|-----------|-----------|-----------|-----------|

---

Unique Subject Identifier=1158010000-0076

Assay variable : PTINR\_VAL1 PT-INR Value

N Mean Standard Deviation Minimum Maximum

---

|   |           |           |           |           |
|---|-----------|-----------|-----------|-----------|
| 6 | 2.0983333 | 0.4266810 | 1.6000000 | 2.6300000 |
|---|-----------|-----------|-----------|-----------|

---

Laboratory tests at the time of obtaining Table 2-6 consent, according to the presence or absence of proton-pump inhibitors

Unique Subject Identifier=1158010000-0080

MEANS Procedure

Assay variable : PTINR\_VAL1 PT-INR Value

N Mean Standard Deviation Minimum Maximum

---

|   |           |           |           |           |
|---|-----------|-----------|-----------|-----------|
| 6 | 2.0250000 | 0.0875785 | 1.9000000 | 2.1600000 |
|---|-----------|-----------|-----------|-----------|

---

Unique Subject Identifier=1158010000-0082

Assay variable : PTINR\_VAL1 PT-INR Value

N Mean Standard Deviation Minimum Maximum

---

|   |           |           |           |           |
|---|-----------|-----------|-----------|-----------|
| 6 | 2.4200000 | 0.3996498 | 1.8100000 | 2.9800000 |
|---|-----------|-----------|-----------|-----------|

---

Unique Subject Identifier=1158010000-0093

Assay variable : PTINR\_VAL1 PT-INR Value

N Mean Standard Deviation Minimum Maximum

---

|   |           |           |           |           |
|---|-----------|-----------|-----------|-----------|
| 6 | 2.0983333 | 0.4264935 | 1.5700000 | 2.8400000 |
|---|-----------|-----------|-----------|-----------|

---

Unique Subject Identifier=1158010000-0095

Assay variable : PTINR\_VAL1 PT-INR Value

N Mean Standard Deviation Minimum Maximum

---

|   |           |           |           |           |
|---|-----------|-----------|-----------|-----------|
| 6 | 2.2450000 | 0.2022622 | 1.9700000 | 2.4800000 |
|---|-----------|-----------|-----------|-----------|

---



Laboratory tests at the time of obtaining Table 2-6 consent, according to the presence or absence of proton-pump inhibitors

Unique Subject Identifier=1158010000-0104

MEANS Procedure

Assay variable : PTINR\_VAL1 PT-INR Value

N Mean Standard Deviation Minimum Maximum

---

|   |           |           |           |           |
|---|-----------|-----------|-----------|-----------|
| 6 | 1.8666667 | 0.3042148 | 1.4700000 | 2.3800000 |
|---|-----------|-----------|-----------|-----------|

---

Unique Subject Identifier=1158010000-0105

Assay variable : PTINR\_VAL1 PT-INR Value

N Mean Standard Deviation Minimum Maximum

---

|   |           |           |           |           |
|---|-----------|-----------|-----------|-----------|
| 6 | 2.0800000 | 0.3533836 | 1.5500000 | 2.5300000 |
|---|-----------|-----------|-----------|-----------|

---

Unique Subject Identifier=1158010000-0106

Assay variable : PTINR\_VAL1 PT-INR Value

N Mean Standard Deviation Minimum Maximum

---

|   |           |           |           |           |
|---|-----------|-----------|-----------|-----------|
| 6 | 2.2600000 | 0.4376300 | 1.7700000 | 3.0100000 |
|---|-----------|-----------|-----------|-----------|

---

Unique Subject Identifier=1158010000-0114

Assay variable : PTINR\_VAL1 PT-INR Value

N Mean Standard Deviation Minimum Maximum

---

|   |          |           |          |          |
|---|----------|-----------|----------|----------|
| 6 | 2.390000 | 0.3985975 | 1.770000 | 2.980000 |
|---|----------|-----------|----------|----------|

---

Laboratory tests at the time of obtaining Table 2-6 consent, according to the presence or absence of proton-pump inhibitors

Unique Subject Identifier=1158010000-0117

MEANS Procedure

Assay variable : PTINR\_VAL1 PT-INR Value

N Mean Standard Deviation Minimum Maximum

---

|   |           |           |           |           |
|---|-----------|-----------|-----------|-----------|
| 6 | 2.0533333 | 0.3923094 | 1.6400000 | 2.7100000 |
|---|-----------|-----------|-----------|-----------|

---

Unique Subject Identifier=1158010000-0124

Assay variable : PTINR\_VAL1 PT-INR Value

N Mean Standard Deviation Minimum Maximum

---

|   |           |           |           |           |
|---|-----------|-----------|-----------|-----------|
| 6 | 1.9900000 | 0.7699610 | 1.1200000 | 3.2900000 |
|---|-----------|-----------|-----------|-----------|

---

Unique Subject Identifier=1158010000-0125

Assay variable : PTINR\_VAL1 PT-INR Value

N Mean Standard Deviation Minimum Maximum

---

|   |           |           |           |           |
|---|-----------|-----------|-----------|-----------|
| 6 | 2.2600000 | 0.9979780 | 1.6400000 | 4.2600000 |
|---|-----------|-----------|-----------|-----------|

---

Unique Subject Identifier=1158010000-0126

Assay variable : PTINR\_VAL1 PT-INR Value

N Mean Standard Deviation Minimum Maximum

---

|   |           |           |           |           |
|---|-----------|-----------|-----------|-----------|
| 6 | 2.1750000 | 0.4345457 | 1.4700000 | 2.6600000 |
|---|-----------|-----------|-----------|-----------|

---

Laboratory tests at the time of obtaining Table 2-6 consent, according to the presence or absence of proton-pump inhibitors

Unique Subject Identifier=1159000000-0001

MEANS Procedure

Assay variable : PTINR\_VAL1 PT-INR Value

N Mean Standard Deviation Minimum Maximum

---

|   |           |           |           |           |
|---|-----------|-----------|-----------|-----------|
| 6 | 2.1000000 | 0.1897367 | 1.8000000 | 2.3000000 |
|---|-----------|-----------|-----------|-----------|

---

Unique Subject Identifier=1159000000-0002

Assay variable : PTINR\_VAL1 PT-INR Value

N Mean Standard Deviation Minimum Maximum

---

|   |           |           |           |           |
|---|-----------|-----------|-----------|-----------|
| 6 | 2.2666667 | 0.1966384 | 1.9000000 | 2.4000000 |
|---|-----------|-----------|-----------|-----------|

---

Unique Subject Identifier=1159000000-0003

Assay variable : PTINR\_VAL1 PT-INR Value

N Mean Standard Deviation Minimum Maximum

---

|   |           |           |           |           |
|---|-----------|-----------|-----------|-----------|
| 6 | 2.0500000 | 0.6348228 | 1.1000000 | 2.8000000 |
|---|-----------|-----------|-----------|-----------|

---

Unique Subject Identifier=1159000000-0005

Assay variable : PTINR\_VAL1 PT-INR Value

N Mean Standard Deviation Minimum Maximum

---

|   |           |           |           |           |
|---|-----------|-----------|-----------|-----------|
| 6 | 2.3666667 | 0.6121002 | 1.5000000 | 3.1000000 |
|---|-----------|-----------|-----------|-----------|

---

Laboratory tests at the time of obtaining Table 2-6 consent, according to the presence or absence of proton-pump inhibitors

Unique Subject Identifier=1159000000-0007

MEANS Procedure

Assay variable : PTINR\_VAL1 PT-INR Value

N Mean Standard Deviation Minimum Maximum

---

|   |           |           |           |           |
|---|-----------|-----------|-----------|-----------|
| 6 | 2.3000000 | 0.5549775 | 1.8000000 | 3.1000000 |
|---|-----------|-----------|-----------|-----------|

---

Unique Subject Identifier=1159000000-0010

Assay variable : PTINR\_VAL1 PT-INR Value

N Mean Standard Deviation Minimum Maximum

---

|   |           |           |           |           |
|---|-----------|-----------|-----------|-----------|
| 5 | 2.1600000 | 0.4037326 | 1.8000000 | 2.8000000 |
|---|-----------|-----------|-----------|-----------|

---

Unique Subject Identifier=1159000000-0013

Assay variable : PTINR\_VAL1 PT-INR Value

N Mean Standard Deviation Minimum Maximum

---

|   |           |           |           |           |
|---|-----------|-----------|-----------|-----------|
| 6 | 2.4833333 | 0.4956477 | 1.5000000 | 2.9000000 |
|---|-----------|-----------|-----------|-----------|

---

Unique Subject Identifier=1159000000-0015

Assay variable : PTINR\_VAL1 PT-INR Value

N Mean Standard Deviation Minimum Maximum

---

|   |          |           |          |          |
|---|----------|-----------|----------|----------|
| 6 | 2.300000 | 0.2898275 | 1.900000 | 2.700000 |
|---|----------|-----------|----------|----------|

---



Laboratory tests at the time of obtaining Table 2-6 consent, according to the presence or absence of proton-pump inhibitors

Unique Subject Identifier=1159000000-0016

MEANS Procedure

Assay variable : PTINR\_VAL1 PT-INR Value

N Mean Standard Deviation Minimum Maximum

---

|   |           |           |           |           |
|---|-----------|-----------|-----------|-----------|
| 6 | 2.1500000 | 0.6220932 | 1.3000000 | 3.1000000 |
|---|-----------|-----------|-----------|-----------|

---

Unique Subject Identifier=1159000000-0017

Assay variable : PTINR\_VAL1 PT-INR Value

N Mean Standard Deviation Minimum Maximum

---

|   |           |           |           |           |
|---|-----------|-----------|-----------|-----------|
| 6 | 2.2333333 | 0.4033196 | 1.8000000 | 2.9000000 |
|---|-----------|-----------|-----------|-----------|

---

Unique Subject Identifier=1159000000-0018

Assay variable : PTINR\_VAL1 PT-INR Value

N Mean Standard Deviation Minimum Maximum

---

|   |           |           |           |           |
|---|-----------|-----------|-----------|-----------|
| 6 | 1.9333333 | 0.4718757 | 1.5000000 | 2.8000000 |
|---|-----------|-----------|-----------|-----------|

---

Unique Subject Identifier=1159000000-0019

Assay variable : PTINR\_VAL1 PT-INR Value

N Mean Standard Deviation Minimum Maximum

---

|   |          |           |          |          |
|---|----------|-----------|----------|----------|
| 6 | 2.000000 | 0.2097618 | 1.800000 | 2.300000 |
|---|----------|-----------|----------|----------|

---

Laboratory tests at the time of obtaining Table 2-6 consent, according to the presence or absence of proton-pump inhibitors

Unique Subject Identifier=116000000-0005

MEANS Procedure

Assay variable : PTINR\_VAL1 PT-INR Value

N Mean Standard Deviation Minimum Maximum

---

|   |           |           |           |           |
|---|-----------|-----------|-----------|-----------|
| 4 | 2.4125000 | 1.2308906 | 1.2400000 | 4.1300000 |
|---|-----------|-----------|-----------|-----------|

---

Unique Subject Identifier=116000000-0035

Assay variable : PTINR\_VAL1 PT-INR Value

N Mean Standard Deviation Minimum Maximum

---

|   |           |           |           |           |
|---|-----------|-----------|-----------|-----------|
| 5 | 1.9560000 | 0.2402707 | 1.6800000 | 2.2100000 |
|---|-----------|-----------|-----------|-----------|

---

Unique Subject Identifier=116000000-0055

Assay variable : PTINR\_VAL1 PT-INR Value

N Mean Standard Deviation Minimum Maximum

---

|   |           |           |           |           |
|---|-----------|-----------|-----------|-----------|
| 4 | 2.4800000 | 1.0526158 | 1.7000000 | 3.9400000 |
|---|-----------|-----------|-----------|-----------|

---

Unique Subject Identifier=116000000-0057

Assay variable : PTINR\_VAL1 PT-INR Value

N Mean Standard Deviation Minimum Maximum

---

|   |           |           |           |           |
|---|-----------|-----------|-----------|-----------|
| 5 | 1.8660000 | 0.2176695 | 1.6600000 | 2.2100000 |
|---|-----------|-----------|-----------|-----------|

---

Laboratory tests at the time of obtaining Table 2-6 consent, according to the presence or absence of proton-pump inhibitors

Unique Subject Identifier=116000000-0094

MEANS Procedure

Assay variable : PTINR\_VAL1 PT-INR Value

| N | Mean      | Standard Deviation | Minimum   | Maximum   |
|---|-----------|--------------------|-----------|-----------|
| 2 | 1.8650000 | 0.0777817          | 1.8100000 | 1.9200000 |

Unique Subject Identifier=116000000-0104

Assay variable : PTINR\_VAL1 PT-INR Value

| N | Mean      | Standard Deviation | Minimum   | Maximum   |
|---|-----------|--------------------|-----------|-----------|
| 4 | 2.1450000 | 0.2487971          | 1.8800000 | 2.4800000 |

Unique Subject Identifier=116000000-0112

Assay variable : PTINR\_VAL1 PT-INR Value

| N | Mean      | Standard Deviation | Minimum   | Maximum   |
|---|-----------|--------------------|-----------|-----------|
| 5 | 1.9240000 | 0.2338376          | 1.7200000 | 2.2500000 |

Unique Subject Identifier=116000000-0118

Assay variable : PTINR\_VAL1 PT-INR Value

N Mean Standard Deviation Minimum Maximum

---

|   |           |           |           |           |
|---|-----------|-----------|-----------|-----------|
| 5 | 1.8360000 | 0.7326527 | 1.2700000 | 3.0900000 |
|---|-----------|-----------|-----------|-----------|

---

Laboratory tests at the time of obtaining Table 2-6 consent, according to the presence or absence of proton-pump inhibitors

Unique Subject Identifier=116000000-0120

MEANS Procedure

Assay variable : PTINR\_VAL1 PT-INR Value

N Mean Standard Deviation Minimum Maximum

---

|   |          |          |          |          |
|---|----------|----------|----------|----------|
| 6 | 2.760000 | 0.482248 | 2.130000 | 3.490000 |
|---|----------|----------|----------|----------|

---

Unique Subject Identifier=1161010100-0001

Assay variable : PTINR\_VAL1 PT-INR Value

N Mean Standard Deviation Minimum Maximum

---

|   |          |  |          |          |
|---|----------|--|----------|----------|
| 1 | 2.490000 |  | 2.490000 | 2.490000 |
|---|----------|--|----------|----------|

---

Unique Subject Identifier=1161010100-0006

Assay variable : PTINR\_VAL1 PT-INR Value

N Mean Standard Deviation Minimum Maximum

---

|   |          |           |          |          |
|---|----------|-----------|----------|----------|
| 3 | 1.656667 | 0.0321455 | 1.620000 | 1.680000 |
|---|----------|-----------|----------|----------|

---

Unique Subject Identifier=1161010100-0011

Assay variable : PTINR\_VAL1 PT-INR Value

N Mean Standard Deviation Minimum Maximum

---

|   |           |           |           |           |
|---|-----------|-----------|-----------|-----------|
| 2 | 1.8250000 | 0.0070711 | 1.8200000 | 1.8300000 |
|---|-----------|-----------|-----------|-----------|

---



Laboratory tests at the time of obtaining Table 2-6 consent, according to the presence or absence of proton-pump inhibitors

Unique Subject Identifier=1161010100-0017

MEANS Procedure

Assay variable : PTINR\_VAL1 PT-INR Value

N Mean Standard Deviation Minimum Maximum

---

|   |           |  |           |           |
|---|-----------|--|-----------|-----------|
| 1 | 2.1900000 |  | 2.1900000 | 2.1900000 |
|---|-----------|--|-----------|-----------|

---

Unique Subject Identifier=1161010100-0022

Assay variable : PTINR\_VAL1 PT-INR Value

N Mean Standard Deviation Minimum Maximum

---

|   |           |  |           |           |
|---|-----------|--|-----------|-----------|
| 1 | 2.0500000 |  | 2.0500000 | 2.0500000 |
|---|-----------|--|-----------|-----------|

---

Unique Subject Identifier=1161010100-0025

Assay variable : PTINR\_VAL1 PT-INR Value

N Mean Standard Deviation Minimum Maximum

---

|   |           |           |           |           |
|---|-----------|-----------|-----------|-----------|
| 2 | 2.3350000 | 0.8980256 | 1.7000000 | 2.9700000 |
|---|-----------|-----------|-----------|-----------|

---

Unique Subject Identifier=1162011100-0003

Assay variable : PTINR\_VAL1 PT-INR Value

N Mean Standard Deviation Minimum Maximum

---

|   |           |           |           |           |
|---|-----------|-----------|-----------|-----------|
| 4 | 1.9900000 | 0.1618641 | 1.7700000 | 2.1600000 |
|---|-----------|-----------|-----------|-----------|

---

Laboratory tests at the time of obtaining Table 2-6 consent, according to the presence or absence of proton-pump inhibitors

Unique Subject Identifier=1167000000-0010

MEANS Procedure

Assay variable : PTINR\_VAL1 PT-INR Value

N Mean Standard Deviation Minimum Maximum

---

|   |           |  |           |           |
|---|-----------|--|-----------|-----------|
| 1 | 2.2100000 |  | 2.2100000 | 2.2100000 |
|---|-----------|--|-----------|-----------|

---

Unique Subject Identifier=1168011000-0006

Assay variable : PTINR\_VAL1 PT-INR Value

N Mean Standard Deviation Minimum Maximum

---

|   |           |           |           |           |
|---|-----------|-----------|-----------|-----------|
| 3 | 2.3966667 | 0.1674316 | 2.3000000 | 2.5900000 |
|---|-----------|-----------|-----------|-----------|

---

Unique Subject Identifier=1168011000-0011

Assay variable : PTINR\_VAL1 PT-INR Value

N Mean Standard Deviation Minimum Maximum

---

|   |           |           |           |           |
|---|-----------|-----------|-----------|-----------|
| 3 | 2.1066667 | 0.1934770 | 1.9900000 | 2.3300000 |
|---|-----------|-----------|-----------|-----------|

---

Unique Subject Identifier=1168011000-0021

Assay variable : PTINR\_VAL1 PT-INR Value

N Mean Standard Deviation Minimum Maximum

---

|   |           |           |           |           |
|---|-----------|-----------|-----------|-----------|
| 2 | 2.2450000 | 0.0777817 | 2.1900000 | 2.3000000 |
|---|-----------|-----------|-----------|-----------|

---

Laboratory tests at the time of obtaining Table 2-6 consent, according to the presence or absence of proton-pump inhibitors

Unique Subject Identifier=1168011000-0026

MEANS Procedure

Assay variable : PTINR\_VAL1 PT-INR Value

N Mean Standard Deviation Minimum Maximum

---

|   |           |  |           |           |
|---|-----------|--|-----------|-----------|
| 1 | 1.6400000 |  | 1.6400000 | 1.6400000 |
|---|-----------|--|-----------|-----------|

---

Unique Subject Identifier=1168011000-0028

Assay variable : PTINR\_VAL1 PT-INR Value

N Mean Standard Deviation Minimum Maximum

---

|   |           |  |           |           |
|---|-----------|--|-----------|-----------|
| 1 | 1.6000000 |  | 1.6000000 | 1.6000000 |
|---|-----------|--|-----------|-----------|

---

Unique Subject Identifier=1168011000-0039

Assay variable : PTINR\_VAL1 PT-INR Value

N Mean Standard Deviation Minimum Maximum

---

|   |           |           |           |           |
|---|-----------|-----------|-----------|-----------|
| 2 | 2.5300000 | 0.1272792 | 2.4400000 | 2.6200000 |
|---|-----------|-----------|-----------|-----------|

---

Unique Subject Identifier=1168011000-0040

Assay variable : PTINR\_VAL1 PT-INR Value

N Mean Standard Deviation Minimum Maximum

---

|   |          |           |          |          |
|---|----------|-----------|----------|----------|
| 2 | 2.660000 | 0.3818377 | 2.390000 | 2.930000 |
|---|----------|-----------|----------|----------|

---

Laboratory tests at the time of obtaining Table 2-6 consent, according to the presence or absence of proton-pump inhibitors

Unique Subject Identifier=1168011000-0050

MEANS Procedure

Assay variable : PTINR\_VAL1 PT-INR Value

N Mean Standard Deviation Minimum Maximum

---

|   |           |           |           |           |
|---|-----------|-----------|-----------|-----------|
| 2 | 1.4200000 | 0.0424264 | 1.3900000 | 1.4500000 |
|---|-----------|-----------|-----------|-----------|

---

Unique Subject Identifier=1169010100-0013

Assay variable : PTINR\_VAL1 PT-INR Value

N Mean Standard Deviation Minimum Maximum

---

|   |           |           |           |           |
|---|-----------|-----------|-----------|-----------|
| 5 | 2.4200000 | 0.2774887 | 2.1000000 | 2.8000000 |
|---|-----------|-----------|-----------|-----------|

---

Unique Subject Identifier=1171000000-0003

Assay variable : PTINR\_VAL1 PT-INR Value

N Mean Standard Deviation Minimum Maximum

---

|   |           |           |           |           |
|---|-----------|-----------|-----------|-----------|
| 5 | 1.6760000 | 0.0391152 | 1.6400000 | 1.7300000 |
|---|-----------|-----------|-----------|-----------|

---

Unique Subject Identifier=1171000000-0004

Assay variable : PTINR\_VAL1 PT-INR Value

N Mean Standard Deviation Minimum Maximum

---

|   |           |           |           |           |
|---|-----------|-----------|-----------|-----------|
| 6 | 1.3383333 | 0.0617792 | 1.2900000 | 1.4400000 |
|---|-----------|-----------|-----------|-----------|

---



Laboratory tests at the time of obtaining Table 2-6 consent, according to the presence or absence of proton-pump inhibitors

Unique Subject Identifier=1172011000-0005

MEANS Procedure

Assay variable : PTINR\_VAL1 PT-INR Value

N Mean Standard Deviation Minimum Maximum

---

|   |           |           |           |           |
|---|-----------|-----------|-----------|-----------|
| 6 | 2.1166667 | 0.1169045 | 2.0000000 | 2.3000000 |
|---|-----------|-----------|-----------|-----------|

---

Unique Subject Identifier=1172011000-0007

Assay variable : PTINR\_VAL1 PT-INR Value

N Mean Standard Deviation Minimum Maximum

---

|   |           |           |           |           |
|---|-----------|-----------|-----------|-----------|
| 6 | 1.6833333 | 0.1329160 | 1.5000000 | 1.9000000 |
|---|-----------|-----------|-----------|-----------|

---

Unique Subject Identifier=1173011100-0002

Assay variable : PTINR\_VAL1 PT-INR Value

N Mean Standard Deviation Minimum Maximum

---

|   |           |           |           |           |
|---|-----------|-----------|-----------|-----------|
| 6 | 1.7833333 | 0.1329160 | 1.6000000 | 2.0000000 |
|---|-----------|-----------|-----------|-----------|

---

Unique Subject Identifier=1173011100-0011

Assay variable : PTINR\_VAL1 PT-INR Value

N Mean Standard Deviation Minimum Maximum

---

|   |           |           |           |           |
|---|-----------|-----------|-----------|-----------|
| 6 | 1.9000000 | 0.3033150 | 1.4000000 | 2.2000000 |
|---|-----------|-----------|-----------|-----------|

---

Laboratory tests at the time of obtaining Table 2-6 consent, according to the presence or absence of proton-pump inhibitors

Unique Subject Identifier=1173011100-0015

MEANS Procedure

Assay variable : PTINR\_VAL1 PT-INR Value

N Mean Standard Deviation Minimum Maximum

---

|   |           |           |           |           |
|---|-----------|-----------|-----------|-----------|
| 6 | 1.6666667 | 0.3265986 | 1.3000000 | 2.2000000 |
|---|-----------|-----------|-----------|-----------|

---

Unique Subject Identifier=1173011100-0018

Assay variable : PTINR\_VAL1 PT-INR Value

N Mean Standard Deviation Minimum Maximum

---

|   |           |           |           |           |
|---|-----------|-----------|-----------|-----------|
| 6 | 2.2833333 | 0.2316607 | 1.9000000 | 2.6000000 |
|---|-----------|-----------|-----------|-----------|

---

Unique Subject Identifier=1173011100-0019

Assay variable : PTINR\_VAL1 PT-INR Value

N Mean Standard Deviation Minimum Maximum

---

|   |           |           |           |           |
|---|-----------|-----------|-----------|-----------|
| 6 | 2.3500000 | 1.0445095 | 1.1000000 | 3.6000000 |
|---|-----------|-----------|-----------|-----------|

---

Unique Subject Identifier=1173011100-0021

Assay variable : PTINR\_VAL1 PT-INR Value

N Mean Standard Deviation Minimum Maximum

---

|   |          |           |          |          |
|---|----------|-----------|----------|----------|
| 6 | 2.500000 | 0.8221922 | 1.700000 | 3.800000 |
|---|----------|-----------|----------|----------|

---

Laboratory tests at the time of obtaining Table 2-6 consent, according to the presence or absence of proton-pump inhibitors

Unique Subject Identifier=1173011100-0026

MEANS Procedure

Assay variable : PTINR\_VAL1 PT-INR Value

N Mean Standard Deviation Minimum Maximum

---

|   |           |           |           |           |
|---|-----------|-----------|-----------|-----------|
| 6 | 2.2500000 | 1.0634848 | 1.5000000 | 4.3000000 |
|---|-----------|-----------|-----------|-----------|

---

Unique Subject Identifier=1173011100-0027

Assay variable : PTINR\_VAL1 PT-INR Value

N Mean Standard Deviation Minimum Maximum

---

|   |           |           |           |           |
|---|-----------|-----------|-----------|-----------|
| 6 | 2.1666667 | 0.7174027 | 1.6000000 | 3.6000000 |
|---|-----------|-----------|-----------|-----------|

---

Unique Subject Identifier=1173011100-0031

Assay variable : PTINR\_VAL1 PT-INR Value

N Mean Standard Deviation Minimum Maximum

---

|   |           |           |           |           |
|---|-----------|-----------|-----------|-----------|
| 6 | 1.6833333 | 0.4445972 | 1.3000000 | 2.3000000 |
|---|-----------|-----------|-----------|-----------|

---

Unique Subject Identifier=1173011100-0041

Assay variable : PTINR\_VAL1 PT-INR Value

N Mean Standard Deviation Minimum Maximum

---

|   |           |           |           |           |
|---|-----------|-----------|-----------|-----------|
| 5 | 1.6800000 | 0.3346640 | 1.4000000 | 2.2000000 |
|---|-----------|-----------|-----------|-----------|

---

Laboratory tests at the time of obtaining Table 2-6 consent, according to the presence or absence of proton-pump inhibitors

Unique Subject Identifier=1175011000-0002

MEANS Procedure

Assay variable : PTINR\_VAL1 PT-INR Value

N Mean Standard Deviation Minimum Maximum

---

|   |           |           |           |           |
|---|-----------|-----------|-----------|-----------|
| 6 | 1.7333333 | 0.0516398 | 1.7000000 | 1.8000000 |
|---|-----------|-----------|-----------|-----------|

---

Unique Subject Identifier=1175011000-0004

Assay variable : PTINR\_VAL1 PT-INR Value

N Mean Standard Deviation Minimum Maximum

---

|   |           |           |           |           |
|---|-----------|-----------|-----------|-----------|
| 6 | 1.7833333 | 0.2316607 | 1.5000000 | 2.1000000 |
|---|-----------|-----------|-----------|-----------|

---

Unique Subject Identifier=1175011000-0005

Assay variable : PTINR\_VAL1 PT-INR Value

N Mean Standard Deviation Minimum Maximum

---

|   |           |           |           |           |
|---|-----------|-----------|-----------|-----------|
| 6 | 2.3666667 | 2.7645373 | 1.0000000 | 8.0000000 |
|---|-----------|-----------|-----------|-----------|

---

Unique Subject Identifier=1175011000-0008

Assay variable : PTINR\_VAL1 PT-INR Value

N Mean Standard Deviation Minimum Maximum

---

|   |           |           |           |           |
|---|-----------|-----------|-----------|-----------|
| 6 | 2.0166667 | 0.2041241 | 1.7000000 | 2.3000000 |
|---|-----------|-----------|-----------|-----------|

---



Laboratory tests at the time of obtaining Table 2-6 consent, according to the presence or absence of proton-pump inhibitors

Unique Subject Identifier=1175011000-0009

MEANS Procedure

Assay variable : PTINR\_VAL1 PT-INR Value

N Mean Standard Deviation Minimum Maximum

---

|   |           |           |           |           |
|---|-----------|-----------|-----------|-----------|
| 6 | 2.0000000 | 0.2756810 | 1.6000000 | 2.4000000 |
|---|-----------|-----------|-----------|-----------|

---

Unique Subject Identifier=1175011000-0010

Assay variable : PTINR\_VAL1 PT-INR Value

N Mean Standard Deviation Minimum Maximum

---

|   |           |           |           |           |
|---|-----------|-----------|-----------|-----------|
| 6 | 1.8500000 | 0.2428992 | 1.5000000 | 2.1000000 |
|---|-----------|-----------|-----------|-----------|

---

Unique Subject Identifier=1175011000-0011

Assay variable : PTINR\_VAL1 PT-INR Value

N Mean Standard Deviation Minimum Maximum

---

|   |           |           |           |           |
|---|-----------|-----------|-----------|-----------|
| 6 | 2.0666667 | 0.4885352 | 1.6000000 | 3.0000000 |
|---|-----------|-----------|-----------|-----------|

---

Unique Subject Identifier=1175011000-0016

Assay variable : PTINR\_VAL1 PT-INR Value

N Mean Standard Deviation Minimum Maximum

---

|   |           |           |           |           |
|---|-----------|-----------|-----------|-----------|
| 6 | 1.7666667 | 0.1366260 | 1.6000000 | 2.0000000 |
|---|-----------|-----------|-----------|-----------|

---

Laboratory tests at the time of obtaining Table 2-6 consent, according to the presence or absence of proton-pump inhibitors

Unique Subject Identifier=1175011000-0018

MEANS Procedure

Assay variable : PTINR\_VAL1 PT-INR Value

N Mean Standard Deviation Minimum Maximum

---

|   |           |           |           |           |
|---|-----------|-----------|-----------|-----------|
| 6 | 2.3500000 | 0.6090977 | 1.5000000 | 3.3000000 |
|---|-----------|-----------|-----------|-----------|

---

Unique Subject Identifier=1175011000-0019

Assay variable : PTINR\_VAL1 PT-INR Value

N Mean Standard Deviation Minimum Maximum

---

|   |           |           |           |           |
|---|-----------|-----------|-----------|-----------|
| 6 | 2.0500000 | 0.4764452 | 1.5000000 | 2.6000000 |
|---|-----------|-----------|-----------|-----------|

---

Unique Subject Identifier=1179000000-0001

Assay variable : PTINR\_VAL1 PT-INR Value

N Mean Standard Deviation Minimum Maximum

---

|   |           |           |           |           |
|---|-----------|-----------|-----------|-----------|
| 6 | 1.7000000 | 0.2280351 | 1.3000000 | 1.9000000 |
|---|-----------|-----------|-----------|-----------|

---

Unique Subject Identifier=1179000000-0002

Assay variable : PTINR\_VAL1 PT-INR Value

N Mean Standard Deviation Minimum Maximum

---

|   |           |           |           |           |
|---|-----------|-----------|-----------|-----------|
| 3 | 1.8333333 | 0.3511885 | 1.5000000 | 2.2000000 |
|---|-----------|-----------|-----------|-----------|

---

Laboratory tests at the time of obtaining Table 2-6 consent, according to the presence or absence of proton-pump inhibitors

Unique Subject Identifier=1179000000-0003

MEANS Procedure

Assay variable : PTINR\_VAL1 PT-INR Value

| N | Mean      | Standard Deviation | Minimum   | Maximum   |
|---|-----------|--------------------|-----------|-----------|
| 6 | 1.9500000 | 1.0310189          | 1.1000000 | 4.0000000 |

Unique Subject Identifier=1179000000-0004

Assay variable : PTINR\_VAL1 PT-INR Value

| N | Mean      | Standard Deviation | Minimum   | Maximum   |
|---|-----------|--------------------|-----------|-----------|
| 3 | 2.0333333 | 0.2081666          | 1.8000000 | 2.2000000 |

Unique Subject Identifier=1179000000-0006

Assay variable : PTINR\_VAL1 PT-INR Value

| N | Mean      | Standard Deviation | Minimum   | Maximum   |
|---|-----------|--------------------|-----------|-----------|
| 3 | 2.2333333 | 0.3214550          | 2.0000000 | 2.6000000 |

Unique Subject Identifier=1181000000-0003

Assay variable : PTINR\_VAL1 PT-INR Value

N Mean Standard Deviation Minimum Maximum

---

|   |           |  |           |           |
|---|-----------|--|-----------|-----------|
| 1 | 2.0300000 |  | 2.0300000 | 2.0300000 |
|---|-----------|--|-----------|-----------|

---

Laboratory tests at the time of obtaining Table 2-6 consent, according to the presence or absence of proton-pump inhibitors

Unique Subject Identifier=1181000000-0004

MEANS Procedure

Assay variable : PTINR\_VAL1 PT-INR Value

N Mean Standard Deviation Minimum Maximum

---

|   |           |  |           |           |
|---|-----------|--|-----------|-----------|
| 1 | 2.3900000 |  | 2.3900000 | 2.3900000 |
|---|-----------|--|-----------|-----------|

---

Unique Subject Identifier=1181000000-0005

Assay variable : PTINR\_VAL1 PT-INR Value

N Mean Standard Deviation Minimum Maximum

---

|   |           |           |           |           |
|---|-----------|-----------|-----------|-----------|
| 2 | 2.7950000 | 0.3889087 | 2.5200000 | 3.0700000 |
|---|-----------|-----------|-----------|-----------|

---

Unique Subject Identifier=1181000000-0006

Assay variable : PTINR\_VAL1 PT-INR Value

N Mean Standard Deviation Minimum Maximum

---

|   |           |           |           |           |
|---|-----------|-----------|-----------|-----------|
| 2 | 2.1000000 | 0.3676955 | 1.8400000 | 2.3600000 |
|---|-----------|-----------|-----------|-----------|

---

Unique Subject Identifier=1181000000-0007

Assay variable : PTINR\_VAL1 PT-INR Value

N Mean Standard Deviation Minimum Maximum

---

|   |           |           |           |           |
|---|-----------|-----------|-----------|-----------|
| 3 | 1.6866667 | 0.3360556 | 1.3200000 | 1.9800000 |
|---|-----------|-----------|-----------|-----------|

---



Laboratory tests at the time of obtaining Table 2-6 consent, according to the presence or absence of proton-pump inhibitors

Unique Subject Identifier=1181000000-0008

MEANS Procedure

Assay variable : PTINR\_VAL1 PT-INR Value

| N | Mean      | Standard Deviation | Minimum   | Maximum   |
|---|-----------|--------------------|-----------|-----------|
| 2 | 1.4650000 | 0.2050610          | 1.3200000 | 1.6100000 |

Unique Subject Identifier=1181000000-0009

Assay variable : PTINR\_VAL1 PT-INR Value

| N | Mean      | Standard Deviation | Minimum   | Maximum   |
|---|-----------|--------------------|-----------|-----------|
| 1 | 3.5700000 |                    | 3.5700000 | 3.5700000 |

Unique Subject Identifier=1181000000-0010

Assay variable : PTINR\_VAL1 PT-INR Value

| N | Mean      | Standard Deviation | Minimum   | Maximum   |
|---|-----------|--------------------|-----------|-----------|
| 2 | 1.7950000 | 0.4030509          | 1.5100000 | 2.0800000 |

Unique Subject Identifier=1181000000-0011

Assay variable : PTINR\_VAL1 PT-INR Value

N Mean Standard Deviation Minimum Maximum

---

|   |          |           |          |          |
|---|----------|-----------|----------|----------|
| 2 | 1.350000 | 0.0282843 | 1.330000 | 1.370000 |
|---|----------|-----------|----------|----------|

---

Laboratory tests at the time of obtaining Table 2-6 consent, according to the presence or absence of proton-pump inhibitors

Unique Subject Identifier=1181000000-0012

MEANS Procedure

Assay variable : PTINR\_VAL1 PT-INR Value

| N | Mean      | Standard Deviation | Minimum   | Maximum   |
|---|-----------|--------------------|-----------|-----------|
| 1 | 1.6200000 |                    | 1.6200000 | 1.6200000 |

Unique Subject Identifier=1181000000-0013

Assay variable : PTINR\_VAL1 PT-INR Value

| N | Mean      | Standard Deviation | Minimum   | Maximum   |
|---|-----------|--------------------|-----------|-----------|
| 3 | 1.6600000 | 0.0754983          | 1.5900000 | 1.7400000 |

Unique Subject Identifier=1181000000-0014

Assay variable : PTINR\_VAL1 PT-INR Value

| N | Mean      | Standard Deviation | Minimum   | Maximum   |
|---|-----------|--------------------|-----------|-----------|
| 3 | 2.1600000 | 0.4396590          | 1.8000000 | 2.6500000 |

Unique Subject Identifier=1181000000-0018

Assay variable : PTINR\_VAL1 PT-INR Value

N Mean Standard Deviation Minimum Maximum

---

|   |           |           |           |           |
|---|-----------|-----------|-----------|-----------|
| 2 | 2.5450000 | 0.2192031 | 2.3900000 | 2.7000000 |
|---|-----------|-----------|-----------|-----------|

---

Laboratory tests at the time of obtaining Table 2-6 consent, according to the presence or absence of proton-pump inhibitors

Unique Subject Identifier=1181000000-0019

MEANS Procedure

Assay variable : PTINR\_VAL1 PT-INR Value

| N | Mean      | Standard Deviation | Minimum   | Maximum   |
|---|-----------|--------------------|-----------|-----------|
| 1 | 1.7200000 |                    | 1.7200000 | 1.7200000 |

Unique Subject Identifier=1182000000-0001

Assay variable : PTINR\_VAL1 PT-INR Value

| N | Mean      | Standard Deviation | Minimum   | Maximum   |
|---|-----------|--------------------|-----------|-----------|
| 4 | 1.4750000 | 0.3403430          | 1.2000000 | 1.9000000 |

Unique Subject Identifier=1182000000-0002

Assay variable : PTINR\_VAL1 PT-INR Value

| N | Mean      | Standard Deviation | Minimum   | Maximum   |
|---|-----------|--------------------|-----------|-----------|
| 6 | 2.0000000 | 0.3741657          | 1.6000000 | 2.6000000 |

Unique Subject Identifier=1186000000-0008

Assay variable : PTINR\_VAL1 PT-INR Value

N Mean Standard Deviation Minimum Maximum

---

|   |           |           |           |           |
|---|-----------|-----------|-----------|-----------|
| 4 | 2.2750000 | 0.9535023 | 1.7000000 | 3.7000000 |
|---|-----------|-----------|-----------|-----------|

---

Laboratory tests at the time of obtaining Table 2-6 consent, according to the presence or absence of proton-pump inhibitors

Unique Subject Identifier=1188011110-0027

MEANS Procedure

Assay variable : PTINR\_VAL1 PT-INR Value

N Mean Standard Deviation Minimum Maximum

---

|   |           |           |           |           |
|---|-----------|-----------|-----------|-----------|
| 5 | 2.0420000 | 0.1953714 | 1.8100000 | 2.2700000 |
|---|-----------|-----------|-----------|-----------|

---

Unique Subject Identifier=1188011110-0068

Assay variable : PTINR\_VAL1 PT-INR Value

N Mean Standard Deviation Minimum Maximum

---

|   |           |           |           |           |
|---|-----------|-----------|-----------|-----------|
| 3 | 2.1433333 | 0.0971253 | 2.0600000 | 2.2500000 |
|---|-----------|-----------|-----------|-----------|

---

Unique Subject Identifier=1188011110-0124

Assay variable : PTINR\_VAL1 PT-INR Value

N Mean Standard Deviation Minimum Maximum

---

|   |           |           |           |           |
|---|-----------|-----------|-----------|-----------|
| 4 | 1.5925000 | 0.1569235 | 1.4200000 | 1.8000000 |
|---|-----------|-----------|-----------|-----------|

---

Unique Subject Identifier=1189001100-0001

Assay variable : PTINR\_VAL1 PT-INR Value

N Mean Standard Deviation Minimum Maximum

---

|   |           |           |           |           |
|---|-----------|-----------|-----------|-----------|
| 2 | 1.3950000 | 0.0636396 | 1.3500000 | 1.4400000 |
|---|-----------|-----------|-----------|-----------|

---



Laboratory tests at the time of obtaining Table 2-6 consent, according to the presence or absence of proton-pump inhibitors

Unique Subject Identifier=1189001100-0008

MEANS Procedure

Assay variable : PTINR\_VAL1 PT-INR Value

N Mean Standard Deviation Minimum Maximum

---

|   |           |           |           |           |
|---|-----------|-----------|-----------|-----------|
| 4 | 3.1475000 | 0.8403323 | 1.9500000 | 3.8500000 |
|---|-----------|-----------|-----------|-----------|

---

Unique Subject Identifier=1189001100-0017

Assay variable : PTINR\_VAL1 PT-INR Value

N Mean Standard Deviation Minimum Maximum

---

|   |           |  |           |           |
|---|-----------|--|-----------|-----------|
| 1 | 1.8800000 |  | 1.8800000 | 1.8800000 |
|---|-----------|--|-----------|-----------|

---

Unique Subject Identifier=1191000000-0001

Assay variable : PTINR\_VAL1 PT-INR Value

N Mean Standard Deviation Minimum Maximum

---

|   |           |           |           |           |
|---|-----------|-----------|-----------|-----------|
| 6 | 1.4550000 | 0.1266096 | 1.3100000 | 1.6200000 |
|---|-----------|-----------|-----------|-----------|

---

Unique Subject Identifier=1194000000-0008

Assay variable : PTINR\_VAL1 PT-INR Value

N Mean Standard Deviation Minimum Maximum

---

|   |           |           |           |           |
|---|-----------|-----------|-----------|-----------|
| 3 | 2.3300000 | 0.4942671 | 1.9000000 | 2.8700000 |
|---|-----------|-----------|-----------|-----------|

---

Laboratory tests at the time of obtaining Table 2-6 consent, according to the presence or absence of proton-pump inhibitors

Unique Subject Identifier=1194000000-0014

MEANS Procedure

Assay variable : PTINR\_VAL1 PT-INR Value

N Mean Standard Deviation Minimum Maximum

---

|   |           |           |           |           |
|---|-----------|-----------|-----------|-----------|
| 2 | 1.8650000 | 0.1484924 | 1.7600000 | 1.9700000 |
|---|-----------|-----------|-----------|-----------|

---

Unique Subject Identifier=1195000000-0006

Assay variable : PTINR\_VAL1 PT-INR Value

N Mean Standard Deviation Minimum Maximum

---

|   |           |           |           |           |
|---|-----------|-----------|-----------|-----------|
| 4 | 1.6700000 | 0.3436083 | 1.4300000 | 2.1700000 |
|---|-----------|-----------|-----------|-----------|

---

Unique Subject Identifier=1195000000-0007

Assay variable : PTINR\_VAL1 PT-INR Value

N Mean Standard Deviation Minimum Maximum

---

|   |           |           |           |           |
|---|-----------|-----------|-----------|-----------|
| 5 | 1.4120000 | 0.1223520 | 1.2400000 | 1.5500000 |
|---|-----------|-----------|-----------|-----------|

---

Unique Subject Identifier=1195000000-0008

Assay variable : PTINR\_VAL1 PT-INR Value

N Mean Standard Deviation Minimum Maximum

---

|   |           |           |           |           |
|---|-----------|-----------|-----------|-----------|
| 2 | 1.8800000 | 0.1414214 | 1.7800000 | 1.9800000 |
|---|-----------|-----------|-----------|-----------|

---

Laboratory tests at the time of obtaining Table 2-6 consent, according to the presence or absence of proton-pump inhibitors

Unique Subject Identifier=1195000000-0009

MEANS Procedure

Assay variable : PTINR\_VAL1 PT-INR Value

N Mean Standard Deviation Minimum Maximum

---

|   |           |           |           |           |
|---|-----------|-----------|-----------|-----------|
| 4 | 2.1350000 | 0.4702836 | 1.8800000 | 2.8400000 |
|---|-----------|-----------|-----------|-----------|

---

Unique Subject Identifier=1195000000-0010

Assay variable : PTINR\_VAL1 PT-INR Value

N Mean Standard Deviation Minimum Maximum

---

|   |           |           |           |           |
|---|-----------|-----------|-----------|-----------|
| 6 | 1.8816667 | 0.2770138 | 1.4300000 | 2.1500000 |
|---|-----------|-----------|-----------|-----------|

---

Unique Subject Identifier=1195000000-0011

Assay variable : PTINR\_VAL1 PT-INR Value

N Mean Standard Deviation Minimum Maximum

---

|   |           |           |           |           |
|---|-----------|-----------|-----------|-----------|
| 5 | 1.9100000 | 0.2876630 | 1.5000000 | 2.2600000 |
|---|-----------|-----------|-----------|-----------|

---

Unique Subject Identifier=1195000000-0012

Assay variable : PTINR\_VAL1 PT-INR Value

N Mean Standard Deviation Minimum Maximum

---

|   |           |           |           |           |
|---|-----------|-----------|-----------|-----------|
| 4 | 1.6900000 | 0.1166190 | 1.5900000 | 1.8100000 |
|---|-----------|-----------|-----------|-----------|

---

Laboratory tests at the time of obtaining Table 2-6 consent, according to the presence or absence of proton-pump inhibitors

Unique Subject Identifier=1195000000-0013

MEANS Procedure

Assay variable : PTINR\_VAL1 PT-INR Value

N Mean Standard Deviation Minimum Maximum

---

|   |           |           |           |           |
|---|-----------|-----------|-----------|-----------|
| 4 | 1.3575000 | 0.1613227 | 1.1200000 | 1.4800000 |
|---|-----------|-----------|-----------|-----------|

---

Unique Subject Identifier=1195000000-0014

Assay variable : PTINR\_VAL1 PT-INR Value

N Mean Standard Deviation Minimum Maximum

---

|   |           |           |           |           |
|---|-----------|-----------|-----------|-----------|
| 4 | 1.9225000 | 0.6399154 | 1.3400000 | 2.8300000 |
|---|-----------|-----------|-----------|-----------|

---

Unique Subject Identifier=1195000000-0015

Assay variable : PTINR\_VAL1 PT-INR Value

N Mean Standard Deviation Minimum Maximum

---

|   |           |           |           |           |
|---|-----------|-----------|-----------|-----------|
| 4 | 1.2400000 | 0.0905539 | 1.1400000 | 1.3600000 |
|---|-----------|-----------|-----------|-----------|

---

Unique Subject Identifier=1195000000-0016

Assay variable : PTINR\_VAL1 PT-INR Value

N Mean Standard Deviation Minimum Maximum

---

|   |           |           |           |           |
|---|-----------|-----------|-----------|-----------|
| 4 | 2.4325000 | 0.2061351 | 2.2300000 | 2.6200000 |
|---|-----------|-----------|-----------|-----------|

---



Laboratory tests at the time of obtaining Table 2-6 consent, according to the presence or absence of proton-pump inhibitors

Unique Subject Identifier=1195000000-0017

MEANS Procedure

Assay variable : PTINR\_VAL1 PT-INR Value

N Mean Standard Deviation Minimum Maximum

---

|   |           |           |           |           |
|---|-----------|-----------|-----------|-----------|
| 4 | 1.8775000 | 0.1164403 | 1.7300000 | 2.0100000 |
|---|-----------|-----------|-----------|-----------|

---

Unique Subject Identifier=1195000000-0018

Assay variable : PTINR\_VAL1 PT-INR Value

N Mean Standard Deviation Minimum Maximum

---

|   |           |           |           |           |
|---|-----------|-----------|-----------|-----------|
| 5 | 1.3260000 | 0.1223928 | 1.1600000 | 1.4200000 |
|---|-----------|-----------|-----------|-----------|

---

Unique Subject Identifier=1195000000-0019

Assay variable : PTINR\_VAL1 PT-INR Value

N Mean Standard Deviation Minimum Maximum

---

|   |           |           |           |           |
|---|-----------|-----------|-----------|-----------|
| 5 | 1.4920000 | 0.0947101 | 1.3400000 | 1.6000000 |
|---|-----------|-----------|-----------|-----------|

---

Unique Subject Identifier=1195000000-0020

Assay variable : PTINR\_VAL1 PT-INR Value

N Mean Standard Deviation Minimum Maximum

---

|   |          |           |          |          |
|---|----------|-----------|----------|----------|
| 4 | 1.920000 | 0.0621825 | 1.870000 | 2.010000 |
|---|----------|-----------|----------|----------|

---

Laboratory tests at the time of obtaining Table 2-6 consent, according to the presence or absence of proton-pump inhibitors

Unique Subject Identifier=1198000000-0003

MEANS Procedure

Assay variable : PTINR\_VAL1 PT-INR Value

N Mean Standard Deviation Minimum Maximum

---

|   |           |           |           |           |
|---|-----------|-----------|-----------|-----------|
| 6 | 2.0616667 | 0.3142876 | 1.6500000 | 2.6000000 |
|---|-----------|-----------|-----------|-----------|

---

Unique Subject Identifier=1198000000-0005

Assay variable : PTINR\_VAL1 PT-INR Value

N Mean Standard Deviation Minimum Maximum

---

|   |           |           |           |           |
|---|-----------|-----------|-----------|-----------|
| 6 | 1.8083333 | 0.0970395 | 1.6500000 | 1.9000000 |
|---|-----------|-----------|-----------|-----------|

---

Unique Subject Identifier=1198000000-0008

Assay variable : PTINR\_VAL1 PT-INR Value

N Mean Standard Deviation Minimum Maximum

---

|   |           |           |           |           |
|---|-----------|-----------|-----------|-----------|
| 6 | 1.9200000 | 0.1963670 | 1.7000000 | 2.1600000 |
|---|-----------|-----------|-----------|-----------|

---

Unique Subject Identifier=1198000000-0009

Assay variable : PTINR\_VAL1 PT-INR Value

N Mean Standard Deviation Minimum Maximum

---

|   |           |           |           |           |
|---|-----------|-----------|-----------|-----------|
| 6 | 1.6250000 | 0.1635543 | 1.4000000 | 1.8500000 |
|---|-----------|-----------|-----------|-----------|

---

Laboratory tests at the time of obtaining Table 2-6 consent, according to the presence or absence of proton-pump inhibitors

Unique Subject Identifier=1198000000-0010

MEANS Procedure

Assay variable : PTINR\_VAL1 PT-INR Value

| N | Mean      | Standard Deviation | Minimum   | Maximum   |
|---|-----------|--------------------|-----------|-----------|
| 5 | 1.6800000 | 0.3213254          | 1.1500000 | 2.0000000 |

Unique Subject Identifier=1198000000-0011

Assay variable : PTINR\_VAL1 PT-INR Value

| N | Mean      | Standard Deviation | Minimum   | Maximum   |
|---|-----------|--------------------|-----------|-----------|
| 6 | 2.2183333 | 0.1158303          | 2.0100000 | 2.3100000 |

Unique Subject Identifier=1198000000-0014

Assay variable : PTINR\_VAL1 PT-INR Value

| N | Mean      | Standard Deviation | Minimum   | Maximum   |
|---|-----------|--------------------|-----------|-----------|
| 5 | 2.3660000 | 0.0536656          | 2.3000000 | 2.4500000 |

Unique Subject Identifier=1198000000-0015

Assay variable : PTINR\_VAL1 PT-INR Value

N Mean Standard Deviation Minimum Maximum

---

|   |           |           |           |           |
|---|-----------|-----------|-----------|-----------|
| 6 | 1.5350000 | 0.2105944 | 1.1500000 | 1.7500000 |
|---|-----------|-----------|-----------|-----------|

---

Laboratory tests at the time of obtaining Table 2-6 consent, according to the presence or absence of proton-pump inhibitors

Unique Subject Identifier=1198000000-0017

MEANS Procedure

Assay variable : PTINR\_VAL1 PT-INR Value

| N | Mean      | Standard Deviation | Minimum   | Maximum   |
|---|-----------|--------------------|-----------|-----------|
| 5 | 2.3000000 | 0.0651920          | 2.2100000 | 2.3600000 |

Unique Subject Identifier=1198000000-0018

Assay variable : PTINR\_VAL1 PT-INR Value

| N | Mean      | Standard Deviation | Minimum   | Maximum   |
|---|-----------|--------------------|-----------|-----------|
| 6 | 1.7033333 | 0.6047038          | 0.4900000 | 2.0600000 |

Unique Subject Identifier=1198000000-0021

Assay variable : PTINR\_VAL1 PT-INR Value

| N | Mean      | Standard Deviation | Minimum   | Maximum   |
|---|-----------|--------------------|-----------|-----------|
| 2 | 1.9500000 | 0                  | 1.9500000 | 1.9500000 |

Unique Subject Identifier=1198000000-0023

Assay variable : PTINR\_VAL1 PT-INR Value

N Mean Standard Deviation Minimum Maximum

---

|   |          |           |          |          |
|---|----------|-----------|----------|----------|
| 5 | 2.240000 | 0.0908295 | 2.110000 | 2.360000 |
|---|----------|-----------|----------|----------|

---



Laboratory tests at the time of obtaining Table 2-6 consent, according to the presence or absence of proton-pump inhibitors

Unique Subject Identifier=1198000000-0024

MEANS Procedure

Assay variable : PTINR\_VAL1 PT-INR Value

| N | Mean      | Standard Deviation | Minimum   | Maximum   |
|---|-----------|--------------------|-----------|-----------|
| 2 | 2.2100000 | 0.0707107          | 2.1600000 | 2.2600000 |

Unique Subject Identifier=1198000000-0026

Assay variable : PTINR\_VAL1 PT-INR Value

| N | Mean      | Standard Deviation | Minimum   | Maximum   |
|---|-----------|--------------------|-----------|-----------|
| 5 | 1.5820000 | 0.3864842          | 1.1500000 | 2.0600000 |

Unique Subject Identifier=1198000000-0029

Assay variable : PTINR\_VAL1 PT-INR Value

| N | Mean      | Standard Deviation | Minimum   | Maximum   |
|---|-----------|--------------------|-----------|-----------|
| 5 | 1.7740000 | 0.3963332          | 1.3500000 | 2.3100000 |

Unique Subject Identifier=1198000000-0030

Assay variable : PTINR\_VAL1 PT-INR Value

N Mean Standard Deviation Minimum Maximum

---

|   |           |           |           |           |
|---|-----------|-----------|-----------|-----------|
| 5 | 1.8860000 | 0.2642537 | 1.5500000 | 2.1100000 |
|---|-----------|-----------|-----------|-----------|

---

Laboratory tests at the time of obtaining Table 2-6 consent, according to the presence or absence of proton-pump inhibitors

Unique Subject Identifier=1198000000-0031

MEANS Procedure

Assay variable : PTINR\_VAL1 PT-INR Value

N Mean Standard Deviation Minimum Maximum

---

|   |           |           |           |           |
|---|-----------|-----------|-----------|-----------|
| 5 | 1.9940000 | 0.4897755 | 1.4000000 | 2.6000000 |
|---|-----------|-----------|-----------|-----------|

---

Unique Subject Identifier=1198000000-0032

Assay variable : PTINR\_VAL1 PT-INR Value

N Mean Standard Deviation Minimum Maximum

---

|   |           |           |           |           |
|---|-----------|-----------|-----------|-----------|
| 5 | 1.6720000 | 0.4745208 | 0.8500000 | 2.0600000 |
|---|-----------|-----------|-----------|-----------|

---

Unique Subject Identifier=1198000000-0033

Assay variable : PTINR\_VAL1 PT-INR Value

N Mean Standard Deviation Minimum Maximum

---

|   |           |           |           |           |
|---|-----------|-----------|-----------|-----------|
| 2 | 0.4950000 | 0.5020458 | 0.1400000 | 0.8500000 |
|---|-----------|-----------|-----------|-----------|

---

Unique Subject Identifier=1198000000-0034

Assay variable : PTINR\_VAL1 PT-INR Value

N Mean Standard Deviation Minimum Maximum

---

|   |          |           |          |          |
|---|----------|-----------|----------|----------|
| 2 | 1.145000 | 0.9263099 | 0.490000 | 1.800000 |
|---|----------|-----------|----------|----------|

---

Laboratory tests at the time of obtaining Table 2-6 consent, according to the presence or absence of proton-pump inhibitors

Unique Subject Identifier=1198000000-0035

MEANS Procedure

Assay variable : PTINR\_VAL1 PT-INR Value

| N | Mean      | Standard Deviation | Minimum   | Maximum   |
|---|-----------|--------------------|-----------|-----------|
| 2 | 2.3350000 | 0.0353553          | 2.3100000 | 2.3600000 |

Unique Subject Identifier=1198000000-0039

Assay variable : PTINR\_VAL1 PT-INR Value

| N | Mean      | Standard Deviation | Minimum   | Maximum   |
|---|-----------|--------------------|-----------|-----------|
| 6 | 1.9050000 | 0.1755847          | 1.7000000 | 2.1100000 |

Unique Subject Identifier=1198000000-0041

Assay variable : PTINR\_VAL1 PT-INR Value

| N | Mean      | Standard Deviation | Minimum   | Maximum   |
|---|-----------|--------------------|-----------|-----------|
| 6 | 2.3350000 | 0.0689202          | 2.2100000 | 2.4100000 |

Unique Subject Identifier=1200010111-0005

Assay variable : PTINR\_VAL1 PT-INR Value

N Mean Standard Deviation Minimum Maximum

---

|   |           |           |           |           |
|---|-----------|-----------|-----------|-----------|
| 4 | 1.5250000 | 0.2500000 | 1.4000000 | 1.9000000 |
|---|-----------|-----------|-----------|-----------|

---

Laboratory tests at the time of obtaining Table 2-6 consent, according to the presence or absence of proton-pump inhibitors

Unique Subject Identifier=1200010111-0007

MEANS Procedure

Assay variable : PTINR\_VAL1 PT-INR Value

N Mean Standard Deviation Minimum Maximum

---

|   |           |           |           |           |
|---|-----------|-----------|-----------|-----------|
| 3 | 1.9000000 | 0.1732051 | 1.7000000 | 2.0000000 |
|---|-----------|-----------|-----------|-----------|

---

Unique Subject Identifier=1200010111-0013

Assay variable : PTINR\_VAL1 PT-INR Value

N Mean Standard Deviation Minimum Maximum

---

|   |           |           |           |           |
|---|-----------|-----------|-----------|-----------|
| 3 | 1.8000000 | 0.1000000 | 1.7000000 | 1.9000000 |
|---|-----------|-----------|-----------|-----------|

---

Unique Subject Identifier=1200010111-0019

Assay variable : PTINR\_VAL1 PT-INR Value

N Mean Standard Deviation Minimum Maximum

---

|   |           |           |           |           |
|---|-----------|-----------|-----------|-----------|
| 3 | 1.6333333 | 0.2081666 | 1.4000000 | 1.8000000 |
|---|-----------|-----------|-----------|-----------|

---

Unique Subject Identifier=1200010111-0020

Assay variable : PTINR\_VAL1 PT-INR Value

N Mean Standard Deviation Minimum Maximum

---

|   |          |          |          |          |
|---|----------|----------|----------|----------|
| 3 | 1.600000 | 0.200000 | 1.400000 | 1.800000 |
|---|----------|----------|----------|----------|

---



Laboratory tests at the time of obtaining Table 2-6 consent, according to the presence or absence of proton-pump inhibitors

Unique Subject Identifier=1200010111-0026

MEANS Procedure

Assay variable : PTINR\_VAL1 PT-INR Value

N Mean Standard Deviation Minimum Maximum

---

|   |           |  |           |           |
|---|-----------|--|-----------|-----------|
| 1 | 1.6000000 |  | 1.6000000 | 1.6000000 |
|---|-----------|--|-----------|-----------|

---

Unique Subject Identifier=1201000000-0001

Assay variable : PTINR\_VAL1 PT-INR Value

N Mean Standard Deviation Minimum Maximum

---

|   |           |           |           |           |
|---|-----------|-----------|-----------|-----------|
| 4 | 1.7175000 | 0.0997914 | 1.6100000 | 1.8400000 |
|---|-----------|-----------|-----------|-----------|

---

Unique Subject Identifier=1201000000-0003

Assay variable : PTINR\_VAL1 PT-INR Value

N Mean Standard Deviation Minimum Maximum

---

|   |           |           |           |           |
|---|-----------|-----------|-----------|-----------|
| 4 | 1.5600000 | 0.1540563 | 1.4200000 | 1.7600000 |
|---|-----------|-----------|-----------|-----------|

---

Unique Subject Identifier=1201000000-0004

Assay variable : PTINR\_VAL1 PT-INR Value

N Mean Standard Deviation Minimum Maximum

---

|   |           |           |           |           |
|---|-----------|-----------|-----------|-----------|
| 5 | 1.9460000 | 0.3261595 | 1.4400000 | 2.3000000 |
|---|-----------|-----------|-----------|-----------|

---

Laboratory tests at the time of obtaining Table 2-6 consent, according to the presence or absence of proton-pump inhibitors

Unique Subject Identifier=1201000000-0007

MEANS Procedure

Assay variable : PTINR\_VAL1 PT-INR Value

N Mean Standard Deviation Minimum Maximum

---

|   |           |           |           |           |
|---|-----------|-----------|-----------|-----------|
| 5 | 1.9120000 | 0.3495283 | 1.4300000 | 2.2400000 |
|---|-----------|-----------|-----------|-----------|

---

Unique Subject Identifier=1201000000-0008

Assay variable : PTINR\_VAL1 PT-INR Value

N Mean Standard Deviation Minimum Maximum

---

|   |           |           |           |           |
|---|-----------|-----------|-----------|-----------|
| 4 | 2.0050000 | 0.3845777 | 1.4800000 | 2.3700000 |
|---|-----------|-----------|-----------|-----------|

---

Unique Subject Identifier=1201000000-0010

Assay variable : PTINR\_VAL1 PT-INR Value

N Mean Standard Deviation Minimum Maximum

---

|   |           |           |           |           |
|---|-----------|-----------|-----------|-----------|
| 4 | 1.8475000 | 0.1090489 | 1.6900000 | 1.9300000 |
|---|-----------|-----------|-----------|-----------|

---

Unique Subject Identifier=1201000000-0011

Assay variable : PTINR\_VAL1 PT-INR Value

N Mean Standard Deviation Minimum Maximum

---

|   |          |           |          |          |
|---|----------|-----------|----------|----------|
| 4 | 1.740000 | 0.1476482 | 1.600000 | 1.930000 |
|---|----------|-----------|----------|----------|

---

Laboratory tests at the time of obtaining Table 2-6 consent, according to the presence or absence of proton-pump inhibitors

Unique Subject Identifier=1203010000-0001

MEANS Procedure

Assay variable : PTINR\_VAL1 PT-INR Value

| N | Mean      | Standard Deviation | Minimum   | Maximum   |
|---|-----------|--------------------|-----------|-----------|
| 5 | 2.3280000 | 0.3598194          | 2.0300000 | 2.9400000 |

Unique Subject Identifier=1203010000-0004

Assay variable : PTINR\_VAL1 PT-INR Value

| N | Mean      | Standard Deviation | Minimum   | Maximum   |
|---|-----------|--------------------|-----------|-----------|
| 6 | 2.3183333 | 0.3921947          | 1.8800000 | 3.0100000 |

Unique Subject Identifier=1203010000-0005

Assay variable : PTINR\_VAL1 PT-INR Value

| N | Mean      | Standard Deviation | Minimum   | Maximum   |
|---|-----------|--------------------|-----------|-----------|
| 6 | 2.0366667 | 0.3356586          | 1.6800000 | 2.6100000 |

Unique Subject Identifier=1203010000-0006

Assay variable : PTINR\_VAL1 PT-INR Value

N Mean Standard Deviation Minimum Maximum

---

|   |           |           |           |           |
|---|-----------|-----------|-----------|-----------|
| 6 | 2.7866667 | 0.2260678 | 2.4300000 | 3.0400000 |
|---|-----------|-----------|-----------|-----------|

---

Laboratory tests at the time of obtaining Table 2-6 consent, according to the presence or absence of proton-pump inhibitors

Unique Subject Identifier=1203010000-0007

MEANS Procedure

Assay variable : PTINR\_VAL1 PT-INR Value

N Mean Standard Deviation Minimum Maximum

---

|   |           |           |           |           |
|---|-----------|-----------|-----------|-----------|
| 6 | 2.6633333 | 0.5982530 | 2.0900000 | 3.7300000 |
|---|-----------|-----------|-----------|-----------|

---

Unique Subject Identifier=1203010000-0009

Assay variable : PTINR\_VAL1 PT-INR Value

N Mean Standard Deviation Minimum Maximum

---

|   |           |           |           |           |
|---|-----------|-----------|-----------|-----------|
| 6 | 2.1983333 | 0.7104764 | 1.5100000 | 3.4000000 |
|---|-----------|-----------|-----------|-----------|

---

Unique Subject Identifier=1203010000-0010

Assay variable : PTINR\_VAL1 PT-INR Value

N Mean Standard Deviation Minimum Maximum

---

|   |           |           |           |           |
|---|-----------|-----------|-----------|-----------|
| 6 | 2.8366667 | 0.6295289 | 2.1100000 | 3.8500000 |
|---|-----------|-----------|-----------|-----------|

---

Unique Subject Identifier=1203010000-0012

Assay variable : PTINR\_VAL1 PT-INR Value

N Mean Standard Deviation Minimum Maximum

---

|   |          |           |          |          |
|---|----------|-----------|----------|----------|
| 6 | 2.440000 | 1.1452161 | 1.010000 | 4.160000 |
|---|----------|-----------|----------|----------|

---



Laboratory tests at the time of obtaining Table 2-6 consent, according to the presence or absence of proton-pump inhibitors

Unique Subject Identifier=1203010000-0013

MEANS Procedure

Assay variable : PTINR\_VAL1 PT-INR Value

N Mean Standard Deviation Minimum Maximum

---

|   |           |           |           |           |
|---|-----------|-----------|-----------|-----------|
| 6 | 2.3300000 | 0.2451938 | 2.0200000 | 2.6900000 |
|---|-----------|-----------|-----------|-----------|

---

Unique Subject Identifier=1203010000-0016

Assay variable : PTINR\_VAL1 PT-INR Value

N Mean Standard Deviation Minimum Maximum

---

|   |           |           |           |           |
|---|-----------|-----------|-----------|-----------|
| 6 | 2.3400000 | 0.4595215 | 1.6400000 | 3.0600000 |
|---|-----------|-----------|-----------|-----------|

---

Unique Subject Identifier=1203010000-0017

Assay variable : PTINR\_VAL1 PT-INR Value

N Mean Standard Deviation Minimum Maximum

---

|   |           |           |           |           |
|---|-----------|-----------|-----------|-----------|
| 6 | 2.4350000 | 1.0120623 | 1.1200000 | 3.8800000 |
|---|-----------|-----------|-----------|-----------|

---

Unique Subject Identifier=1203010000-0018

Assay variable : PTINR\_VAL1 PT-INR Value

N Mean Standard Deviation Minimum Maximum

---

|   |           |           |           |           |
|---|-----------|-----------|-----------|-----------|
| 6 | 2.6266667 | 0.4180750 | 2.0200000 | 3.3200000 |
|---|-----------|-----------|-----------|-----------|

---

Laboratory tests at the time of obtaining Table 2-6 consent, according to the presence or absence of proton-pump inhibitors

Unique Subject Identifier=1203010000-0020

MEANS Procedure

Assay variable : PTINR\_VAL1 PT-INR Value

N Mean Standard Deviation Minimum Maximum

---

|   |           |           |           |           |
|---|-----------|-----------|-----------|-----------|
| 6 | 2.3416667 | 0.3456829 | 1.9700000 | 2.7900000 |
|---|-----------|-----------|-----------|-----------|

---

Unique Subject Identifier=1203010000-0022

Assay variable : PTINR\_VAL1 PT-INR Value

N Mean Standard Deviation Minimum Maximum

---

|   |           |           |           |           |
|---|-----------|-----------|-----------|-----------|
| 6 | 2.2500000 | 0.2279474 | 1.9900000 | 2.6300000 |
|---|-----------|-----------|-----------|-----------|

---

Unique Subject Identifier=1203010000-0024

Assay variable : PTINR\_VAL1 PT-INR Value

N Mean Standard Deviation Minimum Maximum

---

|   |           |           |           |           |
|---|-----------|-----------|-----------|-----------|
| 6 | 2.2000000 | 0.0822192 | 2.0600000 | 2.3000000 |
|---|-----------|-----------|-----------|-----------|

---

Unique Subject Identifier=1203010000-0026

Assay variable : PTINR\_VAL1 PT-INR Value

N Mean Standard Deviation Minimum Maximum

---

|   |           |           |           |           |
|---|-----------|-----------|-----------|-----------|
| 6 | 2.0316667 | 0.1986370 | 1.7900000 | 2.3800000 |
|---|-----------|-----------|-----------|-----------|

---

Laboratory tests at the time of obtaining Table 2-6 consent, according to the presence or absence of proton-pump inhibitors

Unique Subject Identifier=1203010000-0028

MEANS Procedure

Assay variable : PTINR\_VAL1 PT-INR Value

N Mean Standard Deviation Minimum Maximum

---

|   |           |           |           |           |
|---|-----------|-----------|-----------|-----------|
| 6 | 2.4366667 | 0.9070759 | 1.7500000 | 4.1600000 |
|---|-----------|-----------|-----------|-----------|

---

Unique Subject Identifier=1203010000-0030

Assay variable : PTINR\_VAL1 PT-INR Value

N Mean Standard Deviation Minimum Maximum

---

|   |           |           |           |           |
|---|-----------|-----------|-----------|-----------|
| 6 | 2.0050000 | 0.3174114 | 1.6800000 | 2.5800000 |
|---|-----------|-----------|-----------|-----------|

---

Unique Subject Identifier=1203010000-0031

Assay variable : PTINR\_VAL1 PT-INR Value

N Mean Standard Deviation Minimum Maximum

---

|   |           |           |           |           |
|---|-----------|-----------|-----------|-----------|
| 6 | 2.6183333 | 0.3869582 | 2.2100000 | 3.1200000 |
|---|-----------|-----------|-----------|-----------|

---

Unique Subject Identifier=1203010000-0038

Assay variable : PTINR\_VAL1 PT-INR Value

N Mean Standard Deviation Minimum Maximum

---

|   |           |           |           |           |
|---|-----------|-----------|-----------|-----------|
| 6 | 2.6850000 | 0.5224844 | 2.0900000 | 3.4600000 |
|---|-----------|-----------|-----------|-----------|

---

Laboratory tests at the time of obtaining Table 2-6 consent, according to the presence or absence of proton-pump inhibitors

Unique Subject Identifier=1203010000-0040

MEANS Procedure

Assay variable : PTINR\_VAL1 PT-INR Value

N Mean Standard Deviation Minimum Maximum

---

|   |           |           |           |           |
|---|-----------|-----------|-----------|-----------|
| 6 | 1.8400000 | 0.1788854 | 1.5500000 | 2.0600000 |
|---|-----------|-----------|-----------|-----------|

---

Unique Subject Identifier=1206000000-0003

Assay variable : PTINR\_VAL1 PT-INR Value

N Mean Standard Deviation Minimum Maximum

---

|   |           |           |           |           |
|---|-----------|-----------|-----------|-----------|
| 3 | 2.3833333 | 0.2050203 | 2.1800000 | 2.5900000 |
|---|-----------|-----------|-----------|-----------|

---

Unique Subject Identifier=1211000000-0028

Assay variable : PTINR\_VAL1 PT-INR Value

N Mean Standard Deviation Minimum Maximum

---

|   |           |           |           |           |
|---|-----------|-----------|-----------|-----------|
| 5 | 2.1600000 | 0.3847077 | 1.7000000 | 2.5000000 |
|---|-----------|-----------|-----------|-----------|

---

Unique Subject Identifier=1211000000-0036

Assay variable : PTINR\_VAL1 PT-INR Value

N Mean Standard Deviation Minimum Maximum

---

|   |          |          |          |          |
|---|----------|----------|----------|----------|
| 5 | 1.520000 | 0.130384 | 1.400000 | 1.700000 |
|---|----------|----------|----------|----------|

---



Laboratory tests at the time of obtaining Table 2-6 consent, according to the presence or absence of proton-pump inhibitors

Unique Subject Identifier=1212000000-0001

MEANS Procedure

Assay variable : PTINR\_VAL1 PT-INR Value

N Mean Standard Deviation Minimum Maximum

---

|   |           |           |           |           |
|---|-----------|-----------|-----------|-----------|
| 6 | 1.9650000 | 0.3414528 | 1.6200000 | 2.5300000 |
|---|-----------|-----------|-----------|-----------|

---

Unique Subject Identifier=1212000000-0002

Assay variable : PTINR\_VAL1 PT-INR Value

N Mean Standard Deviation Minimum Maximum

---

|   |           |           |           |           |
|---|-----------|-----------|-----------|-----------|
| 6 | 2.0916667 | 0.7101385 | 1.4500000 | 3.4000000 |
|---|-----------|-----------|-----------|-----------|

---

Unique Subject Identifier=1212000000-0003

Assay variable : PTINR\_VAL1 PT-INR Value

N Mean Standard Deviation Minimum Maximum

---

|   |           |           |           |           |
|---|-----------|-----------|-----------|-----------|
| 6 | 2.2216667 | 0.3413747 | 1.9000000 | 2.6500000 |
|---|-----------|-----------|-----------|-----------|

---

Unique Subject Identifier=1212000000-0004

Assay variable : PTINR\_VAL1 PT-INR Value

N Mean Standard Deviation Minimum Maximum

---

|   |           |           |           |           |
|---|-----------|-----------|-----------|-----------|
| 5 | 1.9220000 | 0.6746999 | 1.4900000 | 3.1200000 |
|---|-----------|-----------|-----------|-----------|

---

Laboratory tests at the time of obtaining Table 2-6 consent, according to the presence or absence of proton-pump inhibitors

Unique Subject Identifier=1212000000-0005

MEANS Procedure

Assay variable : PTINR\_VAL1 PT-INR Value

N Mean Standard Deviation Minimum Maximum

---

|   |           |           |           |           |
|---|-----------|-----------|-----------|-----------|
| 6 | 1.9483333 | 0.2242692 | 1.7200000 | 2.3500000 |
|---|-----------|-----------|-----------|-----------|

---

Unique Subject Identifier=1212000000-0006

Assay variable : PTINR\_VAL1 PT-INR Value

N Mean Standard Deviation Minimum Maximum

---

|   |           |           |           |           |
|---|-----------|-----------|-----------|-----------|
| 6 | 2.3450000 | 0.3283748 | 1.8300000 | 2.7300000 |
|---|-----------|-----------|-----------|-----------|

---

Unique Subject Identifier=1212000000-0007

Assay variable : PTINR\_VAL1 PT-INR Value

N Mean Standard Deviation Minimum Maximum

---

|   |           |           |           |           |
|---|-----------|-----------|-----------|-----------|
| 3 | 2.2766667 | 0.1101514 | 2.1500000 | 2.3500000 |
|---|-----------|-----------|-----------|-----------|

---

Unique Subject Identifier=1212000000-0011

Assay variable : PTINR\_VAL1 PT-INR Value

N Mean Standard Deviation Minimum Maximum

---

|   |           |           |           |           |
|---|-----------|-----------|-----------|-----------|
| 6 | 1.7366667 | 0.2789743 | 1.3100000 | 2.1300000 |
|---|-----------|-----------|-----------|-----------|

---

Laboratory tests at the time of obtaining Table 2-6 consent, according to the presence or absence of proton-pump inhibitors

Unique Subject Identifier=1212000000-0012

MEANS Procedure

Assay variable : PTINR\_VAL1 PT-INR Value

N Mean Standard Deviation Minimum Maximum

---

|   |           |           |           |           |
|---|-----------|-----------|-----------|-----------|
| 4 | 1.7750000 | 0.4110556 | 1.4900000 | 2.3800000 |
|---|-----------|-----------|-----------|-----------|

---

Unique Subject Identifier=1212000000-0013

Assay variable : PTINR\_VAL1 PT-INR Value

N Mean Standard Deviation Minimum Maximum

---

|   |           |           |           |           |
|---|-----------|-----------|-----------|-----------|
| 6 | 1.8283333 | 0.2626341 | 1.4700000 | 2.0900000 |
|---|-----------|-----------|-----------|-----------|

---

Unique Subject Identifier=1212000000-0014

Assay variable : PTINR\_VAL1 PT-INR Value

N Mean Standard Deviation Minimum Maximum

---

|   |           |           |           |           |
|---|-----------|-----------|-----------|-----------|
| 6 | 2.3200000 | 0.2384114 | 1.9800000 | 2.6300000 |
|---|-----------|-----------|-----------|-----------|

---

Unique Subject Identifier=1212000000-0015

Assay variable : PTINR\_VAL1 PT-INR Value

N Mean Standard Deviation Minimum Maximum

---

|   |           |           |           |           |
|---|-----------|-----------|-----------|-----------|
| 5 | 2.0980000 | 0.4196070 | 1.7500000 | 2.5800000 |
|---|-----------|-----------|-----------|-----------|

---

Laboratory tests at the time of obtaining Table 2-6 consent, according to the presence or absence of proton-pump inhibitors

Unique Subject Identifier=1212000000-0017

MEANS Procedure

Assay variable : PTINR\_VAL1 PT-INR Value

N Mean Standard Deviation Minimum Maximum

---

|   |           |           |           |           |
|---|-----------|-----------|-----------|-----------|
| 5 | 2.4480000 | 0.3210452 | 2.1600000 | 2.9800000 |
|---|-----------|-----------|-----------|-----------|

---

Unique Subject Identifier=1216000000-0001

Assay variable : PTINR\_VAL1 PT-INR Value

N Mean Standard Deviation Minimum Maximum

---

|   |           |           |           |           |
|---|-----------|-----------|-----------|-----------|
| 5 | 1.3360000 | 0.4370698 | 1.0600000 | 2.1100000 |
|---|-----------|-----------|-----------|-----------|

---

Unique Subject Identifier=1216000000-0002

Assay variable : PTINR\_VAL1 PT-INR Value

N Mean Standard Deviation Minimum Maximum

---

|   |           |           |           |           |
|---|-----------|-----------|-----------|-----------|
| 5 | 1.5400000 | 0.2750455 | 1.0900000 | 1.7900000 |
|---|-----------|-----------|-----------|-----------|

---

Unique Subject Identifier=1216000000-0003

Assay variable : PTINR\_VAL1 PT-INR Value

N Mean Standard Deviation Minimum Maximum

---

|   |           |           |           |           |
|---|-----------|-----------|-----------|-----------|
| 5 | 1.7820000 | 0.6529701 | 1.2300000 | 2.6000000 |
|---|-----------|-----------|-----------|-----------|

---



Laboratory tests at the time of obtaining Table 2-6 consent, according to the presence or absence of proton-pump inhibitors

Unique Subject Identifier=1216000000-0004

MEANS Procedure

Assay variable : PTINR\_VAL1 PT-INR Value

N Mean Standard Deviation Minimum Maximum

---

|   |           |           |           |           |
|---|-----------|-----------|-----------|-----------|
| 3 | 1.3433333 | 0.1619671 | 1.2400000 | 1.5300000 |
|---|-----------|-----------|-----------|-----------|

---

Unique Subject Identifier=1219000000-0002

Assay variable : PTINR\_VAL1 PT-INR Value

N Mean Standard Deviation Minimum Maximum

---

|   |           |           |           |           |
|---|-----------|-----------|-----------|-----------|
| 4 | 2.3425000 | 0.6785954 | 1.7700000 | 3.2500000 |
|---|-----------|-----------|-----------|-----------|

---

Unique Subject Identifier=1219000000-0004

Assay variable : PTINR\_VAL1 PT-INR Value

N Mean Standard Deviation Minimum Maximum

---

|   |           |           |           |           |
|---|-----------|-----------|-----------|-----------|
| 3 | 2.2533333 | 0.1289703 | 2.1100000 | 2.3600000 |
|---|-----------|-----------|-----------|-----------|

---

Unique Subject Identifier=1219000000-0005

Assay variable : PTINR\_VAL1 PT-INR Value

N Mean Standard Deviation Minimum Maximum

---

|   |           |           |           |           |
|---|-----------|-----------|-----------|-----------|
| 2 | 1.5700000 | 0.1272792 | 1.4800000 | 1.6600000 |
|---|-----------|-----------|-----------|-----------|

---

Laboratory tests at the time of obtaining Table 2-6 consent, according to the presence or absence of proton-pump inhibitors

Unique Subject Identifier=1219000000-0006

MEANS Procedure

Assay variable : PTINR\_VAL1 PT-INR Value

N Mean Standard Deviation Minimum Maximum

---

|   |           |           |           |           |
|---|-----------|-----------|-----------|-----------|
| 3 | 2.0300000 | 0.3315117 | 1.7600000 | 2.4000000 |
|---|-----------|-----------|-----------|-----------|

---

Unique Subject Identifier=1219000000-0007

Assay variable : PTINR\_VAL1 PT-INR Value

N Mean Standard Deviation Minimum Maximum

---

|   |           |   |           |           |
|---|-----------|---|-----------|-----------|
| 2 | 2.1700000 | 0 | 2.1700000 | 2.1700000 |
|---|-----------|---|-----------|-----------|

---

Unique Subject Identifier=1219000000-0009

Assay variable : PTINR\_VAL1 PT-INR Value

N Mean Standard Deviation Minimum Maximum

---

|   |           |           |           |           |
|---|-----------|-----------|-----------|-----------|
| 4 | 1.9000000 | 0.0787401 | 1.8000000 | 1.9900000 |
|---|-----------|-----------|-----------|-----------|

---

Unique Subject Identifier=1219000000-0010

Assay variable : PTINR\_VAL1 PT-INR Value

N Mean Standard Deviation Minimum Maximum

---

|   |           |           |           |           |
|---|-----------|-----------|-----------|-----------|
| 3 | 1.2733333 | 0.1700980 | 1.0800000 | 1.4000000 |
|---|-----------|-----------|-----------|-----------|

---

Laboratory tests at the time of obtaining Table 2-6 consent, according to the presence or absence of proton-pump inhibitors

Unique Subject Identifier=1219000000-0011

MEANS Procedure

Assay variable : PTINR\_VAL1 PT-INR Value

N Mean Standard Deviation Minimum Maximum

---

|   |           |           |           |           |
|---|-----------|-----------|-----------|-----------|
| 3 | 2.2500000 | 0.2007486 | 2.0600000 | 2.4600000 |
|---|-----------|-----------|-----------|-----------|

---

Unique Subject Identifier=1219000000-0013

Assay variable : PTINR\_VAL1 PT-INR Value

N Mean Standard Deviation Minimum Maximum

---

|   |           |           |           |           |
|---|-----------|-----------|-----------|-----------|
| 3 | 2.2433333 | 0.2608320 | 2.0500000 | 2.5400000 |
|---|-----------|-----------|-----------|-----------|

---

Unique Subject Identifier=1219000000-0014

Assay variable : PTINR\_VAL1 PT-INR Value

N Mean Standard Deviation Minimum Maximum

---

|   |           |           |           |           |
|---|-----------|-----------|-----------|-----------|
| 4 | 1.7850000 | 0.0723418 | 1.7200000 | 1.8700000 |
|---|-----------|-----------|-----------|-----------|

---

Unique Subject Identifier=1219000000-0016

Assay variable : PTINR\_VAL1 PT-INR Value

N Mean Standard Deviation Minimum Maximum

---

|   |           |           |           |           |
|---|-----------|-----------|-----------|-----------|
| 3 | 2.2466667 | 0.4842864 | 1.9000000 | 2.8000000 |
|---|-----------|-----------|-----------|-----------|

---

Laboratory tests at the time of obtaining Table 2-6 consent, according to the presence or absence of proton-pump inhibitors

Unique Subject Identifier=1219000000-0017

MEANS Procedure

Assay variable : PTINR\_VAL1 PT-INR Value

| N | Mean      | Standard Deviation | Minimum   | Maximum   |
|---|-----------|--------------------|-----------|-----------|
| 3 | 2.2833333 | 0.3089229          | 1.9500000 | 2.5600000 |

Unique Subject Identifier=1219000000-0018

Assay variable : PTINR\_VAL1 PT-INR Value

| N | Mean      | Standard Deviation | Minimum   | Maximum   |
|---|-----------|--------------------|-----------|-----------|
| 4 | 2.0450000 | 1.3675647          | 1.0200000 | 4.0600000 |

Unique Subject Identifier=1219000000-0021

Assay variable : PTINR\_VAL1 PT-INR Value

| N | Mean      | Standard Deviation | Minimum   | Maximum   |
|---|-----------|--------------------|-----------|-----------|
| 3 | 1.7666667 | 0.4128357          | 1.2900000 | 2.0100000 |

Unique Subject Identifier=1219000000-0023

Assay variable : PTINR\_VAL1 PT-INR Value

N Mean Standard Deviation Minimum Maximum

---

|   |          |           |          |          |
|---|----------|-----------|----------|----------|
| 3 | 2.210000 | 0.1571623 | 2.070000 | 2.380000 |
|---|----------|-----------|----------|----------|

---



Laboratory tests at the time of obtaining Table 2-6 consent, according to the presence or absence of proton-pump inhibitors

Unique Subject Identifier=1219000000-0024

MEANS Procedure

Assay variable : PTINR\_VAL1 PT-INR Value

N Mean Standard Deviation Minimum Maximum

---

|   |           |           |           |           |
|---|-----------|-----------|-----------|-----------|
| 3 | 2.2800000 | 0.1571623 | 2.1400000 | 2.4500000 |
|---|-----------|-----------|-----------|-----------|

---

Unique Subject Identifier=1219000000-0026

Assay variable : PTINR\_VAL1 PT-INR Value

N Mean Standard Deviation Minimum Maximum

---

|   |           |           |           |           |
|---|-----------|-----------|-----------|-----------|
| 2 | 1.7800000 | 0.1414214 | 1.6800000 | 1.8800000 |
|---|-----------|-----------|-----------|-----------|

---

Unique Subject Identifier=1219000000-0028

Assay variable : PTINR\_VAL1 PT-INR Value

N Mean Standard Deviation Minimum Maximum

---

|   |           |           |           |           |
|---|-----------|-----------|-----------|-----------|
| 4 | 2.2550000 | 0.4258717 | 1.6700000 | 2.6300000 |
|---|-----------|-----------|-----------|-----------|

---

Unique Subject Identifier=1219000000-0030

Assay variable : PTINR\_VAL1 PT-INR Value

N Mean Standard Deviation Minimum Maximum

---

|   |          |          |          |          |
|---|----------|----------|----------|----------|
| 3 | 1.800000 | 0.010000 | 1.790000 | 1.810000 |
|---|----------|----------|----------|----------|

---

Laboratory tests at the time of obtaining Table 2-6 consent, according to the presence or absence of proton-pump inhibitors

Unique Subject Identifier=1219000000-0033

MEANS Procedure

Assay variable : PTINR\_VAL1 PT-INR Value

| N | Mean      | Standard Deviation | Minimum   | Maximum   |
|---|-----------|--------------------|-----------|-----------|
| 3 | 1.8300000 | 0.8029321          | 1.1000000 | 2.6900000 |

Unique Subject Identifier=1219000000-0034

Assay variable : PTINR\_VAL1 PT-INR Value

| N | Mean      | Standard Deviation | Minimum   | Maximum   |
|---|-----------|--------------------|-----------|-----------|
| 4 | 1.5650000 | 0.0704746          | 1.4700000 | 1.6400000 |

Unique Subject Identifier=1219000000-0035

Assay variable : PTINR\_VAL1 PT-INR Value

| N | Mean      | Standard Deviation | Minimum   | Maximum   |
|---|-----------|--------------------|-----------|-----------|
| 1 | 1.9500000 |                    | 1.9500000 | 1.9500000 |

Unique Subject Identifier=1219000000-0036

Assay variable : PTINR\_VAL1 PT-INR Value

N Mean Standard Deviation Minimum Maximum

---

|   |          |           |          |          |
|---|----------|-----------|----------|----------|
| 2 | 2.020000 | 0.1697056 | 1.900000 | 2.140000 |
|---|----------|-----------|----------|----------|

---

Laboratory tests at the time of obtaining Table 2-6 consent, according to the presence or absence of proton-pump inhibitors

Unique Subject Identifier=1219000000-0037

MEANS Procedure

Assay variable : PTINR\_VAL1 PT-INR Value

N Mean Standard Deviation Minimum Maximum

---

|   |           |           |           |           |
|---|-----------|-----------|-----------|-----------|
| 4 | 2.3400000 | 0.2230097 | 2.0900000 | 2.6300000 |
|---|-----------|-----------|-----------|-----------|

---

Unique Subject Identifier=1221000000-0001

Assay variable : PTINR\_VAL1 PT-INR Value

N Mean Standard Deviation Minimum Maximum

---

|   |           |           |           |           |
|---|-----------|-----------|-----------|-----------|
| 6 | 2.1000000 | 0.5621388 | 1.5000000 | 3.1000000 |
|---|-----------|-----------|-----------|-----------|

---

Unique Subject Identifier=1221000000-0003

Assay variable : PTINR\_VAL1 PT-INR Value

N Mean Standard Deviation Minimum Maximum

---

|   |           |           |           |           |
|---|-----------|-----------|-----------|-----------|
| 5 | 1.9200000 | 0.3271085 | 1.7000000 | 2.5000000 |
|---|-----------|-----------|-----------|-----------|

---

Unique Subject Identifier=1222000000-0002

Assay variable : PTINR\_VAL1 PT-INR Value

N Mean Standard Deviation Minimum Maximum

---

|   |           |           |           |           |
|---|-----------|-----------|-----------|-----------|
| 6 | 2.5166667 | 0.4020779 | 1.9000000 | 3.1000000 |
|---|-----------|-----------|-----------|-----------|

---

Laboratory tests at the time of obtaining Table 2-6 consent, according to the presence or absence of proton-pump inhibitors

Unique Subject Identifier=1222000000-0003

MEANS Procedure

Assay variable : PTINR\_VAL1 PT-INR Value

N Mean Standard Deviation Minimum Maximum

---

|   |           |           |           |           |
|---|-----------|-----------|-----------|-----------|
| 5 | 2.3000000 | 0.1224745 | 2.1000000 | 2.4000000 |
|---|-----------|-----------|-----------|-----------|

---

Unique Subject Identifier=1222000000-0005

Assay variable : PTINR\_VAL1 PT-INR Value

N Mean Standard Deviation Minimum Maximum

---

|   |           |           |           |           |
|---|-----------|-----------|-----------|-----------|
| 6 | 1.9666667 | 0.3204164 | 1.7000000 | 2.5000000 |
|---|-----------|-----------|-----------|-----------|

---

Unique Subject Identifier=1222000000-0007

Assay variable : PTINR\_VAL1 PT-INR Value

N Mean Standard Deviation Minimum Maximum

---

|   |           |           |           |           |
|---|-----------|-----------|-----------|-----------|
| 4 | 2.0750000 | 0.0957427 | 2.0000000 | 2.2000000 |
|---|-----------|-----------|-----------|-----------|

---

Unique Subject Identifier=1222000000-0008

Assay variable : PTINR\_VAL1 PT-INR Value

N Mean Standard Deviation Minimum Maximum

---

|   |          |          |          |          |
|---|----------|----------|----------|----------|
| 5 | 1.820000 | 0.083666 | 1.700000 | 1.900000 |
|---|----------|----------|----------|----------|

---



Laboratory tests at the time of obtaining Table 2-6 consent, according to the presence or absence of proton-pump inhibitors

Unique Subject Identifier=1222000000-0009

MEANS Procedure

Assay variable : PTINR\_VAL1 PT-INR Value

N Mean Standard Deviation Minimum Maximum

---

|   |           |           |           |           |
|---|-----------|-----------|-----------|-----------|
| 5 | 1.8600000 | 0.2880972 | 1.5000000 | 2.2000000 |
|---|-----------|-----------|-----------|-----------|

---

Unique Subject Identifier=1222000000-0011

Assay variable : PTINR\_VAL1 PT-INR Value

N Mean Standard Deviation Minimum Maximum

---

|   |           |           |           |           |
|---|-----------|-----------|-----------|-----------|
| 5 | 1.6800000 | 0.1788854 | 1.5000000 | 1.9000000 |
|---|-----------|-----------|-----------|-----------|

---

Unique Subject Identifier=1222000000-0012

Assay variable : PTINR\_VAL1 PT-INR Value

N Mean Standard Deviation Minimum Maximum

---

|   |           |           |           |           |
|---|-----------|-----------|-----------|-----------|
| 6 | 1.8833333 | 0.3250641 | 1.6000000 | 2.5000000 |
|---|-----------|-----------|-----------|-----------|

---

Unique Subject Identifier=1223010000-0002

Assay variable : PTINR\_VAL1 PT-INR Value

N Mean Standard Deviation Minimum Maximum

---

|   |           |           |           |           |
|---|-----------|-----------|-----------|-----------|
| 4 | 2.2250000 | 0.4645787 | 1.6000000 | 2.7000000 |
|---|-----------|-----------|-----------|-----------|

---

Laboratory tests at the time of obtaining Table 2-6 consent, according to the presence or absence of proton-pump inhibitors

Unique Subject Identifier=1223010000-0003

MEANS Procedure

Assay variable : PTINR\_VAL1 PT-INR Value

N Mean Standard Deviation Minimum Maximum

---

|   |           |           |           |           |
|---|-----------|-----------|-----------|-----------|
| 4 | 2.4750000 | 0.8958236 | 1.6000000 | 3.7000000 |
|---|-----------|-----------|-----------|-----------|

---

Unique Subject Identifier=1223010000-0005

Assay variable : PTINR\_VAL1 PT-INR Value

N Mean Standard Deviation Minimum Maximum

---

|   |           |           |           |           |
|---|-----------|-----------|-----------|-----------|
| 4 | 2.3250000 | 0.2986079 | 2.0000000 | 2.7000000 |
|---|-----------|-----------|-----------|-----------|

---

Unique Subject Identifier=1223010000-0006

Assay variable : PTINR\_VAL1 PT-INR Value

N Mean Standard Deviation Minimum Maximum

---

|   |           |           |           |           |
|---|-----------|-----------|-----------|-----------|
| 4 | 1.6000000 | 0.2160247 | 1.3000000 | 1.8000000 |
|---|-----------|-----------|-----------|-----------|

---

Unique Subject Identifier=1223010000-0007

Assay variable : PTINR\_VAL1 PT-INR Value

N Mean Standard Deviation Minimum Maximum

---

|   |           |           |           |           |
|---|-----------|-----------|-----------|-----------|
| 6 | 1.8666667 | 0.3932768 | 1.1000000 | 2.2000000 |
|---|-----------|-----------|-----------|-----------|

---

Laboratory tests at the time of obtaining Table 2-6 consent, according to the presence or absence of proton-pump inhibitors

Unique Subject Identifier=1223010000-0008

MEANS Procedure

Assay variable : PTINR\_VAL1 PT-INR Value

N Mean Standard Deviation Minimum Maximum

---

|   |           |           |           |           |
|---|-----------|-----------|-----------|-----------|
| 6 | 2.2000000 | 0.1788854 | 2.0000000 | 2.5000000 |
|---|-----------|-----------|-----------|-----------|

---

Unique Subject Identifier=1223010000-0012

Assay variable : PTINR\_VAL1 PT-INR Value

N Mean Standard Deviation Minimum Maximum

---

|   |           |           |           |           |
|---|-----------|-----------|-----------|-----------|
| 5 | 1.8400000 | 0.2408319 | 1.6000000 | 2.1000000 |
|---|-----------|-----------|-----------|-----------|

---

Unique Subject Identifier=1223010000-0013

Assay variable : PTINR\_VAL1 PT-INR Value

N Mean Standard Deviation Minimum Maximum

---

|   |           |           |           |           |
|---|-----------|-----------|-----------|-----------|
| 5 | 1.7800000 | 0.1303840 | 1.6000000 | 1.9000000 |
|---|-----------|-----------|-----------|-----------|

---

Unique Subject Identifier=1223010000-0015

Assay variable : PTINR\_VAL1 PT-INR Value

N Mean Standard Deviation Minimum Maximum

---

|   |           |           |           |           |
|---|-----------|-----------|-----------|-----------|
| 4 | 2.0500000 | 0.1290994 | 1.9000000 | 2.2000000 |
|---|-----------|-----------|-----------|-----------|

---

Laboratory tests at the time of obtaining Table 2-6 consent, according to the presence or absence of proton-pump inhibitors

Unique Subject Identifier=1223010000-0018

MEANS Procedure

Assay variable : PTINR\_VAL1 PT-INR Value

N Mean Standard Deviation Minimum Maximum

---

|   |           |           |           |           |
|---|-----------|-----------|-----------|-----------|
| 5 | 2.0200000 | 0.5761944 | 1.5000000 | 2.9000000 |
|---|-----------|-----------|-----------|-----------|

---

Unique Subject Identifier=1223010000-0021

Assay variable : PTINR\_VAL1 PT-INR Value

N Mean Standard Deviation Minimum Maximum

---

|   |           |           |           |           |
|---|-----------|-----------|-----------|-----------|
| 6 | 1.8666667 | 0.1632993 | 1.7000000 | 2.1000000 |
|---|-----------|-----------|-----------|-----------|

---

Unique Subject Identifier=1223010000-0023

Assay variable : PTINR\_VAL1 PT-INR Value

N Mean Standard Deviation Minimum Maximum

---

|   |           |           |           |           |
|---|-----------|-----------|-----------|-----------|
| 4 | 1.8500000 | 0.2081666 | 1.6000000 | 2.1000000 |
|---|-----------|-----------|-----------|-----------|

---

Unique Subject Identifier=1223010000-0025

Assay variable : PTINR\_VAL1 PT-INR Value

N Mean Standard Deviation Minimum Maximum

---

|   |           |           |           |           |
|---|-----------|-----------|-----------|-----------|
| 6 | 1.7500000 | 0.0836660 | 1.7000000 | 1.9000000 |
|---|-----------|-----------|-----------|-----------|

---



Laboratory tests at the time of obtaining Table 2-6 consent, according to the presence or absence of proton-pump inhibitors

Unique Subject Identifier=1223010000-0030

MEANS Procedure

Assay variable : PTINR\_VAL1 PT-INR Value

N Mean Standard Deviation Minimum Maximum

---

|   |           |           |           |           |
|---|-----------|-----------|-----------|-----------|
| 4 | 1.9000000 | 0.1825742 | 1.7000000 | 2.1000000 |
|---|-----------|-----------|-----------|-----------|

---

Unique Subject Identifier=1223010000-0031

Assay variable : PTINR\_VAL1 PT-INR Value

N Mean Standard Deviation Minimum Maximum

---

|   |           |           |           |           |
|---|-----------|-----------|-----------|-----------|
| 5 | 2.0000000 | 0.2236068 | 1.7000000 | 2.3000000 |
|---|-----------|-----------|-----------|-----------|

---

Unique Subject Identifier=1223010000-0033

Assay variable : PTINR\_VAL1 PT-INR Value

N Mean Standard Deviation Minimum Maximum

---

|   |           |           |           |           |
|---|-----------|-----------|-----------|-----------|
| 4 | 2.3250000 | 0.3862210 | 1.8000000 | 2.7000000 |
|---|-----------|-----------|-----------|-----------|

---

Unique Subject Identifier=1223010000-0035

Assay variable : PTINR\_VAL1 PT-INR Value

N Mean Standard Deviation Minimum Maximum

---

|   |           |           |           |           |
|---|-----------|-----------|-----------|-----------|
| 4 | 2.0500000 | 0.3872983 | 1.5000000 | 2.4000000 |
|---|-----------|-----------|-----------|-----------|

---

Laboratory tests at the time of obtaining Table 2-6 consent, according to the presence or absence of proton-pump inhibitors

Unique Subject Identifier=1223010000-0037

MEANS Procedure

Assay variable : PTINR\_VAL1 PT-INR Value

N Mean Standard Deviation Minimum Maximum

---

|   |           |           |           |           |
|---|-----------|-----------|-----------|-----------|
| 4 | 1.6250000 | 0.1258306 | 1.5000000 | 1.8000000 |
|---|-----------|-----------|-----------|-----------|

---

Unique Subject Identifier=1223010000-0038

Assay variable : PTINR\_VAL1 PT-INR Value

N Mean Standard Deviation Minimum Maximum

---

|   |           |           |           |           |
|---|-----------|-----------|-----------|-----------|
| 4 | 2.1500000 | 0.7937254 | 1.0000000 | 2.8000000 |
|---|-----------|-----------|-----------|-----------|

---

Unique Subject Identifier=1223010000-0039

Assay variable : PTINR\_VAL1 PT-INR Value

N Mean Standard Deviation Minimum Maximum

---

|   |           |           |           |           |
|---|-----------|-----------|-----------|-----------|
| 4 | 2.1250000 | 0.1500000 | 2.0000000 | 2.3000000 |
|---|-----------|-----------|-----------|-----------|

---

Unique Subject Identifier=1223010000-0041

Assay variable : PTINR\_VAL1 PT-INR Value

N Mean Standard Deviation Minimum Maximum

---

|   |           |           |           |           |
|---|-----------|-----------|-----------|-----------|
| 6 | 2.1166667 | 0.3763863 | 1.7000000 | 2.8000000 |
|---|-----------|-----------|-----------|-----------|

---

Laboratory tests at the time of obtaining Table 2-6 consent, according to the presence or absence of proton-pump inhibitors

Unique Subject Identifier=1223010000-0042

MEANS Procedure

Assay variable : PTINR\_VAL1 PT-INR Value

N Mean Standard Deviation Minimum Maximum

---

|   |           |           |           |           |
|---|-----------|-----------|-----------|-----------|
| 4 | 1.8500000 | 0.3696846 | 1.4000000 | 2.3000000 |
|---|-----------|-----------|-----------|-----------|

---

Unique Subject Identifier=1223010000-0043

Assay variable : PTINR\_VAL1 PT-INR Value

N Mean Standard Deviation Minimum Maximum

---

|   |           |           |           |           |
|---|-----------|-----------|-----------|-----------|
| 5 | 2.3800000 | 0.4147288 | 2.0000000 | 3.0000000 |
|---|-----------|-----------|-----------|-----------|

---

Unique Subject Identifier=1226000000-0002

Assay variable : PTINR\_VAL1 PT-INR Value

N Mean Standard Deviation Minimum Maximum

---

|   |           |           |           |           |
|---|-----------|-----------|-----------|-----------|
| 2 | 1.2300000 | 0.0707107 | 1.1800000 | 1.2800000 |
|---|-----------|-----------|-----------|-----------|

---

Unique Subject Identifier=1226000000-0003

Assay variable : PTINR\_VAL1 PT-INR Value

N Mean Standard Deviation Minimum Maximum

---

|   |           |           |           |           |
|---|-----------|-----------|-----------|-----------|
| 5 | 1.9180000 | 0.2087343 | 1.6600000 | 2.2100000 |
|---|-----------|-----------|-----------|-----------|

---

Laboratory tests at the time of obtaining Table 2-6 consent, according to the presence or absence of proton-pump inhibitors

Unique Subject Identifier=1226000000-0005

MEANS Procedure

Assay variable : PTINR\_VAL1 PT-INR Value

N Mean Standard Deviation Minimum Maximum

---

|   |           |           |           |           |
|---|-----------|-----------|-----------|-----------|
| 4 | 2.0700000 | 0.1626858 | 1.9200000 | 2.2300000 |
|---|-----------|-----------|-----------|-----------|

---

Unique Subject Identifier=1226000000-0006

Assay variable : PTINR\_VAL1 PT-INR Value

N Mean Standard Deviation Minimum Maximum

---

|   |           |           |           |           |
|---|-----------|-----------|-----------|-----------|
| 5 | 1.9680000 | 0.1283355 | 1.8000000 | 2.1300000 |
|---|-----------|-----------|-----------|-----------|

---

Unique Subject Identifier=1226000000-0007

Assay variable : PTINR\_VAL1 PT-INR Value

N Mean Standard Deviation Minimum Maximum

---

|   |           |           |           |           |
|---|-----------|-----------|-----------|-----------|
| 3 | 1.7700000 | 0.2137756 | 1.6000000 | 2.0100000 |
|---|-----------|-----------|-----------|-----------|

---

Unique Subject Identifier=1226000000-0008

Assay variable : PTINR\_VAL1 PT-INR Value

N Mean Standard Deviation Minimum Maximum

---

|   |           |           |           |           |
|---|-----------|-----------|-----------|-----------|
| 5 | 1.6360000 | 0.1327780 | 1.5000000 | 1.8400000 |
|---|-----------|-----------|-----------|-----------|

---



Laboratory tests at the time of obtaining Table 2-6 consent, according to the presence or absence of proton-pump inhibitors

Unique Subject Identifier=1226000000-0010

MEANS Procedure

Assay variable : PTINR\_VAL1 PT-INR Value

| N | Mean      | Standard Deviation | Minimum   | Maximum   |
|---|-----------|--------------------|-----------|-----------|
| 5 | 1.8080000 | 0.0846759          | 1.7100000 | 1.9200000 |

Unique Subject Identifier=1226000000-0011

Assay variable : PTINR\_VAL1 PT-INR Value

| N | Mean      | Standard Deviation | Minimum   | Maximum   |
|---|-----------|--------------------|-----------|-----------|
| 6 | 1.9116667 | 0.1921891          | 1.5600000 | 2.1400000 |

Unique Subject Identifier=1226000000-0012

Assay variable : PTINR\_VAL1 PT-INR Value

| N | Mean      | Standard Deviation | Minimum   | Maximum   |
|---|-----------|--------------------|-----------|-----------|
| 3 | 2.0133333 | 0.4960175          | 1.5000000 | 2.4900000 |

Unique Subject Identifier=1226000000-0013

Assay variable : PTINR\_VAL1 PT-INR Value

N Mean Standard Deviation Minimum Maximum

---

|   |           |           |           |           |
|---|-----------|-----------|-----------|-----------|
| 4 | 1.7850000 | 0.1103026 | 1.6400000 | 1.9000000 |
|---|-----------|-----------|-----------|-----------|

---

Laboratory tests at the time of obtaining Table 2-6 consent, according to the presence or absence of proton-pump inhibitors

Unique Subject Identifier=1226000000-0014

MEANS Procedure

Assay variable : PTINR\_VAL1 PT-INR Value

N Mean Standard Deviation Minimum Maximum

---

|   |           |           |           |           |
|---|-----------|-----------|-----------|-----------|
| 5 | 2.0760000 | 0.4936902 | 1.5800000 | 2.8900000 |
|---|-----------|-----------|-----------|-----------|

---

Unique Subject Identifier=1226000000-0030

Assay variable : PTINR\_VAL1 PT-INR Value

N Mean Standard Deviation Minimum Maximum

---

|   |           |           |           |           |
|---|-----------|-----------|-----------|-----------|
| 4 | 2.1225000 | 0.4256270 | 1.6100000 | 2.6500000 |
|---|-----------|-----------|-----------|-----------|

---

Unique Subject Identifier=1226000000-0031

Assay variable : PTINR\_VAL1 PT-INR Value

N Mean Standard Deviation Minimum Maximum

---

|   |           |           |           |           |
|---|-----------|-----------|-----------|-----------|
| 5 | 1.7000000 | 0.2351595 | 1.4700000 | 2.0300000 |
|---|-----------|-----------|-----------|-----------|

---

Unique Subject Identifier=1226000000-0032

Assay variable : PTINR\_VAL1 PT-INR Value

N Mean Standard Deviation Minimum Maximum

---

|   |           |           |           |           |
|---|-----------|-----------|-----------|-----------|
| 5 | 1.9840000 | 0.1597811 | 1.7900000 | 2.2100000 |
|---|-----------|-----------|-----------|-----------|

---

Laboratory tests at the time of obtaining Table 2-6 consent, according to the presence or absence of proton-pump inhibitors

Unique Subject Identifier=1226000000-0034

MEANS Procedure

Assay variable : PTINR\_VAL1 PT-INR Value

N Mean Standard Deviation Minimum Maximum

---

|   |           |           |           |           |
|---|-----------|-----------|-----------|-----------|
| 4 | 2.1525000 | 0.3247948 | 1.8900000 | 2.5800000 |
|---|-----------|-----------|-----------|-----------|

---

Unique Subject Identifier=1227000000-0027

Assay variable : PTINR\_VAL1 PT-INR Value

N Mean Standard Deviation Minimum Maximum

---

|   |           |           |           |           |
|---|-----------|-----------|-----------|-----------|
| 4 | 2.3250000 | 0.2500000 | 2.0000000 | 2.6000000 |
|---|-----------|-----------|-----------|-----------|

---

Unique Subject Identifier=1227000000-0028

Assay variable : PTINR\_VAL1 PT-INR Value

N Mean Standard Deviation Minimum Maximum

---

|   |           |           |           |           |
|---|-----------|-----------|-----------|-----------|
| 6 | 2.3833333 | 0.2228602 | 2.1000000 | 2.7000000 |
|---|-----------|-----------|-----------|-----------|

---

Unique Subject Identifier=1227000000-0029

Assay variable : PTINR\_VAL1 PT-INR Value

N Mean Standard Deviation Minimum Maximum

---

|   |           |           |           |           |
|---|-----------|-----------|-----------|-----------|
| 4 | 2.3750000 | 0.5439056 | 1.6000000 | 2.8000000 |
|---|-----------|-----------|-----------|-----------|

---

Laboratory tests at the time of obtaining Table 2-6 consent, according to the presence or absence of proton-pump inhibitors

Unique Subject Identifier=1227000000-0030

MEANS Procedure

Assay variable : PTINR\_VAL1 PT-INR Value

N Mean Standard Deviation Minimum Maximum

---

|   |           |           |           |           |
|---|-----------|-----------|-----------|-----------|
| 3 | 2.0666667 | 0.5507571 | 1.7000000 | 2.7000000 |
|---|-----------|-----------|-----------|-----------|

---

Unique Subject Identifier=1227000000-0031

Assay variable : PTINR\_VAL1 PT-INR Value

N Mean Standard Deviation Minimum Maximum

---

|   |           |           |           |           |
|---|-----------|-----------|-----------|-----------|
| 5 | 2.1600000 | 0.2880972 | 1.9000000 | 2.6000000 |
|---|-----------|-----------|-----------|-----------|

---

Unique Subject Identifier=1227000000-0032

Assay variable : PTINR\_VAL1 PT-INR Value

N Mean Standard Deviation Minimum Maximum

---

|   |           |           |           |           |
|---|-----------|-----------|-----------|-----------|
| 5 | 2.1000000 | 0.2000000 | 1.9000000 | 2.4000000 |
|---|-----------|-----------|-----------|-----------|

---

Unique Subject Identifier=1227000000-0034

Assay variable : PTINR\_VAL1 PT-INR Value

N Mean Standard Deviation Minimum Maximum

---

|   |          |           |          |          |
|---|----------|-----------|----------|----------|
| 5 | 2.220000 | 0.5263079 | 1.400000 | 2.800000 |
|---|----------|-----------|----------|----------|

---



Laboratory tests at the time of obtaining Table 2-6 consent, according to the presence or absence of proton-pump inhibitors

Unique Subject Identifier=1227000000-0035

MEANS Procedure

Assay variable : PTINR\_VAL1 PT-INR Value

N Mean Standard Deviation Minimum Maximum

---

|   |           |           |           |           |
|---|-----------|-----------|-----------|-----------|
| 4 | 2.0750000 | 0.3862210 | 1.7000000 | 2.6000000 |
|---|-----------|-----------|-----------|-----------|

---

Unique Subject Identifier=1227000000-0038

Assay variable : PTINR\_VAL1 PT-INR Value

N Mean Standard Deviation Minimum Maximum

---

|   |           |           |           |           |
|---|-----------|-----------|-----------|-----------|
| 5 | 2.3000000 | 0.2915476 | 1.9000000 | 2.7000000 |
|---|-----------|-----------|-----------|-----------|

---

Unique Subject Identifier=1227000000-0041

Assay variable : PTINR\_VAL1 PT-INR Value

N Mean Standard Deviation Minimum Maximum

---

|   |           |           |           |           |
|---|-----------|-----------|-----------|-----------|
| 4 | 2.3000000 | 0.4966555 | 1.7000000 | 2.8000000 |
|---|-----------|-----------|-----------|-----------|

---

Unique Subject Identifier=1227000000-0043

Assay variable : PTINR\_VAL1 PT-INR Value

N Mean Standard Deviation Minimum Maximum

---

|   |          |           |          |          |
|---|----------|-----------|----------|----------|
| 5 | 2.200000 | 0.1414214 | 2.100000 | 2.400000 |
|---|----------|-----------|----------|----------|

---

Laboratory tests at the time of obtaining Table 2-6 consent, according to the presence or absence of proton-pump inhibitors

Unique Subject Identifier=1227000000-0047

MEANS Procedure

Assay variable : PTINR\_VAL1 PT-INR Value

N Mean Standard Deviation Minimum Maximum

---

|   |           |           |           |           |
|---|-----------|-----------|-----------|-----------|
| 5 | 2.0400000 | 0.3847077 | 1.6000000 | 2.6000000 |
|---|-----------|-----------|-----------|-----------|

---

Unique Subject Identifier=1227000000-0050

Assay variable : PTINR\_VAL1 PT-INR Value

N Mean Standard Deviation Minimum Maximum

---

|   |           |           |           |           |
|---|-----------|-----------|-----------|-----------|
| 6 | 1.9000000 | 0.1673320 | 1.7000000 | 2.1000000 |
|---|-----------|-----------|-----------|-----------|

---

Unique Subject Identifier=1227000000-0055

Assay variable : PTINR\_VAL1 PT-INR Value

N Mean Standard Deviation Minimum Maximum

---

|   |           |           |           |           |
|---|-----------|-----------|-----------|-----------|
| 6 | 2.4333333 | 0.7004760 | 1.4000000 | 3.3000000 |
|---|-----------|-----------|-----------|-----------|

---

Unique Subject Identifier=1227000000-0058

Assay variable : PTINR\_VAL1 PT-INR Value

N Mean Standard Deviation Minimum Maximum

---

|   |           |           |           |           |
|---|-----------|-----------|-----------|-----------|
| 6 | 2.0500000 | 0.2664583 | 1.7000000 | 2.4000000 |
|---|-----------|-----------|-----------|-----------|

---

Laboratory tests at the time of obtaining Table 2-6 consent, according to the presence or absence of proton-pump inhibitors

Unique Subject Identifier=1227000000-0064

MEANS Procedure

Assay variable : PTINR\_VAL1 PT-INR Value

N Mean Standard Deviation Minimum Maximum

---

|   |           |           |           |           |
|---|-----------|-----------|-----------|-----------|
| 4 | 2.9500000 | 0.5972158 | 2.4000000 | 3.8000000 |
|---|-----------|-----------|-----------|-----------|

---

Unique Subject Identifier=1227000000-0078

Assay variable : PTINR\_VAL1 PT-INR Value

N Mean Standard Deviation Minimum Maximum

---

|   |           |           |           |           |
|---|-----------|-----------|-----------|-----------|
| 5 | 1.8600000 | 0.0894427 | 1.8000000 | 2.0000000 |
|---|-----------|-----------|-----------|-----------|

---

Unique Subject Identifier=1227000000-0089

Assay variable : PTINR\_VAL1 PT-INR Value

N Mean Standard Deviation Minimum Maximum

---

|   |           |           |           |           |
|---|-----------|-----------|-----------|-----------|
| 6 | 1.8166667 | 0.2994439 | 1.3000000 | 2.1000000 |
|---|-----------|-----------|-----------|-----------|

---

Unique Subject Identifier=1227000000-0091

Assay variable : PTINR\_VAL1 PT-INR Value

N Mean Standard Deviation Minimum Maximum

---

|   |           |           |           |           |
|---|-----------|-----------|-----------|-----------|
| 6 | 2.3166667 | 0.3868678 | 1.9000000 | 3.0000000 |
|---|-----------|-----------|-----------|-----------|

---

Laboratory tests at the time of obtaining Table 2-6 consent, according to the presence or absence of proton-pump inhibitors

Unique Subject Identifier=1228000000-0004

MEANS Procedure

Assay variable : PTINR\_VAL1 PT-INR Value

N Mean Standard Deviation Minimum Maximum

---

|   |           |  |           |           |
|---|-----------|--|-----------|-----------|
| 1 | 2.9800000 |  | 2.9800000 | 2.9800000 |
|---|-----------|--|-----------|-----------|

---

Unique Subject Identifier=1229000000-0006

Assay variable : PTINR\_VAL1 PT-INR Value

N Mean Standard Deviation Minimum Maximum

---

|   |           |           |           |           |
|---|-----------|-----------|-----------|-----------|
| 6 | 2.0500000 | 0.1048809 | 1.9000000 | 2.2000000 |
|---|-----------|-----------|-----------|-----------|

---

Unique Subject Identifier=1229000000-0007

Assay variable : PTINR\_VAL1 PT-INR Value

N Mean Standard Deviation Minimum Maximum

---

|   |           |           |           |           |
|---|-----------|-----------|-----------|-----------|
| 5 | 2.4200000 | 0.1643168 | 2.3000000 | 2.6000000 |
|---|-----------|-----------|-----------|-----------|

---

Unique Subject Identifier=1229000000-0010

Assay variable : PTINR\_VAL1 PT-INR Value

N Mean Standard Deviation Minimum Maximum

---

|   |           |           |           |           |
|---|-----------|-----------|-----------|-----------|
| 6 | 2.2333333 | 0.1032796 | 2.1000000 | 2.4000000 |
|---|-----------|-----------|-----------|-----------|

---



Laboratory tests at the time of obtaining Table 2-6 consent, according to the presence or absence of proton-pump inhibitors

Unique Subject Identifier=1229000000-0016

MEANS Procedure

Assay variable : PTINR\_VAL1 PT-INR Value

N Mean Standard Deviation Minimum Maximum

---

|   |           |           |           |           |
|---|-----------|-----------|-----------|-----------|
| 6 | 2.1666667 | 0.2732520 | 1.8000000 | 2.5000000 |
|---|-----------|-----------|-----------|-----------|

---

Unique Subject Identifier=1229000000-0017

Assay variable : PTINR\_VAL1 PT-INR Value

N Mean Standard Deviation Minimum Maximum

---

|   |           |           |           |           |
|---|-----------|-----------|-----------|-----------|
| 6 | 2.3666667 | 0.9114092 | 1.6000000 | 4.1000000 |
|---|-----------|-----------|-----------|-----------|

---

Unique Subject Identifier=1229000000-0020

Assay variable : PTINR\_VAL1 PT-INR Value

N Mean Standard Deviation Minimum Maximum

---

|   |           |           |           |           |
|---|-----------|-----------|-----------|-----------|
| 6 | 2.1833333 | 0.4119061 | 1.6000000 | 2.6000000 |
|---|-----------|-----------|-----------|-----------|

---

Unique Subject Identifier=1229000000-0021

Assay variable : PTINR\_VAL1 PT-INR Value

N Mean Standard Deviation Minimum Maximum

---

|   |           |           |           |           |
|---|-----------|-----------|-----------|-----------|
| 6 | 2.0500000 | 0.2073644 | 1.9000000 | 2.4000000 |
|---|-----------|-----------|-----------|-----------|

---

Laboratory tests at the time of obtaining Table 2-6 consent, according to the presence or absence of proton-pump inhibitors

Unique Subject Identifier=1232000000-0003

MEANS Procedure

Assay variable : PTINR\_VAL1 PT-INR Value

N Mean Standard Deviation Minimum Maximum

---

|   |           |           |           |           |
|---|-----------|-----------|-----------|-----------|
| 6 | 1.8166667 | 0.5913262 | 1.1000000 | 2.6000000 |
|---|-----------|-----------|-----------|-----------|

---

Unique Subject Identifier=1232000000-0004

Assay variable : PTINR\_VAL1 PT-INR Value

N Mean Standard Deviation Minimum Maximum

---

|   |           |           |           |           |
|---|-----------|-----------|-----------|-----------|
| 6 | 2.0166667 | 0.4708149 | 1.5000000 | 2.6000000 |
|---|-----------|-----------|-----------|-----------|

---

Unique Subject Identifier=1232000000-0005

Assay variable : PTINR\_VAL1 PT-INR Value

N Mean Standard Deviation Minimum Maximum

---

|   |           |           |           |           |
|---|-----------|-----------|-----------|-----------|
| 6 | 2.0833333 | 0.3920034 | 1.6000000 | 2.6000000 |
|---|-----------|-----------|-----------|-----------|

---

Unique Subject Identifier=1232000000-0008

Assay variable : PTINR\_VAL1 PT-INR Value

N Mean Standard Deviation Minimum Maximum

---

|   |          |           |          |          |
|---|----------|-----------|----------|----------|
| 5 | 2.040000 | 0.2073644 | 1.700000 | 2.200000 |
|---|----------|-----------|----------|----------|

---

Laboratory tests at the time of obtaining Table 2-6 consent, according to the presence or absence of proton-pump inhibitors

Unique Subject Identifier=1232000000-0014

MEANS Procedure

Assay variable : PTINR\_VAL1 PT-INR Value

N Mean Standard Deviation Minimum Maximum

---

|   |           |           |           |           |
|---|-----------|-----------|-----------|-----------|
| 6 | 2.0833333 | 0.5946988 | 1.5000000 | 3.2000000 |
|---|-----------|-----------|-----------|-----------|

---

Unique Subject Identifier=1232000000-0016

Assay variable : PTINR\_VAL1 PT-INR Value

N Mean Standard Deviation Minimum Maximum

---

|   |           |           |           |           |
|---|-----------|-----------|-----------|-----------|
| 6 | 1.7500000 | 0.1048809 | 1.6000000 | 1.9000000 |
|---|-----------|-----------|-----------|-----------|

---

Unique Subject Identifier=1232000000-0017

Assay variable : PTINR\_VAL1 PT-INR Value

N Mean Standard Deviation Minimum Maximum

---

|   |           |           |           |           |
|---|-----------|-----------|-----------|-----------|
| 5 | 1.8000000 | 0.1870829 | 1.6000000 | 2.1000000 |
|---|-----------|-----------|-----------|-----------|

---

Unique Subject Identifier=1232000000-0020

Assay variable : PTINR\_VAL1 PT-INR Value

N Mean Standard Deviation Minimum Maximum

---

|   |          |           |          |          |
|---|----------|-----------|----------|----------|
| 6 | 2.400000 | 0.4604346 | 1.800000 | 3.200000 |
|---|----------|-----------|----------|----------|

---

Laboratory tests at the time of obtaining Table 2-6 consent, according to the presence or absence of proton-pump inhibitors

Unique Subject Identifier=1234001000-0006

MEANS Procedure

Assay variable : PTINR\_VAL1 PT-INR Value

| N | Mean      | Standard Deviation | Minimum   | Maximum   |
|---|-----------|--------------------|-----------|-----------|
| 1 | 1.0300000 |                    | 1.0300000 | 1.0300000 |

Unique Subject Identifier=1235000000-0001

Assay variable : PTINR\_VAL1 PT-INR Value

| N | Mean      | Standard Deviation | Minimum   | Maximum   |
|---|-----------|--------------------|-----------|-----------|
| 5 | 1.6580000 | 0.1360882          | 1.4500000 | 1.7700000 |

Unique Subject Identifier=1235000000-0003

Assay variable : PTINR\_VAL1 PT-INR Value

| N | Mean      | Standard Deviation | Minimum   | Maximum   |
|---|-----------|--------------------|-----------|-----------|
| 5 | 1.4020000 | 0.0952365          | 1.2500000 | 1.5000000 |

Unique Subject Identifier=1235000000-0005

Assay variable : PTINR\_VAL1 PT-INR Value

N Mean Standard Deviation Minimum Maximum

---

|   |           |           |           |           |
|---|-----------|-----------|-----------|-----------|
| 6 | 1.4550000 | 0.0971082 | 1.3600000 | 1.6300000 |
|---|-----------|-----------|-----------|-----------|

---



Laboratory tests at the time of obtaining Table 2-6 consent, according to the presence or absence of proton-pump inhibitors

Unique Subject Identifier=1235000000-0006

MEANS Procedure

Assay variable : PTINR\_VAL1 PT-INR Value

N Mean Standard Deviation Minimum Maximum

---

|   |           |           |           |           |
|---|-----------|-----------|-----------|-----------|
| 3 | 1.4233333 | 0.1234234 | 1.3200000 | 1.5600000 |
|---|-----------|-----------|-----------|-----------|

---

Unique Subject Identifier=1235000000-0008

Assay variable : PTINR\_VAL1 PT-INR Value

N Mean Standard Deviation Minimum Maximum

---

|   |           |           |           |           |
|---|-----------|-----------|-----------|-----------|
| 5 | 1.8520000 | 0.1255787 | 1.7100000 | 1.9800000 |
|---|-----------|-----------|-----------|-----------|

---

Unique Subject Identifier=1235000000-0009

Assay variable : PTINR\_VAL1 PT-INR Value

N Mean Standard Deviation Minimum Maximum

---

|   |           |           |           |           |
|---|-----------|-----------|-----------|-----------|
| 3 | 1.6466667 | 0.1616581 | 1.5000000 | 1.8200000 |
|---|-----------|-----------|-----------|-----------|

---

Unique Subject Identifier=1235000000-0010

Assay variable : PTINR\_VAL1 PT-INR Value

N Mean Standard Deviation Minimum Maximum

---

|   |           |           |           |           |
|---|-----------|-----------|-----------|-----------|
| 6 | 1.6300000 | 0.2368122 | 1.2000000 | 1.8800000 |
|---|-----------|-----------|-----------|-----------|

---

Laboratory tests at the time of obtaining Table 2-6 consent, according to the presence or absence of proton-pump inhibitors

Unique Subject Identifier=1235000000-0011

MEANS Procedure

Assay variable : PTINR\_VAL1 PT-INR Value

N Mean Standard Deviation Minimum Maximum

---

|   |           |           |           |           |
|---|-----------|-----------|-----------|-----------|
| 6 | 1.5500000 | 0.2484351 | 1.3500000 | 2.0400000 |
|---|-----------|-----------|-----------|-----------|

---

Unique Subject Identifier=1235000000-0013

Assay variable : PTINR\_VAL1 PT-INR Value

N Mean Standard Deviation Minimum Maximum

---

|   |           |           |           |           |
|---|-----------|-----------|-----------|-----------|
| 6 | 1.4433333 | 0.0871015 | 1.3600000 | 1.5500000 |
|---|-----------|-----------|-----------|-----------|

---

Unique Subject Identifier=1235000000-0015

Assay variable : PTINR\_VAL1 PT-INR Value

N Mean Standard Deviation Minimum Maximum

---

|   |           |           |           |           |
|---|-----------|-----------|-----------|-----------|
| 6 | 1.7150000 | 0.2714959 | 1.4700000 | 2.1800000 |
|---|-----------|-----------|-----------|-----------|

---

Unique Subject Identifier=1235000000-0017

Assay variable : PTINR\_VAL1 PT-INR Value

N Mean Standard Deviation Minimum Maximum

---

|   |           |           |           |           |
|---|-----------|-----------|-----------|-----------|
| 5 | 1.5700000 | 0.1234909 | 1.4200000 | 1.7300000 |
|---|-----------|-----------|-----------|-----------|

---

Laboratory tests at the time of obtaining Table 2-6 consent, according to the presence or absence of proton-pump inhibitors

Unique Subject Identifier=1235000000-0020

MEANS Procedure

Assay variable : PTINR\_VAL1 PT-INR Value

N Mean Standard Deviation Minimum Maximum

---

|   |           |           |           |           |
|---|-----------|-----------|-----------|-----------|
| 6 | 1.6316667 | 0.1404872 | 1.4800000 | 1.8400000 |
|---|-----------|-----------|-----------|-----------|

---

Unique Subject Identifier=1235000000-0021

Assay variable : PTINR\_VAL1 PT-INR Value

N Mean Standard Deviation Minimum Maximum

---

|   |           |           |           |           |
|---|-----------|-----------|-----------|-----------|
| 6 | 1.2966667 | 0.0920145 | 1.2100000 | 1.4100000 |
|---|-----------|-----------|-----------|-----------|

---

Unique Subject Identifier=1235000000-0022

Assay variable : PTINR\_VAL1 PT-INR Value

N Mean Standard Deviation Minimum Maximum

---

|   |           |           |           |           |
|---|-----------|-----------|-----------|-----------|
| 6 | 1.6166667 | 0.2487301 | 1.3500000 | 1.9500000 |
|---|-----------|-----------|-----------|-----------|

---

Unique Subject Identifier=1235000000-0023

Assay variable : PTINR\_VAL1 PT-INR Value

N Mean Standard Deviation Minimum Maximum

---

|   |           |           |           |           |
|---|-----------|-----------|-----------|-----------|
| 6 | 1.7250000 | 0.1375136 | 1.5800000 | 1.9100000 |
|---|-----------|-----------|-----------|-----------|

---

Laboratory tests at the time of obtaining Table 2-6 consent, according to the presence or absence of proton-pump inhibitors

Unique Subject Identifier=1235000000-0024

MEANS Procedure

Assay variable : PTINR\_VAL1 PT-INR Value

N Mean Standard Deviation Minimum Maximum

---

|   |           |           |           |           |
|---|-----------|-----------|-----------|-----------|
| 6 | 1.3716667 | 0.0793515 | 1.2700000 | 1.5000000 |
|---|-----------|-----------|-----------|-----------|

---

Unique Subject Identifier=1235000000-0026

Assay variable : PTINR\_VAL1 PT-INR Value

N Mean Standard Deviation Minimum Maximum

---

|   |           |           |           |           |
|---|-----------|-----------|-----------|-----------|
| 6 | 1.4750000 | 0.1710848 | 1.2200000 | 1.6600000 |
|---|-----------|-----------|-----------|-----------|

---

Unique Subject Identifier=1235000000-0027

Assay variable : PTINR\_VAL1 PT-INR Value

N Mean Standard Deviation Minimum Maximum

---

|   |           |           |           |           |
|---|-----------|-----------|-----------|-----------|
| 2 | 2.0100000 | 0.1131371 | 1.9300000 | 2.0900000 |
|---|-----------|-----------|-----------|-----------|

---

Unique Subject Identifier=1235000000-0033

Assay variable : PTINR\_VAL1 PT-INR Value

N Mean Standard Deviation Minimum Maximum

---

|   |          |           |          |          |
|---|----------|-----------|----------|----------|
| 6 | 1.940000 | 0.4784976 | 1.350000 | 2.520000 |
|---|----------|-----------|----------|----------|

---



Laboratory tests at the time of obtaining Table 2-6 consent, according to the presence or absence of proton-pump inhibitors

Unique Subject Identifier=1235000000-0034

MEANS Procedure

Assay variable : PTINR\_VAL1 PT-INR Value

N Mean Standard Deviation Minimum Maximum

---

|   |           |           |           |           |
|---|-----------|-----------|-----------|-----------|
| 6 | 1.6650000 | 0.3907301 | 1.3300000 | 2.3500000 |
|---|-----------|-----------|-----------|-----------|

---

Unique Subject Identifier=1235000000-0040

Assay variable : PTINR\_VAL1 PT-INR Value

N Mean Standard Deviation Minimum Maximum

---

|   |           |           |           |           |
|---|-----------|-----------|-----------|-----------|
| 3 | 1.7733333 | 0.0404145 | 1.7300000 | 1.8100000 |
|---|-----------|-----------|-----------|-----------|

---

Unique Subject Identifier=1235000000-0042

Assay variable : PTINR\_VAL1 PT-INR Value

N Mean Standard Deviation Minimum Maximum

---

|   |           |           |           |           |
|---|-----------|-----------|-----------|-----------|
| 6 | 1.7666667 | 0.6168198 | 1.2600000 | 2.9900000 |
|---|-----------|-----------|-----------|-----------|

---

Unique Subject Identifier=1235000000-0043

Assay variable : PTINR\_VAL1 PT-INR Value

N Mean Standard Deviation Minimum Maximum

---

|   |           |           |           |           |
|---|-----------|-----------|-----------|-----------|
| 5 | 2.0400000 | 0.3647602 | 1.6800000 | 2.5400000 |
|---|-----------|-----------|-----------|-----------|

---

Laboratory tests at the time of obtaining Table 2-6 consent, according to the presence or absence of proton-pump inhibitors

Unique Subject Identifier=1235000000-0045

MEANS Procedure

Assay variable : PTINR\_VAL1 PT-INR Value

N Mean Standard Deviation Minimum Maximum

---

|   |           |           |           |           |
|---|-----------|-----------|-----------|-----------|
| 6 | 1.5666667 | 0.1751190 | 1.2900000 | 1.8000000 |
|---|-----------|-----------|-----------|-----------|

---

Unique Subject Identifier=1235000000-0050

Assay variable : PTINR\_VAL1 PT-INR Value

N Mean Standard Deviation Minimum Maximum

---

|   |           |           |           |           |
|---|-----------|-----------|-----------|-----------|
| 6 | 1.9616667 | 0.5810479 | 1.0400000 | 2.5200000 |
|---|-----------|-----------|-----------|-----------|

---

Unique Subject Identifier=1237000000-0006

Assay variable : PTINR\_VAL1 PT-INR Value

N Mean Standard Deviation Minimum Maximum

---

|   |           |           |           |           |
|---|-----------|-----------|-----------|-----------|
| 5 | 2.1000000 | 0.3162278 | 1.8000000 | 2.6000000 |
|---|-----------|-----------|-----------|-----------|

---

Unique Subject Identifier=1237000000-0007

Assay variable : PTINR\_VAL1 PT-INR Value

N Mean Standard Deviation Minimum Maximum

---

|   |          |           |          |          |
|---|----------|-----------|----------|----------|
| 5 | 1.900000 | 0.3872983 | 1.500000 | 2.400000 |
|---|----------|-----------|----------|----------|

---

Laboratory tests at the time of obtaining Table 2-6 consent, according to the presence or absence of proton-pump inhibitors

Unique Subject Identifier=1237000000-0010

MEANS Procedure

Assay variable : PTINR\_VAL1 PT-INR Value

| N | Mean      | Standard Deviation | Minimum   | Maximum   |
|---|-----------|--------------------|-----------|-----------|
| 3 | 1.7333333 | 0.0577350          | 1.7000000 | 1.8000000 |

Unique Subject Identifier=1237000000-0011

Assay variable : PTINR\_VAL1 PT-INR Value

| N | Mean      | Standard Deviation | Minimum   | Maximum   |
|---|-----------|--------------------|-----------|-----------|
| 3 | 2.0000000 | 0.1732051          | 1.9000000 | 2.2000000 |

Unique Subject Identifier=1237000000-0012

Assay variable : PTINR\_VAL1 PT-INR Value

| N | Mean      | Standard Deviation | Minimum   | Maximum   |
|---|-----------|--------------------|-----------|-----------|
| 3 | 1.5333333 | 0.1527525          | 1.4000000 | 1.7000000 |

Unique Subject Identifier=1237000000-0013

Assay variable : PTINR\_VAL1 PT-INR Value

N Mean Standard Deviation Minimum Maximum

---

|   |           |           |           |           |
|---|-----------|-----------|-----------|-----------|
| 4 | 1.5250000 | 0.1500000 | 1.3000000 | 1.6000000 |
|---|-----------|-----------|-----------|-----------|

---

Laboratory tests at the time of obtaining Table 2-6 consent, according to the presence or absence of proton-pump inhibitors

Unique Subject Identifier=1237000000-0014

MEANS Procedure

Assay variable : PTINR\_VAL1 PT-INR Value

N Mean Standard Deviation Minimum Maximum

---

|   |           |           |           |           |
|---|-----------|-----------|-----------|-----------|
| 3 | 1.5666667 | 0.2516611 | 1.3000000 | 1.8000000 |
|---|-----------|-----------|-----------|-----------|

---

Unique Subject Identifier=1241000000-0005

Assay variable : PTINR\_VAL1 PT-INR Value

N Mean Standard Deviation Minimum Maximum

---

|   |           |  |           |           |
|---|-----------|--|-----------|-----------|
| 1 | 2.7900000 |  | 2.7900000 | 2.7900000 |
|---|-----------|--|-----------|-----------|

---

Unique Subject Identifier=1241000000-0006

Assay variable : PTINR\_VAL1 PT-INR Value

N Mean Standard Deviation Minimum Maximum

---

|   |           |           |           |           |
|---|-----------|-----------|-----------|-----------|
| 5 | 2.8220000 | 0.7436868 | 1.5500000 | 3.4700000 |
|---|-----------|-----------|-----------|-----------|

---

Unique Subject Identifier=1248000000-0001

Assay variable : PTINR\_VAL1 PT-INR Value

N Mean Standard Deviation Minimum Maximum

---

|   |           |           |           |           |
|---|-----------|-----------|-----------|-----------|
| 2 | 2.4450000 | 0.3323402 | 2.2100000 | 2.6800000 |
|---|-----------|-----------|-----------|-----------|

---



Laboratory tests at the time of obtaining Table 2-6 consent, according to the presence or absence of proton-pump inhibitors

Unique Subject Identifier=1249000000-0002

MEANS Procedure

Assay variable : PTINR\_VAL1 PT-INR Value

N Mean Standard Deviation Minimum Maximum

---

|   |           |           |           |           |
|---|-----------|-----------|-----------|-----------|
| 6 | 2.2166667 | 0.2141650 | 1.9700000 | 2.5600000 |
|---|-----------|-----------|-----------|-----------|

---

Unique Subject Identifier=1249000000-0008

Assay variable : PTINR\_VAL1 PT-INR Value

N Mean Standard Deviation Minimum Maximum

---

|   |           |           |           |           |
|---|-----------|-----------|-----------|-----------|
| 6 | 1.8083333 | 0.1435851 | 1.6400000 | 2.0400000 |
|---|-----------|-----------|-----------|-----------|

---

Unique Subject Identifier=1254100000-0002

Assay variable : PTINR\_VAL1 PT-INR Value

N Mean Standard Deviation Minimum Maximum

---

|   |           |           |           |           |
|---|-----------|-----------|-----------|-----------|
| 5 | 1.9600000 | 0.4159327 | 1.5000000 | 2.6000000 |
|---|-----------|-----------|-----------|-----------|

---

Unique Subject Identifier=1254100000-0013

Assay variable : PTINR\_VAL1 PT-INR Value

N Mean Standard Deviation Minimum Maximum

---

|   |          |          |          |          |
|---|----------|----------|----------|----------|
| 6 | 1.800000 | 0.219089 | 1.500000 | 2.100000 |
|---|----------|----------|----------|----------|

---

Laboratory tests at the time of obtaining Table 2-6 consent, according to the presence or absence of proton-pump inhibitors

Unique Subject Identifier=1254100000-0018

MEANS Procedure

Assay variable : PTINR\_VAL1 PT-INR Value

N Mean Standard Deviation Minimum Maximum

---

|   |           |           |           |           |
|---|-----------|-----------|-----------|-----------|
| 6 | 2.1333333 | 0.1211060 | 2.0000000 | 2.3000000 |
|---|-----------|-----------|-----------|-----------|

---

Unique Subject Identifier=1254100000-0019

Assay variable : PTINR\_VAL1 PT-INR Value

N Mean Standard Deviation Minimum Maximum

---

|   |           |           |           |           |
|---|-----------|-----------|-----------|-----------|
| 5 | 2.2200000 | 0.3563706 | 1.7000000 | 2.7000000 |
|---|-----------|-----------|-----------|-----------|

---

Unique Subject Identifier=1254100000-0021

Assay variable : PTINR\_VAL1 PT-INR Value

N Mean Standard Deviation Minimum Maximum

---

|   |           |           |           |           |
|---|-----------|-----------|-----------|-----------|
| 6 | 2.2166667 | 0.3311596 | 1.9000000 | 2.8000000 |
|---|-----------|-----------|-----------|-----------|

---

Unique Subject Identifier=1254100000-0024

Assay variable : PTINR\_VAL1 PT-INR Value

N Mean Standard Deviation Minimum Maximum

---

|   |           |           |           |           |
|---|-----------|-----------|-----------|-----------|
| 6 | 2.0666667 | 0.3204164 | 1.7000000 | 2.5000000 |
|---|-----------|-----------|-----------|-----------|

---

Laboratory tests at the time of obtaining Table 2-6 consent, according to the presence or absence of proton-pump inhibitors

Unique Subject Identifier=1254100000-0025

MEANS Procedure

Assay variable : PTINR\_VAL1 PT-INR Value

N Mean Standard Deviation Minimum Maximum

---

|   |           |           |           |           |
|---|-----------|-----------|-----------|-----------|
| 6 | 2.1166667 | 0.4665476 | 1.3000000 | 2.6000000 |
|---|-----------|-----------|-----------|-----------|

---

Unique Subject Identifier=1255011110-0002

Assay variable : PTINR\_VAL1 PT-INR Value

N Mean Standard Deviation Minimum Maximum

---

|   |           |           |           |           |
|---|-----------|-----------|-----------|-----------|
| 2 | 2.4200000 | 0.3535534 | 2.1700000 | 2.6700000 |
|---|-----------|-----------|-----------|-----------|

---

Unique Subject Identifier=1255011110-0004

Assay variable : PTINR\_VAL1 PT-INR Value

N Mean Standard Deviation Minimum Maximum

---

|   |           |  |           |           |
|---|-----------|--|-----------|-----------|
| 1 | 2.3000000 |  | 2.3000000 | 2.3000000 |
|---|-----------|--|-----------|-----------|

---

Unique Subject Identifier=1258000000-0005

Assay variable : PTINR\_VAL1 PT-INR Value

N Mean Standard Deviation Minimum Maximum

---

|   |           |           |           |           |
|---|-----------|-----------|-----------|-----------|
| 6 | 2.0050000 | 0.3219161 | 1.8500000 | 2.6600000 |
|---|-----------|-----------|-----------|-----------|

---

Laboratory tests at the time of obtaining Table 2-6 consent, according to the presence or absence of proton-pump inhibitors

Unique Subject Identifier=1262000000-0016

MEANS Procedure

Assay variable : PTINR\_VAL1 PT-INR Value

N Mean Standard Deviation Minimum Maximum

---

|   |           |   |           |           |
|---|-----------|---|-----------|-----------|
| 2 | 1.5000000 | 0 | 1.5000000 | 1.5000000 |
|---|-----------|---|-----------|-----------|

---

Unique Subject Identifier=1262000000-0019

Assay variable : PTINR\_VAL1 PT-INR Value

N Mean Standard Deviation Minimum Maximum

---

|   |           |           |           |           |
|---|-----------|-----------|-----------|-----------|
| 2 | 1.3500000 | 0.2121320 | 1.2000000 | 1.5000000 |
|---|-----------|-----------|-----------|-----------|

---

Unique Subject Identifier=1262000000-0020

Assay variable : PTINR\_VAL1 PT-INR Value

N Mean Standard Deviation Minimum Maximum

---

|   |           |           |           |           |
|---|-----------|-----------|-----------|-----------|
| 2 | 1.6000000 | 0.1414214 | 1.5000000 | 1.7000000 |
|---|-----------|-----------|-----------|-----------|

---

Unique Subject Identifier=1262000000-0023

Assay variable : PTINR\_VAL1 PT-INR Value

N Mean Standard Deviation Minimum Maximum

---

|   |           |  |           |           |
|---|-----------|--|-----------|-----------|
| 1 | 1.7000000 |  | 1.7000000 | 1.7000000 |
|---|-----------|--|-----------|-----------|

---



Laboratory tests at the time of obtaining Table 2-6 consent, according to the presence or absence of proton-pump inhibitors

Unique Subject Identifier=1262000000-0027

MEANS Procedure

Assay variable : PTINR\_VAL1 PT-INR Value

N Mean Standard Deviation Minimum Maximum

---

|   |           |           |           |           |
|---|-----------|-----------|-----------|-----------|
| 2 | 1.9500000 | 0.6363961 | 1.5000000 | 2.4000000 |
|---|-----------|-----------|-----------|-----------|

---

Unique Subject Identifier=1262000000-0030

Assay variable : PTINR\_VAL1 PT-INR Value

N Mean Standard Deviation Minimum Maximum

---

|   |           |           |           |           |
|---|-----------|-----------|-----------|-----------|
| 3 | 1.7333333 | 0.2081666 | 1.5000000 | 1.9000000 |
|---|-----------|-----------|-----------|-----------|

---

Unique Subject Identifier=1262000000-0049

Assay variable : PTINR\_VAL1 PT-INR Value

N Mean Standard Deviation Minimum Maximum

---

|   |           |  |           |           |
|---|-----------|--|-----------|-----------|
| 1 | 1.3000000 |  | 1.3000000 | 1.3000000 |
|---|-----------|--|-----------|-----------|

---

Unique Subject Identifier=1262000000-0058

Assay variable : PTINR\_VAL1 PT-INR Value

N Mean Standard Deviation Minimum Maximum

---

|   |           |  |           |           |
|---|-----------|--|-----------|-----------|
| 1 | 1.3000000 |  | 1.3000000 | 1.3000000 |
|---|-----------|--|-----------|-----------|

---

Laboratory tests at the time of obtaining Table 2-6 consent, according to the presence or absence of proton-pump inhibitors

Unique Subject Identifier=1262000000-0064

MEANS Procedure

Assay variable : PTINR\_VAL1 PT-INR Value

N Mean Standard Deviation Minimum Maximum

---

|   |           |           |           |           |
|---|-----------|-----------|-----------|-----------|
| 2 | 1.9000000 | 0.2828427 | 1.7000000 | 2.1000000 |
|---|-----------|-----------|-----------|-----------|

---

Unique Subject Identifier=1262000000-0071

Assay variable : PTINR\_VAL1 PT-INR Value

N Mean Standard Deviation Minimum Maximum

---

|   |           |           |           |           |
|---|-----------|-----------|-----------|-----------|
| 5 | 1.8200000 | 0.1303840 | 1.6000000 | 1.9000000 |
|---|-----------|-----------|-----------|-----------|

---

Unique Subject Identifier=1262000000-0075

Assay variable : PTINR\_VAL1 PT-INR Value

N Mean Standard Deviation Minimum Maximum

---

|   |           |           |           |           |
|---|-----------|-----------|-----------|-----------|
| 2 | 1.4500000 | 0.2121320 | 1.3000000 | 1.6000000 |
|---|-----------|-----------|-----------|-----------|

---

Unique Subject Identifier=1262000000-0079

Assay variable : PTINR\_VAL1 PT-INR Value

N Mean Standard Deviation Minimum Maximum

---

|   |           |           |           |           |
|---|-----------|-----------|-----------|-----------|
| 2 | 2.2500000 | 0.3535534 | 2.0000000 | 2.5000000 |
|---|-----------|-----------|-----------|-----------|

---

Laboratory tests at the time of obtaining Table 2-6 consent, according to the presence or absence of proton-pump inhibitors

Unique Subject Identifier=1263011000-0004

MEANS Procedure

Assay variable : PTINR\_VAL1 PT-INR Value

N Mean Standard Deviation Minimum Maximum

---

|   |           |           |           |           |
|---|-----------|-----------|-----------|-----------|
| 6 | 2.3133333 | 0.2189673 | 2.0900000 | 2.5800000 |
|---|-----------|-----------|-----------|-----------|

---

Unique Subject Identifier=1263011000-0007

Assay variable : PTINR\_VAL1 PT-INR Value

N Mean Standard Deviation Minimum Maximum

---

|   |           |           |           |           |
|---|-----------|-----------|-----------|-----------|
| 4 | 2.5700000 | 0.9076343 | 1.6000000 | 3.6700000 |
|---|-----------|-----------|-----------|-----------|

---

Unique Subject Identifier=1263011000-0014

Assay variable : PTINR\_VAL1 PT-INR Value

N Mean Standard Deviation Minimum Maximum

---

|   |           |           |           |           |
|---|-----------|-----------|-----------|-----------|
| 6 | 2.6133333 | 0.5203717 | 2.0400000 | 3.2300000 |
|---|-----------|-----------|-----------|-----------|

---

Unique Subject Identifier=1263011000-0018

Assay variable : PTINR\_VAL1 PT-INR Value

N Mean Standard Deviation Minimum Maximum

---

|   |           |           |           |           |
|---|-----------|-----------|-----------|-----------|
| 6 | 2.3416667 | 0.2632426 | 1.9700000 | 2.6100000 |
|---|-----------|-----------|-----------|-----------|

---

Laboratory tests at the time of obtaining Table 2-6 consent, according to the presence or absence of proton-pump inhibitors

Unique Subject Identifier=1263011000-0027

MEANS Procedure

Assay variable : PTINR\_VAL1 PT-INR Value

N Mean Standard Deviation Minimum Maximum

---

|   |           |           |           |           |
|---|-----------|-----------|-----------|-----------|
| 6 | 2.0200000 | 0.1589969 | 1.8800000 | 2.2900000 |
|---|-----------|-----------|-----------|-----------|

---

Unique Subject Identifier=1263011000-0033

Assay variable : PTINR\_VAL1 PT-INR Value

N Mean Standard Deviation Minimum Maximum

---

|   |           |           |           |           |
|---|-----------|-----------|-----------|-----------|
| 6 | 2.0183333 | 0.6587994 | 1.5100000 | 3.2600000 |
|---|-----------|-----------|-----------|-----------|

---

Unique Subject Identifier=1264001000-0007

Assay variable : PTINR\_VAL1 PT-INR Value

N Mean Standard Deviation Minimum Maximum

---

|   |           |           |           |           |
|---|-----------|-----------|-----------|-----------|
| 6 | 2.1166667 | 0.6080022 | 1.4000000 | 2.8000000 |
|---|-----------|-----------|-----------|-----------|

---

Unique Subject Identifier=1266000000-0001

Assay variable : PTINR\_VAL1 PT-INR Value

N Mean Standard Deviation Minimum Maximum

---

|   |           |           |           |           |
|---|-----------|-----------|-----------|-----------|
| 6 | 2.0283333 | 0.3773283 | 1.4000000 | 2.4500000 |
|---|-----------|-----------|-----------|-----------|

---



Laboratory tests at the time of obtaining Table 2-6 consent, according to the presence or absence of proton-pump inhibitors

Unique Subject Identifier=1266000000-0005

MEANS Procedure

Assay variable : PTINR\_VAL1 PT-INR Value

N Mean Standard Deviation Minimum Maximum

---

|   |           |           |           |           |
|---|-----------|-----------|-----------|-----------|
| 6 | 2.2616667 | 0.2018333 | 2.1000000 | 2.6000000 |
|---|-----------|-----------|-----------|-----------|

---

Unique Subject Identifier=1266000000-0009

Assay variable : PTINR\_VAL1 PT-INR Value

N Mean Standard Deviation Minimum Maximum

---

|   |           |           |           |           |
|---|-----------|-----------|-----------|-----------|
| 6 | 2.2583333 | 0.3009596 | 1.9000000 | 2.6000000 |
|---|-----------|-----------|-----------|-----------|

---

Unique Subject Identifier=1266000000-0015

Assay variable : PTINR\_VAL1 PT-INR Value

N Mean Standard Deviation Minimum Maximum

---

|   |           |           |           |           |
|---|-----------|-----------|-----------|-----------|
| 6 | 2.0766667 | 0.5020624 | 1.4000000 | 2.6600000 |
|---|-----------|-----------|-----------|-----------|

---

Unique Subject Identifier=1266000000-0016

Assay variable : PTINR\_VAL1 PT-INR Value

N Mean Standard Deviation Minimum Maximum

---

|   |           |           |           |           |
|---|-----------|-----------|-----------|-----------|
| 6 | 2.0350000 | 0.8365584 | 1.3000000 | 3.2000000 |
|---|-----------|-----------|-----------|-----------|

---

Laboratory tests at the time of obtaining Table 2-6 consent, according to the presence or absence of proton-pump inhibitors

Unique Subject Identifier=1266000000-0020

MEANS Procedure

Assay variable : PTINR\_VAL1 PT-INR Value

N Mean Standard Deviation Minimum Maximum

---

|   |           |           |           |           |
|---|-----------|-----------|-----------|-----------|
| 6 | 1.4316667 | 0.1837843 | 1.2000000 | 1.7000000 |
|---|-----------|-----------|-----------|-----------|

---

Unique Subject Identifier=1266000000-0021

Assay variable : PTINR\_VAL1 PT-INR Value

N Mean Standard Deviation Minimum Maximum

---

|   |           |           |           |           |
|---|-----------|-----------|-----------|-----------|
| 6 | 2.1716667 | 0.3237540 | 1.8000000 | 2.7000000 |
|---|-----------|-----------|-----------|-----------|

---

Unique Subject Identifier=1266000000-0022

Assay variable : PTINR\_VAL1 PT-INR Value

N Mean Standard Deviation Minimum Maximum

---

|   |           |           |           |           |
|---|-----------|-----------|-----------|-----------|
| 4 | 2.1975000 | 0.2723203 | 2.0000000 | 2.6000000 |
|---|-----------|-----------|-----------|-----------|

---

Unique Subject Identifier=1266000000-0025

Assay variable : PTINR\_VAL1 PT-INR Value

N Mean Standard Deviation Minimum Maximum

---

|   |           |           |           |           |
|---|-----------|-----------|-----------|-----------|
| 6 | 2.5566667 | 0.6370767 | 1.5000000 | 3.3100000 |
|---|-----------|-----------|-----------|-----------|

---

Laboratory tests at the time of obtaining Table 2-6 consent, according to the presence or absence of proton-pump inhibitors

Unique Subject Identifier=1266000000-0027

MEANS Procedure

Assay variable : PTINR\_VAL1 PT-INR Value

N Mean Standard Deviation Minimum Maximum

---

|   |           |           |           |           |
|---|-----------|-----------|-----------|-----------|
| 6 | 2.2783333 | 0.1510519 | 2.1000000 | 2.5000000 |
|---|-----------|-----------|-----------|-----------|

---

Unique Subject Identifier=1266000000-0029

Assay variable : PTINR\_VAL1 PT-INR Value

N Mean Standard Deviation Minimum Maximum

---

|   |           |           |           |           |
|---|-----------|-----------|-----------|-----------|
| 6 | 1.9283333 | 0.2204011 | 1.6400000 | 2.2800000 |
|---|-----------|-----------|-----------|-----------|

---

Unique Subject Identifier=1266000000-0030

Assay variable : PTINR\_VAL1 PT-INR Value

N Mean Standard Deviation Minimum Maximum

---

|   |           |           |           |           |
|---|-----------|-----------|-----------|-----------|
| 6 | 2.2450000 | 0.2847279 | 1.8000000 | 2.6000000 |
|---|-----------|-----------|-----------|-----------|

---

Unique Subject Identifier=1266000000-0031

Assay variable : PTINR\_VAL1 PT-INR Value

N Mean Standard Deviation Minimum Maximum

---

|   |           |           |           |           |
|---|-----------|-----------|-----------|-----------|
| 6 | 1.7666667 | 0.1175868 | 1.7000000 | 2.0000000 |
|---|-----------|-----------|-----------|-----------|

---

Laboratory tests at the time of obtaining Table 2-6 consent, according to the presence or absence of proton-pump inhibitors

Unique Subject Identifier=1266000000-0032

MEANS Procedure

Assay variable : PTINR\_VAL1 PT-INR Value

N Mean Standard Deviation Minimum Maximum

---

|   |           |           |           |           |
|---|-----------|-----------|-----------|-----------|
| 6 | 1.6983333 | 0.5077959 | 0.7200000 | 2.1000000 |
|---|-----------|-----------|-----------|-----------|

---

Unique Subject Identifier=1266000000-0033

Assay variable : PTINR\_VAL1 PT-INR Value

N Mean Standard Deviation Minimum Maximum

---

|   |           |           |           |           |
|---|-----------|-----------|-----------|-----------|
| 6 | 1.8833333 | 0.1329160 | 1.7000000 | 2.0000000 |
|---|-----------|-----------|-----------|-----------|

---

Unique Subject Identifier=1266000000-0034

Assay variable : PTINR\_VAL1 PT-INR Value

N Mean Standard Deviation Minimum Maximum

---

|   |           |           |           |           |
|---|-----------|-----------|-----------|-----------|
| 6 | 1.6466667 | 0.1782882 | 1.5000000 | 2.0000000 |
|---|-----------|-----------|-----------|-----------|

---

Unique Subject Identifier=1266000000-0036

Assay variable : PTINR\_VAL1 PT-INR Value

N Mean Standard Deviation Minimum Maximum

---

|   |          |           |          |          |
|---|----------|-----------|----------|----------|
| 6 | 1.860000 | 0.1814387 | 1.700000 | 2.170000 |
|---|----------|-----------|----------|----------|

---



Laboratory tests at the time of obtaining Table 2-6 consent, according to the presence or absence of proton-pump inhibitors

Unique Subject Identifier=1266000000-0038

MEANS Procedure

Assay variable : PTINR\_VAL1 PT-INR Value

N Mean Standard Deviation Minimum Maximum

---

|   |           |           |           |           |
|---|-----------|-----------|-----------|-----------|
| 6 | 2.1250000 | 0.1740977 | 1.9000000 | 2.4000000 |
|---|-----------|-----------|-----------|-----------|

---

Unique Subject Identifier=1266000000-0039

Assay variable : PTINR\_VAL1 PT-INR Value

N Mean Standard Deviation Minimum Maximum

---

|   |           |           |           |           |
|---|-----------|-----------|-----------|-----------|
| 6 | 1.6566667 | 0.1787363 | 1.4000000 | 1.9000000 |
|---|-----------|-----------|-----------|-----------|

---

Unique Subject Identifier=1266000000-0041

Assay variable : PTINR\_VAL1 PT-INR Value

N Mean Standard Deviation Minimum Maximum

---

|   |           |           |           |           |
|---|-----------|-----------|-----------|-----------|
| 6 | 1.9000000 | 0.2529822 | 1.6000000 | 2.2000000 |
|---|-----------|-----------|-----------|-----------|

---

Unique Subject Identifier=1266000000-0047

Assay variable : PTINR\_VAL1 PT-INR Value

N Mean Standard Deviation Minimum Maximum

---

|   |           |           |           |           |
|---|-----------|-----------|-----------|-----------|
| 6 | 1.4850000 | 0.2843062 | 1.1900000 | 1.8700000 |
|---|-----------|-----------|-----------|-----------|

---

Laboratory tests at the time of obtaining Table 2-6 consent, according to the presence or absence of proton-pump inhibitors

Unique Subject Identifier=1266000000-0049

MEANS Procedure

Assay variable : PTINR\_VAL1 PT-INR Value

N Mean Standard Deviation Minimum Maximum

---

|   |           |           |           |           |
|---|-----------|-----------|-----------|-----------|
| 6 | 2.5066667 | 1.1082719 | 1.5000000 | 4.6000000 |
|---|-----------|-----------|-----------|-----------|

---

Unique Subject Identifier=1266000000-0050

Assay variable : PTINR\_VAL1 PT-INR Value

N Mean Standard Deviation Minimum Maximum

---

|   |           |           |           |           |
|---|-----------|-----------|-----------|-----------|
| 6 | 1.6283333 | 0.3717212 | 1.3000000 | 2.3600000 |
|---|-----------|-----------|-----------|-----------|

---

Unique Subject Identifier=1266000000-0051

Assay variable : PTINR\_VAL1 PT-INR Value

N Mean Standard Deviation Minimum Maximum

---

|   |           |           |           |           |
|---|-----------|-----------|-----------|-----------|
| 5 | 2.0340000 | 0.3240062 | 1.6100000 | 2.5000000 |
|---|-----------|-----------|-----------|-----------|

---

Unique Subject Identifier=1266000000-0052

Assay variable : PTINR\_VAL1 PT-INR Value

N Mean Standard Deviation Minimum Maximum

---

|   |           |           |           |           |
|---|-----------|-----------|-----------|-----------|
| 6 | 1.9050000 | 0.1963415 | 1.6000000 | 2.1300000 |
|---|-----------|-----------|-----------|-----------|

---

Laboratory tests at the time of obtaining Table 2-6 consent, according to the presence or absence of proton-pump inhibitors

Unique Subject Identifier=1266000000-0053

MEANS Procedure

Assay variable : PTINR\_VAL1 PT-INR Value

N Mean Standard Deviation Minimum Maximum

---

|   |           |           |           |           |
|---|-----------|-----------|-----------|-----------|
| 6 | 2.4983333 | 0.1980320 | 2.2000000 | 2.8000000 |
|---|-----------|-----------|-----------|-----------|

---

Unique Subject Identifier=1266000000-0055

Assay variable : PTINR\_VAL1 PT-INR Value

N Mean Standard Deviation Minimum Maximum

---

|   |           |           |           |           |
|---|-----------|-----------|-----------|-----------|
| 6 | 2.1800000 | 0.2497999 | 1.8000000 | 2.5800000 |
|---|-----------|-----------|-----------|-----------|

---

Unique Subject Identifier=1266000000-0056

Assay variable : PTINR\_VAL1 PT-INR Value

N Mean Standard Deviation Minimum Maximum

---

|   |           |           |           |           |
|---|-----------|-----------|-----------|-----------|
| 6 | 2.1200000 | 0.3891015 | 1.6000000 | 2.6000000 |
|---|-----------|-----------|-----------|-----------|

---

Unique Subject Identifier=1266000000-0058

Assay variable : PTINR\_VAL1 PT-INR Value

N Mean Standard Deviation Minimum Maximum

---

|   |           |           |           |           |
|---|-----------|-----------|-----------|-----------|
| 5 | 1.6980000 | 0.1298846 | 1.4800000 | 1.8000000 |
|---|-----------|-----------|-----------|-----------|

---

Laboratory tests at the time of obtaining Table 2-6 consent, according to the presence or absence of proton-pump inhibitors

Unique Subject Identifier=1266000000-0059

MEANS Procedure

Assay variable : PTINR\_VAL1 PT-INR Value

N Mean Standard Deviation Minimum Maximum

---

|   |           |           |           |           |
|---|-----------|-----------|-----------|-----------|
| 6 | 2.2900000 | 0.4923007 | 1.9000000 | 3.2000000 |
|---|-----------|-----------|-----------|-----------|

---

Unique Subject Identifier=1266000000-0061

Assay variable : PTINR\_VAL1 PT-INR Value

N Mean Standard Deviation Minimum Maximum

---

|   |           |           |           |           |
|---|-----------|-----------|-----------|-----------|
| 6 | 2.0400000 | 0.2387467 | 1.7000000 | 2.3900000 |
|---|-----------|-----------|-----------|-----------|

---

Unique Subject Identifier=1266000000-0062

Assay variable : PTINR\_VAL1 PT-INR Value

N Mean Standard Deviation Minimum Maximum

---

|   |           |           |           |           |
|---|-----------|-----------|-----------|-----------|
| 6 | 2.2116667 | 0.2049797 | 1.9200000 | 2.4500000 |
|---|-----------|-----------|-----------|-----------|

---

Unique Subject Identifier=1266000000-0063

Assay variable : PTINR\_VAL1 PT-INR Value

N Mean Standard Deviation Minimum Maximum

---

|   |           |           |           |           |
|---|-----------|-----------|-----------|-----------|
| 6 | 2.3433333 | 0.5746883 | 1.6000000 | 2.9000000 |
|---|-----------|-----------|-----------|-----------|

---



Laboratory tests at the time of obtaining Table 2-6 consent, according to the presence or absence of proton-pump inhibitors

Unique Subject Identifier=1266000000-0068

MEANS Procedure

Assay variable : PTINR\_VAL1 PT-INR Value

N Mean Standard Deviation Minimum Maximum

---

|   |           |           |           |           |
|---|-----------|-----------|-----------|-----------|
| 6 | 1.8616667 | 0.1397736 | 1.7000000 | 2.1000000 |
|---|-----------|-----------|-----------|-----------|

---

Unique Subject Identifier=1266000000-0070

Assay variable : PTINR\_VAL1 PT-INR Value

N Mean Standard Deviation Minimum Maximum

---

|   |           |           |           |           |
|---|-----------|-----------|-----------|-----------|
| 6 | 1.6433333 | 0.2367840 | 1.2000000 | 1.8000000 |
|---|-----------|-----------|-----------|-----------|

---

Unique Subject Identifier=1266000000-0071

Assay variable : PTINR\_VAL1 PT-INR Value

N Mean Standard Deviation Minimum Maximum

---

|   |           |           |           |           |
|---|-----------|-----------|-----------|-----------|
| 6 | 2.0916667 | 0.3350473 | 1.8000000 | 2.7000000 |
|---|-----------|-----------|-----------|-----------|

---

Unique Subject Identifier=1266000000-0072

Assay variable : PTINR\_VAL1 PT-INR Value

N Mean Standard Deviation Minimum Maximum

---

|   |           |           |           |           |
|---|-----------|-----------|-----------|-----------|
| 6 | 2.2333333 | 0.3023684 | 1.7000000 | 2.5000000 |
|---|-----------|-----------|-----------|-----------|

---

Laboratory tests at the time of obtaining Table 2-6 consent, according to the presence or absence of proton-pump inhibitors

Unique Subject Identifier=1266000000-0077

MEANS Procedure

Assay variable : PTINR\_VAL1 PT-INR Value

N Mean Standard Deviation Minimum Maximum

---

|   |           |           |           |           |
|---|-----------|-----------|-----------|-----------|
| 6 | 1.5250000 | 0.1405347 | 1.4000000 | 1.7000000 |
|---|-----------|-----------|-----------|-----------|

---

Unique Subject Identifier=1266000000-0082

Assay variable : PTINR\_VAL1 PT-INR Value

N Mean Standard Deviation Minimum Maximum

---

|   |           |           |           |           |
|---|-----------|-----------|-----------|-----------|
| 6 | 2.0666667 | 0.2726659 | 1.8500000 | 2.5900000 |
|---|-----------|-----------|-----------|-----------|

---

Unique Subject Identifier=1268000000-0001

Assay variable : PTINR\_VAL1 PT-INR Value

N Mean Standard Deviation Minimum Maximum

---

|   |           |           |           |           |
|---|-----------|-----------|-----------|-----------|
| 3 | 2.0066667 | 0.3500476 | 1.6600000 | 2.3600000 |
|---|-----------|-----------|-----------|-----------|

---

Unique Subject Identifier=1268000000-0003

Assay variable : PTINR\_VAL1 PT-INR Value

N Mean Standard Deviation Minimum Maximum

---

|   |           |           |           |           |
|---|-----------|-----------|-----------|-----------|
| 6 | 1.5916667 | 0.1704602 | 1.3800000 | 1.8900000 |
|---|-----------|-----------|-----------|-----------|

---

Laboratory tests at the time of obtaining Table 2-6 consent, according to the presence or absence of proton-pump inhibitors

Unique Subject Identifier=1268000000-0004

MEANS Procedure

Assay variable : PTINR\_VAL1 PT-INR Value

N Mean Standard Deviation Minimum Maximum

---

|   |           |           |           |           |
|---|-----------|-----------|-----------|-----------|
| 4 | 1.6150000 | 0.1047219 | 1.5200000 | 1.7200000 |
|---|-----------|-----------|-----------|-----------|

---

Unique Subject Identifier=1268000000-0006

Assay variable : PTINR\_VAL1 PT-INR Value

N Mean Standard Deviation Minimum Maximum

---

|   |           |           |           |           |
|---|-----------|-----------|-----------|-----------|
| 6 | 1.6616667 | 0.1433062 | 1.4300000 | 1.8200000 |
|---|-----------|-----------|-----------|-----------|

---

Unique Subject Identifier=1268000000-0007

Assay variable : PTINR\_VAL1 PT-INR Value

N Mean Standard Deviation Minimum Maximum

---

|   |           |           |           |           |
|---|-----------|-----------|-----------|-----------|
| 5 | 1.5580000 | 0.1822635 | 1.3000000 | 1.7000000 |
|---|-----------|-----------|-----------|-----------|

---

Unique Subject Identifier=1269000000-0002

Assay variable : PTINR\_VAL1 PT-INR Value

N Mean Standard Deviation Minimum Maximum

---

|   |           |           |           |           |
|---|-----------|-----------|-----------|-----------|
| 6 | 1.6083333 | 0.4269153 | 1.0500000 | 2.2500000 |
|---|-----------|-----------|-----------|-----------|

---

Laboratory tests at the time of obtaining Table 2-6 consent, according to the presence or absence of proton-pump inhibitors

Unique Subject Identifier=1269000000-0007

MEANS Procedure

Assay variable : PTINR\_VAL1 PT-INR Value

N Mean Standard Deviation Minimum Maximum

---

|   |           |           |           |           |
|---|-----------|-----------|-----------|-----------|
| 4 | 1.8625000 | 0.1990603 | 1.6400000 | 2.1200000 |
|---|-----------|-----------|-----------|-----------|

---

Unique Subject Identifier=1269000000-0008

Assay variable : PTINR\_VAL1 PT-INR Value

N Mean Standard Deviation Minimum Maximum

---

|   |           |           |           |           |
|---|-----------|-----------|-----------|-----------|
| 6 | 2.1200000 | 0.2794280 | 1.6200000 | 2.4400000 |
|---|-----------|-----------|-----------|-----------|

---

Unique Subject Identifier=1269000000-0009

Assay variable : PTINR\_VAL1 PT-INR Value

N Mean Standard Deviation Minimum Maximum

---

|   |           |           |           |           |
|---|-----------|-----------|-----------|-----------|
| 6 | 1.8533333 | 0.3991324 | 1.1900000 | 2.1600000 |
|---|-----------|-----------|-----------|-----------|

---

Unique Subject Identifier=1269000000-0010

Assay variable : PTINR\_VAL1 PT-INR Value

N Mean Standard Deviation Minimum Maximum

---

|   |          |           |          |          |
|---|----------|-----------|----------|----------|
| 5 | 1.840000 | 0.2164486 | 1.560000 | 2.050000 |
|---|----------|-----------|----------|----------|

---



Laboratory tests at the time of obtaining Table 2-6 consent, according to the presence or absence of proton-pump inhibitors

Unique Subject Identifier=1269000000-0012

MEANS Procedure

Assay variable : PTINR\_VAL1 PT-INR Value

N Mean Standard Deviation Minimum Maximum

---

|   |           |           |           |           |
|---|-----------|-----------|-----------|-----------|
| 6 | 1.8933333 | 0.1742029 | 1.7200000 | 2.1600000 |
|---|-----------|-----------|-----------|-----------|

---

Unique Subject Identifier=1269000000-0018

Assay variable : PTINR\_VAL1 PT-INR Value

N Mean Standard Deviation Minimum Maximum

---

|   |           |           |           |           |
|---|-----------|-----------|-----------|-----------|
| 6 | 1.8233333 | 0.4719181 | 1.2600000 | 2.5500000 |
|---|-----------|-----------|-----------|-----------|

---

Unique Subject Identifier=1269000000-0019

Assay variable : PTINR\_VAL1 PT-INR Value

N Mean Standard Deviation Minimum Maximum

---

|   |           |           |           |           |
|---|-----------|-----------|-----------|-----------|
| 2 | 1.5500000 | 0.3252691 | 1.3200000 | 1.7800000 |
|---|-----------|-----------|-----------|-----------|

---

Unique Subject Identifier=1269000000-0020

Assay variable : PTINR\_VAL1 PT-INR Value

N Mean Standard Deviation Minimum Maximum

---

|   |           |           |           |           |
|---|-----------|-----------|-----------|-----------|
| 6 | 1.5016667 | 0.1826928 | 1.2100000 | 1.7000000 |
|---|-----------|-----------|-----------|-----------|

---

Laboratory tests at the time of obtaining Table 2-6 consent, according to the presence or absence of proton-pump inhibitors

Unique Subject Identifier=1270000000-0001

MEANS Procedure

Assay variable : PTINR\_VAL1 PT-INR Value

N Mean Standard Deviation Minimum Maximum

---

|   |           |           |           |           |
|---|-----------|-----------|-----------|-----------|
| 2 | 1.9500000 | 0.2121320 | 1.8000000 | 2.1000000 |
|---|-----------|-----------|-----------|-----------|

---

Unique Subject Identifier=1270000000-0002

Assay variable : PTINR\_VAL1 PT-INR Value

N Mean Standard Deviation Minimum Maximum

---

|   |           |           |           |           |
|---|-----------|-----------|-----------|-----------|
| 3 | 2.0933333 | 0.0404145 | 2.0500000 | 2.1300000 |
|---|-----------|-----------|-----------|-----------|

---

Unique Subject Identifier=1270000000-0003

Assay variable : PTINR\_VAL1 PT-INR Value

N Mean Standard Deviation Minimum Maximum

---

|   |           |           |           |           |
|---|-----------|-----------|-----------|-----------|
| 2 | 1.8750000 | 0.0353553 | 1.8500000 | 1.9000000 |
|---|-----------|-----------|-----------|-----------|

---

Unique Subject Identifier=1270000000-0004

Assay variable : PTINR\_VAL1 PT-INR Value

N Mean Standard Deviation Minimum Maximum

---

|   |           |           |           |           |
|---|-----------|-----------|-----------|-----------|
| 2 | 1.9000000 | 0.1414214 | 1.8000000 | 2.0000000 |
|---|-----------|-----------|-----------|-----------|

---

Laboratory tests at the time of obtaining Table 2-6 consent, according to the presence or absence of proton-pump inhibitors

Unique Subject Identifier=1270000000-0005

MEANS Procedure

Assay variable : PTINR\_VAL1 PT-INR Value

N Mean Standard Deviation Minimum Maximum

---

|   |           |           |           |           |
|---|-----------|-----------|-----------|-----------|
| 4 | 1.8500000 | 0.3696846 | 1.4000000 | 2.2000000 |
|---|-----------|-----------|-----------|-----------|

---

Unique Subject Identifier=1270000000-0007

Assay variable : PTINR\_VAL1 PT-INR Value

N Mean Standard Deviation Minimum Maximum

---

|   |           |           |           |           |
|---|-----------|-----------|-----------|-----------|
| 2 | 1.8500000 | 0.3535534 | 1.6000000 | 2.1000000 |
|---|-----------|-----------|-----------|-----------|

---

Unique Subject Identifier=1270000000-0008

Assay variable : PTINR\_VAL1 PT-INR Value

N Mean Standard Deviation Minimum Maximum

---

|   |           |           |           |           |
|---|-----------|-----------|-----------|-----------|
| 2 | 1.8000000 | 0.2828427 | 1.6000000 | 2.0000000 |
|---|-----------|-----------|-----------|-----------|

---

Unique Subject Identifier=1270000000-0009

Assay variable : PTINR\_VAL1 PT-INR Value

N Mean Standard Deviation Minimum Maximum

---

|   |           |           |           |           |
|---|-----------|-----------|-----------|-----------|
| 3 | 2.3333333 | 0.1154701 | 2.2000000 | 2.4000000 |
|---|-----------|-----------|-----------|-----------|

---

Laboratory tests at the time of obtaining Table 2-6 consent, according to the presence or absence of proton-pump inhibitors

Unique Subject Identifier=1270000000-0010

MEANS Procedure

Assay variable : PTINR\_VAL1 PT-INR Value

| N | Mean      | Standard Deviation | Minimum   | Maximum   |
|---|-----------|--------------------|-----------|-----------|
| 3 | 1.9666667 | 0.2516611          | 1.7000000 | 2.2000000 |

Unique Subject Identifier=1270000000-0011

Assay variable : PTINR\_VAL1 PT-INR Value

| N | Mean      | Standard Deviation | Minimum   | Maximum   |
|---|-----------|--------------------|-----------|-----------|
| 2 | 2.5000000 | 1.5556349          | 1.4000000 | 3.6000000 |

Unique Subject Identifier=1270000000-0012

Assay variable : PTINR\_VAL1 PT-INR Value

| N | Mean      | Standard Deviation | Minimum   | Maximum   |
|---|-----------|--------------------|-----------|-----------|
| 2 | 2.5750000 | 0.0353553          | 2.5500000 | 2.6000000 |

Unique Subject Identifier=1270000000-0013

Assay variable : PTINR\_VAL1 PT-INR Value

N Mean Standard Deviation Minimum Maximum

---

|   |           |  |           |           |
|---|-----------|--|-----------|-----------|
| 1 | 2.0000000 |  | 2.0000000 | 2.0000000 |
|---|-----------|--|-----------|-----------|

---



Laboratory tests at the time of obtaining Table 2-6 consent, according to the presence or absence of proton-pump inhibitors

Unique Subject Identifier=1270000000-0015

MEANS Procedure

Assay variable : PTINR\_VAL1 PT-INR Value

N Mean Standard Deviation Minimum Maximum

---

|   |           |           |           |           |
|---|-----------|-----------|-----------|-----------|
| 4 | 1.5275000 | 0.1001249 | 1.4100000 | 1.6500000 |
|---|-----------|-----------|-----------|-----------|

---

Unique Subject Identifier=1270000000-0016

Assay variable : PTINR\_VAL1 PT-INR Value

N Mean Standard Deviation Minimum Maximum

---

|   |           |           |           |           |
|---|-----------|-----------|-----------|-----------|
| 2 | 1.8500000 | 0.0707107 | 1.8000000 | 1.9000000 |
|---|-----------|-----------|-----------|-----------|

---

Unique Subject Identifier=1270000000-0017

Assay variable : PTINR\_VAL1 PT-INR Value

N Mean Standard Deviation Minimum Maximum

---

|   |           |           |           |           |
|---|-----------|-----------|-----------|-----------|
| 3 | 2.8000000 | 1.1532563 | 1.9000000 | 4.1000000 |
|---|-----------|-----------|-----------|-----------|

---

Unique Subject Identifier=1270000000-0021

Assay variable : PTINR\_VAL1 PT-INR Value

N Mean Standard Deviation Minimum Maximum

---

|   |           |           |           |           |
|---|-----------|-----------|-----------|-----------|
| 2 | 2.2300000 | 0.2404163 | 2.0600000 | 2.4000000 |
|---|-----------|-----------|-----------|-----------|

---

Laboratory tests at the time of obtaining Table 2-6 consent, according to the presence or absence of proton-pump inhibitors

Unique Subject Identifier=1270000000-0023

MEANS Procedure

Assay variable : PTINR\_VAL1 PT-INR Value

| N | Mean      | Standard Deviation | Minimum   | Maximum   |
|---|-----------|--------------------|-----------|-----------|
| 3 | 1.7666667 | 0.6027714          | 1.2000000 | 2.4000000 |

Unique Subject Identifier=1274000000-0003

Assay variable : PTINR\_VAL1 PT-INR Value

| N | Mean      | Standard Deviation | Minimum   | Maximum   |
|---|-----------|--------------------|-----------|-----------|
| 2 | 1.4550000 | 0.0494975          | 1.4200000 | 1.4900000 |

Unique Subject Identifier=1276000000-0001

Assay variable : PTINR\_VAL1 PT-INR Value

| N | Mean      | Standard Deviation | Minimum   | Maximum   |
|---|-----------|--------------------|-----------|-----------|
| 6 | 2.5900000 | 0.7753193          | 1.8000000 | 3.9000000 |

Unique Subject Identifier=1276000000-0002

Assay variable : PTINR\_VAL1 PT-INR Value

N Mean Standard Deviation Minimum Maximum

---

|   |           |           |           |           |
|---|-----------|-----------|-----------|-----------|
| 2 | 2.0500000 | 0.0565685 | 2.0100000 | 2.0900000 |
|---|-----------|-----------|-----------|-----------|

---

Laboratory tests at the time of obtaining Table 2-6 consent, according to the presence or absence of proton-pump inhibitors

Unique Subject Identifier=1276000000-0004

MEANS Procedure

Assay variable : PTINR\_VAL1 PT-INR Value

N Mean Standard Deviation Minimum Maximum

---

|   |           |           |           |           |
|---|-----------|-----------|-----------|-----------|
| 4 | 1.7250000 | 0.2747726 | 1.4300000 | 2.0600000 |
|---|-----------|-----------|-----------|-----------|

---

Unique Subject Identifier=1276000000-0005

Assay variable : PTINR\_VAL1 PT-INR Value

N Mean Standard Deviation Minimum Maximum

---

|   |           |           |           |           |
|---|-----------|-----------|-----------|-----------|
| 3 | 2.1000000 | 0.2951271 | 1.8000000 | 2.3900000 |
|---|-----------|-----------|-----------|-----------|

---

Unique Subject Identifier=1276000000-0008

Assay variable : PTINR\_VAL1 PT-INR Value

N Mean Standard Deviation Minimum Maximum

---

|   |           |           |           |           |
|---|-----------|-----------|-----------|-----------|
| 3 | 1.8633333 | 0.0665833 | 1.8200000 | 1.9400000 |
|---|-----------|-----------|-----------|-----------|

---

Unique Subject Identifier=1277010100-0001

Assay variable : PTINR\_VAL1 PT-INR Value

N Mean Standard Deviation Minimum Maximum

---

|   |          |           |          |          |
|---|----------|-----------|----------|----------|
| 6 | 2.190000 | 0.0678233 | 2.100000 | 2.300000 |
|---|----------|-----------|----------|----------|

---

Laboratory tests at the time of obtaining Table 2-6 consent, according to the presence or absence of proton-pump inhibitors

Unique Subject Identifier=1277010100-0002

MEANS Procedure

Assay variable : PTINR\_VAL1 PT-INR Value

N Mean Standard Deviation Minimum Maximum

---

|   |           |           |           |           |
|---|-----------|-----------|-----------|-----------|
| 6 | 1.8416667 | 0.1357080 | 1.6000000 | 2.0000000 |
|---|-----------|-----------|-----------|-----------|

---

Unique Subject Identifier=1277010100-0003

Assay variable : PTINR\_VAL1 PT-INR Value

N Mean Standard Deviation Minimum Maximum

---

|   |           |           |           |           |
|---|-----------|-----------|-----------|-----------|
| 6 | 2.3333333 | 0.1632993 | 2.2000000 | 2.6000000 |
|---|-----------|-----------|-----------|-----------|

---

Unique Subject Identifier=1277010100-0004

Assay variable : PTINR\_VAL1 PT-INR Value

N Mean Standard Deviation Minimum Maximum

---

|   |           |           |           |           |
|---|-----------|-----------|-----------|-----------|
| 6 | 1.7750000 | 0.2444381 | 1.5000000 | 2.2000000 |
|---|-----------|-----------|-----------|-----------|

---

Unique Subject Identifier=1277010100-0005

Assay variable : PTINR\_VAL1 PT-INR Value

N Mean Standard Deviation Minimum Maximum

---

|   |           |           |           |           |
|---|-----------|-----------|-----------|-----------|
| 6 | 2.1783333 | 0.1040032 | 2.0700000 | 2.3000000 |
|---|-----------|-----------|-----------|-----------|

---



Laboratory tests at the time of obtaining Table 2-6 consent, according to the presence or absence of proton-pump inhibitors

Unique Subject Identifier=1277010100-0006

MEANS Procedure

Assay variable : PTINR\_VAL1 PT-INR Value

N Mean Standard Deviation Minimum Maximum

---

|   |           |           |           |           |
|---|-----------|-----------|-----------|-----------|
| 6 | 2.4333333 | 0.2732520 | 2.2000000 | 2.9000000 |
|---|-----------|-----------|-----------|-----------|

---

Unique Subject Identifier=1277010100-0007

Assay variable : PTINR\_VAL1 PT-INR Value

N Mean Standard Deviation Minimum Maximum

---

|   |           |           |           |           |
|---|-----------|-----------|-----------|-----------|
| 6 | 1.9150000 | 0.2072438 | 1.5900000 | 2.2000000 |
|---|-----------|-----------|-----------|-----------|

---

Unique Subject Identifier=1277010100-0008

Assay variable : PTINR\_VAL1 PT-INR Value

N Mean Standard Deviation Minimum Maximum

---

|   |           |           |           |           |
|---|-----------|-----------|-----------|-----------|
| 6 | 2.3000000 | 0.2529822 | 1.9000000 | 2.6000000 |
|---|-----------|-----------|-----------|-----------|

---

Unique Subject Identifier=1277010100-0010

Assay variable : PTINR\_VAL1 PT-INR Value

N Mean Standard Deviation Minimum Maximum

---

|   |           |           |           |           |
|---|-----------|-----------|-----------|-----------|
| 6 | 1.9000000 | 0.0894427 | 1.8000000 | 2.0000000 |
|---|-----------|-----------|-----------|-----------|

---

Laboratory tests at the time of obtaining Table 2-6 consent, according to the presence or absence of proton-pump inhibitors

Unique Subject Identifier=1277010100-0011

MEANS Procedure

Assay variable : PTINR\_VAL1 PT-INR Value

N Mean Standard Deviation Minimum Maximum

---

|   |           |           |           |           |
|---|-----------|-----------|-----------|-----------|
| 6 | 2.4100000 | 0.4259108 | 1.8000000 | 2.9000000 |
|---|-----------|-----------|-----------|-----------|

---

Unique Subject Identifier=1277010100-0012

Assay variable : PTINR\_VAL1 PT-INR Value

N Mean Standard Deviation Minimum Maximum

---

|   |           |           |           |           |
|---|-----------|-----------|-----------|-----------|
| 6 | 1.8666667 | 0.2804758 | 1.5000000 | 2.2000000 |
|---|-----------|-----------|-----------|-----------|

---

Unique Subject Identifier=1277010100-0015

Assay variable : PTINR\_VAL1 PT-INR Value

N Mean Standard Deviation Minimum Maximum

---

|   |           |           |           |           |
|---|-----------|-----------|-----------|-----------|
| 6 | 1.9000000 | 0.3577709 | 1.6000000 | 2.4000000 |
|---|-----------|-----------|-----------|-----------|

---

Unique Subject Identifier=1277010100-0016

Assay variable : PTINR\_VAL1 PT-INR Value

N Mean Standard Deviation Minimum Maximum

---

|   |          |           |          |          |
|---|----------|-----------|----------|----------|
| 6 | 2.800000 | 0.8390471 | 1.500000 | 3.800000 |
|---|----------|-----------|----------|----------|

---

Laboratory tests at the time of obtaining Table 2-6 consent, according to the presence or absence of proton-pump inhibitors

Unique Subject Identifier=1277010100-0017

MEANS Procedure

Assay variable : PTINR\_VAL1 PT-INR Value

N Mean Standard Deviation Minimum Maximum

---

|   |           |           |           |           |
|---|-----------|-----------|-----------|-----------|
| 6 | 2.1950000 | 0.1554027 | 2.1000000 | 2.5000000 |
|---|-----------|-----------|-----------|-----------|

---

Unique Subject Identifier=1278011100-0002

Assay variable : PTINR\_VAL1 PT-INR Value

N Mean Standard Deviation Minimum Maximum

---

|   |           |           |           |           |
|---|-----------|-----------|-----------|-----------|
| 4 | 2.1750000 | 0.3361051 | 1.8900000 | 2.6600000 |
|---|-----------|-----------|-----------|-----------|

---

Unique Subject Identifier=1278011100-0006

Assay variable : PTINR\_VAL1 PT-INR Value

N Mean Standard Deviation Minimum Maximum

---

|   |           |           |           |           |
|---|-----------|-----------|-----------|-----------|
| 5 | 1.8340000 | 0.3822041 | 1.1900000 | 2.1200000 |
|---|-----------|-----------|-----------|-----------|

---

Unique Subject Identifier=1278011100-0009

Assay variable : PTINR\_VAL1 PT-INR Value

N Mean Standard Deviation Minimum Maximum

---

|   |           |           |           |           |
|---|-----------|-----------|-----------|-----------|
| 2 | 2.1350000 | 0.1484924 | 2.0300000 | 2.2400000 |
|---|-----------|-----------|-----------|-----------|

---

Laboratory tests at the time of obtaining Table 2-6 consent, according to the presence or absence of proton-pump inhibitors

Unique Subject Identifier=1278011100-0011

MEANS Procedure

Assay variable : PTINR\_VAL1 PT-INR Value

N Mean Standard Deviation Minimum Maximum

---

|   |           |           |           |           |
|---|-----------|-----------|-----------|-----------|
| 6 | 2.2816667 | 1.0698863 | 1.5800000 | 4.4200000 |
|---|-----------|-----------|-----------|-----------|

---

Unique Subject Identifier=1278011100-0012

Assay variable : PTINR\_VAL1 PT-INR Value

N Mean Standard Deviation Minimum Maximum

---

|   |           |           |           |           |
|---|-----------|-----------|-----------|-----------|
| 2 | 1.9950000 | 0.0353553 | 1.9700000 | 2.0200000 |
|---|-----------|-----------|-----------|-----------|

---

Unique Subject Identifier=1278011100-0013

Assay variable : PTINR\_VAL1 PT-INR Value

N Mean Standard Deviation Minimum Maximum

---

|   |           |           |           |           |
|---|-----------|-----------|-----------|-----------|
| 2 | 1.6900000 | 0.0141421 | 1.6800000 | 1.7000000 |
|---|-----------|-----------|-----------|-----------|

---

Unique Subject Identifier=1279000000-0003

Assay variable : PTINR\_VAL1 PT-INR Value

N Mean Standard Deviation Minimum Maximum

---

|   |          |           |          |          |
|---|----------|-----------|----------|----------|
| 4 | 2.450000 | 0.4358899 | 2.100000 | 3.000000 |
|---|----------|-----------|----------|----------|

---



Laboratory tests at the time of obtaining Table 2-6 consent, according to the presence or absence of proton-pump inhibitors

Unique Subject Identifier=1279000000-0007

MEANS Procedure

Assay variable : PTINR\_VAL1 PT-INR Value

N Mean Standard Deviation Minimum Maximum

---

|   |           |  |           |           |
|---|-----------|--|-----------|-----------|
| 1 | 1.6000000 |  | 1.6000000 | 1.6000000 |
|---|-----------|--|-----------|-----------|

---

Unique Subject Identifier=1279000000-0008

Assay variable : PTINR\_VAL1 PT-INR Value

N Mean Standard Deviation Minimum Maximum

---

|   |           |           |           |           |
|---|-----------|-----------|-----------|-----------|
| 2 | 1.5750000 | 0.1202082 | 1.4900000 | 1.6600000 |
|---|-----------|-----------|-----------|-----------|

---

Unique Subject Identifier=1280001000-0003

Assay variable : PTINR\_VAL1 PT-INR Value

N Mean Standard Deviation Minimum Maximum

---

|   |           |           |           |           |
|---|-----------|-----------|-----------|-----------|
| 4 | 1.4500000 | 0.2081666 | 1.2000000 | 1.7000000 |
|---|-----------|-----------|-----------|-----------|

---

Unique Subject Identifier=1280001000-0005

Assay variable : PTINR\_VAL1 PT-INR Value

N Mean Standard Deviation Minimum Maximum

---

|   |           |           |           |           |
|---|-----------|-----------|-----------|-----------|
| 6 | 2.0333333 | 0.2250926 | 1.7000000 | 2.2000000 |
|---|-----------|-----------|-----------|-----------|

---

Laboratory tests at the time of obtaining Table 2-6 consent, according to the presence or absence of proton-pump inhibitors

Unique Subject Identifier=1281000000-0001

MEANS Procedure

Assay variable : PTINR\_VAL1 PT-INR Value

N Mean Standard Deviation Minimum Maximum

---

|   |           |           |           |           |
|---|-----------|-----------|-----------|-----------|
| 6 | 2.1716667 | 0.1702253 | 2.0000000 | 2.4600000 |
|---|-----------|-----------|-----------|-----------|

---

Unique Subject Identifier=1281000000-0005

Assay variable : PTINR\_VAL1 PT-INR Value

N Mean Standard Deviation Minimum Maximum

---

|   |           |           |           |           |
|---|-----------|-----------|-----------|-----------|
| 5 | 1.8200000 | 0.1673320 | 1.5600000 | 1.9700000 |
|---|-----------|-----------|-----------|-----------|

---

Unique Subject Identifier=1282011111-0001

Assay variable : PTINR\_VAL1 PT-INR Value

N Mean Standard Deviation Minimum Maximum

---

|   |           |           |           |           |
|---|-----------|-----------|-----------|-----------|
| 6 | 2.3000000 | 0.2828427 | 2.0000000 | 2.8000000 |
|---|-----------|-----------|-----------|-----------|

---

Unique Subject Identifier=1282011111-0005

Assay variable : PTINR\_VAL1 PT-INR Value

N Mean Standard Deviation Minimum Maximum

---

|   |           |           |           |           |
|---|-----------|-----------|-----------|-----------|
| 6 | 1.9166667 | 0.4445972 | 1.1000000 | 2.4000000 |
|---|-----------|-----------|-----------|-----------|

---

Laboratory tests at the time of obtaining Table 2-6 consent, according to the presence or absence of proton-pump inhibitors

Unique Subject Identifier=1286000000-0004

MEANS Procedure

Assay variable : PTINR\_VAL1 PT-INR Value

N Mean Standard Deviation Minimum Maximum

---

|   |           |           |           |           |
|---|-----------|-----------|-----------|-----------|
| 6 | 1.9333333 | 0.3444803 | 1.6000000 | 2.5000000 |
|---|-----------|-----------|-----------|-----------|

---

Unique Subject Identifier=1286000000-0017

Assay variable : PTINR\_VAL1 PT-INR Value

N Mean Standard Deviation Minimum Maximum

---

|   |           |  |           |           |
|---|-----------|--|-----------|-----------|
| 1 | 1.7000000 |  | 1.7000000 | 1.7000000 |
|---|-----------|--|-----------|-----------|

---

Unique Subject Identifier=1286000000-0026

Assay variable : PTINR\_VAL1 PT-INR Value

N Mean Standard Deviation Minimum Maximum

---

|   |           |           |           |           |
|---|-----------|-----------|-----------|-----------|
| 6 | 2.2833333 | 0.9453394 | 1.4000000 | 4.0000000 |
|---|-----------|-----------|-----------|-----------|

---

Unique Subject Identifier=1286000000-0027

Assay variable : PTINR\_VAL1 PT-INR Value

N Mean Standard Deviation Minimum Maximum

---

|   |           |           |           |           |
|---|-----------|-----------|-----------|-----------|
| 6 | 2.1166667 | 0.1602082 | 2.0000000 | 2.4000000 |
|---|-----------|-----------|-----------|-----------|

---

Laboratory tests at the time of obtaining Table 2-6 consent, according to the presence or absence of proton-pump inhibitors

Unique Subject Identifier=1286000000-0028

MEANS Procedure

Assay variable : PTINR\_VAL1 PT-INR Value

N Mean Standard Deviation Minimum Maximum

---

|   |           |           |           |           |
|---|-----------|-----------|-----------|-----------|
| 6 | 1.9333333 | 0.7501111 | 1.3000000 | 3.4000000 |
|---|-----------|-----------|-----------|-----------|

---

Unique Subject Identifier=1287000000-0005

Assay variable : PTINR\_VAL1 PT-INR Value

N Mean Standard Deviation Minimum Maximum

---

|   |           |           |           |           |
|---|-----------|-----------|-----------|-----------|
| 6 | 1.8833333 | 0.1940790 | 1.6000000 | 2.1000000 |
|---|-----------|-----------|-----------|-----------|

---

Unique Subject Identifier=1287000000-0010

Assay variable : PTINR\_VAL1 PT-INR Value

N Mean Standard Deviation Minimum Maximum

---

|   |           |           |           |           |
|---|-----------|-----------|-----------|-----------|
| 5 | 1.5200000 | 0.1095445 | 1.4000000 | 1.7000000 |
|---|-----------|-----------|-----------|-----------|

---

Unique Subject Identifier=1287000000-0014

Assay variable : PTINR\_VAL1 PT-INR Value

N Mean Standard Deviation Minimum Maximum

---

|   |           |           |           |           |
|---|-----------|-----------|-----------|-----------|
| 6 | 1.9000000 | 0.4000000 | 1.4000000 | 2.5000000 |
|---|-----------|-----------|-----------|-----------|

---



Laboratory tests at the time of obtaining Table 2-6 consent, according to the presence or absence of proton-pump inhibitors

Unique Subject Identifier=1287000000-0015

MEANS Procedure

Assay variable : PTINR\_VAL1 PT-INR Value

N Mean Standard Deviation Minimum Maximum

---

|   |           |           |           |           |
|---|-----------|-----------|-----------|-----------|
| 2 | 1.9000000 | 0.2828427 | 1.7000000 | 2.1000000 |
|---|-----------|-----------|-----------|-----------|

---

Unique Subject Identifier=1289000000-0001

Assay variable : PTINR\_VAL1 PT-INR Value

N Mean Standard Deviation Minimum Maximum

---

|   |           |           |           |           |
|---|-----------|-----------|-----------|-----------|
| 3 | 1.3600000 | 0.1637071 | 1.1800000 | 1.5000000 |
|---|-----------|-----------|-----------|-----------|

---

Unique Subject Identifier=1289000000-0002

Assay variable : PTINR\_VAL1 PT-INR Value

N Mean Standard Deviation Minimum Maximum

---

|   |           |           |           |           |
|---|-----------|-----------|-----------|-----------|
| 3 | 1.8566667 | 0.3137409 | 1.5000000 | 2.0900000 |
|---|-----------|-----------|-----------|-----------|

---

Unique Subject Identifier=1289000000-0003

Assay variable : PTINR\_VAL1 PT-INR Value

N Mean Standard Deviation Minimum Maximum

---

|   |           |           |           |           |
|---|-----------|-----------|-----------|-----------|
| 2 | 1.4150000 | 0.0070711 | 1.4100000 | 1.4200000 |
|---|-----------|-----------|-----------|-----------|

---

Laboratory tests at the time of obtaining Table 2-6 consent, according to the presence or absence of proton-pump inhibitors

Unique Subject Identifier=1289000000-0004

MEANS Procedure

Assay variable : PTINR\_VAL1 PT-INR Value

N Mean Standard Deviation Minimum Maximum

---

|   |           |           |           |           |
|---|-----------|-----------|-----------|-----------|
| 2 | 1.5700000 | 0.2404163 | 1.4000000 | 1.7400000 |
|---|-----------|-----------|-----------|-----------|

---

Unique Subject Identifier=1289000000-0005

Assay variable : PTINR\_VAL1 PT-INR Value

N Mean Standard Deviation Minimum Maximum

---

|   |           |           |           |           |
|---|-----------|-----------|-----------|-----------|
| 2 | 1.6200000 | 0.0707107 | 1.5700000 | 1.6700000 |
|---|-----------|-----------|-----------|-----------|

---

Unique Subject Identifier=1289000000-0006

Assay variable : PTINR\_VAL1 PT-INR Value

N Mean Standard Deviation Minimum Maximum

---

|   |           |           |           |           |
|---|-----------|-----------|-----------|-----------|
| 3 | 1.6366667 | 0.1833939 | 1.4300000 | 1.7800000 |
|---|-----------|-----------|-----------|-----------|

---

Unique Subject Identifier=1289000000-0008

Assay variable : PTINR\_VAL1 PT-INR Value

N Mean Standard Deviation Minimum Maximum

---

|   |           |           |           |           |
|---|-----------|-----------|-----------|-----------|
| 4 | 1.8825000 | 0.3341033 | 1.4000000 | 2.1600000 |
|---|-----------|-----------|-----------|-----------|

---

Laboratory tests at the time of obtaining Table 2-6 consent, according to the presence or absence of proton-pump inhibitors

Unique Subject Identifier=1289000000-0009

MEANS Procedure

Assay variable : PTINR\_VAL1 PT-INR Value

N Mean Standard Deviation Minimum Maximum

---

|   |           |           |           |           |
|---|-----------|-----------|-----------|-----------|
| 3 | 2.1033333 | 0.4000417 | 1.7000000 | 2.5000000 |
|---|-----------|-----------|-----------|-----------|

---

Unique Subject Identifier=1290011000-0004

Assay variable : PTINR\_VAL1 PT-INR Value

N Mean Standard Deviation Minimum Maximum

---

|   |           |           |           |           |
|---|-----------|-----------|-----------|-----------|
| 3 | 1.5233333 | 0.0680686 | 1.4700000 | 1.6000000 |
|---|-----------|-----------|-----------|-----------|

---

Unique Subject Identifier=1290011000-0005

Assay variable : PTINR\_VAL1 PT-INR Value

N Mean Standard Deviation Minimum Maximum

---

|   |           |           |           |           |
|---|-----------|-----------|-----------|-----------|
| 2 | 1.7150000 | 0.2333452 | 1.5500000 | 1.8800000 |
|---|-----------|-----------|-----------|-----------|

---

Unique Subject Identifier=1290011000-0011

Assay variable : PTINR\_VAL1 PT-INR Value

N Mean Standard Deviation Minimum Maximum

---

|   |          |           |          |          |
|---|----------|-----------|----------|----------|
| 2 | 1.760000 | 0.6929646 | 1.270000 | 2.250000 |
|---|----------|-----------|----------|----------|

---

Laboratory tests at the time of obtaining Table 2-6 consent, according to the presence or absence of proton-pump inhibitors

Unique Subject Identifier=1291000000-0001

MEANS Procedure

Assay variable : PTINR\_VAL1 PT-INR Value

N Mean Standard Deviation Minimum Maximum

---

|   |           |           |           |           |
|---|-----------|-----------|-----------|-----------|
| 4 | 2.0500000 | 0.4509250 | 1.7000000 | 2.7000000 |
|---|-----------|-----------|-----------|-----------|

---

Unique Subject Identifier=1291000000-0002

Assay variable : PTINR\_VAL1 PT-INR Value

N Mean Standard Deviation Minimum Maximum

---

|   |           |           |           |           |
|---|-----------|-----------|-----------|-----------|
| 2 | 1.3500000 | 0.2121320 | 1.2000000 | 1.5000000 |
|---|-----------|-----------|-----------|-----------|

---

Unique Subject Identifier=1291000000-0003

Assay variable : PTINR\_VAL1 PT-INR Value

N Mean Standard Deviation Minimum Maximum

---

|   |           |           |           |           |
|---|-----------|-----------|-----------|-----------|
| 6 | 1.9833333 | 0.6112828 | 1.5000000 | 2.9000000 |
|---|-----------|-----------|-----------|-----------|

---

Unique Subject Identifier=1291000000-0004

Assay variable : PTINR\_VAL1 PT-INR Value

N Mean Standard Deviation Minimum Maximum

---

|   |           |           |           |           |
|---|-----------|-----------|-----------|-----------|
| 6 | 1.6500000 | 0.1643168 | 1.4000000 | 1.9000000 |
|---|-----------|-----------|-----------|-----------|

---



Laboratory tests at the time of obtaining Table 2-6 consent, according to the presence or absence of proton-pump inhibitors

Unique Subject Identifier=1291000000-0005

MEANS Procedure

Assay variable : PTINR\_VAL1 PT-INR Value

N Mean Standard Deviation Minimum Maximum

---

|   |           |           |           |           |
|---|-----------|-----------|-----------|-----------|
| 5 | 1.8000000 | 0.1870829 | 1.5000000 | 2.0000000 |
|---|-----------|-----------|-----------|-----------|

---

Unique Subject Identifier=1291000000-0006

Assay variable : PTINR\_VAL1 PT-INR Value

N Mean Standard Deviation Minimum Maximum

---

|   |           |           |           |           |
|---|-----------|-----------|-----------|-----------|
| 5 | 2.1400000 | 0.5727128 | 1.4000000 | 2.8000000 |
|---|-----------|-----------|-----------|-----------|

---

Unique Subject Identifier=1291000000-0007

Assay variable : PTINR\_VAL1 PT-INR Value

N Mean Standard Deviation Minimum Maximum

---

|   |           |           |           |           |
|---|-----------|-----------|-----------|-----------|
| 4 | 2.5500000 | 0.6557439 | 2.0000000 | 3.5000000 |
|---|-----------|-----------|-----------|-----------|

---

Unique Subject Identifier=1291000000-0008

Assay variable : PTINR\_VAL1 PT-INR Value

N Mean Standard Deviation Minimum Maximum

---

|   |          |           |          |          |
|---|----------|-----------|----------|----------|
| 3 | 2.133333 | 0.3511885 | 1.800000 | 2.500000 |
|---|----------|-----------|----------|----------|

---

Laboratory tests at the time of obtaining Table 2-6 consent, according to the presence or absence of proton-pump inhibitors

Unique Subject Identifier=1291000000-0009

MEANS Procedure

Assay variable : PTINR\_VAL1 PT-INR Value

N Mean Standard Deviation Minimum Maximum

---

|   |           |           |           |           |
|---|-----------|-----------|-----------|-----------|
| 5 | 1.6200000 | 0.1483240 | 1.4000000 | 1.8000000 |
|---|-----------|-----------|-----------|-----------|

---

Unique Subject Identifier=1291000000-0010

Assay variable : PTINR\_VAL1 PT-INR Value

N Mean Standard Deviation Minimum Maximum

---

|   |           |           |           |           |
|---|-----------|-----------|-----------|-----------|
| 4 | 1.8500000 | 0.1732051 | 1.6000000 | 2.0000000 |
|---|-----------|-----------|-----------|-----------|

---

Unique Subject Identifier=1291000000-0011

Assay variable : PTINR\_VAL1 PT-INR Value

N Mean Standard Deviation Minimum Maximum

---

|   |           |           |           |           |
|---|-----------|-----------|-----------|-----------|
| 4 | 1.7750000 | 0.3095696 | 1.5000000 | 2.2000000 |
|---|-----------|-----------|-----------|-----------|

---

Unique Subject Identifier=1291000000-0012

Assay variable : PTINR\_VAL1 PT-INR Value

N Mean Standard Deviation Minimum Maximum

---

|   |           |           |           |           |
|---|-----------|-----------|-----------|-----------|
| 5 | 1.6200000 | 0.4438468 | 1.2000000 | 2.3000000 |
|---|-----------|-----------|-----------|-----------|

---

Laboratory tests at the time of obtaining Table 2-6 consent, according to the presence or absence of proton-pump inhibitors

Unique Subject Identifier=1291000000-0013

MEANS Procedure

Assay variable : PTINR\_VAL1 PT-INR Value

N Mean Standard Deviation Minimum Maximum

---

|   |           |           |           |           |
|---|-----------|-----------|-----------|-----------|
| 6 | 1.9166667 | 0.6013873 | 1.2000000 | 3.0000000 |
|---|-----------|-----------|-----------|-----------|

---

Unique Subject Identifier=1291000000-0014

Assay variable : PTINR\_VAL1 PT-INR Value

N Mean Standard Deviation Minimum Maximum

---

|   |           |           |           |           |
|---|-----------|-----------|-----------|-----------|
| 5 | 1.5200000 | 0.0836660 | 1.4000000 | 1.6000000 |
|---|-----------|-----------|-----------|-----------|

---

Unique Subject Identifier=1291000000-0015

Assay variable : PTINR\_VAL1 PT-INR Value

N Mean Standard Deviation Minimum Maximum

---

|   |           |           |           |           |
|---|-----------|-----------|-----------|-----------|
| 2 | 2.0000000 | 0.8485281 | 1.4000000 | 2.6000000 |
|---|-----------|-----------|-----------|-----------|

---

Unique Subject Identifier=1291000000-0016

Assay variable : PTINR\_VAL1 PT-INR Value

N Mean Standard Deviation Minimum Maximum

---

|   |          |          |          |          |
|---|----------|----------|----------|----------|
| 3 | 1.833333 | 0.305505 | 1.500000 | 2.100000 |
|---|----------|----------|----------|----------|

---

Laboratory tests at the time of obtaining Table 2-6 consent, according to the presence or absence of proton-pump inhibitors

Unique Subject Identifier=1291000000-0017

MEANS Procedure

Assay variable : PTINR\_VAL1 PT-INR Value

N Mean Standard Deviation Minimum Maximum

---

|   |           |           |           |           |
|---|-----------|-----------|-----------|-----------|
| 6 | 1.5333333 | 0.2732520 | 1.1000000 | 1.9000000 |
|---|-----------|-----------|-----------|-----------|

---

Unique Subject Identifier=1291000000-0018

Assay variable : PTINR\_VAL1 PT-INR Value

N Mean Standard Deviation Minimum Maximum

---

|   |           |  |           |           |
|---|-----------|--|-----------|-----------|
| 1 | 1.9000000 |  | 1.9000000 | 1.9000000 |
|---|-----------|--|-----------|-----------|

---

Unique Subject Identifier=1291000000-0019

Assay variable : PTINR\_VAL1 PT-INR Value

N Mean Standard Deviation Minimum Maximum

---

|   |           |           |           |           |
|---|-----------|-----------|-----------|-----------|
| 6 | 1.7166667 | 0.2786874 | 1.4000000 | 2.2000000 |
|---|-----------|-----------|-----------|-----------|

---

Unique Subject Identifier=1293000000-0001

Assay variable : PTINR\_VAL1 PT-INR Value

N Mean Standard Deviation Minimum Maximum

---

|   |           |           |           |           |
|---|-----------|-----------|-----------|-----------|
| 6 | 1.3166667 | 0.1169045 | 1.2000000 | 1.5000000 |
|---|-----------|-----------|-----------|-----------|

---



Laboratory tests at the time of obtaining Table 2-6 consent, according to the presence or absence of proton-pump inhibitors

Unique Subject Identifier=1293000000-0003

MEANS Procedure

Assay variable : PTINR\_VAL1 PT-INR Value

N Mean Standard Deviation Minimum Maximum

---

|   |           |           |           |           |
|---|-----------|-----------|-----------|-----------|
| 6 | 1.7833333 | 0.2041241 | 1.6000000 | 2.0000000 |
|---|-----------|-----------|-----------|-----------|

---

Unique Subject Identifier=1293000000-0005

Assay variable : PTINR\_VAL1 PT-INR Value

N Mean Standard Deviation Minimum Maximum

---

|   |           |           |           |           |
|---|-----------|-----------|-----------|-----------|
| 6 | 1.2333333 | 0.1861899 | 1.1000000 | 1.6000000 |
|---|-----------|-----------|-----------|-----------|

---

Unique Subject Identifier=1293000000-0006

Assay variable : PTINR\_VAL1 PT-INR Value

N Mean Standard Deviation Minimum Maximum

---

|   |           |           |           |           |
|---|-----------|-----------|-----------|-----------|
| 3 | 1.3333333 | 0.4163332 | 1.0000000 | 1.8000000 |
|---|-----------|-----------|-----------|-----------|

---

Unique Subject Identifier=1293000000-0007

Assay variable : PTINR\_VAL1 PT-INR Value

N Mean Standard Deviation Minimum Maximum

---

|   |           |           |           |           |
|---|-----------|-----------|-----------|-----------|
| 6 | 1.6166667 | 0.1329160 | 1.4000000 | 1.8000000 |
|---|-----------|-----------|-----------|-----------|

---

Laboratory tests at the time of obtaining Table 2-6 consent, according to the presence or absence of proton-pump inhibitors

Unique Subject Identifier=1293000000-0008

MEANS Procedure

Assay variable : PTINR\_VAL1 PT-INR Value

N Mean Standard Deviation Minimum Maximum

---

|   |           |           |           |           |
|---|-----------|-----------|-----------|-----------|
| 6 | 1.7333333 | 0.1861899 | 1.5000000 | 2.0000000 |
|---|-----------|-----------|-----------|-----------|

---

Unique Subject Identifier=1293000000-0010

Assay variable : PTINR\_VAL1 PT-INR Value

N Mean Standard Deviation Minimum Maximum

---

|   |           |           |           |           |
|---|-----------|-----------|-----------|-----------|
| 6 | 1.5333333 | 0.1632993 | 1.3000000 | 1.7000000 |
|---|-----------|-----------|-----------|-----------|

---

Unique Subject Identifier=1293000000-0011

Assay variable : PTINR\_VAL1 PT-INR Value

N Mean Standard Deviation Minimum Maximum

---

|   |           |           |           |           |
|---|-----------|-----------|-----------|-----------|
| 5 | 1.3600000 | 0.0547723 | 1.3000000 | 1.4000000 |
|---|-----------|-----------|-----------|-----------|

---

Unique Subject Identifier=1293000000-0012

Assay variable : PTINR\_VAL1 PT-INR Value

N Mean Standard Deviation Minimum Maximum

---

|   |           |           |           |           |
|---|-----------|-----------|-----------|-----------|
| 6 | 1.3666667 | 0.0816497 | 1.3000000 | 1.5000000 |
|---|-----------|-----------|-----------|-----------|

---

Laboratory tests at the time of obtaining Table 2-6 consent, according to the presence or absence of proton-pump inhibitors

Unique Subject Identifier=1293000000-0013

MEANS Procedure

Assay variable : PTINR\_VAL1 PT-INR Value

| N | Mean      | Standard Deviation | Minimum   | Maximum   |
|---|-----------|--------------------|-----------|-----------|
| 1 | 1.6000000 |                    | 1.6000000 | 1.6000000 |

Unique Subject Identifier=1293000000-0016

Assay variable : PTINR\_VAL1 PT-INR Value

| N | Mean      | Standard Deviation | Minimum   | Maximum   |
|---|-----------|--------------------|-----------|-----------|
| 6 | 1.4333333 | 0.1632993          | 1.3000000 | 1.7000000 |

Unique Subject Identifier=1293000000-0020

Assay variable : PTINR\_VAL1 PT-INR Value

| N | Mean      | Standard Deviation | Minimum   | Maximum   |
|---|-----------|--------------------|-----------|-----------|
| 5 | 1.4800000 | 0.2489980          | 1.3000000 | 1.9000000 |

Unique Subject Identifier=1293000000-0022

Assay variable : PTINR\_VAL1 PT-INR Value

N Mean Standard Deviation Minimum Maximum

---

|   |          |          |          |          |
|---|----------|----------|----------|----------|
| 5 | 1.300000 | 0.100000 | 1.200000 | 1.400000 |
|---|----------|----------|----------|----------|

---

Laboratory tests at the time of obtaining Table 2-6 consent, according to the presence or absence of proton-pump inhibitors

Unique Subject Identifier=1293000000-0023

MEANS Procedure

Assay variable : PTINR\_VAL1 PT-INR Value

N Mean Standard Deviation Minimum Maximum

---

|   |           |           |           |           |
|---|-----------|-----------|-----------|-----------|
| 5 | 2.0200000 | 0.1923538 | 1.7000000 | 2.2000000 |
|---|-----------|-----------|-----------|-----------|

---

Unique Subject Identifier=1293000000-0024

Assay variable : PTINR\_VAL1 PT-INR Value

N Mean Standard Deviation Minimum Maximum

---

|   |           |           |           |           |
|---|-----------|-----------|-----------|-----------|
| 5 | 1.4200000 | 0.1643168 | 1.3000000 | 1.7000000 |
|---|-----------|-----------|-----------|-----------|

---

Unique Subject Identifier=1293000000-0029

Assay variable : PTINR\_VAL1 PT-INR Value

N Mean Standard Deviation Minimum Maximum

---

|   |           |           |           |           |
|---|-----------|-----------|-----------|-----------|
| 5 | 1.5000000 | 0.1581139 | 1.3000000 | 1.7000000 |
|---|-----------|-----------|-----------|-----------|

---

Unique Subject Identifier=1293000000-0030

Assay variable : PTINR\_VAL1 PT-INR Value

N Mean Standard Deviation Minimum Maximum

---

|   |          |           |          |          |
|---|----------|-----------|----------|----------|
| 6 | 1.333333 | 0.1751190 | 1.000000 | 1.500000 |
|---|----------|-----------|----------|----------|

---



Laboratory tests at the time of obtaining Table 2-6 consent, according to the presence or absence of proton-pump inhibitors

Unique Subject Identifier=1294011001-0009

MEANS Procedure

Assay variable : PTINR\_VAL1 PT-INR Value

N Mean Standard Deviation Minimum Maximum

---

|   |           |           |           |           |
|---|-----------|-----------|-----------|-----------|
| 6 | 2.4700000 | 0.3459480 | 1.9100000 | 2.9000000 |
|---|-----------|-----------|-----------|-----------|

---

Unique Subject Identifier=1296011000-0006

Assay variable : PTINR\_VAL1 PT-INR Value

N Mean Standard Deviation Minimum Maximum

---

|   |           |  |           |           |
|---|-----------|--|-----------|-----------|
| 1 | 2.0300000 |  | 2.0300000 | 2.0300000 |
|---|-----------|--|-----------|-----------|

---

Unique Subject Identifier=1296011000-0007

Assay variable : PTINR\_VAL1 PT-INR Value

N Mean Standard Deviation Minimum Maximum

---

|   |           |  |           |           |
|---|-----------|--|-----------|-----------|
| 1 | 1.1200000 |  | 1.1200000 | 1.1200000 |
|---|-----------|--|-----------|-----------|

---

Unique Subject Identifier=1296011000-0013

Assay variable : PTINR\_VAL1 PT-INR Value

N Mean Standard Deviation Minimum Maximum

---

|   |           |  |           |           |
|---|-----------|--|-----------|-----------|
| 1 | 2.2100000 |  | 2.2100000 | 2.2100000 |
|---|-----------|--|-----------|-----------|

---

Laboratory tests at the time of obtaining Table 2-6 consent, according to the presence or absence of proton-pump inhibitors

Unique Subject Identifier=1296011000-0015

MEANS Procedure

Assay variable : PTINR\_VAL1 PT-INR Value

| N | Mean      | Standard Deviation | Minimum   | Maximum   |
|---|-----------|--------------------|-----------|-----------|
| 2 | 2.1050000 | 0.6576093          | 1.6400000 | 2.5700000 |

Unique Subject Identifier=1296011000-0017

Assay variable : PTINR\_VAL1 PT-INR Value

| N | Mean      | Standard Deviation | Minimum   | Maximum   |
|---|-----------|--------------------|-----------|-----------|
| 5 | 1.9820000 | 0.5526482          | 1.0800000 | 2.5500000 |

Unique Subject Identifier=1296011000-0026

Assay variable : PTINR\_VAL1 PT-INR Value

| N | Mean      | Standard Deviation | Minimum   | Maximum   |
|---|-----------|--------------------|-----------|-----------|
| 4 | 1.1550000 | 0.0793725          | 1.0400000 | 1.2200000 |

Unique Subject Identifier=1296011000-0028

Assay variable : PTINR\_VAL1 PT-INR Value

N Mean Standard Deviation Minimum Maximum

---

|   |           |  |           |           |
|---|-----------|--|-----------|-----------|
| 1 | 1.5500000 |  | 1.5500000 | 1.5500000 |
|---|-----------|--|-----------|-----------|

---

Laboratory tests at the time of obtaining Table 2-6 consent, according to the presence or absence of proton-pump inhibitors

Unique Subject Identifier=1297011000-0005

MEANS Procedure

Assay variable : PTINR\_VAL1 PT-INR Value

N Mean Standard Deviation Minimum Maximum

---

|   |           |           |           |           |
|---|-----------|-----------|-----------|-----------|
| 6 | 2.1833333 | 1.3166878 | 1.2000000 | 4.2000000 |
|---|-----------|-----------|-----------|-----------|

---

Unique Subject Identifier=1297011000-0008

Assay variable : PTINR\_VAL1 PT-INR Value

N Mean Standard Deviation Minimum Maximum

---

|   |           |           |           |           |
|---|-----------|-----------|-----------|-----------|
| 4 | 1.8500000 | 0.2645751 | 1.6000000 | 2.2000000 |
|---|-----------|-----------|-----------|-----------|

---

Unique Subject Identifier=1297011000-0010

Assay variable : PTINR\_VAL1 PT-INR Value

N Mean Standard Deviation Minimum Maximum

---

|   |           |           |           |           |
|---|-----------|-----------|-----------|-----------|
| 5 | 1.7600000 | 0.2408319 | 1.5000000 | 2.1000000 |
|---|-----------|-----------|-----------|-----------|

---

Unique Subject Identifier=1297011000-0017

Assay variable : PTINR\_VAL1 PT-INR Value

N Mean Standard Deviation Minimum Maximum

---

|   |          |           |          |          |
|---|----------|-----------|----------|----------|
| 6 | 1.833333 | 0.5125102 | 1.200000 | 2.600000 |
|---|----------|-----------|----------|----------|

---

Laboratory tests at the time of obtaining Table 2-6 consent, according to the presence or absence of proton-pump inhibitors

Unique Subject Identifier=1298011000-0002

MEANS Procedure

Assay variable : PTINR\_VAL1 PT-INR Value

N Mean Standard Deviation Minimum Maximum

---

|   |           |           |           |           |
|---|-----------|-----------|-----------|-----------|
| 5 | 2.3200000 | 0.7049823 | 1.4000000 | 3.3000000 |
|---|-----------|-----------|-----------|-----------|

---

Unique Subject Identifier=1298011000-0006

Assay variable : PTINR\_VAL1 PT-INR Value

N Mean Standard Deviation Minimum Maximum

---

|   |           |           |           |           |
|---|-----------|-----------|-----------|-----------|
| 6 | 2.2666667 | 0.3723797 | 1.9000000 | 2.9000000 |
|---|-----------|-----------|-----------|-----------|

---

Unique Subject Identifier=1298011000-0010

Assay variable : PTINR\_VAL1 PT-INR Value

N Mean Standard Deviation Minimum Maximum

---

|   |           |           |           |           |
|---|-----------|-----------|-----------|-----------|
| 6 | 1.6666667 | 0.1032796 | 1.5000000 | 1.8000000 |
|---|-----------|-----------|-----------|-----------|

---

Unique Subject Identifier=1298011000-0011

Assay variable : PTINR\_VAL1 PT-INR Value

N Mean Standard Deviation Minimum Maximum

---

|   |           |           |           |           |
|---|-----------|-----------|-----------|-----------|
| 6 | 2.1166667 | 0.2483277 | 1.7000000 | 2.4000000 |
|---|-----------|-----------|-----------|-----------|

---



Laboratory tests at the time of obtaining Table 2-6 consent, according to the presence or absence of proton-pump inhibitors

Unique Subject Identifier=1298011000-0014

MEANS Procedure

Assay variable : PTINR\_VAL1 PT-INR Value

N Mean Standard Deviation Minimum Maximum

---

|   |           |           |           |           |
|---|-----------|-----------|-----------|-----------|
| 5 | 1.8000000 | 0.3162278 | 1.5000000 | 2.3000000 |
|---|-----------|-----------|-----------|-----------|

---

Unique Subject Identifier=1298011000-0017

Assay variable : PTINR\_VAL1 PT-INR Value

N Mean Standard Deviation Minimum Maximum

---

|   |           |           |           |           |
|---|-----------|-----------|-----------|-----------|
| 6 | 1.9500000 | 0.2073644 | 1.6000000 | 2.2000000 |
|---|-----------|-----------|-----------|-----------|

---

Unique Subject Identifier=1298011000-0020

Assay variable : PTINR\_VAL1 PT-INR Value

N Mean Standard Deviation Minimum Maximum

---

|   |           |           |           |           |
|---|-----------|-----------|-----------|-----------|
| 6 | 1.7500000 | 0.4636809 | 1.1000000 | 2.5000000 |
|---|-----------|-----------|-----------|-----------|

---

Unique Subject Identifier=1298011000-0021

Assay variable : PTINR\_VAL1 PT-INR Value

N Mean Standard Deviation Minimum Maximum

---

|   |          |          |          |          |
|---|----------|----------|----------|----------|
| 6 | 2.100000 | 0.513893 | 1.600000 | 3.000000 |
|---|----------|----------|----------|----------|

---

Laboratory tests at the time of obtaining Table 2-6 consent, according to the presence or absence of proton-pump inhibitors

Unique Subject Identifier=1298011000-0022

MEANS Procedure

Assay variable : PTINR\_VAL1 PT-INR Value

N Mean Standard Deviation Minimum Maximum

---

|   |           |           |           |           |
|---|-----------|-----------|-----------|-----------|
| 6 | 1.9833333 | 0.2316607 | 1.6000000 | 2.2000000 |
|---|-----------|-----------|-----------|-----------|

---

Unique Subject Identifier=1298011000-0025

Assay variable : PTINR\_VAL1 PT-INR Value

N Mean Standard Deviation Minimum Maximum

---

|   |           |           |           |           |
|---|-----------|-----------|-----------|-----------|
| 5 | 1.5800000 | 0.2774887 | 1.2000000 | 1.9000000 |
|---|-----------|-----------|-----------|-----------|

---

Unique Subject Identifier=1298011000-0027

Assay variable : PTINR\_VAL1 PT-INR Value

N Mean Standard Deviation Minimum Maximum

---

|   |           |           |           |           |
|---|-----------|-----------|-----------|-----------|
| 6 | 2.4666667 | 0.2943920 | 2.1000000 | 2.8000000 |
|---|-----------|-----------|-----------|-----------|

---

Unique Subject Identifier=1299010000-0006

Assay variable : PTINR\_VAL1 PT-INR Value

N Mean Standard Deviation Minimum Maximum

---

|   |           |           |           |           |
|---|-----------|-----------|-----------|-----------|
| 6 | 1.2783333 | 0.1197358 | 1.1800000 | 1.5000000 |
|---|-----------|-----------|-----------|-----------|

---

Laboratory tests at the time of obtaining Table 2-6 consent, according to the presence or absence of proton-pump inhibitors

Unique Subject Identifier=1299010000-0009

MEANS Procedure

Assay variable : PTINR\_VAL1 PT-INR Value

N Mean Standard Deviation Minimum Maximum

---

|   |           |  |           |           |
|---|-----------|--|-----------|-----------|
| 1 | 1.9000000 |  | 1.9000000 | 1.9000000 |
|---|-----------|--|-----------|-----------|

---

Unique Subject Identifier=1299010000-0012

Assay variable : PTINR\_VAL1 PT-INR Value

N Mean Standard Deviation Minimum Maximum

---

|   |           |           |           |           |
|---|-----------|-----------|-----------|-----------|
| 6 | 2.7700000 | 0.5978294 | 1.9000000 | 3.4000000 |
|---|-----------|-----------|-----------|-----------|

---

Unique Subject Identifier=1299010000-0013

Assay variable : PTINR\_VAL1 PT-INR Value

N Mean Standard Deviation Minimum Maximum

---

|   |           |           |           |           |
|---|-----------|-----------|-----------|-----------|
| 6 | 1.5600000 | 0.1979899 | 1.2600000 | 1.8000000 |
|---|-----------|-----------|-----------|-----------|

---

Unique Subject Identifier=1299010000-0016

Assay variable : PTINR\_VAL1 PT-INR Value

N Mean Standard Deviation Minimum Maximum

---

|   |           |           |           |           |
|---|-----------|-----------|-----------|-----------|
| 6 | 2.2666667 | 0.1211060 | 2.1000000 | 2.4000000 |
|---|-----------|-----------|-----------|-----------|

---

Laboratory tests at the time of obtaining Table 2-6 consent, according to the presence or absence of proton-pump inhibitors

Unique Subject Identifier=1299010000-0018

MEANS Procedure

Assay variable : PTINR\_VAL1 PT-INR Value

N Mean Standard Deviation Minimum Maximum

---

|   |           |           |           |           |
|---|-----------|-----------|-----------|-----------|
| 6 | 1.9700000 | 0.3685105 | 1.6200000 | 2.6000000 |
|---|-----------|-----------|-----------|-----------|

---

Unique Subject Identifier=1299010000-0020

Assay variable : PTINR\_VAL1 PT-INR Value

N Mean Standard Deviation Minimum Maximum

---

|   |           |           |           |           |
|---|-----------|-----------|-----------|-----------|
| 5 | 2.0580000 | 0.7316557 | 1.5000000 | 3.3000000 |
|---|-----------|-----------|-----------|-----------|

---

Unique Subject Identifier=1301000000-0001

Assay variable : PTINR\_VAL1 PT-INR Value

N Mean Standard Deviation Minimum Maximum

---

|   |           |           |           |           |
|---|-----------|-----------|-----------|-----------|
| 6 | 2.2200000 | 0.5196152 | 1.7300000 | 3.0600000 |
|---|-----------|-----------|-----------|-----------|

---

Unique Subject Identifier=1301000000-0005

Assay variable : PTINR\_VAL1 PT-INR Value

N Mean Standard Deviation Minimum Maximum

---

|   |           |           |           |           |
|---|-----------|-----------|-----------|-----------|
| 6 | 1.2366667 | 0.1616993 | 1.0700000 | 1.5100000 |
|---|-----------|-----------|-----------|-----------|

---



Laboratory tests at the time of obtaining Table 2-6 consent, according to the presence or absence of proton-pump inhibitors

Unique Subject Identifier=1301000000-0006

MEANS Procedure

Assay variable : PTINR\_VAL1 PT-INR Value

N Mean Standard Deviation Minimum Maximum

---

|   |           |           |           |           |
|---|-----------|-----------|-----------|-----------|
| 4 | 1.3400000 | 0.1089342 | 1.2500000 | 1.4700000 |
|---|-----------|-----------|-----------|-----------|

---

Unique Subject Identifier=1303000000-0001

Assay variable : PTINR\_VAL1 PT-INR Value

N Mean Standard Deviation Minimum Maximum

---

|   |           |           |           |           |
|---|-----------|-----------|-----------|-----------|
| 5 | 1.8600000 | 0.4159327 | 1.4000000 | 2.5000000 |
|---|-----------|-----------|-----------|-----------|

---

Unique Subject Identifier=1303000000-0002

Assay variable : PTINR\_VAL1 PT-INR Value

N Mean Standard Deviation Minimum Maximum

---

|   |           |           |           |           |
|---|-----------|-----------|-----------|-----------|
| 5 | 1.7800000 | 0.3271085 | 1.5000000 | 2.3000000 |
|---|-----------|-----------|-----------|-----------|

---

Unique Subject Identifier=1303000000-0003

Assay variable : PTINR\_VAL1 PT-INR Value

N Mean Standard Deviation Minimum Maximum

---

|   |           |           |           |           |
|---|-----------|-----------|-----------|-----------|
| 3 | 2.5333333 | 0.3511885 | 2.2000000 | 2.9000000 |
|---|-----------|-----------|-----------|-----------|

---

Laboratory tests at the time of obtaining Table 2-6 consent, according to the presence or absence of proton-pump inhibitors

Unique Subject Identifier=1303000000-0004

MEANS Procedure

Assay variable : PTINR\_VAL1 PT-INR Value

N Mean Standard Deviation Minimum Maximum

---

|   |           |           |           |           |
|---|-----------|-----------|-----------|-----------|
| 5 | 2.1800000 | 0.2774887 | 1.8000000 | 2.5000000 |
|---|-----------|-----------|-----------|-----------|

---

Unique Subject Identifier=1303000000-0006

Assay variable : PTINR\_VAL1 PT-INR Value

N Mean Standard Deviation Minimum Maximum

---

|   |           |           |           |           |
|---|-----------|-----------|-----------|-----------|
| 6 | 2.0000000 | 0.1264911 | 1.8000000 | 2.1000000 |
|---|-----------|-----------|-----------|-----------|

---

Unique Subject Identifier=1303000000-0008

Assay variable : PTINR\_VAL1 PT-INR Value

N Mean Standard Deviation Minimum Maximum

---

|   |           |           |           |           |
|---|-----------|-----------|-----------|-----------|
| 4 | 2.0000000 | 0.3559026 | 1.7000000 | 2.5000000 |
|---|-----------|-----------|-----------|-----------|

---

Unique Subject Identifier=1303000000-0009

Assay variable : PTINR\_VAL1 PT-INR Value

N Mean Standard Deviation Minimum Maximum

---

|   |           |           |           |           |
|---|-----------|-----------|-----------|-----------|
| 5 | 1.6800000 | 0.1095445 | 1.6000000 | 1.8000000 |
|---|-----------|-----------|-----------|-----------|

---

Laboratory tests at the time of obtaining Table 2-6 consent, according to the presence or absence of proton-pump inhibitors

Unique Subject Identifier=1303000000-0012

MEANS Procedure

Assay variable : PTINR\_VAL1 PT-INR Value

| N | Mean      | Standard Deviation | Minimum   | Maximum   |
|---|-----------|--------------------|-----------|-----------|
| 5 | 1.9800000 | 0.5848077          | 1.6000000 | 3.0000000 |

Unique Subject Identifier=1303000000-0013

Assay variable : PTINR\_VAL1 PT-INR Value

| N | Mean      | Standard Deviation | Minimum   | Maximum   |
|---|-----------|--------------------|-----------|-----------|
| 6 | 1.8500000 | 0.2073644          | 1.5000000 | 2.1000000 |

Unique Subject Identifier=1303000000-0015

Assay variable : PTINR\_VAL1 PT-INR Value

| N | Mean      | Standard Deviation | Minimum   | Maximum   |
|---|-----------|--------------------|-----------|-----------|
| 6 | 1.7166667 | 0.1169045          | 1.6000000 | 1.9000000 |

Unique Subject Identifier=1303000000-0016

Assay variable : PTINR\_VAL1 PT-INR Value

N Mean Standard Deviation Minimum Maximum

---

|   |          |           |          |          |
|---|----------|-----------|----------|----------|
| 6 | 1.750000 | 0.1048809 | 1.600000 | 1.900000 |
|---|----------|-----------|----------|----------|

---

Laboratory tests at the time of obtaining Table 2-6 consent, according to the presence or absence of proton-pump inhibitors

Unique Subject Identifier=1303000000-0025

MEANS Procedure

Assay variable : PTINR\_VAL1 PT-INR Value

| N | Mean      | Standard Deviation | Minimum   | Maximum   |
|---|-----------|--------------------|-----------|-----------|
| 6 | 2.0166667 | 0.4875107          | 1.3000000 | 2.7000000 |

Unique Subject Identifier=1303000000-0026

Assay variable : PTINR\_VAL1 PT-INR Value

| N | Mean      | Standard Deviation | Minimum   | Maximum   |
|---|-----------|--------------------|-----------|-----------|
| 5 | 1.9200000 | 0.3271085          | 1.5000000 | 2.3000000 |

Unique Subject Identifier=1303000000-0027

Assay variable : PTINR\_VAL1 PT-INR Value

| N | Mean      | Standard Deviation | Minimum   | Maximum   |
|---|-----------|--------------------|-----------|-----------|
| 5 | 1.7400000 | 0.3577709          | 1.4000000 | 2.2000000 |

Unique Subject Identifier=1303000000-0029

Assay variable : PTINR\_VAL1 PT-INR Value

N Mean Standard Deviation Minimum Maximum

---

|   |          |          |          |          |
|---|----------|----------|----------|----------|
| 4 | 1.600000 | 0.244949 | 1.300000 | 1.800000 |
|---|----------|----------|----------|----------|

---



Laboratory tests at the time of obtaining Table 2-6 consent, according to the presence or absence of proton-pump inhibitors

Unique Subject Identifier=1306000000-0007

MEANS Procedure

Assay variable : PTINR\_VAL1 PT-INR Value

| N | Mean      | Standard Deviation | Minimum   | Maximum   |
|---|-----------|--------------------|-----------|-----------|
| 1 | 1.5900000 |                    | 1.5900000 | 1.5900000 |

Unique Subject Identifier=1308000000-0001

Assay variable : PTINR\_VAL1 PT-INR Value

| N | Mean      | Standard Deviation | Minimum   | Maximum   |
|---|-----------|--------------------|-----------|-----------|
| 5 | 1.7320000 | 0.2258761          | 1.5100000 | 2.0600000 |

Unique Subject Identifier=1308000000-0003

Assay variable : PTINR\_VAL1 PT-INR Value

| N | Mean      | Standard Deviation | Minimum   | Maximum   |
|---|-----------|--------------------|-----------|-----------|
| 6 | 1.9550000 | 0.3385705          | 1.4200000 | 2.4200000 |

Unique Subject Identifier=1308000000-0004

Assay variable : PTINR\_VAL1 PT-INR Value

N Mean Standard Deviation Minimum Maximum

---

|   |          |   |          |          |
|---|----------|---|----------|----------|
| 2 | 1.100000 | 0 | 1.100000 | 1.100000 |
|---|----------|---|----------|----------|

---

Laboratory tests at the time of obtaining Table 2-6 consent, according to the presence or absence of proton-pump inhibitors

Unique Subject Identifier=1312000000-0005

MEANS Procedure

Assay variable : PTINR\_VAL1 PT-INR Value

N Mean Standard Deviation Minimum Maximum

---

|   |           |           |           |           |
|---|-----------|-----------|-----------|-----------|
| 6 | 2.0433333 | 0.3311596 | 1.7000000 | 2.4000000 |
|---|-----------|-----------|-----------|-----------|

---

Unique Subject Identifier=1312000000-0014

Assay variable : PTINR\_VAL1 PT-INR Value

N Mean Standard Deviation Minimum Maximum

---

|   |           |           |           |           |
|---|-----------|-----------|-----------|-----------|
| 6 | 2.3550000 | 0.3434967 | 1.7900000 | 2.6600000 |
|---|-----------|-----------|-----------|-----------|

---

Unique Subject Identifier=1313000000-0013

Assay variable : PTINR\_VAL1 PT-INR Value

N Mean Standard Deviation Minimum Maximum

---

|   |           |  |           |           |
|---|-----------|--|-----------|-----------|
| 1 | 1.4200000 |  | 1.4200000 | 1.4200000 |
|---|-----------|--|-----------|-----------|

---

Unique Subject Identifier=1313000000-0014

Assay variable : PTINR\_VAL1 PT-INR Value

N Mean Standard Deviation Minimum Maximum

---

|   |          |  |          |          |
|---|----------|--|----------|----------|
| 1 | 1.510000 |  | 1.510000 | 1.510000 |
|---|----------|--|----------|----------|

---

Laboratory tests at the time of obtaining Table 2-6 consent, according to the presence or absence of proton-pump inhibitors

Unique Subject Identifier=1313000000-0018

MEANS Procedure

Assay variable : PTINR\_VAL1 PT-INR Value

N Mean Standard Deviation Minimum Maximum

---

|   |           |  |           |           |
|---|-----------|--|-----------|-----------|
| 1 | 1.3100000 |  | 1.3100000 | 1.3100000 |
|---|-----------|--|-----------|-----------|

---

Unique Subject Identifier=1314010000-0007

Assay variable : PTINR\_VAL1 PT-INR Value

N Mean Standard Deviation Minimum Maximum

---

|   |           |  |           |           |
|---|-----------|--|-----------|-----------|
| 1 | 1.5000000 |  | 1.5000000 | 1.5000000 |
|---|-----------|--|-----------|-----------|

---

Unique Subject Identifier=1319000000-0001

Assay variable : PTINR\_VAL1 PT-INR Value

N Mean Standard Deviation Minimum Maximum

---

|   |           |  |           |           |
|---|-----------|--|-----------|-----------|
| 1 | 3.0000000 |  | 3.0000000 | 3.0000000 |
|---|-----------|--|-----------|-----------|

---

Unique Subject Identifier=1319000000-0005

Assay variable : PTINR\_VAL1 PT-INR Value

N Mean Standard Deviation Minimum Maximum

---

|   |          |           |          |          |
|---|----------|-----------|----------|----------|
| 6 | 1.950000 | 0.2880972 | 1.600000 | 2.300000 |
|---|----------|-----------|----------|----------|

---

Laboratory tests at the time of obtaining Table 2-6 consent, according to the presence or absence of proton-pump inhibitors

Unique Subject Identifier=1319000000-0009

MEANS Procedure

Assay variable : PTINR\_VAL1 PT-INR Value

| N | Mean      | Standard Deviation | Minimum   | Maximum   |
|---|-----------|--------------------|-----------|-----------|
| 5 | 1.9000000 | 0.3464102          | 1.4000000 | 2.2000000 |

Unique Subject Identifier=1319000000-0011

Assay variable : PTINR\_VAL1 PT-INR Value

| N | Mean      | Standard Deviation | Minimum   | Maximum   |
|---|-----------|--------------------|-----------|-----------|
| 3 | 1.5366667 | 0.1096966          | 1.4100000 | 1.6000000 |

Unique Subject Identifier=1319000000-0018

Assay variable : PTINR\_VAL1 PT-INR Value

| N | Mean      | Standard Deviation | Minimum   | Maximum   |
|---|-----------|--------------------|-----------|-----------|
| 6 | 2.4833333 | 0.4020779          | 1.8000000 | 3.0000000 |

Unique Subject Identifier=1319000000-0019

Assay variable : PTINR\_VAL1 PT-INR Value

N Mean Standard Deviation Minimum Maximum

---

|   |           |           |           |           |
|---|-----------|-----------|-----------|-----------|
| 6 | 2.5166667 | 1.0068101 | 1.7000000 | 4.4000000 |
|---|-----------|-----------|-----------|-----------|

---



Laboratory tests at the time of obtaining Table 2-6 consent, according to the presence or absence of proton-pump inhibitors

Unique Subject Identifier=1319000000-0020

MEANS Procedure

Assay variable : PTINR\_VAL1 PT-INR Value

N Mean Standard Deviation Minimum Maximum

---

|   |           |           |           |           |
|---|-----------|-----------|-----------|-----------|
| 6 | 1.8500000 | 0.2073644 | 1.6000000 | 2.1000000 |
|---|-----------|-----------|-----------|-----------|

---

Unique Subject Identifier=1320000000-0002

Assay variable : PTINR\_VAL1 PT-INR Value

N Mean Standard Deviation Minimum Maximum

---

|   |           |           |           |           |
|---|-----------|-----------|-----------|-----------|
| 6 | 2.0566667 | 0.2809033 | 1.7600000 | 2.4700000 |
|---|-----------|-----------|-----------|-----------|

---

Unique Subject Identifier=1320000000-0003

Assay variable : PTINR\_VAL1 PT-INR Value

N Mean Standard Deviation Minimum Maximum

---

|   |           |           |           |           |
|---|-----------|-----------|-----------|-----------|
| 4 | 1.8650000 | 0.3162805 | 1.5900000 | 2.3200000 |
|---|-----------|-----------|-----------|-----------|

---

Unique Subject Identifier=1320000000-0004

Assay variable : PTINR\_VAL1 PT-INR Value

N Mean Standard Deviation Minimum Maximum

---

|   |           |           |           |           |
|---|-----------|-----------|-----------|-----------|
| 6 | 2.3700000 | 0.3960303 | 1.9500000 | 3.0900000 |
|---|-----------|-----------|-----------|-----------|

---

Laboratory tests at the time of obtaining Table 2-6 consent, according to the presence or absence of proton-pump inhibitors

Unique Subject Identifier=1320000000-0005

MEANS Procedure

Assay variable : PTINR\_VAL1 PT-INR Value

N Mean Standard Deviation Minimum Maximum

---

|   |           |           |           |           |
|---|-----------|-----------|-----------|-----------|
| 6 | 2.1666667 | 0.3539868 | 1.7100000 | 2.5700000 |
|---|-----------|-----------|-----------|-----------|

---

Unique Subject Identifier=1320000000-0006

Assay variable : PTINR\_VAL1 PT-INR Value

N Mean Standard Deviation Minimum Maximum

---

|   |           |           |           |           |
|---|-----------|-----------|-----------|-----------|
| 4 | 1.9150000 | 0.3267517 | 1.4400000 | 2.1400000 |
|---|-----------|-----------|-----------|-----------|

---

Unique Subject Identifier=1320000000-0007

Assay variable : PTINR\_VAL1 PT-INR Value

N Mean Standard Deviation Minimum Maximum

---

|   |           |           |           |           |
|---|-----------|-----------|-----------|-----------|
| 4 | 1.8850000 | 0.5557877 | 1.3000000 | 2.6400000 |
|---|-----------|-----------|-----------|-----------|

---

Unique Subject Identifier=1320000000-0008

Assay variable : PTINR\_VAL1 PT-INR Value

N Mean Standard Deviation Minimum Maximum

---

|   |          |           |          |          |
|---|----------|-----------|----------|----------|
| 5 | 2.080000 | 0.2589401 | 1.780000 | 2.320000 |
|---|----------|-----------|----------|----------|

---

Laboratory tests at the time of obtaining Table 2-6 consent, according to the presence or absence of proton-pump inhibitors

Unique Subject Identifier=1320000000-0009

MEANS Procedure

Assay variable : PTINR\_VAL1 PT-INR Value

N Mean Standard Deviation Minimum Maximum

---

|   |           |           |           |           |
|---|-----------|-----------|-----------|-----------|
| 5 | 1.9780000 | 0.5148495 | 1.3300000 | 2.4600000 |
|---|-----------|-----------|-----------|-----------|

---

Unique Subject Identifier=1320000000-0011

Assay variable : PTINR\_VAL1 PT-INR Value

N Mean Standard Deviation Minimum Maximum

---

|   |           |           |           |           |
|---|-----------|-----------|-----------|-----------|
| 5 | 1.7040000 | 0.2951779 | 1.3000000 | 2.0000000 |
|---|-----------|-----------|-----------|-----------|

---

Unique Subject Identifier=1320000000-0012

Assay variable : PTINR\_VAL1 PT-INR Value

N Mean Standard Deviation Minimum Maximum

---

|   |           |           |           |           |
|---|-----------|-----------|-----------|-----------|
| 6 | 1.7816667 | 0.0879583 | 1.6700000 | 1.9000000 |
|---|-----------|-----------|-----------|-----------|

---

Unique Subject Identifier=1320000000-0013

Assay variable : PTINR\_VAL1 PT-INR Value

N Mean Standard Deviation Minimum Maximum

---

|   |           |           |           |           |
|---|-----------|-----------|-----------|-----------|
| 6 | 1.7350000 | 0.1534601 | 1.5200000 | 1.9100000 |
|---|-----------|-----------|-----------|-----------|

---

Laboratory tests at the time of obtaining Table 2-6 consent, according to the presence or absence of proton-pump inhibitors

Unique Subject Identifier=1320000000-0014

MEANS Procedure

Assay variable : PTINR\_VAL1 PT-INR Value

| N | Mean      | Standard Deviation | Minimum   | Maximum   |
|---|-----------|--------------------|-----------|-----------|
| 5 | 1.7560000 | 0.3250846          | 1.4800000 | 2.2000000 |

Unique Subject Identifier=1320000000-0016

Assay variable : PTINR\_VAL1 PT-INR Value

| N | Mean      | Standard Deviation | Minimum   | Maximum   |
|---|-----------|--------------------|-----------|-----------|
| 6 | 2.5616667 | 0.6723218          | 1.6800000 | 3.2600000 |

Unique Subject Identifier=1320000000-0017

Assay variable : PTINR\_VAL1 PT-INR Value

| N | Mean      | Standard Deviation | Minimum   | Maximum   |
|---|-----------|--------------------|-----------|-----------|
| 6 | 2.2066667 | 0.3567445          | 1.9000000 | 2.7000000 |

Unique Subject Identifier=1320000000-0018

Assay variable : PTINR\_VAL1 PT-INR Value

N Mean Standard Deviation Minimum Maximum

---

|   |           |           |           |           |
|---|-----------|-----------|-----------|-----------|
| 5 | 1.9200000 | 0.3896794 | 1.3300000 | 2.2700000 |
|---|-----------|-----------|-----------|-----------|

---



Laboratory tests at the time of obtaining Table 2-6 consent, according to the presence or absence of proton-pump inhibitors

Unique Subject Identifier=1320000000-0020

MEANS Procedure

Assay variable : PTINR\_VAL1 PT-INR Value

N Mean Standard Deviation Minimum Maximum

---

|   |           |           |           |           |
|---|-----------|-----------|-----------|-----------|
| 6 | 2.1700000 | 0.6441739 | 1.4700000 | 3.1500000 |
|---|-----------|-----------|-----------|-----------|

---

Unique Subject Identifier=1320000000-0021

Assay variable : PTINR\_VAL1 PT-INR Value

N Mean Standard Deviation Minimum Maximum

---

|   |           |           |           |           |
|---|-----------|-----------|-----------|-----------|
| 6 | 1.8733333 | 0.5328289 | 1.1700000 | 2.5000000 |
|---|-----------|-----------|-----------|-----------|

---

Unique Subject Identifier=1320000000-0022

Assay variable : PTINR\_VAL1 PT-INR Value

N Mean Standard Deviation Minimum Maximum

---

|   |           |           |           |           |
|---|-----------|-----------|-----------|-----------|
| 5 | 2.2040000 | 0.2899655 | 1.8000000 | 2.6000000 |
|---|-----------|-----------|-----------|-----------|

---

Unique Subject Identifier=1320000000-0024

Assay variable : PTINR\_VAL1 PT-INR Value

N Mean Standard Deviation Minimum Maximum

---

|   |           |           |           |           |
|---|-----------|-----------|-----------|-----------|
| 6 | 1.9266667 | 0.3090415 | 1.5900000 | 2.4600000 |
|---|-----------|-----------|-----------|-----------|

---

Laboratory tests at the time of obtaining Table 2-6 consent, according to the presence or absence of proton-pump inhibitors

Unique Subject Identifier=1320000000-0025

MEANS Procedure

Assay variable : PTINR\_VAL1 PT-INR Value

N Mean Standard Deviation Minimum Maximum

---

|   |           |           |           |           |
|---|-----------|-----------|-----------|-----------|
| 6 | 2.2083333 | 0.7145185 | 1.5000000 | 3.5100000 |
|---|-----------|-----------|-----------|-----------|

---

Unique Subject Identifier=1320000000-0026

Assay variable : PTINR\_VAL1 PT-INR Value

N Mean Standard Deviation Minimum Maximum

---

|   |           |           |           |           |
|---|-----------|-----------|-----------|-----------|
| 5 | 2.5820000 | 1.0081766 | 1.2000000 | 4.0000000 |
|---|-----------|-----------|-----------|-----------|

---

Unique Subject Identifier=1320000000-0028

Assay variable : PTINR\_VAL1 PT-INR Value

N Mean Standard Deviation Minimum Maximum

---

|   |           |           |           |           |
|---|-----------|-----------|-----------|-----------|
| 6 | 1.9716667 | 0.1146153 | 1.8000000 | 2.1000000 |
|---|-----------|-----------|-----------|-----------|

---

Unique Subject Identifier=1320000000-0029

Assay variable : PTINR\_VAL1 PT-INR Value

N Mean Standard Deviation Minimum Maximum

---

|   |           |           |           |           |
|---|-----------|-----------|-----------|-----------|
| 6 | 1.7050000 | 0.4458139 | 1.0000000 | 2.1700000 |
|---|-----------|-----------|-----------|-----------|

---

Laboratory tests at the time of obtaining Table 2-6 consent, according to the presence or absence of proton-pump inhibitors

Unique Subject Identifier=1320000000-0030

MEANS Procedure

Assay variable : PTINR\_VAL1 PT-INR Value

N Mean Standard Deviation Minimum Maximum

---

|   |           |           |           |           |
|---|-----------|-----------|-----------|-----------|
| 6 | 1.9950000 | 0.1315675 | 1.7700000 | 2.1500000 |
|---|-----------|-----------|-----------|-----------|

---

Unique Subject Identifier=1321011110-0004

Assay variable : PTINR\_VAL1 PT-INR Value

N Mean Standard Deviation Minimum Maximum

---

|   |           |  |           |           |
|---|-----------|--|-----------|-----------|
| 1 | 3.1600000 |  | 3.1600000 | 3.1600000 |
|---|-----------|--|-----------|-----------|

---

Unique Subject Identifier=1321011110-0016

Assay variable : PTINR\_VAL1 PT-INR Value

N Mean Standard Deviation Minimum Maximum

---

|   |           |  |           |           |
|---|-----------|--|-----------|-----------|
| 1 | 2.2900000 |  | 2.2900000 | 2.2900000 |
|---|-----------|--|-----------|-----------|

---

Unique Subject Identifier=1321011110-0023

Assay variable : PTINR\_VAL1 PT-INR Value

N Mean Standard Deviation Minimum Maximum

---

|   |           |           |           |           |
|---|-----------|-----------|-----------|-----------|
| 4 | 1.5975000 | 0.0660177 | 1.5100000 | 1.6700000 |
|---|-----------|-----------|-----------|-----------|

---

Laboratory tests at the time of obtaining Table 2-6 consent, according to the presence or absence of proton-pump inhibitors

Unique Subject Identifier=1321011110-0025

MEANS Procedure

Assay variable : PTINR\_VAL1 PT-INR Value

N Mean Standard Deviation Minimum Maximum

---

|   |           |           |           |           |
|---|-----------|-----------|-----------|-----------|
| 6 | 2.9550000 | 0.5216416 | 2.4000000 | 3.7400000 |
|---|-----------|-----------|-----------|-----------|

---

Unique Subject Identifier=1322000000-0001

Assay variable : PTINR\_VAL1 PT-INR Value

N Mean Standard Deviation Minimum Maximum

---

|   |           |           |           |           |
|---|-----------|-----------|-----------|-----------|
| 3 | 1.6600000 | 0.4613025 | 1.1800000 | 2.1000000 |
|---|-----------|-----------|-----------|-----------|

---

Unique Subject Identifier=1322000000-0002

Assay variable : PTINR\_VAL1 PT-INR Value

N Mean Standard Deviation Minimum Maximum

---

|   |           |  |           |           |
|---|-----------|--|-----------|-----------|
| 1 | 0.9800000 |  | 0.9800000 | 0.9800000 |
|---|-----------|--|-----------|-----------|

---

Unique Subject Identifier=1322000000-0009

Assay variable : PTINR\_VAL1 PT-INR Value

N Mean Standard Deviation Minimum Maximum

---

|   |           |           |           |           |
|---|-----------|-----------|-----------|-----------|
| 2 | 1.1550000 | 0.0353553 | 1.1300000 | 1.1800000 |
|---|-----------|-----------|-----------|-----------|

---



Laboratory tests at the time of obtaining Table 2-6 consent, according to the presence or absence of proton-pump inhibitors

Unique Subject Identifier=1324111000-0003

MEANS Procedure

Assay variable : PTINR\_VAL1 PT-INR Value

N Mean Standard Deviation Minimum Maximum

---

|   |           |           |           |           |
|---|-----------|-----------|-----------|-----------|
| 6 | 2.1666667 | 0.4179314 | 1.7000000 | 2.8000000 |
|---|-----------|-----------|-----------|-----------|

---

Unique Subject Identifier=1324111000-0004

Assay variable : PTINR\_VAL1 PT-INR Value

N Mean Standard Deviation Minimum Maximum

---

|   |           |           |           |           |
|---|-----------|-----------|-----------|-----------|
| 6 | 2.0333333 | 0.6501282 | 1.2000000 | 3.1000000 |
|---|-----------|-----------|-----------|-----------|

---

Unique Subject Identifier=1324111000-0009

Assay variable : PTINR\_VAL1 PT-INR Value

N Mean Standard Deviation Minimum Maximum

---

|   |           |           |           |           |
|---|-----------|-----------|-----------|-----------|
| 6 | 2.5166667 | 0.3544949 | 2.0000000 | 3.1000000 |
|---|-----------|-----------|-----------|-----------|

---

Unique Subject Identifier=1324111000-0013

Assay variable : PTINR\_VAL1 PT-INR Value

N Mean Standard Deviation Minimum Maximum

---

|   |           |           |           |           |
|---|-----------|-----------|-----------|-----------|
| 6 | 1.6500000 | 0.2428992 | 1.4000000 | 2.0000000 |
|---|-----------|-----------|-----------|-----------|

---

Laboratory tests at the time of obtaining Table 2-6 consent, according to the presence or absence of proton-pump inhibitors

Unique Subject Identifier=1324111000-0014

MEANS Procedure

Assay variable : PTINR\_VAL1 PT-INR Value

N Mean Standard Deviation Minimum Maximum

---

|   |           |           |           |           |
|---|-----------|-----------|-----------|-----------|
| 6 | 1.7166667 | 0.3060501 | 1.4000000 | 2.2000000 |
|---|-----------|-----------|-----------|-----------|

---

Unique Subject Identifier=1324111000-0015

Assay variable : PTINR\_VAL1 PT-INR Value

N Mean Standard Deviation Minimum Maximum

---

|   |           |           |           |           |
|---|-----------|-----------|-----------|-----------|
| 5 | 2.0800000 | 0.3962323 | 1.6000000 | 2.6000000 |
|---|-----------|-----------|-----------|-----------|

---

Unique Subject Identifier=1324111000-0019

Assay variable : PTINR\_VAL1 PT-INR Value

N Mean Standard Deviation Minimum Maximum

---

|   |           |           |           |           |
|---|-----------|-----------|-----------|-----------|
| 6 | 1.2333333 | 0.0516398 | 1.2000000 | 1.3000000 |
|---|-----------|-----------|-----------|-----------|

---

Unique Subject Identifier=1326000000-0001

Assay variable : PTINR\_VAL1 PT-INR Value

N Mean Standard Deviation Minimum Maximum

---

|   |          |           |          |          |
|---|----------|-----------|----------|----------|
| 5 | 1.500000 | 0.1581139 | 1.300000 | 1.700000 |
|---|----------|-----------|----------|----------|

---

Laboratory tests at the time of obtaining Table 2-6 consent, according to the presence or absence of proton-pump inhibitors

Unique Subject Identifier=1326000000-0005

MEANS Procedure

Assay variable : PTINR\_VAL1 PT-INR Value

| N | Mean      | Standard Deviation | Minimum | Maximum   |
|---|-----------|--------------------|---------|-----------|
| 5 | 0.9000000 |                    | 0       | 0.9000000 |

Unique Subject Identifier=1326000000-0008

Assay variable : PTINR\_VAL1 PT-INR Value

| N | Mean      | Standard Deviation | Minimum   | Maximum   |
|---|-----------|--------------------|-----------|-----------|
| 6 | 1.3500000 | 0.0836660          | 1.3000000 | 1.5000000 |

Unique Subject Identifier=1326000000-0009

Assay variable : PTINR\_VAL1 PT-INR Value

| N | Mean      | Standard Deviation | Minimum | Maximum   |
|---|-----------|--------------------|---------|-----------|
| 6 | 1.0000000 |                    | 0       | 1.0000000 |

Unique Subject Identifier=1326000000-0010

Assay variable : PTINR\_VAL1 PT-INR Value

N Mean Standard Deviation Minimum Maximum

---

|   |          |           |          |          |
|---|----------|-----------|----------|----------|
| 6 | 1.100000 | 0.0632456 | 1.000000 | 1.200000 |
|---|----------|-----------|----------|----------|

---

Laboratory tests at the time of obtaining Table 2-6 consent, according to the presence or absence of proton-pump inhibitors

Unique Subject Identifier=1328011111-0003

MEANS Procedure

Assay variable : PTINR\_VAL1 PT-INR Value

N Mean Standard Deviation Minimum Maximum

---

|   |           |           |           |           |
|---|-----------|-----------|-----------|-----------|
| 6 | 2.3183333 | 0.4281783 | 1.7900000 | 3.0400000 |
|---|-----------|-----------|-----------|-----------|

---

Unique Subject Identifier=1328011111-0005

Assay variable : PTINR\_VAL1 PT-INR Value

N Mean Standard Deviation Minimum Maximum

---

|   |           |           |           |           |
|---|-----------|-----------|-----------|-----------|
| 6 | 2.4183333 | 0.3291454 | 1.8300000 | 2.7900000 |
|---|-----------|-----------|-----------|-----------|

---

Unique Subject Identifier=1328011111-0009

Assay variable : PTINR\_VAL1 PT-INR Value

N Mean Standard Deviation Minimum Maximum

---

|   |           |           |           |           |
|---|-----------|-----------|-----------|-----------|
| 4 | 1.5900000 | 0.2597435 | 1.3900000 | 1.9500000 |
|---|-----------|-----------|-----------|-----------|

---

Unique Subject Identifier=1328011111-0033

Assay variable : PTINR\_VAL1 PT-INR Value

N Mean Standard Deviation Minimum Maximum

---

|   |           |           |           |           |
|---|-----------|-----------|-----------|-----------|
| 2 | 1.2250000 | 0.1202082 | 1.1400000 | 1.3100000 |
|---|-----------|-----------|-----------|-----------|

---



Laboratory tests at the time of obtaining Table 2-6 consent, according to the presence or absence of proton-pump inhibitors

Unique Subject Identifier=1328011111-0036

MEANS Procedure

Assay variable : PTINR\_VAL1 PT-INR Value

N Mean Standard Deviation Minimum Maximum

---

|   |           |           |           |           |
|---|-----------|-----------|-----------|-----------|
| 6 | 1.9633333 | 0.3518333 | 1.6200000 | 2.5600000 |
|---|-----------|-----------|-----------|-----------|

---

Unique Subject Identifier=1328011111-0043

Assay variable : PTINR\_VAL1 PT-INR Value

N Mean Standard Deviation Minimum Maximum

---

|   |           |           |           |           |
|---|-----------|-----------|-----------|-----------|
| 6 | 1.8166667 | 0.2701604 | 1.4700000 | 2.2800000 |
|---|-----------|-----------|-----------|-----------|

---

Unique Subject Identifier=1328011111-0044

Assay variable : PTINR\_VAL1 PT-INR Value

N Mean Standard Deviation Minimum Maximum

---

|   |           |           |           |           |
|---|-----------|-----------|-----------|-----------|
| 2 | 1.7600000 | 0.0424264 | 1.7300000 | 1.7900000 |
|---|-----------|-----------|-----------|-----------|

---

Unique Subject Identifier=1328011111-0045

Assay variable : PTINR\_VAL1 PT-INR Value

N Mean Standard Deviation Minimum Maximum

---

|   |           |           |           |           |
|---|-----------|-----------|-----------|-----------|
| 2 | 1.2450000 | 0.1767767 | 1.1200000 | 1.3700000 |
|---|-----------|-----------|-----------|-----------|

---

Laboratory tests at the time of obtaining Table 2-6 consent, according to the presence or absence of proton-pump inhibitors

Unique Subject Identifier=1328011111-0050

MEANS Procedure

Assay variable : PTINR\_VAL1 PT-INR Value

N Mean Standard Deviation Minimum Maximum

---

|   |           |           |           |           |
|---|-----------|-----------|-----------|-----------|
| 6 | 1.7950000 | 0.0926823 | 1.6300000 | 1.9000000 |
|---|-----------|-----------|-----------|-----------|

---

Unique Subject Identifier=1328011111-0060

Assay variable : PTINR\_VAL1 PT-INR Value

N Mean Standard Deviation Minimum Maximum

---

|   |           |           |           |           |
|---|-----------|-----------|-----------|-----------|
| 2 | 1.2050000 | 0.2333452 | 1.0400000 | 1.3700000 |
|---|-----------|-----------|-----------|-----------|

---

Unique Subject Identifier=1328011111-0072

Assay variable : PTINR\_VAL1 PT-INR Value

N Mean Standard Deviation Minimum Maximum

---

|   |           |           |           |           |
|---|-----------|-----------|-----------|-----------|
| 5 | 2.2160000 | 0.2659511 | 1.8800000 | 2.5800000 |
|---|-----------|-----------|-----------|-----------|

---

Unique Subject Identifier=1328011111-0074

Assay variable : PTINR\_VAL1 PT-INR Value

N Mean Standard Deviation Minimum Maximum

---

|   |           |  |           |           |
|---|-----------|--|-----------|-----------|
| 1 | 1.9900000 |  | 1.9900000 | 1.9900000 |
|---|-----------|--|-----------|-----------|

---

Laboratory tests at the time of obtaining Table 2-6 consent, according to the presence or absence of proton-pump inhibitors

Unique Subject Identifier=1328011111-0075

MEANS Procedure

Assay variable : PTINR\_VAL1 PT-INR Value

N Mean Standard Deviation Minimum Maximum

---

|   |           |  |           |           |
|---|-----------|--|-----------|-----------|
| 1 | 1.9500000 |  | 1.9500000 | 1.9500000 |
|---|-----------|--|-----------|-----------|

---

Unique Subject Identifier=1328011111-0079

Assay variable : PTINR\_VAL1 PT-INR Value

N Mean Standard Deviation Minimum Maximum

---

|   |           |           |           |           |
|---|-----------|-----------|-----------|-----------|
| 4 | 2.3575000 | 0.1252664 | 2.1700000 | 2.4300000 |
|---|-----------|-----------|-----------|-----------|

---

Unique Subject Identifier=1328011111-0086

Assay variable : PTINR\_VAL1 PT-INR Value

N Mean Standard Deviation Minimum Maximum

---

|   |           |           |           |           |
|---|-----------|-----------|-----------|-----------|
| 6 | 1.6766667 | 0.2522433 | 1.3700000 | 2.0900000 |
|---|-----------|-----------|-----------|-----------|

---

Unique Subject Identifier=1328011111-0090

Assay variable : PTINR\_VAL1 PT-INR Value

N Mean Standard Deviation Minimum Maximum

---

|   |           |           |           |           |
|---|-----------|-----------|-----------|-----------|
| 5 | 1.6440000 | 0.1130487 | 1.5100000 | 1.7700000 |
|---|-----------|-----------|-----------|-----------|

---

Laboratory tests at the time of obtaining Table 2-6 consent, according to the presence or absence of proton-pump inhibitors

Unique Subject Identifier=1336011110-0001

MEANS Procedure

Assay variable : PTINR\_VAL1 PT-INR Value

N Mean Standard Deviation Minimum Maximum

---

|   |           |           |           |           |
|---|-----------|-----------|-----------|-----------|
| 4 | 1.4250000 | 0.2629956 | 1.2000000 | 1.8000000 |
|---|-----------|-----------|-----------|-----------|

---

Unique Subject Identifier=1341011111-0008

Assay variable : PTINR\_VAL1 PT-INR Value

N Mean Standard Deviation Minimum Maximum

---

|   |           |           |           |           |
|---|-----------|-----------|-----------|-----------|
| 5 | 1.9160000 | 0.1283745 | 1.7000000 | 2.0400000 |
|---|-----------|-----------|-----------|-----------|

---

Unique Subject Identifier=1341011111-0011

Assay variable : PTINR\_VAL1 PT-INR Value

N Mean Standard Deviation Minimum Maximum

---

|   |           |           |           |           |
|---|-----------|-----------|-----------|-----------|
| 5 | 2.3500000 | 0.3421257 | 1.9100000 | 2.8700000 |
|---|-----------|-----------|-----------|-----------|

---

Unique Subject Identifier=1341011111-0014

Assay variable : PTINR\_VAL1 PT-INR Value

N Mean Standard Deviation Minimum Maximum

---

|   |           |  |           |           |
|---|-----------|--|-----------|-----------|
| 1 | 2.4300000 |  | 2.4300000 | 2.4300000 |
|---|-----------|--|-----------|-----------|

---



Laboratory tests at the time of obtaining Table 2-6 consent, according to the presence or absence of proton-pump inhibitors

Unique Subject Identifier=1341011111-0015

MEANS Procedure

Assay variable : PTINR\_VAL1 PT-INR Value

| N | Mean      | Standard Deviation | Minimum   | Maximum   |
|---|-----------|--------------------|-----------|-----------|
| 3 | 2.5100000 | 0.3950949          | 2.1100000 | 2.9000000 |

Unique Subject Identifier=1342000000-0006

Assay variable : PTINR\_VAL1 PT-INR Value

| N | Mean      | Standard Deviation | Minimum   | Maximum   |
|---|-----------|--------------------|-----------|-----------|
| 6 | 2.3200000 | 0.3955250          | 1.7200000 | 2.8100000 |

Unique Subject Identifier=1351010111-0002

Assay variable : PTINR\_VAL1 PT-INR Value

| N | Mean      | Standard Deviation | Minimum   | Maximum   |
|---|-----------|--------------------|-----------|-----------|
| 6 | 1.8166667 | 0.2714160          | 1.3000000 | 2.1000000 |

Unique Subject Identifier=1351010111-0003

Assay variable : PTINR\_VAL1 PT-INR Value

N Mean Standard Deviation Minimum Maximum

---

|   |          |           |          |          |
|---|----------|-----------|----------|----------|
| 6 | 2.166667 | 0.3386247 | 1.900000 | 2.800000 |
|---|----------|-----------|----------|----------|

---

Laboratory tests at the time of obtaining Table 2-6 consent, according to the presence or absence of proton-pump inhibitors

Unique Subject Identifier=1351010111-0009

MEANS Procedure

Assay variable : PTINR\_VAL1 PT-INR Value

N Mean Standard Deviation Minimum Maximum

---

|   |           |           |           |           |
|---|-----------|-----------|-----------|-----------|
| 6 | 1.8833333 | 0.3430258 | 1.4000000 | 2.3000000 |
|---|-----------|-----------|-----------|-----------|

---

Unique Subject Identifier=1351010111-0012

Assay variable : PTINR\_VAL1 PT-INR Value

N Mean Standard Deviation Minimum Maximum

---

|   |           |           |           |           |
|---|-----------|-----------|-----------|-----------|
| 6 | 1.5666667 | 0.2581989 | 1.2000000 | 1.9000000 |
|---|-----------|-----------|-----------|-----------|

---

Unique Subject Identifier=1351010111-0013

Assay variable : PTINR\_VAL1 PT-INR Value

N Mean Standard Deviation Minimum Maximum

---

|   |           |           |           |           |
|---|-----------|-----------|-----------|-----------|
| 6 | 1.7000000 | 0.2529822 | 1.5000000 | 2.2000000 |
|---|-----------|-----------|-----------|-----------|

---

Unique Subject Identifier=1351010111-0015

Assay variable : PTINR\_VAL1 PT-INR Value

N Mean Standard Deviation Minimum Maximum

---

|   |          |           |          |          |
|---|----------|-----------|----------|----------|
| 6 | 2.150000 | 0.3146427 | 1.700000 | 2.600000 |
|---|----------|-----------|----------|----------|

---

Laboratory tests at the time of obtaining Table 2-6 consent, according to the presence or absence of proton-pump inhibitors

Unique Subject Identifier=1351010111-0018

MEANS Procedure

Assay variable : PTINR\_VAL1 PT-INR Value

N Mean Standard Deviation Minimum Maximum

---

|   |           |           |           |           |
|---|-----------|-----------|-----------|-----------|
| 6 | 2.1166667 | 0.2994439 | 1.7000000 | 2.5000000 |
|---|-----------|-----------|-----------|-----------|

---

Unique Subject Identifier=1351010111-0022

Assay variable : PTINR\_VAL1 PT-INR Value

N Mean Standard Deviation Minimum Maximum

---

|   |           |           |           |           |
|---|-----------|-----------|-----------|-----------|
| 6 | 1.9333333 | 0.7089899 | 1.0000000 | 3.1000000 |
|---|-----------|-----------|-----------|-----------|

---

Unique Subject Identifier=1352011010-0003

Assay variable : PTINR\_VAL1 PT-INR Value

N Mean Standard Deviation Minimum Maximum

---

|   |           |           |           |           |
|---|-----------|-----------|-----------|-----------|
| 6 | 2.2833333 | 0.6493587 | 1.3000000 | 3.0000000 |
|---|-----------|-----------|-----------|-----------|

---

Unique Subject Identifier=1352011010-0011

Assay variable : PTINR\_VAL1 PT-INR Value

N Mean Standard Deviation Minimum Maximum

---

|   |           |           |           |           |
|---|-----------|-----------|-----------|-----------|
| 6 | 2.0666667 | 0.3559026 | 1.6000000 | 2.7000000 |
|---|-----------|-----------|-----------|-----------|

---

Laboratory tests at the time of obtaining Table 2-6 consent, according to the presence or absence of proton-pump inhibitors

Unique Subject Identifier=1352011010-0012

MEANS Procedure

Assay variable : PTINR\_VAL1 PT-INR Value

N Mean Standard Deviation Minimum Maximum

---

|   |           |           |           |           |
|---|-----------|-----------|-----------|-----------|
| 6 | 1.6333333 | 0.4760952 | 1.2000000 | 2.5000000 |
|---|-----------|-----------|-----------|-----------|

---

Unique Subject Identifier=1353000000-0001

Assay variable : PTINR\_VAL1 PT-INR Value

N Mean Standard Deviation Minimum Maximum

---

|   |           |           |           |           |
|---|-----------|-----------|-----------|-----------|
| 2 | 1.8500000 | 0.0707107 | 1.8000000 | 1.9000000 |
|---|-----------|-----------|-----------|-----------|

---

Unique Subject Identifier=1353000000-0003

Assay variable : PTINR\_VAL1 PT-INR Value

N Mean Standard Deviation Minimum Maximum

---

|   |           |           |           |           |
|---|-----------|-----------|-----------|-----------|
| 2 | 1.9000000 | 0.1414214 | 1.8000000 | 2.0000000 |
|---|-----------|-----------|-----------|-----------|

---

Unique Subject Identifier=1353000000-0005

Assay variable : PTINR\_VAL1 PT-INR Value

N Mean Standard Deviation Minimum Maximum

---

|   |           |  |           |           |
|---|-----------|--|-----------|-----------|
| 1 | 2.2000000 |  | 2.2000000 | 2.2000000 |
|---|-----------|--|-----------|-----------|

---



Laboratory tests at the time of obtaining Table 2-6 consent, according to the presence or absence of proton-pump inhibitors

Unique Subject Identifier=1353000000-0015

MEANS Procedure

Assay variable : PTINR\_VAL1 PT-INR Value

N Mean Standard Deviation Minimum Maximum

---

|   |           |  |           |           |
|---|-----------|--|-----------|-----------|
| 1 | 2.4000000 |  | 2.4000000 | 2.4000000 |
|---|-----------|--|-----------|-----------|

---

Unique Subject Identifier=1353000000-0017

Assay variable : PTINR\_VAL1 PT-INR Value

N Mean Standard Deviation Minimum Maximum

---

|   |           |  |           |           |
|---|-----------|--|-----------|-----------|
| 1 | 1.9000000 |  | 1.9000000 | 1.9000000 |
|---|-----------|--|-----------|-----------|

---

Unique Subject Identifier=1353000000-0024

Assay variable : PTINR\_VAL1 PT-INR Value

N Mean Standard Deviation Minimum Maximum

---

|   |           |           |           |           |
|---|-----------|-----------|-----------|-----------|
| 2 | 2.1500000 | 0.2121320 | 2.0000000 | 2.3000000 |
|---|-----------|-----------|-----------|-----------|

---

Unique Subject Identifier=1353000000-0028

Assay variable : PTINR\_VAL1 PT-INR Value

N Mean Standard Deviation Minimum Maximum

---

|   |           |           |           |           |
|---|-----------|-----------|-----------|-----------|
| 2 | 1.8500000 | 0.2121320 | 1.7000000 | 2.0000000 |
|---|-----------|-----------|-----------|-----------|

---

Laboratory tests at the time of obtaining Table 2-6 consent, according to the presence or absence of proton-pump inhibitors

Unique Subject Identifier=1353000000-0034

MEANS Procedure

Assay variable : PTINR\_VAL1 PT-INR Value

N Mean Standard Deviation Minimum Maximum

---

|   |           |           |           |           |
|---|-----------|-----------|-----------|-----------|
| 2 | 1.5500000 | 0.0707107 | 1.5000000 | 1.6000000 |
|---|-----------|-----------|-----------|-----------|

---

Unique Subject Identifier=1353000000-0039

Assay variable : PTINR\_VAL1 PT-INR Value

N Mean Standard Deviation Minimum Maximum

---

|   |           |  |           |           |
|---|-----------|--|-----------|-----------|
| 1 | 2.2000000 |  | 2.2000000 | 2.2000000 |
|---|-----------|--|-----------|-----------|

---

Unique Subject Identifier=1353000000-0048

Assay variable : PTINR\_VAL1 PT-INR Value

N Mean Standard Deviation Minimum Maximum

---

|   |           |           |           |           |
|---|-----------|-----------|-----------|-----------|
| 2 | 1.5000000 | 0.4242641 | 1.2000000 | 1.8000000 |
|---|-----------|-----------|-----------|-----------|

---

Unique Subject Identifier=1353000000-0049

Assay variable : PTINR\_VAL1 PT-INR Value

N Mean Standard Deviation Minimum Maximum

---

|   |           |           |           |           |
|---|-----------|-----------|-----------|-----------|
| 2 | 1.6500000 | 0.0707107 | 1.6000000 | 1.7000000 |
|---|-----------|-----------|-----------|-----------|

---

Laboratory tests at the time of obtaining Table 2-6 consent, according to the presence or absence of proton-pump inhibitors

Unique Subject Identifier=1353000000-0050

MEANS Procedure

Assay variable : PTINR\_VAL1 PT-INR Value

N Mean Standard Deviation Minimum Maximum

---

|   |           |  |           |           |
|---|-----------|--|-----------|-----------|
| 1 | 1.2000000 |  | 1.2000000 | 1.2000000 |
|---|-----------|--|-----------|-----------|

---

Unique Subject Identifier=1353000000-0051

Assay variable : PTINR\_VAL1 PT-INR Value

N Mean Standard Deviation Minimum Maximum

---

|   |           |  |           |           |
|---|-----------|--|-----------|-----------|
| 1 | 1.8000000 |  | 1.8000000 | 1.8000000 |
|---|-----------|--|-----------|-----------|

---

Unique Subject Identifier=1354010000-0001

Assay variable : PTINR\_VAL1 PT-INR Value

N Mean Standard Deviation Minimum Maximum

---

|   |           |           |           |           |
|---|-----------|-----------|-----------|-----------|
| 6 | 1.6100000 | 0.1005982 | 1.5100000 | 1.7400000 |
|---|-----------|-----------|-----------|-----------|

---

Unique Subject Identifier=1354010000-0004

Assay variable : PTINR\_VAL1 PT-INR Value

N Mean Standard Deviation Minimum Maximum

---

|   |           |           |           |           |
|---|-----------|-----------|-----------|-----------|
| 5 | 2.1960000 | 0.2434748 | 1.9300000 | 2.5500000 |
|---|-----------|-----------|-----------|-----------|

---

Laboratory tests at the time of obtaining Table 2-6 consent, according to the presence or absence of proton-pump inhibitors

Unique Subject Identifier=1354010000-0006

MEANS Procedure

Assay variable : PTINR\_VAL1 PT-INR Value

N Mean Standard Deviation Minimum Maximum

---

|   |           |           |           |           |
|---|-----------|-----------|-----------|-----------|
| 5 | 1.8140000 | 0.1443260 | 1.5900000 | 1.9600000 |
|---|-----------|-----------|-----------|-----------|

---

Unique Subject Identifier=1354010000-0007

Assay variable : PTINR\_VAL1 PT-INR Value

N Mean Standard Deviation Minimum Maximum

---

|   |           |           |           |           |
|---|-----------|-----------|-----------|-----------|
| 5 | 1.5680000 | 0.1219426 | 1.4800000 | 1.7800000 |
|---|-----------|-----------|-----------|-----------|

---

Unique Subject Identifier=1354010000-0011

Assay variable : PTINR\_VAL1 PT-INR Value

N Mean Standard Deviation Minimum Maximum

---

|   |           |           |           |           |
|---|-----------|-----------|-----------|-----------|
| 3 | 1.4733333 | 0.0757188 | 1.4200000 | 1.5600000 |
|---|-----------|-----------|-----------|-----------|

---

Unique Subject Identifier=1354010000-0012

Assay variable : PTINR\_VAL1 PT-INR Value

N Mean Standard Deviation Minimum Maximum

---

|   |          |           |          |          |
|---|----------|-----------|----------|----------|
| 6 | 1.810000 | 0.1186592 | 1.640000 | 1.970000 |
|---|----------|-----------|----------|----------|

---



Laboratory tests at the time of obtaining Table 2-6 consent, according to the presence or absence of proton-pump inhibitors

Unique Subject Identifier=1354010000-0013

MEANS Procedure

Assay variable : PTINR\_VAL1 PT-INR Value

N Mean Standard Deviation Minimum Maximum

---

|   |           |           |           |           |
|---|-----------|-----------|-----------|-----------|
| 5 | 1.9380000 | 0.4510211 | 1.6000000 | 2.7000000 |
|---|-----------|-----------|-----------|-----------|

---

Unique Subject Identifier=1354010000-0015

Assay variable : PTINR\_VAL1 PT-INR Value

N Mean Standard Deviation Minimum Maximum

---

|   |           |           |           |           |
|---|-----------|-----------|-----------|-----------|
| 5 | 2.1240000 | 0.1504327 | 1.8600000 | 2.2100000 |
|---|-----------|-----------|-----------|-----------|

---

Unique Subject Identifier=1354010000-0016

Assay variable : PTINR\_VAL1 PT-INR Value

N Mean Standard Deviation Minimum Maximum

---

|   |           |           |           |           |
|---|-----------|-----------|-----------|-----------|
| 3 | 1.9233333 | 0.2315887 | 1.7300000 | 2.1800000 |
|---|-----------|-----------|-----------|-----------|

---

Unique Subject Identifier=1354010000-0023

Assay variable : PTINR\_VAL1 PT-INR Value

N Mean Standard Deviation Minimum Maximum

---

|   |           |           |           |           |
|---|-----------|-----------|-----------|-----------|
| 5 | 1.5940000 | 0.1277889 | 1.4400000 | 1.7900000 |
|---|-----------|-----------|-----------|-----------|

---

Laboratory tests at the time of obtaining Table 2-6 consent, according to the presence or absence of proton-pump inhibitors

Unique Subject Identifier=1354010000-0024

MEANS Procedure

Assay variable : PTINR\_VAL1 PT-INR Value

N Mean Standard Deviation Minimum Maximum

---

|   |           |           |           |           |
|---|-----------|-----------|-----------|-----------|
| 6 | 1.5616667 | 0.1185608 | 1.4100000 | 1.7500000 |
|---|-----------|-----------|-----------|-----------|

---

Unique Subject Identifier=1354010000-0027

Assay variable : PTINR\_VAL1 PT-INR Value

N Mean Standard Deviation Minimum Maximum

---

|   |           |           |           |           |
|---|-----------|-----------|-----------|-----------|
| 6 | 1.7050000 | 0.3923137 | 1.3700000 | 2.4400000 |
|---|-----------|-----------|-----------|-----------|

---

Unique Subject Identifier=1354010000-0032

Assay variable : PTINR\_VAL1 PT-INR Value

N Mean Standard Deviation Minimum Maximum

---

|   |           |           |           |           |
|---|-----------|-----------|-----------|-----------|
| 6 | 1.4733333 | 0.1116542 | 1.3000000 | 1.6100000 |
|---|-----------|-----------|-----------|-----------|

---

Unique Subject Identifier=1354010000-0033

Assay variable : PTINR\_VAL1 PT-INR Value

N Mean Standard Deviation Minimum Maximum

---

|   |           |           |           |           |
|---|-----------|-----------|-----------|-----------|
| 6 | 1.6900000 | 0.3095158 | 1.2200000 | 2.0600000 |
|---|-----------|-----------|-----------|-----------|

---

Laboratory tests at the time of obtaining Table 2-6 consent, according to the presence or absence of proton-pump inhibitors

Unique Subject Identifier=1354010000-0034

MEANS Procedure

Assay variable : PTINR\_VAL1 PT-INR Value

| N | Mean      | Standard Deviation | Minimum   | Maximum   |
|---|-----------|--------------------|-----------|-----------|
| 6 | 1.8083333 | 0.1801573          | 1.5800000 | 2.0800000 |

Unique Subject Identifier=1354010000-0035

Assay variable : PTINR\_VAL1 PT-INR Value

| N | Mean      | Standard Deviation | Minimum   | Maximum   |
|---|-----------|--------------------|-----------|-----------|
| 3 | 1.6100000 | 0.4330127          | 1.1100000 | 1.8600000 |

Unique Subject Identifier=1354010000-0037

Assay variable : PTINR\_VAL1 PT-INR Value

| N | Mean      | Standard Deviation | Minimum   | Maximum   |
|---|-----------|--------------------|-----------|-----------|
| 6 | 1.4383333 | 0.1360025          | 1.3000000 | 1.6500000 |

Unique Subject Identifier=1354010000-0045

Assay variable : PTINR\_VAL1 PT-INR Value

N Mean Standard Deviation Minimum Maximum

---

|   |           |           |           |           |
|---|-----------|-----------|-----------|-----------|
| 6 | 1.8366667 | 0.3957609 | 1.3400000 | 2.5100000 |
|---|-----------|-----------|-----------|-----------|

---

Laboratory tests at the time of obtaining Table 2-6 consent, according to the presence or absence of proton-pump inhibitors

Unique Subject Identifier=1354010000-0046

MEANS Procedure

Assay variable : PTINR\_VAL1 PT-INR Value

N Mean Standard Deviation Minimum Maximum

---

|   |           |           |           |           |
|---|-----------|-----------|-----------|-----------|
| 5 | 2.0760000 | 0.2469413 | 1.6600000 | 2.2700000 |
|---|-----------|-----------|-----------|-----------|

---

Unique Subject Identifier=1354010000-0050

Assay variable : PTINR\_VAL1 PT-INR Value

N Mean Standard Deviation Minimum Maximum

---

|   |           |           |           |           |
|---|-----------|-----------|-----------|-----------|
| 5 | 1.7380000 | 0.1728294 | 1.5400000 | 1.9800000 |
|---|-----------|-----------|-----------|-----------|

---

Unique Subject Identifier=1354010000-0052

Assay variable : PTINR\_VAL1 PT-INR Value

N Mean Standard Deviation Minimum Maximum

---

|   |           |           |           |           |
|---|-----------|-----------|-----------|-----------|
| 6 | 2.2083333 | 1.4976838 | 1.1600000 | 5.1000000 |
|---|-----------|-----------|-----------|-----------|

---

Unique Subject Identifier=1354010000-0056

Assay variable : PTINR\_VAL1 PT-INR Value

N Mean Standard Deviation Minimum Maximum

---

|   |           |           |           |           |
|---|-----------|-----------|-----------|-----------|
| 6 | 1.7100000 | 0.1572260 | 1.5300000 | 1.9800000 |
|---|-----------|-----------|-----------|-----------|

---



Laboratory tests at the time of obtaining Table 2-6 consent, according to the presence or absence of proton-pump inhibitors

Unique Subject Identifier=1355000000-0005

MEANS Procedure

Assay variable : PTINR\_VAL1 PT-INR Value

N Mean Standard Deviation Minimum Maximum

---

|   |           |           |           |           |
|---|-----------|-----------|-----------|-----------|
| 6 | 2.1166667 | 0.3371449 | 1.6000000 | 2.6000000 |
|---|-----------|-----------|-----------|-----------|

---

Unique Subject Identifier=1355000000-0007

Assay variable : PTINR\_VAL1 PT-INR Value

N Mean Standard Deviation Minimum Maximum

---

|   |           |           |           |           |
|---|-----------|-----------|-----------|-----------|
| 6 | 2.1166667 | 0.0752773 | 2.0000000 | 2.2000000 |
|---|-----------|-----------|-----------|-----------|

---

Unique Subject Identifier=1365010000-0002

Assay variable : PTINR\_VAL1 PT-INR Value

N Mean Standard Deviation Minimum Maximum

---

|   |           |           |           |           |
|---|-----------|-----------|-----------|-----------|
| 4 | 2.0400000 | 0.2174090 | 1.7600000 | 2.2900000 |
|---|-----------|-----------|-----------|-----------|

---

Unique Subject Identifier=1365010000-0004

Assay variable : PTINR\_VAL1 PT-INR Value

N Mean Standard Deviation Minimum Maximum

---

|   |           |           |           |           |
|---|-----------|-----------|-----------|-----------|
| 4 | 1.9325000 | 0.0607591 | 1.8600000 | 2.0000000 |
|---|-----------|-----------|-----------|-----------|

---

Laboratory tests at the time of obtaining Table 2-6 consent, according to the presence or absence of proton-pump inhibitors

Unique Subject Identifier=1365010000-0005

MEANS Procedure

Assay variable : PTINR\_VAL1 PT-INR Value

N Mean Standard Deviation Minimum Maximum

---

|   |           |           |           |           |
|---|-----------|-----------|-----------|-----------|
| 4 | 1.7650000 | 0.1040833 | 1.6400000 | 1.8900000 |
|---|-----------|-----------|-----------|-----------|

---

Unique Subject Identifier=1365010000-0006

Assay variable : PTINR\_VAL1 PT-INR Value

N Mean Standard Deviation Minimum Maximum

---

|   |           |           |           |           |
|---|-----------|-----------|-----------|-----------|
| 6 | 1.7083333 | 0.1762290 | 1.4900000 | 1.8800000 |
|---|-----------|-----------|-----------|-----------|

---

Unique Subject Identifier=1365010000-0007

Assay variable : PTINR\_VAL1 PT-INR Value

N Mean Standard Deviation Minimum Maximum

---

|   |           |           |           |           |
|---|-----------|-----------|-----------|-----------|
| 6 | 2.0833333 | 0.4950421 | 1.5000000 | 2.7000000 |
|---|-----------|-----------|-----------|-----------|

---

Unique Subject Identifier=1365010000-0008

Assay variable : PTINR\_VAL1 PT-INR Value

N Mean Standard Deviation Minimum Maximum

---

|   |           |           |           |           |
|---|-----------|-----------|-----------|-----------|
| 5 | 1.8940000 | 0.3383489 | 1.6100000 | 2.3200000 |
|---|-----------|-----------|-----------|-----------|

---

Laboratory tests at the time of obtaining Table 2-6 consent, according to the presence or absence of proton-pump inhibitors

Unique Subject Identifier=1365010000-0019

MEANS Procedure

Assay variable : PTINR\_VAL1 PT-INR Value

N Mean Standard Deviation Minimum Maximum

---

|   |           |           |           |           |
|---|-----------|-----------|-----------|-----------|
| 3 | 1.7700000 | 0.2000000 | 1.5700000 | 1.9700000 |
|---|-----------|-----------|-----------|-----------|

---

Unique Subject Identifier=1365010000-0021

Assay variable : PTINR\_VAL1 PT-INR Value

N Mean Standard Deviation Minimum Maximum

---

|   |           |  |           |           |
|---|-----------|--|-----------|-----------|
| 1 | 1.6500000 |  | 1.6500000 | 1.6500000 |
|---|-----------|--|-----------|-----------|

---

Unique Subject Identifier=1368011111-0001

Assay variable : PTINR\_VAL1 PT-INR Value

N Mean Standard Deviation Minimum Maximum

---

|   |           |           |           |           |
|---|-----------|-----------|-----------|-----------|
| 2 | 1.3250000 | 0.1060660 | 1.2500000 | 1.4000000 |
|---|-----------|-----------|-----------|-----------|

---

Unique Subject Identifier=1368011111-0002

Assay variable : PTINR\_VAL1 PT-INR Value

N Mean Standard Deviation Minimum Maximum

---

|   |          |           |          |          |
|---|----------|-----------|----------|----------|
| 2 | 1.960000 | 0.1131371 | 1.880000 | 2.040000 |
|---|----------|-----------|----------|----------|

---

Laboratory tests at the time of obtaining Table 2-6 consent, according to the presence or absence of proton-pump inhibitors

Unique Subject Identifier=1369010010-0001

MEANS Procedure

Assay variable : PTINR\_VAL1 PT-INR Value

| N | Mean      | Standard Deviation | Minimum   | Maximum   |
|---|-----------|--------------------|-----------|-----------|
| 5 | 1.9460000 | 0.2567684          | 1.7300000 | 2.3000000 |

Unique Subject Identifier=1370010000-0012

Assay variable : PTINR\_VAL1 PT-INR Value

| N | Mean      | Standard Deviation | Minimum   | Maximum   |
|---|-----------|--------------------|-----------|-----------|
| 1 | 2.1800000 |                    | 2.1800000 | 2.1800000 |

Unique Subject Identifier=1371000000-0004

Assay variable : PTINR\_VAL1 PT-INR Value

| N | Mean      | Standard Deviation | Minimum   | Maximum   |
|---|-----------|--------------------|-----------|-----------|
| 6 | 2.1233333 | 0.3201666          | 1.6800000 | 2.5800000 |

Unique Subject Identifier=1371000000-0005

Assay variable : PTINR\_VAL1 PT-INR Value

N Mean Standard Deviation Minimum Maximum

---

|   |           |           |           |           |
|---|-----------|-----------|-----------|-----------|
| 6 | 1.6833333 | 0.2959504 | 1.4200000 | 2.1800000 |
|---|-----------|-----------|-----------|-----------|

---



Laboratory tests at the time of obtaining Table 2-6 consent, according to the presence or absence of proton-pump inhibitors

Unique Subject Identifier=1371000000-0007

MEANS Procedure

Assay variable : PTINR\_VAL1 PT-INR Value

N Mean Standard Deviation Minimum Maximum

---

|   |           |           |           |           |
|---|-----------|-----------|-----------|-----------|
| 6 | 2.0300000 | 0.1908926 | 1.7400000 | 2.2900000 |
|---|-----------|-----------|-----------|-----------|

---

Unique Subject Identifier=1371000000-0009

Assay variable : PTINR\_VAL1 PT-INR Value

N Mean Standard Deviation Minimum Maximum

---

|   |           |           |           |           |
|---|-----------|-----------|-----------|-----------|
| 6 | 1.7900000 | 0.1352036 | 1.6100000 | 1.9700000 |
|---|-----------|-----------|-----------|-----------|

---

Unique Subject Identifier=1371000000-0010

Assay variable : PTINR\_VAL1 PT-INR Value

N Mean Standard Deviation Minimum Maximum

---

|   |           |           |           |           |
|---|-----------|-----------|-----------|-----------|
| 6 | 1.7700000 | 0.3878144 | 1.4200000 | 2.5300000 |
|---|-----------|-----------|-----------|-----------|

---

Unique Subject Identifier=1371000000-0011

Assay variable : PTINR\_VAL1 PT-INR Value

N Mean Standard Deviation Minimum Maximum

---

|   |           |           |           |           |
|---|-----------|-----------|-----------|-----------|
| 5 | 1.8440000 | 0.2234502 | 1.4800000 | 2.0200000 |
|---|-----------|-----------|-----------|-----------|

---

Laboratory tests at the time of obtaining Table 2-6 consent, according to the presence or absence of proton-pump inhibitors

Unique Subject Identifier=1371000000-0015

MEANS Procedure

Assay variable : PTINR\_VAL1 PT-INR Value

| N | Mean      | Standard Deviation | Minimum   | Maximum   |
|---|-----------|--------------------|-----------|-----------|
| 5 | 1.8700000 | 0.2813361          | 1.5500000 | 2.1900000 |

Unique Subject Identifier=1371000000-0016

Assay variable : PTINR\_VAL1 PT-INR Value

| N | Mean      | Standard Deviation | Minimum   | Maximum   |
|---|-----------|--------------------|-----------|-----------|
| 6 | 1.9400000 | 0.3752333          | 1.4000000 | 2.4300000 |

Unique Subject Identifier=1371000000-0017

Assay variable : PTINR\_VAL1 PT-INR Value

| N | Mean      | Standard Deviation | Minimum   | Maximum   |
|---|-----------|--------------------|-----------|-----------|
| 6 | 1.6366667 | 0.1979562          | 1.4600000 | 1.9900000 |

Unique Subject Identifier=1371000000-0021

Assay variable : PTINR\_VAL1 PT-INR Value

N Mean Standard Deviation Minimum Maximum

---

|   |           |           |           |           |
|---|-----------|-----------|-----------|-----------|
| 6 | 1.8866667 | 0.2130415 | 1.6000000 | 2.0900000 |
|---|-----------|-----------|-----------|-----------|

---

Laboratory tests at the time of obtaining Table 2-6 consent, according to the presence or absence of proton-pump inhibitors

Unique Subject Identifier=1371000000-0023

MEANS Procedure

Assay variable : PTINR\_VAL1 PT-INR Value

N Mean Standard Deviation Minimum Maximum

---

|   |           |           |           |           |
|---|-----------|-----------|-----------|-----------|
| 6 | 1.7516667 | 0.6507662 | 1.0700000 | 2.9600000 |
|---|-----------|-----------|-----------|-----------|

---

Unique Subject Identifier=1371000000-0024

Assay variable : PTINR\_VAL1 PT-INR Value

N Mean Standard Deviation Minimum Maximum

---

|   |           |           |           |           |
|---|-----------|-----------|-----------|-----------|
| 6 | 1.7283333 | 0.3864410 | 1.2100000 | 2.0400000 |
|---|-----------|-----------|-----------|-----------|

---

Unique Subject Identifier=1372011010-0006

Assay variable : PTINR\_VAL1 PT-INR Value

N Mean Standard Deviation Minimum Maximum

---

|   |           |           |           |           |
|---|-----------|-----------|-----------|-----------|
| 4 | 1.8000000 | 0.7845593 | 1.2400000 | 2.9500000 |
|---|-----------|-----------|-----------|-----------|

---

Unique Subject Identifier=1373000000-0002

Assay variable : PTINR\_VAL1 PT-INR Value

N Mean Standard Deviation Minimum Maximum

---

|   |          |           |          |          |
|---|----------|-----------|----------|----------|
| 5 | 1.480000 | 0.2774887 | 1.200000 | 1.900000 |
|---|----------|-----------|----------|----------|

---

Laboratory tests at the time of obtaining Table 2-6 consent, according to the presence or absence of proton-pump inhibitors

Unique Subject Identifier=1377011000-0002

MEANS Procedure

Assay variable : PTINR\_VAL1 PT-INR Value

N Mean Standard Deviation Minimum Maximum

---

|   |           |           |           |           |
|---|-----------|-----------|-----------|-----------|
| 5 | 2.3140000 | 0.3150079 | 1.8800000 | 2.7600000 |
|---|-----------|-----------|-----------|-----------|

---

Unique Subject Identifier=1377011000-0003

Assay variable : PTINR\_VAL1 PT-INR Value

N Mean Standard Deviation Minimum Maximum

---

|   |           |           |           |           |
|---|-----------|-----------|-----------|-----------|
| 4 | 1.5925000 | 0.0780491 | 1.4900000 | 1.6800000 |
|---|-----------|-----------|-----------|-----------|

---

Unique Subject Identifier=1377011000-0004

Assay variable : PTINR\_VAL1 PT-INR Value

N Mean Standard Deviation Minimum Maximum

---

|   |           |           |           |           |
|---|-----------|-----------|-----------|-----------|
| 4 | 2.1300000 | 1.0241419 | 1.1200000 | 3.3500000 |
|---|-----------|-----------|-----------|-----------|

---

Unique Subject Identifier=1377011000-0009

Assay variable : PTINR\_VAL1 PT-INR Value

N Mean Standard Deviation Minimum Maximum

---

|   |          |           |          |          |
|---|----------|-----------|----------|----------|
| 4 | 2.140000 | 0.4913926 | 1.450000 | 2.530000 |
|---|----------|-----------|----------|----------|

---



Laboratory tests at the time of obtaining Table 2-6 consent, according to the presence or absence of proton-pump inhibitors

Unique Subject Identifier=1377011000-0011

MEANS Procedure

Assay variable : PTINR\_VAL1 PT-INR Value

N Mean Standard Deviation Minimum Maximum

---

|   |           |           |           |           |
|---|-----------|-----------|-----------|-----------|
| 6 | 2.2766667 | 0.4296821 | 1.7900000 | 2.8700000 |
|---|-----------|-----------|-----------|-----------|

---

Unique Subject Identifier=1377011000-0012

Assay variable : PTINR\_VAL1 PT-INR Value

N Mean Standard Deviation Minimum Maximum

---

|   |           |           |           |           |
|---|-----------|-----------|-----------|-----------|
| 5 | 1.4240000 | 0.2244549 | 1.0900000 | 1.6800000 |
|---|-----------|-----------|-----------|-----------|

---

Unique Subject Identifier=1377011000-0016

Assay variable : PTINR\_VAL1 PT-INR Value

N Mean Standard Deviation Minimum Maximum

---

|   |           |           |           |           |
|---|-----------|-----------|-----------|-----------|
| 5 | 1.9560000 | 0.2370232 | 1.6200000 | 2.1300000 |
|---|-----------|-----------|-----------|-----------|

---

Unique Subject Identifier=1380000110-0008

Assay variable : PTINR\_VAL1 PT-INR Value

N Mean Standard Deviation Minimum Maximum

---

|   |          |           |          |          |
|---|----------|-----------|----------|----------|
| 6 | 1.850000 | 0.5576737 | 1.400000 | 2.800000 |
|---|----------|-----------|----------|----------|

---

Laboratory tests at the time of obtaining Table 2-6 consent, according to the presence or absence of proton-pump inhibitors

Unique Subject Identifier=1380000110-0011

MEANS Procedure

Assay variable : PTINR\_VAL1 PT-INR Value

N Mean Standard Deviation Minimum Maximum

---

|   |           |           |           |           |
|---|-----------|-----------|-----------|-----------|
| 6 | 2.0000000 | 0.2366432 | 1.6000000 | 2.3000000 |
|---|-----------|-----------|-----------|-----------|

---

Unique Subject Identifier=1380000110-0016

Assay variable : PTINR\_VAL1 PT-INR Value

N Mean Standard Deviation Minimum Maximum

---

|   |           |           |           |           |
|---|-----------|-----------|-----------|-----------|
| 6 | 2.1000000 | 0.7293833 | 1.3000000 | 3.3000000 |
|---|-----------|-----------|-----------|-----------|

---

Unique Subject Identifier=1380000110-0022

Assay variable : PTINR\_VAL1 PT-INR Value

N Mean Standard Deviation Minimum Maximum

---

|   |           |           |           |           |
|---|-----------|-----------|-----------|-----------|
| 6 | 2.0666667 | 0.3444803 | 1.6000000 | 2.5000000 |
|---|-----------|-----------|-----------|-----------|

---

Unique Subject Identifier=1380000110-0024

Assay variable : PTINR\_VAL1 PT-INR Value

N Mean Standard Deviation Minimum Maximum

---

|   |           |           |           |           |
|---|-----------|-----------|-----------|-----------|
| 6 | 1.8666667 | 0.2875181 | 1.4000000 | 2.2000000 |
|---|-----------|-----------|-----------|-----------|

---

Laboratory tests at the time of obtaining Table 2-6 consent, according to the presence or absence of proton-pump inhibitors

Unique Subject Identifier=1380000110-0027

MEANS Procedure

Assay variable : PTINR\_VAL1 PT-INR Value

N Mean Standard Deviation Minimum Maximum

---

|   |          |           |          |          |
|---|----------|-----------|----------|----------|
| 5 | 2.280000 | 0.3033150 | 1.800000 | 2.600000 |
|---|----------|-----------|----------|----------|

---

Unique Subject Identifier=1381000000-0008

Assay variable : PTINR\_VAL1 PT-INR Value

N Mean Standard Deviation Minimum Maximum

---

|   |          |           |          |          |
|---|----------|-----------|----------|----------|
| 2 | 2.115000 | 0.4171930 | 1.820000 | 2.410000 |
|---|----------|-----------|----------|----------|

---

Unique Subject Identifier=1385011000-0011

Assay variable : PTINR\_VAL1 PT-INR Value

N Mean Standard Deviation Minimum Maximum

---

|   |          |           |          |          |
|---|----------|-----------|----------|----------|
| 5 | 2.082000 | 0.2811050 | 1.720000 | 2.410000 |
|---|----------|-----------|----------|----------|

---

Unique Subject Identifier=1385011000-0014

Assay variable : PTINR\_VAL1 PT-INR Value

N Mean Standard Deviation Minimum Maximum

---

|   |           |           |           |           |
|---|-----------|-----------|-----------|-----------|
| 3 | 2.4733333 | 0.7379928 | 1.7000000 | 3.1700000 |
|---|-----------|-----------|-----------|-----------|

---

Laboratory tests at the time of obtaining Table 2-6 consent, according to the presence or absence of proton-pump inhibitors

Unique Subject Identifier=1385011000-0016

MEANS Procedure

Assay variable : PTINR\_VAL1 PT-INR Value

N Mean Standard Deviation Minimum Maximum

---

|   |           |           |           |           |
|---|-----------|-----------|-----------|-----------|
| 3 | 2.1500000 | 0.0888819 | 2.0800000 | 2.2500000 |
|---|-----------|-----------|-----------|-----------|

---

Unique Subject Identifier=1385011000-0027

Assay variable : PTINR\_VAL1 PT-INR Value

N Mean Standard Deviation Minimum Maximum

---

|   |           |           |           |           |
|---|-----------|-----------|-----------|-----------|
| 2 | 2.1200000 | 0.0282843 | 2.1000000 | 2.1400000 |
|---|-----------|-----------|-----------|-----------|

---

Unique Subject Identifier=1385011000-0028

Assay variable : PTINR\_VAL1 PT-INR Value

N Mean Standard Deviation Minimum Maximum

---

|   |           |           |           |           |
|---|-----------|-----------|-----------|-----------|
| 3 | 2.2933333 | 0.0450925 | 2.2500000 | 2.3400000 |
|---|-----------|-----------|-----------|-----------|

---

Unique Subject Identifier=1385011000-0035

Assay variable : PTINR\_VAL1 PT-INR Value

N Mean Standard Deviation Minimum Maximum

---

|   |           |  |           |           |
|---|-----------|--|-----------|-----------|
| 1 | 1.6800000 |  | 1.6800000 | 1.6800000 |
|---|-----------|--|-----------|-----------|

---



Laboratory tests at the time of obtaining Table 2-6 consent, according to the presence or absence of proton-pump inhibitors

Unique Subject Identifier=1385011000-0044

MEANS Procedure

Assay variable : PTINR\_VAL1 PT-INR Value

| N | Mean      | Standard Deviation | Minimum   | Maximum   |
|---|-----------|--------------------|-----------|-----------|
| 3 | 2.1200000 | 0.6100000          | 1.5100000 | 2.7300000 |

Unique Subject Identifier=1385011000-0057

Assay variable : PTINR\_VAL1 PT-INR Value

| N | Mean      | Standard Deviation | Minimum   | Maximum   |
|---|-----------|--------------------|-----------|-----------|
| 1 | 1.8200000 |                    | 1.8200000 | 1.8200000 |

Unique Subject Identifier=1385011000-0059

Assay variable : PTINR\_VAL1 PT-INR Value

| N | Mean      | Standard Deviation | Minimum   | Maximum   |
|---|-----------|--------------------|-----------|-----------|
| 4 | 1.6200000 | 0.1346601          | 1.4200000 | 1.7000000 |

Unique Subject Identifier=1385011000-0061

Assay variable : PTINR\_VAL1 PT-INR Value

N Mean Standard Deviation Minimum Maximum

---

|   |           |           |           |           |
|---|-----------|-----------|-----------|-----------|
| 3 | 2.2866667 | 0.0152753 | 2.2700000 | 2.3000000 |
|---|-----------|-----------|-----------|-----------|

---

Laboratory tests at the time of obtaining Table 2-6 consent, according to the presence or absence of proton-pump inhibitors

Unique Subject Identifier=1385011000-0065

MEANS Procedure

Assay variable : PTINR\_VAL1 PT-INR Value

N Mean Standard Deviation Minimum Maximum

---

|   |          |          |          |          |
|---|----------|----------|----------|----------|
| 3 | 2.250000 | 0.060000 | 2.190000 | 2.310000 |
|---|----------|----------|----------|----------|

---

Unique Subject Identifier=1385011000-0110

Assay variable : PTINR\_VAL1 PT-INR Value

N Mean Standard Deviation Minimum Maximum

---

|   |          |           |          |          |
|---|----------|-----------|----------|----------|
| 2 | 2.100000 | 0.0282843 | 2.080000 | 2.120000 |
|---|----------|-----------|----------|----------|

---

Unique Subject Identifier=1386000000-0006

Assay variable : PTINR\_VAL1 PT-INR Value

N Mean Standard Deviation Minimum Maximum

---

|   |           |           |          |          |
|---|-----------|-----------|----------|----------|
| 6 | 2.6483333 | 0.8358808 | 1.490000 | 3.760000 |
|---|-----------|-----------|----------|----------|

---

Unique Subject Identifier=1386000000-0007

Assay variable : PTINR\_VAL1 PT-INR Value

N Mean Standard Deviation Minimum Maximum

---

|   |          |          |          |          |
|---|----------|----------|----------|----------|
| 3 | 1.250000 | 0.050000 | 1.200000 | 1.300000 |
|---|----------|----------|----------|----------|

---

Laboratory tests at the time of obtaining Table 2-6 consent, according to the presence or absence of proton-pump inhibitors

Unique Subject Identifier=1386000000-0017

MEANS Procedure

Assay variable : PTINR\_VAL1 PT-INR Value

N Mean Standard Deviation Minimum Maximum

---

|   |           |           |           |           |
|---|-----------|-----------|-----------|-----------|
| 2 | 1.8150000 | 0.5444722 | 1.4300000 | 2.2000000 |
|---|-----------|-----------|-----------|-----------|

---

Unique Subject Identifier=1386000000-0018

Assay variable : PTINR\_VAL1 PT-INR Value

N Mean Standard Deviation Minimum Maximum

---

|   |           |           |           |           |
|---|-----------|-----------|-----------|-----------|
| 4 | 1.9650000 | 0.3481858 | 1.6000000 | 2.3900000 |
|---|-----------|-----------|-----------|-----------|

---

Unique Subject Identifier=1386000000-0021

Assay variable : PTINR\_VAL1 PT-INR Value

N Mean Standard Deviation Minimum Maximum

---

|   |           |  |           |           |
|---|-----------|--|-----------|-----------|
| 1 | 3.3000000 |  | 3.3000000 | 3.3000000 |
|---|-----------|--|-----------|-----------|

---

Unique Subject Identifier=1386000000-0022

Assay variable : PTINR\_VAL1 PT-INR Value

N Mean Standard Deviation Minimum Maximum

---

|   |           |           |           |           |
|---|-----------|-----------|-----------|-----------|
| 3 | 2.7933333 | 0.9222979 | 1.9700000 | 3.7900000 |
|---|-----------|-----------|-----------|-----------|

---

Laboratory tests at the time of obtaining Table 2-6 consent, according to the presence or absence of proton-pump inhibitors

Unique Subject Identifier=1392011110-0003

MEANS Procedure

Assay variable : PTINR\_VAL1 PT-INR Value

N Mean Standard Deviation Minimum Maximum

---

|   |           |           |           |           |
|---|-----------|-----------|-----------|-----------|
| 6 | 1.6166667 | 0.2483277 | 1.3000000 | 2.0000000 |
|---|-----------|-----------|-----------|-----------|

---

Unique Subject Identifier=1392011110-0006

Assay variable : PTINR\_VAL1 PT-INR Value

N Mean Standard Deviation Minimum Maximum

---

|   |           |           |           |           |
|---|-----------|-----------|-----------|-----------|
| 6 | 2.0833333 | 0.4020779 | 1.6000000 | 2.6000000 |
|---|-----------|-----------|-----------|-----------|

---

Unique Subject Identifier=1392011110-0007

Assay variable : PTINR\_VAL1 PT-INR Value

N Mean Standard Deviation Minimum Maximum

---

|   |           |           |           |           |
|---|-----------|-----------|-----------|-----------|
| 6 | 1.8666667 | 0.3386247 | 1.6000000 | 2.5000000 |
|---|-----------|-----------|-----------|-----------|

---

Unique Subject Identifier=1392011110-0008

Assay variable : PTINR\_VAL1 PT-INR Value

N Mean Standard Deviation Minimum Maximum

---

|   |           |           |           |           |
|---|-----------|-----------|-----------|-----------|
| 6 | 1.5666667 | 0.2065591 | 1.2000000 | 1.8000000 |
|---|-----------|-----------|-----------|-----------|

---



Laboratory tests at the time of obtaining Table 2-6 consent, according to the presence or absence of proton-pump inhibitors

Unique Subject Identifier=1392011110-0011

MEANS Procedure

Assay variable : PTINR\_VAL1 PT-INR Value

| N | Mean      | Standard Deviation | Minimum   | Maximum   |
|---|-----------|--------------------|-----------|-----------|
| 6 | 1.8166667 | 0.1602082          | 1.6000000 | 2.0000000 |

Unique Subject Identifier=1392011110-0012

Assay variable : PTINR\_VAL1 PT-INR Value

| N | Mean      | Standard Deviation | Minimum   | Maximum   |
|---|-----------|--------------------|-----------|-----------|
| 6 | 1.9166667 | 0.3544949          | 1.7000000 | 2.6000000 |

Unique Subject Identifier=1392011110-0013

Assay variable : PTINR\_VAL1 PT-INR Value

| N | Mean      | Standard Deviation | Minimum   | Maximum   |
|---|-----------|--------------------|-----------|-----------|
| 6 | 2.0666667 | 0.3011091          | 1.8000000 | 2.5000000 |

Unique Subject Identifier=1392011110-0016

Assay variable : PTINR\_VAL1 PT-INR Value

N Mean Standard Deviation Minimum Maximum

---

|   |          |          |          |          |
|---|----------|----------|----------|----------|
| 6 | 2.200000 | 0.303315 | 1.800000 | 2.600000 |
|---|----------|----------|----------|----------|

---

Laboratory tests at the time of obtaining Table 2-6 consent, according to the presence or absence of proton-pump inhibitors

Unique Subject Identifier=1392011110-0017

MEANS Procedure

Assay variable : PTINR\_VAL1 PT-INR Value

N Mean Standard Deviation Minimum Maximum

---

|   |           |           |           |           |
|---|-----------|-----------|-----------|-----------|
| 6 | 1.8500000 | 0.1048809 | 1.7000000 | 2.0000000 |
|---|-----------|-----------|-----------|-----------|

---

Unique Subject Identifier=1394011010-0001

Assay variable : PTINR\_VAL1 PT-INR Value

N Mean Standard Deviation Minimum Maximum

---

|   |           |           |           |           |
|---|-----------|-----------|-----------|-----------|
| 2 | 3.4000000 | 1.1313708 | 2.6000000 | 4.2000000 |
|---|-----------|-----------|-----------|-----------|

---

Unique Subject Identifier=1394011010-0004

Assay variable : PTINR\_VAL1 PT-INR Value

N Mean Standard Deviation Minimum Maximum

---

|   |           |           |           |           |
|---|-----------|-----------|-----------|-----------|
| 3 | 1.9666667 | 1.0016653 | 1.2000000 | 3.1000000 |
|---|-----------|-----------|-----------|-----------|

---

Unique Subject Identifier=1395000000-0007

Assay variable : PTINR\_VAL1 PT-INR Value

N Mean Standard Deviation Minimum Maximum

---

|   |           |           |           |           |
|---|-----------|-----------|-----------|-----------|
| 5 | 2.3880000 | 0.4996699 | 1.9000000 | 3.2300000 |
|---|-----------|-----------|-----------|-----------|

---

Laboratory tests at the time of obtaining Table 2-6 consent, according to the presence or absence of proton-pump inhibitors

Unique Subject Identifier=1396000000-0005

MEANS Procedure

Assay variable : PTINR\_VAL1 PT-INR Value

N Mean Standard Deviation Minimum Maximum

---

|   |           |  |           |           |
|---|-----------|--|-----------|-----------|
| 1 | 1.6000000 |  | 1.6000000 | 1.6000000 |
|---|-----------|--|-----------|-----------|

---

Unique Subject Identifier=1396000000-0006

Assay variable : PTINR\_VAL1 PT-INR Value

N Mean Standard Deviation Minimum Maximum

---

|   |           |  |           |           |
|---|-----------|--|-----------|-----------|
| 1 | 1.5000000 |  | 1.5000000 | 1.5000000 |
|---|-----------|--|-----------|-----------|

---

Unique Subject Identifier=1396000000-0007

Assay variable : PTINR\_VAL1 PT-INR Value

N Mean Standard Deviation Minimum Maximum

---

|   |           |  |           |           |
|---|-----------|--|-----------|-----------|
| 1 | 2.0000000 |  | 2.0000000 | 2.0000000 |
|---|-----------|--|-----------|-----------|

---

Unique Subject Identifier=1396000000-0014

Assay variable : PTINR\_VAL1 PT-INR Value

N Mean Standard Deviation Minimum Maximum

---

|   |          |           |          |          |
|---|----------|-----------|----------|----------|
| 6 | 2.000000 | 0.2607681 | 1.500000 | 2.200000 |
|---|----------|-----------|----------|----------|

---

Laboratory tests at the time of obtaining Table 2-6 consent, according to the presence or absence of proton-pump inhibitors

Unique Subject Identifier=1398010000-0007

MEANS Procedure

Assay variable : PTINR\_VAL1 PT-INR Value

| N | Mean      | Standard Deviation | Minimum   | Maximum   |
|---|-----------|--------------------|-----------|-----------|
| 5 | 1.7400000 | 0.2302173          | 1.5000000 | 2.1000000 |

Unique Subject Identifier=1398010000-0016

Assay variable : PTINR\_VAL1 PT-INR Value

| N | Mean      | Standard Deviation | Minimum   | Maximum   |
|---|-----------|--------------------|-----------|-----------|
| 4 | 1.7000000 | 0.3366502          | 1.3000000 | 2.1000000 |

Unique Subject Identifier=1398010000-0018

Assay variable : PTINR\_VAL1 PT-INR Value

| N | Mean      | Standard Deviation | Minimum   | Maximum   |
|---|-----------|--------------------|-----------|-----------|
| 5 | 1.9800000 | 0.1923538          | 1.7000000 | 2.2000000 |

Unique Subject Identifier=1398010000-0019

Assay variable : PTINR\_VAL1 PT-INR Value

N Mean Standard Deviation Minimum Maximum

---

|   |           |           |           |           |
|---|-----------|-----------|-----------|-----------|
| 3 | 1.9333333 | 0.2309401 | 1.8000000 | 2.2000000 |
|---|-----------|-----------|-----------|-----------|

---



Laboratory tests at the time of obtaining Table 2-6 consent, according to the presence or absence of proton-pump inhibitors

Unique Subject Identifier=1398010000-0021

MEANS Procedure

Assay variable : PTINR\_VAL1 PT-INR Value

N Mean Standard Deviation Minimum Maximum

---

|   |           |           |           |           |
|---|-----------|-----------|-----------|-----------|
| 4 | 2.0500000 | 0.4509250 | 1.7000000 | 2.7000000 |
|---|-----------|-----------|-----------|-----------|

---

Unique Subject Identifier=1398010000-0022

Assay variable : PTINR\_VAL1 PT-INR Value

N Mean Standard Deviation Minimum Maximum

---

|   |           |           |           |           |
|---|-----------|-----------|-----------|-----------|
| 5 | 2.2000000 | 0.3082207 | 1.9000000 | 2.6000000 |
|---|-----------|-----------|-----------|-----------|

---

Unique Subject Identifier=1398010000-0026

Assay variable : PTINR\_VAL1 PT-INR Value

N Mean Standard Deviation Minimum Maximum

---

|   |           |           |           |           |
|---|-----------|-----------|-----------|-----------|
| 5 | 2.1200000 | 0.5069517 | 1.6000000 | 2.9000000 |
|---|-----------|-----------|-----------|-----------|

---

Unique Subject Identifier=1398010000-0032

Assay variable : PTINR\_VAL1 PT-INR Value

N Mean Standard Deviation Minimum Maximum

---

|   |           |           |           |           |
|---|-----------|-----------|-----------|-----------|
| 3 | 1.5333333 | 0.0577350 | 1.5000000 | 1.6000000 |
|---|-----------|-----------|-----------|-----------|

---

Laboratory tests at the time of obtaining Table 2-6 consent, according to the presence or absence of proton-pump inhibitors

Unique Subject Identifier=1398010000-0034

MEANS Procedure

Assay variable : PTINR\_VAL1 PT-INR Value

N Mean Standard Deviation Minimum Maximum

---

|   |           |           |           |           |
|---|-----------|-----------|-----------|-----------|
| 4 | 1.8000000 | 0.1414214 | 1.6000000 | 1.9000000 |
|---|-----------|-----------|-----------|-----------|

---

Unique Subject Identifier=1398010000-0036

Assay variable : PTINR\_VAL1 PT-INR Value

N Mean Standard Deviation Minimum Maximum

---

|   |           |           |           |           |
|---|-----------|-----------|-----------|-----------|
| 3 | 2.2333333 | 0.1527525 | 2.1000000 | 2.4000000 |
|---|-----------|-----------|-----------|-----------|

---

Unique Subject Identifier=1398010000-0038

Assay variable : PTINR\_VAL1 PT-INR Value

N Mean Standard Deviation Minimum Maximum

---

|   |           |           |           |           |
|---|-----------|-----------|-----------|-----------|
| 4 | 1.2750000 | 0.1500000 | 1.2000000 | 1.5000000 |
|---|-----------|-----------|-----------|-----------|

---

Unique Subject Identifier=1398010000-0043

Assay variable : PTINR\_VAL1 PT-INR Value

N Mean Standard Deviation Minimum Maximum

---

|   |          |          |          |          |
|---|----------|----------|----------|----------|
| 3 | 2.300000 | 0.100000 | 2.200000 | 2.400000 |
|---|----------|----------|----------|----------|

---

Laboratory tests at the time of obtaining Table 2-6 consent, according to the presence or absence of proton-pump inhibitors

Unique Subject Identifier=1400000000-0001

MEANS Procedure

Assay variable : PTINR\_VAL1 PT-INR Value

| N | Mean      | Standard Deviation | Minimum   | Maximum   |
|---|-----------|--------------------|-----------|-----------|
| 5 | 2.3120000 | 0.5893810          | 1.6700000 | 3.0800000 |

Unique Subject Identifier=1400000000-0002

Assay variable : PTINR\_VAL1 PT-INR Value

| N | Mean      | Standard Deviation | Minimum   | Maximum   |
|---|-----------|--------------------|-----------|-----------|
| 5 | 2.0620000 | 0.5821684          | 1.4600000 | 2.9300000 |

Unique Subject Identifier=1400000000-0005

Assay variable : PTINR\_VAL1 PT-INR Value

| N | Mean      | Standard Deviation | Minimum   | Maximum   |
|---|-----------|--------------------|-----------|-----------|
| 1 | 2.7800000 |                    | 2.7800000 | 2.7800000 |

Unique Subject Identifier=1400000000-0006

Assay variable : PTINR\_VAL1 PT-INR Value

N Mean Standard Deviation Minimum Maximum

---

|   |           |           |           |           |
|---|-----------|-----------|-----------|-----------|
| 3 | 2.0666667 | 0.2514624 | 1.7800000 | 2.2500000 |
|---|-----------|-----------|-----------|-----------|

---

Laboratory tests at the time of obtaining Table 2-6 consent, according to the presence or absence of proton-pump inhibitors

Unique Subject Identifier=1400000000-0007

MEANS Procedure

Assay variable : PTINR\_VAL1 PT-INR Value

| N | Mean      | Standard Deviation | Minimum   | Maximum   |
|---|-----------|--------------------|-----------|-----------|
| 3 | 1.7200000 | 0.0781025          | 1.6300000 | 1.7700000 |

Unique Subject Identifier=1400000000-0010

Assay variable : PTINR\_VAL1 PT-INR Value

| N | Mean      | Standard Deviation | Minimum   | Maximum   |
|---|-----------|--------------------|-----------|-----------|
| 3 | 2.3233333 | 0.6473278          | 1.7100000 | 3.0000000 |

Unique Subject Identifier=1401000000-0002

Assay variable : PTINR\_VAL1 PT-INR Value

| N | Mean      | Standard Deviation | Minimum   | Maximum   |
|---|-----------|--------------------|-----------|-----------|
| 5 | 2.0780000 | 0.3787083          | 1.5800000 | 2.5100000 |

Unique Subject Identifier=1401000000-0003

Assay variable : PTINR\_VAL1 PT-INR Value

N Mean Standard Deviation Minimum Maximum

---

|   |           |           |           |           |
|---|-----------|-----------|-----------|-----------|
| 6 | 2.3716667 | 0.4688888 | 1.5400000 | 2.9400000 |
|---|-----------|-----------|-----------|-----------|

---



Laboratory tests at the time of obtaining Table 2-6 consent, according to the presence or absence of proton-pump inhibitors

Unique Subject Identifier=1401000000-0004

MEANS Procedure

Assay variable : PTINR\_VAL1 PT-INR Value

N Mean Standard Deviation Minimum Maximum

---

|   |           |           |           |           |
|---|-----------|-----------|-----------|-----------|
| 5 | 2.4740000 | 0.2583215 | 2.0800000 | 2.7500000 |
|---|-----------|-----------|-----------|-----------|

---

Unique Subject Identifier=1401000000-0007

Assay variable : PTINR\_VAL1 PT-INR Value

N Mean Standard Deviation Minimum Maximum

---

|   |           |           |           |           |
|---|-----------|-----------|-----------|-----------|
| 5 | 2.8940000 | 0.4098536 | 2.3800000 | 3.3100000 |
|---|-----------|-----------|-----------|-----------|

---

Unique Subject Identifier=1401000000-0008

Assay variable : PTINR\_VAL1 PT-INR Value

N Mean Standard Deviation Minimum Maximum

---

|   |           |           |           |           |
|---|-----------|-----------|-----------|-----------|
| 5 | 2.6740000 | 0.3907429 | 2.1900000 | 3.2600000 |
|---|-----------|-----------|-----------|-----------|

---

Unique Subject Identifier=1401000000-0009

Assay variable : PTINR\_VAL1 PT-INR Value

N Mean Standard Deviation Minimum Maximum

---

|   |           |           |           |           |
|---|-----------|-----------|-----------|-----------|
| 4 | 1.9450000 | 0.4747280 | 1.3900000 | 2.5500000 |
|---|-----------|-----------|-----------|-----------|

---

Laboratory tests at the time of obtaining Table 2-6 consent, according to the presence or absence of proton-pump inhibitors

Unique Subject Identifier=1401000000-0010

MEANS Procedure

Assay variable : PTINR\_VAL1 PT-INR Value

N Mean Standard Deviation Minimum Maximum

---

|   |           |           |           |           |
|---|-----------|-----------|-----------|-----------|
| 6 | 2.9566667 | 0.3767050 | 2.5200000 | 3.5300000 |
|---|-----------|-----------|-----------|-----------|

---

Unique Subject Identifier=1405000000-0001

Assay variable : PTINR\_VAL1 PT-INR Value

N Mean Standard Deviation Minimum Maximum

---

|   |           |           |           |           |
|---|-----------|-----------|-----------|-----------|
| 5 | 2.1400000 | 0.2792848 | 1.9000000 | 2.6000000 |
|---|-----------|-----------|-----------|-----------|

---

Unique Subject Identifier=1405000000-0002

Assay variable : PTINR\_VAL1 PT-INR Value

N Mean Standard Deviation Minimum Maximum

---

|   |           |           |           |           |
|---|-----------|-----------|-----------|-----------|
| 6 | 2.5333333 | 0.6218253 | 1.9000000 | 3.3000000 |
|---|-----------|-----------|-----------|-----------|

---

Unique Subject Identifier=1405000000-0003

Assay variable : PTINR\_VAL1 PT-INR Value

N Mean Standard Deviation Minimum Maximum

---

|   |          |           |          |          |
|---|----------|-----------|----------|----------|
| 6 | 2.250000 | 0.3674235 | 1.900000 | 2.800000 |
|---|----------|-----------|----------|----------|

---

Laboratory tests at the time of obtaining Table 2-6 consent, according to the presence or absence of proton-pump inhibitors

Unique Subject Identifier=1405000000-0004

MEANS Procedure

Assay variable : PTINR\_VAL1 PT-INR Value

N Mean Standard Deviation Minimum Maximum

---

|   |           |           |           |           |
|---|-----------|-----------|-----------|-----------|
| 6 | 2.0000000 | 0.1549193 | 1.8000000 | 2.2000000 |
|---|-----------|-----------|-----------|-----------|

---

Unique Subject Identifier=1405000000-0005

Assay variable : PTINR\_VAL1 PT-INR Value

N Mean Standard Deviation Minimum Maximum

---

|   |           |           |           |           |
|---|-----------|-----------|-----------|-----------|
| 6 | 2.0833333 | 0.2401388 | 1.9000000 | 2.5000000 |
|---|-----------|-----------|-----------|-----------|

---

Unique Subject Identifier=1405000000-0006

Assay variable : PTINR\_VAL1 PT-INR Value

N Mean Standard Deviation Minimum Maximum

---

|   |           |           |           |           |
|---|-----------|-----------|-----------|-----------|
| 6 | 2.1666667 | 0.4082483 | 1.6000000 | 2.7000000 |
|---|-----------|-----------|-----------|-----------|

---

Unique Subject Identifier=1405000000-0008

Assay variable : PTINR\_VAL1 PT-INR Value

N Mean Standard Deviation Minimum Maximum

---

|   |           |           |           |           |
|---|-----------|-----------|-----------|-----------|
| 6 | 2.2666667 | 0.1861899 | 2.0000000 | 2.5000000 |
|---|-----------|-----------|-----------|-----------|

---

Laboratory tests at the time of obtaining Table 2-6 consent, according to the presence or absence of proton-pump inhibitors

Unique Subject Identifier=1405000000-0009

MEANS Procedure

Assay variable : PTINR\_VAL1 PT-INR Value

N Mean Standard Deviation Minimum Maximum

---

|   |           |           |           |           |
|---|-----------|-----------|-----------|-----------|
| 6 | 2.2166667 | 0.6306082 | 1.7000000 | 3.4000000 |
|---|-----------|-----------|-----------|-----------|

---

Unique Subject Identifier=1405000000-0010

Assay variable : PTINR\_VAL1 PT-INR Value

N Mean Standard Deviation Minimum Maximum

---

|   |           |           |           |           |
|---|-----------|-----------|-----------|-----------|
| 6 | 2.4500000 | 0.1048809 | 2.3000000 | 2.6000000 |
|---|-----------|-----------|-----------|-----------|

---

Unique Subject Identifier=1405000000-0011

Assay variable : PTINR\_VAL1 PT-INR Value

N Mean Standard Deviation Minimum Maximum

---

|   |           |           |           |           |
|---|-----------|-----------|-----------|-----------|
| 6 | 2.4666667 | 0.3502380 | 1.9000000 | 2.9000000 |
|---|-----------|-----------|-----------|-----------|

---

Unique Subject Identifier=1405000000-0013

Assay variable : PTINR\_VAL1 PT-INR Value

N Mean Standard Deviation Minimum Maximum

---

|   |           |           |           |           |
|---|-----------|-----------|-----------|-----------|
| 6 | 2.0333333 | 0.1366260 | 1.9000000 | 2.3000000 |
|---|-----------|-----------|-----------|-----------|

---



Laboratory tests at the time of obtaining Table 2-6 consent, according to the presence or absence of proton-pump inhibitors

Unique Subject Identifier=1405000000-0015

MEANS Procedure

Assay variable : PTINR\_VAL1 PT-INR Value

N Mean Standard Deviation Minimum Maximum

---

|   |           |           |           |           |
|---|-----------|-----------|-----------|-----------|
| 6 | 2.6666667 | 0.6947422 | 1.6000000 | 3.6000000 |
|---|-----------|-----------|-----------|-----------|

---

Unique Subject Identifier=1405000000-0016

Assay variable : PTINR\_VAL1 PT-INR Value

N Mean Standard Deviation Minimum Maximum

---

|   |           |           |           |           |
|---|-----------|-----------|-----------|-----------|
| 6 | 2.4233333 | 0.4233989 | 1.8000000 | 2.8000000 |
|---|-----------|-----------|-----------|-----------|

---

Unique Subject Identifier=1405000000-0017

Assay variable : PTINR\_VAL1 PT-INR Value

N Mean Standard Deviation Minimum Maximum

---

|   |           |           |           |           |
|---|-----------|-----------|-----------|-----------|
| 6 | 2.3666667 | 0.2658320 | 1.9000000 | 2.7000000 |
|---|-----------|-----------|-----------|-----------|

---

Unique Subject Identifier=1405000000-0018

Assay variable : PTINR\_VAL1 PT-INR Value

N Mean Standard Deviation Minimum Maximum

---

|   |          |           |          |          |
|---|----------|-----------|----------|----------|
| 6 | 1.833333 | 0.2422120 | 1.400000 | 2.000000 |
|---|----------|-----------|----------|----------|

---

Laboratory tests at the time of obtaining Table 2-6 consent, according to the presence or absence of proton-pump inhibitors

Unique Subject Identifier=1405000000-0019

MEANS Procedure

Assay variable : PTINR\_VAL1 PT-INR Value

N Mean Standard Deviation Minimum Maximum

---

|   |           |           |           |           |
|---|-----------|-----------|-----------|-----------|
| 6 | 2.4666667 | 0.6742897 | 1.7000000 | 3.6000000 |
|---|-----------|-----------|-----------|-----------|

---

Unique Subject Identifier=1405000000-0020

Assay variable : PTINR\_VAL1 PT-INR Value

N Mean Standard Deviation Minimum Maximum

---

|   |           |           |           |           |
|---|-----------|-----------|-----------|-----------|
| 6 | 2.0500000 | 0.3271085 | 1.7000000 | 2.5000000 |
|---|-----------|-----------|-----------|-----------|

---

Unique Subject Identifier=1405000000-0021

Assay variable : PTINR\_VAL1 PT-INR Value

N Mean Standard Deviation Minimum Maximum

---

|   |           |           |           |           |
|---|-----------|-----------|-----------|-----------|
| 6 | 2.1666667 | 0.4501851 | 1.4000000 | 2.6000000 |
|---|-----------|-----------|-----------|-----------|

---

Unique Subject Identifier=1405000000-0022

Assay variable : PTINR\_VAL1 PT-INR Value

N Mean Standard Deviation Minimum Maximum

---

|   |           |           |           |           |
|---|-----------|-----------|-----------|-----------|
| 6 | 2.0166667 | 0.4996666 | 1.6000000 | 3.0000000 |
|---|-----------|-----------|-----------|-----------|

---

Laboratory tests at the time of obtaining Table 2-6 consent, according to the presence or absence of proton-pump inhibitors

Unique Subject Identifier=1405000000-0023

MEANS Procedure

Assay variable : PTINR\_VAL1 PT-INR Value

N Mean Standard Deviation Minimum Maximum

---

|   |           |           |           |           |
|---|-----------|-----------|-----------|-----------|
| 6 | 2.0666667 | 0.1861899 | 1.9000000 | 2.4000000 |
|---|-----------|-----------|-----------|-----------|

---

Unique Subject Identifier=1405000000-0024

Assay variable : PTINR\_VAL1 PT-INR Value

N Mean Standard Deviation Minimum Maximum

---

|   |           |           |           |           |
|---|-----------|-----------|-----------|-----------|
| 6 | 2.4666667 | 0.3723797 | 1.8000000 | 2.8000000 |
|---|-----------|-----------|-----------|-----------|

---

Unique Subject Identifier=1405000000-0025

Assay variable : PTINR\_VAL1 PT-INR Value

N Mean Standard Deviation Minimum Maximum

---

|   |           |           |           |           |
|---|-----------|-----------|-----------|-----------|
| 6 | 2.3000000 | 0.1788854 | 2.1000000 | 2.6000000 |
|---|-----------|-----------|-----------|-----------|

---

Unique Subject Identifier=1405000000-0026

Assay variable : PTINR\_VAL1 PT-INR Value

N Mean Standard Deviation Minimum Maximum

---

|   |           |           |           |           |
|---|-----------|-----------|-----------|-----------|
| 6 | 2.1833333 | 0.2136976 | 1.9000000 | 2.4000000 |
|---|-----------|-----------|-----------|-----------|

---

Laboratory tests at the time of obtaining Table 2-6 consent, according to the presence or absence of proton-pump inhibitors

Unique Subject Identifier=1405000000-0027

MEANS Procedure

Assay variable : PTINR\_VAL1 PT-INR Value

N Mean Standard Deviation Minimum Maximum

---

|   |           |           |           |           |
|---|-----------|-----------|-----------|-----------|
| 6 | 2.6833333 | 1.0534072 | 1.3000000 | 4.4000000 |
|---|-----------|-----------|-----------|-----------|

---

Unique Subject Identifier=1405000000-0028

Assay variable : PTINR\_VAL1 PT-INR Value

N Mean Standard Deviation Minimum Maximum

---

|   |           |           |           |           |
|---|-----------|-----------|-----------|-----------|
| 6 | 2.3833333 | 0.5706721 | 1.7000000 | 3.4000000 |
|---|-----------|-----------|-----------|-----------|

---

Unique Subject Identifier=1405000000-0029

Assay variable : PTINR\_VAL1 PT-INR Value

N Mean Standard Deviation Minimum Maximum

---

|   |           |           |           |           |
|---|-----------|-----------|-----------|-----------|
| 6 | 2.7666667 | 0.6470446 | 1.9000000 | 3.6000000 |
|---|-----------|-----------|-----------|-----------|

---

Unique Subject Identifier=1405000000-0030

Assay variable : PTINR\_VAL1 PT-INR Value

N Mean Standard Deviation Minimum Maximum

---

|   |          |           |          |          |
|---|----------|-----------|----------|----------|
| 6 | 2.500000 | 0.2097618 | 2.300000 | 2.900000 |
|---|----------|-----------|----------|----------|

---



Laboratory tests at the time of obtaining Table 2-6 consent, according to the presence or absence of proton-pump inhibitors

Unique Subject Identifier=1405000000-0033

MEANS Procedure

Assay variable : PTINR\_VAL1 PT-INR Value

N Mean Standard Deviation Minimum Maximum

---

|   |           |           |           |           |
|---|-----------|-----------|-----------|-----------|
| 6 | 1.9833333 | 0.4622409 | 1.4000000 | 2.6000000 |
|---|-----------|-----------|-----------|-----------|

---

Unique Subject Identifier=1406000000-0001

Assay variable : PTINR\_VAL1 PT-INR Value

N Mean Standard Deviation Minimum Maximum

---

|   |           |  |           |           |
|---|-----------|--|-----------|-----------|
| 1 | 1.1400000 |  | 1.1400000 | 1.1400000 |
|---|-----------|--|-----------|-----------|

---

Unique Subject Identifier=1406000000-0005

Assay variable : PTINR\_VAL1 PT-INR Value

N Mean Standard Deviation Minimum Maximum

---

|   |           |  |           |           |
|---|-----------|--|-----------|-----------|
| 1 | 1.2800000 |  | 1.2800000 | 1.2800000 |
|---|-----------|--|-----------|-----------|

---

Unique Subject Identifier=1406000000-0006

Assay variable : PTINR\_VAL1 PT-INR Value

N Mean Standard Deviation Minimum Maximum

---

|   |          |  |          |          |
|---|----------|--|----------|----------|
| 1 | 3.260000 |  | 3.260000 | 3.260000 |
|---|----------|--|----------|----------|

---

Laboratory tests at the time of obtaining Table 2-6 consent, according to the presence or absence of proton-pump inhibitors

Unique Subject Identifier=1406000000-0007

MEANS Procedure

Assay variable : PTINR\_VAL1 PT-INR Value

N Mean Standard Deviation Minimum Maximum

---

|   |          |          |          |
|---|----------|----------|----------|
| 1 | 2.450000 | 2.450000 | 2.450000 |
|---|----------|----------|----------|

---

Unique Subject Identifier=1406000000-0008

Assay variable : PTINR\_VAL1 PT-INR Value

N Mean Standard Deviation Minimum Maximum

---

|   |          |          |          |
|---|----------|----------|----------|
| 1 | 1.430000 | 1.430000 | 1.430000 |
|---|----------|----------|----------|

---

Unique Subject Identifier=1406000000-0009

Assay variable : PTINR\_VAL1 PT-INR Value

N Mean Standard Deviation Minimum Maximum

---

|   |          |          |          |
|---|----------|----------|----------|
| 1 | 1.290000 | 1.290000 | 1.290000 |
|---|----------|----------|----------|

---

Unique Subject Identifier=1406000000-0011

Assay variable : PTINR\_VAL1 PT-INR Value

N Mean Standard Deviation Minimum Maximum

---

|   |          |  |          |          |
|---|----------|--|----------|----------|
| 1 | 2.500000 |  | 2.500000 | 2.500000 |
|---|----------|--|----------|----------|

---

Laboratory tests at the time of obtaining Table 2-6 consent, according to the presence or absence of proton-pump inhibitors

Unique Subject Identifier=1406000000-0014

MEANS Procedure

Assay variable : PTINR\_VAL1 PT-INR Value

N Mean Standard Deviation Minimum Maximum

---

|   |           |  |           |           |
|---|-----------|--|-----------|-----------|
| 1 | 1.7700000 |  | 1.7700000 | 1.7700000 |
|---|-----------|--|-----------|-----------|

---

Unique Subject Identifier=1406000000-0018

Assay variable : PTINR\_VAL1 PT-INR Value

N Mean Standard Deviation Minimum Maximum

---

|   |           |  |           |           |
|---|-----------|--|-----------|-----------|
| 1 | 1.5300000 |  | 1.5300000 | 1.5300000 |
|---|-----------|--|-----------|-----------|

---

Unique Subject Identifier=1406000000-0019

Assay variable : PTINR\_VAL1 PT-INR Value

N Mean Standard Deviation Minimum Maximum

---

|   |           |  |           |           |
|---|-----------|--|-----------|-----------|
| 1 | 1.6000000 |  | 1.6000000 | 1.6000000 |
|---|-----------|--|-----------|-----------|

---

Unique Subject Identifier=1406000000-0020

Assay variable : PTINR\_VAL1 PT-INR Value

N Mean Standard Deviation Minimum Maximum

---

|   |          |  |          |          |
|---|----------|--|----------|----------|
| 1 | 1.250000 |  | 1.250000 | 1.250000 |
|---|----------|--|----------|----------|

---

Laboratory tests at the time of obtaining Table 2-6 consent, according to the presence or absence of proton-pump inhibitors

Unique Subject Identifier=1406000000-0021

MEANS Procedure

Assay variable : PTINR\_VAL1 PT-INR Value

| N | Mean      | Standard Deviation | Minimum   | Maximum   |
|---|-----------|--------------------|-----------|-----------|
| 1 | 1.0500000 |                    | 1.0500000 | 1.0500000 |

Unique Subject Identifier=1407000000-0004

Assay variable : PTINR\_VAL1 PT-INR Value

| N | Mean      | Standard Deviation | Minimum   | Maximum   |
|---|-----------|--------------------|-----------|-----------|
| 6 | 1.9650000 | 0.1980656          | 1.7300000 | 2.3300000 |

Unique Subject Identifier=1407000000-0007

Assay variable : PTINR\_VAL1 PT-INR Value

| N | Mean      | Standard Deviation | Minimum   | Maximum   |
|---|-----------|--------------------|-----------|-----------|
| 6 | 2.0166667 | 0.1189398          | 1.9200000 | 2.2400000 |

Unique Subject Identifier=1407000000-0010

Assay variable : PTINR\_VAL1 PT-INR Value

N Mean Standard Deviation Minimum Maximum

---

|   |          |           |          |          |
|---|----------|-----------|----------|----------|
| 6 | 1.688333 | 0.2422739 | 1.500000 | 2.140000 |
|---|----------|-----------|----------|----------|

---



Laboratory tests at the time of obtaining Table 2-6 consent, according to the presence or absence of proton-pump inhibitors

Unique Subject Identifier=1407000000-0013

MEANS Procedure

Assay variable : PTINR\_VAL1 PT-INR Value

N Mean Standard Deviation Minimum Maximum

---

|   |           |           |           |           |
|---|-----------|-----------|-----------|-----------|
| 6 | 1.8750000 | 0.1488288 | 1.6800000 | 2.0600000 |
|---|-----------|-----------|-----------|-----------|

---

Unique Subject Identifier=1407000000-0016

Assay variable : PTINR\_VAL1 PT-INR Value

N Mean Standard Deviation Minimum Maximum

---

|   |           |           |           |           |
|---|-----------|-----------|-----------|-----------|
| 6 | 2.3616667 | 0.2377744 | 2.0800000 | 2.7100000 |
|---|-----------|-----------|-----------|-----------|

---

Unique Subject Identifier=1407000000-0027

Assay variable : PTINR\_VAL1 PT-INR Value

N Mean Standard Deviation Minimum Maximum

---

|   |           |           |           |           |
|---|-----------|-----------|-----------|-----------|
| 5 | 2.1520000 | 0.2169562 | 1.8900000 | 2.4900000 |
|---|-----------|-----------|-----------|-----------|

---

Unique Subject Identifier=1407000000-0030

Assay variable : PTINR\_VAL1 PT-INR Value

N Mean Standard Deviation Minimum Maximum

---

|   |           |           |           |           |
|---|-----------|-----------|-----------|-----------|
| 6 | 1.8800000 | 0.3470447 | 1.3400000 | 2.2600000 |
|---|-----------|-----------|-----------|-----------|

---

Laboratory tests at the time of obtaining Table 2-6 consent, according to the presence or absence of proton-pump inhibitors

Unique Subject Identifier=1408010000-0001

MEANS Procedure

Assay variable : PTINR\_VAL1 PT-INR Value

N Mean Standard Deviation Minimum Maximum

---

|   |           |           |           |           |
|---|-----------|-----------|-----------|-----------|
| 5 | 2.1640000 | 0.2016928 | 1.8600000 | 2.3800000 |
|---|-----------|-----------|-----------|-----------|

---

Unique Subject Identifier=1408010000-0004

Assay variable : PTINR\_VAL1 PT-INR Value

N Mean Standard Deviation Minimum Maximum

---

|   |           |           |           |           |
|---|-----------|-----------|-----------|-----------|
| 5 | 2.6160000 | 0.3574633 | 2.3700000 | 3.2300000 |
|---|-----------|-----------|-----------|-----------|

---

Unique Subject Identifier=1408010000-0006

Assay variable : PTINR\_VAL1 PT-INR Value

N Mean Standard Deviation Minimum Maximum

---

|   |           |           |           |           |
|---|-----------|-----------|-----------|-----------|
| 6 | 2.6933333 | 0.4401666 | 1.9400000 | 3.1800000 |
|---|-----------|-----------|-----------|-----------|

---

Unique Subject Identifier=1408010000-0007

Assay variable : PTINR\_VAL1 PT-INR Value

N Mean Standard Deviation Minimum Maximum

---

|   |           |           |           |           |
|---|-----------|-----------|-----------|-----------|
| 5 | 2.4700000 | 0.4941660 | 2.1700000 | 3.3500000 |
|---|-----------|-----------|-----------|-----------|

---

Laboratory tests at the time of obtaining Table 2-6 consent, according to the presence or absence of proton-pump inhibitors

Unique Subject Identifier=1408010000-0008

MEANS Procedure

Assay variable : PTINR\_VAL1 PT-INR Value

N Mean Standard Deviation Minimum Maximum

---

|   |           |           |           |           |
|---|-----------|-----------|-----------|-----------|
| 4 | 1.7600000 | 0.0408248 | 1.7000000 | 1.7900000 |
|---|-----------|-----------|-----------|-----------|

---

Unique Subject Identifier=1408010000-0012

Assay variable : PTINR\_VAL1 PT-INR Value

N Mean Standard Deviation Minimum Maximum

---

|   |           |           |           |           |
|---|-----------|-----------|-----------|-----------|
| 5 | 3.0720000 | 0.4856645 | 2.5200000 | 3.8500000 |
|---|-----------|-----------|-----------|-----------|

---

Unique Subject Identifier=1408010000-0013

Assay variable : PTINR\_VAL1 PT-INR Value

N Mean Standard Deviation Minimum Maximum

---

|   |           |           |           |           |
|---|-----------|-----------|-----------|-----------|
| 4 | 2.1725000 | 0.2780138 | 1.7800000 | 2.4200000 |
|---|-----------|-----------|-----------|-----------|

---

Unique Subject Identifier=1408010000-0015

Assay variable : PTINR\_VAL1 PT-INR Value

N Mean Standard Deviation Minimum Maximum

---

|   |          |           |          |          |
|---|----------|-----------|----------|----------|
| 6 | 2.420000 | 0.3701351 | 2.020000 | 2.910000 |
|---|----------|-----------|----------|----------|

---

Laboratory tests at the time of obtaining Table 2-6 consent, according to the presence or absence of proton-pump inhibitors

Unique Subject Identifier=1408010000-0021

MEANS Procedure

Assay variable : PTINR\_VAL1 PT-INR Value

N Mean Standard Deviation Minimum Maximum

---

|   |           |           |           |           |
|---|-----------|-----------|-----------|-----------|
| 4 | 1.8375000 | 0.1472809 | 1.6400000 | 1.9500000 |
|---|-----------|-----------|-----------|-----------|

---

Unique Subject Identifier=1408010000-0025

Assay variable : PTINR\_VAL1 PT-INR Value

N Mean Standard Deviation Minimum Maximum

---

|   |           |           |           |           |
|---|-----------|-----------|-----------|-----------|
| 4 | 2.1075000 | 0.3824809 | 1.8900000 | 2.6800000 |
|---|-----------|-----------|-----------|-----------|

---

Unique Subject Identifier=1408010000-0029

Assay variable : PTINR\_VAL1 PT-INR Value

N Mean Standard Deviation Minimum Maximum

---

|   |           |           |           |           |
|---|-----------|-----------|-----------|-----------|
| 4 | 2.5700000 | 0.1476482 | 2.4800000 | 2.7900000 |
|---|-----------|-----------|-----------|-----------|

---

Unique Subject Identifier=1408010000-0033

Assay variable : PTINR\_VAL1 PT-INR Value

N Mean Standard Deviation Minimum Maximum

---

|   |           |           |           |           |
|---|-----------|-----------|-----------|-----------|
| 5 | 1.9540000 | 0.1722788 | 1.7900000 | 2.2400000 |
|---|-----------|-----------|-----------|-----------|

---



Laboratory tests at the time of obtaining Table 2-6 consent, according to the presence or absence of proton-pump inhibitors

Unique Subject Identifier=1412000000-0002

MEANS Procedure

Assay variable : PTINR\_VAL1 PT-INR Value

N Mean Standard Deviation Minimum Maximum

---

|   |           |           |           |           |
|---|-----------|-----------|-----------|-----------|
| 6 | 2.0500000 | 0.0836660 | 1.9000000 | 2.1000000 |
|---|-----------|-----------|-----------|-----------|

---

Unique Subject Identifier=1412000000-0007

Assay variable : PTINR\_VAL1 PT-INR Value

N Mean Standard Deviation Minimum Maximum

---

|   |           |           |           |           |
|---|-----------|-----------|-----------|-----------|
| 6 | 1.8333333 | 0.4273952 | 1.3000000 | 2.3000000 |
|---|-----------|-----------|-----------|-----------|

---

Unique Subject Identifier=1412000000-0014

Assay variable : PTINR\_VAL1 PT-INR Value

N Mean Standard Deviation Minimum Maximum

---

|   |           |           |           |           |
|---|-----------|-----------|-----------|-----------|
| 6 | 1.8333333 | 0.2065591 | 1.6000000 | 2.1000000 |
|---|-----------|-----------|-----------|-----------|

---

Unique Subject Identifier=1412000000-0021

Assay variable : PTINR\_VAL1 PT-INR Value

N Mean Standard Deviation Minimum Maximum

---

|   |          |           |          |          |
|---|----------|-----------|----------|----------|
| 6 | 2.166667 | 0.1632993 | 1.900000 | 2.400000 |
|---|----------|-----------|----------|----------|

---

Laboratory tests at the time of obtaining Table 2-6 consent, according to the presence or absence of proton-pump inhibitors

Unique Subject Identifier=1412000000-0023

MEANS Procedure

Assay variable : PTINR\_VAL1 PT-INR Value

N Mean Standard Deviation Minimum Maximum

---

|   |           |           |           |           |
|---|-----------|-----------|-----------|-----------|
| 6 | 1.7833333 | 0.1329160 | 1.7000000 | 2.0000000 |
|---|-----------|-----------|-----------|-----------|

---

Unique Subject Identifier=1412000000-0025

Assay variable : PTINR\_VAL1 PT-INR Value

N Mean Standard Deviation Minimum Maximum

---

|   |           |           |           |           |
|---|-----------|-----------|-----------|-----------|
| 6 | 1.6333333 | 0.1632993 | 1.4000000 | 1.9000000 |
|---|-----------|-----------|-----------|-----------|

---

Unique Subject Identifier=1412000000-0028

Assay variable : PTINR\_VAL1 PT-INR Value

N Mean Standard Deviation Minimum Maximum

---

|   |           |           |           |           |
|---|-----------|-----------|-----------|-----------|
| 6 | 2.6000000 | 1.4926487 | 1.4000000 | 5.5000000 |
|---|-----------|-----------|-----------|-----------|

---

Unique Subject Identifier=1412000000-0029

Assay variable : PTINR\_VAL1 PT-INR Value

N Mean Standard Deviation Minimum Maximum

---

|   |          |           |          |          |
|---|----------|-----------|----------|----------|
| 5 | 1.540000 | 0.1140175 | 1.400000 | 1.700000 |
|---|----------|-----------|----------|----------|

---

Laboratory tests at the time of obtaining Table 2-6 consent, according to the presence or absence of proton-pump inhibitors

Unique Subject Identifier=1412000000-0031

MEANS Procedure

Assay variable : PTINR\_VAL1 PT-INR Value

N Mean Standard Deviation Minimum Maximum

---

|   |           |           |           |           |
|---|-----------|-----------|-----------|-----------|
| 6 | 2.2166667 | 0.3544949 | 2.0000000 | 2.9000000 |
|---|-----------|-----------|-----------|-----------|

---

Unique Subject Identifier=1420010000-0004

Assay variable : PTINR\_VAL1 PT-INR Value

N Mean Standard Deviation Minimum Maximum

---

|   |           |           |           |           |
|---|-----------|-----------|-----------|-----------|
| 6 | 1.8333333 | 0.3881580 | 1.4000000 | 2.4000000 |
|---|-----------|-----------|-----------|-----------|

---

Unique Subject Identifier=1420010000-0007

Assay variable : PTINR\_VAL1 PT-INR Value

N Mean Standard Deviation Minimum Maximum

---

|   |           |           |           |           |
|---|-----------|-----------|-----------|-----------|
| 6 | 2.2666667 | 0.3777124 | 1.8000000 | 2.8000000 |
|---|-----------|-----------|-----------|-----------|

---

Unique Subject Identifier=1420010000-0008

Assay variable : PTINR\_VAL1 PT-INR Value

N Mean Standard Deviation Minimum Maximum

---

|   |          |          |          |          |
|---|----------|----------|----------|----------|
| 5 | 1.760000 | 0.181659 | 1.500000 | 2.000000 |
|---|----------|----------|----------|----------|

---

Laboratory tests at the time of obtaining Table 2-6 consent, according to the presence or absence of proton-pump inhibitors

Unique Subject Identifier=1420010000-0010

MEANS Procedure

Assay variable : PTINR\_VAL1 PT-INR Value

N Mean Standard Deviation Minimum Maximum

---

|   |           |           |           |           |
|---|-----------|-----------|-----------|-----------|
| 6 | 1.8333333 | 0.1751190 | 1.5000000 | 2.0000000 |
|---|-----------|-----------|-----------|-----------|

---

Unique Subject Identifier=1420010000-0012

Assay variable : PTINR\_VAL1 PT-INR Value

N Mean Standard Deviation Minimum Maximum

---

|   |           |           |           |           |
|---|-----------|-----------|-----------|-----------|
| 6 | 2.1166667 | 0.2714160 | 1.6000000 | 2.4000000 |
|---|-----------|-----------|-----------|-----------|

---

Unique Subject Identifier=1420010000-0013

Assay variable : PTINR\_VAL1 PT-INR Value

N Mean Standard Deviation Minimum Maximum

---

|   |           |           |           |           |
|---|-----------|-----------|-----------|-----------|
| 5 | 1.6400000 | 0.3049590 | 1.1000000 | 1.8000000 |
|---|-----------|-----------|-----------|-----------|

---

Unique Subject Identifier=1420010000-0014

Assay variable : PTINR\_VAL1 PT-INR Value

N Mean Standard Deviation Minimum Maximum

---

|   |          |           |          |          |
|---|----------|-----------|----------|----------|
| 6 | 2.083333 | 0.1169045 | 1.900000 | 2.200000 |
|---|----------|-----------|----------|----------|

---



Laboratory tests at the time of obtaining Table 2-6 consent, according to the presence or absence of proton-pump inhibitors

Unique Subject Identifier=1420010000-0017

MEANS Procedure

Assay variable : PTINR\_VAL1 PT-INR Value

N Mean Standard Deviation Minimum Maximum

---

|   |           |           |           |           |
|---|-----------|-----------|-----------|-----------|
| 3 | 1.6333333 | 0.4041452 | 1.2000000 | 2.0000000 |
|---|-----------|-----------|-----------|-----------|

---

Unique Subject Identifier=1423000000-0001

Assay variable : PTINR\_VAL1 PT-INR Value

N Mean Standard Deviation Minimum Maximum

---

|   |           |           |           |           |
|---|-----------|-----------|-----------|-----------|
| 2 | 1.9100000 | 0.4666905 | 1.5800000 | 2.2400000 |
|---|-----------|-----------|-----------|-----------|

---

Unique Subject Identifier=1423000000-0006

Assay variable : PTINR\_VAL1 PT-INR Value

N Mean Standard Deviation Minimum Maximum

---

|   |           |  |           |           |
|---|-----------|--|-----------|-----------|
| 1 | 1.3900000 |  | 1.3900000 | 1.3900000 |
|---|-----------|--|-----------|-----------|

---

Unique Subject Identifier=1423000000-0010

Assay variable : PTINR\_VAL1 PT-INR Value

N Mean Standard Deviation Minimum Maximum

---

|   |           |           |           |           |
|---|-----------|-----------|-----------|-----------|
| 3 | 1.4900000 | 0.2251666 | 1.3600000 | 1.7500000 |
|---|-----------|-----------|-----------|-----------|

---

Laboratory tests at the time of obtaining Table 2-6 consent, according to the presence or absence of proton-pump inhibitors

Unique Subject Identifier=1423000000-0015

MEANS Procedure

Assay variable : PTINR\_VAL1 PT-INR Value

| N | Mean      | Standard Deviation | Minimum   | Maximum   |
|---|-----------|--------------------|-----------|-----------|
| 2 | 2.0550000 | 0.1626346          | 1.9400000 | 2.1700000 |

Unique Subject Identifier=1423000000-0021

Assay variable : PTINR\_VAL1 PT-INR Value

| N | Mean      | Standard Deviation | Minimum   | Maximum   |
|---|-----------|--------------------|-----------|-----------|
| 1 | 2.0200000 |                    | 2.0200000 | 2.0200000 |

Unique Subject Identifier=1423000000-0022

Assay variable : PTINR\_VAL1 PT-INR Value

| N | Mean      | Standard Deviation | Minimum   | Maximum   |
|---|-----------|--------------------|-----------|-----------|
| 2 | 1.2700000 | 0.0282843          | 1.2500000 | 1.2900000 |

Unique Subject Identifier=1427000000-0003

Assay variable : PTINR\_VAL1 PT-INR Value

N Mean Standard Deviation Minimum Maximum

---

|   |          |           |          |          |
|---|----------|-----------|----------|----------|
| 6 | 1.800000 | 0.3521363 | 1.400000 | 2.300000 |
|---|----------|-----------|----------|----------|

---

Laboratory tests at the time of obtaining Table 2-6 consent, according to the presence or absence of proton-pump inhibitors

Unique Subject Identifier=1428011110-0001

MEANS Procedure

Assay variable : PTINR\_VAL1 PT-INR Value

N Mean Standard Deviation Minimum Maximum

---

|   |           |           |           |           |
|---|-----------|-----------|-----------|-----------|
| 2 | 1.7850000 | 0.2616295 | 1.6000000 | 1.9700000 |
|---|-----------|-----------|-----------|-----------|

---

Unique Subject Identifier=1428011110-0002

Assay variable : PTINR\_VAL1 PT-INR Value

N Mean Standard Deviation Minimum Maximum

---

|   |           |           |           |           |
|---|-----------|-----------|-----------|-----------|
| 2 | 1.4650000 | 0.2474874 | 1.2900000 | 1.6400000 |
|---|-----------|-----------|-----------|-----------|

---

Unique Subject Identifier=1428011110-0003

Assay variable : PTINR\_VAL1 PT-INR Value

N Mean Standard Deviation Minimum Maximum

---

|   |           |  |           |           |
|---|-----------|--|-----------|-----------|
| 1 | 1.6900000 |  | 1.6900000 | 1.6900000 |
|---|-----------|--|-----------|-----------|

---

Unique Subject Identifier=1428011110-0006

Assay variable : PTINR\_VAL1 PT-INR Value

N Mean Standard Deviation Minimum Maximum

---

|   |           |           |           |           |
|---|-----------|-----------|-----------|-----------|
| 2 | 1.7300000 | 0.0424264 | 1.7000000 | 1.7600000 |
|---|-----------|-----------|-----------|-----------|

---

Laboratory tests at the time of obtaining Table 2-6 consent, according to the presence or absence of proton-pump inhibitors

Unique Subject Identifier=1428011110-0008

MEANS Procedure

Assay variable : PTINR\_VAL1 PT-INR Value

| N | Mean      | Standard Deviation | Minimum   | Maximum   |
|---|-----------|--------------------|-----------|-----------|
| 2 | 2.4750000 | 0.7566043          | 1.9400000 | 3.0100000 |

Unique Subject Identifier=1428011110-0009

Assay variable : PTINR\_VAL1 PT-INR Value

| N | Mean      | Standard Deviation | Minimum   | Maximum   |
|---|-----------|--------------------|-----------|-----------|
| 2 | 1.7150000 | 0.7990307          | 1.1500000 | 2.2800000 |

Unique Subject Identifier=1428011110-0010

Assay variable : PTINR\_VAL1 PT-INR Value

| N | Mean      | Standard Deviation | Minimum   | Maximum   |
|---|-----------|--------------------|-----------|-----------|
| 2 | 2.2450000 | 0.1484924          | 2.1400000 | 2.3500000 |

Unique Subject Identifier=1428011110-0011

Assay variable : PTINR\_VAL1 PT-INR Value

N Mean Standard Deviation Minimum Maximum

---

|   |           |           |           |           |
|---|-----------|-----------|-----------|-----------|
| 2 | 2.1850000 | 0.3040559 | 1.9700000 | 2.4000000 |
|---|-----------|-----------|-----------|-----------|

---



Laboratory tests at the time of obtaining Table 2-6 consent, according to the presence or absence of proton-pump inhibitors

Unique Subject Identifier=1428011110-0013

MEANS Procedure

Assay variable : PTINR\_VAL1 PT-INR Value

N Mean Standard Deviation Minimum Maximum

---

|   |           |  |           |           |
|---|-----------|--|-----------|-----------|
| 1 | 1.6800000 |  | 1.6800000 | 1.6800000 |
|---|-----------|--|-----------|-----------|

---

Unique Subject Identifier=1428011110-0015

Assay variable : PTINR\_VAL1 PT-INR Value

N Mean Standard Deviation Minimum Maximum

---

|   |           |           |           |           |
|---|-----------|-----------|-----------|-----------|
| 2 | 1.3700000 | 0.2687006 | 1.1800000 | 1.5600000 |
|---|-----------|-----------|-----------|-----------|

---

Unique Subject Identifier=1428011110-0017

Assay variable : PTINR\_VAL1 PT-INR Value

N Mean Standard Deviation Minimum Maximum

---

|   |           |  |           |           |
|---|-----------|--|-----------|-----------|
| 1 | 1.4900000 |  | 1.4900000 | 1.4900000 |
|---|-----------|--|-----------|-----------|

---

Unique Subject Identifier=1428011110-0019

Assay variable : PTINR\_VAL1 PT-INR Value

N Mean Standard Deviation Minimum Maximum

---

|   |           |           |           |           |
|---|-----------|-----------|-----------|-----------|
| 3 | 1.9833333 | 0.2309401 | 1.8500000 | 2.2500000 |
|---|-----------|-----------|-----------|-----------|

---

Laboratory tests at the time of obtaining Table 2-6 consent, according to the presence or absence of proton-pump inhibitors

Unique Subject Identifier=1428011110-0021

MEANS Procedure

Assay variable : PTINR\_VAL1 PT-INR Value

N Mean Standard Deviation Minimum Maximum

---

|   |           |  |           |           |
|---|-----------|--|-----------|-----------|
| 1 | 2.8600000 |  | 2.8600000 | 2.8600000 |
|---|-----------|--|-----------|-----------|

---

Unique Subject Identifier=1428011110-0023

Assay variable : PTINR\_VAL1 PT-INR Value

N Mean Standard Deviation Minimum Maximum

---

|   |           |  |           |           |
|---|-----------|--|-----------|-----------|
| 1 | 1.5800000 |  | 1.5800000 | 1.5800000 |
|---|-----------|--|-----------|-----------|

---

Unique Subject Identifier=1428011110-0025

Assay variable : PTINR\_VAL1 PT-INR Value

N Mean Standard Deviation Minimum Maximum

---

|   |           |           |           |           |
|---|-----------|-----------|-----------|-----------|
| 2 | 1.8100000 | 0.4666905 | 1.4800000 | 2.1400000 |
|---|-----------|-----------|-----------|-----------|

---

Unique Subject Identifier=1428011110-0032

Assay variable : PTINR\_VAL1 PT-INR Value

N Mean Standard Deviation Minimum Maximum

---

|   |           |           |           |           |
|---|-----------|-----------|-----------|-----------|
| 3 | 1.7866667 | 0.5345403 | 1.4200000 | 2.4000000 |
|---|-----------|-----------|-----------|-----------|

---

Laboratory tests at the time of obtaining Table 2-6 consent, according to the presence or absence of proton-pump inhibitors

Unique Subject Identifier=1430011010-0003

MEANS Procedure

Assay variable : PTINR\_VAL1 PT-INR Value

N Mean Standard Deviation Minimum Maximum

---

|   |           |           |           |           |
|---|-----------|-----------|-----------|-----------|
| 6 | 1.8166667 | 0.2786874 | 1.5000000 | 2.1000000 |
|---|-----------|-----------|-----------|-----------|

---

Unique Subject Identifier=1430011010-0004

Assay variable : PTINR\_VAL1 PT-INR Value

N Mean Standard Deviation Minimum Maximum

---

|   |           |           |           |           |
|---|-----------|-----------|-----------|-----------|
| 6 | 1.8666667 | 0.3444803 | 1.6000000 | 2.4000000 |
|---|-----------|-----------|-----------|-----------|

---

Unique Subject Identifier=1432000000-0011

Assay variable : PTINR\_VAL1 PT-INR Value

N Mean Standard Deviation Minimum Maximum

---

|   |           |           |           |           |
|---|-----------|-----------|-----------|-----------|
| 6 | 1.1833333 | 0.0752773 | 1.1000000 | 1.3000000 |
|---|-----------|-----------|-----------|-----------|

---

Unique Subject Identifier=1432000000-0015

Assay variable : PTINR\_VAL1 PT-INR Value

N Mean Standard Deviation Minimum Maximum

---

|   |           |           |           |           |
|---|-----------|-----------|-----------|-----------|
| 6 | 1.8333333 | 0.7865537 | 1.1000000 | 3.3000000 |
|---|-----------|-----------|-----------|-----------|

---

Laboratory tests at the time of obtaining Table 2-6 consent, according to the presence or absence of proton-pump inhibitors

Unique Subject Identifier=1432000000-0017

MEANS Procedure

Assay variable : PTINR\_VAL1 PT-INR Value

N Mean Standard Deviation Minimum Maximum

---

|   |           |           |           |           |
|---|-----------|-----------|-----------|-----------|
| 6 | 2.3500000 | 0.4549725 | 1.8000000 | 3.0000000 |
|---|-----------|-----------|-----------|-----------|

---

Unique Subject Identifier=1432000000-0020

Assay variable : PTINR\_VAL1 PT-INR Value

N Mean Standard Deviation Minimum Maximum

---

|   |           |           |           |           |
|---|-----------|-----------|-----------|-----------|
| 5 | 1.9400000 | 0.4449719 | 1.6000000 | 2.6000000 |
|---|-----------|-----------|-----------|-----------|

---

Unique Subject Identifier=1432000000-0023

Assay variable : PTINR\_VAL1 PT-INR Value

N Mean Standard Deviation Minimum Maximum

---

|   |           |           |           |           |
|---|-----------|-----------|-----------|-----------|
| 6 | 1.8500000 | 0.5648008 | 1.2000000 | 2.7000000 |
|---|-----------|-----------|-----------|-----------|

---

Unique Subject Identifier=1432000000-0028

Assay variable : PTINR\_VAL1 PT-INR Value

N Mean Standard Deviation Minimum Maximum

---

|   |          |          |          |          |
|---|----------|----------|----------|----------|
| 6 | 2.333333 | 0.546504 | 1.700000 | 3.200000 |
|---|----------|----------|----------|----------|

---



Laboratory tests at the time of obtaining Table 2-6 consent, according to the presence or absence of proton-pump inhibitors

Unique Subject Identifier=1432000000-0034

MEANS Procedure

Assay variable : PTINR\_VAL1 PT-INR Value

N Mean Standard Deviation Minimum Maximum

---

|   |           |           |           |           |
|---|-----------|-----------|-----------|-----------|
| 6 | 2.1000000 | 0.3162278 | 1.7000000 | 2.6000000 |
|---|-----------|-----------|-----------|-----------|

---

Unique Subject Identifier=1432000000-0037

Assay variable : PTINR\_VAL1 PT-INR Value

N Mean Standard Deviation Minimum Maximum

---

|   |           |           |           |           |
|---|-----------|-----------|-----------|-----------|
| 6 | 1.4333333 | 0.0516398 | 1.4000000 | 1.5000000 |
|---|-----------|-----------|-----------|-----------|

---

Unique Subject Identifier=1432000000-0042

Assay variable : PTINR\_VAL1 PT-INR Value

N Mean Standard Deviation Minimum Maximum

---

|   |           |           |           |           |
|---|-----------|-----------|-----------|-----------|
| 5 | 1.7600000 | 0.5176872 | 1.3000000 | 2.6000000 |
|---|-----------|-----------|-----------|-----------|

---

Unique Subject Identifier=1432000000-0049

Assay variable : PTINR\_VAL1 PT-INR Value

N Mean Standard Deviation Minimum Maximum

---

|   |           |           |           |           |
|---|-----------|-----------|-----------|-----------|
| 6 | 1.7833333 | 0.6112828 | 1.1000000 | 2.6000000 |
|---|-----------|-----------|-----------|-----------|

---

Laboratory tests at the time of obtaining Table 2-6 consent, according to the presence or absence of proton-pump inhibitors

Unique Subject Identifier=1432000000-0056

MEANS Procedure

Assay variable : PTINR\_VAL1 PT-INR Value

N Mean Standard Deviation Minimum Maximum

---

|   |           |           |           |           |
|---|-----------|-----------|-----------|-----------|
| 6 | 2.0833333 | 0.5455884 | 1.2000000 | 2.6000000 |
|---|-----------|-----------|-----------|-----------|

---

Unique Subject Identifier=1432000000-0071

Assay variable : PTINR\_VAL1 PT-INR Value

N Mean Standard Deviation Minimum Maximum

---

|   |           |           |           |           |
|---|-----------|-----------|-----------|-----------|
| 6 | 2.2833333 | 0.2483277 | 1.9000000 | 2.6000000 |
|---|-----------|-----------|-----------|-----------|

---

Unique Subject Identifier=1432000000-0072

Assay variable : PTINR\_VAL1 PT-INR Value

N Mean Standard Deviation Minimum Maximum

---

|   |           |           |           |           |
|---|-----------|-----------|-----------|-----------|
| 6 | 1.7000000 | 0.3033150 | 1.3000000 | 2.2000000 |
|---|-----------|-----------|-----------|-----------|

---

Unique Subject Identifier=1432000000-0073

Assay variable : PTINR\_VAL1 PT-INR Value

N Mean Standard Deviation Minimum Maximum

---

|   |           |           |           |           |
|---|-----------|-----------|-----------|-----------|
| 6 | 2.1166667 | 0.1602082 | 1.9000000 | 2.3000000 |
|---|-----------|-----------|-----------|-----------|

---

Laboratory tests at the time of obtaining Table 2-6 consent, according to the presence or absence of proton-pump inhibitors

Unique Subject Identifier=1435000000-0003

MEANS Procedure

Assay variable : PTINR\_VAL1 PT-INR Value

N Mean Standard Deviation Minimum Maximum

---

|   |          |  |          |          |
|---|----------|--|----------|----------|
| 1 | 2.140000 |  | 2.140000 | 2.140000 |
|---|----------|--|----------|----------|

---

Unique Subject Identifier=1435000000-0018

Assay variable : PTINR\_VAL1 PT-INR Value

N Mean Standard Deviation Minimum Maximum

---

|   |          |  |          |          |
|---|----------|--|----------|----------|
| 1 | 1.670000 |  | 1.670000 | 1.670000 |
|---|----------|--|----------|----------|

---

Unique Subject Identifier=1435000000-0021

Assay variable : PTINR\_VAL1 PT-INR Value

N Mean Standard Deviation Minimum Maximum

---

|   |          |  |          |          |
|---|----------|--|----------|----------|
| 1 | 1.160000 |  | 1.160000 | 1.160000 |
|---|----------|--|----------|----------|

---

Unique Subject Identifier=1435000000-0028

Assay variable : PTINR\_VAL1 PT-INR Value

N Mean Standard Deviation Minimum Maximum

---

|   |          |           |          |          |
|---|----------|-----------|----------|----------|
| 3 | 2.660000 | 0.1081665 | 2.570000 | 2.780000 |
|---|----------|-----------|----------|----------|

---

Laboratory tests at the time of obtaining Table 2-6 consent, according to the presence or absence of proton-pump inhibitors

Unique Subject Identifier=1435000000-0039

MEANS Procedure

Assay variable : PTINR\_VAL1 PT-INR Value

| N | Mean      | Standard Deviation | Minimum   | Maximum   |
|---|-----------|--------------------|-----------|-----------|
| 3 | 1.7266667 | 0.2402776          | 1.4800000 | 1.9600000 |

Unique Subject Identifier=1435000000-0041

Assay variable : PTINR\_VAL1 PT-INR Value

| N | Mean      | Standard Deviation | Minimum   | Maximum   |
|---|-----------|--------------------|-----------|-----------|
| 5 | 2.2780000 | 0.2723417          | 1.9700000 | 2.5800000 |

Unique Subject Identifier=1435000000-0042

Assay variable : PTINR\_VAL1 PT-INR Value

| N | Mean      | Standard Deviation | Minimum   | Maximum   |
|---|-----------|--------------------|-----------|-----------|
| 5 | 2.1240000 | 0.1270039          | 2.0000000 | 2.2800000 |

Unique Subject Identifier=1435000000-0048

Assay variable : PTINR\_VAL1 PT-INR Value

N Mean Standard Deviation Minimum Maximum

---

|   |           |           |           |           |
|---|-----------|-----------|-----------|-----------|
| 5 | 1.9720000 | 0.6191688 | 1.3900000 | 3.0200000 |
|---|-----------|-----------|-----------|-----------|

---



Laboratory tests at the time of obtaining Table 2-6 consent, according to the presence or absence of proton-pump inhibitors

Unique Subject Identifier=1435000000-0051

MEANS Procedure

Assay variable : PTINR\_VAL1 PT-INR Value

N Mean Standard Deviation Minimum Maximum

---

|   |           |  |           |           |
|---|-----------|--|-----------|-----------|
| 1 | 2.0900000 |  | 2.0900000 | 2.0900000 |
|---|-----------|--|-----------|-----------|

---

Unique Subject Identifier=1435000000-0055

Assay variable : PTINR\_VAL1 PT-INR Value

N Mean Standard Deviation Minimum Maximum

---

|   |           |           |           |           |
|---|-----------|-----------|-----------|-----------|
| 6 | 1.5500000 | 0.5843629 | 1.1600000 | 2.7100000 |
|---|-----------|-----------|-----------|-----------|

---

Unique Subject Identifier=1435000000-0065

Assay variable : PTINR\_VAL1 PT-INR Value

N Mean Standard Deviation Minimum Maximum

---

|   |           |  |           |           |
|---|-----------|--|-----------|-----------|
| 1 | 2.1800000 |  | 2.1800000 | 2.1800000 |
|---|-----------|--|-----------|-----------|

---

Unique Subject Identifier=1435000000-0071

Assay variable : PTINR\_VAL1 PT-INR Value

N Mean Standard Deviation Minimum Maximum

---

|   |           |           |           |           |
|---|-----------|-----------|-----------|-----------|
| 6 | 1.2450000 | 0.2508984 | 1.0600000 | 1.6400000 |
|---|-----------|-----------|-----------|-----------|

---

Laboratory tests at the time of obtaining Table 2-6 consent, according to the presence or absence of proton-pump inhibitors

Unique Subject Identifier=1435000000-0072

MEANS Procedure

Assay variable : PTINR\_VAL1 PT-INR Value

N Mean Standard Deviation Minimum Maximum

---

|   |           |           |           |           |
|---|-----------|-----------|-----------|-----------|
| 4 | 1.8275000 | 0.2848830 | 1.5900000 | 2.2000000 |
|---|-----------|-----------|-----------|-----------|

---

Unique Subject Identifier=1435000000-0075

Assay variable : PTINR\_VAL1 PT-INR Value

N Mean Standard Deviation Minimum Maximum

---

|   |           |           |           |           |
|---|-----------|-----------|-----------|-----------|
| 3 | 1.1466667 | 0.0251661 | 1.1200000 | 1.1700000 |
|---|-----------|-----------|-----------|-----------|

---

Unique Subject Identifier=1435000000-0091

Assay variable : PTINR\_VAL1 PT-INR Value

N Mean Standard Deviation Minimum Maximum

---

|   |           |           |           |           |
|---|-----------|-----------|-----------|-----------|
| 3 | 2.1500000 | 0.2505993 | 1.8900000 | 2.3900000 |
|---|-----------|-----------|-----------|-----------|

---

Unique Subject Identifier=1435000000-0103

Assay variable : PTINR\_VAL1 PT-INR Value

N Mean Standard Deviation Minimum Maximum

---

|   |           |           |           |           |
|---|-----------|-----------|-----------|-----------|
| 2 | 2.7750000 | 0.0494975 | 2.7400000 | 2.8100000 |
|---|-----------|-----------|-----------|-----------|

---

Laboratory tests at the time of obtaining Table 2-6 consent, according to the presence or absence of proton-pump inhibitors

Unique Subject Identifier=1435000000-0105

MEANS Procedure

Assay variable : PTINR\_VAL1 PT-INR Value

N Mean Standard Deviation Minimum Maximum

---

|   |           |  |           |           |
|---|-----------|--|-----------|-----------|
| 1 | 1.5300000 |  | 1.5300000 | 1.5300000 |
|---|-----------|--|-----------|-----------|

---

Unique Subject Identifier=1435000000-0107

Assay variable : PTINR\_VAL1 PT-INR Value

N Mean Standard Deviation Minimum Maximum

---

|   |           |           |           |           |
|---|-----------|-----------|-----------|-----------|
| 3 | 1.5866667 | 0.2318045 | 1.3200000 | 1.7400000 |
|---|-----------|-----------|-----------|-----------|

---

Unique Subject Identifier=1435000000-0117

Assay variable : PTINR\_VAL1 PT-INR Value

N Mean Standard Deviation Minimum Maximum

---

|   |           |           |           |           |
|---|-----------|-----------|-----------|-----------|
| 6 | 2.4450000 | 0.2246553 | 2.2400000 | 2.8400000 |
|---|-----------|-----------|-----------|-----------|

---

Unique Subject Identifier=1435000000-0119

Assay variable : PTINR\_VAL1 PT-INR Value

N Mean Standard Deviation Minimum Maximum

---

|   |          |  |          |          |
|---|----------|--|----------|----------|
| 1 | 2.420000 |  | 2.420000 | 2.420000 |
|---|----------|--|----------|----------|

---

Laboratory tests at the time of obtaining Table 2-6 consent, according to the presence or absence of proton-pump inhibitors

Unique Subject Identifier=1435000000-0120

MEANS Procedure

Assay variable : PTINR\_VAL1 PT-INR Value

| N | Mean      | Standard Deviation | Minimum   | Maximum   |
|---|-----------|--------------------|-----------|-----------|
| 6 | 1.6683333 | 0.4972491          | 1.1800000 | 2.5300000 |

Unique Subject Identifier=1435000000-0132

Assay variable : PTINR\_VAL1 PT-INR Value

| N | Mean      | Standard Deviation | Minimum   | Maximum   |
|---|-----------|--------------------|-----------|-----------|
| 2 | 2.4550000 | 0.4030509          | 2.1700000 | 2.7400000 |

Unique Subject Identifier=1435000000-0139

Assay variable : PTINR\_VAL1 PT-INR Value

| N | Mean      | Standard Deviation | Minimum   | Maximum   |
|---|-----------|--------------------|-----------|-----------|
| 2 | 2.6450000 | 1.4919953          | 1.5900000 | 3.7000000 |

Unique Subject Identifier=1435000000-0140

Assay variable : PTINR\_VAL1 PT-INR Value

N Mean Standard Deviation Minimum Maximum

---

|   |           |           |           |           |
|---|-----------|-----------|-----------|-----------|
| 6 | 1.4450000 | 0.1980656 | 1.2400000 | 1.8100000 |
|---|-----------|-----------|-----------|-----------|

---



Laboratory tests at the time of obtaining Table 2-6 consent, according to the presence or absence of proton-pump inhibitors

Unique Subject Identifier=1435000000-0145

MEANS Procedure

Assay variable : PTINR\_VAL1 PT-INR Value

N Mean Standard Deviation Minimum Maximum

---

|   |           |           |           |           |
|---|-----------|-----------|-----------|-----------|
| 6 | 1.5983333 | 0.3660829 | 1.1900000 | 2.1900000 |
|---|-----------|-----------|-----------|-----------|

---

Unique Subject Identifier=1435000000-0153

Assay variable : PTINR\_VAL1 PT-INR Value

N Mean Standard Deviation Minimum Maximum

---

|   |           |           |           |           |
|---|-----------|-----------|-----------|-----------|
| 5 | 1.7040000 | 0.1050238 | 1.5800000 | 1.8500000 |
|---|-----------|-----------|-----------|-----------|

---

Unique Subject Identifier=1435000000-0177

Assay variable : PTINR\_VAL1 PT-INR Value

N Mean Standard Deviation Minimum Maximum

---

|   |           |           |           |           |
|---|-----------|-----------|-----------|-----------|
| 5 | 1.9480000 | 0.3900897 | 1.5500000 | 2.4600000 |
|---|-----------|-----------|-----------|-----------|

---

Unique Subject Identifier=1435000000-0188

Assay variable : PTINR\_VAL1 PT-INR Value

N Mean Standard Deviation Minimum Maximum

---

|   |           |           |           |           |
|---|-----------|-----------|-----------|-----------|
| 4 | 1.4350000 | 0.3641886 | 1.2200000 | 1.9800000 |
|---|-----------|-----------|-----------|-----------|

---

Laboratory tests at the time of obtaining Table 2-6 consent, according to the presence or absence of proton-pump inhibitors

Unique Subject Identifier=1435000000-0200

MEANS Procedure

Assay variable : PTINR\_VAL1 PT-INR Value

N Mean Standard Deviation Minimum Maximum

---

|   |           |           |           |           |
|---|-----------|-----------|-----------|-----------|
| 2 | 1.1650000 | 0.0636396 | 1.1200000 | 1.2100000 |
|---|-----------|-----------|-----------|-----------|

---

Unique Subject Identifier=1435000000-0209

Assay variable : PTINR\_VAL1 PT-INR Value

N Mean Standard Deviation Minimum Maximum

---

|   |           |           |           |           |
|---|-----------|-----------|-----------|-----------|
| 6 | 1.4316667 | 0.3882482 | 1.2200000 | 2.2200000 |
|---|-----------|-----------|-----------|-----------|

---

Unique Subject Identifier=1435000000-0212

Assay variable : PTINR\_VAL1 PT-INR Value

N Mean Standard Deviation Minimum Maximum

---

|   |           |  |           |           |
|---|-----------|--|-----------|-----------|
| 1 | 1.5800000 |  | 1.5800000 | 1.5800000 |
|---|-----------|--|-----------|-----------|

---

Unique Subject Identifier=1435000000-0215

Assay variable : PTINR\_VAL1 PT-INR Value

N Mean Standard Deviation Minimum Maximum

---

|   |           |           |           |           |
|---|-----------|-----------|-----------|-----------|
| 3 | 1.8533333 | 0.2872862 | 1.6400000 | 2.1800000 |
|---|-----------|-----------|-----------|-----------|

---

Laboratory tests at the time of obtaining Table 2-6 consent, according to the presence or absence of proton-pump inhibitors

Unique Subject Identifier=1436000000-0003

MEANS Procedure

Assay variable : PTINR\_VAL1 PT-INR Value

N Mean Standard Deviation Minimum Maximum

---

|   |           |           |           |           |
|---|-----------|-----------|-----------|-----------|
| 3 | 1.7666667 | 0.1709776 | 1.5700000 | 1.8800000 |
|---|-----------|-----------|-----------|-----------|

---

Unique Subject Identifier=1436000000-0008

Assay variable : PTINR\_VAL1 PT-INR Value

N Mean Standard Deviation Minimum Maximum

---

|   |           |           |           |           |
|---|-----------|-----------|-----------|-----------|
| 5 | 2.1300000 | 0.2152905 | 1.7700000 | 2.3400000 |
|---|-----------|-----------|-----------|-----------|

---

Unique Subject Identifier=1436000000-0010

Assay variable : PTINR\_VAL1 PT-INR Value

N Mean Standard Deviation Minimum Maximum

---

|   |           |  |           |           |
|---|-----------|--|-----------|-----------|
| 1 | 3.3300000 |  | 3.3300000 | 3.3300000 |
|---|-----------|--|-----------|-----------|

---

Unique Subject Identifier=1436000000-0013

Assay variable : PTINR\_VAL1 PT-INR Value

N Mean Standard Deviation Minimum Maximum

---

|   |          |  |          |          |
|---|----------|--|----------|----------|
| 1 | 2.240000 |  | 2.240000 | 2.240000 |
|---|----------|--|----------|----------|

---

Laboratory tests at the time of obtaining Table 2-6 consent, according to the presence or absence of proton-pump inhibitors

Unique Subject Identifier=1436000000-0018

MEANS Procedure

Assay variable : PTINR\_VAL1 PT-INR Value

| N | Mean      | Standard Deviation | Minimum   | Maximum   |
|---|-----------|--------------------|-----------|-----------|
| 1 | 1.7200000 |                    | 1.7200000 | 1.7200000 |

Unique Subject Identifier=1436000000-0019

Assay variable : PTINR\_VAL1 PT-INR Value

| N | Mean      | Standard Deviation | Minimum   | Maximum   |
|---|-----------|--------------------|-----------|-----------|
| 2 | 1.6350000 | 0.1484924          | 1.5300000 | 1.7400000 |

Unique Subject Identifier=1436000000-0020

Assay variable : PTINR\_VAL1 PT-INR Value

| N | Mean      | Standard Deviation | Minimum   | Maximum   |
|---|-----------|--------------------|-----------|-----------|
| 2 | 2.4400000 | 0.3252691          | 2.2100000 | 2.6700000 |

Unique Subject Identifier=1436000000-0021

Assay variable : PTINR\_VAL1 PT-INR Value

N Mean Standard Deviation Minimum Maximum

---

|   |           |  |           |           |
|---|-----------|--|-----------|-----------|
| 1 | 1.3700000 |  | 1.3700000 | 1.3700000 |
|---|-----------|--|-----------|-----------|

---



Laboratory tests at the time of obtaining Table 2-6 consent, according to the presence or absence of proton-pump inhibitors

Unique Subject Identifier=1436000000-0022

MEANS Procedure

Assay variable : PTINR\_VAL1 PT-INR Value

N Mean Standard Deviation Minimum Maximum

---

|   |           |  |           |           |
|---|-----------|--|-----------|-----------|
| 1 | 2.2200000 |  | 2.2200000 | 2.2200000 |
|---|-----------|--|-----------|-----------|

---

Unique Subject Identifier=1436000000-0023

Assay variable : PTINR\_VAL1 PT-INR Value

N Mean Standard Deviation Minimum Maximum

---

|   |           |  |           |           |
|---|-----------|--|-----------|-----------|
| 1 | 1.7900000 |  | 1.7900000 | 1.7900000 |
|---|-----------|--|-----------|-----------|

---

Unique Subject Identifier=1436000000-0024

Assay variable : PTINR\_VAL1 PT-INR Value

N Mean Standard Deviation Minimum Maximum

---

|   |           |           |           |           |
|---|-----------|-----------|-----------|-----------|
| 2 | 2.3150000 | 0.0212132 | 2.3000000 | 2.3300000 |
|---|-----------|-----------|-----------|-----------|

---

Unique Subject Identifier=1436000000-0028

Assay variable : PTINR\_VAL1 PT-INR Value

N Mean Standard Deviation Minimum Maximum

---

|   |           |           |           |           |
|---|-----------|-----------|-----------|-----------|
| 2 | 2.0900000 | 0.2121320 | 1.9400000 | 2.2400000 |
|---|-----------|-----------|-----------|-----------|

---

Laboratory tests at the time of obtaining Table 2-6 consent, according to the presence or absence of proton-pump inhibitors

Unique Subject Identifier=1436000000-0032

MEANS Procedure

Assay variable : PTINR\_VAL1 PT-INR Value

N Mean Standard Deviation Minimum Maximum

---

|   |           |  |           |           |
|---|-----------|--|-----------|-----------|
| 1 | 2.6300000 |  | 2.6300000 | 2.6300000 |
|---|-----------|--|-----------|-----------|

---

Unique Subject Identifier=1436000000-0034

Assay variable : PTINR\_VAL1 PT-INR Value

N Mean Standard Deviation Minimum Maximum

---

|   |           |  |           |           |
|---|-----------|--|-----------|-----------|
| 1 | 1.3800000 |  | 1.3800000 | 1.3800000 |
|---|-----------|--|-----------|-----------|

---

Unique Subject Identifier=1436000000-0038

Assay variable : PTINR\_VAL1 PT-INR Value

N Mean Standard Deviation Minimum Maximum

---

|   |           |           |           |           |
|---|-----------|-----------|-----------|-----------|
| 3 | 2.5166667 | 0.6859543 | 1.7300000 | 2.9900000 |
|---|-----------|-----------|-----------|-----------|

---

Unique Subject Identifier=1436000000-0047

Assay variable : PTINR\_VAL1 PT-INR Value

N Mean Standard Deviation Minimum Maximum

---

|   |           |  |           |           |
|---|-----------|--|-----------|-----------|
| 1 | 2.0700000 |  | 2.0700000 | 2.0700000 |
|---|-----------|--|-----------|-----------|

---

Laboratory tests at the time of obtaining Table 2-6 consent, according to the presence or absence of proton-pump inhibitors

Unique Subject Identifier=1436000000-0048

MEANS Procedure

Assay variable : PTINR\_VAL1 PT-INR Value

N Mean Standard Deviation Minimum Maximum

---

|   |           |  |           |           |
|---|-----------|--|-----------|-----------|
| 1 | 2.2200000 |  | 2.2200000 | 2.2200000 |
|---|-----------|--|-----------|-----------|

---

Unique Subject Identifier=1436000000-0063

Assay variable : PTINR\_VAL1 PT-INR Value

N Mean Standard Deviation Minimum Maximum

---

|   |           |  |           |           |
|---|-----------|--|-----------|-----------|
| 1 | 1.8600000 |  | 1.8600000 | 1.8600000 |
|---|-----------|--|-----------|-----------|

---

Unique Subject Identifier=1437000000-0009

Assay variable : PTINR\_VAL1 PT-INR Value

N Mean Standard Deviation Minimum Maximum

---

|   |           |           |           |           |
|---|-----------|-----------|-----------|-----------|
| 6 | 1.8500000 | 0.2258318 | 1.6000000 | 2.2000000 |
|---|-----------|-----------|-----------|-----------|

---

Unique Subject Identifier=1437000000-0010

Assay variable : PTINR\_VAL1 PT-INR Value

N Mean Standard Deviation Minimum Maximum

---

|   |           |           |           |           |
|---|-----------|-----------|-----------|-----------|
| 6 | 1.9166667 | 0.3710346 | 1.3000000 | 2.3000000 |
|---|-----------|-----------|-----------|-----------|

---

Laboratory tests at the time of obtaining Table 2-6 consent, according to the presence or absence of proton-pump inhibitors

Unique Subject Identifier=1437000000-0011

MEANS Procedure

Assay variable : PTINR\_VAL1 PT-INR Value

| N | Mean      | Standard Deviation | Minimum   | Maximum   |
|---|-----------|--------------------|-----------|-----------|
| 6 | 1.7833333 | 0.3060501          | 1.4000000 | 2.3000000 |

Unique Subject Identifier=1438000000-0001

Assay variable : PTINR\_VAL1 PT-INR Value

| N | Mean      | Standard Deviation | Minimum   | Maximum   |
|---|-----------|--------------------|-----------|-----------|
| 2 | 1.6550000 | 0.1343503          | 1.5600000 | 1.7500000 |

Unique Subject Identifier=1438000000-0010

Assay variable : PTINR\_VAL1 PT-INR Value

| N | Mean      | Standard Deviation | Minimum   | Maximum   |
|---|-----------|--------------------|-----------|-----------|
| 5 | 2.3000000 | 0.0764853          | 2.2100000 | 2.3900000 |

Unique Subject Identifier=1438000000-0017

Assay variable : PTINR\_VAL1 PT-INR Value

N Mean Standard Deviation Minimum Maximum

---

|   |           |           |           |           |
|---|-----------|-----------|-----------|-----------|
| 2 | 2.8100000 | 0.2404163 | 2.6400000 | 2.9800000 |
|---|-----------|-----------|-----------|-----------|

---



Laboratory tests at the time of obtaining Table 2-6 consent, according to the presence or absence of proton-pump inhibitors

Unique Subject Identifier=1438000000-0030

MEANS Procedure

Assay variable : PTINR\_VAL1 PT-INR Value

N Mean Standard Deviation Minimum Maximum

---

|   |           |  |           |           |
|---|-----------|--|-----------|-----------|
| 1 | 1.7200000 |  | 1.7200000 | 1.7200000 |
|---|-----------|--|-----------|-----------|

---

Unique Subject Identifier=1438000000-0036

Assay variable : PTINR\_VAL1 PT-INR Value

N Mean Standard Deviation Minimum Maximum

---

|   |           |  |           |           |
|---|-----------|--|-----------|-----------|
| 1 | 1.1800000 |  | 1.1800000 | 1.1800000 |
|---|-----------|--|-----------|-----------|

---

Unique Subject Identifier=1438000000-0043

Assay variable : PTINR\_VAL1 PT-INR Value

N Mean Standard Deviation Minimum Maximum

---

|   |           |  |           |           |
|---|-----------|--|-----------|-----------|
| 1 | 1.6200000 |  | 1.6200000 | 1.6200000 |
|---|-----------|--|-----------|-----------|

---

Unique Subject Identifier=1438000000-0047

Assay variable : PTINR\_VAL1 PT-INR Value

N Mean Standard Deviation Minimum Maximum

---

|   |           |           |           |           |
|---|-----------|-----------|-----------|-----------|
| 5 | 1.3040000 | 0.0870632 | 1.1700000 | 1.4100000 |
|---|-----------|-----------|-----------|-----------|

---

Laboratory tests at the time of obtaining Table 2-6 consent, according to the presence or absence of proton-pump inhibitors

Unique Subject Identifier=1438000000-0049

MEANS Procedure

Assay variable : PTINR\_VAL1 PT-INR Value

N Mean Standard Deviation Minimum Maximum

---

|   |           |           |           |           |
|---|-----------|-----------|-----------|-----------|
| 4 | 2.4200000 | 0.3988316 | 2.0100000 | 2.8700000 |
|---|-----------|-----------|-----------|-----------|

---

Unique Subject Identifier=1440000000-0001

Assay variable : PTINR\_VAL1 PT-INR Value

N Mean Standard Deviation Minimum Maximum

---

|   |           |           |           |           |
|---|-----------|-----------|-----------|-----------|
| 4 | 1.3000000 | 0.1920069 | 1.1200000 | 1.4900000 |
|---|-----------|-----------|-----------|-----------|

---

Unique Subject Identifier=1440000000-0011

Assay variable : PTINR\_VAL1 PT-INR Value

N Mean Standard Deviation Minimum Maximum

---

|   |           |           |           |           |
|---|-----------|-----------|-----------|-----------|
| 3 | 1.9133333 | 0.5744853 | 1.2500000 | 2.2500000 |
|---|-----------|-----------|-----------|-----------|

---

Unique Subject Identifier=1440000000-0013

Assay variable : PTINR\_VAL1 PT-INR Value

N Mean Standard Deviation Minimum Maximum

---

|   |          |           |          |          |
|---|----------|-----------|----------|----------|
| 3 | 1.960000 | 0.1734935 | 1.850000 | 2.160000 |
|---|----------|-----------|----------|----------|

---

Laboratory tests at the time of obtaining Table 2-6 consent, according to the presence or absence of proton-pump inhibitors

Unique Subject Identifier=1440000000-0014

MEANS Procedure

Assay variable : PTINR\_VAL1 PT-INR Value

N Mean Standard Deviation Minimum Maximum

---

|   |           |           |           |           |
|---|-----------|-----------|-----------|-----------|
| 5 | 2.0280000 | 0.2251000 | 1.7000000 | 2.3000000 |
|---|-----------|-----------|-----------|-----------|

---

Unique Subject Identifier=1440000000-0016

Assay variable : PTINR\_VAL1 PT-INR Value

N Mean Standard Deviation Minimum Maximum

---

|   |           |           |           |           |
|---|-----------|-----------|-----------|-----------|
| 3 | 2.9566667 | 0.2858904 | 2.7100000 | 3.2700000 |
|---|-----------|-----------|-----------|-----------|

---

Unique Subject Identifier=1440000000-0018

Assay variable : PTINR\_VAL1 PT-INR Value

N Mean Standard Deviation Minimum Maximum

---

|   |           |           |           |           |
|---|-----------|-----------|-----------|-----------|
| 5 | 1.3940000 | 0.1556599 | 1.2800000 | 1.6500000 |
|---|-----------|-----------|-----------|-----------|

---

Unique Subject Identifier=1440000000-0019

Assay variable : PTINR\_VAL1 PT-INR Value

N Mean Standard Deviation Minimum Maximum

---

|   |           |           |           |           |
|---|-----------|-----------|-----------|-----------|
| 2 | 1.1050000 | 0.0212132 | 1.0900000 | 1.1200000 |
|---|-----------|-----------|-----------|-----------|

---

Laboratory tests at the time of obtaining Table 2-6 consent, according to the presence or absence of proton-pump inhibitors

Unique Subject Identifier=1441000000-0001

MEANS Procedure

Assay variable : PTINR\_VAL1 PT-INR Value

N Mean Standard Deviation Minimum Maximum

---

|   |           |           |           |           |
|---|-----------|-----------|-----------|-----------|
| 5 | 1.7880000 | 0.2462113 | 1.5000000 | 2.1500000 |
|---|-----------|-----------|-----------|-----------|

---

Unique Subject Identifier=1444000000-0009

Assay variable : PTINR\_VAL1 PT-INR Value

N Mean Standard Deviation Minimum Maximum

---

|   |           |           |           |           |
|---|-----------|-----------|-----------|-----------|
| 5 | 1.9260000 | 0.3471023 | 1.4400000 | 2.3000000 |
|---|-----------|-----------|-----------|-----------|

---

Unique Subject Identifier=1444000000-0019

Assay variable : PTINR\_VAL1 PT-INR Value

N Mean Standard Deviation Minimum Maximum

---

|   |           |           |           |           |
|---|-----------|-----------|-----------|-----------|
| 6 | 1.9033333 | 0.1983599 | 1.7300000 | 2.2800000 |
|---|-----------|-----------|-----------|-----------|

---

Unique Subject Identifier=1444000000-0040

Assay variable : PTINR\_VAL1 PT-INR Value

N Mean Standard Deviation Minimum Maximum

---

|   |           |           |           |           |
|---|-----------|-----------|-----------|-----------|
| 6 | 2.0050000 | 0.3040230 | 1.6500000 | 2.5200000 |
|---|-----------|-----------|-----------|-----------|

---



Laboratory tests at the time of obtaining Table 2-6 consent, according to the presence or absence of proton-pump inhibitors

Unique Subject Identifier=1444000000-0045

MEANS Procedure

Assay variable : PTINR\_VAL1 PT-INR Value

N Mean Standard Deviation Minimum Maximum

---

|   |           |           |           |           |
|---|-----------|-----------|-----------|-----------|
| 6 | 1.9616667 | 0.5192462 | 1.3400000 | 2.8100000 |
|---|-----------|-----------|-----------|-----------|

---

Unique Subject Identifier=1444000000-0048

Assay variable : PTINR\_VAL1 PT-INR Value

N Mean Standard Deviation Minimum Maximum

---

|   |           |           |           |           |
|---|-----------|-----------|-----------|-----------|
| 6 | 2.3050000 | 0.4026289 | 1.8500000 | 3.0000000 |
|---|-----------|-----------|-----------|-----------|

---

Unique Subject Identifier=1446000000-0004

Assay variable : PTINR\_VAL1 PT-INR Value

N Mean Standard Deviation Minimum Maximum

---

|   |           |           |           |           |
|---|-----------|-----------|-----------|-----------|
| 5 | 1.6200000 | 0.1095445 | 1.5000000 | 1.8000000 |
|---|-----------|-----------|-----------|-----------|

---

Unique Subject Identifier=1446000000-0010

Assay variable : PTINR\_VAL1 PT-INR Value

N Mean Standard Deviation Minimum Maximum

---

|   |           |           |           |           |
|---|-----------|-----------|-----------|-----------|
| 3 | 1.7666667 | 0.2081666 | 1.6000000 | 2.0000000 |
|---|-----------|-----------|-----------|-----------|

---

Laboratory tests at the time of obtaining Table 2-6 consent, according to the presence or absence of proton-pump inhibitors

Unique Subject Identifier=1446000000-0012

MEANS Procedure

Assay variable : PTINR\_VAL1 PT-INR Value

N Mean Standard Deviation Minimum Maximum

---

|   |           |           |           |           |
|---|-----------|-----------|-----------|-----------|
| 3 | 1.8666667 | 0.0577350 | 1.8000000 | 1.9000000 |
|---|-----------|-----------|-----------|-----------|

---

Unique Subject Identifier=1446000000-0014

Assay variable : PTINR\_VAL1 PT-INR Value

N Mean Standard Deviation Minimum Maximum

---

|   |           |           |           |           |
|---|-----------|-----------|-----------|-----------|
| 6 | 1.9666667 | 0.2160247 | 1.6000000 | 2.2000000 |
|---|-----------|-----------|-----------|-----------|

---

Unique Subject Identifier=1448000000-0002

Assay variable : PTINR\_VAL1 PT-INR Value

N Mean Standard Deviation Minimum Maximum

---

|   |           |  |           |           |
|---|-----------|--|-----------|-----------|
| 1 | 1.4300000 |  | 1.4300000 | 1.4300000 |
|---|-----------|--|-----------|-----------|

---

Unique Subject Identifier=1448000000-0004

Assay variable : PTINR\_VAL1 PT-INR Value

N Mean Standard Deviation Minimum Maximum

---

|   |           |           |           |           |
|---|-----------|-----------|-----------|-----------|
| 2 | 1.6800000 | 0.1697056 | 1.5600000 | 1.8000000 |
|---|-----------|-----------|-----------|-----------|

---

Laboratory tests at the time of obtaining Table 2-6 consent, according to the presence or absence of proton-pump inhibitors

Unique Subject Identifier=1448000000-0009

MEANS Procedure

Assay variable : PTINR\_VAL1 PT-INR Value

| N | Mean      | Standard Deviation | Minimum   | Maximum   |
|---|-----------|--------------------|-----------|-----------|
| 2 | 1.6750000 | 0.0070711          | 1.6700000 | 1.6800000 |

Unique Subject Identifier=1448000000-0016

Assay variable : PTINR\_VAL1 PT-INR Value

| N | Mean      | Standard Deviation | Minimum   | Maximum   |
|---|-----------|--------------------|-----------|-----------|
| 2 | 2.1150000 | 0.6434672          | 1.6600000 | 2.5700000 |

Unique Subject Identifier=1449000000-0003

Assay variable : PTINR\_VAL1 PT-INR Value

| N | Mean      | Standard Deviation | Minimum   | Maximum   |
|---|-----------|--------------------|-----------|-----------|
| 5 | 2.2800000 | 0.2863564          | 1.9000000 | 2.7000000 |

Unique Subject Identifier=1451000000-0001

Assay variable : PTINR\_VAL1 PT-INR Value

N Mean Standard Deviation Minimum Maximum

---

|   |          |           |          |          |
|---|----------|-----------|----------|----------|
| 6 | 1.950000 | 0.1378405 | 1.800000 | 2.100000 |
|---|----------|-----------|----------|----------|

---

Laboratory tests at the time of obtaining Table 2-6 consent, according to the presence or absence of proton-pump inhibitors

Unique Subject Identifier=1451000000-0002

MEANS Procedure

Assay variable : PTINR\_VAL1 PT-INR Value

N Mean Standard Deviation Minimum Maximum

---

|   |           |           |           |           |
|---|-----------|-----------|-----------|-----------|
| 2 | 1.8000000 | 0.1414214 | 1.7000000 | 1.9000000 |
|---|-----------|-----------|-----------|-----------|

---

Unique Subject Identifier=1451000000-0003

Assay variable : PTINR\_VAL1 PT-INR Value

N Mean Standard Deviation Minimum Maximum

---

|   |           |           |           |           |
|---|-----------|-----------|-----------|-----------|
| 4 | 1.6500000 | 0.3696846 | 1.4000000 | 2.2000000 |
|---|-----------|-----------|-----------|-----------|

---

Unique Subject Identifier=1451000000-0004

Assay variable : PTINR\_VAL1 PT-INR Value

N Mean Standard Deviation Minimum Maximum

---

|   |           |           |           |           |
|---|-----------|-----------|-----------|-----------|
| 3 | 2.3000000 | 0.5567764 | 1.8000000 | 2.9000000 |
|---|-----------|-----------|-----------|-----------|

---

Unique Subject Identifier=1451000000-0005

Assay variable : PTINR\_VAL1 PT-INR Value

N Mean Standard Deviation Minimum Maximum

---

|   |          |           |          |          |
|---|----------|-----------|----------|----------|
| 5 | 2.220000 | 0.2774887 | 1.900000 | 2.500000 |
|---|----------|-----------|----------|----------|

---



Laboratory tests at the time of obtaining Table 2-6 consent, according to the presence or absence of proton-pump inhibitors

Unique Subject Identifier=1451000000-0007

MEANS Procedure

Assay variable : PTINR\_VAL1 PT-INR Value

| N | Mean      | Standard Deviation | Minimum   | Maximum   |
|---|-----------|--------------------|-----------|-----------|
| 6 | 2.0000000 | 0.2190890          | 1.7000000 | 2.3000000 |

Unique Subject Identifier=1451000000-0012

Assay variable : PTINR\_VAL1 PT-INR Value

| N | Mean      | Standard Deviation | Minimum   | Maximum   |
|---|-----------|--------------------|-----------|-----------|
| 6 | 1.8500000 | 0.1974842          | 1.6000000 | 2.2000000 |

Unique Subject Identifier=1451000000-0013

Assay variable : PTINR\_VAL1 PT-INR Value

| N | Mean      | Standard Deviation | Minimum   | Maximum   |
|---|-----------|--------------------|-----------|-----------|
| 6 | 1.8166667 | 0.2714160          | 1.5000000 | 2.3000000 |

Unique Subject Identifier=1451000000-0018

Assay variable : PTINR\_VAL1 PT-INR Value

N Mean Standard Deviation Minimum Maximum

---

|   |           |           |           |           |
|---|-----------|-----------|-----------|-----------|
| 6 | 1.9666667 | 0.4082483 | 1.3000000 | 2.5000000 |
|---|-----------|-----------|-----------|-----------|

---

Laboratory tests at the time of obtaining Table 2-6 consent, according to the presence or absence of proton-pump inhibitors

Unique Subject Identifier=1451000000-0019

MEANS Procedure

Assay variable : PTINR\_VAL1 PT-INR Value

| N | Mean      | Standard Deviation | Minimum   | Maximum   |
|---|-----------|--------------------|-----------|-----------|
| 2 | 1.9500000 | 0.6363961          | 1.5000000 | 2.4000000 |

Unique Subject Identifier=1451000000-0021

Assay variable : PTINR\_VAL1 PT-INR Value

| N | Mean      | Standard Deviation | Minimum   | Maximum   |
|---|-----------|--------------------|-----------|-----------|
| 6 | 1.9500000 | 0.1760682          | 1.8000000 | 2.2000000 |

Unique Subject Identifier=1451000000-0023

Assay variable : PTINR\_VAL1 PT-INR Value

| N | Mean      | Standard Deviation | Minimum   | Maximum   |
|---|-----------|--------------------|-----------|-----------|
| 6 | 1.7833333 | 0.1329160          | 1.7000000 | 2.0000000 |

Unique Subject Identifier=1451000000-0024

Assay variable : PTINR\_VAL1 PT-INR Value

N Mean Standard Deviation Minimum Maximum

---

|   |           |           |           |           |
|---|-----------|-----------|-----------|-----------|
| 6 | 2.5333333 | 0.6377042 | 2.0000000 | 3.8000000 |
|---|-----------|-----------|-----------|-----------|

---

Laboratory tests at the time of obtaining Table 2-6 consent, according to the presence or absence of proton-pump inhibitors

Unique Subject Identifier=1451000000-0025

MEANS Procedure

Assay variable : PTINR\_VAL1 PT-INR Value

N Mean Standard Deviation Minimum Maximum

---

|   |           |  |           |           |
|---|-----------|--|-----------|-----------|
| 1 | 2.9000000 |  | 2.9000000 | 2.9000000 |
|---|-----------|--|-----------|-----------|

---

Unique Subject Identifier=1451000000-0026

Assay variable : PTINR\_VAL1 PT-INR Value

N Mean Standard Deviation Minimum Maximum

---

|   |           |           |           |           |
|---|-----------|-----------|-----------|-----------|
| 6 | 1.9000000 | 0.4098780 | 1.4000000 | 2.5000000 |
|---|-----------|-----------|-----------|-----------|

---

Unique Subject Identifier=1451000000-0027

Assay variable : PTINR\_VAL1 PT-INR Value

N Mean Standard Deviation Minimum Maximum

---

|   |           |           |           |           |
|---|-----------|-----------|-----------|-----------|
| 5 | 2.0800000 | 0.1788854 | 1.9000000 | 2.3000000 |
|---|-----------|-----------|-----------|-----------|

---

Unique Subject Identifier=1451000000-0028

Assay variable : PTINR\_VAL1 PT-INR Value

N Mean Standard Deviation Minimum Maximum

---

|   |          |          |          |          |
|---|----------|----------|----------|----------|
| 6 | 2.250000 | 0.418330 | 1.600000 | 2.800000 |
|---|----------|----------|----------|----------|

---

Laboratory tests at the time of obtaining Table 2-6 consent, according to the presence or absence of proton-pump inhibitors

Unique Subject Identifier=1451000000-0029

MEANS Procedure

Assay variable : PTINR\_VAL1 PT-INR Value

N Mean Standard Deviation Minimum Maximum

---

|   |           |           |           |           |
|---|-----------|-----------|-----------|-----------|
| 6 | 1.8333333 | 0.2250926 | 1.6000000 | 2.2000000 |
|---|-----------|-----------|-----------|-----------|

---

Unique Subject Identifier=1451000000-0030

Assay variable : PTINR\_VAL1 PT-INR Value

N Mean Standard Deviation Minimum Maximum

---

|   |           |           |           |           |
|---|-----------|-----------|-----------|-----------|
| 5 | 2.3600000 | 1.0334409 | 1.3000000 | 3.7000000 |
|---|-----------|-----------|-----------|-----------|

---

Unique Subject Identifier=1451000000-0031

Assay variable : PTINR\_VAL1 PT-INR Value

N Mean Standard Deviation Minimum Maximum

---

|   |           |           |           |           |
|---|-----------|-----------|-----------|-----------|
| 6 | 1.7333333 | 0.1966384 | 1.4000000 | 2.0000000 |
|---|-----------|-----------|-----------|-----------|

---

Unique Subject Identifier=1451000000-0032

Assay variable : PTINR\_VAL1 PT-INR Value

N Mean Standard Deviation Minimum Maximum

---

|   |           |           |           |           |
|---|-----------|-----------|-----------|-----------|
| 6 | 1.8500000 | 0.3728270 | 1.4000000 | 2.3000000 |
|---|-----------|-----------|-----------|-----------|

---



Laboratory tests at the time of obtaining Table 2-6 consent, according to the presence or absence of proton-pump inhibitors

Unique Subject Identifier=1451000000-0033

MEANS Procedure

Assay variable : PTINR\_VAL1 PT-INR Value

N Mean Standard Deviation Minimum Maximum

---

|   |           |           |           |           |
|---|-----------|-----------|-----------|-----------|
| 6 | 1.2450000 | 0.1819615 | 1.0600000 | 1.5000000 |
|---|-----------|-----------|-----------|-----------|

---

Unique Subject Identifier=1451000000-0034

Assay variable : PTINR\_VAL1 PT-INR Value

N Mean Standard Deviation Minimum Maximum

---

|   |           |           |           |           |
|---|-----------|-----------|-----------|-----------|
| 6 | 1.8666667 | 0.1632993 | 1.6000000 | 2.1000000 |
|---|-----------|-----------|-----------|-----------|

---

Unique Subject Identifier=1451000000-0035

Assay variable : PTINR\_VAL1 PT-INR Value

N Mean Standard Deviation Minimum Maximum

---

|   |           |           |           |           |
|---|-----------|-----------|-----------|-----------|
| 6 | 2.5333333 | 0.2338090 | 2.4000000 | 3.0000000 |
|---|-----------|-----------|-----------|-----------|

---

Unique Subject Identifier=1451000000-0040

Assay variable : PTINR\_VAL1 PT-INR Value

N Mean Standard Deviation Minimum Maximum

---

|   |           |           |           |           |
|---|-----------|-----------|-----------|-----------|
| 6 | 2.2833333 | 0.8886319 | 1.5000000 | 4.0000000 |
|---|-----------|-----------|-----------|-----------|

---

Laboratory tests at the time of obtaining Table 2-6 consent, according to the presence or absence of proton-pump inhibitors

Unique Subject Identifier=1451000000-0042

MEANS Procedure

Assay variable : PTINR\_VAL1 PT-INR Value

N Mean Standard Deviation Minimum Maximum

---

|   |           |           |           |           |
|---|-----------|-----------|-----------|-----------|
| 6 | 1.9333333 | 0.2160247 | 1.6000000 | 2.2000000 |
|---|-----------|-----------|-----------|-----------|

---

Unique Subject Identifier=1451000000-0043

Assay variable : PTINR\_VAL1 PT-INR Value

N Mean Standard Deviation Minimum Maximum

---

|   |           |           |           |           |
|---|-----------|-----------|-----------|-----------|
| 6 | 1.8833333 | 0.2786874 | 1.6000000 | 2.3000000 |
|---|-----------|-----------|-----------|-----------|

---

Unique Subject Identifier=1451000000-0044

Assay variable : PTINR\_VAL1 PT-INR Value

N Mean Standard Deviation Minimum Maximum

---

|   |           |           |           |           |
|---|-----------|-----------|-----------|-----------|
| 6 | 2.2166667 | 0.5636193 | 1.6000000 | 2.9000000 |
|---|-----------|-----------|-----------|-----------|

---

Unique Subject Identifier=1451000000-0046

Assay variable : PTINR\_VAL1 PT-INR Value

N Mean Standard Deviation Minimum Maximum

---

|   |          |           |          |          |
|---|----------|-----------|----------|----------|
| 6 | 1.500000 | 0.1673320 | 1.300000 | 1.700000 |
|---|----------|-----------|----------|----------|

---

Laboratory tests at the time of obtaining Table 2-6 consent, according to the presence or absence of proton-pump inhibitors

Unique Subject Identifier=1451000000-0047

MEANS Procedure

Assay variable : PTINR\_VAL1 PT-INR Value

N Mean Standard Deviation Minimum Maximum

---

|   |           |           |           |           |
|---|-----------|-----------|-----------|-----------|
| 6 | 2.4833333 | 0.8232051 | 1.4000000 | 3.5000000 |
|---|-----------|-----------|-----------|-----------|

---

Unique Subject Identifier=1451000000-0048

Assay variable : PTINR\_VAL1 PT-INR Value

N Mean Standard Deviation Minimum Maximum

---

|   |           |           |           |           |
|---|-----------|-----------|-----------|-----------|
| 6 | 1.8000000 | 0.6066300 | 1.1000000 | 2.9000000 |
|---|-----------|-----------|-----------|-----------|

---

Unique Subject Identifier=1451000000-0049

Assay variable : PTINR\_VAL1 PT-INR Value

N Mean Standard Deviation Minimum Maximum

---

|   |           |           |           |           |
|---|-----------|-----------|-----------|-----------|
| 6 | 2.0833333 | 0.3544949 | 1.7000000 | 2.6000000 |
|---|-----------|-----------|-----------|-----------|

---

Unique Subject Identifier=1451000000-0050

Assay variable : PTINR\_VAL1 PT-INR Value

N Mean Standard Deviation Minimum Maximum

---

|   |           |           |           |           |
|---|-----------|-----------|-----------|-----------|
| 6 | 2.3166667 | 0.9537645 | 1.1000000 | 3.9000000 |
|---|-----------|-----------|-----------|-----------|

---

Laboratory tests at the time of obtaining Table 2-6 consent, according to the presence or absence of proton-pump inhibitors

Unique Subject Identifier=1451000000-0051

MEANS Procedure

Assay variable : PTINR\_VAL1 PT-INR Value

N Mean Standard Deviation Minimum Maximum

---

|   |           |           |           |           |
|---|-----------|-----------|-----------|-----------|
| 6 | 1.9500000 | 0.3619392 | 1.5000000 | 2.4000000 |
|---|-----------|-----------|-----------|-----------|

---

Unique Subject Identifier=1451000000-0052

Assay variable : PTINR\_VAL1 PT-INR Value

N Mean Standard Deviation Minimum Maximum

---

|   |           |           |           |           |
|---|-----------|-----------|-----------|-----------|
| 6 | 2.0666667 | 0.6314006 | 1.1000000 | 2.8000000 |
|---|-----------|-----------|-----------|-----------|

---

Unique Subject Identifier=1451000000-0053

Assay variable : PTINR\_VAL1 PT-INR Value

N Mean Standard Deviation Minimum Maximum

---

|   |           |           |           |           |
|---|-----------|-----------|-----------|-----------|
| 6 | 1.8666667 | 0.2338090 | 1.5000000 | 2.2000000 |
|---|-----------|-----------|-----------|-----------|

---

Unique Subject Identifier=1451000000-0054

Assay variable : PTINR\_VAL1 PT-INR Value

N Mean Standard Deviation Minimum Maximum

---

|   |          |           |          |          |
|---|----------|-----------|----------|----------|
| 6 | 2.200000 | 0.4472136 | 1.400000 | 2.700000 |
|---|----------|-----------|----------|----------|

---



Laboratory tests at the time of obtaining Table 2-6 consent, according to the presence or absence of proton-pump inhibitors

Unique Subject Identifier=1451000000-0055

MEANS Procedure

Assay variable : PTINR\_VAL1 PT-INR Value

N Mean Standard Deviation Minimum Maximum

---

|   |           |           |           |           |
|---|-----------|-----------|-----------|-----------|
| 6 | 1.7666667 | 0.1861899 | 1.6000000 | 2.1000000 |
|---|-----------|-----------|-----------|-----------|

---

Unique Subject Identifier=1451000000-0063

Assay variable : PTINR\_VAL1 PT-INR Value

N Mean Standard Deviation Minimum Maximum

---

|   |           |           |           |           |
|---|-----------|-----------|-----------|-----------|
| 6 | 1.4666667 | 0.2250926 | 1.1000000 | 1.7000000 |
|---|-----------|-----------|-----------|-----------|

---

Unique Subject Identifier=1452000000-0002

Assay variable : PTINR\_VAL1 PT-INR Value

N Mean Standard Deviation Minimum Maximum

---

|   |           |           |           |           |
|---|-----------|-----------|-----------|-----------|
| 5 | 2.2240000 | 0.2228901 | 1.9100000 | 2.5400000 |
|---|-----------|-----------|-----------|-----------|

---

Unique Subject Identifier=1452000000-0003

Assay variable : PTINR\_VAL1 PT-INR Value

N Mean Standard Deviation Minimum Maximum

---

|   |           |           |           |           |
|---|-----------|-----------|-----------|-----------|
| 6 | 2.4866667 | 0.4723840 | 1.9300000 | 3.2000000 |
|---|-----------|-----------|-----------|-----------|

---

Laboratory tests at the time of obtaining Table 2-6 consent, according to the presence or absence of proton-pump inhibitors

Unique Subject Identifier=1452000000-0004

MEANS Procedure

Assay variable : PTINR\_VAL1 PT-INR Value

N Mean Standard Deviation Minimum Maximum

---

|   |           |           |           |           |
|---|-----------|-----------|-----------|-----------|
| 6 | 2.0100000 | 0.2126029 | 1.7400000 | 2.3200000 |
|---|-----------|-----------|-----------|-----------|

---

Unique Subject Identifier=1452000000-0006

Assay variable : PTINR\_VAL1 PT-INR Value

N Mean Standard Deviation Minimum Maximum

---

|   |           |           |           |           |
|---|-----------|-----------|-----------|-----------|
| 6 | 2.5516667 | 0.2155381 | 2.3600000 | 2.9500000 |
|---|-----------|-----------|-----------|-----------|

---

Unique Subject Identifier=1452000000-0007

Assay variable : PTINR\_VAL1 PT-INR Value

N Mean Standard Deviation Minimum Maximum

---

|   |           |           |           |           |
|---|-----------|-----------|-----------|-----------|
| 5 | 1.8660000 | 0.1379493 | 1.6900000 | 2.0600000 |
|---|-----------|-----------|-----------|-----------|

---

Unique Subject Identifier=1452000000-0008

Assay variable : PTINR\_VAL1 PT-INR Value

N Mean Standard Deviation Minimum Maximum

---

|   |           |           |           |           |
|---|-----------|-----------|-----------|-----------|
| 4 | 2.9475000 | 0.7501278 | 2.5000000 | 4.0700000 |
|---|-----------|-----------|-----------|-----------|

---

Laboratory tests at the time of obtaining Table 2-6 consent, according to the presence or absence of proton-pump inhibitors

Unique Subject Identifier=1452000000-0010

MEANS Procedure

Assay variable : PTINR\_VAL1 PT-INR Value

N Mean Standard Deviation Minimum Maximum

---

|   |           |           |           |           |
|---|-----------|-----------|-----------|-----------|
| 4 | 1.8200000 | 0.4180112 | 1.3800000 | 2.3800000 |
|---|-----------|-----------|-----------|-----------|

---

Unique Subject Identifier=1452000000-0011

Assay variable : PTINR\_VAL1 PT-INR Value

N Mean Standard Deviation Minimum Maximum

---

|   |           |           |           |           |
|---|-----------|-----------|-----------|-----------|
| 6 | 1.7016667 | 0.5537298 | 1.2000000 | 2.7800000 |
|---|-----------|-----------|-----------|-----------|

---

Unique Subject Identifier=1452000000-0012

Assay variable : PTINR\_VAL1 PT-INR Value

N Mean Standard Deviation Minimum Maximum

---

|   |           |           |           |           |
|---|-----------|-----------|-----------|-----------|
| 5 | 1.9400000 | 0.2756810 | 1.5700000 | 2.2500000 |
|---|-----------|-----------|-----------|-----------|

---

Unique Subject Identifier=1452000000-0013

Assay variable : PTINR\_VAL1 PT-INR Value

N Mean Standard Deviation Minimum Maximum

---

|   |          |           |          |          |
|---|----------|-----------|----------|----------|
| 6 | 2.080000 | 0.7291365 | 1.550000 | 3.170000 |
|---|----------|-----------|----------|----------|

---

Laboratory tests at the time of obtaining Table 2-6 consent, according to the presence or absence of proton-pump inhibitors

Unique Subject Identifier=1452000000-0014

MEANS Procedure

Assay variable : PTINR\_VAL1 PT-INR Value

N Mean Standard Deviation Minimum Maximum

---

|   |           |           |           |           |
|---|-----------|-----------|-----------|-----------|
| 6 | 2.6233333 | 0.5473451 | 1.9500000 | 3.2800000 |
|---|-----------|-----------|-----------|-----------|

---

Unique Subject Identifier=1452000000-0015

Assay variable : PTINR\_VAL1 PT-INR Value

N Mean Standard Deviation Minimum Maximum

---

|   |           |           |           |           |
|---|-----------|-----------|-----------|-----------|
| 6 | 2.3266667 | 0.0886942 | 2.2300000 | 2.4500000 |
|---|-----------|-----------|-----------|-----------|

---

Unique Subject Identifier=1452000000-0018

Assay variable : PTINR\_VAL1 PT-INR Value

N Mean Standard Deviation Minimum Maximum

---

|   |           |           |           |           |
|---|-----------|-----------|-----------|-----------|
| 5 | 2.4340000 | 0.4462398 | 1.6900000 | 2.8000000 |
|---|-----------|-----------|-----------|-----------|

---

Unique Subject Identifier=1452000000-0019

Assay variable : PTINR\_VAL1 PT-INR Value

N Mean Standard Deviation Minimum Maximum

---

|   |           |           |           |           |
|---|-----------|-----------|-----------|-----------|
| 5 | 2.5580000 | 0.2932917 | 2.1600000 | 2.8800000 |
|---|-----------|-----------|-----------|-----------|

---



Laboratory tests at the time of obtaining Table 2-6 consent, according to the presence or absence of proton-pump inhibitors

Unique Subject Identifier=1452000000-0020

MEANS Procedure

Assay variable : PTINR\_VAL1 PT-INR Value

N Mean Standard Deviation Minimum Maximum

---

|   |           |           |           |           |
|---|-----------|-----------|-----------|-----------|
| 6 | 2.1000000 | 0.3241605 | 1.8300000 | 2.5700000 |
|---|-----------|-----------|-----------|-----------|

---

Unique Subject Identifier=1452000000-0021

Assay variable : PTINR\_VAL1 PT-INR Value

N Mean Standard Deviation Minimum Maximum

---

|   |           |           |           |           |
|---|-----------|-----------|-----------|-----------|
| 6 | 2.1700000 | 0.2033716 | 1.8900000 | 2.4600000 |
|---|-----------|-----------|-----------|-----------|

---

Unique Subject Identifier=1452000000-0024

Assay variable : PTINR\_VAL1 PT-INR Value

N Mean Standard Deviation Minimum Maximum

---

|   |           |           |           |           |
|---|-----------|-----------|-----------|-----------|
| 6 | 2.1966667 | 0.3460443 | 1.8500000 | 2.7800000 |
|---|-----------|-----------|-----------|-----------|

---

Unique Subject Identifier=1452000000-0025

Assay variable : PTINR\_VAL1 PT-INR Value

N Mean Standard Deviation Minimum Maximum

---

|   |           |           |           |           |
|---|-----------|-----------|-----------|-----------|
| 6 | 1.7983333 | 0.2129241 | 1.5100000 | 2.1600000 |
|---|-----------|-----------|-----------|-----------|

---

Laboratory tests at the time of obtaining Table 2-6 consent, according to the presence or absence of proton-pump inhibitors

Unique Subject Identifier=1452000000-0026

MEANS Procedure

Assay variable : PTINR\_VAL1 PT-INR Value

| N | Mean      | Standard Deviation | Minimum   | Maximum   |
|---|-----------|--------------------|-----------|-----------|
| 4 | 1.6925000 | 0.4897193          | 1.1700000 | 2.1200000 |

Unique Subject Identifier=1452000000-0027

Assay variable : PTINR\_VAL1 PT-INR Value

| N | Mean      | Standard Deviation | Minimum   | Maximum   |
|---|-----------|--------------------|-----------|-----------|
| 5 | 2.0800000 | 0.2931723          | 1.7400000 | 2.4400000 |

Unique Subject Identifier=1452000000-0028

Assay variable : PTINR\_VAL1 PT-INR Value

| N | Mean      | Standard Deviation | Minimum   | Maximum   |
|---|-----------|--------------------|-----------|-----------|
| 6 | 2.2400000 | 0.5422914          | 1.6100000 | 3.2200000 |

Unique Subject Identifier=1452000000-0029

Assay variable : PTINR\_VAL1 PT-INR Value

N Mean Standard Deviation Minimum Maximum

---

|   |          |           |           |           |
|---|----------|-----------|-----------|-----------|
| 6 | 2.483333 | 0.2224110 | 2.2900000 | 2.8800000 |
|---|----------|-----------|-----------|-----------|

---

Laboratory tests at the time of obtaining Table 2-6 consent, according to the presence or absence of proton-pump inhibitors

Unique Subject Identifier=1452000000-0030

MEANS Procedure

Assay variable : PTINR\_VAL1 PT-INR Value

N Mean Standard Deviation Minimum Maximum

---

|   |           |           |           |           |
|---|-----------|-----------|-----------|-----------|
| 6 | 2.4333333 | 0.7724938 | 1.6900000 | 3.8500000 |
|---|-----------|-----------|-----------|-----------|

---

Unique Subject Identifier=1452000000-0031

Assay variable : PTINR\_VAL1 PT-INR Value

N Mean Standard Deviation Minimum Maximum

---

|   |           |           |           |           |
|---|-----------|-----------|-----------|-----------|
| 6 | 1.8550000 | 0.1693222 | 1.6300000 | 2.1000000 |
|---|-----------|-----------|-----------|-----------|

---

Unique Subject Identifier=1452000000-0033

Assay variable : PTINR\_VAL1 PT-INR Value

N Mean Standard Deviation Minimum Maximum

---

|   |           |           |           |           |
|---|-----------|-----------|-----------|-----------|
| 6 | 1.7133333 | 0.3641245 | 1.2900000 | 2.2700000 |
|---|-----------|-----------|-----------|-----------|

---

Unique Subject Identifier=1452000000-0034

Assay variable : PTINR\_VAL1 PT-INR Value

N Mean Standard Deviation Minimum Maximum

---

|   |           |           |           |           |
|---|-----------|-----------|-----------|-----------|
| 6 | 2.0716667 | 0.2058559 | 1.8700000 | 2.3000000 |
|---|-----------|-----------|-----------|-----------|

---

Laboratory tests at the time of obtaining Table 2-6 consent, according to the presence or absence of proton-pump inhibitors

Unique Subject Identifier=1452000000-0035

MEANS Procedure

Assay variable : PTINR\_VAL1 PT-INR Value

| N | Mean      | Standard Deviation | Minimum   | Maximum   |
|---|-----------|--------------------|-----------|-----------|
| 6 | 2.4700000 | 0.5721888          | 1.6700000 | 3.3300000 |

Unique Subject Identifier=1452000000-0036

Assay variable : PTINR\_VAL1 PT-INR Value

| N | Mean      | Standard Deviation | Minimum   | Maximum   |
|---|-----------|--------------------|-----------|-----------|
| 6 | 2.0600000 | 0.5149369          | 1.7000000 | 3.0700000 |

Unique Subject Identifier=1452000000-0037

Assay variable : PTINR\_VAL1 PT-INR Value

| N | Mean      | Standard Deviation | Minimum   | Maximum   |
|---|-----------|--------------------|-----------|-----------|
| 6 | 1.9033333 | 0.4987852          | 1.2900000 | 2.5900000 |

Unique Subject Identifier=1452000000-0038

Assay variable : PTINR\_VAL1 PT-INR Value

N Mean Standard Deviation Minimum Maximum

---

|   |           |           |           |           |
|---|-----------|-----------|-----------|-----------|
| 4 | 2.0875000 | 0.2972513 | 1.7600000 | 2.4600000 |
|---|-----------|-----------|-----------|-----------|

---



Laboratory tests at the time of obtaining Table 2-6 consent, according to the presence or absence of proton-pump inhibitors

Unique Subject Identifier=1452000000-0040

MEANS Procedure

Assay variable : PTINR\_VAL1 PT-INR Value

| N | Mean     | Standard Deviation | Minimum  | Maximum  |
|---|----------|--------------------|----------|----------|
| 3 | 1.810000 | 0.3704052          | 1.530000 | 2.230000 |

Unique Subject Identifier=1452000000-0041

Assay variable : PTINR\_VAL1 PT-INR Value

| N | Mean     | Standard Deviation | Minimum  | Maximum  |
|---|----------|--------------------|----------|----------|
| 6 | 2.135000 | 0.7433102          | 1.220000 | 3.020000 |

Unique Subject Identifier=1452000000-0042

Assay variable : PTINR\_VAL1 PT-INR Value

| N | Mean      | Standard Deviation | Minimum  | Maximum  |
|---|-----------|--------------------|----------|----------|
| 6 | 1.8716667 | 0.3365363          | 1.550000 | 2.380000 |

Unique Subject Identifier=1452000000-0048

Assay variable : PTINR\_VAL1 PT-INR Value

N Mean Standard Deviation Minimum Maximum

---

|   |          |           |          |          |
|---|----------|-----------|----------|----------|
| 5 | 2.062000 | 0.6736245 | 1.360000 | 3.050000 |
|---|----------|-----------|----------|----------|

---

Laboratory tests at the time of obtaining Table 2-6 consent, according to the presence or absence of proton-pump inhibitors

Unique Subject Identifier=1452000000-0049

MEANS Procedure

Assay variable : PTINR\_VAL1 PT-INR Value

N Mean Standard Deviation Minimum Maximum

---

|   |           |           |           |           |
|---|-----------|-----------|-----------|-----------|
| 5 | 2.5280000 | 0.4078235 | 2.0800000 | 3.1000000 |
|---|-----------|-----------|-----------|-----------|

---

Unique Subject Identifier=1452000000-0050

Assay variable : PTINR\_VAL1 PT-INR Value

N Mean Standard Deviation Minimum Maximum

---

|   |           |           |           |           |
|---|-----------|-----------|-----------|-----------|
| 5 | 2.4340000 | 0.2597691 | 2.1000000 | 2.7800000 |
|---|-----------|-----------|-----------|-----------|

---

Unique Subject Identifier=1452000000-0052

Assay variable : PTINR\_VAL1 PT-INR Value

N Mean Standard Deviation Minimum Maximum

---

|   |           |           |           |           |
|---|-----------|-----------|-----------|-----------|
| 4 | 2.4450000 | 0.3181719 | 2.0800000 | 2.8300000 |
|---|-----------|-----------|-----------|-----------|

---

Unique Subject Identifier=1452000000-0054

Assay variable : PTINR\_VAL1 PT-INR Value

N Mean Standard Deviation Minimum Maximum

---

|   |           |           |           |           |
|---|-----------|-----------|-----------|-----------|
| 5 | 1.9160000 | 0.5048564 | 1.3600000 | 2.4200000 |
|---|-----------|-----------|-----------|-----------|

---

Laboratory tests at the time of obtaining Table 2-6 consent, according to the presence or absence of proton-pump inhibitors

Unique Subject Identifier=1452000000-0055

MEANS Procedure

Assay variable : PTINR\_VAL1 PT-INR Value

N Mean Standard Deviation Minimum Maximum

---

|   |           |           |           |           |
|---|-----------|-----------|-----------|-----------|
| 5 | 2.1360000 | 0.8257300 | 1.2200000 | 3.2500000 |
|---|-----------|-----------|-----------|-----------|

---

Unique Subject Identifier=1452000000-0056

Assay variable : PTINR\_VAL1 PT-INR Value

N Mean Standard Deviation Minimum Maximum

---

|   |           |           |           |           |
|---|-----------|-----------|-----------|-----------|
| 4 | 1.7975000 | 0.1203813 | 1.6300000 | 1.9100000 |
|---|-----------|-----------|-----------|-----------|

---

Unique Subject Identifier=1452000000-0057

Assay variable : PTINR\_VAL1 PT-INR Value

N Mean Standard Deviation Minimum Maximum

---

|   |           |           |           |           |
|---|-----------|-----------|-----------|-----------|
| 3 | 1.3766667 | 0.3212994 | 1.1300000 | 1.7400000 |
|---|-----------|-----------|-----------|-----------|

---

Unique Subject Identifier=1452000000-0059

Assay variable : PTINR\_VAL1 PT-INR Value

N Mean Standard Deviation Minimum Maximum

---

|   |          |           |          |          |
|---|----------|-----------|----------|----------|
| 6 | 1.980000 | 0.1879362 | 1.840000 | 2.340000 |
|---|----------|-----------|----------|----------|

---

Laboratory tests at the time of obtaining Table 2-6 consent, according to the presence or absence of proton-pump inhibitors

Unique Subject Identifier=1452000000-0060

MEANS Procedure

Assay variable : PTINR\_VAL1 PT-INR Value

N Mean Standard Deviation Minimum Maximum

---

|   |           |           |           |           |
|---|-----------|-----------|-----------|-----------|
| 5 | 1.6220000 | 0.2580116 | 1.2500000 | 1.9400000 |
|---|-----------|-----------|-----------|-----------|

---

Unique Subject Identifier=1452000000-0061

Assay variable : PTINR\_VAL1 PT-INR Value

N Mean Standard Deviation Minimum Maximum

---

|   |           |           |           |           |
|---|-----------|-----------|-----------|-----------|
| 4 | 1.8200000 | 0.3842742 | 1.2500000 | 2.0800000 |
|---|-----------|-----------|-----------|-----------|

---

Unique Subject Identifier=1452000000-0062

Assay variable : PTINR\_VAL1 PT-INR Value

N Mean Standard Deviation Minimum Maximum

---

|   |           |           |           |           |
|---|-----------|-----------|-----------|-----------|
| 5 | 2.0620000 | 0.4810094 | 1.3000000 | 2.5500000 |
|---|-----------|-----------|-----------|-----------|

---

Unique Subject Identifier=1452000000-0065

Assay variable : PTINR\_VAL1 PT-INR Value

N Mean Standard Deviation Minimum Maximum

---

|   |           |           |           |           |
|---|-----------|-----------|-----------|-----------|
| 4 | 1.9900000 | 0.2694439 | 1.6400000 | 2.2700000 |
|---|-----------|-----------|-----------|-----------|

---



Laboratory tests at the time of obtaining Table 2-6 consent, according to the presence or absence of proton-pump inhibitors

Unique Subject Identifier=1452000000-0066

MEANS Procedure

Assay variable : PTINR\_VAL1 PT-INR Value

N Mean Standard Deviation Minimum Maximum

---

|   |           |           |           |           |
|---|-----------|-----------|-----------|-----------|
| 5 | 2.2800000 | 0.5793099 | 1.7000000 | 3.1300000 |
|---|-----------|-----------|-----------|-----------|

---

Unique Subject Identifier=1452000000-0067

Assay variable : PTINR\_VAL1 PT-INR Value

N Mean Standard Deviation Minimum Maximum

---

|   |           |           |           |           |
|---|-----------|-----------|-----------|-----------|
| 6 | 2.0500000 | 0.1951410 | 1.8000000 | 2.3000000 |
|---|-----------|-----------|-----------|-----------|

---

Unique Subject Identifier=1452000000-0068

Assay variable : PTINR\_VAL1 PT-INR Value

N Mean Standard Deviation Minimum Maximum

---

|   |           |           |           |           |
|---|-----------|-----------|-----------|-----------|
| 6 | 1.9450000 | 0.2251888 | 1.7600000 | 2.3800000 |
|---|-----------|-----------|-----------|-----------|

---

Unique Subject Identifier=1452000000-0069

Assay variable : PTINR\_VAL1 PT-INR Value

N Mean Standard Deviation Minimum Maximum

---

|   |          |           |          |          |
|---|----------|-----------|----------|----------|
| 6 | 2.188333 | 0.1330288 | 2.060000 | 2.420000 |
|---|----------|-----------|----------|----------|

---

Laboratory tests at the time of obtaining Table 2-6 consent, according to the presence or absence of proton-pump inhibitors

Unique Subject Identifier=1452000000-0074

MEANS Procedure

Assay variable : PTINR\_VAL1 PT-INR Value

N Mean Standard Deviation Minimum Maximum

---

|   |           |           |           |           |
|---|-----------|-----------|-----------|-----------|
| 6 | 2.4333333 | 0.2188759 | 2.1300000 | 2.7300000 |
|---|-----------|-----------|-----------|-----------|

---

Unique Subject Identifier=1452000000-0080

Assay variable : PTINR\_VAL1 PT-INR Value

N Mean Standard Deviation Minimum Maximum

---

|   |           |           |           |           |
|---|-----------|-----------|-----------|-----------|
| 6 | 2.2450000 | 0.3602638 | 1.8300000 | 2.8000000 |
|---|-----------|-----------|-----------|-----------|

---

Unique Subject Identifier=1452000000-0081

Assay variable : PTINR\_VAL1 PT-INR Value

N Mean Standard Deviation Minimum Maximum

---

|   |           |           |           |           |
|---|-----------|-----------|-----------|-----------|
| 6 | 1.6683333 | 0.2830135 | 1.1400000 | 1.9400000 |
|---|-----------|-----------|-----------|-----------|

---

Unique Subject Identifier=1452000000-0083

Assay variable : PTINR\_VAL1 PT-INR Value

N Mean Standard Deviation Minimum Maximum

---

|   |           |           |           |           |
|---|-----------|-----------|-----------|-----------|
| 6 | 2.3450000 | 0.1808591 | 2.0600000 | 2.5100000 |
|---|-----------|-----------|-----------|-----------|

---

Laboratory tests at the time of obtaining Table 2-6 consent, according to the presence or absence of proton-pump inhibitors

Unique Subject Identifier=1452000000-0084

MEANS Procedure

Assay variable : PTINR\_VAL1 PT-INR Value

N Mean Standard Deviation Minimum Maximum

---

|   |           |           |           |           |
|---|-----------|-----------|-----------|-----------|
| 2 | 1.7850000 | 0.3747666 | 1.5200000 | 2.0500000 |
|---|-----------|-----------|-----------|-----------|

---

Unique Subject Identifier=1452000000-0086

Assay variable : PTINR\_VAL1 PT-INR Value

N Mean Standard Deviation Minimum Maximum

---

|   |           |           |           |           |
|---|-----------|-----------|-----------|-----------|
| 2 | 1.7200000 | 0.2828427 | 1.5200000 | 1.9200000 |
|---|-----------|-----------|-----------|-----------|

---

Unique Subject Identifier=1452000000-0090

Assay variable : PTINR\_VAL1 PT-INR Value

N Mean Standard Deviation Minimum Maximum

---

|   |           |           |           |           |
|---|-----------|-----------|-----------|-----------|
| 6 | 1.9233333 | 0.3040833 | 1.6300000 | 2.3100000 |
|---|-----------|-----------|-----------|-----------|

---

Unique Subject Identifier=1452000000-0095

Assay variable : PTINR\_VAL1 PT-INR Value

N Mean Standard Deviation Minimum Maximum

---

|   |           |           |           |           |
|---|-----------|-----------|-----------|-----------|
| 3 | 1.9766667 | 0.5643876 | 1.3300000 | 2.3700000 |
|---|-----------|-----------|-----------|-----------|

---

Laboratory tests at the time of obtaining Table 2-6 consent, according to the presence or absence of proton-pump inhibitors

Unique Subject Identifier=1452000000-0101

MEANS Procedure

Assay variable : PTINR\_VAL1 PT-INR Value

N Mean Standard Deviation Minimum Maximum

---

|   |           |           |           |           |
|---|-----------|-----------|-----------|-----------|
| 6 | 1.8083333 | 0.1702253 | 1.6600000 | 2.1100000 |
|---|-----------|-----------|-----------|-----------|

---

Unique Subject Identifier=1452000000-0103

Assay variable : PTINR\_VAL1 PT-INR Value

N Mean Standard Deviation Minimum Maximum

---

|   |           |           |           |           |
|---|-----------|-----------|-----------|-----------|
| 6 | 2.3233333 | 0.2125716 | 2.0100000 | 2.6600000 |
|---|-----------|-----------|-----------|-----------|

---

Unique Subject Identifier=1452000000-0107

Assay variable : PTINR\_VAL1 PT-INR Value

N Mean Standard Deviation Minimum Maximum

---

|   |           |           |           |           |
|---|-----------|-----------|-----------|-----------|
| 4 | 2.1375000 | 0.9040050 | 1.1400000 | 3.2200000 |
|---|-----------|-----------|-----------|-----------|

---

Unique Subject Identifier=1452000000-0109

Assay variable : PTINR\_VAL1 PT-INR Value

N Mean Standard Deviation Minimum Maximum

---

|   |           |           |           |           |
|---|-----------|-----------|-----------|-----------|
| 6 | 1.8366667 | 0.2488909 | 1.4900000 | 2.2100000 |
|---|-----------|-----------|-----------|-----------|

---



Laboratory tests at the time of obtaining Table 2-6 consent, according to the presence or absence of proton-pump inhibitors

Unique Subject Identifier=1454000000-0005

MEANS Procedure

Assay variable : PTINR\_VAL1 PT-INR Value

N Mean Standard Deviation Minimum Maximum

---

|   |           |           |           |           |
|---|-----------|-----------|-----------|-----------|
| 6 | 2.4533333 | 0.4206978 | 1.9000000 | 2.9500000 |
|---|-----------|-----------|-----------|-----------|

---

Unique Subject Identifier=1454000000-0022

Assay variable : PTINR\_VAL1 PT-INR Value

N Mean Standard Deviation Minimum Maximum

---

|   |           |           |           |           |
|---|-----------|-----------|-----------|-----------|
| 6 | 1.9100000 | 0.6382789 | 1.1400000 | 2.5600000 |
|---|-----------|-----------|-----------|-----------|

---

Unique Subject Identifier=1454000000-0028

Assay variable : PTINR\_VAL1 PT-INR Value

N Mean Standard Deviation Minimum Maximum

---

|   |           |           |           |           |
|---|-----------|-----------|-----------|-----------|
| 6 | 2.1466667 | 0.3545514 | 1.8300000 | 2.8200000 |
|---|-----------|-----------|-----------|-----------|

---

Unique Subject Identifier=1454000000-0039

Assay variable : PTINR\_VAL1 PT-INR Value

N Mean Standard Deviation Minimum Maximum

---

|   |           |           |           |           |
|---|-----------|-----------|-----------|-----------|
| 6 | 2.2066667 | 0.3184755 | 1.6400000 | 2.4800000 |
|---|-----------|-----------|-----------|-----------|

---

Laboratory tests at the time of obtaining Table 2-6 consent, according to the presence or absence of proton-pump inhibitors

Unique Subject Identifier=1454000000-0061

MEANS Procedure

Assay variable : PTINR\_VAL1 PT-INR Value

| N | Mean      | Standard Deviation | Minimum   | Maximum   |
|---|-----------|--------------------|-----------|-----------|
| 5 | 2.0200000 | 0.2285826          | 1.7200000 | 2.3300000 |

Unique Subject Identifier=1454000000-0064

Assay variable : PTINR\_VAL1 PT-INR Value

| N | Mean      | Standard Deviation | Minimum   | Maximum   |
|---|-----------|--------------------|-----------|-----------|
| 6 | 1.9216667 | 0.1290607          | 1.7700000 | 2.1100000 |

Unique Subject Identifier=1454000000-0066

Assay variable : PTINR\_VAL1 PT-INR Value

| N | Mean      | Standard Deviation | Minimum   | Maximum   |
|---|-----------|--------------------|-----------|-----------|
| 1 | 2.1100000 |                    | 2.1100000 | 2.1100000 |

Unique Subject Identifier=1454000000-0067

Assay variable : PTINR\_VAL1 PT-INR Value

N Mean Standard Deviation Minimum Maximum

---

|   |          |           |          |          |
|---|----------|-----------|----------|----------|
| 6 | 2.103333 | 0.2608959 | 1.810000 | 2.560000 |
|---|----------|-----------|----------|----------|

---

Laboratory tests at the time of obtaining Table 2-6 consent, according to the presence or absence of proton-pump inhibitors

Unique Subject Identifier=1457000000-0001

MEANS Procedure

Assay variable : PTINR\_VAL1 PT-INR Value

N Mean Standard Deviation Minimum Maximum

---

|   |          |           |          |          |
|---|----------|-----------|----------|----------|
| 5 | 1.860000 | 0.4393177 | 1.300000 | 2.500000 |
|---|----------|-----------|----------|----------|

---

Unique Subject Identifier=1463010000-0002

Assay variable : PTINR\_VAL1 PT-INR Value

N Mean Standard Deviation Minimum Maximum

---

|   |          |           |          |          |
|---|----------|-----------|----------|----------|
| 5 | 1.684000 | 0.1745852 | 1.440000 | 1.840000 |
|---|----------|-----------|----------|----------|

---

Unique Subject Identifier=1463010000-0009

Assay variable : PTINR\_VAL1 PT-INR Value

N Mean Standard Deviation Minimum Maximum

---

|   |          |           |          |          |
|---|----------|-----------|----------|----------|
| 5 | 2.016000 | 0.6467070 | 1.300000 | 2.850000 |
|---|----------|-----------|----------|----------|

---

Unique Subject Identifier=1463010000-0014

Assay variable : PTINR\_VAL1 PT-INR Value

N Mean Standard Deviation Minimum Maximum

---

|   |           |           |           |           |
|---|-----------|-----------|-----------|-----------|
| 5 | 1.3880000 | 0.1267675 | 1.2800000 | 1.5900000 |
|---|-----------|-----------|-----------|-----------|

---

Laboratory tests at the time of obtaining Table 2-6 consent, according to the presence or absence of proton-pump inhibitors

Unique Subject Identifier=1463010000-0017

MEANS Procedure

Assay variable : PTINR\_VAL1 PT-INR Value

N Mean Standard Deviation Minimum Maximum

---

|   |           |           |           |           |
|---|-----------|-----------|-----------|-----------|
| 6 | 1.7950000 | 0.1617096 | 1.6400000 | 2.0700000 |
|---|-----------|-----------|-----------|-----------|

---

Unique Subject Identifier=1463010000-0018

Assay variable : PTINR\_VAL1 PT-INR Value

N Mean Standard Deviation Minimum Maximum

---

|   |           |           |           |           |
|---|-----------|-----------|-----------|-----------|
| 6 | 2.0333333 | 0.3765988 | 1.4900000 | 2.6100000 |
|---|-----------|-----------|-----------|-----------|

---

Unique Subject Identifier=1463010000-0025

Assay variable : PTINR\_VAL1 PT-INR Value

N Mean Standard Deviation Minimum Maximum

---

|   |           |           |           |           |
|---|-----------|-----------|-----------|-----------|
| 6 | 2.2816667 | 0.2688804 | 1.8900000 | 2.6000000 |
|---|-----------|-----------|-----------|-----------|

---

Unique Subject Identifier=1463010000-0030

Assay variable : PTINR\_VAL1 PT-INR Value

N Mean Standard Deviation Minimum Maximum

---

|   |           |           |           |           |
|---|-----------|-----------|-----------|-----------|
| 6 | 1.2266667 | 0.0121106 | 1.2100000 | 1.2400000 |
|---|-----------|-----------|-----------|-----------|

---



Laboratory tests at the time of obtaining Table 2-6 consent, according to the presence or absence of proton-pump inhibitors

Unique Subject Identifier=1463010000-0035

MEANS Procedure

Assay variable : PTINR\_VAL1 PT-INR Value

N Mean Standard Deviation Minimum Maximum

---

|   |           |           |           |           |
|---|-----------|-----------|-----------|-----------|
| 5 | 2.4900000 | 0.4252646 | 1.8200000 | 2.8700000 |
|---|-----------|-----------|-----------|-----------|

---

Unique Subject Identifier=1469010110-0011

Assay variable : PTINR\_VAL1 PT-INR Value

N Mean Standard Deviation Minimum Maximum

---

|   |           |           |           |           |
|---|-----------|-----------|-----------|-----------|
| 3 | 1.5800000 | 0.1252996 | 1.4500000 | 1.7000000 |
|---|-----------|-----------|-----------|-----------|

---

Unique Subject Identifier=1470000000-0001

Assay variable : PTINR\_VAL1 PT-INR Value

N Mean Standard Deviation Minimum Maximum

---

|   |           |           |           |           |
|---|-----------|-----------|-----------|-----------|
| 4 | 1.0075000 | 0.0095743 | 1.0000000 | 1.0200000 |
|---|-----------|-----------|-----------|-----------|

---

Unique Subject Identifier=1470000000-0002

Assay variable : PTINR\_VAL1 PT-INR Value

N Mean Standard Deviation Minimum Maximum

---

|   |           |           |           |           |
|---|-----------|-----------|-----------|-----------|
| 2 | 1.8550000 | 0.2474874 | 1.6800000 | 2.0300000 |
|---|-----------|-----------|-----------|-----------|

---

Laboratory tests at the time of obtaining Table 2-6 consent, according to the presence or absence of proton-pump inhibitors

Unique Subject Identifier=1470000000-0003

MEANS Procedure

Assay variable : PTINR\_VAL1 PT-INR Value

N Mean Standard Deviation Minimum Maximum

---

|   |           |           |           |           |
|---|-----------|-----------|-----------|-----------|
| 4 | 1.6775000 | 0.1960230 | 1.4700000 | 1.9400000 |
|---|-----------|-----------|-----------|-----------|

---

Unique Subject Identifier=1470000000-0004

Assay variable : PTINR\_VAL1 PT-INR Value

N Mean Standard Deviation Minimum Maximum

---

|   |           |           |           |           |
|---|-----------|-----------|-----------|-----------|
| 2 | 1.6950000 | 0.1626346 | 1.5800000 | 1.8100000 |
|---|-----------|-----------|-----------|-----------|

---

Unique Subject Identifier=1470000000-0009

Assay variable : PTINR\_VAL1 PT-INR Value

N Mean Standard Deviation Minimum Maximum

---

|   |           |           |           |           |
|---|-----------|-----------|-----------|-----------|
| 4 | 1.4350000 | 0.0675771 | 1.3600000 | 1.5100000 |
|---|-----------|-----------|-----------|-----------|

---

Unique Subject Identifier=1474000000-0002

Assay variable : PTINR\_VAL1 PT-INR Value

N Mean Standard Deviation Minimum Maximum

---

|   |           |           |           |           |
|---|-----------|-----------|-----------|-----------|
| 5 | 1.9200000 | 0.4764452 | 1.5000000 | 2.7000000 |
|---|-----------|-----------|-----------|-----------|

---

Laboratory tests at the time of obtaining Table 2-6 consent, according to the presence or absence of proton-pump inhibitors

Unique Subject Identifier=1475000000-0005

MEANS Procedure

Assay variable : PTINR\_VAL1 PT-INR Value

N Mean Standard Deviation Minimum Maximum

---

|   |           |           |           |           |
|---|-----------|-----------|-----------|-----------|
| 3 | 1.9000000 | 0.1000000 | 1.8000000 | 2.0000000 |
|---|-----------|-----------|-----------|-----------|

---

Unique Subject Identifier=1475000000-0006

Assay variable : PTINR\_VAL1 PT-INR Value

N Mean Standard Deviation Minimum Maximum

---

|   |           |           |           |           |
|---|-----------|-----------|-----------|-----------|
| 3 | 2.6333333 | 0.8020806 | 1.8000000 | 3.4000000 |
|---|-----------|-----------|-----------|-----------|

---

Unique Subject Identifier=1475000000-0012

Assay variable : PTINR\_VAL1 PT-INR Value

N Mean Standard Deviation Minimum Maximum

---

|   |           |   |           |           |
|---|-----------|---|-----------|-----------|
| 2 | 1.7000000 | 0 | 1.7000000 | 1.7000000 |
|---|-----------|---|-----------|-----------|

---

Unique Subject Identifier=1475000000-0016

Assay variable : PTINR\_VAL1 PT-INR Value

N Mean Standard Deviation Minimum Maximum

---

|   |          |          |          |          |
|---|----------|----------|----------|----------|
| 3 | 2.433333 | 0.251661 | 2.200000 | 2.700000 |
|---|----------|----------|----------|----------|

---

Laboratory tests at the time of obtaining Table 2-6 consent, according to the presence or absence of proton-pump inhibitors

Unique Subject Identifier=1477000000-0005

MEANS Procedure

Assay variable : PTINR\_VAL1 PT-INR Value

N Mean Standard Deviation Minimum Maximum

---

|   |           |           |           |           |
|---|-----------|-----------|-----------|-----------|
| 6 | 2.0833333 | 0.1717750 | 1.9900000 | 2.4300000 |
|---|-----------|-----------|-----------|-----------|

---

Unique Subject Identifier=1477000000-0007

Assay variable : PTINR\_VAL1 PT-INR Value

N Mean Standard Deviation Minimum Maximum

---

|   |           |           |           |           |
|---|-----------|-----------|-----------|-----------|
| 5 | 2.1800000 | 0.2062765 | 1.9700000 | 2.5200000 |
|---|-----------|-----------|-----------|-----------|

---

Unique Subject Identifier=1477000000-0014

Assay variable : PTINR\_VAL1 PT-INR Value

N Mean Standard Deviation Minimum Maximum

---

|   |           |           |           |           |
|---|-----------|-----------|-----------|-----------|
| 4 | 2.3300000 | 0.1902630 | 2.1400000 | 2.5900000 |
|---|-----------|-----------|-----------|-----------|

---

Unique Subject Identifier=1478011111-0011

Assay variable : PTINR\_VAL1 PT-INR Value

N Mean Standard Deviation Minimum Maximum

---

|   |           |           |           |           |
|---|-----------|-----------|-----------|-----------|
| 4 | 2.2625000 | 1.0897209 | 1.1200000 | 3.5400000 |
|---|-----------|-----------|-----------|-----------|

---



Laboratory tests at the time of obtaining Table 2-6 consent, according to the presence or absence of proton-pump inhibitors

Unique Subject Identifier=1478011111-0016

MEANS Procedure

Assay variable : PTINR\_VAL1 PT-INR Value

N Mean Standard Deviation Minimum Maximum

---

|   |          |           |          |          |
|---|----------|-----------|----------|----------|
| 2 | 2.560000 | 0.6646804 | 2.090000 | 3.030000 |
|---|----------|-----------|----------|----------|

---

Unique Subject Identifier=1478011111-0028

Assay variable : PTINR\_VAL1 PT-INR Value

N Mean Standard Deviation Minimum Maximum

---

|   |          |           |          |          |
|---|----------|-----------|----------|----------|
| 4 | 2.577500 | 1.1448835 | 1.450000 | 4.140000 |
|---|----------|-----------|----------|----------|

---

Unique Subject Identifier=1478011111-0030

Assay variable : PTINR\_VAL1 PT-INR Value

N Mean Standard Deviation Minimum Maximum

---

|   |          |           |          |          |
|---|----------|-----------|----------|----------|
| 3 | 2.476667 | 0.1193035 | 2.380000 | 2.610000 |
|---|----------|-----------|----------|----------|

---

Unique Subject Identifier=1478011111-0031

Assay variable : PTINR\_VAL1 PT-INR Value

N Mean Standard Deviation Minimum Maximum

---

|   |           |           |           |           |
|---|-----------|-----------|-----------|-----------|
| 5 | 2.7340000 | 1.1840524 | 1.9600000 | 4.7800000 |
|---|-----------|-----------|-----------|-----------|

---

Laboratory tests at the time of obtaining Table 2-6 consent, according to the presence or absence of proton-pump inhibitors

Unique Subject Identifier=1478011111-0034

MEANS Procedure

Assay variable : PTINR\_VAL1 PT-INR Value

N Mean Standard Deviation Minimum Maximum

---

|   |           |           |           |           |
|---|-----------|-----------|-----------|-----------|
| 3 | 1.6966667 | 0.2200757 | 1.4800000 | 1.9200000 |
|---|-----------|-----------|-----------|-----------|

---

Unique Subject Identifier=1478011111-0037

Assay variable : PTINR\_VAL1 PT-INR Value

N Mean Standard Deviation Minimum Maximum

---

|   |           |           |           |           |
|---|-----------|-----------|-----------|-----------|
| 3 | 2.6400000 | 0.3451087 | 2.3000000 | 2.9900000 |
|---|-----------|-----------|-----------|-----------|

---

Unique Subject Identifier=1478011111-0038

Assay variable : PTINR\_VAL1 PT-INR Value

N Mean Standard Deviation Minimum Maximum

---

|   |           |           |           |           |
|---|-----------|-----------|-----------|-----------|
| 3 | 2.9666667 | 0.2538372 | 2.7600000 | 3.2500000 |
|---|-----------|-----------|-----------|-----------|

---

Unique Subject Identifier=1478011111-0040

Assay variable : PTINR\_VAL1 PT-INR Value

N Mean Standard Deviation Minimum Maximum

---

|   |           |           |           |           |
|---|-----------|-----------|-----------|-----------|
| 3 | 2.1233333 | 0.0723418 | 2.0400000 | 2.1700000 |
|---|-----------|-----------|-----------|-----------|

---

Laboratory tests at the time of obtaining Table 2-6 consent, according to the presence or absence of proton-pump inhibitors

Unique Subject Identifier=1478011111-0041

MEANS Procedure

Assay variable : PTINR\_VAL1 PT-INR Value

N Mean Standard Deviation Minimum Maximum

---

|   |           |           |           |           |
|---|-----------|-----------|-----------|-----------|
| 3 | 2.3966667 | 0.0602771 | 2.3400000 | 2.4600000 |
|---|-----------|-----------|-----------|-----------|

---

Unique Subject Identifier=1478011111-0051

Assay variable : PTINR\_VAL1 PT-INR Value

N Mean Standard Deviation Minimum Maximum

---

|   |           |           |           |           |
|---|-----------|-----------|-----------|-----------|
| 2 | 1.1900000 | 0.0565685 | 1.1500000 | 1.2300000 |
|---|-----------|-----------|-----------|-----------|

---

Unique Subject Identifier=1478011111-0060

Assay variable : PTINR\_VAL1 PT-INR Value

N Mean Standard Deviation Minimum Maximum

---

|   |           |           |           |           |
|---|-----------|-----------|-----------|-----------|
| 3 | 2.8366667 | 0.6034346 | 2.4300000 | 3.5300000 |
|---|-----------|-----------|-----------|-----------|

---

Unique Subject Identifier=1478011111-0066

Assay variable : PTINR\_VAL1 PT-INR Value

N Mean Standard Deviation Minimum Maximum

---

|   |           |           |           |           |
|---|-----------|-----------|-----------|-----------|
| 3 | 1.8433333 | 0.3162805 | 1.4900000 | 2.1000000 |
|---|-----------|-----------|-----------|-----------|

---

Laboratory tests at the time of obtaining Table 2-6 consent, according to the presence or absence of proton-pump inhibitors

Unique Subject Identifier=1478011111-0069

MEANS Procedure

Assay variable : PTINR\_VAL1 PT-INR Value

N Mean Standard Deviation Minimum Maximum

---

|   |           |           |           |           |
|---|-----------|-----------|-----------|-----------|
| 3 | 2.5466667 | 0.0305505 | 2.5200000 | 2.5800000 |
|---|-----------|-----------|-----------|-----------|

---

Unique Subject Identifier=1478011111-0070

Assay variable : PTINR\_VAL1 PT-INR Value

N Mean Standard Deviation Minimum Maximum

---

|   |           |           |           |           |
|---|-----------|-----------|-----------|-----------|
| 3 | 1.9900000 | 0.4450843 | 1.4800000 | 2.3000000 |
|---|-----------|-----------|-----------|-----------|

---

Unique Subject Identifier=1478011111-0079

Assay variable : PTINR\_VAL1 PT-INR Value

N Mean Standard Deviation Minimum Maximum

---

|   |           |           |           |           |
|---|-----------|-----------|-----------|-----------|
| 4 | 2.7100000 | 0.9296236 | 1.9100000 | 3.9700000 |
|---|-----------|-----------|-----------|-----------|

---

Unique Subject Identifier=1478011111-0093

Assay variable : PTINR\_VAL1 PT-INR Value

N Mean Standard Deviation Minimum Maximum

---

|   |           |           |           |           |
|---|-----------|-----------|-----------|-----------|
| 4 | 1.6525000 | 0.2003954 | 1.4700000 | 1.9100000 |
|---|-----------|-----------|-----------|-----------|

---



Laboratory tests at the time of obtaining Table 2-6 consent, according to the presence or absence of proton-pump inhibitors

Unique Subject Identifier=1478011111-0096

MEANS Procedure

Assay variable : PTINR\_VAL1 PT-INR Value

N Mean Standard Deviation Minimum Maximum

---

|   |           |           |           |           |
|---|-----------|-----------|-----------|-----------|
| 2 | 2.5350000 | 0.1626346 | 2.4200000 | 2.6500000 |
|---|-----------|-----------|-----------|-----------|

---

Unique Subject Identifier=1478011111-0097

Assay variable : PTINR\_VAL1 PT-INR Value

N Mean Standard Deviation Minimum Maximum

---

|   |           |           |           |           |
|---|-----------|-----------|-----------|-----------|
| 3 | 2.2300000 | 0.7454529 | 1.4700000 | 2.9600000 |
|---|-----------|-----------|-----------|-----------|

---

Unique Subject Identifier=1478011111-0108

Assay variable : PTINR\_VAL1 PT-INR Value

N Mean Standard Deviation Minimum Maximum

---

|   |           |           |           |           |
|---|-----------|-----------|-----------|-----------|
| 4 | 2.1225000 | 0.2441823 | 1.8400000 | 2.4000000 |
|---|-----------|-----------|-----------|-----------|

---

Unique Subject Identifier=1478011111-0118

Assay variable : PTINR\_VAL1 PT-INR Value

N Mean Standard Deviation Minimum Maximum

---

|   |           |           |           |           |
|---|-----------|-----------|-----------|-----------|
| 4 | 2.7350000 | 0.0911043 | 2.6400000 | 2.8500000 |
|---|-----------|-----------|-----------|-----------|

---

Laboratory tests at the time of obtaining Table 2-6 consent, according to the presence or absence of proton-pump inhibitors

Unique Subject Identifier=1478011111-0120

MEANS Procedure

Assay variable : PTINR\_VAL1 PT-INR Value

N Mean Standard Deviation Minimum Maximum

---

|   |           |           |           |           |
|---|-----------|-----------|-----------|-----------|
| 4 | 2.0225000 | 0.5209846 | 1.4000000 | 2.5100000 |
|---|-----------|-----------|-----------|-----------|

---

Unique Subject Identifier=1478011111-0121

Assay variable : PTINR\_VAL1 PT-INR Value

N Mean Standard Deviation Minimum Maximum

---

|   |           |           |           |           |
|---|-----------|-----------|-----------|-----------|
| 3 | 2.0933333 | 0.1721434 | 1.9700000 | 2.2900000 |
|---|-----------|-----------|-----------|-----------|

---

Unique Subject Identifier=1478011111-0127

Assay variable : PTINR\_VAL1 PT-INR Value

N Mean Standard Deviation Minimum Maximum

---

|   |           |           |           |           |
|---|-----------|-----------|-----------|-----------|
| 4 | 1.8225000 | 0.0350000 | 1.7700000 | 1.8400000 |
|---|-----------|-----------|-----------|-----------|

---

Unique Subject Identifier=1478011111-0144

Assay variable : PTINR\_VAL1 PT-INR Value

N Mean Standard Deviation Minimum Maximum

---

|   |           |           |           |           |
|---|-----------|-----------|-----------|-----------|
| 2 | 2.2250000 | 0.1909188 | 2.0900000 | 2.3600000 |
|---|-----------|-----------|-----------|-----------|

---

Laboratory tests at the time of obtaining Table 2-6 consent, according to the presence or absence of proton-pump inhibitors

Unique Subject Identifier=1478011111-0147

MEANS Procedure

Assay variable : PTINR\_VAL1 PT-INR Value

N Mean Standard Deviation Minimum Maximum

---

|   |           |           |           |           |
|---|-----------|-----------|-----------|-----------|
| 3 | 2.1666667 | 0.2396525 | 1.8900000 | 2.3100000 |
|---|-----------|-----------|-----------|-----------|

---

Unique Subject Identifier=1480011111-0002

Assay variable : PTINR\_VAL1 PT-INR Value

N Mean Standard Deviation Minimum Maximum

---

|   |           |  |           |           |
|---|-----------|--|-----------|-----------|
| 1 | 1.0800000 |  | 1.0800000 | 1.0800000 |
|---|-----------|--|-----------|-----------|

---

Unique Subject Identifier=1480011111-0003

Assay variable : PTINR\_VAL1 PT-INR Value

N Mean Standard Deviation Minimum Maximum

---

|   |           |           |           |           |
|---|-----------|-----------|-----------|-----------|
| 3 | 2.5600000 | 0.9497895 | 1.4700000 | 3.2100000 |
|---|-----------|-----------|-----------|-----------|

---

Unique Subject Identifier=1480011111-0005

Assay variable : PTINR\_VAL1 PT-INR Value

N Mean Standard Deviation Minimum Maximum

---

|   |           |           |           |           |
|---|-----------|-----------|-----------|-----------|
| 3 | 2.2533333 | 0.8220300 | 1.7200000 | 3.2000000 |
|---|-----------|-----------|-----------|-----------|

---

Laboratory tests at the time of obtaining Table 2-6 consent, according to the presence or absence of proton-pump inhibitors

Unique Subject Identifier=1487000000-0001

MEANS Procedure

Assay variable : PTINR\_VAL1 PT-INR Value

N Mean Standard Deviation Minimum Maximum

---

|   |           |           |           |           |
|---|-----------|-----------|-----------|-----------|
| 6 | 2.3333333 | 0.4320494 | 1.9000000 | 3.1000000 |
|---|-----------|-----------|-----------|-----------|

---

Unique Subject Identifier=1487000000-0002

Assay variable : PTINR\_VAL1 PT-INR Value

N Mean Standard Deviation Minimum Maximum

---

|   |           |           |           |           |
|---|-----------|-----------|-----------|-----------|
| 6 | 2.1166667 | 0.3710346 | 1.7000000 | 2.7000000 |
|---|-----------|-----------|-----------|-----------|

---

Unique Subject Identifier=1487000000-0007

Assay variable : PTINR\_VAL1 PT-INR Value

N Mean Standard Deviation Minimum Maximum

---

|   |           |           |           |           |
|---|-----------|-----------|-----------|-----------|
| 6 | 1.9166667 | 0.1834848 | 1.6000000 | 2.1000000 |
|---|-----------|-----------|-----------|-----------|

---

Unique Subject Identifier=1487000000-0010

Assay variable : PTINR\_VAL1 PT-INR Value

N Mean Standard Deviation Minimum Maximum

---

|   |          |          |          |          |
|---|----------|----------|----------|----------|
| 6 | 2.200000 | 0.551362 | 1.500000 | 3.100000 |
|---|----------|----------|----------|----------|

---



Laboratory tests at the time of obtaining Table 2-6 consent, according to the presence or absence of proton-pump inhibitors

Unique Subject Identifier=1487000000-0012

MEANS Procedure

Assay variable : PTINR\_VAL1 PT-INR Value

N Mean Standard Deviation Minimum Maximum

---

|   |           |           |           |           |
|---|-----------|-----------|-----------|-----------|
| 6 | 2.1333333 | 0.2581989 | 1.8000000 | 2.5000000 |
|---|-----------|-----------|-----------|-----------|

---

Unique Subject Identifier=1487000000-0017

Assay variable : PTINR\_VAL1 PT-INR Value

N Mean Standard Deviation Minimum Maximum

---

|   |           |           |           |           |
|---|-----------|-----------|-----------|-----------|
| 6 | 2.0666667 | 0.3614784 | 1.6000000 | 2.7000000 |
|---|-----------|-----------|-----------|-----------|

---

Unique Subject Identifier=1487000000-0019

Assay variable : PTINR\_VAL1 PT-INR Value

N Mean Standard Deviation Minimum Maximum

---

|   |           |           |           |           |
|---|-----------|-----------|-----------|-----------|
| 6 | 2.1500000 | 0.1516575 | 2.0000000 | 2.4000000 |
|---|-----------|-----------|-----------|-----------|

---

Unique Subject Identifier=1487000000-0022

Assay variable : PTINR\_VAL1 PT-INR Value

N Mean Standard Deviation Minimum Maximum

---

|   |          |          |          |          |
|---|----------|----------|----------|----------|
| 5 | 2.160000 | 0.450552 | 1.700000 | 2.800000 |
|---|----------|----------|----------|----------|

---

Laboratory tests at the time of obtaining Table 2-6 consent, according to the presence or absence of proton-pump inhibitors

Unique Subject Identifier=1487000000-0023

MEANS Procedure

Assay variable : PTINR\_VAL1 PT-INR Value

N Mean Standard Deviation Minimum Maximum

---

|   |           |           |           |           |
|---|-----------|-----------|-----------|-----------|
| 6 | 2.0333333 | 0.3141125 | 1.6000000 | 2.5000000 |
|---|-----------|-----------|-----------|-----------|

---

Unique Subject Identifier=1487000000-0027

Assay variable : PTINR\_VAL1 PT-INR Value

N Mean Standard Deviation Minimum Maximum

---

|   |           |           |           |           |
|---|-----------|-----------|-----------|-----------|
| 6 | 2.1166667 | 0.3710346 | 1.6000000 | 2.6000000 |
|---|-----------|-----------|-----------|-----------|

---

Unique Subject Identifier=1487000000-0028

Assay variable : PTINR\_VAL1 PT-INR Value

N Mean Standard Deviation Minimum Maximum

---

|   |           |           |           |           |
|---|-----------|-----------|-----------|-----------|
| 6 | 1.8666667 | 0.4273952 | 1.5000000 | 2.5000000 |
|---|-----------|-----------|-----------|-----------|

---

Unique Subject Identifier=1487000000-0029

Assay variable : PTINR\_VAL1 PT-INR Value

N Mean Standard Deviation Minimum Maximum

---

|   |           |           |           |           |
|---|-----------|-----------|-----------|-----------|
| 6 | 2.3833333 | 0.9304121 | 1.5000000 | 4.0000000 |
|---|-----------|-----------|-----------|-----------|

---

Laboratory tests at the time of obtaining Table 2-6 consent, according to the presence or absence of proton-pump inhibitors

Unique Subject Identifier=1487000000-0031

MEANS Procedure

Assay variable : PTINR\_VAL1 PT-INR Value

N Mean Standard Deviation Minimum Maximum

---

|   |           |           |           |           |
|---|-----------|-----------|-----------|-----------|
| 6 | 2.0833333 | 0.4622409 | 1.5000000 | 2.8000000 |
|---|-----------|-----------|-----------|-----------|

---

Unique Subject Identifier=1487000000-0032

Assay variable : PTINR\_VAL1 PT-INR Value

N Mean Standard Deviation Minimum Maximum

---

|   |           |           |           |           |
|---|-----------|-----------|-----------|-----------|
| 5 | 2.2800000 | 0.1643168 | 2.1000000 | 2.5000000 |
|---|-----------|-----------|-----------|-----------|

---

Unique Subject Identifier=1487000000-0033

Assay variable : PTINR\_VAL1 PT-INR Value

N Mean Standard Deviation Minimum Maximum

---

|   |           |           |           |           |
|---|-----------|-----------|-----------|-----------|
| 6 | 2.4666667 | 0.4802777 | 2.0000000 | 3.2000000 |
|---|-----------|-----------|-----------|-----------|

---

Unique Subject Identifier=1491000000-0002

Assay variable : PTINR\_VAL1 PT-INR Value

N Mean Standard Deviation Minimum Maximum

---

|   |           |           |           |           |
|---|-----------|-----------|-----------|-----------|
| 4 | 2.3225000 | 0.9042262 | 1.7200000 | 3.6500000 |
|---|-----------|-----------|-----------|-----------|

---

Laboratory tests at the time of obtaining Table 2-6 consent, according to the presence or absence of proton-pump inhibitors

Unique Subject Identifier=1491000000-0006

MEANS Procedure

Assay variable : PTINR\_VAL1 PT-INR Value

N Mean Standard Deviation Minimum Maximum

---

|   |           |           |           |           |
|---|-----------|-----------|-----------|-----------|
| 4 | 2.1075000 | 0.2436357 | 1.7600000 | 2.3300000 |
|---|-----------|-----------|-----------|-----------|

---

Unique Subject Identifier=1491000000-0007

Assay variable : PTINR\_VAL1 PT-INR Value

N Mean Standard Deviation Minimum Maximum

---

|   |           |           |           |           |
|---|-----------|-----------|-----------|-----------|
| 6 | 1.6833333 | 0.2338090 | 1.4200000 | 2.0600000 |
|---|-----------|-----------|-----------|-----------|

---

Unique Subject Identifier=1491000000-0008

Assay variable : PTINR\_VAL1 PT-INR Value

N Mean Standard Deviation Minimum Maximum

---

|   |           |           |           |           |
|---|-----------|-----------|-----------|-----------|
| 6 | 2.2966667 | 0.3324856 | 1.8900000 | 2.7700000 |
|---|-----------|-----------|-----------|-----------|

---

Unique Subject Identifier=1491000000-0009

Assay variable : PTINR\_VAL1 PT-INR Value

N Mean Standard Deviation Minimum Maximum

---

|   |          |           |          |          |
|---|----------|-----------|----------|----------|
| 5 | 2.106000 | 0.5477043 | 1.540000 | 2.970000 |
|---|----------|-----------|----------|----------|

---



Laboratory tests at the time of obtaining Table 2-6 consent, according to the presence or absence of proton-pump inhibitors

Unique Subject Identifier=1491000000-0010

MEANS Procedure

Assay variable : PTINR\_VAL1 PT-INR Value

N Mean Standard Deviation Minimum Maximum

---

|   |          |           |          |          |
|---|----------|-----------|----------|----------|
| 4 | 2.360000 | 0.5832667 | 1.510000 | 2.830000 |
|---|----------|-----------|----------|----------|

---

Unique Subject Identifier=1491000000-0011

Assay variable : PTINR\_VAL1 PT-INR Value

N Mean Standard Deviation Minimum Maximum

---

|   |          |           |          |          |
|---|----------|-----------|----------|----------|
| 4 | 2.482500 | 0.8079759 | 1.520000 | 3.380000 |
|---|----------|-----------|----------|----------|

---

Unique Subject Identifier=1491000000-0012

Assay variable : PTINR\_VAL1 PT-INR Value

N Mean Standard Deviation Minimum Maximum

---

|   |          |           |          |          |
|---|----------|-----------|----------|----------|
| 4 | 1.897500 | 0.0427200 | 1.870000 | 1.960000 |
|---|----------|-----------|----------|----------|

---

Unique Subject Identifier=1491000000-0019

Assay variable : PTINR\_VAL1 PT-INR Value

N Mean Standard Deviation Minimum Maximum

---

|   |           |           |           |           |
|---|-----------|-----------|-----------|-----------|
| 4 | 2.2975000 | 0.3704389 | 1.9200000 | 2.7900000 |
|---|-----------|-----------|-----------|-----------|

---

Laboratory tests at the time of obtaining Table 2-6 consent, according to the presence or absence of proton-pump inhibitors

Unique Subject Identifier=1491000000-0020

MEANS Procedure

Assay variable : PTINR\_VAL1 PT-INR Value

| N | Mean      | Standard Deviation | Minimum   | Maximum   |
|---|-----------|--------------------|-----------|-----------|
| 3 | 1.9133333 | 0.1601041          | 1.7500000 | 2.0700000 |

Unique Subject Identifier=1491000000-0021

Assay variable : PTINR\_VAL1 PT-INR Value

| N | Mean      | Standard Deviation | Minimum   | Maximum   |
|---|-----------|--------------------|-----------|-----------|
| 6 | 2.0583333 | 0.3400833          | 1.7500000 | 2.5600000 |

Unique Subject Identifier=1491000000-0025

Assay variable : PTINR\_VAL1 PT-INR Value

| N | Mean      | Standard Deviation | Minimum   | Maximum   |
|---|-----------|--------------------|-----------|-----------|
| 3 | 2.3033333 | 0.0737111          | 2.2200000 | 2.3600000 |

Unique Subject Identifier=1491000000-0031

Assay variable : PTINR\_VAL1 PT-INR Value

N Mean Standard Deviation Minimum Maximum

---

|   |           |           |           |           |
|---|-----------|-----------|-----------|-----------|
| 3 | 1.8466667 | 0.0513160 | 1.7900000 | 1.8900000 |
|---|-----------|-----------|-----------|-----------|

---

Laboratory tests at the time of obtaining Table 2-6 consent, according to the presence or absence of proton-pump inhibitors

Unique Subject Identifier=1491000000-0032

MEANS Procedure

Assay variable : PTINR\_VAL1 PT-INR Value

| N | Mean     | Standard Deviation | Minimum  | Maximum  |
|---|----------|--------------------|----------|----------|
| 3 | 1.850000 | 0.2325941          | 1.600000 | 2.060000 |

Unique Subject Identifier=1491000000-0035

Assay variable : PTINR\_VAL1 PT-INR Value

| N | Mean     | Standard Deviation | Minimum  | Maximum  |
|---|----------|--------------------|----------|----------|
| 4 | 1.947500 | 0.3264327          | 1.630000 | 2.400000 |

Unique Subject Identifier=1491000000-0040

Assay variable : PTINR\_VAL1 PT-INR Value

| N | Mean     | Standard Deviation | Minimum  | Maximum  |
|---|----------|--------------------|----------|----------|
| 6 | 2.633333 | 0.5336915          | 1.890000 | 3.540000 |

Unique Subject Identifier=1491000000-0041

Assay variable : PTINR\_VAL1 PT-INR Value

N Mean Standard Deviation Minimum Maximum

---

|   |          |           |          |          |
|---|----------|-----------|----------|----------|
| 4 | 2.040000 | 0.5090514 | 1.600000 | 2.630000 |
|---|----------|-----------|----------|----------|

---

Laboratory tests at the time of obtaining Table 2-6 consent, according to the presence or absence of proton-pump inhibitors

Unique Subject Identifier=1491000000-0044

MEANS Procedure

Assay variable : PTINR\_VAL1 PT-INR Value

N Mean Standard Deviation Minimum Maximum

---

|   |           |           |           |           |
|---|-----------|-----------|-----------|-----------|
| 4 | 1.9550000 | 0.4466542 | 1.6600000 | 2.6200000 |
|---|-----------|-----------|-----------|-----------|

---

Unique Subject Identifier=1491000000-0045

Assay variable : PTINR\_VAL1 PT-INR Value

N Mean Standard Deviation Minimum Maximum

---

|   |           |           |           |           |
|---|-----------|-----------|-----------|-----------|
| 4 | 1.9100000 | 0.2947315 | 1.6100000 | 2.3000000 |
|---|-----------|-----------|-----------|-----------|

---

Unique Subject Identifier=1491000000-0047

Assay variable : PTINR\_VAL1 PT-INR Value

N Mean Standard Deviation Minimum Maximum

---

|   |           |           |           |           |
|---|-----------|-----------|-----------|-----------|
| 6 | 1.8016667 | 0.1619156 | 1.6200000 | 2.0900000 |
|---|-----------|-----------|-----------|-----------|

---

Unique Subject Identifier=1491000000-0049

Assay variable : PTINR\_VAL1 PT-INR Value

N Mean Standard Deviation Minimum Maximum

---

|   |           |           |           |           |
|---|-----------|-----------|-----------|-----------|
| 6 | 1.8566667 | 0.4394390 | 1.3900000 | 2.6700000 |
|---|-----------|-----------|-----------|-----------|

---



Laboratory tests at the time of obtaining Table 2-6 consent, according to the presence or absence of proton-pump inhibitors

Unique Subject Identifier=1491000000-0050

MEANS Procedure

Assay variable : PTINR\_VAL1 PT-INR Value

N Mean Standard Deviation Minimum Maximum

---

|   |           |           |           |           |
|---|-----------|-----------|-----------|-----------|
| 3 | 1.8200000 | 0.0818535 | 1.7300000 | 1.8900000 |
|---|-----------|-----------|-----------|-----------|

---

Unique Subject Identifier=1491000000-0056

Assay variable : PTINR\_VAL1 PT-INR Value

N Mean Standard Deviation Minimum Maximum

---

|   |           |           |           |           |
|---|-----------|-----------|-----------|-----------|
| 3 | 1.9766667 | 0.0378594 | 1.9500000 | 2.0200000 |
|---|-----------|-----------|-----------|-----------|

---

Unique Subject Identifier=1491000000-0057

Assay variable : PTINR\_VAL1 PT-INR Value

N Mean Standard Deviation Minimum Maximum

---

|   |           |           |           |           |
|---|-----------|-----------|-----------|-----------|
| 3 | 2.0800000 | 0.2718455 | 1.7800000 | 2.3100000 |
|---|-----------|-----------|-----------|-----------|

---

Unique Subject Identifier=1491000000-0059

Assay variable : PTINR\_VAL1 PT-INR Value

N Mean Standard Deviation Minimum Maximum

---

|   |           |           |           |           |
|---|-----------|-----------|-----------|-----------|
| 4 | 2.3575000 | 0.2555223 | 2.1000000 | 2.6900000 |
|---|-----------|-----------|-----------|-----------|

---

Laboratory tests at the time of obtaining Table 2-6 consent, according to the presence or absence of proton-pump inhibitors

Unique Subject Identifier=1491000000-0060

MEANS Procedure

Assay variable : PTINR\_VAL1 PT-INR Value

N Mean Standard Deviation Minimum Maximum

---

|   |           |           |           |           |
|---|-----------|-----------|-----------|-----------|
| 4 | 1.9075000 | 0.1946578 | 1.7500000 | 2.1500000 |
|---|-----------|-----------|-----------|-----------|

---

Unique Subject Identifier=1491000000-0062

Assay variable : PTINR\_VAL1 PT-INR Value

N Mean Standard Deviation Minimum Maximum

---

|   |           |           |           |           |
|---|-----------|-----------|-----------|-----------|
| 5 | 1.8600000 | 0.2309762 | 1.6900000 | 2.2600000 |
|---|-----------|-----------|-----------|-----------|

---

Unique Subject Identifier=1491000000-0063

Assay variable : PTINR\_VAL1 PT-INR Value

N Mean Standard Deviation Minimum Maximum

---

|   |           |           |           |           |
|---|-----------|-----------|-----------|-----------|
| 4 | 2.2475000 | 0.2644964 | 1.9000000 | 2.5300000 |
|---|-----------|-----------|-----------|-----------|

---

Unique Subject Identifier=1491000000-0066

Assay variable : PTINR\_VAL1 PT-INR Value

N Mean Standard Deviation Minimum Maximum

---

|   |           |           |           |           |
|---|-----------|-----------|-----------|-----------|
| 4 | 2.0725000 | 0.2117192 | 1.8700000 | 2.3100000 |
|---|-----------|-----------|-----------|-----------|

---

Laboratory tests at the time of obtaining Table 2-6 consent, according to the presence or absence of proton-pump inhibitors

Unique Subject Identifier=1491000000-0070

MEANS Procedure

Assay variable : PTINR\_VAL1 PT-INR Value

N Mean Standard Deviation Minimum Maximum

---

|   |           |           |           |           |
|---|-----------|-----------|-----------|-----------|
| 4 | 2.0075000 | 0.0865544 | 1.9300000 | 2.1300000 |
|---|-----------|-----------|-----------|-----------|

---

Unique Subject Identifier=1491000000-0073

Assay variable : PTINR\_VAL1 PT-INR Value

N Mean Standard Deviation Minimum Maximum

---

|   |           |           |           |           |
|---|-----------|-----------|-----------|-----------|
| 3 | 1.9900000 | 0.1997498 | 1.7700000 | 2.1600000 |
|---|-----------|-----------|-----------|-----------|

---

Unique Subject Identifier=1491000000-0074

Assay variable : PTINR\_VAL1 PT-INR Value

N Mean Standard Deviation Minimum Maximum

---

|   |           |           |           |           |
|---|-----------|-----------|-----------|-----------|
| 4 | 2.0675000 | 0.1901534 | 1.8100000 | 2.2300000 |
|---|-----------|-----------|-----------|-----------|

---

Unique Subject Identifier=1491000000-0077

Assay variable : PTINR\_VAL1 PT-INR Value

N Mean Standard Deviation Minimum Maximum

---

|   |           |           |           |           |
|---|-----------|-----------|-----------|-----------|
| 3 | 2.2766667 | 0.4441096 | 1.7900000 | 2.6600000 |
|---|-----------|-----------|-----------|-----------|

---

Laboratory tests at the time of obtaining Table 2-6 consent, according to the presence or absence of proton-pump inhibitors

Unique Subject Identifier=1491000000-0082

MEANS Procedure

Assay variable : PTINR\_VAL1 PT-INR Value

N Mean Standard Deviation Minimum Maximum

---

|   |           |           |           |           |
|---|-----------|-----------|-----------|-----------|
| 4 | 2.3575000 | 0.3834384 | 2.1200000 | 2.9300000 |
|---|-----------|-----------|-----------|-----------|

---

Unique Subject Identifier=1491000000-0084

Assay variable : PTINR\_VAL1 PT-INR Value

N Mean Standard Deviation Minimum Maximum

---

|   |           |           |           |           |
|---|-----------|-----------|-----------|-----------|
| 3 | 2.0066667 | 0.2441994 | 1.8100000 | 2.2800000 |
|---|-----------|-----------|-----------|-----------|

---

Unique Subject Identifier=1491000000-0086

Assay variable : PTINR\_VAL1 PT-INR Value

N Mean Standard Deviation Minimum Maximum

---

|   |           |           |           |           |
|---|-----------|-----------|-----------|-----------|
| 4 | 2.1675000 | 0.2817061 | 1.9300000 | 2.5700000 |
|---|-----------|-----------|-----------|-----------|

---

Unique Subject Identifier=1491000000-0088

Assay variable : PTINR\_VAL1 PT-INR Value

N Mean Standard Deviation Minimum Maximum

---

|   |           |           |           |           |
|---|-----------|-----------|-----------|-----------|
| 4 | 2.7900000 | 0.8003749 | 2.3600000 | 3.9900000 |
|---|-----------|-----------|-----------|-----------|

---



Laboratory tests at the time of obtaining Table 2-6 consent, according to the presence or absence of proton-pump inhibitors

Unique Subject Identifier=1491000000-0089

MEANS Procedure

Assay variable : PTINR\_VAL1 PT-INR Value

N Mean Standard Deviation Minimum Maximum

---

|   |           |           |           |           |
|---|-----------|-----------|-----------|-----------|
| 4 | 1.5925000 | 0.1152895 | 1.4200000 | 1.6600000 |
|---|-----------|-----------|-----------|-----------|

---

Unique Subject Identifier=1491000000-0094

Assay variable : PTINR\_VAL1 PT-INR Value

N Mean Standard Deviation Minimum Maximum

---

|   |           |           |           |           |
|---|-----------|-----------|-----------|-----------|
| 4 | 2.1475000 | 0.1078193 | 2.0500000 | 2.2900000 |
|---|-----------|-----------|-----------|-----------|

---

Unique Subject Identifier=1491000000-0097

Assay variable : PTINR\_VAL1 PT-INR Value

N Mean Standard Deviation Minimum Maximum

---

|   |           |           |           |           |
|---|-----------|-----------|-----------|-----------|
| 3 | 2.6600000 | 0.6577994 | 2.0400000 | 3.3500000 |
|---|-----------|-----------|-----------|-----------|

---

Unique Subject Identifier=1491000000-0098

Assay variable : PTINR\_VAL1 PT-INR Value

N Mean Standard Deviation Minimum Maximum

---

|   |          |          |          |          |
|---|----------|----------|----------|----------|
| 4 | 2.130000 | 0.328126 | 1.860000 | 2.570000 |
|---|----------|----------|----------|----------|

---

Laboratory tests at the time of obtaining Table 2-6 consent, according to the presence or absence of proton-pump inhibitors

Unique Subject Identifier=1491000000-0101

MEANS Procedure

Assay variable : PTINR\_VAL1 PT-INR Value

N Mean Standard Deviation Minimum Maximum

---

|   |           |           |           |           |
|---|-----------|-----------|-----------|-----------|
| 4 | 1.7700000 | 0.2044505 | 1.4700000 | 1.9300000 |
|---|-----------|-----------|-----------|-----------|

---

Unique Subject Identifier=1491000000-0103

Assay variable : PTINR\_VAL1 PT-INR Value

N Mean Standard Deviation Minimum Maximum

---

|   |           |           |           |           |
|---|-----------|-----------|-----------|-----------|
| 4 | 2.5075000 | 0.2325762 | 2.2900000 | 2.8200000 |
|---|-----------|-----------|-----------|-----------|

---

Unique Subject Identifier=1491000000-0105

Assay variable : PTINR\_VAL1 PT-INR Value

N Mean Standard Deviation Minimum Maximum

---

|   |           |           |           |           |
|---|-----------|-----------|-----------|-----------|
| 5 | 1.8920000 | 0.3596804 | 1.5900000 | 2.5000000 |
|---|-----------|-----------|-----------|-----------|

---

Unique Subject Identifier=1492011100-0027

Assay variable : PTINR\_VAL1 PT-INR Value

N Mean Standard Deviation Minimum Maximum

---

|   |          |           |          |          |
|---|----------|-----------|----------|----------|
| 6 | 2.150000 | 0.2509980 | 1.800000 | 2.400000 |
|---|----------|-----------|----------|----------|

---

Laboratory tests at the time of obtaining Table 2-6 consent, according to the presence or absence of proton-pump inhibitors

Unique Subject Identifier=1494000000-0005

MEANS Procedure

Assay variable : PTINR\_VAL1 PT-INR Value

N Mean Standard Deviation Minimum Maximum

---

|   |           |           |           |           |
|---|-----------|-----------|-----------|-----------|
| 2 | 0.9500000 | 0.0424264 | 0.9200000 | 0.9800000 |
|---|-----------|-----------|-----------|-----------|

---

Unique Subject Identifier=1494000000-0007

Assay variable : PTINR\_VAL1 PT-INR Value

N Mean Standard Deviation Minimum Maximum

---

|   |           |           |           |           |
|---|-----------|-----------|-----------|-----------|
| 4 | 1.5500000 | 0.2585859 | 1.2000000 | 1.7900000 |
|---|-----------|-----------|-----------|-----------|

---

Unique Subject Identifier=1494000000-0008

Assay variable : PTINR\_VAL1 PT-INR Value

N Mean Standard Deviation Minimum Maximum

---

|   |           |           |           |           |
|---|-----------|-----------|-----------|-----------|
| 3 | 1.9500000 | 0.1058301 | 1.8300000 | 2.0300000 |
|---|-----------|-----------|-----------|-----------|

---

Unique Subject Identifier=1494000000-0015

Assay variable : PTINR\_VAL1 PT-INR Value

N Mean Standard Deviation Minimum Maximum

---

|   |          |           |          |          |
|---|----------|-----------|----------|----------|
| 2 | 1.560000 | 0.2121320 | 1.410000 | 1.710000 |
|---|----------|-----------|----------|----------|

---

Laboratory tests at the time of obtaining Table 2-6 consent, according to the presence or absence of proton-pump inhibitors

Unique Subject Identifier=1494000000-0017

MEANS Procedure

Assay variable : PTINR\_VAL1 PT-INR Value

N Mean Standard Deviation Minimum Maximum

---

|   |           |           |           |           |
|---|-----------|-----------|-----------|-----------|
| 4 | 1.6825000 | 0.2443188 | 1.3900000 | 1.9300000 |
|---|-----------|-----------|-----------|-----------|

---

Unique Subject Identifier=1494000000-0021

Assay variable : PTINR\_VAL1 PT-INR Value

N Mean Standard Deviation Minimum Maximum

---

|   |           |           |           |           |
|---|-----------|-----------|-----------|-----------|
| 4 | 1.9375000 | 0.6571847 | 1.4000000 | 2.8800000 |
|---|-----------|-----------|-----------|-----------|

---

Unique Subject Identifier=1494000000-0027

Assay variable : PTINR\_VAL1 PT-INR Value

N Mean Standard Deviation Minimum Maximum

---

|   |           |           |           |           |
|---|-----------|-----------|-----------|-----------|
| 3 | 1.7400000 | 0.0200000 | 1.7200000 | 1.7600000 |
|---|-----------|-----------|-----------|-----------|

---

Unique Subject Identifier=1494000000-0033

Assay variable : PTINR\_VAL1 PT-INR Value

N Mean Standard Deviation Minimum Maximum

---

|   |           |           |           |           |
|---|-----------|-----------|-----------|-----------|
| 2 | 1.8150000 | 0.1484924 | 1.7100000 | 1.9200000 |
|---|-----------|-----------|-----------|-----------|

---



Laboratory tests at the time of obtaining Table 2-6 consent, according to the presence or absence of proton-pump inhibitors

Unique Subject Identifier=1495011010-0003

MEANS Procedure

Assay variable : PTINR\_VAL1 PT-INR Value

N Mean Standard Deviation Minimum Maximum

---

|   |          |           |          |          |
|---|----------|-----------|----------|----------|
| 3 | 2.360000 | 0.2193171 | 2.170000 | 2.600000 |
|---|----------|-----------|----------|----------|

---

Unique Subject Identifier=1495011010-0005

Assay variable : PTINR\_VAL1 PT-INR Value

N Mean Standard Deviation Minimum Maximum

---

|   |          |           |          |          |
|---|----------|-----------|----------|----------|
| 2 | 2.670000 | 0.5374012 | 2.290000 | 3.050000 |
|---|----------|-----------|----------|----------|

---

Unique Subject Identifier=1495011010-0009

Assay variable : PTINR\_VAL1 PT-INR Value

N Mean Standard Deviation Minimum Maximum

---

|   |          |           |          |          |
|---|----------|-----------|----------|----------|
| 3 | 2.416667 | 0.5589574 | 1.960000 | 3.040000 |
|---|----------|-----------|----------|----------|

---

Unique Subject Identifier=1495011010-0013

Assay variable : PTINR\_VAL1 PT-INR Value

N Mean Standard Deviation Minimum Maximum

---

|   |           |           |           |           |
|---|-----------|-----------|-----------|-----------|
| 2 | 2.7300000 | 0.9475231 | 2.0600000 | 3.4000000 |
|---|-----------|-----------|-----------|-----------|

---

Laboratory tests at the time of obtaining Table 2-6 consent, according to the presence or absence of proton-pump inhibitors

Unique Subject Identifier=1495011010-0019

MEANS Procedure

Assay variable : PTINR\_VAL1 PT-INR Value

| N | Mean      | Standard Deviation | Minimum   | Maximum   |
|---|-----------|--------------------|-----------|-----------|
| 2 | 2.2950000 | 0.1767767          | 2.1700000 | 2.4200000 |

Unique Subject Identifier=1495011010-0022

Assay variable : PTINR\_VAL1 PT-INR Value

| N | Mean      | Standard Deviation | Minimum   | Maximum   |
|---|-----------|--------------------|-----------|-----------|
| 3 | 2.1266667 | 0.7674199          | 1.5600000 | 3.0000000 |

Unique Subject Identifier=1495011010-0024

Assay variable : PTINR\_VAL1 PT-INR Value

| N | Mean      | Standard Deviation | Minimum   | Maximum   |
|---|-----------|--------------------|-----------|-----------|
| 2 | 2.0500000 | 0.3535534          | 1.8000000 | 2.3000000 |

Unique Subject Identifier=1495011010-0026

Assay variable : PTINR\_VAL1 PT-INR Value

N Mean Standard Deviation Minimum Maximum

---

|   |           |           |           |           |
|---|-----------|-----------|-----------|-----------|
| 3 | 2.2933333 | 0.3971566 | 1.8400000 | 2.5800000 |
|---|-----------|-----------|-----------|-----------|

---

Laboratory tests at the time of obtaining Table 2-6 consent, according to the presence or absence of proton-pump inhibitors

Unique Subject Identifier=1495011010-0027

MEANS Procedure

Assay variable : PTINR\_VAL1 PT-INR Value

N Mean Standard Deviation Minimum Maximum

---

|   |           |           |           |           |
|---|-----------|-----------|-----------|-----------|
| 2 | 1.5200000 | 0.0565685 | 1.4800000 | 1.5600000 |
|---|-----------|-----------|-----------|-----------|

---

Unique Subject Identifier=1496000000-0008

Assay variable : PTINR\_VAL1 PT-INR Value

N Mean Standard Deviation Minimum Maximum

---

|   |           |  |           |           |
|---|-----------|--|-----------|-----------|
| 1 | 2.3000000 |  | 2.3000000 | 2.3000000 |
|---|-----------|--|-----------|-----------|

---

Unique Subject Identifier=1496000000-0012

Assay variable : PTINR\_VAL1 PT-INR Value

N Mean Standard Deviation Minimum Maximum

---

|   |           |  |           |           |
|---|-----------|--|-----------|-----------|
| 1 | 1.4000000 |  | 1.4000000 | 1.4000000 |
|---|-----------|--|-----------|-----------|

---

Unique Subject Identifier=1499000000-0001

Assay variable : PTINR\_VAL1 PT-INR Value

N Mean Standard Deviation Minimum Maximum

---

|   |           |           |           |           |
|---|-----------|-----------|-----------|-----------|
| 2 | 2.0850000 | 0.1343503 | 1.9900000 | 2.1800000 |
|---|-----------|-----------|-----------|-----------|

---

Laboratory tests at the time of obtaining Table 2-6 consent, according to the presence or absence of proton-pump inhibitors

Unique Subject Identifier=1499000000-0008

MEANS Procedure

Assay variable : PTINR\_VAL1 PT-INR Value

N Mean Standard Deviation Minimum Maximum

---

|   |           |           |           |           |
|---|-----------|-----------|-----------|-----------|
| 3 | 1.7566667 | 0.3942503 | 1.4000000 | 2.1800000 |
|---|-----------|-----------|-----------|-----------|

---

Unique Subject Identifier=1501000000-0004

Assay variable : PTINR\_VAL1 PT-INR Value

N Mean Standard Deviation Minimum Maximum

---

|   |           |           |           |           |
|---|-----------|-----------|-----------|-----------|
| 6 | 2.1033333 | 0.5933521 | 1.2000000 | 3.0000000 |
|---|-----------|-----------|-----------|-----------|

---

Unique Subject Identifier=1501000000-0009

Assay variable : PTINR\_VAL1 PT-INR Value

N Mean Standard Deviation Minimum Maximum

---

|   |           |           |           |           |
|---|-----------|-----------|-----------|-----------|
| 5 | 1.5920000 | 0.0729383 | 1.5000000 | 1.7000000 |
|---|-----------|-----------|-----------|-----------|

---

Unique Subject Identifier=1501000000-0010

Assay variable : PTINR\_VAL1 PT-INR Value

N Mean Standard Deviation Minimum Maximum

---

|   |           |           |           |           |
|---|-----------|-----------|-----------|-----------|
| 4 | 1.9700000 | 0.5339788 | 1.5100000 | 2.6700000 |
|---|-----------|-----------|-----------|-----------|

---



Laboratory tests at the time of obtaining Table 2-6 consent, according to the presence or absence of proton-pump inhibitors

Unique Subject Identifier=1501000000-0012

MEANS Procedure

Assay variable : PTINR\_VAL1 PT-INR Value

N Mean Standard Deviation Minimum Maximum

---

|   |           |           |           |           |
|---|-----------|-----------|-----------|-----------|
| 6 | 2.2333333 | 0.3386247 | 1.7000000 | 2.6000000 |
|---|-----------|-----------|-----------|-----------|

---

Unique Subject Identifier=1501000000-0014

Assay variable : PTINR\_VAL1 PT-INR Value

N Mean Standard Deviation Minimum Maximum

---

|   |           |           |           |           |
|---|-----------|-----------|-----------|-----------|
| 5 | 1.7620000 | 0.3475917 | 1.4000000 | 2.2900000 |
|---|-----------|-----------|-----------|-----------|

---

Unique Subject Identifier=1501000000-0022

Assay variable : PTINR\_VAL1 PT-INR Value

N Mean Standard Deviation Minimum Maximum

---

|   |           |           |           |           |
|---|-----------|-----------|-----------|-----------|
| 6 | 1.8750000 | 0.3895510 | 1.5000000 | 2.5000000 |
|---|-----------|-----------|-----------|-----------|

---

Unique Subject Identifier=1501000000-0025

Assay variable : PTINR\_VAL1 PT-INR Value

N Mean Standard Deviation Minimum Maximum

---

|   |           |           |           |           |
|---|-----------|-----------|-----------|-----------|
| 6 | 2.2166667 | 0.5115336 | 1.5000000 | 2.8000000 |
|---|-----------|-----------|-----------|-----------|

---

Laboratory tests at the time of obtaining Table 2-6 consent, according to the presence or absence of proton-pump inhibitors

Unique Subject Identifier=1501000000-0033

MEANS Procedure

Assay variable : PTINR\_VAL1 PT-INR Value

| N | Mean      | Standard Deviation | Minimum   | Maximum   |
|---|-----------|--------------------|-----------|-----------|
| 3 | 1.6700000 | 0.0608276          | 1.6000000 | 1.7100000 |

Unique Subject Identifier=1501000000-0035

Assay variable : PTINR\_VAL1 PT-INR Value

| N | Mean      | Standard Deviation | Minimum   | Maximum   |
|---|-----------|--------------------|-----------|-----------|
| 2 | 1.6400000 | 0.2262742          | 1.4800000 | 1.8000000 |

Unique Subject Identifier=1501000000-0046

Assay variable : PTINR\_VAL1 PT-INR Value

| N | Mean      | Standard Deviation | Minimum   | Maximum   |
|---|-----------|--------------------|-----------|-----------|
| 5 | 2.3360000 | 0.8537740          | 1.2000000 | 3.3900000 |

Unique Subject Identifier=1502000000-0001

Assay variable : PTINR\_VAL1 PT-INR Value

N Mean Standard Deviation Minimum Maximum

---

|   |           |           |           |           |
|---|-----------|-----------|-----------|-----------|
| 4 | 1.6900000 | 0.2336664 | 1.4600000 | 1.9700000 |
|---|-----------|-----------|-----------|-----------|

---

Laboratory tests at the time of obtaining Table 2-6 consent, according to the presence or absence of proton-pump inhibitors

Unique Subject Identifier=1502000000-0003

MEANS Procedure

Assay variable : PTINR\_VAL1 PT-INR Value

N Mean Standard Deviation Minimum Maximum

---

|   |           |  |           |           |
|---|-----------|--|-----------|-----------|
| 1 | 1.5600000 |  | 1.5600000 | 1.5600000 |
|---|-----------|--|-----------|-----------|

---

Unique Subject Identifier=1502000000-0004

Assay variable : PTINR\_VAL1 PT-INR Value

N Mean Standard Deviation Minimum Maximum

---

|   |           |           |           |           |
|---|-----------|-----------|-----------|-----------|
| 4 | 2.1600000 | 0.4730750 | 1.8000000 | 2.8500000 |
|---|-----------|-----------|-----------|-----------|

---

Unique Subject Identifier=1502000000-0005

Assay variable : PTINR\_VAL1 PT-INR Value

N Mean Standard Deviation Minimum Maximum

---

|   |           |  |           |           |
|---|-----------|--|-----------|-----------|
| 1 | 2.1000000 |  | 2.1000000 | 2.1000000 |
|---|-----------|--|-----------|-----------|

---

Unique Subject Identifier=1502000000-0007

Assay variable : PTINR\_VAL1 PT-INR Value

N Mean Standard Deviation Minimum Maximum

---

|   |           |           |           |           |
|---|-----------|-----------|-----------|-----------|
| 2 | 1.7200000 | 0.6646804 | 1.2500000 | 2.1900000 |
|---|-----------|-----------|-----------|-----------|

---

Laboratory tests at the time of obtaining Table 2-6 consent, according to the presence or absence of proton-pump inhibitors

Unique Subject Identifier=1502000000-0008

MEANS Procedure

Assay variable : PTINR\_VAL1 PT-INR Value

N Mean Standard Deviation Minimum Maximum

---

|   |           |           |           |           |
|---|-----------|-----------|-----------|-----------|
| 2 | 1.9900000 | 0.0141421 | 1.9800000 | 2.0000000 |
|---|-----------|-----------|-----------|-----------|

---

Unique Subject Identifier=1502000000-0010

Assay variable : PTINR\_VAL1 PT-INR Value

N Mean Standard Deviation Minimum Maximum

---

|   |           |  |           |           |
|---|-----------|--|-----------|-----------|
| 1 | 1.3700000 |  | 1.3700000 | 1.3700000 |
|---|-----------|--|-----------|-----------|

---

Unique Subject Identifier=1503000000-0001

Assay variable : PTINR\_VAL1 PT-INR Value

N Mean Standard Deviation Minimum Maximum

---

|   |           |  |           |           |
|---|-----------|--|-----------|-----------|
| 1 | 1.7500000 |  | 1.7500000 | 1.7500000 |
|---|-----------|--|-----------|-----------|

---

Unique Subject Identifier=1503000000-0005

Assay variable : PTINR\_VAL1 PT-INR Value

N Mean Standard Deviation Minimum Maximum

---

|   |           |           |           |           |
|---|-----------|-----------|-----------|-----------|
| 3 | 1.8066667 | 1.3367997 | 1.0100000 | 3.3500000 |
|---|-----------|-----------|-----------|-----------|

---



Laboratory tests at the time of obtaining Table 2-6 consent, according to the presence or absence of proton-pump inhibitors

Unique Subject Identifier=1503000000-0007

MEANS Procedure

Assay variable : PTINR\_VAL1 PT-INR Value

N Mean Standard Deviation Minimum Maximum

---

|   |           |           |           |           |
|---|-----------|-----------|-----------|-----------|
| 4 | 2.1825000 | 0.8794458 | 1.4100000 | 3.1000000 |
|---|-----------|-----------|-----------|-----------|

---

Unique Subject Identifier=1503000000-0008

Assay variable : PTINR\_VAL1 PT-INR Value

N Mean Standard Deviation Minimum Maximum

---

|   |           |           |           |           |
|---|-----------|-----------|-----------|-----------|
| 3 | 2.2033333 | 1.2630255 | 1.3200000 | 3.6500000 |
|---|-----------|-----------|-----------|-----------|

---

Unique Subject Identifier=1503000000-0010

Assay variable : PTINR\_VAL1 PT-INR Value

N Mean Standard Deviation Minimum Maximum

---

|   |           |           |           |           |
|---|-----------|-----------|-----------|-----------|
| 2 | 1.4200000 | 0.1838478 | 1.2900000 | 1.5500000 |
|---|-----------|-----------|-----------|-----------|

---

Unique Subject Identifier=1504000000-0001

Assay variable : PTINR\_VAL1 PT-INR Value

N Mean Standard Deviation Minimum Maximum

---

|   |          |           |          |          |
|---|----------|-----------|----------|----------|
| 3 | 2.160000 | 0.3351119 | 1.820000 | 2.490000 |
|---|----------|-----------|----------|----------|

---

Laboratory tests at the time of obtaining Table 2-6 consent, according to the presence or absence of proton-pump inhibitors

Unique Subject Identifier=1504000000-0002

MEANS Procedure

Assay variable : PTINR\_VAL1 PT-INR Value

N Mean Standard Deviation Minimum Maximum

---

|   |           |           |           |           |
|---|-----------|-----------|-----------|-----------|
| 5 | 2.6700000 | 0.3653081 | 2.1400000 | 3.0900000 |
|---|-----------|-----------|-----------|-----------|

---

Unique Subject Identifier=1504000000-0009

Assay variable : PTINR\_VAL1 PT-INR Value

N Mean Standard Deviation Minimum Maximum

---

|   |           |  |           |           |
|---|-----------|--|-----------|-----------|
| 1 | 2.3800000 |  | 2.3800000 | 2.3800000 |
|---|-----------|--|-----------|-----------|

---

Unique Subject Identifier=1512000000-0004

Assay variable : PTINR\_VAL1 PT-INR Value

N Mean Standard Deviation Minimum Maximum

---

|   |           |           |           |           |
|---|-----------|-----------|-----------|-----------|
| 5 | 1.8000000 | 0.3706751 | 1.2700000 | 2.3100000 |
|---|-----------|-----------|-----------|-----------|

---

Unique Subject Identifier=1512000000-0005

Assay variable : PTINR\_VAL1 PT-INR Value

N Mean Standard Deviation Minimum Maximum

---

|   |          |           |          |          |
|---|----------|-----------|----------|----------|
| 3 | 2.000000 | 0.2364318 | 1.750000 | 2.220000 |
|---|----------|-----------|----------|----------|

---

Laboratory tests at the time of obtaining Table 2-6 consent, according to the presence or absence of proton-pump inhibitors

Unique Subject Identifier=1512000000-0007

MEANS Procedure

Assay variable : PTINR\_VAL1 PT-INR Value

N Mean Standard Deviation Minimum Maximum

---

|   |           |           |           |           |
|---|-----------|-----------|-----------|-----------|
| 6 | 2.2116667 | 0.2878483 | 1.8600000 | 2.6900000 |
|---|-----------|-----------|-----------|-----------|

---

Unique Subject Identifier=1513000000-0006

Assay variable : PTINR\_VAL1 PT-INR Value

N Mean Standard Deviation Minimum Maximum

---

|   |           |           |           |           |
|---|-----------|-----------|-----------|-----------|
| 3 | 1.8700000 | 0.1664332 | 1.7500000 | 2.0600000 |
|---|-----------|-----------|-----------|-----------|

---

Unique Subject Identifier=1513000000-0010

Assay variable : PTINR\_VAL1 PT-INR Value

N Mean Standard Deviation Minimum Maximum

---

|   |           |           |           |           |
|---|-----------|-----------|-----------|-----------|
| 3 | 2.1700000 | 0.0435890 | 2.1200000 | 2.2000000 |
|---|-----------|-----------|-----------|-----------|

---

Unique Subject Identifier=1513000000-0011

Assay variable : PTINR\_VAL1 PT-INR Value

N Mean Standard Deviation Minimum Maximum

---

|   |          |           |          |          |
|---|----------|-----------|----------|----------|
| 3 | 1.520000 | 0.2306513 | 1.260000 | 1.700000 |
|---|----------|-----------|----------|----------|

---

Laboratory tests at the time of obtaining Table 2-6 consent, according to the presence or absence of proton-pump inhibitors

Unique Subject Identifier=1514011100-0011

MEANS Procedure

Assay variable : PTINR\_VAL1 PT-INR Value

N Mean Standard Deviation Minimum Maximum

---

|   |          |  |          |          |
|---|----------|--|----------|----------|
| 1 | 2.180000 |  | 2.180000 | 2.180000 |
|---|----------|--|----------|----------|

---

Unique Subject Identifier=1514011100-0012

Assay variable : PTINR\_VAL1 PT-INR Value

N Mean Standard Deviation Minimum Maximum

---

|   |          |           |          |          |
|---|----------|-----------|----------|----------|
| 2 | 1.825000 | 0.2192031 | 1.670000 | 1.980000 |
|---|----------|-----------|----------|----------|

---

Unique Subject Identifier=1516011000-0013

Assay variable : PTINR\_VAL1 PT-INR Value

N Mean Standard Deviation Minimum Maximum

---

|   |          |           |          |          |
|---|----------|-----------|----------|----------|
| 6 | 2.050000 | 0.1516575 | 1.900000 | 2.300000 |
|---|----------|-----------|----------|----------|

---

Unique Subject Identifier=1516011000-0020

Assay variable : PTINR\_VAL1 PT-INR Value

N Mean Standard Deviation Minimum Maximum

---

|   |          |           |          |          |
|---|----------|-----------|----------|----------|
| 5 | 2.140000 | 0.5549775 | 1.300000 | 2.700000 |
|---|----------|-----------|----------|----------|

---



Laboratory tests at the time of obtaining Table 2-6 consent, according to the presence or absence of proton-pump inhibitors

Unique Subject Identifier=1516011000-0041

MEANS Procedure

Assay variable : PTINR\_VAL1 PT-INR Value

N Mean Standard Deviation Minimum Maximum

---

|   |           |           |           |           |
|---|-----------|-----------|-----------|-----------|
| 6 | 2.1233333 | 0.4757590 | 1.4500000 | 2.5600000 |
|---|-----------|-----------|-----------|-----------|

---

Unique Subject Identifier=1516011000-0043

Assay variable : PTINR\_VAL1 PT-INR Value

N Mean Standard Deviation Minimum Maximum

---

|   |           |           |           |           |
|---|-----------|-----------|-----------|-----------|
| 5 | 1.6140000 | 0.0876356 | 1.4900000 | 1.7000000 |
|---|-----------|-----------|-----------|-----------|

---

Unique Subject Identifier=1516011000-0045

Assay variable : PTINR\_VAL1 PT-INR Value

N Mean Standard Deviation Minimum Maximum

---

|   |           |           |           |           |
|---|-----------|-----------|-----------|-----------|
| 6 | 1.5500000 | 0.1643168 | 1.4000000 | 1.8000000 |
|---|-----------|-----------|-----------|-----------|

---

Unique Subject Identifier=1516011000-0051

Assay variable : PTINR\_VAL1 PT-INR Value

N Mean Standard Deviation Minimum Maximum

---

|   |          |           |          |          |
|---|----------|-----------|----------|----------|
| 2 | 2.000000 | 0.9899495 | 1.300000 | 2.700000 |
|---|----------|-----------|----------|----------|

---

Laboratory tests at the time of obtaining Table 2-6 consent, according to the presence or absence of proton-pump inhibitors

Unique Subject Identifier=1516011000-0052

MEANS Procedure

Assay variable : PTINR\_VAL1 PT-INR Value

N Mean Standard Deviation Minimum Maximum

---

|   |           |           |           |           |
|---|-----------|-----------|-----------|-----------|
| 5 | 2.1600000 | 0.5683309 | 1.2000000 | 2.6000000 |
|---|-----------|-----------|-----------|-----------|

---

Unique Subject Identifier=1516011000-0079

Assay variable : PTINR\_VAL1 PT-INR Value

N Mean Standard Deviation Minimum Maximum

---

|   |           |           |           |           |
|---|-----------|-----------|-----------|-----------|
| 6 | 1.8500000 | 0.4086563 | 1.5000000 | 2.6000000 |
|---|-----------|-----------|-----------|-----------|

---

Unique Subject Identifier=1517010100-0003

Assay variable : PTINR\_VAL1 PT-INR Value

N Mean Standard Deviation Minimum Maximum

---

|   |           |           |           |           |
|---|-----------|-----------|-----------|-----------|
| 2 | 1.6900000 | 0.1272792 | 1.6000000 | 1.7800000 |
|---|-----------|-----------|-----------|-----------|

---

Unique Subject Identifier=1517010100-0004

Assay variable : PTINR\_VAL1 PT-INR Value

N Mean Standard Deviation Minimum Maximum

---

|   |           |           |           |           |
|---|-----------|-----------|-----------|-----------|
| 3 | 2.1733333 | 0.4986315 | 1.6300000 | 2.6100000 |
|---|-----------|-----------|-----------|-----------|

---

Laboratory tests at the time of obtaining Table 2-6 consent, according to the presence or absence of proton-pump inhibitors

Unique Subject Identifier=1517010100-0005

MEANS Procedure

Assay variable : PTINR\_VAL1 PT-INR Value

| N | Mean      | Standard Deviation | Minimum   | Maximum   |
|---|-----------|--------------------|-----------|-----------|
| 3 | 1.8766667 | 0.2650157          | 1.6100000 | 2.1400000 |

Unique Subject Identifier=1517010100-0006

Assay variable : PTINR\_VAL1 PT-INR Value

| N | Mean      | Standard Deviation | Minimum   | Maximum   |
|---|-----------|--------------------|-----------|-----------|
| 3 | 2.2633333 | 0.6664333          | 1.5500000 | 2.8700000 |

Unique Subject Identifier=1517010100-0008

Assay variable : PTINR\_VAL1 PT-INR Value

| N | Mean      | Standard Deviation | Minimum   | Maximum   |
|---|-----------|--------------------|-----------|-----------|
| 4 | 1.2925000 | 0.0330404          | 1.2600000 | 1.3300000 |

Unique Subject Identifier=1517010100-0009

Assay variable : PTINR\_VAL1 PT-INR Value

N Mean Standard Deviation Minimum Maximum

---

|   |          |           |          |          |
|---|----------|-----------|----------|----------|
| 3 | 1.950000 | 0.3502856 | 1.640000 | 2.330000 |
|---|----------|-----------|----------|----------|

---

Laboratory tests at the time of obtaining Table 2-6 consent, according to the presence or absence of proton-pump inhibitors

Unique Subject Identifier=1517010100-0011

MEANS Procedure

Assay variable : PTINR\_VAL1 PT-INR Value

| N | Mean      | Standard Deviation | Minimum   | Maximum   |
|---|-----------|--------------------|-----------|-----------|
| 3 | 1.6900000 | 0.1473092          | 1.5600000 | 1.8500000 |

Unique Subject Identifier=1521000000-0002

Assay variable : PTINR\_VAL1 PT-INR Value

| N | Mean      | Standard Deviation | Minimum   | Maximum   |
|---|-----------|--------------------|-----------|-----------|
| 1 | 1.7300000 |                    | 1.7300000 | 1.7300000 |

Unique Subject Identifier=1521000000-0003

Assay variable : PTINR\_VAL1 PT-INR Value

| N | Mean      | Standard Deviation | Minimum   | Maximum   |
|---|-----------|--------------------|-----------|-----------|
| 1 | 2.6600000 |                    | 2.6600000 | 2.6600000 |

Unique Subject Identifier=1521000000-0006

Assay variable : PTINR\_VAL1 PT-INR Value

N Mean Standard Deviation Minimum Maximum

---

|   |           |  |           |           |
|---|-----------|--|-----------|-----------|
| 1 | 1.7100000 |  | 1.7100000 | 1.7100000 |
|---|-----------|--|-----------|-----------|

---



Laboratory tests at the time of obtaining Table 2-6 consent, according to the presence or absence of proton-pump inhibitors

Unique Subject Identifier=1522000000-0001

MEANS Procedure

Assay variable : PTINR\_VAL1 PT-INR Value

N Mean Standard Deviation Minimum Maximum

---

|   |           |           |           |           |
|---|-----------|-----------|-----------|-----------|
| 4 | 2.1100000 | 0.5918896 | 1.6700000 | 2.9400000 |
|---|-----------|-----------|-----------|-----------|

---

Unique Subject Identifier=1522000000-0003

Assay variable : PTINR\_VAL1 PT-INR Value

N Mean Standard Deviation Minimum Maximum

---

|   |           |           |           |           |
|---|-----------|-----------|-----------|-----------|
| 2 | 1.4150000 | 0.4596194 | 1.0900000 | 1.7400000 |
|---|-----------|-----------|-----------|-----------|

---

Unique Subject Identifier=1522000000-0005

Assay variable : PTINR\_VAL1 PT-INR Value

N Mean Standard Deviation Minimum Maximum

---

|   |           |           |           |           |
|---|-----------|-----------|-----------|-----------|
| 5 | 1.9700000 | 0.3586781 | 1.6500000 | 2.4400000 |
|---|-----------|-----------|-----------|-----------|

---

Unique Subject Identifier=1522000000-0006

Assay variable : PTINR\_VAL1 PT-INR Value

N Mean Standard Deviation Minimum Maximum

---

|   |           |           |           |           |
|---|-----------|-----------|-----------|-----------|
| 4 | 1.8775000 | 0.2466272 | 1.6400000 | 2.1500000 |
|---|-----------|-----------|-----------|-----------|

---

Laboratory tests at the time of obtaining Table 2-6 consent, according to the presence or absence of proton-pump inhibitors

Unique Subject Identifier=1522000000-0009

MEANS Procedure

Assay variable : PTINR\_VAL1 PT-INR Value

N Mean Standard Deviation Minimum Maximum

---

|   |           |           |           |           |
|---|-----------|-----------|-----------|-----------|
| 6 | 2.0883333 | 0.5870747 | 1.5500000 | 3.1100000 |
|---|-----------|-----------|-----------|-----------|

---

Unique Subject Identifier=1522000000-0010

Assay variable : PTINR\_VAL1 PT-INR Value

N Mean Standard Deviation Minimum Maximum

---

|   |           |           |           |           |
|---|-----------|-----------|-----------|-----------|
| 6 | 2.4316667 | 0.7141545 | 1.5300000 | 3.4100000 |
|---|-----------|-----------|-----------|-----------|

---

Unique Subject Identifier=1522000000-0011

Assay variable : PTINR\_VAL1 PT-INR Value

N Mean Standard Deviation Minimum Maximum

---

|   |           |           |           |           |
|---|-----------|-----------|-----------|-----------|
| 5 | 2.2160000 | 0.7098098 | 1.3800000 | 2.8600000 |
|---|-----------|-----------|-----------|-----------|

---

Unique Subject Identifier=1522000000-0016

Assay variable : PTINR\_VAL1 PT-INR Value

N Mean Standard Deviation Minimum Maximum

---

|   |          |           |          |          |
|---|----------|-----------|----------|----------|
| 4 | 1.740000 | 0.1913113 | 1.560000 | 1.920000 |
|---|----------|-----------|----------|----------|

---

Laboratory tests at the time of obtaining Table 2-6 consent, according to the presence or absence of proton-pump inhibitors

Unique Subject Identifier=1522000000-0017

MEANS Procedure

Assay variable : PTINR\_VAL1 PT-INR Value

N Mean Standard Deviation Minimum Maximum

---

|   |           |           |           |           |
|---|-----------|-----------|-----------|-----------|
| 4 | 1.9975000 | 0.5490826 | 1.3600000 | 2.4900000 |
|---|-----------|-----------|-----------|-----------|

---

Unique Subject Identifier=1522000000-0022

Assay variable : PTINR\_VAL1 PT-INR Value

N Mean Standard Deviation Minimum Maximum

---

|   |           |           |           |           |
|---|-----------|-----------|-----------|-----------|
| 4 | 2.5100000 | 0.3154890 | 2.1600000 | 2.8900000 |
|---|-----------|-----------|-----------|-----------|

---

Unique Subject Identifier=1522000000-0023

Assay variable : PTINR\_VAL1 PT-INR Value

N Mean Standard Deviation Minimum Maximum

---

|   |           |           |           |           |
|---|-----------|-----------|-----------|-----------|
| 5 | 2.0600000 | 0.1140175 | 1.8900000 | 2.2100000 |
|---|-----------|-----------|-----------|-----------|

---

Unique Subject Identifier=1522000000-0024

Assay variable : PTINR\_VAL1 PT-INR Value

N Mean Standard Deviation Minimum Maximum

---

|   |          |           |          |          |
|---|----------|-----------|----------|----------|
| 4 | 1.960000 | 0.5485131 | 1.210000 | 2.500000 |
|---|----------|-----------|----------|----------|

---

Laboratory tests at the time of obtaining Table 2-6 consent, according to the presence or absence of proton-pump inhibitors

Unique Subject Identifier=1522000000-0027

MEANS Procedure

Assay variable : PTINR\_VAL1 PT-INR Value

N Mean Standard Deviation Minimum Maximum

---

|   |           |           |           |           |
|---|-----------|-----------|-----------|-----------|
| 4 | 1.6675000 | 0.1985573 | 1.5300000 | 1.9600000 |
|---|-----------|-----------|-----------|-----------|

---

Unique Subject Identifier=1522000000-0031

Assay variable : PTINR\_VAL1 PT-INR Value

N Mean Standard Deviation Minimum Maximum

---

|   |           |           |           |           |
|---|-----------|-----------|-----------|-----------|
| 3 | 1.4866667 | 0.0152753 | 1.4700000 | 1.5000000 |
|---|-----------|-----------|-----------|-----------|

---

Unique Subject Identifier=1522000000-0033

Assay variable : PTINR\_VAL1 PT-INR Value

N Mean Standard Deviation Minimum Maximum

---

|   |           |           |           |           |
|---|-----------|-----------|-----------|-----------|
| 3 | 1.2466667 | 0.3384277 | 0.9600000 | 1.6200000 |
|---|-----------|-----------|-----------|-----------|

---

Unique Subject Identifier=1522000000-0035

Assay variable : PTINR\_VAL1 PT-INR Value

N Mean Standard Deviation Minimum Maximum

---

|   |          |           |          |          |
|---|----------|-----------|----------|----------|
| 3 | 1.860000 | 0.4430576 | 1.350000 | 2.150000 |
|---|----------|-----------|----------|----------|

---



Laboratory tests at the time of obtaining Table 2-6 consent, according to the presence or absence of proton-pump inhibitors

Unique Subject Identifier=1523010111-0001

MEANS Procedure

Assay variable : PTINR\_VAL1 PT-INR Value

N Mean Standard Deviation Minimum Maximum

---

|   |           |           |           |           |
|---|-----------|-----------|-----------|-----------|
| 6 | 1.6800000 | 0.3017284 | 1.4100000 | 2.2500000 |
|---|-----------|-----------|-----------|-----------|

---

Unique Subject Identifier=1523010111-0006

Assay variable : PTINR\_VAL1 PT-INR Value

N Mean Standard Deviation Minimum Maximum

---

|   |           |           |           |           |
|---|-----------|-----------|-----------|-----------|
| 6 | 1.5683333 | 0.1646107 | 1.3300000 | 1.7300000 |
|---|-----------|-----------|-----------|-----------|

---

Unique Subject Identifier=1523010111-0011

Assay variable : PTINR\_VAL1 PT-INR Value

N Mean Standard Deviation Minimum Maximum

---

|   |           |           |           |           |
|---|-----------|-----------|-----------|-----------|
| 6 | 1.8616667 | 0.3711828 | 1.5900000 | 2.5800000 |
|---|-----------|-----------|-----------|-----------|

---

Unique Subject Identifier=1524010000-0002

Assay variable : PTINR\_VAL1 PT-INR Value

N Mean Standard Deviation Minimum Maximum

---

|   |           |           |           |           |
|---|-----------|-----------|-----------|-----------|
| 2 | 1.8450000 | 0.2050610 | 1.7000000 | 1.9900000 |
|---|-----------|-----------|-----------|-----------|

---

Laboratory tests at the time of obtaining Table 2-6 consent, according to the presence or absence of proton-pump inhibitors

Unique Subject Identifier=1524010000-0003

MEANS Procedure

Assay variable : PTINR\_VAL1 PT-INR Value

N Mean Standard Deviation Minimum Maximum

---

|   |           |  |           |           |
|---|-----------|--|-----------|-----------|
| 1 | 2.3200000 |  | 2.3200000 | 2.3200000 |
|---|-----------|--|-----------|-----------|

---

Unique Subject Identifier=1524010000-0005

Assay variable : PTINR\_VAL1 PT-INR Value

N Mean Standard Deviation Minimum Maximum

---

|   |           |           |           |           |
|---|-----------|-----------|-----------|-----------|
| 2 | 2.0050000 | 0.1484924 | 1.9000000 | 2.1100000 |
|---|-----------|-----------|-----------|-----------|

---

Unique Subject Identifier=1524010000-0006

Assay variable : PTINR\_VAL1 PT-INR Value

N Mean Standard Deviation Minimum Maximum

---

|   |           |  |           |           |
|---|-----------|--|-----------|-----------|
| 1 | 2.4200000 |  | 2.4200000 | 2.4200000 |
|---|-----------|--|-----------|-----------|

---

Unique Subject Identifier=1524010000-0007

Assay variable : PTINR\_VAL1 PT-INR Value

N Mean Standard Deviation Minimum Maximum

---

|   |           |           |           |           |
|---|-----------|-----------|-----------|-----------|
| 3 | 2.2233333 | 0.1154701 | 2.0900000 | 2.2900000 |
|---|-----------|-----------|-----------|-----------|

---

Laboratory tests at the time of obtaining Table 2-6 consent, according to the presence or absence of proton-pump inhibitors

Unique Subject Identifier=1524010000-0008

MEANS Procedure

Assay variable : PTINR\_VAL1 PT-INR Value

N Mean Standard Deviation Minimum Maximum

---

|   |           |           |           |           |
|---|-----------|-----------|-----------|-----------|
| 4 | 1.8575000 | 0.3262284 | 1.5700000 | 2.3000000 |
|---|-----------|-----------|-----------|-----------|

---

Unique Subject Identifier=1524010000-0009

Assay variable : PTINR\_VAL1 PT-INR Value

N Mean Standard Deviation Minimum Maximum

---

|   |           |           |           |           |
|---|-----------|-----------|-----------|-----------|
| 4 | 1.8200000 | 0.4307358 | 1.2300000 | 2.2000000 |
|---|-----------|-----------|-----------|-----------|

---

Unique Subject Identifier=1524010000-0012

Assay variable : PTINR\_VAL1 PT-INR Value

N Mean Standard Deviation Minimum Maximum

---

|   |           |           |           |           |
|---|-----------|-----------|-----------|-----------|
| 4 | 2.2575000 | 0.2129750 | 1.9600000 | 2.4500000 |
|---|-----------|-----------|-----------|-----------|

---

Unique Subject Identifier=1524010000-0018

Assay variable : PTINR\_VAL1 PT-INR Value

N Mean Standard Deviation Minimum Maximum

---

|   |           |           |           |           |
|---|-----------|-----------|-----------|-----------|
| 4 | 2.2350000 | 0.4086971 | 1.9100000 | 2.8300000 |
|---|-----------|-----------|-----------|-----------|

---

Laboratory tests at the time of obtaining Table 2-6 consent, according to the presence or absence of proton-pump inhibitors

Unique Subject Identifier=1527010000-0001

MEANS Procedure

Assay variable : PTINR\_VAL1 PT-INR Value

N Mean Standard Deviation Minimum Maximum

---

|   |           |           |           |           |
|---|-----------|-----------|-----------|-----------|
| 6 | 1.7250000 | 0.2076295 | 1.4500000 | 1.9900000 |
|---|-----------|-----------|-----------|-----------|

---

Unique Subject Identifier=1527010000-0002

Assay variable : PTINR\_VAL1 PT-INR Value

N Mean Standard Deviation Minimum Maximum

---

|   |           |           |           |           |
|---|-----------|-----------|-----------|-----------|
| 5 | 2.0180000 | 0.1130044 | 1.9300000 | 2.2000000 |
|---|-----------|-----------|-----------|-----------|

---

Unique Subject Identifier=1527010000-0003

Assay variable : PTINR\_VAL1 PT-INR Value

N Mean Standard Deviation Minimum Maximum

---

|   |           |           |           |           |
|---|-----------|-----------|-----------|-----------|
| 6 | 1.8283333 | 0.3559448 | 1.5600000 | 2.5000000 |
|---|-----------|-----------|-----------|-----------|

---

Unique Subject Identifier=1527010000-0004

Assay variable : PTINR\_VAL1 PT-INR Value

N Mean Standard Deviation Minimum Maximum

---

|   |           |           |           |           |
|---|-----------|-----------|-----------|-----------|
| 6 | 2.0766667 | 0.1527962 | 1.9300000 | 2.3000000 |
|---|-----------|-----------|-----------|-----------|

---



Laboratory tests at the time of obtaining Table 2-6 consent, according to the presence or absence of proton-pump inhibitors

Unique Subject Identifier=1527010000-0005

MEANS Procedure

Assay variable : PTINR\_VAL1 PT-INR Value

N Mean Standard Deviation Minimum Maximum

---

|   |           |           |           |           |
|---|-----------|-----------|-----------|-----------|
| 5 | 2.4140000 | 0.5662861 | 2.0300000 | 3.3900000 |
|---|-----------|-----------|-----------|-----------|

---

Unique Subject Identifier=1527010000-0006

Assay variable : PTINR\_VAL1 PT-INR Value

N Mean Standard Deviation Minimum Maximum

---

|   |           |           |           |           |
|---|-----------|-----------|-----------|-----------|
| 6 | 2.0616667 | 0.2521441 | 1.7100000 | 2.4000000 |
|---|-----------|-----------|-----------|-----------|

---

Unique Subject Identifier=1527010000-0007

Assay variable : PTINR\_VAL1 PT-INR Value

N Mean Standard Deviation Minimum Maximum

---

|   |           |           |           |           |
|---|-----------|-----------|-----------|-----------|
| 6 | 2.3883333 | 0.3098656 | 1.9300000 | 2.8000000 |
|---|-----------|-----------|-----------|-----------|

---

Unique Subject Identifier=1527010000-0008

Assay variable : PTINR\_VAL1 PT-INR Value

N Mean Standard Deviation Minimum Maximum

---

|   |           |           |           |           |
|---|-----------|-----------|-----------|-----------|
| 6 | 2.0716667 | 0.3989695 | 1.7100000 | 2.8000000 |
|---|-----------|-----------|-----------|-----------|

---

Laboratory tests at the time of obtaining Table 2-6 consent, according to the presence or absence of proton-pump inhibitors

Unique Subject Identifier=1527010000-0009

MEANS Procedure

Assay variable : PTINR\_VAL1 PT-INR Value

N Mean Standard Deviation Minimum Maximum

---

|   |           |           |           |           |
|---|-----------|-----------|-----------|-----------|
| 6 | 1.9333333 | 0.1298717 | 1.7100000 | 2.1100000 |
|---|-----------|-----------|-----------|-----------|

---

Unique Subject Identifier=1527010000-0010

Assay variable : PTINR\_VAL1 PT-INR Value

N Mean Standard Deviation Minimum Maximum

---

|   |           |           |           |           |
|---|-----------|-----------|-----------|-----------|
| 6 | 1.8316667 | 0.1595515 | 1.5600000 | 1.9300000 |
|---|-----------|-----------|-----------|-----------|

---

Unique Subject Identifier=1527010000-0011

Assay variable : PTINR\_VAL1 PT-INR Value

N Mean Standard Deviation Minimum Maximum

---

|   |           |           |           |           |
|---|-----------|-----------|-----------|-----------|
| 6 | 2.0683333 | 0.3099301 | 1.7100000 | 2.4000000 |
|---|-----------|-----------|-----------|-----------|

---

Unique Subject Identifier=1527010000-0012

Assay variable : PTINR\_VAL1 PT-INR Value

N Mean Standard Deviation Minimum Maximum

---

|   |           |           |           |           |
|---|-----------|-----------|-----------|-----------|
| 4 | 1.7100000 | 0.2933712 | 1.4500000 | 2.1200000 |
|---|-----------|-----------|-----------|-----------|

---

Laboratory tests at the time of obtaining Table 2-6 consent, according to the presence or absence of proton-pump inhibitors

Unique Subject Identifier=1527010000-0013

MEANS Procedure

Assay variable : PTINR\_VAL1 PT-INR Value

N Mean Standard Deviation Minimum Maximum

---

|   |           |           |           |           |
|---|-----------|-----------|-----------|-----------|
| 5 | 2.0380000 | 0.2314519 | 1.7100000 | 2.3000000 |
|---|-----------|-----------|-----------|-----------|

---

Unique Subject Identifier=1527010000-0016

Assay variable : PTINR\_VAL1 PT-INR Value

N Mean Standard Deviation Minimum Maximum

---

|   |           |           |           |           |
|---|-----------|-----------|-----------|-----------|
| 6 | 1.8516667 | 0.1699902 | 1.7100000 | 2.1200000 |
|---|-----------|-----------|-----------|-----------|

---

Unique Subject Identifier=1527010000-0017

Assay variable : PTINR\_VAL1 PT-INR Value

N Mean Standard Deviation Minimum Maximum

---

|   |           |           |           |           |
|---|-----------|-----------|-----------|-----------|
| 5 | 1.9500000 | 0.3967367 | 1.5600000 | 2.4000000 |
|---|-----------|-----------|-----------|-----------|

---

Unique Subject Identifier=1527010000-0018

Assay variable : PTINR\_VAL1 PT-INR Value

N Mean Standard Deviation Minimum Maximum

---

|   |           |           |           |           |
|---|-----------|-----------|-----------|-----------|
| 6 | 2.2633333 | 0.2242023 | 1.9300000 | 2.5000000 |
|---|-----------|-----------|-----------|-----------|

---

Laboratory tests at the time of obtaining Table 2-6 consent, according to the presence or absence of proton-pump inhibitors

Unique Subject Identifier=1527010000-0022

MEANS Procedure

Assay variable : PTINR\_VAL1 PT-INR Value

N Mean Standard Deviation Minimum Maximum

---

|   |           |           |           |           |
|---|-----------|-----------|-----------|-----------|
| 6 | 1.9150000 | 0.6305791 | 1.2500000 | 2.8000000 |
|---|-----------|-----------|-----------|-----------|

---

Unique Subject Identifier=1527010000-0024

Assay variable : PTINR\_VAL1 PT-INR Value

N Mean Standard Deviation Minimum Maximum

---

|   |           |           |           |           |
|---|-----------|-----------|-----------|-----------|
| 6 | 1.9166667 | 0.4050021 | 1.4500000 | 2.6000000 |
|---|-----------|-----------|-----------|-----------|

---

Unique Subject Identifier=1527010000-0026

Assay variable : PTINR\_VAL1 PT-INR Value

N Mean Standard Deviation Minimum Maximum

---

|   |           |           |           |           |
|---|-----------|-----------|-----------|-----------|
| 6 | 2.1050000 | 0.3042860 | 1.7100000 | 2.6000000 |
|---|-----------|-----------|-----------|-----------|

---

Unique Subject Identifier=1528000000-0001

Assay variable : PTINR\_VAL1 PT-INR Value

N Mean Standard Deviation Minimum Maximum

---

|   |           |           |           |           |
|---|-----------|-----------|-----------|-----------|
| 6 | 1.7533333 | 0.1539697 | 1.5100000 | 1.9700000 |
|---|-----------|-----------|-----------|-----------|

---



Laboratory tests at the time of obtaining Table 2-6 consent, according to the presence or absence of proton-pump inhibitors

Unique Subject Identifier=1528000000-0003

MEANS Procedure

Assay variable : PTINR\_VAL1 PT-INR Value

| N | Mean      | Standard Deviation | Minimum   | Maximum   |
|---|-----------|--------------------|-----------|-----------|
| 6 | 2.2866667 | 0.5947324          | 1.3800000 | 3.1300000 |

Unique Subject Identifier=1528000000-0004

Assay variable : PTINR\_VAL1 PT-INR Value

| N | Mean      | Standard Deviation | Minimum   | Maximum   |
|---|-----------|--------------------|-----------|-----------|
| 4 | 1.8200000 | 0.2580698          | 1.4900000 | 2.1000000 |

Unique Subject Identifier=1530000000-0002

Assay variable : PTINR\_VAL1 PT-INR Value

| N | Mean      | Standard Deviation | Minimum   | Maximum   |
|---|-----------|--------------------|-----------|-----------|
| 5 | 1.5800000 | 0.1923538          | 1.4000000 | 1.9000000 |

Unique Subject Identifier=1530000000-0003

Assay variable : PTINR\_VAL1 PT-INR Value

N Mean Standard Deviation Minimum Maximum

---

|   |          |           |          |          |
|---|----------|-----------|----------|----------|
| 5 | 1.580000 | 0.1788854 | 1.300000 | 1.700000 |
|---|----------|-----------|----------|----------|

---

Laboratory tests at the time of obtaining Table 2-6 consent, according to the presence or absence of proton-pump inhibitors

Unique Subject Identifier=1530000000-0026

MEANS Procedure

Assay variable : PTINR\_VAL1 PT-INR Value

N Mean Standard Deviation Minimum Maximum

---

|   |           |           |           |           |
|---|-----------|-----------|-----------|-----------|
| 2 | 4.0500000 | 2.3334524 | 2.4000000 | 5.7000000 |
|---|-----------|-----------|-----------|-----------|

---

Unique Subject Identifier=1530000000-0030

Assay variable : PTINR\_VAL1 PT-INR Value

N Mean Standard Deviation Minimum Maximum

---

|   |           |  |           |           |
|---|-----------|--|-----------|-----------|
| 1 | 1.4000000 |  | 1.4000000 | 1.4000000 |
|---|-----------|--|-----------|-----------|

---

Unique Subject Identifier=1531100000-0011

Assay variable : PTINR\_VAL1 PT-INR Value

N Mean Standard Deviation Minimum Maximum

---

|   |           |           |           |           |
|---|-----------|-----------|-----------|-----------|
| 6 | 2.2833333 | 0.2639444 | 1.9000000 | 2.6000000 |
|---|-----------|-----------|-----------|-----------|

---

Unique Subject Identifier=1600011000-0001

Assay variable : PTINR\_VAL1 PT-INR Value

N Mean Standard Deviation Minimum Maximum

---

|   |           |           |           |           |
|---|-----------|-----------|-----------|-----------|
| 2 | 1.6600000 | 0.0848528 | 1.6000000 | 1.7200000 |
|---|-----------|-----------|-----------|-----------|

---

Laboratory tests at the time of obtaining Table 2-6 consent, according to the presence or absence of proton-pump inhibitors

Unique Subject Identifier=1600011000-0006

MEANS Procedure

Assay variable : PTINR\_VAL1 PT-INR Value

| N | Mean      | Standard Deviation | Minimum   | Maximum   |
|---|-----------|--------------------|-----------|-----------|
| 1 | 2.5700000 |                    | 2.5700000 | 2.5700000 |

Unique Subject Identifier=1600011000-0016

Assay variable : PTINR\_VAL1 PT-INR Value

| N | Mean      | Standard Deviation | Minimum   | Maximum   |
|---|-----------|--------------------|-----------|-----------|
| 3 | 1.3533333 | 0.0680686          | 1.3000000 | 1.4300000 |

Unique Subject Identifier=1600011000-0018

Assay variable : PTINR\_VAL1 PT-INR Value

| N | Mean      | Standard Deviation | Minimum   | Maximum   |
|---|-----------|--------------------|-----------|-----------|
| 6 | 2.0333333 | 0.5442671          | 1.3900000 | 2.7200000 |

Unique Subject Identifier=1600011000-0023

Assay variable : PTINR\_VAL1 PT-INR Value

N Mean Standard Deviation Minimum Maximum

---

|   |           |           |           |           |
|---|-----------|-----------|-----------|-----------|
| 3 | 2.0266667 | 0.2706166 | 1.8100000 | 2.3300000 |
|---|-----------|-----------|-----------|-----------|

---

Laboratory tests at the time of obtaining Table 2-6 consent, according to the presence or absence of proton-pump inhibitors

Unique Subject Identifier=1600011000-0024

MEANS Procedure

Assay variable : PTINR\_VAL1 PT-INR Value

N Mean Standard Deviation Minimum Maximum

---

|   |           |  |           |           |
|---|-----------|--|-----------|-----------|
| 1 | 1.8300000 |  | 1.8300000 | 1.8300000 |
|---|-----------|--|-----------|-----------|

---

Unique Subject Identifier=1600011000-0027

Assay variable : PTINR\_VAL1 PT-INR Value

N Mean Standard Deviation Minimum Maximum

---

|   |           |           |           |           |
|---|-----------|-----------|-----------|-----------|
| 6 | 1.7750000 | 0.3326710 | 1.3100000 | 2.1700000 |
|---|-----------|-----------|-----------|-----------|

---

Unique Subject Identifier=1602000000-0002

Assay variable : PTINR\_VAL1 PT-INR Value

N Mean Standard Deviation Minimum Maximum

---

|   |           |           |           |           |
|---|-----------|-----------|-----------|-----------|
| 3 | 1.5000000 | 0.1000000 | 1.4000000 | 1.6000000 |
|---|-----------|-----------|-----------|-----------|

---

Unique Subject Identifier=1602000000-0003

Assay variable : PTINR\_VAL1 PT-INR Value

N Mean Standard Deviation Minimum Maximum

---

|   |           |           |           |           |
|---|-----------|-----------|-----------|-----------|
| 3 | 1.8333333 | 0.4041452 | 1.4000000 | 2.2000000 |
|---|-----------|-----------|-----------|-----------|

---



Laboratory tests at the time of obtaining Table 2-6 consent, according to the presence or absence of proton-pump inhibitors

Unique Subject Identifier=1603000000-0015

MEANS Procedure

Assay variable : PTINR\_VAL1 PT-INR Value

| N | Mean      | Standard Deviation | Minimum   | Maximum   |
|---|-----------|--------------------|-----------|-----------|
| 5 | 1.7600000 | 0.4669047          | 1.3000000 | 2.4000000 |

Unique Subject Identifier=1603000000-0019

Assay variable : PTINR\_VAL1 PT-INR Value

| N | Mean      | Standard Deviation | Minimum   | Maximum   |
|---|-----------|--------------------|-----------|-----------|
| 6 | 2.5000000 | 0.4939636          | 1.9000000 | 3.0000000 |

Unique Subject Identifier=1701010000-0003

Assay variable : PTINR\_VAL1 PT-INR Value

| N | Mean      | Standard Deviation | Minimum   | Maximum   |
|---|-----------|--------------------|-----------|-----------|
| 6 | 1.5016667 | 0.0685322          | 1.4300000 | 1.5700000 |

Unique Subject Identifier=1701010000-0011

Assay variable : PTINR\_VAL1 PT-INR Value

N Mean Standard Deviation Minimum Maximum

---

|   |           |           |           |           |
|---|-----------|-----------|-----------|-----------|
| 4 | 1.4125000 | 0.2327194 | 1.1000000 | 1.5900000 |
|---|-----------|-----------|-----------|-----------|

---

Laboratory tests at the time of obtaining Table 2-6 consent, according to the presence or absence of proton-pump inhibitors

Unique Subject Identifier=1702010000-0009

MEANS Procedure

Assay variable : PTINR\_VAL1 PT-INR Value

N Mean Standard Deviation Minimum Maximum

---

|   |           |           |           |           |
|---|-----------|-----------|-----------|-----------|
| 2 | 2.1850000 | 0.1343503 | 2.0900000 | 2.2800000 |
|---|-----------|-----------|-----------|-----------|

---

Unique Subject Identifier=1705010000-0002

Assay variable : PTINR\_VAL1 PT-INR Value

N Mean Standard Deviation Minimum Maximum

---

|   |           |           |           |           |
|---|-----------|-----------|-----------|-----------|
| 6 | 1.8116667 | 0.1802683 | 1.5000000 | 1.9700000 |
|---|-----------|-----------|-----------|-----------|

---

Unique Subject Identifier=1705010000-0003

Assay variable : PTINR\_VAL1 PT-INR Value

N Mean Standard Deviation Minimum Maximum

---

|   |           |           |           |           |
|---|-----------|-----------|-----------|-----------|
| 2 | 1.6600000 | 0.0989949 | 1.5900000 | 1.7300000 |
|---|-----------|-----------|-----------|-----------|

---

Unique Subject Identifier=1708010000-0003

Assay variable : PTINR\_VAL1 PT-INR Value

N Mean Standard Deviation Minimum Maximum

---

|   |          |          |          |          |
|---|----------|----------|----------|----------|
| 5 | 2.302000 | 0.329196 | 2.090000 | 2.880000 |
|---|----------|----------|----------|----------|

---

Laboratory tests at the time of obtaining Table 2-6 consent, according to the presence or absence of proton-pump inhibitors

Unique Subject Identifier=1710000000-0001

MEANS Procedure

Assay variable : PTINR\_VAL1 PT-INR Value

N Mean Standard Deviation Minimum Maximum

---

|   |           |           |           |           |
|---|-----------|-----------|-----------|-----------|
| 6 | 2.2450000 | 0.2115420 | 1.9800000 | 2.4700000 |
|---|-----------|-----------|-----------|-----------|

---

Unique Subject Identifier=1710000000-0008

Assay variable : PTINR\_VAL1 PT-INR Value

N Mean Standard Deviation Minimum Maximum

---

|   |           |           |           |           |
|---|-----------|-----------|-----------|-----------|
| 6 | 2.1583333 | 0.3340309 | 1.8100000 | 2.7200000 |
|---|-----------|-----------|-----------|-----------|

---

Unique Subject Identifier=1710000000-0009

Assay variable : PTINR\_VAL1 PT-INR Value

N Mean Standard Deviation Minimum Maximum

---

|   |           |           |           |           |
|---|-----------|-----------|-----------|-----------|
| 5 | 1.9600000 | 0.4259108 | 1.5300000 | 2.5900000 |
|---|-----------|-----------|-----------|-----------|

---

Unique Subject Identifier=1716010000-0004

Assay variable : PTINR\_VAL1 PT-INR Value

N Mean Standard Deviation Minimum Maximum

---

|   |           |           |           |           |
|---|-----------|-----------|-----------|-----------|
| 3 | 1.6933333 | 0.4045162 | 1.3800000 | 2.1500000 |
|---|-----------|-----------|-----------|-----------|

---

Laboratory tests at the time of obtaining Table 2-6 consent, according to the presence or absence of proton-pump inhibitors

Unique Subject Identifier=1716010000-0006

MEANS Procedure

Assay variable : PTINR\_VAL1 PT-INR Value

N Mean Standard Deviation Minimum Maximum

---

|   |           |           |           |           |
|---|-----------|-----------|-----------|-----------|
| 2 | 2.0500000 | 0.4808326 | 1.7100000 | 2.3900000 |
|---|-----------|-----------|-----------|-----------|

---

Unique Subject Identifier=1718000000-0008

Assay variable : PTINR\_VAL1 PT-INR Value

N Mean Standard Deviation Minimum Maximum

---

|   |           |           |           |           |
|---|-----------|-----------|-----------|-----------|
| 6 | 1.7333333 | 0.3559026 | 1.2000000 | 2.1000000 |
|---|-----------|-----------|-----------|-----------|

---

Unique Subject Identifier=1718000000-0011

Assay variable : PTINR\_VAL1 PT-INR Value

N Mean Standard Deviation Minimum Maximum

---

|   |           |           |           |           |
|---|-----------|-----------|-----------|-----------|
| 6 | 1.7000000 | 0.1264911 | 1.6000000 | 1.9000000 |
|---|-----------|-----------|-----------|-----------|

---

Unique Subject Identifier=1718000000-0015

Assay variable : PTINR\_VAL1 PT-INR Value

N Mean Standard Deviation Minimum Maximum

---

|   |          |           |          |          |
|---|----------|-----------|----------|----------|
| 5 | 1.920000 | 0.2683282 | 1.500000 | 2.200000 |
|---|----------|-----------|----------|----------|

---



Laboratory tests at the time of obtaining Table 2-6 consent, according to the presence or absence of proton-pump inhibitors

Unique Subject Identifier=1718000000-0017

MEANS Procedure

Assay variable : PTINR\_VAL1 PT-INR Value

N Mean Standard Deviation Minimum Maximum

---

|   |           |           |           |           |
|---|-----------|-----------|-----------|-----------|
| 6 | 2.2333333 | 0.5819507 | 1.9000000 | 3.4000000 |
|---|-----------|-----------|-----------|-----------|

---

Unique Subject Identifier=1718000000-0018

Assay variable : PTINR\_VAL1 PT-INR Value

N Mean Standard Deviation Minimum Maximum

---

|   |           |           |           |           |
|---|-----------|-----------|-----------|-----------|
| 6 | 1.7666667 | 0.3265986 | 1.4000000 | 2.2000000 |
|---|-----------|-----------|-----------|-----------|

---

Unique Subject Identifier=1718000000-0020

Assay variable : PTINR\_VAL1 PT-INR Value

N Mean Standard Deviation Minimum Maximum

---

|   |           |           |           |           |
|---|-----------|-----------|-----------|-----------|
| 6 | 2.0333333 | 1.2274635 | 1.2000000 | 4.4000000 |
|---|-----------|-----------|-----------|-----------|

---

Unique Subject Identifier=1750100000-0005

Assay variable : PTINR\_VAL1 PT-INR Value

N Mean Standard Deviation Minimum Maximum

---

|   |           |           |           |           |
|---|-----------|-----------|-----------|-----------|
| 3 | 1.8033333 | 0.1550269 | 1.6500000 | 1.9600000 |
|---|-----------|-----------|-----------|-----------|

---

Laboratory tests at the time of obtaining Table 2-6 consent, according to the presence or absence of proton-pump inhibitors

Unique Subject Identifier=1750100000-0006

MEANS Procedure

Assay variable : PTINR\_VAL1 PT-INR Value

N Mean Standard Deviation Minimum Maximum

---

|   |           |           |           |           |
|---|-----------|-----------|-----------|-----------|
| 6 | 1.7966667 | 0.1076414 | 1.6300000 | 1.9000000 |
|---|-----------|-----------|-----------|-----------|

---

Unique Subject Identifier=1750100000-0007

Assay variable : PTINR\_VAL1 PT-INR Value

N Mean Standard Deviation Minimum Maximum

---

|   |           |           |           |           |
|---|-----------|-----------|-----------|-----------|
| 3 | 3.4466667 | 0.3952636 | 3.0100000 | 3.7800000 |
|---|-----------|-----------|-----------|-----------|

---

Unique Subject Identifier=1750100000-0009

Assay variable : PTINR\_VAL1 PT-INR Value

N Mean Standard Deviation Minimum Maximum

---

|   |           |           |           |           |
|---|-----------|-----------|-----------|-----------|
| 5 | 1.6380000 | 0.2701296 | 1.3600000 | 1.9500000 |
|---|-----------|-----------|-----------|-----------|

---

Unique Subject Identifier=1750100000-0012

Assay variable : PTINR\_VAL1 PT-INR Value

N Mean Standard Deviation Minimum Maximum

---

|   |           |           |           |           |
|---|-----------|-----------|-----------|-----------|
| 4 | 1.6325000 | 0.1138347 | 1.5100000 | 1.7800000 |
|---|-----------|-----------|-----------|-----------|

---

Laboratory tests at the time of obtaining Table 2-6 consent, according to the presence or absence of proton-pump inhibitors

Unique Subject Identifier=1750100000-0018

MEANS Procedure

Assay variable : PTINR\_VAL1 PT-INR Value

N Mean Standard Deviation Minimum Maximum

---

|   |           |           |           |           |
|---|-----------|-----------|-----------|-----------|
| 3 | 2.0766667 | 0.2402776 | 1.8300000 | 2.3100000 |
|---|-----------|-----------|-----------|-----------|

---

Unique Subject Identifier=1750100000-0021

Assay variable : PTINR\_VAL1 PT-INR Value

N Mean Standard Deviation Minimum Maximum

---

|   |           |           |           |           |
|---|-----------|-----------|-----------|-----------|
| 3 | 2.2633333 | 0.2419366 | 1.9900000 | 2.4500000 |
|---|-----------|-----------|-----------|-----------|

---

Unique Subject Identifier=1750100000-0025

Assay variable : PTINR\_VAL1 PT-INR Value

N Mean Standard Deviation Minimum Maximum

---

|   |           |           |           |           |
|---|-----------|-----------|-----------|-----------|
| 3 | 1.8366667 | 0.6619919 | 1.4200000 | 2.6000000 |
|---|-----------|-----------|-----------|-----------|

---

Unique Subject Identifier=1750100000-0028

Assay variable : PTINR\_VAL1 PT-INR Value

N Mean Standard Deviation Minimum Maximum

---

|   |           |           |           |           |
|---|-----------|-----------|-----------|-----------|
| 4 | 1.8700000 | 0.6558963 | 1.2100000 | 2.7700000 |
|---|-----------|-----------|-----------|-----------|

---

Laboratory tests at the time of obtaining Table 2-6 consent, according to the presence or absence of proton-pump inhibitors

Unique Subject Identifier=1750100000-0035

MEANS Procedure

Assay variable : PTINR\_VAL1 PT-INR Value

N Mean Standard Deviation Minimum Maximum

---

|   |           |           |           |           |
|---|-----------|-----------|-----------|-----------|
| 4 | 2.0775000 | 0.4478374 | 1.7900000 | 2.7400000 |
|---|-----------|-----------|-----------|-----------|

---

Unique Subject Identifier=1750100000-0036

Assay variable : PTINR\_VAL1 PT-INR Value

N Mean Standard Deviation Minimum Maximum

---

|   |           |           |           |           |
|---|-----------|-----------|-----------|-----------|
| 3 | 2.2033333 | 0.4614470 | 1.8700000 | 2.7300000 |
|---|-----------|-----------|-----------|-----------|

---

Unique Subject Identifier=1750100000-0037

Assay variable : PTINR\_VAL1 PT-INR Value

N Mean Standard Deviation Minimum Maximum

---

|   |           |           |           |           |
|---|-----------|-----------|-----------|-----------|
| 2 | 1.4650000 | 0.0494975 | 1.4300000 | 1.5000000 |
|---|-----------|-----------|-----------|-----------|

---

Unique Subject Identifier=1750100000-0039

Assay variable : PTINR\_VAL1 PT-INR Value

N Mean Standard Deviation Minimum Maximum

---

|   |           |           |           |           |
|---|-----------|-----------|-----------|-----------|
| 5 | 1.9720000 | 0.3858368 | 1.5900000 | 2.3900000 |
|---|-----------|-----------|-----------|-----------|

---



Laboratory tests at the time of obtaining Table 2-6 consent, according to the presence or absence of proton-pump inhibitors

Unique Subject Identifier=1750100000-0040

MEANS Procedure

Assay variable : PTINR\_VAL1 PT-INR Value

N Mean Standard Deviation Minimum Maximum

---

|   |           |           |           |           |
|---|-----------|-----------|-----------|-----------|
| 6 | 1.8750000 | 0.1408190 | 1.6800000 | 2.0400000 |
|---|-----------|-----------|-----------|-----------|

---

Unique Subject Identifier=1750100000-0043

Assay variable : PTINR\_VAL1 PT-INR Value

N Mean Standard Deviation Minimum Maximum

---

|   |           |           |           |           |
|---|-----------|-----------|-----------|-----------|
| 5 | 1.8100000 | 0.2511971 | 1.6400000 | 2.2500000 |
|---|-----------|-----------|-----------|-----------|

---

Unique Subject Identifier=1750100000-0045

Assay variable : PTINR\_VAL1 PT-INR Value

N Mean Standard Deviation Minimum Maximum

---

|   |           |           |           |           |
|---|-----------|-----------|-----------|-----------|
| 6 | 1.8700000 | 0.4787901 | 1.4200000 | 2.6700000 |
|---|-----------|-----------|-----------|-----------|

---

Unique Subject Identifier=1750100000-0047

Assay variable : PTINR\_VAL1 PT-INR Value

N Mean Standard Deviation Minimum Maximum

---

|   |           |           |           |           |
|---|-----------|-----------|-----------|-----------|
| 4 | 1.8800000 | 0.7425631 | 1.4300000 | 2.9900000 |
|---|-----------|-----------|-----------|-----------|

---

Laboratory tests at the time of obtaining Table 2-6 consent, according to the presence or absence of proton-pump inhibitors

Unique Subject Identifier=1750100000-0052

MEANS Procedure

Assay variable : PTINR\_VAL1 PT-INR Value

N Mean Standard Deviation Minimum Maximum

---

|   |           |           |           |           |
|---|-----------|-----------|-----------|-----------|
| 4 | 1.7825000 | 0.2523721 | 1.5700000 | 2.1200000 |
|---|-----------|-----------|-----------|-----------|

---

Unique Subject Identifier=1800000000-0007

Assay variable : PTINR\_VAL1 PT-INR Value

N Mean Standard Deviation Minimum Maximum

---

|   |           |           |           |           |
|---|-----------|-----------|-----------|-----------|
| 4 | 2.1750000 | 0.4645787 | 1.7000000 | 2.8000000 |
|---|-----------|-----------|-----------|-----------|

---

Unique Subject Identifier=1800000000-0008

Assay variable : PTINR\_VAL1 PT-INR Value

N Mean Standard Deviation Minimum Maximum

---

|   |           |           |           |           |
|---|-----------|-----------|-----------|-----------|
| 6 | 1.9166667 | 0.4622409 | 1.4000000 | 2.6000000 |
|---|-----------|-----------|-----------|-----------|

---

Unique Subject Identifier=1800000000-0012

Assay variable : PTINR\_VAL1 PT-INR Value

N Mean Standard Deviation Minimum Maximum

---

|   |           |           |           |           |
|---|-----------|-----------|-----------|-----------|
| 6 | 2.0650000 | 0.3887287 | 1.5000000 | 2.5900000 |
|---|-----------|-----------|-----------|-----------|

---

Laboratory tests at the time of obtaining Table 2-6 consent, according to the presence or absence of proton-pump inhibitors

Unique Subject Identifier=1800000000-0015

MEANS Procedure

Assay variable : PTINR\_VAL1 PT-INR Value

N Mean Standard Deviation Minimum Maximum

---

|   |           |           |           |           |
|---|-----------|-----------|-----------|-----------|
| 6 | 1.8300000 | 0.2909295 | 1.4000000 | 2.1800000 |
|---|-----------|-----------|-----------|-----------|

---

Unique Subject Identifier=1800000000-0021

Assay variable : PTINR\_VAL1 PT-INR Value

N Mean Standard Deviation Minimum Maximum

---

|   |           |           |           |           |
|---|-----------|-----------|-----------|-----------|
| 2 | 2.4950000 | 0.1484924 | 2.3900000 | 2.6000000 |
|---|-----------|-----------|-----------|-----------|

---

Unique Subject Identifier=1800000000-0028

Assay variable : PTINR\_VAL1 PT-INR Value

N Mean Standard Deviation Minimum Maximum

---

|   |           |           |           |           |
|---|-----------|-----------|-----------|-----------|
| 6 | 2.3250000 | 0.3151349 | 1.8500000 | 2.7300000 |
|---|-----------|-----------|-----------|-----------|

---

Unique Subject Identifier=1805000000-0006

Assay variable : PTINR\_VAL1 PT-INR Value

N Mean Standard Deviation Minimum Maximum

---

|   |           |  |           |           |
|---|-----------|--|-----------|-----------|
| 1 | 2.3000000 |  | 2.3000000 | 2.3000000 |
|---|-----------|--|-----------|-----------|

---

Laboratory tests at the time of obtaining Table 2-6 consent, according to the presence or absence of proton-pump inhibitors

Unique Subject Identifier=1810000000-0001

MEANS Procedure

Assay variable : PTINR\_VAL1 PT-INR Value

N Mean Standard Deviation Minimum Maximum

---

|   |           |           |           |           |
|---|-----------|-----------|-----------|-----------|
| 6 | 2.0850000 | 0.3365561 | 1.6200000 | 2.4400000 |
|---|-----------|-----------|-----------|-----------|

---

Unique Subject Identifier=1810000000-0004

Assay variable : PTINR\_VAL1 PT-INR Value

N Mean Standard Deviation Minimum Maximum

---

|   |           |           |           |           |
|---|-----------|-----------|-----------|-----------|
| 5 | 1.8100000 | 0.4154516 | 1.3800000 | 2.4400000 |
|---|-----------|-----------|-----------|-----------|

---

Unique Subject Identifier=1810000000-0005

Assay variable : PTINR\_VAL1 PT-INR Value

N Mean Standard Deviation Minimum Maximum

---

|   |           |           |           |           |
|---|-----------|-----------|-----------|-----------|
| 6 | 1.6716667 | 0.2863855 | 1.3200000 | 2.0700000 |
|---|-----------|-----------|-----------|-----------|

---

Unique Subject Identifier=1810000000-0006

Assay variable : PTINR\_VAL1 PT-INR Value

N Mean Standard Deviation Minimum Maximum

---

|   |           |           |           |           |
|---|-----------|-----------|-----------|-----------|
| 6 | 2.0350000 | 0.1342758 | 1.9100000 | 2.2100000 |
|---|-----------|-----------|-----------|-----------|

---



Laboratory tests at the time of obtaining Table 2-6 consent, according to the presence or absence of proton-pump inhibitors

Unique Subject Identifier=1810000000-0009

MEANS Procedure

Assay variable : PTINR\_VAL1 PT-INR Value

N Mean Standard Deviation Minimum Maximum

---

|   |           |           |           |           |
|---|-----------|-----------|-----------|-----------|
| 6 | 1.9783333 | 0.2976183 | 1.5600000 | 2.4600000 |
|---|-----------|-----------|-----------|-----------|

---

Unique Subject Identifier=1810000000-0011

Assay variable : PTINR\_VAL1 PT-INR Value

N Mean Standard Deviation Minimum Maximum

---

|   |           |           |           |           |
|---|-----------|-----------|-----------|-----------|
| 6 | 1.8600000 | 0.4210463 | 1.4500000 | 2.6500000 |
|---|-----------|-----------|-----------|-----------|

---

Unique Subject Identifier=1810000000-0012

Assay variable : PTINR\_VAL1 PT-INR Value

N Mean Standard Deviation Minimum Maximum

---

|   |           |           |           |           |
|---|-----------|-----------|-----------|-----------|
| 6 | 2.0400000 | 0.1073313 | 1.8900000 | 2.1700000 |
|---|-----------|-----------|-----------|-----------|

---

Unique Subject Identifier=1810000000-0014

Assay variable : PTINR\_VAL1 PT-INR Value

N Mean Standard Deviation Minimum Maximum

---

|   |           |           |           |           |
|---|-----------|-----------|-----------|-----------|
| 6 | 1.9666667 | 0.2732520 | 1.5900000 | 2.2300000 |
|---|-----------|-----------|-----------|-----------|

---

Laboratory tests at the time of obtaining Table 2-6 consent, according to the presence or absence of proton-pump inhibitors

Unique Subject Identifier=1810000000-0017

MEANS Procedure

Assay variable : PTINR\_VAL1 PT-INR Value

N Mean Standard Deviation Minimum Maximum

---

|   |          |           |          |          |
|---|----------|-----------|----------|----------|
| 6 | 2.020000 | 0.2748818 | 1.700000 | 2.320000 |
|---|----------|-----------|----------|----------|

---

Unique Subject Identifier=1810000000-0018

Assay variable : PTINR\_VAL1 PT-INR Value

N Mean Standard Deviation Minimum Maximum

---

|   |          |           |          |          |
|---|----------|-----------|----------|----------|
| 6 | 2.175000 | 0.4289406 | 1.590000 | 2.830000 |
|---|----------|-----------|----------|----------|

---

Unique Subject Identifier=1811000000-0005

Assay variable : PTINR\_VAL1 PT-INR Value

N Mean Standard Deviation Minimum Maximum

---

|   |          |           |          |          |
|---|----------|-----------|----------|----------|
| 6 | 1.590000 | 0.0660303 | 1.530000 | 1.700000 |
|---|----------|-----------|----------|----------|

---

Unique Subject Identifier=1811000000-0006

Assay variable : PTINR\_VAL1 PT-INR Value

N Mean Standard Deviation Minimum Maximum

---

|   |           |           |           |           |
|---|-----------|-----------|-----------|-----------|
| 6 | 2.0950000 | 0.7683684 | 1.2700000 | 3.2500000 |
|---|-----------|-----------|-----------|-----------|

---

Laboratory tests at the time of obtaining Table 2-6 consent, according to the presence or absence of proton-pump inhibitors

Unique Subject Identifier=1811000000-0007

MEANS Procedure

Assay variable : PTINR\_VAL1 PT-INR Value

N Mean Standard Deviation Minimum Maximum

---

|   |           |           |           |           |
|---|-----------|-----------|-----------|-----------|
| 6 | 1.8766667 | 0.2086784 | 1.5400000 | 2.0800000 |
|---|-----------|-----------|-----------|-----------|

---

Unique Subject Identifier=1811000000-0015

Assay variable : PTINR\_VAL1 PT-INR Value

N Mean Standard Deviation Minimum Maximum

---

|   |           |           |           |           |
|---|-----------|-----------|-----------|-----------|
| 4 | 2.5000000 | 0.3900427 | 2.1300000 | 3.0500000 |
|---|-----------|-----------|-----------|-----------|

---

Unique Subject Identifier=1811000000-0021

Assay variable : PTINR\_VAL1 PT-INR Value

N Mean Standard Deviation Minimum Maximum

---

|   |           |           |           |           |
|---|-----------|-----------|-----------|-----------|
| 5 | 2.3140000 | 0.4056230 | 1.8800000 | 2.9500000 |
|---|-----------|-----------|-----------|-----------|

---

Unique Subject Identifier=1811000000-0023

Assay variable : PTINR\_VAL1 PT-INR Value

N Mean Standard Deviation Minimum Maximum

---

|   |          |          |          |          |
|---|----------|----------|----------|----------|
| 5 | 1.720000 | 0.110000 | 1.610000 | 1.870000 |
|---|----------|----------|----------|----------|

---

Laboratory tests at the time of obtaining Table 2-6 consent, according to the presence or absence of proton-pump inhibitors

Unique Subject Identifier=1811000000-0026

MEANS Procedure

Assay variable : PTINR\_VAL1 PT-INR Value

N Mean Standard Deviation Minimum Maximum

---

|   |           |           |           |           |
|---|-----------|-----------|-----------|-----------|
| 6 | 2.4616667 | 0.3459142 | 2.1300000 | 3.0900000 |
|---|-----------|-----------|-----------|-----------|

---

Unique Subject Identifier=1811000000-0028

Assay variable : PTINR\_VAL1 PT-INR Value

N Mean Standard Deviation Minimum Maximum

---

|   |           |           |           |           |
|---|-----------|-----------|-----------|-----------|
| 3 | 2.5866667 | 0.4980295 | 2.0300000 | 2.9900000 |
|---|-----------|-----------|-----------|-----------|

---

Unique Subject Identifier=1812000000-0004

Assay variable : PTINR\_VAL1 PT-INR Value

N Mean Standard Deviation Minimum Maximum

---

|   |           |           |           |           |
|---|-----------|-----------|-----------|-----------|
| 6 | 2.2166667 | 0.4535049 | 1.8000000 | 2.8000000 |
|---|-----------|-----------|-----------|-----------|

---

Unique Subject Identifier=1812000000-0011

Assay variable : PTINR\_VAL1 PT-INR Value

N Mean Standard Deviation Minimum Maximum

---

|   |          |           |          |          |
|---|----------|-----------|----------|----------|
| 6 | 1.500000 | 0.2190890 | 1.200000 | 1.800000 |
|---|----------|-----------|----------|----------|

---



Laboratory tests at the time of obtaining Table 2-6 consent, according to the presence or absence of proton-pump inhibitors

Unique Subject Identifier=1812000000-0013

MEANS Procedure

Assay variable : PTINR\_VAL1 PT-INR Value

N Mean Standard Deviation Minimum Maximum

---

|   |           |           |           |           |
|---|-----------|-----------|-----------|-----------|
| 6 | 2.1166667 | 1.4372427 | 1.0000000 | 4.9000000 |
|---|-----------|-----------|-----------|-----------|

---

Unique Subject Identifier=1812000000-0018

Assay variable : PTINR\_VAL1 PT-INR Value

N Mean Standard Deviation Minimum Maximum

---

|   |           |           |           |           |
|---|-----------|-----------|-----------|-----------|
| 6 | 1.5166667 | 0.0983192 | 1.4000000 | 1.6000000 |
|---|-----------|-----------|-----------|-----------|

---

Unique Subject Identifier=1812000000-0019

Assay variable : PTINR\_VAL1 PT-INR Value

N Mean Standard Deviation Minimum Maximum

---

|   |           |           |           |           |
|---|-----------|-----------|-----------|-----------|
| 6 | 1.7333333 | 0.6742897 | 1.1000000 | 2.8000000 |
|---|-----------|-----------|-----------|-----------|

---

Unique Subject Identifier=1813100000-0009

Assay variable : PTINR\_VAL1 PT-INR Value

N Mean Standard Deviation Minimum Maximum

---

|   |           |           |           |           |
|---|-----------|-----------|-----------|-----------|
| 6 | 2.0850000 | 0.3976305 | 1.7300000 | 2.6200000 |
|---|-----------|-----------|-----------|-----------|

---

Laboratory tests at the time of obtaining Table 2-6 consent, according to the presence or absence of proton-pump inhibitors

Unique Subject Identifier=1813100000-0015

MEANS Procedure

Assay variable : PTINR\_VAL1 PT-INR Value

N Mean Standard Deviation Minimum Maximum

---

|   |           |           |           |           |
|---|-----------|-----------|-----------|-----------|
| 4 | 1.9550000 | 0.1250333 | 1.8100000 | 2.1100000 |
|---|-----------|-----------|-----------|-----------|

---

Unique Subject Identifier=1813100000-0024

Assay variable : PTINR\_VAL1 PT-INR Value

N Mean Standard Deviation Minimum Maximum

---

|   |           |           |           |           |
|---|-----------|-----------|-----------|-----------|
| 3 | 2.1166667 | 0.1201388 | 2.0000000 | 2.2400000 |
|---|-----------|-----------|-----------|-----------|

---

Unique Subject Identifier=1813100000-0025

Assay variable : PTINR\_VAL1 PT-INR Value

N Mean Standard Deviation Minimum Maximum

---

|   |           |  |           |           |
|---|-----------|--|-----------|-----------|
| 1 | 1.6400000 |  | 1.6400000 | 1.6400000 |
|---|-----------|--|-----------|-----------|

---

Unique Subject Identifier=1813100000-0028

Assay variable : PTINR\_VAL1 PT-INR Value

N Mean Standard Deviation Minimum Maximum

---

|   |           |           |           |           |
|---|-----------|-----------|-----------|-----------|
| 4 | 1.6850000 | 0.2810101 | 1.2800000 | 1.9100000 |
|---|-----------|-----------|-----------|-----------|

---

Laboratory tests at the time of obtaining Table 2-6 consent, according to the presence or absence of proton-pump inhibitors

Unique Subject Identifier=1813100000-0046

MEANS Procedure

Assay variable : PTINR\_VAL1 PT-INR Value

N Mean Standard Deviation Minimum Maximum

---

|   |           |           |           |           |
|---|-----------|-----------|-----------|-----------|
| 2 | 2.1900000 | 0.1697056 | 2.0700000 | 2.3100000 |
|---|-----------|-----------|-----------|-----------|

---

Unique Subject Identifier=1813100000-0048

Assay variable : PTINR\_VAL1 PT-INR Value

N Mean Standard Deviation Minimum Maximum

---

|   |           |           |           |           |
|---|-----------|-----------|-----------|-----------|
| 4 | 1.7750000 | 0.2340228 | 1.4300000 | 1.9300000 |
|---|-----------|-----------|-----------|-----------|

---

Unique Subject Identifier=1814100000-0001

Assay variable : PTINR\_VAL1 PT-INR Value

N Mean Standard Deviation Minimum Maximum

---

|   |           |  |           |           |
|---|-----------|--|-----------|-----------|
| 1 | 3.2100000 |  | 3.2100000 | 3.2100000 |
|---|-----------|--|-----------|-----------|

---

Unique Subject Identifier=1814100000-0002

Assay variable : PTINR\_VAL1 PT-INR Value

N Mean Standard Deviation Minimum Maximum

---

|   |           |  |           |           |
|---|-----------|--|-----------|-----------|
| 1 | 2.5700000 |  | 2.5700000 | 2.5700000 |
|---|-----------|--|-----------|-----------|

---

Laboratory tests at the time of obtaining Table 2-6 consent, according to the presence or absence of proton-pump inhibitors

Unique Subject Identifier=1814100000-0005

MEANS Procedure

Assay variable : PTINR\_VAL1 PT-INR Value

N Mean Standard Deviation Minimum Maximum

---

|   |           |  |           |           |
|---|-----------|--|-----------|-----------|
| 1 | 1.9500000 |  | 1.9500000 | 1.9500000 |
|---|-----------|--|-----------|-----------|

---

Unique Subject Identifier=1814100000-0008

Assay variable : PTINR\_VAL1 PT-INR Value

N Mean Standard Deviation Minimum Maximum

---

|   |           |           |           |           |
|---|-----------|-----------|-----------|-----------|
| 2 | 1.5200000 | 0.0707107 | 1.4700000 | 1.5700000 |
|---|-----------|-----------|-----------|-----------|

---

Unique Subject Identifier=1814100000-0010

Assay variable : PTINR\_VAL1 PT-INR Value

N Mean Standard Deviation Minimum Maximum

---

|   |           |           |           |           |
|---|-----------|-----------|-----------|-----------|
| 6 | 1.6450000 | 0.5125915 | 1.1400000 | 2.1900000 |
|---|-----------|-----------|-----------|-----------|

---

Unique Subject Identifier=1814100000-0017

Assay variable : PTINR\_VAL1 PT-INR Value

N Mean Standard Deviation Minimum Maximum

---

|   |           |           |           |           |
|---|-----------|-----------|-----------|-----------|
| 6 | 2.0050000 | 0.6320680 | 1.2700000 | 2.9600000 |
|---|-----------|-----------|-----------|-----------|

---



Laboratory tests at the time of obtaining Table 2-6 consent, according to the presence or absence of proton-pump inhibitors

Unique Subject Identifier=1814100000-0022

MEANS Procedure

Assay variable : PTINR\_VAL1 PT-INR Value

N Mean Standard Deviation Minimum Maximum

---

|   |           |           |           |           |
|---|-----------|-----------|-----------|-----------|
| 6 | 1.8650000 | 0.2738430 | 1.4500000 | 2.1600000 |
|---|-----------|-----------|-----------|-----------|

---

Unique Subject Identifier=1814100000-0026

Assay variable : PTINR\_VAL1 PT-INR Value

N Mean Standard Deviation Minimum Maximum

---

|   |           |           |           |           |
|---|-----------|-----------|-----------|-----------|
| 6 | 2.6150000 | 0.3059902 | 2.2300000 | 2.9600000 |
|---|-----------|-----------|-----------|-----------|

---

Unique Subject Identifier=1814100000-0038

Assay variable : PTINR\_VAL1 PT-INR Value

N Mean Standard Deviation Minimum Maximum

---

|   |           |           |           |           |
|---|-----------|-----------|-----------|-----------|
| 6 | 2.2566667 | 0.2811168 | 1.8200000 | 2.5500000 |
|---|-----------|-----------|-----------|-----------|

---

Unique Subject Identifier=1814100000-0050

Assay variable : PTINR\_VAL1 PT-INR Value

N Mean Standard Deviation Minimum Maximum

---

|   |           |           |           |           |
|---|-----------|-----------|-----------|-----------|
| 4 | 1.7250000 | 0.9980815 | 1.1600000 | 3.2200000 |
|---|-----------|-----------|-----------|-----------|

---

Laboratory tests at the time of obtaining Table 2-6 consent, according to the presence or absence of proton-pump inhibitors

Unique Subject Identifier=1814100000-0053

MEANS Procedure

Assay variable : PTINR\_VAL1 PT-INR Value

| N | Mean      | Standard Deviation | Minimum   | Maximum   |
|---|-----------|--------------------|-----------|-----------|
| 5 | 1.7200000 | 0.2049390          | 1.5000000 | 1.9000000 |

Unique Subject Identifier=1814100000-0055

Assay variable : PTINR\_VAL1 PT-INR Value

| N | Mean      | Standard Deviation | Minimum   | Maximum   |
|---|-----------|--------------------|-----------|-----------|
| 3 | 2.1200000 | 0.4233202          | 1.6400000 | 2.4400000 |

Unique Subject Identifier=1814100000-0058

Assay variable : PTINR\_VAL1 PT-INR Value

| N | Mean      | Standard Deviation | Minimum   | Maximum   |
|---|-----------|--------------------|-----------|-----------|
| 6 | 1.9416667 | 0.8153874          | 1.2700000 | 3.2300000 |

Unique Subject Identifier=1814100000-0063

Assay variable : PTINR\_VAL1 PT-INR Value

N Mean Standard Deviation Minimum Maximum

---

|   |           |           |           |           |
|---|-----------|-----------|-----------|-----------|
| 6 | 1.1066667 | 0.0524087 | 1.0300000 | 1.1800000 |
|---|-----------|-----------|-----------|-----------|

---

Laboratory tests at the time of obtaining Table 2-6 consent, according to the presence or absence of proton-pump inhibitors

Unique Subject Identifier=1814100000-0067

MEANS Procedure

Assay variable : PTINR\_VAL1 PT-INR Value

N Mean Standard Deviation Minimum Maximum

---

|   |           |  |           |           |
|---|-----------|--|-----------|-----------|
| 1 | 1.9900000 |  | 1.9900000 | 1.9900000 |
|---|-----------|--|-----------|-----------|

---

Unique Subject Identifier=1814100000-0069

Assay variable : PTINR\_VAL1 PT-INR Value

N Mean Standard Deviation Minimum Maximum

---

|   |           |           |           |           |
|---|-----------|-----------|-----------|-----------|
| 6 | 2.3416667 | 1.3300739 | 1.3200000 | 4.9500000 |
|---|-----------|-----------|-----------|-----------|

---

Unique Subject Identifier=1815100000-0004

Assay variable : PTINR\_VAL1 PT-INR Value

N Mean Standard Deviation Minimum Maximum

---

|   |           |  |           |           |
|---|-----------|--|-----------|-----------|
| 1 | 1.0500000 |  | 1.0500000 | 1.0500000 |
|---|-----------|--|-----------|-----------|

---

Unique Subject Identifier=1815100000-0044

Assay variable : PTINR\_VAL1 PT-INR Value

N Mean Standard Deviation Minimum Maximum

---

|   |           |           |           |           |
|---|-----------|-----------|-----------|-----------|
| 5 | 1.5640000 | 0.2307163 | 1.3000000 | 1.8800000 |
|---|-----------|-----------|-----------|-----------|

---

Laboratory tests at the time of obtaining Table 2-6 consent, according to the presence or absence of proton-pump inhibitors

Unique Subject Identifier=1815100000-0051

MEANS Procedure

Assay variable : PTINR\_VAL1 PT-INR Value

N Mean Standard Deviation Minimum Maximum

---

|   |           |           |           |           |
|---|-----------|-----------|-----------|-----------|
| 3 | 1.8600000 | 0.7807689 | 1.1000000 | 2.6600000 |
|---|-----------|-----------|-----------|-----------|

---

Unique Subject Identifier=1815100000-0069

Assay variable : PTINR\_VAL1 PT-INR Value

N Mean Standard Deviation Minimum Maximum

---

|   |           |           |           |           |
|---|-----------|-----------|-----------|-----------|
| 3 | 2.3200000 | 0.4063250 | 1.8700000 | 2.6600000 |
|---|-----------|-----------|-----------|-----------|

---

Unique Subject Identifier=1815100000-0079

Assay variable : PTINR\_VAL1 PT-INR Value

N Mean Standard Deviation Minimum Maximum

---

|   |           |  |           |           |
|---|-----------|--|-----------|-----------|
| 1 | 1.0600000 |  | 1.0600000 | 1.0600000 |
|---|-----------|--|-----------|-----------|

---

Unique Subject Identifier=1815100000-0080

Assay variable : PTINR\_VAL1 PT-INR Value

N Mean Standard Deviation Minimum Maximum

---

|   |          |           |          |          |
|---|----------|-----------|----------|----------|
| 2 | 1.840000 | 0.0848528 | 1.780000 | 1.900000 |
|---|----------|-----------|----------|----------|

---



Laboratory tests at the time of obtaining Table 2-6 consent, according to the presence or absence of proton-pump inhibitors

Unique Subject Identifier=1815100000-0082

MEANS Procedure

Assay variable : PTINR\_VAL1 PT-INR Value

N Mean Standard Deviation Minimum Maximum

---

|   |           |  |           |           |
|---|-----------|--|-----------|-----------|
| 1 | 1.3500000 |  | 1.3500000 | 1.3500000 |
|---|-----------|--|-----------|-----------|

---

Unique Subject Identifier=1815100000-0093

Assay variable : PTINR\_VAL1 PT-INR Value

N Mean Standard Deviation Minimum Maximum

---

|   |           |           |           |           |
|---|-----------|-----------|-----------|-----------|
| 6 | 1.8450000 | 0.2425490 | 1.4200000 | 2.0700000 |
|---|-----------|-----------|-----------|-----------|

---

Unique Subject Identifier=1973000000-0002

Assay variable : PTINR\_VAL1 PT-INR Value

N Mean Standard Deviation Minimum Maximum

---

|   |           |           |           |           |
|---|-----------|-----------|-----------|-----------|
| 5 | 1.8800000 | 0.1923538 | 1.6000000 | 2.1000000 |
|---|-----------|-----------|-----------|-----------|

---

Unique Subject Identifier=1973000000-0003

Assay variable : PTINR\_VAL1 PT-INR Value

N Mean Standard Deviation Minimum Maximum

---

|   |           |           |           |           |
|---|-----------|-----------|-----------|-----------|
| 6 | 1.6666667 | 0.2250926 | 1.4000000 | 1.9000000 |
|---|-----------|-----------|-----------|-----------|

---

Laboratory tests at the time of obtaining Table 2-6 consent, according to the presence or absence of proton-pump inhibitors

Unique Subject Identifier=1973000000-0004

MEANS Procedure

Assay variable : PTINR\_VAL1 PT-INR Value

N Mean Standard Deviation Minimum Maximum

---

|   |           |           |           |           |
|---|-----------|-----------|-----------|-----------|
| 6 | 2.3000000 | 0.8602325 | 1.7000000 | 4.0000000 |
|---|-----------|-----------|-----------|-----------|

---

Unique Subject Identifier=1973000000-0006

Assay variable : PTINR\_VAL1 PT-INR Value

N Mean Standard Deviation Minimum Maximum

---

|   |           |           |           |           |
|---|-----------|-----------|-----------|-----------|
| 6 | 2.3000000 | 0.2828427 | 2.0000000 | 2.7000000 |
|---|-----------|-----------|-----------|-----------|

---

Unique Subject Identifier=1973000000-0011

Assay variable : PTINR\_VAL1 PT-INR Value

N Mean Standard Deviation Minimum Maximum

---

|   |           |           |           |           |
|---|-----------|-----------|-----------|-----------|
| 4 | 1.7750000 | 0.2500000 | 1.5000000 | 2.1000000 |
|---|-----------|-----------|-----------|-----------|

---

Unique Subject Identifier=1973000000-0016

Assay variable : PTINR\_VAL1 PT-INR Value

N Mean Standard Deviation Minimum Maximum

---

|   |           |           |           |           |
|---|-----------|-----------|-----------|-----------|
| 6 | 1.7166667 | 0.2926887 | 1.5000000 | 2.3000000 |
|---|-----------|-----------|-----------|-----------|

---

Laboratory tests at the time of obtaining Table 2-6 consent, according to the presence or absence of proton-pump inhibitors

Unique Subject Identifier=1973000000-0017

MEANS Procedure

Assay variable : PTINR\_VAL1 PT-INR Value

N Mean Standard Deviation Minimum Maximum

---

|   |           |           |           |           |
|---|-----------|-----------|-----------|-----------|
| 5 | 1.6000000 | 0.5787918 | 1.2000000 | 2.6000000 |
|---|-----------|-----------|-----------|-----------|

---

Unique Subject Identifier=2008010000-0011

Assay variable : PTINR\_VAL1 PT-INR Value

N Mean Standard Deviation Minimum Maximum

---

|   |           |           |           |           |
|---|-----------|-----------|-----------|-----------|
| 6 | 1.7000000 | 0.1673320 | 1.5000000 | 1.9000000 |
|---|-----------|-----------|-----------|-----------|

---

Unique Subject Identifier=2008010000-0016

Assay variable : PTINR\_VAL1 PT-INR Value

N Mean Standard Deviation Minimum Maximum

---

|   |           |           |           |           |
|---|-----------|-----------|-----------|-----------|
| 6 | 1.6833333 | 0.2562551 | 1.3000000 | 2.0000000 |
|---|-----------|-----------|-----------|-----------|

---

Unique Subject Identifier=2008010000-0018

Assay variable : PTINR\_VAL1 PT-INR Value

N Mean Standard Deviation Minimum Maximum

---

|   |          |          |          |          |
|---|----------|----------|----------|----------|
| 3 | 1.200000 | 0.100000 | 1.100000 | 1.300000 |
|---|----------|----------|----------|----------|

---

Laboratory tests at the time of obtaining Table 2-6 consent, according to the presence or absence of proton-pump inhibitors

Unique Subject Identifier=2008010000-0023

MEANS Procedure

Assay variable : PTINR\_VAL1 PT-INR Value

| N | Mean      | Standard Deviation | Minimum   | Maximum   |
|---|-----------|--------------------|-----------|-----------|
| 2 | 1.2750000 | 0.0777817          | 1.2200000 | 1.3300000 |

Unique Subject Identifier=2008010000-0027

Assay variable : PTINR\_VAL1 PT-INR Value

| N | Mean      | Standard Deviation | Minimum   | Maximum   |
|---|-----------|--------------------|-----------|-----------|
| 4 | 1.9500000 | 0.4123106          | 1.5000000 | 2.3000000 |

Unique Subject Identifier=2008010000-0031

Assay variable : PTINR\_VAL1 PT-INR Value

| N | Mean      | Standard Deviation | Minimum   | Maximum   |
|---|-----------|--------------------|-----------|-----------|
| 6 | 1.8166667 | 0.3656045          | 1.4000000 | 2.3000000 |

Unique Subject Identifier=2008010000-0037

Assay variable : PTINR\_VAL1 PT-INR Value

N Mean Standard Deviation Minimum Maximum

---

|   |          |           |          |          |
|---|----------|-----------|----------|----------|
| 6 | 1.950000 | 0.2073644 | 1.800000 | 2.300000 |
|---|----------|-----------|----------|----------|

---



Laboratory tests at the time of obtaining Table 2-6 consent, according to the presence or absence of proton-pump inhibitors

Unique Subject Identifier=2008010000-0038

MEANS Procedure

Assay variable : PTINR\_VAL1 PT-INR Value

| N | Mean      | Standard Deviation | Minimum   | Maximum   |
|---|-----------|--------------------|-----------|-----------|
| 6 | 1.9500000 | 0.1643168          | 1.8000000 | 2.2000000 |

Unique Subject Identifier=2008010000-0041

Assay variable : PTINR\_VAL1 PT-INR Value

| N | Mean      | Standard Deviation | Minimum   | Maximum   |
|---|-----------|--------------------|-----------|-----------|
| 6 | 1.8166667 | 0.5913262          | 1.5000000 | 3.0000000 |

Unique Subject Identifier=2008010000-0043

Assay variable : PTINR\_VAL1 PT-INR Value

| N | Mean      | Standard Deviation | Minimum   | Maximum   |
|---|-----------|--------------------|-----------|-----------|
| 4 | 1.9250000 | 0.2753785          | 1.6000000 | 2.2000000 |

Unique Subject Identifier=2008010000-0046

Assay variable : PTINR\_VAL1 PT-INR Value

N Mean Standard Deviation Minimum Maximum

---

|   |          |           |          |          |
|---|----------|-----------|----------|----------|
| 4 | 1.600000 | 0.0816497 | 1.500000 | 1.700000 |
|---|----------|-----------|----------|----------|

---

Laboratory tests at the time of obtaining Table 2-6 consent, according to the presence or absence of proton-pump inhibitors

Unique Subject Identifier=2008010000-0047

MEANS Procedure

Assay variable : PTINR\_VAL1 PT-INR Value

N Mean Standard Deviation Minimum Maximum

---

|   |           |           |           |           |
|---|-----------|-----------|-----------|-----------|
| 6 | 1.9500000 | 0.5991661 | 1.3000000 | 2.8000000 |
|---|-----------|-----------|-----------|-----------|

---

Unique Subject Identifier=2008010000-0052

Assay variable : PTINR\_VAL1 PT-INR Value

N Mean Standard Deviation Minimum Maximum

---

|   |           |           |           |           |
|---|-----------|-----------|-----------|-----------|
| 3 | 1.7000000 | 0.2645751 | 1.4000000 | 1.9000000 |
|---|-----------|-----------|-----------|-----------|

---

Unique Subject Identifier=2008010000-0055

Assay variable : PTINR\_VAL1 PT-INR Value

N Mean Standard Deviation Minimum Maximum

---

|   |           |  |           |           |
|---|-----------|--|-----------|-----------|
| 1 | 1.0200000 |  | 1.0200000 | 1.0200000 |
|---|-----------|--|-----------|-----------|

---

Unique Subject Identifier=2016011111-0002

Assay variable : PTINR\_VAL1 PT-INR Value

N Mean Standard Deviation Minimum Maximum

---

|   |           |           |           |           |
|---|-----------|-----------|-----------|-----------|
| 6 | 1.9450000 | 0.2212465 | 1.7600000 | 2.3200000 |
|---|-----------|-----------|-----------|-----------|

---

Laboratory tests at the time of obtaining Table 2-6 consent, according to the presence or absence of proton-pump inhibitors

Unique Subject Identifier=2016011111-0004

MEANS Procedure

Assay variable : PTINR\_VAL1 PT-INR Value

| N | Mean      | Standard Deviation | Minimum   | Maximum   |
|---|-----------|--------------------|-----------|-----------|
| 5 | 2.0080000 | 0.1116692          | 1.8500000 | 2.1300000 |

Unique Subject Identifier=2016011111-0006

Assay variable : PTINR\_VAL1 PT-INR Value

| N | Mean      | Standard Deviation | Minimum   | Maximum   |
|---|-----------|--------------------|-----------|-----------|
| 5 | 2.4700000 | 0.5487714          | 1.7300000 | 3.0300000 |

Unique Subject Identifier=2016011111-0010

Assay variable : PTINR\_VAL1 PT-INR Value

| N | Mean      | Standard Deviation | Minimum   | Maximum   |
|---|-----------|--------------------|-----------|-----------|
| 5 | 2.1640000 | 0.6723689          | 1.5600000 | 3.3200000 |

Unique Subject Identifier=2016011111-0017

Assay variable : PTINR\_VAL1 PT-INR Value

N Mean Standard Deviation Minimum Maximum

---

|   |           |           |           |           |
|---|-----------|-----------|-----------|-----------|
| 6 | 1.8916667 | 0.2997610 | 1.5700000 | 2.1700000 |
|---|-----------|-----------|-----------|-----------|

---

Laboratory tests at the time of obtaining Table 2-6 consent, according to the presence or absence of proton-pump inhibitors

Unique Subject Identifier=2016011111-0018

MEANS Procedure

Assay variable : PTINR\_VAL1 PT-INR Value

N Mean Standard Deviation Minimum Maximum

---

|   |           |           |           |           |
|---|-----------|-----------|-----------|-----------|
| 4 | 1.7375000 | 0.3456757 | 1.5200000 | 2.2500000 |
|---|-----------|-----------|-----------|-----------|

---

Unique Subject Identifier=2016011111-0019

Assay variable : PTINR\_VAL1 PT-INR Value

N Mean Standard Deviation Minimum Maximum

---

|   |           |           |           |           |
|---|-----------|-----------|-----------|-----------|
| 5 | 2.4900000 | 0.3794074 | 2.0800000 | 2.9900000 |
|---|-----------|-----------|-----------|-----------|

---

Unique Subject Identifier=2016011111-0021

Assay variable : PTINR\_VAL1 PT-INR Value

N Mean Standard Deviation Minimum Maximum

---

|   |           |           |           |           |
|---|-----------|-----------|-----------|-----------|
| 4 | 2.5000000 | 0.5707889 | 2.0900000 | 3.3400000 |
|---|-----------|-----------|-----------|-----------|

---

Unique Subject Identifier=2016011111-0023

Assay variable : PTINR\_VAL1 PT-INR Value

N Mean Standard Deviation Minimum Maximum

---

|   |          |           |          |          |
|---|----------|-----------|----------|----------|
| 6 | 2.300000 | 0.6515213 | 1.630000 | 3.160000 |
|---|----------|-----------|----------|----------|

---



Laboratory tests at the time of obtaining Table 2-6 consent, according to the presence or absence of proton-pump inhibitors

Unique Subject Identifier=2016011111-0025

MEANS Procedure

Assay variable : PTINR\_VAL1 PT-INR Value

N Mean Standard Deviation Minimum Maximum

---

|   |           |           |           |           |
|---|-----------|-----------|-----------|-----------|
| 5 | 2.6040000 | 0.3591379 | 2.3300000 | 3.1100000 |
|---|-----------|-----------|-----------|-----------|

---

Unique Subject Identifier=2016011111-0028

Assay variable : PTINR\_VAL1 PT-INR Value

N Mean Standard Deviation Minimum Maximum

---

|   |           |           |           |           |
|---|-----------|-----------|-----------|-----------|
| 3 | 1.5066667 | 0.2458319 | 1.3500000 | 1.7900000 |
|---|-----------|-----------|-----------|-----------|

---

Unique Subject Identifier=2016011111-0030

Assay variable : PTINR\_VAL1 PT-INR Value

N Mean Standard Deviation Minimum Maximum

---

|   |           |           |           |           |
|---|-----------|-----------|-----------|-----------|
| 5 | 2.0160000 | 0.4263567 | 1.6100000 | 2.5500000 |
|---|-----------|-----------|-----------|-----------|

---

Unique Subject Identifier=2016011111-0031

Assay variable : PTINR\_VAL1 PT-INR Value

N Mean Standard Deviation Minimum Maximum

---

|   |           |           |           |           |
|---|-----------|-----------|-----------|-----------|
| 6 | 2.1166667 | 0.2801190 | 1.7700000 | 2.4500000 |
|---|-----------|-----------|-----------|-----------|

---

Laboratory tests at the time of obtaining Table 2-6 consent, according to the presence or absence of proton-pump inhibitors

Unique Subject Identifier=2016011111-0034

MEANS Procedure

Assay variable : PTINR\_VAL1 PT-INR Value

| N | Mean      | Standard Deviation | Minimum   | Maximum   |
|---|-----------|--------------------|-----------|-----------|
| 3 | 2.3833333 | 0.1159023          | 2.2500000 | 2.4600000 |

Unique Subject Identifier=2016011111-0035

Assay variable : PTINR\_VAL1 PT-INR Value

| N | Mean      | Standard Deviation | Minimum   | Maximum   |
|---|-----------|--------------------|-----------|-----------|
| 4 | 2.4100000 | 0.8089911          | 1.7700000 | 3.5600000 |

Unique Subject Identifier=2016011111-0036

Assay variable : PTINR\_VAL1 PT-INR Value

| N | Mean      | Standard Deviation | Minimum   | Maximum   |
|---|-----------|--------------------|-----------|-----------|
| 4 | 2.7700000 | 0.7043673          | 2.2200000 | 3.8000000 |

Unique Subject Identifier=2016011111-0037

Assay variable : PTINR\_VAL1 PT-INR Value

N Mean Standard Deviation Minimum Maximum

---

|   |          |           |          |          |
|---|----------|-----------|----------|----------|
| 6 | 2.090000 | 0.4848092 | 1.610000 | 2.850000 |
|---|----------|-----------|----------|----------|

---

Laboratory tests at the time of obtaining Table 2-6 consent, according to the presence or absence of proton-pump inhibitors

Unique Subject Identifier=2016011111-0040

MEANS Procedure

Assay variable : PTINR\_VAL1 PT-INR Value

N Mean Standard Deviation Minimum Maximum

---

|   |           |           |           |           |
|---|-----------|-----------|-----------|-----------|
| 5 | 2.3620000 | 0.9487465 | 1.4300000 | 3.9100000 |
|---|-----------|-----------|-----------|-----------|

---

Unique Subject Identifier=2016011111-0043

Assay variable : PTINR\_VAL1 PT-INR Value

N Mean Standard Deviation Minimum Maximum

---

|   |           |           |           |           |
|---|-----------|-----------|-----------|-----------|
| 5 | 2.7300000 | 0.4640582 | 2.1500000 | 3.1900000 |
|---|-----------|-----------|-----------|-----------|

---

Unique Subject Identifier=2016011111-0050

Assay variable : PTINR\_VAL1 PT-INR Value

N Mean Standard Deviation Minimum Maximum

---

|   |           |           |           |           |
|---|-----------|-----------|-----------|-----------|
| 4 | 2.2000000 | 0.1363818 | 2.0800000 | 2.3700000 |
|---|-----------|-----------|-----------|-----------|

---

Unique Subject Identifier=2016011111-0057

Assay variable : PTINR\_VAL1 PT-INR Value

N Mean Standard Deviation Minimum Maximum

---

|   |           |           |           |           |
|---|-----------|-----------|-----------|-----------|
| 6 | 1.8666667 | 0.5833924 | 1.0800000 | 2.6700000 |
|---|-----------|-----------|-----------|-----------|

---

Laboratory tests at the time of obtaining Table 2-6 consent, according to the presence or absence of proton-pump inhibitors

Unique Subject Identifier=2016011111-0060

MEANS Procedure

Assay variable : PTINR\_VAL1 PT-INR Value

N Mean Standard Deviation Minimum Maximum

---

|   |          |           |          |          |
|---|----------|-----------|----------|----------|
| 6 | 1.680000 | 0.2228901 | 1.480000 | 2.120000 |
|---|----------|-----------|----------|----------|

---

Unique Subject Identifier=2016011111-0062

Assay variable : PTINR\_VAL1 PT-INR Value

N Mean Standard Deviation Minimum Maximum

---

|   |          |           |          |          |
|---|----------|-----------|----------|----------|
| 4 | 1.877500 | 0.1364734 | 1.710000 | 2.020000 |
|---|----------|-----------|----------|----------|

---

Unique Subject Identifier=2016011111-0063

Assay variable : PTINR\_VAL1 PT-INR Value

N Mean Standard Deviation Minimum Maximum

---

|   |          |           |          |          |
|---|----------|-----------|----------|----------|
| 5 | 2.454000 | 0.1879628 | 2.250000 | 2.760000 |
|---|----------|-----------|----------|----------|

---

Unique Subject Identifier=2016011111-0070

Assay variable : PTINR\_VAL1 PT-INR Value

N Mean Standard Deviation Minimum Maximum

---

|   |           |           |           |           |
|---|-----------|-----------|-----------|-----------|
| 3 | 2.2966667 | 0.3450121 | 1.9500000 | 2.6400000 |
|---|-----------|-----------|-----------|-----------|

---



Laboratory tests at the time of obtaining Table 2-6 consent, according to the presence or absence of proton-pump inhibitors

Unique Subject Identifier=2016011111-0081

MEANS Procedure

Assay variable : PTINR\_VAL1 PT-INR Value

N Mean Standard Deviation Minimum Maximum

---

|   |          |           |          |          |
|---|----------|-----------|----------|----------|
| 3 | 2.310000 | 0.2651415 | 2.080000 | 2.600000 |
|---|----------|-----------|----------|----------|

---

Unique Subject Identifier=2016011111-0082

Assay variable : PTINR\_VAL1 PT-INR Value

N Mean Standard Deviation Minimum Maximum

---

|   |          |           |          |          |
|---|----------|-----------|----------|----------|
| 3 | 1.893333 | 0.1850225 | 1.710000 | 2.080000 |
|---|----------|-----------|----------|----------|

---

Unique Subject Identifier=2016011111-0085

Assay variable : PTINR\_VAL1 PT-INR Value

N Mean Standard Deviation Minimum Maximum

---

|   |          |           |          |          |
|---|----------|-----------|----------|----------|
| 4 | 2.022500 | 0.2652515 | 1.770000 | 2.370000 |
|---|----------|-----------|----------|----------|

---

Unique Subject Identifier=2016011111-0091

Assay variable : PTINR\_VAL1 PT-INR Value

N Mean Standard Deviation Minimum Maximum

---

|   |           |           |           |           |
|---|-----------|-----------|-----------|-----------|
| 4 | 2.3850000 | 0.2666458 | 2.1700000 | 2.7400000 |
|---|-----------|-----------|-----------|-----------|

---

Laboratory tests at the time of obtaining Table 2-6 consent, according to the presence or absence of proton-pump inhibitors

Unique Subject Identifier=2016011111-0095

MEANS Procedure

Assay variable : PTINR\_VAL1 PT-INR Value

N Mean Standard Deviation Minimum Maximum

---

|   |           |           |           |           |
|---|-----------|-----------|-----------|-----------|
| 3 | 2.3833333 | 0.5108163 | 1.8100000 | 2.7900000 |
|---|-----------|-----------|-----------|-----------|

---

Unique Subject Identifier=2016011111-0096

Assay variable : PTINR\_VAL1 PT-INR Value

N Mean Standard Deviation Minimum Maximum

---

|   |           |           |           |           |
|---|-----------|-----------|-----------|-----------|
| 3 | 1.8700000 | 0.2497999 | 1.6700000 | 2.1500000 |
|---|-----------|-----------|-----------|-----------|

---

Unique Subject Identifier=2017011100-0002

Assay variable : PTINR\_VAL1 PT-INR Value

N Mean Standard Deviation Minimum Maximum

---

|   |           |           |           |           |
|---|-----------|-----------|-----------|-----------|
| 5 | 2.2540000 | 0.6454688 | 1.4000000 | 3.2000000 |
|---|-----------|-----------|-----------|-----------|

---

Unique Subject Identifier=2017011100-0004

Assay variable : PTINR\_VAL1 PT-INR Value

N Mean Standard Deviation Minimum Maximum

---

|   |           |           |           |           |
|---|-----------|-----------|-----------|-----------|
| 6 | 2.0483333 | 0.4900782 | 1.4500000 | 2.8500000 |
|---|-----------|-----------|-----------|-----------|

---

Laboratory tests at the time of obtaining Table 2-6 consent, according to the presence or absence of proton-pump inhibitors

Unique Subject Identifier=2017011100-0006

MEANS Procedure

Assay variable : PTINR\_VAL1 PT-INR Value

N Mean Standard Deviation Minimum Maximum

---

|   |           |           |           |           |
|---|-----------|-----------|-----------|-----------|
| 5 | 1.9760000 | 0.1540454 | 1.8400000 | 2.2100000 |
|---|-----------|-----------|-----------|-----------|

---

Unique Subject Identifier=2017011100-0011

Assay variable : PTINR\_VAL1 PT-INR Value

N Mean Standard Deviation Minimum Maximum

---

|   |           |           |           |           |
|---|-----------|-----------|-----------|-----------|
| 3 | 1.0866667 | 0.1975686 | 0.9100000 | 1.3000000 |
|---|-----------|-----------|-----------|-----------|

---

Unique Subject Identifier=2017011100-0012

Assay variable : PTINR\_VAL1 PT-INR Value

N Mean Standard Deviation Minimum Maximum

---

|   |           |           |           |           |
|---|-----------|-----------|-----------|-----------|
| 6 | 2.0150000 | 0.3148174 | 1.6300000 | 2.4300000 |
|---|-----------|-----------|-----------|-----------|

---

Unique Subject Identifier=2017011100-0014

Assay variable : PTINR\_VAL1 PT-INR Value

N Mean Standard Deviation Minimum Maximum

---

|   |           |           |           |           |
|---|-----------|-----------|-----------|-----------|
| 6 | 2.1366667 | 0.4337588 | 1.6300000 | 2.7800000 |
|---|-----------|-----------|-----------|-----------|

---

Laboratory tests at the time of obtaining Table 2-6 consent, according to the presence or absence of proton-pump inhibitors

Unique Subject Identifier=2017011100-0017

MEANS Procedure

Assay variable : PTINR\_VAL1 PT-INR Value

N Mean Standard Deviation Minimum Maximum

---

|   |           |           |           |           |
|---|-----------|-----------|-----------|-----------|
| 6 | 1.5383333 | 0.2977527 | 1.0900000 | 1.8400000 |
|---|-----------|-----------|-----------|-----------|

---

Unique Subject Identifier=2017011100-0019

Assay variable : PTINR\_VAL1 PT-INR Value

N Mean Standard Deviation Minimum Maximum

---

|   |           |           |           |           |
|---|-----------|-----------|-----------|-----------|
| 6 | 1.8083333 | 0.1414803 | 1.6400000 | 1.9400000 |
|---|-----------|-----------|-----------|-----------|

---

Unique Subject Identifier=2017011100-0020

Assay variable : PTINR\_VAL1 PT-INR Value

N Mean Standard Deviation Minimum Maximum

---

|   |           |           |           |           |
|---|-----------|-----------|-----------|-----------|
| 6 | 2.0466667 | 0.4457204 | 1.5000000 | 2.6400000 |
|---|-----------|-----------|-----------|-----------|

---

Unique Subject Identifier=2017011100-0023

Assay variable : PTINR\_VAL1 PT-INR Value

N Mean Standard Deviation Minimum Maximum

---

|   |           |           |           |           |
|---|-----------|-----------|-----------|-----------|
| 6 | 2.0133333 | 0.1944908 | 1.8400000 | 2.3700000 |
|---|-----------|-----------|-----------|-----------|

---



Laboratory tests at the time of obtaining Table 2-6 consent, according to the presence or absence of proton-pump inhibitors

Unique Subject Identifier=2017011100-0025

MEANS Procedure

Assay variable : PTINR\_VAL1 PT-INR Value

N Mean Standard Deviation Minimum Maximum

---

|   |           |           |           |           |
|---|-----------|-----------|-----------|-----------|
| 4 | 1.7850000 | 0.1317826 | 1.6400000 | 1.9600000 |
|---|-----------|-----------|-----------|-----------|

---

Unique Subject Identifier=2017011100-0027

Assay variable : PTINR\_VAL1 PT-INR Value

N Mean Standard Deviation Minimum Maximum

---

|   |           |           |           |           |
|---|-----------|-----------|-----------|-----------|
| 6 | 1.9050000 | 0.0850294 | 1.8300000 | 2.0100000 |
|---|-----------|-----------|-----------|-----------|

---

Unique Subject Identifier=2017011100-0033

Assay variable : PTINR\_VAL1 PT-INR Value

N Mean Standard Deviation Minimum Maximum

---

|   |           |           |           |           |
|---|-----------|-----------|-----------|-----------|
| 5 | 1.8620000 | 0.1572260 | 1.7200000 | 2.0900000 |
|---|-----------|-----------|-----------|-----------|

---

Unique Subject Identifier=2017011100-0035

Assay variable : PTINR\_VAL1 PT-INR Value

N Mean Standard Deviation Minimum Maximum

---

|   |           |  |           |           |
|---|-----------|--|-----------|-----------|
| 1 | 2.2700000 |  | 2.2700000 | 2.2700000 |
|---|-----------|--|-----------|-----------|

---

Laboratory tests at the time of obtaining Table 2-6 consent, according to the presence or absence of proton-pump inhibitors

Unique Subject Identifier=2017011100-0037

MEANS Procedure

Assay variable : PTINR\_VAL1 PT-INR Value

| N | Mean      | Standard Deviation | Minimum   | Maximum   |
|---|-----------|--------------------|-----------|-----------|
| 5 | 2.0360000 | 0.3995372          | 1.7300000 | 2.7200000 |

Unique Subject Identifier=2017011100-0038

Assay variable : PTINR\_VAL1 PT-INR Value

| N | Mean      | Standard Deviation | Minimum   | Maximum   |
|---|-----------|--------------------|-----------|-----------|
| 6 | 2.0600000 | 0.2354570          | 1.6600000 | 2.2700000 |

Unique Subject Identifier=2017011100-0047

Assay variable : PTINR\_VAL1 PT-INR Value

| N | Mean      | Standard Deviation | Minimum   | Maximum   |
|---|-----------|--------------------|-----------|-----------|
| 5 | 2.0060000 | 0.0250998          | 1.9800000 | 2.0300000 |

Unique Subject Identifier=2017011100-0048

Assay variable : PTINR\_VAL1 PT-INR Value

N Mean Standard Deviation Minimum Maximum

---

|   |           |           |           |           |
|---|-----------|-----------|-----------|-----------|
| 6 | 2.0516667 | 0.4543310 | 1.4200000 | 2.6100000 |
|---|-----------|-----------|-----------|-----------|

---

Laboratory tests at the time of obtaining Table 2-6 consent, according to the presence or absence of proton-pump inhibitors

Unique Subject Identifier=2017011100-0049

MEANS Procedure

Assay variable : PTINR\_VAL1 PT-INR Value

N Mean Standard Deviation Minimum Maximum

---

|   |           |           |           |           |
|---|-----------|-----------|-----------|-----------|
| 6 | 2.1283333 | 0.2574814 | 1.8400000 | 2.4300000 |
|---|-----------|-----------|-----------|-----------|

---

Unique Subject Identifier=2017011100-0053

Assay variable : PTINR\_VAL1 PT-INR Value

N Mean Standard Deviation Minimum Maximum

---

|   |           |           |           |           |
|---|-----------|-----------|-----------|-----------|
| 6 | 2.0550000 | 0.5021454 | 1.0800000 | 2.4900000 |
|---|-----------|-----------|-----------|-----------|

---

Unique Subject Identifier=2017011100-0056

Assay variable : PTINR\_VAL1 PT-INR Value

N Mean Standard Deviation Minimum Maximum

---

|   |           |           |           |           |
|---|-----------|-----------|-----------|-----------|
| 6 | 1.8083333 | 0.4073532 | 1.4000000 | 2.5900000 |
|---|-----------|-----------|-----------|-----------|

---

Unique Subject Identifier=2017011100-0058

Assay variable : PTINR\_VAL1 PT-INR Value

N Mean Standard Deviation Minimum Maximum

---

|   |           |           |           |           |
|---|-----------|-----------|-----------|-----------|
| 5 | 2.0100000 | 0.2955503 | 1.6100000 | 2.3300000 |
|---|-----------|-----------|-----------|-----------|

---

Laboratory tests at the time of obtaining Table 2-6 consent, according to the presence or absence of proton-pump inhibitors

Unique Subject Identifier=2017011100-0059

MEANS Procedure

Assay variable : PTINR\_VAL1 PT-INR Value

N Mean Standard Deviation Minimum Maximum

---

|   |           |           |           |           |
|---|-----------|-----------|-----------|-----------|
| 5 | 2.0640000 | 0.5264314 | 1.4000000 | 2.8500000 |
|---|-----------|-----------|-----------|-----------|

---

Unique Subject Identifier=2017011100-0060

Assay variable : PTINR\_VAL1 PT-INR Value

N Mean Standard Deviation Minimum Maximum

---

|   |           |           |           |           |
|---|-----------|-----------|-----------|-----------|
| 6 | 1.7566667 | 0.6880310 | 1.0900000 | 2.9800000 |
|---|-----------|-----------|-----------|-----------|

---

Unique Subject Identifier=2017011100-0061

Assay variable : PTINR\_VAL1 PT-INR Value

N Mean Standard Deviation Minimum Maximum

---

|   |           |           |           |           |
|---|-----------|-----------|-----------|-----------|
| 6 | 2.3733333 | 0.5452950 | 1.7700000 | 3.3300000 |
|---|-----------|-----------|-----------|-----------|

---

Unique Subject Identifier=2017011100-0062

Assay variable : PTINR\_VAL1 PT-INR Value

N Mean Standard Deviation Minimum Maximum

---

|   |           |           |           |           |
|---|-----------|-----------|-----------|-----------|
| 6 | 1.9933333 | 0.3309179 | 1.4500000 | 2.3300000 |
|---|-----------|-----------|-----------|-----------|

---



Laboratory tests at the time of obtaining Table 2-6 consent, according to the presence or absence of proton-pump inhibitors

Unique Subject Identifier=2017011100-0064

MEANS Procedure

Assay variable : PTINR\_VAL1 PT-INR Value

N Mean Standard Deviation Minimum Maximum

---

|   |           |           |           |           |
|---|-----------|-----------|-----------|-----------|
| 6 | 1.9000000 | 0.3244072 | 1.5400000 | 2.3500000 |
|---|-----------|-----------|-----------|-----------|

---

Unique Subject Identifier=2017011100-0075

Assay variable : PTINR\_VAL1 PT-INR Value

N Mean Standard Deviation Minimum Maximum

---

|   |           |           |           |           |
|---|-----------|-----------|-----------|-----------|
| 6 | 2.3216667 | 0.7310928 | 1.4500000 | 3.3300000 |
|---|-----------|-----------|-----------|-----------|

---

Unique Subject Identifier=2017011100-0076

Assay variable : PTINR\_VAL1 PT-INR Value

N Mean Standard Deviation Minimum Maximum

---

|   |           |           |           |           |
|---|-----------|-----------|-----------|-----------|
| 5 | 1.9520000 | 0.4097804 | 1.5900000 | 2.5700000 |
|---|-----------|-----------|-----------|-----------|

---

Unique Subject Identifier=2017011100-0082

Assay variable : PTINR\_VAL1 PT-INR Value

N Mean Standard Deviation Minimum Maximum

---

|   |           |           |           |           |
|---|-----------|-----------|-----------|-----------|
| 5 | 2.2040000 | 0.4834563 | 1.8400000 | 3.0200000 |
|---|-----------|-----------|-----------|-----------|

---

Laboratory tests at the time of obtaining Table 2-6 consent, according to the presence or absence of proton-pump inhibitors

Unique Subject Identifier=2017011100-0085

MEANS Procedure

Assay variable : PTINR\_VAL1 PT-INR Value

N Mean Standard Deviation Minimum Maximum

---

|   |           |           |           |           |
|---|-----------|-----------|-----------|-----------|
| 6 | 1.8333333 | 0.5709524 | 1.1100000 | 2.4900000 |
|---|-----------|-----------|-----------|-----------|

---

Unique Subject Identifier=2017011100-0088

Assay variable : PTINR\_VAL1 PT-INR Value

N Mean Standard Deviation Minimum Maximum

---

|   |           |           |           |           |
|---|-----------|-----------|-----------|-----------|
| 6 | 2.1233333 | 0.2399722 | 1.8400000 | 2.5100000 |
|---|-----------|-----------|-----------|-----------|

---

Unique Subject Identifier=2017011100-0092

Assay variable : PTINR\_VAL1 PT-INR Value

N Mean Standard Deviation Minimum Maximum

---

|   |           |           |           |           |
|---|-----------|-----------|-----------|-----------|
| 6 | 1.9066667 | 0.2593582 | 1.5600000 | 2.1900000 |
|---|-----------|-----------|-----------|-----------|

---

Unique Subject Identifier=2017011100-0093

Assay variable : PTINR\_VAL1 PT-INR Value

N Mean Standard Deviation Minimum Maximum

---

|   |           |           |           |           |
|---|-----------|-----------|-----------|-----------|
| 6 | 1.8216667 | 0.1090718 | 1.6400000 | 1.9600000 |
|---|-----------|-----------|-----------|-----------|

---

Laboratory tests at the time of obtaining Table 2-6 consent, according to the presence or absence of proton-pump inhibitors

Unique Subject Identifier=2017011100-0098

MEANS Procedure

Assay variable : PTINR\_VAL1 PT-INR Value

N Mean Standard Deviation Minimum Maximum

---

|   |           |           |           |           |
|---|-----------|-----------|-----------|-----------|
| 5 | 2.0640000 | 0.4530232 | 1.5600000 | 2.5900000 |
|---|-----------|-----------|-----------|-----------|

---

Unique Subject Identifier=2017011100-0100

Assay variable : PTINR\_VAL1 PT-INR Value

N Mean Standard Deviation Minimum Maximum

---

|   |           |           |           |           |
|---|-----------|-----------|-----------|-----------|
| 6 | 2.1566667 | 0.4348640 | 1.4200000 | 2.7600000 |
|---|-----------|-----------|-----------|-----------|

---

Unique Subject Identifier=2017011100-0109

Assay variable : PTINR\_VAL1 PT-INR Value

N Mean Standard Deviation Minimum Maximum

---

|   |           |           |           |           |
|---|-----------|-----------|-----------|-----------|
| 5 | 1.6940000 | 0.1669731 | 1.4500000 | 1.8600000 |
|---|-----------|-----------|-----------|-----------|

---

Unique Subject Identifier=2017011100-0113

Assay variable : PTINR\_VAL1 PT-INR Value

N Mean Standard Deviation Minimum Maximum

---

|   |           |           |           |           |
|---|-----------|-----------|-----------|-----------|
| 4 | 1.3725000 | 0.1711481 | 1.2000000 | 1.5900000 |
|---|-----------|-----------|-----------|-----------|

---

Laboratory tests at the time of obtaining Table 2-6 consent, according to the presence or absence of proton-pump inhibitors

Unique Subject Identifier=2017011100-0115

MEANS Procedure

Assay variable : PTINR\_VAL1 PT-INR Value

N Mean Standard Deviation Minimum Maximum

---

|   |           |           |           |           |
|---|-----------|-----------|-----------|-----------|
| 6 | 2.3416667 | 0.4252725 | 2.0000000 | 3.0400000 |
|---|-----------|-----------|-----------|-----------|

---

Unique Subject Identifier=2017011100-0116

Assay variable : PTINR\_VAL1 PT-INR Value

N Mean Standard Deviation Minimum Maximum

---

|   |           |           |           |           |
|---|-----------|-----------|-----------|-----------|
| 6 | 1.9816667 | 0.2195829 | 1.7300000 | 2.3700000 |
|---|-----------|-----------|-----------|-----------|

---

Unique Subject Identifier=2017011100-0118

Assay variable : PTINR\_VAL1 PT-INR Value

N Mean Standard Deviation Minimum Maximum

---

|   |           |           |           |           |
|---|-----------|-----------|-----------|-----------|
| 6 | 2.1233333 | 0.2985074 | 1.8300000 | 2.6800000 |
|---|-----------|-----------|-----------|-----------|

---

Unique Subject Identifier=2017011100-0120

Assay variable : PTINR\_VAL1 PT-INR Value

N Mean Standard Deviation Minimum Maximum

---

|   |           |           |           |           |
|---|-----------|-----------|-----------|-----------|
| 6 | 2.1383333 | 0.1697547 | 1.9200000 | 2.3700000 |
|---|-----------|-----------|-----------|-----------|

---



Laboratory tests at the time of obtaining Table 2-6 consent, according to the presence or absence of proton-pump inhibitors

Unique Subject Identifier=2018000000-0005

MEANS Procedure

Assay variable : PTINR\_VAL1 PT-INR Value

N Mean Standard Deviation Minimum Maximum

---

|   |           |           |           |           |
|---|-----------|-----------|-----------|-----------|
| 5 | 1.8820000 | 0.1771158 | 1.6800000 | 2.0500000 |
|---|-----------|-----------|-----------|-----------|

---

Unique Subject Identifier=2018000000-0006

Assay variable : PTINR\_VAL1 PT-INR Value

N Mean Standard Deviation Minimum Maximum

---

|   |           |           |           |           |
|---|-----------|-----------|-----------|-----------|
| 2 | 2.5900000 | 0.2828427 | 2.3900000 | 2.7900000 |
|---|-----------|-----------|-----------|-----------|

---

Unique Subject Identifier=2018000000-0007

Assay variable : PTINR\_VAL1 PT-INR Value

N Mean Standard Deviation Minimum Maximum

---

|   |           |           |           |           |
|---|-----------|-----------|-----------|-----------|
| 6 | 1.2283333 | 0.0604704 | 1.1700000 | 1.3400000 |
|---|-----------|-----------|-----------|-----------|

---

Unique Subject Identifier=2018000000-0008

Assay variable : PTINR\_VAL1 PT-INR Value

N Mean Standard Deviation Minimum Maximum

---

|   |           |           |           |           |
|---|-----------|-----------|-----------|-----------|
| 3 | 2.0666667 | 0.1289703 | 1.9600000 | 2.2100000 |
|---|-----------|-----------|-----------|-----------|

---

Laboratory tests at the time of obtaining Table 2-6 consent, according to the presence or absence of proton-pump inhibitors

Unique Subject Identifier=2018000000-0010

MEANS Procedure

Assay variable : PTINR\_VAL1 PT-INR Value

| N | Mean      | Standard Deviation | Minimum   | Maximum   |
|---|-----------|--------------------|-----------|-----------|
| 5 | 1.8100000 | 0.3000000          | 1.3900000 | 2.1500000 |

Unique Subject Identifier=2018000000-0012

Assay variable : PTINR\_VAL1 PT-INR Value

| N | Mean      | Standard Deviation | Minimum   | Maximum   |
|---|-----------|--------------------|-----------|-----------|
| 2 | 1.4000000 | 0.0565685          | 1.3600000 | 1.4400000 |

Unique Subject Identifier=2018000000-0013

Assay variable : PTINR\_VAL1 PT-INR Value

| N | Mean      | Standard Deviation | Minimum   | Maximum   |
|---|-----------|--------------------|-----------|-----------|
| 2 | 1.8000000 | 0.1414214          | 1.7000000 | 1.9000000 |

Unique Subject Identifier=2026011111-0004

Assay variable : PTINR\_VAL1 PT-INR Value

N Mean Standard Deviation Minimum Maximum

---

|   |          |          |          |          |
|---|----------|----------|----------|----------|
| 6 | 1.600000 | 0.200000 | 1.300000 | 1.800000 |
|---|----------|----------|----------|----------|

---

Laboratory tests at the time of obtaining Table 2-6 consent, according to the presence or absence of proton-pump inhibitors

Unique Subject Identifier=2026011111-0006

MEANS Procedure

Assay variable : PTINR\_VAL1 PT-INR Value

N Mean Standard Deviation Minimum Maximum

---

|   |           |           |           |           |
|---|-----------|-----------|-----------|-----------|
| 6 | 1.9500000 | 0.1870829 | 1.7000000 | 2.2000000 |
|---|-----------|-----------|-----------|-----------|

---

Unique Subject Identifier=2026011111-0008

Assay variable : PTINR\_VAL1 PT-INR Value

N Mean Standard Deviation Minimum Maximum

---

|   |           |           |           |           |
|---|-----------|-----------|-----------|-----------|
| 6 | 2.2666667 | 0.2422120 | 1.9000000 | 2.5000000 |
|---|-----------|-----------|-----------|-----------|

---

Unique Subject Identifier=2027010010-0004

Assay variable : PTINR\_VAL1 PT-INR Value

N Mean Standard Deviation Minimum Maximum

---

|   |           |           |           |           |
|---|-----------|-----------|-----------|-----------|
| 6 | 2.0166667 | 0.1966384 | 1.6600000 | 2.1700000 |
|---|-----------|-----------|-----------|-----------|

---

Unique Subject Identifier=2027010010-0007

Assay variable : PTINR\_VAL1 PT-INR Value

N Mean Standard Deviation Minimum Maximum

---

|   |           |           |           |           |
|---|-----------|-----------|-----------|-----------|
| 3 | 1.6766667 | 0.0665833 | 1.6000000 | 1.7200000 |
|---|-----------|-----------|-----------|-----------|

---

Laboratory tests at the time of obtaining Table 2-6 consent, according to the presence or absence of proton-pump inhibitors

Unique Subject Identifier=2038000000-0005

MEANS Procedure

Assay variable : PTINR\_VAL1 PT-INR Value

N Mean Standard Deviation Minimum Maximum

---

|   |           |           |           |           |
|---|-----------|-----------|-----------|-----------|
| 3 | 1.9933333 | 0.3225420 | 1.6500000 | 2.2900000 |
|---|-----------|-----------|-----------|-----------|

---

Unique Subject Identifier=2038000000-0006

Assay variable : PTINR\_VAL1 PT-INR Value

N Mean Standard Deviation Minimum Maximum

---

|   |           |           |           |           |
|---|-----------|-----------|-----------|-----------|
| 3 | 2.0133333 | 0.6656075 | 1.2900000 | 2.6000000 |
|---|-----------|-----------|-----------|-----------|

---

Unique Subject Identifier=2038000000-0007

Assay variable : PTINR\_VAL1 PT-INR Value

N Mean Standard Deviation Minimum Maximum

---

|   |           |           |           |           |
|---|-----------|-----------|-----------|-----------|
| 3 | 2.0933333 | 0.3108590 | 1.8800000 | 2.4500000 |
|---|-----------|-----------|-----------|-----------|

---

Unique Subject Identifier=2038000000-0009

Assay variable : PTINR\_VAL1 PT-INR Value

N Mean Standard Deviation Minimum Maximum

---

|   |           |           |           |           |
|---|-----------|-----------|-----------|-----------|
| 4 | 2.1650000 | 0.5704092 | 1.3400000 | 2.6500000 |
|---|-----------|-----------|-----------|-----------|

---



Laboratory tests at the time of obtaining Table 2-6 consent, according to the presence or absence of proton-pump inhibitors

Unique Subject Identifier=2047011111-0007

MEANS Procedure

Assay variable : PTINR\_VAL1 PT-INR Value

N Mean Standard Deviation Minimum Maximum

---

|   |           |           |           |           |
|---|-----------|-----------|-----------|-----------|
| 6 | 1.6216667 | 0.2102776 | 1.3700000 | 1.9300000 |
|---|-----------|-----------|-----------|-----------|

---

Unique Subject Identifier=2047011111-0012

Assay variable : PTINR\_VAL1 PT-INR Value

N Mean Standard Deviation Minimum Maximum

---

|   |           |           |           |           |
|---|-----------|-----------|-----------|-----------|
| 2 | 2.4900000 | 0.2687006 | 2.3000000 | 2.6800000 |
|---|-----------|-----------|-----------|-----------|

---

Unique Subject Identifier=2048011011-0035

Assay variable : PTINR\_VAL1 PT-INR Value

N Mean Standard Deviation Minimum Maximum

---

|   |           |           |           |           |
|---|-----------|-----------|-----------|-----------|
| 3 | 1.9000000 | 0.1000000 | 1.8000000 | 2.0000000 |
|---|-----------|-----------|-----------|-----------|

---

Unique Subject Identifier=2048011011-0045

Assay variable : PTINR\_VAL1 PT-INR Value

N Mean Standard Deviation Minimum Maximum

---

|   |          |           |          |          |
|---|----------|-----------|----------|----------|
| 3 | 2.000000 | 0.2645751 | 1.800000 | 2.300000 |
|---|----------|-----------|----------|----------|

---

Laboratory tests at the time of obtaining Table 2-6 consent, according to the presence or absence of proton-pump inhibitors

Unique Subject Identifier=2048011011-0048

MEANS Procedure

Assay variable : PTINR\_VAL1 PT-INR Value

N Mean Standard Deviation Minimum Maximum

---

|   |           |           |           |           |
|---|-----------|-----------|-----------|-----------|
| 6 | 2.0166667 | 1.0068101 | 1.1000000 | 3.3000000 |
|---|-----------|-----------|-----------|-----------|

---

Unique Subject Identifier=2048011011-0049

Assay variable : PTINR\_VAL1 PT-INR Value

N Mean Standard Deviation Minimum Maximum

---

|   |           |           |           |           |
|---|-----------|-----------|-----------|-----------|
| 3 | 2.1666667 | 0.2081666 | 2.0000000 | 2.4000000 |
|---|-----------|-----------|-----------|-----------|

---

Unique Subject Identifier=2048011011-0052

Assay variable : PTINR\_VAL1 PT-INR Value

N Mean Standard Deviation Minimum Maximum

---

|   |           |           |           |           |
|---|-----------|-----------|-----------|-----------|
| 3 | 1.4000000 | 0.5000000 | 0.9000000 | 1.9000000 |
|---|-----------|-----------|-----------|-----------|

---

Unique Subject Identifier=2048011011-0053

Assay variable : PTINR\_VAL1 PT-INR Value

N Mean Standard Deviation Minimum Maximum

---

|   |          |           |          |          |
|---|----------|-----------|----------|----------|
| 2 | 2.750000 | 0.0707107 | 2.700000 | 2.800000 |
|---|----------|-----------|----------|----------|

---

Laboratory tests at the time of obtaining Table 2-6 consent, according to the presence or absence of proton-pump inhibitors

Unique Subject Identifier=2048011011-0056

MEANS Procedure

Assay variable : PTINR\_VAL1 PT-INR Value

N Mean Standard Deviation Minimum Maximum

---

|   |           |           |           |           |
|---|-----------|-----------|-----------|-----------|
| 3 | 2.6666667 | 0.1527525 | 2.5000000 | 2.8000000 |
|---|-----------|-----------|-----------|-----------|

---

Unique Subject Identifier=2048011011-0057

Assay variable : PTINR\_VAL1 PT-INR Value

N Mean Standard Deviation Minimum Maximum

---

|   |           |  |           |           |
|---|-----------|--|-----------|-----------|
| 1 | 2.0000000 |  | 2.0000000 | 2.0000000 |
|---|-----------|--|-----------|-----------|

---

Unique Subject Identifier=2048011011-0067

Assay variable : PTINR\_VAL1 PT-INR Value

N Mean Standard Deviation Minimum Maximum

---

|   |           |           |           |           |
|---|-----------|-----------|-----------|-----------|
| 4 | 2.2000000 | 0.1825742 | 2.0000000 | 2.4000000 |
|---|-----------|-----------|-----------|-----------|

---

Unique Subject Identifier=2048011011-0070

Assay variable : PTINR\_VAL1 PT-INR Value

N Mean Standard Deviation Minimum Maximum

---

|   |          |           |          |          |
|---|----------|-----------|----------|----------|
| 3 | 2.500000 | 0.4582576 | 2.100000 | 3.000000 |
|---|----------|-----------|----------|----------|

---

Laboratory tests at the time of obtaining Table 2-6 consent, according to the presence or absence of proton-pump inhibitors

Unique Subject Identifier=2058011111-0006

MEANS Procedure

Assay variable : PTINR\_VAL1 PT-INR Value

N Mean Standard Deviation Minimum Maximum

---

|   |           |  |           |           |
|---|-----------|--|-----------|-----------|
| 1 | 1.7100000 |  | 1.7100000 | 1.7100000 |
|---|-----------|--|-----------|-----------|

---

Unique Subject Identifier=2064011111-0008

Assay variable : PTINR\_VAL1 PT-INR Value

N Mean Standard Deviation Minimum Maximum

---

|   |           |  |           |           |
|---|-----------|--|-----------|-----------|
| 1 | 1.9700000 |  | 1.9700000 | 1.9700000 |
|---|-----------|--|-----------|-----------|

---

Unique Subject Identifier=2064011111-0011

Assay variable : PTINR\_VAL1 PT-INR Value

N Mean Standard Deviation Minimum Maximum

---

|   |           |           |           |           |
|---|-----------|-----------|-----------|-----------|
| 3 | 2.6533333 | 0.8775154 | 1.7400000 | 3.4900000 |
|---|-----------|-----------|-----------|-----------|

---

Unique Subject Identifier=2069000000-0002

Assay variable : PTINR\_VAL1 PT-INR Value

N Mean Standard Deviation Minimum Maximum

---

|   |           |           |           |           |
|---|-----------|-----------|-----------|-----------|
| 4 | 2.2425000 | 0.2984823 | 1.8600000 | 2.5600000 |
|---|-----------|-----------|-----------|-----------|

---



Laboratory tests at the time of obtaining Table 2-6 consent, according to the presence or absence of proton-pump inhibitors

Unique Subject Identifier=2077011111-0001

MEANS Procedure

Assay variable : PTINR\_VAL1 PT-INR Value

N Mean Standard Deviation Minimum Maximum

---

|   |           |           |           |           |
|---|-----------|-----------|-----------|-----------|
| 6 | 2.2450000 | 0.7159539 | 1.3900000 | 3.2200000 |
|---|-----------|-----------|-----------|-----------|

---

Unique Subject Identifier=2077011111-0003

Assay variable : PTINR\_VAL1 PT-INR Value

N Mean Standard Deviation Minimum Maximum

---

|   |           |           |           |           |
|---|-----------|-----------|-----------|-----------|
| 5 | 2.2580000 | 0.3998375 | 1.8400000 | 2.8100000 |
|---|-----------|-----------|-----------|-----------|

---

Unique Subject Identifier=2077011111-0004

Assay variable : PTINR\_VAL1 PT-INR Value

N Mean Standard Deviation Minimum Maximum

---

|   |           |           |           |           |
|---|-----------|-----------|-----------|-----------|
| 6 | 1.9366667 | 0.6416749 | 1.3200000 | 2.6800000 |
|---|-----------|-----------|-----------|-----------|

---

Unique Subject Identifier=2077011111-0010

Assay variable : PTINR\_VAL1 PT-INR Value

N Mean Standard Deviation Minimum Maximum

---

|   |           |           |           |           |
|---|-----------|-----------|-----------|-----------|
| 6 | 1.6716667 | 0.1094380 | 1.5400000 | 1.8000000 |
|---|-----------|-----------|-----------|-----------|

---

Laboratory tests at the time of obtaining Table 2-6 consent, according to the presence or absence of proton-pump inhibitors

Unique Subject Identifier=2077011111-0016

MEANS Procedure

Assay variable : PTINR\_VAL1 PT-INR Value

N Mean Standard Deviation Minimum Maximum

---

|   |           |           |           |           |
|---|-----------|-----------|-----------|-----------|
| 6 | 2.0883333 | 0.8065089 | 1.1900000 | 3.4000000 |
|---|-----------|-----------|-----------|-----------|

---

Unique Subject Identifier=2077011111-0022

Assay variable : PTINR\_VAL1 PT-INR Value

N Mean Standard Deviation Minimum Maximum

---

|   |           |           |           |           |
|---|-----------|-----------|-----------|-----------|
| 5 | 1.9780000 | 0.1329286 | 1.8300000 | 2.1600000 |
|---|-----------|-----------|-----------|-----------|

---

Unique Subject Identifier=2092011111-0004

Assay variable : PTINR\_VAL1 PT-INR Value

N Mean Standard Deviation Minimum Maximum

---

|   |           |  |           |           |
|---|-----------|--|-----------|-----------|
| 1 | 3.0500000 |  | 3.0500000 | 3.0500000 |
|---|-----------|--|-----------|-----------|

---

Unique Subject Identifier=2096011111-0001

Assay variable : PTINR\_VAL1 PT-INR Value

N Mean Standard Deviation Minimum Maximum

---

|   |          |           |          |          |
|---|----------|-----------|----------|----------|
| 2 | 1.340000 | 0.1131371 | 1.260000 | 1.420000 |
|---|----------|-----------|----------|----------|

---

Laboratory tests at the time of obtaining Table 2-6 consent, according to the presence or absence of proton-pump inhibitors

Unique Subject Identifier=2107011000-0024

MEANS Procedure

Assay variable : PTINR\_VAL1 PT-INR Value

N Mean Standard Deviation Minimum Maximum

---

|   |           |           |           |           |
|---|-----------|-----------|-----------|-----------|
| 6 | 2.1416667 | 0.4149418 | 1.5100000 | 2.6100000 |
|---|-----------|-----------|-----------|-----------|

---

Unique Subject Identifier=2107011000-0036

Assay variable : PTINR\_VAL1 PT-INR Value

N Mean Standard Deviation Minimum Maximum

---

|   |           |           |           |           |
|---|-----------|-----------|-----------|-----------|
| 3 | 2.0533333 | 0.6321656 | 1.3300000 | 2.5000000 |
|---|-----------|-----------|-----------|-----------|

---

Unique Subject Identifier=2107011000-0037

Assay variable : PTINR\_VAL1 PT-INR Value

N Mean Standard Deviation Minimum Maximum

---

|   |           |           |           |           |
|---|-----------|-----------|-----------|-----------|
| 3 | 2.4533333 | 0.6792888 | 1.9700000 | 3.2300000 |
|---|-----------|-----------|-----------|-----------|

---

Unique Subject Identifier=2108011000-0002

Assay variable : PTINR\_VAL1 PT-INR Value

N Mean Standard Deviation Minimum Maximum

---

|   |          |           |           |           |
|---|----------|-----------|-----------|-----------|
| 3 | 3.433333 | 1.6041613 | 1.9000000 | 5.1000000 |
|---|----------|-----------|-----------|-----------|

---

Laboratory tests at the time of obtaining Table 2-6 consent, according to the presence or absence of proton-pump inhibitors

Unique Subject Identifier=2112011011-0001

MEANS Procedure

Assay variable : PTINR\_VAL1 PT-INR Value

N Mean Standard Deviation Minimum Maximum

---

|   |           |           |           |           |
|---|-----------|-----------|-----------|-----------|
| 3 | 2.2266667 | 0.0680686 | 2.1500000 | 2.2800000 |
|---|-----------|-----------|-----------|-----------|

---

Unique Subject Identifier=2112011011-0006

Assay variable : PTINR\_VAL1 PT-INR Value

N Mean Standard Deviation Minimum Maximum

---

|   |           |           |           |           |
|---|-----------|-----------|-----------|-----------|
| 5 | 1.9400000 | 0.1846619 | 1.7500000 | 2.1700000 |
|---|-----------|-----------|-----------|-----------|

---

Unique Subject Identifier=2112011011-0008

Assay variable : PTINR\_VAL1 PT-INR Value

N Mean Standard Deviation Minimum Maximum

---

|   |           |           |           |           |
|---|-----------|-----------|-----------|-----------|
| 5 | 2.4060000 | 0.3755396 | 2.0000000 | 2.8700000 |
|---|-----------|-----------|-----------|-----------|

---

Unique Subject Identifier=2113010111-0001

Assay variable : PTINR\_VAL1 PT-INR Value

N Mean Standard Deviation Minimum Maximum

---

|   |           |           |           |           |
|---|-----------|-----------|-----------|-----------|
| 2 | 1.8700000 | 0.2121320 | 1.7200000 | 2.0200000 |
|---|-----------|-----------|-----------|-----------|

---



Laboratory tests at the time of obtaining Table 2-6 consent, according to the presence or absence of proton-pump inhibitors

Unique Subject Identifier=2113010111-0006

MEANS Procedure

Assay variable : PTINR\_VAL1 PT-INR Value

| N | Mean      | Standard Deviation | Minimum   | Maximum   |
|---|-----------|--------------------|-----------|-----------|
| 3 | 1.8500000 | 0.2066398          | 1.6800000 | 2.0800000 |

Unique Subject Identifier=2113010111-0015

Assay variable : PTINR\_VAL1 PT-INR Value

| N | Mean      | Standard Deviation | Minimum   | Maximum   |
|---|-----------|--------------------|-----------|-----------|
| 1 | 1.2100000 |                    | 1.2100000 | 1.2100000 |

Unique Subject Identifier=2115011111-0025

Assay variable : PTINR\_VAL1 PT-INR Value

| N | Mean      | Standard Deviation | Minimum   | Maximum   |
|---|-----------|--------------------|-----------|-----------|
| 3 | 1.6333333 | 0.1527525          | 1.5000000 | 1.8000000 |

Unique Subject Identifier=2117011111-0001

Assay variable : PTINR\_VAL1 PT-INR Value

N Mean Standard Deviation Minimum Maximum

---

|   |           |           |           |           |
|---|-----------|-----------|-----------|-----------|
| 6 | 1.7750000 | 0.4429334 | 1.1200000 | 2.3800000 |
|---|-----------|-----------|-----------|-----------|

---

Laboratory tests at the time of obtaining Table 2-6 consent, according to the presence or absence of proton-pump inhibitors

Unique Subject Identifier=211800000-0005

MEANS Procedure

Assay variable : PTINR\_VAL1 PT-INR Value

| N | Mean      | Standard Deviation | Minimum   | Maximum   |
|---|-----------|--------------------|-----------|-----------|
| 2 | 1.5550000 | 0.2192031          | 1.4000000 | 1.7100000 |

Unique Subject Identifier=2119011111-0001

Assay variable : PTINR\_VAL1 PT-INR Value

| N | Mean      | Standard Deviation | Minimum   | Maximum   |
|---|-----------|--------------------|-----------|-----------|
| 5 | 1.8540000 | 0.1637987          | 1.6300000 | 2.0800000 |

Unique Subject Identifier=2123010000-0004

Assay variable : PTINR\_VAL1 PT-INR Value

| N | Mean      | Standard Deviation | Minimum   | Maximum   |
|---|-----------|--------------------|-----------|-----------|
| 6 | 2.3166667 | 0.1722401          | 2.1000000 | 2.6000000 |

Unique Subject Identifier=2123010000-0007

Assay variable : PTINR\_VAL1 PT-INR Value

N Mean Standard Deviation Minimum Maximum

---

|   |           |           |           |           |
|---|-----------|-----------|-----------|-----------|
| 6 | 1.8666667 | 0.2065591 | 1.7000000 | 2.2000000 |
|---|-----------|-----------|-----------|-----------|

---

Laboratory tests at the time of obtaining Table 2-6 consent, according to the presence or absence of proton-pump inhibitors

Unique Subject Identifier=2123010000-0009

MEANS Procedure

Assay variable : PTINR\_VAL1 PT-INR Value

N Mean Standard Deviation Minimum Maximum

---

|   |           |           |           |           |
|---|-----------|-----------|-----------|-----------|
| 6 | 2.0500000 | 0.4183300 | 1.6000000 | 2.8000000 |
|---|-----------|-----------|-----------|-----------|

---

Unique Subject Identifier=2123010000-0011

Assay variable : PTINR\_VAL1 PT-INR Value

N Mean Standard Deviation Minimum Maximum

---

|   |           |           |           |           |
|---|-----------|-----------|-----------|-----------|
| 6 | 1.9666667 | 0.2160247 | 1.7000000 | 2.3000000 |
|---|-----------|-----------|-----------|-----------|

---

Unique Subject Identifier=2123010000-0012

Assay variable : PTINR\_VAL1 PT-INR Value

N Mean Standard Deviation Minimum Maximum

---

|   |           |           |           |           |
|---|-----------|-----------|-----------|-----------|
| 6 | 1.5833333 | 0.1722401 | 1.3000000 | 1.8000000 |
|---|-----------|-----------|-----------|-----------|

---

Unique Subject Identifier=2123010000-0013

Assay variable : PTINR\_VAL1 PT-INR Value

N Mean Standard Deviation Minimum Maximum

---

|   |          |           |          |          |
|---|----------|-----------|----------|----------|
| 5 | 1.960000 | 0.2966479 | 1.500000 | 2.300000 |
|---|----------|-----------|----------|----------|

---

Laboratory tests at the time of obtaining Table 2-6 consent, according to the presence or absence of proton-pump inhibitors

Unique Subject Identifier=2123010000-0015

MEANS Procedure

Assay variable : PTINR\_VAL1 PT-INR Value

N Mean Standard Deviation Minimum Maximum

---

|   |           |           |           |           |
|---|-----------|-----------|-----------|-----------|
| 6 | 2.0833333 | 0.1834848 | 1.8000000 | 2.2000000 |
|---|-----------|-----------|-----------|-----------|

---

Unique Subject Identifier=2123010000-0016

Assay variable : PTINR\_VAL1 PT-INR Value

N Mean Standard Deviation Minimum Maximum

---

|   |           |           |           |           |
|---|-----------|-----------|-----------|-----------|
| 6 | 1.9333333 | 0.2160247 | 1.7000000 | 2.2000000 |
|---|-----------|-----------|-----------|-----------|

---

Unique Subject Identifier=2123010000-0017

Assay variable : PTINR\_VAL1 PT-INR Value

N Mean Standard Deviation Minimum Maximum

---

|   |           |           |           |           |
|---|-----------|-----------|-----------|-----------|
| 4 | 2.2250000 | 0.2986079 | 1.8000000 | 2.5000000 |
|---|-----------|-----------|-----------|-----------|

---

Unique Subject Identifier=2123010000-0020

Assay variable : PTINR\_VAL1 PT-INR Value

N Mean Standard Deviation Minimum Maximum

---

|   |           |           |           |           |
|---|-----------|-----------|-----------|-----------|
| 4 | 2.0250000 | 0.4272002 | 1.5000000 | 2.5000000 |
|---|-----------|-----------|-----------|-----------|

---



Laboratory tests at the time of obtaining Table 2-6 consent, according to the presence or absence of proton-pump inhibitors

Unique Subject Identifier=2123010000-0026

MEANS Procedure

Assay variable : PTINR\_VAL1 PT-INR Value

N Mean Standard Deviation Minimum Maximum

---

|   |           |           |           |           |
|---|-----------|-----------|-----------|-----------|
| 6 | 1.9666667 | 0.0816497 | 1.9000000 | 2.1000000 |
|---|-----------|-----------|-----------|-----------|

---

Unique Subject Identifier=2123010000-0029

Assay variable : PTINR\_VAL1 PT-INR Value

N Mean Standard Deviation Minimum Maximum

---

|   |           |           |           |           |
|---|-----------|-----------|-----------|-----------|
| 6 | 1.6833333 | 0.1940790 | 1.5000000 | 2.0000000 |
|---|-----------|-----------|-----------|-----------|

---

Unique Subject Identifier=2125011111-0002

Assay variable : PTINR\_VAL1 PT-INR Value

N Mean Standard Deviation Minimum Maximum

---

|   |           |           |           |           |
|---|-----------|-----------|-----------|-----------|
| 5 | 2.3140000 | 0.1633401 | 2.1500000 | 2.5400000 |
|---|-----------|-----------|-----------|-----------|

---

Unique Subject Identifier=2125011111-0003

Assay variable : PTINR\_VAL1 PT-INR Value

N Mean Standard Deviation Minimum Maximum

---

|   |           |           |           |           |
|---|-----------|-----------|-----------|-----------|
| 5 | 2.2660000 | 0.2591910 | 1.9700000 | 2.6400000 |
|---|-----------|-----------|-----------|-----------|

---

Laboratory tests at the time of obtaining Table 2-6 consent, according to the presence or absence of proton-pump inhibitors

Unique Subject Identifier=2125011111-0011

MEANS Procedure

Assay variable : PTINR\_VAL1 PT-INR Value

N Mean Standard Deviation Minimum Maximum

---

|   |           |           |           |           |
|---|-----------|-----------|-----------|-----------|
| 2 | 1.9150000 | 0.0353553 | 1.8900000 | 1.9400000 |
|---|-----------|-----------|-----------|-----------|

---

Unique Subject Identifier=2125011111-0013

Assay variable : PTINR\_VAL1 PT-INR Value

N Mean Standard Deviation Minimum Maximum

---

|   |           |           |           |           |
|---|-----------|-----------|-----------|-----------|
| 5 | 2.3240000 | 0.7497866 | 1.4600000 | 3.4300000 |
|---|-----------|-----------|-----------|-----------|

---

Unique Subject Identifier=2125011111-0014

Assay variable : PTINR\_VAL1 PT-INR Value

N Mean Standard Deviation Minimum Maximum

---

|   |           |           |           |           |
|---|-----------|-----------|-----------|-----------|
| 5 | 1.8920000 | 0.3536524 | 1.4200000 | 2.2900000 |
|---|-----------|-----------|-----------|-----------|

---

Unique Subject Identifier=2125011111-0027

Assay variable : PTINR\_VAL1 PT-INR Value

N Mean Standard Deviation Minimum Maximum

---

|   |           |           |           |           |
|---|-----------|-----------|-----------|-----------|
| 6 | 2.3683333 | 1.0923629 | 1.1900000 | 3.9600000 |
|---|-----------|-----------|-----------|-----------|

---

Laboratory tests at the time of obtaining Table 2-6 consent, according to the presence or absence of proton-pump inhibitors

Unique Subject Identifier=2127011011-0003

MEANS Procedure

Assay variable : PTINR\_VAL1 PT-INR Value

N Mean Standard Deviation Minimum Maximum

---

|   |          |   |          |          |
|---|----------|---|----------|----------|
| 2 | 1.400000 | 0 | 1.400000 | 1.400000 |
|---|----------|---|----------|----------|

---

Unique Subject Identifier=2127011011-0004

Assay variable : PTINR\_VAL1 PT-INR Value

N Mean Standard Deviation Minimum Maximum

---

|   |          |           |          |          |
|---|----------|-----------|----------|----------|
| 4 | 2.045000 | 0.3831014 | 1.780000 | 2.600000 |
|---|----------|-----------|----------|----------|

---

Unique Subject Identifier=2127011011-0006

Assay variable : PTINR\_VAL1 PT-INR Value

N Mean Standard Deviation Minimum Maximum

---

|   |          |           |          |          |
|---|----------|-----------|----------|----------|
| 6 | 1.550000 | 0.1516575 | 1.400000 | 1.800000 |
|---|----------|-----------|----------|----------|

---

Unique Subject Identifier=2127011011-0008

Assay variable : PTINR\_VAL1 PT-INR Value

N Mean Standard Deviation Minimum Maximum

---

|   |          |           |          |          |
|---|----------|-----------|----------|----------|
| 5 | 1.500000 | 0.1581139 | 1.300000 | 1.700000 |
|---|----------|-----------|----------|----------|

---

Laboratory tests at the time of obtaining Table 2-6 consent, according to the presence or absence of proton-pump inhibitors

Unique Subject Identifier=2127011011-0009

MEANS Procedure

Assay variable : PTINR\_VAL1 PT-INR Value

| N | Mean     | Standard Deviation | Minimum  | Maximum  |
|---|----------|--------------------|----------|----------|
| 3 | 1.500000 | 0.4358899          | 1.200000 | 2.000000 |

Unique Subject Identifier=2127011011-0010

Assay variable : PTINR\_VAL1 PT-INR Value

| N | Mean     | Standard Deviation | Minimum  | Maximum  |
|---|----------|--------------------|----------|----------|
| 5 | 1.920000 | 0.6180615          | 1.300000 | 2.800000 |

Unique Subject Identifier=2127011011-0011

Assay variable : PTINR\_VAL1 PT-INR Value

| N | Mean     | Standard Deviation | Minimum  | Maximum  |
|---|----------|--------------------|----------|----------|
| 6 | 1.533333 | 0.2943920          | 1.100000 | 1.900000 |

Unique Subject Identifier=2127011011-0012

Assay variable : PTINR\_VAL1 PT-INR Value

N Mean Standard Deviation Minimum Maximum

---

|   |          |           |          |          |
|---|----------|-----------|----------|----------|
| 6 | 1.500000 | 0.1414214 | 1.300000 | 1.700000 |
|---|----------|-----------|----------|----------|

---



Laboratory tests at the time of obtaining Table 2-6 consent, according to the presence or absence of proton-pump inhibitors

Unique Subject Identifier=2127011011-0016

MEANS Procedure

Assay variable : PTINR\_VAL1 PT-INR Value

| N | Mean      | Standard Deviation | Minimum   | Maximum   |
|---|-----------|--------------------|-----------|-----------|
| 3 | 1.7000000 | 0.1000000          | 1.6000000 | 1.8000000 |

Unique Subject Identifier=2127011011-0017

Assay variable : PTINR\_VAL1 PT-INR Value

| N | Mean      | Standard Deviation | Minimum   | Maximum   |
|---|-----------|--------------------|-----------|-----------|
| 3 | 1.1666667 | 0.1527525          | 1.0000000 | 1.3000000 |

Unique Subject Identifier=2127011011-0018

Assay variable : PTINR\_VAL1 PT-INR Value

| N | Mean      | Standard Deviation | Minimum   | Maximum   |
|---|-----------|--------------------|-----------|-----------|
| 3 | 1.6333333 | 0.1527525          | 1.5000000 | 1.8000000 |

Unique Subject Identifier=2127011011-0019

Assay variable : PTINR\_VAL1 PT-INR Value

N Mean Standard Deviation Minimum Maximum

---

|   |          |          |          |          |
|---|----------|----------|----------|----------|
| 5 | 1.500000 | 0.244949 | 1.300000 | 1.900000 |
|---|----------|----------|----------|----------|

---

Laboratory tests at the time of obtaining Table 2-6 consent, according to the presence or absence of proton-pump inhibitors

Unique Subject Identifier=2127011011-0021

MEANS Procedure

Assay variable : PTINR\_VAL1 PT-INR Value

| N | Mean      | Standard Deviation | Minimum   | Maximum   |
|---|-----------|--------------------|-----------|-----------|
| 1 | 2.0000000 |                    | 2.0000000 | 2.0000000 |

Unique Subject Identifier=2127011011-0023

Assay variable : PTINR\_VAL1 PT-INR Value

| N | Mean      | Standard Deviation | Minimum   | Maximum   |
|---|-----------|--------------------|-----------|-----------|
| 5 | 1.6400000 | 0.1341641          | 1.5000000 | 1.8000000 |

Unique Subject Identifier=2127011011-0024

Assay variable : PTINR\_VAL1 PT-INR Value

| N | Mean      | Standard Deviation | Minimum   | Maximum   |
|---|-----------|--------------------|-----------|-----------|
| 6 | 1.8833333 | 0.1169045          | 1.7000000 | 2.0000000 |

Unique Subject Identifier=2127011011-0025

Assay variable : PTINR\_VAL1 PT-INR Value

N Mean Standard Deviation Minimum Maximum

---

|   |           |           |           |           |
|---|-----------|-----------|-----------|-----------|
| 6 | 1.8833333 | 0.2401388 | 1.6000000 | 2.3000000 |
|---|-----------|-----------|-----------|-----------|

---

Laboratory tests at the time of obtaining Table 2-6 consent, according to the presence or absence of proton-pump inhibitors

Unique Subject Identifier=2127011011-0026

MEANS Procedure

Assay variable : PTINR\_VAL1 PT-INR Value

| N | Mean      | Standard Deviation | Minimum   | Maximum   |
|---|-----------|--------------------|-----------|-----------|
| 5 | 1.9800000 | 0.4147288          | 1.4000000 | 2.4000000 |

Unique Subject Identifier=2127011011-0027

Assay variable : PTINR\_VAL1 PT-INR Value

| N | Mean      | Standard Deviation | Minimum   | Maximum   |
|---|-----------|--------------------|-----------|-----------|
| 2 | 1.5500000 | 0.0707107          | 1.5000000 | 1.6000000 |

Unique Subject Identifier=2127011011-0030

Assay variable : PTINR\_VAL1 PT-INR Value

| N | Mean      | Standard Deviation | Minimum   | Maximum   |
|---|-----------|--------------------|-----------|-----------|
| 3 | 1.3333333 | 0.1154701          | 1.2000000 | 1.4000000 |

Unique Subject Identifier=2127011011-0034

Assay variable : PTINR\_VAL1 PT-INR Value

N Mean Standard Deviation Minimum Maximum

---

|   |          |           |          |          |
|---|----------|-----------|----------|----------|
| 2 | 2.000000 | 0.7071068 | 1.500000 | 2.500000 |
|---|----------|-----------|----------|----------|

---

Laboratory tests at the time of obtaining Table 2-6 consent, according to the presence or absence of proton-pump inhibitors

Unique Subject Identifier=2127011011-0036

MEANS Procedure

Assay variable : PTINR\_VAL1 PT-INR Value

N Mean Standard Deviation Minimum Maximum

---

|   |           |           |           |           |
|---|-----------|-----------|-----------|-----------|
| 6 | 1.6500000 | 0.2428992 | 1.3000000 | 1.9000000 |
|---|-----------|-----------|-----------|-----------|

---

Unique Subject Identifier=2127011011-0039

Assay variable : PTINR\_VAL1 PT-INR Value

N Mean Standard Deviation Minimum Maximum

---

|   |           |           |           |           |
|---|-----------|-----------|-----------|-----------|
| 5 | 1.2400000 | 0.1140175 | 1.1000000 | 1.4000000 |
|---|-----------|-----------|-----------|-----------|

---

Unique Subject Identifier=2127011011-0041

Assay variable : PTINR\_VAL1 PT-INR Value

N Mean Standard Deviation Minimum Maximum

---

|   |           |           |           |           |
|---|-----------|-----------|-----------|-----------|
| 6 | 2.0166667 | 0.4578937 | 1.6000000 | 2.6000000 |
|---|-----------|-----------|-----------|-----------|

---

Unique Subject Identifier=2127011011-0046

Assay variable : PTINR\_VAL1 PT-INR Value

N Mean Standard Deviation Minimum Maximum

---

|   |          |           |          |          |
|---|----------|-----------|----------|----------|
| 4 | 1.460000 | 0.1720465 | 1.280000 | 1.660000 |
|---|----------|-----------|----------|----------|

---



Laboratory tests at the time of obtaining Table 2-6 consent, according to the presence or absence of proton-pump inhibitors

Unique Subject Identifier=2128010111-0001

MEANS Procedure

Assay variable : PTINR\_VAL1 PT-INR Value

N Mean Standard Deviation Minimum Maximum

---

|   |           |  |           |           |
|---|-----------|--|-----------|-----------|
| 1 | 1.7600000 |  | 1.7600000 | 1.7600000 |
|---|-----------|--|-----------|-----------|

---

Unique Subject Identifier=2134011111-0013

Assay variable : PTINR\_VAL1 PT-INR Value

N Mean Standard Deviation Minimum Maximum

---

|   |           |  |           |           |
|---|-----------|--|-----------|-----------|
| 1 | 1.6000000 |  | 1.6000000 | 1.6000000 |
|---|-----------|--|-----------|-----------|

---

Unique Subject Identifier=2138011111-0002

Assay variable : PTINR\_VAL1 PT-INR Value

N Mean Standard Deviation Minimum Maximum

---

|   |           |           |           |           |
|---|-----------|-----------|-----------|-----------|
| 4 | 1.4375000 | 0.1021029 | 1.3100000 | 1.5600000 |
|---|-----------|-----------|-----------|-----------|

---

Unique Subject Identifier=2138011111-0004

Assay variable : PTINR\_VAL1 PT-INR Value

N Mean Standard Deviation Minimum Maximum

---

|   |           |           |           |           |
|---|-----------|-----------|-----------|-----------|
| 3 | 1.9266667 | 0.0416333 | 1.8800000 | 1.9600000 |
|---|-----------|-----------|-----------|-----------|

---

Laboratory tests at the time of obtaining Table 2-6 consent, according to the presence or absence of proton-pump inhibitors

Unique Subject Identifier=2138011111-0009

MEANS Procedure

Assay variable : PTINR\_VAL1 PT-INR Value

N Mean Standard Deviation Minimum Maximum

---

|   |           |           |           |           |
|---|-----------|-----------|-----------|-----------|
| 5 | 2.0520000 | 0.1943451 | 1.8100000 | 2.3400000 |
|---|-----------|-----------|-----------|-----------|

---

Unique Subject Identifier=2138011111-0021

Assay variable : PTINR\_VAL1 PT-INR Value

N Mean Standard Deviation Minimum Maximum

---

|   |           |           |           |           |
|---|-----------|-----------|-----------|-----------|
| 5 | 1.9760000 | 0.2956011 | 1.5700000 | 2.3700000 |
|---|-----------|-----------|-----------|-----------|

---

Unique Subject Identifier=2138011111-0026

Assay variable : PTINR\_VAL1 PT-INR Value

N Mean Standard Deviation Minimum Maximum

---

|   |           |           |           |           |
|---|-----------|-----------|-----------|-----------|
| 6 | 1.8516667 | 0.2762185 | 1.4400000 | 2.1600000 |
|---|-----------|-----------|-----------|-----------|

---

Unique Subject Identifier=2138011111-0027

Assay variable : PTINR\_VAL1 PT-INR Value

N Mean Standard Deviation Minimum Maximum

---

|   |           |           |           |           |
|---|-----------|-----------|-----------|-----------|
| 6 | 2.4216667 | 0.5288257 | 1.4700000 | 2.8100000 |
|---|-----------|-----------|-----------|-----------|

---

Laboratory tests at the time of obtaining Table 2-6 consent, according to the presence or absence of proton-pump inhibitors

Unique Subject Identifier=2138011111-0028

MEANS Procedure

Assay variable : PTINR\_VAL1 PT-INR Value

N Mean Standard Deviation Minimum Maximum

---

|   |           |           |           |           |
|---|-----------|-----------|-----------|-----------|
| 5 | 1.5300000 | 0.2331309 | 1.1900000 | 1.7800000 |
|---|-----------|-----------|-----------|-----------|

---

Unique Subject Identifier=2138011111-0030

Assay variable : PTINR\_VAL1 PT-INR Value

N Mean Standard Deviation Minimum Maximum

---

|   |           |           |           |           |
|---|-----------|-----------|-----------|-----------|
| 3 | 2.0333333 | 0.1814754 | 1.8400000 | 2.2000000 |
|---|-----------|-----------|-----------|-----------|

---

Unique Subject Identifier=2138011111-0031

Assay variable : PTINR\_VAL1 PT-INR Value

N Mean Standard Deviation Minimum Maximum

---

|   |           |           |           |           |
|---|-----------|-----------|-----------|-----------|
| 4 | 1.7425000 | 0.1851801 | 1.6000000 | 2.0100000 |
|---|-----------|-----------|-----------|-----------|

---

Unique Subject Identifier=2138011111-0032

Assay variable : PTINR\_VAL1 PT-INR Value

N Mean Standard Deviation Minimum Maximum

---

|   |           |           |           |           |
|---|-----------|-----------|-----------|-----------|
| 5 | 1.9460000 | 0.2081586 | 1.6900000 | 2.1600000 |
|---|-----------|-----------|-----------|-----------|

---

Laboratory tests at the time of obtaining Table 2-6 consent, according to the presence or absence of proton-pump inhibitors

Unique Subject Identifier=2138011111-0033

MEANS Procedure

Assay variable : PTINR\_VAL1 PT-INR Value

N Mean Standard Deviation Minimum Maximum

---

|   |           |  |           |           |
|---|-----------|--|-----------|-----------|
| 1 | 1.2600000 |  | 1.2600000 | 1.2600000 |
|---|-----------|--|-----------|-----------|

---

Unique Subject Identifier=2138011111-0040

Assay variable : PTINR\_VAL1 PT-INR Value

N Mean Standard Deviation Minimum Maximum

---

|   |           |           |           |           |
|---|-----------|-----------|-----------|-----------|
| 5 | 1.9100000 | 0.2065188 | 1.6000000 | 2.1700000 |
|---|-----------|-----------|-----------|-----------|

---

Unique Subject Identifier=2138011111-0044

Assay variable : PTINR\_VAL1 PT-INR Value

N Mean Standard Deviation Minimum Maximum

---

|   |           |           |           |           |
|---|-----------|-----------|-----------|-----------|
| 3 | 1.6733333 | 0.0896289 | 1.5700000 | 1.7300000 |
|---|-----------|-----------|-----------|-----------|

---

Unique Subject Identifier=2138011111-0046

Assay variable : PTINR\_VAL1 PT-INR Value

N Mean Standard Deviation Minimum Maximum

---

|   |           |           |           |           |
|---|-----------|-----------|-----------|-----------|
| 3 | 1.6033333 | 0.3744774 | 1.1900000 | 1.9200000 |
|---|-----------|-----------|-----------|-----------|

---



Laboratory tests at the time of obtaining Table 2-6 consent, according to the presence or absence of proton-pump inhibitors

Unique Subject Identifier=2138011111-0049

MEANS Procedure

Assay variable : PTINR\_VAL1 PT-INR Value

N Mean Standard Deviation Minimum Maximum

---

|   |           |           |           |           |
|---|-----------|-----------|-----------|-----------|
| 4 | 2.3825000 | 0.2698611 | 1.9900000 | 2.6000000 |
|---|-----------|-----------|-----------|-----------|

---

Unique Subject Identifier=2138011111-0054

Assay variable : PTINR\_VAL1 PT-INR Value

N Mean Standard Deviation Minimum Maximum

---

|   |           |           |           |           |
|---|-----------|-----------|-----------|-----------|
| 3 | 2.2233333 | 0.5254839 | 1.9100000 | 2.8300000 |
|---|-----------|-----------|-----------|-----------|

---

Unique Subject Identifier=2138011111-0055

Assay variable : PTINR\_VAL1 PT-INR Value

N Mean Standard Deviation Minimum Maximum

---

|   |           |           |           |           |
|---|-----------|-----------|-----------|-----------|
| 6 | 2.1650000 | 0.5103234 | 1.3100000 | 2.7600000 |
|---|-----------|-----------|-----------|-----------|

---

Unique Subject Identifier=2138011111-0056

Assay variable : PTINR\_VAL1 PT-INR Value

N Mean Standard Deviation Minimum Maximum

---

|   |           |           |           |           |
|---|-----------|-----------|-----------|-----------|
| 6 | 1.2950000 | 0.2700926 | 1.0500000 | 1.6900000 |
|---|-----------|-----------|-----------|-----------|

---

Laboratory tests at the time of obtaining Table 2-6 consent, according to the presence or absence of proton-pump inhibitors

Unique Subject Identifier=2138011111-0059

MEANS Procedure

Assay variable : PTINR\_VAL1 PT-INR Value

N Mean Standard Deviation Minimum Maximum

---

|   |           |           |           |           |
|---|-----------|-----------|-----------|-----------|
| 6 | 1.8566667 | 0.4131182 | 1.2200000 | 2.3000000 |
|---|-----------|-----------|-----------|-----------|

---

Unique Subject Identifier=2138011111-0062

Assay variable : PTINR\_VAL1 PT-INR Value

N Mean Standard Deviation Minimum Maximum

---

|   |           |           |           |           |
|---|-----------|-----------|-----------|-----------|
| 3 | 1.8233333 | 0.1154701 | 1.6900000 | 1.8900000 |
|---|-----------|-----------|-----------|-----------|

---

Unique Subject Identifier=2138011111-0065

Assay variable : PTINR\_VAL1 PT-INR Value

N Mean Standard Deviation Minimum Maximum

---

|   |           |           |           |           |
|---|-----------|-----------|-----------|-----------|
| 6 | 2.1066667 | 0.2028464 | 1.8600000 | 2.3400000 |
|---|-----------|-----------|-----------|-----------|

---

Unique Subject Identifier=2140011100-0001

Assay variable : PTINR\_VAL1 PT-INR Value

N Mean Standard Deviation Minimum Maximum

---

|   |          |           |          |          |
|---|----------|-----------|----------|----------|
| 3 | 2.200000 | 0.9165151 | 1.400000 | 3.200000 |
|---|----------|-----------|----------|----------|

---

Laboratory tests at the time of obtaining Table 2-6 consent, according to the presence or absence of proton-pump inhibitors

Unique Subject Identifier=2140011100-0004

MEANS Procedure

Assay variable : PTINR\_VAL1 PT-INR Value

| N | Mean      | Standard Deviation | Minimum   | Maximum   |
|---|-----------|--------------------|-----------|-----------|
| 5 | 2.3000000 | 0.7905694          | 1.7000000 | 3.6000000 |

Unique Subject Identifier=2148011111-0003

Assay variable : PTINR\_VAL1 PT-INR Value

| N | Mean      | Standard Deviation | Minimum   | Maximum   |
|---|-----------|--------------------|-----------|-----------|
| 1 | 1.2600000 |                    | 1.2600000 | 1.2600000 |

Unique Subject Identifier=2148011111-0006

Assay variable : PTINR\_VAL1 PT-INR Value

| N | Mean      | Standard Deviation | Minimum   | Maximum   |
|---|-----------|--------------------|-----------|-----------|
| 3 | 1.0333333 | 0.0577350          | 1.0000000 | 1.1000000 |

Unique Subject Identifier=2155011111-0008

Assay variable : PTINR\_VAL1 PT-INR Value

N Mean Standard Deviation Minimum Maximum

---

|   |           |           |           |           |
|---|-----------|-----------|-----------|-----------|
| 4 | 2.6150000 | 0.4291464 | 2.1800000 | 3.2000000 |
|---|-----------|-----------|-----------|-----------|

---

Laboratory tests at the time of obtaining Table 2-6 consent, according to the presence or absence of proton-pump inhibitors

Unique Subject Identifier=2155011111-0017

MEANS Procedure

Assay variable : PTINR\_VAL1 PT-INR Value

| N | Mean      | Standard Deviation | Minimum   | Maximum   |
|---|-----------|--------------------|-----------|-----------|
| 1 | 1.7000000 |                    | 1.7000000 | 1.7000000 |

Unique Subject Identifier=2157011111-0004

Assay variable : PTINR\_VAL1 PT-INR Value

| N | Mean      | Standard Deviation | Minimum   | Maximum   |
|---|-----------|--------------------|-----------|-----------|
| 6 | 2.2500000 | 0.2258318          | 2.0000000 | 2.6000000 |

Unique Subject Identifier=2163000000-0027

Assay variable : PTINR\_VAL1 PT-INR Value

| N | Mean      | Standard Deviation | Minimum   | Maximum   |
|---|-----------|--------------------|-----------|-----------|
| 2 | 1.8500000 | 0.0707107          | 1.8000000 | 1.9000000 |

Unique Subject Identifier=2163000000-0035

Assay variable : PTINR\_VAL1 PT-INR Value

N Mean Standard Deviation Minimum Maximum

---

|   |          |  |          |          |
|---|----------|--|----------|----------|
| 1 | 1.100000 |  | 1.100000 | 1.100000 |
|---|----------|--|----------|----------|

---



Laboratory tests at the time of obtaining Table 2-6 consent, according to the presence or absence of proton-pump inhibitors

Unique Subject Identifier=216300000-0047

MEANS Procedure

Assay variable : PTINR\_VAL1 PT-INR Value

N Mean Standard Deviation Minimum Maximum

---

|   |          |           |          |          |
|---|----------|-----------|----------|----------|
| 2 | 3.400000 | 1.2727922 | 2.500000 | 4.300000 |
|---|----------|-----------|----------|----------|

---

Unique Subject Identifier=216300000-0051

Assay variable : PTINR\_VAL1 PT-INR Value

N Mean Standard Deviation Minimum Maximum

---

|   |          |  |          |          |
|---|----------|--|----------|----------|
| 1 | 2.300000 |  | 2.300000 | 2.300000 |
|---|----------|--|----------|----------|

---

Unique Subject Identifier=216300000-0058

Assay variable : PTINR\_VAL1 PT-INR Value

N Mean Standard Deviation Minimum Maximum

---

|   |          |   |          |          |
|---|----------|---|----------|----------|
| 2 | 2.000000 | 0 | 2.000000 | 2.000000 |
|---|----------|---|----------|----------|

---

Unique Subject Identifier=216300000-0060

Assay variable : PTINR\_VAL1 PT-INR Value

N Mean Standard Deviation Minimum Maximum

---

|   |           |           |           |           |
|---|-----------|-----------|-----------|-----------|
| 2 | 1.6500000 | 0.0707107 | 1.6000000 | 1.7000000 |
|---|-----------|-----------|-----------|-----------|

---

Laboratory tests at the time of obtaining Table 2-6 consent, according to the presence or absence of proton-pump inhibitors

Unique Subject Identifier=2174011011-0021

MEANS Procedure

Assay variable : PTINR\_VAL1 PT-INR Value

N Mean Standard Deviation Minimum Maximum

---

|   |           |           |           |           |
|---|-----------|-----------|-----------|-----------|
| 6 | 2.6333333 | 0.2732520 | 2.2000000 | 3.0000000 |
|---|-----------|-----------|-----------|-----------|

---

Unique Subject Identifier=2176011011-0013

Assay variable : PTINR\_VAL1 PT-INR Value

N Mean Standard Deviation Minimum Maximum

---

|   |           |           |           |           |
|---|-----------|-----------|-----------|-----------|
| 2 | 2.2250000 | 0.8697413 | 1.6100000 | 2.8400000 |
|---|-----------|-----------|-----------|-----------|

---

Unique Subject Identifier=2176011011-0015

Assay variable : PTINR\_VAL1 PT-INR Value

N Mean Standard Deviation Minimum Maximum

---

|   |           |           |           |           |
|---|-----------|-----------|-----------|-----------|
| 4 | 1.2325000 | 0.0419325 | 1.1900000 | 1.2900000 |
|---|-----------|-----------|-----------|-----------|

---

Unique Subject Identifier=2176011011-0022

Assay variable : PTINR\_VAL1 PT-INR Value

N Mean Standard Deviation Minimum Maximum

---

|   |           |           |           |           |
|---|-----------|-----------|-----------|-----------|
| 4 | 1.8175000 | 0.2969147 | 1.4000000 | 2.1000000 |
|---|-----------|-----------|-----------|-----------|

---

Laboratory tests at the time of obtaining Table 2-6 consent, according to the presence or absence of proton-pump inhibitors

Unique Subject Identifier=2176011011-0026

MEANS Procedure

Assay variable : PTINR\_VAL1 PT-INR Value

| N | Mean      | Standard Deviation | Minimum   | Maximum   |
|---|-----------|--------------------|-----------|-----------|
| 2 | 2.1450000 | 0.0636396          | 2.1000000 | 2.1900000 |

Unique Subject Identifier=2176011011-0028

Assay variable : PTINR\_VAL1 PT-INR Value

| N | Mean      | Standard Deviation | Minimum   | Maximum   |
|---|-----------|--------------------|-----------|-----------|
| 1 | 1.7700000 |                    | 1.7700000 | 1.7700000 |

Unique Subject Identifier=2176011011-0034

Assay variable : PTINR\_VAL1 PT-INR Value

| N | Mean      | Standard Deviation | Minimum   | Maximum   |
|---|-----------|--------------------|-----------|-----------|
| 1 | 2.5200000 |                    | 2.5200000 | 2.5200000 |

Unique Subject Identifier=2176011011-0044

Assay variable : PTINR\_VAL1 PT-INR Value

N Mean Standard Deviation Minimum Maximum

---

|   |           |  |           |           |
|---|-----------|--|-----------|-----------|
| 1 | 2.2900000 |  | 2.2900000 | 2.2900000 |
|---|-----------|--|-----------|-----------|

---

Laboratory tests at the time of obtaining Table 2-6 consent, according to the presence or absence of proton-pump inhibitors

Unique Subject Identifier=2183011011-0007

MEANS Procedure

Assay variable : PTINR\_VAL1 PT-INR Value

| N | Mean      | Standard Deviation | Minimum   | Maximum   |
|---|-----------|--------------------|-----------|-----------|
| 3 | 2.1333333 | 0.4509250          | 1.7000000 | 2.6000000 |

Unique Subject Identifier=2183011011-0008

Assay variable : PTINR\_VAL1 PT-INR Value

| N | Mean      | Standard Deviation | Minimum   | Maximum   |
|---|-----------|--------------------|-----------|-----------|
| 3 | 1.4666667 | 0.0577350          | 1.4000000 | 1.5000000 |

Unique Subject Identifier=2183011011-0009

Assay variable : PTINR\_VAL1 PT-INR Value

| N | Mean      | Standard Deviation | Minimum   | Maximum   |
|---|-----------|--------------------|-----------|-----------|
| 3 | 1.5333333 | 0.2081666          | 1.3000000 | 1.7000000 |

Unique Subject Identifier=2183011011-0011

Assay variable : PTINR\_VAL1 PT-INR Value

N Mean Standard Deviation Minimum Maximum

---

|   |          |   |          |          |
|---|----------|---|----------|----------|
| 2 | 2.100000 | 0 | 2.100000 | 2.100000 |
|---|----------|---|----------|----------|

---



Laboratory tests at the time of obtaining Table 2-6 consent, according to the presence or absence of proton-pump inhibitors

Unique Subject Identifier=2183011011-0012

MEANS Procedure

Assay variable : PTINR\_VAL1 PT-INR Value

| N | Mean      | Standard Deviation | Minimum   | Maximum   |
|---|-----------|--------------------|-----------|-----------|
| 3 | 1.8666667 | 0.2309401          | 1.6000000 | 2.0000000 |

Unique Subject Identifier=2183011011-0014

Assay variable : PTINR\_VAL1 PT-INR Value

| N | Mean      | Standard Deviation | Minimum   | Maximum   |
|---|-----------|--------------------|-----------|-----------|
| 2 | 1.6000000 | 0.5656854          | 1.2000000 | 2.0000000 |

Unique Subject Identifier=2183011011-0017

Assay variable : PTINR\_VAL1 PT-INR Value

| N | Mean      | Standard Deviation | Minimum   | Maximum   |
|---|-----------|--------------------|-----------|-----------|
| 2 | 2.1000000 | 0.5656854          | 1.7000000 | 2.5000000 |

Unique Subject Identifier=2185010010-0002

Assay variable : PTINR\_VAL1 PT-INR Value

N Mean Standard Deviation Minimum Maximum

---

|   |           |  |           |           |
|---|-----------|--|-----------|-----------|
| 1 | 1.7200000 |  | 1.7200000 | 1.7200000 |
|---|-----------|--|-----------|-----------|

---

Laboratory tests at the time of obtaining Table 2-6 consent, according to the presence or absence of proton-pump inhibitors

Unique Subject Identifier=2185010010-0004

MEANS Procedure

Assay variable : PTINR\_VAL1 PT-INR Value

N Mean Standard Deviation Minimum Maximum

---

|   |           |           |           |           |
|---|-----------|-----------|-----------|-----------|
| 6 | 1.9833333 | 0.1471960 | 1.8000000 | 2.1000000 |
|---|-----------|-----------|-----------|-----------|

---

Unique Subject Identifier=2185010010-0005

Assay variable : PTINR\_VAL1 PT-INR Value

N Mean Standard Deviation Minimum Maximum

---

|   |           |           |           |           |
|---|-----------|-----------|-----------|-----------|
| 6 | 1.9500000 | 0.3391165 | 1.6000000 | 2.5000000 |
|---|-----------|-----------|-----------|-----------|

---

Unique Subject Identifier=2185010010-0007

Assay variable : PTINR\_VAL1 PT-INR Value

N Mean Standard Deviation Minimum Maximum

---

|   |           |           |           |           |
|---|-----------|-----------|-----------|-----------|
| 6 | 2.3333333 | 0.4802777 | 1.6000000 | 2.8000000 |
|---|-----------|-----------|-----------|-----------|

---

Unique Subject Identifier=2185010010-0008

Assay variable : PTINR\_VAL1 PT-INR Value

N Mean Standard Deviation Minimum Maximum

---

|   |           |           |           |           |
|---|-----------|-----------|-----------|-----------|
| 6 | 1.9666667 | 0.5645057 | 1.4000000 | 2.9000000 |
|---|-----------|-----------|-----------|-----------|

---

Laboratory tests at the time of obtaining Table 2-6 consent, according to the presence or absence of proton-pump inhibitors

Unique Subject Identifier=2185010010-0010

MEANS Procedure

Assay variable : PTINR\_VAL1 PT-INR Value

| N | Mean      | Standard Deviation | Minimum   | Maximum   |
|---|-----------|--------------------|-----------|-----------|
| 5 | 2.2200000 | 0.4658326          | 1.4000000 | 2.5000000 |

Unique Subject Identifier=2191011011-0005

Assay variable : PTINR\_VAL1 PT-INR Value

| N | Mean      | Standard Deviation | Minimum   | Maximum   |
|---|-----------|--------------------|-----------|-----------|
| 2 | 1.5950000 | 0.0353553          | 1.5700000 | 1.6200000 |

Unique Subject Identifier=2191011011-0008

Assay variable : PTINR\_VAL1 PT-INR Value

| N | Mean      | Standard Deviation | Minimum   | Maximum   |
|---|-----------|--------------------|-----------|-----------|
| 3 | 1.5233333 | 0.1422439          | 1.3600000 | 1.6200000 |

Unique Subject Identifier=2191011011-0012

Assay variable : PTINR\_VAL1 PT-INR Value

N Mean Standard Deviation Minimum Maximum

---

|   |           |  |           |           |
|---|-----------|--|-----------|-----------|
| 1 | 1.5100000 |  | 1.5100000 | 1.5100000 |
|---|-----------|--|-----------|-----------|

---

Laboratory tests at the time of obtaining Table 2-6 consent, according to the presence or absence of proton-pump inhibitors

Unique Subject Identifier=2191011011-0013

MEANS Procedure

Assay variable : PTINR\_VAL1 PT-INR Value

| N | Mean      | Standard Deviation | Minimum   | Maximum   |
|---|-----------|--------------------|-----------|-----------|
| 1 | 1.7300000 |                    | 1.7300000 | 1.7300000 |

Unique Subject Identifier=2192010011-0002

Assay variable : PTINR\_VAL1 PT-INR Value

| N | Mean      | Standard Deviation | Minimum   | Maximum   |
|---|-----------|--------------------|-----------|-----------|
| 6 | 2.4333333 | 0.2943920          | 2.1000000 | 2.7000000 |

Unique Subject Identifier=2200000000-0001

Assay variable : PTINR\_VAL1 PT-INR Value

| N | Mean      | Standard Deviation | Minimum   | Maximum   |
|---|-----------|--------------------|-----------|-----------|
| 3 | 2.6166667 | 0.8975708          | 1.8900000 | 3.6200000 |

Unique Subject Identifier=2203011010-0002

Assay variable : PTINR\_VAL1 PT-INR Value

N Mean Standard Deviation Minimum Maximum

---

|   |           |           |           |           |
|---|-----------|-----------|-----------|-----------|
| 5 | 1.7800000 | 0.8671793 | 1.0000000 | 3.0000000 |
|---|-----------|-----------|-----------|-----------|

---



Laboratory tests at the time of obtaining Table 2-6 consent, according to the presence or absence of proton-pump inhibitors

Unique Subject Identifier=2205001111-0003

MEANS Procedure

Assay variable : PTINR\_VAL1 PT-INR Value

N Mean Standard Deviation Minimum Maximum

---

|   |           |           |           |           |
|---|-----------|-----------|-----------|-----------|
| 6 | 1.9000000 | 0.4690416 | 1.3000000 | 2.6000000 |
|---|-----------|-----------|-----------|-----------|

---

Unique Subject Identifier=2205001111-0018

Assay variable : PTINR\_VAL1 PT-INR Value

N Mean Standard Deviation Minimum Maximum

---

|   |           |           |           |           |
|---|-----------|-----------|-----------|-----------|
| 6 | 2.4666667 | 0.3502380 | 1.9000000 | 2.9000000 |
|---|-----------|-----------|-----------|-----------|

---

Unique Subject Identifier=2205001111-0025

Assay variable : PTINR\_VAL1 PT-INR Value

N Mean Standard Deviation Minimum Maximum

---

|   |           |           |           |           |
|---|-----------|-----------|-----------|-----------|
| 6 | 2.1333333 | 0.1032796 | 2.0000000 | 2.3000000 |
|---|-----------|-----------|-----------|-----------|

---

Unique Subject Identifier=2205001111-0027

Assay variable : PTINR\_VAL1 PT-INR Value

N Mean Standard Deviation Minimum Maximum

---

|   |           |           |           |           |
|---|-----------|-----------|-----------|-----------|
| 6 | 1.7333333 | 0.1632993 | 1.6000000 | 2.0000000 |
|---|-----------|-----------|-----------|-----------|

---

Laboratory tests at the time of obtaining Table 2-6 consent, according to the presence or absence of proton-pump inhibitors

Unique Subject Identifier=2205001111-0041

MEANS Procedure

Assay variable : PTINR\_VAL1 PT-INR Value

N Mean Standard Deviation Minimum Maximum

---

|   |           |           |           |           |
|---|-----------|-----------|-----------|-----------|
| 6 | 1.8166667 | 0.1471960 | 1.7000000 | 2.0000000 |
|---|-----------|-----------|-----------|-----------|

---

Unique Subject Identifier=2205001111-0046

Assay variable : PTINR\_VAL1 PT-INR Value

N Mean Standard Deviation Minimum Maximum

---

|   |           |           |           |           |
|---|-----------|-----------|-----------|-----------|
| 4 | 2.1325000 | 0.1699755 | 1.9000000 | 2.3000000 |
|---|-----------|-----------|-----------|-----------|

---

Unique Subject Identifier=2205001111-0049

Assay variable : PTINR\_VAL1 PT-INR Value

N Mean Standard Deviation Minimum Maximum

---

|   |           |           |           |           |
|---|-----------|-----------|-----------|-----------|
| 6 | 1.9450000 | 0.7634854 | 1.1700000 | 3.2300000 |
|---|-----------|-----------|-----------|-----------|

---

Unique Subject Identifier=2211011111-0001

Assay variable : PTINR\_VAL1 PT-INR Value

N Mean Standard Deviation Minimum Maximum

---

|   |          |  |          |          |
|---|----------|--|----------|----------|
| 1 | 2.600000 |  | 2.600000 | 2.600000 |
|---|----------|--|----------|----------|

---

Laboratory tests at the time of obtaining Table 2-6 consent, according to the presence or absence of proton-pump inhibitors

Unique Subject Identifier=2211011111-0003

MEANS Procedure

Assay variable : PTINR\_VAL1 PT-INR Value

N Mean Standard Deviation Minimum Maximum

---

|   |           |  |           |           |
|---|-----------|--|-----------|-----------|
| 1 | 1.1000000 |  | 1.1000000 | 1.1000000 |
|---|-----------|--|-----------|-----------|

---

Unique Subject Identifier=2211011111-0037

Assay variable : PTINR\_VAL1 PT-INR Value

N Mean Standard Deviation Minimum Maximum

---

|   |           |           |           |           |
|---|-----------|-----------|-----------|-----------|
| 6 | 1.7000000 | 0.6131884 | 1.0000000 | 2.6000000 |
|---|-----------|-----------|-----------|-----------|

---

Unique Subject Identifier=2211011111-0038

Assay variable : PTINR\_VAL1 PT-INR Value

N Mean Standard Deviation Minimum Maximum

---

|   |           |           |           |           |
|---|-----------|-----------|-----------|-----------|
| 4 | 1.9250000 | 0.1892969 | 1.8000000 | 2.2000000 |
|---|-----------|-----------|-----------|-----------|

---

Unique Subject Identifier=2211011111-0039

Assay variable : PTINR\_VAL1 PT-INR Value

N Mean Standard Deviation Minimum Maximum

---

|   |          |           |          |          |
|---|----------|-----------|----------|----------|
| 5 | 1.400000 | 0.1870829 | 1.200000 | 1.700000 |
|---|----------|-----------|----------|----------|

---

Laboratory tests at the time of obtaining Table 2-6 consent, according to the presence or absence of proton-pump inhibitors

Unique Subject Identifier=2211011111-0041

MEANS Procedure

Assay variable : PTINR\_VAL1 PT-INR Value

N Mean Standard Deviation Minimum Maximum

---

|   |           |  |           |           |
|---|-----------|--|-----------|-----------|
| 1 | 2.5000000 |  | 2.5000000 | 2.5000000 |
|---|-----------|--|-----------|-----------|

---

Unique Subject Identifier=2211011111-0044

Assay variable : PTINR\_VAL1 PT-INR Value

N Mean Standard Deviation Minimum Maximum

---

|   |           |           |           |           |
|---|-----------|-----------|-----------|-----------|
| 5 | 1.0940000 | 0.0531977 | 1.0500000 | 1.1800000 |
|---|-----------|-----------|-----------|-----------|

---

Unique Subject Identifier=2211011111-0054

Assay variable : PTINR\_VAL1 PT-INR Value

N Mean Standard Deviation Minimum Maximum

---

|   |           |  |           |           |
|---|-----------|--|-----------|-----------|
| 1 | 1.3500000 |  | 1.3500000 | 1.3500000 |
|---|-----------|--|-----------|-----------|

---

Unique Subject Identifier=2211011111-0057

Assay variable : PTINR\_VAL1 PT-INR Value

N Mean Standard Deviation Minimum Maximum

---

|   |          |  |          |          |
|---|----------|--|----------|----------|
| 1 | 1.600000 |  | 1.600000 | 1.600000 |
|---|----------|--|----------|----------|

---



Laboratory tests at the time of obtaining Table 2-6 consent, according to the presence or absence of proton-pump inhibitors

Unique Subject Identifier=2211011111-0058

MEANS Procedure

Assay variable : PTINR\_VAL1 PT-INR Value

N Mean Standard Deviation Minimum Maximum

---

|   |           |  |           |           |
|---|-----------|--|-----------|-----------|
| 1 | 1.1900000 |  | 1.1900000 | 1.1900000 |
|---|-----------|--|-----------|-----------|

---

Unique Subject Identifier=2211011111-0060

Assay variable : PTINR\_VAL1 PT-INR Value

N Mean Standard Deviation Minimum Maximum

---

|   |           |  |           |           |
|---|-----------|--|-----------|-----------|
| 1 | 1.9100000 |  | 1.9100000 | 1.9100000 |
|---|-----------|--|-----------|-----------|

---

Unique Subject Identifier=2214011111-0003

Assay variable : PTINR\_VAL1 PT-INR Value

N Mean Standard Deviation Minimum Maximum

---

|   |           |           |           |           |
|---|-----------|-----------|-----------|-----------|
| 6 | 2.1683333 | 0.2604163 | 1.8900000 | 2.5900000 |
|---|-----------|-----------|-----------|-----------|

---

Unique Subject Identifier=2227010011-0003

Assay variable : PTINR\_VAL1 PT-INR Value

N Mean Standard Deviation Minimum Maximum

---

|   |           |  |           |           |
|---|-----------|--|-----------|-----------|
| 1 | 1.9000000 |  | 1.9000000 | 1.9000000 |
|---|-----------|--|-----------|-----------|

---

Laboratory tests at the time of obtaining Table 2-6 consent, according to the presence or absence of proton-pump inhibitors

Unique Subject Identifier=2227010011-0011

MEANS Procedure

Assay variable : PTINR\_VAL1 PT-INR Value

N Mean Standard Deviation Minimum Maximum

---

|   |           |  |           |           |
|---|-----------|--|-----------|-----------|
| 1 | 2.8300000 |  | 2.8300000 | 2.8300000 |
|---|-----------|--|-----------|-----------|

---

Unique Subject Identifier=2233011111-0001

Assay variable : PTINR\_VAL1 PT-INR Value

N Mean Standard Deviation Minimum Maximum

---

|   |           |           |           |           |
|---|-----------|-----------|-----------|-----------|
| 6 | 1.9966667 | 0.4012314 | 1.4500000 | 2.5700000 |
|---|-----------|-----------|-----------|-----------|

---

Unique Subject Identifier=2233011111-0002

Assay variable : PTINR\_VAL1 PT-INR Value

N Mean Standard Deviation Minimum Maximum

---

|   |           |           |           |           |
|---|-----------|-----------|-----------|-----------|
| 6 | 1.9400000 | 0.1704113 | 1.7100000 | 2.1500000 |
|---|-----------|-----------|-----------|-----------|

---

Unique Subject Identifier=2233011111-0008

Assay variable : PTINR\_VAL1 PT-INR Value

N Mean Standard Deviation Minimum Maximum

---

|   |          |           |          |          |
|---|----------|-----------|----------|----------|
| 4 | 1.400000 | 0.1157584 | 1.290000 | 1.560000 |
|---|----------|-----------|----------|----------|

---

Laboratory tests at the time of obtaining Table 2-6 consent, according to the presence or absence of proton-pump inhibitors

Unique Subject Identifier=2233011111-0009

MEANS Procedure

Assay variable : PTINR\_VAL1 PT-INR Value

N Mean Standard Deviation Minimum Maximum

---

|   |           |           |           |           |
|---|-----------|-----------|-----------|-----------|
| 4 | 1.7600000 | 0.2047763 | 1.5600000 | 2.0100000 |
|---|-----------|-----------|-----------|-----------|

---

Unique Subject Identifier=2233011111-0011

Assay variable : PTINR\_VAL1 PT-INR Value

N Mean Standard Deviation Minimum Maximum

---

|   |           |           |           |           |
|---|-----------|-----------|-----------|-----------|
| 5 | 2.2540000 | 0.2861468 | 1.9000000 | 2.6000000 |
|---|-----------|-----------|-----------|-----------|

---

Unique Subject Identifier=2233011111-0014

Assay variable : PTINR\_VAL1 PT-INR Value

N Mean Standard Deviation Minimum Maximum

---

|   |           |           |           |           |
|---|-----------|-----------|-----------|-----------|
| 4 | 1.4800000 | 0.2044505 | 1.1800000 | 1.6100000 |
|---|-----------|-----------|-----------|-----------|

---

Unique Subject Identifier=2233011111-0015

Assay variable : PTINR\_VAL1 PT-INR Value

N Mean Standard Deviation Minimum Maximum

---

|   |           |           |           |           |
|---|-----------|-----------|-----------|-----------|
| 6 | 1.6016667 | 0.1358553 | 1.4600000 | 1.8000000 |
|---|-----------|-----------|-----------|-----------|

---

Laboratory tests at the time of obtaining Table 2-6 consent, according to the presence or absence of proton-pump inhibitors

Unique Subject Identifier=2233011111-0016

MEANS Procedure

Assay variable : PTINR\_VAL1 PT-INR Value

N Mean Standard Deviation Minimum Maximum

---

|   |           |           |           |           |
|---|-----------|-----------|-----------|-----------|
| 6 | 1.9616667 | 0.2359167 | 1.6500000 | 2.3600000 |
|---|-----------|-----------|-----------|-----------|

---

Unique Subject Identifier=2233011111-0018

Assay variable : PTINR\_VAL1 PT-INR Value

N Mean Standard Deviation Minimum Maximum

---

|   |           |           |           |           |
|---|-----------|-----------|-----------|-----------|
| 4 | 1.5250000 | 0.1912241 | 1.3100000 | 1.7500000 |
|---|-----------|-----------|-----------|-----------|

---

Unique Subject Identifier=2233011111-0019

Assay variable : PTINR\_VAL1 PT-INR Value

N Mean Standard Deviation Minimum Maximum

---

|   |           |           |           |           |
|---|-----------|-----------|-----------|-----------|
| 2 | 2.2500000 | 0.3535534 | 2.0000000 | 2.5000000 |
|---|-----------|-----------|-----------|-----------|

---

Unique Subject Identifier=2233011111-0020

Assay variable : PTINR\_VAL1 PT-INR Value

N Mean Standard Deviation Minimum Maximum

---

|   |           |           |           |           |
|---|-----------|-----------|-----------|-----------|
| 4 | 1.9075000 | 0.3986122 | 1.3400000 | 2.2000000 |
|---|-----------|-----------|-----------|-----------|

---



Laboratory tests at the time of obtaining Table 2-6 consent, according to the presence or absence of proton-pump inhibitors

Unique Subject Identifier=2233011111-0021

MEANS Procedure

Assay variable : PTINR\_VAL1 PT-INR Value

N Mean Standard Deviation Minimum Maximum

---

|   |           |           |           |           |
|---|-----------|-----------|-----------|-----------|
| 5 | 1.4320000 | 0.1439444 | 1.3100000 | 1.6300000 |
|---|-----------|-----------|-----------|-----------|

---

Unique Subject Identifier=2233011111-0022

Assay variable : PTINR\_VAL1 PT-INR Value

N Mean Standard Deviation Minimum Maximum

---

|   |           |           |           |           |
|---|-----------|-----------|-----------|-----------|
| 5 | 1.5680000 | 0.1231666 | 1.4300000 | 1.7600000 |
|---|-----------|-----------|-----------|-----------|

---

Unique Subject Identifier=2233011111-0023

Assay variable : PTINR\_VAL1 PT-INR Value

N Mean Standard Deviation Minimum Maximum

---

|   |           |           |           |           |
|---|-----------|-----------|-----------|-----------|
| 5 | 1.7000000 | 0.2354782 | 1.3500000 | 1.9700000 |
|---|-----------|-----------|-----------|-----------|

---

Unique Subject Identifier=2233011111-0024

Assay variable : PTINR\_VAL1 PT-INR Value

N Mean Standard Deviation Minimum Maximum

---

|   |           |           |           |           |
|---|-----------|-----------|-----------|-----------|
| 6 | 1.5616667 | 0.2039036 | 1.3400000 | 1.8800000 |
|---|-----------|-----------|-----------|-----------|

---

Laboratory tests at the time of obtaining Table 2-6 consent, according to the presence or absence of proton-pump inhibitors

Unique Subject Identifier=2233011111-0025

MEANS Procedure

Assay variable : PTINR\_VAL1 PT-INR Value

N Mean Standard Deviation Minimum Maximum

---

|   |           |           |           |           |
|---|-----------|-----------|-----------|-----------|
| 3 | 1.5566667 | 0.1556706 | 1.4100000 | 1.7200000 |
|---|-----------|-----------|-----------|-----------|

---

Unique Subject Identifier=2233011111-0026

Assay variable : PTINR\_VAL1 PT-INR Value

N Mean Standard Deviation Minimum Maximum

---

|   |           |           |           |           |
|---|-----------|-----------|-----------|-----------|
| 3 | 1.4666667 | 0.1159023 | 1.3600000 | 1.5900000 |
|---|-----------|-----------|-----------|-----------|

---

Unique Subject Identifier=2233011111-0032

Assay variable : PTINR\_VAL1 PT-INR Value

N Mean Standard Deviation Minimum Maximum

---

|   |           |           |           |           |
|---|-----------|-----------|-----------|-----------|
| 3 | 2.0133333 | 0.2138535 | 1.7800000 | 2.2000000 |
|---|-----------|-----------|-----------|-----------|

---

Unique Subject Identifier=2233011111-0034

Assay variable : PTINR\_VAL1 PT-INR Value

N Mean Standard Deviation Minimum Maximum

---

|   |           |           |           |           |
|---|-----------|-----------|-----------|-----------|
| 4 | 1.3150000 | 0.2056696 | 1.1200000 | 1.5800000 |
|---|-----------|-----------|-----------|-----------|

---

Laboratory tests at the time of obtaining Table 2-6 consent, according to the presence or absence of proton-pump inhibitors

Unique Subject Identifier=2233011111-0035

MEANS Procedure

Assay variable : PTINR\_VAL1 PT-INR Value

| N | Mean      | Standard Deviation | Minimum   | Maximum   |
|---|-----------|--------------------|-----------|-----------|
| 5 | 1.7220000 | 0.2888252          | 1.3300000 | 1.9800000 |

Unique Subject Identifier=2233011111-0036

Assay variable : PTINR\_VAL1 PT-INR Value

| N | Mean      | Standard Deviation | Minimum   | Maximum   |
|---|-----------|--------------------|-----------|-----------|
| 4 | 1.6725000 | 0.0340343          | 1.6300000 | 1.7000000 |

Unique Subject Identifier=2233011111-0037

Assay variable : PTINR\_VAL1 PT-INR Value

| N | Mean      | Standard Deviation | Minimum   | Maximum   |
|---|-----------|--------------------|-----------|-----------|
| 3 | 2.0200000 | 0.1200000          | 1.9000000 | 2.1400000 |

Unique Subject Identifier=2236011111-0001

Assay variable : PTINR\_VAL1 PT-INR Value

N Mean Standard Deviation Minimum Maximum

---

|   |           |           |           |           |
|---|-----------|-----------|-----------|-----------|
| 6 | 2.3866667 | 0.2338090 | 2.0000000 | 2.6000000 |
|---|-----------|-----------|-----------|-----------|

---

Laboratory tests at the time of obtaining Table 2-6 consent, according to the presence or absence of proton-pump inhibitors

Unique Subject Identifier=2236011111-0002

MEANS Procedure

Assay variable : PTINR\_VAL1 PT-INR Value

N Mean Standard Deviation Minimum Maximum

---

|   |           |           |           |           |
|---|-----------|-----------|-----------|-----------|
| 6 | 1.9500000 | 0.4324350 | 1.4000000 | 2.6000000 |
|---|-----------|-----------|-----------|-----------|

---

Unique Subject Identifier=2236011111-0005

Assay variable : PTINR\_VAL1 PT-INR Value

N Mean Standard Deviation Minimum Maximum

---

|   |           |           |           |           |
|---|-----------|-----------|-----------|-----------|
| 4 | 1.7500000 | 0.0577350 | 1.7000000 | 1.8000000 |
|---|-----------|-----------|-----------|-----------|

---

Unique Subject Identifier=2236011111-0007

Assay variable : PTINR\_VAL1 PT-INR Value

N Mean Standard Deviation Minimum Maximum

---

|   |           |           |           |           |
|---|-----------|-----------|-----------|-----------|
| 6 | 1.6783333 | 0.2898563 | 1.3000000 | 2.0000000 |
|---|-----------|-----------|-----------|-----------|

---

Unique Subject Identifier=2236011111-0009

Assay variable : PTINR\_VAL1 PT-INR Value

N Mean Standard Deviation Minimum Maximum

---

|   |          |          |          |          |
|---|----------|----------|----------|----------|
| 5 | 1.950000 | 0.200000 | 1.600000 | 2.100000 |
|---|----------|----------|----------|----------|

---



Laboratory tests at the time of obtaining Table 2-6 consent, according to the presence or absence of proton-pump inhibitors

Unique Subject Identifier=2236011111-0012

MEANS Procedure

Assay variable : PTINR\_VAL1 PT-INR Value

| N | Mean      | Standard Deviation | Minimum   | Maximum   |
|---|-----------|--------------------|-----------|-----------|
| 5 | 1.5800000 | 0.1788854          | 1.3000000 | 1.7000000 |

Unique Subject Identifier=2236011111-0013

Assay variable : PTINR\_VAL1 PT-INR Value

| N | Mean      | Standard Deviation | Minimum   | Maximum   |
|---|-----------|--------------------|-----------|-----------|
| 4 | 2.3500000 | 0.5802298          | 1.8000000 | 3.1000000 |

Unique Subject Identifier=2236011111-0014

Assay variable : PTINR\_VAL1 PT-INR Value

| N | Mean      | Standard Deviation | Minimum   | Maximum   |
|---|-----------|--------------------|-----------|-----------|
| 3 | 1.7366667 | 0.3611556          | 1.3600000 | 2.0800000 |

Unique Subject Identifier=2236011111-0017

Assay variable : PTINR\_VAL1 PT-INR Value

N Mean Standard Deviation Minimum Maximum

---

|   |           |           |           |           |
|---|-----------|-----------|-----------|-----------|
| 6 | 1.7000000 | 0.3687818 | 1.4000000 | 2.3000000 |
|---|-----------|-----------|-----------|-----------|

---

Laboratory tests at the time of obtaining Table 2-6 consent, according to the presence or absence of proton-pump inhibitors

Unique Subject Identifier=2236011111-0018

MEANS Procedure

Assay variable : PTINR\_VAL1 PT-INR Value

N Mean Standard Deviation Minimum Maximum

---

|   |           |           |           |           |
|---|-----------|-----------|-----------|-----------|
| 5 | 2.3400000 | 0.1341641 | 2.2000000 | 2.5000000 |
|---|-----------|-----------|-----------|-----------|

---

Unique Subject Identifier=2236011111-0021

Assay variable : PTINR\_VAL1 PT-INR Value

N Mean Standard Deviation Minimum Maximum

---

|   |           |           |           |           |
|---|-----------|-----------|-----------|-----------|
| 4 | 1.7000000 | 0.1154701 | 1.6000000 | 1.8000000 |
|---|-----------|-----------|-----------|-----------|

---

Unique Subject Identifier=2236011111-0024

Assay variable : PTINR\_VAL1 PT-INR Value

N Mean Standard Deviation Minimum Maximum

---

|   |           |           |           |           |
|---|-----------|-----------|-----------|-----------|
| 6 | 1.4000000 | 0.2000000 | 1.1000000 | 1.6000000 |
|---|-----------|-----------|-----------|-----------|

---

Unique Subject Identifier=2236011111-0025

Assay variable : PTINR\_VAL1 PT-INR Value

N Mean Standard Deviation Minimum Maximum

---

|   |          |  |          |          |
|---|----------|--|----------|----------|
| 1 | 1.500000 |  | 1.500000 | 1.500000 |
|---|----------|--|----------|----------|

---

Laboratory tests at the time of obtaining Table 2-6 consent, according to the presence or absence of proton-pump inhibitors

Unique Subject Identifier=2236011111-0027

MEANS Procedure

Assay variable : PTINR\_VAL1 PT-INR Value

N Mean Standard Deviation Minimum Maximum

---

|   |           |           |           |           |
|---|-----------|-----------|-----------|-----------|
| 4 | 2.0500000 | 0.1732051 | 1.9000000 | 2.3000000 |
|---|-----------|-----------|-----------|-----------|

---

Unique Subject Identifier=2236011111-0028

Assay variable : PTINR\_VAL1 PT-INR Value

N Mean Standard Deviation Minimum Maximum

---

|   |           |           |           |           |
|---|-----------|-----------|-----------|-----------|
| 3 | 2.2666667 | 0.3055050 | 2.0000000 | 2.6000000 |
|---|-----------|-----------|-----------|-----------|

---

Unique Subject Identifier=2236011111-0031

Assay variable : PTINR\_VAL1 PT-INR Value

N Mean Standard Deviation Minimum Maximum

---

|   |           |           |           |           |
|---|-----------|-----------|-----------|-----------|
| 6 | 1.6000000 | 0.2449490 | 1.2000000 | 1.9000000 |
|---|-----------|-----------|-----------|-----------|

---

Unique Subject Identifier=2236011111-0032

Assay variable : PTINR\_VAL1 PT-INR Value

N Mean Standard Deviation Minimum Maximum

---

|   |           |           |           |           |
|---|-----------|-----------|-----------|-----------|
| 6 | 1.9166667 | 0.3125167 | 1.5000000 | 2.3000000 |
|---|-----------|-----------|-----------|-----------|

---

Laboratory tests at the time of obtaining Table 2-6 consent, according to the presence or absence of proton-pump inhibitors

Unique Subject Identifier=2236011111-0034

MEANS Procedure

Assay variable : PTINR\_VAL1 PT-INR Value

| N | Mean      | Standard Deviation | Minimum   | Maximum   |
|---|-----------|--------------------|-----------|-----------|
| 5 | 1.8000000 | 0.2121320          | 1.6000000 | 2.1000000 |

Unique Subject Identifier=2236011111-0039

Assay variable : PTINR\_VAL1 PT-INR Value

| N | Mean      | Standard Deviation | Minimum   | Maximum   |
|---|-----------|--------------------|-----------|-----------|
| 4 | 1.8000000 | 0.1414214          | 1.7000000 | 2.0000000 |

Unique Subject Identifier=2236011111-0042

Assay variable : PTINR\_VAL1 PT-INR Value

| N | Mean      | Standard Deviation | Minimum   | Maximum   |
|---|-----------|--------------------|-----------|-----------|
| 4 | 1.8250000 | 0.2629956          | 1.6000000 | 2.2000000 |

Unique Subject Identifier=2236011111-0043

Assay variable : PTINR\_VAL1 PT-INR Value

N Mean Standard Deviation Minimum Maximum

---

|   |           |           |           |           |
|---|-----------|-----------|-----------|-----------|
| 6 | 1.7833333 | 0.2857738 | 1.4000000 | 2.2000000 |
|---|-----------|-----------|-----------|-----------|

---



Laboratory tests at the time of obtaining Table 2-6 consent, according to the presence or absence of proton-pump inhibitors

Unique Subject Identifier=2236011111-0045

MEANS Procedure

Assay variable : PTINR\_VAL1 PT-INR Value

N Mean Standard Deviation Minimum Maximum

---

|   |          |           |          |          |
|---|----------|-----------|----------|----------|
| 5 | 3.000000 | 0.7681146 | 2.300000 | 4.100000 |
|---|----------|-----------|----------|----------|

---

Unique Subject Identifier=2236011111-0052

Assay variable : PTINR\_VAL1 PT-INR Value

N Mean Standard Deviation Minimum Maximum

---

|   |          |           |          |          |
|---|----------|-----------|----------|----------|
| 6 | 1.700000 | 0.5215362 | 1.200000 | 2.300000 |
|---|----------|-----------|----------|----------|

---

Unique Subject Identifier=2236011111-0053

Assay variable : PTINR\_VAL1 PT-INR Value

N Mean Standard Deviation Minimum Maximum

---

|   |          |           |          |          |
|---|----------|-----------|----------|----------|
| 4 | 1.775000 | 0.1707825 | 1.600000 | 2.000000 |
|---|----------|-----------|----------|----------|

---

Unique Subject Identifier=2236011111-0054

Assay variable : PTINR\_VAL1 PT-INR Value

N Mean Standard Deviation Minimum Maximum

---

|   |           |           |           |           |
|---|-----------|-----------|-----------|-----------|
| 5 | 1.7160000 | 0.1152389 | 1.5800000 | 1.8000000 |
|---|-----------|-----------|-----------|-----------|

---

Laboratory tests at the time of obtaining Table 2-6 consent, according to the presence or absence of proton-pump inhibitors

Unique Subject Identifier=2236011111-0059

MEANS Procedure

Assay variable : PTINR\_VAL1 PT-INR Value

N Mean Standard Deviation Minimum Maximum

---

|   |           |           |           |           |
|---|-----------|-----------|-----------|-----------|
| 5 | 2.5720000 | 0.2567489 | 2.3600000 | 3.0000000 |
|---|-----------|-----------|-----------|-----------|

---

Unique Subject Identifier=2236011111-0062

Assay variable : PTINR\_VAL1 PT-INR Value

N Mean Standard Deviation Minimum Maximum

---

|   |           |           |           |           |
|---|-----------|-----------|-----------|-----------|
| 4 | 2.9000000 | 1.7088007 | 1.8000000 | 5.4000000 |
|---|-----------|-----------|-----------|-----------|

---

Unique Subject Identifier=2236011111-0064

Assay variable : PTINR\_VAL1 PT-INR Value

N Mean Standard Deviation Minimum Maximum

---

|   |           |           |           |           |
|---|-----------|-----------|-----------|-----------|
| 4 | 1.9000000 | 0.4966555 | 1.3000000 | 2.5000000 |
|---|-----------|-----------|-----------|-----------|

---

Unique Subject Identifier=2236011111-0066

Assay variable : PTINR\_VAL1 PT-INR Value

N Mean Standard Deviation Minimum Maximum

---

|   |           |           |           |           |
|---|-----------|-----------|-----------|-----------|
| 5 | 2.3320000 | 0.4734131 | 1.6000000 | 2.9000000 |
|---|-----------|-----------|-----------|-----------|

---

Laboratory tests at the time of obtaining Table 2-6 consent, according to the presence or absence of proton-pump inhibitors

Unique Subject Identifier=2236011111-0070

MEANS Procedure

Assay variable : PTINR\_VAL1 PT-INR Value

N Mean Standard Deviation Minimum Maximum

---

|   |           |           |           |           |
|---|-----------|-----------|-----------|-----------|
| 4 | 2.4500000 | 0.3415650 | 2.1000000 | 2.9000000 |
|---|-----------|-----------|-----------|-----------|

---

Unique Subject Identifier=2236011111-0073

Assay variable : PTINR\_VAL1 PT-INR Value

N Mean Standard Deviation Minimum Maximum

---

|   |           |           |           |           |
|---|-----------|-----------|-----------|-----------|
| 6 | 2.1000000 | 0.2828427 | 1.7000000 | 2.4000000 |
|---|-----------|-----------|-----------|-----------|

---

Unique Subject Identifier=2236011111-0075

Assay variable : PTINR\_VAL1 PT-INR Value

N Mean Standard Deviation Minimum Maximum

---

|   |           |           |           |           |
|---|-----------|-----------|-----------|-----------|
| 3 | 2.5000000 | 0.2000000 | 2.3000000 | 2.7000000 |
|---|-----------|-----------|-----------|-----------|

---

Unique Subject Identifier=2236011111-0080

Assay variable : PTINR\_VAL1 PT-INR Value

N Mean Standard Deviation Minimum Maximum

---

|   |           |           |           |           |
|---|-----------|-----------|-----------|-----------|
| 6 | 2.2166667 | 0.5845226 | 1.6000000 | 2.9000000 |
|---|-----------|-----------|-----------|-----------|

---

Laboratory tests at the time of obtaining Table 2-6 consent, according to the presence or absence of proton-pump inhibitors

Unique Subject Identifier=2241011111-0004

MEANS Procedure

Assay variable : PTINR\_VAL1 PT-INR Value

N Mean Standard Deviation Minimum Maximum

---

|   |           |           |           |           |
|---|-----------|-----------|-----------|-----------|
| 5 | 1.6100000 | 0.1189538 | 1.4700000 | 1.7800000 |
|---|-----------|-----------|-----------|-----------|

---

Unique Subject Identifier=2241011111-0009

Assay variable : PTINR\_VAL1 PT-INR Value

N Mean Standard Deviation Minimum Maximum

---

|   |           |           |           |           |
|---|-----------|-----------|-----------|-----------|
| 6 | 2.2183333 | 0.1267149 | 2.0400000 | 2.4300000 |
|---|-----------|-----------|-----------|-----------|

---

Unique Subject Identifier=2241011111-0011

Assay variable : PTINR\_VAL1 PT-INR Value

N Mean Standard Deviation Minimum Maximum

---

|   |           |           |           |           |
|---|-----------|-----------|-----------|-----------|
| 5 | 1.9700000 | 0.1996246 | 1.8000000 | 2.2600000 |
|---|-----------|-----------|-----------|-----------|

---

Unique Subject Identifier=2243011111-0011

Assay variable : PTINR\_VAL1 PT-INR Value

N Mean Standard Deviation Minimum Maximum

---

|   |           |           |           |           |
|---|-----------|-----------|-----------|-----------|
| 5 | 1.6260000 | 0.1171751 | 1.4500000 | 1.7600000 |
|---|-----------|-----------|-----------|-----------|

---



Laboratory tests at the time of obtaining Table 2-6 consent, according to the presence or absence of proton-pump inhibitors

Unique Subject Identifier=2243011111-0013

MEANS Procedure

Assay variable : PTINR\_VAL1 PT-INR Value

N Mean Standard Deviation Minimum Maximum

---

|   |           |           |           |           |
|---|-----------|-----------|-----------|-----------|
| 6 | 1.7483333 | 0.1584193 | 1.5800000 | 2.0300000 |
|---|-----------|-----------|-----------|-----------|

---

Unique Subject Identifier=2243011111-0014

Assay variable : PTINR\_VAL1 PT-INR Value

N Mean Standard Deviation Minimum Maximum

---

|   |           |           |           |           |
|---|-----------|-----------|-----------|-----------|
| 5 | 1.9360000 | 0.5542833 | 1.3400000 | 2.7400000 |
|---|-----------|-----------|-----------|-----------|

---

Unique Subject Identifier=2243011111-0015

Assay variable : PTINR\_VAL1 PT-INR Value

N Mean Standard Deviation Minimum Maximum

---

|   |           |           |           |           |
|---|-----------|-----------|-----------|-----------|
| 5 | 1.7240000 | 0.1645600 | 1.5200000 | 1.9300000 |
|---|-----------|-----------|-----------|-----------|

---

Unique Subject Identifier=2247010011-0001

Assay variable : PTINR\_VAL1 PT-INR Value

N Mean Standard Deviation Minimum Maximum

---

|   |           |           |           |           |
|---|-----------|-----------|-----------|-----------|
| 2 | 1.7100000 | 0.0424264 | 1.6800000 | 1.7400000 |
|---|-----------|-----------|-----------|-----------|

---

Laboratory tests at the time of obtaining Table 2-6 consent, according to the presence or absence of proton-pump inhibitors

Unique Subject Identifier=2247010011-0002

MEANS Procedure

Assay variable : PTINR\_VAL1 PT-INR Value

N Mean Standard Deviation Minimum Maximum

---

|   |           |           |           |           |
|---|-----------|-----------|-----------|-----------|
| 3 | 1.7266667 | 0.6180885 | 1.3500000 | 2.4400000 |
|---|-----------|-----------|-----------|-----------|

---

Unique Subject Identifier=2247010011-0003

Assay variable : PTINR\_VAL1 PT-INR Value

N Mean Standard Deviation Minimum Maximum

---

|   |           |           |           |           |
|---|-----------|-----------|-----------|-----------|
| 4 | 1.7700000 | 0.1732051 | 1.5600000 | 1.9400000 |
|---|-----------|-----------|-----------|-----------|

---

Unique Subject Identifier=2247010011-0004

Assay variable : PTINR\_VAL1 PT-INR Value

N Mean Standard Deviation Minimum Maximum

---

|   |           |           |           |           |
|---|-----------|-----------|-----------|-----------|
| 3 | 1.7900000 | 0.4059557 | 1.4300000 | 2.2300000 |
|---|-----------|-----------|-----------|-----------|

---

Unique Subject Identifier=2247010011-0005

Assay variable : PTINR\_VAL1 PT-INR Value

N Mean Standard Deviation Minimum Maximum

---

|   |           |           |           |           |
|---|-----------|-----------|-----------|-----------|
| 3 | 1.5466667 | 0.2837840 | 1.2400000 | 1.8000000 |
|---|-----------|-----------|-----------|-----------|

---

Laboratory tests at the time of obtaining Table 2-6 consent, according to the presence or absence of proton-pump inhibitors

Unique Subject Identifier=2247010011-0006

MEANS Procedure

Assay variable : PTINR\_VAL1 PT-INR Value

N Mean Standard Deviation Minimum Maximum

---

|   |           |           |           |           |
|---|-----------|-----------|-----------|-----------|
| 4 | 1.8550000 | 0.1123981 | 1.7100000 | 1.9700000 |
|---|-----------|-----------|-----------|-----------|

---

Unique Subject Identifier=2247010011-0007

Assay variable : PTINR\_VAL1 PT-INR Value

N Mean Standard Deviation Minimum Maximum

---

|   |           |           |           |           |
|---|-----------|-----------|-----------|-----------|
| 4 | 2.0175000 | 0.4503610 | 1.4400000 | 2.4800000 |
|---|-----------|-----------|-----------|-----------|

---

Unique Subject Identifier=2247010011-0008

Assay variable : PTINR\_VAL1 PT-INR Value

N Mean Standard Deviation Minimum Maximum

---

|   |           |           |           |           |
|---|-----------|-----------|-----------|-----------|
| 5 | 1.7020000 | 0.2327445 | 1.4800000 | 1.9700000 |
|---|-----------|-----------|-----------|-----------|

---

Unique Subject Identifier=2247010011-0009

Assay variable : PTINR\_VAL1 PT-INR Value

N Mean Standard Deviation Minimum Maximum

---

|   |           |           |           |           |
|---|-----------|-----------|-----------|-----------|
| 4 | 2.4950000 | 0.5238638 | 1.7100000 | 2.7900000 |
|---|-----------|-----------|-----------|-----------|

---

Laboratory tests at the time of obtaining Table 2-6 consent, according to the presence or absence of proton-pump inhibitors

Unique Subject Identifier=2247010011-0010

MEANS Procedure

Assay variable : PTINR\_VAL1 PT-INR Value

N Mean Standard Deviation Minimum Maximum

---

|   |           |           |           |           |
|---|-----------|-----------|-----------|-----------|
| 4 | 2.5575000 | 0.3375772 | 2.1200000 | 2.8700000 |
|---|-----------|-----------|-----------|-----------|

---

Unique Subject Identifier=2247010011-0011

Assay variable : PTINR\_VAL1 PT-INR Value

N Mean Standard Deviation Minimum Maximum

---

|   |           |           |           |           |
|---|-----------|-----------|-----------|-----------|
| 4 | 2.0500000 | 0.4388622 | 1.4100000 | 2.3800000 |
|---|-----------|-----------|-----------|-----------|

---

Unique Subject Identifier=2247010011-0012

Assay variable : PTINR\_VAL1 PT-INR Value

N Mean Standard Deviation Minimum Maximum

---

|   |           |           |           |           |
|---|-----------|-----------|-----------|-----------|
| 4 | 1.5250000 | 0.2338803 | 1.1900000 | 1.7200000 |
|---|-----------|-----------|-----------|-----------|

---

Unique Subject Identifier=2247010011-0013

Assay variable : PTINR\_VAL1 PT-INR Value

N Mean Standard Deviation Minimum Maximum

---

|   |           |           |           |           |
|---|-----------|-----------|-----------|-----------|
| 4 | 2.3450000 | 0.2517274 | 2.0700000 | 2.6600000 |
|---|-----------|-----------|-----------|-----------|

---



Laboratory tests at the time of obtaining Table 2-6 consent, according to the presence or absence of proton-pump inhibitors

Unique Subject Identifier=2247010011-0014

MEANS Procedure

Assay variable : PTINR\_VAL1 PT-INR Value

N Mean Standard Deviation Minimum Maximum

---

|   |           |           |           |           |
|---|-----------|-----------|-----------|-----------|
| 4 | 1.5475000 | 0.2715849 | 1.3100000 | 1.8900000 |
|---|-----------|-----------|-----------|-----------|

---

Unique Subject Identifier=2247010011-0015

Assay variable : PTINR\_VAL1 PT-INR Value

N Mean Standard Deviation Minimum Maximum

---

|   |           |           |           |           |
|---|-----------|-----------|-----------|-----------|
| 5 | 1.8440000 | 0.1425833 | 1.6400000 | 2.0300000 |
|---|-----------|-----------|-----------|-----------|

---

Unique Subject Identifier=2247010011-0016

Assay variable : PTINR\_VAL1 PT-INR Value

N Mean Standard Deviation Minimum Maximum

---

|   |           |           |           |           |
|---|-----------|-----------|-----------|-----------|
| 4 | 1.5300000 | 0.1219289 | 1.4300000 | 1.6900000 |
|---|-----------|-----------|-----------|-----------|

---

Unique Subject Identifier=2247010011-0017

Assay variable : PTINR\_VAL1 PT-INR Value

N Mean Standard Deviation Minimum Maximum

---

|   |           |           |           |           |
|---|-----------|-----------|-----------|-----------|
| 4 | 1.8850000 | 0.1502221 | 1.6600000 | 1.9700000 |
|---|-----------|-----------|-----------|-----------|

---

Laboratory tests at the time of obtaining Table 2-6 consent, according to the presence or absence of proton-pump inhibitors

Unique Subject Identifier=2247010011-0018

MEANS Procedure

Assay variable : PTINR\_VAL1 PT-INR Value

N Mean Standard Deviation Minimum Maximum

---

|   |           |           |           |           |
|---|-----------|-----------|-----------|-----------|
| 4 | 1.7825000 | 0.3397425 | 1.2800000 | 2.0300000 |
|---|-----------|-----------|-----------|-----------|

---

Unique Subject Identifier=2247010011-0019

Assay variable : PTINR\_VAL1 PT-INR Value

N Mean Standard Deviation Minimum Maximum

---

|   |           |           |           |           |
|---|-----------|-----------|-----------|-----------|
| 6 | 2.0133333 | 0.3028971 | 1.4900000 | 2.3900000 |
|---|-----------|-----------|-----------|-----------|

---

Unique Subject Identifier=2247010011-0020

Assay variable : PTINR\_VAL1 PT-INR Value

N Mean Standard Deviation Minimum Maximum

---

|   |           |           |           |           |
|---|-----------|-----------|-----------|-----------|
| 3 | 1.9966667 | 0.1965536 | 1.7700000 | 2.1200000 |
|---|-----------|-----------|-----------|-----------|

---

Unique Subject Identifier=2247010011-0021

Assay variable : PTINR\_VAL1 PT-INR Value

N Mean Standard Deviation Minimum Maximum

---

|   |          |           |          |          |
|---|----------|-----------|----------|----------|
| 6 | 1.410000 | 0.3959798 | 1.080000 | 2.070000 |
|---|----------|-----------|----------|----------|

---

Laboratory tests at the time of obtaining Table 2-6 consent, according to the presence or absence of proton-pump inhibitors

Unique Subject Identifier=2247010011-0022

MEANS Procedure

Assay variable : PTINR\_VAL1 PT-INR Value

N Mean Standard Deviation Minimum Maximum

---

|   |           |           |           |           |
|---|-----------|-----------|-----------|-----------|
| 4 | 1.5900000 | 0.1227464 | 1.4400000 | 1.7400000 |
|---|-----------|-----------|-----------|-----------|

---

Unique Subject Identifier=2247010011-0023

Assay variable : PTINR\_VAL1 PT-INR Value

N Mean Standard Deviation Minimum Maximum

---

|   |           |           |           |           |
|---|-----------|-----------|-----------|-----------|
| 4 | 2.3800000 | 0.3067029 | 2.1700000 | 2.8200000 |
|---|-----------|-----------|-----------|-----------|

---

Unique Subject Identifier=2247010011-0024

Assay variable : PTINR\_VAL1 PT-INR Value

N Mean Standard Deviation Minimum Maximum

---

|   |           |           |           |           |
|---|-----------|-----------|-----------|-----------|
| 4 | 2.0825000 | 0.1840969 | 1.8500000 | 2.3000000 |
|---|-----------|-----------|-----------|-----------|

---

Unique Subject Identifier=2247010011-0025

Assay variable : PTINR\_VAL1 PT-INR Value

N Mean Standard Deviation Minimum Maximum

---

|   |           |           |           |           |
|---|-----------|-----------|-----------|-----------|
| 4 | 1.9700000 | 0.6274286 | 1.6300000 | 2.9100000 |
|---|-----------|-----------|-----------|-----------|

---

Laboratory tests at the time of obtaining Table 2-6 consent, according to the presence or absence of proton-pump inhibitors

Unique Subject Identifier=2247010011-0026

MEANS Procedure

Assay variable : PTINR\_VAL1 PT-INR Value

N Mean Standard Deviation Minimum Maximum

---

|   |           |           |           |           |
|---|-----------|-----------|-----------|-----------|
| 4 | 2.2625000 | 0.1685972 | 2.0900000 | 2.4800000 |
|---|-----------|-----------|-----------|-----------|

---

Unique Subject Identifier=2247010011-0027

Assay variable : PTINR\_VAL1 PT-INR Value

N Mean Standard Deviation Minimum Maximum

---

|   |           |           |           |           |
|---|-----------|-----------|-----------|-----------|
| 3 | 1.8466667 | 0.0513160 | 1.7900000 | 1.8900000 |
|---|-----------|-----------|-----------|-----------|

---

Unique Subject Identifier=2247010011-0028

Assay variable : PTINR\_VAL1 PT-INR Value

N Mean Standard Deviation Minimum Maximum

---

|   |           |           |           |           |
|---|-----------|-----------|-----------|-----------|
| 4 | 2.2100000 | 0.1311488 | 2.0200000 | 2.3200000 |
|---|-----------|-----------|-----------|-----------|

---

Unique Subject Identifier=2247010011-0029

Assay variable : PTINR\_VAL1 PT-INR Value

N Mean Standard Deviation Minimum Maximum

---

|   |           |           |           |           |
|---|-----------|-----------|-----------|-----------|
| 4 | 2.2475000 | 0.3852597 | 1.8100000 | 2.7400000 |
|---|-----------|-----------|-----------|-----------|

---



Laboratory tests at the time of obtaining Table 2-6 consent, according to the presence or absence of proton-pump inhibitors

Unique Subject Identifier=2247010011-0031

MEANS Procedure

Assay variable : PTINR\_VAL1 PT-INR Value

N Mean Standard Deviation Minimum Maximum

---

|   |           |           |           |           |
|---|-----------|-----------|-----------|-----------|
| 4 | 1.5300000 | 0.0820569 | 1.4500000 | 1.6400000 |
|---|-----------|-----------|-----------|-----------|

---

Unique Subject Identifier=2247010011-0032

Assay variable : PTINR\_VAL1 PT-INR Value

N Mean Standard Deviation Minimum Maximum

---

|   |           |           |           |           |
|---|-----------|-----------|-----------|-----------|
| 4 | 2.3200000 | 0.2585859 | 2.0100000 | 2.6200000 |
|---|-----------|-----------|-----------|-----------|

---

Unique Subject Identifier=2247010011-0033

Assay variable : PTINR\_VAL1 PT-INR Value

N Mean Standard Deviation Minimum Maximum

---

|   |           |           |           |           |
|---|-----------|-----------|-----------|-----------|
| 4 | 1.6950000 | 0.3319136 | 1.2900000 | 2.0000000 |
|---|-----------|-----------|-----------|-----------|

---

Unique Subject Identifier=2247010011-0035

Assay variable : PTINR\_VAL1 PT-INR Value

N Mean Standard Deviation Minimum Maximum

---

|   |           |           |           |           |
|---|-----------|-----------|-----------|-----------|
| 5 | 2.4340000 | 0.4240637 | 2.0900000 | 3.1500000 |
|---|-----------|-----------|-----------|-----------|

---

Laboratory tests at the time of obtaining Table 2-6 consent, according to the presence or absence of proton-pump inhibitors

Unique Subject Identifier=2247010011-0036

MEANS Procedure

Assay variable : PTINR\_VAL1 PT-INR Value

N Mean Standard Deviation Minimum Maximum

---

|   |           |           |           |           |
|---|-----------|-----------|-----------|-----------|
| 6 | 1.6916667 | 0.1110705 | 1.5600000 | 1.8800000 |
|---|-----------|-----------|-----------|-----------|

---

Unique Subject Identifier=2247010011-0037

Assay variable : PTINR\_VAL1 PT-INR Value

N Mean Standard Deviation Minimum Maximum

---

|   |           |           |           |           |
|---|-----------|-----------|-----------|-----------|
| 5 | 1.8380000 | 0.1482228 | 1.6700000 | 2.0700000 |
|---|-----------|-----------|-----------|-----------|

---

Unique Subject Identifier=2247010011-0038

Assay variable : PTINR\_VAL1 PT-INR Value

N Mean Standard Deviation Minimum Maximum

---

|   |           |           |           |           |
|---|-----------|-----------|-----------|-----------|
| 4 | 1.4225000 | 0.1906786 | 1.2600000 | 1.6500000 |
|---|-----------|-----------|-----------|-----------|

---

Unique Subject Identifier=2247010011-0039

Assay variable : PTINR\_VAL1 PT-INR Value

N Mean Standard Deviation Minimum Maximum

---

|   |           |           |           |           |
|---|-----------|-----------|-----------|-----------|
| 4 | 1.9850000 | 0.2522565 | 1.7200000 | 2.2600000 |
|---|-----------|-----------|-----------|-----------|

---

Laboratory tests at the time of obtaining Table 2-6 consent, according to the presence or absence of proton-pump inhibitors

Unique Subject Identifier=2247010011-0040

MEANS Procedure

Assay variable : PTINR\_VAL1 PT-INR Value

N Mean Standard Deviation Minimum Maximum

---

|   |           |           |           |           |
|---|-----------|-----------|-----------|-----------|
| 4 | 1.8800000 | 0.1446836 | 1.7100000 | 2.0100000 |
|---|-----------|-----------|-----------|-----------|

---

Unique Subject Identifier=2247010011-0041

Assay variable : PTINR\_VAL1 PT-INR Value

N Mean Standard Deviation Minimum Maximum

---

|   |           |           |           |           |
|---|-----------|-----------|-----------|-----------|
| 4 | 2.4325000 | 0.6373578 | 1.5500000 | 3.0200000 |
|---|-----------|-----------|-----------|-----------|

---

Unique Subject Identifier=2247010011-0042

Assay variable : PTINR\_VAL1 PT-INR Value

N Mean Standard Deviation Minimum Maximum

---

|   |           |           |           |           |
|---|-----------|-----------|-----------|-----------|
| 5 | 1.7160000 | 0.4074678 | 1.3000000 | 2.2000000 |
|---|-----------|-----------|-----------|-----------|

---

Unique Subject Identifier=2247010011-0043

Assay variable : PTINR\_VAL1 PT-INR Value

N Mean Standard Deviation Minimum Maximum

---

|   |           |           |           |           |
|---|-----------|-----------|-----------|-----------|
| 4 | 1.8125000 | 0.2784930 | 1.6000000 | 2.2000000 |
|---|-----------|-----------|-----------|-----------|

---

Laboratory tests at the time of obtaining Table 2-6 consent, according to the presence or absence of proton-pump inhibitors

Unique Subject Identifier=2247010011-0044

MEANS Procedure

Assay variable : PTINR\_VAL1 PT-INR Value

N Mean Standard Deviation Minimum Maximum

---

|   |          |           |          |          |
|---|----------|-----------|----------|----------|
| 4 | 2.360000 | 0.2565151 | 1.980000 | 2.520000 |
|---|----------|-----------|----------|----------|

---

Unique Subject Identifier=2247010011-0045

Assay variable : PTINR\_VAL1 PT-INR Value

N Mean Standard Deviation Minimum Maximum

---

|   |          |           |          |          |
|---|----------|-----------|----------|----------|
| 4 | 1.902500 | 0.1508587 | 1.750000 | 2.100000 |
|---|----------|-----------|----------|----------|

---

Unique Subject Identifier=2247010011-0046

Assay variable : PTINR\_VAL1 PT-INR Value

N Mean Standard Deviation Minimum Maximum

---

|   |          |          |          |          |
|---|----------|----------|----------|----------|
| 4 | 2.097500 | 0.285000 | 1.790000 | 2.460000 |
|---|----------|----------|----------|----------|

---

Unique Subject Identifier=2247010011-0047

Assay variable : PTINR\_VAL1 PT-INR Value

N Mean Standard Deviation Minimum Maximum

---

|   |           |           |           |           |
|---|-----------|-----------|-----------|-----------|
| 4 | 2.1025000 | 0.0942956 | 1.9900000 | 2.1900000 |
|---|-----------|-----------|-----------|-----------|

---



Laboratory tests at the time of obtaining Table 2-6 consent, according to the presence or absence of proton-pump inhibitors

Unique Subject Identifier=2247010011-0048

MEANS Procedure

Assay variable : PTINR\_VAL1 PT-INR Value

N Mean Standard Deviation Minimum Maximum

---

|   |           |           |           |           |
|---|-----------|-----------|-----------|-----------|
| 4 | 3.2375000 | 0.8573360 | 2.4900000 | 4.4400000 |
|---|-----------|-----------|-----------|-----------|

---

Unique Subject Identifier=2247010011-0049

Assay variable : PTINR\_VAL1 PT-INR Value

N Mean Standard Deviation Minimum Maximum

---

|   |           |           |           |           |
|---|-----------|-----------|-----------|-----------|
| 4 | 1.8075000 | 0.1723127 | 1.6200000 | 2.0100000 |
|---|-----------|-----------|-----------|-----------|

---

Unique Subject Identifier=2247010011-0050

Assay variable : PTINR\_VAL1 PT-INR Value

N Mean Standard Deviation Minimum Maximum

---

|   |           |           |           |           |
|---|-----------|-----------|-----------|-----------|
| 4 | 2.3525000 | 0.1746186 | 2.2000000 | 2.6000000 |
|---|-----------|-----------|-----------|-----------|

---

Unique Subject Identifier=2247010011-0051

Assay variable : PTINR\_VAL1 PT-INR Value

N Mean Standard Deviation Minimum Maximum

---

|   |           |           |           |           |
|---|-----------|-----------|-----------|-----------|
| 5 | 1.6900000 | 0.1504992 | 1.5600000 | 1.9300000 |
|---|-----------|-----------|-----------|-----------|

---

Laboratory tests at the time of obtaining Table 2-6 consent, according to the presence or absence of proton-pump inhibitors

Unique Subject Identifier=2247010011-0052

MEANS Procedure

Assay variable : PTINR\_VAL1 PT-INR Value

N Mean Standard Deviation Minimum Maximum

---

|   |           |  |           |           |
|---|-----------|--|-----------|-----------|
| 1 | 1.4300000 |  | 1.4300000 | 1.4300000 |
|---|-----------|--|-----------|-----------|

---

Unique Subject Identifier=2247010011-0053

Assay variable : PTINR\_VAL1 PT-INR Value

N Mean Standard Deviation Minimum Maximum

---

|   |           |           |           |           |
|---|-----------|-----------|-----------|-----------|
| 6 | 2.3283333 | 0.4026620 | 1.5600000 | 2.6900000 |
|---|-----------|-----------|-----------|-----------|

---

Unique Subject Identifier=2247010011-0054

Assay variable : PTINR\_VAL1 PT-INR Value

N Mean Standard Deviation Minimum Maximum

---

|   |           |           |           |           |
|---|-----------|-----------|-----------|-----------|
| 4 | 1.5150000 | 0.1167619 | 1.3700000 | 1.6400000 |
|---|-----------|-----------|-----------|-----------|

---

Unique Subject Identifier=2247010011-0055

Assay variable : PTINR\_VAL1 PT-INR Value

N Mean Standard Deviation Minimum Maximum

---

|   |           |           |           |           |
|---|-----------|-----------|-----------|-----------|
| 4 | 1.6325000 | 0.2653771 | 1.3200000 | 1.9500000 |
|---|-----------|-----------|-----------|-----------|

---

Laboratory tests at the time of obtaining Table 2-6 consent, according to the presence or absence of proton-pump inhibitors

Unique Subject Identifier=2247010011-0056

MEANS Procedure

Assay variable : PTINR\_VAL1 PT-INR Value

N Mean Standard Deviation Minimum Maximum

---

|   |           |           |           |           |
|---|-----------|-----------|-----------|-----------|
| 6 | 2.1866667 | 0.2207865 | 1.8800000 | 2.5200000 |
|---|-----------|-----------|-----------|-----------|

---

Unique Subject Identifier=2247010011-0057

Assay variable : PTINR\_VAL1 PT-INR Value

N Mean Standard Deviation Minimum Maximum

---

|   |           |           |           |           |
|---|-----------|-----------|-----------|-----------|
| 4 | 2.1075000 | 0.6416840 | 1.6100000 | 3.0500000 |
|---|-----------|-----------|-----------|-----------|

---

Unique Subject Identifier=2247010011-0058

Assay variable : PTINR\_VAL1 PT-INR Value

N Mean Standard Deviation Minimum Maximum

---

|   |           |           |           |           |
|---|-----------|-----------|-----------|-----------|
| 3 | 1.5500000 | 0.0700000 | 1.4700000 | 1.6000000 |
|---|-----------|-----------|-----------|-----------|

---

Unique Subject Identifier=2247010011-0060

Assay variable : PTINR\_VAL1 PT-INR Value

N Mean Standard Deviation Minimum Maximum

---

|   |           |           |           |           |
|---|-----------|-----------|-----------|-----------|
| 6 | 2.1866667 | 0.6503743 | 1.4200000 | 2.9700000 |
|---|-----------|-----------|-----------|-----------|

---

Laboratory tests at the time of obtaining Table 2-6 consent, according to the presence or absence of proton-pump inhibitors

Unique Subject Identifier=2247010011-0061

MEANS Procedure

Assay variable : PTINR\_VAL1 PT-INR Value

N Mean Standard Deviation Minimum Maximum

---

|   |          |           |          |          |
|---|----------|-----------|----------|----------|
| 6 | 2.100000 | 0.1716974 | 1.840000 | 2.290000 |
|---|----------|-----------|----------|----------|

---

Unique Subject Identifier=2247010011-0062

Assay variable : PTINR\_VAL1 PT-INR Value

N Mean Standard Deviation Minimum Maximum

---

|   |          |           |          |          |
|---|----------|-----------|----------|----------|
| 3 | 1.920000 | 1.0142485 | 1.290000 | 3.090000 |
|---|----------|-----------|----------|----------|

---

Unique Subject Identifier=2247010011-0063

Assay variable : PTINR\_VAL1 PT-INR Value

N Mean Standard Deviation Minimum Maximum

---

|   |          |           |          |          |
|---|----------|-----------|----------|----------|
| 3 | 1.583333 | 0.2173323 | 1.350000 | 1.780000 |
|---|----------|-----------|----------|----------|

---

Unique Subject Identifier=2247010011-0064

Assay variable : PTINR\_VAL1 PT-INR Value

N Mean Standard Deviation Minimum Maximum

---

|   |           |           |           |           |
|---|-----------|-----------|-----------|-----------|
| 4 | 1.6325000 | 0.2839454 | 1.2800000 | 1.9400000 |
|---|-----------|-----------|-----------|-----------|

---



Laboratory tests at the time of obtaining Table 2-6 consent, according to the presence or absence of proton-pump inhibitors

Unique Subject Identifier=2247010011-0066

MEANS Procedure

Assay variable : PTINR\_VAL1 PT-INR Value

N Mean Standard Deviation Minimum Maximum

---

|   |           |           |           |           |
|---|-----------|-----------|-----------|-----------|
| 5 | 1.9060000 | 0.2160555 | 1.7300000 | 2.1700000 |
|---|-----------|-----------|-----------|-----------|

---

Unique Subject Identifier=2247010011-0067

Assay variable : PTINR\_VAL1 PT-INR Value

N Mean Standard Deviation Minimum Maximum

---

|   |           |           |           |           |
|---|-----------|-----------|-----------|-----------|
| 4 | 1.4775000 | 0.1908533 | 1.2100000 | 1.6600000 |
|---|-----------|-----------|-----------|-----------|

---

Unique Subject Identifier=2247010011-0068

Assay variable : PTINR\_VAL1 PT-INR Value

N Mean Standard Deviation Minimum Maximum

---

|   |           |           |           |           |
|---|-----------|-----------|-----------|-----------|
| 5 | 2.0100000 | 0.3930649 | 1.6100000 | 2.5200000 |
|---|-----------|-----------|-----------|-----------|

---

Unique Subject Identifier=2247010011-0069

Assay variable : PTINR\_VAL1 PT-INR Value

N Mean Standard Deviation Minimum Maximum

---

|   |           |           |           |           |
|---|-----------|-----------|-----------|-----------|
| 5 | 1.5540000 | 0.2886694 | 1.2900000 | 1.9200000 |
|---|-----------|-----------|-----------|-----------|

---

Laboratory tests at the time of obtaining Table 2-6 consent, according to the presence or absence of proton-pump inhibitors

Unique Subject Identifier=2247010011-0070

MEANS Procedure

Assay variable : PTINR\_VAL1 PT-INR Value

N Mean Standard Deviation Minimum Maximum

---

|   |           |           |           |           |
|---|-----------|-----------|-----------|-----------|
| 4 | 2.2375000 | 0.3467348 | 2.0200000 | 2.7500000 |
|---|-----------|-----------|-----------|-----------|

---

Unique Subject Identifier=2247010011-0071

Assay variable : PTINR\_VAL1 PT-INR Value

N Mean Standard Deviation Minimum Maximum

---

|   |           |           |           |           |
|---|-----------|-----------|-----------|-----------|
| 4 | 2.2725000 | 0.6687987 | 1.7000000 | 3.0300000 |
|---|-----------|-----------|-----------|-----------|

---

Unique Subject Identifier=2247010011-0072

Assay variable : PTINR\_VAL1 PT-INR Value

N Mean Standard Deviation Minimum Maximum

---

|   |           |           |           |           |
|---|-----------|-----------|-----------|-----------|
| 2 | 3.0400000 | 0.5939697 | 2.6200000 | 3.4600000 |
|---|-----------|-----------|-----------|-----------|

---

Unique Subject Identifier=2247010011-0073

Assay variable : PTINR\_VAL1 PT-INR Value

N Mean Standard Deviation Minimum Maximum

---

|   |          |          |          |          |
|---|----------|----------|----------|----------|
| 3 | 1.250000 | 0.298161 | 1.000000 | 1.580000 |
|---|----------|----------|----------|----------|

---

Laboratory tests at the time of obtaining Table 2-6 consent, according to the presence or absence of proton-pump inhibitors

Unique Subject Identifier=2247010011-0074

MEANS Procedure

Assay variable : PTINR\_VAL1 PT-INR Value

N Mean Standard Deviation Minimum Maximum

---

|   |           |           |           |           |
|---|-----------|-----------|-----------|-----------|
| 3 | 1.6533333 | 0.2177919 | 1.4100000 | 1.8300000 |
|---|-----------|-----------|-----------|-----------|

---

Unique Subject Identifier=2247010011-0075

Assay variable : PTINR\_VAL1 PT-INR Value

N Mean Standard Deviation Minimum Maximum

---

|   |           |           |           |           |
|---|-----------|-----------|-----------|-----------|
| 3 | 1.2200000 | 0.1646208 | 1.1200000 | 1.4100000 |
|---|-----------|-----------|-----------|-----------|

---

Unique Subject Identifier=2247010011-0076

Assay variable : PTINR\_VAL1 PT-INR Value

N Mean Standard Deviation Minimum Maximum

---

|   |           |           |           |           |
|---|-----------|-----------|-----------|-----------|
| 4 | 1.7900000 | 0.3667879 | 1.3600000 | 2.1600000 |
|---|-----------|-----------|-----------|-----------|

---

Unique Subject Identifier=2247010011-0077

Assay variable : PTINR\_VAL1 PT-INR Value

N Mean Standard Deviation Minimum Maximum

---

|   |          |           |          |          |
|---|----------|-----------|----------|----------|
| 2 | 1.940000 | 0.5515433 | 1.550000 | 2.330000 |
|---|----------|-----------|----------|----------|

---

Laboratory tests at the time of obtaining Table 2-6 consent, according to the presence or absence of proton-pump inhibitors

Unique Subject Identifier=2247010011-0078

MEANS Procedure

Assay variable : PTINR\_VAL1 PT-INR Value

N Mean Standard Deviation Minimum Maximum

---

|   |           |           |           |           |
|---|-----------|-----------|-----------|-----------|
| 3 | 1.7633333 | 0.0750555 | 1.6900000 | 1.8400000 |
|---|-----------|-----------|-----------|-----------|

---

Unique Subject Identifier=2249011111-0011

Assay variable : PTINR\_VAL1 PT-INR Value

N Mean Standard Deviation Minimum Maximum

---

|   |           |           |           |           |
|---|-----------|-----------|-----------|-----------|
| 2 | 1.4500000 | 0.2121320 | 1.3000000 | 1.6000000 |
|---|-----------|-----------|-----------|-----------|

---

Unique Subject Identifier=2249011111-0017

Assay variable : PTINR\_VAL1 PT-INR Value

N Mean Standard Deviation Minimum Maximum

---

|   |           |           |           |           |
|---|-----------|-----------|-----------|-----------|
| 3 | 2.0566667 | 0.2205297 | 1.8700000 | 2.3000000 |
|---|-----------|-----------|-----------|-----------|

---

Unique Subject Identifier=2258010111-0001

Assay variable : PTINR\_VAL1 PT-INR Value

N Mean Standard Deviation Minimum Maximum

---

|   |          |           |          |          |
|---|----------|-----------|----------|----------|
| 4 | 1.250000 | 0.1290994 | 1.100000 | 1.400000 |
|---|----------|-----------|----------|----------|

---



Laboratory tests at the time of obtaining Table 2-6 consent, according to the presence or absence of proton-pump inhibitors

Unique Subject Identifier=2258010111-0014

MEANS Procedure

Assay variable : PTINR\_VAL1 PT-INR Value

N Mean Standard Deviation Minimum Maximum

---

|   |           |  |           |           |
|---|-----------|--|-----------|-----------|
| 1 | 1.1000000 |  | 1.1000000 | 1.1000000 |
|---|-----------|--|-----------|-----------|

---

Unique Subject Identifier=2259010111-0001

Assay variable : PTINR\_VAL1 PT-INR Value

N Mean Standard Deviation Minimum Maximum

---

|   |           |           |           |           |
|---|-----------|-----------|-----------|-----------|
| 3 | 1.5066667 | 0.1960442 | 1.3000000 | 1.6900000 |
|---|-----------|-----------|-----------|-----------|

---

Unique Subject Identifier=2259010111-0002

Assay variable : PTINR\_VAL1 PT-INR Value

N Mean Standard Deviation Minimum Maximum

---

|   |           |           |           |           |
|---|-----------|-----------|-----------|-----------|
| 4 | 1.3350000 | 0.0881287 | 1.2400000 | 1.4400000 |
|---|-----------|-----------|-----------|-----------|

---

Unique Subject Identifier=2263011111-0001

Assay variable : PTINR\_VAL1 PT-INR Value

N Mean Standard Deviation Minimum Maximum

---

|   |          |           |          |          |
|---|----------|-----------|----------|----------|
| 2 | 2.060000 | 0.8626703 | 1.450000 | 2.670000 |
|---|----------|-----------|----------|----------|

---

Laboratory tests at the time of obtaining Table 2-6 consent, according to the presence or absence of proton-pump inhibitors

Unique Subject Identifier=2264011111-0003

MEANS Procedure

Assay variable : PTINR\_VAL1 PT-INR Value

N Mean Standard Deviation Minimum Maximum

---

|   |           |           |           |           |
|---|-----------|-----------|-----------|-----------|
| 6 | 1.6116667 | 0.3074682 | 1.1800000 | 2.0100000 |
|---|-----------|-----------|-----------|-----------|

---

Unique Subject Identifier=2264011111-0004

Assay variable : PTINR\_VAL1 PT-INR Value

N Mean Standard Deviation Minimum Maximum

---

|   |           |           |           |           |
|---|-----------|-----------|-----------|-----------|
| 6 | 1.7650000 | 0.2074367 | 1.4900000 | 2.0300000 |
|---|-----------|-----------|-----------|-----------|

---

Unique Subject Identifier=2264011111-0006

Assay variable : PTINR\_VAL1 PT-INR Value

N Mean Standard Deviation Minimum Maximum

---

|   |           |           |           |           |
|---|-----------|-----------|-----------|-----------|
| 6 | 1.6650000 | 0.4120073 | 1.1500000 | 2.3200000 |
|---|-----------|-----------|-----------|-----------|

---

Unique Subject Identifier=2264011111-0008

Assay variable : PTINR\_VAL1 PT-INR Value

N Mean Standard Deviation Minimum Maximum

---

|   |           |           |           |           |
|---|-----------|-----------|-----------|-----------|
| 6 | 1.6550000 | 0.1005485 | 1.5100000 | 1.7700000 |
|---|-----------|-----------|-----------|-----------|

---

Laboratory tests at the time of obtaining Table 2-6 consent, according to the presence or absence of proton-pump inhibitors

Unique Subject Identifier=2264011111-0009

MEANS Procedure

Assay variable : PTINR\_VAL1 PT-INR Value

N Mean Standard Deviation Minimum Maximum

---

|   |           |           |           |           |
|---|-----------|-----------|-----------|-----------|
| 6 | 1.5383333 | 0.1626551 | 1.4100000 | 1.8200000 |
|---|-----------|-----------|-----------|-----------|

---

Unique Subject Identifier=2264011111-0010

Assay variable : PTINR\_VAL1 PT-INR Value

N Mean Standard Deviation Minimum Maximum

---

|   |           |           |           |           |
|---|-----------|-----------|-----------|-----------|
| 6 | 1.0516667 | 0.0240139 | 1.0200000 | 1.0800000 |
|---|-----------|-----------|-----------|-----------|

---

Unique Subject Identifier=2264011111-0012

Assay variable : PTINR\_VAL1 PT-INR Value

N Mean Standard Deviation Minimum Maximum

---

|   |           |           |           |           |
|---|-----------|-----------|-----------|-----------|
| 6 | 1.8066667 | 0.6258328 | 1.1600000 | 2.9600000 |
|---|-----------|-----------|-----------|-----------|

---

Unique Subject Identifier=2268011111-0013

Assay variable : PTINR\_VAL1 PT-INR Value

N Mean Standard Deviation Minimum Maximum

---

|   |          |           |          |          |
|---|----------|-----------|----------|----------|
| 4 | 1.850000 | 0.1290994 | 1.700000 | 2.000000 |
|---|----------|-----------|----------|----------|

---

Laboratory tests at the time of obtaining Table 2-6 consent, according to the presence or absence of proton-pump inhibitors

Unique Subject Identifier=2268011111-0021

MEANS Procedure

Assay variable : PTINR\_VAL1 PT-INR Value

N Mean Standard Deviation Minimum Maximum

---

|   |           |           |           |           |
|---|-----------|-----------|-----------|-----------|
| 5 | 2.1400000 | 0.3361547 | 1.6000000 | 2.5000000 |
|---|-----------|-----------|-----------|-----------|

---

Unique Subject Identifier=2268011111-0023

Assay variable : PTINR\_VAL1 PT-INR Value

N Mean Standard Deviation Minimum Maximum

---

|   |           |           |           |           |
|---|-----------|-----------|-----------|-----------|
| 5 | 2.0000000 | 0.2121320 | 1.8000000 | 2.3000000 |
|---|-----------|-----------|-----------|-----------|

---

Unique Subject Identifier=2268011111-0024

Assay variable : PTINR\_VAL1 PT-INR Value

N Mean Standard Deviation Minimum Maximum

---

|   |           |           |           |           |
|---|-----------|-----------|-----------|-----------|
| 5 | 1.6200000 | 0.1788854 | 1.5000000 | 1.9000000 |
|---|-----------|-----------|-----------|-----------|

---

Unique Subject Identifier=2268011111-0028

Assay variable : PTINR\_VAL1 PT-INR Value

N Mean Standard Deviation Minimum Maximum

---

|   |           |           |           |           |
|---|-----------|-----------|-----------|-----------|
| 6 | 2.3166667 | 0.4708149 | 1.9000000 | 3.2000000 |
|---|-----------|-----------|-----------|-----------|

---



Laboratory tests at the time of obtaining Table 2-6 consent, according to the presence or absence of proton-pump inhibitors

Unique Subject Identifier=2268011111-0029

MEANS Procedure

Assay variable : PTINR\_VAL1 PT-INR Value

N Mean Standard Deviation Minimum Maximum

---

|   |           |           |           |           |
|---|-----------|-----------|-----------|-----------|
| 6 | 1.8833333 | 0.5776389 | 1.5000000 | 3.0000000 |
|---|-----------|-----------|-----------|-----------|

---

Unique Subject Identifier=2268011111-0031

Assay variable : PTINR\_VAL1 PT-INR Value

N Mean Standard Deviation Minimum Maximum

---

|   |           |           |           |           |
|---|-----------|-----------|-----------|-----------|
| 3 | 2.3000000 | 0.2645751 | 2.1000000 | 2.6000000 |
|---|-----------|-----------|-----------|-----------|

---

Unique Subject Identifier=2268011111-0042

Assay variable : PTINR\_VAL1 PT-INR Value

N Mean Standard Deviation Minimum Maximum

---

|   |           |           |           |           |
|---|-----------|-----------|-----------|-----------|
| 6 | 1.9666667 | 0.1505545 | 1.7000000 | 2.1000000 |
|---|-----------|-----------|-----------|-----------|

---

Unique Subject Identifier=2282011001-0006

Assay variable : PTINR\_VAL1 PT-INR Value

N Mean Standard Deviation Minimum Maximum

---

|   |           |  |           |           |
|---|-----------|--|-----------|-----------|
| 1 | 1.9200000 |  | 1.9200000 | 1.9200000 |
|---|-----------|--|-----------|-----------|

---

Laboratory tests at the time of obtaining Table 2-6 consent, according to the presence or absence of proton-pump inhibitors

Unique Subject Identifier=2283011000-0008

MEANS Procedure

Assay variable : PTINR\_VAL1 PT-INR Value

N Mean Standard Deviation Minimum Maximum

---

|   |           |           |           |           |
|---|-----------|-----------|-----------|-----------|
| 3 | 2.1833333 | 0.3501904 | 1.7800000 | 2.4100000 |
|---|-----------|-----------|-----------|-----------|

---

Unique Subject Identifier=2283011000-0020

Assay variable : PTINR\_VAL1 PT-INR Value

N Mean Standard Deviation Minimum Maximum

---

|   |           |           |           |           |
|---|-----------|-----------|-----------|-----------|
| 4 | 1.7425000 | 0.2495830 | 1.5300000 | 2.0800000 |
|---|-----------|-----------|-----------|-----------|

---

Unique Subject Identifier=2284011111-0011

Assay variable : PTINR\_VAL1 PT-INR Value

N Mean Standard Deviation Minimum Maximum

---

|   |           |           |           |           |
|---|-----------|-----------|-----------|-----------|
| 5 | 1.7440000 | 0.2388095 | 1.5200000 | 2.1100000 |
|---|-----------|-----------|-----------|-----------|

---

Unique Subject Identifier=2289000000-0001

Assay variable : PTINR\_VAL1 PT-INR Value

N Mean Standard Deviation Minimum Maximum

---

|   |           |  |           |           |
|---|-----------|--|-----------|-----------|
| 1 | 1.7400000 |  | 1.7400000 | 1.7400000 |
|---|-----------|--|-----------|-----------|

---

Laboratory tests at the time of obtaining Table 2-6 consent, according to the presence or absence of proton-pump inhibitors

Unique Subject Identifier=2292000000-0001

MEANS Procedure

Assay variable : PTINR\_VAL1 PT-INR Value

N Mean Standard Deviation Minimum Maximum

---

|   |           |           |           |           |
|---|-----------|-----------|-----------|-----------|
| 4 | 2.2250000 | 0.1500000 | 2.1000000 | 2.4000000 |
|---|-----------|-----------|-----------|-----------|

---

Unique Subject Identifier=2292000000-0005

Assay variable : PTINR\_VAL1 PT-INR Value

N Mean Standard Deviation Minimum Maximum

---

|   |           |           |           |           |
|---|-----------|-----------|-----------|-----------|
| 6 | 1.6333333 | 0.1861899 | 1.3000000 | 1.8000000 |
|---|-----------|-----------|-----------|-----------|

---

Unique Subject Identifier=2292000000-0008

Assay variable : PTINR\_VAL1 PT-INR Value

N Mean Standard Deviation Minimum Maximum

---

|   |           |           |           |           |
|---|-----------|-----------|-----------|-----------|
| 6 | 2.1833333 | 0.4020779 | 1.7000000 | 2.8000000 |
|---|-----------|-----------|-----------|-----------|

---

Unique Subject Identifier=2292000000-0013

Assay variable : PTINR\_VAL1 PT-INR Value

N Mean Standard Deviation Minimum Maximum

---

|   |           |           |           |           |
|---|-----------|-----------|-----------|-----------|
| 6 | 1.9333333 | 0.3614784 | 1.5000000 | 2.5000000 |
|---|-----------|-----------|-----------|-----------|

---

Laboratory tests at the time of obtaining Table 2-6 consent, according to the presence or absence of proton-pump inhibitors

Unique Subject Identifier=2292000000-0014

MEANS Procedure

Assay variable : PTINR\_VAL1 PT-INR Value

| N | Mean      | Standard Deviation | Minimum   | Maximum   |
|---|-----------|--------------------|-----------|-----------|
| 6 | 2.2500000 | 0.3619392          | 1.8000000 | 2.9000000 |

Unique Subject Identifier=2296010111-0002

Assay variable : PTINR\_VAL1 PT-INR Value

| N | Mean      | Standard Deviation | Minimum   | Maximum   |
|---|-----------|--------------------|-----------|-----------|
| 5 | 1.7000000 | 0.0707107          | 1.6000000 | 1.8000000 |

Unique Subject Identifier=2296010111-0005

Assay variable : PTINR\_VAL1 PT-INR Value

| N | Mean      | Standard Deviation | Minimum   | Maximum   |
|---|-----------|--------------------|-----------|-----------|
| 5 | 1.8600000 | 0.0547723          | 1.8000000 | 1.9000000 |

Unique Subject Identifier=2296010111-0006

Assay variable : PTINR\_VAL1 PT-INR Value

N Mean Standard Deviation Minimum Maximum

---

|   |           |           |           |           |
|---|-----------|-----------|-----------|-----------|
| 5 | 1.9000000 | 0.2549510 | 1.6000000 | 2.2000000 |
|---|-----------|-----------|-----------|-----------|

---



Laboratory tests at the time of obtaining Table 2-6 consent, according to the presence or absence of proton-pump inhibitors

Unique Subject Identifier=2296010111-0009

MEANS Procedure

Assay variable : PTINR\_VAL1 PT-INR Value

N Mean Standard Deviation Minimum Maximum

---

|   |           |           |           |           |
|---|-----------|-----------|-----------|-----------|
| 5 | 2.2000000 | 0.2000000 | 1.9000000 | 2.4000000 |
|---|-----------|-----------|-----------|-----------|

---

Unique Subject Identifier=2296010111-0011

Assay variable : PTINR\_VAL1 PT-INR Value

N Mean Standard Deviation Minimum Maximum

---

|   |           |           |           |           |
|---|-----------|-----------|-----------|-----------|
| 6 | 2.1666667 | 0.1211060 | 2.0000000 | 2.3000000 |
|---|-----------|-----------|-----------|-----------|

---

Unique Subject Identifier=2296010111-0012

Assay variable : PTINR\_VAL1 PT-INR Value

N Mean Standard Deviation Minimum Maximum

---

|   |           |           |           |           |
|---|-----------|-----------|-----------|-----------|
| 6 | 1.8500000 | 0.2509980 | 1.6000000 | 2.3000000 |
|---|-----------|-----------|-----------|-----------|

---

Unique Subject Identifier=2301011111-0002

Assay variable : PTINR\_VAL1 PT-INR Value

N Mean Standard Deviation Minimum Maximum

---

|   |          |  |          |          |
|---|----------|--|----------|----------|
| 1 | 2.340000 |  | 2.340000 | 2.340000 |
|---|----------|--|----------|----------|

---

Laboratory tests at the time of obtaining Table 2-6 consent, according to the presence or absence of proton-pump inhibitors

Unique Subject Identifier=2301011111-0010

MEANS Procedure

Assay variable : PTINR\_VAL1 PT-INR Value

| N | Mean      | Standard Deviation | Minimum   | Maximum   |
|---|-----------|--------------------|-----------|-----------|
| 2 | 1.8950000 | 0.7707464          | 1.3500000 | 2.4400000 |

Unique Subject Identifier=2301011111-0013

Assay variable : PTINR\_VAL1 PT-INR Value

| N | Mean      | Standard Deviation | Minimum   | Maximum   |
|---|-----------|--------------------|-----------|-----------|
| 3 | 1.7000000 | 0.1539480          | 1.5700000 | 1.8700000 |

Unique Subject Identifier=2301011111-0022

Assay variable : PTINR\_VAL1 PT-INR Value

| N | Mean      | Standard Deviation | Minimum   | Maximum   |
|---|-----------|--------------------|-----------|-----------|
| 2 | 1.4950000 | 0.0919239          | 1.4300000 | 1.5600000 |

Unique Subject Identifier=2301011111-0027

Assay variable : PTINR\_VAL1 PT-INR Value

N Mean Standard Deviation Minimum Maximum

---

|   |           |           |           |           |
|---|-----------|-----------|-----------|-----------|
| 4 | 1.7500000 | 0.2745906 | 1.3600000 | 2.0000000 |
|---|-----------|-----------|-----------|-----------|

---

Laboratory tests at the time of obtaining Table 2-6 consent, according to the presence or absence of proton-pump inhibitors

Unique Subject Identifier=2301011111-0031

MEANS Procedure

Assay variable : PTINR\_VAL1 PT-INR Value

| N | Mean      | Standard Deviation | Minimum   | Maximum   |
|---|-----------|--------------------|-----------|-----------|
| 1 | 1.9500000 |                    | 1.9500000 | 1.9500000 |

Unique Subject Identifier=2308011000-0001

Assay variable : PTINR\_VAL1 PT-INR Value

| N | Mean      | Standard Deviation | Minimum   | Maximum   |
|---|-----------|--------------------|-----------|-----------|
| 3 | 1.6333333 | 0.0577350          | 1.6000000 | 1.7000000 |

Unique Subject Identifier=2308011000-0002

Assay variable : PTINR\_VAL1 PT-INR Value

| N | Mean      | Standard Deviation | Minimum   | Maximum   |
|---|-----------|--------------------|-----------|-----------|
| 5 | 1.7000000 | 0.3872983          | 1.2000000 | 2.1000000 |

Unique Subject Identifier=2308011000-0004

Assay variable : PTINR\_VAL1 PT-INR Value

N Mean Standard Deviation Minimum Maximum

---

|   |           |           |           |           |
|---|-----------|-----------|-----------|-----------|
| 4 | 2.2250000 | 0.2629956 | 2.0000000 | 2.6000000 |
|---|-----------|-----------|-----------|-----------|

---

Laboratory tests at the time of obtaining Table 2-6 consent, according to the presence or absence of proton-pump inhibitors

Unique Subject Identifier=2308011000-0013

MEANS Procedure

Assay variable : PTINR\_VAL1 PT-INR Value

N Mean Standard Deviation Minimum Maximum

---

|   |           |           |           |           |
|---|-----------|-----------|-----------|-----------|
| 4 | 1.6000000 | 0.1414214 | 1.4000000 | 1.7000000 |
|---|-----------|-----------|-----------|-----------|

---

Unique Subject Identifier=2308011000-0017

Assay variable : PTINR\_VAL1 PT-INR Value

N Mean Standard Deviation Minimum Maximum

---

|   |           |           |           |           |
|---|-----------|-----------|-----------|-----------|
| 3 | 1.7666667 | 0.2886751 | 1.6000000 | 2.1000000 |
|---|-----------|-----------|-----------|-----------|

---

Unique Subject Identifier=2308011000-0018

Assay variable : PTINR\_VAL1 PT-INR Value

N Mean Standard Deviation Minimum Maximum

---

|   |           |           |           |           |
|---|-----------|-----------|-----------|-----------|
| 2 | 1.8500000 | 0.7778175 | 1.3000000 | 2.4000000 |
|---|-----------|-----------|-----------|-----------|

---

Unique Subject Identifier=2309000000-0001

Assay variable : PTINR\_VAL1 PT-INR Value

N Mean Standard Deviation Minimum Maximum

---

|   |           |           |           |           |
|---|-----------|-----------|-----------|-----------|
| 3 | 1.8766667 | 0.3707200 | 1.5200000 | 2.2600000 |
|---|-----------|-----------|-----------|-----------|

---



Laboratory tests at the time of obtaining Table 2-6 consent, according to the presence or absence of proton-pump inhibitors

Unique Subject Identifier=2309000000-0003

MEANS Procedure

Assay variable : PTINR\_VAL1 PT-INR Value

| N | Mean      | Standard Deviation | Minimum   | Maximum   |
|---|-----------|--------------------|-----------|-----------|
| 1 | 2.2900000 |                    | 2.2900000 | 2.2900000 |

Unique Subject Identifier=2310011111-0001

Assay variable : PTINR\_VAL1 PT-INR Value

| N | Mean      | Standard Deviation | Minimum   | Maximum   |
|---|-----------|--------------------|-----------|-----------|
| 2 | 1.8100000 | 0.2404163          | 1.6400000 | 1.9800000 |

Unique Subject Identifier=2310011111-0008

Assay variable : PTINR\_VAL1 PT-INR Value

| N | Mean      | Standard Deviation | Minimum   | Maximum   |
|---|-----------|--------------------|-----------|-----------|
| 4 | 1.9100000 | 0.8183316          | 1.0300000 | 2.6700000 |

Unique Subject Identifier=2310011111-0011

Assay variable : PTINR\_VAL1 PT-INR Value

N Mean Standard Deviation Minimum Maximum

---

|   |           |           |           |           |
|---|-----------|-----------|-----------|-----------|
| 3 | 1.7933333 | 0.1800926 | 1.6100000 | 1.9700000 |
|---|-----------|-----------|-----------|-----------|

---

Laboratory tests at the time of obtaining Table 2-6 consent, according to the presence or absence of proton-pump inhibitors

Unique Subject Identifier=2310011111-0018

MEANS Procedure

Assay variable : PTINR\_VAL1 PT-INR Value

N Mean Standard Deviation Minimum Maximum

---

|   |           |           |           |           |
|---|-----------|-----------|-----------|-----------|
| 4 | 2.2775000 | 0.7902057 | 1.8100000 | 3.4600000 |
|---|-----------|-----------|-----------|-----------|

---

Unique Subject Identifier=2312011111-0005

Assay variable : PTINR\_VAL1 PT-INR Value

N Mean Standard Deviation Minimum Maximum

---

|   |           |           |           |           |
|---|-----------|-----------|-----------|-----------|
| 3 | 2.3666667 | 0.4041452 | 1.9000000 | 2.6000000 |
|---|-----------|-----------|-----------|-----------|

---

Unique Subject Identifier=2312011111-0006

Assay variable : PTINR\_VAL1 PT-INR Value

N Mean Standard Deviation Minimum Maximum

---

|   |           |  |           |           |
|---|-----------|--|-----------|-----------|
| 1 | 2.0000000 |  | 2.0000000 | 2.0000000 |
|---|-----------|--|-----------|-----------|

---

Unique Subject Identifier=2312011111-0008

Assay variable : PTINR\_VAL1 PT-INR Value

N Mean Standard Deviation Minimum Maximum

---

|   |          |           |          |          |
|---|----------|-----------|----------|----------|
| 2 | 1.800000 | 0.2828427 | 1.600000 | 2.000000 |
|---|----------|-----------|----------|----------|

---

Laboratory tests at the time of obtaining Table 2-6 consent, according to the presence or absence of proton-pump inhibitors

Unique Subject Identifier=2312011111-0010

MEANS Procedure

Assay variable : PTINR\_VAL1 PT-INR Value

N Mean Standard Deviation Minimum Maximum

---

|   |           |           |           |           |
|---|-----------|-----------|-----------|-----------|
| 4 | 1.6750000 | 0.0957427 | 1.6000000 | 1.8000000 |
|---|-----------|-----------|-----------|-----------|

---

Unique Subject Identifier=2321011011-0006

Assay variable : PTINR\_VAL1 PT-INR Value

N Mean Standard Deviation Minimum Maximum

---

|   |           |  |           |           |
|---|-----------|--|-----------|-----------|
| 1 | 2.0100000 |  | 2.0100000 | 2.0100000 |
|---|-----------|--|-----------|-----------|

---

Unique Subject Identifier=2327011011-0005

Assay variable : PTINR\_VAL1 PT-INR Value

N Mean Standard Deviation Minimum Maximum

---

|   |           |           |           |           |
|---|-----------|-----------|-----------|-----------|
| 4 | 1.7100000 | 0.2096028 | 1.4600000 | 1.9400000 |
|---|-----------|-----------|-----------|-----------|

---

Unique Subject Identifier=2327011011-0007

Assay variable : PTINR\_VAL1 PT-INR Value

N Mean Standard Deviation Minimum Maximum

---

|   |           |           |           |           |
|---|-----------|-----------|-----------|-----------|
| 3 | 2.0733333 | 0.9042308 | 1.3300000 | 3.0800000 |
|---|-----------|-----------|-----------|-----------|

---

Laboratory tests at the time of obtaining Table 2-6 consent, according to the presence or absence of proton-pump inhibitors

Unique Subject Identifier=2327011011-0018

MEANS Procedure

Assay variable : PTINR\_VAL1 PT-INR Value

| N | Mean      | Standard Deviation | Minimum   | Maximum   |
|---|-----------|--------------------|-----------|-----------|
| 3 | 2.4900000 | 0.5604463          | 1.8900000 | 3.0000000 |

Unique Subject Identifier=2327011011-0020

Assay variable : PTINR\_VAL1 PT-INR Value

| N | Mean      | Standard Deviation | Minimum   | Maximum   |
|---|-----------|--------------------|-----------|-----------|
| 4 | 2.2000000 | 0.1512173          | 2.0000000 | 2.3400000 |

Unique Subject Identifier=2327011011-0022

Assay variable : PTINR\_VAL1 PT-INR Value

| N | Mean      | Standard Deviation | Minimum   | Maximum   |
|---|-----------|--------------------|-----------|-----------|
| 4 | 1.9525000 | 0.1477329          | 1.7700000 | 2.1000000 |

Unique Subject Identifier=2327011011-0027

Assay variable : PTINR\_VAL1 PT-INR Value

N Mean Standard Deviation Minimum Maximum

---

|   |           |           |           |           |
|---|-----------|-----------|-----------|-----------|
| 4 | 2.0950000 | 0.2829016 | 1.8500000 | 2.4900000 |
|---|-----------|-----------|-----------|-----------|

---



Laboratory tests at the time of obtaining Table 2-6 consent, according to the presence or absence of proton-pump inhibitors

Unique Subject Identifier=2327011011-0028

MEANS Procedure

Assay variable : PTINR\_VAL1 PT-INR Value

| N | Mean      | Standard Deviation | Minimum   | Maximum   |
|---|-----------|--------------------|-----------|-----------|
| 3 | 1.9733333 | 0.1137248          | 1.8800000 | 2.1000000 |

Unique Subject Identifier=2327011011-0031

Assay variable : PTINR\_VAL1 PT-INR Value

| N | Mean      | Standard Deviation | Minimum   | Maximum   |
|---|-----------|--------------------|-----------|-----------|
| 4 | 1.8800000 | 0.2592296          | 1.5600000 | 2.1600000 |

Unique Subject Identifier=2327011011-0032

Assay variable : PTINR\_VAL1 PT-INR Value

| N | Mean      | Standard Deviation | Minimum   | Maximum   |
|---|-----------|--------------------|-----------|-----------|
| 4 | 1.8250000 | 0.1292285          | 1.6500000 | 1.9600000 |

Unique Subject Identifier=2327011011-0034

Assay variable : PTINR\_VAL1 PT-INR Value

N Mean Standard Deviation Minimum Maximum

---

|   |           |           |           |           |
|---|-----------|-----------|-----------|-----------|
| 4 | 1.8725000 | 0.0531507 | 1.8300000 | 1.9500000 |
|---|-----------|-----------|-----------|-----------|

---

Laboratory tests at the time of obtaining Table 2-6 consent, according to the presence or absence of proton-pump inhibitors

Unique Subject Identifier=2327011011-0038

MEANS Procedure

Assay variable : PTINR\_VAL1 PT-INR Value

N Mean Standard Deviation Minimum Maximum

---

|   |           |           |           |           |
|---|-----------|-----------|-----------|-----------|
| 4 | 1.7275000 | 0.2396351 | 1.4900000 | 2.0200000 |
|---|-----------|-----------|-----------|-----------|

---

Unique Subject Identifier=2327011011-0039

Assay variable : PTINR\_VAL1 PT-INR Value

N Mean Standard Deviation Minimum Maximum

---

|   |           |           |           |           |
|---|-----------|-----------|-----------|-----------|
| 4 | 2.1100000 | 0.2201515 | 1.9000000 | 2.4200000 |
|---|-----------|-----------|-----------|-----------|

---

Unique Subject Identifier=2327011011-0041

Assay variable : PTINR\_VAL1 PT-INR Value

N Mean Standard Deviation Minimum Maximum

---

|   |           |           |           |           |
|---|-----------|-----------|-----------|-----------|
| 4 | 1.9600000 | 0.5112729 | 1.5600000 | 2.7100000 |
|---|-----------|-----------|-----------|-----------|

---

Unique Subject Identifier=2327011011-0046

Assay variable : PTINR\_VAL1 PT-INR Value

N Mean Standard Deviation Minimum Maximum

---

|   |           |           |           |           |
|---|-----------|-----------|-----------|-----------|
| 4 | 1.8125000 | 0.2794489 | 1.4600000 | 2.0700000 |
|---|-----------|-----------|-----------|-----------|

---

Laboratory tests at the time of obtaining Table 2-6 consent, according to the presence or absence of proton-pump inhibitors

Unique Subject Identifier=2327011011-0047

MEANS Procedure

Assay variable : PTINR\_VAL1 PT-INR Value

N Mean Standard Deviation Minimum Maximum

---

|   |           |           |           |           |
|---|-----------|-----------|-----------|-----------|
| 6 | 2.3916667 | 0.1847611 | 2.0900000 | 2.6100000 |
|---|-----------|-----------|-----------|-----------|

---

Unique Subject Identifier=2341001000-0003

Assay variable : PTINR\_VAL1 PT-INR Value

N Mean Standard Deviation Minimum Maximum

---

|   |           |  |           |           |
|---|-----------|--|-----------|-----------|
| 1 | 1.4200000 |  | 1.4200000 | 1.4200000 |
|---|-----------|--|-----------|-----------|

---

Unique Subject Identifier=2341001000-0004

Assay variable : PTINR\_VAL1 PT-INR Value

N Mean Standard Deviation Minimum Maximum

---

|   |           |           |           |           |
|---|-----------|-----------|-----------|-----------|
| 2 | 1.1450000 | 0.0070711 | 1.1400000 | 1.1500000 |
|---|-----------|-----------|-----------|-----------|

---

Unique Subject Identifier=2341001000-0008

Assay variable : PTINR\_VAL1 PT-INR Value

N Mean Standard Deviation Minimum Maximum

---

|   |           |  |           |           |
|---|-----------|--|-----------|-----------|
| 1 | 1.9100000 |  | 1.9100000 | 1.9100000 |
|---|-----------|--|-----------|-----------|

---

Laboratory tests at the time of obtaining Table 2-6 consent, according to the presence or absence of proton-pump inhibitors

Unique Subject Identifier=2341001000-0010

MEANS Procedure

Assay variable : PTINR\_VAL1 PT-INR Value

N Mean Standard Deviation Minimum Maximum

---

|   |           |  |           |           |
|---|-----------|--|-----------|-----------|
| 1 | 2.5900000 |  | 2.5900000 | 2.5900000 |
|---|-----------|--|-----------|-----------|

---

Unique Subject Identifier=2341001000-0013

Assay variable : PTINR\_VAL1 PT-INR Value

N Mean Standard Deviation Minimum Maximum

---

|   |           |  |           |           |
|---|-----------|--|-----------|-----------|
| 1 | 1.6000000 |  | 1.6000000 | 1.6000000 |
|---|-----------|--|-----------|-----------|

---

Unique Subject Identifier=2341001000-0015

Assay variable : PTINR\_VAL1 PT-INR Value

N Mean Standard Deviation Minimum Maximum

---

|   |           |  |           |           |
|---|-----------|--|-----------|-----------|
| 1 | 1.4600000 |  | 1.4600000 | 1.4600000 |
|---|-----------|--|-----------|-----------|

---

Unique Subject Identifier=2347011111-0001

Assay variable : PTINR\_VAL1 PT-INR Value

N Mean Standard Deviation Minimum Maximum

---

|   |           |           |           |           |
|---|-----------|-----------|-----------|-----------|
| 6 | 1.8633333 | 0.2362767 | 1.5300000 | 2.2000000 |
|---|-----------|-----------|-----------|-----------|

---



Laboratory tests at the time of obtaining Table 2-6 consent, according to the presence or absence of proton-pump inhibitors

Unique Subject Identifier=2347011111-0002

MEANS Procedure

Assay variable : PTINR\_VAL1 PT-INR Value

N Mean Standard Deviation Minimum Maximum

---

|   |           |           |           |           |
|---|-----------|-----------|-----------|-----------|
| 6 | 2.6183333 | 0.4615373 | 2.1500000 | 3.4700000 |
|---|-----------|-----------|-----------|-----------|

---

Unique Subject Identifier=2347011111-0005

Assay variable : PTINR\_VAL1 PT-INR Value

N Mean Standard Deviation Minimum Maximum

---

|   |           |           |           |           |
|---|-----------|-----------|-----------|-----------|
| 5 | 1.4620000 | 0.3902179 | 0.9700000 | 2.0500000 |
|---|-----------|-----------|-----------|-----------|

---

Unique Subject Identifier=2347011111-0006

Assay variable : PTINR\_VAL1 PT-INR Value

N Mean Standard Deviation Minimum Maximum

---

|   |           |           |           |           |
|---|-----------|-----------|-----------|-----------|
| 6 | 2.4033333 | 1.0029091 | 1.3200000 | 4.0000000 |
|---|-----------|-----------|-----------|-----------|

---

Unique Subject Identifier=2347011111-0007

Assay variable : PTINR\_VAL1 PT-INR Value

N Mean Standard Deviation Minimum Maximum

---

|   |           |           |           |           |
|---|-----------|-----------|-----------|-----------|
| 5 | 1.9680000 | 0.2846401 | 1.5900000 | 2.2800000 |
|---|-----------|-----------|-----------|-----------|

---

Laboratory tests at the time of obtaining Table 2-6 consent, according to the presence or absence of proton-pump inhibitors

Unique Subject Identifier=2347011111-0008

MEANS Procedure

Assay variable : PTINR\_VAL1 PT-INR Value

N Mean Standard Deviation Minimum Maximum

---

|   |           |           |           |           |
|---|-----------|-----------|-----------|-----------|
| 6 | 1.9616667 | 0.0646271 | 1.8600000 | 2.0500000 |
|---|-----------|-----------|-----------|-----------|

---

Unique Subject Identifier=2347011111-0009

Assay variable : PTINR\_VAL1 PT-INR Value

N Mean Standard Deviation Minimum Maximum

---

|   |           |           |           |           |
|---|-----------|-----------|-----------|-----------|
| 6 | 2.5550000 | 0.4134126 | 2.0100000 | 3.1600000 |
|---|-----------|-----------|-----------|-----------|

---

Unique Subject Identifier=2347011111-0011

Assay variable : PTINR\_VAL1 PT-INR Value

N Mean Standard Deviation Minimum Maximum

---

|   |           |           |           |           |
|---|-----------|-----------|-----------|-----------|
| 6 | 2.3883333 | 0.4908937 | 1.8900000 | 3.0600000 |
|---|-----------|-----------|-----------|-----------|

---

Unique Subject Identifier=2347011111-0012

Assay variable : PTINR\_VAL1 PT-INR Value

N Mean Standard Deviation Minimum Maximum

---

|   |           |           |           |           |
|---|-----------|-----------|-----------|-----------|
| 5 | 2.3960000 | 0.3449348 | 1.9700000 | 2.7800000 |
|---|-----------|-----------|-----------|-----------|

---

Laboratory tests at the time of obtaining Table 2-6 consent, according to the presence or absence of proton-pump inhibitors

Unique Subject Identifier=2347011111-0013

MEANS Procedure

Assay variable : PTINR\_VAL1 PT-INR Value

N Mean Standard Deviation Minimum Maximum

---

|   |           |           |           |           |
|---|-----------|-----------|-----------|-----------|
| 6 | 1.5333333 | 0.2520053 | 1.2300000 | 1.9000000 |
|---|-----------|-----------|-----------|-----------|

---

Unique Subject Identifier=2347011111-0014

Assay variable : PTINR\_VAL1 PT-INR Value

N Mean Standard Deviation Minimum Maximum

---

|   |           |           |           |           |
|---|-----------|-----------|-----------|-----------|
| 6 | 2.2316667 | 0.1570244 | 2.0500000 | 2.4700000 |
|---|-----------|-----------|-----------|-----------|

---

Unique Subject Identifier=2347011111-0016

Assay variable : PTINR\_VAL1 PT-INR Value

N Mean Standard Deviation Minimum Maximum

---

|   |           |           |           |           |
|---|-----------|-----------|-----------|-----------|
| 6 | 1.9300000 | 0.1825377 | 1.6200000 | 2.1500000 |
|---|-----------|-----------|-----------|-----------|

---

Unique Subject Identifier=2347011111-0018

Assay variable : PTINR\_VAL1 PT-INR Value

N Mean Standard Deviation Minimum Maximum

---

|   |           |           |           |           |
|---|-----------|-----------|-----------|-----------|
| 6 | 1.4783333 | 0.1919809 | 1.2800000 | 1.8100000 |
|---|-----------|-----------|-----------|-----------|

---

Laboratory tests at the time of obtaining Table 2-6 consent, according to the presence or absence of proton-pump inhibitors

Unique Subject Identifier=2347011111-0019

MEANS Procedure

Assay variable : PTINR\_VAL1 PT-INR Value

N Mean Standard Deviation Minimum Maximum

---

|   |           |           |           |           |
|---|-----------|-----------|-----------|-----------|
| 6 | 1.7483333 | 0.2143284 | 1.4900000 | 1.9500000 |
|---|-----------|-----------|-----------|-----------|

---

Unique Subject Identifier=2347011111-0020

Assay variable : PTINR\_VAL1 PT-INR Value

N Mean Standard Deviation Minimum Maximum

---

|   |           |           |           |           |
|---|-----------|-----------|-----------|-----------|
| 6 | 1.8816667 | 0.1767956 | 1.5600000 | 2.0700000 |
|---|-----------|-----------|-----------|-----------|

---

Unique Subject Identifier=2347011111-0021

Assay variable : PTINR\_VAL1 PT-INR Value

N Mean Standard Deviation Minimum Maximum

---

|   |           |           |           |           |
|---|-----------|-----------|-----------|-----------|
| 6 | 1.8633333 | 0.1841376 | 1.5400000 | 2.0700000 |
|---|-----------|-----------|-----------|-----------|

---

Unique Subject Identifier=2347011111-0022

Assay variable : PTINR\_VAL1 PT-INR Value

N Mean Standard Deviation Minimum Maximum

---

|   |           |           |           |           |
|---|-----------|-----------|-----------|-----------|
| 6 | 1.9066667 | 0.1297176 | 1.7200000 | 2.0700000 |
|---|-----------|-----------|-----------|-----------|

---



Laboratory tests at the time of obtaining Table 2-6 consent, according to the presence or absence of proton-pump inhibitors

Unique Subject Identifier=2347011111-0023

MEANS Procedure

Assay variable : PTINR\_VAL1 PT-INR Value

N Mean Standard Deviation Minimum Maximum

---

|   |           |           |           |           |
|---|-----------|-----------|-----------|-----------|
| 6 | 2.0066667 | 0.3538738 | 1.5300000 | 2.3700000 |
|---|-----------|-----------|-----------|-----------|

---

Unique Subject Identifier=2347011111-0024

Assay variable : PTINR\_VAL1 PT-INR Value

N Mean Standard Deviation Minimum Maximum

---

|   |           |           |           |           |
|---|-----------|-----------|-----------|-----------|
| 6 | 2.0033333 | 0.1116542 | 1.8400000 | 2.1500000 |
|---|-----------|-----------|-----------|-----------|

---

Unique Subject Identifier=2347011111-0026

Assay variable : PTINR\_VAL1 PT-INR Value

N Mean Standard Deviation Minimum Maximum

---

|   |           |           |           |           |
|---|-----------|-----------|-----------|-----------|
| 6 | 1.8900000 | 0.3367492 | 1.3300000 | 2.2000000 |
|---|-----------|-----------|-----------|-----------|

---

Unique Subject Identifier=2347011111-0029

Assay variable : PTINR\_VAL1 PT-INR Value

N Mean Standard Deviation Minimum Maximum

---

|   |           |           |           |           |
|---|-----------|-----------|-----------|-----------|
| 6 | 1.6933333 | 0.2259794 | 1.3600000 | 2.0100000 |
|---|-----------|-----------|-----------|-----------|

---

Laboratory tests at the time of obtaining Table 2-6 consent, according to the presence or absence of proton-pump inhibitors

Unique Subject Identifier=2347011111-0030

MEANS Procedure

Assay variable : PTINR\_VAL1 PT-INR Value

N Mean Standard Deviation Minimum Maximum

---

|   |           |           |           |           |
|---|-----------|-----------|-----------|-----------|
| 6 | 1.3700000 | 0.1685230 | 1.1600000 | 1.6000000 |
|---|-----------|-----------|-----------|-----------|

---

Unique Subject Identifier=2347011111-0032

Assay variable : PTINR\_VAL1 PT-INR Value

N Mean Standard Deviation Minimum Maximum

---

|   |           |           |           |           |
|---|-----------|-----------|-----------|-----------|
| 6 | 1.9483333 | 0.3411402 | 1.3800000 | 2.3000000 |
|---|-----------|-----------|-----------|-----------|

---

Unique Subject Identifier=2347011111-0033

Assay variable : PTINR\_VAL1 PT-INR Value

N Mean Standard Deviation Minimum Maximum

---

|   |           |           |           |           |
|---|-----------|-----------|-----------|-----------|
| 6 | 1.8200000 | 0.2174396 | 1.4900000 | 2.1100000 |
|---|-----------|-----------|-----------|-----------|

---

Unique Subject Identifier=2347011111-0034

Assay variable : PTINR\_VAL1 PT-INR Value

N Mean Standard Deviation Minimum Maximum

---

|   |           |           |           |           |
|---|-----------|-----------|-----------|-----------|
| 6 | 2.0850000 | 0.3237746 | 1.6800000 | 2.4400000 |
|---|-----------|-----------|-----------|-----------|

---

Laboratory tests at the time of obtaining Table 2-6 consent, according to the presence or absence of proton-pump inhibitors

Unique Subject Identifier=2347011111-0035

MEANS Procedure

Assay variable : PTINR\_VAL1 PT-INR Value

N Mean Standard Deviation Minimum Maximum

---

|   |           |           |           |           |
|---|-----------|-----------|-----------|-----------|
| 6 | 1.9766667 | 0.2438579 | 1.7100000 | 2.4300000 |
|---|-----------|-----------|-----------|-----------|

---

Unique Subject Identifier=2347011111-0038

Assay variable : PTINR\_VAL1 PT-INR Value

N Mean Standard Deviation Minimum Maximum

---

|   |           |           |           |           |
|---|-----------|-----------|-----------|-----------|
| 4 | 1.6950000 | 0.8847033 | 1.0400000 | 2.9700000 |
|---|-----------|-----------|-----------|-----------|

---

Unique Subject Identifier=2347011111-0043

Assay variable : PTINR\_VAL1 PT-INR Value

N Mean Standard Deviation Minimum Maximum

---

|   |           |           |           |           |
|---|-----------|-----------|-----------|-----------|
| 6 | 1.9233333 | 0.2250926 | 1.6900000 | 2.3300000 |
|---|-----------|-----------|-----------|-----------|

---

Unique Subject Identifier=2348000000-0006

Assay variable : PTINR\_VAL1 PT-INR Value

N Mean Standard Deviation Minimum Maximum

---

|   |           |           |           |           |
|---|-----------|-----------|-----------|-----------|
| 3 | 1.7866667 | 0.1680278 | 1.6400000 | 1.9700000 |
|---|-----------|-----------|-----------|-----------|

---

Laboratory tests at the time of obtaining Table 2-6 consent, according to the presence or absence of proton-pump inhibitors

Unique Subject Identifier=2353011111-0002

MEANS Procedure

Assay variable : PTINR\_VAL1 PT-INR Value

N Mean Standard Deviation Minimum Maximum

---

|   |           |           |           |           |
|---|-----------|-----------|-----------|-----------|
| 6 | 1.8350000 | 0.2117310 | 1.6000000 | 2.2100000 |
|---|-----------|-----------|-----------|-----------|

---

Unique Subject Identifier=2353011111-0009

Assay variable : PTINR\_VAL1 PT-INR Value

N Mean Standard Deviation Minimum Maximum

---

|   |           |           |           |           |
|---|-----------|-----------|-----------|-----------|
| 6 | 2.2916667 | 0.3473567 | 1.7900000 | 2.5800000 |
|---|-----------|-----------|-----------|-----------|

---

Unique Subject Identifier=2353011111-0010

Assay variable : PTINR\_VAL1 PT-INR Value

N Mean Standard Deviation Minimum Maximum

---

|   |           |           |           |           |
|---|-----------|-----------|-----------|-----------|
| 6 | 1.8433333 | 0.1906480 | 1.6400000 | 2.1100000 |
|---|-----------|-----------|-----------|-----------|

---

Unique Subject Identifier=2353011111-0012

Assay variable : PTINR\_VAL1 PT-INR Value

N Mean Standard Deviation Minimum Maximum

---

|   |           |           |           |           |
|---|-----------|-----------|-----------|-----------|
| 6 | 1.9350000 | 0.2247443 | 1.5300000 | 2.1300000 |
|---|-----------|-----------|-----------|-----------|

---



Laboratory tests at the time of obtaining Table 2-6 consent, according to the presence or absence of proton-pump inhibitors

Unique Subject Identifier=2353011111-0015

MEANS Procedure

Assay variable : PTINR\_VAL1 PT-INR Value

N Mean Standard Deviation Minimum Maximum

---

|   |           |           |           |           |
|---|-----------|-----------|-----------|-----------|
| 4 | 1.8375000 | 0.7744407 | 1.0000000 | 2.7400000 |
|---|-----------|-----------|-----------|-----------|

---

Unique Subject Identifier=2353011111-0016

Assay variable : PTINR\_VAL1 PT-INR Value

N Mean Standard Deviation Minimum Maximum

---

|   |           |           |           |           |
|---|-----------|-----------|-----------|-----------|
| 6 | 2.1850000 | 0.5272096 | 1.5100000 | 2.9000000 |
|---|-----------|-----------|-----------|-----------|

---

Unique Subject Identifier=2354011111-0001

Assay variable : PTINR\_VAL1 PT-INR Value

N Mean Standard Deviation Minimum Maximum

---

|   |           |           |           |           |
|---|-----------|-----------|-----------|-----------|
| 5 | 1.7280000 | 0.2139392 | 1.4100000 | 1.9500000 |
|---|-----------|-----------|-----------|-----------|

---

Unique Subject Identifier=2354011111-0002

Assay variable : PTINR\_VAL1 PT-INR Value

N Mean Standard Deviation Minimum Maximum

---

|   |           |           |           |           |
|---|-----------|-----------|-----------|-----------|
| 4 | 1.6925000 | 0.0997914 | 1.6200000 | 1.8400000 |
|---|-----------|-----------|-----------|-----------|

---

Laboratory tests at the time of obtaining Table 2-6 consent, according to the presence or absence of proton-pump inhibitors

Unique Subject Identifier=2354011111-0003

MEANS Procedure

Assay variable : PTINR\_VAL1 PT-INR Value

N Mean Standard Deviation Minimum Maximum

---

|   |           |           |           |           |
|---|-----------|-----------|-----------|-----------|
| 6 | 1.5100000 | 0.0848528 | 1.4300000 | 1.6700000 |
|---|-----------|-----------|-----------|-----------|

---

Unique Subject Identifier=2354011111-0004

Assay variable : PTINR\_VAL1 PT-INR Value

N Mean Standard Deviation Minimum Maximum

---

|   |           |           |           |           |
|---|-----------|-----------|-----------|-----------|
| 6 | 1.7566667 | 0.2421294 | 1.4200000 | 2.0700000 |
|---|-----------|-----------|-----------|-----------|

---

Unique Subject Identifier=2354011111-0005

Assay variable : PTINR\_VAL1 PT-INR Value

N Mean Standard Deviation Minimum Maximum

---

|   |           |           |           |           |
|---|-----------|-----------|-----------|-----------|
| 6 | 2.2216667 | 0.1820348 | 1.9700000 | 2.5100000 |
|---|-----------|-----------|-----------|-----------|

---

Unique Subject Identifier=2354011111-0007

Assay variable : PTINR\_VAL1 PT-INR Value

N Mean Standard Deviation Minimum Maximum

---

|   |           |           |           |           |
|---|-----------|-----------|-----------|-----------|
| 5 | 2.0980000 | 0.9495894 | 1.1000000 | 3.1500000 |
|---|-----------|-----------|-----------|-----------|

---

Laboratory tests at the time of obtaining Table 2-6 consent, according to the presence or absence of proton-pump inhibitors

Unique Subject Identifier=2354011111-0008

MEANS Procedure

Assay variable : PTINR\_VAL1 PT-INR Value

N Mean Standard Deviation Minimum Maximum

---

|   |           |           |           |           |
|---|-----------|-----------|-----------|-----------|
| 6 | 2.0533333 | 0.4229736 | 1.3300000 | 2.4900000 |
|---|-----------|-----------|-----------|-----------|

---

Unique Subject Identifier=2354011111-0009

Assay variable : PTINR\_VAL1 PT-INR Value

N Mean Standard Deviation Minimum Maximum

---

|   |           |           |           |           |
|---|-----------|-----------|-----------|-----------|
| 5 | 2.2620000 | 0.2512369 | 2.0100000 | 2.5700000 |
|---|-----------|-----------|-----------|-----------|

---

Unique Subject Identifier=2354011111-0012

Assay variable : PTINR\_VAL1 PT-INR Value

N Mean Standard Deviation Minimum Maximum

---

|   |           |           |           |           |
|---|-----------|-----------|-----------|-----------|
| 4 | 2.3900000 | 0.0824621 | 2.2800000 | 2.4800000 |
|---|-----------|-----------|-----------|-----------|

---

Unique Subject Identifier=2354011111-0014

Assay variable : PTINR\_VAL1 PT-INR Value

N Mean Standard Deviation Minimum Maximum

---

|   |           |           |           |           |
|---|-----------|-----------|-----------|-----------|
| 6 | 1.5150000 | 0.2960912 | 1.1900000 | 1.9300000 |
|---|-----------|-----------|-----------|-----------|

---

Laboratory tests at the time of obtaining Table 2-6 consent, according to the presence or absence of proton-pump inhibitors

Unique Subject Identifier=2354011111-0016

MEANS Procedure

Assay variable : PTINR\_VAL1 PT-INR Value

| N | Mean      | Standard Deviation | Minimum   | Maximum   |
|---|-----------|--------------------|-----------|-----------|
| 4 | 1.6175000 | 0.0892095          | 1.5100000 | 1.7200000 |

Unique Subject Identifier=2354011111-0019

Assay variable : PTINR\_VAL1 PT-INR Value

| N | Mean      | Standard Deviation | Minimum   | Maximum   |
|---|-----------|--------------------|-----------|-----------|
| 3 | 1.4800000 | 0.1752142          | 1.3100000 | 1.6600000 |

Unique Subject Identifier=2355011111-0004

Assay variable : PTINR\_VAL1 PT-INR Value

| N | Mean      | Standard Deviation | Minimum   | Maximum   |
|---|-----------|--------------------|-----------|-----------|
| 2 | 3.9300000 | 3.6203867          | 1.3700000 | 6.4900000 |

Unique Subject Identifier=2355011111-0005

Assay variable : PTINR\_VAL1 PT-INR Value

N Mean Standard Deviation Minimum Maximum

---

|   |           |           |           |           |
|---|-----------|-----------|-----------|-----------|
| 2 | 2.6250000 | 0.3181981 | 2.4000000 | 2.8500000 |
|---|-----------|-----------|-----------|-----------|

---



Laboratory tests at the time of obtaining Table 2-6 consent, according to the presence or absence of proton-pump inhibitors

Unique Subject Identifier=2355011111-0007

MEANS Procedure

Assay variable : PTINR\_VAL1 PT-INR Value

N Mean Standard Deviation Minimum Maximum

---

|   |          |           |          |          |
|---|----------|-----------|----------|----------|
| 2 | 1.560000 | 0.0141421 | 1.550000 | 1.570000 |
|---|----------|-----------|----------|----------|

---

Unique Subject Identifier=2356011111-0001

Assay variable : PTINR\_VAL1 PT-INR Value

N Mean Standard Deviation Minimum Maximum

---

|   |          |           |          |          |
|---|----------|-----------|----------|----------|
| 2 | 1.615000 | 0.1060660 | 1.540000 | 1.690000 |
|---|----------|-----------|----------|----------|

---

Unique Subject Identifier=2356011111-0002

Assay variable : PTINR\_VAL1 PT-INR Value

N Mean Standard Deviation Minimum Maximum

---

|   |          |           |          |          |
|---|----------|-----------|----------|----------|
| 3 | 1.633333 | 0.0416333 | 1.600000 | 1.680000 |
|---|----------|-----------|----------|----------|

---

Unique Subject Identifier=2356011111-0004

Assay variable : PTINR\_VAL1 PT-INR Value

N Mean Standard Deviation Minimum Maximum

---

|   |          |           |          |          |
|---|----------|-----------|----------|----------|
| 3 | 1.840000 | 0.3517101 | 1.470000 | 2.170000 |
|---|----------|-----------|----------|----------|

---

Laboratory tests at the time of obtaining Table 2-6 consent, according to the presence or absence of proton-pump inhibitors

Unique Subject Identifier=2356011111-0007

MEANS Procedure

Assay variable : PTINR\_VAL1 PT-INR Value

N Mean Standard Deviation Minimum Maximum

---

|   |           |           |           |           |
|---|-----------|-----------|-----------|-----------|
| 2 | 2.0700000 | 0.5232590 | 1.7000000 | 2.4400000 |
|---|-----------|-----------|-----------|-----------|

---

Unique Subject Identifier=2356011111-0009

Assay variable : PTINR\_VAL1 PT-INR Value

N Mean Standard Deviation Minimum Maximum

---

|   |           |           |           |           |
|---|-----------|-----------|-----------|-----------|
| 2 | 1.9750000 | 0.0636396 | 1.9300000 | 2.0200000 |
|---|-----------|-----------|-----------|-----------|

---

Unique Subject Identifier=2356011111-0015

Assay variable : PTINR\_VAL1 PT-INR Value

N Mean Standard Deviation Minimum Maximum

---

|   |           |           |           |           |
|---|-----------|-----------|-----------|-----------|
| 2 | 1.8050000 | 0.6434672 | 1.3500000 | 2.2600000 |
|---|-----------|-----------|-----------|-----------|

---

Unique Subject Identifier=2356011111-0016

Assay variable : PTINR\_VAL1 PT-INR Value

N Mean Standard Deviation Minimum Maximum

---

|   |          |           |          |          |
|---|----------|-----------|----------|----------|
| 2 | 2.720000 | 0.6081118 | 2.290000 | 3.150000 |
|---|----------|-----------|----------|----------|

---

Laboratory tests at the time of obtaining Table 2-6 consent, according to the presence or absence of proton-pump inhibitors

Unique Subject Identifier=2356011111-0019

MEANS Procedure

Assay variable : PTINR\_VAL1 PT-INR Value

| N | Mean      | Standard Deviation | Minimum   | Maximum   |
|---|-----------|--------------------|-----------|-----------|
| 2 | 1.9900000 | 0.1555635          | 1.8800000 | 2.1000000 |

Unique Subject Identifier=2356011111-0021

Assay variable : PTINR\_VAL1 PT-INR Value

| N | Mean      | Standard Deviation | Minimum   | Maximum   |
|---|-----------|--------------------|-----------|-----------|
| 1 | 1.6300000 |                    | 1.6300000 | 1.6300000 |

Unique Subject Identifier=2357011010-0005

Assay variable : PTINR\_VAL1 PT-INR Value

| N | Mean      | Standard Deviation | Minimum   | Maximum   |
|---|-----------|--------------------|-----------|-----------|
| 3 | 1.8500000 | 1.1435471          | 1.1600000 | 3.1700000 |

Unique Subject Identifier=2357011010-0009

Assay variable : PTINR\_VAL1 PT-INR Value

N Mean Standard Deviation Minimum Maximum

---

|   |           |           |           |           |
|---|-----------|-----------|-----------|-----------|
| 4 | 1.5900000 | 0.4543860 | 1.2200000 | 2.2300000 |
|---|-----------|-----------|-----------|-----------|

---

Laboratory tests at the time of obtaining Table 2-6 consent, according to the presence or absence of proton-pump inhibitors

Unique Subject Identifier=2357011010-0018

MEANS Procedure

Assay variable : PTINR\_VAL1 PT-INR Value

N Mean Standard Deviation Minimum Maximum

---

|   |           |           |           |           |
|---|-----------|-----------|-----------|-----------|
| 3 | 2.3866667 | 1.3743847 | 1.0800000 | 3.8200000 |
|---|-----------|-----------|-----------|-----------|

---

Unique Subject Identifier=2357011010-0019

Assay variable : PTINR\_VAL1 PT-INR Value

N Mean Standard Deviation Minimum Maximum

---

|   |           |   |           |           |
|---|-----------|---|-----------|-----------|
| 2 | 2.0500000 | 0 | 2.0500000 | 2.0500000 |
|---|-----------|---|-----------|-----------|

---

Unique Subject Identifier=2357011010-0020

Assay variable : PTINR\_VAL1 PT-INR Value

N Mean Standard Deviation Minimum Maximum

---

|   |           |           |           |           |
|---|-----------|-----------|-----------|-----------|
| 2 | 1.6100000 | 0.5656854 | 1.2100000 | 2.0100000 |
|---|-----------|-----------|-----------|-----------|

---

Unique Subject Identifier=2357011010-0021

Assay variable : PTINR\_VAL1 PT-INR Value

N Mean Standard Deviation Minimum Maximum

---

|   |           |           |           |           |
|---|-----------|-----------|-----------|-----------|
| 4 | 1.8350000 | 0.8066598 | 1.2700000 | 3.0200000 |
|---|-----------|-----------|-----------|-----------|

---



Laboratory tests at the time of obtaining Table 2-6 consent, according to the presence or absence of proton-pump inhibitors

Unique Subject Identifier=2357011010-0027

MEANS Procedure

Assay variable : PTINR\_VAL1 PT-INR Value

N Mean Standard Deviation Minimum Maximum

---

|   |           |           |           |           |
|---|-----------|-----------|-----------|-----------|
| 3 | 2.5733333 | 0.2154840 | 2.3300000 | 2.7400000 |
|---|-----------|-----------|-----------|-----------|

---

Unique Subject Identifier=2358000000-0001

Assay variable : PTINR\_VAL1 PT-INR Value

N Mean Standard Deviation Minimum Maximum

---

|   |           |           |           |           |
|---|-----------|-----------|-----------|-----------|
| 6 | 1.6133333 | 0.1127239 | 1.4400000 | 1.7500000 |
|---|-----------|-----------|-----------|-----------|

---

Unique Subject Identifier=2358000000-0005

Assay variable : PTINR\_VAL1 PT-INR Value

N Mean Standard Deviation Minimum Maximum

---

|   |           |           |           |           |
|---|-----------|-----------|-----------|-----------|
| 3 | 1.5666667 | 0.0321455 | 1.5300000 | 1.5900000 |
|---|-----------|-----------|-----------|-----------|

---

Unique Subject Identifier=2359000100-0001

Assay variable : PTINR\_VAL1 PT-INR Value

N Mean Standard Deviation Minimum Maximum

---

|   |           |  |           |           |
|---|-----------|--|-----------|-----------|
| 1 | 1.7400000 |  | 1.7400000 | 1.7400000 |
|---|-----------|--|-----------|-----------|

---

Laboratory tests at the time of obtaining Table 2-6 consent, according to the presence or absence of proton-pump inhibitors

Unique Subject Identifier=2361011111-0012

MEANS Procedure

Assay variable : PTINR\_VAL1 PT-INR Value

N Mean Standard Deviation Minimum Maximum

---

|   |           |  |           |           |
|---|-----------|--|-----------|-----------|
| 1 | 1.4900000 |  | 1.4900000 | 1.4900000 |
|---|-----------|--|-----------|-----------|

---

Unique Subject Identifier=2361011111-0013

Assay variable : PTINR\_VAL1 PT-INR Value

N Mean Standard Deviation Minimum Maximum

---

|   |           |  |           |           |
|---|-----------|--|-----------|-----------|
| 1 | 1.3500000 |  | 1.3500000 | 1.3500000 |
|---|-----------|--|-----------|-----------|

---

Unique Subject Identifier=2362011111-0001

Assay variable : PTINR\_VAL1 PT-INR Value

N Mean Standard Deviation Minimum Maximum

---

|   |           |           |           |           |
|---|-----------|-----------|-----------|-----------|
| 3 | 1.6233333 | 0.2345918 | 1.3600000 | 1.8100000 |
|---|-----------|-----------|-----------|-----------|

---

Unique Subject Identifier=2362011111-0003

Assay variable : PTINR\_VAL1 PT-INR Value

N Mean Standard Deviation Minimum Maximum

---

|   |           |           |           |           |
|---|-----------|-----------|-----------|-----------|
| 3 | 1.7966667 | 0.4718404 | 1.4900000 | 2.3400000 |
|---|-----------|-----------|-----------|-----------|

---

Laboratory tests at the time of obtaining Table 2-6 consent, according to the presence or absence of proton-pump inhibitors

Unique Subject Identifier=2362011111-0006

MEANS Procedure

Assay variable : PTINR\_VAL1 PT-INR Value

N Mean Standard Deviation Minimum Maximum

---

|   |          |           |          |          |
|---|----------|-----------|----------|----------|
| 3 | 1.320000 | 0.1473092 | 1.190000 | 1.480000 |
|---|----------|-----------|----------|----------|

---

Unique Subject Identifier=2362011111-0007

Assay variable : PTINR\_VAL1 PT-INR Value

N Mean Standard Deviation Minimum Maximum

---

|   |          |           |          |          |
|---|----------|-----------|----------|----------|
| 4 | 1.197500 | 0.0736546 | 1.110000 | 1.280000 |
|---|----------|-----------|----------|----------|

---

Unique Subject Identifier=2365011111-0003

Assay variable : PTINR\_VAL1 PT-INR Value

N Mean Standard Deviation Minimum Maximum

---

|   |          |           |          |          |
|---|----------|-----------|----------|----------|
| 6 | 2.016667 | 0.8035339 | 1.200000 | 3.500000 |
|---|----------|-----------|----------|----------|

---

Unique Subject Identifier=2366011111-0017

Assay variable : PTINR\_VAL1 PT-INR Value

N Mean Standard Deviation Minimum Maximum

---

|   |          |  |          |          |
|---|----------|--|----------|----------|
| 1 | 2.100000 |  | 2.100000 | 2.100000 |
|---|----------|--|----------|----------|

---

Laboratory tests at the time of obtaining Table 2-6 consent, according to the presence or absence of proton-pump inhibitors

Unique Subject Identifier=2370011111-0002

MEANS Procedure

Assay variable : PTINR\_VAL1 PT-INR Value

| N | Mean      | Standard Deviation | Minimum   | Maximum   |
|---|-----------|--------------------|-----------|-----------|
| 5 | 2.1660000 | 0.1866280          | 1.9800000 | 2.4100000 |

Unique Subject Identifier=2370011111-0003

Assay variable : PTINR\_VAL1 PT-INR Value

| N | Mean      | Standard Deviation | Minimum   | Maximum   |
|---|-----------|--------------------|-----------|-----------|
| 5 | 2.1760000 | 0.4535747          | 1.7700000 | 2.7500000 |

Unique Subject Identifier=2370011111-0006

Assay variable : PTINR\_VAL1 PT-INR Value

| N | Mean      | Standard Deviation | Minimum   | Maximum   |
|---|-----------|--------------------|-----------|-----------|
| 6 | 2.0500000 | 0.2866357          | 1.6200000 | 2.3800000 |

Unique Subject Identifier=2378000010-0011

Assay variable : PTINR\_VAL1 PT-INR Value

N Mean Standard Deviation Minimum Maximum

---

|   |           |           |           |           |
|---|-----------|-----------|-----------|-----------|
| 6 | 2.3833333 | 0.3763863 | 1.7000000 | 2.7000000 |
|---|-----------|-----------|-----------|-----------|

---



Laboratory tests at the time of obtaining Table 2-6 consent, according to the presence or absence of proton-pump inhibitors

Unique Subject Identifier=2378000010-0012

MEANS Procedure

Assay variable : PTINR\_VAL1 PT-INR Value

| N | Mean      | Standard Deviation | Minimum   | Maximum   |
|---|-----------|--------------------|-----------|-----------|
| 6 | 1.9833333 | 0.4262237          | 1.4000000 | 2.7000000 |

Unique Subject Identifier=2378000010-0013

Assay variable : PTINR\_VAL1 PT-INR Value

| N | Mean      | Standard Deviation | Minimum   | Maximum   |
|---|-----------|--------------------|-----------|-----------|
| 6 | 1.5733333 | 0.1177568          | 1.4000000 | 1.7000000 |

Unique Subject Identifier=2378000010-0015

Assay variable : PTINR\_VAL1 PT-INR Value

| N | Mean      | Standard Deviation | Minimum   | Maximum   |
|---|-----------|--------------------|-----------|-----------|
| 5 | 2.0400000 | 0.3286335          | 1.5000000 | 2.3000000 |

Unique Subject Identifier=2378000010-0018

Assay variable : PTINR\_VAL1 PT-INR Value

N Mean Standard Deviation Minimum Maximum

---

|   |           |           |           |           |
|---|-----------|-----------|-----------|-----------|
| 6 | 1.3666667 | 0.1751190 | 1.1000000 | 1.6000000 |
|---|-----------|-----------|-----------|-----------|

---

Laboratory tests at the time of obtaining Table 2-6 consent, according to the presence or absence of proton-pump inhibitors

Unique Subject Identifier=2378000010-0034

MEANS Procedure

Assay variable : PTINR\_VAL1 PT-INR Value

N Mean Standard Deviation Minimum Maximum

---

|   |           |           |           |           |
|---|-----------|-----------|-----------|-----------|
| 6 | 1.3833333 | 0.1169045 | 1.2000000 | 1.5000000 |
|---|-----------|-----------|-----------|-----------|

---

Unique Subject Identifier=2378000010-0043

Assay variable : PTINR\_VAL1 PT-INR Value

N Mean Standard Deviation Minimum Maximum

---

|   |           |           |           |           |
|---|-----------|-----------|-----------|-----------|
| 5 | 1.3000000 | 0.0707107 | 1.2000000 | 1.4000000 |
|---|-----------|-----------|-----------|-----------|

---

Unique Subject Identifier=2380011111-0001

Assay variable : PTINR\_VAL1 PT-INR Value

N Mean Standard Deviation Minimum Maximum

---

|   |           |           |           |           |
|---|-----------|-----------|-----------|-----------|
| 2 | 1.2650000 | 0.0636396 | 1.2200000 | 1.3100000 |
|---|-----------|-----------|-----------|-----------|

---

Unique Subject Identifier=2383011110-0013

Assay variable : PTINR\_VAL1 PT-INR Value

N Mean Standard Deviation Minimum Maximum

---

|   |           |           |           |           |
|---|-----------|-----------|-----------|-----------|
| 4 | 2.0225000 | 0.2067809 | 1.8300000 | 2.2300000 |
|---|-----------|-----------|-----------|-----------|

---

Laboratory tests at the time of obtaining Table 2-6 consent, according to the presence or absence of proton-pump inhibitors

Unique Subject Identifier=2383011110-0030

MEANS Procedure

Assay variable : PTINR\_VAL1 PT-INR Value

N Mean Standard Deviation Minimum Maximum

---

|   |           |           |           |           |
|---|-----------|-----------|-----------|-----------|
| 3 | 1.7966667 | 0.0513160 | 1.7400000 | 1.8400000 |
|---|-----------|-----------|-----------|-----------|

---

Unique Subject Identifier=2383011110-0031

Assay variable : PTINR\_VAL1 PT-INR Value

N Mean Standard Deviation Minimum Maximum

---

|   |           |           |           |           |
|---|-----------|-----------|-----------|-----------|
| 3 | 2.2500000 | 0.5056679 | 1.7600000 | 2.7700000 |
|---|-----------|-----------|-----------|-----------|

---

Unique Subject Identifier=2383011110-0033

Assay variable : PTINR\_VAL1 PT-INR Value

N Mean Standard Deviation Minimum Maximum

---

|   |           |           |           |           |
|---|-----------|-----------|-----------|-----------|
| 6 | 2.1300000 | 0.1433876 | 1.9800000 | 2.4000000 |
|---|-----------|-----------|-----------|-----------|

---

Unique Subject Identifier=2386011111-0003

Assay variable : PTINR\_VAL1 PT-INR Value

N Mean Standard Deviation Minimum Maximum

---

|   |           |           |           |           |
|---|-----------|-----------|-----------|-----------|
| 6 | 1.8833333 | 0.3060501 | 1.6000000 | 2.4000000 |
|---|-----------|-----------|-----------|-----------|

---

Laboratory tests at the time of obtaining Table 2-6 consent, according to the presence or absence of proton-pump inhibitors

Unique Subject Identifier=2386011111-0008

MEANS Procedure

Assay variable : PTINR\_VAL1 PT-INR Value

N Mean Standard Deviation Minimum Maximum

---

|   |           |           |           |           |
|---|-----------|-----------|-----------|-----------|
| 6 | 2.3500000 | 0.7341662 | 1.5000000 | 3.2000000 |
|---|-----------|-----------|-----------|-----------|

---

Unique Subject Identifier=2386011111-0010

Assay variable : PTINR\_VAL1 PT-INR Value

N Mean Standard Deviation Minimum Maximum

---

|   |           |           |           |           |
|---|-----------|-----------|-----------|-----------|
| 5 | 2.3000000 | 0.3807887 | 1.7000000 | 2.7000000 |
|---|-----------|-----------|-----------|-----------|

---

Unique Subject Identifier=2389011111-0003

Assay variable : PTINR\_VAL1 PT-INR Value

N Mean Standard Deviation Minimum Maximum

---

|   |           |           |           |           |
|---|-----------|-----------|-----------|-----------|
| 3 | 2.1133333 | 0.6242863 | 1.4000000 | 2.5600000 |
|---|-----------|-----------|-----------|-----------|

---

Unique Subject Identifier=2389011111-0005

Assay variable : PTINR\_VAL1 PT-INR Value

N Mean Standard Deviation Minimum Maximum

---

|   |           |           |           |           |
|---|-----------|-----------|-----------|-----------|
| 4 | 1.7475000 | 0.3148942 | 1.4800000 | 2.0900000 |
|---|-----------|-----------|-----------|-----------|

---



Laboratory tests at the time of obtaining Table 2-6 consent, according to the presence or absence of proton-pump inhibitors

Unique Subject Identifier=2389011111-0017

MEANS Procedure

Assay variable : PTINR\_VAL1 PT-INR Value

| N | Mean      | Standard Deviation | Minimum   | Maximum   |
|---|-----------|--------------------|-----------|-----------|
| 5 | 1.6260000 | 0.2085186          | 1.3600000 | 1.7900000 |

Unique Subject Identifier=2392000000-0001

Assay variable : PTINR\_VAL1 PT-INR Value

| N | Mean      | Standard Deviation | Minimum   | Maximum   |
|---|-----------|--------------------|-----------|-----------|
| 4 | 2.1000000 | 0.1825742          | 1.9000000 | 2.3000000 |

Unique Subject Identifier=2392000000-0005

Assay variable : PTINR\_VAL1 PT-INR Value

| N | Mean      | Standard Deviation | Minimum   | Maximum   |
|---|-----------|--------------------|-----------|-----------|
| 6 | 2.2333333 | 0.4676181          | 1.6000000 | 2.7000000 |

Unique Subject Identifier=2392000000-0006

Assay variable : PTINR\_VAL1 PT-INR Value

N Mean Standard Deviation Minimum Maximum

---

|   |           |           |           |           |
|---|-----------|-----------|-----------|-----------|
| 5 | 1.9400000 | 0.5366563 | 1.4000000 | 2.8000000 |
|---|-----------|-----------|-----------|-----------|

---

Laboratory tests at the time of obtaining Table 2-6 consent, according to the presence or absence of proton-pump inhibitors

Unique Subject Identifier=2392000000-0013

MEANS Procedure

Assay variable : PTINR\_VAL1 PT-INR Value

N Mean Standard Deviation Minimum Maximum

---

|   |           |           |           |           |
|---|-----------|-----------|-----------|-----------|
| 6 | 2.1666667 | 0.8453796 | 1.6000000 | 3.8000000 |
|---|-----------|-----------|-----------|-----------|

---

Unique Subject Identifier=2392000000-0017

Assay variable : PTINR\_VAL1 PT-INR Value

N Mean Standard Deviation Minimum Maximum

---

|   |           |           |           |           |
|---|-----------|-----------|-----------|-----------|
| 5 | 2.0400000 | 0.1516575 | 1.8000000 | 2.2000000 |
|---|-----------|-----------|-----------|-----------|

---

Unique Subject Identifier=2392000000-0018

Assay variable : PTINR\_VAL1 PT-INR Value

N Mean Standard Deviation Minimum Maximum

---

|   |           |           |           |           |
|---|-----------|-----------|-----------|-----------|
| 6 | 1.9166667 | 0.2786874 | 1.6000000 | 2.3000000 |
|---|-----------|-----------|-----------|-----------|

---

Unique Subject Identifier=2392000000-0020

Assay variable : PTINR\_VAL1 PT-INR Value

N Mean Standard Deviation Minimum Maximum

---

|   |           |           |           |           |
|---|-----------|-----------|-----------|-----------|
| 4 | 2.0000000 | 0.1414214 | 1.9000000 | 2.2000000 |
|---|-----------|-----------|-----------|-----------|

---

Laboratory tests at the time of obtaining Table 2-6 consent, according to the presence or absence of proton-pump inhibitors

Unique Subject Identifier=2393011111-0003

MEANS Procedure

Assay variable : PTINR\_VAL1 PT-INR Value

| N | Mean      | Standard Deviation | Minimum   | Maximum   |
|---|-----------|--------------------|-----------|-----------|
| 6 | 1.7283333 | 0.1621625          | 1.5200000 | 1.9900000 |

Unique Subject Identifier=2393011111-0004

Assay variable : PTINR\_VAL1 PT-INR Value

| N | Mean      | Standard Deviation | Minimum   | Maximum   |
|---|-----------|--------------------|-----------|-----------|
| 3 | 1.2000000 | 0.1452584          | 1.0500000 | 1.3400000 |

Unique Subject Identifier=2393011111-0005

Assay variable : PTINR\_VAL1 PT-INR Value

| N | Mean      | Standard Deviation | Minimum   | Maximum   |
|---|-----------|--------------------|-----------|-----------|
| 5 | 1.7680000 | 0.2751727          | 1.5000000 | 2.1300000 |

Unique Subject Identifier=2393011111-0008

Assay variable : PTINR\_VAL1 PT-INR Value

N Mean Standard Deviation Minimum Maximum

---

|   |           |           |           |           |
|---|-----------|-----------|-----------|-----------|
| 6 | 1.4066667 | 0.1474675 | 1.1900000 | 1.5600000 |
|---|-----------|-----------|-----------|-----------|

---

Laboratory tests at the time of obtaining Table 2-6 consent, according to the presence or absence of proton-pump inhibitors

Unique Subject Identifier=2393011111-0009

MEANS Procedure

Assay variable : PTINR\_VAL1 PT-INR Value

N Mean Standard Deviation Minimum Maximum

---

|   |           |           |           |           |
|---|-----------|-----------|-----------|-----------|
| 6 | 1.6000000 | 0.2359661 | 1.2900000 | 2.0100000 |
|---|-----------|-----------|-----------|-----------|

---

Unique Subject Identifier=2393011111-0010

Assay variable : PTINR\_VAL1 PT-INR Value

N Mean Standard Deviation Minimum Maximum

---

|   |           |           |           |           |
|---|-----------|-----------|-----------|-----------|
| 3 | 2.0900000 | 0.5943063 | 1.6700000 | 2.7700000 |
|---|-----------|-----------|-----------|-----------|

---

Unique Subject Identifier=2393011111-0017

Assay variable : PTINR\_VAL1 PT-INR Value

N Mean Standard Deviation Minimum Maximum

---

|   |           |           |           |           |
|---|-----------|-----------|-----------|-----------|
| 4 | 1.6000000 | 0.0616441 | 1.5100000 | 1.6400000 |
|---|-----------|-----------|-----------|-----------|

---

Unique Subject Identifier=2393011111-0021

Assay variable : PTINR\_VAL1 PT-INR Value

N Mean Standard Deviation Minimum Maximum

---

|   |           |  |           |           |
|---|-----------|--|-----------|-----------|
| 1 | 1.4200000 |  | 1.4200000 | 1.4200000 |
|---|-----------|--|-----------|-----------|

---



Laboratory tests at the time of obtaining Table 2-6 consent, according to the presence or absence of proton-pump inhibitors

Unique Subject Identifier=2393011111-0023

MEANS Procedure

Assay variable : PTINR\_VAL1 PT-INR Value

N Mean Standard Deviation Minimum Maximum

---

|   |           |  |           |           |
|---|-----------|--|-----------|-----------|
| 1 | 1.0400000 |  | 1.0400000 | 1.0400000 |
|---|-----------|--|-----------|-----------|

---

Unique Subject Identifier=2393011111-0025

Assay variable : PTINR\_VAL1 PT-INR Value

N Mean Standard Deviation Minimum Maximum

---

|   |           |  |           |           |
|---|-----------|--|-----------|-----------|
| 1 | 3.4000000 |  | 3.4000000 | 3.4000000 |
|---|-----------|--|-----------|-----------|

---

Unique Subject Identifier=2396000000-0005

Assay variable : PTINR\_VAL1 PT-INR Value

N Mean Standard Deviation Minimum Maximum

---

|   |           |           |           |           |
|---|-----------|-----------|-----------|-----------|
| 6 | 2.3800000 | 1.3431902 | 1.0100000 | 4.6600000 |
|---|-----------|-----------|-----------|-----------|

---

Unique Subject Identifier=2399011111-0004

Assay variable : PTINR\_VAL1 PT-INR Value

N Mean Standard Deviation Minimum Maximum

---

|   |           |           |           |           |
|---|-----------|-----------|-----------|-----------|
| 3 | 1.9300000 | 0.5273519 | 1.3300000 | 2.3200000 |
|---|-----------|-----------|-----------|-----------|

---

Laboratory tests at the time of obtaining Table 2-6 consent, according to the presence or absence of proton-pump inhibitors

Unique Subject Identifier=2399011111-0014

MEANS Procedure

Assay variable : PTINR\_VAL1 PT-INR Value

N Mean Standard Deviation Minimum Maximum

---

|   |           |           |           |           |
|---|-----------|-----------|-----------|-----------|
| 5 | 2.0540000 | 0.2409979 | 1.7000000 | 2.3700000 |
|---|-----------|-----------|-----------|-----------|

---

Unique Subject Identifier=2403010000-0002

Assay variable : PTINR\_VAL1 PT-INR Value

N Mean Standard Deviation Minimum Maximum

---

|   |           |           |           |           |
|---|-----------|-----------|-----------|-----------|
| 6 | 1.9816667 | 0.5278036 | 1.3400000 | 2.8600000 |
|---|-----------|-----------|-----------|-----------|

---

Unique Subject Identifier=2403010000-0003

Assay variable : PTINR\_VAL1 PT-INR Value

N Mean Standard Deviation Minimum Maximum

---

|   |           |           |           |           |
|---|-----------|-----------|-----------|-----------|
| 6 | 2.2700000 | 0.4328048 | 1.6200000 | 2.7500000 |
|---|-----------|-----------|-----------|-----------|

---

Unique Subject Identifier=2403010000-0004

Assay variable : PTINR\_VAL1 PT-INR Value

N Mean Standard Deviation Minimum Maximum

---

|   |           |           |           |           |
|---|-----------|-----------|-----------|-----------|
| 6 | 2.4583333 | 0.8422213 | 1.8200000 | 4.1100000 |
|---|-----------|-----------|-----------|-----------|

---

Laboratory tests at the time of obtaining Table 2-6 consent, according to the presence or absence of proton-pump inhibitors

Unique Subject Identifier=2403010000-0005

MEANS Procedure

Assay variable : PTINR\_VAL1 PT-INR Value

N Mean Standard Deviation Minimum Maximum

---

|   |           |           |           |           |
|---|-----------|-----------|-----------|-----------|
| 6 | 2.2833333 | 0.3762269 | 1.9600000 | 3.0300000 |
|---|-----------|-----------|-----------|-----------|

---

Unique Subject Identifier=2403010000-0010

Assay variable : PTINR\_VAL1 PT-INR Value

N Mean Standard Deviation Minimum Maximum

---

|   |           |           |           |           |
|---|-----------|-----------|-----------|-----------|
| 6 | 2.1766667 | 0.3940389 | 1.6100000 | 2.6700000 |
|---|-----------|-----------|-----------|-----------|

---

Unique Subject Identifier=2403010000-0015

Assay variable : PTINR\_VAL1 PT-INR Value

N Mean Standard Deviation Minimum Maximum

---

|   |           |  |           |           |
|---|-----------|--|-----------|-----------|
| 1 | 2.1800000 |  | 2.1800000 | 2.1800000 |
|---|-----------|--|-----------|-----------|

---

Unique Subject Identifier=2403010000-0016

Assay variable : PTINR\_VAL1 PT-INR Value

N Mean Standard Deviation Minimum Maximum

---

|   |           |           |           |           |
|---|-----------|-----------|-----------|-----------|
| 5 | 1.7780000 | 0.5202596 | 1.1900000 | 2.6100000 |
|---|-----------|-----------|-----------|-----------|

---

Laboratory tests at the time of obtaining Table 2-6 consent, according to the presence or absence of proton-pump inhibitors

Unique Subject Identifier=2403010000-0025

MEANS Procedure

Assay variable : PTINR\_VAL1 PT-INR Value

| N | Mean      | Standard Deviation | Minimum   | Maximum   |
|---|-----------|--------------------|-----------|-----------|
| 3 | 1.6433333 | 0.2829016          | 1.3300000 | 1.8800000 |

Unique Subject Identifier=2403010000-0027

Assay variable : PTINR\_VAL1 PT-INR Value

| N | Mean      | Standard Deviation | Minimum   | Maximum   |
|---|-----------|--------------------|-----------|-----------|
| 6 | 1.7783333 | 0.1731377          | 1.5200000 | 1.9800000 |

Unique Subject Identifier=2403010000-0043

Assay variable : PTINR\_VAL1 PT-INR Value

| N | Mean      | Standard Deviation | Minimum   | Maximum   |
|---|-----------|--------------------|-----------|-----------|
| 5 | 2.4040000 | 0.2707951          | 2.0300000 | 2.7400000 |

Unique Subject Identifier=2403010000-0048

Assay variable : PTINR\_VAL1 PT-INR Value

N Mean Standard Deviation Minimum Maximum

---

|   |           |           |           |           |
|---|-----------|-----------|-----------|-----------|
| 6 | 2.1666667 | 0.1751190 | 1.9000000 | 2.4000000 |
|---|-----------|-----------|-----------|-----------|

---



Laboratory tests at the time of obtaining Table 2-6 consent, according to the presence or absence of proton-pump inhibitors

Unique Subject Identifier=2403010000-0051

MEANS Procedure

Assay variable : PTINR\_VAL1 PT-INR Value

| N | Mean      | Standard Deviation | Minimum   | Maximum   |
|---|-----------|--------------------|-----------|-----------|
| 3 | 1.5300000 | 0.1915724          | 1.3100000 | 1.6600000 |

Unique Subject Identifier=2403010000-0060

Assay variable : PTINR\_VAL1 PT-INR Value

| N | Mean      | Standard Deviation | Minimum   | Maximum   |
|---|-----------|--------------------|-----------|-----------|
| 6 | 2.0750000 | 0.2072438          | 1.8800000 | 2.4600000 |

Unique Subject Identifier=2403010000-0061

Assay variable : PTINR\_VAL1 PT-INR Value

| N | Mean      | Standard Deviation | Minimum   | Maximum   |
|---|-----------|--------------------|-----------|-----------|
| 4 | 1.9300000 | 0.4208721          | 1.5000000 | 2.3300000 |

Unique Subject Identifier=2403010000-0069

Assay variable : PTINR\_VAL1 PT-INR Value

N Mean Standard Deviation Minimum Maximum

---

|   |          |  |          |          |
|---|----------|--|----------|----------|
| 1 | 2.310000 |  | 2.310000 | 2.310000 |
|---|----------|--|----------|----------|

---

Laboratory tests at the time of obtaining Table 2-6 consent, according to the presence or absence of proton-pump inhibitors

Unique Subject Identifier=2403010000-0077

MEANS Procedure

Assay variable : PTINR\_VAL1 PT-INR Value

| N | Mean      | Standard Deviation | Minimum   | Maximum   |
|---|-----------|--------------------|-----------|-----------|
| 1 | 2.0800000 |                    | 2.0800000 | 2.0800000 |

Unique Subject Identifier=2403110000-0004

Assay variable : PTINR\_VAL1 PT-INR Value

| N | Mean      | Standard Deviation | Minimum   | Maximum   |
|---|-----------|--------------------|-----------|-----------|
| 4 | 2.2075000 | 0.8871443          | 1.3300000 | 3.4200000 |

Unique Subject Identifier=2403110000-0005

Assay variable : PTINR\_VAL1 PT-INR Value

| N | Mean      | Standard Deviation | Minimum   | Maximum   |
|---|-----------|--------------------|-----------|-----------|
| 3 | 1.5200000 | 0.3235738          | 1.1500000 | 1.7500000 |

Unique Subject Identifier=2403110000-0008

Assay variable : PTINR\_VAL1 PT-INR Value

N Mean Standard Deviation Minimum Maximum

---

|   |           |           |           |           |
|---|-----------|-----------|-----------|-----------|
| 2 | 2.3350000 | 0.1767767 | 2.2100000 | 2.4600000 |
|---|-----------|-----------|-----------|-----------|

---

Laboratory tests at the time of obtaining Table 2-6 consent, according to the presence or absence of proton-pump inhibitors

Unique Subject Identifier=2403110000-0013

MEANS Procedure

Assay variable : PTINR\_VAL1 PT-INR Value

| N | Mean      | Standard Deviation | Minimum   | Maximum   |
|---|-----------|--------------------|-----------|-----------|
| 5 | 1.8800000 | 0.1172604          | 1.7400000 | 2.0200000 |

Unique Subject Identifier=2403110000-0016

Assay variable : PTINR\_VAL1 PT-INR Value

| N | Mean      | Standard Deviation | Minimum   | Maximum   |
|---|-----------|--------------------|-----------|-----------|
| 3 | 1.8866667 | 0.0850490          | 1.7900000 | 1.9500000 |

Unique Subject Identifier=2403110000-0017

Assay variable : PTINR\_VAL1 PT-INR Value

| N | Mean      | Standard Deviation | Minimum   | Maximum   |
|---|-----------|--------------------|-----------|-----------|
| 1 | 1.8000000 |                    | 1.8000000 | 1.8000000 |

Unique Subject Identifier=2403110000-0018

Assay variable : PTINR\_VAL1 PT-INR Value

N Mean Standard Deviation Minimum Maximum

---

|   |           |           |           |           |
|---|-----------|-----------|-----------|-----------|
| 6 | 2.2583333 | 0.5069287 | 1.8100000 | 2.8900000 |
|---|-----------|-----------|-----------|-----------|

---

Laboratory tests at the time of obtaining Table 2-6 consent, according to the presence or absence of proton-pump inhibitors

Unique Subject Identifier=2403110000-0021

MEANS Procedure

Assay variable : PTINR\_VAL1 PT-INR Value

N Mean Standard Deviation Minimum Maximum

---

|   |           |           |           |           |
|---|-----------|-----------|-----------|-----------|
| 4 | 2.1075000 | 0.1560716 | 1.8800000 | 2.2300000 |
|---|-----------|-----------|-----------|-----------|

---

Unique Subject Identifier=2403110000-0022

Assay variable : PTINR\_VAL1 PT-INR Value

N Mean Standard Deviation Minimum Maximum

---

|   |           |           |           |           |
|---|-----------|-----------|-----------|-----------|
| 6 | 1.9016667 | 0.5437800 | 1.1300000 | 2.7500000 |
|---|-----------|-----------|-----------|-----------|

---

Unique Subject Identifier=2404011111-0003

Assay variable : PTINR\_VAL1 PT-INR Value

N Mean Standard Deviation Minimum Maximum

---

|   |           |           |           |           |
|---|-----------|-----------|-----------|-----------|
| 6 | 1.9833333 | 0.3430258 | 1.3000000 | 2.2000000 |
|---|-----------|-----------|-----------|-----------|

---

Unique Subject Identifier=2404011111-0005

Assay variable : PTINR\_VAL1 PT-INR Value

N Mean Standard Deviation Minimum Maximum

---

|   |          |          |          |          |
|---|----------|----------|----------|----------|
| 6 | 1.950000 | 0.441588 | 1.600000 | 2.800000 |
|---|----------|----------|----------|----------|

---



Laboratory tests at the time of obtaining Table 2-6 consent, according to the presence or absence of proton-pump inhibitors

Unique Subject Identifier=2404011111-0006

MEANS Procedure

Assay variable : PTINR\_VAL1 PT-INR Value

N Mean Standard Deviation Minimum Maximum

---

|   |           |           |           |           |
|---|-----------|-----------|-----------|-----------|
| 6 | 1.8833333 | 0.2857738 | 1.5000000 | 2.3000000 |
|---|-----------|-----------|-----------|-----------|

---

Unique Subject Identifier=2405011111-0002

Assay variable : PTINR\_VAL1 PT-INR Value

N Mean Standard Deviation Minimum Maximum

---

|   |           |           |           |           |
|---|-----------|-----------|-----------|-----------|
| 6 | 1.8466667 | 0.3586456 | 1.4900000 | 2.4600000 |
|---|-----------|-----------|-----------|-----------|

---

Unique Subject Identifier=2405011111-0005

Assay variable : PTINR\_VAL1 PT-INR Value

N Mean Standard Deviation Minimum Maximum

---

|   |           |           |           |           |
|---|-----------|-----------|-----------|-----------|
| 3 | 1.9866667 | 0.2369247 | 1.8400000 | 2.2600000 |
|---|-----------|-----------|-----------|-----------|

---

Unique Subject Identifier=2405011111-0008

Assay variable : PTINR\_VAL1 PT-INR Value

N Mean Standard Deviation Minimum Maximum

---

|   |           |           |           |           |
|---|-----------|-----------|-----------|-----------|
| 6 | 2.1950000 | 0.1857687 | 2.0300000 | 2.5000000 |
|---|-----------|-----------|-----------|-----------|

---

Laboratory tests at the time of obtaining Table 2-6 consent, according to the presence or absence of proton-pump inhibitors

Unique Subject Identifier=2405011111-0011

MEANS Procedure

Assay variable : PTINR\_VAL1 PT-INR Value

N Mean Standard Deviation Minimum Maximum

---

|   |           |           |           |           |
|---|-----------|-----------|-----------|-----------|
| 5 | 2.5240000 | 0.4204521 | 1.8700000 | 2.9500000 |
|---|-----------|-----------|-----------|-----------|

---

Unique Subject Identifier=2405011111-0014

Assay variable : PTINR\_VAL1 PT-INR Value

N Mean Standard Deviation Minimum Maximum

---

|   |           |           |           |           |
|---|-----------|-----------|-----------|-----------|
| 6 | 1.5200000 | 0.4461390 | 1.1300000 | 2.3900000 |
|---|-----------|-----------|-----------|-----------|

---

Unique Subject Identifier=2405011111-0015

Assay variable : PTINR\_VAL1 PT-INR Value

N Mean Standard Deviation Minimum Maximum

---

|   |           |           |           |           |
|---|-----------|-----------|-----------|-----------|
| 6 | 1.8216667 | 0.0934701 | 1.6900000 | 1.9700000 |
|---|-----------|-----------|-----------|-----------|

---

Unique Subject Identifier=2410011111-0002

Assay variable : PTINR\_VAL1 PT-INR Value

N Mean Standard Deviation Minimum Maximum

---

|   |           |           |           |           |
|---|-----------|-----------|-----------|-----------|
| 2 | 1.6800000 | 0.2545584 | 1.5000000 | 1.8600000 |
|---|-----------|-----------|-----------|-----------|

---

Laboratory tests at the time of obtaining Table 2-6 consent, according to the presence or absence of proton-pump inhibitors

Unique Subject Identifier=2410011111-0008

MEANS Procedure

Assay variable : PTINR\_VAL1 PT-INR Value

| N | Mean     | Standard Deviation | Minimum  | Maximum  |
|---|----------|--------------------|----------|----------|
| 3 | 1.610000 | 0.3732292          | 1.200000 | 1.930000 |

Unique Subject Identifier=2410011111-0012

Assay variable : PTINR\_VAL1 PT-INR Value

| N | Mean     | Standard Deviation | Minimum  | Maximum  |
|---|----------|--------------------|----------|----------|
| 1 | 1.380000 |                    | 1.380000 | 1.380000 |

Unique Subject Identifier=2410011111-0013

Assay variable : PTINR\_VAL1 PT-INR Value

| N | Mean     | Standard Deviation | Minimum  | Maximum  |
|---|----------|--------------------|----------|----------|
| 2 | 2.300000 | 0.4242641          | 2.000000 | 2.600000 |

Unique Subject Identifier=2410011111-0017

Assay variable : PTINR\_VAL1 PT-INR Value

N Mean Standard Deviation Minimum Maximum

---

|   |          |  |          |          |
|---|----------|--|----------|----------|
| 1 | 2.280000 |  | 2.280000 | 2.280000 |
|---|----------|--|----------|----------|

---

Laboratory tests at the time of obtaining Table 2-6 consent, according to the presence or absence of proton-pump inhibitors

Unique Subject Identifier=2410011111-0019

MEANS Procedure

Assay variable : PTINR\_VAL1 PT-INR Value

N Mean Standard Deviation Minimum Maximum

---

|   |           |  |           |           |
|---|-----------|--|-----------|-----------|
| 1 | 1.7700000 |  | 1.7700000 | 1.7700000 |
|---|-----------|--|-----------|-----------|

---

Unique Subject Identifier=2410011111-0020

Assay variable : PTINR\_VAL1 PT-INR Value

N Mean Standard Deviation Minimum Maximum

---

|   |           |           |           |           |
|---|-----------|-----------|-----------|-----------|
| 2 | 1.7100000 | 0.8343860 | 1.1200000 | 2.3000000 |
|---|-----------|-----------|-----------|-----------|

---

Unique Subject Identifier=2410011111-0022

Assay variable : PTINR\_VAL1 PT-INR Value

N Mean Standard Deviation Minimum Maximum

---

|   |           |           |           |           |
|---|-----------|-----------|-----------|-----------|
| 2 | 2.6150000 | 0.3040559 | 2.4000000 | 2.8300000 |
|---|-----------|-----------|-----------|-----------|

---

Unique Subject Identifier=2410011111-0023

Assay variable : PTINR\_VAL1 PT-INR Value

N Mean Standard Deviation Minimum Maximum

---

|   |           |           |           |           |
|---|-----------|-----------|-----------|-----------|
| 2 | 2.7650000 | 1.0818734 | 2.0000000 | 3.5300000 |
|---|-----------|-----------|-----------|-----------|

---



Laboratory tests at the time of obtaining Table 2-6 consent, according to the presence or absence of proton-pump inhibitors

Unique Subject Identifier=2410011111-0025

MEANS Procedure

Assay variable : PTINR\_VAL1 PT-INR Value

N Mean Standard Deviation Minimum Maximum

---

|   |           |           |           |           |
|---|-----------|-----------|-----------|-----------|
| 2 | 2.2150000 | 0.0212132 | 2.2000000 | 2.2300000 |
|---|-----------|-----------|-----------|-----------|

---

Unique Subject Identifier=2410011111-0031

Assay variable : PTINR\_VAL1 PT-INR Value

N Mean Standard Deviation Minimum Maximum

---

|   |           |           |           |           |
|---|-----------|-----------|-----------|-----------|
| 3 | 2.0833333 | 0.3547299 | 1.7000000 | 2.4000000 |
|---|-----------|-----------|-----------|-----------|

---

Unique Subject Identifier=2410011111-0032

Assay variable : PTINR\_VAL1 PT-INR Value

N Mean Standard Deviation Minimum Maximum

---

|   |           |           |           |           |
|---|-----------|-----------|-----------|-----------|
| 2 | 1.8400000 | 0.7636753 | 1.3000000 | 2.3800000 |
|---|-----------|-----------|-----------|-----------|

---

Unique Subject Identifier=2412011111-0001

Assay variable : PTINR\_VAL1 PT-INR Value

N Mean Standard Deviation Minimum Maximum

---

|   |           |           |           |           |
|---|-----------|-----------|-----------|-----------|
| 2 | 1.4300000 | 0.0282843 | 1.4100000 | 1.4500000 |
|---|-----------|-----------|-----------|-----------|

---

Laboratory tests at the time of obtaining Table 2-6 consent, according to the presence or absence of proton-pump inhibitors

Unique Subject Identifier=2412011111-0002

MEANS Procedure

Assay variable : PTINR\_VAL1 PT-INR Value

N Mean Standard Deviation Minimum Maximum

---

|   |           |  |           |           |
|---|-----------|--|-----------|-----------|
| 1 | 2.3500000 |  | 2.3500000 | 2.3500000 |
|---|-----------|--|-----------|-----------|

---

Unique Subject Identifier=2412011111-0003

Assay variable : PTINR\_VAL1 PT-INR Value

N Mean Standard Deviation Minimum Maximum

---

|   |           |           |           |           |
|---|-----------|-----------|-----------|-----------|
| 2 | 1.3600000 | 0.2121320 | 1.2100000 | 1.5100000 |
|---|-----------|-----------|-----------|-----------|

---

Unique Subject Identifier=2412011111-0004

Assay variable : PTINR\_VAL1 PT-INR Value

N Mean Standard Deviation Minimum Maximum

---

|   |           |           |           |           |
|---|-----------|-----------|-----------|-----------|
| 2 | 2.5000000 | 0.0848528 | 2.4400000 | 2.5600000 |
|---|-----------|-----------|-----------|-----------|

---

Unique Subject Identifier=2412011111-0006

Assay variable : PTINR\_VAL1 PT-INR Value

N Mean Standard Deviation Minimum Maximum

---

|   |           |  |           |           |
|---|-----------|--|-----------|-----------|
| 1 | 2.6300000 |  | 2.6300000 | 2.6300000 |
|---|-----------|--|-----------|-----------|

---

Laboratory tests at the time of obtaining Table 2-6 consent, according to the presence or absence of proton-pump inhibitors

Unique Subject Identifier=2421010000-0003

MEANS Procedure

Assay variable : PTINR\_VAL1 PT-INR Value

| N | Mean      | Standard Deviation | Minimum   | Maximum   |
|---|-----------|--------------------|-----------|-----------|
| 2 | 1.5850000 | 0.0212132          | 1.5700000 | 1.6000000 |

Unique Subject Identifier=2421010000-0007

Assay variable : PTINR\_VAL1 PT-INR Value

| N | Mean      | Standard Deviation | Minimum   | Maximum   |
|---|-----------|--------------------|-----------|-----------|
| 1 | 1.6800000 |                    | 1.6800000 | 1.6800000 |

Unique Subject Identifier=2421010000-0020

Assay variable : PTINR\_VAL1 PT-INR Value

| N | Mean      | Standard Deviation | Minimum   | Maximum   |
|---|-----------|--------------------|-----------|-----------|
| 2 | 2.5000000 | 0.2545584          | 2.3200000 | 2.6800000 |

Unique Subject Identifier=2421010000-0035

Assay variable : PTINR\_VAL1 PT-INR Value

N Mean Standard Deviation Minimum Maximum

---

|   |          |  |          |          |
|---|----------|--|----------|----------|
| 1 | 1.450000 |  | 1.450000 | 1.450000 |
|---|----------|--|----------|----------|

---

Laboratory tests at the time of obtaining Table 2-6 consent, according to the presence or absence of proton-pump inhibitors

Unique Subject Identifier=2421010000-0037

MEANS Procedure

Assay variable : PTINR\_VAL1 PT-INR Value

N Mean Standard Deviation Minimum Maximum

---

|   |           |           |           |           |
|---|-----------|-----------|-----------|-----------|
| 4 | 2.3900000 | 0.1471960 | 2.2700000 | 2.6000000 |
|---|-----------|-----------|-----------|-----------|

---

Unique Subject Identifier=2421010000-0041

Assay variable : PTINR\_VAL1 PT-INR Value

N Mean Standard Deviation Minimum Maximum

---

|   |           |  |           |           |
|---|-----------|--|-----------|-----------|
| 1 | 1.8100000 |  | 1.8100000 | 1.8100000 |
|---|-----------|--|-----------|-----------|

---

Unique Subject Identifier=2421010000-0047

Assay variable : PTINR\_VAL1 PT-INR Value

N Mean Standard Deviation Minimum Maximum

---

|   |           |  |           |           |
|---|-----------|--|-----------|-----------|
| 1 | 2.0500000 |  | 2.0500000 | 2.0500000 |
|---|-----------|--|-----------|-----------|

---

Unique Subject Identifier=2421010000-0059

Assay variable : PTINR\_VAL1 PT-INR Value

N Mean Standard Deviation Minimum Maximum

---

|   |           |           |           |           |
|---|-----------|-----------|-----------|-----------|
| 4 | 1.5750000 | 0.1367479 | 1.3800000 | 1.6700000 |
|---|-----------|-----------|-----------|-----------|

---



Laboratory tests at the time of obtaining Table 2-6 consent, according to the presence or absence of proton-pump inhibitors

Unique Subject Identifier=2421010000-0064

MEANS Procedure

Assay variable : PTINR\_VAL1 PT-INR Value

N Mean Standard Deviation Minimum Maximum

---

|   |           |           |           |           |
|---|-----------|-----------|-----------|-----------|
| 4 | 1.3700000 | 0.1749286 | 1.1100000 | 1.4900000 |
|---|-----------|-----------|-----------|-----------|

---

Unique Subject Identifier=2421010000-0066

Assay variable : PTINR\_VAL1 PT-INR Value

N Mean Standard Deviation Minimum Maximum

---

|   |           |           |           |           |
|---|-----------|-----------|-----------|-----------|
| 5 | 1.2700000 | 0.2295648 | 1.1200000 | 1.6400000 |
|---|-----------|-----------|-----------|-----------|

---

Unique Subject Identifier=2421010000-0073

Assay variable : PTINR\_VAL1 PT-INR Value

N Mean Standard Deviation Minimum Maximum

---

|   |           |           |           |           |
|---|-----------|-----------|-----------|-----------|
| 4 | 2.4000000 | 0.4198412 | 1.9800000 | 2.8000000 |
|---|-----------|-----------|-----------|-----------|

---

Unique Subject Identifier=2421010000-0077

Assay variable : PTINR\_VAL1 PT-INR Value

N Mean Standard Deviation Minimum Maximum

---

|   |           |  |           |           |
|---|-----------|--|-----------|-----------|
| 1 | 1.1700000 |  | 1.1700000 | 1.1700000 |
|---|-----------|--|-----------|-----------|

---

Laboratory tests at the time of obtaining Table 2-6 consent, according to the presence or absence of proton-pump inhibitors

Unique Subject Identifier=2421010000-0079

MEANS Procedure

Assay variable : PTINR\_VAL1 PT-INR Value

N Mean Standard Deviation Minimum Maximum

---

|   |           |  |           |           |
|---|-----------|--|-----------|-----------|
| 1 | 1.4200000 |  | 1.4200000 | 1.4200000 |
|---|-----------|--|-----------|-----------|

---

Unique Subject Identifier=2421010000-0086

Assay variable : PTINR\_VAL1 PT-INR Value

N Mean Standard Deviation Minimum Maximum

---

|   |           |  |           |           |
|---|-----------|--|-----------|-----------|
| 1 | 2.3000000 |  | 2.3000000 | 2.3000000 |
|---|-----------|--|-----------|-----------|

---

Unique Subject Identifier=2421010000-0095

Assay variable : PTINR\_VAL1 PT-INR Value

N Mean Standard Deviation Minimum Maximum

---

|   |           |           |           |           |
|---|-----------|-----------|-----------|-----------|
| 4 | 1.7950000 | 0.3303029 | 1.3900000 | 2.1200000 |
|---|-----------|-----------|-----------|-----------|

---

Unique Subject Identifier=2421010000-0096

Assay variable : PTINR\_VAL1 PT-INR Value

N Mean Standard Deviation Minimum Maximum

---

|   |           |  |           |           |
|---|-----------|--|-----------|-----------|
| 1 | 1.9600000 |  | 1.9600000 | 1.9600000 |
|---|-----------|--|-----------|-----------|

---

Laboratory tests at the time of obtaining Table 2-6 consent, according to the presence or absence of proton-pump inhibitors

Unique Subject Identifier=2421010000-0097

MEANS Procedure

Assay variable : PTINR\_VAL1 PT-INR Value

N Mean Standard Deviation Minimum Maximum

---

|   |           |           |           |           |
|---|-----------|-----------|-----------|-----------|
| 6 | 2.2066667 | 0.5789185 | 1.5500000 | 2.9500000 |
|---|-----------|-----------|-----------|-----------|

---

Unique Subject Identifier=2421010000-0119

Assay variable : PTINR\_VAL1 PT-INR Value

N Mean Standard Deviation Minimum Maximum

---

|   |           |  |           |           |
|---|-----------|--|-----------|-----------|
| 1 | 2.4900000 |  | 2.4900000 | 2.4900000 |
|---|-----------|--|-----------|-----------|

---

Unique Subject Identifier=2421010000-0128

Assay variable : PTINR\_VAL1 PT-INR Value

N Mean Standard Deviation Minimum Maximum

---

|   |           |  |           |           |
|---|-----------|--|-----------|-----------|
| 1 | 1.8800000 |  | 1.8800000 | 1.8800000 |
|---|-----------|--|-----------|-----------|

---

Unique Subject Identifier=2421010000-0135

Assay variable : PTINR\_VAL1 PT-INR Value

N Mean Standard Deviation Minimum Maximum

---

|   |           |  |           |           |
|---|-----------|--|-----------|-----------|
| 1 | 2.0300000 |  | 2.0300000 | 2.0300000 |
|---|-----------|--|-----------|-----------|

---

Laboratory tests at the time of obtaining Table 2-6 consent, according to the presence or absence of proton-pump inhibitors

Unique Subject Identifier=2421010000-0137

MEANS Procedure

Assay variable : PTINR\_VAL1 PT-INR Value

| N | Mean      | Standard Deviation | Minimum   | Maximum   |
|---|-----------|--------------------|-----------|-----------|
| 1 | 1.9600000 |                    | 1.9600000 | 1.9600000 |

Unique Subject Identifier=2421010000-0138

Assay variable : PTINR\_VAL1 PT-INR Value

| N | Mean      | Standard Deviation | Minimum   | Maximum   |
|---|-----------|--------------------|-----------|-----------|
| 3 | 1.5733333 | 0.0416333          | 1.5400000 | 1.6200000 |

Unique Subject Identifier=2421010000-0144

Assay variable : PTINR\_VAL1 PT-INR Value

| N | Mean      | Standard Deviation | Minimum   | Maximum   |
|---|-----------|--------------------|-----------|-----------|
| 2 | 2.1350000 | 0.1909188          | 2.0000000 | 2.2700000 |

Unique Subject Identifier=2421010000-0150

Assay variable : PTINR\_VAL1 PT-INR Value

N Mean Standard Deviation Minimum Maximum

---

|   |           |           |           |           |
|---|-----------|-----------|-----------|-----------|
| 4 | 1.9025000 | 0.2670050 | 1.7000000 | 2.2700000 |
|---|-----------|-----------|-----------|-----------|

---



Laboratory tests at the time of obtaining Table 2-6 consent, according to the presence or absence of proton-pump inhibitors

Unique Subject Identifier=2421010000-0157

MEANS Procedure

Assay variable : PTINR\_VAL1 PT-INR Value

N Mean Standard Deviation Minimum Maximum

---

|   |           |           |           |           |
|---|-----------|-----------|-----------|-----------|
| 4 | 2.3325000 | 1.0938426 | 1.2200000 | 3.8400000 |
|---|-----------|-----------|-----------|-----------|

---

Unique Subject Identifier=2421010000-0158

Assay variable : PTINR\_VAL1 PT-INR Value

N Mean Standard Deviation Minimum Maximum

---

|   |           |           |           |           |
|---|-----------|-----------|-----------|-----------|
| 6 | 1.8050000 | 0.3218540 | 1.4600000 | 2.2900000 |
|---|-----------|-----------|-----------|-----------|

---

Unique Subject Identifier=2421010000-0168

Assay variable : PTINR\_VAL1 PT-INR Value

N Mean Standard Deviation Minimum Maximum

---

|   |           |           |           |           |
|---|-----------|-----------|-----------|-----------|
| 4 | 1.6725000 | 0.7430736 | 1.2100000 | 2.7700000 |
|---|-----------|-----------|-----------|-----------|

---

Unique Subject Identifier=2421010000-0174

Assay variable : PTINR\_VAL1 PT-INR Value

N Mean Standard Deviation Minimum Maximum

---

|   |           |           |           |           |
|---|-----------|-----------|-----------|-----------|
| 4 | 2.5150000 | 0.9033456 | 1.8800000 | 3.8400000 |
|---|-----------|-----------|-----------|-----------|

---

Laboratory tests at the time of obtaining Table 2-6 consent, according to the presence or absence of proton-pump inhibitors

Unique Subject Identifier=2421010000-0198

MEANS Procedure

Assay variable : PTINR\_VAL1 PT-INR Value

N Mean Standard Deviation Minimum Maximum

---

|   |           |  |           |           |
|---|-----------|--|-----------|-----------|
| 1 | 2.7600000 |  | 2.7600000 | 2.7600000 |
|---|-----------|--|-----------|-----------|

---

Unique Subject Identifier=2421010000-0210

Assay variable : PTINR\_VAL1 PT-INR Value

N Mean Standard Deviation Minimum Maximum

---

|   |           |  |           |           |
|---|-----------|--|-----------|-----------|
| 1 | 1.6700000 |  | 1.6700000 | 1.6700000 |
|---|-----------|--|-----------|-----------|

---

Unique Subject Identifier=2421010000-0216

Assay variable : PTINR\_VAL1 PT-INR Value

N Mean Standard Deviation Minimum Maximum

---

|   |           |           |           |           |
|---|-----------|-----------|-----------|-----------|
| 2 | 2.0500000 | 0.2121320 | 1.9000000 | 2.2000000 |
|---|-----------|-----------|-----------|-----------|

---

Unique Subject Identifier=2421010000-0232

Assay variable : PTINR\_VAL1 PT-INR Value

N Mean Standard Deviation Minimum Maximum

---

|   |          |  |          |          |
|---|----------|--|----------|----------|
| 1 | 1.140000 |  | 1.140000 | 1.140000 |
|---|----------|--|----------|----------|

---

Laboratory tests at the time of obtaining Table 2-6 consent, according to the presence or absence of proton-pump inhibitors

Unique Subject Identifier=2421010000-0238

MEANS Procedure

Assay variable : PTINR\_VAL1 PT-INR Value

N Mean Standard Deviation Minimum Maximum

---

|   |           |           |           |           |
|---|-----------|-----------|-----------|-----------|
| 6 | 2.1800000 | 0.1436663 | 1.9500000 | 2.3400000 |
|---|-----------|-----------|-----------|-----------|

---

Unique Subject Identifier=2423010010-0001

Assay variable : PTINR\_VAL1 PT-INR Value

N Mean Standard Deviation Minimum Maximum

---

|   |           |  |           |           |
|---|-----------|--|-----------|-----------|
| 1 | 1.7100000 |  | 1.7100000 | 1.7100000 |
|---|-----------|--|-----------|-----------|

---

Unique Subject Identifier=2423010010-0002

Assay variable : PTINR\_VAL1 PT-INR Value

N Mean Standard Deviation Minimum Maximum

---

|   |           |  |           |           |
|---|-----------|--|-----------|-----------|
| 1 | 1.8000000 |  | 1.8000000 | 1.8000000 |
|---|-----------|--|-----------|-----------|

---

Unique Subject Identifier=2423010010-0004

Assay variable : PTINR\_VAL1 PT-INR Value

N Mean Standard Deviation Minimum Maximum

---

|   |           |           |           |           |
|---|-----------|-----------|-----------|-----------|
| 2 | 2.3050000 | 0.0636396 | 2.2600000 | 2.3500000 |
|---|-----------|-----------|-----------|-----------|

---

Laboratory tests at the time of obtaining Table 2-6 consent, according to the presence or absence of proton-pump inhibitors

Unique Subject Identifier=2423010010-0006

MEANS Procedure

Assay variable : PTINR\_VAL1 PT-INR Value

N Mean Standard Deviation Minimum Maximum

---

|   |           |  |           |           |
|---|-----------|--|-----------|-----------|
| 1 | 3.8400000 |  | 3.8400000 | 3.8400000 |
|---|-----------|--|-----------|-----------|

---

Unique Subject Identifier=2425010000-0001

Assay variable : PTINR\_VAL1 PT-INR Value

N Mean Standard Deviation Minimum Maximum

---

|   |           |  |           |           |
|---|-----------|--|-----------|-----------|
| 1 | 1.2200000 |  | 1.2200000 | 1.2200000 |
|---|-----------|--|-----------|-----------|

---

Unique Subject Identifier=2425010000-0002

Assay variable : PTINR\_VAL1 PT-INR Value

N Mean Standard Deviation Minimum Maximum

---

|   |           |  |           |           |
|---|-----------|--|-----------|-----------|
| 1 | 1.1200000 |  | 1.1200000 | 1.1200000 |
|---|-----------|--|-----------|-----------|

---

Unique Subject Identifier=2425010000-0003

Assay variable : PTINR\_VAL1 PT-INR Value

N Mean Standard Deviation Minimum Maximum

---

|   |           |  |           |           |
|---|-----------|--|-----------|-----------|
| 1 | 1.0600000 |  | 1.0600000 | 1.0600000 |
|---|-----------|--|-----------|-----------|

---



Laboratory tests at the time of obtaining Table 2-6 consent, according to the presence or absence of proton-pump inhibitors

Unique Subject Identifier=2425010000-0004

MEANS Procedure

Assay variable : PTINR\_VAL1 PT-INR Value

N Mean Standard Deviation Minimum Maximum

---

|   |           |           |           |
|---|-----------|-----------|-----------|
| 1 | 1.0600000 | 1.0600000 | 1.0600000 |
|---|-----------|-----------|-----------|

---

Unique Subject Identifier=2425010000-0006

Assay variable : PTINR\_VAL1 PT-INR Value

N Mean Standard Deviation Minimum Maximum

---

|   |           |           |           |
|---|-----------|-----------|-----------|
| 1 | 1.1900000 | 1.1900000 | 1.1900000 |
|---|-----------|-----------|-----------|

---

Unique Subject Identifier=2425010000-0008

Assay variable : PTINR\_VAL1 PT-INR Value

N Mean Standard Deviation Minimum Maximum

---

|   |           |           |           |
|---|-----------|-----------|-----------|
| 1 | 1.1700000 | 1.1700000 | 1.1700000 |
|---|-----------|-----------|-----------|

---

Unique Subject Identifier=2425010000-0009

Assay variable : PTINR\_VAL1 PT-INR Value

N Mean Standard Deviation Minimum Maximum

---

|   |           |  |           |           |
|---|-----------|--|-----------|-----------|
| 1 | 2.0800000 |  | 2.0800000 | 2.0800000 |
|---|-----------|--|-----------|-----------|

---

Laboratory tests at the time of obtaining Table 2-6 consent, according to the presence or absence of proton-pump inhibitors

Unique Subject Identifier=2425010000-0017

MEANS Procedure

Assay variable : PTINR\_VAL1 PT-INR Value

N Mean Standard Deviation Minimum Maximum

---

|   |           |  |           |           |
|---|-----------|--|-----------|-----------|
| 1 | 1.7900000 |  | 1.7900000 | 1.7900000 |
|---|-----------|--|-----------|-----------|

---

Unique Subject Identifier=2425010000-0019

Assay variable : PTINR\_VAL1 PT-INR Value

N Mean Standard Deviation Minimum Maximum

---

|   |           |  |           |           |
|---|-----------|--|-----------|-----------|
| 1 | 2.0700000 |  | 2.0700000 | 2.0700000 |
|---|-----------|--|-----------|-----------|

---

Unique Subject Identifier=2425010000-0025

Assay variable : PTINR\_VAL1 PT-INR Value

N Mean Standard Deviation Minimum Maximum

---

|   |           |  |           |           |
|---|-----------|--|-----------|-----------|
| 1 | 1.4600000 |  | 1.4600000 | 1.4600000 |
|---|-----------|--|-----------|-----------|

---

Unique Subject Identifier=2425010000-0029

Assay variable : PTINR\_VAL1 PT-INR Value

N Mean Standard Deviation Minimum Maximum

---

|   |           |  |           |           |
|---|-----------|--|-----------|-----------|
| 1 | 1.4200000 |  | 1.4200000 | 1.4200000 |
|---|-----------|--|-----------|-----------|

---

Laboratory tests at the time of obtaining Table 2-6 consent, according to the presence or absence of proton-pump inhibitors

Unique Subject Identifier=2425010000-0035

MEANS Procedure

Assay variable : PTINR\_VAL1 PT-INR Value

N Mean Standard Deviation Minimum Maximum

---

|   |           |  |           |           |
|---|-----------|--|-----------|-----------|
| 1 | 1.4300000 |  | 1.4300000 | 1.4300000 |
|---|-----------|--|-----------|-----------|

---

Unique Subject Identifier=2425010000-0041

Assay variable : PTINR\_VAL1 PT-INR Value

N Mean Standard Deviation Minimum Maximum

---

|   |           |  |           |           |
|---|-----------|--|-----------|-----------|
| 1 | 2.3700000 |  | 2.3700000 | 2.3700000 |
|---|-----------|--|-----------|-----------|

---

Unique Subject Identifier=2425010000-0050

Assay variable : PTINR\_VAL1 PT-INR Value

N Mean Standard Deviation Minimum Maximum

---

|   |           |  |           |           |
|---|-----------|--|-----------|-----------|
| 1 | 1.8600000 |  | 1.8600000 | 1.8600000 |
|---|-----------|--|-----------|-----------|

---

Unique Subject Identifier=2425010000-0051

Assay variable : PTINR\_VAL1 PT-INR Value

N Mean Standard Deviation Minimum Maximum

---

|   |          |  |          |          |
|---|----------|--|----------|----------|
| 1 | 2.120000 |  | 2.120000 | 2.120000 |
|---|----------|--|----------|----------|

---

Laboratory tests at the time of obtaining Table 2-6 consent, according to the presence or absence of proton-pump inhibitors

Unique Subject Identifier=2425010000-0061

MEANS Procedure

Assay variable : PTINR\_VAL1 PT-INR Value

N Mean Standard Deviation Minimum Maximum

---

|   |           |           |           |           |
|---|-----------|-----------|-----------|-----------|
| 3 | 2.4133333 | 0.1069268 | 2.3200000 | 2.5300000 |
|---|-----------|-----------|-----------|-----------|

---

Unique Subject Identifier=2426011100-0001

Assay variable : PTINR\_VAL1 PT-INR Value

N Mean Standard Deviation Minimum Maximum

---

|   |           |           |           |           |
|---|-----------|-----------|-----------|-----------|
| 6 | 2.1000000 | 0.4049691 | 1.7000000 | 2.8000000 |
|---|-----------|-----------|-----------|-----------|

---

Unique Subject Identifier=2426011100-0003

Assay variable : PTINR\_VAL1 PT-INR Value

N Mean Standard Deviation Minimum Maximum

---

|   |           |           |           |           |
|---|-----------|-----------|-----------|-----------|
| 6 | 1.6833333 | 0.3710346 | 1.1000000 | 2.1000000 |
|---|-----------|-----------|-----------|-----------|

---

Unique Subject Identifier=2427000000-0001

Assay variable : PTINR\_VAL1 PT-INR Value

N Mean Standard Deviation Minimum Maximum

---

|   |          |           |          |          |
|---|----------|-----------|----------|----------|
| 6 | 1.620000 | 0.1907878 | 1.370000 | 1.940000 |
|---|----------|-----------|----------|----------|

---



Laboratory tests at the time of obtaining Table 2-6 consent, according to the presence or absence of proton-pump inhibitors

Unique Subject Identifier=2427000000-0006

MEANS Procedure

Assay variable : PTINR\_VAL1 PT-INR Value

N Mean Standard Deviation Minimum Maximum

---

|   |           |           |           |           |
|---|-----------|-----------|-----------|-----------|
| 6 | 1.7833333 | 0.8420135 | 0.9900000 | 2.9600000 |
|---|-----------|-----------|-----------|-----------|

---

Unique Subject Identifier=2428011111-0004

Assay variable : PTINR\_VAL1 PT-INR Value

N Mean Standard Deviation Minimum Maximum

---

|   |           |           |           |           |
|---|-----------|-----------|-----------|-----------|
| 6 | 1.7733333 | 0.1287892 | 1.6000000 | 1.9700000 |
|---|-----------|-----------|-----------|-----------|

---

Unique Subject Identifier=2434011000-0002

Assay variable : PTINR\_VAL1 PT-INR Value

N Mean Standard Deviation Minimum Maximum

---

|   |           |           |           |           |
|---|-----------|-----------|-----------|-----------|
| 3 | 2.1333333 | 0.4932883 | 1.8000000 | 2.7000000 |
|---|-----------|-----------|-----------|-----------|

---

Unique Subject Identifier=2434011000-0004

Assay variable : PTINR\_VAL1 PT-INR Value

N Mean Standard Deviation Minimum Maximum

---

|   |           |           |           |           |
|---|-----------|-----------|-----------|-----------|
| 4 | 2.2250000 | 0.8139410 | 1.5000000 | 3.3000000 |
|---|-----------|-----------|-----------|-----------|

---

Laboratory tests at the time of obtaining Table 2-6 consent, according to the presence or absence of proton-pump inhibitors

Unique Subject Identifier=2434011000-0007

MEANS Procedure

Assay variable : PTINR\_VAL1 PT-INR Value

N Mean Standard Deviation Minimum Maximum

---

|   |           |           |           |           |
|---|-----------|-----------|-----------|-----------|
| 3 | 2.8000000 | 0.7937254 | 2.2000000 | 3.7000000 |
|---|-----------|-----------|-----------|-----------|

---

Unique Subject Identifier=2434011000-0009

Assay variable : PTINR\_VAL1 PT-INR Value

N Mean Standard Deviation Minimum Maximum

---

|   |           |           |           |           |
|---|-----------|-----------|-----------|-----------|
| 3 | 2.2666667 | 0.2516611 | 2.0000000 | 2.5000000 |
|---|-----------|-----------|-----------|-----------|

---

Unique Subject Identifier=2434011000-0010

Assay variable : PTINR\_VAL1 PT-INR Value

N Mean Standard Deviation Minimum Maximum

---

|   |           |           |           |           |
|---|-----------|-----------|-----------|-----------|
| 4 | 2.2000000 | 0.3464102 | 1.7000000 | 2.5000000 |
|---|-----------|-----------|-----------|-----------|

---

Unique Subject Identifier=2434011000-0011

Assay variable : PTINR\_VAL1 PT-INR Value

N Mean Standard Deviation Minimum Maximum

---

|   |           |           |           |           |
|---|-----------|-----------|-----------|-----------|
| 4 | 2.3750000 | 0.4991660 | 2.0000000 | 3.1000000 |
|---|-----------|-----------|-----------|-----------|

---

Laboratory tests at the time of obtaining Table 2-6 consent, according to the presence or absence of proton-pump inhibitors

Unique Subject Identifier=2434011000-0015

MEANS Procedure

Assay variable : PTINR\_VAL1 PT-INR Value

N Mean Standard Deviation Minimum Maximum

---

|   |          |           |          |          |
|---|----------|-----------|----------|----------|
| 4 | 2.500000 | 0.2581989 | 2.200000 | 2.800000 |
|---|----------|-----------|----------|----------|

---

Unique Subject Identifier=2434011000-0016

Assay variable : PTINR\_VAL1 PT-INR Value

N Mean Standard Deviation Minimum Maximum

---

|   |          |           |          |          |
|---|----------|-----------|----------|----------|
| 4 | 2.425000 | 0.2217356 | 2.200000 | 2.700000 |
|---|----------|-----------|----------|----------|

---

Unique Subject Identifier=2434011000-0018

Assay variable : PTINR\_VAL1 PT-INR Value

N Mean Standard Deviation Minimum Maximum

---

|   |          |           |          |          |
|---|----------|-----------|----------|----------|
| 4 | 2.475000 | 0.4031129 | 1.900000 | 2.800000 |
|---|----------|-----------|----------|----------|

---

Unique Subject Identifier=2437000000-0006

Assay variable : PTINR\_VAL1 PT-INR Value

N Mean Standard Deviation Minimum Maximum

---

|   |           |           |           |           |
|---|-----------|-----------|-----------|-----------|
| 3 | 1.6300000 | 0.1216553 | 1.4900000 | 1.7100000 |
|---|-----------|-----------|-----------|-----------|

---

Laboratory tests at the time of obtaining Table 2-6 consent, according to the presence or absence of proton-pump inhibitors

Unique Subject Identifier=2437000000-0008

MEANS Procedure

Assay variable : PTINR\_VAL1 PT-INR Value

| N | Mean      | Standard Deviation | Minimum   | Maximum   |
|---|-----------|--------------------|-----------|-----------|
| 2 | 1.8500000 | 0.3818377          | 1.5800000 | 2.1200000 |

Unique Subject Identifier=2437000000-0011

Assay variable : PTINR\_VAL1 PT-INR Value

| N | Mean      | Standard Deviation | Minimum   | Maximum   |
|---|-----------|--------------------|-----------|-----------|
| 1 | 1.9500000 |                    | 1.9500000 | 1.9500000 |

Unique Subject Identifier=2437000000-0013

Assay variable : PTINR\_VAL1 PT-INR Value

| N | Mean      | Standard Deviation | Minimum   | Maximum   |
|---|-----------|--------------------|-----------|-----------|
| 3 | 1.2066667 | 0.0577350          | 1.1400000 | 1.2400000 |

Unique Subject Identifier=2438010011-0002

Assay variable : PTINR\_VAL1 PT-INR Value

N Mean Standard Deviation Minimum Maximum

---

|   |           |           |           |           |
|---|-----------|-----------|-----------|-----------|
| 6 | 1.9016667 | 0.5045163 | 1.4400000 | 2.7400000 |
|---|-----------|-----------|-----------|-----------|

---



Laboratory tests at the time of obtaining Table 2-6 consent, according to the presence or absence of proton-pump inhibitors

Unique Subject Identifier=2438010011-0006

MEANS Procedure

Assay variable : PTINR\_VAL1 PT-INR Value

N Mean Standard Deviation Minimum Maximum

---

|   |           |           |           |           |
|---|-----------|-----------|-----------|-----------|
| 6 | 1.9350000 | 0.1947049 | 1.7500000 | 2.2800000 |
|---|-----------|-----------|-----------|-----------|

---

Unique Subject Identifier=2438010011-0011

Assay variable : PTINR\_VAL1 PT-INR Value

N Mean Standard Deviation Minimum Maximum

---

|   |           |           |           |           |
|---|-----------|-----------|-----------|-----------|
| 6 | 1.6466667 | 0.2516082 | 1.4100000 | 1.9700000 |
|---|-----------|-----------|-----------|-----------|

---

Unique Subject Identifier=2438010011-0017

Assay variable : PTINR\_VAL1 PT-INR Value

N Mean Standard Deviation Minimum Maximum

---

|   |           |           |           |           |
|---|-----------|-----------|-----------|-----------|
| 4 | 1.8500000 | 0.2362202 | 1.5900000 | 2.0600000 |
|---|-----------|-----------|-----------|-----------|

---

Unique Subject Identifier=2438010011-0025

Assay variable : PTINR\_VAL1 PT-INR Value

N Mean Standard Deviation Minimum Maximum

---

|   |           |           |           |           |
|---|-----------|-----------|-----------|-----------|
| 6 | 1.9216667 | 0.2240015 | 1.6500000 | 2.2500000 |
|---|-----------|-----------|-----------|-----------|

---

Laboratory tests at the time of obtaining Table 2-6 consent, according to the presence or absence of proton-pump inhibitors

Unique Subject Identifier=2438010011-0027

MEANS Procedure

Assay variable : PTINR\_VAL1 PT-INR Value

N Mean Standard Deviation Minimum Maximum

---

|   |           |           |           |           |
|---|-----------|-----------|-----------|-----------|
| 6 | 1.8233333 | 0.2899425 | 1.3500000 | 2.1200000 |
|---|-----------|-----------|-----------|-----------|

---

Unique Subject Identifier=2438010011-0035

Assay variable : PTINR\_VAL1 PT-INR Value

N Mean Standard Deviation Minimum Maximum

---

|   |           |           |           |           |
|---|-----------|-----------|-----------|-----------|
| 6 | 2.1566667 | 0.4078071 | 1.7900000 | 2.8100000 |
|---|-----------|-----------|-----------|-----------|

---

Unique Subject Identifier=2438010011-0036

Assay variable : PTINR\_VAL1 PT-INR Value

N Mean Standard Deviation Minimum Maximum

---

|   |           |           |           |           |
|---|-----------|-----------|-----------|-----------|
| 5 | 1.7040000 | 0.1722788 | 1.4600000 | 1.8700000 |
|---|-----------|-----------|-----------|-----------|

---

Unique Subject Identifier=2438010011-0040

Assay variable : PTINR\_VAL1 PT-INR Value

N Mean Standard Deviation Minimum Maximum

---

|   |           |           |           |           |
|---|-----------|-----------|-----------|-----------|
| 5 | 2.0300000 | 0.1927434 | 1.8300000 | 2.2800000 |
|---|-----------|-----------|-----------|-----------|

---

Laboratory tests at the time of obtaining Table 2-6 consent, according to the presence or absence of proton-pump inhibitors

Unique Subject Identifier=2438010011-0044

MEANS Procedure

Assay variable : PTINR\_VAL1 PT-INR Value

N Mean Standard Deviation Minimum Maximum

---

|   |           |           |           |           |
|---|-----------|-----------|-----------|-----------|
| 6 | 2.1583333 | 0.3638910 | 1.7700000 | 2.8100000 |
|---|-----------|-----------|-----------|-----------|

---

Unique Subject Identifier=2438010011-0048

Assay variable : PTINR\_VAL1 PT-INR Value

N Mean Standard Deviation Minimum Maximum

---

|   |           |           |           |           |
|---|-----------|-----------|-----------|-----------|
| 5 | 2.4760000 | 0.6522500 | 2.0400000 | 3.6100000 |
|---|-----------|-----------|-----------|-----------|

---

Unique Subject Identifier=2438010011-0053

Assay variable : PTINR\_VAL1 PT-INR Value

N Mean Standard Deviation Minimum Maximum

---

|   |           |           |           |           |
|---|-----------|-----------|-----------|-----------|
| 3 | 1.5733333 | 0.5519360 | 1.0500000 | 2.1500000 |
|---|-----------|-----------|-----------|-----------|

---

Unique Subject Identifier=2438010011-0059

Assay variable : PTINR\_VAL1 PT-INR Value

N Mean Standard Deviation Minimum Maximum

---

|   |          |           |          |          |
|---|----------|-----------|----------|----------|
| 2 | 1.600000 | 0.5656854 | 1.200000 | 2.000000 |
|---|----------|-----------|----------|----------|

---

Laboratory tests at the time of obtaining Table 2-6 consent, according to the presence or absence of proton-pump inhibitors

Unique Subject Identifier=2438010011-0062

MEANS Procedure

Assay variable : PTINR\_VAL1 PT-INR Value

| N | Mean      | Standard Deviation | Minimum   | Maximum   |
|---|-----------|--------------------|-----------|-----------|
| 6 | 2.3950000 | 0.4478727          | 1.9900000 | 3.1000000 |

Unique Subject Identifier=2438010011-0065

Assay variable : PTINR\_VAL1 PT-INR Value

| N | Mean      | Standard Deviation | Minimum   | Maximum   |
|---|-----------|--------------------|-----------|-----------|
| 3 | 1.5933333 | 0.0873689          | 1.5200000 | 1.6900000 |

Unique Subject Identifier=2438010011-0066

Assay variable : PTINR\_VAL1 PT-INR Value

| N | Mean      | Standard Deviation | Minimum   | Maximum   |
|---|-----------|--------------------|-----------|-----------|
| 3 | 2.0900000 | 0.6349803          | 1.6100000 | 2.8100000 |

Unique Subject Identifier=2438010011-0067

Assay variable : PTINR\_VAL1 PT-INR Value

N Mean Standard Deviation Minimum Maximum

---

|   |           |  |           |           |
|---|-----------|--|-----------|-----------|
| 1 | 1.0000000 |  | 1.0000000 | 1.0000000 |
|---|-----------|--|-----------|-----------|

---



Laboratory tests at the time of obtaining Table 2-6 consent, according to the presence or absence of proton-pump inhibitors

Unique Subject Identifier=2448011111-0001

MEANS Procedure

Assay variable : PTINR\_VAL1 PT-INR Value

N Mean Standard Deviation Minimum Maximum

---

|   |           |  |           |           |
|---|-----------|--|-----------|-----------|
| 1 | 1.1800000 |  | 1.1800000 | 1.1800000 |
|---|-----------|--|-----------|-----------|

---

Unique Subject Identifier=2448011111-0002

Assay variable : PTINR\_VAL1 PT-INR Value

N Mean Standard Deviation Minimum Maximum

---

|   |           |           |           |           |
|---|-----------|-----------|-----------|-----------|
| 2 | 1.4900000 | 0.4949747 | 1.1400000 | 1.8400000 |
|---|-----------|-----------|-----------|-----------|

---

Unique Subject Identifier=2449011111-0001

Assay variable : PTINR\_VAL1 PT-INR Value

N Mean Standard Deviation Minimum Maximum

---

|   |           |           |           |           |
|---|-----------|-----------|-----------|-----------|
| 6 | 1.9333333 | 0.7633261 | 1.2000000 | 3.2000000 |
|---|-----------|-----------|-----------|-----------|

---

Unique Subject Identifier=2449011111-0003

Assay variable : PTINR\_VAL1 PT-INR Value

N Mean Standard Deviation Minimum Maximum

---

|   |           |           |           |           |
|---|-----------|-----------|-----------|-----------|
| 6 | 2.3166667 | 0.4578937 | 1.6000000 | 2.7000000 |
|---|-----------|-----------|-----------|-----------|

---

Laboratory tests at the time of obtaining Table 2-6 consent, according to the presence or absence of proton-pump inhibitors

Unique Subject Identifier=2449011111-0005

MEANS Procedure

Assay variable : PTINR\_VAL1 PT-INR Value

N Mean Standard Deviation Minimum Maximum

---

|   |          |           |          |          |
|---|----------|-----------|----------|----------|
| 6 | 1.500000 | 0.2756810 | 1.200000 | 1.900000 |
|---|----------|-----------|----------|----------|

---

Unique Subject Identifier=2449011111-0006

Assay variable : PTINR\_VAL1 PT-INR Value

N Mean Standard Deviation Minimum Maximum

---

|   |          |           |          |          |
|---|----------|-----------|----------|----------|
| 6 | 2.100000 | 0.1673320 | 1.900000 | 2.300000 |
|---|----------|-----------|----------|----------|

---

Unique Subject Identifier=2449011111-0008

Assay variable : PTINR\_VAL1 PT-INR Value

N Mean Standard Deviation Minimum Maximum

---

|   |          |           |          |          |
|---|----------|-----------|----------|----------|
| 6 | 2.216667 | 0.3868678 | 1.700000 | 2.800000 |
|---|----------|-----------|----------|----------|

---

Unique Subject Identifier=2449011111-0010

Assay variable : PTINR\_VAL1 PT-INR Value

N Mean Standard Deviation Minimum Maximum

---

|   |          |           |          |          |
|---|----------|-----------|----------|----------|
| 6 | 2.350000 | 0.1048809 | 2.200000 | 2.500000 |
|---|----------|-----------|----------|----------|

---

Laboratory tests at the time of obtaining Table 2-6 consent, according to the presence or absence of proton-pump inhibitors

Unique Subject Identifier=2449011111-0014

MEANS Procedure

Assay variable : PTINR\_VAL1 PT-INR Value

N Mean Standard Deviation Minimum Maximum

---

|   |           |           |           |           |
|---|-----------|-----------|-----------|-----------|
| 3 | 1.6333333 | 0.0577350 | 1.6000000 | 1.7000000 |
|---|-----------|-----------|-----------|-----------|

---

Unique Subject Identifier=2449011111-0018

Assay variable : PTINR\_VAL1 PT-INR Value

N Mean Standard Deviation Minimum Maximum

---

|   |           |           |           |           |
|---|-----------|-----------|-----------|-----------|
| 5 | 2.2000000 | 0.2549510 | 1.9000000 | 2.6000000 |
|---|-----------|-----------|-----------|-----------|

---

Unique Subject Identifier=2449011111-0019

Assay variable : PTINR\_VAL1 PT-INR Value

N Mean Standard Deviation Minimum Maximum

---

|   |           |           |           |           |
|---|-----------|-----------|-----------|-----------|
| 6 | 2.2833333 | 0.3600926 | 1.9000000 | 2.9000000 |
|---|-----------|-----------|-----------|-----------|

---

Unique Subject Identifier=2449011111-0020

Assay variable : PTINR\_VAL1 PT-INR Value

N Mean Standard Deviation Minimum Maximum

---

|   |          |           |          |          |
|---|----------|-----------|----------|----------|
| 4 | 1.500000 | 0.1414214 | 1.300000 | 1.600000 |
|---|----------|-----------|----------|----------|

---

Laboratory tests at the time of obtaining Table 2-6 consent, according to the presence or absence of proton-pump inhibitors

Unique Subject Identifier=2449011111-0021

MEANS Procedure

Assay variable : PTINR\_VAL1 PT-INR Value

N Mean Standard Deviation Minimum Maximum

---

|   |           |           |           |           |
|---|-----------|-----------|-----------|-----------|
| 6 | 1.5500000 | 0.1378405 | 1.4000000 | 1.7000000 |
|---|-----------|-----------|-----------|-----------|

---

Unique Subject Identifier=2449011111-0022

Assay variable : PTINR\_VAL1 PT-INR Value

N Mean Standard Deviation Minimum Maximum

---

|   |           |           |           |           |
|---|-----------|-----------|-----------|-----------|
| 6 | 1.9500000 | 0.6252999 | 1.2000000 | 3.1000000 |
|---|-----------|-----------|-----------|-----------|

---

Unique Subject Identifier=2449011111-0023

Assay variable : PTINR\_VAL1 PT-INR Value

N Mean Standard Deviation Minimum Maximum

---

|   |           |           |           |           |
|---|-----------|-----------|-----------|-----------|
| 5 | 1.5200000 | 0.1095445 | 1.4000000 | 1.6000000 |
|---|-----------|-----------|-----------|-----------|

---

Unique Subject Identifier=2449011111-0026

Assay variable : PTINR\_VAL1 PT-INR Value

N Mean Standard Deviation Minimum Maximum

---

|   |           |           |           |           |
|---|-----------|-----------|-----------|-----------|
| 6 | 1.8166667 | 0.2639444 | 1.6000000 | 2.3000000 |
|---|-----------|-----------|-----------|-----------|

---



Laboratory tests at the time of obtaining Table 2-6 consent, according to the presence or absence of proton-pump inhibitors

Unique Subject Identifier=2449011111-0030

MEANS Procedure

Assay variable : PTINR\_VAL1 PT-INR Value

N Mean Standard Deviation Minimum Maximum

---

|   |           |           |           |           |
|---|-----------|-----------|-----------|-----------|
| 6 | 1.8500000 | 0.1870829 | 1.7000000 | 2.2000000 |
|---|-----------|-----------|-----------|-----------|

---

Unique Subject Identifier=2449011111-0032

Assay variable : PTINR\_VAL1 PT-INR Value

N Mean Standard Deviation Minimum Maximum

---

|   |           |           |           |           |
|---|-----------|-----------|-----------|-----------|
| 5 | 1.0400000 | 0.0547723 | 1.0000000 | 1.1000000 |
|---|-----------|-----------|-----------|-----------|

---

Unique Subject Identifier=2449011111-0033

Assay variable : PTINR\_VAL1 PT-INR Value

N Mean Standard Deviation Minimum Maximum

---

|   |           |           |           |           |
|---|-----------|-----------|-----------|-----------|
| 6 | 1.7833333 | 0.1834848 | 1.6000000 | 2.1000000 |
|---|-----------|-----------|-----------|-----------|

---

Unique Subject Identifier=2449011111-0034

Assay variable : PTINR\_VAL1 PT-INR Value

N Mean Standard Deviation Minimum Maximum

---

|   |          |          |          |          |
|---|----------|----------|----------|----------|
| 5 | 1.940000 | 0.502991 | 1.200000 | 2.500000 |
|---|----------|----------|----------|----------|

---

Laboratory tests at the time of obtaining Table 2-6 consent, according to the presence or absence of proton-pump inhibitors

Unique Subject Identifier=2449011111-0036

MEANS Procedure

Assay variable : PTINR\_VAL1 PT-INR Value

N Mean Standard Deviation Minimum Maximum

---

|   |           |           |           |           |
|---|-----------|-----------|-----------|-----------|
| 6 | 1.6833333 | 0.1169045 | 1.6000000 | 1.9000000 |
|---|-----------|-----------|-----------|-----------|

---

Unique Subject Identifier=2449011111-0041

Assay variable : PTINR\_VAL1 PT-INR Value

N Mean Standard Deviation Minimum Maximum

---

|   |           |           |           |           |
|---|-----------|-----------|-----------|-----------|
| 6 | 2.2000000 | 0.2097618 | 1.9000000 | 2.5000000 |
|---|-----------|-----------|-----------|-----------|

---

Unique Subject Identifier=2449011111-0042

Assay variable : PTINR\_VAL1 PT-INR Value

N Mean Standard Deviation Minimum Maximum

---

|   |           |           |           |           |
|---|-----------|-----------|-----------|-----------|
| 6 | 1.7833333 | 0.1329160 | 1.7000000 | 2.0000000 |
|---|-----------|-----------|-----------|-----------|

---

Unique Subject Identifier=2449011111-0043

Assay variable : PTINR\_VAL1 PT-INR Value

N Mean Standard Deviation Minimum Maximum

---

|   |           |           |           |           |
|---|-----------|-----------|-----------|-----------|
| 6 | 1.7666667 | 0.5354126 | 1.3000000 | 2.7000000 |
|---|-----------|-----------|-----------|-----------|

---

Laboratory tests at the time of obtaining Table 2-6 consent, according to the presence or absence of proton-pump inhibitors

Unique Subject Identifier=2449011111-0046

MEANS Procedure

Assay variable : PTINR\_VAL1 PT-INR Value

N Mean Standard Deviation Minimum Maximum

---

|   |           |           |           |           |
|---|-----------|-----------|-----------|-----------|
| 6 | 1.9500000 | 0.2880972 | 1.7000000 | 2.4000000 |
|---|-----------|-----------|-----------|-----------|

---

Unique Subject Identifier=2449011111-0047

Assay variable : PTINR\_VAL1 PT-INR Value

N Mean Standard Deviation Minimum Maximum

---

|   |           |           |           |           |
|---|-----------|-----------|-----------|-----------|
| 5 | 1.9200000 | 0.3033150 | 1.5000000 | 2.3000000 |
|---|-----------|-----------|-----------|-----------|

---

Unique Subject Identifier=2449011111-0048

Assay variable : PTINR\_VAL1 PT-INR Value

N Mean Standard Deviation Minimum Maximum

---

|   |           |  |           |           |
|---|-----------|--|-----------|-----------|
| 1 | 2.6000000 |  | 2.6000000 | 2.6000000 |
|---|-----------|--|-----------|-----------|

---

Unique Subject Identifier=2453011111-0001

Assay variable : PTINR\_VAL1 PT-INR Value

N Mean Standard Deviation Minimum Maximum

---

|   |          |           |          |          |
|---|----------|-----------|----------|----------|
| 5 | 2.072000 | 0.1876699 | 1.850000 | 2.360000 |
|---|----------|-----------|----------|----------|

---

Laboratory tests at the time of obtaining Table 2-6 consent, according to the presence or absence of proton-pump inhibitors

Unique Subject Identifier=2456000000-0001

MEANS Procedure

Assay variable : PTINR\_VAL1 PT-INR Value

N Mean Standard Deviation Minimum Maximum

---

|   |           |           |           |           |
|---|-----------|-----------|-----------|-----------|
| 3 | 1.6000000 | 0.0624500 | 1.5300000 | 1.6500000 |
|---|-----------|-----------|-----------|-----------|

---

Unique Subject Identifier=2456000000-0003

Assay variable : PTINR\_VAL1 PT-INR Value

N Mean Standard Deviation Minimum Maximum

---

|   |           |           |           |           |
|---|-----------|-----------|-----------|-----------|
| 3 | 1.7033333 | 0.1908752 | 1.5600000 | 1.9200000 |
|---|-----------|-----------|-----------|-----------|

---

Unique Subject Identifier=2456000000-0006

Assay variable : PTINR\_VAL1 PT-INR Value

N Mean Standard Deviation Minimum Maximum

---

|   |           |           |           |           |
|---|-----------|-----------|-----------|-----------|
| 2 | 1.8950000 | 0.0777817 | 1.8400000 | 1.9500000 |
|---|-----------|-----------|-----------|-----------|

---

Unique Subject Identifier=2456000000-0007

Assay variable : PTINR\_VAL1 PT-INR Value

N Mean Standard Deviation Minimum Maximum

---

|   |           |           |           |           |
|---|-----------|-----------|-----------|-----------|
| 3 | 1.6466667 | 0.2177919 | 1.4700000 | 1.8900000 |
|---|-----------|-----------|-----------|-----------|

---



Laboratory tests at the time of obtaining Table 2-6 consent, according to the presence or absence of proton-pump inhibitors

Unique Subject Identifier=2471011111-0001

MEANS Procedure

Assay variable : PTINR\_VAL1 PT-INR Value

N Mean Standard Deviation Minimum Maximum

---

|   |           |           |           |           |
|---|-----------|-----------|-----------|-----------|
| 6 | 1.6500000 | 0.1224745 | 1.5000000 | 1.8000000 |
|---|-----------|-----------|-----------|-----------|

---

Unique Subject Identifier=2471011111-0003

Assay variable : PTINR\_VAL1 PT-INR Value

N Mean Standard Deviation Minimum Maximum

---

|   |           |           |           |           |
|---|-----------|-----------|-----------|-----------|
| 5 | 2.3800000 | 0.2774887 | 2.1000000 | 2.8000000 |
|---|-----------|-----------|-----------|-----------|

---

Unique Subject Identifier=2471011111-0004

Assay variable : PTINR\_VAL1 PT-INR Value

N Mean Standard Deviation Minimum Maximum

---

|   |           |           |           |           |
|---|-----------|-----------|-----------|-----------|
| 6 | 2.3166667 | 0.3060501 | 1.9000000 | 2.6000000 |
|---|-----------|-----------|-----------|-----------|

---

Unique Subject Identifier=2471011111-0005

Assay variable : PTINR\_VAL1 PT-INR Value

N Mean Standard Deviation Minimum Maximum

---

|   |           |           |           |           |
|---|-----------|-----------|-----------|-----------|
| 5 | 1.9800000 | 0.1483240 | 1.8000000 | 2.2000000 |
|---|-----------|-----------|-----------|-----------|

---

Laboratory tests at the time of obtaining Table 2-6 consent, according to the presence or absence of proton-pump inhibitors

Unique Subject Identifier=2480011111-0003

MEANS Procedure

Assay variable : PTINR\_VAL1 PT-INR Value

N Mean Standard Deviation Minimum Maximum

---

|   |           |           |           |           |
|---|-----------|-----------|-----------|-----------|
| 6 | 2.3550000 | 0.2442744 | 2.0000000 | 2.7600000 |
|---|-----------|-----------|-----------|-----------|

---

Unique Subject Identifier=2480011111-0004

Assay variable : PTINR\_VAL1 PT-INR Value

N Mean Standard Deviation Minimum Maximum

---

|   |           |           |           |           |
|---|-----------|-----------|-----------|-----------|
| 4 | 2.3025000 | 0.1479583 | 2.1100000 | 2.4600000 |
|---|-----------|-----------|-----------|-----------|

---

Unique Subject Identifier=2480011111-0011

Assay variable : PTINR\_VAL1 PT-INR Value

N Mean Standard Deviation Minimum Maximum

---

|   |           |           |           |           |
|---|-----------|-----------|-----------|-----------|
| 2 | 1.3800000 | 0.0707107 | 1.3300000 | 1.4300000 |
|---|-----------|-----------|-----------|-----------|

---

Unique Subject Identifier=2480011111-0013

Assay variable : PTINR\_VAL1 PT-INR Value

N Mean Standard Deviation Minimum Maximum

---

|   |           |           |           |           |
|---|-----------|-----------|-----------|-----------|
| 3 | 2.3933333 | 0.0450925 | 2.3500000 | 2.4400000 |
|---|-----------|-----------|-----------|-----------|

---

Laboratory tests at the time of obtaining Table 2-6 consent, according to the presence or absence of proton-pump inhibitors

Unique Subject Identifier=2485000000-0002

MEANS Procedure

Assay variable : PTINR\_VAL1 PT-INR Value

N Mean Standard Deviation Minimum Maximum

---

|   |           |           |           |           |
|---|-----------|-----------|-----------|-----------|
| 4 | 1.7050000 | 0.1144552 | 1.5700000 | 1.8000000 |
|---|-----------|-----------|-----------|-----------|

---

Unique Subject Identifier=2487000000-0001

Assay variable : PTINR\_VAL1 PT-INR Value

N Mean Standard Deviation Minimum Maximum

---

|   |           |           |           |           |
|---|-----------|-----------|-----------|-----------|
| 4 | 1.6000000 | 0.4242641 | 1.2000000 | 2.1000000 |
|---|-----------|-----------|-----------|-----------|

---

Unique Subject Identifier=2487000000-0004

Assay variable : PTINR\_VAL1 PT-INR Value

N Mean Standard Deviation Minimum Maximum

---

|   |           |           |           |           |
|---|-----------|-----------|-----------|-----------|
| 3 | 1.5000000 | 0.2645751 | 1.3000000 | 1.8000000 |
|---|-----------|-----------|-----------|-----------|

---

Unique Subject Identifier=2487000000-0014

Assay variable : PTINR\_VAL1 PT-INR Value

N Mean Standard Deviation Minimum Maximum

---

|   |           |           |           |           |
|---|-----------|-----------|-----------|-----------|
| 5 | 1.7200000 | 0.2489980 | 1.4000000 | 2.1000000 |
|---|-----------|-----------|-----------|-----------|

---

Laboratory tests at the time of obtaining Table 2-6 consent, according to the presence or absence of proton-pump inhibitors

Unique Subject Identifier=2487000000-0016

MEANS Procedure

Assay variable : PTINR\_VAL1 PT-INR Value

N Mean Standard Deviation Minimum Maximum

---

|   |           |  |           |           |
|---|-----------|--|-----------|-----------|
| 1 | 1.5000000 |  | 1.5000000 | 1.5000000 |
|---|-----------|--|-----------|-----------|

---

Unique Subject Identifier=2488011100-0001

Assay variable : PTINR\_VAL1 PT-INR Value

N Mean Standard Deviation Minimum Maximum

---

|   |           |  |           |           |
|---|-----------|--|-----------|-----------|
| 1 | 1.6000000 |  | 1.6000000 | 1.6000000 |
|---|-----------|--|-----------|-----------|

---

Unique Subject Identifier=2488011100-0008

Assay variable : PTINR\_VAL1 PT-INR Value

N Mean Standard Deviation Minimum Maximum

---

|   |           |           |           |           |
|---|-----------|-----------|-----------|-----------|
| 2 | 1.2300000 | 0.0424264 | 1.2000000 | 1.2600000 |
|---|-----------|-----------|-----------|-----------|

---

Unique Subject Identifier=2488011100-0009

Assay variable : PTINR\_VAL1 PT-INR Value

N Mean Standard Deviation Minimum Maximum

---

|   |           |           |           |           |
|---|-----------|-----------|-----------|-----------|
| 2 | 1.3950000 | 0.0777817 | 1.3400000 | 1.4500000 |
|---|-----------|-----------|-----------|-----------|

---



Laboratory tests at the time of obtaining Table 2-6 consent, according to the presence or absence of proton-pump inhibitors

Unique Subject Identifier=2490011000-0006

MEANS Procedure

Assay variable : PTINR\_VAL1 PT-INR Value

| N | Mean      | Standard Deviation | Minimum   | Maximum   |
|---|-----------|--------------------|-----------|-----------|
| 2 | 1.8350000 | 0.2050610          | 1.6900000 | 1.9800000 |

Unique Subject Identifier=2498010111-0001

Assay variable : PTINR\_VAL1 PT-INR Value

| N | Mean      | Standard Deviation | Minimum   | Maximum   |
|---|-----------|--------------------|-----------|-----------|
| 5 | 1.6800000 | 0.1483240          | 1.5000000 | 1.9000000 |

Unique Subject Identifier=2498010111-0006

Assay variable : PTINR\_VAL1 PT-INR Value

| N | Mean      | Standard Deviation | Minimum   | Maximum   |
|---|-----------|--------------------|-----------|-----------|
| 5 | 2.0800000 | 0.4438468          | 1.4000000 | 2.5000000 |

Unique Subject Identifier=2498010111-0010

Assay variable : PTINR\_VAL1 PT-INR Value

N Mean Standard Deviation Minimum Maximum

---

|   |          |           |          |          |
|---|----------|-----------|----------|----------|
| 5 | 1.840000 | 0.1516575 | 1.600000 | 2.000000 |
|---|----------|-----------|----------|----------|

---

Laboratory tests at the time of obtaining Table 2-6 consent, according to the presence or absence of proton-pump inhibitors

Unique Subject Identifier=2498010111-0013

MEANS Procedure

Assay variable : PTINR\_VAL1 PT-INR Value

| N | Mean      | Standard Deviation | Minimum   | Maximum   |
|---|-----------|--------------------|-----------|-----------|
| 5 | 1.7600000 | 0.1140175          | 1.6000000 | 1.9000000 |

Unique Subject Identifier=2498010111-0018

Assay variable : PTINR\_VAL1 PT-INR Value

| N | Mean      | Standard Deviation | Minimum   | Maximum   |
|---|-----------|--------------------|-----------|-----------|
| 4 | 1.8250000 | 0.3403430          | 1.4000000 | 2.1000000 |

Unique Subject Identifier=2507000000-0004

Assay variable : PTINR\_VAL1 PT-INR Value

| N | Mean      | Standard Deviation | Minimum   | Maximum   |
|---|-----------|--------------------|-----------|-----------|
| 2 | 2.4150000 | 0.1202082          | 2.3300000 | 2.5000000 |

Unique Subject Identifier=2507000000-0008

Assay variable : PTINR\_VAL1 PT-INR Value

N Mean Standard Deviation Minimum Maximum

---

|   |          |           |          |          |
|---|----------|-----------|----------|----------|
| 3 | 2.130000 | 0.4158125 | 1.880000 | 2.610000 |
|---|----------|-----------|----------|----------|

---

Laboratory tests at the time of obtaining Table 2-6 consent, according to the presence or absence of proton-pump inhibitors

Unique Subject Identifier=2507000000-0009

MEANS Procedure

Assay variable : PTINR\_VAL1 PT-INR Value

| N | Mean     | Standard Deviation | Minimum  | Maximum  |
|---|----------|--------------------|----------|----------|
| 2 | 2.410000 | 1.0606602          | 1.660000 | 3.160000 |

Unique Subject Identifier=2507000000-0014

Assay variable : PTINR\_VAL1 PT-INR Value

| N | Mean     | Standard Deviation | Minimum  | Maximum  |
|---|----------|--------------------|----------|----------|
| 5 | 2.138000 | 0.1359044          | 1.970000 | 2.300000 |

Unique Subject Identifier=2507000000-0016

Assay variable : PTINR\_VAL1 PT-INR Value

| N | Mean     | Standard Deviation | Minimum  | Maximum  |
|---|----------|--------------------|----------|----------|
| 1 | 2.110000 |                    | 2.110000 | 2.110000 |

Unique Subject Identifier=2507000000-0019

Assay variable : PTINR\_VAL1 PT-INR Value

N Mean Standard Deviation Minimum Maximum

---

|   |           |           |           |           |
|---|-----------|-----------|-----------|-----------|
| 5 | 1.7300000 | 0.2517936 | 1.5500000 | 2.1300000 |
|---|-----------|-----------|-----------|-----------|

---

Laboratory tests at the time of obtaining Table 2-6 consent, according to the presence or absence of proton-pump inhibitors

Unique Subject Identifier=2511011000-0001

MEANS Procedure

Assay variable : PTINR\_VAL1 PT-INR Value

N Mean Standard Deviation Minimum Maximum

---

|   |           |           |           |           |
|---|-----------|-----------|-----------|-----------|
| 6 | 2.1833333 | 0.7521081 | 1.5000000 | 3.4000000 |
|---|-----------|-----------|-----------|-----------|

---

Unique Subject Identifier=2511011000-0002

Assay variable : PTINR\_VAL1 PT-INR Value

N Mean Standard Deviation Minimum Maximum

---

|   |           |           |           |           |
|---|-----------|-----------|-----------|-----------|
| 5 | 1.6800000 | 0.1303840 | 1.6000000 | 1.9000000 |
|---|-----------|-----------|-----------|-----------|

---

Unique Subject Identifier=2511011000-0004

Assay variable : PTINR\_VAL1 PT-INR Value

N Mean Standard Deviation Minimum Maximum

---

|   |           |           |           |           |
|---|-----------|-----------|-----------|-----------|
| 5 | 2.2460000 | 0.3950696 | 1.9000000 | 2.9000000 |
|---|-----------|-----------|-----------|-----------|

---

Unique Subject Identifier=2511011000-0007

Assay variable : PTINR\_VAL1 PT-INR Value

N Mean Standard Deviation Minimum Maximum

---

|   |          |           |          |          |
|---|----------|-----------|----------|----------|
| 6 | 1.333333 | 0.1632993 | 1.200000 | 1.600000 |
|---|----------|-----------|----------|----------|

---



Laboratory tests at the time of obtaining Table 2-6 consent, according to the presence or absence of proton-pump inhibitors

Unique Subject Identifier=2511011000-0008

MEANS Procedure

Assay variable : PTINR\_VAL1 PT-INR Value

N Mean Standard Deviation Minimum Maximum

---

|   |           |           |           |           |
|---|-----------|-----------|-----------|-----------|
| 5 | 2.2200000 | 0.2387467 | 2.0000000 | 2.6000000 |
|---|-----------|-----------|-----------|-----------|

---

Unique Subject Identifier=2511011000-0023

Assay variable : PTINR\_VAL1 PT-INR Value

N Mean Standard Deviation Minimum Maximum

---

|   |           |           |           |           |
|---|-----------|-----------|-----------|-----------|
| 6 | 2.2333333 | 0.3747355 | 1.8800000 | 2.9000000 |
|---|-----------|-----------|-----------|-----------|

---

Unique Subject Identifier=2511011000-0025

Assay variable : PTINR\_VAL1 PT-INR Value

N Mean Standard Deviation Minimum Maximum

---

|   |           |           |           |           |
|---|-----------|-----------|-----------|-----------|
| 6 | 1.5833333 | 0.1940790 | 1.3000000 | 1.8000000 |
|---|-----------|-----------|-----------|-----------|

---

Unique Subject Identifier=2511011000-0027

Assay variable : PTINR\_VAL1 PT-INR Value

N Mean Standard Deviation Minimum Maximum

---

|   |           |           |           |           |
|---|-----------|-----------|-----------|-----------|
| 6 | 2.2033333 | 0.6986177 | 1.5000000 | 3.3000000 |
|---|-----------|-----------|-----------|-----------|

---

Laboratory tests at the time of obtaining Table 2-6 consent, according to the presence or absence of proton-pump inhibitors

Unique Subject Identifier=2511011000-0033

MEANS Procedure

Assay variable : PTINR\_VAL1 PT-INR Value

N Mean Standard Deviation Minimum Maximum

---

|   |           |           |           |           |
|---|-----------|-----------|-----------|-----------|
| 6 | 1.3833333 | 0.2786874 | 1.1000000 | 1.9000000 |
|---|-----------|-----------|-----------|-----------|

---

Unique Subject Identifier=2511011000-0044

Assay variable : PTINR\_VAL1 PT-INR Value

N Mean Standard Deviation Minimum Maximum

---

|   |           |           |           |           |
|---|-----------|-----------|-----------|-----------|
| 6 | 1.8000000 | 0.5549775 | 1.4000000 | 2.8000000 |
|---|-----------|-----------|-----------|-----------|

---

Unique Subject Identifier=2511011000-0050

Assay variable : PTINR\_VAL1 PT-INR Value

N Mean Standard Deviation Minimum Maximum

---

|   |           |           |           |           |
|---|-----------|-----------|-----------|-----------|
| 5 | 2.1240000 | 0.4897755 | 1.9000000 | 3.0000000 |
|---|-----------|-----------|-----------|-----------|

---

Unique Subject Identifier=2511011000-0055

Assay variable : PTINR\_VAL1 PT-INR Value

N Mean Standard Deviation Minimum Maximum

---

|   |           |           |           |           |
|---|-----------|-----------|-----------|-----------|
| 6 | 1.7000000 | 0.6164414 | 1.3000000 | 2.9000000 |
|---|-----------|-----------|-----------|-----------|

---

Laboratory tests at the time of obtaining Table 2-6 consent, according to the presence or absence of proton-pump inhibitors

Unique Subject Identifier=2511011000-0056

MEANS Procedure

Assay variable : PTINR\_VAL1 PT-INR Value

N Mean Standard Deviation Minimum Maximum

---

|   |           |           |           |           |
|---|-----------|-----------|-----------|-----------|
| 6 | 1.7300000 | 0.1892089 | 1.5000000 | 2.0000000 |
|---|-----------|-----------|-----------|-----------|

---

Unique Subject Identifier=2511011000-0065

Assay variable : PTINR\_VAL1 PT-INR Value

N Mean Standard Deviation Minimum Maximum

---

|   |           |           |           |           |
|---|-----------|-----------|-----------|-----------|
| 6 | 1.7333333 | 0.1632993 | 1.5000000 | 1.9000000 |
|---|-----------|-----------|-----------|-----------|

---

Unique Subject Identifier=2511011000-0067

Assay variable : PTINR\_VAL1 PT-INR Value

N Mean Standard Deviation Minimum Maximum

---

|   |           |           |           |           |
|---|-----------|-----------|-----------|-----------|
| 6 | 1.9500000 | 0.2073644 | 1.7000000 | 2.3000000 |
|---|-----------|-----------|-----------|-----------|

---

Unique Subject Identifier=2511011000-0075

Assay variable : PTINR\_VAL1 PT-INR Value

N Mean Standard Deviation Minimum Maximum

---

|   |          |           |          |          |
|---|----------|-----------|----------|----------|
| 5 | 2.120000 | 0.2683282 | 1.900000 | 2.500000 |
|---|----------|-----------|----------|----------|

---

Laboratory tests at the time of obtaining Table 2-6 consent, according to the presence or absence of proton-pump inhibitors

Unique Subject Identifier=2522011111-0002

MEANS Procedure

Assay variable : PTINR\_VAL1 PT-INR Value

| N | Mean      | Standard Deviation | Minimum   | Maximum   |
|---|-----------|--------------------|-----------|-----------|
| 2 | 2.2150000 | 1.3364318          | 1.2700000 | 3.1600000 |

Unique Subject Identifier=2524011001-0001

Assay variable : PTINR\_VAL1 PT-INR Value

| N | Mean      | Standard Deviation | Minimum   | Maximum   |
|---|-----------|--------------------|-----------|-----------|
| 1 | 1.7700000 |                    | 1.7700000 | 1.7700000 |

Unique Subject Identifier=2524011001-0002

Assay variable : PTINR\_VAL1 PT-INR Value

| N | Mean      | Standard Deviation | Minimum   | Maximum   |
|---|-----------|--------------------|-----------|-----------|
| 2 | 1.8400000 | 0.2545584          | 1.6600000 | 2.0200000 |

Unique Subject Identifier=2527000000-0008

Assay variable : PTINR\_VAL1 PT-INR Value

N Mean Standard Deviation Minimum Maximum

---

|   |           |           |           |           |
|---|-----------|-----------|-----------|-----------|
| 6 | 2.0666667 | 0.2658320 | 1.8000000 | 2.4000000 |
|---|-----------|-----------|-----------|-----------|

---



Laboratory tests at the time of obtaining Table 2-6 consent, according to the presence or absence of proton-pump inhibitors

Unique Subject Identifier=2527000000-0009

MEANS Procedure

Assay variable : PTINR\_VAL1 PT-INR Value

| N | Mean      | Standard Deviation | Minimum   | Maximum   |
|---|-----------|--------------------|-----------|-----------|
| 6 | 1.9833333 | 0.2483277          | 1.5000000 | 2.2000000 |

Unique Subject Identifier=2527000000-0012

Assay variable : PTINR\_VAL1 PT-INR Value

| N | Mean      | Standard Deviation | Minimum   | Maximum   |
|---|-----------|--------------------|-----------|-----------|
| 5 | 1.6400000 | 0.1516575          | 1.5000000 | 1.8000000 |

Unique Subject Identifier=2527000000-0016

Assay variable : PTINR\_VAL1 PT-INR Value

| N | Mean      | Standard Deviation | Minimum   | Maximum   |
|---|-----------|--------------------|-----------|-----------|
| 6 | 2.0666667 | 0.2658320          | 1.7000000 | 2.4000000 |

Unique Subject Identifier=2527000000-0022

Assay variable : PTINR\_VAL1 PT-INR Value

N Mean Standard Deviation Minimum Maximum

---

|   |          |           |          |          |
|---|----------|-----------|----------|----------|
| 5 | 1.860000 | 0.6465292 | 1.400000 | 3.000000 |
|---|----------|-----------|----------|----------|

---

Laboratory tests at the time of obtaining Table 2-6 consent, according to the presence or absence of proton-pump inhibitors

Unique Subject Identifier=2527000000-0023

MEANS Procedure

Assay variable : PTINR\_VAL1 PT-INR Value

N Mean Standard Deviation Minimum Maximum

---

|   |           |           |           |           |
|---|-----------|-----------|-----------|-----------|
| 6 | 2.3666667 | 0.3265986 | 2.1000000 | 3.0000000 |
|---|-----------|-----------|-----------|-----------|

---

Unique Subject Identifier=2527000000-0024

Assay variable : PTINR\_VAL1 PT-INR Value

N Mean Standard Deviation Minimum Maximum

---

|   |           |           |           |           |
|---|-----------|-----------|-----------|-----------|
| 6 | 2.1166667 | 0.5154286 | 1.5000000 | 2.9000000 |
|---|-----------|-----------|-----------|-----------|

---

Unique Subject Identifier=2527000000-0029

Assay variable : PTINR\_VAL1 PT-INR Value

N Mean Standard Deviation Minimum Maximum

---

|   |           |           |           |           |
|---|-----------|-----------|-----------|-----------|
| 6 | 2.0166667 | 0.4445972 | 1.5000000 | 2.6000000 |
|---|-----------|-----------|-----------|-----------|

---

Unique Subject Identifier=2527000000-0033

Assay variable : PTINR\_VAL1 PT-INR Value

N Mean Standard Deviation Minimum Maximum

---

|   |           |           |           |           |
|---|-----------|-----------|-----------|-----------|
| 5 | 1.7800000 | 0.2167948 | 1.5000000 | 2.1000000 |
|---|-----------|-----------|-----------|-----------|

---

Laboratory tests at the time of obtaining Table 2-6 consent, according to the presence or absence of proton-pump inhibitors

Unique Subject Identifier=2527000000-0036

MEANS Procedure

Assay variable : PTINR\_VAL1 PT-INR Value

N Mean Standard Deviation Minimum Maximum

---

|   |           |           |           |           |
|---|-----------|-----------|-----------|-----------|
| 6 | 2.0333333 | 0.3265986 | 1.6000000 | 2.5000000 |
|---|-----------|-----------|-----------|-----------|

---

Unique Subject Identifier=2527000000-0037

Assay variable : PTINR\_VAL1 PT-INR Value

N Mean Standard Deviation Minimum Maximum

---

|   |           |           |           |           |
|---|-----------|-----------|-----------|-----------|
| 6 | 2.0333333 | 0.2422120 | 1.8000000 | 2.4000000 |
|---|-----------|-----------|-----------|-----------|

---

Unique Subject Identifier=2527000000-0042

Assay variable : PTINR\_VAL1 PT-INR Value

N Mean Standard Deviation Minimum Maximum

---

|   |           |           |           |           |
|---|-----------|-----------|-----------|-----------|
| 6 | 2.0666667 | 0.4273952 | 1.6000000 | 2.8000000 |
|---|-----------|-----------|-----------|-----------|

---

Unique Subject Identifier=2527000000-0048

Assay variable : PTINR\_VAL1 PT-INR Value

N Mean Standard Deviation Minimum Maximum

---

|   |           |           |           |           |
|---|-----------|-----------|-----------|-----------|
| 6 | 1.6833333 | 0.2401388 | 1.3000000 | 1.9000000 |
|---|-----------|-----------|-----------|-----------|

---

Laboratory tests at the time of obtaining Table 2-6 consent, according to the presence or absence of proton-pump inhibitors

Unique Subject Identifier=2527000000-0050

MEANS Procedure

Assay variable : PTINR\_VAL1 PT-INR Value

N Mean Standard Deviation Minimum Maximum

---

|   |           |           |           |           |
|---|-----------|-----------|-----------|-----------|
| 6 | 1.9500000 | 0.1224745 | 1.8000000 | 2.1000000 |
|---|-----------|-----------|-----------|-----------|

---

Unique Subject Identifier=2527000000-0058

Assay variable : PTINR\_VAL1 PT-INR Value

N Mean Standard Deviation Minimum Maximum

---

|   |           |           |           |           |
|---|-----------|-----------|-----------|-----------|
| 6 | 1.5500000 | 0.2345208 | 1.3000000 | 2.0000000 |
|---|-----------|-----------|-----------|-----------|

---

Unique Subject Identifier=2527000000-0060

Assay variable : PTINR\_VAL1 PT-INR Value

N Mean Standard Deviation Minimum Maximum

---

|   |           |           |           |           |
|---|-----------|-----------|-----------|-----------|
| 5 | 1.5800000 | 0.1303840 | 1.4000000 | 1.7000000 |
|---|-----------|-----------|-----------|-----------|

---

Unique Subject Identifier=2527000000-0063

Assay variable : PTINR\_VAL1 PT-INR Value

N Mean Standard Deviation Minimum Maximum

---

|   |           |           |           |           |
|---|-----------|-----------|-----------|-----------|
| 6 | 2.0666667 | 0.6055301 | 1.4000000 | 3.0000000 |
|---|-----------|-----------|-----------|-----------|

---



Laboratory tests at the time of obtaining Table 2-6 consent, according to the presence or absence of proton-pump inhibitors

Unique Subject Identifier=2527000000-0065

MEANS Procedure

Assay variable : PTINR\_VAL1 PT-INR Value

N Mean Standard Deviation Minimum Maximum

---

|   |           |           |           |           |
|---|-----------|-----------|-----------|-----------|
| 6 | 2.3000000 | 0.5366563 | 1.7000000 | 3.2000000 |
|---|-----------|-----------|-----------|-----------|

---

Unique Subject Identifier=2527000000-0067

Assay variable : PTINR\_VAL1 PT-INR Value

N Mean Standard Deviation Minimum Maximum

---

|   |           |           |           |           |
|---|-----------|-----------|-----------|-----------|
| 6 | 1.8833333 | 0.1169045 | 1.8000000 | 2.1000000 |
|---|-----------|-----------|-----------|-----------|

---

Unique Subject Identifier=2527000000-0068

Assay variable : PTINR\_VAL1 PT-INR Value

N Mean Standard Deviation Minimum Maximum

---

|   |           |           |           |           |
|---|-----------|-----------|-----------|-----------|
| 5 | 1.8400000 | 0.3577709 | 1.3000000 | 2.2000000 |
|---|-----------|-----------|-----------|-----------|

---

Unique Subject Identifier=2527000000-0069

Assay variable : PTINR\_VAL1 PT-INR Value

N Mean Standard Deviation Minimum Maximum

---

|   |           |           |           |           |
|---|-----------|-----------|-----------|-----------|
| 6 | 1.9000000 | 0.1897367 | 1.7000000 | 2.1000000 |
|---|-----------|-----------|-----------|-----------|

---

Laboratory tests at the time of obtaining Table 2-6 consent, according to the presence or absence of proton-pump inhibitors

Unique Subject Identifier=2527000000-0070

MEANS Procedure

Assay variable : PTINR\_VAL1 PT-INR Value

N Mean Standard Deviation Minimum Maximum

---

|   |           |           |           |           |
|---|-----------|-----------|-----------|-----------|
| 6 | 1.7166667 | 0.1471960 | 1.5000000 | 1.9000000 |
|---|-----------|-----------|-----------|-----------|

---

Unique Subject Identifier=2527000000-0071

Assay variable : PTINR\_VAL1 PT-INR Value

N Mean Standard Deviation Minimum Maximum

---

|   |           |           |           |           |
|---|-----------|-----------|-----------|-----------|
| 6 | 2.0166667 | 0.2639444 | 1.6000000 | 2.4000000 |
|---|-----------|-----------|-----------|-----------|

---

Unique Subject Identifier=2527000000-0073

Assay variable : PTINR\_VAL1 PT-INR Value

N Mean Standard Deviation Minimum Maximum

---

|   |           |           |           |           |
|---|-----------|-----------|-----------|-----------|
| 6 | 2.1166667 | 0.3868678 | 1.6000000 | 2.6000000 |
|---|-----------|-----------|-----------|-----------|

---

Unique Subject Identifier=2527000000-0074

Assay variable : PTINR\_VAL1 PT-INR Value

N Mean Standard Deviation Minimum Maximum

---

|   |          |          |          |          |
|---|----------|----------|----------|----------|
| 6 | 2.250000 | 0.492953 | 1.600000 | 2.900000 |
|---|----------|----------|----------|----------|

---

Laboratory tests at the time of obtaining Table 2-6 consent, according to the presence or absence of proton-pump inhibitors

Unique Subject Identifier=2527000000-0075

MEANS Procedure

Assay variable : PTINR\_VAL1 PT-INR Value

N Mean Standard Deviation Minimum Maximum

---

|   |           |           |           |           |
|---|-----------|-----------|-----------|-----------|
| 5 | 1.6600000 | 0.6107373 | 1.1000000 | 2.5000000 |
|---|-----------|-----------|-----------|-----------|

---

Unique Subject Identifier=2527000000-0076

Assay variable : PTINR\_VAL1 PT-INR Value

N Mean Standard Deviation Minimum Maximum

---

|   |           |           |           |           |
|---|-----------|-----------|-----------|-----------|
| 5 | 1.5800000 | 0.3420526 | 1.2000000 | 2.1000000 |
|---|-----------|-----------|-----------|-----------|

---

Unique Subject Identifier=2527000000-0077

Assay variable : PTINR\_VAL1 PT-INR Value

N Mean Standard Deviation Minimum Maximum

---

|   |           |           |           |           |
|---|-----------|-----------|-----------|-----------|
| 6 | 1.8333333 | 0.2065591 | 1.6000000 | 2.2000000 |
|---|-----------|-----------|-----------|-----------|

---

Unique Subject Identifier=2535000000-0001

Assay variable : PTINR\_VAL1 PT-INR Value

N Mean Standard Deviation Minimum Maximum

---

|   |           |           |           |           |
|---|-----------|-----------|-----------|-----------|
| 6 | 2.3833333 | 0.4445972 | 1.6000000 | 2.7000000 |
|---|-----------|-----------|-----------|-----------|

---

Laboratory tests at the time of obtaining Table 2-6 consent, according to the presence or absence of proton-pump inhibitors

Unique Subject Identifier=2560011100-0001

MEANS Procedure

Assay variable : PTINR\_VAL1 PT-INR Value

N Mean Standard Deviation Minimum Maximum

---

|   |           |           |           |           |
|---|-----------|-----------|-----------|-----------|
| 6 | 1.0983333 | 0.0495648 | 1.0300000 | 1.1400000 |
|---|-----------|-----------|-----------|-----------|

---

Unique Subject Identifier=2560011100-0003

Assay variable : PTINR\_VAL1 PT-INR Value

N Mean Standard Deviation Minimum Maximum

---

|   |           |           |           |           |
|---|-----------|-----------|-----------|-----------|
| 2 | 1.5850000 | 0.1343503 | 1.4900000 | 1.6800000 |
|---|-----------|-----------|-----------|-----------|

---

Unique Subject Identifier=2560011100-0005

Assay variable : PTINR\_VAL1 PT-INR Value

N Mean Standard Deviation Minimum Maximum

---

|   |           |  |           |           |
|---|-----------|--|-----------|-----------|
| 1 | 1.7000000 |  | 1.7000000 | 1.7000000 |
|---|-----------|--|-----------|-----------|

---

Unique Subject Identifier=2560011100-0006

Assay variable : PTINR\_VAL1 PT-INR Value

N Mean Standard Deviation Minimum Maximum

---

|   |          |  |          |          |
|---|----------|--|----------|----------|
| 1 | 1.600000 |  | 1.600000 | 1.600000 |
|---|----------|--|----------|----------|

---



Laboratory tests at the time of obtaining Table 2-6 consent, according to the presence or absence of proton-pump inhibitors

Unique Subject Identifier=2560011100-0007

MEANS Procedure

Assay variable : PTINR\_VAL1 PT-INR Value

N Mean Standard Deviation Minimum Maximum

---

|   |           |           |           |           |
|---|-----------|-----------|-----------|-----------|
| 3 | 1.4000000 | 0.4000000 | 1.0000000 | 1.8000000 |
|---|-----------|-----------|-----------|-----------|

---

Unique Subject Identifier=2560011100-0008

Assay variable : PTINR\_VAL1 PT-INR Value

N Mean Standard Deviation Minimum Maximum

---

|   |           |  |           |           |
|---|-----------|--|-----------|-----------|
| 1 | 1.5000000 |  | 1.5000000 | 1.5000000 |
|---|-----------|--|-----------|-----------|

---

Unique Subject Identifier=2582010000-0002

Assay variable : PTINR\_VAL1 PT-INR Value

N Mean Standard Deviation Minimum Maximum

---

|   |           |           |           |           |
|---|-----------|-----------|-----------|-----------|
| 4 | 2.4450000 | 0.3622614 | 2.1800000 | 2.9800000 |
|---|-----------|-----------|-----------|-----------|

---

Unique Subject Identifier=2582010000-0004

Assay variable : PTINR\_VAL1 PT-INR Value

N Mean Standard Deviation Minimum Maximum

---

|   |          |           |          |          |
|---|----------|-----------|----------|----------|
| 6 | 2.135000 | 0.3440203 | 1.800000 | 2.640000 |
|---|----------|-----------|----------|----------|

---

Laboratory tests at the time of obtaining Table 2-6 consent, according to the presence or absence of proton-pump inhibitors

Unique Subject Identifier=2582010000-0006

MEANS Procedure

Assay variable : PTINR\_VAL1 PT-INR Value

N Mean Standard Deviation Minimum Maximum

---

|   |           |           |           |           |
|---|-----------|-----------|-----------|-----------|
| 6 | 1.9433333 | 0.2124774 | 1.6500000 | 2.2000000 |
|---|-----------|-----------|-----------|-----------|

---

Unique Subject Identifier=2582010000-0007

Assay variable : PTINR\_VAL1 PT-INR Value

N Mean Standard Deviation Minimum Maximum

---

|   |           |           |           |           |
|---|-----------|-----------|-----------|-----------|
| 6 | 2.0100000 | 0.1256981 | 1.8000000 | 2.1500000 |
|---|-----------|-----------|-----------|-----------|

---

Unique Subject Identifier=2582010000-0015

Assay variable : PTINR\_VAL1 PT-INR Value

N Mean Standard Deviation Minimum Maximum

---

|   |           |           |           |           |
|---|-----------|-----------|-----------|-----------|
| 6 | 1.7083333 | 0.2526196 | 1.3400000 | 2.0500000 |
|---|-----------|-----------|-----------|-----------|

---

Unique Subject Identifier=2582010000-0016

Assay variable : PTINR\_VAL1 PT-INR Value

N Mean Standard Deviation Minimum Maximum

---

|   |           |           |           |           |
|---|-----------|-----------|-----------|-----------|
| 6 | 1.4516667 | 0.0798540 | 1.3800000 | 1.5800000 |
|---|-----------|-----------|-----------|-----------|

---

Laboratory tests at the time of obtaining Table 2-6 consent, according to the presence or absence of proton-pump inhibitors

Unique Subject Identifier=2582010000-0018

MEANS Procedure

Assay variable : PTINR\_VAL1 PT-INR Value

N Mean Standard Deviation Minimum Maximum

---

|   |           |           |           |           |
|---|-----------|-----------|-----------|-----------|
| 6 | 1.5866667 | 0.0688961 | 1.4700000 | 1.6500000 |
|---|-----------|-----------|-----------|-----------|

---

Unique Subject Identifier=2582010000-0019

Assay variable : PTINR\_VAL1 PT-INR Value

N Mean Standard Deviation Minimum Maximum

---

|   |           |           |           |           |
|---|-----------|-----------|-----------|-----------|
| 6 | 1.4000000 | 0.4267552 | 1.0100000 | 2.1000000 |
|---|-----------|-----------|-----------|-----------|

---

Unique Subject Identifier=2582010000-0020

Assay variable : PTINR\_VAL1 PT-INR Value

N Mean Standard Deviation Minimum Maximum

---

|   |           |           |           |           |
|---|-----------|-----------|-----------|-----------|
| 6 | 1.9683333 | 0.2100873 | 1.7300000 | 2.2100000 |
|---|-----------|-----------|-----------|-----------|

---

Unique Subject Identifier=2582010000-0025

Assay variable : PTINR\_VAL1 PT-INR Value

N Mean Standard Deviation Minimum Maximum

---

|   |           |           |           |           |
|---|-----------|-----------|-----------|-----------|
| 6 | 1.7133333 | 0.1846799 | 1.6300000 | 2.0900000 |
|---|-----------|-----------|-----------|-----------|

---

Laboratory tests at the time of obtaining Table 2-6 consent, according to the presence or absence of proton-pump inhibitors

Unique Subject Identifier=2582010000-0029

MEANS Procedure

Assay variable : PTINR\_VAL1 PT-INR Value

N Mean Standard Deviation Minimum Maximum

---

|   |           |           |           |           |
|---|-----------|-----------|-----------|-----------|
| 5 | 1.5660000 | 0.2020643 | 1.3400000 | 1.7900000 |
|---|-----------|-----------|-----------|-----------|

---

Unique Subject Identifier=2600000000-0001

Assay variable : PTINR\_VAL1 PT-INR Value

N Mean Standard Deviation Minimum Maximum

---

|   |           |           |           |           |
|---|-----------|-----------|-----------|-----------|
| 6 | 2.2500000 | 0.2738613 | 1.8000000 | 2.5000000 |
|---|-----------|-----------|-----------|-----------|

---

Unique Subject Identifier=2600000000-0002

Assay variable : PTINR\_VAL1 PT-INR Value

N Mean Standard Deviation Minimum Maximum

---

|   |           |           |           |           |
|---|-----------|-----------|-----------|-----------|
| 6 | 1.7333333 | 0.1505545 | 1.6000000 | 1.9000000 |
|---|-----------|-----------|-----------|-----------|

---

Unique Subject Identifier=2603011011-0001

Assay variable : PTINR\_VAL1 PT-INR Value

N Mean Standard Deviation Minimum Maximum

---

|   |          |           |          |          |
|---|----------|-----------|----------|----------|
| 6 | 2.166667 | 0.3669696 | 1.500000 | 2.600000 |
|---|----------|-----------|----------|----------|

---



Laboratory tests at the time of obtaining Table 2-6 consent, according to the presence or absence of proton-pump inhibitors

Unique Subject Identifier=2603011011-0002

MEANS Procedure

Assay variable : PTINR\_VAL1 PT-INR Value

N Mean Standard Deviation Minimum Maximum

---

|   |           |           |           |           |
|---|-----------|-----------|-----------|-----------|
| 6 | 2.0333333 | 0.3141125 | 1.8000000 | 2.6000000 |
|---|-----------|-----------|-----------|-----------|

---

Unique Subject Identifier=2603011011-0012

Assay variable : PTINR\_VAL1 PT-INR Value

N Mean Standard Deviation Minimum Maximum

---

|   |           |           |           |           |
|---|-----------|-----------|-----------|-----------|
| 6 | 2.1833333 | 0.4445972 | 1.7000000 | 2.9000000 |
|---|-----------|-----------|-----------|-----------|

---

Unique Subject Identifier=2603011011-0015

Assay variable : PTINR\_VAL1 PT-INR Value

N Mean Standard Deviation Minimum Maximum

---

|   |           |           |           |           |
|---|-----------|-----------|-----------|-----------|
| 6 | 2.2000000 | 0.4289522 | 1.7000000 | 2.9000000 |
|---|-----------|-----------|-----------|-----------|

---

Unique Subject Identifier=2603011011-0025

Assay variable : PTINR\_VAL1 PT-INR Value

N Mean Standard Deviation Minimum Maximum

---

|   |           |           |           |           |
|---|-----------|-----------|-----------|-----------|
| 6 | 2.2833333 | 0.1940790 | 2.0000000 | 2.5000000 |
|---|-----------|-----------|-----------|-----------|

---

Laboratory tests at the time of obtaining Table 2-6 consent, according to the presence or absence of proton-pump inhibitors

Unique Subject Identifier=2603011011-0029

MEANS Procedure

Assay variable : PTINR\_VAL1 PT-INR Value

N Mean Standard Deviation Minimum Maximum

---

|   |           |           |           |           |
|---|-----------|-----------|-----------|-----------|
| 6 | 2.1000000 | 0.5865151 | 1.5000000 | 2.8000000 |
|---|-----------|-----------|-----------|-----------|

---

Unique Subject Identifier=2603011011-0032

Assay variable : PTINR\_VAL1 PT-INR Value

N Mean Standard Deviation Minimum Maximum

---

|   |           |           |           |           |
|---|-----------|-----------|-----------|-----------|
| 6 | 2.0666667 | 0.2065591 | 1.7000000 | 2.3000000 |
|---|-----------|-----------|-----------|-----------|

---

Unique Subject Identifier=2603011011-0035

Assay variable : PTINR\_VAL1 PT-INR Value

N Mean Standard Deviation Minimum Maximum

---

|   |           |           |           |           |
|---|-----------|-----------|-----------|-----------|
| 6 | 2.2166667 | 0.2136976 | 2.0000000 | 2.6000000 |
|---|-----------|-----------|-----------|-----------|

---

Unique Subject Identifier=2603011011-0041

Assay variable : PTINR\_VAL1 PT-INR Value

N Mean Standard Deviation Minimum Maximum

---

|   |           |           |           |           |
|---|-----------|-----------|-----------|-----------|
| 6 | 2.2166667 | 0.3600926 | 1.6000000 | 2.7000000 |
|---|-----------|-----------|-----------|-----------|

---

Laboratory tests at the time of obtaining Table 2-6 consent, according to the presence or absence of proton-pump inhibitors

Unique Subject Identifier=2605010000-0003

MEANS Procedure

Assay variable : PTINR\_VAL1 PT-INR Value

| N | Mean      | Standard Deviation | Minimum   | Maximum   |
|---|-----------|--------------------|-----------|-----------|
| 3 | 1.4800000 | 0.3666061          | 1.1600000 | 1.8800000 |

Unique Subject Identifier=2605010000-0014

Assay variable : PTINR\_VAL1 PT-INR Value

| N | Mean      | Standard Deviation | Minimum   | Maximum   |
|---|-----------|--------------------|-----------|-----------|
| 5 | 2.0000000 | 0.3970516          | 1.4700000 | 2.5400000 |

Unique Subject Identifier=2605010000-0015

Assay variable : PTINR\_VAL1 PT-INR Value

| N | Mean      | Standard Deviation | Minimum   | Maximum   |
|---|-----------|--------------------|-----------|-----------|
| 5 | 2.0100000 | 0.2220360          | 1.6900000 | 2.2400000 |

Unique Subject Identifier=2606011111-0002

Assay variable : PTINR\_VAL1 PT-INR Value

N Mean Standard Deviation Minimum Maximum

---

|   |          |           |          |          |
|---|----------|-----------|----------|----------|
| 2 | 1.410000 | 0.1697056 | 1.290000 | 1.530000 |
|---|----------|-----------|----------|----------|

---

Laboratory tests at the time of obtaining Table 2-6 consent, according to the presence or absence of proton-pump inhibitors

Unique Subject Identifier=2606011111-0019

MEANS Procedure

Assay variable : PTINR\_VAL1 PT-INR Value

N Mean Standard Deviation Minimum Maximum

---

|   |           |           |           |           |
|---|-----------|-----------|-----------|-----------|
| 6 | 1.5516667 | 0.2847045 | 1.1100000 | 1.9400000 |
|---|-----------|-----------|-----------|-----------|

---

Unique Subject Identifier=2606011111-0029

Assay variable : PTINR\_VAL1 PT-INR Value

N Mean Standard Deviation Minimum Maximum

---

|   |           |           |           |           |
|---|-----------|-----------|-----------|-----------|
| 6 | 2.1216667 | 0.5464583 | 1.1400000 | 2.6900000 |
|---|-----------|-----------|-----------|-----------|

---

Unique Subject Identifier=2606011111-0036

Assay variable : PTINR\_VAL1 PT-INR Value

N Mean Standard Deviation Minimum Maximum

---

|   |           |           |           |           |
|---|-----------|-----------|-----------|-----------|
| 6 | 2.1183333 | 0.1847611 | 1.8600000 | 2.4200000 |
|---|-----------|-----------|-----------|-----------|

---

Unique Subject Identifier=2606011111-0038

Assay variable : PTINR\_VAL1 PT-INR Value

N Mean Standard Deviation Minimum Maximum

---

|   |           |           |           |           |
|---|-----------|-----------|-----------|-----------|
| 3 | 1.8033333 | 0.0723418 | 1.7200000 | 1.8500000 |
|---|-----------|-----------|-----------|-----------|

---



Laboratory tests at the time of obtaining Table 2-6 consent, according to the presence or absence of proton-pump inhibitors

Unique Subject Identifier=2606011111-0043

MEANS Procedure

Assay variable : PTINR\_VAL1 PT-INR Value

N Mean Standard Deviation Minimum Maximum

---

|   |           |           |           |           |
|---|-----------|-----------|-----------|-----------|
| 3 | 1.9833333 | 0.1844813 | 1.7800000 | 2.1400000 |
|---|-----------|-----------|-----------|-----------|

---

Unique Subject Identifier=2606011111-0046

Assay variable : PTINR\_VAL1 PT-INR Value

N Mean Standard Deviation Minimum Maximum

---

|   |           |           |           |           |
|---|-----------|-----------|-----------|-----------|
| 3 | 2.3666667 | 0.0321455 | 2.3300000 | 2.3900000 |
|---|-----------|-----------|-----------|-----------|

---

Unique Subject Identifier=2606011111-0087

Assay variable : PTINR\_VAL1 PT-INR Value

N Mean Standard Deviation Minimum Maximum

---

|   |           |           |           |           |
|---|-----------|-----------|-----------|-----------|
| 5 | 1.6600000 | 0.6224950 | 1.0100000 | 2.5700000 |
|---|-----------|-----------|-----------|-----------|

---

Unique Subject Identifier=2606011111-0090

Assay variable : PTINR\_VAL1 PT-INR Value

N Mean Standard Deviation Minimum Maximum

---

|   |           |           |           |           |
|---|-----------|-----------|-----------|-----------|
| 5 | 1.8240000 | 0.2786216 | 1.3900000 | 2.1600000 |
|---|-----------|-----------|-----------|-----------|

---

Laboratory tests at the time of obtaining Table 2-6 consent, according to the presence or absence of proton-pump inhibitors

Unique Subject Identifier=2606011111-0091

MEANS Procedure

Assay variable : PTINR\_VAL1 PT-INR Value

N Mean Standard Deviation Minimum Maximum

---

|   |           |           |           |           |
|---|-----------|-----------|-----------|-----------|
| 4 | 1.7650000 | 0.1866369 | 1.5800000 | 2.0100000 |
|---|-----------|-----------|-----------|-----------|

---

Unique Subject Identifier=2606011111-0098

Assay variable : PTINR\_VAL1 PT-INR Value

N Mean Standard Deviation Minimum Maximum

---

|   |           |           |           |           |
|---|-----------|-----------|-----------|-----------|
| 5 | 1.3240000 | 0.0832466 | 1.2600000 | 1.4200000 |
|---|-----------|-----------|-----------|-----------|

---

Unique Subject Identifier=2606011111-0100

Assay variable : PTINR\_VAL1 PT-INR Value

N Mean Standard Deviation Minimum Maximum

---

|   |           |           |           |           |
|---|-----------|-----------|-----------|-----------|
| 6 | 1.0500000 | 0.1219836 | 0.9500000 | 1.2900000 |
|---|-----------|-----------|-----------|-----------|

---

Unique Subject Identifier=2606011111-0101

Assay variable : PTINR\_VAL1 PT-INR Value

N Mean Standard Deviation Minimum Maximum

---

|   |           |           |           |           |
|---|-----------|-----------|-----------|-----------|
| 6 | 1.4483333 | 0.3348084 | 0.9500000 | 1.8500000 |
|---|-----------|-----------|-----------|-----------|

---

Laboratory tests at the time of obtaining Table 2-6 consent, according to the presence or absence of proton-pump inhibitors

Unique Subject Identifier=2606011111-0104

MEANS Procedure

Assay variable : PTINR\_VAL1 PT-INR Value

N Mean Standard Deviation Minimum Maximum

---

|   |           |           |           |           |
|---|-----------|-----------|-----------|-----------|
| 3 | 1.8133333 | 0.4743768 | 1.5100000 | 2.3600000 |
|---|-----------|-----------|-----------|-----------|

---

Unique Subject Identifier=2606011111-0124

Assay variable : PTINR\_VAL1 PT-INR Value

N Mean Standard Deviation Minimum Maximum

---

|   |           |  |           |           |
|---|-----------|--|-----------|-----------|
| 1 | 3.5100000 |  | 3.5100000 | 3.5100000 |
|---|-----------|--|-----------|-----------|

---

Unique Subject Identifier=2606011111-0130

Assay variable : PTINR\_VAL1 PT-INR Value

N Mean Standard Deviation Minimum Maximum

---

|   |           |           |           |           |
|---|-----------|-----------|-----------|-----------|
| 6 | 1.8350000 | 0.1123833 | 1.6300000 | 1.9700000 |
|---|-----------|-----------|-----------|-----------|

---

Unique Subject Identifier=2606011111-0142

Assay variable : PTINR\_VAL1 PT-INR Value

N Mean Standard Deviation Minimum Maximum

---

|   |           |           |           |           |
|---|-----------|-----------|-----------|-----------|
| 6 | 1.9100000 | 0.4762352 | 1.4500000 | 2.7600000 |
|---|-----------|-----------|-----------|-----------|

---

Laboratory tests at the time of obtaining Table 2-6 consent, according to the presence or absence of proton-pump inhibitors

Unique Subject Identifier=2607010010-0004

MEANS Procedure

Assay variable : PTINR\_VAL1 PT-INR Value

| N | Mean      | Standard Deviation | Minimum   | Maximum   |
|---|-----------|--------------------|-----------|-----------|
| 6 | 2.4316667 | 0.3943307          | 1.7500000 | 2.7600000 |

Unique Subject Identifier=2607010010-0007

Assay variable : PTINR\_VAL1 PT-INR Value

| N | Mean      | Standard Deviation | Minimum   | Maximum   |
|---|-----------|--------------------|-----------|-----------|
| 4 | 2.1750000 | 0.1454877          | 1.9800000 | 2.3200000 |

Unique Subject Identifier=2607010010-0020

Assay variable : PTINR\_VAL1 PT-INR Value

| N | Mean      | Standard Deviation | Minimum   | Maximum   |
|---|-----------|--------------------|-----------|-----------|
| 3 | 2.2433333 | 0.6051722          | 1.6300000 | 2.8400000 |

Unique Subject Identifier=2607010010-0023

Assay variable : PTINR\_VAL1 PT-INR Value

N Mean Standard Deviation Minimum Maximum

---

|   |           |           |           |           |
|---|-----------|-----------|-----------|-----------|
| 3 | 1.6366667 | 0.2059935 | 1.4200000 | 1.8300000 |
|---|-----------|-----------|-----------|-----------|

---



Laboratory tests at the time of obtaining Table 2-6 consent, according to the presence or absence of proton-pump inhibitors

Unique Subject Identifier=2607010010-0037

MEANS Procedure

Assay variable : PTINR\_VAL1 PT-INR Value

N Mean Standard Deviation Minimum Maximum

---

|   |           |           |           |           |
|---|-----------|-----------|-----------|-----------|
| 3 | 2.0500000 | 0.4887740 | 1.5300000 | 2.5000000 |
|---|-----------|-----------|-----------|-----------|

---

Unique Subject Identifier=2607010010-0038

Assay variable : PTINR\_VAL1 PT-INR Value

N Mean Standard Deviation Minimum Maximum

---

|   |           |           |           |           |
|---|-----------|-----------|-----------|-----------|
| 4 | 2.1425000 | 0.0846069 | 2.0400000 | 2.2300000 |
|---|-----------|-----------|-----------|-----------|

---

Unique Subject Identifier=2607010010-0045

Assay variable : PTINR\_VAL1 PT-INR Value

N Mean Standard Deviation Minimum Maximum

---

|   |           |           |           |           |
|---|-----------|-----------|-----------|-----------|
| 4 | 1.5425000 | 0.0505800 | 1.4800000 | 1.6000000 |
|---|-----------|-----------|-----------|-----------|

---

Unique Subject Identifier=2607010010-0047

Assay variable : PTINR\_VAL1 PT-INR Value

N Mean Standard Deviation Minimum Maximum

---

|   |           |           |           |           |
|---|-----------|-----------|-----------|-----------|
| 3 | 1.8766667 | 0.4354691 | 1.4300000 | 2.3000000 |
|---|-----------|-----------|-----------|-----------|

---

Laboratory tests at the time of obtaining Table 2-6 consent, according to the presence or absence of proton-pump inhibitors

Unique Subject Identifier=2607010010-0058

MEANS Procedure

Assay variable : PTINR\_VAL1 PT-INR Value

N Mean Standard Deviation Minimum Maximum

---

|   |           |           |           |           |
|---|-----------|-----------|-----------|-----------|
| 6 | 2.1583333 | 0.5357394 | 1.5700000 | 3.1000000 |
|---|-----------|-----------|-----------|-----------|

---

Unique Subject Identifier=2607010010-0061

Assay variable : PTINR\_VAL1 PT-INR Value

N Mean Standard Deviation Minimum Maximum

---

|   |           |           |           |           |
|---|-----------|-----------|-----------|-----------|
| 3 | 1.7800000 | 0.0556776 | 1.7200000 | 1.8300000 |
|---|-----------|-----------|-----------|-----------|

---

Unique Subject Identifier=2607010010-0063

Assay variable : PTINR\_VAL1 PT-INR Value

N Mean Standard Deviation Minimum Maximum

---

|   |           |           |           |           |
|---|-----------|-----------|-----------|-----------|
| 4 | 2.0225000 | 0.3346018 | 1.6300000 | 2.4400000 |
|---|-----------|-----------|-----------|-----------|

---

Unique Subject Identifier=2607010010-0072

Assay variable : PTINR\_VAL1 PT-INR Value

N Mean Standard Deviation Minimum Maximum

---

|   |           |           |           |           |
|---|-----------|-----------|-----------|-----------|
| 6 | 2.0650000 | 0.3690935 | 1.4600000 | 2.5800000 |
|---|-----------|-----------|-----------|-----------|

---

Laboratory tests at the time of obtaining Table 2-6 consent, according to the presence or absence of proton-pump inhibitors

Unique Subject Identifier=2607010010-0076

MEANS Procedure

Assay variable : PTINR\_VAL1 PT-INR Value

N Mean Standard Deviation Minimum Maximum

---

|   |           |           |           |           |
|---|-----------|-----------|-----------|-----------|
| 6 | 1.9866667 | 0.4856199 | 1.4700000 | 2.8200000 |
|---|-----------|-----------|-----------|-----------|

---

Unique Subject Identifier=2608010010-0009

Assay variable : PTINR\_VAL1 PT-INR Value

N Mean Standard Deviation Minimum Maximum

---

|   |           |           |           |           |
|---|-----------|-----------|-----------|-----------|
| 3 | 2.1333333 | 0.7247298 | 1.7000000 | 2.9700000 |
|---|-----------|-----------|-----------|-----------|

---

Unique Subject Identifier=2608010010-0020

Assay variable : PTINR\_VAL1 PT-INR Value

N Mean Standard Deviation Minimum Maximum

---

|   |           |           |           |           |
|---|-----------|-----------|-----------|-----------|
| 4 | 1.9275000 | 0.1252664 | 1.8000000 | 2.0400000 |
|---|-----------|-----------|-----------|-----------|

---

Unique Subject Identifier=2608010010-0027

Assay variable : PTINR\_VAL1 PT-INR Value

N Mean Standard Deviation Minimum Maximum

---

|   |          |           |          |          |
|---|----------|-----------|----------|----------|
| 3 | 1.210000 | 0.1044031 | 1.090000 | 1.280000 |
|---|----------|-----------|----------|----------|

---

Laboratory tests at the time of obtaining Table 2-6 consent, according to the presence or absence of proton-pump inhibitors

Unique Subject Identifier=2608010010-0030

MEANS Procedure

Assay variable : PTINR\_VAL1 PT-INR Value

N Mean Standard Deviation Minimum Maximum

---

|   |           |           |           |           |
|---|-----------|-----------|-----------|-----------|
| 5 | 1.6700000 | 0.1734935 | 1.4800000 | 1.9500000 |
|---|-----------|-----------|-----------|-----------|

---

Unique Subject Identifier=2608010010-0035

Assay variable : PTINR\_VAL1 PT-INR Value

N Mean Standard Deviation Minimum Maximum

---

|   |           |           |           |           |
|---|-----------|-----------|-----------|-----------|
| 5 | 2.1140000 | 0.3235429 | 1.7700000 | 2.6300000 |
|---|-----------|-----------|-----------|-----------|

---

Unique Subject Identifier=2608010010-0038

Assay variable : PTINR\_VAL1 PT-INR Value

N Mean Standard Deviation Minimum Maximum

---

|   |           |           |           |           |
|---|-----------|-----------|-----------|-----------|
| 2 | 1.4650000 | 0.1060660 | 1.3900000 | 1.5400000 |
|---|-----------|-----------|-----------|-----------|

---

Unique Subject Identifier=2608010010-0039

Assay variable : PTINR\_VAL1 PT-INR Value

N Mean Standard Deviation Minimum Maximum

---

|   |           |           |           |           |
|---|-----------|-----------|-----------|-----------|
| 3 | 1.5266667 | 0.1305118 | 1.3900000 | 1.6500000 |
|---|-----------|-----------|-----------|-----------|

---



Laboratory tests at the time of obtaining Table 2-6 consent, according to the presence or absence of proton-pump inhibitors

Unique Subject Identifier=2608010010-0042

MEANS Procedure

Assay variable : PTINR\_VAL1 PT-INR Value

| N | Mean      | Standard Deviation | Minimum   | Maximum   |
|---|-----------|--------------------|-----------|-----------|
| 4 | 1.6525000 | 0.0670199          | 1.5900000 | 1.7200000 |

Unique Subject Identifier=2608010010-0047

Assay variable : PTINR\_VAL1 PT-INR Value

| N | Mean      | Standard Deviation | Minimum   | Maximum   |
|---|-----------|--------------------|-----------|-----------|
| 3 | 1.4900000 | 0.2206808          | 1.2800000 | 1.7200000 |

Unique Subject Identifier=2608010010-0048

Assay variable : PTINR\_VAL1 PT-INR Value

| N | Mean      | Standard Deviation | Minimum   | Maximum   |
|---|-----------|--------------------|-----------|-----------|
| 6 | 1.9200000 | 0.2499600          | 1.6800000 | 2.3700000 |

Unique Subject Identifier=2608010010-0051

Assay variable : PTINR\_VAL1 PT-INR Value

N Mean Standard Deviation Minimum Maximum

---

|   |           |           |           |           |
|---|-----------|-----------|-----------|-----------|
| 5 | 2.2680000 | 0.6436381 | 1.7400000 | 3.3600000 |
|---|-----------|-----------|-----------|-----------|

---

Laboratory tests at the time of obtaining Table 2-6 consent, according to the presence or absence of proton-pump inhibitors

Unique Subject Identifier=2608010010-0052

MEANS Procedure

Assay variable : PTINR\_VAL1 PT-INR Value

N Mean Standard Deviation Minimum Maximum

---

|   |           |           |           |           |
|---|-----------|-----------|-----------|-----------|
| 5 | 2.0280000 | 0.4770430 | 1.6900000 | 2.8700000 |
|---|-----------|-----------|-----------|-----------|

---

Unique Subject Identifier=2608010010-0056

Assay variable : PTINR\_VAL1 PT-INR Value

N Mean Standard Deviation Minimum Maximum

---

|   |           |           |           |           |
|---|-----------|-----------|-----------|-----------|
| 5 | 1.5960000 | 0.2307163 | 1.4200000 | 1.9000000 |
|---|-----------|-----------|-----------|-----------|

---

Unique Subject Identifier=2608010010-0060

Assay variable : PTINR\_VAL1 PT-INR Value

N Mean Standard Deviation Minimum Maximum

---

|   |           |           |           |           |
|---|-----------|-----------|-----------|-----------|
| 5 | 1.7520000 | 0.2411846 | 1.3900000 | 1.9600000 |
|---|-----------|-----------|-----------|-----------|

---

Unique Subject Identifier=2608010010-0061

Assay variable : PTINR\_VAL1 PT-INR Value

N Mean Standard Deviation Minimum Maximum

---

|   |           |           |           |           |
|---|-----------|-----------|-----------|-----------|
| 5 | 1.7180000 | 0.1935717 | 1.4900000 | 2.0100000 |
|---|-----------|-----------|-----------|-----------|

---

Laboratory tests at the time of obtaining Table 2-6 consent, according to the presence or absence of proton-pump inhibitors

Unique Subject Identifier=2608010010-0063

MEANS Procedure

Assay variable : PTINR\_VAL1 PT-INR Value

| N | Mean      | Standard Deviation | Minimum   | Maximum   |
|---|-----------|--------------------|-----------|-----------|
| 4 | 2.0700000 | 1.0701090          | 1.0400000 | 3.4300000 |

Unique Subject Identifier=2608010010-0064

Assay variable : PTINR\_VAL1 PT-INR Value

| N | Mean      | Standard Deviation | Minimum   | Maximum   |
|---|-----------|--------------------|-----------|-----------|
| 1 | 1.3400000 |                    | 1.3400000 | 1.3400000 |

Unique Subject Identifier=2608010010-0066

Assay variable : PTINR\_VAL1 PT-INR Value

| N | Mean      | Standard Deviation | Minimum   | Maximum   |
|---|-----------|--------------------|-----------|-----------|
| 5 | 1.9360000 | 0.1092245          | 1.7600000 | 2.0400000 |

Unique Subject Identifier=2608010010-0067

Assay variable : PTINR\_VAL1 PT-INR Value

N Mean Standard Deviation Minimum Maximum

---

|   |           |           |           |           |
|---|-----------|-----------|-----------|-----------|
| 5 | 1.7880000 | 0.2141728 | 1.5100000 | 2.1100000 |
|---|-----------|-----------|-----------|-----------|

---

Laboratory tests at the time of obtaining Table 2-6 consent, according to the presence or absence of proton-pump inhibitors

Unique Subject Identifier=2608010010-0068

MEANS Procedure

Assay variable : PTINR\_VAL1 PT-INR Value

N Mean Standard Deviation Minimum Maximum

---

|   |           |           |           |           |
|---|-----------|-----------|-----------|-----------|
| 6 | 2.1433333 | 0.1938728 | 1.8400000 | 2.4500000 |
|---|-----------|-----------|-----------|-----------|

---

Unique Subject Identifier=2608010010-0077

Assay variable : PTINR\_VAL1 PT-INR Value

N Mean Standard Deviation Minimum Maximum

---

|   |           |  |           |           |
|---|-----------|--|-----------|-----------|
| 1 | 1.4700000 |  | 1.4700000 | 1.4700000 |
|---|-----------|--|-----------|-----------|

---

Unique Subject Identifier=2608010010-0078

Assay variable : PTINR\_VAL1 PT-INR Value

N Mean Standard Deviation Minimum Maximum

---

|   |           |           |           |           |
|---|-----------|-----------|-----------|-----------|
| 4 | 1.7825000 | 0.2051625 | 1.4900000 | 1.9300000 |
|---|-----------|-----------|-----------|-----------|

---

Unique Subject Identifier=2608010010-0079

Assay variable : PTINR\_VAL1 PT-INR Value

N Mean Standard Deviation Minimum Maximum

---

|   |           |           |           |           |
|---|-----------|-----------|-----------|-----------|
| 6 | 2.2350000 | 1.1811308 | 1.2600000 | 4.3300000 |
|---|-----------|-----------|-----------|-----------|

---



Laboratory tests at the time of obtaining Table 2-6 consent, according to the presence or absence of proton-pump inhibitors

Unique Subject Identifier=2608010010-0082

MEANS Procedure

Assay variable : PTINR\_VAL1 PT-INR Value

| N | Mean      | Standard Deviation | Minimum   | Maximum   |
|---|-----------|--------------------|-----------|-----------|
| 2 | 2.2950000 | 0.0919239          | 2.2300000 | 2.3600000 |

Unique Subject Identifier=2608010010-0084

Assay variable : PTINR\_VAL1 PT-INR Value

| N | Mean      | Standard Deviation | Minimum   | Maximum   |
|---|-----------|--------------------|-----------|-----------|
| 4 | 1.5075000 | 0.0788987          | 1.4200000 | 1.6000000 |

Unique Subject Identifier=2608010010-0085

Assay variable : PTINR\_VAL1 PT-INR Value

| N | Mean      | Standard Deviation | Minimum   | Maximum   |
|---|-----------|--------------------|-----------|-----------|
| 6 | 1.6133333 | 0.0752773          | 1.5400000 | 1.7100000 |

Unique Subject Identifier=2608010010-0086

Assay variable : PTINR\_VAL1 PT-INR Value

N Mean Standard Deviation Minimum Maximum

---

|   |           |           |           |           |
|---|-----------|-----------|-----------|-----------|
| 6 | 2.0766667 | 0.4405754 | 1.5600000 | 2.6400000 |
|---|-----------|-----------|-----------|-----------|

---

Laboratory tests at the time of obtaining Table 2-6 consent, according to the presence or absence of proton-pump inhibitors

Unique Subject Identifier=2608010010-0097

MEANS Procedure

Assay variable : PTINR\_VAL1 PT-INR Value

N Mean Standard Deviation Minimum Maximum

---

|   |           |           |           |           |
|---|-----------|-----------|-----------|-----------|
| 2 | 2.5050000 | 0.6717514 | 2.0300000 | 2.9800000 |
|---|-----------|-----------|-----------|-----------|

---

Unique Subject Identifier=2608010010-0102

Assay variable : PTINR\_VAL1 PT-INR Value

N Mean Standard Deviation Minimum Maximum

---

|   |           |  |           |           |
|---|-----------|--|-----------|-----------|
| 1 | 2.3300000 |  | 2.3300000 | 2.3300000 |
|---|-----------|--|-----------|-----------|

---

Unique Subject Identifier=2612011111-0005

Assay variable : PTINR\_VAL1 PT-INR Value

N Mean Standard Deviation Minimum Maximum

---

|   |           |  |           |           |
|---|-----------|--|-----------|-----------|
| 1 | 1.8000000 |  | 1.8000000 | 1.8000000 |
|---|-----------|--|-----------|-----------|

---

Unique Subject Identifier=2614000000-0001

Assay variable : PTINR\_VAL1 PT-INR Value

N Mean Standard Deviation Minimum Maximum

---

|   |           |           |           |           |
|---|-----------|-----------|-----------|-----------|
| 3 | 1.9033333 | 0.7136059 | 1.4000000 | 2.7200000 |
|---|-----------|-----------|-----------|-----------|

---

Laboratory tests at the time of obtaining Table 2-6 consent, according to the presence or absence of proton-pump inhibitors

Unique Subject Identifier=261400000-0007

MEANS Procedure

Assay variable : PTINR\_VAL1 PT-INR Value

| N | Mean      | Standard Deviation | Minimum   | Maximum   |
|---|-----------|--------------------|-----------|-----------|
| 5 | 1.4880000 | 0.2834078          | 1.2500000 | 1.9100000 |

Unique Subject Identifier=261400000-0008

Assay variable : PTINR\_VAL1 PT-INR Value

| N | Mean      | Standard Deviation | Minimum   | Maximum   |
|---|-----------|--------------------|-----------|-----------|
| 3 | 2.0466667 | 0.1386843          | 1.9300000 | 2.2000000 |

Unique Subject Identifier=261400000-0009

Assay variable : PTINR\_VAL1 PT-INR Value

| N | Mean      | Standard Deviation | Minimum   | Maximum   |
|---|-----------|--------------------|-----------|-----------|
| 2 | 1.8650000 | 0.2474874          | 1.6900000 | 2.0400000 |

Unique Subject Identifier=261400000-0010

Assay variable : PTINR\_VAL1 PT-INR Value

N Mean Standard Deviation Minimum Maximum

---

|   |          |           |          |          |
|---|----------|-----------|----------|----------|
| 3 | 1.750000 | 0.1637071 | 1.610000 | 1.930000 |
|---|----------|-----------|----------|----------|

---

Laboratory tests at the time of obtaining Table 2-6 consent, according to the presence or absence of proton-pump inhibitors

Unique Subject Identifier=261400000-0013

MEANS Procedure

Assay variable : PTINR\_VAL1 PT-INR Value

N Mean Standard Deviation Minimum Maximum

---

|   |           |           |           |           |
|---|-----------|-----------|-----------|-----------|
| 6 | 2.1933333 | 0.5227874 | 1.5500000 | 3.0400000 |
|---|-----------|-----------|-----------|-----------|

---

Unique Subject Identifier=261400000-0022

Assay variable : PTINR\_VAL1 PT-INR Value

N Mean Standard Deviation Minimum Maximum

---

|   |           |           |           |           |
|---|-----------|-----------|-----------|-----------|
| 3 | 2.5300000 | 0.3726929 | 2.3000000 | 2.9600000 |
|---|-----------|-----------|-----------|-----------|

---

Unique Subject Identifier=261400000-0028

Assay variable : PTINR\_VAL1 PT-INR Value

N Mean Standard Deviation Minimum Maximum

---

|   |           |           |           |           |
|---|-----------|-----------|-----------|-----------|
| 3 | 2.2566667 | 0.7925486 | 1.7500000 | 3.1700000 |
|---|-----------|-----------|-----------|-----------|

---

Unique Subject Identifier=261400000-0031

Assay variable : PTINR\_VAL1 PT-INR Value

N Mean Standard Deviation Minimum Maximum

---

|   |          |           |          |          |
|---|----------|-----------|----------|----------|
| 4 | 2.080000 | 0.2438579 | 1.840000 | 2.300000 |
|---|----------|-----------|----------|----------|

---



Laboratory tests at the time of obtaining Table 2-6 consent, according to the presence or absence of proton-pump inhibitors

Unique Subject Identifier=261400000-0033

MEANS Procedure

Assay variable : PTINR\_VAL1 PT-INR Value

N Mean Standard Deviation Minimum Maximum

---

|   |           |           |           |           |
|---|-----------|-----------|-----------|-----------|
| 2 | 2.2250000 | 0.1626346 | 2.1100000 | 2.3400000 |
|---|-----------|-----------|-----------|-----------|

---

Unique Subject Identifier=261400000-0035

Assay variable : PTINR\_VAL1 PT-INR Value

N Mean Standard Deviation Minimum Maximum

---

|   |           |           |           |           |
|---|-----------|-----------|-----------|-----------|
| 4 | 1.3325000 | 0.2056494 | 1.1600000 | 1.6300000 |
|---|-----------|-----------|-----------|-----------|

---

Unique Subject Identifier=261400000-0036

Assay variable : PTINR\_VAL1 PT-INR Value

N Mean Standard Deviation Minimum Maximum

---

|   |           |  |           |           |
|---|-----------|--|-----------|-----------|
| 1 | 1.7500000 |  | 1.7500000 | 1.7500000 |
|---|-----------|--|-----------|-----------|

---

Unique Subject Identifier=261400000-0040

Assay variable : PTINR\_VAL1 PT-INR Value

N Mean Standard Deviation Minimum Maximum

---

|   |          |           |          |          |
|---|----------|-----------|----------|----------|
| 3 | 1.760000 | 0.2920616 | 1.450000 | 2.030000 |
|---|----------|-----------|----------|----------|

---

Laboratory tests at the time of obtaining Table 2-6 consent, according to the presence or absence of proton-pump inhibitors

Unique Subject Identifier=261400000-0046

MEANS Procedure

Assay variable : PTINR\_VAL1 PT-INR Value

N Mean Standard Deviation Minimum Maximum

---

|   |           |           |           |           |
|---|-----------|-----------|-----------|-----------|
| 4 | 1.7075000 | 0.2051625 | 1.5300000 | 1.9400000 |
|---|-----------|-----------|-----------|-----------|

---

Unique Subject Identifier=261400000-0047

Assay variable : PTINR\_VAL1 PT-INR Value

N Mean Standard Deviation Minimum Maximum

---

|   |           |           |           |           |
|---|-----------|-----------|-----------|-----------|
| 3 | 2.0400000 | 0.4243819 | 1.7900000 | 2.5300000 |
|---|-----------|-----------|-----------|-----------|

---

Unique Subject Identifier=261400000-0055

Assay variable : PTINR\_VAL1 PT-INR Value

N Mean Standard Deviation Minimum Maximum

---

|   |           |           |           |           |
|---|-----------|-----------|-----------|-----------|
| 3 | 1.6266667 | 0.2150194 | 1.4100000 | 1.8400000 |
|---|-----------|-----------|-----------|-----------|

---

Unique Subject Identifier=261400000-0061

Assay variable : PTINR\_VAL1 PT-INR Value

N Mean Standard Deviation Minimum Maximum

---

|   |           |           |           |           |
|---|-----------|-----------|-----------|-----------|
| 3 | 2.5233333 | 0.0680686 | 2.4700000 | 2.6000000 |
|---|-----------|-----------|-----------|-----------|

---

Laboratory tests at the time of obtaining Table 2-6 consent, according to the presence or absence of proton-pump inhibitors

Unique Subject Identifier=261400000-0069

MEANS Procedure

Assay variable : PTINR\_VAL1 PT-INR Value

N Mean Standard Deviation Minimum Maximum

---

|   |           |           |           |           |
|---|-----------|-----------|-----------|-----------|
| 3 | 1.4933333 | 0.1850225 | 1.2800000 | 1.6100000 |
|---|-----------|-----------|-----------|-----------|

---

Unique Subject Identifier=261400000-0071

Assay variable : PTINR\_VAL1 PT-INR Value

N Mean Standard Deviation Minimum Maximum

---

|   |           |           |           |           |
|---|-----------|-----------|-----------|-----------|
| 3 | 2.6266667 | 0.5005330 | 2.1400000 | 3.1400000 |
|---|-----------|-----------|-----------|-----------|

---

Unique Subject Identifier=261400000-0073

Assay variable : PTINR\_VAL1 PT-INR Value

N Mean Standard Deviation Minimum Maximum

---

|   |           |           |           |           |
|---|-----------|-----------|-----------|-----------|
| 4 | 1.3475000 | 0.3710683 | 1.0700000 | 1.8800000 |
|---|-----------|-----------|-----------|-----------|

---

Unique Subject Identifier=261400000-0081

Assay variable : PTINR\_VAL1 PT-INR Value

N Mean Standard Deviation Minimum Maximum

---

|   |           |           |           |           |
|---|-----------|-----------|-----------|-----------|
| 2 | 1.5550000 | 0.0353553 | 1.5300000 | 1.5800000 |
|---|-----------|-----------|-----------|-----------|

---

Laboratory tests at the time of obtaining Table 2-6 consent, according to the presence or absence of proton-pump inhibitors

Unique Subject Identifier=261400000-0083

MEANS Procedure

Assay variable : PTINR\_VAL1 PT-INR Value

| N | Mean      | Standard Deviation | Minimum   | Maximum   |
|---|-----------|--------------------|-----------|-----------|
| 3 | 2.2300000 | 0.0953939          | 2.1200000 | 2.2900000 |

Unique Subject Identifier=261400000-0085

Assay variable : PTINR\_VAL1 PT-INR Value

| N | Mean      | Standard Deviation | Minimum   | Maximum   |
|---|-----------|--------------------|-----------|-----------|
| 3 | 1.7400000 | 0.0655744          | 1.6800000 | 1.8100000 |

Unique Subject Identifier=261400000-0091

Assay variable : PTINR\_VAL1 PT-INR Value

| N | Mean      | Standard Deviation | Minimum   | Maximum   |
|---|-----------|--------------------|-----------|-----------|
| 2 | 1.6500000 | 0.1555635          | 1.5400000 | 1.7600000 |

Unique Subject Identifier=261400000-0095

Assay variable : PTINR\_VAL1 PT-INR Value

N Mean Standard Deviation Minimum Maximum

---

|   |          |           |          |          |
|---|----------|-----------|----------|----------|
| 3 | 2.620000 | 0.8020598 | 1.910000 | 3.490000 |
|---|----------|-----------|----------|----------|

---



Laboratory tests at the time of obtaining Table 2-6 consent, according to the presence or absence of proton-pump inhibitors

Unique Subject Identifier=261600000-0005

MEANS Procedure

Assay variable : PTINR\_VAL1 PT-INR Value

| N | Mean      | Standard Deviation | Minimum   | Maximum   |
|---|-----------|--------------------|-----------|-----------|
| 3 | 1.5200000 | 0.1216553          | 1.3800000 | 1.6000000 |

Unique Subject Identifier=261600000-0006

Assay variable : PTINR\_VAL1 PT-INR Value

| N | Mean      | Standard Deviation | Minimum   | Maximum   |
|---|-----------|--------------------|-----------|-----------|
| 4 | 2.7000000 | 0.4152911          | 2.2300000 | 3.2400000 |

Unique Subject Identifier=261600000-0007

Assay variable : PTINR\_VAL1 PT-INR Value

| N | Mean      | Standard Deviation | Minimum   | Maximum   |
|---|-----------|--------------------|-----------|-----------|
| 6 | 2.5083333 | 1.2747614          | 1.5000000 | 4.9100000 |

Unique Subject Identifier=261600000-0008

Assay variable : PTINR\_VAL1 PT-INR Value

N Mean Standard Deviation Minimum Maximum

---

|   |          |          |          |          |
|---|----------|----------|----------|----------|
| 3 | 1.580000 | 0.200000 | 1.380000 | 1.780000 |
|---|----------|----------|----------|----------|

---

Laboratory tests at the time of obtaining Table 2-6 consent, according to the presence or absence of proton-pump inhibitors

Unique Subject Identifier=261600000-0009

MEANS Procedure

Assay variable : PTINR\_VAL1 PT-INR Value

N Mean Standard Deviation Minimum Maximum

---

|   |           |           |           |           |
|---|-----------|-----------|-----------|-----------|
| 4 | 2.6675000 | 0.9233048 | 1.7600000 | 3.9400000 |
|---|-----------|-----------|-----------|-----------|

---

Unique Subject Identifier=261600000-0011

Assay variable : PTINR\_VAL1 PT-INR Value

N Mean Standard Deviation Minimum Maximum

---

|   |           |           |           |           |
|---|-----------|-----------|-----------|-----------|
| 5 | 1.9420000 | 0.4100854 | 1.5800000 | 2.6500000 |
|---|-----------|-----------|-----------|-----------|

---

Unique Subject Identifier=261600000-0013

Assay variable : PTINR\_VAL1 PT-INR Value

N Mean Standard Deviation Minimum Maximum

---

|   |           |           |           |           |
|---|-----------|-----------|-----------|-----------|
| 3 | 2.1300000 | 0.4744470 | 1.7800000 | 2.6700000 |
|---|-----------|-----------|-----------|-----------|

---

Unique Subject Identifier=261600000-0014

Assay variable : PTINR\_VAL1 PT-INR Value

N Mean Standard Deviation Minimum Maximum

---

|   |           |           |           |           |
|---|-----------|-----------|-----------|-----------|
| 3 | 1.8466667 | 0.6268439 | 1.2800000 | 2.5200000 |
|---|-----------|-----------|-----------|-----------|

---

Laboratory tests at the time of obtaining Table 2-6 consent, according to the presence or absence of proton-pump inhibitors

Unique Subject Identifier=261600000-0015

MEANS Procedure

Assay variable : PTINR\_VAL1 PT-INR Value

N Mean Standard Deviation Minimum Maximum

---

|   |           |           |           |           |
|---|-----------|-----------|-----------|-----------|
| 3 | 1.7533333 | 0.1700980 | 1.5600000 | 1.8800000 |
|---|-----------|-----------|-----------|-----------|

---

Unique Subject Identifier=261600000-0017

Assay variable : PTINR\_VAL1 PT-INR Value

N Mean Standard Deviation Minimum Maximum

---

|   |           |           |           |           |
|---|-----------|-----------|-----------|-----------|
| 4 | 1.6800000 | 0.1319091 | 1.5200000 | 1.8300000 |
|---|-----------|-----------|-----------|-----------|

---

Unique Subject Identifier=261600000-0021

Assay variable : PTINR\_VAL1 PT-INR Value

N Mean Standard Deviation Minimum Maximum

---

|   |           |           |           |           |
|---|-----------|-----------|-----------|-----------|
| 3 | 2.3666667 | 0.0802081 | 2.2900000 | 2.4500000 |
|---|-----------|-----------|-----------|-----------|

---

Unique Subject Identifier=261600000-0022

Assay variable : PTINR\_VAL1 PT-INR Value

N Mean Standard Deviation Minimum Maximum

---

|   |           |           |           |           |
|---|-----------|-----------|-----------|-----------|
| 4 | 1.8850000 | 0.2046949 | 1.5800000 | 2.0200000 |
|---|-----------|-----------|-----------|-----------|

---

Laboratory tests at the time of obtaining Table 2-6 consent, according to the presence or absence of proton-pump inhibitors

Unique Subject Identifier=261600000-0039

MEANS Procedure

Assay variable : PTINR\_VAL1 PT-INR Value

N Mean Standard Deviation Minimum Maximum

---

|   |           |  |           |           |
|---|-----------|--|-----------|-----------|
| 1 | 1.7800000 |  | 1.7800000 | 1.7800000 |
|---|-----------|--|-----------|-----------|

---

Unique Subject Identifier=261600000-0045

Assay variable : PTINR\_VAL1 PT-INR Value

N Mean Standard Deviation Minimum Maximum

---

|   |           |           |           |           |
|---|-----------|-----------|-----------|-----------|
| 6 | 2.1783333 | 0.1834575 | 1.9200000 | 2.3900000 |
|---|-----------|-----------|-----------|-----------|

---

Unique Subject Identifier=261600000-0046

Assay variable : PTINR\_VAL1 PT-INR Value

N Mean Standard Deviation Minimum Maximum

---

|   |           |           |           |           |
|---|-----------|-----------|-----------|-----------|
| 3 | 1.9466667 | 0.1738774 | 1.7500000 | 2.0800000 |
|---|-----------|-----------|-----------|-----------|

---

Unique Subject Identifier=261600000-0051

Assay variable : PTINR\_VAL1 PT-INR Value

N Mean Standard Deviation Minimum Maximum

---

|   |          |           |          |          |
|---|----------|-----------|----------|----------|
| 2 | 1.460000 | 0.0848528 | 1.400000 | 1.520000 |
|---|----------|-----------|----------|----------|

---



Laboratory tests at the time of obtaining Table 2-6 consent, according to the presence or absence of proton-pump inhibitors

Unique Subject Identifier=261600000-0052

MEANS Procedure

Assay variable : PTINR\_VAL1 PT-INR Value

| N | Mean      | Standard Deviation | Minimum   | Maximum   |
|---|-----------|--------------------|-----------|-----------|
| 2 | 1.8850000 | 0.5444722          | 1.5000000 | 2.2700000 |

Unique Subject Identifier=261600000-0053

Assay variable : PTINR\_VAL1 PT-INR Value

| N | Mean      | Standard Deviation | Minimum   | Maximum   |
|---|-----------|--------------------|-----------|-----------|
| 4 | 1.4200000 | 0.1180395          | 1.3400000 | 1.5900000 |

Unique Subject Identifier=261600000-0055

Assay variable : PTINR\_VAL1 PT-INR Value

| N | Mean      | Standard Deviation | Minimum   | Maximum   |
|---|-----------|--------------------|-----------|-----------|
| 2 | 2.5750000 | 0.5020458          | 2.2200000 | 2.9300000 |

Unique Subject Identifier=261600000-0056

Assay variable : PTINR\_VAL1 PT-INR Value

N Mean Standard Deviation Minimum Maximum

---

|   |           |           |           |           |
|---|-----------|-----------|-----------|-----------|
| 2 | 2.1350000 | 0.3606245 | 1.8800000 | 2.3900000 |
|---|-----------|-----------|-----------|-----------|

---

Laboratory tests at the time of obtaining Table 2-6 consent, according to the presence or absence of proton-pump inhibitors

Unique Subject Identifier=261600000-0058

MEANS Procedure

Assay variable : PTINR\_VAL1 PT-INR Value

N Mean Standard Deviation Minimum Maximum

---

|   |           |           |           |           |
|---|-----------|-----------|-----------|-----------|
| 2 | 1.7150000 | 0.4171930 | 1.4200000 | 2.0100000 |
|---|-----------|-----------|-----------|-----------|

---

Unique Subject Identifier=261600000-0059

Assay variable : PTINR\_VAL1 PT-INR Value

N Mean Standard Deviation Minimum Maximum

---

|   |           |           |           |           |
|---|-----------|-----------|-----------|-----------|
| 3 | 2.0733333 | 0.0950438 | 1.9800000 | 2.1700000 |
|---|-----------|-----------|-----------|-----------|

---

Unique Subject Identifier=261600000-0061

Assay variable : PTINR\_VAL1 PT-INR Value

N Mean Standard Deviation Minimum Maximum

---

|   |           |           |           |           |
|---|-----------|-----------|-----------|-----------|
| 2 | 3.1000000 | 0.2545584 | 2.9200000 | 3.2800000 |
|---|-----------|-----------|-----------|-----------|

---

Unique Subject Identifier=261600000-0069

Assay variable : PTINR\_VAL1 PT-INR Value

N Mean Standard Deviation Minimum Maximum

---

|   |           |           |           |           |
|---|-----------|-----------|-----------|-----------|
| 2 | 2.2350000 | 0.0494975 | 2.2000000 | 2.2700000 |
|---|-----------|-----------|-----------|-----------|

---

Laboratory tests at the time of obtaining Table 2-6 consent, according to the presence or absence of proton-pump inhibitors

Unique Subject Identifier=261600000-0074

MEANS Procedure

Assay variable : PTINR\_VAL1 PT-INR Value

N Mean Standard Deviation Minimum Maximum

---

|   |           |           |           |           |
|---|-----------|-----------|-----------|-----------|
| 3 | 2.0833333 | 0.3987898 | 1.7200000 | 2.5100000 |
|---|-----------|-----------|-----------|-----------|

---

Unique Subject Identifier=261600000-0078

Assay variable : PTINR\_VAL1 PT-INR Value

N Mean Standard Deviation Minimum Maximum

---

|   |           |           |           |           |
|---|-----------|-----------|-----------|-----------|
| 2 | 1.3950000 | 0.3040559 | 1.1800000 | 1.6100000 |
|---|-----------|-----------|-----------|-----------|

---

Unique Subject Identifier=261700000-0001

Assay variable : PTINR\_VAL1 PT-INR Value

N Mean Standard Deviation Minimum Maximum

---

|   |           |           |           |           |
|---|-----------|-----------|-----------|-----------|
| 5 | 2.3840000 | 0.1942421 | 2.0900000 | 2.5800000 |
|---|-----------|-----------|-----------|-----------|

---

Unique Subject Identifier=261700000-0004

Assay variable : PTINR\_VAL1 PT-INR Value

N Mean Standard Deviation Minimum Maximum

---

|   |           |           |           |           |
|---|-----------|-----------|-----------|-----------|
| 3 | 2.0966667 | 0.4186088 | 1.8500000 | 2.5800000 |
|---|-----------|-----------|-----------|-----------|

---

Laboratory tests at the time of obtaining Table 2-6 consent, according to the presence or absence of proton-pump inhibitors

Unique Subject Identifier=2617000000-0006

MEANS Procedure

Assay variable : PTINR\_VAL1 PT-INR Value

N Mean Standard Deviation Minimum Maximum

---

|   |           |           |           |           |
|---|-----------|-----------|-----------|-----------|
| 3 | 1.5366667 | 0.2369247 | 1.3900000 | 1.8100000 |
|---|-----------|-----------|-----------|-----------|

---

Unique Subject Identifier=2617000000-0011

Assay variable : PTINR\_VAL1 PT-INR Value

N Mean Standard Deviation Minimum Maximum

---

|   |           |           |           |           |
|---|-----------|-----------|-----------|-----------|
| 3 | 2.2266667 | 0.6164684 | 1.7800000 | 2.9300000 |
|---|-----------|-----------|-----------|-----------|

---

Unique Subject Identifier=2617000000-0012

Assay variable : PTINR\_VAL1 PT-INR Value

N Mean Standard Deviation Minimum Maximum

---

|   |           |           |           |           |
|---|-----------|-----------|-----------|-----------|
| 4 | 2.0250000 | 0.2157931 | 1.7100000 | 2.1700000 |
|---|-----------|-----------|-----------|-----------|

---

Unique Subject Identifier=2617000000-0013

Assay variable : PTINR\_VAL1 PT-INR Value

N Mean Standard Deviation Minimum Maximum

---

|   |          |           |          |          |
|---|----------|-----------|----------|----------|
| 2 | 2.540000 | 1.3010765 | 1.620000 | 3.460000 |
|---|----------|-----------|----------|----------|

---



Laboratory tests at the time of obtaining Table 2-6 consent, according to the presence or absence of proton-pump inhibitors

Unique Subject Identifier=2617000000-0015

MEANS Procedure

Assay variable : PTINR\_VAL1 PT-INR Value

N Mean Standard Deviation Minimum Maximum

---

|   |           |           |           |           |
|---|-----------|-----------|-----------|-----------|
| 6 | 2.3516667 | 0.7882999 | 1.4300000 | 3.4000000 |
|---|-----------|-----------|-----------|-----------|

---

Unique Subject Identifier=2617000000-0016

Assay variable : PTINR\_VAL1 PT-INR Value

N Mean Standard Deviation Minimum Maximum

---

|   |           |           |           |           |
|---|-----------|-----------|-----------|-----------|
| 2 | 1.0350000 | 0.0353553 | 1.0100000 | 1.0600000 |
|---|-----------|-----------|-----------|-----------|

---

Unique Subject Identifier=2617000000-0017

Assay variable : PTINR\_VAL1 PT-INR Value

N Mean Standard Deviation Minimum Maximum

---

|   |           |           |           |           |
|---|-----------|-----------|-----------|-----------|
| 6 | 2.3483333 | 0.1633911 | 2.1900000 | 2.5400000 |
|---|-----------|-----------|-----------|-----------|

---

Unique Subject Identifier=2617000000-0019

Assay variable : PTINR\_VAL1 PT-INR Value

N Mean Standard Deviation Minimum Maximum

---

|   |           |           |           |           |
|---|-----------|-----------|-----------|-----------|
| 2 | 2.0050000 | 0.2616295 | 1.8200000 | 2.1900000 |
|---|-----------|-----------|-----------|-----------|

---

Laboratory tests at the time of obtaining Table 2-6 consent, according to the presence or absence of proton-pump inhibitors

Unique Subject Identifier=2617000000-0020

MEANS Procedure

Assay variable : PTINR\_VAL1 PT-INR Value

N Mean Standard Deviation Minimum Maximum

---

|   |           |           |           |           |
|---|-----------|-----------|-----------|-----------|
| 4 | 1.8500000 | 0.4354308 | 1.2500000 | 2.2700000 |
|---|-----------|-----------|-----------|-----------|

---

Unique Subject Identifier=2617000000-0021

Assay variable : PTINR\_VAL1 PT-INR Value

N Mean Standard Deviation Minimum Maximum

---

|   |           |           |           |           |
|---|-----------|-----------|-----------|-----------|
| 6 | 2.0633333 | 1.2088452 | 1.2200000 | 4.4300000 |
|---|-----------|-----------|-----------|-----------|

---

Unique Subject Identifier=2617000000-0025

Assay variable : PTINR\_VAL1 PT-INR Value

N Mean Standard Deviation Minimum Maximum

---

|   |           |           |           |           |
|---|-----------|-----------|-----------|-----------|
| 3 | 1.6633333 | 0.5430776 | 1.0900000 | 2.1700000 |
|---|-----------|-----------|-----------|-----------|

---

Unique Subject Identifier=2617000000-0029

Assay variable : PTINR\_VAL1 PT-INR Value

N Mean Standard Deviation Minimum Maximum

---

|   |          |           |          |          |
|---|----------|-----------|----------|----------|
| 3 | 2.140000 | 0.0916515 | 2.060000 | 2.240000 |
|---|----------|-----------|----------|----------|

---

Laboratory tests at the time of obtaining Table 2-6 consent, according to the presence or absence of proton-pump inhibitors

Unique Subject Identifier=2617000000-0031

MEANS Procedure

Assay variable : PTINR\_VAL1 PT-INR Value

N Mean Standard Deviation Minimum Maximum

---

|   |           |           |           |           |
|---|-----------|-----------|-----------|-----------|
| 4 | 2.1925000 | 0.5868773 | 1.3400000 | 2.5900000 |
|---|-----------|-----------|-----------|-----------|

---

Unique Subject Identifier=2617000000-0036

Assay variable : PTINR\_VAL1 PT-INR Value

N Mean Standard Deviation Minimum Maximum

---

|   |           |  |           |           |
|---|-----------|--|-----------|-----------|
| 1 | 1.8400000 |  | 1.8400000 | 1.8400000 |
|---|-----------|--|-----------|-----------|

---

Unique Subject Identifier=2617000000-0041

Assay variable : PTINR\_VAL1 PT-INR Value

N Mean Standard Deviation Minimum Maximum

---

|   |           |           |           |           |
|---|-----------|-----------|-----------|-----------|
| 4 | 1.7750000 | 0.1234234 | 1.6500000 | 1.9000000 |
|---|-----------|-----------|-----------|-----------|

---

Unique Subject Identifier=2617000000-0042

Assay variable : PTINR\_VAL1 PT-INR Value

N Mean Standard Deviation Minimum Maximum

---

|   |          |           |          |          |
|---|----------|-----------|----------|----------|
| 3 | 1.440000 | 0.1513275 | 1.270000 | 1.560000 |
|---|----------|-----------|----------|----------|

---

Laboratory tests at the time of obtaining Table 2-6 consent, according to the presence or absence of proton-pump inhibitors

Unique Subject Identifier=2617000000-0043

MEANS Procedure

Assay variable : PTINR\_VAL1 PT-INR Value

N Mean Standard Deviation Minimum Maximum

---

|   |           |           |           |           |
|---|-----------|-----------|-----------|-----------|
| 4 | 1.7350000 | 0.1040833 | 1.6200000 | 1.8500000 |
|---|-----------|-----------|-----------|-----------|

---

Unique Subject Identifier=2617000000-0044

Assay variable : PTINR\_VAL1 PT-INR Value

N Mean Standard Deviation Minimum Maximum

---

|   |           |           |           |           |
|---|-----------|-----------|-----------|-----------|
| 2 | 1.7150000 | 0.0212132 | 1.7000000 | 1.7300000 |
|---|-----------|-----------|-----------|-----------|

---

Unique Subject Identifier=2617000000-0045

Assay variable : PTINR\_VAL1 PT-INR Value

N Mean Standard Deviation Minimum Maximum

---

|   |           |           |           |           |
|---|-----------|-----------|-----------|-----------|
| 2 | 1.8300000 | 0.0141421 | 1.8200000 | 1.8400000 |
|---|-----------|-----------|-----------|-----------|

---

Unique Subject Identifier=2617000000-0047

Assay variable : PTINR\_VAL1 PT-INR Value

N Mean Standard Deviation Minimum Maximum

---

|   |           |           |           |           |
|---|-----------|-----------|-----------|-----------|
| 4 | 2.1525000 | 0.1925920 | 1.9500000 | 2.3500000 |
|---|-----------|-----------|-----------|-----------|

---



Laboratory tests at the time of obtaining Table 2-6 consent, according to the presence or absence of proton-pump inhibitors

Unique Subject Identifier=2617000000-0049

MEANS Procedure

Assay variable : PTINR\_VAL1 PT-INR Value

| N | Mean      | Standard Deviation | Minimum   | Maximum   |
|---|-----------|--------------------|-----------|-----------|
| 2 | 2.7650000 | 0.4313351          | 2.4600000 | 3.0700000 |

Unique Subject Identifier=2617000000-0056

Assay variable : PTINR\_VAL1 PT-INR Value

| N | Mean      | Standard Deviation | Minimum   | Maximum   |
|---|-----------|--------------------|-----------|-----------|
| 6 | 1.4783333 | 0.2339587          | 1.2400000 | 1.7100000 |

Unique Subject Identifier=2617000000-0058

Assay variable : PTINR\_VAL1 PT-INR Value

| N | Mean      | Standard Deviation | Minimum   | Maximum   |
|---|-----------|--------------------|-----------|-----------|
| 6 | 1.6966667 | 0.3600926          | 1.3300000 | 2.2100000 |

Unique Subject Identifier=2617000000-0060

Assay variable : PTINR\_VAL1 PT-INR Value

N Mean Standard Deviation Minimum Maximum

---

|   |          |           |          |          |
|---|----------|-----------|----------|----------|
| 5 | 2.100000 | 0.3839271 | 1.640000 | 2.690000 |
|---|----------|-----------|----------|----------|

---

Laboratory tests at the time of obtaining Table 2-6 consent, according to the presence or absence of proton-pump inhibitors

Unique Subject Identifier=2617000000-0061

MEANS Procedure

Assay variable : PTINR\_VAL1 PT-INR Value

N Mean Standard Deviation Minimum Maximum

---

|   |           |           |           |           |
|---|-----------|-----------|-----------|-----------|
| 3 | 1.7833333 | 0.3910669 | 1.3500000 | 2.1100000 |
|---|-----------|-----------|-----------|-----------|

---

Unique Subject Identifier=2617000000-0066

Assay variable : PTINR\_VAL1 PT-INR Value

N Mean Standard Deviation Minimum Maximum

---

|   |           |           |           |           |
|---|-----------|-----------|-----------|-----------|
| 3 | 2.6033333 | 0.5877358 | 2.2200000 | 3.2800000 |
|---|-----------|-----------|-----------|-----------|

---

Unique Subject Identifier=2617000000-0068

Assay variable : PTINR\_VAL1 PT-INR Value

N Mean Standard Deviation Minimum Maximum

---

|   |           |           |           |           |
|---|-----------|-----------|-----------|-----------|
| 3 | 1.7166667 | 0.3875994 | 1.2800000 | 2.0200000 |
|---|-----------|-----------|-----------|-----------|

---

Unique Subject Identifier=2617000000-0072

Assay variable : PTINR\_VAL1 PT-INR Value

N Mean Standard Deviation Minimum Maximum

---

|   |           |           |           |           |
|---|-----------|-----------|-----------|-----------|
| 3 | 2.8766667 | 0.3073001 | 2.5500000 | 3.1600000 |
|---|-----------|-----------|-----------|-----------|

---

Laboratory tests at the time of obtaining Table 2-6 consent, according to the presence or absence of proton-pump inhibitors

Unique Subject Identifier=2617000000-0076

MEANS Procedure

Assay variable : PTINR\_VAL1 PT-INR Value

N Mean Standard Deviation Minimum Maximum

---

|   |           |           |           |           |
|---|-----------|-----------|-----------|-----------|
| 4 | 2.2675000 | 0.4007805 | 1.8800000 | 2.7800000 |
|---|-----------|-----------|-----------|-----------|

---

Unique Subject Identifier=2617000000-0078

Assay variable : PTINR\_VAL1 PT-INR Value

N Mean Standard Deviation Minimum Maximum

---

|   |           |           |           |           |
|---|-----------|-----------|-----------|-----------|
| 4 | 1.9100000 | 0.3522310 | 1.5700000 | 2.3600000 |
|---|-----------|-----------|-----------|-----------|

---

Unique Subject Identifier=2617000000-0081

Assay variable : PTINR\_VAL1 PT-INR Value

N Mean Standard Deviation Minimum Maximum

---

|   |           |           |           |           |
|---|-----------|-----------|-----------|-----------|
| 4 | 2.4350000 | 0.4647939 | 1.9900000 | 3.0700000 |
|---|-----------|-----------|-----------|-----------|

---

Unique Subject Identifier=2617000000-0082

Assay variable : PTINR\_VAL1 PT-INR Value

N Mean Standard Deviation Minimum Maximum

---

|   |           |           |           |           |
|---|-----------|-----------|-----------|-----------|
| 4 | 2.2950000 | 0.2372762 | 2.0500000 | 2.6200000 |
|---|-----------|-----------|-----------|-----------|

---

Laboratory tests at the time of obtaining Table 2-6 consent, according to the presence or absence of proton-pump inhibitors

Unique Subject Identifier=2617000000-0083

MEANS Procedure

Assay variable : PTINR\_VAL1 PT-INR Value

N Mean Standard Deviation Minimum Maximum

---

|   |           |  |           |           |
|---|-----------|--|-----------|-----------|
| 1 | 1.9100000 |  | 1.9100000 | 1.9100000 |
|---|-----------|--|-----------|-----------|

---

Unique Subject Identifier=2617000000-0086

Assay variable : PTINR\_VAL1 PT-INR Value

N Mean Standard Deviation Minimum Maximum

---

|   |           |           |           |           |
|---|-----------|-----------|-----------|-----------|
| 3 | 2.3933333 | 0.0763763 | 2.3100000 | 2.4600000 |
|---|-----------|-----------|-----------|-----------|

---

Unique Subject Identifier=2617000000-0087

Assay variable : PTINR\_VAL1 PT-INR Value

N Mean Standard Deviation Minimum Maximum

---

|   |           |           |           |           |
|---|-----------|-----------|-----------|-----------|
| 3 | 1.9233333 | 0.3312602 | 1.6100000 | 2.2700000 |
|---|-----------|-----------|-----------|-----------|

---

Unique Subject Identifier=2617000000-0089

Assay variable : PTINR\_VAL1 PT-INR Value

N Mean Standard Deviation Minimum Maximum

---

|   |           |           |           |           |
|---|-----------|-----------|-----------|-----------|
| 2 | 1.9500000 | 0.0282843 | 1.9300000 | 1.9700000 |
|---|-----------|-----------|-----------|-----------|

---



Laboratory tests at the time of obtaining Table 2-6 consent, according to the presence or absence of proton-pump inhibitors

Unique Subject Identifier=2617000000-0092

MEANS Procedure

Assay variable : PTINR\_VAL1 PT-INR Value

N Mean Standard Deviation Minimum Maximum

---

|   |           |           |           |           |
|---|-----------|-----------|-----------|-----------|
| 4 | 1.8475000 | 0.1652019 | 1.7000000 | 2.0800000 |
|---|-----------|-----------|-----------|-----------|

---

Unique Subject Identifier=2617000000-0093

Assay variable : PTINR\_VAL1 PT-INR Value

N Mean Standard Deviation Minimum Maximum

---

|   |           |  |           |           |
|---|-----------|--|-----------|-----------|
| 1 | 1.6300000 |  | 1.6300000 | 1.6300000 |
|---|-----------|--|-----------|-----------|

---

Unique Subject Identifier=2617000000-0094

Assay variable : PTINR\_VAL1 PT-INR Value

N Mean Standard Deviation Minimum Maximum

---

|   |           |           |           |           |
|---|-----------|-----------|-----------|-----------|
| 5 | 1.7620000 | 0.1003494 | 1.6500000 | 1.9000000 |
|---|-----------|-----------|-----------|-----------|

---

Unique Subject Identifier=2617000000-0096

Assay variable : PTINR\_VAL1 PT-INR Value

N Mean Standard Deviation Minimum Maximum

---

|   |          |           |          |          |
|---|----------|-----------|----------|----------|
| 3 | 1.850000 | 0.3377869 | 1.650000 | 2.240000 |
|---|----------|-----------|----------|----------|

---

Laboratory tests at the time of obtaining Table 2-6 consent, according to the presence or absence of proton-pump inhibitors

Unique Subject Identifier=2617000000-0101

MEANS Procedure

Assay variable : PTINR\_VAL1 PT-INR Value

N Mean Standard Deviation Minimum Maximum

---

|   |           |           |           |           |
|---|-----------|-----------|-----------|-----------|
| 4 | 1.7575000 | 0.1405643 | 1.6400000 | 1.9200000 |
|---|-----------|-----------|-----------|-----------|

---

Unique Subject Identifier=2617000000-0102

Assay variable : PTINR\_VAL1 PT-INR Value

N Mean Standard Deviation Minimum Maximum

---

|   |           |           |           |           |
|---|-----------|-----------|-----------|-----------|
| 4 | 1.7275000 | 0.2099802 | 1.5000000 | 1.9600000 |
|---|-----------|-----------|-----------|-----------|

---

Unique Subject Identifier=2617000000-0108

Assay variable : PTINR\_VAL1 PT-INR Value

N Mean Standard Deviation Minimum Maximum

---

|   |           |           |           |           |
|---|-----------|-----------|-----------|-----------|
| 4 | 2.0475000 | 0.1701715 | 1.8100000 | 2.2100000 |
|---|-----------|-----------|-----------|-----------|

---

Unique Subject Identifier=2617000000-0109

Assay variable : PTINR\_VAL1 PT-INR Value

N Mean Standard Deviation Minimum Maximum

---

|   |           |           |           |           |
|---|-----------|-----------|-----------|-----------|
| 4 | 2.3750000 | 0.5471441 | 1.9300000 | 3.1500000 |
|---|-----------|-----------|-----------|-----------|

---

Laboratory tests at the time of obtaining Table 2-6 consent, according to the presence or absence of proton-pump inhibitors

Unique Subject Identifier=2617000000-0114

MEANS Procedure

Assay variable : PTINR\_VAL1 PT-INR Value

N Mean Standard Deviation Minimum Maximum

---

|   |           |           |           |           |
|---|-----------|-----------|-----------|-----------|
| 3 | 1.6166667 | 0.1006645 | 1.5100000 | 1.7100000 |
|---|-----------|-----------|-----------|-----------|

---

Unique Subject Identifier=2617000000-0115

Assay variable : PTINR\_VAL1 PT-INR Value

N Mean Standard Deviation Minimum Maximum

---

|   |           |           |           |           |
|---|-----------|-----------|-----------|-----------|
| 3 | 1.7333333 | 0.0737111 | 1.6500000 | 1.7900000 |
|---|-----------|-----------|-----------|-----------|

---

Unique Subject Identifier=2617000000-0116

Assay variable : PTINR\_VAL1 PT-INR Value

N Mean Standard Deviation Minimum Maximum

---

|   |           |           |           |           |
|---|-----------|-----------|-----------|-----------|
| 5 | 1.7680000 | 0.2922670 | 1.4900000 | 2.2500000 |
|---|-----------|-----------|-----------|-----------|

---

Unique Subject Identifier=2617000000-0117

Assay variable : PTINR\_VAL1 PT-INR Value

N Mean Standard Deviation Minimum Maximum

---

|   |           |           |           |           |
|---|-----------|-----------|-----------|-----------|
| 6 | 2.0733333 | 0.5709174 | 1.3300000 | 2.9900000 |
|---|-----------|-----------|-----------|-----------|

---

Laboratory tests at the time of obtaining Table 2-6 consent, according to the presence or absence of proton-pump inhibitors

Unique Subject Identifier=2617000000-0119

MEANS Procedure

Assay variable : PTINR\_VAL1 PT-INR Value

N Mean Standard Deviation Minimum Maximum

---

|   |           |           |           |           |
|---|-----------|-----------|-----------|-----------|
| 3 | 1.9000000 | 0.0519615 | 1.8400000 | 1.9300000 |
|---|-----------|-----------|-----------|-----------|

---

Unique Subject Identifier=2617000000-0120

Assay variable : PTINR\_VAL1 PT-INR Value

N Mean Standard Deviation Minimum Maximum

---

|   |           |           |           |           |
|---|-----------|-----------|-----------|-----------|
| 3 | 1.9566667 | 0.2400694 | 1.7800000 | 2.2300000 |
|---|-----------|-----------|-----------|-----------|

---

Unique Subject Identifier=2617000000-0121

Assay variable : PTINR\_VAL1 PT-INR Value

N Mean Standard Deviation Minimum Maximum

---

|   |           |           |           |           |
|---|-----------|-----------|-----------|-----------|
| 3 | 1.9566667 | 0.2400694 | 1.7800000 | 2.2300000 |
|---|-----------|-----------|-----------|-----------|

---

Unique Subject Identifier=2617000000-0127

Assay variable : PTINR\_VAL1 PT-INR Value

N Mean Standard Deviation Minimum Maximum

---

|   |           |           |           |           |
|---|-----------|-----------|-----------|-----------|
| 4 | 1.7925000 | 0.2643703 | 1.4100000 | 2.0000000 |
|---|-----------|-----------|-----------|-----------|

---



Laboratory tests at the time of obtaining Table 2-6 consent, according to the presence or absence of proton-pump inhibitors

Unique Subject Identifier=2617000000-0128

MEANS Procedure

Assay variable : PTINR\_VAL1 PT-INR Value

N Mean Standard Deviation Minimum Maximum

---

|   |           |           |           |           |
|---|-----------|-----------|-----------|-----------|
| 2 | 1.7500000 | 0.2262742 | 1.5900000 | 1.9100000 |
|---|-----------|-----------|-----------|-----------|

---

Unique Subject Identifier=2617000000-0131

Assay variable : PTINR\_VAL1 PT-INR Value

N Mean Standard Deviation Minimum Maximum

---

|   |           |           |           |           |
|---|-----------|-----------|-----------|-----------|
| 2 | 1.9800000 | 0.3394113 | 1.7400000 | 2.2200000 |
|---|-----------|-----------|-----------|-----------|

---

Unique Subject Identifier=2617000000-0136

Assay variable : PTINR\_VAL1 PT-INR Value

N Mean Standard Deviation Minimum Maximum

---

|   |           |  |           |           |
|---|-----------|--|-----------|-----------|
| 1 | 1.4600000 |  | 1.4600000 | 1.4600000 |
|---|-----------|--|-----------|-----------|

---

Unique Subject Identifier=2617000000-0139

Assay variable : PTINR\_VAL1 PT-INR Value

N Mean Standard Deviation Minimum Maximum

---

|   |           |           |           |           |
|---|-----------|-----------|-----------|-----------|
| 6 | 1.4883333 | 0.1599271 | 1.2100000 | 1.6900000 |
|---|-----------|-----------|-----------|-----------|

---

Laboratory tests at the time of obtaining Table 2-6 consent, according to the presence or absence of proton-pump inhibitors

Unique Subject Identifier=2617000000-0140

MEANS Procedure

Assay variable : PTINR\_VAL1 PT-INR Value

N Mean Standard Deviation Minimum Maximum

---

|   |           |           |           |           |
|---|-----------|-----------|-----------|-----------|
| 6 | 1.2533333 | 0.0691857 | 1.1500000 | 1.3400000 |
|---|-----------|-----------|-----------|-----------|

---

Unique Subject Identifier=2617000000-0143

Assay variable : PTINR\_VAL1 PT-INR Value

N Mean Standard Deviation Minimum Maximum

---

|   |           |           |           |           |
|---|-----------|-----------|-----------|-----------|
| 4 | 1.9025000 | 0.1144188 | 1.8000000 | 2.0600000 |
|---|-----------|-----------|-----------|-----------|

---

Unique Subject Identifier=2617000000-0144

Assay variable : PTINR\_VAL1 PT-INR Value

N Mean Standard Deviation Minimum Maximum

---

|   |           |           |           |           |
|---|-----------|-----------|-----------|-----------|
| 2 | 1.8250000 | 0.1060660 | 1.7500000 | 1.9000000 |
|---|-----------|-----------|-----------|-----------|

---

Unique Subject Identifier=2617000000-0147

Assay variable : PTINR\_VAL1 PT-INR Value

N Mean Standard Deviation Minimum Maximum

---

|   |           |           |           |           |
|---|-----------|-----------|-----------|-----------|
| 4 | 2.5900000 | 0.3365511 | 2.1500000 | 2.9700000 |
|---|-----------|-----------|-----------|-----------|

---

Laboratory tests at the time of obtaining Table 2-6 consent, according to the presence or absence of proton-pump inhibitors

Unique Subject Identifier=2617000000-0148

MEANS Procedure

Assay variable : PTINR\_VAL1 PT-INR Value

| N | Mean      | Standard Deviation | Minimum   | Maximum   |
|---|-----------|--------------------|-----------|-----------|
| 3 | 2.0666667 | 0.2600641          | 1.8100000 | 2.3300000 |

Unique Subject Identifier=2617000000-0149

Assay variable : PTINR\_VAL1 PT-INR Value

| N | Mean      | Standard Deviation | Minimum   | Maximum   |
|---|-----------|--------------------|-----------|-----------|
| 3 | 1.6800000 | 0.1705872          | 1.5400000 | 1.8700000 |

Unique Subject Identifier=2617000000-0151

Assay variable : PTINR\_VAL1 PT-INR Value

| N | Mean      | Standard Deviation | Minimum   | Maximum   |
|---|-----------|--------------------|-----------|-----------|
| 3 | 1.7833333 | 0.1778576          | 1.5800000 | 1.9100000 |

Unique Subject Identifier=2617000000-0152

Assay variable : PTINR\_VAL1 PT-INR Value

N Mean Standard Deviation Minimum Maximum

---

|   |          |           |          |          |
|---|----------|-----------|----------|----------|
| 4 | 2.200000 | 0.2255364 | 1.940000 | 2.490000 |
|---|----------|-----------|----------|----------|

---

Laboratory tests at the time of obtaining Table 2-6 consent, according to the presence or absence of proton-pump inhibitors

Unique Subject Identifier=2617000000-0153

MEANS Procedure

Assay variable : PTINR\_VAL1 PT-INR Value

N Mean Standard Deviation Minimum Maximum

---

|   |           |           |           |           |
|---|-----------|-----------|-----------|-----------|
| 2 | 2.0400000 | 0.1414214 | 1.9400000 | 2.1400000 |
|---|-----------|-----------|-----------|-----------|

---

Unique Subject Identifier=2617000000-0155

Assay variable : PTINR\_VAL1 PT-INR Value

N Mean Standard Deviation Minimum Maximum

---

|   |           |           |           |           |
|---|-----------|-----------|-----------|-----------|
| 2 | 2.5350000 | 0.3606245 | 2.2800000 | 2.7900000 |
|---|-----------|-----------|-----------|-----------|

---

Unique Subject Identifier=2617000000-0160

Assay variable : PTINR\_VAL1 PT-INR Value

N Mean Standard Deviation Minimum Maximum

---

|   |           |           |           |           |
|---|-----------|-----------|-----------|-----------|
| 3 | 2.3133333 | 0.4781562 | 1.8700000 | 2.8200000 |
|---|-----------|-----------|-----------|-----------|

---

Unique Subject Identifier=2617000000-0162

Assay variable : PTINR\_VAL1 PT-INR Value

N Mean Standard Deviation Minimum Maximum

---

|   |           |           |           |           |
|---|-----------|-----------|-----------|-----------|
| 6 | 2.2416667 | 0.2527779 | 1.9100000 | 2.6000000 |
|---|-----------|-----------|-----------|-----------|

---



Laboratory tests at the time of obtaining Table 2-6 consent, according to the presence or absence of proton-pump inhibitors

Unique Subject Identifier=2617000000-0166

MEANS Procedure

Assay variable : PTINR\_VAL1 PT-INR Value

N Mean Standard Deviation Minimum Maximum

---

|   |           |           |           |           |
|---|-----------|-----------|-----------|-----------|
| 4 | 2.2700000 | 0.3522310 | 1.9700000 | 2.7300000 |
|---|-----------|-----------|-----------|-----------|

---

Unique Subject Identifier=2617000000-0167

Assay variable : PTINR\_VAL1 PT-INR Value

N Mean Standard Deviation Minimum Maximum

---

|   |           |           |           |           |
|---|-----------|-----------|-----------|-----------|
| 4 | 1.8075000 | 0.2192981 | 1.5700000 | 2.1000000 |
|---|-----------|-----------|-----------|-----------|

---

Unique Subject Identifier=2617000000-0169

Assay variable : PTINR\_VAL1 PT-INR Value

N Mean Standard Deviation Minimum Maximum

---

|   |           |           |           |           |
|---|-----------|-----------|-----------|-----------|
| 4 | 2.1750000 | 0.2441994 | 1.9600000 | 2.4200000 |
|---|-----------|-----------|-----------|-----------|

---

Unique Subject Identifier=2617000000-0177

Assay variable : PTINR\_VAL1 PT-INR Value

N Mean Standard Deviation Minimum Maximum

---

|   |           |           |           |           |
|---|-----------|-----------|-----------|-----------|
| 3 | 2.2433333 | 0.0321455 | 2.2200000 | 2.2800000 |
|---|-----------|-----------|-----------|-----------|

---

Laboratory tests at the time of obtaining Table 2-6 consent, according to the presence or absence of proton-pump inhibitors

Unique Subject Identifier=2617000000-0178

MEANS Procedure

Assay variable : PTINR\_VAL1 PT-INR Value

| N | Mean      | Standard Deviation | Minimum   | Maximum   |
|---|-----------|--------------------|-----------|-----------|
| 5 | 1.8060000 | 0.5015775          | 1.0800000 | 2.4800000 |

Unique Subject Identifier=2617000000-0179

Assay variable : PTINR\_VAL1 PT-INR Value

| N | Mean      | Standard Deviation | Minimum   | Maximum   |
|---|-----------|--------------------|-----------|-----------|
| 3 | 2.2233333 | 0.5672154          | 1.8100000 | 2.8700000 |

Unique Subject Identifier=2617000000-0180

Assay variable : PTINR\_VAL1 PT-INR Value

| N | Mean      | Standard Deviation | Minimum   | Maximum   |
|---|-----------|--------------------|-----------|-----------|
| 2 | 1.5900000 | 0.4384062          | 1.2800000 | 1.9000000 |

Unique Subject Identifier=2617000000-0183

Assay variable : PTINR\_VAL1 PT-INR Value

N Mean Standard Deviation Minimum Maximum

---

|   |           |           |           |           |
|---|-----------|-----------|-----------|-----------|
| 2 | 1.5750000 | 0.1767767 | 1.4500000 | 1.7000000 |
|---|-----------|-----------|-----------|-----------|

---

Laboratory tests at the time of obtaining Table 2-6 consent, according to the presence or absence of proton-pump inhibitors

Unique Subject Identifier=2617000000-0184

MEANS Procedure

Assay variable : PTINR\_VAL1 PT-INR Value

N Mean Standard Deviation Minimum Maximum

---

|   |           |           |           |           |
|---|-----------|-----------|-----------|-----------|
| 3 | 2.3866667 | 0.3089229 | 2.0300000 | 2.5700000 |
|---|-----------|-----------|-----------|-----------|

---

Unique Subject Identifier=2617000000-0188

Assay variable : PTINR\_VAL1 PT-INR Value

N Mean Standard Deviation Minimum Maximum

---

|   |           |           |           |           |
|---|-----------|-----------|-----------|-----------|
| 3 | 1.9066667 | 0.3707200 | 1.6400000 | 2.3300000 |
|---|-----------|-----------|-----------|-----------|

---

Unique Subject Identifier=2617000000-0190

Assay variable : PTINR\_VAL1 PT-INR Value

N Mean Standard Deviation Minimum Maximum

---

|   |           |           |           |           |
|---|-----------|-----------|-----------|-----------|
| 4 | 1.8875000 | 0.3312980 | 1.5300000 | 2.2300000 |
|---|-----------|-----------|-----------|-----------|

---

Unique Subject Identifier=2617000000-0193

Assay variable : PTINR\_VAL1 PT-INR Value

N Mean Standard Deviation Minimum Maximum

---

|   |          |           |          |          |
|---|----------|-----------|----------|----------|
| 3 | 2.030000 | 0.5040833 | 1.480000 | 2.470000 |
|---|----------|-----------|----------|----------|

---

Laboratory tests at the time of obtaining Table 2-6 consent, according to the presence or absence of proton-pump inhibitors

Unique Subject Identifier=2617000000-0195

MEANS Procedure

Assay variable : PTINR\_VAL1 PT-INR Value

N Mean Standard Deviation Minimum Maximum

---

|   |           |           |           |           |
|---|-----------|-----------|-----------|-----------|
| 4 | 2.3175000 | 0.1543535 | 2.1500000 | 2.5100000 |
|---|-----------|-----------|-----------|-----------|

---

Unique Subject Identifier=2617000000-0200

Assay variable : PTINR\_VAL1 PT-INR Value

N Mean Standard Deviation Minimum Maximum

---

|   |           |           |           |           |
|---|-----------|-----------|-----------|-----------|
| 3 | 1.9633333 | 0.6379133 | 1.4300000 | 2.6700000 |
|---|-----------|-----------|-----------|-----------|

---

Unique Subject Identifier=2617000000-0201

Assay variable : PTINR\_VAL1 PT-INR Value

N Mean Standard Deviation Minimum Maximum

---

|   |           |           |           |           |
|---|-----------|-----------|-----------|-----------|
| 4 | 2.0100000 | 0.7092719 | 0.9600000 | 2.4600000 |
|---|-----------|-----------|-----------|-----------|

---

Unique Subject Identifier=2617000000-0202

Assay variable : PTINR\_VAL1 PT-INR Value

N Mean Standard Deviation Minimum Maximum

---

|   |           |           |           |           |
|---|-----------|-----------|-----------|-----------|
| 2 | 2.3750000 | 0.1767767 | 2.2500000 | 2.5000000 |
|---|-----------|-----------|-----------|-----------|

---



Laboratory tests at the time of obtaining Table 2-6 consent, according to the presence or absence of proton-pump inhibitors

Unique Subject Identifier=2617000000-0203

MEANS Procedure

Assay variable : PTINR\_VAL1 PT-INR Value

N Mean Standard Deviation Minimum Maximum

---

|   |           |           |           |           |
|---|-----------|-----------|-----------|-----------|
| 5 | 2.1980000 | 0.6521273 | 1.4300000 | 3.0900000 |
|---|-----------|-----------|-----------|-----------|

---

Unique Subject Identifier=2617000000-0204

Assay variable : PTINR\_VAL1 PT-INR Value

N Mean Standard Deviation Minimum Maximum

---

|   |           |           |           |           |
|---|-----------|-----------|-----------|-----------|
| 5 | 1.2140000 | 0.0901665 | 1.0600000 | 1.2800000 |
|---|-----------|-----------|-----------|-----------|

---

Unique Subject Identifier=2617000000-0205

Assay variable : PTINR\_VAL1 PT-INR Value

N Mean Standard Deviation Minimum Maximum

---

|   |           |           |           |           |
|---|-----------|-----------|-----------|-----------|
| 2 | 2.1750000 | 0.5586144 | 1.7800000 | 2.5700000 |
|---|-----------|-----------|-----------|-----------|

---

Unique Subject Identifier=2617000000-0208

Assay variable : PTINR\_VAL1 PT-INR Value

N Mean Standard Deviation Minimum Maximum

---

|   |           |           |           |           |
|---|-----------|-----------|-----------|-----------|
| 4 | 1.7650000 | 0.2292742 | 1.4800000 | 1.9700000 |
|---|-----------|-----------|-----------|-----------|

---

Laboratory tests at the time of obtaining Table 2-6 consent, according to the presence or absence of proton-pump inhibitors

Unique Subject Identifier=2617000000-0210

MEANS Procedure

Assay variable : PTINR\_VAL1 PT-INR Value

N Mean Standard Deviation Minimum Maximum

---

|   |           |           |           |           |
|---|-----------|-----------|-----------|-----------|
| 3 | 1.7466667 | 0.1250333 | 1.6200000 | 1.8700000 |
|---|-----------|-----------|-----------|-----------|

---

Unique Subject Identifier=2617000000-0213

Assay variable : PTINR\_VAL1 PT-INR Value

N Mean Standard Deviation Minimum Maximum

---

|   |           |           |           |           |
|---|-----------|-----------|-----------|-----------|
| 4 | 1.8550000 | 0.1236932 | 1.7000000 | 2.0000000 |
|---|-----------|-----------|-----------|-----------|

---

Unique Subject Identifier=2617000000-0214

Assay variable : PTINR\_VAL1 PT-INR Value

N Mean Standard Deviation Minimum Maximum

---

|   |           |           |           |           |
|---|-----------|-----------|-----------|-----------|
| 3 | 2.1000000 | 0.5456189 | 1.7800000 | 2.7300000 |
|---|-----------|-----------|-----------|-----------|

---

Unique Subject Identifier=2617000000-0215

Assay variable : PTINR\_VAL1 PT-INR Value

N Mean Standard Deviation Minimum Maximum

---

|   |          |           |          |          |
|---|----------|-----------|----------|----------|
| 2 | 2.100000 | 0.3676955 | 1.840000 | 2.360000 |
|---|----------|-----------|----------|----------|

---

Laboratory tests at the time of obtaining Table 2-6 consent, according to the presence or absence of proton-pump inhibitors

Unique Subject Identifier=2617000000-0216

MEANS Procedure

Assay variable : PTINR\_VAL1 PT-INR Value

N Mean Standard Deviation Minimum Maximum

---

|   |           |           |           |           |
|---|-----------|-----------|-----------|-----------|
| 4 | 1.5450000 | 0.1310216 | 1.3500000 | 1.6300000 |
|---|-----------|-----------|-----------|-----------|

---

Unique Subject Identifier=2617000000-0218

Assay variable : PTINR\_VAL1 PT-INR Value

N Mean Standard Deviation Minimum Maximum

---

|   |           |           |           |           |
|---|-----------|-----------|-----------|-----------|
| 6 | 2.1300000 | 0.1711140 | 2.0000000 | 2.4200000 |
|---|-----------|-----------|-----------|-----------|

---

Unique Subject Identifier=2617000000-0221

Assay variable : PTINR\_VAL1 PT-INR Value

N Mean Standard Deviation Minimum Maximum

---

|   |           |           |           |           |
|---|-----------|-----------|-----------|-----------|
| 4 | 2.1575000 | 0.2085466 | 1.8800000 | 2.3500000 |
|---|-----------|-----------|-----------|-----------|

---

Unique Subject Identifier=2617000000-0222

Assay variable : PTINR\_VAL1 PT-INR Value

N Mean Standard Deviation Minimum Maximum

---

|   |          |           |          |          |
|---|----------|-----------|----------|----------|
| 3 | 1.940000 | 0.9734988 | 1.130000 | 3.020000 |
|---|----------|-----------|----------|----------|

---

Laboratory tests at the time of obtaining Table 2-6 consent, according to the presence or absence of proton-pump inhibitors

Unique Subject Identifier=2617000000-0223

MEANS Procedure

Assay variable : PTINR\_VAL1 PT-INR Value

N Mean Standard Deviation Minimum Maximum

---

|   |           |           |           |           |
|---|-----------|-----------|-----------|-----------|
| 3 | 2.0233333 | 0.0757188 | 1.9700000 | 2.1100000 |
|---|-----------|-----------|-----------|-----------|

---

Unique Subject Identifier=2617000000-0224

Assay variable : PTINR\_VAL1 PT-INR Value

N Mean Standard Deviation Minimum Maximum

---

|   |           |           |           |           |
|---|-----------|-----------|-----------|-----------|
| 3 | 1.6300000 | 0.1178983 | 1.5000000 | 1.7300000 |
|---|-----------|-----------|-----------|-----------|

---

Unique Subject Identifier=2617000000-0226

Assay variable : PTINR\_VAL1 PT-INR Value

N Mean Standard Deviation Minimum Maximum

---

|   |           |           |           |           |
|---|-----------|-----------|-----------|-----------|
| 4 | 2.2600000 | 0.2978814 | 1.9500000 | 2.5200000 |
|---|-----------|-----------|-----------|-----------|

---

Unique Subject Identifier=2617000000-0230

Assay variable : PTINR\_VAL1 PT-INR Value

N Mean Standard Deviation Minimum Maximum

---

|   |           |           |           |           |
|---|-----------|-----------|-----------|-----------|
| 3 | 2.4433333 | 0.8064945 | 1.5200000 | 3.0100000 |
|---|-----------|-----------|-----------|-----------|

---



Laboratory tests at the time of obtaining Table 2-6 consent, according to the presence or absence of proton-pump inhibitors

Unique Subject Identifier=2617000000-0231

MEANS Procedure

Assay variable : PTINR\_VAL1 PT-INR Value

N Mean Standard Deviation Minimum Maximum

---

|   |           |           |           |           |
|---|-----------|-----------|-----------|-----------|
| 4 | 2.0550000 | 0.3812698 | 1.5300000 | 2.3700000 |
|---|-----------|-----------|-----------|-----------|

---

Unique Subject Identifier=2617000000-0232

Assay variable : PTINR\_VAL1 PT-INR Value

N Mean Standard Deviation Minimum Maximum

---

|   |           |           |           |           |
|---|-----------|-----------|-----------|-----------|
| 3 | 2.0600000 | 0.2981610 | 1.7300000 | 2.3100000 |
|---|-----------|-----------|-----------|-----------|

---

Unique Subject Identifier=2617000000-0233

Assay variable : PTINR\_VAL1 PT-INR Value

N Mean Standard Deviation Minimum Maximum

---

|   |           |           |           |           |
|---|-----------|-----------|-----------|-----------|
| 3 | 1.7766667 | 0.0850490 | 1.6900000 | 1.8600000 |
|---|-----------|-----------|-----------|-----------|

---

Unique Subject Identifier=2617000000-0239

Assay variable : PTINR\_VAL1 PT-INR Value

N Mean Standard Deviation Minimum Maximum

---

|   |          |           |          |          |
|---|----------|-----------|----------|----------|
| 3 | 2.133333 | 0.1106044 | 2.030000 | 2.250000 |
|---|----------|-----------|----------|----------|

---

Laboratory tests at the time of obtaining Table 2-6 consent, according to the presence or absence of proton-pump inhibitors

Unique Subject Identifier=2617000000-0243

MEANS Procedure

Assay variable : PTINR\_VAL1 PT-INR Value

N Mean Standard Deviation Minimum Maximum

---

|   |           |           |           |           |
|---|-----------|-----------|-----------|-----------|
| 3 | 1.8966667 | 0.2874601 | 1.6700000 | 2.2200000 |
|---|-----------|-----------|-----------|-----------|

---

Unique Subject Identifier=2617000000-0244

Assay variable : PTINR\_VAL1 PT-INR Value

N Mean Standard Deviation Minimum Maximum

---

|   |           |           |           |           |
|---|-----------|-----------|-----------|-----------|
| 5 | 2.1760000 | 0.4657574 | 1.3900000 | 2.6100000 |
|---|-----------|-----------|-----------|-----------|

---

Unique Subject Identifier=2617000000-0251

Assay variable : PTINR\_VAL1 PT-INR Value

N Mean Standard Deviation Minimum Maximum

---

|   |           |           |           |           |
|---|-----------|-----------|-----------|-----------|
| 4 | 1.7475000 | 0.1723127 | 1.5000000 | 1.8700000 |
|---|-----------|-----------|-----------|-----------|

---

Unique Subject Identifier=2617000000-0255

Assay variable : PTINR\_VAL1 PT-INR Value

N Mean Standard Deviation Minimum Maximum

---

|   |           |           |           |           |
|---|-----------|-----------|-----------|-----------|
| 2 | 2.3950000 | 0.1767767 | 2.2700000 | 2.5200000 |
|---|-----------|-----------|-----------|-----------|

---

Laboratory tests at the time of obtaining Table 2-6 consent, according to the presence or absence of proton-pump inhibitors

Unique Subject Identifier=2617000000-0256

MEANS Procedure

Assay variable : PTINR\_VAL1 PT-INR Value

| N | Mean      | Standard Deviation | Minimum   | Maximum   |
|---|-----------|--------------------|-----------|-----------|
| 3 | 1.5733333 | 0.1497776          | 1.4500000 | 1.7400000 |

Unique Subject Identifier=2617000000-0258

Assay variable : PTINR\_VAL1 PT-INR Value

| N | Mean      | Standard Deviation | Minimum   | Maximum   |
|---|-----------|--------------------|-----------|-----------|
| 3 | 1.8700000 | 0.0458258          | 1.8300000 | 1.9200000 |

Unique Subject Identifier=2617000000-0259

Assay variable : PTINR\_VAL1 PT-INR Value

| N | Mean      | Standard Deviation | Minimum   | Maximum   |
|---|-----------|--------------------|-----------|-----------|
| 6 | 1.9333333 | 0.2353437          | 1.6300000 | 2.2700000 |

Unique Subject Identifier=2617000000-0261

Assay variable : PTINR\_VAL1 PT-INR Value

N Mean Standard Deviation Minimum Maximum

---

|   |           |           |           |           |
|---|-----------|-----------|-----------|-----------|
| 3 | 2.6266667 | 0.2400694 | 2.4200000 | 2.8900000 |
|---|-----------|-----------|-----------|-----------|

---

Laboratory tests at the time of obtaining Table 2-6 consent, according to the presence or absence of proton-pump inhibitors

Unique Subject Identifier=2617000000-0262

MEANS Procedure

Assay variable : PTINR\_VAL1 PT-INR Value

N Mean Standard Deviation Minimum Maximum

---

|   |           |           |           |           |
|---|-----------|-----------|-----------|-----------|
| 4 | 1.6925000 | 0.2657536 | 1.3800000 | 2.0300000 |
|---|-----------|-----------|-----------|-----------|

---

Unique Subject Identifier=2617000000-0264

Assay variable : PTINR\_VAL1 PT-INR Value

N Mean Standard Deviation Minimum Maximum

---

|   |           |           |           |           |
|---|-----------|-----------|-----------|-----------|
| 5 | 2.0320000 | 1.1410828 | 1.1600000 | 3.7800000 |
|---|-----------|-----------|-----------|-----------|

---

Unique Subject Identifier=2617000000-0270

Assay variable : PTINR\_VAL1 PT-INR Value

N Mean Standard Deviation Minimum Maximum

---

|   |           |           |           |           |
|---|-----------|-----------|-----------|-----------|
| 5 | 1.8940000 | 0.5493906 | 1.0500000 | 2.5500000 |
|---|-----------|-----------|-----------|-----------|

---

Unique Subject Identifier=2617000000-0271

Assay variable : PTINR\_VAL1 PT-INR Value

N Mean Standard Deviation Minimum Maximum

---

|   |           |           |           |           |
|---|-----------|-----------|-----------|-----------|
| 4 | 1.6975000 | 0.1609089 | 1.4800000 | 1.8500000 |
|---|-----------|-----------|-----------|-----------|

---



Laboratory tests at the time of obtaining Table 2-6 consent, according to the presence or absence of proton-pump inhibitors

Unique Subject Identifier=2617000000-0272

MEANS Procedure

Assay variable : PTINR\_VAL1 PT-INR Value

N Mean Standard Deviation Minimum Maximum

---

|   |           |           |           |           |
|---|-----------|-----------|-----------|-----------|
| 2 | 1.9200000 | 0.0282843 | 1.9000000 | 1.9400000 |
|---|-----------|-----------|-----------|-----------|

---

Unique Subject Identifier=2617000000-0274

Assay variable : PTINR\_VAL1 PT-INR Value

N Mean Standard Deviation Minimum Maximum

---

|   |           |           |           |           |
|---|-----------|-----------|-----------|-----------|
| 2 | 1.8900000 | 0.1838478 | 1.7600000 | 2.0200000 |
|---|-----------|-----------|-----------|-----------|

---

Unique Subject Identifier=2617000000-0278

Assay variable : PTINR\_VAL1 PT-INR Value

N Mean Standard Deviation Minimum Maximum

---

|   |           |           |           |           |
|---|-----------|-----------|-----------|-----------|
| 2 | 1.2200000 | 0.2828427 | 1.0200000 | 1.4200000 |
|---|-----------|-----------|-----------|-----------|

---

Unique Subject Identifier=2617000000-0279

Assay variable : PTINR\_VAL1 PT-INR Value

N Mean Standard Deviation Minimum Maximum

---

|   |           |           |           |           |
|---|-----------|-----------|-----------|-----------|
| 4 | 2.0075000 | 0.2286737 | 1.6800000 | 2.2100000 |
|---|-----------|-----------|-----------|-----------|

---

Laboratory tests at the time of obtaining Table 2-6 consent, according to the presence or absence of proton-pump inhibitors

Unique Subject Identifier=2617000000-0281

MEANS Procedure

Assay variable : PTINR\_VAL1 PT-INR Value

N Mean Standard Deviation Minimum Maximum

---

|   |           |           |           |           |
|---|-----------|-----------|-----------|-----------|
| 3 | 2.0833333 | 0.2821938 | 1.7600000 | 2.2800000 |
|---|-----------|-----------|-----------|-----------|

---

Unique Subject Identifier=2617000000-0282

Assay variable : PTINR\_VAL1 PT-INR Value

N Mean Standard Deviation Minimum Maximum

---

|   |           |           |           |           |
|---|-----------|-----------|-----------|-----------|
| 4 | 2.2625000 | 0.8172464 | 1.5000000 | 3.3800000 |
|---|-----------|-----------|-----------|-----------|

---

Unique Subject Identifier=2617000000-0284

Assay variable : PTINR\_VAL1 PT-INR Value

N Mean Standard Deviation Minimum Maximum

---

|   |           |           |           |           |
|---|-----------|-----------|-----------|-----------|
| 6 | 1.7416667 | 0.2171098 | 1.5100000 | 2.0600000 |
|---|-----------|-----------|-----------|-----------|

---

Unique Subject Identifier=2617000000-0287

Assay variable : PTINR\_VAL1 PT-INR Value

N Mean Standard Deviation Minimum Maximum

---

|   |           |           |           |           |
|---|-----------|-----------|-----------|-----------|
| 4 | 1.9300000 | 0.3068116 | 1.5900000 | 2.2700000 |
|---|-----------|-----------|-----------|-----------|

---

Laboratory tests at the time of obtaining Table 2-6 consent, according to the presence or absence of proton-pump inhibitors

Unique Subject Identifier=2617000000-0288

MEANS Procedure

Assay variable : PTINR\_VAL1 PT-INR Value

N Mean Standard Deviation Minimum Maximum

---

|   |           |           |           |           |
|---|-----------|-----------|-----------|-----------|
| 3 | 1.9566667 | 0.3707200 | 1.6900000 | 2.3800000 |
|---|-----------|-----------|-----------|-----------|

---

Unique Subject Identifier=2617000000-0290

Assay variable : PTINR\_VAL1 PT-INR Value

N Mean Standard Deviation Minimum Maximum

---

|   |           |           |           |           |
|---|-----------|-----------|-----------|-----------|
| 3 | 1.7466667 | 0.0896289 | 1.6900000 | 1.8500000 |
|---|-----------|-----------|-----------|-----------|

---

Unique Subject Identifier=2617000000-0294

Assay variable : PTINR\_VAL1 PT-INR Value

N Mean Standard Deviation Minimum Maximum

---

|   |           |           |           |           |
|---|-----------|-----------|-----------|-----------|
| 4 | 2.3175000 | 0.9911735 | 1.3900000 | 3.7000000 |
|---|-----------|-----------|-----------|-----------|

---

Unique Subject Identifier=2617000000-0295

Assay variable : PTINR\_VAL1 PT-INR Value

N Mean Standard Deviation Minimum Maximum

---

|   |           |           |           |           |
|---|-----------|-----------|-----------|-----------|
| 2 | 1.9150000 | 0.2899138 | 1.7100000 | 2.1200000 |
|---|-----------|-----------|-----------|-----------|

---

Laboratory tests at the time of obtaining Table 2-6 consent, according to the presence or absence of proton-pump inhibitors

Unique Subject Identifier=2617000000-0296

MEANS Procedure

Assay variable : PTINR\_VAL1 PT-INR Value

N Mean Standard Deviation Minimum Maximum

---

|   |           |           |           |           |
|---|-----------|-----------|-----------|-----------|
| 4 | 1.9500000 | 0.1373560 | 1.7500000 | 2.0400000 |
|---|-----------|-----------|-----------|-----------|

---

Unique Subject Identifier=2617000000-0298

Assay variable : PTINR\_VAL1 PT-INR Value

N Mean Standard Deviation Minimum Maximum

---

|   |           |           |           |           |
|---|-----------|-----------|-----------|-----------|
| 4 | 1.0500000 | 0.0355903 | 1.0000000 | 1.0800000 |
|---|-----------|-----------|-----------|-----------|

---

Unique Subject Identifier=2617000000-0299

Assay variable : PTINR\_VAL1 PT-INR Value

N Mean Standard Deviation Minimum Maximum

---

|   |           |           |           |           |
|---|-----------|-----------|-----------|-----------|
| 4 | 1.8250000 | 0.0310913 | 1.8000000 | 1.8700000 |
|---|-----------|-----------|-----------|-----------|

---

Unique Subject Identifier=2617000000-0301

Assay variable : PTINR\_VAL1 PT-INR Value

N Mean Standard Deviation Minimum Maximum

---

|   |           |  |           |           |
|---|-----------|--|-----------|-----------|
| 1 | 1.5500000 |  | 1.5500000 | 1.5500000 |
|---|-----------|--|-----------|-----------|

---



Laboratory tests at the time of obtaining Table 2-6 consent, according to the presence or absence of proton-pump inhibitors

Unique Subject Identifier=2617000000-0303

MEANS Procedure

Assay variable : PTINR\_VAL1 PT-INR Value

| N | Mean      | Standard Deviation | Minimum   | Maximum   |
|---|-----------|--------------------|-----------|-----------|
| 5 | 1.9240000 | 0.1913897          | 1.7200000 | 2.1700000 |

Unique Subject Identifier=2617000000-0305

Assay variable : PTINR\_VAL1 PT-INR Value

| N | Mean      | Standard Deviation | Minimum   | Maximum   |
|---|-----------|--------------------|-----------|-----------|
| 3 | 2.5733333 | 0.5810622          | 1.9300000 | 3.0600000 |

Unique Subject Identifier=2617000000-0306

Assay variable : PTINR\_VAL1 PT-INR Value

| N | Mean      | Standard Deviation | Minimum   | Maximum   |
|---|-----------|--------------------|-----------|-----------|
| 4 | 1.6600000 | 0.1957890          | 1.4000000 | 1.8300000 |

Unique Subject Identifier=2617000000-0308

Assay variable : PTINR\_VAL1 PT-INR Value

N Mean Standard Deviation Minimum Maximum

---

|   |           |           |           |           |
|---|-----------|-----------|-----------|-----------|
| 3 | 1.7733333 | 0.1457166 | 1.6700000 | 1.9400000 |
|---|-----------|-----------|-----------|-----------|

---

Laboratory tests at the time of obtaining Table 2-6 consent, according to the presence or absence of proton-pump inhibitors

Unique Subject Identifier=2617000000-0312

MEANS Procedure

Assay variable : PTINR\_VAL1 PT-INR Value

N Mean Standard Deviation Minimum Maximum

---

|   |           |           |           |           |
|---|-----------|-----------|-----------|-----------|
| 3 | 1.5666667 | 0.5598512 | 1.1900000 | 2.2100000 |
|---|-----------|-----------|-----------|-----------|

---

Unique Subject Identifier=2617000000-0314

Assay variable : PTINR\_VAL1 PT-INR Value

N Mean Standard Deviation Minimum Maximum

---

|   |           |           |           |           |
|---|-----------|-----------|-----------|-----------|
| 3 | 1.5533333 | 0.0450925 | 1.5100000 | 1.6000000 |
|---|-----------|-----------|-----------|-----------|

---

Unique Subject Identifier=2617000000-0315

Assay variable : PTINR\_VAL1 PT-INR Value

N Mean Standard Deviation Minimum Maximum

---

|   |           |           |           |           |
|---|-----------|-----------|-----------|-----------|
| 2 | 2.0850000 | 0.3606245 | 1.8300000 | 2.3400000 |
|---|-----------|-----------|-----------|-----------|

---

Unique Subject Identifier=2617000000-0320

Assay variable : PTINR\_VAL1 PT-INR Value

N Mean Standard Deviation Minimum Maximum

---

|   |          |           |          |          |
|---|----------|-----------|----------|----------|
| 4 | 2.100000 | 0.7140028 | 1.520000 | 3.020000 |
|---|----------|-----------|----------|----------|

---

Laboratory tests at the time of obtaining Table 2-6 consent, according to the presence or absence of proton-pump inhibitors

Unique Subject Identifier=2617000000-0324

MEANS Procedure

Assay variable : PTINR\_VAL1 PT-INR Value

N Mean Standard Deviation Minimum Maximum

---

|   |          |           |          |          |
|---|----------|-----------|----------|----------|
| 3 | 2.350000 | 0.4386342 | 1.870000 | 2.730000 |
|---|----------|-----------|----------|----------|

---

Unique Subject Identifier=2617000000-0325

Assay variable : PTINR\_VAL1 PT-INR Value

N Mean Standard Deviation Minimum Maximum

---

|   |          |           |          |          |
|---|----------|-----------|----------|----------|
| 3 | 2.200000 | 0.1014889 | 2.090000 | 2.290000 |
|---|----------|-----------|----------|----------|

---

Unique Subject Identifier=2617000000-0328

Assay variable : PTINR\_VAL1 PT-INR Value

N Mean Standard Deviation Minimum Maximum

---

|   |          |           |          |          |
|---|----------|-----------|----------|----------|
| 6 | 1.808333 | 0.5617977 | 1.210000 | 2.510000 |
|---|----------|-----------|----------|----------|

---

Unique Subject Identifier=2617000000-0331

Assay variable : PTINR\_VAL1 PT-INR Value

N Mean Standard Deviation Minimum Maximum

---

|   |          |           |          |          |
|---|----------|-----------|----------|----------|
| 2 | 2.130000 | 0.0707107 | 2.080000 | 2.180000 |
|---|----------|-----------|----------|----------|

---

Laboratory tests at the time of obtaining Table 2-6 consent, according to the presence or absence of proton-pump inhibitors

Unique Subject Identifier=2617000000-0340

MEANS Procedure

Assay variable : PTINR\_VAL1 PT-INR Value

| N | Mean      | Standard Deviation | Minimum   | Maximum   |
|---|-----------|--------------------|-----------|-----------|
| 1 | 1.3300000 |                    | 1.3300000 | 1.3300000 |

Unique Subject Identifier=2617000000-0341

Assay variable : PTINR\_VAL1 PT-INR Value

| N | Mean      | Standard Deviation | Minimum   | Maximum   |
|---|-----------|--------------------|-----------|-----------|
| 3 | 2.4100000 | 0.7856208          | 1.7300000 | 3.2700000 |

Unique Subject Identifier=2617000000-0344

Assay variable : PTINR\_VAL1 PT-INR Value

| N | Mean      | Standard Deviation | Minimum   | Maximum   |
|---|-----------|--------------------|-----------|-----------|
| 1 | 0.9800000 |                    | 0.9800000 | 0.9800000 |

Unique Subject Identifier=2617000000-0348

Assay variable : PTINR\_VAL1 PT-INR Value

N Mean Standard Deviation Minimum Maximum

---

|   |           |           |           |           |
|---|-----------|-----------|-----------|-----------|
| 4 | 1.9100000 | 0.9333452 | 1.1400000 | 3.1900000 |
|---|-----------|-----------|-----------|-----------|

---



Laboratory tests at the time of obtaining Table 2-6 consent, according to the presence or absence of proton-pump inhibitors

Unique Subject Identifier=2617000000-0350

MEANS Procedure

Assay variable : PTINR\_VAL1 PT-INR Value

N Mean Standard Deviation Minimum Maximum

---

|   |           |           |           |           |
|---|-----------|-----------|-----------|-----------|
| 6 | 1.8983333 | 0.4334243 | 1.1700000 | 2.3500000 |
|---|-----------|-----------|-----------|-----------|

---

Unique Subject Identifier=2617000000-0356

Assay variable : PTINR\_VAL1 PT-INR Value

N Mean Standard Deviation Minimum Maximum

---

|   |           |           |           |           |
|---|-----------|-----------|-----------|-----------|
| 4 | 1.7250000 | 0.1470827 | 1.5500000 | 1.9100000 |
|---|-----------|-----------|-----------|-----------|

---

Unique Subject Identifier=2617000000-0358

Assay variable : PTINR\_VAL1 PT-INR Value

N Mean Standard Deviation Minimum Maximum

---

|   |           |           |           |           |
|---|-----------|-----------|-----------|-----------|
| 4 | 1.9600000 | 0.3086530 | 1.6400000 | 2.3700000 |
|---|-----------|-----------|-----------|-----------|

---

Unique Subject Identifier=2617000000-0359

Assay variable : PTINR\_VAL1 PT-INR Value

N Mean Standard Deviation Minimum Maximum

---

|   |           |           |           |           |
|---|-----------|-----------|-----------|-----------|
| 4 | 1.6275000 | 0.1982213 | 1.4800000 | 1.9100000 |
|---|-----------|-----------|-----------|-----------|

---

Laboratory tests at the time of obtaining Table 2-6 consent, according to the presence or absence of proton-pump inhibitors

Unique Subject Identifier=2617000000-0366

MEANS Procedure

Assay variable : PTINR\_VAL1 PT-INR Value

| N | Mean      | Standard Deviation | Minimum   | Maximum   |
|---|-----------|--------------------|-----------|-----------|
| 3 | 1.8433333 | 0.1850225          | 1.6300000 | 1.9600000 |

Unique Subject Identifier=2619011010-0032

Assay variable : PTINR\_VAL1 PT-INR Value

| N | Mean      | Standard Deviation | Minimum   | Maximum   |
|---|-----------|--------------------|-----------|-----------|
| 5 | 2.1040000 | 0.2884961          | 1.7700000 | 2.4200000 |

Unique Subject Identifier=2619011010-0037

Assay variable : PTINR\_VAL1 PT-INR Value

| N | Mean      | Standard Deviation | Minimum   | Maximum   |
|---|-----------|--------------------|-----------|-----------|
| 6 | 1.8666667 | 0.2574231          | 1.5100000 | 2.2800000 |

Unique Subject Identifier=2619011010-0039

Assay variable : PTINR\_VAL1 PT-INR Value

N Mean Standard Deviation Minimum Maximum

---

|   |          |           |          |          |
|---|----------|-----------|----------|----------|
| 3 | 2.403333 | 0.2411086 | 2.150000 | 2.630000 |
|---|----------|-----------|----------|----------|

---

Laboratory tests at the time of obtaining Table 2-6 consent, according to the presence or absence of proton-pump inhibitors

Unique Subject Identifier=2619011010-0042

MEANS Procedure

Assay variable : PTINR\_VAL1 PT-INR Value

N Mean Standard Deviation Minimum Maximum

---

|   |           |           |           |           |
|---|-----------|-----------|-----------|-----------|
| 6 | 1.7050000 | 0.2647074 | 1.5500000 | 2.2400000 |
|---|-----------|-----------|-----------|-----------|

---

Unique Subject Identifier=2619011010-0045

Assay variable : PTINR\_VAL1 PT-INR Value

N Mean Standard Deviation Minimum Maximum

---

|   |           |           |           |           |
|---|-----------|-----------|-----------|-----------|
| 3 | 2.1400000 | 0.8944831 | 1.3300000 | 3.1000000 |
|---|-----------|-----------|-----------|-----------|

---

Unique Subject Identifier=2619011010-0047

Assay variable : PTINR\_VAL1 PT-INR Value

N Mean Standard Deviation Minimum Maximum

---

|   |           |           |           |           |
|---|-----------|-----------|-----------|-----------|
| 6 | 1.5916667 | 0.5448455 | 1.0900000 | 2.3200000 |
|---|-----------|-----------|-----------|-----------|

---

Unique Subject Identifier=2619011010-0048

Assay variable : PTINR\_VAL1 PT-INR Value

N Mean Standard Deviation Minimum Maximum

---

|   |           |           |           |           |
|---|-----------|-----------|-----------|-----------|
| 4 | 1.9625000 | 0.5040751 | 1.3500000 | 2.5700000 |
|---|-----------|-----------|-----------|-----------|

---

Laboratory tests at the time of obtaining Table 2-6 consent, according to the presence or absence of proton-pump inhibitors

Unique Subject Identifier=2621011111-0002

MEANS Procedure

Assay variable : PTINR\_VAL1 PT-INR Value

| N | Mean      | Standard Deviation | Minimum   | Maximum   |
|---|-----------|--------------------|-----------|-----------|
| 1 | 1.5600000 |                    | 1.5600000 | 1.5600000 |

Unique Subject Identifier=2621011111-0004

Assay variable : PTINR\_VAL1 PT-INR Value

| N | Mean      | Standard Deviation | Minimum   | Maximum   |
|---|-----------|--------------------|-----------|-----------|
| 5 | 1.7460000 | 0.1094532          | 1.6100000 | 1.8800000 |

Unique Subject Identifier=2621011111-0013

Assay variable : PTINR\_VAL1 PT-INR Value

| N | Mean      | Standard Deviation | Minimum   | Maximum   |
|---|-----------|--------------------|-----------|-----------|
| 4 | 1.8100000 | 0.2930301          | 1.5100000 | 2.1500000 |

Unique Subject Identifier=2621011111-0019

Assay variable : PTINR\_VAL1 PT-INR Value

N Mean Standard Deviation Minimum Maximum

---

|   |           |           |           |           |
|---|-----------|-----------|-----------|-----------|
| 5 | 2.0720000 | 0.7127903 | 1.3500000 | 3.2700000 |
|---|-----------|-----------|-----------|-----------|

---



Laboratory tests at the time of obtaining Table 2-6 consent, according to the presence or absence of proton-pump inhibitors

Unique Subject Identifier=2623000000-0005

MEANS Procedure

Assay variable : PTINR\_VAL1 PT-INR Value

| N | Mean      | Standard Deviation | Minimum   | Maximum   |
|---|-----------|--------------------|-----------|-----------|
| 3 | 2.0366667 | 0.1159023          | 1.9300000 | 2.1600000 |

Unique Subject Identifier=2623000000-0006

Assay variable : PTINR\_VAL1 PT-INR Value

| N | Mean      | Standard Deviation | Minimum   | Maximum   |
|---|-----------|--------------------|-----------|-----------|
| 4 | 1.5675000 | 0.1682013          | 1.3500000 | 1.7100000 |

Unique Subject Identifier=2623000000-0008

Assay variable : PTINR\_VAL1 PT-INR Value

| N | Mean      | Standard Deviation | Minimum   | Maximum   |
|---|-----------|--------------------|-----------|-----------|
| 6 | 2.0266667 | 0.2779688          | 1.8200000 | 2.5800000 |

Unique Subject Identifier=2623000000-0009

Assay variable : PTINR\_VAL1 PT-INR Value

N Mean Standard Deviation Minimum Maximum

---

|   |           |           |           |           |
|---|-----------|-----------|-----------|-----------|
| 6 | 1.8883333 | 0.7314757 | 1.0700000 | 2.9900000 |
|---|-----------|-----------|-----------|-----------|

---

Laboratory tests at the time of obtaining Table 2-6 consent, according to the presence or absence of proton-pump inhibitors

Unique Subject Identifier=2623000000-0016

MEANS Procedure

Assay variable : PTINR\_VAL1 PT-INR Value

| N | Mean      | Standard Deviation | Minimum   | Maximum   |
|---|-----------|--------------------|-----------|-----------|
| 3 | 2.0500000 | 0.1637071          | 1.8700000 | 2.1900000 |

Unique Subject Identifier=2623000000-0017

Assay variable : PTINR\_VAL1 PT-INR Value

| N | Mean      | Standard Deviation | Minimum   | Maximum   |
|---|-----------|--------------------|-----------|-----------|
| 3 | 1.6000000 | 0.0529150          | 1.5600000 | 1.6600000 |

Unique Subject Identifier=2623000000-0018

Assay variable : PTINR\_VAL1 PT-INR Value

| N | Mean      | Standard Deviation | Minimum   | Maximum   |
|---|-----------|--------------------|-----------|-----------|
| 6 | 1.6016667 | 0.1927088          | 1.3200000 | 1.8800000 |

Unique Subject Identifier=2623000000-0025

Assay variable : PTINR\_VAL1 PT-INR Value

N Mean Standard Deviation Minimum Maximum

---

|   |          |           |          |          |
|---|----------|-----------|----------|----------|
| 4 | 2.190000 | 1.1400877 | 1.130000 | 3.320000 |
|---|----------|-----------|----------|----------|

---

Laboratory tests at the time of obtaining Table 2-6 consent, according to the presence or absence of proton-pump inhibitors

Unique Subject Identifier=2623000000-0030

MEANS Procedure

Assay variable : PTINR\_VAL1 PT-INR Value

N Mean Standard Deviation Minimum Maximum

---

|   |           |           |           |           |
|---|-----------|-----------|-----------|-----------|
| 4 | 2.0400000 | 0.2563851 | 1.7300000 | 2.2700000 |
|---|-----------|-----------|-----------|-----------|

---

Unique Subject Identifier=2623000000-0031

Assay variable : PTINR\_VAL1 PT-INR Value

N Mean Standard Deviation Minimum Maximum

---

|   |           |           |           |           |
|---|-----------|-----------|-----------|-----------|
| 3 | 2.0033333 | 0.4675824 | 1.4800000 | 2.3800000 |
|---|-----------|-----------|-----------|-----------|

---

Unique Subject Identifier=2623000000-0034

Assay variable : PTINR\_VAL1 PT-INR Value

N Mean Standard Deviation Minimum Maximum

---

|   |           |           |           |           |
|---|-----------|-----------|-----------|-----------|
| 3 | 2.5966667 | 0.2315887 | 2.3400000 | 2.7900000 |
|---|-----------|-----------|-----------|-----------|

---

Unique Subject Identifier=2623000000-0035

Assay variable : PTINR\_VAL1 PT-INR Value

N Mean Standard Deviation Minimum Maximum

---

|   |           |           |           |           |
|---|-----------|-----------|-----------|-----------|
| 5 | 2.4620000 | 0.2728919 | 2.2700000 | 2.9400000 |
|---|-----------|-----------|-----------|-----------|

---

Laboratory tests at the time of obtaining Table 2-6 consent, according to the presence or absence of proton-pump inhibitors

Unique Subject Identifier=2623000000-0037

MEANS Procedure

Assay variable : PTINR\_VAL1 PT-INR Value

N Mean Standard Deviation Minimum Maximum

---

|   |           |           |           |           |
|---|-----------|-----------|-----------|-----------|
| 3 | 2.0633333 | 0.1418920 | 1.9100000 | 2.1900000 |
|---|-----------|-----------|-----------|-----------|

---

Unique Subject Identifier=2623000000-0039

Assay variable : PTINR\_VAL1 PT-INR Value

N Mean Standard Deviation Minimum Maximum

---

|   |           |           |           |           |
|---|-----------|-----------|-----------|-----------|
| 3 | 2.0533333 | 0.2324507 | 1.7900000 | 2.2300000 |
|---|-----------|-----------|-----------|-----------|

---

Unique Subject Identifier=2623000000-0040

Assay variable : PTINR\_VAL1 PT-INR Value

N Mean Standard Deviation Minimum Maximum

---

|   |           |           |           |           |
|---|-----------|-----------|-----------|-----------|
| 4 | 1.6875000 | 0.4157223 | 1.2700000 | 2.0500000 |
|---|-----------|-----------|-----------|-----------|

---

Unique Subject Identifier=2623000000-0043

Assay variable : PTINR\_VAL1 PT-INR Value

N Mean Standard Deviation Minimum Maximum

---

|   |          |           |          |          |
|---|----------|-----------|----------|----------|
| 3 | 1.820000 | 0.3051229 | 1.480000 | 2.070000 |
|---|----------|-----------|----------|----------|

---



Laboratory tests at the time of obtaining Table 2-6 consent, according to the presence or absence of proton-pump inhibitors

Unique Subject Identifier=2623000000-0049

MEANS Procedure

Assay variable : PTINR\_VAL1 PT-INR Value

N Mean Standard Deviation Minimum Maximum

---

|   |           |           |           |           |
|---|-----------|-----------|-----------|-----------|
| 3 | 2.2600000 | 0.1311488 | 2.1400000 | 2.4000000 |
|---|-----------|-----------|-----------|-----------|

---

Unique Subject Identifier=2623000000-0051

Assay variable : PTINR\_VAL1 PT-INR Value

N Mean Standard Deviation Minimum Maximum

---

|   |           |  |           |           |
|---|-----------|--|-----------|-----------|
| 1 | 2.5000000 |  | 2.5000000 | 2.5000000 |
|---|-----------|--|-----------|-----------|

---

Unique Subject Identifier=2623000000-0059

Assay variable : PTINR\_VAL1 PT-INR Value

N Mean Standard Deviation Minimum Maximum

---

|   |           |           |           |           |
|---|-----------|-----------|-----------|-----------|
| 4 | 2.1325000 | 0.2364142 | 1.7900000 | 2.3200000 |
|---|-----------|-----------|-----------|-----------|

---

Unique Subject Identifier=2623000000-0062

Assay variable : PTINR\_VAL1 PT-INR Value

N Mean Standard Deviation Minimum Maximum

---

|   |           |           |           |           |
|---|-----------|-----------|-----------|-----------|
| 4 | 1.7575000 | 0.4713368 | 1.2600000 | 2.3400000 |
|---|-----------|-----------|-----------|-----------|

---

Laboratory tests at the time of obtaining Table 2-6 consent, according to the presence or absence of proton-pump inhibitors

Unique Subject Identifier=2623000000-0063

MEANS Procedure

Assay variable : PTINR\_VAL1 PT-INR Value

| N | Mean      | Standard Deviation | Minimum   | Maximum   |
|---|-----------|--------------------|-----------|-----------|
| 3 | 2.0000000 | 0.0346410          | 1.9800000 | 2.0400000 |

Unique Subject Identifier=2623000000-0069

Assay variable : PTINR\_VAL1 PT-INR Value

| N | Mean      | Standard Deviation | Minimum   | Maximum   |
|---|-----------|--------------------|-----------|-----------|
| 4 | 1.7950000 | 0.1027943          | 1.6600000 | 1.9100000 |

Unique Subject Identifier=2623000000-0075

Assay variable : PTINR\_VAL1 PT-INR Value

| N | Mean      | Standard Deviation | Minimum   | Maximum   |
|---|-----------|--------------------|-----------|-----------|
| 2 | 2.1300000 | 0.3535534          | 1.8800000 | 2.3800000 |

Unique Subject Identifier=2623000000-0080

Assay variable : PTINR\_VAL1 PT-INR Value

N Mean Standard Deviation Minimum Maximum

---

|   |          |           |          |          |
|---|----------|-----------|----------|----------|
| 3 | 1.890000 | 0.1997498 | 1.720000 | 2.110000 |
|---|----------|-----------|----------|----------|

---

Laboratory tests at the time of obtaining Table 2-6 consent, according to the presence or absence of proton-pump inhibitors

Unique Subject Identifier=2623000000-0081

MEANS Procedure

Assay variable : PTINR\_VAL1 PT-INR Value

N Mean Standard Deviation Minimum Maximum

---

|   |           |           |           |           |
|---|-----------|-----------|-----------|-----------|
| 6 | 2.1366667 | 0.2517671 | 1.7700000 | 2.4600000 |
|---|-----------|-----------|-----------|-----------|

---

Unique Subject Identifier=2623000000-0086

Assay variable : PTINR\_VAL1 PT-INR Value

N Mean Standard Deviation Minimum Maximum

---

|   |           |           |           |           |
|---|-----------|-----------|-----------|-----------|
| 2 | 1.5900000 | 0.0424264 | 1.5600000 | 1.6200000 |
|---|-----------|-----------|-----------|-----------|

---

Unique Subject Identifier=2623000000-0087

Assay variable : PTINR\_VAL1 PT-INR Value

N Mean Standard Deviation Minimum Maximum

---

|   |           |           |           |           |
|---|-----------|-----------|-----------|-----------|
| 2 | 2.5300000 | 0.2545584 | 2.3500000 | 2.7100000 |
|---|-----------|-----------|-----------|-----------|

---

Unique Subject Identifier=2626011111-0005

Assay variable : PTINR\_VAL1 PT-INR Value

N Mean Standard Deviation Minimum Maximum

---

|   |           |           |           |           |
|---|-----------|-----------|-----------|-----------|
| 3 | 1.7066667 | 0.4697162 | 1.2800000 | 2.2100000 |
|---|-----------|-----------|-----------|-----------|

---

Laboratory tests at the time of obtaining Table 2-6 consent, according to the presence or absence of proton-pump inhibitors

Unique Subject Identifier=2626011111-0006

MEANS Procedure

Assay variable : PTINR\_VAL1 PT-INR Value

N Mean Standard Deviation Minimum Maximum

---

|   |          |           |          |          |
|---|----------|-----------|----------|----------|
| 3 | 1.600000 | 0.1389244 | 1.440000 | 1.690000 |
|---|----------|-----------|----------|----------|

---

Unique Subject Identifier=2626011111-0010

Assay variable : PTINR\_VAL1 PT-INR Value

N Mean Standard Deviation Minimum Maximum

---

|   |          |           |          |          |
|---|----------|-----------|----------|----------|
| 6 | 1.663333 | 0.2174090 | 1.340000 | 2.020000 |
|---|----------|-----------|----------|----------|

---

Unique Subject Identifier=2626011111-0012

Assay variable : PTINR\_VAL1 PT-INR Value

N Mean Standard Deviation Minimum Maximum

---

|   |          |           |          |          |
|---|----------|-----------|----------|----------|
| 4 | 1.832500 | 0.4608959 | 1.260000 | 2.370000 |
|---|----------|-----------|----------|----------|

---

Unique Subject Identifier=2626011111-0017

Assay variable : PTINR\_VAL1 PT-INR Value

N Mean Standard Deviation Minimum Maximum

---

|   |           |           |           |           |
|---|-----------|-----------|-----------|-----------|
| 3 | 1.8466667 | 0.4495924 | 1.4600000 | 2.3400000 |
|---|-----------|-----------|-----------|-----------|

---



Laboratory tests at the time of obtaining Table 2-6 consent, according to the presence or absence of proton-pump inhibitors

Unique Subject Identifier=2626011111-0021

MEANS Procedure

Assay variable : PTINR\_VAL1 PT-INR Value

N Mean Standard Deviation Minimum Maximum

---

|   |           |           |           |           |
|---|-----------|-----------|-----------|-----------|
| 5 | 1.8620000 | 0.4428544 | 1.2700000 | 2.4900000 |
|---|-----------|-----------|-----------|-----------|

---

Unique Subject Identifier=2626011111-0026

Assay variable : PTINR\_VAL1 PT-INR Value

N Mean Standard Deviation Minimum Maximum

---

|   |           |           |           |           |
|---|-----------|-----------|-----------|-----------|
| 4 | 1.9150000 | 0.5519964 | 1.5100000 | 2.7200000 |
|---|-----------|-----------|-----------|-----------|

---

Unique Subject Identifier=2626011111-0035

Assay variable : PTINR\_VAL1 PT-INR Value

N Mean Standard Deviation Minimum Maximum

---

|   |           |           |           |           |
|---|-----------|-----------|-----------|-----------|
| 3 | 1.6600000 | 0.0600000 | 1.6000000 | 1.7200000 |
|---|-----------|-----------|-----------|-----------|

---

Unique Subject Identifier=2626011111-0037

Assay variable : PTINR\_VAL1 PT-INR Value

N Mean Standard Deviation Minimum Maximum

---

|   |           |           |           |           |
|---|-----------|-----------|-----------|-----------|
| 4 | 2.1725000 | 0.6584008 | 1.2700000 | 2.8400000 |
|---|-----------|-----------|-----------|-----------|

---

Laboratory tests at the time of obtaining Table 2-6 consent, according to the presence or absence of proton-pump inhibitors

Unique Subject Identifier=2626011111-0038

MEANS Procedure

Assay variable : PTINR\_VAL1 PT-INR Value

N Mean Standard Deviation Minimum Maximum

---

|   |           |           |           |           |
|---|-----------|-----------|-----------|-----------|
| 5 | 1.8500000 | 0.1440486 | 1.6900000 | 1.9800000 |
|---|-----------|-----------|-----------|-----------|

---

Unique Subject Identifier=2626011111-0043

Assay variable : PTINR\_VAL1 PT-INR Value

N Mean Standard Deviation Minimum Maximum

---

|   |           |           |           |           |
|---|-----------|-----------|-----------|-----------|
| 4 | 1.7700000 | 0.2409703 | 1.5100000 | 1.9800000 |
|---|-----------|-----------|-----------|-----------|

---

Unique Subject Identifier=2626011111-0044

Assay variable : PTINR\_VAL1 PT-INR Value

N Mean Standard Deviation Minimum Maximum

---

|   |           |           |           |           |
|---|-----------|-----------|-----------|-----------|
| 6 | 1.5550000 | 0.1405347 | 1.2900000 | 1.7100000 |
|---|-----------|-----------|-----------|-----------|

---

Unique Subject Identifier=2626011111-0046

Assay variable : PTINR\_VAL1 PT-INR Value

N Mean Standard Deviation Minimum Maximum

---

|   |           |           |           |           |
|---|-----------|-----------|-----------|-----------|
| 3 | 1.7933333 | 0.0907377 | 1.7100000 | 1.8900000 |
|---|-----------|-----------|-----------|-----------|

---

Laboratory tests at the time of obtaining Table 2-6 consent, according to the presence or absence of proton-pump inhibitors

Unique Subject Identifier=2626011111-0048

MEANS Procedure

Assay variable : PTINR\_VAL1 PT-INR Value

N Mean Standard Deviation Minimum Maximum

---

|   |           |           |           |           |
|---|-----------|-----------|-----------|-----------|
| 4 | 2.0125000 | 0.1541374 | 1.8500000 | 2.2200000 |
|---|-----------|-----------|-----------|-----------|

---

Unique Subject Identifier=2627011111-0002

Assay variable : PTINR\_VAL1 PT-INR Value

N Mean Standard Deviation Minimum Maximum

---

|   |           |           |           |           |
|---|-----------|-----------|-----------|-----------|
| 6 | 2.1716667 | 0.1154845 | 1.9700000 | 2.2900000 |
|---|-----------|-----------|-----------|-----------|

---

Unique Subject Identifier=2627011111-0010

Assay variable : PTINR\_VAL1 PT-INR Value

N Mean Standard Deviation Minimum Maximum

---

|   |           |           |           |           |
|---|-----------|-----------|-----------|-----------|
| 4 | 1.9200000 | 0.1009950 | 1.8500000 | 2.0700000 |
|---|-----------|-----------|-----------|-----------|

---

Unique Subject Identifier=2627011111-0012

Assay variable : PTINR\_VAL1 PT-INR Value

N Mean Standard Deviation Minimum Maximum

---

|   |           |           |           |           |
|---|-----------|-----------|-----------|-----------|
| 4 | 2.0675000 | 0.3966001 | 1.7300000 | 2.5800000 |
|---|-----------|-----------|-----------|-----------|

---

Laboratory tests at the time of obtaining Table 2-6 consent, according to the presence or absence of proton-pump inhibitors

Unique Subject Identifier=2627011111-0033

MEANS Procedure

Assay variable : PTINR\_VAL1 PT-INR Value

N Mean Standard Deviation Minimum Maximum

---

|   |           |           |           |           |
|---|-----------|-----------|-----------|-----------|
| 4 | 1.9225000 | 0.1543535 | 1.7200000 | 2.0900000 |
|---|-----------|-----------|-----------|-----------|

---

Unique Subject Identifier=2628011111-0001

Assay variable : PTINR\_VAL1 PT-INR Value

N Mean Standard Deviation Minimum Maximum

---

|   |           |           |           |           |
|---|-----------|-----------|-----------|-----------|
| 5 | 1.5540000 | 0.2530415 | 1.1900000 | 1.8400000 |
|---|-----------|-----------|-----------|-----------|

---

Unique Subject Identifier=2628011111-0003

Assay variable : PTINR\_VAL1 PT-INR Value

N Mean Standard Deviation Minimum Maximum

---

|   |           |           |           |           |
|---|-----------|-----------|-----------|-----------|
| 4 | 1.7775000 | 0.2260347 | 1.4400000 | 1.9200000 |
|---|-----------|-----------|-----------|-----------|

---

Unique Subject Identifier=2628011111-0004

Assay variable : PTINR\_VAL1 PT-INR Value

N Mean Standard Deviation Minimum Maximum

---

|   |           |           |           |           |
|---|-----------|-----------|-----------|-----------|
| 4 | 2.1850000 | 0.3445287 | 1.7000000 | 2.4500000 |
|---|-----------|-----------|-----------|-----------|

---



Laboratory tests at the time of obtaining Table 2-6 consent, according to the presence or absence of proton-pump inhibitors

Unique Subject Identifier=2628011111-0006

MEANS Procedure

Assay variable : PTINR\_VAL1 PT-INR Value

N Mean Standard Deviation Minimum Maximum

---

|   |           |           |           |           |
|---|-----------|-----------|-----------|-----------|
| 4 | 2.2875000 | 0.5296776 | 1.8500000 | 2.9500000 |
|---|-----------|-----------|-----------|-----------|

---

Unique Subject Identifier=2628011111-0007

Assay variable : PTINR\_VAL1 PT-INR Value

N Mean Standard Deviation Minimum Maximum

---

|   |           |           |           |           |
|---|-----------|-----------|-----------|-----------|
| 3 | 1.9333333 | 0.2064784 | 1.7900000 | 2.1700000 |
|---|-----------|-----------|-----------|-----------|

---

Unique Subject Identifier=2628011111-0009

Assay variable : PTINR\_VAL1 PT-INR Value

N Mean Standard Deviation Minimum Maximum

---

|   |           |           |           |           |
|---|-----------|-----------|-----------|-----------|
| 2 | 1.4950000 | 0.3040559 | 1.2800000 | 1.7100000 |
|---|-----------|-----------|-----------|-----------|

---

Unique Subject Identifier=2628011111-0011

Assay variable : PTINR\_VAL1 PT-INR Value

N Mean Standard Deviation Minimum Maximum

---

|   |           |           |           |           |
|---|-----------|-----------|-----------|-----------|
| 3 | 1.8900000 | 0.2389561 | 1.6300000 | 2.1000000 |
|---|-----------|-----------|-----------|-----------|

---

Laboratory tests at the time of obtaining Table 2-6 consent, according to the presence or absence of proton-pump inhibitors

Unique Subject Identifier=2628011111-0012

MEANS Procedure

Assay variable : PTINR\_VAL1 PT-INR Value

N Mean Standard Deviation Minimum Maximum

---

|   |           |           |           |           |
|---|-----------|-----------|-----------|-----------|
| 4 | 2.0325000 | 0.3850000 | 1.6400000 | 2.4200000 |
|---|-----------|-----------|-----------|-----------|

---

Unique Subject Identifier=2628011111-0016

Assay variable : PTINR\_VAL1 PT-INR Value

N Mean Standard Deviation Minimum Maximum

---

|   |           |           |           |           |
|---|-----------|-----------|-----------|-----------|
| 4 | 2.3575000 | 0.6473214 | 1.9100000 | 3.3100000 |
|---|-----------|-----------|-----------|-----------|

---

Unique Subject Identifier=2628011111-0024

Assay variable : PTINR\_VAL1 PT-INR Value

N Mean Standard Deviation Minimum Maximum

---

|   |           |           |           |           |
|---|-----------|-----------|-----------|-----------|
| 2 | 2.3600000 | 0.0848528 | 2.3000000 | 2.4200000 |
|---|-----------|-----------|-----------|-----------|

---

Unique Subject Identifier=2628011111-0025

Assay variable : PTINR\_VAL1 PT-INR Value

N Mean Standard Deviation Minimum Maximum

---

|   |           |           |           |           |
|---|-----------|-----------|-----------|-----------|
| 5 | 1.8240000 | 0.1524139 | 1.6400000 | 2.0500000 |
|---|-----------|-----------|-----------|-----------|

---

Laboratory tests at the time of obtaining Table 2-6 consent, according to the presence or absence of proton-pump inhibitors

Unique Subject Identifier=2628011111-0042

MEANS Procedure

Assay variable : PTINR\_VAL1 PT-INR Value

N Mean Standard Deviation Minimum Maximum

---

|   |           |           |           |           |
|---|-----------|-----------|-----------|-----------|
| 4 | 1.4575000 | 0.2721978 | 1.2100000 | 1.8000000 |
|---|-----------|-----------|-----------|-----------|

---

Unique Subject Identifier=2628011111-0043

Assay variable : PTINR\_VAL1 PT-INR Value

N Mean Standard Deviation Minimum Maximum

---

|   |           |           |           |           |
|---|-----------|-----------|-----------|-----------|
| 5 | 1.8300000 | 0.3910882 | 1.4100000 | 2.2400000 |
|---|-----------|-----------|-----------|-----------|

---

Unique Subject Identifier=2628011111-0052

Assay variable : PTINR\_VAL1 PT-INR Value

N Mean Standard Deviation Minimum Maximum

---

|   |           |           |           |           |
|---|-----------|-----------|-----------|-----------|
| 3 | 1.6333333 | 0.3000556 | 1.3300000 | 1.9300000 |
|---|-----------|-----------|-----------|-----------|

---

Unique Subject Identifier=2628011111-0061

Assay variable : PTINR\_VAL1 PT-INR Value

N Mean Standard Deviation Minimum Maximum

---

|   |           |           |           |           |
|---|-----------|-----------|-----------|-----------|
| 6 | 1.4683333 | 0.0453505 | 1.4200000 | 1.5300000 |
|---|-----------|-----------|-----------|-----------|

---

Laboratory tests at the time of obtaining Table 2-6 consent, according to the presence or absence of proton-pump inhibitors

Unique Subject Identifier=2628011111-0065

MEANS Procedure

Assay variable : PTINR\_VAL1 PT-INR Value

N Mean Standard Deviation Minimum Maximum

---

|   |           |           |           |           |
|---|-----------|-----------|-----------|-----------|
| 3 | 2.6666667 | 0.7023769 | 2.0000000 | 3.4000000 |
|---|-----------|-----------|-----------|-----------|

---

Unique Subject Identifier=2628011111-0066

Assay variable : PTINR\_VAL1 PT-INR Value

N Mean Standard Deviation Minimum Maximum

---

|   |           |           |           |           |
|---|-----------|-----------|-----------|-----------|
| 4 | 2.3500000 | 0.2585859 | 2.0600000 | 2.6500000 |
|---|-----------|-----------|-----------|-----------|

---

Unique Subject Identifier=2628011111-0067

Assay variable : PTINR\_VAL1 PT-INR Value

N Mean Standard Deviation Minimum Maximum

---

|   |           |           |           |           |
|---|-----------|-----------|-----------|-----------|
| 3 | 2.3866667 | 0.3300505 | 2.0600000 | 2.7200000 |
|---|-----------|-----------|-----------|-----------|

---

Unique Subject Identifier=2630000000-0005

Assay variable : PTINR\_VAL1 PT-INR Value

N Mean Standard Deviation Minimum Maximum

---

|   |          |           |          |          |
|---|----------|-----------|----------|----------|
| 2 | 1.500000 | 0.1414214 | 1.400000 | 1.600000 |
|---|----------|-----------|----------|----------|

---



Laboratory tests at the time of obtaining Table 2-6 consent, according to the presence or absence of proton-pump inhibitors

Unique Subject Identifier=2630000000-0006

MEANS Procedure

Assay variable : PTINR\_VAL1 PT-INR Value

N Mean Standard Deviation Minimum Maximum

---

|   |           |           |           |           |
|---|-----------|-----------|-----------|-----------|
| 5 | 1.9600000 | 0.3286335 | 1.6000000 | 2.4000000 |
|---|-----------|-----------|-----------|-----------|

---

Unique Subject Identifier=2630000000-0011

Assay variable : PTINR\_VAL1 PT-INR Value

N Mean Standard Deviation Minimum Maximum

---

|   |           |  |           |           |
|---|-----------|--|-----------|-----------|
| 1 | 2.4000000 |  | 2.4000000 | 2.4000000 |
|---|-----------|--|-----------|-----------|

---

Unique Subject Identifier=2630000000-0012

Assay variable : PTINR\_VAL1 PT-INR Value

N Mean Standard Deviation Minimum Maximum

---

|   |           |           |           |           |
|---|-----------|-----------|-----------|-----------|
| 3 | 1.7333333 | 0.3214550 | 1.5000000 | 2.1000000 |
|---|-----------|-----------|-----------|-----------|

---

Unique Subject Identifier=2630000000-0013

Assay variable : PTINR\_VAL1 PT-INR Value

N Mean Standard Deviation Minimum Maximum

---

|   |           |           |           |           |
|---|-----------|-----------|-----------|-----------|
| 2 | 2.0500000 | 0.0707107 | 2.0000000 | 2.1000000 |
|---|-----------|-----------|-----------|-----------|

---

Laboratory tests at the time of obtaining Table 2-6 consent, according to the presence or absence of proton-pump inhibitors

Unique Subject Identifier=2630000000-0014

MEANS Procedure

Assay variable : PTINR\_VAL1 PT-INR Value

| N | Mean      | Standard Deviation | Minimum   | Maximum   |
|---|-----------|--------------------|-----------|-----------|
| 3 | 1.4666667 | 0.2516611          | 1.2000000 | 1.7000000 |

Unique Subject Identifier=2630000000-0019

Assay variable : PTINR\_VAL1 PT-INR Value

| N | Mean      | Standard Deviation | Minimum   | Maximum   |
|---|-----------|--------------------|-----------|-----------|
| 2 | 2.2000000 | 0.2828427          | 2.0000000 | 2.4000000 |

Unique Subject Identifier=2630000000-0020

Assay variable : PTINR\_VAL1 PT-INR Value

| N | Mean      | Standard Deviation | Minimum   | Maximum   |
|---|-----------|--------------------|-----------|-----------|
| 1 | 1.9000000 |                    | 1.9000000 | 1.9000000 |

Unique Subject Identifier=2630000000-0021

Assay variable : PTINR\_VAL1 PT-INR Value

N Mean Standard Deviation Minimum Maximum

---

|   |           |           |           |           |
|---|-----------|-----------|-----------|-----------|
| 5 | 1.9800000 | 0.6685806 | 1.5000000 | 3.1000000 |
|---|-----------|-----------|-----------|-----------|

---

Laboratory tests at the time of obtaining Table 2-6 consent, according to the presence or absence of proton-pump inhibitors

Unique Subject Identifier=2630000000-0022

MEANS Procedure

Assay variable : PTINR\_VAL1 PT-INR Value

| N | Mean      | Standard Deviation | Minimum   | Maximum   |
|---|-----------|--------------------|-----------|-----------|
| 2 | 2.0500000 | 0.7778175          | 1.5000000 | 2.6000000 |

Unique Subject Identifier=2630000000-0027

Assay variable : PTINR\_VAL1 PT-INR Value

| N | Mean      | Standard Deviation | Minimum   | Maximum   |
|---|-----------|--------------------|-----------|-----------|
| 1 | 1.7000000 |                    | 1.7000000 | 1.7000000 |

Unique Subject Identifier=2630000000-0038

Assay variable : PTINR\_VAL1 PT-INR Value

| N | Mean      | Standard Deviation | Minimum   | Maximum   |
|---|-----------|--------------------|-----------|-----------|
| 5 | 1.1200000 | 0.0836660          | 1.0000000 | 1.2000000 |

Unique Subject Identifier=2630000000-0040

Assay variable : PTINR\_VAL1 PT-INR Value

N Mean Standard Deviation Minimum Maximum

---

|   |           |           |           |           |
|---|-----------|-----------|-----------|-----------|
| 4 | 1.8500000 | 0.2081666 | 1.6000000 | 2.1000000 |
|---|-----------|-----------|-----------|-----------|

---

Laboratory tests at the time of obtaining Table 2-6 consent, according to the presence or absence of proton-pump inhibitors

Unique Subject Identifier=2634000000-0002

MEANS Procedure

Assay variable : PTINR\_VAL1 PT-INR Value

N Mean Standard Deviation Minimum Maximum

---

|   |           |           |           |           |
|---|-----------|-----------|-----------|-----------|
| 3 | 2.2466667 | 0.2888483 | 2.0700000 | 2.5800000 |
|---|-----------|-----------|-----------|-----------|

---

Unique Subject Identifier=2634000000-0004

Assay variable : PTINR\_VAL1 PT-INR Value

N Mean Standard Deviation Minimum Maximum

---

|   |           |           |           |           |
|---|-----------|-----------|-----------|-----------|
| 3 | 1.6633333 | 0.5024274 | 1.3200000 | 2.2400000 |
|---|-----------|-----------|-----------|-----------|

---

Unique Subject Identifier=2634000000-0008

Assay variable : PTINR\_VAL1 PT-INR Value

N Mean Standard Deviation Minimum Maximum

---

|   |           |           |           |           |
|---|-----------|-----------|-----------|-----------|
| 3 | 1.8700000 | 0.2628688 | 1.6800000 | 2.1700000 |
|---|-----------|-----------|-----------|-----------|

---

Unique Subject Identifier=2634000000-0010

Assay variable : PTINR\_VAL1 PT-INR Value

N Mean Standard Deviation Minimum Maximum

---

|   |           |           |           |           |
|---|-----------|-----------|-----------|-----------|
| 4 | 1.7850000 | 0.1744515 | 1.5400000 | 1.9400000 |
|---|-----------|-----------|-----------|-----------|

---



Laboratory tests at the time of obtaining Table 2-6 consent, according to the presence or absence of proton-pump inhibitors

Unique Subject Identifier=2634000000-0017

MEANS Procedure

Assay variable : PTINR\_VAL1 PT-INR Value

N Mean Standard Deviation Minimum Maximum

---

|   |           |           |           |           |
|---|-----------|-----------|-----------|-----------|
| 3 | 2.0966667 | 0.1401190 | 1.9600000 | 2.2400000 |
|---|-----------|-----------|-----------|-----------|

---

Unique Subject Identifier=2634000000-0019

Assay variable : PTINR\_VAL1 PT-INR Value

N Mean Standard Deviation Minimum Maximum

---

|   |           |           |           |           |
|---|-----------|-----------|-----------|-----------|
| 3 | 2.5266667 | 0.7311863 | 2.0700000 | 3.3700000 |
|---|-----------|-----------|-----------|-----------|

---

Unique Subject Identifier=2634000000-0020

Assay variable : PTINR\_VAL1 PT-INR Value

N Mean Standard Deviation Minimum Maximum

---

|   |           |           |           |           |
|---|-----------|-----------|-----------|-----------|
| 4 | 2.2050000 | 0.5768015 | 1.6300000 | 3.0000000 |
|---|-----------|-----------|-----------|-----------|

---

Unique Subject Identifier=2634000000-0021

Assay variable : PTINR\_VAL1 PT-INR Value

N Mean Standard Deviation Minimum Maximum

---

|   |           |           |           |           |
|---|-----------|-----------|-----------|-----------|
| 6 | 1.5566667 | 0.0674290 | 1.4900000 | 1.6400000 |
|---|-----------|-----------|-----------|-----------|

---

Laboratory tests at the time of obtaining Table 2-6 consent, according to the presence or absence of proton-pump inhibitors

Unique Subject Identifier=2636011000-0004

MEANS Procedure

Assay variable : PTINR\_VAL1 PT-INR Value

| N | Mean      | Standard Deviation | Minimum   | Maximum   |
|---|-----------|--------------------|-----------|-----------|
| 5 | 2.0400000 | 0.2709243          | 1.7300000 | 2.3400000 |

Unique Subject Identifier=2636011000-0007

Assay variable : PTINR\_VAL1 PT-INR Value

| N | Mean      | Standard Deviation | Minimum   | Maximum   |
|---|-----------|--------------------|-----------|-----------|
| 3 | 1.8400000 | 0.1249000          | 1.7000000 | 1.9400000 |

Unique Subject Identifier=2636011000-0010

Assay variable : PTINR\_VAL1 PT-INR Value

| N | Mean      | Standard Deviation | Minimum   | Maximum   |
|---|-----------|--------------------|-----------|-----------|
| 4 | 2.0000000 | 0.0571548          | 1.9300000 | 2.0700000 |

Unique Subject Identifier=2636011000-0016

Assay variable : PTINR\_VAL1 PT-INR Value

N Mean Standard Deviation Minimum Maximum

---

|   |          |           |          |          |
|---|----------|-----------|----------|----------|
| 4 | 1.960000 | 0.2258318 | 1.770000 | 2.280000 |
|---|----------|-----------|----------|----------|

---

Laboratory tests at the time of obtaining Table 2-6 consent, according to the presence or absence of proton-pump inhibitors

Unique Subject Identifier=2636011000-0017

MEANS Procedure

Assay variable : PTINR\_VAL1 PT-INR Value

N Mean Standard Deviation Minimum Maximum

---

|   |           |           |           |           |
|---|-----------|-----------|-----------|-----------|
| 4 | 1.6250000 | 0.4017877 | 1.3200000 | 2.2000000 |
|---|-----------|-----------|-----------|-----------|

---

Unique Subject Identifier=2636011000-0019

Assay variable : PTINR\_VAL1 PT-INR Value

N Mean Standard Deviation Minimum Maximum

---

|   |           |  |           |           |
|---|-----------|--|-----------|-----------|
| 1 | 2.2100000 |  | 2.2100000 | 2.2100000 |
|---|-----------|--|-----------|-----------|

---

Unique Subject Identifier=2636011000-0032

Assay variable : PTINR\_VAL1 PT-INR Value

N Mean Standard Deviation Minimum Maximum

---

|   |           |           |           |           |
|---|-----------|-----------|-----------|-----------|
| 6 | 2.1766667 | 0.5461380 | 1.5700000 | 2.8800000 |
|---|-----------|-----------|-----------|-----------|

---

Unique Subject Identifier=2636011000-0043

Assay variable : PTINR\_VAL1 PT-INR Value

N Mean Standard Deviation Minimum Maximum

---

|   |          |           |          |          |
|---|----------|-----------|----------|----------|
| 3 | 2.100000 | 0.8351647 | 1.350000 | 3.000000 |
|---|----------|-----------|----------|----------|

---

Laboratory tests at the time of obtaining Table 2-6 consent, according to the presence or absence of proton-pump inhibitors

Unique Subject Identifier=2638000000-0010

MEANS Procedure

Assay variable : PTINR\_VAL1 PT-INR Value

N Mean Standard Deviation Minimum Maximum

---

|   |           |           |           |           |
|---|-----------|-----------|-----------|-----------|
| 4 | 1.2550000 | 0.0412311 | 1.2100000 | 1.2900000 |
|---|-----------|-----------|-----------|-----------|

---

Unique Subject Identifier=2638000000-0020

Assay variable : PTINR\_VAL1 PT-INR Value

N Mean Standard Deviation Minimum Maximum

---

|   |           |           |           |           |
|---|-----------|-----------|-----------|-----------|
| 3 | 2.1800000 | 0.0655744 | 2.1200000 | 2.2500000 |
|---|-----------|-----------|-----------|-----------|

---

Unique Subject Identifier=2638000000-0029

Assay variable : PTINR\_VAL1 PT-INR Value

N Mean Standard Deviation Minimum Maximum

---

|   |           |  |           |           |
|---|-----------|--|-----------|-----------|
| 1 | 2.1100000 |  | 2.1100000 | 2.1100000 |
|---|-----------|--|-----------|-----------|

---

Unique Subject Identifier=2640011000-0004

Assay variable : PTINR\_VAL1 PT-INR Value

N Mean Standard Deviation Minimum Maximum

---

|   |           |           |           |           |
|---|-----------|-----------|-----------|-----------|
| 6 | 2.4166667 | 0.4273952 | 1.9800000 | 3.0700000 |
|---|-----------|-----------|-----------|-----------|

---



Laboratory tests at the time of obtaining Table 2-6 consent, according to the presence or absence of proton-pump inhibitors

Unique Subject Identifier=2640011000-0006

MEANS Procedure

Assay variable : PTINR\_VAL1 PT-INR Value

N Mean Standard Deviation Minimum Maximum

---

|   |           |           |           |           |
|---|-----------|-----------|-----------|-----------|
| 6 | 1.9783333 | 0.6804533 | 1.2000000 | 3.0600000 |
|---|-----------|-----------|-----------|-----------|

---

Unique Subject Identifier=2640011000-0007

Assay variable : PTINR\_VAL1 PT-INR Value

N Mean Standard Deviation Minimum Maximum

---

|   |           |           |           |           |
|---|-----------|-----------|-----------|-----------|
| 5 | 1.7860000 | 0.1795272 | 1.6100000 | 1.9800000 |
|---|-----------|-----------|-----------|-----------|

---

Unique Subject Identifier=2640011000-0008

Assay variable : PTINR\_VAL1 PT-INR Value

N Mean Standard Deviation Minimum Maximum

---

|   |           |           |           |           |
|---|-----------|-----------|-----------|-----------|
| 6 | 2.1316667 | 0.5223568 | 1.6900000 | 2.9500000 |
|---|-----------|-----------|-----------|-----------|

---

Unique Subject Identifier=2640011000-0010

Assay variable : PTINR\_VAL1 PT-INR Value

N Mean Standard Deviation Minimum Maximum

---

|   |           |           |           |           |
|---|-----------|-----------|-----------|-----------|
| 6 | 1.8850000 | 0.3490415 | 1.3900000 | 2.4500000 |
|---|-----------|-----------|-----------|-----------|

---

Laboratory tests at the time of obtaining Table 2-6 consent, according to the presence or absence of proton-pump inhibitors

Unique Subject Identifier=2641010000-0003

MEANS Procedure

Assay variable : PTINR\_VAL1 PT-INR Value

N Mean Standard Deviation Minimum Maximum

---

|   |           |           |           |           |
|---|-----------|-----------|-----------|-----------|
| 3 | 1.9500000 | 0.3404409 | 1.6000000 | 2.2800000 |
|---|-----------|-----------|-----------|-----------|

---

Unique Subject Identifier=2641010000-0005

Assay variable : PTINR\_VAL1 PT-INR Value

N Mean Standard Deviation Minimum Maximum

---

|   |           |           |           |           |
|---|-----------|-----------|-----------|-----------|
| 5 | 2.3960000 | 0.5628321 | 1.9300000 | 3.3700000 |
|---|-----------|-----------|-----------|-----------|

---

Unique Subject Identifier=2641010000-0007

Assay variable : PTINR\_VAL1 PT-INR Value

N Mean Standard Deviation Minimum Maximum

---

|   |           |           |           |           |
|---|-----------|-----------|-----------|-----------|
| 3 | 2.2233333 | 0.2345918 | 2.0200000 | 2.4800000 |
|---|-----------|-----------|-----------|-----------|

---

Unique Subject Identifier=2641010000-0009

Assay variable : PTINR\_VAL1 PT-INR Value

N Mean Standard Deviation Minimum Maximum

---

|   |           |           |           |           |
|---|-----------|-----------|-----------|-----------|
| 3 | 2.3300000 | 0.3726929 | 1.9000000 | 2.5600000 |
|---|-----------|-----------|-----------|-----------|

---

Laboratory tests at the time of obtaining Table 2-6 consent, according to the presence or absence of proton-pump inhibitors

Unique Subject Identifier=2641010000-0010

MEANS Procedure

Assay variable : PTINR\_VAL1 PT-INR Value

N Mean Standard Deviation Minimum Maximum

---

|   |           |           |           |           |
|---|-----------|-----------|-----------|-----------|
| 4 | 1.9875000 | 0.5950560 | 1.1300000 | 2.4000000 |
|---|-----------|-----------|-----------|-----------|

---

Unique Subject Identifier=2641010000-0011

Assay variable : PTINR\_VAL1 PT-INR Value

N Mean Standard Deviation Minimum Maximum

---

|   |           |           |           |           |
|---|-----------|-----------|-----------|-----------|
| 5 | 2.3120000 | 0.2875239 | 1.9200000 | 2.6200000 |
|---|-----------|-----------|-----------|-----------|

---

Unique Subject Identifier=2641010000-0012

Assay variable : PTINR\_VAL1 PT-INR Value

N Mean Standard Deviation Minimum Maximum

---

|   |           |           |           |           |
|---|-----------|-----------|-----------|-----------|
| 3 | 1.8066667 | 0.2538372 | 1.6000000 | 2.0900000 |
|---|-----------|-----------|-----------|-----------|

---

Unique Subject Identifier=2655000000-0008

Assay variable : PTINR\_VAL1 PT-INR Value

N Mean Standard Deviation Minimum Maximum

---

|   |           |  |           |           |
|---|-----------|--|-----------|-----------|
| 1 | 3.7100000 |  | 3.7100000 | 3.7100000 |
|---|-----------|--|-----------|-----------|

---

Laboratory tests at the time of obtaining Table 2-6 consent, according to the presence or absence of proton-pump inhibitors

Unique Subject Identifier=2656011000-0001

MEANS Procedure

Assay variable : PTINR\_VAL1 PT-INR Value

| N | Mean      | Standard Deviation | Minimum   | Maximum   |
|---|-----------|--------------------|-----------|-----------|
| 3 | 1.9033333 | 0.2025669          | 1.7400000 | 2.1300000 |

Unique Subject Identifier=2656011000-0005

Assay variable : PTINR\_VAL1 PT-INR Value

| N | Mean      | Standard Deviation | Minimum   | Maximum   |
|---|-----------|--------------------|-----------|-----------|
| 3 | 2.1766667 | 0.1078579          | 2.1000000 | 2.3000000 |

Unique Subject Identifier=2656011000-0007

Assay variable : PTINR\_VAL1 PT-INR Value

| N | Mean      | Standard Deviation | Minimum   | Maximum   |
|---|-----------|--------------------|-----------|-----------|
| 3 | 2.3766667 | 0.4518112          | 1.9500000 | 2.8500000 |

Unique Subject Identifier=2656011000-0008

Assay variable : PTINR\_VAL1 PT-INR Value

N Mean Standard Deviation Minimum Maximum

---

|   |          |           |          |          |
|---|----------|-----------|----------|----------|
| 3 | 1.960000 | 0.3477068 | 1.730000 | 2.360000 |
|---|----------|-----------|----------|----------|

---



Laboratory tests at the time of obtaining Table 2-6 consent, according to the presence or absence of proton-pump inhibitors

Unique Subject Identifier=2656011000-0013

MEANS Procedure

Assay variable : PTINR\_VAL1 PT-INR Value

| N | Mean      | Standard Deviation | Minimum   | Maximum   |
|---|-----------|--------------------|-----------|-----------|
| 2 | 1.6850000 | 0.4171930          | 1.3900000 | 1.9800000 |

Unique Subject Identifier=2656011000-0016

Assay variable : PTINR\_VAL1 PT-INR Value

| N | Mean      | Standard Deviation | Minimum   | Maximum   |
|---|-----------|--------------------|-----------|-----------|
| 2 | 1.6550000 | 0.0919239          | 1.5900000 | 1.7200000 |

Unique Subject Identifier=2660011111-0010

Assay variable : PTINR\_VAL1 PT-INR Value

| N | Mean      | Standard Deviation | Minimum   | Maximum   |
|---|-----------|--------------------|-----------|-----------|
| 1 | 1.5000000 |                    | 1.5000000 | 1.5000000 |

Unique Subject Identifier=2662011111-0001

Assay variable : PTINR\_VAL1 PT-INR Value

N Mean Standard Deviation Minimum Maximum

---

|   |           |           |           |           |
|---|-----------|-----------|-----------|-----------|
| 6 | 1.7166667 | 0.3371449 | 1.3000000 | 2.1000000 |
|---|-----------|-----------|-----------|-----------|

---

Laboratory tests at the time of obtaining Table 2-6 consent, according to the presence or absence of proton-pump inhibitors

Unique Subject Identifier=2662011111-0004

MEANS Procedure

Assay variable : PTINR\_VAL1 PT-INR Value

N Mean Standard Deviation Minimum Maximum

---

|   |           |           |           |           |
|---|-----------|-----------|-----------|-----------|
| 6 | 1.9166667 | 0.3656045 | 1.5000000 | 2.4000000 |
|---|-----------|-----------|-----------|-----------|

---

Unique Subject Identifier=2662011111-0005

Assay variable : PTINR\_VAL1 PT-INR Value

N Mean Standard Deviation Minimum Maximum

---

|   |           |           |           |           |
|---|-----------|-----------|-----------|-----------|
| 6 | 1.9000000 | 0.2966479 | 1.4000000 | 2.2000000 |
|---|-----------|-----------|-----------|-----------|

---

Unique Subject Identifier=2662011111-0014

Assay variable : PTINR\_VAL1 PT-INR Value

N Mean Standard Deviation Minimum Maximum

---

|   |           |           |           |           |
|---|-----------|-----------|-----------|-----------|
| 6 | 2.2333333 | 0.4273952 | 1.5000000 | 2.7000000 |
|---|-----------|-----------|-----------|-----------|

---

Unique Subject Identifier=2662011111-0018

Assay variable : PTINR\_VAL1 PT-INR Value

N Mean Standard Deviation Minimum Maximum

---

|   |          |           |          |          |
|---|----------|-----------|----------|----------|
| 6 | 2.150000 | 0.5958188 | 1.500000 | 3.200000 |
|---|----------|-----------|----------|----------|

---

Laboratory tests at the time of obtaining Table 2-6 consent, according to the presence or absence of proton-pump inhibitors

Unique Subject Identifier=2662011111-0026

MEANS Procedure

Assay variable : PTINR\_VAL1 PT-INR Value

N Mean Standard Deviation Minimum Maximum

---

|   |           |           |           |           |
|---|-----------|-----------|-----------|-----------|
| 6 | 1.9500000 | 1.3187115 | 1.1000000 | 4.6000000 |
|---|-----------|-----------|-----------|-----------|

---

Unique Subject Identifier=2662011111-0035

Assay variable : PTINR\_VAL1 PT-INR Value

N Mean Standard Deviation Minimum Maximum

---

|   |           |           |           |           |
|---|-----------|-----------|-----------|-----------|
| 5 | 2.0800000 | 0.2167948 | 1.9000000 | 2.4000000 |
|---|-----------|-----------|-----------|-----------|

---

Unique Subject Identifier=2662011111-0036

Assay variable : PTINR\_VAL1 PT-INR Value

N Mean Standard Deviation Minimum Maximum

---

|   |           |           |           |           |
|---|-----------|-----------|-----------|-----------|
| 3 | 1.5666667 | 0.3511885 | 1.2000000 | 1.9000000 |
|---|-----------|-----------|-----------|-----------|

---

Unique Subject Identifier=2662011111-0039

Assay variable : PTINR\_VAL1 PT-INR Value

N Mean Standard Deviation Minimum Maximum

---

|   |           |           |           |           |
|---|-----------|-----------|-----------|-----------|
| 6 | 1.9666667 | 0.2250926 | 1.7000000 | 2.2000000 |
|---|-----------|-----------|-----------|-----------|

---

Laboratory tests at the time of obtaining Table 2-6 consent, according to the presence or absence of proton-pump inhibitors

Unique Subject Identifier=2662011111-0045

MEANS Procedure

Assay variable : PTINR\_VAL1 PT-INR Value

N Mean Standard Deviation Minimum Maximum

---

|   |           |           |           |           |
|---|-----------|-----------|-----------|-----------|
| 4 | 2.1750000 | 0.4991660 | 1.8000000 | 2.9000000 |
|---|-----------|-----------|-----------|-----------|

---

Unique Subject Identifier=2662011111-0046

Assay variable : PTINR\_VAL1 PT-INR Value

N Mean Standard Deviation Minimum Maximum

---

|   |           |           |           |           |
|---|-----------|-----------|-----------|-----------|
| 4 | 1.8250000 | 0.1258306 | 1.7000000 | 2.0000000 |
|---|-----------|-----------|-----------|-----------|

---

Unique Subject Identifier=2662011111-0047

Assay variable : PTINR\_VAL1 PT-INR Value

N Mean Standard Deviation Minimum Maximum

---

|   |           |           |           |           |
|---|-----------|-----------|-----------|-----------|
| 3 | 1.6433333 | 0.2040425 | 1.4200000 | 1.8200000 |
|---|-----------|-----------|-----------|-----------|

---

Unique Subject Identifier=2662011111-0049

Assay variable : PTINR\_VAL1 PT-INR Value

N Mean Standard Deviation Minimum Maximum

---

|   |           |           |           |           |
|---|-----------|-----------|-----------|-----------|
| 4 | 1.8750000 | 0.5188127 | 1.4000000 | 2.5000000 |
|---|-----------|-----------|-----------|-----------|

---



Laboratory tests at the time of obtaining Table 2-6 consent, according to the presence or absence of proton-pump inhibitors

Unique Subject Identifier=2662011111-0052

MEANS Procedure

Assay variable : PTINR\_VAL1 PT-INR Value

| N | Mean      | Standard Deviation | Minimum   | Maximum   |
|---|-----------|--------------------|-----------|-----------|
| 3 | 2.0000000 | 0.1732051          | 1.9000000 | 2.2000000 |

Unique Subject Identifier=2662011111-0063

Assay variable : PTINR\_VAL1 PT-INR Value

| N | Mean      | Standard Deviation | Minimum   | Maximum   |
|---|-----------|--------------------|-----------|-----------|
| 4 | 1.4750000 | 0.4573474          | 1.0000000 | 2.1000000 |

Unique Subject Identifier=2668011000-0026

Assay variable : PTINR\_VAL1 PT-INR Value

| N | Mean      | Standard Deviation | Minimum   | Maximum   |
|---|-----------|--------------------|-----------|-----------|
| 5 | 2.2740000 | 0.9598854          | 1.3400000 | 3.8600000 |

Unique Subject Identifier=2668011000-0030

Assay variable : PTINR\_VAL1 PT-INR Value

N Mean Standard Deviation Minimum Maximum

---

|   |           |           |           |           |
|---|-----------|-----------|-----------|-----------|
| 4 | 1.9975000 | 0.1977161 | 1.7700000 | 2.2000000 |
|---|-----------|-----------|-----------|-----------|

---

Laboratory tests at the time of obtaining Table 2-6 consent, according to the presence or absence of proton-pump inhibitors

Unique Subject Identifier=2668011000-0031

MEANS Procedure

Assay variable : PTINR\_VAL1 PT-INR Value

N Mean Standard Deviation Minimum Maximum

---

|   |           |           |           |           |
|---|-----------|-----------|-----------|-----------|
| 3 | 1.8366667 | 0.1656301 | 1.6800000 | 2.0100000 |
|---|-----------|-----------|-----------|-----------|

---

Unique Subject Identifier=2668011000-0040

Assay variable : PTINR\_VAL1 PT-INR Value

N Mean Standard Deviation Minimum Maximum

---

|   |           |           |           |           |
|---|-----------|-----------|-----------|-----------|
| 3 | 1.8866667 | 0.4429823 | 1.5000000 | 2.3700000 |
|---|-----------|-----------|-----------|-----------|

---

Unique Subject Identifier=2668011000-0073

Assay variable : PTINR\_VAL1 PT-INR Value

N Mean Standard Deviation Minimum Maximum

---

|   |           |           |           |           |
|---|-----------|-----------|-----------|-----------|
| 3 | 1.8800000 | 0.2722132 | 1.6300000 | 2.1700000 |
|---|-----------|-----------|-----------|-----------|

---

Unique Subject Identifier=2669000000-0001

Assay variable : PTINR\_VAL1 PT-INR Value

N Mean Standard Deviation Minimum Maximum

---

|   |           |           |           |           |
|---|-----------|-----------|-----------|-----------|
| 6 | 1.8700000 | 0.4251588 | 1.3500000 | 2.5500000 |
|---|-----------|-----------|-----------|-----------|

---

Laboratory tests at the time of obtaining Table 2-6 consent, according to the presence or absence of proton-pump inhibitors

Unique Subject Identifier=2669000000-0006

MEANS Procedure

Assay variable : PTINR\_VAL1 PT-INR Value

N Mean Standard Deviation Minimum Maximum

---

|   |           |           |           |           |
|---|-----------|-----------|-----------|-----------|
| 4 | 2.1150000 | 0.4051749 | 1.7100000 | 2.5800000 |
|---|-----------|-----------|-----------|-----------|

---

Unique Subject Identifier=2669000000-0014

Assay variable : PTINR\_VAL1 PT-INR Value

N Mean Standard Deviation Minimum Maximum

---

|   |           |           |           |           |
|---|-----------|-----------|-----------|-----------|
| 3 | 2.0300000 | 0.1509967 | 1.8700000 | 2.1700000 |
|---|-----------|-----------|-----------|-----------|

---

Unique Subject Identifier=2669000000-0015

Assay variable : PTINR\_VAL1 PT-INR Value

N Mean Standard Deviation Minimum Maximum

---

|   |           |           |           |           |
|---|-----------|-----------|-----------|-----------|
| 3 | 2.2933333 | 0.1850225 | 2.1100000 | 2.4800000 |
|---|-----------|-----------|-----------|-----------|

---

Unique Subject Identifier=2671000000-0004

Assay variable : PTINR\_VAL1 PT-INR Value

N Mean Standard Deviation Minimum Maximum

---

|   |           |           |           |           |
|---|-----------|-----------|-----------|-----------|
| 6 | 1.7166667 | 0.6198602 | 1.1800000 | 2.8400000 |
|---|-----------|-----------|-----------|-----------|

---

Laboratory tests at the time of obtaining Table 2-6 consent, according to the presence or absence of proton-pump inhibitors

Unique Subject Identifier=2671000000-0006

MEANS Procedure

Assay variable : PTINR\_VAL1 PT-INR Value

N Mean Standard Deviation Minimum Maximum

---

|   |           |           |           |           |
|---|-----------|-----------|-----------|-----------|
| 2 | 1.9550000 | 0.4030509 | 1.6700000 | 2.2400000 |
|---|-----------|-----------|-----------|-----------|

---

Unique Subject Identifier=2671000000-0020

Assay variable : PTINR\_VAL1 PT-INR Value

N Mean Standard Deviation Minimum Maximum

---

|   |           |           |           |           |
|---|-----------|-----------|-----------|-----------|
| 2 | 2.0550000 | 0.0353553 | 2.0300000 | 2.0800000 |
|---|-----------|-----------|-----------|-----------|

---

Unique Subject Identifier=2671000000-0023

Assay variable : PTINR\_VAL1 PT-INR Value

N Mean Standard Deviation Minimum Maximum

---

|   |           |           |           |           |
|---|-----------|-----------|-----------|-----------|
| 3 | 2.4033333 | 0.1379613 | 2.3000000 | 2.5600000 |
|---|-----------|-----------|-----------|-----------|

---

Unique Subject Identifier=2671000000-0025

Assay variable : PTINR\_VAL1 PT-INR Value

N Mean Standard Deviation Minimum Maximum

---

|   |           |           |           |           |
|---|-----------|-----------|-----------|-----------|
| 3 | 2.3433333 | 0.2914332 | 2.0700000 | 2.6500000 |
|---|-----------|-----------|-----------|-----------|

---



Laboratory tests at the time of obtaining Table 2-6 consent, according to the presence or absence of proton-pump inhibitors

Unique Subject Identifier=2671000000-0026

MEANS Procedure

Assay variable : PTINR\_VAL1 PT-INR Value

N Mean Standard Deviation Minimum Maximum

---

|   |           |           |           |           |
|---|-----------|-----------|-----------|-----------|
| 4 | 1.8500000 | 0.3157003 | 1.6400000 | 2.3200000 |
|---|-----------|-----------|-----------|-----------|

---

Unique Subject Identifier=2671000000-0027

Assay variable : PTINR\_VAL1 PT-INR Value

N Mean Standard Deviation Minimum Maximum

---

|   |           |           |           |           |
|---|-----------|-----------|-----------|-----------|
| 3 | 2.1166667 | 0.3716629 | 1.8100000 | 2.5300000 |
|---|-----------|-----------|-----------|-----------|

---

Unique Subject Identifier=2671000000-0030

Assay variable : PTINR\_VAL1 PT-INR Value

N Mean Standard Deviation Minimum Maximum

---

|   |           |           |           |           |
|---|-----------|-----------|-----------|-----------|
| 3 | 1.9900000 | 0.5574944 | 1.3500000 | 2.3700000 |
|---|-----------|-----------|-----------|-----------|

---

Unique Subject Identifier=2671000000-0031

Assay variable : PTINR\_VAL1 PT-INR Value

N Mean Standard Deviation Minimum Maximum

---

|   |           |           |           |           |
|---|-----------|-----------|-----------|-----------|
| 3 | 1.8533333 | 0.2136196 | 1.7300000 | 2.1000000 |
|---|-----------|-----------|-----------|-----------|

---

Laboratory tests at the time of obtaining Table 2-6 consent, according to the presence or absence of proton-pump inhibitors

Unique Subject Identifier=2671000000-0034

MEANS Procedure

Assay variable : PTINR\_VAL1 PT-INR Value

| N | Mean      | Standard Deviation | Minimum   | Maximum   |
|---|-----------|--------------------|-----------|-----------|
| 3 | 1.6900000 | 0.2325941          | 1.4800000 | 1.9400000 |

Unique Subject Identifier=2671000000-0051

Assay variable : PTINR\_VAL1 PT-INR Value

| N | Mean      | Standard Deviation | Minimum   | Maximum   |
|---|-----------|--------------------|-----------|-----------|
| 4 | 2.2325000 | 0.2087063          | 2.0200000 | 2.4700000 |

Unique Subject Identifier=2671000000-0055

Assay variable : PTINR\_VAL1 PT-INR Value

| N | Mean      | Standard Deviation | Minimum   | Maximum   |
|---|-----------|--------------------|-----------|-----------|
| 5 | 1.9900000 | 0.2740438          | 1.7500000 | 2.4000000 |

Unique Subject Identifier=2671000000-0057

Assay variable : PTINR\_VAL1 PT-INR Value

N Mean Standard Deviation Minimum Maximum

---

|   |           |           |           |           |
|---|-----------|-----------|-----------|-----------|
| 3 | 1.8533333 | 0.2919475 | 1.6700000 | 2.1900000 |
|---|-----------|-----------|-----------|-----------|

---

Laboratory tests at the time of obtaining Table 2-6 consent, according to the presence or absence of proton-pump inhibitors

Unique Subject Identifier=2671000000-0058

MEANS Procedure

Assay variable : PTINR\_VAL1 PT-INR Value

N Mean Standard Deviation Minimum Maximum

---

|   |           |           |           |           |
|---|-----------|-----------|-----------|-----------|
| 6 | 2.4900000 | 0.9104504 | 1.5700000 | 3.6100000 |
|---|-----------|-----------|-----------|-----------|

---

Unique Subject Identifier=2671000000-0060

Assay variable : PTINR\_VAL1 PT-INR Value

N Mean Standard Deviation Minimum Maximum

---

|   |           |           |           |           |
|---|-----------|-----------|-----------|-----------|
| 3 | 2.4266667 | 0.2802380 | 2.2000000 | 2.7400000 |
|---|-----------|-----------|-----------|-----------|

---

Unique Subject Identifier=2671000000-0061

Assay variable : PTINR\_VAL1 PT-INR Value

N Mean Standard Deviation Minimum Maximum

---

|   |           |           |           |           |
|---|-----------|-----------|-----------|-----------|
| 3 | 3.2533333 | 1.4408447 | 2.0500000 | 4.8500000 |
|---|-----------|-----------|-----------|-----------|

---

Unique Subject Identifier=2671000000-0062

Assay variable : PTINR\_VAL1 PT-INR Value

N Mean Standard Deviation Minimum Maximum

---

|   |           |  |           |           |
|---|-----------|--|-----------|-----------|
| 1 | 2.3300000 |  | 2.3300000 | 2.3300000 |
|---|-----------|--|-----------|-----------|

---

Laboratory tests at the time of obtaining Table 2-6 consent, according to the presence or absence of proton-pump inhibitors

Unique Subject Identifier=2671000000-0064

MEANS Procedure

Assay variable : PTINR\_VAL1 PT-INR Value

N Mean Standard Deviation Minimum Maximum

---

|   |           |           |           |           |
|---|-----------|-----------|-----------|-----------|
| 5 | 1.8620000 | 0.5265169 | 1.2400000 | 2.6400000 |
|---|-----------|-----------|-----------|-----------|

---

Unique Subject Identifier=2671000000-0065

Assay variable : PTINR\_VAL1 PT-INR Value

N Mean Standard Deviation Minimum Maximum

---

|   |           |           |           |           |
|---|-----------|-----------|-----------|-----------|
| 2 | 2.2000000 | 0.2969848 | 1.9900000 | 2.4100000 |
|---|-----------|-----------|-----------|-----------|

---

Unique Subject Identifier=2671000000-0066

Assay variable : PTINR\_VAL1 PT-INR Value

N Mean Standard Deviation Minimum Maximum

---

|   |           |           |           |           |
|---|-----------|-----------|-----------|-----------|
| 3 | 2.0700000 | 0.6122091 | 1.4300000 | 2.6500000 |
|---|-----------|-----------|-----------|-----------|

---

Unique Subject Identifier=2671000000-0071

Assay variable : PTINR\_VAL1 PT-INR Value

N Mean Standard Deviation Minimum Maximum

---

|   |           |           |           |           |
|---|-----------|-----------|-----------|-----------|
| 3 | 2.2866667 | 0.3165965 | 2.0700000 | 2.6500000 |
|---|-----------|-----------|-----------|-----------|

---



Laboratory tests at the time of obtaining Table 2-6 consent, according to the presence or absence of proton-pump inhibitors

Unique Subject Identifier=2671000000-0072

MEANS Procedure

Assay variable : PTINR\_VAL1 PT-INR Value

N Mean Standard Deviation Minimum Maximum

---

|   |           |           |           |           |
|---|-----------|-----------|-----------|-----------|
| 3 | 1.8700000 | 0.3176476 | 1.6000000 | 2.2200000 |
|---|-----------|-----------|-----------|-----------|

---

Unique Subject Identifier=2671000000-0073

Assay variable : PTINR\_VAL1 PT-INR Value

N Mean Standard Deviation Minimum Maximum

---

|   |           |           |           |           |
|---|-----------|-----------|-----------|-----------|
| 3 | 2.1100000 | 0.3559494 | 1.8800000 | 2.5200000 |
|---|-----------|-----------|-----------|-----------|

---

Unique Subject Identifier=2672000000-0010

Assay variable : PTINR\_VAL1 PT-INR Value

N Mean Standard Deviation Minimum Maximum

---

|   |           |           |           |           |
|---|-----------|-----------|-----------|-----------|
| 3 | 2.1666667 | 0.1674316 | 2.0700000 | 2.3600000 |
|---|-----------|-----------|-----------|-----------|

---

Unique Subject Identifier=2672000000-0013

Assay variable : PTINR\_VAL1 PT-INR Value

N Mean Standard Deviation Minimum Maximum

---

|   |           |           |           |           |
|---|-----------|-----------|-----------|-----------|
| 3 | 1.7433333 | 0.2956913 | 1.4200000 | 2.0000000 |
|---|-----------|-----------|-----------|-----------|

---

Laboratory tests at the time of obtaining Table 2-6 consent, according to the presence or absence of proton-pump inhibitors

Unique Subject Identifier=2672000000-0020

MEANS Procedure

Assay variable : PTINR\_VAL1 PT-INR Value

N Mean Standard Deviation Minimum Maximum

---

|   |           |           |           |           |
|---|-----------|-----------|-----------|-----------|
| 3 | 2.0666667 | 0.2804164 | 1.7600000 | 2.3100000 |
|---|-----------|-----------|-----------|-----------|

---

Unique Subject Identifier=2672000000-0022

Assay variable : PTINR\_VAL1 PT-INR Value

N Mean Standard Deviation Minimum Maximum

---

|   |           |           |           |           |
|---|-----------|-----------|-----------|-----------|
| 2 | 2.1500000 | 0.2121320 | 2.0000000 | 2.3000000 |
|---|-----------|-----------|-----------|-----------|

---

Unique Subject Identifier=2672000000-0027

Assay variable : PTINR\_VAL1 PT-INR Value

N Mean Standard Deviation Minimum Maximum

---

|   |           |           |           |           |
|---|-----------|-----------|-----------|-----------|
| 2 | 2.3000000 | 0.2687006 | 2.1100000 | 2.4900000 |
|---|-----------|-----------|-----------|-----------|

---

Unique Subject Identifier=2672000000-0028

Assay variable : PTINR\_VAL1 PT-INR Value

N Mean Standard Deviation Minimum Maximum

---

|   |          |           |          |          |
|---|----------|-----------|----------|----------|
| 2 | 1.680000 | 0.2687006 | 1.490000 | 1.870000 |
|---|----------|-----------|----------|----------|

---

Laboratory tests at the time of obtaining Table 2-6 consent, according to the presence or absence of proton-pump inhibitors

Unique Subject Identifier=2673011101-0001

MEANS Procedure

Assay variable : PTINR\_VAL1 PT-INR Value

N Mean Standard Deviation Minimum Maximum

---

|   |           |           |           |           |
|---|-----------|-----------|-----------|-----------|
| 3 | 1.8266667 | 0.0568624 | 1.7800000 | 1.8900000 |
|---|-----------|-----------|-----------|-----------|

---

Unique Subject Identifier=2673011101-0002

Assay variable : PTINR\_VAL1 PT-INR Value

N Mean Standard Deviation Minimum Maximum

---

|   |           |           |           |           |
|---|-----------|-----------|-----------|-----------|
| 2 | 1.5800000 | 0.0989949 | 1.5100000 | 1.6500000 |
|---|-----------|-----------|-----------|-----------|

---

Unique Subject Identifier=2675000000-0005

Assay variable : PTINR\_VAL1 PT-INR Value

N Mean Standard Deviation Minimum Maximum

---

|   |           |           |           |           |
|---|-----------|-----------|-----------|-----------|
| 4 | 2.3200000 | 0.3329665 | 1.9900000 | 2.7500000 |
|---|-----------|-----------|-----------|-----------|

---

Unique Subject Identifier=2675000000-0010

Assay variable : PTINR\_VAL1 PT-INR Value

N Mean Standard Deviation Minimum Maximum

---

|   |           |  |           |           |
|---|-----------|--|-----------|-----------|
| 1 | 0.9700000 |  | 0.9700000 | 0.9700000 |
|---|-----------|--|-----------|-----------|

---

Laboratory tests at the time of obtaining Table 2-6 consent, according to the presence or absence of proton-pump inhibitors

Unique Subject Identifier=2675000000-0013

MEANS Procedure

Assay variable : PTINR\_VAL1 PT-INR Value

| N | Mean      | Standard Deviation | Minimum   | Maximum   |
|---|-----------|--------------------|-----------|-----------|
| 5 | 1.9460000 | 0.3591379          | 1.3600000 | 2.2100000 |

Unique Subject Identifier=2675000000-0016

Assay variable : PTINR\_VAL1 PT-INR Value

| N | Mean      | Standard Deviation | Minimum   | Maximum   |
|---|-----------|--------------------|-----------|-----------|
| 2 | 1.1700000 | 0.0424264          | 1.1400000 | 1.2000000 |

Unique Subject Identifier=2675000000-0021

Assay variable : PTINR\_VAL1 PT-INR Value

| N | Mean      | Standard Deviation | Minimum   | Maximum   |
|---|-----------|--------------------|-----------|-----------|
| 5 | 1.9820000 | 0.2265392          | 1.7300000 | 2.1800000 |

Unique Subject Identifier=2675000000-0022

Assay variable : PTINR\_VAL1 PT-INR Value

N Mean Standard Deviation Minimum Maximum

---

|   |           |           |           |           |
|---|-----------|-----------|-----------|-----------|
| 3 | 1.7133333 | 0.2433790 | 1.4500000 | 1.9300000 |
|---|-----------|-----------|-----------|-----------|

---



Laboratory tests at the time of obtaining Table 2-6 consent, according to the presence or absence of proton-pump inhibitors

Unique Subject Identifier=2678010000-0002

MEANS Procedure

Assay variable : PTINR\_VAL1 PT-INR Value

N Mean Standard Deviation Minimum Maximum

---

|   |           |           |           |           |
|---|-----------|-----------|-----------|-----------|
| 3 | 2.2166667 | 0.2020726 | 2.1000000 | 2.4500000 |
|---|-----------|-----------|-----------|-----------|

---

Unique Subject Identifier=2678010000-0005

Assay variable : PTINR\_VAL1 PT-INR Value

N Mean Standard Deviation Minimum Maximum

---

|   |           |           |           |           |
|---|-----------|-----------|-----------|-----------|
| 5 | 1.9020000 | 0.2669644 | 1.6500000 | 2.2800000 |
|---|-----------|-----------|-----------|-----------|

---

Unique Subject Identifier=2678010000-0009

Assay variable : PTINR\_VAL1 PT-INR Value

N Mean Standard Deviation Minimum Maximum

---

|   |           |           |           |           |
|---|-----------|-----------|-----------|-----------|
| 4 | 1.7750000 | 0.2776689 | 1.4800000 | 2.1500000 |
|---|-----------|-----------|-----------|-----------|

---

Unique Subject Identifier=2678010000-0012

Assay variable : PTINR\_VAL1 PT-INR Value

N Mean Standard Deviation Minimum Maximum

---

|   |           |           |           |           |
|---|-----------|-----------|-----------|-----------|
| 4 | 1.9350000 | 0.1658312 | 1.7500000 | 2.0800000 |
|---|-----------|-----------|-----------|-----------|

---

Laboratory tests at the time of obtaining Table 2-6 consent, according to the presence or absence of proton-pump inhibitors

Unique Subject Identifier=2678010000-0014

MEANS Procedure

Assay variable : PTINR\_VAL1 PT-INR Value

N Mean Standard Deviation Minimum Maximum

---

|   |           |           |           |           |
|---|-----------|-----------|-----------|-----------|
| 4 | 2.0950000 | 0.3875134 | 1.6900000 | 2.6000000 |
|---|-----------|-----------|-----------|-----------|

---

Unique Subject Identifier=2678010000-0019

Assay variable : PTINR\_VAL1 PT-INR Value

N Mean Standard Deviation Minimum Maximum

---

|   |           |           |           |           |
|---|-----------|-----------|-----------|-----------|
| 3 | 2.2633333 | 0.1331666 | 2.1500000 | 2.4100000 |
|---|-----------|-----------|-----------|-----------|

---

Unique Subject Identifier=2678010000-0034

Assay variable : PTINR\_VAL1 PT-INR Value

N Mean Standard Deviation Minimum Maximum

---

|   |           |           |           |           |
|---|-----------|-----------|-----------|-----------|
| 3 | 1.5233333 | 0.0251661 | 1.5000000 | 1.5500000 |
|---|-----------|-----------|-----------|-----------|

---

Unique Subject Identifier=2678010000-0035

Assay variable : PTINR\_VAL1 PT-INR Value

N Mean Standard Deviation Minimum Maximum

---

|   |          |           |          |          |
|---|----------|-----------|----------|----------|
| 3 | 2.003333 | 0.3579572 | 1.610000 | 2.310000 |
|---|----------|-----------|----------|----------|

---

Laboratory tests at the time of obtaining Table 2-6 consent, according to the presence or absence of proton-pump inhibitors

Unique Subject Identifier=2678010000-0037

MEANS Procedure

Assay variable : PTINR\_VAL1 PT-INR Value

N Mean Standard Deviation Minimum Maximum

---

|   |           |           |           |           |
|---|-----------|-----------|-----------|-----------|
| 5 | 1.7880000 | 0.2058397 | 1.5700000 | 1.9900000 |
|---|-----------|-----------|-----------|-----------|

---

Unique Subject Identifier=2678010000-0039

Assay variable : PTINR\_VAL1 PT-INR Value

N Mean Standard Deviation Minimum Maximum

---

|   |           |           |           |           |
|---|-----------|-----------|-----------|-----------|
| 5 | 2.1500000 | 0.4368066 | 1.6200000 | 2.5700000 |
|---|-----------|-----------|-----------|-----------|

---

Unique Subject Identifier=2678010000-0041

Assay variable : PTINR\_VAL1 PT-INR Value

N Mean Standard Deviation Minimum Maximum

---

|   |           |           |           |           |
|---|-----------|-----------|-----------|-----------|
| 4 | 1.7000000 | 0.1230176 | 1.5400000 | 1.8300000 |
|---|-----------|-----------|-----------|-----------|

---

Unique Subject Identifier=2687001000-0001

Assay variable : PTINR\_VAL1 PT-INR Value

N Mean Standard Deviation Minimum Maximum

---

|   |          |          |          |          |
|---|----------|----------|----------|----------|
| 5 | 1.840000 | 0.167332 | 1.600000 | 2.000000 |
|---|----------|----------|----------|----------|

---

Laboratory tests at the time of obtaining Table 2-6 consent, according to the presence or absence of proton-pump inhibitors

Unique Subject Identifier=2687001000-0003

MEANS Procedure

Assay variable : PTINR\_VAL1 PT-INR Value

N Mean Standard Deviation Minimum Maximum

---

|   |           |           |           |           |
|---|-----------|-----------|-----------|-----------|
| 6 | 2.1500000 | 0.4929503 | 1.5000000 | 3.0000000 |
|---|-----------|-----------|-----------|-----------|

---

Unique Subject Identifier=2687001000-0010

Assay variable : PTINR\_VAL1 PT-INR Value

N Mean Standard Deviation Minimum Maximum

---

|   |           |           |           |           |
|---|-----------|-----------|-----------|-----------|
| 6 | 1.9500000 | 0.2258318 | 1.6000000 | 2.3000000 |
|---|-----------|-----------|-----------|-----------|

---

Unique Subject Identifier=2687001000-0013

Assay variable : PTINR\_VAL1 PT-INR Value

N Mean Standard Deviation Minimum Maximum

---

|   |           |           |           |           |
|---|-----------|-----------|-----------|-----------|
| 3 | 2.0000000 | 0.4582576 | 1.5000000 | 2.4000000 |
|---|-----------|-----------|-----------|-----------|

---

Unique Subject Identifier=2687001000-0016

Assay variable : PTINR\_VAL1 PT-INR Value

N Mean Standard Deviation Minimum Maximum

---

|   |          |           |          |          |
|---|----------|-----------|----------|----------|
| 5 | 2.200000 | 0.2236068 | 1.900000 | 2.500000 |
|---|----------|-----------|----------|----------|

---



Laboratory tests at the time of obtaining Table 2-6 consent, according to the presence or absence of proton-pump inhibitors

Unique Subject Identifier=2687001000-0036

MEANS Procedure

Assay variable : PTINR\_VAL1 PT-INR Value

N Mean Standard Deviation Minimum Maximum

---

|   |           |           |           |           |
|---|-----------|-----------|-----------|-----------|
| 5 | 2.1200000 | 0.2863564 | 1.9000000 | 2.6000000 |
|---|-----------|-----------|-----------|-----------|

---

Unique Subject Identifier=2687001000-0039

Assay variable : PTINR\_VAL1 PT-INR Value

N Mean Standard Deviation Minimum Maximum

---

|   |           |           |           |           |
|---|-----------|-----------|-----------|-----------|
| 5 | 2.1180000 | 0.4267552 | 1.5000000 | 2.7000000 |
|---|-----------|-----------|-----------|-----------|

---

Unique Subject Identifier=2687001000-0040

Assay variable : PTINR\_VAL1 PT-INR Value

N Mean Standard Deviation Minimum Maximum

---

|   |           |           |           |           |
|---|-----------|-----------|-----------|-----------|
| 5 | 2.3600000 | 0.4615192 | 1.6000000 | 2.8000000 |
|---|-----------|-----------|-----------|-----------|

---

Unique Subject Identifier=2687001000-0042

Assay variable : PTINR\_VAL1 PT-INR Value

N Mean Standard Deviation Minimum Maximum

---

|   |          |           |          |          |
|---|----------|-----------|----------|----------|
| 5 | 1.600000 | 0.0707107 | 1.500000 | 1.700000 |
|---|----------|-----------|----------|----------|

---

Laboratory tests at the time of obtaining Table 2-6 consent, according to the presence or absence of proton-pump inhibitors

Unique Subject Identifier=2687001000-0046

MEANS Procedure

Assay variable : PTINR\_VAL1 PT-INR Value

N Mean Standard Deviation Minimum Maximum

---

|   |           |           |           |           |
|---|-----------|-----------|-----------|-----------|
| 5 | 1.6800000 | 0.3346640 | 1.4000000 | 2.2000000 |
|---|-----------|-----------|-----------|-----------|

---

Unique Subject Identifier=2688011111-0001

Assay variable : PTINR\_VAL1 PT-INR Value

N Mean Standard Deviation Minimum Maximum

---

|   |           |           |           |           |
|---|-----------|-----------|-----------|-----------|
| 6 | 2.5000000 | 0.4604346 | 2.0000000 | 3.3000000 |
|---|-----------|-----------|-----------|-----------|

---

Unique Subject Identifier=2688011111-0002

Assay variable : PTINR\_VAL1 PT-INR Value

N Mean Standard Deviation Minimum Maximum

---

|   |           |           |           |           |
|---|-----------|-----------|-----------|-----------|
| 6 | 1.7833333 | 0.2714160 | 1.5000000 | 2.2000000 |
|---|-----------|-----------|-----------|-----------|

---

Unique Subject Identifier=2688011111-0003

Assay variable : PTINR\_VAL1 PT-INR Value

N Mean Standard Deviation Minimum Maximum

---

|   |          |           |          |          |
|---|----------|-----------|----------|----------|
| 5 | 2.040000 | 0.2302173 | 1.800000 | 2.400000 |
|---|----------|-----------|----------|----------|

---

Laboratory tests at the time of obtaining Table 2-6 consent, according to the presence or absence of proton-pump inhibitors

Unique Subject Identifier=2688011111-0006

MEANS Procedure

Assay variable : PTINR\_VAL1 PT-INR Value

N Mean Standard Deviation Minimum Maximum

---

|   |           |           |           |           |
|---|-----------|-----------|-----------|-----------|
| 6 | 1.5500000 | 0.0836660 | 1.5000000 | 1.7000000 |
|---|-----------|-----------|-----------|-----------|

---

Unique Subject Identifier=2688011111-0007

Assay variable : PTINR\_VAL1 PT-INR Value

N Mean Standard Deviation Minimum Maximum

---

|   |           |           |           |           |
|---|-----------|-----------|-----------|-----------|
| 6 | 2.3500000 | 0.5958188 | 1.3000000 | 3.0000000 |
|---|-----------|-----------|-----------|-----------|

---

Unique Subject Identifier=2688011111-0008

Assay variable : PTINR\_VAL1 PT-INR Value

N Mean Standard Deviation Minimum Maximum

---

|   |           |           |           |           |
|---|-----------|-----------|-----------|-----------|
| 6 | 1.6666667 | 0.1505545 | 1.5000000 | 1.8000000 |
|---|-----------|-----------|-----------|-----------|

---

Unique Subject Identifier=2688011111-0010

Assay variable : PTINR\_VAL1 PT-INR Value

N Mean Standard Deviation Minimum Maximum

---

|   |           |           |           |           |
|---|-----------|-----------|-----------|-----------|
| 6 | 2.0166667 | 0.3970726 | 1.7000000 | 2.7000000 |
|---|-----------|-----------|-----------|-----------|

---

Laboratory tests at the time of obtaining Table 2-6 consent, according to the presence or absence of proton-pump inhibitors

Unique Subject Identifier=2688011111-0011

MEANS Procedure

Assay variable : PTINR\_VAL1 PT-INR Value

| N | Mean      | Standard Deviation | Minimum   | Maximum   |
|---|-----------|--------------------|-----------|-----------|
| 6 | 2.1833333 | 0.6493587          | 1.5000000 | 3.0000000 |

Unique Subject Identifier=2688011111-0012

Assay variable : PTINR\_VAL1 PT-INR Value

| N | Mean      | Standard Deviation | Minimum   | Maximum   |
|---|-----------|--------------------|-----------|-----------|
| 5 | 1.9600000 | 0.1140175          | 1.8000000 | 2.1000000 |

Unique Subject Identifier=2688011111-0013

Assay variable : PTINR\_VAL1 PT-INR Value

| N | Mean      | Standard Deviation | Minimum   | Maximum   |
|---|-----------|--------------------|-----------|-----------|
| 6 | 1.6833333 | 0.2136976          | 1.4000000 | 2.0000000 |

Unique Subject Identifier=2688011111-0014

Assay variable : PTINR\_VAL1 PT-INR Value

N Mean Standard Deviation Minimum Maximum

---

|   |           |           |           |           |
|---|-----------|-----------|-----------|-----------|
| 6 | 1.7166667 | 0.2041241 | 1.4000000 | 2.0000000 |
|---|-----------|-----------|-----------|-----------|

---



Laboratory tests at the time of obtaining Table 2-6 consent, according to the presence or absence of proton-pump inhibitors

Unique Subject Identifier=2688011111-0015

MEANS Procedure

Assay variable : PTINR\_VAL1 PT-INR Value

| N | Mean      | Standard Deviation | Minimum   | Maximum   |
|---|-----------|--------------------|-----------|-----------|
| 5 | 1.8000000 | 0.1581139          | 1.6000000 | 2.0000000 |

Unique Subject Identifier=2688011111-0016

Assay variable : PTINR\_VAL1 PT-INR Value

| N | Mean      | Standard Deviation | Minimum   | Maximum   |
|---|-----------|--------------------|-----------|-----------|
| 5 | 2.3800000 | 0.3898718          | 2.0000000 | 3.0000000 |

Unique Subject Identifier=2688011111-0018

Assay variable : PTINR\_VAL1 PT-INR Value

| N | Mean      | Standard Deviation | Minimum   | Maximum   |
|---|-----------|--------------------|-----------|-----------|
| 6 | 1.5666667 | 0.2160247          | 1.3000000 | 1.9000000 |

Unique Subject Identifier=2688011111-0020

Assay variable : PTINR\_VAL1 PT-INR Value

N Mean Standard Deviation Minimum Maximum

---

|   |          |           |          |          |
|---|----------|-----------|----------|----------|
| 5 | 1.860000 | 0.2408319 | 1.600000 | 2.100000 |
|---|----------|-----------|----------|----------|

---

Laboratory tests at the time of obtaining Table 2-6 consent, according to the presence or absence of proton-pump inhibitors

Unique Subject Identifier=2688011111-0022

MEANS Procedure

Assay variable : PTINR\_VAL1 PT-INR Value

| N | Mean      | Standard Deviation | Minimum   | Maximum   |
|---|-----------|--------------------|-----------|-----------|
| 5 | 1.6800000 | 0.7563068          | 1.2000000 | 3.0000000 |

Unique Subject Identifier=2688011111-0023

Assay variable : PTINR\_VAL1 PT-INR Value

| N | Mean      | Standard Deviation | Minimum   | Maximum   |
|---|-----------|--------------------|-----------|-----------|
| 5 | 2.0800000 | 0.3271085          | 1.7000000 | 2.6000000 |

Unique Subject Identifier=2688011111-0024

Assay variable : PTINR\_VAL1 PT-INR Value

| N | Mean      | Standard Deviation | Minimum   | Maximum   |
|---|-----------|--------------------|-----------|-----------|
| 5 | 2.2000000 | 0.3162278          | 1.9000000 | 2.7000000 |

Unique Subject Identifier=2688011111-0026

Assay variable : PTINR\_VAL1 PT-INR Value

N Mean Standard Deviation Minimum Maximum

---

|   |          |  |          |          |
|---|----------|--|----------|----------|
| 1 | 1.500000 |  | 1.500000 | 1.500000 |
|---|----------|--|----------|----------|

---

Laboratory tests at the time of obtaining Table 2-6 consent, according to the presence or absence of proton-pump inhibitors

Unique Subject Identifier=2688011111-0027

MEANS Procedure

Assay variable : PTINR\_VAL1 PT-INR Value

N Mean Standard Deviation Minimum Maximum

---

|   |          |          |          |          |
|---|----------|----------|----------|----------|
| 5 | 2.260000 | 0.522494 | 1.700000 | 3.100000 |
|---|----------|----------|----------|----------|

---

Unique Subject Identifier=2688011111-0028

Assay variable : PTINR\_VAL1 PT-INR Value

N Mean Standard Deviation Minimum Maximum

---

|   |          |          |          |          |
|---|----------|----------|----------|----------|
| 5 | 1.600000 | 0.291547 | 1.200000 | 1.900000 |
|---|----------|----------|----------|----------|

---

Unique Subject Identifier=2688011111-0031

Assay variable : PTINR\_VAL1 PT-INR Value

N Mean Standard Deviation Minimum Maximum

---

|   |          |          |          |          |
|---|----------|----------|----------|----------|
| 5 | 1.640000 | 0.089442 | 1.500000 | 1.700000 |
|---|----------|----------|----------|----------|

---

Unique Subject Identifier=2688011111-0034

Assay variable : PTINR\_VAL1 PT-INR Value

N Mean Standard Deviation Minimum Maximum

---

|   |          |           |          |          |
|---|----------|-----------|----------|----------|
| 5 | 1.760000 | 0.1516575 | 1.600000 | 2.000000 |
|---|----------|-----------|----------|----------|

---

Laboratory tests at the time of obtaining Table 2-6 consent, according to the presence or absence of proton-pump inhibitors

Unique Subject Identifier=2688011111-0036

MEANS Procedure

Assay variable : PTINR\_VAL1 PT-INR Value

| N | Mean     | Standard Deviation | Minimum  | Maximum  |
|---|----------|--------------------|----------|----------|
| 5 | 1.660000 | 0.181659           | 1.400000 | 1.900000 |

Unique Subject Identifier=2688011111-0037

Assay variable : PTINR\_VAL1 PT-INR Value

| N | Mean     | Standard Deviation | Minimum  | Maximum  |
|---|----------|--------------------|----------|----------|
| 5 | 1.680000 | 0.571839           | 1.200000 | 2.600000 |

Unique Subject Identifier=2688011111-0038

Assay variable : PTINR\_VAL1 PT-INR Value

| N | Mean     | Standard Deviation | Minimum  | Maximum  |
|---|----------|--------------------|----------|----------|
| 5 | 2.360000 | 0.134164           | 2.200000 | 2.500000 |

Unique Subject Identifier=2688011111-0040

Assay variable : PTINR\_VAL1 PT-INR Value

N Mean Standard Deviation Minimum Maximum

---

|   |          |           |          |          |
|---|----------|-----------|----------|----------|
| 3 | 2.166667 | 0.3511885 | 1.800000 | 2.500000 |
|---|----------|-----------|----------|----------|

---



Laboratory tests at the time of obtaining Table 2-6 consent, according to the presence or absence of proton-pump inhibitors

Unique Subject Identifier=2688011111-0041

MEANS Procedure

Assay variable : PTINR\_VAL1 PT-INR Value

N Mean Standard Deviation Minimum Maximum

---

|   |           |           |           |           |
|---|-----------|-----------|-----------|-----------|
| 6 | 1.4333333 | 0.2943920 | 1.2000000 | 2.0000000 |
|---|-----------|-----------|-----------|-----------|

---

Unique Subject Identifier=2688011111-0044

Assay variable : PTINR\_VAL1 PT-INR Value

N Mean Standard Deviation Minimum Maximum

---

|   |           |           |           |           |
|---|-----------|-----------|-----------|-----------|
| 5 | 1.7800000 | 0.1095445 | 1.6000000 | 1.9000000 |
|---|-----------|-----------|-----------|-----------|

---

Unique Subject Identifier=2688011111-0046

Assay variable : PTINR\_VAL1 PT-INR Value

N Mean Standard Deviation Minimum Maximum

---

|   |           |           |           |           |
|---|-----------|-----------|-----------|-----------|
| 6 | 1.7000000 | 0.1897367 | 1.5000000 | 2.0000000 |
|---|-----------|-----------|-----------|-----------|

---

Unique Subject Identifier=2688011111-0047

Assay variable : PTINR\_VAL1 PT-INR Value

N Mean Standard Deviation Minimum Maximum

---

|   |          |           |          |          |
|---|----------|-----------|----------|----------|
| 6 | 1.550000 | 0.1378405 | 1.400000 | 1.800000 |
|---|----------|-----------|----------|----------|

---

Laboratory tests at the time of obtaining Table 2-6 consent, according to the presence or absence of proton-pump inhibitors

Unique Subject Identifier=2688011111-0048

MEANS Procedure

Assay variable : PTINR\_VAL1 PT-INR Value

| N | Mean      | Standard Deviation | Minimum   | Maximum   |
|---|-----------|--------------------|-----------|-----------|
| 6 | 2.1000000 | 0.4774935          | 1.4000000 | 2.7000000 |

Unique Subject Identifier=2688011111-0049

Assay variable : PTINR\_VAL1 PT-INR Value

| N | Mean      | Standard Deviation | Minimum   | Maximum   |
|---|-----------|--------------------|-----------|-----------|
| 5 | 2.0000000 | 0.2000000          | 1.7000000 | 2.2000000 |

Unique Subject Identifier=2688011111-0050

Assay variable : PTINR\_VAL1 PT-INR Value

| N | Mean      | Standard Deviation | Minimum   | Maximum   |
|---|-----------|--------------------|-----------|-----------|
| 4 | 2.3250000 | 0.6994045          | 1.4000000 | 3.0000000 |

Unique Subject Identifier=2688011111-0052

Assay variable : PTINR\_VAL1 PT-INR Value

N Mean Standard Deviation Minimum Maximum

---

|   |          |           |          |          |
|---|----------|-----------|----------|----------|
| 4 | 2.000000 | 0.1414214 | 1.900000 | 2.200000 |
|---|----------|-----------|----------|----------|

---

Laboratory tests at the time of obtaining Table 2-6 consent, according to the presence or absence of proton-pump inhibitors

Unique Subject Identifier=2688011111-0054

MEANS Procedure

Assay variable : PTINR\_VAL1 PT-INR Value

N Mean Standard Deviation Minimum Maximum

---

|   |          |           |          |          |
|---|----------|-----------|----------|----------|
| 5 | 2.060000 | 0.3286335 | 1.700000 | 2.400000 |
|---|----------|-----------|----------|----------|

---

Unique Subject Identifier=2688011111-0057

Assay variable : PTINR\_VAL1 PT-INR Value

N Mean Standard Deviation Minimum Maximum

---

|   |          |           |          |          |
|---|----------|-----------|----------|----------|
| 5 | 2.320000 | 0.1923538 | 2.100000 | 2.600000 |
|---|----------|-----------|----------|----------|

---

Unique Subject Identifier=2688011111-0058

Assay variable : PTINR\_VAL1 PT-INR Value

N Mean Standard Deviation Minimum Maximum

---

|   |          |           |          |          |
|---|----------|-----------|----------|----------|
| 5 | 1.960000 | 0.2302173 | 1.600000 | 2.200000 |
|---|----------|-----------|----------|----------|

---

Unique Subject Identifier=2688011111-0059

Assay variable : PTINR\_VAL1 PT-INR Value

N Mean Standard Deviation Minimum Maximum

---

|   |          |           |          |          |
|---|----------|-----------|----------|----------|
| 6 | 1.800000 | 0.3898718 | 1.300000 | 2.400000 |
|---|----------|-----------|----------|----------|

---

Laboratory tests at the time of obtaining Table 2-6 consent, according to the presence or absence of proton-pump inhibitors

Unique Subject Identifier=2688011111-0061

MEANS Procedure

Assay variable : PTINR\_VAL1 PT-INR Value

| N | Mean      | Standard Deviation | Minimum   | Maximum   |
|---|-----------|--------------------|-----------|-----------|
| 5 | 1.6200000 | 0.2167948          | 1.3000000 | 1.8000000 |

Unique Subject Identifier=2688011111-0062

Assay variable : PTINR\_VAL1 PT-INR Value

| N | Mean      | Standard Deviation | Minimum   | Maximum   |
|---|-----------|--------------------|-----------|-----------|
| 6 | 2.5833333 | 1.0008330          | 1.3000000 | 4.1000000 |

Unique Subject Identifier=2688011111-0064

Assay variable : PTINR\_VAL1 PT-INR Value

| N | Mean      | Standard Deviation | Minimum   | Maximum   |
|---|-----------|--------------------|-----------|-----------|
| 5 | 1.8400000 | 0.8443933          | 1.2000000 | 3.3000000 |

Unique Subject Identifier=2688011111-0065

Assay variable : PTINR\_VAL1 PT-INR Value

N Mean Standard Deviation Minimum Maximum

---

|   |          |           |          |          |
|---|----------|-----------|----------|----------|
| 5 | 1.940000 | 0.2966479 | 1.500000 | 2.200000 |
|---|----------|-----------|----------|----------|

---



Laboratory tests at the time of obtaining Table 2-6 consent, according to the presence or absence of proton-pump inhibitors

Unique Subject Identifier=2688011111-0067

MEANS Procedure

Assay variable : PTINR\_VAL1 PT-INR Value

N Mean Standard Deviation Minimum Maximum

---

|   |           |           |           |           |
|---|-----------|-----------|-----------|-----------|
| 5 | 1.7600000 | 0.0894427 | 1.7000000 | 1.9000000 |
|---|-----------|-----------|-----------|-----------|

---

Unique Subject Identifier=2688011111-0072

Assay variable : PTINR\_VAL1 PT-INR Value

N Mean Standard Deviation Minimum Maximum

---

|   |           |           |           |           |
|---|-----------|-----------|-----------|-----------|
| 5 | 1.4600000 | 0.2509980 | 1.1000000 | 1.8000000 |
|---|-----------|-----------|-----------|-----------|

---

Unique Subject Identifier=2688011111-0073

Assay variable : PTINR\_VAL1 PT-INR Value

N Mean Standard Deviation Minimum Maximum

---

|   |           |           |           |           |
|---|-----------|-----------|-----------|-----------|
| 5 | 1.7400000 | 0.2302173 | 1.5000000 | 2.0000000 |
|---|-----------|-----------|-----------|-----------|

---

Unique Subject Identifier=2688011111-0074

Assay variable : PTINR\_VAL1 PT-INR Value

N Mean Standard Deviation Minimum Maximum

---

|   |          |           |          |          |
|---|----------|-----------|----------|----------|
| 5 | 2.140000 | 0.3130495 | 1.800000 | 2.600000 |
|---|----------|-----------|----------|----------|

---

Laboratory tests at the time of obtaining Table 2-6 consent, according to the presence or absence of proton-pump inhibitors

Unique Subject Identifier=2688011111-0077

MEANS Procedure

Assay variable : PTINR\_VAL1 PT-INR Value

N Mean Standard Deviation Minimum Maximum

---

|   |           |           |           |           |
|---|-----------|-----------|-----------|-----------|
| 5 | 1.9000000 | 0.5000000 | 1.1000000 | 2.4000000 |
|---|-----------|-----------|-----------|-----------|

---

Unique Subject Identifier=2688011111-0078

Assay variable : PTINR\_VAL1 PT-INR Value

N Mean Standard Deviation Minimum Maximum

---

|   |           |           |           |           |
|---|-----------|-----------|-----------|-----------|
| 5 | 2.3400000 | 0.2190890 | 2.0000000 | 2.6000000 |
|---|-----------|-----------|-----------|-----------|

---

Unique Subject Identifier=2688011111-0079

Assay variable : PTINR\_VAL1 PT-INR Value

N Mean Standard Deviation Minimum Maximum

---

|   |           |           |           |           |
|---|-----------|-----------|-----------|-----------|
| 5 | 1.9200000 | 0.2280351 | 1.7000000 | 2.3000000 |
|---|-----------|-----------|-----------|-----------|

---

Unique Subject Identifier=2688011111-0082

Assay variable : PTINR\_VAL1 PT-INR Value

N Mean Standard Deviation Minimum Maximum

---

|   |           |           |           |           |
|---|-----------|-----------|-----------|-----------|
| 6 | 2.2333333 | 0.1032796 | 2.1000000 | 2.4000000 |
|---|-----------|-----------|-----------|-----------|

---

Laboratory tests at the time of obtaining Table 2-6 consent, according to the presence or absence of proton-pump inhibitors

Unique Subject Identifier=2688011111-0083

MEANS Procedure

Assay variable : PTINR\_VAL1 PT-INR Value

| N | Mean      | Standard Deviation | Minimum   | Maximum   |
|---|-----------|--------------------|-----------|-----------|
| 1 | 1.7000000 |                    | 1.7000000 | 1.7000000 |

Unique Subject Identifier=2690000000-0010

Assay variable : PTINR\_VAL1 PT-INR Value

| N | Mean      | Standard Deviation | Minimum   | Maximum   |
|---|-----------|--------------------|-----------|-----------|
| 6 | 1.7683333 | 0.0875024          | 1.6300000 | 1.8800000 |

Unique Subject Identifier=2692000000-0001

Assay variable : PTINR\_VAL1 PT-INR Value

| N | Mean      | Standard Deviation | Minimum   | Maximum   |
|---|-----------|--------------------|-----------|-----------|
| 5 | 1.9120000 | 0.3250692          | 1.4700000 | 2.3600000 |

Unique Subject Identifier=2692000000-0005

Assay variable : PTINR\_VAL1 PT-INR Value

N Mean Standard Deviation Minimum Maximum

---

|   |           |           |           |           |
|---|-----------|-----------|-----------|-----------|
| 6 | 1.8283333 | 0.3561694 | 1.4500000 | 2.4900000 |
|---|-----------|-----------|-----------|-----------|

---

Laboratory tests at the time of obtaining Table 2-6 consent, according to the presence or absence of proton-pump inhibitors

Unique Subject Identifier=2692000000-0009

MEANS Procedure

Assay variable : PTINR\_VAL1 PT-INR Value

N Mean Standard Deviation Minimum Maximum

---

|   |           |           |           |           |
|---|-----------|-----------|-----------|-----------|
| 6 | 1.9716667 | 0.4512834 | 1.5800000 | 2.6200000 |
|---|-----------|-----------|-----------|-----------|

---

Unique Subject Identifier=2692000000-0015

Assay variable : PTINR\_VAL1 PT-INR Value

N Mean Standard Deviation Minimum Maximum

---

|   |           |           |           |           |
|---|-----------|-----------|-----------|-----------|
| 6 | 1.7700000 | 0.2934621 | 1.4100000 | 2.1200000 |
|---|-----------|-----------|-----------|-----------|

---

Unique Subject Identifier=2692000000-0016

Assay variable : PTINR\_VAL1 PT-INR Value

N Mean Standard Deviation Minimum Maximum

---

|   |           |           |           |           |
|---|-----------|-----------|-----------|-----------|
| 4 | 1.7650000 | 0.1771064 | 1.5800000 | 1.9900000 |
|---|-----------|-----------|-----------|-----------|

---

Unique Subject Identifier=2692000000-0020

Assay variable : PTINR\_VAL1 PT-INR Value

N Mean Standard Deviation Minimum Maximum

---

|   |           |           |           |           |
|---|-----------|-----------|-----------|-----------|
| 6 | 2.0366667 | 0.1949017 | 1.7500000 | 2.3600000 |
|---|-----------|-----------|-----------|-----------|

---



Laboratory tests at the time of obtaining Table 2-6 consent, according to the presence or absence of proton-pump inhibitors

Unique Subject Identifier=2692000000-0021

MEANS Procedure

Assay variable : PTINR\_VAL1 PT-INR Value

N Mean Standard Deviation Minimum Maximum

---

|   |           |           |           |           |
|---|-----------|-----------|-----------|-----------|
| 5 | 1.9980000 | 0.3875822 | 1.5600000 | 2.6200000 |
|---|-----------|-----------|-----------|-----------|

---

Unique Subject Identifier=2692000000-0029

Assay variable : PTINR\_VAL1 PT-INR Value

N Mean Standard Deviation Minimum Maximum

---

|   |           |           |           |           |
|---|-----------|-----------|-----------|-----------|
| 4 | 1.9550000 | 0.1147461 | 1.8100000 | 2.0900000 |
|---|-----------|-----------|-----------|-----------|

---

Unique Subject Identifier=2692000000-0033

Assay variable : PTINR\_VAL1 PT-INR Value

N Mean Standard Deviation Minimum Maximum

---

|   |           |           |           |           |
|---|-----------|-----------|-----------|-----------|
| 6 | 2.0916667 | 0.1158303 | 1.9000000 | 2.2100000 |
|---|-----------|-----------|-----------|-----------|

---

Unique Subject Identifier=2699000000-0001

Assay variable : PTINR\_VAL1 PT-INR Value

N Mean Standard Deviation Minimum Maximum

---

|   |           |           |           |           |
|---|-----------|-----------|-----------|-----------|
| 3 | 2.1466667 | 0.4473626 | 1.6600000 | 2.5400000 |
|---|-----------|-----------|-----------|-----------|

---

Laboratory tests at the time of obtaining Table 2-6 consent, according to the presence or absence of proton-pump inhibitors

Unique Subject Identifier=2699000000-0004

MEANS Procedure

Assay variable : PTINR\_VAL1 PT-INR Value

| N | Mean      | Standard Deviation | Minimum   | Maximum   |
|---|-----------|--------------------|-----------|-----------|
| 4 | 2.3075000 | 0.6827091          | 1.3600000 | 2.9600000 |

Unique Subject Identifier=2699000000-0005

Assay variable : PTINR\_VAL1 PT-INR Value

| N | Mean      | Standard Deviation | Minimum   | Maximum   |
|---|-----------|--------------------|-----------|-----------|
| 3 | 1.9433333 | 0.0832666          | 1.8500000 | 2.0100000 |

Unique Subject Identifier=2699000000-0009

Assay variable : PTINR\_VAL1 PT-INR Value

| N | Mean      | Standard Deviation | Minimum   | Maximum   |
|---|-----------|--------------------|-----------|-----------|
| 2 | 2.4450000 | 0.9828784          | 1.7500000 | 3.1400000 |

Unique Subject Identifier=2699000000-0010

Assay variable : PTINR\_VAL1 PT-INR Value

N Mean Standard Deviation Minimum Maximum

---

|   |           |           |           |           |
|---|-----------|-----------|-----------|-----------|
| 3 | 1.7766667 | 0.2150194 | 1.5400000 | 1.9600000 |
|---|-----------|-----------|-----------|-----------|

---

Laboratory tests at the time of obtaining Table 2-6 consent, according to the presence or absence of proton-pump inhibitors

Unique Subject Identifier=2701011011-0001

MEANS Procedure

Assay variable : PTINR\_VAL1 PT-INR Value

N Mean Standard Deviation Minimum Maximum

---

|   |           |           |           |           |
|---|-----------|-----------|-----------|-----------|
| 6 | 2.1500000 | 0.1516575 | 1.9000000 | 2.3000000 |
|---|-----------|-----------|-----------|-----------|

---

Unique Subject Identifier=2701011011-0002

Assay variable : PTINR\_VAL1 PT-INR Value

N Mean Standard Deviation Minimum Maximum

---

|   |           |           |           |           |
|---|-----------|-----------|-----------|-----------|
| 6 | 1.5500000 | 0.0547723 | 1.5000000 | 1.6000000 |
|---|-----------|-----------|-----------|-----------|

---

Unique Subject Identifier=2701011011-0003

Assay variable : PTINR\_VAL1 PT-INR Value

N Mean Standard Deviation Minimum Maximum

---

|   |           |           |           |           |
|---|-----------|-----------|-----------|-----------|
| 6 | 1.9333333 | 0.2250926 | 1.7000000 | 2.3000000 |
|---|-----------|-----------|-----------|-----------|

---

Unique Subject Identifier=2703000000-0002

Assay variable : PTINR\_VAL1 PT-INR Value

N Mean Standard Deviation Minimum Maximum

---

|   |           |           |           |           |
|---|-----------|-----------|-----------|-----------|
| 2 | 1.9000000 | 0.1414214 | 1.8000000 | 2.0000000 |
|---|-----------|-----------|-----------|-----------|

---

Laboratory tests at the time of obtaining Table 2-6 consent, according to the presence or absence of proton-pump inhibitors

Unique Subject Identifier=2703000000-0003

MEANS Procedure

Assay variable : PTINR\_VAL1 PT-INR Value

| N | Mean      | Standard Deviation | Minimum   | Maximum   |
|---|-----------|--------------------|-----------|-----------|
| 2 | 2.0500000 | 0.0707107          | 2.0000000 | 2.1000000 |

Unique Subject Identifier=2703000000-0005

Assay variable : PTINR\_VAL1 PT-INR Value

| N | Mean      | Standard Deviation | Minimum   | Maximum   |
|---|-----------|--------------------|-----------|-----------|
| 1 | 1.2000000 |                    | 1.2000000 | 1.2000000 |

Unique Subject Identifier=2703000000-0006

Assay variable : PTINR\_VAL1 PT-INR Value

| N | Mean      | Standard Deviation | Minimum   | Maximum   |
|---|-----------|--------------------|-----------|-----------|
| 3 | 2.0333333 | 0.4725816          | 1.5000000 | 2.4000000 |

Unique Subject Identifier=2703000000-0007

Assay variable : PTINR\_VAL1 PT-INR Value

N Mean Standard Deviation Minimum Maximum

---

|   |          |  |          |          |
|---|----------|--|----------|----------|
| 1 | 2.100000 |  | 2.100000 | 2.100000 |
|---|----------|--|----------|----------|

---



Laboratory tests at the time of obtaining Table 2-6 consent, according to the presence or absence of proton-pump inhibitors

Unique Subject Identifier=2703000000-0008

MEANS Procedure

Assay variable : PTINR\_VAL1 PT-INR Value

N Mean Standard Deviation Minimum Maximum

---

|   |           |           |           |           |
|---|-----------|-----------|-----------|-----------|
| 2 | 1.5500000 | 0.0707107 | 1.5000000 | 1.6000000 |
|---|-----------|-----------|-----------|-----------|

---

Unique Subject Identifier=2703000000-0009

Assay variable : PTINR\_VAL1 PT-INR Value

N Mean Standard Deviation Minimum Maximum

---

|   |           |           |           |           |
|---|-----------|-----------|-----------|-----------|
| 6 | 1.6333333 | 0.1366260 | 1.4000000 | 1.8000000 |
|---|-----------|-----------|-----------|-----------|

---

Unique Subject Identifier=2703000000-0010

Assay variable : PTINR\_VAL1 PT-INR Value

N Mean Standard Deviation Minimum Maximum

---

|   |           |  |           |           |
|---|-----------|--|-----------|-----------|
| 1 | 2.1000000 |  | 2.1000000 | 2.1000000 |
|---|-----------|--|-----------|-----------|

---

Unique Subject Identifier=2703000000-0012

Assay variable : PTINR\_VAL1 PT-INR Value

N Mean Standard Deviation Minimum Maximum

---

|   |           |           |           |           |
|---|-----------|-----------|-----------|-----------|
| 3 | 1.9333333 | 0.7505553 | 1.5000000 | 2.8000000 |
|---|-----------|-----------|-----------|-----------|

---

Laboratory tests at the time of obtaining Table 2-6 consent, according to the presence or absence of proton-pump inhibitors

Unique Subject Identifier=2703000000-0013

MEANS Procedure

Assay variable : PTINR\_VAL1 PT-INR Value

| N | Mean      | Standard Deviation | Minimum | Maximum   |
|---|-----------|--------------------|---------|-----------|
| 2 | 1.6000000 |                    | 0       | 1.6000000 |
|   |           |                    |         | 1.6000000 |

Unique Subject Identifier=2703000000-0018

Assay variable : PTINR\_VAL1 PT-INR Value

| N | Mean      | Standard Deviation | Minimum | Maximum   |
|---|-----------|--------------------|---------|-----------|
| 1 | 1.3000000 |                    |         | 1.3000000 |
|   |           |                    |         | 1.3000000 |

Unique Subject Identifier=2703000000-0019

Assay variable : PTINR\_VAL1 PT-INR Value

| N | Mean      | Standard Deviation | Minimum   | Maximum   |
|---|-----------|--------------------|-----------|-----------|
| 3 | 1.5533333 | 0.3233162          | 1.2600000 | 1.9000000 |

Unique Subject Identifier=2729000000-0001

Assay variable : PTINR\_VAL1 PT-INR Value

N Mean Standard Deviation Minimum Maximum

---

|   |           |           |           |           |
|---|-----------|-----------|-----------|-----------|
| 6 | 1.7933333 | 0.2315743 | 1.3900000 | 2.0300000 |
|---|-----------|-----------|-----------|-----------|

---

Laboratory tests at the time of obtaining Table 2-6 consent, according to the presence or absence of proton-pump inhibitors

Unique Subject Identifier=2729000000-0003

MEANS Procedure

Assay variable : PTINR\_VAL1 PT-INR Value

N Mean Standard Deviation Minimum Maximum

---

|   |           |           |           |           |
|---|-----------|-----------|-----------|-----------|
| 5 | 1.5800000 | 0.1763519 | 1.3700000 | 1.7800000 |
|---|-----------|-----------|-----------|-----------|

---

Unique Subject Identifier=2729000000-0004

Assay variable : PTINR\_VAL1 PT-INR Value

N Mean Standard Deviation Minimum Maximum

---

|   |           |           |           |           |
|---|-----------|-----------|-----------|-----------|
| 6 | 2.4433333 | 0.2484888 | 2.1100000 | 2.8100000 |
|---|-----------|-----------|-----------|-----------|

---

Unique Subject Identifier=2729000000-0005

Assay variable : PTINR\_VAL1 PT-INR Value

N Mean Standard Deviation Minimum Maximum

---

|   |           |           |           |           |
|---|-----------|-----------|-----------|-----------|
| 6 | 2.6083333 | 0.2908207 | 2.1800000 | 3.0100000 |
|---|-----------|-----------|-----------|-----------|

---

Unique Subject Identifier=2732010001-0004

Assay variable : PTINR\_VAL1 PT-INR Value

N Mean Standard Deviation Minimum Maximum

---

|   |          |           |          |          |
|---|----------|-----------|----------|----------|
| 6 | 2.500000 | 0.3633180 | 2.000000 | 3.000000 |
|---|----------|-----------|----------|----------|

---

Laboratory tests at the time of obtaining Table 2-6 consent, according to the presence or absence of proton-pump inhibitors

Unique Subject Identifier=2732010001-0005

MEANS Procedure

Assay variable : PTINR\_VAL1 PT-INR Value

N Mean Standard Deviation Minimum Maximum

---

|   |           |           |           |           |
|---|-----------|-----------|-----------|-----------|
| 4 | 2.0750000 | 0.3403430 | 1.8000000 | 2.5000000 |
|---|-----------|-----------|-----------|-----------|

---

Unique Subject Identifier=2733010000-0002

Assay variable : PTINR\_VAL1 PT-INR Value

N Mean Standard Deviation Minimum Maximum

---

|   |           |           |           |           |
|---|-----------|-----------|-----------|-----------|
| 6 | 1.9633333 | 0.2173170 | 1.7600000 | 2.3100000 |
|---|-----------|-----------|-----------|-----------|

---

Unique Subject Identifier=2733010000-0008

Assay variable : PTINR\_VAL1 PT-INR Value

N Mean Standard Deviation Minimum Maximum

---

|   |           |           |           |           |
|---|-----------|-----------|-----------|-----------|
| 6 | 2.1783333 | 0.2780228 | 1.8100000 | 2.5600000 |
|---|-----------|-----------|-----------|-----------|

---

Unique Subject Identifier=2733010000-0009

Assay variable : PTINR\_VAL1 PT-INR Value

N Mean Standard Deviation Minimum Maximum

---

|   |           |           |           |           |
|---|-----------|-----------|-----------|-----------|
| 6 | 1.9383333 | 0.2949859 | 1.5300000 | 2.3800000 |
|---|-----------|-----------|-----------|-----------|

---



Laboratory tests at the time of obtaining Table 2-6 consent, according to the presence or absence of proton-pump inhibitors

Unique Subject Identifier=2733010000-0011

MEANS Procedure

Assay variable : PTINR\_VAL1 PT-INR Value

| N | Mean      | Standard Deviation | Minimum   | Maximum   |
|---|-----------|--------------------|-----------|-----------|
| 6 | 2.4550000 | 0.3565810          | 2.1400000 | 2.9500000 |

Unique Subject Identifier=2733010000-0016

Assay variable : PTINR\_VAL1 PT-INR Value

| N | Mean      | Standard Deviation | Minimum   | Maximum   |
|---|-----------|--------------------|-----------|-----------|
| 5 | 2.4400000 | 0.7313686          | 1.6500000 | 3.4900000 |

Unique Subject Identifier=2733010000-0017

Assay variable : PTINR\_VAL1 PT-INR Value

| N | Mean      | Standard Deviation | Minimum   | Maximum   |
|---|-----------|--------------------|-----------|-----------|
| 6 | 1.9500000 | 0.5913713          | 1.1400000 | 2.5900000 |

Unique Subject Identifier=2733010000-0018

Assay variable : PTINR\_VAL1 PT-INR Value

N Mean Standard Deviation Minimum Maximum

---

|   |           |           |           |           |
|---|-----------|-----------|-----------|-----------|
| 6 | 2.1716667 | 0.3365957 | 1.8300000 | 2.7800000 |
|---|-----------|-----------|-----------|-----------|

---

Laboratory tests at the time of obtaining Table 2-6 consent, according to the presence or absence of proton-pump inhibitors

Unique Subject Identifier=2737011111-0001

MEANS Procedure

Assay variable : PTINR\_VAL1 PT-INR Value

N Mean Standard Deviation Minimum Maximum

---

|   |           |           |           |           |
|---|-----------|-----------|-----------|-----------|
| 6 | 1.2666667 | 0.1032796 | 1.1000000 | 1.4000000 |
|---|-----------|-----------|-----------|-----------|

---

Unique Subject Identifier=2737011111-0002

Assay variable : PTINR\_VAL1 PT-INR Value

N Mean Standard Deviation Minimum Maximum

---

|   |           |           |           |           |
|---|-----------|-----------|-----------|-----------|
| 6 | 1.5500000 | 0.1048809 | 1.4000000 | 1.7000000 |
|---|-----------|-----------|-----------|-----------|

---

Unique Subject Identifier=2737011111-0003

Assay variable : PTINR\_VAL1 PT-INR Value

N Mean Standard Deviation Minimum Maximum

---

|   |           |           |           |           |
|---|-----------|-----------|-----------|-----------|
| 6 | 1.4833333 | 0.0983192 | 1.4000000 | 1.6000000 |
|---|-----------|-----------|-----------|-----------|

---

Unique Subject Identifier=2737011111-0005

Assay variable : PTINR\_VAL1 PT-INR Value

N Mean Standard Deviation Minimum Maximum

---

|   |          |          |          |          |
|---|----------|----------|----------|----------|
| 6 | 1.750000 | 0.398748 | 1.300000 | 2.500000 |
|---|----------|----------|----------|----------|

---

Laboratory tests at the time of obtaining Table 2-6 consent, according to the presence or absence of proton-pump inhibitors

Unique Subject Identifier=2737011111-0007

MEANS Procedure

Assay variable : PTINR\_VAL1 PT-INR Value

N Mean Standard Deviation Minimum Maximum

---

|   |           |           |           |           |
|---|-----------|-----------|-----------|-----------|
| 4 | 1.9500000 | 0.4123106 | 1.4000000 | 2.4000000 |
|---|-----------|-----------|-----------|-----------|

---

Unique Subject Identifier=2737011111-0008

Assay variable : PTINR\_VAL1 PT-INR Value

N Mean Standard Deviation Minimum Maximum

---

|   |           |           |           |           |
|---|-----------|-----------|-----------|-----------|
| 6 | 1.4666667 | 0.1505545 | 1.3000000 | 1.7000000 |
|---|-----------|-----------|-----------|-----------|

---

Unique Subject Identifier=2748011000-0004

Assay variable : PTINR\_VAL1 PT-INR Value

N Mean Standard Deviation Minimum Maximum

---

|   |           |           |           |           |
|---|-----------|-----------|-----------|-----------|
| 5 | 1.7120000 | 0.2275302 | 1.5400000 | 1.9900000 |
|---|-----------|-----------|-----------|-----------|

---

Unique Subject Identifier=2748011000-0022

Assay variable : PTINR\_VAL1 PT-INR Value

N Mean Standard Deviation Minimum Maximum

---

|   |           |           |           |           |
|---|-----------|-----------|-----------|-----------|
| 2 | 2.3750000 | 0.0353553 | 2.3500000 | 2.4000000 |
|---|-----------|-----------|-----------|-----------|

---

Laboratory tests at the time of obtaining Table 2-6 consent, according to the presence or absence of proton-pump inhibitors

Unique Subject Identifier=2748011000-0024

MEANS Procedure

Assay variable : PTINR\_VAL1 PT-INR Value

N Mean Standard Deviation Minimum Maximum

---

|   |           |           |           |           |
|---|-----------|-----------|-----------|-----------|
| 4 | 1.5300000 | 0.2615339 | 1.1800000 | 1.7400000 |
|---|-----------|-----------|-----------|-----------|

---

Unique Subject Identifier=2748011000-0031

Assay variable : PTINR\_VAL1 PT-INR Value

N Mean Standard Deviation Minimum Maximum

---

|   |           |           |           |           |
|---|-----------|-----------|-----------|-----------|
| 3 | 2.2200000 | 0.0435890 | 2.1900000 | 2.2700000 |
|---|-----------|-----------|-----------|-----------|

---

Unique Subject Identifier=2748011000-0036

Assay variable : PTINR\_VAL1 PT-INR Value

N Mean Standard Deviation Minimum Maximum

---

|   |           |           |           |           |
|---|-----------|-----------|-----------|-----------|
| 3 | 2.6733333 | 0.1761628 | 2.5100000 | 2.8600000 |
|---|-----------|-----------|-----------|-----------|

---

Unique Subject Identifier=2748011000-0042

Assay variable : PTINR\_VAL1 PT-INR Value

N Mean Standard Deviation Minimum Maximum

---

|   |          |           |          |          |
|---|----------|-----------|----------|----------|
| 3 | 2.090000 | 0.2722132 | 1.840000 | 2.380000 |
|---|----------|-----------|----------|----------|

---



Laboratory tests at the time of obtaining Table 2-6 consent, according to the presence or absence of proton-pump inhibitors

Unique Subject Identifier=2748011000-0045

MEANS Procedure

Assay variable : PTINR\_VAL1 PT-INR Value

N Mean Standard Deviation Minimum Maximum

---

|   |           |           |           |           |
|---|-----------|-----------|-----------|-----------|
| 6 | 2.5850000 | 0.4136061 | 2.0900000 | 3.2400000 |
|---|-----------|-----------|-----------|-----------|

---

Unique Subject Identifier=2748011000-0051

Assay variable : PTINR\_VAL1 PT-INR Value

N Mean Standard Deviation Minimum Maximum

---

|   |           |           |           |           |
|---|-----------|-----------|-----------|-----------|
| 4 | 2.0875000 | 0.2372586 | 1.7900000 | 2.3200000 |
|---|-----------|-----------|-----------|-----------|

---

Unique Subject Identifier=2748011000-0052

Assay variable : PTINR\_VAL1 PT-INR Value

N Mean Standard Deviation Minimum Maximum

---

|   |           |           |           |           |
|---|-----------|-----------|-----------|-----------|
| 6 | 1.8716667 | 0.4007202 | 1.3600000 | 2.2600000 |
|---|-----------|-----------|-----------|-----------|

---

Unique Subject Identifier=2748011000-0053

Assay variable : PTINR\_VAL1 PT-INR Value

N Mean Standard Deviation Minimum Maximum

---

|   |           |           |           |           |
|---|-----------|-----------|-----------|-----------|
| 4 | 2.1175000 | 0.3013719 | 1.9000000 | 2.5600000 |
|---|-----------|-----------|-----------|-----------|

---

Laboratory tests at the time of obtaining Table 2-6 consent, according to the presence or absence of proton-pump inhibitors

Unique Subject Identifier=2748011000-0054

MEANS Procedure

Assay variable : PTINR\_VAL1 PT-INR Value

N Mean Standard Deviation Minimum Maximum

---

|   |           |           |           |           |
|---|-----------|-----------|-----------|-----------|
| 4 | 2.2450000 | 0.2223361 | 1.9400000 | 2.4200000 |
|---|-----------|-----------|-----------|-----------|

---

Unique Subject Identifier=2748011000-0057

Assay variable : PTINR\_VAL1 PT-INR Value

N Mean Standard Deviation Minimum Maximum

---

|   |           |           |           |           |
|---|-----------|-----------|-----------|-----------|
| 2 | 1.7600000 | 0.0424264 | 1.7300000 | 1.7900000 |
|---|-----------|-----------|-----------|-----------|

---

Unique Subject Identifier=2748011000-0059

Assay variable : PTINR\_VAL1 PT-INR Value

N Mean Standard Deviation Minimum Maximum

---

|   |           |           |           |           |
|---|-----------|-----------|-----------|-----------|
| 4 | 2.7425000 | 0.2808766 | 2.4100000 | 3.0500000 |
|---|-----------|-----------|-----------|-----------|

---

Unique Subject Identifier=2748011000-0060

Assay variable : PTINR\_VAL1 PT-INR Value

N Mean Standard Deviation Minimum Maximum

---

|   |           |           |           |           |
|---|-----------|-----------|-----------|-----------|
| 4 | 2.0300000 | 0.3232130 | 1.7200000 | 2.4800000 |
|---|-----------|-----------|-----------|-----------|

---

Laboratory tests at the time of obtaining Table 2-6 consent, according to the presence or absence of proton-pump inhibitors

Unique Subject Identifier=2749000000-0003

MEANS Procedure

Assay variable : PTINR\_VAL1 PT-INR Value

N Mean Standard Deviation Minimum Maximum

---

|   |          |           |          |          |
|---|----------|-----------|----------|----------|
| 2 | 2.260000 | 0.2545584 | 2.080000 | 2.440000 |
|---|----------|-----------|----------|----------|

---

Unique Subject Identifier=2749000000-0007

Assay variable : PTINR\_VAL1 PT-INR Value

N Mean Standard Deviation Minimum Maximum

---

|   |          |           |          |          |
|---|----------|-----------|----------|----------|
| 6 | 2.176667 | 0.2716370 | 1.890000 | 2.480000 |
|---|----------|-----------|----------|----------|

---

Unique Subject Identifier=2763011100-0002

Assay variable : PTINR\_VAL1 PT-INR Value

N Mean Standard Deviation Minimum Maximum

---

|   |          |           |          |          |
|---|----------|-----------|----------|----------|
| 4 | 2.425000 | 0.2753785 | 2.100000 | 2.700000 |
|---|----------|-----------|----------|----------|

---

Unique Subject Identifier=2764000000-0009

Assay variable : PTINR\_VAL1 PT-INR Value

N Mean Standard Deviation Minimum Maximum

---

|   |           |  |           |           |
|---|-----------|--|-----------|-----------|
| 1 | 2.0000000 |  | 2.0000000 | 2.0000000 |
|---|-----------|--|-----------|-----------|

---

Laboratory tests at the time of obtaining Table 2-6 consent, according to the presence or absence of proton-pump inhibitors

Unique Subject Identifier=2765000000-0002

MEANS Procedure

Assay variable : PTINR\_VAL1 PT-INR Value

| N | Mean      | Standard Deviation | Minimum   | Maximum   |
|---|-----------|--------------------|-----------|-----------|
| 5 | 1.7420000 | 0.4029516          | 1.2400000 | 2.3500000 |

Unique Subject Identifier=2765000000-0003

Assay variable : PTINR\_VAL1 PT-INR Value

| N | Mean      | Standard Deviation | Minimum   | Maximum   |
|---|-----------|--------------------|-----------|-----------|
| 6 | 1.7600000 | 0.2596151          | 1.4400000 | 2.1800000 |

Unique Subject Identifier=2765000000-0009

Assay variable : PTINR\_VAL1 PT-INR Value

| N | Mean      | Standard Deviation | Minimum   | Maximum   |
|---|-----------|--------------------|-----------|-----------|
| 4 | 1.9475000 | 0.1848197          | 1.8100000 | 2.2200000 |

Unique Subject Identifier=2766010111-0005

Assay variable : PTINR\_VAL1 PT-INR Value

N Mean Standard Deviation Minimum Maximum

---

|   |          |           |          |          |
|---|----------|-----------|----------|----------|
| 6 | 2.188333 | 0.4578828 | 1.700000 | 2.970000 |
|---|----------|-----------|----------|----------|

---



Laboratory tests at the time of obtaining Table 2-6 consent, according to the presence or absence of proton-pump inhibitors

Unique Subject Identifier=2766010111-0006

MEANS Procedure

Assay variable : PTINR\_VAL1 PT-INR Value

| N | Mean      | Standard Deviation | Minimum   | Maximum   |
|---|-----------|--------------------|-----------|-----------|
| 6 | 1.9250000 | 0.1385280          | 1.7800000 | 2.1000000 |

Unique Subject Identifier=2769000000-0001

Assay variable : PTINR\_VAL1 PT-INR Value

| N | Mean      | Standard Deviation | Minimum   | Maximum   |
|---|-----------|--------------------|-----------|-----------|
| 1 | 1.7900000 |                    | 1.7900000 | 1.7900000 |

Unique Subject Identifier=2777011010-0006

Assay variable : PTINR\_VAL1 PT-INR Value

| N | Mean      | Standard Deviation | Minimum   | Maximum   |
|---|-----------|--------------------|-----------|-----------|
| 4 | 2.1275000 | 0.3636276          | 1.6400000 | 2.4200000 |

Unique Subject Identifier=2777011010-0007

Assay variable : PTINR\_VAL1 PT-INR Value

N Mean Standard Deviation Minimum Maximum

---

|   |           |           |           |           |
|---|-----------|-----------|-----------|-----------|
| 4 | 1.4650000 | 0.2145538 | 1.2800000 | 1.7100000 |
|---|-----------|-----------|-----------|-----------|

---

Laboratory tests at the time of obtaining Table 2-6 consent, according to the presence or absence of proton-pump inhibitors

Unique Subject Identifier=2777011010-0009

MEANS Procedure

Assay variable : PTINR\_VAL1 PT-INR Value

| N | Mean     | Standard Deviation | Minimum  | Maximum  |
|---|----------|--------------------|----------|----------|
| 3 | 2.340000 | 0.1732051          | 2.240000 | 2.540000 |

Unique Subject Identifier=2777011010-0011

Assay variable : PTINR\_VAL1 PT-INR Value

| N | Mean     | Standard Deviation | Minimum  | Maximum  |
|---|----------|--------------------|----------|----------|
| 5 | 2.348000 | 0.1907092          | 2.060000 | 2.590000 |

Unique Subject Identifier=2777011010-0012

Assay variable : PTINR\_VAL1 PT-INR Value

| N | Mean     | Standard Deviation | Minimum  | Maximum  |
|---|----------|--------------------|----------|----------|
| 6 | 2.133333 | 0.4344038          | 1.770000 | 2.980000 |

Unique Subject Identifier=2777011010-0013

Assay variable : PTINR\_VAL1 PT-INR Value

N Mean Standard Deviation Minimum Maximum

---

|   |           |           |           |           |
|---|-----------|-----------|-----------|-----------|
| 3 | 1.7033333 | 0.2413158 | 1.5000000 | 1.9700000 |
|---|-----------|-----------|-----------|-----------|

---

Laboratory tests at the time of obtaining Table 2-6 consent, according to the presence or absence of proton-pump inhibitors

Unique Subject Identifier=2777011010-0014

MEANS Procedure

Assay variable : PTINR\_VAL1 PT-INR Value

| N | Mean     | Standard Deviation | Minimum  | Maximum  |
|---|----------|--------------------|----------|----------|
| 3 | 2.150000 | 0.1852026          | 1.940000 | 2.290000 |

Unique Subject Identifier=2777011010-0017

Assay variable : PTINR\_VAL1 PT-INR Value

| N | Mean     | Standard Deviation | Minimum  | Maximum  |
|---|----------|--------------------|----------|----------|
| 3 | 1.850000 | 0.3559494          | 1.620000 | 2.260000 |

Unique Subject Identifier=2777011010-0020

Assay variable : PTINR\_VAL1 PT-INR Value

| N | Mean     | Standard Deviation | Minimum  | Maximum  |
|---|----------|--------------------|----------|----------|
| 3 | 2.203333 | 0.2665208          | 1.900000 | 2.400000 |

Unique Subject Identifier=2777011010-0021

Assay variable : PTINR\_VAL1 PT-INR Value

N Mean Standard Deviation Minimum Maximum

---

|   |           |           |           |           |
|---|-----------|-----------|-----------|-----------|
| 4 | 1.6625000 | 0.4193149 | 1.1500000 | 2.0200000 |
|---|-----------|-----------|-----------|-----------|

---

Laboratory tests at the time of obtaining Table 2-6 consent, according to the presence or absence of proton-pump inhibitors

Unique Subject Identifier=2777011010-0023

MEANS Procedure

Assay variable : PTINR\_VAL1 PT-INR Value

| N | Mean      | Standard Deviation | Minimum   | Maximum   |
|---|-----------|--------------------|-----------|-----------|
| 5 | 1.9680000 | 0.2752635          | 1.5800000 | 2.2700000 |

Unique Subject Identifier=2777011010-0024

Assay variable : PTINR\_VAL1 PT-INR Value

| N | Mean      | Standard Deviation | Minimum   | Maximum   |
|---|-----------|--------------------|-----------|-----------|
| 4 | 1.7400000 | 0.1739732          | 1.5700000 | 1.8900000 |

Unique Subject Identifier=2777011010-0025

Assay variable : PTINR\_VAL1 PT-INR Value

| N | Mean      | Standard Deviation | Minimum   | Maximum   |
|---|-----------|--------------------|-----------|-----------|
| 3 | 2.0800000 | 0.0264575          | 2.0600000 | 2.1100000 |

Unique Subject Identifier=2777011010-0028

Assay variable : PTINR\_VAL1 PT-INR Value

N Mean Standard Deviation Minimum Maximum

---

|   |           |           |           |           |
|---|-----------|-----------|-----------|-----------|
| 3 | 1.8300000 | 0.2570992 | 1.6300000 | 2.1200000 |
|---|-----------|-----------|-----------|-----------|

---



Laboratory tests at the time of obtaining Table 2-6 consent, according to the presence or absence of proton-pump inhibitors

Unique Subject Identifier=2777011010-0031

MEANS Procedure

Assay variable : PTINR\_VAL1 PT-INR Value

| N | Mean      | Standard Deviation | Minimum   | Maximum   |
|---|-----------|--------------------|-----------|-----------|
| 2 | 1.7950000 | 0.6010408          | 1.3700000 | 2.2200000 |

Unique Subject Identifier=2777011010-0033

Assay variable : PTINR\_VAL1 PT-INR Value

| N | Mean      | Standard Deviation | Minimum   | Maximum   |
|---|-----------|--------------------|-----------|-----------|
| 3 | 1.8100000 | 0.1907878          | 1.5900000 | 1.9300000 |

Unique Subject Identifier=2777011010-0035

Assay variable : PTINR\_VAL1 PT-INR Value

| N | Mean      | Standard Deviation | Minimum   | Maximum   |
|---|-----------|--------------------|-----------|-----------|
| 5 | 1.6860000 | 0.2124382          | 1.4000000 | 1.9900000 |

Unique Subject Identifier=2777011010-0036

Assay variable : PTINR\_VAL1 PT-INR Value

N Mean Standard Deviation Minimum Maximum

---

|   |          |           |          |          |
|---|----------|-----------|----------|----------|
| 3 | 2.190000 | 0.3704052 | 1.830000 | 2.570000 |
|---|----------|-----------|----------|----------|

---

Laboratory tests at the time of obtaining Table 2-6 consent, according to the presence or absence of proton-pump inhibitors

Unique Subject Identifier=2777011010-0039

MEANS Procedure

Assay variable : PTINR\_VAL1 PT-INR Value

N Mean Standard Deviation Minimum Maximum

---

|   |           |           |           |           |
|---|-----------|-----------|-----------|-----------|
| 3 | 1.6566667 | 0.2020726 | 1.4400000 | 1.8400000 |
|---|-----------|-----------|-----------|-----------|

---

Unique Subject Identifier=2777011010-0043

Assay variable : PTINR\_VAL1 PT-INR Value

N Mean Standard Deviation Minimum Maximum

---

|   |           |           |           |           |
|---|-----------|-----------|-----------|-----------|
| 3 | 2.0100000 | 0.2605763 | 1.7400000 | 2.2600000 |
|---|-----------|-----------|-----------|-----------|

---

Unique Subject Identifier=2777011010-0044

Assay variable : PTINR\_VAL1 PT-INR Value

N Mean Standard Deviation Minimum Maximum

---

|   |           |           |           |           |
|---|-----------|-----------|-----------|-----------|
| 3 | 2.2833333 | 0.4722641 | 1.8400000 | 2.7800000 |
|---|-----------|-----------|-----------|-----------|

---

Unique Subject Identifier=2777011010-0045

Assay variable : PTINR\_VAL1 PT-INR Value

N Mean Standard Deviation Minimum Maximum

---

|   |          |           |          |          |
|---|----------|-----------|----------|----------|
| 4 | 2.560000 | 1.2616127 | 1.660000 | 4.360000 |
|---|----------|-----------|----------|----------|

---

Laboratory tests at the time of obtaining Table 2-6 consent, according to the presence or absence of proton-pump inhibitors

Unique Subject Identifier=2777011010-0046

MEANS Procedure

Assay variable : PTINR\_VAL1 PT-INR Value

| N | Mean      | Standard Deviation | Minimum   | Maximum   |
|---|-----------|--------------------|-----------|-----------|
| 3 | 2.0400000 | 0.3996248          | 1.6800000 | 2.4700000 |

Unique Subject Identifier=2777011010-0049

Assay variable : PTINR\_VAL1 PT-INR Value

| N | Mean      | Standard Deviation | Minimum   | Maximum   |
|---|-----------|--------------------|-----------|-----------|
| 3 | 2.0166667 | 0.4758501          | 1.6100000 | 2.5400000 |

Unique Subject Identifier=2777011010-0050

Assay variable : PTINR\_VAL1 PT-INR Value

| N | Mean      | Standard Deviation | Minimum   | Maximum   |
|---|-----------|--------------------|-----------|-----------|
| 3 | 2.0166667 | 0.0568624          | 1.9700000 | 2.0800000 |

Unique Subject Identifier=2780000000-0003

Assay variable : PTINR\_VAL1 PT-INR Value

N Mean Standard Deviation Minimum Maximum

---

|   |           |           |           |           |
|---|-----------|-----------|-----------|-----------|
| 6 | 1.9833333 | 0.1602082 | 1.9000000 | 2.3000000 |
|---|-----------|-----------|-----------|-----------|

---

Laboratory tests at the time of obtaining Table 2-6 consent, according to the presence or absence of proton-pump inhibitors

Unique Subject Identifier=2780000000-0008

MEANS Procedure

Assay variable : PTINR\_VAL1 PT-INR Value

N Mean Standard Deviation Minimum Maximum

---

|   |           |           |           |           |
|---|-----------|-----------|-----------|-----------|
| 6 | 1.5166667 | 0.0752773 | 1.4000000 | 1.6000000 |
|---|-----------|-----------|-----------|-----------|

---

Unique Subject Identifier=2782000000-0007

Assay variable : PTINR\_VAL1 PT-INR Value

N Mean Standard Deviation Minimum Maximum

---

|   |           |           |           |           |
|---|-----------|-----------|-----------|-----------|
| 3 | 2.0633333 | 0.1537314 | 1.9600000 | 2.2400000 |
|---|-----------|-----------|-----------|-----------|

---

Unique Subject Identifier=2784011111-0002

Assay variable : PTINR\_VAL1 PT-INR Value

N Mean Standard Deviation Minimum Maximum

---

|   |           |           |           |           |
|---|-----------|-----------|-----------|-----------|
| 5 | 2.2200000 | 0.3701351 | 1.8000000 | 2.7000000 |
|---|-----------|-----------|-----------|-----------|

---

Unique Subject Identifier=2784011111-0009

Assay variable : PTINR\_VAL1 PT-INR Value

N Mean Standard Deviation Minimum Maximum

---

|   |          |           |          |          |
|---|----------|-----------|----------|----------|
| 5 | 1.740000 | 0.2073644 | 1.600000 | 2.100000 |
|---|----------|-----------|----------|----------|

---



Laboratory tests at the time of obtaining Table 2-6 consent, according to the presence or absence of proton-pump inhibitors

Unique Subject Identifier=2784011111-0010

MEANS Procedure

Assay variable : PTINR\_VAL1 PT-INR Value

N Mean Standard Deviation Minimum Maximum

---

|   |           |           |           |           |
|---|-----------|-----------|-----------|-----------|
| 5 | 1.4400000 | 0.7635444 | 1.0000000 | 2.8000000 |
|---|-----------|-----------|-----------|-----------|

---

Unique Subject Identifier=2784011111-0013

Assay variable : PTINR\_VAL1 PT-INR Value

N Mean Standard Deviation Minimum Maximum

---

|   |           |           |           |           |
|---|-----------|-----------|-----------|-----------|
| 5 | 1.4800000 | 0.2683282 | 1.2000000 | 1.8000000 |
|---|-----------|-----------|-----------|-----------|

---

Unique Subject Identifier=2791010010-0004

Assay variable : PTINR\_VAL1 PT-INR Value

N Mean Standard Deviation Minimum Maximum

---

|   |           |           |           |           |
|---|-----------|-----------|-----------|-----------|
| 6 | 1.8000000 | 0.1095445 | 1.6000000 | 1.9000000 |
|---|-----------|-----------|-----------|-----------|

---

Unique Subject Identifier=2800011010-0033

Assay variable : PTINR\_VAL1 PT-INR Value

N Mean Standard Deviation Minimum Maximum

---

|   |           |           |           |           |
|---|-----------|-----------|-----------|-----------|
| 2 | 1.5050000 | 0.0919239 | 1.4400000 | 1.5700000 |
|---|-----------|-----------|-----------|-----------|

---

Laboratory tests at the time of obtaining Table 2-6 consent, according to the presence or absence of proton-pump inhibitors

Unique Subject Identifier=2800011010-0037

MEANS Procedure

Assay variable : PTINR\_VAL1 PT-INR Value

N Mean Standard Deviation Minimum Maximum

---

|   |           |  |           |           |
|---|-----------|--|-----------|-----------|
| 1 | 2.0600000 |  | 2.0600000 | 2.0600000 |
|---|-----------|--|-----------|-----------|

---

Unique Subject Identifier=2808000000-0002

Assay variable : PTINR\_VAL1 PT-INR Value

N Mean Standard Deviation Minimum Maximum

---

|   |           |           |           |           |
|---|-----------|-----------|-----------|-----------|
| 5 | 1.6500000 | 0.3323402 | 1.1900000 | 1.9500000 |
|---|-----------|-----------|-----------|-----------|

---

Unique Subject Identifier=2809000000-0009

Assay variable : PTINR\_VAL1 PT-INR Value

N Mean Standard Deviation Minimum Maximum

---

|   |           |           |           |           |
|---|-----------|-----------|-----------|-----------|
| 5 | 2.0760000 | 0.1779888 | 1.8600000 | 2.2800000 |
|---|-----------|-----------|-----------|-----------|

---

Unique Subject Identifier=2809000000-0011

Assay variable : PTINR\_VAL1 PT-INR Value

N Mean Standard Deviation Minimum Maximum

---

|   |           |           |           |           |
|---|-----------|-----------|-----------|-----------|
| 6 | 1.2133333 | 0.0618601 | 1.1400000 | 1.3000000 |
|---|-----------|-----------|-----------|-----------|

---

Laboratory tests at the time of obtaining Table 2-6 consent, according to the presence or absence of proton-pump inhibitors

Unique Subject Identifier=2828010110-0001

MEANS Procedure

Assay variable : PTINR\_VAL1 PT-INR Value

N Mean Standard Deviation Minimum Maximum

---

|   |           |   |           |           |
|---|-----------|---|-----------|-----------|
| 2 | 1.6000000 | 0 | 1.6000000 | 1.6000000 |
|---|-----------|---|-----------|-----------|

---

Unique Subject Identifier=2861011011-0003

Assay variable : PTINR\_VAL1 PT-INR Value

N Mean Standard Deviation Minimum Maximum

---

|   |           |           |           |           |
|---|-----------|-----------|-----------|-----------|
| 3 | 2.0500000 | 0.2861818 | 1.8700000 | 2.3800000 |
|---|-----------|-----------|-----------|-----------|

---

Unique Subject Identifier=2861011011-0006

Assay variable : PTINR\_VAL1 PT-INR Value

N Mean Standard Deviation Minimum Maximum

---

|   |           |           |           |           |
|---|-----------|-----------|-----------|-----------|
| 5 | 1.3440000 | 0.2920274 | 1.1000000 | 1.8300000 |
|---|-----------|-----------|-----------|-----------|

---

Unique Subject Identifier=2861011011-0010

Assay variable : PTINR\_VAL1 PT-INR Value

N Mean Standard Deviation Minimum Maximum

---

|   |           |           |           |           |
|---|-----------|-----------|-----------|-----------|
| 6 | 1.7433333 | 0.1201111 | 1.6200000 | 1.9200000 |
|---|-----------|-----------|-----------|-----------|

---

Laboratory tests at the time of obtaining Table 2-6 consent, according to the presence or absence of proton-pump inhibitors

Unique Subject Identifier=2862000000-0003

MEANS Procedure

Assay variable : PTINR\_VAL1 PT-INR Value

| N | Mean      | Standard Deviation | Minimum   | Maximum   |
|---|-----------|--------------------|-----------|-----------|
| 3 | 2.2300000 | 0.0888819          | 2.1300000 | 2.3000000 |

Unique Subject Identifier=2862000000-0004

Assay variable : PTINR\_VAL1 PT-INR Value

| N | Mean      | Standard Deviation | Minimum   | Maximum   |
|---|-----------|--------------------|-----------|-----------|
| 1 | 1.9000000 |                    | 1.9000000 | 1.9000000 |

Unique Subject Identifier=2868000000-0002

Assay variable : PTINR\_VAL1 PT-INR Value

| N | Mean      | Standard Deviation | Minimum   | Maximum   |
|---|-----------|--------------------|-----------|-----------|
| 4 | 1.9975000 | 0.3151058          | 1.5500000 | 2.2900000 |

Unique Subject Identifier=2868000000-0007

Assay variable : PTINR\_VAL1 PT-INR Value

N Mean Standard Deviation Minimum Maximum

---

|   |           |           |           |           |
|---|-----------|-----------|-----------|-----------|
| 2 | 2.3150000 | 1.0677312 | 1.5600000 | 3.0700000 |
|---|-----------|-----------|-----------|-----------|

---



Laboratory tests at the time of obtaining Table 2-6 consent, according to the presence or absence of proton-pump inhibitors

Unique Subject Identifier=2868000000-0009

MEANS Procedure

Assay variable : PTINR\_VAL1 PT-INR Value

| N | Mean      | Standard Deviation | Minimum   | Maximum   |
|---|-----------|--------------------|-----------|-----------|
| 5 | 2.1220000 | 0.5362555          | 1.5200000 | 2.8200000 |

Unique Subject Identifier=2868000000-0019

Assay variable : PTINR\_VAL1 PT-INR Value

| N | Mean      | Standard Deviation | Minimum   | Maximum   |
|---|-----------|--------------------|-----------|-----------|
| 3 | 2.2800000 | 0.2389561          | 2.0200000 | 2.4900000 |

Unique Subject Identifier=2872000000-0003

Assay variable : PTINR\_VAL1 PT-INR Value

| N | Mean      | Standard Deviation | Minimum   | Maximum   |
|---|-----------|--------------------|-----------|-----------|
| 3 | 1.7366667 | 0.2746513          | 1.4200000 | 1.9100000 |

Unique Subject Identifier=2872000000-0004

Assay variable : PTINR\_VAL1 PT-INR Value

N Mean Standard Deviation Minimum Maximum

---

|   |           |           |           |           |
|---|-----------|-----------|-----------|-----------|
| 3 | 1.6233333 | 0.2510644 | 1.4100000 | 1.9000000 |
|---|-----------|-----------|-----------|-----------|

---

Laboratory tests at the time of obtaining Table 2-6 consent, according to the presence or absence of proton-pump inhibitors

Unique Subject Identifier=2872000000-0005

MEANS Procedure

Assay variable : PTINR\_VAL1 PT-INR Value

N Mean Standard Deviation Minimum Maximum

---

|   |           |           |           |           |
|---|-----------|-----------|-----------|-----------|
| 4 | 2.3275000 | 0.8367148 | 1.5600000 | 3.5000000 |
|---|-----------|-----------|-----------|-----------|

---

Unique Subject Identifier=2875000000-0004

Assay variable : PTINR\_VAL1 PT-INR Value

N Mean Standard Deviation Minimum Maximum

---

|   |           |  |           |           |
|---|-----------|--|-----------|-----------|
| 1 | 1.0200000 |  | 1.0200000 | 1.0200000 |
|---|-----------|--|-----------|-----------|

---

Unique Subject Identifier=2875000000-0012

Assay variable : PTINR\_VAL1 PT-INR Value

N Mean Standard Deviation Minimum Maximum

---

|   |           |           |           |           |
|---|-----------|-----------|-----------|-----------|
| 6 | 1.5466667 | 0.2045157 | 1.3000000 | 1.8200000 |
|---|-----------|-----------|-----------|-----------|

---

Unique Subject Identifier=2875000000-0017

Assay variable : PTINR\_VAL1 PT-INR Value

N Mean Standard Deviation Minimum Maximum

---

|   |           |           |           |           |
|---|-----------|-----------|-----------|-----------|
| 4 | 1.9275000 | 0.2639918 | 1.6800000 | 2.2800000 |
|---|-----------|-----------|-----------|-----------|

---

Laboratory tests at the time of obtaining Table 2-6 consent, according to the presence or absence of proton-pump inhibitors

Unique Subject Identifier=2875000000-0019

MEANS Procedure

Assay variable : PTINR\_VAL1 PT-INR Value

N Mean Standard Deviation Minimum Maximum

---

|   |           |           |           |           |
|---|-----------|-----------|-----------|-----------|
| 5 | 1.4840000 | 0.1283745 | 1.3100000 | 1.6000000 |
|---|-----------|-----------|-----------|-----------|

---

Unique Subject Identifier=2875000000-0023

Assay variable : PTINR\_VAL1 PT-INR Value

N Mean Standard Deviation Minimum Maximum

---

|   |           |           |           |           |
|---|-----------|-----------|-----------|-----------|
| 2 | 2.1750000 | 0.2333452 | 2.0100000 | 2.3400000 |
|---|-----------|-----------|-----------|-----------|

---

Unique Subject Identifier=2875000000-0025

Assay variable : PTINR\_VAL1 PT-INR Value

N Mean Standard Deviation Minimum Maximum

---

|   |           |           |           |           |
|---|-----------|-----------|-----------|-----------|
| 2 | 1.8700000 | 0.0848528 | 1.8100000 | 1.9300000 |
|---|-----------|-----------|-----------|-----------|

---

Unique Subject Identifier=2875000000-0026

Assay variable : PTINR\_VAL1 PT-INR Value

N Mean Standard Deviation Minimum Maximum

---

|   |          |           |          |          |
|---|----------|-----------|----------|----------|
| 5 | 1.510000 | 0.1721918 | 1.340000 | 1.710000 |
|---|----------|-----------|----------|----------|

---

Laboratory tests at the time of obtaining Table 2-6 consent, according to the presence or absence of proton-pump inhibitors

Unique Subject Identifier=2875000000-0027

MEANS Procedure

Assay variable : PTINR\_VAL1 PT-INR Value

N Mean Standard Deviation Minimum Maximum

---

|   |           |           |           |           |
|---|-----------|-----------|-----------|-----------|
| 6 | 1.7183333 | 0.3345096 | 1.3500000 | 2.2000000 |
|---|-----------|-----------|-----------|-----------|

---

Unique Subject Identifier=2875000000-0030

Assay variable : PTINR\_VAL1 PT-INR Value

N Mean Standard Deviation Minimum Maximum

---

|   |           |           |           |           |
|---|-----------|-----------|-----------|-----------|
| 5 | 2.1120000 | 0.2107605 | 1.8400000 | 2.3700000 |
|---|-----------|-----------|-----------|-----------|

---

Unique Subject Identifier=2875000000-0035

Assay variable : PTINR\_VAL1 PT-INR Value

N Mean Standard Deviation Minimum Maximum

---

|   |           |           |           |           |
|---|-----------|-----------|-----------|-----------|
| 4 | 1.5375000 | 0.3564992 | 1.2000000 | 1.9200000 |
|---|-----------|-----------|-----------|-----------|

---

Unique Subject Identifier=2875000000-0038

Assay variable : PTINR\_VAL1 PT-INR Value

N Mean Standard Deviation Minimum Maximum

---

|   |           |           |           |           |
|---|-----------|-----------|-----------|-----------|
| 3 | 2.0066667 | 0.2055075 | 1.8100000 | 2.2200000 |
|---|-----------|-----------|-----------|-----------|

---



Laboratory tests at the time of obtaining Table 2-6 consent, according to the presence or absence of proton-pump inhibitors

Unique Subject Identifier=2875000000-0041

MEANS Procedure

Assay variable : PTINR\_VAL1 PT-INR Value

N Mean Standard Deviation Minimum Maximum

---

|   |           |           |           |           |
|---|-----------|-----------|-----------|-----------|
| 3 | 2.1566667 | 0.1069268 | 2.0400000 | 2.2500000 |
|---|-----------|-----------|-----------|-----------|

---

Unique Subject Identifier=2875000000-0049

Assay variable : PTINR\_VAL1 PT-INR Value

N Mean Standard Deviation Minimum Maximum

---

|   |           |           |           |           |
|---|-----------|-----------|-----------|-----------|
| 4 | 1.9675000 | 0.3559377 | 1.6900000 | 2.4900000 |
|---|-----------|-----------|-----------|-----------|

---

Unique Subject Identifier=2889010000-0002

Assay variable : PTINR\_VAL1 PT-INR Value

N Mean Standard Deviation Minimum Maximum

---

|   |           |           |           |           |
|---|-----------|-----------|-----------|-----------|
| 5 | 1.3520000 | 0.0164317 | 1.3300000 | 1.3700000 |
|---|-----------|-----------|-----------|-----------|

---

Unique Subject Identifier=2889010000-0003

Assay variable : PTINR\_VAL1 PT-INR Value

N Mean Standard Deviation Minimum Maximum

---

|   |           |           |           |           |
|---|-----------|-----------|-----------|-----------|
| 5 | 1.7200000 | 1.1529744 | 0.9200000 | 3.7100000 |
|---|-----------|-----------|-----------|-----------|

---

Laboratory tests at the time of obtaining Table 2-6 consent, according to the presence or absence of proton-pump inhibitors

Unique Subject Identifier=2890001000-0001

MEANS Procedure

Assay variable : PTINR\_VAL1 PT-INR Value

N Mean Standard Deviation Minimum Maximum

---

|   |           |           |           |           |
|---|-----------|-----------|-----------|-----------|
| 4 | 3.1225000 | 0.4659310 | 2.5200000 | 3.6500000 |
|---|-----------|-----------|-----------|-----------|

---

Unique Subject Identifier=2890001000-0003

Assay variable : PTINR\_VAL1 PT-INR Value

N Mean Standard Deviation Minimum Maximum

---

|   |           |           |           |           |
|---|-----------|-----------|-----------|-----------|
| 4 | 2.6925000 | 0.2248518 | 2.4500000 | 2.9300000 |
|---|-----------|-----------|-----------|-----------|

---

Unique Subject Identifier=2890001000-0006

Assay variable : PTINR\_VAL1 PT-INR Value

N Mean Standard Deviation Minimum Maximum

---

|   |           |           |           |           |
|---|-----------|-----------|-----------|-----------|
| 3 | 1.2100000 | 0.0435890 | 1.1800000 | 1.2600000 |
|---|-----------|-----------|-----------|-----------|

---

Unique Subject Identifier=2890001000-0007

Assay variable : PTINR\_VAL1 PT-INR Value

N Mean Standard Deviation Minimum Maximum

---

|   |           |           |           |           |
|---|-----------|-----------|-----------|-----------|
| 4 | 2.3225000 | 0.1635797 | 2.1900000 | 2.5600000 |
|---|-----------|-----------|-----------|-----------|

---

Laboratory tests at the time of obtaining Table 2-6 consent, according to the presence or absence of proton-pump inhibitors

Unique Subject Identifier=2898010000-0008

MEANS Procedure

Assay variable : PTINR\_VAL1 PT-INR Value

N Mean Standard Deviation Minimum Maximum

---

|   |           |           |           |           |
|---|-----------|-----------|-----------|-----------|
| 4 | 1.7500000 | 0.0594418 | 1.6800000 | 1.8200000 |
|---|-----------|-----------|-----------|-----------|

---

Unique Subject Identifier=2898010000-0012

Assay variable : PTINR\_VAL1 PT-INR Value

N Mean Standard Deviation Minimum Maximum

---

|   |           |           |           |           |
|---|-----------|-----------|-----------|-----------|
| 5 | 1.9440000 | 0.2618778 | 1.7100000 | 2.2800000 |
|---|-----------|-----------|-----------|-----------|

---

Unique Subject Identifier=2898010000-0017

Assay variable : PTINR\_VAL1 PT-INR Value

N Mean Standard Deviation Minimum Maximum

---

|   |           |           |           |           |
|---|-----------|-----------|-----------|-----------|
| 6 | 2.1033333 | 0.2989091 | 1.6000000 | 2.4400000 |
|---|-----------|-----------|-----------|-----------|

---

Unique Subject Identifier=2898010000-0018

Assay variable : PTINR\_VAL1 PT-INR Value

N Mean Standard Deviation Minimum Maximum

---

|   |           |           |           |           |
|---|-----------|-----------|-----------|-----------|
| 6 | 2.1266667 | 0.6186976 | 1.3800000 | 2.8400000 |
|---|-----------|-----------|-----------|-----------|

---

Laboratory tests at the time of obtaining Table 2-6 consent, according to the presence or absence of proton-pump inhibitors

Unique Subject Identifier=2898010000-0020

MEANS Procedure

Assay variable : PTINR\_VAL1 PT-INR Value

N Mean Standard Deviation Minimum Maximum

---

|   |           |           |           |           |
|---|-----------|-----------|-----------|-----------|
| 3 | 1.6000000 | 0.0888819 | 1.5300000 | 1.7000000 |
|---|-----------|-----------|-----------|-----------|

---

Unique Subject Identifier=2898010000-0021

Assay variable : PTINR\_VAL1 PT-INR Value

N Mean Standard Deviation Minimum Maximum

---

|   |           |           |           |           |
|---|-----------|-----------|-----------|-----------|
| 3 | 1.8000000 | 0.3605551 | 1.5000000 | 2.2000000 |
|---|-----------|-----------|-----------|-----------|

---

Unique Subject Identifier=2898010000-0025

Assay variable : PTINR\_VAL1 PT-INR Value

N Mean Standard Deviation Minimum Maximum

---

|   |           |           |           |           |
|---|-----------|-----------|-----------|-----------|
| 5 | 1.6100000 | 0.1612452 | 1.4600000 | 1.8800000 |
|---|-----------|-----------|-----------|-----------|

---

Unique Subject Identifier=2898010000-0030

Assay variable : PTINR\_VAL1 PT-INR Value

N Mean Standard Deviation Minimum Maximum

---

|   |          |          |          |          |
|---|----------|----------|----------|----------|
| 3 | 2.490000 | 0.556507 | 1.880000 | 2.970000 |
|---|----------|----------|----------|----------|

---



Laboratory tests at the time of obtaining Table 2-6 consent, according to the presence or absence of proton-pump inhibitors

Unique Subject Identifier=2910000000-0002

MEANS Procedure

Assay variable : PTINR\_VAL1 PT-INR Value

N Mean Standard Deviation Minimum Maximum

---

|   |           |           |           |           |
|---|-----------|-----------|-----------|-----------|
| 2 | 2.0550000 | 0.1484924 | 1.9500000 | 2.1600000 |
|---|-----------|-----------|-----------|-----------|

---

Unique Subject Identifier=2910000000-0005

Assay variable : PTINR\_VAL1 PT-INR Value

N Mean Standard Deviation Minimum Maximum

---

|   |           |           |           |           |
|---|-----------|-----------|-----------|-----------|
| 3 | 2.0766667 | 0.2706166 | 1.8600000 | 2.3800000 |
|---|-----------|-----------|-----------|-----------|

---

Unique Subject Identifier=2910000000-0008

Assay variable : PTINR\_VAL1 PT-INR Value

N Mean Standard Deviation Minimum Maximum

---

|   |           |           |           |           |
|---|-----------|-----------|-----------|-----------|
| 2 | 2.1650000 | 0.1484924 | 2.0600000 | 2.2700000 |
|---|-----------|-----------|-----------|-----------|

---

Unique Subject Identifier=2910000000-0010

Assay variable : PTINR\_VAL1 PT-INR Value

N Mean Standard Deviation Minimum Maximum

---

|   |           |           |           |           |
|---|-----------|-----------|-----------|-----------|
| 2 | 2.2300000 | 0.1555635 | 2.1200000 | 2.3400000 |
|---|-----------|-----------|-----------|-----------|

---

Laboratory tests at the time of obtaining Table 2-6 consent, according to the presence or absence of proton-pump inhibitors

Unique Subject Identifier=2910000000-0014

MEANS Procedure

Assay variable : PTINR\_VAL1 PT-INR Value

N Mean Standard Deviation Minimum Maximum

---

|   |           |           |           |           |
|---|-----------|-----------|-----------|-----------|
| 4 | 2.2125000 | 0.6854864 | 1.5700000 | 2.8200000 |
|---|-----------|-----------|-----------|-----------|

---

Unique Subject Identifier=2910000000-0016

Assay variable : PTINR\_VAL1 PT-INR Value

N Mean Standard Deviation Minimum Maximum

---

|   |           |           |           |           |
|---|-----------|-----------|-----------|-----------|
| 2 | 2.0950000 | 0.0919239 | 2.0300000 | 2.1600000 |
|---|-----------|-----------|-----------|-----------|

---

Unique Subject Identifier=2910000000-0018

Assay variable : PTINR\_VAL1 PT-INR Value

N Mean Standard Deviation Minimum Maximum

---

|   |           |           |           |           |
|---|-----------|-----------|-----------|-----------|
| 3 | 1.9100000 | 0.2193171 | 1.6600000 | 2.0700000 |
|---|-----------|-----------|-----------|-----------|

---

Unique Subject Identifier=2910000000-0020

Assay variable : PTINR\_VAL1 PT-INR Value

N Mean Standard Deviation Minimum Maximum

---

|   |           |           |           |           |
|---|-----------|-----------|-----------|-----------|
| 6 | 2.3700000 | 0.4295579 | 1.8500000 | 2.8900000 |
|---|-----------|-----------|-----------|-----------|

---

Laboratory tests at the time of obtaining Table 2-6 consent, according to the presence or absence of proton-pump inhibitors

Unique Subject Identifier=2910000000-0021

MEANS Procedure

Assay variable : PTINR\_VAL1 PT-INR Value

| N | Mean      | Standard Deviation | Minimum   | Maximum   |
|---|-----------|--------------------|-----------|-----------|
| 2 | 1.4650000 | 0.0212132          | 1.4500000 | 1.4800000 |

Unique Subject Identifier=2910000000-0022

Assay variable : PTINR\_VAL1 PT-INR Value

| N | Mean      | Standard Deviation | Minimum   | Maximum   |
|---|-----------|--------------------|-----------|-----------|
| 4 | 1.8650000 | 0.3049044          | 1.6100000 | 2.2600000 |

Unique Subject Identifier=2910000000-0024

Assay variable : PTINR\_VAL1 PT-INR Value

| N | Mean      | Standard Deviation | Minimum   | Maximum   |
|---|-----------|--------------------|-----------|-----------|
| 3 | 1.8733333 | 0.3464583          | 1.5100000 | 2.2000000 |

Unique Subject Identifier=2910000000-0025

Assay variable : PTINR\_VAL1 PT-INR Value

N Mean Standard Deviation Minimum Maximum

---

|   |           |           |           |           |
|---|-----------|-----------|-----------|-----------|
| 5 | 2.3640000 | 0.3633593 | 1.8000000 | 2.7600000 |
|---|-----------|-----------|-----------|-----------|

---

Laboratory tests at the time of obtaining Table 2-6 consent, according to the presence or absence of proton-pump inhibitors

Unique Subject Identifier=291000000-0026

MEANS Procedure

Assay variable : PTINR\_VAL1 PT-INR Value

N Mean Standard Deviation Minimum Maximum

---

|   |          |           |          |          |
|---|----------|-----------|----------|----------|
| 2 | 2.240000 | 0.0282843 | 2.220000 | 2.260000 |
|---|----------|-----------|----------|----------|

---

Unique Subject Identifier=291000000-0027

Assay variable : PTINR\_VAL1 PT-INR Value

N Mean Standard Deviation Minimum Maximum

---

|   |          |           |          |          |
|---|----------|-----------|----------|----------|
| 2 | 2.130000 | 0.1131371 | 2.050000 | 2.210000 |
|---|----------|-----------|----------|----------|

---

Unique Subject Identifier=291300000-0004

Assay variable : PTINR\_VAL1 PT-INR Value

N Mean Standard Deviation Minimum Maximum

---

|   |          |           |          |          |
|---|----------|-----------|----------|----------|
| 3 | 1.663333 | 0.0776745 | 1.600000 | 1.750000 |
|---|----------|-----------|----------|----------|

---

Unique Subject Identifier=291300000-0005

Assay variable : PTINR\_VAL1 PT-INR Value

N Mean Standard Deviation Minimum Maximum

---

|   |          |           |          |          |
|---|----------|-----------|----------|----------|
| 5 | 2.310000 | 0.2511971 | 1.920000 | 2.600000 |
|---|----------|-----------|----------|----------|

---



Laboratory tests at the time of obtaining Table 2-6 consent, according to the presence or absence of proton-pump inhibitors

Unique Subject Identifier=291300000-0006

MEANS Procedure

Assay variable : PTINR\_VAL1 PT-INR Value

N Mean Standard Deviation Minimum Maximum

---

|   |           |           |           |           |
|---|-----------|-----------|-----------|-----------|
| 3 | 1.8966667 | 0.1504438 | 1.8000000 | 2.0700000 |
|---|-----------|-----------|-----------|-----------|

---

Unique Subject Identifier=291300000-0014

Assay variable : PTINR\_VAL1 PT-INR Value

N Mean Standard Deviation Minimum Maximum

---

|   |           |           |           |           |
|---|-----------|-----------|-----------|-----------|
| 3 | 1.8066667 | 0.4212284 | 1.3500000 | 2.1800000 |
|---|-----------|-----------|-----------|-----------|

---

Unique Subject Identifier=291300000-0016

Assay variable : PTINR\_VAL1 PT-INR Value

N Mean Standard Deviation Minimum Maximum

---

|   |           |           |           |           |
|---|-----------|-----------|-----------|-----------|
| 5 | 1.7400000 | 0.5002499 | 1.0600000 | 2.4000000 |
|---|-----------|-----------|-----------|-----------|

---

Unique Subject Identifier=291300000-0023

Assay variable : PTINR\_VAL1 PT-INR Value

N Mean Standard Deviation Minimum Maximum

---

|   |           |           |           |           |
|---|-----------|-----------|-----------|-----------|
| 6 | 1.7716667 | 0.2058559 | 1.4800000 | 2.0900000 |
|---|-----------|-----------|-----------|-----------|

---

Laboratory tests at the time of obtaining Table 2-6 consent, according to the presence or absence of proton-pump inhibitors

Unique Subject Identifier=2913000000-0027

MEANS Procedure

Assay variable : PTINR\_VAL1 PT-INR Value

N Mean Standard Deviation Minimum Maximum

---

|   |           |           |           |           |
|---|-----------|-----------|-----------|-----------|
| 4 | 2.3625000 | 0.9694113 | 1.5200000 | 3.7600000 |
|---|-----------|-----------|-----------|-----------|

---

Unique Subject Identifier=2913000000-0034

Assay variable : PTINR\_VAL1 PT-INR Value

N Mean Standard Deviation Minimum Maximum

---

|   |           |           |           |           |
|---|-----------|-----------|-----------|-----------|
| 6 | 1.8983333 | 0.4070586 | 1.3500000 | 2.4300000 |
|---|-----------|-----------|-----------|-----------|

---

Unique Subject Identifier=2914000000-0005

Assay variable : PTINR\_VAL1 PT-INR Value

N Mean Standard Deviation Minimum Maximum

---

|   |           |           |           |           |
|---|-----------|-----------|-----------|-----------|
| 4 | 2.0550000 | 0.0785281 | 1.9400000 | 2.1100000 |
|---|-----------|-----------|-----------|-----------|

---

Unique Subject Identifier=2914000000-0007

Assay variable : PTINR\_VAL1 PT-INR Value

N Mean Standard Deviation Minimum Maximum

---

|   |          |          |          |          |
|---|----------|----------|----------|----------|
| 4 | 2.140000 | 0.137356 | 1.960000 | 2.290000 |
|---|----------|----------|----------|----------|

---

Laboratory tests at the time of obtaining Table 2-6 consent, according to the presence or absence of proton-pump inhibitors

Unique Subject Identifier=2926011010-0001

MEANS Procedure

Assay variable : PTINR\_VAL1 PT-INR Value

| N | Mean      | Standard Deviation | Minimum   | Maximum   |
|---|-----------|--------------------|-----------|-----------|
| 4 | 1.8650000 | 0.2991655          | 1.6000000 | 2.2600000 |

Unique Subject Identifier=2926011010-0016

Assay variable : PTINR\_VAL1 PT-INR Value

| N | Mean      | Standard Deviation | Minimum   | Maximum   |
|---|-----------|--------------------|-----------|-----------|
| 5 | 1.6280000 | 0.1584929          | 1.4000000 | 1.7700000 |

Unique Subject Identifier=2937010011-0001

Assay variable : PTINR\_VAL1 PT-INR Value

| N | Mean      | Standard Deviation | Minimum   | Maximum   |
|---|-----------|--------------------|-----------|-----------|
| 3 | 1.5133333 | 0.1960442          | 1.3300000 | 1.7200000 |

Unique Subject Identifier=2937010011-0009

Assay variable : PTINR\_VAL1 PT-INR Value

N Mean Standard Deviation Minimum Maximum

---

|   |           |           |           |           |
|---|-----------|-----------|-----------|-----------|
| 4 | 1.7425000 | 0.3920353 | 1.3300000 | 2.1300000 |
|---|-----------|-----------|-----------|-----------|

---

Laboratory tests at the time of obtaining Table 2-6 consent, according to the presence or absence of proton-pump inhibitors

Unique Subject Identifier=2937010011-0013

MEANS Procedure

Assay variable : PTINR\_VAL1 PT-INR Value

| N | Mean      | Standard Deviation | Minimum   | Maximum   |
|---|-----------|--------------------|-----------|-----------|
| 5 | 1.8080000 | 1.0148497          | 1.0200000 | 3.5500000 |

Unique Subject Identifier=2937010011-0015

Assay variable : PTINR\_VAL1 PT-INR Value

| N | Mean      | Standard Deviation | Minimum   | Maximum   |
|---|-----------|--------------------|-----------|-----------|
| 6 | 1.7816667 | 0.1452469          | 1.6200000 | 1.9900000 |

Unique Subject Identifier=2937010011-0017

Assay variable : PTINR\_VAL1 PT-INR Value

| N | Mean      | Standard Deviation | Minimum   | Maximum   |
|---|-----------|--------------------|-----------|-----------|
| 6 | 1.9016667 | 0.4646899          | 1.5100000 | 2.6300000 |

Unique Subject Identifier=2937010011-0018

Assay variable : PTINR\_VAL1 PT-INR Value

N Mean Standard Deviation Minimum Maximum

---

|   |           |           |           |           |
|---|-----------|-----------|-----------|-----------|
| 6 | 2.0950000 | 0.2341581 | 1.7200000 | 2.4300000 |
|---|-----------|-----------|-----------|-----------|

---



Laboratory tests at the time of obtaining Table 2-6 consent, according to the presence or absence of proton-pump inhibitors

Unique Subject Identifier=2937010011-0019

MEANS Procedure

Assay variable : PTINR\_VAL1 PT-INR Value

N Mean Standard Deviation Minimum Maximum

---

|   |           |           |           |           |
|---|-----------|-----------|-----------|-----------|
| 6 | 1.7683333 | 0.1248065 | 1.6000000 | 1.9500000 |
|---|-----------|-----------|-----------|-----------|

---

Unique Subject Identifier=2937010011-0022

Assay variable : PTINR\_VAL1 PT-INR Value

N Mean Standard Deviation Minimum Maximum

---

|   |           |           |           |           |
|---|-----------|-----------|-----------|-----------|
| 4 | 1.9225000 | 0.3247948 | 1.6000000 | 2.2800000 |
|---|-----------|-----------|-----------|-----------|

---

Unique Subject Identifier=2941010110-0014

Assay variable : PTINR\_VAL1 PT-INR Value

N Mean Standard Deviation Minimum Maximum

---

|   |           |           |           |           |
|---|-----------|-----------|-----------|-----------|
| 5 | 1.8600000 | 0.3209361 | 1.6000000 | 2.4000000 |
|---|-----------|-----------|-----------|-----------|

---

Unique Subject Identifier=2941010110-0016

Assay variable : PTINR\_VAL1 PT-INR Value

N Mean Standard Deviation Minimum Maximum

---

|   |          |           |          |          |
|---|----------|-----------|----------|----------|
| 5 | 1.840000 | 0.3435113 | 1.500000 | 2.300000 |
|---|----------|-----------|----------|----------|

---

Laboratory tests at the time of obtaining Table 2-6 consent, according to the presence or absence of proton-pump inhibitors

Unique Subject Identifier=2949000000-0001

MEANS Procedure

Assay variable : PTINR\_VAL1 PT-INR Value

| N | Mean      | Standard Deviation | Minimum   | Maximum   |
|---|-----------|--------------------|-----------|-----------|
| 3 | 1.6966667 | 0.3043572          | 1.4600000 | 2.0400000 |

Unique Subject Identifier=2949000000-0003

Assay variable : PTINR\_VAL1 PT-INR Value

| N | Mean      | Standard Deviation | Minimum   | Maximum   |
|---|-----------|--------------------|-----------|-----------|
| 1 | 2.6500000 |                    | 2.6500000 | 2.6500000 |

Unique Subject Identifier=2949000000-0004

Assay variable : PTINR\_VAL1 PT-INR Value

| N | Mean      | Standard Deviation | Minimum   | Maximum   |
|---|-----------|--------------------|-----------|-----------|
| 3 | 1.8433333 | 0.3027100          | 1.5200000 | 2.1200000 |

Unique Subject Identifier=2949000000-0012

Assay variable : PTINR\_VAL1 PT-INR Value

N Mean Standard Deviation Minimum Maximum

---

|   |           |  |           |           |
|---|-----------|--|-----------|-----------|
| 1 | 2.0300000 |  | 2.0300000 | 2.0300000 |
|---|-----------|--|-----------|-----------|

---

Laboratory tests at the time of obtaining Table 2-6 consent, according to the presence or absence of proton-pump inhibitors

Unique Subject Identifier=2949000000-0016

MEANS Procedure

Assay variable : PTINR\_VAL1 PT-INR Value

| N | Mean      | Standard Deviation | Minimum   | Maximum   |
|---|-----------|--------------------|-----------|-----------|
| 2 | 1.8300000 | 0.2404163          | 1.6600000 | 2.0000000 |

Unique Subject Identifier=2949000000-0018

Assay variable : PTINR\_VAL1 PT-INR Value

| N | Mean      | Standard Deviation | Minimum   | Maximum   |
|---|-----------|--------------------|-----------|-----------|
| 1 | 2.1100000 |                    | 2.1100000 | 2.1100000 |

Unique Subject Identifier=2949000000-0021

Assay variable : PTINR\_VAL1 PT-INR Value

| N | Mean      | Standard Deviation | Minimum   | Maximum   |
|---|-----------|--------------------|-----------|-----------|
| 2 | 2.2150000 | 0.4737615          | 1.8800000 | 2.5500000 |

Unique Subject Identifier=2949000000-0026

Assay variable : PTINR\_VAL1 PT-INR Value

N Mean Standard Deviation Minimum Maximum

---

|   |           |           |           |           |
|---|-----------|-----------|-----------|-----------|
| 3 | 2.1533333 | 0.0709460 | 2.0900000 | 2.2300000 |
|---|-----------|-----------|-----------|-----------|

---

Laboratory tests at the time of obtaining Table 2-6 consent, according to the presence or absence of proton-pump inhibitors

Unique Subject Identifier=2949000000-0027

MEANS Procedure

Assay variable : PTINR\_VAL1 PT-INR Value

N Mean Standard Deviation Minimum Maximum

---

|   |           |           |           |           |
|---|-----------|-----------|-----------|-----------|
| 2 | 1.8300000 | 0.2404163 | 1.6600000 | 2.0000000 |
|---|-----------|-----------|-----------|-----------|

---

Unique Subject Identifier=2949000000-0033

Assay variable : PTINR\_VAL1 PT-INR Value

N Mean Standard Deviation Minimum Maximum

---

|   |           |           |           |           |
|---|-----------|-----------|-----------|-----------|
| 2 | 2.1850000 | 0.4030509 | 1.9000000 | 2.4700000 |
|---|-----------|-----------|-----------|-----------|

---

Unique Subject Identifier=2949000000-0037

Assay variable : PTINR\_VAL1 PT-INR Value

N Mean Standard Deviation Minimum Maximum

---

|   |           |           |           |           |
|---|-----------|-----------|-----------|-----------|
| 2 | 1.9250000 | 0.1060660 | 1.8500000 | 2.0000000 |
|---|-----------|-----------|-----------|-----------|

---

Unique Subject Identifier=2949000000-0039

Assay variable : PTINR\_VAL1 PT-INR Value

N Mean Standard Deviation Minimum Maximum

---

|   |           |           |           |           |
|---|-----------|-----------|-----------|-----------|
| 3 | 1.8733333 | 0.6087966 | 1.3700000 | 2.5500000 |
|---|-----------|-----------|-----------|-----------|

---



Laboratory tests at the time of obtaining Table 2-6 consent, according to the presence or absence of proton-pump inhibitors

Unique Subject Identifier=2953000000-0003

MEANS Procedure

Assay variable : PTINR\_VAL1 PT-INR Value

N Mean Standard Deviation Minimum Maximum

---

|   |           |           |           |           |
|---|-----------|-----------|-----------|-----------|
| 5 | 2.5620000 | 0.1061603 | 2.4300000 | 2.7000000 |
|---|-----------|-----------|-----------|-----------|

---

Unique Subject Identifier=2953000000-0004

Assay variable : PTINR\_VAL1 PT-INR Value

N Mean Standard Deviation Minimum Maximum

---

|   |           |           |           |           |
|---|-----------|-----------|-----------|-----------|
| 6 | 2.1066667 | 0.2170407 | 1.8400000 | 2.5000000 |
|---|-----------|-----------|-----------|-----------|

---

Unique Subject Identifier=2954000000-0003

Assay variable : PTINR\_VAL1 PT-INR Value

N Mean Standard Deviation Minimum Maximum

---

|   |           |           |           |           |
|---|-----------|-----------|-----------|-----------|
| 4 | 2.6250000 | 0.8148006 | 1.8000000 | 3.7500000 |
|---|-----------|-----------|-----------|-----------|

---

Unique Subject Identifier=2954000000-0009

Assay variable : PTINR\_VAL1 PT-INR Value

N Mean Standard Deviation Minimum Maximum

---

|   |           |           |           |           |
|---|-----------|-----------|-----------|-----------|
| 5 | 2.2960000 | 0.7554337 | 1.2500000 | 3.3800000 |
|---|-----------|-----------|-----------|-----------|

---

Laboratory tests at the time of obtaining Table 2-6 consent, according to the presence or absence of proton-pump inhibitors

Unique Subject Identifier=2954000000-0013

MEANS Procedure

Assay variable : PTINR\_VAL1 PT-INR Value

| N | Mean      | Standard Deviation | Minimum   | Maximum   |
|---|-----------|--------------------|-----------|-----------|
| 6 | 1.6766667 | 0.2069460          | 1.3800000 | 1.9800000 |

Unique Subject Identifier=2954000000-0015

Assay variable : PTINR\_VAL1 PT-INR Value

| N | Mean      | Standard Deviation | Minimum   | Maximum   |
|---|-----------|--------------------|-----------|-----------|
| 3 | 2.1066667 | 0.4186088          | 1.8600000 | 2.5900000 |

Unique Subject Identifier=2957000000-0016

Assay variable : PTINR\_VAL1 PT-INR Value

| N | Mean      | Standard Deviation | Minimum   | Maximum   |
|---|-----------|--------------------|-----------|-----------|
| 6 | 2.0816667 | 0.2756387          | 1.6300000 | 2.4100000 |

Unique Subject Identifier=2957000000-0017

Assay variable : PTINR\_VAL1 PT-INR Value

N Mean Standard Deviation Minimum Maximum

---

|   |           |           |           |           |
|---|-----------|-----------|-----------|-----------|
| 4 | 2.1925000 | 0.1144188 | 2.0900000 | 2.3500000 |
|---|-----------|-----------|-----------|-----------|

---

Laboratory tests at the time of obtaining Table 2-6 consent, according to the presence or absence of proton-pump inhibitors

Unique Subject Identifier=2957000000-0018

MEANS Procedure

Assay variable : PTINR\_VAL1 PT-INR Value

N Mean Standard Deviation Minimum Maximum

---

|   |           |           |           |           |
|---|-----------|-----------|-----------|-----------|
| 6 | 1.8816667 | 0.2513497 | 1.5900000 | 2.3300000 |
|---|-----------|-----------|-----------|-----------|

---

Unique Subject Identifier=3001010001-0002

Assay variable : PTINR\_VAL1 PT-INR Value

N Mean Standard Deviation Minimum Maximum

---

|   |           |           |           |           |
|---|-----------|-----------|-----------|-----------|
| 4 | 1.8975000 | 0.2953388 | 1.4900000 | 2.1600000 |
|---|-----------|-----------|-----------|-----------|

---

Unique Subject Identifier=3001010001-0003

Assay variable : PTINR\_VAL1 PT-INR Value

N Mean Standard Deviation Minimum Maximum

---

|   |           |           |           |           |
|---|-----------|-----------|-----------|-----------|
| 5 | 1.6920000 | 0.2604227 | 1.4900000 | 2.0200000 |
|---|-----------|-----------|-----------|-----------|

---

Unique Subject Identifier=3001010001-0004

Assay variable : PTINR\_VAL1 PT-INR Value

N Mean Standard Deviation Minimum Maximum

---

|   |           |           |           |           |
|---|-----------|-----------|-----------|-----------|
| 6 | 1.8250000 | 0.1170897 | 1.6500000 | 1.9400000 |
|---|-----------|-----------|-----------|-----------|

---

Laboratory tests at the time of obtaining Table 2-6 consent, according to the presence or absence of proton-pump inhibitors

Unique Subject Identifier=3001010001-0009

MEANS Procedure

Assay variable : PTINR\_VAL1 PT-INR Value

N Mean Standard Deviation Minimum Maximum

---

|   |           |           |           |           |
|---|-----------|-----------|-----------|-----------|
| 5 | 1.7360000 | 0.1699412 | 1.6100000 | 1.9800000 |
|---|-----------|-----------|-----------|-----------|

---

Unique Subject Identifier=3001010001-0010

Assay variable : PTINR\_VAL1 PT-INR Value

N Mean Standard Deviation Minimum Maximum

---

|   |           |           |           |           |
|---|-----------|-----------|-----------|-----------|
| 4 | 2.0650000 | 0.2483948 | 1.7700000 | 2.3700000 |
|---|-----------|-----------|-----------|-----------|

---

Unique Subject Identifier=3001010001-0013

Assay variable : PTINR\_VAL1 PT-INR Value

N Mean Standard Deviation Minimum Maximum

---

|   |           |           |           |           |
|---|-----------|-----------|-----------|-----------|
| 4 | 2.3675000 | 0.4050823 | 1.8500000 | 2.8400000 |
|---|-----------|-----------|-----------|-----------|

---

Unique Subject Identifier=3001010001-0014

Assay variable : PTINR\_VAL1 PT-INR Value

N Mean Standard Deviation Minimum Maximum

---

|   |           |           |           |           |
|---|-----------|-----------|-----------|-----------|
| 6 | 2.1550000 | 0.2165872 | 1.9100000 | 2.4800000 |
|---|-----------|-----------|-----------|-----------|

---



Laboratory tests at the time of obtaining Table 2-6 consent, according to the presence or absence of proton-pump inhibitors

Unique Subject Identifier=3001010001-0015

MEANS Procedure

Assay variable : PTINR\_VAL1 PT-INR Value

N Mean Standard Deviation Minimum Maximum

---

|   |           |           |           |           |
|---|-----------|-----------|-----------|-----------|
| 6 | 2.1016667 | 0.3437101 | 1.6300000 | 2.5100000 |
|---|-----------|-----------|-----------|-----------|

---

Unique Subject Identifier=3001010001-0016

Assay variable : PTINR\_VAL1 PT-INR Value

N Mean Standard Deviation Minimum Maximum

---

|   |           |           |           |           |
|---|-----------|-----------|-----------|-----------|
| 6 | 1.9816667 | 0.4285985 | 1.6800000 | 2.8300000 |
|---|-----------|-----------|-----------|-----------|

---

Unique Subject Identifier=3001010001-0017

Assay variable : PTINR\_VAL1 PT-INR Value

N Mean Standard Deviation Minimum Maximum

---

|   |           |           |           |           |
|---|-----------|-----------|-----------|-----------|
| 6 | 1.7166667 | 0.3188521 | 1.4000000 | 2.3000000 |
|---|-----------|-----------|-----------|-----------|

---

Unique Subject Identifier=3001010001-0018

Assay variable : PTINR\_VAL1 PT-INR Value

N Mean Standard Deviation Minimum Maximum

---

|   |           |           |           |           |
|---|-----------|-----------|-----------|-----------|
| 6 | 2.1366667 | 0.2878657 | 1.7900000 | 2.6000000 |
|---|-----------|-----------|-----------|-----------|

---

Laboratory tests at the time of obtaining Table 2-6 consent, according to the presence or absence of proton-pump inhibitors

Unique Subject Identifier=3001010001-0020

MEANS Procedure

Assay variable : PTINR\_VAL1 PT-INR Value

| N | Mean      | Standard Deviation | Minimum   | Maximum   |
|---|-----------|--------------------|-----------|-----------|
| 6 | 1.8433333 | 0.1123684          | 1.6700000 | 1.9900000 |

Unique Subject Identifier=3001010001-0026

Assay variable : PTINR\_VAL1 PT-INR Value

| N | Mean      | Standard Deviation | Minimum   | Maximum   |
|---|-----------|--------------------|-----------|-----------|
| 5 | 1.9760000 | 0.1064425          | 1.8900000 | 2.1200000 |

Unique Subject Identifier=3001010001-0035

Assay variable : PTINR\_VAL1 PT-INR Value

| N | Mean      | Standard Deviation | Minimum   | Maximum   |
|---|-----------|--------------------|-----------|-----------|
| 5 | 1.7440000 | 0.2411016          | 1.4800000 | 2.1300000 |

Unique Subject Identifier=3001010001-0037

Assay variable : PTINR\_VAL1 PT-INR Value

N Mean Standard Deviation Minimum Maximum

---

|   |          |          |          |          |
|---|----------|----------|----------|----------|
| 4 | 1.550000 | 0.132916 | 1.380000 | 1.690000 |
|---|----------|----------|----------|----------|

---

Laboratory tests at the time of obtaining Table 2-6 consent, according to the presence or absence of proton-pump inhibitors

Unique Subject Identifier=3001010001-0041

MEANS Procedure

Assay variable : PTINR\_VAL1 PT-INR Value

| N | Mean      | Standard Deviation | Minimum   | Maximum   |
|---|-----------|--------------------|-----------|-----------|
| 3 | 1.9433333 | 0.1457166          | 1.7900000 | 2.0800000 |

Unique Subject Identifier=3001010001-0044

Assay variable : PTINR\_VAL1 PT-INR Value

| N | Mean      | Standard Deviation | Minimum   | Maximum   |
|---|-----------|--------------------|-----------|-----------|
| 4 | 2.1825000 | 0.1685972          | 2.0200000 | 2.4100000 |

Unique Subject Identifier=3001010001-0046

Assay variable : PTINR\_VAL1 PT-INR Value

| N | Mean      | Standard Deviation | Minimum   | Maximum   |
|---|-----------|--------------------|-----------|-----------|
| 4 | 2.1900000 | 0.2171021          | 2.0300000 | 2.5000000 |

Unique Subject Identifier=3001010001-0049

Assay variable : PTINR\_VAL1 PT-INR Value

N Mean Standard Deviation Minimum Maximum

---

|   |          |           |          |          |
|---|----------|-----------|----------|----------|
| 5 | 2.192000 | 0.2622403 | 1.890000 | 2.470000 |
|---|----------|-----------|----------|----------|

---

Laboratory tests at the time of obtaining Table 2-6 consent, according to the presence or absence of proton-pump inhibitors

Unique Subject Identifier=3001010001-0051

MEANS Procedure

Assay variable : PTINR\_VAL1 PT-INR Value

| N | Mean      | Standard Deviation | Minimum   | Maximum   |
|---|-----------|--------------------|-----------|-----------|
| 6 | 1.8866667 | 0.3142398          | 1.4500000 | 2.2700000 |

Unique Subject Identifier=3001010001-0055

Assay variable : PTINR\_VAL1 PT-INR Value

| N | Mean      | Standard Deviation | Minimum   | Maximum   |
|---|-----------|--------------------|-----------|-----------|
| 5 | 1.7960000 | 0.1291511          | 1.6200000 | 1.9200000 |

Unique Subject Identifier=3001010001-0057

Assay variable : PTINR\_VAL1 PT-INR Value

| N | Mean      | Standard Deviation | Minimum   | Maximum   |
|---|-----------|--------------------|-----------|-----------|
| 3 | 2.1066667 | 0.1803700          | 1.9200000 | 2.2800000 |

Unique Subject Identifier=3001010001-0062

Assay variable : PTINR\_VAL1 PT-INR Value

N Mean Standard Deviation Minimum Maximum

---

|   |           |           |           |           |
|---|-----------|-----------|-----------|-----------|
| 5 | 1.9160000 | 0.3692289 | 1.5200000 | 2.4600000 |
|---|-----------|-----------|-----------|-----------|

---



Laboratory tests at the time of obtaining Table 2-6 consent, according to the presence or absence of proton-pump inhibitors

Unique Subject Identifier=3001010001-0064

MEANS Procedure

Assay variable : PTINR\_VAL1 PT-INR Value

| N | Mean      | Standard Deviation | Minimum   | Maximum   |
|---|-----------|--------------------|-----------|-----------|
| 4 | 1.6625000 | 0.2707243          | 1.2700000 | 1.8800000 |

Unique Subject Identifier=3003011110-0001

Assay variable : PTINR\_VAL1 PT-INR Value

| N | Mean      | Standard Deviation | Minimum   | Maximum   |
|---|-----------|--------------------|-----------|-----------|
| 3 | 1.5333333 | 0.4933896          | 1.1500000 | 2.0900000 |

Unique Subject Identifier=3003011110-0007

Assay variable : PTINR\_VAL1 PT-INR Value

| N | Mean      | Standard Deviation | Minimum   | Maximum   |
|---|-----------|--------------------|-----------|-----------|
| 3 | 1.3933333 | 0.3564174          | 1.0200000 | 1.7300000 |

Unique Subject Identifier=3003011110-0015

Assay variable : PTINR\_VAL1 PT-INR Value

N Mean Standard Deviation Minimum Maximum

---

|   |           |           |           |           |
|---|-----------|-----------|-----------|-----------|
| 6 | 2.1916667 | 0.2978870 | 1.8400000 | 2.6300000 |
|---|-----------|-----------|-----------|-----------|

---

Laboratory tests at the time of obtaining Table 2-6 consent, according to the presence or absence of proton-pump inhibitors

Unique Subject Identifier=3009011111-0006

MEANS Procedure

Assay variable : PTINR\_VAL1 PT-INR Value

N Mean Standard Deviation Minimum Maximum

---

|   |           |           |           |           |
|---|-----------|-----------|-----------|-----------|
| 3 | 1.8800000 | 0.1473092 | 1.7500000 | 2.0400000 |
|---|-----------|-----------|-----------|-----------|

---

Unique Subject Identifier=3009011111-0012

Assay variable : PTINR\_VAL1 PT-INR Value

N Mean Standard Deviation Minimum Maximum

---

|   |           |           |           |           |
|---|-----------|-----------|-----------|-----------|
| 3 | 1.6000000 | 0.2913760 | 1.2800000 | 1.8500000 |
|---|-----------|-----------|-----------|-----------|

---

Unique Subject Identifier=3009011111-0019

Assay variable : PTINR\_VAL1 PT-INR Value

N Mean Standard Deviation Minimum Maximum

---

|   |           |           |           |           |
|---|-----------|-----------|-----------|-----------|
| 3 | 2.0800000 | 0.0700000 | 2.0100000 | 2.1500000 |
|---|-----------|-----------|-----------|-----------|

---

Unique Subject Identifier=3009011111-0020

Assay variable : PTINR\_VAL1 PT-INR Value

N Mean Standard Deviation Minimum Maximum

---

|   |           |           |           |           |
|---|-----------|-----------|-----------|-----------|
| 2 | 2.0500000 | 0.1414214 | 1.9500000 | 2.1500000 |
|---|-----------|-----------|-----------|-----------|

---

Laboratory tests at the time of obtaining Table 2-6 consent, according to the presence or absence of proton-pump inhibitors

Unique Subject Identifier=3010011111-0001

MEANS Procedure

Assay variable : PTINR\_VAL1 PT-INR Value

| N | Mean      | Standard Deviation | Minimum   | Maximum   |
|---|-----------|--------------------|-----------|-----------|
| 5 | 1.9020000 | 0.2240982          | 1.6000000 | 2.2300000 |

Unique Subject Identifier=3010011111-0002

Assay variable : PTINR\_VAL1 PT-INR Value

| N | Mean      | Standard Deviation | Minimum   | Maximum   |
|---|-----------|--------------------|-----------|-----------|
| 6 | 1.9800000 | 0.2705550          | 1.5500000 | 2.3400000 |

Unique Subject Identifier=3011010000-0004

Assay variable : PTINR\_VAL1 PT-INR Value

| N | Mean      | Standard Deviation | Minimum   | Maximum   |
|---|-----------|--------------------|-----------|-----------|
| 6 | 1.7550000 | 0.3245766          | 1.4300000 | 2.2000000 |

Unique Subject Identifier=3011010000-0006

Assay variable : PTINR\_VAL1 PT-INR Value

N Mean Standard Deviation Minimum Maximum

---

|   |           |           |           |           |
|---|-----------|-----------|-----------|-----------|
| 6 | 1.8150000 | 0.3179151 | 1.3900000 | 2.2400000 |
|---|-----------|-----------|-----------|-----------|

---

Laboratory tests at the time of obtaining Table 2-6 consent, according to the presence or absence of proton-pump inhibitors

Unique Subject Identifier=3011010000-0010

MEANS Procedure

Assay variable : PTINR\_VAL1 PT-INR Value

N Mean Standard Deviation Minimum Maximum

---

|   |           |           |           |           |
|---|-----------|-----------|-----------|-----------|
| 6 | 1.8383333 | 0.2523027 | 1.6300000 | 2.3100000 |
|---|-----------|-----------|-----------|-----------|

---

Unique Subject Identifier=3016111111-0026

Assay variable : PTINR\_VAL1 PT-INR Value

N Mean Standard Deviation Minimum Maximum

---

|   |           |           |           |           |
|---|-----------|-----------|-----------|-----------|
| 6 | 1.6416667 | 0.3370114 | 1.2000000 | 2.0300000 |
|---|-----------|-----------|-----------|-----------|

---

Unique Subject Identifier=3016111111-0037

Assay variable : PTINR\_VAL1 PT-INR Value

N Mean Standard Deviation Minimum Maximum

---

|   |           |  |           |           |
|---|-----------|--|-----------|-----------|
| 1 | 1.2000000 |  | 1.2000000 | 1.2000000 |
|---|-----------|--|-----------|-----------|

---

Unique Subject Identifier=3016111111-0068

Assay variable : PTINR\_VAL1 PT-INR Value

N Mean Standard Deviation Minimum Maximum

---

|   |           |           |           |           |
|---|-----------|-----------|-----------|-----------|
| 2 | 2.5450000 | 0.1767767 | 2.4200000 | 2.6700000 |
|---|-----------|-----------|-----------|-----------|

---



Laboratory tests at the time of obtaining Table 2-6 consent, according to the presence or absence of proton-pump inhibitors

Unique Subject Identifier=3019011110-0002

MEANS Procedure

Assay variable : PTINR\_VAL1 PT-INR Value

| N | Mean      | Standard Deviation | Minimum   | Maximum   |
|---|-----------|--------------------|-----------|-----------|
| 1 | 2.2700000 |                    | 2.2700000 | 2.2700000 |

Unique Subject Identifier=3019011110-0005

Assay variable : PTINR\_VAL1 PT-INR Value

| N | Mean      | Standard Deviation | Minimum   | Maximum   |
|---|-----------|--------------------|-----------|-----------|
| 3 | 1.9733333 | 0.6493330          | 1.2700000 | 2.5500000 |

Unique Subject Identifier=3019011110-0008

Assay variable : PTINR\_VAL1 PT-INR Value

| N | Mean      | Standard Deviation | Minimum   | Maximum   |
|---|-----------|--------------------|-----------|-----------|
| 3 | 2.0133333 | 0.6242863          | 1.4800000 | 2.7000000 |

Unique Subject Identifier=3019011110-0010

Assay variable : PTINR\_VAL1 PT-INR Value

N Mean Standard Deviation Minimum Maximum

---

|   |           |           |           |           |
|---|-----------|-----------|-----------|-----------|
| 6 | 2.0133333 | 0.1240430 | 1.8100000 | 2.1400000 |
|---|-----------|-----------|-----------|-----------|

---

Laboratory tests at the time of obtaining Table 2-6 consent, according to the presence or absence of proton-pump inhibitors

Unique Subject Identifier=3019011110-0012

MEANS Procedure

Assay variable : PTINR\_VAL1 PT-INR Value

N Mean Standard Deviation Minimum Maximum

---

|   |           |           |           |           |
|---|-----------|-----------|-----------|-----------|
| 3 | 2.0366667 | 0.1709776 | 1.8400000 | 2.1500000 |
|---|-----------|-----------|-----------|-----------|

---

Unique Subject Identifier=3019011110-0014

Assay variable : PTINR\_VAL1 PT-INR Value

N Mean Standard Deviation Minimum Maximum

---

|   |           |           |           |           |
|---|-----------|-----------|-----------|-----------|
| 2 | 1.8850000 | 0.0636396 | 1.8400000 | 1.9300000 |
|---|-----------|-----------|-----------|-----------|

---

Unique Subject Identifier=3019011110-0019

Assay variable : PTINR\_VAL1 PT-INR Value

N Mean Standard Deviation Minimum Maximum

---

|   |           |  |           |           |
|---|-----------|--|-----------|-----------|
| 1 | 1.3000000 |  | 1.3000000 | 1.3000000 |
|---|-----------|--|-----------|-----------|

---

Unique Subject Identifier=3019011110-0021

Assay variable : PTINR\_VAL1 PT-INR Value

N Mean Standard Deviation Minimum Maximum

---

|   |           |           |           |           |
|---|-----------|-----------|-----------|-----------|
| 3 | 1.7200000 | 0.1212436 | 1.6100000 | 1.8500000 |
|---|-----------|-----------|-----------|-----------|

---

Laboratory tests at the time of obtaining Table 2-6 consent, according to the presence or absence of proton-pump inhibitors

Unique Subject Identifier=3019011110-0023

MEANS Procedure

Assay variable : PTINR\_VAL1 PT-INR Value

N Mean Standard Deviation Minimum Maximum

---

|   |           |           |           |           |
|---|-----------|-----------|-----------|-----------|
| 3 | 2.1266667 | 0.2722744 | 1.8200000 | 2.3400000 |
|---|-----------|-----------|-----------|-----------|

---

Unique Subject Identifier=3019011110-0026

Assay variable : PTINR\_VAL1 PT-INR Value

N Mean Standard Deviation Minimum Maximum

---

|   |           |           |           |           |
|---|-----------|-----------|-----------|-----------|
| 3 | 1.5400000 | 0.1646208 | 1.3500000 | 1.6400000 |
|---|-----------|-----------|-----------|-----------|

---

Unique Subject Identifier=3019011110-0035

Assay variable : PTINR\_VAL1 PT-INR Value

N Mean Standard Deviation Minimum Maximum

---

|   |           |           |           |           |
|---|-----------|-----------|-----------|-----------|
| 5 | 1.6800000 | 0.1743560 | 1.5400000 | 1.9600000 |
|---|-----------|-----------|-----------|-----------|

---

Unique Subject Identifier=3019011110-0038

Assay variable : PTINR\_VAL1 PT-INR Value

N Mean Standard Deviation Minimum Maximum

---

|   |           |           |           |           |
|---|-----------|-----------|-----------|-----------|
| 2 | 1.9100000 | 0.1272792 | 1.8200000 | 2.0000000 |
|---|-----------|-----------|-----------|-----------|

---

Laboratory tests at the time of obtaining Table 2-6 consent, according to the presence or absence of proton-pump inhibitors

Unique Subject Identifier=3019011110-0039

MEANS Procedure

Assay variable : PTINR\_VAL1 PT-INR Value

| N | Mean      | Standard Deviation | Minimum   | Maximum   |
|---|-----------|--------------------|-----------|-----------|
| 3 | 1.9833333 | 0.7320064          | 1.2000000 | 2.6500000 |

Unique Subject Identifier=3019011110-0041

Assay variable : PTINR\_VAL1 PT-INR Value

| N | Mean      | Standard Deviation | Minimum   | Maximum   |
|---|-----------|--------------------|-----------|-----------|
| 3 | 1.6933333 | 0.3043572          | 1.4700000 | 2.0400000 |

Unique Subject Identifier=3019011110-0043

Assay variable : PTINR\_VAL1 PT-INR Value

| N | Mean      | Standard Deviation | Minimum   | Maximum   |
|---|-----------|--------------------|-----------|-----------|
| 3 | 1.6466667 | 0.3431229          | 1.2800000 | 1.9600000 |

Unique Subject Identifier=3019011110-0044

Assay variable : PTINR\_VAL1 PT-INR Value

N Mean Standard Deviation Minimum Maximum

---

|   |          |           |          |          |
|---|----------|-----------|----------|----------|
| 3 | 1.920000 | 0.1178983 | 1.820000 | 2.050000 |
|---|----------|-----------|----------|----------|

---



Laboratory tests at the time of obtaining Table 2-6 consent, according to the presence or absence of proton-pump inhibitors

Unique Subject Identifier=3019011110-0046

MEANS Procedure

Assay variable : PTINR\_VAL1 PT-INR Value

N Mean Standard Deviation Minimum Maximum

---

|   |           |           |           |           |
|---|-----------|-----------|-----------|-----------|
| 4 | 1.8450000 | 0.2100000 | 1.6000000 | 2.1000000 |
|---|-----------|-----------|-----------|-----------|

---

Unique Subject Identifier=3019011110-0047

Assay variable : PTINR\_VAL1 PT-INR Value

N Mean Standard Deviation Minimum Maximum

---

|   |           |           |           |           |
|---|-----------|-----------|-----------|-----------|
| 3 | 1.8766667 | 0.0513160 | 1.8200000 | 1.9200000 |
|---|-----------|-----------|-----------|-----------|

---

Unique Subject Identifier=3019011110-0051

Assay variable : PTINR\_VAL1 PT-INR Value

N Mean Standard Deviation Minimum Maximum

---

|   |           |           |           |           |
|---|-----------|-----------|-----------|-----------|
| 3 | 1.6300000 | 0.1670329 | 1.4800000 | 1.8100000 |
|---|-----------|-----------|-----------|-----------|

---

Unique Subject Identifier=3019011110-0052

Assay variable : PTINR\_VAL1 PT-INR Value

N Mean Standard Deviation Minimum Maximum

---

|   |           |  |           |           |
|---|-----------|--|-----------|-----------|
| 1 | 1.5800000 |  | 1.5800000 | 1.5800000 |
|---|-----------|--|-----------|-----------|

---

Laboratory tests at the time of obtaining Table 2-6 consent, according to the presence or absence of proton-pump inhibitors

Unique Subject Identifier=3021011010-0005

MEANS Procedure

Assay variable : PTINR\_VAL1 PT-INR Value

N Mean Standard Deviation Minimum Maximum

---

|   |           |           |           |           |
|---|-----------|-----------|-----------|-----------|
| 3 | 2.3466667 | 1.0304045 | 1.3000000 | 3.3600000 |
|---|-----------|-----------|-----------|-----------|

---

Unique Subject Identifier=3022000000-0002

Assay variable : PTINR\_VAL1 PT-INR Value

N Mean Standard Deviation Minimum Maximum

---

|   |           |           |           |           |
|---|-----------|-----------|-----------|-----------|
| 6 | 1.4950000 | 0.6555227 | 1.1000000 | 2.8000000 |
|---|-----------|-----------|-----------|-----------|

---

Unique Subject Identifier=3022000000-0005

Assay variable : PTINR\_VAL1 PT-INR Value

N Mean Standard Deviation Minimum Maximum

---

|   |           |           |           |           |
|---|-----------|-----------|-----------|-----------|
| 3 | 1.6166667 | 0.4532475 | 1.3500000 | 2.1400000 |
|---|-----------|-----------|-----------|-----------|

---

Unique Subject Identifier=3026011100-0016

Assay variable : PTINR\_VAL1 PT-INR Value

N Mean Standard Deviation Minimum Maximum

---

|   |           |           |           |           |
|---|-----------|-----------|-----------|-----------|
| 3 | 2.5066667 | 0.3962743 | 2.1300000 | 2.9200000 |
|---|-----------|-----------|-----------|-----------|

---

Laboratory tests at the time of obtaining Table 2-6 consent, according to the presence or absence of proton-pump inhibitors

Unique Subject Identifier=3026011100-0025

MEANS Procedure

Assay variable : PTINR\_VAL1 PT-INR Value

| N | Mean      | Standard Deviation | Minimum   | Maximum   |
|---|-----------|--------------------|-----------|-----------|
| 3 | 1.9300000 | 0.3078961          | 1.5900000 | 2.1900000 |

Unique Subject Identifier=3026011100-0028

Assay variable : PTINR\_VAL1 PT-INR Value

| N | Mean      | Standard Deviation | Minimum   | Maximum   |
|---|-----------|--------------------|-----------|-----------|
| 3 | 1.8900000 | 0.2882707          | 1.5800000 | 2.1500000 |

Unique Subject Identifier=3026011100-0031

Assay variable : PTINR\_VAL1 PT-INR Value

| N | Mean      | Standard Deviation | Minimum   | Maximum   |
|---|-----------|--------------------|-----------|-----------|
| 3 | 2.0366667 | 0.4331666          | 1.5500000 | 2.3800000 |

Unique Subject Identifier=3026011100-0033

Assay variable : PTINR\_VAL1 PT-INR Value

N Mean Standard Deviation Minimum Maximum

---

|   |           |           |           |           |
|---|-----------|-----------|-----------|-----------|
| 3 | 2.6233333 | 0.6903864 | 1.9200000 | 3.3000000 |
|---|-----------|-----------|-----------|-----------|

---

Laboratory tests at the time of obtaining Table 2-6 consent, according to the presence or absence of proton-pump inhibitors

Unique Subject Identifier=3026011100-0039

MEANS Procedure

Assay variable : PTINR\_VAL1 PT-INR Value

N Mean Standard Deviation Minimum Maximum

---

|   |           |           |           |           |
|---|-----------|-----------|-----------|-----------|
| 3 | 2.7100000 | 1.0318430 | 1.5700000 | 3.5800000 |
|---|-----------|-----------|-----------|-----------|

---

Unique Subject Identifier=3026011100-0040

Assay variable : PTINR\_VAL1 PT-INR Value

N Mean Standard Deviation Minimum Maximum

---

|   |           |           |           |           |
|---|-----------|-----------|-----------|-----------|
| 6 | 1.5600000 | 0.1363818 | 1.3100000 | 1.6800000 |
|---|-----------|-----------|-----------|-----------|

---

Unique Subject Identifier=3026011100-0043

Assay variable : PTINR\_VAL1 PT-INR Value

N Mean Standard Deviation Minimum Maximum

---

|   |           |           |           |           |
|---|-----------|-----------|-----------|-----------|
| 2 | 1.6750000 | 0.3606245 | 1.4200000 | 1.9300000 |
|---|-----------|-----------|-----------|-----------|

---

Unique Subject Identifier=3026011100-0055

Assay variable : PTINR\_VAL1 PT-INR Value

N Mean Standard Deviation Minimum Maximum

---

|   |           |           |           |           |
|---|-----------|-----------|-----------|-----------|
| 3 | 2.6866667 | 0.2437895 | 2.4100000 | 2.8700000 |
|---|-----------|-----------|-----------|-----------|

---



Laboratory tests at the time of obtaining Table 2-6 consent, according to the presence or absence of proton-pump inhibitors

Unique Subject Identifier=3026011100-0058

MEANS Procedure

Assay variable : PTINR\_VAL1 PT-INR Value

N Mean Standard Deviation Minimum Maximum

---

|   |           |           |           |           |
|---|-----------|-----------|-----------|-----------|
| 4 | 1.7650000 | 0.1913984 | 1.5900000 | 1.9500000 |
|---|-----------|-----------|-----------|-----------|

---

Unique Subject Identifier=3026011100-0064

Assay variable : PTINR\_VAL1 PT-INR Value

N Mean Standard Deviation Minimum Maximum

---

|   |           |           |           |           |
|---|-----------|-----------|-----------|-----------|
| 5 | 1.6760000 | 0.7995186 | 1.0800000 | 3.0400000 |
|---|-----------|-----------|-----------|-----------|

---

Unique Subject Identifier=3056000000-0007

Assay variable : PTINR\_VAL1 PT-INR Value

N Mean Standard Deviation Minimum Maximum

---

|   |           |           |           |           |
|---|-----------|-----------|-----------|-----------|
| 5 | 1.6560000 | 0.1505988 | 1.5100000 | 1.9000000 |
|---|-----------|-----------|-----------|-----------|

---

Unique Subject Identifier=3056000000-0009

Assay variable : PTINR\_VAL1 PT-INR Value

N Mean Standard Deviation Minimum Maximum

---

|   |           |           |           |           |
|---|-----------|-----------|-----------|-----------|
| 4 | 2.1175000 | 0.3069609 | 1.7600000 | 2.5100000 |
|---|-----------|-----------|-----------|-----------|

---

Laboratory tests at the time of obtaining Table 2-6 consent, according to the presence or absence of proton-pump inhibitors

Unique Subject Identifier=3056000000-0010

MEANS Procedure

Assay variable : PTINR\_VAL1 PT-INR Value

| N | Mean      | Standard Deviation | Minimum   | Maximum   |
|---|-----------|--------------------|-----------|-----------|
| 6 | 1.9916667 | 0.6568232          | 1.2100000 | 2.8500000 |

Unique Subject Identifier=3056000000-0015

Assay variable : PTINR\_VAL1 PT-INR Value

| N | Mean      | Standard Deviation | Minimum   | Maximum   |
|---|-----------|--------------------|-----------|-----------|
| 4 | 1.8200000 | 0.4496665          | 1.3500000 | 2.3700000 |

Unique Subject Identifier=3056000000-0024

Assay variable : PTINR\_VAL1 PT-INR Value

| N | Mean      | Standard Deviation | Minimum   | Maximum   |
|---|-----------|--------------------|-----------|-----------|
| 3 | 2.3133333 | 0.7900211          | 1.5200000 | 3.1000000 |

Unique Subject Identifier=3056000000-0025

Assay variable : PTINR\_VAL1 PT-INR Value

N Mean Standard Deviation Minimum Maximum

---

|   |          |           |          |          |
|---|----------|-----------|----------|----------|
| 2 | 2.560000 | 0.5374012 | 2.180000 | 2.940000 |
|---|----------|-----------|----------|----------|

---

Laboratory tests at the time of obtaining Table 2-6 consent, according to the presence or absence of proton-pump inhibitors

Unique Subject Identifier=3056000000-0028

MEANS Procedure

Assay variable : PTINR\_VAL1 PT-INR Value

N Mean Standard Deviation Minimum Maximum

---

|   |           |           |           |           |
|---|-----------|-----------|-----------|-----------|
| 2 | 1.6950000 | 0.0636396 | 1.6500000 | 1.7400000 |
|---|-----------|-----------|-----------|-----------|

---

Unique Subject Identifier=3060011100-0004

Assay variable : PTINR\_VAL1 PT-INR Value

N Mean Standard Deviation Minimum Maximum

---

|   |           |           |           |           |
|---|-----------|-----------|-----------|-----------|
| 6 | 1.7333333 | 0.5202563 | 1.2000000 | 2.6000000 |
|---|-----------|-----------|-----------|-----------|

---

Unique Subject Identifier=3060011100-0007

Assay variable : PTINR\_VAL1 PT-INR Value

N Mean Standard Deviation Minimum Maximum

---

|   |           |           |           |           |
|---|-----------|-----------|-----------|-----------|
| 5 | 2.1800000 | 0.4086563 | 1.6000000 | 2.7000000 |
|---|-----------|-----------|-----------|-----------|

---

Unique Subject Identifier=3060011100-0011

Assay variable : PTINR\_VAL1 PT-INR Value

N Mean Standard Deviation Minimum Maximum

---

|   |           |           |           |           |
|---|-----------|-----------|-----------|-----------|
| 6 | 1.5666667 | 0.1366260 | 1.4000000 | 1.7000000 |
|---|-----------|-----------|-----------|-----------|

---

Laboratory tests at the time of obtaining Table 2-6 consent, according to the presence or absence of proton-pump inhibitors

Unique Subject Identifier=3060011100-0013

MEANS Procedure

Assay variable : PTINR\_VAL1 PT-INR Value

| N | Mean      | Standard Deviation | Minimum   | Maximum   |
|---|-----------|--------------------|-----------|-----------|
| 3 | 1.6000000 | 0.2645751          | 1.4000000 | 1.9000000 |

Unique Subject Identifier=3060011100-0016

Assay variable : PTINR\_VAL1 PT-INR Value

| N | Mean      | Standard Deviation | Minimum   | Maximum   |
|---|-----------|--------------------|-----------|-----------|
| 6 | 1.5666667 | 0.1966384          | 1.4000000 | 1.9000000 |

Unique Subject Identifier=3060011100-0017

Assay variable : PTINR\_VAL1 PT-INR Value

| N | Mean      | Standard Deviation | Minimum   | Maximum   |
|---|-----------|--------------------|-----------|-----------|
| 6 | 1.7833333 | 0.4792355          | 1.4000000 | 2.7000000 |

Unique Subject Identifier=3060011100-0020

Assay variable : PTINR\_VAL1 PT-INR Value

N Mean Standard Deviation Minimum Maximum

---

|   |          |           |          |          |
|---|----------|-----------|----------|----------|
| 6 | 2.100000 | 0.0632456 | 2.000000 | 2.200000 |
|---|----------|-----------|----------|----------|

---



Laboratory tests at the time of obtaining Table 2-6 consent, according to the presence or absence of proton-pump inhibitors

Unique Subject Identifier=3076011000-0005

MEANS Procedure

Assay variable : PTINR\_VAL1 PT-INR Value

N Mean Standard Deviation Minimum Maximum

---

|   |           |           |           |           |
|---|-----------|-----------|-----------|-----------|
| 5 | 1.9200000 | 0.3420526 | 1.5000000 | 2.4000000 |
|---|-----------|-----------|-----------|-----------|

---

Unique Subject Identifier=3077010011-0007

Assay variable : PTINR\_VAL1 PT-INR Value

N Mean Standard Deviation Minimum Maximum

---

|   |           |           |           |           |
|---|-----------|-----------|-----------|-----------|
| 5 | 1.9840000 | 0.2069541 | 1.7200000 | 2.1700000 |
|---|-----------|-----------|-----------|-----------|

---

Unique Subject Identifier=3077010011-0011

Assay variable : PTINR\_VAL1 PT-INR Value

N Mean Standard Deviation Minimum Maximum

---

|   |           |           |           |           |
|---|-----------|-----------|-----------|-----------|
| 5 | 1.7660000 | 0.0835464 | 1.7000000 | 1.9100000 |
|---|-----------|-----------|-----------|-----------|

---

Unique Subject Identifier=3077010011-0014

Assay variable : PTINR\_VAL1 PT-INR Value

N Mean Standard Deviation Minimum Maximum

---

|   |           |           |           |           |
|---|-----------|-----------|-----------|-----------|
| 3 | 1.5033333 | 0.0461880 | 1.4500000 | 1.5300000 |
|---|-----------|-----------|-----------|-----------|

---

Laboratory tests at the time of obtaining Table 2-6 consent, according to the presence or absence of proton-pump inhibitors

Unique Subject Identifier=3084010000-0002

MEANS Procedure

Assay variable : PTINR\_VAL1 PT-INR Value

N Mean Standard Deviation Minimum Maximum

---

|   |           |           |           |           |
|---|-----------|-----------|-----------|-----------|
| 2 | 1.2550000 | 0.2333452 | 1.0900000 | 1.4200000 |
|---|-----------|-----------|-----------|-----------|

---

Unique Subject Identifier=3084010000-0004

Assay variable : PTINR\_VAL1 PT-INR Value

N Mean Standard Deviation Minimum Maximum

---

|   |           |           |           |           |
|---|-----------|-----------|-----------|-----------|
| 2 | 2.2200000 | 0.2121320 | 2.0700000 | 2.3700000 |
|---|-----------|-----------|-----------|-----------|

---

Unique Subject Identifier=3084010000-0007

Assay variable : PTINR\_VAL1 PT-INR Value

N Mean Standard Deviation Minimum Maximum

---

|   |           |  |           |           |
|---|-----------|--|-----------|-----------|
| 1 | 1.9500000 |  | 1.9500000 | 1.9500000 |
|---|-----------|--|-----------|-----------|

---

Unique Subject Identifier=3084010000-0013

Assay variable : PTINR\_VAL1 PT-INR Value

N Mean Standard Deviation Minimum Maximum

---

|   |          |  |          |          |
|---|----------|--|----------|----------|
| 1 | 1.500000 |  | 1.500000 | 1.500000 |
|---|----------|--|----------|----------|

---

Laboratory tests at the time of obtaining Table 2-6 consent, according to the presence or absence of proton-pump inhibitors

Unique Subject Identifier=3084010000-0014

MEANS Procedure

Assay variable : PTINR\_VAL1 PT-INR Value

N Mean Standard Deviation Minimum Maximum

---

|   |           |           |           |           |
|---|-----------|-----------|-----------|-----------|
| 3 | 1.6133333 | 0.2289833 | 1.4300000 | 1.8700000 |
|---|-----------|-----------|-----------|-----------|

---

Unique Subject Identifier=3084010000-0015

Assay variable : PTINR\_VAL1 PT-INR Value

N Mean Standard Deviation Minimum Maximum

---

|   |           |           |           |           |
|---|-----------|-----------|-----------|-----------|
| 3 | 1.6033333 | 0.0750555 | 1.5600000 | 1.6900000 |
|---|-----------|-----------|-----------|-----------|

---

Unique Subject Identifier=3084010000-0017

Assay variable : PTINR\_VAL1 PT-INR Value

N Mean Standard Deviation Minimum Maximum

---

|   |           |           |           |           |
|---|-----------|-----------|-----------|-----------|
| 2 | 2.0550000 | 0.3889087 | 1.7800000 | 2.3300000 |
|---|-----------|-----------|-----------|-----------|

---

Unique Subject Identifier=3084010000-0018

Assay variable : PTINR\_VAL1 PT-INR Value

N Mean Standard Deviation Minimum Maximum

---

|   |           |           |           |           |
|---|-----------|-----------|-----------|-----------|
| 2 | 1.9150000 | 0.1484924 | 1.8100000 | 2.0200000 |
|---|-----------|-----------|-----------|-----------|

---

Laboratory tests at the time of obtaining Table 2-6 consent, according to the presence or absence of proton-pump inhibitors

Unique Subject Identifier=3084010000-0019

MEANS Procedure

Assay variable : PTINR\_VAL1 PT-INR Value

| N | Mean      | Standard Deviation | Minimum   | Maximum   |
|---|-----------|--------------------|-----------|-----------|
| 3 | 1.6133333 | 0.2565801          | 1.3300000 | 1.8300000 |

Unique Subject Identifier=3084010000-0021

Assay variable : PTINR\_VAL1 PT-INR Value

| N | Mean      | Standard Deviation | Minimum   | Maximum   |
|---|-----------|--------------------|-----------|-----------|
| 3 | 1.1066667 | 0.0832666          | 1.0400000 | 1.2000000 |

Unique Subject Identifier=3084010000-0032

Assay variable : PTINR\_VAL1 PT-INR Value

| N | Mean      | Standard Deviation | Minimum   | Maximum   |
|---|-----------|--------------------|-----------|-----------|
| 1 | 1.5700000 |                    | 1.5700000 | 1.5700000 |

Unique Subject Identifier=3085010000-0005

Assay variable : PTINR\_VAL1 PT-INR Value

N Mean Standard Deviation Minimum Maximum

---

|   |           |           |           |           |
|---|-----------|-----------|-----------|-----------|
| 3 | 1.5466667 | 0.4792007 | 1.2700000 | 2.1000000 |
|---|-----------|-----------|-----------|-----------|

---



Laboratory tests at the time of obtaining Table 2-6 consent, according to the presence or absence of proton-pump inhibitors

Unique Subject Identifier=3085010000-0007

MEANS Procedure

Assay variable : PTINR\_VAL1 PT-INR Value

N Mean Standard Deviation Minimum Maximum

---

|   |           |           |           |           |
|---|-----------|-----------|-----------|-----------|
| 3 | 1.5333333 | 0.0585947 | 1.4900000 | 1.6000000 |
|---|-----------|-----------|-----------|-----------|

---

Unique Subject Identifier=3085010000-0009

Assay variable : PTINR\_VAL1 PT-INR Value

N Mean Standard Deviation Minimum Maximum

---

|   |           |           |           |           |
|---|-----------|-----------|-----------|-----------|
| 3 | 2.1800000 | 0.4403408 | 1.7300000 | 2.6100000 |
|---|-----------|-----------|-----------|-----------|

---

Unique Subject Identifier=3085010000-0010

Assay variable : PTINR\_VAL1 PT-INR Value

N Mean Standard Deviation Minimum Maximum

---

|   |           |           |           |           |
|---|-----------|-----------|-----------|-----------|
| 3 | 1.9633333 | 0.4086971 | 1.5900000 | 2.4000000 |
|---|-----------|-----------|-----------|-----------|

---

Unique Subject Identifier=3085010000-0016

Assay variable : PTINR\_VAL1 PT-INR Value

N Mean Standard Deviation Minimum Maximum

---

|   |           |           |           |           |
|---|-----------|-----------|-----------|-----------|
| 2 | 1.7850000 | 0.1626346 | 1.6700000 | 1.9000000 |
|---|-----------|-----------|-----------|-----------|

---

Laboratory tests at the time of obtaining Table 2-6 consent, according to the presence or absence of proton-pump inhibitors

Unique Subject Identifier=3085010000-0018

MEANS Procedure

Assay variable : PTINR\_VAL1 PT-INR Value

N Mean Standard Deviation Minimum Maximum

---

|   |           |           |           |           |
|---|-----------|-----------|-----------|-----------|
| 5 | 1.8100000 | 0.2298913 | 1.5600000 | 2.0500000 |
|---|-----------|-----------|-----------|-----------|

---

Unique Subject Identifier=3085010000-0019

Assay variable : PTINR\_VAL1 PT-INR Value

N Mean Standard Deviation Minimum Maximum

---

|   |           |           |           |           |
|---|-----------|-----------|-----------|-----------|
| 3 | 1.8066667 | 0.1266228 | 1.6700000 | 1.9200000 |
|---|-----------|-----------|-----------|-----------|

---

Unique Subject Identifier=3085010000-0025

Assay variable : PTINR\_VAL1 PT-INR Value

N Mean Standard Deviation Minimum Maximum

---

|   |           |           |           |           |
|---|-----------|-----------|-----------|-----------|
| 3 | 1.9366667 | 0.1285820 | 1.7900000 | 2.0300000 |
|---|-----------|-----------|-----------|-----------|

---

Unique Subject Identifier=3085010000-0028

Assay variable : PTINR\_VAL1 PT-INR Value

N Mean Standard Deviation Minimum Maximum

---

|   |           |           |           |           |
|---|-----------|-----------|-----------|-----------|
| 3 | 1.7700000 | 0.0556776 | 1.7200000 | 1.8300000 |
|---|-----------|-----------|-----------|-----------|

---

Laboratory tests at the time of obtaining Table 2-6 consent, according to the presence or absence of proton-pump inhibitors

Unique Subject Identifier=3092000000-0003

MEANS Procedure

Assay variable : PTINR\_VAL1 PT-INR Value

| N | Mean      | Standard Deviation | Minimum   | Maximum   |
|---|-----------|--------------------|-----------|-----------|
| 5 | 2.0920000 | 0.1235718          | 1.9200000 | 2.2600000 |

Unique Subject Identifier=3092000000-0008

Assay variable : PTINR\_VAL1 PT-INR Value

| N | Mean      | Standard Deviation | Minimum   | Maximum   |
|---|-----------|--------------------|-----------|-----------|
| 1 | 1.6400000 |                    | 1.6400000 | 1.6400000 |

Unique Subject Identifier=3096000000-0003

Assay variable : PTINR\_VAL1 PT-INR Value

| N | Mean      | Standard Deviation | Minimum   | Maximum   |
|---|-----------|--------------------|-----------|-----------|
| 5 | 1.8800000 | 0.2774887          | 1.6000000 | 2.3000000 |

Unique Subject Identifier=3096000000-0004

Assay variable : PTINR\_VAL1 PT-INR Value

N Mean Standard Deviation Minimum Maximum

---

|   |           |           |           |           |
|---|-----------|-----------|-----------|-----------|
| 4 | 2.5750000 | 0.5678908 | 2.0000000 | 3.2000000 |
|---|-----------|-----------|-----------|-----------|

---

Laboratory tests at the time of obtaining Table 2-6 consent, according to the presence or absence of proton-pump inhibitors

Unique Subject Identifier=3096000000-0007

MEANS Procedure

Assay variable : PTINR\_VAL1 PT-INR Value

N Mean Standard Deviation Minimum Maximum

---

|   |           |           |           |           |
|---|-----------|-----------|-----------|-----------|
| 4 | 2.2750000 | 0.5377422 | 1.6000000 | 2.8000000 |
|---|-----------|-----------|-----------|-----------|

---

Unique Subject Identifier=3096000000-0010

Assay variable : PTINR\_VAL1 PT-INR Value

N Mean Standard Deviation Minimum Maximum

---

|   |           |           |           |           |
|---|-----------|-----------|-----------|-----------|
| 4 | 2.6250000 | 0.7365460 | 1.8000000 | 3.5000000 |
|---|-----------|-----------|-----------|-----------|

---

Unique Subject Identifier=3096000000-0012

Assay variable : PTINR\_VAL1 PT-INR Value

N Mean Standard Deviation Minimum Maximum

---

|   |           |           |           |           |
|---|-----------|-----------|-----------|-----------|
| 4 | 1.9500000 | 0.1914854 | 1.7000000 | 2.1000000 |
|---|-----------|-----------|-----------|-----------|

---

Unique Subject Identifier=3097011000-0004

Assay variable : PTINR\_VAL1 PT-INR Value

N Mean Standard Deviation Minimum Maximum

---

|   |           |           |           |           |
|---|-----------|-----------|-----------|-----------|
| 4 | 1.4775000 | 0.0708872 | 1.3900000 | 1.5400000 |
|---|-----------|-----------|-----------|-----------|

---



Laboratory tests at the time of obtaining Table 2-6 consent, according to the presence or absence of proton-pump inhibitors

Unique Subject Identifier=3098011000-0002

MEANS Procedure

Assay variable : PTINR\_VAL1 PT-INR Value

N Mean Standard Deviation Minimum Maximum

---

|   |           |           |           |           |
|---|-----------|-----------|-----------|-----------|
| 3 | 2.2566667 | 0.1429452 | 2.1000000 | 2.3800000 |
|---|-----------|-----------|-----------|-----------|

---

Unique Subject Identifier=3098011000-0004

Assay variable : PTINR\_VAL1 PT-INR Value

N Mean Standard Deviation Minimum Maximum

---

|   |           |           |           |           |
|---|-----------|-----------|-----------|-----------|
| 3 | 1.4033333 | 0.0723418 | 1.3200000 | 1.4500000 |
|---|-----------|-----------|-----------|-----------|

---

Unique Subject Identifier=3098011000-0005

Assay variable : PTINR\_VAL1 PT-INR Value

N Mean Standard Deviation Minimum Maximum

---

|   |           |           |           |           |
|---|-----------|-----------|-----------|-----------|
| 4 | 1.9300000 | 0.2954093 | 1.5100000 | 2.1600000 |
|---|-----------|-----------|-----------|-----------|

---

Unique Subject Identifier=3098011000-0006

Assay variable : PTINR\_VAL1 PT-INR Value

N Mean Standard Deviation Minimum Maximum

---

|   |           |           |           |           |
|---|-----------|-----------|-----------|-----------|
| 4 | 2.3950000 | 0.7583535 | 1.3000000 | 2.9200000 |
|---|-----------|-----------|-----------|-----------|

---

Laboratory tests at the time of obtaining Table 2-6 consent, according to the presence or absence of proton-pump inhibitors

Unique Subject Identifier=3102111011-0003

MEANS Procedure

Assay variable : PTINR\_VAL1 PT-INR Value

N Mean Standard Deviation Minimum Maximum

---

|   |           |           |           |           |
|---|-----------|-----------|-----------|-----------|
| 2 | 2.3450000 | 0.2474874 | 2.1700000 | 2.5200000 |
|---|-----------|-----------|-----------|-----------|

---

Unique Subject Identifier=3102111011-0009

Assay variable : PTINR\_VAL1 PT-INR Value

N Mean Standard Deviation Minimum Maximum

---

|   |           |           |           |           |
|---|-----------|-----------|-----------|-----------|
| 2 | 1.0550000 | 0.0494975 | 1.0200000 | 1.0900000 |
|---|-----------|-----------|-----------|-----------|

---

Unique Subject Identifier=3102111011-0013

Assay variable : PTINR\_VAL1 PT-INR Value

N Mean Standard Deviation Minimum Maximum

---

|   |           |           |           |           |
|---|-----------|-----------|-----------|-----------|
| 2 | 1.8500000 | 0.0707107 | 1.8000000 | 1.9000000 |
|---|-----------|-----------|-----------|-----------|

---

Unique Subject Identifier=3102111011-0032

Assay variable : PTINR\_VAL1 PT-INR Value

N Mean Standard Deviation Minimum Maximum

---

|   |           |           |           |           |
|---|-----------|-----------|-----------|-----------|
| 4 | 1.9475000 | 0.5564396 | 1.5400000 | 2.7700000 |
|---|-----------|-----------|-----------|-----------|

---

Laboratory tests at the time of obtaining Table 2-6 consent, according to the presence or absence of proton-pump inhibitors

Unique Subject Identifier=3102111011-0045

MEANS Procedure

Assay variable : PTINR\_VAL1 PT-INR Value

N Mean Standard Deviation Minimum Maximum

---

|   |           |           |           |           |
|---|-----------|-----------|-----------|-----------|
| 3 | 1.6300000 | 0.2151743 | 1.4200000 | 1.8500000 |
|---|-----------|-----------|-----------|-----------|

---

Unique Subject Identifier=3102111011-0057

Assay variable : PTINR\_VAL1 PT-INR Value

N Mean Standard Deviation Minimum Maximum

---

|   |           |           |           |           |
|---|-----------|-----------|-----------|-----------|
| 4 | 1.5350000 | 0.1405940 | 1.3900000 | 1.6700000 |
|---|-----------|-----------|-----------|-----------|

---

Unique Subject Identifier=3102111011-0059

Assay variable : PTINR\_VAL1 PT-INR Value

N Mean Standard Deviation Minimum Maximum

---

|   |           |           |           |           |
|---|-----------|-----------|-----------|-----------|
| 5 | 1.7100000 | 0.3766298 | 1.4000000 | 2.3500000 |
|---|-----------|-----------|-----------|-----------|

---

Unique Subject Identifier=3102111011-0066

Assay variable : PTINR\_VAL1 PT-INR Value

N Mean Standard Deviation Minimum Maximum

---

|   |           |  |           |           |
|---|-----------|--|-----------|-----------|
| 1 | 1.9600000 |  | 1.9600000 | 1.9600000 |
|---|-----------|--|-----------|-----------|

---

Laboratory tests at the time of obtaining Table 2-6 consent, according to the presence or absence of proton-pump inhibitors

Unique Subject Identifier=3102111011-0067

MEANS Procedure

Assay variable : PTINR\_VAL1 PT-INR Value

| N | Mean      | Standard Deviation | Minimum   | Maximum   |
|---|-----------|--------------------|-----------|-----------|
| 3 | 1.7966667 | 0.1250333          | 1.6700000 | 1.9200000 |

Unique Subject Identifier=3102111011-0071

Assay variable : PTINR\_VAL1 PT-INR Value

| N | Mean      | Standard Deviation | Minimum   | Maximum   |
|---|-----------|--------------------|-----------|-----------|
| 2 | 1.3500000 | 0.1131371          | 1.2700000 | 1.4300000 |

Unique Subject Identifier=3102111011-0073

Assay variable : PTINR\_VAL1 PT-INR Value

| N | Mean      | Standard Deviation | Minimum   | Maximum   |
|---|-----------|--------------------|-----------|-----------|
| 3 | 2.0200000 | 0.3950949          | 1.6300000 | 2.4200000 |

Unique Subject Identifier=3102111011-0085

Assay variable : PTINR\_VAL1 PT-INR Value

N Mean Standard Deviation Minimum Maximum

---

|   |           |           |           |           |
|---|-----------|-----------|-----------|-----------|
| 2 | 1.7150000 | 0.0919239 | 1.6500000 | 1.7800000 |
|---|-----------|-----------|-----------|-----------|

---



Laboratory tests at the time of obtaining Table 2-6 consent, according to the presence or absence of proton-pump inhibitors

Unique Subject Identifier=3102111011-0088

MEANS Procedure

Assay variable : PTINR\_VAL1 PT-INR Value

N Mean Standard Deviation Minimum Maximum

---

|   |           |           |           |           |
|---|-----------|-----------|-----------|-----------|
| 5 | 2.0980000 | 0.5374663 | 1.5100000 | 2.6000000 |
|---|-----------|-----------|-----------|-----------|

---

Unique Subject Identifier=3102111011-0112

Assay variable : PTINR\_VAL1 PT-INR Value

N Mean Standard Deviation Minimum Maximum

---

|   |           |           |           |           |
|---|-----------|-----------|-----------|-----------|
| 3 | 2.5833333 | 0.3231615 | 2.3400000 | 2.9500000 |
|---|-----------|-----------|-----------|-----------|

---

Unique Subject Identifier=3102111011-0114

Assay variable : PTINR\_VAL1 PT-INR Value

N Mean Standard Deviation Minimum Maximum

---

|   |           |           |           |           |
|---|-----------|-----------|-----------|-----------|
| 2 | 1.8450000 | 0.2192031 | 1.6900000 | 2.0000000 |
|---|-----------|-----------|-----------|-----------|

---

Unique Subject Identifier=3102111011-0115

Assay variable : PTINR\_VAL1 PT-INR Value

N Mean Standard Deviation Minimum Maximum

---

|   |           |  |           |           |
|---|-----------|--|-----------|-----------|
| 1 | 1.3300000 |  | 1.3300000 | 1.3300000 |
|---|-----------|--|-----------|-----------|

---

Laboratory tests at the time of obtaining Table 2-6 consent, according to the presence or absence of proton-pump inhibitors

Unique Subject Identifier=3102111011-0119

MEANS Procedure

Assay variable : PTINR\_VAL1 PT-INR Value

N Mean Standard Deviation Minimum Maximum

---

|   |           |           |           |           |
|---|-----------|-----------|-----------|-----------|
| 4 | 1.7300000 | 0.3841007 | 1.2900000 | 2.1300000 |
|---|-----------|-----------|-----------|-----------|

---

Unique Subject Identifier=3102111011-0138

Assay variable : PTINR\_VAL1 PT-INR Value

N Mean Standard Deviation Minimum Maximum

---

|   |           |           |           |           |
|---|-----------|-----------|-----------|-----------|
| 4 | 2.2225000 | 0.1062623 | 2.0900000 | 2.3500000 |
|---|-----------|-----------|-----------|-----------|

---

Unique Subject Identifier=3105011000-0001

Assay variable : PTINR\_VAL1 PT-INR Value

N Mean Standard Deviation Minimum Maximum

---

|   |           |           |           |           |
|---|-----------|-----------|-----------|-----------|
| 3 | 1.6533333 | 0.1361372 | 1.5000000 | 1.7600000 |
|---|-----------|-----------|-----------|-----------|

---

Unique Subject Identifier=3105011000-0002

Assay variable : PTINR\_VAL1 PT-INR Value

N Mean Standard Deviation Minimum Maximum

---

|   |           |           |           |           |
|---|-----------|-----------|-----------|-----------|
| 3 | 1.9033333 | 0.0493288 | 1.8700000 | 1.9600000 |
|---|-----------|-----------|-----------|-----------|

---

Laboratory tests at the time of obtaining Table 2-6 consent, according to the presence or absence of proton-pump inhibitors

Unique Subject Identifier=3105011000-0003

MEANS Procedure

Assay variable : PTINR\_VAL1 PT-INR Value

| N | Mean     | Standard Deviation | Minimum  | Maximum  |
|---|----------|--------------------|----------|----------|
| 5 | 1.940000 | 0.6307139          | 1.360000 | 3.010000 |

Unique Subject Identifier=3105011000-0007

Assay variable : PTINR\_VAL1 PT-INR Value

| N | Mean     | Standard Deviation | Minimum  | Maximum  |
|---|----------|--------------------|----------|----------|
| 4 | 2.045000 | 0.5570458          | 1.470000 | 2.730000 |

Unique Subject Identifier=3105011000-0009

Assay variable : PTINR\_VAL1 PT-INR Value

| N | Mean     | Standard Deviation | Minimum  | Maximum  |
|---|----------|--------------------|----------|----------|
| 3 | 1.696667 | 0.2811287          | 1.510000 | 2.020000 |

Unique Subject Identifier=3114011111-0014

Assay variable : PTINR\_VAL1 PT-INR Value

N Mean Standard Deviation Minimum Maximum

---

|   |           |           |           |           |
|---|-----------|-----------|-----------|-----------|
| 3 | 1.2133333 | 0.1556706 | 1.0500000 | 1.3600000 |
|---|-----------|-----------|-----------|-----------|

---

Laboratory tests at the time of obtaining Table 2-6 consent, according to the presence or absence of proton-pump inhibitors

Unique Subject Identifier=3114011111-0027

MEANS Procedure

Assay variable : PTINR\_VAL1 PT-INR Value

| N | Mean      | Standard Deviation | Minimum   | Maximum   |
|---|-----------|--------------------|-----------|-----------|
| 5 | 2.6620000 | 0.5276078          | 1.7900000 | 3.1900000 |

Unique Subject Identifier=3117010110-0003

Assay variable : PTINR\_VAL1 PT-INR Value

| N | Mean      | Standard Deviation | Minimum   | Maximum   |
|---|-----------|--------------------|-----------|-----------|
| 1 | 2.5000000 |                    | 2.5000000 | 2.5000000 |

Unique Subject Identifier=3117010110-0007

Assay variable : PTINR\_VAL1 PT-INR Value

| N | Mean      | Standard Deviation | Minimum   | Maximum   |
|---|-----------|--------------------|-----------|-----------|
| 2 | 1.9500000 | 0.0707107          | 1.9000000 | 2.0000000 |

Unique Subject Identifier=3121011111-0001

Assay variable : PTINR\_VAL1 PT-INR Value

N Mean Standard Deviation Minimum Maximum

---

|   |           |           |           |           |
|---|-----------|-----------|-----------|-----------|
| 3 | 1.9733333 | 0.6285168 | 1.2700000 | 2.4800000 |
|---|-----------|-----------|-----------|-----------|

---



Laboratory tests at the time of obtaining Table 2-6 consent, according to the presence or absence of proton-pump inhibitors

Unique Subject Identifier=3122010111-0002

MEANS Procedure

Assay variable : PTINR\_VAL1 PT-INR Value

N Mean Standard Deviation Minimum Maximum

---

|   |          |           |          |          |
|---|----------|-----------|----------|----------|
| 2 | 2.360000 | 0.8485281 | 1.760000 | 2.960000 |
|---|----------|-----------|----------|----------|

---

Unique Subject Identifier=3122010111-0003

Assay variable : PTINR\_VAL1 PT-INR Value

N Mean Standard Deviation Minimum Maximum

---

|   |          |           |          |          |
|---|----------|-----------|----------|----------|
| 3 | 1.943333 | 0.2663331 | 1.650000 | 2.170000 |
|---|----------|-----------|----------|----------|

---

Unique Subject Identifier=3122010111-0005

Assay variable : PTINR\_VAL1 PT-INR Value

N Mean Standard Deviation Minimum Maximum

---

|   |          |  |          |          |
|---|----------|--|----------|----------|
| 1 | 2.800000 |  | 2.800000 | 2.800000 |
|---|----------|--|----------|----------|

---

Unique Subject Identifier=3122010111-0006

Assay variable : PTINR\_VAL1 PT-INR Value

N Mean Standard Deviation Minimum Maximum

---

|   |          |           |          |          |
|---|----------|-----------|----------|----------|
| 4 | 1.460000 | 0.2253886 | 1.250000 | 1.710000 |
|---|----------|-----------|----------|----------|

---

Laboratory tests at the time of obtaining Table 2-6 consent, according to the presence or absence of proton-pump inhibitors

Unique Subject Identifier=3122010111-0007

MEANS Procedure

Assay variable : PTINR\_VAL1 PT-INR Value

N Mean Standard Deviation Minimum Maximum

---

|   |           |           |           |
|---|-----------|-----------|-----------|
| 1 | 2.5300000 | 2.5300000 | 2.5300000 |
|---|-----------|-----------|-----------|

---

Unique Subject Identifier=3122010111-0008

Assay variable : PTINR\_VAL1 PT-INR Value

N Mean Standard Deviation Minimum Maximum

---

|   |           |           |           |
|---|-----------|-----------|-----------|
| 1 | 2.1300000 | 2.1300000 | 2.1300000 |
|---|-----------|-----------|-----------|

---

Unique Subject Identifier=3122010111-0015

Assay variable : PTINR\_VAL1 PT-INR Value

N Mean Standard Deviation Minimum Maximum

---

|   |           |           |           |
|---|-----------|-----------|-----------|
| 1 | 2.0000000 | 2.0000000 | 2.0000000 |
|---|-----------|-----------|-----------|

---

Unique Subject Identifier=3122010111-0017

Assay variable : PTINR\_VAL1 PT-INR Value

N Mean Standard Deviation Minimum Maximum

---

|   |           |  |           |           |
|---|-----------|--|-----------|-----------|
| 1 | 1.9500000 |  | 1.9500000 | 1.9500000 |
|---|-----------|--|-----------|-----------|

---

Laboratory tests at the time of obtaining Table 2-6 consent, according to the presence or absence of proton-pump inhibitors

Unique Subject Identifier=3122010111-0018

MEANS Procedure

Assay variable : PTINR\_VAL1 PT-INR Value

N Mean Standard Deviation Minimum Maximum

---

|   |           |  |           |           |
|---|-----------|--|-----------|-----------|
| 1 | 2.3600000 |  | 2.3600000 | 2.3600000 |
|---|-----------|--|-----------|-----------|

---

Unique Subject Identifier=3122010111-0019

Assay variable : PTINR\_VAL1 PT-INR Value

N Mean Standard Deviation Minimum Maximum

---

|   |           |           |           |           |
|---|-----------|-----------|-----------|-----------|
| 3 | 2.0466667 | 0.6585843 | 1.5800000 | 2.8000000 |
|---|-----------|-----------|-----------|-----------|

---

Unique Subject Identifier=3122010111-0023

Assay variable : PTINR\_VAL1 PT-INR Value

N Mean Standard Deviation Minimum Maximum

---

|   |           |  |           |           |
|---|-----------|--|-----------|-----------|
| 1 | 1.6500000 |  | 1.6500000 | 1.6500000 |
|---|-----------|--|-----------|-----------|

---

Unique Subject Identifier=3122010111-0024

Assay variable : PTINR\_VAL1 PT-INR Value

N Mean Standard Deviation Minimum Maximum

---

|   |           |           |           |           |
|---|-----------|-----------|-----------|-----------|
| 4 | 2.1075000 | 0.2934138 | 1.8900000 | 2.5400000 |
|---|-----------|-----------|-----------|-----------|

---

Laboratory tests at the time of obtaining Table 2-6 consent, according to the presence or absence of proton-pump inhibitors

Unique Subject Identifier=3122010111-0025

MEANS Procedure

Assay variable : PTINR\_VAL1 PT-INR Value

N Mean Standard Deviation Minimum Maximum

---

|   |           |  |           |           |
|---|-----------|--|-----------|-----------|
| 1 | 2.2800000 |  | 2.2800000 | 2.2800000 |
|---|-----------|--|-----------|-----------|

---

Unique Subject Identifier=3122010111-0026

Assay variable : PTINR\_VAL1 PT-INR Value

N Mean Standard Deviation Minimum Maximum

---

|   |           |  |           |           |
|---|-----------|--|-----------|-----------|
| 1 | 1.5000000 |  | 1.5000000 | 1.5000000 |
|---|-----------|--|-----------|-----------|

---

Unique Subject Identifier=3122010111-0028

Assay variable : PTINR\_VAL1 PT-INR Value

N Mean Standard Deviation Minimum Maximum

---

|   |           |           |           |           |
|---|-----------|-----------|-----------|-----------|
| 2 | 2.2950000 | 0.1626346 | 2.1800000 | 2.4100000 |
|---|-----------|-----------|-----------|-----------|

---

Unique Subject Identifier=3122010111-0030

Assay variable : PTINR\_VAL1 PT-INR Value

N Mean Standard Deviation Minimum Maximum

---

|   |           |           |           |           |
|---|-----------|-----------|-----------|-----------|
| 2 | 2.0750000 | 0.7283200 | 1.5600000 | 2.5900000 |
|---|-----------|-----------|-----------|-----------|

---



Laboratory tests at the time of obtaining Table 2-6 consent, according to the presence or absence of proton-pump inhibitors

Unique Subject Identifier=3122010111-0031

MEANS Procedure

Assay variable : PTINR\_VAL1 PT-INR Value

N Mean Standard Deviation Minimum Maximum

---

|   |           |           |           |           |
|---|-----------|-----------|-----------|-----------|
| 4 | 2.0875000 | 0.1719254 | 1.8800000 | 2.2800000 |
|---|-----------|-----------|-----------|-----------|

---

Unique Subject Identifier=3122010111-0032

Assay variable : PTINR\_VAL1 PT-INR Value

N Mean Standard Deviation Minimum Maximum

---

|   |           |           |           |           |
|---|-----------|-----------|-----------|-----------|
| 5 | 1.9520000 | 0.2588822 | 1.6300000 | 2.2700000 |
|---|-----------|-----------|-----------|-----------|

---

Unique Subject Identifier=3122010111-0033

Assay variable : PTINR\_VAL1 PT-INR Value

N Mean Standard Deviation Minimum Maximum

---

|   |           |           |           |           |
|---|-----------|-----------|-----------|-----------|
| 3 | 2.5533333 | 0.0493288 | 2.5200000 | 2.6100000 |
|---|-----------|-----------|-----------|-----------|

---

Unique Subject Identifier=3122010111-0034

Assay variable : PTINR\_VAL1 PT-INR Value

N Mean Standard Deviation Minimum Maximum

---

|   |          |           |          |          |
|---|----------|-----------|----------|----------|
| 3 | 2.493333 | 0.0493288 | 2.460000 | 2.550000 |
|---|----------|-----------|----------|----------|

---

Laboratory tests at the time of obtaining Table 2-6 consent, according to the presence or absence of proton-pump inhibitors

Unique Subject Identifier=3122010111-0041

MEANS Procedure

Assay variable : PTINR\_VAL1 PT-INR Value

N Mean Standard Deviation Minimum Maximum

---

|   |           |           |           |           |
|---|-----------|-----------|-----------|-----------|
| 4 | 2.4675000 | 0.2072639 | 2.2100000 | 2.6500000 |
|---|-----------|-----------|-----------|-----------|

---

Unique Subject Identifier=3122010111-0043

Assay variable : PTINR\_VAL1 PT-INR Value

N Mean Standard Deviation Minimum Maximum

---

|   |           |  |           |           |
|---|-----------|--|-----------|-----------|
| 1 | 1.8200000 |  | 1.8200000 | 1.8200000 |
|---|-----------|--|-----------|-----------|

---

Unique Subject Identifier=3122010111-0044

Assay variable : PTINR\_VAL1 PT-INR Value

N Mean Standard Deviation Minimum Maximum

---

|   |           |  |           |           |
|---|-----------|--|-----------|-----------|
| 1 | 1.4900000 |  | 1.4900000 | 1.4900000 |
|---|-----------|--|-----------|-----------|

---

Unique Subject Identifier=3122010111-0047

Assay variable : PTINR\_VAL1 PT-INR Value

N Mean Standard Deviation Minimum Maximum

---

|   |           |  |           |           |
|---|-----------|--|-----------|-----------|
| 1 | 2.0800000 |  | 2.0800000 | 2.0800000 |
|---|-----------|--|-----------|-----------|

---

Laboratory tests at the time of obtaining Table 2-6 consent, according to the presence or absence of proton-pump inhibitors

Unique Subject Identifier=3122010111-0050

MEANS Procedure

Assay variable : PTINR\_VAL1 PT-INR Value

N Mean Standard Deviation Minimum Maximum

---

|   |           |           |           |           |
|---|-----------|-----------|-----------|-----------|
| 6 | 2.3250000 | 0.6476033 | 1.4300000 | 3.2800000 |
|---|-----------|-----------|-----------|-----------|

---

Unique Subject Identifier=3122010111-0051

Assay variable : PTINR\_VAL1 PT-INR Value

N Mean Standard Deviation Minimum Maximum

---

|   |           |           |           |           |
|---|-----------|-----------|-----------|-----------|
| 4 | 2.0825000 | 0.1195478 | 1.9400000 | 2.2300000 |
|---|-----------|-----------|-----------|-----------|

---

Unique Subject Identifier=3122010111-0054

Assay variable : PTINR\_VAL1 PT-INR Value

N Mean Standard Deviation Minimum Maximum

---

|   |           |           |           |           |
|---|-----------|-----------|-----------|-----------|
| 5 | 2.0900000 | 0.4991493 | 1.2300000 | 2.4800000 |
|---|-----------|-----------|-----------|-----------|

---

Unique Subject Identifier=3122010111-0056

Assay variable : PTINR\_VAL1 PT-INR Value

N Mean Standard Deviation Minimum Maximum

---

|   |           |           |           |           |
|---|-----------|-----------|-----------|-----------|
| 4 | 2.2175000 | 0.2944345 | 1.9200000 | 2.6200000 |
|---|-----------|-----------|-----------|-----------|

---

Laboratory tests at the time of obtaining Table 2-6 consent, according to the presence or absence of proton-pump inhibitors

Unique Subject Identifier=3122010111-0058

MEANS Procedure

Assay variable : PTINR\_VAL1 PT-INR Value

N Mean Standard Deviation Minimum Maximum

---

|   |           |  |           |           |
|---|-----------|--|-----------|-----------|
| 1 | 1.7600000 |  | 1.7600000 | 1.7600000 |
|---|-----------|--|-----------|-----------|

---

Unique Subject Identifier=3122010111-0059

Assay variable : PTINR\_VAL1 PT-INR Value

N Mean Standard Deviation Minimum Maximum

---

|   |           |  |           |           |
|---|-----------|--|-----------|-----------|
| 1 | 1.8600000 |  | 1.8600000 | 1.8600000 |
|---|-----------|--|-----------|-----------|

---

Unique Subject Identifier=3122010111-0060

Assay variable : PTINR\_VAL1 PT-INR Value

N Mean Standard Deviation Minimum Maximum

---

|   |           |           |           |           |
|---|-----------|-----------|-----------|-----------|
| 4 | 1.5825000 | 0.1676057 | 1.3900000 | 1.7900000 |
|---|-----------|-----------|-----------|-----------|

---

Unique Subject Identifier=3122010111-0061

Assay variable : PTINR\_VAL1 PT-INR Value

N Mean Standard Deviation Minimum Maximum

---

|   |           |           |           |           |
|---|-----------|-----------|-----------|-----------|
| 4 | 2.6700000 | 0.5993886 | 2.0600000 | 3.4900000 |
|---|-----------|-----------|-----------|-----------|

---



Laboratory tests at the time of obtaining Table 2-6 consent, according to the presence or absence of proton-pump inhibitors

Unique Subject Identifier=3122010111-0062

MEANS Procedure

Assay variable : PTINR\_VAL1 PT-INR Value

N Mean Standard Deviation Minimum Maximum

---

|   |           |  |           |           |
|---|-----------|--|-----------|-----------|
| 1 | 2.4200000 |  | 2.4200000 | 2.4200000 |
|---|-----------|--|-----------|-----------|

---

Unique Subject Identifier=3122010111-0068

Assay variable : PTINR\_VAL1 PT-INR Value

N Mean Standard Deviation Minimum Maximum

---

|   |           |           |           |           |
|---|-----------|-----------|-----------|-----------|
| 3 | 1.8633333 | 0.0907377 | 1.7600000 | 1.9300000 |
|---|-----------|-----------|-----------|-----------|

---

Unique Subject Identifier=3122010111-0069

Assay variable : PTINR\_VAL1 PT-INR Value

N Mean Standard Deviation Minimum Maximum

---

|   |           |  |           |           |
|---|-----------|--|-----------|-----------|
| 1 | 2.0900000 |  | 2.0900000 | 2.0900000 |
|---|-----------|--|-----------|-----------|

---

Unique Subject Identifier=3122010111-0071

Assay variable : PTINR\_VAL1 PT-INR Value

N Mean Standard Deviation Minimum Maximum

---

|   |           |           |           |           |
|---|-----------|-----------|-----------|-----------|
| 3 | 2.0633333 | 0.1942507 | 1.8500000 | 2.2300000 |
|---|-----------|-----------|-----------|-----------|

---

Laboratory tests at the time of obtaining Table 2-6 consent, according to the presence or absence of proton-pump inhibitors

Unique Subject Identifier=3122010111-0075

MEANS Procedure

Assay variable : PTINR\_VAL1 PT-INR Value

N Mean Standard Deviation Minimum Maximum

---

|   |          |  |          |          |
|---|----------|--|----------|----------|
| 1 | 2.400000 |  | 2.400000 | 2.400000 |
|---|----------|--|----------|----------|

---

Unique Subject Identifier=3122010111-0076

Assay variable : PTINR\_VAL1 PT-INR Value

N Mean Standard Deviation Minimum Maximum

---

|   |          |  |          |          |
|---|----------|--|----------|----------|
| 1 | 1.430000 |  | 1.430000 | 1.430000 |
|---|----------|--|----------|----------|

---

Unique Subject Identifier=3122010111-0078

Assay variable : PTINR\_VAL1 PT-INR Value

N Mean Standard Deviation Minimum Maximum

---

|   |          |  |          |          |
|---|----------|--|----------|----------|
| 1 | 1.470000 |  | 1.470000 | 1.470000 |
|---|----------|--|----------|----------|

---

Unique Subject Identifier=3122010111-0079

Assay variable : PTINR\_VAL1 PT-INR Value

N Mean Standard Deviation Minimum Maximum

---

|   |           |           |           |           |
|---|-----------|-----------|-----------|-----------|
| 4 | 1.7450000 | 0.1466288 | 1.5400000 | 1.8800000 |
|---|-----------|-----------|-----------|-----------|

---

Laboratory tests at the time of obtaining Table 2-6 consent, according to the presence or absence of proton-pump inhibitors

Unique Subject Identifier=3122010111-0080

MEANS Procedure

Assay variable : PTINR\_VAL1 PT-INR Value

N Mean Standard Deviation Minimum Maximum

---

|   |           |           |           |           |
|---|-----------|-----------|-----------|-----------|
| 3 | 1.4966667 | 0.1101514 | 1.3700000 | 1.5700000 |
|---|-----------|-----------|-----------|-----------|

---

Unique Subject Identifier=3122010111-0081

Assay variable : PTINR\_VAL1 PT-INR Value

N Mean Standard Deviation Minimum Maximum

---

|   |           |           |           |           |
|---|-----------|-----------|-----------|-----------|
| 3 | 2.1600000 | 0.2364318 | 1.9900000 | 2.4300000 |
|---|-----------|-----------|-----------|-----------|

---

Unique Subject Identifier=3122010111-0082

Assay variable : PTINR\_VAL1 PT-INR Value

N Mean Standard Deviation Minimum Maximum

---

|   |           |           |           |           |
|---|-----------|-----------|-----------|-----------|
| 3 | 1.6000000 | 0.1228821 | 1.5100000 | 1.7400000 |
|---|-----------|-----------|-----------|-----------|

---

Unique Subject Identifier=3122010111-0083

Assay variable : PTINR\_VAL1 PT-INR Value

N Mean Standard Deviation Minimum Maximum

---

|   |           |           |           |           |
|---|-----------|-----------|-----------|-----------|
| 3 | 1.7466667 | 0.3552933 | 1.4000000 | 2.1100000 |
|---|-----------|-----------|-----------|-----------|

---

Laboratory tests at the time of obtaining Table 2-6 consent, according to the presence or absence of proton-pump inhibitors

Unique Subject Identifier=3122010111-0084

MEANS Procedure

Assay variable : PTINR\_VAL1 PT-INR Value

| N | Mean      | Standard Deviation | Minimum   | Maximum   |
|---|-----------|--------------------|-----------|-----------|
| 3 | 1.8600000 | 0.1178983          | 1.7600000 | 1.9900000 |

Unique Subject Identifier=3122010111-0085

Assay variable : PTINR\_VAL1 PT-INR Value

| N | Mean      | Standard Deviation | Minimum   | Maximum   |
|---|-----------|--------------------|-----------|-----------|
| 3 | 2.0600000 | 0.1513275          | 1.9400000 | 2.2300000 |

Unique Subject Identifier=3122010111-0088

Assay variable : PTINR\_VAL1 PT-INR Value

| N | Mean      | Standard Deviation | Minimum   | Maximum   |
|---|-----------|--------------------|-----------|-----------|
| 4 | 2.3375000 | 1.0215144          | 1.6400000 | 3.8500000 |

Unique Subject Identifier=3122010111-0089

Assay variable : PTINR\_VAL1 PT-INR Value

N Mean Standard Deviation Minimum Maximum

---

|   |           |           |           |           |
|---|-----------|-----------|-----------|-----------|
| 6 | 2.1166667 | 0.5361219 | 1.3000000 | 2.8700000 |
|---|-----------|-----------|-----------|-----------|

---



Laboratory tests at the time of obtaining Table 2-6 consent, according to the presence or absence of proton-pump inhibitors

Unique Subject Identifier=3122010111-0092

MEANS Procedure

Assay variable : PTINR\_VAL1 PT-INR Value

N Mean Standard Deviation Minimum Maximum

---

|   |           |           |           |           |
|---|-----------|-----------|-----------|-----------|
| 3 | 2.7300000 | 0.8671217 | 2.0300000 | 3.7000000 |
|---|-----------|-----------|-----------|-----------|

---

Unique Subject Identifier=3122010111-0095

Assay variable : PTINR\_VAL1 PT-INR Value

N Mean Standard Deviation Minimum Maximum

---

|   |           |           |           |           |
|---|-----------|-----------|-----------|-----------|
| 3 | 2.1266667 | 0.0808290 | 2.0400000 | 2.2000000 |
|---|-----------|-----------|-----------|-----------|

---

Unique Subject Identifier=3122010111-0098

Assay variable : PTINR\_VAL1 PT-INR Value

N Mean Standard Deviation Minimum Maximum

---

|   |           |           |           |           |
|---|-----------|-----------|-----------|-----------|
| 3 | 1.6366667 | 0.1644182 | 1.4500000 | 1.7600000 |
|---|-----------|-----------|-----------|-----------|

---

Unique Subject Identifier=3122010111-0099

Assay variable : PTINR\_VAL1 PT-INR Value

N Mean Standard Deviation Minimum Maximum

---

|   |          |           |          |          |
|---|----------|-----------|----------|----------|
| 3 | 1.550000 | 0.3764306 | 1.140000 | 1.880000 |
|---|----------|-----------|----------|----------|

---

Laboratory tests at the time of obtaining Table 2-6 consent, according to the presence or absence of proton-pump inhibitors

Unique Subject Identifier=3122010111-0100

MEANS Procedure

Assay variable : PTINR\_VAL1 PT-INR Value

| N | Mean      | Standard Deviation | Minimum   | Maximum   |
|---|-----------|--------------------|-----------|-----------|
| 3 | 1.8333333 | 0.4007909          | 1.3900000 | 2.1700000 |

Unique Subject Identifier=3122010111-0102

Assay variable : PTINR\_VAL1 PT-INR Value

| N | Mean      | Standard Deviation | Minimum   | Maximum   |
|---|-----------|--------------------|-----------|-----------|
| 5 | 2.0740000 | 0.5116933          | 1.4500000 | 2.8000000 |

Unique Subject Identifier=3122010111-0103

Assay variable : PTINR\_VAL1 PT-INR Value

| N | Mean      | Standard Deviation | Minimum   | Maximum   |
|---|-----------|--------------------|-----------|-----------|
| 1 | 4.4300000 |                    | 4.4300000 | 4.4300000 |

Unique Subject Identifier=3122010111-0106

Assay variable : PTINR\_VAL1 PT-INR Value

N Mean Standard Deviation Minimum Maximum

---

|   |           |           |           |           |
|---|-----------|-----------|-----------|-----------|
| 4 | 1.9350000 | 0.1126943 | 1.8300000 | 2.0600000 |
|---|-----------|-----------|-----------|-----------|

---

Laboratory tests at the time of obtaining Table 2-6 consent, according to the presence or absence of proton-pump inhibitors

Unique Subject Identifier=3122010111-0107

MEANS Procedure

Assay variable : PTINR\_VAL1 PT-INR Value

N Mean Standard Deviation Minimum Maximum

---

|   |           |  |           |           |
|---|-----------|--|-----------|-----------|
| 1 | 2.4400000 |  | 2.4400000 | 2.4400000 |
|---|-----------|--|-----------|-----------|

---

Unique Subject Identifier=3122010111-0108

Assay variable : PTINR\_VAL1 PT-INR Value

N Mean Standard Deviation Minimum Maximum

---

|   |           |  |           |           |
|---|-----------|--|-----------|-----------|
| 1 | 2.1100000 |  | 2.1100000 | 2.1100000 |
|---|-----------|--|-----------|-----------|

---

Unique Subject Identifier=3122010111-0112

Assay variable : PTINR\_VAL1 PT-INR Value

N Mean Standard Deviation Minimum Maximum

---

|   |           |  |           |           |
|---|-----------|--|-----------|-----------|
| 1 | 2.1400000 |  | 2.1400000 | 2.1400000 |
|---|-----------|--|-----------|-----------|

---

Unique Subject Identifier=3122010111-0117

Assay variable : PTINR\_VAL1 PT-INR Value

N Mean Standard Deviation Minimum Maximum

---

|   |           |           |           |           |
|---|-----------|-----------|-----------|-----------|
| 4 | 1.9475000 | 0.2845318 | 1.6500000 | 2.3200000 |
|---|-----------|-----------|-----------|-----------|

---

Laboratory tests at the time of obtaining Table 2-6 consent, according to the presence or absence of proton-pump inhibitors

Unique Subject Identifier=3122010111-0118

MEANS Procedure

Assay variable : PTINR\_VAL1 PT-INR Value

| N | Mean      | Standard Deviation | Minimum   | Maximum   |
|---|-----------|--------------------|-----------|-----------|
| 2 | 1.6900000 | 0.3111270          | 1.4700000 | 1.9100000 |

Unique Subject Identifier=3122010111-0122

Assay variable : PTINR\_VAL1 PT-INR Value

| N | Mean      | Standard Deviation | Minimum   | Maximum   |
|---|-----------|--------------------|-----------|-----------|
| 1 | 2.0600000 |                    | 2.0600000 | 2.0600000 |

Unique Subject Identifier=3122010111-0126

Assay variable : PTINR\_VAL1 PT-INR Value

| N | Mean      | Standard Deviation | Minimum   | Maximum   |
|---|-----------|--------------------|-----------|-----------|
| 1 | 1.8300000 |                    | 1.8300000 | 1.8300000 |

Unique Subject Identifier=3122010111-0127

Assay variable : PTINR\_VAL1 PT-INR Value

N Mean Standard Deviation Minimum Maximum

---

|   |          |  |          |          |
|---|----------|--|----------|----------|
| 1 | 2.320000 |  | 2.320000 | 2.320000 |
|---|----------|--|----------|----------|

---



Laboratory tests at the time of obtaining Table 2-6 consent, according to the presence or absence of proton-pump inhibitors

Unique Subject Identifier=3122010111-0128

MEANS Procedure

Assay variable : PTINR\_VAL1 PT-INR Value

N Mean Standard Deviation Minimum Maximum

---

|   |           |           |           |           |
|---|-----------|-----------|-----------|-----------|
| 3 | 1.6966667 | 0.3257811 | 1.4700000 | 2.0700000 |
|---|-----------|-----------|-----------|-----------|

---

Unique Subject Identifier=3122010111-0129

Assay variable : PTINR\_VAL1 PT-INR Value

N Mean Standard Deviation Minimum Maximum

---

|   |           |           |           |           |
|---|-----------|-----------|-----------|-----------|
| 3 | 2.3266667 | 0.2685765 | 2.0200000 | 2.5200000 |
|---|-----------|-----------|-----------|-----------|

---

Unique Subject Identifier=3122010111-0131

Assay variable : PTINR\_VAL1 PT-INR Value

N Mean Standard Deviation Minimum Maximum

---

|   |           |           |           |           |
|---|-----------|-----------|-----------|-----------|
| 6 | 3.0350000 | 2.4783442 | 1.2900000 | 7.8800000 |
|---|-----------|-----------|-----------|-----------|

---

Unique Subject Identifier=3122010111-0132

Assay variable : PTINR\_VAL1 PT-INR Value

N Mean Standard Deviation Minimum Maximum

---

|   |          |  |          |          |
|---|----------|--|----------|----------|
| 1 | 1.800000 |  | 1.800000 | 1.800000 |
|---|----------|--|----------|----------|

---

Laboratory tests at the time of obtaining Table 2-6 consent, according to the presence or absence of proton-pump inhibitors

Unique Subject Identifier=3122010111-0136

MEANS Procedure

Assay variable : PTINR\_VAL1 PT-INR Value

N Mean Standard Deviation Minimum Maximum

---

|   |           |  |           |           |
|---|-----------|--|-----------|-----------|
| 1 | 2.1100000 |  | 2.1100000 | 2.1100000 |
|---|-----------|--|-----------|-----------|

---

Unique Subject Identifier=3122010111-0139

Assay variable : PTINR\_VAL1 PT-INR Value

N Mean Standard Deviation Minimum Maximum

---

|   |           |  |           |           |
|---|-----------|--|-----------|-----------|
| 1 | 1.7100000 |  | 1.7100000 | 1.7100000 |
|---|-----------|--|-----------|-----------|

---

Unique Subject Identifier=3122010111-0142

Assay variable : PTINR\_VAL1 PT-INR Value

N Mean Standard Deviation Minimum Maximum

---

|   |           |           |           |           |
|---|-----------|-----------|-----------|-----------|
| 6 | 2.2100000 | 0.7181643 | 1.3800000 | 3.3900000 |
|---|-----------|-----------|-----------|-----------|

---

Unique Subject Identifier=3122010111-0144

Assay variable : PTINR\_VAL1 PT-INR Value

N Mean Standard Deviation Minimum Maximum

---

|   |           |           |           |           |
|---|-----------|-----------|-----------|-----------|
| 3 | 1.8666667 | 0.3074627 | 1.6600000 | 2.2200000 |
|---|-----------|-----------|-----------|-----------|

---

Laboratory tests at the time of obtaining Table 2-6 consent, according to the presence or absence of proton-pump inhibitors

Unique Subject Identifier=3122010111-0145

MEANS Procedure

Assay variable : PTINR\_VAL1 PT-INR Value

| N | Mean      | Standard Deviation | Minimum   | Maximum   |
|---|-----------|--------------------|-----------|-----------|
| 3 | 2.0733333 | 0.2757414          | 1.8100000 | 2.3600000 |

Unique Subject Identifier=3122010111-0148

Assay variable : PTINR\_VAL1 PT-INR Value

| N | Mean      | Standard Deviation | Minimum   | Maximum   |
|---|-----------|--------------------|-----------|-----------|
| 4 | 2.5925000 | 0.6295700          | 2.0400000 | 3.3900000 |

Unique Subject Identifier=3122010111-0149

Assay variable : PTINR\_VAL1 PT-INR Value

| N | Mean      | Standard Deviation | Minimum   | Maximum   |
|---|-----------|--------------------|-----------|-----------|
| 1 | 3.2000000 |                    | 3.2000000 | 3.2000000 |

Unique Subject Identifier=3122010111-0150

Assay variable : PTINR\_VAL1 PT-INR Value

N Mean Standard Deviation Minimum Maximum

---

|   |           |  |           |           |
|---|-----------|--|-----------|-----------|
| 1 | 2.2200000 |  | 2.2200000 | 2.2200000 |
|---|-----------|--|-----------|-----------|

---

Laboratory tests at the time of obtaining Table 2-6 consent, according to the presence or absence of proton-pump inhibitors

Unique Subject Identifier=3122010111-0155

MEANS Procedure

Assay variable : PTINR\_VAL1 PT-INR Value

N Mean Standard Deviation Minimum Maximum

---

|   |           |  |           |           |
|---|-----------|--|-----------|-----------|
| 1 | 1.2900000 |  | 1.2900000 | 1.2900000 |
|---|-----------|--|-----------|-----------|

---

Unique Subject Identifier=3122010111-0165

Assay variable : PTINR\_VAL1 PT-INR Value

N Mean Standard Deviation Minimum Maximum

---

|   |           |  |           |           |
|---|-----------|--|-----------|-----------|
| 1 | 1.6300000 |  | 1.6300000 | 1.6300000 |
|---|-----------|--|-----------|-----------|

---

Unique Subject Identifier=3122010111-0167

Assay variable : PTINR\_VAL1 PT-INR Value

N Mean Standard Deviation Minimum Maximum

---

|   |           |  |           |           |
|---|-----------|--|-----------|-----------|
| 1 | 2.1000000 |  | 2.1000000 | 2.1000000 |
|---|-----------|--|-----------|-----------|

---

Unique Subject Identifier=3122010111-0170

Assay variable : PTINR\_VAL1 PT-INR Value

N Mean Standard Deviation Minimum Maximum

---

|   |           |  |           |           |
|---|-----------|--|-----------|-----------|
| 1 | 2.0900000 |  | 2.0900000 | 2.0900000 |
|---|-----------|--|-----------|-----------|

---



Laboratory tests at the time of obtaining Table 2-6 consent, according to the presence or absence of proton-pump inhibitors

Unique Subject Identifier=3122010111-0172

MEANS Procedure

Assay variable : PTINR\_VAL1 PT-INR Value

N Mean Standard Deviation Minimum Maximum

---

|   |           |  |           |           |
|---|-----------|--|-----------|-----------|
| 1 | 1.3200000 |  | 1.3200000 | 1.3200000 |
|---|-----------|--|-----------|-----------|

---

Unique Subject Identifier=3122010111-0173

Assay variable : PTINR\_VAL1 PT-INR Value

N Mean Standard Deviation Minimum Maximum

---

|   |           |  |           |           |
|---|-----------|--|-----------|-----------|
| 1 | 2.5300000 |  | 2.5300000 | 2.5300000 |
|---|-----------|--|-----------|-----------|

---

Unique Subject Identifier=3122010111-0174

Assay variable : PTINR\_VAL1 PT-INR Value

N Mean Standard Deviation Minimum Maximum

---

|   |           |  |           |           |
|---|-----------|--|-----------|-----------|
| 1 | 2.3900000 |  | 2.3900000 | 2.3900000 |
|---|-----------|--|-----------|-----------|

---

Unique Subject Identifier=3122010111-0176

Assay variable : PTINR\_VAL1 PT-INR Value

N Mean Standard Deviation Minimum Maximum

---

|   |           |           |           |           |
|---|-----------|-----------|-----------|-----------|
| 5 | 2.5260000 | 0.5103724 | 1.9300000 | 3.2100000 |
|---|-----------|-----------|-----------|-----------|

---

Laboratory tests at the time of obtaining Table 2-6 consent, according to the presence or absence of proton-pump inhibitors

Unique Subject Identifier=3122010111-0186

MEANS Procedure

Assay variable : PTINR\_VAL1 PT-INR Value

N Mean Standard Deviation Minimum Maximum

---

|   |           |  |           |           |
|---|-----------|--|-----------|-----------|
| 1 | 2.1300000 |  | 2.1300000 | 2.1300000 |
|---|-----------|--|-----------|-----------|

---

Unique Subject Identifier=3122010111-0187

Assay variable : PTINR\_VAL1 PT-INR Value

N Mean Standard Deviation Minimum Maximum

---

|   |           |  |           |           |
|---|-----------|--|-----------|-----------|
| 1 | 1.6700000 |  | 1.6700000 | 1.6700000 |
|---|-----------|--|-----------|-----------|

---

Unique Subject Identifier=3122010111-0189

Assay variable : PTINR\_VAL1 PT-INR Value

N Mean Standard Deviation Minimum Maximum

---

|   |           |  |           |           |
|---|-----------|--|-----------|-----------|
| 1 | 2.0000000 |  | 2.0000000 | 2.0000000 |
|---|-----------|--|-----------|-----------|

---

Unique Subject Identifier=3122010111-0191

Assay variable : PTINR\_VAL1 PT-INR Value

N Mean Standard Deviation Minimum Maximum

---

|   |          |  |          |          |
|---|----------|--|----------|----------|
| 1 | 2.140000 |  | 2.140000 | 2.140000 |
|---|----------|--|----------|----------|

---

Laboratory tests at the time of obtaining Table 2-6 consent, according to the presence or absence of proton-pump inhibitors

Unique Subject Identifier=3122010111-0192

MEANS Procedure

Assay variable : PTINR\_VAL1 PT-INR Value

| N | Mean      | Standard Deviation | Minimum   | Maximum   |
|---|-----------|--------------------|-----------|-----------|
| 1 | 1.5200000 |                    | 1.5200000 | 1.5200000 |

Unique Subject Identifier=3122010111-0194

Assay variable : PTINR\_VAL1 PT-INR Value

| N | Mean      | Standard Deviation | Minimum   | Maximum   |
|---|-----------|--------------------|-----------|-----------|
| 5 | 1.8440000 | 0.0918150          | 1.7100000 | 1.9400000 |

Unique Subject Identifier=3122010111-0195

Assay variable : PTINR\_VAL1 PT-INR Value

| N | Mean      | Standard Deviation | Minimum   | Maximum   |
|---|-----------|--------------------|-----------|-----------|
| 1 | 2.5200000 |                    | 2.5200000 | 2.5200000 |

Unique Subject Identifier=3122010111-0198

Assay variable : PTINR\_VAL1 PT-INR Value

N Mean Standard Deviation Minimum Maximum

---

|   |           |  |           |           |
|---|-----------|--|-----------|-----------|
| 1 | 1.7800000 |  | 1.7800000 | 1.7800000 |
|---|-----------|--|-----------|-----------|

---

Laboratory tests at the time of obtaining Table 2-6 consent, according to the presence or absence of proton-pump inhibitors

Unique Subject Identifier=3122010111-0201

MEANS Procedure

Assay variable : PTINR\_VAL1 PT-INR Value

N Mean Standard Deviation Minimum Maximum

---

|   |           |           |           |           |
|---|-----------|-----------|-----------|-----------|
| 3 | 2.3000000 | 0.0700000 | 2.2200000 | 2.3500000 |
|---|-----------|-----------|-----------|-----------|

---

Unique Subject Identifier=3122010111-0202

Assay variable : PTINR\_VAL1 PT-INR Value

N Mean Standard Deviation Minimum Maximum

---

|   |           |  |           |           |
|---|-----------|--|-----------|-----------|
| 1 | 3.0900000 |  | 3.0900000 | 3.0900000 |
|---|-----------|--|-----------|-----------|

---

Unique Subject Identifier=3122010111-0206

Assay variable : PTINR\_VAL1 PT-INR Value

N Mean Standard Deviation Minimum Maximum

---

|   |           |  |           |           |
|---|-----------|--|-----------|-----------|
| 1 | 1.8500000 |  | 1.8500000 | 1.8500000 |
|---|-----------|--|-----------|-----------|

---

Unique Subject Identifier=3122010111-0208

Assay variable : PTINR\_VAL1 PT-INR Value

N Mean Standard Deviation Minimum Maximum

---

|   |           |  |           |           |
|---|-----------|--|-----------|-----------|
| 1 | 2.5500000 |  | 2.5500000 | 2.5500000 |
|---|-----------|--|-----------|-----------|

---



Laboratory tests at the time of obtaining Table 2-6 consent, according to the presence or absence of proton-pump inhibitors

Unique Subject Identifier=3122010111-0211

MEANS Procedure

Assay variable : PTINR\_VAL1 PT-INR Value

N Mean Standard Deviation Minimum Maximum

---

|   |           |  |           |           |
|---|-----------|--|-----------|-----------|
| 1 | 1.8100000 |  | 1.8100000 | 1.8100000 |
|---|-----------|--|-----------|-----------|

---

Unique Subject Identifier=3122010111-0212

Assay variable : PTINR\_VAL1 PT-INR Value

N Mean Standard Deviation Minimum Maximum

---

|   |           |  |           |           |
|---|-----------|--|-----------|-----------|
| 1 | 2.7100000 |  | 2.7100000 | 2.7100000 |
|---|-----------|--|-----------|-----------|

---

Unique Subject Identifier=3122010111-0213

Assay variable : PTINR\_VAL1 PT-INR Value

N Mean Standard Deviation Minimum Maximum

---

|   |           |           |           |           |
|---|-----------|-----------|-----------|-----------|
| 4 | 1.5050000 | 0.1126943 | 1.3900000 | 1.6600000 |
|---|-----------|-----------|-----------|-----------|

---

Unique Subject Identifier=3122010111-0214

Assay variable : PTINR\_VAL1 PT-INR Value

N Mean Standard Deviation Minimum Maximum

---

|   |           |  |           |           |
|---|-----------|--|-----------|-----------|
| 1 | 1.4900000 |  | 1.4900000 | 1.4900000 |
|---|-----------|--|-----------|-----------|

---

Laboratory tests at the time of obtaining Table 2-6 consent, according to the presence or absence of proton-pump inhibitors

Unique Subject Identifier=3122010111-0216

MEANS Procedure

Assay variable : PTINR\_VAL1 PT-INR Value

N Mean Standard Deviation Minimum Maximum

---

|   |           |  |           |           |
|---|-----------|--|-----------|-----------|
| 1 | 2.1900000 |  | 2.1900000 | 2.1900000 |
|---|-----------|--|-----------|-----------|

---

Unique Subject Identifier=3122010111-0217

Assay variable : PTINR\_VAL1 PT-INR Value

N Mean Standard Deviation Minimum Maximum

---

|   |           |  |           |           |
|---|-----------|--|-----------|-----------|
| 1 | 2.5000000 |  | 2.5000000 | 2.5000000 |
|---|-----------|--|-----------|-----------|

---

Unique Subject Identifier=3122010111-0218

Assay variable : PTINR\_VAL1 PT-INR Value

N Mean Standard Deviation Minimum Maximum

---

|   |           |  |           |           |
|---|-----------|--|-----------|-----------|
| 1 | 2.2200000 |  | 2.2200000 | 2.2200000 |
|---|-----------|--|-----------|-----------|

---

Unique Subject Identifier=3122010111-0222

Assay variable : PTINR\_VAL1 PT-INR Value

N Mean Standard Deviation Minimum Maximum

---

|   |           |  |           |           |
|---|-----------|--|-----------|-----------|
| 1 | 1.8500000 |  | 1.8500000 | 1.8500000 |
|---|-----------|--|-----------|-----------|

---

Laboratory tests at the time of obtaining Table 2-6 consent, according to the presence or absence of proton-pump inhibitors

Unique Subject Identifier=3122010111-0226

MEANS Procedure

Assay variable : PTINR\_VAL1 PT-INR Value

N Mean Standard Deviation Minimum Maximum

---

|   |           |  |           |           |
|---|-----------|--|-----------|-----------|
| 1 | 2.0700000 |  | 2.0700000 | 2.0700000 |
|---|-----------|--|-----------|-----------|

---

Unique Subject Identifier=3122010111-0230

Assay variable : PTINR\_VAL1 PT-INR Value

N Mean Standard Deviation Minimum Maximum

---

|   |           |  |           |           |
|---|-----------|--|-----------|-----------|
| 1 | 1.6500000 |  | 1.6500000 | 1.6500000 |
|---|-----------|--|-----------|-----------|

---

Unique Subject Identifier=3122010111-0231

Assay variable : PTINR\_VAL1 PT-INR Value

N Mean Standard Deviation Minimum Maximum

---

|   |           |           |           |           |
|---|-----------|-----------|-----------|-----------|
| 6 | 1.7316667 | 0.2162791 | 1.4500000 | 1.9400000 |
|---|-----------|-----------|-----------|-----------|

---

Unique Subject Identifier=3122010111-0232

Assay variable : PTINR\_VAL1 PT-INR Value

N Mean Standard Deviation Minimum Maximum

---

|   |          |  |          |          |
|---|----------|--|----------|----------|
| 1 | 1.480000 |  | 1.480000 | 1.480000 |
|---|----------|--|----------|----------|

---

Laboratory tests at the time of obtaining Table 2-6 consent, according to the presence or absence of proton-pump inhibitors

Unique Subject Identifier=3122010111-0234

MEANS Procedure

Assay variable : PTINR\_VAL1 PT-INR Value

N Mean Standard Deviation Minimum Maximum

---

|   |           |  |           |           |
|---|-----------|--|-----------|-----------|
| 1 | 1.2000000 |  | 1.2000000 | 1.2000000 |
|---|-----------|--|-----------|-----------|

---

Unique Subject Identifier=3122010111-0237

Assay variable : PTINR\_VAL1 PT-INR Value

N Mean Standard Deviation Minimum Maximum

---

|   |           |  |           |           |
|---|-----------|--|-----------|-----------|
| 1 | 2.2100000 |  | 2.2100000 | 2.2100000 |
|---|-----------|--|-----------|-----------|

---

Unique Subject Identifier=3122010111-0239

Assay variable : PTINR\_VAL1 PT-INR Value

N Mean Standard Deviation Minimum Maximum

---

|   |           |  |           |           |
|---|-----------|--|-----------|-----------|
| 1 | 1.7800000 |  | 1.7800000 | 1.7800000 |
|---|-----------|--|-----------|-----------|

---

Unique Subject Identifier=3122010111-0240

Assay variable : PTINR\_VAL1 PT-INR Value

N Mean Standard Deviation Minimum Maximum

---

|   |           |  |           |           |
|---|-----------|--|-----------|-----------|
| 1 | 2.0000000 |  | 2.0000000 | 2.0000000 |
|---|-----------|--|-----------|-----------|

---



Laboratory tests at the time of obtaining Table 2-6 consent, according to the presence or absence of proton-pump inhibitors

Unique Subject Identifier=3122010111-0241

MEANS Procedure

Assay variable : PTINR\_VAL1 PT-INR Value

N Mean Standard Deviation Minimum Maximum

---

|   |           |  |           |           |
|---|-----------|--|-----------|-----------|
| 1 | 2.4100000 |  | 2.4100000 | 2.4100000 |
|---|-----------|--|-----------|-----------|

---

Unique Subject Identifier=3122010111-0242

Assay variable : PTINR\_VAL1 PT-INR Value

N Mean Standard Deviation Minimum Maximum

---

|   |           |  |           |           |
|---|-----------|--|-----------|-----------|
| 1 | 1.7700000 |  | 1.7700000 | 1.7700000 |
|---|-----------|--|-----------|-----------|

---

Unique Subject Identifier=3122010111-0243

Assay variable : PTINR\_VAL1 PT-INR Value

N Mean Standard Deviation Minimum Maximum

---

|   |           |  |           |           |
|---|-----------|--|-----------|-----------|
| 1 | 2.0100000 |  | 2.0100000 | 2.0100000 |
|---|-----------|--|-----------|-----------|

---

Unique Subject Identifier=3122010111-0250

Assay variable : PTINR\_VAL1 PT-INR Value

N Mean Standard Deviation Minimum Maximum

---

|   |           |  |           |           |
|---|-----------|--|-----------|-----------|
| 1 | 1.8800000 |  | 1.8800000 | 1.8800000 |
|---|-----------|--|-----------|-----------|

---

Laboratory tests at the time of obtaining Table 2-6 consent, according to the presence or absence of proton-pump inhibitors

Unique Subject Identifier=3122010111-0254

MEANS Procedure

Assay variable : PTINR\_VAL1 PT-INR Value

N Mean Standard Deviation Minimum Maximum

---

|   |           |  |           |           |
|---|-----------|--|-----------|-----------|
| 1 | 2.5500000 |  | 2.5500000 | 2.5500000 |
|---|-----------|--|-----------|-----------|

---

Unique Subject Identifier=3122010111-0259

Assay variable : PTINR\_VAL1 PT-INR Value

N Mean Standard Deviation Minimum Maximum

---

|   |           |           |           |           |
|---|-----------|-----------|-----------|-----------|
| 3 | 1.8866667 | 0.0321455 | 1.8500000 | 1.9100000 |
|---|-----------|-----------|-----------|-----------|

---

Unique Subject Identifier=3122010111-0260

Assay variable : PTINR\_VAL1 PT-INR Value

N Mean Standard Deviation Minimum Maximum

---

|   |           |           |           |           |
|---|-----------|-----------|-----------|-----------|
| 2 | 1.9550000 | 0.1484924 | 1.8500000 | 2.0600000 |
|---|-----------|-----------|-----------|-----------|

---

Unique Subject Identifier=3122010111-0262

Assay variable : PTINR\_VAL1 PT-INR Value

N Mean Standard Deviation Minimum Maximum

---

|   |          |  |          |          |
|---|----------|--|----------|----------|
| 1 | 2.960000 |  | 2.960000 | 2.960000 |
|---|----------|--|----------|----------|

---

Laboratory tests at the time of obtaining Table 2-6 consent, according to the presence or absence of proton-pump inhibitors

Unique Subject Identifier=3122010111-0263

MEANS Procedure

Assay variable : PTINR\_VAL1 PT-INR Value

N Mean Standard Deviation Minimum Maximum

---

|   |           |           |           |           |
|---|-----------|-----------|-----------|-----------|
| 5 | 1.8240000 | 0.1383112 | 1.7100000 | 2.0600000 |
|---|-----------|-----------|-----------|-----------|

---

Unique Subject Identifier=3126000000-0002

Assay variable : PTINR\_VAL1 PT-INR Value

N Mean Standard Deviation Minimum Maximum

---

|   |           |  |           |           |
|---|-----------|--|-----------|-----------|
| 1 | 2.1000000 |  | 2.1000000 | 2.1000000 |
|---|-----------|--|-----------|-----------|

---

Unique Subject Identifier=3129000000-0001

Assay variable : PTINR\_VAL1 PT-INR Value

N Mean Standard Deviation Minimum Maximum

---

|   |           |  |           |           |
|---|-----------|--|-----------|-----------|
| 1 | 1.9000000 |  | 1.9000000 | 1.9000000 |
|---|-----------|--|-----------|-----------|

---

Unique Subject Identifier=3129000000-0002

Assay variable : PTINR\_VAL1 PT-INR Value

N Mean Standard Deviation Minimum Maximum

---

|   |          |          |          |          |
|---|----------|----------|----------|----------|
| 6 | 2.423333 | 0.299777 | 1.880000 | 2.790000 |
|---|----------|----------|----------|----------|

---

Laboratory tests at the time of obtaining Table 2-6 consent, according to the presence or absence of proton-pump inhibitors

Unique Subject Identifier=3129000000-0005

MEANS Procedure

Assay variable : PTINR\_VAL1 PT-INR Value

N Mean Standard Deviation Minimum Maximum

---

|   |           |           |           |           |
|---|-----------|-----------|-----------|-----------|
| 6 | 1.9966667 | 0.3787171 | 1.4700000 | 2.6300000 |
|---|-----------|-----------|-----------|-----------|

---

Unique Subject Identifier=3129000000-0006

Assay variable : PTINR\_VAL1 PT-INR Value

N Mean Standard Deviation Minimum Maximum

---

|   |           |           |           |           |
|---|-----------|-----------|-----------|-----------|
| 6 | 2.3183333 | 0.6036031 | 1.6000000 | 3.3200000 |
|---|-----------|-----------|-----------|-----------|

---

Unique Subject Identifier=3129000000-0009

Assay variable : PTINR\_VAL1 PT-INR Value

N Mean Standard Deviation Minimum Maximum

---

|   |           |           |           |           |
|---|-----------|-----------|-----------|-----------|
| 4 | 1.8650000 | 0.4133199 | 1.2700000 | 2.1600000 |
|---|-----------|-----------|-----------|-----------|

---

Unique Subject Identifier=3131010000-0012

Assay variable : PTINR\_VAL1 PT-INR Value

N Mean Standard Deviation Minimum Maximum

---

|   |          |           |          |          |
|---|----------|-----------|----------|----------|
| 4 | 2.180000 | 1.7153037 | 1.130000 | 4.730000 |
|---|----------|-----------|----------|----------|

---



Laboratory tests at the time of obtaining Table 2-6 consent, according to the presence or absence of proton-pump inhibitors

Unique Subject Identifier=3131010000-0017

MEANS Procedure

Assay variable : PTINR\_VAL1 PT-INR Value

| N | Mean      | Standard Deviation | Minimum   | Maximum   |
|---|-----------|--------------------|-----------|-----------|
| 2 | 2.7300000 | 0.3252691          | 2.5000000 | 2.9600000 |

Unique Subject Identifier=3131010000-0021

Assay variable : PTINR\_VAL1 PT-INR Value

| N | Mean      | Standard Deviation | Minimum   | Maximum   |
|---|-----------|--------------------|-----------|-----------|
| 1 | 2.2300000 |                    | 2.2300000 | 2.2300000 |

Unique Subject Identifier=3131010000-0026

Assay variable : PTINR\_VAL1 PT-INR Value

| N | Mean      | Standard Deviation | Minimum   | Maximum   |
|---|-----------|--------------------|-----------|-----------|
| 3 | 2.1433333 | 0.4606879          | 1.7300000 | 2.6400000 |

Unique Subject Identifier=3131010000-0034

Assay variable : PTINR\_VAL1 PT-INR Value

N Mean Standard Deviation Minimum Maximum

---

|   |           |           |           |           |
|---|-----------|-----------|-----------|-----------|
| 2 | 1.6150000 | 0.1060660 | 1.5400000 | 1.6900000 |
|---|-----------|-----------|-----------|-----------|

---

Laboratory tests at the time of obtaining Table 2-6 consent, according to the presence or absence of proton-pump inhibitors

Unique Subject Identifier=3131010000-0042

MEANS Procedure

Assay variable : PTINR\_VAL1 PT-INR Value

N Mean Standard Deviation Minimum Maximum

---

|   |          |           |          |          |
|---|----------|-----------|----------|----------|
| 4 | 1.440000 | 0.1439907 | 1.300000 | 1.640000 |
|---|----------|-----------|----------|----------|

---

Unique Subject Identifier=3131010000-0044

Assay variable : PTINR\_VAL1 PT-INR Value

N Mean Standard Deviation Minimum Maximum

---

|   |          |           |          |          |
|---|----------|-----------|----------|----------|
| 4 | 1.782500 | 0.4825194 | 1.060000 | 2.060000 |
|---|----------|-----------|----------|----------|

---

Unique Subject Identifier=3133000000-0005

Assay variable : PTINR\_VAL1 PT-INR Value

N Mean Standard Deviation Minimum Maximum

---

|   |          |           |          |          |
|---|----------|-----------|----------|----------|
| 3 | 2.320000 | 0.2783882 | 2.070000 | 2.620000 |
|---|----------|-----------|----------|----------|

---

Unique Subject Identifier=3133000000-0007

Assay variable : PTINR\_VAL1 PT-INR Value

N Mean Standard Deviation Minimum Maximum

---

|   |           |           |           |           |
|---|-----------|-----------|-----------|-----------|
| 4 | 1.6875000 | 0.1793274 | 1.5100000 | 1.9300000 |
|---|-----------|-----------|-----------|-----------|

---

Laboratory tests at the time of obtaining Table 2-6 consent, according to the presence or absence of proton-pump inhibitors

Unique Subject Identifier=313300000-0008

MEANS Procedure

Assay variable : PTINR\_VAL1 PT-INR Value

N Mean Standard Deviation Minimum Maximum

---

|   |           |           |           |           |
|---|-----------|-----------|-----------|-----------|
| 4 | 1.2450000 | 0.1869938 | 1.0800000 | 1.4400000 |
|---|-----------|-----------|-----------|-----------|

---

Unique Subject Identifier=313300000-0009

Assay variable : PTINR\_VAL1 PT-INR Value

N Mean Standard Deviation Minimum Maximum

---

|   |           |           |           |           |
|---|-----------|-----------|-----------|-----------|
| 3 | 2.5533333 | 2.1909207 | 1.1800000 | 5.0800000 |
|---|-----------|-----------|-----------|-----------|

---

Unique Subject Identifier=313300000-0010

Assay variable : PTINR\_VAL1 PT-INR Value

N Mean Standard Deviation Minimum Maximum

---

|   |           |           |           |           |
|---|-----------|-----------|-----------|-----------|
| 5 | 1.9100000 | 0.3012474 | 1.5400000 | 2.3500000 |
|---|-----------|-----------|-----------|-----------|

---

Unique Subject Identifier=313300000-0011

Assay variable : PTINR\_VAL1 PT-INR Value

N Mean Standard Deviation Minimum Maximum

---

|   |           |           |           |           |
|---|-----------|-----------|-----------|-----------|
| 3 | 1.9033333 | 0.3464583 | 1.6600000 | 2.3000000 |
|---|-----------|-----------|-----------|-----------|

---

Laboratory tests at the time of obtaining Table 2-6 consent, according to the presence or absence of proton-pump inhibitors

Unique Subject Identifier=3133000000-0012

MEANS Procedure

Assay variable : PTINR\_VAL1 PT-INR Value

| N | Mean      | Standard Deviation | Minimum   | Maximum   |
|---|-----------|--------------------|-----------|-----------|
| 3 | 1.0800000 | 0.0360555          | 1.0500000 | 1.1200000 |

Unique Subject Identifier=3133000000-0014

Assay variable : PTINR\_VAL1 PT-INR Value

| N | Mean      | Standard Deviation | Minimum   | Maximum   |
|---|-----------|--------------------|-----------|-----------|
| 4 | 1.7950000 | 0.1317826          | 1.7000000 | 1.9900000 |

Unique Subject Identifier=3133000000-0015

Assay variable : PTINR\_VAL1 PT-INR Value

| N | Mean      | Standard Deviation | Minimum   | Maximum   |
|---|-----------|--------------------|-----------|-----------|
| 4 | 1.9100000 | 0.0989949          | 1.7700000 | 1.9800000 |

Unique Subject Identifier=3133000000-0020

Assay variable : PTINR\_VAL1 PT-INR Value

N Mean Standard Deviation Minimum Maximum

---

|   |           |           |           |           |
|---|-----------|-----------|-----------|-----------|
| 3 | 2.6300000 | 0.6584831 | 2.2300000 | 3.3900000 |
|---|-----------|-----------|-----------|-----------|

---



Laboratory tests at the time of obtaining Table 2-6 consent, according to the presence or absence of proton-pump inhibitors

Unique Subject Identifier=313300000-0021

MEANS Procedure

Assay variable : PTINR\_VAL1 PT-INR Value

| N | Mean      | Standard Deviation | Minimum   | Maximum   |
|---|-----------|--------------------|-----------|-----------|
| 4 | 1.8425000 | 0.1828251          | 1.6400000 | 2.0500000 |

Unique Subject Identifier=313300000-0022

Assay variable : PTINR\_VAL1 PT-INR Value

| N | Mean      | Standard Deviation | Minimum   | Maximum   |
|---|-----------|--------------------|-----------|-----------|
| 2 | 2.1000000 | 0.6222540          | 1.6600000 | 2.5400000 |

Unique Subject Identifier=313300000-0026

Assay variable : PTINR\_VAL1 PT-INR Value

| N | Mean      | Standard Deviation | Minimum   | Maximum   |
|---|-----------|--------------------|-----------|-----------|
| 3 | 0.9866667 | 0.0472582          | 0.9500000 | 1.0400000 |

Unique Subject Identifier=313300000-0031

Assay variable : PTINR\_VAL1 PT-INR Value

N Mean Standard Deviation Minimum Maximum

---

|   |          |           |          |          |
|---|----------|-----------|----------|----------|
| 2 | 2.250000 | 0.9899495 | 1.550000 | 2.950000 |
|---|----------|-----------|----------|----------|

---

Laboratory tests at the time of obtaining Table 2-6 consent, according to the presence or absence of proton-pump inhibitors

Unique Subject Identifier=313300000-0032

MEANS Procedure

Assay variable : PTINR\_VAL1 PT-INR Value

| N | Mean      | Standard Deviation | Minimum   | Maximum   |
|---|-----------|--------------------|-----------|-----------|
| 5 | 2.5380000 | 0.7537042          | 1.8200000 | 3.6500000 |

Unique Subject Identifier=313300000-0034

Assay variable : PTINR\_VAL1 PT-INR Value

| N | Mean      | Standard Deviation | Minimum   | Maximum   |
|---|-----------|--------------------|-----------|-----------|
| 3 | 2.3266667 | 0.1814754          | 2.1600000 | 2.5200000 |

Unique Subject Identifier=313300000-0040

Assay variable : PTINR\_VAL1 PT-INR Value

| N | Mean      | Standard Deviation | Minimum   | Maximum   |
|---|-----------|--------------------|-----------|-----------|
| 5 | 2.0400000 | 0.2650472          | 1.7200000 | 2.3600000 |

Unique Subject Identifier=313300000-0041

Assay variable : PTINR\_VAL1 PT-INR Value

N Mean Standard Deviation Minimum Maximum

---

|   |           |           |           |           |
|---|-----------|-----------|-----------|-----------|
| 3 | 1.6133333 | 0.2804164 | 1.3700000 | 1.9200000 |
|---|-----------|-----------|-----------|-----------|

---

Laboratory tests at the time of obtaining Table 2-6 consent, according to the presence or absence of proton-pump inhibitors

Unique Subject Identifier=3133000000-0050

MEANS Procedure

Assay variable : PTINR\_VAL1 PT-INR Value

N Mean Standard Deviation Minimum Maximum

---

|   |           |           |           |           |
|---|-----------|-----------|-----------|-----------|
| 3 | 2.0766667 | 0.2274496 | 1.8900000 | 2.3300000 |
|---|-----------|-----------|-----------|-----------|

---

Unique Subject Identifier=3133000000-0054

Assay variable : PTINR\_VAL1 PT-INR Value

N Mean Standard Deviation Minimum Maximum

---

|   |           |           |           |           |
|---|-----------|-----------|-----------|-----------|
| 5 | 2.0560000 | 0.9046436 | 1.3100000 | 3.5900000 |
|---|-----------|-----------|-----------|-----------|

---

Unique Subject Identifier=3133000000-0055

Assay variable : PTINR\_VAL1 PT-INR Value

N Mean Standard Deviation Minimum Maximum

---

|   |           |           |           |           |
|---|-----------|-----------|-----------|-----------|
| 2 | 2.0550000 | 0.2333452 | 1.8900000 | 2.2200000 |
|---|-----------|-----------|-----------|-----------|

---

Unique Subject Identifier=3133000000-0056

Assay variable : PTINR\_VAL1 PT-INR Value

N Mean Standard Deviation Minimum Maximum

---

|   |           |           |           |           |
|---|-----------|-----------|-----------|-----------|
| 3 | 1.4766667 | 0.3066486 | 1.2300000 | 1.8200000 |
|---|-----------|-----------|-----------|-----------|

---

Laboratory tests at the time of obtaining Table 2-6 consent, according to the presence or absence of proton-pump inhibitors

Unique Subject Identifier=313300000-0057

MEANS Procedure

Assay variable : PTINR\_VAL1 PT-INR Value

N Mean Standard Deviation Minimum Maximum

---

|   |          |           |          |          |
|---|----------|-----------|----------|----------|
| 2 | 3.510000 | 0.1414214 | 3.410000 | 3.610000 |
|---|----------|-----------|----------|----------|

---

Unique Subject Identifier=313300000-0061

Assay variable : PTINR\_VAL1 PT-INR Value

N Mean Standard Deviation Minimum Maximum

---

|   |           |           |          |          |
|---|-----------|-----------|----------|----------|
| 6 | 1.6583333 | 0.2319842 | 1.290000 | 1.890000 |
|---|-----------|-----------|----------|----------|

---

Unique Subject Identifier=313300000-0073

Assay variable : PTINR\_VAL1 PT-INR Value

N Mean Standard Deviation Minimum Maximum

---

|   |          |           |          |          |
|---|----------|-----------|----------|----------|
| 4 | 2.207500 | 0.2482438 | 2.010000 | 2.550000 |
|---|----------|-----------|----------|----------|

---

Unique Subject Identifier=313300000-0076

Assay variable : PTINR\_VAL1 PT-INR Value

N Mean Standard Deviation Minimum Maximum

---

|   |           |           |           |           |
|---|-----------|-----------|-----------|-----------|
| 5 | 1.2160000 | 0.3338862 | 1.0100000 | 1.8100000 |
|---|-----------|-----------|-----------|-----------|

---



Laboratory tests at the time of obtaining Table 2-6 consent, according to the presence or absence of proton-pump inhibitors

Unique Subject Identifier=313300000-0081

MEANS Procedure

Assay variable : PTINR\_VAL1 PT-INR Value

N Mean Standard Deviation Minimum Maximum

---

|   |           |           |           |           |
|---|-----------|-----------|-----------|-----------|
| 3 | 1.4666667 | 0.1800926 | 1.2600000 | 1.5900000 |
|---|-----------|-----------|-----------|-----------|

---

Unique Subject Identifier=313300000-0084

Assay variable : PTINR\_VAL1 PT-INR Value

N Mean Standard Deviation Minimum Maximum

---

|   |           |           |           |           |
|---|-----------|-----------|-----------|-----------|
| 2 | 1.6200000 | 0.4949747 | 1.2700000 | 1.9700000 |
|---|-----------|-----------|-----------|-----------|

---

Unique Subject Identifier=313300000-0086

Assay variable : PTINR\_VAL1 PT-INR Value

N Mean Standard Deviation Minimum Maximum

---

|   |           |           |           |           |
|---|-----------|-----------|-----------|-----------|
| 3 | 2.3833333 | 0.2950141 | 2.1700000 | 2.7200000 |
|---|-----------|-----------|-----------|-----------|

---

Unique Subject Identifier=313300000-0090

Assay variable : PTINR\_VAL1 PT-INR Value

N Mean Standard Deviation Minimum Maximum

---

|   |           |           |           |           |
|---|-----------|-----------|-----------|-----------|
| 4 | 1.2775000 | 0.0377492 | 1.2300000 | 1.3200000 |
|---|-----------|-----------|-----------|-----------|

---

Laboratory tests at the time of obtaining Table 2-6 consent, according to the presence or absence of proton-pump inhibitors

Unique Subject Identifier=313400000-0004

MEANS Procedure

Assay variable : PTINR\_VAL1 PT-INR Value

| N | Mean      | Standard Deviation | Minimum   | Maximum   |
|---|-----------|--------------------|-----------|-----------|
| 1 | 1.9000000 |                    | 1.9000000 | 1.9000000 |

Unique Subject Identifier=313500000-0004

Assay variable : PTINR\_VAL1 PT-INR Value

| N | Mean      | Standard Deviation | Minimum   | Maximum   |
|---|-----------|--------------------|-----------|-----------|
| 1 | 1.6400000 |                    | 1.6400000 | 1.6400000 |

Unique Subject Identifier=313500000-0005

Assay variable : PTINR\_VAL1 PT-INR Value

| N | Mean      | Standard Deviation | Minimum   | Maximum   |
|---|-----------|--------------------|-----------|-----------|
| 2 | 1.5800000 | 0.4808326          | 1.2400000 | 1.9200000 |

Unique Subject Identifier=313500000-0009

Assay variable : PTINR\_VAL1 PT-INR Value

N Mean Standard Deviation Minimum Maximum

---

|   |          |           |          |          |
|---|----------|-----------|----------|----------|
| 2 | 1.940000 | 0.0707107 | 1.890000 | 1.990000 |
|---|----------|-----------|----------|----------|

---

Laboratory tests at the time of obtaining Table 2-6 consent, according to the presence or absence of proton-pump inhibitors

Unique Subject Identifier=3135000000-0034

MEANS Procedure

Assay variable : PTINR\_VAL1 PT-INR Value

| N | Mean      | Standard Deviation | Minimum   | Maximum   |
|---|-----------|--------------------|-----------|-----------|
| 2 | 2.0350000 | 0.2333452          | 1.8700000 | 2.2000000 |

Unique Subject Identifier=3139000000-0004

Assay variable : PTINR\_VAL1 PT-INR Value

| N | Mean      | Standard Deviation | Minimum   | Maximum   |
|---|-----------|--------------------|-----------|-----------|
| 3 | 1.5166667 | 0.2514624          | 1.3200000 | 1.8000000 |

Unique Subject Identifier=3139000000-0012

Assay variable : PTINR\_VAL1 PT-INR Value

| N | Mean      | Standard Deviation | Minimum   | Maximum   |
|---|-----------|--------------------|-----------|-----------|
| 1 | 2.1600000 |                    | 2.1600000 | 2.1600000 |

Unique Subject Identifier=3139000000-0021

Assay variable : PTINR\_VAL1 PT-INR Value

N Mean Standard Deviation Minimum Maximum

---

|   |           |           |           |           |
|---|-----------|-----------|-----------|-----------|
| 2 | 1.9200000 | 0.0282843 | 1.9000000 | 1.9400000 |
|---|-----------|-----------|-----------|-----------|

---

Laboratory tests at the time of obtaining Table 2-6 consent, according to the presence or absence of proton-pump inhibitors

Unique Subject Identifier=314300000-0001

MEANS Procedure

Assay variable : PTINR\_VAL1 PT-INR Value

N Mean Standard Deviation Minimum Maximum

---

|   |           |           |           |           |
|---|-----------|-----------|-----------|-----------|
| 4 | 1.3000000 | 0.1414214 | 1.1000000 | 1.4000000 |
|---|-----------|-----------|-----------|-----------|

---

Unique Subject Identifier=314300000-0010

Assay variable : PTINR\_VAL1 PT-INR Value

N Mean Standard Deviation Minimum Maximum

---

|   |           |           |           |           |
|---|-----------|-----------|-----------|-----------|
| 6 | 1.7066667 | 0.2299275 | 1.4900000 | 2.0900000 |
|---|-----------|-----------|-----------|-----------|

---

Unique Subject Identifier=314300000-0012

Assay variable : PTINR\_VAL1 PT-INR Value

N Mean Standard Deviation Minimum Maximum

---

|   |           |           |           |           |
|---|-----------|-----------|-----------|-----------|
| 5 | 1.9100000 | 0.7227379 | 1.2800000 | 3.1100000 |
|---|-----------|-----------|-----------|-----------|

---

Unique Subject Identifier=3147011110-0004

Assay variable : PTINR\_VAL1 PT-INR Value

N Mean Standard Deviation Minimum Maximum

---

|   |           |           |           |           |
|---|-----------|-----------|-----------|-----------|
| 3 | 2.2933333 | 0.1357694 | 2.1500000 | 2.4200000 |
|---|-----------|-----------|-----------|-----------|

---



Laboratory tests at the time of obtaining Table 2-6 consent, according to the presence or absence of proton-pump inhibitors

Unique Subject Identifier=3147011110-0005

MEANS Procedure

Assay variable : PTINR\_VAL1 PT-INR Value

N Mean Standard Deviation Minimum Maximum

---

|   |           |           |           |           |
|---|-----------|-----------|-----------|-----------|
| 4 | 2.0050000 | 0.6614378 | 1.5300000 | 2.9800000 |
|---|-----------|-----------|-----------|-----------|

---

Unique Subject Identifier=3147011110-0006

Assay variable : PTINR\_VAL1 PT-INR Value

N Mean Standard Deviation Minimum Maximum

---

|   |           |           |           |           |
|---|-----------|-----------|-----------|-----------|
| 2 | 1.8150000 | 0.2333452 | 1.6500000 | 1.9800000 |
|---|-----------|-----------|-----------|-----------|

---

Unique Subject Identifier=3147011110-0009

Assay variable : PTINR\_VAL1 PT-INR Value

N Mean Standard Deviation Minimum Maximum

---

|   |           |  |           |           |
|---|-----------|--|-----------|-----------|
| 1 | 1.6800000 |  | 1.6800000 | 1.6800000 |
|---|-----------|--|-----------|-----------|

---

Unique Subject Identifier=3150000000-0001

Assay variable : PTINR\_VAL1 PT-INR Value

N Mean Standard Deviation Minimum Maximum

---

|   |           |           |           |           |
|---|-----------|-----------|-----------|-----------|
| 6 | 2.2833333 | 0.5845226 | 1.8000000 | 3.4000000 |
|---|-----------|-----------|-----------|-----------|

---

Laboratory tests at the time of obtaining Table 2-6 consent, according to the presence or absence of proton-pump inhibitors

Unique Subject Identifier=315000000-0002

MEANS Procedure

Assay variable : PTINR\_VAL1 PT-INR Value

N Mean Standard Deviation Minimum Maximum

---

|   |           |           |           |           |
|---|-----------|-----------|-----------|-----------|
| 6 | 2.3833333 | 0.6400521 | 1.9000000 | 3.5000000 |
|---|-----------|-----------|-----------|-----------|

---

Unique Subject Identifier=315000000-0003

Assay variable : PTINR\_VAL1 PT-INR Value

N Mean Standard Deviation Minimum Maximum

---

|   |           |           |           |           |
|---|-----------|-----------|-----------|-----------|
| 6 | 1.9833333 | 0.4792355 | 1.5000000 | 2.6000000 |
|---|-----------|-----------|-----------|-----------|

---

Unique Subject Identifier=315000000-0004

Assay variable : PTINR\_VAL1 PT-INR Value

N Mean Standard Deviation Minimum Maximum

---

|   |           |           |           |           |
|---|-----------|-----------|-----------|-----------|
| 6 | 1.8666667 | 0.3204164 | 1.4000000 | 2.2000000 |
|---|-----------|-----------|-----------|-----------|

---

Unique Subject Identifier=315000000-0005

Assay variable : PTINR\_VAL1 PT-INR Value

N Mean Standard Deviation Minimum Maximum

---

|   |           |           |           |           |
|---|-----------|-----------|-----------|-----------|
| 6 | 2.1166667 | 0.5154286 | 1.3000000 | 2.7000000 |
|---|-----------|-----------|-----------|-----------|

---

Laboratory tests at the time of obtaining Table 2-6 consent, according to the presence or absence of proton-pump inhibitors

Unique Subject Identifier=315000000-0006

MEANS Procedure

Assay variable : PTINR\_VAL1 PT-INR Value

N Mean Standard Deviation Minimum Maximum

---

|   |           |           |           |           |
|---|-----------|-----------|-----------|-----------|
| 6 | 1.8000000 | 0.3405877 | 1.2000000 | 2.2000000 |
|---|-----------|-----------|-----------|-----------|

---

Unique Subject Identifier=315000000-0009

Assay variable : PTINR\_VAL1 PT-INR Value

N Mean Standard Deviation Minimum Maximum

---

|   |           |           |           |           |
|---|-----------|-----------|-----------|-----------|
| 6 | 1.6833333 | 0.3250641 | 1.2000000 | 2.2000000 |
|---|-----------|-----------|-----------|-----------|

---

Unique Subject Identifier=315000000-0010

Assay variable : PTINR\_VAL1 PT-INR Value

N Mean Standard Deviation Minimum Maximum

---

|   |           |           |           |           |
|---|-----------|-----------|-----------|-----------|
| 6 | 1.6166667 | 0.2401388 | 1.5000000 | 2.1000000 |
|---|-----------|-----------|-----------|-----------|

---

Unique Subject Identifier=315100000-0001

Assay variable : PTINR\_VAL1 PT-INR Value

N Mean Standard Deviation Minimum Maximum

---

|   |           |           |           |           |
|---|-----------|-----------|-----------|-----------|
| 5 | 1.4560000 | 0.2850088 | 1.1100000 | 1.7800000 |
|---|-----------|-----------|-----------|-----------|

---

Laboratory tests at the time of obtaining Table 2-6 consent, according to the presence or absence of proton-pump inhibitors

Unique Subject Identifier=3151000000-0002

MEANS Procedure

Assay variable : PTINR\_VAL1 PT-INR Value

| N | Mean      | Standard Deviation | Minimum   | Maximum   |
|---|-----------|--------------------|-----------|-----------|
| 5 | 1.2800000 | 0.0845577          | 1.2200000 | 1.4200000 |

Unique Subject Identifier=3151000000-0003

Assay variable : PTINR\_VAL1 PT-INR Value

| N | Mean      | Standard Deviation | Minimum   | Maximum   |
|---|-----------|--------------------|-----------|-----------|
| 6 | 2.2800000 | 0.0933809          | 2.1100000 | 2.3700000 |

Unique Subject Identifier=3151000000-0007

Assay variable : PTINR\_VAL1 PT-INR Value

| N | Mean      | Standard Deviation | Minimum   | Maximum   |
|---|-----------|--------------------|-----------|-----------|
| 6 | 1.5983333 | 0.1495883          | 1.3900000 | 1.7600000 |

Unique Subject Identifier=3151000000-0008

Assay variable : PTINR\_VAL1 PT-INR Value

N Mean Standard Deviation Minimum Maximum

---

|   |           |           |           |           |
|---|-----------|-----------|-----------|-----------|
| 6 | 1.8533333 | 0.1834848 | 1.6000000 | 2.0800000 |
|---|-----------|-----------|-----------|-----------|

---



Laboratory tests at the time of obtaining Table 2-6 consent, according to the presence or absence of proton-pump inhibitors

Unique Subject Identifier=3151000000-0010

MEANS Procedure

Assay variable : PTINR\_VAL1 PT-INR Value

N Mean Standard Deviation Minimum Maximum

---

|   |           |  |           |           |
|---|-----------|--|-----------|-----------|
| 1 | 1.4200000 |  | 1.4200000 | 1.4200000 |
|---|-----------|--|-----------|-----------|

---

Unique Subject Identifier=3151000000-0011

Assay variable : PTINR\_VAL1 PT-INR Value

N Mean Standard Deviation Minimum Maximum

---

|   |           |           |           |           |
|---|-----------|-----------|-----------|-----------|
| 3 | 0.9800000 | 0.0100000 | 0.9700000 | 0.9900000 |
|---|-----------|-----------|-----------|-----------|

---

Unique Subject Identifier=3152011000-0007

Assay variable : PTINR\_VAL1 PT-INR Value

N Mean Standard Deviation Minimum Maximum

---

|   |           |           |           |           |
|---|-----------|-----------|-----------|-----------|
| 5 | 1.5000000 | 0.1224745 | 1.4000000 | 1.7000000 |
|---|-----------|-----------|-----------|-----------|

---

Unique Subject Identifier=3152011000-0019

Assay variable : PTINR\_VAL1 PT-INR Value

N Mean Standard Deviation Minimum Maximum

---

|   |           |           |           |           |
|---|-----------|-----------|-----------|-----------|
| 4 | 1.6500000 | 0.1914854 | 1.4000000 | 1.8000000 |
|---|-----------|-----------|-----------|-----------|

---

Laboratory tests at the time of obtaining Table 2-6 consent, according to the presence or absence of proton-pump inhibitors

Unique Subject Identifier=3152011000-0020

MEANS Procedure

Assay variable : PTINR\_VAL1 PT-INR Value

N Mean Standard Deviation Minimum Maximum

---

|   |           |           |           |           |
|---|-----------|-----------|-----------|-----------|
| 4 | 1.9500000 | 0.2380476 | 1.8000000 | 2.3000000 |
|---|-----------|-----------|-----------|-----------|

---

Unique Subject Identifier=3158111111-0002

Assay variable : PTINR\_VAL1 PT-INR Value

N Mean Standard Deviation Minimum Maximum

---

|   |           |           |           |           |
|---|-----------|-----------|-----------|-----------|
| 4 | 2.8050000 | 0.6251666 | 2.0900000 | 3.5500000 |
|---|-----------|-----------|-----------|-----------|

---

Unique Subject Identifier=3158111111-0003

Assay variable : PTINR\_VAL1 PT-INR Value

N Mean Standard Deviation Minimum Maximum

---

|   |           |           |           |           |
|---|-----------|-----------|-----------|-----------|
| 4 | 2.1125000 | 0.2077458 | 1.9200000 | 2.3800000 |
|---|-----------|-----------|-----------|-----------|

---

Unique Subject Identifier=3158111111-0005

Assay variable : PTINR\_VAL1 PT-INR Value

N Mean Standard Deviation Minimum Maximum

---

|   |           |           |           |           |
|---|-----------|-----------|-----------|-----------|
| 5 | 2.1540000 | 0.5195479 | 1.7300000 | 3.0500000 |
|---|-----------|-----------|-----------|-----------|

---

Laboratory tests at the time of obtaining Table 2-6 consent, according to the presence or absence of proton-pump inhibitors

Unique Subject Identifier=3158111111-0006

MEANS Procedure

Assay variable : PTINR\_VAL1 PT-INR Value

N Mean Standard Deviation Minimum Maximum

---

|   |          |           |          |          |
|---|----------|-----------|----------|----------|
| 6 | 2.150000 | 0.4448820 | 1.600000 | 2.750000 |
|---|----------|-----------|----------|----------|

---

Unique Subject Identifier=3158111111-0007

Assay variable : PTINR\_VAL1 PT-INR Value

N Mean Standard Deviation Minimum Maximum

---

|   |          |           |          |          |
|---|----------|-----------|----------|----------|
| 6 | 1.975000 | 0.4844275 | 1.450000 | 2.750000 |
|---|----------|-----------|----------|----------|

---

Unique Subject Identifier=3158111111-0009

Assay variable : PTINR\_VAL1 PT-INR Value

N Mean Standard Deviation Minimum Maximum

---

|   |          |           |          |          |
|---|----------|-----------|----------|----------|
| 3 | 2.400000 | 0.1473092 | 2.230000 | 2.490000 |
|---|----------|-----------|----------|----------|

---

Unique Subject Identifier=3158111111-0010

Assay variable : PTINR\_VAL1 PT-INR Value

N Mean Standard Deviation Minimum Maximum

---

|   |           |           |           |           |
|---|-----------|-----------|-----------|-----------|
| 5 | 2.2740000 | 0.2769115 | 1.9800000 | 2.6800000 |
|---|-----------|-----------|-----------|-----------|

---

Laboratory tests at the time of obtaining Table 2-6 consent, according to the presence or absence of proton-pump inhibitors

Unique Subject Identifier=3158111111-0011

MEANS Procedure

Assay variable : PTINR\_VAL1 PT-INR Value

N Mean Standard Deviation Minimum Maximum

---

|   |          |           |           |           |
|---|----------|-----------|-----------|-----------|
| 4 | 2.000000 | 0.1329160 | 1.8200000 | 2.1100000 |
|---|----------|-----------|-----------|-----------|

---

Unique Subject Identifier=3158111111-0014

Assay variable : PTINR\_VAL1 PT-INR Value

N Mean Standard Deviation Minimum Maximum

---

|   |           |           |           |           |
|---|-----------|-----------|-----------|-----------|
| 5 | 1.9260000 | 0.0859069 | 1.8000000 | 2.0400000 |
|---|-----------|-----------|-----------|-----------|

---

Unique Subject Identifier=3158111111-0015

Assay variable : PTINR\_VAL1 PT-INR Value

N Mean Standard Deviation Minimum Maximum

---

|   |           |           |           |           |
|---|-----------|-----------|-----------|-----------|
| 4 | 2.0750000 | 0.2230844 | 1.9000000 | 2.4000000 |
|---|-----------|-----------|-----------|-----------|

---

Unique Subject Identifier=3158111111-0019

Assay variable : PTINR\_VAL1 PT-INR Value

N Mean Standard Deviation Minimum Maximum

---

|   |           |           |           |           |
|---|-----------|-----------|-----------|-----------|
| 3 | 1.9700000 | 0.1915724 | 1.8400000 | 2.1900000 |
|---|-----------|-----------|-----------|-----------|

---



Laboratory tests at the time of obtaining Table 2-6 consent, according to the presence or absence of proton-pump inhibitors

Unique Subject Identifier=3158111111-0020

MEANS Procedure

Assay variable : PTINR\_VAL1 PT-INR Value

| N | Mean      | Standard Deviation | Minimum   | Maximum   |
|---|-----------|--------------------|-----------|-----------|
| 6 | 1.3966667 | 0.1936664          | 1.2200000 | 1.7000000 |

Unique Subject Identifier=3158111111-0024

Assay variable : PTINR\_VAL1 PT-INR Value

| N | Mean      | Standard Deviation | Minimum   | Maximum   |
|---|-----------|--------------------|-----------|-----------|
| 3 | 2.5300000 | 0.8201829          | 1.7000000 | 3.3400000 |

Unique Subject Identifier=3158111111-0027

Assay variable : PTINR\_VAL1 PT-INR Value

| N | Mean      | Standard Deviation | Minimum   | Maximum   |
|---|-----------|--------------------|-----------|-----------|
| 4 | 1.9050000 | 0.3092464          | 1.4800000 | 2.2100000 |

Unique Subject Identifier=3158111111-0029

Assay variable : PTINR\_VAL1 PT-INR Value

N Mean Standard Deviation Minimum Maximum

---

|   |          |           |          |          |
|---|----------|-----------|----------|----------|
| 4 | 2.050000 | 0.0697615 | 1.990000 | 2.150000 |
|---|----------|-----------|----------|----------|

---

Laboratory tests at the time of obtaining Table 2-6 consent, according to the presence or absence of proton-pump inhibitors

Unique Subject Identifier=3158111111-0030

MEANS Procedure

Assay variable : PTINR\_VAL1 PT-INR Value

| N | Mean      | Standard Deviation | Minimum   | Maximum   |
|---|-----------|--------------------|-----------|-----------|
| 5 | 2.9220000 | 0.3417163          | 2.5500000 | 3.2800000 |

Unique Subject Identifier=3158111111-0034

Assay variable : PTINR\_VAL1 PT-INR Value

| N | Mean      | Standard Deviation | Minimum   | Maximum   |
|---|-----------|--------------------|-----------|-----------|
| 5 | 1.5860000 | 0.2169793          | 1.3200000 | 1.9200000 |

Unique Subject Identifier=3158111111-0035

Assay variable : PTINR\_VAL1 PT-INR Value

| N | Mean      | Standard Deviation | Minimum   | Maximum   |
|---|-----------|--------------------|-----------|-----------|
| 4 | 2.3925000 | 0.6396027          | 1.8000000 | 3.2500000 |

Unique Subject Identifier=3158111111-0036

Assay variable : PTINR\_VAL1 PT-INR Value

N Mean Standard Deviation Minimum Maximum

---

|   |           |           |           |           |
|---|-----------|-----------|-----------|-----------|
| 4 | 1.9800000 | 0.0752773 | 1.8900000 | 2.0600000 |
|---|-----------|-----------|-----------|-----------|

---

Laboratory tests at the time of obtaining Table 2-6 consent, according to the presence or absence of proton-pump inhibitors

Unique Subject Identifier=3158111111-0038

MEANS Procedure

Assay variable : PTINR\_VAL1 PT-INR Value

N Mean Standard Deviation Minimum Maximum

---

|   |          |           |          |          |
|---|----------|-----------|----------|----------|
| 4 | 2.760000 | 0.4667619 | 2.100000 | 3.200000 |
|---|----------|-----------|----------|----------|

---

Unique Subject Identifier=3158111111-0042

Assay variable : PTINR\_VAL1 PT-INR Value

N Mean Standard Deviation Minimum Maximum

---

|   |          |           |          |          |
|---|----------|-----------|----------|----------|
| 4 | 2.275000 | 0.1717556 | 2.160000 | 2.530000 |
|---|----------|-----------|----------|----------|

---

Unique Subject Identifier=3158111111-0046

Assay variable : PTINR\_VAL1 PT-INR Value

N Mean Standard Deviation Minimum Maximum

---

|   |          |           |          |          |
|---|----------|-----------|----------|----------|
| 3 | 1.660000 | 0.3041381 | 1.460000 | 2.010000 |
|---|----------|-----------|----------|----------|

---

Unique Subject Identifier=3158111111-0047

Assay variable : PTINR\_VAL1 PT-INR Value

N Mean Standard Deviation Minimum Maximum

---

|   |           |           |           |           |
|---|-----------|-----------|-----------|-----------|
| 5 | 2.3060000 | 0.2736421 | 1.9600000 | 2.5900000 |
|---|-----------|-----------|-----------|-----------|

---

Laboratory tests at the time of obtaining Table 2-6 consent, according to the presence or absence of proton-pump inhibitors

Unique Subject Identifier=3158111111-0048

MEANS Procedure

Assay variable : PTINR\_VAL1 PT-INR Value

N Mean Standard Deviation Minimum Maximum

---

|   |           |           |           |           |
|---|-----------|-----------|-----------|-----------|
| 4 | 2.0875000 | 0.3432565 | 1.7500000 | 2.4400000 |
|---|-----------|-----------|-----------|-----------|

---

Unique Subject Identifier=3158111111-0050

Assay variable : PTINR\_VAL1 PT-INR Value

N Mean Standard Deviation Minimum Maximum

---

|   |           |           |           |           |
|---|-----------|-----------|-----------|-----------|
| 6 | 2.0600000 | 0.1970787 | 1.8400000 | 2.3100000 |
|---|-----------|-----------|-----------|-----------|

---

Unique Subject Identifier=3158111111-0056

Assay variable : PTINR\_VAL1 PT-INR Value

N Mean Standard Deviation Minimum Maximum

---

|   |           |           |           |           |
|---|-----------|-----------|-----------|-----------|
| 2 | 1.1700000 | 0.0424264 | 1.1400000 | 1.2000000 |
|---|-----------|-----------|-----------|-----------|

---

Unique Subject Identifier=3158111111-0057

Assay variable : PTINR\_VAL1 PT-INR Value

N Mean Standard Deviation Minimum Maximum

---

|   |           |           |           |           |
|---|-----------|-----------|-----------|-----------|
| 6 | 1.7616667 | 0.4397007 | 1.2800000 | 2.5100000 |
|---|-----------|-----------|-----------|-----------|

---



Laboratory tests at the time of obtaining Table 2-6 consent, according to the presence or absence of proton-pump inhibitors

Unique Subject Identifier=3158111111-0060

MEANS Procedure

Assay variable : PTINR\_VAL1 PT-INR Value

N Mean Standard Deviation Minimum Maximum

---

|   |           |           |           |           |
|---|-----------|-----------|-----------|-----------|
| 6 | 2.5533333 | 0.3623074 | 2.1100000 | 3.0200000 |
|---|-----------|-----------|-----------|-----------|

---

Unique Subject Identifier=3158111111-0062

Assay variable : PTINR\_VAL1 PT-INR Value

N Mean Standard Deviation Minimum Maximum

---

|   |           |           |           |           |
|---|-----------|-----------|-----------|-----------|
| 4 | 1.9500000 | 0.3721111 | 1.4400000 | 2.3000000 |
|---|-----------|-----------|-----------|-----------|

---

Unique Subject Identifier=3158111111-0063

Assay variable : PTINR\_VAL1 PT-INR Value

N Mean Standard Deviation Minimum Maximum

---

|   |           |           |           |           |
|---|-----------|-----------|-----------|-----------|
| 3 | 1.9700000 | 0.1322876 | 1.8200000 | 2.0700000 |
|---|-----------|-----------|-----------|-----------|

---

Unique Subject Identifier=3158111111-0064

Assay variable : PTINR\_VAL1 PT-INR Value

N Mean Standard Deviation Minimum Maximum

---

|   |          |          |          |          |
|---|----------|----------|----------|----------|
| 3 | 2.280000 | 0.062450 | 2.230000 | 2.350000 |
|---|----------|----------|----------|----------|

---

Laboratory tests at the time of obtaining Table 2-6 consent, according to the presence or absence of proton-pump inhibitors

Unique Subject Identifier=3158111111-0068

MEANS Procedure

Assay variable : PTINR\_VAL1 PT-INR Value

N Mean Standard Deviation Minimum Maximum

---

|   |           |           |           |           |
|---|-----------|-----------|-----------|-----------|
| 6 | 1.7716667 | 0.4928455 | 1.4300000 | 2.7500000 |
|---|-----------|-----------|-----------|-----------|

---

Unique Subject Identifier=3158111111-0069

Assay variable : PTINR\_VAL1 PT-INR Value

N Mean Standard Deviation Minimum Maximum

---

|   |           |  |           |           |
|---|-----------|--|-----------|-----------|
| 1 | 1.4700000 |  | 1.4700000 | 1.4700000 |
|---|-----------|--|-----------|-----------|

---

Unique Subject Identifier=3158111111-0070

Assay variable : PTINR\_VAL1 PT-INR Value

N Mean Standard Deviation Minimum Maximum

---

|   |           |           |           |           |
|---|-----------|-----------|-----------|-----------|
| 4 | 1.9250000 | 0.2880393 | 1.6500000 | 2.3300000 |
|---|-----------|-----------|-----------|-----------|

---

Unique Subject Identifier=3161010111-0002

Assay variable : PTINR\_VAL1 PT-INR Value

N Mean Standard Deviation Minimum Maximum

---

|   |          |           |          |          |
|---|----------|-----------|----------|----------|
| 3 | 2.033333 | 0.0907377 | 1.930000 | 2.100000 |
|---|----------|-----------|----------|----------|

---

Laboratory tests at the time of obtaining Table 2-6 consent, according to the presence or absence of proton-pump inhibitors

Unique Subject Identifier=3161010111-0004

MEANS Procedure

Assay variable : PTINR\_VAL1 PT-INR Value

N Mean Standard Deviation Minimum Maximum

---

|   |           |           |           |           |
|---|-----------|-----------|-----------|-----------|
| 4 | 2.3975000 | 0.3927998 | 2.0200000 | 2.7800000 |
|---|-----------|-----------|-----------|-----------|

---

Unique Subject Identifier=3162011000-0001

Assay variable : PTINR\_VAL1 PT-INR Value

N Mean Standard Deviation Minimum Maximum

---

|   |           |           |           |           |
|---|-----------|-----------|-----------|-----------|
| 4 | 2.1300000 | 0.3909817 | 1.6500000 | 2.5600000 |
|---|-----------|-----------|-----------|-----------|

---

Unique Subject Identifier=3162011000-0002

Assay variable : PTINR\_VAL1 PT-INR Value

N Mean Standard Deviation Minimum Maximum

---

|   |           |           |           |           |
|---|-----------|-----------|-----------|-----------|
| 2 | 2.4700000 | 0.6363961 | 2.0200000 | 2.9200000 |
|---|-----------|-----------|-----------|-----------|

---

Unique Subject Identifier=3162011000-0003

Assay variable : PTINR\_VAL1 PT-INR Value

N Mean Standard Deviation Minimum Maximum

---

|   |          |           |          |          |
|---|----------|-----------|----------|----------|
| 3 | 1.920000 | 0.2051828 | 1.720000 | 2.130000 |
|---|----------|-----------|----------|----------|

---

Laboratory tests at the time of obtaining Table 2-6 consent, according to the presence or absence of proton-pump inhibitors

Unique Subject Identifier=3162011000-0006

MEANS Procedure

Assay variable : PTINR\_VAL1 PT-INR Value

N Mean Standard Deviation Minimum Maximum

---

|   |           |           |           |           |
|---|-----------|-----------|-----------|-----------|
| 4 | 2.0025000 | 0.4342330 | 1.6400000 | 2.5400000 |
|---|-----------|-----------|-----------|-----------|

---

Unique Subject Identifier=3162011000-0007

Assay variable : PTINR\_VAL1 PT-INR Value

N Mean Standard Deviation Minimum Maximum

---

|   |           |  |           |           |
|---|-----------|--|-----------|-----------|
| 1 | 2.0600000 |  | 2.0600000 | 2.0600000 |
|---|-----------|--|-----------|-----------|

---

Unique Subject Identifier=3162011000-0012

Assay variable : PTINR\_VAL1 PT-INR Value

N Mean Standard Deviation Minimum Maximum

---

|   |           |  |           |           |
|---|-----------|--|-----------|-----------|
| 1 | 1.5000000 |  | 1.5000000 | 1.5000000 |
|---|-----------|--|-----------|-----------|

---

Unique Subject Identifier=3162011000-0018

Assay variable : PTINR\_VAL1 PT-INR Value

N Mean Standard Deviation Minimum Maximum

---

|   |           |           |           |           |
|---|-----------|-----------|-----------|-----------|
| 4 | 1.8050000 | 0.3591193 | 1.3100000 | 2.1200000 |
|---|-----------|-----------|-----------|-----------|

---



Laboratory tests at the time of obtaining Table 2-6 consent, according to the presence or absence of proton-pump inhibitors

Unique Subject Identifier=3162011000-0024

MEANS Procedure

Assay variable : PTINR\_VAL1 PT-INR Value

N Mean Standard Deviation Minimum Maximum

---

|   |           |           |           |           |
|---|-----------|-----------|-----------|-----------|
| 4 | 2.1125000 | 0.2831225 | 1.6900000 | 2.2900000 |
|---|-----------|-----------|-----------|-----------|

---

Unique Subject Identifier=3162011000-0025

Assay variable : PTINR\_VAL1 PT-INR Value

N Mean Standard Deviation Minimum Maximum

---

|   |           |           |           |           |
|---|-----------|-----------|-----------|-----------|
| 2 | 1.8800000 | 0.1838478 | 1.7500000 | 2.0100000 |
|---|-----------|-----------|-----------|-----------|

---

Unique Subject Identifier=3163011011-0002

Assay variable : PTINR\_VAL1 PT-INR Value

N Mean Standard Deviation Minimum Maximum

---

|   |           |           |           |           |
|---|-----------|-----------|-----------|-----------|
| 5 | 1.9200000 | 0.7823043 | 1.2000000 | 3.2000000 |
|---|-----------|-----------|-----------|-----------|

---

Unique Subject Identifier=3163011011-0005

Assay variable : PTINR\_VAL1 PT-INR Value

N Mean Standard Deviation Minimum Maximum

---

|   |           |           |           |           |
|---|-----------|-----------|-----------|-----------|
| 4 | 2.0500000 | 0.1732051 | 1.8000000 | 2.2000000 |
|---|-----------|-----------|-----------|-----------|

---

Laboratory tests at the time of obtaining Table 2-6 consent, according to the presence or absence of proton-pump inhibitors

Unique Subject Identifier=3163011011-0006

MEANS Procedure

Assay variable : PTINR\_VAL1 PT-INR Value

N Mean Standard Deviation Minimum Maximum

---

|   |           |           |           |           |
|---|-----------|-----------|-----------|-----------|
| 5 | 1.9400000 | 0.3714835 | 1.4000000 | 2.4000000 |
|---|-----------|-----------|-----------|-----------|

---

Unique Subject Identifier=3163011011-0009

Assay variable : PTINR\_VAL1 PT-INR Value

N Mean Standard Deviation Minimum Maximum

---

|   |           |           |           |           |
|---|-----------|-----------|-----------|-----------|
| 2 | 1.8500000 | 0.3535534 | 1.6000000 | 2.1000000 |
|---|-----------|-----------|-----------|-----------|

---

Unique Subject Identifier=3164011100-0003

Assay variable : PTINR\_VAL1 PT-INR Value

N Mean Standard Deviation Minimum Maximum

---

|   |           |           |           |           |
|---|-----------|-----------|-----------|-----------|
| 4 | 1.3925000 | 0.1678044 | 1.1500000 | 1.5100000 |
|---|-----------|-----------|-----------|-----------|

---

Unique Subject Identifier=3166011110-0011

Assay variable : PTINR\_VAL1 PT-INR Value

N Mean Standard Deviation Minimum Maximum

---

|   |          |  |          |          |
|---|----------|--|----------|----------|
| 1 | 1.610000 |  | 1.610000 | 1.610000 |
|---|----------|--|----------|----------|

---

Laboratory tests at the time of obtaining Table 2-6 consent, according to the presence or absence of proton-pump inhibitors

Unique Subject Identifier=3166011110-0017

MEANS Procedure

Assay variable : PTINR\_VAL1 PT-INR Value

| N | Mean      | Standard Deviation | Minimum   | Maximum   |
|---|-----------|--------------------|-----------|-----------|
| 2 | 2.7150000 | 0.6151829          | 2.2800000 | 3.1500000 |

Unique Subject Identifier=3171010000-0005

Assay variable : PTINR\_VAL1 PT-INR Value

| N | Mean      | Standard Deviation | Minimum   | Maximum   |
|---|-----------|--------------------|-----------|-----------|
| 4 | 1.7250000 | 0.1892969          | 1.6000000 | 2.0000000 |

Unique Subject Identifier=3175011000-0002

Assay variable : PTINR\_VAL1 PT-INR Value

| N | Mean      | Standard Deviation | Minimum   | Maximum   |
|---|-----------|--------------------|-----------|-----------|
| 4 | 1.7375000 | 0.1878608          | 1.5800000 | 2.0100000 |

Unique Subject Identifier=3175011000-0003

Assay variable : PTINR\_VAL1 PT-INR Value

N Mean Standard Deviation Minimum Maximum

---

|   |          |  |          |          |
|---|----------|--|----------|----------|
| 1 | 2.130000 |  | 2.130000 | 2.130000 |
|---|----------|--|----------|----------|

---

Laboratory tests at the time of obtaining Table 2-6 consent, according to the presence or absence of proton-pump inhibitors

Unique Subject Identifier=3175011000-0005

MEANS Procedure

Assay variable : PTINR\_VAL1 PT-INR Value

| N | Mean      | Standard Deviation | Minimum   | Maximum   |
|---|-----------|--------------------|-----------|-----------|
| 6 | 1.8583333 | 0.1468900          | 1.6500000 | 2.0500000 |

Unique Subject Identifier=3179010000-0007

Assay variable : PTINR\_VAL1 PT-INR Value

| N | Mean      | Standard Deviation | Minimum   | Maximum   |
|---|-----------|--------------------|-----------|-----------|
| 3 | 1.5833333 | 0.5345403          | 0.9700000 | 1.9500000 |

Unique Subject Identifier=3180010000-0002

Assay variable : PTINR\_VAL1 PT-INR Value

| N | Mean      | Standard Deviation | Minimum   | Maximum   |
|---|-----------|--------------------|-----------|-----------|
| 6 | 1.8366667 | 0.6839201          | 1.2700000 | 3.1600000 |

Unique Subject Identifier=3180010000-0010

Assay variable : PTINR\_VAL1 PT-INR Value

N Mean Standard Deviation Minimum Maximum

---

|   |           |           |           |           |
|---|-----------|-----------|-----------|-----------|
| 5 | 2.4440000 | 1.1439755 | 1.2100000 | 4.1600000 |
|---|-----------|-----------|-----------|-----------|

---



Laboratory tests at the time of obtaining Table 2-6 consent, according to the presence or absence of proton-pump inhibitors

Unique Subject Identifier=3185010010-0012

MEANS Procedure

Assay variable : PTINR\_VAL1 PT-INR Value

| N | Mean      | Standard Deviation | Minimum   | Maximum   |
|---|-----------|--------------------|-----------|-----------|
| 4 | 1.2725000 | 0.1826426          | 1.1100000 | 1.4500000 |

Unique Subject Identifier=3185010010-0018

Assay variable : PTINR\_VAL1 PT-INR Value

| N | Mean      | Standard Deviation | Minimum   | Maximum   |
|---|-----------|--------------------|-----------|-----------|
| 3 | 1.8466667 | 0.2844878          | 1.5200000 | 2.0400000 |

Unique Subject Identifier=3185010010-0019

Assay variable : PTINR\_VAL1 PT-INR Value

| N | Mean      | Standard Deviation | Minimum   | Maximum   |
|---|-----------|--------------------|-----------|-----------|
| 3 | 2.4433333 | 0.7543430          | 1.7400000 | 3.2400000 |

Unique Subject Identifier=3185010010-0020

Assay variable : PTINR\_VAL1 PT-INR Value

N Mean Standard Deviation Minimum Maximum

---

|   |           |           |           |           |
|---|-----------|-----------|-----------|-----------|
| 6 | 1.2866667 | 0.0668331 | 1.2200000 | 1.4000000 |
|---|-----------|-----------|-----------|-----------|

---

Laboratory tests at the time of obtaining Table 2-6 consent, according to the presence or absence of proton-pump inhibitors

Unique Subject Identifier=3185010010-0023

MEANS Procedure

Assay variable : PTINR\_VAL1 PT-INR Value

| N | Mean      | Standard Deviation | Minimum   | Maximum   |
|---|-----------|--------------------|-----------|-----------|
| 6 | 1.3466667 | 0.1136075          | 1.1900000 | 1.5100000 |

Unique Subject Identifier=3185010010-0024

Assay variable : PTINR\_VAL1 PT-INR Value

| N | Mean      | Standard Deviation | Minimum   | Maximum   |
|---|-----------|--------------------|-----------|-----------|
| 5 | 1.5640000 | 0.3812873          | 1.1900000 | 2.0900000 |

Unique Subject Identifier=3185010010-0029

Assay variable : PTINR\_VAL1 PT-INR Value

| N | Mean      | Standard Deviation | Minimum   | Maximum   |
|---|-----------|--------------------|-----------|-----------|
| 6 | 1.5650000 | 0.8708329          | 1.0500000 | 3.2800000 |

Unique Subject Identifier=3185010010-0030

Assay variable : PTINR\_VAL1 PT-INR Value

N Mean Standard Deviation Minimum Maximum

---

|   |          |           |          |          |
|---|----------|-----------|----------|----------|
| 4 | 1.310000 | 0.1505545 | 1.130000 | 1.490000 |
|---|----------|-----------|----------|----------|

---

Laboratory tests at the time of obtaining Table 2-6 consent, according to the presence or absence of proton-pump inhibitors

Unique Subject Identifier=3185010010-0032

MEANS Procedure

Assay variable : PTINR\_VAL1 PT-INR Value

N Mean Standard Deviation Minimum Maximum

---

|   |           |           |           |           |
|---|-----------|-----------|-----------|-----------|
| 4 | 2.5475000 | 0.7944547 | 1.6600000 | 3.4000000 |
|---|-----------|-----------|-----------|-----------|

---

Unique Subject Identifier=3185010010-0034

Assay variable : PTINR\_VAL1 PT-INR Value

N Mean Standard Deviation Minimum Maximum

---

|   |           |           |           |           |
|---|-----------|-----------|-----------|-----------|
| 5 | 1.8280000 | 0.4853555 | 1.4000000 | 2.6100000 |
|---|-----------|-----------|-----------|-----------|

---

Unique Subject Identifier=3185010010-0038

Assay variable : PTINR\_VAL1 PT-INR Value

N Mean Standard Deviation Minimum Maximum

---

|   |           |           |           |           |
|---|-----------|-----------|-----------|-----------|
| 4 | 1.9350000 | 0.5476313 | 1.4600000 | 2.7200000 |
|---|-----------|-----------|-----------|-----------|

---

Unique Subject Identifier=3185010010-0040

Assay variable : PTINR\_VAL1 PT-INR Value

N Mean Standard Deviation Minimum Maximum

---

|   |           |           |           |           |
|---|-----------|-----------|-----------|-----------|
| 6 | 1.5733333 | 0.1688392 | 1.3800000 | 1.8200000 |
|---|-----------|-----------|-----------|-----------|

---

Laboratory tests at the time of obtaining Table 2-6 consent, according to the presence or absence of proton-pump inhibitors

Unique Subject Identifier=3185010010-0042

MEANS Procedure

Assay variable : PTINR\_VAL1 PT-INR Value

N Mean Standard Deviation Minimum Maximum

---

|   |           |           |           |           |
|---|-----------|-----------|-----------|-----------|
| 3 | 2.3966667 | 0.7870409 | 1.7700000 | 3.2800000 |
|---|-----------|-----------|-----------|-----------|

---

Unique Subject Identifier=3185010010-0046

Assay variable : PTINR\_VAL1 PT-INR Value

N Mean Standard Deviation Minimum Maximum

---

|   |           |           |           |           |
|---|-----------|-----------|-----------|-----------|
| 6 | 1.6483333 | 0.3326510 | 1.4000000 | 2.3000000 |
|---|-----------|-----------|-----------|-----------|

---

Unique Subject Identifier=3187000000-0001

Assay variable : PTINR\_VAL1 PT-INR Value

N Mean Standard Deviation Minimum Maximum

---

|   |           |           |           |           |
|---|-----------|-----------|-----------|-----------|
| 5 | 2.4800000 | 0.6445153 | 1.8100000 | 3.1800000 |
|---|-----------|-----------|-----------|-----------|

---

Unique Subject Identifier=3187000000-0003

Assay variable : PTINR\_VAL1 PT-INR Value

N Mean Standard Deviation Minimum Maximum

---

|   |          |           |          |          |
|---|----------|-----------|----------|----------|
| 3 | 2.100000 | 0.5469004 | 1.610000 | 2.690000 |
|---|----------|-----------|----------|----------|

---



Laboratory tests at the time of obtaining Table 2-6 consent, according to the presence or absence of proton-pump inhibitors

Unique Subject Identifier=3187000000-0006

MEANS Procedure

Assay variable : PTINR\_VAL1 PT-INR Value

N Mean Standard Deviation Minimum Maximum

---

|   |          |           |          |          |
|---|----------|-----------|----------|----------|
| 6 | 2.460000 | 1.2437363 | 1.440000 | 4.930000 |
|---|----------|-----------|----------|----------|

---

Unique Subject Identifier=3187000000-0008

Assay variable : PTINR\_VAL1 PT-INR Value

N Mean Standard Deviation Minimum Maximum

---

|   |           |           |          |          |
|---|-----------|-----------|----------|----------|
| 6 | 1.9483333 | 0.3566745 | 1.460000 | 2.250000 |
|---|-----------|-----------|----------|----------|

---

Unique Subject Identifier=3187000000-0009

Assay variable : PTINR\_VAL1 PT-INR Value

N Mean Standard Deviation Minimum Maximum

---

|   |           |           |          |          |
|---|-----------|-----------|----------|----------|
| 3 | 2.4366667 | 0.1205543 | 2.310000 | 2.550000 |
|---|-----------|-----------|----------|----------|

---

Unique Subject Identifier=3190111111-0001

Assay variable : PTINR\_VAL1 PT-INR Value

N Mean Standard Deviation Minimum Maximum

---

|   |           |           |           |           |
|---|-----------|-----------|-----------|-----------|
| 6 | 2.1833333 | 0.3253716 | 1.6600000 | 2.5800000 |
|---|-----------|-----------|-----------|-----------|

---

Laboratory tests at the time of obtaining Table 2-6 consent, according to the presence or absence of proton-pump inhibitors

Unique Subject Identifier=3190111111-0004

MEANS Procedure

Assay variable : PTINR\_VAL1 PT-INR Value

N Mean Standard Deviation Minimum Maximum

---

|   |           |           |           |           |
|---|-----------|-----------|-----------|-----------|
| 4 | 1.8375000 | 0.2088660 | 1.6800000 | 2.1400000 |
|---|-----------|-----------|-----------|-----------|

---

Unique Subject Identifier=3190111111-0005

Assay variable : PTINR\_VAL1 PT-INR Value

N Mean Standard Deviation Minimum Maximum

---

|   |           |           |           |           |
|---|-----------|-----------|-----------|-----------|
| 5 | 1.8540000 | 0.1837934 | 1.5600000 | 2.0300000 |
|---|-----------|-----------|-----------|-----------|

---

Unique Subject Identifier=3190111111-0006

Assay variable : PTINR\_VAL1 PT-INR Value

N Mean Standard Deviation Minimum Maximum

---

|   |           |           |           |           |
|---|-----------|-----------|-----------|-----------|
| 2 | 2.0050000 | 0.1060660 | 1.9300000 | 2.0800000 |
|---|-----------|-----------|-----------|-----------|

---

Unique Subject Identifier=3197000000-0003

Assay variable : PTINR\_VAL1 PT-INR Value

N Mean Standard Deviation Minimum Maximum

---

|   |          |           |          |          |
|---|----------|-----------|----------|----------|
| 2 | 1.310000 | 0.2404163 | 1.140000 | 1.480000 |
|---|----------|-----------|----------|----------|

---

Laboratory tests at the time of obtaining Table 2-6 consent, according to the presence or absence of proton-pump inhibitors

Unique Subject Identifier=3197000000-0005

MEANS Procedure

Assay variable : PTINR\_VAL1 PT-INR Value

N Mean Standard Deviation Minimum Maximum

---

|   |           |           |           |           |
|---|-----------|-----------|-----------|-----------|
| 6 | 2.3916667 | 0.4574458 | 1.8700000 | 3.1900000 |
|---|-----------|-----------|-----------|-----------|

---

Unique Subject Identifier=3197000000-0017

Assay variable : PTINR\_VAL1 PT-INR Value

N Mean Standard Deviation Minimum Maximum

---

|   |           |           |           |           |
|---|-----------|-----------|-----------|-----------|
| 6 | 2.1116667 | 0.9602378 | 1.1900000 | 3.6400000 |
|---|-----------|-----------|-----------|-----------|

---

Unique Subject Identifier=3197000000-0048

Assay variable : PTINR\_VAL1 PT-INR Value

N Mean Standard Deviation Minimum Maximum

---

|   |           |           |           |           |
|---|-----------|-----------|-----------|-----------|
| 6 | 1.7950000 | 0.4539053 | 1.2700000 | 2.3300000 |
|---|-----------|-----------|-----------|-----------|

---

Unique Subject Identifier=3197000000-0058

Assay variable : PTINR\_VAL1 PT-INR Value

N Mean Standard Deviation Minimum Maximum

---

|   |           |           |           |           |
|---|-----------|-----------|-----------|-----------|
| 6 | 2.2750000 | 0.5256900 | 1.6700000 | 3.1000000 |
|---|-----------|-----------|-----------|-----------|

---

Laboratory tests at the time of obtaining Table 2-6 consent, according to the presence or absence of proton-pump inhibitors

Unique Subject Identifier=3204010110-0002

MEANS Procedure

Assay variable : PTINR\_VAL1 PT-INR Value

| N | Mean      | Standard Deviation | Minimum   | Maximum   |
|---|-----------|--------------------|-----------|-----------|
| 3 | 2.1633333 | 0.0550757          | 2.1100000 | 2.2200000 |

Unique Subject Identifier=3205011100-0001

Assay variable : PTINR\_VAL1 PT-INR Value

| N | Mean      | Standard Deviation | Minimum   | Maximum   |
|---|-----------|--------------------|-----------|-----------|
| 5 | 1.6800000 | 0.1095445          | 1.5000000 | 1.8000000 |

Unique Subject Identifier=3205011100-0003

Assay variable : PTINR\_VAL1 PT-INR Value

| N | Mean      | Standard Deviation | Minimum   | Maximum   |
|---|-----------|--------------------|-----------|-----------|
| 3 | 2.3000000 | 0.1732051          | 2.2000000 | 2.5000000 |

Unique Subject Identifier=3205011100-0010

Assay variable : PTINR\_VAL1 PT-INR Value

N Mean Standard Deviation Minimum Maximum

---

|   |           |           |           |           |
|---|-----------|-----------|-----------|-----------|
| 3 | 1.7333333 | 0.0577350 | 1.7000000 | 1.8000000 |
|---|-----------|-----------|-----------|-----------|

---



Laboratory tests at the time of obtaining Table 2-6 consent, according to the presence or absence of proton-pump inhibitors

Unique Subject Identifier=3205011100-0019

MEANS Procedure

Assay variable : PTINR\_VAL1 PT-INR Value

N Mean Standard Deviation Minimum Maximum

---

|   |           |           |           |           |
|---|-----------|-----------|-----------|-----------|
| 6 | 1.7000000 | 0.1788854 | 1.5000000 | 2.0000000 |
|---|-----------|-----------|-----------|-----------|

---

Unique Subject Identifier=3205011100-0021

Assay variable : PTINR\_VAL1 PT-INR Value

N Mean Standard Deviation Minimum Maximum

---

|   |           |           |           |           |
|---|-----------|-----------|-----------|-----------|
| 6 | 2.2166667 | 0.4833908 | 1.7000000 | 3.0000000 |
|---|-----------|-----------|-----------|-----------|

---

Unique Subject Identifier=3205011100-0027

Assay variable : PTINR\_VAL1 PT-INR Value

N Mean Standard Deviation Minimum Maximum

---

|   |           |           |           |           |
|---|-----------|-----------|-----------|-----------|
| 6 | 2.1666667 | 0.3444803 | 1.6000000 | 2.5000000 |
|---|-----------|-----------|-----------|-----------|

---

Unique Subject Identifier=3206011010-0004

Assay variable : PTINR\_VAL1 PT-INR Value

N Mean Standard Deviation Minimum Maximum

---

|   |           |           |           |           |
|---|-----------|-----------|-----------|-----------|
| 2 | 2.5150000 | 0.2192031 | 2.3600000 | 2.6700000 |
|---|-----------|-----------|-----------|-----------|

---

Laboratory tests at the time of obtaining Table 2-6 consent, according to the presence or absence of proton-pump inhibitors

Unique Subject Identifier=3206011010-0005

MEANS Procedure

Assay variable : PTINR\_VAL1 PT-INR Value

| N | Mean      | Standard Deviation | Minimum   | Maximum   |
|---|-----------|--------------------|-----------|-----------|
| 2 | 1.9650000 | 0.2333452          | 1.8000000 | 2.1300000 |

Unique Subject Identifier=3208000000-0002

Assay variable : PTINR\_VAL1 PT-INR Value

| N | Mean      | Standard Deviation | Minimum   | Maximum   |
|---|-----------|--------------------|-----------|-----------|
| 6 | 1.4666667 | 0.2133229          | 1.2700000 | 1.8000000 |

Unique Subject Identifier=3208000000-0006

Assay variable : PTINR\_VAL1 PT-INR Value

| N | Mean      | Standard Deviation | Minimum   | Maximum   |
|---|-----------|--------------------|-----------|-----------|
| 6 | 1.7600000 | 0.5092347          | 0.9800000 | 2.3000000 |

Unique Subject Identifier=3208000000-0007

Assay variable : PTINR\_VAL1 PT-INR Value

N Mean Standard Deviation Minimum Maximum

---

|   |           |           |           |           |
|---|-----------|-----------|-----------|-----------|
| 5 | 2.0140000 | 0.3176161 | 1.7200000 | 2.4600000 |
|---|-----------|-----------|-----------|-----------|

---

Laboratory tests at the time of obtaining Table 2-6 consent, according to the presence or absence of proton-pump inhibitors

Unique Subject Identifier=3214111000-0004

MEANS Procedure

Assay variable : PTINR\_VAL1 PT-INR Value

| N | Mean      | Standard Deviation | Minimum   | Maximum   |
|---|-----------|--------------------|-----------|-----------|
| 1 | 2.1100000 |                    | 2.1100000 | 2.1100000 |

Unique Subject Identifier=3214111000-0005

Assay variable : PTINR\_VAL1 PT-INR Value

| N | Mean      | Standard Deviation | Minimum   | Maximum   |
|---|-----------|--------------------|-----------|-----------|
| 1 | 1.0500000 |                    | 1.0500000 | 1.0500000 |

Unique Subject Identifier=3301010000-0008

Assay variable : PTINR\_VAL1 PT-INR Value

| N | Mean      | Standard Deviation | Minimum   | Maximum   |
|---|-----------|--------------------|-----------|-----------|
| 6 | 1.5500000 | 0.1870829          | 1.3000000 | 1.8000000 |

Unique Subject Identifier=3301010000-0013

Assay variable : PTINR\_VAL1 PT-INR Value

N Mean Standard Deviation Minimum Maximum

---

|   |          |           |          |          |
|---|----------|-----------|----------|----------|
| 6 | 1.600000 | 0.1095445 | 1.400000 | 1.700000 |
|---|----------|-----------|----------|----------|

---

Laboratory tests at the time of obtaining Table 2-6 consent, according to the presence or absence of proton-pump inhibitors

Unique Subject Identifier=3301010000-0018

MEANS Procedure

Assay variable : PTINR\_VAL1 PT-INR Value

N Mean Standard Deviation Minimum Maximum

---

|   |          |           |          |          |
|---|----------|-----------|----------|----------|
| 5 | 2.160000 | 0.2302173 | 1.800000 | 2.400000 |
|---|----------|-----------|----------|----------|

---

Unique Subject Identifier=3301010000-0021

Assay variable : PTINR\_VAL1 PT-INR Value

N Mean Standard Deviation Minimum Maximum

---

|   |          |           |          |          |
|---|----------|-----------|----------|----------|
| 6 | 2.183333 | 0.5419102 | 1.700000 | 3.100000 |
|---|----------|-----------|----------|----------|

---

Unique Subject Identifier=3301010000-0026

Assay variable : PTINR\_VAL1 PT-INR Value

N Mean Standard Deviation Minimum Maximum

---

|   |          |           |          |          |
|---|----------|-----------|----------|----------|
| 6 | 1.316667 | 0.1169045 | 1.200000 | 1.500000 |
|---|----------|-----------|----------|----------|

---

Unique Subject Identifier=3301010000-0027

Assay variable : PTINR\_VAL1 PT-INR Value

N Mean Standard Deviation Minimum Maximum

---

|   |           |           |           |           |
|---|-----------|-----------|-----------|-----------|
| 6 | 1.8166667 | 0.2228602 | 1.4000000 | 2.0000000 |
|---|-----------|-----------|-----------|-----------|

---



Laboratory tests at the time of obtaining Table 2-6 consent, according to the presence or absence of proton-pump inhibitors

Unique Subject Identifier=3301010000-0033

MEANS Procedure

Assay variable : PTINR\_VAL1 PT-INR Value

N Mean Standard Deviation Minimum Maximum

---

|   |          |           |          |          |
|---|----------|-----------|----------|----------|
| 6 | 1.650000 | 0.3146427 | 1.100000 | 2.000000 |
|---|----------|-----------|----------|----------|

---

Unique Subject Identifier=3302010000-0005

Assay variable : PTINR\_VAL1 PT-INR Value

N Mean Standard Deviation Minimum Maximum

---

|   |          |           |          |          |
|---|----------|-----------|----------|----------|
| 4 | 1.387500 | 0.1260622 | 1.290000 | 1.570000 |
|---|----------|-----------|----------|----------|

---

Unique Subject Identifier=3302010000-0010

Assay variable : PTINR\_VAL1 PT-INR Value

N Mean Standard Deviation Minimum Maximum

---

|   |          |           |          |          |
|---|----------|-----------|----------|----------|
| 6 | 2.173333 | 0.6104971 | 1.580000 | 3.100000 |
|---|----------|-----------|----------|----------|

---

Unique Subject Identifier=3302010000-0021

Assay variable : PTINR\_VAL1 PT-INR Value

N Mean Standard Deviation Minimum Maximum

---

|   |           |           |           |           |
|---|-----------|-----------|-----------|-----------|
| 6 | 1.8050000 | 0.2564176 | 1.3800000 | 2.1400000 |
|---|-----------|-----------|-----------|-----------|

---

Laboratory tests at the time of obtaining Table 2-6 consent, according to the presence or absence of proton-pump inhibitors

Unique Subject Identifier=3302010000-0023

MEANS Procedure

Assay variable : PTINR\_VAL1 PT-INR Value

N Mean Standard Deviation Minimum Maximum

---

|   |           |           |           |           |
|---|-----------|-----------|-----------|-----------|
| 6 | 1.9566667 | 0.3199167 | 1.6300000 | 2.5000000 |
|---|-----------|-----------|-----------|-----------|

---

Unique Subject Identifier=3302010000-0028

Assay variable : PTINR\_VAL1 PT-INR Value

N Mean Standard Deviation Minimum Maximum

---

|   |           |           |           |           |
|---|-----------|-----------|-----------|-----------|
| 4 | 2.3175000 | 0.8429067 | 1.4100000 | 3.4500000 |
|---|-----------|-----------|-----------|-----------|

---

Unique Subject Identifier=3304011000-0004

Assay variable : PTINR\_VAL1 PT-INR Value

N Mean Standard Deviation Minimum Maximum

---

|   |           |           |           |           |
|---|-----------|-----------|-----------|-----------|
| 5 | 2.4400000 | 0.9343447 | 1.7000000 | 4.0000000 |
|---|-----------|-----------|-----------|-----------|

---

Unique Subject Identifier=3304011000-0005

Assay variable : PTINR\_VAL1 PT-INR Value

N Mean Standard Deviation Minimum Maximum

---

|   |          |           |          |          |
|---|----------|-----------|----------|----------|
| 4 | 1.800000 | 0.2160247 | 1.600000 | 2.100000 |
|---|----------|-----------|----------|----------|

---

Laboratory tests at the time of obtaining Table 2-6 consent, according to the presence or absence of proton-pump inhibitors

Unique Subject Identifier=3344010000-0006

MEANS Procedure

Assay variable : PTINR\_VAL1 PT-INR Value

N Mean Standard Deviation Minimum Maximum

---

|   |           |  |           |           |
|---|-----------|--|-----------|-----------|
| 1 | 2.1000000 |  | 2.1000000 | 2.1000000 |
|---|-----------|--|-----------|-----------|

---

Unique Subject Identifier=3347010000-0003

Assay variable : PTINR\_VAL1 PT-INR Value

N Mean Standard Deviation Minimum Maximum

---

|   |           |           |           |           |
|---|-----------|-----------|-----------|-----------|
| 6 | 2.1900000 | 0.3221801 | 1.8400000 | 2.7000000 |
|---|-----------|-----------|-----------|-----------|

---

Unique Subject Identifier=3347010000-0004

Assay variable : PTINR\_VAL1 PT-INR Value

N Mean Standard Deviation Minimum Maximum

---

|   |           |           |           |           |
|---|-----------|-----------|-----------|-----------|
| 6 | 2.1833333 | 0.1169045 | 2.0000000 | 2.3000000 |
|---|-----------|-----------|-----------|-----------|

---

Unique Subject Identifier=3347010000-0006

Assay variable : PTINR\_VAL1 PT-INR Value

N Mean Standard Deviation Minimum Maximum

---

|   |           |           |           |           |
|---|-----------|-----------|-----------|-----------|
| 6 | 2.2333333 | 0.3881580 | 1.9000000 | 3.0000000 |
|---|-----------|-----------|-----------|-----------|

---

Laboratory tests at the time of obtaining Table 2-6 consent, according to the presence or absence of proton-pump inhibitors

Unique Subject Identifier=3347010000-0008

MEANS Procedure

Assay variable : PTINR\_VAL1 PT-INR Value

N Mean Standard Deviation Minimum Maximum

---

|   |           |           |           |           |
|---|-----------|-----------|-----------|-----------|
| 6 | 2.1000000 | 0.3577709 | 1.7000000 | 2.7000000 |
|---|-----------|-----------|-----------|-----------|

---

Unique Subject Identifier=3347010000-0009

Assay variable : PTINR\_VAL1 PT-INR Value

N Mean Standard Deviation Minimum Maximum

---

|   |           |           |           |           |
|---|-----------|-----------|-----------|-----------|
| 6 | 1.7183333 | 0.1166905 | 1.5000000 | 1.8000000 |
|---|-----------|-----------|-----------|-----------|

---

Unique Subject Identifier=3347010000-0011

Assay variable : PTINR\_VAL1 PT-INR Value

N Mean Standard Deviation Minimum Maximum

---

|   |           |           |           |           |
|---|-----------|-----------|-----------|-----------|
| 6 | 2.3800000 | 0.2332381 | 2.0000000 | 2.7000000 |
|---|-----------|-----------|-----------|-----------|

---

Unique Subject Identifier=3347010000-0012

Assay variable : PTINR\_VAL1 PT-INR Value

N Mean Standard Deviation Minimum Maximum

---

|   |           |           |           |           |
|---|-----------|-----------|-----------|-----------|
| 6 | 2.3450000 | 0.3668106 | 1.9000000 | 2.7000000 |
|---|-----------|-----------|-----------|-----------|

---



Laboratory tests at the time of obtaining Table 2-6 consent, according to the presence or absence of proton-pump inhibitors

Unique Subject Identifier=3347010000-0013

MEANS Procedure

Assay variable : PTINR\_VAL1 PT-INR Value

| N | Mean      | Standard Deviation | Minimum   | Maximum   |
|---|-----------|--------------------|-----------|-----------|
| 6 | 1.9150000 | 0.1433527          | 1.8000000 | 2.1900000 |

Unique Subject Identifier=3347010000-0014

Assay variable : PTINR\_VAL1 PT-INR Value

| N | Mean      | Standard Deviation | Minimum   | Maximum   |
|---|-----------|--------------------|-----------|-----------|
| 6 | 2.5000000 | 0.3464102          | 2.0000000 | 3.0000000 |

Unique Subject Identifier=3347010000-0016

Assay variable : PTINR\_VAL1 PT-INR Value

| N | Mean      | Standard Deviation | Minimum   | Maximum   |
|---|-----------|--------------------|-----------|-----------|
| 5 | 1.7920000 | 0.1879362          | 1.6000000 | 2.1000000 |

Unique Subject Identifier=3347010000-0017

Assay variable : PTINR\_VAL1 PT-INR Value

N Mean Standard Deviation Minimum Maximum

---

|   |           |           |           |           |
|---|-----------|-----------|-----------|-----------|
| 6 | 1.7200000 | 0.2433105 | 1.4200000 | 2.1000000 |
|---|-----------|-----------|-----------|-----------|

---

Laboratory tests at the time of obtaining Table 2-6 consent, according to the presence or absence of proton-pump inhibitors

Unique Subject Identifier=3347010000-0020

MEANS Procedure

Assay variable : PTINR\_VAL1 PT-INR Value

N Mean Standard Deviation Minimum Maximum

---

|   |           |           |           |           |
|---|-----------|-----------|-----------|-----------|
| 6 | 2.1083333 | 0.1855173 | 1.8000000 | 2.3000000 |
|---|-----------|-----------|-----------|-----------|

---

Unique Subject Identifier=3347010000-0021

Assay variable : PTINR\_VAL1 PT-INR Value

N Mean Standard Deviation Minimum Maximum

---

|   |           |           |           |           |
|---|-----------|-----------|-----------|-----------|
| 6 | 1.8483333 | 0.2891655 | 1.6000000 | 2.3000000 |
|---|-----------|-----------|-----------|-----------|

---

Unique Subject Identifier=3347010000-0023

Assay variable : PTINR\_VAL1 PT-INR Value

N Mean Standard Deviation Minimum Maximum

---

|   |           |           |           |           |
|---|-----------|-----------|-----------|-----------|
| 6 | 2.1666667 | 0.5125102 | 1.3000000 | 2.6000000 |
|---|-----------|-----------|-----------|-----------|

---

Unique Subject Identifier=3347010000-0027

Assay variable : PTINR\_VAL1 PT-INR Value

N Mean Standard Deviation Minimum Maximum

---

|   |          |           |          |          |
|---|----------|-----------|----------|----------|
| 6 | 1.500000 | 0.0894427 | 1.400000 | 1.600000 |
|---|----------|-----------|----------|----------|

---

Laboratory tests at the time of obtaining Table 2-6 consent, according to the presence or absence of proton-pump inhibitors

Unique Subject Identifier=3347010000-0028

MEANS Procedure

Assay variable : PTINR\_VAL1 PT-INR Value

N Mean Standard Deviation Minimum Maximum

---

|   |           |           |           |           |
|---|-----------|-----------|-----------|-----------|
| 4 | 1.5250000 | 0.2217356 | 1.3000000 | 1.8000000 |
|---|-----------|-----------|-----------|-----------|

---

Unique Subject Identifier=3347010000-0030

Assay variable : PTINR\_VAL1 PT-INR Value

N Mean Standard Deviation Minimum Maximum

---

|   |           |           |           |           |
|---|-----------|-----------|-----------|-----------|
| 6 | 1.9666667 | 0.2250926 | 1.6000000 | 2.2000000 |
|---|-----------|-----------|-----------|-----------|

---

Unique Subject Identifier=3347010000-0037

Assay variable : PTINR\_VAL1 PT-INR Value

N Mean Standard Deviation Minimum Maximum

---

|   |           |           |           |           |
|---|-----------|-----------|-----------|-----------|
| 4 | 1.7375000 | 0.1265899 | 1.5600000 | 1.8600000 |
|---|-----------|-----------|-----------|-----------|

---

Unique Subject Identifier=3347010000-0039

Assay variable : PTINR\_VAL1 PT-INR Value

N Mean Standard Deviation Minimum Maximum

---

|   |           |           |           |           |
|---|-----------|-----------|-----------|-----------|
| 6 | 1.9050000 | 0.4900510 | 1.4000000 | 2.8000000 |
|---|-----------|-----------|-----------|-----------|

---

Laboratory tests at the time of obtaining Table 2-6 consent, according to the presence or absence of proton-pump inhibitors

Unique Subject Identifier=3347010000-0041

MEANS Procedure

Assay variable : PTINR\_VAL1 PT-INR Value

N Mean Standard Deviation Minimum Maximum

---

|   |           |           |           |           |
|---|-----------|-----------|-----------|-----------|
| 6 | 1.8800000 | 0.2262742 | 1.6000000 | 2.1800000 |
|---|-----------|-----------|-----------|-----------|

---

Unique Subject Identifier=3347010000-0044

Assay variable : PTINR\_VAL1 PT-INR Value

N Mean Standard Deviation Minimum Maximum

---

|   |           |           |           |           |
|---|-----------|-----------|-----------|-----------|
| 6 | 2.0783333 | 0.1371739 | 1.9000000 | 2.2000000 |
|---|-----------|-----------|-----------|-----------|

---

Unique Subject Identifier=3347010000-0045

Assay variable : PTINR\_VAL1 PT-INR Value

N Mean Standard Deviation Minimum Maximum

---

|   |           |           |           |           |
|---|-----------|-----------|-----------|-----------|
| 6 | 2.5000000 | 0.5796551 | 1.9000000 | 3.3000000 |
|---|-----------|-----------|-----------|-----------|

---

Unique Subject Identifier=3347010000-0046

Assay variable : PTINR\_VAL1 PT-INR Value

N Mean Standard Deviation Minimum Maximum

---

|   |           |           |           |           |
|---|-----------|-----------|-----------|-----------|
| 6 | 2.3250000 | 0.6570769 | 1.5000000 | 3.1000000 |
|---|-----------|-----------|-----------|-----------|

---



Laboratory tests at the time of obtaining Table 2-6 consent, according to the presence or absence of proton-pump inhibitors

Unique Subject Identifier=3349010000-0003

MEANS Procedure

Assay variable : PTINR\_VAL1 PT-INR Value

N Mean Standard Deviation Minimum Maximum

---

|   |           |           |           |           |
|---|-----------|-----------|-----------|-----------|
| 6 | 1.8500000 | 0.1643168 | 1.6000000 | 2.0000000 |
|---|-----------|-----------|-----------|-----------|

---

Unique Subject Identifier=3349010000-0006

Assay variable : PTINR\_VAL1 PT-INR Value

N Mean Standard Deviation Minimum Maximum

---

|   |           |           |           |           |
|---|-----------|-----------|-----------|-----------|
| 6 | 1.3333333 | 0.2065591 | 1.0000000 | 1.5000000 |
|---|-----------|-----------|-----------|-----------|

---

Unique Subject Identifier=3349010000-0008

Assay variable : PTINR\_VAL1 PT-INR Value

N Mean Standard Deviation Minimum Maximum

---

|   |           |           |           |           |
|---|-----------|-----------|-----------|-----------|
| 6 | 1.7833333 | 0.2316607 | 1.6000000 | 2.2000000 |
|---|-----------|-----------|-----------|-----------|

---

Unique Subject Identifier=3349010000-0009

Assay variable : PTINR\_VAL1 PT-INR Value

N Mean Standard Deviation Minimum Maximum

---

|   |           |           |           |           |
|---|-----------|-----------|-----------|-----------|
| 6 | 1.6666667 | 0.2338090 | 1.4000000 | 2.0000000 |
|---|-----------|-----------|-----------|-----------|

---

Laboratory tests at the time of obtaining Table 2-6 consent, according to the presence or absence of proton-pump inhibitors

Unique Subject Identifier=3349010000-0010

MEANS Procedure

Assay variable : PTINR\_VAL1 PT-INR Value

N Mean Standard Deviation Minimum Maximum

---

|   |           |           |           |           |
|---|-----------|-----------|-----------|-----------|
| 6 | 2.1000000 | 0.7694154 | 1.2000000 | 3.4000000 |
|---|-----------|-----------|-----------|-----------|

---

Unique Subject Identifier=3350010000-0002

Assay variable : PTINR\_VAL1 PT-INR Value

N Mean Standard Deviation Minimum Maximum

---

|   |           |           |           |           |
|---|-----------|-----------|-----------|-----------|
| 4 | 2.1750000 | 0.4645787 | 1.6000000 | 2.6000000 |
|---|-----------|-----------|-----------|-----------|

---

Unique Subject Identifier=3350010000-0003

Assay variable : PTINR\_VAL1 PT-INR Value

N Mean Standard Deviation Minimum Maximum

---

|   |           |           |           |           |
|---|-----------|-----------|-----------|-----------|
| 5 | 2.1800000 | 0.5761944 | 1.6000000 | 2.8000000 |
|---|-----------|-----------|-----------|-----------|

---

Unique Subject Identifier=3350010000-0004

Assay variable : PTINR\_VAL1 PT-INR Value

N Mean Standard Deviation Minimum Maximum

---

|   |           |           |           |           |
|---|-----------|-----------|-----------|-----------|
| 6 | 1.5833333 | 0.1329160 | 1.4000000 | 1.8000000 |
|---|-----------|-----------|-----------|-----------|

---

Laboratory tests at the time of obtaining Table 2-6 consent, according to the presence or absence of proton-pump inhibitors

Unique Subject Identifier=3350010000-0005

MEANS Procedure

Assay variable : PTINR\_VAL1 PT-INR Value

N Mean Standard Deviation Minimum Maximum

---

|   |           |           |           |           |
|---|-----------|-----------|-----------|-----------|
| 6 | 2.6333333 | 0.3265986 | 2.2000000 | 3.2000000 |
|---|-----------|-----------|-----------|-----------|

---

Unique Subject Identifier=3401000000-0004

Assay variable : PTINR\_VAL1 PT-INR Value

N Mean Standard Deviation Minimum Maximum

---

|   |           |           |           |           |
|---|-----------|-----------|-----------|-----------|
| 4 | 2.1125000 | 0.3233548 | 1.7500000 | 2.4000000 |
|---|-----------|-----------|-----------|-----------|

---

Unique Subject Identifier=3401000000-0011

Assay variable : PTINR\_VAL1 PT-INR Value

N Mean Standard Deviation Minimum Maximum

---

|   |           |           |           |           |
|---|-----------|-----------|-----------|-----------|
| 4 | 1.8850000 | 0.5774946 | 1.3900000 | 2.7200000 |
|---|-----------|-----------|-----------|-----------|

---

Unique Subject Identifier=3401000000-0016

Assay variable : PTINR\_VAL1 PT-INR Value

N Mean Standard Deviation Minimum Maximum

---

|   |           |           |           |           |
|---|-----------|-----------|-----------|-----------|
| 5 | 1.8900000 | 0.6411708 | 1.3300000 | 2.9000000 |
|---|-----------|-----------|-----------|-----------|

---

Laboratory tests at the time of obtaining Table 2-6 consent, according to the presence or absence of proton-pump inhibitors

Unique Subject Identifier=3401000000-0017

MEANS Procedure

Assay variable : PTINR\_VAL1 PT-INR Value

| N | Mean      | Standard Deviation | Minimum   | Maximum   |
|---|-----------|--------------------|-----------|-----------|
| 6 | 1.5116667 | 0.2470155          | 1.2700000 | 1.9700000 |

Unique Subject Identifier=3401000000-0019

Assay variable : PTINR\_VAL1 PT-INR Value

| N | Mean      | Standard Deviation | Minimum   | Maximum   |
|---|-----------|--------------------|-----------|-----------|
| 4 | 1.4175000 | 0.0736546          | 1.3300000 | 1.5000000 |

Unique Subject Identifier=3401000000-0020

Assay variable : PTINR\_VAL1 PT-INR Value

| N | Mean      | Standard Deviation | Minimum   | Maximum   |
|---|-----------|--------------------|-----------|-----------|
| 5 | 1.8460000 | 0.2968670          | 1.5100000 | 2.3200000 |

Unique Subject Identifier=3401000000-0021

Assay variable : PTINR\_VAL1 PT-INR Value

N Mean Standard Deviation Minimum Maximum

---

|   |          |           |          |          |
|---|----------|-----------|----------|----------|
| 5 | 2.118000 | 0.3089013 | 1.710000 | 2.520000 |
|---|----------|-----------|----------|----------|

---



Laboratory tests at the time of obtaining Table 2-6 consent, according to the presence or absence of proton-pump inhibitors

Unique Subject Identifier=3401000000-0024

MEANS Procedure

Assay variable : PTINR\_VAL1 PT-INR Value

N Mean Standard Deviation Minimum Maximum

---

|   |           |           |           |           |
|---|-----------|-----------|-----------|-----------|
| 4 | 1.7325000 | 0.2478407 | 1.5700000 | 2.1000000 |
|---|-----------|-----------|-----------|-----------|

---

Unique Subject Identifier=3401000000-0026

Assay variable : PTINR\_VAL1 PT-INR Value

N Mean Standard Deviation Minimum Maximum

---

|   |           |           |           |           |
|---|-----------|-----------|-----------|-----------|
| 4 | 1.9875000 | 0.2729316 | 1.7100000 | 2.3600000 |
|---|-----------|-----------|-----------|-----------|

---

Unique Subject Identifier=3401000000-0027

Assay variable : PTINR\_VAL1 PT-INR Value

N Mean Standard Deviation Minimum Maximum

---

|   |           |           |           |           |
|---|-----------|-----------|-----------|-----------|
| 6 | 2.0616667 | 0.5977095 | 1.4000000 | 3.0400000 |
|---|-----------|-----------|-----------|-----------|

---

Unique Subject Identifier=3401000000-0033

Assay variable : PTINR\_VAL1 PT-INR Value

N Mean Standard Deviation Minimum Maximum

---

|   |           |           |           |           |
|---|-----------|-----------|-----------|-----------|
| 4 | 1.9625000 | 0.2766918 | 1.6200000 | 2.2900000 |
|---|-----------|-----------|-----------|-----------|

---

Laboratory tests at the time of obtaining Table 2-6 consent, according to the presence or absence of proton-pump inhibitors

Unique Subject Identifier=3401000000-0034

MEANS Procedure

Assay variable : PTINR\_VAL1 PT-INR Value

N Mean Standard Deviation Minimum Maximum

---

|   |           |           |           |           |
|---|-----------|-----------|-----------|-----------|
| 4 | 1.7450000 | 0.5634122 | 1.2700000 | 2.4900000 |
|---|-----------|-----------|-----------|-----------|

---

Unique Subject Identifier=3401000000-0035

Assay variable : PTINR\_VAL1 PT-INR Value

N Mean Standard Deviation Minimum Maximum

---

|   |           |           |           |           |
|---|-----------|-----------|-----------|-----------|
| 6 | 2.2150000 | 0.3503570 | 1.8400000 | 2.7200000 |
|---|-----------|-----------|-----------|-----------|

---

Unique Subject Identifier=3401000000-0037

Assay variable : PTINR\_VAL1 PT-INR Value

N Mean Standard Deviation Minimum Maximum

---

|   |           |           |           |           |
|---|-----------|-----------|-----------|-----------|
| 6 | 1.8566667 | 0.4036170 | 1.5000000 | 2.6000000 |
|---|-----------|-----------|-----------|-----------|

---

Unique Subject Identifier=3401000000-0038

Assay variable : PTINR\_VAL1 PT-INR Value

N Mean Standard Deviation Minimum Maximum

---

|   |           |           |           |           |
|---|-----------|-----------|-----------|-----------|
| 4 | 1.7975000 | 0.3088014 | 1.4800000 | 2.2200000 |
|---|-----------|-----------|-----------|-----------|

---

Laboratory tests at the time of obtaining Table 2-6 consent, according to the presence or absence of proton-pump inhibitors

Unique Subject Identifier=3401000000-0039

MEANS Procedure

Assay variable : PTINR\_VAL1 PT-INR Value

N Mean Standard Deviation Minimum Maximum

---

|   |           |           |           |           |
|---|-----------|-----------|-----------|-----------|
| 6 | 1.8083333 | 0.1068488 | 1.6600000 | 1.9900000 |
|---|-----------|-----------|-----------|-----------|

---

Unique Subject Identifier=3401000000-0041

Assay variable : PTINR\_VAL1 PT-INR Value

N Mean Standard Deviation Minimum Maximum

---

|   |           |           |           |           |
|---|-----------|-----------|-----------|-----------|
| 4 | 1.8075000 | 0.4439501 | 1.4300000 | 2.4400000 |
|---|-----------|-----------|-----------|-----------|

---

Unique Subject Identifier=3401000000-0043

Assay variable : PTINR\_VAL1 PT-INR Value

N Mean Standard Deviation Minimum Maximum

---

|   |           |           |           |           |
|---|-----------|-----------|-----------|-----------|
| 5 | 1.5840000 | 0.1375863 | 1.4900000 | 1.8200000 |
|---|-----------|-----------|-----------|-----------|

---

Unique Subject Identifier=3401000000-0045

Assay variable : PTINR\_VAL1 PT-INR Value

N Mean Standard Deviation Minimum Maximum

---

|   |           |           |           |           |
|---|-----------|-----------|-----------|-----------|
| 6 | 1.7283333 | 0.5647448 | 1.1400000 | 2.7900000 |
|---|-----------|-----------|-----------|-----------|

---

Laboratory tests at the time of obtaining Table 2-6 consent, according to the presence or absence of proton-pump inhibitors

Unique Subject Identifier=3401000000-0046

MEANS Procedure

Assay variable : PTINR\_VAL1 PT-INR Value

N Mean Standard Deviation Minimum Maximum

---

|   |           |           |           |           |
|---|-----------|-----------|-----------|-----------|
| 5 | 1.7800000 | 0.4046604 | 1.1300000 | 2.2200000 |
|---|-----------|-----------|-----------|-----------|

---

Unique Subject Identifier=3402010011-0007

Assay variable : PTINR\_VAL1 PT-INR Value

N Mean Standard Deviation Minimum Maximum

---

|   |           |           |           |           |
|---|-----------|-----------|-----------|-----------|
| 6 | 1.9833333 | 0.3060501 | 1.4000000 | 2.3000000 |
|---|-----------|-----------|-----------|-----------|

---

Unique Subject Identifier=3402010011-0023

Assay variable : PTINR\_VAL1 PT-INR Value

N Mean Standard Deviation Minimum Maximum

---

|   |           |           |           |           |
|---|-----------|-----------|-----------|-----------|
| 5 | 1.8000000 | 0.2000000 | 1.6000000 | 2.1000000 |
|---|-----------|-----------|-----------|-----------|

---

Unique Subject Identifier=3402010011-0025

Assay variable : PTINR\_VAL1 PT-INR Value

N Mean Standard Deviation Minimum Maximum

---

|   |          |           |          |          |
|---|----------|-----------|----------|----------|
| 6 | 2.166667 | 0.2503331 | 1.800000 | 2.500000 |
|---|----------|-----------|----------|----------|

---



Laboratory tests at the time of obtaining Table 2-6 consent, according to the presence or absence of proton-pump inhibitors

Unique Subject Identifier=3402010011-0027

MEANS Procedure

Assay variable : PTINR\_VAL1 PT-INR Value

N Mean Standard Deviation Minimum Maximum

---

|   |           |           |           |           |
|---|-----------|-----------|-----------|-----------|
| 6 | 2.0666667 | 0.4802777 | 1.7000000 | 2.9000000 |
|---|-----------|-----------|-----------|-----------|

---

Unique Subject Identifier=3402010011-0040

Assay variable : PTINR\_VAL1 PT-INR Value

N Mean Standard Deviation Minimum Maximum

---

|   |           |           |           |           |
|---|-----------|-----------|-----------|-----------|
| 6 | 2.0000000 | 0.2097618 | 1.7000000 | 2.2000000 |
|---|-----------|-----------|-----------|-----------|

---

Unique Subject Identifier=3403011000-0012

Assay variable : PTINR\_VAL1 PT-INR Value

N Mean Standard Deviation Minimum Maximum

---

|   |           |           |           |           |
|---|-----------|-----------|-----------|-----------|
| 2 | 1.9000000 | 0.2828427 | 1.7000000 | 2.1000000 |
|---|-----------|-----------|-----------|-----------|

---

Unique Subject Identifier=3406010000-0003

Assay variable : PTINR\_VAL1 PT-INR Value

N Mean Standard Deviation Minimum Maximum

---

|   |           |           |           |           |
|---|-----------|-----------|-----------|-----------|
| 4 | 2.1775000 | 0.1528343 | 2.0400000 | 2.3900000 |
|---|-----------|-----------|-----------|-----------|

---

Laboratory tests at the time of obtaining Table 2-6 consent, according to the presence or absence of proton-pump inhibitors

Unique Subject Identifier=3406010000-0008

MEANS Procedure

Assay variable : PTINR\_VAL1 PT-INR Value

N Mean Standard Deviation Minimum Maximum

---

|   |           |           |           |           |
|---|-----------|-----------|-----------|-----------|
| 3 | 1.9800000 | 0.9184770 | 1.2800000 | 3.0200000 |
|---|-----------|-----------|-----------|-----------|

---

Unique Subject Identifier=3407010011-0001

Assay variable : PTINR\_VAL1 PT-INR Value

N Mean Standard Deviation Minimum Maximum

---

|   |           |           |           |           |
|---|-----------|-----------|-----------|-----------|
| 6 | 1.8250000 | 0.2720110 | 1.4700000 | 2.2700000 |
|---|-----------|-----------|-----------|-----------|

---

Unique Subject Identifier=3407010011-0006

Assay variable : PTINR\_VAL1 PT-INR Value

N Mean Standard Deviation Minimum Maximum

---

|   |           |           |           |           |
|---|-----------|-----------|-----------|-----------|
| 2 | 2.0600000 | 0.0282843 | 2.0400000 | 2.0800000 |
|---|-----------|-----------|-----------|-----------|

---

Unique Subject Identifier=3412000000-0002

Assay variable : PTINR\_VAL1 PT-INR Value

N Mean Standard Deviation Minimum Maximum

---

|   |           |           |           |           |
|---|-----------|-----------|-----------|-----------|
| 4 | 1.7000000 | 0.1113553 | 1.5500000 | 1.8100000 |
|---|-----------|-----------|-----------|-----------|

---

Laboratory tests at the time of obtaining Table 2-6 consent, according to the presence or absence of proton-pump inhibitors

Unique Subject Identifier=3412000000-0004

MEANS Procedure

Assay variable : PTINR\_VAL1 PT-INR Value

N Mean Standard Deviation Minimum Maximum

---

|   |           |           |           |           |
|---|-----------|-----------|-----------|-----------|
| 4 | 1.4925000 | 0.0471699 | 1.4600000 | 1.5600000 |
|---|-----------|-----------|-----------|-----------|

---

Unique Subject Identifier=3412000000-0005

Assay variable : PTINR\_VAL1 PT-INR Value

N Mean Standard Deviation Minimum Maximum

---

|   |           |           |           |           |
|---|-----------|-----------|-----------|-----------|
| 6 | 2.1700000 | 1.4140438 | 1.1700000 | 5.0000000 |
|---|-----------|-----------|-----------|-----------|

---

Unique Subject Identifier=3415011000-0011

Assay variable : PTINR\_VAL1 PT-INR Value

N Mean Standard Deviation Minimum Maximum

---

|   |           |           |           |           |
|---|-----------|-----------|-----------|-----------|
| 4 | 2.3175000 | 0.1071992 | 2.2300000 | 2.4600000 |
|---|-----------|-----------|-----------|-----------|

---

Unique Subject Identifier=3417111111-0003

Assay variable : PTINR\_VAL1 PT-INR Value

N Mean Standard Deviation Minimum Maximum

---

|   |           |           |           |           |
|---|-----------|-----------|-----------|-----------|
| 4 | 1.4900000 | 0.1745470 | 1.2600000 | 1.6400000 |
|---|-----------|-----------|-----------|-----------|

---

Laboratory tests at the time of obtaining Table 2-6 consent, according to the presence or absence of proton-pump inhibitors

Unique Subject Identifier=3417111111-0008

MEANS Procedure

Assay variable : PTINR\_VAL1 PT-INR Value

N Mean Standard Deviation Minimum Maximum

---

|   |           |           |           |           |
|---|-----------|-----------|-----------|-----------|
| 6 | 1.7100000 | 0.2366432 | 1.4000000 | 2.0100000 |
|---|-----------|-----------|-----------|-----------|

---

Unique Subject Identifier=3417111111-0009

Assay variable : PTINR\_VAL1 PT-INR Value

N Mean Standard Deviation Minimum Maximum

---

|   |           |           |           |           |
|---|-----------|-----------|-----------|-----------|
| 6 | 1.9400000 | 0.2276840 | 1.6800000 | 2.2500000 |
|---|-----------|-----------|-----------|-----------|

---

Unique Subject Identifier=3417111111-0013

Assay variable : PTINR\_VAL1 PT-INR Value

N Mean Standard Deviation Minimum Maximum

---

|   |           |           |           |           |
|---|-----------|-----------|-----------|-----------|
| 6 | 1.9016667 | 0.0511534 | 1.8500000 | 1.9900000 |
|---|-----------|-----------|-----------|-----------|

---

Unique Subject Identifier=3421000000-0002

Assay variable : PTINR\_VAL1 PT-INR Value

N Mean Standard Deviation Minimum Maximum

---

|   |          |           |          |          |
|---|----------|-----------|----------|----------|
| 6 | 2.188333 | 0.3823829 | 1.730000 | 2.850000 |
|---|----------|-----------|----------|----------|

---



Laboratory tests at the time of obtaining Table 2-6 consent, according to the presence or absence of proton-pump inhibitors

Unique Subject Identifier=3421000000-0014

MEANS Procedure

Assay variable : PTINR\_VAL1 PT-INR Value

N Mean Standard Deviation Minimum Maximum

---

|   |           |           |           |           |
|---|-----------|-----------|-----------|-----------|
| 6 | 2.0916667 | 0.3975634 | 1.4600000 | 2.6400000 |
|---|-----------|-----------|-----------|-----------|

---

Unique Subject Identifier=3421000000-0015

Assay variable : PTINR\_VAL1 PT-INR Value

N Mean Standard Deviation Minimum Maximum

---

|   |           |           |           |           |
|---|-----------|-----------|-----------|-----------|
| 4 | 2.5025000 | 0.6128825 | 1.6400000 | 2.9400000 |
|---|-----------|-----------|-----------|-----------|

---

Unique Subject Identifier=3421000000-0019

Assay variable : PTINR\_VAL1 PT-INR Value

N Mean Standard Deviation Minimum Maximum

---

|   |           |           |           |           |
|---|-----------|-----------|-----------|-----------|
| 5 | 1.7980000 | 0.1801943 | 1.6100000 | 1.9800000 |
|---|-----------|-----------|-----------|-----------|

---

Unique Subject Identifier=3421000000-0022

Assay variable : PTINR\_VAL1 PT-INR Value

N Mean Standard Deviation Minimum Maximum

---

|   |           |           |           |           |
|---|-----------|-----------|-----------|-----------|
| 4 | 1.9800000 | 0.1630951 | 1.7800000 | 2.1600000 |
|---|-----------|-----------|-----------|-----------|

---

Laboratory tests at the time of obtaining Table 2-6 consent, according to the presence or absence of proton-pump inhibitors

Unique Subject Identifier=3421000000-0023

MEANS Procedure

Assay variable : PTINR\_VAL1 PT-INR Value

N Mean Standard Deviation Minimum Maximum

---

|   |           |           |           |           |
|---|-----------|-----------|-----------|-----------|
| 3 | 1.7433333 | 0.0152753 | 1.7300000 | 1.7600000 |
|---|-----------|-----------|-----------|-----------|

---

Unique Subject Identifier=3421000000-0025

Assay variable : PTINR\_VAL1 PT-INR Value

N Mean Standard Deviation Minimum Maximum

---

|   |           |           |           |           |
|---|-----------|-----------|-----------|-----------|
| 4 | 1.9800000 | 0.1858315 | 1.7900000 | 2.2300000 |
|---|-----------|-----------|-----------|-----------|

---

Unique Subject Identifier=3421000000-0028

Assay variable : PTINR\_VAL1 PT-INR Value

N Mean Standard Deviation Minimum Maximum

---

|   |           |           |           |           |
|---|-----------|-----------|-----------|-----------|
| 3 | 2.0400000 | 0.3576311 | 1.7100000 | 2.4200000 |
|---|-----------|-----------|-----------|-----------|

---

Unique Subject Identifier=3421000000-0030

Assay variable : PTINR\_VAL1 PT-INR Value

N Mean Standard Deviation Minimum Maximum

---

|   |           |           |           |           |
|---|-----------|-----------|-----------|-----------|
| 4 | 2.3175000 | 0.2288194 | 2.0300000 | 2.5900000 |
|---|-----------|-----------|-----------|-----------|

---

Laboratory tests at the time of obtaining Table 2-6 consent, according to the presence or absence of proton-pump inhibitors

Unique Subject Identifier=3421000000-0031

MEANS Procedure

Assay variable : PTINR\_VAL1 PT-INR Value

N Mean Standard Deviation Minimum Maximum

---

|   |           |           |           |           |
|---|-----------|-----------|-----------|-----------|
| 3 | 2.1066667 | 0.9450044 | 1.0700000 | 2.9200000 |
|---|-----------|-----------|-----------|-----------|

---

Unique Subject Identifier=3422000000-0003

Assay variable : PTINR\_VAL1 PT-INR Value

N Mean Standard Deviation Minimum Maximum

---

|   |           |           |           |           |
|---|-----------|-----------|-----------|-----------|
| 3 | 1.8666667 | 0.5507571 | 1.5000000 | 2.5000000 |
|---|-----------|-----------|-----------|-----------|

---

Unique Subject Identifier=3422000000-0004

Assay variable : PTINR\_VAL1 PT-INR Value

N Mean Standard Deviation Minimum Maximum

---

|   |           |           |           |           |
|---|-----------|-----------|-----------|-----------|
| 5 | 1.4000000 | 0.1000000 | 1.3000000 | 1.5000000 |
|---|-----------|-----------|-----------|-----------|

---

Unique Subject Identifier=3422000000-0009

Assay variable : PTINR\_VAL1 PT-INR Value

N Mean Standard Deviation Minimum Maximum

---

|   |           |           |           |           |
|---|-----------|-----------|-----------|-----------|
| 3 | 1.5666667 | 0.4041452 | 1.2000000 | 2.0000000 |
|---|-----------|-----------|-----------|-----------|

---

Laboratory tests at the time of obtaining Table 2-6 consent, according to the presence or absence of proton-pump inhibitors

Unique Subject Identifier=3422000000-0011

MEANS Procedure

Assay variable : PTINR\_VAL1 PT-INR Value

| N | Mean      | Standard Deviation | Minimum   | Maximum   |
|---|-----------|--------------------|-----------|-----------|
| 3 | 2.1000000 | 0.4582576          | 1.7000000 | 2.6000000 |

Unique Subject Identifier=3422000000-0024

Assay variable : PTINR\_VAL1 PT-INR Value

| N | Mean      | Standard Deviation | Minimum   | Maximum   |
|---|-----------|--------------------|-----------|-----------|
| 3 | 2.0666667 | 0.2081666          | 1.9000000 | 2.3000000 |

Unique Subject Identifier=3422000000-0025

Assay variable : PTINR\_VAL1 PT-INR Value

| N | Mean      | Standard Deviation | Minimum   | Maximum   |
|---|-----------|--------------------|-----------|-----------|
| 5 | 1.8800000 | 0.8526429          | 1.4000000 | 3.4000000 |

Unique Subject Identifier=3422000000-0026

Assay variable : PTINR\_VAL1 PT-INR Value

N Mean Standard Deviation Minimum Maximum

---

|   |           |           |           |           |
|---|-----------|-----------|-----------|-----------|
| 4 | 2.0750000 | 0.6184658 | 1.7000000 | 3.0000000 |
|---|-----------|-----------|-----------|-----------|

---



Laboratory tests at the time of obtaining Table 2-6 consent, according to the presence or absence of proton-pump inhibitors

Unique Subject Identifier=3422000000-0046

MEANS Procedure

Assay variable : PTINR\_VAL1 PT-INR Value

N Mean Standard Deviation Minimum Maximum

---

|   |           |           |           |           |
|---|-----------|-----------|-----------|-----------|
| 2 | 2.0500000 | 0.2121320 | 1.9000000 | 2.2000000 |
|---|-----------|-----------|-----------|-----------|

---

Unique Subject Identifier=3422000000-0048

Assay variable : PTINR\_VAL1 PT-INR Value

N Mean Standard Deviation Minimum Maximum

---

|   |           |           |           |           |
|---|-----------|-----------|-----------|-----------|
| 2 | 2.1000000 | 0.4242641 | 1.8000000 | 2.4000000 |
|---|-----------|-----------|-----------|-----------|

---

Unique Subject Identifier=3422000000-0056

Assay variable : PTINR\_VAL1 PT-INR Value

N Mean Standard Deviation Minimum Maximum

---

|   |           |           |           |           |
|---|-----------|-----------|-----------|-----------|
| 3 | 2.2000000 | 0.7937254 | 1.6000000 | 3.1000000 |
|---|-----------|-----------|-----------|-----------|

---

Unique Subject Identifier=3422000000-0060

Assay variable : PTINR\_VAL1 PT-INR Value

N Mean Standard Deviation Minimum Maximum

---

|   |           |           |           |           |
|---|-----------|-----------|-----------|-----------|
| 3 | 1.6333333 | 0.1527525 | 1.5000000 | 1.8000000 |
|---|-----------|-----------|-----------|-----------|

---

Laboratory tests at the time of obtaining Table 2-6 consent, according to the presence or absence of proton-pump inhibitors

Unique Subject Identifier=3422000000-0069

MEANS Procedure

Assay variable : PTINR\_VAL1 PT-INR Value

N Mean Standard Deviation Minimum Maximum

---

|   |           |           |           |           |
|---|-----------|-----------|-----------|-----------|
| 3 | 1.2666667 | 0.1154701 | 1.2000000 | 1.4000000 |
|---|-----------|-----------|-----------|-----------|

---

Unique Subject Identifier=3422000000-0070

Assay variable : PTINR\_VAL1 PT-INR Value

N Mean Standard Deviation Minimum Maximum

---

|   |           |           |           |           |
|---|-----------|-----------|-----------|-----------|
| 3 | 2.2000000 | 0.3605551 | 1.9000000 | 2.6000000 |
|---|-----------|-----------|-----------|-----------|

---

Unique Subject Identifier=3422000000-0073

Assay variable : PTINR\_VAL1 PT-INR Value

N Mean Standard Deviation Minimum Maximum

---

|   |           |           |           |           |
|---|-----------|-----------|-----------|-----------|
| 3 | 2.1000000 | 0.4000000 | 1.7000000 | 2.5000000 |
|---|-----------|-----------|-----------|-----------|

---

Unique Subject Identifier=3422000000-0089

Assay variable : PTINR\_VAL1 PT-INR Value

N Mean Standard Deviation Minimum Maximum

---

|   |           |           |           |           |
|---|-----------|-----------|-----------|-----------|
| 4 | 1.5250000 | 0.2217356 | 1.2000000 | 1.7000000 |
|---|-----------|-----------|-----------|-----------|

---

Laboratory tests at the time of obtaining Table 2-6 consent, according to the presence or absence of proton-pump inhibitors

Unique Subject Identifier=3422000000-0090

MEANS Procedure

Assay variable : PTINR\_VAL1 PT-INR Value

N Mean Standard Deviation Minimum Maximum

---

|   |           |           |           |           |
|---|-----------|-----------|-----------|-----------|
| 3 | 1.9000000 | 0.3605551 | 1.5000000 | 2.2000000 |
|---|-----------|-----------|-----------|-----------|

---

Unique Subject Identifier=3422000000-0098

Assay variable : PTINR\_VAL1 PT-INR Value

N Mean Standard Deviation Minimum Maximum

---

|   |           |           |           |           |
|---|-----------|-----------|-----------|-----------|
| 4 | 1.6750000 | 0.2872281 | 1.5000000 | 2.1000000 |
|---|-----------|-----------|-----------|-----------|

---

Unique Subject Identifier=3422000000-0115

Assay variable : PTINR\_VAL1 PT-INR Value

N Mean Standard Deviation Minimum Maximum

---

|   |           |           |           |           |
|---|-----------|-----------|-----------|-----------|
| 4 | 1.7500000 | 0.2081666 | 1.5000000 | 2.0000000 |
|---|-----------|-----------|-----------|-----------|

---

Unique Subject Identifier=3423000000-0003

Assay variable : PTINR\_VAL1 PT-INR Value

N Mean Standard Deviation Minimum Maximum

---

|   |           |           |           |           |
|---|-----------|-----------|-----------|-----------|
| 6 | 1.5466667 | 0.6122962 | 0.9900000 | 2.6700000 |
|---|-----------|-----------|-----------|-----------|

---

Laboratory tests at the time of obtaining Table 2-6 consent, according to the presence or absence of proton-pump inhibitors

Unique Subject Identifier=3423000000-0021

MEANS Procedure

Assay variable : PTINR\_VAL1 PT-INR Value

N Mean Standard Deviation Minimum Maximum

---

|   |          |           |          |          |
|---|----------|-----------|----------|----------|
| 3 | 2.360000 | 0.0888819 | 2.260000 | 2.430000 |
|---|----------|-----------|----------|----------|

---

Unique Subject Identifier=3423000000-0031

Assay variable : PTINR\_VAL1 PT-INR Value

N Mean Standard Deviation Minimum Maximum

---

|   |          |           |          |          |
|---|----------|-----------|----------|----------|
| 5 | 1.840000 | 0.6213292 | 1.440000 | 2.940000 |
|---|----------|-----------|----------|----------|

---

Unique Subject Identifier=3423000000-0036

Assay variable : PTINR\_VAL1 PT-INR Value

N Mean Standard Deviation Minimum Maximum

---

|   |          |   |          |          |
|---|----------|---|----------|----------|
| 2 | 2.020000 | 0 | 2.020000 | 2.020000 |
|---|----------|---|----------|----------|

---

Unique Subject Identifier=3423000000-0037

Assay variable : PTINR\_VAL1 PT-INR Value

N Mean Standard Deviation Minimum Maximum

---

|   |           |           |           |           |
|---|-----------|-----------|-----------|-----------|
| 4 | 1.8475000 | 0.6827091 | 1.0700000 | 2.4600000 |
|---|-----------|-----------|-----------|-----------|

---



Laboratory tests at the time of obtaining Table 2-6 consent, according to the presence or absence of proton-pump inhibitors

Unique Subject Identifier=3423000000-0041

MEANS Procedure

Assay variable : PTINR\_VAL1 PT-INR Value

| N | Mean      | Standard Deviation | Minimum   | Maximum   |
|---|-----------|--------------------|-----------|-----------|
| 2 | 1.7300000 | 0.3535534          | 1.4800000 | 1.9800000 |

Unique Subject Identifier=3424000000-0016

Assay variable : PTINR\_VAL1 PT-INR Value

| N | Mean      | Standard Deviation | Minimum   | Maximum   |
|---|-----------|--------------------|-----------|-----------|
| 3 | 1.9466667 | 0.5093460          | 1.5900000 | 2.5300000 |

Unique Subject Identifier=3424000000-0021

Assay variable : PTINR\_VAL1 PT-INR Value

| N | Mean      | Standard Deviation | Minimum   | Maximum   |
|---|-----------|--------------------|-----------|-----------|
| 3 | 1.5466667 | 0.4271222          | 1.2200000 | 2.0300000 |

Unique Subject Identifier=3424000000-0026

Assay variable : PTINR\_VAL1 PT-INR Value

N Mean Standard Deviation Minimum Maximum

---

|   |           |           |           |           |
|---|-----------|-----------|-----------|-----------|
| 5 | 1.8960000 | 0.6223584 | 1.1400000 | 2.6900000 |
|---|-----------|-----------|-----------|-----------|

---

Laboratory tests at the time of obtaining Table 2-6 consent, according to the presence or absence of proton-pump inhibitors

Unique Subject Identifier=3424000000-0032

MEANS Procedure

Assay variable : PTINR\_VAL1 PT-INR Value

| N | Mean      | Standard Deviation | Minimum   | Maximum   |
|---|-----------|--------------------|-----------|-----------|
| 3 | 2.2933333 | 0.1069268          | 2.2000000 | 2.4100000 |

Unique Subject Identifier=3424000000-0033

Assay variable : PTINR\_VAL1 PT-INR Value

| N | Mean      | Standard Deviation | Minimum   | Maximum   |
|---|-----------|--------------------|-----------|-----------|
| 2 | 2.5600000 | 0.1979899          | 2.4200000 | 2.7000000 |

Unique Subject Identifier=3424000000-0035

Assay variable : PTINR\_VAL1 PT-INR Value

| N | Mean      | Standard Deviation | Minimum   | Maximum   |
|---|-----------|--------------------|-----------|-----------|
| 4 | 2.3150000 | 0.1968925          | 2.2100000 | 2.6100000 |

Unique Subject Identifier=3424000000-0036

Assay variable : PTINR\_VAL1 PT-INR Value

N Mean Standard Deviation Minimum Maximum

---

|   |          |           |          |          |
|---|----------|-----------|----------|----------|
| 6 | 1.950000 | 0.4419502 | 1.400000 | 2.730000 |
|---|----------|-----------|----------|----------|

---

Laboratory tests at the time of obtaining Table 2-6 consent, according to the presence or absence of proton-pump inhibitors

Unique Subject Identifier=3424000000-0038

MEANS Procedure

Assay variable : PTINR\_VAL1 PT-INR Value

N Mean Standard Deviation Minimum Maximum

---

|   |           |           |           |           |
|---|-----------|-----------|-----------|-----------|
| 3 | 1.7366667 | 0.1222020 | 1.6300000 | 1.8700000 |
|---|-----------|-----------|-----------|-----------|

---

Unique Subject Identifier=3424000000-0040

Assay variable : PTINR\_VAL1 PT-INR Value

N Mean Standard Deviation Minimum Maximum

---

|   |           |           |           |           |
|---|-----------|-----------|-----------|-----------|
| 3 | 2.3266667 | 0.3850108 | 1.9400000 | 2.7100000 |
|---|-----------|-----------|-----------|-----------|

---

Unique Subject Identifier=3424000000-0041

Assay variable : PTINR\_VAL1 PT-INR Value

N Mean Standard Deviation Minimum Maximum

---

|   |           |           |           |           |
|---|-----------|-----------|-----------|-----------|
| 3 | 2.0966667 | 0.5300314 | 1.6700000 | 2.6900000 |
|---|-----------|-----------|-----------|-----------|

---

Unique Subject Identifier=3424000000-0042

Assay variable : PTINR\_VAL1 PT-INR Value

N Mean Standard Deviation Minimum Maximum

---

|   |           |           |           |           |
|---|-----------|-----------|-----------|-----------|
| 5 | 2.6560000 | 0.6932027 | 1.8700000 | 3.5200000 |
|---|-----------|-----------|-----------|-----------|

---

Laboratory tests at the time of obtaining Table 2-6 consent, according to the presence or absence of proton-pump inhibitors

Unique Subject Identifier=3424000000-0044

MEANS Procedure

Assay variable : PTINR\_VAL1 PT-INR Value

N Mean Standard Deviation Minimum Maximum

---

|   |           |           |           |           |
|---|-----------|-----------|-----------|-----------|
| 6 | 1.8483333 | 0.4343002 | 1.1400000 | 2.3600000 |
|---|-----------|-----------|-----------|-----------|

---

Unique Subject Identifier=3424000000-0046

Assay variable : PTINR\_VAL1 PT-INR Value

N Mean Standard Deviation Minimum Maximum

---

|   |           |           |           |           |
|---|-----------|-----------|-----------|-----------|
| 3 | 2.4666667 | 0.8658137 | 1.5800000 | 3.3100000 |
|---|-----------|-----------|-----------|-----------|

---

Unique Subject Identifier=3424000000-0047

Assay variable : PTINR\_VAL1 PT-INR Value

N Mean Standard Deviation Minimum Maximum

---

|   |           |           |           |           |
|---|-----------|-----------|-----------|-----------|
| 2 | 2.2500000 | 0.1838478 | 2.1200000 | 2.3800000 |
|---|-----------|-----------|-----------|-----------|

---

Unique Subject Identifier=3424000000-0049

Assay variable : PTINR\_VAL1 PT-INR Value

N Mean Standard Deviation Minimum Maximum

---

|   |          |           |          |          |
|---|----------|-----------|----------|----------|
| 3 | 2.610000 | 0.7644606 | 2.110000 | 3.490000 |
|---|----------|-----------|----------|----------|

---



Laboratory tests at the time of obtaining Table 2-6 consent, according to the presence or absence of proton-pump inhibitors

Unique Subject Identifier=342400000-0055

MEANS Procedure

Assay variable : PTINR\_VAL1 PT-INR Value

N Mean Standard Deviation Minimum Maximum

---

|   |          |           |          |          |
|---|----------|-----------|----------|----------|
| 3 | 1.810000 | 0.3148015 | 1.550000 | 2.160000 |
|---|----------|-----------|----------|----------|

---

Unique Subject Identifier=342400000-0058

Assay variable : PTINR\_VAL1 PT-INR Value

N Mean Standard Deviation Minimum Maximum

---

|   |          |           |          |          |
|---|----------|-----------|----------|----------|
| 2 | 2.365000 | 1.4919953 | 1.310000 | 3.420000 |
|---|----------|-----------|----------|----------|

---

Unique Subject Identifier=342400000-0060

Assay variable : PTINR\_VAL1 PT-INR Value

N Mean Standard Deviation Minimum Maximum

---

|   |          |           |          |          |
|---|----------|-----------|----------|----------|
| 4 | 2.272500 | 0.6992079 | 1.590000 | 3.160000 |
|---|----------|-----------|----------|----------|

---

Unique Subject Identifier=3425001000-0005

Assay variable : PTINR\_VAL1 PT-INR Value

N Mean Standard Deviation Minimum Maximum

---

|   |           |           |           |           |
|---|-----------|-----------|-----------|-----------|
| 4 | 1.9175000 | 0.5340022 | 1.3300000 | 2.5900000 |
|---|-----------|-----------|-----------|-----------|

---

Laboratory tests at the time of obtaining Table 2-6 consent, according to the presence or absence of proton-pump inhibitors

Unique Subject Identifier=3425001000-0006

MEANS Procedure

Assay variable : PTINR\_VAL1 PT-INR Value

N Mean Standard Deviation Minimum Maximum

---

|   |           |           |           |           |
|---|-----------|-----------|-----------|-----------|
| 3 | 1.8233333 | 0.0115470 | 1.8100000 | 1.8300000 |
|---|-----------|-----------|-----------|-----------|

---

Unique Subject Identifier=3425001000-0007

Assay variable : PTINR\_VAL1 PT-INR Value

N Mean Standard Deviation Minimum Maximum

---

|   |           |           |           |           |
|---|-----------|-----------|-----------|-----------|
| 4 | 2.2100000 | 0.2409703 | 1.9700000 | 2.5000000 |
|---|-----------|-----------|-----------|-----------|

---

Unique Subject Identifier=3425001000-0010

Assay variable : PTINR\_VAL1 PT-INR Value

N Mean Standard Deviation Minimum Maximum

---

|   |           |           |           |           |
|---|-----------|-----------|-----------|-----------|
| 3 | 2.3200000 | 0.0818535 | 2.2300000 | 2.3900000 |
|---|-----------|-----------|-----------|-----------|

---

Unique Subject Identifier=3425001000-0015

Assay variable : PTINR\_VAL1 PT-INR Value

N Mean Standard Deviation Minimum Maximum

---

|   |           |           |           |           |
|---|-----------|-----------|-----------|-----------|
| 3 | 2.1333333 | 0.2350177 | 1.9000000 | 2.3700000 |
|---|-----------|-----------|-----------|-----------|

---

Laboratory tests at the time of obtaining Table 2-6 consent, according to the presence or absence of proton-pump inhibitors

Unique Subject Identifier=3425001000-0022

MEANS Procedure

Assay variable : PTINR\_VAL1 PT-INR Value

N Mean Standard Deviation Minimum Maximum

---

|   |           |           |           |           |
|---|-----------|-----------|-----------|-----------|
| 4 | 1.9200000 | 0.2708013 | 1.5200000 | 2.1200000 |
|---|-----------|-----------|-----------|-----------|

---

Unique Subject Identifier=3425001000-0023

Assay variable : PTINR\_VAL1 PT-INR Value

N Mean Standard Deviation Minimum Maximum

---

|   |           |           |           |           |
|---|-----------|-----------|-----------|-----------|
| 4 | 2.0025000 | 0.1147098 | 1.8500000 | 2.1200000 |
|---|-----------|-----------|-----------|-----------|

---

Unique Subject Identifier=3425001000-0034

Assay variable : PTINR\_VAL1 PT-INR Value

N Mean Standard Deviation Minimum Maximum

---

|   |           |           |           |           |
|---|-----------|-----------|-----------|-----------|
| 4 | 2.2450000 | 0.2392349 | 1.9100000 | 2.4600000 |
|---|-----------|-----------|-----------|-----------|

---

Unique Subject Identifier=3425001000-0037

Assay variable : PTINR\_VAL1 PT-INR Value

N Mean Standard Deviation Minimum Maximum

---

|   |           |           |           |           |
|---|-----------|-----------|-----------|-----------|
| 4 | 1.7900000 | 0.0761577 | 1.6800000 | 1.8500000 |
|---|-----------|-----------|-----------|-----------|

---

Laboratory tests at the time of obtaining Table 2-6 consent, according to the presence or absence of proton-pump inhibitors

Unique Subject Identifier=3425001000-0040

MEANS Procedure

Assay variable : PTINR\_VAL1 PT-INR Value

N Mean Standard Deviation Minimum Maximum

---

|   |           |           |           |           |
|---|-----------|-----------|-----------|-----------|
| 5 | 2.4440000 | 0.2576432 | 2.2200000 | 2.8700000 |
|---|-----------|-----------|-----------|-----------|

---

Unique Subject Identifier=3426100000-0008

Assay variable : PTINR\_VAL1 PT-INR Value

N Mean Standard Deviation Minimum Maximum

---

|   |           |           |           |           |
|---|-----------|-----------|-----------|-----------|
| 3 | 1.8866667 | 0.7471501 | 1.3500000 | 2.7400000 |
|---|-----------|-----------|-----------|-----------|

---

Unique Subject Identifier=3426100000-0031

Assay variable : PTINR\_VAL1 PT-INR Value

N Mean Standard Deviation Minimum Maximum

---

|   |           |           |           |           |
|---|-----------|-----------|-----------|-----------|
| 5 | 2.6220000 | 0.3401029 | 2.0700000 | 2.9900000 |
|---|-----------|-----------|-----------|-----------|

---

Unique Subject Identifier=3426100000-0033

Assay variable : PTINR\_VAL1 PT-INR Value

N Mean Standard Deviation Minimum Maximum

---

|   |           |  |           |           |
|---|-----------|--|-----------|-----------|
| 1 | 0.9900000 |  | 0.9900000 | 0.9900000 |
|---|-----------|--|-----------|-----------|

---



Laboratory tests at the time of obtaining Table 2-6 consent, according to the presence or absence of proton-pump inhibitors

Unique Subject Identifier=3426100000-0036

MEANS Procedure

Assay variable : PTINR\_VAL1 PT-INR Value

N Mean Standard Deviation Minimum Maximum

---

|   |           |  |           |           |
|---|-----------|--|-----------|-----------|
| 1 | 1.5800000 |  | 1.5800000 | 1.5800000 |
|---|-----------|--|-----------|-----------|

---

Unique Subject Identifier=3427001000-0002

Assay variable : PTINR\_VAL1 PT-INR Value

N Mean Standard Deviation Minimum Maximum

---

|   |           |           |           |           |
|---|-----------|-----------|-----------|-----------|
| 5 | 1.9920000 | 0.2752635 | 1.6500000 | 2.4000000 |
|---|-----------|-----------|-----------|-----------|

---

Unique Subject Identifier=3427001000-0015

Assay variable : PTINR\_VAL1 PT-INR Value

N Mean Standard Deviation Minimum Maximum

---

|   |           |           |           |           |
|---|-----------|-----------|-----------|-----------|
| 4 | 2.0675000 | 0.2777739 | 1.8000000 | 2.3500000 |
|---|-----------|-----------|-----------|-----------|

---

Unique Subject Identifier=3428000000-0001

Assay variable : PTINR\_VAL1 PT-INR Value

N Mean Standard Deviation Minimum Maximum

---

|   |           |           |           |           |
|---|-----------|-----------|-----------|-----------|
| 6 | 1.9483333 | 0.3818595 | 1.4500000 | 2.4400000 |
|---|-----------|-----------|-----------|-----------|

---

Laboratory tests at the time of obtaining Table 2-6 consent, according to the presence or absence of proton-pump inhibitors

Unique Subject Identifier=3428000000-0002

MEANS Procedure

Assay variable : PTINR\_VAL1 PT-INR Value

| N | Mean      | Standard Deviation | Minimum   | Maximum   |
|---|-----------|--------------------|-----------|-----------|
| 6 | 2.0283333 | 0.3252947          | 1.6300000 | 2.5000000 |

Unique Subject Identifier=3428000000-0004

Assay variable : PTINR\_VAL1 PT-INR Value

| N | Mean      | Standard Deviation | Minimum   | Maximum   |
|---|-----------|--------------------|-----------|-----------|
| 3 | 1.6466667 | 0.3980368          | 1.3200000 | 2.0900000 |

Unique Subject Identifier=3428000000-0005

Assay variable : PTINR\_VAL1 PT-INR Value

| N | Mean      | Standard Deviation | Minimum   | Maximum   |
|---|-----------|--------------------|-----------|-----------|
| 4 | 2.1175000 | 0.1796988          | 1.8600000 | 2.2700000 |

Unique Subject Identifier=3442000011-0001

Assay variable : PTINR\_VAL1 PT-INR Value

N Mean Standard Deviation Minimum Maximum

---

|   |          |           |          |          |
|---|----------|-----------|----------|----------|
| 5 | 2.120000 | 0.0796869 | 2.040000 | 2.240000 |
|---|----------|-----------|----------|----------|

---

Laboratory tests at the time of obtaining Table 2-6 consent, according to the presence or absence of proton-pump inhibitors

Unique Subject Identifier=3442000011-0003

MEANS Procedure

Assay variable : PTINR\_VAL1 PT-INR Value

N Mean Standard Deviation Minimum Maximum

---

|   |           |           |           |           |
|---|-----------|-----------|-----------|-----------|
| 4 | 1.5750000 | 0.1912241 | 1.2900000 | 1.6900000 |
|---|-----------|-----------|-----------|-----------|

---

Unique Subject Identifier=3442000011-0007

Assay variable : PTINR\_VAL1 PT-INR Value

N Mean Standard Deviation Minimum Maximum

---

|   |           |           |           |           |
|---|-----------|-----------|-----------|-----------|
| 5 | 1.9040000 | 0.2250111 | 1.6300000 | 2.1600000 |
|---|-----------|-----------|-----------|-----------|

---

Unique Subject Identifier=3442000011-0008

Assay variable : PTINR\_VAL1 PT-INR Value

N Mean Standard Deviation Minimum Maximum

---

|   |           |           |           |           |
|---|-----------|-----------|-----------|-----------|
| 3 | 2.0866667 | 0.1908752 | 1.8700000 | 2.2300000 |
|---|-----------|-----------|-----------|-----------|

---

Unique Subject Identifier=3443011001-0004

Assay variable : PTINR\_VAL1 PT-INR Value

N Mean Standard Deviation Minimum Maximum

---

|   |           |           |           |           |
|---|-----------|-----------|-----------|-----------|
| 6 | 2.0316667 | 0.4054833 | 1.5800000 | 2.5500000 |
|---|-----------|-----------|-----------|-----------|

---

Laboratory tests at the time of obtaining Table 2-6 consent, according to the presence or absence of proton-pump inhibitors

Unique Subject Identifier=3443011001-0009

MEANS Procedure

Assay variable : PTINR\_VAL1 PT-INR Value

N Mean Standard Deviation Minimum Maximum

---

|   |           |           |           |           |
|---|-----------|-----------|-----------|-----------|
| 6 | 1.9483333 | 0.3301767 | 1.5000000 | 2.4200000 |
|---|-----------|-----------|-----------|-----------|

---

Unique Subject Identifier=3443011001-0011

Assay variable : PTINR\_VAL1 PT-INR Value

N Mean Standard Deviation Minimum Maximum

---

|   |           |           |           |           |
|---|-----------|-----------|-----------|-----------|
| 6 | 2.2616667 | 0.2148876 | 1.8600000 | 2.4400000 |
|---|-----------|-----------|-----------|-----------|

---

Unique Subject Identifier=3444000000-0002

Assay variable : PTINR\_VAL1 PT-INR Value

N Mean Standard Deviation Minimum Maximum

---

|   |           |           |           |           |
|---|-----------|-----------|-----------|-----------|
| 4 | 2.0475000 | 0.1071992 | 1.9200000 | 2.1700000 |
|---|-----------|-----------|-----------|-----------|

---

Unique Subject Identifier=3444000000-0004

Assay variable : PTINR\_VAL1 PT-INR Value

N Mean Standard Deviation Minimum Maximum

---

|   |           |           |           |           |
|---|-----------|-----------|-----------|-----------|
| 4 | 2.0975000 | 0.6357345 | 1.6000000 | 3.0000000 |
|---|-----------|-----------|-----------|-----------|

---



Laboratory tests at the time of obtaining Table 2-6 consent, according to the presence or absence of proton-pump inhibitors

Unique Subject Identifier=3444000000-0006

MEANS Procedure

Assay variable : PTINR\_VAL1 PT-INR Value

N Mean Standard Deviation Minimum Maximum

---

|   |           |           |           |           |
|---|-----------|-----------|-----------|-----------|
| 3 | 2.1733333 | 0.1755942 | 1.9900000 | 2.3400000 |
|---|-----------|-----------|-----------|-----------|

---

Unique Subject Identifier=3444000000-0009

Assay variable : PTINR\_VAL1 PT-INR Value

N Mean Standard Deviation Minimum Maximum

---

|   |           |           |           |           |
|---|-----------|-----------|-----------|-----------|
| 4 | 2.2650000 | 0.3875994 | 1.7300000 | 2.5700000 |
|---|-----------|-----------|-----------|-----------|

---

Unique Subject Identifier=3444000000-0010

Assay variable : PTINR\_VAL1 PT-INR Value

N Mean Standard Deviation Minimum Maximum

---

|   |           |           |           |           |
|---|-----------|-----------|-----------|-----------|
| 4 | 2.3450000 | 0.1586401 | 2.1800000 | 2.5400000 |
|---|-----------|-----------|-----------|-----------|

---

Unique Subject Identifier=3444000000-0011

Assay variable : PTINR\_VAL1 PT-INR Value

N Mean Standard Deviation Minimum Maximum

---

|   |           |           |           |           |
|---|-----------|-----------|-----------|-----------|
| 3 | 2.4700000 | 0.4392038 | 2.0000000 | 2.8700000 |
|---|-----------|-----------|-----------|-----------|

---

Laboratory tests at the time of obtaining Table 2-6 consent, according to the presence or absence of proton-pump inhibitors

Unique Subject Identifier=3444000000-0015

MEANS Procedure

Assay variable : PTINR\_VAL1 PT-INR Value

N Mean Standard Deviation Minimum Maximum

---

|   |           |           |           |           |
|---|-----------|-----------|-----------|-----------|
| 5 | 2.2020000 | 0.6975815 | 1.4500000 | 3.2200000 |
|---|-----------|-----------|-----------|-----------|

---

Unique Subject Identifier=3444000000-0017

Assay variable : PTINR\_VAL1 PT-INR Value

N Mean Standard Deviation Minimum Maximum

---

|   |           |           |           |           |
|---|-----------|-----------|-----------|-----------|
| 4 | 1.9175000 | 0.4294473 | 1.4400000 | 2.4000000 |
|---|-----------|-----------|-----------|-----------|

---

Unique Subject Identifier=3444000000-0019

Assay variable : PTINR\_VAL1 PT-INR Value

N Mean Standard Deviation Minimum Maximum

---

|   |           |           |           |           |
|---|-----------|-----------|-----------|-----------|
| 3 | 2.0633333 | 0.3189566 | 1.8500000 | 2.4300000 |
|---|-----------|-----------|-----------|-----------|

---

Unique Subject Identifier=3444000000-0021

Assay variable : PTINR\_VAL1 PT-INR Value

N Mean Standard Deviation Minimum Maximum

---

|   |           |           |           |           |
|---|-----------|-----------|-----------|-----------|
| 3 | 2.3333333 | 0.3023795 | 1.9900000 | 2.5600000 |
|---|-----------|-----------|-----------|-----------|

---

Laboratory tests at the time of obtaining Table 2-6 consent, according to the presence or absence of proton-pump inhibitors

Unique Subject Identifier=3444000000-0025

MEANS Procedure

Assay variable : PTINR\_VAL1 PT-INR Value

N Mean Standard Deviation Minimum Maximum

---

|   |           |           |           |           |
|---|-----------|-----------|-----------|-----------|
| 4 | 2.2175000 | 0.2156193 | 1.9100000 | 2.4100000 |
|---|-----------|-----------|-----------|-----------|

---

Unique Subject Identifier=3444000000-0027

Assay variable : PTINR\_VAL1 PT-INR Value

N Mean Standard Deviation Minimum Maximum

---

|   |           |           |           |           |
|---|-----------|-----------|-----------|-----------|
| 4 | 2.3850000 | 1.0434718 | 1.2700000 | 3.7900000 |
|---|-----------|-----------|-----------|-----------|

---

Unique Subject Identifier=3444000000-0029

Assay variable : PTINR\_VAL1 PT-INR Value

N Mean Standard Deviation Minimum Maximum

---

|   |           |           |           |           |
|---|-----------|-----------|-----------|-----------|
| 3 | 2.1833333 | 0.4883987 | 1.7900000 | 2.7300000 |
|---|-----------|-----------|-----------|-----------|

---

Unique Subject Identifier=3444000000-0030

Assay variable : PTINR\_VAL1 PT-INR Value

N Mean Standard Deviation Minimum Maximum

---

|   |           |           |           |           |
|---|-----------|-----------|-----------|-----------|
| 3 | 1.8300000 | 0.2251666 | 1.6100000 | 2.0600000 |
|---|-----------|-----------|-----------|-----------|

---

Laboratory tests at the time of obtaining Table 2-6 consent, according to the presence or absence of proton-pump inhibitors

Unique Subject Identifier=3444000000-0032

MEANS Procedure

Assay variable : PTINR\_VAL1 PT-INR Value

N Mean Standard Deviation Minimum Maximum

---

|   |           |           |           |           |
|---|-----------|-----------|-----------|-----------|
| 6 | 2.6150000 | 0.5350421 | 1.6100000 | 3.1400000 |
|---|-----------|-----------|-----------|-----------|

---

Unique Subject Identifier=3444000000-0035

Assay variable : PTINR\_VAL1 PT-INR Value

N Mean Standard Deviation Minimum Maximum

---

|   |           |           |           |           |
|---|-----------|-----------|-----------|-----------|
| 4 | 2.3025000 | 0.3510342 | 1.8800000 | 2.6600000 |
|---|-----------|-----------|-----------|-----------|

---

Unique Subject Identifier=3444000000-0036

Assay variable : PTINR\_VAL1 PT-INR Value

N Mean Standard Deviation Minimum Maximum

---

|   |           |           |           |           |
|---|-----------|-----------|-----------|-----------|
| 3 | 1.6233333 | 0.0288675 | 1.5900000 | 1.6400000 |
|---|-----------|-----------|-----------|-----------|

---

Unique Subject Identifier=3444000000-0037

Assay variable : PTINR\_VAL1 PT-INR Value

N Mean Standard Deviation Minimum Maximum

---

|   |           |           |           |           |
|---|-----------|-----------|-----------|-----------|
| 4 | 2.3550000 | 0.9300358 | 1.8000000 | 3.7400000 |
|---|-----------|-----------|-----------|-----------|

---



Laboratory tests at the time of obtaining Table 2-6 consent, according to the presence or absence of proton-pump inhibitors

Unique Subject Identifier=3444000000-0038

MEANS Procedure

Assay variable : PTINR\_VAL1 PT-INR Value

N Mean Standard Deviation Minimum Maximum

---

|   |           |           |           |           |
|---|-----------|-----------|-----------|-----------|
| 3 | 1.7700000 | 0.0556776 | 1.7100000 | 1.8200000 |
|---|-----------|-----------|-----------|-----------|

---

Unique Subject Identifier=3444000000-0039

Assay variable : PTINR\_VAL1 PT-INR Value

N Mean Standard Deviation Minimum Maximum

---

|   |           |           |           |           |
|---|-----------|-----------|-----------|-----------|
| 3 | 2.5333333 | 0.2967041 | 2.3100000 | 2.8700000 |
|---|-----------|-----------|-----------|-----------|

---

Unique Subject Identifier=3444000000-0041

Assay variable : PTINR\_VAL1 PT-INR Value

N Mean Standard Deviation Minimum Maximum

---

|   |           |           |           |           |
|---|-----------|-----------|-----------|-----------|
| 5 | 2.3560000 | 0.1558204 | 2.1300000 | 2.5100000 |
|---|-----------|-----------|-----------|-----------|

---

Unique Subject Identifier=3444000000-0043

Assay variable : PTINR\_VAL1 PT-INR Value

N Mean Standard Deviation Minimum Maximum

---

|   |          |           |          |          |
|---|----------|-----------|----------|----------|
| 6 | 2.400000 | 0.2827720 | 1.960000 | 2.650000 |
|---|----------|-----------|----------|----------|

---

Laboratory tests at the time of obtaining Table 2-6 consent, according to the presence or absence of proton-pump inhibitors

Unique Subject Identifier=3444000000-0046

MEANS Procedure

Assay variable : PTINR\_VAL1 PT-INR Value

N Mean Standard Deviation Minimum Maximum

---

|   |           |           |           |           |
|---|-----------|-----------|-----------|-----------|
| 4 | 1.8350000 | 0.0810350 | 1.7200000 | 1.9100000 |
|---|-----------|-----------|-----------|-----------|

---

Unique Subject Identifier=3444000000-0048

Assay variable : PTINR\_VAL1 PT-INR Value

N Mean Standard Deviation Minimum Maximum

---

|   |           |           |           |           |
|---|-----------|-----------|-----------|-----------|
| 3 | 1.9133333 | 0.1985783 | 1.6900000 | 2.0700000 |
|---|-----------|-----------|-----------|-----------|

---

Unique Subject Identifier=3444000000-0049

Assay variable : PTINR\_VAL1 PT-INR Value

N Mean Standard Deviation Minimum Maximum

---

|   |           |           |           |           |
|---|-----------|-----------|-----------|-----------|
| 3 | 2.4100000 | 0.1819341 | 2.3000000 | 2.6200000 |
|---|-----------|-----------|-----------|-----------|

---

Unique Subject Identifier=3444000000-0050

Assay variable : PTINR\_VAL1 PT-INR Value

N Mean Standard Deviation Minimum Maximum

---

|   |           |           |           |           |
|---|-----------|-----------|-----------|-----------|
| 4 | 1.9400000 | 0.4112582 | 1.3900000 | 2.2600000 |
|---|-----------|-----------|-----------|-----------|

---

Laboratory tests at the time of obtaining Table 2-6 consent, according to the presence or absence of proton-pump inhibitors

Unique Subject Identifier=3444000000-0051

MEANS Procedure

Assay variable : PTINR\_VAL1 PT-INR Value

N Mean Standard Deviation Minimum Maximum

---

|   |           |           |           |           |
|---|-----------|-----------|-----------|-----------|
| 4 | 2.4825000 | 0.1286792 | 2.2900000 | 2.5600000 |
|---|-----------|-----------|-----------|-----------|

---

Unique Subject Identifier=3444000000-0052

Assay variable : PTINR\_VAL1 PT-INR Value

N Mean Standard Deviation Minimum Maximum

---

|   |           |           |           |           |
|---|-----------|-----------|-----------|-----------|
| 4 | 1.7050000 | 0.1517674 | 1.5800000 | 1.9200000 |
|---|-----------|-----------|-----------|-----------|

---

Unique Subject Identifier=3444000000-0054

Assay variable : PTINR\_VAL1 PT-INR Value

N Mean Standard Deviation Minimum Maximum

---

|   |           |           |           |           |
|---|-----------|-----------|-----------|-----------|
| 5 | 2.0200000 | 0.1488288 | 1.8800000 | 2.1900000 |
|---|-----------|-----------|-----------|-----------|

---

Unique Subject Identifier=3444000000-0055

Assay variable : PTINR\_VAL1 PT-INR Value

N Mean Standard Deviation Minimum Maximum

---

|   |           |           |           |           |
|---|-----------|-----------|-----------|-----------|
| 4 | 1.5700000 | 0.1860108 | 1.3400000 | 1.7900000 |
|---|-----------|-----------|-----------|-----------|

---

Laboratory tests at the time of obtaining Table 2-6 consent, according to the presence or absence of proton-pump inhibitors

Unique Subject Identifier=3444000000-0057

MEANS Procedure

Assay variable : PTINR\_VAL1 PT-INR Value

N Mean Standard Deviation Minimum Maximum

---

|   |           |           |           |           |
|---|-----------|-----------|-----------|-----------|
| 4 | 2.4625000 | 0.2615817 | 2.1400000 | 2.7800000 |
|---|-----------|-----------|-----------|-----------|

---

Unique Subject Identifier=3444000000-0060

Assay variable : PTINR\_VAL1 PT-INR Value

N Mean Standard Deviation Minimum Maximum

---

|   |           |           |           |           |
|---|-----------|-----------|-----------|-----------|
| 3 | 1.8100000 | 0.3732292 | 1.5700000 | 2.2400000 |
|---|-----------|-----------|-----------|-----------|

---

Unique Subject Identifier=3444000000-0061

Assay variable : PTINR\_VAL1 PT-INR Value

N Mean Standard Deviation Minimum Maximum

---

|   |           |           |           |           |
|---|-----------|-----------|-----------|-----------|
| 4 | 1.7900000 | 0.1378405 | 1.6300000 | 1.9600000 |
|---|-----------|-----------|-----------|-----------|

---

Unique Subject Identifier=3444000000-0063

Assay variable : PTINR\_VAL1 PT-INR Value

N Mean Standard Deviation Minimum Maximum

---

|   |           |           |           |           |
|---|-----------|-----------|-----------|-----------|
| 3 | 1.9566667 | 0.1446836 | 1.7900000 | 2.0500000 |
|---|-----------|-----------|-----------|-----------|

---



Laboratory tests at the time of obtaining Table 2-6 consent, according to the presence or absence of proton-pump inhibitors

Unique Subject Identifier=3444000000-0064

MEANS Procedure

Assay variable : PTINR\_VAL1 PT-INR Value

N Mean Standard Deviation Minimum Maximum

---

|   |           |           |           |           |
|---|-----------|-----------|-----------|-----------|
| 3 | 2.0033333 | 0.1803700 | 1.8300000 | 2.1900000 |
|---|-----------|-----------|-----------|-----------|

---

Unique Subject Identifier=3444000000-0065

Assay variable : PTINR\_VAL1 PT-INR Value

N Mean Standard Deviation Minimum Maximum

---

|   |           |           |           |           |
|---|-----------|-----------|-----------|-----------|
| 3 | 1.5666667 | 0.0737111 | 1.5100000 | 1.6500000 |
|---|-----------|-----------|-----------|-----------|

---

Unique Subject Identifier=3444000000-0066

Assay variable : PTINR\_VAL1 PT-INR Value

N Mean Standard Deviation Minimum Maximum

---

|   |           |           |           |           |
|---|-----------|-----------|-----------|-----------|
| 3 | 1.6233333 | 0.0057735 | 1.6200000 | 1.6300000 |
|---|-----------|-----------|-----------|-----------|

---

Unique Subject Identifier=3444000000-0067

Assay variable : PTINR\_VAL1 PT-INR Value

N Mean Standard Deviation Minimum Maximum

---

|   |           |           |           |           |
|---|-----------|-----------|-----------|-----------|
| 3 | 2.0766667 | 0.3900427 | 1.6900000 | 2.4700000 |
|---|-----------|-----------|-----------|-----------|

---

Laboratory tests at the time of obtaining Table 2-6 consent, according to the presence or absence of proton-pump inhibitors

Unique Subject Identifier=3444000000-0070

MEANS Procedure

Assay variable : PTINR\_VAL1 PT-INR Value

N Mean Standard Deviation Minimum Maximum

---

|   |           |           |           |           |
|---|-----------|-----------|-----------|-----------|
| 5 | 1.7880000 | 0.3751933 | 1.4100000 | 2.3200000 |
|---|-----------|-----------|-----------|-----------|

---

Unique Subject Identifier=3444000000-0071

Assay variable : PTINR\_VAL1 PT-INR Value

N Mean Standard Deviation Minimum Maximum

---

|   |           |           |           |           |
|---|-----------|-----------|-----------|-----------|
| 3 | 1.8800000 | 0.2600000 | 1.5800000 | 2.0400000 |
|---|-----------|-----------|-----------|-----------|

---

Unique Subject Identifier=3444000000-0072

Assay variable : PTINR\_VAL1 PT-INR Value

N Mean Standard Deviation Minimum Maximum

---

|   |           |           |           |           |
|---|-----------|-----------|-----------|-----------|
| 4 | 1.6925000 | 0.1664081 | 1.4800000 | 1.8800000 |
|---|-----------|-----------|-----------|-----------|

---

Unique Subject Identifier=3444000000-0073

Assay variable : PTINR\_VAL1 PT-INR Value

N Mean Standard Deviation Minimum Maximum

---

|   |           |           |           |           |
|---|-----------|-----------|-----------|-----------|
| 3 | 1.8633333 | 0.1677299 | 1.6700000 | 1.9700000 |
|---|-----------|-----------|-----------|-----------|

---

Laboratory tests at the time of obtaining Table 2-6 consent, according to the presence or absence of proton-pump inhibitors

Unique Subject Identifier=3444000000-0074

MEANS Procedure

Assay variable : PTINR\_VAL1 PT-INR Value

N Mean Standard Deviation Minimum Maximum

---

|   |           |           |           |           |
|---|-----------|-----------|-----------|-----------|
| 5 | 1.6780000 | 0.4704997 | 1.1800000 | 2.3900000 |
|---|-----------|-----------|-----------|-----------|

---

Unique Subject Identifier=3444000000-0075

Assay variable : PTINR\_VAL1 PT-INR Value

N Mean Standard Deviation Minimum Maximum

---

|   |           |           |           |           |
|---|-----------|-----------|-----------|-----------|
| 4 | 2.0800000 | 0.6319810 | 1.6200000 | 3.0100000 |
|---|-----------|-----------|-----------|-----------|

---

Unique Subject Identifier=3444000000-0083

Assay variable : PTINR\_VAL1 PT-INR Value

N Mean Standard Deviation Minimum Maximum

---

|   |           |           |           |           |
|---|-----------|-----------|-----------|-----------|
| 3 | 2.2700000 | 0.3477068 | 1.9000000 | 2.5900000 |
|---|-----------|-----------|-----------|-----------|

---

Unique Subject Identifier=3444000000-0084

Assay variable : PTINR\_VAL1 PT-INR Value

N Mean Standard Deviation Minimum Maximum

---

|   |           |           |           |           |
|---|-----------|-----------|-----------|-----------|
| 4 | 1.7800000 | 0.1435270 | 1.6000000 | 1.9500000 |
|---|-----------|-----------|-----------|-----------|

---

Laboratory tests at the time of obtaining Table 2-6 consent, according to the presence or absence of proton-pump inhibitors

Unique Subject Identifier=3444000000-0086

MEANS Procedure

Assay variable : PTINR\_VAL1 PT-INR Value

N Mean Standard Deviation Minimum Maximum

---

|   |          |           |          |          |
|---|----------|-----------|----------|----------|
| 4 | 2.600000 | 0.1230176 | 2.460000 | 2.760000 |
|---|----------|-----------|----------|----------|

---

Unique Subject Identifier=3444000000-0092

Assay variable : PTINR\_VAL1 PT-INR Value

N Mean Standard Deviation Minimum Maximum

---

|   |          |           |          |          |
|---|----------|-----------|----------|----------|
| 6 | 2.428333 | 1.0451682 | 1.120000 | 3.850000 |
|---|----------|-----------|----------|----------|

---

Unique Subject Identifier=3448111011-0005

Assay variable : PTINR\_VAL1 PT-INR Value

N Mean Standard Deviation Minimum Maximum

---

|   |          |           |          |          |
|---|----------|-----------|----------|----------|
| 4 | 1.722500 | 0.2860507 | 1.410000 | 2.090000 |
|---|----------|-----------|----------|----------|

---

Unique Subject Identifier=3452000000-0002

Assay variable : PTINR\_VAL1 PT-INR Value

N Mean Standard Deviation Minimum Maximum

---

|   |           |           |           |           |
|---|-----------|-----------|-----------|-----------|
| 3 | 1.7100000 | 0.1276715 | 1.5700000 | 1.8200000 |
|---|-----------|-----------|-----------|-----------|

---



Laboratory tests at the time of obtaining Table 2-6 consent, according to the presence or absence of proton-pump inhibitors

Unique Subject Identifier=3452000000-0004

MEANS Procedure

Assay variable : PTINR\_VAL1 PT-INR Value

N Mean Standard Deviation Minimum Maximum

---

|   |           |           |           |           |
|---|-----------|-----------|-----------|-----------|
| 4 | 2.1925000 | 0.2632331 | 1.9600000 | 2.5200000 |
|---|-----------|-----------|-----------|-----------|

---

Unique Subject Identifier=3452000000-0005

Assay variable : PTINR\_VAL1 PT-INR Value

N Mean Standard Deviation Minimum Maximum

---

|   |           |           |           |           |
|---|-----------|-----------|-----------|-----------|
| 5 | 2.1920000 | 0.2230919 | 1.8700000 | 2.3800000 |
|---|-----------|-----------|-----------|-----------|

---

Unique Subject Identifier=3452000000-0006

Assay variable : PTINR\_VAL1 PT-INR Value

N Mean Standard Deviation Minimum Maximum

---

|   |           |           |           |           |
|---|-----------|-----------|-----------|-----------|
| 4 | 2.2675000 | 0.4836235 | 1.7800000 | 2.9100000 |
|---|-----------|-----------|-----------|-----------|

---

Unique Subject Identifier=3452000000-0007

Assay variable : PTINR\_VAL1 PT-INR Value

N Mean Standard Deviation Minimum Maximum

---

|   |           |           |           |           |
|---|-----------|-----------|-----------|-----------|
| 3 | 1.9633333 | 0.0750555 | 1.9200000 | 2.0500000 |
|---|-----------|-----------|-----------|-----------|

---

Laboratory tests at the time of obtaining Table 2-6 consent, according to the presence or absence of proton-pump inhibitors

Unique Subject Identifier=3452000000-0008

MEANS Procedure

Assay variable : PTINR\_VAL1 PT-INR Value

N Mean Standard Deviation Minimum Maximum

---

|   |           |           |           |           |
|---|-----------|-----------|-----------|-----------|
| 4 | 1.7400000 | 0.4661902 | 1.2800000 | 2.2600000 |
|---|-----------|-----------|-----------|-----------|

---

Unique Subject Identifier=3452000000-0009

Assay variable : PTINR\_VAL1 PT-INR Value

N Mean Standard Deviation Minimum Maximum

---

|   |           |           |           |           |
|---|-----------|-----------|-----------|-----------|
| 3 | 2.3866667 | 0.5604760 | 1.8400000 | 2.9600000 |
|---|-----------|-----------|-----------|-----------|

---

Unique Subject Identifier=3453000000-0002

Assay variable : PTINR\_VAL1 PT-INR Value

N Mean Standard Deviation Minimum Maximum

---

|   |           |           |           |           |
|---|-----------|-----------|-----------|-----------|
| 2 | 1.9450000 | 0.4313351 | 1.6400000 | 2.2500000 |
|---|-----------|-----------|-----------|-----------|

---

Unique Subject Identifier=3453000000-0005

Assay variable : PTINR\_VAL1 PT-INR Value

N Mean Standard Deviation Minimum Maximum

---

|   |           |           |           |           |
|---|-----------|-----------|-----------|-----------|
| 2 | 2.0650000 | 0.3181981 | 1.8400000 | 2.2900000 |
|---|-----------|-----------|-----------|-----------|

---

Laboratory tests at the time of obtaining Table 2-6 consent, according to the presence or absence of proton-pump inhibitors

Unique Subject Identifier=3453000000-0007

MEANS Procedure

Assay variable : PTINR\_VAL1 PT-INR Value

| N | Mean      | Standard Deviation | Minimum   | Maximum   |
|---|-----------|--------------------|-----------|-----------|
| 2 | 1.7100000 | 0.1697056          | 1.5900000 | 1.8300000 |

Unique Subject Identifier=3453000000-0008

Assay variable : PTINR\_VAL1 PT-INR Value

| N | Mean      | Standard Deviation | Minimum   | Maximum   |
|---|-----------|--------------------|-----------|-----------|
| 2 | 2.0350000 | 0.0353553          | 2.0100000 | 2.0600000 |

Unique Subject Identifier=3462011111-0002

Assay variable : PTINR\_VAL1 PT-INR Value

| N | Mean      | Standard Deviation | Minimum   | Maximum   |
|---|-----------|--------------------|-----------|-----------|
| 4 | 2.0175000 | 0.0946485          | 1.9100000 | 2.1400000 |

Unique Subject Identifier=3462011111-0011

Assay variable : PTINR\_VAL1 PT-INR Value

N Mean Standard Deviation Minimum Maximum

---

|   |          |           |          |          |
|---|----------|-----------|----------|----------|
| 6 | 1.903333 | 0.1689576 | 1.720000 | 2.110000 |
|---|----------|-----------|----------|----------|

---

Laboratory tests at the time of obtaining Table 2-6 consent, according to the presence or absence of proton-pump inhibitors

Unique Subject Identifier=3462011111-0023

MEANS Procedure

Assay variable : PTINR\_VAL1 PT-INR Value

N Mean Standard Deviation Minimum Maximum

---

|   |           |           |           |           |
|---|-----------|-----------|-----------|-----------|
| 6 | 2.1783333 | 0.3364174 | 1.9000000 | 2.7700000 |
|---|-----------|-----------|-----------|-----------|

---

Unique Subject Identifier=3472000000-0013

Assay variable : PTINR\_VAL1 PT-INR Value

N Mean Standard Deviation Minimum Maximum

---

|   |           |  |           |           |
|---|-----------|--|-----------|-----------|
| 1 | 2.3600000 |  | 2.3600000 | 2.3600000 |
|---|-----------|--|-----------|-----------|

---

Unique Subject Identifier=3472000000-0017

Assay variable : PTINR\_VAL1 PT-INR Value

N Mean Standard Deviation Minimum Maximum

---

|   |           |           |           |           |
|---|-----------|-----------|-----------|-----------|
| 6 | 1.8333333 | 0.3983298 | 1.2000000 | 2.3000000 |
|---|-----------|-----------|-----------|-----------|

---

Unique Subject Identifier=3481010111-0002

Assay variable : PTINR\_VAL1 PT-INR Value

N Mean Standard Deviation Minimum Maximum

---

|   |          |           |          |          |
|---|----------|-----------|----------|----------|
| 5 | 1.460000 | 0.0547723 | 1.400000 | 1.500000 |
|---|----------|-----------|----------|----------|

---



Laboratory tests at the time of obtaining Table 2-6 consent, according to the presence or absence of proton-pump inhibitors

Unique Subject Identifier=3481010111-0004

MEANS Procedure

Assay variable : PTINR\_VAL1 PT-INR Value

N Mean Standard Deviation Minimum Maximum

---

|   |           |           |           |           |
|---|-----------|-----------|-----------|-----------|
| 4 | 1.8000000 | 0.0816497 | 1.7000000 | 1.9000000 |
|---|-----------|-----------|-----------|-----------|

---

Unique Subject Identifier=3481010111-0006

Assay variable : PTINR\_VAL1 PT-INR Value

N Mean Standard Deviation Minimum Maximum

---

|   |           |           |           |           |
|---|-----------|-----------|-----------|-----------|
| 3 | 2.0666667 | 0.2516611 | 1.8000000 | 2.3000000 |
|---|-----------|-----------|-----------|-----------|

---

Unique Subject Identifier=3481010111-0007

Assay variable : PTINR\_VAL1 PT-INR Value

N Mean Standard Deviation Minimum Maximum

---

|   |           |           |           |           |
|---|-----------|-----------|-----------|-----------|
| 3 | 2.1666667 | 0.0577350 | 2.1000000 | 2.2000000 |
|---|-----------|-----------|-----------|-----------|

---

Unique Subject Identifier=3481010111-0008

Assay variable : PTINR\_VAL1 PT-INR Value

N Mean Standard Deviation Minimum Maximum

---

|   |          |  |          |          |
|---|----------|--|----------|----------|
| 1 | 1.100000 |  | 1.100000 | 1.100000 |
|---|----------|--|----------|----------|

---

Laboratory tests at the time of obtaining Table 2-6 consent, according to the presence or absence of proton-pump inhibitors

Unique Subject Identifier=3481010111-0009

MEANS Procedure

Assay variable : PTINR\_VAL1 PT-INR Value

| N | Mean      | Standard Deviation | Minimum   | Maximum   |
|---|-----------|--------------------|-----------|-----------|
| 5 | 1.3200000 | 0.0836660          | 1.2000000 | 1.4000000 |

Unique Subject Identifier=3481010111-0010

Assay variable : PTINR\_VAL1 PT-INR Value

| N | Mean      | Standard Deviation | Minimum   | Maximum   |
|---|-----------|--------------------|-----------|-----------|
| 2 | 1.6000000 | 0.1414214          | 1.5000000 | 1.7000000 |

Unique Subject Identifier=3481010111-0012

Assay variable : PTINR\_VAL1 PT-INR Value

| N | Mean      | Standard Deviation | Minimum   | Maximum   |
|---|-----------|--------------------|-----------|-----------|
| 4 | 1.6750000 | 0.0957427          | 1.6000000 | 1.8000000 |

Unique Subject Identifier=3481010111-0013

Assay variable : PTINR\_VAL1 PT-INR Value

N Mean Standard Deviation Minimum Maximum

---

|   |          |           |          |          |
|---|----------|-----------|----------|----------|
| 5 | 2.440000 | 0.5319774 | 1.800000 | 3.000000 |
|---|----------|-----------|----------|----------|

---

Laboratory tests at the time of obtaining Table 2-6 consent, according to the presence or absence of proton-pump inhibitors

Unique Subject Identifier=3481010111-0014

MEANS Procedure

Assay variable : PTINR\_VAL1 PT-INR Value

N Mean Standard Deviation Minimum Maximum

---

|   |           |           |           |           |
|---|-----------|-----------|-----------|-----------|
| 3 | 1.1666667 | 0.0577350 | 1.1000000 | 1.2000000 |
|---|-----------|-----------|-----------|-----------|

---

Unique Subject Identifier=3481010111-0015

Assay variable : PTINR\_VAL1 PT-INR Value

N Mean Standard Deviation Minimum Maximum

---

|   |           |           |           |           |
|---|-----------|-----------|-----------|-----------|
| 3 | 2.4666667 | 0.1527525 | 2.3000000 | 2.6000000 |
|---|-----------|-----------|-----------|-----------|

---

Unique Subject Identifier=3481010111-0016

Assay variable : PTINR\_VAL1 PT-INR Value

N Mean Standard Deviation Minimum Maximum

---

|   |           |           |           |           |
|---|-----------|-----------|-----------|-----------|
| 6 | 1.5000000 | 0.1264911 | 1.3000000 | 1.6000000 |
|---|-----------|-----------|-----------|-----------|

---

Unique Subject Identifier=3481010111-0017

Assay variable : PTINR\_VAL1 PT-INR Value

N Mean Standard Deviation Minimum Maximum

---

|   |           |           |           |           |
|---|-----------|-----------|-----------|-----------|
| 4 | 1.9250000 | 0.8057088 | 1.4000000 | 3.1000000 |
|---|-----------|-----------|-----------|-----------|

---

Laboratory tests at the time of obtaining Table 2-6 consent, according to the presence or absence of proton-pump inhibitors

Unique Subject Identifier=3481010111-0019

MEANS Procedure

Assay variable : PTINR\_VAL1 PT-INR Value

N Mean Standard Deviation Minimum Maximum

---

|   |           |           |           |           |
|---|-----------|-----------|-----------|-----------|
| 3 | 2.0000000 | 0.5000000 | 1.5000000 | 2.5000000 |
|---|-----------|-----------|-----------|-----------|

---

Unique Subject Identifier=3481010111-0022

Assay variable : PTINR\_VAL1 PT-INR Value

N Mean Standard Deviation Minimum Maximum

---

|   |           |           |           |           |
|---|-----------|-----------|-----------|-----------|
| 3 | 1.5666667 | 0.3214550 | 1.2000000 | 1.8000000 |
|---|-----------|-----------|-----------|-----------|

---

Unique Subject Identifier=3481010111-0024

Assay variable : PTINR\_VAL1 PT-INR Value

N Mean Standard Deviation Minimum Maximum

---

|   |           |           |           |           |
|---|-----------|-----------|-----------|-----------|
| 2 | 1.4000000 | 0.4242641 | 1.1000000 | 1.7000000 |
|---|-----------|-----------|-----------|-----------|

---

Unique Subject Identifier=3481010111-0026

Assay variable : PTINR\_VAL1 PT-INR Value

N Mean Standard Deviation Minimum Maximum

---

|   |           |           |           |           |
|---|-----------|-----------|-----------|-----------|
| 3 | 2.5666667 | 0.6110101 | 1.9000000 | 3.1000000 |
|---|-----------|-----------|-----------|-----------|

---



Laboratory tests at the time of obtaining Table 2-6 consent, according to the presence or absence of proton-pump inhibitors

Unique Subject Identifier=3481010111-0029

MEANS Procedure

Assay variable : PTINR\_VAL1 PT-INR Value

N Mean Standard Deviation Minimum Maximum

---

|   |           |           |           |           |
|---|-----------|-----------|-----------|-----------|
| 4 | 2.2000000 | 0.9933110 | 1.0000000 | 3.4000000 |
|---|-----------|-----------|-----------|-----------|

---

Unique Subject Identifier=3491001000-0031

Assay variable : PTINR\_VAL1 PT-INR Value

N Mean Standard Deviation Minimum Maximum

---

|   |           |  |           |           |
|---|-----------|--|-----------|-----------|
| 1 | 1.7800000 |  | 1.7800000 | 1.7800000 |
|---|-----------|--|-----------|-----------|

---

Unique Subject Identifier=3491001000-0032

Assay variable : PTINR\_VAL1 PT-INR Value

N Mean Standard Deviation Minimum Maximum

---

|   |           |  |           |           |
|---|-----------|--|-----------|-----------|
| 1 | 2.2200000 |  | 2.2200000 | 2.2200000 |
|---|-----------|--|-----------|-----------|

---

Unique Subject Identifier=3501111111-0003

Assay variable : PTINR\_VAL1 PT-INR Value

N Mean Standard Deviation Minimum Maximum

---

|   |           |           |           |           |
|---|-----------|-----------|-----------|-----------|
| 6 | 2.3950000 | 0.9346604 | 1.0600000 | 3.7800000 |
|---|-----------|-----------|-----------|-----------|

---

Laboratory tests at the time of obtaining Table 2-6 consent, according to the presence or absence of proton-pump inhibitors

Unique Subject Identifier=350111111-0004

MEANS Procedure

Assay variable : PTINR\_VAL1 PT-INR Value

N Mean Standard Deviation Minimum Maximum

---

|   |           |           |           |           |
|---|-----------|-----------|-----------|-----------|
| 6 | 1.4916667 | 0.3354649 | 1.0000000 | 2.0000000 |
|---|-----------|-----------|-----------|-----------|

---

Unique Subject Identifier=350111111-0011

Assay variable : PTINR\_VAL1 PT-INR Value

N Mean Standard Deviation Minimum Maximum

---

|   |           |           |           |           |
|---|-----------|-----------|-----------|-----------|
| 3 | 2.2133333 | 0.4027820 | 1.7500000 | 2.4800000 |
|---|-----------|-----------|-----------|-----------|

---

Unique Subject Identifier=350111111-0012

Assay variable : PTINR\_VAL1 PT-INR Value

N Mean Standard Deviation Minimum Maximum

---

|   |           |           |           |           |
|---|-----------|-----------|-----------|-----------|
| 2 | 1.9600000 | 0.1131371 | 1.8800000 | 2.0400000 |
|---|-----------|-----------|-----------|-----------|

---

Unique Subject Identifier=350111111-0019

Assay variable : PTINR\_VAL1 PT-INR Value

N Mean Standard Deviation Minimum Maximum

---

|   |           |           |           |           |
|---|-----------|-----------|-----------|-----------|
| 5 | 1.9360000 | 0.2223286 | 1.6800000 | 2.1700000 |
|---|-----------|-----------|-----------|-----------|

---

Laboratory tests at the time of obtaining Table 2-6 consent, according to the presence or absence of proton-pump inhibitors

Unique Subject Identifier=350111111-0026

MEANS Procedure

Assay variable : PTINR\_VAL1 PT-INR Value

| N | Mean      | Standard Deviation | Minimum   | Maximum   |
|---|-----------|--------------------|-----------|-----------|
| 3 | 2.7700000 | 1.7963296          | 1.5300000 | 4.8300000 |

Unique Subject Identifier=5001010000-0001

Assay variable : PTINR\_VAL1 PT-INR Value

| N | Mean      | Standard Deviation | Minimum   | Maximum   |
|---|-----------|--------------------|-----------|-----------|
| 1 | 2.2500000 |                    | 2.2500000 | 2.2500000 |

Unique Subject Identifier=5001010000-0007

Assay variable : PTINR\_VAL1 PT-INR Value

| N | Mean      | Standard Deviation | Minimum   | Maximum   |
|---|-----------|--------------------|-----------|-----------|
| 3 | 1.9333333 | 0.0723418          | 1.8500000 | 1.9800000 |

Unique Subject Identifier=5001010000-0012

Assay variable : PTINR\_VAL1 PT-INR Value

N Mean Standard Deviation Minimum Maximum

---

|   |          |          |          |          |
|---|----------|----------|----------|----------|
| 3 | 1.500000 | 0.100000 | 1.400000 | 1.600000 |
|---|----------|----------|----------|----------|

---

Laboratory tests at the time of obtaining Table 2-6 consent, according to the presence or absence of proton-pump inhibitors

Unique Subject Identifier=5001010000-0013

MEANS Procedure

Assay variable : PTINR\_VAL1 PT-INR Value

| N | Mean      | Standard Deviation | Minimum   | Maximum   |
|---|-----------|--------------------|-----------|-----------|
| 1 | 2.0300000 |                    | 2.0300000 | 2.0300000 |

Unique Subject Identifier=5001010000-0021

Assay variable : PTINR\_VAL1 PT-INR Value

| N | Mean      | Standard Deviation | Minimum   | Maximum   |
|---|-----------|--------------------|-----------|-----------|
| 4 | 2.2300000 | 0.2041241          | 1.9600000 | 2.4200000 |

Unique Subject Identifier=5001010000-0031

Assay variable : PTINR\_VAL1 PT-INR Value

| N | Mean      | Standard Deviation | Minimum   | Maximum   |
|---|-----------|--------------------|-----------|-----------|
| 6 | 2.3466667 | 0.7982898          | 1.1800000 | 3.5400000 |

Unique Subject Identifier=5001010000-0033

Assay variable : PTINR\_VAL1 PT-INR Value

N Mean Standard Deviation Minimum Maximum

---

|   |           |           |           |           |
|---|-----------|-----------|-----------|-----------|
| 4 | 1.8225000 | 0.1948290 | 1.5400000 | 1.9700000 |
|---|-----------|-----------|-----------|-----------|

---



Laboratory tests at the time of obtaining Table 2-6 consent, according to the presence or absence of proton-pump inhibitors

Unique Subject Identifier=5002010010-0002

MEANS Procedure

Assay variable : PTINR\_VAL1 PT-INR Value

| N | Mean      | Standard Deviation | Minimum   | Maximum   |
|---|-----------|--------------------|-----------|-----------|
| 5 | 1.8800000 | 0.1519868          | 1.6300000 | 2.0300000 |

Unique Subject Identifier=5002010010-0006

Assay variable : PTINR\_VAL1 PT-INR Value

| N | Mean      | Standard Deviation | Minimum   | Maximum   |
|---|-----------|--------------------|-----------|-----------|
| 2 | 1.6550000 | 0.3889087          | 1.3800000 | 1.9300000 |

Unique Subject Identifier=5002010010-0008

Assay variable : PTINR\_VAL1 PT-INR Value

| N | Mean      | Standard Deviation | Minimum   | Maximum   |
|---|-----------|--------------------|-----------|-----------|
| 4 | 2.6300000 | 0.4993996          | 2.0800000 | 3.2200000 |

Unique Subject Identifier=5002010010-0012

Assay variable : PTINR\_VAL1 PT-INR Value

N Mean Standard Deviation Minimum Maximum

---

|   |           |           |           |           |
|---|-----------|-----------|-----------|-----------|
| 2 | 1.9050000 | 0.1484924 | 1.8000000 | 2.0100000 |
|---|-----------|-----------|-----------|-----------|

---

Laboratory tests at the time of obtaining Table 2-6 consent, according to the presence or absence of proton-pump inhibitors

Unique Subject Identifier=5002010010-0013

MEANS Procedure

Assay variable : PTINR\_VAL1 PT-INR Value

N Mean Standard Deviation Minimum Maximum

---

|   |           |           |           |           |
|---|-----------|-----------|-----------|-----------|
| 2 | 1.6150000 | 0.1484924 | 1.5100000 | 1.7200000 |
|---|-----------|-----------|-----------|-----------|

---

Unique Subject Identifier=5002010010-0014

Assay variable : PTINR\_VAL1 PT-INR Value

N Mean Standard Deviation Minimum Maximum

---

|   |           |           |           |           |
|---|-----------|-----------|-----------|-----------|
| 4 | 1.9625000 | 0.1658061 | 1.8000000 | 2.1200000 |
|---|-----------|-----------|-----------|-----------|

---

Unique Subject Identifier=5002010010-0015

Assay variable : PTINR\_VAL1 PT-INR Value

N Mean Standard Deviation Minimum Maximum

---

|   |           |           |           |           |
|---|-----------|-----------|-----------|-----------|
| 2 | 1.8750000 | 0.1909188 | 1.7400000 | 2.0100000 |
|---|-----------|-----------|-----------|-----------|

---

Unique Subject Identifier=5002010010-0016

Assay variable : PTINR\_VAL1 PT-INR Value

N Mean Standard Deviation Minimum Maximum

---

|   |           |           |           |           |
|---|-----------|-----------|-----------|-----------|
| 3 | 1.7700000 | 0.0781025 | 1.7200000 | 1.8600000 |
|---|-----------|-----------|-----------|-----------|

---

Laboratory tests at the time of obtaining Table 2-6 consent, according to the presence or absence of proton-pump inhibitors

Unique Subject Identifier=5002010010-0022

MEANS Procedure

Assay variable : PTINR\_VAL1 PT-INR Value

N Mean Standard Deviation Minimum Maximum

---

|   |           |           |           |           |
|---|-----------|-----------|-----------|-----------|
| 4 | 1.7100000 | 0.6702736 | 1.2800000 | 2.7100000 |
|---|-----------|-----------|-----------|-----------|

---

Unique Subject Identifier=5002010010-0023

Assay variable : PTINR\_VAL1 PT-INR Value

N Mean Standard Deviation Minimum Maximum

---

|   |           |           |           |           |
|---|-----------|-----------|-----------|-----------|
| 6 | 2.0566667 | 0.4529312 | 1.6400000 | 2.9000000 |
|---|-----------|-----------|-----------|-----------|

---

Unique Subject Identifier=5002010010-0025

Assay variable : PTINR\_VAL1 PT-INR Value

N Mean Standard Deviation Minimum Maximum

---

|   |           |           |           |           |
|---|-----------|-----------|-----------|-----------|
| 3 | 2.1600000 | 0.7269113 | 1.5400000 | 2.9600000 |
|---|-----------|-----------|-----------|-----------|

---

Unique Subject Identifier=5002010010-0026

Assay variable : PTINR\_VAL1 PT-INR Value

N Mean Standard Deviation Minimum Maximum

---

|   |          |           |          |          |
|---|----------|-----------|----------|----------|
| 6 | 2.340000 | 0.2816381 | 1.890000 | 2.730000 |
|---|----------|-----------|----------|----------|

---

Laboratory tests at the time of obtaining Table 2-6 consent, according to the presence or absence of proton-pump inhibitors

Unique Subject Identifier=5002010010-0030

MEANS Procedure

Assay variable : PTINR\_VAL1 PT-INR Value

| N | Mean      | Standard Deviation | Minimum   | Maximum   |
|---|-----------|--------------------|-----------|-----------|
| 6 | 2.4650000 | 0.1486943          | 2.2800000 | 2.6900000 |

Unique Subject Identifier=5002010010-0031

Assay variable : PTINR\_VAL1 PT-INR Value

| N | Mean      | Standard Deviation | Minimum   | Maximum   |
|---|-----------|--------------------|-----------|-----------|
| 6 | 1.8300000 | 0.2572159          | 1.5000000 | 2.2200000 |

Unique Subject Identifier=5002010010-0032

Assay variable : PTINR\_VAL1 PT-INR Value

| N | Mean      | Standard Deviation | Minimum   | Maximum   |
|---|-----------|--------------------|-----------|-----------|
| 6 | 2.1933333 | 0.1517454          | 1.9500000 | 2.3400000 |

Unique Subject Identifier=5002010010-0037

Assay variable : PTINR\_VAL1 PT-INR Value

N Mean Standard Deviation Minimum Maximum

---

|   |           |           |           |           |
|---|-----------|-----------|-----------|-----------|
| 3 | 2.3233333 | 0.3696395 | 2.1000000 | 2.7500000 |
|---|-----------|-----------|-----------|-----------|

---



Laboratory tests at the time of obtaining Table 2-6 consent, according to the presence or absence of proton-pump inhibitors

Unique Subject Identifier=5002010010-0039

MEANS Procedure

Assay variable : PTINR\_VAL1 PT-INR Value

| N | Mean     | Standard Deviation | Minimum  | Maximum  |
|---|----------|--------------------|----------|----------|
| 3 | 1.760000 | 0.3567913          | 1.520000 | 2.170000 |

Unique Subject Identifier=5002010010-0044

Assay variable : PTINR\_VAL1 PT-INR Value

| N | Mean     | Standard Deviation | Minimum  | Maximum  |
|---|----------|--------------------|----------|----------|
| 3 | 1.770000 | 0.2233831          | 1.590000 | 2.020000 |

Unique Subject Identifier=5002010010-0045

Assay variable : PTINR\_VAL1 PT-INR Value

| N | Mean      | Standard Deviation | Minimum  | Maximum  |
|---|-----------|--------------------|----------|----------|
| 6 | 1.8216667 | 0.3260930          | 1.530000 | 2.420000 |

Unique Subject Identifier=5002010010-0050

Assay variable : PTINR\_VAL1 PT-INR Value

N Mean Standard Deviation Minimum Maximum

---

|   |          |           |          |          |
|---|----------|-----------|----------|----------|
| 5 | 2.262000 | 0.4080686 | 1.840000 | 2.930000 |
|---|----------|-----------|----------|----------|

---

Laboratory tests at the time of obtaining Table 2-6 consent, according to the presence or absence of proton-pump inhibitors

Unique Subject Identifier=5002010010-0053

MEANS Procedure

Assay variable : PTINR\_VAL1 PT-INR Value

| N | Mean      | Standard Deviation | Minimum   | Maximum   |
|---|-----------|--------------------|-----------|-----------|
| 2 | 2.2700000 | 0.1131371          | 2.1900000 | 2.3500000 |

Unique Subject Identifier=5002010010-0054

Assay variable : PTINR\_VAL1 PT-INR Value

| N | Mean      | Standard Deviation | Minimum   | Maximum   |
|---|-----------|--------------------|-----------|-----------|
| 4 | 2.0025000 | 0.1297112          | 1.8800000 | 2.1800000 |

Unique Subject Identifier=5002010010-0058

Assay variable : PTINR\_VAL1 PT-INR Value

| N | Mean      | Standard Deviation | Minimum   | Maximum   |
|---|-----------|--------------------|-----------|-----------|
| 5 | 1.5980000 | 0.5341535          | 1.0400000 | 2.2400000 |

Unique Subject Identifier=5002010010-0060

Assay variable : PTINR\_VAL1 PT-INR Value

N Mean Standard Deviation Minimum Maximum

---

|   |           |           |           |           |
|---|-----------|-----------|-----------|-----------|
| 6 | 1.8800000 | 0.6824368 | 1.3900000 | 3.2500000 |
|---|-----------|-----------|-----------|-----------|

---

Laboratory tests at the time of obtaining Table 2-6 consent, according to the presence or absence of proton-pump inhibitors

Unique Subject Identifier=5002010010-0063

MEANS Procedure

Assay variable : PTINR\_VAL1 PT-INR Value

N Mean Standard Deviation Minimum Maximum

---

|   |           |           |           |           |
|---|-----------|-----------|-----------|-----------|
| 2 | 2.2750000 | 0.1909188 | 2.1400000 | 2.4100000 |
|---|-----------|-----------|-----------|-----------|

---

Unique Subject Identifier=5002010010-0069

Assay variable : PTINR\_VAL1 PT-INR Value

N Mean Standard Deviation Minimum Maximum

---

|   |           |           |           |           |
|---|-----------|-----------|-----------|-----------|
| 4 | 1.9350000 | 0.5406478 | 1.4700000 | 2.6000000 |
|---|-----------|-----------|-----------|-----------|

---

Unique Subject Identifier=5002010010-0070

Assay variable : PTINR\_VAL1 PT-INR Value

N Mean Standard Deviation Minimum Maximum

---

|   |           |           |           |           |
|---|-----------|-----------|-----------|-----------|
| 4 | 2.1350000 | 0.3702702 | 1.8600000 | 2.6600000 |
|---|-----------|-----------|-----------|-----------|

---

Unique Subject Identifier=5002010010-0074

Assay variable : PTINR\_VAL1 PT-INR Value

N Mean Standard Deviation Minimum Maximum

---

|   |          |           |          |          |
|---|----------|-----------|----------|----------|
| 3 | 1.813333 | 0.1814754 | 1.620000 | 1.980000 |
|---|----------|-----------|----------|----------|

---

Laboratory tests at the time of obtaining Table 2-6 consent, according to the presence or absence of proton-pump inhibitors

Unique Subject Identifier=5002010010-0079

MEANS Procedure

Assay variable : PTINR\_VAL1 PT-INR Value

| N | Mean     | Standard Deviation | Minimum  | Maximum  |
|---|----------|--------------------|----------|----------|
| 3 | 1.960000 | 0.1081665          | 1.840000 | 2.050000 |

Unique Subject Identifier=5002010010-0080

Assay variable : PTINR\_VAL1 PT-INR Value

| N | Mean     | Standard Deviation | Minimum  | Maximum  |
|---|----------|--------------------|----------|----------|
| 2 | 1.915000 | 0.0494975          | 1.880000 | 1.950000 |

Unique Subject Identifier=5002010010-0085

Assay variable : PTINR\_VAL1 PT-INR Value

| N | Mean     | Standard Deviation | Minimum  | Maximum  |
|---|----------|--------------------|----------|----------|
| 3 | 1.643333 | 0.2914332          | 1.310000 | 1.850000 |

Unique Subject Identifier=5002010010-0086

Assay variable : PTINR\_VAL1 PT-INR Value

N Mean Standard Deviation Minimum Maximum

---

|   |           |           |           |           |
|---|-----------|-----------|-----------|-----------|
| 3 | 1.7300000 | 0.3304542 | 1.4100000 | 2.0700000 |
|---|-----------|-----------|-----------|-----------|

---



Laboratory tests at the time of obtaining Table 2-6 consent, according to the presence or absence of proton-pump inhibitors

Unique Subject Identifier=5002010010-0091

MEANS Procedure

Assay variable : PTINR\_VAL1 PT-INR Value

N Mean Standard Deviation Minimum Maximum

---

|   |           |           |           |           |
|---|-----------|-----------|-----------|-----------|
| 3 | 1.7033333 | 0.0230940 | 1.6900000 | 1.7300000 |
|---|-----------|-----------|-----------|-----------|

---

Unique Subject Identifier=5002010010-0092

Assay variable : PTINR\_VAL1 PT-INR Value

N Mean Standard Deviation Minimum Maximum

---

|   |           |           |           |           |
|---|-----------|-----------|-----------|-----------|
| 3 | 1.6733333 | 0.2478575 | 1.3900000 | 1.8500000 |
|---|-----------|-----------|-----------|-----------|

---

Unique Subject Identifier=5002010010-0095

Assay variable : PTINR\_VAL1 PT-INR Value

N Mean Standard Deviation Minimum Maximum

---

|   |           |           |           |           |
|---|-----------|-----------|-----------|-----------|
| 2 | 2.0000000 | 0.1979899 | 1.8600000 | 2.1400000 |
|---|-----------|-----------|-----------|-----------|

---

Unique Subject Identifier=5004000111-0003

Assay variable : PTINR\_VAL1 PT-INR Value

N Mean Standard Deviation Minimum Maximum

---

|   |           |           |           |           |
|---|-----------|-----------|-----------|-----------|
| 6 | 2.0816667 | 0.3817023 | 1.3900000 | 2.5000000 |
|---|-----------|-----------|-----------|-----------|

---

Laboratory tests at the time of obtaining Table 2-6 consent, according to the presence or absence of proton-pump inhibitors

Unique Subject Identifier=5004000111-0008

MEANS Procedure

Assay variable : PTINR\_VAL1 PT-INR Value

N Mean Standard Deviation Minimum Maximum

---

|   |           |           |           |           |
|---|-----------|-----------|-----------|-----------|
| 4 | 2.0650000 | 0.5967970 | 1.6500000 | 2.9200000 |
|---|-----------|-----------|-----------|-----------|

---

Unique Subject Identifier=5004000111-0012

Assay variable : PTINR\_VAL1 PT-INR Value

N Mean Standard Deviation Minimum Maximum

---

|   |           |           |           |           |
|---|-----------|-----------|-----------|-----------|
| 3 | 2.1733333 | 0.2052641 | 2.0000000 | 2.4000000 |
|---|-----------|-----------|-----------|-----------|

---

Unique Subject Identifier=5004000111-0016

Assay variable : PTINR\_VAL1 PT-INR Value

N Mean Standard Deviation Minimum Maximum

---

|   |           |           |           |           |
|---|-----------|-----------|-----------|-----------|
| 4 | 2.0350000 | 0.1181807 | 1.9500000 | 2.2100000 |
|---|-----------|-----------|-----------|-----------|

---

Unique Subject Identifier=5004000111-0019

Assay variable : PTINR\_VAL1 PT-INR Value

N Mean Standard Deviation Minimum Maximum

---

|   |           |           |           |           |
|---|-----------|-----------|-----------|-----------|
| 6 | 2.2416667 | 0.7647069 | 1.7100000 | 3.7600000 |
|---|-----------|-----------|-----------|-----------|

---

Laboratory tests at the time of obtaining Table 2-6 consent, according to the presence or absence of proton-pump inhibitors

Unique Subject Identifier=5004000111-0022

MEANS Procedure

Assay variable : PTINR\_VAL1 PT-INR Value

| N | Mean      | Standard Deviation | Minimum   | Maximum   |
|---|-----------|--------------------|-----------|-----------|
| 6 | 1.6416667 | 0.1238413          | 1.4400000 | 1.7900000 |

Unique Subject Identifier=5004000111-0024

Assay variable : PTINR\_VAL1 PT-INR Value

| N | Mean      | Standard Deviation | Minimum   | Maximum   |
|---|-----------|--------------------|-----------|-----------|
| 2 | 1.9250000 | 0.0494975          | 1.8900000 | 1.9600000 |

Unique Subject Identifier=5004000111-0026

Assay variable : PTINR\_VAL1 PT-INR Value

| N | Mean      | Standard Deviation | Minimum   | Maximum   |
|---|-----------|--------------------|-----------|-----------|
| 5 | 1.9580000 | 0.9992847          | 1.0200000 | 3.2700000 |

Unique Subject Identifier=5004000111-0031

Assay variable : PTINR\_VAL1 PT-INR Value

N Mean Standard Deviation Minimum Maximum

---

|   |          |           |          |          |
|---|----------|-----------|----------|----------|
| 2 | 1.810000 | 0.1697056 | 1.690000 | 1.930000 |
|---|----------|-----------|----------|----------|

---

Laboratory tests at the time of obtaining Table 2-6 consent, according to the presence or absence of proton-pump inhibitors

Unique Subject Identifier=5004000111-0033

MEANS Procedure

Assay variable : PTINR\_VAL1 PT-INR Value

N Mean Standard Deviation Minimum Maximum

---

|   |           |           |           |           |
|---|-----------|-----------|-----------|-----------|
| 3 | 2.4300000 | 0.2165641 | 2.1800000 | 2.5600000 |
|---|-----------|-----------|-----------|-----------|

---

Unique Subject Identifier=5004000111-0035

Assay variable : PTINR\_VAL1 PT-INR Value

N Mean Standard Deviation Minimum Maximum

---

|   |           |           |           |           |
|---|-----------|-----------|-----------|-----------|
| 6 | 1.9033333 | 0.3640696 | 1.4700000 | 2.3700000 |
|---|-----------|-----------|-----------|-----------|

---

Unique Subject Identifier=5004000111-0037

Assay variable : PTINR\_VAL1 PT-INR Value

N Mean Standard Deviation Minimum Maximum

---

|   |           |           |           |           |
|---|-----------|-----------|-----------|-----------|
| 4 | 2.4375000 | 0.1645955 | 2.2000000 | 2.5700000 |
|---|-----------|-----------|-----------|-----------|

---

Unique Subject Identifier=5004000111-0039

Assay variable : PTINR\_VAL1 PT-INR Value

N Mean Standard Deviation Minimum Maximum

---

|   |           |           |           |           |
|---|-----------|-----------|-----------|-----------|
| 3 | 2.0966667 | 0.5300314 | 1.4900000 | 2.4700000 |
|---|-----------|-----------|-----------|-----------|

---



Laboratory tests at the time of obtaining Table 2-6 consent, according to the presence or absence of proton-pump inhibitors

Unique Subject Identifier=5004000111-0041

MEANS Procedure

Assay variable : PTINR\_VAL1 PT-INR Value

N Mean Standard Deviation Minimum Maximum

---

|   |           |           |           |           |
|---|-----------|-----------|-----------|-----------|
| 4 | 1.7425000 | 0.0607591 | 1.6900000 | 1.8300000 |
|---|-----------|-----------|-----------|-----------|

---

Unique Subject Identifier=5004000111-0043

Assay variable : PTINR\_VAL1 PT-INR Value

N Mean Standard Deviation Minimum Maximum

---

|   |           |           |           |           |
|---|-----------|-----------|-----------|-----------|
| 2 | 1.5650000 | 0.0636396 | 1.5200000 | 1.6100000 |
|---|-----------|-----------|-----------|-----------|

---

Unique Subject Identifier=5004000111-0047

Assay variable : PTINR\_VAL1 PT-INR Value

N Mean Standard Deviation Minimum Maximum

---

|   |           |           |           |           |
|---|-----------|-----------|-----------|-----------|
| 4 | 1.9275000 | 0.1908533 | 1.7700000 | 2.1700000 |
|---|-----------|-----------|-----------|-----------|

---

Unique Subject Identifier=5004000111-0052

Assay variable : PTINR\_VAL1 PT-INR Value

N Mean Standard Deviation Minimum Maximum

---

|   |           |           |           |           |
|---|-----------|-----------|-----------|-----------|
| 6 | 1.7916667 | 0.2430158 | 1.4900000 | 2.1800000 |
|---|-----------|-----------|-----------|-----------|

---

Laboratory tests at the time of obtaining Table 2-6 consent, according to the presence or absence of proton-pump inhibitors

Unique Subject Identifier=5004000111-0057

MEANS Procedure

Assay variable : PTINR\_VAL1 PT-INR Value

N Mean Standard Deviation Minimum Maximum

---

|   |           |           |           |           |
|---|-----------|-----------|-----------|-----------|
| 4 | 2.5250000 | 0.8266599 | 1.6600000 | 3.6500000 |
|---|-----------|-----------|-----------|-----------|

---

Unique Subject Identifier=5004000111-0059

Assay variable : PTINR\_VAL1 PT-INR Value

N Mean Standard Deviation Minimum Maximum

---

|   |           |           |           |           |
|---|-----------|-----------|-----------|-----------|
| 2 | 2.1600000 | 0.1979899 | 2.0200000 | 2.3000000 |
|---|-----------|-----------|-----------|-----------|

---

Unique Subject Identifier=5004000111-0061

Assay variable : PTINR\_VAL1 PT-INR Value

N Mean Standard Deviation Minimum Maximum

---

|   |           |           |           |           |
|---|-----------|-----------|-----------|-----------|
| 6 | 1.7600000 | 0.0834266 | 1.6600000 | 1.8700000 |
|---|-----------|-----------|-----------|-----------|

---

Unique Subject Identifier=5004000111-0062

Assay variable : PTINR\_VAL1 PT-INR Value

N Mean Standard Deviation Minimum Maximum

---

|   |          |           |          |          |
|---|----------|-----------|----------|----------|
| 2 | 2.125000 | 0.4737615 | 1.790000 | 2.460000 |
|---|----------|-----------|----------|----------|

---

Laboratory tests at the time of obtaining Table 2-6 consent, according to the presence or absence of proton-pump inhibitors

Unique Subject Identifier=5004000111-0063

MEANS Procedure

Assay variable : PTINR\_VAL1 PT-INR Value

N Mean Standard Deviation Minimum Maximum

---

|   |           |           |           |           |
|---|-----------|-----------|-----------|-----------|
| 3 | 2.2166667 | 0.1882374 | 2.0000000 | 2.3400000 |
|---|-----------|-----------|-----------|-----------|

---

Unique Subject Identifier=5004000111-0071

Assay variable : PTINR\_VAL1 PT-INR Value

N Mean Standard Deviation Minimum Maximum

---

|   |           |           |           |           |
|---|-----------|-----------|-----------|-----------|
| 4 | 2.7925000 | 0.6411643 | 1.9500000 | 3.4900000 |
|---|-----------|-----------|-----------|-----------|

---

Unique Subject Identifier=5004000111-0072

Assay variable : PTINR\_VAL1 PT-INR Value

N Mean Standard Deviation Minimum Maximum

---

|   |           |           |           |           |
|---|-----------|-----------|-----------|-----------|
| 5 | 1.8100000 | 0.2359025 | 1.4800000 | 2.1100000 |
|---|-----------|-----------|-----------|-----------|

---

Unique Subject Identifier=5004000111-0073

Assay variable : PTINR\_VAL1 PT-INR Value

N Mean Standard Deviation Minimum Maximum

---

|   |           |           |           |           |
|---|-----------|-----------|-----------|-----------|
| 4 | 2.0550000 | 0.4651523 | 1.6200000 | 2.6800000 |
|---|-----------|-----------|-----------|-----------|

---

Laboratory tests at the time of obtaining Table 2-6 consent, according to the presence or absence of proton-pump inhibitors

Unique Subject Identifier=5004000111-0076

MEANS Procedure

Assay variable : PTINR\_VAL1 PT-INR Value

N Mean Standard Deviation Minimum Maximum

---

|   |          |           |          |          |
|---|----------|-----------|----------|----------|
| 4 | 2.430000 | 0.6195159 | 2.000000 | 3.350000 |
|---|----------|-----------|----------|----------|

---

Unique Subject Identifier=5004000111-0078

Assay variable : PTINR\_VAL1 PT-INR Value

N Mean Standard Deviation Minimum Maximum

---

|   |          |           |          |          |
|---|----------|-----------|----------|----------|
| 4 | 1.932500 | 0.3089094 | 1.500000 | 2.220000 |
|---|----------|-----------|----------|----------|

---

Unique Subject Identifier=5004000111-0079

Assay variable : PTINR\_VAL1 PT-INR Value

N Mean Standard Deviation Minimum Maximum

---

|   |          |           |          |          |
|---|----------|-----------|----------|----------|
| 5 | 1.482000 | 0.1173456 | 1.290000 | 1.610000 |
|---|----------|-----------|----------|----------|

---

Unique Subject Identifier=5004000111-0080

Assay variable : PTINR\_VAL1 PT-INR Value

N Mean Standard Deviation Minimum Maximum

---

|   |           |           |           |           |
|---|-----------|-----------|-----------|-----------|
| 3 | 2.2766667 | 0.1553491 | 2.1500000 | 2.4500000 |
|---|-----------|-----------|-----------|-----------|

---



Laboratory tests at the time of obtaining Table 2-6 consent, according to the presence or absence of proton-pump inhibitors

Unique Subject Identifier=5007111000-0005

MEANS Procedure

Assay variable : PTINR\_VAL1 PT-INR Value

| N | Mean      | Standard Deviation | Minimum   | Maximum   |
|---|-----------|--------------------|-----------|-----------|
| 3 | 1.8800000 | 0.2251666          | 1.6200000 | 2.0100000 |

Unique Subject Identifier=5007111000-0008

Assay variable : PTINR\_VAL1 PT-INR Value

| N | Mean      | Standard Deviation | Minimum   | Maximum   |
|---|-----------|--------------------|-----------|-----------|
| 3 | 1.8800000 | 0.2251666          | 1.6200000 | 2.0100000 |

Unique Subject Identifier=5007111000-0010

Assay variable : PTINR\_VAL1 PT-INR Value

| N | Mean      | Standard Deviation | Minimum   | Maximum   |
|---|-----------|--------------------|-----------|-----------|
| 3 | 1.9666667 | 0.0305505          | 1.9400000 | 2.0000000 |

Unique Subject Identifier=5007111000-0012

Assay variable : PTINR\_VAL1 PT-INR Value

N Mean Standard Deviation Minimum Maximum

---

|   |           |           |           |           |
|---|-----------|-----------|-----------|-----------|
| 3 | 2.0566667 | 0.0680686 | 1.9800000 | 2.1100000 |
|---|-----------|-----------|-----------|-----------|

---

Laboratory tests at the time of obtaining Table 2-6 consent, according to the presence or absence of proton-pump inhibitors

Unique Subject Identifier=5007111000-0024

MEANS Procedure

Assay variable : PTINR\_VAL1 PT-INR Value

N Mean Standard Deviation Minimum Maximum

---

|   |           |           |           |           |
|---|-----------|-----------|-----------|-----------|
| 3 | 2.1866667 | 0.1331666 | 2.0400000 | 2.3000000 |
|---|-----------|-----------|-----------|-----------|

---

Unique Subject Identifier=5007111000-0025

Assay variable : PTINR\_VAL1 PT-INR Value

N Mean Standard Deviation Minimum Maximum

---

|   |           |           |           |           |
|---|-----------|-----------|-----------|-----------|
| 3 | 2.2133333 | 0.3153305 | 1.8900000 | 2.5200000 |
|---|-----------|-----------|-----------|-----------|

---

Unique Subject Identifier=5007111000-0030

Assay variable : PTINR\_VAL1 PT-INR Value

N Mean Standard Deviation Minimum Maximum

---

|   |           |           |           |           |
|---|-----------|-----------|-----------|-----------|
| 3 | 1.7200000 | 0.3966106 | 1.3900000 | 2.1600000 |
|---|-----------|-----------|-----------|-----------|

---

Unique Subject Identifier=5007111000-0036

Assay variable : PTINR\_VAL1 PT-INR Value

N Mean Standard Deviation Minimum Maximum

---

|   |           |           |           |           |
|---|-----------|-----------|-----------|-----------|
| 6 | 1.9566667 | 0.3189148 | 1.5900000 | 2.4400000 |
|---|-----------|-----------|-----------|-----------|

---

Laboratory tests at the time of obtaining Table 2-6 consent, according to the presence or absence of proton-pump inhibitors

Unique Subject Identifier=5007111000-0037

MEANS Procedure

Assay variable : PTINR\_VAL1 PT-INR Value

| N | Mean      | Standard Deviation | Minimum   | Maximum   |
|---|-----------|--------------------|-----------|-----------|
| 3 | 1.9300000 | 0.0871780          | 1.8300000 | 1.9900000 |

Unique Subject Identifier=5007111000-0038

Assay variable : PTINR\_VAL1 PT-INR Value

| N | Mean      | Standard Deviation | Minimum   | Maximum   |
|---|-----------|--------------------|-----------|-----------|
| 3 | 2.0533333 | 0.1569501          | 1.9300000 | 2.2300000 |

Unique Subject Identifier=5007111000-0044

Assay variable : PTINR\_VAL1 PT-INR Value

| N | Mean      | Standard Deviation | Minimum   | Maximum   |
|---|-----------|--------------------|-----------|-----------|
| 4 | 2.0825000 | 0.5145467          | 1.3300000 | 2.4900000 |

Unique Subject Identifier=5007111000-0049

Assay variable : PTINR\_VAL1 PT-INR Value

N Mean Standard Deviation Minimum Maximum

---

|   |          |           |          |          |
|---|----------|-----------|----------|----------|
| 6 | 2.340000 | 0.5876053 | 1.770000 | 3.440000 |
|---|----------|-----------|----------|----------|

---

Laboratory tests at the time of obtaining Table 2-6 consent, according to the presence or absence of proton-pump inhibitors

Unique Subject Identifier=5007111000-0055

MEANS Procedure

Assay variable : PTINR\_VAL1 PT-INR Value

| N | Mean      | Standard Deviation | Minimum   | Maximum   |
|---|-----------|--------------------|-----------|-----------|
| 5 | 1.9460000 | 0.2939898          | 1.6900000 | 2.4400000 |

Unique Subject Identifier=5007111000-0058

Assay variable : PTINR\_VAL1 PT-INR Value

| N | Mean      | Standard Deviation | Minimum   | Maximum   |
|---|-----------|--------------------|-----------|-----------|
| 5 | 2.0260000 | 0.4407720          | 1.3300000 | 2.4500000 |

Unique Subject Identifier=5007111000-0060

Assay variable : PTINR\_VAL1 PT-INR Value

| N | Mean      | Standard Deviation | Minimum   | Maximum   |
|---|-----------|--------------------|-----------|-----------|
| 4 | 1.7900000 | 0.1512173          | 1.5700000 | 1.9100000 |

Unique Subject Identifier=5008011111-0007

Assay variable : PTINR\_VAL1 PT-INR Value

N Mean Standard Deviation Minimum Maximum

---

|   |           |           |           |           |
|---|-----------|-----------|-----------|-----------|
| 5 | 2.3140000 | 0.5144706 | 1.8600000 | 3.2000000 |
|---|-----------|-----------|-----------|-----------|

---



Laboratory tests at the time of obtaining Table 2-6 consent, according to the presence or absence of proton-pump inhibitors

Unique Subject Identifier=5008011111-0009

MEANS Procedure

Assay variable : PTINR\_VAL1 PT-INR Value

| N | Mean      | Standard Deviation | Minimum   | Maximum   |
|---|-----------|--------------------|-----------|-----------|
| 5 | 2.1320000 | 0.2678992          | 1.8300000 | 2.4600000 |

Unique Subject Identifier=5008011111-0011

Assay variable : PTINR\_VAL1 PT-INR Value

| N | Mean      | Standard Deviation | Minimum   | Maximum   |
|---|-----------|--------------------|-----------|-----------|
| 4 | 2.3225000 | 0.3250000          | 2.0500000 | 2.7800000 |

Unique Subject Identifier=5009000010-0010

Assay variable : PTINR\_VAL1 PT-INR Value

| N | Mean      | Standard Deviation | Minimum   | Maximum   |
|---|-----------|--------------------|-----------|-----------|
| 6 | 1.9866667 | 0.2273910          | 1.7700000 | 2.3800000 |

Unique Subject Identifier=5009000010-0013

Assay variable : PTINR\_VAL1 PT-INR Value

N Mean Standard Deviation Minimum Maximum

---

|   |           |           |           |           |
|---|-----------|-----------|-----------|-----------|
| 6 | 1.9050000 | 0.4008865 | 1.4700000 | 2.4000000 |
|---|-----------|-----------|-----------|-----------|

---

Laboratory tests at the time of obtaining Table 2-6 consent, according to the presence or absence of proton-pump inhibitors

Unique Subject Identifier=5010000100-0005

MEANS Procedure

Assay variable : PTINR\_VAL1 PT-INR Value

N Mean Standard Deviation Minimum Maximum

---

|   |           |           |           |           |
|---|-----------|-----------|-----------|-----------|
| 2 | 2.0550000 | 0.2899138 | 1.8500000 | 2.2600000 |
|---|-----------|-----------|-----------|-----------|

---

Unique Subject Identifier=5010000100-0011

Assay variable : PTINR\_VAL1 PT-INR Value

N Mean Standard Deviation Minimum Maximum

---

|   |           |           |           |           |
|---|-----------|-----------|-----------|-----------|
| 3 | 1.7133333 | 0.4266536 | 1.2500000 | 2.0900000 |
|---|-----------|-----------|-----------|-----------|

---

Unique Subject Identifier=5010000100-0018

Assay variable : PTINR\_VAL1 PT-INR Value

N Mean Standard Deviation Minimum Maximum

---

|   |           |  |           |           |
|---|-----------|--|-----------|-----------|
| 1 | 2.1500000 |  | 2.1500000 | 2.1500000 |
|---|-----------|--|-----------|-----------|

---

Unique Subject Identifier=5010000100-0024

Assay variable : PTINR\_VAL1 PT-INR Value

N Mean Standard Deviation Minimum Maximum

---

|   |          |           |          |          |
|---|----------|-----------|----------|----------|
| 2 | 1.920000 | 0.3535534 | 1.670000 | 2.170000 |
|---|----------|-----------|----------|----------|

---

Laboratory tests at the time of obtaining Table 2-6 consent, according to the presence or absence of proton-pump inhibitors

Unique Subject Identifier=5010000100-0026

MEANS Procedure

Assay variable : PTINR\_VAL1 PT-INR Value

N Mean Standard Deviation Minimum Maximum

---

|   |           |  |           |           |
|---|-----------|--|-----------|-----------|
| 1 | 2.0400000 |  | 2.0400000 | 2.0400000 |
|---|-----------|--|-----------|-----------|

---

Unique Subject Identifier=5010000100-0038

Assay variable : PTINR\_VAL1 PT-INR Value

N Mean Standard Deviation Minimum Maximum

---

|   |           |           |           |           |
|---|-----------|-----------|-----------|-----------|
| 6 | 2.1550000 | 0.7552682 | 1.4500000 | 3.2200000 |
|---|-----------|-----------|-----------|-----------|

---

Unique Subject Identifier=5010000100-0041

Assay variable : PTINR\_VAL1 PT-INR Value

N Mean Standard Deviation Minimum Maximum

---

|   |           |           |           |           |
|---|-----------|-----------|-----------|-----------|
| 3 | 2.1866667 | 0.2182506 | 1.9500000 | 2.3800000 |
|---|-----------|-----------|-----------|-----------|

---

Unique Subject Identifier=5011010000-0002

Assay variable : PTINR\_VAL1 PT-INR Value

N Mean Standard Deviation Minimum Maximum

---

|   |           |           |           |           |
|---|-----------|-----------|-----------|-----------|
| 5 | 1.9640000 | 0.5542833 | 1.5400000 | 2.9200000 |
|---|-----------|-----------|-----------|-----------|

---

Laboratory tests at the time of obtaining Table 2-6 consent, according to the presence or absence of proton-pump inhibitors

Unique Subject Identifier=5011010000-0006

MEANS Procedure

Assay variable : PTINR\_VAL1 PT-INR Value

N Mean Standard Deviation Minimum Maximum

---

|   |           |           |           |           |
|---|-----------|-----------|-----------|-----------|
| 4 | 2.3650000 | 0.4891830 | 1.8600000 | 3.0000000 |
|---|-----------|-----------|-----------|-----------|

---

Unique Subject Identifier=5011010000-0014

Assay variable : PTINR\_VAL1 PT-INR Value

N Mean Standard Deviation Minimum Maximum

---

|   |           |           |           |           |
|---|-----------|-----------|-----------|-----------|
| 5 | 1.7880000 | 0.2721580 | 1.3400000 | 2.0000000 |
|---|-----------|-----------|-----------|-----------|

---

Unique Subject Identifier=5011010000-0016

Assay variable : PTINR\_VAL1 PT-INR Value

N Mean Standard Deviation Minimum Maximum

---

|   |           |           |           |           |
|---|-----------|-----------|-----------|-----------|
| 6 | 1.9633333 | 0.2535087 | 1.6300000 | 2.3000000 |
|---|-----------|-----------|-----------|-----------|

---

Unique Subject Identifier=5011010000-0020

Assay variable : PTINR\_VAL1 PT-INR Value

N Mean Standard Deviation Minimum Maximum

---

|   |           |           |           |           |
|---|-----------|-----------|-----------|-----------|
| 6 | 1.6966667 | 0.3229654 | 1.4100000 | 2.1600000 |
|---|-----------|-----------|-----------|-----------|

---



Laboratory tests at the time of obtaining Table 2-6 consent, according to the presence or absence of proton-pump inhibitors

Unique Subject Identifier=5011010000-0022

MEANS Procedure

Assay variable : PTINR\_VAL1 PT-INR Value

N Mean Standard Deviation Minimum Maximum

---

|   |           |           |           |           |
|---|-----------|-----------|-----------|-----------|
| 3 | 2.2466667 | 0.0757188 | 2.1600000 | 2.3000000 |
|---|-----------|-----------|-----------|-----------|

---

Unique Subject Identifier=5011010000-0026

Assay variable : PTINR\_VAL1 PT-INR Value

N Mean Standard Deviation Minimum Maximum

---

|   |           |           |           |           |
|---|-----------|-----------|-----------|-----------|
| 6 | 2.0316667 | 0.6728274 | 1.4900000 | 3.1100000 |
|---|-----------|-----------|-----------|-----------|

---

Unique Subject Identifier=5011010000-0035

Assay variable : PTINR\_VAL1 PT-INR Value

N Mean Standard Deviation Minimum Maximum

---

|   |           |           |           |           |
|---|-----------|-----------|-----------|-----------|
| 5 | 2.1540000 | 0.1908664 | 1.9900000 | 2.4800000 |
|---|-----------|-----------|-----------|-----------|

---

Unique Subject Identifier=5011010000-0040

Assay variable : PTINR\_VAL1 PT-INR Value

N Mean Standard Deviation Minimum Maximum

---

|   |          |          |          |          |
|---|----------|----------|----------|----------|
| 3 | 2.000000 | 0.070000 | 1.920000 | 2.050000 |
|---|----------|----------|----------|----------|

---

Laboratory tests at the time of obtaining Table 2-6 consent, according to the presence or absence of proton-pump inhibitors

Unique Subject Identifier=5011010000-0045

MEANS Procedure

Assay variable : PTINR\_VAL1 PT-INR Value

| N | Mean      | Standard Deviation | Minimum   | Maximum   |
|---|-----------|--------------------|-----------|-----------|
| 5 | 1.8460000 | 0.4565413          | 1.2900000 | 2.3300000 |

Unique Subject Identifier=5011010000-0046

Assay variable : PTINR\_VAL1 PT-INR Value

| N | Mean      | Standard Deviation | Minimum   | Maximum   |
|---|-----------|--------------------|-----------|-----------|
| 3 | 1.9400000 | 0.3204684          | 1.6300000 | 2.2700000 |

Unique Subject Identifier=5011010000-0048

Assay variable : PTINR\_VAL1 PT-INR Value

| N | Mean      | Standard Deviation | Minimum   | Maximum   |
|---|-----------|--------------------|-----------|-----------|
| 4 | 2.4225000 | 0.3162673          | 2.0000000 | 2.7600000 |

Unique Subject Identifier=5011010000-0049

Assay variable : PTINR\_VAL1 PT-INR Value

N Mean Standard Deviation Minimum Maximum

---

|   |           |           |           |           |
|---|-----------|-----------|-----------|-----------|
| 4 | 1.6875000 | 0.2389386 | 1.4700000 | 1.9700000 |
|---|-----------|-----------|-----------|-----------|

---

Laboratory tests at the time of obtaining Table 2-6 consent, according to the presence or absence of proton-pump inhibitors

Unique Subject Identifier=5011010000-0052

MEANS Procedure

Assay variable : PTINR\_VAL1 PT-INR Value

N Mean Standard Deviation Minimum Maximum

---

|   |           |           |           |           |
|---|-----------|-----------|-----------|-----------|
| 3 | 2.4233333 | 0.3372437 | 2.1900000 | 2.8100000 |
|---|-----------|-----------|-----------|-----------|

---

Unique Subject Identifier=5012000000-0001

Assay variable : PTINR\_VAL1 PT-INR Value

N Mean Standard Deviation Minimum Maximum

---

|   |           |           |           |           |
|---|-----------|-----------|-----------|-----------|
| 6 | 2.5500000 | 0.4408174 | 2.1200000 | 3.2000000 |
|---|-----------|-----------|-----------|-----------|

---

Unique Subject Identifier=5012000000-0004

Assay variable : PTINR\_VAL1 PT-INR Value

N Mean Standard Deviation Minimum Maximum

---

|   |           |           |           |           |
|---|-----------|-----------|-----------|-----------|
| 5 | 1.6800000 | 0.0961769 | 1.5400000 | 1.7700000 |
|---|-----------|-----------|-----------|-----------|

---

Unique Subject Identifier=5012000000-0006

Assay variable : PTINR\_VAL1 PT-INR Value

N Mean Standard Deviation Minimum Maximum

---

|   |           |           |           |           |
|---|-----------|-----------|-----------|-----------|
| 5 | 2.0240000 | 0.4243583 | 1.5900000 | 2.5900000 |
|---|-----------|-----------|-----------|-----------|

---

Laboratory tests at the time of obtaining Table 2-6 consent, according to the presence or absence of proton-pump inhibitors

Unique Subject Identifier=5012000000-0007

MEANS Procedure

Assay variable : PTINR\_VAL1 PT-INR Value

N Mean Standard Deviation Minimum Maximum

---

|   |           |           |           |           |
|---|-----------|-----------|-----------|-----------|
| 6 | 2.1583333 | 0.5896920 | 1.6700000 | 3.1100000 |
|---|-----------|-----------|-----------|-----------|

---

Unique Subject Identifier=5012000000-0013

Assay variable : PTINR\_VAL1 PT-INR Value

N Mean Standard Deviation Minimum Maximum

---

|   |           |           |           |           |
|---|-----------|-----------|-----------|-----------|
| 6 | 1.5616667 | 0.1090718 | 1.3900000 | 1.6900000 |
|---|-----------|-----------|-----------|-----------|

---

Unique Subject Identifier=5012000000-0015

Assay variable : PTINR\_VAL1 PT-INR Value

N Mean Standard Deviation Minimum Maximum

---

|   |           |           |           |           |
|---|-----------|-----------|-----------|-----------|
| 4 | 2.2625000 | 0.3517930 | 1.8300000 | 2.6800000 |
|---|-----------|-----------|-----------|-----------|

---

Unique Subject Identifier=5012000000-0016

Assay variable : PTINR\_VAL1 PT-INR Value

N Mean Standard Deviation Minimum Maximum

---

|   |          |           |          |          |
|---|----------|-----------|----------|----------|
| 4 | 2.080000 | 0.1505545 | 1.900000 | 2.240000 |
|---|----------|-----------|----------|----------|

---



Laboratory tests at the time of obtaining Table 2-6 consent, according to the presence or absence of proton-pump inhibitors

Unique Subject Identifier=5012000000-0017

MEANS Procedure

Assay variable : PTINR\_VAL1 PT-INR Value

| N | Mean      | Standard Deviation | Minimum   | Maximum   |
|---|-----------|--------------------|-----------|-----------|
| 5 | 1.8700000 | 0.3196091          | 1.5100000 | 2.2000000 |

Unique Subject Identifier=5012000000-0018

Assay variable : PTINR\_VAL1 PT-INR Value

| N | Mean      | Standard Deviation | Minimum   | Maximum   |
|---|-----------|--------------------|-----------|-----------|
| 6 | 1.5150000 | 0.2935132          | 1.1700000 | 1.8000000 |

Unique Subject Identifier=5012000000-0020

Assay variable : PTINR\_VAL1 PT-INR Value

| N | Mean      | Standard Deviation | Minimum   | Maximum   |
|---|-----------|--------------------|-----------|-----------|
| 4 | 1.5025000 | 0.0457347          | 1.4400000 | 1.5500000 |

Unique Subject Identifier=5012000000-0023

Assay variable : PTINR\_VAL1 PT-INR Value

N Mean Standard Deviation Minimum Maximum

---

|   |           |           |           |           |
|---|-----------|-----------|-----------|-----------|
| 3 | 2.0266667 | 0.1250333 | 1.9000000 | 2.1500000 |
|---|-----------|-----------|-----------|-----------|

---

Laboratory tests at the time of obtaining Table 2-6 consent, according to the presence or absence of proton-pump inhibitors

Unique Subject Identifier=5012000000-0028

MEANS Procedure

Assay variable : PTINR\_VAL1 PT-INR Value

N Mean Standard Deviation Minimum Maximum

---

|   |           |           |           |           |
|---|-----------|-----------|-----------|-----------|
| 4 | 1.9950000 | 0.0580230 | 1.9300000 | 2.0700000 |
|---|-----------|-----------|-----------|-----------|

---

Unique Subject Identifier=5013000000-0016

Assay variable : PTINR\_VAL1 PT-INR Value

N Mean Standard Deviation Minimum Maximum

---

|   |           |           |           |           |
|---|-----------|-----------|-----------|-----------|
| 6 | 1.8733333 | 0.2174090 | 1.5400000 | 2.1000000 |
|---|-----------|-----------|-----------|-----------|

---

Unique Subject Identifier=5013000000-0019

Assay variable : PTINR\_VAL1 PT-INR Value

N Mean Standard Deviation Minimum Maximum

---

|   |           |           |           |           |
|---|-----------|-----------|-----------|-----------|
| 3 | 1.7566667 | 0.0416333 | 1.7100000 | 1.7900000 |
|---|-----------|-----------|-----------|-----------|

---

Unique Subject Identifier=5013000000-0032

Assay variable : PTINR\_VAL1 PT-INR Value

N Mean Standard Deviation Minimum Maximum

---

|   |           |           |           |           |
|---|-----------|-----------|-----------|-----------|
| 4 | 2.0975000 | 0.1286792 | 1.9800000 | 2.2800000 |
|---|-----------|-----------|-----------|-----------|

---

Laboratory tests at the time of obtaining Table 2-6 consent, according to the presence or absence of proton-pump inhibitors

Unique Subject Identifier=5013000000-0040

MEANS Procedure

Assay variable : PTINR\_VAL1 PT-INR Value

| N | Mean      | Standard Deviation | Minimum   | Maximum   |
|---|-----------|--------------------|-----------|-----------|
| 6 | 1.6983333 | 0.3235686          | 1.1400000 | 2.0000000 |

Unique Subject Identifier=5013000000-0042

Assay variable : PTINR\_VAL1 PT-INR Value

| N | Mean      | Standard Deviation | Minimum   | Maximum   |
|---|-----------|--------------------|-----------|-----------|
| 3 | 1.9866667 | 0.2657693          | 1.6800000 | 2.1500000 |

Unique Subject Identifier=5013000000-0045

Assay variable : PTINR\_VAL1 PT-INR Value

| N | Mean      | Standard Deviation | Minimum   | Maximum   |
|---|-----------|--------------------|-----------|-----------|
| 3 | 2.0633333 | 0.2891943          | 1.7500000 | 2.3200000 |

Unique Subject Identifier=5013000000-0051

Assay variable : PTINR\_VAL1 PT-INR Value

N Mean Standard Deviation Minimum Maximum

---

|   |           |           |           |           |
|---|-----------|-----------|-----------|-----------|
| 3 | 2.2133333 | 0.2309401 | 2.0800000 | 2.4800000 |
|---|-----------|-----------|-----------|-----------|

---

Laboratory tests at the time of obtaining Table 2-6 consent, according to the presence or absence of proton-pump inhibitors

Unique Subject Identifier=5013000000-0055

MEANS Procedure

Assay variable : PTINR\_VAL1 PT-INR Value

N Mean Standard Deviation Minimum Maximum

---

|   |           |           |           |           |
|---|-----------|-----------|-----------|-----------|
| 4 | 1.7875000 | 0.3181588 | 1.3600000 | 2.0300000 |
|---|-----------|-----------|-----------|-----------|

---

Unique Subject Identifier=5013000000-0059

Assay variable : PTINR\_VAL1 PT-INR Value

N Mean Standard Deviation Minimum Maximum

---

|   |           |           |           |           |
|---|-----------|-----------|-----------|-----------|
| 3 | 2.2000000 | 0.0556776 | 2.1400000 | 2.2500000 |
|---|-----------|-----------|-----------|-----------|

---

Unique Subject Identifier=5013000000-0063

Assay variable : PTINR\_VAL1 PT-INR Value

N Mean Standard Deviation Minimum Maximum

---

|   |           |           |           |           |
|---|-----------|-----------|-----------|-----------|
| 2 | 1.7350000 | 0.1060660 | 1.6600000 | 1.8100000 |
|---|-----------|-----------|-----------|-----------|

---

Unique Subject Identifier=5013000000-0071

Assay variable : PTINR\_VAL1 PT-INR Value

N Mean Standard Deviation Minimum Maximum

---

|   |           |  |           |           |
|---|-----------|--|-----------|-----------|
| 1 | 2.5300000 |  | 2.5300000 | 2.5300000 |
|---|-----------|--|-----------|-----------|

---



Laboratory tests at the time of obtaining Table 2-6 consent, according to the presence or absence of proton-pump inhibitors

Unique Subject Identifier=5013000000-0099

MEANS Procedure

Assay variable : PTINR\_VAL1 PT-INR Value

| N | Mean      | Standard Deviation | Minimum   | Maximum   |
|---|-----------|--------------------|-----------|-----------|
| 6 | 2.0050000 | 0.2776869          | 1.5000000 | 2.3100000 |

Unique Subject Identifier=5013000000-0102

Assay variable : PTINR\_VAL1 PT-INR Value

| N | Mean      | Standard Deviation | Minimum   | Maximum   |
|---|-----------|--------------------|-----------|-----------|
| 2 | 2.2250000 | 0.1060660          | 2.1500000 | 2.3000000 |

Unique Subject Identifier=5013000000-0106

Assay variable : PTINR\_VAL1 PT-INR Value

| N | Mean      | Standard Deviation | Minimum   | Maximum   |
|---|-----------|--------------------|-----------|-----------|
| 6 | 1.5150000 | 0.2665896          | 1.2700000 | 1.9600000 |

Unique Subject Identifier=5013000000-0120

Assay variable : PTINR\_VAL1 PT-INR Value

N Mean Standard Deviation Minimum Maximum

---

|   |           |           |           |           |
|---|-----------|-----------|-----------|-----------|
| 3 | 1.6633333 | 0.1855622 | 1.4700000 | 1.8400000 |
|---|-----------|-----------|-----------|-----------|

---

Laboratory tests at the time of obtaining Table 2-6 consent, according to the presence or absence of proton-pump inhibitors

Unique Subject Identifier=5013000000-0126

MEANS Procedure

Assay variable : PTINR\_VAL1 PT-INR Value

N Mean Standard Deviation Minimum Maximum

---

|   |           |           |           |           |
|---|-----------|-----------|-----------|-----------|
| 3 | 2.7233333 | 0.1942507 | 2.5100000 | 2.8900000 |
|---|-----------|-----------|-----------|-----------|

---

Unique Subject Identifier=5013000000-0132

Assay variable : PTINR\_VAL1 PT-INR Value

N Mean Standard Deviation Minimum Maximum

---

|   |           |           |           |           |
|---|-----------|-----------|-----------|-----------|
| 6 | 1.8350000 | 0.2517737 | 1.4700000 | 2.1300000 |
|---|-----------|-----------|-----------|-----------|

---

Unique Subject Identifier=5013000000-0142

Assay variable : PTINR\_VAL1 PT-INR Value

N Mean Standard Deviation Minimum Maximum

---

|   |           |           |           |           |
|---|-----------|-----------|-----------|-----------|
| 3 | 1.8033333 | 0.2023199 | 1.5700000 | 1.9300000 |
|---|-----------|-----------|-----------|-----------|

---

Unique Subject Identifier=5013000000-0143

Assay variable : PTINR\_VAL1 PT-INR Value

N Mean Standard Deviation Minimum Maximum

---

|   |          |           |          |          |
|---|----------|-----------|----------|----------|
| 3 | 1.810000 | 0.2685144 | 1.500000 | 1.970000 |
|---|----------|-----------|----------|----------|

---

Laboratory tests at the time of obtaining Table 2-6 consent, according to the presence or absence of proton-pump inhibitors

Unique Subject Identifier=5013000000-0156

MEANS Procedure

Assay variable : PTINR\_VAL1 PT-INR Value

| N | Mean      | Standard Deviation | Minimum   | Maximum   |
|---|-----------|--------------------|-----------|-----------|
| 5 | 1.9140000 | 0.1687602          | 1.7400000 | 2.1400000 |

Unique Subject Identifier=5013000000-0157

Assay variable : PTINR\_VAL1 PT-INR Value

| N | Mean      | Standard Deviation | Minimum   | Maximum   |
|---|-----------|--------------------|-----------|-----------|
| 6 | 1.7683333 | 0.0968332          | 1.6900000 | 1.9100000 |

Unique Subject Identifier=5013000000-0166

Assay variable : PTINR\_VAL1 PT-INR Value

| N | Mean      | Standard Deviation | Minimum   | Maximum   |
|---|-----------|--------------------|-----------|-----------|
| 6 | 2.1516667 | 0.2797439          | 1.7400000 | 2.5400000 |

Unique Subject Identifier=5013000000-0174

Assay variable : PTINR\_VAL1 PT-INR Value

N Mean Standard Deviation Minimum Maximum

---

|   |           |           |           |           |
|---|-----------|-----------|-----------|-----------|
| 2 | 1.6700000 | 0.5091169 | 1.3100000 | 2.0300000 |
|---|-----------|-----------|-----------|-----------|

---

Laboratory tests at the time of obtaining Table 2-6 consent, according to the presence or absence of proton-pump inhibitors

Unique Subject Identifier=5013000000-0176

MEANS Procedure

Assay variable : PTINR\_VAL1 PT-INR Value

| N | Mean      | Standard Deviation | Minimum   | Maximum   |
|---|-----------|--------------------|-----------|-----------|
| 3 | 2.1200000 | 0.1135782          | 2.0400000 | 2.2500000 |

Unique Subject Identifier=5013000000-0203

Assay variable : PTINR\_VAL1 PT-INR Value

| N | Mean      | Standard Deviation | Minimum   | Maximum   |
|---|-----------|--------------------|-----------|-----------|
| 4 | 2.0350000 | 0.4690771          | 1.7000000 | 2.7000000 |

Unique Subject Identifier=5013000000-0204

Assay variable : PTINR\_VAL1 PT-INR Value

| N | Mean      | Standard Deviation | Minimum   | Maximum   |
|---|-----------|--------------------|-----------|-----------|
| 4 | 2.0300000 | 0.0778888          | 1.9300000 | 2.1200000 |

Unique Subject Identifier=5013000000-0205

Assay variable : PTINR\_VAL1 PT-INR Value

N Mean Standard Deviation Minimum Maximum

---

|   |           |  |           |           |
|---|-----------|--|-----------|-----------|
| 1 | 1.9600000 |  | 1.9600000 | 1.9600000 |
|---|-----------|--|-----------|-----------|

---



Laboratory tests at the time of obtaining Table 2-6 consent, according to the presence or absence of proton-pump inhibitors

Unique Subject Identifier=5013000000-0209

MEANS Procedure

Assay variable : PTINR\_VAL1 PT-INR Value

N Mean Standard Deviation Minimum Maximum

---

|   |           |           |           |           |
|---|-----------|-----------|-----------|-----------|
| 3 | 1.9533333 | 0.1890326 | 1.7400000 | 2.1000000 |
|---|-----------|-----------|-----------|-----------|

---

Unique Subject Identifier=5013000000-0217

Assay variable : PTINR\_VAL1 PT-INR Value

N Mean Standard Deviation Minimum Maximum

---

|   |           |           |           |           |
|---|-----------|-----------|-----------|-----------|
| 3 | 2.3033333 | 0.3286842 | 1.9500000 | 2.6000000 |
|---|-----------|-----------|-----------|-----------|

---

Unique Subject Identifier=5013000000-0227

Assay variable : PTINR\_VAL1 PT-INR Value

N Mean Standard Deviation Minimum Maximum

---

|   |           |           |           |           |
|---|-----------|-----------|-----------|-----------|
| 4 | 2.3125000 | 0.7481254 | 1.6600000 | 3.2900000 |
|---|-----------|-----------|-----------|-----------|

---

Unique Subject Identifier=5013000000-0261

Assay variable : PTINR\_VAL1 PT-INR Value

N Mean Standard Deviation Minimum Maximum

---

|   |           |           |           |           |
|---|-----------|-----------|-----------|-----------|
| 3 | 1.9133333 | 0.3685557 | 1.6300000 | 2.3300000 |
|---|-----------|-----------|-----------|-----------|

---

Laboratory tests at the time of obtaining Table 2-6 consent, according to the presence or absence of proton-pump inhibitors

Unique Subject Identifier=5013000000-0262

MEANS Procedure

Assay variable : PTINR\_VAL1 PT-INR Value

| N | Mean      | Standard Deviation | Minimum   | Maximum   |
|---|-----------|--------------------|-----------|-----------|
| 2 | 1.6900000 | 0.1555635          | 1.5800000 | 1.8000000 |

Unique Subject Identifier=5013000000-0263

Assay variable : PTINR\_VAL1 PT-INR Value

| N | Mean      | Standard Deviation | Minimum   | Maximum   |
|---|-----------|--------------------|-----------|-----------|
| 6 | 2.5300000 | 0.5399630          | 1.7400000 | 3.3300000 |

Unique Subject Identifier=5013000000-0279

Assay variable : PTINR\_VAL1 PT-INR Value

| N | Mean      | Standard Deviation | Minimum   | Maximum   |
|---|-----------|--------------------|-----------|-----------|
| 6 | 1.7266667 | 0.2202423          | 1.5800000 | 2.1700000 |

Unique Subject Identifier=5013000000-0282

Assay variable : PTINR\_VAL1 PT-INR Value

N Mean Standard Deviation Minimum Maximum

---

|   |           |           |           |           |
|---|-----------|-----------|-----------|-----------|
| 5 | 1.8660000 | 0.6208704 | 1.3200000 | 2.8600000 |
|---|-----------|-----------|-----------|-----------|

---

Laboratory tests at the time of obtaining Table 2-6 consent, according to the presence or absence of proton-pump inhibitors

Unique Subject Identifier=5013000000-0283

MEANS Procedure

Assay variable : PTINR\_VAL1 PT-INR Value

| N | Mean      | Standard Deviation | Minimum   | Maximum   |
|---|-----------|--------------------|-----------|-----------|
| 5 | 2.2880000 | 0.1943451          | 2.1600000 | 2.6300000 |

Unique Subject Identifier=5013000000-0286

Assay variable : PTINR\_VAL1 PT-INR Value

| N | Mean      | Standard Deviation | Minimum   | Maximum   |
|---|-----------|--------------------|-----------|-----------|
| 2 | 2.4100000 | 0.2687006          | 2.2200000 | 2.6000000 |

Unique Subject Identifier=5013000000-0297

Assay variable : PTINR\_VAL1 PT-INR Value

| N | Mean      | Standard Deviation | Minimum   | Maximum   |
|---|-----------|--------------------|-----------|-----------|
| 6 | 1.8650000 | 0.3950063          | 1.0800000 | 2.1300000 |

Unique Subject Identifier=5013000000-0301

Assay variable : PTINR\_VAL1 PT-INR Value

N Mean Standard Deviation Minimum Maximum

---

|   |           |           |           |           |
|---|-----------|-----------|-----------|-----------|
| 4 | 1.7025000 | 0.3012612 | 1.3900000 | 2.1100000 |
|---|-----------|-----------|-----------|-----------|

---

Laboratory tests at the time of obtaining Table 2-6 consent, according to the presence or absence of proton-pump inhibitors

Unique Subject Identifier=5013000000-0304

MEANS Procedure

Assay variable : PTINR\_VAL1 PT-INR Value

N Mean Standard Deviation Minimum Maximum

---

|   |           |           |           |           |
|---|-----------|-----------|-----------|-----------|
| 6 | 1.7016667 | 0.1655798 | 1.4900000 | 1.9700000 |
|---|-----------|-----------|-----------|-----------|

---

Unique Subject Identifier=5013000000-0312

Assay variable : PTINR\_VAL1 PT-INR Value

N Mean Standard Deviation Minimum Maximum

---

|   |           |           |           |           |
|---|-----------|-----------|-----------|-----------|
| 3 | 2.1366667 | 0.1497776 | 1.9700000 | 2.2600000 |
|---|-----------|-----------|-----------|-----------|

---

Unique Subject Identifier=5013000000-0318

Assay variable : PTINR\_VAL1 PT-INR Value

N Mean Standard Deviation Minimum Maximum

---

|   |           |           |           |           |
|---|-----------|-----------|-----------|-----------|
| 4 | 2.1500000 | 0.2152518 | 1.8400000 | 2.3100000 |
|---|-----------|-----------|-----------|-----------|

---

Unique Subject Identifier=5013000000-0323

Assay variable : PTINR\_VAL1 PT-INR Value

N Mean Standard Deviation Minimum Maximum

---

|   |          |           |          |          |
|---|----------|-----------|----------|----------|
| 6 | 1.440000 | 0.2419917 | 1.150000 | 1.750000 |
|---|----------|-----------|----------|----------|

---



Laboratory tests at the time of obtaining Table 2-6 consent, according to the presence or absence of proton-pump inhibitors

Unique Subject Identifier=5013000000-0330

MEANS Procedure

Assay variable : PTINR\_VAL1 PT-INR Value

N Mean Standard Deviation Minimum Maximum

---

|   |           |           |           |           |
|---|-----------|-----------|-----------|-----------|
| 6 | 2.4500000 | 0.3728270 | 1.9000000 | 3.0000000 |
|---|-----------|-----------|-----------|-----------|

---

Unique Subject Identifier=5013000000-0338

Assay variable : PTINR\_VAL1 PT-INR Value

N Mean Standard Deviation Minimum Maximum

---

|   |           |           |           |           |
|---|-----------|-----------|-----------|-----------|
| 3 | 2.3600000 | 0.3508561 | 1.9700000 | 2.6500000 |
|---|-----------|-----------|-----------|-----------|

---

Unique Subject Identifier=5013000000-0345

Assay variable : PTINR\_VAL1 PT-INR Value

N Mean Standard Deviation Minimum Maximum

---

|   |           |           |           |           |
|---|-----------|-----------|-----------|-----------|
| 6 | 2.0850000 | 1.1294556 | 0.9500000 | 3.9600000 |
|---|-----------|-----------|-----------|-----------|

---

Unique Subject Identifier=5013000000-0347

Assay variable : PTINR\_VAL1 PT-INR Value

N Mean Standard Deviation Minimum Maximum

---

|   |           |           |           |           |
|---|-----------|-----------|-----------|-----------|
| 5 | 1.3920000 | 0.2519325 | 1.0800000 | 1.7600000 |
|---|-----------|-----------|-----------|-----------|

---

Laboratory tests at the time of obtaining Table 2-6 consent, according to the presence or absence of proton-pump inhibitors

Unique Subject Identifier=5013000000-0355

MEANS Procedure

Assay variable : PTINR\_VAL1 PT-INR Value

| N | Mean      | Standard Deviation | Minimum   | Maximum   |
|---|-----------|--------------------|-----------|-----------|
| 3 | 2.2200000 | 0.4744470          | 1.6800000 | 2.5700000 |

Unique Subject Identifier=5013000000-0356

Assay variable : PTINR\_VAL1 PT-INR Value

| N | Mean      | Standard Deviation | Minimum   | Maximum   |
|---|-----------|--------------------|-----------|-----------|
| 5 | 2.0840000 | 1.1571646          | 1.1400000 | 3.8200000 |

Unique Subject Identifier=5013000000-0366

Assay variable : PTINR\_VAL1 PT-INR Value

| N | Mean      | Standard Deviation | Minimum   | Maximum   |
|---|-----------|--------------------|-----------|-----------|
| 3 | 1.8333333 | 0.0950438          | 1.7400000 | 1.9300000 |

Unique Subject Identifier=5013000000-0372

Assay variable : PTINR\_VAL1 PT-INR Value

N Mean Standard Deviation Minimum Maximum

---

|   |          |           |          |          |
|---|----------|-----------|----------|----------|
| 6 | 1.483333 | 0.1162182 | 1.310000 | 1.650000 |
|---|----------|-----------|----------|----------|

---

Laboratory tests at the time of obtaining Table 2-6 consent, according to the presence or absence of proton-pump inhibitors

Unique Subject Identifier=5013000000-0374

MEANS Procedure

Assay variable : PTINR\_VAL1 PT-INR Value

| N | Mean      | Standard Deviation | Minimum   | Maximum   |
|---|-----------|--------------------|-----------|-----------|
| 3 | 2.5533333 | 0.1692139          | 2.4100000 | 2.7400000 |

Unique Subject Identifier=5013000000-0377

Assay variable : PTINR\_VAL1 PT-INR Value

| N | Mean      | Standard Deviation | Minimum   | Maximum   |
|---|-----------|--------------------|-----------|-----------|
| 2 | 1.7450000 | 0.0494975          | 1.7100000 | 1.7800000 |

Unique Subject Identifier=5013000000-0379

Assay variable : PTINR\_VAL1 PT-INR Value

| N | Mean      | Standard Deviation | Minimum   | Maximum   |
|---|-----------|--------------------|-----------|-----------|
| 6 | 2.2350000 | 0.9610567          | 1.3700000 | 3.7700000 |

Unique Subject Identifier=5013000000-0394

Assay variable : PTINR\_VAL1 PT-INR Value

N Mean Standard Deviation Minimum Maximum

---

|   |           |           |           |           |
|---|-----------|-----------|-----------|-----------|
| 3 | 1.6366667 | 0.0814453 | 1.5800000 | 1.7300000 |
|---|-----------|-----------|-----------|-----------|

---

Laboratory tests at the time of obtaining Table 2-6 consent, according to the presence or absence of proton-pump inhibitors

Unique Subject Identifier=5013000000-0401

MEANS Procedure

Assay variable : PTINR\_VAL1 PT-INR Value

N Mean Standard Deviation Minimum Maximum

---

|   |           |  |           |           |
|---|-----------|--|-----------|-----------|
| 1 | 2.0600000 |  | 2.0600000 | 2.0600000 |
|---|-----------|--|-----------|-----------|

---

Unique Subject Identifier=5013000000-0419

Assay variable : PTINR\_VAL1 PT-INR Value

N Mean Standard Deviation Minimum Maximum

---

|   |           |           |           |           |
|---|-----------|-----------|-----------|-----------|
| 2 | 2.0100000 | 0.1131371 | 1.9300000 | 2.0900000 |
|---|-----------|-----------|-----------|-----------|

---

Unique Subject Identifier=5013000000-0426

Assay variable : PTINR\_VAL1 PT-INR Value

N Mean Standard Deviation Minimum Maximum

---

|   |           |           |           |           |
|---|-----------|-----------|-----------|-----------|
| 3 | 1.8133333 | 0.2013289 | 1.6000000 | 2.0000000 |
|---|-----------|-----------|-----------|-----------|

---

Unique Subject Identifier=5013000000-0435

Assay variable : PTINR\_VAL1 PT-INR Value

N Mean Standard Deviation Minimum Maximum

---

|   |           |           |           |           |
|---|-----------|-----------|-----------|-----------|
| 2 | 1.9650000 | 0.1060660 | 1.8900000 | 2.0400000 |
|---|-----------|-----------|-----------|-----------|

---



Laboratory tests at the time of obtaining Table 2-6 consent, according to the presence or absence of proton-pump inhibitors

Unique Subject Identifier=5013000000-0465

MEANS Procedure

Assay variable : PTINR\_VAL1 PT-INR Value

| N | Mean      | Standard Deviation | Minimum   | Maximum   |
|---|-----------|--------------------|-----------|-----------|
| 6 | 1.9433333 | 0.2307957          | 1.7000000 | 2.2800000 |

Unique Subject Identifier=5013000000-0476

Assay variable : PTINR\_VAL1 PT-INR Value

| N | Mean      | Standard Deviation | Minimum   | Maximum   |
|---|-----------|--------------------|-----------|-----------|
| 1 | 1.8200000 |                    | 1.8200000 | 1.8200000 |

Unique Subject Identifier=5013000000-0483

Assay variable : PTINR\_VAL1 PT-INR Value

| N | Mean      | Standard Deviation | Minimum   | Maximum   |
|---|-----------|--------------------|-----------|-----------|
| 4 | 2.4825000 | 0.1284199          | 2.3800000 | 2.6700000 |

Unique Subject Identifier=5013000000-0486

Assay variable : PTINR\_VAL1 PT-INR Value

N Mean Standard Deviation Minimum Maximum

---

|   |           |  |           |           |
|---|-----------|--|-----------|-----------|
| 1 | 2.9500000 |  | 2.9500000 | 2.9500000 |
|---|-----------|--|-----------|-----------|

---

Laboratory tests at the time of obtaining Table 2-6 consent, according to the presence or absence of proton-pump inhibitors

Unique Subject Identifier=5013000000-0493

MEANS Procedure

Assay variable : PTINR\_VAL1 PT-INR Value

N Mean Standard Deviation Minimum Maximum

---

|   |           |           |           |           |
|---|-----------|-----------|-----------|-----------|
| 2 | 1.8400000 | 0.1555635 | 1.7300000 | 1.9500000 |
|---|-----------|-----------|-----------|-----------|

---

Unique Subject Identifier=5013000000-0506

Assay variable : PTINR\_VAL1 PT-INR Value

N Mean Standard Deviation Minimum Maximum

---

|   |           |           |           |           |
|---|-----------|-----------|-----------|-----------|
| 3 | 2.1766667 | 0.4821134 | 1.8000000 | 2.7200000 |
|---|-----------|-----------|-----------|-----------|

---

Unique Subject Identifier=5013000000-0508

Assay variable : PTINR\_VAL1 PT-INR Value

N Mean Standard Deviation Minimum Maximum

---

|   |           |           |           |           |
|---|-----------|-----------|-----------|-----------|
| 3 | 1.9533333 | 0.0709460 | 1.8900000 | 2.0300000 |
|---|-----------|-----------|-----------|-----------|

---

Unique Subject Identifier=5013000000-0518

Assay variable : PTINR\_VAL1 PT-INR Value

N Mean Standard Deviation Minimum Maximum

---

|   |           |           |           |           |
|---|-----------|-----------|-----------|-----------|
| 4 | 2.4150000 | 0.3169122 | 2.0800000 | 2.7100000 |
|---|-----------|-----------|-----------|-----------|

---

Laboratory tests at the time of obtaining Table 2-6 consent, according to the presence or absence of proton-pump inhibitors

Unique Subject Identifier=5013000000-0523

MEANS Procedure

Assay variable : PTINR\_VAL1 PT-INR Value

N Mean Standard Deviation Minimum Maximum

---

|   |           |  |           |           |
|---|-----------|--|-----------|-----------|
| 1 | 1.2200000 |  | 1.2200000 | 1.2200000 |
|---|-----------|--|-----------|-----------|

---

Unique Subject Identifier=5013000000-0543

Assay variable : PTINR\_VAL1 PT-INR Value

N Mean Standard Deviation Minimum Maximum

---

|   |           |  |           |           |
|---|-----------|--|-----------|-----------|
| 1 | 1.4800000 |  | 1.4800000 | 1.4800000 |
|---|-----------|--|-----------|-----------|

---

Unique Subject Identifier=5013000000-0544

Assay variable : PTINR\_VAL1 PT-INR Value

N Mean Standard Deviation Minimum Maximum

---

|   |           |           |           |           |
|---|-----------|-----------|-----------|-----------|
| 3 | 2.7800000 | 0.1969772 | 2.6200000 | 3.0000000 |
|---|-----------|-----------|-----------|-----------|

---

Unique Subject Identifier=5013000000-0546

Assay variable : PTINR\_VAL1 PT-INR Value

N Mean Standard Deviation Minimum Maximum

---

|   |           |           |           |           |
|---|-----------|-----------|-----------|-----------|
| 3 | 2.5366667 | 0.3855299 | 2.1400000 | 2.9100000 |
|---|-----------|-----------|-----------|-----------|

---

Laboratory tests at the time of obtaining Table 2-6 consent, according to the presence or absence of proton-pump inhibitors

Unique Subject Identifier=5013000000-0547

MEANS Procedure

Assay variable : PTINR\_VAL1 PT-INR Value

N Mean Standard Deviation Minimum Maximum

---

|   |           |           |           |           |
|---|-----------|-----------|-----------|-----------|
| 2 | 1.3950000 | 0.1626346 | 1.2800000 | 1.5100000 |
|---|-----------|-----------|-----------|-----------|

---

Unique Subject Identifier=5013000000-0553

Assay variable : PTINR\_VAL1 PT-INR Value

N Mean Standard Deviation Minimum Maximum

---

|   |           |           |           |           |
|---|-----------|-----------|-----------|-----------|
| 6 | 1.3106667 | 0.2588024 | 1.1100000 | 1.8000000 |
|---|-----------|-----------|-----------|-----------|

---

Unique Subject Identifier=5013000000-0556

Assay variable : PTINR\_VAL1 PT-INR Value

N Mean Standard Deviation Minimum Maximum

---

|   |           |  |           |           |
|---|-----------|--|-----------|-----------|
| 1 | 1.5300000 |  | 1.5300000 | 1.5300000 |
|---|-----------|--|-----------|-----------|

---

Unique Subject Identifier=5013000000-0557

Assay variable : PTINR\_VAL1 PT-INR Value

N Mean Standard Deviation Minimum Maximum

---

|   |           |  |           |           |
|---|-----------|--|-----------|-----------|
| 1 | 1.7800000 |  | 1.7800000 | 1.7800000 |
|---|-----------|--|-----------|-----------|

---



Laboratory tests at the time of obtaining Table 2-6 consent, according to the presence or absence of proton-pump inhibitors

Unique Subject Identifier=5013000000-0560

MEANS Procedure

Assay variable : PTINR\_VAL1 PT-INR Value

N Mean Standard Deviation Minimum Maximum

---

|   |           |           |           |           |
|---|-----------|-----------|-----------|-----------|
| 4 | 2.5125000 | 0.7355893 | 1.8700000 | 3.5700000 |
|---|-----------|-----------|-----------|-----------|

---

Unique Subject Identifier=5013000000-0568

Assay variable : PTINR\_VAL1 PT-INR Value

N Mean Standard Deviation Minimum Maximum

---

|   |           |           |           |           |
|---|-----------|-----------|-----------|-----------|
| 6 | 1.2783333 | 0.4282717 | 0.9300000 | 1.8400000 |
|---|-----------|-----------|-----------|-----------|

---

Unique Subject Identifier=5013000000-0576

Assay variable : PTINR\_VAL1 PT-INR Value

N Mean Standard Deviation Minimum Maximum

---

|   |           |           |           |           |
|---|-----------|-----------|-----------|-----------|
| 6 | 1.9100000 | 0.7090839 | 1.1900000 | 2.8200000 |
|---|-----------|-----------|-----------|-----------|

---

Unique Subject Identifier=5013000000-0580

Assay variable : PTINR\_VAL1 PT-INR Value

N Mean Standard Deviation Minimum Maximum

---

|   |          |           |          |          |
|---|----------|-----------|----------|----------|
| 4 | 1.610000 | 0.2672078 | 1.360000 | 1.960000 |
|---|----------|-----------|----------|----------|

---

Laboratory tests at the time of obtaining Table 2-6 consent, according to the presence or absence of proton-pump inhibitors

Unique Subject Identifier=5013000000-0589

MEANS Procedure

Assay variable : PTINR\_VAL1 PT-INR Value

| N | Mean      | Standard Deviation | Minimum   | Maximum   |
|---|-----------|--------------------|-----------|-----------|
| 6 | 1.2466667 | 0.2231293          | 0.9900000 | 1.6100000 |

Unique Subject Identifier=5013000000-0595

Assay variable : PTINR\_VAL1 PT-INR Value

| N | Mean      | Standard Deviation | Minimum   | Maximum   |
|---|-----------|--------------------|-----------|-----------|
| 6 | 2.3666667 | 0.4015304          | 1.9400000 | 2.9900000 |

Unique Subject Identifier=5014010001-0009

Assay variable : PTINR\_VAL1 PT-INR Value

| N | Mean      | Standard Deviation | Minimum   | Maximum   |
|---|-----------|--------------------|-----------|-----------|
| 3 | 1.7433333 | 0.2059935          | 1.5500000 | 1.9600000 |

Unique Subject Identifier=5014010001-0013

Assay variable : PTINR\_VAL1 PT-INR Value

N Mean Standard Deviation Minimum Maximum

---

|   |          |  |          |          |
|---|----------|--|----------|----------|
| 1 | 1.250000 |  | 1.250000 | 1.250000 |
|---|----------|--|----------|----------|

---

Laboratory tests at the time of obtaining Table 2-6 consent, according to the presence or absence of proton-pump inhibitors

Unique Subject Identifier=5014010001-0016

MEANS Procedure

Assay variable : PTINR\_VAL1 PT-INR Value

N Mean Standard Deviation Minimum Maximum

---

|   |           |           |           |           |
|---|-----------|-----------|-----------|-----------|
| 5 | 1.9560000 | 0.3299697 | 1.6000000 | 2.5000000 |
|---|-----------|-----------|-----------|-----------|

---

Unique Subject Identifier=5014010001-0020

Assay variable : PTINR\_VAL1 PT-INR Value

N Mean Standard Deviation Minimum Maximum

---

|   |           |           |           |           |
|---|-----------|-----------|-----------|-----------|
| 5 | 2.2520000 | 0.3851234 | 1.8500000 | 2.8700000 |
|---|-----------|-----------|-----------|-----------|

---

Unique Subject Identifier=5014010001-0022

Assay variable : PTINR\_VAL1 PT-INR Value

N Mean Standard Deviation Minimum Maximum

---

|   |           |           |           |           |
|---|-----------|-----------|-----------|-----------|
| 5 | 2.4280000 | 0.2007984 | 2.1800000 | 2.6600000 |
|---|-----------|-----------|-----------|-----------|

---

Unique Subject Identifier=5014010001-0024

Assay variable : PTINR\_VAL1 PT-INR Value

N Mean Standard Deviation Minimum Maximum

---

|   |          |  |          |          |
|---|----------|--|----------|----------|
| 1 | 2.640000 |  | 2.640000 | 2.640000 |
|---|----------|--|----------|----------|

---

Laboratory tests at the time of obtaining Table 2-6 consent, according to the presence or absence of proton-pump inhibitors

Unique Subject Identifier=5014010001-0027

MEANS Procedure

Assay variable : PTINR\_VAL1 PT-INR Value

| N | Mean      | Standard Deviation | Minimum   | Maximum   |
|---|-----------|--------------------|-----------|-----------|
| 3 | 1.5366667 | 0.0702377          | 1.4700000 | 1.6100000 |

Unique Subject Identifier=5015000000-0012

Assay variable : PTINR\_VAL1 PT-INR Value

| N | Mean      | Standard Deviation | Minimum   | Maximum   |
|---|-----------|--------------------|-----------|-----------|
| 3 | 1.7666667 | 0.0472582          | 1.7300000 | 1.8200000 |

Unique Subject Identifier=5015000000-0014

Assay variable : PTINR\_VAL1 PT-INR Value

| N | Mean      | Standard Deviation | Minimum   | Maximum   |
|---|-----------|--------------------|-----------|-----------|
| 3 | 2.3800000 | 0.3019934          | 2.1000000 | 2.7000000 |

Unique Subject Identifier=5015000000-0017

Assay variable : PTINR\_VAL1 PT-INR Value

N Mean Standard Deviation Minimum Maximum

---

|   |          |           |          |          |
|---|----------|-----------|----------|----------|
| 6 | 2.400000 | 0.1836301 | 2.060000 | 2.580000 |
|---|----------|-----------|----------|----------|

---



Laboratory tests at the time of obtaining Table 2-6 consent, according to the presence or absence of proton-pump inhibitors

Unique Subject Identifier=5015000000-0021

MEANS Procedure

Assay variable : PTINR\_VAL1 PT-INR Value

N Mean Standard Deviation Minimum Maximum

---

|   |           |           |           |           |
|---|-----------|-----------|-----------|-----------|
| 5 | 1.8780000 | 0.2754451 | 1.4200000 | 2.1100000 |
|---|-----------|-----------|-----------|-----------|

---

Unique Subject Identifier=5015000000-0025

Assay variable : PTINR\_VAL1 PT-INR Value

N Mean Standard Deviation Minimum Maximum

---

|   |           |           |           |           |
|---|-----------|-----------|-----------|-----------|
| 3 | 1.7700000 | 0.0984886 | 1.6900000 | 1.8800000 |
|---|-----------|-----------|-----------|-----------|

---

Unique Subject Identifier=5016000000-0004

Assay variable : PTINR\_VAL1 PT-INR Value

N Mean Standard Deviation Minimum Maximum

---

|   |           |           |           |           |
|---|-----------|-----------|-----------|-----------|
| 3 | 2.4700000 | 0.8685045 | 1.5600000 | 3.2900000 |
|---|-----------|-----------|-----------|-----------|

---

Unique Subject Identifier=5016000000-0007

Assay variable : PTINR\_VAL1 PT-INR Value

N Mean Standard Deviation Minimum Maximum

---

|   |           |           |           |           |
|---|-----------|-----------|-----------|-----------|
| 2 | 2.0050000 | 0.3323402 | 1.7700000 | 2.2400000 |
|---|-----------|-----------|-----------|-----------|

---

Laboratory tests at the time of obtaining Table 2-6 consent, according to the presence or absence of proton-pump inhibitors

Unique Subject Identifier=5016000000-0008

MEANS Procedure

Assay variable : PTINR\_VAL1 PT-INR Value

N Mean Standard Deviation Minimum Maximum

---

|   |           |           |           |           |
|---|-----------|-----------|-----------|-----------|
| 4 | 2.4450000 | 0.2111082 | 2.1300000 | 2.5800000 |
|---|-----------|-----------|-----------|-----------|

---

Unique Subject Identifier=5016000000-0013

Assay variable : PTINR\_VAL1 PT-INR Value

N Mean Standard Deviation Minimum Maximum

---

|   |           |           |           |           |
|---|-----------|-----------|-----------|-----------|
| 4 | 1.2800000 | 0.1606238 | 1.0600000 | 1.4300000 |
|---|-----------|-----------|-----------|-----------|

---

Unique Subject Identifier=5016000000-0014

Assay variable : PTINR\_VAL1 PT-INR Value

N Mean Standard Deviation Minimum Maximum

---

|   |           |           |           |           |
|---|-----------|-----------|-----------|-----------|
| 4 | 2.1325000 | 0.1918984 | 2.0300000 | 2.4200000 |
|---|-----------|-----------|-----------|-----------|

---

Unique Subject Identifier=5016000000-0016

Assay variable : PTINR\_VAL1 PT-INR Value

N Mean Standard Deviation Minimum Maximum

---

|   |           |           |           |           |
|---|-----------|-----------|-----------|-----------|
| 3 | 1.9133333 | 0.2742870 | 1.7500000 | 2.2300000 |
|---|-----------|-----------|-----------|-----------|

---

Laboratory tests at the time of obtaining Table 2-6 consent, according to the presence or absence of proton-pump inhibitors

Unique Subject Identifier=5016000000-0018

MEANS Procedure

Assay variable : PTINR\_VAL1 PT-INR Value

| N | Mean      | Standard Deviation | Minimum   | Maximum   |
|---|-----------|--------------------|-----------|-----------|
| 2 | 2.1750000 | 0.3747666          | 1.9100000 | 2.4400000 |

Unique Subject Identifier=5016000000-0019

Assay variable : PTINR\_VAL1 PT-INR Value

| N | Mean      | Standard Deviation | Minimum   | Maximum   |
|---|-----------|--------------------|-----------|-----------|
| 3 | 2.8533333 | 0.0808290          | 2.7800000 | 2.9400000 |

Unique Subject Identifier=5016000000-0020

Assay variable : PTINR\_VAL1 PT-INR Value

| N | Mean      | Standard Deviation | Minimum   | Maximum   |
|---|-----------|--------------------|-----------|-----------|
| 3 | 2.2800000 | 0.5765414          | 1.7600000 | 2.9000000 |

Unique Subject Identifier=5016000000-0021

Assay variable : PTINR\_VAL1 PT-INR Value

N Mean Standard Deviation Minimum Maximum

---

|   |           |           |           |           |
|---|-----------|-----------|-----------|-----------|
| 6 | 1.6933333 | 0.0542832 | 1.6200000 | 1.7600000 |
|---|-----------|-----------|-----------|-----------|

---

Laboratory tests at the time of obtaining Table 2-6 consent, according to the presence or absence of proton-pump inhibitors

Unique Subject Identifier=5016000000-0023

MEANS Procedure

Assay variable : PTINR\_VAL1 PT-INR Value

N Mean Standard Deviation Minimum Maximum

---

|   |           |  |           |           |
|---|-----------|--|-----------|-----------|
| 1 | 1.6600000 |  | 1.6600000 | 1.6600000 |
|---|-----------|--|-----------|-----------|

---

Unique Subject Identifier=5016000000-0026

Assay variable : PTINR\_VAL1 PT-INR Value

N Mean Standard Deviation Minimum Maximum

---

|   |           |           |           |           |
|---|-----------|-----------|-----------|-----------|
| 3 | 2.5066667 | 0.5472050 | 1.9900000 | 3.0800000 |
|---|-----------|-----------|-----------|-----------|

---

Unique Subject Identifier=5016000000-0029

Assay variable : PTINR\_VAL1 PT-INR Value

N Mean Standard Deviation Minimum Maximum

---

|   |           |  |           |           |
|---|-----------|--|-----------|-----------|
| 1 | 1.6700000 |  | 1.6700000 | 1.6700000 |
|---|-----------|--|-----------|-----------|

---

Unique Subject Identifier=5016000000-0030

Assay variable : PTINR\_VAL1 PT-INR Value

N Mean Standard Deviation Minimum Maximum

---

|   |           |           |           |           |
|---|-----------|-----------|-----------|-----------|
| 4 | 2.1525000 | 0.2244066 | 1.8500000 | 2.3800000 |
|---|-----------|-----------|-----------|-----------|

---



Laboratory tests at the time of obtaining Table 2-6 consent, according to the presence or absence of proton-pump inhibitors

Unique Subject Identifier=5016000000-0035

MEANS Procedure

Assay variable : PTINR\_VAL1 PT-INR Value

N Mean Standard Deviation Minimum Maximum

---

|   |           |           |           |           |
|---|-----------|-----------|-----------|-----------|
| 3 | 1.9333333 | 0.0503322 | 1.8800000 | 1.9800000 |
|---|-----------|-----------|-----------|-----------|

---

Unique Subject Identifier=5016000000-0038

Assay variable : PTINR\_VAL1 PT-INR Value

N Mean Standard Deviation Minimum Maximum

---

|   |           |           |           |           |
|---|-----------|-----------|-----------|-----------|
| 3 | 1.2966667 | 0.1069268 | 1.1800000 | 1.3900000 |
|---|-----------|-----------|-----------|-----------|

---

Unique Subject Identifier=5016000000-0039

Assay variable : PTINR\_VAL1 PT-INR Value

N Mean Standard Deviation Minimum Maximum

---

|   |           |           |           |           |
|---|-----------|-----------|-----------|-----------|
| 2 | 2.2150000 | 0.2757716 | 2.0200000 | 2.4100000 |
|---|-----------|-----------|-----------|-----------|

---

Unique Subject Identifier=5016000000-0047

Assay variable : PTINR\_VAL1 PT-INR Value

N Mean Standard Deviation Minimum Maximum

---

|   |           |           |           |           |
|---|-----------|-----------|-----------|-----------|
| 4 | 2.1975000 | 0.6012418 | 1.3800000 | 2.7400000 |
|---|-----------|-----------|-----------|-----------|

---

Laboratory tests at the time of obtaining Table 2-6 consent, according to the presence or absence of proton-pump inhibitors

Unique Subject Identifier=5016000000-0052

MEANS Procedure

Assay variable : PTINR\_VAL1 PT-INR Value

| N | Mean      | Standard Deviation | Minimum   | Maximum   |
|---|-----------|--------------------|-----------|-----------|
| 3 | 1.8100000 | 0.4677606          | 1.2700000 | 2.0900000 |

Unique Subject Identifier=5016000000-0053

Assay variable : PTINR\_VAL1 PT-INR Value

| N | Mean      | Standard Deviation | Minimum   | Maximum   |
|---|-----------|--------------------|-----------|-----------|
| 5 | 1.6480000 | 0.3802236          | 1.2400000 | 2.2600000 |

Unique Subject Identifier=5016000000-0057

Assay variable : PTINR\_VAL1 PT-INR Value

| N | Mean      | Standard Deviation | Minimum   | Maximum   |
|---|-----------|--------------------|-----------|-----------|
| 1 | 1.9300000 |                    | 1.9300000 | 1.9300000 |

Unique Subject Identifier=5016000000-0058

Assay variable : PTINR\_VAL1 PT-INR Value

N Mean Standard Deviation Minimum Maximum

---

|   |          |           |          |          |
|---|----------|-----------|----------|----------|
| 4 | 2.420000 | 0.4606517 | 1.770000 | 2.850000 |
|---|----------|-----------|----------|----------|

---

Laboratory tests at the time of obtaining Table 2-6 consent, according to the presence or absence of proton-pump inhibitors

Unique Subject Identifier=501600000-0059

MEANS Procedure

Assay variable : PTINR\_VAL1 PT-INR Value

N Mean Standard Deviation Minimum Maximum

---

|   |           |           |           |           |
|---|-----------|-----------|-----------|-----------|
| 5 | 2.5160000 | 0.4261807 | 2.2200000 | 3.2500000 |
|---|-----------|-----------|-----------|-----------|

---

Unique Subject Identifier=501600000-0062

Assay variable : PTINR\_VAL1 PT-INR Value

N Mean Standard Deviation Minimum Maximum

---

|   |           |           |           |           |
|---|-----------|-----------|-----------|-----------|
| 3 | 2.0366667 | 0.5862025 | 1.6400000 | 2.7100000 |
|---|-----------|-----------|-----------|-----------|

---

Unique Subject Identifier=501600000-0073

Assay variable : PTINR\_VAL1 PT-INR Value

N Mean Standard Deviation Minimum Maximum

---

|   |           |           |           |           |
|---|-----------|-----------|-----------|-----------|
| 2 | 2.2900000 | 0.1697056 | 2.1700000 | 2.4100000 |
|---|-----------|-----------|-----------|-----------|

---

Unique Subject Identifier=501600000-0077

Assay variable : PTINR\_VAL1 PT-INR Value

N Mean Standard Deviation Minimum Maximum

---

|   |           |           |           |           |
|---|-----------|-----------|-----------|-----------|
| 3 | 2.6766667 | 0.3442867 | 2.4300000 | 3.0700000 |
|---|-----------|-----------|-----------|-----------|

---

Laboratory tests at the time of obtaining Table 2-6 consent, according to the presence or absence of proton-pump inhibitors

Unique Subject Identifier=5016000000-0078

MEANS Procedure

Assay variable : PTINR\_VAL1 PT-INR Value

N Mean Standard Deviation Minimum Maximum

---

|   |           |           |           |           |
|---|-----------|-----------|-----------|-----------|
| 4 | 1.7225000 | 0.3238698 | 1.2800000 | 2.0100000 |
|---|-----------|-----------|-----------|-----------|

---

Unique Subject Identifier=5016000000-0083

Assay variable : PTINR\_VAL1 PT-INR Value

N Mean Standard Deviation Minimum Maximum

---

|   |           |           |           |           |
|---|-----------|-----------|-----------|-----------|
| 4 | 1.8875000 | 0.2458150 | 1.6900000 | 2.2300000 |
|---|-----------|-----------|-----------|-----------|

---

Unique Subject Identifier=5016000000-0090

Assay variable : PTINR\_VAL1 PT-INR Value

N Mean Standard Deviation Minimum Maximum

---

|   |           |           |           |           |
|---|-----------|-----------|-----------|-----------|
| 4 | 2.1400000 | 0.5934644 | 1.5800000 | 2.8900000 |
|---|-----------|-----------|-----------|-----------|

---

Unique Subject Identifier=5016000000-0093

Assay variable : PTINR\_VAL1 PT-INR Value

N Mean Standard Deviation Minimum Maximum

---

|   |           |           |           |           |
|---|-----------|-----------|-----------|-----------|
| 5 | 1.9360000 | 0.2903963 | 1.6300000 | 2.2900000 |
|---|-----------|-----------|-----------|-----------|

---



Laboratory tests at the time of obtaining Table 2-6 consent, according to the presence or absence of proton-pump inhibitors

Unique Subject Identifier=5016000000-0094

MEANS Procedure

Assay variable : PTINR\_VAL1 PT-INR Value

N Mean Standard Deviation Minimum Maximum

---

|   |           |           |           |           |
|---|-----------|-----------|-----------|-----------|
| 2 | 1.7000000 | 0.0282843 | 1.6800000 | 1.7200000 |
|---|-----------|-----------|-----------|-----------|

---

Unique Subject Identifier=5016000000-0095

Assay variable : PTINR\_VAL1 PT-INR Value

N Mean Standard Deviation Minimum Maximum

---

|   |           |           |           |           |
|---|-----------|-----------|-----------|-----------|
| 3 | 2.6333333 | 0.0513160 | 2.5900000 | 2.6900000 |
|---|-----------|-----------|-----------|-----------|

---

Unique Subject Identifier=5016000000-0098

Assay variable : PTINR\_VAL1 PT-INR Value

N Mean Standard Deviation Minimum Maximum

---

|   |           |           |           |           |
|---|-----------|-----------|-----------|-----------|
| 3 | 2.1166667 | 0.4239497 | 1.7300000 | 2.5700000 |
|---|-----------|-----------|-----------|-----------|

---

Unique Subject Identifier=5016000000-0100

Assay variable : PTINR\_VAL1 PT-INR Value

N Mean Standard Deviation Minimum Maximum

---

|   |           |           |           |           |
|---|-----------|-----------|-----------|-----------|
| 3 | 1.8866667 | 0.0901850 | 1.8000000 | 1.9800000 |
|---|-----------|-----------|-----------|-----------|

---

Laboratory tests at the time of obtaining Table 2-6 consent, according to the presence or absence of proton-pump inhibitors

Unique Subject Identifier=5016000000-0101

MEANS Procedure

Assay variable : PTINR\_VAL1 PT-INR Value

| N | Mean      | Standard Deviation | Minimum   | Maximum   |
|---|-----------|--------------------|-----------|-----------|
| 3 | 2.1433333 | 0.2400694          | 1.9000000 | 2.3800000 |

Unique Subject Identifier=5016000000-0102

Assay variable : PTINR\_VAL1 PT-INR Value

| N | Mean      | Standard Deviation | Minimum   | Maximum   |
|---|-----------|--------------------|-----------|-----------|
| 3 | 2.3733333 | 0.0378594          | 2.3300000 | 2.4000000 |

Unique Subject Identifier=5016000000-0107

Assay variable : PTINR\_VAL1 PT-INR Value

| N | Mean      | Standard Deviation | Minimum   | Maximum   |
|---|-----------|--------------------|-----------|-----------|
| 3 | 1.9866667 | 0.1950214          | 1.7900000 | 2.1800000 |

Unique Subject Identifier=5016000000-0109

Assay variable : PTINR\_VAL1 PT-INR Value

N Mean Standard Deviation Minimum Maximum

---

|   |           |           |           |           |
|---|-----------|-----------|-----------|-----------|
| 2 | 1.9900000 | 0.5374012 | 1.6100000 | 2.3700000 |
|---|-----------|-----------|-----------|-----------|

---

Laboratory tests at the time of obtaining Table 2-6 consent, according to the presence or absence of proton-pump inhibitors

Unique Subject Identifier=5016000000-0111

MEANS Procedure

Assay variable : PTINR\_VAL1 PT-INR Value

N Mean Standard Deviation Minimum Maximum

---

|   |           |           |           |           |
|---|-----------|-----------|-----------|-----------|
| 4 | 1.6925000 | 0.2677530 | 1.4200000 | 2.0600000 |
|---|-----------|-----------|-----------|-----------|

---

Unique Subject Identifier=5016000000-0112

Assay variable : PTINR\_VAL1 PT-INR Value

N Mean Standard Deviation Minimum Maximum

---

|   |           |  |           |           |
|---|-----------|--|-----------|-----------|
| 1 | 2.2600000 |  | 2.2600000 | 2.2600000 |
|---|-----------|--|-----------|-----------|

---

Unique Subject Identifier=5016000000-0116

Assay variable : PTINR\_VAL1 PT-INR Value

N Mean Standard Deviation Minimum Maximum

---

|   |           |           |           |           |
|---|-----------|-----------|-----------|-----------|
| 4 | 1.8425000 | 0.2160825 | 1.5200000 | 1.9800000 |
|---|-----------|-----------|-----------|-----------|

---

Unique Subject Identifier=5016000000-0117

Assay variable : PTINR\_VAL1 PT-INR Value

N Mean Standard Deviation Minimum Maximum

---

|   |           |           |           |           |
|---|-----------|-----------|-----------|-----------|
| 3 | 1.7933333 | 0.1882374 | 1.6700000 | 2.0100000 |
|---|-----------|-----------|-----------|-----------|

---

Laboratory tests at the time of obtaining Table 2-6 consent, according to the presence or absence of proton-pump inhibitors

Unique Subject Identifier=5016000000-0120

MEANS Procedure

Assay variable : PTINR\_VAL1 PT-INR Value

| N | Mean      | Standard Deviation | Minimum   | Maximum   |
|---|-----------|--------------------|-----------|-----------|
| 2 | 2.2850000 | 0.2899138          | 2.0800000 | 2.4900000 |

Unique Subject Identifier=5016000000-0122

Assay variable : PTINR\_VAL1 PT-INR Value

| N | Mean      | Standard Deviation | Minimum   | Maximum   |
|---|-----------|--------------------|-----------|-----------|
| 3 | 1.6133333 | 0.2157159          | 1.4600000 | 1.8600000 |

Unique Subject Identifier=5016000000-0124

Assay variable : PTINR\_VAL1 PT-INR Value

| N | Mean      | Standard Deviation | Minimum   | Maximum   |
|---|-----------|--------------------|-----------|-----------|
| 3 | 1.8066667 | 0.1305118          | 1.6600000 | 1.9100000 |

Unique Subject Identifier=5016000000-0125

Assay variable : PTINR\_VAL1 PT-INR Value

N Mean Standard Deviation Minimum Maximum

---

|   |          |  |          |          |
|---|----------|--|----------|----------|
| 1 | 2.100000 |  | 2.100000 | 2.100000 |
|---|----------|--|----------|----------|

---



Laboratory tests at the time of obtaining Table 2-6 consent, according to the presence or absence of proton-pump inhibitors

Unique Subject Identifier=5016000000-0128

MEANS Procedure

Assay variable : PTINR\_VAL1 PT-INR Value

N Mean Standard Deviation Minimum Maximum

---

|   |           |           |           |           |
|---|-----------|-----------|-----------|-----------|
| 4 | 1.7575000 | 0.3929695 | 1.3000000 | 2.1000000 |
|---|-----------|-----------|-----------|-----------|

---

Unique Subject Identifier=5016000000-0129

Assay variable : PTINR\_VAL1 PT-INR Value

N Mean Standard Deviation Minimum Maximum

---

|   |           |           |           |           |
|---|-----------|-----------|-----------|-----------|
| 4 | 1.9700000 | 0.5846366 | 1.4400000 | 2.7300000 |
|---|-----------|-----------|-----------|-----------|

---

Unique Subject Identifier=5016000000-0131

Assay variable : PTINR\_VAL1 PT-INR Value

N Mean Standard Deviation Minimum Maximum

---

|   |           |           |           |           |
|---|-----------|-----------|-----------|-----------|
| 3 | 2.2300000 | 0.1442221 | 2.0700000 | 2.3500000 |
|---|-----------|-----------|-----------|-----------|

---

Unique Subject Identifier=5016000000-0137

Assay variable : PTINR\_VAL1 PT-INR Value

N Mean Standard Deviation Minimum Maximum

---

|   |          |           |          |          |
|---|----------|-----------|----------|----------|
| 3 | 1.980000 | 0.1705872 | 1.840000 | 2.170000 |
|---|----------|-----------|----------|----------|

---

Laboratory tests at the time of obtaining Table 2-6 consent, according to the presence or absence of proton-pump inhibitors

Unique Subject Identifier=5016000000-0140

MEANS Procedure

Assay variable : PTINR\_VAL1 PT-INR Value

N Mean Standard Deviation Minimum Maximum

---

|   |           |           |           |           |
|---|-----------|-----------|-----------|-----------|
| 3 | 2.2766667 | 0.7696969 | 1.7500000 | 3.1600000 |
|---|-----------|-----------|-----------|-----------|

---

Unique Subject Identifier=5016000000-0141

Assay variable : PTINR\_VAL1 PT-INR Value

N Mean Standard Deviation Minimum Maximum

---

|   |           |           |           |           |
|---|-----------|-----------|-----------|-----------|
| 3 | 1.9566667 | 0.4554485 | 1.4900000 | 2.4000000 |
|---|-----------|-----------|-----------|-----------|

---

Unique Subject Identifier=5016000000-0142

Assay variable : PTINR\_VAL1 PT-INR Value

N Mean Standard Deviation Minimum Maximum

---

|   |           |           |           |           |
|---|-----------|-----------|-----------|-----------|
| 4 | 2.2250000 | 0.4744470 | 1.9000000 | 2.9300000 |
|---|-----------|-----------|-----------|-----------|

---

Unique Subject Identifier=5016000000-0146

Assay variable : PTINR\_VAL1 PT-INR Value

N Mean Standard Deviation Minimum Maximum

---

|   |          |           |          |          |
|---|----------|-----------|----------|----------|
| 3 | 2.200000 | 0.8861151 | 1.180000 | 2.780000 |
|---|----------|-----------|----------|----------|

---

Laboratory tests at the time of obtaining Table 2-6 consent, according to the presence or absence of proton-pump inhibitors

Unique Subject Identifier=5016000000-0147

MEANS Procedure

Assay variable : PTINR\_VAL1 PT-INR Value

N Mean Standard Deviation Minimum Maximum

---

|   |           |           |           |           |
|---|-----------|-----------|-----------|-----------|
| 4 | 1.7075000 | 0.0713559 | 1.6200000 | 1.7900000 |
|---|-----------|-----------|-----------|-----------|

---

Unique Subject Identifier=5016000000-0148

Assay variable : PTINR\_VAL1 PT-INR Value

N Mean Standard Deviation Minimum Maximum

---

|   |           |           |           |           |
|---|-----------|-----------|-----------|-----------|
| 3 | 2.4966667 | 0.8981277 | 1.7000000 | 3.4700000 |
|---|-----------|-----------|-----------|-----------|

---

Unique Subject Identifier=5016000000-0149

Assay variable : PTINR\_VAL1 PT-INR Value

N Mean Standard Deviation Minimum Maximum

---

|   |           |           |           |           |
|---|-----------|-----------|-----------|-----------|
| 3 | 2.3366667 | 0.7788667 | 1.8000000 | 3.2300000 |
|---|-----------|-----------|-----------|-----------|

---

Unique Subject Identifier=5016000000-0153

Assay variable : PTINR\_VAL1 PT-INR Value

N Mean Standard Deviation Minimum Maximum

---

|   |          |           |          |          |
|---|----------|-----------|----------|----------|
| 4 | 2.140000 | 0.1013246 | 2.010000 | 2.230000 |
|---|----------|-----------|----------|----------|

---

Laboratory tests at the time of obtaining Table 2-6 consent, according to the presence or absence of proton-pump inhibitors

Unique Subject Identifier=501600000-0155

MEANS Procedure

Assay variable : PTINR\_VAL1 PT-INR Value

| N | Mean      | Standard Deviation | Minimum   | Maximum   |
|---|-----------|--------------------|-----------|-----------|
| 5 | 1.8480000 | 0.1084896          | 1.6600000 | 1.9300000 |

Unique Subject Identifier=501600000-0157

Assay variable : PTINR\_VAL1 PT-INR Value

| N | Mean      | Standard Deviation | Minimum   | Maximum   |
|---|-----------|--------------------|-----------|-----------|
| 3 | 2.3133333 | 0.5451911          | 1.7300000 | 2.8100000 |

Unique Subject Identifier=501600000-0159

Assay variable : PTINR\_VAL1 PT-INR Value

| N | Mean      | Standard Deviation | Minimum   | Maximum   |
|---|-----------|--------------------|-----------|-----------|
| 3 | 2.0733333 | 0.3056687          | 1.7800000 | 2.3900000 |

Unique Subject Identifier=501600000-0164

Assay variable : PTINR\_VAL1 PT-INR Value

N Mean Standard Deviation Minimum Maximum

---

|   |          |           |          |          |
|---|----------|-----------|----------|----------|
| 5 | 2.154000 | 0.4639289 | 1.680000 | 2.800000 |
|---|----------|-----------|----------|----------|

---



Laboratory tests at the time of obtaining Table 2-6 consent, according to the presence or absence of proton-pump inhibitors

Unique Subject Identifier=5016000000-0168

MEANS Procedure

Assay variable : PTINR\_VAL1 PT-INR Value

| N | Mean      | Standard Deviation | Minimum   | Maximum   |
|---|-----------|--------------------|-----------|-----------|
| 5 | 1.9020000 | 0.5697982          | 1.3700000 | 2.8700000 |

Unique Subject Identifier=5016000000-0174

Assay variable : PTINR\_VAL1 PT-INR Value

| N | Mean      | Standard Deviation | Minimum   | Maximum   |
|---|-----------|--------------------|-----------|-----------|
| 2 | 1.8050000 | 1.1101576          | 1.0200000 | 2.5900000 |

Unique Subject Identifier=5016000000-0177

Assay variable : PTINR\_VAL1 PT-INR Value

| N | Mean      | Standard Deviation | Minimum   | Maximum   |
|---|-----------|--------------------|-----------|-----------|
| 6 | 1.8883333 | 0.3213980          | 1.4900000 | 2.3000000 |

Unique Subject Identifier=5016000000-0178

Assay variable : PTINR\_VAL1 PT-INR Value

N Mean Standard Deviation Minimum Maximum

---

|   |          |           |          |          |
|---|----------|-----------|----------|----------|
| 4 | 2.110000 | 0.2019901 | 1.910000 | 2.390000 |
|---|----------|-----------|----------|----------|

---

Laboratory tests at the time of obtaining Table 2-6 consent, according to the presence or absence of proton-pump inhibitors

Unique Subject Identifier=5016000000-0179

MEANS Procedure

Assay variable : PTINR\_VAL1 PT-INR Value

N Mean Standard Deviation Minimum Maximum

---

|   |           |           |           |           |
|---|-----------|-----------|-----------|-----------|
| 4 | 2.0625000 | 0.1426826 | 1.8500000 | 2.1500000 |
|---|-----------|-----------|-----------|-----------|

---

Unique Subject Identifier=5016000000-0182

Assay variable : PTINR\_VAL1 PT-INR Value

N Mean Standard Deviation Minimum Maximum

---

|   |           |           |           |           |
|---|-----------|-----------|-----------|-----------|
| 2 | 2.1800000 | 0.0565685 | 2.1400000 | 2.2200000 |
|---|-----------|-----------|-----------|-----------|

---

Unique Subject Identifier=5016000000-0184

Assay variable : PTINR\_VAL1 PT-INR Value

N Mean Standard Deviation Minimum Maximum

---

|   |           |  |           |           |
|---|-----------|--|-----------|-----------|
| 1 | 1.4100000 |  | 1.4100000 | 1.4100000 |
|---|-----------|--|-----------|-----------|

---

Unique Subject Identifier=5016000000-0187

Assay variable : PTINR\_VAL1 PT-INR Value

N Mean Standard Deviation Minimum Maximum

---

|   |           |           |           |           |
|---|-----------|-----------|-----------|-----------|
| 4 | 1.6200000 | 0.1089342 | 1.5300000 | 1.7500000 |
|---|-----------|-----------|-----------|-----------|

---

Laboratory tests at the time of obtaining Table 2-6 consent, according to the presence or absence of proton-pump inhibitors

Unique Subject Identifier=5016000000-0188

MEANS Procedure

Assay variable : PTINR\_VAL1 PT-INR Value

N Mean Standard Deviation Minimum Maximum

---

|   |           |           |           |           |
|---|-----------|-----------|-----------|-----------|
| 5 | 2.4440000 | 0.3880464 | 2.0600000 | 2.8500000 |
|---|-----------|-----------|-----------|-----------|

---

Unique Subject Identifier=5016000000-0191

Assay variable : PTINR\_VAL1 PT-INR Value

N Mean Standard Deviation Minimum Maximum

---

|   |           |           |           |           |
|---|-----------|-----------|-----------|-----------|
| 3 | 2.0533333 | 0.1101514 | 1.9800000 | 2.1800000 |
|---|-----------|-----------|-----------|-----------|

---

Unique Subject Identifier=5016000000-0207

Assay variable : PTINR\_VAL1 PT-INR Value

N Mean Standard Deviation Minimum Maximum

---

|   |           |           |           |           |
|---|-----------|-----------|-----------|-----------|
| 2 | 1.8150000 | 0.2757716 | 1.6200000 | 2.0100000 |
|---|-----------|-----------|-----------|-----------|

---

Unique Subject Identifier=5016000000-0211

Assay variable : PTINR\_VAL1 PT-INR Value

N Mean Standard Deviation Minimum Maximum

---

|   |           |           |           |           |
|---|-----------|-----------|-----------|-----------|
| 6 | 2.3150000 | 0.7912206 | 1.6700000 | 3.8300000 |
|---|-----------|-----------|-----------|-----------|

---

Laboratory tests at the time of obtaining Table 2-6 consent, according to the presence or absence of proton-pump inhibitors

Unique Subject Identifier=501600000-0213

MEANS Procedure

Assay variable : PTINR\_VAL1 PT-INR Value

N Mean Standard Deviation Minimum Maximum

---

|   |           |           |           |           |
|---|-----------|-----------|-----------|-----------|
| 6 | 2.0316667 | 0.5348800 | 1.4800000 | 2.8400000 |
|---|-----------|-----------|-----------|-----------|

---

Unique Subject Identifier=501600000-0222

Assay variable : PTINR\_VAL1 PT-INR Value

N Mean Standard Deviation Minimum Maximum

---

|   |           |           |           |           |
|---|-----------|-----------|-----------|-----------|
| 3 | 2.4900000 | 0.5367495 | 1.8800000 | 2.8900000 |
|---|-----------|-----------|-----------|-----------|

---

Unique Subject Identifier=501600000-0235

Assay variable : PTINR\_VAL1 PT-INR Value

N Mean Standard Deviation Minimum Maximum

---

|   |           |           |           |           |
|---|-----------|-----------|-----------|-----------|
| 6 | 2.0733333 | 0.6205052 | 1.5000000 | 3.2800000 |
|---|-----------|-----------|-----------|-----------|

---

Unique Subject Identifier=501600000-0237

Assay variable : PTINR\_VAL1 PT-INR Value

N Mean Standard Deviation Minimum Maximum

---

|   |           |           |           |           |
|---|-----------|-----------|-----------|-----------|
| 3 | 1.7733333 | 0.1607275 | 1.5900000 | 1.8900000 |
|---|-----------|-----------|-----------|-----------|

---



Laboratory tests at the time of obtaining Table 2-6 consent, according to the presence or absence of proton-pump inhibitors

Unique Subject Identifier=5016000000-0238

MEANS Procedure

Assay variable : PTINR\_VAL1 PT-INR Value

N Mean Standard Deviation Minimum Maximum

---

|   |           |           |           |           |
|---|-----------|-----------|-----------|-----------|
| 4 | 1.7250000 | 0.1206924 | 1.6400000 | 1.9000000 |
|---|-----------|-----------|-----------|-----------|

---

Unique Subject Identifier=5016000000-0240

Assay variable : PTINR\_VAL1 PT-INR Value

N Mean Standard Deviation Minimum Maximum

---

|   |           |           |           |           |
|---|-----------|-----------|-----------|-----------|
| 4 | 2.0850000 | 0.3399510 | 1.7500000 | 2.5500000 |
|---|-----------|-----------|-----------|-----------|

---

Unique Subject Identifier=5016000000-0241

Assay variable : PTINR\_VAL1 PT-INR Value

N Mean Standard Deviation Minimum Maximum

---

|   |           |           |           |           |
|---|-----------|-----------|-----------|-----------|
| 3 | 2.6233333 | 0.9609544 | 2.0000000 | 3.7300000 |
|---|-----------|-----------|-----------|-----------|

---

Unique Subject Identifier=5016000000-0242

Assay variable : PTINR\_VAL1 PT-INR Value

N Mean Standard Deviation Minimum Maximum

---

|   |           |           |           |           |
|---|-----------|-----------|-----------|-----------|
| 4 | 1.9025000 | 0.1637834 | 1.6900000 | 2.0800000 |
|---|-----------|-----------|-----------|-----------|

---

Laboratory tests at the time of obtaining Table 2-6 consent, according to the presence or absence of proton-pump inhibitors

Unique Subject Identifier=5016000000-0244

MEANS Procedure

Assay variable : PTINR\_VAL1 PT-INR Value

N Mean Standard Deviation Minimum Maximum

---

|   |           |           |           |           |
|---|-----------|-----------|-----------|-----------|
| 3 | 1.5933333 | 0.0680686 | 1.5400000 | 1.6700000 |
|---|-----------|-----------|-----------|-----------|

---

Unique Subject Identifier=5016000000-0248

Assay variable : PTINR\_VAL1 PT-INR Value

N Mean Standard Deviation Minimum Maximum

---

|   |           |           |           |           |
|---|-----------|-----------|-----------|-----------|
| 3 | 1.9166667 | 0.2685765 | 1.6100000 | 2.1100000 |
|---|-----------|-----------|-----------|-----------|

---

Unique Subject Identifier=5016000000-0249

Assay variable : PTINR\_VAL1 PT-INR Value

N Mean Standard Deviation Minimum Maximum

---

|   |           |           |           |           |
|---|-----------|-----------|-----------|-----------|
| 5 | 2.5460000 | 0.9822067 | 2.0500000 | 4.3000000 |
|---|-----------|-----------|-----------|-----------|

---

Unique Subject Identifier=5016000000-0251

Assay variable : PTINR\_VAL1 PT-INR Value

N Mean Standard Deviation Minimum Maximum

---

|   |          |           |          |          |
|---|----------|-----------|----------|----------|
| 6 | 1.933333 | 0.8179405 | 1.080000 | 3.210000 |
|---|----------|-----------|----------|----------|

---

Laboratory tests at the time of obtaining Table 2-6 consent, according to the presence or absence of proton-pump inhibitors

Unique Subject Identifier=5016000000-0252

MEANS Procedure

Assay variable : PTINR\_VAL1 PT-INR Value

| N | Mean      | Standard Deviation | Minimum   | Maximum   |
|---|-----------|--------------------|-----------|-----------|
| 3 | 2.3000000 | 0.1153256          | 2.2100000 | 2.4300000 |

Unique Subject Identifier=5016000000-0255

Assay variable : PTINR\_VAL1 PT-INR Value

| N | Mean      | Standard Deviation | Minimum   | Maximum   |
|---|-----------|--------------------|-----------|-----------|
| 3 | 1.6133333 | 0.2722744          | 1.4000000 | 1.9200000 |

Unique Subject Identifier=5016000000-0258

Assay variable : PTINR\_VAL1 PT-INR Value

| N | Mean      | Standard Deviation | Minimum   | Maximum   |
|---|-----------|--------------------|-----------|-----------|
| 1 | 2.1800000 |                    | 2.1800000 | 2.1800000 |

Unique Subject Identifier=5016000000-0263

Assay variable : PTINR\_VAL1 PT-INR Value

N Mean Standard Deviation Minimum Maximum

---

|   |          |  |          |          |
|---|----------|--|----------|----------|
| 1 | 1.450000 |  | 1.450000 | 1.450000 |
|---|----------|--|----------|----------|

---

Laboratory tests at the time of obtaining Table 2-6 consent, according to the presence or absence of proton-pump inhibitors

Unique Subject Identifier=5016000000-0264

MEANS Procedure

Assay variable : PTINR\_VAL1 PT-INR Value

| N | Mean      | Standard Deviation | Minimum   | Maximum   |
|---|-----------|--------------------|-----------|-----------|
| 4 | 2.0650000 | 0.1506652          | 1.9300000 | 2.2100000 |

Unique Subject Identifier=5016000000-0265

Assay variable : PTINR\_VAL1 PT-INR Value

| N | Mean      | Standard Deviation | Minimum   | Maximum   |
|---|-----------|--------------------|-----------|-----------|
| 4 | 2.2125000 | 0.1332604          | 2.0900000 | 2.3600000 |

Unique Subject Identifier=5016000000-0267

Assay variable : PTINR\_VAL1 PT-INR Value

| N | Mean      | Standard Deviation | Minimum   | Maximum   |
|---|-----------|--------------------|-----------|-----------|
| 5 | 1.8500000 | 0.4913247          | 1.4300000 | 2.6900000 |

Unique Subject Identifier=5016000000-0272

Assay variable : PTINR\_VAL1 PT-INR Value

N Mean Standard Deviation Minimum Maximum

---

|   |          |           |          |          |
|---|----------|-----------|----------|----------|
| 3 | 2.460000 | 0.6478426 | 1.850000 | 3.140000 |
|---|----------|-----------|----------|----------|

---



Laboratory tests at the time of obtaining Table 2-6 consent, according to the presence or absence of proton-pump inhibitors

Unique Subject Identifier=5016000000-0273

MEANS Procedure

Assay variable : PTINR\_VAL1 PT-INR Value

| N | Mean      | Standard Deviation | Minimum   | Maximum   |
|---|-----------|--------------------|-----------|-----------|
| 3 | 1.6266667 | 0.8285731          | 0.6800000 | 2.2200000 |

Unique Subject Identifier=5016000000-0275

Assay variable : PTINR\_VAL1 PT-INR Value

| N | Mean      | Standard Deviation | Minimum   | Maximum   |
|---|-----------|--------------------|-----------|-----------|
| 3 | 2.0166667 | 0.0602771          | 1.9600000 | 2.0800000 |

Unique Subject Identifier=5016000000-0277

Assay variable : PTINR\_VAL1 PT-INR Value

| N | Mean      | Standard Deviation | Minimum   | Maximum   |
|---|-----------|--------------------|-----------|-----------|
| 3 | 2.0033333 | 0.1903506          | 1.8200000 | 2.2000000 |

Unique Subject Identifier=5016000000-0279

Assay variable : PTINR\_VAL1 PT-INR Value

N Mean Standard Deviation Minimum Maximum

---

|   |           |           |           |           |
|---|-----------|-----------|-----------|-----------|
| 2 | 2.1550000 | 0.8697413 | 1.5400000 | 2.7700000 |
|---|-----------|-----------|-----------|-----------|

---

Laboratory tests at the time of obtaining Table 2-6 consent, according to the presence or absence of proton-pump inhibitors

Unique Subject Identifier=5016000000-0280

MEANS Procedure

Assay variable : PTINR\_VAL1 PT-INR Value

| N | Mean      | Standard Deviation | Minimum   | Maximum   |
|---|-----------|--------------------|-----------|-----------|
| 2 | 1.2850000 | 0.3606245          | 1.0300000 | 1.5400000 |

Unique Subject Identifier=5016000000-0282

Assay variable : PTINR\_VAL1 PT-INR Value

| N | Mean      | Standard Deviation | Minimum   | Maximum   |
|---|-----------|--------------------|-----------|-----------|
| 2 | 2.1200000 | 0.0141421          | 2.1100000 | 2.1300000 |

Unique Subject Identifier=5016000000-0283

Assay variable : PTINR\_VAL1 PT-INR Value

| N | Mean      | Standard Deviation | Minimum   | Maximum   |
|---|-----------|--------------------|-----------|-----------|
| 3 | 1.9733333 | 0.1401190          | 1.8300000 | 2.1100000 |

Unique Subject Identifier=5016000000-0284

Assay variable : PTINR\_VAL1 PT-INR Value

N Mean Standard Deviation Minimum Maximum

---

|   |           |           |           |           |
|---|-----------|-----------|-----------|-----------|
| 6 | 2.1316667 | 0.3020210 | 1.8500000 | 2.6300000 |
|---|-----------|-----------|-----------|-----------|

---

Laboratory tests at the time of obtaining Table 2-6 consent, according to the presence or absence of proton-pump inhibitors

Unique Subject Identifier=5016000000-0285

MEANS Procedure

Assay variable : PTINR\_VAL1 PT-INR Value

| N | Mean      | Standard Deviation | Minimum   | Maximum   |
|---|-----------|--------------------|-----------|-----------|
| 3 | 1.8233333 | 0.1792577          | 1.7100000 | 2.0300000 |

Unique Subject Identifier=5016000000-0290

Assay variable : PTINR\_VAL1 PT-INR Value

| N | Mean      | Standard Deviation | Minimum   | Maximum   |
|---|-----------|--------------------|-----------|-----------|
| 4 | 2.8375000 | 0.6825626          | 2.0300000 | 3.7000000 |

Unique Subject Identifier=5016000000-0291

Assay variable : PTINR\_VAL1 PT-INR Value

| N | Mean      | Standard Deviation | Minimum   | Maximum   |
|---|-----------|--------------------|-----------|-----------|
| 1 | 1.0200000 |                    | 1.0200000 | 1.0200000 |

Unique Subject Identifier=5016000000-0295

Assay variable : PTINR\_VAL1 PT-INR Value

N Mean Standard Deviation Minimum Maximum

---

|   |           |           |           |           |
|---|-----------|-----------|-----------|-----------|
| 3 | 1.5966667 | 0.0351188 | 1.5600000 | 1.6300000 |
|---|-----------|-----------|-----------|-----------|

---

Laboratory tests at the time of obtaining Table 2-6 consent, according to the presence or absence of proton-pump inhibitors

Unique Subject Identifier=5016000000-0297

MEANS Procedure

Assay variable : PTINR\_VAL1 PT-INR Value

N Mean Standard Deviation Minimum Maximum

---

|   |           |           |           |           |
|---|-----------|-----------|-----------|-----------|
| 4 | 1.4025000 | 0.1357387 | 1.2200000 | 1.5200000 |
|---|-----------|-----------|-----------|-----------|

---

Unique Subject Identifier=5016000000-0306

Assay variable : PTINR\_VAL1 PT-INR Value

N Mean Standard Deviation Minimum Maximum

---

|   |           |           |           |           |
|---|-----------|-----------|-----------|-----------|
| 2 | 1.5600000 | 0.0989949 | 1.4900000 | 1.6300000 |
|---|-----------|-----------|-----------|-----------|

---

Unique Subject Identifier=5016000000-0317

Assay variable : PTINR\_VAL1 PT-INR Value

N Mean Standard Deviation Minimum Maximum

---

|   |           |           |           |           |
|---|-----------|-----------|-----------|-----------|
| 3 | 1.8300000 | 0.4714870 | 1.5000000 | 2.3700000 |
|---|-----------|-----------|-----------|-----------|

---

Unique Subject Identifier=5016000000-0322

Assay variable : PTINR\_VAL1 PT-INR Value

N Mean Standard Deviation Minimum Maximum

---

|   |          |  |          |          |
|---|----------|--|----------|----------|
| 1 | 2.610000 |  | 2.610000 | 2.610000 |
|---|----------|--|----------|----------|

---



Laboratory tests at the time of obtaining Table 2-6 consent, according to the presence or absence of proton-pump inhibitors

Unique Subject Identifier=5016000000-0328

MEANS Procedure

Assay variable : PTINR\_VAL1 PT-INR Value

N Mean Standard Deviation Minimum Maximum

---

|   |           |           |           |           |
|---|-----------|-----------|-----------|-----------|
| 6 | 2.3616667 | 0.1689280 | 2.1000000 | 2.5500000 |
|---|-----------|-----------|-----------|-----------|

---

Unique Subject Identifier=5016000000-0330

Assay variable : PTINR\_VAL1 PT-INR Value

N Mean Standard Deviation Minimum Maximum

---

|   |           |  |           |           |
|---|-----------|--|-----------|-----------|
| 1 | 2.1900000 |  | 2.1900000 | 2.1900000 |
|---|-----------|--|-----------|-----------|

---

Unique Subject Identifier=5016000000-0333

Assay variable : PTINR\_VAL1 PT-INR Value

N Mean Standard Deviation Minimum Maximum

---

|   |           |           |           |           |
|---|-----------|-----------|-----------|-----------|
| 3 | 2.8833333 | 0.3910669 | 2.5100000 | 3.2900000 |
|---|-----------|-----------|-----------|-----------|

---

Unique Subject Identifier=5016000000-0335

Assay variable : PTINR\_VAL1 PT-INR Value

N Mean Standard Deviation Minimum Maximum

---

|   |           |           |           |           |
|---|-----------|-----------|-----------|-----------|
| 3 | 2.3833333 | 0.2631223 | 2.0800000 | 2.5500000 |
|---|-----------|-----------|-----------|-----------|

---

Laboratory tests at the time of obtaining Table 2-6 consent, according to the presence or absence of proton-pump inhibitors

Unique Subject Identifier=5016000000-0337

MEANS Procedure

Assay variable : PTINR\_VAL1 PT-INR Value

N Mean Standard Deviation Minimum Maximum

---

|   |           |           |           |           |
|---|-----------|-----------|-----------|-----------|
| 2 | 1.9450000 | 0.2474874 | 1.7700000 | 2.1200000 |
|---|-----------|-----------|-----------|-----------|

---

Unique Subject Identifier=5016000000-0341

Assay variable : PTINR\_VAL1 PT-INR Value

N Mean Standard Deviation Minimum Maximum

---

|   |           |           |           |           |
|---|-----------|-----------|-----------|-----------|
| 4 | 2.1125000 | 0.1337597 | 1.9700000 | 2.2800000 |
|---|-----------|-----------|-----------|-----------|

---

Unique Subject Identifier=5016000000-0348

Assay variable : PTINR\_VAL1 PT-INR Value

N Mean Standard Deviation Minimum Maximum

---

|   |           |           |           |           |
|---|-----------|-----------|-----------|-----------|
| 6 | 1.9631667 | 0.3504628 | 1.3400000 | 2.3100000 |
|---|-----------|-----------|-----------|-----------|

---

Unique Subject Identifier=5017011110-0001

Assay variable : PTINR\_VAL1 PT-INR Value

N Mean Standard Deviation Minimum Maximum

---

|   |           |           |           |           |
|---|-----------|-----------|-----------|-----------|
| 4 | 2.6750000 | 0.3767846 | 2.2800000 | 3.1400000 |
|---|-----------|-----------|-----------|-----------|

---

Laboratory tests at the time of obtaining Table 2-6 consent, according to the presence or absence of proton-pump inhibitors

Unique Subject Identifier=5017011110-0005

MEANS Procedure

Assay variable : PTINR\_VAL1 PT-INR Value

N Mean Standard Deviation Minimum Maximum

---

|   |          |           |          |          |
|---|----------|-----------|----------|----------|
| 2 | 2.500000 | 0.4242641 | 2.200000 | 2.800000 |
|---|----------|-----------|----------|----------|

---

Unique Subject Identifier=5017011110-0008

Assay variable : PTINR\_VAL1 PT-INR Value

N Mean Standard Deviation Minimum Maximum

---

|   |          |           |          |          |
|---|----------|-----------|----------|----------|
| 4 | 2.197500 | 0.3617895 | 1.730000 | 2.530000 |
|---|----------|-----------|----------|----------|

---

Unique Subject Identifier=5017011110-0012

Assay variable : PTINR\_VAL1 PT-INR Value

N Mean Standard Deviation Minimum Maximum

---

|   |          |           |          |          |
|---|----------|-----------|----------|----------|
| 4 | 2.105000 | 0.2563201 | 1.790000 | 2.390000 |
|---|----------|-----------|----------|----------|

---

Unique Subject Identifier=5017011110-0015

Assay variable : PTINR\_VAL1 PT-INR Value

N Mean Standard Deviation Minimum Maximum

---

|   |          |           |          |          |
|---|----------|-----------|----------|----------|
| 3 | 2.083333 | 0.5263396 | 1.580000 | 2.630000 |
|---|----------|-----------|----------|----------|

---

Laboratory tests at the time of obtaining Table 2-6 consent, according to the presence or absence of proton-pump inhibitors

Unique Subject Identifier=5017011110-0016

MEANS Procedure

Assay variable : PTINR\_VAL1 PT-INR Value

| N | Mean      | Standard Deviation | Minimum   | Maximum   |
|---|-----------|--------------------|-----------|-----------|
| 5 | 1.2760000 | 0.1040673          | 1.1800000 | 1.4200000 |

Unique Subject Identifier=5017011110-0017

Assay variable : PTINR\_VAL1 PT-INR Value

| N | Mean      | Standard Deviation | Minimum   | Maximum   |
|---|-----------|--------------------|-----------|-----------|
| 6 | 1.4250000 | 0.1671825          | 1.2400000 | 1.7000000 |

Unique Subject Identifier=5017011110-0019

Assay variable : PTINR\_VAL1 PT-INR Value

| N | Mean      | Standard Deviation | Minimum   | Maximum   |
|---|-----------|--------------------|-----------|-----------|
| 6 | 1.9083333 | 0.6652343          | 1.3500000 | 3.1200000 |

Unique Subject Identifier=5017011110-0021

Assay variable : PTINR\_VAL1 PT-INR Value

N Mean Standard Deviation Minimum Maximum

---

|   |           |           |           |           |
|---|-----------|-----------|-----------|-----------|
| 5 | 1.9860000 | 0.2021880 | 1.8300000 | 2.3400000 |
|---|-----------|-----------|-----------|-----------|

---



Laboratory tests at the time of obtaining Table 2-6 consent, according to the presence or absence of proton-pump inhibitors

Unique Subject Identifier=5017011110-0032

MEANS Procedure

Assay variable : PTINR\_VAL1 PT-INR Value

N Mean Standard Deviation Minimum Maximum

---

|   |           |           |           |           |
|---|-----------|-----------|-----------|-----------|
| 6 | 2.0500000 | 0.6796764 | 1.4900000 | 3.0700000 |
|---|-----------|-----------|-----------|-----------|

---

Unique Subject Identifier=5020011000-0004

Assay variable : PTINR\_VAL1 PT-INR Value

N Mean Standard Deviation Minimum Maximum

---

|   |           |           |           |           |
|---|-----------|-----------|-----------|-----------|
| 3 | 2.8800000 | 0.5499091 | 2.4000000 | 3.4800000 |
|---|-----------|-----------|-----------|-----------|

---

Unique Subject Identifier=5020011000-0010

Assay variable : PTINR\_VAL1 PT-INR Value

N Mean Standard Deviation Minimum Maximum

---

|   |           |           |           |           |
|---|-----------|-----------|-----------|-----------|
| 3 | 2.5300000 | 0.7458552 | 2.0600000 | 3.3900000 |
|---|-----------|-----------|-----------|-----------|

---

Unique Subject Identifier=5020011000-0012

Assay variable : PTINR\_VAL1 PT-INR Value

N Mean Standard Deviation Minimum Maximum

---

|   |           |           |           |           |
|---|-----------|-----------|-----------|-----------|
| 3 | 2.1766667 | 0.2709859 | 1.9200000 | 2.4600000 |
|---|-----------|-----------|-----------|-----------|

---

Laboratory tests at the time of obtaining Table 2-6 consent, according to the presence or absence of proton-pump inhibitors

Unique Subject Identifier=5020011000-0013

MEANS Procedure

Assay variable : PTINR\_VAL1 PT-INR Value

| N | Mean      | Standard Deviation | Minimum   | Maximum   |
|---|-----------|--------------------|-----------|-----------|
| 3 | 1.8500000 | 0.2705550          | 1.5900000 | 2.1300000 |

Unique Subject Identifier=5020011000-0014

Assay variable : PTINR\_VAL1 PT-INR Value

| N | Mean      | Standard Deviation | Minimum   | Maximum   |
|---|-----------|--------------------|-----------|-----------|
| 3 | 2.0200000 | 0.4003748          | 1.6100000 | 2.4100000 |

Unique Subject Identifier=5020011000-0016

Assay variable : PTINR\_VAL1 PT-INR Value

| N | Mean      | Standard Deviation | Minimum   | Maximum   |
|---|-----------|--------------------|-----------|-----------|
| 3 | 2.7800000 | 0.1997498          | 2.5600000 | 2.9500000 |

Unique Subject Identifier=5020011000-0020

Assay variable : PTINR\_VAL1 PT-INR Value

N Mean Standard Deviation Minimum Maximum

---

|   |           |           |           |           |
|---|-----------|-----------|-----------|-----------|
| 4 | 2.3350000 | 0.5791085 | 1.5000000 | 2.8300000 |
|---|-----------|-----------|-----------|-----------|

---

Laboratory tests at the time of obtaining Table 2-6 consent, according to the presence or absence of proton-pump inhibitors

Unique Subject Identifier=5020011000-0021

MEANS Procedure

Assay variable : PTINR\_VAL1 PT-INR Value

N Mean Standard Deviation Minimum Maximum

---

|   |           |           |           |           |
|---|-----------|-----------|-----------|-----------|
| 3 | 2.0766667 | 0.2119748 | 1.8500000 | 2.2700000 |
|---|-----------|-----------|-----------|-----------|

---

Unique Subject Identifier=5020011000-0025

Assay variable : PTINR\_VAL1 PT-INR Value

N Mean Standard Deviation Minimum Maximum

---

|   |           |           |           |           |
|---|-----------|-----------|-----------|-----------|
| 3 | 1.8966667 | 0.6645550 | 1.3600000 | 2.6400000 |
|---|-----------|-----------|-----------|-----------|

---

Unique Subject Identifier=5020011000-0030

Assay variable : PTINR\_VAL1 PT-INR Value

N Mean Standard Deviation Minimum Maximum

---

|   |           |           |           |           |
|---|-----------|-----------|-----------|-----------|
| 6 | 1.6700000 | 0.1637071 | 1.4600000 | 1.9000000 |
|---|-----------|-----------|-----------|-----------|

---

Unique Subject Identifier=5020011000-0036

Assay variable : PTINR\_VAL1 PT-INR Value

N Mean Standard Deviation Minimum Maximum

---

|   |           |           |           |           |
|---|-----------|-----------|-----------|-----------|
| 4 | 1.8025000 | 0.1547848 | 1.5900000 | 1.9400000 |
|---|-----------|-----------|-----------|-----------|

---

Laboratory tests at the time of obtaining Table 2-6 consent, according to the presence or absence of proton-pump inhibitors

Unique Subject Identifier=5020011000-0039

MEANS Procedure

Assay variable : PTINR\_VAL1 PT-INR Value

| N | Mean      | Standard Deviation | Minimum   | Maximum   |
|---|-----------|--------------------|-----------|-----------|
| 3 | 2.2300000 | 0.3061046          | 1.9400000 | 2.5500000 |

Unique Subject Identifier=5020011000-0042

Assay variable : PTINR\_VAL1 PT-INR Value

| N | Mean      | Standard Deviation | Minimum   | Maximum   |
|---|-----------|--------------------|-----------|-----------|
| 3 | 2.2200000 | 0.3011644          | 1.8900000 | 2.4800000 |

Unique Subject Identifier=5020011000-0043

Assay variable : PTINR\_VAL1 PT-INR Value

| N | Mean      | Standard Deviation | Minimum   | Maximum   |
|---|-----------|--------------------|-----------|-----------|
| 6 | 2.3666667 | 0.3654951          | 1.8200000 | 2.8600000 |

Unique Subject Identifier=5020011000-0048

Assay variable : PTINR\_VAL1 PT-INR Value

N Mean Standard Deviation Minimum Maximum

---

|   |           |           |           |           |
|---|-----------|-----------|-----------|-----------|
| 4 | 1.8675000 | 0.2920474 | 1.4400000 | 2.1000000 |
|---|-----------|-----------|-----------|-----------|

---



Laboratory tests at the time of obtaining Table 2-6 consent, according to the presence or absence of proton-pump inhibitors

Unique Subject Identifier=5020011000-0064

MEANS Procedure

Assay variable : PTINR\_VAL1 PT-INR Value

N Mean Standard Deviation Minimum Maximum

---

|   |           |           |           |           |
|---|-----------|-----------|-----------|-----------|
| 4 | 1.5050000 | 0.1420094 | 1.3700000 | 1.6600000 |
|---|-----------|-----------|-----------|-----------|

---

Unique Subject Identifier=5021011111-0028

Assay variable : PTINR\_VAL1 PT-INR Value

N Mean Standard Deviation Minimum Maximum

---

|   |           |           |           |           |
|---|-----------|-----------|-----------|-----------|
| 6 | 2.1150000 | 0.2025586 | 1.9400000 | 2.5100000 |
|---|-----------|-----------|-----------|-----------|

---

Unique Subject Identifier=5021011111-0032

Assay variable : PTINR\_VAL1 PT-INR Value

N Mean Standard Deviation Minimum Maximum

---

|   |           |           |           |           |
|---|-----------|-----------|-----------|-----------|
| 5 | 2.4120000 | 0.2942278 | 2.1000000 | 2.8800000 |
|---|-----------|-----------|-----------|-----------|

---

Unique Subject Identifier=5021011111-0036

Assay variable : PTINR\_VAL1 PT-INR Value

N Mean Standard Deviation Minimum Maximum

---

|   |           |           |           |           |
|---|-----------|-----------|-----------|-----------|
| 4 | 2.4425000 | 0.2789713 | 2.1500000 | 2.7100000 |
|---|-----------|-----------|-----------|-----------|

---

Laboratory tests at the time of obtaining Table 2-6 consent, according to the presence or absence of proton-pump inhibitors

Unique Subject Identifier=5021011111-0039

MEANS Procedure

Assay variable : PTINR\_VAL1 PT-INR Value

N Mean Standard Deviation Minimum Maximum

---

|   |           |           |           |           |
|---|-----------|-----------|-----------|-----------|
| 6 | 1.9983333 | 0.1591750 | 1.7400000 | 2.1900000 |
|---|-----------|-----------|-----------|-----------|

---

Unique Subject Identifier=5021011111-0040

Assay variable : PTINR\_VAL1 PT-INR Value

N Mean Standard Deviation Minimum Maximum

---

|   |           |           |           |           |
|---|-----------|-----------|-----------|-----------|
| 3 | 2.0500000 | 0.1513275 | 1.8800000 | 2.1700000 |
|---|-----------|-----------|-----------|-----------|

---

Unique Subject Identifier=5021011111-0045

Assay variable : PTINR\_VAL1 PT-INR Value

N Mean Standard Deviation Minimum Maximum

---

|   |           |           |           |           |
|---|-----------|-----------|-----------|-----------|
| 4 | 1.4300000 | 0.4081666 | 0.9600000 | 1.8500000 |
|---|-----------|-----------|-----------|-----------|

---

Unique Subject Identifier=5021011111-0048

Assay variable : PTINR\_VAL1 PT-INR Value

N Mean Standard Deviation Minimum Maximum

---

|   |           |           |           |           |
|---|-----------|-----------|-----------|-----------|
| 4 | 2.0650000 | 0.4353160 | 1.5800000 | 2.5600000 |
|---|-----------|-----------|-----------|-----------|

---

Laboratory tests at the time of obtaining Table 2-6 consent, according to the presence or absence of proton-pump inhibitors

Unique Subject Identifier=5021011111-0050

MEANS Procedure

Assay variable : PTINR\_VAL1 PT-INR Value

| N | Mean      | Standard Deviation | Minimum   | Maximum   |
|---|-----------|--------------------|-----------|-----------|
| 3 | 1.8200000 | 0.1053565          | 1.7200000 | 1.9300000 |

Unique Subject Identifier=5024000000-0001

Assay variable : PTINR\_VAL1 PT-INR Value

| N | Mean      | Standard Deviation | Minimum   | Maximum   |
|---|-----------|--------------------|-----------|-----------|
| 2 | 1.7200000 | 0.1697056          | 1.6000000 | 1.8400000 |

Unique Subject Identifier=5025000100-0001

Assay variable : PTINR\_VAL1 PT-INR Value

| N | Mean      | Standard Deviation | Minimum   | Maximum   |
|---|-----------|--------------------|-----------|-----------|
| 4 | 2.5750000 | 0.9542012          | 1.8100000 | 3.9700000 |

Unique Subject Identifier=5025000100-0007

Assay variable : PTINR\_VAL1 PT-INR Value

N Mean Standard Deviation Minimum Maximum

---

|   |           |           |           |           |
|---|-----------|-----------|-----------|-----------|
| 6 | 2.3650000 | 0.4174087 | 1.9800000 | 3.1100000 |
|---|-----------|-----------|-----------|-----------|

---

Laboratory tests at the time of obtaining Table 2-6 consent, according to the presence or absence of proton-pump inhibitors

Unique Subject Identifier=5025000100-0009

MEANS Procedure

Assay variable : PTINR\_VAL1 PT-INR Value

| N | Mean      | Standard Deviation | Minimum   | Maximum   |
|---|-----------|--------------------|-----------|-----------|
| 2 | 1.7400000 | 0.2969848          | 1.5300000 | 1.9500000 |

Unique Subject Identifier=5025000100-0013

Assay variable : PTINR\_VAL1 PT-INR Value

| N | Mean      | Standard Deviation | Minimum   | Maximum   |
|---|-----------|--------------------|-----------|-----------|
| 3 | 2.5633333 | 0.2968726          | 2.3100000 | 2.8900000 |

Unique Subject Identifier=5025000100-0015

Assay variable : PTINR\_VAL1 PT-INR Value

| N | Mean      | Standard Deviation | Minimum   | Maximum   |
|---|-----------|--------------------|-----------|-----------|
| 6 | 1.7016667 | 0.1265570          | 1.5500000 | 1.8900000 |

Unique Subject Identifier=5026101000-0001

Assay variable : PTINR\_VAL1 PT-INR Value

N Mean Standard Deviation Minimum Maximum

---

|   |           |           |           |           |
|---|-----------|-----------|-----------|-----------|
| 4 | 1.8350000 | 0.1340398 | 1.7300000 | 2.0300000 |
|---|-----------|-----------|-----------|-----------|

---



Laboratory tests at the time of obtaining Table 2-6 consent, according to the presence or absence of proton-pump inhibitors

Unique Subject Identifier=5026101000-0006

MEANS Procedure

Assay variable : PTINR\_VAL1 PT-INR Value

N Mean Standard Deviation Minimum Maximum

---

|   |           |           |           |           |
|---|-----------|-----------|-----------|-----------|
| 6 | 2.0266667 | 0.3228416 | 1.5800000 | 2.4300000 |
|---|-----------|-----------|-----------|-----------|

---

Unique Subject Identifier=5026101000-0007

Assay variable : PTINR\_VAL1 PT-INR Value

N Mean Standard Deviation Minimum Maximum

---

|   |           |           |           |           |
|---|-----------|-----------|-----------|-----------|
| 3 | 1.7766667 | 0.2600641 | 1.5200000 | 2.0400000 |
|---|-----------|-----------|-----------|-----------|

---

Unique Subject Identifier=5026101000-0010

Assay variable : PTINR\_VAL1 PT-INR Value

N Mean Standard Deviation Minimum Maximum

---

|   |           |           |           |           |
|---|-----------|-----------|-----------|-----------|
| 3 | 1.6133333 | 0.3288363 | 1.2400000 | 1.8600000 |
|---|-----------|-----------|-----------|-----------|

---

Unique Subject Identifier=5026101000-0011

Assay variable : PTINR\_VAL1 PT-INR Value

N Mean Standard Deviation Minimum Maximum

---

|   |           |           |           |           |
|---|-----------|-----------|-----------|-----------|
| 6 | 1.8550000 | 0.2261637 | 1.7100000 | 2.3000000 |
|---|-----------|-----------|-----------|-----------|

---

Laboratory tests at the time of obtaining Table 2-6 consent, according to the presence or absence of proton-pump inhibitors

Unique Subject Identifier=5026101000-0014

MEANS Procedure

Assay variable : PTINR\_VAL1 PT-INR Value

N Mean Standard Deviation Minimum Maximum

---

|   |           |           |           |           |
|---|-----------|-----------|-----------|-----------|
| 5 | 2.2200000 | 0.2930017 | 1.9000000 | 2.6200000 |
|---|-----------|-----------|-----------|-----------|

---

Unique Subject Identifier=5026101000-0016

Assay variable : PTINR\_VAL1 PT-INR Value

N Mean Standard Deviation Minimum Maximum

---

|   |           |           |           |           |
|---|-----------|-----------|-----------|-----------|
| 5 | 1.9960000 | 0.0952890 | 1.8400000 | 2.0700000 |
|---|-----------|-----------|-----------|-----------|

---

Unique Subject Identifier=5026101000-0018

Assay variable : PTINR\_VAL1 PT-INR Value

N Mean Standard Deviation Minimum Maximum

---

|   |           |           |           |           |
|---|-----------|-----------|-----------|-----------|
| 6 | 1.5350000 | 0.2157545 | 1.2500000 | 1.7700000 |
|---|-----------|-----------|-----------|-----------|

---

Unique Subject Identifier=5026101000-0019

Assay variable : PTINR\_VAL1 PT-INR Value

N Mean Standard Deviation Minimum Maximum

---

|   |           |           |           |           |
|---|-----------|-----------|-----------|-----------|
| 5 | 2.3420000 | 0.3293478 | 1.9400000 | 2.8100000 |
|---|-----------|-----------|-----------|-----------|

---

Laboratory tests at the time of obtaining Table 2-6 consent, according to the presence or absence of proton-pump inhibitors

Unique Subject Identifier=5026101000-0020

MEANS Procedure

Assay variable : PTINR\_VAL1 PT-INR Value

| N | Mean      | Standard Deviation | Minimum   | Maximum   |
|---|-----------|--------------------|-----------|-----------|
| 6 | 1.9700000 | 0.3825180          | 1.5000000 | 2.5400000 |

Unique Subject Identifier=5026101000-0023

Assay variable : PTINR\_VAL1 PT-INR Value

| N | Mean      | Standard Deviation | Minimum   | Maximum   |
|---|-----------|--------------------|-----------|-----------|
| 5 | 1.9020000 | 0.5618897          | 1.5600000 | 2.9000000 |

Unique Subject Identifier=5026101000-0024

Assay variable : PTINR\_VAL1 PT-INR Value

| N | Mean      | Standard Deviation | Minimum   | Maximum   |
|---|-----------|--------------------|-----------|-----------|
| 4 | 1.5175000 | 0.3023657          | 1.2100000 | 1.8200000 |

Unique Subject Identifier=5026101000-0026

Assay variable : PTINR\_VAL1 PT-INR Value

N Mean Standard Deviation Minimum Maximum

---

|   |           |           |           |           |
|---|-----------|-----------|-----------|-----------|
| 6 | 1.9766667 | 0.2718578 | 1.5400000 | 2.3100000 |
|---|-----------|-----------|-----------|-----------|

---

Laboratory tests at the time of obtaining Table 2-6 consent, according to the presence or absence of proton-pump inhibitors

Unique Subject Identifier=5026101000-0031

MEANS Procedure

Assay variable : PTINR\_VAL1 PT-INR Value

N Mean Standard Deviation Minimum Maximum

---

|   |           |           |           |           |
|---|-----------|-----------|-----------|-----------|
| 3 | 1.9700000 | 0.3044667 | 1.7000000 | 2.3000000 |
|---|-----------|-----------|-----------|-----------|

---

Unique Subject Identifier=5026101000-0037

Assay variable : PTINR\_VAL1 PT-INR Value

N Mean Standard Deviation Minimum Maximum

---

|   |           |           |           |           |
|---|-----------|-----------|-----------|-----------|
| 3 | 1.5166667 | 0.2454248 | 1.2800000 | 1.7700000 |
|---|-----------|-----------|-----------|-----------|

---

Unique Subject Identifier=5026101000-0038

Assay variable : PTINR\_VAL1 PT-INR Value

N Mean Standard Deviation Minimum Maximum

---

|   |           |           |           |           |
|---|-----------|-----------|-----------|-----------|
| 4 | 2.0675000 | 0.1481834 | 1.8700000 | 2.2000000 |
|---|-----------|-----------|-----------|-----------|

---

Unique Subject Identifier=5026101000-0039

Assay variable : PTINR\_VAL1 PT-INR Value

N Mean Standard Deviation Minimum Maximum

---

|   |          |           |          |          |
|---|----------|-----------|----------|----------|
| 3 | 2.110000 | 0.2773085 | 1.790000 | 2.280000 |
|---|----------|-----------|----------|----------|

---



Laboratory tests at the time of obtaining Table 2-6 consent, according to the presence or absence of proton-pump inhibitors

Unique Subject Identifier=5026101000-0040

MEANS Procedure

Assay variable : PTINR\_VAL1 PT-INR Value

N Mean Standard Deviation Minimum Maximum

---

|   |           |           |           |           |
|---|-----------|-----------|-----------|-----------|
| 6 | 2.1850000 | 0.1707337 | 1.9800000 | 2.3900000 |
|---|-----------|-----------|-----------|-----------|

---

Unique Subject Identifier=5026101000-0041

Assay variable : PTINR\_VAL1 PT-INR Value

N Mean Standard Deviation Minimum Maximum

---

|   |           |           |           |           |
|---|-----------|-----------|-----------|-----------|
| 4 | 1.8425000 | 0.5897104 | 1.3000000 | 2.6800000 |
|---|-----------|-----------|-----------|-----------|

---

Unique Subject Identifier=5026101000-0044

Assay variable : PTINR\_VAL1 PT-INR Value

N Mean Standard Deviation Minimum Maximum

---

|   |           |           |           |           |
|---|-----------|-----------|-----------|-----------|
| 3 | 1.5833333 | 0.1418920 | 1.4300000 | 1.7100000 |
|---|-----------|-----------|-----------|-----------|

---

Unique Subject Identifier=5026101000-0045

Assay variable : PTINR\_VAL1 PT-INR Value

N Mean Standard Deviation Minimum Maximum

---

|   |          |           |          |          |
|---|----------|-----------|----------|----------|
| 3 | 2.240000 | 0.3551056 | 1.890000 | 2.600000 |
|---|----------|-----------|----------|----------|

---

Laboratory tests at the time of obtaining Table 2-6 consent, according to the presence or absence of proton-pump inhibitors

Unique Subject Identifier=5026101000-0049

MEANS Procedure

Assay variable : PTINR\_VAL1 PT-INR Value

N Mean Standard Deviation Minimum Maximum

---

|   |           |           |           |           |
|---|-----------|-----------|-----------|-----------|
| 6 | 1.9166667 | 0.3360754 | 1.3900000 | 2.2500000 |
|---|-----------|-----------|-----------|-----------|

---

Unique Subject Identifier=5026101000-0050

Assay variable : PTINR\_VAL1 PT-INR Value

N Mean Standard Deviation Minimum Maximum

---

|   |           |           |           |           |
|---|-----------|-----------|-----------|-----------|
| 3 | 2.3033333 | 0.5601190 | 1.9700000 | 2.9500000 |
|---|-----------|-----------|-----------|-----------|

---

Unique Subject Identifier=5026101000-0051

Assay variable : PTINR\_VAL1 PT-INR Value

N Mean Standard Deviation Minimum Maximum

---

|   |           |           |           |           |
|---|-----------|-----------|-----------|-----------|
| 6 | 1.9233333 | 0.5225961 | 1.3500000 | 2.8100000 |
|---|-----------|-----------|-----------|-----------|

---

Unique Subject Identifier=5026101000-0058

Assay variable : PTINR\_VAL1 PT-INR Value

N Mean Standard Deviation Minimum Maximum

---

|   |           |           |           |           |
|---|-----------|-----------|-----------|-----------|
| 3 | 2.9366667 | 2.0850020 | 1.4500000 | 5.3200000 |
|---|-----------|-----------|-----------|-----------|

---

Laboratory tests at the time of obtaining Table 2-6 consent, according to the presence or absence of proton-pump inhibitors

Unique Subject Identifier=5026101000-0063

MEANS Procedure

Assay variable : PTINR\_VAL1 PT-INR Value

N Mean Standard Deviation Minimum Maximum

---

|   |           |           |           |           |
|---|-----------|-----------|-----------|-----------|
| 3 | 1.7033333 | 0.1101514 | 1.6300000 | 1.8300000 |
|---|-----------|-----------|-----------|-----------|

---

Unique Subject Identifier=5026101000-0065

Assay variable : PTINR\_VAL1 PT-INR Value

N Mean Standard Deviation Minimum Maximum

---

|   |           |           |           |           |
|---|-----------|-----------|-----------|-----------|
| 4 | 2.2250000 | 0.3145897 | 1.9200000 | 2.5700000 |
|---|-----------|-----------|-----------|-----------|

---

Unique Subject Identifier=5026101000-0066

Assay variable : PTINR\_VAL1 PT-INR Value

N Mean Standard Deviation Minimum Maximum

---

|   |           |           |           |           |
|---|-----------|-----------|-----------|-----------|
| 6 | 2.3000000 | 0.3119615 | 1.9300000 | 2.8800000 |
|---|-----------|-----------|-----------|-----------|

---

Unique Subject Identifier=5026101000-0068

Assay variable : PTINR\_VAL1 PT-INR Value

N Mean Standard Deviation Minimum Maximum

---

|   |           |           |           |           |
|---|-----------|-----------|-----------|-----------|
| 2 | 2.2050000 | 0.2899138 | 2.0000000 | 2.4100000 |
|---|-----------|-----------|-----------|-----------|

---

Laboratory tests at the time of obtaining Table 2-6 consent, according to the presence or absence of proton-pump inhibitors

Unique Subject Identifier=5026101000-0071

MEANS Procedure

Assay variable : PTINR\_VAL1 PT-INR Value

| N | Mean      | Standard Deviation | Minimum   | Maximum   |
|---|-----------|--------------------|-----------|-----------|
| 3 | 1.6766667 | 0.4675824          | 1.3000000 | 2.2000000 |

Unique Subject Identifier=5026101000-0074

Assay variable : PTINR\_VAL1 PT-INR Value

| N | Mean      | Standard Deviation | Minimum   | Maximum   |
|---|-----------|--------------------|-----------|-----------|
| 5 | 2.4080000 | 0.8267829          | 1.1200000 | 3.1600000 |

Unique Subject Identifier=5026101000-0089

Assay variable : PTINR\_VAL1 PT-INR Value

| N | Mean      | Standard Deviation | Minimum   | Maximum   |
|---|-----------|--------------------|-----------|-----------|
| 4 | 1.5200000 | 0.1516575          | 1.3600000 | 1.6900000 |

Unique Subject Identifier=5026101000-0095

Assay variable : PTINR\_VAL1 PT-INR Value

N Mean Standard Deviation Minimum Maximum

---

|   |           |           |           |           |
|---|-----------|-----------|-----------|-----------|
| 2 | 1.8750000 | 0.1484924 | 1.7700000 | 1.9800000 |
|---|-----------|-----------|-----------|-----------|

---



Laboratory tests at the time of obtaining Table 2-6 consent, according to the presence or absence of proton-pump inhibitors

Unique Subject Identifier=5026101000-0096

MEANS Procedure

Assay variable : PTINR\_VAL1 PT-INR Value

| N | Mean      | Standard Deviation | Minimum   | Maximum   |
|---|-----------|--------------------|-----------|-----------|
| 3 | 2.1033333 | 0.1193035          | 2.0200000 | 2.2400000 |

Unique Subject Identifier=5026101000-0100

Assay variable : PTINR\_VAL1 PT-INR Value

| N | Mean      | Standard Deviation | Minimum   | Maximum   |
|---|-----------|--------------------|-----------|-----------|
| 6 | 2.0300000 | 0.2504396          | 1.6800000 | 2.4500000 |

Unique Subject Identifier=5026101000-0105

Assay variable : PTINR\_VAL1 PT-INR Value

| N | Mean      | Standard Deviation | Minimum   | Maximum   |
|---|-----------|--------------------|-----------|-----------|
| 4 | 2.4200000 | 0.1718527          | 2.2200000 | 2.6400000 |

Unique Subject Identifier=5026101000-0107

Assay variable : PTINR\_VAL1 PT-INR Value

N Mean Standard Deviation Minimum Maximum

---

|   |           |  |           |           |
|---|-----------|--|-----------|-----------|
| 1 | 1.3000000 |  | 1.3000000 | 1.3000000 |
|---|-----------|--|-----------|-----------|

---

Laboratory tests at the time of obtaining Table 2-6 consent, according to the presence or absence of proton-pump inhibitors

Unique Subject Identifier=5026101000-0111

MEANS Procedure

Assay variable : PTINR\_VAL1 PT-INR Value

N Mean Standard Deviation Minimum Maximum

---

|   |           |           |           |           |
|---|-----------|-----------|-----------|-----------|
| 3 | 1.9033333 | 0.0665833 | 1.8600000 | 1.9800000 |
|---|-----------|-----------|-----------|-----------|

---

Unique Subject Identifier=5026101000-0116

Assay variable : PTINR\_VAL1 PT-INR Value

N Mean Standard Deviation Minimum Maximum

---

|   |           |           |           |           |
|---|-----------|-----------|-----------|-----------|
| 4 | 1.8525000 | 0.0830161 | 1.7400000 | 1.9400000 |
|---|-----------|-----------|-----------|-----------|

---

Unique Subject Identifier=5026101000-0118

Assay variable : PTINR\_VAL1 PT-INR Value

N Mean Standard Deviation Minimum Maximum

---

|   |           |           |           |           |
|---|-----------|-----------|-----------|-----------|
| 5 | 2.5160000 | 0.5725644 | 1.7600000 | 3.3500000 |
|---|-----------|-----------|-----------|-----------|

---

Unique Subject Identifier=5026101000-0119

Assay variable : PTINR\_VAL1 PT-INR Value

N Mean Standard Deviation Minimum Maximum

---

|   |           |           |           |           |
|---|-----------|-----------|-----------|-----------|
| 6 | 2.5766667 | 1.0478295 | 1.4800000 | 3.9100000 |
|---|-----------|-----------|-----------|-----------|

---

Laboratory tests at the time of obtaining Table 2-6 consent, according to the presence or absence of proton-pump inhibitors

Unique Subject Identifier=5027000100-0006

MEANS Procedure

Assay variable : PTINR\_VAL1 PT-INR Value

N Mean Standard Deviation Minimum Maximum

---

|   |           |           |           |           |
|---|-----------|-----------|-----------|-----------|
| 6 | 2.2366667 | 0.3651666 | 1.6000000 | 2.6400000 |
|---|-----------|-----------|-----------|-----------|

---

Unique Subject Identifier=5030010000-0007

Assay variable : PTINR\_VAL1 PT-INR Value

N Mean Standard Deviation Minimum Maximum

---

|   |           |           |           |           |
|---|-----------|-----------|-----------|-----------|
| 5 | 1.7780000 | 0.3134007 | 1.2200000 | 1.9600000 |
|---|-----------|-----------|-----------|-----------|

---

Unique Subject Identifier=5030010000-0008

Assay variable : PTINR\_VAL1 PT-INR Value

N Mean Standard Deviation Minimum Maximum

---

|   |           |           |           |           |
|---|-----------|-----------|-----------|-----------|
| 6 | 1.5750000 | 0.2702406 | 1.2700000 | 2.0200000 |
|---|-----------|-----------|-----------|-----------|

---

Unique Subject Identifier=5030010000-0009

Assay variable : PTINR\_VAL1 PT-INR Value

N Mean Standard Deviation Minimum Maximum

---

|   |           |           |           |           |
|---|-----------|-----------|-----------|-----------|
| 6 | 1.7266667 | 0.1522717 | 1.4700000 | 1.8600000 |
|---|-----------|-----------|-----------|-----------|

---

Laboratory tests at the time of obtaining Table 2-6 consent, according to the presence or absence of proton-pump inhibitors

Unique Subject Identifier=5030010000-0014

MEANS Procedure

Assay variable : PTINR\_VAL1 PT-INR Value

| N | Mean      | Standard Deviation | Minimum   | Maximum   |
|---|-----------|--------------------|-----------|-----------|
| 6 | 2.0733333 | 0.7299224          | 1.4100000 | 3.2000000 |

Unique Subject Identifier=5030010000-0026

Assay variable : PTINR\_VAL1 PT-INR Value

| N | Mean      | Standard Deviation | Minimum   | Maximum   |
|---|-----------|--------------------|-----------|-----------|
| 5 | 1.8320000 | 0.3149921          | 1.6500000 | 2.3900000 |

Unique Subject Identifier=5030010000-0031

Assay variable : PTINR\_VAL1 PT-INR Value

| N | Mean      | Standard Deviation | Minimum   | Maximum   |
|---|-----------|--------------------|-----------|-----------|
| 5 | 2.2100000 | 0.2586503          | 1.9400000 | 2.6400000 |

Unique Subject Identifier=5030010000-0035

Assay variable : PTINR\_VAL1 PT-INR Value

N Mean Standard Deviation Minimum Maximum

---

|   |           |           |           |           |
|---|-----------|-----------|-----------|-----------|
| 6 | 1.7733333 | 0.1737431 | 1.5700000 | 2.0200000 |
|---|-----------|-----------|-----------|-----------|

---



Laboratory tests at the time of obtaining Table 2-6 consent, according to the presence or absence of proton-pump inhibitors

Unique Subject Identifier=5030010000-0036

MEANS Procedure

Assay variable : PTINR\_VAL1 PT-INR Value

N Mean Standard Deviation Minimum Maximum

---

|   |           |           |           |           |
|---|-----------|-----------|-----------|-----------|
| 6 | 1.7983333 | 0.4104347 | 1.2800000 | 2.4600000 |
|---|-----------|-----------|-----------|-----------|

---

Unique Subject Identifier=5030010000-0037

Assay variable : PTINR\_VAL1 PT-INR Value

N Mean Standard Deviation Minimum Maximum

---

|   |           |           |           |           |
|---|-----------|-----------|-----------|-----------|
| 6 | 2.2283333 | 0.3453356 | 1.8900000 | 2.8400000 |
|---|-----------|-----------|-----------|-----------|

---

Unique Subject Identifier=5030010000-0038

Assay variable : PTINR\_VAL1 PT-INR Value

N Mean Standard Deviation Minimum Maximum

---

|   |           |  |           |           |
|---|-----------|--|-----------|-----------|
| 1 | 2.8100000 |  | 2.8100000 | 2.8100000 |
|---|-----------|--|-----------|-----------|

---

Unique Subject Identifier=5030010000-0039

Assay variable : PTINR\_VAL1 PT-INR Value

N Mean Standard Deviation Minimum Maximum

---

|   |          |           |          |          |
|---|----------|-----------|----------|----------|
| 5 | 1.640000 | 0.2021138 | 1.360000 | 1.850000 |
|---|----------|-----------|----------|----------|

---

Laboratory tests at the time of obtaining Table 2-6 consent, according to the presence or absence of proton-pump inhibitors

Unique Subject Identifier=5030010000-0040

MEANS Procedure

Assay variable : PTINR\_VAL1 PT-INR Value

| N | Mean      | Standard Deviation | Minimum   | Maximum   |
|---|-----------|--------------------|-----------|-----------|
| 6 | 1.7150000 | 0.2550882          | 1.5000000 | 2.1900000 |

Unique Subject Identifier=5030010000-0047

Assay variable : PTINR\_VAL1 PT-INR Value

| N | Mean      | Standard Deviation | Minimum   | Maximum   |
|---|-----------|--------------------|-----------|-----------|
| 2 | 1.2850000 | 0.0212132          | 1.2700000 | 1.3000000 |

Unique Subject Identifier=5030010000-0049

Assay variable : PTINR\_VAL1 PT-INR Value

| N | Mean      | Standard Deviation | Minimum   | Maximum   |
|---|-----------|--------------------|-----------|-----------|
| 4 | 1.9925000 | 0.2573422          | 1.6800000 | 2.2800000 |

Unique Subject Identifier=5030010000-0052

Assay variable : PTINR\_VAL1 PT-INR Value

N Mean Standard Deviation Minimum Maximum

---

|   |           |           |           |           |
|---|-----------|-----------|-----------|-----------|
| 6 | 1.9466667 | 0.2022540 | 1.7000000 | 2.2400000 |
|---|-----------|-----------|-----------|-----------|

---

Laboratory tests at the time of obtaining Table 2-6 consent, according to the presence or absence of proton-pump inhibitors

Unique Subject Identifier=5030010000-0054

MEANS Procedure

Assay variable : PTINR\_VAL1 PT-INR Value

| N | Mean      | Standard Deviation | Minimum   | Maximum   |
|---|-----------|--------------------|-----------|-----------|
| 5 | 1.8960000 | 0.1393915          | 1.7500000 | 2.0600000 |

Unique Subject Identifier=5030010000-0055

Assay variable : PTINR\_VAL1 PT-INR Value

| N | Mean      | Standard Deviation | Minimum   | Maximum   |
|---|-----------|--------------------|-----------|-----------|
| 1 | 1.6300000 |                    | 1.6300000 | 1.6300000 |

Unique Subject Identifier=5030010000-0057

Assay variable : PTINR\_VAL1 PT-INR Value

| N | Mean      | Standard Deviation | Minimum   | Maximum   |
|---|-----------|--------------------|-----------|-----------|
| 1 | 1.2900000 |                    | 1.2900000 | 1.2900000 |

Unique Subject Identifier=5030010000-0058

Assay variable : PTINR\_VAL1 PT-INR Value

N Mean Standard Deviation Minimum Maximum

---

|   |           |           |           |           |
|---|-----------|-----------|-----------|-----------|
| 2 | 1.8000000 | 0.4242641 | 1.5000000 | 2.1000000 |
|---|-----------|-----------|-----------|-----------|

---

Laboratory tests at the time of obtaining Table 2-6 consent, according to the presence or absence of proton-pump inhibitors

Unique Subject Identifier=5031111000-0018

MEANS Procedure

Assay variable : PTINR\_VAL1 PT-INR Value

| N | Mean      | Standard Deviation | Minimum   | Maximum   |
|---|-----------|--------------------|-----------|-----------|
| 3 | 2.0000000 | 0.0793725          | 1.9100000 | 2.0600000 |

Unique Subject Identifier=5031111000-0019

Assay variable : PTINR\_VAL1 PT-INR Value

| N | Mean      | Standard Deviation | Minimum   | Maximum   |
|---|-----------|--------------------|-----------|-----------|
| 3 | 1.8766667 | 0.1457166          | 1.7400000 | 2.0300000 |

Unique Subject Identifier=5032010000-0001

Assay variable : PTINR\_VAL1 PT-INR Value

| N | Mean      | Standard Deviation | Minimum   | Maximum   |
|---|-----------|--------------------|-----------|-----------|
| 6 | 2.3283333 | 0.0913053          | 2.2000000 | 2.4500000 |

Unique Subject Identifier=5032010000-0005

Assay variable : PTINR\_VAL1 PT-INR Value

N Mean Standard Deviation Minimum Maximum

---

|   |           |           |           |           |
|---|-----------|-----------|-----------|-----------|
| 5 | 2.4120000 | 0.2832314 | 2.0700000 | 2.8300000 |
|---|-----------|-----------|-----------|-----------|

---



Laboratory tests at the time of obtaining Table 2-6 consent, according to the presence or absence of proton-pump inhibitors

Unique Subject Identifier=5032010000-0006

MEANS Procedure

Assay variable : PTINR\_VAL1 PT-INR Value

N Mean Standard Deviation Minimum Maximum

---

|   |           |           |           |           |
|---|-----------|-----------|-----------|-----------|
| 5 | 1.7180000 | 0.3067083 | 1.1800000 | 1.9000000 |
|---|-----------|-----------|-----------|-----------|

---

Unique Subject Identifier=5032010000-0009

Assay variable : PTINR\_VAL1 PT-INR Value

N Mean Standard Deviation Minimum Maximum

---

|   |           |           |           |           |
|---|-----------|-----------|-----------|-----------|
| 5 | 2.4320000 | 0.5597946 | 1.6800000 | 3.1200000 |
|---|-----------|-----------|-----------|-----------|

---

Unique Subject Identifier=5032010000-0010

Assay variable : PTINR\_VAL1 PT-INR Value

N Mean Standard Deviation Minimum Maximum

---

|   |           |           |           |           |
|---|-----------|-----------|-----------|-----------|
| 6 | 1.2650000 | 0.3125860 | 1.0800000 | 1.8900000 |
|---|-----------|-----------|-----------|-----------|

---

Unique Subject Identifier=5032010000-0013

Assay variable : PTINR\_VAL1 PT-INR Value

N Mean Standard Deviation Minimum Maximum

---

|   |           |           |           |           |
|---|-----------|-----------|-----------|-----------|
| 6 | 2.4083333 | 0.1874478 | 2.2400000 | 2.6800000 |
|---|-----------|-----------|-----------|-----------|

---

Laboratory tests at the time of obtaining Table 2-6 consent, according to the presence or absence of proton-pump inhibitors

Unique Subject Identifier=5033000000-0001

MEANS Procedure

Assay variable : PTINR\_VAL1 PT-INR Value

N Mean Standard Deviation Minimum Maximum

---

|   |           |           |           |           |
|---|-----------|-----------|-----------|-----------|
| 3 | 1.8100000 | 0.3732292 | 1.4900000 | 2.2200000 |
|---|-----------|-----------|-----------|-----------|

---

Unique Subject Identifier=5034000010-0002

Assay variable : PTINR\_VAL1 PT-INR Value

N Mean Standard Deviation Minimum Maximum

---

|   |           |           |           |           |
|---|-----------|-----------|-----------|-----------|
| 3 | 2.0033333 | 0.2565801 | 1.7200000 | 2.2200000 |
|---|-----------|-----------|-----------|-----------|

---

Unique Subject Identifier=5034000010-0004

Assay variable : PTINR\_VAL1 PT-INR Value

N Mean Standard Deviation Minimum Maximum

---

|   |           |           |           |           |
|---|-----------|-----------|-----------|-----------|
| 2 | 1.7950000 | 0.0070711 | 1.7900000 | 1.8000000 |
|---|-----------|-----------|-----------|-----------|

---

Unique Subject Identifier=5034000010-0018

Assay variable : PTINR\_VAL1 PT-INR Value

N Mean Standard Deviation Minimum Maximum

---

|   |           |           |           |           |
|---|-----------|-----------|-----------|-----------|
| 4 | 1.4850000 | 0.2444722 | 1.2600000 | 1.7800000 |
|---|-----------|-----------|-----------|-----------|

---

Laboratory tests at the time of obtaining Table 2-6 consent, according to the presence or absence of proton-pump inhibitors

Unique Subject Identifier=5034000010-0024

MEANS Procedure

Assay variable : PTINR\_VAL1 PT-INR Value

| N | Mean      | Standard Deviation | Minimum   | Maximum   |
|---|-----------|--------------------|-----------|-----------|
| 4 | 1.8900000 | 0.1930458          | 1.7100000 | 2.0900000 |

Unique Subject Identifier=5035010010-0001

Assay variable : PTINR\_VAL1 PT-INR Value

| N | Mean      | Standard Deviation | Minimum   | Maximum   |
|---|-----------|--------------------|-----------|-----------|
| 2 | 2.0600000 | 0.0282843          | 2.0400000 | 2.0800000 |

Unique Subject Identifier=5035010010-0003

Assay variable : PTINR\_VAL1 PT-INR Value

| N | Mean      | Standard Deviation | Minimum   | Maximum   |
|---|-----------|--------------------|-----------|-----------|
| 3 | 1.9300000 | 0.3340659          | 1.5700000 | 2.2300000 |

Unique Subject Identifier=5035010010-0004

Assay variable : PTINR\_VAL1 PT-INR Value

N Mean Standard Deviation Minimum Maximum

---

|   |           |           |           |           |
|---|-----------|-----------|-----------|-----------|
| 3 | 1.8266667 | 0.3231615 | 1.4700000 | 2.1000000 |
|---|-----------|-----------|-----------|-----------|

---

Laboratory tests at the time of obtaining Table 2-6 consent, according to the presence or absence of proton-pump inhibitors

Unique Subject Identifier=5035010010-0008

MEANS Procedure

Assay variable : PTINR\_VAL1 PT-INR Value

N Mean Standard Deviation Minimum Maximum

---

|   |           |           |           |           |
|---|-----------|-----------|-----------|-----------|
| 4 | 1.7075000 | 0.5095995 | 1.3300000 | 2.4600000 |
|---|-----------|-----------|-----------|-----------|

---

Unique Subject Identifier=5035010010-0012

Assay variable : PTINR\_VAL1 PT-INR Value

N Mean Standard Deviation Minimum Maximum

---

|   |           |           |           |           |
|---|-----------|-----------|-----------|-----------|
| 3 | 1.7266667 | 0.4821134 | 1.3500000 | 2.2700000 |
|---|-----------|-----------|-----------|-----------|

---

Unique Subject Identifier=5035010010-0017

Assay variable : PTINR\_VAL1 PT-INR Value

N Mean Standard Deviation Minimum Maximum

---

|   |           |  |           |           |
|---|-----------|--|-----------|-----------|
| 1 | 2.2300000 |  | 2.2300000 | 2.2300000 |
|---|-----------|--|-----------|-----------|

---

Unique Subject Identifier=5035010010-0018

Assay variable : PTINR\_VAL1 PT-INR Value

N Mean Standard Deviation Minimum Maximum

---

|   |           |           |           |           |
|---|-----------|-----------|-----------|-----------|
| 4 | 2.1350000 | 0.1554563 | 2.0000000 | 2.3300000 |
|---|-----------|-----------|-----------|-----------|

---



Laboratory tests at the time of obtaining Table 2-6 consent, according to the presence or absence of proton-pump inhibitors

Unique Subject Identifier=5035010010-0019

MEANS Procedure

Assay variable : PTINR\_VAL1 PT-INR Value

| N | Mean      | Standard Deviation | Minimum   | Maximum   |
|---|-----------|--------------------|-----------|-----------|
| 6 | 1.7366667 | 0.1521403          | 1.5500000 | 1.9800000 |

Unique Subject Identifier=5035010010-0036

Assay variable : PTINR\_VAL1 PT-INR Value

| N | Mean      | Standard Deviation | Minimum   | Maximum   |
|---|-----------|--------------------|-----------|-----------|
| 4 | 2.1125000 | 0.4731719          | 1.6100000 | 2.7300000 |

Unique Subject Identifier=5035010010-0041

Assay variable : PTINR\_VAL1 PT-INR Value

| N | Mean      | Standard Deviation | Minimum   | Maximum   |
|---|-----------|--------------------|-----------|-----------|
| 5 | 2.1840000 | 0.5774340          | 1.2200000 | 2.6300000 |

Unique Subject Identifier=5035010010-0044

Assay variable : PTINR\_VAL1 PT-INR Value

N Mean Standard Deviation Minimum Maximum

---

|   |           |           |           |           |
|---|-----------|-----------|-----------|-----------|
| 6 | 2.2566667 | 0.9109482 | 1.6000000 | 4.0800000 |
|---|-----------|-----------|-----------|-----------|

---

Laboratory tests at the time of obtaining Table 2-6 consent, according to the presence or absence of proton-pump inhibitors

Unique Subject Identifier=5035010010-0045

MEANS Procedure

Assay variable : PTINR\_VAL1 PT-INR Value

N Mean Standard Deviation Minimum Maximum

---

|   |           |           |           |           |
|---|-----------|-----------|-----------|-----------|
| 3 | 1.7666667 | 0.2914332 | 1.5600000 | 2.1000000 |
|---|-----------|-----------|-----------|-----------|

---

Unique Subject Identifier=5035010010-0053

Assay variable : PTINR\_VAL1 PT-INR Value

N Mean Standard Deviation Minimum Maximum

---

|   |           |           |           |           |
|---|-----------|-----------|-----------|-----------|
| 6 | 2.0250000 | 0.1277106 | 1.8900000 | 2.2100000 |
|---|-----------|-----------|-----------|-----------|

---

Unique Subject Identifier=5035010010-0055

Assay variable : PTINR\_VAL1 PT-INR Value

N Mean Standard Deviation Minimum Maximum

---

|   |           |           |           |           |
|---|-----------|-----------|-----------|-----------|
| 5 | 1.5440000 | 0.5030209 | 1.1400000 | 2.1700000 |
|---|-----------|-----------|-----------|-----------|

---

Unique Subject Identifier=5035010010-0056

Assay variable : PTINR\_VAL1 PT-INR Value

N Mean Standard Deviation Minimum Maximum

---

|   |           |           |           |           |
|---|-----------|-----------|-----------|-----------|
| 3 | 2.3366667 | 0.2203028 | 2.1100000 | 2.5500000 |
|---|-----------|-----------|-----------|-----------|

---

Laboratory tests at the time of obtaining Table 2-6 consent, according to the presence or absence of proton-pump inhibitors

Unique Subject Identifier=5036010000-0003

MEANS Procedure

Assay variable : PTINR\_VAL1 PT-INR Value

N Mean Standard Deviation Minimum Maximum

---

|   |           |           |           |           |
|---|-----------|-----------|-----------|-----------|
| 4 | 1.7175000 | 0.2444552 | 1.5500000 | 2.0800000 |
|---|-----------|-----------|-----------|-----------|

---

Unique Subject Identifier=5036010000-0007

Assay variable : PTINR\_VAL1 PT-INR Value

N Mean Standard Deviation Minimum Maximum

---

|   |           |           |           |           |
|---|-----------|-----------|-----------|-----------|
| 5 | 2.2340000 | 0.4251235 | 1.8000000 | 2.9400000 |
|---|-----------|-----------|-----------|-----------|

---

Unique Subject Identifier=5036010000-0012

Assay variable : PTINR\_VAL1 PT-INR Value

N Mean Standard Deviation Minimum Maximum

---

|   |           |           |           |           |
|---|-----------|-----------|-----------|-----------|
| 5 | 1.8520000 | 0.3199531 | 1.4000000 | 2.1300000 |
|---|-----------|-----------|-----------|-----------|

---

Unique Subject Identifier=5036010000-0013

Assay variable : PTINR\_VAL1 PT-INR Value

N Mean Standard Deviation Minimum Maximum

---

|   |           |           |           |           |
|---|-----------|-----------|-----------|-----------|
| 6 | 1.1466667 | 0.2329521 | 0.9300000 | 1.5400000 |
|---|-----------|-----------|-----------|-----------|

---

Laboratory tests at the time of obtaining Table 2-6 consent, according to the presence or absence of proton-pump inhibitors

Unique Subject Identifier=5036010000-0021

MEANS Procedure

Assay variable : PTINR\_VAL1 PT-INR Value

N Mean Standard Deviation Minimum Maximum

---

|   |           |  |           |           |
|---|-----------|--|-----------|-----------|
| 1 | 1.9600000 |  | 1.9600000 | 1.9600000 |
|---|-----------|--|-----------|-----------|

---

Unique Subject Identifier=5036010000-0026

Assay variable : PTINR\_VAL1 PT-INR Value

N Mean Standard Deviation Minimum Maximum

---

|   |           |           |           |           |
|---|-----------|-----------|-----------|-----------|
| 4 | 1.8500000 | 0.0621825 | 1.8000000 | 1.9400000 |
|---|-----------|-----------|-----------|-----------|

---

Unique Subject Identifier=5036010000-0034

Assay variable : PTINR\_VAL1 PT-INR Value

N Mean Standard Deviation Minimum Maximum

---

|   |           |           |           |           |
|---|-----------|-----------|-----------|-----------|
| 6 | 1.6266667 | 0.2657568 | 1.2400000 | 1.9400000 |
|---|-----------|-----------|-----------|-----------|

---

Unique Subject Identifier=5036010000-0039

Assay variable : PTINR\_VAL1 PT-INR Value

N Mean Standard Deviation Minimum Maximum

---

|   |          |           |          |          |
|---|----------|-----------|----------|----------|
| 4 | 1.760000 | 0.2146315 | 1.580000 | 2.070000 |
|---|----------|-----------|----------|----------|

---



Laboratory tests at the time of obtaining Table 2-6 consent, according to the presence or absence of proton-pump inhibitors

Unique Subject Identifier=5036010000-0050

MEANS Procedure

Assay variable : PTINR\_VAL1 PT-INR Value

N Mean Standard Deviation Minimum Maximum

---

|   |           |           |           |           |
|---|-----------|-----------|-----------|-----------|
| 4 | 1.9450000 | 0.2318764 | 1.6400000 | 2.1400000 |
|---|-----------|-----------|-----------|-----------|

---

Unique Subject Identifier=5036010000-0054

Assay variable : PTINR\_VAL1 PT-INR Value

N Mean Standard Deviation Minimum Maximum

---

|   |           |           |           |           |
|---|-----------|-----------|-----------|-----------|
| 6 | 2.1000000 | 0.1555635 | 1.8900000 | 2.3000000 |
|---|-----------|-----------|-----------|-----------|

---

Unique Subject Identifier=5036010000-0055

Assay variable : PTINR\_VAL1 PT-INR Value

N Mean Standard Deviation Minimum Maximum

---

|   |           |           |           |           |
|---|-----------|-----------|-----------|-----------|
| 4 | 1.8000000 | 0.2293469 | 1.5000000 | 2.0500000 |
|---|-----------|-----------|-----------|-----------|

---

Unique Subject Identifier=5037010000-0002

Assay variable : PTINR\_VAL1 PT-INR Value

N Mean Standard Deviation Minimum Maximum

---

|   |          |  |          |          |
|---|----------|--|----------|----------|
| 1 | 1.460000 |  | 1.460000 | 1.460000 |
|---|----------|--|----------|----------|

---

Laboratory tests at the time of obtaining Table 2-6 consent, according to the presence or absence of proton-pump inhibitors

Unique Subject Identifier=5037010000-0007

MEANS Procedure

Assay variable : PTINR\_VAL1 PT-INR Value

| N | Mean      | Standard Deviation | Minimum   | Maximum   |
|---|-----------|--------------------|-----------|-----------|
| 1 | 1.2000000 |                    | 1.2000000 | 1.2000000 |

Unique Subject Identifier=5037010000-0026

Assay variable : PTINR\_VAL1 PT-INR Value

| N | Mean      | Standard Deviation | Minimum   | Maximum   |
|---|-----------|--------------------|-----------|-----------|
| 2 | 1.5150000 | 0.1909188          | 1.3800000 | 1.6500000 |

Unique Subject Identifier=5037010000-0039

Assay variable : PTINR\_VAL1 PT-INR Value

| N | Mean      | Standard Deviation | Minimum   | Maximum   |
|---|-----------|--------------------|-----------|-----------|
| 1 | 3.0300000 |                    | 3.0300000 | 3.0300000 |

Unique Subject Identifier=5040011000-0001

Assay variable : PTINR\_VAL1 PT-INR Value

N Mean Standard Deviation Minimum Maximum

---

|   |           |           |           |           |
|---|-----------|-----------|-----------|-----------|
| 4 | 2.4025000 | 0.1830073 | 2.1400000 | 2.5600000 |
|---|-----------|-----------|-----------|-----------|

---

Laboratory tests at the time of obtaining Table 2-6 consent, according to the presence or absence of proton-pump inhibitors

Unique Subject Identifier=5040011000-0003

MEANS Procedure

Assay variable : PTINR\_VAL1 PT-INR Value

N Mean Standard Deviation Minimum Maximum

---

|   |           |           |           |           |
|---|-----------|-----------|-----------|-----------|
| 3 | 2.3100000 | 0.3559494 | 2.0800000 | 2.7200000 |
|---|-----------|-----------|-----------|-----------|

---

Unique Subject Identifier=5040011000-0004

Assay variable : PTINR\_VAL1 PT-INR Value

N Mean Standard Deviation Minimum Maximum

---

|   |           |           |           |           |
|---|-----------|-----------|-----------|-----------|
| 2 | 1.8000000 | 0.1272792 | 1.7100000 | 1.8900000 |
|---|-----------|-----------|-----------|-----------|

---

Unique Subject Identifier=5040011000-0006

Assay variable : PTINR\_VAL1 PT-INR Value

N Mean Standard Deviation Minimum Maximum

---

|   |           |           |           |           |
|---|-----------|-----------|-----------|-----------|
| 4 | 1.7900000 | 0.1023067 | 1.6600000 | 1.8900000 |
|---|-----------|-----------|-----------|-----------|

---

Unique Subject Identifier=5040011000-0007

Assay variable : PTINR\_VAL1 PT-INR Value

N Mean Standard Deviation Minimum Maximum

---

|   |           |           |           |           |
|---|-----------|-----------|-----------|-----------|
| 4 | 1.3375000 | 0.1081280 | 1.2100000 | 1.4500000 |
|---|-----------|-----------|-----------|-----------|

---

Laboratory tests at the time of obtaining Table 2-6 consent, according to the presence or absence of proton-pump inhibitors

Unique Subject Identifier=5040011000-0008

MEANS Procedure

Assay variable : PTINR\_VAL1 PT-INR Value

N Mean Standard Deviation Minimum Maximum

---

|   |           |           |           |           |
|---|-----------|-----------|-----------|-----------|
| 5 | 2.0520000 | 0.7066612 | 1.5500000 | 3.2900000 |
|---|-----------|-----------|-----------|-----------|

---

Unique Subject Identifier=5040011000-0010

Assay variable : PTINR\_VAL1 PT-INR Value

N Mean Standard Deviation Minimum Maximum

---

|   |           |           |           |           |
|---|-----------|-----------|-----------|-----------|
| 4 | 2.8625000 | 0.3236639 | 2.4100000 | 3.1200000 |
|---|-----------|-----------|-----------|-----------|

---

Unique Subject Identifier=5040011000-0015

Assay variable : PTINR\_VAL1 PT-INR Value

N Mean Standard Deviation Minimum Maximum

---

|   |           |           |           |           |
|---|-----------|-----------|-----------|-----------|
| 5 | 1.9920000 | 0.3459335 | 1.6000000 | 2.5200000 |
|---|-----------|-----------|-----------|-----------|

---

Unique Subject Identifier=5041011000-0007

Assay variable : PTINR\_VAL1 PT-INR Value

N Mean Standard Deviation Minimum Maximum

---

|   |           |           |           |           |
|---|-----------|-----------|-----------|-----------|
| 3 | 1.9166667 | 0.2454248 | 1.6800000 | 2.1700000 |
|---|-----------|-----------|-----------|-----------|

---



Laboratory tests at the time of obtaining Table 2-6 consent, according to the presence or absence of proton-pump inhibitors

Unique Subject Identifier=5041011000-0008

MEANS Procedure

Assay variable : PTINR\_VAL1 PT-INR Value

N Mean Standard Deviation Minimum Maximum

---

|   |           |           |           |           |
|---|-----------|-----------|-----------|-----------|
| 6 | 1.8900000 | 0.5465528 | 1.3800000 | 2.5900000 |
|---|-----------|-----------|-----------|-----------|

---

Unique Subject Identifier=5044000000-0002

Assay variable : PTINR\_VAL1 PT-INR Value

N Mean Standard Deviation Minimum Maximum

---

|   |           |           |           |           |
|---|-----------|-----------|-----------|-----------|
| 6 | 1.7016667 | 0.6760301 | 1.0900000 | 2.6400000 |
|---|-----------|-----------|-----------|-----------|

---

Unique Subject Identifier=5044000000-0013

Assay variable : PTINR\_VAL1 PT-INR Value

N Mean Standard Deviation Minimum Maximum

---

|   |           |           |           |           |
|---|-----------|-----------|-----------|-----------|
| 2 | 2.2100000 | 0.1979899 | 2.0700000 | 2.3500000 |
|---|-----------|-----------|-----------|-----------|

---

Unique Subject Identifier=5044000000-0016

Assay variable : PTINR\_VAL1 PT-INR Value

N Mean Standard Deviation Minimum Maximum

---

|   |          |           |          |          |
|---|----------|-----------|----------|----------|
| 5 | 2.000000 | 0.2738613 | 1.700000 | 2.400000 |
|---|----------|-----------|----------|----------|

---

Laboratory tests at the time of obtaining Table 2-6 consent, according to the presence or absence of proton-pump inhibitors

Unique Subject Identifier=5044000000-0021

MEANS Procedure

Assay variable : PTINR\_VAL1 PT-INR Value

N Mean Standard Deviation Minimum Maximum

---

|   |           |           |           |           |
|---|-----------|-----------|-----------|-----------|
| 5 | 2.1140000 | 0.3083504 | 1.7900000 | 2.5600000 |
|---|-----------|-----------|-----------|-----------|

---

Unique Subject Identifier=5044000000-0026

Assay variable : PTINR\_VAL1 PT-INR Value

N Mean Standard Deviation Minimum Maximum

---

|   |           |           |           |           |
|---|-----------|-----------|-----------|-----------|
| 3 | 2.3133333 | 0.3050137 | 2.0100000 | 2.6200000 |
|---|-----------|-----------|-----------|-----------|

---

Unique Subject Identifier=5044000000-0038

Assay variable : PTINR\_VAL1 PT-INR Value

N Mean Standard Deviation Minimum Maximum

---

|   |           |           |           |           |
|---|-----------|-----------|-----------|-----------|
| 4 | 2.2325000 | 0.3142584 | 1.8600000 | 2.5800000 |
|---|-----------|-----------|-----------|-----------|

---

Unique Subject Identifier=5044000000-0043

Assay variable : PTINR\_VAL1 PT-INR Value

N Mean Standard Deviation Minimum Maximum

---

|   |           |           |           |           |
|---|-----------|-----------|-----------|-----------|
| 6 | 1.9166667 | 0.3020375 | 1.5600000 | 2.3600000 |
|---|-----------|-----------|-----------|-----------|

---

Laboratory tests at the time of obtaining Table 2-6 consent, according to the presence or absence of proton-pump inhibitors

Unique Subject Identifier=5044000000-0044

MEANS Procedure

Assay variable : PTINR\_VAL1 PT-INR Value

N Mean Standard Deviation Minimum Maximum

---

|   |           |           |           |           |
|---|-----------|-----------|-----------|-----------|
| 5 | 2.2780000 | 0.5363488 | 1.5900000 | 2.9700000 |
|---|-----------|-----------|-----------|-----------|

---

Unique Subject Identifier=5044000000-0053

Assay variable : PTINR\_VAL1 PT-INR Value

N Mean Standard Deviation Minimum Maximum

---

|   |           |           |           |           |
|---|-----------|-----------|-----------|-----------|
| 5 | 1.9900000 | 0.3931921 | 1.3500000 | 2.4300000 |
|---|-----------|-----------|-----------|-----------|

---

Unique Subject Identifier=5045010110-0011

Assay variable : PTINR\_VAL1 PT-INR Value

N Mean Standard Deviation Minimum Maximum

---

|   |           |           |           |           |
|---|-----------|-----------|-----------|-----------|
| 4 | 1.8250000 | 0.1968925 | 1.5700000 | 1.9900000 |
|---|-----------|-----------|-----------|-----------|

---

Unique Subject Identifier=5046010000-0007

Assay variable : PTINR\_VAL1 PT-INR Value

N Mean Standard Deviation Minimum Maximum

---

|   |           |           |           |           |
|---|-----------|-----------|-----------|-----------|
| 3 | 1.9066667 | 0.3302020 | 1.5700000 | 2.2300000 |
|---|-----------|-----------|-----------|-----------|

---

Laboratory tests at the time of obtaining Table 2-6 consent, according to the presence or absence of proton-pump inhibitors

Unique Subject Identifier=5046010000-0010

MEANS Procedure

Assay variable : PTINR\_VAL1 PT-INR Value

| N | Mean      | Standard Deviation | Minimum   | Maximum   |
|---|-----------|--------------------|-----------|-----------|
| 4 | 1.9700000 | 0.4588391          | 1.5400000 | 2.4600000 |

Unique Subject Identifier=5046010000-0023

Assay variable : PTINR\_VAL1 PT-INR Value

| N | Mean      | Standard Deviation | Minimum   | Maximum   |
|---|-----------|--------------------|-----------|-----------|
| 5 | 1.6520000 | 0.2872629          | 1.2400000 | 1.9800000 |

Unique Subject Identifier=5046010000-0028

Assay variable : PTINR\_VAL1 PT-INR Value

| N | Mean      | Standard Deviation | Minimum   | Maximum   |
|---|-----------|--------------------|-----------|-----------|
| 6 | 2.2566667 | 0.2976351          | 1.7600000 | 2.5400000 |

Unique Subject Identifier=5046010000-0035

Assay variable : PTINR\_VAL1 PT-INR Value

N Mean Standard Deviation Minimum Maximum

---

|   |          |           |          |          |
|---|----------|-----------|----------|----------|
| 6 | 2.150000 | 1.1623253 | 1.100000 | 4.100000 |
|---|----------|-----------|----------|----------|

---



Laboratory tests at the time of obtaining Table 2-6 consent, according to the presence or absence of proton-pump inhibitors

Unique Subject Identifier=5047000010-0001

MEANS Procedure

Assay variable : PTINR\_VAL1 PT-INR Value

| N | Mean      | Standard Deviation | Minimum   | Maximum   |
|---|-----------|--------------------|-----------|-----------|
| 6 | 1.8633333 | 0.2439399          | 1.5700000 | 2.2700000 |

Unique Subject Identifier=5047000010-0002

Assay variable : PTINR\_VAL1 PT-INR Value

| N | Mean      | Standard Deviation | Minimum   | Maximum   |
|---|-----------|--------------------|-----------|-----------|
| 6 | 1.9133333 | 0.2501733          | 1.5900000 | 2.3200000 |

Unique Subject Identifier=5047000010-0003

Assay variable : PTINR\_VAL1 PT-INR Value

| N | Mean      | Standard Deviation | Minimum   | Maximum   |
|---|-----------|--------------------|-----------|-----------|
| 4 | 1.6425000 | 0.1372042          | 1.5100000 | 1.7800000 |

Unique Subject Identifier=5047000010-0004

Assay variable : PTINR\_VAL1 PT-INR Value

N Mean Standard Deviation Minimum Maximum

---

|   |           |           |           |           |
|---|-----------|-----------|-----------|-----------|
| 3 | 1.5266667 | 0.1342882 | 1.4300000 | 1.6800000 |
|---|-----------|-----------|-----------|-----------|

---

Laboratory tests at the time of obtaining Table 2-6 consent, according to the presence or absence of proton-pump inhibitors

Unique Subject Identifier=5047000010-0012

MEANS Procedure

Assay variable : PTINR\_VAL1 PT-INR Value

N Mean Standard Deviation Minimum Maximum

---

|   |           |           |           |           |
|---|-----------|-----------|-----------|-----------|
| 4 | 2.2000000 | 0.1714643 | 2.0500000 | 2.4400000 |
|---|-----------|-----------|-----------|-----------|

---

Unique Subject Identifier=5048011000-0006

Assay variable : PTINR\_VAL1 PT-INR Value

N Mean Standard Deviation Minimum Maximum

---

|   |           |           |           |           |
|---|-----------|-----------|-----------|-----------|
| 5 | 2.1380000 | 0.2873500 | 1.8900000 | 2.5500000 |
|---|-----------|-----------|-----------|-----------|

---

Unique Subject Identifier=5048011000-0008

Assay variable : PTINR\_VAL1 PT-INR Value

N Mean Standard Deviation Minimum Maximum

---

|   |           |           |           |           |
|---|-----------|-----------|-----------|-----------|
| 3 | 1.9566667 | 0.5398457 | 1.3800000 | 2.4500000 |
|---|-----------|-----------|-----------|-----------|

---

Unique Subject Identifier=5048011000-0013

Assay variable : PTINR\_VAL1 PT-INR Value

N Mean Standard Deviation Minimum Maximum

---

|   |           |           |           |           |
|---|-----------|-----------|-----------|-----------|
| 4 | 2.0225000 | 0.0485627 | 1.9600000 | 2.0700000 |
|---|-----------|-----------|-----------|-----------|

---

Laboratory tests at the time of obtaining Table 2-6 consent, according to the presence or absence of proton-pump inhibitors

Unique Subject Identifier=5048011000-0015

MEANS Procedure

Assay variable : PTINR\_VAL1 PT-INR Value

N Mean Standard Deviation Minimum Maximum

---

|   |           |           |           |           |
|---|-----------|-----------|-----------|-----------|
| 6 | 1.2033333 | 0.2780408 | 0.9700000 | 1.7300000 |
|---|-----------|-----------|-----------|-----------|

---

Unique Subject Identifier=5048011000-0016

Assay variable : PTINR\_VAL1 PT-INR Value

N Mean Standard Deviation Minimum Maximum

---

|   |           |           |           |           |
|---|-----------|-----------|-----------|-----------|
| 4 | 1.2150000 | 0.0450925 | 1.1800000 | 1.2800000 |
|---|-----------|-----------|-----------|-----------|

---

Unique Subject Identifier=5048011000-0017

Assay variable : PTINR\_VAL1 PT-INR Value

N Mean Standard Deviation Minimum Maximum

---

|   |           |           |           |           |
|---|-----------|-----------|-----------|-----------|
| 6 | 1.7366667 | 0.2778249 | 1.3600000 | 2.1300000 |
|---|-----------|-----------|-----------|-----------|

---

Unique Subject Identifier=5048011000-0019

Assay variable : PTINR\_VAL1 PT-INR Value

N Mean Standard Deviation Minimum Maximum

---

|   |          |           |          |          |
|---|----------|-----------|----------|----------|
| 2 | 1.480000 | 0.0848528 | 1.420000 | 1.540000 |
|---|----------|-----------|----------|----------|

---

Laboratory tests at the time of obtaining Table 2-6 consent, according to the presence or absence of proton-pump inhibitors

Unique Subject Identifier=5048011000-0022

MEANS Procedure

Assay variable : PTINR\_VAL1 PT-INR Value

| N | Mean      | Standard Deviation | Minimum   | Maximum   |
|---|-----------|--------------------|-----------|-----------|
| 3 | 1.6100000 | 0.6000833          | 1.0600000 | 2.2500000 |

Unique Subject Identifier=5048011000-0023

Assay variable : PTINR\_VAL1 PT-INR Value

| N | Mean      | Standard Deviation | Minimum   | Maximum   |
|---|-----------|--------------------|-----------|-----------|
| 6 | 1.9800000 | 0.3051557          | 1.5600000 | 2.3100000 |

Unique Subject Identifier=5048011000-0025

Assay variable : PTINR\_VAL1 PT-INR Value

| N | Mean      | Standard Deviation | Minimum   | Maximum   |
|---|-----------|--------------------|-----------|-----------|
| 3 | 1.2133333 | 0.1379613          | 1.1100000 | 1.3700000 |

Unique Subject Identifier=5048011000-0029

Assay variable : PTINR\_VAL1 PT-INR Value

N Mean Standard Deviation Minimum Maximum

---

|   |           |           |           |           |
|---|-----------|-----------|-----------|-----------|
| 3 | 1.8800000 | 0.3223352 | 1.6600000 | 2.2500000 |
|---|-----------|-----------|-----------|-----------|

---



Laboratory tests at the time of obtaining Table 2-6 consent, according to the presence or absence of proton-pump inhibitors

Unique Subject Identifier=5048011000-0031

MEANS Procedure

Assay variable : PTINR\_VAL1 PT-INR Value

N Mean Standard Deviation Minimum Maximum

---

|   |           |           |           |           |
|---|-----------|-----------|-----------|-----------|
| 3 | 1.5233333 | 0.1527525 | 1.3900000 | 1.6900000 |
|---|-----------|-----------|-----------|-----------|

---

Unique Subject Identifier=5048011000-0032

Assay variable : PTINR\_VAL1 PT-INR Value

N Mean Standard Deviation Minimum Maximum

---

|   |           |           |           |           |
|---|-----------|-----------|-----------|-----------|
| 6 | 1.5533333 | 0.3556215 | 1.3600000 | 2.2700000 |
|---|-----------|-----------|-----------|-----------|

---

Unique Subject Identifier=5048011000-0035

Assay variable : PTINR\_VAL1 PT-INR Value

N Mean Standard Deviation Minimum Maximum

---

|   |           |           |           |           |
|---|-----------|-----------|-----------|-----------|
| 3 | 1.9100000 | 0.0953939 | 1.8000000 | 1.9700000 |
|---|-----------|-----------|-----------|-----------|

---

Unique Subject Identifier=5048011000-0036

Assay variable : PTINR\_VAL1 PT-INR Value

N Mean Standard Deviation Minimum Maximum

---

|   |           |           |           |           |
|---|-----------|-----------|-----------|-----------|
| 4 | 1.5375000 | 0.1746186 | 1.3300000 | 1.7300000 |
|---|-----------|-----------|-----------|-----------|

---

Laboratory tests at the time of obtaining Table 2-6 consent, according to the presence or absence of proton-pump inhibitors

Unique Subject Identifier=5048011000-0037

MEANS Procedure

Assay variable : PTINR\_VAL1 PT-INR Value

N Mean Standard Deviation Minimum Maximum

---

|   |          |           |          |          |
|---|----------|-----------|----------|----------|
| 3 | 1.450000 | 0.2861818 | 1.270000 | 1.780000 |
|---|----------|-----------|----------|----------|

---

Unique Subject Identifier=5048011000-0038

Assay variable : PTINR\_VAL1 PT-INR Value

N Mean Standard Deviation Minimum Maximum

---

|   |          |           |          |          |
|---|----------|-----------|----------|----------|
| 4 | 1.957500 | 0.6702425 | 1.440000 | 2.900000 |
|---|----------|-----------|----------|----------|

---

Unique Subject Identifier=5048011000-0040

Assay variable : PTINR\_VAL1 PT-INR Value

N Mean Standard Deviation Minimum Maximum

---

|   |          |           |          |          |
|---|----------|-----------|----------|----------|
| 4 | 1.492500 | 0.0888351 | 1.410000 | 1.610000 |
|---|----------|-----------|----------|----------|

---

Unique Subject Identifier=5048011000-0044

Assay variable : PTINR\_VAL1 PT-INR Value

N Mean Standard Deviation Minimum Maximum

---

|   |           |           |           |           |
|---|-----------|-----------|-----------|-----------|
| 6 | 1.5466667 | 0.1360392 | 1.3200000 | 1.6900000 |
|---|-----------|-----------|-----------|-----------|

---

Laboratory tests at the time of obtaining Table 2-6 consent, according to the presence or absence of proton-pump inhibitors

Unique Subject Identifier=5048011000-0045

MEANS Procedure

Assay variable : PTINR\_VAL1 PT-INR Value

N Mean Standard Deviation Minimum Maximum

---

|   |           |           |           |           |
|---|-----------|-----------|-----------|-----------|
| 4 | 1.5825000 | 0.3831775 | 1.2500000 | 2.1200000 |
|---|-----------|-----------|-----------|-----------|

---

Unique Subject Identifier=5048011000-0046

Assay variable : PTINR\_VAL1 PT-INR Value

N Mean Standard Deviation Minimum Maximum

---

|   |           |           |           |           |
|---|-----------|-----------|-----------|-----------|
| 3 | 1.4566667 | 0.0702377 | 1.3900000 | 1.5300000 |
|---|-----------|-----------|-----------|-----------|

---

Unique Subject Identifier=5048011000-0049

Assay variable : PTINR\_VAL1 PT-INR Value

N Mean Standard Deviation Minimum Maximum

---

|   |           |           |           |           |
|---|-----------|-----------|-----------|-----------|
| 3 | 1.5900000 | 0.3204684 | 1.2600000 | 1.9000000 |
|---|-----------|-----------|-----------|-----------|

---

Unique Subject Identifier=5048011000-0051

Assay variable : PTINR\_VAL1 PT-INR Value

N Mean Standard Deviation Minimum Maximum

---

|   |           |           |           |           |
|---|-----------|-----------|-----------|-----------|
| 2 | 1.8350000 | 0.1767767 | 1.7100000 | 1.9600000 |
|---|-----------|-----------|-----------|-----------|

---

Laboratory tests at the time of obtaining Table 2-6 consent, according to the presence or absence of proton-pump inhibitors

Unique Subject Identifier=5048011000-0063

MEANS Procedure

Assay variable : PTINR\_VAL1 PT-INR Value

N Mean Standard Deviation Minimum Maximum

---

|   |           |           |           |           |
|---|-----------|-----------|-----------|-----------|
| 4 | 1.9700000 | 0.1555635 | 1.8700000 | 2.2000000 |
|---|-----------|-----------|-----------|-----------|

---

Unique Subject Identifier=5048011000-0068

Assay variable : PTINR\_VAL1 PT-INR Value

N Mean Standard Deviation Minimum Maximum

---

|   |           |           |           |           |
|---|-----------|-----------|-----------|-----------|
| 4 | 1.3250000 | 0.0772442 | 1.2200000 | 1.4000000 |
|---|-----------|-----------|-----------|-----------|

---

Unique Subject Identifier=5048011000-0070

Assay variable : PTINR\_VAL1 PT-INR Value

N Mean Standard Deviation Minimum Maximum

---

|   |           |           |           |           |
|---|-----------|-----------|-----------|-----------|
| 5 | 1.8340000 | 0.2289760 | 1.4500000 | 2.0500000 |
|---|-----------|-----------|-----------|-----------|

---

Unique Subject Identifier=5048011000-0075

Assay variable : PTINR\_VAL1 PT-INR Value

N Mean Standard Deviation Minimum Maximum

---

|   |           |           |           |           |
|---|-----------|-----------|-----------|-----------|
| 6 | 1.6916667 | 0.2980884 | 1.3700000 | 2.0500000 |
|---|-----------|-----------|-----------|-----------|

---



Laboratory tests at the time of obtaining Table 2-6 consent, according to the presence or absence of proton-pump inhibitors

Unique Subject Identifier=5048011000-0084

MEANS Procedure

Assay variable : PTINR\_VAL1 PT-INR Value

N Mean Standard Deviation Minimum Maximum

---

|   |           |           |           |           |
|---|-----------|-----------|-----------|-----------|
| 3 | 1.8700000 | 0.2426932 | 1.7200000 | 2.1500000 |
|---|-----------|-----------|-----------|-----------|

---

Unique Subject Identifier=5048011000-0087

Assay variable : PTINR\_VAL1 PT-INR Value

N Mean Standard Deviation Minimum Maximum

---

|   |           |           |           |           |
|---|-----------|-----------|-----------|-----------|
| 4 | 2.1875000 | 0.1873277 | 1.9700000 | 2.4000000 |
|---|-----------|-----------|-----------|-----------|

---

Unique Subject Identifier=5048011000-0088

Assay variable : PTINR\_VAL1 PT-INR Value

N Mean Standard Deviation Minimum Maximum

---

|   |           |           |           |           |
|---|-----------|-----------|-----------|-----------|
| 3 | 1.8266667 | 0.0873689 | 1.7300000 | 1.9000000 |
|---|-----------|-----------|-----------|-----------|

---

Unique Subject Identifier=5048011000-0091

Assay variable : PTINR\_VAL1 PT-INR Value

N Mean Standard Deviation Minimum Maximum

---

|   |           |           |           |           |
|---|-----------|-----------|-----------|-----------|
| 3 | 1.7133333 | 0.1222020 | 1.5800000 | 1.8200000 |
|---|-----------|-----------|-----------|-----------|

---

Laboratory tests at the time of obtaining Table 2-6 consent, according to the presence or absence of proton-pump inhibitors

Unique Subject Identifier=5048011000-0105

MEANS Procedure

Assay variable : PTINR\_VAL1 PT-INR Value

| N | Mean      | Standard Deviation | Minimum   | Maximum   |
|---|-----------|--------------------|-----------|-----------|
| 3 | 2.1900000 | 0.1300000          | 2.1100000 | 2.3400000 |

Unique Subject Identifier=5048011000-0106

Assay variable : PTINR\_VAL1 PT-INR Value

| N | Mean      | Standard Deviation | Minimum   | Maximum   |
|---|-----------|--------------------|-----------|-----------|
| 5 | 1.5540000 | 0.2092367          | 1.2500000 | 1.8400000 |

Unique Subject Identifier=5048011000-0108

Assay variable : PTINR\_VAL1 PT-INR Value

| N | Mean      | Standard Deviation | Minimum   | Maximum   |
|---|-----------|--------------------|-----------|-----------|
| 6 | 2.5083333 | 0.3590775          | 2.0400000 | 3.0400000 |

Unique Subject Identifier=5048011000-0109

Assay variable : PTINR\_VAL1 PT-INR Value

N Mean Standard Deviation Minimum Maximum

---

|   |           |           |           |           |
|---|-----------|-----------|-----------|-----------|
| 3 | 1.5133333 | 0.2468468 | 1.2400000 | 1.7200000 |
|---|-----------|-----------|-----------|-----------|

---

Laboratory tests at the time of obtaining Table 2-6 consent, according to the presence or absence of proton-pump inhibitors

Unique Subject Identifier=5048011000-0128

MEANS Procedure

Assay variable : PTINR\_VAL1 PT-INR Value

| N | Mean      | Standard Deviation | Minimum   | Maximum   |
|---|-----------|--------------------|-----------|-----------|
| 5 | 2.1680000 | 0.9975821          | 1.0900000 | 3.3600000 |

Unique Subject Identifier=5048011000-0130

Assay variable : PTINR\_VAL1 PT-INR Value

| N | Mean      | Standard Deviation | Minimum   | Maximum   |
|---|-----------|--------------------|-----------|-----------|
| 3 | 1.9033333 | 0.6439203          | 1.1600000 | 2.2900000 |

Unique Subject Identifier=5050011100-0002

Assay variable : PTINR\_VAL1 PT-INR Value

| N | Mean      | Standard Deviation | Minimum   | Maximum   |
|---|-----------|--------------------|-----------|-----------|
| 5 | 2.3140000 | 0.4131344          | 1.8600000 | 2.8300000 |

Unique Subject Identifier=5050011100-0003

Assay variable : PTINR\_VAL1 PT-INR Value

N Mean Standard Deviation Minimum Maximum

---

|   |          |           |          |          |
|---|----------|-----------|----------|----------|
| 5 | 2.300000 | 0.2877499 | 1.880000 | 2.590000 |
|---|----------|-----------|----------|----------|

---

Laboratory tests at the time of obtaining Table 2-6 consent, according to the presence or absence of proton-pump inhibitors

Unique Subject Identifier=5050011100-0005

MEANS Procedure

Assay variable : PTINR\_VAL1 PT-INR Value

| N | Mean      | Standard Deviation | Minimum   | Maximum   |
|---|-----------|--------------------|-----------|-----------|
| 5 | 2.3660000 | 0.4697127          | 2.0700000 | 3.1700000 |

Unique Subject Identifier=5050011100-0007

Assay variable : PTINR\_VAL1 PT-INR Value

| N | Mean      | Standard Deviation | Minimum   | Maximum   |
|---|-----------|--------------------|-----------|-----------|
| 4 | 2.3125000 | 0.4699202          | 1.9100000 | 2.9600000 |

Unique Subject Identifier=5050011100-0008

Assay variable : PTINR\_VAL1 PT-INR Value

| N | Mean      | Standard Deviation | Minimum   | Maximum   |
|---|-----------|--------------------|-----------|-----------|
| 6 | 2.0516667 | 0.5068892          | 1.5400000 | 2.9100000 |

Unique Subject Identifier=5050011100-0009

Assay variable : PTINR\_VAL1 PT-INR Value

N Mean Standard Deviation Minimum Maximum

---

|   |           |           |           |           |
|---|-----------|-----------|-----------|-----------|
| 5 | 2.3420000 | 0.1531992 | 2.1800000 | 2.5300000 |
|---|-----------|-----------|-----------|-----------|

---



Laboratory tests at the time of obtaining Table 2-6 consent, according to the presence or absence of proton-pump inhibitors

Unique Subject Identifier=5050011100-0010

MEANS Procedure

Assay variable : PTINR\_VAL1 PT-INR Value

N Mean Standard Deviation Minimum Maximum

---

|   |           |           |           |           |
|---|-----------|-----------|-----------|-----------|
| 4 | 2.0425000 | 0.5867637 | 1.5700000 | 2.9000000 |
|---|-----------|-----------|-----------|-----------|

---

Unique Subject Identifier=5050011100-0011

Assay variable : PTINR\_VAL1 PT-INR Value

N Mean Standard Deviation Minimum Maximum

---

|   |           |           |           |           |
|---|-----------|-----------|-----------|-----------|
| 3 | 1.9266667 | 0.1059874 | 1.8300000 | 2.0400000 |
|---|-----------|-----------|-----------|-----------|

---

Unique Subject Identifier=5050011100-0012

Assay variable : PTINR\_VAL1 PT-INR Value

N Mean Standard Deviation Minimum Maximum

---

|   |           |           |           |           |
|---|-----------|-----------|-----------|-----------|
| 4 | 2.1525000 | 0.1813606 | 1.9200000 | 2.3200000 |
|---|-----------|-----------|-----------|-----------|

---

Unique Subject Identifier=5050011100-0016

Assay variable : PTINR\_VAL1 PT-INR Value

N Mean Standard Deviation Minimum Maximum

---

|   |          |           |          |          |
|---|----------|-----------|----------|----------|
| 3 | 2.633333 | 0.8372773 | 1.990000 | 3.580000 |
|---|----------|-----------|----------|----------|

---

Laboratory tests at the time of obtaining Table 2-6 consent, according to the presence or absence of proton-pump inhibitors

Unique Subject Identifier=5050011100-0026

MEANS Procedure

Assay variable : PTINR\_VAL1 PT-INR Value

N Mean Standard Deviation Minimum Maximum

---

|   |           |           |           |           |
|---|-----------|-----------|-----------|-----------|
| 5 | 1.9080000 | 0.1536880 | 1.7700000 | 2.1100000 |
|---|-----------|-----------|-----------|-----------|

---

Unique Subject Identifier=5050011100-0028

Assay variable : PTINR\_VAL1 PT-INR Value

N Mean Standard Deviation Minimum Maximum

---

|   |           |           |           |           |
|---|-----------|-----------|-----------|-----------|
| 4 | 1.7525000 | 0.5141579 | 1.1500000 | 2.4000000 |
|---|-----------|-----------|-----------|-----------|

---

Unique Subject Identifier=5051100000-0006

Assay variable : PTINR\_VAL1 PT-INR Value

N Mean Standard Deviation Minimum Maximum

---

|   |           |           |           |           |
|---|-----------|-----------|-----------|-----------|
| 4 | 2.0025000 | 0.1878608 | 1.7600000 | 2.1700000 |
|---|-----------|-----------|-----------|-----------|

---

Unique Subject Identifier=5051100000-0021

Assay variable : PTINR\_VAL1 PT-INR Value

N Mean Standard Deviation Minimum Maximum

---

|   |           |           |           |           |
|---|-----------|-----------|-----------|-----------|
| 4 | 1.8375000 | 0.4241364 | 1.2600000 | 2.1800000 |
|---|-----------|-----------|-----------|-----------|

---

Laboratory tests at the time of obtaining Table 2-6 consent, according to the presence or absence of proton-pump inhibitors

Unique Subject Identifier=5052000000-0003

MEANS Procedure

Assay variable : PTINR\_VAL1 PT-INR Value

| N | Mean      | Standard Deviation | Minimum   | Maximum   |
|---|-----------|--------------------|-----------|-----------|
| 3 | 1.6333333 | 0.2950141          | 1.3400000 | 1.9300000 |

Unique Subject Identifier=5052000000-0009

Assay variable : PTINR\_VAL1 PT-INR Value

| N | Mean      | Standard Deviation | Minimum   | Maximum   |
|---|-----------|--------------------|-----------|-----------|
| 4 | 2.2775000 | 0.8479141          | 1.6200000 | 3.4300000 |

Unique Subject Identifier=5052000000-0015

Assay variable : PTINR\_VAL1 PT-INR Value

| N | Mean      | Standard Deviation | Minimum   | Maximum   |
|---|-----------|--------------------|-----------|-----------|
| 6 | 2.0050000 | 0.4781945          | 1.5300000 | 2.7300000 |

Unique Subject Identifier=5052000000-0022

Assay variable : PTINR\_VAL1 PT-INR Value

N Mean Standard Deviation Minimum Maximum

---

|   |          |          |          |          |
|---|----------|----------|----------|----------|
| 3 | 2.280000 | 0.130767 | 2.190000 | 2.430000 |
|---|----------|----------|----------|----------|

---

Laboratory tests at the time of obtaining Table 2-6 consent, according to the presence or absence of proton-pump inhibitors

Unique Subject Identifier=5052000000-0023

MEANS Procedure

Assay variable : PTINR\_VAL1 PT-INR Value

| N | Mean      | Standard Deviation | Minimum   | Maximum   |
|---|-----------|--------------------|-----------|-----------|
| 3 | 1.8233333 | 0.1270171          | 1.7500000 | 1.9700000 |

Unique Subject Identifier=5052000000-0024

Assay variable : PTINR\_VAL1 PT-INR Value

| N | Mean      | Standard Deviation | Minimum   | Maximum   |
|---|-----------|--------------------|-----------|-----------|
| 3 | 2.1366667 | 0.5468394          | 1.7000000 | 2.7500000 |

Unique Subject Identifier=5052000000-0029

Assay variable : PTINR\_VAL1 PT-INR Value

| N | Mean      | Standard Deviation | Minimum   | Maximum   |
|---|-----------|--------------------|-----------|-----------|
| 6 | 1.6866667 | 0.1709581          | 1.4700000 | 1.9800000 |

Unique Subject Identifier=5052000000-0030

Assay variable : PTINR\_VAL1 PT-INR Value

N Mean Standard Deviation Minimum Maximum

---

|   |          |           |          |          |
|---|----------|-----------|----------|----------|
| 5 | 1.840000 | 0.2315167 | 1.590000 | 2.150000 |
|---|----------|-----------|----------|----------|

---



Laboratory tests at the time of obtaining Table 2-6 consent, according to the presence or absence of proton-pump inhibitors

Unique Subject Identifier=5052000000-0032

MEANS Procedure

Assay variable : PTINR\_VAL1 PT-INR Value

N Mean Standard Deviation Minimum Maximum

---

|   |           |           |           |           |
|---|-----------|-----------|-----------|-----------|
| 5 | 1.8520000 | 0.1704993 | 1.7000000 | 2.0900000 |
|---|-----------|-----------|-----------|-----------|

---

Unique Subject Identifier=5052000000-0033

Assay variable : PTINR\_VAL1 PT-INR Value

N Mean Standard Deviation Minimum Maximum

---

|   |           |           |           |           |
|---|-----------|-----------|-----------|-----------|
| 5 | 1.8560000 | 0.2249000 | 1.6100000 | 2.1300000 |
|---|-----------|-----------|-----------|-----------|

---

Unique Subject Identifier=5052000000-0035

Assay variable : PTINR\_VAL1 PT-INR Value

N Mean Standard Deviation Minimum Maximum

---

|   |           |           |           |           |
|---|-----------|-----------|-----------|-----------|
| 4 | 1.9400000 | 0.0658281 | 1.8700000 | 2.0100000 |
|---|-----------|-----------|-----------|-----------|

---

Unique Subject Identifier=5052000000-0038

Assay variable : PTINR\_VAL1 PT-INR Value

N Mean Standard Deviation Minimum Maximum

---

|   |           |           |           |           |
|---|-----------|-----------|-----------|-----------|
| 4 | 1.6425000 | 0.2814694 | 1.4200000 | 2.0500000 |
|---|-----------|-----------|-----------|-----------|

---

Laboratory tests at the time of obtaining Table 2-6 consent, according to the presence or absence of proton-pump inhibitors

Unique Subject Identifier=5052000000-0041

MEANS Procedure

Assay variable : PTINR\_VAL1 PT-INR Value

| N | Mean      | Standard Deviation | Minimum   | Maximum   |
|---|-----------|--------------------|-----------|-----------|
| 6 | 1.7566667 | 0.1502886          | 1.6000000 | 1.9700000 |

Unique Subject Identifier=5052000000-0042

Assay variable : PTINR\_VAL1 PT-INR Value

| N | Mean      | Standard Deviation | Minimum   | Maximum   |
|---|-----------|--------------------|-----------|-----------|
| 3 | 1.5200000 | 0.1513275          | 1.3500000 | 1.6400000 |

Unique Subject Identifier=5052000000-0045

Assay variable : PTINR\_VAL1 PT-INR Value

| N | Mean      | Standard Deviation | Minimum   | Maximum   |
|---|-----------|--------------------|-----------|-----------|
| 4 | 1.9025000 | 0.0946485          | 1.7800000 | 2.0100000 |

Unique Subject Identifier=5052000000-0051

Assay variable : PTINR\_VAL1 PT-INR Value

N Mean Standard Deviation Minimum Maximum

---

|   |           |           |           |           |
|---|-----------|-----------|-----------|-----------|
| 3 | 1.7133333 | 0.0378594 | 1.6700000 | 1.7400000 |
|---|-----------|-----------|-----------|-----------|

---

Laboratory tests at the time of obtaining Table 2-6 consent, according to the presence or absence of proton-pump inhibitors

Unique Subject Identifier=5052000000-0063

MEANS Procedure

Assay variable : PTINR\_VAL1 PT-INR Value

N Mean Standard Deviation Minimum Maximum

---

|   |           |  |           |           |
|---|-----------|--|-----------|-----------|
| 1 | 1.4100000 |  | 1.4100000 | 1.4100000 |
|---|-----------|--|-----------|-----------|

---

Unique Subject Identifier=5053000000-0004

Assay variable : PTINR\_VAL1 PT-INR Value

N Mean Standard Deviation Minimum Maximum

---

|   |           |           |           |           |
|---|-----------|-----------|-----------|-----------|
| 3 | 2.5333333 | 0.9330238 | 1.5600000 | 3.4200000 |
|---|-----------|-----------|-----------|-----------|

---

Unique Subject Identifier=5053000000-0005

Assay variable : PTINR\_VAL1 PT-INR Value

N Mean Standard Deviation Minimum Maximum

---

|   |           |           |           |           |
|---|-----------|-----------|-----------|-----------|
| 2 | 1.6750000 | 0.0494975 | 1.6400000 | 1.7100000 |
|---|-----------|-----------|-----------|-----------|

---

Unique Subject Identifier=5053000000-0006

Assay variable : PTINR\_VAL1 PT-INR Value

N Mean Standard Deviation Minimum Maximum

---

|   |          |          |          |          |
|---|----------|----------|----------|----------|
| 3 | 2.040000 | 0.020000 | 2.020000 | 2.060000 |
|---|----------|----------|----------|----------|

---

Laboratory tests at the time of obtaining Table 2-6 consent, according to the presence or absence of proton-pump inhibitors

Unique Subject Identifier=5053000000-0009

MEANS Procedure

Assay variable : PTINR\_VAL1 PT-INR Value

| N | Mean      | Standard Deviation | Minimum   | Maximum   |
|---|-----------|--------------------|-----------|-----------|
| 1 | 2.7000000 |                    | 2.7000000 | 2.7000000 |

Unique Subject Identifier=5053000000-0010

Assay variable : PTINR\_VAL1 PT-INR Value

| N | Mean      | Standard Deviation | Minimum   | Maximum   |
|---|-----------|--------------------|-----------|-----------|
| 5 | 1.8140000 | 0.3134167          | 1.4000000 | 2.1100000 |

Unique Subject Identifier=5053000000-0011

Assay variable : PTINR\_VAL1 PT-INR Value

| N | Mean      | Standard Deviation | Minimum   | Maximum   |
|---|-----------|--------------------|-----------|-----------|
| 3 | 1.6400000 | 0.1249000          | 1.5000000 | 1.7400000 |

Unique Subject Identifier=5053000000-0013

Assay variable : PTINR\_VAL1 PT-INR Value

N Mean Standard Deviation Minimum Maximum

---

|   |           |           |           |           |
|---|-----------|-----------|-----------|-----------|
| 2 | 1.5750000 | 0.0212132 | 1.5600000 | 1.5900000 |
|---|-----------|-----------|-----------|-----------|

---



Laboratory tests at the time of obtaining Table 2-6 consent, according to the presence or absence of proton-pump inhibitors

Unique Subject Identifier=5053000000-0014

MEANS Procedure

Assay variable : PTINR\_VAL1 PT-INR Value

N Mean Standard Deviation Minimum Maximum

---

|   |           |           |           |           |
|---|-----------|-----------|-----------|-----------|
| 4 | 1.8875000 | 0.2467624 | 1.6100000 | 2.1800000 |
|---|-----------|-----------|-----------|-----------|

---

Unique Subject Identifier=5053000000-0017

Assay variable : PTINR\_VAL1 PT-INR Value

N Mean Standard Deviation Minimum Maximum

---

|   |           |           |           |           |
|---|-----------|-----------|-----------|-----------|
| 4 | 1.6025000 | 0.6232375 | 1.0300000 | 2.2000000 |
|---|-----------|-----------|-----------|-----------|

---

Unique Subject Identifier=5053000000-0019

Assay variable : PTINR\_VAL1 PT-INR Value

N Mean Standard Deviation Minimum Maximum

---

|   |           |           |           |           |
|---|-----------|-----------|-----------|-----------|
| 2 | 2.1650000 | 0.0777817 | 2.1100000 | 2.2200000 |
|---|-----------|-----------|-----------|-----------|

---

Unique Subject Identifier=5053000000-0021

Assay variable : PTINR\_VAL1 PT-INR Value

N Mean Standard Deviation Minimum Maximum

---

|   |          |           |          |          |
|---|----------|-----------|----------|----------|
| 3 | 2.260000 | 0.4648656 | 1.860000 | 2.770000 |
|---|----------|-----------|----------|----------|

---

Laboratory tests at the time of obtaining Table 2-6 consent, according to the presence or absence of proton-pump inhibitors

Unique Subject Identifier=5053000000-0023

MEANS Procedure

Assay variable : PTINR\_VAL1 PT-INR Value

| N | Mean      | Standard Deviation | Minimum   | Maximum   |
|---|-----------|--------------------|-----------|-----------|
| 3 | 2.2933333 | 0.4932883          | 1.9600000 | 2.8600000 |

Unique Subject Identifier=5053000000-0024

Assay variable : PTINR\_VAL1 PT-INR Value

| N | Mean      | Standard Deviation | Minimum   | Maximum   |
|---|-----------|--------------------|-----------|-----------|
| 3 | 1.9833333 | 0.2444040          | 1.7700000 | 2.2500000 |

Unique Subject Identifier=5053000000-0026

Assay variable : PTINR\_VAL1 PT-INR Value

| N | Mean      | Standard Deviation | Minimum   | Maximum   |
|---|-----------|--------------------|-----------|-----------|
| 3 | 1.5600000 | 0.3835362          | 1.2100000 | 1.9700000 |

Unique Subject Identifier=5053000000-0027

Assay variable : PTINR\_VAL1 PT-INR Value

N Mean Standard Deviation Minimum Maximum

---

|   |           |           |           |           |
|---|-----------|-----------|-----------|-----------|
| 3 | 1.8300000 | 0.1374773 | 1.6800000 | 1.9500000 |
|---|-----------|-----------|-----------|-----------|

---

Laboratory tests at the time of obtaining Table 2-6 consent, according to the presence or absence of proton-pump inhibitors

Unique Subject Identifier=5053000000-0028

MEANS Procedure

Assay variable : PTINR\_VAL1 PT-INR Value

N Mean Standard Deviation Minimum Maximum

---

|   |           |           |           |           |
|---|-----------|-----------|-----------|-----------|
| 3 | 1.5800000 | 0.3345146 | 1.2000000 | 1.8300000 |
|---|-----------|-----------|-----------|-----------|

---

Unique Subject Identifier=5053000000-0030

Assay variable : PTINR\_VAL1 PT-INR Value

N Mean Standard Deviation Minimum Maximum

---

|   |           |           |           |           |
|---|-----------|-----------|-----------|-----------|
| 3 | 2.1166667 | 0.5950070 | 1.4300000 | 2.4800000 |
|---|-----------|-----------|-----------|-----------|

---

Unique Subject Identifier=5054010000-0001

Assay variable : PTINR\_VAL1 PT-INR Value

N Mean Standard Deviation Minimum Maximum

---

|   |           |           |           |           |
|---|-----------|-----------|-----------|-----------|
| 3 | 2.3633333 | 0.7921069 | 1.4700000 | 2.9800000 |
|---|-----------|-----------|-----------|-----------|

---

Unique Subject Identifier=5054010000-0006

Assay variable : PTINR\_VAL1 PT-INR Value

N Mean Standard Deviation Minimum Maximum

---

|   |          |           |          |          |
|---|----------|-----------|----------|----------|
| 6 | 1.403333 | 0.2957476 | 1.060000 | 1.870000 |
|---|----------|-----------|----------|----------|

---

Laboratory tests at the time of obtaining Table 2-6 consent, according to the presence or absence of proton-pump inhibitors

Unique Subject Identifier=5054010000-0009

MEANS Procedure

Assay variable : PTINR\_VAL1 PT-INR Value

N Mean Standard Deviation Minimum Maximum

---

|   |           |           |           |           |
|---|-----------|-----------|-----------|-----------|
| 3 | 2.1666667 | 0.7379928 | 1.4700000 | 2.9400000 |
|---|-----------|-----------|-----------|-----------|

---

Unique Subject Identifier=5054010000-0011

Assay variable : PTINR\_VAL1 PT-INR Value

N Mean Standard Deviation Minimum Maximum

---

|   |           |           |           |           |
|---|-----------|-----------|-----------|-----------|
| 6 | 2.2150000 | 0.4840558 | 1.7800000 | 3.0700000 |
|---|-----------|-----------|-----------|-----------|

---

Unique Subject Identifier=5054010000-0013

Assay variable : PTINR\_VAL1 PT-INR Value

N Mean Standard Deviation Minimum Maximum

---

|   |           |  |           |           |
|---|-----------|--|-----------|-----------|
| 1 | 3.1500000 |  | 3.1500000 | 3.1500000 |
|---|-----------|--|-----------|-----------|

---

Unique Subject Identifier=5054010000-0015

Assay variable : PTINR\_VAL1 PT-INR Value

N Mean Standard Deviation Minimum Maximum

---

|   |          |           |          |          |
|---|----------|-----------|----------|----------|
| 5 | 2.142000 | 0.3011146 | 1.830000 | 2.590000 |
|---|----------|-----------|----------|----------|

---



Laboratory tests at the time of obtaining Table 2-6 consent, according to the presence or absence of proton-pump inhibitors

Unique Subject Identifier=5054010000-0017

MEANS Procedure

Assay variable : PTINR\_VAL1 PT-INR Value

| N | Mean      | Standard Deviation | Minimum   | Maximum   |
|---|-----------|--------------------|-----------|-----------|
| 2 | 1.6800000 | 0.1414214          | 1.5800000 | 1.7800000 |

Unique Subject Identifier=5054010000-0018

Assay variable : PTINR\_VAL1 PT-INR Value

| N | Mean      | Standard Deviation | Minimum   | Maximum   |
|---|-----------|--------------------|-----------|-----------|
| 4 | 1.8250000 | 0.3304038          | 1.5000000 | 2.2000000 |

Unique Subject Identifier=5054010000-0020

Assay variable : PTINR\_VAL1 PT-INR Value

| N | Mean      | Standard Deviation | Minimum   | Maximum   |
|---|-----------|--------------------|-----------|-----------|
| 6 | 2.0433333 | 0.7488569          | 1.1300000 | 3.0200000 |

Unique Subject Identifier=5054010000-0025

Assay variable : PTINR\_VAL1 PT-INR Value

N Mean Standard Deviation Minimum Maximum

---

|   |           |           |           |           |
|---|-----------|-----------|-----------|-----------|
| 3 | 1.1966667 | 0.1401190 | 1.0600000 | 1.3400000 |
|---|-----------|-----------|-----------|-----------|

---

Laboratory tests at the time of obtaining Table 2-6 consent, according to the presence or absence of proton-pump inhibitors

Unique Subject Identifier=5054010000-0026

MEANS Procedure

Assay variable : PTINR\_VAL1 PT-INR Value

N Mean Standard Deviation Minimum Maximum

---

|   |           |           |           |           |
|---|-----------|-----------|-----------|-----------|
| 2 | 1.9000000 | 0.1697056 | 1.7800000 | 2.0200000 |
|---|-----------|-----------|-----------|-----------|

---

Unique Subject Identifier=5055000000-0001

Assay variable : PTINR\_VAL1 PT-INR Value

N Mean Standard Deviation Minimum Maximum

---

|   |           |           |           |           |
|---|-----------|-----------|-----------|-----------|
| 4 | 2.0125000 | 0.0895824 | 1.8900000 | 2.1000000 |
|---|-----------|-----------|-----------|-----------|

---

Unique Subject Identifier=5055000000-0002

Assay variable : PTINR\_VAL1 PT-INR Value

N Mean Standard Deviation Minimum Maximum

---

|   |           |           |           |           |
|---|-----------|-----------|-----------|-----------|
| 6 | 2.0100000 | 0.4378127 | 1.4100000 | 2.5000000 |
|---|-----------|-----------|-----------|-----------|

---

Unique Subject Identifier=5055000000-0003

Assay variable : PTINR\_VAL1 PT-INR Value

N Mean Standard Deviation Minimum Maximum

---

|   |           |           |           |           |
|---|-----------|-----------|-----------|-----------|
| 6 | 1.7266667 | 0.3415065 | 1.4200000 | 2.2900000 |
|---|-----------|-----------|-----------|-----------|

---

Laboratory tests at the time of obtaining Table 2-6 consent, according to the presence or absence of proton-pump inhibitors

Unique Subject Identifier=5055000000-0004

MEANS Procedure

Assay variable : PTINR\_VAL1 PT-INR Value

N Mean Standard Deviation Minimum Maximum

---

|   |           |           |           |           |
|---|-----------|-----------|-----------|-----------|
| 6 | 1.6916667 | 0.1571517 | 1.5200000 | 1.9200000 |
|---|-----------|-----------|-----------|-----------|

---

Unique Subject Identifier=5055000000-0005

Assay variable : PTINR\_VAL1 PT-INR Value

N Mean Standard Deviation Minimum Maximum

---

|   |           |           |           |           |
|---|-----------|-----------|-----------|-----------|
| 6 | 2.0633333 | 0.4966152 | 1.6200000 | 2.9700000 |
|---|-----------|-----------|-----------|-----------|

---

Unique Subject Identifier=5055000000-0007

Assay variable : PTINR\_VAL1 PT-INR Value

N Mean Standard Deviation Minimum Maximum

---

|   |           |           |           |           |
|---|-----------|-----------|-----------|-----------|
| 5 | 1.9540000 | 0.1852836 | 1.7700000 | 2.2400000 |
|---|-----------|-----------|-----------|-----------|

---

Unique Subject Identifier=5055000000-0008

Assay variable : PTINR\_VAL1 PT-INR Value

N Mean Standard Deviation Minimum Maximum

---

|   |           |           |           |           |
|---|-----------|-----------|-----------|-----------|
| 4 | 2.3650000 | 0.2500000 | 2.1300000 | 2.7100000 |
|---|-----------|-----------|-----------|-----------|

---

Laboratory tests at the time of obtaining Table 2-6 consent, according to the presence or absence of proton-pump inhibitors

Unique Subject Identifier=5055000000-0009

MEANS Procedure

Assay variable : PTINR\_VAL1 PT-INR Value

N Mean Standard Deviation Minimum Maximum

---

|   |          |           |          |          |
|---|----------|-----------|----------|----------|
| 5 | 2.260000 | 0.2685144 | 2.010000 | 2.700000 |
|---|----------|-----------|----------|----------|

---

Unique Subject Identifier=5055000000-0010

Assay variable : PTINR\_VAL1 PT-INR Value

N Mean Standard Deviation Minimum Maximum

---

|   |           |           |          |          |
|---|-----------|-----------|----------|----------|
| 6 | 2.1116667 | 0.2282469 | 1.880000 | 2.540000 |
|---|-----------|-----------|----------|----------|

---

Unique Subject Identifier=5055000000-0011

Assay variable : PTINR\_VAL1 PT-INR Value

N Mean Standard Deviation Minimum Maximum

---

|   |          |           |          |          |
|---|----------|-----------|----------|----------|
| 4 | 1.512500 | 0.4283593 | 1.130000 | 2.120000 |
|---|----------|-----------|----------|----------|

---

Unique Subject Identifier=5055000000-0012

Assay variable : PTINR\_VAL1 PT-INR Value

N Mean Standard Deviation Minimum Maximum

---

|   |           |           |           |           |
|---|-----------|-----------|-----------|-----------|
| 3 | 1.8300000 | 0.3214032 | 1.6200000 | 2.2000000 |
|---|-----------|-----------|-----------|-----------|

---



Laboratory tests at the time of obtaining Table 2-6 consent, according to the presence or absence of proton-pump inhibitors

Unique Subject Identifier=5055000000-0013

MEANS Procedure

Assay variable : PTINR\_VAL1 PT-INR Value

| N | Mean      | Standard Deviation | Minimum   | Maximum   |
|---|-----------|--------------------|-----------|-----------|
| 4 | 1.2450000 | 0.0288675          | 1.2100000 | 1.2800000 |

Unique Subject Identifier=5055000000-0017

Assay variable : PTINR\_VAL1 PT-INR Value

| N | Mean      | Standard Deviation | Minimum   | Maximum   |
|---|-----------|--------------------|-----------|-----------|
| 5 | 1.8380000 | 0.0920326          | 1.7100000 | 1.9600000 |

Unique Subject Identifier=5055000000-0018

Assay variable : PTINR\_VAL1 PT-INR Value

| N | Mean      | Standard Deviation | Minimum   | Maximum   |
|---|-----------|--------------------|-----------|-----------|
| 6 | 1.7750000 | 0.2356905          | 1.5000000 | 2.1100000 |

Unique Subject Identifier=5055000000-0019

Assay variable : PTINR\_VAL1 PT-INR Value

N Mean Standard Deviation Minimum Maximum

---

|   |           |           |           |           |
|---|-----------|-----------|-----------|-----------|
| 3 | 1.5633333 | 0.3262412 | 1.2800000 | 1.9200000 |
|---|-----------|-----------|-----------|-----------|

---

Laboratory tests at the time of obtaining Table 2-6 consent, according to the presence or absence of proton-pump inhibitors

Unique Subject Identifier=5055000000-0020

MEANS Procedure

Assay variable : PTINR\_VAL1 PT-INR Value

N Mean Standard Deviation Minimum Maximum

---

|   |          |           |          |          |
|---|----------|-----------|----------|----------|
| 6 | 2.150000 | 0.2940748 | 1.790000 | 2.660000 |
|---|----------|-----------|----------|----------|

---

Unique Subject Identifier=5055000000-0022

Assay variable : PTINR\_VAL1 PT-INR Value

N Mean Standard Deviation Minimum Maximum

---

|   |          |           |          |          |
|---|----------|-----------|----------|----------|
| 6 | 2.238333 | 0.3947869 | 1.890000 | 2.990000 |
|---|----------|-----------|----------|----------|

---

Unique Subject Identifier=5055000000-0023

Assay variable : PTINR\_VAL1 PT-INR Value

N Mean Standard Deviation Minimum Maximum

---

|   |          |           |          |          |
|---|----------|-----------|----------|----------|
| 6 | 1.828333 | 0.2577919 | 1.520000 | 2.290000 |
|---|----------|-----------|----------|----------|

---

Unique Subject Identifier=5055000000-0024

Assay variable : PTINR\_VAL1 PT-INR Value

N Mean Standard Deviation Minimum Maximum

---

|   |           |           |           |           |
|---|-----------|-----------|-----------|-----------|
| 6 | 1.9183333 | 0.5442212 | 1.4200000 | 2.8700000 |
|---|-----------|-----------|-----------|-----------|

---

Laboratory tests at the time of obtaining Table 2-6 consent, according to the presence or absence of proton-pump inhibitors

Unique Subject Identifier=5055000000-0025

MEANS Procedure

Assay variable : PTINR\_VAL1 PT-INR Value

| N | Mean      | Standard Deviation | Minimum   | Maximum   |
|---|-----------|--------------------|-----------|-----------|
| 6 | 2.0750000 | 0.2662893          | 1.6000000 | 2.4000000 |

Unique Subject Identifier=5055000000-0026

Assay variable : PTINR\_VAL1 PT-INR Value

| N | Mean      | Standard Deviation | Minimum   | Maximum   |
|---|-----------|--------------------|-----------|-----------|
| 5 | 1.8460000 | 0.1716974          | 1.6600000 | 2.0600000 |

Unique Subject Identifier=5055000000-0028

Assay variable : PTINR\_VAL1 PT-INR Value

| N | Mean      | Standard Deviation | Minimum   | Maximum   |
|---|-----------|--------------------|-----------|-----------|
| 5 | 1.8840000 | 0.0907193          | 1.7300000 | 1.9600000 |

Unique Subject Identifier=5056000000-0002

Assay variable : PTINR\_VAL1 PT-INR Value

N Mean Standard Deviation Minimum Maximum

---

|   |          |           |          |          |
|---|----------|-----------|----------|----------|
| 4 | 2.175000 | 0.5678908 | 1.600000 | 2.800000 |
|---|----------|-----------|----------|----------|

---

Laboratory tests at the time of obtaining Table 2-6 consent, according to the presence or absence of proton-pump inhibitors

Unique Subject Identifier=5056000000-0005

MEANS Procedure

Assay variable : PTINR\_VAL1 PT-INR Value

N Mean Standard Deviation Minimum Maximum

---

|   |           |  |           |           |
|---|-----------|--|-----------|-----------|
| 1 | 2.5000000 |  | 2.5000000 | 2.5000000 |
|---|-----------|--|-----------|-----------|

---

Unique Subject Identifier=5056000000-0009

Assay variable : PTINR\_VAL1 PT-INR Value

N Mean Standard Deviation Minimum Maximum

---

|   |           |           |           |           |
|---|-----------|-----------|-----------|-----------|
| 4 | 2.3250000 | 0.1892969 | 2.2000000 | 2.6000000 |
|---|-----------|-----------|-----------|-----------|

---

Unique Subject Identifier=5056000000-0010

Assay variable : PTINR\_VAL1 PT-INR Value

N Mean Standard Deviation Minimum Maximum

---

|   |           |           |           |           |
|---|-----------|-----------|-----------|-----------|
| 3 | 1.7000000 | 0.1000000 | 1.6000000 | 1.8000000 |
|---|-----------|-----------|-----------|-----------|

---

Unique Subject Identifier=5056000000-0012

Assay variable : PTINR\_VAL1 PT-INR Value

N Mean Standard Deviation Minimum Maximum

---

|   |          |          |          |          |
|---|----------|----------|----------|----------|
| 4 | 2.350000 | 1.040833 | 1.200000 | 3.500000 |
|---|----------|----------|----------|----------|

---



Laboratory tests at the time of obtaining Table 2-6 consent, according to the presence or absence of proton-pump inhibitors

Unique Subject Identifier=5056000000-0014

MEANS Procedure

Assay variable : PTINR\_VAL1 PT-INR Value

N Mean Standard Deviation Minimum Maximum

---

|   |           |           |           |           |
|---|-----------|-----------|-----------|-----------|
| 5 | 1.6200000 | 0.1303840 | 1.5000000 | 1.8000000 |
|---|-----------|-----------|-----------|-----------|

---

Unique Subject Identifier=5056000000-0021

Assay variable : PTINR\_VAL1 PT-INR Value

N Mean Standard Deviation Minimum Maximum

---

|   |           |  |           |           |
|---|-----------|--|-----------|-----------|
| 1 | 2.1000000 |  | 2.1000000 | 2.1000000 |
|---|-----------|--|-----------|-----------|

---

Unique Subject Identifier=5056000000-0023

Assay variable : PTINR\_VAL1 PT-INR Value

N Mean Standard Deviation Minimum Maximum

---

|   |           |           |           |           |
|---|-----------|-----------|-----------|-----------|
| 4 | 2.4750000 | 0.3947573 | 2.0000000 | 2.8000000 |
|---|-----------|-----------|-----------|-----------|

---

Unique Subject Identifier=5056000000-0025

Assay variable : PTINR\_VAL1 PT-INR Value

N Mean Standard Deviation Minimum Maximum

---

|   |          |           |          |          |
|---|----------|-----------|----------|----------|
| 3 | 2.760000 | 0.3616628 | 2.380000 | 3.100000 |
|---|----------|-----------|----------|----------|

---

Laboratory tests at the time of obtaining Table 2-6 consent, according to the presence or absence of proton-pump inhibitors

Unique Subject Identifier=5056000000-0027

MEANS Procedure

Assay variable : PTINR\_VAL1 PT-INR Value

| N | Mean      | Standard Deviation | Minimum   | Maximum   |
|---|-----------|--------------------|-----------|-----------|
| 3 | 2.3333333 | 0.1527525          | 2.2000000 | 2.5000000 |

Unique Subject Identifier=5056000000-0028

Assay variable : PTINR\_VAL1 PT-INR Value

| N | Mean      | Standard Deviation | Minimum   | Maximum   |
|---|-----------|--------------------|-----------|-----------|
| 4 | 1.5750000 | 0.2217356          | 1.4000000 | 1.9000000 |

Unique Subject Identifier=5056000000-0036

Assay variable : PTINR\_VAL1 PT-INR Value

| N | Mean      | Standard Deviation | Minimum   | Maximum   |
|---|-----------|--------------------|-----------|-----------|
| 4 | 2.0000000 | 0.4618802          | 1.6000000 | 2.4000000 |

Unique Subject Identifier=5056000000-0038

Assay variable : PTINR\_VAL1 PT-INR Value

N Mean Standard Deviation Minimum Maximum

---

|   |          |           |           |           |
|---|----------|-----------|-----------|-----------|
| 3 | 2.166667 | 0.5131601 | 1.6000000 | 2.6000000 |
|---|----------|-----------|-----------|-----------|

---

Laboratory tests at the time of obtaining Table 2-6 consent, according to the presence or absence of proton-pump inhibitors

Unique Subject Identifier=5056000000-0039

MEANS Procedure

Assay variable : PTINR\_VAL1 PT-INR Value

N Mean Standard Deviation Minimum Maximum

---

|   |           |           |           |           |
|---|-----------|-----------|-----------|-----------|
| 3 | 2.1666667 | 0.0577350 | 2.1000000 | 2.2000000 |
|---|-----------|-----------|-----------|-----------|

---

Unique Subject Identifier=5057111111-0006

Assay variable : PTINR\_VAL1 PT-INR Value

N Mean Standard Deviation Minimum Maximum

---

|   |           |           |           |           |
|---|-----------|-----------|-----------|-----------|
| 3 | 1.4533333 | 0.1504438 | 1.2800000 | 1.5500000 |
|---|-----------|-----------|-----------|-----------|

---

Unique Subject Identifier=5057111111-0016

Assay variable : PTINR\_VAL1 PT-INR Value

N Mean Standard Deviation Minimum Maximum

---

|   |           |           |           |           |
|---|-----------|-----------|-----------|-----------|
| 3 | 2.5966667 | 1.0110556 | 1.5600000 | 3.5800000 |
|---|-----------|-----------|-----------|-----------|

---

Unique Subject Identifier=5057111111-0023

Assay variable : PTINR\_VAL1 PT-INR Value

N Mean Standard Deviation Minimum Maximum

---

|   |           |           |           |           |
|---|-----------|-----------|-----------|-----------|
| 5 | 2.0460000 | 0.3861088 | 1.3900000 | 2.4100000 |
|---|-----------|-----------|-----------|-----------|

---

Laboratory tests at the time of obtaining Table 2-6 consent, according to the presence or absence of proton-pump inhibitors

Unique Subject Identifier=5058011111-0003

MEANS Procedure

Assay variable : PTINR\_VAL1 PT-INR Value

N Mean Standard Deviation Minimum Maximum

---

|   |           |           |           |           |
|---|-----------|-----------|-----------|-----------|
| 4 | 2.2775000 | 0.6266512 | 1.8400000 | 3.2000000 |
|---|-----------|-----------|-----------|-----------|

---

Unique Subject Identifier=5058011111-0006

Assay variable : PTINR\_VAL1 PT-INR Value

N Mean Standard Deviation Minimum Maximum

---

|   |           |           |           |           |
|---|-----------|-----------|-----------|-----------|
| 3 | 1.9666667 | 0.3121431 | 1.7000000 | 2.3100000 |
|---|-----------|-----------|-----------|-----------|

---

Unique Subject Identifier=5058011111-0007

Assay variable : PTINR\_VAL1 PT-INR Value

N Mean Standard Deviation Minimum Maximum

---

|   |           |           |           |           |
|---|-----------|-----------|-----------|-----------|
| 6 | 1.8466667 | 0.4288900 | 1.2500000 | 2.2700000 |
|---|-----------|-----------|-----------|-----------|

---

Unique Subject Identifier=5058011111-0009

Assay variable : PTINR\_VAL1 PT-INR Value

N Mean Standard Deviation Minimum Maximum

---

|   |           |           |           |           |
|---|-----------|-----------|-----------|-----------|
| 3 | 2.7700000 | 1.0826357 | 2.1300000 | 4.0200000 |
|---|-----------|-----------|-----------|-----------|

---



Laboratory tests at the time of obtaining Table 2-6 consent, according to the presence or absence of proton-pump inhibitors

Unique Subject Identifier=5058011111-0011

MEANS Procedure

Assay variable : PTINR\_VAL1 PT-INR Value

N Mean Standard Deviation Minimum Maximum

---

|   |           |           |           |           |
|---|-----------|-----------|-----------|-----------|
| 2 | 1.3700000 | 0.0424264 | 1.3400000 | 1.4000000 |
|---|-----------|-----------|-----------|-----------|

---

Unique Subject Identifier=5058011111-0012

Assay variable : PTINR\_VAL1 PT-INR Value

N Mean Standard Deviation Minimum Maximum

---

|   |           |           |           |           |
|---|-----------|-----------|-----------|-----------|
| 2 | 2.3650000 | 0.5727565 | 1.9600000 | 2.7700000 |
|---|-----------|-----------|-----------|-----------|

---

Unique Subject Identifier=5058011111-0017

Assay variable : PTINR\_VAL1 PT-INR Value

N Mean Standard Deviation Minimum Maximum

---

|   |           |           |           |           |
|---|-----------|-----------|-----------|-----------|
| 3 | 2.1766667 | 0.4895236 | 1.6200000 | 2.5400000 |
|---|-----------|-----------|-----------|-----------|

---

Unique Subject Identifier=5058011111-0019

Assay variable : PTINR\_VAL1 PT-INR Value

N Mean Standard Deviation Minimum Maximum

---

|   |           |           |           |           |
|---|-----------|-----------|-----------|-----------|
| 4 | 1.8350000 | 0.2305790 | 1.5300000 | 2.0500000 |
|---|-----------|-----------|-----------|-----------|

---

Laboratory tests at the time of obtaining Table 2-6 consent, according to the presence or absence of proton-pump inhibitors

Unique Subject Identifier=5058011111-0028

MEANS Procedure

Assay variable : PTINR\_VAL1 PT-INR Value

N Mean Standard Deviation Minimum Maximum

---

|   |           |           |           |           |
|---|-----------|-----------|-----------|-----------|
| 5 | 2.0800000 | 0.3664014 | 1.5400000 | 2.4200000 |
|---|-----------|-----------|-----------|-----------|

---

Unique Subject Identifier=5060111000-0002

Assay variable : PTINR\_VAL1 PT-INR Value

N Mean Standard Deviation Minimum Maximum

---

|   |           |   |           |           |
|---|-----------|---|-----------|-----------|
| 5 | 1.9000000 | 0 | 1.9000000 | 1.9000000 |
|---|-----------|---|-----------|-----------|

---

Unique Subject Identifier=5060111000-0004

Assay variable : PTINR\_VAL1 PT-INR Value

N Mean Standard Deviation Minimum Maximum

---

|   |           |           |           |           |
|---|-----------|-----------|-----------|-----------|
| 5 | 1.8600000 | 0.4219005 | 1.3000000 | 2.4000000 |
|---|-----------|-----------|-----------|-----------|

---

Unique Subject Identifier=5060111000-0008

Assay variable : PTINR\_VAL1 PT-INR Value

N Mean Standard Deviation Minimum Maximum

---

|   |           |           |           |           |
|---|-----------|-----------|-----------|-----------|
| 3 | 1.7000000 | 0.3000000 | 1.4000000 | 2.0000000 |
|---|-----------|-----------|-----------|-----------|

---

Laboratory tests at the time of obtaining Table 2-6 consent, according to the presence or absence of proton-pump inhibitors

Unique Subject Identifier=5060111000-0012

MEANS Procedure

Assay variable : PTINR\_VAL1 PT-INR Value

| N | Mean      | Standard Deviation | Minimum   | Maximum   |
|---|-----------|--------------------|-----------|-----------|
| 2 | 1.6400000 | 0.2969848          | 1.4300000 | 1.8500000 |

Unique Subject Identifier=5060111000-0016

Assay variable : PTINR\_VAL1 PT-INR Value

| N | Mean      | Standard Deviation | Minimum   | Maximum   |
|---|-----------|--------------------|-----------|-----------|
| 3 | 1.8333333 | 0.3214550          | 1.6000000 | 2.2000000 |

Unique Subject Identifier=5060111000-0018

Assay variable : PTINR\_VAL1 PT-INR Value

| N | Mean      | Standard Deviation | Minimum   | Maximum   |
|---|-----------|--------------------|-----------|-----------|
| 6 | 2.4133333 | 0.5181763          | 1.9300000 | 3.1100000 |

Unique Subject Identifier=5060111000-0025

Assay variable : PTINR\_VAL1 PT-INR Value

N Mean Standard Deviation Minimum Maximum

---

|   |          |           |          |          |
|---|----------|-----------|----------|----------|
| 3 | 2.600000 | 0.5291503 | 2.000000 | 3.000000 |
|---|----------|-----------|----------|----------|

---

Laboratory tests at the time of obtaining Table 2-6 consent, according to the presence or absence of proton-pump inhibitors

Unique Subject Identifier=5060111000-0028

MEANS Procedure

Assay variable : PTINR\_VAL1 PT-INR Value

| N | Mean      | Standard Deviation | Minimum   | Maximum   |
|---|-----------|--------------------|-----------|-----------|
| 2 | 1.8300000 | 0.1838478          | 1.7000000 | 1.9600000 |

Unique Subject Identifier=5063000000-0006

Assay variable : PTINR\_VAL1 PT-INR Value

| N | Mean      | Standard Deviation | Minimum   | Maximum   |
|---|-----------|--------------------|-----------|-----------|
| 3 | 2.2933333 | 0.1850225          | 2.1100000 | 2.4800000 |

Unique Subject Identifier=5063000000-0008

Assay variable : PTINR\_VAL1 PT-INR Value

| N | Mean      | Standard Deviation | Minimum   | Maximum   |
|---|-----------|--------------------|-----------|-----------|
| 3 | 1.9233333 | 0.1955335          | 1.7600000 | 2.1400000 |

Unique Subject Identifier=5064000000-0003

Assay variable : PTINR\_VAL1 PT-INR Value

N Mean Standard Deviation Minimum Maximum

---

|   |           |           |           |           |
|---|-----------|-----------|-----------|-----------|
| 6 | 2.4566667 | 0.7464226 | 1.4700000 | 3.4000000 |
|---|-----------|-----------|-----------|-----------|

---



Laboratory tests at the time of obtaining Table 2-6 consent, according to the presence or absence of proton-pump inhibitors

Unique Subject Identifier=506400000-0004

MEANS Procedure

Assay variable : PTINR\_VAL1 PT-INR Value

N Mean Standard Deviation Minimum Maximum

---

|   |           |           |           |           |
|---|-----------|-----------|-----------|-----------|
| 6 | 2.1483333 | 0.2926716 | 1.6900000 | 2.6000000 |
|---|-----------|-----------|-----------|-----------|

---

Unique Subject Identifier=506400000-0005

Assay variable : PTINR\_VAL1 PT-INR Value

N Mean Standard Deviation Minimum Maximum

---

|   |           |           |           |           |
|---|-----------|-----------|-----------|-----------|
| 6 | 2.0800000 | 0.8060025 | 1.1300000 | 3.2400000 |
|---|-----------|-----------|-----------|-----------|

---

Unique Subject Identifier=506400000-0006

Assay variable : PTINR\_VAL1 PT-INR Value

N Mean Standard Deviation Minimum Maximum

---

|   |           |           |           |           |
|---|-----------|-----------|-----------|-----------|
| 6 | 1.9083333 | 0.2874312 | 1.6800000 | 2.4600000 |
|---|-----------|-----------|-----------|-----------|

---

Unique Subject Identifier=5066000100-0002

Assay variable : PTINR\_VAL1 PT-INR Value

N Mean Standard Deviation Minimum Maximum

---

|   |           |           |           |           |
|---|-----------|-----------|-----------|-----------|
| 3 | 1.6700000 | 0.2426932 | 1.4000000 | 1.8700000 |
|---|-----------|-----------|-----------|-----------|

---

Laboratory tests at the time of obtaining Table 2-6 consent, according to the presence or absence of proton-pump inhibitors

Unique Subject Identifier=5066000100-0004

MEANS Procedure

Assay variable : PTINR\_VAL1 PT-INR Value

N Mean Standard Deviation Minimum Maximum

---

|   |           |           |           |           |
|---|-----------|-----------|-----------|-----------|
| 4 | 2.4850000 | 0.3889730 | 2.0500000 | 2.8700000 |
|---|-----------|-----------|-----------|-----------|

---

Unique Subject Identifier=5066000100-0012

Assay variable : PTINR\_VAL1 PT-INR Value

N Mean Standard Deviation Minimum Maximum

---

|   |           |           |           |           |
|---|-----------|-----------|-----------|-----------|
| 6 | 1.5566667 | 0.3164596 | 1.1900000 | 2.0400000 |
|---|-----------|-----------|-----------|-----------|

---

Unique Subject Identifier=5066000100-0013

Assay variable : PTINR\_VAL1 PT-INR Value

N Mean Standard Deviation Minimum Maximum

---

|   |           |           |           |           |
|---|-----------|-----------|-----------|-----------|
| 2 | 1.9400000 | 0.1272792 | 1.8500000 | 2.0300000 |
|---|-----------|-----------|-----------|-----------|

---

Unique Subject Identifier=5066000100-0015

Assay variable : PTINR\_VAL1 PT-INR Value

N Mean Standard Deviation Minimum Maximum

---

|   |           |           |           |           |
|---|-----------|-----------|-----------|-----------|
| 6 | 2.0683333 | 0.1002829 | 1.9300000 | 2.2300000 |
|---|-----------|-----------|-----------|-----------|

---

Laboratory tests at the time of obtaining Table 2-6 consent, according to the presence or absence of proton-pump inhibitors

Unique Subject Identifier=5066000100-0027

MEANS Procedure

Assay variable : PTINR\_VAL1 PT-INR Value

N Mean Standard Deviation Minimum Maximum

---

|   |           |           |           |           |
|---|-----------|-----------|-----------|-----------|
| 3 | 2.2033333 | 0.2358672 | 1.9800000 | 2.4500000 |
|---|-----------|-----------|-----------|-----------|

---

Unique Subject Identifier=5066000100-0030

Assay variable : PTINR\_VAL1 PT-INR Value

N Mean Standard Deviation Minimum Maximum

---

|   |           |           |           |           |
|---|-----------|-----------|-----------|-----------|
| 3 | 2.0833333 | 0.2542309 | 1.8600000 | 2.3600000 |
|---|-----------|-----------|-----------|-----------|

---

Unique Subject Identifier=5067000000-0001

Assay variable : PTINR\_VAL1 PT-INR Value

N Mean Standard Deviation Minimum Maximum

---

|   |           |           |           |           |
|---|-----------|-----------|-----------|-----------|
| 5 | 2.1580000 | 0.5593478 | 1.6000000 | 3.0500000 |
|---|-----------|-----------|-----------|-----------|

---

Unique Subject Identifier=5068011111-0001

Assay variable : PTINR\_VAL1 PT-INR Value

N Mean Standard Deviation Minimum Maximum

---

|   |           |           |           |           |
|---|-----------|-----------|-----------|-----------|
| 3 | 2.2366667 | 0.4652240 | 1.7800000 | 2.7100000 |
|---|-----------|-----------|-----------|-----------|

---

Laboratory tests at the time of obtaining Table 2-6 consent, according to the presence or absence of proton-pump inhibitors

Unique Subject Identifier=5068011111-0002

MEANS Procedure

Assay variable : PTINR\_VAL1 PT-INR Value

N Mean Standard Deviation Minimum Maximum

---

|   |           |           |           |           |
|---|-----------|-----------|-----------|-----------|
| 3 | 2.0066667 | 0.3150132 | 1.6900000 | 2.3200000 |
|---|-----------|-----------|-----------|-----------|

---

Unique Subject Identifier=5068011111-0015

Assay variable : PTINR\_VAL1 PT-INR Value

N Mean Standard Deviation Minimum Maximum

---

|   |           |           |           |           |
|---|-----------|-----------|-----------|-----------|
| 4 | 1.9275000 | 0.1972097 | 1.7100000 | 2.1400000 |
|---|-----------|-----------|-----------|-----------|

---

Unique Subject Identifier=5068011111-0020

Assay variable : PTINR\_VAL1 PT-INR Value

N Mean Standard Deviation Minimum Maximum

---

|   |           |           |           |           |
|---|-----------|-----------|-----------|-----------|
| 3 | 1.9900000 | 0.1417745 | 1.8300000 | 2.1000000 |
|---|-----------|-----------|-----------|-----------|

---

Unique Subject Identifier=5068011111-0023

Assay variable : PTINR\_VAL1 PT-INR Value

N Mean Standard Deviation Minimum Maximum

---

|   |           |           |           |           |
|---|-----------|-----------|-----------|-----------|
| 3 | 1.7666667 | 0.0650641 | 1.7000000 | 1.8300000 |
|---|-----------|-----------|-----------|-----------|

---



Laboratory tests at the time of obtaining Table 2-6 consent, according to the presence or absence of proton-pump inhibitors

Unique Subject Identifier=5068011111-0030

MEANS Procedure

Assay variable : PTINR\_VAL1 PT-INR Value

N Mean Standard Deviation Minimum Maximum

---

|   |           |           |           |           |
|---|-----------|-----------|-----------|-----------|
| 3 | 1.9366667 | 0.4916638 | 1.4700000 | 2.4500000 |
|---|-----------|-----------|-----------|-----------|

---

Unique Subject Identifier=5071110000-0003

Assay variable : PTINR\_VAL1 PT-INR Value

N Mean Standard Deviation Minimum Maximum

---

|   |           |           |           |           |
|---|-----------|-----------|-----------|-----------|
| 4 | 1.6650000 | 0.1271482 | 1.5300000 | 1.8200000 |
|---|-----------|-----------|-----------|-----------|

---

Unique Subject Identifier=5071110000-0011

Assay variable : PTINR\_VAL1 PT-INR Value

N Mean Standard Deviation Minimum Maximum

---

|   |           |           |           |           |
|---|-----------|-----------|-----------|-----------|
| 6 | 0.9700000 | 0.0167332 | 0.9400000 | 0.9800000 |
|---|-----------|-----------|-----------|-----------|

---

Unique Subject Identifier=5071110000-0021

Assay variable : PTINR\_VAL1 PT-INR Value

N Mean Standard Deviation Minimum Maximum

---

|   |           |           |           |           |
|---|-----------|-----------|-----------|-----------|
| 6 | 1.2183333 | 0.2004412 | 1.0300000 | 1.6000000 |
|---|-----------|-----------|-----------|-----------|

---

Laboratory tests at the time of obtaining Table 2-6 consent, according to the presence or absence of proton-pump inhibitors

Unique Subject Identifier=5071110000-0022

MEANS Procedure

Assay variable : PTINR\_VAL1 PT-INR Value

N Mean Standard Deviation Minimum Maximum

---

|   |           |           |           |           |
|---|-----------|-----------|-----------|-----------|
| 5 | 2.0000000 | 0.4756049 | 1.5000000 | 2.7800000 |
|---|-----------|-----------|-----------|-----------|

---

Unique Subject Identifier=5073000010-0003

Assay variable : PTINR\_VAL1 PT-INR Value

N Mean Standard Deviation Minimum Maximum

---

|   |           |           |           |           |
|---|-----------|-----------|-----------|-----------|
| 6 | 1.9633333 | 0.9886287 | 1.0700000 | 3.7200000 |
|---|-----------|-----------|-----------|-----------|

---

Unique Subject Identifier=5073000010-0005

Assay variable : PTINR\_VAL1 PT-INR Value

N Mean Standard Deviation Minimum Maximum

---

|   |           |           |           |           |
|---|-----------|-----------|-----------|-----------|
| 6 | 1.8433333 | 0.5318521 | 1.1900000 | 2.3700000 |
|---|-----------|-----------|-----------|-----------|

---

Unique Subject Identifier=5073000010-0010

Assay variable : PTINR\_VAL1 PT-INR Value

N Mean Standard Deviation Minimum Maximum

---

|   |           |           |           |           |
|---|-----------|-----------|-----------|-----------|
| 6 | 1.7983333 | 0.6251853 | 1.1700000 | 2.7100000 |
|---|-----------|-----------|-----------|-----------|

---

Laboratory tests at the time of obtaining Table 2-6 consent, according to the presence or absence of proton-pump inhibitors

Unique Subject Identifier=5073000010-0013

MEANS Procedure

Assay variable : PTINR\_VAL1 PT-INR Value

N Mean Standard Deviation Minimum Maximum

---

|   |           |           |           |           |
|---|-----------|-----------|-----------|-----------|
| 4 | 1.8775000 | 0.1372042 | 1.7000000 | 2.0000000 |
|---|-----------|-----------|-----------|-----------|

---

Unique Subject Identifier=5073000010-0015

Assay variable : PTINR\_VAL1 PT-INR Value

N Mean Standard Deviation Minimum Maximum

---

|   |           |           |           |           |
|---|-----------|-----------|-----------|-----------|
| 5 | 1.6880000 | 0.3448478 | 1.4300000 | 2.2900000 |
|---|-----------|-----------|-----------|-----------|

---

Unique Subject Identifier=5073000010-0017

Assay variable : PTINR\_VAL1 PT-INR Value

N Mean Standard Deviation Minimum Maximum

---

|   |           |           |           |           |
|---|-----------|-----------|-----------|-----------|
| 3 | 2.1266667 | 0.1242310 | 2.0500000 | 2.2700000 |
|---|-----------|-----------|-----------|-----------|

---

Unique Subject Identifier=5073000010-0026

Assay variable : PTINR\_VAL1 PT-INR Value

N Mean Standard Deviation Minimum Maximum

---

|   |          |           |          |          |
|---|----------|-----------|----------|----------|
| 5 | 2.022000 | 0.3020265 | 1.600000 | 2.360000 |
|---|----------|-----------|----------|----------|

---

Laboratory tests at the time of obtaining Table 2-6 consent, according to the presence or absence of proton-pump inhibitors

Unique Subject Identifier=5073000010-0031

MEANS Procedure

Assay variable : PTINR\_VAL1 PT-INR Value

N Mean Standard Deviation Minimum Maximum

---

|   |           |           |           |           |
|---|-----------|-----------|-----------|-----------|
| 4 | 1.7225000 | 0.1839157 | 1.5000000 | 1.9100000 |
|---|-----------|-----------|-----------|-----------|

---

Unique Subject Identifier=5073000010-0048

Assay variable : PTINR\_VAL1 PT-INR Value

N Mean Standard Deviation Minimum Maximum

---

|   |           |           |           |           |
|---|-----------|-----------|-----------|-----------|
| 4 | 2.0825000 | 0.2471673 | 1.8500000 | 2.4200000 |
|---|-----------|-----------|-----------|-----------|

---

Unique Subject Identifier=5073000010-0051

Assay variable : PTINR\_VAL1 PT-INR Value

N Mean Standard Deviation Minimum Maximum

---

|   |           |           |           |           |
|---|-----------|-----------|-----------|-----------|
| 3 | 2.6566667 | 0.1201388 | 2.5400000 | 2.7800000 |
|---|-----------|-----------|-----------|-----------|

---

Unique Subject Identifier=5073000010-0055

Assay variable : PTINR\_VAL1 PT-INR Value

N Mean Standard Deviation Minimum Maximum

---

|   |          |          |          |          |
|---|----------|----------|----------|----------|
| 2 | 2.440000 | 0.212132 | 2.290000 | 2.590000 |
|---|----------|----------|----------|----------|

---



Laboratory tests at the time of obtaining Table 2-6 consent, according to the presence or absence of proton-pump inhibitors

Unique Subject Identifier=5073000010-0066

MEANS Procedure

Assay variable : PTINR\_VAL1 PT-INR Value

N Mean Standard Deviation Minimum Maximum

---

|   |           |           |           |           |
|---|-----------|-----------|-----------|-----------|
| 4 | 2.7025000 | 0.2994857 | 2.3900000 | 3.1000000 |
|---|-----------|-----------|-----------|-----------|

---

Unique Subject Identifier=5073000010-0075

Assay variable : PTINR\_VAL1 PT-INR Value

N Mean Standard Deviation Minimum Maximum

---

|   |           |           |           |           |
|---|-----------|-----------|-----------|-----------|
| 3 | 1.7166667 | 0.0971253 | 1.6100000 | 1.8000000 |
|---|-----------|-----------|-----------|-----------|

---

Unique Subject Identifier=5073000010-0081

Assay variable : PTINR\_VAL1 PT-INR Value

N Mean Standard Deviation Minimum Maximum

---

|   |           |           |           |           |
|---|-----------|-----------|-----------|-----------|
| 5 | 2.0520000 | 0.5072179 | 1.5300000 | 2.8200000 |
|---|-----------|-----------|-----------|-----------|

---

Unique Subject Identifier=5073000010-0083

Assay variable : PTINR\_VAL1 PT-INR Value

N Mean Standard Deviation Minimum Maximum

---

|   |          |           |          |          |
|---|----------|-----------|----------|----------|
| 3 | 2.010000 | 0.6153861 | 1.630000 | 2.720000 |
|---|----------|-----------|----------|----------|

---

Laboratory tests at the time of obtaining Table 2-6 consent, according to the presence or absence of proton-pump inhibitors

Unique Subject Identifier=5073000010-0085

MEANS Procedure

Assay variable : PTINR\_VAL1 PT-INR Value

| N | Mean      | Standard Deviation | Minimum   | Maximum   |
|---|-----------|--------------------|-----------|-----------|
| 4 | 1.3875000 | 0.1244655          | 1.2100000 | 1.5000000 |

Unique Subject Identifier=5073000010-0086

Assay variable : PTINR\_VAL1 PT-INR Value

| N | Mean      | Standard Deviation | Minimum   | Maximum   |
|---|-----------|--------------------|-----------|-----------|
| 4 | 1.6675000 | 0.5208567          | 1.1400000 | 2.3500000 |

Unique Subject Identifier=5098010011-0005

Assay variable : PTINR\_VAL1 PT-INR Value

| N | Mean      | Standard Deviation | Minimum   | Maximum   |
|---|-----------|--------------------|-----------|-----------|
| 4 | 1.7200000 | 0.1430618          | 1.5600000 | 1.9000000 |

Unique Subject Identifier=5098010011-0007

Assay variable : PTINR\_VAL1 PT-INR Value

N Mean Standard Deviation Minimum Maximum

---

|   |          |           |          |          |
|---|----------|-----------|----------|----------|
| 5 | 2.140000 | 0.3208582 | 1.760000 | 2.640000 |
|---|----------|-----------|----------|----------|

---

Laboratory tests at the time of obtaining Table 2-6 consent, according to the presence or absence of proton-pump inhibitors

Unique Subject Identifier=5098010011-0008

MEANS Procedure

Assay variable : PTINR\_VAL1 PT-INR Value

| N | Mean      | Standard Deviation | Minimum   | Maximum   |
|---|-----------|--------------------|-----------|-----------|
| 5 | 2.0060000 | 0.2215401          | 1.7800000 | 2.3600000 |

Unique Subject Identifier=5098010011-0009

Assay variable : PTINR\_VAL1 PT-INR Value

| N | Mean      | Standard Deviation | Minimum   | Maximum   |
|---|-----------|--------------------|-----------|-----------|
| 5 | 1.9680000 | 0.3094673          | 1.6900000 | 2.4800000 |

Unique Subject Identifier=5098010011-0016

Assay variable : PTINR\_VAL1 PT-INR Value

| N | Mean      | Standard Deviation | Minimum   | Maximum   |
|---|-----------|--------------------|-----------|-----------|
| 5 | 1.8220000 | 0.1934425          | 1.5000000 | 2.0000000 |

Unique Subject Identifier=5098010011-0017

Assay variable : PTINR\_VAL1 PT-INR Value

N Mean Standard Deviation Minimum Maximum

---

|   |          |           |          |          |
|---|----------|-----------|----------|----------|
| 6 | 2.118333 | 0.4181587 | 1.680000 | 2.890000 |
|---|----------|-----------|----------|----------|

---

Laboratory tests at the time of obtaining Table 2-6 consent, according to the presence or absence of proton-pump inhibitors

Unique Subject Identifier=5098010011-0020

MEANS Procedure

Assay variable : PTINR\_VAL1 PT-INR Value

N Mean Standard Deviation Minimum Maximum

---

|   |           |           |           |           |
|---|-----------|-----------|-----------|-----------|
| 2 | 2.4150000 | 0.0212132 | 2.4000000 | 2.4300000 |
|---|-----------|-----------|-----------|-----------|

---

Unique Subject Identifier=5098010011-0021

Assay variable : PTINR\_VAL1 PT-INR Value

N Mean Standard Deviation Minimum Maximum

---

|   |           |           |           |           |
|---|-----------|-----------|-----------|-----------|
| 4 | 1.9525000 | 0.2828869 | 1.6300000 | 2.2800000 |
|---|-----------|-----------|-----------|-----------|

---

Unique Subject Identifier=5098010011-0024

Assay variable : PTINR\_VAL1 PT-INR Value

N Mean Standard Deviation Minimum Maximum

---

|   |           |           |           |           |
|---|-----------|-----------|-----------|-----------|
| 6 | 2.2450000 | 0.2388933 | 2.0100000 | 2.6700000 |
|---|-----------|-----------|-----------|-----------|

---

Unique Subject Identifier=5098010011-0027

Assay variable : PTINR\_VAL1 PT-INR Value

N Mean Standard Deviation Minimum Maximum

---

|   |           |           |           |           |
|---|-----------|-----------|-----------|-----------|
| 4 | 1.6925000 | 0.3346018 | 1.2700000 | 2.0400000 |
|---|-----------|-----------|-----------|-----------|

---



Laboratory tests at the time of obtaining Table 2-6 consent, according to the presence or absence of proton-pump inhibitors

Unique Subject Identifier=5098010011-0028

MEANS Procedure

Assay variable : PTINR\_VAL1 PT-INR Value

N Mean Standard Deviation Minimum Maximum

---

|   |           |           |           |           |
|---|-----------|-----------|-----------|-----------|
| 6 | 1.6383333 | 0.0915241 | 1.5000000 | 1.7300000 |
|---|-----------|-----------|-----------|-----------|

---

Unique Subject Identifier=5098010011-0030

Assay variable : PTINR\_VAL1 PT-INR Value

N Mean Standard Deviation Minimum Maximum

---

|   |           |           |           |           |
|---|-----------|-----------|-----------|-----------|
| 6 | 2.0366667 | 0.8263091 | 1.2600000 | 3.6100000 |
|---|-----------|-----------|-----------|-----------|

---

Unique Subject Identifier=5098010011-0031

Assay variable : PTINR\_VAL1 PT-INR Value

N Mean Standard Deviation Minimum Maximum

---

|   |           |           |           |           |
|---|-----------|-----------|-----------|-----------|
| 4 | 2.3425000 | 0.1327592 | 2.2000000 | 2.4700000 |
|---|-----------|-----------|-----------|-----------|

---

Unique Subject Identifier=5098010011-0032

Assay variable : PTINR\_VAL1 PT-INR Value

N Mean Standard Deviation Minimum Maximum

---

|   |           |           |           |           |
|---|-----------|-----------|-----------|-----------|
| 5 | 1.8900000 | 0.1146734 | 1.7500000 | 2.0600000 |
|---|-----------|-----------|-----------|-----------|

---

Laboratory tests at the time of obtaining Table 2-6 consent, according to the presence or absence of proton-pump inhibitors

Unique Subject Identifier=5098010011-0035

MEANS Procedure

Assay variable : PTINR\_VAL1 PT-INR Value

| N | Mean      | Standard Deviation | Minimum   | Maximum   |
|---|-----------|--------------------|-----------|-----------|
| 5 | 2.0460000 | 0.4027779          | 1.8000000 | 2.7600000 |

Unique Subject Identifier=5098010011-0038

Assay variable : PTINR\_VAL1 PT-INR Value

| N | Mean      | Standard Deviation | Minimum   | Maximum   |
|---|-----------|--------------------|-----------|-----------|
| 4 | 2.9025000 | 0.7606740          | 2.1600000 | 3.9300000 |

Unique Subject Identifier=5098010011-0043

Assay variable : PTINR\_VAL1 PT-INR Value

| N | Mean      | Standard Deviation | Minimum   | Maximum   |
|---|-----------|--------------------|-----------|-----------|
| 5 | 1.8640000 | 0.1955249          | 1.6300000 | 2.1000000 |

Unique Subject Identifier=5098010011-0044

Assay variable : PTINR\_VAL1 PT-INR Value

N Mean Standard Deviation Minimum Maximum

---

|   |           |           |           |           |
|---|-----------|-----------|-----------|-----------|
| 5 | 1.6140000 | 0.3165912 | 1.3000000 | 2.1100000 |
|---|-----------|-----------|-----------|-----------|

---

Laboratory tests at the time of obtaining Table 2-6 consent, according to the presence or absence of proton-pump inhibitors

Unique Subject Identifier=5098010011-0054

MEANS Procedure

Assay variable : PTINR\_VAL1 PT-INR Value

N Mean Standard Deviation Minimum Maximum

---

|   |           |           |           |           |
|---|-----------|-----------|-----------|-----------|
| 6 | 1.4150000 | 0.4225044 | 1.0600000 | 2.1300000 |
|---|-----------|-----------|-----------|-----------|

---

Unique Subject Identifier=5098010011-0059

Assay variable : PTINR\_VAL1 PT-INR Value

N Mean Standard Deviation Minimum Maximum

---

|   |           |           |           |           |
|---|-----------|-----------|-----------|-----------|
| 6 | 1.7233333 | 0.2260678 | 1.4600000 | 2.0200000 |
|---|-----------|-----------|-----------|-----------|

---

Unique Subject Identifier=5098010011-0061

Assay variable : PTINR\_VAL1 PT-INR Value

N Mean Standard Deviation Minimum Maximum

---

|   |           |           |           |           |
|---|-----------|-----------|-----------|-----------|
| 4 | 1.8800000 | 0.2367840 | 1.6300000 | 2.1800000 |
|---|-----------|-----------|-----------|-----------|

---

Unique Subject Identifier=5098010011-0063

Assay variable : PTINR\_VAL1 PT-INR Value

N Mean Standard Deviation Minimum Maximum

---

|   |           |           |           |           |
|---|-----------|-----------|-----------|-----------|
| 5 | 2.3260000 | 0.3467420 | 1.9200000 | 2.6700000 |
|---|-----------|-----------|-----------|-----------|

---

Laboratory tests at the time of obtaining Table 2-6 consent, according to the presence or absence of proton-pump inhibitors

Unique Subject Identifier=5098010011-0065

MEANS Procedure

Assay variable : PTINR\_VAL1 PT-INR Value

N Mean Standard Deviation Minimum Maximum

---

|   |           |           |           |           |
|---|-----------|-----------|-----------|-----------|
| 3 | 2.3366667 | 0.1401190 | 2.1800000 | 2.4500000 |
|---|-----------|-----------|-----------|-----------|

---

Unique Subject Identifier=5098010011-0066

Assay variable : PTINR\_VAL1 PT-INR Value

N Mean Standard Deviation Minimum Maximum

---

|   |           |           |           |           |
|---|-----------|-----------|-----------|-----------|
| 4 | 2.2750000 | 0.4327817 | 1.8500000 | 2.8700000 |
|---|-----------|-----------|-----------|-----------|

---

Unique Subject Identifier=5098010011-0067

Assay variable : PTINR\_VAL1 PT-INR Value

N Mean Standard Deviation Minimum Maximum

---

|   |           |           |           |           |
|---|-----------|-----------|-----------|-----------|
| 3 | 2.0966667 | 0.1305118 | 1.9600000 | 2.2200000 |
|---|-----------|-----------|-----------|-----------|

---

Unique Subject Identifier=5098010011-0068

Assay variable : PTINR\_VAL1 PT-INR Value

N Mean Standard Deviation Minimum Maximum

---

|   |           |           |           |           |
|---|-----------|-----------|-----------|-----------|
| 4 | 2.3975000 | 0.2943213 | 2.0300000 | 2.6900000 |
|---|-----------|-----------|-----------|-----------|

---



Laboratory tests at the time of obtaining Table 2-6 consent, according to the presence or absence of proton-pump inhibitors

Unique Subject Identifier=5098010011-0069

MEANS Procedure

Assay variable : PTINR\_VAL1 PT-INR Value

N Mean Standard Deviation Minimum Maximum

---

|   |           |           |           |           |
|---|-----------|-----------|-----------|-----------|
| 4 | 2.3350000 | 0.6630485 | 1.5600000 | 3.1800000 |
|---|-----------|-----------|-----------|-----------|

---

Unique Subject Identifier=5098010011-0070

Assay variable : PTINR\_VAL1 PT-INR Value

N Mean Standard Deviation Minimum Maximum

---

|   |           |           |           |           |
|---|-----------|-----------|-----------|-----------|
| 5 | 1.9560000 | 0.3090793 | 1.6300000 | 2.3600000 |
|---|-----------|-----------|-----------|-----------|

---

Unique Subject Identifier=5098010011-0072

Assay variable : PTINR\_VAL1 PT-INR Value

N Mean Standard Deviation Minimum Maximum

---

|   |           |           |           |           |
|---|-----------|-----------|-----------|-----------|
| 4 | 2.2850000 | 0.3152248 | 2.0500000 | 2.7500000 |
|---|-----------|-----------|-----------|-----------|

---

Unique Subject Identifier=5098010011-0074

Assay variable : PTINR\_VAL1 PT-INR Value

N Mean Standard Deviation Minimum Maximum

---

|   |           |           |           |           |
|---|-----------|-----------|-----------|-----------|
| 4 | 2.5325000 | 0.9687578 | 1.2400000 | 3.4100000 |
|---|-----------|-----------|-----------|-----------|

---

Laboratory tests at the time of obtaining Table 2-6 consent, according to the presence or absence of proton-pump inhibitors

Unique Subject Identifier=5098010011-0076

MEANS Procedure

Assay variable : PTINR\_VAL1 PT-INR Value

N Mean Standard Deviation Minimum Maximum

---

|   |           |           |           |           |
|---|-----------|-----------|-----------|-----------|
| 4 | 2.1050000 | 0.4198809 | 1.5400000 | 2.5000000 |
|---|-----------|-----------|-----------|-----------|

---

Unique Subject Identifier=5098010011-0077

Assay variable : PTINR\_VAL1 PT-INR Value

N Mean Standard Deviation Minimum Maximum

---

|   |           |           |           |           |
|---|-----------|-----------|-----------|-----------|
| 4 | 2.1875000 | 0.3866415 | 1.6100000 | 2.4100000 |
|---|-----------|-----------|-----------|-----------|

---

Unique Subject Identifier=5098010011-0080

Assay variable : PTINR\_VAL1 PT-INR Value

N Mean Standard Deviation Minimum Maximum

---

|   |           |           |           |           |
|---|-----------|-----------|-----------|-----------|
| 4 | 1.9800000 | 0.2224110 | 1.7300000 | 2.2500000 |
|---|-----------|-----------|-----------|-----------|

---

Unique Subject Identifier=5098010011-0082

Assay variable : PTINR\_VAL1 PT-INR Value

N Mean Standard Deviation Minimum Maximum

---

|   |           |           |           |           |
|---|-----------|-----------|-----------|-----------|
| 5 | 2.0840000 | 0.1331540 | 1.9700000 | 2.2700000 |
|---|-----------|-----------|-----------|-----------|

---

Laboratory tests at the time of obtaining Table 2-6 consent, according to the presence or absence of proton-pump inhibitors

Unique Subject Identifier=5098010011-0087

MEANS Procedure

Assay variable : PTINR\_VAL1 PT-INR Value

N Mean Standard Deviation Minimum Maximum

---

|   |           |           |           |           |
|---|-----------|-----------|-----------|-----------|
| 4 | 2.1250000 | 0.1135782 | 2.0100000 | 2.2500000 |
|---|-----------|-----------|-----------|-----------|

---

Unique Subject Identifier=5098010011-0089

Assay variable : PTINR\_VAL1 PT-INR Value

N Mean Standard Deviation Minimum Maximum

---

|   |           |           |           |           |
|---|-----------|-----------|-----------|-----------|
| 5 | 1.9860000 | 0.2320129 | 1.6700000 | 2.2600000 |
|---|-----------|-----------|-----------|-----------|

---

Unique Subject Identifier=5100001000-0001

Assay variable : PTINR\_VAL1 PT-INR Value

N Mean Standard Deviation Minimum Maximum

---

|   |           |           |           |           |
|---|-----------|-----------|-----------|-----------|
| 4 | 1.4300000 | 0.1205543 | 1.3200000 | 1.6000000 |
|---|-----------|-----------|-----------|-----------|

---

Unique Subject Identifier=5100001000-0003

Assay variable : PTINR\_VAL1 PT-INR Value

N Mean Standard Deviation Minimum Maximum

---

|   |           |           |           |           |
|---|-----------|-----------|-----------|-----------|
| 4 | 1.8025000 | 0.3967682 | 1.5100000 | 2.3500000 |
|---|-----------|-----------|-----------|-----------|

---

Laboratory tests at the time of obtaining Table 2-6 consent, according to the presence or absence of proton-pump inhibitors

Unique Subject Identifier=5100001000-0006

MEANS Procedure

Assay variable : PTINR\_VAL1 PT-INR Value

| N | Mean      | Standard Deviation | Minimum   | Maximum   |
|---|-----------|--------------------|-----------|-----------|
| 4 | 1.7250000 | 0.2724579          | 1.4600000 | 1.9600000 |

Unique Subject Identifier=5101010000-0002

Assay variable : PTINR\_VAL1 PT-INR Value

| N | Mean      | Standard Deviation | Minimum   | Maximum   |
|---|-----------|--------------------|-----------|-----------|
| 2 | 2.3000000 | 0.1131371          | 2.2200000 | 2.3800000 |

Unique Subject Identifier=5103000000-0002

Assay variable : PTINR\_VAL1 PT-INR Value

| N | Mean      | Standard Deviation | Minimum   | Maximum   |
|---|-----------|--------------------|-----------|-----------|
| 6 | 2.0833333 | 0.3970726          | 1.5000000 | 2.7000000 |

Unique Subject Identifier=5103000000-0003

Assay variable : PTINR\_VAL1 PT-INR Value

N Mean Standard Deviation Minimum Maximum

---

|   |          |           |          |          |
|---|----------|-----------|----------|----------|
| 6 | 2.350000 | 0.3937004 | 1.800000 | 2.800000 |
|---|----------|-----------|----------|----------|

---



Laboratory tests at the time of obtaining Table 2-6 consent, according to the presence or absence of proton-pump inhibitors

Unique Subject Identifier=5103000000-0009

MEANS Procedure

Assay variable : PTINR\_VAL1 PT-INR Value

N Mean Standard Deviation Minimum Maximum

---

|   |           |           |           |           |
|---|-----------|-----------|-----------|-----------|
| 6 | 1.9333333 | 0.4457204 | 1.6000000 | 2.8000000 |
|---|-----------|-----------|-----------|-----------|

---

Unique Subject Identifier=5103000000-0017

Assay variable : PTINR\_VAL1 PT-INR Value

N Mean Standard Deviation Minimum Maximum

---

|   |           |           |           |           |
|---|-----------|-----------|-----------|-----------|
| 6 | 1.9166667 | 0.9108604 | 1.2000000 | 3.7000000 |
|---|-----------|-----------|-----------|-----------|

---

Unique Subject Identifier=5103000000-0019

Assay variable : PTINR\_VAL1 PT-INR Value

N Mean Standard Deviation Minimum Maximum

---

|   |           |           |           |           |
|---|-----------|-----------|-----------|-----------|
| 6 | 2.4333333 | 0.3614784 | 2.0000000 | 3.0000000 |
|---|-----------|-----------|-----------|-----------|

---

Unique Subject Identifier=5103000000-0020

Assay variable : PTINR\_VAL1 PT-INR Value

N Mean Standard Deviation Minimum Maximum

---

|   |          |           |          |          |
|---|----------|-----------|----------|----------|
| 6 | 2.000000 | 0.2966479 | 1.700000 | 2.500000 |
|---|----------|-----------|----------|----------|

---

Laboratory tests at the time of obtaining Table 2-6 consent, according to the presence or absence of proton-pump inhibitors

Unique Subject Identifier=5103000000-0026

MEANS Procedure

Assay variable : PTINR\_VAL1 PT-INR Value

N Mean Standard Deviation Minimum Maximum

---

|   |           |           |           |           |
|---|-----------|-----------|-----------|-----------|
| 6 | 1.6666667 | 0.2422120 | 1.3000000 | 2.0000000 |
|---|-----------|-----------|-----------|-----------|

---

Unique Subject Identifier=5103000000-0034

Assay variable : PTINR\_VAL1 PT-INR Value

N Mean Standard Deviation Minimum Maximum

---

|   |           |           |           |           |
|---|-----------|-----------|-----------|-----------|
| 6 | 1.7833333 | 0.3371449 | 1.3000000 | 2.3000000 |
|---|-----------|-----------|-----------|-----------|

---

Unique Subject Identifier=5103000000-0039

Assay variable : PTINR\_VAL1 PT-INR Value

N Mean Standard Deviation Minimum Maximum

---

|   |           |           |           |           |
|---|-----------|-----------|-----------|-----------|
| 6 | 1.8833333 | 0.2041241 | 1.6000000 | 2.2000000 |
|---|-----------|-----------|-----------|-----------|

---

Unique Subject Identifier=5103000000-0040

Assay variable : PTINR\_VAL1 PT-INR Value

N Mean Standard Deviation Minimum Maximum

---

|   |          |           |          |          |
|---|----------|-----------|----------|----------|
| 6 | 2.250000 | 0.6024948 | 1.600000 | 3.100000 |
|---|----------|-----------|----------|----------|

---

Laboratory tests at the time of obtaining Table 2-6 consent, according to the presence or absence of proton-pump inhibitors

Unique Subject Identifier=5103000000-0044

MEANS Procedure

Assay variable : PTINR\_VAL1 PT-INR Value

N Mean Standard Deviation Minimum Maximum

---

|   |           |           |           |           |
|---|-----------|-----------|-----------|-----------|
| 6 | 1.9500000 | 0.3507136 | 1.6000000 | 2.3000000 |
|---|-----------|-----------|-----------|-----------|

---

Unique Subject Identifier=5103000000-0045

Assay variable : PTINR\_VAL1 PT-INR Value

N Mean Standard Deviation Minimum Maximum

---

|   |           |           |           |           |
|---|-----------|-----------|-----------|-----------|
| 6 | 1.7833333 | 0.2136976 | 1.5000000 | 2.0000000 |
|---|-----------|-----------|-----------|-----------|

---

Unique Subject Identifier=5103000000-0047

Assay variable : PTINR\_VAL1 PT-INR Value

N Mean Standard Deviation Minimum Maximum

---

|   |           |           |           |           |
|---|-----------|-----------|-----------|-----------|
| 6 | 2.0833333 | 0.3920034 | 1.5000000 | 2.7000000 |
|---|-----------|-----------|-----------|-----------|

---

Unique Subject Identifier=5103000000-0049

Assay variable : PTINR\_VAL1 PT-INR Value

N Mean Standard Deviation Minimum Maximum

---

|   |           |           |           |           |
|---|-----------|-----------|-----------|-----------|
| 6 | 1.9833333 | 0.3763863 | 1.4000000 | 2.5000000 |
|---|-----------|-----------|-----------|-----------|

---

Laboratory tests at the time of obtaining Table 2-6 consent, according to the presence or absence of proton-pump inhibitors

Unique Subject Identifier=5103000000-0050

MEANS Procedure

Assay variable : PTINR\_VAL1 PT-INR Value

N Mean Standard Deviation Minimum Maximum

---

|   |           |           |           |           |
|---|-----------|-----------|-----------|-----------|
| 6 | 2.1166667 | 0.2786874 | 1.7000000 | 2.4000000 |
|---|-----------|-----------|-----------|-----------|

---

Unique Subject Identifier=5103000000-0051

Assay variable : PTINR\_VAL1 PT-INR Value

N Mean Standard Deviation Minimum Maximum

---

|   |           |           |           |           |
|---|-----------|-----------|-----------|-----------|
| 5 | 1.8000000 | 0.3240370 | 1.4000000 | 2.1000000 |
|---|-----------|-----------|-----------|-----------|

---

Unique Subject Identifier=5103000000-0058

Assay variable : PTINR\_VAL1 PT-INR Value

N Mean Standard Deviation Minimum Maximum

---

|   |           |           |           |           |
|---|-----------|-----------|-----------|-----------|
| 6 | 1.5833333 | 0.1329160 | 1.4000000 | 1.8000000 |
|---|-----------|-----------|-----------|-----------|

---

Unique Subject Identifier=5103000000-0060

Assay variable : PTINR\_VAL1 PT-INR Value

N Mean Standard Deviation Minimum Maximum

---

|   |           |           |           |           |
|---|-----------|-----------|-----------|-----------|
| 6 | 1.9833333 | 0.4020779 | 1.5000000 | 2.7000000 |
|---|-----------|-----------|-----------|-----------|

---



Laboratory tests at the time of obtaining Table 2-6 consent, according to the presence or absence of proton-pump inhibitors

Unique Subject Identifier=5103000000-0061

MEANS Procedure

Assay variable : PTINR\_VAL1 PT-INR Value

N Mean Standard Deviation Minimum Maximum

---

|   |           |           |           |           |
|---|-----------|-----------|-----------|-----------|
| 5 | 1.6600000 | 0.2509980 | 1.3000000 | 2.0000000 |
|---|-----------|-----------|-----------|-----------|

---

Unique Subject Identifier=5103000000-0062

Assay variable : PTINR\_VAL1 PT-INR Value

N Mean Standard Deviation Minimum Maximum

---

|   |           |           |           |           |
|---|-----------|-----------|-----------|-----------|
| 6 | 1.6300000 | 0.1412799 | 1.5000000 | 1.9000000 |
|---|-----------|-----------|-----------|-----------|

---

Unique Subject Identifier=5103000000-0064

Assay variable : PTINR\_VAL1 PT-INR Value

N Mean Standard Deviation Minimum Maximum

---

|   |           |           |           |           |
|---|-----------|-----------|-----------|-----------|
| 6 | 2.0666667 | 0.2875181 | 1.7000000 | 2.5000000 |
|---|-----------|-----------|-----------|-----------|

---

Unique Subject Identifier=5103000000-0067

Assay variable : PTINR\_VAL1 PT-INR Value

N Mean Standard Deviation Minimum Maximum

---

|   |          |           |          |          |
|---|----------|-----------|----------|----------|
| 6 | 2.050000 | 0.6090977 | 1.200000 | 3.000000 |
|---|----------|-----------|----------|----------|

---

Laboratory tests at the time of obtaining Table 2-6 consent, according to the presence or absence of proton-pump inhibitors

Unique Subject Identifier=5103000000-0069

MEANS Procedure

Assay variable : PTINR\_VAL1 PT-INR Value

N Mean Standard Deviation Minimum Maximum

---

|   |           |           |           |           |
|---|-----------|-----------|-----------|-----------|
| 6 | 2.2000000 | 0.5176872 | 1.6000000 | 2.8000000 |
|---|-----------|-----------|-----------|-----------|

---

Unique Subject Identifier=5103000000-0075

Assay variable : PTINR\_VAL1 PT-INR Value

N Mean Standard Deviation Minimum Maximum

---

|   |           |           |           |           |
|---|-----------|-----------|-----------|-----------|
| 6 | 1.8333333 | 0.1632993 | 1.6000000 | 2.1000000 |
|---|-----------|-----------|-----------|-----------|

---

Unique Subject Identifier=5103000000-0076

Assay variable : PTINR\_VAL1 PT-INR Value

N Mean Standard Deviation Minimum Maximum

---

|   |           |           |           |           |
|---|-----------|-----------|-----------|-----------|
| 6 | 1.8166667 | 0.1329160 | 1.6000000 | 1.9000000 |
|---|-----------|-----------|-----------|-----------|

---

Unique Subject Identifier=5103000000-0078

Assay variable : PTINR\_VAL1 PT-INR Value

N Mean Standard Deviation Minimum Maximum

---

|   |          |           |          |          |
|---|----------|-----------|----------|----------|
| 6 | 1.450000 | 0.2073644 | 1.100000 | 1.700000 |
|---|----------|-----------|----------|----------|

---

Laboratory tests at the time of obtaining Table 2-6 consent, according to the presence or absence of proton-pump inhibitors

Unique Subject Identifier=5103000000-0079

MEANS Procedure

Assay variable : PTINR\_VAL1 PT-INR Value

N Mean Standard Deviation Minimum Maximum

---

|   |           |           |           |           |
|---|-----------|-----------|-----------|-----------|
| 6 | 2.1500000 | 0.2345208 | 1.7000000 | 2.3000000 |
|---|-----------|-----------|-----------|-----------|

---

Unique Subject Identifier=5103000000-0084

Assay variable : PTINR\_VAL1 PT-INR Value

N Mean Standard Deviation Minimum Maximum

---

|   |           |           |           |           |
|---|-----------|-----------|-----------|-----------|
| 6 | 1.8666667 | 0.2732520 | 1.5000000 | 2.3000000 |
|---|-----------|-----------|-----------|-----------|

---

Unique Subject Identifier=5103000000-0087

Assay variable : PTINR\_VAL1 PT-INR Value

N Mean Standard Deviation Minimum Maximum

---

|   |           |           |           |           |
|---|-----------|-----------|-----------|-----------|
| 6 | 1.7666667 | 0.3614784 | 1.4000000 | 2.4000000 |
|---|-----------|-----------|-----------|-----------|

---

Unique Subject Identifier=5103000000-0089

Assay variable : PTINR\_VAL1 PT-INR Value

N Mean Standard Deviation Minimum Maximum

---

|   |           |           |           |           |
|---|-----------|-----------|-----------|-----------|
| 6 | 1.7833333 | 0.2714160 | 1.4000000 | 2.2000000 |
|---|-----------|-----------|-----------|-----------|

---

Laboratory tests at the time of obtaining Table 2-6 consent, according to the presence or absence of proton-pump inhibitors

Unique Subject Identifier=5103000000-0091

MEANS Procedure

Assay variable : PTINR\_VAL1 PT-INR Value

| N | Mean      | Standard Deviation | Minimum   | Maximum   |
|---|-----------|--------------------|-----------|-----------|
| 6 | 1.5833333 | 0.2926887          | 1.3000000 | 2.0000000 |

Unique Subject Identifier=5103000000-0092

Assay variable : PTINR\_VAL1 PT-INR Value

| N | Mean      | Standard Deviation | Minimum   | Maximum   |
|---|-----------|--------------------|-----------|-----------|
| 6 | 1.9666667 | 0.3829708          | 1.6000000 | 2.5000000 |

Unique Subject Identifier=5103000000-0098

Assay variable : PTINR\_VAL1 PT-INR Value

| N | Mean      | Standard Deviation | Minimum   | Maximum   |
|---|-----------|--------------------|-----------|-----------|
| 6 | 2.1333333 | 0.4844241          | 1.5000000 | 2.8000000 |

Unique Subject Identifier=5103000000-0106

Assay variable : PTINR\_VAL1 PT-INR Value

N Mean Standard Deviation Minimum Maximum

---

|   |           |           |           |           |
|---|-----------|-----------|-----------|-----------|
| 6 | 1.7333333 | 0.2503331 | 1.4000000 | 2.1000000 |
|---|-----------|-----------|-----------|-----------|

---



Laboratory tests at the time of obtaining Table 2-6 consent, according to the presence or absence of proton-pump inhibitors

Unique Subject Identifier=5103000000-0108

MEANS Procedure

Assay variable : PTINR\_VAL1 PT-INR Value

| N | Mean      | Standard Deviation | Minimum   | Maximum   |
|---|-----------|--------------------|-----------|-----------|
| 6 | 1.7166667 | 0.2483277          | 1.5000000 | 2.2000000 |

Unique Subject Identifier=5103000000-0112

Assay variable : PTINR\_VAL1 PT-INR Value

| N | Mean      | Standard Deviation | Minimum   | Maximum   |
|---|-----------|--------------------|-----------|-----------|
| 5 | 2.1800000 | 0.5540758          | 1.7000000 | 3.0000000 |

Unique Subject Identifier=5103000000-0134

Assay variable : PTINR\_VAL1 PT-INR Value

| N | Mean      | Standard Deviation | Minimum   | Maximum   |
|---|-----------|--------------------|-----------|-----------|
| 5 | 2.6200000 | 0.2863564          | 2.2000000 | 3.0000000 |

Unique Subject Identifier=5103000000-0139

Assay variable : PTINR\_VAL1 PT-INR Value

N Mean Standard Deviation Minimum Maximum

---

|   |           |           |           |           |
|---|-----------|-----------|-----------|-----------|
| 4 | 1.7750000 | 0.3095696 | 1.5000000 | 2.2000000 |
|---|-----------|-----------|-----------|-----------|

---

Laboratory tests at the time of obtaining Table 2-6 consent, according to the presence or absence of proton-pump inhibitors

Unique Subject Identifier=5103000000-0141

MEANS Procedure

Assay variable : PTINR\_VAL1 PT-INR Value

N Mean Standard Deviation Minimum Maximum

---

|   |           |           |           |           |
|---|-----------|-----------|-----------|-----------|
| 6 | 1.9666667 | 0.3011091 | 1.6000000 | 2.3000000 |
|---|-----------|-----------|-----------|-----------|

---

Unique Subject Identifier=5103000000-0142

Assay variable : PTINR\_VAL1 PT-INR Value

N Mean Standard Deviation Minimum Maximum

---

|   |           |           |           |           |
|---|-----------|-----------|-----------|-----------|
| 6 | 2.3666667 | 1.1395906 | 1.4000000 | 4.6000000 |
|---|-----------|-----------|-----------|-----------|

---

Unique Subject Identifier=5103000000-0147

Assay variable : PTINR\_VAL1 PT-INR Value

N Mean Standard Deviation Minimum Maximum

---

|   |           |           |           |           |
|---|-----------|-----------|-----------|-----------|
| 6 | 1.6666667 | 0.7229569 | 1.1000000 | 3.1000000 |
|---|-----------|-----------|-----------|-----------|

---

Unique Subject Identifier=5103000000-0150

Assay variable : PTINR\_VAL1 PT-INR Value

N Mean Standard Deviation Minimum Maximum

---

|   |          |           |          |          |
|---|----------|-----------|----------|----------|
| 6 | 2.233333 | 1.1570076 | 1.100000 | 4.100000 |
|---|----------|-----------|----------|----------|

---

Laboratory tests at the time of obtaining Table 2-6 consent, according to the presence or absence of proton-pump inhibitors

Unique Subject Identifier=5108001000-0010

MEANS Procedure

Assay variable : PTINR\_VAL1 PT-INR Value

N Mean Standard Deviation Minimum Maximum

---

|   |           |           |           |           |
|---|-----------|-----------|-----------|-----------|
| 4 | 2.3250000 | 0.4031129 | 2.0000000 | 2.9000000 |
|---|-----------|-----------|-----------|-----------|

---

Unique Subject Identifier=5108001000-0015

Assay variable : PTINR\_VAL1 PT-INR Value

N Mean Standard Deviation Minimum Maximum

---

|   |           |           |           |           |
|---|-----------|-----------|-----------|-----------|
| 3 | 1.3566667 | 0.4843897 | 0.9700000 | 1.9000000 |
|---|-----------|-----------|-----------|-----------|

---

Unique Subject Identifier=5108001000-0017

Assay variable : PTINR\_VAL1 PT-INR Value

N Mean Standard Deviation Minimum Maximum

---

|   |           |           |           |           |
|---|-----------|-----------|-----------|-----------|
| 4 | 1.3500000 | 0.1290994 | 1.2000000 | 1.5000000 |
|---|-----------|-----------|-----------|-----------|

---

Unique Subject Identifier=5108001000-0023

Assay variable : PTINR\_VAL1 PT-INR Value

N Mean Standard Deviation Minimum Maximum

---

|   |           |           |           |           |
|---|-----------|-----------|-----------|-----------|
| 6 | 1.2166667 | 0.0752773 | 1.1000000 | 1.3000000 |
|---|-----------|-----------|-----------|-----------|

---

Laboratory tests at the time of obtaining Table 2-6 consent, according to the presence or absence of proton-pump inhibitors

Unique Subject Identifier=511400000-0001

MEANS Procedure

Assay variable : PTINR\_VAL1 PT-INR Value

N Mean Standard Deviation Minimum Maximum

---

|   |          |  |          |          |
|---|----------|--|----------|----------|
| 1 | 3.680000 |  | 3.680000 | 3.680000 |
|---|----------|--|----------|----------|

---

Unique Subject Identifier=511400000-0007

Assay variable : PTINR\_VAL1 PT-INR Value

N Mean Standard Deviation Minimum Maximum

---

|   |          |           |          |          |
|---|----------|-----------|----------|----------|
| 2 | 1.835000 | 0.1202082 | 1.750000 | 1.920000 |
|---|----------|-----------|----------|----------|

---

Unique Subject Identifier=511400000-0009

Assay variable : PTINR\_VAL1 PT-INR Value

N Mean Standard Deviation Minimum Maximum

---

|   |           |           |          |          |
|---|-----------|-----------|----------|----------|
| 6 | 1.4816667 | 0.2443290 | 1.250000 | 1.960000 |
|---|-----------|-----------|----------|----------|

---

Unique Subject Identifier=511400000-0010

Assay variable : PTINR\_VAL1 PT-INR Value

N Mean Standard Deviation Minimum Maximum

---

|   |           |  |           |           |
|---|-----------|--|-----------|-----------|
| 1 | 1.0300000 |  | 1.0300000 | 1.0300000 |
|---|-----------|--|-----------|-----------|

---



Laboratory tests at the time of obtaining Table 2-6 consent, according to the presence or absence of proton-pump inhibitors

Unique Subject Identifier=511400000-0016

MEANS Procedure

Assay variable : PTINR\_VAL1 PT-INR Value

N Mean Standard Deviation Minimum Maximum

---

|   |           |           |           |           |
|---|-----------|-----------|-----------|-----------|
| 2 | 2.0700000 | 0.3111270 | 1.8500000 | 2.2900000 |
|---|-----------|-----------|-----------|-----------|

---

Unique Subject Identifier=511400000-0028

Assay variable : PTINR\_VAL1 PT-INR Value

N Mean Standard Deviation Minimum Maximum

---

|   |           |           |           |           |
|---|-----------|-----------|-----------|-----------|
| 4 | 2.0700000 | 0.6102459 | 1.3400000 | 2.7800000 |
|---|-----------|-----------|-----------|-----------|

---

Unique Subject Identifier=511400000-0030

Assay variable : PTINR\_VAL1 PT-INR Value

N Mean Standard Deviation Minimum Maximum

---

|   |           |  |           |           |
|---|-----------|--|-----------|-----------|
| 1 | 1.2800000 |  | 1.2800000 | 1.2800000 |
|---|-----------|--|-----------|-----------|

---

Unique Subject Identifier=5120011000-0005

Assay variable : PTINR\_VAL1 PT-INR Value

N Mean Standard Deviation Minimum Maximum

---

|   |          |           |          |          |
|---|----------|-----------|----------|----------|
| 5 | 2.124000 | 0.4569245 | 1.630000 | 2.650000 |
|---|----------|-----------|----------|----------|

---

Laboratory tests at the time of obtaining Table 2-6 consent, according to the presence or absence of proton-pump inhibitors

Unique Subject Identifier=5120011000-0007

MEANS Procedure

Assay variable : PTINR\_VAL1 PT-INR Value

N Mean Standard Deviation Minimum Maximum

---

|   |           |           |           |           |
|---|-----------|-----------|-----------|-----------|
| 4 | 2.1225000 | 0.6075840 | 1.5700000 | 2.8700000 |
|---|-----------|-----------|-----------|-----------|

---

Unique Subject Identifier=5120011000-0008

Assay variable : PTINR\_VAL1 PT-INR Value

N Mean Standard Deviation Minimum Maximum

---

|   |           |           |           |           |
|---|-----------|-----------|-----------|-----------|
| 4 | 1.7975000 | 0.4035984 | 1.4300000 | 2.2600000 |
|---|-----------|-----------|-----------|-----------|

---

Unique Subject Identifier=5120011000-0014

Assay variable : PTINR\_VAL1 PT-INR Value

N Mean Standard Deviation Minimum Maximum

---

|   |           |           |           |           |
|---|-----------|-----------|-----------|-----------|
| 3 | 2.0666667 | 0.2967041 | 1.7300000 | 2.2900000 |
|---|-----------|-----------|-----------|-----------|

---

Unique Subject Identifier=5120011000-0015

Assay variable : PTINR\_VAL1 PT-INR Value

N Mean Standard Deviation Minimum Maximum

---

|   |           |           |           |           |
|---|-----------|-----------|-----------|-----------|
| 4 | 2.4300000 | 0.6185467 | 2.0100000 | 3.3500000 |
|---|-----------|-----------|-----------|-----------|

---

Laboratory tests at the time of obtaining Table 2-6 consent, according to the presence or absence of proton-pump inhibitors

Unique Subject Identifier=512400000-0005

MEANS Procedure

Assay variable : PTINR\_VAL1 PT-INR Value

N Mean Standard Deviation Minimum Maximum

---

|   |          |           |          |          |
|---|----------|-----------|----------|----------|
| 3 | 2.060000 | 0.7432362 | 1.280000 | 2.760000 |
|---|----------|-----------|----------|----------|

---

Unique Subject Identifier=512400000-0008

Assay variable : PTINR\_VAL1 PT-INR Value

N Mean Standard Deviation Minimum Maximum

---

|   |          |           |          |          |
|---|----------|-----------|----------|----------|
| 6 | 2.610000 | 0.4574713 | 2.070000 | 3.420000 |
|---|----------|-----------|----------|----------|

---

Unique Subject Identifier=512500000-0001

Assay variable : PTINR\_VAL1 PT-INR Value

N Mean Standard Deviation Minimum Maximum

---

|   |          |           |          |          |
|---|----------|-----------|----------|----------|
| 6 | 1.950000 | 0.1974842 | 1.700000 | 2.300000 |
|---|----------|-----------|----------|----------|

---

Unique Subject Identifier=513101111-0004

Assay variable : PTINR\_VAL1 PT-INR Value

N Mean Standard Deviation Minimum Maximum

---

|   |           |           |           |           |
|---|-----------|-----------|-----------|-----------|
| 3 | 1.7933333 | 0.3493327 | 1.4800000 | 2.1700000 |
|---|-----------|-----------|-----------|-----------|

---

Laboratory tests at the time of obtaining Table 2-6 consent, according to the presence or absence of proton-pump inhibitors

Unique Subject Identifier=5131011111-0005

MEANS Procedure

Assay variable : PTINR\_VAL1 PT-INR Value

N Mean Standard Deviation Minimum Maximum

---

|   |           |           |           |           |
|---|-----------|-----------|-----------|-----------|
| 3 | 2.1333333 | 0.3098925 | 1.9300000 | 2.4900000 |
|---|-----------|-----------|-----------|-----------|

---

Unique Subject Identifier=5131011111-0010

Assay variable : PTINR\_VAL1 PT-INR Value

N Mean Standard Deviation Minimum Maximum

---

|   |           |           |           |           |
|---|-----------|-----------|-----------|-----------|
| 3 | 1.8800000 | 0.1992486 | 1.7600000 | 2.1100000 |
|---|-----------|-----------|-----------|-----------|

---

Unique Subject Identifier=5131011111-0013

Assay variable : PTINR\_VAL1 PT-INR Value

N Mean Standard Deviation Minimum Maximum

---

|   |           |           |           |           |
|---|-----------|-----------|-----------|-----------|
| 3 | 1.7600000 | 0.3109662 | 1.4200000 | 2.0300000 |
|---|-----------|-----------|-----------|-----------|

---

Unique Subject Identifier=5131011111-0017

Assay variable : PTINR\_VAL1 PT-INR Value

N Mean Standard Deviation Minimum Maximum

---

|   |           |           |           |           |
|---|-----------|-----------|-----------|-----------|
| 5 | 1.6320000 | 0.4152951 | 1.3200000 | 2.3100000 |
|---|-----------|-----------|-----------|-----------|

---



Laboratory tests at the time of obtaining Table 2-6 consent, according to the presence or absence of proton-pump inhibitors

Unique Subject Identifier=5131011111-0018

MEANS Procedure

Assay variable : PTINR\_VAL1 PT-INR Value

N Mean Standard Deviation Minimum Maximum

---

|   |           |           |           |           |
|---|-----------|-----------|-----------|-----------|
| 3 | 1.5666667 | 0.1530795 | 1.4500000 | 1.7400000 |
|---|-----------|-----------|-----------|-----------|

---

Unique Subject Identifier=5131011111-0019

Assay variable : PTINR\_VAL1 PT-INR Value

N Mean Standard Deviation Minimum Maximum

---

|   |           |           |           |           |
|---|-----------|-----------|-----------|-----------|
| 5 | 2.2800000 | 0.8635103 | 1.2800000 | 3.1800000 |
|---|-----------|-----------|-----------|-----------|

---

Unique Subject Identifier=5135000000-0003

Assay variable : PTINR\_VAL1 PT-INR Value

N Mean Standard Deviation Minimum Maximum

---

|   |           |           |           |           |
|---|-----------|-----------|-----------|-----------|
| 3 | 1.6666667 | 0.0981495 | 1.6100000 | 1.7800000 |
|---|-----------|-----------|-----------|-----------|

---

Unique Subject Identifier=5135000000-0004

Assay variable : PTINR\_VAL1 PT-INR Value

N Mean Standard Deviation Minimum Maximum

---

|   |          |  |          |          |
|---|----------|--|----------|----------|
| 1 | 2.480000 |  | 2.480000 | 2.480000 |
|---|----------|--|----------|----------|

---

Laboratory tests at the time of obtaining Table 2-6 consent, according to the presence or absence of proton-pump inhibitors

Unique Subject Identifier=513500000-0006

MEANS Procedure

Assay variable : PTINR\_VAL1 PT-INR Value

N Mean Standard Deviation Minimum Maximum

---

|   |           |           |           |           |
|---|-----------|-----------|-----------|-----------|
| 3 | 2.0166667 | 0.2577466 | 1.7400000 | 2.2500000 |
|---|-----------|-----------|-----------|-----------|

---

Unique Subject Identifier=513600000-0003

Assay variable : PTINR\_VAL1 PT-INR Value

N Mean Standard Deviation Minimum Maximum

---

|   |           |           |           |           |
|---|-----------|-----------|-----------|-----------|
| 4 | 2.1800000 | 0.6470446 | 1.6000000 | 2.7600000 |
|---|-----------|-----------|-----------|-----------|

---

Unique Subject Identifier=513600000-0004

Assay variable : PTINR\_VAL1 PT-INR Value

N Mean Standard Deviation Minimum Maximum

---

|   |           |           |           |           |
|---|-----------|-----------|-----------|-----------|
| 4 | 1.4375000 | 0.2802826 | 1.1200000 | 1.7200000 |
|---|-----------|-----------|-----------|-----------|

---

Unique Subject Identifier=513600000-0005

Assay variable : PTINR\_VAL1 PT-INR Value

N Mean Standard Deviation Minimum Maximum

---

|   |          |           |          |          |
|---|----------|-----------|----------|----------|
| 6 | 1.350000 | 0.3485972 | 1.040000 | 1.990000 |
|---|----------|-----------|----------|----------|

---

Laboratory tests at the time of obtaining Table 2-6 consent, according to the presence or absence of proton-pump inhibitors

Unique Subject Identifier=513600000-0011

MEANS Procedure

Assay variable : PTINR\_VAL1 PT-INR Value

N Mean Standard Deviation Minimum Maximum

---

|   |           |           |           |           |
|---|-----------|-----------|-----------|-----------|
| 6 | 2.1800000 | 1.1414552 | 0.9600000 | 3.6700000 |
|---|-----------|-----------|-----------|-----------|

---

Unique Subject Identifier=513600000-0012

Assay variable : PTINR\_VAL1 PT-INR Value

N Mean Standard Deviation Minimum Maximum

---

|   |           |           |           |           |
|---|-----------|-----------|-----------|-----------|
| 3 | 1.9033333 | 0.1415392 | 1.7400000 | 1.9900000 |
|---|-----------|-----------|-----------|-----------|

---

Unique Subject Identifier=513600000-0016

Assay variable : PTINR\_VAL1 PT-INR Value

N Mean Standard Deviation Minimum Maximum

---

|   |           |           |           |           |
|---|-----------|-----------|-----------|-----------|
| 5 | 2.3200000 | 0.1864135 | 2.0400000 | 2.5300000 |
|---|-----------|-----------|-----------|-----------|

---

Unique Subject Identifier=513600000-0022

Assay variable : PTINR\_VAL1 PT-INR Value

N Mean Standard Deviation Minimum Maximum

---

|   |          |           |          |          |
|---|----------|-----------|----------|----------|
| 3 | 1.610000 | 0.2505993 | 1.350000 | 1.850000 |
|---|----------|-----------|----------|----------|

---

Laboratory tests at the time of obtaining Table 2-6 consent, according to the presence or absence of proton-pump inhibitors

Unique Subject Identifier=513600000-0026

MEANS Procedure

Assay variable : PTINR\_VAL1 PT-INR Value

| N | Mean      | Standard Deviation | Minimum   | Maximum   |
|---|-----------|--------------------|-----------|-----------|
| 5 | 1.7460000 | 0.4400341          | 1.1700000 | 2.2900000 |

Unique Subject Identifier=513600000-0028

Assay variable : PTINR\_VAL1 PT-INR Value

| N | Mean      | Standard Deviation | Minimum   | Maximum   |
|---|-----------|--------------------|-----------|-----------|
| 1 | 1.7300000 |                    | 1.7300000 | 1.7300000 |

Unique Subject Identifier=5137010111-0002

Assay variable : PTINR\_VAL1 PT-INR Value

| N | Mean      | Standard Deviation | Minimum   | Maximum   |
|---|-----------|--------------------|-----------|-----------|
| 4 | 2.4050000 | 0.3504759          | 2.0400000 | 2.8600000 |

Unique Subject Identifier=5140011000-0004

Assay variable : PTINR\_VAL1 PT-INR Value

N Mean Standard Deviation Minimum Maximum

---

|   |           |           |           |           |
|---|-----------|-----------|-----------|-----------|
| 3 | 1.8300000 | 0.3508561 | 1.4400000 | 2.1200000 |
|---|-----------|-----------|-----------|-----------|

---



Laboratory tests at the time of obtaining Table 2-6 consent, according to the presence or absence of proton-pump inhibitors

Unique Subject Identifier=5141111100-0001

MEANS Procedure

Assay variable : PTINR\_VAL1 PT-INR Value

N Mean Standard Deviation Minimum Maximum

---

|   |           |           |           |           |
|---|-----------|-----------|-----------|-----------|
| 6 | 1.7983333 | 0.2667146 | 1.4300000 | 2.1700000 |
|---|-----------|-----------|-----------|-----------|

---

Unique Subject Identifier=5141111100-0010

Assay variable : PTINR\_VAL1 PT-INR Value

N Mean Standard Deviation Minimum Maximum

---

|   |           |           |           |           |
|---|-----------|-----------|-----------|-----------|
| 4 | 1.8150000 | 0.3570714 | 1.5300000 | 2.3200000 |
|---|-----------|-----------|-----------|-----------|

---

Unique Subject Identifier=5141111100-0012

Assay variable : PTINR\_VAL1 PT-INR Value

N Mean Standard Deviation Minimum Maximum

---

|   |           |  |           |           |
|---|-----------|--|-----------|-----------|
| 1 | 1.6800000 |  | 1.6800000 | 1.6800000 |
|---|-----------|--|-----------|-----------|

---

Unique Subject Identifier=5141111100-0016

Assay variable : PTINR\_VAL1 PT-INR Value

N Mean Standard Deviation Minimum Maximum

---

|   |          |  |          |          |
|---|----------|--|----------|----------|
| 1 | 2.540000 |  | 2.540000 | 2.540000 |
|---|----------|--|----------|----------|

---

Laboratory tests at the time of obtaining Table 2-6 consent, according to the presence or absence of proton-pump inhibitors

Unique Subject Identifier=5141111100-0017

MEANS Procedure

Assay variable : PTINR\_VAL1 PT-INR Value

| N | Mean      | Standard Deviation | Minimum   | Maximum   |
|---|-----------|--------------------|-----------|-----------|
| 3 | 2.5100000 | 0.1652271          | 2.3500000 | 2.6800000 |

Unique Subject Identifier=5141111100-0018

Assay variable : PTINR\_VAL1 PT-INR Value

| N | Mean      | Standard Deviation | Minimum   | Maximum   |
|---|-----------|--------------------|-----------|-----------|
| 3 | 1.7200000 | 0.2515949          | 1.5600000 | 2.0100000 |

Unique Subject Identifier=5141111100-0023

Assay variable : PTINR\_VAL1 PT-INR Value

| N | Mean      | Standard Deviation | Minimum   | Maximum   |
|---|-----------|--------------------|-----------|-----------|
| 3 | 1.5166667 | 0.3442867          | 1.2700000 | 1.9100000 |

Unique Subject Identifier=5141111100-0027

Assay variable : PTINR\_VAL1 PT-INR Value

N Mean Standard Deviation Minimum Maximum

---

|   |           |           |           |           |
|---|-----------|-----------|-----------|-----------|
| 3 | 2.5066667 | 0.3360556 | 2.1400000 | 2.8000000 |
|---|-----------|-----------|-----------|-----------|

---

Laboratory tests at the time of obtaining Table 2-6 consent, according to the presence or absence of proton-pump inhibitors

Unique Subject Identifier=5141111100-0030

MEANS Procedure

Assay variable : PTINR\_VAL1 PT-INR Value

| N | Mean      | Standard Deviation | Minimum   | Maximum   |
|---|-----------|--------------------|-----------|-----------|
| 3 | 1.1266667 | 0.1266228          | 1.0300000 | 1.2700000 |

Unique Subject Identifier=5155000000-0004

Assay variable : PTINR\_VAL1 PT-INR Value

| N | Mean      | Standard Deviation | Minimum   | Maximum   |
|---|-----------|--------------------|-----------|-----------|
| 5 | 2.3660000 | 0.3339611          | 1.8700000 | 2.7200000 |

Unique Subject Identifier=5155000000-0011

Assay variable : PTINR\_VAL1 PT-INR Value

| N | Mean      | Standard Deviation | Minimum   | Maximum   |
|---|-----------|--------------------|-----------|-----------|
| 4 | 1.7075000 | 0.0873212          | 1.6300000 | 1.8100000 |

Unique Subject Identifier=5155000000-0012

Assay variable : PTINR\_VAL1 PT-INR Value

N Mean Standard Deviation Minimum Maximum

---

|   |           |           |           |           |
|---|-----------|-----------|-----------|-----------|
| 4 | 1.6750000 | 0.0939858 | 1.5600000 | 1.7700000 |
|---|-----------|-----------|-----------|-----------|

---

Laboratory tests at the time of obtaining Table 2-6 consent, according to the presence or absence of proton-pump inhibitors

Unique Subject Identifier=5155000000-0015

MEANS Procedure

Assay variable : PTINR\_VAL1 PT-INR Value

| N | Mean      | Standard Deviation | Minimum   | Maximum   |
|---|-----------|--------------------|-----------|-----------|
| 3 | 2.2466667 | 0.0929157          | 2.1400000 | 2.3100000 |

Unique Subject Identifier=5155000000-0022

Assay variable : PTINR\_VAL1 PT-INR Value

| N | Mean      | Standard Deviation | Minimum   | Maximum   |
|---|-----------|--------------------|-----------|-----------|
| 6 | 2.9050000 | 1.0010744          | 2.0000000 | 4.8000000 |

Unique Subject Identifier=5157010010-0003

Assay variable : PTINR\_VAL1 PT-INR Value

| N | Mean      | Standard Deviation | Minimum   | Maximum   |
|---|-----------|--------------------|-----------|-----------|
| 3 | 1.7033333 | 0.1628906          | 1.5900000 | 1.8900000 |

Unique Subject Identifier=5157010010-0014

Assay variable : PTINR\_VAL1 PT-INR Value

N Mean Standard Deviation Minimum Maximum

---

|   |           |           |           |           |
|---|-----------|-----------|-----------|-----------|
| 3 | 2.3300000 | 0.2463737 | 2.0700000 | 2.5600000 |
|---|-----------|-----------|-----------|-----------|

---



Laboratory tests at the time of obtaining Table 2-6 consent, according to the presence or absence of proton-pump inhibitors

Unique Subject Identifier=5157010010-0015

MEANS Procedure

Assay variable : PTINR\_VAL1 PT-INR Value

| N | Mean      | Standard Deviation | Minimum   | Maximum   |
|---|-----------|--------------------|-----------|-----------|
| 3 | 2.3833333 | 0.1422439          | 2.2200000 | 2.4800000 |

Unique Subject Identifier=5161010010-0004

Assay variable : PTINR\_VAL1 PT-INR Value

| N | Mean      | Standard Deviation | Minimum   | Maximum   |
|---|-----------|--------------------|-----------|-----------|
| 4 | 1.9275000 | 0.2324328          | 1.7300000 | 2.2500000 |

Unique Subject Identifier=5161010010-0005

Assay variable : PTINR\_VAL1 PT-INR Value

| N | Mean      | Standard Deviation | Minimum   | Maximum   |
|---|-----------|--------------------|-----------|-----------|
| 3 | 3.2800000 | 1.2038688          | 2.5700000 | 4.6700000 |

Unique Subject Identifier=5166000000-0002

Assay variable : PTINR\_VAL1 PT-INR Value

N Mean Standard Deviation Minimum Maximum

---

|   |           |           |           |           |
|---|-----------|-----------|-----------|-----------|
| 4 | 1.7825000 | 0.1206579 | 1.6900000 | 1.9600000 |
|---|-----------|-----------|-----------|-----------|

---

Laboratory tests at the time of obtaining Table 2-6 consent, according to the presence or absence of proton-pump inhibitors

Unique Subject Identifier=516600000-0009

MEANS Procedure

Assay variable : PTINR\_VAL1 PT-INR Value

| N | Mean      | Standard Deviation | Minimum   | Maximum   |
|---|-----------|--------------------|-----------|-----------|
| 5 | 1.9960000 | 0.1213672          | 1.8100000 | 2.1100000 |

Unique Subject Identifier=5171010000-0023

Assay variable : PTINR\_VAL1 PT-INR Value

| N | Mean      | Standard Deviation | Minimum   | Maximum   |
|---|-----------|--------------------|-----------|-----------|
| 5 | 2.0320000 | 0.1370036          | 1.8700000 | 2.2500000 |

Unique Subject Identifier=5171010000-0025

Assay variable : PTINR\_VAL1 PT-INR Value

| N | Mean      | Standard Deviation | Minimum   | Maximum   |
|---|-----------|--------------------|-----------|-----------|
| 3 | 1.9033333 | 0.2914332          | 1.6700000 | 2.2300000 |

Unique Subject Identifier=5198000001-0010

Assay variable : PTINR\_VAL1 PT-INR Value

N Mean Standard Deviation Minimum Maximum

---

|   |           |           |           |           |
|---|-----------|-----------|-----------|-----------|
| 4 | 1.9300000 | 0.3190611 | 1.5800000 | 2.3500000 |
|---|-----------|-----------|-----------|-----------|

---

Laboratory tests at the time of obtaining Table 2-6 consent, according to the presence or absence of proton-pump inhibitors

Unique Subject Identifier=5198000001-0015

MEANS Procedure

Assay variable : PTINR\_VAL1 PT-INR Value

| N | Mean      | Standard Deviation | Minimum   | Maximum   |
|---|-----------|--------------------|-----------|-----------|
| 2 | 2.0000000 | 0.2545584          | 1.8200000 | 2.1800000 |

Unique Subject Identifier=5198000001-0019

Assay variable : PTINR\_VAL1 PT-INR Value

| N | Mean      | Standard Deviation | Minimum   | Maximum   |
|---|-----------|--------------------|-----------|-----------|
| 1 | 1.3000000 |                    | 1.3000000 | 1.3000000 |

Unique Subject Identifier=5198000001-0025

Assay variable : PTINR\_VAL1 PT-INR Value

| N | Mean      | Standard Deviation | Minimum   | Maximum   |
|---|-----------|--------------------|-----------|-----------|
| 2 | 1.9250000 | 0.2899138          | 1.7200000 | 2.1300000 |

Unique Subject Identifier=5198000001-0031

Assay variable : PTINR\_VAL1 PT-INR Value

N Mean Standard Deviation Minimum Maximum

---

|   |          |  |          |          |
|---|----------|--|----------|----------|
| 1 | 1.200000 |  | 1.200000 | 1.200000 |
|---|----------|--|----------|----------|

---

Laboratory tests at the time of obtaining Table 2-6 consent, according to the presence or absence of proton-pump inhibitors

Unique Subject Identifier=5198000001-0033

MEANS Procedure

Assay variable : PTINR\_VAL1 PT-INR Value

| N | Mean      | Standard Deviation | Minimum   | Maximum   |
|---|-----------|--------------------|-----------|-----------|
| 2 | 2.4300000 | 0.0848528          | 2.3700000 | 2.4900000 |

Unique Subject Identifier=5198000001-0034

Assay variable : PTINR\_VAL1 PT-INR Value

| N | Mean      | Standard Deviation | Minimum   | Maximum   |
|---|-----------|--------------------|-----------|-----------|
| 4 | 1.9700000 | 0.6019413          | 1.2100000 | 2.5900000 |

Unique Subject Identifier=5198000001-0044

Assay variable : PTINR\_VAL1 PT-INR Value

| N | Mean      | Standard Deviation | Minimum   | Maximum   |
|---|-----------|--------------------|-----------|-----------|
| 6 | 2.2950000 | 0.3868721          | 1.6800000 | 2.7400000 |

Unique Subject Identifier=5198000001-0046

Assay variable : PTINR\_VAL1 PT-INR Value

N Mean Standard Deviation Minimum Maximum

---

|   |           |           |           |           |
|---|-----------|-----------|-----------|-----------|
| 2 | 1.6700000 | 0.1414214 | 1.5700000 | 1.7700000 |
|---|-----------|-----------|-----------|-----------|

---



Laboratory tests at the time of obtaining Table 2-6 consent, according to the presence or absence of proton-pump inhibitors

Unique Subject Identifier=5198000001-0050

MEANS Procedure

Assay variable : PTINR\_VAL1 PT-INR Value

N Mean Standard Deviation Minimum Maximum

---

|   |           |           |           |           |
|---|-----------|-----------|-----------|-----------|
| 4 | 1.5300000 | 0.3408812 | 1.1200000 | 1.9500000 |
|---|-----------|-----------|-----------|-----------|

---

Unique Subject Identifier=5198000001-0053

Assay variable : PTINR\_VAL1 PT-INR Value

N Mean Standard Deviation Minimum Maximum

---

|   |           |           |           |           |
|---|-----------|-----------|-----------|-----------|
| 4 | 2.2575000 | 0.3925451 | 1.9900000 | 2.8400000 |
|---|-----------|-----------|-----------|-----------|

---

Unique Subject Identifier=5198000001-0057

Assay variable : PTINR\_VAL1 PT-INR Value

N Mean Standard Deviation Minimum Maximum

---

|   |           |  |           |           |
|---|-----------|--|-----------|-----------|
| 1 | 2.4800000 |  | 2.4800000 | 2.4800000 |
|---|-----------|--|-----------|-----------|

---

Unique Subject Identifier=5198000001-0071

Assay variable : PTINR\_VAL1 PT-INR Value

N Mean Standard Deviation Minimum Maximum

---

|   |           |  |           |           |
|---|-----------|--|-----------|-----------|
| 1 | 2.2000000 |  | 2.2000000 | 2.2000000 |
|---|-----------|--|-----------|-----------|

---

Laboratory tests at the time of obtaining Table 2-6 consent, according to the presence or absence of proton-pump inhibitors

Unique Subject Identifier=5198000001-0073

MEANS Procedure

Assay variable : PTINR\_VAL1 PT-INR Value

| N | Mean      | Standard Deviation | Minimum | Maximum   |
|---|-----------|--------------------|---------|-----------|
| 2 | 1.7100000 |                    | 0       | 1.7100000 |
|   |           |                    |         | 1.7100000 |

Unique Subject Identifier=5198000001-0076

Assay variable : PTINR\_VAL1 PT-INR Value

| N | Mean      | Standard Deviation | Minimum   | Maximum   |
|---|-----------|--------------------|-----------|-----------|
| 2 | 2.1650000 | 0.2616295          | 1.9800000 | 2.3500000 |

Unique Subject Identifier=5198000001-0081

Assay variable : PTINR\_VAL1 PT-INR Value

| N | Mean      | Standard Deviation | Minimum   | Maximum   |
|---|-----------|--------------------|-----------|-----------|
| 4 | 2.1250000 | 0.7048641          | 1.5300000 | 3.1400000 |

Unique Subject Identifier=5198000001-0085

Assay variable : PTINR\_VAL1 PT-INR Value

N Mean Standard Deviation Minimum Maximum

---

|   |          |  |          |          |
|---|----------|--|----------|----------|
| 1 | 2.440000 |  | 2.440000 | 2.440000 |
|---|----------|--|----------|----------|

---

Laboratory tests at the time of obtaining Table 2-6 consent, according to the presence or absence of proton-pump inhibitors

Unique Subject Identifier=5198000001-0093

MEANS Procedure

Assay variable : PTINR\_VAL1 PT-INR Value

| N | Mean      | Standard Deviation | Minimum   | Maximum   |
|---|-----------|--------------------|-----------|-----------|
| 1 | 2.0700000 |                    | 2.0700000 | 2.0700000 |

Unique Subject Identifier=5198000001-0098

Assay variable : PTINR\_VAL1 PT-INR Value

| N | Mean      | Standard Deviation | Minimum   | Maximum   |
|---|-----------|--------------------|-----------|-----------|
| 1 | 1.3400000 |                    | 1.3400000 | 1.3400000 |

Unique Subject Identifier=5198000001-0101

Assay variable : PTINR\_VAL1 PT-INR Value

| N | Mean      | Standard Deviation | Minimum   | Maximum   |
|---|-----------|--------------------|-----------|-----------|
| 5 | 1.7960000 | 0.7152832          | 0.9600000 | 2.8300000 |

Unique Subject Identifier=5198000001-0107

Assay variable : PTINR\_VAL1 PT-INR Value

N Mean Standard Deviation Minimum Maximum

---

|   |           |           |           |           |
|---|-----------|-----------|-----------|-----------|
| 2 | 1.7850000 | 0.6151829 | 1.3500000 | 2.2200000 |
|---|-----------|-----------|-----------|-----------|

---

Laboratory tests at the time of obtaining Table 2-6 consent, according to the presence or absence of proton-pump inhibitors

Unique Subject Identifier=5198000001-0115

MEANS Procedure

Assay variable : PTINR\_VAL1 PT-INR Value

| N | Mean      | Standard Deviation | Minimum   | Maximum   |
|---|-----------|--------------------|-----------|-----------|
| 2 | 2.0250000 | 0.0919239          | 1.9600000 | 2.0900000 |

Unique Subject Identifier=5198000001-0116

Assay variable : PTINR\_VAL1 PT-INR Value

| N | Mean      | Standard Deviation | Minimum   | Maximum   |
|---|-----------|--------------------|-----------|-----------|
| 2 | 1.4900000 | 0.5939697          | 1.0700000 | 1.9100000 |

Unique Subject Identifier=5198000001-0117

Assay variable : PTINR\_VAL1 PT-INR Value

| N | Mean      | Standard Deviation | Minimum   | Maximum   |
|---|-----------|--------------------|-----------|-----------|
| 3 | 2.1300000 | 0.2851315          | 1.8500000 | 2.4200000 |

Unique Subject Identifier=5198000001-0120

Assay variable : PTINR\_VAL1 PT-INR Value

N Mean Standard Deviation Minimum Maximum

---

|   |           |  |           |           |
|---|-----------|--|-----------|-----------|
| 1 | 1.7800000 |  | 1.7800000 | 1.7800000 |
|---|-----------|--|-----------|-----------|

---



Laboratory tests at the time of obtaining Table 2-6 consent, according to the presence or absence of proton-pump inhibitors

Unique Subject Identifier=5198000001-0122

MEANS Procedure

Assay variable : PTINR\_VAL1 PT-INR Value

N Mean Standard Deviation Minimum Maximum

---

|   |           |           |           |           |
|---|-----------|-----------|-----------|-----------|
| 5 | 1.9300000 | 0.2166795 | 1.7800000 | 2.3100000 |
|---|-----------|-----------|-----------|-----------|

---

Unique Subject Identifier=5198000001-0137

Assay variable : PTINR\_VAL1 PT-INR Value

N Mean Standard Deviation Minimum Maximum

---

|   |           |  |           |           |
|---|-----------|--|-----------|-----------|
| 1 | 1.4100000 |  | 1.4100000 | 1.4100000 |
|---|-----------|--|-----------|-----------|

---

Unique Subject Identifier=5198000001-0138

Assay variable : PTINR\_VAL1 PT-INR Value

N Mean Standard Deviation Minimum Maximum

---

|   |           |  |           |           |
|---|-----------|--|-----------|-----------|
| 1 | 2.4300000 |  | 2.4300000 | 2.4300000 |
|---|-----------|--|-----------|-----------|

---

Unique Subject Identifier=5198000001-0143

Assay variable : PTINR\_VAL1 PT-INR Value

N Mean Standard Deviation Minimum Maximum

---

|   |           |  |           |           |
|---|-----------|--|-----------|-----------|
| 1 | 2.0100000 |  | 2.0100000 | 2.0100000 |
|---|-----------|--|-----------|-----------|

---

Laboratory tests at the time of obtaining Table 2-6 consent, according to the presence or absence of proton-pump inhibitors

Unique Subject Identifier=5198000001-0147

MEANS Procedure

Assay variable : PTINR\_VAL1 PT-INR Value

N Mean Standard Deviation Minimum Maximum

---

|   |           |  |           |           |
|---|-----------|--|-----------|-----------|
| 1 | 1.8000000 |  | 1.8000000 | 1.8000000 |
|---|-----------|--|-----------|-----------|

---

Unique Subject Identifier=5198000001-0152

Assay variable : PTINR\_VAL1 PT-INR Value

N Mean Standard Deviation Minimum Maximum

---

|   |           |           |           |           |
|---|-----------|-----------|-----------|-----------|
| 5 | 1.9880000 | 0.6437546 | 1.2200000 | 2.9700000 |
|---|-----------|-----------|-----------|-----------|

---

Unique Subject Identifier=5198000001-0162

Assay variable : PTINR\_VAL1 PT-INR Value

N Mean Standard Deviation Minimum Maximum

---

|   |           |  |           |           |
|---|-----------|--|-----------|-----------|
| 1 | 2.8300000 |  | 2.8300000 | 2.8300000 |
|---|-----------|--|-----------|-----------|

---

Unique Subject Identifier=5198000001-0165

Assay variable : PTINR\_VAL1 PT-INR Value

N Mean Standard Deviation Minimum Maximum

---

|   |           |  |           |           |
|---|-----------|--|-----------|-----------|
| 1 | 2.2000000 |  | 2.2000000 | 2.2000000 |
|---|-----------|--|-----------|-----------|

---

Laboratory tests at the time of obtaining Table 2-6 consent, according to the presence or absence of proton-pump inhibitors

Unique Subject Identifier=5198000001-0169

MEANS Procedure

Assay variable : PTINR\_VAL1 PT-INR Value

N Mean Standard Deviation Minimum Maximum

---

|   |           |  |           |           |
|---|-----------|--|-----------|-----------|
| 1 | 1.5700000 |  | 1.5700000 | 1.5700000 |
|---|-----------|--|-----------|-----------|

---

Unique Subject Identifier=5198000001-0172

Assay variable : PTINR\_VAL1 PT-INR Value

N Mean Standard Deviation Minimum Maximum

---

|   |           |  |           |           |
|---|-----------|--|-----------|-----------|
| 1 | 1.7900000 |  | 1.7900000 | 1.7900000 |
|---|-----------|--|-----------|-----------|

---

Unique Subject Identifier=5198000001-0176

Assay variable : PTINR\_VAL1 PT-INR Value

N Mean Standard Deviation Minimum Maximum

---

|   |           |  |           |           |
|---|-----------|--|-----------|-----------|
| 1 | 1.9500000 |  | 1.9500000 | 1.9500000 |
|---|-----------|--|-----------|-----------|

---

Unique Subject Identifier=5198000001-0186

Assay variable : PTINR\_VAL1 PT-INR Value

N Mean Standard Deviation Minimum Maximum

---

|   |          |          |          |          |
|---|----------|----------|----------|----------|
| 3 | 1.120000 | 0.175784 | 0.990000 | 1.320000 |
|---|----------|----------|----------|----------|

---

Laboratory tests at the time of obtaining Table 2-6 consent, according to the presence or absence of proton-pump inhibitors

Unique Subject Identifier=5198000001-0188

MEANS Procedure

Assay variable : PTINR\_VAL1 PT-INR Value

N Mean Standard Deviation Minimum Maximum

---

|   |           |           |           |           |
|---|-----------|-----------|-----------|-----------|
| 5 | 2.1740000 | 0.5151019 | 1.7900000 | 3.0600000 |
|---|-----------|-----------|-----------|-----------|

---

Unique Subject Identifier=5198000001-0194

Assay variable : PTINR\_VAL1 PT-INR Value

N Mean Standard Deviation Minimum Maximum

---

|   |           |           |           |           |
|---|-----------|-----------|-----------|-----------|
| 6 | 1.6433333 | 0.1795179 | 1.5000000 | 1.9200000 |
|---|-----------|-----------|-----------|-----------|

---

Unique Subject Identifier=5198000001-0195

Assay variable : PTINR\_VAL1 PT-INR Value

N Mean Standard Deviation Minimum Maximum

---

|   |           |  |           |           |
|---|-----------|--|-----------|-----------|
| 1 | 1.2300000 |  | 1.2300000 | 1.2300000 |
|---|-----------|--|-----------|-----------|

---

Unique Subject Identifier=5198000001-0198

Assay variable : PTINR\_VAL1 PT-INR Value

N Mean Standard Deviation Minimum Maximum

---

|   |          |           |          |          |
|---|----------|-----------|----------|----------|
| 6 | 1.600000 | 0.3036445 | 1.190000 | 1.890000 |
|---|----------|-----------|----------|----------|

---



Laboratory tests at the time of obtaining Table 2-6 consent, according to the presence or absence of proton-pump inhibitors

Unique Subject Identifier=5198000001-0201

MEANS Procedure

Assay variable : PTINR\_VAL1 PT-INR Value

N Mean Standard Deviation Minimum Maximum

---

|   |          |  |          |          |
|---|----------|--|----------|----------|
| 1 | 3.400000 |  | 3.400000 | 3.400000 |
|---|----------|--|----------|----------|

---

Unique Subject Identifier=5198000001-0210

Assay variable : PTINR\_VAL1 PT-INR Value

N Mean Standard Deviation Minimum Maximum

---

|   |          |  |          |          |
|---|----------|--|----------|----------|
| 1 | 2.380000 |  | 2.380000 | 2.380000 |
|---|----------|--|----------|----------|

---

Unique Subject Identifier=5198000001-0218

Assay variable : PTINR\_VAL1 PT-INR Value

N Mean Standard Deviation Minimum Maximum

---

|   |          |           |          |          |
|---|----------|-----------|----------|----------|
| 3 | 2.163333 | 0.3066486 | 1.840000 | 2.450000 |
|---|----------|-----------|----------|----------|

---

Unique Subject Identifier=5198000001-0219

Assay variable : PTINR\_VAL1 PT-INR Value

N Mean Standard Deviation Minimum Maximum

---

|   |           |           |           |           |
|---|-----------|-----------|-----------|-----------|
| 6 | 1.6366667 | 0.1802961 | 1.4800000 | 1.8800000 |
|---|-----------|-----------|-----------|-----------|

---

Laboratory tests at the time of obtaining Table 2-6 consent, according to the presence or absence of proton-pump inhibitors

Unique Subject Identifier=5198000001-0224

MEANS Procedure

Assay variable : PTINR\_VAL1 PT-INR Value

| N | Mean      | Standard Deviation | Minimum   | Maximum   |
|---|-----------|--------------------|-----------|-----------|
| 2 | 2.3550000 | 0.1484924          | 2.2500000 | 2.4600000 |

Unique Subject Identifier=5198000001-0228

Assay variable : PTINR\_VAL1 PT-INR Value

| N | Mean      | Standard Deviation | Minimum   | Maximum   |
|---|-----------|--------------------|-----------|-----------|
| 1 | 1.9700000 |                    | 1.9700000 | 1.9700000 |

Unique Subject Identifier=5198000001-0230

Assay variable : PTINR\_VAL1 PT-INR Value

| N | Mean      | Standard Deviation | Minimum   | Maximum   |
|---|-----------|--------------------|-----------|-----------|
| 2 | 2.2850000 | 0.4313351          | 1.9800000 | 2.5900000 |

Unique Subject Identifier=5198000001-0234

Assay variable : PTINR\_VAL1 PT-INR Value

N Mean Standard Deviation Minimum Maximum

---

|   |           |  |           |           |
|---|-----------|--|-----------|-----------|
| 1 | 1.9500000 |  | 1.9500000 | 1.9500000 |
|---|-----------|--|-----------|-----------|

---

Laboratory tests at the time of obtaining Table 2-6 consent, according to the presence or absence of proton-pump inhibitors

Unique Subject Identifier=5198000001-0243

MEANS Procedure

Assay variable : PTINR\_VAL1 PT-INR Value

N Mean Standard Deviation Minimum Maximum

---

|   |          |  |          |          |
|---|----------|--|----------|----------|
| 1 | 3.480000 |  | 3.480000 | 3.480000 |
|---|----------|--|----------|----------|

---

Unique Subject Identifier=5198000001-0248

Assay variable : PTINR\_VAL1 PT-INR Value

N Mean Standard Deviation Minimum Maximum

---

|   |          |           |          |          |
|---|----------|-----------|----------|----------|
| 2 | 1.370000 | 0.0848528 | 1.310000 | 1.430000 |
|---|----------|-----------|----------|----------|

---

Unique Subject Identifier=5208011010-0002

Assay variable : PTINR\_VAL1 PT-INR Value

N Mean Standard Deviation Minimum Maximum

---

|   |          |           |          |          |
|---|----------|-----------|----------|----------|
| 2 | 1.995000 | 0.0919239 | 1.930000 | 2.060000 |
|---|----------|-----------|----------|----------|

---

Unique Subject Identifier=5208011010-0008

Assay variable : PTINR\_VAL1 PT-INR Value

N Mean Standard Deviation Minimum Maximum

---

|   |          |          |          |          |
|---|----------|----------|----------|----------|
| 5 | 2.116000 | 0.252448 | 1.900000 | 2.540000 |
|---|----------|----------|----------|----------|

---

Laboratory tests at the time of obtaining Table 2-6 consent, according to the presence or absence of proton-pump inhibitors

Unique Subject Identifier=5208011010-0011

MEANS Procedure

Assay variable : PTINR\_VAL1 PT-INR Value

N Mean Standard Deviation Minimum Maximum

---

|   |           |           |           |           |
|---|-----------|-----------|-----------|-----------|
| 5 | 2.4020000 | 0.2808380 | 2.1500000 | 2.8200000 |
|---|-----------|-----------|-----------|-----------|

---

Unique Subject Identifier=5210000100-0019

Assay variable : PTINR\_VAL1 PT-INR Value

N Mean Standard Deviation Minimum Maximum

---

|   |           |           |           |           |
|---|-----------|-----------|-----------|-----------|
| 3 | 1.9333333 | 0.5179125 | 1.6000000 | 2.5300000 |
|---|-----------|-----------|-----------|-----------|

---

Unique Subject Identifier=5210000100-0023

Assay variable : PTINR\_VAL1 PT-INR Value

N Mean Standard Deviation Minimum Maximum

---

|   |           |           |           |           |
|---|-----------|-----------|-----------|-----------|
| 3 | 1.8766667 | 0.2914332 | 1.5500000 | 2.1100000 |
|---|-----------|-----------|-----------|-----------|

---

Unique Subject Identifier=5210000100-0024

Assay variable : PTINR\_VAL1 PT-INR Value

N Mean Standard Deviation Minimum Maximum

---

|   |          |           |          |          |
|---|----------|-----------|----------|----------|
| 3 | 1.833333 | 0.0929157 | 1.730000 | 1.910000 |
|---|----------|-----------|----------|----------|

---



Laboratory tests at the time of obtaining Table 2-6 consent, according to the presence or absence of proton-pump inhibitors

Unique Subject Identifier=5210000100-0026

MEANS Procedure

Assay variable : PTINR\_VAL1 PT-INR Value

| N | Mean      | Standard Deviation | Minimum   | Maximum   |
|---|-----------|--------------------|-----------|-----------|
| 3 | 2.4066667 | 0.1193035          | 2.3100000 | 2.5400000 |

Unique Subject Identifier=5214010110-0002

Assay variable : PTINR\_VAL1 PT-INR Value

| N | Mean      | Standard Deviation | Minimum   | Maximum   |
|---|-----------|--------------------|-----------|-----------|
| 2 | 1.7750000 | 0.1202082          | 1.6900000 | 1.8600000 |

Unique Subject Identifier=5223000000-0001

Assay variable : PTINR\_VAL1 PT-INR Value

| N | Mean      | Standard Deviation | Minimum   | Maximum   |
|---|-----------|--------------------|-----------|-----------|
| 6 | 1.1266667 | 0.0868716          | 1.0000000 | 1.2100000 |

Unique Subject Identifier=5223000000-0005

Assay variable : PTINR\_VAL1 PT-INR Value

N Mean Standard Deviation Minimum Maximum

---

|   |           |           |           |           |
|---|-----------|-----------|-----------|-----------|
| 3 | 2.7833333 | 0.3003886 | 2.6000000 | 3.1300000 |
|---|-----------|-----------|-----------|-----------|

---

Laboratory tests at the time of obtaining Table 2-6 consent, according to the presence or absence of proton-pump inhibitors

Unique Subject Identifier=5223000000-0010

MEANS Procedure

Assay variable : PTINR\_VAL1 PT-INR Value

| N | Mean      | Standard Deviation | Minimum   | Maximum   |
|---|-----------|--------------------|-----------|-----------|
| 4 | 2.2075000 | 0.2393568          | 1.9200000 | 2.4700000 |

Unique Subject Identifier=5223000000-0011

Assay variable : PTINR\_VAL1 PT-INR Value

| N | Mean      | Standard Deviation | Minimum   | Maximum   |
|---|-----------|--------------------|-----------|-----------|
| 5 | 1.9060000 | 0.5252904          | 1.3700000 | 2.7000000 |

Unique Subject Identifier=5223000000-0012

Assay variable : PTINR\_VAL1 PT-INR Value

| N | Mean      | Standard Deviation | Minimum   | Maximum   |
|---|-----------|--------------------|-----------|-----------|
| 3 | 3.0733333 | 0.4499259          | 2.5900000 | 3.4800000 |

Unique Subject Identifier=5223000000-0014

Assay variable : PTINR\_VAL1 PT-INR Value

N Mean Standard Deviation Minimum Maximum

---

|   |           |           |           |           |
|---|-----------|-----------|-----------|-----------|
| 3 | 1.4166667 | 0.1550269 | 1.2400000 | 1.5300000 |
|---|-----------|-----------|-----------|-----------|

---

Laboratory tests at the time of obtaining Table 2-6 consent, according to the presence or absence of proton-pump inhibitors

Unique Subject Identifier=5223000000-0019

MEANS Procedure

Assay variable : PTINR\_VAL1 PT-INR Value

N Mean Standard Deviation Minimum Maximum

---

|   |           |           |           |           |
|---|-----------|-----------|-----------|-----------|
| 3 | 1.9466667 | 0.1069268 | 1.8800000 | 2.0700000 |
|---|-----------|-----------|-----------|-----------|

---

Unique Subject Identifier=5223000000-0021

Assay variable : PTINR\_VAL1 PT-INR Value

N Mean Standard Deviation Minimum Maximum

---

|   |           |           |           |           |
|---|-----------|-----------|-----------|-----------|
| 3 | 1.8433333 | 0.2345918 | 1.6400000 | 2.1000000 |
|---|-----------|-----------|-----------|-----------|

---

Unique Subject Identifier=5224000000-0001

Assay variable : PTINR\_VAL1 PT-INR Value

N Mean Standard Deviation Minimum Maximum

---

|   |           |           |           |           |
|---|-----------|-----------|-----------|-----------|
| 4 | 1.6775000 | 0.1925920 | 1.4800000 | 1.9400000 |
|---|-----------|-----------|-----------|-----------|

---

Unique Subject Identifier=5232010000-0007

Assay variable : PTINR\_VAL1 PT-INR Value

N Mean Standard Deviation Minimum Maximum

---

|   |           |           |           |           |
|---|-----------|-----------|-----------|-----------|
| 5 | 1.7300000 | 0.2442335 | 1.4900000 | 2.0500000 |
|---|-----------|-----------|-----------|-----------|

---

Laboratory tests at the time of obtaining Table 2-6 consent, according to the presence or absence of proton-pump inhibitors

Unique Subject Identifier=5232010000-0010

MEANS Procedure

Assay variable : PTINR\_VAL1 PT-INR Value

N Mean Standard Deviation Minimum Maximum

---

|   |           |           |           |           |
|---|-----------|-----------|-----------|-----------|
| 4 | 1.9550000 | 0.2636285 | 1.5900000 | 2.2200000 |
|---|-----------|-----------|-----------|-----------|

---

Unique Subject Identifier=5232010000-0012

Assay variable : PTINR\_VAL1 PT-INR Value

N Mean Standard Deviation Minimum Maximum

---

|   |           |           |           |           |
|---|-----------|-----------|-----------|-----------|
| 4 | 1.7875000 | 0.1767060 | 1.5300000 | 1.9300000 |
|---|-----------|-----------|-----------|-----------|

---

Unique Subject Identifier=5232010000-0015

Assay variable : PTINR\_VAL1 PT-INR Value

N Mean Standard Deviation Minimum Maximum

---

|   |           |           |           |           |
|---|-----------|-----------|-----------|-----------|
| 6 | 1.9083333 | 0.4707618 | 1.4800000 | 2.6100000 |
|---|-----------|-----------|-----------|-----------|

---

Unique Subject Identifier=5232010000-0023

Assay variable : PTINR\_VAL1 PT-INR Value

N Mean Standard Deviation Minimum Maximum

---

|   |           |           |           |           |
|---|-----------|-----------|-----------|-----------|
| 6 | 1.8066667 | 0.1840290 | 1.6200000 | 2.0700000 |
|---|-----------|-----------|-----------|-----------|

---



Laboratory tests at the time of obtaining Table 2-6 consent, according to the presence or absence of proton-pump inhibitors

Unique Subject Identifier=5232010000-0027

MEANS Procedure

Assay variable : PTINR\_VAL1 PT-INR Value

| N | Mean     | Standard Deviation | Minimum  | Maximum  |
|---|----------|--------------------|----------|----------|
| 3 | 2.100000 | 0.4765501          | 1.810000 | 2.650000 |

Unique Subject Identifier=5233000000-0008

Assay variable : PTINR\_VAL1 PT-INR Value

| N | Mean     | Standard Deviation | Minimum  | Maximum  |
|---|----------|--------------------|----------|----------|
| 4 | 1.912500 | 0.8410460          | 1.100000 | 3.050000 |

Unique Subject Identifier=5233000000-0009

Assay variable : PTINR\_VAL1 PT-INR Value

| N | Mean     | Standard Deviation | Minimum  | Maximum  |
|---|----------|--------------------|----------|----------|
| 5 | 1.596000 | 0.3983466          | 1.280000 | 2.290000 |

Unique Subject Identifier=5235000000-0005

Assay variable : PTINR\_VAL1 PT-INR Value

N Mean Standard Deviation Minimum Maximum

---

|   |           |           |           |           |
|---|-----------|-----------|-----------|-----------|
| 6 | 2.2833333 | 0.4622409 | 1.9000000 | 3.1000000 |
|---|-----------|-----------|-----------|-----------|

---

Laboratory tests at the time of obtaining Table 2-6 consent, according to the presence or absence of proton-pump inhibitors

Unique Subject Identifier=5235000000-0015

MEANS Procedure

Assay variable : PTINR\_VAL1 PT-INR Value

N Mean Standard Deviation Minimum Maximum

---

|   |           |           |           |           |
|---|-----------|-----------|-----------|-----------|
| 6 | 2.1500000 | 0.2073644 | 1.9000000 | 2.5000000 |
|---|-----------|-----------|-----------|-----------|

---

Unique Subject Identifier=5235000000-0026

Assay variable : PTINR\_VAL1 PT-INR Value

N Mean Standard Deviation Minimum Maximum

---

|   |           |           |           |           |
|---|-----------|-----------|-----------|-----------|
| 6 | 2.0500000 | 0.1378405 | 1.9000000 | 2.2000000 |
|---|-----------|-----------|-----------|-----------|

---

Unique Subject Identifier=5235000000-0030

Assay variable : PTINR\_VAL1 PT-INR Value

N Mean Standard Deviation Minimum Maximum

---

|   |           |           |           |           |
|---|-----------|-----------|-----------|-----------|
| 6 | 2.0616667 | 0.1830209 | 1.9500000 | 2.4200000 |
|---|-----------|-----------|-----------|-----------|

---

Unique Subject Identifier=5235000000-0050

Assay variable : PTINR\_VAL1 PT-INR Value

N Mean Standard Deviation Minimum Maximum

---

|   |           |           |           |           |
|---|-----------|-----------|-----------|-----------|
| 6 | 1.6666667 | 0.1005319 | 1.5500000 | 1.8100000 |
|---|-----------|-----------|-----------|-----------|

---

Laboratory tests at the time of obtaining Table 2-6 consent, according to the presence or absence of proton-pump inhibitors

Unique Subject Identifier=5235000000-0057

MEANS Procedure

Assay variable : PTINR\_VAL1 PT-INR Value

N Mean Standard Deviation Minimum Maximum

---

|   |           |           |           |           |
|---|-----------|-----------|-----------|-----------|
| 4 | 1.7825000 | 0.1426826 | 1.6200000 | 1.9300000 |
|---|-----------|-----------|-----------|-----------|

---

Unique Subject Identifier=5235000000-0068

Assay variable : PTINR\_VAL1 PT-INR Value

N Mean Standard Deviation Minimum Maximum

---

|   |           |           |           |           |
|---|-----------|-----------|-----------|-----------|
| 6 | 1.7000000 | 0.0894427 | 1.6000000 | 1.8000000 |
|---|-----------|-----------|-----------|-----------|

---

Unique Subject Identifier=5236000000-0003

Assay variable : PTINR\_VAL1 PT-INR Value

N Mean Standard Deviation Minimum Maximum

---

|   |           |           |           |           |
|---|-----------|-----------|-----------|-----------|
| 6 | 1.6133333 | 0.2304488 | 1.1600000 | 1.7700000 |
|---|-----------|-----------|-----------|-----------|

---

Unique Subject Identifier=5236000000-0010

Assay variable : PTINR\_VAL1 PT-INR Value

N Mean Standard Deviation Minimum Maximum

---

|   |           |           |           |           |
|---|-----------|-----------|-----------|-----------|
| 6 | 1.9266667 | 0.7148613 | 1.2600000 | 2.8500000 |
|---|-----------|-----------|-----------|-----------|

---

Laboratory tests at the time of obtaining Table 2-6 consent, according to the presence or absence of proton-pump inhibitors

Unique Subject Identifier=523600000-0019

MEANS Procedure

Assay variable : PTINR\_VAL1 PT-INR Value

N Mean Standard Deviation Minimum Maximum

---

|   |           |           |           |           |
|---|-----------|-----------|-----------|-----------|
| 5 | 2.0580000 | 0.2839366 | 1.8600000 | 2.5600000 |
|---|-----------|-----------|-----------|-----------|

---

Unique Subject Identifier=523600000-0021

Assay variable : PTINR\_VAL1 PT-INR Value

N Mean Standard Deviation Minimum Maximum

---

|   |           |           |           |           |
|---|-----------|-----------|-----------|-----------|
| 6 | 2.2716667 | 0.7649161 | 1.4800000 | 3.2800000 |
|---|-----------|-----------|-----------|-----------|

---

Unique Subject Identifier=5237010000-0002

Assay variable : PTINR\_VAL1 PT-INR Value

N Mean Standard Deviation Minimum Maximum

---

|   |           |           |           |           |
|---|-----------|-----------|-----------|-----------|
| 6 | 2.1433333 | 0.2946637 | 1.8700000 | 2.7000000 |
|---|-----------|-----------|-----------|-----------|

---

Unique Subject Identifier=5237010000-0003

Assay variable : PTINR\_VAL1 PT-INR Value

N Mean Standard Deviation Minimum Maximum

---

|   |           |           |           |           |
|---|-----------|-----------|-----------|-----------|
| 5 | 2.0260000 | 0.6477114 | 1.3300000 | 2.9300000 |
|---|-----------|-----------|-----------|-----------|

---



Laboratory tests at the time of obtaining Table 2-6 consent, according to the presence or absence of proton-pump inhibitors

Unique Subject Identifier=5237010000-0004

MEANS Procedure

Assay variable : PTINR\_VAL1 PT-INR Value

| N | Mean      | Standard Deviation | Minimum   | Maximum   |
|---|-----------|--------------------|-----------|-----------|
| 4 | 1.9300000 | 0.2853069          | 1.6400000 | 2.3000000 |

Unique Subject Identifier=5237010000-0007

Assay variable : PTINR\_VAL1 PT-INR Value

| N | Mean      | Standard Deviation | Minimum   | Maximum   |
|---|-----------|--------------------|-----------|-----------|
| 5 | 2.2840000 | 0.3001333          | 1.9300000 | 2.6900000 |

Unique Subject Identifier=5237010000-0008

Assay variable : PTINR\_VAL1 PT-INR Value

| N | Mean      | Standard Deviation | Minimum   | Maximum   |
|---|-----------|--------------------|-----------|-----------|
| 5 | 1.7160000 | 0.2997165          | 1.4600000 | 2.2300000 |

Unique Subject Identifier=5237010000-0010

Assay variable : PTINR\_VAL1 PT-INR Value

N Mean Standard Deviation Minimum Maximum

---

|   |           |           |           |           |
|---|-----------|-----------|-----------|-----------|
| 6 | 2.1066667 | 0.1736280 | 1.9400000 | 2.3300000 |
|---|-----------|-----------|-----------|-----------|

---

Laboratory tests at the time of obtaining Table 2-6 consent, according to the presence or absence of proton-pump inhibitors

Unique Subject Identifier=5237010000-0013

MEANS Procedure

Assay variable : PTINR\_VAL1 PT-INR Value

| N | Mean      | Standard Deviation | Minimum   | Maximum   |
|---|-----------|--------------------|-----------|-----------|
| 5 | 2.0320000 | 0.1488959          | 1.8400000 | 2.2400000 |

Unique Subject Identifier=5237010000-0014

Assay variable : PTINR\_VAL1 PT-INR Value

| N | Mean      | Standard Deviation | Minimum   | Maximum   |
|---|-----------|--------------------|-----------|-----------|
| 4 | 1.7275000 | 0.4285149          | 1.2700000 | 2.3000000 |

Unique Subject Identifier=5255000000-0001

Assay variable : PTINR\_VAL1 PT-INR Value

| N | Mean      | Standard Deviation | Minimum   | Maximum   |
|---|-----------|--------------------|-----------|-----------|
| 2 | 2.4450000 | 0.2474874          | 2.2700000 | 2.6200000 |

Unique Subject Identifier=5255000000-0006

Assay variable : PTINR\_VAL1 PT-INR Value

N Mean Standard Deviation Minimum Maximum

---

|   |           |           |           |           |
|---|-----------|-----------|-----------|-----------|
| 4 | 2.3950000 | 0.3145897 | 2.1300000 | 2.7700000 |
|---|-----------|-----------|-----------|-----------|

---

Laboratory tests at the time of obtaining Table 2-6 consent, according to the presence or absence of proton-pump inhibitors

Unique Subject Identifier=5255000000-0010

MEANS Procedure

Assay variable : PTINR\_VAL1 PT-INR Value

N Mean Standard Deviation Minimum Maximum

---

|   |          |  |          |          |
|---|----------|--|----------|----------|
| 1 | 2.180000 |  | 2.180000 | 2.180000 |
|---|----------|--|----------|----------|

---

Unique Subject Identifier=5260010000-0001

Assay variable : PTINR\_VAL1 PT-INR Value

N Mean Standard Deviation Minimum Maximum

---

|   |          |           |          |          |
|---|----------|-----------|----------|----------|
| 5 | 1.832000 | 0.2392070 | 1.560000 | 2.210000 |
|---|----------|-----------|----------|----------|

---

Unique Subject Identifier=5260010000-0002

Assay variable : PTINR\_VAL1 PT-INR Value

N Mean Standard Deviation Minimum Maximum

---

|   |           |           |          |          |
|---|-----------|-----------|----------|----------|
| 6 | 1.9116667 | 0.3362985 | 1.520000 | 2.340000 |
|---|-----------|-----------|----------|----------|

---

Unique Subject Identifier=5260010000-0003

Assay variable : PTINR\_VAL1 PT-INR Value

N Mean Standard Deviation Minimum Maximum

---

|   |           |           |           |           |
|---|-----------|-----------|-----------|-----------|
| 6 | 2.0700000 | 0.1692336 | 1.8900000 | 2.3900000 |
|---|-----------|-----------|-----------|-----------|

---

Laboratory tests at the time of obtaining Table 2-6 consent, according to the presence or absence of proton-pump inhibitors

Unique Subject Identifier=5260010000-0004

MEANS Procedure

Assay variable : PTINR\_VAL1 PT-INR Value

N Mean Standard Deviation Minimum Maximum

---

|   |           |           |           |           |
|---|-----------|-----------|-----------|-----------|
| 2 | 1.5450000 | 0.0353553 | 1.5200000 | 1.5700000 |
|---|-----------|-----------|-----------|-----------|

---

Unique Subject Identifier=5260010000-0008

Assay variable : PTINR\_VAL1 PT-INR Value

N Mean Standard Deviation Minimum Maximum

---

|   |           |           |           |           |
|---|-----------|-----------|-----------|-----------|
| 3 | 1.8800000 | 0.3897435 | 1.4600000 | 2.2300000 |
|---|-----------|-----------|-----------|-----------|

---

Unique Subject Identifier=5260010000-0010

Assay variable : PTINR\_VAL1 PT-INR Value

N Mean Standard Deviation Minimum Maximum

---

|   |           |           |           |           |
|---|-----------|-----------|-----------|-----------|
| 3 | 1.8833333 | 0.2484619 | 1.7300000 | 2.1700000 |
|---|-----------|-----------|-----------|-----------|

---

Unique Subject Identifier=5260010000-0011

Assay variable : PTINR\_VAL1 PT-INR Value

N Mean Standard Deviation Minimum Maximum

---

|   |           |           |           |           |
|---|-----------|-----------|-----------|-----------|
| 6 | 2.2766667 | 0.1167333 | 2.1000000 | 2.4100000 |
|---|-----------|-----------|-----------|-----------|

---



Laboratory tests at the time of obtaining Table 2-6 consent, according to the presence or absence of proton-pump inhibitors

Unique Subject Identifier=5260010000-0013

MEANS Procedure

Assay variable : PTINR\_VAL1 PT-INR Value

| N | Mean      | Standard Deviation | Minimum   | Maximum   |
|---|-----------|--------------------|-----------|-----------|
| 4 | 2.1075000 | 0.2550000          | 1.8500000 | 2.4600000 |

Unique Subject Identifier=5260010000-0015

Assay variable : PTINR\_VAL1 PT-INR Value

| N | Mean      | Standard Deviation | Minimum   | Maximum   |
|---|-----------|--------------------|-----------|-----------|
| 5 | 1.8720000 | 0.1892617          | 1.6100000 | 2.1200000 |

Unique Subject Identifier=5260010000-0018

Assay variable : PTINR\_VAL1 PT-INR Value

| N | Mean      | Standard Deviation | Minimum   | Maximum   |
|---|-----------|--------------------|-----------|-----------|
| 2 | 2.1700000 | 0.2121320          | 2.0200000 | 2.3200000 |

Unique Subject Identifier=5260010000-0019

Assay variable : PTINR\_VAL1 PT-INR Value

N Mean Standard Deviation Minimum Maximum

---

|   |           |           |           |           |
|---|-----------|-----------|-----------|-----------|
| 5 | 1.6580000 | 0.2629068 | 1.2500000 | 1.9700000 |
|---|-----------|-----------|-----------|-----------|

---

Laboratory tests at the time of obtaining Table 2-6 consent, according to the presence or absence of proton-pump inhibitors

Unique Subject Identifier=5260010000-0023

MEANS Procedure

Assay variable : PTINR\_VAL1 PT-INR Value

N Mean Standard Deviation Minimum Maximum

---

|   |           |           |           |           |
|---|-----------|-----------|-----------|-----------|
| 4 | 1.8075000 | 0.3661853 | 1.2600000 | 2.0200000 |
|---|-----------|-----------|-----------|-----------|

---

Unique Subject Identifier=5260010000-0024

Assay variable : PTINR\_VAL1 PT-INR Value

N Mean Standard Deviation Minimum Maximum

---

|   |           |           |           |           |
|---|-----------|-----------|-----------|-----------|
| 3 | 2.0666667 | 0.2196209 | 1.9300000 | 2.3200000 |
|---|-----------|-----------|-----------|-----------|

---

Unique Subject Identifier=5260010000-0025

Assay variable : PTINR\_VAL1 PT-INR Value

N Mean Standard Deviation Minimum Maximum

---

|   |           |           |           |           |
|---|-----------|-----------|-----------|-----------|
| 3 | 1.8800000 | 0.3897435 | 1.4600000 | 2.2300000 |
|---|-----------|-----------|-----------|-----------|

---

Unique Subject Identifier=5261010010-0014

Assay variable : PTINR\_VAL1 PT-INR Value

N Mean Standard Deviation Minimum Maximum

---

|   |           |           |           |           |
|---|-----------|-----------|-----------|-----------|
| 3 | 1.8066667 | 0.1331666 | 1.6600000 | 1.9200000 |
|---|-----------|-----------|-----------|-----------|

---

Laboratory tests at the time of obtaining Table 2-6 consent, according to the presence or absence of proton-pump inhibitors

Unique Subject Identifier=5261010010-0018

MEANS Procedure

Assay variable : PTINR\_VAL1 PT-INR Value

N Mean Standard Deviation Minimum Maximum

---

|   |           |           |           |           |
|---|-----------|-----------|-----------|-----------|
| 4 | 1.6675000 | 0.3820449 | 1.2000000 | 2.0400000 |
|---|-----------|-----------|-----------|-----------|

---

Unique Subject Identifier=5261010010-0025

Assay variable : PTINR\_VAL1 PT-INR Value

N Mean Standard Deviation Minimum Maximum

---

|   |           |           |           |           |
|---|-----------|-----------|-----------|-----------|
| 2 | 2.4700000 | 0.7071068 | 1.9700000 | 2.9700000 |
|---|-----------|-----------|-----------|-----------|

---

Unique Subject Identifier=5298011110-0001

Assay variable : PTINR\_VAL1 PT-INR Value

N Mean Standard Deviation Minimum Maximum

---

|   |           |           |           |           |
|---|-----------|-----------|-----------|-----------|
| 5 | 2.2760000 | 0.1408190 | 2.1000000 | 2.4300000 |
|---|-----------|-----------|-----------|-----------|

---

Unique Subject Identifier=5298011110-0016

Assay variable : PTINR\_VAL1 PT-INR Value

N Mean Standard Deviation Minimum Maximum

---

|   |           |           |           |           |
|---|-----------|-----------|-----------|-----------|
| 5 | 2.0460000 | 0.2341581 | 1.7500000 | 2.2900000 |
|---|-----------|-----------|-----------|-----------|

---

Laboratory tests at the time of obtaining Table 2-6 consent, according to the presence or absence of proton-pump inhibitors

Unique Subject Identifier=5298011110-0020

MEANS Procedure

Assay variable : PTINR\_VAL1 PT-INR Value

| N | Mean      | Standard Deviation | Minimum   | Maximum   |
|---|-----------|--------------------|-----------|-----------|
| 6 | 2.6066667 | 0.3750022          | 2.1900000 | 3.3000000 |

Unique Subject Identifier=5298011110-0034

Assay variable : PTINR\_VAL1 PT-INR Value

| N | Mean      | Standard Deviation | Minimum   | Maximum   |
|---|-----------|--------------------|-----------|-----------|
| 3 | 2.2733333 | 0.2874601          | 2.0100000 | 2.5800000 |

Unique Subject Identifier=5305000000-0009

Assay variable : PTINR\_VAL1 PT-INR Value

| N | Mean      | Standard Deviation | Minimum   | Maximum   |
|---|-----------|--------------------|-----------|-----------|
| 6 | 2.0983333 | 0.5871769          | 1.3300000 | 2.8800000 |

Unique Subject Identifier=5305000000-0016

Assay variable : PTINR\_VAL1 PT-INR Value

N Mean Standard Deviation Minimum Maximum

---

|   |           |           |           |           |
|---|-----------|-----------|-----------|-----------|
| 4 | 1.8925000 | 0.3764195 | 1.4200000 | 2.3200000 |
|---|-----------|-----------|-----------|-----------|

---



Laboratory tests at the time of obtaining Table 2-6 consent, according to the presence or absence of proton-pump inhibitors

Unique Subject Identifier=5305000000-0039

MEANS Procedure

Assay variable : PTINR\_VAL1 PT-INR Value

N Mean Standard Deviation Minimum Maximum

---

|   |           |           |           |           |
|---|-----------|-----------|-----------|-----------|
| 3 | 2.2633333 | 0.5253887 | 1.8700000 | 2.8600000 |
|---|-----------|-----------|-----------|-----------|

---

Unique Subject Identifier=5326000000-0001

Assay variable : PTINR\_VAL1 PT-INR Value

N Mean Standard Deviation Minimum Maximum

---

|   |           |           |           |           |
|---|-----------|-----------|-----------|-----------|
| 3 | 2.0000000 | 0.3260368 | 1.6600000 | 2.3100000 |
|---|-----------|-----------|-----------|-----------|

---

Unique Subject Identifier=5342011001-0013

Assay variable : PTINR\_VAL1 PT-INR Value

N Mean Standard Deviation Minimum Maximum

---

|   |           |           |           |           |
|---|-----------|-----------|-----------|-----------|
| 6 | 2.1483333 | 0.6879947 | 1.5300000 | 3.4600000 |
|---|-----------|-----------|-----------|-----------|

---

Unique Subject Identifier=5342011001-0023

Assay variable : PTINR\_VAL1 PT-INR Value

N Mean Standard Deviation Minimum Maximum

---

|   |           |           |           |           |
|---|-----------|-----------|-----------|-----------|
| 6 | 1.9283333 | 0.3761604 | 1.3700000 | 2.2700000 |
|---|-----------|-----------|-----------|-----------|

---

Laboratory tests at the time of obtaining Table 2-6 consent, according to the presence or absence of proton-pump inhibitors

Unique Subject Identifier=5355000000-0014

MEANS Procedure

Assay variable : PTINR\_VAL1 PT-INR Value

N Mean Standard Deviation Minimum Maximum

---

|   |           |           |           |           |
|---|-----------|-----------|-----------|-----------|
| 3 | 1.8133333 | 0.2948446 | 1.4800000 | 2.0400000 |
|---|-----------|-----------|-----------|-----------|

---

Unique Subject Identifier=5355000000-0019

Assay variable : PTINR\_VAL1 PT-INR Value

N Mean Standard Deviation Minimum Maximum

---

|   |           |           |           |           |
|---|-----------|-----------|-----------|-----------|
| 6 | 2.0066667 | 0.8450010 | 1.6100000 | 3.7300000 |
|---|-----------|-----------|-----------|-----------|

---

Unique Subject Identifier=5355000000-0027

Assay variable : PTINR\_VAL1 PT-INR Value

N Mean Standard Deviation Minimum Maximum

---

|   |           |           |           |           |
|---|-----------|-----------|-----------|-----------|
| 2 | 2.0350000 | 0.0212132 | 2.0200000 | 2.0500000 |
|---|-----------|-----------|-----------|-----------|

---

Unique Subject Identifier=5357000010-0021

Assay variable : PTINR\_VAL1 PT-INR Value

N Mean Standard Deviation Minimum Maximum

---

|   |           |           |           |           |
|---|-----------|-----------|-----------|-----------|
| 3 | 1.7666667 | 0.2081666 | 1.6000000 | 2.0000000 |
|---|-----------|-----------|-----------|-----------|

---

Laboratory tests at the time of obtaining Table 2-6 consent, according to the presence or absence of proton-pump inhibitors

Unique Subject Identifier=5357000010-0030

MEANS Procedure

Assay variable : PTINR\_VAL1 PT-INR Value

| N | Mean      | Standard Deviation | Minimum   | Maximum   |
|---|-----------|--------------------|-----------|-----------|
| 3 | 2.1000000 | 0.6000000          | 1.5000000 | 2.7000000 |

Unique Subject Identifier=5414010000-0001

Assay variable : PTINR\_VAL1 PT-INR Value

| N | Mean      | Standard Deviation | Minimum   | Maximum   |
|---|-----------|--------------------|-----------|-----------|
| 4 | 1.4500000 | 0.1568439          | 1.3000000 | 1.6000000 |

Unique Subject Identifier=5414010000-0006

Assay variable : PTINR\_VAL1 PT-INR Value

| N | Mean      | Standard Deviation | Minimum   | Maximum   |
|---|-----------|--------------------|-----------|-----------|
| 5 | 1.4400000 | 0.4939636          | 1.0700000 | 2.2900000 |

Unique Subject Identifier=5414010000-0007

Assay variable : PTINR\_VAL1 PT-INR Value

N Mean Standard Deviation Minimum Maximum

---

|   |           |           |           |           |
|---|-----------|-----------|-----------|-----------|
| 5 | 2.2880000 | 0.6480895 | 1.6300000 | 3.3500000 |
|---|-----------|-----------|-----------|-----------|

---

Laboratory tests at the time of obtaining Table 2-6 consent, according to the presence or absence of proton-pump inhibitors

Unique Subject Identifier=5414010000-0009

MEANS Procedure

Assay variable : PTINR\_VAL1 PT-INR Value

N Mean Standard Deviation Minimum Maximum

---

|   |           |           |           |           |
|---|-----------|-----------|-----------|-----------|
| 5 | 1.2900000 | 0.5819364 | 0.9400000 | 2.2900000 |
|---|-----------|-----------|-----------|-----------|

---

Unique Subject Identifier=5414010000-0012

Assay variable : PTINR\_VAL1 PT-INR Value

N Mean Standard Deviation Minimum Maximum

---

|   |           |           |           |           |
|---|-----------|-----------|-----------|-----------|
| 6 | 1.5450000 | 0.1681368 | 1.2600000 | 1.7700000 |
|---|-----------|-----------|-----------|-----------|

---

Unique Subject Identifier=5414010000-0014

Assay variable : PTINR\_VAL1 PT-INR Value

N Mean Standard Deviation Minimum Maximum

---

|   |           |           |           |           |
|---|-----------|-----------|-----------|-----------|
| 6 | 1.7450000 | 0.2980436 | 1.2800000 | 2.1900000 |
|---|-----------|-----------|-----------|-----------|

---

Unique Subject Identifier=5414010000-0017

Assay variable : PTINR\_VAL1 PT-INR Value

N Mean Standard Deviation Minimum Maximum

---

|   |           |           |           |           |
|---|-----------|-----------|-----------|-----------|
| 6 | 1.5800000 | 0.2282981 | 1.3200000 | 1.9600000 |
|---|-----------|-----------|-----------|-----------|

---



Laboratory tests at the time of obtaining Table 2-6 consent, according to the presence or absence of proton-pump inhibitors

Unique Subject Identifier=5414010000-0022

MEANS Procedure

Assay variable : PTINR\_VAL1 PT-INR Value

| N | Mean      | Standard Deviation | Minimum   | Maximum   |
|---|-----------|--------------------|-----------|-----------|
| 2 | 2.1950000 | 0.1202082          | 2.1100000 | 2.2800000 |

Unique Subject Identifier=5414010000-0023

Assay variable : PTINR\_VAL1 PT-INR Value

| N | Mean      | Standard Deviation | Minimum   | Maximum   |
|---|-----------|--------------------|-----------|-----------|
| 3 | 1.9100000 | 0.1212436          | 1.8000000 | 2.0400000 |

Unique Subject Identifier=5414010000-0027

Assay variable : PTINR\_VAL1 PT-INR Value

| N | Mean      | Standard Deviation | Minimum   | Maximum   |
|---|-----------|--------------------|-----------|-----------|
| 3 | 1.5333333 | 0.3785939          | 1.1000000 | 1.8000000 |

Unique Subject Identifier=5414010000-0030

Assay variable : PTINR\_VAL1 PT-INR Value

N Mean Standard Deviation Minimum Maximum

---

|   |           |           |           |           |
|---|-----------|-----------|-----------|-----------|
| 6 | 1.5650000 | 0.1674216 | 1.4300000 | 1.8900000 |
|---|-----------|-----------|-----------|-----------|

---

Laboratory tests at the time of obtaining Table 2-6 consent, according to the presence or absence of proton-pump inhibitors

Unique Subject Identifier=5414010000-0031

MEANS Procedure

Assay variable : PTINR\_VAL1 PT-INR Value

| N | Mean      | Standard Deviation | Minimum   | Maximum   |
|---|-----------|--------------------|-----------|-----------|
| 5 | 1.6520000 | 0.4814250          | 1.0600000 | 2.0900000 |

Unique Subject Identifier=5414010000-0032

Assay variable : PTINR\_VAL1 PT-INR Value

| N | Mean      | Standard Deviation | Minimum   | Maximum   |
|---|-----------|--------------------|-----------|-----------|
| 6 | 1.6383333 | 0.2628624          | 1.3400000 | 1.9600000 |

Unique Subject Identifier=5414010000-0033

Assay variable : PTINR\_VAL1 PT-INR Value

| N | Mean      | Standard Deviation | Minimum   | Maximum   |
|---|-----------|--------------------|-----------|-----------|
| 6 | 1.7183333 | 0.1582930          | 1.5600000 | 1.9900000 |

Unique Subject Identifier=5414010000-0034

Assay variable : PTINR\_VAL1 PT-INR Value

N Mean Standard Deviation Minimum Maximum

---

|   |           |           |           |           |
|---|-----------|-----------|-----------|-----------|
| 4 | 1.4325000 | 0.1167262 | 1.2800000 | 1.5500000 |
|---|-----------|-----------|-----------|-----------|

---

Laboratory tests at the time of obtaining Table 2-6 consent, according to the presence or absence of proton-pump inhibitors

Unique Subject Identifier=5414010000-0035

MEANS Procedure

Assay variable : PTINR\_VAL1 PT-INR Value

| N | Mean      | Standard Deviation | Minimum   | Maximum   |
|---|-----------|--------------------|-----------|-----------|
| 2 | 1.9300000 | 0.7495332          | 1.4000000 | 2.4600000 |

Unique Subject Identifier=5414010000-0039

Assay variable : PTINR\_VAL1 PT-INR Value

| N | Mean      | Standard Deviation | Minimum   | Maximum   |
|---|-----------|--------------------|-----------|-----------|
| 5 | 1.7420000 | 0.1389964          | 1.6700000 | 1.9900000 |

Unique Subject Identifier=5414010000-0040

Assay variable : PTINR\_VAL1 PT-INR Value

| N | Mean      | Standard Deviation | Minimum   | Maximum   |
|---|-----------|--------------------|-----------|-----------|
| 2 | 2.3100000 | 0.4384062          | 2.0000000 | 2.6200000 |

Unique Subject Identifier=5414010000-0046

Assay variable : PTINR\_VAL1 PT-INR Value

N Mean Standard Deviation Minimum Maximum

---

|   |          |           |          |          |
|---|----------|-----------|----------|----------|
| 2 | 2.000000 | 0.6081118 | 1.570000 | 2.430000 |
|---|----------|-----------|----------|----------|

---

Laboratory tests at the time of obtaining Table 2-6 consent, according to the presence or absence of proton-pump inhibitors

Unique Subject Identifier=5414010000-0048

MEANS Procedure

Assay variable : PTINR\_VAL1 PT-INR Value

| N | Mean      | Standard Deviation | Minimum   | Maximum   |
|---|-----------|--------------------|-----------|-----------|
| 3 | 1.6333333 | 0.3821431          | 1.3600000 | 2.0700000 |

Unique Subject Identifier=5414010000-0057

Assay variable : PTINR\_VAL1 PT-INR Value

| N | Mean      | Standard Deviation | Minimum   | Maximum   |
|---|-----------|--------------------|-----------|-----------|
| 1 | 2.3000000 |                    | 2.3000000 | 2.3000000 |

Unique Subject Identifier=5414010000-0059

Assay variable : PTINR\_VAL1 PT-INR Value

| N | Mean      | Standard Deviation | Minimum   | Maximum   |
|---|-----------|--------------------|-----------|-----------|
| 5 | 2.0720000 | 0.8327785          | 1.2200000 | 3.4200000 |

Unique Subject Identifier=5414010000-0063

Assay variable : PTINR\_VAL1 PT-INR Value

N Mean Standard Deviation Minimum Maximum

---

|   |           |           |           |           |
|---|-----------|-----------|-----------|-----------|
| 5 | 1.9340000 | 0.3501857 | 1.5900000 | 2.5200000 |
|---|-----------|-----------|-----------|-----------|

---



Laboratory tests at the time of obtaining Table 2-6 consent, according to the presence or absence of proton-pump inhibitors

Unique Subject Identifier=5414010000-0064

MEANS Procedure

Assay variable : PTINR\_VAL1 PT-INR Value

| N | Mean      | Standard Deviation | Minimum   | Maximum   |
|---|-----------|--------------------|-----------|-----------|
| 4 | 1.9275000 | 0.5612709          | 1.2800000 | 2.4500000 |

Unique Subject Identifier=5466000000-0003

Assay variable : PTINR\_VAL1 PT-INR Value

| N | Mean      | Standard Deviation | Minimum   | Maximum   |
|---|-----------|--------------------|-----------|-----------|
| 6 | 2.3516667 | 0.4270090          | 2.0200000 | 3.1400000 |

Unique Subject Identifier=5466000000-0004

Assay variable : PTINR\_VAL1 PT-INR Value

| N | Mean      | Standard Deviation | Minimum   | Maximum   |
|---|-----------|--------------------|-----------|-----------|
| 5 | 2.5000000 | 0.1102270          | 2.4100000 | 2.6200000 |

Unique Subject Identifier=5466000000-0005

Assay variable : PTINR\_VAL1 PT-INR Value

N Mean Standard Deviation Minimum Maximum

---

|   |           |           |           |           |
|---|-----------|-----------|-----------|-----------|
| 4 | 2.3175000 | 0.3972719 | 2.0600000 | 2.9100000 |
|---|-----------|-----------|-----------|-----------|

---

Laboratory tests at the time of obtaining Table 2-6 consent, according to the presence or absence of proton-pump inhibitors

Unique Subject Identifier=5466000000-0009

MEANS Procedure

Assay variable : PTINR\_VAL1 PT-INR Value

N Mean Standard Deviation Minimum Maximum

---

|   |           |           |           |           |
|---|-----------|-----------|-----------|-----------|
| 6 | 2.1033333 | 0.2243806 | 1.7700000 | 2.3900000 |
|---|-----------|-----------|-----------|-----------|

---

Unique Subject Identifier=5466000000-0010

Assay variable : PTINR\_VAL1 PT-INR Value

N Mean Standard Deviation Minimum Maximum

---

|   |           |           |           |           |
|---|-----------|-----------|-----------|-----------|
| 6 | 2.4283333 | 0.6023094 | 1.6900000 | 3.1400000 |
|---|-----------|-----------|-----------|-----------|

---

Unique Subject Identifier=5466000000-0012

Assay variable : PTINR\_VAL1 PT-INR Value

N Mean Standard Deviation Minimum Maximum

---

|   |           |           |           |           |
|---|-----------|-----------|-----------|-----------|
| 6 | 1.8900000 | 0.1517893 | 1.7100000 | 2.1500000 |
|---|-----------|-----------|-----------|-----------|

---

Unique Subject Identifier=5466000000-0015

Assay variable : PTINR\_VAL1 PT-INR Value

N Mean Standard Deviation Minimum Maximum

---

|   |           |           |           |           |
|---|-----------|-----------|-----------|-----------|
| 6 | 2.1550000 | 0.1650152 | 1.9100000 | 2.3700000 |
|---|-----------|-----------|-----------|-----------|

---

Laboratory tests at the time of obtaining Table 2-6 consent, according to the presence or absence of proton-pump inhibitors

Unique Subject Identifier=551400000-0004

MEANS Procedure

Assay variable : PTINR\_VAL1 PT-INR Value

N Mean Standard Deviation Minimum Maximum

---

|   |           |           |           |           |
|---|-----------|-----------|-----------|-----------|
| 6 | 1.5866667 | 0.2106814 | 1.3000000 | 1.8400000 |
|---|-----------|-----------|-----------|-----------|

---

Unique Subject Identifier=551400000-0005

Assay variable : PTINR\_VAL1 PT-INR Value

N Mean Standard Deviation Minimum Maximum

---

|   |           |           |           |           |
|---|-----------|-----------|-----------|-----------|
| 4 | 2.1650000 | 0.5940539 | 1.7300000 | 3.0300000 |
|---|-----------|-----------|-----------|-----------|

---

Unique Subject Identifier=551400000-0006

Assay variable : PTINR\_VAL1 PT-INR Value

N Mean Standard Deviation Minimum Maximum

---

|   |           |           |           |           |
|---|-----------|-----------|-----------|-----------|
| 4 | 1.5150000 | 0.0810350 | 1.4400000 | 1.6300000 |
|---|-----------|-----------|-----------|-----------|

---

Unique Subject Identifier=551400000-0009

Assay variable : PTINR\_VAL1 PT-INR Value

N Mean Standard Deviation Minimum Maximum

---

|   |           |           |           |           |
|---|-----------|-----------|-----------|-----------|
| 3 | 1.6333333 | 0.2081666 | 1.4000000 | 1.8000000 |
|---|-----------|-----------|-----------|-----------|

---

Laboratory tests at the time of obtaining Table 2-6 consent, according to the presence or absence of proton-pump inhibitors

Unique Subject Identifier=551400000-0016

MEANS Procedure

Assay variable : PTINR\_VAL1 PT-INR Value

| N | Mean     | Standard Deviation | Minimum  | Maximum  |
|---|----------|--------------------|----------|----------|
| 6 | 1.850000 | 0.3519091          | 1.270000 | 2.270000 |

Unique Subject Identifier=551400000-0026

Assay variable : PTINR\_VAL1 PT-INR Value

| N | Mean     | Standard Deviation | Minimum  | Maximum  |
|---|----------|--------------------|----------|----------|
| 6 | 2.228333 | 0.2108475          | 1.830000 | 2.430000 |

Unique Subject Identifier=551400000-0038

Assay variable : PTINR\_VAL1 PT-INR Value

| N | Mean     | Standard Deviation | Minimum  | Maximum  |
|---|----------|--------------------|----------|----------|
| 4 | 1.817500 | 0.2489143          | 1.500000 | 2.090000 |

Unique Subject Identifier=551400000-0039

Assay variable : PTINR\_VAL1 PT-INR Value

N Mean Standard Deviation Minimum Maximum

---

|   |           |           |           |           |
|---|-----------|-----------|-----------|-----------|
| 2 | 2.0150000 | 0.1909188 | 1.8800000 | 2.1500000 |
|---|-----------|-----------|-----------|-----------|

---



Laboratory tests at the time of obtaining Table 2-6 consent, according to the presence or absence of proton-pump inhibitors

Unique Subject Identifier=5514000000-0040

MEANS Procedure

Assay variable : PTINR\_VAL1 PT-INR Value

| N | Mean     | Standard Deviation | Minimum  | Maximum  |
|---|----------|--------------------|----------|----------|
| 2 | 2.460000 | 0.0424264          | 2.430000 | 2.490000 |

Unique Subject Identifier=5514000000-0041

Assay variable : PTINR\_VAL1 PT-INR Value

| N | Mean     | Standard Deviation | Minimum  | Maximum  |
|---|----------|--------------------|----------|----------|
| 4 | 2.617500 | 0.3613286          | 2.120000 | 2.950000 |

Unique Subject Identifier=5542000000-0004

Assay variable : PTINR\_VAL1 PT-INR Value

| N | Mean     | Standard Deviation | Minimum  | Maximum  |
|---|----------|--------------------|----------|----------|
| 1 | 2.100000 |                    | 2.100000 | 2.100000 |

Unique Subject Identifier=5542000000-0005

Assay variable : PTINR\_VAL1 PT-INR Value

N Mean Standard Deviation Minimum Maximum

---

|   |           |           |           |           |
|---|-----------|-----------|-----------|-----------|
| 6 | 1.7450000 | 0.4741624 | 1.2700000 | 2.3300000 |
|---|-----------|-----------|-----------|-----------|

---

Laboratory tests at the time of obtaining Table 2-6 consent, according to the presence or absence of proton-pump inhibitors

Unique Subject Identifier=5542000000-0008

MEANS Procedure

Assay variable : PTINR\_VAL1 PT-INR Value

| N | Mean      | Standard Deviation | Minimum   | Maximum   |
|---|-----------|--------------------|-----------|-----------|
| 2 | 2.3800000 | 0.6222540          | 1.9400000 | 2.8200000 |

Unique Subject Identifier=5542000000-0009

Assay variable : PTINR\_VAL1 PT-INR Value

| N | Mean      | Standard Deviation | Minimum   | Maximum   |
|---|-----------|--------------------|-----------|-----------|
| 1 | 1.6500000 |                    | 1.6500000 | 1.6500000 |

Unique Subject Identifier=5542000000-0013

Assay variable : PTINR\_VAL1 PT-INR Value

| N | Mean      | Standard Deviation | Minimum   | Maximum   |
|---|-----------|--------------------|-----------|-----------|
| 5 | 1.1120000 | 0.0303315          | 1.0800000 | 1.1600000 |

Unique Subject Identifier=5542000000-0014

Assay variable : PTINR\_VAL1 PT-INR Value

N Mean Standard Deviation Minimum Maximum

---

|   |           |  |           |           |
|---|-----------|--|-----------|-----------|
| 1 | 2.0300000 |  | 2.0300000 | 2.0300000 |
|---|-----------|--|-----------|-----------|

---

Laboratory tests at the time of obtaining Table 2-6 consent, according to the presence or absence of proton-pump inhibitors

Unique Subject Identifier=5542000000-0015

MEANS Procedure

Assay variable : PTINR\_VAL1 PT-INR Value

N Mean Standard Deviation Minimum Maximum

---

|   |           |           |           |           |
|---|-----------|-----------|-----------|-----------|
| 2 | 1.4200000 | 0.3959798 | 1.1400000 | 1.7000000 |
|---|-----------|-----------|-----------|-----------|

---

Unique Subject Identifier=5542000000-0016

Assay variable : PTINR\_VAL1 PT-INR Value

N Mean Standard Deviation Minimum Maximum

---

|   |           |  |           |           |
|---|-----------|--|-----------|-----------|
| 1 | 1.5300000 |  | 1.5300000 | 1.5300000 |
|---|-----------|--|-----------|-----------|

---

Unique Subject Identifier=5542000000-0017

Assay variable : PTINR\_VAL1 PT-INR Value

N Mean Standard Deviation Minimum Maximum

---

|   |           |           |           |           |
|---|-----------|-----------|-----------|-----------|
| 6 | 2.1666667 | 0.4706449 | 1.6600000 | 2.8900000 |
|---|-----------|-----------|-----------|-----------|

---

Unique Subject Identifier=5542000000-0019

Assay variable : PTINR\_VAL1 PT-INR Value

N Mean Standard Deviation Minimum Maximum

---

|   |           |           |           |           |
|---|-----------|-----------|-----------|-----------|
| 6 | 1.8383333 | 0.3072730 | 1.4400000 | 2.1600000 |
|---|-----------|-----------|-----------|-----------|

---

Laboratory tests at the time of obtaining Table 2-6 consent, according to the presence or absence of proton-pump inhibitors

Unique Subject Identifier=5542000000-0022

MEANS Procedure

Assay variable : PTINR\_VAL1 PT-INR Value

N Mean Standard Deviation Minimum Maximum

---

|   |           |           |           |           |
|---|-----------|-----------|-----------|-----------|
| 4 | 1.6675000 | 0.3675482 | 1.3300000 | 2.1200000 |
|---|-----------|-----------|-----------|-----------|

---

Unique Subject Identifier=5542000000-0024

Assay variable : PTINR\_VAL1 PT-INR Value

N Mean Standard Deviation Minimum Maximum

---

|   |           |           |           |           |
|---|-----------|-----------|-----------|-----------|
| 2 | 1.9250000 | 0.1626346 | 1.8100000 | 2.0400000 |
|---|-----------|-----------|-----------|-----------|

---

Unique Subject Identifier=5542000000-0027

Assay variable : PTINR\_VAL1 PT-INR Value

N Mean Standard Deviation Minimum Maximum

---

|   |           |           |           |           |
|---|-----------|-----------|-----------|-----------|
| 5 | 1.7600000 | 0.6942622 | 1.1400000 | 2.8700000 |
|---|-----------|-----------|-----------|-----------|

---

Unique Subject Identifier=5542000000-0030

Assay variable : PTINR\_VAL1 PT-INR Value

N Mean Standard Deviation Minimum Maximum

---

|   |           |           |           |           |
|---|-----------|-----------|-----------|-----------|
| 3 | 1.7433333 | 0.1234234 | 1.6400000 | 1.8800000 |
|---|-----------|-----------|-----------|-----------|

---



Laboratory tests at the time of obtaining Table 2-6 consent, according to the presence or absence of proton-pump inhibitors

Unique Subject Identifier=5542000000-0031

MEANS Procedure

Assay variable : PTINR\_VAL1 PT-INR Value

N Mean Standard Deviation Minimum Maximum

---

|   |           |  |           |           |
|---|-----------|--|-----------|-----------|
| 1 | 2.0600000 |  | 2.0600000 | 2.0600000 |
|---|-----------|--|-----------|-----------|

---

Unique Subject Identifier=5542000000-0033

Assay variable : PTINR\_VAL1 PT-INR Value

N Mean Standard Deviation Minimum Maximum

---

|   |           |  |           |           |
|---|-----------|--|-----------|-----------|
| 1 | 1.1700000 |  | 1.1700000 | 1.1700000 |
|---|-----------|--|-----------|-----------|

---

Unique Subject Identifier=5542000000-0034

Assay variable : PTINR\_VAL1 PT-INR Value

N Mean Standard Deviation Minimum Maximum

---

|   |           |           |           |           |
|---|-----------|-----------|-----------|-----------|
| 2 | 1.4250000 | 0.0212132 | 1.4100000 | 1.4400000 |
|---|-----------|-----------|-----------|-----------|

---

Unique Subject Identifier=5542000000-0035

Assay variable : PTINR\_VAL1 PT-INR Value

N Mean Standard Deviation Minimum Maximum

---

|   |           |  |           |           |
|---|-----------|--|-----------|-----------|
| 1 | 1.7700000 |  | 1.7700000 | 1.7700000 |
|---|-----------|--|-----------|-----------|

---

Laboratory tests at the time of obtaining Table 2-6 consent, according to the presence or absence of proton-pump inhibitors

Unique Subject Identifier=5542000000-0039

MEANS Procedure

Assay variable : PTINR\_VAL1 PT-INR Value

| N | Mean      | Standard Deviation | Minimum   | Maximum   |
|---|-----------|--------------------|-----------|-----------|
| 2 | 1.6100000 | 0.1838478          | 1.4800000 | 1.7400000 |

Unique Subject Identifier=5542000000-0041

Assay variable : PTINR\_VAL1 PT-INR Value

| N | Mean      | Standard Deviation | Minimum   | Maximum   |
|---|-----------|--------------------|-----------|-----------|
| 6 | 1.7100000 | 0.1954482          | 1.5000000 | 2.0000000 |

Unique Subject Identifier=5542000000-0043

Assay variable : PTINR\_VAL1 PT-INR Value

| N | Mean      | Standard Deviation | Minimum   | Maximum   |
|---|-----------|--------------------|-----------|-----------|
| 4 | 1.7350000 | 0.7977259          | 1.2900000 | 2.9300000 |

Unique Subject Identifier=5717000000-0001

Assay variable : PTINR\_VAL1 PT-INR Value

N Mean Standard Deviation Minimum Maximum

---

|   |           |           |           |           |
|---|-----------|-----------|-----------|-----------|
| 5 | 1.6360000 | 0.2290851 | 1.5000000 | 2.0400000 |
|---|-----------|-----------|-----------|-----------|

---

Laboratory tests at the time of obtaining Table 2-6 consent, according to the presence or absence of proton-pump inhibitors

Unique Subject Identifier=5717000000-0003

MEANS Procedure

Assay variable : PTINR\_VAL1 PT-INR Value

| N | Mean      | Standard Deviation | Minimum   | Maximum   |
|---|-----------|--------------------|-----------|-----------|
| 6 | 1.8283333 | 0.1218879          | 1.7000000 | 1.9900000 |

Unique Subject Identifier=5717000000-0004

Assay variable : PTINR\_VAL1 PT-INR Value

| N | Mean      | Standard Deviation | Minimum   | Maximum   |
|---|-----------|--------------------|-----------|-----------|
| 5 | 1.8480000 | 0.2364741          | 1.5600000 | 2.1800000 |

Unique Subject Identifier=5717000000-0005

Assay variable : PTINR\_VAL1 PT-INR Value

| N | Mean      | Standard Deviation | Minimum   | Maximum   |
|---|-----------|--------------------|-----------|-----------|
| 6 | 2.0900000 | 0.1194990          | 1.9500000 | 2.3000000 |

Unique Subject Identifier=5717000000-0008

Assay variable : PTINR\_VAL1 PT-INR Value

N Mean Standard Deviation Minimum Maximum

---

|   |           |           |           |           |
|---|-----------|-----------|-----------|-----------|
| 5 | 1.8780000 | 0.1063955 | 1.7500000 | 1.9900000 |
|---|-----------|-----------|-----------|-----------|

---

Laboratory tests at the time of obtaining Table 2-6 consent, according to the presence or absence of proton-pump inhibitors

Unique Subject Identifier=5717000000-0010

MEANS Procedure

Assay variable : PTINR\_VAL1 PT-INR Value

| N | Mean      | Standard Deviation | Minimum   | Maximum   |
|---|-----------|--------------------|-----------|-----------|
| 5 | 1.8700000 | 0.1437011          | 1.6900000 | 2.0900000 |

Unique Subject Identifier=6000010011-0001

Assay variable : PTINR\_VAL1 PT-INR Value

| N | Mean      | Standard Deviation | Minimum   | Maximum   |
|---|-----------|--------------------|-----------|-----------|
| 4 | 2.4150000 | 0.2066398          | 2.2200000 | 2.6600000 |

Unique Subject Identifier=6000010011-0002

Assay variable : PTINR\_VAL1 PT-INR Value

| N | Mean      | Standard Deviation | Minimum   | Maximum   |
|---|-----------|--------------------|-----------|-----------|
| 6 | 2.3916667 | 0.3663559          | 1.6800000 | 2.7200000 |

Unique Subject Identifier=6002010000-0008

Assay variable : PTINR\_VAL1 PT-INR Value

N Mean Standard Deviation Minimum Maximum

---

|   |           |           |           |           |
|---|-----------|-----------|-----------|-----------|
| 5 | 1.7980000 | 0.5187678 | 0.9900000 | 2.3100000 |
|---|-----------|-----------|-----------|-----------|

---



Laboratory tests at the time of obtaining Table 2-6 consent, according to the presence or absence of proton-pump inhibitors

Unique Subject Identifier=6002010000-0014

MEANS Procedure

Assay variable : PTINR\_VAL1 PT-INR Value

N Mean Standard Deviation Minimum Maximum

---

|   |           |           |           |           |
|---|-----------|-----------|-----------|-----------|
| 6 | 2.0833333 | 0.6929262 | 1.3200000 | 3.1100000 |
|---|-----------|-----------|-----------|-----------|

---

Unique Subject Identifier=6002010000-0015

Assay variable : PTINR\_VAL1 PT-INR Value

N Mean Standard Deviation Minimum Maximum

---

|   |           |           |           |           |
|---|-----------|-----------|-----------|-----------|
| 6 | 2.1150000 | 0.4907443 | 1.2900000 | 2.6900000 |
|---|-----------|-----------|-----------|-----------|

---

Unique Subject Identifier=6002010000-0016

Assay variable : PTINR\_VAL1 PT-INR Value

N Mean Standard Deviation Minimum Maximum

---

|   |           |           |           |           |
|---|-----------|-----------|-----------|-----------|
| 4 | 2.3325000 | 0.5786983 | 1.5200000 | 2.7900000 |
|---|-----------|-----------|-----------|-----------|

---

Unique Subject Identifier=6002010000-0018

Assay variable : PTINR\_VAL1 PT-INR Value

N Mean Standard Deviation Minimum Maximum

---

|   |           |           |           |           |
|---|-----------|-----------|-----------|-----------|
| 5 | 1.8240000 | 0.3764705 | 1.4200000 | 2.3100000 |
|---|-----------|-----------|-----------|-----------|

---

Laboratory tests at the time of obtaining Table 2-6 consent, according to the presence or absence of proton-pump inhibitors

Unique Subject Identifier=6002010000-0020

MEANS Procedure

Assay variable : PTINR\_VAL1 PT-INR Value

N Mean Standard Deviation Minimum Maximum

---

|   |           |           |           |           |
|---|-----------|-----------|-----------|-----------|
| 4 | 2.4325000 | 0.2321458 | 2.1700000 | 2.7200000 |
|---|-----------|-----------|-----------|-----------|

---

Unique Subject Identifier=6002010000-0021

Assay variable : PTINR\_VAL1 PT-INR Value

N Mean Standard Deviation Minimum Maximum

---

|   |           |           |           |           |
|---|-----------|-----------|-----------|-----------|
| 5 | 2.3460000 | 0.7411680 | 1.5600000 | 3.2300000 |
|---|-----------|-----------|-----------|-----------|

---

Unique Subject Identifier=6002010000-0030

Assay variable : PTINR\_VAL1 PT-INR Value

N Mean Standard Deviation Minimum Maximum

---

|   |           |           |           |           |
|---|-----------|-----------|-----------|-----------|
| 5 | 2.4440000 | 0.9090820 | 1.4900000 | 3.5800000 |
|---|-----------|-----------|-----------|-----------|

---

Unique Subject Identifier=6002010000-0037

Assay variable : PTINR\_VAL1 PT-INR Value

N Mean Standard Deviation Minimum Maximum

---

|   |          |           |          |          |
|---|----------|-----------|----------|----------|
| 6 | 2.133333 | 0.1736280 | 1.940000 | 2.450000 |
|---|----------|-----------|----------|----------|

---

Laboratory tests at the time of obtaining Table 2-6 consent, according to the presence or absence of proton-pump inhibitors

Unique Subject Identifier=6002010000-0038

MEANS Procedure

Assay variable : PTINR\_VAL1 PT-INR Value

N Mean Standard Deviation Minimum Maximum

---

|   |           |           |           |           |
|---|-----------|-----------|-----------|-----------|
| 6 | 2.0050000 | 0.2820461 | 1.7300000 | 2.4600000 |
|---|-----------|-----------|-----------|-----------|

---

Unique Subject Identifier=6002010000-0041

Assay variable : PTINR\_VAL1 PT-INR Value

N Mean Standard Deviation Minimum Maximum

---

|   |           |           |           |           |
|---|-----------|-----------|-----------|-----------|
| 5 | 2.1500000 | 0.2091650 | 1.9500000 | 2.4700000 |
|---|-----------|-----------|-----------|-----------|

---

Unique Subject Identifier=6002010000-0042

Assay variable : PTINR\_VAL1 PT-INR Value

N Mean Standard Deviation Minimum Maximum

---

|   |           |           |           |           |
|---|-----------|-----------|-----------|-----------|
| 6 | 2.5133333 | 1.4973799 | 1.5400000 | 5.4900000 |
|---|-----------|-----------|-----------|-----------|

---

Unique Subject Identifier=6002010000-0043

Assay variable : PTINR\_VAL1 PT-INR Value

N Mean Standard Deviation Minimum Maximum

---

|   |           |           |           |           |
|---|-----------|-----------|-----------|-----------|
| 6 | 1.9883333 | 0.1926049 | 1.7900000 | 2.2000000 |
|---|-----------|-----------|-----------|-----------|

---

Laboratory tests at the time of obtaining Table 2-6 consent, according to the presence or absence of proton-pump inhibitors

Unique Subject Identifier=6002010000-0044

MEANS Procedure

Assay variable : PTINR\_VAL1 PT-INR Value

N Mean Standard Deviation Minimum Maximum

---

|   |           |           |           |           |
|---|-----------|-----------|-----------|-----------|
| 6 | 2.3183333 | 0.1923972 | 2.0800000 | 2.5700000 |
|---|-----------|-----------|-----------|-----------|

---

Unique Subject Identifier=6002010000-0047

Assay variable : PTINR\_VAL1 PT-INR Value

N Mean Standard Deviation Minimum Maximum

---

|   |           |           |           |           |
|---|-----------|-----------|-----------|-----------|
| 5 | 2.2220000 | 1.2194548 | 1.0800000 | 4.1100000 |
|---|-----------|-----------|-----------|-----------|

---

Unique Subject Identifier=6002010000-0048

Assay variable : PTINR\_VAL1 PT-INR Value

N Mean Standard Deviation Minimum Maximum

---

|   |           |           |           |           |
|---|-----------|-----------|-----------|-----------|
| 6 | 2.3250000 | 0.7963605 | 1.5600000 | 3.8000000 |
|---|-----------|-----------|-----------|-----------|

---

Unique Subject Identifier=6002010000-0052

Assay variable : PTINR\_VAL1 PT-INR Value

N Mean Standard Deviation Minimum Maximum

---

|   |           |           |           |           |
|---|-----------|-----------|-----------|-----------|
| 6 | 2.1016667 | 0.4427829 | 1.6200000 | 2.7900000 |
|---|-----------|-----------|-----------|-----------|

---



Laboratory tests at the time of obtaining Table 2-6 consent, according to the presence or absence of proton-pump inhibitors

Unique Subject Identifier=6002010000-0058

MEANS Procedure

Assay variable : PTINR\_VAL1 PT-INR Value

N Mean Standard Deviation Minimum Maximum

---

|   |           |           |           |           |
|---|-----------|-----------|-----------|-----------|
| 6 | 2.1616667 | 0.2437553 | 1.8800000 | 2.5200000 |
|---|-----------|-----------|-----------|-----------|

---

Unique Subject Identifier=6002010000-0067

Assay variable : PTINR\_VAL1 PT-INR Value

N Mean Standard Deviation Minimum Maximum

---

|   |           |           |           |           |
|---|-----------|-----------|-----------|-----------|
| 5 | 2.4180000 | 0.3492420 | 1.9500000 | 2.7800000 |
|---|-----------|-----------|-----------|-----------|

---

Unique Subject Identifier=6002010000-0080

Assay variable : PTINR\_VAL1 PT-INR Value

N Mean Standard Deviation Minimum Maximum

---

|   |           |           |           |           |
|---|-----------|-----------|-----------|-----------|
| 5 | 2.0600000 | 0.1369306 | 1.8400000 | 2.1800000 |
|---|-----------|-----------|-----------|-----------|

---

Unique Subject Identifier=6002010000-0082

Assay variable : PTINR\_VAL1 PT-INR Value

N Mean Standard Deviation Minimum Maximum

---

|   |           |           |           |           |
|---|-----------|-----------|-----------|-----------|
| 6 | 1.9950000 | 0.1850135 | 1.8400000 | 2.3200000 |
|---|-----------|-----------|-----------|-----------|

---

Laboratory tests at the time of obtaining Table 2-6 consent, according to the presence or absence of proton-pump inhibitors

Unique Subject Identifier=6002010000-0083

MEANS Procedure

Assay variable : PTINR\_VAL1 PT-INR Value

N Mean Standard Deviation Minimum Maximum

---

|   |           |           |           |           |
|---|-----------|-----------|-----------|-----------|
| 6 | 1.9666667 | 0.1942850 | 1.5800000 | 2.1200000 |
|---|-----------|-----------|-----------|-----------|

---

Unique Subject Identifier=6002010000-0085

Assay variable : PTINR\_VAL1 PT-INR Value

N Mean Standard Deviation Minimum Maximum

---

|   |           |           |           |           |
|---|-----------|-----------|-----------|-----------|
| 6 | 2.1383333 | 0.3679357 | 1.8300000 | 2.8300000 |
|---|-----------|-----------|-----------|-----------|

---

Unique Subject Identifier=6002010000-0088

Assay variable : PTINR\_VAL1 PT-INR Value

N Mean Standard Deviation Minimum Maximum

---

|   |           |           |           |           |
|---|-----------|-----------|-----------|-----------|
| 6 | 1.8133333 | 0.4719605 | 1.0700000 | 2.3200000 |
|---|-----------|-----------|-----------|-----------|

---

Unique Subject Identifier=6002010000-0090

Assay variable : PTINR\_VAL1 PT-INR Value

N Mean Standard Deviation Minimum Maximum

---

|   |          |           |          |          |
|---|----------|-----------|----------|----------|
| 6 | 2.240000 | 0.3439767 | 1.750000 | 2.600000 |
|---|----------|-----------|----------|----------|

---

Laboratory tests at the time of obtaining Table 2-6 consent, according to the presence or absence of proton-pump inhibitors

Unique Subject Identifier=6002010000-0098

MEANS Procedure

Assay variable : PTINR\_VAL1 PT-INR Value

N Mean Standard Deviation Minimum Maximum

---

|   |           |           |           |           |
|---|-----------|-----------|-----------|-----------|
| 6 | 1.7633333 | 0.4236823 | 1.3500000 | 2.4500000 |
|---|-----------|-----------|-----------|-----------|

---

Unique Subject Identifier=6002010000-0102

Assay variable : PTINR\_VAL1 PT-INR Value

N Mean Standard Deviation Minimum Maximum

---

|   |           |           |           |           |
|---|-----------|-----------|-----------|-----------|
| 4 | 2.3100000 | 0.1235584 | 2.1300000 | 2.4000000 |
|---|-----------|-----------|-----------|-----------|

---

Unique Subject Identifier=6002010000-0103

Assay variable : PTINR\_VAL1 PT-INR Value

N Mean Standard Deviation Minimum Maximum

---

|   |           |           |           |           |
|---|-----------|-----------|-----------|-----------|
| 6 | 2.4200000 | 1.1630305 | 1.5400000 | 4.6000000 |
|---|-----------|-----------|-----------|-----------|

---

Unique Subject Identifier=6002010000-0105

Assay variable : PTINR\_VAL1 PT-INR Value

N Mean Standard Deviation Minimum Maximum

---

|   |           |           |           |           |
|---|-----------|-----------|-----------|-----------|
| 6 | 2.6083333 | 1.4570713 | 1.4700000 | 5.4000000 |
|---|-----------|-----------|-----------|-----------|

---

Laboratory tests at the time of obtaining Table 2-6 consent, according to the presence or absence of proton-pump inhibitors

Unique Subject Identifier=6002010000-0107

MEANS Procedure

Assay variable : PTINR\_VAL1 PT-INR Value

N Mean Standard Deviation Minimum Maximum

---

|   |           |           |           |           |
|---|-----------|-----------|-----------|-----------|
| 6 | 2.5300000 | 0.2744449 | 2.2400000 | 3.0400000 |
|---|-----------|-----------|-----------|-----------|

---

Unique Subject Identifier=6005000000-0004

Assay variable : PTINR\_VAL1 PT-INR Value

N Mean Standard Deviation Minimum Maximum

---

|   |           |           |           |           |
|---|-----------|-----------|-----------|-----------|
| 5 | 1.9520000 | 0.2555778 | 1.7100000 | 2.2900000 |
|---|-----------|-----------|-----------|-----------|

---

Unique Subject Identifier=6005000000-0005

Assay variable : PTINR\_VAL1 PT-INR Value

N Mean Standard Deviation Minimum Maximum

---

|   |           |           |           |           |
|---|-----------|-----------|-----------|-----------|
| 3 | 2.6733333 | 0.3197395 | 2.3900000 | 3.0200000 |
|---|-----------|-----------|-----------|-----------|

---

Unique Subject Identifier=6008011111-0001

Assay variable : PTINR\_VAL1 PT-INR Value

N Mean Standard Deviation Minimum Maximum

---

|   |           |           |           |           |
|---|-----------|-----------|-----------|-----------|
| 3 | 1.1366667 | 0.0723418 | 1.0900000 | 1.2200000 |
|---|-----------|-----------|-----------|-----------|

---



Laboratory tests at the time of obtaining Table 2-6 consent, according to the presence or absence of proton-pump inhibitors

Unique Subject Identifier=6009000000-0009

MEANS Procedure

Assay variable : PTINR\_VAL1 PT-INR Value

N Mean Standard Deviation Minimum Maximum

---

|   |           |           |           |           |
|---|-----------|-----------|-----------|-----------|
| 6 | 1.9000000 | 0.4516636 | 1.2000000 | 2.5000000 |
|---|-----------|-----------|-----------|-----------|

---

Unique Subject Identifier=6009000000-0014

Assay variable : PTINR\_VAL1 PT-INR Value

N Mean Standard Deviation Minimum Maximum

---

|   |           |           |           |           |
|---|-----------|-----------|-----------|-----------|
| 6 | 1.8500000 | 0.5049752 | 1.3000000 | 2.8000000 |
|---|-----------|-----------|-----------|-----------|

---

Unique Subject Identifier=6009000000-0015

Assay variable : PTINR\_VAL1 PT-INR Value

N Mean Standard Deviation Minimum Maximum

---

|   |           |           |           |           |
|---|-----------|-----------|-----------|-----------|
| 5 | 1.7000000 | 0.1000000 | 1.6000000 | 1.8000000 |
|---|-----------|-----------|-----------|-----------|

---

Unique Subject Identifier=6009000000-0016

Assay variable : PTINR\_VAL1 PT-INR Value

N Mean Standard Deviation Minimum Maximum

---

|   |           |           |           |           |
|---|-----------|-----------|-----------|-----------|
| 5 | 1.9400000 | 0.4449719 | 1.2000000 | 2.4000000 |
|---|-----------|-----------|-----------|-----------|

---

Laboratory tests at the time of obtaining Table 2-6 consent, according to the presence or absence of proton-pump inhibitors

Unique Subject Identifier=6009000000-0017

MEANS Procedure

Assay variable : PTINR\_VAL1 PT-INR Value

N Mean Standard Deviation Minimum Maximum

---

|   |           |           |           |           |
|---|-----------|-----------|-----------|-----------|
| 6 | 1.6666667 | 0.6772493 | 1.1000000 | 3.0000000 |
|---|-----------|-----------|-----------|-----------|

---

Unique Subject Identifier=6009000000-0019

Assay variable : PTINR\_VAL1 PT-INR Value

N Mean Standard Deviation Minimum Maximum

---

|   |           |           |           |           |
|---|-----------|-----------|-----------|-----------|
| 5 | 1.9800000 | 0.6833740 | 1.3000000 | 3.1000000 |
|---|-----------|-----------|-----------|-----------|

---

Unique Subject Identifier=6009000000-0022

Assay variable : PTINR\_VAL1 PT-INR Value

N Mean Standard Deviation Minimum Maximum

---

|   |           |           |           |           |
|---|-----------|-----------|-----------|-----------|
| 5 | 1.8200000 | 0.2683282 | 1.4000000 | 2.1000000 |
|---|-----------|-----------|-----------|-----------|

---

Unique Subject Identifier=6009000000-0024

Assay variable : PTINR\_VAL1 PT-INR Value

N Mean Standard Deviation Minimum Maximum

---

|   |           |           |           |           |
|---|-----------|-----------|-----------|-----------|
| 3 | 1.5333333 | 0.3214550 | 1.3000000 | 1.9000000 |
|---|-----------|-----------|-----------|-----------|

---

Laboratory tests at the time of obtaining Table 2-6 consent, according to the presence or absence of proton-pump inhibitors

Unique Subject Identifier=6009000000-0026

MEANS Procedure

Assay variable : PTINR\_VAL1 PT-INR Value

N Mean Standard Deviation Minimum Maximum

---

|   |           |           |           |           |
|---|-----------|-----------|-----------|-----------|
| 6 | 1.5333333 | 0.1966384 | 1.3000000 | 1.8000000 |
|---|-----------|-----------|-----------|-----------|

---

Unique Subject Identifier=6009000000-0027

Assay variable : PTINR\_VAL1 PT-INR Value

N Mean Standard Deviation Minimum Maximum

---

|   |           |           |           |           |
|---|-----------|-----------|-----------|-----------|
| 5 | 1.8600000 | 0.8763561 | 1.2000000 | 3.4000000 |
|---|-----------|-----------|-----------|-----------|

---

Unique Subject Identifier=6009000000-0029

Assay variable : PTINR\_VAL1 PT-INR Value

N Mean Standard Deviation Minimum Maximum

---

|   |           |           |           |           |
|---|-----------|-----------|-----------|-----------|
| 3 | 2.3666667 | 2.1126603 | 1.0000000 | 4.8000000 |
|---|-----------|-----------|-----------|-----------|

---

Unique Subject Identifier=6009000000-0030

Assay variable : PTINR\_VAL1 PT-INR Value

N Mean Standard Deviation Minimum Maximum

---

|   |          |           |          |          |
|---|----------|-----------|----------|----------|
| 5 | 2.240000 | 0.4393177 | 1.500000 | 2.600000 |
|---|----------|-----------|----------|----------|

---

Laboratory tests at the time of obtaining Table 2-6 consent, according to the presence or absence of proton-pump inhibitors

Unique Subject Identifier=6009000000-0032

MEANS Procedure

Assay variable : PTINR\_VAL1 PT-INR Value

N Mean Standard Deviation Minimum Maximum

---

|   |           |           |           |           |
|---|-----------|-----------|-----------|-----------|
| 4 | 1.6250000 | 0.2061553 | 1.4000000 | 1.8000000 |
|---|-----------|-----------|-----------|-----------|

---

Unique Subject Identifier=6009000000-0035

Assay variable : PTINR\_VAL1 PT-INR Value

N Mean Standard Deviation Minimum Maximum

---

|   |           |           |           |           |
|---|-----------|-----------|-----------|-----------|
| 6 | 2.1833333 | 0.4400758 | 1.7000000 | 3.0000000 |
|---|-----------|-----------|-----------|-----------|

---

Unique Subject Identifier=6009000000-0037

Assay variable : PTINR\_VAL1 PT-INR Value

N Mean Standard Deviation Minimum Maximum

---

|   |           |           |           |           |
|---|-----------|-----------|-----------|-----------|
| 6 | 1.8666667 | 0.0816497 | 1.8000000 | 2.0000000 |
|---|-----------|-----------|-----------|-----------|

---

Unique Subject Identifier=6009000000-0040

Assay variable : PTINR\_VAL1 PT-INR Value

N Mean Standard Deviation Minimum Maximum

---

|   |           |           |           |           |
|---|-----------|-----------|-----------|-----------|
| 4 | 1.8750000 | 0.4856267 | 1.4000000 | 2.5000000 |
|---|-----------|-----------|-----------|-----------|

---



Laboratory tests at the time of obtaining Table 2-6 consent, according to the presence or absence of proton-pump inhibitors

Unique Subject Identifier=6009000000-0041

MEANS Procedure

Assay variable : PTINR\_VAL1 PT-INR Value

N Mean Standard Deviation Minimum Maximum

---

|   |           |           |           |           |
|---|-----------|-----------|-----------|-----------|
| 2 | 2.9000000 | 2.5455844 | 1.1000000 | 4.7000000 |
|---|-----------|-----------|-----------|-----------|

---

Unique Subject Identifier=6009000000-0045

Assay variable : PTINR\_VAL1 PT-INR Value

N Mean Standard Deviation Minimum Maximum

---

|   |           |           |           |           |
|---|-----------|-----------|-----------|-----------|
| 4 | 1.8500000 | 0.2081666 | 1.6000000 | 2.1000000 |
|---|-----------|-----------|-----------|-----------|

---

Unique Subject Identifier=6009000000-0050

Assay variable : PTINR\_VAL1 PT-INR Value

N Mean Standard Deviation Minimum Maximum

---

|   |           |           |           |           |
|---|-----------|-----------|-----------|-----------|
| 2 | 1.7500000 | 0.4949747 | 1.4000000 | 2.1000000 |
|---|-----------|-----------|-----------|-----------|

---

Unique Subject Identifier=6009000000-0051

Assay variable : PTINR\_VAL1 PT-INR Value

N Mean Standard Deviation Minimum Maximum

---

|   |           |           |           |           |
|---|-----------|-----------|-----------|-----------|
| 3 | 2.3000000 | 0.3464102 | 2.1000000 | 2.7000000 |
|---|-----------|-----------|-----------|-----------|

---

Laboratory tests at the time of obtaining Table 2-6 consent, according to the presence or absence of proton-pump inhibitors

Unique Subject Identifier=6011010000-0003

MEANS Procedure

Assay variable : PTINR\_VAL1 PT-INR Value

N Mean Standard Deviation Minimum Maximum

---

|   |           |           |           |           |
|---|-----------|-----------|-----------|-----------|
| 2 | 1.9450000 | 0.7990307 | 1.3800000 | 2.5100000 |
|---|-----------|-----------|-----------|-----------|

---

Unique Subject Identifier=6014011010-0002

Assay variable : PTINR\_VAL1 PT-INR Value

N Mean Standard Deviation Minimum Maximum

---

|   |           |  |           |           |
|---|-----------|--|-----------|-----------|
| 1 | 2.3200000 |  | 2.3200000 | 2.3200000 |
|---|-----------|--|-----------|-----------|

---

Unique Subject Identifier=6014011010-0004

Assay variable : PTINR\_VAL1 PT-INR Value

N Mean Standard Deviation Minimum Maximum

---

|   |           |           |           |           |
|---|-----------|-----------|-----------|-----------|
| 4 | 1.6250000 | 0.0932738 | 1.5400000 | 1.7200000 |
|---|-----------|-----------|-----------|-----------|

---

Unique Subject Identifier=6014011010-0005

Assay variable : PTINR\_VAL1 PT-INR Value

N Mean Standard Deviation Minimum Maximum

---

|   |           |           |           |           |
|---|-----------|-----------|-----------|-----------|
| 3 | 2.4933333 | 0.6476367 | 1.9500000 | 3.2100000 |
|---|-----------|-----------|-----------|-----------|

---

Laboratory tests at the time of obtaining Table 2-6 consent, according to the presence or absence of proton-pump inhibitors

Unique Subject Identifier=6014011010-0007

MEANS Procedure

Assay variable : PTINR\_VAL1 PT-INR Value

| N | Mean      | Standard Deviation | Minimum   | Maximum   |
|---|-----------|--------------------|-----------|-----------|
| 3 | 2.1333333 | 0.5036202          | 1.7800000 | 2.7100000 |

Unique Subject Identifier=6014011010-0009

Assay variable : PTINR\_VAL1 PT-INR Value

| N | Mean      | Standard Deviation | Minimum   | Maximum   |
|---|-----------|--------------------|-----------|-----------|
| 5 | 2.6520000 | 0.2508386          | 2.2800000 | 2.8700000 |

Unique Subject Identifier=6014011010-0010

Assay variable : PTINR\_VAL1 PT-INR Value

| N | Mean      | Standard Deviation | Minimum   | Maximum   |
|---|-----------|--------------------|-----------|-----------|
| 3 | 2.3866667 | 0.1342882          | 2.2900000 | 2.5400000 |

Unique Subject Identifier=6014011010-0013

Assay variable : PTINR\_VAL1 PT-INR Value

N Mean Standard Deviation Minimum Maximum

---

|   |           |           |           |           |
|---|-----------|-----------|-----------|-----------|
| 3 | 2.2833333 | 0.6351640 | 1.7000000 | 2.9600000 |
|---|-----------|-----------|-----------|-----------|

---

Laboratory tests at the time of obtaining Table 2-6 consent, according to the presence or absence of proton-pump inhibitors

Unique Subject Identifier=6014011010-0015

MEANS Procedure

Assay variable : PTINR\_VAL1 PT-INR Value

N Mean Standard Deviation Minimum Maximum

---

|   |          |           |          |          |
|---|----------|-----------|----------|----------|
| 6 | 2.100000 | 0.3025888 | 1.580000 | 2.390000 |
|---|----------|-----------|----------|----------|

---

Unique Subject Identifier=6014011010-0016

Assay variable : PTINR\_VAL1 PT-INR Value

N Mean Standard Deviation Minimum Maximum

---

|   |          |           |          |          |
|---|----------|-----------|----------|----------|
| 3 | 2.053333 | 0.4021608 | 1.720000 | 2.500000 |
|---|----------|-----------|----------|----------|

---

Unique Subject Identifier=6014011010-0018

Assay variable : PTINR\_VAL1 PT-INR Value

N Mean Standard Deviation Minimum Maximum

---

|   |          |           |          |          |
|---|----------|-----------|----------|----------|
| 4 | 1.822500 | 0.4914858 | 1.130000 | 2.290000 |
|---|----------|-----------|----------|----------|

---

Unique Subject Identifier=6014011010-0019

Assay variable : PTINR\_VAL1 PT-INR Value

N Mean Standard Deviation Minimum Maximum

---

|   |          |           |          |          |
|---|----------|-----------|----------|----------|
| 3 | 2.333333 | 0.6515622 | 1.880000 | 3.080000 |
|---|----------|-----------|----------|----------|

---



Laboratory tests at the time of obtaining Table 2-6 consent, according to the presence or absence of proton-pump inhibitors

Unique Subject Identifier=6014011010-0020

MEANS Procedure

Assay variable : PTINR\_VAL1 PT-INR Value

N Mean Standard Deviation Minimum Maximum

---

|   |           |           |           |           |
|---|-----------|-----------|-----------|-----------|
| 2 | 1.8350000 | 0.5586144 | 1.4400000 | 2.2300000 |
|---|-----------|-----------|-----------|-----------|

---

Unique Subject Identifier=6014011010-0021

Assay variable : PTINR\_VAL1 PT-INR Value

N Mean Standard Deviation Minimum Maximum

---

|   |           |           |           |           |
|---|-----------|-----------|-----------|-----------|
| 5 | 2.1020000 | 0.8499235 | 1.4500000 | 3.3500000 |
|---|-----------|-----------|-----------|-----------|

---

Unique Subject Identifier=6014011010-0026

Assay variable : PTINR\_VAL1 PT-INR Value

N Mean Standard Deviation Minimum Maximum

---

|   |           |           |           |           |
|---|-----------|-----------|-----------|-----------|
| 5 | 1.7540000 | 0.4057462 | 1.3000000 | 2.2500000 |
|---|-----------|-----------|-----------|-----------|

---

Unique Subject Identifier=6014011010-0029

Assay variable : PTINR\_VAL1 PT-INR Value

N Mean Standard Deviation Minimum Maximum

---

|   |           |           |           |           |
|---|-----------|-----------|-----------|-----------|
| 2 | 2.1150000 | 0.2333452 | 1.9500000 | 2.2800000 |
|---|-----------|-----------|-----------|-----------|

---

Laboratory tests at the time of obtaining Table 2-6 consent, according to the presence or absence of proton-pump inhibitors

Unique Subject Identifier=6014011010-0032

MEANS Procedure

Assay variable : PTINR\_VAL1 PT-INR Value

N Mean Standard Deviation Minimum Maximum

---

|   |           |           |           |           |
|---|-----------|-----------|-----------|-----------|
| 4 | 2.0000000 | 0.4690416 | 1.4000000 | 2.5000000 |
|---|-----------|-----------|-----------|-----------|

---

Unique Subject Identifier=6014011010-0033

Assay variable : PTINR\_VAL1 PT-INR Value

N Mean Standard Deviation Minimum Maximum

---

|   |           |           |           |           |
|---|-----------|-----------|-----------|-----------|
| 3 | 2.1900000 | 0.4014972 | 1.8100000 | 2.6100000 |
|---|-----------|-----------|-----------|-----------|

---

Unique Subject Identifier=6014011010-0034

Assay variable : PTINR\_VAL1 PT-INR Value

N Mean Standard Deviation Minimum Maximum

---

|   |           |           |           |           |
|---|-----------|-----------|-----------|-----------|
| 3 | 1.9333333 | 0.7076958 | 1.5000000 | 2.7500000 |
|---|-----------|-----------|-----------|-----------|

---

Unique Subject Identifier=6014011010-0037

Assay variable : PTINR\_VAL1 PT-INR Value

N Mean Standard Deviation Minimum Maximum

---

|   |           |           |           |           |
|---|-----------|-----------|-----------|-----------|
| 4 | 1.9775000 | 0.4458980 | 1.6400000 | 2.6000000 |
|---|-----------|-----------|-----------|-----------|

---

Laboratory tests at the time of obtaining Table 2-6 consent, according to the presence or absence of proton-pump inhibitors

Unique Subject Identifier=6014011010-0038

MEANS Procedure

Assay variable : PTINR\_VAL1 PT-INR Value

| N | Mean      | Standard Deviation | Minimum   | Maximum   |
|---|-----------|--------------------|-----------|-----------|
| 2 | 1.0000000 | 0.0141421          | 0.9900000 | 1.0100000 |

Unique Subject Identifier=6014011010-0040

Assay variable : PTINR\_VAL1 PT-INR Value

| N | Mean      | Standard Deviation | Minimum   | Maximum   |
|---|-----------|--------------------|-----------|-----------|
| 2 | 1.4150000 | 0.1626346          | 1.3000000 | 1.5300000 |

Unique Subject Identifier=6017010000-0007

Assay variable : PTINR\_VAL1 PT-INR Value

| N | Mean      | Standard Deviation | Minimum   | Maximum   |
|---|-----------|--------------------|-----------|-----------|
| 5 | 1.5800000 | 0.2303259          | 1.2400000 | 1.8000000 |

Unique Subject Identifier=6017010000-0008

Assay variable : PTINR\_VAL1 PT-INR Value

N Mean Standard Deviation Minimum Maximum

---

|   |           |           |           |           |
|---|-----------|-----------|-----------|-----------|
| 3 | 2.0233333 | 0.2064784 | 1.8800000 | 2.2600000 |
|---|-----------|-----------|-----------|-----------|

---

Laboratory tests at the time of obtaining Table 2-6 consent, according to the presence or absence of proton-pump inhibitors

Unique Subject Identifier=6017010000-0017

MEANS Procedure

Assay variable : PTINR\_VAL1 PT-INR Value

N Mean Standard Deviation Minimum Maximum

---

|   |           |           |           |           |
|---|-----------|-----------|-----------|-----------|
| 5 | 1.6260000 | 0.2253442 | 1.3800000 | 1.9600000 |
|---|-----------|-----------|-----------|-----------|

---

Unique Subject Identifier=6017010000-0018

Assay variable : PTINR\_VAL1 PT-INR Value

N Mean Standard Deviation Minimum Maximum

---

|   |           |           |           |           |
|---|-----------|-----------|-----------|-----------|
| 4 | 2.4350000 | 0.2340228 | 2.2600000 | 2.7800000 |
|---|-----------|-----------|-----------|-----------|

---

Unique Subject Identifier=6017010000-0021

Assay variable : PTINR\_VAL1 PT-INR Value

N Mean Standard Deviation Minimum Maximum

---

|   |           |           |           |           |
|---|-----------|-----------|-----------|-----------|
| 3 | 2.0033333 | 0.3970306 | 1.7400000 | 2.4600000 |
|---|-----------|-----------|-----------|-----------|

---

Unique Subject Identifier=6017010000-0026

Assay variable : PTINR\_VAL1 PT-INR Value

N Mean Standard Deviation Minimum Maximum

---

|   |           |           |           |           |
|---|-----------|-----------|-----------|-----------|
| 2 | 1.4300000 | 0.1414214 | 1.3300000 | 1.5300000 |
|---|-----------|-----------|-----------|-----------|

---



Laboratory tests at the time of obtaining Table 2-6 consent, according to the presence or absence of proton-pump inhibitors

Unique Subject Identifier=6017010000-0028

MEANS Procedure

Assay variable : PTINR\_VAL1 PT-INR Value

N Mean Standard Deviation Minimum Maximum

---

|   |           |           |           |           |
|---|-----------|-----------|-----------|-----------|
| 4 | 2.3150000 | 0.9781786 | 1.6200000 | 3.7500000 |
|---|-----------|-----------|-----------|-----------|

---

Unique Subject Identifier=6022000000-0006

Assay variable : PTINR\_VAL1 PT-INR Value

N Mean Standard Deviation Minimum Maximum

---

|   |           |  |           |           |
|---|-----------|--|-----------|-----------|
| 1 | 1.5400000 |  | 1.5400000 | 1.5400000 |
|---|-----------|--|-----------|-----------|

---

Unique Subject Identifier=6022000000-0008

Assay variable : PTINR\_VAL1 PT-INR Value

N Mean Standard Deviation Minimum Maximum

---

|   |           |           |           |           |
|---|-----------|-----------|-----------|-----------|
| 2 | 1.7150000 | 0.2757716 | 1.5200000 | 1.9100000 |
|---|-----------|-----------|-----------|-----------|

---

Unique Subject Identifier=6022000000-0013

Assay variable : PTINR\_VAL1 PT-INR Value

N Mean Standard Deviation Minimum Maximum

---

|   |           |  |           |           |
|---|-----------|--|-----------|-----------|
| 1 | 2.2300000 |  | 2.2300000 | 2.2300000 |
|---|-----------|--|-----------|-----------|

---

Laboratory tests at the time of obtaining Table 2-6 consent, according to the presence or absence of proton-pump inhibitors

Unique Subject Identifier=6022000000-0015

MEANS Procedure

Assay variable : PTINR\_VAL1 PT-INR Value

N Mean Standard Deviation Minimum Maximum

---

|   |           |           |           |           |
|---|-----------|-----------|-----------|-----------|
| 3 | 1.7566667 | 0.2466441 | 1.5900000 | 2.0400000 |
|---|-----------|-----------|-----------|-----------|

---

Unique Subject Identifier=6022000000-0018

Assay variable : PTINR\_VAL1 PT-INR Value

N Mean Standard Deviation Minimum Maximum

---

|   |           |  |           |           |
|---|-----------|--|-----------|-----------|
| 1 | 1.6700000 |  | 1.6700000 | 1.6700000 |
|---|-----------|--|-----------|-----------|

---

Unique Subject Identifier=6022000000-0024

Assay variable : PTINR\_VAL1 PT-INR Value

N Mean Standard Deviation Minimum Maximum

---

|   |           |           |           |           |
|---|-----------|-----------|-----------|-----------|
| 4 | 2.2525000 | 0.4459727 | 1.7900000 | 2.8600000 |
|---|-----------|-----------|-----------|-----------|

---

Unique Subject Identifier=6022000000-0030

Assay variable : PTINR\_VAL1 PT-INR Value

N Mean Standard Deviation Minimum Maximum

---

|   |           |           |           |           |
|---|-----------|-----------|-----------|-----------|
| 4 | 2.7850000 | 1.8992016 | 1.2400000 | 5.5100000 |
|---|-----------|-----------|-----------|-----------|

---

Laboratory tests at the time of obtaining Table 2-6 consent, according to the presence or absence of proton-pump inhibitors

Unique Subject Identifier=6022000000-0033

MEANS Procedure

Assay variable : PTINR\_VAL1 PT-INR Value

N Mean Standard Deviation Minimum Maximum

---

|   |           |           |           |           |
|---|-----------|-----------|-----------|-----------|
| 3 | 2.3566667 | 1.3392660 | 1.5000000 | 3.9000000 |
|---|-----------|-----------|-----------|-----------|

---

Unique Subject Identifier=6022000000-0060

Assay variable : PTINR\_VAL1 PT-INR Value

N Mean Standard Deviation Minimum Maximum

---

|   |           |  |           |           |
|---|-----------|--|-----------|-----------|
| 1 | 2.8500000 |  | 2.8500000 | 2.8500000 |
|---|-----------|--|-----------|-----------|

---

Unique Subject Identifier=6023000000-0001

Assay variable : PTINR\_VAL1 PT-INR Value

N Mean Standard Deviation Minimum Maximum

---

|   |           |           |           |           |
|---|-----------|-----------|-----------|-----------|
| 4 | 2.2500000 | 0.9469248 | 1.3000000 | 3.5000000 |
|---|-----------|-----------|-----------|-----------|

---

Unique Subject Identifier=6023000000-0002

Assay variable : PTINR\_VAL1 PT-INR Value

N Mean Standard Deviation Minimum Maximum

---

|   |          |           |          |          |
|---|----------|-----------|----------|----------|
| 5 | 1.640000 | 0.1140175 | 1.500000 | 1.800000 |
|---|----------|-----------|----------|----------|

---

Laboratory tests at the time of obtaining Table 2-6 consent, according to the presence or absence of proton-pump inhibitors

Unique Subject Identifier=6023000000-0003

MEANS Procedure

Assay variable : PTINR\_VAL1 PT-INR Value

N Mean Standard Deviation Minimum Maximum

---

|   |           |           |           |           |
|---|-----------|-----------|-----------|-----------|
| 3 | 1.7666667 | 0.3785939 | 1.5000000 | 2.2000000 |
|---|-----------|-----------|-----------|-----------|

---

Unique Subject Identifier=6023000000-0004

Assay variable : PTINR\_VAL1 PT-INR Value

N Mean Standard Deviation Minimum Maximum

---

|   |           |           |           |           |
|---|-----------|-----------|-----------|-----------|
| 4 | 1.9500000 | 0.2516611 | 1.7000000 | 2.3000000 |
|---|-----------|-----------|-----------|-----------|

---

Unique Subject Identifier=6023000000-0005

Assay variable : PTINR\_VAL1 PT-INR Value

N Mean Standard Deviation Minimum Maximum

---

|   |           |           |           |           |
|---|-----------|-----------|-----------|-----------|
| 4 | 1.7500000 | 0.2645751 | 1.4000000 | 2.0000000 |
|---|-----------|-----------|-----------|-----------|

---

Unique Subject Identifier=6023000000-0007

Assay variable : PTINR\_VAL1 PT-INR Value

N Mean Standard Deviation Minimum Maximum

---

|   |           |           |           |           |
|---|-----------|-----------|-----------|-----------|
| 4 | 1.9250000 | 0.4573474 | 1.4000000 | 2.4000000 |
|---|-----------|-----------|-----------|-----------|

---



Laboratory tests at the time of obtaining Table 2-6 consent, according to the presence or absence of proton-pump inhibitors

Unique Subject Identifier=6023000000-0009

MEANS Procedure

Assay variable : PTINR\_VAL1 PT-INR Value

N Mean Standard Deviation Minimum Maximum

---

|   |           |           |           |           |
|---|-----------|-----------|-----------|-----------|
| 3 | 1.6666667 | 0.0577350 | 1.6000000 | 1.7000000 |
|---|-----------|-----------|-----------|-----------|

---

Unique Subject Identifier=6023000000-0010

Assay variable : PTINR\_VAL1 PT-INR Value

N Mean Standard Deviation Minimum Maximum

---

|   |           |           |           |           |
|---|-----------|-----------|-----------|-----------|
| 6 | 1.6000000 | 0.2966479 | 1.2000000 | 1.9000000 |
|---|-----------|-----------|-----------|-----------|

---

Unique Subject Identifier=6023000000-0013

Assay variable : PTINR\_VAL1 PT-INR Value

N Mean Standard Deviation Minimum Maximum

---

|   |           |           |           |           |
|---|-----------|-----------|-----------|-----------|
| 6 | 2.1833333 | 0.1722401 | 2.0000000 | 2.4000000 |
|---|-----------|-----------|-----------|-----------|

---

Unique Subject Identifier=6023000000-0014

Assay variable : PTINR\_VAL1 PT-INR Value

N Mean Standard Deviation Minimum Maximum

---

|   |           |           |           |           |
|---|-----------|-----------|-----------|-----------|
| 3 | 1.7666667 | 0.0577350 | 1.7000000 | 1.8000000 |
|---|-----------|-----------|-----------|-----------|

---

Laboratory tests at the time of obtaining Table 2-6 consent, according to the presence or absence of proton-pump inhibitors

Unique Subject Identifier=6023000000-0015

MEANS Procedure

Assay variable : PTINR\_VAL1 PT-INR Value

| N | Mean      | Standard Deviation | Minimum   | Maximum   |
|---|-----------|--------------------|-----------|-----------|
| 3 | 1.8666667 | 0.3055050          | 1.6000000 | 2.2000000 |

Unique Subject Identifier=6023000000-0017

Assay variable : PTINR\_VAL1 PT-INR Value

| N | Mean      | Standard Deviation | Minimum   | Maximum   |
|---|-----------|--------------------|-----------|-----------|
| 5 | 1.7400000 | 0.1816590          | 1.5000000 | 1.9000000 |

Unique Subject Identifier=6023000000-0020

Assay variable : PTINR\_VAL1 PT-INR Value

| N | Mean      | Standard Deviation | Minimum   | Maximum   |
|---|-----------|--------------------|-----------|-----------|
| 1 | 2.2000000 |                    | 2.2000000 | 2.2000000 |

Unique Subject Identifier=6023000000-0022

Assay variable : PTINR\_VAL1 PT-INR Value

N Mean Standard Deviation Minimum Maximum

---

|   |          |           |          |          |
|---|----------|-----------|----------|----------|
| 6 | 2.500000 | 0.9591663 | 1.600000 | 3.800000 |
|---|----------|-----------|----------|----------|

---

Laboratory tests at the time of obtaining Table 2-6 consent, according to the presence or absence of proton-pump inhibitors

Unique Subject Identifier=6023000000-0025

MEANS Procedure

Assay variable : PTINR\_VAL1 PT-INR Value

N Mean Standard Deviation Minimum Maximum

---

|   |           |           |           |           |
|---|-----------|-----------|-----------|-----------|
| 2 | 1.9500000 | 0.0707107 | 1.9000000 | 2.0000000 |
|---|-----------|-----------|-----------|-----------|

---

Unique Subject Identifier=6023000000-0026

Assay variable : PTINR\_VAL1 PT-INR Value

N Mean Standard Deviation Minimum Maximum

---

|   |           |           |           |           |
|---|-----------|-----------|-----------|-----------|
| 4 | 2.0250000 | 0.2217356 | 1.7000000 | 2.2000000 |
|---|-----------|-----------|-----------|-----------|

---

Unique Subject Identifier=6023000000-0031

Assay variable : PTINR\_VAL1 PT-INR Value

N Mean Standard Deviation Minimum Maximum

---

|   |           |           |           |           |
|---|-----------|-----------|-----------|-----------|
| 4 | 2.6250000 | 0.1892969 | 2.5000000 | 2.9000000 |
|---|-----------|-----------|-----------|-----------|

---

Unique Subject Identifier=6023000000-0032

Assay variable : PTINR\_VAL1 PT-INR Value

N Mean Standard Deviation Minimum Maximum

---

|   |           |           |           |           |
|---|-----------|-----------|-----------|-----------|
| 6 | 2.2666667 | 0.5465040 | 1.2000000 | 2.7000000 |
|---|-----------|-----------|-----------|-----------|

---

Laboratory tests at the time of obtaining Table 2-6 consent, according to the presence or absence of proton-pump inhibitors

Unique Subject Identifier=6023000000-0034

MEANS Procedure

Assay variable : PTINR\_VAL1 PT-INR Value

N Mean Standard Deviation Minimum Maximum

---

|   |           |           |           |           |
|---|-----------|-----------|-----------|-----------|
| 4 | 1.7250000 | 0.2753785 | 1.4000000 | 2.0000000 |
|---|-----------|-----------|-----------|-----------|

---

Unique Subject Identifier=6023000000-0035

Assay variable : PTINR\_VAL1 PT-INR Value

N Mean Standard Deviation Minimum Maximum

---

|   |           |           |           |           |
|---|-----------|-----------|-----------|-----------|
| 5 | 1.8400000 | 0.3781534 | 1.5000000 | 2.4000000 |
|---|-----------|-----------|-----------|-----------|

---

Unique Subject Identifier=6023000000-0039

Assay variable : PTINR\_VAL1 PT-INR Value

N Mean Standard Deviation Minimum Maximum

---

|   |           |           |           |           |
|---|-----------|-----------|-----------|-----------|
| 2 | 2.3500000 | 0.9192388 | 1.7000000 | 3.0000000 |
|---|-----------|-----------|-----------|-----------|

---

Unique Subject Identifier=6023000000-0042

Assay variable : PTINR\_VAL1 PT-INR Value

N Mean Standard Deviation Minimum Maximum

---

|   |           |           |           |           |
|---|-----------|-----------|-----------|-----------|
| 3 | 2.0666667 | 0.1527525 | 1.9000000 | 2.2000000 |
|---|-----------|-----------|-----------|-----------|

---



Laboratory tests at the time of obtaining Table 2-6 consent, according to the presence or absence of proton-pump inhibitors

Unique Subject Identifier=6023000000-0043

MEANS Procedure

Assay variable : PTINR\_VAL1 PT-INR Value

N Mean Standard Deviation Minimum Maximum

---

|   |           |           |           |           |
|---|-----------|-----------|-----------|-----------|
| 6 | 2.3500000 | 1.1040833 | 1.0000000 | 3.7000000 |
|---|-----------|-----------|-----------|-----------|

---

Unique Subject Identifier=6023000000-0044

Assay variable : PTINR\_VAL1 PT-INR Value

N Mean Standard Deviation Minimum Maximum

---

|   |           |           |           |           |
|---|-----------|-----------|-----------|-----------|
| 2 | 2.0500000 | 0.0707107 | 2.0000000 | 2.1000000 |
|---|-----------|-----------|-----------|-----------|

---

Unique Subject Identifier=6023000000-0045

Assay variable : PTINR\_VAL1 PT-INR Value

N Mean Standard Deviation Minimum Maximum

---

|   |           |           |           |           |
|---|-----------|-----------|-----------|-----------|
| 3 | 2.2666667 | 0.1527525 | 2.1000000 | 2.4000000 |
|---|-----------|-----------|-----------|-----------|

---

Unique Subject Identifier=6023000000-0046

Assay variable : PTINR\_VAL1 PT-INR Value

N Mean Standard Deviation Minimum Maximum

---

|   |           |           |           |           |
|---|-----------|-----------|-----------|-----------|
| 4 | 1.9500000 | 0.4654747 | 1.5000000 | 2.6000000 |
|---|-----------|-----------|-----------|-----------|

---

Laboratory tests at the time of obtaining Table 2-6 consent, according to the presence or absence of proton-pump inhibitors

Unique Subject Identifier=6023000000-0048

MEANS Procedure

Assay variable : PTINR\_VAL1 PT-INR Value

| N | Mean      | Standard Deviation | Minimum   | Maximum   |
|---|-----------|--------------------|-----------|-----------|
| 5 | 1.6000000 | 0.2915476          | 1.2000000 | 2.0000000 |

Unique Subject Identifier=6023000000-0049

Assay variable : PTINR\_VAL1 PT-INR Value

| N | Mean      | Standard Deviation | Minimum   | Maximum   |
|---|-----------|--------------------|-----------|-----------|
| 3 | 1.7333333 | 0.2516611          | 1.5000000 | 2.0000000 |

Unique Subject Identifier=6023000000-0052

Assay variable : PTINR\_VAL1 PT-INR Value

| N | Mean      | Standard Deviation | Minimum   | Maximum   |
|---|-----------|--------------------|-----------|-----------|
| 2 | 2.4500000 | 0.0707107          | 2.4000000 | 2.5000000 |

Unique Subject Identifier=6023000000-0054

Assay variable : PTINR\_VAL1 PT-INR Value

N Mean Standard Deviation Minimum Maximum

---

|   |          |           |          |          |
|---|----------|-----------|----------|----------|
| 5 | 1.920000 | 0.6648308 | 1.500000 | 3.100000 |
|---|----------|-----------|----------|----------|

---

Laboratory tests at the time of obtaining Table 2-6 consent, according to the presence or absence of proton-pump inhibitors

Unique Subject Identifier=6026000000-0021

MEANS Procedure

Assay variable : PTINR\_VAL1 PT-INR Value

N Mean Standard Deviation Minimum Maximum

---

|   |           |           |           |           |
|---|-----------|-----------|-----------|-----------|
| 4 | 1.8675000 | 0.2617091 | 1.5600000 | 2.2000000 |
|---|-----------|-----------|-----------|-----------|

---

Unique Subject Identifier=6027000000-0002

Assay variable : PTINR\_VAL1 PT-INR Value

N Mean Standard Deviation Minimum Maximum

---

|   |           |           |           |           |
|---|-----------|-----------|-----------|-----------|
| 5 | 1.7820000 | 0.2258761 | 1.4400000 | 2.0200000 |
|---|-----------|-----------|-----------|-----------|

---

Unique Subject Identifier=6027000000-0003

Assay variable : PTINR\_VAL1 PT-INR Value

N Mean Standard Deviation Minimum Maximum

---

|   |           |           |           |           |
|---|-----------|-----------|-----------|-----------|
| 3 | 1.7766667 | 0.2802380 | 1.4900000 | 2.0500000 |
|---|-----------|-----------|-----------|-----------|

---

Unique Subject Identifier=6027000000-0012

Assay variable : PTINR\_VAL1 PT-INR Value

N Mean Standard Deviation Minimum Maximum

---

|   |           |           |           |           |
|---|-----------|-----------|-----------|-----------|
| 4 | 2.0075000 | 0.5292369 | 1.6400000 | 2.7800000 |
|---|-----------|-----------|-----------|-----------|

---

Laboratory tests at the time of obtaining Table 2-6 consent, according to the presence or absence of proton-pump inhibitors

Unique Subject Identifier=6027000000-0015

MEANS Procedure

Assay variable : PTINR\_VAL1 PT-INR Value

N Mean Standard Deviation Minimum Maximum

---

|   |           |           |           |           |
|---|-----------|-----------|-----------|-----------|
| 3 | 2.3333333 | 0.3784618 | 2.1000000 | 2.7700000 |
|---|-----------|-----------|-----------|-----------|

---

Unique Subject Identifier=6027000000-0020

Assay variable : PTINR\_VAL1 PT-INR Value

N Mean Standard Deviation Minimum Maximum

---

|   |           |           |           |           |
|---|-----------|-----------|-----------|-----------|
| 3 | 2.6366667 | 0.3239341 | 2.4300000 | 3.0100000 |
|---|-----------|-----------|-----------|-----------|

---

Unique Subject Identifier=6027000000-0024

Assay variable : PTINR\_VAL1 PT-INR Value

N Mean Standard Deviation Minimum Maximum

---

|   |           |           |           |           |
|---|-----------|-----------|-----------|-----------|
| 5 | 2.6820000 | 0.8302229 | 1.7100000 | 3.9800000 |
|---|-----------|-----------|-----------|-----------|

---

Unique Subject Identifier=6029000000-0001

Assay variable : PTINR\_VAL1 PT-INR Value

N Mean Standard Deviation Minimum Maximum

---

|   |          |           |          |          |
|---|----------|-----------|----------|----------|
| 6 | 2.140000 | 0.1475127 | 1.990000 | 2.410000 |
|---|----------|-----------|----------|----------|

---



Laboratory tests at the time of obtaining Table 2-6 consent, according to the presence or absence of proton-pump inhibitors

Unique Subject Identifier=6029000000-0005

MEANS Procedure

Assay variable : PTINR\_VAL1 PT-INR Value

| N | Mean      | Standard Deviation | Minimum   | Maximum   |
|---|-----------|--------------------|-----------|-----------|
| 6 | 2.0750000 | 0.3825049          | 1.5500000 | 2.6800000 |

Unique Subject Identifier=6029000000-0006

Assay variable : PTINR\_VAL1 PT-INR Value

| N | Mean      | Standard Deviation | Minimum   | Maximum   |
|---|-----------|--------------------|-----------|-----------|
| 3 | 1.9600000 | 0.5910161          | 1.3500000 | 2.5300000 |

Unique Subject Identifier=6029000000-0011

Assay variable : PTINR\_VAL1 PT-INR Value

| N | Mean      | Standard Deviation | Minimum   | Maximum   |
|---|-----------|--------------------|-----------|-----------|
| 4 | 1.4875000 | 0.3539656          | 1.1800000 | 1.9900000 |

Unique Subject Identifier=6029000000-0012

Assay variable : PTINR\_VAL1 PT-INR Value

N Mean Standard Deviation Minimum Maximum

---

|   |           |           |           |           |
|---|-----------|-----------|-----------|-----------|
| 4 | 2.0125000 | 0.1699755 | 1.8200000 | 2.1700000 |
|---|-----------|-----------|-----------|-----------|

---

Laboratory tests at the time of obtaining Table 2-6 consent, according to the presence or absence of proton-pump inhibitors

Unique Subject Identifier=6029000000-0020

MEANS Procedure

Assay variable : PTINR\_VAL1 PT-INR Value

| N | Mean      | Standard Deviation | Minimum   | Maximum   |
|---|-----------|--------------------|-----------|-----------|
| 2 | 1.7400000 | 0.2828427          | 1.5400000 | 1.9400000 |

Unique Subject Identifier=6029000000-0026

Assay variable : PTINR\_VAL1 PT-INR Value

| N | Mean      | Standard Deviation | Minimum   | Maximum   |
|---|-----------|--------------------|-----------|-----------|
| 1 | 2.7900000 |                    | 2.7900000 | 2.7900000 |

Unique Subject Identifier=6031011010-0003

Assay variable : PTINR\_VAL1 PT-INR Value

| N | Mean      | Standard Deviation | Minimum   | Maximum   |
|---|-----------|--------------------|-----------|-----------|
| 3 | 1.6800000 | 0.0360555          | 1.6400000 | 1.7100000 |

Unique Subject Identifier=6031011010-0006

Assay variable : PTINR\_VAL1 PT-INR Value

N Mean Standard Deviation Minimum Maximum

---

|   |           |           |           |           |
|---|-----------|-----------|-----------|-----------|
| 6 | 1.7933333 | 0.2618142 | 1.4000000 | 2.1600000 |
|---|-----------|-----------|-----------|-----------|

---

Laboratory tests at the time of obtaining Table 2-6 consent, according to the presence or absence of proton-pump inhibitors

Unique Subject Identifier=6031011010-0009

MEANS Procedure

Assay variable : PTINR\_VAL1 PT-INR Value

N Mean Standard Deviation Minimum Maximum

---

|   |           |           |           |           |
|---|-----------|-----------|-----------|-----------|
| 4 | 2.1325000 | 0.3088014 | 1.7600000 | 2.4500000 |
|---|-----------|-----------|-----------|-----------|

---

Unique Subject Identifier=6031011010-0010

Assay variable : PTINR\_VAL1 PT-INR Value

N Mean Standard Deviation Minimum Maximum

---

|   |           |           |           |           |
|---|-----------|-----------|-----------|-----------|
| 5 | 1.9780000 | 0.3420819 | 1.5700000 | 2.4000000 |
|---|-----------|-----------|-----------|-----------|

---

Unique Subject Identifier=6031011010-0011

Assay variable : PTINR\_VAL1 PT-INR Value

N Mean Standard Deviation Minimum Maximum

---

|   |           |           |           |           |
|---|-----------|-----------|-----------|-----------|
| 4 | 1.7575000 | 0.2321458 | 1.5000000 | 2.0200000 |
|---|-----------|-----------|-----------|-----------|

---

Unique Subject Identifier=6031011010-0012

Assay variable : PTINR\_VAL1 PT-INR Value

N Mean Standard Deviation Minimum Maximum

---

|   |          |          |          |          |
|---|----------|----------|----------|----------|
| 5 | 2.112000 | 0.802041 | 1.280000 | 3.290000 |
|---|----------|----------|----------|----------|

---

Laboratory tests at the time of obtaining Table 2-6 consent, according to the presence or absence of proton-pump inhibitors

Unique Subject Identifier=6031011010-0017

MEANS Procedure

Assay variable : PTINR\_VAL1 PT-INR Value

N Mean Standard Deviation Minimum Maximum

---

|   |           |           |           |           |
|---|-----------|-----------|-----------|-----------|
| 6 | 2.4200000 | 0.3189357 | 2.0400000 | 2.9200000 |
|---|-----------|-----------|-----------|-----------|

---

Unique Subject Identifier=6031011010-0018

Assay variable : PTINR\_VAL1 PT-INR Value

N Mean Standard Deviation Minimum Maximum

---

|   |           |           |           |           |
|---|-----------|-----------|-----------|-----------|
| 4 | 2.3600000 | 0.3468910 | 1.9500000 | 2.7400000 |
|---|-----------|-----------|-----------|-----------|

---

Unique Subject Identifier=6031011010-0019

Assay variable : PTINR\_VAL1 PT-INR Value

N Mean Standard Deviation Minimum Maximum

---

|   |           |           |           |           |
|---|-----------|-----------|-----------|-----------|
| 6 | 2.0933333 | 0.5123540 | 1.5100000 | 2.6700000 |
|---|-----------|-----------|-----------|-----------|

---

Unique Subject Identifier=6031011010-0021

Assay variable : PTINR\_VAL1 PT-INR Value

N Mean Standard Deviation Minimum Maximum

---

|   |          |          |          |          |
|---|----------|----------|----------|----------|
| 3 | 1.750000 | 0.010000 | 1.740000 | 1.760000 |
|---|----------|----------|----------|----------|

---



Laboratory tests at the time of obtaining Table 2-6 consent, according to the presence or absence of proton-pump inhibitors

Unique Subject Identifier=6031011010-0023

MEANS Procedure

Assay variable : PTINR\_VAL1 PT-INR Value

N Mean Standard Deviation Minimum Maximum

---

|   |           |           |           |           |
|---|-----------|-----------|-----------|-----------|
| 6 | 1.6983333 | 0.1800463 | 1.5400000 | 2.0200000 |
|---|-----------|-----------|-----------|-----------|

---

Unique Subject Identifier=6031011010-0024

Assay variable : PTINR\_VAL1 PT-INR Value

N Mean Standard Deviation Minimum Maximum

---

|   |           |           |           |           |
|---|-----------|-----------|-----------|-----------|
| 5 | 1.9160000 | 0.2597691 | 1.5600000 | 2.1400000 |
|---|-----------|-----------|-----------|-----------|

---

Unique Subject Identifier=6031011010-0025

Assay variable : PTINR\_VAL1 PT-INR Value

N Mean Standard Deviation Minimum Maximum

---

|   |           |           |           |           |
|---|-----------|-----------|-----------|-----------|
| 6 | 1.7383333 | 0.2262226 | 1.4500000 | 2.0600000 |
|---|-----------|-----------|-----------|-----------|

---

Unique Subject Identifier=6031011010-0027

Assay variable : PTINR\_VAL1 PT-INR Value

N Mean Standard Deviation Minimum Maximum

---

|   |           |           |           |           |
|---|-----------|-----------|-----------|-----------|
| 5 | 2.2720000 | 0.2816381 | 1.9100000 | 2.5900000 |
|---|-----------|-----------|-----------|-----------|

---

Laboratory tests at the time of obtaining Table 2-6 consent, according to the presence or absence of proton-pump inhibitors

Unique Subject Identifier=6032010000-0011

MEANS Procedure

Assay variable : PTINR\_VAL1 PT-INR Value

N Mean Standard Deviation Minimum Maximum

---

|   |           |           |           |           |
|---|-----------|-----------|-----------|-----------|
| 2 | 3.3050000 | 0.9687363 | 2.6200000 | 3.9900000 |
|---|-----------|-----------|-----------|-----------|

---

Unique Subject Identifier=6032010000-0012

Assay variable : PTINR\_VAL1 PT-INR Value

N Mean Standard Deviation Minimum Maximum

---

|   |           |           |           |           |
|---|-----------|-----------|-----------|-----------|
| 6 | 2.4733333 | 1.3273382 | 1.0500000 | 4.2200000 |
|---|-----------|-----------|-----------|-----------|

---

Unique Subject Identifier=6032010000-0013

Assay variable : PTINR\_VAL1 PT-INR Value

N Mean Standard Deviation Minimum Maximum

---

|   |           |           |           |           |
|---|-----------|-----------|-----------|-----------|
| 6 | 1.6966667 | 0.1120119 | 1.4900000 | 1.8300000 |
|---|-----------|-----------|-----------|-----------|

---

Unique Subject Identifier=6032010000-0015

Assay variable : PTINR\_VAL1 PT-INR Value

N Mean Standard Deviation Minimum Maximum

---

|   |           |           |           |           |
|---|-----------|-----------|-----------|-----------|
| 2 | 1.6500000 | 0.2121320 | 1.5000000 | 1.8000000 |
|---|-----------|-----------|-----------|-----------|

---

Laboratory tests at the time of obtaining Table 2-6 consent, according to the presence or absence of proton-pump inhibitors

Unique Subject Identifier=6032010000-0018

MEANS Procedure

Assay variable : PTINR\_VAL1 PT-INR Value

N Mean Standard Deviation Minimum Maximum

---

|   |           |           |           |           |
|---|-----------|-----------|-----------|-----------|
| 3 | 1.9066667 | 0.0577350 | 1.8400000 | 1.9400000 |
|---|-----------|-----------|-----------|-----------|

---

Unique Subject Identifier=6032010000-0019

Assay variable : PTINR\_VAL1 PT-INR Value

N Mean Standard Deviation Minimum Maximum

---

|   |           |           |           |           |
|---|-----------|-----------|-----------|-----------|
| 4 | 1.8025000 | 0.5687633 | 1.4400000 | 2.6500000 |
|---|-----------|-----------|-----------|-----------|

---

Unique Subject Identifier=6032010000-0020

Assay variable : PTINR\_VAL1 PT-INR Value

N Mean Standard Deviation Minimum Maximum

---

|   |           |           |           |           |
|---|-----------|-----------|-----------|-----------|
| 3 | 2.1533333 | 0.1833939 | 2.0100000 | 2.3600000 |
|---|-----------|-----------|-----------|-----------|

---

Unique Subject Identifier=6032010000-0026

Assay variable : PTINR\_VAL1 PT-INR Value

N Mean Standard Deviation Minimum Maximum

---

|   |           |  |           |           |
|---|-----------|--|-----------|-----------|
| 1 | 2.5900000 |  | 2.5900000 | 2.5900000 |
|---|-----------|--|-----------|-----------|

---

Laboratory tests at the time of obtaining Table 2-6 consent, according to the presence or absence of proton-pump inhibitors

Unique Subject Identifier=6032010000-0028

MEANS Procedure

Assay variable : PTINR\_VAL1 PT-INR Value

N Mean Standard Deviation Minimum Maximum

---

|   |           |  |           |           |
|---|-----------|--|-----------|-----------|
| 1 | 1.8000000 |  | 1.8000000 | 1.8000000 |
|---|-----------|--|-----------|-----------|

---

Unique Subject Identifier=6032010000-0030

Assay variable : PTINR\_VAL1 PT-INR Value

N Mean Standard Deviation Minimum Maximum

---

|   |           |           |           |           |
|---|-----------|-----------|-----------|-----------|
| 2 | 2.7150000 | 0.6717514 | 2.2400000 | 3.1900000 |
|---|-----------|-----------|-----------|-----------|

---

Unique Subject Identifier=6032010000-0032

Assay variable : PTINR\_VAL1 PT-INR Value

N Mean Standard Deviation Minimum Maximum

---

|   |           |           |           |           |
|---|-----------|-----------|-----------|-----------|
| 2 | 1.3650000 | 0.1484924 | 1.2600000 | 1.4700000 |
|---|-----------|-----------|-----------|-----------|

---

Unique Subject Identifier=6032010000-0038

Assay variable : PTINR\_VAL1 PT-INR Value

N Mean Standard Deviation Minimum Maximum

---

|   |           |           |           |           |
|---|-----------|-----------|-----------|-----------|
| 6 | 2.5766667 | 0.4231627 | 2.1100000 | 3.2800000 |
|---|-----------|-----------|-----------|-----------|

---



Laboratory tests at the time of obtaining Table 2-6 consent, according to the presence or absence of proton-pump inhibitors

Unique Subject Identifier=6032010000-0042

MEANS Procedure

Assay variable : PTINR\_VAL1 PT-INR Value

N Mean Standard Deviation Minimum Maximum

---

|   |           |           |           |           |
|---|-----------|-----------|-----------|-----------|
| 5 | 2.3060000 | 0.2140794 | 2.0800000 | 2.5500000 |
|---|-----------|-----------|-----------|-----------|

---

Unique Subject Identifier=6032010000-0044

Assay variable : PTINR\_VAL1 PT-INR Value

N Mean Standard Deviation Minimum Maximum

---

|   |           |           |           |           |
|---|-----------|-----------|-----------|-----------|
| 3 | 2.0033333 | 0.0404145 | 1.9800000 | 2.0500000 |
|---|-----------|-----------|-----------|-----------|

---

Unique Subject Identifier=6032010000-0045

Assay variable : PTINR\_VAL1 PT-INR Value

N Mean Standard Deviation Minimum Maximum

---

|   |           |           |           |           |
|---|-----------|-----------|-----------|-----------|
| 3 | 2.2966667 | 0.2579406 | 2.0100000 | 2.5100000 |
|---|-----------|-----------|-----------|-----------|

---

Unique Subject Identifier=6032010000-0046

Assay variable : PTINR\_VAL1 PT-INR Value

N Mean Standard Deviation Minimum Maximum

---

|   |          |           |          |          |
|---|----------|-----------|----------|----------|
| 2 | 2.340000 | 0.4242641 | 2.040000 | 2.640000 |
|---|----------|-----------|----------|----------|

---

Laboratory tests at the time of obtaining Table 2-6 consent, according to the presence or absence of proton-pump inhibitors

Unique Subject Identifier=6032010000-0059

MEANS Procedure

Assay variable : PTINR\_VAL1 PT-INR Value

| N | Mean     | Standard Deviation | Minimum  | Maximum  |
|---|----------|--------------------|----------|----------|
| 3 | 3.590000 | 2.8840770          | 1.890000 | 6.920000 |

Unique Subject Identifier=6032010000-0064

Assay variable : PTINR\_VAL1 PT-INR Value

| N | Mean     | Standard Deviation | Minimum  | Maximum  |
|---|----------|--------------------|----------|----------|
| 2 | 2.235000 | 0.9687363          | 1.550000 | 2.920000 |

Unique Subject Identifier=6032010000-0065

Assay variable : PTINR\_VAL1 PT-INR Value

| N | Mean     | Standard Deviation | Minimum  | Maximum  |
|---|----------|--------------------|----------|----------|
| 5 | 1.944000 | 0.4271768          | 1.250000 | 2.390000 |

Unique Subject Identifier=6032010000-0072

Assay variable : PTINR\_VAL1 PT-INR Value

N Mean Standard Deviation Minimum Maximum

---

|   |           |           |           |           |
|---|-----------|-----------|-----------|-----------|
| 3 | 2.4966667 | 0.6601010 | 1.9500000 | 3.2300000 |
|---|-----------|-----------|-----------|-----------|

---

Laboratory tests at the time of obtaining Table 2-6 consent, according to the presence or absence of proton-pump inhibitors

Unique Subject Identifier=6032010000-0074

MEANS Procedure

Assay variable : PTINR\_VAL1 PT-INR Value

N Mean Standard Deviation Minimum Maximum

---

|   |           |           |           |           |
|---|-----------|-----------|-----------|-----------|
| 3 | 2.2933333 | 0.2138535 | 2.0600000 | 2.4800000 |
|---|-----------|-----------|-----------|-----------|

---

Unique Subject Identifier=6032010000-0077

Assay variable : PTINR\_VAL1 PT-INR Value

N Mean Standard Deviation Minimum Maximum

---

|   |           |           |           |           |
|---|-----------|-----------|-----------|-----------|
| 2 | 2.4850000 | 0.4879037 | 2.1400000 | 2.8300000 |
|---|-----------|-----------|-----------|-----------|

---

Unique Subject Identifier=6032010000-0079

Assay variable : PTINR\_VAL1 PT-INR Value

N Mean Standard Deviation Minimum Maximum

---

|   |           |           |           |           |
|---|-----------|-----------|-----------|-----------|
| 4 | 2.0100000 | 0.2181742 | 1.7400000 | 2.2400000 |
|---|-----------|-----------|-----------|-----------|

---

Unique Subject Identifier=6032010000-0080

Assay variable : PTINR\_VAL1 PT-INR Value

N Mean Standard Deviation Minimum Maximum

---

|   |          |           |          |          |
|---|----------|-----------|----------|----------|
| 2 | 2.440000 | 0.4808326 | 2.100000 | 2.780000 |
|---|----------|-----------|----------|----------|

---

Laboratory tests at the time of obtaining Table 2-6 consent, according to the presence or absence of proton-pump inhibitors

Unique Subject Identifier=6032010000-0081

MEANS Procedure

Assay variable : PTINR\_VAL1 PT-INR Value

N Mean Standard Deviation Minimum Maximum

---

|   |           |           |           |           |
|---|-----------|-----------|-----------|-----------|
| 4 | 2.9875000 | 0.5244918 | 2.4000000 | 3.4300000 |
|---|-----------|-----------|-----------|-----------|

---

Unique Subject Identifier=6032010000-0082

Assay variable : PTINR\_VAL1 PT-INR Value

N Mean Standard Deviation Minimum Maximum

---

|   |           |           |           |           |
|---|-----------|-----------|-----------|-----------|
| 3 | 2.0333333 | 0.6908208 | 1.6000000 | 2.8300000 |
|---|-----------|-----------|-----------|-----------|

---

Unique Subject Identifier=6035000000-0002

Assay variable : PTINR\_VAL1 PT-INR Value

N Mean Standard Deviation Minimum Maximum

---

|   |           |  |           |           |
|---|-----------|--|-----------|-----------|
| 1 | 2.9300000 |  | 2.9300000 | 2.9300000 |
|---|-----------|--|-----------|-----------|

---

Unique Subject Identifier=6035000000-0010

Assay variable : PTINR\_VAL1 PT-INR Value

N Mean Standard Deviation Minimum Maximum

---

|   |           |           |           |           |
|---|-----------|-----------|-----------|-----------|
| 3 | 2.2766667 | 0.3481858 | 1.9800000 | 2.6600000 |
|---|-----------|-----------|-----------|-----------|

---



Laboratory tests at the time of obtaining Table 2-6 consent, according to the presence or absence of proton-pump inhibitors

Unique Subject Identifier=6035000000-0017

MEANS Procedure

Assay variable : PTINR\_VAL1 PT-INR Value

| N | Mean      | Standard Deviation | Minimum   | Maximum   |
|---|-----------|--------------------|-----------|-----------|
| 5 | 2.2120000 | 0.7254792          | 1.4800000 | 3.4000000 |

Unique Subject Identifier=6035000000-0018

Assay variable : PTINR\_VAL1 PT-INR Value

| N | Mean      | Standard Deviation | Minimum   | Maximum   |
|---|-----------|--------------------|-----------|-----------|
| 6 | 2.0516667 | 0.5956985          | 1.4500000 | 3.0500000 |

Unique Subject Identifier=6035000000-0019

Assay variable : PTINR\_VAL1 PT-INR Value

| N | Mean      | Standard Deviation | Minimum   | Maximum   |
|---|-----------|--------------------|-----------|-----------|
| 3 | 2.0300000 | 0.2306513          | 1.7900000 | 2.2500000 |

Unique Subject Identifier=6035000000-0022

Assay variable : PTINR\_VAL1 PT-INR Value

N Mean Standard Deviation Minimum Maximum

---

|   |           |           |           |           |
|---|-----------|-----------|-----------|-----------|
| 3 | 1.5866667 | 0.1703917 | 1.3900000 | 1.6900000 |
|---|-----------|-----------|-----------|-----------|

---

Laboratory tests at the time of obtaining Table 2-6 consent, according to the presence or absence of proton-pump inhibitors

Unique Subject Identifier=6035000000-0023

MEANS Procedure

Assay variable : PTINR\_VAL1 PT-INR Value

N Mean Standard Deviation Minimum Maximum

---

|   |           |  |           |           |
|---|-----------|--|-----------|-----------|
| 1 | 2.2000000 |  | 2.2000000 | 2.2000000 |
|---|-----------|--|-----------|-----------|

---

Unique Subject Identifier=6036000000-0004

Assay variable : PTINR\_VAL1 PT-INR Value

N Mean Standard Deviation Minimum Maximum

---

|   |           |           |           |           |
|---|-----------|-----------|-----------|-----------|
| 4 | 2.2525000 | 0.3569664 | 1.8400000 | 2.7100000 |
|---|-----------|-----------|-----------|-----------|

---

Unique Subject Identifier=6036000000-0006

Assay variable : PTINR\_VAL1 PT-INR Value

N Mean Standard Deviation Minimum Maximum

---

|   |           |           |           |           |
|---|-----------|-----------|-----------|-----------|
| 6 | 1.7333333 | 0.4803193 | 1.3000000 | 2.6400000 |
|---|-----------|-----------|-----------|-----------|

---

Unique Subject Identifier=6036000000-0009

Assay variable : PTINR\_VAL1 PT-INR Value

N Mean Standard Deviation Minimum Maximum

---

|   |           |           |           |           |
|---|-----------|-----------|-----------|-----------|
| 4 | 2.2800000 | 0.2741046 | 2.0000000 | 2.6500000 |
|---|-----------|-----------|-----------|-----------|

---

Laboratory tests at the time of obtaining Table 2-6 consent, according to the presence or absence of proton-pump inhibitors

Unique Subject Identifier=6036000000-0010

MEANS Procedure

Assay variable : PTINR\_VAL1 PT-INR Value

N Mean Standard Deviation Minimum Maximum

---

|   |           |           |           |           |
|---|-----------|-----------|-----------|-----------|
| 4 | 1.9225000 | 0.2474369 | 1.5600000 | 2.1100000 |
|---|-----------|-----------|-----------|-----------|

---

Unique Subject Identifier=6040011000-0001

Assay variable : PTINR\_VAL1 PT-INR Value

N Mean Standard Deviation Minimum Maximum

---

|   |           |           |           |           |
|---|-----------|-----------|-----------|-----------|
| 5 | 2.2780000 | 0.3104352 | 1.8600000 | 2.6700000 |
|---|-----------|-----------|-----------|-----------|

---

Unique Subject Identifier=6041000000-0001

Assay variable : PTINR\_VAL1 PT-INR Value

N Mean Standard Deviation Minimum Maximum

---

|   |           |           |           |           |
|---|-----------|-----------|-----------|-----------|
| 3 | 1.6700000 | 0.1307670 | 1.5200000 | 1.7600000 |
|---|-----------|-----------|-----------|-----------|

---

Unique Subject Identifier=6041000000-0002

Assay variable : PTINR\_VAL1 PT-INR Value

N Mean Standard Deviation Minimum Maximum

---

|   |           |           |           |           |
|---|-----------|-----------|-----------|-----------|
| 4 | 1.9825000 | 0.1723127 | 1.8100000 | 2.1800000 |
|---|-----------|-----------|-----------|-----------|

---

Laboratory tests at the time of obtaining Table 2-6 consent, according to the presence or absence of proton-pump inhibitors

Unique Subject Identifier=6041000000-0006

MEANS Procedure

Assay variable : PTINR\_VAL1 PT-INR Value

N Mean Standard Deviation Minimum Maximum

---

|   |           |           |           |           |
|---|-----------|-----------|-----------|-----------|
| 6 | 1.5233333 | 0.4314935 | 1.1200000 | 2.2500000 |
|---|-----------|-----------|-----------|-----------|

---

Unique Subject Identifier=6041000000-0007

Assay variable : PTINR\_VAL1 PT-INR Value

N Mean Standard Deviation Minimum Maximum

---

|   |           |           |           |           |
|---|-----------|-----------|-----------|-----------|
| 3 | 1.9133333 | 0.1861003 | 1.7400000 | 2.1100000 |
|---|-----------|-----------|-----------|-----------|

---

Unique Subject Identifier=6041000000-0008

Assay variable : PTINR\_VAL1 PT-INR Value

N Mean Standard Deviation Minimum Maximum

---

|   |           |           |           |           |
|---|-----------|-----------|-----------|-----------|
| 3 | 1.5700000 | 0.0500000 | 1.5200000 | 1.6200000 |
|---|-----------|-----------|-----------|-----------|

---

Unique Subject Identifier=6041000000-0013

Assay variable : PTINR\_VAL1 PT-INR Value

N Mean Standard Deviation Minimum Maximum

---

|   |           |           |           |           |
|---|-----------|-----------|-----------|-----------|
| 3 | 1.8533333 | 0.2458319 | 1.6200000 | 2.1100000 |
|---|-----------|-----------|-----------|-----------|

---



Laboratory tests at the time of obtaining Table 2-6 consent, according to the presence or absence of proton-pump inhibitors

Unique Subject Identifier=6041000000-0017

MEANS Procedure

Assay variable : PTINR\_VAL1 PT-INR Value

N Mean Standard Deviation Minimum Maximum

---

|   |           |           |           |           |
|---|-----------|-----------|-----------|-----------|
| 5 | 1.6480000 | 0.3406905 | 1.3600000 | 2.0600000 |
|---|-----------|-----------|-----------|-----------|

---

Unique Subject Identifier=6041000000-0019

Assay variable : PTINR\_VAL1 PT-INR Value

N Mean Standard Deviation Minimum Maximum

---

|   |           |           |           |           |
|---|-----------|-----------|-----------|-----------|
| 3 | 1.6633333 | 0.0503322 | 1.6100000 | 1.7100000 |
|---|-----------|-----------|-----------|-----------|

---

Unique Subject Identifier=6041000000-0020

Assay variable : PTINR\_VAL1 PT-INR Value

N Mean Standard Deviation Minimum Maximum

---

|   |           |           |           |           |
|---|-----------|-----------|-----------|-----------|
| 6 | 2.0016667 | 0.3270117 | 1.3700000 | 2.3100000 |
|---|-----------|-----------|-----------|-----------|

---

Unique Subject Identifier=6041000000-0022

Assay variable : PTINR\_VAL1 PT-INR Value

N Mean Standard Deviation Minimum Maximum

---

|   |           |           |           |           |
|---|-----------|-----------|-----------|-----------|
| 3 | 2.0866667 | 0.2484619 | 1.8000000 | 2.2400000 |
|---|-----------|-----------|-----------|-----------|

---

Laboratory tests at the time of obtaining Table 2-6 consent, according to the presence or absence of proton-pump inhibitors

Unique Subject Identifier=6041000000-0024

MEANS Procedure

Assay variable : PTINR\_VAL1 PT-INR Value

N Mean Standard Deviation Minimum Maximum

---

|   |           |           |           |           |
|---|-----------|-----------|-----------|-----------|
| 6 | 1.9033333 | 0.2281812 | 1.6100000 | 2.1300000 |
|---|-----------|-----------|-----------|-----------|

---

Unique Subject Identifier=6041000000-0025

Assay variable : PTINR\_VAL1 PT-INR Value

N Mean Standard Deviation Minimum Maximum

---

|   |           |           |           |           |
|---|-----------|-----------|-----------|-----------|
| 6 | 2.0683333 | 0.2205826 | 1.6800000 | 2.2400000 |
|---|-----------|-----------|-----------|-----------|

---

Unique Subject Identifier=6041000000-0027

Assay variable : PTINR\_VAL1 PT-INR Value

N Mean Standard Deviation Minimum Maximum

---

|   |           |           |           |           |
|---|-----------|-----------|-----------|-----------|
| 3 | 1.5166667 | 0.0929157 | 1.4400000 | 1.6200000 |
|---|-----------|-----------|-----------|-----------|

---

Unique Subject Identifier=6041000000-0028

Assay variable : PTINR\_VAL1 PT-INR Value

N Mean Standard Deviation Minimum Maximum

---

|   |           |           |           |           |
|---|-----------|-----------|-----------|-----------|
| 3 | 1.4966667 | 0.1530795 | 1.3200000 | 1.5900000 |
|---|-----------|-----------|-----------|-----------|

---

Laboratory tests at the time of obtaining Table 2-6 consent, according to the presence or absence of proton-pump inhibitors

Unique Subject Identifier=6041000000-0029

MEANS Procedure

Assay variable : PTINR\_VAL1 PT-INR Value

N Mean Standard Deviation Minimum Maximum

---

|   |           |           |           |           |
|---|-----------|-----------|-----------|-----------|
| 6 | 1.5833333 | 0.3390968 | 1.2400000 | 2.1600000 |
|---|-----------|-----------|-----------|-----------|

---

Unique Subject Identifier=6041000000-0032

Assay variable : PTINR\_VAL1 PT-INR Value

N Mean Standard Deviation Minimum Maximum

---

|   |           |           |           |           |
|---|-----------|-----------|-----------|-----------|
| 3 | 1.4500000 | 0.0529150 | 1.3900000 | 1.4900000 |
|---|-----------|-----------|-----------|-----------|

---

Unique Subject Identifier=6041000000-0037

Assay variable : PTINR\_VAL1 PT-INR Value

N Mean Standard Deviation Minimum Maximum

---

|   |           |           |           |           |
|---|-----------|-----------|-----------|-----------|
| 4 | 1.6000000 | 0.1893850 | 1.4300000 | 1.8700000 |
|---|-----------|-----------|-----------|-----------|

---

Unique Subject Identifier=6041000000-0038

Assay variable : PTINR\_VAL1 PT-INR Value

N Mean Standard Deviation Minimum Maximum

---

|   |           |           |           |           |
|---|-----------|-----------|-----------|-----------|
| 6 | 1.5633333 | 0.1440370 | 1.4400000 | 1.7800000 |
|---|-----------|-----------|-----------|-----------|

---

Laboratory tests at the time of obtaining Table 2-6 consent, according to the presence or absence of proton-pump inhibitors

Unique Subject Identifier=6041000000-0042

MEANS Procedure

Assay variable : PTINR\_VAL1 PT-INR Value

| N | Mean      | Standard Deviation | Minimum   | Maximum   |
|---|-----------|--------------------|-----------|-----------|
| 3 | 1.5166667 | 0.1150362          | 1.4000000 | 1.6300000 |

Unique Subject Identifier=6041000000-0048

Assay variable : PTINR\_VAL1 PT-INR Value

| N | Mean      | Standard Deviation | Minimum   | Maximum   |
|---|-----------|--------------------|-----------|-----------|
| 4 | 1.5850000 | 0.4695033          | 1.2900000 | 2.2800000 |

Unique Subject Identifier=6041000000-0049

Assay variable : PTINR\_VAL1 PT-INR Value

| N | Mean      | Standard Deviation | Minimum   | Maximum   |
|---|-----------|--------------------|-----------|-----------|
| 4 | 1.5425000 | 0.1550000          | 1.3800000 | 1.7400000 |

Unique Subject Identifier=6041000000-0050

Assay variable : PTINR\_VAL1 PT-INR Value

N Mean Standard Deviation Minimum Maximum

---

|   |           |           |           |           |
|---|-----------|-----------|-----------|-----------|
| 3 | 2.0766667 | 0.0838650 | 1.9800000 | 2.1300000 |
|---|-----------|-----------|-----------|-----------|

---



Laboratory tests at the time of obtaining Table 2-6 consent, according to the presence or absence of proton-pump inhibitors

Unique Subject Identifier=6041000000-0059

MEANS Procedure

Assay variable : PTINR\_VAL1 PT-INR Value

N Mean Standard Deviation Minimum Maximum

---

|   |           |           |           |           |
|---|-----------|-----------|-----------|-----------|
| 3 | 1.6933333 | 0.2157159 | 1.5400000 | 1.9400000 |
|---|-----------|-----------|-----------|-----------|

---

Unique Subject Identifier=6042000000-0001

Assay variable : PTINR\_VAL1 PT-INR Value

N Mean Standard Deviation Minimum Maximum

---

|   |           |           |           |           |
|---|-----------|-----------|-----------|-----------|
| 6 | 1.6650000 | 0.5169429 | 1.1000000 | 2.3300000 |
|---|-----------|-----------|-----------|-----------|

---

Unique Subject Identifier=6042000000-0002

Assay variable : PTINR\_VAL1 PT-INR Value

N Mean Standard Deviation Minimum Maximum

---

|   |           |           |           |           |
|---|-----------|-----------|-----------|-----------|
| 5 | 1.1920000 | 0.0614003 | 1.1300000 | 1.2800000 |
|---|-----------|-----------|-----------|-----------|

---

Unique Subject Identifier=6042000000-0003

Assay variable : PTINR\_VAL1 PT-INR Value

N Mean Standard Deviation Minimum Maximum

---

|   |           |           |           |           |
|---|-----------|-----------|-----------|-----------|
| 6 | 1.9383333 | 0.5394225 | 1.5000000 | 2.9200000 |
|---|-----------|-----------|-----------|-----------|

---

Laboratory tests at the time of obtaining Table 2-6 consent, according to the presence or absence of proton-pump inhibitors

Unique Subject Identifier=6042000000-0004

MEANS Procedure

Assay variable : PTINR\_VAL1 PT-INR Value

N Mean Standard Deviation Minimum Maximum

---

|   |           |           |           |           |
|---|-----------|-----------|-----------|-----------|
| 6 | 1.7316667 | 0.1911457 | 1.5600000 | 1.9700000 |
|---|-----------|-----------|-----------|-----------|

---

Unique Subject Identifier=6042000000-0007

Assay variable : PTINR\_VAL1 PT-INR Value

N Mean Standard Deviation Minimum Maximum

---

|   |           |           |           |           |
|---|-----------|-----------|-----------|-----------|
| 3 | 1.5933333 | 0.3611556 | 1.3700000 | 2.0100000 |
|---|-----------|-----------|-----------|-----------|

---

Unique Subject Identifier=6045010111-0002

Assay variable : PTINR\_VAL1 PT-INR Value

N Mean Standard Deviation Minimum Maximum

---

|   |           |           |           |           |
|---|-----------|-----------|-----------|-----------|
| 3 | 2.5033333 | 1.0830205 | 1.5300000 | 3.6700000 |
|---|-----------|-----------|-----------|-----------|

---

Unique Subject Identifier=6045010111-0013

Assay variable : PTINR\_VAL1 PT-INR Value

N Mean Standard Deviation Minimum Maximum

---

|   |           |           |           |           |
|---|-----------|-----------|-----------|-----------|
| 4 | 2.1025000 | 0.1664081 | 1.9900000 | 2.3500000 |
|---|-----------|-----------|-----------|-----------|

---

Laboratory tests at the time of obtaining Table 2-6 consent, according to the presence or absence of proton-pump inhibitors

Unique Subject Identifier=6045010111-0021

MEANS Procedure

Assay variable : PTINR\_VAL1 PT-INR Value

N Mean Standard Deviation Minimum Maximum

---

|   |           |           |           |           |
|---|-----------|-----------|-----------|-----------|
| 6 | 1.7933333 | 0.3669696 | 1.5100000 | 2.5100000 |
|---|-----------|-----------|-----------|-----------|

---

Unique Subject Identifier=6045010111-0039

Assay variable : PTINR\_VAL1 PT-INR Value

N Mean Standard Deviation Minimum Maximum

---

|   |           |           |           |           |
|---|-----------|-----------|-----------|-----------|
| 4 | 2.0350000 | 0.3765191 | 1.6300000 | 2.5400000 |
|---|-----------|-----------|-----------|-----------|

---

Unique Subject Identifier=6045010111-0040

Assay variable : PTINR\_VAL1 PT-INR Value

N Mean Standard Deviation Minimum Maximum

---

|   |           |           |           |           |
|---|-----------|-----------|-----------|-----------|
| 6 | 2.1716667 | 0.1719787 | 1.8700000 | 2.3600000 |
|---|-----------|-----------|-----------|-----------|

---

Unique Subject Identifier=6045010111-0052

Assay variable : PTINR\_VAL1 PT-INR Value

N Mean Standard Deviation Minimum Maximum

---

|   |           |           |           |           |
|---|-----------|-----------|-----------|-----------|
| 4 | 2.1425000 | 0.1317510 | 2.0200000 | 2.3200000 |
|---|-----------|-----------|-----------|-----------|

---

Laboratory tests at the time of obtaining Table 2-6 consent, according to the presence or absence of proton-pump inhibitors

Unique Subject Identifier=6045010111-0063

MEANS Procedure

Assay variable : PTINR\_VAL1 PT-INR Value

N Mean Standard Deviation Minimum Maximum

---

|   |           |           |           |           |
|---|-----------|-----------|-----------|-----------|
| 3 | 2.2200000 | 0.4293018 | 1.7600000 | 2.6100000 |
|---|-----------|-----------|-----------|-----------|

---

Unique Subject Identifier=6045010111-0067

Assay variable : PTINR\_VAL1 PT-INR Value

N Mean Standard Deviation Minimum Maximum

---

|   |           |           |           |           |
|---|-----------|-----------|-----------|-----------|
| 4 | 1.9250000 | 0.2298550 | 1.6300000 | 2.1400000 |
|---|-----------|-----------|-----------|-----------|

---

Unique Subject Identifier=6045010111-0073

Assay variable : PTINR\_VAL1 PT-INR Value

N Mean Standard Deviation Minimum Maximum

---

|   |           |           |           |           |
|---|-----------|-----------|-----------|-----------|
| 3 | 2.0933333 | 0.4061199 | 1.8200000 | 2.5600000 |
|---|-----------|-----------|-----------|-----------|

---

Unique Subject Identifier=6048010000-0001

Assay variable : PTINR\_VAL1 PT-INR Value

N Mean Standard Deviation Minimum Maximum

---

|   |           |  |           |           |
|---|-----------|--|-----------|-----------|
| 1 | 2.9000000 |  | 2.9000000 | 2.9000000 |
|---|-----------|--|-----------|-----------|

---



Laboratory tests at the time of obtaining Table 2-6 consent, according to the presence or absence of proton-pump inhibitors

Unique Subject Identifier=6048010000-0021

MEANS Procedure

Assay variable : PTINR\_VAL1 PT-INR Value

N Mean Standard Deviation Minimum Maximum

---

|   |           |  |           |           |
|---|-----------|--|-----------|-----------|
| 1 | 2.5000000 |  | 2.5000000 | 2.5000000 |
|---|-----------|--|-----------|-----------|

---

Unique Subject Identifier=6048010000-0024

Assay variable : PTINR\_VAL1 PT-INR Value

N Mean Standard Deviation Minimum Maximum

---

|   |           |           |           |           |
|---|-----------|-----------|-----------|-----------|
| 4 | 2.6500000 | 0.1914854 | 2.5000000 | 2.9000000 |
|---|-----------|-----------|-----------|-----------|

---

Unique Subject Identifier=6048010000-0043

Assay variable : PTINR\_VAL1 PT-INR Value

N Mean Standard Deviation Minimum Maximum

---

|   |           |           |           |           |
|---|-----------|-----------|-----------|-----------|
| 2 | 2.1000000 | 0.4242641 | 1.8000000 | 2.4000000 |
|---|-----------|-----------|-----------|-----------|

---

Unique Subject Identifier=6048010000-0045

Assay variable : PTINR\_VAL1 PT-INR Value

N Mean Standard Deviation Minimum Maximum

---

|   |           |  |           |           |
|---|-----------|--|-----------|-----------|
| 1 | 1.9000000 |  | 1.9000000 | 1.9000000 |
|---|-----------|--|-----------|-----------|

---

Laboratory tests at the time of obtaining Table 2-6 consent, according to the presence or absence of proton-pump inhibitors

Unique Subject Identifier=6048010000-0046

MEANS Procedure

Assay variable : PTINR\_VAL1 PT-INR Value

N Mean Standard Deviation Minimum Maximum

---

|   |           |           |           |           |
|---|-----------|-----------|-----------|-----------|
| 2 | 3.4500000 | 0.0707107 | 3.4000000 | 3.5000000 |
|---|-----------|-----------|-----------|-----------|

---

Unique Subject Identifier=6048010000-0047

Assay variable : PTINR\_VAL1 PT-INR Value

N Mean Standard Deviation Minimum Maximum

---

|   |           |  |           |           |
|---|-----------|--|-----------|-----------|
| 1 | 2.3000000 |  | 2.3000000 | 2.3000000 |
|---|-----------|--|-----------|-----------|

---

Unique Subject Identifier=6048010000-0048

Assay variable : PTINR\_VAL1 PT-INR Value

N Mean Standard Deviation Minimum Maximum

---

|   |           |  |           |           |
|---|-----------|--|-----------|-----------|
| 1 | 1.8000000 |  | 1.8000000 | 1.8000000 |
|---|-----------|--|-----------|-----------|

---

Unique Subject Identifier=6048010000-0049

Assay variable : PTINR\_VAL1 PT-INR Value

N Mean Standard Deviation Minimum Maximum

---

|   |           |           |           |           |
|---|-----------|-----------|-----------|-----------|
| 2 | 1.9000000 | 0.4242641 | 1.6000000 | 2.2000000 |
|---|-----------|-----------|-----------|-----------|

---

Laboratory tests at the time of obtaining Table 2-6 consent, according to the presence or absence of proton-pump inhibitors

Unique Subject Identifier=6048010000-0050

MEANS Procedure

Assay variable : PTINR\_VAL1 PT-INR Value

| N | Mean      | Standard Deviation | Minimum   | Maximum   |
|---|-----------|--------------------|-----------|-----------|
| 1 | 3.5000000 |                    | 3.5000000 | 3.5000000 |

Unique Subject Identifier=6048010000-0054

Assay variable : PTINR\_VAL1 PT-INR Value

| N | Mean      | Standard Deviation | Minimum   | Maximum   |
|---|-----------|--------------------|-----------|-----------|
| 2 | 2.8000000 | 0.7071068          | 2.3000000 | 3.3000000 |

Unique Subject Identifier=6048010000-0058

Assay variable : PTINR\_VAL1 PT-INR Value

| N | Mean      | Standard Deviation | Minimum   | Maximum   |
|---|-----------|--------------------|-----------|-----------|
| 3 | 2.4666667 | 0.6027714          | 1.9000000 | 3.1000000 |

Unique Subject Identifier=6048010000-0061

Assay variable : PTINR\_VAL1 PT-INR Value

N Mean Standard Deviation Minimum Maximum

---

|   |          |  |          |          |
|---|----------|--|----------|----------|
| 1 | 1.800000 |  | 1.800000 | 1.800000 |
|---|----------|--|----------|----------|

---

Laboratory tests at the time of obtaining Table 2-6 consent, according to the presence or absence of proton-pump inhibitors

Unique Subject Identifier=6048010000-0066

MEANS Procedure

Assay variable : PTINR\_VAL1 PT-INR Value

N Mean Standard Deviation Minimum Maximum

---

|   |           |  |           |           |
|---|-----------|--|-----------|-----------|
| 1 | 2.2000000 |  | 2.2000000 | 2.2000000 |
|---|-----------|--|-----------|-----------|

---

Unique Subject Identifier=6048010000-0076

Assay variable : PTINR\_VAL1 PT-INR Value

N Mean Standard Deviation Minimum Maximum

---

|   |           |           |           |           |
|---|-----------|-----------|-----------|-----------|
| 2 | 2.2500000 | 0.4949747 | 1.9000000 | 2.6000000 |
|---|-----------|-----------|-----------|-----------|

---

Unique Subject Identifier=6048010000-0080

Assay variable : PTINR\_VAL1 PT-INR Value

N Mean Standard Deviation Minimum Maximum

---

|   |           |           |           |           |
|---|-----------|-----------|-----------|-----------|
| 6 | 1.6333333 | 0.4179314 | 1.2000000 | 2.3000000 |
|---|-----------|-----------|-----------|-----------|

---

Unique Subject Identifier=6048010000-0082

Assay variable : PTINR\_VAL1 PT-INR Value

N Mean Standard Deviation Minimum Maximum

---

|   |           |           |           |           |
|---|-----------|-----------|-----------|-----------|
| 3 | 1.0666667 | 0.0577350 | 1.0000000 | 1.1000000 |
|---|-----------|-----------|-----------|-----------|

---



Laboratory tests at the time of obtaining Table 2-6 consent, according to the presence or absence of proton-pump inhibitors

Unique Subject Identifier=6048010000-0086

MEANS Procedure

Assay variable : PTINR\_VAL1 PT-INR Value

N Mean Standard Deviation Minimum Maximum

---

|   |           |           |           |           |
|---|-----------|-----------|-----------|-----------|
| 6 | 2.1333333 | 0.9584710 | 1.5000000 | 3.8000000 |
|---|-----------|-----------|-----------|-----------|

---

Unique Subject Identifier=6048010000-0092

Assay variable : PTINR\_VAL1 PT-INR Value

N Mean Standard Deviation Minimum Maximum

---

|   |           |           |           |           |
|---|-----------|-----------|-----------|-----------|
| 3 | 1.3666667 | 0.0577350 | 1.3000000 | 1.4000000 |
|---|-----------|-----------|-----------|-----------|

---

Unique Subject Identifier=6048010000-0093

Assay variable : PTINR\_VAL1 PT-INR Value

N Mean Standard Deviation Minimum Maximum

---

|   |           |  |           |           |
|---|-----------|--|-----------|-----------|
| 1 | 1.8000000 |  | 1.8000000 | 1.8000000 |
|---|-----------|--|-----------|-----------|

---

Unique Subject Identifier=6048010000-0100

Assay variable : PTINR\_VAL1 PT-INR Value

N Mean Standard Deviation Minimum Maximum

---

|   |           |  |           |           |
|---|-----------|--|-----------|-----------|
| 1 | 2.3000000 |  | 2.3000000 | 2.3000000 |
|---|-----------|--|-----------|-----------|

---

Laboratory tests at the time of obtaining Table 2-6 consent, according to the presence or absence of proton-pump inhibitors

Unique Subject Identifier=6050011100-0001

MEANS Procedure

Assay variable : PTINR\_VAL1 PT-INR Value

N Mean Standard Deviation Minimum Maximum

---

|   |           |           |           |           |
|---|-----------|-----------|-----------|-----------|
| 3 | 2.3033333 | 0.4990324 | 1.7400000 | 2.6900000 |
|---|-----------|-----------|-----------|-----------|

---

Unique Subject Identifier=6050011100-0002

Assay variable : PTINR\_VAL1 PT-INR Value

N Mean Standard Deviation Minimum Maximum

---

|   |           |           |           |           |
|---|-----------|-----------|-----------|-----------|
| 3 | 1.8866667 | 0.0838650 | 1.7900000 | 1.9400000 |
|---|-----------|-----------|-----------|-----------|

---

Unique Subject Identifier=6050011100-0004

Assay variable : PTINR\_VAL1 PT-INR Value

N Mean Standard Deviation Minimum Maximum

---

|   |           |           |           |           |
|---|-----------|-----------|-----------|-----------|
| 4 | 2.3300000 | 0.3524202 | 2.0700000 | 2.8500000 |
|---|-----------|-----------|-----------|-----------|

---

Unique Subject Identifier=6050011100-0009

Assay variable : PTINR\_VAL1 PT-INR Value

N Mean Standard Deviation Minimum Maximum

---

|   |          |           |          |          |
|---|----------|-----------|----------|----------|
| 2 | 2.115000 | 0.2616295 | 1.930000 | 2.300000 |
|---|----------|-----------|----------|----------|

---

Laboratory tests at the time of obtaining Table 2-6 consent, according to the presence or absence of proton-pump inhibitors

Unique Subject Identifier=6050011100-0012

MEANS Procedure

Assay variable : PTINR\_VAL1 PT-INR Value

N Mean Standard Deviation Minimum Maximum

---

|   |           |           |           |           |
|---|-----------|-----------|-----------|-----------|
| 3 | 2.0933333 | 0.6208328 | 1.5500000 | 2.7700000 |
|---|-----------|-----------|-----------|-----------|

---

Unique Subject Identifier=6050011100-0016

Assay variable : PTINR\_VAL1 PT-INR Value

N Mean Standard Deviation Minimum Maximum

---

|   |           |           |           |           |
|---|-----------|-----------|-----------|-----------|
| 3 | 2.1500000 | 0.0529150 | 2.1100000 | 2.2100000 |
|---|-----------|-----------|-----------|-----------|

---

Unique Subject Identifier=6050011100-0017

Assay variable : PTINR\_VAL1 PT-INR Value

N Mean Standard Deviation Minimum Maximum

---

|   |           |           |           |           |
|---|-----------|-----------|-----------|-----------|
| 2 | 2.1500000 | 0.4666905 | 1.8200000 | 2.4800000 |
|---|-----------|-----------|-----------|-----------|

---

Unique Subject Identifier=6050011100-0019

Assay variable : PTINR\_VAL1 PT-INR Value

N Mean Standard Deviation Minimum Maximum

---

|   |           |           |           |           |
|---|-----------|-----------|-----------|-----------|
| 3 | 2.0766667 | 0.2112660 | 1.9400000 | 2.3200000 |
|---|-----------|-----------|-----------|-----------|

---

Laboratory tests at the time of obtaining Table 2-6 consent, according to the presence or absence of proton-pump inhibitors

Unique Subject Identifier=6050011100-0022

MEANS Procedure

Assay variable : PTINR\_VAL1 PT-INR Value

| N | Mean      | Standard Deviation | Minimum   | Maximum   |
|---|-----------|--------------------|-----------|-----------|
| 2 | 2.0900000 | 0.1414214          | 1.9900000 | 2.1900000 |

Unique Subject Identifier=6050011100-0023

Assay variable : PTINR\_VAL1 PT-INR Value

| N | Mean      | Standard Deviation | Minimum   | Maximum   |
|---|-----------|--------------------|-----------|-----------|
| 3 | 1.9033333 | 0.0635085          | 1.8300000 | 1.9400000 |

Unique Subject Identifier=6050011100-0025

Assay variable : PTINR\_VAL1 PT-INR Value

| N | Mean      | Standard Deviation | Minimum   | Maximum   |
|---|-----------|--------------------|-----------|-----------|
| 3 | 1.8833333 | 0.0896289          | 1.7800000 | 1.9400000 |

Unique Subject Identifier=6050011100-0026

Assay variable : PTINR\_VAL1 PT-INR Value

N Mean Standard Deviation Minimum Maximum

---

|   |           |           |           |           |
|---|-----------|-----------|-----------|-----------|
| 5 | 2.1080000 | 0.8909938 | 1.2500000 | 3.4200000 |
|---|-----------|-----------|-----------|-----------|

---



Laboratory tests at the time of obtaining Table 2-6 consent, according to the presence or absence of proton-pump inhibitors

Unique Subject Identifier=6055000000-0021

MEANS Procedure

Assay variable : PTINR\_VAL1 PT-INR Value

| N | Mean      | Standard Deviation | Minimum   | Maximum   |
|---|-----------|--------------------|-----------|-----------|
| 4 | 2.0050000 | 0.8294777          | 1.4700000 | 3.2300000 |

Unique Subject Identifier=6058010011-0003

Assay variable : PTINR\_VAL1 PT-INR Value

| N | Mean      | Standard Deviation | Minimum   | Maximum   |
|---|-----------|--------------------|-----------|-----------|
| 6 | 2.0733333 | 0.5177515          | 1.4000000 | 2.6400000 |

Unique Subject Identifier=6058010011-0004

Assay variable : PTINR\_VAL1 PT-INR Value

| N | Mean      | Standard Deviation | Minimum   | Maximum   |
|---|-----------|--------------------|-----------|-----------|
| 6 | 2.4633333 | 0.2251814          | 2.1300000 | 2.8100000 |

Unique Subject Identifier=6058010011-0005

Assay variable : PTINR\_VAL1 PT-INR Value

N Mean Standard Deviation Minimum Maximum

---

|   |           |           |           |           |
|---|-----------|-----------|-----------|-----------|
| 6 | 2.7083333 | 1.3459631 | 1.6700000 | 5.3000000 |
|---|-----------|-----------|-----------|-----------|

---

Laboratory tests at the time of obtaining Table 2-6 consent, according to the presence or absence of proton-pump inhibitors

Unique Subject Identifier=6058010011-0007

MEANS Procedure

Assay variable : PTINR\_VAL1 PT-INR Value

N Mean Standard Deviation Minimum Maximum

---

|   |           |           |           |           |
|---|-----------|-----------|-----------|-----------|
| 6 | 2.4300000 | 0.1980909 | 2.3000000 | 2.8100000 |
|---|-----------|-----------|-----------|-----------|

---

Unique Subject Identifier=6058010011-0012

Assay variable : PTINR\_VAL1 PT-INR Value

N Mean Standard Deviation Minimum Maximum

---

|   |           |           |           |           |
|---|-----------|-----------|-----------|-----------|
| 6 | 1.8066667 | 0.2935075 | 1.5000000 | 2.2900000 |
|---|-----------|-----------|-----------|-----------|

---

Unique Subject Identifier=6058010011-0013

Assay variable : PTINR\_VAL1 PT-INR Value

N Mean Standard Deviation Minimum Maximum

---

|   |           |           |           |           |
|---|-----------|-----------|-----------|-----------|
| 6 | 2.1533333 | 0.1315548 | 1.9400000 | 2.2900000 |
|---|-----------|-----------|-----------|-----------|

---

Unique Subject Identifier=6058010011-0014

Assay variable : PTINR\_VAL1 PT-INR Value

N Mean Standard Deviation Minimum Maximum

---

|   |           |           |           |           |
|---|-----------|-----------|-----------|-----------|
| 6 | 1.9000000 | 0.3553027 | 1.2800000 | 2.2200000 |
|---|-----------|-----------|-----------|-----------|

---

Laboratory tests at the time of obtaining Table 2-6 consent, according to the presence or absence of proton-pump inhibitors

Unique Subject Identifier=6058010011-0015

MEANS Procedure

Assay variable : PTINR\_VAL1 PT-INR Value

N Mean Standard Deviation Minimum Maximum

---

|   |           |           |           |           |
|---|-----------|-----------|-----------|-----------|
| 6 | 1.8283333 | 0.1251266 | 1.6400000 | 2.0000000 |
|---|-----------|-----------|-----------|-----------|

---

Unique Subject Identifier=6058010011-0016

Assay variable : PTINR\_VAL1 PT-INR Value

N Mean Standard Deviation Minimum Maximum

---

|   |           |           |           |           |
|---|-----------|-----------|-----------|-----------|
| 6 | 2.2083333 | 0.3705896 | 1.7000000 | 2.6400000 |
|---|-----------|-----------|-----------|-----------|

---

Unique Subject Identifier=6058010011-0019

Assay variable : PTINR\_VAL1 PT-INR Value

N Mean Standard Deviation Minimum Maximum

---

|   |           |           |           |           |
|---|-----------|-----------|-----------|-----------|
| 6 | 2.2000000 | 0.2450306 | 1.9600000 | 2.5700000 |
|---|-----------|-----------|-----------|-----------|

---

Unique Subject Identifier=6058010011-0020

Assay variable : PTINR\_VAL1 PT-INR Value

N Mean Standard Deviation Minimum Maximum

---

|   |           |           |           |           |
|---|-----------|-----------|-----------|-----------|
| 6 | 2.0750000 | 0.3429140 | 1.8100000 | 2.7500000 |
|---|-----------|-----------|-----------|-----------|

---

Laboratory tests at the time of obtaining Table 2-6 consent, according to the presence or absence of proton-pump inhibitors

Unique Subject Identifier=6058010011-0021

MEANS Procedure

Assay variable : PTINR\_VAL1 PT-INR Value

N Mean Standard Deviation Minimum Maximum

---

|   |           |           |           |           |
|---|-----------|-----------|-----------|-----------|
| 6 | 2.4066667 | 0.4194123 | 2.1300000 | 3.2400000 |
|---|-----------|-----------|-----------|-----------|

---

Unique Subject Identifier=6058010011-0022

Assay variable : PTINR\_VAL1 PT-INR Value

N Mean Standard Deviation Minimum Maximum

---

|   |           |           |           |           |
|---|-----------|-----------|-----------|-----------|
| 6 | 2.3033333 | 0.2956800 | 1.9300000 | 2.7600000 |
|---|-----------|-----------|-----------|-----------|

---

Unique Subject Identifier=6058010011-0023

Assay variable : PTINR\_VAL1 PT-INR Value

N Mean Standard Deviation Minimum Maximum

---

|   |           |           |           |           |
|---|-----------|-----------|-----------|-----------|
| 4 | 2.4350000 | 0.0597216 | 2.3700000 | 2.5100000 |
|---|-----------|-----------|-----------|-----------|

---

Unique Subject Identifier=6058010011-0027

Assay variable : PTINR\_VAL1 PT-INR Value

N Mean Standard Deviation Minimum Maximum

---

|   |           |           |           |           |
|---|-----------|-----------|-----------|-----------|
| 6 | 2.1966667 | 0.1939759 | 2.0200000 | 2.5500000 |
|---|-----------|-----------|-----------|-----------|

---



Laboratory tests at the time of obtaining Table 2-6 consent, according to the presence or absence of proton-pump inhibitors

Unique Subject Identifier=6058010011-0028

MEANS Procedure

Assay variable : PTINR\_VAL1 PT-INR Value

N Mean Standard Deviation Minimum Maximum

---

|   |           |           |           |           |
|---|-----------|-----------|-----------|-----------|
| 6 | 1.7450000 | 0.1386723 | 1.6200000 | 1.9900000 |
|---|-----------|-----------|-----------|-----------|

---

Unique Subject Identifier=6060011000-0002

Assay variable : PTINR\_VAL1 PT-INR Value

N Mean Standard Deviation Minimum Maximum

---

|   |           |           |           |           |
|---|-----------|-----------|-----------|-----------|
| 4 | 2.4750000 | 0.0675771 | 2.4000000 | 2.5500000 |
|---|-----------|-----------|-----------|-----------|

---

Unique Subject Identifier=6060011000-0014

Assay variable : PTINR\_VAL1 PT-INR Value

N Mean Standard Deviation Minimum Maximum

---

|   |           |           |           |           |
|---|-----------|-----------|-----------|-----------|
| 3 | 1.8866667 | 0.2433790 | 1.6700000 | 2.1500000 |
|---|-----------|-----------|-----------|-----------|

---

Unique Subject Identifier=6060011000-0016

Assay variable : PTINR\_VAL1 PT-INR Value

N Mean Standard Deviation Minimum Maximum

---

|   |           |           |           |           |
|---|-----------|-----------|-----------|-----------|
| 3 | 1.7866667 | 0.1900877 | 1.6000000 | 1.9800000 |
|---|-----------|-----------|-----------|-----------|

---

Laboratory tests at the time of obtaining Table 2-6 consent, according to the presence or absence of proton-pump inhibitors

Unique Subject Identifier=6061000000-0004

MEANS Procedure

Assay variable : PTINR\_VAL1 PT-INR Value

N Mean Standard Deviation Minimum Maximum

---

|   |           |           |           |           |
|---|-----------|-----------|-----------|-----------|
| 3 | 2.3900000 | 0.2858321 | 2.2200000 | 2.7200000 |
|---|-----------|-----------|-----------|-----------|

---

Unique Subject Identifier=6071010010-0002

Assay variable : PTINR\_VAL1 PT-INR Value

N Mean Standard Deviation Minimum Maximum

---

|   |           |           |           |           |
|---|-----------|-----------|-----------|-----------|
| 4 | 2.0525000 | 0.2657536 | 1.8300000 | 2.4000000 |
|---|-----------|-----------|-----------|-----------|

---

Unique Subject Identifier=6071010010-0006

Assay variable : PTINR\_VAL1 PT-INR Value

N Mean Standard Deviation Minimum Maximum

---

|   |           |           |           |           |
|---|-----------|-----------|-----------|-----------|
| 4 | 2.0900000 | 0.3558089 | 1.6500000 | 2.5200000 |
|---|-----------|-----------|-----------|-----------|

---

Unique Subject Identifier=6071010010-0008

Assay variable : PTINR\_VAL1 PT-INR Value

N Mean Standard Deviation Minimum Maximum

---

|   |           |           |           |           |
|---|-----------|-----------|-----------|-----------|
| 6 | 2.3166667 | 0.0852447 | 2.2300000 | 2.4300000 |
|---|-----------|-----------|-----------|-----------|

---

Laboratory tests at the time of obtaining Table 2-6 consent, according to the presence or absence of proton-pump inhibitors

Unique Subject Identifier=6071010010-0013

MEANS Procedure

Assay variable : PTINR\_VAL1 PT-INR Value

N Mean Standard Deviation Minimum Maximum

---

|   |           |           |           |           |
|---|-----------|-----------|-----------|-----------|
| 6 | 2.2750000 | 0.2051097 | 2.0400000 | 2.6000000 |
|---|-----------|-----------|-----------|-----------|

---

Unique Subject Identifier=6071010010-0016

Assay variable : PTINR\_VAL1 PT-INR Value

N Mean Standard Deviation Minimum Maximum

---

|   |           |           |           |           |
|---|-----------|-----------|-----------|-----------|
| 3 | 2.7133333 | 0.5978573 | 2.0300000 | 3.1400000 |
|---|-----------|-----------|-----------|-----------|

---

Unique Subject Identifier=6071010010-0018

Assay variable : PTINR\_VAL1 PT-INR Value

N Mean Standard Deviation Minimum Maximum

---

|   |           |           |           |           |
|---|-----------|-----------|-----------|-----------|
| 4 | 2.7750000 | 0.9058513 | 1.7600000 | 3.9600000 |
|---|-----------|-----------|-----------|-----------|

---

Unique Subject Identifier=6071010010-0020

Assay variable : PTINR\_VAL1 PT-INR Value

N Mean Standard Deviation Minimum Maximum

---

|   |          |           |          |          |
|---|----------|-----------|----------|----------|
| 3 | 1.850000 | 0.1385641 | 1.690000 | 1.930000 |
|---|----------|-----------|----------|----------|

---

Laboratory tests at the time of obtaining Table 2-6 consent, according to the presence or absence of proton-pump inhibitors

Unique Subject Identifier=6098000000-0011

MEANS Procedure

Assay variable : PTINR\_VAL1 PT-INR Value

N Mean Standard Deviation Minimum Maximum

---

|   |           |           |           |           |
|---|-----------|-----------|-----------|-----------|
| 3 | 1.4666667 | 0.2081666 | 1.3000000 | 1.7000000 |
|---|-----------|-----------|-----------|-----------|

---

Unique Subject Identifier=6098000000-0013

Assay variable : PTINR\_VAL1 PT-INR Value

N Mean Standard Deviation Minimum Maximum

---

|   |           |           |           |           |
|---|-----------|-----------|-----------|-----------|
| 2 | 2.0000000 | 0.1414214 | 1.9000000 | 2.1000000 |
|---|-----------|-----------|-----------|-----------|

---

Unique Subject Identifier=6098000000-0014

Assay variable : PTINR\_VAL1 PT-INR Value

N Mean Standard Deviation Minimum Maximum

---

|   |           |           |           |           |
|---|-----------|-----------|-----------|-----------|
| 6 | 2.1333333 | 0.6562520 | 1.2000000 | 3.1000000 |
|---|-----------|-----------|-----------|-----------|

---

Unique Subject Identifier=6098000000-0017

Assay variable : PTINR\_VAL1 PT-INR Value

N Mean Standard Deviation Minimum Maximum

---

|   |           |           |           |           |
|---|-----------|-----------|-----------|-----------|
| 3 | 2.4666667 | 0.1527525 | 2.3000000 | 2.6000000 |
|---|-----------|-----------|-----------|-----------|

---



Laboratory tests at the time of obtaining Table 2-6 consent, according to the presence or absence of proton-pump inhibitors

Unique Subject Identifier=6098000000-0021

MEANS Procedure

Assay variable : PTINR\_VAL1 PT-INR Value

N Mean Standard Deviation Minimum Maximum

---

|   |           |           |           |           |
|---|-----------|-----------|-----------|-----------|
| 3 | 1.9000000 | 0.1732051 | 1.8000000 | 2.1000000 |
|---|-----------|-----------|-----------|-----------|

---

Unique Subject Identifier=6104000000-0001

Assay variable : PTINR\_VAL1 PT-INR Value

N Mean Standard Deviation Minimum Maximum

---

|   |           |           |           |           |
|---|-----------|-----------|-----------|-----------|
| 6 | 1.9516667 | 0.3741880 | 1.4200000 | 2.3600000 |
|---|-----------|-----------|-----------|-----------|

---

Unique Subject Identifier=6104000000-0002

Assay variable : PTINR\_VAL1 PT-INR Value

N Mean Standard Deviation Minimum Maximum

---

|   |           |           |           |           |
|---|-----------|-----------|-----------|-----------|
| 6 | 1.9000000 | 0.0843801 | 1.7900000 | 2.0000000 |
|---|-----------|-----------|-----------|-----------|

---

Unique Subject Identifier=6104000000-0004

Assay variable : PTINR\_VAL1 PT-INR Value

N Mean Standard Deviation Minimum Maximum

---

|   |           |           |           |           |
|---|-----------|-----------|-----------|-----------|
| 6 | 1.9866667 | 0.6669533 | 1.2700000 | 3.2500000 |
|---|-----------|-----------|-----------|-----------|

---

Laboratory tests at the time of obtaining Table 2-6 consent, according to the presence or absence of proton-pump inhibitors

Unique Subject Identifier=6104000000-0006

MEANS Procedure

Assay variable : PTINR\_VAL1 PT-INR Value

N Mean Standard Deviation Minimum Maximum

---

|   |           |           |           |           |
|---|-----------|-----------|-----------|-----------|
| 2 | 1.7550000 | 0.2192031 | 1.6000000 | 1.9100000 |
|---|-----------|-----------|-----------|-----------|

---

Unique Subject Identifier=6104000000-0008

Assay variable : PTINR\_VAL1 PT-INR Value

N Mean Standard Deviation Minimum Maximum

---

|   |           |           |           |           |
|---|-----------|-----------|-----------|-----------|
| 6 | 1.6550000 | 0.3602638 | 1.1500000 | 2.0600000 |
|---|-----------|-----------|-----------|-----------|

---

Unique Subject Identifier=6104000000-0012

Assay variable : PTINR\_VAL1 PT-INR Value

N Mean Standard Deviation Minimum Maximum

---

|   |           |           |           |           |
|---|-----------|-----------|-----------|-----------|
| 5 | 2.0900000 | 0.2411431 | 1.7200000 | 2.3600000 |
|---|-----------|-----------|-----------|-----------|

---

Unique Subject Identifier=6104000000-0013

Assay variable : PTINR\_VAL1 PT-INR Value

N Mean Standard Deviation Minimum Maximum

---

|   |          |           |          |          |
|---|----------|-----------|----------|----------|
| 3 | 1.940000 | 0.4103657 | 1.520000 | 2.340000 |
|---|----------|-----------|----------|----------|

---

Laboratory tests at the time of obtaining Table 2-6 consent, according to the presence or absence of proton-pump inhibitors

Unique Subject Identifier=6105000000-0004

MEANS Procedure

Assay variable : PTINR\_VAL1 PT-INR Value

| N | Mean      | Standard Deviation | Minimum   | Maximum   |
|---|-----------|--------------------|-----------|-----------|
| 5 | 1.6520000 | 0.1347961          | 1.5200000 | 1.8200000 |

Unique Subject Identifier=6105000000-0010

Assay variable : PTINR\_VAL1 PT-INR Value

| N | Mean      | Standard Deviation | Minimum   | Maximum   |
|---|-----------|--------------------|-----------|-----------|
| 4 | 2.0025000 | 0.7981802          | 1.3400000 | 3.1200000 |

Unique Subject Identifier=6105000000-0012

Assay variable : PTINR\_VAL1 PT-INR Value

| N | Mean      | Standard Deviation | Minimum   | Maximum   |
|---|-----------|--------------------|-----------|-----------|
| 4 | 1.8500000 | 0.1801851          | 1.6100000 | 2.0200000 |

Unique Subject Identifier=6105000000-0014

Assay variable : PTINR\_VAL1 PT-INR Value

N Mean Standard Deviation Minimum Maximum

---

|   |           |           |           |           |
|---|-----------|-----------|-----------|-----------|
| 5 | 1.8740000 | 0.2150116 | 1.5100000 | 2.0200000 |
|---|-----------|-----------|-----------|-----------|

---

Laboratory tests at the time of obtaining Table 2-6 consent, according to the presence or absence of proton-pump inhibitors

Unique Subject Identifier=6105000000-0015

MEANS Procedure

Assay variable : PTINR\_VAL1 PT-INR Value

N Mean Standard Deviation Minimum Maximum

---

|   |           |           |           |           |
|---|-----------|-----------|-----------|-----------|
| 6 | 1.7683333 | 0.3649338 | 1.4800000 | 2.3900000 |
|---|-----------|-----------|-----------|-----------|

---

Unique Subject Identifier=6105000000-0016

Assay variable : PTINR\_VAL1 PT-INR Value

N Mean Standard Deviation Minimum Maximum

---

|   |           |           |           |           |
|---|-----------|-----------|-----------|-----------|
| 6 | 1.7483333 | 0.2955278 | 1.2700000 | 2.1000000 |
|---|-----------|-----------|-----------|-----------|

---

Unique Subject Identifier=6105000000-0018

Assay variable : PTINR\_VAL1 PT-INR Value

N Mean Standard Deviation Minimum Maximum

---

|   |           |           |           |           |
|---|-----------|-----------|-----------|-----------|
| 3 | 1.9766667 | 0.4052571 | 1.5800000 | 2.3900000 |
|---|-----------|-----------|-----------|-----------|

---

Unique Subject Identifier=6105000000-0021

Assay variable : PTINR\_VAL1 PT-INR Value

N Mean Standard Deviation Minimum Maximum

---

|   |          |           |          |          |
|---|----------|-----------|----------|----------|
| 6 | 2.118333 | 0.2009395 | 1.800000 | 2.350000 |
|---|----------|-----------|----------|----------|

---



Laboratory tests at the time of obtaining Table 2-6 consent, according to the presence or absence of proton-pump inhibitors

Unique Subject Identifier=6108011010-0006

MEANS Procedure

Assay variable : PTINR\_VAL1 PT-INR Value

N Mean Standard Deviation Minimum Maximum

---

|   |           |           |           |           |
|---|-----------|-----------|-----------|-----------|
| 4 | 1.6700000 | 0.1435270 | 1.5400000 | 1.8700000 |
|---|-----------|-----------|-----------|-----------|

---

Unique Subject Identifier=6108011010-0007

Assay variable : PTINR\_VAL1 PT-INR Value

N Mean Standard Deviation Minimum Maximum

---

|   |           |           |           |           |
|---|-----------|-----------|-----------|-----------|
| 6 | 1.8816667 | 0.4183499 | 1.3500000 | 2.5800000 |
|---|-----------|-----------|-----------|-----------|

---

Unique Subject Identifier=6109000000-0002

Assay variable : PTINR\_VAL1 PT-INR Value

N Mean Standard Deviation Minimum Maximum

---

|   |           |           |           |           |
|---|-----------|-----------|-----------|-----------|
| 5 | 1.5680000 | 0.0637966 | 1.4800000 | 1.6400000 |
|---|-----------|-----------|-----------|-----------|

---

Unique Subject Identifier=6109000000-0007

Assay variable : PTINR\_VAL1 PT-INR Value

N Mean Standard Deviation Minimum Maximum

---

|   |           |           |           |           |
|---|-----------|-----------|-----------|-----------|
| 5 | 1.9740000 | 0.3146903 | 1.6000000 | 2.3100000 |
|---|-----------|-----------|-----------|-----------|

---

Laboratory tests at the time of obtaining Table 2-6 consent, according to the presence or absence of proton-pump inhibitors

Unique Subject Identifier=6109000000-0015

MEANS Procedure

Assay variable : PTINR\_VAL1 PT-INR Value

N Mean Standard Deviation Minimum Maximum

---

|   |           |           |           |           |
|---|-----------|-----------|-----------|-----------|
| 4 | 1.9525000 | 0.1596611 | 1.7400000 | 2.1100000 |
|---|-----------|-----------|-----------|-----------|

---

Unique Subject Identifier=6109000000-0016

Assay variable : PTINR\_VAL1 PT-INR Value

N Mean Standard Deviation Minimum Maximum

---

|   |           |           |           |           |
|---|-----------|-----------|-----------|-----------|
| 4 | 2.2550000 | 0.7723773 | 1.7300000 | 3.3700000 |
|---|-----------|-----------|-----------|-----------|

---

Unique Subject Identifier=6109000000-0027

Assay variable : PTINR\_VAL1 PT-INR Value

N Mean Standard Deviation Minimum Maximum

---

|   |           |           |           |           |
|---|-----------|-----------|-----------|-----------|
| 5 | 1.9120000 | 0.1799166 | 1.6500000 | 2.1400000 |
|---|-----------|-----------|-----------|-----------|

---

Unique Subject Identifier=6109000000-0034

Assay variable : PTINR\_VAL1 PT-INR Value

N Mean Standard Deviation Minimum Maximum

---

|   |          |           |          |          |
|---|----------|-----------|----------|----------|
| 6 | 2.650000 | 0.4605214 | 1.920000 | 3.300000 |
|---|----------|-----------|----------|----------|

---

Laboratory tests at the time of obtaining Table 2-6 consent, according to the presence or absence of proton-pump inhibitors

Unique Subject Identifier=6109000000-0036

MEANS Procedure

Assay variable : PTINR\_VAL1 PT-INR Value

N Mean Standard Deviation Minimum Maximum

---

|   |           |           |           |           |
|---|-----------|-----------|-----------|-----------|
| 3 | 1.5533333 | 0.0351188 | 1.5200000 | 1.5900000 |
|---|-----------|-----------|-----------|-----------|

---

Unique Subject Identifier=6109000000-0043

Assay variable : PTINR\_VAL1 PT-INR Value

N Mean Standard Deviation Minimum Maximum

---

|   |           |           |           |           |
|---|-----------|-----------|-----------|-----------|
| 4 | 2.5000000 | 0.6245532 | 2.0500000 | 3.4100000 |
|---|-----------|-----------|-----------|-----------|

---

Unique Subject Identifier=6117010000-0002

Assay variable : PTINR\_VAL1 PT-INR Value

N Mean Standard Deviation Minimum Maximum

---

|   |           |           |           |           |
|---|-----------|-----------|-----------|-----------|
| 6 | 2.1916667 | 0.1675012 | 2.0300000 | 2.4100000 |
|---|-----------|-----------|-----------|-----------|

---

Unique Subject Identifier=6117010000-0003

Assay variable : PTINR\_VAL1 PT-INR Value

N Mean Standard Deviation Minimum Maximum

---

|   |           |           |           |           |
|---|-----------|-----------|-----------|-----------|
| 6 | 1.7133333 | 0.1693123 | 1.5000000 | 1.9900000 |
|---|-----------|-----------|-----------|-----------|

---

Laboratory tests at the time of obtaining Table 2-6 consent, according to the presence or absence of proton-pump inhibitors

Unique Subject Identifier=6117010000-0004

MEANS Procedure

Assay variable : PTINR\_VAL1 PT-INR Value

N Mean Standard Deviation Minimum Maximum

---

|   |           |           |           |           |
|---|-----------|-----------|-----------|-----------|
| 5 | 1.9080000 | 0.7322022 | 1.2300000 | 3.0700000 |
|---|-----------|-----------|-----------|-----------|

---

Unique Subject Identifier=6117010000-0005

Assay variable : PTINR\_VAL1 PT-INR Value

N Mean Standard Deviation Minimum Maximum

---

|   |           |           |           |           |
|---|-----------|-----------|-----------|-----------|
| 4 | 2.2325000 | 0.3031364 | 1.8200000 | 2.5500000 |
|---|-----------|-----------|-----------|-----------|

---

Unique Subject Identifier=6117010000-0006

Assay variable : PTINR\_VAL1 PT-INR Value

N Mean Standard Deviation Minimum Maximum

---

|   |           |           |           |           |
|---|-----------|-----------|-----------|-----------|
| 6 | 1.9516667 | 0.2314663 | 1.5900000 | 2.1600000 |
|---|-----------|-----------|-----------|-----------|

---

Unique Subject Identifier=6117010000-0008

Assay variable : PTINR\_VAL1 PT-INR Value

N Mean Standard Deviation Minimum Maximum

---

|   |           |           |           |           |
|---|-----------|-----------|-----------|-----------|
| 4 | 1.9425000 | 0.2324328 | 1.6200000 | 2.1400000 |
|---|-----------|-----------|-----------|-----------|

---



Laboratory tests at the time of obtaining Table 2-6 consent, according to the presence or absence of proton-pump inhibitors

Unique Subject Identifier=6117010000-0009

MEANS Procedure

Assay variable : PTINR\_VAL1 PT-INR Value

N Mean Standard Deviation Minimum Maximum

---

|   |           |           |           |           |
|---|-----------|-----------|-----------|-----------|
| 6 | 2.2366667 | 0.5143021 | 1.7700000 | 3.0500000 |
|---|-----------|-----------|-----------|-----------|

---

Unique Subject Identifier=6117010000-0010

Assay variable : PTINR\_VAL1 PT-INR Value

N Mean Standard Deviation Minimum Maximum

---

|   |           |           |           |           |
|---|-----------|-----------|-----------|-----------|
| 4 | 1.8275000 | 0.2718302 | 1.6100000 | 2.2200000 |
|---|-----------|-----------|-----------|-----------|

---

Unique Subject Identifier=6123000000-0001

Assay variable : PTINR\_VAL1 PT-INR Value

N Mean Standard Deviation Minimum Maximum

---

|   |           |           |           |           |
|---|-----------|-----------|-----------|-----------|
| 4 | 2.5575000 | 0.9107277 | 1.6500000 | 3.8000000 |
|---|-----------|-----------|-----------|-----------|

---

Unique Subject Identifier=6123000000-0002

Assay variable : PTINR\_VAL1 PT-INR Value

N Mean Standard Deviation Minimum Maximum

---

|   |           |           |           |           |
|---|-----------|-----------|-----------|-----------|
| 3 | 1.5566667 | 0.5326662 | 1.2100000 | 2.1700000 |
|---|-----------|-----------|-----------|-----------|

---

Laboratory tests at the time of obtaining Table 2-6 consent, according to the presence or absence of proton-pump inhibitors

Unique Subject Identifier=6123000000-0014

MEANS Procedure

Assay variable : PTINR\_VAL1 PT-INR Value

N Mean Standard Deviation Minimum Maximum

---

|   |           |           |           |           |
|---|-----------|-----------|-----------|-----------|
| 3 | 2.0233333 | 0.4771094 | 1.6200000 | 2.5500000 |
|---|-----------|-----------|-----------|-----------|

---

Unique Subject Identifier=6123000000-0028

Assay variable : PTINR\_VAL1 PT-INR Value

N Mean Standard Deviation Minimum Maximum

---

|   |           |           |           |           |
|---|-----------|-----------|-----------|-----------|
| 3 | 1.8400000 | 0.3218695 | 1.5800000 | 2.2000000 |
|---|-----------|-----------|-----------|-----------|

---

Unique Subject Identifier=6123000000-0029

Assay variable : PTINR\_VAL1 PT-INR Value

N Mean Standard Deviation Minimum Maximum

---

|   |           |           |           |           |
|---|-----------|-----------|-----------|-----------|
| 3 | 1.6766667 | 0.0550757 | 1.6400000 | 1.7400000 |
|---|-----------|-----------|-----------|-----------|

---

Unique Subject Identifier=6123000000-0030

Assay variable : PTINR\_VAL1 PT-INR Value

N Mean Standard Deviation Minimum Maximum

---

|   |           |  |           |           |
|---|-----------|--|-----------|-----------|
| 1 | 1.6300000 |  | 1.6300000 | 1.6300000 |
|---|-----------|--|-----------|-----------|

---

Laboratory tests at the time of obtaining Table 2-6 consent, according to the presence or absence of proton-pump inhibitors

Unique Subject Identifier=612400000-0003

MEANS Procedure

Assay variable : PTINR\_VAL1 PT-INR Value

N Mean Standard Deviation Minimum Maximum

---

|   |           |           |           |           |
|---|-----------|-----------|-----------|-----------|
| 6 | 1.4066667 | 0.1163901 | 1.3200000 | 1.6300000 |
|---|-----------|-----------|-----------|-----------|

---

Unique Subject Identifier=612400000-0004

Assay variable : PTINR\_VAL1 PT-INR Value

N Mean Standard Deviation Minimum Maximum

---

|   |           |           |           |           |
|---|-----------|-----------|-----------|-----------|
| 6 | 1.5600000 | 0.0933809 | 1.4400000 | 1.6500000 |
|---|-----------|-----------|-----------|-----------|

---

Unique Subject Identifier=612400000-0006

Assay variable : PTINR\_VAL1 PT-INR Value

N Mean Standard Deviation Minimum Maximum

---

|   |           |           |           |           |
|---|-----------|-----------|-----------|-----------|
| 5 | 1.9800000 | 0.1923538 | 1.7000000 | 2.2000000 |
|---|-----------|-----------|-----------|-----------|

---

Unique Subject Identifier=612500000-0002

Assay variable : PTINR\_VAL1 PT-INR Value

N Mean Standard Deviation Minimum Maximum

---

|   |           |           |           |           |
|---|-----------|-----------|-----------|-----------|
| 5 | 1.3860000 | 0.1935975 | 1.1000000 | 1.6000000 |
|---|-----------|-----------|-----------|-----------|

---

Laboratory tests at the time of obtaining Table 2-6 consent, according to the presence or absence of proton-pump inhibitors

Unique Subject Identifier=6125000000-0003

MEANS Procedure

Assay variable : PTINR\_VAL1 PT-INR Value

N Mean Standard Deviation Minimum Maximum

---

|   |           |           |           |           |
|---|-----------|-----------|-----------|-----------|
| 6 | 2.2683333 | 0.2877093 | 1.8700000 | 2.6500000 |
|---|-----------|-----------|-----------|-----------|

---

Unique Subject Identifier=6125000000-0006

Assay variable : PTINR\_VAL1 PT-INR Value

N Mean Standard Deviation Minimum Maximum

---

|   |           |           |           |           |
|---|-----------|-----------|-----------|-----------|
| 6 | 1.7200000 | 0.5220728 | 1.1900000 | 2.5000000 |
|---|-----------|-----------|-----------|-----------|

---

Unique Subject Identifier=6125000000-0007

Assay variable : PTINR\_VAL1 PT-INR Value

N Mean Standard Deviation Minimum Maximum

---

|   |           |           |           |           |
|---|-----------|-----------|-----------|-----------|
| 3 | 2.4566667 | 0.3957693 | 2.0000000 | 2.7000000 |
|---|-----------|-----------|-----------|-----------|

---

Unique Subject Identifier=6125000000-0009

Assay variable : PTINR\_VAL1 PT-INR Value

N Mean Standard Deviation Minimum Maximum

---

|   |          |           |          |          |
|---|----------|-----------|----------|----------|
| 5 | 1.840000 | 0.3435113 | 1.500000 | 2.300000 |
|---|----------|-----------|----------|----------|

---



Laboratory tests at the time of obtaining Table 2-6 consent, according to the presence or absence of proton-pump inhibitors

Unique Subject Identifier=6125000000-0010

MEANS Procedure

Assay variable : PTINR\_VAL1 PT-INR Value

N Mean Standard Deviation Minimum Maximum

---

|   |           |           |           |           |
|---|-----------|-----------|-----------|-----------|
| 5 | 2.3800000 | 0.2167948 | 2.2000000 | 2.7000000 |
|---|-----------|-----------|-----------|-----------|

---

Unique Subject Identifier=6125000000-0013

Assay variable : PTINR\_VAL1 PT-INR Value

N Mean Standard Deviation Minimum Maximum

---

|   |           |           |           |           |
|---|-----------|-----------|-----------|-----------|
| 6 | 2.6166667 | 0.5231316 | 2.0000000 | 3.3000000 |
|---|-----------|-----------|-----------|-----------|

---

Unique Subject Identifier=6125000000-0014

Assay variable : PTINR\_VAL1 PT-INR Value

N Mean Standard Deviation Minimum Maximum

---

|   |           |           |           |           |
|---|-----------|-----------|-----------|-----------|
| 6 | 2.2616667 | 0.4834632 | 1.8000000 | 3.1600000 |
|---|-----------|-----------|-----------|-----------|

---

Unique Subject Identifier=6125000000-0019

Assay variable : PTINR\_VAL1 PT-INR Value

N Mean Standard Deviation Minimum Maximum

---

|   |           |           |           |           |
|---|-----------|-----------|-----------|-----------|
| 4 | 1.7025000 | 0.3671852 | 1.4000000 | 2.2200000 |
|---|-----------|-----------|-----------|-----------|

---

Laboratory tests at the time of obtaining Table 2-6 consent, according to the presence or absence of proton-pump inhibitors

Unique Subject Identifier=6125000000-0020

MEANS Procedure

Assay variable : PTINR\_VAL1 PT-INR Value

N Mean Standard Deviation Minimum Maximum

---

|   |           |           |           |           |
|---|-----------|-----------|-----------|-----------|
| 6 | 2.2766667 | 0.4222164 | 1.7000000 | 2.8600000 |
|---|-----------|-----------|-----------|-----------|

---

Unique Subject Identifier=6125000000-0023

Assay variable : PTINR\_VAL1 PT-INR Value

N Mean Standard Deviation Minimum Maximum

---

|   |           |           |           |           |
|---|-----------|-----------|-----------|-----------|
| 3 | 1.1900000 | 0.0435890 | 1.1400000 | 1.2200000 |
|---|-----------|-----------|-----------|-----------|

---

Unique Subject Identifier=6125000000-0029

Assay variable : PTINR\_VAL1 PT-INR Value

N Mean Standard Deviation Minimum Maximum

---

|   |           |           |           |           |
|---|-----------|-----------|-----------|-----------|
| 6 | 1.8383333 | 0.1580401 | 1.6000000 | 2.0300000 |
|---|-----------|-----------|-----------|-----------|

---

Unique Subject Identifier=6125000000-0032

Assay variable : PTINR\_VAL1 PT-INR Value

N Mean Standard Deviation Minimum Maximum

---

|   |           |           |           |           |
|---|-----------|-----------|-----------|-----------|
| 5 | 1.9120000 | 0.2340299 | 1.8000000 | 2.3300000 |
|---|-----------|-----------|-----------|-----------|

---

Laboratory tests at the time of obtaining Table 2-6 consent, according to the presence or absence of proton-pump inhibitors

Unique Subject Identifier=6125000000-0035

MEANS Procedure

Assay variable : PTINR\_VAL1 PT-INR Value

N Mean Standard Deviation Minimum Maximum

---

|   |          |           |          |          |
|---|----------|-----------|----------|----------|
| 3 | 2.460000 | 0.3421988 | 2.070000 | 2.710000 |
|---|----------|-----------|----------|----------|

---

Unique Subject Identifier=6125000000-0039

Assay variable : PTINR\_VAL1 PT-INR Value

N Mean Standard Deviation Minimum Maximum

---

|   |          |           |          |          |
|---|----------|-----------|----------|----------|
| 3 | 2.100000 | 0.4358899 | 1.800000 | 2.600000 |
|---|----------|-----------|----------|----------|

---

Unique Subject Identifier=6125000000-0040

Assay variable : PTINR\_VAL1 PT-INR Value

N Mean Standard Deviation Minimum Maximum

---

|   |          |           |          |          |
|---|----------|-----------|----------|----------|
| 2 | 1.820000 | 0.3818377 | 1.550000 | 2.090000 |
|---|----------|-----------|----------|----------|

---

Unique Subject Identifier=6125000000-0041

Assay variable : PTINR\_VAL1 PT-INR Value

N Mean Standard Deviation Minimum Maximum

---

|   |          |           |          |          |
|---|----------|-----------|----------|----------|
| 3 | 1.803333 | 0.3326159 | 1.550000 | 2.180000 |
|---|----------|-----------|----------|----------|

---

Laboratory tests at the time of obtaining Table 2-6 consent, according to the presence or absence of proton-pump inhibitors

Unique Subject Identifier=612500000-0044

MEANS Procedure

Assay variable : PTINR\_VAL1 PT-INR Value

N Mean Standard Deviation Minimum Maximum

---

|   |           |           |           |           |
|---|-----------|-----------|-----------|-----------|
| 3 | 1.7333333 | 0.2081666 | 1.5000000 | 1.9000000 |
|---|-----------|-----------|-----------|-----------|

---

Unique Subject Identifier=612500000-0045

Assay variable : PTINR\_VAL1 PT-INR Value

N Mean Standard Deviation Minimum Maximum

---

|   |           |           |           |           |
|---|-----------|-----------|-----------|-----------|
| 5 | 2.0560000 | 0.7491195 | 1.5100000 | 3.3700000 |
|---|-----------|-----------|-----------|-----------|

---

Unique Subject Identifier=612500000-0047

Assay variable : PTINR\_VAL1 PT-INR Value

N Mean Standard Deviation Minimum Maximum

---

|   |           |           |           |           |
|---|-----------|-----------|-----------|-----------|
| 4 | 1.5750000 | 0.1258306 | 1.4000000 | 1.7000000 |
|---|-----------|-----------|-----------|-----------|

---

Unique Subject Identifier=612500000-0050

Assay variable : PTINR\_VAL1 PT-INR Value

N Mean Standard Deviation Minimum Maximum

---

|   |           |           |           |           |
|---|-----------|-----------|-----------|-----------|
| 4 | 1.9400000 | 0.5424021 | 1.3800000 | 2.4900000 |
|---|-----------|-----------|-----------|-----------|

---



Laboratory tests at the time of obtaining Table 2-6 consent, according to the presence or absence of proton-pump inhibitors

Unique Subject Identifier=612500000-0061

MEANS Procedure

Assay variable : PTINR\_VAL1 PT-INR Value

N Mean Standard Deviation Minimum Maximum

---

|   |           |           |           |           |
|---|-----------|-----------|-----------|-----------|
| 4 | 2.1075000 | 0.2066196 | 1.9300000 | 2.3900000 |
|---|-----------|-----------|-----------|-----------|

---

Unique Subject Identifier=612500000-0065

Assay variable : PTINR\_VAL1 PT-INR Value

N Mean Standard Deviation Minimum Maximum

---

|   |           |  |           |           |
|---|-----------|--|-----------|-----------|
| 1 | 2.3400000 |  | 2.3400000 | 2.3400000 |
|---|-----------|--|-----------|-----------|

---

Unique Subject Identifier=612500000-0069

Assay variable : PTINR\_VAL1 PT-INR Value

N Mean Standard Deviation Minimum Maximum

---

|   |           |           |           |           |
|---|-----------|-----------|-----------|-----------|
| 3 | 1.8800000 | 0.5902542 | 1.5000000 | 2.5600000 |
|---|-----------|-----------|-----------|-----------|

---

Unique Subject Identifier=612500000-0074

Assay variable : PTINR\_VAL1 PT-INR Value

N Mean Standard Deviation Minimum Maximum

---

|   |          |           |          |          |
|---|----------|-----------|----------|----------|
| 4 | 2.190000 | 0.1518771 | 2.060000 | 2.400000 |
|---|----------|-----------|----------|----------|

---

Laboratory tests at the time of obtaining Table 2-6 consent, according to the presence or absence of proton-pump inhibitors

Unique Subject Identifier=612500000-0076

MEANS Procedure

Assay variable : PTINR\_VAL1 PT-INR Value

N Mean Standard Deviation Minimum Maximum

---

|   |           |           |           |           |
|---|-----------|-----------|-----------|-----------|
| 6 | 2.3383333 | 0.5295061 | 1.4000000 | 2.9700000 |
|---|-----------|-----------|-----------|-----------|

---

Unique Subject Identifier=612500000-0085

Assay variable : PTINR\_VAL1 PT-INR Value

N Mean Standard Deviation Minimum Maximum

---

|   |           |           |           |           |
|---|-----------|-----------|-----------|-----------|
| 3 | 1.9200000 | 0.2986637 | 1.7000000 | 2.2600000 |
|---|-----------|-----------|-----------|-----------|

---

Unique Subject Identifier=612500000-0086

Assay variable : PTINR\_VAL1 PT-INR Value

N Mean Standard Deviation Minimum Maximum

---

|   |           |           |           |           |
|---|-----------|-----------|-----------|-----------|
| 5 | 1.5580000 | 0.1559487 | 1.3000000 | 1.7000000 |
|---|-----------|-----------|-----------|-----------|

---

Unique Subject Identifier=612500000-0091

Assay variable : PTINR\_VAL1 PT-INR Value

N Mean Standard Deviation Minimum Maximum

---

|   |           |           |           |           |
|---|-----------|-----------|-----------|-----------|
| 4 | 2.1350000 | 0.2801785 | 1.7300000 | 2.3500000 |
|---|-----------|-----------|-----------|-----------|

---

Laboratory tests at the time of obtaining Table 2-6 consent, according to the presence or absence of proton-pump inhibitors

Unique Subject Identifier=6125000000-0096

MEANS Procedure

Assay variable : PTINR\_VAL1 PT-INR Value

N Mean Standard Deviation Minimum Maximum

---

|   |           |           |           |           |
|---|-----------|-----------|-----------|-----------|
| 4 | 2.2325000 | 0.1228481 | 2.0600000 | 2.3300000 |
|---|-----------|-----------|-----------|-----------|

---

Unique Subject Identifier=6126000000-0001

Assay variable : PTINR\_VAL1 PT-INR Value

N Mean Standard Deviation Minimum Maximum

---

|   |           |           |           |           |
|---|-----------|-----------|-----------|-----------|
| 4 | 2.1500000 | 0.3834058 | 1.6600000 | 2.5900000 |
|---|-----------|-----------|-----------|-----------|

---

Unique Subject Identifier=6126000000-0003

Assay variable : PTINR\_VAL1 PT-INR Value

N Mean Standard Deviation Minimum Maximum

---

|   |           |           |           |           |
|---|-----------|-----------|-----------|-----------|
| 3 | 1.9700000 | 0.5204805 | 1.3700000 | 2.3000000 |
|---|-----------|-----------|-----------|-----------|

---

Unique Subject Identifier=6126000000-0004

Assay variable : PTINR\_VAL1 PT-INR Value

N Mean Standard Deviation Minimum Maximum

---

|   |          |           |          |          |
|---|----------|-----------|----------|----------|
| 3 | 2.033333 | 0.0929157 | 1.930000 | 2.110000 |
|---|----------|-----------|----------|----------|

---

Laboratory tests at the time of obtaining Table 2-6 consent, according to the presence or absence of proton-pump inhibitors

Unique Subject Identifier=6127000000-0011

MEANS Procedure

Assay variable : PTINR\_VAL1 PT-INR Value

N Mean Standard Deviation Minimum Maximum

---

|   |           |           |           |           |
|---|-----------|-----------|-----------|-----------|
| 5 | 1.8040000 | 0.1327780 | 1.6400000 | 1.9500000 |
|---|-----------|-----------|-----------|-----------|

---

Unique Subject Identifier=6127000000-0012

Assay variable : PTINR\_VAL1 PT-INR Value

N Mean Standard Deviation Minimum Maximum

---

|   |           |           |           |           |
|---|-----------|-----------|-----------|-----------|
| 5 | 1.9780000 | 0.4507438 | 1.5400000 | 2.6900000 |
|---|-----------|-----------|-----------|-----------|

---

Unique Subject Identifier=6127000000-0015

Assay variable : PTINR\_VAL1 PT-INR Value

N Mean Standard Deviation Minimum Maximum

---

|   |           |           |           |           |
|---|-----------|-----------|-----------|-----------|
| 6 | 1.8600000 | 0.1479189 | 1.6500000 | 2.0500000 |
|---|-----------|-----------|-----------|-----------|

---

Unique Subject Identifier=6127000000-0017

Assay variable : PTINR\_VAL1 PT-INR Value

N Mean Standard Deviation Minimum Maximum

---

|   |           |           |           |           |
|---|-----------|-----------|-----------|-----------|
| 6 | 1.7133333 | 0.2376272 | 1.3200000 | 2.0000000 |
|---|-----------|-----------|-----------|-----------|

---



Laboratory tests at the time of obtaining Table 2-6 consent, according to the presence or absence of proton-pump inhibitors

Unique Subject Identifier=6127000000-0019

MEANS Procedure

Assay variable : PTINR\_VAL1 PT-INR Value

N Mean Standard Deviation Minimum Maximum

---

|   |           |           |           |           |
|---|-----------|-----------|-----------|-----------|
| 6 | 1.8316667 | 0.5717838 | 1.3100000 | 2.9100000 |
|---|-----------|-----------|-----------|-----------|

---

Unique Subject Identifier=6127000000-0020

Assay variable : PTINR\_VAL1 PT-INR Value

N Mean Standard Deviation Minimum Maximum

---

|   |           |           |           |           |
|---|-----------|-----------|-----------|-----------|
| 6 | 1.7950000 | 0.7933410 | 1.3400000 | 3.4000000 |
|---|-----------|-----------|-----------|-----------|

---

Unique Subject Identifier=6127000000-0021

Assay variable : PTINR\_VAL1 PT-INR Value

N Mean Standard Deviation Minimum Maximum

---

|   |           |           |           |           |
|---|-----------|-----------|-----------|-----------|
| 6 | 1.6133333 | 0.3310388 | 1.1800000 | 2.0300000 |
|---|-----------|-----------|-----------|-----------|

---

Unique Subject Identifier=6127000000-0022

Assay variable : PTINR\_VAL1 PT-INR Value

N Mean Standard Deviation Minimum Maximum

---

|   |           |           |           |           |
|---|-----------|-----------|-----------|-----------|
| 5 | 2.0580000 | 0.4012107 | 1.3500000 | 2.3100000 |
|---|-----------|-----------|-----------|-----------|

---

Laboratory tests at the time of obtaining Table 2-6 consent, according to the presence or absence of proton-pump inhibitors

Unique Subject Identifier=6127000000-0024

MEANS Procedure

Assay variable : PTINR\_VAL1 PT-INR Value

N Mean Standard Deviation Minimum Maximum

---

|   |           |           |           |           |
|---|-----------|-----------|-----------|-----------|
| 6 | 2.1700000 | 0.4394997 | 1.4700000 | 2.7100000 |
|---|-----------|-----------|-----------|-----------|

---

Unique Subject Identifier=6131011111-0001

Assay variable : PTINR\_VAL1 PT-INR Value

N Mean Standard Deviation Minimum Maximum

---

|   |           |           |           |           |
|---|-----------|-----------|-----------|-----------|
| 5 | 1.6300000 | 0.1305756 | 1.4900000 | 1.8300000 |
|---|-----------|-----------|-----------|-----------|

---

Unique Subject Identifier=6131011111-0003

Assay variable : PTINR\_VAL1 PT-INR Value

N Mean Standard Deviation Minimum Maximum

---

|   |           |           |           |           |
|---|-----------|-----------|-----------|-----------|
| 6 | 1.7933333 | 0.1645195 | 1.6700000 | 2.1100000 |
|---|-----------|-----------|-----------|-----------|

---

Unique Subject Identifier=6136110000-0004

Assay variable : PTINR\_VAL1 PT-INR Value

N Mean Standard Deviation Minimum Maximum

---

|   |           |           |           |           |
|---|-----------|-----------|-----------|-----------|
| 4 | 1.9325000 | 1.5902909 | 1.0200000 | 4.3100000 |
|---|-----------|-----------|-----------|-----------|

---

Laboratory tests at the time of obtaining Table 2-6 consent, according to the presence or absence of proton-pump inhibitors

Unique Subject Identifier=6136110000-0008

MEANS Procedure

Assay variable : PTINR\_VAL1 PT-INR Value

N Mean Standard Deviation Minimum Maximum

---

|   |           |           |           |           |
|---|-----------|-----------|-----------|-----------|
| 3 | 2.0133333 | 0.6305817 | 1.3400000 | 2.5900000 |
|---|-----------|-----------|-----------|-----------|

---

Unique Subject Identifier=6140011000-0006

Assay variable : PTINR\_VAL1 PT-INR Value

N Mean Standard Deviation Minimum Maximum

---

|   |           |           |           |           |
|---|-----------|-----------|-----------|-----------|
| 6 | 2.0516667 | 0.5531516 | 1.3500000 | 2.7900000 |
|---|-----------|-----------|-----------|-----------|

---

Unique Subject Identifier=6142000000-0001

Assay variable : PTINR\_VAL1 PT-INR Value

N Mean Standard Deviation Minimum Maximum

---

|   |           |           |           |           |
|---|-----------|-----------|-----------|-----------|
| 4 | 3.2150000 | 0.4759902 | 2.6900000 | 3.7900000 |
|---|-----------|-----------|-----------|-----------|

---

Unique Subject Identifier=6142000000-0005

Assay variable : PTINR\_VAL1 PT-INR Value

N Mean Standard Deviation Minimum Maximum

---

|   |           |           |           |           |
|---|-----------|-----------|-----------|-----------|
| 6 | 2.0533333 | 0.4994263 | 1.4600000 | 2.6200000 |
|---|-----------|-----------|-----------|-----------|

---

Laboratory tests at the time of obtaining Table 2-6 consent, according to the presence or absence of proton-pump inhibitors

Unique Subject Identifier=614200000-0008

MEANS Procedure

Assay variable : PTINR\_VAL1 PT-INR Value

N Mean Standard Deviation Minimum Maximum

---

|   |           |           |           |           |
|---|-----------|-----------|-----------|-----------|
| 6 | 1.7200000 | 0.6161493 | 1.1400000 | 2.8400000 |
|---|-----------|-----------|-----------|-----------|

---

Unique Subject Identifier=614200000-0009

Assay variable : PTINR\_VAL1 PT-INR Value

N Mean Standard Deviation Minimum Maximum

---

|   |           |           |           |           |
|---|-----------|-----------|-----------|-----------|
| 5 | 1.6500000 | 0.1623268 | 1.4700000 | 1.8400000 |
|---|-----------|-----------|-----------|-----------|

---

Unique Subject Identifier=614200000-0012

Assay variable : PTINR\_VAL1 PT-INR Value

N Mean Standard Deviation Minimum Maximum

---

|   |           |           |           |           |
|---|-----------|-----------|-----------|-----------|
| 4 | 2.3700000 | 0.4627454 | 2.0300000 | 3.0100000 |
|---|-----------|-----------|-----------|-----------|

---

Unique Subject Identifier=614200000-0014

Assay variable : PTINR\_VAL1 PT-INR Value

N Mean Standard Deviation Minimum Maximum

---

|   |           |           |           |           |
|---|-----------|-----------|-----------|-----------|
| 6 | 1.8433333 | 0.2362767 | 1.5300000 | 2.2100000 |
|---|-----------|-----------|-----------|-----------|

---



Laboratory tests at the time of obtaining Table 2-6 consent, according to the presence or absence of proton-pump inhibitors

Unique Subject Identifier=614200000-0015

MEANS Procedure

Assay variable : PTINR\_VAL1 PT-INR Value

N Mean Standard Deviation Minimum Maximum

---

|   |           |           |           |           |
|---|-----------|-----------|-----------|-----------|
| 5 | 1.7940000 | 0.1411737 | 1.6600000 | 2.0300000 |
|---|-----------|-----------|-----------|-----------|

---

Unique Subject Identifier=614200000-0023

Assay variable : PTINR\_VAL1 PT-INR Value

N Mean Standard Deviation Minimum Maximum

---

|   |           |           |           |           |
|---|-----------|-----------|-----------|-----------|
| 5 | 2.1120000 | 0.3702297 | 1.7300000 | 2.7300000 |
|---|-----------|-----------|-----------|-----------|

---

Unique Subject Identifier=614200000-0026

Assay variable : PTINR\_VAL1 PT-INR Value

N Mean Standard Deviation Minimum Maximum

---

|   |           |           |           |           |
|---|-----------|-----------|-----------|-----------|
| 5 | 2.1560000 | 0.4077744 | 1.6100000 | 2.5700000 |
|---|-----------|-----------|-----------|-----------|

---

Unique Subject Identifier=614200000-0027

Assay variable : PTINR\_VAL1 PT-INR Value

N Mean Standard Deviation Minimum Maximum

---

|   |           |           |           |           |
|---|-----------|-----------|-----------|-----------|
| 3 | 1.9166667 | 0.6803920 | 1.2500000 | 2.6100000 |
|---|-----------|-----------|-----------|-----------|

---

Laboratory tests at the time of obtaining Table 2-6 consent, according to the presence or absence of proton-pump inhibitors

Unique Subject Identifier=614200000-0028

MEANS Procedure

Assay variable : PTINR\_VAL1 PT-INR Value

N Mean Standard Deviation Minimum Maximum

---

|   |           |           |           |           |
|---|-----------|-----------|-----------|-----------|
| 6 | 1.8650000 | 0.4125409 | 1.5200000 | 2.6600000 |
|---|-----------|-----------|-----------|-----------|

---

Unique Subject Identifier=614200000-0029

Assay variable : PTINR\_VAL1 PT-INR Value

N Mean Standard Deviation Minimum Maximum

---

|   |           |           |           |           |
|---|-----------|-----------|-----------|-----------|
| 6 | 1.5066667 | 0.0671317 | 1.4400000 | 1.6100000 |
|---|-----------|-----------|-----------|-----------|

---

Unique Subject Identifier=614200000-0030

Assay variable : PTINR\_VAL1 PT-INR Value

N Mean Standard Deviation Minimum Maximum

---

|   |           |           |           |           |
|---|-----------|-----------|-----------|-----------|
| 3 | 1.9400000 | 0.4186884 | 1.6500000 | 2.4200000 |
|---|-----------|-----------|-----------|-----------|

---

Unique Subject Identifier=614200000-0037

Assay variable : PTINR\_VAL1 PT-INR Value

N Mean Standard Deviation Minimum Maximum

---

|   |           |           |           |           |
|---|-----------|-----------|-----------|-----------|
| 6 | 2.2533333 | 0.2558645 | 1.9200000 | 2.5300000 |
|---|-----------|-----------|-----------|-----------|

---

Laboratory tests at the time of obtaining Table 2-6 consent, according to the presence or absence of proton-pump inhibitors

Unique Subject Identifier=614200000-0045

MEANS Procedure

Assay variable : PTINR\_VAL1 PT-INR Value

| N | Mean      | Standard Deviation | Minimum   | Maximum   |
|---|-----------|--------------------|-----------|-----------|
| 3 | 1.3200000 | 0.1743560          | 1.1200000 | 1.4400000 |

Unique Subject Identifier=614200000-0046

Assay variable : PTINR\_VAL1 PT-INR Value

| N | Mean      | Standard Deviation | Minimum   | Maximum   |
|---|-----------|--------------------|-----------|-----------|
| 6 | 2.3266667 | 0.6191177          | 1.5900000 | 3.2200000 |

Unique Subject Identifier=614200000-0050

Assay variable : PTINR\_VAL1 PT-INR Value

| N | Mean      | Standard Deviation | Minimum   | Maximum   |
|---|-----------|--------------------|-----------|-----------|
| 6 | 1.8333333 | 0.0796660          | 1.7400000 | 1.9600000 |

Unique Subject Identifier=6143001010-0003

Assay variable : PTINR\_VAL1 PT-INR Value

N Mean Standard Deviation Minimum Maximum

---

|   |          |           |          |          |
|---|----------|-----------|----------|----------|
| 3 | 2.520000 | 0.2722132 | 2.230000 | 2.770000 |
|---|----------|-----------|----------|----------|

---

Laboratory tests at the time of obtaining Table 2-6 consent, according to the presence or absence of proton-pump inhibitors

Unique Subject Identifier=6147000000-0003

MEANS Procedure

Assay variable : PTINR\_VAL1 PT-INR Value

| N | Mean      | Standard Deviation | Minimum   | Maximum   |
|---|-----------|--------------------|-----------|-----------|
| 2 | 2.1300000 | 0.5091169          | 1.7700000 | 2.4900000 |

Unique Subject Identifier=6147000000-0005

Assay variable : PTINR\_VAL1 PT-INR Value

| N | Mean      | Standard Deviation | Minimum   | Maximum   |
|---|-----------|--------------------|-----------|-----------|
| 1 | 1.8900000 |                    | 1.8900000 | 1.8900000 |

Unique Subject Identifier=6154000000-0015

Assay variable : PTINR\_VAL1 PT-INR Value

| N | Mean      | Standard Deviation | Minimum   | Maximum   |
|---|-----------|--------------------|-----------|-----------|
| 4 | 2.0475000 | 0.5223265          | 1.3100000 | 2.5200000 |

Unique Subject Identifier=6161010010-0001

Assay variable : PTINR\_VAL1 PT-INR Value

N Mean Standard Deviation Minimum Maximum

---

|   |          |           |          |          |
|---|----------|-----------|----------|----------|
| 2 | 2.200000 | 0.9899495 | 1.500000 | 2.900000 |
|---|----------|-----------|----------|----------|

---



Laboratory tests at the time of obtaining Table 2-6 consent, according to the presence or absence of proton-pump inhibitors

Unique Subject Identifier=6161010010-0004

MEANS Procedure

Assay variable : PTINR\_VAL1 PT-INR Value

N Mean Standard Deviation Minimum Maximum

---

|   |           |           |           |           |
|---|-----------|-----------|-----------|-----------|
| 4 | 1.5500000 | 0.0577350 | 1.5000000 | 1.6000000 |
|---|-----------|-----------|-----------|-----------|

---

Unique Subject Identifier=6166000000-0006

Assay variable : PTINR\_VAL1 PT-INR Value

N Mean Standard Deviation Minimum Maximum

---

|   |           |           |           |           |
|---|-----------|-----------|-----------|-----------|
| 4 | 2.0100000 | 0.5443038 | 1.2900000 | 2.5300000 |
|---|-----------|-----------|-----------|-----------|

---

Unique Subject Identifier=6166000000-0007

Assay variable : PTINR\_VAL1 PT-INR Value

N Mean Standard Deviation Minimum Maximum

---

|   |           |           |           |           |
|---|-----------|-----------|-----------|-----------|
| 4 | 2.0650000 | 0.1178983 | 1.9000000 | 2.1800000 |
|---|-----------|-----------|-----------|-----------|

---

Unique Subject Identifier=6166000000-0016

Assay variable : PTINR\_VAL1 PT-INR Value

N Mean Standard Deviation Minimum Maximum

---

|   |           |           |           |           |
|---|-----------|-----------|-----------|-----------|
| 6 | 2.1366667 | 0.3290390 | 1.6800000 | 2.6600000 |
|---|-----------|-----------|-----------|-----------|

---

Laboratory tests at the time of obtaining Table 2-6 consent, according to the presence or absence of proton-pump inhibitors

Unique Subject Identifier=616600000-0022

MEANS Procedure

Assay variable : PTINR\_VAL1 PT-INR Value

N Mean Standard Deviation Minimum Maximum

---

|   |          |           |          |          |
|---|----------|-----------|----------|----------|
| 6 | 1.510000 | 0.0529150 | 1.450000 | 1.600000 |
|---|----------|-----------|----------|----------|

---

Unique Subject Identifier=616600000-0025

Assay variable : PTINR\_VAL1 PT-INR Value

N Mean Standard Deviation Minimum Maximum

---

|   |          |           |          |          |
|---|----------|-----------|----------|----------|
| 4 | 1.847500 | 0.1785824 | 1.710000 | 2.110000 |
|---|----------|-----------|----------|----------|

---

Unique Subject Identifier=616600000-0026

Assay variable : PTINR\_VAL1 PT-INR Value

N Mean Standard Deviation Minimum Maximum

---

|   |          |           |          |          |
|---|----------|-----------|----------|----------|
| 6 | 1.170000 | 0.0456070 | 1.130000 | 1.260000 |
|---|----------|-----------|----------|----------|

---

Unique Subject Identifier=6171011010-0001

Assay variable : PTINR\_VAL1 PT-INR Value

N Mean Standard Deviation Minimum Maximum

---

|   |          |           |          |          |
|---|----------|-----------|----------|----------|
| 5 | 2.022000 | 0.8532116 | 1.300000 | 3.280000 |
|---|----------|-----------|----------|----------|

---

Laboratory tests at the time of obtaining Table 2-6 consent, according to the presence or absence of proton-pump inhibitors

Unique Subject Identifier=6171011010-0002

MEANS Procedure

Assay variable : PTINR\_VAL1 PT-INR Value

| N | Mean      | Standard Deviation | Minimum   | Maximum   |
|---|-----------|--------------------|-----------|-----------|
| 3 | 1.6766667 | 0.1680278          | 1.5300000 | 1.8600000 |

Unique Subject Identifier=6171011010-0004

Assay variable : PTINR\_VAL1 PT-INR Value

| N | Mean      | Standard Deviation | Minimum   | Maximum   |
|---|-----------|--------------------|-----------|-----------|
| 5 | 2.1380000 | 0.2712379          | 1.9300000 | 2.5900000 |

Unique Subject Identifier=6171011010-0010

Assay variable : PTINR\_VAL1 PT-INR Value

| N | Mean      | Standard Deviation | Minimum   | Maximum   |
|---|-----------|--------------------|-----------|-----------|
| 3 | 2.1233333 | 0.3579572          | 1.7100000 | 2.3300000 |

Unique Subject Identifier=6171011010-0012

Assay variable : PTINR\_VAL1 PT-INR Value

N Mean Standard Deviation Minimum Maximum

---

|   |           |           |           |           |
|---|-----------|-----------|-----------|-----------|
| 6 | 2.0033333 | 0.2031420 | 1.6900000 | 2.2900000 |
|---|-----------|-----------|-----------|-----------|

---

Laboratory tests at the time of obtaining Table 2-6 consent, according to the presence or absence of proton-pump inhibitors

Unique Subject Identifier=6171011010-0014

MEANS Procedure

Assay variable : PTINR\_VAL1 PT-INR Value

N Mean Standard Deviation Minimum Maximum

---

|   |           |           |           |           |
|---|-----------|-----------|-----------|-----------|
| 6 | 1.8833333 | 0.0968848 | 1.7200000 | 1.9800000 |
|---|-----------|-----------|-----------|-----------|

---

Unique Subject Identifier=6171011010-0018

Assay variable : PTINR\_VAL1 PT-INR Value

N Mean Standard Deviation Minimum Maximum

---

|   |           |           |           |           |
|---|-----------|-----------|-----------|-----------|
| 6 | 2.5916667 | 0.3220818 | 2.1600000 | 3.1200000 |
|---|-----------|-----------|-----------|-----------|

---

Unique Subject Identifier=6171011010-0020

Assay variable : PTINR\_VAL1 PT-INR Value

N Mean Standard Deviation Minimum Maximum

---

|   |           |           |           |           |
|---|-----------|-----------|-----------|-----------|
| 6 | 2.0083333 | 0.3429529 | 1.6500000 | 2.4500000 |
|---|-----------|-----------|-----------|-----------|

---

Unique Subject Identifier=6171011010-0021

Assay variable : PTINR\_VAL1 PT-INR Value

N Mean Standard Deviation Minimum Maximum

---

|   |           |           |           |           |
|---|-----------|-----------|-----------|-----------|
| 5 | 2.4160000 | 0.6340978 | 1.5800000 | 3.2600000 |
|---|-----------|-----------|-----------|-----------|

---



Laboratory tests at the time of obtaining Table 2-6 consent, according to the presence or absence of proton-pump inhibitors

Unique Subject Identifier=6171011010-0022

MEANS Procedure

Assay variable : PTINR\_VAL1 PT-INR Value

N Mean Standard Deviation Minimum Maximum

---

|   |           |           |           |           |
|---|-----------|-----------|-----------|-----------|
| 6 | 1.9416667 | 0.3609109 | 1.5900000 | 2.6400000 |
|---|-----------|-----------|-----------|-----------|

---

Unique Subject Identifier=6171011010-0024

Assay variable : PTINR\_VAL1 PT-INR Value

N Mean Standard Deviation Minimum Maximum

---

|   |           |           |           |           |
|---|-----------|-----------|-----------|-----------|
| 6 | 2.1800000 | 0.3216831 | 1.7800000 | 2.7600000 |
|---|-----------|-----------|-----------|-----------|

---

Unique Subject Identifier=6171011010-0025

Assay variable : PTINR\_VAL1 PT-INR Value

N Mean Standard Deviation Minimum Maximum

---

|   |           |           |           |           |
|---|-----------|-----------|-----------|-----------|
| 4 | 2.1675000 | 0.4269563 | 1.5900000 | 2.5100000 |
|---|-----------|-----------|-----------|-----------|

---

Unique Subject Identifier=6171011010-0027

Assay variable : PTINR\_VAL1 PT-INR Value

N Mean Standard Deviation Minimum Maximum

---

|   |           |           |           |           |
|---|-----------|-----------|-----------|-----------|
| 6 | 1.7116667 | 0.1954908 | 1.4700000 | 2.0200000 |
|---|-----------|-----------|-----------|-----------|

---

Laboratory tests at the time of obtaining Table 2-6 consent, according to the presence or absence of proton-pump inhibitors

Unique Subject Identifier=6171011010-0030

MEANS Procedure

Assay variable : PTINR\_VAL1 PT-INR Value

N Mean Standard Deviation Minimum Maximum

---

|   |           |           |           |           |
|---|-----------|-----------|-----------|-----------|
| 4 | 2.5100000 | 1.0395512 | 1.4000000 | 3.7200000 |
|---|-----------|-----------|-----------|-----------|

---

Unique Subject Identifier=6198011000-0002

Assay variable : PTINR\_VAL1 PT-INR Value

N Mean Standard Deviation Minimum Maximum

---

|   |           |           |           |           |
|---|-----------|-----------|-----------|-----------|
| 6 | 1.7216667 | 0.1783723 | 1.5700000 | 1.9800000 |
|---|-----------|-----------|-----------|-----------|

---

Unique Subject Identifier=6198011000-0004

Assay variable : PTINR\_VAL1 PT-INR Value

N Mean Standard Deviation Minimum Maximum

---

|   |           |           |           |           |
|---|-----------|-----------|-----------|-----------|
| 5 | 1.8160000 | 0.2906544 | 1.4900000 | 2.2700000 |
|---|-----------|-----------|-----------|-----------|

---

Unique Subject Identifier=6198011000-0005

Assay variable : PTINR\_VAL1 PT-INR Value

N Mean Standard Deviation Minimum Maximum

---

|   |           |           |           |           |
|---|-----------|-----------|-----------|-----------|
| 3 | 1.8066667 | 0.1270171 | 1.6600000 | 1.8800000 |
|---|-----------|-----------|-----------|-----------|

---

Laboratory tests at the time of obtaining Table 2-6 consent, according to the presence or absence of proton-pump inhibitors

Unique Subject Identifier=6198011000-0008

MEANS Procedure

Assay variable : PTINR\_VAL1 PT-INR Value

N Mean Standard Deviation Minimum Maximum

---

|   |           |           |           |           |
|---|-----------|-----------|-----------|-----------|
| 4 | 1.7500000 | 0.0648074 | 1.6900000 | 1.8400000 |
|---|-----------|-----------|-----------|-----------|

---

Unique Subject Identifier=6198011000-0011

Assay variable : PTINR\_VAL1 PT-INR Value

N Mean Standard Deviation Minimum Maximum

---

|   |           |           |           |           |
|---|-----------|-----------|-----------|-----------|
| 5 | 1.9540000 | 0.3189514 | 1.5700000 | 2.3400000 |
|---|-----------|-----------|-----------|-----------|

---

Unique Subject Identifier=6198011000-0013

Assay variable : PTINR\_VAL1 PT-INR Value

N Mean Standard Deviation Minimum Maximum

---

|   |           |           |           |           |
|---|-----------|-----------|-----------|-----------|
| 5 | 2.1040000 | 0.2198409 | 1.7600000 | 2.3200000 |
|---|-----------|-----------|-----------|-----------|

---

Unique Subject Identifier=6198011000-0043

Assay variable : PTINR\_VAL1 PT-INR Value

N Mean Standard Deviation Minimum Maximum

---

|   |          |           |          |          |
|---|----------|-----------|----------|----------|
| 6 | 1.818333 | 0.7112923 | 1.250000 | 3.230000 |
|---|----------|-----------|----------|----------|

---

Laboratory tests at the time of obtaining Table 2-6 consent, according to the presence or absence of proton-pump inhibitors

Unique Subject Identifier=6201010000-0002

MEANS Procedure

Assay variable : PTINR\_VAL1 PT-INR Value

N Mean Standard Deviation Minimum Maximum

---

|   |           |           |           |           |
|---|-----------|-----------|-----------|-----------|
| 6 | 1.8000000 | 0.1264911 | 1.7000000 | 2.0000000 |
|---|-----------|-----------|-----------|-----------|

---

Unique Subject Identifier=6201010000-0007

Assay variable : PTINR\_VAL1 PT-INR Value

N Mean Standard Deviation Minimum Maximum

---

|   |           |           |           |           |
|---|-----------|-----------|-----------|-----------|
| 6 | 2.2833333 | 0.0983192 | 2.2000000 | 2.4000000 |
|---|-----------|-----------|-----------|-----------|

---

Unique Subject Identifier=6201010000-0010

Assay variable : PTINR\_VAL1 PT-INR Value

N Mean Standard Deviation Minimum Maximum

---

|   |           |           |           |           |
|---|-----------|-----------|-----------|-----------|
| 6 | 1.7500000 | 0.0836660 | 1.6000000 | 1.8000000 |
|---|-----------|-----------|-----------|-----------|

---

Unique Subject Identifier=6204000000-0001

Assay variable : PTINR\_VAL1 PT-INR Value

N Mean Standard Deviation Minimum Maximum

---

|   |           |           |           |           |
|---|-----------|-----------|-----------|-----------|
| 3 | 2.3533333 | 0.3028751 | 2.1400000 | 2.7000000 |
|---|-----------|-----------|-----------|-----------|

---



Laboratory tests at the time of obtaining Table 2-6 consent, according to the presence or absence of proton-pump inhibitors

Unique Subject Identifier=6204000000-0002

MEANS Procedure

Assay variable : PTINR\_VAL1 PT-INR Value

N Mean Standard Deviation Minimum Maximum

---

|   |           |           |           |           |
|---|-----------|-----------|-----------|-----------|
| 4 | 1.6650000 | 0.1936492 | 1.5200000 | 1.9500000 |
|---|-----------|-----------|-----------|-----------|

---

Unique Subject Identifier=6204000000-0003

Assay variable : PTINR\_VAL1 PT-INR Value

N Mean Standard Deviation Minimum Maximum

---

|   |           |           |           |           |
|---|-----------|-----------|-----------|-----------|
| 2 | 2.0150000 | 0.2192031 | 1.8600000 | 2.1700000 |
|---|-----------|-----------|-----------|-----------|

---

Unique Subject Identifier=6204000000-0004

Assay variable : PTINR\_VAL1 PT-INR Value

N Mean Standard Deviation Minimum Maximum

---

|   |           |           |           |           |
|---|-----------|-----------|-----------|-----------|
| 3 | 2.0033333 | 0.1662328 | 1.8500000 | 2.1800000 |
|---|-----------|-----------|-----------|-----------|

---

Unique Subject Identifier=6204000000-0005

Assay variable : PTINR\_VAL1 PT-INR Value

N Mean Standard Deviation Minimum Maximum

---

|   |           |           |           |           |
|---|-----------|-----------|-----------|-----------|
| 3 | 2.2066667 | 0.3496188 | 1.9900000 | 2.6100000 |
|---|-----------|-----------|-----------|-----------|

---

Laboratory tests at the time of obtaining Table 2-6 consent, according to the presence or absence of proton-pump inhibitors

Unique Subject Identifier=6204000000-0006

MEANS Procedure

Assay variable : PTINR\_VAL1 PT-INR Value

N Mean Standard Deviation Minimum Maximum

---

|   |           |           |           |           |
|---|-----------|-----------|-----------|-----------|
| 2 | 1.4950000 | 0.1343503 | 1.4000000 | 1.5900000 |
|---|-----------|-----------|-----------|-----------|

---

Unique Subject Identifier=6204000000-0007

Assay variable : PTINR\_VAL1 PT-INR Value

N Mean Standard Deviation Minimum Maximum

---

|   |           |           |           |           |
|---|-----------|-----------|-----------|-----------|
| 4 | 2.1050000 | 0.3890587 | 1.7700000 | 2.6000000 |
|---|-----------|-----------|-----------|-----------|

---

Unique Subject Identifier=6204000000-0008

Assay variable : PTINR\_VAL1 PT-INR Value

N Mean Standard Deviation Minimum Maximum

---

|   |           |           |           |           |
|---|-----------|-----------|-----------|-----------|
| 3 | 1.5800000 | 0.1352775 | 1.4400000 | 1.7100000 |
|---|-----------|-----------|-----------|-----------|

---

Unique Subject Identifier=6204000000-0011

Assay variable : PTINR\_VAL1 PT-INR Value

N Mean Standard Deviation Minimum Maximum

---

|   |           |           |           |           |
|---|-----------|-----------|-----------|-----------|
| 3 | 1.9133333 | 0.5560875 | 1.4500000 | 2.5300000 |
|---|-----------|-----------|-----------|-----------|

---

Laboratory tests at the time of obtaining Table 2-6 consent, according to the presence or absence of proton-pump inhibitors

Unique Subject Identifier=6204000000-0012

MEANS Procedure

Assay variable : PTINR\_VAL1 PT-INR Value

| N | Mean      | Standard Deviation | Minimum   | Maximum   |
|---|-----------|--------------------|-----------|-----------|
| 5 | 2.4280000 | 1.2278111          | 1.2300000 | 4.0300000 |

Unique Subject Identifier=6204000000-0013

Assay variable : PTINR\_VAL1 PT-INR Value

| N | Mean      | Standard Deviation | Minimum   | Maximum   |
|---|-----------|--------------------|-----------|-----------|
| 3 | 1.7100000 | 0.1442221          | 1.5500000 | 1.8300000 |

Unique Subject Identifier=6204000000-0014

Assay variable : PTINR\_VAL1 PT-INR Value

| N | Mean      | Standard Deviation | Minimum   | Maximum   |
|---|-----------|--------------------|-----------|-----------|
| 3 | 2.4066667 | 0.3234708          | 2.2100000 | 2.7800000 |

Unique Subject Identifier=6208000000-0006

Assay variable : PTINR\_VAL1 PT-INR Value

N Mean Standard Deviation Minimum Maximum

---

|   |           |  |           |           |
|---|-----------|--|-----------|-----------|
| 1 | 1.6500000 |  | 1.6500000 | 1.6500000 |
|---|-----------|--|-----------|-----------|

---

Laboratory tests at the time of obtaining Table 2-6 consent, according to the presence or absence of proton-pump inhibitors

Unique Subject Identifier=621400000-0010

MEANS Procedure

Assay variable : PTINR\_VAL1 PT-INR Value

N Mean Standard Deviation Minimum Maximum

---

|   |           |           |           |           |
|---|-----------|-----------|-----------|-----------|
| 4 | 2.0100000 | 0.7942712 | 1.4100000 | 3.1800000 |
|---|-----------|-----------|-----------|-----------|

---

Unique Subject Identifier=621400000-0016

Assay variable : PTINR\_VAL1 PT-INR Value

N Mean Standard Deviation Minimum Maximum

---

|   |           |           |           |           |
|---|-----------|-----------|-----------|-----------|
| 6 | 1.7383333 | 0.5724130 | 1.2900000 | 2.8000000 |
|---|-----------|-----------|-----------|-----------|

---

Unique Subject Identifier=621400000-0040

Assay variable : PTINR\_VAL1 PT-INR Value

N Mean Standard Deviation Minimum Maximum

---

|   |           |           |           |           |
|---|-----------|-----------|-----------|-----------|
| 5 | 1.6740000 | 0.1550161 | 1.4900000 | 1.8000000 |
|---|-----------|-----------|-----------|-----------|

---

Unique Subject Identifier=621400000-0045

Assay variable : PTINR\_VAL1 PT-INR Value

N Mean Standard Deviation Minimum Maximum

---

|   |          |           |          |          |
|---|----------|-----------|----------|----------|
| 4 | 2.410000 | 0.4181706 | 1.910000 | 2.770000 |
|---|----------|-----------|----------|----------|

---



Laboratory tests at the time of obtaining Table 2-6 consent, according to the presence or absence of proton-pump inhibitors

Unique Subject Identifier=621400000-0049

MEANS Procedure

Assay variable : PTINR\_VAL1 PT-INR Value

N Mean Standard Deviation Minimum Maximum

---

|   |           |           |           |           |
|---|-----------|-----------|-----------|-----------|
| 4 | 1.9000000 | 0.2076857 | 1.6700000 | 2.1600000 |
|---|-----------|-----------|-----------|-----------|

---

Unique Subject Identifier=621400000-0061

Assay variable : PTINR\_VAL1 PT-INR Value

N Mean Standard Deviation Minimum Maximum

---

|   |           |           |           |           |
|---|-----------|-----------|-----------|-----------|
| 3 | 1.7900000 | 0.0754983 | 1.7200000 | 1.8700000 |
|---|-----------|-----------|-----------|-----------|

---

Unique Subject Identifier=622300000-0001

Assay variable : PTINR\_VAL1 PT-INR Value

N Mean Standard Deviation Minimum Maximum

---

|   |           |           |           |           |
|---|-----------|-----------|-----------|-----------|
| 3 | 1.6966667 | 0.2829016 | 1.3700000 | 1.8600000 |
|---|-----------|-----------|-----------|-----------|

---

Unique Subject Identifier=622300000-0002

Assay variable : PTINR\_VAL1 PT-INR Value

N Mean Standard Deviation Minimum Maximum

---

|   |           |           |           |           |
|---|-----------|-----------|-----------|-----------|
| 3 | 2.2266667 | 0.2663331 | 2.0000000 | 2.5200000 |
|---|-----------|-----------|-----------|-----------|

---

Laboratory tests at the time of obtaining Table 2-6 consent, according to the presence or absence of proton-pump inhibitors

Unique Subject Identifier=6223000000-0008

MEANS Procedure

Assay variable : PTINR\_VAL1 PT-INR Value

| N | Mean      | Standard Deviation | Minimum   | Maximum   |
|---|-----------|--------------------|-----------|-----------|
| 3 | 2.0333333 | 0.2025669          | 1.8700000 | 2.2600000 |

Unique Subject Identifier=6232010000-0006

Assay variable : PTINR\_VAL1 PT-INR Value

| N | Mean      | Standard Deviation | Minimum   | Maximum   |
|---|-----------|--------------------|-----------|-----------|
| 3 | 2.1866667 | 0.2150194          | 1.9700000 | 2.4000000 |

Unique Subject Identifier=6232010000-0013

Assay variable : PTINR\_VAL1 PT-INR Value

| N | Mean      | Standard Deviation | Minimum   | Maximum   |
|---|-----------|--------------------|-----------|-----------|
| 3 | 1.6366667 | 0.1401190          | 1.4800000 | 1.7500000 |

Unique Subject Identifier=6235000000-0017

Assay variable : PTINR\_VAL1 PT-INR Value

N Mean Standard Deviation Minimum Maximum

---

|   |           |           |           |           |
|---|-----------|-----------|-----------|-----------|
| 4 | 1.9500000 | 0.2380476 | 1.7000000 | 2.2000000 |
|---|-----------|-----------|-----------|-----------|

---

Laboratory tests at the time of obtaining Table 2-6 consent, according to the presence or absence of proton-pump inhibitors

Unique Subject Identifier=6236010000-0001

MEANS Procedure

Assay variable : PTINR\_VAL1 PT-INR Value

N Mean Standard Deviation Minimum Maximum

---

|   |           |           |           |           |
|---|-----------|-----------|-----------|-----------|
| 6 | 1.5750000 | 0.3858886 | 1.1300000 | 2.1100000 |
|---|-----------|-----------|-----------|-----------|

---

Unique Subject Identifier=6236010000-0010

Assay variable : PTINR\_VAL1 PT-INR Value

N Mean Standard Deviation Minimum Maximum

---

|   |           |           |           |           |
|---|-----------|-----------|-----------|-----------|
| 6 | 1.8783333 | 0.3113465 | 1.5300000 | 2.2000000 |
|---|-----------|-----------|-----------|-----------|

---

Unique Subject Identifier=6236010000-0013

Assay variable : PTINR\_VAL1 PT-INR Value

N Mean Standard Deviation Minimum Maximum

---

|   |           |           |           |           |
|---|-----------|-----------|-----------|-----------|
| 3 | 1.9400000 | 0.7847930 | 1.2100000 | 2.7700000 |
|---|-----------|-----------|-----------|-----------|

---

Unique Subject Identifier=6236010000-0016

Assay variable : PTINR\_VAL1 PT-INR Value

N Mean Standard Deviation Minimum Maximum

---

|   |           |           |           |           |
|---|-----------|-----------|-----------|-----------|
| 6 | 1.6433333 | 0.4206503 | 1.1700000 | 2.3700000 |
|---|-----------|-----------|-----------|-----------|

---

Laboratory tests at the time of obtaining Table 2-6 consent, according to the presence or absence of proton-pump inhibitors

Unique Subject Identifier=6236010000-0020

MEANS Procedure

Assay variable : PTINR\_VAL1 PT-INR Value

| N | Mean      | Standard Deviation | Minimum   | Maximum   |
|---|-----------|--------------------|-----------|-----------|
| 2 | 1.7250000 | 0.3181981          | 1.5000000 | 1.9500000 |

Unique Subject Identifier=6236010000-0021

Assay variable : PTINR\_VAL1 PT-INR Value

| N | Mean      | Standard Deviation | Minimum   | Maximum   |
|---|-----------|--------------------|-----------|-----------|
| 4 | 2.1575000 | 0.4836235          | 1.8200000 | 2.8700000 |

Unique Subject Identifier=6237010111-0002

Assay variable : PTINR\_VAL1 PT-INR Value

| N | Mean      | Standard Deviation | Minimum   | Maximum   |
|---|-----------|--------------------|-----------|-----------|
| 4 | 2.2575000 | 0.1322561          | 2.1400000 | 2.4200000 |

Unique Subject Identifier=6240011000-0002

Assay variable : PTINR\_VAL1 PT-INR Value

N Mean Standard Deviation Minimum Maximum

---

|   |           |           |           |           |
|---|-----------|-----------|-----------|-----------|
| 6 | 2.1983333 | 0.4192096 | 1.8100000 | 2.8400000 |
|---|-----------|-----------|-----------|-----------|

---



Laboratory tests at the time of obtaining Table 2-6 consent, according to the presence or absence of proton-pump inhibitors

Unique Subject Identifier=6240011000-0004

MEANS Procedure

Assay variable : PTINR\_VAL1 PT-INR Value

N Mean Standard Deviation Minimum Maximum

---

|   |           |           |           |           |
|---|-----------|-----------|-----------|-----------|
| 6 | 2.1033333 | 0.4317715 | 1.5100000 | 2.5800000 |
|---|-----------|-----------|-----------|-----------|

---

Unique Subject Identifier=6240011000-0005

Assay variable : PTINR\_VAL1 PT-INR Value

N Mean Standard Deviation Minimum Maximum

---

|   |           |           |           |           |
|---|-----------|-----------|-----------|-----------|
| 6 | 2.4300000 | 0.6781150 | 1.5100000 | 3.0600000 |
|---|-----------|-----------|-----------|-----------|

---

Unique Subject Identifier=6240011000-0006

Assay variable : PTINR\_VAL1 PT-INR Value

N Mean Standard Deviation Minimum Maximum

---

|   |           |           |           |           |
|---|-----------|-----------|-----------|-----------|
| 6 | 1.8933333 | 0.4325120 | 1.3900000 | 2.6300000 |
|---|-----------|-----------|-----------|-----------|

---

Unique Subject Identifier=6240011000-0007

Assay variable : PTINR\_VAL1 PT-INR Value

N Mean Standard Deviation Minimum Maximum

---

|   |           |           |           |           |
|---|-----------|-----------|-----------|-----------|
| 6 | 1.8466667 | 0.1219289 | 1.6800000 | 2.0400000 |
|---|-----------|-----------|-----------|-----------|

---

Laboratory tests at the time of obtaining Table 2-6 consent, according to the presence or absence of proton-pump inhibitors

Unique Subject Identifier=6240011000-0008

MEANS Procedure

Assay variable : PTINR\_VAL1 PT-INR Value

N Mean Standard Deviation Minimum Maximum

---

|   |           |           |           |           |
|---|-----------|-----------|-----------|-----------|
| 6 | 2.3083333 | 0.3014907 | 1.9500000 | 2.8200000 |
|---|-----------|-----------|-----------|-----------|

---

Unique Subject Identifier=6240011000-0011

Assay variable : PTINR\_VAL1 PT-INR Value

N Mean Standard Deviation Minimum Maximum

---

|   |           |           |           |           |
|---|-----------|-----------|-----------|-----------|
| 6 | 1.7300000 | 0.2445404 | 1.3700000 | 2.1100000 |
|---|-----------|-----------|-----------|-----------|

---

Unique Subject Identifier=6240011000-0014

Assay variable : PTINR\_VAL1 PT-INR Value

N Mean Standard Deviation Minimum Maximum

---

|   |           |           |           |           |
|---|-----------|-----------|-----------|-----------|
| 5 | 2.2900000 | 0.1367479 | 2.0600000 | 2.4000000 |
|---|-----------|-----------|-----------|-----------|

---

Unique Subject Identifier=6240011000-0018

Assay variable : PTINR\_VAL1 PT-INR Value

N Mean Standard Deviation Minimum Maximum

---

|   |          |          |          |          |
|---|----------|----------|----------|----------|
| 6 | 2.303333 | 0.419553 | 1.620000 | 2.930000 |
|---|----------|----------|----------|----------|

---

Laboratory tests at the time of obtaining Table 2-6 consent, according to the presence or absence of proton-pump inhibitors

Unique Subject Identifier=6240011000-0019

MEANS Procedure

Assay variable : PTINR\_VAL1 PT-INR Value

N Mean Standard Deviation Minimum Maximum

---

|   |           |           |           |           |
|---|-----------|-----------|-----------|-----------|
| 6 | 2.1966667 | 0.9717956 | 1.5300000 | 4.0700000 |
|---|-----------|-----------|-----------|-----------|

---

Unique Subject Identifier=6240011000-0021

Assay variable : PTINR\_VAL1 PT-INR Value

N Mean Standard Deviation Minimum Maximum

---

|   |           |           |           |           |
|---|-----------|-----------|-----------|-----------|
| 6 | 2.1016667 | 0.3192752 | 1.6800000 | 2.6300000 |
|---|-----------|-----------|-----------|-----------|

---

Unique Subject Identifier=6240011000-0024

Assay variable : PTINR\_VAL1 PT-INR Value

N Mean Standard Deviation Minimum Maximum

---

|   |           |           |           |           |
|---|-----------|-----------|-----------|-----------|
| 6 | 2.0950000 | 0.1867351 | 1.7900000 | 2.2800000 |
|---|-----------|-----------|-----------|-----------|

---

Unique Subject Identifier=6240011000-0026

Assay variable : PTINR\_VAL1 PT-INR Value

N Mean Standard Deviation Minimum Maximum

---

|   |          |           |          |          |
|---|----------|-----------|----------|----------|
| 6 | 1.850000 | 0.1414214 | 1.700000 | 2.090000 |
|---|----------|-----------|----------|----------|

---

Laboratory tests at the time of obtaining Table 2-6 consent, according to the presence or absence of proton-pump inhibitors

Unique Subject Identifier=6240011000-0027

MEANS Procedure

Assay variable : PTINR\_VAL1 PT-INR Value

N Mean Standard Deviation Minimum Maximum

---

|   |           |           |           |           |
|---|-----------|-----------|-----------|-----------|
| 6 | 1.8750000 | 0.3347686 | 1.5100000 | 2.4300000 |
|---|-----------|-----------|-----------|-----------|

---

Unique Subject Identifier=6240011000-0029

Assay variable : PTINR\_VAL1 PT-INR Value

N Mean Standard Deviation Minimum Maximum

---

|   |           |           |           |           |
|---|-----------|-----------|-----------|-----------|
| 6 | 2.3683333 | 0.9636891 | 1.2500000 | 4.1000000 |
|---|-----------|-----------|-----------|-----------|

---

Unique Subject Identifier=6240011000-0032

Assay variable : PTINR\_VAL1 PT-INR Value

N Mean Standard Deviation Minimum Maximum

---

|   |           |           |           |           |
|---|-----------|-----------|-----------|-----------|
| 6 | 1.7783333 | 0.2232861 | 1.4700000 | 2.1300000 |
|---|-----------|-----------|-----------|-----------|

---

Unique Subject Identifier=6245000000-0002

Assay variable : PTINR\_VAL1 PT-INR Value

N Mean Standard Deviation Minimum Maximum

---

|   |           |           |           |           |
|---|-----------|-----------|-----------|-----------|
| 3 | 1.9333333 | 0.0960902 | 1.8300000 | 2.0200000 |
|---|-----------|-----------|-----------|-----------|

---



Laboratory tests at the time of obtaining Table 2-6 consent, according to the presence or absence of proton-pump inhibitors

Unique Subject Identifier=624500000-0006

MEANS Procedure

Assay variable : PTINR\_VAL1 PT-INR Value

N Mean Standard Deviation Minimum Maximum

---

|   |           |           |           |           |
|---|-----------|-----------|-----------|-----------|
| 3 | 2.3000000 | 0.3988734 | 2.0500000 | 2.7600000 |
|---|-----------|-----------|-----------|-----------|

---

Unique Subject Identifier=624500000-0007

Assay variable : PTINR\_VAL1 PT-INR Value

N Mean Standard Deviation Minimum Maximum

---

|   |           |           |           |           |
|---|-----------|-----------|-----------|-----------|
| 3 | 1.9700000 | 0.4881598 | 1.4300000 | 2.3800000 |
|---|-----------|-----------|-----------|-----------|

---

Unique Subject Identifier=624500000-0010

Assay variable : PTINR\_VAL1 PT-INR Value

N Mean Standard Deviation Minimum Maximum

---

|   |           |           |           |           |
|---|-----------|-----------|-----------|-----------|
| 4 | 2.0175000 | 0.3185776 | 1.6800000 | 2.4200000 |
|---|-----------|-----------|-----------|-----------|

---

Unique Subject Identifier=624500000-0011

Assay variable : PTINR\_VAL1 PT-INR Value

N Mean Standard Deviation Minimum Maximum

---

|   |           |           |           |           |
|---|-----------|-----------|-----------|-----------|
| 3 | 2.2433333 | 0.2702468 | 1.9800000 | 2.5200000 |
|---|-----------|-----------|-----------|-----------|

---

Laboratory tests at the time of obtaining Table 2-6 consent, according to the presence or absence of proton-pump inhibitors

Unique Subject Identifier=6245000000-0012

MEANS Procedure

Assay variable : PTINR\_VAL1 PT-INR Value

N Mean Standard Deviation Minimum Maximum

---

|   |           |           |           |           |
|---|-----------|-----------|-----------|-----------|
| 3 | 2.2766667 | 0.2059935 | 2.0600000 | 2.4700000 |
|---|-----------|-----------|-----------|-----------|

---

Unique Subject Identifier=6245000000-0013

Assay variable : PTINR\_VAL1 PT-INR Value

N Mean Standard Deviation Minimum Maximum

---

|   |           |           |           |           |
|---|-----------|-----------|-----------|-----------|
| 3 | 1.6433333 | 0.0305505 | 1.6100000 | 1.6700000 |
|---|-----------|-----------|-----------|-----------|

---

Unique Subject Identifier=6245000000-0014

Assay variable : PTINR\_VAL1 PT-INR Value

N Mean Standard Deviation Minimum Maximum

---

|   |           |           |           |           |
|---|-----------|-----------|-----------|-----------|
| 3 | 1.8833333 | 0.1320353 | 1.7400000 | 2.0000000 |
|---|-----------|-----------|-----------|-----------|

---

Unique Subject Identifier=6245000000-0016

Assay variable : PTINR\_VAL1 PT-INR Value

N Mean Standard Deviation Minimum Maximum

---

|   |           |           |           |           |
|---|-----------|-----------|-----------|-----------|
| 3 | 1.6333333 | 0.1550269 | 1.4800000 | 1.7900000 |
|---|-----------|-----------|-----------|-----------|

---

Laboratory tests at the time of obtaining Table 2-6 consent, according to the presence or absence of proton-pump inhibitors

Unique Subject Identifier=6245000000-0023

MEANS Procedure

Assay variable : PTINR\_VAL1 PT-INR Value

N Mean Standard Deviation Minimum Maximum

---

|   |           |           |           |           |
|---|-----------|-----------|-----------|-----------|
| 4 | 1.8700000 | 0.1570563 | 1.7000000 | 2.0800000 |
|---|-----------|-----------|-----------|-----------|

---

Unique Subject Identifier=6245000000-0026

Assay variable : PTINR\_VAL1 PT-INR Value

N Mean Standard Deviation Minimum Maximum

---

|   |           |           |           |           |
|---|-----------|-----------|-----------|-----------|
| 4 | 1.9400000 | 1.2091319 | 1.2300000 | 3.7500000 |
|---|-----------|-----------|-----------|-----------|

---

Unique Subject Identifier=6248110111-0005

Assay variable : PTINR\_VAL1 PT-INR Value

N Mean Standard Deviation Minimum Maximum

---

|   |           |  |           |           |
|---|-----------|--|-----------|-----------|
| 1 | 2.7400000 |  | 2.7400000 | 2.7400000 |
|---|-----------|--|-----------|-----------|

---

Unique Subject Identifier=6248110111-0006

Assay variable : PTINR\_VAL1 PT-INR Value

N Mean Standard Deviation Minimum Maximum

---

|   |           |           |           |           |
|---|-----------|-----------|-----------|-----------|
| 3 | 1.4266667 | 0.0850490 | 1.3300000 | 1.4900000 |
|---|-----------|-----------|-----------|-----------|

---

Laboratory tests at the time of obtaining Table 2-6 consent, according to the presence or absence of proton-pump inhibitors

Unique Subject Identifier=6254000000-0003

MEANS Procedure

Assay variable : PTINR\_VAL1 PT-INR Value

N Mean Standard Deviation Minimum Maximum

---

|   |           |  |           |           |
|---|-----------|--|-----------|-----------|
| 1 | 2.0900000 |  | 2.0900000 | 2.0900000 |
|---|-----------|--|-----------|-----------|

---

Unique Subject Identifier=6298000000-0001

Assay variable : PTINR\_VAL1 PT-INR Value

N Mean Standard Deviation Minimum Maximum

---

|   |           |           |           |           |
|---|-----------|-----------|-----------|-----------|
| 4 | 1.8100000 | 0.2816617 | 1.5000000 | 2.1800000 |
|---|-----------|-----------|-----------|-----------|

---

Unique Subject Identifier=6298000000-0008

Assay variable : PTINR\_VAL1 PT-INR Value

N Mean Standard Deviation Minimum Maximum

---

|   |           |           |           |           |
|---|-----------|-----------|-----------|-----------|
| 3 | 2.1833333 | 0.5762233 | 1.5200000 | 2.5600000 |
|---|-----------|-----------|-----------|-----------|

---

Unique Subject Identifier=6298000000-0012

Assay variable : PTINR\_VAL1 PT-INR Value

N Mean Standard Deviation Minimum Maximum

---

|   |           |           |           |           |
|---|-----------|-----------|-----------|-----------|
| 6 | 1.9550000 | 0.1189538 | 1.7900000 | 2.1100000 |
|---|-----------|-----------|-----------|-----------|

---



Laboratory tests at the time of obtaining Table 2-6 consent, according to the presence or absence of proton-pump inhibitors

Unique Subject Identifier=6298000000-0013

MEANS Procedure

Assay variable : PTINR\_VAL1 PT-INR Value

| N | Mean      | Standard Deviation | Minimum   | Maximum   |
|---|-----------|--------------------|-----------|-----------|
| 2 | 1.8450000 | 0.0636396          | 1.8000000 | 1.8900000 |

Unique Subject Identifier=6298000000-0017

Assay variable : PTINR\_VAL1 PT-INR Value

| N | Mean      | Standard Deviation | Minimum   | Maximum   |
|---|-----------|--------------------|-----------|-----------|
| 4 | 2.1225000 | 0.1532699          | 1.9800000 | 2.3300000 |

Unique Subject Identifier=6298000000-0022

Assay variable : PTINR\_VAL1 PT-INR Value

| N | Mean      | Standard Deviation | Minimum   | Maximum   |
|---|-----------|--------------------|-----------|-----------|
| 5 | 1.7700000 | 0.4071241          | 1.3200000 | 2.3900000 |

Unique Subject Identifier=6298000000-0024

Assay variable : PTINR\_VAL1 PT-INR Value

N Mean Standard Deviation Minimum Maximum

---

|   |           |           |           |           |
|---|-----------|-----------|-----------|-----------|
| 6 | 2.3266667 | 0.2387188 | 2.0400000 | 2.6700000 |
|---|-----------|-----------|-----------|-----------|

---

Laboratory tests at the time of obtaining Table 2-6 consent, according to the presence or absence of proton-pump inhibitors

Unique Subject Identifier=6298000000-0026

MEANS Procedure

Assay variable : PTINR\_VAL1 PT-INR Value

| N | Mean      | Standard Deviation | Minimum   | Maximum   |
|---|-----------|--------------------|-----------|-----------|
| 4 | 1.6875000 | 0.2535580          | 1.3300000 | 1.9200000 |

Unique Subject Identifier=6298000000-0028

Assay variable : PTINR\_VAL1 PT-INR Value

| N | Mean      | Standard Deviation | Minimum   | Maximum   |
|---|-----------|--------------------|-----------|-----------|
| 5 | 1.7580000 | 0.0605805          | 1.6900000 | 1.8300000 |

Unique Subject Identifier=6298000000-0029

Assay variable : PTINR\_VAL1 PT-INR Value

| N | Mean      | Standard Deviation | Minimum   | Maximum   |
|---|-----------|--------------------|-----------|-----------|
| 6 | 1.5116667 | 0.3346291          | 1.1200000 | 1.8900000 |

Unique Subject Identifier=6298000000-0036

Assay variable : PTINR\_VAL1 PT-INR Value

N Mean Standard Deviation Minimum Maximum

---

|   |           |           |           |           |
|---|-----------|-----------|-----------|-----------|
| 3 | 2.3333333 | 0.0115470 | 2.3200000 | 2.3400000 |
|---|-----------|-----------|-----------|-----------|

---

Laboratory tests at the time of obtaining Table 2-6 consent, according to the presence or absence of proton-pump inhibitors

Unique Subject Identifier=6298000000-0037

MEANS Procedure

Assay variable : PTINR\_VAL1 PT-INR Value

N Mean Standard Deviation Minimum Maximum

---

|   |           |           |           |           |
|---|-----------|-----------|-----------|-----------|
| 4 | 2.2650000 | 0.1738774 | 2.0300000 | 2.4500000 |
|---|-----------|-----------|-----------|-----------|

---

Unique Subject Identifier=6298000000-0040

Assay variable : PTINR\_VAL1 PT-INR Value

N Mean Standard Deviation Minimum Maximum

---

|   |           |  |           |           |
|---|-----------|--|-----------|-----------|
| 1 | 1.1500000 |  | 1.1500000 | 1.1500000 |
|---|-----------|--|-----------|-----------|

---

Unique Subject Identifier=6298000000-0042

Assay variable : PTINR\_VAL1 PT-INR Value

N Mean Standard Deviation Minimum Maximum

---

|   |           |           |           |           |
|---|-----------|-----------|-----------|-----------|
| 6 | 1.9783333 | 0.4015678 | 1.4000000 | 2.6300000 |
|---|-----------|-----------|-----------|-----------|

---

Unique Subject Identifier=6298000000-0044

Assay variable : PTINR\_VAL1 PT-INR Value

N Mean Standard Deviation Minimum Maximum

---

|   |          |           |          |          |
|---|----------|-----------|----------|----------|
| 3 | 1.500000 | 0.1178983 | 1.400000 | 1.630000 |
|---|----------|-----------|----------|----------|

---

Laboratory tests at the time of obtaining Table 2-6 consent, according to the presence or absence of proton-pump inhibitors

Unique Subject Identifier=6298000000-0046

MEANS Procedure

Assay variable : PTINR\_VAL1 PT-INR Value

N Mean Standard Deviation Minimum Maximum

---

|   |           |           |           |           |
|---|-----------|-----------|-----------|-----------|
| 4 | 1.9975000 | 0.0801561 | 1.9200000 | 2.1100000 |
|---|-----------|-----------|-----------|-----------|

---

Unique Subject Identifier=6298000000-0048

Assay variable : PTINR\_VAL1 PT-INR Value

N Mean Standard Deviation Minimum Maximum

---

|   |           |           |           |           |
|---|-----------|-----------|-----------|-----------|
| 4 | 1.9450000 | 0.0834666 | 1.8700000 | 2.0600000 |
|---|-----------|-----------|-----------|-----------|

---

Unique Subject Identifier=6298000000-0052

Assay variable : PTINR\_VAL1 PT-INR Value

N Mean Standard Deviation Minimum Maximum

---

|   |           |           |           |           |
|---|-----------|-----------|-----------|-----------|
| 4 | 1.8650000 | 0.6180345 | 1.3200000 | 2.7400000 |
|---|-----------|-----------|-----------|-----------|

---

Unique Subject Identifier=6298000000-0055

Assay variable : PTINR\_VAL1 PT-INR Value

N Mean Standard Deviation Minimum Maximum

---

|   |           |           |           |           |
|---|-----------|-----------|-----------|-----------|
| 5 | 2.0980000 | 0.4737827 | 1.3800000 | 2.6600000 |
|---|-----------|-----------|-----------|-----------|

---



Laboratory tests at the time of obtaining Table 2-6 consent, according to the presence or absence of proton-pump inhibitors

Unique Subject Identifier=6298000000-0058

MEANS Procedure

Assay variable : PTINR\_VAL1 PT-INR Value

N Mean Standard Deviation Minimum Maximum

---

|   |           |           |           |           |
|---|-----------|-----------|-----------|-----------|
| 6 | 2.5566667 | 0.4728495 | 1.8000000 | 3.0800000 |
|---|-----------|-----------|-----------|-----------|

---

Unique Subject Identifier=6298000000-0059

Assay variable : PTINR\_VAL1 PT-INR Value

N Mean Standard Deviation Minimum Maximum

---

|   |           |           |           |           |
|---|-----------|-----------|-----------|-----------|
| 5 | 2.2380000 | 0.7084631 | 1.3700000 | 2.9200000 |
|---|-----------|-----------|-----------|-----------|

---

Unique Subject Identifier=6298000000-0060

Assay variable : PTINR\_VAL1 PT-INR Value

N Mean Standard Deviation Minimum Maximum

---

|   |           |           |           |           |
|---|-----------|-----------|-----------|-----------|
| 3 | 2.0500000 | 0.4648656 | 1.6500000 | 2.5600000 |
|---|-----------|-----------|-----------|-----------|

---

Unique Subject Identifier=6298000000-0061

Assay variable : PTINR\_VAL1 PT-INR Value

N Mean Standard Deviation Minimum Maximum

---

|   |           |           |           |           |
|---|-----------|-----------|-----------|-----------|
| 6 | 1.6083333 | 0.2803866 | 1.2200000 | 1.9300000 |
|---|-----------|-----------|-----------|-----------|

---

Laboratory tests at the time of obtaining Table 2-6 consent, according to the presence or absence of proton-pump inhibitors

Unique Subject Identifier=6298000000-0064

MEANS Procedure

Assay variable : PTINR\_VAL1 PT-INR Value

| N | Mean      | Standard Deviation | Minimum   | Maximum   |
|---|-----------|--------------------|-----------|-----------|
| 3 | 1.7366667 | 0.1908752          | 1.5200000 | 1.8800000 |

Unique Subject Identifier=6298000000-0067

Assay variable : PTINR\_VAL1 PT-INR Value

| N | Mean      | Standard Deviation | Minimum   | Maximum   |
|---|-----------|--------------------|-----------|-----------|
| 3 | 1.9666667 | 0.1418920          | 1.8400000 | 2.1200000 |

Unique Subject Identifier=6298000000-0068

Assay variable : PTINR\_VAL1 PT-INR Value

| N | Mean      | Standard Deviation | Minimum   | Maximum   |
|---|-----------|--------------------|-----------|-----------|
| 3 | 2.4133333 | 0.9972629          | 1.5400000 | 3.5000000 |

Unique Subject Identifier=6298000000-0073

Assay variable : PTINR\_VAL1 PT-INR Value

N Mean Standard Deviation Minimum Maximum

---

|   |          |  |          |          |
|---|----------|--|----------|----------|
| 1 | 2.120000 |  | 2.120000 | 2.120000 |
|---|----------|--|----------|----------|

---

Laboratory tests at the time of obtaining Table 2-6 consent, according to the presence or absence of proton-pump inhibitors

Unique Subject Identifier=6298000000-0075

MEANS Procedure

Assay variable : PTINR\_VAL1 PT-INR Value

N Mean Standard Deviation Minimum Maximum

---

|   |           |           |           |           |
|---|-----------|-----------|-----------|-----------|
| 3 | 1.7733333 | 0.1123981 | 1.6500000 | 1.8700000 |
|---|-----------|-----------|-----------|-----------|

---

Unique Subject Identifier=6298000000-0076

Assay variable : PTINR\_VAL1 PT-INR Value

N Mean Standard Deviation Minimum Maximum

---

|   |           |           |           |           |
|---|-----------|-----------|-----------|-----------|
| 2 | 1.7150000 | 0.0212132 | 1.7000000 | 1.7300000 |
|---|-----------|-----------|-----------|-----------|

---

Unique Subject Identifier=6298000000-0077

Assay variable : PTINR\_VAL1 PT-INR Value

N Mean Standard Deviation Minimum Maximum

---

|   |           |           |           |           |
|---|-----------|-----------|-----------|-----------|
| 5 | 1.8940000 | 0.2623547 | 1.5500000 | 2.2100000 |
|---|-----------|-----------|-----------|-----------|

---

Unique Subject Identifier=6298000000-0080

Assay variable : PTINR\_VAL1 PT-INR Value

N Mean Standard Deviation Minimum Maximum

---

|   |           |           |           |           |
|---|-----------|-----------|-----------|-----------|
| 2 | 1.8750000 | 0.0919239 | 1.8100000 | 1.9400000 |
|---|-----------|-----------|-----------|-----------|

---

Laboratory tests at the time of obtaining Table 2-6 consent, according to the presence or absence of proton-pump inhibitors

Unique Subject Identifier=6298000000-0081

MEANS Procedure

Assay variable : PTINR\_VAL1 PT-INR Value

| N | Mean      | Standard Deviation | Minimum   | Maximum   |
|---|-----------|--------------------|-----------|-----------|
| 2 | 2.8250000 | 0.0919239          | 2.7600000 | 2.8900000 |

Unique Subject Identifier=6298000000-0082

Assay variable : PTINR\_VAL1 PT-INR Value

| N | Mean      | Standard Deviation | Minimum   | Maximum   |
|---|-----------|--------------------|-----------|-----------|
| 1 | 1.2400000 |                    | 1.2400000 | 1.2400000 |

Unique Subject Identifier=6298000000-0091

Assay variable : PTINR\_VAL1 PT-INR Value

| N | Mean      | Standard Deviation | Minimum   | Maximum   |
|---|-----------|--------------------|-----------|-----------|
| 3 | 1.9966667 | 0.1975686          | 1.8200000 | 2.2100000 |

Unique Subject Identifier=6298000000-0092

Assay variable : PTINR\_VAL1 PT-INR Value

N Mean Standard Deviation Minimum Maximum

---

|   |           |           |           |           |
|---|-----------|-----------|-----------|-----------|
| 6 | 2.4116667 | 0.0773089 | 2.3100000 | 2.5000000 |
|---|-----------|-----------|-----------|-----------|

---



Laboratory tests at the time of obtaining Table 2-6 consent, according to the presence or absence of proton-pump inhibitors

Unique Subject Identifier=6298000000-0093

MEANS Procedure

Assay variable : PTINR\_VAL1 PT-INR Value

N Mean Standard Deviation Minimum Maximum

---

|   |           |           |           |           |
|---|-----------|-----------|-----------|-----------|
| 6 | 1.9733333 | 0.2540604 | 1.6600000 | 2.2800000 |
|---|-----------|-----------|-----------|-----------|

---

Unique Subject Identifier=6298000000-0095

Assay variable : PTINR\_VAL1 PT-INR Value

N Mean Standard Deviation Minimum Maximum

---

|   |           |           |           |           |
|---|-----------|-----------|-----------|-----------|
| 6 | 2.2033333 | 0.8501686 | 1.4700000 | 3.8100000 |
|---|-----------|-----------|-----------|-----------|

---

Unique Subject Identifier=6298000000-0096

Assay variable : PTINR\_VAL1 PT-INR Value

N Mean Standard Deviation Minimum Maximum

---

|   |           |  |           |           |
|---|-----------|--|-----------|-----------|
| 1 | 1.8400000 |  | 1.8400000 | 1.8400000 |
|---|-----------|--|-----------|-----------|

---

Unique Subject Identifier=6298000000-0098

Assay variable : PTINR\_VAL1 PT-INR Value

N Mean Standard Deviation Minimum Maximum

---

|   |          |           |          |          |
|---|----------|-----------|----------|----------|
| 2 | 2.125000 | 0.0353553 | 2.100000 | 2.150000 |
|---|----------|-----------|----------|----------|

---

Laboratory tests at the time of obtaining Table 2-6 consent, according to the presence or absence of proton-pump inhibitors

Unique Subject Identifier=6298000000-0109

MEANS Procedure

Assay variable : PTINR\_VAL1 PT-INR Value

| N | Mean     | Standard Deviation | Minimum  | Maximum  |
|---|----------|--------------------|----------|----------|
| 2 | 2.750000 | 0.5798276          | 2.340000 | 3.160000 |

Unique Subject Identifier=6298000000-0110

Assay variable : PTINR\_VAL1 PT-INR Value

| N | Mean     | Standard Deviation | Minimum  | Maximum  |
|---|----------|--------------------|----------|----------|
| 3 | 2.193333 | 0.2371357          | 1.940000 | 2.410000 |

Unique Subject Identifier=6298000000-0111

Assay variable : PTINR\_VAL1 PT-INR Value

| N | Mean     | Standard Deviation | Minimum  | Maximum  |
|---|----------|--------------------|----------|----------|
| 3 | 1.810000 | 0.1442221          | 1.650000 | 1.930000 |

Unique Subject Identifier=6298000000-0112

Assay variable : PTINR\_VAL1 PT-INR Value

N Mean Standard Deviation Minimum Maximum

---

|   |           |           |           |           |
|---|-----------|-----------|-----------|-----------|
| 4 | 2.2050000 | 0.6450581 | 1.5000000 | 3.0000000 |
|---|-----------|-----------|-----------|-----------|

---

Laboratory tests at the time of obtaining Table 2-6 consent, according to the presence or absence of proton-pump inhibitors

Unique Subject Identifier=6298000000-0113

MEANS Procedure

Assay variable : PTINR\_VAL1 PT-INR Value

N Mean Standard Deviation Minimum Maximum

---

|   |           |           |           |           |
|---|-----------|-----------|-----------|-----------|
| 6 | 2.0833333 | 0.5444508 | 1.3600000 | 2.7200000 |
|---|-----------|-----------|-----------|-----------|

---

Unique Subject Identifier=6298000000-0120

Assay variable : PTINR\_VAL1 PT-INR Value

N Mean Standard Deviation Minimum Maximum

---

|   |           |           |           |           |
|---|-----------|-----------|-----------|-----------|
| 3 | 1.9733333 | 0.5163655 | 1.5100000 | 2.5300000 |
|---|-----------|-----------|-----------|-----------|

---

Unique Subject Identifier=6298000000-0137

Assay variable : PTINR\_VAL1 PT-INR Value

N Mean Standard Deviation Minimum Maximum

---

|   |           |           |           |           |
|---|-----------|-----------|-----------|-----------|
| 4 | 2.0575000 | 0.6261190 | 1.5800000 | 2.9200000 |
|---|-----------|-----------|-----------|-----------|

---

Unique Subject Identifier=6298000000-0147

Assay variable : PTINR\_VAL1 PT-INR Value

N Mean Standard Deviation Minimum Maximum

---

|   |          |           |          |          |
|---|----------|-----------|----------|----------|
| 4 | 2.440000 | 0.7682448 | 1.940000 | 3.580000 |
|---|----------|-----------|----------|----------|

---

Laboratory tests at the time of obtaining Table 2-6 consent, according to the presence or absence of proton-pump inhibitors

Unique Subject Identifier=6298000000-0151

MEANS Procedure

Assay variable : PTINR\_VAL1 PT-INR Value

N Mean Standard Deviation Minimum Maximum

---

|   |           |           |           |           |
|---|-----------|-----------|-----------|-----------|
| 4 | 2.2125000 | 0.5720358 | 1.7100000 | 2.7800000 |
|---|-----------|-----------|-----------|-----------|

---

Unique Subject Identifier=6298000000-0154

Assay variable : PTINR\_VAL1 PT-INR Value

N Mean Standard Deviation Minimum Maximum

---

|   |           |           |           |           |
|---|-----------|-----------|-----------|-----------|
| 6 | 1.7283333 | 0.1859480 | 1.5300000 | 1.9500000 |
|---|-----------|-----------|-----------|-----------|

---

Unique Subject Identifier=6298000000-0159

Assay variable : PTINR\_VAL1 PT-INR Value

N Mean Standard Deviation Minimum Maximum

---

|   |           |           |           |           |
|---|-----------|-----------|-----------|-----------|
| 3 | 2.0533333 | 0.2100794 | 1.8400000 | 2.2600000 |
|---|-----------|-----------|-----------|-----------|

---

Unique Subject Identifier=6298000000-0167

Assay variable : PTINR\_VAL1 PT-INR Value

N Mean Standard Deviation Minimum Maximum

---

|   |           |           |           |           |
|---|-----------|-----------|-----------|-----------|
| 4 | 1.9150000 | 0.1927866 | 1.6600000 | 2.1200000 |
|---|-----------|-----------|-----------|-----------|

---
